# Supplementary material for: A Fault Diagnosis Method for One‐Dimensional Vibration Signal Based on Multiresolution tlsDMD and Approximate Entropy
Source: Hindawi journal article supplement (doi:10.1155/2019/3262818), 2019-01-01
Supplement: f1 [file 3262818.f1.zip › 3262818.f1/gear signals/normal gear signal/Data6.txt]

-208   192    
192    544    
464    704    
-304   64     
-64    -112   
144    -160   
96     144    
288    176    
-176   240    
96     192    
0      -48    
80     -16    
-96    96     
128    16     
176    -176   
-64    48     
64     16     
80     -48    
48     96     
96     224    
0      -48    
176    -480   
-64    -112   
-144   32     
-80    112    
240    144    
-192   96     
96     48     
-128   -272   
128    16     
-16    144    
16     16     
176    -32    
224    48     
48     96     
288    208    
-176   160    
80     112    
-160   -144   
128    -144   
-80    144    
176    64     
48     -176   
48     48     
112    64     
0      -224   
80     32     
80     64     
-160   -96    
224    -96    
176    384    
-240   112    
80     64     
0      -192   
96     96     
32     0      
96     -128   
-16    -112   
-32    -48    
384    384    
-64    -320   
-304   208    
160    -160   
-96    272    
80     16     
-16    80     
0      -208   
-96    0      
480    32     
48     240    
-112   -112   
64     -192   
80     -16    
208    -272   
112    96     
32     16     
48     48     
224    96     
448    160    
-304   256    
-80    80     
-192   368    
80     96     
-80    -256   
400    -416   
64     -48    
144    176    
0      128    
80     32     
-368   -160   
32     -256   
144    -128   
64     -432   
256    -64    
80     176    
80     48     
64     80     
96     -16    
128    112    
-128   304    
-128   32     
144    -192   
272    64     
0      64     
-16    16     
144    -240   
128    160    
240    -32    
48     -192   
0      80     
16     160    
128    48     
112    144    
-96    -224   
-32    208    
96     -16    
0      -64    
176    112    
-64    -400   
80     112    
48     -336   
224    208    
-48    -832   
144    368    
-144   0      
0      48     
64     112    
240    -176   
48     272    
624    832    
-320   240    
-160   304    
128    -272   
32     -384   
208    80     
176    -48    
-64    -96    
192    112    
0      144    
-48    96     
-112   96     
-272   -112   
336    -240   
208    0      
336    -16    
80     -1312  
160    -112   
80     288    
-624   -80    
-64    -112   
192    -144   
512    64     
-48    -48    
400    352    
32     144    
-512   -560   
0      32     
208    -272   
-48    -304   
224    -192   
496    -208   
992    528    
-480   128    
192    -32    
-32    32     
-160   -32    
-160   -288   
192    -32    
144    -256   
416    224    
-96    -336   
160    16     
-64    0      
192    -144   
80     -16    
32     -192   
240    -48    
-224   -192   
64     -80    
80     -240   
-32    -32    
128    0      
-32    64     
176    64     
320    32     
-64    -64    
32     16     
-288   -112   
96     -32    
-1040  16     
160    80     
-112   -144   
224    -64    
48     16     
288    -384   
0      16     
64     -32    
-320   -16    
304    32     
-304   208    
160    -160   
128    160    
-416   -64    
672    64     
-16    160    
-32    -144   
448    -48    
-336   192    
144    -64    
-16    -80    
-288   64     
464    -304   
-64    32     
32     -288   
176    0      
-368   32     
144    -16    
0      32     
80     -32    
192    -16    
-272   -160   
-704   16     
640    0      
-224   96     
-96    -48    
160    -144   
-96    -368   
144    224    
-320   16     
320    64     
112    -64    
240    -80    
32     16     
-48    -32    
-96    0      
-48    -16    
208    32     
-160   0      
-80    0      
80     -192   
96     32     
0      -336   
-16    96     
304    96     
-64    -32    
-144   16     
144    -80    
-224   -80    
320    224    
-544   -48    
320    -48    
-672   -64    
48     -16    
128    16     
80     -16    
32     -32    
128    -80    
0      96     
64     304    
32     96     
-176   -16    
224    -32    
16     16     
-48    0      
-192   -64    
-32    -112   
-80    112    
-144   -176   
112    -32    
256    48     
-16    -480   
-144   -320   
128    288    
-128   192    
192    160    
-96    -240   
336    192    
-416   -112   
48     32     
-224   112    
112    -224   
-48    112    
80     -144   
-128   96     
96     32     
-96    144    
-1120  -128   
-176   -256   
80     352    
-144   16     
480    768    
-256   -736   
-208   272    
256    144    
16     -160   
128    80     
64     16     
-192   528    
-32    -112   
-800   -112   
-32    -16    
-1088  -416   
0      144    
-192   -736   
-304   1040   
-16    -80    
-816   -384   
48     224    
80     -320   
352    496    
-32    -112   
64     96     
-256   -192   
0      16     
-192   32     
80     -64    
80     -112   
-80    -16    
32     0      
-416   0      
-144   -208   
-224   336    
80     224    
-368   64     
-64    -16    
48     -208   
-144   128    
-352   80     
112    128    
16     192    
64     208    
272    112    
-432   384    
-96    64     
16     240    
96     288    
352    176    
-80    112    
-1248  16     
-336   64     
-656   -64    
144    96     
-64    -80    
176    16     
64     -80    
-320   -112   
-80    -32    
-112   0      
-128   240    
304    208    
352    320    
-528   144    
-192   -80    
-400   -224   
64     16     
-1008  288    
144    192    
400    32     
-64    192    
-208   -112   
-368   -96    
-32    16     
160    96     
16     -80    
192    48     
-192   80     
-192   208    
128    96     
-128   -48    
0      80     
-304   64     
0      16     
-48    -96    
96     -16    
144    0      
48     0      
64     80     
208    64     
-144   80     
0      176    
-112   -112   
-48    -112   
176    0      
-64    32     
16     96     
-240   -112   
160    144    
-304   -16    
16     -48    
-48    -64    
208    48     
320    288    
-64    256    
-32    160    
0      112    
432    368    
-464   16     
-64    400    
-64    592    
-208   640    
16     432    
208    0      
-336   0      
-304   -160   
32     304    
-96    -96    
-192   -144   
-112   16     
-112   160    
304    272    
272    16     
-288   -96    
32     -176   
-352   16     
208    -224   
-160   32     
96     176    
-64    64     
-16    160    
112    -64    
-16    32     
-192   80     
-32    48     
448    192    
-240   176    
0      -16    
208    -64    
-448   -128   
-256   0      
96     272    
-128   192    
144    32     
128    16     
-16    -128   
-160   -240   
16     -432   
160    -128   
48     48     
-224   -16    
112    128    
-208   -96    
-64    16     
96     0      
16     112    
96     -16    
-320   -32    
128    80     
-272   112    
336    -272   
-16    128    
208    320    
-432   0      
-48    32     
-64    -16    
0      48     
464    208    
-256   208    
48     128    
-32    160    
64     288    
-176   -48    
-80    16     
112    64     
80     128    
128    128    
-128   224    
-272   80     
-80    32     
160    -16    
160    208    
160    176    
96     240    
128    192    
-176   0      
128    -80    
16     -80    
-64    -112   
-48    16     
144    176    
208    16     
96     448    
224    336    
-48    48     
96     96     
32     80     
-32    16     
-16    -288   
-112   -256   
48     -240   
-112   128    
128    -64    
64     48     
-80    0      
112    -256   
336    400    
-256   -336   
272    640    
272    80     
-96    -176   
-240   144    
96     -112   
-96    -288   
224    192    
-32    -112   
-160   -1328  
16     96     
80     96     
160    32     
32     -32    
64     16     
96     64     
80     80     
16     64     
0      80     
-64    48     
80     32     
-16    80     
272    48     
160    640    
-512   352    
32     208    
400    48     
80     32     
112    128    
-112   -176   
-368   176    
96     272    
-304   -256   
368    -144   
-320   -16    
496    96     
304    32     
-272   80     
432    32     
112    -176   
-368   32     
-144   304    
32     64     
48     0      
-96    32     
16     -48    
432    48     
80     0      
272    96     
-16    -48    
-240   32     
-160   -32    
-112   -48    
-208   80     
128    -112   
320    112    
-128   -272   
-288   64     
112    -48    
176    -64    
160    -160   
32     32     
-32    272    
-208   80     
144    48     
-32    -16    
176    32     
-128   -80    
336    64     
-112   16     
304    -16    
208    -144   
-96    16     
-320   -416   
336    64     
336    80     
128    -16    
128    -48    
-112   80     
-160   -96    
64     144    
-48    80     
-32    -48    
-112   16     
-192   -128   
176    32     
32     -128   
32     80     
192    -432   
32     32     
-16    -96    
48     16     
0      -48    
80     224    
208    64     
-16    64     
64     -16    
128    -16    
32     -64    
-208   -64    
16     16     
240    64     
64     48     
-288   -496   
240    64     
176    128    
-352   32     
656    64     
-208   16     
16     80     
160    -64    
32     144    
144    176    
32     -128   
48     -64    
-32    112    
-128   -208   
384    80     
368    352    
144    160    
-144   -64    
416    448    
-464   -16    
496    -160   
240    160    
-256   48     
784    144    
-320   -48    
80     336    
-112   16     
112    80     
736    112    
-432   64     
96     -288   
80     112    
96     16     
48     -896   
144    64     
32     -288   
64     -448   
144    -80    
80     -448   
-48    128    
96     320    
176    -64    
192    224    
-112   0      
112    304    
256    368    
-16    -416   
192    -16    
-16    -176   
-112   256    
80     176    
192    -160   
32     112    
176    -352   
160    16     
-64    -640   
288    96     
64     112    
64     -256   
80     0      
-16    16     
0      -160   
176    176    
-32    0      
32     0      
-64    80     
144    -128   
-240   96     
288    -160   
-16    -480   
80     224    
-16    -96    
336    320    
80     96     
256    -1184  
-320   192    
-128   -320   
-336   96     
320    -272   
272    448    
-624   144    
112    0      
-704   176    
32     240    
-288   -208   
-80    -272   
160    -112   
192    -128   
-16    -16    
240    240    
32     336    
-32    64     
80     48     
128    -32    
32     -96    
-112   48     
48     16     
-528   -80    
112    -48    
-128   -208   
128    -192   
32     112    
-160   -112   
144    144    
176    -768   
80     64     
-32    32     
-48    -144   
-192   -16    
-16    -64    
-64    16     
96     32     
-416   96     
32     48     
-112   192    
48     144    
-192   0      
128    272    
-304   128    
304    -176   
96     -16    
80     -64    
112    32     
-208   -320   
96     -112   
0      208    
-272   48     
-256   16     
272    -128   
-48    32     
80     32     
-272   32     
96     -160   
96     0      
144    -272   
64     176    
224    -32    
-128   -80    
-32    48     
96     64     
-80    0      
144    -32    
-32    64     
80     48     
-16    32     
16     -80    
-112   32     
272    -64    
-64    0      
176    -448   
144    80     
16     272    
192    160    
-128   64     
-144   -224   
-608   -224   
-64    -352   
16     -224   
320    80     
32     -64    
256    -128   
-208   -32    
-256   -352   
-16    -112   
16     -48    
-32    112    
-176   -112   
480    -96    
-176   112    
224    80     
-304   0      
32     192    
-96    32     
80     48     
-432   176    
112    80     
80     96     
80     -64    
144    64     
-320   80     
-544   -64    
-192   -144   
-2096  -160   
32     128    
32     -32    
112    128    
288    -48    
48     32     
128    -64    
-432   -16    
-912   -32    
-320   -96    
-144   -160   
16     -96    
16     -272   
-320   -32    
-112   208    
-672   -160   
64     -432   
-560   -16    
-192   -64    
-912   -112   
-400   -144   
128    -288   
0      32     
16     -112   
32     -352   
-160   -16    
-32    0      
-16    80     
32     0      
-128   272    
-32    -64    
-224   -176   
592    64     
-352   400    
-1088  96     
-80    -80    
96     272    
144    208    
-384   -112   
304    -256   
-256   -128   
128    -144   
-160   -320   
-16    -192   
-144   -368   
-304   -224   
32     -160   
-16    16     
64     0      
-96    288    
304    256    
-1184  -240   
16     96     
-208   -368   
128    192    
128    0      
80     -64    
80     224    
-320   -160   
16     32     
-48    16     
-368   -368   
-240   -80    
80     64     
-96    -288   
112    320    
-1280  -128   
160    144    
-352   -384   
192    208    
112    160    
-272   -224   
112    96     
32     160    
-16    48     
-320   -96    
112    48     
-64    64     
-128   -160   
-176   240    
-16    -128   
-144   80     
-16    112    
-80    -224   
352    352    
144    -16    
-208   -160   
-96    224    
-112   192    
128    -48    
-224   -192   
80     128    
32     80     
-32    192    
-48    -64    
-32    -80    
-192   16     
144    128    
-2048  -48    
-112   32     
-16    -32    
-80    176    
48     128    
288    240    
-144   -80    
-96    -112   
16     48     
-176   -16    
-80    48     
-32    -16    
176    320    
-224   -112   
176    80     
-1344  320    
-48    32     
208    48     
-48    -32    
208    0      
-112   -80    
-208   -32    
-32    96     
-80    32     
-48    96     
32     96     
-96    0      
208    64     
-176   16     
96     0      
64     -16    
-80    48     
-64    16     
192    32     
80     80     
-32    -592   
720    -688   
544    128    
-96    320    
-16    48     
224    48     
-880   -64    
512    -32    
48     -160   
-368   -128   
208    192    
-32    -80    
320    -32    
48     80     
-144   80     
-208   -160   
304    128    
-32    128    
-288   64     
-96    -48    
-272   0      
144    -48    
-32    176    
-704   0      
64     48     
-128   -64    
384    0      
320    32     
272    -16    
576    304    
-256   64     
16     32     
-32    32     
-16    64     
48     -16    
0      48     
224    -96    
368    144    
-640   64     
-144   -160   
304    32     
64     144    
64     32     
-64    0      
192    144    
-368   32     
-16    0      
-176   48     
64     80     
-208   -112   
416    16     
16     64     
80     160    
400    160    
-496   -32    
-48    16     
288    128    
32     0      
48     96     
80     112    
-368   -144   
336    -64    
32     96     
144    48     
-32    32     
128    32     
-176   -64    
16     -176   
-112   32     
176    80     
0      -16    
128    64     
-16    80     
16     0      
64     48     
352    400    
-240   224    
256    16     
-208   48     
352    192    
-208   176    
224    16     
128    -432   
288    240    
-224   240    
144    96     
-112   -16    
192    80     
128    32     
0      368    
448    544    
96     112    
-320   -64    
-384   -80    
-160   -272   
0      -192   
96     112    
-256   0      
-176   336    
48     464    
16     -128   
-128   -368   
128    64     
320    144    
-144   368    
-288   -464   
480    -304   
-128   304    
-32    128    
-48    -48    
32     -16    
48     96     
80     112    
240    -112   
32     -240   
80     128    
80     -48    
256    208    
-208   -16    
288    144    
16     -128   
-16    400    
16     112    
448    912    
224    576    
-592   -1040  
96     608    
144    96     
320    320    
-192   -368   
144    144    
112    144    
208    256    
48     0      
0      -336   
96     -16    
-96    -96    
-144   -16    
80     176    
144    128    
80     128    
-16    48     
48     -192   
192    32     
16     -48    
112    -96    
-64    -176   
-32    32     
128    -64    
224    48     
-272   -224   
96     -112   
64     32     
-48    -48    
-128   -160   
96     -192   
208    128    
128    -112   
-16    32     
48     -432   
-96    96     
-32    -256   
48     128    
128    240    
128    144    
32     -112   
304    32     
-144   16     
-32    -240   
-112   64     
160    0      
176    128    
-80    -112   
80     48     
48     16     
16     96     
0      96     
80     64     
16     32     
272    80     
-48    -16    
144    -64    
-48    80     
-128   176    
-32    272    
384    -272   
32     -16    
192    -288   
16     144    
-112   -32    
128    16     
-16    -48    
112    64     
-80    -96    
288    0      
-32    48     
-80    -48    
176    -64    
384    480    
-368   368    
128    -224   
448    112    
128    48     
64     64     
0      32     
144    -16    
64     -768   
-144   -240   
-16    32     
192    208    
-112   0      
368    64     
-96    -48    
-128   144    
-224   -848   
-32    -144   
-32    -192   
-304   -160   
208    -80    
16     80     
448    -96    
-64    48     
96     112    
-112   16     
160    160    
-16    48     
-1232  -240   
144    -224   
-16    96     
272    -32    
144    -112   
16     -576   
192    -272   
80     -688   
48     -48    
176    -160   
-128   16     
-64    -224   
-96    64     
-160   -64    
-48    -48    
-336   16     
224    -96    
352    -16    
48     -96    
128    16     
-96    0      
-64    -160   
240    -560   
128    -112   
64     16     
-112   176    
176    -64    
0      64     
-112   -112   
208    -256   
-144   48     
-48    32     
-528   112    
32     0      
48     0      
0      32     
96     -224   
96     80     
240    208    
-128   -624   
240    224    
-16    144    
240    240    
96     304    
208    432    
-320   16     
-96    -480   
-864   -192   
80     304    
304    -32    
208    -192   
208    432    
-160   -32    
-224   96     
240    -1808  
-384   -416   
-16    -48    
128    16     
-224   512    
144    -384   
-208   32     
192    208    
-112   80     
160    0      
-1616  -240   
64     80     
288    48     
-48    -592   
-352   0      
-80    -448   
272    208    
-32    64     
-144   -272   
304    80     
256    112    
-16    -128   
640    -480   
0      448    
-80    0      
-1712  -80    
16     -144   
-272   -176   
48     -112   
32     96     
160    -304   
160    0      
-320   96     
176    208    
-80    -16    
64     0      
-432   -128   
32     96     
-272   96     
112    -160   
-224   -32    
160    16     
208    32     
-208   -160   
64     80     
0      -160   
192    144    
-192   -64    
272    16     
-160   48     
-128   -32    
-112   -32    
-64    16     
-48    -112   
64     80     
-64    128    
64     -48    
176    96     
224    16     
112    96     
16     -144   
-32    -96    
0      80     
96     96     
48     64     
96     16     
-48    -144   
-64    -128   
-112   48     
16     16     
-64    32     
176    -64    
-288   0      
-896   -176   
80     128    
-240   -144   
-368   96     
-64    0      
-464   0      
32     48     
352    96     
-272   64     
80     0      
64     16     
128    -48    
-160   80     
-928   -112   
32     32     
-304   -32    
48     96     
64     16     
-96    32     
-336   -128   
64     -112   
-80    0      
-448   160    
80     144    
0      16     
-96    -32    
-160   16     
128    80     
-288   -16    
128    80     
-48    80     
144    80     
-64    -16    
-224   -96    
-208   -208   
-416   -32    
32     160    
-80    32     
80     -96    
-640   -240   
-64    32     
48     -32    
64     80     
272    160    
-208   48     
32     -96    
192    16     
-80    0      
64     -64    
320    96     
-80    -80    
592    -64    
-208   -64    
-400   -16    
-1472  80     
-480   16     
-720   -80    
112    0      
240    16     
192    144    
-208   -64    
-160   64     
-160   16     
-512   16     
-16    128    
80     64     
-144   -32    
80     96     
0      192    
-192   0      
48     192    
-576   176    
192    48     
-480   -144   
112    -64    
160    80     
32     112    
48     16     
-112   0      
32     288    
64     240    
-176   -96    
-112   0      
144    16     
-144   0      
96     32     
-112   -16    
224    256    
-448   32     
16     80     
-320   48     
16     80     
272    96     
-304   -64    
80     -64    
80     0      
480    320    
-640   96     
-208   -80    
-176   -80    
-160   32     
-432   -48    
-80    -112   
0      -176   
160    64     
144    64     
32     16     
80     96     
0      16     
-112   48     
-16    64     
96     160    
-80    0      
48     32     
-128   64     
224    112    
-128   32     
32     -16    
-80    -128   
-48    48     
0      64     
-32    -144   
-64    -144   
48     -240   
-64    64     
160    0      
224    112    
-112   256    
48     224    
-256   -384   
432    -176   
320    400    
224    -192   
320    -112   
32     432    
-448   0      
128    1056   
80     -416   
-368   -832   
608    848    
144    -640   
176    400    
-304   144    
160    -80    
-16    272    
-64    -48    
-32    176    
-112   -272   
16     128    
16     -32    
112    -16    
-288   0      
336    -816   
64     592    
64     240    
160    320    
16     768    
128    -272   
-176   240    
-144   -176   
192    -176   
-32    160    
48     144    
16     992    
304    288    
160    272    
-400   96     
176    -704   
-96    -64    
128    208    
496    368    
-240   160    
-160   -32    
48     80     
-64    112    
352    224    
-32    16     
48     -96    
0      -176   
32     -16    
-32    176    
-192   64     
240    -80    
16     160    
80     80     
32     -16    
224    -48    
-144   48     
-48    96     
-32    -48    
-80    -32    
144    32     
240    128    
-144   80     
-80    0      
272    -64    
32     64     
-64    -176   
-96    -144   
-144   32     
-144   32     
32     48     
-16    48     
80     48     
16     0      
176    -736   
-112   80     
128    32     
48     64     
64     -48    
112    -80    
0      -64    
0      112    
-192   32     
0      0      
128    64     
128    96     
80     176    
128    112    
-32    48     
144    -1104  
112    0      
32     48     
-64    160    
32     112    
64     -48    
-144   -112   
80     -16    
96     96     
224    32     
240    128    
-32    144    
-96    0      
208    0      
-112   0      
128    -432   
-16    112    
144    192    
16     160    
-112   -64    
224    0      
-112   128    
-128   16     
144    -48    
144    16     
80     -48    
320    32     
-176   144    
-112   -48    
-96    32     
288    -32    
96     0      
-128   -64    
48     0      
240    272    
-240   288    
-96    112    
0      32     
32     176    
320    64     
0      -160   
-144   -64    
-144   -16    
-64    0      
-48    64     
160    -16    
256    0      
240    -816   
48     160    
240    272    
64     96     
48     16     
-80    64     
48     -64    
0      144    
-16    128    
192    128    
-32    320    
112    -288   
256    -496   
128    -192   
112    0      
224    -32    
368    112    
416    -480   
0      336    
48     224    
80     176    
144    448    
-96    128    
32     -448   
160    -224   
160    128    
240    144    
400    192    
-384   -352   
32     -64    
-64    0      
208    -48    
288    -384   
80     -144   
48     160    
64     80     
48     -32    
48     -16    
16     512    
32     -240   
128    64     
-96    -400   
288    -224   
-64    32     
-80    -80    
-80    -192   
80     240    
-32    -160   
288    -272   
-64    -224   
64     144    
16     16     
128    16     
-16    -32    
176    0      
-80    96     
-64    -144   
-224   -240   
32     16     
32     512    
672    624    
-752   -864   
112    -800   
224    -160   
128    0      
384    -272   
176    -128   
-16    304    
-144   -288   
224    272    
-208   -192   
-288   -400   
144    0      
-176   0      
48     -80    
48     -112   
144    -208   
272    -80    
-112   128    
304    -80    
224    -592   
64     144    
-144   192    
-464   32     
160    -96    
128    -800   
-80    -176   
192    -1296  
-32    -16    
96     0      
48     80     
-80    0      
240    -80    
-112   -368   
208    -32    
96     -16    
160    64     
-592   0      
-224   -16    
-16    -160   
320    -144   
208    128    
160    48     
-16    32     
32     -272   
16     -80    
224    -16    
48     64     
0      -80    
-80    0      
32     -128   
160    -112   
-208   -64    
-144   -96    
96     -64    
160    48     
-16    64     
96     -112   
64     96     
176    -448   
32     -32    
32     0      
144    32     
80     16     
0      80     
32     -16    
64     -128   
-336   0      
-64    144    
-752   48     
304    -16    
208    -144   
64     -48    
-64    -208   
128    -208   
-144   48     
-240   64     
224    112    
160    -32    
0      -64    
-48    32     
288    160    
-256   0      
112    -96    
-1408  16     
16     32     
48     -16    
16     -144   
48     -32    
-32    80     
224    144    
240    -208   
-96    160    
208    32     
240    -96    
-112   0      
16     32     
176    272    
-16    -16    
-160   64     
96     32     
-1408  112    
16     112    
160    0      
192    -208   
112    -48    
160    -448   
-176   64     
0      16     
240    0      
-272   -16    
112    0      
32     448    
224    176    
-352   -80    
-32    -16    
-512   -48    
-192   -112   
256    -128   
352    -96    
-16    384    
-160   -304   
64     -96    
240    16     
432    -32    
48     -16    
48     -96    
-176   -16    
16     0      
128    -80    
176    80     
-1360  -320   
192    -208   
-256   176    
-112   -80    
128    32     
-64    -48    
240    192    
-176   16     
-176   -96    
-624   -32    
-368   -288   
-64    -80    
64     160    
-160   32     
64     -192   
-240   -96    
512    16     
-16    112    
96     -112   
128    -96    
-672   -336   
-128   -64    
-224   64     
-64    16     
-256   -48    
224    -80    
0      -64    
448    -16    
432    80     
-80    -16    
-192   208    
-464   0      
96     48     
-416   -160   
-384   112    
208    176    
64     -16    
-112   -144   
-96    -80    
48     64     
-288   80     
-192   -144   
-96    -96    
-96    368    
-192   400    
32     48     
-368   -256   
112    192    
-160   64     
-96    16     
160    384    
-192   -192   
16     48     
-256   -16    
-80    -16    
-992   -496   
-320   496    
-224   64     
-176   -160   
128    160    
272    -224   
320    96     
144    48     
16     96     
-192   704    
-112   -400   
144    -144   
-240   -32    
144    496    
-272   48     
-80    -96    
-128   -720   
-144   160    
304    688    
-576   -112   
-48    256    
-208   -48    
144    -112   
-224   -480   
208    -32    
-32    32     
-32    0      
0      -64    
-128   0      
-80    544    
48     224    
208    80     
-288   128    
192    -16    
-416   -256   
-144   0      
64     48     
-64    128    
256    176    
-48    336    
-48    112    
-240   -96    
-32    0      
80     208    
96     -16    
96     16     
-192   96     
-496   -16    
0      48     
-432   -128   
352    -288   
32     400    
48     496    
-96    -16    
-64    272    
64     -48    
-128   -96    
144    -176   
-144   -144   
-112   32     
-144   48     
-64    128    
-16    64     
-64    0      
-688   -128   
176    -48    
-48    0      
160    64     
-176   112    
-16    112    
160    80     
80     0      
176    64     
-112   112    
-32    0      
-96    -32    
-32    144    
16     128    
240    48     
-384   -144   
304    208    
32     352    
240    144    
320    192    
-160   32     
-128   16     
-128   -48    
48     32     
-80    224    
-224   -80    
16     176    
112    96     
112    -64    
144    -16    
-320   0      
16     48     
-32    64     
80     16     
-80    -64    
-48    -16    
160    -16    
128    64     
32     208    
-256   112    
96     16     
-176   -32    
16     32     
-416   0      
160    64     
-320   -368   
144    -160   
96     112    
-208   -48    
304    288    
-160   192    
48     48     
96     0      
0      0      
96     240    
-16    256    
-96    48     
-64    -64    
-16    -224   
96     -176   
192    16     
-80    48     
16     80     
-96    -48    
64     -96    
176    -96    
192    128    
-112   96     
-272   -96    
-96    -32    
-352   -224   
128    -448   
208    -176   
352    16     
32     0      
-112   144    
-160   192    
-256   -176   
32     -208   
144    192    
144    384    
64     240    
64     192    
64     -16    
-288   48     
48     160    
48     -176   
256    160    
-64    272    
-336   -432   
384    80     
112    320    
400    48     
64     -176   
400    -128   
464    464    
-144   48     
48     0      
-224   144    
48     48     
288    240    
-560   -96    
160    48     
-64    0      
464    -192   
240    160    
32     160    
208    128    
-192   -32    
-128   -320   
-64    -96    
-32    240    
16     32     
624    112    
-176   -96    
-96    -112   
-48    -32    
-48    112    
-128   32     
192    256    
-32    80     
-192   0      
-64    144    
160    128    
64     -32    
128    16     
112    48     
-16    -16    
192    160    
0      0      
16     48     
-112   64     
-32    48     
112    48     
64     -848   
32     16     
96     48     
16     -32    
208    96     
240    112    
-192   -32    
-176   16     
16     128    
-160   -32    
256    0      
48     112    
176    96     
304    32     
48     208    
144    -160   
352    176    
-656   -48    
64     -16    
0      -48    
224    64     
-176   32     
-96    32     
96     -128   
144    48     
80     64     
-80    48     
208    112    
400    240    
-736   192    
-272   -288   
32     -96    
208    -208   
-16    176    
416    176    
-416   0      
-64    48     
96     64     
80     128    
80     16     
-48    -48    
208    96     
-16    80     
-48    -64    
176    96     
-32    -288   
176    48     
128    -704   
96     32     
-64    -32    
192    0      
32     -64    
144    112    
-48    32     
96     32     
192    64     
32     -64    
160    96     
64     32     
64     16     
16     -16    
48     48     
0      112    
256    192    
-80    -336   
80     -16    
240    96     
240    176    
-96    -64    
176    -16    
-48    112    
0      -16    
240    48     
80     16     
-32    48     
16     -320   
16     64     
-144   -80    
80     32     
64     -192   
64     -224   
144    48     
176    64     
0      16     
64     112    
-80    32     
192    112    
16     48     
80     -384   
192    48     
0      -128   
304    272    
128    16     
-64    160    
48     176    
32     48     
-16    0      
80     0      
64     32     
64     -16    
32     -64    
64     -48    
144    -16    
32     -208   
32     160    
80     64     
-16    48     
112    -160   
64     16     
-16    -320   
128    64     
112    112    
-32    -272   
-16    -16    
80     -64    
80     96     
80     -64    
144    144    
96     128    
112    112    
16     -192   
80     -48    
-16    -32    
480    752    
-544   208    
0      -256   
144    -208   
240    -464   
96     80     
-1520  80     
304    208    
192    -32    
-368   208    
224    16     
-128   -912   
16     32     
160    16     
16     -96    
-160   16     
-80    16     
-64    -320   
240    -64    
160    -224   
160    208    
-368   -16    
-80    -192   
-336   48     
-96    -48    
80     -240   
352    -560   
256    48     
608    448    
-112   96     
-144   -160   
-368   -304   
-224   160    
192    -720   
176    -560   
432    304    
-304   -352   
-432   240    
-96    -80    
-336   0      
368    528    
32     -544   
-368   -48    
64     -560   
-256   -80    
-48    0      
-144   16     
128    -16    
208    112    
-16    0      
192    192    
-160   -720   
-80    144    
-1952  0      
-80    -544   
176    288    
96     160    
64     -224   
208    -256   
-80    0      
144    16     
96     352    
96     -448   
112    -304   
-272   224    
80     -96    
-192   16     
160    -288   
-64    -688   
-16    16     
208    496    
176    112    
-80    -112   
64     -256   
96     80     
-48    -1056  
96     224    
208    192    
320    560    
-640   224    
176    -352   
-144   -64    
128    16     
-112   464    
-48    -48    
-1760  -16    
160    80     
-32    32     
192    0      
0      -128   
128    -480   
16     48     
16     16     
240    -176   
-320   0      
16     -384   
-32    -336   
32     -96    
-384   80     
16     96     
-800   -32    
-112   -32    
192    144    
144    224    
-16    288    
128    -224   
-16    -80    
-32    -64    
-80    32     
256    96     
-112   32     
-16    32     
-144   -160   
128    -352   
48     -128   
-64    80     
64     -64    
128    64     
96     -176   
-16    256    
224    -288   
-288   -16    
-272   -32    
48     16     
192    160    
-48    464    
-304   -144   
176    -192   
-16    -112   
256    -256   
-192   144    
-160   -256   
160    0      
224    -272   
144    144    
48     -96    
-16    32     
-208   128    
-48    64     
128    64     
128    -16    
-176   -48    
80     -160   
-64    96     
-16    48     
384    160    
-1312  -48    
256    32     
-496   32     
-48    80     
32     96     
-272   -48    
-80    192    
-160   32     
240    -16    
-1360  64     
144    240    
-80    -48    
-80    -16    
0      -16    
64     112    
-80    -80    
48     -112   
32     -208   
-16    -64    
-160   208    
48     96     
-272   64     
-176   32     
80     -16    
-496   16     
-176   -64    
-848   -96    
-96    64     
-224   -96    
48     -48    
-80    -96    
64     -176   
-192   -16    
-96    -64    
-240   32     
160    0      
16     16     
208    64     
-48    256    
-432   80     
-16    -160   
-32    -32    
128    -32    
32     -16    
32     -48    
-240   -128   
0      -64    
144    224    
160    176    
-96    80     
-96    16     
-48    -144   
64     336    
-48    160    
-48    -224   
-112   32     
-224   16     
96     64     
-496   -192   
112    240    
-240   -96    
0      -80    
-192   -128   
224    288    
64     112    
-16    112    
32     304    
-192   16     
-48    -32    
-16    192    
16     48     
-144   288    
-128   96     
-720   -352   
224    -64    
80     -80    
80     96     
272    224    
-288   -272   
-80    -96    
-432   -144   
624    -240   
480    -80    
368    -96    
208    -16    
-16    80     
-544   224    
-416   48     
-304   -144   
160    -112   
144    -16    
208    32     
144    64     
-144   -32    
-240   48     
-96    0      
192    0      
-80    0      
64     16     
-192   -48    
16     64     
-176   80     
-112   32     
80     16     
224    144    
-320   16     
352    64     
-128   -16    
-320   -416   
128    -112   
-288   256    
-336   -32    
208    192    
-240   80     
-64    48     
160    0      
-208   16     
256    0      
-224   0      
80     16     
-32    32     
144    112    
-256   -16    
64     64     
-112   112    
160    16     
0      64     
80     -32    
-16    16     
-80    32     
16     80     
64     192    
0      128    
-384   0      
-96    -16    
64     -16    
224    128    
192    192    
-144   112    
-352   -80    
208    48     
-112   80     
-144   -32    
224    32     
-64    64     
112    112    
-176   -480   
224    -224   
-432   320    
-128   64     
0      128    
-592   32     
-352   -240   
176    -80    
96     -48    
272    384    
-208   -80    
-272   -288   
416    160    
-224   96     
-496   -80    
-32    16     
96     0      
-144   80     
288    48     
-64    0      
96     160    
0      32     
128    0      
-96    64     
112    96     
-16    -16    
-144   -32    
192    48     
-64    16     
176    48     
0      0      
-32    -48    
80     32     
-48    80     
160    0      
-16    64     
0      48     
-144   80     
352    80     
-112   0      
-128   -160   
192    -96    
-48    48     
288    32     
-64    0      
-176   64     
80     112    
0      64     
48     0      
160    64     
-32    144    
208    48     
0      -16    
-16    16     
0      128    
144    160    
-96    16     
112    0      
-80    16     
-48    80     
192    -16    
176    -800   
80     -48    
80     48     
-80    0      
128    0      
96     144    
-48    128    
112    -32    
64     0      
64     -64    
-208   -112   
112    16     
-192   -176   
176    -16    
112    48     
128    -208   
16     288    
-80    -112   
-16    112    
32     -32    
80     16     
96     128    
-80    -448   
64     352    
208    0      
0      0      
32     64     
-144   48     
48     16     
-128   64     
-16    -176   
16     128    
-112   -160   
272    -32    
80     176    
208    0      
16     240    
-96    -96    
-80    -112   
128    -16    
64     48     
-272   48     
0      128    
-16    -48    
96     64     
448    -48    
-80    0      
96     320    
352    416    
-272   -288   
272    528    
224    -48    
48     -48    
208    96     
160    -96    
64     -16    
-32    112    
-64    -16    
112    -112   
80     112    
48     16     
112    96     
-176   -368   
352    1600   
224    640    
192    -1136  
32     -32    
64     288    
-16    32     
96     368    
-384   -192   
400    224    
96     352    
496    -544   
272    112    
304    384    
400    32     
-48    -1040  
352    80     
-240   -1232  
272    16     
-560   -224   
-16    -224   
-176   16     
-48    -16    
336    -32    
144    -64    
352    -112   
112    -224   
-48    -48    
64     -48    
128    96     
-48    0      
-48    256    
80     -112   
144    -48    
144    112    
336    160    
-16    224    
80     96     
64     -48    
128    176    
-48    144    
144    32     
16     -16    
64     -80    
208    48     
-16    80     
96     144    
288    320    
-96    96     
-32    272    
288    -16    
0      -32    
112    -176   
-80    -16    
48     -16    
-128   -160   
224    -112   
-144   128    
-256   -336   
416    -304   
320    96     
-160   480    
-112   -496   
64     -1424  
112    -48    
192    -256   
112    304    
-176   -64    
480    400    
-400   128    
-80    -624   
144    -272   
80     -80    
192    -112   
64     -64    
128    -112   
80     -1392  
144    -64    
224    -352   
-272   0      
416    -144   
96     -224   
-336   -16    
-240   -256   
-64    -16    
128    16     
64     96     
160    -176   
32     112    
32     80     
16     -64    
192    -16    
-112   80     
288    -48    
-80    -64    
-32    0      
400    128    
-1328  16     
224    -288   
0      -32    
272    112    
-192   96     
144    -224   
-224   -160   
112    -864   
192    80     
-48    64     
96     -80    
-128   -112   
64     192    
112    240    
160    32     
-384   0      
176    -64    
-368   16     
320    160    
-480   112    
176    -96    
0      -160   
-64    -96    
-80    32     
128    -32    
32     96     
240    -224   
-208   -160   
112    -176   
-208   -80    
80     16     
96     288    
64     80     
112    -448   
-144   -208   
-48    -64    
-112   64     
208    -80    
144    144    
16     -32    
96     96     
80     80     
160    -80    
112    16     
-96    0      
-208   16     
-176   176    
-800   -16    
224    144    
304    192    
0      0      
80     96     
112    -272   
-48    16     
96     -1616  
80     144    
-96    240    
48     208    
64     64     
128    -112   
-176   -176   
32     -144   
-240   160    
224    -272   
-688   144    
0      -272   
-96    -48    
96     -160   
-16    16     
-32    128    
48     -80    
-32    -48    
112    112    
-48    0      
192    -48    
-624   -48    
48     -96    
32     80     
64     -64    
-576   -352   
176    16     
128    368    
-32    144    
256    -192   
272    -176   
208    48     
-480   16     
-96    -256   
-64    0      
-336   128    
-336   192    
-224   192    
-528   -112   
32     -80    
-704   -80    
480    0      
-32    64     
288    -80    
-32    -80    
192    -240   
64     32     
528    448    
-592   208    
-272   -96    
480    0      
-288   0      
32     0      
64     32     
-480   -96    
48     0      
32     80     
-640   208    
-720   -16    
480    48     
32     16     
-208   144    
-96    96     
-272   80     
-416   -160   
256    -128   
160    240    
32     -16    
288    16     
-64    -48    
304    -16    
-448   -16    
-96    -16    
-336   -128   
-464   -32    
128    64     
-192   -32    
112    -112   
-576   -96    
-256   96     
-640   -48    
0      80     
176    16     
192    32     
-32    -48    
144    128    
-240   -80    
32     96     
32     -96    
-80    0      
-16    96     
-192   0      
-32    -128   
-208   -32    
0      -16    
-32    -32    
192    64     
288    16     
32     112    
-16    96     
-304   -16    
48     -80    
96     112    
0      96     
32     48     
64     32     
-208   112    
240    -128   
-48    -112   
96     96     
112    160    
-448   -32    
-528   -128   
48     32     
128    80     
-208   32     
208    0      
-336   -160   
128    0      
-160   80     
-160   -48    
208    144    
64     352    
-656   16     
-304   -64    
-16    -16    
-176   -32    
-480   -224   
288    -48    
-400   -96    
800    448    
-1264  32     
-128   -208   
400    -16    
-16    32     
128    32     
64     0      
320    192    
-320   32     
-16    0      
-208   -112   
0      16     
-48    80     
80     32     
-192   -48    
112    64     
16     0      
-48    48     
32     96     
16     32     
80     48     
-64    -16    
0      240    
-16    288    
48     -16    
128    224    
16     144    
16     -48    
112    32     
-544   0      
144    80     
-144   16     
160    64     
-144   128    
48     144    
-160   112    
48     -80    
48     -64    
-80    0      
16     -160   
-176   -64    
-64    144    
-528   16     
192    80     
-768   16     
144    -96    
-160   -192   
80     160    
-112   144    
32     0      
16     80     
224    160    
-208   -128   
176    96     
176    224    
-288   -272   
0      160    
-80    -144   
240    80     
48     208    
16     64     
80     32     
-240   304    
144    -656   
256    576    
-240   -304   
-80    -160   
176    448    
64     -128   
-176   -224   
-240   -80    
16     368    
144    -320   
-160   -496   
48     96     
160    -32    
64     368    
64     -144   
48     -80    
128    80     
32     -80    
96     112    
-176   0      
-16    -16    
96     64     
-32    96     
-64    -384   
-16    -16    
96     176    
192    48     
96     352    
16     -48    
48     32     
192    176    
352    384    
-96    16     
-160   -96    
112    256    
-80    128    
64     112    
304    256    
112    512    
-224   176    
80     -384   
208    48     
288    32     
224    64     
96     160    
112    176    
-256   -32    
-16    -64    
48     144    
-176   64     
144    0      
240    64     
464    384    
128    256    
-112   32     
-80    -64    
96     112    
128    176    
-128   96     
-240   -128   
80     -48    
-144   -48    
-176   -16    
-32    -80    
-128   80     
112    16     
112    -32    
64     32     
-272   128    
368    -16    
-256   112    
-320   -16    
-48    32     
160    48     
320    -128   
176    32     
-80    -160   
-64    -112   
-112   96     
-144   128    
16     -16    
208    32     
80     112    
80     96     
144    -32    
-16    -352   
16     -272   
-64    -32    
64     192    
112    160    
0      192    
0      48     
48     16     
-80    -64    
192    -80    
0      16     
176    -48    
-32    -240   
-144   -752   
48     384    
128    -928   
48     144    
128    160    
208    -64    
128    -112   
144    16     
-112   64     
32     128    
112    -16    
64     48     
-240   -112   
48     -96    
0      -48    
-64    -256   
-16    -80    
400    -368   
128    96     
48     -16    
32     32     
-80    352    
272    352    
-64    256    
160    -176   
-80    48     
16     -144   
240    -160   
400    96     
128    -176   
-256   -816   
384    -192   
-48    464    
-592   16     
48     208    
48     -144   
256    272    
464    -384   
-128   -160   
-64    128    
-592   336    
80     -48    
-160   64     
176    -64    
96     80     
304    -48    
80     -16    
176    -176   
96     -112   
-256   -176   
-32    -64    
-32    128    
-80    32     
-176   -112   
352    -432   
-32    112    
400    224    
-336   224    
-48    -608   
-32    -256   
256    -96    
-160   -80    
80     -240   
208    -240   
432    288    
-160   128    
160    448    
-32    0      
320    240    
32     336    
80     160    
480    176    
96     416    
-64    304    
128    272    
-16    208    
400    480    
-144   384    
48     192    
48     -48    
176    -96    
-192   -144   
192    400    
80     -192   
0      -192   
272    448    
-192   32     
80     80     
320    -144   
112    96     
48     -112   
32     224    
-32    -192   
224    -16    
-112   -144   
48     0      
400    -192   
-112   400    
-240   -720   
0      144    
80     112    
112    352    
64     -656   
144    192    
-224   -80    
0      96     
144    32     
176    -176   
176    96     
96     -176   
80     112    
-64    128    
-80    -192   
64     -16    
-16    -48    
64     -256   
176    64     
128    -96    
224    -32    
208    -608   
-48    -80    
-32    -736   
192    -144   
64     32     
160    144    
32     0      
96     32     
-48    -160   
-160   -80    
32     -224   
112    144    
-1376  -128   
624    -176   
160    -48    
128    64     
80     -128   
0      -1216  
16     -176   
112    -16    
-368   -64    
16     -160   
-432   16     
-224   -112   
-208   48     
-336   32     
448    256    
-1360  0      
0      -192   
224    -80    
16     -48    
176    64     
32     -16    
64     -176   
352    -480   
544    96     
304    -128   
560    48     
480    0      
-176   64     
-752   -160   
-160   -64    
-672   -16    
-64    -128   
144    -16    
336    32     
192    16     
48     -192   
448    -80    
160    -768   
-96    112    
160    -32    
192    -80    
336    176    
-224   0      
-128   -32    
80     -48    
-48    -16    
400    -32    
-1024  0      
16     0      
-80    -144   
112    -176   
-368   -64    
304    -464   
-176   0      
464    96     
80     96     
32     80     
0      -80    
-96    -32    
240    64     
-160   0      
304    -32    
-624   80     
80     0      
64     16     
48     -32    
-96    -16    
272    160    
-64    48     
128    -1024  
128    32     
-64    48     
272    -48    
0      -32    
144    64     
-176   -144   
432    -112   
-448   -16    
48     -80    
-160   16     
176    -16    
528    304    
-160   -144   
800    224    
-576   -640   
-160   -160   
224    48     
128    128    
-288   -48    
96     -144   
-432   -96    
-48    -96    
-464   0      
288    48     
-576   -32    
432    -368   
256    -112   
-336   -16    
192    320    
-96    64     
-128   -64    
96     48     
32     32     
-112   80     
432    80     
48     -16    
640    192    
-256   -160   
112    48     
-544   -48    
208    16     
-64    96     
-64    -128   
304    240    
16     32     
-1328  -16    
-128   112    
-128   -64    
-64    -80    
112    -16    
80     160    
16     -32    
-16    -16    
80     -96    
-64    -64    
-816   -432   
128    112    
96     192    
-832   -128   
-176   288    
-848   64     
-304   -288   
-528   144    
80     16     
-416   0      
48     -16    
-16    544    
-176   48     
-528   -272   
336    336    
128    -208   
-80    288    
-352   -48    
96     -448   
32     192    
-208   480    
208    -48    
-80    0      
-32    -464   
-304   864    
-80    560    
16     -560   
-48    96     
-32    -16    
96     112    
128    336    
80     208    
160    176    
-112   48     
224    -32    
-80    0      
0      80     
-224   176    
-32    368    
-32    32     
-96    -32    
-96    0      
-64    32     
80     -128   
48     80     
48     -112   
176    80     
-176   304    
-80    16     
-144   112    
-160   0      
-224   48     
32     64     
-32    -32    
-96    -32    
80     80     
-224   -96    
80     48     
-192   -144   
160    -64    
-80    80     
176    48     
80     80     
80     48     
-192   128    
-272   0      
-48    -48    
112    48     
-96    96     
112    128    
0      32     
64     80     
-64    192    
-1104  -128   
368    -80    
-48    96     
-112   32     
16     80     
-96    16     
-176   -256   
-96    -240   
32     -160   
-80    128    
-80    208    
-288   -80    
160    16     
-416   48     
-16    144    
-1312  -80    
192    0      
64     48     
128    128    
-112   -16    
-32    32     
-112   -96    
32     -48    
144    16     
-96    16     
0      0      
-16    -64    
32     112    
-32    -80    
-64    32     
-80    -112   
-96    0      
64     224    
64     48     
128    48     
96     32     
16     320    
64     240    
-272   16     
16     -48    
-144   48     
64     -64    
288    192    
-176   48     
176    80     
96     0      
48     16     
208    0      
144    64     
-240   96     
16     80     
64     144    
48     0      
-112   -96    
80     16     
80     80     
-96    32     
0      -16    
-64    112    
80     176    
48     48     
128    -64    
-32    80     
0      -32    
16     64     
64     160    
64     80     
112    -64    
-208   -224   
240    128    
-272   -176   
-304   -368   
32     -48    
-320   -96    
320    64     
-320   80     
528    -240   
128    -160   
128    -144   
256    -112   
-208   -80    
224    -464   
112    80     
-96    -368   
-240   -80    
-144   -208   
-112   -416   
144    144    
64     -432   
16     -272   
64     -192   
208    0      
192    80     
352    -240   
-48    96     
-464   -464   
80     -160   
-352   -160   
192    48     
-304   96     
0      176    
-48    208    
48     -80    
-352   -352   
528    -688   
48     32     
256    48     
256    32     
64     144    
-96    -352   
96     -64    
-48    -80    
-272   112    
-144   48     
32     -320   
-48    64     
288    -32    
-128   128    
224    -544   
192    256    
144    144    
-112   160    
128    -32    
-96    -96    
128    -144   
-240   -224   
-16    64     
64     208    
-128   -80    
336    32     
16     96     
-80    112    
48     -640   
0      -144   
-160   80     
-96    -48    
176    256    
-304   -48    
-80    48     
336    176    
-112   -352   
-32    192    
16     48     
176    16     
-240   16     
208    -80    
-112   16     
128    -64    
192    160    
-32    -16    
48     -16    
0      48     
128    48     
-96    32     
128    -32    
-176   128    
-80    160    
32     96     
176    64     
32     -48    
16     -16    
96     80     
32     -224   
48     96     
48     -816   
-32    -320   
-192   -224   
128    192    
112    -176   
-96    -128   
128    16     
208    0      
0      128    
96     -16    
16     112    
32     80     
-176   304    
80     32     
0      96     
-112   -736   
208    48     
16     -176   
144    -16    
0      176    
-32    16     
-32    -64    
240    32     
80     80     
224    320    
-192   208    
112    -208   
288    -32    
-48    -32    
64     32     
128    -96    
16     48     
176    0      
144    48     
208    192    
-272   16     
80     -32    
304    64     
64     64     
400    368    
-448   144    
144    -128   
80     -240   
256    -16    
288    176    
592    256    
48     288    
-528   -1056  
32     -32    
-192   0      
96     192    
48     96     
96     32     
128    32     
-48    128    
256    -48    
400    -64    
-176   112    
80     112    
0      0      
32     -160   
336    400    
-64    208    
352    -240   
480    112    
-272   224    
-80    32     
80     -32    
32     192    
-144   112    
-112   -48    
-64    -96    
208    -48    
-160   -368   
-16    128    
48     -192   
448    208    
-208   -64    
224    16     
-144   -16    
-80    16     
192    16     
112    80     
80     80     
-80    -64    
288    -16    
208    80     
192    160    
-96    -128   
32     -64    
192    -112   
288    144    
96     -16    
-32    128    
-208   0      
48     -752   
64     96     
-48    -880   
96     -1040  
112    -128   
80     -1008  
32     0      
-48    224    
48     400    
208    208    
80     -80    
-64    16     
64     -112   
16     -112   
-64    64     
128    16     
-16    96     
128    -128   
160    -16    
0      80     
32     -80    
256    -224   
320    -736   
352    32     
176    -16    
48     -224   
-32    -48    
-48    -272   
256    96     
96     144    
64     -208   
192    -64    
-448   -64    
224    -96    
-1024  192    
304    208    
384    64     
-48    96     
416    -144   
208    -272   
144    80     
32     224    
-96    -96    
-64    32     
288    368    
160    -240   
336    -96    
-16    -240   
-112   64     
-160   48     
-304   -208   
224    64     
48     432    
112    -592   
288    112    
160    -112   
-80    -672   
-32    736    
160    -640   
-16    256    
-128   0      
64     -208   
-192   32     
272    208    
-128   -112   
-64    -240   
208    176    
-240   -112   
416    -768   
-96    -16    
32     816    
288    -64    
-224   192    
96     -144   
48     96     
-16    -128   
32     -272   
0      -144   
96     -112   
-576   32     
144    0      
-2240  -304   
-16    -256   
32     -48    
-48    48     
80     176    
336    -32    
-64    64     
64     -48    
96     64     
176    96     
48     0      
-32    -192   
16     -240   
-160   -80    
-32    -48    
-80    64     
-48    -64    
-176   -80    
192    -144   
-128   48     
64     -192   
80     32     
128    -512   
288    -16    
-176   -16    
16     -144   
-16    -32    
48     48     
-352   48     
256    -64    
-320   -32    
-16    -48    
-928   -80    
288    -16    
-144   416    
48     -48    
176    -192   
144    -304   
0      80     
-224   48     
176    48     
96     304    
-288   208    
-48    -128   
64     -64    
-176   -16    
192    16     
-224   -80    
-176   -48    
32     -96    
304    -80    
176    -16    
-368   -32    
80     80     
-416   80     
240    32     
-112   -80    
128    32     
-448   112    
48     -80    
80     -80    
-32    -176   
112    -208   
192    160    
32     352    
208    240    
-288   272    
-144   -64    
-1344  112    
-48    96     
-304   -224   
-240   16     
-208   112    
-400   -32    
176    0      
-144   -16    
-48    -80    
160    32     
96     -144   
208    16     
-240   -192   
48     -32    
-288   128    
-128   144    
-64    96     
-208   -112   
592    80     
336    112    
112    16     
288    128    
-448   80     
-528   128    
480    352    
-368   -64    
-304   32     
-208   -304   
-176   -368   
-48    -208   
-256   48     
16     192    
-400   0      
368    336    
-416   208    
-304   -48    
192    16     
0      112    
80     0      
96     80     
160    -64    
32     -128   
-80    64     
-176   16     
48     80     
64     -16    
-80    80     
-32    128    
-48    -144   
80     320    
48     304    
-512   336    
-48    -240   
-16    -128   
-128   96     
64     -448   
-32    416    
80     448    
192    -144   
-176   -192   
-16    256    
32     64     
-80    192    
0      176    
-384   272    
-128   -80    
-656   -256   
64     -192   
-240   304    
416    48     
48     16     
272    -112   
-288   0      
-48    -32    
-64    208    
-64    -144   
160    192    
-80    64     
-528   -688   
112    800    
-224   -80    
-480   -544   
384    672    
-640   80     
112    -512   
224    0      
-240   144    
208    -144   
48     96     
496    160    
-336   -144   
-1120  -1248  
48     -96    
-80    976    
-544   80     
-96    -48    
16     -208   
384    -192   
-1920  160    
-16    48     
-32    -224   
-240   -144   
-32    96     
-32    112    
-16    0      
-80    48     
112    80     
64     48     
80     48     
-32    16     
64     32     
-272   -112   
96     32     
-176   -48    
48     80     
96     16     
144    96     
-304   -32    
-32    -48    
240    80     
-64    80     
64     48     
0      48     
-64    208    
-256   64     
0      80     
-432   16     
368    48     
80     112    
-48    -80    
160    128    
16     0      
-64    112    
176    -16    
-32    112    
208    -48    
-256   -64    
-64    0      
0      48     
-144   32     
48     32     
-64    -48    
144    16     
-176   96     
80     64     
-48    48     
112    -48    
-48    32     
-32    -32    
208    -16    
-96    -48    
96     32     
128    128    
0      240    
-64    128    
0      -96    
-16    -80    
64     64     
-48    48     
32     -32    
48     16     
224    160    
-112   128    
-96    96     
80     112    
112    176    
-96    -48    
-80    0      
320    160    
-240   32     
-32    0      
-80    -224   
-80    -64    
-48    160    
-48    112    
224    128    
-32    -16    
160    -16    
32     96     
-32    48     
-96    -48    
128    16     
-48    16     
176    96     
-384   -48    
48     48     
96     -80    
-208   80     
-400   160    
160    -16    
192    -32    
192    32     
-144   0      
272    -16    
112    -48    
96     -80    
224    -32    
-96    -32    
-96    176    
-160   -96    
224    -96    
160    48     
160    128    
32     -16    
272    32     
240    112    
-48    160    
32     80     
48     -32    
256    112    
32     16     
80     -192   
-32    -80    
-464   0      
16     -112   
-16    -352   
-336   80     
96     32     
240    -16    
-16    16     
48     0      
-16    16     
-144   96     
-384   -16    
-432   -32    
48     -16    
144    32     
-128   -144   
336    16     
-80    48     
-80    -400   
352    48     
144    96     
-144   -32    
176    16     
480    240    
-112   64     
-48    16     
-192   0      
336    48     
48     -32    
112    80     
-32    -48    
96     -16    
128    64     
176    -176   
144    32     
48     -400   
80     0      
-32    0      
32     16     
64     112    
192    64     
112    144    
192    112    
320    224    
-16    144    
-16    16     
32     64     
112    128    
112    64     
-64    -288   
160    -272   
-32    96     
160    32     
96     160    
176    208    
32     480    
-512   144    
368    256    
-96    -32    
32     -16    
-176   464    
128    -672   
-368   -32    
144    320    
-112   -144   
-256   -240   
64     128    
0      -1184  
-64    0      
832    48     
-64    176    
-208   -304   
-192   -240   
288    352    
-160   144    
-176   80     
448    32     
-192   224    
256    -128   
-64    128    
-80    -240   
-80    64     
256    -176   
-48    -160   
176    176    
208    48     
160    16     
-112   -48    
336    -96    
-128   272    
128    192    
160    -320   
-256   -32    
160    -416   
-16    96     
96     48     
32     64     
-128   -576   
400    -176   
-224   96     
224    32     
256    48     
-208   144    
-96    144    
32     -64    
192    80     
80     -192   
64     80     
112    16     
208    48     
144    -112   
-16    144    
224    -208   
32     -64    
160    0      
16     64     
64     -64    
96     -112   
-304   -256   
400    32     
80     80     
48     -80    
160    160    
112    -16    
112    64     
112    -48    
32     -48    
64     -16    
160    32     
0      128    
-48    80     
32     0      
432    80     
-128   -592   
64     -96    
32     -112   
64     -144   
144    -1440  
96     -128   
80     48     
80     -96    
64     -80    
-80    96     
-96    -304   
64     -16    
48     32     
-80    48     
-688   -112   
224    -176   
128    144    
48     -48    
208    -336   
32     -448   
16     0      
112    -448   
-16    -16    
32     -32    
240    128    
16     64     
128    80     
80     16     
160    80     
64     -80    
176    -48    
384    96     
-80    16     
112    32     
64     48     
160    32     
-32    -80    
80     -192   
192    -80    
176    208    
-80    64     
80     64     
112    -64    
-80    48     
-304   -96    
-32    -16    
-752   -128   
352    -208   
-192   -288   
-160   -400   
-80    -224   
-112   -32    
96     112    
-48    -288   
96     240    
224    -144   
160    -16    
64     -32    
-80    32     
-128   -64    
320    16     
-176   -16    
-16    0      
144    80     
176    128    
16     80     
64     -384   
-384   -176   
96     -256   
-32    -176   
-128   -80    
336    80     
208    0      
304    -192   
48     -160   
-112   320    
0      48     
-304   -256   
-1680  144    
64     -272   
-144   -64    
160    -112   
256    -16    
-64    -416   
80     112    
16     -96    
32     -144   
288    400    
-32    -304   
-144   48     
48     48     
-48    16     
560    -320   
-992   -528   
-32    240    
-288   64     
32     -272   
320    -80    
128    -240   
-144   128    
-48    160    
-80    -80    
-208   16     
320    192    
-176   -32    
192    -272   
-336   -32    
-64    96     
-176   480    
352    224    
-160   0      
112    -96    
96     48     
-144   -80    
448    176    
80     -32    
224    -16    
-976   -352   
32     -64    
-400   464    
-448   -208   
128    -48    
-112   0      
464    224    
-32    -160   
128    64     
0      -224   
-32    -32    
64     -128   
-144   0      
-64    48     
480    32     
-304   -16    
176    -80    
-176   -160   
-336   32     
-80    96     
-224   -112   
224    -176   
256    -96    
-112   112    
-496   -240   
864    112    
-208   -128   
480    112    
16     -304   
-768   240    
-880   -224   
208    48     
-64    32     
0      96     
-64    -32    
-128   -48    
0      80     
-512   -64    
96     80     
16     -16    
128    80     
-656   -128   
-432   -48    
-80    64     
-176   16     
32     128    
-336   16     
32     -64    
-1328  16     
64     80     
128    -96    
-80    -32    
-176   -64    
128    48     
16     32     
96     16     
-48    -208   
144    -80    
-320   192    
224    0      
-16    32     
-448   -32    
-224   16     
-1984  -144   
176    -48    
0      -176   
-192   -176   
-176   -144   
-16    112    
-96    -192   
96     -16    
128    128    
-128   -32    
-208   32     
-48    32     
16     0      
80     -64    
-96    80     
32     64     
128    48     
-832   -112   
128    32     
-112   0      
-48    80     
48     48     
208    80     
32     -208   
-272   -112   
112    112    
-208   -64    
-16    -16    
64     32     
16     80     
-208   32     
0      64     
-144   -16    
32     112    
0      0      
48     64     
48     96     
-144   -96    
-16    0      
-128   -16    
-96    16     
-160   48     
96     -64    
32     -64    
-32    80     
-160   64     
-96    96     
-400   -48    
128    32     
208    48     
112    128    
-128   64     
-208   -48    
80     32     
16     0      
176    80     
-32    96     
272    720    
-32    352    
-96    -176   
-272   -96    
32     64     
-240   208    
96     256    
-1152  -16    
32     528    
-320   336    
-64    -80    
320    -16    
336    112    
224    80     
-96    64     
144    80     
0      -16    
0      96     
-256   -32    
-144   -208   
0      -64    
-240   160    
-528   64     
-416   64     
-192   0      
32     144    
32     80     
336    128    
160    16     
32     -144   
80     -48    
-240   64     
80     16     
-48    -16    
-128   16     
-176   -176   
368    48     
-48    160    
-16    128    
-480   0      
0      144    
-32    368    
-480   192    
-112   128    
-32    128    
192    80     
288    32     
-48    -192   
0      -80    
-176   48     
-240   -208   
-256   -240   
-720   -144   
480    944    
-48    -64    
-16    -336   
-16    272    
-288   208    
-208   112    
240    -32    
112    16     
-160   -32    
176    64     
-288   -32    
64     -80    
-64    80     
-48    224    
64     -64    
80     304    
320    -64    
-16    -176   
32     224    
0      80     
-32    64     
-112   160    
272    -320   
128    128    
-16    112    
-48    -192   
384    48     
176    -496   
-96    448    
-336   112    
-224   -208   
64     160    
-16    -16    
80     400    
128    656    
-32    400    
80     0      
16     -96    
112    0      
-96    -32    
320    -16    
-16    -64    
96     -64    
-112   -48    
32     80     
-256   -112   
112    -208   
-160   112    
-384   -128   
-32    0      
-464   16     
384    256    
384    112    
-176   -32    
112    -32    
-64    0      
-48    -304   
-48    64     
176    32     
-48    -288   
-64    0      
-48    96     
176    112    
0      -128   
48     -272   
144    16     
-96    144    
-32    144    
-160   -64    
64     -32    
96     112    
-352   16     
80     -160   
-16    -160   
96     -16    
112    176    
-48    128    
192    176    
-128   48     
128    16     
96     -64    
-112   -48    
128    -32    
320    336    
-224   272    
-48    112    
64     -272   
160    0      
-112   64     
208    -112   
160    64     
-48    128    
-32    -64    
80     -32    
-160   160    
96     48     
16     96     
48     -32    
-160   80     
-304   -240   
224    48     
16     -224   
-32    48     
16     -1280  
112    128    
64     96     
16     0      
144    64     
0      96     
-80    -128   
80     64     
-32    -32    
144    -80    
-48    -32    
128    -176   
0      112    
80     -64    
64     64     
-160   -496   
160    48     
160    48     
-112   -128   
64     -80    
144    112    
-176   0      
112    112    
128    0      
48     16     
112    64     
192    128    
-144   176    
16     -64    
0      80     
96     -48    
240    -32    
176    -384   
-32    80     
-16    0      
192    160    
-144   224    
-112   96     
-48    0      
240    -80    
336    -112   
96     -16    
-32    -464   
176    -224   
64     -48    
-256   -32    
128    96     
96     -352   
-208   176    
32     -96    
112    96     
16     -16    
64     336    
0      0      
-64    -112   
80     -208   
-112   -304   
80     240    
-256   160    
208    96     
368    -128   
640    592    
48     96     
-112   -192   
128    -64    
352    64     
-176   -480   
-432   0      
48     -32    
464    192    
384    192    
16     -192   
-208   176    
-64    176    
-160   -256   
-144   -176   
128    96     
512    144    
256    144    
192    -64    
-224   -368   
176    -240   
288    208    
320    -400   
-112   144    
-32    0      
-48    -16    
-128   112    
448    -160   
176    -112   
-16    -64    
32     176    
192    -16    
-368   -816   
256    240    
-176   -464   
144    -32    
144    -240   
400    -16    
-96    0      
-128   -336   
80     -80    
0      -480   
112    32     
16     80     
48     -64    
176    48     
-32    -16    
16     -224   
208    64     
-192   -128   
336    176    
-656   -128   
368    -48    
-32    -16    
96     -48    
-208   -400   
832    -480   
-400   112    
704    -80    
-256   -448   
-256   -288   
32     80     
-48    48     
-64    128    
496    16     
112    -128   
-400   64     
64     -144   
-1040  -224   
-32    0      
-16    0      
96     -272   
-112   -16    
128    -320   
80     16     
96     32     
-32    -112   
304    -96    
128    48     
352    -16    
-16    80     
-544   -144   
832    32     
-1552  160    
-304   -16    
-432   -224   
672    -16    
-224   -16    
192    -144   
320    32     
144    -192   
64     48     
-80    -16    
240    80     
304    304    
-416   96     
80     -48    
176    -64    
-400   -32    
64     -96    
-752   32     
-64    -48    
-336   96     
160    -112   
64     96     
-384   -1072  
304    112    
0      32     
304    80     
-256   -64    
160    -96    
-112   0      
64     0      
0      -48    
32     -16    
-656   -304   
192    -32    
-336   16     
16     -32    
96     48     
192    -320   
32     48     
-224   -48    
400    80     
-112   112    
0      96     
-80    80     
208    0      
-144   128    
-160   -64    
-464   0      
48     48     
-48    32     
-16    -112   
0      112    
32     192    
-32    48     
32     0      
192    -128   
176    144    
-48    32     
-32    0      
240    -16    
-384   80     
320    256    
-656   80     
-48    80     
160    160    
112    32     
96     48     
48     -176   
80     64     
-704   -16    
96     -32    
-288   -80    
112    0      
-160   112    
32     -128   
80     -32    
160    -112   
-32    64     
128    -112   
-48    -16    
240    -144   
-16    80     
-960   -192   
-384   -96    
16     128    
-336   384    
-32    192    
-16    -112   
-144   64     
0      64     
0      96     
64     144    
-528   -64    
-736   -48    
48     48     
-1024  16     
-448   -816   
-656   -224   
-352   320    
112    96     
32     -48    
-144   -32    
-320   160    
-80    -32    
416    64     
384    -128   
224    -112   
32     240    
-240   -112   
-128   32     
-336   112    
-128   144    
-256   -48    
64     32     
48     256    
224    80     
-240   0      
-528   -528   
0      -640   
-576   720    
-112   -176   
592    -208   
208    272    
144    -96    
352    32     
-192   64     
-144   -80    
-224   0      
16     144    
-256   -112   
-96    48     
48     208    
32     256    
-336   0      
-432   -352   
208    400    
-272   -272   
288    -272   
176    176    
192    -80    
-96    -16    
-336   112    
-96    -128   
-32    208    
-160   -256   
-288   -128   
320    0      
32     48     
80     304    
-240   -432   
-176   304    
-128   -64    
-48    -80    
80     -144   
-32    -176   
48     432    
32     -112   
32     128    
96     -64    
32     16     
-128   -32    
-112   208    
-368   464    
192    304    
-304   320    
176    672    
-192   320    
128    144    
-16    -96    
320    288    
-192   368    
336    16     
-240   -256   
176    -192   
-80    -32    
208    160    
-208   208    
0      208    
-80    352    
32     80     
304    48     
-464   -192   
-96    -352   
-48    -96    
368    112    
336    160    
304    -64    
-112   32     
-352   -48    
16     -64    
-208   -16    
-112   144    
-288   64     
128    -112   
480    112    
-208   192    
-320   -128   
208    -48    
-1456  -192   
64     -32    
-208   -96    
-176   -112   
-48    48     
-16    96     
64     128    
16     -80    
256    32     
-272   32     
144    80     
336    224    
-416   304    
-144   -224   
112    -80    
-192   -336   
64     -48    
-128   0      
144    -48    
0      112    
48     112    
0      192    
240    -112   
-64    32     
-112   -128   
-80    112    
16     48     
64     64     
-160   -160   
144    32     
16     128    
96     96     
-256   128    
240    16     
-256   368    
-16    32     
176    -64    
0      16     
96     80     
-304   0      
304    -16    
288    -16    
-128   48     
-320   -80    
-32    -16    
32     128    
112    48     
176    48     
48     16     
-64    -64    
64     -64    
-32    128    
-112   96     
16     -32    
-144   16     
32     96     
-16    -16    
0      80     
-16    48     
176    224    
32     240    
160    -112   
-160   -16    
-16    -16    
-272   304    
16     96     
224    -80    
-128   -224   
-80    48     
-32    144    
144    112    
-176   -48    
240    -192   
96     32     
-48    160    
0      320    
48     16     
32     -16    
0      0      
0      -144   
128    -240   
-112   -496   
-288   -112   
0      80     
-144   144    
64     -176   
-96    -272   
80     -64    
-48    160    
144    96     
-336   -368   
176    256    
-112   160    
-16    192    
192    80     
0      -640   
320    960    
-112   96     
224    -208   
-16    256    
144    -64    
-112   48     
224    -192   
-352   -160   
-176   -16    
176    240    
288    144    
256    -176   
32     64     
-240   -384   
-96    208    
-112   352    
-80    -112   
352    32     
-176   -272   
-16    -48    
144    368    
-320   -48    
-32    80     
0      0      
16     -48    
192    -192   
432    -48    
-96    80     
304    80     
432    208    
112    48     
-208   16     
32     16     
-48    96     
-96    96     
0      -32    
112    -160   
160    112    
640    304    
-480   32     
-144   -64    
-16    16     
-32    64     
64     16     
128    0      
592    208    
-592   -176   
0      80     
368    -16    
-416   -272   
0      16     
160    -240   
16     16     
208    -992   
-192   112    
-208   32     
0      208    
32     0      
160    -32    
-96    96     
-32    80     
304    48     
-112   -16    
48     32     
112    80     
192    64     
48     -112   
160    0      
-208   -512   
176    -48    
-64    0      
240    48     
16     64     
224    96     
16     -272   
0      -80    
-320   -16    
128    -64    
224    160    
0      64     
-16    48     
32     -240   
112    -80    
320    240    
-336   224    
16     -704   
288    -32    
-224   -16    
224    16     
416    336    
-288   208    
-256   -80    
256    16     
-272   -32    
176    -112   
496    144    
32     -16    
352    32     
128    32     
-160   0      
0      -288   
176    64     
-560   -64    
288    160    
608    -16    
-656   64     
-96    48     
-16    -112   
432    128    
208    -48    
80     128    
352    96     
-224   -16    
80     -256   
-64    128    
176    -80    
0      16     
128    96     
64     16     
48     16     
240    48     
64     48     
-112   -32    
80     48     
-32    16     
352    288    
-64    -48    
-192   -16    
-32    -288   
144    -64    
96     -496   
224    80     
-32    64     
48     -1456  
-64    -128   
304    -64    
128    -64    
32     -96    
32     -160   
176    0      
-64    64     
176    -112   
96     96     
-64    176    
272    176    
-32    -16    
32     -320   
-48    80     
240    -384   
-16    0      
-624   -48    
240    32     
-32    16     
256    -128   
-176   -192   
128    -944   
-32    224    
64     16     
160    -64    
80     208    
-16    -16    
96     48     
0      -96    
176    -176   
-16    432    
-240   48     
-208   -32    
256    -320   
176    192    
-80    -144   
48     -176   
128    -32    
48     -448   
-64    96     
256    -112   
32     16     
32     -48    
208    -64    
224    -32    
80     16     
-464   32     
16     -16    
-208   -160   
256    464    
0      -112   
-48    -304   
96     80     
112    -32    
-48    0      
-80    -64    
192    -368   
176    576    
224    -80    
-80    -80    
-80    80     
48     128    
-112   -320   
0      -64    
-80    304    
32     0      
0      -64    
16     -176   
96     -208   
16     16     
160    -304   
48     -176   
-48    64     
48     624    
-192   -752   
16     -192   
-224   544    
32     -16    
-112   -304   
-80    -272   
64     -80    
-16    -96    
32     -80    
48     -288   
-32    432    
160    -528   
-160   -192   
-272   -288   
-64    -448   
-64    16     
384    -80    
-160   -720   
-464   -512   
-1424  -352   
48     -48    
-1088  16     
320    64     
-80    192    
64     -96    
224    224    
-192   -368   
48     -80    
-32    144    
0      304    
176    0      
96     128    
80     64     
96     -80    
-352   -16    
-64    -128   
-256   64     
112    80     
80     320    
160    -112   
-112   16     
32     -192   
-64    208    
176    0      
64     -48    
-128   -64    
96     -112   
-80    -16    
192    -48    
-64    64     
0      -32    
-272   16     
176    -80    
112    -16    
-32    112    
-144   0      
176    -208   
-112   240    
-32    48     
-192   304    
-304   -224   
192    0      
64     16     
128    48     
-16    -96    
-112   -192   
-16    352    
32     -112   
-32    160    
48     -144   
144    -336   
-1552  -240   
-144   -224   
-272   -16    
-1680  -16    
48     -80    
208    -48    
112    160    
-144   16     
-272   -48    
-368   -48    
80     -32    
-144   -80    
320    112    
-272   0      
-160   -144   
48     16     
-192   64     
32     128    
-48    -16    
272    48     
-784   -16    
-320   224    
176    -192   
32     -256   
16     -80    
192    96     
-448   176    
-32    -112   
-368   -160   
32     16     
176    336    
-224   80     
128    -48    
-320   -240   
0      48     
-240   112    
-272   352    
224    176    
-208   32     
128    -16    
-32    -16    
32     -144   
-336   -208   
-64    -128   
-80    -32    
-16    16     
-64    -80    
-160   160    
-80    32     
-176   0      
32     -352   
48     -144   
448    464    
-720   400    
-816   -32    
-96    0      
-64    -16    
112    -448   
-16    -96    
-32    -80    
-144   192    
32     240    
176    64     
-32    -16    
-80    48     
-176   304    
112    112    
-640   96     
-224   0      
-672   32     
-16    80     
144    32     
144    192    
144    160    
16     16     
-16    -128   
0      96     
-112   -48    
-128   64     
128    176    
-160   -112   
-32    -144   
-368   -160   
112    288    
-240   320    
144    -32    
-64    -176   
128    -128   
32     400    
-176   -32    
96     16     
0      256    
0      32     
0      160    
160    -32    
208    272    
-128   -32    
-64    80     
224    -48    
-112   -48    
-64    -64    
-96    64     
192    64     
144    32     
-208   -112   
192    128    
-48    112    
48     -48    
-208   -16    
-32    -16    
-176   -32    
-144   32     
-96    32     
208    32     
-688   -32    
0      128    
448    512    
32     96     
112    0      
-48    48     
-80    64     
64     128    
-16    112    
80     304    
-288   384    
432    320    
-416   96     
-336   -224   
224    48     
-80    160    
-144   64     
112    -48    
-160   160    
176    208    
304    48     
-672   -16    
-96    -16    
48     160    
-208   -32    
176    64     
-144   -48    
112    96     
-96    -288   
160    -256   
128    192    
-144   160    
224    32     
96     0      
-128   64     
128    -16    
-176   48     
-16    32     
256    208    
-512   48     
-112   16     
-544   -32    
544    96     
288    352    
-688   80     
-80    -48    
96     32     
160    16     
304    64     
176    112    
-48    48     
-128   64     
256    64     
-32    32     
-304   -16    
-64    48     
-96    -64    
416    32     
-96    96     
16     32     
-48    80     
-48    32     
-16    112    
400    160    
-16    48     
64     80     
-32    -16    
-80    32     
80     48     
-64    16     
48     -192   
-176   -16    
208    64     
-304   -48    
144    80     
16     48     
112    48     
-128   -48    
208    272    
-48    0      
240    240    
128    80     
-112   -64    
320    112    
-384   0      
400    128    
-32    48     
-48    112    
-192   16     
144    80     
-304   -176   
0      -96    
80     64     
-96    96     
-16    -64    
384    96     
-176   144    
288    96     
-112   16     
-560   -128   
336    96     
144    224    
-480   160    
176    16     
288    -64    
-368   80     
64     -208   
176    -240   
560    112    
-80    32     
144    96     
320    144    
-240   48     
80     64     
-96    64     
-16    32     
-64    -160   
176    96     
208    -48    
0      -288   
64     64     
176    48     
-96    144    
64     -32    
96     16     
144    -16    
112    144    
-176   176    
256    32     
0      -80    
208    144    
-32    176    
112    16     
64     384    
0      -96    
-32    0      
0      176    
192    32     
-112   48     
-32    176    
160    -16    
16     -16    
16     288    
-16    96     
160    32     
192    176    
-240   16     
96     -80    
16     112    
160    -368   
16     896    
-16    -1088  
368    144    
-32    224    
144    -80    
-64    -112   
128    -48    
-64    -144   
368    -48    
112    96     
32     176    
16     48     
48     -144   
448    -16    
0      112    
64     528    
224    -96    
-144   -288   
-64    -448   
-16    192    
256    704    
144    128    
64     -432   
128    112    
-272   0      
-416   -208   
208    144    
-96    -16    
128    160    
368    32     
-16    656    
48     -576   
192    -368   
96     -640   
0      -208   
160    -16    
144    48     
32     96     
144    -48    
80     32     
240    -16    
-48    352    
80     160    
208    112    
32     80     
32     16     
128    -80    
-192   -576   
320    112    
112    176    
-16    32     
112    80     
-112   80     
240    128    
32     112    
160    -16    
-64    160    
-16    -160   
-80    -208   
224    -96    
144    112    
-16    32     
-16    16     
16     -176   
-48    160    
-112   -16    
160    16     
-80    -112   
272    -96    
-16    32     
160    -80    
224    -128   
96     16     
144    -80    
-16    -112   
-128   80     
-16    -256   
-112   -48    
-384   -80    
48     -96    
160    48     
288    -144   
0      48     
224    112    
-112   -32    
384    -80    
144    -336   
96     -48    
-416   -288   
-48    144    
160    192    
288    -192   
32     -16    
-80    208    
-224   0      
-144   80     
96     -160   
160    -224   
-560   -48    
112    48     
208    -96    
32     96     
-16    112    
48     -896   
32     -144   
96     16     
144    -144   
224    -112   
-112   -384   
80     -224   
128    96     
80     32     
128    176    
-240   -144   
0      144    
0      -32    
-160   80     
352    128    
-48    192    
352    -16    
288    -448   
32     80     
288    -96    
-144   416    
144    112    
320    -64    
-16    -192   
-160   -208   
192    -64    
16     64     
0      -48    
80     -192   
48     432    
576    208    
0      96     
-32    64     
-16    480    
208    288    
432    -112   
192    112    
176    64     
-112   64     
48     -16    
-304   240    
-192   240    
-1680  -208   
192    -96    
-320   0      
-64    176    
64     -32    
-272   -256   
-64    -96    
640    -416   
-512   320    
96     -208   
-48    -160   
-192   -80    
240    -192   
-112   16     
-32    -608   
-480   -272   
64     0      
-720   448    
192    64     
-272   -416   
160    -288   
224    -416   
-32    -176   
432    80     
-80    -48    
16     -48    
-96    -64    
-112   -16    
-128   176    
656    544    
80     288    
16     -336   
-224   -240   
176    80     
304    400    
240    464    
-64    192    
256    -800   
-128   -80    
-224   800    
496    -432   
-256   -320   
176    288    
400    224    
-624   -320   
-64    -576   
16     128    
-432   384    
256    -416   
-176   -336   
128    80     
64     128    
-64    -32    
240    16     
-256   -32    
64     160    
32     -64    
-96    240    
-176   -400   
144    240    
-400   176    
-64    -496   
-1248  144    
128    -80    
-32    128    
176    -80    
400    320    
-144   -96    
80     -48    
48     32     
-48    160    
-48    -160   
-16    -160   
-32    240    
176    32     
160    -64    
160    -48    
-336   48     
16     -128   
32     48     
-368   -160   
16     32     
-32    256    
-48    32     
-64    -96    
-528   -32    
-16    16     
48     96     
-144   16     
16     272    
-48    96     
64     -256   
80     -240   
-576   -144   
-32    160    
128    -96    
16     80     
16     112    
-176   -16    
-64    -64    
-192   96     
-96    32     
-352   -16    
32     48     
-208   48     
-256   32     
-400   -64    
144    144    
-368   0      
-16    -112   
96     -272   
-32    -144   
336    96     
-144   -80    
144    64     
96     -32    
64     -16    
-288   48     
-112   128    
-1984  -96    
80     48     
-240   -176   
384    -32    
304    112    
-32    64     
192    -80    
-128   -32    
-176   112    
0      240    
16     480    
-96    384    
-304   -32    
-528   -256   
336    -64    
-416   -32    
416    96     
320    -16    
-336   224    
-304   -112   
64     128    
-128   48     
-192   64     
96     80     
192    160    
-336   -48    
-128   32     
-112   -16    
176    32     
128    -16    
-272   -16    
96     112    
-144   -16    
-352   32     
288    0      
272    64     
-224   112    
160    112    
-208   -176   
-32    -64    
128    -32    
-48    -48    
32     32     
-80    144    
-64    48     
-144   -96    
0      16     
-224   -16    
112    80     
96     -16    
-16    0      
160    48     
-144   48     
-112   -96    
-64    0      
-16    32     
112    0      
0      48     
-16    352    
-96    128    
-32    -144   
-32    224    
-528   -176   
0      -192   
64     112    
-272   16     
-32    80     
-320   -64    
704    -96    
-480   -32    
448    -32    
560    400    
-368   240    
32     -128   
288    160    
-128   16     
304    160    
-352   -176   
512    -112   
96     -352   
-128   -240   
64     32     
112    -96    
96     -256   
-192   -288   
128    -176   
-368   64     
-64    160    
-192   64     
80     192    
-32    -16    
160    80     
-576   -16    
-16    -32    
32     112    
208    160    
-176   -224   
160    -128   
-32    64     
0      32     
-64    32     
-304   -240   
0      -16    
-176   144    
224    96     
-128   -64    
-48    16     
-336   -704   
-32    352    
208    -144   
80     352    
-224   -128   
64     128    
0      176    
-16    -1152  
96     896    
128    -112   
-64    -384   
96     -32    
160    304    
144    320    
-224   304    
96     128    
128    -400   
-208   160    
160    -64    
-64    -96    
96     160    
64     0      
16     64     
112    160    
96     -208   
0      0      
128    -48    
-176   64     
-32    64     
-96    0      
208    0      
0      96     
-160   48     
-192   -144   
-80    -48    
304    224    
-208   272    
64     160    
208    80     
0      0      
208    64     
112    32     
-16    176    
-304   224    
176    48     
16     80     
-32    0      
0      112    
-32    48     
144    0      
208    16     
96     112    
-208   48     
-16    -64    
176    160    
0      192    
-48    16     
0      -64    
80     48     
-64    0      
144    80     
-64    48     
32     -48    
224    112    
-224   48     
64     -48    
16     64     
128    16     
96     96     
64     80     
320    144    
-32    80     
-160   80     
-80    16     
-80    -992   
144    -32    
144    112    
192    64     
32     32     
128    80     
-192   0      
-32    0      
32     0      
256    -16    
240    0      
224    64     
-96    -48    
-128   32     
32     0      
-32    -48    
208    -80    
-160   -32    
32     208    
-176   64     
192    -32    
64     -128   
160    96     
-64    96     
-32    16     
-16    -192   
-16    -16    
-16    -48    
64     -80    
-208   128    
-32    -256   
96     16     
16     80     
176    352    
-112   0      
224    160    
-240   96     
-48    -32    
-32    -32    
288    240    
256    -16    
-16    -64    
-192   256    
80     304    
-80    320    
80     -240   
96     96     
-16    -512   
96     -128   
160    0      
-160   192    
-48    64     
32     -64    
112    80     
64     288    
160    208    
128    48     
-48    -16    
-48    -112   
-32    -128   
192    -400   
48     64     
-16    -144   
128    160    
-16    16     
48     80     
144    16     
256    16     
-176   240    
96     224    
0      160    
-144   96     
48     -48    
224    32     
-160   416    
-176   992    
560    -384   
160    -32    
-320   304    
48     -688   
-160   -720   
0      -352   
496    480    
-320   480    
-64    384    
208    -256   
-32    -448   
96     -80    
224    608    
128    112    
384    -528   
0      368    
-64    -64    
112    32     
0      -144   
-16    -208   
144    0      
272    176    
-912   -528   
-560   -496   
-32    640    
96     736    
48     -512   
576    368    
160    -576   
384    -160   
-16    720    
-288   -752   
-288   176    
432    560    
-464   288    
176    -224   
0      -1024  
400    848    
-48    -448   
-96    480    
304    -32    
288    304    
-96    -272   
-32    -16    
16     112    
128    -96    
176    48     
144    144    
-208   -272   
352    -208   
-16    128    
400    -864   
-192   -16    
-224   304    
64     -368   
-128   0      
192    -368   
112    -96    
16     -16    
112    -32    
32     32     
80     -16    
144    -128   
-64    32     
112    -416   
48     16     
112    -160   
240    48     
-480   -80    
128    -112   
160    48     
16     -208   
224    -32    
-80    64     
208    0      
32     -128   
112    -48    
80     -192   
96     -224   
-80    -176   
64     224    
80     16     
-192   -96    
-624   -160   
16     -80    
32     -80    
64     16     
96     48     
272    -144   
48     208    
192    -832   
-16    32     
-16    0      
160    64     
144    96     
-192   64     
-96    -64    
144    -80    
-448   -32    
208    64     
144    64     
256    48     
-128   -112   
48     -416   
160    48     
80     -80    
144    -16    
80     224    
48     80     
224    -80    
32     -16    
-240   -160   
32     16     
-320   32     
128    112    
-896   -64    
240    32     
-144   0      
0      -32    
144    32     
96     -96    
64     -240   
400    -608   
-16    112    
160    112    
32     -96    
144    32     
-224   -192   
192    176    
-64    -64    
64     640    
-624   128    
-592   -224   
336    48     
128    144    
368    -144   
64     80     
-64    -912   
-128   16     
-288   0      
224    -48    
288    128    
-160   -64    
-320   -16    
176    -112   
-224   16     
-16    -16    
-480   96     
80     -272   
32     -112   
-480   192    
-272   288    
-208   0      
256    -32    
352    32     
256    32     
-80    64     
-112   -48    
304    16     
-192   0      
-208   16     
-48    -64    
-80    -48    
272    -64    
144    176    
-272   -192   
176    0      
-80    -144   
96     -16    
-48    96     
-112   -80    
256    0      
64     0      
-160   64     
432    224    
-624   0      
224    -112   
-144   32     
-48    -64    
208    64     
64     -48    
-144   32     
-608   -240   
-1920  -16    
-224   16     
-240   48     
48     48     
16     16     
-64    32     
128    64     
-544   -80    
128    -288   
-96    -16    
-208   -16    
160    128    
-336   -144   
112    -48    
-512   32     
96     128    
-160   -64    
416    80     
-496   0      
32     -48    
0      -80    
528    -128   
16     -48    
-224   -80    
-128   -208   
0      -176   
-128   -48    
-16    -240   
0      -112   
192    240    
-544   64     
48     128    
-544   32     
128    -192   
-528   -224   
32     320    
176    -32    
-48    -80    
-224   -80    
-32    -192   
1888   1824   
-1520  448    
-112   -1104  
-256   -384   
-112   448    
528    -336   
432    32     
-416   240    
-80    -192   
-80    -16    
-304   16     
-224   48     
112    -80    
-480   -288   
224    16     
-64    64     
-32    -240   
64     -464   
144    -272   
-64    112    
0      288    
-80    320    
400    192    
-240   272    
-256   48     
-224   0      
-272   336    
400    304    
384    352    
-400   160    
-192   -64    
160    -16    
64     64     
-32    -192   
32     0      
-176   -16    
-208   -112   
80     16     
32     128    
-96    48     
32     -80    
-592   -224   
128    -112   
-544   112    
48     32     
-16    -64    
-32    -64    
-304   32     
16     -16    
-16    32     
-16    0      
112    32     
-176   96     
240    128    
-144   144    
-48    16     
-48    -80    
128    64     
-656   -80    
192    0      
-144   -112   
-288   -16    
48     0      
240    48     
-16    32     
160    0      
-16    160    
16     16     
-80    0      
0      32     
80     -16    
-96    16     
64     80     
-48    -16    
48     16     
112    64     
112    48     
-144   32     
-256   16     
80     80     
16     96     
272    240    
-32    112    
-80    48     
16     -112   
64     -160   
-16    96     
-48    160    
32     -16    
-192   96     
48     -16    
-80    -32    
112    256    
-96    80     
144    -16    
-48    16     
-32    -160   
320    -48    
-16    64     
-192   -16    
64     80     
-448   -96    
176    64     
-96    16     
-16    16     
32     144    
-48    64     
-176   -64    
-304   -48    
176    -64    
-112   272    
256    48     
-16    48     
-176   0      
-224   -128   
240    128    
112    64     
384    48     
32     32     
224    224    
-224   208    
-272   -64    
208    -272   
-208   -480   
480    -128   
144    160    
-576   144    
-96    32     
48     16     
256    64     
496    32     
-256   336    
128    672    
48     -16    
80     -272   
-160   112    
-208   -64    
176    -48    
192    -32    
16     -224   
-272   112    
-32    0      
-192   -176   
-112   -80    
-144   -128   
48     -112   
-320   -416   
464    -480   
144    -160   
224    -128   
-160   -416   
112    16     
-144   176    
-16    96     
112    272    
112    -32    
32     64     
80     192    
160    -240   
-32    -96    
-32    256    
-160   -32    
-48    160    
208    -32    
240    672    
-128   -144   
112    -160   
336    32     
224    112    
32     -64    
160    416    
352    -192   
-304   -96    
48     -16    
160    80     
-208   -32    
816    784    
-416   -288   
192    -528   
336    288    
288    -96    
112    -160   
0      304    
432    272    
-64    32     
-416   -208   
160    32     
112    144    
48     -16    
48     -80    
-32    -80    
-256   192    
272    -1248  
-400   -544   
432    -512   
320    448    
416    672    
560    368    
-112   -112   
-720   -528   
16     240    
-32    224    
-288   -48    
0      48     
-80    48     
208    -16    
128    80     
32     -240   
304    176    
-144   0      
192    -32    
96     32     
-32    144    
80     0      
-16    0      
112    32     
64     48     
176    64     
32     32     
-112   32     
144    -288   
16     -224   
-384   -192   
16     128    
160    -96    
176    16     
-16    112    
-48    32     
240    192    
-16    80     
16     -80    
240    80     
128    112    
-192   -32    
112    0      
0      -32    
0      48     
256    -144   
16     0      
16     -1488  
160    -16    
192    32     
-48    32     
-32    48     
304    160    
-320   -64    
112    -80    
224    48     
-48    0      
160    -16    
496    64     
-256   -32    
-64    -128   
0      128    
32     -304   
96     -64    
96     -144   
96     112    
-80    64     
112    64     
-32    240    
288    48     
112    -32    
0      -80    
-32    -32    
0      -160   
16     32     
96     -608   
-48    48     
96     -208   
32     0      
48     -128   
0      64     
64     -16    
96     16     
112    48     
112    48     
80     48     
96     -48    
224    0      
48     -256   
-192   128    
-32    -16    
176    -32    
160    48     
-176   96     
-96    -256   
32     -16    
48     -32    
256    96     
-128   -32    
16     64     
-64    96     
112    -16    
96     -48    
-320   -64    
-64    192    
-16    48     
240    -64    
112    -80    
-48    64     
48     -160   
128    16     
496    96     
-48    32     
192    -64    
384    16     
32     -1008  
368    -48    
112    48     
128    16     
64     16     
240    -64    
-144   -96    
240    -336   
256    -336   
-32    256    
-48    0      
-80    -48    
320    -288   
144    176    
-656   96     
96     -96    
0      48     
64     64     
48     -176   
-80    -16    
192    -48    
-144   48     
-224   -64    
240    -320   
416    -48    
464    64     
144    -192   
-96    -256   
-272   -160   
-672   -48    
368    16     
240    32     
480    -112   
144    -96    
-160   -864   
-80    16     
240    304    
-240   48     
-144   -112   
160    32     
-224   -176   
352    0      
-352   -224   
128    -64    
-432   48     
0      48     
-96    -240   
96     -224   
32     -32    
176    -416   
208    64     
48     -400   
48     -16    
32     -128   
-64    -64    
32     -32    
-48    48     
-64    -64    
96     128    
-80    -128   
-224   -128   
-944   -32    
336    -64    
-224   -32    
288    80     
-96    -160   
16     -528   
240    384    
-192   -400   
176    128    
-16    32     
160    48     
-80    160    
64     64     
-320   -192   
0      -48    
144    -848   
672    288    
416    144    
64     -288   
64     272    
-144   -96    
400    144    
304    32     
528    160    
64     -336   
-32    -400   
80     -96    
16     320    
-176   80     
-576   -608   
-400   -16    
352    144    
-1136  128    
80     96     
32     384    
48     -208   
192    -144   
160    -880   
-96    -32    
64     -80    
-240   -224   
-96    -48    
-64    0      
16     -16    
144    64     
-64    288    
-192   48     
80     32     
-32    -112   
0      -48    
288    16     
16     320    
256    -384   
-16    -272   
96     64     
48     48     
16     80     
272    0      
-144   112    
-144   -32    
-336   -272   
272    -352   
-96    80     
416    -80    
16     32     
48     -80    
-32    48     
96     -336   
-16    -64    
304    -16    
112    32     
-320   16     
48     48     
-288   0      
192    256    
-176   16     
0      -64    
-1264  -80    
176    -80    
-16    16     
-720   -96    
160    80     
80     80     
-576   80     
-16    32     
-1104  -16    
-32    112    
192    96     
16     16     
32     80     
-112   304    
160    -112   
32     -112   
-1456  -48    
16     64     
-480   0      
64     64     
-80    -16    
-208   -80    
-128   -32    
-640   48     
-16    96     
80     48     
-32    48     
96     -64    
-16    32     
16     -16    
80     -176   
160    -16    
256    208    
-144   64     
-368   -48    
-128   -48    
0      -48    
-160   160    
-304   0      
-16    0      
-160   -112   
-64    80     
352    -32    
-96    16     
96     -144   
-160   0      
80     304    
-176   416    
0      80     
128    -128   
48     -16    
-32    0      
-16    -80    
-160   -32    
-336   48     
-176   -160   
112    -80    
-128   48     
176    128    
144    80     
-208   -224   
112    -400   
64     -80    
112    48     
112    112    
-80    160    
-368   -80    
-288   -304   
384    -704   
96     -96    
336    48     
-32    -80    
-272   96     
-416   288    
-384   496    
384    112    
0      -416   
-208   -112   
-144   -144   
-128   160    
-192   -144   
336    -304   
192    432    
-256   480    
192    -176   
256    576    
-176   -128   
96     -112   
304    416    
-784   64     
-176   -560   
272    208    
32     96     
160    -192   
-192   -48    
400    -96    
-112   128    
-176   -128   
-48    160    
-64    32     
-336   288    
160    -48    
-80    -352   
32     144    
112    192    
-112   96     
-48    144    
224    192    
-304   -32    
-96    0      
-48    0      
192    32     
128    48     
208    48     
32     64     
-416   -336   
-96    -112   
-416   176    
64     -96    
-576   -48    
288    128    
176    160    
64     64     
-288   0      
-160   -32    
-176   176    
80     -32    
192    192    
-96    96     
96     -128   
-720   32     
-96    112    
-336   -96    
-48    112    
-368   64     
-336   -192   
288    -80    
-80    128    
-48    -16    
384    144    
-144   32     
-48    -96    
640    80     
-144   -192   
-96    192    
-720   -368   
448    -32    
144    80     
-464   32     
-32    -48    
16     -64    
304    160    
400    176    
240    224    
-432   -80    
416    -32    
0      96     
48     80     
64     -16    
192    64     
-224   -16    
-32    64     
-112   -16    
80     64     
64     0      
96     112    
-112   -16    
32     32     
48     32     
64     48     
16     0      
208    -96    
-112   -80    
-48    48     
160    160    
-160   -16    
176    80     
-96    -48    
-96    16     
-16    48     
-80    80     
16     224    
528    176    
-144   -64    
-144   -32    
0      32     
32     112    
80     64     
-160   -32    
96     48     
112    64     
176    32     
48     64     
64     80     
208    96     
-48    16     
-64    -80    
160    80     
64     64     
64     32     
128    16     
-96    16     
48     64     
112    112    
96     16     
-32    32     
-80    -32    
48     80     
16     112    
-16    144    
-80    -32    
160    0      
208    368    
224    80     
48     16     
-80    48     
-16    48     
304    112    
-240   48     
48     -32    
-96    -192   
64     -144   
-32    -16    
144    0      
64     144    
-32    176    
0      192    
112    96     
32     96     
16     112    
96     48     
96     112    
272    16     
48     -48    
16     -48    
-192   -160   
112    48     
96     112    
32     -400   
80     48     
96     -16    
96     80     
176    96     
-176   -16    
-48    -192   
112    -400   
128    32     
368    -48    
96     -128   
208    80     
-112   176    
64     208    
112    384    
48     -224   
-128   -304   
96     272    
-96    384    
-32    112    
64     -64    
96     48     
48     112    
-288   -32    
192    16     
-16    32     
-464   -224   
144    320    
-32    288    
-224   -32    
144    -400   
-64    32     
352    -48    
240    -160   
256    -80    
-176   -128   
32     -224   
-112   128    
48     144    
-96    80     
-16    0      
-64    -224   
528    256    
-128   416    
-224   112    
208    -304   
240    -304   
624    -48    
-224   112    
688    -176   
-240   -624   
416    64     
-16    208    
-320   144    
0      96     
-240   -496   
-16    32     
160    208    
96     -112   
320    224    
16     -32    
144    64     
-16    64     
-32    -16    
-176   -128   
-192   -176   
544    784    
-112   -400   
0      0      
80     160    
64     -32    
48     16     
32     240    
48     -80    
-32    -208   
112    608    
0      -576   
16     176    
144    -32    
-144   -32    
-224   96     
160    -928   
272    16     
272    736    
64     112    
-416   -144   
16     -432   
128    384    
224    -96    
400    192    
-192   -16    
80     -112   
-128   -32    
-64    -176   
256    -32    
-208   64     
64     -96    
96     64     
-240   32     
-80    -16    
-224   -112   
320    -176   
528    240    
144    -160   
528    64     
192    -224   
32     32     
-144   -16    
-128   -80    
592    96     
-208   -112   
64     -208   
256    -320   
64     -304   
336    -48    
128    32     
128    -16    
32     -816   
0      -144   
-80    -160   
304    -128   
-320   320    
0      -64    
240    -608   
-96    -32    
320    160    
-48    32     
304    -64    
-32    -272   
128    112    
160    -624   
-320   -320   
128    -272   
-176   128    
208    -544   
64     96     
16     80     
-192   176    
240    96     
304    -16    
144    32     
-64    624    
288    368    
64     -80    
-656   -512   
64     -368   
-144   176    
-160   -128   
272    -96    
368    32     
32     336    
-240   -592   
32     -96    
160    -48    
-32    80     
-16    32     
-176   -48    
-400   -112   
-160   -48    
-144   0      
32     96     
64     0      
160    16     
0      -16    
48     -160   
96     0      
32     176    
-32    16     
272    -96    
-128   96     
0      -64    
48     -320   
-176   0      
80     80     
-320   -80    
272    -160   
224    64     
-48    -48    
-96    -48    
224    -256   
-176   -48    
208    -304   
144    0      
160    160    
-128   64     
-128   -16    
16     16     
-96    -32    
144    80     
-336   32     
304    32     
-240   -32    
96     -64    
0      -16    
112    16     
432    272    
-192   0      
-16    128    
192    -512   
32     112    
112    -128   
-144   -272   
160    -384   
80     -80    
-368   -608   
160    -176   
-512   352    
32     96     
112    560    
16     176    
64     -160   
208    -224   
288    368    
-112   -944   
-192   -544   
-112   224    
32     128    
128    0      
368    176    
-272   96     
0      48     
-512   48     
32     -16    
-64    -16    
192    -256   
32     928    
96     -112   
160    96     
-336   -448   
-48    16     
-320   80     
80     -176   
160    -432   
336    -96    
128    288    
288    192    
-352   64     
-304   -192   
-416   -80    
64     -160   
16     96     
560    -304   
-256   -48    
-624   192    
-160   256    
-224   -48    
112    -240   
0      -80    
352    32     
-304   -176   
16     -144   
-144   64     
-16    32     
304    160    
-512   0      
64     64     
-912   -16    
464    304    
-304   32     
-848   -96    
0      -32    
-288   64     
-240   64     
224    -80    
-384   64     
352    16     
80     32     
-400   -32    
-16    48     
-128   -80    
-96    -112   
192    -240   
-224   128    
0      80     
-288   -144   
-80    32     
-672   32     
-80    32     
-288   -64    
144    160    
-464   48     
80     32     
-288   32     
-16    16     
-368   -192   
240    0      
-192   -16    
432    32     
272    32     
-48    64     
-176   -64    
0      144    
-256   -64    
560    304    
-560   96     
-1664  -144   
352    -64    
-528   -48    
608    160    
0      80     
-480   -144   
112    80     
-528   80     
-128   -160   
288    -16    
-336   -32    
288    112    
0      96     
-272   128    
320    96     
-560   -112   
128    48     
-64    64     
144    80     
176    -16    
-416   -32    
128    -16    
-64    -48    
-144   -16    
96     -64    
-16    176    
-16    -32    
-128   -16    
-160   -16    
-32    -32    
-208   -16    
192    64     
32     -16    
384    304    
-416   32     
-112   -48    
64     48     
-32    64     
288    96     
32     96     
-208   16     
-128   -16    
-64    16     
32     0      
-160   -80    
-208   -16    
-32    96     
-672   -48    
144    -64    
-128   0      
112    48     
-32    16     
160    32     
112    16     
-320   0      
80     0      
-112   32     
192    48     
-160   -48    
240    -32    
-256   48     
48     0      
-1152  -112   
240    -48    
-144   208    
-192   112    
80     -32    
16     64     
-16    -176   
-80    -48    
16     96     
-224   64     
80     48     
-96    -192   
176    -32    
-256   -32    
176    144    
-864   -240   
-176   0      
32     96     
96     0      
64     -16    
32     -16    
112    112    
-48    320    
16     192    
80     -80    
0      -48    
-144   336    
128    -96    
-96    -48    
160    128    
-80    -192   
240    496    
32     144    
144    -16    
64     48     
-80    192    
-64    112    
-144   -80    
0      -32    
-48    -64    
32     128    
-16    -64    
192    80     
-16    -48    
192    192    
-96    144    
-272   -80    
112    896    
288    -80    
256    -112   
160    160    
32     48     
32     304    
80     -528   
-352   16     
48     80     
-176   -64    
64     176    
-336   -752   
128    720    
32     688    
-192   -368   
-288   -432   
-32    320    
-240   64     
192    -160   
320    80     
0      80     
64     80     
64     -64    
208    80     
-96    224    
384    464    
-320   -288   
-224   112    
-208   256    
48     208    
64     0      
-96    -208   
16     240    
48     288    
192    -16    
-144   64     
-96    -32    
-256   32     
112    -112   
-32    -400   
-112   -32    
16     480    
-80    416    
-128   -160   
112    -96    
304    112    
-192   -64    
80     128    
288    144    
-16    176    
32     48     
16     16     
-112   -64    
64     0      
16     32     
16     -32    
16     48     
256    240    
64     448    
-64    160    
192    192    
-32    112    
64     112    
160    16     
64     112    
-160   64     
16     0      
-80    320    
48     64     
128    128    
336    176    
-64    272    
128    192    
272    592    
-368   304    
304    336    
336    544    
-336   48     
-128   -96    
192    -112   
96     112    
304    320    
-64    144    
0      208    
64     32     
-144   -496   
208    112    
-96    -976   
528    -144   
224    32     
-64    64     
-64    -128   
32     64     
160    192    
0      -160   
208    -544   
224    -32    
-192   176    
-400   80     
208    208    
-288   -208   
144    160    
-128   -416   
192    32     
64     112    
48     48     
192    -48    
176    64     
-16    64     
304    224    
-208   96     
80     112    
-160   -144   
96     -240   
32     128    
144    16     
64     -144   
48     -32    
80     48     
-32    -96    
80     48     
64     64     
-128   -144   
208    -128   
176    400    
-192   112    
80     48     
32     48     
64     -32    
80     32     
112    -160   
-64    -96    
32     -32    
384    320    
64     368    
-256   208    
192    -96    
-80    272    
32     -48    
32     80     
16     -144   
-96    96     
576    80     
16     128    
-48    -64    
112    -144   
64     64     
256    -192   
144    48     
64     -208   
96     80     
176    -256   
368    16     
-336   -32    
16     80     
-128   368    
48     192    
-32    -304   
272    -496   
192    -128   
112    16     
32     48     
144    64     
-272   144    
64     128    
16     -64    
96     -96    
336    96     
144    0      
96     16     
176    -224   
0      -96    
112    128    
-208   -304   
-32    80     
128    16     
304    416    
16     176    
-64    64     
96     -32    
80     -80    
240    -352   
192    16     
48     336    
-144   192    
208    -608   
-80    -80    
64     352    
64     -208   
48     96     
0      96     
96     -144   
48     -96    
64     80     
32     -112   
224    128    
48     32     
64     144    
-192   -144   
-32    -224   
96     -272   
240    -48    
64     -32    
288    288    
-208   -976   
-112   -448   
240    -240   
128    -16    
272    32     
64     0      
64     -16    
176    96     
144    -48    
-320   0      
-704   0      
-224   -192   
208    -256   
176    -160   
352    32     
160    16     
144    -80    
64     -1200  
-512   -160   
-128   -112   
128    80     
224    -128   
-160   192    
384    64     
48     -48    
-528   32     
-176   112    
-656   -64    
656    256    
-432   48     
160    -112   
864    -160   
96     -80    
-64    80     
-288   32     
-96    48     
128    -48    
-96    16     
128    -64    
288    0      
-32    0      
16     16     
-240   -16    
192    -96    
192    48     
-192   32     
-16    32     
304    -80    
96     -32    
-144   -832   
144    80     
-16    -112   
272    32     
-32    48     
-64    -80    
48     -48    
64     0      
-208   48     
-32    16     
-736   32     
80     -96    
448    208    
-464   -80    
96     -96    
144    -64    
112    16     
-112   -80    
832    160    
-384   -192   
544    -96    
-464   -128   
32     -176   
-32    272    
-576   32     
-1152  -320   
256    160    
-160   -64    
624    -272   
-320   80     
176    -80    
32     -16    
-64    -208   
192    80     
112    176    
192    -48    
304    48     
-144   -32    
-208   -48    
384    0      
-560   16     
816    80     
-80    -64    
32     -128   
608    160    
-112   -304   
-128   32     
-112   -1264  
16     16     
-16    112    
-192   32     
-336   48     
32     80     
-384   -64    
336    -16    
448    176    
-160   -64    
-208   -96    
176    -96    
-16    32     
0      -224   
64     32     
-336   -32    
224    -16    
-208   80     
64     0      
-224   16     
96     64     
0      -64    
128    0      
64     32     
-176   96     
-256   -16    
208    -48    
144    16     
0      -32    
96     80     
-208   32     
-1120  -176   
-96    -176   
-128   -32    
-16    -32    
160    48     
16     64     
80     -16    
-112   16     
128    -80    
-144   208    
0      80     
96     32     
-208   0      
-144   -80    
128    -304   
-208   -208   
-192   32     
-1136  240    
-48    128    
-48    176    
-160   -64    
64     -64    
-528   0      
64     -240   
176    112    
-48    -96    
112    -80    
-160   -64    
-32    64     
-128   224    
32     -416   
-96    224    
-336   -80    
-16    944    
-560   -416   
-208   144    
-224   112    
96     -112   
0      80     
32     -288   
128    320    
-176   96     
-128   176    
32     -80    
96     -128   
-336   144    
128    -1120  
-32    304    
-32    32     
-272   -464   
-224   256    
-192   -352   
80     320    
16     -32    
0      112    
48     -160   
64     144    
48     112    
48     16     
0      128    
-224   16     
-288   0      
-400   32     
-112   -496   
-320   192    
32     112    
-1104  48     
208    224    
-80    -176   
32     0      
256    224    
96     288    
-32    272    
96     32     
-112   -192   
80     416    
-16    432    
-224   368    
64     272    
0      96     
176    112    
-160   192    
-96    224    
-240   -160   
48     -32    
96     -64    
-32    -32    
128    0      
128    16     
16     192    
-240   128    
-112   96     
112    256    
48     256    
240    -32    
192    -112   
-112   -192   
-16    144    
-1248  96     
0      -48    
96     96     
-112   80     
224    -64    
-128   32     
-176   16     
-112   -64    
80     -48    
-176   160    
-112   128    
-272   32     
64     272    
-128   -16    
16     32     
-672   0      
0      48     
-32    0      
-128   -272   
-96    -208   
160    -48    
0      112    
144    192    
-96    96     
-272   -80    
48     -336   
-16    32     
96     224    
48     224    
144    256    
-336   -16    
-48    176    
192    96     
-80    -48    
64     48     
-208   96     
-224   -16    
0      -80    
128    0      
-48    -48    
192    592    
368    304    
0      128    
-320   0      
256    -96    
112    48     
-192   -128   
32     -48    
64     -464   
-80    128    
240    -32    
-16    96     
96     240    
-288   96     
-320   16     
112    -16    
320    64     
288    48     
80     352    
-208   224    
-416   64     
-160   0      
-176   64     
32     64     
208    -32    
176    80     
304    64     
-64    80     
-144   192    
-32    96     
-128   -208   
-16    96     
320    160    
432    256    
-448   192    
80     0      
-96    48     
-112   -16    
208    -208   
-128   -208   
240    -240   
-256   -144   
256    176    
128    80     
-208   16     
368    -112   
-144   64     
112    -48    
-176   80     
192    96     
-80    80     
-64    96     
256    48     
-160   144    
32     96     
32     400    
272    208    
96     16     
-16    -96    
-64    16     
-224   64     
160    224    
96     0      
48     -80    
80     112    
128    96     
112    96     
176    -48    
-48    128    
128    144    
160    176    
288    176    
128    176    
-80    432    
-128   272    
144    64     
32     96     
-32    -480   
128    -32    
144    -96    
176    -224   
0      -32    
48     -144   
0      -48    
-32    -240   
-160   -448   
96     -128   
-48    304    
112    -208   
64     32     
-64    -96    
-304   320    
32     0      
0      -48    
288    32     
-48    32     
-112   16     
304    272    
-160   -48    
-64    128    
192    -112   
-192   -448   
-48    512    
48     -32    
112    80     
32     432    
-16    -96    
208    -240   
112    448    
128    128    
-48    -64    
-80    32     
144    112    
80     64     
112    112    
48     96     
128    16     
-32    -48    
128    0      
80     32     
64     64     
80     64     
-64    -64    
64     -592   
-128   -608   
-208   272    
-48    128    
144    16     
80     0      
128    0      
384    -224   
208    112    
128    304    
-352   -32    
144    -32    
-224   0      
16     -64    
464    -160   
-64    -32    
240    -32    
256    -16    
368    112    
-288   64     
-160   240    
96     -32    
-16    160    
-16    16     
304    64     
272    96     
-16    -32    
112    -16    
160    48     
80     -176   
80     -32    
32     -32    
-64    -32    
272    -1152  
32     160    
-592   16     
-400   -80    
320    192    
208    240    
-80    -16    
-240   -16    
32     32     
-224   -16    
208    128    
-80    -256   
464    -80    
176    -80    
64     112    
208    -64    
224    96     
-432   -96    
192    64     
64     16     
-64    -32    
416    96     
16     -112   
-16    64     
-64    -192   
-16    48     
-208   -288   
64     112    
-160   -352   
96     64     
48     -96    
80     64     
128    80     
80     32     
32     16     
208    176    
-96    -48    
240    64     
112    80     
224    -112   
-80    64     
240    -96    
-448   -480   
368    -32    
-336   224    
448    -64    
-464   -16    
-288   -48    
48     432    
48     -96    
-160   -528   
32     -272   
176    -208   
-112   -480   
144    -112   
384    112    
16     -48    
112    -48    
-96    32     
-32    64     
-320   -176   
320    -336   
320    0      
288    -272   
48     128    
128    240    
-304   -464   
176    -144   
528    -112   
-368   -16    
496    -128   
-16    -96    
160    672    
-272   32     
32     16     
768    176    
-272   -256   
112    32     
32     0      
-80    -48    
-512   -80    
240    -16    
-48    0      
96     -64    
224    112    
-96    -128   
32     -160   
128    -544   
112    -144   
144    -96    
-64    208    
112    -368   
112    16     
224    144    
-16    -192   
-64    0      
-240   -256   
144    16     
160    112    
160    0      
0      -48    
128    -96    
80     -96    
-48    16     
240    48     
-80    224    
64     -224   
-32    32     
144    96     
-64    144    
144    -176   
144    64     
-1008  80     
48     -176   
112    -320   
-176   112    
208    -112   
96     208    
640    416    
-464   -880   
-304   -96    
64     128    
288    -176   
-128   64     
144    240    
-176   352    
48     -80    
-800   -48    
160    -192   
-640   -16    
-48    -240   
416    -208   
192    176    
-32    224    
-16    -192   
112    32     
-64    208    
80     -144   
80     -160   
160    -176   
-16    -80    
288    0      
-224   160    
-80    32     
-352   16     
-16    16     
352    48     
-64    160    
64     224    
192    -112   
-80    -496   
112    -368   
-32    96     
-144   16     
112    -144   
-32    48     
128    16     
-96    16     
32     -16    
-480   16     
208    64     
-160   32     
96     -112   
80     96     
192    16     
352    496    
-176   96     
176    -240   
-528   -144   
-16    -64    
-144   -112   
80     -48    
-64    -144   
320    32     
-240   192    
-144   -32    
208    48     
-16    -48    
-16    32     
-80    -112   
48     16     
-176   -48    
-112   32     
-96    -128   
128    64     
80     48     
208    16     
-176   32     
160    -80    
-112   80     
-16    64     
0      64     
96     -96    
208    32     
-992   -80    
-464   -16    
48     -80    
-400   112    
-304   80     
-608   224    
-304   -32    
16     -80    
144    -128   
64     -352   
-16    -224   
-656   -208   
-352   -64    
-1120  -176   
32     48     
-432   -176   
112    -192   
32     -32    
-80    80     
80     112    
-288   -208   
-352   -48    
-128   48     
144    112    
400    240    
-144   -16    
-192   -80    
160    160    
-160   176    
-16    80     
80     32     
-80    48     
-96    0      
-208   0      
48     -112   
-48    -96    
96     -32    
-48    32     
160    128    
-192   -80    
-160   -48    
-208   -48    
80     112    
48     -16    
112    96     
160    16     
-256   -160   
-64    -64    
-128   0      
304    112    
-144   416    
32     -272   
-1184  -304   
-288   -48    
-1424  -144   
-176   144    
112    -112   
144    160    
-352   -176   
-16    -32    
128    -32    
288    32     
208    32     
144    96     
-288   -128   
-256   -112   
320    64     
-144   -80    
0      48     
48     -16    
560    48     
544    160    
-352   352    
-112   112    
208    48     
-224   -192   
-128   16     
-80    560    
80     368    
288    336    
-320   80     
96     112    
-384   -16    
-32    48     
112    -192   
16     112    
-176   -48    
0      -160   
-48    64     
272    -304   
144    112    
-144   -16    
-256   -64    
-96    48     
80     -32    
-144   128    
48     352    
256    -64    
288    32     
-912   192    
-272   -368   
-1184  -192   
336    208    
-64    288    
48     -128   
-32    16     
-16    336    
256    -32    
-80    -96    
-16    -64    
112    64     
240    32     
-320   -96    
160    64     
-336   -240   
48     480    
-176   -160   
48     80     
432    560    
-288   -240   
-64    224    
96     96     
48     -80    
144    32     
-96    144    
48     -16    
48     -96    
-288   32     
48     -48    
32     224    
64     80     
64     -48    
-32    32     
-176   -16    
-96    80     
64     -80    
-96    -192   
16     96     
-80    64     
-80    352    
-64    112    
80     -64    
-176   -32    
256    64     
-96    16     
-144   -192   
128    176    
-192   176    
48     -64    
-64    -32    
112    32     
-80    64     
32     0      
48     32     
96     -48    
128    -32    
80     80     
32     -64    
64     80     
-16    -32    
-32    16     
16     48     
48     -32    
128    48     
112    112    
-16    64     
96     32     
-224   0      
-32    80     
128    -320   
-448   -112   
-80    64     
-80    -16    
144    64     
-144   -96    
208    -272   
224    128    
240    208    
176    272    
-336   32     
96     -128   
48     112    
80     96     
-128   -176   
288    -160   
-48    144    
80     80     
-64    -16    
256    -32    
-80    0      
464    32     
112    -32    
448    96     
48     80     
-352   0      
-112   96     
-384   0      
-64    -48    
-96    96     
128    64     
-80    -80    
224    0      
-48    64     
-16    -224   
-320   -96    
496    -48    
192    192    
16     -16    
320    0      
-192   0      
-64    48     
176    16     
176    0      
208    -32    
192    64     
192    0      
144    16     
-32    112    
-192   -928   
144    64     
-96    80     
-272   -32    
384    80     
208    160    
-80    -48    
128    -16    
-208   48     
208    96     
-16    0      
-112   -160   
96     64     
-96    80     
96     0      
0      -960   
-64    0      
192    96     
112    48     
208    16     
-48    112    
64     -32    
16     112    
32     32     
176    64     
80     16     
32     432    
0      32     
368    32     
-240   -96    
464    -32    
0      64     
-48    -304   
-80    32     
64     240    
48     176    
64     240    
-144   176    
16     -80    
752    624    
-672   432    
48     64     
80     0      
304    0      
-288   32     
-80    -176   
0      48     
144    -560   
832    400    
0      400    
0      -96    
0      -208   
48     -160   
80     -112   
80     368    
-96    -144   
-144   -336   
144    352    
-16    32     
176    -160   
128    -272   
160    160    
96     -16    
48     -80    
-160   -288   
240    -64    
-112   -64    
80     224    
112    0      
16     128    
-16    -96    
48     352    
768    368    
-544   -32    
-272   -608   
480    -784   
-48    704    
368    160    
-144   -176   
208    -480   
80     288    
96     208    
-96    -112   
-208   -144   
32     -144   
80     96     
208    96     
16     -80    
-32    16     
272    64     
-96    -208   
80     -48    
0      -112   
-16    208    
-112   -592   
-16    112    
352    112    
80     144    
16     48     
-16    -16    
256    80     
-128   -64    
-32    80     
144    -128   
368    320    
80     -64    
-112   32     
32     -256   
80     0      
112    -1408  
160    96     
48     64     
48     96     
96     -112   
48     -80    
80     240    
-272   -112   
128    224    
128    96     
432    272    
96     -48    
48     -16    
96     -64    
0      96     
64     -128   
144    -16    
128    -48    
48     -144   
48     96     
-192   0      
80     16     
16     -48    
128    -432   
96     -16    
272    -800   
-176   -208   
80     112    
-224   48     
144    0      
144    48     
0      -464   
224    -16    
32     -176   
-80    0      
-688   48     
144    -32    
96     80     
-64    48     
0      -224   
624    -400   
16     144    
48     48     
16     -224   
0      96     
0      80     
-160   -192   
-96    -48    
160    0      
336    -80    
80     32     
304    0      
-256   64     
48     -80    
-32    -128   
512    -64    
-352   176    
80     -16    
208    -48    
48     32     
176    -16    
-48    -64    
160    -64    
-16    80     
80     -128   
-736   -224   
-80    -160   
-400   -16    
-176   -64    
352    -160   
96     32     
-224   96     
-176   -560   
48     -16    
176    112    
48     176    
-208   32     
64     48     
-256   96     
-48    -48    
-48    48     
272    16     
-176   -128   
288    16     
-112   80     
-32    16     
-240   -160   
160    0      
80     144    
-16    176    
160    112    
112    0      
0      -32    
48     16     
-112   -128   
-128   64     
-48    -16    
-272   128    
160    -32    
-944   0      
272    -96    
-128   64     
160    48     
240    144    
-80    432    
64     -48    
224    -272   
0      -16    
0      -304   
80     -80    
-48    0      
-448   -240   
-224   -576   
0      272    
-400   464    
272    -288   
-272   -176   
-64    112    
-336   0      
160    -688   
0      -336   
-48    96     
496    336    
-416   272    
368    80     
-256   -640   
32     128    
288    464    
-576   -704   
64     192    
-400   -176   
144    192    
48     -112   
-432   -320   
800    672    
224    416    
-432   -16    
-16    -32    
240    -160   
384    128    
-512   64     
160    -192   
-128   96     
-576   272    
-16    -80    
304    -448   
-736   -16    
160    144    
-96    -48    
-48    144    
272    -80    
-128   16     
400    -16    
-96    -112   
-96    -192   
80     -16    
48     80     
176    384    
-224   -128   
-176   -288   
192    16     
16     160    
-992   -144   
-112   -128   
-64    -128   
-688   0      
-128   -32    
-944   0      
48     -80    
-672   32     
-64    -32    
176    48     
-128   64     
-224   16     
-48    96     
-656   32     
96     176    
64     -32    
128    160    
-288   32     
-304   -80    
80     32     
-464   0      
-64    64     
-32    0      
-320   64     
-2512  32     
-80    -48    
112    -128   
144    160    
48     16     
144    48     
-160   -208   
0      -48    
16     16     
-144   -48    
192    32     
-96    32     
48     16     
-272   16     
-176   48     
-656   0      
0      112    
16     16     
-16    32     
-272   -128   
48     16     
-112   -144   
-224   176    
112    208    
128    48     
-144   -48    
0      96     
-16    0      
-80    -192   
16     -144   
-32    160    
32     256    
-736   0      
80     -64    
-64    48     
-16    96     
0      32     
208    -32    
-128   0      
-176   96     
0      48     
-272   -64    
64     -176   
208    -80    
240    144    
-208   64     
-48    -48    
-1280  -240   
80     -48    
-48    32     
64     48     
64     80     
-224   0      
144    0      
-96    96     
-336   16     
-128   16     
224    128    
-480   64     
-16    -64    
-208   -96    
160    -48    
-48    80     
80     16     
192    -48    
16     64     
-224   64     
-288   0      
128    32     
288    64     
144    48     
80     -96    
-16    -160   
272    32     
-16    -48    
96     16     
-16    112    
-464   -32    
224    80     
-1200  -80    
32     240    
48     64     
256    80     
-32    32     
-96    -64    
32     144    
48     48     
80     224    
-432   0      
272    112    
144    16     
48     -32    
-416   -48    
-144   48     
96     32     
-160   0      
-240   -80    
400    48     
-112   -16    
160    -32    
-272   64     
-384   -48    
32     0      
-32    32     
0      32     
-400   0      
304    64     
80     -64    
32     -16    
80     0      
192    48     
272    96     
-176   -80    
-96    0      
-144   16     
192    32     
-32    64     
176    -96    
32     -80    
144    80     
-352   -96    
64     -32    
-304   -96    
48     16     
64     48     
80     32     
-64    -96    
192    -208   
32     16     
32     144    
240    144    
720    432    
-288   -192   
32     -128   
-64    240    
-480   -304   
16     -192   
32     272    
304    544    
-384   -480   
-464   -144   
128    464    
16     -240   
-144   -176   
176    -688   
240    -48    
-400   1120   
240    112    
0      -512   
656    656    
144    -32    
48     0      
-96    -16    
-64    -160   
-96    272    
-16    -272   
-384   144    
528    160    
-560   224    
-112   64     
-128   -176   
400    736    
-176   0      
-16    272    
368    96     
-320   -560   
192    -272   
-144   -320   
-128   112    
320    352    
-272   256    
0      112    
112    -336   
64     0      
240    -288   
-416   -192   
144    -432   
-32    -112   
96     384    
464    144    
-496   144    
16     112    
-112   160    
256    48     
256    288    
-64    64     
-48    -160   
-64    -368   
80     -144   
112    160    
-192   -32    
288    -96    
64     128    
-32    176    
32     80     
176    -96    
128    -400   
-112   32     
112    -112   
-96    -32    
144    16     
160    64     
-64    80     
-80    96     
240    -32    
144    -16    
-240   -272   
0      -96    
-112   -32    
32     0      
-16    80     
32     -96    
32     64     
48     64     
160    32     
-128   48     
176    0      
16     80     
160    -64    
-16    -128   
48     -112   
-48    48     
-128   80     
0      -16    
144    48     
80     48     
160    0      
112    160    
-16    -464   
176    64     
80     -16    
48     32     
-64    144    
16     96     
-16    -224   
-80    -96    
32     -48    
160    112    
144    -16    
288    -64    
-32    96     
16     -384   
208    16     
-48    -272   
160    64     
-16    112    
80     160    
0      64     
-32    -64    
224    -16    
-96    128    
-160   32     
256    -16    
112    48     
128    112    
304    208    
-176   80     
-96    -64    
0      -432   
160    -80    
-16    -256   
-16    -16    
64     96     
352    368    
-240   304    
160    32     
96     -80    
112    64     
160    96     
48     32     
-256   -96    
160    -96    
48     112    
48     -96    
48     384    
224    -80    
256    0      
-144   128    
288    256    
-32    80     
144    48     
-16    -16    
272    -96    
-16    96     
-16    -16    
-160   -48    
176    -448   
128    -112   
160    -416   
112    -544   
0      -288   
288    16     
272    48     
368    128    
-80    80     
48     192    
96     80     
208    304    
32     256    
112    -208   
80     -400   
112    -80    
288    208    
400    208    
-368   -160   
48     -432   
16     64     
160    -208   
448    432    
-48    -224   
64     144    
32     128    
32     -192   
0      128    
176    384    
16     -16    
96     -128   
-16    112    
224    -176   
-32    80     
-112   -368   
-144   -1360  
128    192    
48     -16    
240    -32    
-880   -480   
-112   -304   
32     -32    
32     -336   
-32    64     
144    -416   
-96    -32    
-64    0      
-144   -352   
-320   -864   
-64    368    
768    1040   
-96    560    
320    -624   
304    -272   
-976   -208   
416    -192   
80     -160   
128    -368   
208    -144   
-144   -224   
192    64     
416    -480   
-128   -256   
64     -64    
256    128    
384    96     
16     288    
-80    144    
64     -96    
-336   160    
-176   96     
80     -32    
-240   -288   
192    -112   
432    0      
-288   -48    
624    -560   
-320   -16    
272    -64    
-336   96     
160    32     
0      -16    
-80    80     
64     -16    
-64    64     
160    -48    
-1840  0      
0      64     
-96    32     
240    -16    
112    144    
256    -16    
224    -16    
-128   -464   
144    64     
208    -128   
32     16     
-80    80     
-16    32     
-192   16     
112    16     
-320   48     
112    32     
80     -48    
16     0      
32     48     
-32    -48    
-112   -48    
64     -208   
32     64     
-80    -16    
32     -80    
0      48     
144    -64    
-288   -64    
128    -80    
-272   -16    
-240   -160   
-576   -160   
192    -112   
-32    0      
208    -192   
-80    48     
256    -448   
-240   -32    
64     -16    
-16    -128   
-80    -96    
320    -64    
-48    80     
32     32     
-448   -48    
144    -32    
-1504  96     
-96    -96    
16     16     
192    -128   
-32    64     
-80    112    
208    16     
128    -64    
-64    -144   
16     -208   
80     -48    
-400   176    
-32    0      
-256   0      
32     -208   
-64    -16    
176    -112   
-32    -32    
64     -160   
112    -112   
192    -192   
224    128    
-736   48     
0      -32    
0      -32    
144    -32    
-144   32     
64     -16    
-256   0      
-16    -480   
-112   -96    
0      64     
-192   -112   
112    -96    
-80    -64    
-32    -112   
-304   64     
-176   -128   
112    -224   
288    -272   
304    -112   
16     176    
-64    32     
32     -48    
192    80     
128    48     
-1920  32     
-256   80     
-608   -240   
-96    48     
-496   -32    
-96    0      
64     112    
-816   -80    
32     -16    
-128   64     
-528   128    
-304   -128   
96     -176   
-48    -176   
-160   64     
-256   -80    
224    -64    
96     -160   
480    32     
16     -32    
-288   -32    
16     48     
96     64     
-80    -32    
-432   -48    
-176   32     
-1248  0      
-64    -32    
32     -48    
272    112    
336    32     
-208   32     
144    80     
-432   144    
-128   80     
-192   -16    
-288   -336   
240    0      
64     144    
16     32     
-160   -128   
-176   -32    
-96    80     
128    112    
-288   48     
-352   -720   
144    224    
-192   288    
-112   -16    
-80    96     
-96    -80    
-272   -144   
16     16     
96     256    
-224   -176   
-32    208    
-368   -96    
272    -80    
-1248  -480   
608    144    
-480   16     
352    -544   
240    496    
144    -752   
16     336    
-112   -208   
16     -80    
16     848    
-96    -240   
-80    128    
144    48     
-160   128    
128    576    
-1088  -736   
-336   -336   
304    112    
-512   768    
-288   64     
-48    48     
480    192    
-112   -496   
192    -160   
32     -48    
-144   112    
48     48     
-288   128    
-736   480    
96     208    
32     -256   
0      96     
208    0      
-304   -64    
-320   -80    
64     48     
-128   96     
160    96     
32     208    
96     0      
-80    -48    
-96    -96    
80     0      
-16    -144   
352    176    
-400   80     
112    64     
-16    32     
-336   -16    
240    -288   
-64    368    
64     480    
-112   0      
176    192    
96     -96    
-96    -80    
16     -160   
-80    -80    
-288   0      
64     144    
-112   80     
272    112    
-144   0      
-208   -176   
80     -112   
0      64     
128    80     
-176   96     
-80    96     
144    32     
64     0      
64     48     
-64    112    
-48    -16    
-48    0      
-160   128    
16     128    
176    32     
-160   -64    
224    320    
64     368    
336    112    
224    208    
-208   0      
-256   -32    
-32    -16    
0      48     
64     272    
-368   -80    
64     192    
-96    32     
272    -32    
48     -32    
-144   32     
32     48     
-32    48     
48     -48    
-80    -32    
64     -16    
224    -16    
288    112    
-16    224    
-192   144    
-80    -64    
48     16     
16     32     
-96    96     
192    64     
-128   -352   
240    -112   
64     128    
-176   -64    
272    272    
-160   208    
48     48     
112    32     
-144   -64    
176    272    
-96    192    
176    32     
-96    -16    
64     -128   
32     -112   
304    0      
0      16     
-32    32     
-64    -96    
96     -128   
160    -128   
112    -32    
32     0      
-384   -256   
64     -48    
-208   -128   
144    -160   
192    -128   
288    -128   
-176   -160   
-48    -32    
-32    112    
-144   -224   
80     -32    
96     272    
80     256    
-128   144    
144    160    
64     -80    
-160   144    
48     160    
160    64     
240    240    
96     304    
-384   -496   
400    144    
64     240    
480    48     
64     -160   
368    -160   
512    496    
-192   0      
208    48     
-320   64     
112    176    
224    272    
-432   -816   
160    -16    
128    112    
528    -208   
208    80     
32     256    
128    112    
-192   -64    
-80    -320   
-32    -192   
-48    256    
128    96     
496    32     
-96    -208   
-112   -176   
80     -400   
-32    64     
0      -80    
48     64     
-64    112    
-144   -32    
-64    80     
336    176    
-16    -240   
144    48     
0      32     
-32    0      
32     112    
144    -64    
-16    48     
48     32     
-16    16     
112    -512   
80     208    
48     64     
80     64     
0      -112   
432    176    
192    64     
-80    32     
-240   -64    
16     112    
-176   -80    
336    64     
176    48     
112    -32    
320    80     
-64    112    
128    96     
272    160    
-624   -48    
48     32     
176    48     
112    96     
-144   80     
-192   -48    
256    16     
160    64     
-48    -48    
-80    80     
384    128    
32     336    
-592   -96    
112    -112   
464    -352   
-224   32     
-48    48     
272    64     
-320   -32    
144    32     
96     48     
-112   -144   
192    144    
240    -256   
-160   -32    
48     -144   
32     0      
208    -48    
-96    32     
224    32     
128    112    
128    64     
0      96     
16     240    
272    128    
48     48     
-144   -304   
176    -16    
96     16     
-112   96     
144    -16    
224    80     
0      -32    
80     80     
-192   32     
224    80     
-64    -80    
208    -16    
-16    144    
144    64     
176    0      
48     -96    
-144   112    
224    16     
160    112    
-48    -176   
128    80     
48     -112   
-128   32     
-16    0      
208    80     
96     16     
160    16     
32     288    
0      224    
144    -576   
-144   -48    
96     -720   
160    32     
48     144    
176    -96    
32     48     
160    80     
304    64     
-288   -176   
-16    -352   
-16    48     
80     -288   
112    -16    
-784   48     
176    32     
-32    48     
48     -656   
64     176    
96     -112   
176    64     
128    0      
32     -80    
32     -144   
208    112    
-16    -80    
-160   48     
192    -64    
-16    -96    
-304   64     
128    -112   
176    96     
-48    128    
64     -48    
224    32     
32     32     
16     288    
-64    -160   
144    -208   
-208   144    
-16    -96    
-240   -112   
512    -672   
176    -672   
-240   -256   
-80    -64    
-144   48     
112    208    
-272   352    
48     -32    
320    288    
-48    -464   
224    -176   
288    -32    
-32    -48    
16     -192   
176    -80    
80     -64    
176    -64    
-432   -144   
96     -64    
160    432    
-16    -64    
176    -352   
352    -144   
352    144    
176    -208   
-320   -224   
-16    -144   
-304   320    
176    352    
224    -64    
-32    -320   
384    -128   
704    800    
-688   -1136  
-1264  -368   
144    -176   
336    -368   
448    384    
64     -240   
144    112    
-32    416    
240    -624   
336    160    
240    -80    
16     -96    
256    192    
-48    -16    
-160   48     
48     48     
-128   176    
-16    -480   
-592   0      
240    0      
192    -224   
160    -288   
64     288    
-32    -112   
-32    80     
-80    288    
208    -112   
256    400    
-256   304    
96     -384   
112    -224   
16     304    
80     -32    
-288   -16    
-96    -304   
64     -784   
384    112    
-128   352    
16     48     
16     0      
-112   64     
144    288    
208    -64    
48     80     
-400   112    
80     432    
272    400    
32     240    
-144   208    
192    -160   
-16    448    
272    80     
-288   144    
-144   -384   
144    -112   
-336   448    
-64    128    
-80    32     
-64    32     
-160   80     
-96    48     
192    -80    
336    272    
32     176    
160    -16    
80     32     
-576   -48    
-128   -16    
-48    64     
-752   0      
16     -160   
288    -256   
-224   96     
-192   144    
-144   48     
304    -32    
-128   -96    
144    -144   
128    96     
48     192    
-48    416    
-288   0      
-16    -96    
-96    96     
-608   -80    
32     16     
0      -96    
-384   -176   
-544   -96    
-352   176    
16     -16    
464    288    
-768   -304   
0      112    
16     272    
16     352    
48     64     
-48    -208   
-96    240    
112    256    
128    240    
224    48     
-288   48     
-512   -144   
-176   -112   
-128   96     
224    96     
32     16     
48     80     
32     192    
-112   144    
0      176    
64     192    
112    112    
96     -64    
-160   -96    
-160   -48    
-128   32     
-432   -16    
208    48     
-432   144    
-16    -128   
128    -48    
80     96     
-272   -64    
80     -224   
112    -32    
-32    96     
16     48     
288    112    
-304   144    
-256   -256   
112    -16    
64     160    
-224   336    
-272   32     
0      -128   
48     -48    
128    16     
80     80     
96     32     
-64    176    
-48    128    
-96    -144   
-304   -208   
32     32     
-48    64     
-144   96     
48     16     
-208   -48    
240    144    
64     480    
-128   160    
128    64     
48     16     
192    -176   
-16    -64    
-144   -176   
-112   -96    
-64    0      
192    272    
48     160    
-128   80     
-384   0      
-16    -96    
80     288    
48     80     
48     -208   
-64    80     
-224   -64    
128    80     
-240   -128   
0      256    
-208   80     
96     -48    
-224   -192   
192    112    
80     112    
32     160    
-48    240    
-208   -48    
64     -16    
-688   160    
112    96     
80     352    
-160   32     
-144   -272   
288    -48    
128    32     
96     128    
256    224    
112    -144   
-96    368    
-304   128    
464    -64    
240    112    
464    0      
16     -16    
48     80     
-176   272    
-432   64     
-80    -64    
-160   -160   
144    48     
384    112    
112    80     
80     0      
-48    96     
-272   -32    
320    -16    
-224   -32    
112    48     
0      0      
32     48     
352    352    
-672   -32    
272    16     
80     80     
-208   80     
320    64     
0      -32    
-576   -192   
224    0      
-480   160    
-464   -32    
352    208    
-128   96     
112    80     
176    32     
-208   16     
80     0      
-32    48     
96     16     
-48    0      
352    192    
-384   -32    
-80    16     
-144   64     
64     32     
240    16     
144    48     
-48    32     
-128   -16    
-144   48     
224    176    
64     80     
64     96     
-48    16     
64     32     
128    64     
144    192    
-240   176    
-224   -16    
80     -32    
-80    96     
-272   -64    
256    64     
48     96     
-16    -16    
1040   256    
-656   16     
-464   -32    
32     96     
-480   112    
-336   -80    
-160   -208   
704    128    
-384   192    
-144   208    
-160   -128   
48     -352   
272    80     
-128   240    
-176   -32    
-32    48     
144    96     
-240   16     
416    128    
-112   0      
128    80     
96     48     
-64    -32    
-16    48     
-16    64     
64     32     
0      16     
176    0      
16     -32    
128    16     
32     0      
-80    -48    
176    -32    
16     80     
160    16     
-32    64     
-16    48     
-240   48     
368    96     
-64    -16    
-112   -272   
272    -64    
-64    0      
288    32     
-160   -16    
-128   64     
96     128    
32     48     
64     -16    
208    64     
-112   112    
208    16     
-16    -16    
80     48     
0      112    
144    -32    
-64    0      
64     -256   
32     32     
-64    96     
160    -32    
176    -256   
128    -64    
64     0      
-144   -48    
96     48     
128    144    
-48    96     
144    -32    
112    64     
32     -160   
-176   -144   
48     -48    
-64    -64    
208    -208   
80     48     
96     48     
-16    288    
-80    -256   
16     96     
-16    -64    
80     16     
80     128    
-176   -592   
48     400    
112    -176   
128    96     
48     -48    
-64    96     
32     -368   
-128   -16    
-16    16     
-16    128    
-64    -416   
336    304    
48     16     
256    80     
-32    176    
-48    -176   
-16    48     
64     -176   
144    -128   
-224   16     
-80    96     
-96    -160   
-16    32     
464    672    
-48    -480   
176    416    
256    160    
-32    -96    
-112   576    
112    -368   
128    304    
160    -48    
16     0      
144    128    
16     -176   
32     48     
192    80     
64     -80    
112    80     
128    64     
512    816    
-176   624    
-16    -1456  
464    80     
64     544    
112    0      
16     -240   
-32    -752   
-112   368    
-160   -32    
-224   -464   
768    576    
-224   416    
192    -400   
384    -400   
288    368    
336    -48    
272    -272   
192    -208   
-176   224    
176    256    
-272   192    
-144   -160   
-48    64     
160    -80    
192    -96    
320    -160   
80     176    
128    96     
112    48     
400    496    
-112   -32    
-240   64     
-80    -112   
208    -16    
352    112    
112    -992   
96     -32    
16     64     
32     -192   
16     16     
-48    -128   
48     -96    
-16    0      
160    -80    
112    -16    
112    16     
48     -368   
-2016  -432   
224    -208   
128    256    
192    -48    
-32    -112   
-32    -864   
64     -208   
112    432    
224    -16    
0      -336   
320    256    
48     432    
80     240    
-224   -336   
0      -32    
-336   80     
-304   256    
256    -80    
64     -416   
160    -64    
-304   -640   
64     -272   
-96    336    
96     496    
-464   112    
-304   16     
128    -96    
608    208    
16     528    
-320   64     
-112   -80    
320    -144   
256    80     
320    -128   
-96    -160   
256    -272   
320    32     
0      -176   
-16    -16    
-96    -144   
-16    -48    
96     16     
176    48     
0      0      
176    -80    
-512   112    
-176   -64    
-16    -144   
-16    -32    
224    64     
-64    80     
160    -16    
48     -832   
-176   0      
-48    48     
112    192    
160    144    
176    -48    
-80    -64    
0      -16    
-432   -96    
112    -256   
-576   -176   
96     -64    
-224   64     
-96    -144   
288    -48    
-272   -528   
288    -112   
192    224    
-240   224    
-96    80     
16     -64    
-64    0      
112    -144   
64     16     
336    96     
-256   128    
-224   -144   
-80    -48    
176    -240   
128    208    
-80    272    
176    160    
224    -400   
-112   -144   
-64    -64    
16     -128   
0      16     
352    -64    
-48    128    
48     144    
-1184  -96    
32     -176   
-240   16     
-48    32     
-176   16     
320    -384   
-16    -96    
128    -336   
176    -304   
128    112    
144    80     
-80    80     
-224   -144   
-208   -208   
64     -224   
-224   -192   
144    -16    
-160   192    
224    160    
48     -144   
80     112    
-80    -16    
48     -32    
128    144    
0      -32    
96     112    
64     -96    
112    48     
176    240    
-112   -112   
32     32     
80     0      
-112   32     
-496   32     
48     48     
-208   -144   
-64    176    
352    112    
-560   -48    
-496   -464   
-352   -112   
-96    192    
128    0      
32     -48    
160    144    
48     64     
128    32     
-128   -16    
-336   -176   
16     96     
-336   -48    
-144   64     
-16    -16    
-128   32     
-32    64     
-400   16     
16     16     
-112   32     
208    -80    
-144   -96    
-752   -16    
-464   -176   
288    80     
-144   0      
-16    16     
-112   96     
-384   160    
0      -192   
112    -80    
-112   144    
48     16     
176    -96    
-640   -64    
48     -112   
-2432  -16    
48     144    
-336   0      
192    144    
-176   0      
96     32     
-128   -128   
176    -64    
48     48     
64     -16    
-80    48     
-400   64     
64     32     
-336   -112   
-336   -80    
-32    0      
128    208    
-48    176    
-352   48     
16     -80    
128    64     
0      48     
144    128    
-176   -32    
144    16     
-160   -32    
144    96     
-240   16     
-64    -16    
-352   -16    
128    112    
-96    -16    
-1344  -128   
0      80     
-160   16     
384    112    
288    -16    
-144   -32    
-208   48     
-80    96     
-192   80     
-128   -16    
128    -16    
560    560    
-480   0      
-64    -208   
512    160    
-1744  -192   
80     80     
-240   -64    
16     -80    
240    96     
-256   16     
160    96     
-512   16     
-64    -96    
144    -32    
-320   -48    
144    0      
256    208    
-848   -16    
-256   96     
-448   0      
64     16     
-224   -144   
208    -80    
-144   -160   
1008   464    
-1136  224    
-304   -128   
352    -32    
16     48     
16     0      
-80    0      
640    256    
-496   0      
-128   0      
-64    -128   
-144   -32    
96     128    
32     16     
176    16     
0      16     
32     32     
-64    32     
48     64     
-80    -16    
32     16     
-160   -96    
160    64     
-112   224    
192    16     
-416   -32    
144    64     
0      0      
64     -48    
-16    -16    
16     16     
-112   32     
112    112    
-96    96     
80     112    
64     176    
96     384    
176    160    
-368   -144   
96     128    
-224   -64    
0      -128   
16     160    
144    160    
288    96     
176    400    
-288   -256   
-112   -80    
128    160    
32     32     
176    16     
144    128    
-96    -80    
-16    -64    
208    64     
-48    112    
-96    -144   
160    144    
96     -64    
-48    32     
16     -16    
32     64     
112    0      
-48    720    
16     -528   
16     448    
-208   64     
144    -368   
208    352    
-48    384    
-112   -48    
96     -336   
192    512    
176    672    
48     -48    
96     48     
80     -208   
48     192    
32     64     
-48    48     
-32    160    
-208   64     
304    112    
-192   48     
16     80     
-16    -112   
224    16     
144    288    
176    192    
-32    -128   
-32    0      
32     64     
176    160    
48     352    
-384   -96    
64     -416   
352    656    
-64    464    
176    80     
64     -96    
-32    64     
-16    288    
32     -32    
-64    -96    
128    368    
16     304    
-192   80     
-48    -16    
16     80     
16     176    
80     64     
64     -48    
96     -192   
80     112    
-16    288    
0      208    
-144   272    
0      96     
144    64     
144    112    
-64    48     
224    112    
16     0      
192    -64    
16     -256   
288    -96    
128    -160   
160    0      
48     48     
-144   -464   
192    0      
-96    192    
-160   -80    
320    -16    
464    48     
512    208    
112    -32    
-320   -128   
-16    -128   
-272   -128   
272    -176   
256    -96    
128    144    
112    112    
-160   -368   
336    96     
-96    96     
-96    16     
-32    -112   
64     -336   
128    -32    
160    48     
-80    32     
144    224    
0      32     
128    80     
96     -16    
0      -112   
32     -32    
0      -576   
-192   -128   
208    -272   
288    48     
-112   304    
192    496    
-224   -96    
-80    16     
-112   -288   
0      -160   
64     32     
224    32     
0      16     
80     -144   
-64    -224   
384    -544   
192    -176   
176    -176   
32     48     
64     96     
-416   -128   
96     -64    
160    192    
224    240    
352    576    
-480   240    
208    -160   
336    -176   
96     80     
512    304    
-240   176    
-400   -48    
-448   -128   
720    208    
192    80     
384    -16    
320    32     
-352   64     
-400   0      
-64    224    
-224   576    
304    240    
240    -272   
416    -400   
80     -32    
-240   80     
-96    -96    
112    -528   
64     -16    
96     128    
-32    0      
208    96     
176    32     
-48    -32    
80     80     
64     0      
464    256    
-176   560    
224    -64    
32     -288   
192    -160   
-128   560    
496    272    
80     176    
-256   -224   
0      96     
96     272    
144    -384   
-32    -160   
80     -336   
-64    -128   
288    -128   
-384   -240   
224    -32    
-432   64     
-112   -384   
-64    -208   
-64    -128   
-48    -80    
112    -576   
-32    -1216  
128    -64    
-80    -144   
64     64     
240    -128   
368    -192   
32     416    
96     -496   
-16    -512   
80     -80    
64     -64    
0      -224   
0      -96    
448    -288   
80     -176   
336    -32    
0      48     
80     16     
16     -32    
48     -432   
0      -656   
-80    544    
464    -208   
96     112    
32     -192   
272    80     
80     -400   
-208   64     
-128   32     
-64    80     
96     0      
240    -80    
-16    16     
272    -16    
-720   -32    
-16    -48    
-48    16     
16     96     
-32    80     
48     -496   
64     -64    
224    -416   
240    96     
16     32     
-80    -64    
112    -192   
0      80     
-208   32     
-96    -80    
-112   -32    
48     112    
80     112    
-80    -48    
16     32     
-48    -400   
432    -464   
320    -432   
288    272    
192    48     
-48    -64    
16     -128   
112    -64    
-208   32     
-32    -48    
-336   48     
-96    -48    
-528   -16    
96     -32    
160    -64    
-80    -80    
-64    96     
-96    -224   
96     48     
144    64     
480    768    
-688   240    
80     -48    
224    -96    
416    32     
272    48     
112    -304   
-784   -128   
-128   80     
-432   48     
-368   -112   
144    80     
144    48     
-48    64     
160    -912   
384    208    
-160   -32    
320    -128   
-96    -80    
256    -96    
96     0      
576    208    
-240   240    
-528   -64    
-560   -96    
96     -208   
64     -64    
608    -368   
96     64     
32     -768   
240    -32    
144    176    
-80    -32    
-320   -160   
352    0      
0      48     
256    64     
-384   -16    
32     16     
16     -32    
432    112    
-160   32     
256    -32    
112    48     
64     -240   
80     -48    
-1008  16     
208    0      
-272   -80    
176    96     
-160   -64    
192    0      
16     128    
96     -80    
352    0      
-48    -32    
160    -80    
288    48     
-176   48     
336    240    
-1504  -208   
624    -64    
-32    48     
144    -48    
240    64     
-880   -128   
320    -160   
-112   64     
-320   -48    
176    0      
-496   -336   
592    192    
-896   32     
32     0      
-16    32     
-1104  -608   
96     -544   
-176   128    
-176   96     
-48    -80    
-128   80     
16     112    
160    192    
-240   -64    
384    -80    
64     -128   
224    -240   
-528   -208   
-16    144    
-160   80     
64     160    
64     96     
-336   80     
176    -128   
-1360  -128   
192    176    
128    0      
0      64     
48     -32    
64     240    
32     -256   
-16    64     
80     96     
-48    16     
128    -16    
-272   32     
-80    256    
-160   -176   
-336   -96    
-224   -64    
-16    -48    
-944   -64    
-144   144    
-176   -176   
112    112    
448    352    
-320   576    
0      -112   
-144   -160   
160    -32    
240    400    
-208   -160   
32     -1024  
48     848    
16     368    
-256   -48    
-512   -48    
128    -224   
32     656    
352    560    
-192   32     
-48    -560   
-80    32     
-96    128    
0      -64    
48     96     
0      32     
32     192    
-64    -112   
112    -208   
-176   80     
-288   112    
16     192    
-64    96     
64     48     
-144   80     
96     144    
-80    -64    
112    -144   
16     -64    
128    -176   
32     -112   
-128   0      
-48    -96    
-304   -16    
-32    16     
-144   256    
160    -16    
-32    -208   
192    64     
32     80     
-16    64     
240    64     
80     -16    
-80    -160   
16     80     
0      16     
32     0      
-48    48     
-32    -16    
32     80     
-160   32     
96     0      
96     176    
-80    192    
48     64     
-32    -16    
-48    -32    
48     256    
-96    96     
64     -96    
-64    16     
32     0      
0      80     
-192   240    
432    208    
-288   96     
-96    -160   
224    -64    
-64    144    
-208   16     
48     -64    
48     -32    
-64    64     
0      80     
0      16     
192    -32    
-160   -16    
224    144    
-288   48     
-112   128    
-304   -80    
192    112    
48     48     
-32    -16    
320    -48    
384    48     
-48    64     
-192   80     
-192   -32    
32     -128   
128    80     
80     -64    
-96    -48    
-32    -224   
64     -48    
96     80     
48     -112   
-96    64     
-304   48     
16     -96    
-96    -144   
16     16     
-112   -16    
256    160    
-160   48     
160    -64    
112    -64    
-208   32     
0      16     
144    48     
-64    32     
0      -160   
64     96     
96     112    
32     128    
48     -128   
-48    -32    
96     96     
-32    64     
112    80     
112    -96    
-208   -112   
96     -192   
-176   64     
32     336    
-160   208    
-112   272    
96     448    
176    208    
80     64     
48     128    
16     48     
400    576    
-448   384    
0      256    
304    -144   
-352   -224   
416    272    
-480   192    
64     240    
224    192    
288    192    
720    528    
-256   368    
-128   -48    
-240   240    
32     80     
912    320    
-400   752    
80     304    
-176   80     
192    256    
896    160    
-224   320    
528    16     
0      -16    
400    -288   
368    128    
256    272    
0      256    
656    704    
-576   -400   
32     -64    
-400   0      
-352   -96    
208    336    
96     80     
64     48     
-112   -96    
48     -96    
368    160    
-272   368    
144    272    
-208   -288   
384    304    
48     496    
-128   -208   
-16    -560   
240    704    
48     -160   
-96    288    
96     240    
96     272    
224    -32    
-208   -224   
224    320    
-208   176    
80     -96    
256    160    
64     80     
48     160    
176    -128   
-192   -64    
80     64     
-32    -64    
288    16     
-144   272    
304    64     
48     -64    
128    80     
-96    -48    
160    -368   
-80    64     
-32    -16    
32     48     
-32    96     
160    96     
64     0      
16     0      
-48    32     
160    48     
112    -80    
64     -144   
-16    16     
-32    -192   
320    288    
-16    -112   
0      0      
256    -1232  
208    64     
-48    80     
-48    -48    
176    0      
304    -176   
16     -80    
64     208    
112    288    
-80    -32    
-16    -80    
112    -48    
80     16     
0      -160   
-32    -288   
224    -352   
96     144    
144    112    
144    64     
-64    0      
208    48     
0      32     
160    176    
64     48     
16     32     
-64    32     
16     -96    
-16    -320   
-16    -688   
80     336    
-160   0      
160    -48    
224    -496   
-64    112    
0      -32    
112    48     
80     16     
-48    -512   
-80    -160   
-96    208    
-128   96     
16     -160   
48     -352   
0      -256   
64     224    
-16    -96    
48     -128   
128    0      
64     32     
80     -96    
-16    96     
-272   48     
32     -96    
-16    -80    
-144   -80    
96     128    
-224   -256   
400    -112   
384    224    
-16    80     
256    -48    
64     16     
112    144    
-288   -16    
32     -240   
288    -320   
-80    288    
16     -288   
192    80     
-112   -16    
-144   160    
0      -96    
-176   -112   
48     -64    
144    224    
272    -64    
528    -176   
-448   -80    
-112   -352   
-320   -96    
320    -224   
-80    -80    
0      16     
256    64     
-208   0      
112    -272   
192    -48    
240    -512   
-288   -80    
64     -32    
464    0      
-128   -176   
-160   32     
144    -64    
-80    0      
16     -80    
96     -112   
-672   16     
32     -16    
128    -48    
-32    -336   
-48    -16    
-64    -592   
304    48     
80     -48    
-224   -320   
592    -384   
16     -16    
352    112    
128    64     
-272   16     
-48    -64    
32     96     
-400   -64    
144    -48    
-272   -208   
704    352    
32     16     
-224   -64    
80     -1456  
144    144    
160    -128   
432    304    
-32    96     
192    32     
-192   -32    
240    -96    
-1072  -144   
80     48     
304    -32    
80     32     
-176   -176   
528    0      
256    -96    
416    -48    
16     32     
-144   -192   
80     32     
512    320    
-192   -32    
384    112    
-368   416    
-368   -272   
192    -384   
256    48     
544    -304   
-128   256    
320    -64    
-592   -208   
-112   320    
112    -144   
176    -464   
80     592    
48     -160   
16     -240   
-176   560    
192    -544   
-16    208    
-144   48     
-400   -160   
-48    -64    
400    192    
96     -160   
-96    -96    
224    -96    
-224   64     
336    -1056  
0      -208   
-80    672    
352    576    
-176   320    
128    48     
-48    144    
-32    -80    
-160   -208   
112    -256   
-320   32     
32     432    
144    192    
64     -112   
-240   -368   
128    -720   
16     80     
-512   32     
272    -80    
-80    0      
80     -48    
-208   48     
160    16     
-96    -64    
208    -64    
-112   80     
208    -112   
-96    48     
288    -112   
-32    -96    
-192   -64    
-64    32     
-80    16     
-48    16     
-208   112    
144    -16    
-96    48     
64     -96    
-64    32     
96     48     
-240   112    
-32    -240   
112    48     
-1200  -64    
-144   64     
-192   -16    
-720   -112   
0      -432   
-208   -160   
-80    256    
-96    96     
-80    -32    
208    -48    
-336   -32    
-1360  -304   
80     -272   
-1296  0      
256    208    
-144   -48    
-160   -16    
-192   -144   
-528   -64    
96     144    
-272   160    
208    208    
-1072  -32    
80     -48    
432    288    
-480   160    
96     -16    
-16    64     
384    -16    
208    144    
64     -144   
-192   -16    
-432   -208   
-64    -320   
64     -32    
-400   -352   
192    -192   
-176   144    
-208   48     
0      -64    
-192   -16    
-96    -128   
272    96     
-112   -80    
80     48     
32     -16    
48     176    
176    112    
-48    32     
-160   -128   
112    -144   
-96    -96    
-128   -112   
16     48     
-224   272    
208    464    
-96    0      
144    -48    
-432   -48    
-368   -80    
224    -176   
96     -48    
-208   -112   
144    -224   
96     -144   
416    48     
48     80     
64     192    
160    -64    
-464   0      
432    272    
-576   160    
208    96     
-32    32     
48     48     
96     64     
-112   0      
-80    16     
-304   -16    
-160   -64    
-112   288    
208    256    
-112   64     
-176   16     
-576   -96    
32     80     
-80    -48    
96     464    
192    496    
-144   288    
-16    -224   
-80    -48    
96     16     
0      -224   
0      96     
336    272    
-448   224    
-144   -464   
144    240    
-256   176    
224    -16    
-400   16     
16     384    
80     32     
208    -16    
304    -336   
384    480    
-160   0      
-224   64     
-240   64     
-128   -336   
288    208    
-32    -272   
256    160    
-192   -192   
80     304    
-976   -256   
352    -528   
480    928    
320    -112   
-112   -352   
-192   384    
-480   176    
64     -16    
-96    -112   
352    224    
-416   -192   
-16    96     
80     288    
-512   -128   
1152   -768   
-288   -848   
304    352    
160    256    
816    496    
-864   192    
-320   -304   
-144   160    
208    128    
336    -96    
-48    -192   
128    0      
-32    96     
-16    16     
-112   0      
-64    96     
240    96     
-48    80     
16     48     
144    -16    
240    80     
-208   -32    
-64    -32    
-96    80     
32     80     
64     64     
208    112    
-160   -80    
-176   -80    
-128   -16    
-64    32     
-176   -80    
176    -128   
32     16     
96     -16    
112    -48    
-128   128    
-32    48     
144    0      
-16    64     
-144   -64    
96     144    
-240   -64    
128    48     
-272   64     
288    144    
32     32     
-80    16     
-96    -48    
96     32     
144    80     
96     -80    
192    64     
96     64     
-16    48     
-64    64     
48     32     
256    144    
-256   32     
112    96     
112    64     
112    -272   
80     -192   
144    192    
144    224    
-96    128    
32     0      
176    48     
-176   16     
-32    16     
-192   -80    
144    64     
48     -16    
-32    16     
96     -144   
-128   0      
64     32     
48     48     
128    64     
32     64     
-64    240    
112    32     
112    32     
-64    -80    
-64    16     
-144   0      
64     80     
48     -96    
64     -64    
48     112    
0      64     
144    32     
96     16     
64     48     
32     80     
-96    320    
272    0      
80     64     
-208   32     
128    96     
144    -16    
-64    112    
96     128    
128    80     
256    48     
304    -96    
112    32     
128    16     
208    256    
-176   128    
0      64     
-112   -48    
128    80     
16     80     
32     -16    
-48    0      
-176   128    
-208   0      
96     -224   
112    64     
288    -80    
-32    -16    
480    0      
240    80     
48     -96    
272    -48    
32     128    
48     32     
96     -240   
96     16     
64     32     
160    -96    
112    -48    
272    16     
-96    160    
0      -752   
480    128    
0      -176   
-32    0      
256    96     
-32    80     
-16    64     
160    144    
-128   48     
-288   -16    
160    128    
128    48     
96     144    
-208   -48    
64     0      
192    -112   
144    144    
48     0      
-64    16     
48     -416   
176    64     
-16    32     
80     128    
112    48     
160    80     
-112   32     
64     0      
0      96     
64     -16    
-32    64     
224    32     
-112   16     
-160   -1664  
80     64     
-176   -128   
512    368    
-240   -32    
464    -96    
-240   -16    
80     128    
-240   -336   
-240   -32    
656    -208   
-48    320    
352    240    
224    -64    
448    880    
-576   -1072  
480    -496   
288    432    
432    -96    
48     -16    
160    0      
-448   32     
432    -336   
-624   -192   
160    -192   
336    -112   
336    -256   
-128   160    
-144   -192   
-16    64     
-240   -416   
288    96     
304    -32    
256    -208   
368    -80    
192    -240   
-416   -80    
352    48     
-528   400    
64     16     
32     -32    
32     -512   
160    -32    
64     32     
-176   -144   
224    -304   
-16    288    
128    128    
16     -1104  
80     48     
192    -576   
208    -336   
-288   -32    
48     -384   
-48    -80    
64     -256   
368    16     
160    144    
224    -144   
-48    96     
16     -144   
96     -128   
-96    -32    
96     -224   
48     112    
-192   16     
-64    -112   
96     -80    
-48    -416   
128    -80    
144    -464   
-96    -64    
208    -48    
-96    64     
160    0      
144    16     
-32    -16    
64     -16    
80     16     
-16    0      
-640   -32    
-80    -112   
-96    -80    
0      -80    
240    -16    
16     64     
-144   160    
192    -224   
208    -128   
-32    -64    
144    -64    
16     -128   
16     16     
0      -96    
176    -32    
-96    0      
128    48     
16     -96    
144    32     
128    64     
32     -64    
64     -256   
64     -80    
-32    96     
-304   -352   
224    -160   
160    32     
-32    112    
64     -64    
176    -16    
-112   0      
64     176    
-160   48     
192    -64    
16     -16    
16     -16    
160    16     
-16    -96    
80     48     
80     -704   
48     32     
48     -16    
-80    32     
80     208    
-96    144    
32     -112   
64     -128   
-592   80     
-48    -240   
-832   -128   
160    -32    
-112   352    
416    512    
-208   0      
208    -640   
80     -304   
352    -192   
144    32     
32     16     
208    240    
-432   192    
-32    64     
-624   -80    
144    -176   
-48    -96    
128    32     
-1104  -16    
-16    -160   
160    144    
0      80     
288    240    
-80    -128   
-208   80     
304    160    
16     16     
-16    -32    
96     576    
128    416    
48     240    
-336   32     
16     48     
-48    208    
-288   -320   
176    -32    
320    -144   
112    -288   
16     -16    
-32    0      
-272   -32    
-80    96     
16     48     
208    -208   
-64    128    
-144   48     
-384   -448   
128    16     
448    64     
112    -224   
-304   -272   
192    336    
16     96     
-128   -128   
384    -16    
-64    320    
-224   48     
368    352    
-400   -192   
48     -144   
272    64     
-96    -128   
320    -224   
-192   -16    
-1136  304    
-224   80     
-336   -160   
-704   -496   
112    -112   
-288   80     
80     -48    
128    -16    
-432   -256   
336    0      
-464   48     
512    512    
-272   368    
-160   -288   
96     -64    
-48    -144   
640    208    
-304   -128   
256    -32    
-176   64     
-336   -16    
-272   64     
-528   -16    
-240   64     
288    -16    
16     -16    
64     -80    
-192   -32    
-544   -112   
240    256    
-208   -192   
160    0      
-496   32     
-32    32     
432    128    
-528   16     
-1104  -336   
192    -192   
-672   -224   
-192   -320   
384    224    
1296   224    
-816   176    
80     -144   
16     -32    
-144   -16    
48     0      
64     48     
-64    -32    
-48    144    
-64    -48    
-128   -48    
-64    64     
-32    32     
-128   -16    
-128   0      
-2352  -144   
208    0      
32     -64    
160    176    
80     0      
-96    -16    
0      -16    
-112   128    
-16    160    
160    -16    
-48    16     
-304   -16    
-208   64     
320    64     
-400   -80    
-1120  -32    
-80    80     
112    -64    
256    112    
-48    32     
32     -208   
128    -96    
-160   64     
160    64     
128    64     
-96    -48    
-160   -48    
128    -48    
32     48     
128    16     
-256   16     
0      64     
-80    32     
64     128    
-224   -176   
80     -32    
176    128    
-64    64     
176    64     
16     -48    
-256   -48    
-16    96     
160    -32    
-192   96     
80     16     
-176   112    
-16    64     
-608   -16    
80     16     
112    32     
-96    32     
112    -48    
-272   -112   
0      -64    
-80    -64    
64     -128   
32     32     
-16    16     
-192   -128   
32     128    
-304   -320   
96     -176   
-912   -32    
-128   80     
96     32     
96     32     
48     48     
0      96     
-64    48     
64     80     
96     -32    
0      -80    
32     128    
-320   -32    
64     64     
448    688    
-400   640    
176    -64    
144    -144   
160    -48    
80     160    
-64    112    
48     80     
160    -80    
-32    192    
-16    128    
-288   -80    
-176   0      
-32    -16    
32     96     
-128   0      
-64    48     
-96    48     
-112   64     
0      -176   
144    -128   
128    -144   
496    0      
80     80     
128    32     
16     48     
-240   16     
640    480    
-528   256    
-48    -32    
-96    -128   
96     16     
144    64     
144    96     
64     112    
-48    0      
-80    -80    
-208   -32    
96     112    
0      0      
-48    -48    
224    128    
64     272    
160    240    
192    176    
-352   80     
160    208    
-96    80     
288    -176   
256    -48    
96     -32    
544    -272   
-64    -464   
448    672    
128    800    
80     -192   
-128   -272   
368    192    
208    272    
32     -16    
-96    16     
-16    -128   
80     48     
32     192    
112    -16    
32     -208   
48     144    
96     352    
-16    176    
-96    176    
-304   -192   
128    48     
16     272    
0      -304   
96     -400   
-32    96     
-304   -144   
128    128    
272    336    
-96    -176   
-416   -256   
256    -288   
96     240    
592    176    
160    -352   
112    144    
-144   -176   
-224   -144   
-80    528    
-192   32     
0      0      
352    96     
-32    96     
272    176    
-352   0      
176    -128   
0      128    
96     128    
-64    224    
208    272    
32     304    
-64    -32    
400    32     
-176   -16    
432    -448   
176    -64    
256    48     
224    80     
272    160    
-352   96     
16     -16    
-176   16     
-208   32     
80     208    
96     32     
352    -96    
-112   128    
144    -48    
224    512    
80     -112   
176    -112   
-16    -128   
16     80     
-64    112    
48     -144   
256    -80    
-160   144    
160    352    
0      32     
128    0      
80     32     
64     -80    
-48    -48    
80     176    
80     32     
48     112    
224    -48    
-32    -368   
32     -272   
64     176    
64     48     
32     80     
144    48     
0      176    
256    208    
-208   128    
-192   32     
-48    -80    
-96    112    
160    48     
112    -48    
-16    -208   
112    32     
-16    144    
288    48     
-64    -32    
32     -48    
-32    80     
112    32     
-80    16     
112    64     
128    16     
0      -64    
16     -160   
80     -144   
-32    96     
32     -320   
96     -112   
160    -64    
0      80     
64     64     
80     48     
-192   64     
256    64     
128    64     
-144   -192   
112    -32    
176    16     
-112   80     
96     -32    
128    -16    
16     -32    
112    96     
160    192    
-144   192    
32     0      
32     80     
48     0      
272    0      
176    208    
-96    -16    
-16    -48    
144    -16    
-112   336    
-80    -32    
96     16     
160    -288   
304    -128   
80     -240   
-64    -544   
32     -272   
64     -32    
-224   32     
144    -624   
224    -608   
-208   112    
80     64     
112    -16    
48     -48    
80     304    
80     128    
0      -208   
160    -208   
-144   -432   
176    336    
-16    240    
256    -816   
192    80     
-624   112    
16     336    
-64    -176   
160    -160   
448    432    
-304   -752   
-240   -208   
256    -64    
400    112    
288    176    
-64    -32    
-304   -224   
-96    368    
-112   -160   
-192   -240   
-208   -80    
544    48     
176    192    
16     -32    
-128   -256   
176    -736   
240    -176   
256    -480   
-48    240    
-224   -112   
144    -96    
160    -48    
-64    144    
224    -16    
-160   -128   
-288   -32    
-64    16     
-224   -96    
144    128    
-96    160    
272    160    
288    -48    
96     -80    
-80    -32    
160    16     
-304   -16    
112    -80    
16     64     
144    -16    
176    0      
-224   -32    
0      -128   
-1008  -16    
160    48     
-32    32     
-160   16     
400    96     
-160   -160   
-112   0      
-48    -1152  
208    128    
-80    464    
400    -16    
16     -208   
144    432    
-976   96     
64     -32    
-32    -64    
816    -176   
-32    48     
-96    48     
-224   -256   
400    240    
-464   80     
-80    -848   
112    32     
176    -48    
112    -32    
-96    -64    
240    -32    
64     16     
336    80     
-704   -64    
-16    64     
-176   0      
-208   -192   
240    0      
-192   -16    
208    80     
-128   -208   
416    144    
-448   -128   
304    -48    
64     32     
-144   0      
0      48     
16     -80    
-48    64     
96     -80    
-560   -256   
304    -160   
144    128    
-48    -80    
80     112    
160    -160   
64     -32    
-32    -272   
288    -80    
-32    0      
112    -96    
192    -32    
-80    0      
-80    0      
-32    -112   
192    -64    
32     96     
16     -112   
96     -112   
-80    32     
-32    -160   
384    208    
-352   80     
176    96     
-64    -16    
224    144    
-304   0      
-32    16     
112    144    
-128   80     
-592   0      
112    -48    
128    176    
96     -96    
-96    -48    
192    -32    
16     96     
96     160    
-704   -64    
-112   32     
288    48     
-192   160    
256    16     
48     48     
32     -64    
-624   48     
-592   -64    
224    96     
-368   -96    
0      48     
-224   -16    
-288   48     
304    80     
-704   32     
-80    144    
-208   -32    
-64    -80    
192    96     
-192   0      
64     -64    
-80    0      
-96    64     
80     144    
-352   -64    
-64    -16    
-176   16     
-48    96     
-48    -144   
-64    -32    
-80    16     
-32    96     
32     80     
-336   -48    
-128   256    
192    304    
-160   112    
-48    -192   
160    48     
48     -32    
32     48     
0      80     
16     -112   
16     0      
-80    80     
-384   -288   
-160   -976   
16     128    
-32    464    
-80    128    
-64    32     
0      144    
16     208    
32     96     
-384   16     
-192   -320   
-224   48     
-80    176    
-32    -112   
-48    -16    
160    48     
-80    -112   
112    -16    
-16    64     
240    256    
-1808  -224   
144    208    
-304   -64    
-240   400    
480    848    
-160   -288   
-320   -80    
-352   336    
-16    16     
-304   0      
-144   0      
96     -48    
176    144    
16     80     
48     -80    
-256   288    
192    288    
-256   -112   
256    -128   
240    32     
-32    592    
384    -224   
-256   -192   
-144   320    
-128   -16    
-80    96     
32     112    
144    -80    
-320   16     
96     -112   
-64    320    
16     384    
0      176    
-256   144    
-144   -368   
-112   384    
224    80     
224    -96    
80     272    
48     128    
64     432    
-144   -224   
-64    96     
-272   -80    
-32    -96    
-336   48     
320    320    
-496   176    
-192   96     
272    432    
-64    368    
-64    -64    
16     -176   
16     -112   
-112   80     
288    208    
-32    128    
144    144    
-368   -48    
240    96     
-144   -32    
224    -64    
112    96     
384    208    
112    208    
-160   192    
-272   32     
112    240    
512    224    
192    -128   
128    0      
-144   0      
-256   0      
-64    -32    
0      80     
-256   112    
208    48     
576    -112   
176    160    
-80    64     
304    -224   
-16    48     
-80    176    
352    192    
-192   48     
432    112    
-192   144    
-16    64     
-112   -128   
144    128    
-240   -48    
-208   96     
240    -16    
-16    80     
-160   -160   
304    -272   
-144   192    
0      288    
432    256    
-144   48     
144    64     
-256   32     
176    112    
-128   -128   
304    16     
-144   80     
-64    112    
160    112    
128    -112   
-176   -32    
-96    -64    
272    224    
-240   64     
-16    -32    
-64    -80    
224    -16    
-112   16     
192    -160   
-80    -144   
-16    160    
0      128    
64     -32    
80     -96    
-176   -64    
-80    112    
32     112    
80     80     
-48    -16    
48     -48    
-96    -16    
176    64     
-16    0      
-32    32     
-48    128    
176    80     
96     -48    
64     16     
-16    -48    
32     16     
144    48     
-16    48     
48     -16    
-16    64     
48     96     
384    224    
-256   192    
64     -48    
-176   16     
-128   -16    
560    -624   
-288   240    
-144   16     
160    32     
208    112    
96     0      
208    16     
160    112    
-128   208    
32     480    
176    240    
96     80     
-16    -32    
64     -16    
208    -16    
-272   -752   
-208   -336   
-32    112    
48     240    
64     0      
-16    -96    
0      -128   
-16    112    
192    240    
-272   -160   
16     112    
16     208    
-112   16     
320    496    
-192   -576   
400    -80    
224    1008   
96     -368   
128    192    
112    -32    
32     144    
368    416    
-256   -224   
-80    -32    
256    -144   
224    96     
112    224    
-48    16     
112    -240   
-256   -240   
0      -304   
176    128    
192    -272   
400    208    
-272   -128   
-112   -176   
96     80     
176    224    
-80    144    
96     -64    
-16    -176   
288    -112   
192    -208   
416    -192   
320    128    
32     -16    
-16    32     
-272   -336   
32     128    
-80    -144   
-96    -16    
144    16     
208    96     
464    368    
-560   64     
208    -16    
-16    80     
144    32     
16     -96    
112    -32    
336    192    
-480   32     
80     -368   
848    336    
-688   208    
128    -48    
224    16     
256    -64    
16     -64    
-176   112    
-176   64     
-48    176    
112    16     
0      -80    
-48    64     
-32    160    
416    96     
-256   -192   
112    48     
112    -16    
272    64     
-16    32     
208    0      
-304   -144   
288    -64    
-144   144    
352    16     
48     80     
352    -16    
-224   -320   
64     -320   
-400   32     
-80    -224   
336    160    
64     128    
-160   48     
-16    -192   
64     -80    
224    320    
-432   224    
48     -80    
320    -128   
-208   16     
336    -64    
352    336    
-224   16     
-112   -80    
272    64     
-384   -192   
352    -256   
624    272    
-80    16     
640    160    
-96    48     
-48    -416   
-32    -592   
176    32     
-832   -1488  
432    -80    
496    144    
-656   0      
48     32     
128    -64    
752    240    
-16    64     
64     -208   
496    128    
-448   32     
112    -96    
-704   -48    
128    -48    
48     -96    
160    -368   
64     -160   
144    -368   
192    16     
-96    -48    
-64    -96    
80     128    
16     96     
304    -96    
-176   128    
-48    -112   
-48    -80    
48     -160   
80     -48    
224    -32    
0      16     
-32    -32    
64     -336   
304    -16    
48     -800   
-48    -80    
32     -192   
160    112    
0      -96    
32     32     
128    -16    
-96    48     
176    128    
16     -48    
-64    16     
32     16     
208    32     
176    16     
-208   -96    
240    -96    
32     112    
272    -64    
-400   -96    
144    -320   
32     128    
-112   -48    
48     -96    
-144   64     
32     -80    
-288   0      
144    -64    
0      -512   
-144   -80    
144    16     
-48    -176   
-48    -144   
208    -1600  
-80    80     
0      -240   
32     112    
-80    48     
48     -160   
-144   16     
176    -48    
-112   48     
192    432    
-16    -64    
-160   48     
-32    -32    
160    -80    
-80    -16    
128    -1248  
144    384    
208    160    
80     -80    
32     64     
96     -208   
-256   0      
128    336    
-16    -560   
32     208    
-752   80     
192    -64    
0      -192   
0      -224   
32     560    
192    -592   
-128   96     
96     48     
144    16     
-160   -80    
144    0      
80     -48    
112    176    
-352   48     
192    -768   
-432   464    
-32    48     
64     -256   
128    -192   
48     144    
32     -224   
-112   0      
-48    -48    
96     96     
-112   -16    
-112   -336   
-160   -208   
96     48     
-224   176    
192    320    
-96    112    
80     -32    
-96    64     
304    592    
624    384    
336    -80    
432    112    
-144   -32    
112    -16    
-240   -128   
-16    -80    
-64    -64    
-96    160    
368    288    
240    -240   
-112   0      
96     32     
-176   48     
-288   -64    
0      176    
320    -192   
-1504  16     
80     -80    
-992   -80    
-272   -80    
-112   -80    
-96    32     
384    112    
-48    176    
176    64     
-32    96     
-1632  -64    
48     -16    
-128   -384   
64     16     
16     48     
-192   64     
-32    0      
-400   -112   
-112   0      
-992   0      
-208   0      
496    400    
-144   432    
-96    528    
240    -48    
-192   -96    
16     -176   
-352   -32    
32     -208   
32     -192   
16     112    
-48    0      
-176   192    
-64    64     
-288   -352   
224    -304   
-864   -240   
-160   -176   
272    64     
-368   -176   
-176   -240   
-288   32     
176    -112   
224    128    
336    80     
-80    48     
-128   -48    
-64    0      
-416   192    
272    -80    
192    -160   
-576   64     
-192   -16    
-272   -128   
-16    96     
-512   -224   
480    160    
-400   32     
-256   -240   
96     -192   
32     144    
-48    176    
80     128    
384    -96    
-160   112    
0      32     
-576   224    
192    16     
-320   -64    
304    48     
112    160    
320    496    
-64    192    
-48    96     
-16    48     
64     -16    
-80    -64    
-112   144    
112    -64    
-224   144    
-96    80     
128    176    
-32    192    
16     0      
32     16     
-144   -160   
0      -112   
0      0      
-224   560    
432    160    
80     -240   
-160   -176   
-160   48     
16     64     
-32    224    
432    176    
-368   240    
-96    0      
-608   -32    
112    192    
-16    -224   
32     -112   
64     -96    
96     0      
-96    -80    
-112   32     
-48    -112   
48     96     
144    -144   
-96    80     
176    80     
-112   0      
-16    128    
-144   -48    
160    96     
64     -160   
-128   304    
16     32     
160    176    
224    64     
48     -224   
-224   176    
400    512    
-160   288    
-160   -176   
96     0      
-208   112    
96     -144   
-208   0      
-32    0      
32     0      
48     -272   
-64    0      
96     -32    
16     80     
80     160    
-224   -48    
-128   0      
16     -144   
-160   -16    
304    192    
-176   -48    
112    -64    
48     -32    
48     64     
112    128    
80     128    
-112   112    
0      16     
32     -48    
144    48     
-176   -208   
384    -496   
144    -208   
256    128    
-16    64     
-32    -16    
224    16     
-176   -80    
240    144    
-112   -80    
-16    -96    
-128   -64    
-112   128    
96     -48    
272    128    
-128   80     
-272   64     
336    64     
144    16     
304    -32    
-144   96     
-160   0      
240    -32    
-160   48     
-16    0      
80     -64    
256    16     
80     512    
-480   64     
0      32     
48     16     
0      64     
128    -16    
144    -112   
64     96     
-96    -32    
-128   32     
384    48     
-272   96     
-352   64     
-272   160    
288    32     
608    256    
-592   32     
16     96     
-128   0      
-112   -48    
448    48     
112    128    
0      80     
-96    16     
208    32     
48     48     
-224   32     
32     32     
-176   -96    
496    48     
48     112    
-48    32     
-80    80     
-80    64     
-128   80     
464    224    
-224   32     
96     64     
-48    -32    
80     -688   
16     32     
80     32     
-128   -304   
144    32     
-128   80     
-288   -48    
256    112    
-32    16     
480    176    
-400   -80    
496    272    
-240   -32    
480    256    
192    64     
0      -832   
432    128    
-368   48     
368    96     
192    128    
-32    112    
-32    16     
176    160    
-320   -144   
16     -112   
48     -16    
-112   112    
-16    -80    
384    -16    
-240   128    
304    -16    
-128   32     
-464   -112   
320    96     
160    240    
-512   128    
192    0      
192    96     
-320   -160   
48     -192   
304    -304   
592    176    
-288   -16    
144    -48    
224    176    
-288   -32    
144    80     
64     -544   
-96    32     
160    -32    
128    48     
144    -64    
-64    -64    
48     -160   
208    -16    
-112   32     
112    32     
128    32     
80     -96    
176    -160   
-80    -144   
224    112    
-64    -848   
192    -128   
48     -320   
96     32     
-64    -48    
-32    224    
16     144    
80     -80    
64     144    
-48    -16    
-64    32     
240    80     
32     0      
0      -64    
64     -128   
-112   112    
272    -80    
-224   144    
208    144    
32     -32    
-240   208    
448    -1024  
-80    912    
192    -32    
112    -112   
16     176    
32     -256   
32     96     
304    0      
224    64     
128    -112   
48     -16    
16     -624   
-144   -144   
64     -160   
96     48     
-32    -224   
-160   96     
480    640    
160    384    
-112   -320   
64     -608   
48     208    
96     416    
16     80     
-16    -192   
-32    80     
48     64     
208    112    
144    -32    
112    -80    
128    -464   
64     304    
288    416    
160    80     
-32    240    
-32    112    
208    144    
112    -112   
64     16     
64     -256   
32     -64    
96     -400   
128    -64    
48     144    
288    -736   
-112   -64    
-1360  -16    
-80    -592   
-48    -848   
224    -752   
-64    -80    
64     256    
32     -16    
176    0      
96     0      
-16    -192   
-160   -144   
80     -368   
-112   -80    
64     128    
-176   336    
-1120  160    
-96    -64    
64     64     
112    -80    
144    -16    
288    -608   
-80    64     
384    224    
48     128    
272    -32    
80     64     
32     -48    
64     -16    
-64    0      
-112   48     
96     432    
-352   -32    
-32    -80    
400    -192   
112    80     
64     -384   
48     -80    
224    -688   
96     -320   
192    -48    
64     192    
96     176    
-400   48     
-352   0      
352    0      
-144   128    
-336   0      
-64    192    
-48    128    
16     96     
336    -208   
288    -160   
96     -1024  
64     -96    
320    112    
-224   160    
80     -16    
80     96     
-80    -16    
272    -288   
48     -176   
160    32     
-624   -384   
-48    -96    
0      16     
80     256    
96     128    
48     112    
64     -48    
80     -288   
-128   208    
144    -224   
176    160    
208    -272   
272    32     
-128   -64    
128    -48    
-464   144    
64     -128   
96     -224   
-64    -272   
-128   -112   
160    -48    
-48    128    
112    -320   
128    -32    
-48    368    
656    400    
-160   16     
-224   16     
-192   272    
400    240    
-128   -32    
336    208    
-1296  -16    
32     -32    
-48    -96    
32     176    
-176   80     
0      -352   
160    96     
-672   320    
-112   0      
-112   -96    
-208   64     
-736   -32    
320    352    
-496   192    
528    16     
-144   -256   
96     -80    
336    -48    
80     64     
400    240    
-496   -160   
80     144    
-144   352    
304    176    
-496   96     
208    -192   
96     160    
-112   -128   
160    -160   
144    64     
-416   -208   
80     -112   
-192   -16    
176    -448   
-48    -64    
240    -96    
-128   176    
-256   -192   
16     -512   
-176   -400   
-64    -224   
-176   112    
272    160    
-304   -48    
352    16     
-528   512    
-240   144    
16     -512   
-576   272    
-144   512    
-832   -144   
-336   -560   
-32    0      
-640   448    
-176   96     
32     -160   
16     -96    
0      480    
32     -128   
32     48     
-16    -16    
-640   0      
-208   208    
-224   -160   
112    192    
64     224    
-176   -352   
-64    -16    
-80    -80    
-80    256    
-528   -192   
208    256    
-176   176    
0      32     
96     -288   
-128   144    
-16    -96    
-16    -288   
-64    64     
-64    128    
160    -32    
0      -32    
-160   -16    
-128   -16    
-64    32     
-672   -80    
-48    16     
-1392  96     
112    48     
-48    -64    
64     32     
-80    -64    
-16    -32    
-112   -256   
0      -176   
112    64     
80     112    
64     -16    
-16    80     
-224   112    
0      0      
-64    112    
-48    -48    
32     16     
-288   -16    
144    288    
-112   -112   
-48    -144   
80     0      
-288   128    
16     48     
48     -16    
64     144    
-176   32     
128    0      
32     -80    
80     0      
-304   176    
0      -16    
-2144  -192   
-64    64     
-80    64     
-32    32     
-48    -16    
16     32     
-48    96     
-272   -160   
432    -80    
176    64     
96     16     
-64    0      
-160   -16    
-560   -80    
208    32     
-1488  -16    
-224   320    
-128   16     
-272   16     
288    -16    
192    0      
400    48     
-64    144    
-512   0      
32     16     
-64    80     
-16    48     
-64    0      
-144   16     
160    176    
-432   -64    
96     80     
-48    -80    
144    16     
176    0      
-272   16     
80     80     
-128   48     
-400   -32    
304    48     
192    32     
-368   96     
192    96     
-272   -160   
128    -32    
-128   -32    
176    16     
-16    -16    
-48    128    
-112   48     
-192   -80    
128    0      
-80    80     
32     80     
-112   0      
-96    -16    
192    48     
-32    96     
-656   -192   
144    32     
-720   -64    
96     -32    
96     64     
128    432    
16     128    
256    -112   
-144   208    
-352   -112   
-96    -224   
128    128    
-272   -32    
-48    96     
-240   -32    
544    -160   
-384   -48    
384    -16    
528    416    
-304   240    
80     -144   
176    160    
-80    64     
208    112    
-192   -144   
576    16     
112    -336   
0      -368   
-112   -96    
224    80     
64     -192   
48     -192   
32     -288   
-432   -112   
-48    128    
-128   96     
-112   224    
48     -64    
224    64     
-272   32     
80     -80    
-80    0      
480    304    
-368   -64    
192    -128   
-160   48     
128    16     
96     160    
-80    -144   
-32    96     
-64    64     
256    128    
96     144    
-96    48     
128    -224   
-208   -672   
96     560    
48     -224   
-128   464    
96     -256   
80     96     
80     336    
-288   -1040  
288    560    
112    528    
-320   -208   
544    16     
0      -112   
-32    176    
16     416    
160    -16    
-160   -112   
144    144    
-96    -80    
336    -160   
-32    16     
-48    160    
176    32     
272    192    
-160   128    
176    128    
-96    240    
64     32     
-32    224    
80     96     
32     64     
-176   64     
0      176    
-160   64     
64     -80    
96     -96    
32     -1184  
192    -96    
144    112    
16     80     
-96    -64    
112    -96    
-128   -160   
96     0      
128    32     
0      48     
32     16     
240    64     
-64    16     
-48    32     
-64    -48    
128    -400   
160    96     
-32    -96    
80     -64    
-32    0      
176    240    
80     96     
240    160    
-288   80     
112    -64    
16     -16    
16     80     
64     -64    
32     -80    
144    16     
-64    -384   
176    16     
176    16     
-128   0      
80     -80    
112    -64    
64     -64    
224    192    
112    80     
144    0      
-96    32     
32     80     
-32    0      
192    -192   
208    48     
96     -48    
32     224    
-48    -144   
-176   80     
-240   16     
0      -48    
0      -112   
144    112    
48     144    
208    64     
160    64     
256    48     
96     192    
208    48     
-144   80     
144    -128   
112    -48    
96     -48    
64     80     
304    288    
16     32     
256    128    
64     48     
-96    32     
48     -96    
80     -64    
-48    -96    
-224   -16    
384    -64    
176    64     
272    -80    
80     -48    
-464   -512   
-368   16     
192    -528   
-32    -144   
32     -144   
256    -32    
80     -80    
80     144    
64     80     
-160   32     
288    48     
0      -80    
64     48     
144    -416   
0      -48    
64     -144   
-144   -32    
80     -32    
128    32     
-32    -144   
32     -272   
48     -64    
96     32     
128    96     
112    192    
144    208    
16     -16    
-128   -80    
400    256    
-48    144    
144    64     
208    160    
144    -320   
64     -128   
-32    128    
912    1392   
-768   48     
-224   -240   
208    -384   
128    176    
-208   -464   
288    -1264  
112    -256   
96     592    
736    672    
208    304    
-416   -96    
-224   -640   
48     -1008  
-96    448    
16     -96    
-288   -176   
208    304    
288    304    
-272   -80    
224    -32    
144    -48    
224    32     
400    336    
192    -336   
288    -1136  
32     -448   
128    752    
848    144    
-384   1200   
-320   -592   
240    -480   
-448   480    
480    -688   
272    -16    
80     48     
-32    752    
-144   -512   
96     -496   
16     544    
80     -176   
144    240    
128    -48    
-96    -64    
48     208    
176    -336   
-32    144    
-208   -80    
16     -112   
160    304    
112    -48    
-272   -112   
64     -48    
112    -64    
192    -1536  
64     -64    
-112   16     
-272   112    
144    -80    
-160   32     
160    -32    
128    0      
-320   -32    
352    -48    
-112   -96    
64     -48    
0      0      
-64    16     
144    32     
-16    -112   
-48    64     
128    16     
-80    0      
400    112    
-48    -128   
0      -128   
224    96     
-256   0      
64     -64    
-1184  32     
144    224    
96     208    
208    -96    
-48    -112   
16     -192   
-48    160    
208    16     
304    224    
-128   32     
-64    -32    
-160   32     
320    -192   
-48    0      
144    -48    
-16    -32    
80     16     
-480   -96    
16     -208   
-208   -64    
96     -176   
32     112    
16     -400   
144    64     
-16    -160   
48     -224   
-192   -64    
192    -112   
-64    112    
16     -32    
176    16     
-48    0      
-1168  48     
144    -48    
48     32     
80     -128   
-96    48     
48     -80    
48     32     
0      -176   
16     -64    
-288   64     
128    -16    
-192   96     
240    -240   
-288   -256   
272    32     
-32    16     
-64    -32    
208    64     
96     96     
272    80     
-80    -416   
-48    -112   
-320   96     
-128   -240   
96     0      
272    144    
-192   -144   
176    -80    
-336   -16    
-176   16     
-144   32     
144    -128   
256    80     
-368   -208   
-160   32     
-176   -48    
144    32     
-144   48     
176    80     
-448   -288   
416    -128   
-320   400    
-336   176    
-336   -64    
224    192    
176    16     
32     -128   
176    16     
-1248  -32    
528    144    
-192   16     
-432   -16    
-192   -48    
-240   -96    
144    64     
384    80     
-416   -32    
192    0      
-144   -16    
48     0      
192    96     
-448   -80    
48     -32    
240    -64    
-64    112    
320    160    
-544   0      
-192   -80    
-512   -16    
-224   0      
-192   64     
-160   32     
-912   0      
-352   -16    
-256   -112   
160    64     
-64    -16    
112    16     
-80    -128   
0      0      
-48    0      
-288   -160   
-64    -256   
-16    64     
32     32     
96     32     
-16    64     
-464   48     
-400   192    
-96    -48    
-16    -16    
128    112    
-128   160    
-176   32     
64     -80    
128    -96    
144    16     
176    64     
-112   -96    
96     128    
-608   112    
-304   -32    
48     64     
-80    64     
-240   -48    
80     144    
-432   -224   
-144   -320   
112    432    
-96    -16    
432    -176   
0      112    
-112   -96    
-240   64     
384    112    
-560   -1248  
-496   -512   
-784   -96    
80     0      
-1744  112    
1168   752    
-512   -432   
176    320    
-80    96     
-176   -240   
32     64     
-128   -512   
-320   224    
160    48     
-32    16     
-128   0      
128    -688   
32     -48    
32     448    
-432   272    
64     304    
304    0      
-224   64     
-176   -96    
-304   -48    
144    368    
256    208    
336    336    
-480   16     
-192   -64    
64     -80    
64     64     
-272   -208   
96     16     
-832   -32    
-112   -80    
144    32     
-64    112    
48     64     
64     -96    
16     -160   
80     -144   
-32    144    
-80    -16    
-32    0      
-64    -80    
-256   0      
-64    -64    
64     64     
-448   0      
128    48     
-112   96     
272    128    
96     208    
0      32     
240    -16    
48     64     
64     0      
144    16     
0      32     
-304   -80    
96     0      
160    0      
32     48     
0      -32    
32     160    
96     0      
0      16     
64     64     
48     -16    
80     48     
-48    64     
112    16     
-64    0      
96     80     
-16    -48    
-128   -48    
-400   -48    
208    64     
112    192    
192    272    
0      128    
-96    64     
112    -80    
-16    -256   
224    144    
-160   128    
192    64     
32     96     
48     -32    
-208   -64    
160    304    
-288   32     
208    -32    
-96    -64    
128    -256   
384    -16    
0      112    
-16    32     
0      96     
-176   0      
192    80     
80     160    
-16    -64    
16     80     
-176   32     
-160   0      
-352   -128   
144    -96    
-128   128    
240    -32    
16     80     
-160   -16    
-32    -32    
208    128    
208    80     
192    32     
-64    32     
64     160    
-112   224    
-272   -48    
352    -208   
-224   -704   
112    -208   
-240   32     
-304   80     
144    48     
192    32     
336    64     
256    -192   
-80    256    
-144   672    
272    32     
-80    -368   
-224   -16    
-192   -64    
128    80     
320    -32    
16     -128   
-96    160    
0      80     
-16    -128   
-128   -96    
16     -80    
-48    -112   
-96    -368   
448    -512   
208    -144   
160    -208   
-80    -384   
160    144    
-160   -32    
-16    128    
96     -352   
144    32     
64     64     
176    48     
128    -320   
224    128    
-176   144    
0      -128   
-80    -112   
176    112    
96     464    
-112   -752   
-96    192    
320    -224   
112    112    
16     -192   
128    16     
-256   -352   
544    32     
-480   128    
48     -80    
-240   -32    
432    576    
-736   -720   
144    0      
160    304    
400    -96    
368    16     
144    288    
176    32     
-112   -384   
-224   16     
16     112    
128    -32    
0      -96    
192    64     
0      96     
-256   64     
128    -96    
-320   -592   
416    64     
368    928    
432    352    
496    96     
-96    -336   
-656   -272   
144    464    
0      -768   
-256   -64    
64     -128   
-80    48     
144    64     
192    96     
112    80     
192    176    
-240   -112   
224    -112   
80     64     
-64    -32    
128    0      
-32    -208   
144    112    
0      112    
256    96     
32     -64    
-128   0      
128    -176   
80     -208   
-336   64     
48     128    
48     -64    
192    -48    
80     176    
-48    -64    
288    128    
-80    -32    
128    0      
256    -160   
192    112    
-288   -1280  
160    -16    
-16    96     
48     64     
240    80     
-16    0      
80     96     
128    -16    
192    48     
48     80     
48     64     
208    32     
-272   -144   
176    -16    
176    208    
-80    -96    
240    -16    
320    -112   
-160   -128   
0      80     
-48    -416   
-32    48     
176    -224   
160    64     
-16    -48    
-32    32     
80     -144   
-16    16     
176    -112   
160    48     
0      -224   
32     80     
16     160    
64     -1312  
112    -80    
48     -32    
64     -400   
32     -64    
96     -480   
16     -64    
144    128    
-64    -112   
144    32     
96     -16    
48     -640   
80     48     
48     -368   
112    -272   
-48    16     
-112   -16    
-784   0      
128    -480   
-80    -16    
-64    -128   
-48    0      
112    288    
224    64     
-32    48     
224    32     
-160   -256   
16     0      
-304   -928   
-80    -304   
-128   352    
-160   80     
-1936  -160   
64     -320   
-16    -80    
128    32     
48     48     
176    80     
144    0      
176    16     
208    -16    
80     -192   
-160   -176   
48     -144   
112    0      
-32    96     
96     -48    
-1760  16     
-192   -112   
352    64     
160    0      
-80    0      
-48    -112   
-240   -208   
112    -1104  
-48    -48    
-304   -80    
160    16     
192    0      
112    64     
144    0      
112    -80    
112    64     
16     -48    
-80    16     
144    -16    
320    -64    
160    48     
368    192    
-16    -192   
-256   32     
-272   -16    
16     64     
144    -80    
336    -48    
176    48     
64     -16    
-224   -80    
64     16     
-208   16     
-224   -128   
416    -48    
64     -64    
528    192    
-16    -336   
48     -64    
112    -1376  
400    304    
-496   -16    
16     -64    
-32    0      
64     -64    
16     -16    
144    -32    
-160   48     
160    -128   
-960   -32    
96     32     
-16    -128   
-48    -256   
-240   544    
240    -640   
-160   -128   
-192   64     
496    64     
-240   96     
160    -336   
-128   400    
-80    -48    
-16    -80    
-16    -96    
-48    -240   
224    -112   
-48    80     
-96    -368   
-208   368    
-320   -624   
448    1680   
-272   -896   
144    -192   
-608   656    
144    -752   
32     -96    
-96    64     
96     -16    
176    0      
400    336    
224    128    
256    96     
-336   -480   
-96    -96    
0      528    
352    160    
-688   -432   
256    -336   
160    -64    
-464   -272   
-112   16     
112    64     
-32    64     
224    48     
-528   32     
-80    -32    
256    144    
-336   112    
112    16     
-192   -112   
-352   -416   
-32    -16    
0      64     
80     160    
0      -80    
80     -208   
128    -112   
-80    16     
-16    0      
160    -16    
-16    -32    
144    0      
-224   -144   
-320   -112   
-144   64     
112    144    
-96    -48    
48     -160   
-96    -48    
-1904  -16    
-64    -32    
48     -64    
-32    32     
-352   192    
240    64     
-48    -112   
144    80     
-368   -208   
-16    -80    
-128   32     
-80    80     
-80    -16    
-192   -48    
-128   -80    
-400   -32    
80     -96    
240    96     
192    240    
-80    32     
48     32     
-224   -144   
144    32     
0      48     
-80    32     
32     64     
-128   352    
64     32     
-80    -192   
32     112    
-720   -16    
48     64     
-1040  0      
16     48     
-64    -128   
-80    16     
32     16     
64     128    
144    16     
-80    64     
-112   0      
-256   -32    
-160   -16    
-160   -208   
96     80     
192    128    
-176   144    
-496   -48    
0      0      
112    -48    
-32    128    
-80    -48    
32     -16    
-16    -112   
48     -16    
-48    64     
-64    32     
80     -112   
-176   -64    
128    400    
-368   336    
-128   80     
-304   -144   
144    0      
-944   32     
48     -16    
-128   -16    
-176   112    
-96    -48    
112    -96    
208    48     
160    96     
144    176    
-304   -208   
80     -224   
-32    -160   
64     -16    
-16    96     
-112   128    
-704   -128   
-112   -304   
288    -576   
32     -128   
192    -16    
-256   -240   
160    96     
-336   240    
-144   448    
96     32     
-96    -192   
-256   -144   
32     -112   
-160   128    
-48    -64    
-288   -368   
128    -16    
-176   512    
192    -192   
384    464    
-112   -64    
368    -32    
160    256    
192    144    
-208   -448   
272    -16    
-16    208    
208    -144   
-224   -48    
400    -144   
-176   96     
-64    -304   
-80    128    
-144   112    
-240   320    
144    240    
192    -208   
-192   -176   
448    80     
-176   96     
32     32     
-64    144    
-208   64     
-256   -64    
48     32     
192    192    
128    96     
192    -48    
-128   80     
-32    -320   
-272   -464   
-272   -48    
128    -48    
0      -32    
128    0      
176    224    
-208   32     
-336   48     
-256   16     
-224   -160   
576    -128   
-368   0      
288    80     
48     -80    
-720   -176   
96     144    
-16    0      
-128   -64    
192    0      
-240   -16    
288    288    
-384   -112   
512    48     
-32    -32    
96     32     
384    176    
320    576    
-352   256    
32     -144   
832    176    
-208   80     
-240   160    
-96    -96    
-240   -112   
704    224    
-304   -16    
-80    -96    
224    -16    
-176   -64    
176    144    
-368   0      
432    48     
160    96     
-720   -160   
256    64     
-16    -80    
-64    16     
96     96     
-16    32     
-48    -48    
144    48     
-208   -32    
192    128    
16     48     
-64    0      
-208   -32    
208    32     
96     144    
-112   -32    
32     -80    
-96    32     
64     48     
80     32     
224    112    
64     0      
400    128    
-608   -16    
112    32     
160    96     
224    96     
96     96     
-32    80     
208    -16    
-16    96     
96     48     
-176   0      
96     32     
-16    64     
-48    48     
-96    80     
224    80     
-96    -64    
32     -240   
112    48     
-112   -592   
64     -16    
64     16     
128    112    
-64    0      
32     0      
144    -32    
32     48     
-48    64     
112    64     
64     0      
32     0      
208    -16    
-240   -160   
-112   64     
224    -672   
32     224    
-64    -16    
64     32     
160    64     
-96    144    
-16    112    
256    176    
16     0      
32     48     
-16    -112   
160    16     
96     16     
32     -32    
32     64     
96     -16    
144    112    
64     80     
-128   128    
0      -48    
80     -288   
0      -32    
128    240    
-64    80     
32     64     
-48    -176   
64     -32    
-64    64     
-16    0      
192    16     
112    160    
192    448    
-112   -432   
-192   -64    
-80    -480   
160    192    
-192   352    
256    320    
-208   -208   
112    -96    
-48    336    
176    192    
192    96     
144    -16    
0      -16    
112    -64    
128    96     
0      -464   
128    32     
-32    -928   
240    384    
224    432    
208    32     
32     0      
-48    48     
208    -112   
-240   -192   
64     -96    
48     -208   
-48    -48    
336    -304   
64     32     
256    -48    
336    128    
-128   -48    
-16    -96    
-160   176    
224    240    
640    336    
-368   -192   
-240   -400   
48     -96    
1072   656    
-368   -480   
-176   -304   
144    0      
144    96     
304    128    
816    448    
-352   -496   
240    160    
-208   112    
32     -48    
-80    192    
-16    -96    
240    112    
160    -176   
192    32     
160    32     
-16    -832   
-192   896    
48     -80    
80     -352   
0      112    
80     16     
160    16     
144    192    
128    -176   
128    -1120  
-80    512    
288    -1344  
16     384    
192    -256   
224    -240   
0      -256   
-96    -720   
-80    -64    
-160   480    
496    -256   
192    96     
496    224    
-112   144    
-112   -160   
-144   -272   
-32    -16    
48     -464   
224    -48    
304    -128   
-160   -144   
32     -288   
96     -112   
272    16     
352    16     
208    -80    
336    -48    
-288   -32    
-496   160    
-512   -32    
-128   -80    
-816   -96    
112    -64    
32     -128   
80     64     
-544   -448   
384    -304   
-48    -176   
-304   -352   
96     48     
-96    -64    
-96    144    
208    -160   
96     32     
-112   -32    
224    160    
-432   400    
416    -160   
240    -176   
16     -48    
192    0      
0      -384   
-16    -160   
-112   -752   
112    -16    
64     -48    
-64    480    
480    256    
-32    -32    
32     176    
-32    80     
-48    -128   
192    -80    
-1728  -96    
-64    -112   
-64    -112   
-64    -272   
-560   -368   
-112   -544   
0      -32    
352    240    
64     224    
288    -64    
240    -16    
-272   -16    
-144   -368   
-144   -128   
320    -32    
-672   0      
-144   32     
240    -16    
336    16     
144    64     
96     -16    
352    208    
-176   -48    
128    -32    
96     0      
-48    -48    
112    -112   
208    -16    
0      48     
32     -16    
-256   16     
16     160    
-960   176    
96     -176   
368    288    
32     144    
-208   -224   
320    -864   
80     144    
-144   96     
112    32     
-32    -128   
32     32     
-144   -32    
-176   -80    
-352   0      
32     -96    
-96    -32    
160    -96    
16     48     
64     -176   
16     64     
80     -320   
-32    96     
-64    32     
144    -16    
-48    -48    
-16    -16    
-496   80     
224    224    
-16    16     
0      16     
192    48     
-16    -128   
64     -32    
-304   -416   
-192   -400   
112    -736   
96     -320   
208    80     
144    -16    
-64    480    
320    272    
-304   -128   
64     -32    
-192   160    
192    -624   
-400   -224   
-1248  336    
-32    -96    
-1472  -160   
96     240    
0      -80    
-480   -16    
-224   -16    
-496   48     
-176   -64    
160    -48    
-48    272    
224    -112   
80     96     
-304   80     
-128   96     
-1056  -16    
416    480    
-800   -416   
32     -160   
-128   272    
0      128    
192    16     
256    32     
-128   -96    
-896   -32    
-432   -96    
48     -208   
560    176    
48     192    
272    144    
-80    -160   
224    -128   
-48    -96    
16     -160   
128    -64    
-144   -16    
-96    0      
32     80     
-112   32     
-560   112    
48     0      
-1824  -48    
192    -32    
144    -48    
16     -32    
160    -48    
64     16     
112    0      
208    272    
-544   0      
96     48     
144    96     
-48    0      
-48    16     
-768   -64    
-240   -128   
-1392  -16    
-64    128    
-96    96     
160    160    
-400   -64    
48     16     
0      -16    
-48    80     
208    160    
96     48     
288    32     
-176   -32    
-32    -32    
-96    -48    
256    112    
-176   -80    
-336   -112   
-160   128    
-112   16     
48     -112   
-96    -16    
-208   -16    
640    96     
-128   32     
-256   -256   
576    96     
-592   32     
80     -48    
80     96     
176    80     
32     160    
-128   48     
-336   -96    
144    16     
-160   -64    
336    -16    
944    400    
-912   48     
-592   -80    
-160   -16    
-16    80     
48     64     
-112   64     
-176   96     
-64    96     
-672   -256   
272    80     
-880   0      
-96    32     
144    64     
-32    -16    
64     48     
16     48     
-64    48     
112    32     
64     -16    
-224   -32    
96     -160   
-320   -16    
192    256    
128    -32    
-112   16     
-272   -16    
32     0      
160    192    
-80    64     
-16    -32    
288    176    
-128   64     
160    112    
16     128    
-80    16     
144    80     
-160   16     
112    -16    
-192   32     
144    32     
-624   0      
-144   16     
0      16     
80     0      
48     -32    
16     176    
112    112    
-128   0      
-144   32     
64     0      
64     -80    
16     -64    
144    96     
-224   -80    
32     192    
-80    96     
16     32     
112    32     
-32    32     
192    128    
48     128    
48     112    
-80    -80    
48     272    
-80    112    
112    -16    
16     32     
80     80     
-128   32     
-96    0      
48     -208   
-48    -192   
160    192    
32     272    
-176   -352   
16     0      
144    224    
0      -48    
-64    96     
-176   -256   
288    -192   
-112   48     
-112   0      
-112   80     
-224   -112   
128    128    
128    96     
-32    144    
64     32     
128    -16    
144    64     
256    48     
-416   -64    
80     240    
464    640    
96     -512   
112    -496   
128    368    
-128   -48    
-32    -32    
-176   -224   
-64    416    
0      320    
-112   -96    
112    16     
192    -128   
480    592    
-384   -560   
0      -336   
128    400    
144    416    
-208   -224   
192    -48    
224    144    
80     80     
-96    80     
32     -48    
112    80     
32     16     
128    -80    
-32    -144   
-96    512    
-144   -128   
-64    -320   
96     -112   
320    352    
-144   128    
0      -752   
192    -32    
192    368    
-96    208    
96     128    
-48    112    
96     128    
416    480    
-384   -224   
-64    -368   
32     48     
352    400    
176    48     
160    -48    
-432   -64    
160    -656   
240    32     
96     144    
16     16     
-64    0      
112    -112   
-16    -16    
-16    -224   
128    -112   
-48    -80    
80     -368   
208    96     
-48    192    
272    48     
0      48     
0      16     
80     176    
64     -432   
96     224    
-48    176    
112    -208   
32     -48    
0      -128   
48     -16    
48     -128   
-176   -80    
144    -208   
176    -304   
-32    96     
624    144    
80     -64    
80     -96    
-16    -320   
80     64     
304    224    
-176   32     
-48    -224   
112    -16    
96     16     
-16    48     
432    -64    
96     176    
-176   32     
48     -96    
80     208    
-16    -112   
-48    128    
608    -32    
304    496    
-144   -224   
-464   48     
-160   -64    
192    0      
176    16     
336    -48    
176    0      
144    96     
0      32     
128    -144   
-208   -32    
224    -32    
-48    192    
160    32     
192    -32    
96     -208   
-112   64     
32     -624   
144    64     
224    16     
32     192    
64     96     
96     96     
144    96     
-80    -208   
160    48     
144    -96    
-96    208    
48     -400   
96     -80    
-64    -320   
256    96     
96     0      
-16    48     
240    128    
-144   192    
-48    -48    
-208   -192   
416    -448   
-16    -144   
256    0      
0      -192   
-96    48     
-80    -176   
16     192    
320    -32    
-208   240    
176    -256   
96     224    
-80    112    
256    -176   
-80    176    
16     -48    
176    -256   
32     -80    
-32    0      
176    -80    
176    -160   
-64    -144   
112    -208   
48     -192   
48     80     
-176   560    
272    48     
176    -112   
32     -368   
16     -16    
176    160    
-304   80     
320    -48    
288    -784   
-112   80     
-48    -64    
-32    0      
48     32     
-112   -160   
128    -400   
176    -240   
224    -128   
208    144    
-176   112    
80     -192   
32     -48    
112    -48    
96     -96    
-80    -176   
-64    128    
160    -32    
272    -112   
80     160    
0      -32    
320    336    
-48    -304   
176    96     
16     160    
-16    -80    
176    48     
-1024  -160   
272    112    
-32    -16    
432    560    
-384   -256   
96     -544   
288    192    
80     -432   
160    160    
16     128    
-128   -320   
224    -336   
144    -608   
-192   -16    
96     176    
-608   -96    
48     32     
208    112    
-208   -128   
96     -144   
-64    -256   
16     32     
208    -1120  
-32    16     
16     16     
-64    112    
-32    -80    
-48    16     
-288   -224   
288    -64    
96     0      
304    64     
-176   -32    
256    144    
-416   -80    
-272   -80    
64     0      
256    -208   
512    160    
-32    -208   
416    -112   
208    -32    
-112   -288   
336    -240   
-192   96     
176    128    
192    -32    
-240   0      
16     -96    
-304   80     
-272   -176   
272    32     
160    -112   
256    96     
32     -80    
64     -16    
320    272    
-496   -48    
-176   -128   
112    -48    
16     32     
48     -16    
-336   -80    
128    -96    
16     -96    
64     48     
-144   48     
192    -48    
32     0      
32     -272   
320    32     
-144   -16    
16     -96    
112    160    
128    -128   
-32    16     
-48    64     
-16    32     
272    -688   
-224   -208   
-320   -96    
256    -32    
-96    -96    
208    80     
128    272    
208    -80    
272    -80    
-304   80     
-384   -160   
496    64     
-432   96     
80     -16    
-320   -32    
352    -80    
-160   96     
-352   0      
-80    16     
64     -32    
-304   0      
-304   -144   
288    32     
-176   -64    
192    -48    
-832   32     
144    -80    
240    16     
-48    64     
-144   128    
80     -112   
384    -16    
-224   -64    
80     128    
-336   -192   
-608   -16    
-256   16     
-416   -80    
352    176    
-832   -48    
0      -32    
-192   32     
-208   -64    
-32    16     
32     16     
0      80     
-176   80     
-400   -16    
96     48     
-224   16     
-640   192    
-96    32     
-64    0      
-96    32     
-208   -64    
-96    -16    
-1648  48     
-176   48     
256    64     
-64    48     
224    160    
-176   112    
-80    -256   
416    80     
-192   80     
-16    16     
32     80     
32     0      
-144   48     
-128   -32    
112    -96    
-704   0      
-80    16     
-768   -288   
208    544    
-320   160    
112    -64    
-48    -160   
-112   -96    
-64    208    
16     -240   
112    128    
80     16     
0      -48    
-80    240    
-128   -112   
32     192    
-32    48     
-144   32     
64     -32    
144    -80    
32     416    
192    -160   
-336   224    
64     -1104  
80     576    
32     64     
-128   -144   
16     112    
-64    -64    
48     544    
-96    -464   
-144   -16    
-384   -192   
32     80     
160    240    
240    -48    
48     1184   
-176   -416   
0      -96    
-80    432    
128    -224   
-80    384    
-16    -288   
-336   48     
-64    -144   
-16    112    
16     48     
-256   -160   
64     -48    
-2528  -160   
16     64     
-112   96     
0      32     
0      448    
-80    80     
0      32     
-48    -80    
16     16     
64     192    
-176   288    
-112   -96    
64     -224   
-160   -192   
112    -80    
-432   448    
64     -144   
64     -144   
-128   -128   
-176   -112   
-112   -16    
112    48     
48     80     
-112   -160   
-64    32     
160    128    
-112   64     
16     16     
-112   -96    
112    32     
-176   -128   
160    208    
-144   304    
-272   -32    
96     80     
16     80     
-32    96     
176    288    
128    240    
-112   48     
-128   16     
48     80     
80     -16    
224    -192   
272    0      
-64    80     
-128   128    
48     0      
176    -128   
16     80     
-64    -96    
16     -224   
0      48     
144    32     
-80    48     
80     64     
-208   0      
-32    304    
80     288    
0      160    
-48    -96    
176    -112   
16     32     
208    208    
-32    272    
32     -16    
96     -208   
-64    -96    
32     -128   
-208   -64    
64     -16    
80     -224   
224    0      
-80    48     
-64    16     
-96    272    
32     304    
96     128    
-192   16     
224    -176   
320    208    
32     320    
336    480    
-32    640    
-192   160    
48     16     
-160   -112   
32     224    
48     80     
224    -32    
320    -144   
624    208    
-48    416    
-736   112    
-416   -80    
-256   -272   
288    -176   
192    -400   
224    -144   
-96    160    
-320   208    
-400   176    
-224   96     
80     -32    
224    64     
432    128    
-192   48     
224    112    
0      96     
-368   -96    
736    -96    
208    128    
352    32     
-144   32     
-288   32     
-96    48     
-256   -160   
288    -176   
256    32     
16     80     
-80    -64    
352    144    
-208   80     
112    64     
112    80     
32     -80    
16     16     
-128   -64    
352    144    
-272   -208   
160    112    
-256   -256   
16     -336   
-160   -16    
240    -16    
128    176    
96     112    
176    112    
-32    -32    
-32    272    
304    288    
-32    208    
0      144    
80     64     
112    -48    
64     64     
96     112    
80     -48    
112    208    
144    -464   
272    48     
-128   -176   
96     -208   
-208   32     
-96    224    
-192   64     
128    96     
-80    0      
-48    128    
208    112    
464    0      
0      64     
32     32     
-64    416    
160    320    
0      240    
128    -224   
80     336    
16     -112   
-208   -272   
288    -336   
-48    0      
288    192    
144    96     
-224   -16    
144    -176   
-112   -160   
-144   -48    
224    -48    
64     -112   
80     528    
-80    -208   
96     144    
272    -176   
-192   -352   
32     240    
-64    144    
48     -448   
240    48     
0      272    
-32    -16    
96     -16    
128    -80    
0      32     
16     -144   
16     80     
64     -176   
128    48     
32     0      
256    112    
-224   -64    
96     128    
-80    400    
112    192    
144    144    
-208   -16    
48     48     
-32    -192   
208    80     
-48    -64    
400    112    
80     -400   
64     16     
-256   48     
32     0      
64     256    
-176   16     
128    48     
224    32     
192    128    
-16    -208   
224    -16    
128    -16    
-32    32     
-32    -48    
32     48     
-192   48     
64     -32    
336    256    
-80    192    
64     80     
448    128    
-16    0      
-80    -288   
320    -32    
208    -96    
160    48     
288    -64    
80     -112   
-64    32     
272    128    
416    -112   
160    32     
288    176    
-96    112    
0      -32    
-64    -752   
448    -1152  
-352   -32    
-240   -1024  
48     32     
208    96     
48     -176   
304    48     
48     16     
-384   48     
208    -48    
-32    -1104  
80     112    
208    -48    
112    80     
192    -448   
320    -160   
-32    -32    
96     -48    
176    -16    
-48    -416   
16     -48    
160    192    
32     -64    
-48    -176   
560    240    
-368   -304   
-144   -64    
80     -128   
-176   0      
-256   -288   
32     -304   
656    352    
-176   -176   
464    -48    
496    -256   
-144   -16    
304    -976   
864    304    
-544   -16    
176    -64    
-64    -208   
-48    -32    
16     -48    
0      -48    
-336   -112   
0      -16    
-1728  -32    
448    -16    
-336   -176   
272    -112   
-96    -256   
288    48     
208    80     
128    -848   
-912   -128   
192    -96    
128    128    
-480   -256   
832    -128   
304    112    
352    80     
-1312  48     
-176   -112   
336    0      
64     80     
32     160    
160    32     
16     160    
64     -400   
128    -32    
16     -16    
96     48     
-16    -96    
160    160    
-16    128    
0      -64    
-240   96     
128    -80    
-576   272    
-160   320    
-192   -256   
-64    -64    
0      -144   
336    -240   
80     272    
112    -208   
-112   112    
-48    -48    
-16    -96    
-80    -64    
192    -64    
-336   272    
224    -32    
-1632  32     
112    -240   
112    96     
64     -480   
0      192    
208    -352   
-64    48     
32     -48    
192    -32    
-48    160    
80     112    
-96    -528   
-256   -64    
-64    -624   
48     592    
-656   240    
-64    -240   
480    416    
256    -256   
128    -16    
-80    -704   
-144   16     
-192   112    
144    16     
48     96     
176    304    
144    64     
80     -96    
-128   -48    
-48    -80    
32     -384   
-16    -192   
96     144    
176    80     
-16    112    
-112   -288   
144    -32    
-80    -48    
256    16     
160    16     
-96    32     
48     -192   
64     -240   
-112   -224   
368    208    
-336   528    
112    0      
-224   -64    
208    -64    
48     112    
-480   -48    
-320   -48    
16     48     
-736   -32    
-256   -64    
224    -208   
-128   16     
96     -32    
128    -176   
-112   -320   
0      -272   
-1776  48     
32     160    
-560   48     
-144   80     
-80    0      
-208   160    
-112   32     
-320   -144   
96     -128   
-64    0      
64     96     
304    80     
48     16     
32     0      
0      208    
128    -32    
96     160    
144    0      
192    112    
-96    48     
-304   -160   
-48    -64    
-96    -80    
-80    32     
-256   32     
-48    -16    
-800   -16    
-176   -16    
144    -128   
32     32     
-128   16     
-16    80     
-128   -192   
176    64     
64     48     
96     160    
224    320    
-48    80     
-224   224    
-320   16     
0      80     
-80    96     
144    -96    
16     256    
-96    192    
32     48     
48     16     
128    272    
-416   160    
176    -80    
80     -64    
192    -80    
-64    -48    
-128   32     
-224   -112   
-16    -192   
-144   0      
16     160    
-576   -32    
128    0      
32     -128   
-32    48     
48     96     
-32    112    
-80    -16    
-48    80     
48     80     
-320   64     
96     112    
112    16     
96     32     
-128   160    
272    272    
-1296  -32    
16     128    
384    112    
160    32     
-128   -112   
272    464    
-160   304    
32     16     
176    320    
-144   48     
224    336    
144    144    
-48    48     
64     288    
432    208    
224    -32    
32     16     
-16    32     
-304   -224   
-64    -336   
-64    112    
496    208    
80     -368   
608    -256   
432    0      
-240   80     
-96    -192   
80     -64    
480    256    
-160   416    
-352   -32    
-288   112    
0      240    
176    80     
-64    320    
-48    160    
-80    96     
-80    48     
0      0      
176    -64    
-288   -128   
-240   128    
-48    48     
-16    480    
320    320    
-144   160    
32     128    
-64    -208   
64     80     
128    -32    
96     -160   
320    288    
-208   256    
128    -256   
-112   304    
-16    272    
208    -128   
0      -80    
-240   160    
64     0      
-304   -240   
208    64     
128    176    
144    112    
-160   0      
-48    -32    
144    80     
-160   32     
-144   272    
80     -352   
112    192    
-16    -16    
-176   -288   
240    32     
0      144    
48     -208   
32     144    
128    80     
-256   -16    
-176   -144   
32     288    
48     16     
-144   16     
160    -64    
80     -48    
-48    128    
-80    -48    
192    112    
-224   -48    
256    160    
-80    160    
-48    16     
96     16     
96     -208   
-112   -112   
96     96     
176    48     
0      64     
64     0      
-80    64     
112    48     
-64    -16    
160    96     
32     -48    
80     96     
224    96     
-48    80     
176    48     
16     -16    
-64    48     
0      80     
-48    64     
-16    16     
96     80     
48     16     
112    96     
-16    32     
32     32     
16     -48    
-16    -496   
-96    48     
32     16     
-32    48     
224    208    
16     -144   
320    208    
160    176    
-96    -32    
272    48     
-160   240    
224    64     
-192   -336   
-128   -112   
128    16     
32     -720   
112    -32    
128    112    
32     96     
-32    144    
96     80     
-16    48     
-144   64     
-80    -48    
80     64     
16     0      
288    176    
-640   -48    
-160   -48    
64     112    
32     -64    
512    176    
272    112    
496    112    
-208   -48    
48     128    
-304   32     
-16    64     
64     16     
80     64     
-320   -176   
528    -32    
-80    0      
-336   64     
176    32     
176    48     
32     48     
-64    128    
-48    -32    
-16    -64    
-80    0      
-16    48     
48     80     
80     128    
-160   16     
240    -16    
320    128    
-240   -128   
224    -64    
-64    96     
-96    -128   
272    96     
-48    -352   
64     0      
160    240    
-224   128    
240    -16    
48     16     
64     80     
272    160    
-176   32     
80     16     
-96    -80    
208    -64    
272    208    
80     -96    
224    16     
-64    -192   
-128   0      
256    -384   
128    16     
-384   -128   
144    0      
-560   -416   
368    -160   
32     48     
288    144    
32     -48    
128    -176   
64     96     
288    80     
48     0      
-64    -192   
880    224    
320    -816   
32     -192   
208    -816   
0      288    
-176   128    
96     80     
144    112    
-240   -128   
64     272    
128    -160   
-48    -416   
-32    -64    
128    208    
464    -96    
-288   144    
-416   -992   
464    96     
48     224    
-112   16     
272    -112   
0      80     
-48    48     
80     96     
288    -96    
96     112    
48     128    
128    -320   
256    128    
-288   -176   
352    240    
80     0      
-32    368    
16     160    
384    288    
352    496    
-576   -656   
16     528    
320    -48    
352    784    
-208   -272   
64     -240   
160    -48    
192    192    
160    32     
-64    -160   
160    -128   
-112   -144   
-224   16     
96     144    
160    -16    
160    32     
-16    -144   
48     -144   
160    -304   
-64    -32    
208    16     
-16    -208   
32     48     
224    -176   
240    160    
-176   -272   
-48    -336   
64     -48    
-16    -96    
-96    -176   
-192   -160   
256    -272   
96     64     
-64    -416   
32     -64    
-80    -672   
-16    -80    
32     48     
128    160    
144    112    
64     -272   
288    -128   
-176   16     
0      -224   
-128   0      
-80    -32    
176    0      
-48    0      
96     -176   
80     80     
-16    -48    
-64    16     
112    -864   
64     -96    
240    -112   
-32    -16    
224    -48    
-160   112    
-112   -16    
-96    80     
144    128    
160    -80    
-1792  -32    
16     80     
-96    -48    
96     -144   
32     16     
176    -240   
-112   -96    
336    -96    
-32    96     
-48    -176   
160    -64    
128    416    
-240   192    
240    -96    
416    16     
-704   112    
64     -96    
-80    16     
128    -192   
128    -48    
-32    -240   
80     16     
176    -688   
-208   -64    
320    -80    
-128   64     
-176   160    
-16    -64    
-208   -128   
32     -208   
-656   -96    
288    -64    
-2000  80     
240    64     
-32    -48    
128    -32    
-32    80     
96     -192   
32     16     
0      -192   
192    32     
48     208    
192    0      
-240   -80    
16     -32    
-48    -16    
64     48     
-544   -112   
128    0      
-432   0      
-80    -208   
-144   32     
-80    -288   
48     64     
128    -112   
272    16     
160    0      
32     -96    
-544   -16    
0      -80    
-80    -16    
240    -96    
-80    -16    
-16    -80    
-32    96     
160    -80    
0      144    
-160   -144   
64     -96    
-64    0      
-80    -64    
-848   16     
64     -80    
-64    -32    
48     -16    
-96    -320   
32     -288   
208    208    
-112   -80    
368    48     
144    208    
256    256    
160    -80    
64     352    
-336   400    
-64    -448   
-48    -352   
128    464    
16     16     
160    -240   
-192   304    
16     240    
-320   272    
288    -384   
-192   -416   
-672   -288   
192    -128   
-1040  608    
-352   -320   
-304   -336   
-256   560    
-80    16     
528    160    
-400   -208   
-96    16     
432    416    
-208   -640   
-736   -240   
-560   32     
128    192    
-224   0      
-272   -224   
352    -96    
256    240    
-48    -128   
384    -432   
224    400    
-656   80     
272    16     
48     -144   
-304   0      
-192   -128   
-64    144    
0      -64    
176    48     
-176   48     
112    176    
64     48     
16     0      
-32    -352   
-192   176    
-128   160    
-32    -208   
48     -32    
-48    224    
272    128    
-592   -112   
144    112    
-176   -32    
256    160    
-16    16     
144    48     
48     64     
-240   -128   
32     -64    
-192   16     
64     -80    
-224   16     
16     -32    
-160   48     
80     -32    
-1008  -48    
48     112    
16     -32    
-64    48     
144    0      
-208   -48    
256    -32    
-96    48     
48     112    
-96    -48    
-96    16     
-128   16     
-112   48     
-400   -80    
80     32     
-1216  32     
112    112    
-48    -32    
16     32     
-80    0      
16     -16    
0      -16    
64     -32    
128    48     
0      80     
-16    -112   
48     64     
-16    32     
-224   -160   
288    -176   
-256   -48    
192    80     
-176   -32    
-80    32     
-64    16     
-96    192    
80     96     
128    -32    
-64    -192   
-288   -32    
0      64     
-128   -64    
96     -16    
-80    -16    
0      224    
-240   16     
144    32     
-112   -48    
-64    112    
16     352    
-176   112    
80     -16    
112    16     
48     16     
16     208    
-64    0      
192    16     
-96    32     
-384   -320   
256    -320   
-352   0      
384    144    
80     64     
80     64     
-80    96     
112    -48    
16     160    
-64    176    
0      240    
-80    16     
192    64     
192    64     
160    80     
-112   64     
96     96     
-384   48     
0      0      
160    64     
-144   -304   
-128   -192   
-64    16     
-32    32     
288    80     
16     128    
80     0      
-48    112    
-32    0      
-64    112    
-320   0      
128    16     
32     96     
-80    16     
32     80     
-96    48     
-32    320    
160    272    
-256   -64    
-80    -64    
304    96     
-272   -32    
192    -16    
-96    48     
96     128    
-304   16     
-48    48     
-416   -48    
128    32     
480    224    
-176   0      
240    -32    
192    48     
288    272    
-512   112    
-96    -64    
192    32     
-176   48     
-48    -16    
-128   -96    
192    -160   
208    0      
272    64     
-96    -32    
240    144    
-96    -16    
-112   -16    
-48    48     
144    112    
-80    -80    
208    80     
80     80     
384    144    
-144   -16    
-64    -32    
-400   -304   
128    -64    
32     96     
16     -160   
-112   -160   
32     -240   
-288   -80    
304    144    
144    128    
-48    192    
-176   288    
-160   -240   
512    -656   
448    384    
480    448    
-48    -560   
224    -832   
-560   -560   
224    992    
336    736    
-480   -1152  
528    240    
128    16     
192    -16    
224    288    
112    48     
32     144    
48     320    
96     -80    
160    128    
-112   160    
224    -432   
288    0      
112    16     
64     272    
464    -400   
-64    -592   
-128   16     
240    -416   
-32    672    
112    512    
64     -16    
64     208    
304    -272   
-16    64     
-96    64     
320    256    
-64    224    
32     -192   
0      608    
256    80     
112    -48    
80     48     
80     -96    
-160   -96    
176    -48    
-64    16     
160    -64    
0      -48    
48     -48    
192    448    
128    96     
-64    32     
240    -592   
-208   224    
144    -16    
-48    -32    
240    0      
32     128    
-96    192    
224    32     
-32    224    
192    96     
-112   48     
208    16     
48     16     
112    -48    
144    112    
-112   -320   
384    208    
-240   208    
-112   -32    
-64    48     
144    128    
160    64     
96     16     
0      -48    
192    112    
80     48     
80     32     
272    32     
64     -112   
48     192    
176    112    
-160   128    
-32    -1072  
-32    48     
144    32     
128    80     
-32    -112   
128    -48    
-16    -128   
96     -96    
240    96     
16     48     
-80    32     
96     -144   
80     48     
-144   -48    
160    -48    
112    -288   
336    64     
-48    -64    
160    32     
64     32     
208    176    
-160   80     
192    112    
48     160    
96     80     
112    32     
64     -288   
224    160    
-144   64     
-16    32     
304    -160   
32     96     
112    320    
304    384    
-272   128    
-64    -128   
112    -336   
112    0      
48     112    
16     -224   
64     128    
272    240    
-208   256    
144    -128   
176    -112   
160    -128   
80     128    
64     224    
-176   16     
128    -48    
96     112    
80     -480   
48     240    
224    144    
112    -32    
-64    48     
288    0      
32     128    
144    -80    
112    -32    
160    -32    
-64    32     
-176   64     
-208   -1040  
240    -592   
-496   -64    
160    -64    
16     -704   
-80    -480   
288    -208   
96     -1360  
144    -160   
-160   -208   
48     0      
96     -192   
192    240    
144    304    
224    160    
-16    -576   
0      -160   
-128   0      
320    96     
-240   0      
112    -544   
128    48     
16     -768   
416    320    
-80    -240   
128    96     
96     -48    
-48    -16    
-80    -336   
32     320    
32     80     
112    -160   
-240   64     
272    -32    
-16    -32    
-16    -224   
-128   -112   
144    128    
48     240    
368    -224   
32     -432   
-128   -48    
-176   32     
144    48     
0      16     
288    32     
64     48     
-272   -96    
-352   -448   
-1472  -160   
-16    432    
736    1248   
-288   64     
304    -768   
352    -656   
-160   -32    
416    -272   
80     -224   
16     -208   
64     -16    
-160   -64    
128    80     
32     -48    
-128   -336   
-208   16     
272    -32    
336    112    
208    -48    
-64    32     
0      -576   
336    240    
-112   -960   
0      16     
-208   -256   
192    -32    
256    80     
-272   -96    
608    128    
-400   16     
-256   -48    
-128   64     
-1952  16     
80     -48    
48     64     
48     -128   
128    80     
128    -144   
144    48     
16     -16    
-48    -16    
176    48     
96     112    
144    -32    
0      -48    
-608   -16    
208    -32    
80     -48    
0      -32    
-80    32     
0      -32    
80     80     
112    -16    
128    96     
-128   0      
96     -112   
-16    64     
240    -16    
-496   -16    
48     -48    
-448   -144   
64     -64    
-304   -16    
48     -64    
48     128    
224    -128   
32     16     
48     -176   
128    64     
-240   16     
224    -32    
64     -16    
96     48     
-96    0      
-32    32     
96     224    
-192   16     
-64    -16    
160    -176   
-16    -16    
256    -176   
144    128    
-240   -16    
-368   -112   
48     -64    
-592   192    
-336   0      
64     -16    
112    0      
-32    64     
-208   48     
288    -80    
32     -80    
-1008  -128   
112    -96    
-128   -96    
0      160    
-80    32     
-368   -80    
-208   -256   
-1312  -240   
32     0      
-1104  -32    
-96    -16    
144    -160   
-32    -112   
192    224    
-368   48     
-448   -224   
144    -80    
32     -96    
0      96     
0      -16    
-32    32     
-16    -624   
-368   -240   
-80    304    
-320   64     
-176   0      
272    64     
-448   176    
-240   -144   
-16    -32    
208    -128   
304    288    
-96    32     
-176   -16    
-160   -32    
-48    16     
64     80     
-16    32     
-96    48     
-432   -16    
304    368    
-1008  192    
-16    -32    
224    -64    
144    80     
-48    -112   
48     -64    
32     64     
-512   80     
96     80     
464    336    
-144   224    
0      0      
-48    -112   
-48    0      
-16    96     
208    64     
48     -64    
-1584  -64    
176    64     
-304   0      
-80    176    
-96    16     
-208   -48    
64     48     
-272   64     
80     80     
0      -16    
144    80     
-176   112    
-160   -96    
-240   -112   
-64    96     
-304   -16    
512    -80    
80     -176   
-80    -32    
160    208    
-64    144    
-112   80     
-224   -32    
96     128    
-304   160    
528    112    
-240   -592   
-48    -224   
-368   192    
224    -144   
-576   112    
-32    -128   
-64    -432   
160    288    
-144   96     
-80    -16    
80     32     
64     496    
-128   -448   
256    -96    
-224   48     
128    432    
48     -528   
-304   560    
-48    -192   
-304   -112   
0      -256   
160    -352   
-304   496    
352    -32    
-80    -176   
416    -192   
128    -176   
592    1136   
-192   96     
-400   -416   
-192   -704   
240    224    
16     64     
160    80     
448    608    
-128   256    
-112   96     
-336   -48    
80     48     
-112   80     
32     -496   
288    -448   
32     160    
-496   32     
-128   48     
-96    112    
320    112    
-224   16     
336    32     
-448   -80    
-16    -16    
0      160    
240    272    
48     48     
80     112    
16     224    
-96    0      
144    0      
-80    80     
96     48     
-80    -32    
-192   -16    
0      -80    
144    128    
-16    -224   
-48    272    
0      80     
-16    64     
-96    112    
288    80     
64     -32    
80     -224   
16     16     
-64    128    
112    -16    
272    304    
-80    240    
-144   -96    
-64    32     
208    112    
112    16     
32     80     
192    112    
-32    96     
192    48     
-64    112    
16     48     
80     -80    
32     -32    
96     64     
-96    80     
-240   -416   
192    -240   
96     144    
-128   32     
112    0      
16     48     
192    128    
64     -64    
48     -80    
32     -256   
-16    -16    
-32    128    
-272   0      
16     48     
32     96     
192    112    
16     -16    
-16    16     
160    -32    
48     112    
-48    -32    
-16    0      
-32    -128   
192    -96    
16     160    
48     48     
0      48     
160    64     
0      160    
352    160    
-288   384    
-416   -32    
192    -720   
96     -64    
304    -192   
16     48     
16     112    
-16    80     
-80    -160   
32     -80    
-64    0      
144    64     
112    272    
224    352    
-384   144    
32     48     
96     0      
80     -704   
32     96     
320    272    
-176   112    
-144   -16    
176    160    
0      144    
208    16     
112    464    
288    416    
-176   176    
-16    48     
16     -128   
144    -96    
176    -32    
192    -32    
32     32     
-176   -336   
0      -144   
-64    -192   
48     32     
80     112    
144    48     
-112   -80    
16     128    
0      -192   
224    96     
144    288    
192    -304   
0      160    
0      -96    
-96    352    
-64    -480   
32     -64    
64     48     
528    304    
-384   -208   
-80    -80    
272    16     
384    160    
368    -112   
-32    256    
-64    16     
-240   -432   
48     128    
-64    -80    
544    368    
-144   -192   
288    0      
256    16     
144    96     
-64    96     
-32    208    
112    128    
144    96     
496    320    
-544   -192   
16     -96    
16     -32    
192    64     
176    -160   
96     16     
-16    -464   
64     96     
16     160    
-240   -128   
224    48     
-64    112    
-48    32     
304    64     
-208   -16    
32     -144   
112    -32    
48     64     
176    48     
-272   -176   
192    32     
-96    -400   
48     160    
0      -432   
624    144    
16     112    
-64    -16    
64     -112   
256    128    
96     -176   
-128   -144   
-320   96     
288    -288   
-32    112    
272    64     
0      32     
-128   -352   
272    144    
112    64     
-48    144    
-320   -80    
144    64     
-128   -96    
-256   -240   
624    16     
720    80     
416    112    
-224   -176   
240    144    
-256   -160   
288    48     
176    32     
320    128    
-400   -224   
320    0      
96     128    
-336   -160   
272    80     
-16    -32    
48     -64    
32     -96    
176    -304   
176    16     
64     64     
-64    -16    
-16    -16    
160    -64    
-48    144    
-48    -32    
224    -832   
-48    16     
-64    -176   
64     96     
-688   -32    
16     -368   
48     -80    
-64    -720   
192    -32    
32     -288   
48     -64    
144    112    
48     -64    
160    16     
0      -32    
-128   -32    
48     128    
208    -48    
-48    -96    
-1760  -64    
144    -144   
-112   -96    
32     0      
288    48     
144    -16    
96     -96    
16     -688   
-16    112    
96     -208   
-96    -80    
128    -192   
176    64     
64     -48    
32     0      
-64    -96    
144    0      
272    96     
-208   112    
-96    -144   
80     -240   
48     -80    
256    -304   
96     112    
128    80     
-144   48     
48     0      
-48    176    
-128   64     
208    -16    
-144   -80    
80     -64    
-624   -80    
192    48     
-64    48     
48     0      
224    -32    
-96    -288   
16     80     
144    -208   
160    176    
16     16     
96     -64    
144    48     
16     64     
-192   64     
16     -48    
-1280  -32    
64     16     
112    16     
-144   -64    
592    -480   
192    -768   
176    -160   
-32    -720   
16     64     
96     144    
-256   240    
-16    -32    
352    240    
-272   -64    
192    -208   
192    32     
16     -112   
-416   -80    
96     -48    
64     -64    
80     -288   
-96    16     
112    -288   
192    272    
-128   -160   
128    -480   
32     48     
96     32     
-320   0      
-64    -240   
16     192    
-336   256    
-16    -32    
160    -384   
32     -240   
256    0      
-32    -512   
-304   -960   
-272   304    
-208   -336   
576    352    
16     192    
608    144    
-352   448    
-80    -224   
32     32     
112    48     
-208   -48    
128    96     
384    32     
48     -64    
48     112    
0      -16    
-48    -176   
-384   -448   
160    400    
-96    -32    
320    -96    
128    352    
160    -144   
128    -80    
-128   -32    
-32    -208   
144    144    
48     -160   
-432   -592   
-96    144    
-512   224    
-1424  -192   
96     96     
-624   16     
32     240    
128    960    
-192   -192   
96     -400   
-224   -192   
32     0      
32     16     
-528   -352   
-80    64     
-592   -288   
-144   -464   
432    -256   
-288   -352   
-48    48     
-112   -160   
-208   -352   
-800   -304   
64     -304   
320    16     
112    176    
-48    -160   
112    -32    
-656   -80    
96     32     
16     -80    
-96    -16    
160    48     
0      304    
-432   304    
-448   256    
-176   -208   
-176   -176   
256    128    
-656   16     
-272   -192   
-320   -224   
240    224    
-64    -32    
176    160    
-48    -144   
-32    -96    
-416   -48    
-144   -176   
-192   16     
-144   80     
-64    224    
48     16     
160    -16    
-80    -176   
-160   176    
-240   -192   
48     144    
-224   -272   
464    -112   
-224   144    
176    176    
-96    -32    
-240   624    
480    192    
32     64     
64     256    
-272   -80    
-64    -16    
-192   16     
64     224    
-304   -112   
-176   64     
16     -128   
160    64     
208    -32    
-144   16     
-256   16     
-176   32     
48     128    
-112   -96    
112    128    
176    224    
-160   336    
-304   -32    
-80    -48    
-288   -16    
176    112    
32     -32    
-96    -48    
208    144    
-192   144    
-80    -48    
176    0      
-224   272    
-112   48     
96     -80    
-48    -64    
-160   96     
-240   16     
112    -16    
-560   -128   
144    -128   
240    0      
-96    112    
112    144    
160    160    
224    -16    
48     -48    
-80    32     
-128   -16    
-96    160    
128    0      
-16    0      
-80    -64    
32     -176   
-240   -112   
32     -16    
128    32     
144    48     
32     32     
-48    16     
-240   240    
48     256    
336    48     
-80    -48    
32     -48    
-336   -320   
-16    -112   
-224   -128   
240    -64    
-80    160    
-256   160    
0      48     
112    -48    
80     16     
96     256    
-208   224    
-160   -224   
112    -32    
96     144    
-16    -64    
-96    -176   
256    0      
96     288    
-80    -192   
-80    32     
0      64     
-160   240    
-32    -80    
-80    224    
224    224    
96     112    
64     80     
64     64     
176    112    
96     96     
-64    -64    
-64    -64    
-160   -16    
304    176    
-16    64     
-48    128    
-304   160    
304    336    
-496   -32    
-528   -80    
-32    240    
-464   32     
-16    0      
336    192    
208    160    
64     16     
160    -32    
-256   -16    
-16    144    
-304   0      
96     0      
272    160    
-240   80     
112    0      
0      -64    
-16    64     
-80    32     
32     64     
48     16     
48     176    
-112   16     
256    32     
64     160    
-560   0      
80     80     
16     224    
-240   112    
400    208    
768    352    
-688   32     
320    -16    
144    64     
16     -16    
0      0      
96     48     
32     -16    
80     16     
208    32     
-336   0      
288    16     
-48    112    
496    16     
-112   16     
16     -80    
-16    -16    
48     112    
48     64     
272    -32    
-96    -16    
-80    16     
-256   64     
-112   -96    
32     96     
48     16     
144    -112   
80     16     
416    64     
-192   0      
176    48     
144    80     
-112   -48    
80     -48    
256    176    
-704   -352   
448    -112   
-96    288    
128    -80    
384    0      
352    -1360  
272    128    
-416   -112   
544    -64    
288    32     
128    80     
-400   208    
-224   -48    
320    80     
160    48     
96     -32    
368    32     
80     64     
-96    -64    
384    -48    
144    -32    
-256   160    
176    48     
96     16     
16     48     
96     0      
80     48     
96     128    
-32    -112   
16     96     
160    32     
-48    32     
80     64     
128    -112   
48     32     
48     -256   
32     64     
288    16     
-96    96     
16     0      
144    16     
-16    -384   
64     -160   
-144   64     
16     -16    
304    112    
32     80     
96     48     
176    -32    
-224   -16    
288    -80    
-144   48     
112    -768   
16     96     
144    192    
0      112    
80     16     
240    0      
-112   16     
112    16     
352    48     
-288   -352   
112    -112   
0      -16    
128    -112   
144    -112   
-48    112    
144    -112   
48     96     
-32    -240   
-48    16     
208    -128   
112    -80    
224    64     
0      96     
-112   64     
32     0      
80     224    
192    -160   
64     -64    
208    -304   
-80    -32    
48     -32    
48     -112   
176    -192   
32     224    
-64    16     
48     32     
176    -32    
128    64     
208    112    
112    -336   
128    16     
80     -48    
-32    -736   
-64    128    
32     -16    
-16    -32    
112    144    
208    -96    
32     96     
32     16     
320    112    
96     -32    
272    -16    
0      304    
-80    -32    
-112   608    
-32    -400   
80     304    
-48    96     
128    -480   
16     560    
-240   -144   
128    16     
16     -48    
64     -80    
288    48     
64     -64    
-32    -48    
48     -304   
112    -48    
112    -352   
112    0      
-96    -368   
272    1344   
-128   288    
48     -816   
192    -16    
0      48     
224    -192   
16     144    
16     -448   
-96    432    
-1664  -208   
-96    -384   
240    688    
-64    224    
-160   -336   
224    -880   
224    192    
176    80     
16     -192   
384    -496   
128    16     
272    0      
-48    -96    
-160   -160   
16     -80    
-560   -48    
16     -352   
144    32     
-64    -64    
176    -80    
48     112    
224    160    
224    -128   
-16    -128   
-48    64     
-64    240    
144    64     
16     160    
16     -128   
144    192    
-416   -16    
128    -208   
48     32     
48     -64    
112    160    
96     -32    
96     0      
0      -48    
144    80     
-96    -48    
16     -16    
112    -80    
96     80     
-48    -32    
-128   -128   
-192   -368   
96     96     
-1712  112    
112    -528   
-96    -272   
-208   -80    
256    48     
480    -240   
-384   -240   
112    -64    
-240   112    
48     272    
144    -96    
48     576    
192    112    
112    -240   
-256   -384   
-112   -272   
48     144    
-480   -96    
16     -208   
-128   -672   
352    -128   
-176   32     
0      -992   
64     96     
-176   -16    
464    160    
96     208    
16     -48    
304    -96    
32     -64    
-16    48     
-64    -16    
-560   32     
16     -16    
16     0      
160    -176   
32     -80    
176    -416   
64     128    
-112   -32    
64     -208   
-48    -64    
128    32     
-480   272    
272    48     
-224   -112   
144    -144   
336    272    
-576   176    
144    -32    
32     0      
528    368    
-304   240    
-176   64     
-336   64     
48     -32    
192    128    
48     128    
80     336    
240    128    
16     -256   
304    -224   
-48    16     
0      -48    
32     32     
96     -16    
-64    48     
256    -80    
-64    48     
-112   0      
80     0      
-176   32     
80     -208   
224    -208   
208    128    
112    160    
-144   0      
-1488  -112   
-16    -160   
256    192    
-928   -16    
0      -160   
-128   -144   
-480   32     
-16    96     
-640   -48    
-16    -128   
448    208    
-288   176    
96     80     
112    112    
-1968  96     
96     -32    
-80    -16    
64     -16    
-144   144    
32     272    
32     208    
-864   96     
-112   -16    
144    0      
0      -48    
-720   -32    
-176   -176   
32     -48    
-32    -144   
160    -16    
-16    -96    
-96    -144   
208    128    
-112   -176   
-96    -48    
-32    96     
-48    32     
0      32     
16     -80    
-160   0      
-528   32     
-96    -208   
-544   -128   
-160   80     
144    416    
176    336    
-400   -304   
-112   -16    
96     112    
64     -112   
128    -32    
112    0      
224    16     
32     224    
64     64     
-160   -16    
-48    0      
-224   -16    
-112   64     
-160   -48    
32     32     
-160   -80    
80     96     
32     32     
64     256    
-16    176    
-48    32     
-192   32     
-176   16     
80     -64    
128    -16    
80     -96    
128    128    
416    496    
-1440  48     
144    32     
112    96     
-144   0      
16     160    
-176   -96    
160    0      
-80    -96    
64     16     
-512   0      
-48    16     
-80    16     
112    64     
-1008  -160   
80     80     
-1568  -64    
144    0      
224    16     
-32    80     
-48    -144   
272    -64    
-144   96     
48     48     
-160   32     
288    48     
-240   -80    
-320   -16    
-64    80     
-144   32     
352    208    
-464   -80    
256    16     
0      48     
176    48     
-176   -176   
208    -32    
48     96     
128    16     
0      -96    
-96    32     
-112   240    
-352   16     
304    128    
0      -80    
224    0      
-256   96     
16     192    
32     -64    
320    256    
-656   96     
112    -32    
-256   16     
-304   16     
304    64     
-32    32     
224    -32    
-80    48     
80     160    
-240   -112   
176    32     
-240   -48    
368    128    
-32    16     
144    48     
240    112    
112    96     
144    128    
192    48     
320    160    
-352   -32    
-176   -112   
0      -96    
176    32     
224    176    
48     144    
160    -128   
176    80     
-192   112    
-16    48     
-352   48     
320    64     
96     48     
48     32     
48     -48    
400    208    
-176   0      
-192   0      
-32    32     
-32    -64    
160    80     
-112   80     
112    -32    
32     32     
-64    16     
-32    80     
96     208    
0      128    
0      0      
-80    192    
0      16     
64     -48    
-144   -16    
112    96     
-48    64     
112    112    
0      0      
96     80     
48     272    
176    272    
-160   -112   
96     -128   
-16    160    
192    -80    
80     -32    
144    224    
144    128    
-240   -16    
-32    112    
-48    -256   
176    80     
96     48     
64     0      
-16    32     
-64    80     
208    0      
16     48     
0      -16    
-304   -32    
368    -208   
-48    144    
0      -32    
-144   -32    
96     144    
64     128    
80     176    
176    416    
-96    -464   
128    528    
160    -144   
64     -384   
-96    416    
-32    112    
192    -144   
160    -96    
-16    400    
-128   0      
-144   -720   
16     0      
-128   -176   
80     400    
48     -48    
-16    -32    
0      -16    
-48    -352   
32     -16    
160    -32    
112    80     
-48    96     
144    304    
-128   -352   
-16    -128   
-96    160    
-16    -32    
80     128    
16     -704   
80     -80    
-64    160    
224    432    
48     -432   
160    -160   
80     192    
64     288    
-64    160    
-128   64     
64     224    
112    96     
-160   -448   
-32    -64    
-80    96     
192    -544   
112    208    
-48    16     
352    -64    
208    80     
-144   0      
-48    64     
-80    32     
0      -176   
48     400    
160    96     
176    48     
160    16     
-16    -160   
224    128    
48     -96    
128    -96    
32     -240   
144    16     
64     160    
-96    64     
48     0      
-48    96     
288    48     
-176   -16    
112    -288   
128    -272   
160    -32    
80     -144   
-128   -16    
-128   -64    
112    -16    
-64    -624   
288    -128   
-16    -352   
64     144    
16     32     
-48    -16    
352    256    
-96    192    
-80    -80    
16     -272   
96     -352   
128    -160   
128    32     
-32    16     
96     224    
32     -368   
80     64     
96     -528   
0      -16    
32     -64    
64     -112   
-176   -144   
224    -304   
352    128    
-112   176    
176    240    
-64    -48    
-64    32     
-32    -256   
64     -32    
128    48     
368    64     
-160   -80    
128    16     
128    112    
96     128    
272    32     
128    -208   
304    64     
0      -192   
-224   80     
48     -32    
-128   -32    
320    160    
-80    32     
-208   96     
-368   32     
-32    144    
192    -128   
-96    -192   
112    -272   
-192   32     
-32    -448   
-272   -128   
576    -96    
64     272    
528    -144   
272    -48    
48     -32    
-432   -240   
544    -432   
224    32     
384    320    
448    -1056  
64     144    
80     -352   
-128   0      
-176   -128   
-96    -144   
32     -208   
80     160    
144    96     
336    16     
272    -16    
-32    -64    
160    0      
112    -816   
-480   -256   
16     64     
-144   416    
-32    -208   
528    -944   
-1040  -448   
256    -544   
32     -288   
0      -32    
-64    -224   
0      -144   
416    144    
16     352    
48     96     
-128   -176   
320    0      
64     -272   
-304   -256   
-64    128    
288    -64    
-704   48     
224    -16    
16     400    
480    400    
-80    80     
-16    -288   
80     -80    
320    32     
-272   32     
272    -400   
64     48     
128    304    
64     48     
48     128    
-96    224    
-32    96     
96     -32    
320    144    
-144   -432   
96     16     
160    -16    
64     -112   
208    496    
-336   -96    
672    -496   
-208   128    
192    -32    
96     128    
-16    160    
368    -128   
48     -32    
96     -128   
-1184  -64    
0      80     
-16    -48    
32     -48    
48     80     
240    -288   
96     32     
144    -16    
-32    -16    
48     64     
48     144    
-272   32     
-96    -96    
-48    -128   
208    -96    
-352   32     
-96    -80    
-48    48     
64     -144   
128    16     
-16    -288   
32     32     
80     -1312  
32     -16    
-176   160    
224    128    
-656   112    
-176   -64    
-16    32     
208    -80    
-304   32     
240    -48    
-2464  -96    
464    -160   
112    48     
384    -16    
96     48     
80     -128   
-16    -48    
-48    144    
192    -32    
-176   -48    
96     -16    
-16    80     
64     0      
-464   -176   
-64    -208   
-80    176    
-256   -64    
96     16     
32     -48    
224    -32    
640    -48    
176    -96    
-144   -128   
224    -64    
-16    0      
64     0      
-336   0      
-64    -32    
-256   -160   
112    0      
-1360  176    
-80    32     
-32    112    
-144   -208   
-96    32     
-112   -48    
240    80     
-176   48     
-160   0      
-64    64     
-256   0      
0      0      
336    0      
-256   -16    
-48    -48    
-16    32     
-1824  -112   
-160   -32    
-688   0      
-16    -16    
128    48     
-112   0      
-32    128    
-1808  -80    
112    64     
64     -64    
0      -32    
192    64     
80     32     
160    -64    
128    96     
-144   -128   
16     16     
144    -16    
-416   48     
-144   -16    
-144   80     
-224   16     
-736   -368   
192    -64    
-464   112    
144    144    
-400   -160   
496    224    
-816   32     
-240   -144   
288    144    
-96    112    
608    32     
-416   16     
-96    -48    
128    32     
-192   -32    
336    48     
-192   -16    
192    16     
-16    32     
-384   -208   
720    32     
224    -16    
160    48     
432    288    
-160   240    
-144   -48    
-192   -48    
-368   80     
400    336    
-304   272    
-16    176    
-80    112    
-384   -160   
-144   -80    
-416   -48    
288    0      
-64    16     
208    96     
-208   128    
-48    -176   
64     64     
-64    48     
112    -32    
64     -48    
0      -16    
-176   144    
-48    -112   
-64    0      
-112   0      
128    96     
-336   -288   
-864   -144   
160    384    
0      -416   
48     320    
-32    256    
208    -80    
0      192    
-48    -48    
-144   -48    
-64    -800   
256    160    
-144   208    
-80    -80    
-176   464    
112    -512   
16     224    
48     1088   
-112   -848   
16     -432   
32     400    
-192   -64    
-48    368    
112    -624   
16     -224   
144    -224   
96     256    
16     128    
-16    -144   
-208   0      
-48    -64    
-864   -16    
32     -112   
208    160    
-144   112    
-144   -48    
-96    -176   
-64    -112   
32     -160   
-240   -16    
112    80     
112    -16    
-48    48     
80     80     
-80    -16    
16     96     
-624   -144   
208    -208   
0      48     
0      -16    
-32    0      
80     16     
-80    -16    
80     80     
128    64     
-112   -48    
96     96     
16     16     
304    176    
-336   64     
96     -48    
-304   -64    
80     -16    
16     -16    
64     -64    
0      48     
80     80     
32     0      
96     0      
-112   -144   
-128   -32    
0      -96    
-160   -144   
240    208    
-304   112    
160    0      
-16    16     
32     32     
-64    16     
128    400    
256    384    
-80    240    
-160   112    
208    -112   
80     96     
-224   112    
80     0      
-32    -144   
128    96     
-176   64     
32     112    
208    112    
-112   -16    
128    -32    
0      -96    
-48    144    
-144   80     
112    144    
160    144    
-48    96     
208    0      
128    -288   
-176   -80    
0      80     
-176   -32    
80     -64    
144    48     
96     16     
-32    -80    
80     32     
-32    16     
160    0      
-48    -368   
-32    48     
-144   96     
-208   -176   
208    -96    
-96    -16    
-32    48     
192    96     
-32    96     
112    -80    
352    32     
-224   -32    
-32    32     
176    32     
128    48     
16     -144   
16     64     
160    224    
-48    80     
32     -64    
-144   -64    
144    144    
0      48     
160    96     
64     -128   
-112   -96    
96     -176   
-64    48     
32     336    
96     208    
-80    256    
32     384    
192    144    
64     80     
80     112    
-16    -16    
336    368    
-400   368    
0      208    
320    -160   
-400   -288   
304    208    
-288   208    
32     240    
96     160    
240    144    
608    496    
-224   352    
-64    -80    
-176   320    
112    112    
864    -16    
-384   848    
48     -160   
-240   64     
352    304    
800    144    
-160   240    
480    -48    
32     16     
480    -304   
352    32     
352    272    
-64    224    
736    768    
-528   -272   
48     -160   
-336   0      
-288   -208   
256    272    
480    176    
160    32     
-80    -96    
16     80     
352    288    
-240   416    
112    224    
-160   -160   
288    176    
-448   368    
-64    -32    
-16    -864   
208    768    
208    -112   
-144   288    
128    -544   
32     384    
336    -128   
-208   -240   
240    448    
-160   -48    
64     -48    
272    160    
64     0      
64     272    
112    -304   
-16    -112   
32     112    
32     -128   
256    0      
-96    0      
320    -16    
48     -144   
160    256    
-176   -160   
208    48     
-112   -16    
0      16     
96     80     
-32    0      
144    96     
80     -96    
0      16     
32     -128   
112    32     
192    -96    
48     -32    
-112   -32    
32     -96    
272    272    
32     144    
16     32     
256    96     
240    96     
-96    -224   
48     -16    
208    128    
352    -160   
96     -144   
16     208    
240    112    
-80    16     
-80    -128   
144    0      
32     -16    
160    -64    
-160   -256   
192    -464   
96     128    
144    0      
96     16     
-32    -96    
144    80     
48     -64    
128    144    
-16    -112   
0      80     
-32    -112   
96     48     
-64    -256   
32     -416   
-16    -384   
-208   112    
128    -320   
256    48     
-32    -64    
112    -64    
96     48     
112    -16    
-48    -416   
-16    -160   
-96    -288   
-208   80     
80     -656   
-48    -352   
128    -304   
0      -208   
-32    -48    
112    -128   
80     -48    
64     -192   
192    -32    
16     32     
-160   -32    
96     32     
-16    -112   
-32    48     
48     80     
32     -160   
-80    -48    
272    144    
16     -16    
112    -80    
32     -80    
112    -48    
-240   -288   
-112   -144   
304    -48    
176    128    
-192   -96    
192    -144   
48     -16    
-48    80     
-16    -48    
-64    -32    
-384   16     
416    -64    
-1312  -96    
368    -32    
-288   -80    
-160   16     
-240   -96    
288    16     
16     -64    
80     16     
80     80     
-192   -64    
64     -16    
0      -96    
304    -32    
-368   -48    
-16    -112   
-96    -176   
80     -96    
80     112    
-96    -80    
80     -48    
128    -304   
-144   -48    
240    -592   
-128   80     
64     16     
0      -16    
-48    0      
112    32     
-48    -48    
128    -224   
-272   -192   
0      -256   
-1168  64     
192    -32    
320    -112   
240    -64    
-128   32     
176    -528   
-64    64     
16     -48    
192    192    
-464   -368   
-64    -336   
-112   48     
48     80     
-704   -176   
128    32     
-464   -160   
0      -192   
-480   80     
240    -16    
64     144    
-144   -144   
256    0      
128    -864   
80     32     
192    48     
112    224    
-32    256    
-208   48     
-192   48     
-224   -96    
-224   -192   
32     -160   
-48    272    
-320   -544   
48     -48    
-176   384    
-192   64     
592    -224   
-64    -176   
336    144    
64     176    
64     -304   
480    -176   
-256   624    
-304   -416   
-320   -96    
96     80     
-192   -320   
176    576    
64     -432   
128    -96    
240    160    
48     -176   
0      16     
-352   144    
64     176    
-192   112    
-32    -32    
432    320    
-336   432    
-304   -448   
240    -304   
-64    -16    
224    -48    
16     -48    
-368   -80    
160    128    
112    368    
-1904  112    
-80    32     
144    64     
112    -16    
144    208    
272    240    
-96    -176   
-224   -96    
48     -160   
-48    -144   
-112   -48    
32     80     
-288   -192   
-304   -16    
128    112    
-272   128    
-64    208    
-656   96     
-96    -48    
-1824  48     
-96    -16    
192    112    
-112   16     
96     -16    
112    80     
-112   -32    
80     64     
-208   -96    
16     -16    
144    144    
-176   80     
-32    -32    
16     -16    
-192   48     
-80    16     
160    -16    
288    0      
-256   -384   
-288   -288   
48     128    
-160   112    
112    80     
0      0      
-48    0      
64     -16    
-224   -176   
224    -80    
-224   128    
-224   16     
-336   64     
64     208    
-192   176    
96     -16    
-192   48     
-128   80     
-16    80     
112    96     
-144   -160   
224    -352   
16     0      
32     256    
-208   -144   
-192   -32    
-160   64     
-320   128    
384    400    
-1696  272    
-16    -32    
48     -320   
-64    -224   
160    -240   
64     96     
-144   -128   
16     80     
-80    240    
-80    16     
176    -96    
-64    -32    
-32    32     
-64    112    
-320   48     
-256   -64    
160    128    
256    240    
16     176    
-16    160    
-64    -32    
-112   -336   
-288   -320   
-64    0      
-256   64     
80     48     
-16    -32    
-48    160    
16     48     
-64    -32    
-176   64     
240    240    
-1488  224    
32     192    
144    176    
-16    112    
-240   64     
-64    -160   
192    -288   
-112   -128   
224    -80    
48     -160   
-64    0      
-208   80     
-64    -16    
-80    -32    
0      80     
-176   -240   
-432   -208   
16     -128   
-176   32     
96     48     
48     64     
144    80     
-64    -448   
-192   -384   
32     -208   
-32    464    
192    32     
0      16     
128    224    
-144   -192   
-624   32     
144    368    
-208   112    
272    -416   
32     176    
32     32     
-304   -128   
336    -176   
224    240    
-16    176    
176    272    
-192   -288   
-208   320    
-432   -64    
80     -16    
48     96     
304    -112   
208    -288   
-16    -16    
112    112    
-112   -192   
-32    272    
80     -992   
480    128    
480    1040   
-528   -496   
-144   -160   
-560   624    
336    256    
128    -176   
576    192    
-288   32     
32     -128   
-32    144    
272    432    
1072   496    
0      -848   
512    -480   
-208   432    
16     336    
-448   112    
-208   0      
96     -96    
288    144    
112    272    
144    80     
-144   -208   
-48    112    
32     80     
16     32     
-48    -32    
208    64     
-16    64     
16     48     
80     0      
192    96     
-144   64     
-80    -48    
0      80     
16     32     
0      16     
192    96     
80     48     
-256   -64    
160    32     
-48    48     
-112   96     
-16    -208   
176    -240   
-64    16     
240    -112   
-208   208    
32     96     
128    0      
192    64     
-80    -32    
192    96     
-48    0      
144    48     
-144   16     
192    96     
96     0      
-64    112    
-32    -16    
-64    32     
288    96     
0      32     
128    32     
96     96     
0      32     
64     80     
0      16     
304    176    
-304   48     
64     112    
144    80     
144    -224   
-32    -288   
176    192    
16     224    
-96    64     
16     -64    
176    -80    
16     96     
-64    -16    
-64    -32    
128    112    
128    -16    
-32    0      
112    -112   
-160   32     
112    16     
-80    32     
160    64     
-16    -64    
-16    224    
224    64     
112    -384   
-32    -48    
-96    -1120  
-112   16     
64     80     
224    -32    
96     96     
32     128    
-64    48     
160    16     
32     0      
112    80     
0      80     
-160   272    
288    32     
48     -64    
-176   32     
96     -64    
192    128    
-176   96     
128    128    
64     80     
224    48     
272    0      
176    16     
112    -32    
160    208    
-160   80     
16     -80    
0      -48    
80     -64    
112    80     
32     -272   
64     64     
-272   336    
-48    -32    
208    -64    
144    96     
208    240    
-32    0      
240    -48    
240    64     
80     -48    
192    -96    
96     160    
160    -80    
176    80     
64     -240   
128    80     
112    -448   
64     -48    
240    304    
-32    160    
48     -64    
528    144    
-80    48     
-32    0      
256    96     
-32    64     
48     80     
128    128    
-96    64     
-256   -352   
176    160    
96     -96    
240    208    
-240   -80    
96     0      
80     32     
256    176    
0      96     
-96    176    
96     64     
112    0      
48     32     
112    -112   
112    80     
272    32     
-304   64     
80     48     
48     160    
-144   64     
-80    96     
192    80     
-128   16     
-208   -128   
48     -16    
-224   -320   
688    144    
-240   -16    
480    -176   
-144   32     
64     16     
-176   -544   
-336   -96    
720    -464   
16     288    
320    416    
-16    -176   
672    384    
-448   -880   
304    -1088  
448    -384   
432    208    
-80    -112   
96     -64    
-304   144    
608    32     
-448   -80    
112    -192   
208    -32    
448    -16    
-160   -384   
-416   144    
-160   -144   
-176   -624   
448    -256   
336    -240   
464    144    
176    -640   
304    144    
-592   -512   
80     -48    
-256   480    
176    0      
32     112    
400    -112   
-288   -496   
144    -16    
-176   -192   
-208   -48    
-1088  144    
80     80     
176    64     
160    48     
128    -64    
432    0      
-464   144    
128    -224   
-48    192    
32     -256   
336    16     
272    -224   
208    16     
-224   96     
112    -32    
-1104  -16    
48     -192   
112    80     
16     -80    
160    16     
-240   -80    
208    96     
32     -720   
160    32     
128    32     
-336   48     
192    -80    
-32    16     
48     -32    
176    -128   
-1152  -80    
80     -96    
96     -16    
-64    -32    
48     96     
240    -144   
176    -48    
0      -880   
-48    64     
80     0      
-128   -144   
144    -48    
80     64     
-240   -32    
128    240    
-128   64     
176    -48    
-1808  16     
112    208    
-160   -16    
192    -224   
272    0      
-48    -112   
-32    32     
128    48     
336    176    
-256   64     
-48    -96    
32     16     
32     64     
-64    48     
160    -48    
-64    -32    
48     -96    
-1200  16     
-112   -176   
32     -16    
128    -112   
0      48     
80     -992   
-48    -32    
-224   16     
-64    -112   
224    48     
32     144    
-224   0      
128    -48    
-992   -64    
16     -336   
80     0      
64     0      
224    -32    
128    -48    
96     192    
128    -816   
64     -240   
-384   -496   
304    -128   
-176   288    
208    432    
-96    368    
64     -48    
-192   64     
-16    -256   
64     -256   
208    -240   
224    112    
208    144    
-144   64     
-128   96     
224    0      
0      112    
64     -80    
112    -96    
-144   -288   
-16    -208   
176    -128   
112    0      
80     -16    
-192   160    
112    -240   
-352   -448   
64     -432   
-1136  96     
240    64     
-672   -160   
256    -144   
-2112  256    
64     0      
64     48     
-176   128    
96     -16    
-224   64     
-208   -16    
0      80     
-336   -336   
-16    192    
-208   -176   
80     -96    
96     80     
-480   -96    
-320   -16    
-96    112    
-96    688    
-32    -240   
64     -96    
-272   128    
0      192    
-272   -144   
128    -240   
320    -208   
208    48     
48     144    
-352   -128   
-256   32     
32     80     
-112   224    
128    32     
-112   -128   
-1040  -480   
-128   -80    
32     -48    
-160   -16    
16     -64    
16     -32    
-144   96     
160    176    
96     64     
272    160    
-16    -336   
-272   -208   
160    400    
-272   192    
-464   -112   
-832   -224   
16     -16    
-928   -32    
144    48     
544    16     
272    96     
32     -64    
-160   -16    
-320   -80    
256    32     
-208   208    
-176   176    
32     -48    
32     -80    
288    224    
-928   48     
48     0      
192    48     
32     96     
-352   -112   
416    176    
-1248  -272   
0      -32    
480    32     
48     192    
-512   -64    
80     64     
192    -64    
-400   0      
176    176    
-48    -64    
-32    96     
-176   -32    
-16    16     
48     16     
208    32     
0      48     
32     16     
-80    -16    
-16    0      
-160   -32    
-160   80     
-128   -16    
48     48     
-160   96     
32     -16    
32     144    
-1168  -96    
176    16     
-1536  -48    
176    176    
16     80     
-160   48     
96     16     
96     128    
176    0      
-112   48     
-32    16     
-96    80     
-208   -112   
0      -64    
128    144    
-320   -32    
160    32     
-240   -16    
-64    -64    
-96    0      
32     16     
-64    16     
144    144    
0      80     
-128   64     
240    48     
-80    -96    
-96    0      
32     32     
-48    64     
-128   -16    
224    48     
112    64     
-240   -112   
176    112    
144    80     
-80    48     
32     64     
112    48     
-16    16     
-176   0      
-48    16     
-16    32     
-32    -208   
48     -16    
-176   80     
-16    -160   
-144   -16    
48     64     
-16    -48    
192    16     
-48    -96    
-16    -208   
192    -96    
80     32     
48     32     
-64    96     
-80    -32    
-128   -16    
160    48     
-96    -32    
-32    96     
0      48     
48     48     
144    32     
96     48     
-64    144    
432    288    
80     96     
128    80     
32     16     
-112   -16    
112    160    
-80    192    
112    -96    
64     384    
-224   240    
64     -64    
240    112    
128    64     
16     48     
80     80     
64     0      
128    16     
48     64     
-80    -16    
-192   0      
96     144    
-400   0      
-48    64     
-16    64     
32     48     
240    96     
-96    -32    
336    -64    
32     -144   
160    -48    
192    48     
-16    80     
-80    -48    
160    0      
-16    -32    
128    32     
368    304    
-64    160    
-112   -16    
-80    256    
0      288    
272    240    
-336   32     
-128   -64    
128    96     
-16    -16    
336    -96    
-240   -304   
352    48     
48     64     
-400   -176   
-320   144    
-352   112    
272    208    
96     -608   
144    -144   
-32    112    
-48    96     
-48    -112   
0      96     
96     48     
112    208    
16     128    
112    -192   
160    64     
0      192    
-48    -112   
64     0      
-224   -304   
336    -32    
0      208    
240    -64    
32     64     
-160   -16    
-64    -160   
320    368    
224    112    
32     -48    
48     240    
64     0      
64     592    
528    -304   
48     -192   
192    544    
-256   -656   
-64    144    
-176   -240   
-704   -688   
32     -240   
96     96     
384    -16    
48     128    
-48    112    
-32    128    
-48    208    
-112   80     
-208   32     
-208   -256   
-160   32     
-240   -480   
192    -96    
-272   144    
-96    -64    
192    128    
192    32     
368    112    
96     112    
80     240    
-448   64     
80     -96    
-176   0      
64     32     
32     16     
112    0      
272    -32    
80     80     
80     -1024  
240    -16    
208    -64    
128    -32    
-160   48     
80     96     
-96    16     
208    -112   
-16    32     
-144   32     
144    96     
-16    -96    
176    -80    
48     -128   
192    96     
-160   80     
32     96     
32     -16    
16     0      
240    16     
96     -224   
-80    -144   
-16    80     
64     160    
48     -16    
144    96     
48     0      
320    288    
-224   -128   
-80    80     
-64    -272   
-144   128    
128    80     
128    -16    
0      -64    
160    16     
-80    176    
256    -208   
0      80     
64     -208   
80     96     
96     -128   
80     64     
112    -112   
48     32     
-32    -160   
80     -128   
128    32     
-32    144    
-64    -16    
288    -64    
16     96     
-16    -48    
176    64     
0      -64    
144    176    
32     32     
96     16     
-32    -48    
304    96     
96     0      
48     -352   
176    0      
48     -640   
-16    16     
112    -240   
0      -512   
112    -128   
-32    -176   
-144   -160   
80     -976   
224    32     
224    48     
112    -16    
32     80     
-64    -128   
-32    -496   
-80    -32    
-80    48     
256    192    
-256   272    
160    32     
224    512    
304    128    
64     -48    
80     -64    
48     16     
-32    -640   
48     -240   
128    -128   
-96    64     
144    -48    
96     -208   
32     -32    
48     80     
-224   256    
192    176    
0      -208   
-256   -400   
80     0      
208    -48    
240    -336   
-96    -544   
128    144    
-16    -80    
80     -96    
48     368    
-32    192    
-64    -80    
400    -144   
-192   -112   
128    128    
-784   -144   
64     -176   
112    208    
-416   -144   
224    -64    
128    -544   
32     -208   
144    -352   
128    704    
16     176    
128    -96    
-32    -288   
80     -128   
224    192    
-288   -48    
-304   -128   
-80    112    
64     112    
464    -80    
160    -48    
384    -96    
-64    -48    
-224   -464   
-48    -112   
-144   0      
144    128    
-32    0      
272    48     
-80    128    
96     32     
-256   -48    
32     -160   
-272   -64    
144    32     
176    64     
112    -16    
80     16     
-160   -176   
160    32     
48     -160   
80     112    
176    48     
64     -16    
-32    0      
640    544    
-1824  -128   
784    -48    
-1008  -80    
240    176    
-160   416    
-496   -400   
48     0      
144    -176   
-80    80     
96     0      
224    -16    
-464   -96    
576    112    
-528   0      
64     0      
-304   -64    
-32    0      
-240   -16    
240    16     
-16    -48    
272    -32    
320    80     
64     48     
-432   -144   
672    32     
272    144    
-1280  -48    
-368   -400   
592    96     
64     112    
-176   64     
336    0      
-48    96     
48     -144   
304    96     
48     -32    
-16    48     
-16    -176   
-576   -480   
224    -240   
-416   368    
-336   -96    
224    16     
-144   32     
128    -64    
-80    0      
-80    -80    
-480   -64    
48     -208   
96     64     
-304   -32    
-16    16     
-688   -160   
-528   -16    
0      -64    
-96    -32    
64     112    
-688   32     
-16    32     
-224   144    
384    144    
-192   32     
-176   -64    
-208   64     
368    160    
-240   -96    
-48    144    
160    32     
-144   80     
-160   -16    
-416   -48    
96     128    
-160   -160   
-128   -16    
-1264  0      
-48    80     
240    48     
-112   32     
-64    -64    
-32    80     
-208   -64    
48     32     
64     80     
176    -16    
-208   0      
-256   -48    
16     16     
-288   -48    
0      -144   
-384   -272   
0      48     
-352   0      
144    -32    
-16    -160   
0      160    
-48    -32    
64     48     
48     0      
-160   176    
0      160    
-144   48     
-64    -96    
96     32     
160    160    
-64    -16    
-64    -80    
-1088  -80    
224    208    
-48    64     
32     16     
144    32     
-48    64     
128    208    
-48    -176   
0      -64    
-48    208    
-144   -16    
144    32     
-144   -48    
-608   -48    
64     48     
-288   -16    
-48    -976   
-144   -240   
-16    560    
-128   192    
128    -48    
80     160    
-240   256    
64     112    
256    16     
48     32     
144    -160   
96     112    
-64    112    
-16    -96    
-288   -64    
-64    96     
-160   -128   
-96    0      
64     96     
80     32     
160    16     
-64    240    
192    -176   
-144   800    
128    208    
0      -288   
320    288    
-288   -32    
224    0      
-192   32     
-80    80     
-624   -96    
0      32     
112    112    
-48    48     
-48    288    
48     32     
-32    -64    
-320   48     
288    496    
-496   -112   
96     32     
96     144    
144    32     
-192   112    
224    16     
-16    -176   
-64    128    
240    -80    
-80    336    
128    144    
-304   288    
128    176    
128    -464   
464    576    
-272   -16    
-368   -64    
-320   32     
-80    336    
-144   272    
32     -192   
32     96     
96     -112   
64     64     
176    -48    
-64    160    
-160   176    
32     -144   
176    128    
-352   96     
-80    -384   
48     -320   
-128   -384   
256    80     
160    528    
-416   32     
0      -80    
0      -64    
352    48     
-176   112    
384    96     
-144   -16    
144    208    
-224   256    
-80    240    
288    400    
112    192    
-560   0      
-208   272    
-112   -96    
224    0      
144    -160   
224    -96    
48     80     
0      32     
-176   96     
-320   -32    
-304   64     
-224   160    
352    208    
-96    0      
288    224    
-464   0      
-160   -256   
496    -48    
-272   128    
0      -96    
160    96     
-16    96     
32     80     
208    -16    
176    32     
32     0      
48     144    
432    96     
-416   16     
32     16     
-144   -160   
-176   -432   
208    -80    
48     112    
176    -32    
16     80     
112    48     
-96    416    
240    -16    
80     -64    
-32    -32    
-80    -64    
272    144    
-96    32     
-144   32     
112    -48    
0      -208   
160    80     
-288   112    
112    -64    
-320   304    
16     80     
64     -32    
112    32     
32     32     
-112   272    
112    32     
448    0      
-272   -240   
-112   16     
176    32     
48     -160   
176    32     
160    64     
80     64     
48     -16    
128    -64    
16     112    
0      160    
-144   -32    
32     144    
-80    80     
224    32     
-32    48     
0      64     
208    64     
-16    -128   
-144   -192   
0      -208   
0      48     
-32    224    
16     240    
-240   -512   
0      -208   
0      16     
32     96     
16     32     
64     48     
-32    -64    
64     -176   
32     -48    
0      -688   
16     -128   
64     -1008  
-112   -32    
80     16     
-96    -176   
112    160    
80     400    
-112   -176   
0      -176   
-128   -176   
240    96     
64     304    
-16    -160   
0      -160   
-16    32     
0      32     
-48    -464   
-112   -32    
-32    -288   
496    656    
-384   32     
-32    -800   
192    480    
-48    -112   
80     144    
-16    48     
-48    -224   
16     144    
64     176    
96     160    
144    -192   
288    -112   
144    208    
-208   240    
208    336    
32     32     
-80    -32    
64     16     
-32    96     
-128   64     
128    96     
-160   0      
80     -64    
176    80     
64     -144   
112    80     
-32    -128   
64     224    
304    -80    
288    64     
16     -48    
-48    0      
0      48     
128    80     
-144   48     
64     0      
128    48     
128    -96    
336    -64    
-192   -288   
-288   -16    
48     -112   
32     80     
240    -160   
192    96     
368    32     
-304   -48    
-176   -16    
-128   -256   
304    0      
-16    -176   
48     80     
-192   32     
336    96     
-48    -80    
-80    0      
160    -96    
80     16     
160    -688   
-48    64     
-64    48     
-32    -192   
224    32     
-176   -544   
144    -336   
80     -32    
16     -112   
-160   -112   
496    352    
-448   0      
144    -112   
0      -96    
256    144    
240    16     
-640   -512   
720    128    
-416   0      
-320   32     
-304   -16    
-48    -304   
-16    0      
0      32     
208    48     
-336   -496   
432    -80    
-176   192    
32     -128   
272    -144   
-368   48     
336    -48    
-192   16     
-144   32     
-128   -80    
368    384    
-128   192    
-176   -128   
368    -112   
-352   -112   
368    -384   
-48    -80    
176    -880   
-32    -48    
800    240    
-32    64     
240    -112   
-80    48     
-80    64     
-128   -80    
-592   -224   
368    -112   
496    80     
-272   -336   
384    -192   
80     176    
-320   0      
176    -352   
16     16     
96     -64    
-256   64     
0      -48    
80     16     
-32    0      
-16    -128   
-160   -272   
64     32     
-2384  -128   
208    48     
-144   16     
32     64     
-80    112    
176    -208   
48     48     
80     -640   
208    64     
-80    80     
96     112    
144    -112   
160    -160   
-16    -64    
128    -80    
16     16     
80     -64    
-208   -96    
144    -240   
128    -96    
64     -288   
-112   -64    
112    -112   
176    80     
32     48     
160    -32    
-128   -96    
-48    -16    
-192   32     
304    144    
32     272    
-256   -160   
-3648  -96    
224    -16    
0      -112   
32     -48    
-96    -192   
96     -352   
208    480    
400    -144   
-144   -80    
-224   -288   
288    304    
48     -144   
96     144    
-160   -32    
144    -16    
-512   -48    
0      -128   
128    64     
64     -64    
-160   -64    
384    -144   
80     128    
256    48     
-112   -96    
-304   -32    
352    320    
-224   -336   
-16    16     
-208   128    
144    -48    
-48    112    
32     -64    
192    112    
-48    288    
32     -512   
320    -16    
-48    112    
-352   64     
48     -160   
112    160    
-80    256    
-400   -208   
128    -16    
-304   0      
64     64     
16     -48    
0      48     
-16    -16    
-32    64     
-224   112    
-240   -832   
-672   448    
-64    96     
-752   -400   
32     -64    
192    176    
-64    112    
160    64     
0      -32    
80     80     
-560   -64    
-240   -624   
96     -32    
-128   176    
16     16     
-320   240    
-80    -16    
-176   -144   
-240   272    
-224   384    
-1936  192    
80     32     
208    32     
32     0      
-256   -64    
112    -16    
-240   -144   
128    96     
-80    32     
-112   352    
-48    -64    
-336   32     
32     48     
-32    208    
64     80     
-112   96     
-144   32     
-896   -64    
-176   32     
48     -208   
48     32     
0      -64    
-96    80     
-160   16     
-32    192    
-80    64     
128    144    
64     64     
16     -144   
112    -144   
-16    -16    
-96    64     
-448   32     
-32    -16    
0      -144   
80     -48    
-176   160    
128    80     
-288   384    
-16    336    
-288   -160   
-128   80     
-32    -112   
-112   112    
176    -80    
-32    -32    
-80    96     
-160   -352   
-160   -144   
64     -32    
224    384    
-368   176    
48     -64    
160    48     
-128   16     
320    -320   
64     0      
272    128    
-16    -208   
-64    16     
-256   -16    
-304   416    
-208   192    
-48    96     
160    352    
-128   80     
-16    -176   
240    -64    
-64    -32    
16     64     
-144   64     
528    240    
-432   336    
-176   320    
112    160    
176    -96    
0      -48    
272    -16    
-112   128    
-656   -96    
48     48     
48     16     
176    208    
-224   96     
128    -224   
-224   -16    
64     -112   
-192   48     
-112   192    
192    112    
-272   0      
48     64     
-160   -80    
160    -144   
-368   -224   
96     -16    
64     -48    
-304   -160   
-16    -112   
-128   128    
144    128    
-64    0      
80     -256   
32     -160   
480    304    
-784   224    
64     48     
-320   -32    
48     96     
-128   -400   
96     -48    
-32    -64    
-64    80     
112    304    
192    64     
-16    0      
16     96     
-144   288    
96     96     
144    80     
-112   0      
112    96     
-96    16     
240    80     
-16    128    
128    80     
96     48     
16     -128   
176    48     
-80    -32    
-128   48     
80     160    
-224   -80    
0      -64    
-112   32     
96     272    
272    416    
-80    -80    
64     -96    
96     32     
32     432    
-48    32     
64     -64    
-16    256    
-32    -48    
32     144    
128    -16    
448    384    
-208   -112   
80     128    
-96    -160   
-32    -32    
-368   -144   
-176   128    
240    208    
192    64     
-112   -96    
176    96     
-16    192    
160    -80    
48     0      
-16    16     
-64    0      
-192   16     
96     80     
96     -32    
32     64     
-64    96     
496    624    
224    112    
32     48     
-32    48     
-80    48     
112    112    
32     96     
48     240    
-240   256    
240    288    
-400   64     
160    -80    
144    96     
128    160    
-128   -16    
64     -16    
-64    32     
16     96     
32     96     
-288   -48    
0      32     
32     160    
144    -16    
32     48     
-112   0      
64     96     
208    -192   
-32    -240   
352    192    
64     96     
128    -560   
48     48     
-144   80     
192    48     
-224   112    
80     0      
128    192    
-464   -32    
176    64     
-128   16     
416    48     
-32    288    
-592   -16    
160    -32    
208    32     
304    -416   
240    64     
144    112    
-48    48     
-224   32     
320    96     
-32    32     
-144   16     
-48    32     
240    -16    
176    -272   
32     176    
-160   -48    
-48    -32    
-16    80     
-128   -208   
320    112    
-96    48     
32     112    
-32    -16    
16     80     
96     32     
80     48     
288    -48    
-272   -48    
-64    -48    
-160   16     
144    48     
112    0      
64     -112   
-16    -208   
160    272    
0      -1424  
400    288    
96     0      
192    -80    
240    240    
-304   -16    
336    80     
48     160    
-64    80     
128    -64    
208    112    
-176   -144   
0      -128   
16     32     
-208   48     
240    -208   
256    176    
-288   112    
400    112    
-288   -48    
-352   -112   
192    48     
96     224    
-560   48     
272    32     
112    16     
-208   -224   
16     -208   
464    -336   
640    160    
-192   -192   
144    32     
256    -1616  
-320   16     
80     48     
448    192    
-112   -16    
240    16     
48     64     
176    -96    
0      -80    
64     -48    
240    48     
-32    -32    
96     32     
128    0      
128    16     
96     -528   
-64    192    
240    48     
64     64     
176    -32    
48     192    
128    128    
32     -16    
32     208    
-48    -112   
-32    240    
288    16     
-160   48     
-96    192    
352    0      
16     -80    
144    160    
-80    0      
176    0      
96     32     
-240   80     
128    0      
-16    0      
96     -432   
400    608    
-160   -464   
304    112    
64     160    
64     32     
32     -176   
48     -176   
192    32     
224    -128   
192    -1424  
0      160    
-176   -288   
-112   -96    
288    -704   
-32    352    
80     96     
-48    144    
304    832    
96     -112   
-192   -736   
192    -528   
128    384    
112    272    
-64    -16    
32     -320   
-144   112    
-240   -80    
192    0      
112    -16    
144    -304   
128    -224   
80     -464   
304    352    
208    144    
-128   32     
-16    -160   
128    64     
144    -32    
-224   -16    
112    -112   
32     -128   
-848   -448   
64     -288   
48     64     
336    144    
-80    -32    
112    -192   
-16    160    
-80    -1008  
160    -320   
-80    -80    
-112   32     
96     0      
96     -16    
-128   0      
-16    -288   
-384   -208   
48     -240   
-16    -64    
0      112    
16     272    
128    144    
-16    16     
64     -576   
128    -80    
160    64     
240    192    
-48    112    
304    288    
16     144    
272    -64    
-64    64     
64     -32    
-640   -16    
-64    -64    
-64    112    
432    224    
-304   208    
64     -32    
416    -64    
96     -496   
-96    -48    
96     -96    
128    -208   
96     -96    
-64    -32    
-16    96     
144    128    
-688   -48    
32     -112   
-272   -144   
96     96     
-368   16     
144    -208   
96     16     
48     -192   
224    160    
240    192    
48     -96    
0      -16    
240    96     
-320   -32    
80     -96    
-176   -112   
48     48     
-320   144    
160    160    
-32    -16    
208    256    
-144   176    
80     -64    
48     32     
112    -80    
176    192    
-112   0      
176    64     
-208   -32    
-144   -128   
400    -432   
96     64     
-144   96     
-32    -192   
-128   16     
-16    -416   
112    -176   
32     -112   
-64    128    
-144   128    
-16    192    
-272   -96    
256    -64    
-80    64     
-112   -384   
-32    -352   
160    -192   
-1424  -320   
16     -624   
464    -384   
64     144    
0      -48    
-256   0      
96     -192   
-416   -64    
-144   -224   
224    -176   
-64    64     
-304   -32    
-304   0      
-384   -144   
-16    32     
-400   -64    
-144   -32    
-144   -192   
-1520  -288   
672    192    
-320   256    
96     -16    
32     288    
-208   112    
640    512    
-2080  384    
96     16     
-144   -560   
-64    -80    
512    192    
-64    256    
0      320    
32     160    
-128   0      
272    32     
-384   240    
-144   16     
-96    48     
160    16     
-720   -320   
-1328  -160   
-352   96     
128    496    
416    288    
-112   80     
-112   -80    
-656   -448   
-96    384    
96     64     
0      -608   
-304   -112   
160    -176   
-512   192    
160    -96    
272    -336   
-304   400    
208    384    
-240   176    
-128   -448   
80     -32    
256    320    
-80    32     
-64    -480   
-176   48     
64     -48    
64     80     
-128   64     
-160   -64    
-496   -368   
128    208    
208    96     
416    -256   
-416   128    
96     -96    
112    -240   
128    208    
-64    -144   
80     -240   
32     160    
128    368    
-160   -192   
-128   -48    
96     288    
-80    112    
16     -64    
-240   -80    
-224   48     
-128   48     
48     80     
-672   -80    
128    96     
80     -16    
336    208    
-256   -80    
0      -32    
16     64     
32     0      
0      48     
-48    128    
208    416    
-96    160    
-112   -96    
-400   -160   
128    -80    
-336   48     
128    16     
0      -176   
32     128    
-176   96     
0      48     
-48    -224   
-144   -80    
128    336    
-224   128    
128    -96    
0      0      
160    16     
-176   -32    
272    -16    
-640   32     
48     96     
-160   -64    
-96    -176   
-48    -16    
-48    240    
-160   -16    
-48    -96    
-16    16     
48     112    
32     16     
32     -16    
16     32     
-384   -128   
48     64     
-592   48     
-64    -16    
128    0      
320    256    
-176   240    
304    608    
-224   256    
208    -32    
96     -48    
64     -160   
0      96     
-544   80     
80     -32    
144    96     
-80    16     
208    32     
-80    0      
256    256    
-144   16     
64     -32    
192    0      
64     80     
336    64     
-272   64     
-144   16     
80     16     
-240   0      
192    16     
352    192    
-224   32     
-208   -32    
256    160    
-416   0      
-64    32     
-128   64     
32     -80    
16     -64    
80     144    
-64    0      
48     -32    
176    144    
-240   0      
176    48     
-32    -16    
128    48     
112    80     
-48    16     
64     -96    
224    112    
112    80     
192    48     
48     96     
96     32     
-64    -304   
-80    -96    
-176   128    
-96    -80    
144    80     
64     320    
-288   96     
432    32     
-432   -160   
336    -16    
-224   256    
144    0      
-336   -48    
-224   -192   
656    -64    
80     128    
-64    -112   
240    -32    
-256   -112   
304    96     
-736   -96    
80     96     
272    496    
-352   208    
-480   -128   
-48    48     
240    272    
-400   288    
592    432    
-352   144    
240    80     
-352   -208   
176    0      
-192   -16    
240    80     
32     -112   
208    160    
-208   -80    
224    -240   
-16    160    
64     176    
80     -64    
128    32     
80     -32    
0      -64    
160    48     
-48    16     
-32    -112   
64     128    
176    32     
256    784    
-304   -1120  
48     -16    
-16    -112   
288    96     
144    112    
-48    -480   
464    672    
-288   -176   
-128   -144   
224    -256   
-416   272    
304    224    
48     304    
-192   32     
-96    -720   
144    -672   
64     -64    
160    96     
0      352    
160    -112   
48     16     
16     96     
-112   -48    
64     -32    
-224   -192   
240    -16    
16     144    
96     -16    
32     -128   
0      64     
16     -208   
240    -48    
160    -64    
96     32     
160    208    
176    224    
-48    224    
16     64     
48     64     
0      16     
-64    240    
528    352    
-80    64     
112    -96    
176    32     
128    -32    
112    80     
-64    -352   
-16    -32    
80     16     
112    -16    
176    48     
32     96     
0      80     
32     96     
-160   -32    
288    80     
176    48     
-64    -64    
192    16     
64     -176   
-64    -48    
144    -848   
112    64     
64     96     
0      -16    
0      16     
48     96     
-208   16     
-16    112    
176    112    
256    112    
-32    -64    
128    -128   
-112   96     
-144   -176   
48     48     
64     -192   
224    144    
96     -112   
112    64     
-176   -96    
-80    48     
-176   -48    
112    80     
224    96     
128    0      
144    48     
48     -176   
128    -32    
128    -128   
32     80     
80     -32    
-80    -16    
112    -240   
32     144    
48     16     
-32    32     
32     16     
-128   -32    
192    -16    
176    -64    
64     96     
48     -96    
272    192    
-144   16     
160    176    
160    -176   
144    160    
32     -976   
272    48     
0      224    
-96    16     
224    -16    
400    160    
-48    448    
128    176    
176    288    
96     144    
48     -16    
208    -208   
-80    -64    
272    -32    
-64    144    
16     -48    
320    -624   
-112   208    
208    -352   
-192   256    
-176   -176   
64     -688   
96     -128   
-64    -752   
96     -144   
80     -176   
80     48     
96     176    
128    64     
112    16     
-176   -48    
416    256    
-16    192    
160    32     
192    -256   
-656   48     
80     -208   
96     176    
944    928    
-624   400    
-144   -416   
272    384    
176    560    
-272   -384   
352    -1008  
160    -432   
96     528    
544    528    
64     384    
-400   -64    
-464   -640   
64     224    
-48    416    
-48    -256   
-80    -160   
304    320    
256    208    
-208   -80    
240    272    
128    -208   
208    16     
512    272    
208    -672   
272    -704   
208    144    
-176   688    
1088   272    
-928   784    
-544   -720   
208    -208   
64     384    
816    -544   
224    -160   
144    784    
208    496    
-208   -368   
112    -304   
-224   784    
-128   -256   
224    128    
-416   -160   
-240   96     
-432   -128   
144    176    
-80    -64    
96     -96    
-416   96     
64     -80    
80     -240   
-208   80     
-144   192    
112    -496   
224    16     
-64    112    
16     -144   
-64    80     
128    -32    
-752   -112   
448    16     
-400   -16    
64     -112   
96     0      
48     -96    
192    112    
80     -208   
32     144    
-160   80     
48     16     
208    48     
64     -48    
-160   -32    
240    -240   
-512   -176   
272    0      
-352   32     
144    16     
0      16     
176    48     
144    -64    
176    -528   
272    64     
-128   144    
80     64     
64     -32    
128    16     
-288   -32    
-112   -128   
-400   -16    
-16    -224   
-48    -160   
224    -80    
176    -48    
176    -144   
-16    80     
-16    -496   
176    -64    
-176   32     
-48    -64    
-256   64     
-96    0      
-160   -16    
48     -16    
0      16     
80     64     
-1264  -16    
176    -32    
-16    16     
192    -160   
-32    112    
96     -32    
-16    -32    
144    112    
-16    -16    
-144   32     
-32    -80    
-64    32     
64     16     
96     64     
144    16     
-528   16     
-800   -96    
432    576    
-736   384    
96     -16    
-64    -112   
-768   16     
-176   -160   
480    -48    
16     16     
320    32     
-320   -176   
-16    -16    
-512   112    
-1056  -144   
48     64     
-416   0      
208    80     
-160   -96    
-240   -16    
-80    80     
-80    0      
-48    32     
-176   64     
-288   32     
-144   0      
48     64     
-192   -112   
-112   -112   
416    160    
368    112    
-80    -176   
-336   -128   
-176   -48    
-288   -16    
-192   32     
64     64     
-320   -112   
224    -128   
64     32     
160    80     
-144   -32    
-880   48     
-144   64     
-128   -48    
48     -32    
320    -96    
64     0      
64     -96    
128    32     
-64    16     
80     -64    
64     96     
-400   16     
-16    16     
-496   -48    
96     48     
80     -16    
-112   80     
176    -64    
-144   -32    
32     -96    
80     16     
16     80     
96     48     
-64    0      
-32    32     
-16    96     
32     80     
0      32     
64     112    
208    112    
-512   -80    
96     -16    
-160   80     
-64    64     
-80    -176   
128    -96    
240    112    
-272   64     
-176   -256   
-32    -16    
-176   0      
-112   16     
-80    -16    
-288   -96    
32     16     
-288   -96    
128    -128   
-416   -304   
-112   -144   
304    48     
-256   -144   
256    48     
0      16     
16     80     
208    176    
16     -176   
-224   -64    
96     464    
-448   -176   
272    -48    
80     0      
112    -80    
-960   1744   
272    848    
144    -656   
240    -352   
-720   352    
-288   -384   
-320   -272   
416    240    
32     -48    
-32    48     
336    160    
-528   64     
-224   208    
272    -224   
128    -160   
-176   80     
336    -224   
-160   160    
-336   -144   
160    -464   
48     -16    
16     -80    
-224   224    
448    336    
-48    176    
144    112    
-32    48     
48     -112   
-320   -64    
384    176    
-208   64     
-240   0      
32     128    
16     0      
64     64     
112    80     
144    128    
-112   -16    
-32    -16    
-16    -16    
0      240    
16     144    
256    128    
-192   -48    
80     32     
64     112    
-208   32     
112    128    
16     16     
128    32     
160    80     
-80    -16    
192    -32    
80     -16    
176    -64    
288    112    
-192   16     
192    48     
-176   64     
224    64     
208    192    
-224   128    
144    32     
-48    0      
-192   48     
32     64     
128    16     
64     80     
0      32     
-80    16     
16     128    
-48    -16    
160    64     
0      16     
112    96     
-48    48     
-256   -176   
80     -112   
-32    0      
64     -80    
32     64     
176    -48    
-64    16     
16     112    
-176   16     
32     48     
80     -128   
80     -16    
16     0      
32     32     
64     80     
-64    0      
256    -96    
224    176    
-16    240    
16     256    
-304   256    
-160   -64    
176    16     
144    -16    
192    16     
16     64     
-64    -16    
64     -48    
0      -48    
320    -16    
176    160    
-80    64     
-128   112    
-240   -32    
224    -32    
0      128    
160    48     
96     80     
-64    64     
-32    -64    
112    -64    
96     112    
128    64     
32     -816   
-16    -64    
208    128    
-272   320    
320    688    
224    368    
16     48     
-208   -144   
16     -48    
48     160    
0      -16    
96     160    
-336   -560   
320    -720   
48     160    
256    -400   
-32    -96    
-144   48     
64     112    
96     160    
160    192    
144    -176   
160    160    
-96    320    
32     64     
-176   272    
16     240    
496    624    
-304   560    
320    304    
80     48     
256    352    
112    -80    
128    -96    
0      80     
-176   -144   
0      80     
96     -96    
112    -160   
208    368    
256    64     
-48    -160   
96     128    
48     -64    
-112   32     
0      -928   
-48    304    
32     -784   
128    192    
0      -64    
16     128    
-48    -96    
-272   288    
512    128    
-192   -32    
-144   128    
32     48     
-752   -1024  
48     464    
-32    656    
-224   -560   
496    336    
528    176    
-48    -192   
-144   -304   
-128   16     
160    224    
-96    0      
-96    -32    
128    192    
48     208    
48     -32    
0      -48    
16     64     
656    704    
128    784    
112    -176   
208    -640   
-80    -352   
176    -96    
592    752    
48     64     
624    -80    
-416   48     
96     176    
-224   0      
-32    -208   
288    80     
-16    -96    
-48    -176   
48     -608   
-320   112    
112    -48    
144    0      
-16    -32    
80     48     
48     -32    
80     80     
16     112    
144    64     
-48    0      
-64    -80    
288    -16    
-288   -16    
-80    -16    
-48    -160   
384    96     
128    32     
-160   16     
352    0      
-112   96     
128    16     
192    80     
160    -16    
-144   -64    
160    -688   
-96    -112   
32     -352   
256    32     
-48    16     
112    -32    
96     48     
176    32     
112    -96    
-16    0      
160    -272   
-256   -112   
144    128    
112    -320   
-64    -96    
240    -464   
400    -320   
-96    -576   
80     144    
-16    96     
-48    -48    
224    0      
144    -80    
-16    -384   
0      0      
64     -256   
-64    -160   
208    -192   
160    -16    
-1536  -112   
48     -48    
128    192    
64     -96    
176    -128   
-32    -224   
-48    -64    
96     160    
80     -64    
96     -64    
112    224    
-80    -32    
96     48     
32     0      
16     -160   
96     -32    
-64    -304   
176    -176   
80     32     
-192   16     
-16    -48    
48     -272   
80     -304   
-96    176    
-80    48     
16     80     
112    -80    
-80    0      
32     0      
-80    -64    
-320   -16    
-336   -704   
224    -304   
-80    192    
-304   16     
160    -224   
16     -128   
32     -400   
-96    144    
32     16     
112    -16    
224    0      
160    64     
64     32     
112    -32    
-368   -176   
0      -144   
-1920  -112   
160    112    
128    0      
144    32     
-32    -80    
224    16     
96     96     
-32    -336   
-32    16     
-80    -128   
-32    -240   
-80    -80    
32     -144   
-48    0      
192    -32    
-304   32     
128    -64    
-544   0      
128    -48    
-80    -16    
48     -192   
192    96     
368    -1056  
80     272    
128    240    
-64    -48    
-432   -48    
-176   -80    
-224   -32    
160    -64    
160    32     
288    0      
-624   -32    
-96    -240   
48     48     
80     -48    
-176   -16    
416    -336   
32     -16    
240    144    
32     -16    
-224   -48    
112    -48    
368    240    
-48    48     
-96    -32    
64     -48    
-240   -80    
240    -96    
144    16     
32     0      
128    -144   
128    -96    
160    32     
-224   -352   
0      -96    
-368   352    
240    -128   
-288   -128   
-192   96     
304    0      
-176   16     
256    32     
32     16     
16     208    
-720   -528   
-64    -240   
-64    -144   
320    32     
-32    -80    
-64    144    
-256   96     
336    480    
-608   736    
-208   -864   
-64    48     
0      352    
96     -544   
80     288    
-384   464    
-336   -352   
176    448    
256    576    
160    160    
-112   -432   
-624   -224   
-224   -96    
-416   288    
-64    -176   
-64    -144   
16     224    
-384   -352   
-400   -240   
-544   -48    
0      144    
-240   80     
240    192    
-16    144    
-192   240    
-16    80     
-144   64     
-80    16     
-672   -80    
-16    -224   
512    -64    
-112   64     
112    16     
64     208    
-112   -176   
192    -80    
-48    -32    
-80    176    
-32    0      
-96    0      
-80    -64    
-208   -16    
80     -112   
-224   16     
192    368    
-3424  128    
48     48     
-352   0      
192    32     
96     -32    
112    48     
-80    16     
-64    96     
32     48     
112    16     
144    32     
-16    -80    
-96    -16    
-208   -208   
0      32     
-352   96     
-96    48     
-144   0      
144    0      
0      -80    
16     0      
160    48     
-112   -80    
-32    16     
-32    -16    
64     -16    
-96    16     
-144   -32    
-256   -112   
256    -64    
80     256    
-64    160    
-1008  -80    
0      64     
-16    -80    
0      0      
-96    32     
-144   64     
-80    16     
32     16     
-32    -16    
-288   -48    
48     80     
-96    48     
16     -32    
-96    0      
-16    112    
-880   -32    
48     -96    
80     -32    
-80    32     
64     -16    
0      112    
-96    0      
-96    48     
-32    16     
-112   -64    
128    -80    
16     96     
16     48     
-288   -128   
64     0      
-576   -64    
-112   -64    
-64    80     
-80    112    
16     -16    
96     176    
16     128    
80     160    
80     48     
32     336    
-144   0      
-144   -160   
320    80     
-64    80     
256    208    
-336   64     
-48    -80    
192    -128   
144    80     
-256   32     
-224   80     
128    -48    
-64    288    
256    0      
160    -96    
0      -32    
64     0      
-576   -224   
96     -960   
16     -208   
-32    240    
48     0      
0      176    
64     -96    
272    240    
32     272    
112    320    
-240   -560   
160    208    
-256   -128   
112    16     
-112   304    
288    -80    
-128   -112   
320    432    
-128   32     
208    -96    
32     192    
144    -80    
416    208    
-16    0      
80     224    
0      -48    
-144   -32    
-80    -416   
96     64     
-64    256    
336    112    
-240   -16    
-128   -48    
-48    -64    
160    -80    
48     32     
-64    96     
48     -16    
-176   -32    
0      144    
288    32     
48     -48    
80     464    
160    400    
-80    -96    
-80    96     
-272   80     
32     48     
64     -128   
256    -32    
112    64     
-224   -16    
400    176    
-464   -96    
688    -32    
224    -16    
240    208    
240    -16    
-128   0      
-176   -64    
112    16     
112    -32    
384    144    
-192   48     
464    192    
-384   48     
288    16     
128    192    
-400   -32    
-512   -448   
32     -128   
256    352    
-672   160    
-112   48     
64     -192   
320    -192   
752    544    
-1040  0      
32     -176   
544    -32    
16     0      
656    160    
-496   96     
368    -16    
0      48     
-512   -160   
528    -64    
0      0      
336    16     
-304   112    
-16    -112   
32     48     
160    48     
-64    16     
144    48     
-16    80     
256    16     
80     -48    
224    -48    
-128   96     
112    144    
96     -32    
80     -96    
160    128    
-16    48     
-16    -16    
-64    -32    
-96    -208   
144    176    
320    32     
0      -64    
48     48     
-128   112    
64     80     
128    112    
-112   32     
112    64     
192    -32    
48     32     
96     96     
160    -16    
208    144    
-96    -176   
80     0      
80     80     
-32    96     
80     -32    
160    64     
32     -112   
-96    160    
32     -16    
128    112    
-192   -192   
-16    -64    
144    96     
96     0      
-32    48     
48     -352   
-112   -112   
224    -1488  
208    48     
192    272    
32     16     
80     -32    
224    32     
-64    16     
64     128    
160    144    
-80    192    
16     16     
112    -32    
96     -160   
32     -128   
-16    -48    
96     -176   
64     -16    
160    -32    
-64    176    
-64    -96    
208    96     
32     96     
80     -96    
48     -48    
64     -16    
144    112    
80     -64    
80     48     
64     -192   
144    80     
208    -304   
-176   16     
464    -112   
-304   864    
-48    240    
272    32     
96     80     
288    0      
288    384    
112    -128   
192    -288   
-32    -352   
336    512    
160    64     
0      -32    
32     -160   
32     -80    
96     -64    
32     48     
64     176    
32     96     
-48    80     
144    240    
128    224    
-48    -160   
-16    0      
192    48     
0      0      
80     -32    
16     64     
112    -128   
96     240    
-16    16     
64     128    
16     0      
-48    -576   
112    -944   
32     96     
464    -928   
-96    112    
-464   -736   
160    -528   
160    16     
240    -16    
-240   -448   
480    -496   
-32    192    
352    288    
240    -144   
-128   160    
-96    -208   
384    -160   
-400   224    
384    -32    
128    32     
352    96     
-64    -304   
64     80     
0      -96    
64     -16    
48     80     
176    -304   
64     0      
64     -176   
176    -128   
-32    256    
-64    144    
-656   -112   
16     -288   
-48    32     
304    -96    
-192   -272   
128    -256   
176    -160   
176    -32    
48     80     
208    -160   
-336   704    
192    496    
416    224    
-272   -368   
-16    48     
-1312  272    
32     -656   
176    -16    
160    -336   
288    -32    
112    112    
-336   32     
144    -176   
-240   16     
176    64     
224    192    
384    64     
32     16     
-32    64     
-32    144    
-480   48     
-16    -192   
-112   -80    
736    256    
112    128    
416    -192   
-416   64     
-352   -416   
992    432    
-400   240    
224    288    
-192   80     
-64    -32    
0      -112   
336    -128   
128    112    
64     -16    
-1072  48     
-64    -48    
32     -448   
160    -128   
-224   224    
208    64     
128    32     
480    192    
-416   336    
48     -224   
32     -128   
-64    48     
-80    -400   
-32    -288   
64     -16    
-544   -176   
160    -224   
-400   16     
-16    0      
112    192    
48     -16    
272    64     
0      -1392  
48     448    
192    224    
16     -32    
-160   -272   
256    -272   
-544   16     
-208   -64    
-96    48     
256    288    
-16    192    
-208   32     
-48    64     
64     -240   
-64    64     
128    -560   
0      -16    
48     -32    
-48    -128   
-176   32     
-48    48     
-192   48     
112    -64    
-96    176    
128    16     
128    -16    
64     -144   
32     0      
96     -336   
16     -32    
-64    64     
-112   -304   
-128   -176   
160    128    
-640   208    
288    -32    
112    16     
48     0      
-112   -32    
144    -144   
-384   -64    
144    -224   
176    0      
-128   16     
-32    144    
16     0      
-160   16     
-80    -32    
-400   80     
-144   32     
240    48     
-32    -64    
128    16     
-112   64     
-1792  32     
512    496    
-336   288    
0      128    
-240   32     
-272   64     
80     -96    
-448   -352   
304    -224   
-128   64     
48     -160   
192    656    
-256   608    
0      192    
176    352    
-272   -304   
32     -304   
160    192    
288    64     
-368   -672   
-176   336    
-208   448    
-192   -272   
32     112    
16     64     
-176   -64    
-288   128    
-208   32     
112    32     
48     -112   
-16    48     
32     368    
-208   -400   
80     240    
-272   0      
32     0      
64     -16    
-144   -192   
144    -384   
64     208    
0      240    
64     -48    
-64    -64    
-96    32     
112    176    
-288   -32    
160    304    
96     288    
-208   48     
-96    64     
-96    -32    
-48    -144   
-368   -128   
112    96     
-208   -64    
-224   -80    
96     80     
32     112    
-208   16     
176    32     
32     -64    
-64    0      
-64    -64    
-32    -240   
-16    -160   
-224   96     
-192   32     
-96    0      
-128   0      
-160   0      
272    96     
-304   -48    
160    0      
-720   -96    
-16    80     
-352   -32    
208    192    
-128   16     
224    80     
192    16     
-288   -112   
272    48     
96     16     
32     64     
64     32     
-48    -176   
96     0      
-384   80     
-96    -160   
80     144    
80     128    
-272   32     
-96    80     
-352   -16    
64     64     
320    -16    
96     64     
-32    32     
48     112    
-480   -176   
256    -48    
112    368    
-752   -64    
272    48     
-272   -80    
-176   -192   
208    64     
96     0      
240    -48    
-80    160    
0      16     
224    96     
-528   -32    
-448   -352   
672    32     
336    208    
-240   -64    
368    80     
-272   -128   
240    0      
96     272    
-384   80     
352    144    
-448   -16    
352    64     
0      0      
160    64     
64     -32    
16     128    
-16    -32    
224    96     
-384   48     
192    16     
-112   -16    
64     -208   
224    -128   
-288   192    
-144   0      
128    0      
96     0      
-32    16     
144    80     
-96    176    
160    64     
-112   16     
-32    192    
16     128    
-32    80     
16     -32    
-80    16     
144    48     
0      48     
16     16     
176    64     
-128   -48    
96     64     
0      80     
-32    48     
80     32     
-224   -32    
128    64     
-112   32     
336    112    
-272   80     
208    -32    
-176   -80    
48     32     
-64    48     
144    -80    
128    96     
80     144    
160    16     
-256   -112   
80     32     
-96    160    
64     32     
64     144    
240    0      
64     304    
16     144    
-32    16     
32     16     
128    64     
64     80     
208    48     
-144   -288   
112    -176   
32     128    
176    320    
0      -336   
48     80     
-160   64     
128    -48    
304    288    
-144   -192   
48     -240   
224    0      
144    -16    
112    80     
-48    -64    
-128   96     
-32    0      
64     176    
32     112    
-192   16     
192    96     
-160   -128   
400    -272   
656    1168   
-416   1232   
-64    -336   
-32    -352   
144    256    
272    -112   
192    176    
80     -560   
368    176    
-32    320    
80     48     
-96    48     
-112   -32    
32     816    
144    -448   
16     -432   
-80    112    
160    368    
0      96     
-64    -48    
32     32     
160    32     
144    48     
48     64     
-32    -16    
80     -16    
-32    -144   
176    -368   
64     320    
-48    -192   
192    64     
-128   -1472  
-16    32     
64     320    
128    48     
-144   -240   
-16    -160   
128    112    
-80    0      
80     -112   
192    288    
-48    240    
160    320    
-128   -64    
-64    -432   
-96    224    
48     -352   
192    -64    
320    288    
-112   64     
64     -96    
96     -144   
16     -144   
272    240    
-128   176    
144    224    
96     112    
-192   192    
112    192    
-160   -288   
-48    -480   
112    -160   
32     -128   
64     -960   
192    -32    
32     96     
96     -32    
-80    -128   
64     64     
-16    -128   
16     128    
192    -96    
96     -96    
32     -128   
96     -256   
64     -304   
-448   -496   
64     -368   
-240   -960   
32     112    
48     -48    
-64    160    
208    -16    
-16    -160   
304    -32    
64     -64    
32     176    
-192   -16    
16     32     
112    16     
288    160    
512    -128   
0      32     
-144   48     
-48    -160   
160    -112   
-32    80     
240    432    
160    48     
176    -80    
-96    -32    
-96    80     
-224   -224   
-160   96     
-208   -368   
32     -48    
240    160    
16     128    
544    128    
-32    -16    
176    -16    
176    48     
-240   32     
48     64     
-16    -16    
144    -80    
16     64     
64     -80    
128    -64    
128    -80    
32     96     
48     -80    
160    32     
48     -64    
-144   32     
144    -96    
192    -368   
-208   -48    
64     -32    
0      0      
80     -48    
192    -256   
-64    -256   
208    -144   
48     32     
544    624    
-464   224    
-272   80     
-96    -368   
128    -160   
192    96     
32     0      
240    64     
-496   208    
464    288    
-32    -112   
-48    -112   
336    144    
-144   272    
192    -128   
208    -448   
64     -48    
144    128    
48     -32    
48     -304   
64     -224   
112    0      
-64    96     
-336   128    
208    -176   
-1600  -80    
240    -192   
64     -112   
128    -256   
112    -64    
-16    -976   
128    320    
-176   176    
128    64     
224    48     
-80    -160   
96     -64    
352    -240   
-192   80     
48     -16    
-560   -304   
32     0      
96     176    
192    256    
80     16     
16     -32    
48     80     
112    0      
144    -224   
240    176    
16     160    
-128   -48    
256    48     
-80    16     
-64    288    
-160   -160   
128    32     
-64    80     
64     -176   
192    336    
160    -64    
-304   176    
128    -384   
176    800    
0      -80    
-80    16     
-112   48     
0      -240   
128    112    
-48    48     
-384   -432   
-224   -320   
-592   -576   
240    64     
-48    192    
64     -240   
-160   -16    
240    -272   
128    32     
224    -16    
-16    16     
-96    32     
64     16     
-176   -48    
128    0      
80     32     
176    0      
-704   0      
-112   -224   
-1424  -48    
-64    -32    
144    96     
80     -144   
464    16     
224    -432   
144    48     
-80    0      
-96    -48    
-544   0      
432    48     
-512   -144   
16     16     
-352   -64    
544    -16    
-576   -16    
-224   -32    
48     16     
128    -112   
176    32     
80     112    
-208   32     
-272   -16    
-64    -112   
-160   -16    
64     32     
-272   -128   
560    -144   
-144   32     
80     16     
-768   -32    
48     -80    
144    64     
-128   -160   
0      -80    
-80    96     
128    80     
48     64     
176    -16    
-192   -48    
-144   -64    
-256   -32    
-80    32     
-320   -160   
112    -32    
-144   80     
-448   -96    
48     64     
-1296  -352   
-464   -208   
544    400    
-784   -16    
336    16     
-1824  0      
272    80     
-256   64     
-688   -32    
320    -96    
-32    176    
-848   -176   
752    176    
-480   -128   
592    352    
-592   -64    
-192   -224   
32     -32    
-272   144    
-112   -64    
336    144    
-80    176    
-400   -32    
-16    -128   
-176   -176   
688    448    
-752   -16    
-176   -160   
224    -64    
96     -16    
176    -32    
-144   -16    
-160   32     
-64    0      
-256   -32    
96     48     
-208   64     
-192   64     
-656   -224   
-704   64     
176    144    
-240   32     
80     16     
-32    0      
0      64     
96     -64    
-176   -16    
144    16     
112    0      
-256   -32    
96     -192   
-96    80     
-544   96     
112    0      
-192   -96    
-80    64     
0      16     
128    0      
0      -64    
0      -32    
-128   -160   
80     80     
192    336    
-96    0      
32     -48    
-176   0      
48     80     
-192   -80    
32     -64    
-144   -16    
32     176    
-16    -144   
-32    32     
-304   96     
256    -544   
96     32     
112    336    
16     48     
-32    -48    
-128   -368   
48     480    
176    0      
0      32     
-288   -48    
-208   0      
64     176    
-1088  -160   
144    48     
64     -32    
112    128    
-16    0      
-64    -208   
-64    256    
-224   -160   
0      1024   
224    -576   
16     160    
-288   128    
112    -144   
-400   16     
16     -192   
-1200  608    
-224   -128   
-80    -80    
112    48     
48     -384   
-400   48     
176    -1024  
64     832    
-16    -48    
-32    -272   
-256   112    
-368   -400   
96     832    
-272   -304   
-48    64     
-224   -64    
64     128    
80     96     
48     -64    
16     16     
-48    48     
-96    64     
-16    80     
-80    -368   
-128   528    
32     32     
-112   -112   
160    304    
-16    -176   
16     208    
240    304    
-16    -16    
-112   -112   
80     -160   
128    544    
224    272    
48     128    
-240   48     
-112   0      
-96    32     
176    96     
192    128    
-64    -32    
-192   16     
-32    0      
0      64     
0      -48    
112    16     
80     -48    
-64    16     
32     176    
-64    320    
-176   208    
144    208    
32     64     
64     48     
32     160    
128    320    
-224   192    
-48    80     
192    224    
-32    128    
224    -304   
80     -16    
-112   80     
-64    16     
112    -32    
128    32     
16     208    
-64    32     
48     48     
-128   -112   
96     32     
32     112    
32     64     
0      16     
-64    -80    
96     128    
48     208    
-16    -64    
128    48     
48     128    
-16    80     
144    64     
-112   -112   
144    -80    
-32    32     
80     -16    
-32    -16    
0      64     
112    -176   
16     -192   
0      16     
-48    64     
-128   400    
192    288    
96     224    
-192   96     
176    272    
432    320    
64     384    
288    736    
112    432    
-64    432    
-16    -176   
-64    -112   
112    -96    
32     192    
352    48     
288    -160   
496    320    
-160   336    
-784   160    
-192   -96    
-16    -176   
384    -160   
224    -208   
64     -288   
-208   128    
-320   192    
-272   224    
-176   96     
160    -48    
176    64     
448    112    
-144   80     
96     144    
-16    112    
-336   -192   
528    -80    
272    112    
512    192    
-368   -48    
-112   0      
-128   96     
-176   16     
240    -208   
64     -160   
160    -144   
-176   -160   
336    208    
80     176    
-64    -128   
304    -96    
-128   -48    
-704   -224   
-128   112    
288    48     
-112   64     
96     -1104  
176    -32    
-160   128    
-48    64     
144    352    
336    208    
96     -128   
64     -80    
16     -16    
-208   160    
272    176    
16     16     
144    -48    
96     48     
160    64     
48     -160   
128    -80    
-16    -208   
160    208    
176    224    
384    128    
144    48     
-48    400    
-288   208    
128    96     
80     48     
16     -64    
160    -144   
64     -512   
224    -192   
96     -208   
80     -32    
48     -400   
-192   -512   
-48    -224   
144    -96    
-48    32     
176    -32    
80     -32    
-144   16     
0      -288   
-64    -368   
160    -64    
224    48     
-96    -32    
32     -208   
224    176    
-224   -848   
144    528    
-144   -480   
16     192    
0      192    
160    -80    
336    272    
-96    0      
-160   -160   
112    80     
192    240    
144    -368   
0      64     
-80    96     
176    112    
80     -176   
32     64     
48     64     
32     96     
-16    0      
160    48     
80     -32    
144    -448   
0      48     
0      -64    
-208   -496   
112    -384   
-80    336    
-240   16     
144    -16    
0      -96    
176    -96    
224    -432   
352    192    
256    320    
-304   -1184  
16     -768   
-144   -80    
16     -400   
224    -144   
160    -16    
208    -64    
128    64     
96     -144   
-80    128    
-32    -176   
64     -880   
208    80     
-48    -512   
176    0      
208    -240   
-96    -432   
208    32     
272    -192   
16     -64    
64     -160   
96     0      
80     112    
64     0      
-16    16     
-160   -80    
96     176    
240    160    
32     -64    
-176   -144   
-32    32     
-112   -32    
64     -96    
176    16     
304    160    
-352   -128   
432    -96    
112    32     
224    64     
128    -64    
128    192    
-400   32     
-368   -144   
416    32     
160    16     
16     -16    
224    -64    
-1200  -48    
16     -48    
112    16     
96     -112   
128    16     
64     -160   
0      -48    
112    -48    
176    96     
64     -48    
176    96     
272    -32    
-288   -240   
-16    -112   
192    80     
-560   -32    
208    0      
-32    32     
400    352    
-112   -48    
384    -272   
-784   -48    
272    -624   
240    176    
32     16     
-384   -176   
272    -64    
-64    112    
144    144    
144    144    
-352   16     
128    -64    
-144   32     
112    -224   
-112   0      
-112   -240   
240    176    
-160   -512   
-176   32     
-80    64     
32     -240   
-448   -336   
912    544    
-512   16     
128    -112   
-144   -32    
-656   -80    
-944   32     
0      -416   
0      -112   
192    32     
-336   -176   
304    -224   
96     0      
-112   -128   
640    192    
-384   -112   
-144   -144   
-64    144    
128    -48    
-368   -16    
368    272    
-352   -144   
0      -176   
112    96     
80     -368   
-112   -32    
192    -224   
-16    -240   
128    -432   
256    48     
-32    352    
48     -144   
-736   -288   
160    144    
-320   32     
160    -48    
-80    16     
-96    -64    
304    224    
-32    -240   
112    -48    
64     -144   
-64    176    
-128   -208   
208    112    
-240   48     
0      48     
144    -80    
176    96     
-352   368    
320    -176   
-432   -208   
128    -144   
-16    -704   
208    624    
112    288    
0      -112   
-224   464    
-496   32     
-1232  -224   
-32    -528   
240    144    
96     0      
96     144    
80     16     
160    240    
-224   240    
80     -224   
16     -32    
112    0      
-208   -128   
-496   -480   
-336   64     
-288   80     
-784   64     
48     80     
-336   -16    
-144   -96    
176    -96    
-64    96     
16     -48    
176    160    
-192   -144   
16     -144   
-272   -224   
-16    48     
160    352    
-160   64     
32     -64    
96     240    
-128   64     
-304   48     
-176   -96    
-96    -48    
-16    -32    
-160   -80    
48     -144   
-192   -240   
192    96     
-400   -336   
400    -240   
64     144    
-16    192    
-64    64     
-128   32     
288    320    
-592   160    
-32    0      
144    -48    
176    64     
-80    -16    
-80    -48    
-128   -96    
-80    16     
64     144    
-16    96     
-128   16     
-16    -96    
-128   80     
-32    0      
-64    0      
-48    -48    
128    48     
-48    112    
-224   -128   
-208   -128   
-16    64     
-32    0      
-32    96     
-32    -80    
112    112    
-48    176    
-48    -96    
32     -48    
64     -96    
-48    0      
160    224    
-176   80     
80     432    
64     256    
-272   64     
336    128    
-160   0      
160    128    
128    48     
-16    240    
-64    48     
-32    0      
80     96     
16     304    
80     32     
-96    -64    
-96    -64    
-240   -160   
0      32     
-416   -16    
96     -96    
-224   -144   
-64    -96    
48     128    
32     64     
-32    0      
32     0      
144    112    
-272   64     
64     16     
-112   32     
-128   -80    
80     64     
176    128    
-512   -64    
0      48     
-960   -80    
-32    112    
64     224    
672    272    
-432   128    
-112   0      
-144   -32    
368    -64    
48     576    
64     240    
192    -32    
-272   128    
256    64     
-400   352    
-272   -16    
432    160    
-432   400    
-368   32     
-64    -16    
96     0      
48     64     
448    80     
208    80     
-272   256    
-800   144    
-32    -256   
-448   16     
96     128    
-160   -272   
160    -192   
-64    -16    
-592   176    
112    160    
128    -112   
-240   -208   
-64    -208   
-112   -304   
352    208    
144    0      
-160   0      
336    128    
-384   -208   
-16    144    
160    -64    
-16    272    
464    432    
-272   176    
16     128    
112    128    
96     336    
96     -112   
-64    240    
-224   -256   
128    -176   
-96    464    
288    -128   
0      0      
336    352    
-288   -64    
-128   -112   
288    128    
32     192    
64     -80    
-16    -176   
48     224    
-144   -96    
128    96     
144    32     
-64    16     
32     -32    
416    352    
-160   64     
16     -208   
-64    64     
-16    -32    
112    -80    
-144   208    
96     -208   
-64    272    
-16    0      
48     128    
80     -288   
304    400    
-144   0      
176    0      
64     64     
-368   -224   
288    112    
64     96     
80     -16    
96     64     
128    96     
0      208    
16     128    
112    -48    
-128   -128   
96     -224   
80     64     
16     96     
-32    -16    
96     48     
-64    -16    
336    80     
-176   -48    
64     80     
272    176    
-240   -144   
-32    32     
48     176    
-96    80     
96     32     
0      -32    
48     32     
256    160    
-64    -48    
160    112    
-64    96     
16     -192   
208    112    
-144   32     
64     16     
48     0      
128    -16    
0      48     
144    80     
-32    48     
-160   368    
-32    112    
192    -48    
-192   48     
176    64     
368    240    
-400   -32    
64     48     
176    64     
-64    -64    
96     48     
-16    160    
-16    16     
64     -16    
112    112    
-16    48     
48     -32    
144    64     
144    80     
32     -96    
-80    160    
-48    -80    
192    48     
384    -272   
144    96     
112    16     
-16    0      
-144   0      
0      -48    
64     -80    
144    144    
160    48     
128    64     
-128   -48    
48     -112   
304    256    
-288   -112   
-64    16     
256    -256   
192    64     
-32    16     
0      128    
16     -96    
144    144    
-224   32     
160    160    
-48    48     
96     16     
-16    -32    
320    -32    
-32    96     
48     -80    
288    192    
-368   -464   
64     -16    
320    -80    
-16    0      
64     0      
16     160    
-48    -32    
384    16     
0      16     
160    48     
-48    16     
96     -48    
160    -64    
112    -96    
-64    64     
16     -96    
0      -112   
48     -80    
-16    96     
32     -16    
80     96     
160    128    
-160   32     
320    160    
-192   32     
1168   736    
-528   -144   
176    32     
32     -112   
176    48     
-144   64     
208    144    
-320   -352   
272    48     
128    176    
-496   -176   
240    -16    
144    256    
-368   80     
-288   -464   
80     -240   
80     -240   
-128   32     
-64    64     
-368   -80    
48     224    
192    304    
-240   -624   
208    -64    
128    -64    
128    336    
160    112    
544    -1216  
-48    -320   
32     64     
272    -560   
-96    -224   
48     64     
304    80     
192    -64    
208    96     
16     64     
96     -96    
336    -304   
-304   48     
336    -64    
-160   -208   
-832   384    
32     -704   
320    768    
464    304    
-496   -528   
-112   -336   
352    -640   
384    928    
-208   256    
16     -224   
144    -384   
160    96     
144    288    
-64    -288   
80     128    
-576   -352   
-192   96     
112    48     
272    -48    
112    224    
-64    -64    
48     -160   
128    -320   
-80    -32    
272    -64    
-80    -64    
64     -144   
96     -80    
240    96     
16     -96    
-304   -16    
48     -64    
-592   -64    
96     -272   
-128   -112   
256    -48    
176    208    
-64    -96    
80     16     
-32    -144   
-112   -32    
0      32     
-32    160    
112    16     
192    -224   
-224   -80    
0      -144   
-944   -192   
16     -224   
144    0      
160    32     
-80    0      
96     -304   
-32    48     
16     -432   
-192   128    
128    -144   
0      16     
48     -16    
48     -64    
-32    16     
-112   48     
-496   16     
-32    16     
-112   160    
208    -32    
0      -32    
0      -80    
-112   16     
112    -128   
16     96     
224    64     
-32    -96    
192    -48    
16     48     
-192   -112   
160    -128   
160    528    
-288   240    
-1408  -128   
464    -32    
96     112    
80     -96    
-64    128    
144    -672   
64     -96    
-48    -208   
64     -96    
48     128    
-96    -112   
64     -64    
-48    16     
-432   176    
-48    -176   
-1088  -144   
64     -208   
-112   -96    
304    -80    
16     176    
240    -224   
-144   0      
-48    64     
32     0      
64     272    
48     16     
-160   -176   
192    32     
-176   160    
160    16     
-224   -64    
64     -80    
224    0      
16     -32    
-64    0      
80     -80    
-64    16     
-160   -64    
64     -16    
-112   16     
96     -16    
-48    32     
160    -112   
64     0      
-16    -96    
-160   -16    
112    -96    
0      16     
-96    -272   
16     -96    
-704   -80    
-224   128    
16     32     
-576   64     
-400   -80    
-800   -192   
-224   -16    
-128   64     
-80    144    
32     32     
-656   -32    
-896   -64    
64     -304   
-528   -96    
336    304    
-176   -32    
-48    96     
-96    272    
-16    192    
32     240    
-192   464    
-256   160    
-240   -480   
48     -160   
112    416    
192    -48    
-112   -240   
192    480    
-160   64     
-144   32     
80     -528   
-608   -496   
144    16     
-16    176    
16     416    
-240   -448   
-80    400    
-928   80     
-80    -80    
272    -96    
-160   -96    
-112   64     
432    -272   
-416   -336   
-704   80     
-336   112    
-48    144    
-256   -48    
-320   -272   
416    208    
-80    80     
-176   -256   
352    -320   
240    464    
-112   -128   
560    48     
-80    -96    
-256   -112   
-320   -176   
-144   64     
160    64     
288    64     
-96    208    
224    48     
-96    32     
-80    -80    
-112   -160   
-128   256    
0      -128   
-752   -176   
128    224    
96     32     
256    -64    
-304   -16    
48     80     
-48    64     
80     176    
-96    -16    
64     0      
48     48     
-272   -112   
80     -80    
-192   -32    
64     -32    
-1120  -48    
80     0      
64     -48    
96     -80    
0      0      
32     112    
-144   0      
-112   0      
0      48     
-96    0      
272    -48    
-32    48     
80     144    
-336   -128   
0      48     
-256   32     
0      64     
272    -48    
176    48     
-32    48     
96     96     
32     16     
-48    0      
-16    16     
48     32     
112    16     
-96    -64    
32     -16    
-208   0      
144    -64    
0      48     
112    80     
-112   -176   
176    -224   
64     64     
-16    64     
-48    -16    
-80    32     
-48    32     
16     160    
16     32     
64     0      
-16    -112   
-160   -16    
48     80     
-64    -80    
112    0      
0      16     
-128   192    
96     80     
112    0      
-32    16     
16     112    
-32    384    
-288   80     
112    -48    
48     16     
96     64     
-48    224    
16     16     
-224   -96    
-112   16     
-128   -256   
288    -288   
144    64     
368    64     
48     64     
16     80     
-176   -64    
0      -16    
-64    144    
-48    144    
96     112    
-192   -112   
336    112    
128    80     
80     0      
0      32     
-16    16     
-144   16     
16     32     
208    32     
96     80     
-96    32     
64     0      
208    112    
32     16     
16     -32    
-48    -32    
208    -32    
-144   -48    
16     16     
16     16     
80     48     
-16    48     
0      16     
80     -16    
48     48     
-16    -128   
-256   -176   
96     16     
-16    16     
384    144    
-32    32     
208    128    
-112   48     
-96    -48    
352    32     
-128   16     
384    48     
160    64     
176    -48    
208    48     
240    160    
-64    64     
-192   -128   
192    -64    
288    128    
-48    96     
112    -96    
144    64     
-32    32     
112    288    
160    160    
64     -32    
48     64     
-192   -16    
80     16     
-32    48     
128    80     
0      -32    
160    16     
160    96     
144    32     
-96    -304   
80     32     
-16    64     
496    432    
-208   224    
32     -64    
48     208    
-64    320    
-496   80     
432    192    
48     -32    
0      64     
272    -16    
176    -224   
128    -96    
-144   48     
192    128    
-128   -384   
-240   -16    
0      464    
768    384    
-272   96     
-320   -1200  
560    480    
-208   672    
-576   -560   
-336   512    
-368   96     
112    -288   
80     -32    
224    -352   
144    192    
112    -208   
288    32     
-16    48     
160    192    
208    96     
-80    -656   
-336   128    
320    368    
-336   720    
96     368    
128    208    
-16    128    
208    -224   
48     -304   
-112   -128   
208    -1280  
448    672    
-384   400    
112    304    
-48    -64    
208    -128   
-160   -480   
192    -80    
-240   160    
-32    304    
368    304    
96     -80    
160    112    
-176   -128   
-32    80     
160    -304   
144    16     
-32    -304   
32     208    
-64    64     
336    0      
-272   80     
144    128    
-112   -32    
-32    -112   
128    224    
-112   96     
224    112    
-32    -64    
272    16     
-160   -272   
32     128    
96     -544   
64     -48    
-16    192    
-64    64     
256    -64    
224    96     
256    80     
64     -96    
48     32     
-32    -128   
-16    48     
-16    -208   
0      0      
128    16     
-144   96     
48     -384   
160    96     
-16    64     
208    176    
0      64     
320    48     
-16    64     
-80    -256   
16     -16    
0      -48    
96     -80    
128    -192   
-96    48     
48     -160   
80     48     
112    -880   
80     64     
176    16     
256    0      
-144   0      
-128   -32    
64     128    
16     -48    
64     -16    
48     16     
0      176    
256    112    
16     160    
48     0      
128    -48    
48     -208   
192    0      
-64    192    
96     -96    
-32    -32    
-1152  48     
176    240    
-96    256    
16     -720   
272    -112   
48     -272   
32     -320   
64     96     
-64    80     
112    -96    
48     48     
-16    -96    
112    -32    
64     -112   
-160   -160   
-224   48     
160    32     
96     96     
192    -240   
-48    0      
64     -336   
336    208    
-80    384    
112    48     
64     32     
96     -16    
32     -96    
64     64     
16     -112   
32     -112   
-192   -128   
272    80     
128    80     
80     -576   
-160   -224   
208    -288   
-368   -528   
64     -928   
64     -240   
-224   -112   
-16    -144   
48     112    
288    224    
144    0      
176    -32    
80     272    
-48    96     
-352   -560   
64     -80    
-48    -160   
-32    -32    
112    144    
224    -576   
-16    -80    
32     -144   
-96    16     
-80    0      
16     224    
-256   16     
48     -16    
-144   -32    
176    -176   
-992   400    
128    -240   
48     -32    
208    192    
-192   -256   
208    -16    
64     -176   
96     -400   
336    304    
-240   16     
-32    -608   
288    -48    
128    144    
544    192    
0      144    
-608   -224   
-16    -96    
-816   16     
224    -224   
512    -64    
544    192    
-64    432    
304    432    
512    -128   
-400   -688   
32     -224   
176    240    
-224   -208   
-288   -464   
-16    -464   
16     -176   
-32    16     
-384   -80    
304    -176   
16     -208   
320    -160   
48     16     
208    -256   
432    256    
-240   96     
336    80     
-112   80     
-32    16     
96     -64    
-240   -176   
208    -32    
208    144    
-864   -64    
784    80     
-240   -64    
576    112    
-96    112    
-48    64     
384    128    
-816   32     
368    0      
-336   64     
96     -144   
16     64     
48     32     
176    96     
64     128    
-560   -32    
368    -48    
-48    0      
96     0      
0      32     
16     -128   
-288   -16    
64     48     
80     -32    
96     64     
-64    0      
-64    16     
32     -64    
-192   -48    
160    -64    
-752   -48    
208    -112   
48     -32    
-432   -144   
176    144    
-544   -160   
-528   80     
-272   -80    
112    16     
32     32     
-448   112    
-80    -32    
320    -144   
-384   -304   
-128   -16    
48     128    
-176   32     
64     48     
-640   -48    
400    80     
-256   -48    
64     -48    
-64    32     
-256   16     
-48    48     
-80    -48    
-64    -96    
0      48     
16     32     
96     -32    
80     16     
-48    0      
192    192    
-192   -80    
-32    -96    
-32    -16    
-96    -256   
-96    -176   
-32    64     
-112   80     
-288   16     
32     48     
-96    -192   
0      16     
0      -32    
64     -16    
-32    -192   
-144   -80    
-96    32     
96     80     
128    64     
32     32     
96     -32    
-16    32     
-96    -64    
80     112    
-48    -240   
-256   -224   
64     112    
-320   -160   
160    -16    
32     -48    
224    64     
80     160    
-16    0      
-144   -240   
-272   0      
-240   -32    
-64    32     
64     96     
16     -16    
96     128    
-160   0      
48     0      
-128   48     
0      -80    
272    -48    
224    80     
-112   16     
-256   0      
-48    0      
-144   -96    
-80    -80    
240    64     
208    64     
-336   -80    
32     -96    
-432   -128   
16     64     
-384   16     
-16    80     
-208   -160   
-112   -80    
304    112    
-336   96     
176    272    
-144   32     
-16    -112   
192    64     
-80    48     
176    80     
0      48     
-112   96     
-192   48     
-320   -48    
272    80     
-64    160    
64     160    
112    32     
-96    -128   
-32    96     
-96    96     
-16    0      
112    -16    
16     64     
-112   -48    
96     48     
96     -48    
96     -320   
-544   0      
80     352    
160    320    
48     48     
32     16     
-32    -128   
32     32     
-80    448    
0      -272   
64     96     
32     0      
-336   -304   
672    320    
-736   144    
592    48     
-512   -448   
352    464    
-432   -592   
-288   384    
-176   48     
-64    400    
240    240    
-32    -768   
176    160    
176    32     
-80    112    
-16    80     
-128   -688   
176    544    
-32    480    
144    -32    
560    -16    
64     16     
-208   -320   
400    -368   
-224   336    
-64    -16    
-48    -16    
16     -16    
256    -80    
896    384    
-400   144    
-96    256    
-352   176    
-272   -64    
272    -64    
416    80     
0      112    
272    0      
-112   48     
0      192    
-112   272    
256    80     
192    64     
-16    96     
32     112    
-16    -48    
-80    176    
-16    96     
144    48     
16     64     
80     -464   
-32    -256   
-48    432    
224    400    
0      176    
-64    -16    
112    -80    
-16    -160   
-32    -128   
128    -32    
80     112    
-128   160    
-96    -32    
16     128    
96     16     
288    -128   
16     0      
-16    64     
16     112    
272    112    
-48    -32    
16     -16    
16     32     
0      48     
144    112    
64     -32    
384    96     
-96    112    
-16    80     
-96    0      
592    160    
-368   96     
-224   80     
-192   240    
176    80     
192    128    
144    -80    
240    0      
-80    144    
240    96     
48     64     
-96    112    
-16    -48    
-128   -896   
128    48     
208    48     
112    64     
-32    -48    
128    0      
96     64     
-96    -16    
-144   -112   
48     128    
48     224    
112    32     
48     -16    
80     -32    
192    112    
-32    -64    
48     -80    
0      -96    
-16    64     
240    -64    
-32    -16    
160    80     
0      208    
-64    64     
112    16     
128    -32    
-112   112    
-48    16     
128    -32    
112    80     
128    -160   
-96    16     
128    32     
144    64     
-32    16     
32     -96    
16     16     
-128   0      
-176   -160   
256    -96    
112    -96    
224    48     
-80    240    
160    112    
-192   -80    
96     -432   
224    -16    
144    -800   
80     -128   
96     176    
144    208    
-224   48     
160    -224   
-80    -112   
0      -128   
-64    176    
304    64     
-96    -48    
-16    176    
80     -16    
176    -240   
224    384    
-96    -80    
-80    16     
-16    -496   
64     -80    
-256   176    
208    -16    
-96    48     
448    192    
-352   -16    
160    -128   
240    -96    
352    80     
96     96     
-400   -208   
16     208    
112    -480   
-32    -80    
208    -288   
48     16     
96     240    
176    288    
176    0      
-48    -96    
16     -64    
144    48     
96     192    
64     -32    
336    304    
-160   32     
64     112    
32     48     
256    112    
96     -256   
48     -16    
0      16     
-32    32     
16     64     
96     -64    
-32    -32    
-32    -16    
32     80     
208    48     
-64    32     
192    -112   
96     -160   
96     48     
144    80     
-320   -272   
48     -112   
0      -16    
144    144    
224    64     
240    -48    
0      -1280  
-48    -288   
48     -16    
160    -80    
592    240    
-480   -128   
-112   48     
272    0      
-144   80     
128    -240   
272    -464   
96     48     
352    128    
-304   -48    
-368   -80    
-16    -240   
-32    16     
48     -224   
288    -80    
736    -96    
144    -96    
144    96     
304    64     
-80    -80    
-96    -96    
352    -64    
176    64     
304    64     
480    -192   
-1216  -32    
-320   -160   
16     16     
448    -112   
96     -64    
128    -96    
224    -64    
-48    32     
32     16     
-32    -32    
-64    -16    
448    192    
-592   -16    
160    -32    
304    16     
-304   32     
-48    -128   
192    -80    
16     -192   
-32    -80    
-16    -128   
128    -32    
240    0      
-16    0      
144    -80    
-64    64     
64     -32    
112    -32    
-352   16     
112    0      
-64    16     
48     -96    
-32    -64    
128    0      
0      0      
112    -48    
144    16     
288    -16    
80     0      
160    -16    
-80    0      
256    192    
-80    -32    
-64    -48    
80     16     
-80    -16    
80     192    
-32    16     
64     -128   
144    64     
0      -16    
-544   -16    
160    -576   
-16    0      
176    -400   
96     -32    
80     32     
0      16     
-32    -64    
112    -192   
-80    -64    
192    -64    
-432   16     
-32    16     
-144   32     
176    -128   
176    16     
0      -112   
112    16     
112    -16    
-80    16     
-112   0      
144    80     
-144   -128   
16     -32    
16     -32    
96     0      
-1168  32     
16     -80    
-848   -112   
192    -128   
16     32     
144    16     
-16    32     
288    -144   
-384   -1024  
-160   -608   
-112   -16    
-400   112    
64     32     
-624   -16    
336    240    
-160   64     
112    48     
-16    48     
144    -160   
-96    80     
32     -272   
48     -48    
80     -176   
0      48     
-32    16     
96     0      
-192   32     
32     48     
-128   -160   
80     -208   
-384   -96    
-96    32     
-928   32     
112    -208   
48     -32    
240    224    
256    240    
-144   -240   
-752   -192   
-128   0      
-1008  16     
144    -1008  
304    112    
64     48     
-160   -240   
-144   464    
80     -16    
-352   448    
-1808  -80    
-48    -224   
-448   144    
160    32     
16     192    
-1200  -96    
-16    16     
-608   16     
16     96     
-816   32     
-80    -992   
320    896    
-192   -192   
32     -352   
-16    560    
-304   -48    
-16    -336   
32     32     
240    160    
-176   -144   
-256   -48    
16     -576   
-144   160    
96     192    
-496   -96    
-128   -128   
-2416  0      
-208   144    
-432   256    
-48    784    
-16    -352   
96     -272   
0      -208   
-176   -48    
-128   -160   
80     -272   
0      -48    
240    320    
0      -352   
-624   -224   
-160   -704   
-1248  -96    
48     -32    
-48    -320   
0      16     
-240   -272   
368    288    
-224   160    
-80    -224   
16     -192   
144    -16    
-80    16     
-160   -48    
80     -64    
-272   16     
-240   -288   
0      -240   
-112   -64    
240    0      
16     144    
0      -16    
-96    -32    
336    80     
144    288    
-112   384    
-112   0      
-16    -160   
336    -48    
-160   32     
320    176    
-224   64     
-288   0      
-240   -112   
-1296  -448   
48     -16    
-112   48     
64     16     
208    48     
-48    32     
-32    192    
368    112    
-560   160    
64     -160   
-80    -16    
32     -80    
176    48     
-368   -240   
96     -80    
-368   -400   
-16    -16    
-96    144    
-224   -208   
48     -112   
-144   -128   
32     64     
144    -32    
0      176    
32     96     
32     96     
48     -64    
0      0      
-304   -80    
-48    -112   
-176   -192   
-48    -240   
192    -80    
64     -80    
16     80     
-144   96     
48     48     
160    32     
96     32     
-288   -48    
160    0      
-128   16     
-224   32     
-64    -112   
112    48     
-496   240    
48     96     
176    -48    
32     -16    
-176   32     
240    32     
192    304    
-192   32     
0      -128   
-16    -208   
-16    -80    
16     128    
48     96     
-16    -48    
144    -16    
-208   -16    
-80    -48    
-96    0      
-96    80     
64     304    
-16    64     
240    32     
-128   -16    
-32    -16    
112    80     
-32    -16    
16     -224   
256    -64    
-176   64     
-16    80     
32     144    
128    336    
-96    288    
0      80     
16     112    
32     -80    
-48    -16    
-80    -64    
96     0      
64     208    
16     -160   
-16    -16    
0      288    
-304   -112   
0      -128   
96     208    
-32    192    
-64    -48    
160    64     
16     128    
64     -96    
32     -192   
224    80     
-144   16     
-48    -224   
96     0      
-48    -16    
-256   -16    
-48    0      
-80    -176   
240    80     
320    224    
16     112    
-64    32     
-16    -128   
16     -80    
-144   32     
112    -336   
256    -96    
288    -96    
240    16     
-16    -32    
-96    32     
-48    144    
-112   -80    
-128   -16    
64     32     
336    112    
144    96     
-16    0      
-96    -16    
-16    80     
-304   -128   
144    0      
-32    144    
128    128    
48     0      
-80    -16    
-64    64     
-144   -96    
272    -80    
96     80     
288    80     
-32    -64    
288    32     
-128   64     
304    -112   
-304   -208   
-176   64     
-48    -224   
192    -48    
-80    80     
48     32     
288    112    
-208   176    
288    32     
-48    96     
-32    112    
-48    0      
160    112    
-304   16     
96     80     
-160   48     
208    32     
-144   208    
336    64     
-240   48     
-32    -112   
-32    32     
112    -384   
208    64     
-80    128    
-48    0      
336    16     
80     96     
208    192    
-80    208    
-336   -208   
224    32     
-224   0      
-16    16     
288    96     
0      -16    
0      -32    
1232   352    
-960   192    
-288   -256   
160    144    
-528   64     
-80    -64    
128    -144   
768    240    
-720   160    
-48    112    
-144   -64    
512    -144   
64     64     
-160   96     
112    16     
-144   -48    
96     96     
-144   -160   
864    272    
-448   48     
-288   -80    
256    64     
16     0      
-96    -32    
208    80     
64     48     
0      -48    
144    80     
64     -176   
0      48     
16     -80    
-144   0      
160    -448   
-16    -16    
176    -480   
-224   -80    
-32    -32    
0      -16    
144    16     
144    80     
-288   48     
176    0      
208    16     
112    -48    
-32    16     
-80    -240   
224    96     
112    -208   
-48    32     
208    96     
-32    48     
176    128    
80     64     
-176   48     
48     -48    
128    16     
144    -64    
-80    0      
256    -192   
0      64     
48     96     
304    288    
-64    -224   
16     128    
160    112    
160    0      
64     0      
80     -48    
144    160    
-80    -160   
240    240    
-224   48     
64     32     
-32    -80    
128    -176   
224    0      
-64    48     
-16    -96    
-48    272    
16     -448   
96     112    
48     -96    
96     -896   
160    272    
-32    -368   
208    -272   
64     0      
32     -448   
0      -64    
224    96     
-144   96     
144    96     
112    0      
16     -1248  
32     -480   
224    -960   
64     -16    
-96    -336   
32     64     
-80    -112   
272    128    
272    288    
-400   -128   
224    32     
-32    -544   
208    64     
432    80     
48     320    
128    -400   
224    304    
-224   -80    
208    -144   
304    496    
64     -560   
-464   112    
64     -272   
32     -192   
32     160    
48     -48    
128    -240   
48     64     
32     256    
16     -32    
-32    -496   
272    416    
352    1152   
48     0      
-368   -304   
144    -112   
-224   224    
16     224    
-112   -384   
352    448    
16     -304   
320    -272   
80     560    
112    128    
320    -224   
0      -64    
160    256    
-80    32     
160    -304   
-480   -304   
32     -64    
-160   208    
64     -16    
-640   -64    
48     -144   
160    -192   
64     -368   
-48    48     
112    112    
96     160    
176    432    
-32    576    
48     48     
160    -112   
64     304    
336    128    
-272   144    
64     -144   
-1120  -272   
128    144    
80     -64    
112    -80    
-48    -48    
48     -528   
112    0      
48     -1264  
32     160    
256    160    
-128   -128   
-64    224    
240    112    
-112   -80    
112    -144   
-608   -208   
96     -16    
-640   32     
336    -144   
-144   -48    
0      -272   
272    224    
544    -16    
-400   320    
-224   -128   
208    -272   
-160   192    
416    48     
-192   -32    
16     -112   
64     16     
-272   -32    
-1280  32     
96     256    
-432   0      
16     -160   
304    -336   
400    -432   
160    -352   
-320   -64    
256    -224   
-832   192    
352    48     
224    -64    
64     -272   
-128   -144   
-176   160    
-752   96     
96     -16    
-48    0      
144    -112   
-16    96     
240    -352   
192    -48    
-304   16     
256    -16    
-256   -48    
32     352    
176    96     
16     -16    
-128   -64    
80     -96    
0      112    
-224   48     
160    48     
-2096  16     
32     -96    
256    -208   
-1904  48     
128    64     
-688   -96    
64     32     
208    128    
-64    112    
192    -64    
-64    -192   
-192   -144   
208    96     
-464   32     
160    32     
-352   -160   
-96    0      
-48    -32    
0      0      
-64    48     
-192   -192   
-304   -96    
-144   -144   
-432   -96    
192    48     
-16    256    
-288   48     
32     -336   
-336   -256   
-80    0      
-208   -80    
64     96     
160    64     
-32    -16    
48     48     
-112   96     
0      0      
112    -16    
-144   96     
256    112    
-288   288    
-176   0      
208    192    
-48    96     
-64    32     
208    -32    
-32    128    
0      48     
-128   -16    
-64    64     
-192   48     
0      64     
160    -80    
32     -64    
-576   -80    
16     48     
-160   64     
112    48     
160    128    
-48    -112   
-112   0      
16     16     
-64    128    
-32    -32    
80     16     
112    224    
-80    -32    
-432   -144   
-32    -16    
-688   -128   
48     112    
64     -16    
64     112    
-368   -208   
192    144    
80     464    
-304   -32    
128    -416   
144    80     
208    208    
16     -16    
-128   -96    
-96    48     
-368   144    
-256   288    
-16    128    
64     -32    
64     64     
-80    -96    
160    48     
-48    16     
144    32     
-16    -32    
32     16     
-16    48     
192    288    
-336   64     
-128   -80    
256    80     
-96    32     
48     48     
-96    -16    
-224   -48    
-144   0      
0      48     
-112   192    
96     -16    
-16    48     
-48    -16    
224    160    
-80    32     
32     96     
-368   -176   
336    -96    
112    240    
16     48     
-336   -48    
-32    64     
208    0      
160    144    
-144   -32    
-16    16     
-112   16     
96     16     
-208   16     
144    -16    
-16    32     
-304   112    
32     112    
-384   32     
224    32     
144    0      
16     64     
160    176    
-128   16     
0      48     
80     -32    
-48    16     
-32    64     
-64    32     
-144   -144   
160    64     
-304   -16    
32     -32    
0      0      
0      96     
272    144    
320    160    
-512   -96    
-80    -48    
16     144    
-192   96     
-32    32     
112    32     
352    544    
-368   -32    
288    -160   
160    96     
208    0      
-272   0      
-112   -32    
0      -64    
224    112    
-176   16     
272    128    
-448   -48    
128    -32    
0      64     
-192   -48    
272    96     
32     240    
-432   -16    
-288   -16    
144    144    
-288   -32    
-160   -176   
256    -112   
-64    -16    
784    432    
-1152  176    
-48    -176   
480    32     
-32    16     
48     -16    
-16    -48    
544    256    
-368   64     
-304   -112   
-128   -240   
-96    -144   
0      160    
112    48     
240    -16    
0      96     
0      16     
-64    -80    
64     48     
48     64     
48     64     
-32    -16    
64     -144   
16     80     
32     16     
-128   -128   
288    16     
32     80     
112    -48    
-32    -80    
-16    -16    
16     48     
48     32     
176    32     
128    -80    
128    32     
112    352    
48     192    
-80    -96    
-48    32     
-48    272    
64     32     
112    -48    
192    0      
80     48     
176    128    
-128   48     
-16    16     
176    32     
128    80     
64     -16    
0      -96    
64     272    
112    -112   
-32    80     
-64    -160   
0      240    
112    -144   
160    176    
-144   128    
128    -48    
-32    32     
160    32     
-336   -624   
0      448    
-48    -368   
192    192    
64     352    
-160   -288   
224    -240   
176    128    
16     288    
-160   -1408  
144    -512   
176    448    
-80    48     
-16    240    
-48    -208   
-32    16     
64     192    
-16    -64    
-80    64     
32     160    
112    112    
80     -64    
16     -80    
64     -240   
16     -368   
32     128    
-64    240    
-96    144    
-64    -96    
80     128    
128    112    
-144   320    
80     208    
160    -368   
16     144    
96     176    
128    256    
0      208    
-80    224    
80     128    
16     -32    
-80    -992   
16     304    
-144   240    
160    112    
64     160    
32     128    
176    -80    
224    16     
-128   48     
16     80     
-32    176    
80     128    
-16    496    
160    128    
144    112    
192    -336   
16     112    
272    16     
48     16     
96     -144   
96     -80    
96     -112   
80     -48    
48     48     
0      0      
-64    96     
240    0      
-48    16     
32     -368   
320    48     
272    0      
160    192    
-80    -400   
-112   -48    
48     -144   
-32    -96    
208    -112   
48     -64    
112    160    
64     224    
-96    48     
352    128    
-80    224    
-80    -112   
16     -128   
48     -496   
112    -64    
16     -320   
64     128    
112    224    
128    64     
64     16     
0      -96    
80     -224   
0      -128   
48     0      
-192   -176   
208    -192   
192    -144   
-48    208    
208    448    
-160   128    
-32    64     
96     -592   
-48    -192   
80     -1168  
112    -704   
32     -112   
48     -240   
-80    -272   
416    -1216  
112    -192   
160    -16    
-32    0      
192    352    
-304   -176   
48     -64    
128    128    
176    32     
240    368    
-352   240    
336    -224   
80     -272   
144    16     
464    176    
-272   -144   
-432   -160   
-400   -176   
688    336    
240    176    
480    -272   
288    0      
-416   32     
-416   -160   
-128   96     
-496   384    
320    96     
-80    -336   
384    -144   
80     -32    
-320   144    
-176   -176   
240    -64    
192    -48    
272    -320   
0      -128   
272    -96    
-80    -80    
-16    -96    
32     112    
-144   16     
256    -48    
-224   0      
224    -304   
80     -320   
128    32     
-288   704    
720    560    
112    400    
-96    -608   
-144   176    
320    352    
160    -176   
-80    -48    
160    -432   
-416   -64    
496    128    
-768   176    
240    16     
-912   224    
-16    32     
-176   -64    
-16    -240   
0      0      
400    -320   
-432   -144   
176    -176   
-144   80     
-112   -64    
32     112    
112    -32    
32     208    
-80    192    
144    0      
-928   -16    
128    -16    
-224   -208   
32     -288   
224    32     
48     -224   
288    -224   
64     48     
0      160    
-144   -240   
96     -64    
-208   -656   
-208   48     
224    176    
80     112    
-192   128    
240    -128   
-512   -352   
-176   48     
-112   64     
48     -128   
32     -48    
240    -704   
112    80     
80     32     
0      -64    
-160   32     
16     -32    
-944   32     
-48    48     
-256   32     
144    0      
96     -112   
288    0      
-32    48     
-32    -304   
64     -240   
96     -544   
224    160    
-144   64     
160    32     
-288   80     
192    96     
-256   -16    
32     128    
-144   -352   
448    -352   
80     0      
304    80     
144    96     
0      -208   
-16    -80    
16     -48    
-80    16     
-144   -32    
-112   0      
-208   -32    
0      -16    
16     16     
176    16     
-48    32     
64     -32    
-256   -48    
-768   -96    
64     80     
-176   272    
-304   48     
128    -48    
-416   -80    
16     16     
-2016  32     
-160   -160   
-160   -96    
-304   32     
-48    -48    
-256   -32    
112    -48    
-128   48     
96     -80    
160    64     
64     -16    
-384   -64    
0      48     
-208   -64    
48     -32    
160    48     
304    272    
-736   240    
-704   -64    
176    -80    
-96    -96    
0      -80    
432    64     
-112   0      
48     -48    
96     -80    
48     128    
-128   16     
-112   -64    
128    32     
-112   80     
112    32     
-464   0      
-128   16     
96     -32    
448    240    
-240   -16    
144    16     
-32    -96    
-16    32     
-16    32     
-112   32     
16     -16    
-16    0      
80     96     
-368   -112   
112    48     
-592   160    
-112   -32    
-816   -32    
224    224    
-320   16     
256    80     
-336   -112   
544    224    
-528   -240   
272    -128   
208    176    
-384   -416   
464    -16    
-496   16     
-32    -96    
304    112    
-368   -16    
-80    -48    
-96    -112   
80     64     
-96    112    
-160   -96    
288    160    
-992   48     
-224   -64    
240    -48    
-448   -304   
80     -112   
160    96     
-160   64     
224    16     
-64    -160   
-336   -128   
224    -16    
-560   -112   
208    176    
16     16     
80     16     
32     160    
0      0      
-256   -64    
160    -208   
96     128    
32     -96    
16     -32    
-272   64     
-80    64     
-512   -96    
160    -144   
-896   240    
128    16     
-32    64     
192    48     
-224   400    
64     -96    
64     -240   
-240   416    
80     -512   
-80    -96    
112    224    
-128   -48    
16     48     
-176   -64    
496    448    
-944   -496   
-128   -176   
-240   208    
208    -480   
160    752    
-192   -432   
432    -1088  
-16    1264   
-128   432    
-128   -528   
-144   80     
64     -272   
128    880    
144    336    
-32    -16    
-224   -352   
-32    -80    
-32    96     
-16    -144   
64     -208   
-128   -128   
-48    32     
-64    -192   
208    -32    
-176   -16    
128    112    
-208   -48    
128    -144   
-224   -32    
64     256    
208    208    
160    32     
208    16     
144    -80    
64     -80    
-64    -176   
144    -288   
32     -32    
16     -48    
-32    -16    
96     144    
-240   -16    
96     32     
64     48     
-48    -32    
160    128    
208    48     
304    208    
-304   64     
48     -96    
0      0      
176    48     
80     48     
80     -32    
-80    0      
96     48     
-192   -16    
160    -128   
-160   -224   
-32    -48    
-16    -16    
-128   -48    
176    16     
-80    96     
80     64     
80     16     
144    96     
-144   -32    
240    240    
-64    304    
48     208    
-224   192    
112    -64    
112    -16    
-48    192    
16     96     
48     -112   
160    32     
48     96     
64     128    
96     192    
-128   -128   
-16    -272   
96     -160   
16     80     
-128   160    
-16    32     
192    208    
-96    128    
112    -16    
64     -336   
96     -96    
32     144    
-144   -32    
48     144    
128    -16    
80     64     
0      -64    
144    288    
-48    112    
192    -160   
-240   -352   
32     -320   
-32    48     
-144   -32    
304    96     
0      48     
48     144    
64     -80    
-96    0      
96     80     
288    160    
-128   16     
64     -32    
64     -240   
160    -64    
-80    32     
128    -80    
128    160    
96     -208   
-64    224    
-16    48     
48     -48    
80     32     
176    32     
-16    -16    
160    80     
-112   144    
-48    -112   
48     -96    
64     -64    
-64    -64    
160    -352   
64     -128   
64     -336   
-64    -96    
48     320    
-32    -304   
-432   -384   
-16    -320   
-320   96     
176    176    
-80    -416   
112    -240   
-96    -336   
160    -352   
-64    -144   
288    -464   
256    -112   
-208   -400   
-192   -528   
-176   -736   
368    304    
-336   -464   
-192   -272   
-320   -64    
208    -128   
288    -160   
528    -32    
64     128    
80     -224   
128    400    
320    -32    
240    80     
16     -256   
-64    -832   
-336   -1504  
144    -48    
-304   192    
-192   144    
-128   16     
-16    -288   
368    -176   
160    64     
176    -48    
304    112    
-208   -80    
-112   -112   
-176   -208   
432    240    
-384   -336   
-144   -1184  
560    -160   
16     272    
288    288    
-336   -400   
288    336    
0      -288   
160    -48    
-160   192    
240    -288   
-336   16     
176    -336   
112    80     
176    -80    
176    -192   
-304   -224   
608    -416   
-208   272    
480    240    
-112   -112   
-192   32     
352    -336   
64     96     
176    -80    
16     -64    
272    64     
-144   -144   
16     48     
32     -96    
48     16     
112    0      
352    192    
-192   -224   
128    0      
-32    112    
160    -80    
32     -32    
160    80     
-48    -672   
112    -112   
-16    -320   
112    0      
160    80     
-16    -144   
96     -112   
-240   -320   
272    -592   
32     80     
128    -688   
208    -288   
144    48     
-80    -256   
64     16     
-32    -96    
32     -64    
0      -1008  
176    32     
96     -64    
128    48     
192    0      
0      -80    
32     -224   
80     -64    
80     -256   
144    16     
-128   16     
128    -16    
16     16     
0      -80    
16     32     
80     16     
128    -96    
-80    -272   
-160   32     
176    -96    
32     32     
112    32     
-208   64     
96     -32    
-192   -128   
16     -96    
48     48     
-336   48     
32     16     
-176   -176   
144    -288   
-112   -224   
-64    -144   
144    112    
-16    16     
80     144    
336    144    
-112   16     
-32    -48    
128    -16    
-288   -64    
64     16     
-80    32     
128    48     
-64    -144   
208    -160   
144    -80    
64     -64    
96     -32    
128    -352   
-80    112    
-96    64     
48     128    
96     -144   
0      16     
96     64     
96     32     
-288   -16    
128    112    
-1968  0      
-64    -192   
304    -160   
320    -96    
32     32     
-112   -112   
-32    16     
-16    -64    
112    64     
80     32     
144    32     
-64    -32    
-80    -112   
16     64     
-80    -112   
112    -48    
48     32     
-400   64     
-256   -112   
160    0      
240    -384   
-320   48     
208    -48    
112    32     
32     -96    
400    -80    
-160   32     
48     -64    
-160   -32    
-16    -80    
-432   -32    
16     -64    
-224   64     
736    512    
-864   192    
288    -240   
32     64     
96     -736   
352    128    
-176   16     
32     -96    
-160   64     
-112   -64    
80     -160   
-336   -336   
-640   16     
48     64     
-64    -128   
-416   -32    
-64    48     
-288   -336   
0      -32    
96     -80    
240    -64    
-272   96     
-96    -48    
96     0      
96     -48    
-80    -16    
320    -32    
-48    240    
96     192    
-256   96     
-112   32     
-224   0      
-816   -272   
0      -192   
-80    192    
-208   -320   
-176   -176   
-256   384    
-272   96     
512    176    
-128   -176   
592    80     
-240   208    
112    -208   
416    -432   
-832   880    
-384   -224   
-1392  -464   
-192   48     
-16    -176   
208    512    
16     -304   
-400   176    
0      -16    
-64    -128   
-160   48     
96     32     
-32    144    
-80    64     
-64    -144   
176    64     
-240   528    
-272   -320   
240    -336   
-144   -112   
16     -80    
-80    -80    
-304   -128   
64     64     
-48    400    
-64    144    
48     0      
-16    -48    
-80    -128   
96     208    
368    208    
-80    -16    
-96    -16    
-144   -64    
-160   -144   
-432   -32    
-160   0      
-112   -16    
32     32     
-640   128    
-208   144    
-1408  64     
-208   48     
-64    -64    
-32    32     
64     80     
96     176    
48     0      
96     -16    
-16    -16    
32     32     
0      80     
208    80     
-80    -16    
-64    48     
-176   -64    
-1344  -80    
96     32     
-32    0      
96     -16    
-48    16     
144    144    
0      528    
-352   96     
-64    16     
-16    64     
176    -64    
-192   -16    
-32    16     
-224   80     
96     -16    
-432   64     
0      16     
-128   -80    
144    32     
-256   -288   
0      -304   
-160   176    
-224   0      
128    0      
-48    -80    
128    -96    
16     64     
-80    416    
96     224    
-176   -128   
-64    96     
-288   160    
-448   -144   
192    -32    
0      -192   
160    -416   
176    -48    
-144   208    
16     64     
-224   272    
-272   32     
256    224    
80     112    
48     -208   
80     -32    
-288   144    
-48    80     
64     32     
32     0      
80     -32    
144    -32    
96     16     
-80    -176   
-80    -96    
64     -112   
-16    64     
192    352    
0      336    
-224   0      
480    0      
-144   0      
128    16     
-320   -64    
-144   -64    
112    144    
128    176    
-304   -160   
-208   -128   
-96    -272   
-128   -336   
0      -144   
-96    0      
16     112    
-400   64     
336    384    
-304   160    
-64    48     
128    96     
16     80     
176    128    
16     48     
144    32     
48     -112   
-16    160    
64     80     
144    144    
80     64     
64     112    
-64    208    
64     -144   
16     304    
256    304    
128    416    
-128   -240   
48     -144   
-144   112    
144    -304   
16     400    
80     304    
112    48     
-96    -256   
-80    64     
112    176    
-96    192    
176    -160   
-384   304    
128    64     
-160   160    
-64    -448   
-112   640    
352    -32    
0      0      
416    272    
-384   -96    
-416   -240   
-160   -144   
-64    80     
112    -208   
0      368    
-112   -1040  
-64    272    
-48    896    
-352   -736   
-96    -160   
1120   768    
-112   32     
-32    -368   
48     64     
0      64     
288    -112   
224    352    
-160   256    
800    -48    
-1168  -1296  
-336   -352   
128    624    
48     48     
624    256    
336    144    
368    -112   
-48    224    
-112   224    
-416   -144   
176    -192   
-64    112    
96     80     
64     -64    
144    80     
-16    32     
-64    -48    
48     80     
64     16     
-192   -80    
-32    96     
240    0      
144    112    
128    48     
-32    16     
-32    48     
-160   -16    
224    96     
-32    -48    
80     64     
-48    -96    
432    -176   
-464   -368   
128    -64    
224    -32    
-80    48     
288    32     
-32    96     
0      32     
16     64     
32     0      
0      -16    
96     80     
-64    -16    
144    32     
-144   112    
160    -48    
176    48     
112    -416   
-16    0      
16     160    
64     16     
-80    48     
160    0      
0      80     
112    64     
-64    16     
96     144    
240    208    
-64    64     
-176   -16    
160    -192   
-64    -16    
144    -320   
-16    16     
160    96     
32     16     
-64    80     
208    48     
32     16     
64     -48    
48     -32    
-16    -32    
-32    32     
96     -32    
208    176    
-96    -64    
64     -16    
96     -640   
224    304    
-128   32     
144    -16    
144    0      
128    -32    
192    32     
144    128    
-80    32     
64     0      
48     32     
0      -16    
160    80     
-32    -16    
32     32     
0      -96    
368    144    
-192   -368   
352    112    
160    32     
-16    64     
-32    0      
160    224    
96     64     
160    32     
16     48     
-160   32     
-112   16     
-16    -176   
80     96     
32     48     
208    112    
128    -288   
64     80     
-64    48     
32     -48    
48     -144   
288    64     
112    96     
-16    0      
-80    16     
128    16     
-112   128    
368    96     
-176   48     
80     -80    
-16    -32    
0      -32    
-32    48     
0      48     
160    112    
32     16     
-16    16     
128    16     
32     -112   
-32    0      
112    32     
32     96     
-80    0      
144    80     
208    0      
-112   16     
96     -144   
48     144    
0      96     
432    240    
-368   48     
0      -192   
112    -304   
96     -112   
224    -624   
-48    -96    
160    48     
16     -96    
128    64     
112    -48    
48     48     
64     -48    
224    -464   
-112   -32    
32     -576   
-48    128    
-352   -16    
80     64     
128    160    
496    416    
-240   224    
32     -304   
48     32     
112    256    
96     96     
-368   -336   
496    32     
-144   176    
112    -80    
192    -32    
320    496    
-16    176    
-288   352    
304    0      
-16    -320   
-80    -224   
-48    -560   
288    -512   
-80    1248   
384    48     
80     -432   
-160   320    
-16    112    
-272   -272   
160    400    
688    160    
-368   32     
-160   -32    
-1456  112    
288    416    
-432   -432   
16     208    
240    336    
-16    -64    
144    -96    
528    208    
-800   544    
0      -64    
-224   304    
-144   -32    
688    -528   
-416   -48    
288    -176   
-288   384    
-224   272    
80     -128   
32     256    
-240   192    
128    -208   
-256   -80    
240    -176   
80     128    
80     16     
128    48     
16     -160   
-144   -176   
-112   -32    
240    -80    
-64    -96    
112    176    
144    96     
160    -208   
16     -48    
48     -160   
64     240    
160    -624   
64     -48    
176    -64    
-80    96     
-112   -32    
240    -32    
-32    16     
128    -32    
-496   -128   
-208   224    
-928   96     
128    -128   
-176   0      
224    -80    
64     80     
176    -160   
0      16     
-16    -192   
304    0      
-96    0      
32     16     
-336   64     
144    -16    
144    -48    
-64    48     
-736   32     
0      32     
-656   96     
224    -112   
192    176    
0      -112   
-64    -112   
-32    -48    
192    16     
160    64     
-48    -16    
-192   -48    
112    -112   
64     48     
-96    0      
-96    -64    
336    48     
-144   208    
0      -160   
160    0      
192    -112   
-16    96     
-96    48     
48     -144   
-656   -64    
64     -112   
-128   -16    
160    48     
-288   144    
64     -32    
-128   -80    
176    -224   
-16    32     
-16    -160   
96     -16    
-160   176    
-368   80     
-128   32     
304    -96    
0      -48    
80     48     
-176   128    
208    48     
-96    -112   
-320   -208   
-176   -96    
-944   176    
192    464    
-32    416    
32     64     
-256   -48    
-752   -336   
32     -304   
-64    -240   
192    176    
-192   160    
-32    32     
112    -32    
80     -32    
16     48     
16     0      
224    -96    
-208   -288   
80     -288   
144    -64    
-64    -48    
-272   -64    
0      112    
-256   -192   
-384   -544   
-320   -400   
-48    112    
-1424  48     
-272   -112   
320    -80    
272    272    
16     -48    
-32    288    
-144   48     
48     16     
-112   64     
128    -16    
16     0      
112    -32    
-224   176    
-64    -272   
-80    416    
-48    -48    
-112   80     
-560   32     
-96    64     
-112   112    
240    -384   
0      80     
-112   160    
128    128    
-176   -240   
-16    -48    
128    32     
-32    144    
16     0      
-128   32     
-96    256    
96     320    
-1376  -272   
240    -144   
-16    -80    
240    384    
-64    432    
160    -64    
-96    80     
-112   0      
400    288    
-688   32     
160    16     
-480   -272   
240    -496   
-448   -272   
560    656    
0      96     
-320   -464   
-80    -176   
-304   224    
0      -48    
16     16     
112    128    
96     0      
336    32     
256    48     
-96    0      
-32    176    
112    144    
-64    128    
96     -32    
112    -80    
32     -32    
-16    384    
-464   160    
-336   -112   
288    -32    
704    432    
-624   272    
208    80     
-480   208    
-320   320    
-240   -464   
928    0      
-384   80     
176    96     
-96    0      
320    64     
-784   112    
-256   -64    
-32    48     
16     32     
-208   -48    
96     128    
176    16     
-96    32     
112    32     
-80    16     
112    32     
-240   -16    
16     96     
-400   -80    
32     64     
-80    96     
272    80     
240    128    
-368   -32    
0      0      
224    48     
304    240    
-336   80     
80     -80    
48     0      
288    112    
0      -16    
-16    64     
-80    48     
-144   96     
-96    224    
320    208    
64     48     
-240   -96    
160    128    
-16    16     
0      64     
48     128    
224    64     
-192   -32    
208    160    
-320   -80    
16     112    
80     -16    
-32    80     
48     80     
64     -16    
-176   0      
-64    -48    
144    32     
16     96     
-96    96     
192    128    
112    16     
-368   -128   
64     16     
80     48     
160    32     
-144   -48    
64     16     
-96    -144   
176    -64    
-16    112    
32     80     
-80    -96    
-32    80     
32     48     
-176   -16    
160    48     
16     -48    
-80    32     
32     16     
192    0      
128    0      
-112   -80    
-96    0      
0      80     
96     0      
48     -64    
128    144    
-144   128    
-96    -32    
160    16     
96     48     
-144   -192   
400    -384   
-64    0      
224    -1024  
16     48     
-16    -64    
128    -80    
160    96     
-32    64     
-64    48     
-272   32     
-160   -32    
192    128    
160    64     
176    112    
-32    16     
80     0      
-112   -176   
128    -192   
0      32     
192    256    
192    320    
-112   96     
-112   80     
-112   48     
-48    -16    
256    16     
112    -48    
48     -112   
0      -96    
96     16     
64     48     
80     96     
16     -96    
48     0      
96     48     
160    80     
224    160    
16     32     
-112   -32    
320    64     
128    64     
160    -16    
-240   -64    
-48    -64    
32     -80    
208    16     
48     -16    
-32    96     
176    96     
112    -128   
-144   240    
16     320    
320    -80    
16     -608   
144    -224   
-32    16     
-48    -96    
-48    -80    
80     160    
-208   0      
224    -16    
48     16     
64     -224   
112    0      
176    -128   
-16    -96    
80     -176   
-32    16     
-176   -16    
80     384    
0      -80    
256    -112   
16     240    
-32    -192   
-32    16     
128    128    
224    96     
256    -160   
-112   336    
64     -256   
112    -160   
448    -304   
448    160    
288    384    
-192   -96    
-128   -112   
-224   -288   
-672   -784   
16     32     
64     160    
432    -48    
-16    224    
96     64     
-80    176    
64     -96    
-144   160    
-192   -544   
-208   -112   
-128   192    
-208   160    
112    -160   
-176   160    
-176   -96    
240    128    
224    0      
480    80     
112    176    
144    208    
-480   96     
48     -144   
-144   64     
96     -144   
48     208    
128    -32    
304    208    
48     0      
64     112    
208    -48    
224    -288   
160    16     
-144   0      
48     80     
-64    -224   
256    -48    
-144   -16    
-80    80     
144    -112   
64     -32    
96     -80    
32     64     
128    160    
-112   128    
96     112    
80     -112   
-48    -32    
192    -128   
304    176    
-208   16     
-16    160    
80     -112   
128    -16    
-64    -64    
240    -64    
176    144    
-64    -256   
-48    -48    
64     -272   
-64    -368   
112    -80    
128    -704   
16     -176   
-64    160    
16     -112   
208    16     
48     -112   
-32    -320   
48     112    
144    -512   
48     96     
0      -256   
176    80     
-368   16     
0      -32    
144    48     
112    -192   
192    -16    
-112   -544   
192    -112   
48     304    
32     -64    
112    0      
-176   -80    
176    -80    
64     96     
48     -240   
-48    16     
48     16     
-80    -96    
-192   0      
176    -160   
80     -80    
80     -272   
272    224    
-176   192    
80     16     
128    -32    
128    64     
208    -96    
48     112    
-48    -112   
16     -48    
0      16     
-32    256    
-912   64     
96     -80    
192    -192   
272    -320   
128    16     
-32    -768   
32     -400   
16     -368   
-256   32     
128    -64    
160    224    
-336   208    
80     0      
96     64     
80     -256   
-176   208    
112    64     
32     -32    
176    -208   
-208   -368   
128    32     
-224   176    
288    -592   
160    32     
192    144    
0      336    
-96    -112   
192    -112   
48     320    
-128   -144   
-368   -80    
320    -192   
-144   160    
0      64     
-464   -48    
-32    -688   
-224   176    
64     -800   
96     -16    
288    48     
176    -48    
-224   32     
144    240    
-208   80     
64     -384   
-16    -192   
48     32     
-560   64     
48     -80    
128    -144   
160    -16    
192    176    
80     32     
-192   -16    
-16    -80    
-64    -144   
-256   -64    
160    0      
-192   160    
256    176    
160    48     
64     -48    
-480   32     
192    0      
-96    -16    
112    -112   
16     48     
128    -96    
96     64     
-320   0      
0      -64    
-272   32     
256    96     
-320   16     
-96    64     
32     16     
-48    -144   
-560   -48    
0      -32    
128    80     
368    352    
0      -160   
368    -288   
256    544    
-736   160    
128    16     
-336   -64    
496    -304   
64     32     
96     192    
-192   -160   
416    400    
-656   48     
-32    -112   
0      80     
-1312  -144   
32     0      
-1680  -192   
-112   -48    
128    -16    
-112   64     
-544   -16    
-416   112    
112    128    
-480   -128   
256    -48    
160    144    
368    352    
-1392  -160   
384    -16    
-512   -96    
144    0      
144    48     
-32    0      
-128   64     
-512   -112   
-96    16     
-960   -176   
-48    -32    
-304   32     
256    208    
-32    -176   
64     128    
-80    -128   
96     32     
-128   -16    
224    -48    
16     16     
112    -64    
-64    0      
-16    64     
32     16     
-240   -32    
192    -16    
-512   112    
-256   -112   
-64    -64    
-48    48     
-224   -48    
480    352    
-432   64     
80     -32    
80     -80    
-16    48     
-176   48     
-112   -32    
320    224    
-448   16     
-32    0      
-320   -64    
240    96     
-288   48     
-80    -176   
224    -16    
-128   32     
128    -16    
-272   -96    
-32    32     
96     48     
-112   16     
80     -32    
-32    48     
-64    0      
-304   -32    
-304   -64    
176    80     
-416   -16    
96     -32    
-176   -256   
96     -320   
288    -32    
32     -144   
64     -208   
-96    16     
112    112    
128    -48    
-224   16     
-160   -32    
240    208    
-112   48     
0      -32    
-320   -144   
128    224    
-112   16     
64     -48    
48     96     
64     144    
0      80     
-48    -16    
80     0      
-48    96     
16     -96    
-32    -240   
-64    -128   
-256   64     
-32    0      
-304   -144   
48     32     
160    -144   
64     48     
112    64     
-16    16     
0      16     
-112   720    
32     480    
288    -176   
64     -80    
-80    -48    
48     160    
-160   -176   
32     -224   
-352   -48    
112    96     
-80    224    
-224   -64    
-112   -64    
32     144    
-80    -32    
224    -32    
208    112    
112    32     
32     -96    
-240   32     
0      0      
-240   -176   
352    896    
96     -432   
80     80     
-80    96     
128    -208   
144    112    
-16    160
[truncated: 2,011 more chars]
