# Supplementary material for: A Fault Diagnosis Method for One‐Dimensional Vibration Signal Based on Multiresolution tlsDMD and Approximate Entropy
Source: Hindawi journal article supplement (doi:10.1155/2019/3262818), 2019-01-01
Supplement: f1 [file 3262818.f1.zip › 3262818.f1/gear signals/normal gear signal/Data7.txt]

48     304    
368    80     
128    160    
80     48     
-80    -80    
-336   -176   
64     16     
-64    -224   
-48    -464   
128    -80    
112    48     
192    464    
208    240    
16     64     
224    32     
0      -16    
112    -128   
16     48     
0      16     
112    112    
80     256    
96     -16    
-928   80     
16     0      
-48    48     
112    -32    
16     -240   
80     -272   
-16    -80    
304    -112   
48     160    
-80    192    
-144   -384   
256    128    
64     192    
-128   -48    
16     560    
-432   272    
-48    80     
224    -48    
112    -256   
432    208    
80     -128   
80     -16    
96     -384   
-32    -80    
624    -320   
272    192    
96     256    
112    16     
-400   0      
240    -432   
160    16     
-32    -352   
-688   -704   
336    -272   
48     384    
-512   -160   
-16    64     
96     -448   
304    112    
528    -224   
64     -240   
-352   144    
-864   160    
-304   -64    
-64    -16    
176    32     
208    -32    
416    0      
80     -96    
-480   64     
-48    -160   
-144   160    
-64    -272   
-64    160    
144    -464   
32     -128   
-320   592    
192    336    
64     144    
-64    -64    
-544   -560   
-640   -704   
-256   -240   
-48    -32    
208    -80    
0      -80    
112    -64    
-16    -96    
64     -32    
-320   64     
-80    -144   
256    -512   
-112   -32    
144    160    
128    0      
16     -208   
0      -128   
48     -32    
-192   -272   
128    -544   
-16    -288   
256    112    
112    -32    
0      16     
-384   -240   
512    112    
-240   80     
80     -144   
96     -16    
-176   -160   
80     -64    
176    -80    
16     80     
-112   -160   
-80    16     
-304   288    
128    176    
-16    -288   
-112   -80    
32     -448   
80     368    
-416   240    
-656   -32    
240    -48    
-256   -272   
-160   -96    
192    256    
-400   -128   
-144   -32    
-32    112    
-288   -64    
64     128    
-224   32     
-128   64     
-208   -16    
96     -48    
64     80     
16     96     
96     32     
-544   -64    
-272   0      
-32    0      
-112   -16    
-272   -64    
48     -160   
-48    -16    
80     80     
-64    0      
-32    -48    
112    128    
-240   80     
80     208    
-176   144    
32     -64    
-672   -512   
-144   -368   
-240   160    
-256   96     
-80    -32    
160    160    
-208   -128   
32     128    
-64    -64    
64     -16    
176    48     
48     32     
128    80     
-336   -128   
112    -16    
-704   -16    
32     48     
-1408  -32    
48     64     
-96    -80    
128    240    
-48    -80    
-224   -16    
-224   -48    
-144   112    
-224   -144   
160    -144   
304    -16    
224    176    
32     -16    
64     0      
0      48     
-272   -16    
16     96     
-160   -32    
-64    64     
112    16     
-80    32     
-64    16     
-112   64     
-272   0      
0      32     
176    96     
112    64     
-64    -48    
-208   -80    
-64    -32    
-464   0      
112    64     
-32    -16    
-64    96     
-64    0      
-16    48     
-144   -16    
16     64     
-32    0      
0      32     
48     64     
-16    0      
-80    -32    
-240   64     
96     64     
-224   -16    
80     0      
192    16     
80     64     
-144   -48    
64     -16    
-96    64     
128    80     
112    64     
-32    64     
-32    64     
-48    -16    
32     32     
-432   208    
208    112    
-80    -48    
-16    -96    
80     0      
-304   32     
336    144    
-272   -16    
-208   -112   
240    112    
-224   96     
192    128    
48     -32    
-224   80     
256    336    
-784   -32    
320    0      
-144   32     
0      32     
1088   704    
-432   640    
-480   -96    
-64    -144   
-272   -80    
160    16     
144    16     
-144   -192   
160    -160   
-256   32     
-48    128    
-32    144    
-240   352    
-480   -96    
256    112    
-224   128    
32     -144   
96     -32    
-80    -208   
160    192    
-80    96     
-352   -160   
0      96     
-32    80     
48     16     
0      -128   
96     256    
80     -16    
-112   48     
-64    32     
96     480    
128    16     
96     -304   
-112   224    
176    -544   
-80    16     
128    256    
-64    -80    
144    32     
-48    48     
-80    32     
-96    -368   
-176   288    
528    -64    
-80    -240   
80     448    
-64    -48    
-272   -1216  
192    512    
160    736    
-128   -208   
112    -80    
-16    -320   
432    592    
-464   480    
-16    368    
-144   -192   
128    64     
112    0      
-48    16     
-48    -208   
48     -160   
192    0      
-48    -64    
-112   -80    
80     32     
160    144    
0      48     
160    16     
-32    -144   
448    256    
-304   208    
-32    -272   
-240   -48    
-32    -80    
-64    -80    
16     -80    
160    -80    
-128   -224   
80     -32    
80     0      
304    112    
-160   80     
32     -96    
-16    64     
64     96     
-208   32     
-176   -288   
-16    16     
-96    -32    
320    80     
-32    64     
-32    0      
-112   -32    
32     -80    
16     16     
160    128    
-176   16     
128    -16    
-144   -80    
144    64     
48     112    
48     -400   
320    112    
-80    480    
-64    -48    
160    16     
32     -32    
48     48     
416    304    
-336   208    
128    176    
144    -32    
224    -32    
0      -32    
32     80     
80     -16    
128    -96    
80     -48    
-48    96     
48     80     
-96    -64    
192    64     
128    128    
96     272    
64     -32    
112    80     
64     32     
96     144    
32     16     
80     -16    
-288   16     
208    -416   
80     176    
-16    -304   
48     -144   
112    -240   
-16    -48    
16     96     
160    -272   
-80    -224   
304    48     
-208   -32    
272    -128   
48     240    
-80    -64    
176    -144   
-32    -192   
32     -80    
128    -160   
64     80     
-16    -656   
-64    -160   
-16    112    
160    -32    
-48    48     
32     64     
160    -32    
-112   -16    
-32    96     
64     96     
0      -48    
192    -80    
160    0      
48     -32    
0      96     
-80    -288   
176    -144   
16     -192   
192    0      
224    224    
-32    368    
256    224    
48     240    
32     96     
-16    16     
64     144    
80     -256   
64     -96    
160    592    
416    608    
-240   -672   
32     -800   
160    -368   
-48    272    
128    -48    
96     112    
-304   -48    
240    224    
-48    720    
224    128    
640    528    
16     0      
-144   -304   
-496   0      
400    272    
128    512    
96     -48    
-160   304    
-256   -800   
-256   -16    
-128   -624   
-160   -560   
-304   80     
-96    -944   
-96    112    
368    240    
0      736    
560    -48    
-48    -176   
64     176    
240    -112   
-352   144    
-48    272    
16     16     
176    -64    
-560   32     
-64    -112   
384    96     
32     192    
208    -48    
-160   -400   
208    304    
400    848    
-384   -800   
144    288    
-16    16     
208    144    
256    192    
-32    -48    
-64    160    
144    -560   
-80    592    
192    -224   
-16    -128   
-32    -80    
192    48     
0      480    
480    128    
-80    112    
160    -336   
256    -368   
-288   -80    
448    192    
-144   32     
32     -112   
0      160    
160    -320   
-624   96     
240    -48    
0      -16    
192    48     
0      -112   
112    -640   
16     0      
160    96     
48     -48    
-64    0      
112    144    
208    0      
256    -176   
-304   -176   
0      160    
-112   96     
176    -112   
-32    -16    
144    144    
80     112    
208    -192   
-304   464    
96     -144   
128    -16    
128    16     
-96    176    
-272   -16    
64     -48    
-144   64     
64     96     
-32    256    
480    448    
48     -128   
144    -224   
-144   -128   
192    -48    
128    112    
0      -416   
80     112    
96     -32    
272    -128   
32     96     
32     0      
-192   80     
288    176    
-336   16     
32     -96    
64     -96    
-32    16     
-32    -64    
160    -112   
-48    64     
-80    -384   
-112   128    
336    384    
176    -32    
32     0      
-16    -128   
-272   0      
160    240    
-208   144    
96     16     
-288   96     
112    80     
-288   -192   
208    -240   
400    112    
176    -64    
112    16     
-16    48     
80     16     
-80    64     
-16    -16    
-48    176    
-208   -32    
-32    -112   
272    32     
-112   48     
80     -64    
96     16     
112    48     
-112   192    
48     -176   
32     -64    
-448   96     
240    16     
-272   -112   
128    -16    
80     80     
208    80     
-176   -96    
32     -48    
80     192    
96     -64    
64     -16    
-16    -48    
112    48     
-816   -80    
-1744  -32    
48     48     
-16    -32    
-80    16     
192    80     
-128   16     
80     -48    
-304   16     
16     -176   
-128   80     
-1136  0      
96     80     
-384   -112   
80     32     
64     -160   
-64    -48    
80     -64    
-32    96     
-32    0      
-736   16     
-128   -80    
160    16     
-64    112    
-128   48     
384    304    
-384   80     
256    -48    
-336   -16    
112    32     
128    32     
0      32     
-48    96     
-224   -32    
-160   -80    
-704   -176   
0      224    
-1648  272    
-48    -16    
-320   -128   
-224   160    
-288   -112   
-240   -16    
272    128    
-352   16     
176    224    
-208   64     
-80    0      
-480   16     
-64    16     
-512   -48    
576    368    
-784   -16    
-112   -176   
-1488  -16    
-160   -240   
-112   -336   
-176   128    
80     160    
112    -16    
80     320    
176    -16    
464    -32    
-544   128    
-144   -256   
-384   144    
-192   16     
112    -256   
208    272    
-1520  96     
96     -736   
160    272    
144    240    
-144   0      
0      624    
-176   -784   
-160   432    
80     32     
240    -112   
80     320    
-96    -64    
-64    -192   
-144   -32    
32     144    
-400   80     
-128   -304   
-80    -304   
496    512    
-448   256    
0      96     
-192   160    
0      128    
-32    160    
-112   -16    
80     -192   
-240   -144   
208    144    
-512   32     
-48    64     
-208   -128   
-32    -176   
-352   -48    
144    32     
-80    32     
-96    224    
144    48     
96     16     
-80    0      
-176   32     
-160   -144   
80     -112   
64     -176   
64     48     
-16    144    
-144   -144   
96     -64    
-176   -80    
-64    112    
208    32     
16     80     
-112   16     
-128   -16    
-48    -16    
32     -16    
128    16     
-128   64     
112    128    
-320   -48    
16     48     
-224   -32    
192    64     
0      -272   
-112   -176   
32     16     
-96    -16    
80     -16    
-16    80     
80     48     
-16    -16    
64     -16    
-112   96     
224    64     
-304   -112   
48     80     
-288   0      
224    448    
48     176    
112    -96    
-48    -16    
-224   0      
32     128    
32     128    
-160   -192   
256    -432   
96     -32    
32     224    
-80    -80    
-48    -48    
-64    112    
-176   80     
400    448    
-304   480    
-128   48     
256    -32    
-96    -96    
224    -224   
112    -16    
0      -96    
96     64     
-32    256    
-112   0      
240    -80    
-144   -64    
48     96     
128    208    
-304   64     
-48    -32    
176    128    
192    288    
-16    144    
-80    80     
-48    -32    
-16    -208   
-224   -192   
-64    32     
-240   32     
160    96     
-32    -48    
-80    48     
112    64     
48     -48    
160    -128   
-16    160    
80     288    
-32    432    
256    464    
-16    112    
-32    32     
-16    -64    
160    96     
-80    -192   
80     -192   
-16    0      
-32    -672   
-16    -16    
144    -80    
112    48     
80     64     
96     288    
-240   -64    
-80    -16    
48     48     
0      -96    
-96    -32    
128    -64    
128    288    
-272   -432   
64     -272   
192    -400   
128    128    
0      160    
64     16     
-64    256    
-304   -144   
320    -336   
96     256    
-48    160    
144    -192   
-224   32     
-112   -208   
32     480    
160    16     
-80    -64    
-144   -1360  
-304   560    
-48    -432   
48     256    
352    128    
208    -112   
0      64     
160    320    
-144   48     
544    64     
48     64     
176    -96    
16     1312   
-1280  -576   
-48    -672   
-144   496    
352    -32    
-272   -816   
384    128    
512    288    
-16    -80    
384    224    
-16    160    
176    -512   
192    -32    
-624   832    
880    1104   
240    -208   
-720   -624   
-640   -208   
-32    -32    
192    352    
592    -512   
112    -160   
-272   0      
320    336    
-352   192    
-240   0      
96     0      
32     64     
96     -112   
208    0      
176    32     
64     -32    
48     80     
0      -128   
160    80     
-160   16     
256    64     
112    112    
160    48     
-128   -64    
112    64     
64     112    
80     128    
0      32     
160    48     
192    624    
144    384    
48     -16    
-144   48     
224    112    
16     -128   
-48    -16    
336    -448   
-64    64     
128    0      
176    96     
16     64     
208    -96    
-112   -128   
176    32     
-64    80     
32     -64    
64     128    
96     -400   
48     48     
-112   -96    
128    64     
32     -32    
32     -112   
-16    -112   
-16    80     
128    -80    
-96    0      
224    64     
224    224    
-32    128    
16     -112   
16     -32    
160    -224   
32     96     
-16    -32    
80     96     
32     -112   
304    112    
-144   16     
48     192    
160    32     
256    400    
-96    0      
48     176    
256    128    
-48    -96    
-16    16     
-32    -240   
48     -32    
0      64     
-64    160    
176    176    
0      16     
208    -80    
128    16     
-48    32     
-688   -80    
144    -704   
16     -64    
176    -1248  
-80    -16    
80     224    
-48    -544   
-144   -224   
-176   80     
144    80     
208    -80    
160    32     
-144   -64    
208    -96    
-144   0      
-992   -112   
16     -16    
0      -32    
48     48     
32     -112   
96     -624   
144    -112   
160    112    
16     -96    
144    -112   
144    112    
-16    32     
-16    48     
256    -128   
272    16     
-80    16     
-80    -224   
-64    -96    
-48    16     
112    -32    
16     -288   
32     80     
192    -784   
80     0      
48     -16    
-32    0      
64     -32    
-144   64     
32     -16    
-64    -48    
-144   -64    
176    32     
-176   -64    
64     -96    
48     -16    
80     -128   
144    16     
32     -560   
-96    -176   
160    -16    
48     -96    
16     -144   
16     48     
-160   -80    
176    48     
-176   -16    
160    16     
-1552  -32    
96     64     
96     -96    
176    0      
176    -32    
48     -96    
-32    32     
128    -432   
16     16     
64     -16    
48     80     
-48    -32    
96     -80    
-192   -256   
96     -176   
-272   16     
16     -128   
48     -48    
-32    -208   
-128   208    
32     -208   
96     -64    
-144   -176   
192    16     
48     -464   
-64    64     
272    -352   
48     112    
48     288    
64     -144   
48     960    
-608   -688   
-720   -608   
400    608    
-736   -320   
16     -96    
144    80     
-336   -624   
400    272    
-880   -304   
240    -48    
160    -304   
368    -48    
-272   288    
-64    -320   
-848   -16    
-96    -128   
-32    128    
320    -192   
224    -176   
432    -64    
96     -224   
-384   -336   
384    208    
-688   480    
32     64     
48     -128   
208    -240   
-336   -128   
128    -16    
-256   -208   
128    -208   
0      176    
192    64     
-32    128    
144    -176   
96     0      
256    -320   
-304   96     
-128   32     
-48    0      
-96    144    
320    48     
0      0      
240    -128   
-320   80     
80     0      
-416   -48    
0      -240   
48     48     
-1280  -48    
0      128    
-832   -144   
-128   48     
-96    32     
-64    -16    
0      32     
-144   -16    
96     -224   
-80    96     
80     16     
192    -32    
-336   64     
-512   -96    
80     48     
-544   -64    
128    128    
-48    96     
-720   -48    
-112   -80    
-704   -16    
-80    144    
-320   128    
160    -64    
272    0      
-208   -48    
144    -96    
-48    0      
48     -80    
0      16     
48     64     
96     32     
0      32     
48     -64    
-64    16     
-80    64     
0      64     
-240   -96    
-256   16     
-736   16     
-352   -144   
96     -176   
80     128    
-16    0      
-16    0      
-80    -176   
-96    0      
-160   96     
48     32     
144    96     
-112   48     
-192   -16    
96     -80    
-128   48     
-208   80     
128    208    
-32    80     
32     16     
-112   0      
96     -176   
-176   -80    
176    80     
-96    160    
-16    48     
-80    -112   
96     48     
0      112    
-368   -176   
144    -144   
-112   -112   
16     -240   
-1456  -400   
160    -336   
80     48     
32     80     
96     416    
-192   272    
-64    144    
-304   -48    
80     -64    
-112   112    
-128   48     
-96    0      
-112   -48    
-128   48     
32     16     
-272   240    
112    368    
-144   16     
352    -144   
16     -112   
128    32     
-32    160    
96     496    
-160   224    
-16    -96    
32     -80    
240    160    
-240   32     
48     -224   
496    304    
-480   -128   
80     -128   
-352   -64    
-48    0      
32     128    
96     -64    
32     208    
0      -112   
96     304    
-144   -240   
16     176    
-64    -48    
-144   -16    
-400   -192   
224    -256   
-144   592    
160    48     
32     -144   
-144   -112   
-96    176    
336    272    
160    32     
160    80     
176    32     
-272   48     
96     -48    
-320   -288   
96     -16    
-64    96     
496    496    
-416   64     
160    0      
96     64     
80     32     
160    208    
160    -96    
-224   -64    
64     16     
-208   -160   
240    240    
128    672    
208    -160   
48     -176   
-128   16     
144    176    
-160   32     
16     80     
48     64     
48     160    
-304   -16    
128    16     
48     32     
-176   -112   
320    64     
-112   -160   
144    -208   
224    32     
384    224    
-416   32     
-192   -304   
240    -128   
192    352    
-576   144    
-160   -320   
96     -384   
-736   -272   
880    -336   
592    -176   
288    384    
-432   32     
576    64     
-160   48     
-144   -112   
256    -64    
208    16     
224    48     
112    144    
64     32     
-240   0      
0      0      
-32    64     
160    80     
0      32     
32     -48    
96     16     
32     0      
48     80     
160    96     
-288   -80    
208    -48    
-48    112    
112    -16    
64     32     
-64    80     
-96    -16    
32     -144   
96     -48    
-96    128    
-48    0      
0      0      
128    48     
208    64     
48     -16    
-320   -208   
64     -96    
96     32     
0      48     
48     32     
80     48     
-176   0      
96     32     
288    48     
128    96     
-112   -16    
-112   -128   
-48    -16    
-32    16     
-80    96     
64     64     
176    -1328  
-80    -16    
64     16     
256    128    
-192   96     
-64    -16    
320    -16    
0      64     
32     48     
64     32     
64     64     
144    48     
112    32     
112    -80    
-16    48     
128    112    
256    192    
48     144    
0      48     
-64    208    
96     112    
16     64     
16     176    
64     48     
416    304    
-208   144    
-64    144    
16     16     
112    -16    
32     0      
32     -448   
-32    112    
32     -144   
32     -16    
240    112    
-32    112    
-112   16     
224    48     
-128   -112   
208    -256   
-144   -480   
240    144    
240    -16    
16     0      
64     -48    
48     -240   
160    -16    
80     -672   
-288   -368   
-176   -64    
-176   128    
-16    -32    
208    48     
32     -16    
64     112    
16     112    
16     48     
144    0      
32     -64    
304    -128   
240    -208   
144    64     
-64    -128   
-96    32     
-112   -320   
112    32     
288    176    
-208   128    
-64    160    
240    112    
16     -48    
80     0      
48     112    
0      -96    
96     -16    
96     -64    
128    -64    
0      -400   
-128   -112   
176    -1136  
160    -32    
16     -48    
48     16     
-64    0      
-64    -48    
112    80     
48     48     
160    176    
224    -176   
128    80     
176    0      
-32    -224   
208    -832   
48     64     
48     128    
-16    -48    
16     112    
176    112    
-48    176    
-48    16     
128    -16    
80     -336   
96     -32    
128    144    
128    -80    
64     -320   
128    224    
-48    -48    
96     304    
-176   112    
272    -96    
-48    256    
64     -96    
32     80     
80     112    
-240   16     
208    16     
240    0      
-176   -272   
-288   -208   
352    -288   
288    352    
480    -144   
160    -336   
-16    48     
-16    -576   
-128   16     
224    544    
-48    240    
-752   -64    
304    -80    
64     -160   
208    0      
-352   -240   
192    -416   
96     -96    
320    192    
-32    112    
368    -816   
160    192    
-48    -176   
432    -112   
-16    -160   
400    -416   
-432   -96    
176    -352   
464    -128   
288    -256   
-192   32     
-192   0      
-272   -112   
-208   96     
176    -48    
240    32     
304    -48    
32     96     
224    64     
208    432    
0      -64    
-688   -240   
32     -112   
32     -32    
16     80     
16     -144   
352    -320   
-192   0      
176    -1552  
-32    -32    
192    -32    
48     0      
96     -144   
-64    32     
-160   80     
80     32     
-416   -16    
272    112    
128    -368   
80     -256   
16     64     
64     16     
48     -80    
160    -112   
-192   112    
384    208    
-240   160    
-32    -80    
-48    -48    
-240   128    
160    80     
80     -80    
48     -176   
-800   -16    
-48    64     
320    -16    
32     -112   
160    -80    
64     -128   
96     48     
96     -1376  
0      -16    
128    -32    
16     0      
-112   -128   
64     -16    
-320   -48    
64     -128   
-224   -176   
128    -64    
-2480  16     
128    -32    
144    -32    
-128   -144   
144    48     
176    -720   
-160   -144   
144    -96    
208    48     
-288   32     
128    64     
-64    -48    
32     -16    
-208   32     
192    208    
-576   160    
16     -32    
-64    64     
80     -208   
208    -64    
272    -144   
-64    80     
-64    -48    
192    64     
-176   192    
-96    -16    
-96    0      
224    -112   
112    -128   
144    -16    
-480   -544   
160    -272   
16     -96    
-176   -112   
128    112    
176    -16    
-192   112    
272    -128   
160    64     
-128   112    
64     240    
-64    -80    
-32    -256   
-96    -352   
-80    -352   
-192   224    
-64    80     
304    32     
304    -64    
80     288    
256    32     
-144   -160   
16     -48    
128    176    
-224   -224   
-48    48     
144    -144   
336    160    
-304   112    
-112   -96    
-80    -48    
-416   176    
-48    -144   
-1360  -80    
240    80     
144    48     
-752   48     
80     208    
-288   -96    
-48    -448   
-1552  -160   
-80    160    
-32    96     
16     32     
48     -64    
64     224    
-16    -32    
16     -48    
-336   -160   
-112   80     
-80    16     
-144   48     
48     192    
-496   128    
-32    96     
-960   -64    
-64    32     
128    16     
-16    -32    
-464   -80    
64     16     
-144   -64    
0      64     
-64    -64    
16     16     
-64    0      
16     16     
80     80     
-240   32     
144    256    
32     -16    
128    48     
-624   -16    
-64    0      
-320   -272   
416    48     
-336   -16    
480    128    
-432   -192   
-368   -160   
48     48     
-112   -16    
32     -48    
32     -32    
32     64     
-16    96     
112    -48    
-960   -144   
-64    16     
0      64     
96     128    
-64    0      
160    112    
-80    16     
-16    -16    
-176   -128   
160    -16    
80     32     
320    64     
-208   96     
-736   -192   
576    80     
-16    16     
-224   48     
-2400  -176   
640    48     
-480   -96    
128    -80    
256    32     
128    32     
176    80     
-192   32     
160    96     
912    624    
-992   240    
-320   -240   
256    -48    
-80    32     
224    0      
-128   80     
-80    64     
-144   0      
-48    16     
416    224    
-496   -144   
416    64     
-144   80     
224    112    
-320   -80    
160    80     
32     96     
64     128    
-144   -96    
-48    48     
-224   -288   
-112   -80    
-48    80     
-128   160    
80     -32    
-112   -112   
-48    96     
-224   -160   
80     -16    
-80    -96    
16     0      
64     160    
32     -32    
-16    144    
-64    -16    
-496   -32    
160    80     
144    112    
-32    16     
-144   -32    
0      32     
32     96     
32     16     
192    16     
16     -16    
48     112    
-160   48     
160    32     
-192   128    
304    272    
-176   384    
-80    192    
208    128    
144    320    
-32    80     
32     -64    
96     80     
0      -16    
48     96     
0      -224   
-32    -96    
-80    -32    
48     240    
128    -128   
64     -16    
-160   96     
-16    -32    
96     0      
-48    -48    
144    32     
0      48     
80     -144   
48     -32    
-16    -80    
32     352    
-128   112    
-192   -240   
192    176    
-80    112    
144    144    
-16    0      
192    16     
160    64     
624    848    
-368   64     
-96    -640   
160    48     
96     224    
-16    -64    
16     -256   
160    -16    
16     64     
176    -144   
80     336    
-96    -64    
-112   -64    
-16    224    
-32    64     
-176   32     
176    128    
64     16     
224    80     
128    64     
80     96     
-176   -160   
-224   48     
-64    -1216  
224    160    
16     320    
96     -272   
64     208    
176    0      
128    16     
-208   96     
0      -96    
96     64     
80     112    
-128   0      
80     -112   
-32    224    
-16    272    
-192   -64    
64     -272   
288    416    
48     -256   
208    -240   
64     288    
16     -144   
48     160    
-96    128    
80     -16    
96     -128   
-128   176    
-32    -208   
112    272    
256    128    
-16    -208   
208    144    
-160   240    
-160   -240   
-16    -96    
80     640    
80     16     
-16    -64    
176    -96    
80     32     
128    144    
64     -144   
128    288    
-176   80     
96     -64    
192    112    
-288   -80    
96     -368   
-32    -1376  
16     -240   
192    144    
272    736    
-384   0      
-16    -96    
64     16     
368    144    
-176   160    
400    176    
-224   -80    
64     128    
-64    224    
0      48     
368    416    
160    96     
-480   176    
-96    400    
32     16     
272    -16    
48     -144   
192    -48    
160    112    
16     128    
-80    128    
-320   -96    
-16    128    
-32    304    
96     64     
-32    -16    
288    320    
-496   160    
-320   -224   
400    -64    
-208   208    
16     -16    
96     16     
-32    64     
-32    -32    
384    80     
80     48     
48     -112   
48     64     
224    -224   
-208   -96    
0      32     
-64    -96    
-80    -128   
240    -64    
224    -32    
80     -32    
32     -32    
80     16     
-96    320    
144    160    
160    -80    
-112   0      
128    -144   
320    16     
48     112    
-144   80     
352    -16    
48     -160   
144    -16    
-144   -128   
0      -80    
-112   32     
80     208    
-16    32     
144    64     
16     16     
80     384    
208    240    
304    -112   
64     -48    
-80    -64    
224    80     
32     96     
176    112    
0      -96    
96     48     
224    64     
-32    32     
16     -32    
32     112    
16     96     
32     -160   
32     112    
48     -160   
48     32     
16     -64    
160    -96    
16     -192   
-240   96     
144    16     
-48    16     
112    -192   
80     -480   
-400   64     
96     0      
256    -688   
-32    -96    
80     0      
160    0      
-48    288    
80     -64    
160    -192   
48     -352   
32     -48    
48     -48    
-64    -432   
96     80     
-16    -432   
208    416    
-656   48     
-32    -160   
32     -144   
-80    128    
160    112    
176    -1408  
64     16     
16     -80    
112    96     
48     -80    
-32    0      
-80    -224   
-16    368    
352    416    
-448   -1120  
-1184  432    
-48    -224   
80     -48    
48     -352   
16     -48    
32     144    
128    80     
160    240    
-384   -304   
48     -288   
320    304    
208    64     
80     96     
32     -176   
176    -64    
-784   48     
48     0      
224    208    
-32    16     
80     -192   
-144   -320   
48     -16    
128    -240   
144    48     
400    192    
-224   112    
48     -48    
64     -16    
64     -64    
208    -16    
-96    -16    
160    -176   
-16    16     
112    32     
-48    48     
-16    -128   
96     -48    
32     -256   
-32    96     
-32    16     
-32    0      
80     16     
144    -128   
-160   -32    
112    -16    
-96    0      
80     -32    
-640   128    
240    32     
-80    0      
-80    -240   
64     -32    
176    -176   
16     0      
176    -256   
16     16     
192    16     
144    16     
-192   -48    
48     48     
-128   64     
112    0      
-368   -64    
-16    -64    
-1520  -32    
16     -48    
112    96     
80     -192   
96     16     
144    -624   
-96    32     
-64    -16    
-128   -112   
384    128    
-96    -64    
192    -32    
-96    -64    
-608   0      
160    0      
-320   32     
96     -144   
-144   -80    
432    128    
-160   16     
224    -800   
-208   32     
144    -128   
176    32     
-624   16     
176    -96    
-288   0      
-112   -16    
-592   -176   
-16    -128   
-192   128    
-160   -128   
240    0      
-128   -80    
224    32     
-48    -288   
464    192    
-624   -16    
272    -48    
-64    -128   
336    32     
208    0      
-16    16     
112    160    
-336   64     
-336   -16    
400    -16    
32     32     
48     -208   
112    128    
-112   64     
-704   32     
-96    16     
-1504  -80    
32     32     
112    -32    
0      64     
480    224    
-416   32     
96     -16    
-32    176    
256    -64    
304    32     
-32    -112   
-16    -32    
-224   16     
-112   -48    
96     48     
-304   -48    
-352   -96    
-1120  0      
-96    48     
192    -16    
-288   -32    
-384   -96    
256    128    
-144   -64    
112    80     
-176   0      
-144   96     
-80    -80    
48     48     
0      48     
-192   144    
112    64     
-176   32     
-144   -64    
-288   -80    
288    -48    
48     -80    
16     -112   
-272   -80    
160    -48    
-144   -48    
-48    96     
-144   -112   
32     320    
-112   -80    
-128   -528   
112    -96    
-240   -32    
256    384    
-480   -160   
112    128    
0      -128   
144    80     
-112   -144   
-64    -64    
160    144    
-128   0      
0      96     
-16    -16    
-176   256    
112    -112   
80     -144   
-128   144    
-64    192    
-448   -592   
16     -48    
-224   240    
32     -80    
-32    -128   
0      16     
112    -160   
384    672    
-288   -528   
16     368    
16     112    
-32    -80    
112    -144   
16     112    
48     496    
-384   -864   
176    304    
-736   -16    
80     96     
-64    -32    
16     80     
-176   -64    
-48    112    
64     144    
-32    -480   
16     864    
64     -48    
64     -144   
-176   112    
0      112    
-112   16     
368    32     
-320   96     
176    48     
32     0      
-224   -176   
64     -32    
96     256    
192    240    
208    208    
-160   160    
-336   -80    
-144   272    
176    944    
-208   288    
-352   48     
0      144    
-128   -80    
48     64     
112    -192   
-16    -64    
-32    -176   
208    144    
-128   176    
-192   -32    
96     -32    
-64    -16    
112    -112   
-32    32     
112    128    
-96    0      
48     112    
-192   -96    
-80    0      
128    -240   
-64    -128   
112    -16    
-64    32     
112    128    
-80    144    
-80    112    
96     112    
48     112    
-80    -128   
160    -112   
-96    -112   
80     80     
-224   -16    
0      -112   
112    -144   
-32    -16    
-112   240    
32     80     
-288   544    
32     224    
-432   -528   
-144   -224   
32     -112   
-80    112    
176    -96    
-208   -192   
-48    144    
176    224    
-160   -144   
80     -32    
16     112    
48     -112   
80     -96    
192    0      
-48    144    
80     -128   
-64    -144   
272    -48    
-80    48     
-160   96     
-352   -48    
-400   304    
128    144    
32     160    
496    432    
-80    208    
-112   -160   
304    -32    
-48    48     
96     96     
-32    48     
272    128    
-176   288    
-368   416    
288    -32    
176    -256   
16     -32    
416    48     
-288   256    
-208   -112   
-16    48     
112    16     
256    352    
-144   96     
128    -128   
-304   -192   
48     16     
-208   288    
-224   256    
464    224    
-144   48     
144    -16    
-64    0      
304    64     
-352   -112   
96     -112   
0      128    
96     224    
-96    160    
-48    128    
208    0      
-32    16     
224    -144   
-112   -96    
496    384    
-432   320    
48     -192   
0      -48    
112    112    
352    -16    
-352   -16    
48     64     
-304   320    
288    112    
528    64     
0      64     
-128   48     
192    -160   
-192   -208   
128    -288   
-80    -32    
192    -1056  
80     -48    
-48    -48    
-112   -128   
-48    0      
208    -16    
-64    224    
64     128    
-64    112    
96     48     
-112   -144   
480    64     
-208   208    
368    176    
-368   0      
-112   -1216  
16     32     
192    240    
48     800    
96     48     
144    -128   
-96    128    
16     -128   
32     64     
224    32     
32     -96    
-192   48     
144    -96    
-16    208    
0      48     
96     80     
144    -64    
384    416    
48     -272   
-16    208    
-48    -32    
-80    -80    
-32    -80    
-112   -32    
-48    96     
-80    128    
32     -48    
80     144    
272    -32    
0      48     
16     -80    
0      112    
80     -848   
-352   -640   
-240   -304   
0      48     
16     -112   
224    112    
-320   16     
304    272    
16     176    
112    -208   
368    128    
80     -112   
128    -64    
32     -112   
48     80     
80     -800   
272    176    
-288   -1616  
16     16     
368    160    
16     16     
176    16     
128    64     
32     96     
80     -32    
128    48     
-160   -64    
32     0      
96     96     
64     48     
-144   -288   
144    16     
128    -32    
-96    32     
176    32     
80     16     
-32    -128   
304    160    
128    64     
192    -80    
-160   -32    
128    -224   
272    128    
112    -160   
96     0      
-48    -160   
16     80     
-96    112    
160    160    
112    112    
-128   -48    
64     48     
192    -32    
288    64     
-32    -64    
96     0      
48     -80    
112    48     
128    0      
144    48     
192    112    
-224   48     
32     -64    
112    -80    
48     0      
144    -976   
-16    16     
112    -16    
112    -608   
32     -192   
64     -656   
224    0      
32     144    
112    -48    
-96    64     
48     208    
112    144    
0      -160   
-64    -304   
96     -64    
32     112    
48     -144   
176    32     
-384   -320   
128    -144   
-128   -624   
448    144    
-176   -1168  
400    -96    
-240   224    
-208   -176   
288    -48    
-32    64     
-80    -144   
80     -32    
-496   -16    
-32    -32    
-1952  240    
-416   -32    
16     -144   
480    96     
64     -64    
192    -144   
528    32     
256    -32    
96     192    
-192   48     
352    -16    
-304   -192   
-208   0      
-16    -32    
-320   -16    
-528   -288   
336    -64    
144    224    
0      -32    
16     -48    
48     -384   
32     144    
32     -928   
144    80     
160    -16    
80     32     
-32    -32    
0      160    
32     -48    
48     -80    
-336   16     
-48    144    
160    48     
48     -128   
0      80     
0      -320   
-96    -208   
544    144    
-512   -256   
240    -144   
144    176    
-128   -48    
288    -16    
-208   32     
256    128    
-528   -80    
-32    240    
-960   -128   
208    -16    
192    32     
-16    -192   
64     1408   
336    -1120  
-32    400    
-16    -48    
64     -400   
-128   192    
48     -288   
64     240    
112    -208   
-288   -224   
224    272    
-320   224    
0      208    
-1232  -240   
96     384    
128    384    
160    -304   
-160   240    
176    -640   
288    0      
-208   464    
32     160    
-320   -32    
128    -144   
-96    -48    
240    32     
-144   -96    
144    -96    
-144   48     
-48    -208   
176    544    
48     224    
-160   -128   
48     -128   
96     -208   
-528   -272   
96     -80    
-128   112    
-64    48     
-128   48     
48     -32    
-448   288    
160    176    
-112   96     
-80    -96    
-16    96     
-16    -112   
-112   -64    
96     416    
176    336    
-32    96     
0      -80    
96     80     
16     -48    
-48    96     
288    160    
-192   224    
0      272    
160    160    
-224   -64    
-176   -400   
-864   -336   
80     -80    
-112   -80    
-368   0      
-128   32     
-448   -96    
-128   -304   
-128   -96    
176    -144   
208    160    
-208   0      
128    0      
16     128    
-688   48     
240    32     
-480   -208   
128    -64    
304    -112   
-208   112    
-176   0      
-96    -32    
-48    -80    
-624   0      
240    288    
-240   128    
16     0      
-400   -112   
48     -16    
-352   -304   
-80    -192   
-48    -64    
-144   -48    
0      -112   
-112   -128   
-48    -80    
-528   -32    
192    240    
-288   16     
32     48     
-1328  0      
-160   -64    
-80    -240   
80     -112   
64     -16    
48     480    
128    256    
-256   -32    
176    480    
-240   128    
16     160    
-16    -144   
16     16     
-272   272    
-112   112    
-1904  -64    
-32    -144   
-176   -160   
400    -400   
-32    144    
16     32     
-160   -16    
-224   -32    
-112   -480   
16     -160   
-144   48     
-224   0      
-144   48     
-272   0      
-80    -48    
-48    96     
224    240    
-16    -352   
-160   -384   
-48    -400   
-528   -112   
80     -432   
192    -304   
-304   144    
-304   64     
-448   208    
-272   -272   
-128   0      
-160   -368   
416    -144   
-384   -64    
-256   -32    
-2496  -320   
-224   -16    
-80    -32    
-32    -32    
-128   64     
-208   -256   
544    -384   
480    16     
64     368    
144    -16    
80     320    
80     80     
480    432    
-864   352    
176    32     
-2160  -704   
0      -96    
528    176    
-48    352    
256    320    
0      176    
-128   192    
208    48     
-288   288    
112    16     
0      80     
256    16     
-496   -288   
-320   -144   
-144   144    
-352   496    
336    208    
-96    32     
-176   -144   
-192   -272   
-160   432    
192    144    
112    -656   
-160   288    
48     -112   
-288   -48    
96     96     
304    -64    
-144   432    
368    368    
-384   80     
16     -176   
0      208    
224    192    
-16    144    
-208   -384   
-64    0      
144    96     
80     112    
-160   -176   
-192   -480   
-448   -560   
224    368    
240    480    
384    -128   
-208   48     
128    16     
32     -144   
144    272    
80     -224   
32     208    
32     336    
80     -80    
-48    -256   
0      144    
16     -64    
-48    32     
224    48     
-128   80     
0      96     
16     48     
-16    128    
-16    112    
80     48     
128    80     
-16    -192   
-128   -256   
-144   96     
0      96     
32     64     
128    16     
-96    80     
304    208    
-80    -176   
16     112    
0      192    
144    256    
-48    -32    
-80    -48    
80     16     
48     -80    
-48    16     
-96    48     
-48    80     
-144   -48    
80     48     
-304   -32    
-16    96     
176    64     
192    80     
16     -48    
96     -48    
240    128    
32     176    
-32    96     
16     -48    
48     -32    
-32    32     
-80    80     
-192   64     
0      48     
-32    -48    
128    48     
48     32     
112    -16    
176    128    
96     64     
-48    48     
-192   -16    
112    32     
64     -96    
96     80     
-240   -144   
-240   -208   
176    -32    
256    64     
16     16     
112    -128   
-256   16     
-192   -80    
16     -64    
80     -32    
256    80     
96     64     
256    144    
-224   -64    
128    -16    
-80    0      
112    80     
144    112    
-80    16     
-96    16     
16     -160   
64     64     
48     -560   
176    -16    
64     16     
32     64     
16     -128   
-96    16     
48     80     
64     64     
96     208    
16     80     
64     80     
-32    -48    
96     32     
240    0      
-32    16     
96     80     
80     48     
64     32     
96     32     
112    112    
48     16     
176    48     
16     48     
192    0      
160    112    
-64    -64    
-96    -304   
32     48     
-80    80     
48     -64    
48     -16    
32     112    
-192   208    
320    32     
-224   0      
272    16     
176    272    
16     128    
112    48     
-128   16     
208    -112   
192    80     
-48    80     
288    -48    
-144   -32    
336    -288   
16     400    
320    -176   
336    128    
-208   -128   
32     288    
96     368    
592    352    
-432   64     
-80    -528   
-48    -176   
-128   -48    
-160   0      
128    16     
208    48     
0      96     
208    -32    
176    -64    
176    16     
-16    -96    
48     176    
-80    -160   
144    96     
112    -16    
128    336    
-48    -48    
48     -112   
144    96     
32     192    
16     112    
464    272    
-240   -128   
-128   -208   
112    288    
-48    -112   
176    160    
256    192    
320    -256   
-128   1152   
-128   -928   
128    -608   
-96    -176   
-80    368    
144    128    
160    -320   
-256   -304   
-32    -560   
128    -64    
-16    32     
256    112    
80     368    
144    -48    
80     -16    
64     32     
-48    -160   
160    16     
-304   -192   
304    -80    
0      64     
208    48     
48     -160   
32     64     
64     32     
288    0      
160    -32    
112    -144   
64     192    
192    0      
0      -496   
-16    -32    
96     -400   
-48    -80    
-128   80     
496    96     
-16    16     
112    -192   
192    32     
128    -64    
64     -32    
-32    -16    
32     -320   
-80    176    
32     -208   
192    32     
0      0      
0      224    
112    16     
32     -320   
224    -80    
-80    -608   
160    -144   
208    128    
192    32     
96     -176   
-32    160    
256    0      
-96    80     
0      0      
-64    -48    
-704   -64    
0      -192   
0      -64    
272    96     
224    208    
0      -48    
-16    -32    
-160   -592   
-48    -32    
144    -128   
80     16     
128    176    
16     64     
-208   -16    
-112   -192   
-1216  -96    
-32    -128   
208    0      
208    -64    
224    -16    
80     -432   
112    -64    
16     -1392  
-160   -16    
16     -176   
16     16     
-80    -48    
144    16     
-272   144    
128    48     
-592   144    
48     112    
-160   -16    
176    128    
96     0      
208    -352   
48     16     
192    0      
-160   16     
192    32     
240    -32    
-224   -16    
-16    -256   
-16    0      
-64    -208   
112    -96    
320    16     
-1200  0      
32     -336   
-448   16     
-48    -48    
16     -32    
64     -128   
96     208    
176    -272   
64     48     
0      -32    
48     -48    
0      80     
-16    80     
-208   48     
16     0      
-704   304    
32     -112   
-720   160    
-64    80     
16     -64    
112    -32    
0      -16    
144    -656   
-64    -208   
48     -64    
-32    64     
-352   -64    
560    112    
0      96     
176    64     
-160   80     
144    336    
-48    -416   
-304   -1136  
576    32     
96     544    
144    48     
-368   -448   
-48    448    
-192   832    
352    -80    
-64    -1152  
-160   128    
304    144    
-48    240    
160    496    
192    -688   
288    96     
16     240    
16     -432   
64     -400   
176    384    
-352   32     
-96    -416   
80     112    
480    16     
-304   -256   
288    592    
-176   544    
-288   -672   
32     -672   
-320   -32    
304    -1008  
752    576    
224    384    
0      -656   
-112   608    
-48    160    
-848   -336   
-736   -1008  
-448   384    
-400   656    
352    -704   
-192   -48    
-112   -224   
-48    224    
-800   -32    
-176   -208   
-144   64     
-48    -16    
-240   16     
-16    -80    
128    -304   
-384   -64    
80     16     
-736   96     
336    -144   
-1776  0      
-64    192    
-128   -144   
64     32     
0      80     
128    48     
-192   -48    
192    80     
-256   64     
160    192    
96     48     
-160   -48    
-144   0      
0      16     
-48    -48    
-800   -16    
-224   16     
80     -32    
80     64     
-176   -240   
272    96     
-272   128    
192    144    
16     32     
64     64     
-48    -80    
0      -176   
-160   -64    
-144   96     
144    128    
-48    96     
16     -96    
-576   -80    
-16    0      
-64    -272   
64     32     
96     -16    
-32    352    
96     512    
-208   0      
-144   112    
-16    64     
-32    80     
-144   0      
48     80     
64     -48    
16     -64    
-752   48     
144    48     
240    192    
-32    288    
16     -64    
16     208    
0      80     
-240   -96    
-240   -144   
112    48     
96     0      
-144   0      
0      48     
-496   -64    
-80    16     
-384   -32    
192    80     
-1232  128    
-32    80     
16     0      
32     0      
0      16     
80     112    
368    784    
-176   80     
80     -80    
-128   16     
-48    32     
-192   -224   
-240   16     
48     160    
0      -64    
-672   -240   
384    208    
144    128    
112    16     
96     64     
-208   0      
128    48     
-80    -16    
144    16     
-96    16     
96     0      
-16    48     
272    112    
32     32     
48     32     
-432   -48    
-144   -208   
192    416    
-416   192    
-48    -144   
128    -208   
128    -32    
32     96     
80     16     
32     32     
-16    32     
32     16     
-192   0      
-336   -80    
224    112    
160    48     
160    112    
-16    96     
-64    -64    
96     0      
-16    32     
144    96     
-32    64     
16     -32    
80     16     
272    192    
-112   16     
128    64     
-112   48     
48     48     
192    112    
-112   -32    
32     16     
0      16     
160    80     
-64    0      
128    0      
112    96     
16     80     
-64    -16    
96     64     
-112   32     
144    144    
-48    64     
-192   0      
192    96     
16     32     
96     48     
-64    128    
32     32     
0      -80    
-288   -32    
96     48     
-48    -16    
-32    -176   
-48    32     
176    -64    
144    64     
-16    -144   
16     0      
0      32     
-192   -128   
176    -32    
0      -96    
256    192    
32     112    
240    112    
-352   16     
80     128    
-304   32     
224    -240   
-112   -256   
208    384    
304    272    
-112   -304   
-64    32     
0      -192   
2080   2080   
-1312  1456   
112    -272   
-464   -784   
-160   320    
656    -288   
480    -32    
-144   352    
48     -176   
-96    0      
-160   -320   
48     96     
368    224    
-320   -448   
144    -32    
48     128    
-80    -384   
-64    64     
112    -160   
96     -400   
16     32     
48     64     
464    240    
-160   400    
-256   272    
-112   -224   
16     208    
368    224    
496    288    
-256   352    
-64    -32    
32     80     
224    224    
144    -16    
32     48     
-160   -96    
-96    -96    
-144   -48    
112    160    
160    -16    
240    -48    
32     0      
-112   32     
-16    16     
-48    32     
80     32     
160    -16    
-112   -16    
48     -48    
32     64     
-128   -272   
48     144    
-112   64     
208    -32    
32     -96    
-112   -96    
160    64     
-64    -1120  
224    -64    
48     64     
32     -48    
160    -48    
-48    64     
128    16     
304    80     
80     32     
160    -80    
0      64     
-16    -80    
64     0      
160    -176   
32     16     
48     -144   
80     48     
16     -176   
64     64     
352    224    
-176   304    
-32    -16    
80     112    
208    64     
128    -32    
16     -64    
-96    -128   
128    64     
176    256    
32     224    
144    -144   
48     112    
144    -480   
64     16     
-64    -144   
-80    32     
48     32     
144    -64    
-112   -320   
416    -240   
176    160    
96     112    
0      48     
32     0      
-96    16     
144    -288   
144    288    
32     -64    
-80    -64    
-96    0      
-80    48     
-160   -80    
240    -16    
-192   0      
288    -144   
64     80     
-128   -192   
48     0      
256    -176   
208    112    
176    -128   
-32    16     
224    144    
-80    272    
-128   32     
272    -208   
-304   -672   
80     -272   
96     -32    
-176   -208   
176    112    
176    -48    
160    80     
240    -240   
-16    400    
288    704    
240    336    
0      -64    
80     272    
0      144    
160    -16    
208    -80    
32     -544   
32     -432   
128    -48    
-32    -1472  
-64    -96    
64     -16    
0      16     
144    -176   
208    -176   
352    192    
112    -64    
32     256    
144    64     
-96    -160   
64     272    
-32    -144   
192    -448   
96     80     
112    -144   
160    -352   
208    80     
-128   0      
64     -128   
-64    -240   
176    128    
112    496    
-96    -944   
16     48     
304    176    
160    -32    
-80    -64    
128    -144   
64     -256   
48     -112   
16     48     
288    -288   
-176   -176   
432    -1024  
-352   -784   
352    -336   
176    512    
320    -80    
160    -160   
128    416    
192    0      
-368   -352   
-128   -64    
-896   64     
96     -112   
-32    -176   
192    64     
-48    -16    
-272   -512   
224    -32    
-304   -672   
432    176    
384    960    
336    336    
496    -128   
-112   -496   
-576   -32    
112    560    
-1024  16     
-256   -96    
48     32     
-128   -16    
128    32     
176    48     
0      112    
336    -640   
-304   -192   
-16    -208   
112    48     
0      96     
144    -48    
-32    -48    
272    -16    
-80    32     
176    0      
-688   16     
-64    -48    
32     -224   
240    -496   
-224   -32    
0      -320   
-64    -160   
400    16     
96     160    
-224   32     
368    144    
-368   0      
176    -48    
96     -48    
224    -112   
-416   -48    
96     -112   
-480   -48    
48     -256   
96     0      
-32    -176   
32     16     
160    80     
192    48     
-144   -32    
32     -32    
-32    -32    
-240   -160   
-448   -64    
224    96     
-848   -32    
240    -96    
384    -32    
-128   -192   
-16    144    
80     144    
-48    64     
112    128    
192    -144   
-208   32     
48     -112   
-144   -32    
16     48     
-192   -64    
96     -176   
-256   -112   
-16    -16    
-48    112    
112    -48    
160    -48    
16     -64    
64     64     
-320   -16    
96     32     
-176   48     
176    16     
-240   -80    
208    16     
-304   -16    
32     -64    
-96    -32    
32     -336   
144    -192   
-16    16     
-192   112    
112    -128   
-144   -240   
-160   16     
32     112    
-160   48     
112    -32    
96     96     
-128   -16    
128    64     
-112   0      
16     16     
-160   -832   
-80    -368   
-1456  240    
-224   96     
-128   -96    
-128   -240   
-80    16     
-352   128    
0      64     
-272   -32    
80     32     
176    64     
144    96     
48     -80    
-96    -144   
-144   -112   
112    48     
-112   32     
112    32     
0      0      
-304   -176   
32     48     
-560   16     
-272   48     
-688   -64    
-144   -160   
-896   -176   
-144   48     
96     -32    
-80    32     
-192   -48    
16     48     
-48    -144   
96     32     
-64    48     
-160   -48    
-32    -64    
192    32     
208    64     
-112   -32    
-144   -32    
-896   0      
-304   -144   
-544   -160   
224    80     
112    -64    
96     -32    
-64    -80    
-160   48     
-112   -112   
-272   -96    
-16    64     
48     64     
48     128    
-32    32     
16     48     
-304   0      
112    0      
-1072  0      
256    160    
-80    0      
-16    64     
32     -176   
-96    0      
80     80     
96     112    
-112   48     
16     80     
-112   64     
-80    -16    
-16    112    
-224   -32    
-64    -64    
-832   240    
-64    176    
-32    -176   
224    96     
32     0      
48     128    
208    112    
-192   -32    
-32    448    
-208   -32    
-208   -208   
160    96     
-96    48     
-32    -128   
-16    368    
-528   -608   
800    2224   
-608   -992   
96     -224   
144    352    
-32    -752   
192    112    
-224   176    
128    0      
96     -64    
432    576    
128    336    
144    -240   
-672   -416   
112    0      
-336   832    
272    96     
-288   -512   
144    -208   
160    -128   
-656   -288   
-64    0      
-96    80     
160    96     
176    112    
112    32     
-320   80     
176    96     
-240   112    
96     -16    
-192   -144   
80     -336   
80     48     
-48    112    
32     128    
-112   -176   
192    -192   
80     48     
80     80     
-32    80     
96     -16    
-144   -16    
176    0      
-96    -16    
240    -16    
-128   112    
112    96     
0      -96    
32     -192   
48     -80    
64     32     
144    32     
-80    48     
64     32     
-304   176    
240    32     
16     -32    
176    80     
-192   -16    
112    -32    
-320   48     
-96    80     
-48    -32    
-16    -48    
0      -16    
-48    0      
112    -48    
112    64     
176    208    
16     96     
32     16     
-128   -48    
176    96     
-160   64     
64     64     
-224   0      
0      384    
128    -32    
256    -112   
32     128    
-16    48     
48     48     
0      32     
32     48     
32     0      
16     16     
-32    32     
96     112    
96     32     
32     80     
64     0      
32     48     
0      48     
64     -192   
144    32     
224    208    
-112   224    
-48    -16    
64     32     
144    -16    
-32    144    
-128   -16    
96     32     
32     -16    
64     128    
48     32     
-80    -16    
176    64     
-288   32     
144    272    
-128   352    
176    48     
144    -96    
48     32     
-208   -128   
96     -32    
-320   -96    
-128   48     
-176   -224   
320    -1552  
192    128    
80     80     
144    16     
-240   -144   
208    -144   
96     16     
-48    128    
-80    64     
-32    96     
-160   -128   
48     -16    
336    -304   
224    80     
80     64     
-272   -224   
-64    -112   
-32    -80    
0      1168   
448    512    
-192   -80    
-144   -176   
160    -32    
96     192    
-96    -176   
128    -128   
-64    -240   
112    272    
224    -80    
208    64     
-16    112    
176    -112   
64     -256   
112    0      
-64    208    
80     -384   
32     320    
48     80     
0      -96    
80     -112   
-32    208    
64     -384   
-288   48     
176    64     
16     112    
176    208    
128    32     
0      -336   
208    0      
-64    48     
192    -80    
48     96     
16     112    
32     0      
96     32     
48     176    
144    128    
-48    -80    
-32    112    
48     -240   
-304   -416   
-32    -128   
128    -16    
0      -16    
208    0      
96     176    
32     96     
-176   48     
-48    32     
80     -48    
176    -64    
0      128    
256    64     
-96    -160   
-368   -144   
224    -32    
-16    -48    
80     -32    
256    80     
-160   -784   
288    208    
-304   -208   
464    0      
80     16     
128    -32    
304    160    
624    704    
-384   288    
-48    -336   
656    144    
-64    16     
-112   176    
-96    -288   
-192   -176   
848    -176   
-128   0      
64     -16    
272    128    
-272   -16    
560    16     
-272   48     
320    -80    
240    112    
-464   -112   
192    272    
-80    -256   
64     16     
80     0      
48     32     
112    16     
32     32     
96     64     
160    144    
16     48     
16     0      
-256   48     
320    144    
80     192    
-80    -352   
48     -64    
-16    -176   
64     112    
48     -128   
160    96     
96     -128   
528    80     
-528   -64    
96     -1232  
80     96     
224    -512   
128    -400   
16     48     
256    -512   
32     0      
112    48     
-128   -144   
64     80     
48     16     
-16    32     
32     32     
176    -640   
-48    -64    
64     -160   
144    80     
-208   16     
192    -48    
64     -48    
112    0      
-32    -16    
0      -512   
176    -48    
80     64     
80     96     
112    80     
128    64     
32     -336   
256    176    
-208   -48    
-176   -112   
64     448    
32     48     
16     -48    
0      -192   
240    16     
0      -32    
0      -96    
224    -912   
32     -160   
-16    -16    
48     -144   
224    96     
-32    144    
80     -16    
112    16     
-464   -64    
80     144    
-1520  80     
-112   -112   
96     -96    
288    16     
-80    -48    
0      -448   
0      -16    
160    -80    
96     48     
-32    -48    
-16    80     
32     -48    
432    -16    
-576   -576   
-112   -256   
-272   112    
-192   -176   
-16    -64    
48     -240   
0      160    
432    512    
-288   288    
-64    -1680  
272    -64    
192    272    
192    176    
-160   80     
96     -16    
-32    -16    
112    16     
-752   -80    
144    0      
160    -256   
192    -368   
160    176    
48     128    
-16    16     
-32    -336   
80     32     
-112   -80    
128    -128   
48     -64    
16     -192   
32     -80    
80     -48    
-112   0      
144    64     
-496   -32    
16     -112   
0      -16    
128    64     
160    448    
-160   -128   
-16    -48    
224    -16    
560    320    
-384   -416   
144    -464   
112    48     
240    -64    
-240   96     
400    304    
-416   -272   
96     -48    
-544   80     
64     -288   
48     0      
48     -32    
208    32     
-48    -128   
112    -32    
-288   48     
-48    -704   
-368   336    
112    16     
-16    -192   
80     80     
-176   -16    
128    160    
32     80     
96     -176   
176    304    
96     -224   
288    256    
-432   -176   
240    240    
-240   -240   
80     -624   
32     480    
-240   272    
-352   64     
512    0      
-48    -176   
160    112    
-80    -544   
-208   -80    
32     16     
-432   -144   
-768   -80    
96     -80    
-1312  -16    
144    64     
-352   224    
-176   96     
96     0      
-16    144    
48     -80    
64     -208   
-416   -96    
-128   368    
-720   -128   
-320   -144   
16     -32    
-208   -80    
208    -32    
64     -16    
-752   192    
-240   -48    
-208   -48    
160    32     
-160   128    
48     -80    
-208   112    
-416   -32    
48     -48    
32     -160   
0      -240   
240    208    
-240   320    
272    -64    
-16    32     
-64    112    
-496   16     
240    -64    
-560   80     
-80    160    
-176   -112   
336    -256   
-320   -96    
160    224    
-48    -112   
-80    160    
-48    48     
352    192    
-208   80     
-192   -64    
-224   -80    
576    432    
-240   480    
-368   176    
96     -160   
-1040  -320   
64     112    
32     64     
192    -48    
-224   -144   
0      240    
256    320    
-112   32     
64     -80    
-192   -32    
32     144    
-16    96     
80     -16    
-128   -48    
-32    -32    
-960   -48    
160    48     
32     32     
48     48     
0      96     
48     16     
0      32     
0      64     
-144   -80    
224    0      
-16    96     
-208   -64    
336    -144   
-224   48     
48     64     
-256   -96    
112    32     
-64    80     
32     96     
-144   -112   
32     -96    
-48    -80    
-64    -48    
32     64     
-112   96     
-48    80     
-80    -64    
48     32     
-144   -16    
192    160    
-464   -32    
-48    0      
-1152  -96    
-96    48     
0      128    
-112   48     
112    496    
112    272    
-48    48     
-112   80     
-128   -128   
-160   -80    
-64    -352   
-224   -176   
64     -176   
-240   -16    
384    688    
224    256    
160    448    
-48    320    
-16    -256   
-32    -240   
-128   272    
-176   -352   
288    -304   
304    848    
192    48     
32     -80    
-272   -16    
48     -48    
-128   48     
240    112    
96     176    
-16    -16    
16     144    
224    624    
-352   -672   
112    160    
256    144    
208    -80    
112    0      
-240   -208   
-128   -240   
-368   272    
32     112    
-272   -240   
80     -32    
208    128    
112    0      
128    48     
176    288    
-224   176    
-112   224    
320    64     
-192   -192   
16     -48    
-112   48     
-32    80     
-80    16     
144    128    
-112   64     
16     64     
-16    -32    
96     0      
16     -32    
144    16     
112    80     
-64    -80    
48     0      
32     96     
112    80     
-96    16     
176    64     
0      -16    
160    -32    
-32    0      
-144   16     
0      32     
112    48     
-16    32     
80     0      
128    128    
-80    64     
-64    -128   
32     -144   
64     80     
-64    -16    
32     96     
-64    0      
-64    0      
48     16     
32     32     
192    96     
-16    32     
-32    -48    
160    48     
80     128    
144    160    
0      48     
-112   -16    
-64    32     
-48    144    
112    0      
192    192    
-496   -240   
-32    -64    
352    96     
-112   -16    
624    144    
-16    208    
-320   -64    
-224   16     
-240   16     
272    16     
-32    16     
-128   32     
320    112    
-16    128    
-288   -16    
528    16     
352    80     
32     0      
128    48     
32     -16    
48     -112   
80     -80    
240    32     
352    -16    
0      -48    
272    -96    
144    208    
48     16     
-16    -16    
128    48     
0      -320   
80     0      
112    80     
32     -32    
368    320    
-240   208    
48     -80    
64     48     
-112   80     
288    112    
-64    192    
-80    80     
-80    -128   
32     -64    
112    64     
-128   -240   
32     -48    
32     -368   
160    -16    
224    16     
-32    64     
96     16     
-48    32     
112    -32    
192    64     
-224   -16    
160    0      
16     48     
208    -16    
-48    0      
128    -16    
64     112    
-32    0      
128    -48    
64     -96    
48     144    
-176   48     
240    0      
96     304    
96     16     
-192   -272   
32     16     
-96    128    
16     -128   
208    -80    
144    -144   
144    -48    
96     -512   
-112   -224   
-224   -16    
64     208    
208    128    
112    0      
-32    -32    
80     48     
16     352    
-96    80     
192    128    
-64    -496   
80     352    
96     96     
80     -160   
192    -64    
-128   -224   
256    -64    
192    448    
128    -32    
32     128    
-208   -176   
-32    304    
-112   -128   
96     0      
64     -64    
112    -16    
256    16     
144    -640   
240    112    
-160   -16    
-64    -800   
144    -944   
224    768    
320    128    
240    -96    
48     208    
-16    -176   
112    352    
-32    304    
-176   -304   
-16    -576   
32     -32    
32     32     
48     -784   
48     304    
176    576    
-64    -464   
-80    -224   
-112   0      
32     192    
240    -112   
320    32     
-48    144    
64     -128   
112    0      
144    -48    
16     192    
288    384    
-64    -160   
-16    -16    
64     176    
64     -176   
64     48     
0      -128   
64     -224   
208    160    
-848   160    
-176   -720   
0      -128   
-32    -928   
160    -240   
48     -272   
-176   -192   
48     192    
32     160    
0      -256   
192    -32    
272    -32    
-80    -112   
160    224    
16     240    
-1040  -16    
48     -128   
48     -128   
48     96     
64     32     
160    -32    
0      -112   
0      96     
176    224    
-16    -448   
64     -256   
80     -208   
-416   -96    
80     -160   
144    -128   
-288   32     
-112   96     
16     -32    
0      240    
64     -16    
144    0      
288    80     
-80    -432   
144    96     
192    224    
-592   192    
272    -224   
96     224    
-192   -128   
-128   -32    
160    96     
176    64     
-224   464    
112    -256   
-64    80     
48     160    
-48    -80    
240    16     
-144   -272   
496    -288   
32     -48    
-64    -16    
-32    -176   
16     0      
240    64     
-352   -416   
384    -560   
-704   -96    
-80    112    
-368   32     
160    208    
-320   64     
112    -80    
-208   -80    
176    -896   
32     160    
32     -64    
224    -112   
-16    -64    
48     16     
80     96     
-160   128    
-320   32     
-80    -64    
384    -112   
32     0      
272    -64    
32     -144   
32     0      
112    -176   
48     112    
48     -48    
96     -96    
-112   -272   
112    -64    
-64    192    
48     64     
-16    0      
224    -16    
-1056  48     
32     -192   
256    80     
-224   -32    
16     16     
-80    -432   
528    -192   
-400   -128   
368    368    
-256   112    
-16    -16    
-448   -16    
-48    16     
-208   -240   
64     -272   
-176   -48    
32     -112   
-160   32     
304    -400   
-48    192    
-16    -48    
0      16     
-80    -64    
128    48     
192    208    
-16    192    
-368   32     
-64    -304   
-64    -144   
80     48     
96     432    
128    256    
240    -64    
48     -80    
-64    0      
-112   -256   
-208   -160   
96     64     
160    0      
-144   16     
96     0      
-128   96     
64     160    
-128   64     
112    32     
-32    16     
80     -32    
224    -32    
176    -256   
-32    -112   
-272   -96    
-352   -48    
-64    -32    
-480   80     
-240   336    
-288   -176   
80     -96    
64     80     
112    -48    
64     -320   
-752   -128   
-1040  -192   
-80    -176   
-144   160    
48     32     
32     -144   
-160   -128   
-16    -16    
-480   -272   
-112   64     
-112   32     
16     -64    
-800   128    
-128   16     
-96    -32    
-32    -96    
-96    64     
48     -80    
192    496    
-192   0      
-272   -96    
-96    128    
-32    64     
-272   -80    
48     16     
-240   16     
0      32     
-752   32     
0      112    
32     96     
32     64     
-96    -112   
-16    64     
-112   -96    
0      -16    
208    112    
128    64     
0      16     
-272   -80    
-320   -112   
-112   32     
-208   0      
-400   -32    
144    64     
-1120  -160   
400    -16    
128    112    
96     32     
-256   -96    
96     64     
112    112    
-80    16     
48     -16    
-32    -48    
-64    48     
-32    128    
32     32     
64     32     
112    16     
-352   -80    
112    80     
-144   -160   
0      0      
0      80     
-32    -32    
96     112    
-144   32     
0      -32    
-64    -16    
48     16     
208    48     
-128   16     
-112   -16    
32     16     
-544   -48    
96     32     
112    48     
-240   -80    
208    -16    
-144   48     
112    -16    
-240   48     
32     32     
-432   -208   
32     -32    
-224   208    
144    -80    
-320   80     
-112   32     
-176   48     
368    160    
-16    -192   
-48    32     
-128   176    
176    32     
-240   96     
-48    64     
240    176    
96     -80    
48     -224   
-144   16     
-208   32     
32     -48    
-80    96     
-144   -32    
336    64     
-512   -256   
304    16     
64     208    
-288   64     
64     -112   
160    144    
-128   128    
-160   16     
-336   -48    
112    48     
-64    -176   
192    -80    
496    208    
-320   -32    
-16    -192   
-64    -48    
624    352    
-592   112    
-80    -64    
128    0      
-80    32     
96     32     
-112   -112   
256    80     
-144   0      
-64    16     
112    -64    
-144   -96    
-128   112    
-352   48     
272    -16    
128    96     
80     128    
96     -16    
-48    16     
-32    -16    
32     -16    
80     -128   
-160   64     
128    272    
0      16     
-128   -48    
64     48     
-32    80     
144    -80    
-112   -64    
272    224    
-144   64     
48     -96    
144    64     
-80    -576   
-208   -112   
160    384    
16     64     
0      192    
-64    -304   
240    288    
-128   160    
-80    -96    
224    32     
224    -80    
32     64     
32     -48    
-112   -32    
112    80     
-48    128    
352    272    
-368   -192   
192    -64    
-48    224    
336    224    
-304   256    
-128   -208   
320    -16    
64     208    
-48    0      
-160   -96    
64     -240   
-32    624    
304    80     
-48    -64    
-112   240    
48     -352   
32     -16    
-144   -640   
-16    240    
-16    -64    
336    -80    
80     48     
112    -480   
112    560    
32     -96    
176    32     
-64    112    
16     -112   
-176   208    
48     80     
80     -32    
192    96     
-80    0      
-48    -16    
96     -464   
128    -1168  
48     288    
80     -96    
16     224    
-48    -256   
0      80     
16     336    
48     336    
-32    160    
32     -304   
-64    336    
192    288    
112    256    
208    384    
112    208    
-48    -112   
-48    32     
32     144    
112    32     
64     48     
-32    -80    
112    -16    
80     -48    
-112   -64    
160    -16    
144    16     
-48    320    
128    320    
224    224    
-192   208    
48     48     
96     32     
64     432    
144    304    
0      96     
112    192    
48     192    
-112   -320   
-144   -256   
160    0      
96     80     
-64    32     
160    -80    
80     -80    
48     112    
96     -224   
16     -256   
80     -512   
-16    160    
-48    16     
128    48     
128    -240   
64     320    
-16    192    
96     48     
144    -48    
32     48     
192    320    
16     288    
16     224    
144    -256   
16     -160   
80     -176   
0      -192   
176    -192   
-128   16     
-16    -48    
-48    80     
240    -48    
432    304    
16     320    
-48    112    
96     32     
272    -128   
-400   -400   
0      96     
160    720    
-160   416    
208    384    
176    -864   
96     208    
112    -64    
0      192    
-48    -256   
-144   -272   
-64    0      
-48    48     
352    416    
496    -448   
64     -64    
0      -576   
-240   -288   
96     -896   
288    -112   
304    176    
448    288    
288    128    
80     -16    
32     96     
-160   64     
-48    80     
416    -48    
-48    32     
112    32     
-160   16     
-192   -304   
-464   -96    
64     -160   
-112   96     
160    80     
320    32     
80     -48    
-48    -48    
0      240    
416    -96    
-32    112    
144    -80    
272    272    
-64    -48    
192    80     
80     -64    
240    48     
-272   -96    
176    -224   
64     128    
16     -176   
176    -144   
176    -576   
-48    -224   
-448   -160   
80     -80    
-240   -32    
96     -928   
288    -80    
-256   32     
112    144    
128    240    
16     64     
0      -16    
-32    -80    
224    96     
-64    80     
208    -48    
-112   -64    
-1856  48     
-48    -96    
144    -256   
208    16     
96     96     
256    64     
112    208    
-96    112    
240    -192   
16     -192   
-64    -208   
-64    -208   
176    0      
320    -144   
32     336    
-304   64     
48     -336   
32     80     
160    64     
48     -48    
-32    -688   
-64    -400   
160    -1712  
-96    288    
240    32     
-48    -144   
48     288    
224    -384   
32     352    
-16    -528   
-320   640    
240    -208   
-176   -112   
-32    -112   
48     -176   
160    -128   
304    256    
-48    -640   
-224   -208   
48     320    
80     96     
144    -80    
-32    -16    
-128   -128   
160    48     
-32    0      
144    -80    
-688   -16    
32     16     
48     -80    
16     -64    
80     32     
560    576    
-352   640    
32     -1056  
272    -112   
48     -96    
144    48     
-80    -80    
144    192    
-192   176    
-224   -320   
-176   -288   
224    144    
-496   96     
160    32     
48     80     
80     -240   
80     48     
-144   -384   
96     176    
-144   -64    
32     0      
64     -64    
128    0      
-128   -80    
176    0      
-256   -16    
-80    -48    
-176   64     
0      -96    
-160   -80    
64     -144   
112    0      
32     -256   
-64    80     
-96    64     
-48    -128   
-176   -208   
144    -192   
-240   48     
32     208    
-272   -16    
160    0      
-16    -80    
80     -64    
-80    -112   
288    -80    
160    128    
128    -48    
0      -128   
-256   48     
-160   -128   
64     16     
320    96     
-128   -48    
128    48     
-32    16     
32     -128   
-672   16     
48     -32    
-16    16     
64     0      
-48    16     
-1056  -128   
-656   -48    
-112   0      
256    32     
-80    16     
32     32     
16     96     
-176   -112   
128    32     
80     0      
96     16     
-512   -48    
208    -32    
-624   -112   
64     144    
-336   48     
0      -176   
-208   16     
32     144    
-96    96     
-944   -224   
-176   32     
64     80     
224    32     
-112   -48    
112    -64    
-144   48     
-112   16     
-112   32     
-96    112    
-144   -32    
16     96     
-128   -48    
-800   -240   
-96    64     
-192   -176   
0      -256   
608    400    
-416   80     
336    -64    
-16    32     
-960   -160   
0      -80    
48     -384   
-32    16     
112    144    
-320   -208   
144    64     
-112   160    
-336   16     
192    272    
-480   128    
-944   -240   
-112   -16    
-256   -96    
48     -112   
160    224    
-208   192    
-16    -160   
80     64     
-16    -96    
-240   -192   
-16    112    
0      -112   
-48    192    
160    192    
-144   240    
-320   0      
-80    -176   
-128   80     
64     160    
80     -48    
208    256    
-192   -256   
48     208    
-32    272    
-128   -288   
144    32     
-96    96     
-128   -128   
-32    -144   
-112   272    
-416   64     
256    -288   
-1120  240    
-160   512    
160    -416   
-192   160    
0      -208   
-160   -992   
-64    -352   
32     64     
160    288    
-112   144    
-416   304    
-400   -304   
-160   -256   
48     -256   
128    -128   
-304   -48    
112    -144   
16     160    
-96    144    
16     48     
32     16     
96     112    
-272   -112   
64     -304   
96     -80    
-80    32     
64     80     
80     32     
32     -48    
0      -48    
-544   0      
0      96     
-16    0      
48     32     
-96    -96    
-80    -128   
-64    0      
80     400    
240    240    
-80    16     
64     32     
-64    96     
-96    64     
-304   -48    
80     48     
-496   -48    
32     96     
96     -96    
80     144    
-112   32     
-128   -160   
-208   -112   
-96    -384   
384    -16    
16     192    
-64    48     
-96    48     
112    -16    
-464   -144   
64     160    
-256   -16    
64     -176   
112    48     
-48    0      
-16    64     
-128   48     
192    48     
80     128    
-144   160    
-32    96     
-16    48     
-256   128    
64     64     
-64    -48    
192    -32    
-160   -96    
-32    -48    
128    16     
-32    0      
48     -32    
16     112    
-48    0      
32     -272   
80     80     
-80    224    
192    160    
-64    240    
96     32     
-32    96     
-144   32     
16     -144   
96     112    
16     144    
128    96     
-160   48     
0      48     
96     240    
0      96     
-64    64     
-32    16     
16     240    
96     240    
64     128    
-32    -48    
-48    16     
64     32     
48     48     
48     64     
96     -80    
64     192    
160    176    
128    416    
128    208    
64     0      
-48    -32    
192    -64    
-224   -96    
160    -96    
-144   160    
0      192    
384    112    
160    112    
-48    -32    
-64    112    
240    288    
-272   352    
112    192    
400    -144   
-288   0      
-224   -160   
112    208    
-16    416    
144    256    
176    160    
80     32     
0      144    
144    208    
-80    160    
-96    288    
464    96     
-320   -64    
-96    32     
-80    160    
32     0      
-80    -32    
144    -544   
352    32     
-384   32     
-224   -32    
-400   -1760  
-304   -176   
-80    48     
-256   -320   
256    48     
-48    80     
-32    448    
304    160    
352    224    
-224   608    
-96    192    
0      512    
336    336    
-32    64     
240    64     
80     -128   
-240   -384   
96     16     
240    192    
96     64     
224    560    
-368   -16    
-64    176    
144    112    
96     224    
0      -64    
0      128    
-224   -208   
128    -272   
-96    592    
224    -272   
176    128    
304    176    
-304   -208   
-32    -80    
240    144    
64     336    
16     -80    
-16    -48    
128    80     
-192   48     
176    128    
192    -128   
-48    0      
80     48     
400    -96    
64     512    
-80    -480   
0      16     
16     -160   
64     -432   
-160   304    
64     -192   
-32    -112   
80     400    
144    112    
112    -368   
512    288    
-256   96     
288    96     
16     -96    
-144   -96    
192    144    
96     144    
144    -320   
32     160    
192    -80    
16     272    
-16    304    
160    -64    
-208   -64    
96     -336   
192    176    
-32    -16    
32     32     
128    -256   
80     48     
128    -80    
-16    144    
16     64     
256    352    
-240   32     
0      -32    
-144   64     
48     0      
192    32     
64     -176   
128    -48    
160    -144   
160    64     
176    64     
64     80     
32     -160   
96     80     
-32    -80    
160    48     
192    48     
48     64     
80     -16    
-96    48     
16     96     
-80    -608   
-144   -208   
-144   224    
64     128    
144    -96    
-48    -80    
176    -400   
240    160    
240    -96    
256    256    
-256   32     
80     -32    
80     64     
32     -48    
32     -320   
96     -256   
176    208    
160    48     
64     32     
0      -192   
-16    -64    
288    -48    
304    48     
0      64     
-80    -128   
-144   -32    
-64    -352   
-128   0      
-832   -80    
160    48     
64     -16    
48     -16    
96     -80    
96     -432   
48     -48    
-96    -32    
272    -80    
224    176    
112    16     
-32    -480   
-32    -16    
192    -32    
144    -64    
0      0      
240    48     
144    16     
80     -176   
64     -80    
128    -528   
-32    -80    
-16    -48    
64     48     
-64    -112   
192    48     
192    48     
-96    -16    
32     -16    
0      48     
-448   -16    
80     -128   
0      -112   
112    -160   
-16    -64    
64     0      
96     32     
16     -48    
96     16     
128    -32    
-64    -48    
112    96     
0      48     
-80    0      
64     32     
-368   -16    
0      -48    
-1984  32     
-16    -80    
320    -32    
-272   -368   
240    -336   
0      -624   
64     96     
48     64     
0      48     
96     -32    
176    128    
-128   32     
176    -224   
320    352    
-480   336    
-288   -80    
80     -128   
432    336    
-160   112    
-144   48     
-208   -64    
64     96     
816    112    
-128   176    
48     -320   
0      -224   
-432   -192   
176    -224   
224    192    
176    -256   
-320   0      
192    384    
-2816  -208   
-32    -368   
256    -32    
64     32     
16     96     
256    -944   
-464   144    
-64    -64    
-192   -240   
-48    176    
224    -48    
-144   208    
64     -160   
-752   432    
688    -32    
-848   240    
-256   -464   
368    -672   
352    816    
80     -240   
0      288    
-16    -224   
-224   -528   
256    64     
-512   288    
-176   0      
-112   -304   
-48    -16    
112    -192   
224    80     
-32    64     
176    -80    
-64    256    
128    -160   
-112   144    
64     -224   
48     -64    
-256   -160   
320    -128   
-272   0      
96     -240   
-288   -64    
32     -128   
32     -96    
48     -48    
48     48     
176    -160   
240    -128   
-464   -128   
-48    64     
16     -64    
96     64     
-64    32     
-368   0      
-32    32     
208    112    
-320   160    
-32    -96    
-128   -144   
-16    -32    
144    -128   
-416   -240   
144    32     
-304   64     
32     80     
32     48     
-352   -16    
16     96     
64     128    
-96    -32    
-832   0      
-80    -16    
16     -112   
-96    -48    
160    -64    
48     160    
256    128    
-64    288    
-384   -48    
32     -144   
-144   -16    
-112   48     
112    16     
16     112    
-192   0      
-496   -16    
-336   -128   
-464   -32    
-96    32     
0      -224   
176    16     
32     576    
-16    160    
48     -224   
-320   112    
-112   64     
224    256    
-192   80     
-112   -112   
80     -304   
32     -32    
-32    32     
-736   176    
-240   -32    
112    -16    
176    112    
-96    80     
96     112    
96     -112   
160    -112   
-16    -144   
-176   16     
-128   32     
-304   144    
64     176    
-112   -32    
144    80     
-480   80     
-32    16     
-1328  -128   
144    80     
-192   48     
-176   -32    
96     -144   
-160   -288   
-80    -32    
0      64     
-224   48     
16     16     
16     64     
-112   64     
96     48     
-576   -112   
128    -16    
-2656  -224   
-32    -64    
32     -80    
80     16     
-16    384    
-112   256    
-80    -320   
-32    -192   
80     32     
64     16     
64     -64    
-112   -128   
48     -64    
-256   -176   
-64    224    
-80    256    
48     48     
144    -160   
-48    -16    
32     -16    
-32    -160   
96     512    
0      304    
160    -336   
-80    -112   
-96    0      
-112   -96    
96     272    
-528   -176   
144    -16    
-160   272    
208    208    
272    48     
-352   -160   
-32    -112   
-224   -16    
32     -48    
192    -96    
-304   -448   
144    48     
-48    80     
16     192    
208    64     
-192   -112   
416    272    
-512   -272   
144    144    
-304   -208   
272    112    
96     176    
-512   -512   
512    144    
496    720    
-208   224    
16     -32    
192    -240   
272    224    
-288   352    
-336   -192   
-32    64     
-912   0      
272    240    
256    -304   
-816   -16    
64     256    
-128   -96    
16     80     
208    0      
208    32     
32     64     
64     16     
-320   -384   
176    80     
-144   48     
304    560    
-160   -144   
16     -128   
208    336    
-80    16     
-16    -240   
-160   -128   
176    64     
-48    32     
32     0      
-176   -48    
240    -48    
-288   0      
48     32     
-64    -16    
128    128    
160    208    
80     32     
48     -48    
128    160    
160    96     
112    112    
-112   128    
-80    -16    
80     16     
-16    16     
32     48     
224    0      
-128   0      
16     128    
-48    -128   
32     -48    
96     144    
112    32     
128    16     
-80    -48    
-80    -80    
224    112    
-160   48     
112    -16    
0      0      
192    64     
0      16     
48     80     
-112   48     
128    192    
96     96     
-112   -16    
-32    -64    
64     0      
96     32     
-144   256    
144    256    
64     48     
-112   0      
80     48     
176    48     
-96    -192   
80     -128   
64     112    
16     352    
-144   96     
64     48     
176    96     
-96    48     
32     64     
256    32     
-64    32     
16     144    
64     48     
-80    -32    
96     -208   
128    -240   
240    -112   
-48    96     
-48    -592   
-32    -208   
64     -48    
-32    144    
-48    32     
32     96     
32     272    
272    128    
48     32     
-160   32     
-192   -160   
160    32     
-288   48     
-32    -64    
32     -80    
96     -816   
352    32     
224    64     
176    48     
0      16     
-128   0      
16     16     
80     0      
160    -144   
176    112    
112    96     
-16    144    
144    112    
112    -128   
48     64     
16     -160   
-80    48     
272    -64    
-80    128    
256    96     
112    0      
80     -240   
-48    64     
32     0      
112    48     
32     32     
160    240    
-96    48     
192    -80    
176    48     
-64    -160   
96     64     
32     -144   
48     32     
16     64     
176    112    
96     112    
80     96     
64     32     
-16    -32    
32     0      
80     -48    
32     64     
-80    -112   
192    32     
208    -32    
-32    32     
176    -752   
64     80     
80     -1344  
32     96     
48     32     
32     32     
32     48     
0      16     
96     32     
16     32     
208    128    
-64    -128   
96     64     
112    -16    
128    32     
-32    -240   
96     48     
16     -112   
352    352    
-112   144    
160    -16    
96     112    
48     192    
0      0      
256    -48    
144    112    
-48    -16    
128    32     
-48    -400   
80     144    
-64    368    
256    -224   
64     -336   
-80    96     
128    -64    
576    112    
-368   -752   
160    736    
48     544    
-176   -1120  
-80    464    
-160   -336   
-48    -336   
176    48     
32     128    
256    16     
-16    64     
288    -128   
-32    -1056  
336    208    
288    -672   
224    96     
-16    288    
224    -160   
144    208    
-288   -624   
-176   -128   
-96    -480   
304    -368   
80     272    
224    -368   
320    528    
160    128    
-16    -576   
-192   -448   
-96    -256   
32     48     
-16    -176   
432    176    
160    64     
-336   -704   
320    -96    
80     -544   
112    144    
128    -128   
-208   16     
64     16     
0      80     
240    -240   
96     -80    
-208   -112   
48     64     
-2256  -144   
64     -64    
32     -16    
48     96     
-16    -48    
16     -912   
32     -112   
16     -144   
160    -80    
64     16     
-96    -32    
128    -128   
64     128    
-192   -32    
128    -144   
-784   -32    
272    16     
32     32     
48     -144   
144    -48    
240    0      
96     -32    
112    -432   
-96    96     
240    -64    
32     -16    
192    -112   
-48    -64    
-160   -48    
128    -112   
-64    -16    
64     16     
64     -48    
48     -112   
128    32     
96     32     
-64    64     
128    -192   
-16    144    
80     32     
48     32     
272    -16    
0      48     
-48    16     
48     -32    
-96    32     
192    -96    
-1792  -64    
-112   -112   
-80    64     
128    80     
-112   -112   
192    -272   
-160   -32    
192    128    
16     80     
32     96     
224    112    
-352   -160   
336    -208   
0      16     
96     48     
-176   -112   
16     -272   
-1504  -320   
32     -112   
0      96     
272    192    
64     208    
192    -176   
176    0      
-96    -96    
-64    -176   
176    -48    
128    112    
-64    208    
176    240    
-352   -32    
0      -256   
-256   -96    
128    -112   
48     -16    
96     -112   
80     -80    
-176   -512   
-208   -240   
-432   64     
48     -32    
-176   -128   
112    64     
-64    208    
16     32     
-96    144    
96     -160   
-944   -176   
48     528    
144    208    
-80    -320   
208    528    
96     368    
-112   256    
16     -64    
-64    32     
-96    112    
160    -144   
-144   -128   
-16    -64    
80     -32    
240    -64    
-352   416    
400    0      
-16    112    
-960   -192   
192    -16    
-16    256    
-256   80     
32     64     
-656   -160   
64     112    
144    -224   
80     16     
0      64     
-48    -64    
64     464    
-64    -176   
-720   -144   
144    128    
-304   -352   
-320   176    
304    384    
-96    32     
112    -80    
-80    -192   
-208   -128   
-1760  128    
-96    112    
176    64     
-48    -80    
-112   -272   
-112   64     
-336   -80    
240    48     
-48    -16    
320    192    
176    96     
-224   -96    
-256   -1200  
-352   -544   
-32    288    
-176   320    
-320   -288   
-672   -144   
-16    368    
-80    160    
240    160    
64     16     
48     -160   
416    80     
-336   128    
-32    -192   
-80    -96    
-144   -112   
48     -256   
112    0      
-160   -16    
-32    -160   
-1488  -64    
112    96     
-208   112    
128    48     
384    -96    
-352   -32    
224    -16    
-272   0      
400    48     
32     128    
-80    80     
-96    16     
-208   -32    
-112   32     
-208   16     
-720   48     
80     -32    
128    -64    
208    64     
-80    16     
-448   -16    
-32    -16    
144    0      
48     64     
-32    0      
-32    -64    
0      16     
-32    16     
32     48     
112    96     
-272   -80    
96     48     
-1232  64     
224    80     
0      48     
-112   -48    
192    96     
-16    64     
-48    112    
-32    16     
16     32     
32     0      
-96    -16    
144    0      
-80    48     
-352   -32    
112    0      
-624   -288   
48     -64    
160    112    
-256   -32    
96     48     
-144   -48    
144    -48    
64     -48    
112    48     
16     80     
-160   48     
-272   -64    
16     16     
-352   -80    
-64    64     
-272   0      
352    16     
-32    64     
-16    0      
80     48     
400    288    
-336   144    
-112   0      
64     64     
-80    -320   
112    -160   
-144   64     
112    80     
64     32     
144    96     
-208   0      
-16    48     
96     112    
-64    -32    
16     -240   
-192   -112   
96     144    
80     80     
176    80     
-144   0      
96     16     
-96    16     
0      -48    
0      80     
-48    -320   
48     -240   
96     208    
128    -16    
48     -64    
112    16     
208    144    
0      80     
80     0      
-208   -272   
-224   16     
-224   -112   
-64    -32    
144    160    
0      48     
96     160    
-112   16     
128    0      
240    128    
-32    16     
224    112    
80     64     
0      32     
-160   -16    
32     0      
32     -64    
48     -16    
208    48     
208    128    
-304   -48    
32     -48    
112    -16    
-32    32     
0      128    
-48    80     
-32    16     
-48    -48    
272    80     
-128   48     
160    208    
-16    32     
144    -48    
80     32     
32     64     
80     80     
-80    96     
16     112    
-64    128    
-48    48     
64     -32    
0      64     
192    160    
64     64     
-160   -96    
128    -112   
-176   -16    
128    112    
-96    16     
160    64     
96     32     
112    112    
128    48     
-48    -144   
64     -192   
64     32     
224    80     
-144   -64    
128    112    
-96    -112   
160    -256   
-208   80     
176    192    
80     160    
0      0      
-48    32     
304    -32    
-80    80     
192    112    
16     224    
-16    192    
-32    -448   
-160   160    
224    -320   
-16    112    
112    576    
-48    -320   
80     432    
32     -240   
-288   160    
240    256    
-320   -1840  
336    -240   
128    400    
224    640    
416    -144   
48     96     
0      -112   
-64    -368   
-16    -224   
32     -176   
160    32     
128    32     
432    80     
816    576    
-624   688    
-48    -16    
64     80     
-80    -16    
288    -160   
320    112    
304    -16    
160    48     
0      96     
-112   128    
-48    0      
144    -96    
-80    -16    
16     -64    
32     -144   
96     -64    
-208   64     
256    80     
48     -16    
112    128    
320    -144   
-192   -240   
-128   240    
240    512    
16     -80    
32     0      
128    -80    
32     -144   
-48    -48    
64     -64    
128    304    
-160   -48    
64     -96    
16     -128   
16     -64    
352    -256   
-32    112    
32     -16    
-16    16     
256    48     
48     16     
-96    -64    
-16    -128   
-96    16     
208    -224   
176    80     
336    0      
-48    80     
0      16     
-64    -48    
720    384    
-400   448    
-192   -96    
-48    -224   
-16    224    
336    112    
144    -48    
208    16     
48     128    
192    608    
224    96     
32     -272   
-48    -80    
-80    -64    
48     -32    
96     80     
96     48     
64     0      
48     128    
-48    112    
112    -416   
-96    128    
-48    -240   
80     112    
208    -112   
64     48     
80     -80    
64     -32    
112    -272   
-144   16     
224    -400   
128    48     
48     128    
32     -32    
-272   -32    
176    -128   
48     -208   
64     -16    
192    192    
-16    0      
0      32     
176    -112   
96     -112   
-112   -224   
128    -16    
-32    48     
144    -1040  
0      32     
176    -80    
-128   -656   
64     -32    
80     96     
240    64     
208    -448   
96     -16    
-128   -400   
-176   -512   
-16    -176   
-48    176    
272    32     
-80    112    
160    336    
-192   -144   
48     -144   
144    64     
288    320    
80     192    
128    128    
128    -400   
80     0      
112    -960   
-48    -176   
112    64     
-32    112    
144    -400   
-224   64     
48     -160   
-48    144    
80     112    
-240   -208   
-2208  96     
-16    -144   
-32    16     
224    -208   
128    64     
112    96     
-32    0      
-48    -656   
-48    128    
32     -288   
256    32     
-16    80     
208    48     
-16    -48    
48     -304   
-272   -192   
16     -80    
-32    0      
48     16     
160    80     
144    -320   
16     -128   
48     -1664  
32     -112   
112    64     
224    32     
0      -48    
32     -32    
-224   64     
96     -16    
-688   -80    
128    -64    
-416   128    
-112   -80    
160    -112   
80     0      
0      -32    
128    -128   
64     112    
128    96     
-96    16     
-32    0      
-16    -80    
-272   -48    
256    0      
64     48     
336    80     
-1632  -16    
272    -48    
-64    -64    
48     16     
-80    0      
288    48     
-336   96     
256    -144   
128    208    
16     0      
128    -160   
112    -80    
96     16     
208    240    
-304   -96    
-16    -16    
-16    -32    
-144   96     
80     -96    
224    -64    
896    -80    
224    64     
240    -128   
176    112    
-48    48     
-96    -128   
-64    0      
240    -80    
-464   -32    
160    -16    
-304   -16    
-32    112    
-704   128    
432    -208   
128    48     
48     -208   
368    -16    
-32    -32    
160    48     
-304   -32    
-64    -64    
0      -48    
-336   -128   
-176   16     
320    112    
-32    112    
-144   -128   
64     -64    
-32    -208   
96     112    
0      16     
48     64     
208    48     
-432   -32    
144    48     
-16    96     
80     0      
80     -64    
-224   0      
96     96     
-80    0      
64     -144   
16     0      
-624   -32    
-16    -16    
160    48     
-176   0      
-96    -16    
-160   -32    
-80    -16    
-272   -16    
-112   -464   
16     -176   
-208   0      
64     -128   
-160   64     
-784   -96    
96     96     
-416   -80    
240    16     
-416   -208   
-192   64     
-112   176    
-128   208    
48     0      
-16    0      
32     160    
-128   48     
-16    -64    
64     -144   
-48    16     
-192   -160   
160    -80    
-288   -192   
-16    -32    
112    80     
-32    176    
0      -16    
0      32     
32     64     
-32    112    
-128   160    
-608   0      
48     64     
-464   -64    
128    0      
-64    -48    
96     112    
-160   -80    
-32    80     
48     32     
0      48     
-64    -16    
48     48     
-112   64     
208    800    
336    672    
-176   192    
-256   -208   
-1344  -160   
-96    -112   
-208   -160   
272    208    
-80    -400   
320    416    
48     96     
96     -64    
-112   144    
0      -80    
16     -48    
144    32     
-80    48     
-48    -80    
-80    -48    
-560   -224   
240    256    
272    240    
144    -32    
-48    48     
-80    64     
-48    32     
-256   -144   
64     -224   
240    224    
160    352    
-64    48     
16     -336   
384    832    
-432   64     
-304   -560   
208    160    
-1024  -384   
0      48     
-32    32     
0      224    
128    320    
96     -16    
80     176    
-16    -32    
-32    0      
-16    96     
-32    -48    
-160   -16    
80     144    
-176   240    
-64    -912   
-1520  512    
-160   -96    
144    -368   
112    192    
-16    160    
144    -64    
0      -16    
-48    48     
128    64     
-80    -128   
-176   16     
-160   -80    
192    80     
-80    0      
224    112    
-192   112    
-16    112    
176    704    
32     -160   
96     -176   
-144   32     
-32    32     
-144   -96    
128    -464   
-64    16     
-96    -80    
-224   -480   
496    128    
-256   -208   
208    144    
48     -128   
-48    -112   
112    16     
32     -48    
96     -48    
-80    144    
48     -64    
64     -272   
64     16     
-16    16     
80     -32    
-448   -128   
256    48     
-384   64     
-96    64     
0      160    
272    -192   
48     -96    
80     48     
64     64     
48     -160   
48     -160   
96     304    
32     224    
32     16     
16     -208   
-176   -64    
-256   -16    
0      -112   
-192   128    
48     144    
160    -336   
112    -80    
192    -80    
-16    80     
-48    112    
48     -16    
-96    144    
-144   -144   
272    80     
-64    224    
176    16     
32     -48    
-240   304    
544    112    
32     192    
-96    -368   
208    -96    
-16    16     
-16    112    
192    -112   
16     -192   
-224   -16    
-32    -128   
-64    32     
208    144    
0      208    
-112   -64    
-32    64     
32     64     
64     -80    
176    -208   
208    80     
32     112    
-160   -128   
32     0      
-32    176    
112    192    
128    16     
-32    32     
224    112    
-272   64     
80     -352   
128    160    
48     144    
16     -16    
432    144    
-80    192    
-176   32     
-16    16     
144    32     
-64    -160   
16     -48    
128    208    
-176   64     
-16    -112   
112    -352   
192    -128   
-16    160    
-32    32     
-16    -64    
-112   -96    
64     -48    
112    -160   
208    48     
160    144    
-32    80     
-224   -16    
176    -80    
48     64     
0      112    
-32    64     
112    -352   
-112   -336   
48     -224   
-32    64     
176    224    
-48    336    
112    240    
240    144    
96     192    
-48    64     
-32    -32    
176    -80    
176    0      
112    304    
-16    64     
-16    -144   
192    48     
208    -576   
48     -48    
256    -224   
96     464    
176    128    
-96    -304   
-48    176    
96     0      
16     96     
-112   -176   
80     64     
112    -272   
-16    -64    
96     -240   
160    -80    
288    -208   
96     80     
48     -176   
-240   80     
32     16     
128    96     
80     -80    
112    32     
48     48     
416    -48    
-624   -560   
224    -208   
-288   -80    
112    -272   
368    80     
112    -48    
224    -32    
144    -560   
96     48     
0      -128   
-176   -16    
272    112    
112    -16    
64     48     
112    64     
48     0      
144    48     
48     112    
32     16     
176    96     
80     -432   
64     32     
32     -80    
64     16     
-48    -272   
-112   0      
80     16     
80     96     
-16    -32    
192    -208   
80     80     
-32    -288   
128    -48    
0      -352   
64     112    
-96    -224   
64     64     
48     -48    
0      96     
176    112    
-32    -32    
160    32     
64     112    
192    16     
64     32     
32     -64    
144    80     
0      32     
96     -176   
160    96     
64     -64    
-16    -48    
80     -96    
80     80     
368    208    
64     -64    
48     32     
32     160    
160    -672   
160    -112   
128    -1184  
32     0      
128    16     
288    -16    
-48    80     
48     80     
-96    -48    
608    224    
96     -800   
384    -160   
352    -192   
-160   0      
288    -32    
192    -80    
304    16     
528    240    
-640   -96    
16     -528   
496    -144   
-112   128    
-48    -320   
656    48     
80     32     
-16    -256   
144    96     
192    -16    
-496   -144   
-976   -176   
368    80     
-80    -64    
208    -48    
32     0      
96     -80    
80     0      
-48    -368   
160    -128   
160    -48    
-80    16     
384    -16    
-192   -48    
32     -176   
64     -16    
-16    80     
16     -128   
-560   -16    
-64    -48    
96     -32    
528    -32    
-464   -64    
240    -448   
80     128    
192    -16    
-192   0      
-48    48     
48     0      
96     -16    
112    -16    
16     112    
-32    112    
-736   -48    
160    -112   
112    -112   
-160   -176   
160    96     
32     48     
-144   0      
208    -288   
-208   304    
128    128    
176    0      
-32    128    
-48    16     
-80    -192   
0      -48    
-32    -16    
0      32     
-1824  -80    
96     48     
368    240    
0      -112   
64     -192   
-64    32     
48     96     
64     -160   
240    -32    
160    80     
-48    -16    
16     80     
80     80     
-32    -16    
32     464    
48     -224   
32     -32    
-64    -16    
128    -112   
-96    0      
-32    -224   
112    48     
-32    16     
-48    -112   
48     256    
-112   96     
-32    -112   
320    64     
-288   -176   
48     160    
-656   -144   
0      -96    
-16    -336   
208    16     
-192   48     
80     16     
-112   0      
-80    -1648  
16     352    
-16    -256   
160    -240   
-32    656    
-336   -592   
-224   16     
128    96     
0      -144   
48     96     
192    -16    
96     48     
64     -48    
208    -176   
96     -16    
-368   80     
96     64     
64     368    
-464   -1776  
80     -592   
304    864    
-96    -48    
112    -128   
-32    0      
48     -80    
-256   512    
-144   -464   
16     272    
-848   -128   
-64    -656   
160    320    
-112   224    
320    -96    
256    -224   
48     64     
-80    160    
-64    256    
48     -112   
-288   -240   
-1264  16     
-128   160    
-336   48     
-16    176    
-64    128    
-176   -16    
-48    -80    
-256   0      
16     -432   
-880   -448   
-192   -128   
-96    -80    
32     -288   
176    -160   
-192   16     
-32    64     
-48    208    
-240   -208   
112    112    
-16    240    
-128   0      
-96    144    
-368   -64    
-16    48     
-128   -64    
0      -400   
-944   -16    
192    -160   
-80    160    
176    80     
-112   16     
48     240    
80     -16    
240    608    
-48    128    
-128   -80    
272    672    
-256   160    
-48    0      
-176   -480   
-208   48     
112    352    
-464   64     
-64    -112   
-16    -496   
-64    16     
-96    -560   
-288   -432   
128    64     
32     416    
-208   384    
-240   80     
0      256    
528    304    
-128   1056   
-448   256    
-576   -32    
80     208    
16     64     
336    -32    
-192   -368   
208    -192   
16     -16    
-48    96     
208    -16    
-128   -16    
48     0      
-160   0      
176    128    
-64    16     
-128   96     
-80    144    
-208   64     
-272   208    
160    80     
128    -64    
-16    240    
64     -64    
64     -176   
-144   16     
-96    32     
-144   288    
-192   -144   
288    -544   
-96    -144   
0      176    
-208   -176   
96     -496   
-528   -160   
32     112    
32     16     
-64    -208   
-32    -128   
-64    -240   
-336   -48    
64     144    
-304   144    
-48    -32    
-112   -48    
112    48     
16     0      
32     -240   
-64    -64    
-16    -128   
-240   -64    
-432   64     
-144   256    
64     176    
-32    -336   
-48    -80    
-128   -48    
-48    48     
112    96     
176    112    
-240   -64    
48     16     
-240   16     
160    32     
0      -16    
-80    80     
160    128    
-272   272    
16     32     
80     144    
96     160    
-96    -16    
224    -64    
-16    80     
-32    16     
-144   -32    
48     64     
-240   64     
16     112    
48     -32    
96     16     
64     -64    
0      32     
-16    96     
64     96     
192    288    
-80    0      
-128   -224   
144    -64    
80     160    
0      128    
176    -48    
144    240    
-64    16     
-96    -112   
64     -48    
16     48     
48     128    
16     -32    
16     160    
-80    368    
-96    96     
48     96     
-448   -400   
288    -64    
192    112    
208    64     
-48    -64    
0      48     
-112   64     
-192   208    
-16    288    
-32    112    
-48    96     
-48    64     
16     16     
192    80     
-16    80     
96     0      
-32    -48    
-112   -32    
112    80     
-16    224    
-256   64     
-48    -32    
240    0      
64     80     
0      16     
80     64     
-128   32     
-96    80     
16     80     
80     192    
96     112    
16     16     
-16    -16    
288    128    
-16    -32    
64     -48    
-144   -16    
0      -80    
352    192    
-16    32     
80     48     
0      16     
160    -16    
160    96     
-48    -16    
-80    0      
0      80     
0      16     
0      16     
-48    -16    
80     -432   
64     48     
16     48     
0      48     
112    64     
160    16     
96     64     
64     48     
-144   -48    
96     48     
-32    -16    
80     80     
-64    80     
-32    32     
-416   16     
96     -112   
-48    -16    
176    64     
0      64     
96     80     
256    48     
176    -16    
-48    16     
-176   16     
0      48     
-112   16     
128    80     
-32    -128   
224    112    
-176   64     
336    32     
224    64     
-32    -96    
144    80     
-96    48     
0      0      
160    32     
-32    32     
64     96     
192    80     
-128   32     
256    -48    
-112   16     
-32    -176   
192    -16    
144    -32    
-80    96     
-400   -672   
304    16     
192    224    
16     96     
96     48     
-256   -384   
544    -96    
-176   368    
-656   -80    
208    -16    
-32    0      
208    -32    
144    -32    
64     -160   
64     176    
32     -144   
80     16     
112    -1264  
-64    112    
160    48     
112    96     
-112   16     
256    0      
-48    80     
144    96     
16     64     
304    64     
-192   -16    
208    -112   
-48    16     
272    -96    
-128   16     
48     -240   
128    144    
64     48     
112    32     
-48    0      
96     -48    
-192   48     
-16    -176   
-160   -256   
256    16     
-16    256    
208    -368   
48     -48    
16     0      
48     -208   
-128   -208   
32     80     
64     0      
64     448    
192    -240   
144    256    
-256   -112   
112    0      
-64    16     
144    -464   
-16    304    
48     -144   
160    80     
112    192    
80     144    
-32    -96    
160    32     
16     176    
32     -160   
-16    160    
16     -416   
352    -224   
304    576    
-144   -352   
32     -368   
80     480    
96     -512   
-64    32     
80     -320   
-16    48     
96     -112   
-80    -336   
128    48     
192    -240   
48     432    
128    192    
64     -1088  
0      -32    
320    -80    
176    224    
-192   -928   
48     -208   
96     48     
96     -240   
0      -240   
32     -64    
48     -160   
240    96     
160    -96    
-16    32     
-176   32     
272    272    
240    96     
64     -352   
48     304    
128    -352   
0      224    
32     240    
432    304    
0      256    
32     32     
288    -192   
64     288    
320    48     
96     0      
-80    64     
176    16     
-176   96     
64     -176   
192    96     
-96    -368   
80     128    
224    -48    
336    144    
-16    -96    
-64    64     
16     32     
16     48     
-64    -32    
32     -64    
-848   48     
96     -64    
-2544  -80    
64     -144   
112    -144   
144    -144   
64     -112   
-112   -240   
256    -112   
48     224    
112    448    
-80    128    
-176   256    
96     -80    
128    0      
-256   -128   
256    -96    
-224   64     
80     -48    
144    -16    
-48    -48    
112    208    
-16    -192   
-96    -256   
192    -576   
128    208    
192    240    
192    352    
-16    96     
240    32     
-32    -16    
80     -32    
-64    80     
0      -64    
-16    208    
176    80     
-176   48     
176    96     
-32    112    
-32    -160   
32     16     
64     -192   
48     -288   
-112   -32    
336    272    
48     240    
-112   96     
-512   -480   
400    0      
-384   192    
128    -80    
-16    752    
224    208    
-192   256    
-32    -272   
48     -128   
416    240    
80     -48    
64     64     
96     -80    
-352   -128   
416    -368   
-512   160    
112    240    
-144   0      
-96    48     
192    -400   
256    -80    
-80    -272   
-64    -528   
272    -128   
32     368    
-528   -48    
64     0      
16     -224   
-208   0      
336    -592   
96     -320   
-192   80     
-928   272    
-160   -96    
-192   -32    
272    -144   
144    16     
448    -96    
96     -64    
-48    48     
64     -128   
-368   160    
-64    -160   
-272   128    
64     -48    
-240   -144   
304    -176   
-256   224    
368    192    
-272   192    
-192   -864   
-192   -544   
-384   -304   
-304   -96    
-48    -224   
-1296  -288   
208    192    
-240   64     
96     336    
-32    48     
48     96     
96     -352   
-208   -160   
-1248  -224   
48     64     
-400   -64    
0      112    
-736   -160   
-176   48     
-80    336    
-336   256    
192    48     
-544   0      
-272   -96    
-1376  112    
-48    -208   
-32    -176   
272    64     
-224   -48    
64     80     
144    48     
96     224    
-48    48     
-256   32     
32     224    
-80    -160   
-272   -176   
-144   -64    
80     288    
-1248  736    
-176   -96    
-368   -560   
80     240    
-96    48     
-128   112    
128    128    
-336   -208   
-16    208    
160    -16    
16     -80    
48     32     
16     32     
-48    16     
-128   -32    
-272   -16    
-16    96     
-720   -32    
144    -48    
16     0      
160    48     
128    -80    
160    144    
-64    32     
-256   -64    
128    224    
-192   0      
64     128    
-48    16     
-32    48     
-256   -80    
-112   -80    
-1680  -160   
80     32     
16     48     
384    480    
208    320    
-144   -48    
-240   -112   
-192   0      
-48    0      
-288   32     
-64    64     
-240   48     
-128   64     
-256   -16    
112    0      
0      -16    
176    128    
-48    -48    
64     32     
240    80     
-128   64     
-16    16     
-128   -224   
416    -112   
112    80     
208    176    
-160   32     
-80    -32    
-112   48     
-112   240    
-336   -48    
256    96     
-336   32     
-144   -32    
80     -64    
208    32     
80     64     
-144   -64    
176    80     
16     16     
16     16     
-96    96     
-16    -16    
-208   -96    
0      -32    
-80    0      
256    112    
-464   -32    
48     96     
-80    0      
-80    32     
-64    48     
-80    -16    
32     -16    
-112   0      
32     80     
-32    96     
160    80     
-288   -48    
48     16     
-320   -16    
176    80     
-48    -64    
144    -16    
-80    96     
48     32     
-80    32     
32     16     
-48    -32    
64     160    
64     64     
-64    -80    
192    48     
-128   32     
160    0      
-144   16     
0      64     
0      -80    
-16    48     
16     0      
16     16     
-80    -32    
80     16     
48     320    
192    80     
128    144    
-592   128    
288    -16    
-144   160    
176    112    
-176   -96    
-96    48     
272    208    
-336   0      
-80    -80    
224    112    
-304   0      
704    -16    
32     64     
-384   80     
208    272    
-368   112    
-96    -16    
64     -16    
64     48     
112    128    
400    0      
368    0      
640    112    
-112   -192   
176    144    
-416   -112   
-32    -144   
-48    160    
-96    32     
304    256    
-48    -64    
160    32     
-192   240    
-96    -32    
-32    -32    
0      64     
128    144    
32     -80    
128    48     
16     0      
-96    64     
80     -352   
112    256    
96     288    
-176   -288   
16     672    
256    128    
-96    -160   
-256   -640   
160    80     
144    96     
160    -96    
-16    592    
32     -48    
-112   -96    
256    544    
80     -560   
-64    256    
-192   1280   
240    -656   
-208   -624   
-32    304    
400    -48    
0      -64    
16     -416   
-256   -448   
32     -304   
-224   96     
80     -64    
48     -128   
128    -64    
48     112    
240    128    
128    -48    
112    48     
-48    80     
224    32     
0      -32    
80     -112   
-80    -224   
128    -16    
368    -32    
-224   16     
16     16     
-208   176    
128    96     
-80    176    
160    80     
-96    -96    
-48    96     
0      -80    
-672   -48    
144    -64    
112    -288   
-16    144    
-16    320    
160    0      
224    128    
-240   64     
-128   -32    
48     128    
208    -240   
208    80     
-80    32     
96     64     
-112   -96    
64     -80    
144    64     
-16    32     
-32    -48    
128    -432   
96     -32    
112    32     
-16    -80    
160    -80    
176    176    
-176   16     
192    48     
-32    48     
32     80     
464    240    
-256   64     
32     304    
224    336    
-48    16     
240    -288   
272    128    
-144   288    
96     -32    
128    -80    
96     64     
32     160    
-32    112    
48     80     
16     -96    
0      -304   
144    -80    
192    192    
80     48     
16     64     
96     -544   
-32    16     
-224   -688   
208    -320   
128    16     
112    224    
-80    -64    
64     48     
-80    -80    
64     48     
144    -112   
-16    96     
144    112    
-96    -688   
208    -256   
128    -64    
-16    112    
112    -208   
64     -80    
96     0      
64     176    
32     64     
80     80     
-144   -128   
64     304    
192    96     
-16    -480   
-80    16     
80     -288   
80     144    
32     48     
96     224    
-16    -144   
176    -16    
112    32     
112    32     
-80    64     
-96    -16    
160    -400   
80     -288   
144    80     
336    160    
-128   384    
480    208    
-32    192    
0      -128   
32     -160   
0      -272   
96     -208   
-16    16     
224    240    
224    272    
-864   -848   
224    -832   
144    -304   
96     -352   
272    -64    
96     16     
-176   208    
160    224    
-112   352    
240    144    
368    272    
-64    -432   
-16    -720   
-256   784    
528    64     
-272   544    
0      -176   
-192   -96    
-128   -240   
-224   -272   
-64    -256   
-208   -256   
-320   240    
-80    -48    
-80    160    
352    224    
272    32     
432    -464   
240    -272   
224    176    
112    96     
-384   208    
128    0      
-32    0      
80     -176   
48     -560   
-80    256    
336    -624   
80     240    
272    -256   
-480   432    
304    96     
-16    80     
-192   -896   
160    416    
-448   368    
352    16     
288    512    
-224   -208   
0      -208   
448    -64    
-144   320    
288    -272   
-32    -48    
-64    -32    
224    288    
-272   80     
736    352    
-544   0      
176    -48    
48     -336   
-144   -64    
-464   192    
-288   -336   
96     128    
-16    -48    
192    0      
-112   -432   
-96    -48    
-16    -1360  
224    112    
-16    32     
32     -32    
-160   208    
224    -160   
-208   -96    
112    48     
-560   -96    
208    16     
-1328  -144   
-32    48     
0      96     
48     -320   
128    144    
0      -256   
96     48     
112    -192   
528    416    
-608   -320   
32     -528   
144    192    
-112   -32    
-16    -32    
128    32     
-1408  80     
64     -96    
-32    -96    
208    -240   
-144   -528   
48     -512   
-144   -160   
-64    16     
176    0      
288    176    
-80    -48    
-608   48     
80     -32    
-80    0      
160    -32    
-32    48     
-96    -272   
112    -416   
160    -64    
224    240    
16     -144   
80     48     
-640   64     
80     0      
80     16     
-80    0      
-448   -336   
448    -240   
-144   16     
320    64     
64     32     
-64    -256   
208    -176   
64     -272   
256    64     
96     -384   
-80    -96    
-144   0      
-32    -32    
16     -16    
304    128    
-64    16     
48     -80    
16     -64    
160    80     
-80    48     
-48    -240   
-112   80     
-736   -16    
80     32     
-128   -32    
-128   48     
144    64     
-928   -272   
-192   -112   
-592   160    
-64    -16    
80     -32    
128    128    
112    48     
-16    -32    
-64    -144   
96     80     
0      80     
-256   -16    
-64    -144   
-32    -64    
16     112    
-80    48     
-176   16     
-400   32     
-96    -16    
-288   0      
-48    32     
80     -48    
-48    -16    
-304   -144   
128    48     
80     32     
-16    -48    
64     -32    
-32    48     
-32    -16    
64     144    
-48    0      
-64    96     
-48    32     
-432   -80    
96     48     
-224   -16    
144    64     
96     -96    
-64    -16    
-144   -48    
-176   112    
96     304    
80     96     
-112   32     
-64    48     
-16    -48    
-128   16     
48     128    
-352   64     
-32    48     
48     -128   
128    0      
32     32     
48     160    
128    -112   
192    -16    
288    64     
144    -48    
-176   -16    
-176   -48    
-112   -128   
-176   160    
64     112    
-240   -64    
144    -16    
-1136  0      
-16    -128   
64     0      
336    64     
304    192    
144    256    
-48    -336   
-64    -368   
192    304    
-224   320    
416    320    
-528   384    
-240   -368   
-64    -240   
352    -16    
-272   -384   
112    208    
272    176    
-400   -80    
-288   672    
-96    -480   
0      -320   
-304   640    
240    -16    
-32    -208   
64     448    
96     -256   
48     -112   
-448   144    
64     -64    
-896   80     
224    80     
0      -304   
0      -48    
96     208    
-336   -32    
384    -528   
-288   80     
192    464    
112    320    
-16    144    
-128   16     
96     144    
-272   -32    
80     -192   
-384   -144   
0      -96    
128    -48    
64     144    
-16    -48    
112    -48    
96     160    
-96    48     
64     112    
160    240    
-224   32     
-240   -48    
64     32     
64     80     
128    64     
-144   -128   
-32    -160   
-48    -16    
-48    48     
48     16     
-80    32     
32     -32    
160    0      
32     32     
-64    -48    
96     -16    
-16    48     
336    64     
-176   16     
-16    -64    
-144   -80    
-48    48     
0      64     
96     -64    
48     0      
-48    80     
48     80     
96     448    
-336   336    
-64    32     
128    -128   
64     -16    
-16    80     
-224   -16    
176    96     
272    192    
-240   208    
64     -80    
-48    0      
0      -16    
-48    -112   
-128   -224   
-144   112    
-144   -64    
224    -16    
48     -32    
80     -64    
96     128    
-192   272    
240    160    
-80    -112   
176    160    
-320   160    
-48    -48    
208    -64    
-16    -192   
384    -384   
224    16     
-16    272    
-80    96     
-160   240    
-448   -48    
368    208    
-16    96     
48     -208   
80     -48    
-80    160    
-64    96     
64     80     
80     48     
-32    16     
112    -48    
32     -16    
0      -128   
-80    -16    
112    -80    
-112   -32    
240    400    
-160   304    
-144   64     
272    16     
80     32     
224    32     
-112   -112   
16     -80    
144    16     
112    -160   
-352   -224   
16     -144   
-64    288    
304    304    
-32    80     
144    -16    
64     -16    
48     -80    
144    16     
-48    -96    
80     96     
16     0      
32     -80    
80     -64    
80     32     
112    16     
144    336    
-144   48     
-80    128    
-32    -48    
-32    -304   
48     96     
80     -240   
272    480    
-336   -512   
96     -240   
176    32     
32     64     
48     48     
96     64     
0      288    
-240   -144   
112    -352   
160    80     
-272   128    
128    -304   
-48    96     
-96    -160   
176    608    
128    48     
-160   -80    
-176   -384   
-80    160    
-48    -352   
304    352    
272    144    
256    -368   
-48    304    
112    80     
48     320    
256    -160   
48     304    
32     -384   
-112   736    
112    -464   
-320   -944   
-96    352    
528    688    
0      -720   
192    -304   
320    208    
-112   48     
384    32     
80     240    
448    -224   
-64    -384   
-944   32     
736    1136   
160    640    
-624   -768   
-336   -192   
208    -816   
256    -16    
592    288    
96     -112   
-304   -224   
144    208    
-240   256    
-96    16     
192    48     
0      -64    
208    -32    
160    -144   
160    32     
64     80     
16     64     
-16    -624   
144    96     
-96    64     
272    64     
96     64     
176    48     
-176   -64    
80     32     
128    112    
48     -288   
80     48     
128    128    
192    560    
128    192    
80     -64    
-128   0      
256    96     
16     32     
-16    -16    
288    0      
-128   16     
208    -16    
80     -64    
128    96     
112    -208   
-16    -96    
176    -64    
-80    128    
-32    -272   
64     96     
176    -48    
64     80     
-128   96     
128    192    
-80    -112   
16     -224   
64     32     
16     -32    
144    32     
-144   -96    
208    80     
304    48     
-32    112    
112    32     
0      -96    
176    -144   
112    -368   
-16    32     
48     -640   
-112   16     
-320   160    
-48    0      
-48    96     
160    -240   
192    224    
-80    -48    
32     176    
288    240    
-64    -48    
-32    -336   
-16    -272   
32     -176   
-48    192    
-32    128    
240    144    
-1024  -80    
192    -208   
80     0      
16     -16    
0      -96    
144    -176   
64     -48    
176    -944   
-128   -144   
48     -112   
80     -160   
-160   -320   
-64    240    
176    80     
176    -32    
-448   -128   
-64    -176   
192    0      
176    -48    
48     -32    
-32    -80    
-64    -64    
-32    -16    
0      -144   
96     -160   
160    32     
240    48     
0      -16    
16     -16    
160    0      
-128   48     
112    0      
-384   16     
224    48     
16     32     
-112   -400   
-64    -160   
0      -368   
0      -32    
64     32     
-48    112    
176    -32    
16     32     
-192   -48    
64     -96    
-32    -48    
-96    -16    
-1072  0      
-80    -80    
128    -96    
160    -112   
-48    -32    
128    -320   
64     48     
80     -1504  
80     48     
128    32     
-32    -80    
48     -16    
288    96     
-272   -16    
80     -16    
-480   -80    
160    -48    
-736   32     
96     32     
48     -32    
96     -160   
144    64     
160    -592   
64     32     
32     0      
80     48     
-32    16     
0      -80    
-64    16     
128    -16    
0      -16    
176    -80    
96     112    
0      -32    
32     16     
64     -64    
96     80     
160    80     
-224   16     
256    48     
-64    48     
48     -128   
320    -16    
-240   304    
-64    -160   
-320   384    
144    -144   
-416   -224   
-208   -192   
-80    -768   
384    144    
-16    1024   
208    -560   
0      144    
-624   48     
16     48     
-368   -160   
384    224    
128    176    
-128   80     
-128   256    
256    144    
-256   -256   
-384   -48    
224    -48    
144    -80    
256    -80    
-1200  32     
-1040  176    
-544   0      
240    288    
-432   112    
-192   32     
272    -256   
208    -96    
16     -16    
592    224    
-496   64     
144    -240   
32     48     
-864   208    
224    0      
-192   -32    
-352   -112   
0      64     
-288   48     
256    256    
-2144  -48    
-112   -128   
-16    48     
-32    -144   
160    -176   
144    144    
-304   80     
16     -96    
-448   -192   
16     32     
-16    208    
0      80     
-32    -80    
-160   -64    
-208   32     
-400   0      
64     16     
160    64     
-32    0      
-416   -96    
-240   144    
208    112    
128    48     
16     -16    
48     96     
80     64     
-96    16     
-48    -32    
-368   -128   
-32    0      
-160   -80    
16     112    
-400   48     
0      16     
240    160    
-160   144    
16     -144   
32     32     
16     -192   
0      -80    
-32    -48    
-64    -16    
0      -48    
-96    -128   
-144   128    
-256   16     
0      0      
-320   16     
-48    16     
-208   -192   
224    -32    
48     112    
48     48     
80     -240   
-64    0      
-80    112    
32     32     
-64    16     
16     32     
224    112    
-144   64     
-16    64     
-272   48     
192    144    
-736   -112   
192    32     
128    64     
-224   144    
32     0      
-208   16     
128    80     
-16    -96    
32     64     
32     -96    
208    112    
-208   112    
16     32     
-192   -160   
-48    32     
-880   64     
-96    96     
-144   -32    
192    -224   
-288   -304   
-208   -448   
0      -64    
-80    0      
-16    176    
-176   320    
32     304    
-32    -128   
80     -32    
-48    -32    
64     80     
-640   -80    
192    48     
80     16     
-144   48     
48     208    
160    144    
32     208    
0      -32    
-160   -80    
32     -32    
144    -112   
-64    400    
416    352    
-128   64     
32     -80    
-208   -320   
64     480    
-48    -176   
-304   -112   
-32    304    
-48    -224   
16     -16    
-16    96     
240    16     
-144   48     
112    48     
-192   -208   
16     144    
-48    288    
32     -160   
-128   16     
96     192    
96     0      
176    -384   
-352   -288   
96     320    
-112   176    
32     -144   
128    -144   
-112   208    
-144   336    
-256   48     
80     -32    
-224   16     
304    160    
0      96     
80     -208   
64     48     
-64    96     
32     496    
256    272    
-128   0      
48     64     
32     48     
-112   144    
208    96     
-32    16     
112    0      
-192   -224   
-16    -32    
112    288    
-256   -32    
192    80     
-64    96     
336    64     
-16    48     
112    96     
-176   -48    
-16    -64    
-48    16     
-32    32     
32     16     
272    -64    
-160   -64    
-144   -176   
-16    -160   
-304   112    
96     160    
-160   -112   
272    -160   
208    32     
32     144    
-64    -192   
720    -32    
144    -96    
176    -304   
-32    -464   
0      368    
-1168  -32    
128    -16    
224    -48    
0      64     
-112   -48    
-16    -96    
-64    256    
-208   -48    
-32    0      
208    0      
144    64     
32     16     
96     32     
-80    16     
16     -32    
144    96     
-128   -352   
96     64     
-112   48     
176    48     
-48    -48    
64     16     
-112   0      
48     64     
128    96     
144    16     
-144   -160   
304    -96    
-208   96     
320    64     
112    64     
96     -608   
-128   48     
-208   -64    
208    32     
176    -96    
-32    -160   
112    48     
-32    80     
-48    -64    
208    16     
48     -96    
-112   -80    
-160   16     
32     -64    
144    96     
112    -1168  
-112   128    
288    80     
192    16     
-144   -48    
128    80     
-16    80     
-48    48     
96     96     
224    80     
-144   -192   
32     0      
192    128    
-32    0      
32     -48    
192    -144   
48     112    
-48    64     
112    112    
48     64     
160    0      
-80    -224   
64     80     
64     32     
-160   -176   
64     -32    
80     16     
64     16     
-80    -48    
96     -128   
192    -128   
144    80     
80     -64    
48     208    
-64    -80    
96     0      
96     80     
160    144    
-208   -16    
80     -32    
-64    16     
96     -144   
192    48     
32     -16    
384    800    
208    208    
32     -144   
-112   64     
0      48     
-96    -480   
96     128    
128    64     
-16    272    
32     224    
256    80     
272    -32    
160    48     
80     32     
32     -32    
160    96     
32     -64    
64     80     
-16    -224   
-48    -128   
-16    -192   
-192   64     
-112   -16    
112    48     
64     32     
224    176    
-16    64     
208    48     
208    64     
80     -144   
80     32     
80     -80    
96     16     
96     -64    
64     64     
48     64     
192    176    
-96    96     
16     48     
112    208    
32     176    
64     176    
-144   -32    
80     32     
144    48     
144    80     
112    -64    
-64    -160   
176    -48    
-16    64     
-160   -432   
64     128    
16     832    
256    -496   
-32    -48    
16     -160   
32     -544   
0      -80    
96     -368   
48     48     
224    80     
32     48     
16     96     
64     -240   
176    160    
48     32     
128    -96    
-32    -80    
-16    -128   
0      352    
-1376  -64    
128    -512   
64     256    
-48    -512   
16     -192   
192    -1168  
80     16     
368    320    
-112   -112   
112    -80    
304    -656   
432    16     
320    -48    
0      -272   
-96    96     
-752   -336   
-320   -272   
-16    -336   
96     288    
128    176    
352    -160   
-96    176    
240    192    
-176   64     
192    -48    
-16    160    
96     -32    
-240   192    
176    336    
-48    320    
-240   -48    
288    -48    
-160   -112   
544    -512   
192    -176   
336    -224   
288    96     
144    16     
-464   128    
-32    -32    
-352   32     
-64    0      
144    192    
64     80     
368    -112   
-656   16     
208    -96    
-560   464    
48     -16    
208    -160   
32     -112   
48     -48    
-32    -240   
0      -48    
416    -176   
-144   128    
176    208    
16     48     
0      -64    
112    -16    
-128   -144   
64     -32    
-320   64     
64     48     
176    144    
144    64     
-192   -384   
256    -336   
160    192    
112    -464   
-64    112    
80     -80    
-176   112    
96     -192   
-96    -48    
-64    80     
-224   32     
-96    -144   
144    32     
-672   16     
48     -144   
64     -16    
144    64     
160    144    
64     -640   
16     48     
-112   -96    
96     -96    
32     -48    
160    0      
-272   -32    
-16    -176   
-768   -96    
176    -64    
-240   80     
-64    -64    
272    80     
-32    -96    
16     -32    
144    -48    
-80    -16    
-176   144    
128    96     
-144   -32    
-80    64     
80     -32    
176    16     
-208   48     
192    0      
-240   0      
32     -16    
112    16     
16     -288   
48     -48    
-48    -80    
-144   -32    
-128   -32    
224    -64    
48     16     
128    16     
-192   16     
16     -32    
-176   -144   
-16    0      
-608   112    
288    0      
32     240    
112    -144   
224    432    
256    320    
-80    -64    
-192   -48    
-416   16     
-288   -192   
-48    -272   
-128   -32    
48     0      
48     272    
-480   -256   
-128   -128   
-608   -192   
0      64     
-80    304    
0      176    
-416   -272   
-320   -80    
0      0      
-80    -288   
-176   -112   
-144   160    
-96    -16    
80     -64    
-96    128    
-240   32     
-48    -32    
144    -96    
240    0      
-160   96     
-304   -288   
48     48     
-224   128    
-224   -160   
-160   160    
144    64     
-656   -192   
-144   32     
-1200  608    
-32    192    
176    -80    
128    -160   
-96    -64    
96     32     
-240   -240   
-208   -96    
-32    128    
32     48     
224    -32    
32     96     
64     -64    
-640   -128   
-176   -112   
-704   -32    
-96    112    
80     -16    
64     16     
-128   -80    
-16    96     
0      32     
-32    0      
80     0      
16     32     
32     16     
-112   32     
-112   0      
-48    0      
-64    32     
-32    64     
-64    -16    
-160   16     
160    80     
-64    -64    
16     32     
416    368    
-528   96     
400    16     
-352   -16    
256    272    
48     192    
-288   32     
-16    -80    
-48    48     
-400   32     
224    112    
-1536  -160   
-112   48     
352    80     
-144   -32    
16     16     
-272   -32    
0      0      
-176   0      
48     16     
-176   -112   
384    144    
112    144    
-96    128    
-640   -128   
256    0      
352    224    
-752   80     
-224   -32    
48     -64    
512    96     
-432   32     
208    96     
128    64     
-128   48     
128    80     
-144   32     
-16    -16    
-32    16     
-880   -320   
704    0      
-160   64     
-384   96     
32     112    
-160   -48    
80     96     
112    80     
48     -48    
-48    80     
-128   48     
208    64     
-144   32     
0      48     
-16    64     
-128   16     
112    0      
-128   -16    
96     80     
96     64     
16     96     
-80    240    
272    96     
-80    -32    
-320   -128   
-160   48     
192    80     
0      48     
-112   48     
128    32     
-144   32     
-96    -32    
-384   -112   
160    128    
32     -64    
-80    -16    
128    48     
-32    48     
160    48     
-112   -16    
176    32     
-32    16     
16     80     
-64    -48    
96     112    
192    32     
-192   0      
-48    0      
128    -32    
32     -32    
272    -176   
-368   -304   
176    -96    
64     -80    
16     -192   
304    192    
-128   224    
32     -64    
-64    32     
160    -16    
-256   256    
160    224    
128    -64    
0      -224   
112    80     
128    96     
-16    -16    
80     -32    
128    80     
192    160    
-48    -32    
-96    -112   
288    208    
-80    64     
256    320    
-32    -192   
-32    -48    
64     368    
-160   -112   
192    -16    
0      80     
-32    0      
192    80     
80     32     
-160   -1040  
-96    96     
-192   512    
-32    -80    
192    32     
192    128    
-32    192    
144    192    
192    -48    
208    224    
288    -192   
176    48     
112    224    
-128   -96    
-80    16     
-112   112    
0      48     
-96    -32    
208    112    
16     208    
208    64     
-80    224    
-48    -592   
48     32     
272    768    
96     -464   
272    144    
-80    144    
144    -16    
144    0      
-144   112    
96     -96    
64     48     
96     128    
-272   -144   
48     -48    
160    192    
-16    -816   
-48    32     
112    -208   
128    480    
96     -160   
192    -240   
112    288    
48     -64    
96     176    
-64    16     
-32    -16    
128    -192   
-80    304    
-32    -304   
160    336    
256    -224   
64     -320   
144    176    
-160   256    
-112   -192   
16     -64    
112    528    
48     80     
-144   -224   
160    -192   
48     48     
160    160    
128    -96    
112    128    
-96    496    
0      -48    
192    16     
-128   -592   
112    -48    
80     -560   
0      -288   
160    -432   
416    1040   
-432   256    
96     -64    
0      -160   
416    -64    
-96    256    
384    160    
-160   160    
112    240    
-48    432    
112    32     
384    496    
80     224    
-240   16     
48     224    
304    96     
224    80     
64     -240   
-48    -96    
-16    -80    
128    48     
-48    128    
-144   32     
-160   32     
112    208    
384    224    
-144   144    
96     -576   
-272   -32    
-64    -352   
480    -80    
-272   0      
64     -128   
48     64     
16     -80    
48     144    
112    -192   
272    64     
-48    -144   
128    144    
480    -112   
-416   224    
32     -448   
64     -144   
-224   -368   
176    -80    
-144   -48    
240    -48    
0      128    
112    112    
32     208    
320    -240   
-16    48     
64     -208   
-32    144    
112    -32    
16     16     
-32    0      
128    32     
-32    128    
192    144    
-160   -16    
304    16     
-272   272    
80     -112   
160    -48    
48     -48    
128    96     
-224   -288   
224    -144   
288    48     
-80    176    
-80    -112   
16     -864   
64     -48    
160    -464   
224    80     
80     -32    
-32    -544   
128    -96    
80     -272   
48     -144   
112    32     
32     -128   
64     64     
176    -112   
0      -928   
48     -16    
96     -160   
-16    192    
400    -64    
-208   160    
48     -128   
-208   80     
48     -96    
528    224    
-224   80     
-112   -624   
128    0      
240    112    
48     -80    
272    -16    
112    176    
-80    128    
-32    400    
-352   96     
80     -112   
-336   -32    
32     -32    
384    64     
-224   -112   
-176   -336   
-32    -320   
80     144    
192    32     
64     96     
112    -64    
-80    80     
192    -160   
-208   80     
-48    64     
-80    0      
-128   176    
304    160    
-144   -640   
480    -336   
128    720    
176    -960   
144    192    
112    -672   
-224   128    
304    288    
-288   -240   
-64    -368   
368    -144   
96     288    
224    64     
-400   -176   
32     -320   
96     -64    
-16    32     
64     -48    
144    -16    
112    -144   
-176   -368   
64     0      
96     32     
48     176    
96     0      
48     -128   
-112   -112   
288    -144   
-96    -160   
256    -80    
-576   64     
-48    -48    
-96    16     
-48    -32    
-16    48     
-32    -256   
0      -32    
272    -64    
96     112    
144    240    
-192   -48    
-64    0      
80     -48    
-144   -64    
80     -48    
-720   -32    
208    48     
-1392  -96    
128    -64    
352    48     
-256   -256   
192    32     
160    -208   
128    -48    
-144   -80    
0      -16    
-128   80     
80     112    
-160   -16    
16     -32    
-336   0      
80     0      
-160   -32    
0      -208   
112    80     
128    0      
112    48     
80     -192   
96     -176   
-624   96     
-32    -48    
-160   16     
192    0      
64     96     
320    0      
-576   -336   
192    -112   
-496   96     
160    -128   
64     96     
0      -16    
96     64     
48     -608   
320    -160   
-192   64     
16     48     
-48    16     
144    -80    
-208   48     
32     -144   
144    240    
-160   96     
-720   -16    
160    -96    
32     272    
-784   -96    
224    -32    
-96    16     
96     -80    
176    112    
-256   -16    
-208   -48    
192    -32    
0      96     
112    80     
368    16     
-1200  48     
0      128    
-576   -224   
112    0      
16     -128   
-96    80     
256    80     
-336   -128   
-16    96     
-688   96     
144    -16    
-1936  -32    
112    80     
80     -16    
-16    112    
-32    -96    
-96    32     
-320   -128   
176    -64    
-176   -32    
208    208    
-48    0      
-368   -16    
-160   -48    
-256   -64    
0      48     
-96    32     
-96    48     
-832   -64    
-112   -48    
16     64     
128    -16    
-144   -144   
96     16     
128    80     
-160   0      
16     -32    
0      32     
-80    96     
144    96     
-48    -16    
-176   96     
-112   64     
-400   32     
64     -16    
-160   -96    
192    16     
-144   -32    
0      -176   
-64    16     
-32    208    
-176   16     
48     64     
128    16     
-48    80     
-16    64     
-368   160    
0      -320   
-640   -96    
0      448    
240    160    
-208   0      
256    -144   
32     208    
-64    -64    
-64    48     
112    -32    
-96    80     
-240   288    
144    16     
-32    32     
-256   -80    
128    -48    
-160   -16    
96     64     
-2544  -16    
-16    64     
-32    -272   
192    544    
-16    80     
-208   -400   
48     96     
48     -48    
-144   -96    
-176   144    
160    -528   
96     560    
208    -16    
-176   -80    
-112   -48    
-640   144    
-96    96     
176    -512   
-64    480    
-32    -16    
-96    -16    
-96    -64    
-80    16     
176    -48    
128    96     
32     -16    
-256   -224   
208    880    
-224   -496   
-16    -192   
16     384    
-32    240    
160    -80    
-240   -176   
32     16     
-64    64     
-48    -16    
-32    -96    
-48    560    
80     32     
-336   -256   
-512   -192   
48     -384   
-48    128    
288    48     
-528   -816   
-272   -512   
-96    -224   
160    -80    
128    48     
128    48     
-48    272    
80     80     
240    288    
-160   -112   
80     -48    
-112   160    
96     384    
-16    64     
128    368    
112    192    
-32    -64    
80     128    
0      -64    
48     128    
128    192    
144    320    
-144   0      
-64    0      
-32    48     
64     240    
80     176    
80     144    
32     144    
80     16     
-16    -48    
80     -256   
112    -32    
16     80     
32     144    
-16    -16    
32     -144   
-208   80     
-64    192    
96     96     
-112   672    
64     416    
-304   -16    
-368   -336   
0      -96    
96     112    
96     -80    
32     -160   
-96    -16    
192    448    
-128   -16    
16     -16    
16     48     
112    -304   
80     -96    
256    0      
-112   144    
-48    176    
176    -112   
96     -224   
80     304    
-208   48     
-128   0      
-176   96     
208    32     
0      96     
320    240    
-32    304    
-96    -144   
160    16     
16     96     
16     80     
80     48     
272    80     
-112   96     
-272   336    
400    -144   
240    -240   
-16    -48    
272    80     
-144   288    
-96    -144   
-64    32     
144    0      
256    368    
-144   112    
128    -144   
-272   -448   
176    48     
-224   144    
-160   320    
352    192    
-112   80     
192    0      
0      16     
176    -80    
-336   -256   
-64    -64    
96     16     
-64    -80    
0      -16    
-144   160    
176    0      
-16    32     
144    -1136  
96     -144   
672    448    
-704   368    
80     16     
-128   16     
-48    80     
48     -448   
-16    -160   
48     0      
-112   224    
192    368    
288    128    
-48    -144   
32     96     
-64    -176   
144    80     
192    48     
-48    -48    
64     16     
-96    -80    
192    32     
32     32     
64     144    
144    32     
-112   -272   
272    224    
-96    224    
-112   -32    
80     0      
128    -144   
-16    -144   
-240   -368   
-112   -240   
128    -240   
144    80     
16     -48    
128    -704   
-32    -176   
208    -32    
-96    32     
-16    16     
80     64     
128    -80    
192    96     
288    224    
-128   288    
0      -720   
288    64     
-128   -224   
128    192    
-288   -240   
240    304    
0      -64    
-192   64     
192    0      
0      16     
64     -16    
48     -32    
-96    -64    
-176   -192   
32     -96    
64     -352   
288    48     
-144   -864   
64     96     
128    768    
272    656    
-48    192    
-96    0      
64     48     
64     -32    
48     64     
-112   -16    
-112   80     
256    112    
-80    32     
144    -240   
160    144    
16     32     
96     -32    
160    32     
-112   -96    
-32    -16    
64     -16    
-240   -112   
-48    -48    
64     192    
160    0      
240    112    
-96    -16    
80     112    
176    -208   
16     -160   
304    -208   
160    96     
48     16     
96     -208   
-80    -16    
48     -96    
-32    0      
48     -16    
32     96     
-144   -64    
272    96     
272    -128   
-112   -16    
-32    -32    
0      -16    
96     64     
304    -16    
128    0      
48     -496   
-32    -128   
48     -96    
48     -192   
144    48     
32     -400   
-32    -80    
64     -80    
256    -48    
-128   0      
128    0      
96     -176   
80     48     
128    -272   
-240   -64    
-32    -288   
16     -16    
-512   48     
128    -112   
32     -16    
176    -304   
32     -64    
288    -704   
-304   -160   
384    64     
-192   0      
304    -16    
-160   16     
-16    -272   
80     -144   
-96    112    
208    16     
-1952  112    
80     -144   
144    -224   
-16    -112   
96     -176   
-16    -64    
-192   96     
32     -256   
256    -80    
-32    -240   
64     80     
80     -96    
16     32     
-192   -80    
272    -80    
-496   96     
-112   80     
320    48     
-208   -112   
-288   -144   
208    -48    
-32    128    
-336   -320   
192    16     
192    0      
-240   16     
16     -288   
432    -272   
304    176    
48     -144   
240    -16    
368    0      
-144   -32    
80     -32    
240    16     
-160   -304   
176    32     
224    96     
240    -32    
16     -80    
80     80     
48     32     
-64    0      
-160   -64    
160    -48    
48     -16    
208    80     
-1248  112    
224    -240   
-800   -32    
224    -80    
32     176    
112    -208   
0      192    
80     -1168  
-80    -48    
-304   48     
368    160    
-224   16     
-144   176    
288    32     
-32    48     
-80    -64    
-64    -48    
48     -32    
128    48     
-192   48     
128    -128   
80     112    
-96    -1264  
720    -208   
-320   224    
368    96     
-64    128    
-16    176    
-288   -224   
48     -160   
144    -48    
256    192    
208    16     
0      -320   
0      -240   
-64    -368   
48     -192   
-48    -48    
-16    -176   
-448   -16    
480    464    
-272   368    
16     -176   
-256   -592   
0      -144   
-16    80     
32     128    
16     -32    
-32    -80    
32     64     
208    -32    
160    64     
0      -128   
176    -560   
-240   -224   
224    144    
64     96     
0      128    
-192   128    
224    112    
-208   -80    
80     -32    
-48    -64    
-1568  -64    
176    -240   
48     -192   
64     32     
224    112    
-560   -32    
-32    16     
-480   256    
-160   -320   
240    -80    
-256   32     
48     -16    
-48    -48    
-256   -96    
112    16     
-32    -224   
-16    -192   
-32    -240   
-576   112    
-288   64     
-432   192    
-32    64     
-144   48     
-96    -64    
-576   -144   
-80    -16    
192    32     
-144   176    
0      192    
208    160    
-48    -160   
-16    48     
-16    -32    
48     128    
-128   48     
-16    96     
256    304    
-496   304    
-80    -128   
64     -144   
-16    80     
-672   -32    
128    -32    
-32    -240   
160    64     
-336   -112   
128    144    
96     256    
-48    80     
64     -16    
-144   -176   
-32    64     
-352   -16    
80     -96    
-64    -32    
48     32     
-576   96     
224    288    
-32    -160   
80     48     
160    128    
-160   64     
0      -112   
0      -80    
-80    80     
-272   32     
16     32     
-160   -48    
-16    176    
-208   -64    
-64    48     
-320   176    
176    176    
-48    432    
32     -192   
64     -144   
-80    176    
-160   -176   
560    -64    
48     -160   
176    64     
-112   -192   
-48    -160   
-80    -112   
-128   -464   
48     -352   
-448   -224   
-80    -80    
-480   256    
-32    -64    
208    -144   
32     -80    
-80    128    
320    192    
0      192    
-320   -64    
208    192    
544    160    
-128   512    
-240   80     
-96    -144   
-144   80     
48     -80    
-480   160    
144    48     
-224   144    
-128   80     
-560   352    
-112   32     
-48    -48    
-272   -80    
-192   0      
-80    -16    
96     32     
432    272    
-48    64     
-16    -48    
208    96     
-400   80     
544    688    
-816   480    
80     144    
-256   -144   
144    112    
352    352    
48     96     
192    448    
-80    112    
-32    48     
144    0      
-272   112    
-80    32     
-32    16     
336    -64    
-528   -512   
48     -64    
-224   144    
48     400    
240    112    
-112   -112   
-240   -192   
-128   -432   
-160   432    
272    144    
-128   -784   
-144   288    
-80    -208   
-288   -16    
224    32     
320    -224   
-16    512    
272    416    
-368   80     
80     -320   
96     128    
288    256    
32     160    
-352   -464   
-64    -80    
-96    0      
112    288    
-48    -112   
-32    -224   
-336   -656   
64     176    
496    560    
400    -32    
-128   208    
128    -160   
64     -128   
96     336    
-16    -272   
-32    96     
96     384    
80     -80    
96     -240   
-144   144    
-80    -80    
-64    48     
128    -16    
176    208    
-48    96     
80     80     
0      144    
-32    64     
144    48     
144    96     
112    -288   
0      -160   
-128   208    
32     128    
80     96     
32     0      
64     176    
272    304    
112    -64    
32     96     
-48    128    
48     192    
-64    -64    
-64    -32    
160    -32    
-16    -80    
-16    96     
-256   -16    
-96    -896   
-64    -112   
176    160    
-96    112    
32     80     
176    32     
144    48     
-32    -64    
128    -64    
176    80     
0      80     
16     96     
-112   -112   
32     -16    
-144   144    
-192   -48    
32     32     
-32    32     
160    80     
32     48     
32     -16    
48     -32    
48     0      
112    64     
-48    80     
-240   -16    
112    16     
144    -64    
0      224    
96     240    
-64    -112   
256    16     
208    176    
-80    -32    
96     80     
-288   64     
-48    -80    
208    80     
48     -32    
288    96     
-64    -80    
240    208    
-144   -96    
128    16     
128    48     
48     32     
144    32     
-112   -720   
64     48     
32     48     
64     64     
96     16     
192    16     
-128   128    
48     64     
-16    -80    
-64    0      
96     64     
16     -16    
80     128    
0      -64    
128    48     
-48    -80    
160    48     
320    80     
-64    0      
64     -384   
16     48     
48     -48    
144    48     
64     96     
64     -16    
112    16     
-16    -64    
224    16     
80     -48    
48     0      
-112   -528   
-16    32     
-96    -592   
48     -96    
-16    -16    
96     208    
-176   112    
368    32     
-224   -80    
288    16     
16     288    
112    -64    
144    80     
-160   -176   
240    -144   
48     -320   
64     48     
176    -368   
-144   -32    
352    160    
-176   368    
304    432    
336    304    
-320   32     
-128   -48    
160    416    
480    512    
-336   256    
144    -592   
-112   -144   
-96    -208   
-112   -128   
160    16     
80     16     
128    48     
256    16     
128    16     
64     -112   
32     224    
16     176    
48     80     
64     -128   
96     -64    
48     240    
-64    -240   
64     -96    
208    128    
0      -32    
32     192    
368    352    
-208   -128   
-96    -16    
96     -448   
32     -448   
160    -48    
288    -768   
464    -32    
-288   864    
-16    -528   
256    -512   
-192   304    
128    96     
-16    0      
144    -2080  
-224   -528   
192    -512   
128    96     
32     400    
240    0      
208    64     
32     -384   
32     -64    
96     -480   
160    144    
-128   -128   
-16    -128   
128    -80    
80     -144   
112    -48    
96     0      
96     0      
-96    32     
-96    48     
16     -32    
-144   -160   
176    -432   
64     -96    
144    -368   
96     48     
64     -1120  
-80    -112   
128    112    
80     16     
48     -16    
128    16     
32     -96    
144    -80    
-528   -16    
-32    32     
-1504  -64    
-16    -208   
208    -16    
112    0      
-32    -192   
96     -400   
16     0      
96     240    
-32    80     
240    64     
-240   112    
128    -224   
128    -32    
-96    0      
240    -32    
-192   -32    
240    -144   
-64    -16    
192    -80    
160    96     
-192   -48    
-80    -80    
240    -400   
144    -32    
192    144    
112    32     
-32    -16    
-96    32     
-144   64     
-16    -96    
-288   -192   
192    -32    
-1904  0      
32     176    
-320   64     
-96    48     
-368   -48    
112    -576   
-16    80     
176    32     
-32    16     
160    -32    
256    64     
64     64     
112    144    
80     32     
-80    16     
-544   -128   
80     -80    
64     -96    
144    -96    
128    64     
-16    -320   
304    160    
48     -112   
0      32     
-48    -160   
128    -224   
-48    -96    
-96    -160   
208    -16    
112    16     
32     16     
-32    -80    
-656   112    
16     -96    
240    -48    
-16    -464   
64     -112   
224    -208   
48     -128   
-192   112    
-16    32     
-352   48     
128    -128   
-80    -32    
96     -96    
-352   -208   
128    -416   
-112   -160   
16     -368   
96     336    
128    -128   
48     240    
-208   176    
64     0      
-80    32     
80     0      
-64    128    
160    0      
-352   -80    
-48    -208   
16     -448   
-320   -112   
128    -80    
176    -16    
192    288    
-320   16     
-96    -576   
16     -1776  
-1136  -896   
0      256    
-304   -144   
256    -352   
656    1008   
-240   1104   
-288   -240   
128    -1104  
-304   416    
-96    240    
-112   -336   
-144   448    
-144   -432   
-80    64     
-80    96     
-288   -352   
-128   -192   
-1200  32     
48     64     
-224   -208   
-512   128    
-192   -224   
288    -160   
560    1184   
-32    96     
-64    -768   
-80    176    
-704   -992   
-112   -512   
16     992    
-576   -320   
128    48     
-384   720    
-32    -416   
336    -1248  
176    608    
576    304    
-640   -224   
-112   -688   
-32    224    
-80    96     
-128   48     
240    -144   
96     416    
-96    -352   
96     304    
-80    -64    
-192   -240   
144    176    
-144   160    
176    0      
-1920  -32    
0      0      
64     144    
416    16     
80     -112   
-160   160    
-224   48     
-32    160    
-160   -48    
-64    -16    
96     128    
-368   -128   
-48    -80    
-448   16     
-16    -32    
-832   -160   
64     -16    
0      16     
48     -16    
-80    -96    
-16    0      
-112   384    
32     192    
144    -64    
-240   -64    
0      -48    
-144   -64    
-48    -112   
-160   16     
176    128    
-144   -32    
16     -32    
224    -112   
32     80     
32     64     
-224   -176   
80     192    
224    272    
272    784    
-432   368    
-16    0      
32     160    
128    224    
-48    16     
144    64     
-544   48     
-16    -32    
0      -80    
-64    -448   
16     -48    
-176   48     
176    352    
32     64     
112    176    
-176   144    
-64    32     
192    112    
-128   144    
-288   -80    
96     48     
-416   -192   
272    -48    
-48    48     
0      176    
-64    32     
-32    32     
16     128    
32     16     
208    32     
-240   -32    
96     64     
176    464    
-256   -16    
-176   48     
128    96     
0      -48    
-32    -160   
336    -96    
48     176    
192    16     
-112   160    
0      32     
0      256    
-320   80     
0      -16    
80     48     
64     32     
112    64     
-192   -16    
64     64     
-192   0      
48     176    
32     16     
-288   16     
-80    -48    
32     80     
144    -64    
-96    -64    
496    224    
256    96     
-96    16     
-288   -160   
48     80     
-112   -48    
0      112    
-224   -16    
-272   -64    
128    -80    
192    0      
80     96     
-48    0      
-80    64     
-16    32     
-16    0      
64     16     
160    16     
0      16     
144    -16    
-16    16     
32     48     
-160   -64    
-112   96     
48     64     
96     48     
-80    32     
-16    48     
16     0      
-48    32     
176    48     
-144   16     
112    32     
-80    0      
0      112    
-128   -32    
48     16     
48     64     
112    96     
96     64     
32     16     
112    80     
208    64     
-128   -16    
48     -16    
160    128    
-128   48     
112    -80    
-64    -96    
128    128    
-128   48     
32     -192   
80     32     
-48    32     
-48    48     
-80    -64    
-160   -80    
160    96     
112    32     
144    -48    
0      -96    
-112   -64    
112    32     
-96    -64    
304    64     
48     -16    
160    -48    
-48    -272   
176    -176   
-48    608    
32     432    
-192   -432   
160    -32    
-64    -112   
32     128    
1312   640    
-256   -848   
752    -608   
816    592    
-848   -208   
-112   128    
-592   224    
480    -272   
-48    304    
144    -48    
288    32     
-384   -16    
288    -400   
-64    496    
-80    -16    
112    -368   
-48    80     
32     -608   
-224   -400   
128    288    
96     96     
-176   64     
112    304    
272    256    
256    144    
464    240    
-272   336    
-64    -32    
-48    544    
384    240    
352    160    
-160   16     
0      96     
-48    -32    
48     -32    
256    48     
256    16     
-48    144    
-16    -32    
-64    16     
-32    64     
96     144    
224    -96    
128    128    
32     -96    
96     -16    
-144   -96    
256    0      
-96    64     
144    -64    
288    160    
0      -64    
112    0      
-96    -256   
208    -64    
256    -336   
-80    144    
32     -80    
-16    32     
-48    -32    
176    -96    
-64    64     
64     64     
-128   32     
-80    0      
-112   -80    
144    -160   
80     128    
0      0      
32     16     
64     -480   
48     32     
32     -32    
80     16     
176    -32    
-64    96     
48     272    
128    144    
256    96     
-160   0      
-48    -80    
-16    -480   
144    -80    
288    96     
64     272    
16     64     
-176   -16    
224    32     
16     80     
-16    -64    
128    0      
208    48     
-16    -272   
192    32     
-128   -768   
-96    -192   
-80    -112   
-304   64     
144    32     
160    112    
96     -16    
288    192    
-128   80     
-32    96     
80     -80    
400    -64    
304    128    
48     -160   
176    48     
-176   -112   
128    -96    
80     -176   
144    64     
128    -64    
-32    80     
-144   -64    
112    -48    
80     48     
192    -208   
0      192    
112    -400   
288    -960   
-320   -144   
304    -800   
144    128    
-144   -16    
-96    -80    
-32    -48    
-16    -64    
32     32     
48     -384   
304    144    
-64    32     
288    -288   
480    -80    
-144   -192   
176    -336   
-112   16     
96     64     
192    -112   
-32    -352   
80     -160   
96     -144   
96     -64    
-160   -128   
-32    -96    
32     -432   
-352   -576   
48     -464   
16     320    
16     -64    
80     0      
320    0      
48     0      
-160   112    
176    -288   
144    208    
-64    -32    
96     -176   
112    -160   
128    96     
224    48     
16     64     
144    -32    
240    880    
-304   0      
-16    -304   
-1280  -16    
80     -48    
128    128    
-64    320    
224    224    
80     -256   
80     -48    
-64    -64    
-16    64     
-128   624    
16     224    
-144   -480   
-224   -176   
-128   0      
240    -224   
-720   -160   
128    224    
128    224    
160    -128   
80     16     
32     -64    
32     -32    
-224   -1232  
288    -64    
400    240    
-304   112    
272    224    
-752   -960   
-496   -448   
-32    544    
-208   528    
-16    48     
416    -816   
256    -352   
304    112    
48     -32    
-48    32     
32     -336   
-64    112    
96     -64    
-48    -64    
-96    224    
160    240    
-32    0      
-64    -80    
128    32     
-32    -64    
-1664  -16    
16     -112   
-112   32     
128    -16    
-16    16     
32     -480   
64     256    
64     80     
192    -32    
-256   48     
16     16     
48     32     
208    -128   
-464   -128   
-112   -48    
-272   -16    
96     -48    
-112   32     
80     0      
288    112    
16     -192   
-128   -16    
0      96     
32     0      
240    -48    
112    32     
-224   0      
176    -16    
80     64     
112    0      
-144   224    
160    96     
96     16     
-288   -192   
112    64     
128    48     
-160   176    
224    112    
304    -112   
-416   -160   
48     -48    
80     16     
0      32     
0      48     
272    32     
-256   48     
32     48     
0      240    
288    -128   
320    80     
-256   -336   
-288   -112   
112    192    
-1936  80     
0      -96    
-224   -144   
80     48     
80     48     
-224   0      
32     -208   
-400   -64    
-464   -112   
96     48     
-64    -16    
-32    96     
-96    320    
80     240    
48     -112   
64     -16    
-208   -80    
0      112    
80     16     
-480   -48    
-192   -32    
-192   -16    
-128   -112   
80     -16    
32     128    
-176   -48    
0      160    
224    784    
-96    144    
64     -208   
-128   32     
-144   128    
-400   112    
-64    96     
-496   -96    
-208   112    
-48    -32    
128    16     
-32    -128   
128    80     
224    64     
-208   96     
0      32     
-208   0      
64     16     
-48    32     
0      0      
-256   0      
-176   -32    
-48    48     
16     16     
-1008  -48    
176    192    
64     80     
-64    128    
-16    0      
16     -16    
128    0      
48     64     
0      -32    
-48    64     
48     32     
48     112    
-80    128    
-240   -48    
-64    -48    
-432   -144   
272    32     
48     80     
-16    128    
0      96     
-192   -32    
48     128    
128    48     
32     16     
32     32     
160    128    
64     16     
-64    32     
-272   -64    
0      32     
-672   -48    
96     16     
128    48     
32     48     
-80    16     
-160   -192   
-64    -48    
0      48     
-96    16     
32     64     
-48    32     
-192   -32    
64     -16    
-272   -48    
144    64     
-160   -64    
32     240    
-896   -48    
-208   -384   
-16    -32    
-80    -32    
-208   32     
96     64     
-16    -144   
128    208    
-272   -192   
48     -304   
112    224    
128    224    
64     256    
-272   32     
16     80     
-1248  -192   
-112   128    
-112   -672   
-256   -432   
256    912    
-224   -48    
288    0      
32     320    
-16    -464   
80     -112   
-432   112    
-352   -496   
-64    -160   
-96    16     
-128   560    
368    -160   
240    -96    
-192   592    
-320   368    
384    -304   
144    -336   
-80    336    
160    128    
-32    16     
-208   -80    
16     16     
-240   -336   
112    -48    
128    -144   
-96    48     
-80    -16    
48     -176   
-128   -32    
128    48     
-48    240    
80     32     
0      -48    
112    -432   
-128   16     
-272   96     
32     32     
-48    -112   
-16    0      
-16    32     
-80    -16    
48     32     
32     144    
112    144    
-160   -224   
288    -256   
-208   -224   
160    -128   
-160   112    
-64    112    
-112   -64    
256    160    
-112   160    
0      0      
-16    48     
-32    96     
128    -64    
16     80     
192    32     
-80    112    
176    -32    
-64    -64    
96     -16    
-48    48     
-144   32     
-128   32     
-64    240    
-80    16     
112    -64    
192    -32    
-112   48     
0      96     
176    112    
320    304    
-336   128    
-48    -176   
112    -80    
16     192    
-32    64     
160    48     
0      -32    
144    16     
-16    -48    
144    -672   
32     112    
-48    -32    
80     64     
0      96     
80     32     
16     32     
0      -80    
48     -96    
-80    144    
32     192    
96     64     
32     -48    
-32    0      
-64    -32    
112    -432   
80     64     
-16    -64    
176    0      
-64    48     
32     96     
-16    -112   
208    -64    
160    128    
192    544    
-80    192    
80     -80    
-96    -240   
224    128    
-144   64     
240    -464   
272    128    
176    48     
-48    -32    
112    -80    
-32    144    
-160   96     
80     112    
-80    -208   
192    -64    
80     32     
-192   -80    
32     16     
208    -16    
240    176    
-224   -720   
-32    -80    
0      -608   
-64    -224   
160    -64    
176    256    
208    32     
-352   -848   
-80    -816   
48     288    
80     -80    
80     208    
-32    -16    
-208   -112   
240    288    
48     80     
240    -192   
-32    192    
80     -96    
32     160    
-32    -48    
-112   96     
32     -288   
-32    368    
128    -48    
-16    -128   
96     192    
-64    -160   
-80    16     
304    -112   
144    144    
240    96     
352    16     
-176   -128   
32     -672   
64     160    
-96    32     
240    128    
208    192    
16     64     
48     16     
208    48     
0      64     
128    -96    
16     48     
-16    16     
0      160    
64     -160   
96     0      
160    -80    
256    -16    
-32    -48    
144    -16    
32     32     
-80    0      
64     64     
176    -32    
320    208    
-112   -32    
384    192    
-432   -400   
176    -80    
240    -64    
272    192    
256    -144   
48     128    
-48    48     
-16    96     
-128   -176   
176    -32    
-128   144    
160    -48    
0      48     
-112   -144   
0      -288   
336    -496   
368    80     
96     112    
-128   -64    
176    -128   
400    176    
-192   64     
-336   16     
368    -96    
160    -144   
16     48     
128    -48    
-256   -32    
208    -96    
160    112    
-64    16     
80     -64    
-32    -288   
144    176    
-96    -32    
176    160    
160    -16    
48     -64    
80     48     
-336   -48    
112    -576   
48     -80    
-144   -256   
-80    -288   
144    -128   
128    0      
-112   160    
96     -80    
-128   -48    
80     -32    
96     -112   
128    80     
192    -240   
144    192    
-800   160    
80     -144   
256    -112   
112    -16    
112    -64    
112    112    
256    -64    
-16    -784   
112    -48    
-128   -176   
16     64     
128    32     
-176   48     
32     -80    
144    -128   
-80    -96    
-64    -112   
160    32     
-32    -96    
208    32     
64     -176   
64     32     
0      -976   
64     112    
224    -48    
128    48     
112    -16    
-48    96     
192    32     
64     -192   
80     400    
-192   160    
-928   -304   
272    336    
-48    128    
48     -112   
-16    -16    
224    -352   
80     -16    
-208   -960   
128    48     
96     -128   
-96    64     
48     -144   
288    240    
-64    144    
64     16     
-1472  -16    
0      -32    
64     208    
-112   160    
-144   -80    
80     -368   
224    48     
-32    -976   
-16    48     
48     48     
144    16     
64     48     
-48    -16    
-112   32     
-48    -112   
128    48     
-352   -544   
-1008  -16    
-16    240    
-144   -16    
16     -112   
48     -16    
64     -144   
432    560    
64     304    
-176   -544   
144    -288   
160    208    
128    160    
112    112    
-160   -48    
144    -96    
-752   16     
96     -128   
32     -32    
-112   -224   
224    -336   
144    -416   
-96    128    
-160   64     
48     -176   
80     112    
-48    128    
-208   64     
160    80     
-176   -96    
128    -128   
-640   -48    
64     -48    
48     80     
48     32     
80     32     
144    -352   
-96    -144   
-432   80     
-32    272    
-256   240    
208    224    
384    576    
-400   528    
96     -176   
384    -352   
32     48     
80     -192   
384    208    
32     48     
-128   -144   
240    -224   
96     32     
-16    -320   
-16    192    
-16    16     
80     16     
-176   16     
144    -48    
-240   -336   
-144   512    
128    -160   
112    -192   
-16    48     
-480   -320   
64     32     
-176   96     
-16    112    
128    -352   
-512   400    
96     -208   
-720   224    
128    176    
64     -192   
16     -704   
80     -80    
-320   240    
-272   -208   
400    -144   
-224   496    
176    -64    
-272   -384   
-672   -176   
-160   32     
-512   -32    
32     -320   
-208   -80    
80     -16    
16     -32    
-144   176    
96     32     
48     80     
96     144    
-48    -16    
0      -304   
-272   -96    
-80    336    
-352   -32    
-304   -160   
-80    -48    
-112   -48    
-80    -32    
-80    -32    
-2544  48     
240    -32    
-256   -240   
96     -32    
-80    128    
80     -64    
-336   -16    
0      -48    
0      -80    
-16    -32    
32     -224   
80     432    
-160   304    
224    -240   
-32    64     
-144   64     
-336   -144   
-240   -128   
-80    208    
-128   48     
-16    -16    
96     96     
48     96     
80     160    
160    240    
-176   176    
-48    -48    
336    80     
-176   -16    
-48    -80    
-320   -256   
288    48     
-736   256    
-224   16     
96     -368   
432    176    
-16    224    
144    64     
256    -80    
-320   -96    
-208   -240   
-48    80     
176    -32    
-64    -32    
-144   64     
112    32     
272    48     
-400   -32    
112    80     
224    112    
-224   16     
112    -80    
64     16     
-128   0      
144    -96    
96     48     
16     80     
-48    0      
32     48     
-112   240    
-96    96     
160    -48    
-48    256    
32     192    
-448   -224   
384    -176   
16     144    
-80    48     
80     16     
272    16     
-112   128    
48     80     
-144   48     
-240   -16    
-64    -32    
-32    -96    
176    80     
-112   -16    
96     16     
32     -48    
-112   16     
-112   128    
-80    48     
160    -48    
-48    -32    
32     16     
-400   -448   
64     -128   
-208   -128   
-96    -16    
-16    64     
-32    144    
128    496    
-64    128    
0      176    
176    256    
-80    -496   
48     -352   
-256   -208   
-80    -480   
176    112    
-240   432    
48     -80    
-16    -48    
256    448    
96     432    
-16    -320   
-400   -176   
-176   192    
16     -128   
128    96     
48     -48    
-144   -48    
-128   32     
-48    -48    
-112   -432   
384    304    
192    304    
-48    -144   
-16    64     
-400   -64    
16     304    
320    496    
-112   -48    
64     -160   
176    144    
64     208    
112    16     
-112   -32    
-48    -64    
-304   -112   
112    -144   
224    -208   
192    -48    
0      0      
-80    144    
288    128    
-48    32     
176    48     
128    144    
-16    16     
96     -64    
16     -16    
80     64     
-48    64     
16     48     
-64    32     
48     48     
0      128    
176    160    
-64    -16    
80     32     
64     16     
32     16     
160    128    
-160   0      
128    64     
176    96     
0      16     
80     32     
32     64     
-48    -64    
16     48     
32     48     
16     160    
96     48     
-96    -16    
96     -16    
16     32     
16     32     
144    128    
144    64     
80     80     
-64    -16    
96     0      
16     -32    
-80    64     
128    64     
-352   -208   
144    144    
80     64     
160    -1600  
-80    48     
32     -32    
320    160    
32     80     
-96    -176   
0      48     
-192   80     
80     0      
208    96     
368    80     
224    240    
-208   -16    
240    16     
-64    16     
96     -112   
240    64     
624    384    
-704   64     
-352   -48    
0      32     
-112   64     
240    192    
-352   64     
-160   -96    
272    80     
-272   -112   
-32    -48    
-64    -96    
-32    -64    
112    -80    
-32    -48    
112    80     
16     0      
-48    16     
192    80     
16     16     
-208   64     
144    -16    
-48    32     
176    96     
272    64     
-208   -32    
-32    -48    
240    144    
64     -272   
208    128    
-80    -576   
208    -112   
160    64     
48     128    
112    64     
-32    -16    
0      -48    
96     80     
32     48     
0      64     
-48    0      
240    -16    
112    128    
0      -160   
48     80     
16     -64    
80     -32    
80     128    
16     48     
-112   -176   
192    128    
0      176    
320    176    
144    -16    
16     -32    
-128   -304   
64     -192   
128    256    
208    -80    
240    -128   
0      -416   
16     48     
-64    -912   
-80    240    
-224   -224   
288    208    
400    304    
80     -80    
0      -128   
-80    0      
-16    112    
64     32     
416    160    
-144   32     
48     -160   
192    352    
32     -128   
128    -160   
16     112    
16     0      
288    448    
-176   384    
0      -128   
-32    64     
144    -304   
288    288    
144    -112   
192    128    
64     -160   
48     16     
0      -112   
-80    128    
-96    160    
208    96     
-96    16     
-32    -608   
544    928    
-384   304    
-288   -320   
80     80     
32     0      
16     48     
240    400    
-64    -704   
304    128    
128    -64    
16     96     
-80    -368   
128    -672   
128    784    
112    -288   
-144   -256   
-96    -80    
240    352    
-48    -192   
-112   -80    
0      0      
80     -80    
128    80     
-16    80     
144    96     
80     -432   
-80    -128   
288    -48    
176    272    
-48    224    
144    -208   
-192   -144   
96     288    
0      32     
64     -272   
128    -288   
96     0      
304    -80    
-80    16     
48     -96    
272    -352   
160    288    
208    -112   
160    -64    
144    32     
-32    -64    
-672   -176   
48     352    
48     -32    
-16    -368   
32     -160   
48     -432   
64     288    
192    -560   
16     48     
160    192    
144    208    
16     16     
80     -400   
-64    -304   
32     -32    
-384   -176   
80     -48    
-1728  16     
32     64     
128    -96    
144    -320   
176    -112   
16     -608   
-32    -128   
-96    -288   
-16    -160   
48     -208   
-64    -352   
32     32     
272    -384   
-192   -608   
304    -624   
-656   0      
32     -96    
-48    -176   
32     96     
-432   -448   
-32    -64    
336    96     
48     -1104  
160    -16    
128    -96    
-128   96     
-128   -96    
96     192    
48     -80    
64     -32    
-48    -256   
0      -160   
-1152  16     
-16    128    
224    -96    
352    -272   
176    128    
384    -528   
-64    208    
128    80     
0      80     
-48    48     
-16    80     
-160   0      
-80    64     
0      0      
-16    -64    
-32    64     
144    192    
-112   -16    
96     -336   
64     96     
128    -112   
-48    -144   
48     0      
32     -48    
80     16     
64     -48    
-48    -48    
192    224    
-16    96     
176    -96    
-112   64     
192    -112   
64     -16    
112    -112   
32     16     
-16    -96    
176    -128   
-704   -16    
80     48     
-288   624    
624    224    
-48    -112   
272    -64    
-400   -80    
-48    16     
-192   -128   
272    80     
-144   208    
48     144    
48     96     
-1808  -400   
-96    272    
-224   16     
240    -96    
-112   32     
0      48     
-224   -32    
-32    -112   
64     -240   
32     -128   
32     160    
-848   112    
0      80     
-912   -304   
256    -96    
48     48     
-208   -112   
-96    96     
320    208    
-96    416    
-1824  -16    
224    32     
-96    -16    
-224   -64    
16     -144   
-32    -96    
-144   -32    
80     0      
-128   -208   
224    -48    
16     128    
-192   144    
32     112    
-336   48     
16     48     
-496   48     
-304   -112   
32     -176   
-32    160    
160    48     
48     112    
-208   96     
416    448    
-256   -336   
48     80     
64     384    
-48    -336   
96     336    
-128   -64    
64     240    
-176   -48    
32     240    
-144   -144   
-32    192    
-64    -160   
224    128    
-240   -80    
48     96     
-144   -352   
160    -192   
0      -496   
-128   352    
80     256    
-256   -288   
48     64     
144    240    
-256   -16    
-160   -64    
-160   16     
128    -64    
240    96     
32     96     
32     128    
-80    64     
-192   -64    
-128   0      
-80    -96    
208    -48    
160    -16    
-16    96     
-352   -32    
-144   0      
-1072  -176   
48     0      
-352   0      
176    32     
112    16     
-144   -96    
176    -16    
80     80     
-208   -144   
32     -192   
48     128    
160    112    
-96    32     
32     0      
-128   -48    
-176   0      
0      32     
-112   -16    
128    96     
80     -32    
-48    -48    
16     64     
176    96     
-192   0      
64     32     
-64    0      
0      48     
0      64     
-32    -16    
48     -48    
-80    -32    
272    80     
-352   -64    
144    48     
-32    16     
32     32     
80     16     
32     32     
-160   -80    
80     16     
-32    16     
96     16     
-80    64     
-64    32     
-224   -384   
-112   -144   
-144   272    
-256   -160   
-80    160    
-32    64     
368    176    
304    144    
112    -176   
-96    32     
-160   176    
128    -32    
-32    80     
16     112    
-48    192    
128    -16    
-240   -208   
-32    32     
-192   32     
240    -16    
32     96     
-16    16     
240    16     
-464   -80    
160    48     
384    96     
-208   160    
-224   -80    
48     -96    
-272   -80    
192    272    
-608   0      
224    128    
-256   -224   
176    -96    
432    160    
-80    -16    
176    112    
-256   48     
368    128    
-352   -48    
16     16     
0      32     
96     96     
-144   -32    
16     80     
112    96     
-16    0      
-64    32     
208    -16    
-48    32     
256    240    
-384   0      
288    -64    
16     96     
0      48     
32     -16    
-32    48     
-16    0      
96     -16    
48     128    
-144   192    
128    96     
-192   -96    
144    0      
32     64     
-112   16     
144    -80    
-128   -32    
256    128    
-272   -80    
176    16     
112    112    
-144   -608   
-160   384    
176    368    
-288   -272   
192    0      
-64    -96    
400    400    
-272   -64    
-64    -80    
224    112    
80     -48    
224    160    
80     -112   
48     96     
16     176    
-112   80     
96     192    
-240   -496   
256    448    
32     128    
384    672    
-160   -608   
-144   144    
96     368    
128    -336   
144    208    
128    0      
-144   752    
-80    -144   
208    -144   
64     224    
-176   -352   
176    0      
-96    -624   
144    176    
112    32     
-64    -352   
192    176    
112    -256   
448    512    
-32    -48    
80     48     
-64    -96    
32     0      
0      96     
144    -16    
48     -80    
144    -80    
160    96     
64     -304   
96     -160   
272    480    
160    304    
48     48     
32     -48    
-16    -176   
48     256    
48     160    
128    64     
48     240    
-48    80     
256    96     
-288   48     
32     0      
224    -80    
224    224    
240    -48    
-32    96     
-208   -80    
64     -32    
176    -16    
48     144    
-32    0      
144    32     
0      -64    
32     -48    
128    16     
160    -80    
-16    352    
208    304    
224    192    
-208   -608   
16     128    
16     -48    
80     288    
128    96     
80     96     
-16    80     
48     96     
-256   -448   
-64    -176   
192    48     
256    48     
-80    96     
64     -304   
96     -32    
48     -400   
48     -112   
112    -976   
96     128    
-16    144    
-16    -16    
64     80     
256    224    
-96    400    
96     256    
80     -32    
176    -160   
32     -32    
160    80     
-80    576    
80     16     
32     -48    
112    -208   
160    -96    
-32    -64    
256    -96    
-112   16     
48     176    
-48    256    
96     -144   
304    0      
-32    -240   
-16    -160   
48     -336   
176    -688   
-256   -576   
240    -80    
-336   -208   
-80    -592   
-112   -416   
224    -336   
48     -48    
176    352    
144    -272   
-16    -64    
-80    -176   
-80    -80    
-32    32     
416    208    
416    224    
32     -192   
0      -128   
-192   -720   
112    -176   
176    -128   
192    -464   
160    176    
160    16     
48     -736   
112    -16    
-64    112    
32     16     
288    -64    
-112   -176   
80     144    
-144   -192   
-128   -144   
-176   -144   
288    -208   
-128   48     
32     -16    
176    -288   
-608   -160   
-80    -368   
128    144    
528    -208   
-16    48     
112    -464   
272    96     
-112   112    
176    16     
64     32     
224    96     
-144   -160   
256    -224   
144    96     
-176   -64    
-320   -272   
176    -192   
80     -96    
-256   -160   
16     -32    
-144   0      
80     32     
416    144    
-256   32     
96     128    
-48    192    
32     64     
-48    -64    
-80    -16    
208    64     
-208   64     
192    80     
-128   16     
-224   32     
-32    -64    
176    -208   
240    96     
128    64     
192    208    
128    128    
-160   48     
272    -224   
0      -112   
-112   -240   
-96    -192   
-112   -16    
256    -160   
-1264  288    
128    0      
48     -64    
112    80     
96     64     
96     -224   
32     -592   
0      -496   
64     -336   
-96    224    
256    208    
-304   -240   
32     112    
-96    -320   
400    208    
-400   -352   
128    320    
352    272    
-64    -448   
-176   -64    
48     -480   
128    -80    
304    352    
32     -256   
-160   -352   
-32    128    
-48    176    
128    -48    
-160   80     
0      -176   
-352   -32    
176    96     
-2800  -16    
32     -80    
-48    0      
80     -48    
32     48     
272    -144   
0      64     
-96    -32    
160    80     
320    32     
64     16     
-80    112    
96     -32    
-608   -208   
-128   -64    
-416   48     
304    -48    
160    48     
368    -64    
-16    48     
-48    -608   
80     -80    
-208   64     
-112   16     
-496   -96    
160    48     
-64    -48    
112    16     
-160   -48    
112    16     
-112   16     
-16    -80    
16     32     
240    -112   
-320   0      
-48    -448   
112    -16    
-128   32     
160    112    
-320   -16    
128    -80    
64     32     
320    192    
-112   208    
-80    0      
-16    -80    
-16    -128   
160    112    
64     -96    
-32    80     
-96    32     
-352   16     
64     64     
-624   16     
-128   32     
32     -48    
-16    0      
192    64     
352    112    
96     32     
-640   -64    
-1296  -128   
-48    -32    
-176   64     
80     48     
0      0      
-672   -128   
-16    32     
-400   -32    
-16    32     
-832   16     
32     64     
48     -64    
-160   0      
-400   -192   
128    16     
-464   -96    
208    112    
-288   -32    
64     -80    
-112   48     
16     288    
-448   48     
256    -96    
-80    112    
0      -32    
-224   -96    
32     -64    
176    144    
-64    -176   
288    112    
-240   -16    
176    112    
-32    32     
-352   -16    
96     16     
-80    64     
48     16     
32     16     
112    -48    
-480   0      
32     256    
-576   160    
-16    -48    
-176   -16    
16     192    
368    -128   
-208   0      
96     -48    
832    464    
-720   320    
-320   -32    
-160   96     
-48    -80    
0      -16    
-288   32     
208    -64    
-304   -80    
-96    -96    
-864   -288   
192    -80    
-112   32     
48     64     
128    64     
-240   208    
80     -224   
-64    -208   
32     96     
-176   -192   
16     -16    
96     -384   
-176   -80    
48     256    
-256   32     
-928   144    
-240   -240   
144    -80    
144    320    
112    -48    
-176   -144   
-32    48     
-32    96     
-160   176    
-64    -432   
96     176    
-144   -48    
16     128    
-112   -128   
32     480    
-432   -256   
144    0      
32     144    
-448   -176   
16     96     
-256   -112   
112    -144   
-96    160    
560    288    
-144   1264   
-192   384    
-224   144    
160    208    
-224   -112   
160    64     
-400   -320   
16     224    
-32    16     
192    320    
-48    128    
-80    400    
144    128    
272    -160   
-16    -80    
-128   -32    
48     -64    
-288   -32    
80     128    
64     32     
160    80     
-224   -80    
-144   -16    
64     -64    
64     80     
208    80     
192    -16    
-96    -32    
96     -224   
-16    -96    
64     48     
464    432    
-384   144    
32     -64    
-256   -16    
256    48     
64     -16    
64     32     
80     16     
96     48     
80     96     
-96    -16    
-16    32     
-32    112    
-16    0      
336    16     
-32    80     
64     -160   
160    48     
-160   0      
16     64     
-112   -64    
240    -192   
96     48     
80     128    
64     32     
0      16     
80     -64    
-16    96     
144    48     
-80    0      
144    -48    
-48    128    
48     32     
-80    16     
144    160    
144    64     
0      64     
-80    0      
112    -32    
0      32     
-48    112    
64     64     
-32    32     
240    16     
-224   32     
-32    -32    
0      -32    
288    128    
-240   16     
32     224    
-32    -16    
-48    -64    
192    -128   
-128   -368   
-64    -320   
0      -224   
-128   -176   
64     -48    
16     64     
-176   -32    
192    -128   
-208   16     
64     64     
224    96     
-64    -192   
-64    -64    
-16    96     
176    256    
304    320    
-32    80     
64     64     
96     128    
96     224    
0      144    
-16    32     
-48    -16    
-64    48     
128    144    
112    -16    
32     -128   
160    0      
160    272    
240    176    
-304   48     
-144   -16    
-80    -48    
80     128    
32     -48    
160    -32    
144    -304   
-80    -432   
-112   -272   
0      -256   
272    -48    
16     -464   
160    -304   
-240   -464   
-16    -208   
32     -48    
-128   160    
32     -64    
-112   -208   
-176   -480   
0      -320   
-32    -32    
160    80     
-64    -192   
64     32     
80     112    
-32    -576   
512    80     
-256   -64    
208    560    
160    128    
240    224    
480    336    
-336   416    
48     16     
-48    -320   
-160   -384   
144    -16    
0      48     
48     -96    
96     16     
-160   -592   
96     -240   
-160   -48    
64     -32    
272    224    
-16    16     
-112   80     
16     -128   
64     -256   
240    -112   
96     -144   
-112   -80    
0      -224   
-16    96     
240    -32    
-256   -48    
96     128    
224    -528   
400    176    
-400   96     
-144   -272   
112    192    
208    224    
32     -48    
256    -16    
32     176    
16     80     
304    -48    
-128   -288   
16     48     
272    160    
288    48     
-48    -432   
144    -16    
128    -368   
-96    464    
80     0      
32     160    
416    336    
-256   -368   
-80    240    
-32    0      
160    -224   
304    16     
-48    224    
240    -320   
112    112    
-112   16     
224    48     
-32    80     
160    16     
112    48     
128    48     
-128   -32    
80     272    
-16    -256   
-48    -80    
128    400    
-96    -64    
32     128    
48     -352   
96     16     
-16    -96    
160    128    
160    160    
-272   0      
48     16     
-48    208    
240    -48    
160    128    
32     192    
-64    -16    
64     -112   
176    -96    
240    -80    
112    -160   
128    -32    
112    -144   
32     96     
80     -96    
64     -1296  
64     16     
96     -1360  
96     48     
224    80     
32     -96    
128    -32    
-128   -304   
-16    -16    
0      -464   
-160   -224   
-176   336    
48     48     
160    -320   
-64    -128   
224    -400   
272    128    
304    80     
288    272    
-688   -48    
128    -224   
80     -32    
48     -144   
-32    -144   
112    -400   
128    128    
192    96     
-16    -128   
96     -352   
-16    -96    
384    -32    
272    96     
-240   48     
-80    -64    
-2608  -80    
-80    -48    
-32    -16    
80     -32    
160    80     
96     -48    
16     -128   
80     -48    
112    96     
80     0      
-176   -64    
224    -128   
208    176    
-32    -64    
-48    -176   
-288   -16    
208    48     
144    -16    
128    -128   
144    0      
192    -48    
96     -80    
80     -560   
112    112    
0      -96    
-48    -32    
96     48     
-32    -48    
0      0      
208    16     
-192   -48    
112    16     
-240   -64    
144    -32    
64     -80    
-16    0      
48     64     
-16    -368   
48     16     
144    -16    
-32    128    
144    -16    
176    0      
-112   -80    
192    112    
-240   0      
208    -32    
-1344  32     
160    16     
64     -160   
224    -160   
-80    32     
320    -224   
-208   -160   
192    -1024  
-48    64     
80     48     
48     -16    
-128   -96    
96     -80    
-16    -32    
32     -32    
-192   -16    
16     -160   
-496   -96    
80     -96    
-16    -32    
416    -32    
16     176    
320    32     
-336   -32    
16     -64    
32     -464   
-304   -432   
128    208    
-800   256    
144    144    
-128   -64    
336    -240   
64     416    
96     -80    
0      -368   
64     32     
-48    192    
80     -112   
160    -160   
-464   -64    
176    144    
-192   -96    
48     32     
-48    96     
240    -160   
-304   128    
144    -208   
-464   80     
208    -224   
32     -480   
-80    -272   
432    656    
-320   992    
-48    -800   
160    -160   
240    -32    
176    528    
64     160    
0      -464   
-32    112    
-16    -16    
-96    304    
256    192    
-80    -32    
-224   144    
-160   -240   
224    -16    
-176   -96    
-736   -48    
-48    -112   
-544   -48    
-240   -32    
-32    128    
-128   80     
160    -16    
-16    144    
-416   64     
240    144    
-880   -32    
-32    -16    
-256   -128   
144    64     
-272   96     
224    -16    
64     192    
-560   32     
-48    64     
-240   0      
-96    32     
-48    16     
-96    -48    
48     -144   
176    16     
-400   -112   
64     32     
-112   96     
112    -64    
48     80     
-128   0      
-96    -48    
-48    0      
-16    64     
-256   48     
-112   -16    
-608   -80    
-160   0      
-160   -80    
48     0      
112    80     
-224   160    
-16    -48    
-208   -144   
160    -112   
48     16     
-240   80     
-64    0      
-48    -32    
-192   -48    
-48    32     
-272   -16    
-64    96     
48     -16    
-32    64     
-16    -160   
96     208    
-176   -176   
80     -384   
272    -96    
48     192    
48     48     
16     0      
-240   -208   
-48    -64    
-176   240    
-624   96     
240    256    
48     0      
96     -144   
0      -96    
-256   64     
-96    -16    
144    -48    
-208   -160   
16     144    
0      176    
-80    128    
48     144    
-144   -96    
80     -96    
-128   -48    
16     128    
-800   32     
80     -48    
-128   -48    
-96    64     
112    48     
64     0      
-48    32     
-112   208    
96     160    
-128   144    
-176   0      
-96    -64    
-48    32     
-352   -144   
32     32     
-416   -64    
64     96     
48     80     
224    80     
64     32     
-64    0      
-144   -96    
64     -352   
64     -32    
-16    160    
80     -80    
-160   0      
32     160    
-48    112    
0      160    
-96    32     
-16    -32    
16     -32    
-160   -16    
16     176    
-48    128    
-48    16     
48     32     
48     -96    
-80    -640   
384    256    
-288   256    
256    -192   
-16    288    
224    128    
-80    -64    
-224   240    
-192   -96    
-64    -352   
144    64     
16     192    
176    48     
-48    368    
-128   64     
-368   224    
-176   64     
-112   256    
48     48     
-624   -240   
400    -320   
16     512    
0      -192   
80     -240   
-32    176    
240    112    
48     192    
-112   0      
-48    -80    
288    480    
-16    160    
-384   -272   
-144   -176   
64     48     
176    240    
48     -112   
16     -336   
176    80     
48     32     
48     320    
240    -512   
-16    240    
-80    176    
16     0      
-272   160    
-176   0      
128    96     
160    32     
144    0      
-160   -240   
-192   144    
160    48     
-48    128    
208    -32    
-352   -304   
112    240    
80     144    
32     -128   
96     144    
224    304    
-176   0      
176    0      
-144   -32    
128    32     
176    48     
0      112    
96     32     
80     48     
-16    64     
64     -32    
176    80     
-160   0      
272    -48    
128    32     
304    96     
-416   -144   
64     0      
-64    48     
32     80     
144    96     
112    80     
176    112    
48     64     
48     176    
48     96     
-48    48     
112    16     
112    80     
-64    96     
208    96     
-32    128    
16     -96    
112    -32    
0      0      
32     80     
16     32     
64     32     
-80    -48    
320    -32    
160    0      
32     80     
-96    128    
160    128    
32     16     
320    240    
0      -160   
288    192    
-320   144    
-208   -80    
-32    -16    
-368   -1616  
224    16     
384    0      
48     64     
-320   -16    
-128   32     
176    176    
-48    144    
-32    32     
160    -160   
64     -112   
16     80     
48     -16    
48     -48    
16     -192   
288    -208   
192    16     
32     32     
-48    112    
-80    -128   
144    16     
48     32     
-16    48     
-16    80     
160    448    
64     0      
-304   -240   
-144   0      
-96    -48    
160    -32    
-192   -224   
-80    -16    
16     0      
128    -208   
304    96     
272    96     
176    112    
32     0      
-192   -48    
48     32     
-16    -48    
272    -16    
144    80     
240    80     
0      208    
144    -336   
112    -32    
48     -1264  
16     64     
16     48     
240    240    
-144   80     
272    96     
64     -32    
160    -16    
-64    48     
112    0      
96     48     
96     -32    
160    224    
-128   -96    
240    16     
176    -288   
0      -80    
80     -144   
16     80     
-16    -16    
112    32     
112    80     
208    128    
80     96     
64     -48    
-48    -16    
64     160    
128    112    
16     -80    
-48    32     
176    -80    
192    80     
-64    0      
224    64     
0      32     
144    80     
-80    -16    
64     -16    
-16    64     
64     -224   
0      48     
96     -16    
48     160    
192    16     
16     64     
16     -112   
128    128    
-16    16     
-32    16     
64     96     
96     64     
176    176    
0      -80    
144    -48    
0      16     
128    -32    
0      -368   
128    -16    
112    -64    
-64    -96    
-96    64     
192    208    
16     -128   
-64    -480   
80     416    
-128   272    
16     -80    
160    192    
544    240    
-144   112    
128    -1120  
384    160    
96     752    
-368   -736   
-160   688    
-96    0      
208    -160   
48     -32    
240    -432   
-16    144    
128    -384   
160    48     
48     176    
272    160    
160    32     
-64    -960   
-80    624    
416    -416   
-176   432    
-16    512    
160    -592   
-16    0      
160    -208   
96     -272   
16     224    
240    320    
416    704    
-1440  -32    
64     32     
-64    16     
128    -624   
80     -352   
224    -336   
-272   128    
32     0      
272    320    
160    32     
208    80     
-160   32     
-16    80     
0      -80    
160    -272   
-784   -208   
112    128    
-16    160    
272    -208   
-144   48     
96     -192   
-112   -80    
64     -400   
-272   80     
-64    112    
160    96     
32     -48    
224    -80    
-368   32     
48     32     
-240   -32    
64     -112   
-1504  80     
-112   16     
320    -208   
144    80     
208    48     
144    -96    
80     64     
32     -16    
0      32     
-144   -96    
64     -144   
128    80     
-80    48     
-48    -32    
96     -32    
-1296  -32    
224    -32    
-400   16     
336    -128   
-48    64     
-16    -80    
32     32     
-48    224    
16     -96    
0      -128   
-32    80     
-112   0      
176    0      
-96    -64    
32     -16    
-1088  -96    
144    -272   
-400   -64    
-160   -16    
0      32     
-64    -176   
96     -16    
32     -416   
64     64     
0      80     
64     128    
-176   96     
96     -32    
-240   -80    
128    0      
-32    160    
176    144    
-112   -48    
64     -160   
96     288    
-160   112    
-80    160    
176    -112   
80     -384   
-96    -192   
160    -64    
-48    -48    
128    32     
-192   32     
96     336    
80     208    
48     -80    
-128   16     
32     32     
48     64     
224    -160   
176    -48    
-48    48     
192    64     
16     256    
-288   176    
-304   -160   
176    128    
-32    96     
16     208    
-96    96     
16     -144   
-96    -16    
-1568  -224   
304    256    
144    144    
-144   -320   
-240   80     
-208   -128   
-448   -720   
176    80     
-48    -16    
-112   160    
-96    -96    
32     112    
80     288    
-768   -16    
176    112    
32     64     
-96    64     
16     -528   
-400   32     
-144   -16    
-640   -16    
16     80     
144    -208   
-48    16     
-576   -64    
16     32     
-96    -112   
32     400    
-112   -32    
48     -48    
-32    32     
96     -272   
-128   320    
-160   -32    
-64    -64    
80     176    
-272   -208   
48     -224   
-32    -64    
-368   320    
64     240    
-368   0      
0      -192   
-48    -96    
64     144    
-16    -96    
-112   144    
80     -64    
128    64     
208    32     
64     -112   
0      -112   
64     112    
-112   304    
48     912    
80     -48    
-640   -496   
96     -144   
-64    -64    
-80    -208   
-80    -368   
0      -320   
144    -176   
-64    64     
-64    -112   
176    -208   
-128   -48    
48     -80    
0      -80    
80     16     
336    -144   
-704   -224   
224    96     
-32    -80    
-48    -32    
80     48     
-304   144    
112    32     
96     -32    
-464   -80    
256    -48    
-224   48     
368    32     
-96    80     
-64    48     
96     112    
-656   -64    
192    96     
-496   -48    
16     64     
0      -48    
160    -32    
112    64     
0      128    
-496   0      
96     -16    
144    48     
0      80     
-128   -16    
-192   -96    
96     64     
-64    32     
208    64     
-192   48     
-128   -64    
64     48     
-176   64     
208    64     
-16    48     
-16    0      
128    112    
48     64     
-240   48     
48     48     
-80    16     
192    32     
-192   -48    
192    0      
-512   -48    
-112   0      
80     16     
-208   -224   
96     -16    
160    48     
-320   0      
16     -16    
-80    -112   
32     -80    
-16    -48    
272    144    
112    144    
-544   -64    
-64    -32    
-16    48     
80     48     
-96    144    
48     48     
256    -16    
-48    80     
-48    32     
48     16     
496    224    
-176   144    
-176   32     
-48    16     
16     -16    
48     80     
16     128    
112    32     
176    112    
112    80     
-112   368    
16     224    
64     0      
-16    0      
160    16     
-80    192    
-144   -32    
144    -48    
48     16     
80     272    
16     32     
80     32     
-48    0      
144    80     
160    176    
-160   512    
48     160    
144    -304   
16     0      
16     -32    
64     -96    
-32    96     
160    96     
-224   -80    
-96    -144   
-320   -96    
16     64     
0      80     
16     -32    
128    112    
-112   80     
32     -16    
224    48     
-64    -128   
256    -96    
256    96     
-32    32     
0      80     
0      0      
48     80     
-80    -16    
304    64     
272    0      
-112   -96    
32     -96    
64     -32    
80     64     
-64    16     
-16    16     
-176   -64    
64     0      
192    96     
-96    64     
-144   -112   
-64    -544   
176    64     
112    80     
32     80     
112    -16    
-16    -64    
-32    16     
-208   -48    
48     32     
128    128    
32     32     
192    32     
48     0      
224    160    
-192   176    
-64    -208   
0      -80    
112    48     
0      0      
16     80     
80     -128   
112    0      
432    304    
-96    240    
176    224    
96     0      
224    128    
-144   -144   
192    192    
-16    304    
192    -416   
-32    16     
112    -224   
128    0      
32     112    
176    16     
96     16     
208    32     
64     -48    
96     336    
-176   480    
48     -176   
-224   224    
96     -480   
224    16     
-208   288    
288    -144   
-64    -448   
192    80     
-112   -96    
320    624    
-288   -240   
-144   -144   
-16    -128   
96     160    
-112   -48    
112    144    
368    624    
-192   0      
112    128    
-80    -192   
208    96     
-96    -144   
-32    -608   
160    -384   
64     -32    
-160   -64    
80     64     
112    64     
64     176    
-128   -16    
208    48     
-208   -112   
-48    -192   
128    32     
208    144    
96     48     
144    32     
112    192    
-96    -384   
288    -16    
-96    -32    
112    16     
-32    -16    
-160   288    
288    -48    
272    -32    
208    -192   
-32    -16    
32     144    
-48    -16    
0      208    
272    -640   
112    16     
80     -704   
96     -32    
-96    96     
192    0      
336    272    
-144   224    
-48    -48    
-80    -160   
256    48     
0      -48    
112    112    
256    0      
32     64     
240    -112   
-80    96     
32     48     
16     -80    
144    -32    
112    80     
48     96     
-352   -368   
384    -256   
96     80     
16     -64    
112    -32    
32     64     
144    -16    
64     -16    
112    -128   
32     -96    
112    -64    
96     96     
-64    -304   
48     112    
96     128    
128    -432   
144    -1024  
48     -32    
192    -1344  
80     32     
32     144    
16     -112   
-16    -112   
224    -192   
48     160    
48     -112   
16     -1200  
224    80     
-48    64     
304    96     
-256   144    
32     -80    
288    -176   
32     -464   
352    -240   
-16    -144   
80     64     
32     96     
96     -224   
-48    -576   
16     32     
144    -144   
144    224    
240    224    
-224   96     
32     -64    
112    -64    
-288   -80    
64     -224   
240    96     
-96    -272   
-144   -144   
208    -624   
128    -96    
240    -128   
-48    416    
272    352    
-192   -48    
80     -352   
80     -112   
-400   -96    
160    -320   
-1104  224    
96     112    
-224   -160   
96     -320   
-64    -208   
-16    -528   
48     48     
288    16     
-192   -96    
48     160    
-32    -208   
304    -240   
256    480    
-112   -112   
-64    64     
-192   -96    
64     -16    
-128   -80    
96     -80    
64     -16    
416    176    
-160   -160   
176    -272   
320    -160   
320    96     
16     -16    
-240   -16    
0      160    
-32    -128   
32     -112   
-384   0      
336    144    
-752   224    
160    80     
-16    16     
-16    -64    
-128   -64    
96     -320   
0      96     
16     112    
320    256    
-160   64     
96     16     
-144   32     
176    -32    
-160   -96    
64     -96    
-112   16     
64     16     
-128   16     
16     -192   
-112   0      
48     -352   
16     32     
224    -16    
-32    -16    
48     -64    
80     -192   
-176   -16    
176    32     
-192   -64    
0      -32    
-272   -128   
176    32     
192    0      
128    32     
112    144    
32     -64    
32     -32    
-16    -416   
112    -16    
-640   -112   
160    16     
32     64     
32     112    
64     32     
0      -208   
-336   -112   
240    32     
-32    80     
32     32     
-80    0      
112    -80    
-16    0      
-400   -368   
720    -48    
224    144    
336    192    
-320   -48    
112    32     
-512   -128   
272    -32    
0      0      
304    -16    
-224   -80    
176    -112   
128    224    
-912   -32    
224    0      
64     48     
-96    0      
32     0      
48     64     
32     32     
32     0      
-192   -32    
16     -192   
0      -144   
-1296  112    
80     64     
-1200  -64    
-144   -16    
-448   -112   
-336   0      
272    112    
-192   -16    
-64    16     
-320   -112   
-16    32     
112    64     
16     16     
208    64     
-96    80     
-16    -96    
32     16     
-208   -80    
256    160    
160    80     
-112   -32    
-48    0      
-128   -96    
-320   -112   
-672   32     
176    96     
-176   48     
-16    64     
160    32     
-304   -32    
-112   -32    
-64    -32    
48     0      
192    32     
0      0      
-112   160    
-16    -176   
0      -32    
224    144    
-176   272    
-304   -160   
32     -48    
-112   -112   
-416   -96    
144    48     
48     -16    
32     32     
-80    32     
-336   -48    
48     16     
-96    -96    
32     80     
0      224    
-48    80     
0      -80    
-80    112    
-304   48     
208    208    
-688   64     
64     -48    
64     0      
160    80     
48     -96    
-96    -64    
0      48     
-208   64     
-32    96     
-96    -16    
-32    32     
-192   -32    
112    16     
-224   64     
800    512    
-704   -432   
-64    -464   
-208   176    
-192   112    
-64    -192   
-144   224    
160    208    
80     -288   
256    432    
32     -96    
80     -64    
-96    80     
16     -112   
80     -48    
176    48     
-352   -48    
-32    -96    
-1376  -96    
-48    -160   
208    256    
272    256    
112    -80    
-96    96     
-32    64     
-128   -32    
-64    -112   
80     -176   
320    304    
-80    240    
-16    32     
-320   -448   
624    976    
-1552  272    
-80    -592   
240    240    
32     -272   
-128   -80    
-224   -16    
80     -32    
160    288    
112    80     
0      48     
-16    32     
-240   -240   
48     96     
-192   -96    
32     64     
112    96     
112    112    
-272   -192   
160    16     
-64    0      
96     128    
64     -336   
0      144    
-16    144    
-80    80     
80     256    
-32    -144   
240    416    
-256   -112   
128    -192   
128    112    
208    0      
-16    -80    
-48    -32    
-160   -128   
128    -528   
304    352    
-288   48     
-112   -32    
-160   96     
144    128    
32     480    
272    112    
-304   32     
-48    272    
176    160    
176    144    
-48    0      
96     160    
64     32     
-64    32     
16     -32    
-224   96     
-128   -112   
80     16     
0      416    
-80    96     
0      16     
-240   -64    
-32    96     
48     192    
128    -64    
80     -128   
-32    -32    
160    224    
-96    144    
-32    -16    
48     16     
400    224    
-240   176    
80     -192   
-64    -96    
-48    64     
-80    112    
-176   176    
192    128    
-192   352    
224    96     
96     -160   
240    0      
-112   -128   
-16    144    
-80    112    
-16    -64    
-16    80     
32     32     
32     80     
-128   -32    
432    144    
32     -160   
-16    80     
-16    -640   
-208   -272   
64     -48    
-224   0      
240    -16    
-64    288    
-128   0      
288    -80    
-160   192    
112    -32    
32     144    
-208   -352   
-48    48     
112    -64    
80     160    
160    32     
80     16     
160    64     
160    160    
-144   -64    
128    -208   
-96    64     
160    96     
-16    0      
80     -80    
-16    16     
-96    -400   
-32    16     
192    -64    
48     96     
-48    0      
304    -80    
0      -32    
-64    48     
-80    -80    
64     -32    
16     -16    
160    96     
336    96     
-208   224    
-224   -80    
160    -192   
96     16     
-32    -896   
-128   160    
-64    -32    
32     32     
160    48     
48     128    
0      0      
240    288    
-32    192    
224    0      
-112   80     
64     -96    
-48    192    
0      48     
112    16     
-32    -784   
464    208    
0      352    
-336   112    
96     96     
16     -48    
192    -352   
128    -160   
96     -48    
48     -48    
-128   0      
208    -48    
176    16     
80     -96    
-96    -128   
-112   -176   
240    -240   
48     -752   
224    -32    
64     128    
96     144    
16     -368   
160    320    
-192   -144   
-16    -160   
160    384    
256    384    
-144   -176   
96     -32    
240    144    
-128   -176   
80     -128   
144    -400   
256    112    
-32    32     
80     16     
-320   -80    
128    256    
256    144    
-48    -144   
160    -96    
256    0      
640    656    
-368   -528   
368    240    
-48    208    
144    48     
336    -304   
144    -16    
32     48     
112    -80    
0      64     
48     144    
-160   112    
288    -112   
144    80     
64     -416   
0      48     
112    -112   
80     48     
80     32     
48     80     
160    16     
112    32     
48     16     
304    64     
-224   -32    
96     64     
-48    -16    
160    -48    
64     96     
112    -16    
208    240    
-80    -48    
-48    -128   
224    -176   
80     48     
-80    -80    
48     64     
-32    80     
112    -752   
-112   80     
176    48     
64     -432   
160    64     
128    -336   
160    -48    
0      48     
96     -144   
48     112    
160    0      
32     80     
160    32     
64     -48    
0      -48    
160    -416   
16     0      
-16    192    
128    -224   
-32    32     
128    -192   
64     -112   
96     -768   
32     80     
16     112    
128    -16    
112    32     
-80    -64    
176    16     
128    -16    
224    432    
192    -80    
48     -240   
64     16     
-192   -128   
160    -224   
176    0      
256    160    
624    256    
-592   -688   
32     -272   
400    -192   
-144   96     
80     -256   
432    0      
64     112    
16     -48    
-416   32     
48     96     
-2544  -144   
48     -112   
272    80     
-48    -16    
160    0      
48     -208   
32     -80    
112    64     
-32    -64    
176    -112   
176    16     
-64    -32    
320    -64    
-320   -144   
16     -144   
-176   -64    
160    32     
96     -16    
176    -96    
-128   -48    
128    -496   
176    16     
-336   -944   
80     32     
16     48     
224    -16    
-176   -64    
-16    64     
48     48     
-80    -32    
-224   -16    
0      96     
-720   16     
144    -48    
48     -16    
0      -160   
-112   0      
288    -48    
-112   -48    
96     -64    
464    288    
-400   -112   
112    -336   
0      -32    
32     -112   
-128   -48    
-16    48     
-272   32     
48     160    
-304   -224   
16     -64    
288    176    
112    -208   
240    64     
32     176    
-160   -112   
48     -64    
64     128    
368    32     
160    -80    
-208   80     
32     -176   
-192   -64    
112    144    
96     -384   
96     48     
-96    64     
-16    -240   
192    80     
-16    -32    
240    96     
-64    32     
64     -112   
-240   96     
0      -416   
-256   -48    
-32    32     
16     -48    
176    48     
144    -80    
-32    -224   
16     80     
384    176    
48     -32    
160    176    
-224   -128   
-368   48     
-48    496    
-176   -256   
80     320    
-208   112    
112    -688   
-80    624    
-288   -160   
176    -48    
256    144    
32     0      
-272   112    
-720   -64    
-160   48     
-384   -32    
64     64     
320    64     
80     80     
-128   -1200  
-16    928    
-32    864    
-96    -688   
-768   0      
-16    112    
144    144    
80     400    
-160   -288   
-352   464    
-208   -192   
-528   -432   
64     848    
-400   240    
-368   -320   
-576   -112   
48     256    
-48    16     
-64    -208   
224    -304   
128    96     
-224   64     
-16    -64    
-160   -48    
0      -96    
-128   -80    
0      -224   
96     96     
-80    64     
112    48     
-816   528    
16     304    
16     96     
80     128    
-368   176    
96     352    
-128   -144   
-112   -32    
32     -48    
32     32     
-80    -64    
-16    -240   
-32    16     
-192   -112   
48     64     
-96    128    
48     96     
-1392  224    
368    144    
-384   -96    
32     64     
-48    -304   
80     -64    
208    -176   
-160   -64    
-208   48     
32     -144   
-16    -160   
-64    -400   
-16    336    
32     720    
112    80     
-848   -32    
-176   -352   
176    144    
-96    304    
208    128    
128    112    
16     416    
304    480    
0      -128   
-160   80     
224    -320   
0      112    
-192   -304   
-320   -656   
-96    -400   
-400   -224   
16     -16    
128    32     
32     80     
-144   16     
-48    80     
0      240    
-208   96     
240    32     
-96    -32    
240    96     
-240   -32    
192    64     
-208   16     
80     64     
-64    -80    
64     -64    
112    -112   
-144   176    
-128   -64    
-128   -224   
48     -64    
64     80     
-64    304    
112    64     
16     -64    
-16    -176   
416    240    
-736   112    
80     -144   
-208   -16    
576    528    
-384   496    
-208   144    
0      32     
48     16     
224    256    
96     208    
96     384    
320    144    
64     -272   
112    -240   
32     96     
-160   112    
32     48     
-144   128    
-48    128    
352    128    
-144   160    
-32    48     
-64    -80    
16     -32    
48     -128   
128    64     
112    176    
288    192    
-176   128    
-80    -64    
-336   -32    
240    176    
-64    -16    
48     -112   
-16    -32    
-80    0      
96     112    
-192   -176   
80     -208   
128    80     
16     -32    
32     -16    
304    112    
-352   128    
272    16     
0      0      
160    64     
-320   32     
64     -16    
176    80     
-128   160    
0      160    
256    128    
96     16     
112    -160   
-112   -192   
0      -176   
-32    368    
112    80     
-80    -16    
-16    -176   
272    112    
-16    128    
144    -400   
0      16     
16     16     
48     112    
-16    -64    
208    128    
-64    80     
0      -176   
48     -336   
272    176    
-80    480    
0      -80    
-128   48     
-128   80     
272    -80    
176    32     
272    -48    
176    -64    
176    -160   
48     -160   
112    160    
-80    -112   
-96    -32    
-112   16     
-96    -16    
-64    0      
96     80     
-128   80     
96     -864   
128    32     
-96    -208   
-48    -112   
16     128    
-80    48     
128    32     
16     64     
-32    -48    
288    -32    
64     96     
-48    -144   
32     -176   
208    64     
32     128    
-80    -208   
80     -32    
64     0      
112    32     
96     224    
-336   -48    
-32    -48    
96     32     
80     48     
240    192    
-144   -16    
112    96     
-16    16     
-48    -32    
128    80     
112    0      
-16    0      
80     128    
160    48     
64     64     
16     -48    
-128   -16    
80     80     
-80    32     
112    32     
-128   144    
32     -32    
64     16     
128    32     
192    32     
-64    -336   
0      0      
32     -336   
48     32     
80     80     
112    64     
-176   -48    
128    -16    
96     -128   
224    128    
176    32     
-80    64     
0      -64    
-224   -80    
48     144    
0      -192   
64     -160   
-192   -32    
192    128    
304    -16    
16     64     
128    -160   
-16    80     
-80    0      
192    0      
-16    32     
-16    48     
64     0      
-16    48     
48     0      
128    -80    
32     112    
-32    -400   
-32    -256   
-16    -272   
-144   128    
-16    -64    
448    80     
-32    48     
416    208    
-688   -192   
608    -16    
112    96     
-416   -32    
96     0      
64     -128   
32     32     
32     -176   
144    80     
32     -400   
144    -80    
192    0      
-176   192    
-48    0      
96     32     
32     80     
0      -16    
192    -32    
96     32     
96     64     
-48    -16    
240    -64    
-176   -96    
192    160    
-32    -96    
160    -48    
-80    0      
16     64     
16     -48    
208    64     
-32    32     
224    64     
-48    64     
-32    -352   
-64    0      
-48    -144   
144    240    
0      16     
256    -64    
176    192    
48     128    
32     -416   
-112   176    
-32    -64    
16     48     
0      240    
368    -96    
112    16     
-128   -208   
112    128    
-48    -112   
128    -320   
0      288    
-16    -32    
32     -144   
208    -272   
16     48     
0      -480   
224    -32    
64     48     
48     -320   
-32    -80    
0      -944   
336    -448   
432    640    
-224   -352   
-32    -352   
32     160    
160    -944   
-96    64     
48     -400   
-80    64     
336    -192   
-176   -384   
-432   -160   
144    -640   
112    240    
128    112    
112    -32    
80     -592   
208    -176   
192    208    
-208   -112   
144    -352   
80     48     
192    96     
-144   -464   
96     -240   
80     16     
0      -32    
176    368    
0      16     
64     0      
208    80     
384    128    
-80    -208   
-64    -176   
176    304    
16     80     
16     160    
400    224    
48     544    
-208   192    
224    -352   
112    128    
320    80     
-128   64     
112    96     
144    128    
-208   -64    
64     -80    
208    -176   
-48    80     
176    -16    
112    64     
400    384    
-80    288    
-176   80     
32     -48    
-32    64     
64     0      
-1456  0      
-64    -208   
0      -128   
-32    -144   
-240   -96    
160    -304   
-80    32     
176    -1328  
-64    -80    
240    32     
-144   32     
96     -160   
-112   32     
-336   -64    
128    -32    
-80    -16    
160    -240   
-480   -80    
-48    -288   
48     -176   
112    -112   
-80    160    
144    -384   
144    224    
144    336    
240    96     
0      -96    
16     -480   
0      -288   
80     -144   
-80    80     
176    48     
-896   80     
112    -64    
32     -48    
-16    -192   
80     -32    
80     -160   
144    -32    
-48    -256   
-128   -400   
-32    224    
224    304    
-32    176    
304    144    
-368   -256   
112    -176   
-240   -96    
-80    208    
-48    144    
256    -80    
-64    144    
16     -560   
-256   0      
-112   -160   
-80    -128   
-48    -144   
368    -368   
-112   208    
16     -32    
-400   32     
-48    224    
48     752    
224    208    
64     -128   
32     64     
128    -128   
112    160    
272    -32    
304    64     
-64    -384   
-400   -352   
-208   -96    
-80    80     
176    -16    
32     112    
48     64     
448    512    
-864   416    
80     480    
-1536  -48    
-48    -64    
-272   176    
-304   -112   
96     64     
-272   -112   
-208   96     
-1440  -16    
-288   288    
144    -16    
-272   144    
144    0      
-112   -144   
-512   -80    
-80    848    
176    304    
32     112    
32     -160   
528    -16    
-832   -240   
-208   -112   
-192   32     
16     96     
-128   160    
-64    -304   
-64    -64    
-304   -336   
144    160    
-192   -304   
288    -240   
-240   0      
80     224    
112    -16    
0      -192   
-128   -64    
-160   -16    
-288   -192   
16     -592   
-96    -176   
-224   32     
48     80     
-144   -48    
-336   -272   
224    32     
-192   48     
-80    -160   
16     -32    
-272   -144   
64     -64    
16     -32    
-48    48     
-336   -96    
-176   128    
96     416    
-256   96     
-32    -208   
-128   -112   
224    -144   
272    592    
-304   272    
-80    -112   
128    -320   
-288   0      
80     -80    
16     384    
80     -176   
224    192    
-96    0      
-32    128    
-16    0      
-304   32     
-176   272    
-208   -64    
-80    -176   
96     144    
144    -80    
96     -80    
208    -64    
-112   -80    
-32    96     
-48    112    
-80    16     
128    304    
48     208    
-48    -32    
16     0      
-304   -64    
240    32     
-160   -64    
64     64     
80     16     
80     0      
-192   32     
-112   240    
-288   -48    
-352   -80    
-144   48     
32     144    
-192   144    
-112   272    
-16    144    
-288   -64    
128    48     
-176   -32    
224    48     
-96    0      
160    -32    
-16    64     
144    96     
-128   32     
0      48     
-80    -32    
320    208    
64     32     
-240   -32    
0      48     
-192   16     
-96    16     
32     48     
-16    32     
336    112    
160    48     
-16    32     
0      0      
112    64     
-96    80     
-112   -16    
-160   16     
80     64     
-96    -48    
-32    -32    
-144   48     
-336   -128   
96     -32    
208    112    
192    80     
16     -32    
-32    32     
-128   -32    
-144   48     
-32    32     
-64    16     
-144   48     
16     0      
-48    32     
0      80     
-80    48     
0      16     
64     32     
32     80     
96     32     
-48    -48    
80     16     
-48    48     
64     64     
-16    0      
48     48     
32     -48    
48     64     
-48    32     
48     -16    
176    48     
16     112    
80     16     
-48    -16    
16     80     
-16    -48    
0      160    
16     0      
80     16     
-144   -96    
192    -16    
-176   288    
320    160    
-128   64     
-288   112    
288    -48    
-16    272    
176    80     
-16    -112   
-32    96     
80     176    
-192   16     
208    -48    
96     64     
-176   32     
544    112    
-192   224    
-48    112    
48     112    
-48    144    
48     0      
192    16     
64     16     
32     80     
400    -16    
336    32     
592    80     
-112   -176   
128    144    
-400   -128   
0      -112   
-64    112    
-16    48     
224    224    
16     0      
176    16     
-112   160    
16     0      
80     0      
32     64     
96     160    
0      0      
0      -32    
32     0      
-96    -16    
224    -224   
-16    160    
160    288    
-160   -224   
64     -384   
144    0      
32     -192   
-160   176    
144    -48    
128    160    
224    0      
-176   816    
-16    48     
-16    -208   
240    528    
240    -592   
-144   480    
-288   672    
272    -992   
80     -544   
-48    736    
400    -16    
0      224    
-112   -816   
-48    -288   
144    -144   
-80    176    
0      192    
80     -32    
32     128    
192    304    
80     224    
224    -16    
80     160    
160    -96    
128    16     
-32    -96    
64     48     
-80    112    
224    64     
144    -80    
16     -80    
-96    48     
32     80     
-16    144    
176    192    
272    224    
-80    80     
64     192    
-64    -32    
-48    0      
-176   -1008  
416    112    
-32    176    
0      0      
128    80     
160    0      
-144   16     
-32    -16    
32     128    
96     96     
256    64     
96     -16    
80     80     
-128   -80    
64     16     
128    -64    
176    80     
-80    -896   
144    -112   
64     -64    
240    48     
-144   112    
-64    -96    
288    -96    
-32    128    
0      80     
0      -16    
16     32     
96     -288   
0      -96    
64     -288   
96     272    
-160   -736   
128    -16    
192    0      
-64    144    
16     112    
32     16     
96     -80    
48     -64    
32     128    
32     -336   
112    32     
-48    -144   
64     -32    
208    -464   
32     16     
-64    -192   
208    32     
16     80     
288    112    
-144   160    
144    -16    
208    -16    
144    160    
-32    112    
96     48     
112    80     
64     256    
112    32     
-112   -176   
400    304    
-48    112    
192    0      
320    80     
-128   272    
64     96     
-96    -32    
96     -592   
128    -16    
304    -368   
-160   32     
160    32     
112    16     
144    112    
-32    -80    
128    224    
48     -64    
0      -624   
-80    -144   
176    -192   
-224   64     
-848   16     
176    64     
32     -64    
192    -512   
-96    224    
176    -1248  
16     -128   
64     -240   
-48    -320   
128    -288   
-160   -144   
144    -272   
-176   144    
96     64     
336    144    
-624   -320   
352    -512   
336    -16    
496    752    
80     704    
-288   16     
304    -176   
80     -256   
-112   -80    
192    -416   
-288   -448   
128    -512   
96     -48    
256    -336   
256    192    
-224   800    
416    -880   
16     32     
416    -352   
-160   -160   
-80    -32    
208    -192   
0      -64    
192    -272   
-176   112    
112    -48    
0      32     
96     80     
-320   -464   
352    -192   
-384   64     
208    -32    
-1472  -64    
32     -112   
64     -400   
96     -224   
80     16     
-144   -240   
-80    112    
208    -464   
-80    32     
384    -32    
-224   16     
32     -576   
144    128    
80     48     
-16    240    
-544   -16    
-32    -480   
112    112    
-288   -800   
-416   112    
432    288    
-256   -176   
592    -544   
16     112    
112    0      
0      16     
-96    -400   
64     192    
-112   -416   
-144   32     
-240   32     
-64    0      
-544   32     
0      -272   
-112   288    
128    -352   
48     288    
-128   -480   
288    80     
48     144    
128    -80    
16     48     
0      -224   
-272   -16    
64     -208   
-192   96     
112    -16    
80     -128   
-128   48     
-80    128    
112    -32    
128    -96    
192    -432   
0      112    
64     32     
-16    -256   
-288   -80    
144    176    
-368   -704   
-144   0      
-224   480    
64     -240   
-192   -64    
304    -96    
144    0      
112    -64    
32     16     
0      -48    
-32    80     
-608   272    
368    464    
-64    368    
-32    160    
16     -32    
0      -128   
16     -64    
32     -16    
-160   32     
32     -272   
256    128    
112    -48    
-48    144    
-1088  -64    
-432   0      
288    -16    
80     -64    
64     0      
208    16     
-80    32     
144    -64    
0      16     
-112   -96    
-176   -288   
-1312  0      
224    80     
-32    -80    
32     0      
16     -224   
-80    -112   
144    -176   
-96    -64    
-48    80     
-224   192    
-304   32     
-32    -48    
208    80     
112    0      
144    48     
-240   -16    
112    64     
-240   -96    
-80    -48    
-32    128    
-64    64     
-64    -16    
-144   32     
-96    0      
-960   0      
32     -112   
-1344  16     
144    160    
-112   -96    
-64    48     
0      80     
112    96     
-32    -128   
32     32     
32     64     
64     -16    
-368   -112   
-272   -160   
96     16     
32     112    
160    80     
-464   16     
64     48     
-224   -128   
80     32     
-80    -112   
32     64     
16     -16    
0      -32    
64     16     
80     64     
-192   -96    
16     -32    
96     64     
-32    -32    
128    96     
-144   0      
-16    64     
-896   16     
-32    16     
128    16     
64     112    
128    48     
48     16     
-240   -80    
-80    -48    
-16    48     
-112   -160   
96     112    
-368   0      
-64    -32    
-576   -32    
48     80     
-1536  -80    
48     48     
16     32     
112    80     
-224   -32    
96     -256   
64     -48    
112    160    
160    48     
32     0      
-256   16     
-464   -96    
64     -80    
-432   -16    
112    0      
-112   -32    
64     -16    
-128   -80    
144    0      
160    96     
-160   16     
128    32     
112    48     
80     -16    
624    416    
16     160    
-240   -224   
32     -144   
-448   -112   
336    32     
16     384    
128    -64    
208    16     
-224   240    
-80    32     
0      48     
-368   -16    
144    -800   
-192   720    
-16    160    
336    -464   
208    80     
-48    176    
32     384    
-80    -144   
-240   48     
-48    -16    
-48    64     
64     -144   
208    240    
-80    304    
-80    224    
16     48     
-48    32     
-32    624    
288    -288   
-400   -336   
288    64     
-352   96     
128    48     
16     -16    
0      112    
0      144    
-128   64     
240    240    
-96    176    
112    112    
192    176    
-272   16     
-80    16     
64     48     
-96    -48    
128    -80    
144    -144   
144    96     
80     112    
64     16     
16     32     
-144   160    
144    176    
160    192    
176    64     
160    -16    
144    160    
-160   96     
-176   80     
-80    -64    
-128   80     
-32    16     
176    112    
-112   64     
-80    0      
48     80     
-16    112    
160    64     
96     -48    
32     32     
0      0      
-112   64     
-144   -16    
80     272    
288    -112   
256    64     
-112   176    
-160   -16    
80     -48    
192    16     
16     144    
-176   -144   
176    -176   
-16    80     
240    160    
32     0      
112    16     
32     -240   
272    48     
80     144    
48     144    
80     48     
-64    -48    
64     -32    
416    480    
-336   304    
32     32     
48     -16    
352    64     
224    144    
128    -16    
16     48     
-416   -320   
160    -272   
-16    64     
-176   -192   
304    -64    
0      304    
112    128    
-32    16     
-144   -96    
0      -128   
240    144    
32     96     
96     48     
48     32     
64     128    
96     -16    
16     -16    
-176   -320   
224    -96    
-112   -80    
176    -1440  
32     96     
32     448    
208    400    
48     -16    
32     -16    
16     80     
-112   -32    
224    -128   
160    80     
-224   16     
32     -64    
208    -112   
16     -304   
-32    -240   
144    -480   
256    16     
-48    32     
240    112    
-96    384    
240    288    
112    112    
96     64     
-128   0      
0      32     
-48    32     
16     80     
0      -32    
192    32     
160    192    
32     80     
-144   0      
160    -112   
48     176    
64     -16    
48     592    
112    272    
-192   48     
-64    -240   
112    16     
80     -32    
144    -224   
80     320    
368    48     
-432   -160   
336    -80    
16     144    
32     -448   
176    144    
80     -128   
0      336    
176    16     
256    128    
-16    -320   
272    464    
-384   -304   
-64    112    
-256   48     
144    -176   
128    416    
176    96     
64     192    
32     96     
-32    160    
144    -1040  
336    960    
224    336    
176    -832   
16     304    
-160   384    
0      -384   
-176   48     
32     256    
256    -224   
-96    112    
0      -80    
-16    -176   
-208   -384   
256    176    
192    976    
224    112    
144    -256   
320    -464   
-528   -384   
-128   352    
-160   0      
-96    -288   
448    32     
144    304    
256    16     
112    -208   
32     80     
96     16     
-112   -32    
48     -32    
0      48     
48     -32    
32     96     
176    32     
48     -176   
128    144    
-80    -320   
-16    48     
96     -32    
96     48     
64     16     
112    64     
64     -48    
112    48     
-16    -336   
160    336    
48     240    
480    -192   
-176   48     
0      -192   
176    128    
0      -192   
-64    -512   
208    0      
-112   -16    
176    -32    
-176   32     
128    -192   
0      -832   
112    0      
192    -64    
128    160    
-48    -208   
0      32     
-1440  0      
48     -64    
128    -16    
-16    -96    
128    -80    
96     -832   
-112   -192   
112    96     
-80    80     
-160   -48    
48     336    
0      -16    
480    -160   
-240   -560   
-16    -64    
-544   48     
-224   -32    
288    48     
176    -272   
384    -32    
256    -272   
16     32     
64     160    
32     160    
352    384    
-176   112    
96     -80    
16     0      
-96    -288   
352    -320   
144    112    
224    -16    
192    96     
112    80     
-48    -208   
32     -144   
0      16     
144    -176   
16     -112   
48     -96    
-128   32     
128    -48    
112    32     
-352   -112   
576    -416   
-112   48     
256    176    
-1856  -64    
16     -48    
-48    -208   
272    0      
-32    -16    
-32    -224   
0      -96    
96     0      
240    144    
112    0      
112    -160   
-64    -48    
96     -16    
-192   -32    
48     -48    
-176   16     
48     16     
160    128    
-48    -80    
-160   -32    
-16    -64    
80     -80    
208    -992   
96     48     
-144   -96    
64     -16    
96     128    
-80    16     
-32    -16    
48     64     
-224   -80    
128    -64    
48     -80    
272    -32    
80     48     
160    -64    
-80    16     
112    -80    
-32    16     
-64    -32    
48     80     
-176   -16    
96     -32    
-176   -64    
64     -48    
-224   -112   
96     -128   
-368   -32    
112    -48    
64     -32    
0      -32    
80     64     
16     -48    
160    -16    
-480   16     
32     0      
-160   0      
32     -16    
-48    32     
64     -16    
-224   0      
96     -64    
-48    0      
64     -32    
-48    -96    
-16    -256   
-80    -208   
128    -464   
272    -96    
-144   0      
64     -48    
368    128    
-352   80     
16     -144   
-32    -32    
0      -16    
-32    -176   
-192   -368   
16     -448   
-320   80     
-224   -128   
128    224    
-80    -320   
-32    864    
-96    -752   
-48    -400   
-96    544    
32     -496   
208    240    
32     32     
32     -448   
-912   80     
128    32     
-1040  -384   
-192   48     
96     -192   
80     272    
0      -336   
-496   64     
-48    -32    
-112   -160   
-64    112    
-1344  -432   
-160   240    
336    -464   
-208   -112   
-336   480    
256    32     
-16    128    
-224   -144   
320    -384   
-432   288    
-32    -16    
112    -176   
-416   -128   
32     -96    
-208   144    
-368   32     
-208   0      
-1712  -288   
304    -80    
-240   64     
256    48     
176    -32    
-240   256    
-288   -96    
-112   -64    
32     0      
-16    32     
48     64     
48     -32    
128    0      
-128   -16    
-128   160    
-432   0      
48     0      
128    -16    
0      32     
-128   -128   
64     64     
-224   -176   
272    -64    
64     64     
-16    0      
64     128    
-64    -32    
-32    -16    
-64    -16    
16     16     
16     16     
160    48     
-640   32     
48     -16    
-64    -96    
224    224    
-128   80     
48     -64    
0      0      
-112   -128   
-48    -16    
-176   -80    
48     0      
32     64     
-80    16     
-416   32     
-144   -16    
-688   -112   
96     96     
16     16     
-48    -16    
176    64     
-176   176    
-32    0      
240    -128   
-112   0      
-80    48     
16     16     
-16    -32    
32     -16    
-64    16     
96     128    
-224   32     
32     112    
128    -32    
80     -64    
80     48     
96     80     
-48    80     
-48    112    
64     160    
0      16     
-112   -80    
-224   -480   
192    -64    
-208   240    
-64    96     
-304   -48    
160    64     
-256   176    
-144   -160   
64     -256   
-48    -368   
240    32     
-208   -16    
-288   -240   
-272   -192   
-160   128    
-144   32     
64     256    
112    80     
96     -32    
-304   -32    
-80    32     
48     192    
48     48     
224    48     
112    16     
-96    32     
128    48     
80     128    
-32    160    
48     -48    
-288   -144   
112    -112   
-112   -240   
96     208    
96     240    
48     128    
64     16     
48     -160   
32     384    
-96    -144   
-352   -96    
-80    304    
96     -160   
48     0      
80     64     
128    16     
-112   32     
-32    16     
-16    -240   
16     288    
176    208    
16     -176   
-16    48     
48     128    
96     -16    
208    -512   
-256   -48    
112    304    
-144   112    
48     -144   
-32    -80    
16     288    
-192   448    
-48    -16    
48     -112   
-48    96     
208    32     
-80    16     
80     -176   
64     144    
-80    112    
48     416    
176    128    
-224   -96    
64     112    
-16    -16    
-64    112    
160    48     
64     48     
64     0      
-160   -160   
-16    112    
0      160    
-144   32     
160    144    
-48    160    
224    0      
-48    32     
-32    48     
-48    32     
-48    -48    
16     32     
-48    32     
32     32     
208    -16    
-144   -32    
32     -112   
0      -160   
-160   112    
112    160    
-192   -128   
144    -208   
224    80     
112    176    
-144   -160   
480    -192   
96     -32    
-48    -560   
176    -800   
128    368    
-720   224    
16     64     
256    -32    
-80    0      
-176   -64    
96     -64    
-80    176    
0      -16    
16     32     
192    16     
32     0      
64     -64    
64     48     
80     -176   
48     0      
128    96     
-112   -16    
16     48     
-80    32     
176    48     
0      16     
112    32     
0      32     
-144   16     
208    128    
48     0      
0      -192   
272    -112   
-176   -144   
288    48     
64     80     
128    16     
-128   48     
-128   0      
224    32     
224    -80    
-160   -336   
160    48     
-96    64     
48     16     
192    0      
224    32     
-112   -16    
-176   -160   
48     32     
144    160    
192    -16    
-80    80     
304    96     
352    128    
-112   -48    
-80    -32    
48     96     
-96    48     
208    64     
288    112    
64     -320   
-144   -64    
-16    112    
-112   -16    
-48    -112   
128    64     
-48    -64    
-112   96     
-80    32     
176    80     
-48    384    
64     240    
32     -96    
176    208    
-32    -16    
64     -224   
224    160    
-80    -32    
64     80     
192    -544   
176    96     
112    -1344  
64     96     
96     144    
240    288    
-16    32     
192    0      
96     112    
-80    -96    
112    -16    
176    -112   
128    32     
112    -64    
0      96     
-272   -208   
96     240    
-80    -160   
-96    -16    
0      32     
-144   -224   
-32    -80    
144    272    
-80    -208   
240    -32    
400    224    
240    -16    
48     -16    
-64    -272   
-16    0      
176    -32    
96     96     
64     -64    
112    96     
-64    -144   
-192   -64    
-80    -48    
32     -112   
288    112    
224    -112   
96     32     
-80    -112   
-32    272    
336    112    
16     96     
-48    -112   
80     16     
48     -192   
32     -1328  
-16    16     
64     -240   
-48    -272   
80     -128   
80     -32    
48     -352   
-80    -176   
16     -192   
16     -16    
160    16     
96     16     
80     -48    
-16    -480   
128    288    
-16    -64    
-32    32     
240    -176   
-32    -64    
-112   -832   
-176   -592   
80     0      
0      0      
112    -48    
-16    -192   
0      80     
224    -160   
80     80     
-48    -144   
112    -16    
32     -16    
-16    160    
-208   -144   
16     -32    
-1856  128    
96     -96    
336    512    
0      -544   
64     0      
112    -112   
32     -304   
80     -768   
128    0      
192    -48    
-240   32     
176    -448   
208    176    
-208   -656   
-144   592    
-848   -368   
-48    -144   
48     288    
64     -304   
208    384    
176    352    
64     400    
128    -560   
-144   -192   
208    -192   
-48    -80    
224    -288   
-16    -336   
-64    -128   
-48    -160   
-176   144    
-176   -112   
-736   -256   
-80    -64    
64     -160   
-32    -64    
-288   -192   
288    -48    
128    32     
48     -112   
-80    -160   
208    -144   
-32    48     
32     32     
256    -96    
-80    -112   
-80    -304   
-1808  -288   
224    -80    
0      -80    
-16    192    
-48    112    
0      -112   
160    -64    
64     -288   
192    64     
-32    160    
-16    -96    
-80    -80    
48     96     
-256   64     
16     160    
-224   -128   
48     -80    
-672   -96    
48     -112   
0      80     
176    0      
-160   208    
48     -544   
192    -400   
0      -96    
-32    128    
-208   112    
224    -64    
-576   128    
112    176    
0      128    
144    160    
-112   64     
512    -80    
-80    16     
0      -144   
80     64     
128    -112   
160    -48    
-1008  -32    
176    64     
-112   0      
192    32     
-128   -80    
80     -48    
-144   0      
-16    -16    
208    -112   
160    -368   
96     -64    
112    16     
0      16     
-112   -160   
-208   16     
0      64     
112    -16    
-128   48     
352    128    
-320   128    
96     -80    
-208   0      
128    -96    
-240   0      
320    16     
64     144    
-960   -64    
80     48     
-64    16     
-416   -112   
128    48     
-96    112    
80     128    
288    -16    
-192   -48    
-144   -96    
-16    16     
80     48     
80     64     
-16    0      
176    16     
-224   -64    
-224   0      
-240   0      
-64    48     
112    -16    
-544   80     
-32    -64    
-1264  16     
-80    64     
48     -112   
144    0      
-80    -112   
-32    32     
-32    0      
-160   352    
-80    -272   
128    -144   
-32    -208   
0      -256   
-80    96     
32     224    
64     128    
-496   112    
-64    288    
-192   128    
208    -304   
-288   -128   
-80    -16    
96     -480   
272    208    
0      64     
-336   80     
-144   112    
-240   -112   
352    336    
-224   -32    
256    -16    
96     144    
96     48     
-1472  -160   
-16    0      
144    -304   
-48    -240   
32     32     
16     368    
-192   208    
32     -48    
128    -80    
-96    96     
160    144    
-32    -144   
-240   -112   
96     96     
-272   -48    
-304   -48    
208    112    
112    -32    
272    -64    
-16    -192   
16     -32    
-144   48     
-32    -16    
160    32     
-16    48     
80     80     
-48    64     
32     16     
-96    0      
16     48     
-96    32     
176    80     
-800   -64    
160    0      
0      -160   
-48    -32    
-32    64     
-48    48     
32     64     
-16    80     
-336   -80    
256    160    
-384   128    
112    -192   
96     -32    
-48    48     
272    128    
-112   224    
-176   0      
64     16     
-64    48     
0      16     
208    -128   
16     48     
112    80     
-64    -16    
-32    32     
48     32     
-96    48     
16     144    
-256   112    
-304   48     
-688   -128   
-240   -160   
432    0      
48     48     
-272   -160   
0      -320   
208    80     
-128   224    
-144   -80    
256    -16    
64     144    
-368   -32    
48     48     
-208   -32    
112    48     
-144   32     
-256   -112   
416    48     
-272   96     
16     64     
48     -64    
80     32     
-64    -32    
128    -48    
-32    80     
48     48     
-208   -224   
352    -80    
-352   128    
160    0      
-80    0      
176    -64    
0      176    
-16    -112   
-96    -16    
-48    16     
-32    64     
192    80     
-128   96     
-112   16     
304    144    
48     128    
16     80     
-224   32     
352    112    
-112   112    
0      32     
80     96     
176    224    
48     32     
-208   -64    
192    -48    
-16    64     
144    144    
-208   -32    
32     80     
208    96     
-32    80     
48     -96    
80     80     
32     -32    
-96    64     
96     32     
288    64     
64     0      
112    -80    
-64    0      
144    -416   
416    -176   
64     -64    
-48    -256   
-352   16     
48     144    
288    112    
-176   16     
-80    -64    
256    240    
-32    192    
16     112    
0      -208   
-48    336    
-32    32     
-32    -32    
0      -48    
-112   32     
-32    144    
-208   -32    
224    64     
32     144    
32     256    
176    224    
-256   -288   
-16    -32    
96     272    
144    -176   
48     -16    
144    -16    
64     -32    
176    48     
-64    32     
-160   -384   
240    528    
176    272    
384    -208   
-32    112    
16     16     
32     240    
144    96     
32     -48    
-224   304    
-160   -336   
-112   160    
-192   64     
48     -64    
80     64     
240    32     
160    -48    
160    -288   
48     96     
80     -32    
-176   -80    
160    192    
-80    -128   
192    1088   
176    384    
-224   -448   
-144   160    
80     -112   
208    48     
-96    112    
-32    16     
128    0      
80     -16    
0      96     
80     -256   
208    384    
112    -128   
-96    -176   
160    80     
80     48     
176    160    
16     -48    
-96    112    
48     112    
32     144    
-64    -112   
112    -96    
96     160    
96     48     
-48    0      
48     -64    
96     -64    
160    -48    
0      64     
-224   448    
0      -384   
224    128    
-48    128    
192    -240   
-144   -128   
128    -256   
80     464    
64     -80    
32     0      
-32    -80    
64     -128   
80     -1328  
96     -112   
16     -224   
160    -288   
32     352    
192    720    
80     400    
-16    96     
48     -512   
240    -80    
384    128    
-176   -160   
-48    -32    
80     -496   
32     -208   
32     -192   
112    -64    
64     -16    
272    32     
-64    -240   
224    -96    
96     -240   
32     -224   
464    -16    
176    16     
176    224    
-208   224    
-16    80     
192    -80    
-80    -32    
80     16     
-160   80     
240    -192   
368    0      
-80    176    
80     -80    
224    -96    
64     -224   
-64    112    
32     -384   
-112   -64    
0      -192   
80     160    
112    0      
32     -48    
288    -208   
-144   128    
256    -464   
544    416    
-368   464    
64     -304   
48     -128   
-176   -432   
112    -512   
-80    -112   
240    16     
48     32     
48     160    
64     -64    
272    -80    
16     -32    
48     -16    
-16    112    
128    -192   
16     64     
-32    -256   
176    -240   
32     32     
160    -336   
-176   96     
288    -544   
-256   320    
48     0      
144    -144   
144    48     
96     48     
-144   -32    
320    32     
416    -240   
-320   0      
-384   -128   
128    -176   
-1024  96     
192    -80    
192    -16    
128    -208   
32     -112   
144    -1392  
16     48     
16     144    
16     -80    
48     -96    
-240   64     
224    -112   
-64    48     
-240   -16    
208    80     
-1968  112    
-80    -272   
0      -160   
-48    -64    
-96    160    
16     -16    
-96    -560   
48     -176   
0      96     
32     16     
112    16     
-32    -144   
128    -336   
144    -160   
80     -32    
-1200  -112   
48     -64    
48     16     
-48    -64    
80     -16    
0      -368   
32     -304   
32     -704   
-224   -48    
-32    -32    
-160   -192   
208    -64    
112    80     
-176   -48    
48     64     
-224   -80    
80     -16    
-1536  -96    
-16    -144   
64     -240   
592    576    
-624   128    
64     -1120  
208    432    
16     -208   
144    224    
-128   -32    
-32    -384   
-144   192    
128    336    
-272   112    
96     -368   
-848   32     
256    240    
0      240    
128    -80    
128    -32    
-80    -128   
80     48     
96     -416   
-16    96     
80     0      
-208   -48    
-16    -112   
176    32     
-16    112    
240    256    
-640   80     
48     48     
0      16     
208    -112   
112    16     
96     -112   
32     32     
96     -880   
-32    -16    
-272   -32    
112    -48    
16     0      
64     -256   
-496   -128   
-48    -80    
-160   -16    
112    -32    
-96    32     
208    -80    
80     64     
-112   -288   
32     80     
-384   0      
112    16     
-176   64     
16     0      
-96    80     
208    80     
-240   -64    
64     -112   
-16    0      
128    48     
192    80     
-32    -96    
48     80     
32     -96    
128    32     
-112   0      
-656   0      
-160   0      
64     -16    
-48    96     
320    -32    
-256   -64    
288    48     
-192   32     
0      -64    
-48    48     
-528   256    
32     64     
-288   -128   
-368   32     
-304   -48    
-768   -32    
-320   80     
-192   112    
-80    -112   
128    0      
-64    -80    
48     48     
-224   0      
-208   -48    
-144   32     
-176   -128   
0      -48    
-192   -32    
-208   16     
96     -112   
-96    -48    
-64    144    
-16    32     
-32    96     
-176   48     
-16    -80    
128    -32    
-64    -32    
-288   -48    
160    192    
-144   -144   
208    96     
64     32     
-224   32     
-112   160    
-224   32     
80     16     
16     96     
0      64     
-208   -128   
-32    32     
0      32     
-32    80     
64     -16    
-16    -64    
-48    -64    
32     32     
-16    48     
336    224    
-416   64     
80     -96    
32     160    
48     0      
160    -32    
-464   -64    
-64    -32    
-704   16     
-32    48     
112    -32    
160    -16    
-304   -192   
80     48     
64     64     
160    64     
-160   0      
-128   -16    
128    48     
-144   0      
64     48     
48     208    
-48    112    
-160   -112   
208    96     
-80    -16    
-32    128    
128    0      
32     32     
16     -48    
-112   -64    
272    -32    
-96    -128   
48     -48    
-304   -32    
128    -16    
-224   -32    
0      48     
-736   -112   
208    368    
-1680  -176   
128    -624   
192    0      
-80    48     
144    384    
-208   -112   
48     96     
-16    -32    
112    48     
-64    -16    
-192   -64    
-64    16     
-144   128    
-176   48     
80     -16    
-672   224    
160    -160   
192    -160   
0      272    
-32    192    
-48    -560   
-32    -192   
16     400    
-48    -48    
0      0      
-96    -32    
16     -208   
480    736    
-288   -480   
96     352    
-144   96     
-64    -128   
80     -96    
-48    -128   
160    576    
-192   -784   
32     320    
48     112    
-64    -112   
-32    176    
96     96     
-336   -80    
80     128    
-64    256    
-16    -336   
32     -32    
96     576    
64     80     
-80    -432   
96     208    
-32    192    
256    96     
-48    112    
128    0      
-16    64     
80     -224   
-112   -176   
224    128    
-96    336    
256    144    
-112   176    
-96    -32    
-64    320    
336    976    
-208   288    
-112   128    
-96    112    
80     0      
16     32     
128    -176   
144    96     
-176   -112   
352    224    
-208   80     
-128   -320   
112    -80    
-80    -96    
128    -224   
-16    -112   
64     176    
-16    -128   
112    80     
32     -64    
32     -112   
-48    -240   
128    -16    
-32    16     
-64    -64    
-32    -128   
-48    -16    
-48    0      
96     32     
16     96     
96     96     
32     176    
32     -16    
48     -32    
-80    -32    
48     16     
-48    16     
96     -48    
16     -64    
-96    -64    
16     -544   
-80    -416   
-64    -16    
96     160    
-80    144    
32     64     
176    304    
16     272    
0      112    
-144   -496   
-144   -160   
160    48     
464    368    
-368   496    
96     -64    
128    112    
-80    -144   
272    -272   
64     112    
96     288    
-128   -288   
-96    16     
-80    -32    
-16    256    
96     256    
16     128    
160    160    
-48    -48    
48     80     
112    -288   
-16    32     
-16    32     
-32    64     
304    176    
-448   256    
96     128    
80     416    
16     128    
144    64     
320    -48    
-16    -96    
-208   -128   
112    16     
-32    96     
176    -240   
-224   16     
176    -1200  
-96    240    
176    -160   
-48    -128   
0      96     
112    -48    
16     48     
64     128    
-48    32     
64     -240   
-144   -176   
64     32     
128    -64    
-112   -256   
48     -112   
-64    -800   
112    176    
-16    0      
128    -224   
112    -112   
608    320    
-752   416    
80     80     
-192   160    
16     112    
32     -400   
80     -176   
16     -64    
-80    48     
160    352    
208    -352   
16     64     
48     96     
-32    272    
176    -144   
96     64     
-96    -96    
112    96     
-64    -112   
256    0      
16     0      
192    48     
128    64     
-32    -336   
288    208    
-128   112    
-96    144    
112    -912   
80     0      
-80    -304   
-256   -432   
-128   -256   
96     -224   
64     48     
80     -64    
192    -640   
32     -240   
160    -128   
-16    96     
16     112    
64     -176   
80     16     
160    -144   
400    416    
-192   96     
64     -112   
288    32     
-80    -144   
-64    128    
-304   -416   
256    320    
80     80     
-160   0      
208    -400   
0      64     
32     -128   
48     80     
-16    -112   
-80    80     
0      -96    
96     32     
160    -16    
-80    80     
0      32     
240    768    
304    544    
0      32     
-64    -48    
48     -272   
16     32     
48     -96    
-80    224    
-112   224    
336    528    
-208   240    
32     -848   
144    48     
64     192    
64     -288   
224    -16    
-64    -1344  
16     -112   
112    176    
-272   -176   
16     16     
96     128    
160    48     
160    -32    
-96    -128   
80     80     
208    -96    
-64    -160   
304    80     
160    -32    
64     -64    
64     -288   
16     -96    
80     -352   
-16    -16    
32     16     
64     -48    
-144   48     
160    -64    
128    -272   
-112   0      
112    128    
-224   -16    
-288   -32    
240    -64    
224    -16    
160    -32    
32     -16    
16     -64    
32     -16    
192    -192   
16     -32    
-48    32     
16     48     
176    -48    
-32    -32    
128    -32    
48     -80    
-112   16     
112    -16    
-288   -32    
128    32     
0      64     
64     -64    
48     -64    
32     -720   
176    32     
48     -352   
48     -64    
-192   -192   
272    112    
-176   -80    
272    -64    
-64    -16    
176    -64    
-352   -144   
112    16     
96     -64    
128    32     
64     -160   
128    -224   
0      144    
32     -816   
-64    64     
-128   48     
-112   16     
32     -80    
16     0      
-48    32     
80     -80    
-240   -64    
96     -16    
-2400  -64    
64     32     
-144   48     
288    16     
-112   48     
48     -288   
32     16     
96     96     
-176   64     
160    0      
32     -80    
-208   -80    
-16    -320   
288    -272   
288    160    
-192   -16    
176    -16    
208    112    
-80    -144   
0      80     
112    -448   
-96    0      
176    16     
96     48     
64     -48    
-16    -128   
-64    -16    
240    0      
-416   96     
96     -48    
-208   -32    
160    -112   
64     112    
-32    16     
208    -16    
64     -80    
208    96     
64     -144   
144    80     
-112   224    
80     16     
-400   -112   
-32    304    
208    -64    
-128   32     
-144   32     
352    -48    
32     32     
128    -32    
-112   192    
336    -112   
112    208    
-208   -48    
0      16     
-528   32     
480    -96    
-512   1152   
112    -848   
128    64     
-16    256    
96     -400   
-16    192    
48     -32    
-80    -16    
272    -176   
16     -48    
-1776  160    
-48    176    
-688   -144   
416    112    
64     112    
-144   416    
384    400    
-256   80     
48     -224   
-256   64     
-944   400    
144    208    
-144   -80    
80     48     
-304   -128   
-368   0      
144    96     
-272   80     
-48    64     
-272   80     
-112   560    
160    336    
32     -32    
0      -16    
-48    -80    
-64    -144   
96     64     
-176   16     
96     -48    
80     112    
208    32     
-144   224    
-400   -32    
96     -16    
-576   -160   
0      -64    
-320   -32    
-240   -528   
192    -16    
0      -48    
-48    -176   
80     96     
-64    80     
192    144    
-80    112    
-96    240    
-160   96     
-304   16     
-240   -320   
160    -96    
48     -80    
-384   32     
-176   -32    
-544   32     
-48    192    
-112   -64    
112    -96    
-96    -240   
32     -144   
-80    -80    
32     112    
-16    16     
-48    80     
64     32     
-16    -32    
-80    0      
-480   -400   
-144   -144   
-336   80     
-64    160    
32     -48    
208    96     
-96    16     
-16    -48    
-32    320    
96     80     
-32    -128   
-32    -144   
-256   -192   
32     -144   
112    32     
-144   -144   
0      -32    
-480   -160   
-96    -112   
0      -32    
0      -16    
-96    176    
-80    -32    
-16    -48    
-16    -128   
128    -32    
-176   -64    
-96    -160   
112    160    
-208   272    
32     320    
144    48     
-352   416    
160    272    
-768   -144   
144    -976   
112    -128   
32     496    
16     -48    
-80    -128   
-48    0      
16     -416   
-368   -80    
176    -176   
-80    128    
80     -96    
0      -192   
-352   -512   
80     -352   
-304   -176   
128    -192   
128    -176   
-112   96     
128    -32    
-336   48     
-224   -128   
64     -272   
32     -192   
240    0      
224    -304   
-640   -288   
176    304    
-64    560    
352    320    
80     -128   
32     144    
-16    -224   
-192   -224   
128    -208   
240    160    
-144   0      
352    96     
160    -48    
-128   -96    
272    64     
-208   48     
-128   -320   
-48    -128   
-112   400    
128    -16    
80     128    
-112   0      
-16    208    
0      656    
288    384    
176    -32    
288    224    
0      128    
-160   384    
48     336    
-208   336    
176    80     
-192   -336   
48     144    
240    0      
-16    80     
-160   -112   
256    -400   
48     -112   
304    -48    
48     288    
-448   -16    
-112   -320   
-224   -128   
224    -416   
368    160    
-304   176    
-320   -352   
128    -16    
96     -96    
384    272    
-32    -80    
-320   -160   
272    368    
144    416    
-96    288    
64     -416   
64     48     
-208   160    
16     144    
-240   -112   
432    -288   
112    208    
0      176    
-48    -192   
-96    -96    
336    -416   
112    -16    
-224   272    
-416   80     
208    192    
0      48     
0      32     
0      -32    
32     128    
-64    -224   
208    304    
96     128    
-48    -160   
144    48     
80     224    
64     0      
-80    -64    
0      96     
32     208    
112    -64    
-32    80     
32     176    
-128   -48    
-16    -16    
-208   96     
48     -704   
96     32     
192    240    
0      64     
48     48     
256    208    
-16    368    
-128   -128   
16     -64    
-32    112    
0      0      
80     176    
96     64     
-16    -32    
32     -80    
176    -176   
128    128    
-16    -16    
32     -144   
192    16     
352    160    
96     16     
112    144    
-176   32     
-80    80     
16     -160   
-48    -32    
-112   112    
224    176    
96     64     
48     -128   
128    0      
432    160    
112    128    
272    80     
64     -16    
128    16     
-80    16     
80     160    
144    192    
-272   -32    
208    0      
176    64     
80     -16    
-144   -64    
240    -96    
208    -32    
416    -688   
112    -32    
-176   -64    
-128   64     
-112   -16    
208    160    
256    16     
96     64     
-32    -80    
-128   32     
-160   -48    
-32    16     
192    48     
96     -48    
32     -32    
32     -320   
32     32     
128    -992   
144    80     
64     48     
96     80     
0      -32    
16     -16    
-16    -16    
160    128    
64     -16    
192    -96    
192    64     
112    48     
0      16     
32     -176   
96     144    
128    -144   
80     32     
-96    64     
0      80     
32     -16    
32     48     
16     32     
64     16     
64     80     
16     -80    
-16    16     
-64    -256   
32     48     
32     -48    
-48    32     
64     -288   
64     -176   
160    192    
160    16     
48     -80    
80     96     
0      160    
176    -128   
-64    64     
32     -288   
176    240    
-128   64     
400    96     
-192   -144   
112    -80    
-16    -112   
-16    80     
80     -64    
176    32     
-64    48     
224    256    
-48    176    
144    192    
256    224    
160    16     
144    224    
80     224    
320    240    
-64    -144   
320    -128   
-16    -224   
176    0      
-32    112    
144    -64    
-208   -128   
112    -752   
-112   -48    
-32    -80    
16     -496   
192    304    
160    -1088  
-32    -176   
128    -16    
-32    -48    
208    -112   
64     48     
64     -400   
-16    -176   
160    16     
192    128    
-464   544    
272    -560   
176    224    
80     -336   
48     176    
-64    -240   
-48    -128   
96     1056   
336    -400   
-80    -128   
-16    32     
656    320    
-320   0      
112    -512   
-32    -240   
160    -480   
-32    224    
144    -64    
16     128    
32     240    
-64    -96    
112    -32    
96     -352   
16     64     
-16    -64    
256    -128   
96     -224   
-112   -96    
16     -112   
-64    -176   
-176   -144   
128    -112   
-1840  -80    
-80    -112   
64     -80    
272    80     
-160   64     
112    -96    
32     80     
32     -80    
64     16     
448    144    
-224   176    
-208   128    
64     -16    
-336   -32    
48     -16    
-352   32     
32     48     
160    0      
224    -48    
128    -48    
-144   -64    
-16    -96    
288    -640   
32     128    
112    -32    
-80    -32    
-16    0      
32     0      
80     32     
32     -16    
-208   -16    
224    0      
-592   -32    
32     -144   
-80    32     
208    -32    
32     80     
144    -48    
320    128    
80     112    
-176   -80    
-192   -48    
-16    -288   
80     -64    
208    0      
16     32     
96     -64    
-1872  -16    
-128   -32    
-880   -16    
96     -144   
272    -48    
288    -512   
144    32     
128    -144   
-112   96     
-32    -48    
-32    16     
96     -64    
-128   -80    
-224   32     
-16    -32    
128    -80    
192    -128   
80     48     
0      -16    
32     64     
160    -208   
-16    0      
224    32     
-64    80     
16     -96    
96     -32    
-240   16     
0      112    
96     240    
-144   -64    
160    128    
80     -80    
96     32     
80     -112   
32     32     
64     -256   
-64    16     
-224   144    
272    224    
-96    208    
192    80     
-48    32     
160    -80    
-304   -112   
160    48     
-432   48     
80     -160   
96     -16    
-288   192    
160    336    
-160   64     
-112   304    
-144   -176   
-256   16     
-48    -64    
-64    -112   
-32    32     
16     -16    
-176   -64    
112    -208   
-208   -32    
-1136  96     
320    352    
-336   544    
-96    208    
-80    176    
-800   64     
-64    -32    
-160   -160   
96     336    
-64    1568   
464    1168   
-1616  -192   
0      -16    
80     640    
32     -624   
-544   -1088  
192    -320   
-192   1056   
48     -48    
-48    -112   
-112   144    
-144   -432   
-176   336    
192    48     
-384   -240   
0      144    
-1136  256    
64     32     
208    -48    
-112   320    
-160   -80    
224    416    
-368   352    
-144   -816   
-48    -560   
208    240    
-96    16     
-208   288    
272    896    
0      -400   
-384   -144   
368    528    
-512   -496   
-512   -400   
464    176    
-48    112    
80     112    
-304   -832   
384    400    
-16    -112   
-32    112    
-48    -208   
160    320    
-176   -112   
96     16     
224    272    
-128   -224   
-16    64     
-384   384    
272    -128   
128    -48    
272    416    
-464   -208   
96     -16    
192    144    
-192   -32    
80     64     
-160   48     
48     112    
-288   -32    
240    -16    
-240   -80    
-96    -80    
-672   0      
208    128    
48     -64    
80     128    
80     160    
32     -16    
-80    80     
80     16     
16     48     
-32    -32    
96     -80    
-176   -80    
-80    -16    
-240   -32    
144    96     
48     192    
16     112    
-560   48     
-240   -112   
176    0      
192    240    
-128   112    
-128   -32    
176    288    
128    32     
128    -80    
-128   -496   
-416   -656   
-112   -112   
-128   -144   
32     -176   
-48    48     
-1424  -144   
48     -64    
16     80     
208    0      
-208   80     
-32    80     
-96    -176   
-192   -480   
32     -80    
48     -80    
64     -176   
-144   32     
224    64     
-400   -64    
-32    176    
-112   128    
-112   80     
-32    0      
240    32     
224    -16    
0      -16    
-144   -80    
160    -32    
192    16     
80     -48    
272    64     
-352   96     
-416   -784   
-160   -576   
-16    80     
32     112    
128    96     
144    288    
-352   16     
80     64     
48     0      
560    240    
96     0      
288    -96    
-384   0      
-208   -32    
-112   -48    
96     80     
64     0      
128    96     
-16    32     
-192   -64    
48     -96    
16     48     
-96    -16    
-64    0      
128    48     
160    320    
-304   -256   
160    -208   
416    64     
208    320    
96     224    
-16    -80    
-112   0      
16     48     
-16    48     
-64    0      
-32    64     
112    96     
224    64     
-64    -32    
-112   -16    
0      48     
-80    48     
240    48     
-32    48     
80     -16    
32     64     
32     64     
80     32     
0      -80    
192    0      
-16    80     
0      0      
64     16     
96     32     
128    32     
64     80     
-64    32     
144    48     
-32    48     
64     32     
-16    32     
-16    16     
64     32     
80     0      
-32    64     
48     32     
48     -32    
-16    16     
48     96     
80     64     
16     64     
-192   -96    
-16    48     
64     144    
144    -240   
240    0      
144    80     
32     208    
160    -32    
160    16     
80     96     
112    208    
-192   80     
96     -16    
-160   32     
144    176    
64     176    
144    80     
-64    80     
64     -16    
96     0      
80     16     
48     32     
128    384    
-16    112    
-32    -384   
96     80     
-144   336    
32     -144   
80     64     
176    -288   
-480   208    
304    848    
336    368    
80     -288   
256    64     
-304   -80    
256    528    
-64    -544   
80     80     
-192   240    
32     -80    
512    288    
-256   -480   
-112   -112   
112    112    
-64    -192   
-32    368    
176    -96    
80     -704   
0      48     
64     -96    
528    288    
-176   304    
-32    336    
0      16     
-16    64     
272    192    
400    160    
-208   352    
-16    48     
-16    144    
272    112    
128    48     
32     -16    
0      -32    
-112   -208   
-16    64     
112    48     
160    -48    
272    64     
64     48     
-128   48     
-16    16     
-112   16     
96     16     
160    48     
-48    -96    
16     -32    
48     -16    
-16    16     
-16    -272   
-32    32     
32     -608   
32     -112   
-128   -64    
144    96     
-48    32     
240    -32    
-80    32     
48     -144   
208    32     
-48    80     
272    48     
336    -176   
144    48     
176    -320   
80     96     
16     112    
96     0      
160    48     
32     0      
-32    -32    
64     48     
32     -16    
112    16     
416    304    
-224   176    
32     16     
16     -64    
240    48     
96     -144   
96     -64    
-16    -80    
80     80     
80     336    
48     224    
224    -80    
32     160    
112    16     
64     -64    
-64    -192   
-128   -80    
96     16     
160    -256   
-16    -288   
400    -352   
224    128    
32     -288   
16     -896   
16     48     
-32    -368   
112    96     
-416   272    
64     -176   
-64    -128   
-64    -208   
-144   -64    
-160   -16    
240    -64    
-128   112    
272    -144   
32     80     
-96    -96    
80     -144   
240    144    
240    48     
128    0      
-240   -32    
208    -144   
-112   160    
-80    -224   
224    -224   
-160   -656   
192    -224   
192    -1152  
-320   0      
144    48     
144    48     
208    96     
160    160    
-128   192    
336    288    
-608   192    
80     48     
128    352    
-32    80     
176    -176   
160    -144   
64     -368   
32     -752   
160    -32    
-16    -80    
64     80     
16     -80    
-32    160    
224    -176   
192    192    
48     384    
80     64     
-2128  -64    
176    -176   
-80    -48    
80     64     
-80    -240   
224    176    
96     -48    
128    -656   
144    0      
256    80     
-192   -16    
48     -48    
64     -272   
192    160    
32     -16    
-960   -624   
-32    64     
192    64     
128    -48    
-16    32     
112    -336   
32     -128   
192    -1264  
-192   96     
272    -112   
-160   -224   
64     -208   
-176   -528   
48     16     
176    240    
-96    48     
208    -48    
-720   256    
272    -240   
-256   -320   
-32    -112   
-32    48     
80     -1104  
-32    -16    
112    80     
128    208    
-224   -16    
96     -80    
-160   -112   
416    544    
-176   496    
224    -144   
-544   -400   
176    -288   
80     576    
112    160    
192    16     
-256   -64    
128    112    
-96    -32    
144    -64    
128    16     
-16    -32    
-80    -256   
80     -144   
-224   112    
80     -80    
-512   -16    
-64    0      
64     0      
144    -176   
96     32     
112    32     
48     16     
-272   -64    
-64    176    
80     272    
-16    48     
-288   -48    
-112   32     
208    80     
208    -64    
-368   -64    
176    -32    
-16    16     
160    -112   
-128   0      
368    -448   
192    -16    
-192   -16    
-208   16     
48     64     
240    80     
-336   -32    
176    -48    
-176   128    
176    48     
96     -32    
96     -32    
-160   -256   
-1344  -192   
208    208    
-1248  0      
32     96     
144    32     
-256   -240   
-96    -112   
-1936  96     
-336   -112   
-64    112    
224    208    
64     32     
-160   -80    
-32    -80    
-224   -32    
-16    -160   
112    112    
224    112    
-80    96     
-176   -16    
-432   208    
-304   32     
-640   -96    
176    0      
-368   0      
-16    32     
-432   0      
160    80     
-32    128    
-224   0      
-48    0      
16     96     
-112   80     
16     -48    
-368   -16    
-80    -16    
384    -32    
-240   0      
-240   96     
-416   -16    
160    16     
-160   96     
-288   -16    
-48    80     
32     -64    
-112   -32    
-32    -16    
-96    64     
-272   -32    
-368   -352   
-112   -192   
-64    128    
-464   -16    
64     96     
-464   64     
-48    64     
64     160    
16     64     
48     -16    
176    80     
-16    16     
64     16     
64     64     
-128   -32    
-64    48     
-96    -48    
0      64     
-304   -64    
32     96     
-192   144    
112    112    
-192   -96    
-32    16     
-160   -80    
-112   -32    
-144   -192   
-16    -112   
-48    -48    
32     64     
64     96     
-32    32     
32     16     
48     0      
0      96     
-224   -64    
64     -16    
-640   32     
304    64     
-32    112    
-32    128    
-112   32     
-96    -96    
-16    -32    
0      32     
112    -64    
16     0      
0      64     
-32    64     
0      -48    
-336   -96    
0      80     
-336   -32    
208    48     
96     80     
288    96     
-32    32     
-32    -48    
48     0      
176    192    
-112   48     
0      48     
32     32     
-48    -16    
64     32     
-176   -48    
32     96     
16     -16    
16     64     
80     64     
-128   -208   
-48    0      
-96    528    
48     192    
-144   96     
-32    48     
288    32     
-128   96     
32     -96    
176    352    
-128   224    
96     -16    
-368   -224   
16     -384   
-16    112    
-128   0      
16     80     
-128   16     
304    336    
-288   1392   
48     -1728  
80     368    
16     160    
0      -416   
192    608    
-352   192    
64     32     
-96    240    
-32    240    
112    -48    
-64    -512   
-64    368    
0      80     
144    -224   
-96    -304   
64     0      
48     304    
96     -304   
-448   -208   
176    96     
-256   32     
64     160    
304    272    
-112   208    
80     304    
176    128    
144    192    
-80    48     
-80    0      
-64    -160   
240    -64    
-32    16     
224    128    
-80    144    
48     -64    
-16    -176   
80     -32    
64     144    
96     16     
16     16     
32     -64    
-64    -16    
144    -96    
64     64     
224    288    
-96    80     
64     -96    
-64    -32    
-48    48     
208    32     
-80    0      
48     32     
-80    256    
208    48     
96     -16    
144    48     
-112   -48    
80     -16    
-96    -16    
-32    112    
-16    32     
-96    -64    
48     -48    
-64    -48    
208    -48    
32     64     
256    -32    
48     48     
-32    32     
-112   -32    
160    48     
48     112    
0      48     
48     48     
0      416    
176    32     
160    -160   
112    160    
-96    112    
112    48     
48     32     
0      -768   
-16    -80    
-64    0      
80     112    
80     112    
208    32     
0      96     
0      0      
-32    16     
-16    32     
64     -144   
144    96     
192    112    
-80    48     
-80    0      
16     -560   
176    32     
-64    160    
-16    32     
64     -16    
96     -48    
-16    48     
32     32     
-48    -16    
192    0      
-256   -128   
208    352    
-384   320    
64     -176   
208    -80    
144    -96    
16     16     
80     64     
-128   -64    
-128   32     
-96    -128   
256    0      
224    112    
112    96     
208    80     
-224   -192   
240    -208   
112    -80    
-48    0      
80     128    
-96    80     
-144   -96    
-112   -288   
432    -592   
192    -32    
160    64     
-160   -160   
112    48     
-240   224    
0      976    
256    128    
-144   -320   
-80    -32    
112    -272   
64     208    
-48    -256   
288    -112   
48     -112   
-96    432    
272    -672   
288    368    
-96    -16    
288    32     
144    64     
96     288    
-48    -320   
192    64     
48     80     
64     -192   
-64    32     
224    -352   
-32    208    
-32    -400   
-48    208    
80     -448   
0      320    
208    128    
128    -144   
0      64     
208    32     
-144   64     
128    112    
160    192    
-80    -480   
96     64     
48     -16    
160    64     
128    -80    
176    0      
-16    -176   
-32    -256   
-160   -256   
-96    80     
32     -128   
48     16     
192    64     
96     -16    
80     80     
-160   -32    
32     48     
32     -64    
192    -80    
-32    96     
208    96     
-80    -208   
-336   -80    
160    64     
112    -64    
80     -32    
240    -80    
-32    -352   
96     48     
-80    96     
224    -112   
-48    32     
32     -96    
32     48     
240    432    
112    320    
208    48     
240    -384   
-128   -48    
192    -448   
-128   0      
-48    -192   
608    -48    
-48    0      
240    -288   
176    224    
-368   -1488  
400    -192   
-128   80     
256    16     
208    -64    
0      240    
192    192    
-128   -32    
64     -96    
64     -48    
-400   -112   
96     -64    
80     -160   
32     -288   
176    -96    
48     -160   
64     -16    
-16    144    
128    -48    
16     0      
112    -16    
96     16     
96     64     
64     -16    
16     0      
-576   32     
-16    32     
32     -176   
128    -176   
48     112    
-192   0      
224    0      
-16    -448   
-96    -32    
32     -32    
96     16     
80     -64    
160    0      
-16    64     
112    -96    
-272   -112   
144    -208   
-848   160    
32     48     
224    112    
-48    -256   
64     -16    
-48    -384   
96     112    
224    32     
-64    -32    
192    96     
-64    144    
-208   -48    
-48    -288   
-32    0      
48     48     
-240   64     
-240   208    
208    240    
176    -560   
-736   -272   
32     -64    
-64    144    
64     -1040  
128    -16    
-16    -160   
384    -16    
0      -144   
192    112    
-96    128    
-288   -160   
-688   -160   
96     144    
-1344  128    
64     -64    
368    -368   
208    -128   
240    112    
96     -368   
-48    48     
-96    112    
144    80     
112    -160   
-48    -96    
-112   16     
96     112    
-256   -16    
128    -64    
-320   96     
-320   -32    
384    -400   
128    -816   
208    -256   
176    -352   
-48    64     
-272   -512   
-128   -224   
-288   32     
176    528    
-496   -64    
-432   -608   
-288   -176   
112    176    
-64    256    
-32    -112   
32     -16    
0      -208   
64     80     
112    -336   
192    112    
-496   -384   
-16    -272   
-192   128    
16     48     
0      -64    
144    192    
176    304    
16     96     
-240   112    
160    -112   
-48    -80    
96     -16    
64     64     
-352   -64    
-960   144    
-368   -80    
-688   -336   
144    0      
240    288    
160    368    
112    144    
-288   -64    
64     592    
336    656    
-512   -352   
-208   -320   
-64    -128   
-64    0      
-240   384    
96     -96    
-112   -240   
-368   160    
-112   -112   
-1616  -208   
0      192    
0      -16    
-112   0      
80     -16    
-64    128    
160    -880   
96     496    
-224   -16    
-208   -208   
48     128    
16     -160   
-80    -96    
48     240    
-352   80     
-112   -176   
-128   272    
128    64     
-32    -16    
-256   384    
-160   -112   
-32    -832   
288    -16    
-112   -128   
0      96     
-192   -32    
32     112    
112    272    
48     -224   
160    160    
-368   -80    
-48    -64    
-80    -304   
-192   -272   
112    -160   
-64    -80    
-16    -240   
-16    16     
-16    -64    
-16    80     
-64    -208   
144    -80    
96     208    
-224   144    
16     -80    
16     -208   
-80    16     
-48    -32    
-96    -112   
-672   -128   
16     176    
-96    -320   
240    -64    
-64    -16    
48     -64    
48     176    
-48    16     
16     32     
-48    -80    
-112   -224   
224    -112   
-416   224    
-352   -32    
176    32     
-736   -144   
384    432    
-128   112    
208    -112   
-112   -48    
-112   128    
-32    -400   
-208   -304   
96     48     
-368   -32    
80     -192   
16     64     
-112   80     
-160   144    
80     256    
-352   0      
-32    192    
-32    256    
176    288    
-80    96     
-176   -128   
304    -224   
-128   48     
-208   32     
224    64     
16     224    
-368   48     
-224   96     
-256   0      
-64    -64    
-864   -96    
208    96     
-32    0      
-96    -64    
-48    -96    
240    80     
-128   112    
16     80     
48     -16    
-64    176    
96     64     
48     -16    
0      64     
-144   -80    
-80    -208   
-160   -160   
-48    112    
-304   -224   
112    -208   
96     128    
-336   432    
224    0      
160    -48    
96     32     
112    64     
-16    32     
0      -16    
64     32     
-48    -48    
144    64     
-160   128    
112    16     
-48    32     
64     0      
-16    96     
-80    0      
80     -48    
48     -80    
160    48     
16     144    
-16    80     
128    144    
-192   32     
-224   16     
48     80     
128    32     
48     48     
128    -144   
256    80     
128    112    
240    336    
416    768    
-160   384    
-192   160    
144    176    
-64    -96    
-96    -160   
224    176    
128    -176   
16     128    
224    464    
-128   448    
-80    96     
-64    -192   
64     272    
96     -80    
32     96     
-192   0      
0      16     
0      192    
-96    -144   
96     -800   
272    656    
-80    -144   
-272   -64    
-208   -48    
-80    -32    
256    304    
176    320    
80     -192   
224    -64    
128    192    
-16    0      
-128   -64    
-64    32     
-224   -16    
128    -16    
368    240    
-128   -224   
16     -224   
80     48     
272    128    
-48    208    
176    176    
-48    160    
-48    64     
112    16     
-48    -16    
128    64     
-112   -32    
80     -48    
-80    0      
80     64     
32     208    
16     208    
-16    64     
96     0      
32     48     
-16    80     
32     -16    
-32    -64    
128    80     
192    64     
16     16     
16     0      
-16    64     
0      -144   
-112   -288   
160    64     
-64    -1232  
176    80     
16     48     
160    16     
32     48     
48     48     
128    80     
160    16     
-80    80     
32     -16    
80     -48    
48     0      
-64    64     
32     -16    
-240   -80    
128    -640   
112    96     
208    0      
-64    48     
32     -16    
352    144    
-32    48     
80     -80    
-96    48     
-176   64     
112    0      
48     112    
176    -16    
192    128    
-80    16     
80     -240   
176    48     
-16    -256   
192    -32    
432    112    
-400   -48    
32     224    
-32    32     
112    16     
32     -48    
-48    64     
112    224    
-32    48     
16     -128   
96     64     
48     0      
16     -48    
128    -528   
-16    0      
-32    -144   
64     48     
0      -16    
96     64     
48     -32    
-32    -96    
64     -208   
16     -64    
80     224    
272    -96    
0      -16    
-112   -128   
0      48     
160    -240   
-48    64     
16     -848   
352    272    
-80    16     
208    144    
80     176    
64     80     
96     32     
16     32     
48     0      
16     16     
112    48     
96     -64    
16     96     
32     16     
144    16     
80     -32    
32     112    
32     48     
-16    48     
-112   0      
240    160    
80     -32    
96     -528   
208    48     
0      -352   
144    304    
-112   128    
-80    -16    
192    -128   
48     160    
432    176    
48     -16    
96     48     
-48    -160   
0      240    
-240   -16    
-32    -240   
256    16     
208    160    
80     -128   
-160   -48    
-16    -144   
32     0      
128    -80    
96     240    
-224   -432   
80     272    
64     112    
144    -656   
-64    96     
-160   -880   
432    -400   
112    64     
-96    -992   
-16    -48    
-144   -32    
144    48     
192    32     
64     16     
176    64     
160    0      
64     -272   
192    128    
-400   -16    
-176   128    
160    -1024  
-32    -1312  
480    624    
80     -112   
-64    -96    
-32    -960   
-176   -256   
-80    544    
-64    -96    
-16    -208   
96     160    
224    -320   
576    752    
-240   -864   
16     -432   
-720   400    
176    384    
-128   -304   
208    -16    
240    64     
112    -112   
-96    32     
112    32     
96     0      
32     -112   
-32    -64    
32     -336   
-32    416    
-96    -144   
-16    -448   
64     -176   
192    224    
32     160    
64     -496   
160    -160   
208    -272   
-32    384    
48     -704   
80     144    
64     96     
144    256    
-96    -240   
-16    -224   
-16    64     
272    96     
-496   48     
96     -112   
0      -32    
80     -400   
176    -128   
-32    208    
96     64     
32     -352   
128    -208   
64     -144   
32     -176   
176    -160   
-16    -96    
128    -16    
128    496    
-80    320    
240    240    
-416   128    
-16    32     
80     32     
48     48     
-16    16     
16     -112   
48     32     
128    -336   
96     160    
192    96     
64     224    
-64    192    
144    208    
80     16     
160    592    
416    704    
-64    352    
-864   16     
112    -80    
128    192    
272    -208   
-240   352    
288    -656   
112    -48    
-32    -32    
-32    16     
192    32     
-48    -208   
-176   48     
128    -96    
-400   80     
80     -64    
-672   64     
416    224    
-64    32     
-64    -256   
-128   112    
-48    -320   
96     -32    
-304   -128   
128    -144   
-208   -80    
16     64     
-416   -176   
128    -80    
-384   -176   
320    -32    
16     144    
160    -16    
160    -64    
144    -240   
-144   0      
-32    16     
240    -48    
160    48     
48     240    
0      80     
64     64     
48     0      
-48    -48    
128    32     
208    80     
-336   208    
160    -224   
80     -128   
-1376  -112   
256    128    
-16    -32    
-704   -16    
144    80     
-656   160    
-192   -112   
-192   -160   
160    -464   
32     -192   
160    -96    
-416   -256   
-224   -16    
-784   -112   
16     208    
-160   -64    
-240   208    
128    -224   
-16    192    
-176   80     
224    64     
-208   144    
-896   0      
112    -32    
48     -48    
-128   32     
-224   -80    
160    -64    
-304   -144   
16     -272   
0      -128   
-176   128    
-176   592    
80     240    
176    -160   
-208   -96    
-64    -16    
-256   80     
-352   240    
-32    96     
96     16     
-128   16     
0      -80    
16     64     
32     0      
-176   144    
-80    -48    
-32    -208   
128    0      
160    96     
-80    48     
-32    -80    
-384   0      
32     32     
-272   0      
-176   -16    
-160   -16    
96     96     
48     -112   
32     176    
48     128    
256    240    
-240   -464   
128    96     
-64    480    
16     -288   
-32    336    
-80    -176   
-16    -112   
0      -176   
-176   -80    
-736   96     
-144   -64    
-32    -144   
48     64     
-16    176    
0      -32    
-64    -288   
176    16     
-48    -416   
-112   352    
16     128    
-320   -224   
160    208    
-32    144    
-208   -64    
-1424  -80    
-128   48     
128    -32    
160    48     
-16    144    
-32    192    
-80    48     
-128   -16    
-144   64     
-96    -64    
224    -16    
144    16     
-16    64     
-432   -16    
-16    32     
-1296  -176   
48     48     
64     64     
128    16     
192    48     
-144   -48    
272    16     
192    16     
-192   -112   
-32    -256   
64     144    
64     96     
0      48     
16     -32    
16     -32    
-432   32     
64     96     
80     48     
48     48     
128    16     
-16    -32    
32     96     
144    48     
-144   -16    
-32    32     
-48    0      
-48    32     
48     96     
-80    -16    
80     -16    
-80    -32    
128    48     
-144   -16    
48     0      
0      0      
64     32     
96     32     
-64    32     
-240   -96    
-64    -32    
64     32     
0      0      
-16    80     
-144   -16    
-176   -400   
16     -112   
-256   224    
160    -128   
32     192    
-64    64     
368    240    
240    80     
208    -144   
-208   32     
-96    112    
144    -16    
-112   48     
80     112    
-80    160    
80     -16    
16     -80    
-144   32     
48     48     
160    16     
-16    96     
48     16     
80     48     
-176   -208   
144    -32    
80     272    
48     32     
0      -144   
176    128    
-240   48     
32     0      
-192   -80    
288    96     
-64    -192   
240    -48    
256    128    
-96    0      
32     -32    
-16    -16    
208    160    
-368   48     
160    32     
-32    -32    
80     80     
-32    0      
-32    16     
272    112    
-80    32     
-48    32     
224    -16    
-48    -16    
240    224    
-368   16     
272    -48    
64     96     
-96    32     
208    32     
16     64     
-16    0      
160    0      
-16    160    
16     208    
112    48     
-144   -48    
192    16     
32     64     
-176   0      
128    -48    
-112   0      
224    16     
-256   -80    
272    80     
96     80     
-144   -256   
80     512    
96     240    
-112   -224   
160    -176   
0      96     
336    320    
-304   -128   
-112   -16    
208    224    
-80    -16    
272    96     
-16    -96    
144    144    
-16    128    
-160   -224   
128    64     
-176   -1664  
160    384    
0      48     
192    512    
-144   -416   
-160   176    
96     208    
144    -192   
96     80     
240    112    
-208   656    
-48    -272   
96     -64    
32     48     
-16    -320   
96     224    
-160   -560   
144    992    
144    112    
-64    -336   
128    128    
128    -192   
448    560    
-112   -256   
96     64     
-112   -112   
32     0      
48     80     
144    -144   
96     -48    
128    -192   
112    64     
128    -112   
224    -32    
192    528    
160    288    
48     0      
16     -96    
-96    -320   
176    304    
128    64     
64     -144   
144    64     
-112   -176   
224    80     
-304   -320   
-48    -112   
160    -672   
192    -80    
272    -32    
64     48     
-208   -112   
176    -192   
256    32     
48     192    
0      96     
48     48     
64     96     
96     32     
96     -16    
-64    -224   
256    48     
320    -160   
0      -112   
-16    -784   
48     160    
-176   112    
-48    -240   
64     -352   
224    48     
-144   -32    
16     -288   
-80    368    
16     -64    
144    48     
320    16     
-48    128    
-32    -384   
128    48     
32     -96    
48     96     
144    224    
32     -16    
-16    -32    
80     16     
112    48     
96     32     
-128   -240   
80     -208   
96     160    
80     -48    
64     0      
-48    -512   
-48    -464   
176    -352   
0      240    
176    256    
144    368    
-16    160    
112    16     
192    112    
-64    80     
16     96     
-192   -32    
-64    -144   
48     -224   
224    128    
64     112    
240    656    
304    464    
16     -720   
-80    -464   
192    80     
160    416    
-128   224    
112    -224   
224    -256   
48     496    
144    -80    
-80    240    
96     -112   
-16    32     
128    -112   
160    -848   
352    160    
-208   -464   
96     464    
-128   64     
-32    -16    
192    -96    
32     -16    
16     -48    
64     -192   
96     -80    
224    -208   
0      64     
-112   272    
256    64     
-80    -304   
96     320    
464    112    
432    400    
-416   240    
96     -160   
-1184  -80    
-80    -112   
240    -192   
-80    -352   
304    -320   
-240   -416   
320    80     
208    -1136  
-64    32     
368    -144   
-112   96     
96     -96    
-192   80     
80     0      
-64    -80    
-640   64     
192    -96    
-96    32     
-16    0      
128    320    
352    -384   
96     -64    
96     -576   
-288   -16    
-192   96     
368    256    
48     0      
128    -96    
-96    32     
144    32     
-144   80     
144    -80    
320    32     
160    224    
224    112    
368    -16    
48     112    
32     96     
-224   336    
80     112    
0      128    
48     0      
160    -304   
-80    -368   
304    -304   
96     16     
80     -208   
-1120  64     
-240   -576   
80     -64    
144    -176   
16     -256   
112    -144   
96     -48    
-224   -1296  
80     -544   
-368   -560   
384    -768   
96     224    
48     272    
-272   -512   
64     112    
-816   -320   
80     144    
-1168  -304   
64     432    
-112   -416   
16     -32    
96     -336   
-48    -944   
32     272    
-224   -64    
64     -528   
192    368    
96     224    
-336   -48    
160    144    
-240   -256   
32     -80    
-640   160    
-16    -192   
48     112    
192    -48    
64     32     
304    16     
-272   -112   
-592   80     
160    752    
128    432    
-16    32     
-192   -32    
64     -48    
16     -16    
384    240    
-368   240    
352    -48    
-16    -448   
240    -256   
-176   80     
-656   48     
560    256    
-720   32     
96     -64    
96     112    
240    112    
-160   -32    
256    -112   
-96    80     
0      -48    
-176   -48    
-160   -64    
-32    80     
-576   -128   
208    64     
-176   32     
-448   32     
224    80     
-112   -32    
-128   -32    
320    -16    
-176   16     
128    -16    
-208   -112   
-576   -240   
48     -16    
-16    128    
208    80     
-208   -80    
-640   -16    
-16    32     
-336   0      
144    -64    
-240   -16    
-160   80     
-960   -80    
-48    0      
192    32     
96     0      
-304   -112   
-80    16     
-96    -96    
144    144    
-32    -80    
-32    32     
64     32     
32     48     
16     -32    
176    64     
-208   -16    
-16    16     
32     32     
-544   -32    
-48    48     
-96    -80    
16     80     
-112   -80    
176    48     
-224   0      
0      -32    
-48    64     
-112   0      
-32    -176   
0      -32    
272    256    
-208   -80    
208    48     
-688   16     
16     96     
-48    -112   
192    -16    
-208   16     
176    32     
-144   0      
-32    0      
-208   -48    
-16    16     
112    48     
16     80     
160    48     
-128   16     
-240   32     
-208   -320   
-64    -176   
0      128    
0      -144   
16     -224   
-160   192    
0      64     
-80    -16    
-144   0      
16     -32    
-16    -128   
-48    -224   
-80    96     
-224   -64    
48     -128   
-208   48     
48     48     
-1456  48     
160    112    
-128   -16    
-16    16     
-16    48     
112    -16    
-80    80     
176    272    
-32    -80    
-112   -16    
-128   0      
16     -144   
224    64     
-544   -352   
512    80     
-768   208    
288    160    
-80    80     
-16    -320   
176    128    
64     208    
-32    -32    
-176   -64    
48     -48    
-128   176    
-64    -304   
32     -208   
-160   48     
-128   16     
128    -48    
-144   304    
96     -192   
96     0      
-16    48     
-112   -112   
80     208    
-192   -144   
32     -192   
-48    256    
592    288    
-80    1328   
-448   48     
-48    -16    
-80    160    
192    -176   
-352   128    
0      -208   
64     480    
32     96     
208    352    
-96    112    
-96    240    
208    -16    
208    -176   
-48    -16    
-112   -16    
48     -32    
-144   208    
-80    224    
208    48     
128    64     
0      -32    
80     48     
-16    32     
-16    48     
176    80     
128    0      
-16    -48    
48     -112   
-48    -48    
240    128    
144    48     
-144   -224   
-96    -128   
-144   96     
80     -64    
32     0      
48     -16    
32     64     
96     0      
128    112    
64     32     
-144   80     
-64    80     
-208   -80    
400    192    
32     208    
176    -48    
-112   -64    
-64    48     
-64    16     
-64    -112   
208    -208   
80     -16    
128    144    
128    64     
-32    0      
48     -48    
-16    128    
64     48     
-48    -16    
16     -64    
160    176    
0      16     
0      16     
144    208    
144    48     
64     80     
-176   0      
80     -32    
-48    16     
0      112    
32     48     
16     16     
176    -16    
-64    80     
-224   -208   
176    -16    
224    160    
-160   96     
128    304    
0      0      
0      -32    
240    -128   
-80    -336   
-64    -368   
32     -192   
-240   -128   
224    0      
-48    80     
80     48     
80     -96    
-80    0      
48     48     
176    144    
-16    -160   
-80    16     
32     112    
240    240    
304    272    
-32    80     
64     48     
16     96     
224    304    
-80    256    
144    160    
-96    64     
-16    -64    
48     112    
80     -64    
80     -80    
160    -32    
128    288    
240    224    
-256   96     
-176   -32    
-16    -32    
32     80     
144    -16    
96     0      
240    -272   
-208   -480   
16     -400   
48     96     
208    -384   
-96    400    
192    -80    
-208   -416   
-96    -224   
80     48     
-192   16     
128    224    
-64    -112   
-192   -320   
-144   -336   
-176   -256   
192    16     
-16    -224   
112    80     
-48    -224   
80     48     
368    0      
-32    192    
32     128    
272    64     
240    160    
272    112    
-144   432    
192    112    
208    240    
-368   -368   
48     16     
-128   656    
288    368    
112    336    
-32    -32    
64     -576   
-128   -144   
-96    -160   
256    -160   
64     144    
-160   112    
-112   -176   
32     176    
304    -224   
272    128    
-16    128    
-176   -160   
64     -32    
224    32     
-32    208    
48     -128   
416    16     
208    -480   
-272   352    
-400   -224   
368    -400   
288    448    
-48    176    
160    -144   
48     96     
64     160    
336    176    
-48    -160   
-32    -288   
144    96     
352    -32    
-48    32     
96     -96    
-32    -336   
-48    240    
128    0      
96     272    
528    320    
-256   -80    
-80    -16    
96     240    
112    -336   
304    32     
-48    80     
96     192    
224    -336   
-144   64     
176    64     
112    160    
64     64     
144    -48    
32     -544   
-16    -288   
-80    -1360  
224    -128   
-192   -464   
16     208    
128    224    
-144   336    
144    -16    
176    -352   
0      64     
144    16     
32     -32    
-272   -112   
96     -16    
0      -432   
208    -192   
-16    -400   
352    176    
64     -16    
176    -16    
192    -160   
224    -80    
128    -320   
-32    48     
-16    -272   
0      -112   
224    -432   
-80    -64    
112    80     
192    -112   
80     0      
48     -48    
16     -16    
192    -304   
-128   -32    
64     -1440  
560    576    
-496   336    
-16    -208   
448    -32    
-112   80     
64     80     
224    208    
-112   96     
176    -112   
-1328  -160   
320    -128   
-16    96     
96     64     
240    -48    
224    -512   
-16    144    
48     -272   
112    -64    
0      -32    
-240   -32    
288    -80    
-112   80     
224    96     
-256   -48    
-1104  -96    
224    48     
-16    -48    
384    64     
176    80     
80     -48    
-48    -96    
160    -352   
-176   32     
112    -32    
-16    32     
64     0      
96     80     
0      -80    
48     -96    
-464   16     
128    -32    
-304   80     
0      -16    
96     32     
64     0      
-208   -80    
64     -208   
64     112    
96     48     
112    80     
-192   0      
208    -32    
0      32     
-32    16     
-32    -16    
0      16     
-464   16     
128    -176   
-736   -80    
64     -352   
128    64     
-112   -144   
128    32     
128    160    
0      16     
-80    -32    
48     -160   
-48    -32    
224    160    
-288   -144   
272    -80    
-528   32     
208    0      
32     0      
32     -64    
-160   112    
208    96     
-64    64     
256    -704   
80     144    
304    144    
-144   16     
-176   -144   
48     -16    
-192   32     
0      -64    
64     -32    
32     48     
-96    48     
80     -160   
128    64     
144    -96    
0      -32    
-96    -208   
-48    -112   
-128   -48    
112    0      
-400   -112   
96     160    
-192   272    
176    -48    
48     -128   
-32    -16    
-48    32     
16     0      
-32    -368   
16     -176   
144    192    
0      -144   
128    -160   
32     112    
-272   -32    
-48    192    
-144   -96    
192    -16    
-80    48     
0      0      
-48    208    
96     -16    
-432   -112   
-48    448    
-224   -432   
-752   1456   
-240   -96    
-432   -976   
288    720    
-240   -432   
-176   464    
-112   -352   
160    -80    
144    64     
-176   144    
-640   -80    
80     -288   
-320   0      
192    -144   
96     32     
-368   -16    
-96    -32    
-640   208    
-48    16     
-224   96     
-16    80     
-528   -96    
-256   -176   
320    -128   
-80    16     
-112   -320   
-64    -32    
-112   -176   
224    -48    
-80    -80    
-32    32     
112    48     
192    -112   
-256   -32    
-80    -32    
-80    -128   
-176   0      
-48    64     
-624   -16    
192    96     
160    80     
-176   192    
-96    -96    
32     -16    
-128   48     
16     -160   
320    -32    
80     0      
-112   32     
-112   48     
0      48     
-272   -32    
128    48     
-192   112    
-16    48     
32     -16    
-144   0      
-80    -160   
-80    -48    
240    -80    
16     160    
400    208    
-448   192    
-320   32     
-96    -96    
32     -16    
32     112    
48     48     
-144   -32    
-80    32     
128    -128   
-128   -16    
144    0      
16     96     
-112   -96    
96     -48    
352    448    
-224   288    
160    -160   
-112   -16    
-80    80     
240    288    
-336   80     
-448   -176   
256    -192   
128    -112   
80     128    
240    192    
-352   64     
112    -32    
-48    32     
320    144    
-240   272    
64     -16    
240    -32    
-64    -144   
-144   -96    
-96    -16    
-16    -48    
48     144    
-1072  -80    
48     -80    
-144   0      
-176   48     
-112   16     
208    -64    
-96    64     
-192   64     
-112   -112   
-128   -64    
48     16     
-144   64     
-96    112    
-16    -32    
-32    128    
-800   -96    
112    176    
96     48     
80     -80    
144    96     
-16    208    
64     80     
-128   -32    
96     208    
-48    128    
0      192    
80     304    
64     128    
-64    -80    
192    16     
-48    16     
32     160    
-16    192    
-32    128    
0      -16    
-208   -272   
160    -176   
-144   0      
96     80     
288    400    
-160   352    
112    -368   
208    32     
-368   96     
384    -224   
64     160    
-48    -304   
-352   160    
-16    -48    
-112   -16    
224    0      
208    -112   
-144   0      
-32    -144   
-400   208    
224    48     
-288   -192   
176    512    
112    352    
-512   192    
464    -352   
112    -96    
-112   176    
208    -176   
-112   -112   
240    160    
-16    160    
16     160    
32     -160   
80     240    
208    416    
-352   -320   
48     -160   
96     80     
272    208    
-16    -64    
-112   -208   
192    192    
-64    0      
-160   352    
224    -416   
-64    224    
0      176    
272    -80    
-304   128    
96     -64    
-16    96     
208    80     
32     0      
-64    -80    
-32    128    
160    80     
32     96     
160    -224   
-240   -272   
-16    208    
112    192    
-80    -80    
112    128    
224    224    
-208   80     
-16    -80    
-80    -368   
192    128    
144    112    
80     96     
144    80     
16     -16    
16     -32    
-16    -112   
144    48     
-160   16     
160    -192   
192    144    
240    -32    
-128   -128   
-112   64     
0      -464   
-16    96     
144    64     
16     48     
304    -32    
16     16     
32     224    
-16    16     
-80    32     
96     96     
-48    64     
144    64     
112    -48    
48     96     
48     64     
192    -80    
-32    64     
32     224    
32     16     
48     16     
32     -112   
160    0      
112    48     
128    -16    
224    128    
64     -32    
112    -64    
128    -560   
224    -144   
224    144    
48     -64    
-160   96     
-144   80     
-80    256    
80     176    
336    -16    
64     -160   
-144   -48    
-128   192    
80     -32    
0      -64    
16     16     
-288   -64    
176    0      
192    0      
-64    -48    
224    240    
64     288    
-320   144    
-48    -48    
192    0      
288    -368   
224    224    
-224   -176   
448    0      
0      48     
-96    -240   
400    -336   
368    -160   
304    128    
288    -80    
96     48     
-352   -112   
256    48     
-96    -368   
16     384    
-48    272    
-288   -80    
352    -16    
400    64     
224    80     
112    80     
112    112    
-256   -80    
-96    16     
192    0      
256    112    
128    -224   
80     -48    
224    -128   
224    64     
-48    -64    
160    0      
160    -96    
-48    -96    
0      112    
32     -80    
80     96     
80     240    
16     0      
128    -112   
112    64     
-96    -288   
-80    -32    
-16    48     
208    112    
304    112    
32     80     
112    96     
-32    48     
-80    -48    
208    -80    
-48    32     
224    48     
112    16     
208    -96    
48     80     
176    -192   
80     64     
-48    -96    
48     48     
112    32     
128    -144   
-16    64     
112    -688   
0      -384   
256    16     
160    -288   
128    -48    
-32    -272   
32     -80    
32     0      
-16    -96    
112    80     
48     0      
128    -800   
96     96     
144    -560   
64     96     
-144   -48    
48     -208   
-48    -208   
32     -160   
48     -32    
144    -288   
-32    -48    
80     80     
48     -32    
272    32     
64     -64    
176    -144   
-16    176    
48     -128   
224    -224   
-320   32     
128    80     
-48    -208   
-16    -96    
64     192    
0      400    
-48    -736   
16     -704   
256    640    
192    -384   
-32    336    
-16    0      
64     32     
64     48     
-64    -64    
-528   144    
16     -288   
-2240  16     
-16    -96    
112    -80    
-208   16     
432    -1024  
144    432    
48     48     
208    160    
48     704    
160    -256   
-192   416    
64     -304   
128    -304   
144    -16    
80     -32    
-320   1008   
416    288    
80     464    
-144   -80    
32     -304   
80     -256   
224    -16    
496    288    
-176   32     
0      -48    
48     -64    
-192   64     
272    -16    
-64    -48    
112    -80    
-512   32     
96     -32    
-1376  80     
48     -16    
-176   -48    
96     32     
-16    0      
288    -800   
128    32     
-32    96     
32     128    
-32    112    
32     0      
-16    0      
288    32     
-368   0      
64     -128   
176    16     
-64    144    
336    64     
-208   -192   
-128   48     
-80    -32    
48     32     
128    -128   
128    -32    
48     16     
240    -160   
-128   64     
144    -48    
-112   -16    
96     -16    
-176   64     
176    80     
-1360  80     
-48    -176   
0      64     
224    -48    
128    64     
96     -80    
144    -80    
-368   -96    
144    -144   
-64    -16    
64     48     
-224   32     
128    -64    
-400   -96    
-128   -272   
112    -160   
96     -80    
304    64     
80     -160   
128    32     
0      0      
224    112    
-256   16     
224    128    
-96    128    
112    32     
-144   0      
112    -96    
32     128    
-192   64     
0      16     
384    0      
80     80     
-384   176    
-1248  288    
-240   32     
-752   -176   
96     -336   
48     -64    
-48    112    
96     -16    
-32    112    
272    176    
-240   208    
-416   -128   
224    -112   
-16    -128   
112    80     
0      48     
-688   -80    
-16    -48    
-192   64     
-64    48     
-976   336    
-32    128    
128    -32    
-128   64     
336    144    
-160   96     
-32    -48    
160    0      
160    -112   
-144   48     
-112   144    
-112   -80    
288    -336   
16     -48    
-48    -176   
-48    -672   
-80    -176   
-112   32     
208    144    
288    272    
-128   144    
-176   144    
16     16     
-192   240    
-48    -64    
64     -496   
-64    176    
112    -128   
-80    160    
128    128    
-384   -448   
32     48     
-128   -48    
-48    -48    
-528   144    
48     80     
-16    16     
32     -48    
192    48     
-48    -144   
0      304    
-144   96     
-96    -112   
-176   -16    
192    -96    
-144   -64    
-144   0      
-832   288    
-32    144    
-912   48     
288    -144   
-48    -320   
32     80     
-80    -80    
32     32     
-32    64     
-32    112    
-224   16     
-128   -64    
-192   -224   
-192   80     
-112   336    
272    864    
-272   -32    
-32    -496   
176    -208   
16     -128   
-32    -160   
-48    -304   
-144   -160   
-16    -64    
-48    -16    
128    80     
-48    -128   
0      -112   
-224   -48    
48     -64    
-16    -16    
32     64     
-224   -48    
64     -48    
-2080  -48    
-176   0      
64     32     
-32    16     
-48    16     
128    -16    
-48    32     
16     0      
-144   -80    
16     64     
-96    80     
-48    144    
-48    64     
-224   0      
-96    80     
-736   -32    
-112   16     
176    32     
64     32     
-288   32     
0      16     
128    80     
128    144    
112    16     
-96    48     
48     32     
-176   -80    
192    48     
-224   0      
32     64     
-48    64     
16     -16    
112    16     
112    32     
-112   48     
-32    64     
240    80     
-64    32     
64     80     
-48    64     
48     64     
-144   -48    
-96    0      
0      -32    
128    80     
16     32     
64     32     
64     32     
-288   -224   
144    -144   
-64    128    
176    16     
128    -32    
-64    48     
-144   -112   
-128   -96    
-80    -16    
-192   160    
-160   16     
352    -16    
176    -48    
-16    32     
-32    96     
-32    96     
288    112    
-80    16     
-96    48     
112    16     
-32    48     
-192   224    
-112   96     
272    -48    
-64    -224   
-272   -368   
16     32     
144    208    
-144   48     
-16    96     
-96    -144   
96     80     
48     96     
-32    -48    
-112   -128   
80     -288   
80     64     
608    176    
-400   16     
-336   16     
-160   96     
64     48     
208    144    
32     48     
16     32     
-112   -400   
-112   64     
-80    256    
-416   -256   
0      16     
176    -80    
-192   96     
-384   128    
-512   -256   
112    -1088  
416    -112   
384    -32    
256    112    
-64    0      
128    32     
-80    128    
224    64     
64     112    
-288   32     
432    256    
-240   160    
-176   -160   
272    16     
32     128    
112    -144   
48     -112   
80     128    
-256   144    
80     -32    
256    48     
-128   -16    
144    0      
128    0      
224    32     
32     48     
176    48     
-128   -288   
96     80     
176    80     
32     -240   
-48    64     
-80    0      
-32    -32    
64     48     
64     128    
112    128    
128    96     
80     64     
-80    64     
0      -48    
-128   64     
-64    96     
96     48     
144    -208   
32     -496   
64     32     
112    -1280  
48     -16    
0      64     
32     64     
144    160    
-112   16     
80     -336   
16     -128   
32     -64    
48     208    
80     32     
-32    64     
-112   -176   
128    -336   
80     384    
48     -32    
80     128    
64     0      
160    48     
-368   48     
384    80     
-176   32     
176    224    
192    -368   
80     -288   
-96    160    
80     -304   
112    672    
80     -96    
192    -208   
-144   -736   
336    144    
-48    112    
96     160    
128    -608   
-112   400    
192    336    
-288   -176   
-176   176    
0      160    
96     -80    
-160   -464   
256    16     
48     -64    
112    0      
224    -256   
-16    -32    
-48    192    
176    336    
112    64     
48     256    
112    -16    
-160   -32    
-160   -176   
80     32     
-48    112    
320    160    
160    384    
0      64     
-64    -16    
0      -80    
224    304    
112    -16    
464    112    
-160   32     
128    80     
-48    -16    
-176   -32    
336    -400   
64     272    
-80    496    
-16    80     
176    320    
96     -144   
16     -64    
208    -208   
0      -96    
-32    -304   
80     96     
64     96     
256    160    
-112   -48    
-192   -128   
192    -80    
64     16     
208    128    
-144   16     
0      112    
176    16     
128    32     
224    -224   
-48    128    
0      -448   
-32    -32    
-48    160    
112    112    
192    64     
-80    -480   
240    -400   
64     272    
352    -640   
368    128    
-128   48     
-16    -64    
-16    16     
16     -16    
32     256    
-208   -48    
80     80     
128    48     
320    -256   
128    -48    
-1408  -64    
-16    32     
-16    0      
208    -64    
16     -160   
112    -64    
240    -80    
304    -48    
96     192    
-192   112    
64     -32    
80     -48    
128    32     
-96    -112   
144    0      
-432   -368   
416    -80    
48     96     
-160   -160   
304    128    
-160   32     
112    -16    
112    -32    
64     -48    
256    0      
16     240    
64     -48    
-64    0      
80     -48    
128    -96    
224    -16    
-16    -16    
-576   -32    
-32    -208   
80     -96    
96     -128   
336    -80    
128    -384   
-176   -208   
112    -976   
112    208    
-144   208    
176    64     
272    -288   
80     -304   
0      -160   
-96    -112   
-352   -368   
16     16     
224    176    
32     -176   
128    -16    
96     -336   
-128   -96    
-160   -1088  
64     128    
128    -192   
208    144    
-448   -240   
-32    -16    
-240   464    
128    -256   
96     32     
112    -160   
432    176    
272    -64    
-144   48     
-112   -256   
80     192    
128    -368   
0      -32    
-352   -160   
112    -32    
0      -160   
272    128    
32     208    
112    -256   
80     -32    
-32    16     
-880   224    
208    128    
-64    -16    
32     -48    
176    -48    
-48    -368   
128    80     
80     176    
80     32     
0      192    
176    128    
32     -16    
-96    0      
-400   -16    
112    -48    
-208   -32    
176    -48    
48     32     
64     -144   
96     -48    
48     -240   
112    16     
112    -32    
144    64     
-160   32     
80     -48    
-272   16     
96     80     
-32    0      
96     -48    
144    192    
96     32     
32     16     
144    -272   
-128   -32    
224    -16    
80     16     
-160   -80    
16     -48    
96     -160   
192    128    
-240   -64    
48     -96    
-32    80     
-64    96     
80     176    
208    -176   
-64    -128   
-400   16     
128    96     
-48    -96    
-592   0      
-112   64     
-800   48     
-96    -32    
-192   -96    
-16    64     
96     32     
0      -32    
112    -80    
-192   0      
-1072  -128   
192    64     
-272   0      
144    -16    
176    -176   
-368   96     
-96    -16    
-208   16     
48     48     
-80    0      
-176   16     
-976   32     
-128   -16    
0      144    
-432   144    
-208   -32    
288    16     
-32    16     
-96    -16    
96     48     
-320   -64    
-128   32     
-128   16     
48     16     
96     32     
-96    48     
-736   -16    
-64    48     
-128   -48    
176    48     
-304   -64    
96     112    
112    -48    
-176   -128   
-32    -16    
-80    32     
-112   32     
16     32     
-112   32     
80     16     
-80    -32    
-656   -64    
-80    0      
-720   -272   
-48    -288   
-144   -96    
16     -32    
0      0      
80     112    
32     96     
-144   -112   
192    -16    
80     -96    
-144   144    
-80    176    
-96    352    
-32    -48    
160    0      
-208   96     
64     112    
-192   -96    
96     -64    
-80    -16    
-192   -192   
192    -144   
-208   -112   
-160   -80    
16     192    
32     336    
128    -80    
48     0      
16     32     
176    208    
-784   176    
96     64     
-16    -96    
80     32     
240    32     
-112   16     
-32    64     
-304   -16    
-16    112    
-48    0      
-16    16     
-144   -80    
288    64     
-256   -32    
800    848    
-144   -224   
-176   -480   
-528   128    
-416   128    
-160   -304   
-64    96     
272    240    
-48    -416   
512    256    
64     288    
0      -144   
-80    80     
-80    -32    
48     -32    
304    64     
-176   32     
32     16     
-112   -32    
-256   -400   
288    384    
320    384    
48     -112   
-128   128    
0      80     
-96    96     
-80    48     
160    -320   
240    0      
16     208    
16     176    
-176   -272   
528    528    
-336   1056   
0      -480   
192    400    
32     -96    
-80    -128   
-288   16     
16     -432   
192    336    
16     -16    
0      48     
80     64     
-224   -240   
80     144    
-240   -96    
-16    48     
160    96     
144    80     
-192   0      
176    -160   
0      0      
96     32     
112    -320   
-16    192    
48     80     
-32    48     
80     480    
-112   -336   
176    624    
-320   -560   
96     128    
144    -160   
160    80     
96     -64    
48     16     
-80    0      
256    -96    
192    624    
-96    -176   
-80    -160   
-192   112    
64     16     
48     16     
64     -48    
-48    -80    
-192   128    
432    -208   
-224   -32    
192    -480   
48     -144   
16     -16    
-64    -256   
48     32     
-48    32     
-128   368    
0      48     
112    -80    
-96    16     
16     16     
80     -48    
-176   16     
128    64     
-128   0      
96     -288   
16     -128   
256    16     
-240   48     
0      32     
96     96     
320    64     
-176   0      
160    96     
-32    336    
-16    -704   
64     -160   
-48    80     
-32    -32    
64     96     
-16    192    
-32    80     
176    -448   
-16    -192   
240    -48    
-144   208    
16     16     
-48    -64    
96     112    
-96    16     
304    -304   
0      288    
256    -16    
32     -32    
-144   -16    
400    192    
48     240    
-144   -560   
224    -160   
16     -16    
-144   160    
320    -176   
-112   -256   
-32    -32    
0      -80    
16     -240   
96     128    
96     272    
-80    -64    
-16    64     
64     32     
80     -32    
128    -288   
112    16     
96     -32    
-192   -96    
112    -16    
-112   192    
144    128    
96     16     
0      -80    
160    80     
-80    96     
32     -64    
48     160    
112    64     
32     -32    
448    176    
-160   96     
-144   32     
-48    -48    
208    80     
-80    -176   
-32    -80    
-32    224    
-16    16     
-16    -160   
240    -816   
144    128    
-64    192    
16     48     
-32    -160   
-64    -96    
-80    -144   
272    -64    
96     32     
208    240    
-48    128    
-48    -176   
112    16     
192    -48    
32     112    
-48    -16    
176    -240   
-144   -464   
-80    0      
-112   112    
112    160    
-32    272    
160    128    
208    128    
160    112    
-48    80     
80     -160   
144    -96    
192    -32    
64     112    
-80    -80    
144    -192   
80     -928   
192    64     
0      112    
208    -320   
0      96     
352    496    
-240   -416   
16     208    
96     80     
160    -176   
-48    -112   
-16    -64    
-16    -176   
32     -160   
64     -16    
176    -256   
272    -16    
176    96     
176    -112   
-224   112    
0      -48    
0      -48    
192    48     
96     160    
16     -144   
144    -608   
-288   -272   
32     -48    
-448   -464   
80     -112   
160    0      
112    32     
256    -16    
112    96     
32     -16    
-48    48     
-160   -112   
256    -16    
32     -192   
176    32     
128    96     
16     -48    
176    112    
-16    32     
64     32     
144    0      
64     -592   
48     16     
-16    -128   
144    0      
-688   32     
-64    -160   
112    -64    
32     -880   
-64    -336   
224    144    
64     -16    
32     0      
80     -160   
32     112    
80     -112   
-80    -64    
48     32     
80     16     
-16    32     
-624   96     
-48    -96    
176    -16    
80     96     
272    -32    
160    96     
-32    -128   
176    -688   
-32    -128   
112    -240   
160    64     
144    -64    
-32    -32    
176    -64    
112    0      
80     48     
-80    -176   
224    0      
0      64     
192    32     
192    -32    
96     -32    
48     -896   
80     16     
160    -48    
-288   32     
144    80     
-112   -16    
0      288    
0      -48    
-288   -176   
112    16     
160    -16    
64     -112   
-16    -144   
160    128    
288    96     
-208   -416   
-64    -208   
128    -208   
32     160    
80     -240   
336    -48    
-80    96     
64     16     
-48    0      
160    -16    
-1808  -16    
-32    48     
240    0      
-48    -32    
0      32     
80     -48    
-48    0      
112    -192   
32     -48    
96     -64    
272    16     
-112   0      
176    -80    
-128   -80    
80     -128   
-96    -64    
80     32     
-880   112    
16     80     
-112   -64    
112    -128   
-80    -144   
96     -400   
-112   144    
-16    -16    
400    96     
-112   0      
144    -16    
-48    16     
-240   -80    
256    -48    
-112   -32    
-272   -16    
96     -96    
-480   16     
16     -144   
0      48     
224    -336   
-48    80     
-16    -16    
336    -16    
-544   -384   
64     -176   
-240   128    
96     -80    
48     16     
-96    208    
-192   0      
-112   -272   
-32    48     
-80    -80    
560    240    
80     -96    
416    32     
240    288    
-80    -288   
-192   112    
-96    48     
160    32     
144    -96    
16     48     
-32    -272   
-144   80     
128    -64    
288    -160   
208    64     
-128   64     
-896   -176   
160    48     
-144   -128   
304    16     
48     32     
288    -64    
-128   48     
-128   -1136  
-480   320    
-80    -64    
-320   80     
192    48     
240    16     
-1712  -176   
0      64     
-768   -256   
64     -48    
240    400    
-208   -64    
-288   96     
-1456  624    
-64    -304   
16     240    
-112   112    
160    -592   
32     944    
-848   -384   
80     160    
-128   -96    
64     -144   
240    368    
-64    -208   
-96    48     
-752   176    
-16    -48    
-16    16     
32     80     
-288   432    
0      1232   
-240   -832   
32     -496   
-32    432    
-16    -192   
128    -32    
-32    -80    
0      -16    
-240   176    
-240   -416   
-240   192    
112    560    
-448   -16    
-176   -288   
-320   128    
-48    128    
-256   -432   
96     -128   
160    -304   
192    224    
128    64     
-48    -144   
-144   -32    
-160   -208   
-80    -176   
-16    -96    
96     144    
-96    112    
112    160    
-480   656    
32     304    
144    96     
112    176    
-96    320    
64     368    
16     -192   
-192   -128   
32     32     
-32    -64    
-48    -96    
-16    -240   
-64    48     
-272   -144   
-16    64     
-400   48     
128    128    
-992   400    
336    80     
-320   -96    
48     32     
-64    -272   
32     -64    
208    -208   
-48    -112   
-16    -128   
32     -80    
-112   -128   
-112   -560   
-128   336    
32     688    
208    144    
-288   -16    
-112   -384   
176    176    
-144   240    
160    160    
144    112    
80     384    
192    480    
16     -112   
-176   176    
288    -272   
64     80     
-48    -272   
-176   -624   
-48    -240   
-64    -224   
128    0      
-16    208    
48     96     
-176   -32    
176    -112   
0      144    
-240   208    
144    96     
-128   -32    
256    48     
-64    48     
128    0      
-304   -16    
112    112    
-240   -16    
208    48     
352    224    
-240   352    
-48    -64    
-160   -224   
64     64     
-32    -48    
32     208    
128    144    
208    144    
-368   -64    
224    -496   
-576   -560   
48     -160   
-96    64     
160    0      
-336   -272   
-160   16     
-160   208    
-96    48     
384    64     
-128   32     
416    224    
-80    144    
-16    -96    
224    -80    
224    0      
-64    -48    
80     80     
-208   -64    
-160   -96    
96     -224   
-16    -48    
160    48     
64     272    
-80    192    
-128   -160   
352    -320   
112    32     
192    64     
-208   48     
16     32     
-192   96     
224    160    
-112   48     
-64    -96    
48     -96    
144    128    
112    80     
112    256    
-48    176    
400    176    
-224   176    
48     48     
48     -32    
-176   -32    
0      16     
-144   0      
32     0      
336    128    
32     208    
48     0      
-96    -48    
-96    -144   
-48    -16    
96     96     
64     224    
80     272    
-80    64     
144    -320   
-48    32     
160    208    
-64    176    
-144   32     
-48    -16    
-80    368    
176    -128   
-32    64     
0      0      
288    192    
-192   -224   
96     352    
432    464    
32     -16    
-224   -352   
352    144    
16     -48    
-160   -80    
-32    224    
-288   32     
-112   176    
-176   64     
176    224    
416    144    
240    48     
256    80     
96     32     
112    128    
-128   32     
176    -16    
-64    0      
64     80     
80     80     
-64    -1568  
-160   -80    
384    112    
224    128    
192    0      
64     -48    
-112   32     
0      -32    
240    208    
-64    32     
240    240    
464    304    
-256   112    
32     -96    
96     48     
-48    -224   
64     0      
64     0      
256    16     
48     0      
0      32     
-128   64     
-16    32     
96     32     
80     32     
-144   -64    
224    64     
-32    0      
160    -112   
-16    64     
96     -256   
112    16     
16     -240   
64     96     
208    64     
-16    112    
96     48     
-64    0      
0      32     
32     80     
16     0      
144    32     
-48    0      
160    -16    
96     96     
176    -32    
176    80     
-32    -288   
96     96     
32     16     
128    144    
128    32     
-64    0      
-224   -128   
160    64     
16     112    
352    16     
144    -96    
192    32     
32     48     
0      -400   
96     16     
128    112    
-112   16     
16     -16    
-16    -16    
112    0      
160    96     
16     -48    
64     0      
-32    48     
224    -16    
16     64     
112    -48    
208    64     
-144   -224   
128    -48    
16     -272   
96     48     
16     -416   
-96    0      
80     112    
-224   96     
128    64     
-96    -48    
272    -144   
176    48     
224    80     
-80    -352   
128    48     
-144   -144   
144    48     
-48    -96    
64     80     
240    16     
-128   0      
112    0      
160    112    
96     32     
80     80     
32     48     
64     -496   
80     64     
32     -80    
96     48     
64     16     
192    -80    
-80    -160   
192    96     
-160   -672   
304    16     
-32    64     
112    -80    
0      -80    
-16    -48    
-32    -1088  
128    -80    
112    64     
176    0      
176    160    
96     256    
176    144    
-112   -192   
96     144    
-16    64     
-16    -560   
96     208    
112    -336   
80     -16    
-480   112    
-256   -192   
-32    -64    
128    16     
64     16     
224    -560   
208    -32    
-208   208    
160    -176   
256    -48    
96     -32    
-64    -528   
-64    -32    
208    -112   
32     -112   
-48    144    
64     -96    
64     208    
80     528    
16     -352   
32     -240   
-16    144    
176    160    
432    -32    
64     112    
-80    288    
96     -240   
320    480    
128    96     
32     64     
-464   352    
128    -464   
0      -224   
144    -144   
272    64     
-80    -256   
96     -320   
224    -1024  
64     64     
64     -48    
-32    -64    
224    496    
192    256    
32     16     
0      -16    
-448   -352   
112    -32    
-1888  -112   
64     -112   
-32    -112   
-16    160    
96     -304   
0      -720   
-32    -112   
192    -304   
-16    -128   
208    -464   
32     -352   
-144   128    
176    -160   
-48    64     
80     -48    
-464   -48    
0      -176   
208    -16    
-96    0      
-304   -96    
256    -368   
176    128    
144    -1024  
-112   -224   
80     -208   
48     -96    
-144   -32    
-16    -32    
0      32     
-80    16     
-32    -48    
48     -32    
-1824  208    
-64    48     
80     176    
80     -80    
64     32     
304    -528   
-112   128    
-16    -224   
-112   -160   
-192   -352   
176    -192   
16     16     
128    -32    
0      192    
-144   32     
-336   112    
48     48     
32     128    
32     -128   
96     -128   
176    -320   
80     304    
224    176    
160    -128   
-160   -272   
-48    -464   
-224   -144   
16     -96    
-48    32     
0      112    
-96    -16    
96     -16    
-32    -224   
128    -352   
32     -32    
96     -288   
272    -64    
-320   -336   
0      48     
-128   48     
128    240    
112    112    
96     -160   
-80    -256   
224    -224   
-368   320    
-112   -128   
208    -64    
-64    -112   
-32    -608   
-432   -464   
-192   -368   
-304   -64    
-480   -80    
0      -256   
144    48     
-176   -48    
-16    128    
-320   80     
144    688    
240    176    
-1056  -144   
80     64     
48     -176   
48     416    
160    128    
16     128    
-80    240    
-1120  -80    
-304   -144   
-1040  0      
0      16     
352    144    
-176   0      
64     480    
-304   640    
112    400    
-96    -144   
-304   -96    
304    48     
-80    80     
-64    -16    
-96    -64    
-128   144    
96     -16    
-720   272    
64     -80    
-1984  160    
32     -144   
16     -96    
0      96     
-256   448    
464    464    
-208   -80    
128    -240   
592    288    
-624   112    
-256   32     
-64    48     
304    224    
-144   192    
-192   -240   
-336   -80    
-96    -320   
-32    -16    
-96    -240   
80     -176   
-32    32     
80     176    
144    -144   
208    -192   
-128   -112   
96     -16    
-496   -304   
0      -624   
-112   -256   
272    128    
-32    64     
-64    48     
-720   -400   
336    160    
-240   80     
-16    -64    
160    -48    
-288   -160   
80     -64    
-192   -96    
64     32     
-416   -96    
-144   48     
128    480    
0      208    
-432   -272   
-96    -144   
-1200  -576   
320    528    
-176   416    
-128   -128   
304    -224   
-336   -240   
-112   -80    
96     304    
64     -224   
400    176    
32     64     
-128   32     
-80    48     
-592   16     
80     288    
-464   -96    
272    -80    
144    96     
224    0      
80     -64    
160    -112   
-176   -48    
-176   -48    
32     128    
-144   80     
-144   96     
-64    160    
32     48     
-224   -112   
-32    -48    
-192   64     
-64    64     
16     368    
-16    64     
208    -128   
-336   -448   
-176   -368   
-288   48     
-352   48     
-288   48     
208    272    
-368   80     
320    432    
-272   128    
96     -32    
16     -64    
192    16     
400    96     
-112   -48    
368    16     
-16    16     
80     80     
64     16     
-16    48     
-80    48     
64     352    
0      144    
-160   -80    
-320   -128   
-208   112    
-592   -176   
128    -144   
368    16     
336    176    
176    48     
16     -16    
0      32     
-16    48     
0      64     
-48    32     
-48    32     
-96    -64    
0      64     
-224   -64    
48     128    
-176   16     
192    48     
160    128    
64     48     
-64    -80    
-112   -80    
-64    -32    
-128   64     
128    64     
-48    48     
-128   32     
-240   -64    
224    48     
-96    -80    
64     64     
32     16     
0      32     
48     80     
16     16     
32     0      
-16    160    
128    112    
32     0      
0      0      
-80    16     
192    160    
-80    -48    
176    -16    
-32    64     
32     80     
112    48     
-128   48     
0      96     
112    16     
32     48     
-192   48     
192    144    
-144   48     
192    48     
-48    32     
112    -288   
-160   64     
-128   -16    
-16    -272   
48     144    
112    -96    
-16    32     
0      96     
32     0      
80     -64    
-112   -48    
208    144    
32     64     
112    0      
-96    -16    
64     -112   
-80    -64    
16     32     
128    -80    
-16    -128   
16     80     
48     32     
16     64     
-32    -64    
-32    0      
-32    -96    
-32    80     
128    144    
192    64     
-176   160    
240    64     
-80    -96    
16     -224   
48     -64    
16     -496   
-16    -32    
128    64     
-48    64     
96     192    
-48    -80    
128    32     
64     112    
32     64     
32     128    
16     128    
224    144    
96     -208   
-48    -32    
224    -256   
-128   -1088  
96     352    
-32    -144   
160    64     
96     80     
-96    48     
64     -160   
-128   -48    
304    48     
-16    -128   
-16    368    
-80    -256   
-80    -1024  
128    800    
128    48     
-80    -848   
128    160    
112    -448   
400    544    
-208   688    
-64    448    
-48    -208   
128    16     
144    -16    
32     64     
0      -160   
96     -176   
192    80     
-80    -80    
-112   -96    
48     0      
240    176    
64     -80    
240    144    
-96    -64    
272    176    
-176   32     
64     64     
-112   -144   
48     -32    
-96    -144   
-64    -144   
240    240    
-48    -160   
144    80     
160    -64    
304    192    
-192   -16    
32     -208   
48     -1280  
-48    160    
32     0      
-16    64     
-48    32     
-64    -80    
176    32     
-64    32     
-16    16     
-32    -96    
192    32     
48     32     
128    112    
-96    -400   
176    80     
-16    48     
160    224    
32     128    
208    96     
272    160    
-144   48     
144    -96    
128    -208   
96     16     
96     -144   
208    64     
-80    -352   
0      -192   
192    -224   
384    0      
-128   80     
-16    0      
176    -128   
160    80     
0      112    
16     -32    
96     -32    
-16    -336   
96     -32    
32     32     
80     368    
160    64     
128    0      
128    -112   
48     48     
-32    -512   
112    -32    
-288   16     
160    -704   
96     176    
96     -96    
112    -800   
64     -288   
-32    -208   
16     -64    
240    16     
-32    -352   
288    80     
-128   112    
176    -704   
64     240    
-16    -672   
208    80     
32     -176   
-16    -304   
0      -208   
-16    -304   
0      -64    
0      -256   
112    -32    
80     -576   
-48    32     
48     48     
144    48     
0      -224   
-16    16     
176    -80    
96     -48    
192    -144   
96     -80    
-1808  32     
0      16     
32     16     
192    -16    
80     -224   
80     -624   
96     0      
160    176    
176    144    
272    416    
96     272    
48     32     
-16    144    
-128   -80    
64     -208   
-160   656    
336    688    
-160   -384   
-16    -736   
336    -560   
16     -16    
256    -32    
144    96     
-288   144    
288    176    
16     832    
384    128    
384    672    
-16    96     
-176   -416   
-432   0      
416    240    
-368   720    
160    -256   
-80    288    
-80    -208   
48     -160   
-160   -160   
-48    -192   
-32    208    
160    -112   
-32    64     
320    160    
-352   752    
432    -368   
-336   -64    
192    208    
-368   -208   
-80    256    
160    192    
32     240    
0      -320   
32     -256   
-80    128    
304    -48    
-16    448    
144    -256   
-144   304    
0      384    
288    400    
-544   -704   
112    464    
-320   96     
304    208    
-672   224    
-176   -112   
80     -16    
256    -256   
-64    400    
240    -304   
-80    -96    
-160   64     
160    -96    
-160   448    
528    96     
-144   64     
320    16     
0      -320   
-272   -224   
-80    336    
-224   -272   
160    160    
32     -32    
176    -192   
-64    48     
224    -16    
-320   0      
256    96     
-144   48     
112    -32    
-176   224    
256    -32    
-272   -128   
80     0      
128    -96    
208    -48    
160    -80    
-48    32     
-144   96     
0      -512   
176    160    
-144   144    
240    -160   
0      -288   
1296   640    
-976   -528   
-240   -528   
224    304    
-176   -128   
-416   16     
288    48     
112    16     
-2064  -192   
-208   -208   
224    -80    
-240   -624   
80     -112   
-1008  48     
-144   192    
112    224    
304    80     
-48    -96    
-48    0      
16     0      
-16    48     
-64    -80    
16     112    
-352   -464   
176    -304   
80     80     
-80    160    
-112   -32    
128    -16    
-160   96     
-2112  48     
112    -16    
48     16     
-528   -384   
32     -432   
192    0      
32     16     
320    80     
-224   -304   
384    -208   
-48    -144   
384    -16    
64     -80    
-256   -64    
-128   48     
-128   32     
96     64     
384    96     
16     16     
-16    -176   
368    16     
16     32     
144    64     
-144   -288   
-144   -16    
-288   128    
-192   -32    
160    0      
-64    16     
192    96     
-528   -240   
-96    -160   
-1520  144    
-48    48     
0      -128   
144    96     
80     16     
64     -16    
64     -32    
32     16     
128    272    
-272   16     
-80    -144   
64     -32    
0      80     
-128   32     
-112   -16    
-240   32     
0      32     
0      0      
160    64     
-128   -96    
-32    -48    
-32    -80    
112    16     
144    96     
-80    -48    
32     -64    
64     80     
0      16     
128    112    
-16    16     
-128   48     
160    80     
-560   -96    
224    48     
-96    16     
80     0      
176    -32    
-208   -48    
128    48     
-144   96     
48     336    
80     96     
-160   32     
-32    16     
0      0      
-224   -16    
80     96     
-432   -16    
80     112    
32     -64    
-48    -32    
112    112    
-48    128    
144    -48    
208    -32    
304    64     
96     -80    
-144   -48    
-128   -48    
-160   -80    
-400   64     
96     96     
-576   -64    
32     0      
-32    48     
64     -80    
0      240    
112    16     
112    80     
48     160    
64     -288   
48     -256   
0      48     
-192   288    
256    192    
-304   192    
80     -160   
-16    -96    
0      112    
64     -304   
-176   288    
64     -112   
-192   80     
0      768    
128    -656   
272    -400   
-368   336    
144    -32    
-240   -80    
80     -464   
-80    160    
128    0      
-416   0      
32     64     
-96    128    
176    -304   
-64    -336   
-48    -48    
96     -48    
-192   -176   
448    -16    
-496   512    
416    -16    
-144   -192   
96     -304   
-144   -128   
48     -64    
48     16     
192    112    
80     0      
-96    -160   
256    -432   
80     -16    
16     48     
368    320    
-16    368    
-176   32     
96     96     
-48    96     
-144   32     
-224   -48    
-64    -16    
144    48     
240    224    
-32    128    
48     16     
-192   16     
64     48     
-80    32     
64     208    
96     160    
128    16     
240    0      
-48    -48    
112    16     
-64    80     
240    80     
48     32     
32     80     
-16    0      
-96    -16    
-16    0      
-48    -16    
176    -16    
112    80     
288    240    
-224   352    
-272   32     
-176   0      
16     128    
272    -48    
0      0      
96     48     
128    144    
32     -128   
48     32     
-64    112    
-224   48     
96     0      
-320   -272   
240    -128   
-96    240    
-160   80     
48     -64    
-32    32     
272    16     
48     64     
32     400    
128    240    
-48    -48    
192    144    
-352   80     
-112   -64    
128    -48    
48     -96    
176    -224   
224    -160   
48     16     
-304   -352   
-80    -160   
-336   16     
272    -1456  
112    160    
-64    -16    
224    -48    
16     32     
-48    64     
-16    96     
144    192    
-240   96     
80     0      
32     -48    
176    16     
80     96     
-16    -192   
80     -32    
144    -64    
-144   192    
-112   176    
64     48     
144    16     
256    48     
-176   -80    
144    0      
48     -80    
128    -192   
-176   -16    
128    112    
16     448    
352    480    
16     144    
-16    -64    
0      -112   
160    -176   
16     -256   
80     -144   
144    -16    
-48    48     
16     0      
-48    -128   
128    0      
32     32     
64     48     
-160   -192   
0      -176   
-32    128    
0      -304   
64     0      
160    -256   
112    -64    
-224   -624   
96     -192   
32     432    
224    0      
-64    96     
272    256    
-160   -160   
-192   -80    
336    -432   
-64    336    
96     -304   
80     160    
-96    -240   
-96    -112   
224    368    
160    16     
-64    -64    
-64    -448   
-304   288    
48     -160   
160    272    
352    16     
112    240    
176    -32    
0      -64    
-48    112    
384    -16    
64     16     
112    -448   
-16    1120   
-160   -544   
-144   -576   
-48    704    
176    32     
-176   -432   
528    320    
176    96     
32     -368   
224    176    
128    -32    
160    -160   
64     -16    
-112   752    
304    400    
-96    -208   
-144   -192   
176    16     
144    80     
112    304    
224    -144   
-16    -240   
16     464    
208    224    
-96    16     
96     0      
112    128    
16     -80    
96     -80    
176    -80    
80     64     
48     32     
208    -1248  
128    112    
0      -288   
-112   -320   
64     16     
128    -288   
64     -16    
176    -400   
32     -16    
-128   -80    
160    -48    
0      48     
-80    80     
96     -480   
48     -432   
48     -80    
208    -208   
16     192    
16     64     
176    -32    
16     48     
96     -32    
64     -256   
-32    -80    
160    -1168  
-80    112    
304    144    
64     -160   
-16    -128   
-80    -64    
128    -112   
112    64     
32     -128   
128    64     
-2480  16     
48     48     
96     96     
0      -32    
496    128    
-320   -64    
208    -64    
112    -752   
0      -336   
464    -304   
-128   272    
224    384    
-448   144    
-112   -112   
384    -112   
-272   -16    
-64    -64    
-288   -160   
128    -144   
224    0      
-80    -416   
48     -272   
0      -1616  
-32    -64    
-16    -96    
256    160    
64     32     
-32    160    
-256   0      
208    -48    
-304   -208   
-32    -176   
-1488  -48    
-128   16     
256    -160   
128    -48    
-128   48     
-48    -336   
128    32     
128    -128   
176    64     
96     16     
-432   96     
-176   -272   
304    -16    
-688   -32    
256    -48    
-928   128    
-416   128    
-240   48     
128    -80    
320    0      
512    80     
176    -32    
384    -816   
160    240    
-256   80     
64     32     
-112   -32    
96     32     
-16    16     
272    -80    
-224   -64    
-192   -16    
-400   -16    
224    -80    
96     48     
192    0      
16     96     
208    96     
192    64     
-128   -64    
112    -128   
-112   16     
160    -96    
-800   -16    
96     -64    
-240   64     
32     -16    
-784   -48    
96     -272   
48     80     
96     -192   
176    112    
32     -512   
48     -80    
-256   32     
144    32     
-256   -96    
32     -32    
-128   80     
16     -64    
-64    -32    
64     32     
48     -16    
112    -80    
16     64     
144    -80    
32     80     
-48    32     
256    -96    
-112   -32    
160    -64    
-48    32     
80     64     
48     48     
48     -64    
-112   -32    
80     -16    
32     0      
96     -64    
-32    -160   
-352   -192   
-96    48     
-240   -128   
-1584  -32    
-176   -128   
-160   256    
-48    -16    
-240   -112   
-416   -48    
240    -96    
-240   -528   
-768   -192   
304    -288   
-112   208    
112    304    
-672   -400   
304    576    
-320   128    
-272   -1024  
304    544    
16     64     
-400   -256   
-48    0      
-368   64     
368    -32    
-336   -128   
16     -128   
208    64     
-224   -272   
-176   272    
-112   -304   
16     160    
80     -64    
80     176    
-32    -144   
-208   -256   
16     240    
-336   -448   
-176   -16    
144    288    
-512   160    
-112   48     
80     -208   
-224   -320   
304    176    
0      96     
-240   -48    
320    -192   
-288   16     
112    16     
-368   48     
16     64     
16     -48    
-32    -240   
-608   -80    
-96    112    
-192   -192   
64     288    
192    32     
160    144    
128    -112   
-144   16     
-112   48     
-48    -32    
-176   0      
-32    -64    
64     80     
-112   48     
-224   -32    
-224   -96    
-32    64     
16     -96    
160    -16    
-144   -64    
16     -240   
-112   112    
-32    16     
128    32     
-176   64     
64     -32    
-48    -32    
0      -16    
-96    32     
-96    48     
-496   -64    
-16    0      
-1216  -16    
48     160    
-240   160    
-16    -96    
64     0      
-192   0      
64     -16    
-80    -16    
-32    -80    
-112   0      
48     176    
-32    -16    
128    48     
-16    -64    
32     64     
-832   -16    
32     64     
256    32     
-160   112    
-96    96     
-112   -80    
144    -96    
16     112    
16     48     
-48    -64    
96     0      
-80    0      
-80    128    
-48    0      
160    80     
-272   -16    
-272   -64    
80     -16    
-128   80     
-96    48     
128    160    
16     112    
-144   0      
-32    64     
0      -256   
-16    -160   
176    96     
-112   224    
-96    -48    
80     -32    
176    80     
0      144    
-112   -288   
-32    -480   
240    -128   
-224   -32    
208    48     
96     -32    
80     80     
-144   32     
64     144    
-432   0      
160    16     
-16    -48    
208    160    
32     224    
-112   160    
48     -48    
-112   32     
64     -16    
112    -96    
-16    -16    
128    48     
48     -48    
160    -224   
48     -192   
48     16     
-176   -416   
-176   -80    
-112   -176   
96     -48    
80     80     
64     -48    
0      144    
432    0      
384    96     
-16    448    
-80    16     
-96    -64    
-240   -48    
96     -64    
16     64     
224    272    
-256   -240   
128    144    
-32    336    
16     -16    
-32    16     
-128   64     
-96    32     
32     -480   
160    32     
16     96     
64     176    
-64    -80    
16     -80    
192    16     
304    416    
112    160    
144    -80    
-128   96     
96     32     
-64    80     
48     -80    
80     16     
320    320    
48     304    
32     176    
128    -32    
-48    128    
192    192    
32     -32    
-224   -32    
192    64     
-112   -224   
272    -272   
96     192    
352    96     
80     64     
80     112    
32     80     
-16    80     
80     64     
144    0      
80     -16    
32     -16    
224    -96    
80     -32    
-80    -64    
64     -16    
-32    -96    
32     -176   
112    0      
144    112    
-80    80     
0      -112   
32     -112   
-80    128    
-128   80     
112    -160   
-16    -224   
-192   -80    
240    -704   
-64    -144   
208    48     
-112   176    
272    48     
-48    80     
64     -16    
208    32     
-16    16     
112    16     
-48    64     
48     80     
-80    -64    
128    64     
16     48     
48     32     
-16    16     
-16    -736   
192    -16    
32     -16    
176    160    
160    32     
-16    -48    
32     -32    
0      112    
96     0      
192    48     
-48    16     
-192   -192   
-160   -80    
352    -64    
-80    96     
-32    0      
0      96     
128    64     
288    80     
-16    64     
-128   -160   
80     -112   
96     0      
96     48     
112    64     
-112   0      
-160   -144   
176    -16    
288    16     
160    48     
0      -96    
-32    64     
112    -304   
48     128    
-192   -192   
80     -64    
208    112    
-48    96     
208    80     
256    0      
-272   -32    
-96    -128   
368    -48    
-48    96     
64     64     
80     32     
80     16     
-48    -112   
224    128    
176    -112   
-48    32     
208    208    
-160   -176   
0      -208   
160    80     
144    -272   
192    -112   
0      32     
192    -144   
144    112    
-80    -624   
240    -208   
-16    16     
-144   64     
64     -496   
208    -80    
176    -96    
144    128    
0      80     
208    0      
-16    -16    
112    -400   
256    176    
-400   -112   
-64    48     
1072   1072   
-336   560    
-176   -656   
-112   96     
96     -48    
608    464    
-240   304    
32     16     
272    -80    
320    240    
400    96     
16     -96    
-352   208    
-160   16     
-64    128    
16     16     
80     -64    
16     -320   
80     240    
160    -16    
-48    -80    
112    192    
320    -160   
256    -208   
288    -64    
160    -576   
-80    -64    
240    -576   
-144   -208   
-128   -64    
-16    32     
64     96     
80     -96    
80     -416   
160    64     
80     -160   
-384   16     
-208   80     
48     -64    
336    336    
-80    48     
176    64     
240    -32    
192    -48    
192    -192   
-80    -32    
32     -96    
160    -112   
-32    32     
-16    32     
304    0      
32     224    
320    656    
-224   -480   
-752   -368   
96     -192   
96     -64    
80     -240   
16     -304   
144    -304   
128    80     
-80    -80    
224    -16    
16     -208   
-128   224    
80     -80    
48     -304   
-80    -48    
160    16     
-704   448    
16     -128   
-80    -352   
112    96     
128    -64    
160    -352   
48     0      
96     -848   
-400   64     
32     176    
144    -96    
-16    -464   
-336   64     
-464   -272   
-192   -16    
176    -96    
-16    48     
-1824  -272   
384    -32    
64     688    
256    160    
-176   -48    
144    -64    
96     0      
48     -16    
176    -48    
-64    -32    
-16    -96    
-112   224    
80     16     
-112   112    
-96    32     
128    128    
-128   -144   
-512   -352   
32     -336   
-64    -16    
96     -128   
-48    -144   
224    160    
-16    128    
96     48     
304    -144   
-144   48     
-96    -208   
-352   -240   
192    -64    
-1120  -96    
0      160    
-1872  64     
16     32     
160    -32    
16     -16    
224    16     
128    -784   
-144   -272   
-32    -128   
-16    0      
-32    0      
16     176    
-368   80     
128    -48    
-128   -160   
112    -144   
-192   16     
144    16     
-160   224    
400    -16    
-96    192    
-80    -112   
16     -208   
-96    160    
-48    32     
224    96     
-64    -224   
48     -192   
16     -96    
16     208    
192    -16    
-128   16     
144    -80    
-32    112    
-112   -64    
-32    -160   
-192   -32    
224    16     
-48    128    
-112   -112   
-64    64     
16     -32    
-160   16     
112    -16    
-48    16     
0      144    
-208   128    
-400   -160   
176    112    
-688   -16    
-80    80     
80     64     
-304   32     
-80    -32    
-656   -96    
-96    16     
16     80     
144    32     
-256   128    
-240   0      
-1008  -96    
-96    -64    
-160   -96    
64     96     
-32    16     
16     64     
-288   -96    
-304   -112   
128    -48    
-96    48     
64     176    
-544   0      
-48    -80    
32     -80    
-48    -16    
0      -96    
-48    80     
144    -112   
144    -32    
-32    96     
-48    80     
16     240    
-432   -128   
-128   48     
-144   80     
-16    -16    
144    32     
-352   -32    
208    112    
176    80     
-96    -272   
-96    -288   
-112   128    
16     240    
272    352    
-272   176    
-64    -128   
144    -112   
112    -48    
-32    -176   
-304   -272   
-368   112    
32     384    
-64    96     
400    416    
-304   128    
96     -32    
128    -224   
48     64     
-112   144    
-224   -32    
-64    -272   
-304   240    
0      -208   
-32    32     
128    176    
96     -32    
-80    96     
32     256    
-64    -48    
-144   -688   
192    -32    
32     96     
-160   208    
48     96     
-64    -16    
32     208    
-64    80     
-32    -48    
-192   0      
-48    112    
-112   0      
-208   32     
-272   112    
32     192    
-1072  96     
176    -16    
48     48     
32     48     
-32    -32    
-64    -32    
-64    -48    
16     96     
48     64     
32     32     
0      32     
-192   -32    
80     48     
-112   32     
-64    32     
-576   272    
96     16     
32     0      
-112   -16    
0      16     
-144   -96    
336    128    
-176   -32    
352    96     
-480   -96    
-336   -80    
-32    0      
32     0      
192    -176   
96     16     
-528   -32    
-96    32     
160    64     
-352   0      
-16    32     
128    112    
128    16     
0      0      
32     48     
-64    -32    
48     -64    
-112   -144   
-32    80     
-96    48     
192    80     
-96    96     
-16    -16    
240    96     
208    128    
-192   48     
112    -112   
112    64     
-80    64     
96     32     
-16    16     
32     16     
-16    32     
0      64     
80     48     
368    48     
-432   112    
128    -16    
224    64     
16     16     
16     -16    
96     64     
-80    16     
-160   96     
128    32     
272    16     
-368   -144   
224    48     
-64    64     
96     48     
-224   -112   
192    96     
64     16     
0      128    
48     -48    
0      32     
-192   -192   
160    32     
-192   64     
0      176    
-160   -48    
48     0      
-208   0      
-144   -64    
288    64     
0      32     
32     32     
32     176    
80     0      
288    144    
-160   -48    
32     32     
80     128    
160    48     
-32    48     
-144   32     
64     208    
-48    0      
144    112    
208    0      
64     16     
-16    112    
-48    32     
208    96     
0      208    
512    640    
-432   256    
-112   144    
32     160    
304    176    
96     -144   
128    -96    
-48    -16    
64     -528   
80     64     
-144   -320   
0      -96    
48     224    
0      112    
272    16     
96     -80    
128    64     
48     -64    
96     -128   
80     64     
192    128    
-32    -16    
-64    -224   
192    -208   
48     176    
320    336    
-144   -240   
-192   80     
-96    128    
64     128    
-32    160    
64     -96    
304    80     
160    32     
992    608    
-672   -880   
-48    176    
-160   96     
48     -144   
256    80     
176    -288   
288    224    
112    144    
304    -288   
224    64     
48     16     
-64    32     
-48    96     
-176   112    
-176   112    
32     112    
144    -48    
240    0      
240    0      
240    128    
-144   -880   
-320   224    
64     -704   
112    -416   
96     496    
-32    -32    
144    -160   
192    240    
16     32     
-160   -16    
16     16     
80     -32    
32     96     
-64    -144   
112    -288   
32     -384   
-64    112    
144    -1008  
-32    80     
416    -528   
-48    272    
0      304    
96     -272   
32     128    
-80    -80    
96     16     
48     64     
96     176    
-128   -320   
-32    -80    
96     -384   
224    96     
32     192    
-192   -112   
-48    -256   
144    112    
-112   112    
192    -384   
-112   -64    
224    96     
112    288    
64     -80    
64     -144   
0      80     
80     -96    
112    -352   
64     208    
0      -144   
128    -96    
64     544    
160    608    
96     128    
16     -80    
48     -496   
144    320    
416    160    
-160   -176   
32     -32    
80     -304   
96     -128   
-16    -80    
128    16     
32     -64    
240    144    
0      -112   
224    -64    
64     -304   
48     -240   
384    48     
224    -64    
160    160    
-176   16     
-32    48     
208    -64    
-80    -32    
96     32     
-192   96     
304    -160   
384    0      
-112   64     
80     -768   
176    -144   
112    -320   
-96    -960   
16     -272   
-128   -608   
32     -128   
80     384    
96     -64    
16     -32    
336    -128   
-96    160    
304    -48    
448    -944   
-320   416    
32     -368   
64     -80    
-112   -128   
32     -176   
0      -128   
176    -416   
16     -48    
-16    -480   
160    -224   
160    -176   
48     32     
64     -368   
32     80     
0      -80    
-16    96     
48     -240   
-16    0      
-32    128    
160    64     
-80    -48    
288    -80    
-208   128    
64     -80    
208    -96    
96     -608   
128    -16    
-208   -256   
160    -192   
320    0      
-80    128    
-16    -32    
-16    -80    
-656   -112   
144    -64    
-1840  -32    
80     -64    
-32    -64    
192    48     
80     64     
16     -272   
48     -160   
64     -48    
48     80     
224    16     
-80    64     
64     -80    
160    128    
-288   144    
256    -128   
-560   64     
80     -96    
-160   256    
32     -16    
320    -80    
-160   -144   
-304   -48    
128    -560   
208    64     
16     -144   
240    -256   
48     -64    
-16    176    
-16    304    
96     112    
32     64     
64     -48    
-320   -112   
192    -352   
-256   -496   
-48    -224   
-64    48     
0      -112   
-96    -160   
112    -96    
64     32     
-144   -16    
144    -16    
-192   -48    
192    112    
-624   -48    
80     128    
-640   -176   
64     -480   
208    816    
-16    -112   
96     -128   
96     0      
64     -144   
16     176    
160    -48    
-432   -240   
-336   -240   
160    368    
304    128    
64     -400   
320    176    
-336   -112   
64     144    
-128   -16    
48     -96    
160    16     
-64    -368   
96     0      
96     288    
-144   80     
-208   64     
48     32     
-736   -144   
-80    -288   
192    -32    
144    64     
80     96     
368    64     
0      -16    
-16    -128   
0      32     
16     0      
-112   64     
-288   -48    
256    0      
-128   48     
256    96     
-384   -80    
96     -80    
-80    0      
80     -32    
-176   32     
96     -96    
128    16     
-192   -144   
144    96     
-512   -304   
-480   -208   
32     32     
-624   0      
-16    80     
128    32     
-96    32     
16     16     
-96    -16    
16     -16    
-80    16     
-368   -32    
48     64     
-336   -32    
96     48     
-704   -144   
-992   0      
-32    0      
-240   0      
-64    -16    
-192   160    
-384   32     
-656   -32    
-160   0      
240    80     
96     -16    
-368   32     
176    128    
-336   -48    
112    96     
-48    -16    
-368   -96    
-80    96     
-176   128    
-48    -80    
-512   -208   
16     -16    
-1200  112    
0      -64    
176    112    
-320   0      
32     -240   
-144   0      
-80    0      
-16    0      
176    128    
-112   16     
0      112    
80     16     
-144   80     
64     -32    
-160   -32    
64     32     
-96    0      
-192   -176   
-32    192    
-32    -160   
-80    48     
0      64     
-32    64     
-80    48     
48     -80    
96     16     
-144   16     
64     64     
80     -48    
-160   64     
-352   48     
-16    -16    
-1184  -32    
64     -32    
-96    -48    
48     48     
96     80     
192    160    
-448   96     
64     -176   
32     48     
112    64     
112    -64    
-160   32     
-208   0      
-208   16     
-16    0      
-528   -16    
224    48     
-320   -160   
144    48     
80     176    
128    80     
-16    48     
32     32     
240    48     
-160   16     
-16    16     
0      176    
-96    112    
16     -64    
208    112    
-64    32     
-48    64     
-928   -32    
112    -720   
32     -32    
-80    -48    
272    -128   
-48    -240   
144    64     
-256   0      
96     0      
-64    48     
112    96     
-32    144    
64     128    
-464   -496   
256    -32    
-448   -80    
192    256    
112    -64    
-208   0      
32     16     
-80    -96    
192    144    
0      16     
144    -64    
112    240    
-288   16     
-208   16     
496    720    
-752   -432   
128    224    
128    256    
320    48     
-16    32     
-304   -288   
-32    624    
64     0      
96     -256   
32     224    
16     -176   
80     192    
128    -128   
-256   -128   
0      208    
-160   16     
96     -240   
224    -32    
0      224    
-48    -448   
96     96     
96     48     
16     -32    
144    192    
16     32     
-48    -48    
-400   -240   
112    112    
-96    -224   
304    -16    
-240   736    
64     -320   
144    -384   
32     416    
-80    240    
-16    48     
240    -80    
-32    128    
16     -64    
-144   16     
416    256    
-256   304    
256    272    
112    -304   
128    -176   
-192   -384   
-256   -192   
80     -192   
288    -496   
192    -160   
48     -32    
-192   64     
-48    16     
64     160    
80     240    
0      -32    
-80    96     
112    -96    
16     -80    
304    416    
-32    144    
256    240    
-128   176    
80     112    
176    0      
-16    176    
240    16     
0      32     
80     304    
-80    112    
176    80     
-64    0      
208    192    
-128   128    
64     -80    
32     64     
-48    80     
48     16     
-80    -208   
-16    -96    
0      0      
96     144    
-32    112    
48     -112   
0      64     
192    112    
-256   96     
368    416    
-80    352    
224    -160   
352    -480   
48     -96    
-32    -64    
-96    0      
-64    -224   
160    -176   
176    272    
32     336    
192    176    
-144   64     
-112   -256   
192    -64    
32     80     
64     80     
400    272    
-304   -320   
-16    -240   
-64    -16    
192    -32    
224    272    
208    32     
-48    304    
16     32     
128    256    
-192   320    
272    16     
80     -128   
-64    48     
16     80     
112    -288   
112    80     
-176   288    
624    432    
-192   208    
-16    -48    
176    -256   
-32    16     
-224   128    
80     128    
272    0      
0      96     
64     64     
-32    272    
96     176    
208    -224   
48     144    
304    -240   
272    448    
-256   128    
160    112    
-96    128    
176    48     
-160   -256   
208    -224   
16     -144   
160    48     
-224   -16    
192    -368   
48     192    
16     112    
64     96     
-16    -256   
0      -240   
-128   -288   
128    528    
272    304    
272    128    
160    -16    
32     -192   
96     -224   
80     32     
288    144    
-112   48     
-224   224    
80     -112   
128    224    
128    -416   
48     176    
32     -336   
96     0      
80     -64    
208    0      
-144   -16    
224    -48    
-80    176    
-48    -48    
64     -64    
80     -208   
144    160    
128    112    
112    48     
-80    -64    
224    -128   
-64    -160   
336    -400   
0      -256   
176    48     
-160   -96    
-96    -496   
-80    -464   
80     -224   
64     80     
128    48     
224    176    
-64    -96    
80     64     
0      176    
16     528    
224    -176   
0      128    
-64    -64    
176    -32    
128    -160   
32     336    
48     -80    
176    -112   
208    -64    
-160   -80    
288    96     
-48    16     
80     -112   
400    -112   
64     -96    
176    -192   
-48    32     
48     32     
-16    -704   
1040   976    
-96    48     
-128   -432   
-16    -544   
80     -592   
192    176    
-256   176    
-48    96     
400    368    
304    416    
240    432    
-32    -80    
240    -224   
-80    -48    
-288   -400   
112    -64    
-128   16     
-160   -272   
304    128    
48     -160   
592    -176   
656    -304   
-160   64     
48     -32    
176    0      
208    192    
-192   80     
-112   -320   
224    -144   
-128   32     
-240   -16    
-112   -16    
176    -16    
32     16     
192    -112   
96     -128   
96     -320   
160    48     
48     -752   
-272   -240   
336    -192   
128    144    
48     -80    
-16    0      
0      -64    
-128   -80    
-480   48     
64     48     
272    -80    
80     -96    
32     -80    
80     -16    
144    16     
80     64     
-16    -96    
208    -560   
128    32     
64     -80    
96     0      
-64    0      
-16    -96    
-32    -16    
192    -48    
-608   -48    
32     32     
112    32     
-16    -16    
96     64     
16     -400   
-320   176    
64     -896   
32     80     
112    32     
-96    -16    
-48    -48    
80     -272   
-368   -96    
80     112    
-208   0      
16     128    
-544   -304   
32     0      
0      -112   
192    -336   
128    192    
240    -96    
-48    -96    
128    -192   
-112   32     
64     -48    
64     -96    
-64    0      
-16    -48    
-176   48     
80     0      
-688   -16    
144    0      
-1056  -64    
272    -112   
-80    96     
112    -272   
96     32     
-32    -256   
64     -144   
0      -16    
-96    -256   
32     16     
32     128    
-512   -96    
240    48     
-752   -16    
176    0      
336    128    
-208   0      
32     -128   
32     -224   
48     48     
272    -64    
112    32     
-528   -32    
64     0      
-128   32     
160    -32    
-240   0      
32     -80    
80     112    
112    32     
-32    -16    
-16    -400   
64     32     
96     -96    
96     -16    
224    272    
0      96     
16     -96    
16     160    
-112   -48    
352    224    
-176   -112   
-80    -80    
-80    48     
80     -64    
304    176    
-1600  -208   
432    128    
-304   16     
-336   -48    
-48    80     
-640   -816   
144    864    
-16    -240   
-176   -48    
256    384    
-176   -128   
240    -176   
-240   -240   
-48    -80    
-400   32     
-224   -208   
80     -48    
48     -80    
-272   -240   
-320   -272   
-112   -144   
128    496    
-128   480    
0      704    
-528   -64    
-96    -480   
64     112    
-64    128    
-256   192    
80     48     
64     -16    
192    96     
-192   96     
0      48     
-192   48     
-304   -304   
112    112    
-272   176    
-128   -48    
-416   32     
176    160    
-256   144    
-48    48     
-48    -64    
80     -128   
-336   -64    
-240   -320   
80     -32    
-48    96     
-256   -48    
0      -160   
64     0      
-272   48     
-48    -576   
-352   -560   
192    -160   
-64    128    
48     96     
-48    16     
-48    -32    
-16    -256   
-64    -96    
192    -112   
112    -32    
208    64     
-272   416    
-208   48     
-112   32     
112    48     
-176   -16    
144    0      
-1024  -32    
48     288    
-16    64     
-176   224    
-128   48     
80     0      
-16    -16    
144    0      
64     16     
48     80     
-48    0      
160    512    
96     80     
-256   -176   
16     -16    
-608   -80    
32     32     
32     -80    
-208   -64    
288    -192   
-176   96     
16     176    
-112   176    
160    64     
-96    -64    
144    64     
96     192    
96     64     
-160   -16    
176    160    
-80    64     
-112   160    
0      -144   
32     160    
-80    64     
-32    128    
64     96     
64     112    
-32    208    
112    -224   
-208   -368   
32     -208   
-256   -16    
16     -480   
112    0      
64     192    
-96    288    
16     272    
-80    -464   
144    48     
128    288    
256    240    
-176   272    
-160   -48    
-96    128    
-64    -32    
0      -16    
320    320    
-16    320    
-64    80     
32     -48    
304    208    
160    352    
16     0      
-32    -16    
48     -128   
320    272    
-416   416    
-144   400    
192    96     
320    416    
-368   64     
-160   0      
-272   -432   
160    -304   
-384   144    
32     -32    
160    384    
-32    336    
128    320    
-48    128    
240    448    
-176   80     
-48    64     
32     64     
384    64     
-176   32     
-128   464    
32     208    
64     -96    
0      16     
96     -80    
-16    -16    
-144   -128   
272    -336   
-128   80     
288    320    
-160   208    
-48    -80    
-96    -592   
-112   -96    
-240   -416   
-48    -240   
-144   -16    
208    -80    
192    112    
160    0      
-128   -32    
448    16     
-320   336    
320    112    
48     -176   
-368   -400   
0      -656   
-144   -96    
256    80     
112    160    
-192   -128   
128    -256   
-80    752    
16     -80    
240    -288   
64     112    
-80    304    
320    608    
-80    -208   
-48    -528   
64     240    
48     336    
-208   48     
80     64     
-32    -192   
304    496    
-112   32     
-112   -336   
80     176    
-80    -16    
512    -64    
192    176    
-336   -16    
0      -208   
112    208    
-32    48     
96     -48    
-112   272    
16     -256   
-16    512    
160    0      
0      -320   
-16    -464   
144    256    
176    -96    
176    -80    
96     64     
-32    112    
-96    -64    
32     128    
288    -64    
144    -64    
-96    80     
240    96     
-272   -384   
64     496    
32     224    
272    -112   
80     48     
48     0      
160    -112   
0      -544   
-320   -80    
-176   96     
288    288    
-224   -32    
352    -160   
48     -32    
160    208    
-304   32     
160    -144   
208    64     
368    304    
-144   320    
16     -144   
528    -112   
208    -48    
384    160    
-32    64     
-32    64     
-176   -128   
80     48     
0      96     
96     176    
80     96     
-16    -64    
0      -48    
448    -176   
112    112    
304    -432   
240    0      
224    32     
-96    64     
0      -160   
384    304    
-608   -128   
128    -80    
192    64     
224    144    
-128   -96    
384    -160   
32     -112   
640    -416   
336    -144   
-96    -272   
-112   208    
-240   192    
192    128    
192    0      
48     32     
112    -32    
-80    48     
-64    0      
0      48     
176    16     
96     16     
-16    0      
48     -64    
48     32     
128    -64    
192    112    
80     -784   
112    80     
48     -16    
32     -80    
48     -48    
80     144    
-64    -96    
160    -96    
176    64     
224    176    
16     112    
64     -80    
16     32     
176    -96    
80     96     
-48    0      
16     32     
96     48     
96     64     
-80    48     
80     64     
32     48     
80     64     
48     -16    
32     -48    
-32    64     
16     -272   
-80    16     
128    -160   
-16    32     
272    240    
48     0      
160    96     
64     32     
32     -32    
192    48     
192    80     
-112   -128   
288    144    
-224   32     
464    240    
-144   -64    
64     16     
112    0      
32     80     
0      -80    
256    64     
-128   16     
336    -80    
-144   336    
-384   16     
160    -288   
240    16     
16     -304   
64     16     
224    160    
-80    -160   
112    -160   
-16    -144   
240    -272   
-32    176    
160    -64    
-96    -16    
144    32     
-80    32     
-784   -80    
144    240    
96     48     
128    -272   
16     -176   
80     -256   
16     112    
288    -1056  
48     -16    
64     -96    
-48    0      
192    160    
-48    -32    
64     -768   
272    176    
-352   224    
192    48     
192    16     
-16    -16    
-64    192    
-16    -848   
144    144    
96     -192   
144    112    
-192   -400   
-208   -32    
208    304    
304    256    
32     288    
-48    -448   
240    16     
-96    -176   
-960   -288   
128    112    
80     128    
80     -112   
-64    -64    
224    -640   
-224   176    
80     144    
96     128    
160    112    
96     80     
-192   32     
160    64     
128    -32    
240    -16    
-1344  -32    
-80    -48    
192    0      
0      -240   
-256   -32    
96     -112   
-48    16     
-64    -1648  
192    -48    
192    -128   
-16    -16    
-64    32     
112    0      
-256   -48    
112    -64    
-368   16     
112    112    
-2096  112    
224    48     
80     32     
-160   -112   
160    -16    
192    -704   
112    48     
-48    -32    
176    -112   
48     80     
160    0      
-48    48     
32     0      
304    96     
-32    48     
-16    32     
-96    -32    
-144   -80    
80     -272   
-32    -32    
192    -256   
192    208    
-32    -32    
-64    32     
-400   -48    
64     -80    
0      -80    
128    -16    
-112   144    
96     64     
-512   -48    
-128   -160   
-96    -16    
-96    -144   
160    80     
240    -192   
288    32     
80     -32    
176    -16    
-304   112    
96     -32    
-192   -160   
64     -16    
-480   -32    
128    -16    
-96    128    
160    0      
16     240    
128    80     
-176   16     
-64    -48    
256    48     
96     -96    
144    -48    
112    192    
-144   48     
48     144    
272    -80    
-160   80     
80     -64    
112    48     
48     16     
-32    -80    
-1056  -96    
224    160    
-160   192    
-528   160    
-32    128    
-80    128    
-32    -48    
-1776  -96    
-224   -16    
192    0      
-32    80     
80     -64    
208    208    
-368   144    
128    224    
-560   16     
96     32     
-64    -112   
192    -64    
-160   -48    
-144   -176   
-96    32     
-272   -48    
-64    -176   
144    -80    
0      -16    
-688   112    
256    352    
128    336    
80     256    
-32    0      
-16    48     
64     -96    
-144   112    
432    720    
-320   1904   
-192   224    
48     -416   
240    800    
-832   -192   
48     -1232  
272    -320   
80     1200   
80     -176   
112    -160   
-160   176    
160    -160   
64     48     
-192   160    
-144   -128   
-32    32     
160    496    
-16    80     
-240   -80    
-272   384    
-112   -32    
-688   48     
16     352    
112    -672   
224    -144   
96     656    
-64    -80    
448    480    
-352   880    
-160   -656   
112    176    
-112   160    
176    -624   
112    368    
-128   832    
80     -64    
-624   96     
224    -320   
-144   896    
192    -176   
-80    240    
-128   -96    
-256   192    
272    -272   
96     368    
-144   80     
-48    -240   
-224   176    
64     176    
-48    -304   
-144   192    
-720   48     
96     -288   
80     128    
80     80     
16     -80    
0      128    
32     -16    
-144   -96    
240    0      
-416   -96    
80     16     
-112   80     
64     96     
-32    48     
32     32     
-416   0      
-64    64     
-16    128    
368    48     
0      -48    
-112   16     
96     -304   
-176   -32    
176    224    
-64    96     
128    128    
0      64     
96     -16    
-192   -240   
128    -32    
-16    48     
-80    240    
32     80     
208    0      
112    16     
160    -96    
-256   -176   
-176   -176   
-224   -384   
160    144    
176    224    
192    -48    
192    32     
-32    80     
-112   -160   
32     -64    
-288   96     
-320   -112   
160    64     
-192   144    
-80    -16    
-192   -112   
208    336    
-112   176    
-208   -96    
-48    64     
-160   -176   
448    -176   
-64    0      
128    32     
-32    -48    
480    144    
64     96     
48     32     
-144   0      
-128   64     
-112   -80    
224    0      
-16    144    
-256   32     
-80    64     
192    160    
-112   480    
-96    416    
416    48     
-96    64     
32     -16    
400    96     
240    -80    
288    112    
-416   -448   
32     -144   
-720   64     
-176   -48    
96     128    
-112   -48    
352    96     
192    80     
-400   0      
-160   80     
-144   16     
80     -48    
-176   16     
-176   112    
-96    16     
0      -48    
-16    -48    
304    16     
-560   128    
304    112    
-128   16     
-288   -96    
48     -16    
-80    208    
16     16     
96     -16    
144    16     
128    176    
288    128    
-256   0      
0      64     
-48    -16    
208    0      
176    128    
-16    32     
-32    48     
-16    32     
32     80     
-48    96     
80     -160   
16     128    
-128   -48    
96     16     
32     32     
224    32     
-144   32     
80     16     
-32    16     
80     32     
-208   16     
32     80     
-80    32     
64     0      
160    16     
64     -480   
64     32     
64     -32    
-48    -16    
16     32     
-16    16     
80     16     
-96    0      
64     128    
32     0      
80     48     
208    112    
-32    32     
-112   0      
-48    32     
112    -1200  
-64    48     
160    96     
-176   144    
240    80     
128    96     
160    80     
160    64     
32     176    
224    96     
-192   32     
256    80     
48     112    
-80    -16    
32     0      
-16    -64    
96     0      
16     256    
160    -96    
-32    -320   
256    240    
96     176    
80     32     
-144   160    
-352   -736   
784    48     
-400   672    
32     -16    
128    256    
80     -288   
48     -800   
-144   560    
192    -640   
32     288    
288    64     
-160   16     
-192   512    
448    -384   
16     176    
128    368    
128    64     
-32    448    
-224   256    
144    -496   
64     -32    
96     -352   
-192   -128   
400    -144   
-64    192    
-16    -864   
240    -240   
48     -96    
-112   -464   
160    -64    
192    224    
-32    144    
0      48     
128    160    
96     32     
112    160    
32     -32    
144    -48    
0      -48    
80     96     
-16    32     
160    128    
272    160    
96     0      
-16    48     
96     112    
-176   96     
-48    16     
128    32     
128    -256   
128    48     
48     -160   
112    0      
240    -48    
208    128    
224    -320   
80     0      
128    64     
-48    112    
224    48     
160    176    
-176   112    
176    -352   
128    32     
-160   -64    
192    64     
128    112    
80     96     
16     -144   
112    80     
-16    -80    
128    96     
80     32     
176    -64    
48     80     
32     -96    
-112   -496   
80     -256   
-128   128    
160    -96    
80     128    
304    112    
48     176    
-80    0      
16     -96    
32     -288   
368    -112   
-128   96     
336    -96    
-304   80     
-688   0      
-48    -160   
272    80     
64     -64    
128    96     
128    -944   
-224   -64    
320    -64    
32     -144   
176    16     
64     0      
-64    -160   
32     -48    
128    -400   
32     16     
-192   160    
48     160    
-240   -64    
-480   -192   
-16    -160   
-16    -16    
192    96     
144    -32    
80     32     
64     -160   
144    80     
224    -112   
144    80     
64     -64    
176    -32    
-448   0      
-48    -128   
32     -160   
-16    -96    
352    16     
352    -128   
-368   0      
112    -656   
128    64     
240    96     
176    304    
-144   96     
352    224    
-96    240    
96     112    
-720   256    
-80    80     
-336   -144   
112    -96    
112    -144   
48     64     
176    -48    
-48    -352   
-64    96     
32     96     
-32    192    
240    48     
64     464    
240    416    
96     16     
-112   96     
192    -272   
-160   0      
80     128    
-128   -352   
192    304    
-32    -224   
128    -384   
208    160    
288    -496   
-112   -80    
144    -112   
48     -224   
64     96     
-48    -592   
-240   -96    
-48    128    
-208   -32    
144    -32    
-144   -16    
64     -512   
-48    32     
272    32     
-192   48     
256    -480   
-208   -256   
-160   -480   
16     -48    
224    320    
80     112    
176    176    
256    -16    
-224   64     
192    -336   
-160   -208   
32     64     
-32    -16    
96     -288   
-16    0      
128    -320   
112    240    
-112   32     
48     -80    
0      0      
400    592    
-432   352    
192    -144   
-384   -368   
48     -192   
-32    512    
128    144    
160    -80    
-144   -64    
128    128    
-16    -96    
96     0      
112    48     
16     -16    
-80    -224   
48     -176   
-96    80     
112    -48    
16     16     
0      32     
-112   -16    
192    -224   
-48    48     
144    -32    
80     32     
-320   -304   
-224   144    
32     192    
-624   0      
-352   -64    
-80    128    
304    64     
192    0      
-304   -48    
240    -48    
-464   -32    
-1232  -96    
16     -16    
-16    -192   
48     64     
-16    0      
-192   -48    
-48    48     
-112   80     
-176   32     
-432   -32    
-112   128    
176    16     
32     -16    
-784   -48    
-176   -192   
-48    -128   
256    208    
-528   -16    
-176   64     
128    32     
-160   -224   
48     -32    
112    96     
-192   -96    
-960   144    
160    224    
-1088  0      
-160   -96    
224    128    
-352   48     
0      -16    
96     144    
176    -80    
320    64     
0      -48    
80     160    
-192   144    
-144   -16    
128    -48    
-416   -96    
16     48     
-576   80     
224    64     
272    176    
-336   32     
-224   -128   
0      112    
-240   48     
80     -16    
-272   48     
-32    64     
384    -48    
-272   -16    
-288   64     
-224   -48    
272    32     
16     160    
-224   0      
-96    48     
32     -48    
-208   -32    
144    48     
-64    64     
-144   0      
-848   -576   
-272   -272   
192    272    
-576   32     
-112   96     
-256   16     
16     64     
-368   192    
-48    64     
-1776  -16    
176    96     
112    16     
96     64     
96     -16    
0      -16    
-32    0      
-112   -48    
96     112    
0      0      
400    160    
-432   208    
0      64     
-224   -160   
-80    0      
-832   16     
-352   0      
-32    -272   
-112   -144   
-208   -64    
128    0      
128    128    
128    32     
192    16     
48     0      
80     64     
-224   -32    
-32    -16    
0      64     
288    80     
-144   224    
160    208    
-128   16     
-224   -32    
-16    16     
64     48     
128    48     
144    80     
16     32     
-64    0      
0      48     
-128   48     
-16    48     
-192   -16    
192    -32    
-112   -16    
64     48     
-16    32     
-64    0      
112    16     
240    64     
-144   -32    
-48    32     
16     64     
-112   -32    
128    16     
-112   -64    
80     32     
-192   -112   
64     80     
-256   32     
-176   -256   
-16    16     
-128   416    
80     16     
-128   48     
-144   96     
320    0      
-128   144    
304    0      
64     48     
-80    256    
64     -288   
-416   -192   
112    32     
-32    80     
-64    -32    
32     224    
-192   -192   
544    992    
-752   -880   
336    -576   
32     336    
128    112    
192    224    
192    528    
-432   96     
-112   112    
-32    160    
0      -320   
240    -32    
-176   176    
240    240    
-304   -96    
288    -768   
-208   -112   
480    464    
-16    416    
-160   352    
-64    32     
96     112    
-160   -64    
112    -16    
64     -176   
-192   -208   
496    -128   
-240   48     
144    -176   
-144   32     
0      16     
-32    352    
144    208    
64     -48    
96     -112   
160    32     
-336   160    
-16    128    
-48    32     
64     -112   
-224   112    
144    32     
-160   32     
64     48     
32     240    
224    48     
80     -400   
80     -176   
-336   -176   
-48    -32    
-112   176    
32     80     
32     -32    
48     -16    
96     0      
-96    -48    
80     96     
48     48     
208    96     
-96    16     
128    176    
-32    80     
256    -32    
-144   -48    
96     80     
48     160    
-16    80     
-192   -176   
112    -224   
80     80     
48     -880   
288    80     
-144   96     
-112   16     
144    64     
160    48     
0      0      
192    -160   
-80    -32    
0      112    
-80    16     
144    80     
-64    -48    
112    48     
80     64     
32     -400   
112    -48    
64     64     
0      80     
80     0      
96     32     
48     48     
192    64     
-192   -128   
-64    48     
-128   128    
192    16     
192    48     
-16    64     
-32    -64    
96     -192   
64     48     
-16    256    
128    176    
-80    112    
144    -32    
32     80     
208    128    
32     96     
80     112    
80     -16    
144    -16    
-48    32     
-16    -80    
-48    -192   
336    -160   
272    -112   
240    -272   
64     -176   
-160   48     
-208   64     
-112   -112   
160    48     
112    -272   
32     -80    
96     96     
-128   64     
96     -48    
176    16     
208    48     
-176   -464   
-208   -464   
-96    -208   
-96    96     
160    -736   
48     224    
704    832    
-256   384    
-144   32     
240    -16    
-64    -208   
-16    -144   
112    96     
0      -352   
64     -176   
304    752    
32     -96    
-208   -80    
128    416    
-32    -544   
-64    224    
-64    144    
80     16     
-96    -288   
48     320    
128    -112   
64     -160   
48     -160   
-80    64     
160    -256   
144    128    
144    64     
336    176    
-192   -96    
64     -192   
96     128    
-96    64     
224    144    
96     80     
32     112    
144    64     
208    -80    
-16    96     
144    -208   
-32    48     
0      -32    
-48    272    
112    -112   
128    -64    
80     176    
272    32     
-64    -128   
208    -512   
0      80     
-16    -80    
192    -192   
192    -64    
272    -768   
-144   -112   
368    240    
-384   80     
224    -48    
240    -80    
256    256    
224    32     
64     -288   
-32    0      
-32    -64    
-16    -240   
64     -48    
-128   0      
128    -96    
-32    -32    
32     -48    
160    -512   
16     -496   
32     -32    
32     64     
80     -432   
-16    -32    
112    -80    
-32    80     
64     -256   
272    -144   
-800   -48    
112    -64    
96     0      
176    -16    
160    -64    
48     -416   
-64    0      
96     -16    
-16    -240   
160    96     
-112   80     
176    16     
-48    -16    
-224   -32    
160    -32    
-368   0      
128    16     
64     32     
-144   -112   
-48    -208   
48     -496   
112    -16    
-48    -832   
128    16     
-80    -64    
0      0      
112    -80    
112    80     
0      -16    
432    240    
-576   144    
80     -64    
448    -128   
128    -64    
112    -80    
176    32     
240    48     
16     -208   
64     48     
-144   -176   
-48    32     
96     32     
-16    -32    
-32    0      
144    64     
-176   -64    
-48    -112   
-928   16     
16     -48    
224    80     
32     -96    
-240   48     
0      -256   
32     112    
240    128    
96     48     
128    64     
112    112    
-64    128    
0      -288   
448    352    
-464   80     
-544   -336   
176    432    
-1200  256    
224    -176   
-32    -64    
192    -48    
16     64     
-176   -480   
224    96     
-96    -96    
-48    48     
0      -160   
240    224    
144    192    
176    16     
-64    16     
-32    -16    
-1280  272    
-64    32     
-240   -48    
-32    -176   
368    0      
-32    64     
32     16     
16     128    
96     64     
80     -80    
64     48     
-352   48     
-176   -80    
480    48     
-352   -416   
-112   592    
-64    752    
-288   -16    
-64    -64    
-96    304    
-160   16     
672    624    
-752   -240   
-288   -944   
128    304    
272    640    
144    96     
272    -144   
16     -192   
224    32     
-384   144    
160    -160   
320    0      
-2416  -608   
384    -64    
176    464    
-304   240    
144    64     
-304   -160   
128    176    
-288   48     
-304   -192   
128    -80    
16     -160   
224    -48    
144    112    
-96    -48    
16     160    
-544   -64    
64     -128   
0      -256   
-240   32     
32     384    
-528   240    
-64    -48    
-1392  -48    
688    896    
-432   656    
96     -464   
-160   -256   
112    160    
-304   -240   
384    416    
-128   -208   
-48    -224   
64     192    
-240   -128   
0      -224   
-304   176    
16     -32    
-576   64     
32     48     
-1312  -32    
-176   -448   
-448   464    
192    -160   
-32    -128   
32     64     
-16    -96    
-32    0      
96     192    
0      80     
112    -320   
-96    480    
224    -208   
-256   192    
144    208    
-336   -112   
16     -816   
-32    -336   
-208   320    
-208   -112   
416    -176   
64     560    
64     -80    
-288   -288   
-240   -192   
-16    64     
48     32     
-16    -384   
-128   -160   
16     -32    
-832   -64    
16     256    
-48    144    
160    144    
48     128    
-208   -64    
48     -224   
-208   -64    
-48    288    
-48    -96    
-112   -96    
32     -32    
-224   -112   
0      -80    
48     -16    
-608   0      
464    -32    
-2672  -272   
80     -48    
-16    80     
80     -96    
-128   160    
-16    -16    
-48    -64    
-64    -96    
0      -256   
48     480    
-48    336    
304    -256   
128    128    
-96    16     
-256   -208   
-320   -208   
-48    208    
16     144    
-112   0      
144    256    
48     112    
16     112    
0      240    
-192   160    
64     -48    
432    80     
-112   16     
-32    -48    
-368   -256   
336    112    
-176   352    
-192   96     
160    -240   
368    80     
16     144    
64     64     
240    -112   
-208   -144   
-128   -160   
80     224    
160    0      
-240   -128   
-80    64     
16     96     
224    80     
-128   -16    
48     80     
272    176    
-288   32     
128    -64    
128    48     
-64    -32    
144    -64    
96     32     
0      64     
-16    32     
-112   -16    
80     256    
32     176    
64     -48    
384    192    
-48    224    
-208   -208   
256    -272   
96     112    
-16    112    
48     48     
144    -144   
32     32     
-80    -80    
-112   -32    
-176   0      
-16    48     
-48    -32    
192    80     
32     48     
-16    -48    
96     48     
64     80     
-80    192    
-96    16     
48     -16    
-128   -64    
0      32     
-272   -80    
224    112    
-16    -32    
-48    0      
-128   0      
-96    16     
240    288    
-208   -32    
-80    -128   
112    -336   
-64    -672   
176    -256   
-96    -272   
-64    -112   
352    368    
-240   368    
48     -128   
-208   96     
256    176    
-48    -160   
128    -352   
-64    -32    
-240   224    
-16    -192   
96     160    
48     -48    
-80    -16    
-80    64     
0      -96    
-48    -352   
240    656    
160    -80    
96     -32    
96     144    
-208   48     
-112   256    
288    480    
-288   -384   
80     -80    
208    368    
208    160    
224    -80    
-16    -16    
-128   -32    
-336   -80    
-80    -160   
224    -272   
448    80     
32     224    
128    224    
176    0      
-32    -48    
96     -16    
64     16     
96     48     
112    0      
-32    -16    
128    48     
-144   32     
48     112    
0      32     
80     32     
96     48     
112    64     
-16    0      
48     -768   
64     32     
80     64     
144    144    
-96    16     
96     80     
112    64     
48     16     
80     32     
48     80     
32     -80    
-48    0      
-192   32     
-112   0      
176    112    
-80    -384   
176    16     
48     16     
48     80     
96     96     
192    80     
-16    64     
0      -16    
96     48     
32     0      
-144   32     
80     64     
-208   -96    
112    0      
144    64     
208    -96    
-96    32     
16     -16    
288    176    
16     48     
128    -96    
-128   16     
-96    64     
0      -16    
112    112    
160    0      
112    160    
0      -16    
96     -80    
32     48     
144    -144   
16     96     
224    -256   
-304   48     
160    64     
128    32     
-16    96     
128    32     
-208   0      
128    96     
80     64     
-48    -128   
144    16     
-16    -80    
48     16     
128    -64    
0      -16    
80     -192   
0      32     
-16    -1056  
144    64     
48     -32    
-112   -16    
176    -128   
16     64     
208    208    
288    -80    
-144   16     
-128   -160   
128    64     
144    16     
80     128    
-16    -288   
336    160    
-48    0      
160    176    
80     128    
16     80     
144    -32    
-176   -224   
96     16     
-48    -128   
64     48     
112    128    
48     80     
80     -64    
128    16     
64     -160   
48     80     
80     128    
-48    48     
-48    0      
288    128    
48     -80    
128    -224   
176    80     
16     -208   
32     112    
-48    128    
-16    96     
144    -80    
48     112    
256    16     
64     112    
176    240    
-96    -1184  
-80    96     
80     -768   
32     -208   
176    -96    
144    -288   
32     16     
-128   -224   
-16    -352   
176    80     
16     -160   
256    480    
-256   -336   
16     -336   
96     80     
112    -144   
-48    128    
-208   -544   
240    -496   
-144   160    
-128   -48    
208    240    
-144   -496   
272    0      
160    -1104  
32     96     
112    48     
208    -48    
144    -416   
160    208    
-576   16     
-320   160    
416    256    
-96    -1472  
-1152  320    
32     288    
-32    -144   
16     -128   
-448   -176   
-448   -688   
128    384    
-32    -704   
208    80     
224    -160   
448    608    
-176   272    
-272   -832   
-16    64     
288    480    
-1184  144    
192    -272   
240    160    
96     96     
-48    -128   
112    80     
64     -112   
-80    -288   
32     0      
-80    -464   
48     64     
128    192    
80     -368   
-64    -288   
224    32     
-16    192    
48     0      
192    -160   
192    -48    
16     0      
80     -16    
32     -176   
32     -240   
272    320    
16     112    
-32    -144   
208    -304   
320    192    
0      112    
32     -96    
-368   -16    
80     -64    
-720   -96    
-48    -320   
-16    -64    
32     -64    
144    -32    
80     -192   
-32    -160   
192    -1664  
-48    -112   
-128   -272   
176    -32    
-16    352    
224    112    
-224   128    
48     64     
-832   128    
80     48     
32     32     
0      96     
64     -192   
128    -128   
48     -64    
128    -720   
32     -32    
16     160    
160    -32    
224    -112   
96     400    
176    304    
80     352    
0      -48    
16     0      
192    80     
192    -336   
-240   336    
304    -192   
96     -48    
208    -160   
-48    16     
-240   64     
-128   -240   
-656   -32    
144    -176   
-176   96     
80     16     
-144   208    
352    112    
-32    -304   
-64    -352   
-176   96     
-64    16     
176    32     
-96    16     
112    -112   
-144   -80    
96     80     
-144   0      
80     -96    
-80    -192   
384    -32    
-272   112    
304    96     
-1168  128    
352    -80    
-64    -96    
-400   -112   
112    64     
0      -48    
-672   -48    
-144   -16    
-992   -16    
-32    64     
48     -16    
32     0      
-64    -304   
32     -96    
-64    256    
-112   192    
-144   -32    
240    80     
-272   -48    
-368   -80    
16     -48    
-320   -96    
-64    80     
-32    -144   
240    272    
-1072  64     
0      192    
-64    256    
-80    -48    
0      -32    
-32    -96    
-304   -272   
384    -192   
-128   96     
-96    -160   
-144   -112   
192    -240   
96     32     
-160   96     
-112   48     
-688   -16    
96     32     
-64    288    
-208   352    
-224   64     
-96    176    
0      -96    
-80    -160   
336    -128   
48     144    
208    224    
-176   96     
-16    -48    
-640   -352   
-144   -288   
112    -128   
16     -16    
-208   -128   
128    208    
0      -48    
32     160    
32     -112   
80     112    
-144   304    
-208   16     
80     -176   
144    -80    
-208   48     
-128   0      
112    -80    
0      -16    
112    112    
-336   -80    
32     16     
-144   -128   
112    -96    
80     64     
-96    -208   
-16    288    
-16    -208   
-144   80     
64     80     
-48    -304   
16     48     
128    160    
16     192    
32     224    
-192   -160   
48     272    
-944   0      
-48    0      
400    -64    
48     304    
512    480    
-480   -272   
-288   -192   
-16    -304   
32     240    
-16    -96    
48     -144   
-288   0      
336    160    
-144   -16    
128    48     
-576   64     
-320   -144   
96     -192   
48     -48    
192    112    
80     80     
144    0      
-48    64     
-656   -96    
-48    -192   
176    80     
208    32     
144    208    
-16    64     
96     -32    
-1120  -144   
-176   64     
-64    48     
128    208    
64     64     
304    160    
464    32     
-272   -48    
-16    32     
-128   0      
-80    64     
16     48     
80     64     
-112   -80    
240    32     
-240   -112   
48     144    
-16    16     
128    48     
80     48     
-208   80     
112    80     
-64    -16    
96     16     
-192   -32    
64     96     
-160   -16    
96     64     
-176   -16    
64     96     
64     16     
-32    48     
80     48     
-80    0      
-16    64     
96     0      
176    176    
-288   -64    
160    -16    
-16    80     
112    16     
-368   -160   
464    96     
-224   -96    
320    -16    
-208   -112   
-96    -80    
176    304    
-352   112    
128    -128   
32     112    
80     16     
224    -112   
-224   112    
16     0      
112    96     
-48    -48    
160    64     
48     112    
16     64     
64     32     
-144   48     
48     16     
48     16     
-64    32     
240    -144   
32     160    
-112   48     
128    -32    
-48    32     
128    160    
-32    48     
64     -32    
-64    16     
-32    80     
80     -16    
32     16     
112    96     
128    32     
48     -32    
-128   -32    
-80    160    
16     96     
112    -48    
-16    -16    
80     80     
-176   -224   
208    16     
-16    128    
96     48     
-48    32     
160    -144   
64     -80    
128    144    
272    32     
-256   16     
-128   16     
32     32     
224    0      
-160   -16    
224    32     
-256   -112   
128    -176   
272    -16    
-128   96     
112    64     
96     96     
64     80     
64     0      
96     32     
160    0      
-48    224    
144    64     
96     0      
-288   48     
224    -544   
192    -112   
0      256    
48     32     
48     80     
-32    -336   
16     240    
160    144    
128    -48    
-320   -32    
80     -80    
112    176    
64     80     
144    -16    
-96    0      
80     112    
64     368    
112    -512   
0      112    
-16    -848   
-16    912    
224    -256   
16     32     
-64    224    
128    -144   
48     96     
-16    -368   
304    496    
-48    144    
-48    -112   
16     32     
144    -80    
-304   -96    
224    -1040  
144    336    
224    80     
48     -304   
-192   400    
-128   -464   
-16    -96    
-32    256    
64     128    
80     -128   
128    160    
64     -16    
96     64     
48     128    
-112   -96    
-176   80     
48     -128   
64     -304   
-128   -480   
-64    208    
32     16     
192    256    
-96    32     
96     -64    
240    160
[truncated: 8,011 more chars]
