# Supplementary material for: A Fault Diagnosis Method for One‐Dimensional Vibration Signal Based on Multiresolution tlsDMD and Approximate Entropy
Source: Hindawi journal article supplement (doi:10.1155/2019/3262818), 2019-01-01
Supplement: f1 [file 3262818.f1.zip › 3262818.f1/gear signals/normal gear signal/Data8.txt]

-304   112    
-416   80     
64     80     
-400   -96    
-192   -128   
-32    -352   
-96    0      
-1568  192    
-144   48     
288    0      
-32    48     
96     176    
112    320    
80     160    
208    0      
384    48     
-80    -48    
-112   48     
-144   -32    
32     -48    
-128   80     
-368   64     
-704   32     
16     64     
416    16     
-64    -32    
-128   -160   
48     16     
-304   -96    
0      -16    
80     -208   
64     -128   
-16    96     
-80    -16    
-32    -208   
-144   -16    
128    64     
80     64     
-144   48     
-288   32     
-80    208    
-96    -128   
112    48     
-16    -64    
-208   16     
176    32     
-112   80     
-128   48     
-256   0      
16     32     
-64    -80    
80     -16    
-368   16     
64     48     
-432   -64    
-32    16     
-176   -48    
32     48     
32     -16    
-32    0      
96     144    
144    -32    
144    32     
-48    96     
-320   -48    
-128   112    
-240   -128   
-512   -32    
48     -48    
144    0      
192    96     
-336   -112   
256    -48    
-16    -112   
-16    80     
288    336    
-432   416    
-96    -384   
48     -320   
-32    -336   
160    -112   
128    400    
240    160    
480    -32    
-160   64     
-352   272    
-752   -160   
192    -320   
0      0      
-288   -224   
176    -368   
336    144    
384    240    
0      112    
-400   80     
-464   -160   
384    528    
-256   -160   
272    -64    
0      208    
496    0      
-624   -80    
-432   -96    
16     -416   
-48    -208   
-112   368    
16     416    
-224   96     
-160   -224   
256    -192   
-96    128    
384    192    
-64    -224   
-208   -160   
16     96     
-144   32     
-16    -16    
240    112    
96     80     
400    48     
32     -80    
-16    -96    
-160   -16    
16     48     
160    48     
-16    0      
96     80     
-176   16     
128    48     
-176   -32    
128    64     
80     64     
48     0      
32     -16    
80     16     
240    80     
-192   -48    
144    16     
-128   48     
96     32     
-128   -32    
96     -448   
-240   -48    
16     128    
-80    -176   
160    -144   
128    -160   
-16    0      
-80    144    
-80    -80    
-32    80     
160    144    
-80    16     
336    -80    
0      -16    
32     48     
64     16     
-80    32     
96     64     
-304   32     
16     48     
-16    0      
144    16     
64     32     
64     -16    
144    112    
-144   48     
160    -16    
-208   -16    
160    192    
-176   16     
352    48     
-336   16     
208    176    
-16    0      
64     16     
96     16     
16     48     
144    48     
-320   64     
368    208    
-176   64     
112    112    
80     -80    
32     48     
-128   -48    
224    0      
-96    64     
160    112    
-48    -48    
256    -32    
-144   80     
48     48     
-16    48     
48     -16    
96     96     
96     16     
-96    -32    
-32    16     
64     80     
-32    -192   
272    16     
-176   144    
352    -48    
64     80     
48     -48    
-16    160    
192    -32    
32     64     
16     80     
128    160    
16     144    
96     -32    
-256   48     
128    16     
160    80     
112    96     
-208   -32    
-80    -16    
256    80     
-48    -480   
176    64     
112    80     
-96    0      
32     64     
16     112    
96     96     
16     -32    
-128   144    
192    192    
64     336    
432    144    
-80    112    
-32    -112   
-32    -96    
48     -800   
48     128    
-16    48     
64     48     
-16    -96    
80     64     
-16    -96    
96     144    
-144   -224   
16     48     
-80    128    
0      -224   
32     -16    
-112   -48    
-80    32     
224    32     
0      32     
-112   144    
176    416    
-240   16     
-112   -416   
224    112    
240    256    
240    -96    
256    48     
-96    -112   
160    -64    
16     80     
-464   -144   
192    -1472  
208    256    
528    544    
224    -176   
80     176    
-160   -272   
208    304    
112    432    
-624   -176   
-208   48     
-400   80     
-112   112    
48     -16    
80     32     
384    -32    
352    80     
176    -336   
160    80     
-176   -192   
-192   144    
-240   -560   
288    128    
32     -736   
192    -608   
-256   480    
0      -112   
-496   -352   
-144   176    
-192   -48    
-32    -464   
432    160    
176    -96    
176    32     
176    -48    
16     -144   
-48    -160   
240    0      
-64    160    
272    80     
-176   -528   
-192   0      
352    240    
-224   -400   
80     32     
32     -112   
96     48     
128    80     
80     -96    
288    224    
-64    -48    
112    -144   
-144   -368   
64     -128   
224    608    
128    -416   
16     -112   
144    -816   
-128   -16    
64     -160   
64     -352   
64     144    
0      -128   
80     304    
112    -352   
64     -192   
-80    -304   
-16    -688   
144    16     
-16    -656   
272    -352   
208    672    
144    368    
80     336    
64     -80    
-128   -656   
16     128    
0      0      
384    64     
-192   -144   
16     -384   
-32    0      
160    -128   
-144   -112   
-384   -128   
96     -192   
-176   -288   
16     -304   
-48    -288   
-160   -272   
-160   64     
16     -736   
192    112    
176    304    
16     -16    
48     0      
0      32     
144    16     
0      -64    
-208   -240   
-160   -32    
-160   64     
32     -240   
-144   -208   
192    -112   
-176   -32    
400    -96    
32     80     
128    384    
-240   -80    
32     -64    
48     -112   
-128   -32    
96     0      
-272   64     
-96    144    
48     112    
288    -144   
-128   -48    
304    -64    
-112   48     
176    -48    
-32    -32    
192    -496   
-272   -32    
240    -288   
-16    -16    
160    96     
-64    -48    
96     304    
176    -64    
-192   -96    
192    -176   
80     0      
176    -16    
-64    -64    
192    -128   
-208   -16    
304    -512   
192    -16    
-32    80     
-32    48     
-272   -96    
368    -288   
-256   -32    
0      -128   
-48    32     
96     32     
-32    0      
64     -208   
-80    -112   
-64    -160   
96     0      
352    16     
-176   192    
-16    -800   
112    32     
-112   0      
32     -112   
-48    32     
32     64     
-192   -16    
80     -64    
-896   -112   
48     -64    
-544   272    
176    16     
32     -176   
240    -368   
128    0      
-112   224    
48     192    
112    -64    
-80    -32    
-128   32     
272    128    
-336   288    
112    144    
64     80     
112    176    
-224   64     
32     -16    
-16    160    
64     -160   
48     480    
-800   224    
240    -96    
-176   48     
16     48     
-192   304    
32     160    
-128   -80    
64     -48    
-96    96     
208    128    
-256   -176   
176    -64    
-240   192    
-576   240    
32     -304   
-336   -800   
-432   768    
-352   -416   
-32    192    
-352   -304   
16     16     
-288   336    
272    -64    
480    272    
-2160  -464   
-272   80     
-896   224    
96     -128   
16     -256   
-64    -96    
512    128    
-240   96     
-208   32     
-880   144    
-16    16     
224    -176   
-448   -96    
-288   -64    
-160   -16    
-160   48     
592    512    
-352   48     
0      -80    
-208   -176   
-208   -128   
160    0      
160    0      
160    -64    
16     -32    
48     64     
-224   48     
-288   -80    
16     -48    
-496   -80    
384    -32    
-128   16     
-144   -64    
-64    16     
144    16     
128    -16    
-96    48     
160    -16    
-96    48     
-656   128    
208    224    
-400   -48    
-192   -80    
-528   0      
192    128    
-16    -96    
48     -96    
-16    -32    
-64    128    
64     64     
-112   0      
-32    80     
-176   80     
64     48     
-160   -32    
-48    32     
-128   -16    
80     64     
-576   96     
208    -48    
-272   -144   
224    144    
-272   -64    
128    16     
-80    16     
176    352    
48     16     
-352   -64    
-96    48     
-256   -32    
0      -16    
-192   48     
32     192    
-576   -176   
-160   -64    
-128   -144   
-80    176    
-16    0      
272    144    
-240   48     
64     -96    
-160   -64    
0      96     
-160   -32    
208    80     
-128   -16    
-64    128    
256    64     
-224   80     
112    48     
-672   -64    
112    48     
-64    16     
192    -144   
-96    176    
-32    -48    
-112   0      
-32    96     
16     80     
-48    80     
96     -48    
-160   -48    
32     64     
-48    48     
80     -32    
-784   16     
16     96     
-16    16     
16     32     
-48    -48    
-80    32     
48     48     
64     64     
208    192    
-496   96     
112    -176   
-48    16     
176    48     
32     -80    
-48    64     
-512   -64    
-64    112    
-48    16     
224    0      
160    16     
-256   -80    
96     48     
48     96     
192    80     
-128   64     
64     0      
96     32     
-64    32     
80     112    
0      208    
0      64     
16     -32    
256    176    
-48    32     
-64    16     
144    64     
64     32     
-64    -16    
0      -32    
160    -64    
48     -176   
112    96     
-16    48     
-112   48     
-96    48     
128    64     
0      208    
64     -16    
-128   -224   
96     224    
-128   -48    
208    176    
96     -144   
-144   32     
0      -32    
96     16     
-144   112    
80     64     
-32    -64    
48     192    
-128   32     
112    112    
272    640    
-304   -288   
64     128    
128    320    
240    -16    
16     -64    
-160   160    
-96    544    
160    -176   
16     -128   
16     112    
16     -192   
176    352    
112    -560   
-16    32     
-48    128    
-128   -128   
-16    -208   
416    128    
224    400    
-320   -800   
320    480    
-80    0      
96     -64    
48     192    
80     -32    
0      -112   
-144   -48    
0      64     
-64    -368   
416    400    
-128   400    
96     -576   
208    -176   
192    768    
-192   48     
-32    -160   
192    -16    
240    112    
-16    -48    
-64    -928   
528    432    
-288   272    
288    208    
192    -256   
288    -256   
176    -160   
-368   -240   
80     -320   
64     -560   
416    -112   
400    0      
-256   48     
-64    80     
-80    128    
80     48     
48     -32    
-32    128    
96     -112   
112    -80    
288    352    
-112   144    
288    224    
-192   144    
112    64     
144    -48    
80     208    
192    -48    
64     112    
112    336    
-192   -192   
224    48     
112    -528   
192    128    
-48    96     
80     16     
-32    -64    
0      48     
32     -32    
80     32     
-160   -144   
32     96     
-32    16     
-560   -128   
80     64     
128    16     
80     128    
48     -1376  
80     -64    
224    208    
384    608    
256    416    
160    64     
-176   -96    
-32    48     
-16    -112   
64     -160   
176    -144   
-80    560    
224    304    
-48    -80    
16     -400   
64     -624   
-64    -160   
-32    -800   
544    496    
-304   224    
-16    96     
-128   -112   
144    272    
192    208    
16     -112   
112    -128   
16     -352   
112    48     
-96    -32    
288    0      
272    -224   
-224   128    
64     -864   
64     -16    
112    0      
-160   -160   
400    32     
-80    160    
-80    -240   
160    -256   
96     128    
-112   16     
80     208    
336    -224   
-32    160    
144    -160   
-176   400    
240    -224   
112    80     
240    32     
240    112    
352    576    
-96    304    
80     224    
-16    160    
128    32     
-64    -352   
144    144    
160    -192   
80     112    
-128   -192   
144    -112   
32     128    
64     144    
0      64     
32     -128   
-64    -288   
32     -96    
-112   736    
432    112    
240    16     
144    -128   
-16    -112   
128    -336   
64     48     
416    144    
-112   304    
-208   192    
80     96     
80     304    
96     -1456  
32     32     
112    -1376  
112    -16    
80     -48    
80     32     
32     -160   
80     -704   
128    -144   
-64    -16    
144    16     
128    -144   
32     208    
160    -128   
128    32     
64     -352   
32     208    
-128   -368   
352    -544   
64     -304   
192    -512   
-208   -64    
192    -400   
-192   -608   
-32    -144   
96     176    
32     -192   
112    -48    
-64    16     
0      -64    
96     128    
-48    -16    
-320   160    
128    -64    
-48    112    
240    -144   
-96    176    
-32    -320   
80     160    
240    -576   
384    -64    
-112   -256   
224    96     
192    -16    
176    48     
480    -208   
304    -48    
-208   -96    
-96    -96    
-544   32     
160    0      
320    288    
32     768    
288    720    
288    -48    
144    80     
144    -96    
-16    0      
-32    -192   
384    -304   
272    -176   
-224   -160   
-160   -144   
288    96     
-336   128    
-48    -128   
128    -96    
-272   -320   
272    -288   
496    -32    
-528   -160   
864    -416   
96     176    
-64    0      
48     -16    
-224   -48    
144    48     
-128   16     
464    288    
-928   112    
-352   -240   
-832   -128   
96     -96    
16     -32    
400    -80    
64     16     
240    -208   
-160   0      
112    -16    
208    32     
-656   0      
160    48     
-304   0      
608    -80    
-416   -64    
-96    176    
-656   -48    
-128   -32    
368    -16    
352    48     
-64    -32    
48     -368   
0      64     
160    -32    
-80    -16    
96     16     
-160   -96    
160    80     
64     -32    
-208   16     
32     -48    
-96    32     
224    32     
224    160    
-16    -128   
48     0      
0      -272   
112    80     
112    32     
96     -64    
-416   -256   
80     -112   
-560   16     
0      -80    
-32    48     
80     16     
-96    192    
-192   -96    
304    160    
-80    -128   
240    96     
224    16     
16     96     
-16    32     
-48    80     
16     -32    
0      -16    
-208   -48    
224    240    
-80    48     
-32    -80    
-288   -48    
0      -128   
32     112    
320    -48    
192    64     
-1136  16     
-1008  -64    
-112   -32    
-1040  48     
16     16     
-32    96     
-176   112    
160    -32    
96     128    
-128   96     
192    32     
-608   -32    
352    16     
-384   -64    
-16    48     
-64    -144   
-656   0      
-176   32     
96     -112   
48     32     
-672   160    
-48    80     
112    -112   
-48    80     
64     32     
80     96     
-256   -32    
0      0      
-64    -96    
288    192    
-208   208    
-48    0      
64     16     
144    128    
-112   160    
-304   112    
-160   48     
16     96     
64     -48    
-336   -32    
0      144    
16     -112   
-144   112    
-144   -112   
176    64     
112    128    
-48    32     
-112   144    
128    -16    
-112   48     
-288   -64    
-96    16     
-160   64     
400    272    
-2368  384    
128    -320   
128    48     
-64    64     
160    -160   
-96    208    
-48    0      
-272   -112   
288    -48    
48     192    
-16    80     
-112   160    
64     -80    
128    192    
-32    -48    
-1312  240    
320    272    
-288   -560   
0      -288   
-80    240    
192    704    
64     64     
-32    -256   
64     -48    
-128   16     
-176   -32    
48     48     
-224   16     
-64    64     
352    192    
-112   624    
144    144    
48     -160   
160    48     
-80    -112   
-16    -160   
48     0      
48     144    
96     -16    
32     112    
208    80     
-368   272    
-32    80     
128    16     
32     -16    
-144   -32    
192    16     
-1680  -608   
144    80     
-48    -48    
160    -96    
80     112    
-176   128    
80     144    
-192   96     
-16    256    
-208   112    
-16    32     
-368   -320   
224    80     
-288   -48    
144    160    
-1008  -80    
-208   208    
-240   176    
-128   32     
96     80     
-144   -160   
288    -144   
-64    16     
240    96     
208    96     
80     32     
-80    -176   
-80    0      
-432   0      
288    112    
-256   -16    
-368   144    
176    32     
32     16     
112    80     
-32    -48    
224    160    
-80    -192   
288    48     
-160   64     
128    96     
-656   -16    
-64    224    
160    208    
432    96     
-288   48     
-64    240    
-144   240    
-112   128    
176    96     
224    -64    
32     16     
-80    16     
128    80     
-368   112    
48     112    
-48    160    
64     32     
16     -256   
0      -192   
112    -48    
-160   -416   
-96    -160   
32     32     
48     368    
144    288    
-32    -256   
-80    -16    
0      144    
-208   144    
256    176    
128    336    
320    144    
208    -32    
-64    48     
224    16     
-48    624    
240    400    
352    -32    
-48    144    
-112   176    
224    64     
-80    80     
80     -64    
64     -80    
112    544    
384    448    
-64    208    
-208   64     
112    288    
336    304    
176    -688   
-80    -32    
-16    -112   
-16    64     
-128   80     
112    400    
16     640    
-144   -32    
48     64     
-272   288    
32     128    
96     48     
-208   80     
128    -32    
320    416    
-128   560    
176    192    
-224   -208   
16     0      
96     -48    
48     128    
16     -352   
-320   -288   
-16    -64    
-304   592    
208    16     
-80    -432   
240    -304   
16     -224   
-128   -240   
256    -272   
0      192    
-128   -208   
48     -16    
-176   112    
224    -272   
64     848    
224    416    
-208   -368   
32     -288   
272    -608   
224    -256   
128    464    
-80    528    
160    -304   
-144   -336   
224    512    
352    560    
-416   -64    
192    -640   
464    928    
-480   288    
-16    -560   
96     -384   
96     368    
240    32     
-144   -272   
208    -32    
64     -1216  
-32    560    
304    -96    
0      160    
48     80     
48     0      
-320   240    
128    -240   
128    224    
160    208    
-128   -128   
32     -160   
176    16     
-48    144    
224    -208   
336    192    
-160   128    
-32    -352   
128    -144   
-32    384    
16     -208   
-112   64     
128    192    
64     96     
224    32     
-80    -64    
-144   -96    
64     32     
32     -64    
0      48     
-16    -224   
-16    112    
128    32     
48     48     
48     -80    
176    64     
-96    -80    
64     -288   
80     -320   
256    32     
256    80     
96     -176   
80     -48    
96     -48    
-16    64     
-112   64     
-96    16     
160    -112   
224    0      
80     368    
-80    176    
-80    -192   
16     -112   
-256   80     
-64    -16    
256    96     
224    256    
-224   128    
272    -112   
48     48     
-16    -128   
0      96     
112    48     
80     -96    
96     0      
-240   112    
-272   32     
-80    0      
48     48     
-208   -112   
112    -32    
384    -320   
208    64     
304    -160   
-112   32     
-112   -80    
-336   -128   
368    -400   
-496   -336   
-432   -288   
-32    64     
-80    112    
144    224    
528    224    
64     -288   
-384   64     
-112   -224   
224    -16    
96     -64    
352    80     
368    -144   
-192   -48    
-16    -160   
16     64     
160    112    
240    -432   
96     -16    
-784   -64    
-240   -544   
128    48     
-144   -272   
224    -112   
256    -32    
0      0      
16     -112   
-32    -32    
-64    112    
32     -16    
64     176    
0      128    
144    32     
-240   -48    
-1056  -112   
304    -208   
-48    -48    
112    80     
64     -16    
80     -112   
96     -48    
176    -96    
64     -96    
240    64     
0      0      
256    -80    
128    32     
80     -128   
-96    -240   
-128   48     
-48    128    
64     -112   
32     -32    
80     32     
-128   48     
352    -48    
-144   -64    
272    -32    
96     208    
80     64     
240    48     
-192   16     
208    -160   
64     0      
0      48     
160    -96    
-512   -112   
224    -128   
-16    320    
368    144    
48     32     
-64    -64    
80     240    
112    336    
-32    176    
-160   64     
224    -272   
-144   -160   
128    -96    
-432   -48    
144    -32    
-272   -80    
48     0      
176    -32    
48     -64    
96     32     
0      224    
64     0      
-32    -576   
96     16     
128    16     
-48    160    
-160   32     
32     0      
80     -64    
32     96     
-288   208    
368    96     
-1776  -704   
80     320    
-112   -32    
0      112    
96     -48    
192    -176   
464    1040   
-400   -1344  
304    336    
128    544    
-352   -192   
432    112    
32     -464   
-144   320    
64     144    
-480   -96    
-80    -112   
-96    112    
0      -176   
320    -160   
16     -288   
-16    224    
176    -80    
288    -144   
-336   80     
320    112    
-304   240    
208    -16    
-400   144    
144    -16    
-880   0      
-16    -16    
-48    112    
16     32     
32     -96    
48     -512   
32     -176   
-80    -192   
160    96     
-112   80     
-64    -96    
-224   -192   
-160   -192   
-32    -48    
160    48     
-176   32     
128    -32    
208    48     
80     -112   
-48    80     
-80    -64    
128    64     
-48    96     
64     -128   
32     -64    
32     -48    
-32    96     
96     16     
208    80     
-128   112    
-304   -64    
-128   -80    
-48    64     
-768   -160   
64     32     
64     -64    
-592   32     
112    16     
-1680  -16    
-320   -48    
-560   -112   
-80    -112   
64     -96    
304    128    
208    64     
-224   -64    
-576   -128   
-96    48     
-304   -128   
144    -64    
224    0      
112    -16    
208    208    
-144   144    
-256   16     
-720   0      
-352   -96    
-576   48     
-160   32     
-512   96     
32     80     
-128   -112   
336    -48    
80     64     
432    272    
-288   96     
-144   -32    
-32    0      
160    224    
-32    160    
128    176    
-80    96     
-1024  -48    
-64    -80    
-64    -32    
-96    -32    
224    -144   
0      -16    
-272   -240   
-80    -80    
16     -32    
-32    -80    
240    -240   
-304   -48    
-544   80     
-368   -240   
-144   -304   
-208   -208   
176    -176   
368    -96    
192    160    
-272   128    
-32    144    
-176   -208   
16     -32    
80     -16    
-48    -48    
96     -176   
-144   -128   
-64    -224   
-32    288    
64     96     
-48    288    
176    368    
-576   -32    
96     96     
-48    -48    
128    64     
160    -48    
-96    -16    
0      0      
0      -368   
-352   -48    
-48    -128   
144    80     
96     240    
-112   208    
-32    -576   
32     -1920  
-736   -912   
32     112    
-160   -64    
304    -224   
608    1152   
-208   880    
-432   -320   
96     -1088  
192    496    
-160   256    
176    -256   
-288   448    
-208   -368   
-304   64     
-32    128    
-288   -416   
160    -32    
-528   48     
-128   128    
-192   -304   
-416   80     
-32    -224   
512    -112   
208    1056   
-192   -400   
48     -560   
-208   352    
16     -992   
-272   -496   
272    736    
-384   -144   
192    80     
128    640    
-272   -272   
144    -976   
96     752    
272    -128   
-480   368    
304    -800   
-272   272    
0      -80    
-224   32     
144    -192   
192    416    
-48    -144   
0      -160   
0      176    
-112   -80    
32     -80    
160    176    
128    48     
-128   -176   
0      304    
-16    304    
96     -112   
144    144    
-96    96     
48     -16    
-144   48     
64     0      
-592   -144   
256    128    
-224   64     
160    64     
160    80     
16     -48    
-16    -48    
-16    -64    
112    48     
80     16     
32     32     
-48    16     
0      272    
-112   160    
224    0      
-240   -80    
176    0      
-16    32     
32     -112   
-48    80     
16     160    
48     -16    
32     -112   
176    32     
32     144    
16     -16    
-240   16     
144    80     
96     240    
144    544    
-96    320    
144    272    
112    112    
32     112    
0      48     
64     96     
64     48     
0      -16    
-48    112    
-144   16     
64     0      
-176   16     
176    80     
-64    -112   
272    176    
-112   64     
-96    64     
304    240    
-112   208    
-112   80     
0      112    
-160   -144   
192    -64    
272    32     
160    112    
16     80     
-112   -48    
160    48     
128    0      
384    -192   
160    -32    
-208   80     
-368   -784   
144    -848   
-160   96     
-192   144    
64     80     
64     112    
-64    32     
-64    128    
176    -32    
368    320    
48     48     
864    16     
-512   -144   
-464   -80    
80     -32    
-80    32     
400    32     
128    32     
80     32     
-192   -64    
-64    -32    
16     32     
-144   -16    
-128   16     
-224   80     
256    176    
-304   -144   
1040   -80    
208    0      
416    224    
-48    96     
-96    32     
-144   -80    
-160   64     
48     208    
-528   -128   
336    -80    
80     16     
576    144    
-32    0      
-80    48     
-176   64     
-112   -208   
32     -16    
416    -32    
96     48     
176    -16    
128    16     
32     64     
224    64     
-432   192    
-96    64     
80     -16    
-272   -48    
240    64     
-160   -80    
112    64     
224    -272   
-64    64     
64     -1024  
-32    16     
32     64     
176    48     
-16    -288   
48     32     
32     48     
112    80     
48     32     
32     128    
304    288    
-192   0      
192    32     
48     -32    
64     16     
176    -80    
48     -48    
48     -80    
-128   80     
64     -32    
-80    -32    
96     -32    
-224   64     
176    96     
-256   -32    
272    48     
176    -16    
80     176    
128    -64    
-112   -112   
288    -160   
96     128    
64     -128   
48     64     
-96    16     
144    176    
-64    160    
144    -288   
16     48     
112    208    
224    -128   
48     -96    
-64    -112   
-192   832    
816    992    
-448   192    
112    -352   
-208   96     
192    -336   
80     -160   
32     208    
-16    -160   
80     208    
352    0      
-272   16     
-112   256    
384    -208   
96     -144   
32     -64    
256    144    
-144   -400   
-304   -192   
224    -720   
80     112    
-48    224    
16     240    
352    352    
112    176    
272    176    
-32    272    
0      0      
-112   288    
416    400    
272    96     
-144   -48    
48     16     
48     0      
64     16     
208    -752   
224    112    
-32    -112   
-80    16     
-1584  -80    
48     -224   
160    -48    
176    -112   
144    -48    
64     -96    
64     -96    
-64    -64    
208    -64    
-48    -352   
128    -64    
304    16     
-32    32     
128    -240   
-64    -208   
-1264  -192   
240    0      
-96    32     
32     -192   
-16    0      
32     -48    
144    -160   
48     176    
-16    -48    
-112   -16    
-80    16     
-80    -128   
112    32     
128    -32    
0      -80    
-224   -16    
96     -80    
96     -32    
112    -48    
96     -16    
240    -272   
-112   48     
16     -848   
96     96     
288    32     
-112   48     
-16    -96    
-64    -256   
-64    -144   
256    -48    
-192   144    
32     192    
-256   -112   
240    -128   
80     -16    
32     -128   
80     -48    
80     -64    
80     -176   
256    128    
-80    112    
192    112    
-448   224    
-544   -128   
80     -16    
-32    -32    
256    -16    
-1216  48     
-128   -80    
-16    -160   
-48    -144   
384    -48    
448    -32    
-16    80     
-224   224    
-416   -16    
288    -80    
-32    48     
272    32     
224    32     
-96    96     
-80    -240   
-496   16     
160    16     
-368   48     
272    -160   
-16    -128   
-16    -160   
-464   192    
-16    0      
480    304    
640    288    
-368   -96    
-384   -80    
-160   48     
16     48     
416    384    
-1360  -448   
544    -368   
-224   224    
304    352    
160    160    
-288   -112   
32     0      
32     -512   
160    48     
80     -32    
176    144    
-112   240    
32     48     
-368   192    
0      208    
64     256    
64     544    
240    416    
144    -48    
192    208    
160    -272   
32     0      
48     -16    
-128   -288   
-256   352    
80     -224   
0      -288   
192    304    
208    112    
-80    -144   
32     -80    
48     -112   
-224   0      
-16    -832   
-112   64     
-48    80     
80     48     
-448   -48    
112    -96    
-192   -544   
32     48     
224    64     
-176   -16    
16     -160   
-192   -192   
-192   -480   
-48    -240   
176    576    
176    48     
384    176    
-432   -48    
-32    112    
64     -352   
-896   -192   
-64    160    
0      16     
-64    -192   
-576   -80    
-64    112    
128    400    
-208   16     
-48    -240   
224    -16    
224    608    
208    624    
-272   -128   
-48    -272   
-80    -240   
-176   496    
112    288    
-368   -128   
-272   16     
-192   48     
-80    16     
144    -32    
128    48     
-224   16     
80     -112   
-144   -304   
48     64     
32     -32    
32     32     
-80    48     
-64    -64    
-16    -48    
-160   64     
-80    48     
-144   16     
-144   -48    
-816   16     
16     64     
-384   0      
-96    -16    
-240   16     
448    112    
80     -48    
-240   -48    
240    16     
-128   16     
80     16     
48     -16    
112    -64    
-64    48     
32     32     
-1056  -48    
-64    48     
-224   0      
-96    48     
32     -64    
64     128    
144    48     
32     0      
-32    32     
-224   -208   
-144   -96    
176    160    
-144   96     
-224   0      
224    16     
-128   -192   
16     -64    
-208   144    
-48    32     
-48    96     
176    112    
32     -48    
-160   -80    
32     -80    
-48    -64    
-128   -112   
16     -64    
80     64     
-192   -64    
16     16     
-144   208    
0      48     
-144   -80    
0      80     
-176   -64    
-32    16     
48     80     
48     80     
96     144    
-112   -16    
96     80     
80     112    
-144   32     
16     0      
-368   -304   
-48    -224   
448    128    
-704   48     
-208   160    
-64    -96    
144    48     
48     208    
-416   16     
-64    96     
16     -16    
-336   -48    
128    -16    
-160   96     
-256   -32    
-928   -1040  
-16    -688   
-48    608    
-992   144    
-128   32     
-112   -224   
-80    -16    
16     352    
-64    32     
112    48     
48     -32    
112    64     
208    80     
80     -80    
64     -128   
96     0      
-160   -80    
144    128    
-16    -64    
272    64     
-304   16     
288    160    
0      0      
-144   0      
-144   0      
-384   -144   
160    -352   
-80    -96    
-256   80     
-16    -16    
96     64     
-32    0      
176    80     
-32    0      
80     64     
-144   -32    
-48    -96    
304    64     
288    64     
-96    96     
112    208    
-272   48     
-608   -144   
-224   -112   
144    80     
304    -96    
192    -16    
224    160    
-96    16     
-176   -128   
-112   -48    
-96    80     
-80    64     
64     112    
144    128    
96     64     
-64    112    
80     -32    
96     32     
64     96     
-16    128    
-368   16     
80     16     
16     64     
112    16     
64     96     
16     80     
64     176    
-32    112    
0      0      
128    336    
-112   32     
96     -304   
0      400    
-48    128    
272    -160   
0      96     
112    -32    
-64    192    
256    80     
-96    -304   
-32    576    
-32    160    
-256   80     
272    32     
-96    -48    
-16    -32    
-64    192    
-272   -400   
784    16     
-320   1024   
208    -240   
160    32     
-144   112    
-16    -448   
16     -112   
32     80     
128    -160   
272    240    
16     256    
192    80     
-336   -400   
80     -80    
-112   960    
368    256    
-224   -304   
208    -304   
176    -1088  
-368   -272   
80     32     
0      96     
128    144    
208    192    
80     160    
-48    208    
176    112    
112    240    
-16    -80    
48     64     
0      -272   
224    -112   
32     48     
128    -16    
80     176    
-112   -48    
256    -176   
-16    -32    
64     160    
-16    -16    
128    32     
-64    48     
-48    32     
64     -192   
160    48     
320    416    
-304   128    
144    96     
-192   48     
176    32     
176    -144   
128    32     
-128   16     
-32    96     
-48    48     
128    96     
96     -16    
80     -48    
-128   -16    
-112   -160   
96     32     
160    32     
-128   48     
0      -16    
160    -32    
208    -1072  
160    48     
224    0      
-16    -32    
-64    16     
48     -16    
64     -48    
-16    16     
-64    -48    
0      -144   
288    -64    
256    304    
-112   208    
0      -16    
-64    48     
16     -176   
144    32     
-32    16     
16     64     
-80    0      
224    80     
64     0      
32     32     
112    80     
-32    32     
32     0      
176    -64    
0      208    
32     -112   
48     -176   
144    -112   
-112   96     
64     -256   
32     80     
-32    0      
16     80     
0      32     
-80    -32    
224    -32    
80     -48    
96     48     
-16    -48    
144    48     
-64    -288   
-80    -192   
-160   32     
-64    160    
64     -160   
400    176    
-16    176    
304    224    
144    80     
128    400    
-400   96     
-64    -352   
304    48     
352    16     
640    368    
-208   192    
48     -80    
224    -208   
384    96     
0      0      
-64    160    
144    272    
-496   608    
144    112    
336    -256   
400    -1136  
480    -64    
-768   -480   
112    -1104  
-128   -320   
192    144    
336    128    
-32    96     
-32    -80    
96     32     
192    80     
336    656    
-400   -1072  
608    384    
80     80     
-48    -464   
112    320    
416    80     
16     -256   
240    256    
32     0      
112    -112   
96     -32    
32     -320   
576    352    
64     -256   
-96    512    
64     0      
-64    -272   
-688   -224   
112    -112   
96     128    
144    -64    
128    144    
-32    -128   
0      48     
160    32     
-48    -32    
32     48     
0      -32    
96     -48    
-16    112    
176    176    
0      -64    
-304   384    
144    304    
-64    -48    
-48    -192   
0      80     
96     -48    
128    -112   
224    -448   
-96    -32    
-48    -80    
-32    192    
-16    32     
272    80     
48     48     
176    240    
-512   112    
-144   -64    
-1120  -64    
48     64     
320    80     
144    48     
96     -128   
144    -32    
-144   16     
304    -16    
64     96     
64     0      
32     -560   
-192   -240   
144    160    
-272   224    
208    48     
-96    -32    
-16    0      
272    96     
-224   -112   
112    -80    
192    -528   
-112   -80    
208    -272   
-208   96     
160    -32    
112    0      
-192   -112   
288    -416   
-176   32     
128    -64    
-320   64     
96     -32    
-1904  -32    
176    -48    
-112   -48    
128    -128   
-32    96     
272    -448   
-32    -80    
80     -128   
-128   80     
32     112    
128    32     
-64    -80    
80     48     
-240   16     
32     -80    
-176   -32    
-32    -64    
80     320    
352    32     
-32    -16    
16     -240   
-16    96     
-160   0      
64     32     
-32    -16    
16     -32    
-608   -16    
176    -64    
-80    48     
208    32     
144    48     
48     -64    
-32    -32    
160    -112   
0      64     
32     -496   
192    -32    
-272   0      
32     48     
-144   16     
48     -32    
-112   -16    
-80    -64    
-64    16     
80     112    
-1152  112    
-64    -160   
128    32     
272    192    
112    112    
-608   48     
-528   128    
-32    48     
-1056  80     
-352   16     
48     -16    
48     48     
32     16     
-128   -96    
208    -96    
-256   -32    
-2064  -16    
0      160    
-448   -48    
112    128    
112    192    
-1024  256    
-48    128    
-352   -32    
16     48     
-512   32     
32     32     
144    -96    
0      96     
112    0      
-16    32     
192    -144   
208    80     
272    128    
-560   -96    
-192   -176   
-528   -64    
48     704    
272    384    
224    -16    
400    16     
-208   288    
-2336  368    
-96    480    
-112   -512   
-224   -1072  
-64    208    
-160   704    
-256   -32    
-304   -256   
-128   -48    
16     208    
-432   0      
96     -48    
-96    64     
-128   -640   
-400   -304   
-800   352    
144    224    
-208   48     
160    -64    
-80    80     
560    352    
80     128    
-144   -48    
96     16     
-176   -16    
-16    64     
16     -32    
-80    16     
368    208    
-336   -96    
-128   -384   
144    -48    
288    256    
592    480    
32     -192   
-144   -80    
-1008  144    
608    720    
-288   144    
-640   -368   
-96    16     
-448   32     
-304   0      
96     16     
-16    -112   
-576   64     
32     -80    
-624   -224   
128    256    
-48    -48    
0      96     
16     32     
-224   16     
-192   384    
240    -128   
-48    -16    
-64    272    
208    32     
-48    -80    
-96    -176   
-288   -48    
-16    -32    
-304   -416   
320    464    
-176   -496   
-112   320    
32     -304   
-128   192    
240    1184   
176    -288   
-160   -320   
64     -112   
-64    96     
64     160    
80     -336   
48     416    
32     144    
-624   64     
0      256    
288    192    
-288   160    
-32    128    
144    80     
-176   32     
-160   -160   
16     48     
-144   -32    
-48    80     
-32    208    
128    48     
112    -112   
-224   64     
-368   176    
-160   16     
240    128    
304    176    
-304   48     
304    0      
-144   224    
192    64     
-16    192    
-96    -48    
-32    -64    
48     48     
32     0      
0      144    
320    256    
-384   144    
64     -224   
144    -208   
-224   144    
16     80     
-224   -176   
240    272    
-96    192    
208    -48    
32     -64    
128    64     
64     32     
-144   64     
64     -192   
80     -16    
48     -80    
-176   32     
16     -176   
-48    -32    
-16    48     
-32    128    
144    -368   
-256   -528   
240    -80    
-112   320    
-224   192    
-112   -128   
208    96     
-368   96     
-64    256    
64     -160   
272    -176   
0      160    
160    48     
176    32     
-176   -112   
-48    48     
16     96     
48     -48    
-304   -96    
400    32     
-128   80     
48     -16    
128    96     
-112   48     
-80    0      
16     64     
96     48     
64     32     
64     -112   
32     0      
96     80     
-128   -80    
64     -96    
416    240    
-256   304    
-176   -96    
64     -32    
64     32     
-160   176    
112    96     
0      208    
112    80     
128    32     
48     112    
-176   48     
80     0      
80     32     
0      144    
48     32     
-16    16     
-176   -144   
48     48     
0      64     
16     224    
-112   80     
208    112    
176    160    
112    80     
-80    128    
-48    -80    
-48    32     
-96    -64    
32     128    
-16    160    
-112   560    
176    896    
288    384    
528    512    
64     80     
-128   -448   
48     -160   
-192   320    
-480   -416   
64     -656   
432    752    
560    496    
256    -176   
96     64     
-144   -80    
-32    32     
32     48     
320    16     
64     48     
64     -480   
592    1216   
-528   -496   
64     -208   
192    288    
384    -48    
480    48     
0      -240   
-96    -592   
-512   48     
-32    432    
-320   -144   
-64    -192   
320    48     
416    160    
80     -48    
64     192    
-400   -816   
-112   160    
928    624    
64     288    
272    -160   
16     -224   
64     -144   
80     -48    
160    -96    
304    80     
32     112    
-64    -64    
112    96     
0      -192   
-32    144    
80     -32    
16     -48    
304    -16    
144    0      
0      -32    
192    32     
64     16     
160    48     
304    240    
-224   -80    
80     80     
48     -80    
96     16     
80     -32    
96     64     
16     -464   
-80    48     
-48    -848   
32     224    
112    48     
16     64     
-32    -32    
160    48     
0      48     
176    0      
160    48     
240    32     
-16    -16    
192    -192   
48     80     
16     -32    
16     -32    
-272   -128   
96     96     
64     32     
272    16     
-80    32     
-48    -16    
416    80     
-32    192    
160    -64    
96     -256   
-304   64     
48     -112   
48     64     
160    -96    
240    224    
-32    -32    
80     -32    
48     16     
96     32     
48     -48    
320    -144   
-304   -32    
240    112    
0      16     
128    -240   
32     0      
-128   -96    
176    144    
16     0      
80     32     
128    -528   
32     -928   
16     -48    
144    -960   
-32    -16    
64     16     
48     -64    
96     16     
96     -496   
96     -64    
-16    -112   
160    -192   
96     112    
96     112    
208    -304   
0      -32    
-80    -880   
16     80     
208    -16    
-16    -176   
-208   -64    
304    32     
-128   -48    
192    -224   
96     80     
144    -592   
144    32     
16     64     
16     -64    
0      -32    
176    48     
32     96     
-16    64     
96     0      
160    -176   
-432   -176   
80     16     
128    32     
-80    -112   
-16    0      
208    -240   
96     -144   
32     112    
192    -16    
64     -64    
-48    192    
-48    32     
-32    0      
-112   -16    
0      32     
-128   96     
64     96     
128    160    
-64    -176   
80     0      
-96    -48    
64     -256   
128    160    
-64    64     
48     0      
-96    -16    
80     -192   
-16    -96    
-80    -96    
144    240    
-400   -416   
80     96     
-912   48     
80     -32    
-16    64     
-112   -960   
160    48     
128    -240   
-208   32     
128    96     
-240   -128   
240    96     
144    -16    
-160   64     
128    0      
-240   -144   
112    -288   
-1056  256    
-720   -80    
-192   144    
384    -656   
-240   -1392  
928    288    
176    304    
48     -48    
-16    16     
-496   -208   
-496   160    
-64    224    
-112   -176   
16     96     
224    -144   
384    624    
-160   272    
-160   -928   
224    48     
112    608    
-80    -112   
144    -192   
128    -80    
192    128    
-128   -64    
96     -16    
64     -48    
-64    -80    
-128   -32    
-224   -464   
-160   96     
-32    208    
-448   -320   
160    -352   
224    112    
192    144    
112    48     
80     -528   
208    -80    
-256   -16    
32     -48    
-112   -96    
144    112    
112    272    
48     464    
-560   -272   
80     -640   
-128   192    
272    64     
-16    32     
32     -224   
48     224    
-288   32     
96     -176   
-336   -48    
48     -64    
0      272    
160    128    
-160   64     
176    192    
-208   80     
16     -112   
80     -528   
176    -224   
96     -80    
-928   -208   
0      -128   
-48    16     
-1776  0      
96     -64    
-1008  -80    
144    -112   
208    -160   
-240   -112   
-80    -160   
-32    -208   
-752   -208   
0      -496   
48     -336   
80     -448   
-176   -752   
304    -304   
-96    -48    
-32    160    
-16    -96    
-416   144    
-240   -496   
-1728  -128   
48     128    
96     0      
-80    16     
32     -112   
-224   416    
-240   -192   
112    192    
128    -16    
-32    64     
64     -176   
96     -48    
-128   480    
-64    240    
16     48     
176    -144   
-32    -16    
208    -96    
-160   80     
-32    -16    
-80    16     
-176   -16    
64     32     
-112   48     
0      112    
16     128    
-272   -112   
160    -176   
32     -32    
-144   80     
-96    144    
96     128    
-752   64     
-80    0      
16     48     
48     48     
192    -32    
-64    64     
64     0      
128    256    
-192   240    
16     -176   
16     -208   
0      16     
64     48     
-480   -80    
-128   -16    
-720   -112   
0      112    
-32    -128   
48     96     
-160   176    
256    32     
-16    -400   
64     -224   
-128   -128   
-144   64     
-16    32     
224    288    
-288   336    
-128   -128   
48     240    
-176   64     
128    416    
-240   64     
64     -64    
-48    -144   
-176   -32    
-112   -16    
0      -144   
224    -304   
-192   -240   
128    -16    
-176   0      
-32    160    
-368   48     
256    0      
-96    -112   
-48    -208   
-416   -16    
288    352    
-208   432    
208    144    
368    224    
-192   192    
-208   -32    
-128   -112   
-160   -160   
-160   32     
112    -16    
80     -144   
256    -80    
-224   96     
-80    320    
-192   224    
48     128    
144    128    
-16    96     
-160   -160   
-112   -208   
80     272    
240    192    
64     80     
-48    48     
576    416    
-384   -112   
112    112    
-128   288    
-32    -288   
208    256    
-48    48     
176    368    
-48    48     
336    528    
-576   -32    
-96    48     
96     48     
208    -144   
-128   -48    
96     144    
-240   -272   
384    -640   
80     -432   
-128   64     
256    608    
-256   -256   
-160   -144   
192    304    
-368   112    
32     0      
-272   16     
112    16     
240    32     
-192   -48    
32     32     
-112   64     
-16    128    
-480   -64    
-96    -160   
448    -176   
384    -64    
288    112    
-144   96     
192    304    
-512   48     
-368   -96    
224    16     
144    16     
256    16     
256    48     
-112   112    
-48    176    
-384   -256   
240    -320   
-192   64     
160    128    
352    112    
608    112    
-176   80     
-192   -16    
-240   -176   
192    -96    
0      144    
112    96     
-32    32     
-144   -32    
176    192    
-432   -16    
288    80     
-32    16     
160    80     
112    80     
0      0      
224    32     
-144   -32    
64     64     
48     48     
144    128    
-64    -48    
16     80     
-16    16     
-16    32     
160    0      
64     208    
240    -16    
-128   32     
-32    16     
32     48     
544    208    
-544   32     
416    -128   
-160   112    
192    -64    
192    -32    
16     128    
32     -176   
-64    16     
-304   16     
352    -80    
-96    48     
208    64     
96     0      
-32    -32    
16     48     
32     160    
-144   16     
240    32     
-16    64     
96     32     
80     -32    
-80    32     
160    -32    
-128   32     
-64    -480   
240    16     
64     112    
16     96     
-32    80     
80     0      
160    -64    
96     112    
16     80     
-16    96     
-64    16     
-64    48     
-16    16     
160    -272   
0      48     
32     -784   
224    48     
112    32     
-144   32     
176    0      
32     0      
-96    64     
80     112    
32     -16    
368    128    
-400   -16    
-32    -48    
160    64     
0      32     
368    48     
128    -32    
80     64     
-160   0      
192    64     
-144   0      
288    32     
-368   -16    
128    -48    
224    48     
-96    80     
-48    -32    
48     16     
208    80     
-80    0      
96     32     
160    64     
-48    32     
48     -1056  
400    496    
-384   -240   
-32    -384   
160    96     
128    224    
-16    256    
80     -288   
-32    64     
16     64     
224    0      
304    -32    
-112   -80    
16     16     
-64    16     
96     -192   
128    32     
208    -80    
-32    176    
16     -336   
320    208    
96     -80    
48     480    
80     -288   
240    -80    
64     240    
-48    80     
-192   -48    
112    -496   
32     416    
304    16     
-16    128    
-96    -272   
160    -128   
336    608    
-240   -1008  
-112   112    
160    256    
304    -224   
176    480    
-32    -432   
96     80     
48     96     
112    80     
16     96     
-16    -320   
-112   64     
-64    96     
48     32     
160    80     
208    176    
-112   -144   
32     -432   
112    -256   
144    -160   
32     192    
16     144    
0      -144   
0      -304   
-96    96     
-192   -416   
128    -80    
-256   -80    
432    -1008  
192    144    
256    -1152  
384    -976   
-96    -128   
-160   -592   
-176   -16    
-208   -688   
192    -96    
256    16     
144    0      
112    112    
0      160    
-144   0      
-32    64     
32     32     
384    -160   
-48    -288   
-352   -208   
-128   -256   
-48    -48    
224    -16    
256    -608   
80     -336   
-48    -624   
-16    -80    
16     -96    
384    128    
192    128    
240    0      
48     -288   
64     64     
-32    128    
16     16     
-880   -176   
176    16     
80     80     
64     -32    
160    -48    
96     -208   
80     0      
-16    -256   
144    32     
160    -144   
-80    -96    
32     32     
-48    64     
-96    -128   
272    -128   
-160   -128   
96     144    
-16    160    
64     80     
112    256    
64     -144   
96     64     
192    -496   
144    176    
192    80     
32     -128   
256    -272   
-48    -272   
-272   -208   
128    -224   
-320   224    
-48    -304   
224    -464   
240    -752   
-80    -560   
80     -272   
-272   -224   
80     -864   
-224   -368   
208    240    
208    272    
-112   112    
288    -224   
-240   -400   
-176   -32    
-576   -32    
-80    288    
-160   160    
128    448    
16     128    
16     -224   
-16    -128   
16     -352   
176    0      
-48    -400   
64     -16    
-16    -96    
32     -112   
112    -48    
48     -32    
112    -64    
32     32     
-16    -80    
-96    -256   
128    -48    
192    0      
48     16     
192    -144   
0      416    
256    -592   
-352   96     
16     112    
-32    64     
-448   -192   
304    32     
-768   -16    
176    48     
-608   -112   
368    128    
256    160    
-80    64     
240    -224   
-208   160    
112    64     
32     -368   
160    -16    
-96    -144   
160    176    
-32    16     
-16    -96    
128    -144   
32     32     
-96    -128   
32     -160   
-176   -64    
48     -64    
48     0      
144    -96    
-16    32     
144    -208   
0      -16    
96     -160   
80     -176   
16     -208   
64     -224   
-112   -240   
-80    -176   
208    16     
-64    128    
-256   496    
-496   256    
256    288    
-160   16     
-352   -256   
-128   512    
-352   -112   
-208   -224   
-1232  208    
0      -96    
96     224    
-80    0      
320    -32    
-192   288    
-1584  32     
96     16     
-160   -80    
176    160    
-272   -544   
-352   576    
0      -496   
-224   672    
-96    160    
-128   -208   
-48    176    
-1104  -224   
-256   -224   
48     272    
-240   -256   
96     -304   
416    528    
-16    240    
16     -80    
-32    -80    
-352   -272   
-112   -16    
-176   128    
-48    -16    
-80    80     
80     64     
-304   -112   
224    112    
-464   -80    
-48    112    
-432   832    
176    752    
96     -96    
-96    -192   
-144   -128   
-160   -160   
320    144    
-192   240    
240    144    
336    -368   
64     -64    
-960   -48    
-96    0      
-1312  112    
-160   -128   
-32    -64    
160    96     
112    -64    
240    -144   
256    80     
0      128    
-112   16     
-32    32     
-320   16     
-16    32     
176    32     
-96    -128   
224    -160   
48     32     
336    64     
-16    -80    
32     16     
0      32     
-48    48     
192    -64    
-96    -96    
32     192    
-96    48     
-80    -208   
-80    -16    
240    176    
-480   -48    
112    -16    
-272   64     
672    480    
-2048  -32    
208    -80    
240    64     
0      16     
144    -64    
416    208    
-672   -32    
-352   -64    
256    128    
0      -16    
48     0      
-272   -96    
48     32     
-272   -16    
48     96     
-720   0      
-48    -224   
32     64     
-64    16     
0      32     
32     64     
48     16     
48     48     
48     32     
-208   -144   
48     -112   
-48    160    
208    32     
-48    16     
112    48     
-576   224    
-32    80     
-48    -48    
-304   -32    
80     -48    
-80    128    
-64    96     
-256   -160   
16     -64    
-224   176    
192    80     
-160   80     
112    -16    
-48    -32    
16     96     
48     32     
-96    96     
-48    -16    
32     64     
64     0      
32     96     
-80    208    
-16    -208   
-144   -144   
416    288    
-208   96     
-64    -112   
48     48     
-288   176    
144    160    
-32    -112   
96     -32    
176    48     
-128   0      
48     64     
-16    -64    
-32    -16    
160    -112   
-64    -112   
96     64     
-32    160    
-64    0      
-16    112    
16     -64    
-144   -240   
80     80     
64     32     
-48    -48    
-16    -80    
272    -288   
-240   16     
224    160    
-64    16     
208    0      
-80    -240   
48     80     
-176   -16    
112    0      
-112   32     
48     -48    
16     80     
64     -144   
-112   -144   
352    336    
-144   64     
160    -32    
160    304    
-208   -64    
-96    -80    
16     -16    
160    80     
-48    80     
112    -224   
128    128    
112    336    
-208   80     
-64    832    
368    -384   
224    -48    
-144   48     
-272   -464   
64     -80    
-96    144    
304    640    
112    112    
-112   208    
80     -16    
320    144    
-48    -160   
-256   -336   
-32    48     
192    96     
128    -16    
208    224    
160    480    
-112   144    
-48    32     
32     -16    
64     16     
-128   96     
160    112    
-144   0      
-176   -304   
128    32     
-112   -128   
192    96     
-48    240    
-208   96     
96     -144   
112    -176   
192    128    
-64    48     
-48    -192   
64     64     
-160   -16    
96     80     
64     64     
32     -128   
48     192    
256    272    
48     304    
-176   224    
96     528    
-608   224    
192    -192   
176    -16    
112    80     
80     -48    
-144   -272   
128    -80    
96     192    
-448   112    
-144   32     
176    -96    
240    -496   
192    32     
112    80     
80     -48    
64     -32    
160    -128   
0      224    
176    160    
-224   -128   
32     80     
48     64     
-16    -16    
112    48     
224    -128   
48     80     
192    -208   
0      -48    
176    -192   
192    -16    
-48    -128   
128    -96    
32     32     
192    304    
-32    160    
128    112    
-192   -224   
-256   -336   
48     -432   
160    -384   
208    48     
112    -544   
112    16     
-176   -1520  
-208   32     
0      0      
48     64     
0      112    
-80    -32    
400    -32    
96     160    
192    160    
-208   0      
-32    224    
96     32     
96     80     
64     32     
128    240    
96     -448   
80     48     
128    80     
176    96     
-96    -32    
96     -192   
-32    -160   
128    128    
-64    64     
112    176    
336    64     
160    -224   
144    16     
-80    -304   
96     48     
-352   -464   
80     -304   
96     -336   
144    -96    
-256   0      
192    272    
-432   -32    
144    -656   
208    -144   
48     -288   
160    16     
16     16     
32     -320   
80     -256   
240    -464   
-16    -352   
96     -32    
-112   -96    
96     16     
96     -48    
-32    544    
368    0      
-192   128    
640    -112   
-272   224    
48     240    
-48    -80    
64     448    
240    112    
-192   0      
320    -528   
80     -256   
160    -32    
-112   -320   
-80    -160   
-48    -672   
-32    -224   
112    -128   
128    -16    
96     -64    
-112   -1056  
352    64     
80     0      
48     32     
-192   -560   
0      16     
160    -160   
128    -48    
160    64     
-64    -128   
-224   176    
400    128    
-272   -288   
-208   -256   
128    128    
272    -368   
192    48     
-240   160    
224    128    
-256   -368   
224    160    
224    96     
-400   -192   
144    -96    
0      160    
-272   -48    
-208   -208   
288    64     
16     16     
64     -272   
144    144    
48     -176   
0      -112   
80     128    
-96    -144   
224    240    
192    48     
-144   -304   
-16    176    
48     112    
-240   -32    
-224   -320   
-160   112    
128    32     
16     96     
176    -272   
-128   -160   
32     0      
112    -32    
112    -160   
-96    -32    
176    -176   
144    304    
48     0      
336    64     
-304   -208   
48     -32    
-288   96     
32     -80    
-1136  -48    
112    16     
224    192    
32     -160   
32     32     
128    320    
64     96     
256    -208   
-32    16     
128    -16    
-96    -112   
-128   32     
32     -48    
-192   -16    
48     96     
-160   240    
208    144    
176    16     
16     -160   
-32    16     
32     -336   
-64    0      
-112   -32    
272    -16    
0      32     
-176   -800   
768    -784   
608    80     
-256   224    
160    80     
-320   -16    
-704   -144   
-656   -224   
336    -304   
-384   -224   
176    80     
-256   -160   
640    -928   
208    144    
-320   96     
-208   -240   
-96    80     
-32    192    
-432   0      
144    0      
-960   -80    
496    -64    
-176   128    
-400   -48    
16     48     
-48    -160   
576    -64    
544    48     
320    -80    
256    240    
-208   32     
-32    64     
0      -16    
-144   32     
144    -80    
-128   0      
400    -144   
272    128    
-592   -64    
-80    -128   
240    -176   
48     112    
-80    -16    
-112   -48    
128    96     
-240   32     
-208   -64    
16     32     
-256   -16    
-96    -160   
320    -64    
144    16     
16     96     
-224   0      
-416   0      
-1024  -144   
176    80     
32     -32    
32     48     
0      96     
-224   -96    
-80    -128   
144    80     
-64    0      
16     48     
80     0      
-144   -112   
80     112    
-688   -112   
160    128    
-128   -16    
0      32     
-64    64     
-352   -32    
-48    32     
288    304    
-304   192    
-96    -16    
-272   32     
448    64     
-368   48     
96     -48    
128    48     
112    64     
-80    224    
144    96     
-224   48     
-16    16     
-224   -64    
48     272    
144    288    
-48    64     
-192   -16    
-112   -64    
144    -192   
80     -96    
-256   0      
32     96     
128    272    
112    336    
-160   -128   
-272   -288   
0      -112   
112    64     
-64    224    
0      -336   
64     -192   
-16    192    
-192   -32    
-368   -96    
-16    32     
16     48     
112    160    
32     -160   
-128   -144   
32     208    
-64    -112   
176    176    
-240   -32    
320    64     
-128   16     
-160   272    
-368   80     
384    992    
-80    688    
-432   -1136  
96     496    
64     320    
256    -80    
-240   -240   
48     80     
-64    256    
256    96     
-64    -144   
-32    -240   
32     -64    
-176   -48    
-144   -112   
32     192    
-112   80     
112    160    
-1200  -32    
16     16     
144    32     
-96    -16    
80     -80    
-80    -128   
-64    -16    
128    -96    
160    0      
-256   -240   
80     -192   
-80    16     
-64    -48    
-352   -208   
112    -96    
-448   32     
80     -128   
-32    32     
16     0      
-176   64     
-128   -32    
-32    96     
112    256    
80     160    
80     -112   
272    32     
-320   0      
0      -224   
-368   -48    
192    48     
-624   80     
-96    80     
16     16     
0      80     
-48    80     
-144   112    
64     -16    
0      48     
176    0      
-336   -112   
112    32     
-560   64     
-80    80     
-288   16     
384    176    
160    -32    
32     0      
-48    32     
-160   -16    
64     -16    
32     80     
160    96     
-176   -16    
256    48     
-192   48     
-32    -96    
64     16     
192    304    
-176   -32    
384    -128   
160    96     
96     80     
160    16     
-176   -144   
144    -48    
-144   192    
-272   16     
16     160    
176    64     
-32    -256   
384    32     
-416   112    
-240   80     
-224   -112   
-240   -112   
-96    96     
-144   160    
96     112    
112    144    
160    -16    
-16    -128   
-16    16     
-80    112    
-32    128    
144    -112   
-112   -16    
-352   -48    
64     16     
240    0      
-16    48     
-192   224    
112    224    
96     192    
-32    -32    
-32    -16    
-80    48     
-176   -16    
-176   32     
-16    -16    
-16    64     
176    80     
224    144    
144    128    
0      96     
-304   -64    
160    -304   
96     16     
48     416    
160    160    
-64    16     
32     64     
224    128    
-96    144    
-32    96     
-128   96     
48     0      
-192   -96    
0      -592   
96     16     
-80    -80    
32     16     
128    160    
-176   -576   
352    80     
32     416    
32     -192   
352    224    
16     96     
32     -144   
-288   288    
-64    -64    
-144   -464   
144    48     
192    0      
80     80     
-64    272    
-192   96     
16     272    
-96    -144   
144    496    
112    256    
-512   0      
448    -272   
144    176    
-48    -16    
224    -176   
16     64     
192    16     
-16    144    
-32    -208   
48     -96    
160    224    
192    432    
-304   -288   
-16    -128   
48     16     
320    192    
0      -112   
-64    -160   
16     96     
-112   -256   
-176   912    
224    -784   
-64    -224   
-112   -160   
320    32     
-96    224    
64     -16    
64     144    
192    80     
-16    16     
64     -160   
-160   -64    
192    80     
-80    32     
320    192    
-304   -224   
144    -144   
128    304    
48     -48    
96     -16    
112    -48    
0      0      
112    -144   
48     0      
64     -48    
304    16     
-64    96     
112    32     
112    64     
0      48     
128    64     
144    144    
-80    -32    
160    -96    
160    32     
288    -208   
-240   -48    
16     -16    
64     48     
16     48     
80     80     
112    16     
176    48     
48     80     
-48    -16    
96     96     
-32    -64    
128    16     
192    -224   
-32    96     
112    -352   
144    160    
-128   -32    
144    -16    
16     16     
96     64     
48     0      
48     48     
-16    32     
240    -96    
128    16     
-32    -32    
80     112    
160    16     
144    32     
112    16     
176    64     
160    192    
-96    64     
48     -96    
64     16     
-176   -224   
112    -240   
208    64     
48     32     
-128   0      
64     16     
256    176    
-96    -112   
0      64     
112    -288   
64     -80    
-80    16     
80     0      
32     48     
-32    -736   
320    16     
240    -32    
208    64     
-128   64     
-144   -80    
176    -80    
112    144    
-32    -96    
-16    96     
128    384    
176    -320   
512    -160   
256    -800   
-224   80     
-1504  -288   
-112   -64    
-560   -64    
-192   -224   
16     -336   
528    -384   
400    -16    
352    128    
336    0      
-144   0      
-48    -48    
64     -224   
176    64     
160    -144   
512    320    
-400   304    
144    64     
48     -176   
352    -128   
208    0      
-112   -672   
400    336    
-256   -320   
272    80     
64     32     
272    -64    
-16    0      
48     -16    
32     32     
272    32     
144    304    
-400   16     
0      -64    
160    -128   
96     -176   
208    -80    
-224   -16    
192    -192   
32     -96    
-192   -80    
-112   64     
-80    -112   
272    16     
-128   16     
-224   32     
-400   -80    
48     -32    
-960   -64    
-160   80     
272    64     
128    -96    
80     -96    
96     -176   
-16    48     
80     -416   
-112   -128   
64     32     
-80    48     
48     -32    
32     -64    
-32    -128   
96     -64    
16     48     
-80    -80    
-32    -80    
-112   -112   
-144   0      
32     -96    
128    48     
-16    -544   
144    -208   
64     32     
80     32     
-96    -32    
368    176    
-224   -112   
48     16     
-352   128    
-48    -320   
-1664  -176   
96     48     
32     128    
-80    -576   
16     -64    
400    112    
96     -192   
-192   -400   
192    -592   
208    976    
-32    464    
-96    -640   
-32    576    
-16    -656   
144    -80    
-304   256    
32     -16    
160    96     
48     16     
16     176    
160    -240   
80     -16    
16     -256   
48     -16    
336    560    
-416   -752   
-384   -192   
304    -448   
-176   -208   
272    464    
-16    208    
144    384    
32     64     
-320   -496   
0      -256   
208    -384   
128    480    
-16    192    
48     128    
240    624    
-336   192    
-400   48     
96     -144   
-304   -144   
304    -272   
-96    0      
16     -240   
-80    0      
16     -352   
64     0      
-32    144    
-672   320    
-96    96     
-32    -80    
160    272    
-32    128    
32     -80    
64     -128   
-112   80     
128    144    
-656   0      
-528   -48    
0      160    
-176   176    
-64    96     
-320   -176   
-496   -96    
16     64     
-160   96     
160    16     
-176   288    
160    128    
368    0      
64     64     
-48    -48    
-80    -16    
-240   -48    
96     112    
-224   -96    
32     112    
-272   -32    
-224   -32    
80     128    
-192   96     
-32    144    
16     16     
32     -16    
-1616  -32    
-176   -16    
-192   -64    
160    -64    
-32    -64    
64     112    
-128   -96    
-128   48     
-64    -64    
96     -32    
-32    80     
32     96     
112    144    
-384   144    
-64    -16    
16     48     
160    -80    
16     32     
16     32     
-256   -64    
304    80     
-224   -64    
-48    -64    
96     -96    
-96    -80    
16     176    
-144   0      
48     -48    
-192   48     
-224   128    
-112   16     
-48    64     
-1712  -160   
416    -64    
48     112    
-208   160    
-64    112    
-48    160    
-96    64     
-176   0      
-224   -352   
112    -208   
-144   32     
-512   -128   
-224   -176   
-80    -32    
16     176    
-320   112    
-176   64     
-64    -128   
-48    -176   
160    -304   
288    144    
-32    0      
64     -192   
96     -128   
96     48     
32     48     
-208   -16    
-272   112    
-192   -240   
208    -80    
640    448    
-304   48     
-272   80     
176    816    
-16    368    
320    176    
-304   -192   
64     0      
304    -16    
-16    -224   
160    -144   
-272   -48    
-224   -272   
-400   -80    
64     656    
-16    16     
-144   80     
-1296  -192   
-80    -112   
48     400    
48     80     
-112   112    
96     128    
-80    16     
-160   -256   
-128   -32    
-48    80     
144    80     
32     176    
-176   -352   
-112   64     
-48    64     
80     -64    
128    448    
-16    -48    
16     -176   
-80    -96    
-112   -240   
-128   48     
96     528    
32     240    
48     -48    
-16    -48    
-112   -80    
272    160    
-32    -64    
256    -32    
48     112    
-112   80     
-64    32     
-224   -368   
-304   -672   
64     592    
-16    704    
112    448    
384    192    
0      320    
416    368    
-192   16     
80     128    
80     -64    
-320   -16    
16     192    
0      -16    
160    176    
-176   48     
16     32     
96     176    
-48    192    
-16    80     
48     32     
-192   80     
144    48     
-128   -144   
80     32     
-32    112    
48     80     
64     80     
48     0      
48     16     
-48    16     
128    64     
192    32     
-96    64     
160    0      
16     112    
0      -16    
112    80     
-48    64     
176    160    
-32    160    
-144   -16    
400    64     
-128   -16    
80     112    
0      48     
0      -48    
-16    32     
160    48     
-96    -16    
192    128    
-160   48     
128    64     
-144   -16    
64     -192   
128    96     
-256   0      
112    0      
32     48     
16     32     
144    128    
-16    -32    
96     80     
-144   0      
-16    0      
176    64     
-96    64     
144    64     
80     -240   
-192   -640   
80     96     
48     112    
144    96     
32     0      
128    -32    
256    64     
-48    0      
144    48     
-64    96     
-144   32     
32     0      
16     48     
32     -32    
-32    144    
144    -80    
96     32     
128    32     
80     32     
272    208    
-144   128    
0      -48    
96     32     
-48    -288   
96     -128   
-32    96     
80     80     
112    -16    
208    112    
-96    -80    
0      -160   
128    80     
0      -112   
48     -240   
-240   -176   
-32    144    
144    128    
304    128    
0      32     
192    -64    
64     48     
-112   -16    
128    80     
-304   -640   
160    -16    
192    160    
352    -176   
256    -864   
80     -32    
496    160    
128    64     
416    48     
208    -208   
-48    112    
-320   -16    
-48    -64    
64     176    
288    144    
64     128    
-240   -16    
128    -112   
112    112    
208    64     
192    224    
-80    208    
272    32     
-304   -208   
-32    48     
80     -80    
128    -64    
160    -16    
464    224    
112    32     
-144   0      
128    144    
-48    -96    
96     96     
-64    -272   
48     224    
-48    -944   
256    -32    
-160   80     
176    160    
224    288    
176    96     
304    -32    
160    -64    
176    144    
-80    112    
-208   80     
176    -48    
-64    0      
368    -144   
0      -176   
192    -128   
80     112    
-288   -16    
256    -96    
-16    -48    
288    112    
-96    16     
208    -256   
192    96     
144    64     
0      80     
16     128    
0      -400   
32     -256   
192    176    
-208   -48    
176    48     
16     0      
224    32     
-160   -288   
192    352    
48     -48    
48     -16    
80     272    
-16    128    
192    -224   
-272   16     
288    224    
-192   448    
256    256    
0      -512   
368    608    
-48    -608   
-16    -560   
112    592    
48     -544   
-112   112    
48     -352   
-96    -848   
272    304    
-160   -48    
544    -288   
176    -288   
96     272    
112    -96    
176    -32    
-272   -256   
160    208    
-64    112    
240    0      
-752   64     
0      128    
96     -128   
224    -496   
32     -256   
176    -112   
272    -64    
-144   160    
48     -48    
352    144    
-112   80     
224    -96    
-160   -128   
224    -384   
-256   -160   
-320   -80    
64     -144   
-16    -208   
-96    16     
0      -192   
80     -224   
16     -32    
128    -320   
560    304    
-288   336    
-80    -352   
-192   -592   
128    32     
-16    -144   
112    64     
-32    128    
-128   128    
-288   112    
128    96     
0      -96    
48     -256   
0      -160   
48     16     
176    176    
128    144    
224    48     
-32    -224   
64     -80    
96     0      
-192   -96    
-128   -16    
-112   -160   
-944   -160   
176    48     
192    16     
144    -64    
-48    -48    
16     -112   
160    48     
-16    -256   
-192   -176   
-16    -384   
-112   -16    
160    -32    
64     0      
-192   0      
16     -144   
-496   0      
224    -16    
-1424  -144   
32     -80    
-288   32     
96     -288   
-64    80     
32     -1200  
144    48     
32     48     
-80    112    
-48    -32    
-16    -16    
-64    -128   
128    -272   
-208   16     
0      32     
-224   80     
96     -128   
-32    64     
48     -16    
0      560    
480    144    
-48    -48    
-80    96     
-16    -368   
-96    -144   
80     -96    
-96    64     
32     -64    
176    -96    
0      -80    
-352   0      
96     32     
-112   288    
80     208    
304    128    
144    -160   
-80    -48    
-112   0      
112    48     
-224   144    
416    -64    
160    -48    
-32    96     
-256   48     
512    448    
-752   528    
-48    112    
48     -48    
288    48     
160    32     
-224   -400   
-96    192    
-304   112    
80     -160   
16     -400   
336    -176   
96     -160   
432    176    
-256   -144   
112    -16    
-176   208    
416    -64    
-208   -176   
-2048  560    
-544   -16    
-2064  -240   
-496   -48    
176    112    
-320   176    
400    -112   
-832   96     
-592   -144   
144    -96    
-48    64     
16     -208   
-416   80     
-1008  -144   
64     -80    
48     336    
256    96     
208    -224   
80     -32    
16     160    
-1104  336    
48     288    
-1248  -128   
-272   0      
208    -128   
-80    -112   
96     32     
16     80     
-368   -48    
64     368    
-16    64     
128    0      
-208   80     
-144   48     
48     -16    
-160   -32    
32     -16    
-64    48     
-64    -16    
-800   -16    
-304   -80    
-128   -48    
0      112    
-176   32     
64     32     
-80    -112   
-176   -112   
80     48     
-240   -112   
144    -64    
-96    0      
-64    -96    
-352   64     
112    160    
-768   48     
128    32     
-48    -48    
32     -64    
224    32     
240    192    
-64    48     
-32    -32    
-416   -64    
48     48     
-112   -80    
16     -96    
-96    -48    
-160   128    
-16    64     
16     32     
80     0      
-544   -16    
128    16     
16     -48    
-128   112    
-80    64     
128    -48    
128    0      
-80    128    
80     32     
-208   0      
-80    32     
-160   16     
176    64     
-160   48     
16     64     
-256   0      
64     32     
-144   -48    
-32    16     
64     -32    
16     64     
80     32     
32     0      
-144   -176   
224    -48    
-64    64     
0      128    
0      16     
-48    32     
192    64     
-784   -64    
80     96     
64     32     
-144   -16    
-48    0      
-48    16     
-32    48     
64     112    
-80    -32    
-80    0      
160    80     
64     112    
-176   -64    
-160   -80    
32     128    
-560   -48    
272    32     
64     64     
-16    48     
-80    16     
-16    48     
-208   0      
32     16     
32     -48    
16     -304   
144    96     
-112   0      
80     0      
-64    64     
-48    16     
96     0      
96     64     
48     -32    
48     16     
-32    32     
128    208    
112    96     
-112   80     
80     112    
-128   32     
-32    0      
-128   -96    
80     16     
-96    -112   
96     -64    
-160   -32    
64     -64    
-80    -128   
-96    48     
32     176    
-80    -112   
16     -48    
-48    0      
-96    32     
96     208    
0      160    
-256   -48    
-16    32     
-160   0      
64     64     
-144   -48    
32     0      
48     80     
224    128    
144    16     
240    -16    
-544   32     
736    1152   
-912   112    
-160   -528   
304    128    
432    32     
384    -80    
-272   -416   
240    80     
-16    336    
-528   -704   
-32    272    
-160   112    
64     48     
192    160    
32     144    
-176   64     
0      -64    
224    -16    
400    112    
32     48     
-128   -320   
-160   368    
-512   320    
-176   -256   
160    32     
16     64     
400    224    
240    208    
-608   -272   
-288   -48    
-208   48     
352    368    
-224   32     
-288   -352   
320    1040   
-240   -64    
-336   96     
368    96     
144    32     
1056   736    
-352   -496   
-32    -128   
128    240    
-144   0      
112    -16    
176    112    
288    -32    
48     80     
144    16     
-144   16     
-32    -352   
48     464    
-16    -640   
-16    -32    
240    208    
160    208    
112    -112   
224    16     
-224   64     
0      -192   
-64    192    
-80    -272   
-64    -416   
48     224    
64     224    
16     -160   
192    160    
96     -80    
96     144    
192    896    
48     -80    
16     -304   
-64    -96    
-16    144    
-32    0      
64     -448   
-32    0      
-80    -48    
-128   -448   
448    -144   
-112   -304   
208    -32    
32     -544   
0      -144   
128    -80    
96     -16    
144    0      
-48    256    
48     -32    
192    -224   
0      -96    
96     48     
48     -16    
-112   0      
80     -64    
-48    64     
48     112    
0      128    
208    -208   
-64    -832   
64     64     
144    64     
96     -128   
80     -224   
128    304    
48     0      
176    128    
-64    -144   
128    -48    
-176   -144   
240    -256   
-32    96     
-48    -32    
80     80     
96     -448   
288    0      
64     -48    
32     192    
-16    -160   
96     128    
-256   -288   
496    -192   
-144   160    
176    224    
0      32     
-224   704    
640    208    
0      96     
224    304    
-16    -352   
192    16     
192    -112   
0      304    
80     -96    
-128   224    
0      -16    
240    48     
304    -16    
-32    16     
-192   32     
-96    -112   
80     112    
32     -128   
160    144    
400    288    
-80    432    
-112   -96    
-80    -48    
64     0      
208    112    
128    32     
64     -16    
272    160    
-176   -112   
-80    -48    
208    -48    
-80    288    
80     16     
256    -16    
96     -464   
-112   112    
-96    -784   
144    -16    
-224   -96    
144    -176   
240    96     
0      272    
96     144    
240    80     
336    -16    
128    -112   
-16    80     
-48    -208   
-80    160    
144    -144   
80     -112   
240    -192   
48     -1104  
96     -80    
-16    -656   
112    -48    
64     -80    
16     -208   
48     32     
-176   -320   
96     80     
304    -1136  
-64    -160   
176    144    
-176   -160   
32     -32    
80     -96    
224    -384   
-32    112    
-112   -96    
32     144    
-576   -32    
112    -64    
304    192    
-272   0      
48     32     
160    -960   
256    -112   
352    240    
112    -128   
304    -368   
368    464    
160    -128   
-32    -192   
-112   -736   
-16    288    
-528   -16    
-368   -288   
160    160    
80     16     
224    32     
112    96     
256    112    
128    -400   
32     0      
-16    -352   
-128   -64    
208    80     
-112   240    
-160   96     
-192   -880   
-144   112    
-48    -224   
-1584  -352   
-208   -112   
64     -16    
-32    -80    
400    -112   
288    -224   
240    96     
96     -176   
-352   -192   
128    16     
-192   -32    
-32    -16    
208    16     
-320   -48    
432    96     
-368   16     
-96    -112   
176    -16    
96     -128   
64     -64    
-304   -272   
448    80     
-176   -864   
-272   -32    
240    -48    
144    48     
-320   -272   
656    -176   
-64    -16    
32     32     
-352   -160   
-64    48     
-48    80     
-64    -48    
112    32     
80     -112   
-16    64     
288    128    
-80    -48    
256    -48    
80     96     
208    32     
208    80     
-192   -80    
240    0      
-176   -64    
96     -64    
-416   16     
144    96     
-224   0      
144    16     
32     64     
368    -448   
-80    -96    
144    0      
-16    64     
144    80     
208    0      
-16    -96    
80     32     
-288   16     
144    -80    
-208   0      
144    32     
-208   -48    
352    32     
-48    16     
192    -224   
160    16     
-384   32     
48     -144   
-128   -144   
352    176    
144    160    
-272   80     
80     -224   
112    -112   
-1920  80     
144    -160   
176    -48    
80     144    
-48    16     
-16    32     
64     -16    
-528   -48    
-64    16     
48     16     
16     -48    
32     48     
32     -16    
-64    -16    
112    32     
-400   -96    
32     -112   
256    32     
-224   -16    
128    32     
-176   -96    
-608   -32    
-112   -48    
-336   64     
128    64     
-384   80     
-224   -32    
128    -64    
-144   -176   
-192   -208   
-48    112    
-80    -48    
352    48     
-256   -64    
32     96     
96     96     
-560   -32    
176    0      
-160   112    
-16    96     
-416   16     
48     16     
-336   -96    
-176   -16    
-112   32     
-32    48     
-80    -64    
400    272    
-592   -208   
-208   -256   
16     48     
32     -64    
80     0      
-224   -16    
16     -32    
-224   144    
-96    -32    
-528   -48    
240    80     
96     -96    
160    80     
-96    208    
-112   0      
0      -224   
-96    160    
272    64     
-112   -80    
-48    64     
-272   -144   
-160   -64    
-176   96     
64     -384   
-32    224    
-80    16     
-528   -208   
208    48     
-96    -128   
208    176    
224    80     
0      -112   
-80    80     
-112   32     
-416   -608   
-112   368    
64     -112   
192    240    
144    -128   
-352   0      
80     96     
16     368    
64     -160   
208    -96    
-160   -144   
-144   224    
-464   -96    
-128   208    
-96    80     
-144   128    
128    -448   
16     256    
-960   -96    
-80    -128   
-448   128    
112    48     
-192   48     
208    176    
-64    112    
-96    -192   
112    48     
-128   64     
64     96     
-416   -1472  
128    688    
-64    880    
-112   -544   
192    -112   
64     160    
64     256    
96     400    
-160   32     
-432   176    
-288   464    
-592   -416   
-80    -176   
64     576    
-288   160    
496    -208   
112    160    
560    432    
-256   176    
384    0      
-16    -192   
-32    -64    
80     112    
-672   32     
160    240    
-176   192    
16     -16    
208    0      
-32    -64    
-16    -208   
64     -432   
144    -128   
-80    0      
-144   -48    
-32    -112   
32     -80    
-96    144    
192    128    
-160   -80    
-64    256    
48     48     
-32    80     
16     48     
-64    64     
32     128    
16     0      
128    -32    
-48    160    
-32    112    
-96    -80    
80     32     
-80    64     
48     128    
-48    304    
-128   0      
320    -96    
-48    240    
80     112    
272    320    
-256   -384   
-144   -592   
48     -96    
96     32     
-48    304    
-288   -288   
32     -144   
-16    -16    
208    32     
-144   -192   
80     -224   
192    96     
32     -288   
-112   208    
16     0      
16     384    
496    512    
-144   400    
-288   176    
-16    32     
48     -80    
96     80     
-16    48     
-48    48     
176    32     
96     -32    
128    16     
208    -16    
16     -48    
-80    32     
16     80     
112    96     
-48    -32    
64     -48    
48     80     
-208   16     
320    -160   
-272   48     
208    112    
-128   128    
176    144    
16     -208   
80     16     
-80    -112   
176    144    
192    320    
48     480    
192    336    
-16    112    
352    112    
-48    304    
64     80     
112    -48    
192    -64    
-112   -128   
352    48     
-272   -144   
416    -48    
144    0      
-240   80     
-16    176    
-32    96     
32     80     
112    0      
96     192    
320    112    
-48    304    
-176   96     
-64    -304   
144    -224   
144    32     
-80    464    
224    192    
192    112    
-80    16     
-32    -32    
-64    -144   
112    32     
96     -144   
192    80     
-112   144    
-128   -192   
80     -16    
0      -592   
-16    -96    
-160   -64    
160    -288   
32     -144   
96     -32    
80     -176   
240    32     
80     16     
176    32     
-304   -160   
16     -192   
64     -160   
-16    -64    
96     144    
208    -112   
96     160    
96     -32    
-32    272    
96     -96    
32     240    
112    208    
192    32     
-32    -48    
224    -32    
32     128    
352    336    
-160   -96    
-48    -96    
48     80     
16     -128   
64     -128   
160    -704   
96     0      
144    -64    
80     -32    
-80    -496   
-96    176    
16     400    
-80    -240   
176    -32    
352    192    
432    80     
320    -80    
208    -32    
80     -176   
128    -48    
0      -544   
48     144    
0      -400   
-48    -16    
-128   16     
96     80     
-80    32     
208    48     
96     48     
288    -176   
-160   -80    
-432   32     
-64    -64    
304    32     
16     64     
32     -192   
16     240    
-144   64     
80     -96    
288    -64    
80     224    
-48    -16    
176    -48    
240    16     
80     -144   
176    32     
-48    -48    
-128   -48    
368    96     
-64    128    
224    -16    
16     -96    
352    -272   
288    128    
-144   -32    
16     64     
-336   32     
224    80     
-80    16     
176    -48    
96     -48    
-48    0      
-160   32     
176    -48    
160    64     
368    0      
112    16     
160    -272   
0      64     
-32    96     
176    32     
-128   16     
-48    64     
32     -976   
160    -80    
-32    -144   
176    48     
0      -32    
272    48     
64     16     
32     16     
80     0      
-272   -16    
128    -560   
16     64     
96     -48    
192    128    
32     -128   
112    -608   
304    -192   
48     -864   
0      -16    
144    -512   
-224   -144   
128    32     
32     -32    
176    -368   
-16    -16    
144    -64    
16     -160   
176    -80    
0      64     
96     -64    
64     32     
128    112    
-32    -96    
288    -48    
192    32     
-32    -96    
-32    -144   
16     -128   
16     -16    
-64    192    
-400   -32    
144    32     
192    -112   
64     -16    
160    0      
-80    -144   
304    160    
-208   -128   
64     -48    
144    -240   
-32    -128   
208    -32    
48     16     
160    -48    
-16    32     
80     -80    
0      16     
-112   32     
80     -64    
-432   16     
64     -128   
112    -80    
-16    80     
192    -64    
-32    -96    
240    0      
16     -128   
-352   -96    
64     -112   
16     16     
-64    -48    
224    80     
-144   16     
192    32     
-544   112    
144    160    
-1488  96     
-112   -64    
64     64     
-64    32     
80     -240   
160    -144   
16     128    
288    32     
288    336    
-144   -208   
-16    -64    
48     112    
64     -32    
16     -64    
144    -112   
-528   192    
176    -160   
-416   -48    
0      0      
-224   -112   
224    -304   
144    16     
0      -544   
96     -64    
-128   64     
160    -208   
-320   640    
-16    -144   
112    32     
112    208    
-592   -160   
64     -512   
-592   480    
96     -64    
0      -176   
-64    48     
384    112    
144    128    
0      224    
-64    -80    
16     -144   
-144   144    
208    192    
-144   144    
-16    256    
64     128    
32     32     
-176   32     
0      -288   
256    -208   
240    288    
192    368    
48     -112   
-48    32     
-144   -128   
192    144    
-144   336    
-288   -32    
-400   -400   
400    416    
-160   480    
208    112    
-208   272    
96     96     
96     368    
48     -64    
-192   -96    
-64    400    
-192   128    
-304   112    
-304   -16    
-496   32     
-64    144    
-240   80     
304    -144   
112    96     
240    112    
-304   160    
-1328  -16    
-368   96     
-1424  -160   
80     80     
160    160    
32     16     
32     -16    
-208   32     
-48    -96    
-256   -128   
96     -128   
224    -144   
160    48     
-1136  -64    
-80    64     
-96    -144   
-32    208    
-352   -64    
272    80     
416    96     
288    192    
16     -48    
-1040  -240   
-96    -128   
-224   -160   
160    -144   
-64    -144   
0      144    
-32    16     
-192   96     
288    96     
-80    128    
-112   -48    
-176   -160   
-48    -336   
-32    -96    
-16    16     
-112   80     
48     176    
-368   -32    
-96    32     
-1776  -16    
-256   16     
-32    -96    
64     -144   
-208   -128   
192    -320   
256    128    
-160   256    
64     304    
-144   0      
-160   16     
-96    -64    
-32    -112   
16     256    
256    64     
-656   48     
144    32     
48     -128   
352    48     
-64    -224   
160    -32    
64     -80    
-272   -400   
-256   -32    
144    -64    
-32    32     
240    224    
16     704    
-384   208    
-16    96     
32     112    
48     -80    
-1184  -80    
-96    -320   
-240   -240   
-304   -384   
240    -496   
192    -16    
-128   352    
128    -80    
-368   112    
-128   -80    
-112   224    
16     208    
-16    432    
-16    176    
320    368    
-816   -32    
-32    -48    
-96    80     
16     -64    
-80    128    
-16    -160   
-128   352    
64     96     
304    224    
160    80     
-64    64     
128    96     
512    688    
-784   528    
144    256    
-384   112    
96     64     
208    -160   
144    -224   
176    -176   
-352   64     
-144   -80    
-48    -272   
0      -224   
48     -192   
32     208    
-112   16     
-16    -432   
-304   -656   
256    -224   
-1120  -224   
-144   -480   
-64    -240   
-112   -176   
-64    -192   
96     -304   
256    64     
96     416    
-96    208    
-128   272    
240    -400   
0      64     
64     384    
-16    -304   
16     -224   
-80    16     
-16    112    
-80    48     
32     208    
368    -144   
288    224    
64     512    
-128   -272   
80     64     
-224   208    
-208   -496   
48     576    
368    544    
48     -224   
-48    -64    
272    -144   
48     192    
128    96     
-64    -64    
-16    160    
-112   112    
-16    48     
32     16     
144    80     
160    -16    
272    16     
-16    48     
-48    64     
-224   -64    
-176   -64    
-64    -16    
32     96     
16     -64    
64     48     
96     128    
144    320    
-64    320    
-80    16     
144    -32    
-16    16     
-64    -32    
16     -96    
496    240    
-352   -208   
-256   -80    
240    656    
-176   656    
-272   288    
384    -112   
432    48     
80     -16    
304    112    
256    96     
448    192    
-128   -32    
272    112    
32     16     
-96    0      
-80    0      
-272   -128   
144    0      
-32    160    
-224   48     
48     64     
176    96     
656    416    
-656   240    
-416   48     
-64    -32    
256    16     
320    64     
-224   -16    
128    0      
112    208    
-480   -16    
-448   -48    
64     112    
32     176    
-80    32     
160    64     
528    368    
-304   32     
128    -32    
96     -64    
176    0      
432    64     
400    64     
352    -208   
-688   -32    
-112   -272   
-16    -16    
16     16     
528    64     
176    48     
176    48     
192    48     
352    208    
-272   0      
112    0      
-32    32     
144    80     
192    32     
32     -48    
-32    16     
-32    -80    
448    192    
-176   0      
160    32     
16     64     
16     32     
80     48     
80     32     
80     -176   
0      80     
160    32     
-144   -32    
192    48     
192    32     
-48    -16    
176    -160   
128    160    
16     80     
160    80     
-144   64     
288    144    
-256   -256   
320    -128   
-112   96     
208    -160   
-128   16     
-496   -96    
48     -144   
272    80     
-176   48     
224    -240   
-32    -80    
96     -1088  
-112   112    
144    -144   
128    64     
-256   -48    
0      -144   
144    80     
-64    -144   
-16    -176   
320    16     
-16    144    
224    -32    
-32    -224   
144    -192   
224    -16    
128    -208   
96     112    
96     -64    
16     112    
48     112    
-16    -32    
-80    -48    
240    -144   
48     144    
144    -144   
32     64     
144    0      
0      80     
16     -368   
128    -96    
-32    -336   
144    64     
-48    -144   
368    288    
-320   224    
96     -80    
96     -144   
-176   192    
224    -176   
32     -128   
176    320    
32     -256   
16     80     
-16    -32    
336    -128   
-144   -736   
0      32     
-176   128    
144    192    
128    -272   
224    -160   
240    832    
-128   -848   
0      -352   
144    176    
-96    0      
96     288    
128    -384   
48     -496   
288    -160   
96     352    
48     144    
0      -160   
144    80     
-144   -48    
-48    144    
-16    -176   
176    144    
16     -768   
-80    -48    
32     -544   
-16    -240   
128    -96    
-208   -224   
208    64     
144    -16    
448    -80    
-16    112    
288    16     
-192   128    
-64    -224   
320    -160   
48     64     
144    -192   
32     -96    
160    -336   
-32    112    
96     -256   
112    -112   
0      -16    
144    32     
160    -16    
336    240    
-272   64     
-48    -64    
-32    -48    
144    -64    
-656   16     
144    -144   
48     -80    
128    -352   
16     16     
192    -368   
-48    -224   
0      -352   
-16    -112   
32     -176   
368    48     
-80    96     
128    48     
-48    -32    
112    -64    
-960   -144   
144    144    
176    320    
112    160    
-208   128    
96     -272   
128    -80    
-128   -464   
-112   0      
160    -224   
48     96     
-48    48     
-16    48     
16     144    
-32    -96    
-128   -208   
144    -96    
-96    112    
-176   112    
96     48     
128    -48    
-192   48     
272    -416   
208    -336   
304    -48    
-32    160    
-224   -128   
-16    -64    
16     -48    
160    -16    
-64    -176   
208    16     
-880   16     
352    -160   
0      -448   
128    -32    
-288   96     
-272   -480   
192    -112   
-16    -672   
-64    48     
0      0      
16     32     
16     -80    
480    80     
-272   -80    
32     -80    
-144   -48    
96     -64    
112    -112   
128    0      
144    192    
96     -128   
16     -48    
-16    -1568  
64     64     
-96    0      
176    16     
-96    -176   
-96    -240   
-176   -368   
16     32     
-544   384    
176    272    
-144   336    
112    176    
144    160    
64     -48    
32     64     
96     -288   
400    384    
-384   624    
-128   160    
272    -592   
-544   -816   
0      -224   
-240   48     
-48    32     
224    64     
160    352    
256    512    
-224   656    
160    48     
-240   448    
144    16     
384    -832   
-576   848    
288    16     
-208   176    
320    464    
96     -224   
-208   80     
208    -512   
80     224    
-496   64     
64     32     
-80    48     
-640   -176   
352    784    
-576   -48    
-320   -128   
-208   128    
144    16     
48     272    
288    352    
-224   80     
-80    -368   
-144   -48    
320    48     
-112   416    
-96    224    
-112   -240   
-272   64     
-224   672    
-176   -272   
-576   -592   
272    608    
-144   -160   
-96    288    
-400   368    
-16    80     
160    -48    
-160   -80    
256    336    
-160   16     
0      -208   
208    112    
-64    -16    
-304   192    
176    -128   
-336   144    
32     -160   
-352   -160   
48     96     
-448   -16    
96     304    
16     -128   
32     160    
-304   -32    
80     0      
-176   -128   
-16    -32    
16     32     
-48    64     
144    176    
-48    -16    
-112   48     
-64    112    
-48    -80    
16     96     
32     0      
-656   -96    
16     -112   
192    112    
32     240    
-192   -16    
192    48     
208    192    
-112   48     
-16    -32    
-144   480    
208    64     
-96    -208   
-112   240    
96     192    
16     32     
-448   -144   
224    32     
-80    -16    
272    32     
-176   -96    
128    -272   
-64    -160   
-64    -208   
-32    -80    
-160   96     
-16    240    
32     128    
64     -32    
-288   -32    
-176   80     
-880   -112   
256    48     
-896   -176   
-144   -224   
-256   -32    
-96    64     
240    80     
-16    96     
0      -32    
64     -16    
128    64     
224    -16    
784    240    
-640   112    
-576   48     
-320   48     
-144   -48    
784    432    
-352   336    
32     288    
-208   320    
-160   -96    
400    -80    
336    -32    
80     112    
-352   128    
-448   -16    
-160   -64    
-32    160    
-224   64     
-64    0      
-48    -16    
-464   80     
-48    -32    
384    -48    
-64    64     
-144   80     
-96    16     
-144   -16    
304    272    
-160   96     
64     -256   
608    176    
-384   96     
-96    16     
-432   -144   
192    160    
-832   16     
-256   -64    
-176   -208   
240    -48    
-176   144    
0      144    
0      64     
432    240    
-256   48     
224    0      
-176   0      
-336   -64    
368    48     
-96    0      
128    80     
-64    -16    
272    0      
96     128    
-144   -48    
128    32     
80     64     
-64    0      
400    176    
-80    0      
-208   64     
160    112    
-272   -96    
176    48     
-48    32     
160    80     
208    -16    
-176   -48    
96     -32    
-96    64     
-48    144    
160    96     
-208   32     
-64    -48    
16     0      
-80    32     
64     0      
-32    16     
32     96     
128    64     
-144   -80    
112    -336   
128    32     
192    176    
208    -96    
224    -48    
-48    16     
-176   -96    
128    -80    
-208   0      
-16    80     
112    144    
-48    -32    
-32    -32    
48     0      
160    64     
-144   112    
256    48     
208    144    
64     128    
368    160    
-32    -192   
-96    -176   
32     192    
-16    -32    
16     16     
160    304    
-64    -16    
96     32     
-80    -16    
-80    128    
144    128    
-224   -160   
288    -384   
-192   768    
80     -224   
160    -64    
208    32     
-160   16     
256    832    
-256   -704   
96     304    
-288   0      
64     -176   
16     48     
320    320    
16     48     
-64    -64    
160    176    
-240   16     
176    -496   
80     -224   
96     800    
224    592    
-80    352    
0      80     
192    144    
-112   -96    
16     -240   
48     -96    
208    -144   
32     480    
128    176    
0      -48    
-224   -320   
176    -368   
-48    112    
32     48     
160    -48    
128    16     
16     -64    
112    96     
160    96     
-32    -256   
160    -160   
0      -1696  
128    -16    
-32    80     
192    80     
-128   -176   
32     -144   
0      16     
-80    80     
-64    96     
96     144    
80     -16    
192    48     
16     -16    
-32    -96    
176    64     
128    -96    
-16    80     
272    32     
-16    144    
-144   32     
-176   -80    
112    -592   
96     -32    
144    16     
320    0      
-64    176    
-80    0      
0      32     
112    -112   
352    256    
-320   48     
208    -48    
208    -688   
-32    112    
464    336    
-352   400    
-96    -160   
240    -48    
192    16     
288    160    
-208   96     
-64    -64    
-16    -336   
-16    -288   
32     176    
-384   -176   
288    -80    
128    -416   
288    160    
208    16     
160    544    
-48    240    
304    -144   
0      -112   
0      -176   
448    -48    
-176   -192   
480    16     
208    224    
-416   160    
32     -368   
-64    -48    
304    -32    
-16    0      
208    112    
320    176    
320    112    
-16    160    
-144   144    
64     352    
16     112    
96     -240   
416    -400   
432    -240   
192    176    
288    16     
-64    16     
32     32     
0      160    
16     -144   
32     -240   
368    160    
32     240    
720    560    
-64    432    
64     288    
-48    -144   
160    16     
352    -96    
-320   -272   
-16    -272   
-256   -48    
48     -256   
112    -64    
32     32     
192    -192   
-48    -16    
-16    -384   
32     -416   
224    -80    
96     -400   
112    -32    
112    32     
-16    -192   
32     16     
32     -576   
128    -208   
96     -304   
-80    -912   
64     80     
144    32     
-240   512    
464    -416   
-32    -688   
16     160    
224    -96    
-112   -272   
160    0      
112    -144   
304    -240   
-368   -528   
112    80     
128    -288   
384    544    
544    -480   
144    192    
-112   -224   
-592   -48    
16     384    
-704   -320   
16     -32    
48     -64    
-320   -320   
32     -256   
448    -320   
-464   -656   
384    -896   
208    784    
272    80     
-288   -608   
48     80     
-176   208    
-336   -272   
128    288    
-816   64     
-176   -208   
-16    -16    
512    592    
-160   928    
128    -16    
224    -448   
64     -224   
128    128    
96     288    
-64    16     
-80    -208   
256    256    
0      416    
160    48     
-368   -16    
32     -96    
96     -16    
48     -80    
48     -16    
0      -48    
272    16     
192    -304   
-208   -16    
128    128    
208    64     
96     32     
96     32     
-224   -64    
80     -48    
-384   -16    
144    0      
-816   -16    
112    -16    
-112   -16    
464    -112   
-528   -368   
208    -528   
192    16     
-32    -48    
288    32     
-160   16     
48     -32    
-32    16     
-48    -32    
-64    16     
128    -16    
-112   80     
64     -16    
-1056  64     
208    -144   
144    64     
96     -112   
-16    48     
64     -640   
48     -144   
-144   64     
192    -64    
32     176    
80     80     
-160   32     
160    48     
304    144    
-16    -128   
-336   -128   
224    -176   
-96    80     
112    32     
64     0      
208    -224   
48     0      
192    32     
160    -32    
-288   -16    
16     -64    
-64    -112   
80     -96    
-368   -176   
192    -80    
64     16     
-48    -64    
32     64     
48     -112   
80     288    
-272   96     
80     -64    
48     0      
80     -96    
-80    -64    
128    176    
-416   -32    
80     -80    
32     0      
-64    80     
224    112    
-272   -112   
48     32     
-608   -16    
288    -32    
-384   64     
-48    208    
160    -48    
-1856  -16    
0      -48    
224    224    
-192   144    
432    -16    
48     80     
-512   128    
-432   64     
-96    -240   
32     48     
-336   -64    
64     32     
144    -64    
96     48     
-208   80     
-496   -128   
16     -208   
-832   -16    
176    32     
256    -48    
-208   0      
-464   176    
-496   144    
512    192    
-448   160    
-192   -64    
0      -64    
-16    -48    
-320   32     
-48    48     
-80    160    
-176   112    
-288   -48    
208    144    
-416   0      
-208   -64    
48     -16    
160    96     
-416   -32    
16     32     
336    112    
-496   -16    
-80    0      
-80    96     
-112   112    
80     -16    
-240   -48    
-480   80     
64     64     
-384   0      
224    80     
-128   -80    
80     16     
-112   -16    
-112   16     
-16    64     
-144   0      
16     16     
64     96     
-176   16     
-96    0      
-176   16     
-112   32     
-16    64     
-304   -16    
80     16     
-224   -80    
80     176    
-96    -240   
0      -48    
-48    -96    
448    48     
-432   64     
224    -64    
-96    -32    
0      48     
-80    -96    
-16    64     
-176   -496   
-576   160    
224    64     
-336   80     
80     176    
128    624    
48     -1088  
-176   48     
-96    192    
-64    -352   
160    144    
0      144    
32     -480   
48     160    
-128   -16    
-32    -208   
-832   -192   
320    -144   
-1264  304    
64     -304   
-64    64     
-80    32     
-16    -96    
-64    80     
96     -400   
-128   224    
176    -368   
-160   -128   
-64    464    
32     -32    
144    208    
-496   -224   
416    -288   
-1008  256    
-32    64     
256    -160   
-352   -112   
192    -112   
-112   144    
48     32     
-32    48     
-192   -192   
384    -80    
-240   96     
112    -16    
288    112    
-304   192    
-80    80     
-80    -48    
96     80     
32     64     
-16    16     
112    16     
176    64     
112    16     
-112   144    
240    -16    
-96    -96    
192    16     
-96    -16    
80     -80    
-128   -32    
-176   -240   
256    -112   
-16    48     
-48    -32    
80     112    
80     16     
-112   -16    
96     16     
-96    -32    
-80    0      
80     -16    
32     160    
-128   -64    
32     0      
0      112    
-112   64     
64     -48    
80     16     
128    -48    
32     -16    
-32    -80    
64     0      
144    144    
-32    112    
-112   80     
-144   -32    
128    32     
-80    48     
80     128    
-160   16     
144    128    
144    240    
-16    32     
320    -16    
-96    48     
-64    32     
-16    -16    
64     -32    
48     -16    
144    16     
0      48     
48     48     
-64    48     
96     -80    
224    -64    
48     80     
144    144    
-80    64     
16     144    
96     144    
128    48     
-80    16     
-48    -480   
144    -80    
0      336    
-224   48     
48     16     
64     80     
-240   32     
-224   -160   
112    -320   
80     -368   
336    80     
-32    96     
-400   -144   
-352   -208   
-304   192    
-48    96     
-144   160    
400    32     
176    80     
48     160    
-256   -16    
-48    16     
32     16     
256    80     
192    48     
-128   -64    
176    -96    
80     128    
-16    64     
-16    -48    
-208   -176   
0      -160   
-288   -320   
112    -672   
368    -80    
160    80     
32     -208   
96     32     
-400   112    
128    288    
-528   -128   
-272   288    
128    352    
16     32     
192    -48    
208    48     
-80    -16    
-16    32     
0      352    
144    -336   
192    176    
-224   -96    
176    112    
-16    -864   
192    96     
816    608    
-704   -624   
96     -32    
48     160    
48     144    
224    -176   
-128   64     
16     -400   
-256   96     
176    112    
80     -80    
224    288    
80     0      
144    -432   
112    -64    
-144   -80    
96     -80    
144    240    
-16    192    
80     -240   
96     160    
-32    -80    
128    320    
128    16     
-32    -64    
144    112    
-400   -720   
288    -208   
-128   -384   
240    80     
192    -416   
208    112    
0      -32    
16     16     
-16    -16    
-80    48     
-80    32     
-16    16     
176    128    
224    64     
-144   96     
256    112    
-32    240    
-48    -304   
-64    -32    
64     -256   
592    192    
-96    -704   
48     -64    
96     -16    
256    432    
-160   192    
736    384    
-208   624    
-160   32     
64     -272   
64     -272   
64     160    
64     48     
224    96     
-224   -48    
144    -80    
80     64     
128    16     
160    -16    
64     128    
-64    -48    
32     224    
48     96     
48     -208   
96     80     
96     -32    
192    32     
64     -112   
64     96     
416    -16    
-336   16     
-32    -80    
320    128    
16     16     
112    -32    
-48    32     
-16    160    
256    -32    
80     0      
-48    -32    
-240   -176   
160    112    
32     -128   
304    112    
384    272    
-112   144    
-96    32     
256    -640   
64     48     
48     -320   
240    -288   
80     192    
-176   -640   
80     -64    
128    -1136  
176    -48    
208    64     
112    16     
80     -32    
-32    0      
96     16     
96     32     
160    -112   
-112   -96    
0      0      
352    192    
-320   -96    
80     -192   
112    -80    
96     -288   
-32    0      
-96    -688   
64     -96    
80     -64    
48     -16    
0      -320   
-128   112    
128    0      
176    -32    
-112   48     
80     64     
192    64     
-48    -64    
112    -64    
-32    208    
176    192    
144    -208   
-32    -112   
96     -144   
64     16     
64     0      
144    48     
16     -96    
32     -160   
-272   -48    
192    -32    
-160   48     
16     -48    
0      80     
-816   -944   
16     -416   
-16    48     
-224   -16    
-16    -832   
-96    -320   
-16    -320   
-144   144    
-352   -320   
464    -432   
320    -80    
512    32     
144    -80    
-128   -128   
-192   -176   
-16    -288   
112    -16    
64     -272   
128    32     
384    16     
-176   352    
112    16     
-400   -64    
80     -224   
448    -32    
304    -32    
32     -208   
-576   -432   
304    -240   
-1600  416    
-336   304    
64     -96    
-32    -64    
48     48     
224    -192   
112    256    
-256   64     
112    -16    
-128   -64    
784    464    
-272   208    
112    -256   
368    -256   
160    -272   
48     16     
112    0      
-224   -192   
32     -240   
-160   176    
-16    -208   
112    -48    
256    272    
1040   992    
-432   -96    
272    -624   
-336   192    
112    80     
-16    -64    
336    -80    
-272   32     
144    -16    
-144   64     
176    -48    
-32    -16    
-48    -80    
144    224    
96     16     
160    -208   
-128   -48    
48     -272   
-144   96     
160    64     
-160   -128   
240    272    
-112   -144   
80     -288   
-272   176    
80     -64    
48     -64    
-48    176    
176    352    
-320   224    
-560   64     
-144   -96    
240    192    
272    -144   
256    128    
336    96     
96     -624   
-128   -208   
-48    -48    
-112   -80    
112    48     
-48    -48    
-384   -144   
-912   112    
0      16     
-384   -224   
192    -112   
-640   -80    
64     -112   
0      -112   
-256   96     
384    80     
-368   256    
-352   -96    
-32    96     
64     -16    
-32    16     
32     -144   
-128   -32    
-32    96     
32     -48    
80     176    
-400   32     
-496   160    
288    -64    
-208   -208   
-128   -304   
64     -80    
-128   112    
160    80     
16     -16    
32     -160   
160    208    
-96    80     
208    -16    
-256   -192   
80     -80    
-336   80     
-80    64     
32     192    
144    128    
-208   -64    
80     -32    
48     -272   
-160   -16    
64     336    
-16    368    
16     -32    
32     -192   
48     -80    
-288   -80    
-96    -240   
-176   128    
240    -48    
144    -128   
-144   -192   
-528   -32    
-32    112    
-48    -80    
256    96     
0      -32    
64     48     
-144   -32    
96     16     
48     -32    
-32    128    
48     48     
0      80     
0      16     
-112   16     
208    208    
-672   64     
-64    48     
-32    -48    
208    64     
-96    -80    
-96    16     
48     96     
-96    32     
96     -32    
64     -80    
80     32     
-304   -48    
208    -48    
-160   32     
0      -16    
-144   16     
0      96     
-128   -64    
64     16     
32     48     
-272   240    
160    320    
0      0      
32     32     
-96    32     
-144   -32    
-128   -16    
96     -16    
-144   -64    
48     0      
-192   192    
96     144    
-2592  -80    
-256   -80    
-240   -208   
-128   -80    
128    -320   
96     -64    
32     -96    
80     -80    
0      16     
-16    208    
272    384    
-112   -64    
-336   -240   
48     -368   
384    448    
256    544    
176    80     
0      -48    
80     -384   
-16    96     
-128   192    
-400   0      
-304   -128   
-48    -320   
80     544    
208    48     
-304   -32    
96     720    
-224   48     
176    96     
-432   -144   
-224   -80    
208    128    
176    0      
448    -240   
336    320    
112    0      
-288   0      
-96    -48    
-352   -96    
288    432    
-96    368    
688    560    
-496   -496   
-128   -464   
-32    16     
48     192    
176    0      
-256   -160   
0      96     
-224   224    
32     32     
240    -48    
176    48     
80     -64    
96     0      
-288   -112   
-48    16     
-240   144    
64     80     
0      0      
160    32     
48     112    
96     64     
16     -16    
80     16     
16     16     
48     32     
96     80     
-32    16     
96     32     
-176   48     
160    64     
-48    -80    
64     112    
176    32     
16     32     
160    64     
160    352    
-384   16     
192    80     
-32    -64    
256    288    
144    320    
-384   -48    
112    32     
-224   16     
272    128    
160    32     
-16    -16    
-96    48     
112    112    
-176   16     
-32    48     
-64    64     
-32    0      
48     32     
96     80     
96     64     
160    128    
144    16     
0      -32    
-320   -480   
336    0      
192    224    
-416   80     
-192   -224   
368    -112   
-240   272    
160    32     
0      144    
160    80     
-112   0      
160    96     
-96    0      
-16    -16    
224    32     
-80    -304   
224    -32    
-80    176    
-112   32     
176    64     
-16    32     
64     32     
144    112    
-16    0      
-128   0      
-128   32     
272    80     
-112   32     
160    80     
32     48     
-64    -160   
176    32     
80     -32    
208    96     
144    80     
16     128    
0      176    
288    48     
-112   -48    
-64    -96    
-32    16     
352    112    
-32    64     
128    -96    
48     32     
80     -96    
-80    -32    
-16    -448   
160    80     
0      48     
96     0      
64     48     
-16    48     
48     -64    
64     -16    
128    -80    
48     32     
-16    32     
-144   -112   
96     64     
32     -192   
-64    80     
112    -96    
-64    -16    
96     96     
0      -144   
-96    -208   
112    -48    
-272   -176   
336    128    
0      176    
-64    -16    
96     64     
96     -48    
-32    64     
96     -48    
128    -80    
-32    -480   
144    224    
-112   -2272  
112    -96    
96     112    
0      160    
32     16     
64     -48    
-48    32     
80     144    
0      -144   
-32    -192   
224    0      
176    288    
240    -32    
-16    48     
80     224    
-64    -256   
112    112    
48     64     
-336   48     
-64    16     
288    912    
-96    -784   
288    -176   
-80    304    
-224   16     
112    -80    
-320   -448   
-192   112    
48     -32    
-48    432    
-240   -192   
112    -176   
208    176    
176    32     
320    16     
176    80     
-112   64     
-48    -176   
-336   -128   
-80    16     
-144   16     
448    -272   
832    304    
-144   -1008  
-160   32     
128    208    
-368   -320   
-192   80     
-112   -48    
64     -112   
464    336    
208    -1136  
192    16     
208    -720   
-16    -272   
32     -192   
208    -32    
16     224    
320    64     
-176   -816   
-112   224    
224    -368   
-320   -288   
16     -64    
128    -48    
-592   0      
320    128    
80     -256   
240    -304   
64     -288   
192    -1072  
-192   -256   
-48    -48    
64     240    
208    -272   
144    0      
288    48     
-144   -128   
112    -288   
-176   -352   
-1504  96     
48     -64    
80     80     
144    48     
16     -96    
32     -288   
64     -176   
96     -592   
0      -160   
384    64     
176    880    
192    448    
-80    192    
48     -176   
-64    -240   
-128   96     
0      64     
384    -192   
-176   -320   
32     -288   
-80    -176   
208    0      
0      -176   
32     80     
160    -32    
-64    -128   
160    -368   
16     -240   
-144   -128   
-128   32     
-224   -64    
256    -32    
-1856  240    
0      -112   
32     -112   
176    -80    
192    144    
-48    -112   
-288   -304   
-32    -80    
96     128    
-32    -256   
16     -192   
128    -80    
-192   -16    
160    -176   
96     -128   
-432   96     
32     -32    
144    64     
-32    -240   
0      -32    
16     -112   
-144   96     
96     48     
80     160    
256    -240   
160    -128   
0      -192   
32     -208   
-256   -80    
112    -192   
-32    96     
96     128    
-1344  192    
48     -160   
64     -288   
176    -176   
-48    -32    
-80    -128   
96     64     
272    32     
-48    -16    
-80    -16    
240    176    
-96    16     
448    128    
-96    304    
112    -48    
-80    -80    
32     -176   
-320   112    
-112   224    
-144   -48    
16     -272   
208    16     
80     16     
48     80     
-160   96     
-32    -16    
-224   16     
48     32     
-384   -128   
288    -160   
-240   32     
96     -32    
208    96     
112    96     
-16    16     
96     -144   
96     112    
-128   96     
0      32     
-416   -128   
256    -288   
-32    32     
352    240    
-208   144    
-64    -192   
208    -544   
336    -112   
48     96     
-128   -144   
32     80     
-144   -416   
96     -160   
32     -128   
-848   -176   
-288   -384   
-48    -176   
-320   -32    
272    -160   
-352   -96    
80     -448   
-80    160    
-176   80     
160    0      
-1328  -432   
48     -336   
-480   -48    
-112   240    
-32    -176   
64     -288   
-48    208    
-608   0      
208    128    
-48    -96    
-16    -368   
48     1072   
-112   64     
-736   -720   
-112   256    
-288   -128   
176    176    
-240   -64    
368    -320   
96     272    
-96    272    
304    160    
-80    -336   
-416   -48    
-848   -80    
208    560    
208    256    
-160   -112   
48     -96    
-32    -240   
48     -32    
272    272    
-128   80     
32     -16    
368    80     
-272   16     
-160   -48    
-592   -272   
-192   -96    
-304   224    
-448   80     
-352   -32    
-112   48     
272    0      
48     80     
32     -96    
192    128    
-64    112    
-272   -32    
-144   -16    
96     160    
-192   80     
288    32     
-240   -48    
-240   96     
-80    48     
16     0      
176    32     
128    0      
80     -48    
224    -32    
-48    160    
-128   16     
-288   -224   
400    32     
-80    64     
48     64     
-48    0      
64     -16    
0      48     
176    80     
-1040  -80    
-16    48     
-96    0      
64     32     
-32    16     
-112   0      
-16    64     
-160   0      
80     80     
-144   -176   
32     -16    
16     64     
-128   -64    
-208   -48    
-176   48     
64     160    
-176   -80    
160    -96    
-112   0      
-64    64     
-16    64     
-64    16     
0      -48    
-176   -112   
144    208    
-64    48     
176    -48    
-240   48     
-96    -112   
32     64     
-224   128    
144    -32    
-480   -16    
-352   32     
224    -16    
-352   -192   
64     48     
-96    48     
160    0      
-128   64     
64     -32    
-32    -48    
224    112    
-560   -48    
272    112    
-96    -48    
48     16     
64     32     
-288   32     
80     64     
-112   64     
-32    64     
208    112    
-80    48     
-112   -144   
64     64     
-192   -32    
0      32     
-16    -16    
-16    -32    
-384   -48    
16     -16    
-48    48     
432    240    
-352   64     
96     32     
96     160    
208    32     
208    0      
-96    -96    
32     32     
-112   32     
-64    32     
96     16     
192    16     
-384   -96    
64     64     
48     32     
192    64     
-80    64     
16     0      
176    96     
-160   16     
192    144    
0      240    
32     112    
-16    -48    
208    144    
-208   -32    
16     48     
192    96     
80     16     
32     32     
-32    -32    
224    -32    
16     -256   
64     -32    
-128   96     
160    32     
-32    48     
96     112    
-208   0      
96     192    
-272   -224   
224    -112   
144    -32    
80     112    
224    176    
-144   -64    
160    96     
32     -64    
128    160    
80     48     
32     -64    
80     176    
-144   48     
0      96     
320    432    
-304   -128   
160    128    
224    144    
144    96     
-16    80     
-160   -448   
48     560    
96     128    
64     -272   
16     304    
-48    -192   
96     80     
320    464    
-128   -416   
64     384    
-96    -32    
-64    -1200  
160    -176   
16     224    
0      -48    
0      -544   
0      336    
-48    80     
0      48     
-96    32     
176    64     
-336   -160   
48     192    
-208   64     
48     -544   
224    624    
112    -448   
16     -272   
0      -80    
128    320    
48     192    
512    0      
224    48     
304    112    
-64    80     
96     -176   
208    -192   
208    128    
384    336    
528    192    
-32    224    
-80    -64    
-160   288    
464    832    
48     384    
-416   176    
-272   32     
-48    16     
0      0      
304    -192   
208    48     
16     -112   
416    224    
-144   144    
-384   -176   
32     -80    
-96    0      
288    -96    
144    -624   
192    192    
96     16     
-32    80     
-64    -48    
48     -16    
192    -224   
80     0      
144    32     
-48    32     
64     128    
16     128    
0      128    
144    112    
96     96     
64     -432   
176    -80    
112    -48    
64     96     
0      -80    
48     -16    
64     -64    
48     -48    
-16    240    
144    112    
-80    592    
128    272    
-368   -352   
-96    -96    
16     -80    
80     176    
192    -64    
48     -464   
-16    160    
64     128    
-160   -128   
112    -64    
128    224    
-32    64     
176    -96    
224    64     
-64    48     
144    -224   
32     -192   
176    -16    
0      -240   
-224   64     
-112   -192   
-192   336    
304    112    
32     208    
400    304    
16     208    
-48    -64    
224    -112   
32     112    
112    -128   
-48    32     
224    -96    
-32    192    
-192   96     
416    -48    
64     -192   
48     -32    
304    32     
0      336    
-80    -128   
0      80     
96     0      
288    176    
-112   224    
192    -16    
-224   -144   
144    -64    
-224   256    
-96    272    
400    272    
-160   -64    
224    64     
-48    -32    
352    -832   
-448   -144   
-160   -176   
64     -384   
112    -80    
-64    -416   
-64    -16    
160    48     
32     -112   
160    -208   
0      -304   
656    560    
-544   416    
96     -608   
-48    16     
32     -160   
16     -432   
-672   -128   
80     -368   
-128   352    
256    192    
432    112    
64     -320   
-16    128    
144    208    
96     -64    
176    -80    
-80    -48    
144    -192   
16     -144   
176    -64    
64     -144   
-80    128    
160    -144   
-96    -224   
304    -112   
-96    224    
-32    16     
48     -144   
224    16     
-80    -272   
-160   -672   
-160   -416   
96     -416   
16     288    
160    0      
0      -576   
-496   -176   
240    80     
-16    -240   
64     -64    
112    80     
160    -432   
160    -64    
16     -512   
192    384    
64     -176   
208    240    
0      0      
112    256    
-320   -432   
208    -224   
-336   64     
-144   80     
-704   -96    
32     -48    
-112   -128   
0      96     
-16    64     
-112   -336   
128    80     
256    -560   
208    144    
-240   -16    
0      32     
-784   -288   
320    384    
-160   752    
-128   32     
-336   160    
-64    -192   
-64    -96    
-256   -256   
-256   -544   
-176   -432   
288    -208   
400    -464   
32     208    
0      -48    
480    -128   
0      80     
304    16     
-272   -176   
-464   48     
96     48     
-240   -96    
-784   -160   
416    -32    
160    80     
-160   -304   
-128   -96    
192    -320   
160    224    
0      112    
384    -32    
64     -32    
32     -32    
-256   -64    
-128   32     
-48    48     
112    112    
-448   -48    
256    -80    
272    32     
1008   288    
-544   -48    
-240   -336   
528    48     
0      48     
320    -32    
0      0      
0      -80    
-144   -16    
80     64     
160    -16    
-112   -80    
-176   16     
192    -32    
240    -32    
272    48     
-496   48     
144    -128   
96     0      
-368   48     
224    -80    
128    80     
-320   -32    
-48    64     
96     -48    
-32    16     
112    -112   
-368   -64    
144    -80    
64     16     
32     -176   
16     192    
-384   -224   
-1232  32     
-160   -32    
-832   32     
-80    288    
160    96     
-272   -64    
32     -80    
-160   -144   
-16    272    
48     96     
-320   48     
-320   0      
-832   -144   
-32    -64    
48     160    
-656   16     
272    96     
48     48     
80     -16    
-448   0      
-160   16     
16     -80    
176    64     
-128   48     
112    0      
256    144    
-208   48     
48     -208   
368    48     
-48    16     
16     80     
144    96     
-96    80     
-96    112    
-1472  80     
80     -48    
-64    -32    
-208   -80    
48     -96    
-16    112    
-176   -240   
112    32     
64     80     
-64    112    
-32    16     
0      128    
-16    16     
-96    16     
32     16     
0      32     
64     48     
-80    32     
-80    -48    
-400   -208   
64     112    
-208   -80    
64     -48    
48     -160   
-64    -48    
-160   -240   
-208   -80    
80     112    
64     -96    
-128   16     
-32    16     
-64    -160   
-272   128    
48     80     
-736   -128   
112    -48    
-144   -16    
192    -80    
-240   112    
-32    96     
16     -16    
-336   192    
320    -1328  
-32    816    
128    32     
-160   -128   
-112   128    
-320   -80    
48     144    
-416   176    
128    48     
32     16     
-32    -112   
16     -64    
-176   -288   
-96    304    
64     -96    
-128   -432   
-400   32     
320    192    
32     624    
-48    -16    
-256   -704   
16     -208   
-144   224    
0      272    
-112   -16    
-96    -16    
80     96     
112    80     
176    48     
-16    -144   
-16    -608   
-128   -32    
208    304    
64     144    
-32    176    
-208   160    
240    144    
-496   -112   
48     16     
-16    -64    
-96    16     
48     -320   
80     -96    
-80    -16    
192    96     
-208   -32    
16     32     
0      256    
-240   -576   
272    -80    
-416   -64    
64     48     
-192   -80    
144    0      
96     -16    
0      -256   
-128   -208   
16     -208   
-80    16     
-64    224    
-16    304    
96     160    
-192   96     
-384   0      
32     -16    
-128   0      
304    240    
-192   144    
368    224    
64     160    
336    -32    
176    96     
32     -16    
64     -16    
-240   32     
-352   112    
336    448    
-512   160    
-448   -48    
368    -64    
48     64     
160    64     
48     -32    
64     -48    
32     -224   
128    32     
-16    192    
48     272    
-416   80     
-304   64     
288    96     
384    176    
-320   80     
-112   160    
16     208    
-192   80     
288    192    
208    -16    
64     -32    
-32    16     
272    208    
-144   176    
80     16     
32     144    
-32    32     
96     -272   
-16    -192   
80     -32    
-144   -384   
-80    -128   
-80    -48    
-16    432    
208    304    
-80    128    
32     -144   
32     80     
-96    288    
0      -96    
304    304    
256    -144   
240    32     
-96    -96    
128    -128   
-256   288    
160    -16    
128    -336   
-96    32     
-96    32     
176    80     
-96    16     
80     -144   
96     -80    
-32    496    
624    496    
-64    240    
-224   112    
-32    352    
480    384    
16     -432   
-32    96     
96     -112   
0      -544   
16     64     
48     480    
96     528    
-160   0      
304    160    
-256   240    
240    208    
112    80     
-208   80     
16     -96    
416    512    
-256   432    
128    48     
-160   -224   
-16    -784   
128    -48    
16     96     
-32    -624   
-192   -368   
112    -128   
-272   432    
224    -16    
-176   -448   
224    -128   
96     -512   
0      -80    
336    -64    
-96    16     
-16    -128   
0      -368   
-160   176    
112    -144   
352    816    
80     352    
-144   -384   
-96    -320   
208    -400   
176    448    
208    560    
-112   400    
208    -384   
-192   -368   
208    544    
368    448    
-400   -272   
288    -480   
448    -48    
-448   384    
-16    -672   
144    -160   
64     272    
272    -16    
-144   -112   
192    -16    
-16    0      
16     528    
272    -96    
16     128    
112    64     
96     16     
-256   224    
32     -976   
128    304    
176    224    
16     -48    
-64    -128   
176    -16    
-16    288    
224    -240   
192    208    
-128   256    
80     32     
112    -560   
16     128    
-16    -256   
-64    -192   
128    -352   
144    144    
160    -560   
96     -64    
-112   0      
80     96     
-48    -32    
0      -16    
-16    64     
-32    -16    
192    128    
64     -48    
64     48     
128    -16    
-16    -16    
80     -288   
64     -224   
128    -176   
64     16     
96     -96    
112    -16    
-64    96     
32     80     
64     176    
0      112    
96     32     
112    -224   
256    192    
0      -16    
-80    -64    
144    -160   
-208   96     
-32    -224   
144    16     
256    288    
-224   192    
80     16     
144    -96    
-16    -80    
112    -240   
48     80     
48     -96    
192    32     
-128   32     
-176   16     
-112   -176   
96     112    
-160   -48    
0      0      
464    16     
224    -576   
192    48     
-128   -112   
-96    -528   
-320   -208   
400    -208   
-544   -416   
-336   -240   
-16    -32    
-48    112    
96     16     
512    0      
48     -32    
-400   -32    
-208   -128   
304    -176   
-48    -272   
-336   -48    
496    48     
-208   -96    
64     -368   
112    -32    
192    -368   
304    48     
0      16     
-64    48     
-112   48     
64     48     
-48    -144   
512    -32    
32     -64    
-32    -48    
-48    -48    
-144   -32    
32     80     
-176   -16    
-32    -48    
32     -224   
176    160    
-208   -288   
240    0      
320    96     
-96    16     
128    -112   
0      32     
-96    0      
144    16     
-48    32     
96     -64    
240    48     
112    32     
224    -48    
64     32     
112    0      
16     -384   
-304   -64    
96     -32    
-16    -64    
112    16     
112    208    
16     96     
288    -112   
-16    -96    
176    -80    
-720   160    
272    -160   
-96    48     
-80    -192   
320    -112   
32     -480   
-96    -80    
64     -80    
-16    -32    
176    48     
-288   -80    
112    128    
240    320    
-512   112    
-288   -128   
-64    208    
496    336    
-320   208    
608    0      
-432   -160   
192    -368   
-256   -192   
192    -656   
128    0      
-64    16     
192    -80    
-160   0      
-32    -192   
-80    -144   
16     224    
-192   112    
80     -32    
-1936  -112   
112    -64    
64     -160   
208    -80    
64     192    
-80    -416   
96     64     
208    144    
96     624    
-240   -464   
128    96     
16     -272   
192    144    
-432   -160   
112    -560   
208    1104   
-144   -608   
16     -320   
112    0      
-288   96     
208    -336   
176    -352   
-544   -160   
80     -160   
-160   240    
32     -32    
-48    0      
16     336    
-176   -112   
64     -208   
-1104  64     
32     -176   
48     -16    
-192   -384   
288    -128   
32     -64    
208    -128   
-48    -112   
32     -16    
-112   48     
224    -112   
-16    -64    
64     16     
128    144    
224    208    
-128   192    
96     -48    
32     16     
-2112  -80    
-48    288    
400    352    
-288   16     
-32    -32    
-1344  -32    
-48    0      
16     48     
-80    32     
16     -32    
48     32     
96     -32    
-80    96     
-464   -64    
16     160    
-96    0      
-48    -128   
176    16     
-144   -96    
-128   -128   
-160   64     
48     -48    
-320   0      
0      128    
368    32     
-256   32     
112    -96    
-128   64     
-224   -80    
-48    -48    
-144   -144   
96     64     
64     224    
-96    0      
-160   16     
-176   16     
-96    -32    
64     -32    
-112   0      
-272   128    
-48    64     
-16    32     
-144   96     
-352   16     
-112   -48    
192    -64    
80     -80    
544    48     
32     0      
160    128    
-208   192    
-96    64     
-560   -96    
-240   80     
-800   32     
-192   160    
208    -16    
224    96     
64     64     
32     208    
-80    48     
-400   96     
32     32     
48     16     
-128   80     
-192   -128   
0      -208   
-192   -112   
112    176    
-240   -32    
-128   -16    
-736   -128   
-48    -144   
288    32     
304    128    
112    -16    
0      -208   
0      -144   
-208   -128   
-176   -144   
-96    0      
-144   32     
272    128    
48     -16    
-144   -128   
-16    144    
-528   -160   
192    -176   
-112   -192   
0      -96    
112    -208   
-176   112    
128    0      
-96    -16    
128    224    
80     0      
32     112    
32     128    
-192   224    
-144   0      
144    -16    
-672   -208   
96     -384   
160    -80    
-128   -208   
-320   -256   
-128   -208   
80     272    
-624   -80    
-176   -1568  
240    -672   
128    96     
-608   -64    
0      -448   
-320   256    
464    992    
-96    592    
-304   -976   
-128   -208   
224    80     
128    -208   
64     480    
208    -224   
128    80     
192    368    
-320   -288   
-144   -240   
-128   -48    
240    128    
128    -288   
192    32     
-336   -272   
-416   -608   
176    976    
16     384    
64     -368   
0      400    
80     -256   
32     -640   
160    432    
-96    80     
80     -384   
-288   384    
496    784    
-672   -544   
112    288    
-240   -256   
304    976    
-192   -272   
-64    176    
272    48     
192    304    
-176   -368   
-64    176    
0      128    
16     -192   
176    144    
-16    128    
-160   -256   
80     0      
-16    192    
336    -624   
-176   128    
64     352    
16     -224   
-128   32     
192    64     
16     -16    
-32    -112   
16     80     
96     32     
80     32     
-64    -64    
0      128    
-48    64     
96     64     
96     80     
144    16     
-80    96     
32     16     
96     32     
-32    -112   
160    -144   
32     96     
16     160    
-32    -16    
96     64     
-16    32     
208    0      
-336   -304   
0      -80    
112    304    
-112   -32    
112    -32    
-144   0      
0      0      
96     -16    
176    -48    
32     48     
-192   -528   
-128   112    
-64    -16    
-240   -128   
160    80     
-16    64     
32     0      
160    80     
112    32     
208    -64    
112    80     
80     112    
80     -16    
-16    144    
-80    112    
64     144    
16     16     
144    16     
-320   -256   
256    -80    
96     112    
-32    -656   
96     224    
-160   112    
64     -16    
160    48     
160    48     
-224   0      
160    16     
16     96     
176    16     
352    48     
96     96     
-64    832    
-208   384    
32     -112   
32     -320   
-32    32     
304    -96    
-592   -96    
32     176    
-240   -224   
368    -256   
544    320    
-144   80     
656    0      
240    144    
-400   48     
0      0      
-128   -96    
320    32     
240    -592   
352    128    
192    128    
240    80     
464    160    
240    64     
0      32     
-192   -176   
736    560    
-1024  288    
-368   -336   
176    -256   
512    32     
480    64     
288    0      
-32    -224   
-16    16     
560    -480   
-128   -64    
-272   -32    
-96    48     
208    16     
272    112    
-32    0      
80     -32    
224    80     
-160   0      
224    144    
-16    -64    
-160   -80    
144    -80    
416    176    
-96    -240   
256    48     
-144   -496   
240    48     
208    112    
-32    16     
160    16     
-112   48     
192    128    
16     -128   
176    0      
64     -144   
32     48     
80     -64    
112    32     
-32    -96    
112    112    
16     -48    
80     48     
144    320    
144    160    
-32    0      
0      -16    
-16    32     
32     32     
96     -48    
352    16     
144    80     
96     -224   
128    -48    
192    -304   
80     96     
80     128    
-96    112    
0      0      
-48    128    
64     176    
256    160    
112    -112   
-160   -176   
128    160    
80     112    
240    80     
64     -272   
336    448    
-272   -352   
160    -176   
0      368    
-144   16     
-160   -64    
128    -80    
848    640    
-976   1312   
368    16     
192    -176   
112    256    
416    -96    
-160   -368   
144    544    
-48    -640   
48     -224   
-128   528    
32     -16    
480    -672   
-336   -432   
128    -432   
32     144    
-16    -336   
16     -304   
160    -400   
48     -800   
80     128    
96     352    
544    160    
-208   368    
-80    48     
-112   48     
112    400    
400    80     
480    400    
-336   288    
-128   -192   
-1104  -208   
112    -336   
64     -352   
128    -496   
-64    -64    
-144   -304   
112    0      
80     224    
80     -112   
208    -144   
-16    -176   
64     -192   
-96    64     
-272   -96    
64     -96    
-560   -128   
-192   -80    
208    -96    
80     -16    
16     -48    
112    -240   
-96    32     
224    -160   
80     80     
-16    -64    
240    32     
128    0      
96     -64    
48     -64    
16     -144   
-320   -128   
96     -48    
272    0      
96     -96    
160    -64    
144    -128   
112    0      
16     -480   
96     16     
144    -96    
32     16     
96     32     
112    -80    
-224   -112   
112    32     
-128   128    
-144   96     
-1840  -64    
128    0      
240    0      
272    160    
-80    128    
-144   -224   
80     -80    
112    -816   
208    176    
16     64     
256    80     
32     96     
80     -112   
-336   -96    
112    192    
-400   64     
208    -64    
-240   -32    
96     -272   
352    -64    
16     -176   
80     96     
48     -832   
-144   -32    
160    32     
192    16     
0      0      
80     32     
-112   80     
-368   -64    
-864   -128   
0      -144   
-400   240    
368    -64    
112    64     
-64    -128   
-208   -80    
112    -496   
208    16     
336    16     
256    -80    
192    176    
-240   64     
-528   -96    
144    -304   
-432   -416   
544    -192   
0      144    
-544   0      
-80    48     
112    -80    
336    80     
464    -336   
-96    288    
-144   640    
144    224    
-96    -48    
16     368    
-320   128    
80     -48    
-112   -128   
112    -288   
-1600  192    
96     -144   
16     -112   
-80    -96    
16     -64    
-240   -16    
112    -320   
208    -192   
320    64     
160    160    
32     -112   
-16    16     
-128   -48    
-96    224    
0      16     
144    -48    
-800   80     
144    32     
-32    -496   
256    224    
-304   0      
-512   -80    
-96    -240   
-112   96     
-112   288    
-1616  -704   
-144   240    
304    -32    
0      -64    
-208   0      
80     -208   
-160   -368   
64     -32    
-848   -80    
128    -144   
-272   -240   
160    -144   
-256   -400   
320    -16    
96     368    
0      96     
176    -32    
48     272    
160    -224   
-448   -256   
-32    96     
-128   -64    
64     -112   
-224   -160   
0      128    
128    560    
-560   -48    
112    -352   
-96    -16    
80     896    
160    544    
208    -304   
-352   -528   
192    -224   
-128   752    
64     304    
48     -208   
-208   80     
160    144    
-144   0      
0      -16    
-32    0      
-112   16     
-80    -192   
-48    -176   
-224   64     
-112   0      
-816   -64    
-192   48     
-48    -128   
160    -64    
32     0      
112    128    
32     32     
-144   -16    
-224   16     
240    64     
-208   80     
-176   -32    
-208   64     
320    48     
-32    0      
-272   -64    
352    64     
-816   -16    
176    48     
-64    -112   
-48    -112   
-128   48     
-96    -32    
-144   0      
-16    64     
224    112    
-272   -16    
80     -64    
-304   48     
128    64     
-96    -48    
48     48     
-1216  -336   
-128   -144   
144    208    
-176   144    
-112   0      
192    16     
112    -224   
-144   -208   
-48    256    
-256   32     
-128   80     
64     80     
176    -16    
-176   -64    
48     0      
-608   -144   
-32    -80    
160    16     
208    32     
64     -16    
32     48     
48     272    
-16    -48    
112    -16    
-112   64     
-16    32     
-64    32     
144    80     
-176   16     
160    160    
-384   -80    
64     32     
112    112    
-48    32     
48     -32    
-192   -176   
144    -96    
96     48     
-208   32     
-80    128    
80     -32    
-96    0      
-32    160    
-272   -32    
112    128    
-176   -32    
-112   0      
64     -16    
-160   48     
-80    -16    
-704   -832   
128    -448   
208    368    
-544   144    
-208   32     
-160   -128   
-288   -80    
176    304    
-240   112    
48     96     
16     16     
80     32     
192    96     
128    -16    
112    -80    
80     0      
64     16     
80     128    
-16    -32    
192    80     
-288   144    
240    128    
160    0      
-208   -32    
-64    48     
-384   -160   
0      -336   
0      -48    
-224   80     
112    16     
32     32     
48     16     
80     32     
96     48     
64     48     
-128   0      
-80    -112   
336    32     
128    -16    
-176   64     
144    208    
-272   64     
-448   -112   
-144   -128   
272    96     
256    -176   
320    32     
144    192    
-96    32     
-80    -112   
-64    -32    
-256   48     
0      64     
-16    192    
208    176    
80     48     
-16    112    
160    80     
48     32     
160    32     
-96    112    
-64    128    
144    48     
80     64     
0      -32    
96     96     
-112   32     
144    320    
32     144    
16     32     
240    400    
-96    192    
208    -544   
-160   416    
176    160    
240    -288   
32     112    
144    -64    
-208   336    
176    -416   
16     -96    
-144   448    
112    0      
-160   240    
272    -32    
-48    48     
-32    144    
112    -128   
-320   144    
512    -1312  
0      1392   
112    -208   
-64    -544   
-96    848    
-192   -400   
320    -32    
64     176    
256    -608   
48     -400   
-80    -1696  
368    320    
-176   336    
-48    -16    
-192   -400   
432    320    
0      192    
-48    -112   
272    240    
-32    256    
-96    80     
112    -96    
80     -16    
-80    -160   
320    -176   
-272   -368   
64     -32    
-48    0      
352    16     
0      16     
224    272    
-240   -48    
80     96     
-128   -80    
-16    -64    
176    16     
96     320    
256    176    
-32    -144   
224    96     
80     80     
160    64     
208    -112   
96     160    
-160   208    
-208   -224   
208    -208   
32     112    
320    -32    
48     16     
-48    48     
-48    -32    
80     80     
16     -160   
272    -48    
48     -144   
32     80     
64     -336   
-16    128    
224    -192   
-80    48     
-16    -16    
112    0      
128    80     
32     48     
80     176    
176    48     
48     -32    
96     -32    
128    48     
0      -272   
48     224    
240    96     
144    0      
-32    -32    
-112   96     
96     -112   
256    -64    
-16    -128   
176    64     
128    112    
32     -80    
176    16     
64     -64    
16     64     
-64    -176   
48     -16    
128    48     
-16    -48    
80     -784   
64     96     
-112   16     
160    272    
112    -16    
192    -32    
-48    32     
224    -304   
16     96     
144    0      
112    0      
96     -64    
80     48     
240    16     
-48    256    
176    -32    
32     16     
240    240    
-192   -80    
-80    -192   
160    -576   
208    -1376  
144    16     
96     240    
144    48     
144    288    
-448   -32    
-272   -208   
-112   -160   
128    -96    
288    208    
416    -176   
-176   0      
-192   -128   
-224   96     
224    240    
160    64     
-128   32     
80     -176   
64     16     
224    -672   
112    672    
480    512    
16     160    
-176   -64    
-256   96     
192    -240   
-320   -1008  
128    -128   
320    320    
-832   176    
32     -32    
192    -208   
128    272    
-416   288    
304    -240   
96     -672   
128    128    
224    -160   
176    -592   
-16    160    
96     -272   
-16    -128   
-64    -32    
-144   400    
-704   -176   
-32    -176   
176    112    
-320   192    
-64    -112   
448    288    
-224   -144   
176    -992   
480    96     
-64    -368   
-64    16     
256    208    
-240   0      
32     -80    
432    64     
-464   -272   
192    -256   
-16    -16    
112    -64    
128    -48    
160    -96    
-48    -16    
-48    -720   
112    256    
0      272    
144    464    
144    0      
128    112    
-64    48     
32     0      
-432   -144   
176    0      
-1232  0      
336    128    
-96    32     
416    96     
-304   192    
176    -416   
320    208    
240    96     
320    16     
32     128    
16     -16    
-224   64     
-144   -176   
240    -80    
-192   -16    
-352   -32    
-16    -16    
-1024  -64    
96     -352   
288    -400   
352    -80    
96     272    
-96    -1456  
48     -32    
-48    48     
-32    -112   
-640   -192   
592    -32    
128    32     
-32    16     
-896   -224   
-304   -128   
-288   -16    
64     16     
-80    32     
224    -160   
-112   -112   
224    -720   
-32    48     
-64    16     
128    -32    
112    48     
144    16     
-208   -16    
96     16     
-80    16     
-80    -32    
80     -80    
-48    -336   
128    64     
-16    64     
112    64     
-96    -96    
128    -16    
176    48     
160    48     
-64    32     
368    144    
-528   144    
128    16     
192    -16    
176    -32    
-848   32     
128    -112   
176    96     
208    -96    
128    112    
-304   -48    
-1888  -16    
-160   48     
-128   -32    
-144   16     
160    48     
-32    -32    
16     -48    
64     16     
-80    -112   
0      64     
-1408  -144   
64     96     
-544   -112   
-304   64     
0      -64    
-576   48     
-128   -16    
-992   48     
48     80     
-560   -32    
64     256    
-240   0      
-288   -112   
48     240    
16     176    
-128   -64    
32     48     
160    0      
-176   48     
-112   -32    
-64    32     
16     -48    
-240   64     
0      -112   
-1120  112    
-96    128    
48     -80    
-16    80     
-32    48     
128    288    
-112   112    
-128   -48    
-80    -96    
32     -96    
-176   16     
-32    112    
-96    64     
-256   48     
-16    -112   
-272   16     
-176   64     
-1504  -32    
432    16     
-464   -16    
256    480    
-304   400    
-240   64     
-96    48     
112    368    
-224   592    
480    640    
-576   -544   
-400   -832   
48     688    
192    880    
96     -48    
272    -272   
48     -112   
112    32     
176    144    
-160   -128   
208    -32    
-256   -320   
288    432    
304    688    
-48    -32    
208    -16    
-176   -48    
208    -16    
-352   -80    
32     -160   
-272   -240   
-32    -16    
320    0      
128    16     
176    -128   
176    176    
-288   -80    
-240   -208   
-320   80     
80     256    
560    480    
-496   -208   
-304   -496   
-576   192    
1232   1248   
-1328  400    
32     -448   
-1376  -128   
240    144    
368    192    
784    416    
-160   -384   
32     16     
-48    96     
0      -64    
-80    112    
-96    48     
64     16     
-128   0      
144    96     
0      16     
0      -608   
-304   736    
16     -192   
16     -64    
-176   -16    
64     -64    
16     128    
96     176    
48     -16    
128    -592   
-256   720    
176    -528   
-240   496    
208    16     
-32    -96    
-32    -368   
-768   -944   
-192   32     
-144   368    
288    -352   
192    224    
272    208    
-288   64     
-240   -16    
-112   -16    
32     16     
64     -336   
48     -80    
144    -96    
-160   -96    
96     48     
0      0      
160    32     
160    144    
-80    0      
64     -192   
-160   -16    
-16    288    
-176   -16    
-48    -48    
256    0      
-16    32     
80     -16    
48     -32    
-544   304    
448    64     
-96    96     
256    80     
32     80     
64     -32    
-16    0      
-48    48     
112    32     
208    96     
-160   -224   
368    -320   
-192   304    
-96    240    
176    -80    
-176   0      
-80    336    
176    144    
80     -192   
-80    64     
-192   -96    
320    -336   
-192   -80    
256    64     
48     -224   
-64    48     
-288   48     
352    64     
-288   96     
48     96     
-160   192    
496    288    
-384   80     
-16    112    
0      288    
64     -224   
160    -48    
208    80     
-96    80     
-192   192    
96     288    
256    112    
96     192    
144    0      
288    16     
-32    0      
-112   80     
32     48     
80     -48    
-32    -128   
144    80     
144    128    
-64    0      
160    160    
-80    128    
48     32     
48     64     
80     112    
-304   -208   
144    -1152  
16     0      
-176   -16    
208    -336   
144    -96    
400    336    
-240   304    
-64    -96    
16     -64    
48     80     
-208   32     
208    48     
-96    32     
112    16     
-80    32     
80     32     
-80    80     
128    16     
80     64     
0      144    
112    64     
-48    -16    
-16    -112   
16     64     
48     64     
16     128    
-96    80     
96     -64    
160    32     
128    32     
-64    -16    
-16    -32    
32     -576   
-48    288    
112    320    
320    576    
-208   832    
320    208    
240    112    
0      -16    
-96    -752   
-48    -192   
224    416    
-176   -176   
96     0      
192    928    
-144   0      
288    -1168  
288    320    
240    144    
-144   -80    
32     64     
192    96     
272    224    
320    -96    
64     256    
352    -144   
-560   -256   
-176   64     
-32    -160   
112    -256   
560    -112   
288    -560   
-112   -48    
80     -176   
-144   16     
-496   -672   
-192   -16    
-16    112    
304    -32    
432    112    
1040   496    
-48    400    
-544   32     
-16    -112   
-80    -400   
192    0      
96     192    
0      176    
96     -144   
80     176    
64     0      
64     -16    
96     -32    
112    -16    
80     -32    
224    32     
112    64     
-80    -176   
160    32     
144    160    
304    160    
-96    -240   
192    48     
64     -240   
112    -192   
160    -80    
-112   96     
-80    48     
112    64     
-112   16     
96     -176   
96     112    
32     96     
16     -96    
144    -160   
64     16     
48     -144   
-16    96     
144    -16    
-80    16     
112    32     
80     128    
160    96     
16     16     
-48    -96    
192    64     
144    96     
272    0      
32     16     
-16    -96    
-80    48     
96     96     
16     48     
432    240    
-416   128    
0      -704   
464    -672   
-112   -16    
640    -368   
192    -624   
-336   -144   
-144   -1168  
-240   -32    
96     128    
240    -112   
-208   48     
352    16     
0      128    
-160   0      
240    -432   
304    0      
0      -528   
-48    96     
192    -176   
144    -32    
-112   -112   
208    32     
176    -96    
-32    -464   
240    -80    
-96    224    
176    -16    
-32    -32    
112    -64    
128    -192   
32     64     
176    0      
-16    0      
-48    176    
-192   32     
-128   -144   
160    -16    
112    16     
288    96     
48     32     
-16    -624   
-112   -48    
160    -32    
80     0      
-112   -96    
128    16     
-80    0      
224    -96    
-304   -128   
-32    -48    
-912   0      
-32    -64    
272    32     
96     0      
-112   -128   
128    -304   
0      -32    
256    -848   
-160   -48    
224    -48    
-48    112    
112    -96    
32     -48    
80     192    
-128   16     
-272   16     
80     -32    
80     -64    
80     -176   
32     -16    
176    -48    
-368   -32    
112    -144   
16     -48    
144    -176   
80     192    
128    0      
0      -16    
-112   128    
48     32     
-48    -48    
144    -48    
-1488  0      
320    96     
-144   -128   
112    -64    
64     -16    
192    320    
-48    0      
32     -256   
112    64     
48     -16    
272    208    
-176   96     
-16    -448   
-112   -32    
160    -128   
-496   336    
-32    -144   
-32    80     
16     -256   
-64    32     
48     -256   
112    80     
272    -96    
64     -208   
256    112    
272    736    
-496   1424   
-16    -160   
-64    -592   
288    320    
-240   -16    
112    160    
80     -96    
576    -640   
-96    208    
32     -16    
-96    -32    
48     -560   
-80    -640   
0      1040   
240    240    
-416   -576   
-256   -448   
-224   400    
-256   -112   
112    -128   
272    -32    
64     0      
160    48     
176    -64    
240    -96    
48     256    
-96    256    
-128   -480   
-576   176    
-112   336    
-112   96     
64     -112   
-240   -208   
128    304    
-112   192    
160    -288   
-32    64     
-128   -176   
-144   -16    
-32    -224   
-976   -464   
-176   208    
-688   448    
-192   64     
-192   -240   
-48    -96    
368    144    
-272   -128   
112    112    
256    176    
-1040  48     
112    112    
-48    -96    
16     128    
-48    -80    
-144   176    
-96    32     
-272   96     
160    352    
-784   0      
0      -80    
-336   64     
-96    32     
112    -32    
80     -112   
-336   -64    
-160   -64    
-208   -160   
-16    352    
-48    80     
144    192    
288    208    
-288   160    
16     208    
-400   512    
-528   320    
-160   96     
160    432    
-416   32     
-304   -32    
-128   -112   
160    160    
64     336    
64     16     
-80    256    
-80    48     
-176   -96    
48     128    
-128   -144   
240    -224   
-16    -80    
-80    32     
-64    -192   
-1184  16     
144    192    
-64    -208   
160    -464   
-144   -160   
-192   32     
-176   64     
64     224    
-208   96     
16     64     
-48    -96    
32     64     
-48    96     
-352   -128   
0      -128   
-1104  -48    
64     112    
304    128    
-112   208    
0      -64    
-160   -128   
-64    -144   
-80    80     
64     0      
-32    -32    
-80    16     
-80    -16    
-144   16     
-48    -32    
32     -16    
-352   -320   
112    -32    
-144   192    
-32    208    
-48    32     
288    48     
64     96     
32     -16    
208    48     
-240   -48    
-80    48     
-224   -272   
496    -16    
-208   64     
288    464    
-336   320    
-32    48     
-992   -16    
-32    -1504  
16     -240   
272    -272   
96     288    
-112   -208   
-160   -144   
112    -352   
96     96     
-48    192    
48     80     
-64    32     
192    128    
288    320    
-128   416    
-608   128    
-176   160    
80     0      
-64    -160   
176    -32    
48     176    
192    192    
-96    240    
-48    -32    
-336   -368   
-288   -240   
-144   -224   
80     -176   
-160   -224   
96     160    
64     96     
16     240    
-32    -16    
32     64     
-48    240    
-16    48     
192    -144   
64     -336   
-32    -240   
-64    -80    
80     -176   
48     80     
208    512    
-64    240    
16     -320   
96     -192   
-16    112    
192    128    
-224   -768   
-16    224    
112    -144   
-48    -96    
112    288    
-80    -192   
-112   -80    
112    -240   
64     48     
-64    -384   
-160   96     
-224   16     
0      -128   
96     208    
96     -16    
192    80     
240    352    
-160   512    
-144   736    
128    112    
-16    -464   
-176   160    
304    176    
-160   -176   
96     -16    
-288   -16    
-16    80     
-144   80     
0      -32    
192    0      
256    80     
96     64     
16     48     
80     128    
-224   352    
-416   144    
-48    0      
368    -80    
416    16     
-112   -64    
256    32     
16     208    
-528   0      
32     16     
336    112    
-352   -160   
480    -224   
560    224    
896    544    
-496   160    
160    16     
-112   64     
-96    64     
-288   -16    
272    -32    
128    64     
352    192    
-128   -32    
128    -16    
112    80     
128    48     
112    48     
-32    -160   
160    0      
-368   96     
64     0      
-80    0      
-16    64     
64     -16    
64     -304   
112    48     
176    -16    
-128   0      
96     16     
-16    16     
128    0      
112    80     
128    96     
-208   -128   
176    -48    
32     112    
256    32     
16     80     
16     32     
-272   -416   
240    64     
-368   304    
224    -128   
32     192    
-144   48     
560    144    
288    160    
176    -128   
-32    48     
-160   64     
288    32     
-192   80     
64     128    
176    208    
-48    -224   
176    -208   
-16    -640   
-208   48     
208    48     
-48    80     
-80    32     
176    48     
-496   -256   
128    -32    
432    208    
-256   128    
-96    -80    
304    -32    
-160   48     
160    128    
-416   -16    
352    -400   
144    -64    
272    -32    
384    128    
-80    0      
32     48     
-80    0      
256    80     
-256   48     
128    112    
-48    16     
144    0      
32     48     
16     0      
240    112    
-48    -176   
48     48     
96     -672   
80     48     
320    144    
-368   0      
176    -144   
96     32     
-16    16     
176    96     
80     112    
-32    -48    
160    -16    
0      0      
80     208    
16     -208   
-128   16     
240    -80    
48     48     
-144   -64    
144    -48    
-96    0      
192    32     
-208   -48    
240    80     
176    112    
-96    -304   
32     448    
176    112    
-112   -112   
160    -352   
-64    -16    
352    160    
-240   -128   
-16    0      
176    224    
64     160    
288    0      
48     -48    
96     96     
160    144    
-160   -224   
80     -176   
-48    16     
80     208    
32     0      
48     -304   
-96    -96    
-64    96     
64     32     
128    32     
128    -80    
368    176    
-160   48     
32     -400   
112    -112   
48     -16    
48     -64    
32     144    
-48    320    
160    576    
224    80     
-96    -352   
0      -80    
96     160    
368    384    
48     -448   
144    -320   
-16    -288   
112    -112   
80     48     
144    -160   
128    -640   
96     -64    
80     0      
80     -16    
320    256    
-48    192    
80     -192   
64     -224   
-16    -112   
64     -128   
0      128    
256    -384   
176    -176   
192    -432   
-32    -288   
192    -640   
-384   -416   
-336   -224   
-64    -448   
160    -256   
464    -160   
448    -96    
-112   -48    
0      -336   
32     80     
-208   16     
16     0      
192    16     
144    48     
288    64     
16     -112   
-176   -304   
288    -368   
304    -224   
336    -272   
176    -80    
64     160    
-416   192    
-208   -272   
112    -320   
-32    16     
-16    -96    
-1712  -256   
-320   48     
-176   16     
-16    -16    
320    32     
32     64     
-128   -48    
128    -768   
-16    -64    
-48    -112   
224    160    
-48    -32    
-32    -112   
-144   -48    
64     -32    
-80    144    
-96    -80    
80     16     
96     0      
112    -64    
80     -400   
-368   -80    
-16    -672   
112    192    
-32    128    
112    96     
48     80     
64     0      
-32    -48    
160    144    
-144   272    
32     160    
-928   -64    
-16    -528   
-48    -384   
144    -304   
0      -64    
160    64     
208    208    
80     -240   
-256   -752   
48     -304   
192    -304   
-240   96     
144    -224   
-96    -352   
80     48     
-1136  80     
-16    208    
-336   -64    
0      -80    
96     -96    
240    -96    
416    160    
-160   -16    
176    528    
-240   432    
-96    80     
128    -80    
32     -32    
-400   0      
112    -112   
32     32     
240    64     
-64    48     
-64    144    
176    160    
-80    -336   
80     192    
256    176    
448    256    
-528   160    
128    -80    
-416   0      
-112   -192   
16     -272   
0      -368   
-48    -304   
-240   -320   
336    96     
80     -160   
-32    48     
304    -304   
-64    32     
-32    -32    
-144   0      
240    48     
-144   -160   
32     128    
0      -192   
-224   -112   
-128   -32    
-416   128    
272    -16    
16     16     
-976   -144   
-16    16     
-688   144    
144    208    
-96    160    
-704   112    
0      96     
96     -48    
16     96     
96     -16    
0      -16    
80     192    
128    16     
208    -32    
-64    -48    
-16    -192   
-256   128    
-288   192    
-560   16     
-96    48     
-112   -96    
-160   -128   
208    80     
288    48     
-112   96     
-144   224    
-64    144    
96     576    
-64    192    
160    -368   
-48    384    
16     -128   
-272   -176   
272    -368   
-208   -144   
288    144    
64     80     
-192   48     
-16    -48    
-448   -224   
-224   0      
80     -144   
96     384    
-32    544    
16     -352   
-64    96     
0      -256   
-144   -288   
-48    272    
-160   -48    
16     -608   
288    240    
-176   240    
-96    -32    
-240   -64    
32     -112   
-592   -48    
16     48     
-128   -64    
96     160    
32     -48    
-112   -16    
240    96     
-400   -64    
0      80     
-176   640    
-112   432    
-48    -64    
0      -128   
-336   -48    
16     48     
80     512    
-288   368    
-16    -128   
-48    -576   
480    -96    
-352   144    
-96    16     
48     320    
-688   64     
32     0      
96     112    
160    160    
-128   -48    
208    -112   
224    144    
-336   -16    
-64    80     
-80    -16    
-256   64     
16     -96    
0      32     
16     96     
32     96     
352    80     
-64    -32    
-96    -64    
240    -48    
0      32     
-272   -96    
320    -160   
-32    -240   
-80    -64    
-1424  0      
208    112    
64     48     
-144   0      
-48    32     
48     64     
528    -96    
-336   -80    
-480   0      
-80    -16    
0      -16    
-48    -32    
448    16     
-368   -144   
-288   0      
-1296  -112   
64     112    
32     0      
112    48     
160    48     
64     -16    
176    -32    
144    176    
-112   -16    
-64    16     
80     32     
-160   -16    
96     80     
-80    0      
96     48     
-32    16     
256    224    
-288   64     
96     0      
-64    64     
-16    16     
-80    -128   
96     -224   
256    192    
32     32     
0      48     
176    96     
-160   16     
-16    0      
224    272    
-496   32     
368    -80    
-144   -32    
128    0      
-144   -48    
-176   32     
160    -48    
-112   -32    
272    48     
-96    -80    
-96    -64    
0      0      
-144   -64    
80     48     
512    448    
-128   96     
-448   -336   
128    16     
-32    128    
-368   -144   
800    -48    
320    160    
144    272    
-32    0      
-112   32     
64     144    
-16    144    
16     80     
112    48     
-64    80     
16     176    
144    -16    
-48    -16    
32     80     
-16    -80    
96     0      
112    272    
-176   80     
48     16     
-16    208    
240    112    
0      368    
0      -48    
48     -128   
-112   -48    
384    -32    
48     400    
80     16     
-208   -80    
160    32     
-144   80     
32     208    
64     -48    
-80    112    
80     288    
144    -240   
-96    16     
128    -144   
48     -128   
-64    0      
96     64     
48     192    
48     16     
48     -160   
256    320    
80     48     
16     -176   
-384   -64    
240    -832   
32     480    
272    176    
-384   -368   
400    320    
240    272    
336    176    
-176   -592   
-144   -192   
-32    -144   
112    112    
0      -160   
96     144    
304    368    
0      160    
144    64     
-224   -96    
320    -192   
-32    -288   
64     -224   
64     64     
-16    64     
-144   -64    
32     96     
176    16     
144    -16    
112    160    
-16    32     
128    304    
48     -112   
16     -112   
-128   -224   
16     -208   
192    160    
224    -64    
0      48     
48     368    
128    80     
96     80     
128    48     
64     32     
-16    -48    
-48    -144   
112    -128   
128    -96    
-144   192    
80     32     
-176   144    
-176   80     
80     -192   
208    96     
0      -256   
-48    192    
224    32     
32     -48    
-304   -272   
-64    192    
-64    16     
336    -32    
256    -16    
432    96     
-32    144    
-32    -352   
256    -64    
144    -208   
128    0      
80     -64    
32     0      
48     304    
-144   112    
32     96     
240    96     
-16    16     
240    112    
-96    -16    
192    16     
480    320    
-112   48     
16     -32    
272    -176   
80     -48    
208    -240   
176    64     
-176   -1072  
80     -80    
-176   208    
64     -64    
256    -48    
96     48     
288    -32    
0      32     
-288   -240   
-80    -80    
160    16     
-112   -80    
-64    -304   
272    -288   
224    192    
144    128    
-128   16     
-16    32     
80     160    
0      80     
-48    192    
80     16     
32     -384   
64     -80    
160    -32    
144    176    
-96    48     
112    128    
96     -32    
32     208    
-80    -80    
224    32     
128    -16    
176    -32    
112    16     
-32    -16    
16     -240   
-256   -544   
80     -416   
-32    -320   
320    -96    
-176   0      
48     192    
-368   -384   
176    -560   
208    -272   
32     -80    
192    -64    
16     -144   
64     -320   
256    -224   
224    -640   
-16    -368   
80     -144   
-48    -176   
48     160    
176    -32    
-80    400    
352    -64    
-240   -160   
672    64     
-304   416    
-64    128    
-16    -48    
-16    480    
-592   176    
-112   64     
336    -480   
112    -128   
272    48     
-192   -352   
-48    -112   
-160   -672   
-32    -384   
80     -272   
144    80     
144    -160   
-256   336    
448    16     
64     -96    
-720   48     
-176   -608   
-32    -80    
128    48     
144    16     
176    -48    
-80    -80    
112    -80    
416    208    
-288   -192   
-336   -224   
128    224    
320    -400   
192    -48    
-256   16     
64     144    
-208   -272   
-480   80     
240    128    
-320   -208   
128    -160   
48     176    
192    -224   
-496   -48    
176    -512   
-80    64     
32     -352   
96     432    
-16    -144   
0      0      
-48    192    
-192   -16    
-624   -64    
192    144    
-48    -416   
-80    80     
-176   32     
320    176    
-272   -336   
160    -592   
208    160    
-32    -32    
256    112    
-176   -224   
0      64     
-208   16     
112    -80    
-464   -80    
128    -256   
-1376  48     
128    176    
176    160    
64     112    
-64    16     
96     -256   
48     64     
16     0      
144    32     
144    -144   
-32    -320   
-16    128    
80     -336   
-208   16     
160    112    
-48    -64    
32     -96    
-128   48     
-96    -112   
144    16     
64     -176   
80     -80    
-32    -96    
32     -176   
-160   -16    
144    -32    
-240   -64    
144    112    
-176   48     
96     -160   
-832   16     
208    -96    
-32    64     
528    320    
0      304    
176    -112   
112    -48    
112    16     
368    -464   
-512   -16    
-304   480    
-288   288    
-416   -208   
416    32     
240    160    
-528   48     
64     -112   
336    -16    
-112   -80    
-272   64     
80     -192   
-352   16     
-32    -112   
336    320    
-720   64     
176    -80    
16     -16    
288    -96    
256    -48    
160    -16    
64     16     
64     -128   
-16    -16    
-816   -96    
240    80     
-416   -96    
-432   -32    
-16    -48    
-16    256    
-608   80     
-2544  -144   
48     16     
80     -32    
32     -16    
160    64     
-208   80     
-128   -16    
-160   80     
-624   -48    
0      80     
0      -48    
144    16     
160    80     
-320   64     
-208   -48    
-496   -32    
-192   32     
-624   48     
272    96     
-464   -80    
48     -16    
-224   -16    
48     32     
192    -16    
-80    0      
144    80     
-160   -48    
32     16     
-112   -16    
-16    64     
-48    0      
-16    48     
-368   0      
-192   -64    
80     -64    
48     48     
0      0      
64     -80    
80     -240   
-144   160    
16     -32    
64     320    
-160   128    
16     112    
48     48     
-176   -176   
-144   -80    
-272   -16    
-128   -192   
-1360  -112   
272    160    
-336   -496   
-16    -336   
-64    208    
-208   16     
16     -208   
112    -208   
176    0      
-480   -160   
-16    64     
-576   -368   
-16    48     
96     512    
-288   -32    
-112   -224   
32     -80    
96     176    
416    416    
160    -320   
-16    -80    
-32    224    
16     160    
-96    -112   
-64    0      
144    32     
-48    32     
48     16     
-112   80     
144    -16    
-224   -48    
-176   80     
224    -32    
-208   -240   
80     496    
-96    -1088  
256    1200   
448    1024   
-672   -432   
-16    368    
208    -480   
272    800    
-176   -64    
-176   -160   
160    -64    
-352   128    
128    208    
-448   -320   
384    128    
-176   -176   
-176   96     
-16    112    
144    -16    
0      368    
-80    64     
-48    -96    
96     -48    
-96    16     
48     -176   
16     -144   
-176   -32    
192    -96    
224    144    
-208   -224   
-144   -160   
-32    -80    
-80    -80    
-144   -240   
-32    -96    
192    80     
128    96     
-336   -16    
48     32     
-288   0      
-16    -32    
-112   80     
144    192    
96     80     
48     -208   
176    -16    
-176   0      
-64    -176   
-144   -32    
128    32     
16     80     
-176   96     
-96    -16    
64     96     
-160   48     
-32    160    
-144   -32    
48     48     
208    32     
-32    -16    
160    -48    
-32    128    
-160   96     
-80    224    
400    304    
16     -48    
160    -32    
-48    112    
-112   48     
-32    -48    
32     64     
112    64     
-64    -80    
256    -48    
32     80     
-112   -32    
112    -128   
432    608    
-480   384    
0      -64    
400    32     
160    128    
0      80     
48     288    
0      0      
160    -176   
-144   -160   
32     -96    
144    144    
-96    160    
448    16     
-16    -32    
-80    160    
-336   48     
32     16     
-192   -96    
-256   -208   
-80    -112   
128    144    
256    240    
-80    80     
0      96     
-80    0      
96     208    
80     112    
-32    -112   
144    32     
-16    192    
240    96     
128    -64    
0      -320   
256    -160   
-64    -48    
128    64     
96     96     
-96    -544   
0      64     
-112   32     
-208   -16    
-64    0      
-16    16     
144    -176   
384    -64    
-48    -80    
272    160    
-320   336    
-96    -128   
160    -320   
112    -96    
144    32     
-64    -1344  
80     -16    
16     -80    
-144   -112   
256    -80    
112    160    
-48    192    
-48    160    
-112   0      
48     64     
-112   80     
112    160    
112    624    
-48    -96    
-16    -336   
240    96     
-128   -336   
224    -80    
144    80     
272    -288   
160    240    
-96    480    
-208   -112   
-32    -96    
272    16     
272    32     
320    -144   
-432   -256   
192    -576   
-16    336    
96     512    
320    432    
-480   -160   
160    -352   
16     272    
-16    0      
176    -80    
192    -32    
16     16     
96     176    
48     -80    
96     32     
-240   224    
384    16     
256    288    
-208   -480   
-176   16     
448    -80    
-272   -96    
256    112    
416    160    
-96    864    
-128   -592   
256    -144   
144    528    
-224   -240   
144    144    
144    48     
-80    16     
-16    48     
208    -224   
-16    -160   
192    -112   
-96    64     
112    -656   
-48    16     
176    -128   
128    144    
-80    240    
64     32     
96     -32    
32     32     
224    -48    
-48    -32    
-96    48     
96     -240   
-80    -16    
144    -16    
32     48     
128    -48    
32     112    
0      -16    
112    160    
64     64     
-32    -128   
-112   -80    
96     -96    
160    0      
80     -240   
-16    16     
192    -16    
-160   16     
224    -208   
-128   16     
144    -496   
80     144    
16     64     
144    16     
-176   -80    
384    160    
-144   64     
160    -128   
16     80     
48     -16    
-16    80     
144    -32    
32     0      
32     -48    
192    64     
-32    -208   
16     -48    
144    144    
144    -992   
-128   32     
32     -64    
336    80     
-208   -352   
-96    -160   
256    80     
112    48     
112    16     
288    208    
-64    64     
-80    -32    
16     -48    
240    -176   
96     96     
0      -464   
64     16     
-304   -128   
48     64     
-48    -144   
96     -96    
48     -96    
48     -496   
192    -32    
48     240    
48     80     
-16    -80    
16     32     
128    -16    
-96    256    
160    -224   
-32    0      
-400   16     
208    -192   
-192   -288   
-480   160    
-208   -96    
80     -192   
-48    32     
-32    0      
448    128    
0      64     
128    128    
64     16     
144    0      
-128   32     
-416   -32    
-496   -48    
48     -96    
64     -96    
224    0      
272    32     
-256   -80    
528    112    
-16    -144   
256    128    
-352   32     
-208   -64    
112    -32    
-336   -16    
192    -96    
16     -272   
-464   -96    
32     -64    
-1792  16     
80     64     
256    -32    
-144   -96    
-96    -272   
352    -320   
192    -48    
272    64     
-160   208    
-528   -64    
64     32     
-384   -80    
208    0      
48     -48    
-144   -160   
48     64     
-176   -32    
-48    32     
-128   -144   
-320   -48    
-64    -240   
144    32     
352    -720   
64     -16    
-96    0      
-192   -32    
64     64     
-112   16     
272    272    
-240   144    
-400   32     
112    -64    
-272   64     
144    -80    
240    96     
32     -80    
-32    32     
144    -448   
-112   32     
-48    -128   
144    -16    
112    48     
64     0      
-32    64     
128    224    
-304   80     
128    -80    
-528   80     
224    -80    
208    224    
-288   -144   
64     -112   
368    -384   
-224   0      
112    -224   
256    128    
112    656    
128    -192   
64     -256   
448    432    
-512   80     
48     832    
-288   -912   
-112   -848   
288    832    
432    -368   
720    352    
432    160    
-144   -208   
-240   32     
0      -48    
-512   -224   
160    48     
-496   -160   
528    -16    
-464   400    
192    -48    
-48    -272   
768    -144   
-272   432    
112    672    
416    224    
-880   368    
-720   -528   
-400   -368   
-1600  48     
80     -16    
-192   304    
-128   -32    
160    -144   
-128   -48    
320    -320   
-784   -272   
-416   -528   
-112   -128   
32     192    
352    96     
-416   96     
-160   0      
-272   112    
80     48     
176    272    
-800   64     
-112   -176   
-48    -352   
-64    -112   
144    32     
-192   -80    
176    -160   
80     112    
-16    32     
-16    144    
80     -96    
-64    -160   
-160   -64    
16     -112   
-80    -16    
-320   -64    
32     -96    
-1632  48     
-128   160    
80     -96    
192    0      
-272   -288   
112    48     
-48    -96    
-80    -64    
-80    48     
-160   -64    
0      64     
-144   0      
-48    16     
-848   -48    
-112   -64    
-1216  0      
80     -16    
-96    -176   
0      -128   
-160   -96    
-144   64     
-80    -32    
176    64     
32     64     
96     192    
-32    144    
-96    64     
16     32     
-64    -48    
0      32     
-112   144    
-16    96     
-864   -144   
-64    -80    
-128   -112   
208    128    
176    16     
256    128    
-160   80     
-208   -16    
96     -80    
-144   -16    
96     0      
-144   64     
80     112    
-272   96     
-32    -80    
-752   -80    
-112   160    
-160   -32    
112    -64    
32     16     
-80    96     
192    128    
-304   192    
-256   -96    
-64    -192   
192    -112   
-48    -48    
-144   -80    
-304   -48    
256    416    
-1056  400    
-32    128    
0      -80    
192    272    
336    144    
64     32     
-352   -192   
-64    -80    
-64    96     
0      112    
-16    368    
-80    -64    
288    -64    
-224   160    
288    320    
-128   128    
128    64     
0      32     
128    -80    
0      160    
-80    208    
-96    -64    
240    -96    
-64    -128   
32     -432   
80     -528   
-96    -48    
400    272    
112    64     
352    256    
-496   128    
-320   240    
-32    32     
80     368    
-64    -32    
80     -560   
32     64     
96     -48    
112    208    
128    144    
-320   -400   
-144   -64    
96     16     
-320   -192   
288    304    
-304   -144   
32     128    
64     32     
128    32     
-32    -256   
112    480    
-32    -64    
64     -64    
-64    144    
192    -336   
-48    160    
-240   -48    
-16    240    
-112   208    
32     48     
224    -224   
16     -368   
48     96     
16     48     
48     48     
-32    48     
16     192    
-192   80     
-48    -112   
-192   -304   
-80    -48    
-256   320    
960    1264   
-816   -160   
96     -704   
240    -352   
64     -208   
96     -256   
48     -336   
-32    -64    
96     48     
-48    80     
-160   80     
-64    -144   
-272   -256   
-96    32     
-64    -176   
208    96     
112    80     
144    96     
-32    -128   
400    128    
-80    64     
48     64     
48     16     
-208   16     
272    48     
-64    32     
288    64     
-240   -16    
224    112    
-112   80     
128    144    
-128   -32    
64     96     
-16    80     
112    64     
128    -32    
176    112    
48     80     
-256   64     
144    48     
160    128    
144    112    
32     -32    
-32    64     
16     -16    
160    0      
64     32     
-16    48     
-32    96     
0      64     
64     64     
176    80     
64     112    
-80    0      
-16    32     
256    80     
32     64     
-128   16     
96     16     
-192   -176   
-48    -336   
-32    0      
160    -400   
160    80     
48     32     
32     -16    
96     96     
-208   -48    
224    0      
272    32     
32     32     
160    0      
-128   0      
256    256    
-288   0      
-48    -48    
160    0      
-32    32     
160    -16    
128    112    
-16    80     
-112   -128   
192    -96    
192    256    
-32    48     
-48    -64    
96     48     
-128   48     
-96    -32    
336    -32    
16     -112   
-128   80     
176    -336   
-48    32     
-48    -992   
0      16     
80     -16    
16     -112   
32     -144   
160    64     
-160   48     
16     80     
112    -64    
80     -80    
80     288    
-224   16     
0      -112   
160    -160   
160    16     
32     -80    
272    16     
-32    16     
224    -624   
-368   -464   
32     336    
-112   64     
128    96     
384    224    
-480   192    
-256   -176   
-224   -272   
272    -272   
400    96     
400    128    
48     48     
-176   32     
-16    -736   
-80    0      
352    0      
-32    144    
-320   48     
784    592    
-608   272    
96     -176   
160    0      
80     -64    
272    32     
96     -160   
128    176    
-448   -736   
176    144    
496    64     
32     272    
64     -32    
208    -48    
160    16     
64     128    
304    48     
208    -368   
48     0      
144    -64    
-256   112    
-160   128    
-96    80     
-144   -272   
144    48     
-144   96     
288    96     
-32    -48    
-112   0      
0      128    
-208   -48    
160    -128   
-48    -160   
352    80     
672    96     
-208   -160   
-128   -224   
-32    96     
32     96     
-16    96     
-80    -16    
32     -272   
16     -16    
624    256    
-160   -176   
192    -384   
64     -416   
176    -48    
-48    176    
176    -16    
-48    288    
144    -400   
32     240    
-16    -224   
96     -400   
0      64     
464    -432   
-80    0      
496    -336   
160    352    
-32    -64    
-128   464    
-64    -320   
-64    304    
96     32     
240    -1136  
-112   160    
224    -128   
-32    0      
224    -624   
-80    -208   
288    368    
-160   512    
-224   -176   
224    -848   
-112   48     
16     -128   
-16    -32    
576    384    
-224   224    
192    -272   
-48    -32    
112    48     
-16    -16    
64     -496   
-32    -448   
16     128    
-304   0      
-336   -48    
208    48     
-48    64     
-64    -64    
256    -64    
-128   -272   
16     -208   
128    -64    
208    176    
128    -736   
80     48     
144    80     
-272   96     
256    -112   
-64    64     
-192   -80    
32     -32    
-192   256    
304    -112   
464    -272   
192    -304   
-48    -48    
48     144    
-96    16     
64     112    
240    288    
112    -784   
80     -64    
208    -128   
48     -64    
64     -16    
384    256    
-320   240    
-32    -80    
-656   -80    
272    -112   
-32    -112   
192    32     
-32    64     
64     -304   
80     -32    
-48    -1008  
-80    96     
-112   -80    
272    -48    
-112   -64    
128    -80    
-816   -160   
448    -208   
-176   -128   
128    -336   
-1392  0      
32     -16    
128    16     
-32    -224   
64     -176   
-16    -624   
64     -128   
96     -32    
80     80     
-160   80     
160    16     
-160   48     
80     16     
-256   -16    
256    32     
-272   48     
96     -16    
32     96     
-32    -240   
128    -80    
160    -128   
112    112    
-128   0      
176    -96    
-224   16     
512    336    
-576   304    
-48    -16    
-16    224    
144    -80    
-48    -160   
96     -96    
176    -16    
-16    -16    
-208   -160   
224    -384   
112    -48    
-192   -96    
192    112    
64     128    
-144   96     
-224   32     
112    -64    
-32    0      
16     160    
288    304    
-96    64     
-176   112    
-2144  144    
-48    320    
-192   -16    
240    288    
160    240    
0      192    
-320   272    
64     -48    
-160   -80    
224    272    
128    112    
240    -240   
16     -240   
-1088  0      
-64    144    
-480   96     
-96    -208   
80     32     
-144   96     
-160   -192   
-240   -128   
-96    112    
-1280  -176   
336    -112   
192    32     
-32    144    
-464   176    
-112   -224   
-256   -160   
208    32     
192    80     
-320   -80    
-160   -272   
32     288    
112    48     
-48    -96    
-16    384    
-176   -144   
-304   -304   
-352   192    
-400   80     
448    256    
-224   32     
128    -208   
288    48     
192    64     
-112   112    
-64    144    
16     32     
-16    48     
336    -16    
-288   -272   
-224   -80    
-128   16     
-464   -80    
96     -16    
32     0      
96     80     
48     32     
48     80     
-64    32     
-32    48     
-176   32     
-32    -16    
48     -64    
-96    0      
96     128    
-32    96     
-48    80     
-128   0      
16     208    
432    208    
-304   96     
-96    -64    
-192   -144   
128    -160   
-96    64     
-144   -32    
368    64     
112    128    
-416   -144   
80     -16    
-352   64     
-416   -96    
-160   -32    
240    208    
-832   64     
-256   64     
-224   -224   
112    -64    
128    32     
-144   16     
-64    96     
272    208    
-192   288    
-448   128    
144    -64    
448    -16    
-256   32     
-288   48     
256    96     
-928   -48    
64     16     
144    64     
-48    80     
112    32     
0      -144   
-64    -160   
-192   96     
-64    32     
160    64     
-144   32     
192    -32    
80     64     
-96    32     
-64    48     
-256   96     
176    48     
32     32     
-240   -32    
96     16     
-32    0      
-144   0      
80     0      
128    96     
32     16     
-64    48     
-336   0      
224    80     
-192   -64    
192    32     
-192   80     
128    0      
128    64     
-48    32     
-32    0      
128    64     
16     64     
144    64     
64     0      
-160   48     
-192   -16    
-80    80     
-16    32     
16     0      
112    48     
96     -128   
80     80     
144    192    
-32    -16    
128    144    
16     -16    
32     32     
96     -48    
0      160    
32     16     
16     -48    
-112   -80    
160    192    
-224   32     
96     48     
0      80     
-48    16     
144    -16    
16     -16    
0      -32    
32     -16    
32     112    
32     16     
-48    -16    
-176   -176   
96     96     
-96    -96    
64     -64    
-272   -48    
0      -272   
96     48     
0      128    
16     48     
80     16     
-96    -16    
80     64     
64     48     
64     32     
-32    -32    
64     64     
144    144    
32     80     
-272   0      
272    272    
-96    672    
320    112    
240    -320   
128    48     
192    176    
-48    -480   
-96    -304   
-64    272    
-16    -192   
-256   -16    
-176   160    
64     0      
-32    160    
96     208    
-32    64     
96     -32    
256    32     
224    224    
96     144    
-272   -768   
-128   304    
-432   592    
-80    -368   
160    -48    
112    64     
176    272    
304    496    
-784   -288   
-240   -144   
-160   64     
288    272    
16     208    
-368   -736   
560    1056   
-208   192    
-240   96     
304    96     
144    32     
960    800    
-320   -544   
-32    -128   
128    256    
-160   -48    
48     -192   
256    16     
176    -544   
192    80     
144    0      
-80    -32    
32     -448   
-128   928    
96     -304   
64     96     
112    528    
112    -160   
64     -96    
144    256    
-352   -80    
128    -320   
0      128    
-144   -672   
160    272    
-80    400    
96     -32    
-32    -96    
192    96     
240    160    
208    512    
-208   528    
64     -496   
0      -224   
16     192    
80     128    
-16    -48    
80     -144   
-16    0      
-144   -64    
64     -304   
352    256    
128    112    
112    240    
16     64     
16     -176   
0      208    
240    -48    
80     -80    
64     -112   
96     -64    
192    112    
32     64     
128    -160   
144    80     
-64    -784   
96     32     
288    256    
-192   352    
-80    128    
-48    -64    
128    -160   
240    128    
48     -16    
-96    -128   
192    -128   
96     -64    
176    -64    
224    16     
-16    144    
96     -304   
16     -16    
96     -1168  
32     16     
-32    32     
-16    576    
176    128    
160    128    
176    -16    
80     -32    
0      16     
64     -208   
128    0      
144    -272   
96     -16    
112    -48    
-112   144    
0      -368   
288    256    
64     0      
208    656    
-288   128    
160    32     
352    64     
-128   -160   
64     192    
-96    -32    
144    320    
208    16     
272    -80    
48     -208   
-160   176    
-112   -144   
96     112    
32     160    
48     272    
192    224    
-144   16     
-16    112    
-208   -144   
176    -80    
208    -48    
192    96     
48     -160   
128    32     
-112   -176   
-112   48     
144    -256   
-96    -608   
80     32     
16     -704   
16     -112   
112    -32    
-48    -288   
16     -80    
-160   240    
176    -160   
240    -176   
96     -64    
160    288    
144    352    
176    -272   
208    -64    
96     -64    
-144   16     
-64    -128   
176    -32    
-608   80     
192    -80    
0      -320   
176    -432   
80     -128   
144    -1424  
192    -48    
32     -16    
80     0      
-128   112    
64     320    
272    -16    
-144   80     
64     64     
-64    -240   
-1968  -192   
64     -224   
240    -176   
16     176    
-128   112    
48     -112   
240    -16    
112    -848   
240    304    
-112   192    
-96    -160   
160    -208   
272    192    
0      32     
48     -288   
-896   -208   
528    400    
64     -240   
176    -64    
-32    -80    
32     96     
-16    -96    
-272   -224   
16     224    
144    96     
160    240    
0      16     
144    0      
-80    336    
224    -32    
-144   -320   
-192   -128   
32     240    
-288   48     
-128   0      
-352   -176   
-48    608    
-384   -288   
-352   -64    
-160   176    
-400   32     
-64    32     
384    32     
80     192    
208    0      
-32    -176   
-48    -80    
-1072  -32    
-256   -112   
80     -48    
224    64     
-112   16     
448    -64    
-48    -16    
0      -1520  
64     64     
-112   16     
112    0      
-512   64     
512    64     
-320   -32    
-96    16     
-1296  -80    
176    0      
-704   -352   
576    -192   
384    128    
160    48     
-144   0      
64     -448   
128    160    
-96    -16    
192    32     
80     16     
112    -16    
-96    144    
0      -128   
64     -32    
32     128    
352    32     
144    16     
-96    -96    
208    -48    
-48    -32    
96     -16    
176    16     
-480   64     
0      -112   
-176   0      
112    -32    
128    144    
96     -80    
-32    -64    
-128   32     
-208   -96    
224    -32    
-16    112    
-16    -128   
48     16     
224    32     
-144   0      
-80    80     
-96    -112   
544    368    
144    -80    
192    -208   
512    48     
-304   0      
176    -192   
-352   -64    
320    160    
560    400    
-1248  -48    
64     -336   
528    -32    
-1136  32     
-288   -128   
-720   -32    
16     160    
-64    0      
0      64     
128    32     
-272   -80    
64     -64    
256    96     
-192   -80    
96     64     
-336   -128   
-48    -64    
-128   112    
-192   -96    
16     -64    
64     16     
-160   -16    
-608   32     
-304   -144   
0      -112   
0      -16    
32     16     
112    0      
-128   -96    
-112   16     
-80    -176   
352    96     
-544   -32    
160    0      
0      112    
96     -16    
-96    -64    
-288   96     
32     0      
-608   48     
48     48     
-16    64     
-48    160    
64     -80    
128    -32    
64     -96    
-208   -64    
160    160    
-96    16     
-32    16     
-16    64     
-208   272    
-96    176    
192    16     
-80    128    
-32    96     
0      -176   
-16    -16    
0      -128   
48     160    
128    16     
32     16     
160    112    
-96    32     
-96    -352   
-192   336    
-48    -32    
-96    -160   
192    128    
-208   -48    
-16    48     
-80    16     
64     16     
0      48     
-64    160    
0      -192   
16     32     
32     0      
80     32     
16     16     
-80    -112   
64     96     
-128   64     
-144   0      
160    704    
-352   -224   
-560   -224   
288    112    
64     -48    
0      144    
-144   16     
-160   80     
0      288    
-80    96     
-128   -272   
-80    96     
-128   -48    
-352   -848   
-96    400    
16     -272   
16     -192   
-272   512    
-464   -640   
-384   112    
-288   -256   
48     16     
32     176    
256    -16    
-64    128    
-96    32     
-112   -160   
80     -96    
0      64     
224    48     
176    240    
-544   -2032  
-224   112    
160    1040   
128    -240   
176    -16    
64     -80    
-48    32     
-128   416    
-544   -528   
-432   -160   
224    672    
-336   -304   
144    -464   
336    48     
336    320    
192    0      
144    -208   
-144   0      
64     448    
112    336    
-288   0      
-224   64     
-224   96     
128    96     
48     48     
272    176    
128    144    
-96    16     
0      112    
112    48     
-112   -64    
-112   112    
-64    96     
80     64     
48     32     
-32    -272   
48     -48    
-48    160    
32     -240   
48     -32    
-192   -32    
64     48     
-224   -32    
128    -64    
0      -32    
96     0      
32     -256   
-240   -240   
240    -64    
32     272    
96     16     
-80    32     
16     -32    
80     32     
144    512    
16     48     
48     -128   
336    448    
-32    480    
64     176    
-160   -320   
-32    80     
208    240    
-400   256    
208    -16    
16     -352   
16     16     
-160   -592   
-144   -288   
128    64     
16     352    
-160   256    
-96    80     
160    224    
336    176    
-288   768    
-208   144    
-96    16     
176    112    
96     128    
256    32     
-112   -192   
176    -128   
80     64     
80     64     
128    -32    
16     48     
-192   -48    
-16    80     
176    80     
48     48     
96     64     
144    176    
-144   112    
208    160    
64     32     
128    32     
-80    304    
144    -16    
128    -192   
-160   -32    
-32    16     
-80    208    
-48    -80    
288    -272   
176    80     
48     144    
16     -192   
96     -512   
-32    -272   
96     -64    
144    0      
-144   -160   
96     -80    
-272   -336   
112    -160   
128    208    
-400   240    
-16    -240   
-32    48     
64     256    
64     -112   
176    -80    
224    64     
112    112    
-272   0      
0      0      
144    -80    
80     320    
-80    320    
48     112    
128    -80    
-48    -176   
80     -272   
-48    -64    
16     -1280  
304    -48    
144    176    
64     192    
-16    48     
32     -48    
112    112    
-80    272    
-224   -64    
272    -288   
-32    -176   
-304   -192   
192    -320   
192    48     
96     144    
160    0      
-224   -96    
-32    -128   
64     -256   
32     -144   
112    96     
224    288    
176    144    
0      -160   
96     368    
96     -96    
0      96     
64     224    
112    -144   
64     208    
96     -224   
80     128    
320    0      
-208   -368   
96     0      
64     16     
-48    16     
96     0      
64     48     
80     64     
80     304    
96     -144   
0      -400   
-272   -240   
128    192    
128    -96    
208    -80    
304    16     
192    240    
256    80     
128    80     
0      -64    
128    -48    
0      128    
80     160    
16     144    
-16    0      
-96    48     
64     -32    
-80    16     
192    -128   
176    64     
336    -128   
-144   -16    
-480   64     
-80    -64    
224    32     
-32    80     
-64    -16    
48     160    
-128   272    
64     -320   
464    -144   
80     64     
-64    96     
96     -224   
48     -80    
112    -176   
48     48     
240    176    
-432   32     
176    80     
-16    96     
16     0      
80     -112   
224    -608   
192    -64    
192    32     
0      -16    
-160   80     
192    0      
-64    -48    
-224   -80    
352    80     
224    128    
128    -1040  
-464   -32    
176    -64    
192    -352   
112    -32    
160    -608   
-144   -176   
272    -528   
-64    -16    
288    128    
-32    -32    
-48    48     
-160   16     
176    0      
-64    16     
176    -80    
-16    32     
144    0      
320    -144   
128    -112   
-80    -96    
-48    -48    
48     -16    
-128   -80    
128    -176   
64     -128   
176    336    
-128   -48    
416    0      
160    144    
80     -224   
-48    32     
-496   -48    
96     -112   
-656   32     
-32    16     
160    80     
-304   32     
-96    -128   
256    -336   
-224   -96    
288    -96    
320    80     
-112   32     
-336   192    
-160   -176   
224    -128   
-176   32     
112    -32    
-352   -176   
1088   224    
-608   96     
-464   -128   
-48    -144   
160    0      
160    32     
272    -784   
256    48     
16     -48    
-128   80     
16     16     
-16    48     
-48    16     
16     -16    
-304   -112   
128    -80    
-1872  -112   
224    -32    
-80    64     
48     -48    
-64    -64    
272    -256   
-128   96     
240    16     
0      0      
208    224    
-64    32     
-96    -64    
144    80     
-16    32     
144    -16    
-672   -16    
176    -64    
-208   48     
128    -96    
-240   -112   
208    -528   
0      -32    
208    96     
-16    -32    
-48    0      
-16    16     
-256   -112   
224    -32    
80     80     
112    -96    
-208   160    
160    -32    
-1936  -64    
144    32     
0      80     
176    -432   
-64    192    
96     -448   
208    -224   
-80    192    
0      -48    
-16    -32    
272    32     
-96    112    
96     -224   
-592   -16    
48     -560   
-64    32     
208    192    
-64    -352   
160    64     
-48    240    
128    -816   
-80    32     
-48    64     
-32    -160   
16     -320   
-64    -208   
-208   208    
176    64     
-192   32     
128    -96    
-272   64     
112    -48    
208    176    
-656   224    
-112   112    
16     -80    
144    0      
-32    -128   
-16    -400   
-48    64     
80     272    
176    64     
160    192    
-16    -32    
80     16     
224    352    
192    176    
16     -80    
-736   -80    
-624   320    
-128   192    
-400   128    
192    336    
-912   512    
-240   144    
48     -384   
64     0      
416    16     
240    16     
-720   64     
176    240    
-544   -112   
-48    -32    
-400   64     
-224   112    
48     80     
-112   32     
448    464    
-240   240    
-112   64     
-224   -48    
16     112    
240    144    
-176   48     
-784   -224   
112    -16    
-192   -160   
-112   -80    
16     -112   
-304   16     
160    64     
-272   -176   
192    16     
-656   144    
384    96     
-672   160    
-448   32     
-528   -64    
64     16     
224    -288   
256    -32    
-176   -288   
-48    -160   
-16    48     
-384   96     
0      112    
96     64     
80     224    
-160   96     
-32    -96    
-480   -448   
-64    -320   
-1344  -176   
80     128    
80     64     
-80    160    
-144   -128   
-64    -16    
-112   -16    
128    -112   
0      -16    
96     -96    
32     -240   
-176   -384   
-80    240    
96     320    
32     224    
128    144    
176    -96    
32     -176   
224    -32    
-64    224    
-160   48     
208    -16    
-112   16     
-128   -416   
-352   -224   
-64    -208   
-288   -144   
-32    -64    
192    -384   
96     112    
-384   -112   
16     80     
-2352  272    
240    736    
128    256    
112    -240   
-48    128    
16     -208   
64     80     
128    -32    
384    144    
-224   -656   
-384   -496   
-528   128    
-272   224    
-64    -48    
304    48     
-832   96     
608    448    
-560   336    
-96    320    
-496   288    
-64    -160   
128    304    
192    -128   
96     96     
208    -80    
-80    64     
160    0      
-128   160    
-192   96     
-112   64     
-144   240    
16     -80    
-80    48     
-16    448    
176    304    
176    208    
-160   272    
224    -560   
-448   -608   
-16    -272   
-192   80     
32     -368   
-64    -304   
80     -144   
-80    96     
160    240    
-32    256    
-32    -32    
144    -608   
-80    -80    
368    32     
48     -48    
-48    -176   
16     -80    
-96    16     
128    48     
-48    224    
64     432    
-16    192    
176    320    
-144   -240   
-208   -16    
416    224    
-288   -304   
48     -336   
48     208    
-16    112    
128    64     
144    240    
-128   16     
-112   -16    
-96    416    
128    0      
-96    32     
-48    -16    
64     -80    
240    64     
400    912    
-448   -96    
32     48     
80     -480   
-288   -16    
16     -176   
96     400    
64     -96    
352    80     
-128   80     
64     16     
0      128    
-176   0      
64     160    
-144   -48    
160    -48    
80     64     
176    16     
96     -64    
176    -64    
-160   -16    
-80    48     
-112   48     
16     80     
-16    128    
112    144    
96     16     
0      -16    
80     -16    
192    64     
-112   32     
128    272    
112    112    
128    -48    
-304   -176   
-208   -288   
0      80     
-384   48     
-144   176    
192    224    
-288   -32    
320    560    
-368   112    
80     -16    
64     16     
128    16     
368    112    
-96    -64    
352    -32    
16     16     
32     32     
176    64     
-16    48     
-64    16     
128    288    
0      -240   
48     -48    
0      16     
-368   176    
-576   -176   
48     -208   
560    -32    
288    192    
400    0      
416    32     
-32    0      
16     96     
0      0      
-176   0      
-496   0      
240    -192   
32     80     
-80    -144   
0      224    
-432   32     
-96    32     
-144   64     
528    80     
48     -48    
-112   -64    
0      -32    
-256   48     
-32    0      
224    64     
-112   -16    
-112   -80    
336    64     
128    -464   
-48    -32    
-144   96     
-48    16     
80     48     
176    16     
-48    -144   
-176   16     
128    144    
80     0      
-80    -32    
64     -64    
112    80     
32     -32    
112    96     
32     -240   
0      0      
48     272    
-48    48     
-16    -32    
144    112    
-128   32     
128    -208   
-48    -48    
80     112    
160    32     
-16    -144   
608    272    
-512   32     
48     -160   
304    -192   
0      144    
768    -256   
-320   48     
80     -80    
208    64     
-144   -32    
528    32     
-80    32     
256    48     
176    64     
-512   -400   
624    -176   
480    -80    
224    80     
688    144    
64     160    
-112   -96    
208    192    
-272   304    
336    128    
-256   -32    
-160   112    
112    -144   
48     -176   
160    0      
32     -224   
336    240    
16     -160   
192    192    
-160   16     
80     -160   
96     208    
96     0      
48     -80    
128    32     
112    208    
-16    -16    
-48    -80    
32     -240   
48     48     
128    -320   
-192   -288   
64     224    
96     208    
256    -416   
-32    256    
16     -80    
336    -16    
64     272    
64     -176   
-144   192    
-64    -688   
560    -672   
-112   224    
16     96     
-160   16     
112    96     
688    464    
-368   96     
16     -304   
336    0      
-48    272    
32     -128   
-288   48     
304    -944   
0      -144   
336    512    
80     -320   
112    192    
32     -272   
192    16     
-128   -400   
-16    48     
0      128    
208    160    
-128   80     
32     -80    
96     -624   
80     32     
96     112    
-272   -80    
-176   -96    
112    -16    
400    96     
0      80     
288    144    
-112   -32    
-16    32     
352    48     
128    96     
176    -32    
32     -32    
96     -336   
-80    240    
96     -16    
32     -16    
-256   -48    
208    -48    
-160   0      
336    32     
-240   128    
16     -80    
48     -16    
112    -336   
128    -16    
128    -144   
16     0      
112    -32    
0      64     
112    -192   
32     -256   
-304   -144   
32     -128   
-672   -80    
208    -64    
-16    112    
16     -16    
48     -48    
160    -368   
-304   -144   
272    -800   
224    400    
80     160    
-272   224    
-160   -208   
176    -32    
-304   112    
128    -32    
-224   -160   
128    0      
80     48     
16     80     
224    96     
-32    -160   
112    -80    
80     -336   
-32    160    
-144   48     
32     112    
-16    128    
-112   -16    
240    -32    
400    -304   
32     -48    
-64    0      
-1616  -64    
16     -256   
-560   -32    
160    -112   
-32    -128   
224    -192   
-16    -64    
288    -176   
32     -352   
-128   0      
-224   -48    
-288   -192   
80     -272   
-576   -96    
-80    -96    
-208   32     
32     32     
144    -144   
416    -128   
-176   16     
80     -16    
128    0      
112    128    
48     -144   
-48    64     
176    144    
-112   96     
80     -96    
-256   -96    
160    32     
0      64     
176    64     
16     -208   
-80    -384   
96     -224   
-16    -32    
128    432    
160    304    
-160   368    
-272   208    
144    0      
-144   -16    
32     -16    
-16    -32    
368    608    
-448   528    
-208   -64    
-112   -720   
-448   -848   
288    -80    
-1088  -240   
-16    16     
-128   -16    
-2080  240    
96     752    
-160   496    
-32    80     
-256   240    
-96    64     
512    -560   
-576   816    
528    112    
-32    112    
48     448    
672    -16    
-960   -208   
336    -464   
-32    96     
240    16     
224    224    
48     128    
-128   -80    
-144   912    
-992   -48    
-400   -224   
-144   80     
-448   -16    
256    288    
176    320    
-80    176    
-192   -144   
-464   -128   
240    -16    
-336   384    
240    272    
-384   -128   
96     0      
-832   608    
-160   -112   
-288   -560   
336    608    
-32    -224   
-16    304    
-48    208    
80     160    
64     0      
-240   -112   
192    336    
-208   -32    
-112   -176   
80     -16    
-112   112    
-416   192    
192    -112   
-672   208    
64     -176   
-128   -320   
192    240    
-272   -32    
192    96     
80     -64    
64     192    
-160   32     
96     -48    
-160   32     
-48    -16    
0      48     
-96    80     
144    144    
-528   -16    
0      32     
-224   0      
80     32     
64     -32    
-16    -112   
-96    -80    
-128   -64    
288    336    
-224   -16    
-16    -32    
96     64     
192    32     
-304   -176   
-160   -80    
-944   -208   
176    -400   
64     -224   
112    16     
224    224    
-160   -32    
-112   -48    
-80    32     
-64    48     
16     -144   
-96    -368   
-48    -336   
-48    -48    
-144   48     
32     64     
-336   0      
96     96     
-976   32     
64     80     
-80    -16    
-288   48     
-112   16     
80     64     
-32    -464   
-96    -240   
-32    288    
-160   128    
64     -32    
32     128    
-16    96     
-64    -32    
112    48     
-832   -48    
112    -256   
-128   -32    
-352   144    
-64    64     
-48    -64    
464    -64    
-352   0      
0      320    
-208   176    
-224   -192   
224    -80    
64     -64    
-48    -112   
-80    176    
-496   -32    
-144   -64    
80     32     
-320   32     
16     80     
-320   -144   
512    -112   
96     144    
-16    16     
224    48     
-128   48     
-144   64     
-288   -16    
-32    -240   
160    0      
-48    208    
336    112    
0      -32    
-288   0      
-144   48     
80     0      
-304   -128   
-112   -16    
-112   304    
144    208    
448    128    
-608   -112   
32     0      
-64    -48    
160    16     
-144   16     
-176   -16    
160    144    
-240   16     
112    48     
240    80     
160    176    
-208   0      
112    -64    
416    112    
-272   16     
-208   -48    
288    64     
-176   16     
112    0      
-16    -64    
-144   0      
32     128    
64     -32    
-48    32     
-64    48     
-64    96     
-48    -16    
-16    0      
-416   -256   
368    -160   
-96    64     
288    96     
-16    48     
-80    32     
-80    -16    
304    112    
-288   64     
256    64     
-160   96     
592    320    
-128   32     
-224   -144   
192    192    
-80    80     
320    16     
304    304    
-128   -16    
320    64     
48     64     
208    -208   
-96    -64    
272    240    
192    112    
176    80     
-416   -96    
544    16     
64     -16    
96     -48    
-144   192    
-288   96     
-128   336    
320    -480   
-240   -176   
480    272    
-576   -336   
-560   48     
256    192    
96     -192   
592    304    
336    -128   
80     48     
-128   192    
-128   -432   
224    608    
16     592    
-352   -544   
176    -144   
-32    208    
224    32     
0      80     
80     32     
64     -48    
144    112    
-48    -16    
112    32     
112    160    
-64    256    
0      -80    
512    272    
-240   704    
-208   -496   
288    -608   
-64    -80    
176    112    
-32    -64    
80     0      
192    80     
320    432    
-64    176    
64     112    
96     208    
64     -16    
160    304    
352    240    
-144   -240   
-32    -16    
-80    -320   
-96    -176   
-112   -768   
32     96     
-64    16     
64     32     
208    112    
-80    176    
-80    16     
-176   128    
16     0      
-32    80     
64     64     
144    80     
80     48     
240    -128   
64     48     
48     -288   
96     48     
192    -64    
32     16     
160    144    
0      48     
-32    -64    
112    16     
-112   16     
160    16     
160    16     
304    176    
-80    208    
-208   -208   
16     16     
-48    48     
176    0      
32     -496   
112    32     
80     128    
-48    -208   
128    -48    
16     192    
-304   0      
48     -96    
-192   -256   
192    -160   
64     208    
-128   128    
48     96     
-64    -240   
224    0      
112    -320   
80     336    
144    256    
-16    96     
160    96     
-208   48     
-144   -16    
80     -32    
160    16     
32     -272   
208    -192   
80     -432   
-96    -448   
32     -128   
-384   32     
208    -144   
160    160    
80     48     
336    -16    
-48    16     
-112   48     
-160   128    
240    192    
-240   176    
-48    -144   
96     64     
320    0      
208    128    
-80    -96    
64     -16    
80     80     
-272   176    
-448   128    
-80    -512   
144    64     
384    -16    
-160   -800   
112    -256   
128    -528   
96     -384   
-192   -48    
0      16     
-240   384    
272    352    
0      160    
-16    -160   
64     -512   
160    288    
224    -96    
64     -176   
-1344  32     
-32    -192   
-96    -192   
144    -448   
144    -16    
176    112    
240    240    
-96    -800   
-64    48     
160    -64    
16     -64    
80     -160   
112    -96    
352    304    
-304   -96    
16     -224   
256    -352   
16     112    
96     -112   
-32    -208   
192    288    
-256   -240   
192    -1776  
224    -192   
-112   416    
128    -320   
16     144    
-224   -112   
160    592    
128    32     
-352   -176   
-256   -480   
-2096  112    
-112   -448   
320    192    
352    96     
240    -560   
80     -32    
80     16     
-32    -32    
48     0      
144    144    
32     -176   
-160   480    
208    592    
-400   -992   
-112   112    
-1040  848    
-112   -560   
352    -368   
448    224    
-64    -48    
304    -48    
-48    144    
480    -528   
0      -256   
-1184  -832   
640    784    
288    960    
-720   -272   
-672   -336   
288    -448   
240    16     
688    192    
-576   -192   
16     -160   
64     112    
-144   -80    
-64    16     
144    -384   
0      112    
192    48     
208    -48    
-112   -48    
80     -64    
-176   -16    
32     -32    
64     48     
-64    16     
-16    0      
80     -160   
0      -144   
-144   -368   
16     48     
208    -304   
48     96     
96     0      
112    32     
-128   432    
48     288    
-48    -16    
-176   96     
96     -48    
64     0      
-688   -112   
320    48     
-64    48     
112    -32    
160    48     
80     16     
320    -64    
-224   -112   
128    -32    
-208   32     
80     64     
-288   32     
144    -64    
-192   -64    
-96    16     
-64    32     
0      -80    
96     -96    
48     -96    
-96    -32    
272    -256   
-160   -144   
0      16     
80     80     
-64    128    
0      208    
-400   -160   
224    -80    
-192   -80    
-80    -16    
16     -144   
112    0      
256    160    
-352   -64    
0      176    
16     -32    
-416   160    
-80    -32    
-608   16     
176    112    
-272   16     
-192   -64    
160    -176   
-128   -128   
0      176    
-96    80     
-320   -64    
96     0      
-352   -128   
16     160    
-48    48     
-128   -48    
128    0      
-128   -16    
96     48     
-1344  0      
-48    32     
112    -80    
-160   -128   
-432   64     
32     0      
-80    -96    
128    64     
-272   -128   
288    -48    
-96    -48    
-304   -112   
64     -96    
-336   -80    
-352   144    
-416   -96    
128    -144   
-672   -16    
112    80     
-1536  -128   
288    32     
48     32     
-16    192    
-112   -16    
-32    -80    
144    48     
96     64     
0      -160   
-48    -80    
-464   -96    
16     -144   
-224   48     
-864   48     
-144   48     
-192   -16    
-32    0      
64     -32    
16     80     
-288   16     
-352   -112   
-368   -32    
-112   64     
112    48     
-112   -128   
144    -48    
-144   64     
64     -32    
48     -48    
80     144    
-1248  32     
0      96     
368    176    
-240   144    
-96    32     
-96    48     
80     48     
144    80     
-144   -48    
32     16     
-192   0      
-64    0      
112    64     
-176   -32    
112    64     
-640   32     
-144   16     
-80    -64    
16     128    
144    64     
96     48     
48     208    
176    272    
-160   240    
-80    128    
80     64     
-16    128    
-48    32     
192    -112   
-272   32     
-96    -144   
144    -16    
16     96     
0      -64    
80     400    
-624   -848   
-16    624    
-128   -96    
48     208    
-368   448    
192    80     
-160   -1104  
-96    160    
-400   16     
-208   -32    
-208   -64    
144    416    
0      -560   
480    144    
-64    128    
16     -208   
-416   -256   
16     -384   
0      416    
-208   -160   
208    -80    
-288   -48    
48     -192   
-368   80     
-32    -352   
-336   96     
336    -224   
-32    -80    
144    384    
208    112    
160    176    
-256   -160   
336    -160   
-272   240    
48     32     
160    -208   
-400   -128   
256    -64    
-144   112    
112    96     
-192   0      
-240   -192   
432    -112   
-256   96     
224    16     
256    112    
-224   160    
-176   80     
-64    -64    
-16    48     
64     64     
-48    32     
160    32     
64     0      
128    0      
-288   64     
176    -16    
32     -64    
144    32     
-16    16     
-16    -128   
-16    -32    
-256   -208   
352    -48    
0      32     
-16    0      
32     128    
112    32     
-176   -48    
128    32     
80     -32    
32     -16    
160    0      
-48    128    
-32    -32    
32     32     
384    304    
-144   144    
48     -48    
16     -16    
96     -112   
-32    -64    
80     -32    
-16    -16    
176    48     
64     -32    
-96    128    
-128   16     
48     -48    
48     96     
-16    80     
-32    -32    
224    -32    
96     192    
-32    64     
256    -144   
-128   32     
32     80     
0      80     
-32    -816   
64     0      
192    80     
32     128    
16     64     
48     96     
128    0      
144    -112   
-16    32     
160    128    
-224   160    
128    192    
-16    128    
176    112    
-112   0      
-64    -1984  
160    -80    
16     256    
-64    96     
112    32     
208    112    
-192   224    
-96    -112   
48     -288   
80     -336   
128    -16    
64     160    
-240   -144   
-192   -240   
-176   208    
-32    -208   
-64    32     
304    -48    
112    112    
-16    192    
-272   128    
-64    192    
96     32     
224    96     
128    80     
-176   -32    
48     -208   
48     -32    
-112   -224   
-96    0      
-160   -192   
32     -128   
-288   -160   
192    -832   
192    -240   
544    16     
-32    96     
48     272    
-336   -288   
128    400    
-544   48     
-128   -48    
192    496    
160    -16    
208    -32    
144    -160   
-64    -32    
-96    -256   
240    288    
224    -112   
-32    -160   
-192   144    
256    96     
-16    0      
240    96     
384    432    
-368   16     
96     -320   
32     32     
32     224    
112    32     
-80    -112   
64     -432   
-240   96     
288    -112   
112    32     
160    112    
112    -48    
16     288    
192    -32    
-160   -64    
96     -464   
48     64     
0      32     
144    0      
16     -80    
96     -128   
-96    32     
304    112    
-112   -128   
432    480    
-496   -192   
272    -336   
-160   96     
144    32     
320    -16    
272    -80    
160    32     
48     -80    
0      32     
-224   -144   
-160   48     
-240   -128   
16     32     
304    -256   
-240   32     
272    304    
-112   336    
48     80     
-176   -144   
112    -48    
368    352    
-176   160    
224    -192   
-32    0      
-544   48     
16     224    
736    336    
-592   480    
-176   96     
704    16     
128    -112   
-240   192    
16     -112   
160    176    
-96    -16    
144    -224   
176    112    
80     -16    
128    16     
-16    -160   
-16    64     
16     -112   
96     80     
32     -80    
80     -16    
112    16     
240    -672   
64     48     
-480   16     
432    -240   
-304   -16    
48     -304   
240    64     
160    -672   
144    -64    
-112   32     
-112   160    
416    48     
16     64     
-48    -128   
-256   -32    
160    -336   
80     48     
96     112    
368    0      
-144   112    
-64    -96    
272    48     
96     -480   
32     -64    
224    112    
80     208    
-208   -32    
96     -16    
176    -144   
80     32     
160    16     
128    -64    
-928   -48    
16     -96    
96     -48    
176    -320   
128    16     
-48    -80    
80     -80    
400    -272   
-368   -32    
144    -176   
0      0      
112    -144   
-16    80     
-304   16     
16     -64    
-816   -112   
128    -64    
-592   -160   
112    96     
96     64     
192    -80    
160    -32    
64     -304   
192    48     
-64    -32    
144    -32    
16     192    
160    240    
0      -32    
-32    -112   
-64    -64    
208    -64    
16     48     
208    -16    
0      -96    
80     -256   
80     32     
176    0      
112    96     
-48    -912   
-32    80     
-416   -928   
-112   -464   
-160   64     
-320   64     
-80    112    
-32    -384   
-768   -320   
-80    128    
-240   -384   
432    -416   
496    -16    
464    -112   
288    -80    
-48    -304   
-176   -112   
144    -144   
144    96     
-96    -32    
272    80     
224    432    
-192   192    
-256   -144   
-320   -128   
-32    -96    
336    -16    
144    -176   
80     -208   
-512   128    
400    96     
112    368    
-352   0      
-32    -224   
128    0      
80     48     
-336   -48    
368    -16    
-240   -96    
208    -224   
-128   16     
-80    -336   
16     -272   
-240   -352   
-48    -48    
0      32     
112    96     
352    -16    
-112   32     
-368   368    
-144   -16    
-448   -80    
464    208    
-400   -128   
-16    -960   
-432   -144   
128    320    
-96    -288   
176    -80    
-304   96     
-48    -112   
272    0      
32     0      
-144   -80    
-128   -64    
0      64     
-96    0      
112    -128   
-256   0      
32     48     
112    224    
368    208    
48     -176   
-224   16     
-16    240    
-1280  -352   
-1088  80     
112    -80    
-1472  -176   
-160   -48    
-864   176    
352    -144   
96     -592   
-448   64     
-128   -128   
-400   0      
112    -128   
32     112    
144    -16    
320    176    
-144   496    
48     -16    
-288   -160   
96     128    
-48    -16    
64     64     
-128   -80    
192    -32    
-112   -16    
-144   304    
-64    128    
64     0      
-272   112    
-160   -176   
-160   -48    
-528   -304   
272    64     
192    64     
-304   0      
-160   -256   
176    -32    
16     96     
-80    64     
272    0      
-144   -192   
-96    -112   
-464   -256   
224    144    
-208   -224   
-64    48     
64     48     
-96    176    
0      64     
-128   -32    
64     -64    
128    240    
-320   144    
64     -176   
-112   -112   
-464   -128   
32     240    
-64    128    
176    64     
-96    -112   
80     -128   
-128   -64    
-80    -64    
-256   32     
240    304    
-224   288    
-80    -64    
-16    -208   
-448   48     
-224   32     
-2064  -80    
-32    -208   
64     -240   
32     -80    
-32    160    
80     16     
-176   48     
0      48     
-16    48     
-128   128    
-128   -176   
-112   -48    
-48    -80    
-304   32     
-16    -16    
-96    96     
64     64     
-64    -16    
-32    -32    
16     64     
-112   272    
64     128    
80     -48    
272    48     
-288   96     
96     32     
-160   -16    
-80    32     
-160   -64    
16     -144   
-576   -112   
32     96     
368    -64    
-192   96     
-80    48     
-32    -80    
-128   -192   
128    -64    
-64    32     
-112   16     
112    160    
-272   96     
64     64     
16     -16    
176    16     
-208   -16    
-16    0      
-64    -64    
-80    -16    
0      -96    
48     -128   
-144   48     
128    0      
80     -16    
-32    32     
32     -48    
160    304    
-304   -176   
-304   -48    
-16    80     
-304   -64    
80     32     
-80    -48    
224    144    
192    -32    
-112   -320   
-192   -256   
-224   384    
16     560    
240    368    
-240   -144   
-224   -416   
288    48     
-16    -32    
448    -16    
-176   -368   
160    192    
-112   240    
16     -80    
224    224    
-320   400    
256    -96    
400    -48    
160    -80    
-192   -16    
-416   96     
-320   -272   
-304   -224   
-80    256    
96     -32    
384    112    
176    -32    
-208   -176   
-416   -16    
96     336    
16     656    
96     16     
16     -368   
-96    -192   
0      -128   
304    -96    
288    -112   
64     -32    
0      128    
16     80     
-224   -112   
-176   -64    
128    -32    
32     -176   
400    -160   
128    -208   
224    96     
-320   64     
-48    -16    
64     64     
0      80     
16     48     
96     64     
-48    -48    
16     16     
-80    16     
-16    16     
96     80     
16     -80    
160    -48    
-16    -224   
32     -96    
-176   16     
32     16     
-48    32     
64     80     
-912   -176   
1040   256    
-784   64     
96     -160   
-80    16     
-128   64     
688    48     
288    400    
-496   -16    
48     -32    
160    48     
-224   -32    
208    -32    
-32    -16    
352    64     
32     -64    
304    64     
160    16     
144    -416   
-16    176    
80     192    
-544   -48    
-80    -96    
-224   -176   
384    -64    
64     48     
-448   -192   
32     -320   
656    128    
-160   128    
-112   -32    
176    -48    
-16    160    
-272   -608   
48     -16    
-32    16     
112    16     
48     32     
-256   48     
384    64     
-160   48     
-64    48     
144    -80    
-144   -96    
-80    -48    
144    -80    
48     -64    
112    96     
-32    -176   
208    -16    
-96    288    
64     32     
-16    16     
80     0      
16     16     
144    48     
-144   -80    
128    16     
80     32     
16     -192   
352    -48    
-176   0      
336    160    
32     -96    
80     -96    
16     -80    
128    -80    
128    -16    
-48    48     
48     -208   
-16    48     
32     -16    
-96    48     
-48    16     
256    112    
48     32     
-16    -112   
16     0      
176    -112   
80     0      
96     -832   
96     16     
-160   336    
64     -48    
-16    -16    
96     112    
48     -32    
-64    0      
64     64     
80     224    
176    192    
48     -80    
-144   16     
240    32     
16     96     
-80    -560   
64     48     
128    -320   
-32    -32    
80     -48    
128    -112   
-80    96     
48     32     
-128   -32    
48     -144   
192    176    
-16    80     
0      -48    
0      -416   
32     64     
48     64     
-48    -288   
0      -240   
208    224    
112    336    
272    -144   
-96    -80    
80     208    
16     64     
80     -112   
80     48     
-208   -240   
48     48     
304    544    
48     -464   
32     -192   
-48    112    
-64    -288   
336    48     
-304   -304   
-32    16     
240    224    
-48    192    
-48    -736   
144    -272   
240    32     
160    -96    
320    48     
128    -64    
-112   48     
-192   -160   
-352   -112   
-144   -128   
48     -320   
384    -192   
1248   880    
-400   336    
0      -640   
240    256    
288    336    
-272   -688   
112    32     
64     96     
288    -80    
128    48     
32     -128   
160    -96    
80     224    
-80    -144   
208    -96    
-32    -240   
96     -80    
-864   352    
-560   -400   
112    176    
32     352    
144    -272   
96     0      
240    -224   
176    -224   
-32    48     
336    -96    
-48    320    
416    176    
-352   16     
80     -96    
208    -144   
-112   352    
-80    -256   
-48    -80    
96     48     
-32    144    
48     256    
64     -400   
64     -400   
176    -32    
192    -64    
16     128    
0      -96    
-256   -240   
0      -272   
128    -96    
-272   -320   
96     -672   
128    -304   
32     -240   
240    208    
128    64     
-288   -272   
-16    -400   
256    144    
320    80     
-160   240    
352    -96    
-128   -128   
-32    -112   
-48    -96    
-336   16     
304    144    
-576   224    
-432   48     
0      192    
176    -96    
512    -64    
0      -480   
112    -176   
80     80     
-48    32     
-32    80     
-208   -144   
-432   -16    
32     192    
-240   128    
-16    -48    
48     176    
-400   -32    
-48    -304   
496    -192   
-192   32     
48     -288   
80     32     
16     -512   
80     64     
176    -48    
176    -16    
-80    -112   
96     16     
304    16     
-352   -48    
0      48     
64     -256   
-1248  -224   
240    -288   
96     16     
144    -256   
0      16     
176    0      
-128   352    
128    -48    
80     -208   
-400   -160   
-64    -176   
-208   0      
80     -32    
-416   -128   
288    -16    
-176   32     
160    -48    
-240   112    
240    -208   
-304   368    
80     -208   
128    -208   
-144   -32    
128    -32    
-320   160    
336    32     
304    -16    
-48    -96    
-288   -96    
48     -112   
16     112    
176    -48    
192    32     
48     -112   
16     -64    
224    -320   
-16    16     
-128   96     
-96    -64    
-96    48     
80     16     
-16    -32    
0      16     
-32    16     
208    176    
-112   160    
-864   -320   
-32    -96    
-1232  -176   
-208   384    
32     32     
0      -224   
-192   -352   
-400   -96    
-96    160    
320    32     
-144   -16    
272    -96    
-16    96     
0      -32    
-64    368    
-624   -208   
-32    -96    
-128   -144   
-32    -224   
176    -80    
-208   -464   
-416   -256   
-80    160    
-48    208    
16     32     
-240   -368   
-560   -320   
-176   336    
-80    -80    
-144   -16    
80     80     
-16    112    
0      64     
128    448    
-272   -368   
-16    -976   
288    1120   
-32    -160   
80     80     
-16    -64    
0      80     
-544   416    
-608   -144   
-272   -192   
288    -656   
496    272    
336    512    
-112   -304   
112    -352   
-608   -288   
-400   -80    
64     64     
0      32     
224    160    
-432   -256   
-288   -288   
-528   32     
128    176    
-32    32     
224    -48    
-208   -208   
160    -160   
160    -224   
304    -112   
272    48     
-16    64     
-48    0      
-416   0      
-96    32     
-224   -112   
-96    -80    
80     32     
272    112    
-1184  240    
-432   32     
64     -48    
-112   32     
128    -16    
16     -64    
48     -64    
64     176    
-352   -48    
-32    0      
768    464    
-704   -16    
128    -48    
-48    16     
512    -16    
-1312  -208   
-96    32     
-224   -32    
-144   112    
160    48     
-352   -64    
-192   0      
-176   -32    
272    112    
-320   -64    
240    48     
0      16     
64     -48    
-208   -64    
256    224    
-624   -192   
368    -80    
-160   48     
224    176    
-16    -48    
-48    -48    
672    400    
-880   96     
352    -80    
0      112    
-96    -16    
16     0      
64     0      
208    112    
-96    -16    
176    64     
-368   -160   
480    32     
-144   96     
-16    -32    
224    80     
-176   -128   
224    -64    
144    0      
-128   48     
32     -128   
304    -64    
256    144    
-224   -96    
432    160    
-704   -144   
96     32     
-128   0      
-128   32     
-192   -240   
256    -64    
-256   320    
-256   -80    
128    32     
96     -32    
432    80     
-128   80     
80     -16    
-112   -160   
-144   64     
16     32     
96     -16    
48     80     
80     16     
80     -32    
32     0      
96     -32    
80     160    
-176   0      
32     -16    
32     96     
208    48     
16     -128   
-432   -80    
144    0      
-32    16     
320    80     
-32    64     
80     32     
-48    0      
-112   16     
96     32     
192    32     
-64    16     
-96    32     
-32    96     
-16    0      
32     16     
-112   0      
144    16     
-48    -16    
64     64     
0      64     
-80    -48    
-16    -48    
16     0      
160    80     
-208   48     
128    48     
-128   48     
288    128    
-464   32     
48     -64    
32     -144   
240    128    
-208   -96    
-48    -48    
96     96     
304    -208   
32     192    
176    176    
-288   -416   
16     -48    
192    32     
-64    240    
32     -112   
-16    80     
96     -32    
-16    64     
-64    0      
208    -208   
-96    -48    
208    -16    
0      144    
-48    -176   
-112   112    
-208   80     
-48    -176   
192    160    
0      224    
16     -528   
64     96     
288    416    
-48    -208   
32     -240   
128    0      
-64    -48    
80     768    
16     -416   
-64    192    
-48    80     
144    48     
16     -160   
16     0      
-16    464    
112    -480   
-176   80     
144    -144   
112    80     
-16    -320   
128    80     
192    32     
48     176    
-48    96     
48     -880   
240    512    
0      448    
-32    -400   
128    -112   
-80    240    
-112   224    
-288   -32    
-128   -160   
96     160    
64     208    
-272   -416   
0      0      
-144   256    
-256   144    
96     464    
144    144    
464    336    
-272   592    
-160   608    
352    208    
320    80     
496    64     
-32    -32    
16     -64    
-240   -528   
-96    -96    
32     -48    
-112   176    
480    240    
304    -208   
-48    -336   
96     64     
-272   -64    
-80    96     
-112   128    
96     -16    
128    80     
208    -192   
32     -112   
-128   -384   
32     -64    
64     144    
240    160    
16     160    
192    128    
0      112    
-32    48     
-16    16     
0      -208   
0      -64    
32     -80    
96     80     
-32    -16    
16     -128   
112    16     
192    64     
16     -64    
384    384    
-96    416    
384    640    
272    -128   
144    48     
-48    -160   
-80    48     
-16    -224   
80     -272   
224    192    
16     64     
176    256    
-16    -16    
-192   -304   
176    -464   
-128   -240   
32     -128   
496    304    
-336   -176   
16     -144   
-224   -48    
288    -304   
176    208    
320    -48    
-48    64     
48     -144   
32     -16    
-288   96     
320    -32    
400    -192   
32     48     
-80    -16    
-48    -48    
-32    64     
-416   -1600  
512    96     
-240   0      
-80    -288   
208    -352   
128    -416   
-48    32     
64     128    
336    -176   
-48    96     
112    -16    
-112   320    
224    32     
128    -512   
240    32     
256    -128   
352    544    
-592   256    
96     16     
0      -64    
112    -528   
-48    -272   
16     512    
240    -112   
96     176    
-16    -48    
96     -128   
-32    160    
112    -112   
-112   16     
16     -128   
-32    32     
-2000  -64    
-208   336    
512    80     
208    -288   
-48    -192   
32     80     
48     -112   
160    96     
384    64     
-48    288    
-144   0      
-32    32     
96     176    
16     -160   
32     -128   
-1200  -144   
112    -112   
32     -112   
-16    0      
32     -96    
112    -112   
160    -112   
-48    -1296  
112    -16    
160    -48    
-48    -96    
48     -112   
64     32     
-240   -240   
-112   256    
-480   80     
112    528    
192    112    
128    -448   
-48    128    
320    128    
-32    112    
48     -848   
160    336    
80     -48    
-16    -288   
-16    48     
16     -64    
-16    -80    
224    -208   
-288   32     
96     -48    
-432   -224   
80     112    
-160   -464   
-80    448    
16     -304   
112    16     
176    -96    
160    -944   
64     -32    
32     -208   
112    32     
64     80     
48     -16    
-288   112    
32     -48    
-240   -96    
176    -16    
-304   -64    
400    -336   
80     -608   
288    -496   
-144   -112   
16     -1312  
368    -128   
288    16     
464    288    
-192   256    
288    176    
-720   80     
-320   -208   
-432   -112   
208    144    
-544   32     
144    -176   
-224   80     
176    -48    
400    48     
-640   -304   
16     0      
-32    80     
-96    -32    
-400   16     
-64    -16    
-320   48     
240    -192   
0      -320   
272    80     
-16    32     
192    -96    
176    32     
-128   -128   
224    -16    
-112   -32    
160    0      
-368   144    
-464   -80    
-16    -16    
176    -208   
208    -96    
-256   64     
-288   -64    
192    -112   
512    0      
352    -64    
64     16     
-320   -80    
0      -48    
-320   -64    
-192   16     
-400   0      
-32    -80    
-80    -16    
736    128    
-688   -48    
16     -64    
-256   0      
0      -128   
192    -16    
-528   -176   
-112   -96    
-1136  -96    
-96    -16    
0      32     
-112   -32    
64     48     
-48    48     
192    208    
-720   -64    
112    112    
16     -64    
64     32     
16     -48    
-160   16     
-208   64     
-144   16     
0      -160   
-496   -176   
32     -144   
160    224    
-336   0      
-160   -96    
-528   16     
-1232  -80    
-384   -272   
576    176    
-304   -48    
384    96     
-128   224    
-464   -96    
128    -80    
160    0      
-304   -64    
240    -48    
-176   -16    
-192   0      
400    288    
-528   -80    
-528   -176   
416    32     
-800   -112   
80     0      
160    -32    
224    96     
-96    64     
-432   144    
224    -48    
-432   -80    
-272   -32    
240    -80    
-368   48     
-192   -208   
208    -96    
48     112    
-128   112    
-256   -96    
96     64     
-80    96     
64     80     
32     48     
-32    16     
16     16     
-240   -16    
-128   160    
96     112    
16     0      
32     64     
-112   224    
-80    128    
-48    16     
-624   48     
128    0      
-1552  -192   
448    240    
-272   -128   
32     -80    
224    320    
-160   -176   
0      -64    
-48    128    
48     32     
-64    16     
-336   -32    
160    -32    
16     -32    
48     -16    
32     16     
-544   448    
128    -80    
-80    32     
-176   0      
144    48     
-160   -32    
128    -160   
-112   -112   
96     -96    
-416   -144   
80     80     
-64    -112   
96     96     
-256   -496   
-64    80     
-272   -80    
272    528    
-48    752    
-48    -208   
-48    -368   
128    -128   
80     624    
-112   288    
112    -176   
32     -80    
224    48     
144    -96    
-48    96     
-144   16     
-112   112    
-816   -240   
48     576    
112    288    
-64    -80    
32     96     
128    16     
-144   192    
-176   16     
-16    -64    
16     -32    
-64    0      
-368   -384   
32     -144   
-320   -128   
-48    48     
-64    48     
176    80     
-16    112    
288    432    
-272   -560   
32     -224   
128    128    
-48    -32    
32     16     
-64    -96    
-16    -16    
-16    -288   
288    128    
-144   -48    
0      -224   
176    -192   
224    -208   
240    0      
144    -80    
144    -128   
-48    -112   
-112   0      
-192   -192   
288    208    
-368   176    
-48    -64    
-192   -48    
112    -32    
48     64     
112    160    
32     -48    
32     16     
-368   -176   
112    -112   
-64    96     
-320   80     
-32    32     
96     16     
0      144    
-144   -160   
-48    320    
192    16     
160    -144   
-96    -160   
-320   -208   
48     64     
-16    64     
112    -128   
144    -80    
-64    -32    
-288   -176   
-128   -32    
-64    -144   
96     80     
32     32     
96     -48    
-80    -176   
112    32     
-32    128    
-48    -128   
192    -32    
-48    208    
128    192    
160    -32    
-64    64     
16     -48    
-64    -32    
112    -240   
16     0      
64     -336   
-48    160    
-240   96     
-80    -192   
288    512    
-112   112    
256    304    
192    -112   
64     112    
304    128    
-48    400    
144    512    
336    -16    
-64    80     
-112   -64    
48     -32    
16     32     
-128   -80    
96     -160   
64     512    
608    576    
-48    160    
-240   128    
240    384    
288    384    
400    -480   
32     32     
80     -96    
-112   32     
64     96     
80     384    
96     576    
-80    -32    
160    112    
-576   384    
-128   -448   
-32    48     
-256   16     
-96    -32    
224    272    
16     400    
448    384    
-176   -112   
48     -272   
128    -16    
-32    128    
416    336    
-528   0      
128    0      
-288   400    
288    96     
160    400    
176    -176   
144    416    
-64    -80    
0      -304   
112    -240   
-224   -144   
-48    -32    
-80    -160   
192    -304   
-256   -432   
224    96     
-176   384    
80     128    
224    -672   
-160   -720   
-144   -1344  
-16    80     
32     800    
48     160    
64     -1088  
-64    48     
112    368    
-464   -160   
160    -656   
560    240    
-96    688    
256    -272   
-208   -32    
32     128    
256    416    
160    -784   
32     -64    
0      -736   
-80    240    
112    -144   
80     0      
-64    32     
-32    -208   
-208   320    
176    -256   
288    16     
480    -80    
-192   64     
144    -400   
160    -160   
128    -224   
0      48     
64     -496   
32     -48    
112    192    
48     64     
-32    -208   
112    272    
96     256    
80     -240   
0      -64    
-96    -336   
112    80     
160    -80    
64     -16    
96     -16    
192    64     
256    320    
-112   64     
-16    -48    
96     -48    
48     -64    
32     -80    
-16    48     
48     -144   
192    336    
-32    32     
112    -224   
-64    -128   
80     96     
208    -128   
128    32     
-16    48     
-112   208    
64     -32    
144    -432   
-48    -32    
16     64     
176    -224   
144    -144   
224    16     
16     -144   
112    32     
192    -96    
-32    0      
224    -224   
-96    -480   
272    96     
-208   32     
-144   32     
-48    -208   
240    32     
64     -64    
160    -48    
144    -80    
368    48     
0      16     
192    -624   
-240   -48    
-352   -16    
240    -16    
128    80     
176    192    
-320   -336   
160    -160   
-368   -48    
448    96     
-96    48     
608    400    
-768   -64    
-64    -352   
128    -32    
176    -496   
288    -32    
336    96     
-304   16     
-96    -240   
368    16     
0      32     
-96    80     
32     -16    
32     -112   
-400   -96    
160    -32    
128    -96    
176    -288   
160    -32    
-112   -224   
304    -32    
-32    -832   
-256   -112   
384    -144   
240    48     
464    48     
48     176    
-192   16     
-16    -32    
-144   -64    
64     0      
256    -32    
16     -48    
112    -16    
48     16     
-112   -80    
96     -528   
-32    48     
64     -16    
0      0      
0      64     
16     -16    
-80    -48    
-80    -112   
-464   -304   
240    -256   
96     240    
192    -64    
-128   -144   
304    -48    
48     176    
48     -320   
16     32     
80     -48    
592    352    
-880   16     
800    176    
-608   -32    
-256   -192   
-144   16     
-176   -80    
-592   -128   
160    -128   
-224   -80    
352    80     
-384   144    
256    64     
336    256    
400    -352   
128    80     
-96    240    
304    176    
32     48     
416    -224   
112    -256   
288    -16    
-576   16     
176    16     
-336   0      
80     0      
-96    16     
-32    -144   
80     -208   
112    0      
160    16     
-304   -48    
144    144    
-144   -144   
80     112    
-112   -128   
32     32     
-96    -64    
144    -160   
-112   96     
-128   288    
192    304    
320    -448   
-128   256    
-336   -272   
0      32     
-80    -144   
160    -480   
-80    1040   
48     -272   
-304   -816   
528    272    
-160   192    
272    400    
-464   -80    
288    -448   
96     -64    
-2144  -128   
112    -48    
-112   -32    
96     144    
-112   64     
272    0      
-224   96     
192    -224   
-112   0      
336    32     
-272   -32    
-400   0      
-128   -16    
-16    -96    
0      112    
-176   16     
-528   -144   
-80    16     
80     80     
-240   256    
-400   -16    
144    -16    
-1088  48     
128    64     
112    -112   
-144   -48    
-672   -16    
208    0      
16     -32    
-32    0      
-16    -32    
-96    -80    
-32    -80    
48     32     
-160   176    
-208   32     
-80    16     
-240   -16    
-160   32     
-384   -96    
96     -208   
-96    16     
64     -32    
-176   -96    
-16    96     
-64    48     
16     80     
-176   0      
16     32     
96     16     
0      48     
64     16     
0      -112   
-128   -96    
-656   -96    
32     -48    
-80    -32    
352    128    
-48    80     
144    -48    
-64    -32    
-80    -32    
32     0      
-16    16     
112    -16    
-144   -16    
96     80     
-160   96     
-160   -16    
-896   -48    
-176   -112   
-320   0      
-16    80     
-112   32     
-64    80     
96     -32    
288    -64    
80     112    
208    192    
-224   64     
-64    -64    
32     -64    
64     96     
48     112    
-32    32     
-48    0      
96     64     
-16    48     
-16    16     
32     -160   
112    -80    
-112   16     
-288   -112   
224    32     
128    32     
272    80     
160    96     
-656   176    
-336   -48    
32     -32    
32     -32    
-320   -224   
304    16     
112    -16    
-112   48     
32     -64    
-320   -48    
304    48     
-144   64     
64     48     
176    -48    
-160   -32    
-160   -112   
-224   -48    
-240   -272   
112    0      
-256   -224   
-144   -272   
16     0      
-16    -80    
32     64     
80     160    
80     224    
32     64     
-288   -128   
176    176    
-176   96     
-240   64     
160    48     
0      -64    
80     -272   
-240   400    
928    1632   
-672   752    
-256   -336   
160    -112   
352    704    
-320   -512   
176    -1168  
208    -240   
-128   1280   
416    256    
-128   -128   
-240   48     
-144   -480   
240    528    
-128   128    
-240   -336   
-96    192    
272    528    
176    -16    
-272   -144   
272    416    
128    32     
288    128    
160    512    
80     -528   
176    -768   
16     464    
-144   304    
384    16     
-256   1312   
96     -240   
240    -528   
368    272    
112    -32    
128    -160   
64     -480   
-224   896    
-80    -240   
-96    -176   
160    -176   
-192   64     
192    48     
0      -32    
-64    -208   
-64    352    
160    -368   
-128   240    
16     64     
80     -96    
112    32     
96     272    
-224   -16    
80     -64    
64     560    
128    32     
-16    -176   
-256   192    
224    16     
-16    112    
32     112    
32     16     
224    64     
-192   96     
352    128    
32     80     
-32    0      
-112   -32    
-48    -160   
64     -80    
80     80     
-240   -128   
160    32     
32     96     
112    64     
176    160    
-176   112    
240    48     
-16    32     
112    -16    
-48    -112   
48     -368   
-160   -32    
0      272    
128    -80    
-160   64     
-96    -144   
32     -368   
0      -16    
80     -16    
32     64     
160    -16    
0      512    
144    352    
-112   96     
-208   64     
128    112    
-32    80     
16     48     
48     64     
208    -80    
-32    -32    
176    -208   
128    96     
256    352    
0      304    
-48    32     
144    256    
32     96     
144    -32    
-256   -80    
272    -16    
48     80     
16     16     
-48    64     
-160   48     
16     0      
128    -48    
176    48     
-32    -240   
64     0      
32     32     
112    16     
144    16     
48     64     
80     416    
-96    336    
-64    -32    
144    96     
-64    0      
464    80     
-768   -80    
160    -112   
-208   -336   
720    -1392  
368    192    
144    48     
560    -32    
48     144    
-192   -64    
96     -48    
64     -16    
336    32     
176    64     
-48    -208   
320    -144   
304    96     
304    -80    
176    -32    
96     -128   
416    304    
-480   -240   
96     -256   
400    -320   
336    128    
432    192    
48     -16    
-464   -80    
144    64     
0      0      
112    16     
-448   112    
-112   -32    
272    96     
144    -128   
304    16     
0      80     
-192   16     
-48    -32    
176    48     
48     -48    
64     -16    
240    112    
48     32     
-48    -80    
336    -112   
-192   64     
80     -32    
-112   80     
48     -176   
304    32     
-112   48     
224    32     
-144   -32    
176    48     
48     0      
80     80     
48     0      
16     -544   
48     64     
80     -48    
192    80     
128    -112   
112    176    
368    192    
-240   0      
128    -160   
96     160    
-48    -16    
144    -16    
32     -144   
208    64     
-160   48     
192    -80    
-304   -48    
176    -112   
-288   0      
112    -32    
-160   80     
112    -160   
320    112    
432    224    
208    112    
-576   -336   
80     -496   
32     112    
144    -336   
208    80     
-192   -336   
192    -32    
-176   320    
112    -944   
16     -256   
320    144    
368    80     
304    176    
-128   144    
-1232  -2464  
944    -128   
-544   800    
-848   128    
576    -384   
16     336    
928    592    
-272   -896   
272    144    
-96    -64    
48     -304   
112    -912   
-96    -480   
-96    384    
288    208    
224    -208   
-272   208    
224    -688   
144    -144   
-688   496    
160    96     
160    176    
320    -128   
-176   0      
-144   -384   
-112   -144   
208    176    
320    112    
448    192    
-432   224    
-144   -144   
32     -48    
160    32     
112    -192   
0      -112   
-32    -48    
-400   -144   
16     64     
144    128    
144    -96    
256    -16    
16     -112   
-144   -64    
16     -496   
-128   -64    
96     -48    
96     16     
64     -160   
32     -144   
-80    0      
-96    -48    
-32    96     
64     -160   
16     -144   
32     -272   
-144   -176   
48     144    
0      16     
224    -240   
-16    80     
80     48     
128    176    
-160   32     
80     -80    
160    112    
160    -16    
-576   -48    
32     -64    
-512   -112   
128    -160   
144    32     
80     16     
96     0      
0      -480   
-32    96     
-48    -112   
0      -112   
64     -416   
240    -32    
-32    -48    
16     -48    
-192   80     
-64    128    
-176   96     
-16    16     
32     -256   
128    -288   
-16    96     
16     -112   
-80    80     
48     112    
48     80     
320    240    
-176   176    
-176   -128   
176    80     
-256   -64    
192    -192   
80     0      
0      -96    
-16    128    
80     -96    
176    0      
-32    0      
-128   -32    
-368   0      
224    -32    
-304   -64    
352    -144   
-80    -192   
224    64     
-304   -48    
144    -80    
-32    -48    
224    48     
96     64     
-208   0      
-112   -64    
-16    -160   
80     32     
-144   256    
32     192    
-16    -96    
-416   -544   
112    -736   
32     -144   
-160   -272   
320    64     
-352   0      
-240   -208   
-240   -32    
-992   -400   
448    416    
-1008  16     
-208   -192   
448    -64    
-160   -208   
240    -96    
-368   -16    
-96    112    
160    -64    
0      64     
240    -80    
-48    -128   
-192   16     
-224   0      
-48    -64    
416    352    
-848   -288   
-224   -352   
-32    48     
208    96     
-32    -16    
112    -64    
-208   -256   
-2720  -16    
-16    128    
96     -256   
96     -48    
-128   336    
304    -64    
-288   -272   
144    -16    
16     -32    
96     -16    
-128   -608   
-192   -48    
-304   32     
48     -32    
-80    64     
-64    -112   
32     -400   
-208   -240   
416    0      
-496   32     
368    -80    
-384   -240   
304    528    
-576   -1056  
32     -224   
224    512    
192    -144   
192    -160   
-112   464    
224    32     
-288   -208   
-336   -48    
-640   112    
176    144    
-48    -192   
160    -160   
-176   -256   
-224   224    
160    272    
-432   -304   
304    -1072  
144    -48    
304    784    
432    528    
-240   16     
-992   -1056  
48     -208   
-1024  224    
-128   96     
16     -128   
144    0      
112    -176   
80     64     
0      16     
48     128    
-192   288    
240    32     
-64    64     
-48    80     
96     0      
-256   -80    
160    80     
-48    16     
64     16     
-112   -48    
48     32     
432    208    
-400   224    
-32    -16    
192    128    
480    192    
-432   -80    
0      -96    
-96    0      
16     64     
-16    -32    
-16    32     
48     -16    
48     160    
-864   0      
-288   -16    
240    32     
-16    16     
-16    16     
48     -32    
-144   32     
112    112    
16     0      
-208   -64    
-16    64     
-128   -96    
192    80     
-432   0      
288    128    
-416   48     
-208   16     
-128   -64    
48     0      
-176   144    
96     -144   
400    16     
-64    64     
-128   -32    
112    96     
48     0      
-272   -64    
224    -160   
-144   -64    
-16    240    
-48    64     
64     144    
96     144    
-208   -16    
0      -48    
96     32     
112    16     
32     80     
32     -48    
-192   -16    
48     64     
-160   96     
128    80     
-144   -64    
-16    0      
144    32     
-96    -144   
64     -192   
96     16     
0      96     
0      32     
96     -16    
16     -80    
16     64     
-16    48     
96     16     
-144   0      
176    96     
-64    -48    
144    48     
-32    16     
-32    -224   
480    -368   
16     192    
112    272    
0      -80    
64     -144   
-64    -160   
160    -64    
-112   -64    
-128   -96    
-176   144    
-48    48     
-448   -48    
-176   32     
144    32     
-64    64     
144    112    
-272   32     
16     -64    
48     16     
-64    -224   
320    -192   
-160   48     
96     128    
224    32     
-16    -96    
288    128    
96     224    
128    96     
160    32     
-128   32     
80     16     
144    0      
176    -48    
176    0      
144    48     
288    192    
-64    288    
-560   -64    
96     16     
352    96     
448    -224   
272    160    
-32    240    
-240   224    
-272   16     
-16    240    
160    96     
224    -80    
128    32     
-80    64     
-64    32     
16     96     
-304   -64    
512    64     
-32    48     
544    128    
48     64     
80     -112   
32     -64    
400    288    
-64    144    
-80    0      
160    32     
0      -32    
208    -16    
-32    32     
0      112    
32     112    
160    144    
112    48     
144    -160   
-160   -48    
-80    -32    
32     416    
-64    16     
240    -304   
144    96     
-96    16     
-448   -128   
448    160    
-192   -304   
96     544    
-64    96     
-240   160    
384    16     
-64    -64    
-176   96     
-112   -288   
-560   -112   
800    -928   
352    1104   
144    48     
288    -576   
-64    880    
-80    -288   
384    -304   
288    176    
288    -272   
336    -512   
-32    -96    
576    256    
-144   448    
-32    -112   
-576   -384   
512    336    
96     208    
-224   -480   
192    304    
-16    352    
0      96     
96     -160   
96     0      
-64    -48    
320    -240   
-240   -192   
16     -112   
-16    -16    
352    -416   
112    144    
176    -448   
-192   64     
80     -16    
-32    -48    
-48    0      
176    320    
64     192    
256    112    
80     -16    
96     96     
192    96     
96     -128   
336    128    
0      -128   
-48    -16    
-128   -320   
160    96     
80     352    
480    192    
64     80     
0      32     
-64    -32    
-16    64     
304    0      
16     -288   
16     80     
-64    -256   
128    -48    
-32    32     
288    -112   
96     -80    
64     -48    
-64    112    
288    128    
-48    16     
64     -96    
-96    48     
0      -112   
-64    -112   
128    -208   
112    80     
-48    -224   
176    -64    
160    -16    
64     -64    
224    -144   
-160   32     
-288   96     
272    192    
160    64     
128    80     
48     -640   
80     -32    
144    -640   
112    -32    
224    64     
-32    96     
32     -16    
64     -48    
32     160    
80     -80    
144    64     
-16    -192   
144    -240   
-32    128    
96     208    
64     -256   
160    -48    
-32    -496   
80     32     
192    48     
128    -16    
-16    -80    
160    -64    
-48    80     
48     -32    
80     -112   
144    16     
208    -32    
-80    352    
-416   144    
64     -336   
16     -144   
0      -64    
0      -320   
320    -528   
288    -144   
160    -704   
128    -192   
-256   32     
-176   0      
80     -176   
176    32     
512    0      
-288   -32    
-288   -48    
112    32     
400    -64    
176    96     
80     0      
432    672    
-656   144    
-112   96     
32     112    
400    96     
288    -192   
-144   -752   
144    624    
-16    544    
96     -32    
416    -96    
0      -176   
-800   112    
576    176    
-304   -176   
192    -496   
-160   -64    
112    -224   
-288   -368   
112    -1232  
-112   -64    
256    112    
-96    -304   
432    624    
-160   -208   
-64    -64    
-32    160    
-272   -288   
480    192    
336    -32    
-32    368    
240    -144   
-96    -352   
48     -352   
48     -1248  
-16    224    
368    112    
32     144    
-64    -48    
-64    -32    
64     -64    
-48    -80    
-208   64     
0      -96    
-144   -48    
96     32     
288    176    
96     -224   
112    304    
160    336    
-48    144    
-32    -96    
16     0      
-16    144    
160    -80    
144    64     
-160   -32    
-96    -16    
-64    128    
-208   64     
304    160    
-432   208    
192    -64    
-272   240    
-144   -64    
-112   -112   
16     -1168  
256    160    
-432   -128   
224    -176   
-272   -64    
176    -160   
-592   -16    
64     -160   
16     -32    
960    480    
-384   112    
0      -176   
-224   -288   
160    -400   
80     112    
-304   -64    
-144   -224   
656    272    
-112   -48    
-160   64     
288    288    
-624   -48    
576    -96    
-352   -32    
272    32     
192    64     
-384   -128   
96     192    
-32    -208   
-48    -64    
176    64     
0      -32    
-128   -32    
-16    -112   
-80    -32    
176    48     
-32    16     
32     0      
-272   0      
336    -64    
32     144    
-576   -144   
48     -80    
-368   -96    
-112   48     
-64    -48    
-352   32     
-112   0      
-32    112    
-656   -32    
96     0      
96     16     
192    -80    
-160   16     
-368   -64    
208    48     
-32    -16    
144    80     
-176   -16    
-160   -64    
0      64     
-32    16     
-112   16     
128    48     
64     -32    
-960   -48    
144    64     
-48    -48    
224    80     
-160   -96    
128    80     
-112   -48    
64     112    
48     64     
-128   16     
80     16     
-32    0      
0      64     
112    -16    
16     208    
-768   192    
-32    -32    
32     -144   
32     32     
16     16     
-32    16     
80     -64    
-112   -64    
0      -112   
-128   -144   
-16    96     
-96    16     
144    112    
-144   -144   
-176   80     
-1328  -80    
64     -32    
-2384  -112   
-208   -128   
-208   -96    
144    48     
-32    -128   
64     112    
-32    16     
0      80     
48     -16    
64     -48    
-112   -16    
-176   -48    
16     16     
208    -64    
-128   80     
128    512    
-352   512    
-192   -144   
112    -64    
80     -96    
208    32     
336    32     
-80    -416   
224    -832   
16     -48    
416    1200   
208    144    
128    -560   
-288   -320   
-48    176    
-320   96     
112    -16    
-128   -112   
32     -96    
80     16     
-496   320    
112    528    
-96    80     
-304   -128   
112    -96    
-192   16     
160    -176   
224    -80    
-32    -32    
-208   -144   
-16    48     
-176   128    
-160   -32    
-16    80     
-16    112    
208    -160   
16     -240   
-144   96     
144    272    
96     496    
512    64     
192    -288   
-144   304    
-784   816    
336    592    
-96    -208   
-464   -352   
-128   -48    
-272   176    
-384   176    
176    -208   
-32    -64    
48     144    
-80    -160   
192    -128   
64     192    
-96    32     
0      112    
-32    32     
32     48     
-416   208    
336    -208   
-48    48     
-160   224    
208    0      
0      -48    
-16    -48    
128    16     
-16    0      
-176   592    
240    -448   
-48    464    
-176   -272   
32     -208   
-32    336    
-336   -368   
240    576    
-160   640    
-384   -224   
560    -368   
272    144    
80     384    
-16    -400   
-208   -208   
-64    32     
16     16     
96     16     
176    -144   
-96    -112   
160    -64    
-64    96     
-16    -64    
176    -32    
208    128    
48     -96    
112    -192   
-192   48     
-384   320    
-256   -160   
-304   -144   
336    -96    
-128   -96    
96     -80    
-80    48     
-624   -256   
400    -144   
-80    -224   
-320   -192   
48     32     
-96    16     
-32    160    
144    -96    
64     16     
-16    -32    
-16    80     
-176   480    
128    -128   
256    -144   
-80    16     
224    32     
0      -272   
-112   -160   
-160   176    
48     0      
48     16     
-64    368    
528    304    
-128   16     
96     48     
-64    32     
288    -48    
-96    -144   
336    -32    
-208   -32    
48     -736   
-288   -176   
112    -640   
-64    -288   
112    32     
160    256    
176    208    
128    -96    
64     176    
384    304    
-224   -64    
-64    -416   
-16    -96    
-160   144    
-192   -32    
48     -688   
320    16     
80     64     
16     -48    
112    -80    
192    16     
-272   32     
32     32     
64     0      
0      192    
96     64     
160    0      
-144   -96    
80     -32    
80     -176   
48     -464   
80     128    
-96    -176   
-64    -112   
128    80     
-304   80     
240    64     
224    48     
32     32     
-80    16     
80     -128   
0      -80    
64     -272   
160    -112   
112    96     
-64    -16    
112    64     
-64    -736   
16     -16    
32     -16    
-48    64     
224    144    
176    128    
-112   -96    
32     -48    
80     -96    
208    -144   
-32    128    
176    -16    
176    32     
64     -80    
96     224    
32     -320   
-64    128    
96     80     
64     -16    
-560   -928   
0      -768   
64     -352   
224    -80    
64     336    
96     288    
128    96     
-64    -352   
416    736    
-128   416    
-96    -624   
352    -16    
240    -16    
272    112    
-144   32     
-32    -64    
224    64     
304    128    
352    -144   
176    320    
272    -416   
-480   0      
-288   32     
0      -208   
176    -16    
512    -160   
272    -304   
-80    -368   
-144   176    
-32    320    
-480   -464   
-112   -192   
32     80     
352    0      
208    160    
672    416    
-288   288    
-368   224    
544    432    
-112   -32    
192    -96    
48     -448   
160    -48    
32     -96    
160    -112   
240    48     
48     128    
-96    32     
144    48     
-16    48     
-32    48     
64     48     
64     -128   
288    -16    
192    -160   
64     0      
176    -176   
64     0      
192    -144   
272    224    
-336   48     
192    -192   
128    128    
80     -1088  
208    -256   
32     48     
144    -48    
-16    -176   
48     64     
-80    -64    
128    32     
0      16     
224    64     
64     -80    
144    -80    
-160   0      
384    48     
32     32     
-560   -80    
256    -112   
64     -96    
32     -256   
256    96     
-352   16     
-16    -48    
160    112    
304    16     
-144   -240   
96     -32    
48     -144   
112    64     
544    -32    
-544   0      
-688   80     
-272   -208   
0      -96    
704    -96    
96     -128   
304    -176   
400    160    
-96    -416   
480    160    
-384   -224   
-336   -208   
368    -128   
208    160    
176    -112   
176    -80    
-48    -32    
16     -192   
176    16     
-32    -96    
48     144    
-144   -144   
400    0      
-96    -640   
176    0      
144    -64    
16     64     
16     -48    
208    96     
-368   -32    
192    -80    
-144   -64    
80     -256   
-352   -144   
-224   16     
-160   -48    
224    -192   
144    -48    
112    -192   
-224   16     
-80    -1312  
160    64     
80     -112   
-144   80     
-96    32     
-96    64     
0      -32    
32     -64    
-528   -48    
112    0      
96     -96    
288    32     
-16    -48    
-80    -80    
128    32     
0      -576   
224    48     
-80    -144   
224    -64    
-32    80     
80     -48    
-48    -96    
240    80     
-416   80     
-32    32     
-1024  -16    
112    64     
0      -128   
-48    -336   
16     96     
-96    -144   
32     32     
144    -80    
128    -160   
-96    -128   
128    64     
-272   -224   
-144   -112   
-352   32     
208    32     
-144   0      
64     -80    
-32    -96    
80     16     
-80    48     
192    -176   
-160   -448   
-16    112    
128    320    
-192   -112   
160    112    
-320   -160   
176    -128   
64     480    
144    -80    
-240   64     
-112   -336   
-144   128    
64     -96    
144    32     
80     -48    
272    32     
112    -64    
176    16     
-96    112    
-416   -64    
-400   -368   
96     -1408  
96     352    
384    336    
-96    -224   
96     96     
-80    -112   
-96    -144   
-272   496    
-752   -80    
-2048  -96    
-96    0      
448    -80    
624    496    
-208   96     
-272   -816   
192    144    
-256   480    
-80    -112   
96     -96    
-1024  64     
160    112    
-304   -224   
48     0      
-112   -32    
-576   -80    
96     144    
-320   -384   
-208   -128   
-736   192    
144    112    
112    -80    
96     -240   
-80    32     
80     304    
-240   -160   
176    -352   
-16    -128   
-144   -96    
384    32     
-112   -64    
-160   -272   
0      336    
32     368    
160    -304   
208    -288   
-816   112    
-64    80     
-48    0      
-32    192    
-48    -112   
32     176    
-32    -112   
0      0      
-192   48     
96     96     
-128   64     
-256   64     
80     64     
-80    112    
-80    288    
-544   128    
-144   64     
-16    64     
128    128    
-96    -48    
48     -48    
96     -16    
144    48     
32     80     
-32    192    
144    16     
-192   96     
16     96     
288    240    
-80    304    
-720   96     
400    464    
-1952  224    
-48    512    
304    -32    
224    16     
-128   -32    
-176   -240   
80     128    
176    0      
-112   176    
-128   -176   
240    160    
-656   -128   
288    144    
-128   96     
160    0      
-736   48     
48     80     
-16    160    
-400   -64    
32     384    
-96    160    
208    64     
112    0      
144    -48    
-432   -240   
-80    -128   
-432   -160   
0      -64    
-416   96     
224    -48    
-464   -16    
400    176    
-608   -32    
80     -16    
-144   -224   
-112   -112   
16     -32    
128    176    
-48    272    
-128   -16    
-48    -80    
112    144    
128    0      
-96    32     
80     32     
-32    -32    
96     160    
-288   160    
96     -64    
256    -176   
-272   -96    
32     -48    
-176   48     
64     -48    
-32    96     
-96    -128   
16     -64    
112    32     
208    576    
-416   400    
-816   -96    
0      -432   
64     -144   
160    112    
-96    32     
96     96     
-224   192    
448    400    
16     -48    
-160   32     
208    80     
-224   176    
272    -192   
-48    -160   
32     96     
-128   -32    
144    32     
288    -64    
-336   0      
-32    -80    
-240   400    
16     208    
-112   -192   
336    -448   
112    -208   
144    96     
-128   -64    
48     128    
-480   -96    
32     -32    
0      -112   
16     -96    
288    -64    
80     176    
112    32     
48     16     
96     -16    
80     112    
-160   320    
-224   -32    
96     -144   
128    -64    
112    208    
-64    64     
208    32     
112    240    
96     96     
-16    -240   
0      80     
64     128    
0      -32    
96     96     
-240   -672   
-80    192    
16     -112   
0      -192   
128    368    
0      -80    
-192   -112   
128    -192   
96     48     
240    640    
-368   -752   
96     192    
128    16     
128    -96    
80     304    
-48    -144   
-32    -256   
144    16     
0      -400   
80     512    
112    288    
-368   -224   
96     176    
192    224    
-224   -96    
0      -64    
-224   32     
64     16     
112    16     
-64    80     
48     160    
80     112    
0      48     
-272   64     
-432   -256   
320    -192   
352    -32    
400    -928   
0      112    
240    240    
-512   48     
-336   -80    
176    -16    
128    -16    
352    48     
240    32     
64     80     
-96    96     
-224   -160   
112    -400   
-256   48     
224    80     
368    -1008  
512    160    
-192   96     
-16    16     
0      -112   
176    -144   
-96    96     
16     112    
-64    -16    
64     48     
-176   64     
64     16     
272    96     
-48    -96    
96     48     
192    -32    
-32    16     
288    176    
-224   64     
-80    -64    
304    0      
64     32     
192    32     
64     -192   
16     32     
-96    0      
64     144    
-304   -192   
336    -48    
-336   96     
0      -176   
112    96     
-352   -560   
224    -304   
304    448    
-96    32     
272    -208   
144    96     
432    304    
-640   64     
-832   -192   
672    144    
-208   48     
80     -224   
544    112    
64     0      
272    224    
-384   -432   
32     -16    
304    160    
-16    64     
336    64     
32     -16    
48     16     
320    80     
-176   32     
704    80     
160    -48    
-64    -16    
576    160    
-112   16     
-96    -48    
-160   -240   
144    96     
-160   -80    
-96    32     
160    0      
16     80     
192    -96    
256    112    
432    80     
-400   48     
128    -208   
16     -144   
48     112    
-128   -320   
224    96     
-96    -160   
128    176    
144    0      
16     0      
96     -48    
80     32     
64     112    
336    240    
-368   -16    
272    -192   
48     64     
96     -64    
128    48     
96     -64    
-64    -16    
128    -80    
16     80     
-48    -144   
176    112    
-96    -16    
144    64     
16     16     
-64    48     
160    -64    
-96    -144   
272    192    
-80    -96    
112    -64    
128    16     
96     -176   
-400   -416   
128    128    
112    112    
176    288    
-16    -224   
256    -112   
-96    240    
-112   -64    
208    -784   
288    -144   
-48    -1184  
48     -80    
-64    80     
80     -112   
128    0      
144    -80    
96     336    
0      -288   
384    -48    
-224   -448   
368    448    
-176   -272   
-1520  -64    
48     -16    
0      -80    
-16    0      
112    -224   
64     -1008  
0      -80    
80     32     
48     32     
144    48     
304    128    
-16    704    
-96    -496   
128    32     
-16    256    
112    -224   
0      368    
-32    -192   
-16    -192   
-48    -144   
128    -240   
80     48     
32     -176   
64     -160   
112    -96    
-240   16     
-32    48     
-64    64     
112    -32    
-128   240    
0      96     
48     -112   
192    64     
96     -160   
-16    96     
256    80     
176    48     
32     -240   
-16    -96    
-64    -64    
224    352    
128    336    
-192   336    
-48    224    
64     64     
-384   32     
576    176    
-640   160    
-16    -96    
-32    -144   
48     -144   
16     -16    
144    -64    
192    80     
176    -16    
-320   -16    
96     -272   
352    32     
96     80     
496    -48    
112    -144   
-208   -288   
-448   -208   
-80    -176   
-16    -64    
112    -288   
-48    -128   
-48    208    
-160   144    
-96    -400   
176    32     
32     0      
-96    48     
-96    -144   
112    -144   
-240   -32    
224    144    
-224   16     
-48    -112   
-272   -64    
80     -96    
192    272    
-32    -48    
32     176    
128    -352   
64     -128   
-176   -96    
96     64     
-304   400    
64     96     
-96    -128   
144    -192   
-784   -224   
32     -160   
176    -224   
-48    -160   
16     0      
-112   48     
192    -96    
384    32     
-48    304    
112    224    
160    64     
48     224    
-352   -144   
-544   224    
208    640    
-240   672    
336    624    
96     80     
176    96     
64     -112   
48     96     
16     -16    
-160   -208   
48     0      
-304   48     
240    16     
320    -128   
-96    -32    
-272   -32    
48     192    
-16    208    
208    128    
-368   -64    
192    -208   
-32    64     
-608   -208   
-128   -16    
-816   -80    
-352   -64    
336    112    
-176   192    
-144   -32    
624    32     
-400   304    
64     16     
-176   96     
544    0      
96     0      
-576   -48    
224    96     
-144   144    
192    288    
-416   16     
-576   -16    
-272   64     
-1248  -224   
160    80     
-864   32     
128    112    
-176   -48    
160    112    
240    80     
-176   144    
160    -320   
-256   48     
192    -160   
-288   -272   
96     -256   
-128   -176   
0      64     
80     0      
-160   -64    
-272   -32    
48     208    
-2384  -32    
-176   80     
-224   -224   
128    -32    
-96    -96    
0      0      
-48    -208   
-16    192    
96     32     
240    32     
-96    64     
32     16     
-384   208    
-144   192    
-128   160    
-272   -32    
64     -144   
-64    -464   
224    -256   
-48    -288   
48     -128   
48     176    
-176   -368   
-96    -256   
128    -48    
-64    272    
-144   -192   
96     32     
-336   -384   
-144   640    
-64    32     
0      272    
-1824  -240   
-48    240    
-192   -128   
240    112    
32     256    
-64    -560   
336    592    
-416   -432   
0      -112   
-64    128    
0      -256   
-80    336    
176    80     
32     -16    
-16    -256   
-672   320    
-32    208    
-48    -112   
80     -32    
48     -96    
80     0      
32     16     
32     -48    
64     32     
-32    80     
-32    64     
-48    0      
-96    -16    
-80    -48    
480    688    
-560   512    
32     144    
304    -96    
32     -64    
96     32     
-128   -192   
-240   288    
-32    368    
-304   -224   
240    -352   
-48    -32    
128    80     
256    96     
-400   -128   
384    -16    
-448   112    
-368   32     
-352   -128   
-80    -64    
-128   48     
-80    80     
96     -32    
80     16     
176    0      
-160   16     
-144   -16    
-80    -32    
-176   -112   
-384   -48    
144    96     
-336   -32    
80     160    
-240   16     
208    -16    
320    96     
256    304    
-64    288    
-224   96     
80     -128   
384    -160   
32     -16    
352    208    
-96    80     
-192   -64    
-112   -176   
336    0      
-464   128    
-304   -16    
96     80     
96     96     
128    -96    
160    -48    
-304   0      
-80    32     
112    64     
64     32     
48     -16    
288    64     
-240   -160   
400    32     
176    176    
-64    -16    
64     32     
96     48     
-144   0      
-48    16     
0      16     
96     48     
-128   -64    
336    240    
-512   80     
-96    0      
0      -32    
-16    -16    
16     32     
624    112    
-64    -96    
352    0      
-528   0      
160    80     
256    64     
-64    80     
-400   -128   
384    0      
-16    112    
208    256    
-48    144    
48     48     
48     0      
-144   96     
128    80     
-80    128    
-112   -32    
192    144    
-208   16     
-128   -112   
-192   96     
-128   -304   
-192   -400   
496    336    
-176   16     
240    112    
96     64     
-1024  -320   
-96    -144   
144    -240   
-224   -112   
144    48     
192    -32    
112    0      
208    192    
-176   112    
48     0      
-128   288    
0      -80    
48     -32    
-48    64     
176    -160   
96     -96    
-16    288    
64     144    
160    0      
128    176    
-128   80     
16     80     
240    352    
-112   -256   
48     -176   
-32    -80    
-224   48     
208    192    
16     -64    
176    -112   
80     96     
112    -560   
64     160    
-144   0      
192    48     
-224   288    
80     -64    
-16    96     
128    112    
-80    256    
288    -144   
16     -256   
-64    160    
-96    -256   
128    -240   
-176   96     
192    -528   
80     464    
656    256    
-224   800    
-224   -224   
48     -336   
160    128    
192    -224   
144    16     
16     -32    
-80    544    
64     144    
256    304    
-16    64     
-80    272    
144    -80    
272    -336   
16     -176   
0      0      
112    -16    
-32    -16    
0      192    
240    224    
64     192    
16     80     
-112   -16    
96     -64    
144    48     
128    -32    
96     -16    
-144   -48    
240    -192   
96     -320   
208    -48    
400    16     
-240   592    
48     48     
32     -16    
160    64     
96     80     
160    48     
112    -96    
128    96     
64     -128   
-32    -48    
64     -224   
-16    -144   
160    -96    
0      16     
-48    16     
-64    0      
-272   48     
112    96     
160    112    
-32    16     
-64    208    
144    -32    
0      -32    
-128   -144   
48     112    
32     -176   
208    16     
96     -144   
256    16     
-80    96     
80     -208   
304    -128   
208    64     
64     64     
0      -64    
-32    0      
32     32     
-48    80     
128    -64    
272    64     
0      -80    
208    64     
0      -144   
224    32     
192    -160   
80     -32    
128    -112   
112    144    
208    192    
96     80     
160    128    
-96    -144   
-352   -144   
-144   -736   
160    -176   
320    -80    
352    -80    
32     32     
-192   16     
-96    -80    
-32    -144   
-96    32     
64     -528   
-144   96     
352    304    
96     -176   
176    -80    
-128   -320   
16     -112   
112    48     
64     16     
128    -96    
80     0      
224    -400   
48     224    
192    -256   
-16    -32    
64     -160   
160    -96    
-608   80     
80     -304   
128    -128   
-48    -512   
256    32     
224    32     
-128   -64    
0      96     
48     -144   
112    -80    
64     240    
624    496    
-336   112    
-96    -16    
64     -176   
-1200  -480   
-144   16     
160    96     
96     -128   
-128   -80    
96     -96    
-64    -160   
-160   -1968  
-16    -96    
-144   96     
-112   224    
160    -128   
176    -16    
-112   0      
336    544    
-704   352    
272    32     
-432   -256   
80     432    
192    48     
416    -96    
864    400    
-288   0      
-144   224    
112    -304   
-192   -448   
16     -96    
-80    352    
-64    16     
160    32     
-192   -256   
160    -320   
-752   0      
-32    -208   
176    -144   
128    16     
-48    0      
48     -336   
16     240    
256    -352   
240    128    
64     80     
-160   -160   
0      16     
144    -16    
-144   -48    
128    176    
-448   192    
80     -16    
96     224    
-208   48     
176    -304   
432    176    
-160   -32    
-16    0      
-64    16     
-176   -160   
432    304    
-80    64     
208    -16    
-528   -48    
64     -32    
-32    48     
0      -16    
-224   288    
240    -416   
96     160    
112    -128   
-320   -272   
352    -304   
96     288    
144    -352   
112    192    
0      16     
-192   96     
-96    -480   
-80    96     
112    192    
96     -16    
-96    112    
224    -368   
-80    64     
64     -112   
112    -16    
80     -208   
64     -64    
-80    -144   
160    176    
-272   64     
320    256    
-160   0      
-48    -112   
-192   16     
80     -96    
-208   -32    
128    -80    
208    -64    
-16    -352   
128    208    
-80    -672   
192    64     
-144   96     
144    -48    
-128   32     
-32    48     
-304   -16    
176    0      
-160   -48    
32     -256   
64     -112   
-32    -64    
112    64     
-560   -64    
-80    0      
-16    128    
-400   32     
128    -32    
-288   32     
16     0      
96     16     
-288   560    
64     96     
16     -128   
-416   -32    
112    128    
320    512    
-656   288    
-224   -432   
128    -64    
-80    -256   
64     -16    
-336   192    
-160   -48    
-160   -32    
-1152  144    
-288   0      
176    -48    
96     16     
0      -48    
544    288    
-624   -272   
272    -80    
48     -32    
400    -32    
400    32     
-224   64     
-144   96     
-560   -16    
-432   -16    
48     -16    
-32    16     
-496   0      
176    0      
-64    -32    
112    96     
-416   -160   
384    -64    
208    128    
-96    -16    
208    -16    
-336   -64    
-160   32     
80     -32    
192    0      
96     0      
128    64     
-384   -96    
48     -16    
-96    0      
64     0      
0      -32    
-32    64     
-128   0      
-32    32     
112    144    
-224   -128   
-48    0      
-144   16     
192    48     
-448   -96    
96     16     
-1360  -160   
-112   16     
-272   -16    
-64    64     
64     -96    
-48    -64    
0      0      
-80    48     
-144   -128   
336    96     
16     32     
208    0      
-112   0      
-320   -48    
-144   -384   
48     -64    
-256   128    
-608   -80    
-464   -176   
16     -160   
-160   -16    
192    32     
0      -112   
176    -96    
-32    -16    
160    32     
-80    -96    
-48    -64    
560    272    
416    112    
-160   -256   
176    -112   
-800   112    
-128   176    
16     48     
128    128    
-288   0      
-112   368    
-112   0      
-128   -480   
-240   -80    
-16    144    
432    208    
-320   192    
-224   -576   
384    -112   
-48    352    
-208   -112   
160    80     
-176   -64    
32     16     
192    176    
160    -64    
32     80     
-64    48     
144    -32    
208    -32    
-192   32     
32     48     
-64    -192   
-112   224    
-48    -1040  
-80    720    
432    672    
-288   144    
-96    -128   
304    -368   
192    448    
32     240    
48     -176   
160    -256   
-144   176    
96     -32    
-352   272    
336    112    
-224   96     
-80    80     
0      -48    
176    -32    
-48    -144   
-96    48     
16     64     
-128   80     
-112   0      
80     240    
288    240    
-96    -16    
64     176    
-160   -32    
336    176    
-352   176    
0      144    
112    160    
336    272    
80     80     
-160   0      
-64    -112   
48     -128   
16     -48    
112    48     
0      48     
-32    64     
192    80     
-160   160    
-16    144    
-288   -32    
-112   144    
128    -112   
256    -32    
192    -48    
-48    32     
64     80     
0      80     
48     16     
80     48     
224    192    
-96    -48    
128    48     
-240   -96    
0      -48    
-112   -80    
192    176    
80     160    
240    96     
64     176    
-384   48     
272    -112   
-48    32     
144    -48    
192    48     
48     112    
-144   -64    
64     128    
-16    80     
-96    128    
32     -16    
384    80     
-128   176    
-336   -432   
144    -304   
-32    128    
-112   32     
96     64     
64     -80    
288    -112   
224    112    
0      272    
-80    48     
-112   64     
-96    -304   
448    128    
-16    -16    
208    -48    
96     -160   
32     192    
288    160    
-64    64     
-160   -128   
32     -128   
-32    32     
272    80     
-80    -64    
-32    -80    
-176   -160   
288    -288   
96     160    
-16    -160   
96     0      
32     208    
192    64     
48     -48    
128    -368   
160    -176   
64     -96    
-32    -16    
288    80     
-144   -48    
-48    48     
-192   -32    
-176   -288   
0      32     
80     -160   
368    -32    
240    32     
16     -16    
-256   -144   
112    -256   
0      -64    
64     352    
112    -16    
16     32     
-16    96     
256    240    
-64    160    
-80    0      
-48    192    
32     -144   
-48    -96    
-96    -880   
160    -96    
-80    0      
80     32     
320    272    
-96    480    
32     -272   
352    -80    
-144   208    
224    -368   
80     -32    
176    32     
-448   -384   
64     -416   
16     592    
160    -96    
416    -16    
-208   144    
-160   -144   
-320   240    
0      -272   
400    48     
-256   -288   
80     -192   
288    -192   
-64    48     
400    640    
-144   -288   
304    16     
-288   352    
208    -240   
-224   -80    
256    -464   
224    192    
224    224    
-320   -704   
544    16     
384    160    
368    -32    
16     240    
144    -144   
16     -304   
-224   80     
-176   0      
768    592    
-864   -912   
0      224    
352    352    
-192   -160   
400    -64    
288    240    
256    -64    
32     64     
-144   80     
16     -768   
112    96     
112    96     
0      16     
144    112    
-32    -96    
144    -480   
128    208    
-128   -288   
0      -16    
112    -160   
112    -240   
64     -128   
-112   -192   
-48    -432   
192    -208   
-96    -48    
208    -16    
112    32     
-80    -64    
128    64     
-16    -48    
0      -80    
80     144    
0      -112   
48     0      
208    -208   
176    -144   
64     16     
-16    -624   
-32    -32    
160    -176   
-16    16     
352    -880   
48     -16    
96     112    
-48    -112   
16     -32    
32     128    
48     80     
80     32     
112    -128   
144    0      
-1968  -96    
128    16     
48     -32    
48     -304   
96     -96    
48     -544   
-16    -48    
224    0      
96     -16    
-48    0      
80     128    
144    -32    
48     16     
-80    352    
160    144    
32     96     
-208   32     
64     -96    
96     -48    
-32    -224   
176    -496   
144    48     
96     -528   
-160   0      
96     -128   
-32    128    
0      -96    
48     48     
304    112    
-96    32     
-560   32     
112    -48    
-48    -160   
224    -48    
256    -64    
288    -48    
-144   48     
80     -704   
-48    -64    
64     -112   
-96    16     
96     48     
32     0      
-496   -480   
0      -352   
-960   176    
-144   16     
-464   -64    
176    64     
-48    -32    
368    -64    
-608   -32    
128    48     
-16    144    
96     0      
-144   32     
-336   -96    
-128   -48    
-160   -80    
64     -16    
-112   48     
240    112    
-848   -48    
320    208    
0      32     
176    -64    
-352   32     
0      -80    
160    96     
-240   208    
272    176    
-144   64     
256    -160   
-240   -160   
160    -32    
96     16     
192    32     
-304   -112   
48     -144   
-112   272    
192    112    
-224   -80    
-112   -208   
272    112    
0      -896   
352    -32    
-64    -16    
32     128    
-48    48     
-192   -16    
-544   -96    
112    -80    
144    48     
112    -16    
432    -16    
128    -64    
-144   -16    
-80    -224   
160    112    
160    -208   
-16    16     
32     -64    
16     16     
-144   192    
160    48     
-192   -64    
112    48     
-304   -16    
64     0      
-368   48     
224    -48    
-112   0      
240    -80    
64     64     
-16    0      
-672   -32    
-128   48     
240    0      
112    224    
32     256    
-32    32     
64     -48    
-48    -96    
80     -320   
144    304    
-400   -48    
192    -176   
-320   32     
576    384    
-176   -272   
-576   -560   
-64    176    
-1120  208    
-336   -160   
-128   -288   
-368   -336   
480    -208   
528    1408   
-208   144    
-112   -720   
-912   512    
80     -160   
-192   -448   
-48    272    
-320   -80    
-96    -112   
-128   208    
-80    -224   
-192   208    
112    272    
-464   -128   
-352   64     
-32    -144   
288    864    
-208   -96    
-16    -16    
272    272    
-240   -640   
48     -224   
-160   -384   
-192   32     
240    368    
-336   160    
-144   160    
-128   -240   
32     16     
-1024  -320   
-464   -160   
176    -752   
-48    -128   
16     336    
544    272    
-400   192    
-64    0      
-64    128    
80     112    
176    192    
-160   -64    
-96    -144   
-128   -304   
-16    -160   
-1024  80     
-96    -128   
-48    -144   
64     176    
-112   16     
144    -32    
160    0      
-48    192    
32     128    
-48    0      
-64    16     
0      16     
192    192    
-96    0      
48     -128   
-96    -16    
-80    192    
-16    128    
-240   96     
-208   16     
-144   112    
80     128    
64     -16    
16     -16    
-48    32     
64     64     
48     -16    
64     96     
192    16     
-64    16     
-176   112    
224    176    
-416   -32    
112    0      
-48    16     
-16    0      
48     0      
-96    -64    
0      0      
16     32     
-16    64     
-64    160    
-96    32     
-96    -64    
-64    48     
-400   -32    
16     80     
-224   0      
208    48     
-144   32     
-160   -64    
-96    112    
96     144    
-64    -64    
176    -64    
-144   -144   
0      -16    
-32    0      
-128   64     
112    32     
-144   -64    
112    64     
-320   96     
-96    -16    
0      -32    
80     288    
-176   240    
-64    176    
192    80     
-32    -352   
0      -288   
-112   -112   
32     48     
-48    112    
64     192    
-352   32     
240    0      
-80    -112   
-352   -384   
-160   -16    
112    192    
96     288    
144    144    
-224   80     
-112   16     
-48    -112   
-48    0      
432    416    
-128   -32    
320    -224   
-48    -160   
144    64     
48     -16    
-80    -96    
-160   32     
0      -256   
224    -208   
816    688    
-304   -64    
-64    96     
256    912    
-80    128    
336    -16    
-288   -176   
272    272    
320    96     
48     -256   
128    -144   
-32    176    
-128   -224   
-288   -112   
64     624    
224    112    
-32    192    
96     -112   
192    -256   
-176   208    
-48    80     
-320   -192   
304    176    
80     -240   
256    384    
-112   -96    
-272   -32    
112    48     
112    288    
16     64     
176    -32    
144    128    
-224   -128   
288    -240   
-176   192    
-64    256    
-128   224    
-96    128    
-112   -48    
208    -496   
-160   -192   
64     144    
-176   48     
96     -16    
176    96     
96     144    
64     80     
-208   -96    
-176   -240   
-400   -128   
-192   224    
768    1200   
-144   656    
352    -272   
384    -272   
224    -176   
304    112    
48     -192   
96     -320   
304    16     
-320   -96    
240    32     
496    288    
-112   -176   
96     -48    
176    208    
96     96     
-80    -208   
-224   32     
240    208    
-48    128    
-208   96     
96     48     
-128   -64    
336    80     
160    96     
-128   32     
288    -16    
-80    96     
-16    -112   
48     32     
-80    -80    
144    -80    
-80    48     
128    -688   
48     -16    
-16    16     
0      64     
-48    -16    
224    -16    
192    0      
96     -80    
-352   48     
-80    48     
96     16     
192    64     
48     96     
-32    -16    
80     32     
0      -320   
224    64     
144    48     
-16    -32    
96     96     
-48    48     
80     -288   
96     80     
-192   -112   
176    112    
-48    48     
48     80     
160    128    
16     -16    
240    96     
-160   -176   
48     0      
64     -304   
16     80     
80     -96    
320    -288   
-304   -400   
32     80     
32     96     
80     128    
64     16     
48     -32    
448    144    
-256   -224   
160    -32    
64     -160   
-48    16     
80     -640   
144    80     
160    -48    
-176   -96    
64     48     
144    16     
96     80     
0      32     
0      -80    
160    -128   
-16    112    
192    48     
272    304    
-64    304    
160    112    
176    -752   
-112   32     
0      16     
272    240    
-48    -16    
176    128    
16     80     
16     -64    
96     224    
192    -416   
176    -128   
-32    -224   
80     240    
-112   0      
32     32     
192    -112   
-144   80     
80     80     
192    544    
64     208    
96     -160   
-224   -80    
112    0      
-128   -256   
144    -160   
0      288    
-96    -176   
80     -128   
320    -224   
432    -32    
240    80     
80     -32    
144    -32    
128    -176   
192    32     
304    416    
-320   48     
432    80     
-256   -64    
-384   -224   
192    -832   
-48    48     
80     -32    
160    -176   
352    304    
-560   160    
16     -32    
464    288    
-64    -528   
96     -160   
128    -144   
368    -80    
176    -16    
432    -400   
336    -272   
48     -704   
144    16     
-256   -32    
-224   144    
-112   96     
-192   -208   
96     -400   
-112   -32    
288    -80    
32     -16    
-496   -128   
96     -64    
-80    0      
224    -192   
160    -192   
320    -208   
576    288    
-96    32     
-112   -208   
-96    -352   
128    0      
48     -32    
32     32     
224    -16    
272    48     
-256   -576   
272    0      
-224   464    
176    -16    
-80    -224   
192    -16    
-48    -32    
240    -656   
-64    192    
176    -128   
-144   64     
48     96     
16     48     
-160   -400   
480    -368   
-352   144    
256    368    
-816   -848   
80     768    
-48    -448   
432    176    
144    -192   
-64    -832   
-256   480    
80     -736   
-240   -192   
224    -336   
-464   -320   
304    176    
-368   672    
384    -96    
0      -528   
-256   -400   
-16    112    
-1408  144    
-240   -320   
-272   224    
304    32     
176    128    
160    -240   
-160   -192   
-16    -192   
384    224    
-160   192    
304    16     
32     224    
160    -32    
-368   -144   
-144   -112   
-272   0      
-16    64     
224    112    
144    256    
64     32     
-32    -352   
-80    -32    
176    -960   
192    -128   
240    -16    
48     -80    
-144   -48    
16     -96    
-80    -16    
64     208    
-352   32     
512    -144   
-720   32     
176    -448   
48     -16    
-144   -128   
64     176    
176    -704   
80     -144   
0      64     
208    -48    
-384   -112   
96     -32    
176    176    
-208   256    
-416   -80    
-112   -128   
240    -16    
64     -176   
80     32     
288    16     
-80    80     
-432   64     
-48    32     
-256   32     
176    -144   
-16    -48    
144    16     
-128   112    
288    -352   
-384   -224   
-16    80     
-304   464    
272    -32    
112    128    
-1088  -144   
144    -80    
-128   176    
-960   -240   
48     64     
-576   112    
-224   -64    
-112   -144   
-240   -96    
256    -16    
-16    48     
128    -128   
48     0      
-496   -64    
-32    80     
-576   -48    
-240   0      
32     192    
144    0      
16     32     
-528   -16    
-144   -112   
-688   -96    
-192   0      
208    0      
144    -48    
-208   224    
-32    208    
-800   -32    
96     16     
-240   -96    
-32    -16    
-16    -64    
0      -240   
-64    -80    
-256   -96    
-16    48     
-1088  112    
48     144    
272    176    
-80    32     
-32    -128   
96     176    
16     160    
-48    240    
240    96     
64     -16    
-112   208    
-48    160    
160    304    
-384   480    
80     224    
-208   -96    
64     112    
-1712  -96    
-176   -64    
-272   -288   
-16    16     
-16    416    
80     -240   
-32    -80    
64     -80    
128    80     
-272   208    
-208   -208   
144    176    
96     48     
-64    336    
-432   -352   
-144   -64    
272    0      
448    -80    
304    160    
-48    -352   
32     0      
-256   160    
208    112    
-96    -64    
-96    32     
-144   -128   
32     144    
320    208    
-32    -272   
192    448    
-480   -64    
-240   -304   
240    80     
-112   96     
368    208    
-208   352    
176    64     
176    48     
-80    -144   
64     -144   
-16    48     
-176   112    
-48    144    
240    336    
-224   288    
-224   -16    
-16    96     
-848   48     
208    80     
-80    -32    
128    48     
-176   -32    
-48    -32    
224    176    
-352   16     
96     16     
-32    16     
128    80     
-16    0      
176    144    
-128   32     
-16    80     
-144   0      
192    112    
-384   -16    
224    96     
32     80     
160    -16    
-304   -272   
288    -80    
48     96     
48     144    
-336   48     
-544   -144   
-16    -80    
-160   96     
-32    -96    
0      -48    
304    128    
-160   144    
-128   112    
224    64     
48     -48    
96     32     
0      48     
224    16     
0      0      
-304   -128   
-464   -320   
96     -16    
-544   128    
-320   -96    
320    0      
16     64     
64     160    
-128   -32    
-272   0      
-48    48     
320    144    
-112   0      
-48    48     
96     64     
64     -32    
-176   -16    
144    48     
-160   -160   
96     -16    
32     64     
128    80     
-144   32     
64     192    
128    -16    
48     16     
-144   -16    
48     -32    
32     0      
-176   16     
128    32     
64     32     
96     16     
-176   0      
-208   16     
224    64     
-96    -112   
192    -48    
32     160    
48     64     
64     -48    
64     0      
-272   16     
192    112    
96     16     
-96    0      
-128   -16    
160    0      
-64    -32    
16     64     
272    80     
112    32     
48     64     
-64    -144   
-96    -16    
-16    96     
-64    -48    
80     48     
224    -16    
-32    64     
-32    48     
128    -32    
-16    0      
-16    16     
64     256    
-64    160    
80     -48    
208    32     
144    240    
-32    96     
96     -64    
96     -64    
-48    48     
144    -96    
-16    -80    
-16    64     
-160   16     
96     -240   
160    -96    
-80    112    
96     -32    
-16    0      
-64    -16    
64     -112   
16     16     
144    16     
-16    32     
-80    32     
80     48     
-144   -80    
112    -16    
48     16     
96     -144   
0      16     
16     -16    
64     -96    
128    144    
-176   -320   
-416   -384   
-48    128    
64     112    
208    -80    
96     112    
144    208    
192    304    
80     -48    
-272   -16    
112    208    
-144   -176   
32     352    
240    0      
48     208    
-208   -48    
-80    -96    
224    32     
336    48     
144    32     
-224   -304   
32     496    
-560   144    
-304   -432   
160    48     
0      -144   
384    304    
320    -16    
-624   -208   
-240   -96    
-224   32     
176    112    
112    240    
-256   -1152  
240    352    
-336   144    
-144   -128   
400    352    
208    -96    
688    368    
-80    448    
-16    -256   
352    -560   
160    160    
256    -752   
32     128    
432    160    
-80    16     
-48    96     
-16    128    
0      240    
16     -672   
208    224    
288    0      
224    -208   
96     -224   
64     304    
-64    32     
32     48     
32     176    
80     32     
80     176    
-48    592    
160    128    
80     -272   
256    144    
16     144    
80     -32    
-16    112    
-48    96     
176    -752   
-176   32     
64     80     
64     80     
16     -96    
64     -144   
128    80     
64     32     
160    -352   
-16    -320   
-176   -48    
-64    48     
144    -32    
48     -384   
80     -192   
-32    48     
-144   0      
432    128    
-160   192    
32     -576   
-64    -144   
192    -80    
-32    0      
128    32     
240    0      
-80    64     
-64    -528   
224    -320   
48     -304   
-48    176    
112    112    
128    80     
-64    -48    
144    272    
16     -32    
96     -192   
304    -80    
400    -608   
240    112    
0      16     
320    -464   
-192   144    
64     -320   
32     -192   
-32    336    
240    96     
48     64     
144    16     
112    0      
-32    -48    
112    -432   
128    48     
48     -400   
-96    -160   
96     -496   
-64    16     
48     192    
272    -16    
112    -64    
160    464    
-208   64     
112    -208   
336    48     
32     288    
96     208    
-112   -272   
-32    128    
208    -96    
176    -32    
-96    -80    
-192   32     
-304   -48    
32     -32    
64     -128   
128    -480   
448    272    
-48    16     
-80    96     
0      0      
48     80     
192    -32    
144    96     
64     -64    
240    16     
-320   64     
32     -144   
-112   48     
96     16     
32     -128   
464    48     
-16    176    
-144   -304   
0      -144   
192    -960   
-352   -32    
-96    -16    
-176   208    
48     -16    
128    -224   
-160   -336   
112    48     
-944   128    
16     32     
112    -16    
16     -16    
112    0      
224    176    
96     80     
192    -368   
-32    224    
48     -80    
-32    96     
-96    96     
112    -112   
-176   -48    
448    16     
-48    480    
-240   160    
-160   352    
64     16     
448    -336   
48     -368   
80     -176   
-48    -448   
48     112    
224    176    
128    176    
-224   80     
-96    32     
-112   -112   
288    352    
-304   128    
64     -192   
-1712  -64    
-144   -304   
128    128    
-176   -288   
64     112    
48     128    
96     0      
-128   -544   
240    -352   
240    208    
-32    -192   
64     0      
0      32     
-240   -112   
-224   144    
-368   0      
-352   -336   
224    112    
480    240    
224    80     
144    -160   
-256   -256   
16     -80    
-256   -32    
-304   -800   
224    -432   
320    -256   
624    -208   
-80    -48    
-224   -112   
-144   16     
-272   -272   
-160   -96    
32     -96    
320    160    
432    -96    
80     48     
-256   32     
-16    16     
-432   -64    
-16    -96    
-400   -64    
144    -16    
64     80     
-112   -32    
-96    48     
-16    -144   
144    112    
-48    -176   
256    48     
-192   144    
-720   -16    
-64    16     
-880   64     
-240   112    
48     240    
480    320    
-432   96     
-16    16     
112    32     
-208   -144   
-528   -80    
128    48     
-64    0      
320    160    
-336   -80    
-384   -48    
-48    128    
176    -48    
224    80     
-720   -32    
224    96     
-240   -64    
-16    -64    
176    16     
64     80     
-432   -80    
-176   -48    
96     -80    
544    320    
-112   32     
-176   -32    
-320   -16    
-192   -160   
32     -32    
-48    224    
-240   -32    
-528   -112   
-16    32     
-528   -48    
16     0      
128    -64    
-832   16     
496    112    
272    -32    
-304   -144   
256    32     
-224   16     
-160   176    
-656   -208   
48     -208   
448    -16    
-864   256    
-384   80     
-688   -32    
464    32     
-896   -128   
208    112    
64     -80    
-352   -48    
80     -48    
64     16     
80     224    
-272   0      
144    -32    
-224   -32    
128    112    
-176   -48    
0      32     
-624   -48    
0      48     
16     -96    
64     32     
-128   -80    
176    -16    
-64    80     
-64    -48    
-176   16     
-272   -32    
-144   16     
176    32     
16     48     
-464   0      
144    48     
-480   -96    
128    64     
-144   -112   
-64    -48    
160    96     
64     64     
-192   -32    
32     64     
-96    0      
16     48     
48     48     
-160   0      
-160   -48    
-176   -64    
352    80     
-304   32     
256    48     
-880   16     
-64    -176   
48     176    
-160   192    
-176   -144   
224    128    
160    176    
0      48     
112    16     
-256   -224   
-32    144    
-240   0      
176    -128   
-240   48     
304    112    
-848   112    
-144   -336   
-16    192    
0      112    
192    -96    
-16    -32    
160    32     
-208   -96    
-32    48     
-144   -32    
176    -144   
-160   160    
0      64     
-208   -128   
208    64     
48     0      
208    160    
192    80     
32     -80    
0      112    
0      176    
-320   -496   
-96    256    
160    -144   
112    240    
176    -96    
-208   112    
160    112    
32     336    
48     16     
-16    -208   
-96    -16    
-96    0      
-208   -704   
-128   320    
64     -32    
64     -64    
144    528    
-256   -512   
-320   96     
80     -96    
-48    -32    
128    128    
128    -16    
-48    16     
-64    32     
112    -64    
144    -96    
176    80     
160    48     
544    896    
-496   -864   
112    -608   
528    864    
-304   -112   
128    -160   
-192   -80    
-32    32     
-304   -272   
176    544    
-192   -272   
528    -240   
160    912    
352    48     
384    -496   
80     -96    
304    112    
-288   144    
256    -80    
-576   -304   
-112   -208   
-176   48     
32     16     
416    32     
176    48     
304    32     
48     80     
16     -160   
-144   -112   
192    16     
-416   -512   
48     -368   
48     -112   
224    -16    
112    -352   
64     -112   
-144   -80    
-192   256    
96     208    
32     -112   
128    48     
160    0      
80     80     
160    0      
-112   -32    
0      -64    
-32    -64    
-192   -128   
272    -304   
176    160    
-96    112    
-112   -192   
-48    -864   
112    -128   
96     64     
272    128    
-320   272    
256    -112   
64     -128   
-64    64     
32     112    
112    800    
224    -64    
240    16     
-256   -256   
304    208    
-176   352    
256    48     
64     96     
400    608    
224    528    
112    -160   
-368   -272   
160    -400   
80     80     
-176   -272   
32     -448   
-80    -928   
224    -192   
-448   -160   
160    -336   
160    64     
112    -96    
160    352    
112    208    
272    -128   
256    -80    
112    0      
112    -48    
-48    -80    
-32    32     
192    64     
-144   -80    
208    -16    
-64    80     
-96    16     
256    -48    
16     -208   
224    80     
-96    -64    
128    80     
128    -192   
-32    16     
-48    32     
-32    352    
-112   -80    
368    -432   
112    -32    
32     224    
-96    -240   
80     -848   
32     -256   
160    -160   
112    32     
16     -112   
-176   -16    
32     -640   
-416   112    
-32    32     
64     32     
-144   16     
112    -16    
160    -64    
80     80     
176    0      
-240   -208   
64     -80    
-32    -96    
160    0      
32     64     
0      -16    
256    -592   
-320   -128   
-112   80     
0      304    
240    208    
416    -32    
-80    -16    
-96    -64    
-128   -64    
96     -32    
160    -32    
96     16     
-16    -48    
272    -528   
32     -32    
-144   -592   
-64    -224   
208    -128   
-256   -160   
160    -16    
-64    96     
-112   16     
-16    -160   
384    -240   
0      -16    
-32    -224   
64     -144   
-48    160    
-112   -48    
80     192    
176    -64    
-32    304    
32     -160   
128    48     
0      -80    
128    -16    
48     240    
64     -144   
64     128    
160    176    
192    64     
-48    -112   
-16    96     
128    -192   
64     160    
48     -432   
64     32     
256    -176   
48     -1216  
48     272    
-1344  320    
-144   -32    
-96    -176   
240    -400   
160    -48    
240    -496   
192    -208   
208    -144   
64     -352   
176    -240   
16     -144   
96     -96    
0      144    
-192   -288   
-80    0      
-336   16     
-32    -128   
128    -16    
208    -256   
128    -288   
-16    -416   
-400   80     
-160   -960   
208    -80    
-48    -96    
16     -16    
-128   16     
-336   208    
160    -128   
176    32     
-128   80     
96     -112   
112    -160   
240    48     
-16    -144   
256    -208   
-272   -208   
176    -784   
240    128    
32     -48    
128    48     
48     -96    
192    32     
288    112    
-144   -48    
-112   -64    
-16    0      
-368   -48    
48     48     
496    96     
-336   -96    
-160   -112   
48     -272   
544    16     
176    -16    
192    32     
224    -112   
-48    -32    
64     48     
-48    -112   
208    112    
-272   -64    
-368   0      
64     -112   
560    192    
-400   -48    
176    0      
16     -160   
96     48     
432    -496   
-160   -32    
-448   -256   
160    16     
-64    48     
288    -80    
288    80     
80     -16    
-128   -48    
464    48     
-848   112    
64     -16    
-352   -32    
-144   -208   
128    16     
112    -928   
320    48     
64     16     
80     128    
-192   -80    
-16    -256   
-192   -96    
384    128    
-240   -32    
400    32     
-288   96     
-16    0      
128    -208   
176    -288   
-32    64     
-96    -16    
544    80     
128    -80    
400    64     
-656   -336   
640    -160   
-128   128    
-608   -16    
16     -16    
160    0      
96     -16    
0      -288   
112    32     
64     -48    
-64    96     
32     -240   
0      48     
-240   48     
224    -48    
-272   -32    
48     -16    
0      0      
-16    32     
-144   -32    
144    -80    
-2464  -80    
32     16     
112    176    
144    -176   
96     160    
144    16     
-176   -64    
-64    -16    
32     -32    
16     32     
-112   16     
64     80     
16     48     
48     16     
192    128    
48     400    
192    16     
-112   -192   
-1584  64     
-96    160    
-1472  -416   
-1408  112    
128    -16    
-64    -16    
192    224    
-624   -96    
-144   0      
176    -16    
80     0      
176    -32    
-112   -16    
-32    96     
96     -16    
-176   0      
-16    96     
32     208    
96     -112   
80     128    
-208   96     
-144   -32    
-1472  -80    
16     192    
-96    -624   
-112   -144   
-192   448    
192    -320   
-80    -112   
-160   272    
-192   -64    
224    -144   
128    16     
48     368    
-320   96     
-128   -496   
32     224    
-272   -192   
-64    96     
-256   64     
-192   -32    
-224   -16    
160    16     
-64    -272   
48     16     
-48    112    
-96    48     
-16    -128   
-288   544    
-160   80     
-128   -224   
176    32     
-48    -96    
-64    176    
-512   48     
288    128    
-864   -96    
176    -176   
-16    512    
128    432    
-96    160    
-112   96     
192    160    
-160   400    
-32    16     
-32    -288   
144    112    
240    176    
-16    96     
-352   112    
112    192    
-1200  -64    
16     -48    
-16    -48    
16     80     
144    0      
224    16     
320    336    
-64    352    
-112   96     
-80    -80    
-48    48     
48     144    
-240   192    
-48    -112   
-16    -32    
96     128    
-128   96     
-256   96     
-80    16     
144    48     
432    176    
-128   128    
160    -80    
-336   0      
-512   -336   
-32    -64    
224    -16    
368    64     
272    288    
-176   112    
-656   208    
-96    272    
-928   -32    
256    -112   
208    -48    
-176   -32    
-128   -288   
64     -144   
-16    128    
-256   160    
-144   336    
80     240    
224    144    
-240   -16    
256    0      
-304   -96    
144    16     
160    112    
-112   144    
0      32     
-64    -176   
-208   -48    
160    -304   
256    160    
-80    320    
48     272    
-272   32     
-128   -16    
-256   -96    
0      -272   
-48    160    
320    48     
-48    0      
32     -16    
-176   -288   
256    -480   
80     -288   
48     96     
0      -80    
-80    352    
-288   -352   
-176   -64    
224    176    
-48    -144   
128    -224   
-144   -192   
400    -48    
224    -80    
128    48     
176    0      
-128   432    
-176   96     
-544   48     
128    784    
160    352    
608    48     
-544   16     
-336   -48    
-480   -128   
112    -160   
-304   -864   
448    -496   
-160   -240   
-512   -32    
-176   240    
-144   -208   
208    208    
128    48     
352    112    
80     -80    
192    144    
-80    -32    
-240   32     
-224   -80    
-16    128    
64     128    
0      -80    
96     448    
192    128    
208    208    
-144   224    
240    -336   
-688   -592   
-32    -240   
-112   96     
368    -192   
-320   -256   
128    -304   
-176   -144   
64     -96    
144    224    
-128   -32    
240    -672   
-144   -144   
96     -160   
48     -144   
272    -432   
-128   -224   
144    -48    
-384   -400   
64     -288   
-144   -384   
160    48     
-80    -80    
288    304    
-320   -64    
64     -192   
144    528    
-64    208    
208    -192   
-96    64     
176    16     
-64    -192   
176    112    
-448   192    
112    -336   
-128   -176   
176    240    
96     64     
144    -400   
64     544    
-224   -576   
608    -208   
-192   160    
112    -224   
128    288    
128    160    
208    16     
192    16     
0      0      
-64    96     
-64    64     
32     -48    
48     -16    
160    -128   
224    -16    
96     16     
-32    64     
48     -80    
-128   -32    
-144   -16    
0      96     
-80    -32    
160    64     
64     128    
160    208    
-128   176    
128    -128   
192    -48    
-32    -208   
32     -16    
32     -320   
208    208    
-80    80     
-48    16     
0      -176   
272    -480   
240    -160   
464    32     
144    160    
96     80     
16     96     
48     0      
-208   160    
-64    -176   
-16    -80    
0      -752   
-112   48     
-96    80     
272    144    
-256   16     
-32    16     
0      -96    
144    32     
0      96     
144    240    
-96    -48    
256    -96    
704    0      
320    -192   
432    80     
512    -368   
-128   144    
-832   -560   
-144   96     
-64    64     
-80    16     
48     -144   
432    32     
176    0      
-80    -256   
448    32     
-16    -80    
224    112    
-32    -64    
16     -32    
-112   -368   
-80    -80    
400    -112   
96     64     
192    80     
272    144    
-224   16     
16     80     
-144   48     
-160   0      
80     64     
-48    -128   
48     96     
-192   -240   
384    64     
64     -80    
16     80     
-96    32     
208    -16    
160    -96    
0      144    
-80    48     
112    -16    
80     -16    
144    -48    
224    176    
-128   -144   
304    -32    
16     -16    
-176   0      
352    -64    
-48    32     
-336   -1184  
320    112    
0      80     
-384   -256   
384    -32    
-128   -704   
128    -400   
-240   -240   
720    432    
-624   144    
-32    -192   
320    144    
-96    176    
800    160    
-432   80     
96     -192   
112    -912   
128    64     
512    -32    
-32    -64    
-1232  -128   
-144   -272   
256    32     
256    336    
112    192    
352    -336   
0      -128   
-160   112    
160    0      
-240   -368   
-16    -208   
224    48     
-80    240    
240    -112   
-16    -368   
-480   96     
32     -64    
160    112    
32     -64    
112    -192   
-96    -176   
240    -240   
32     96     
96     96     
144    -224   
16     32     
64     -128   
-192   160    
144    -320   
-16    96     
-80    64     
96     -96    
-32    -112   
240    -320   
144    368    
128    -32    
-112   -304   
112    272    
96     16     
0      -320   
-176   96     
176    -96    
144    64     
-144   -240   
320    -320   
-400   32     
208    64     
384    144    
80     -416   
-64    224    
-32    -80    
160    448    
16     -448   
16     -496   
256    -80    
128    208    
384    832    
-448   -448   
-336   -640   
-32    -192   
-256   0      
192    -16    
-256   -272   
0      -144   
64     -384   
192    -128   
-480   -224   
-64    -544   
-48    160    
256    -176   
64     240    
288    32     
-64    -80    
16     32     
0      48     
-144   16     
48     -144   
-528   -80    
80     -112   
-1856  -128   
224    96     
16     32     
160    0      
240    112    
160    112    
-80    80     
48     80     
160    -16    
-80    16     
-64    -112   
80     -32    
80     0      
-672   0      
-80    -32    
-640   -16    
0      -32    
-464   48     
192    -32    
32     96     
64     -272   
64     -32    
0      16     
80     -240   
-256   -144   
32     -160   
-480   -80    
48     -96    
-64    -32    
0      32     
-32    80     
64     -64    
96     48     
0      -288   
-16    352    
384    96     
32     240    
-272   128    
224    -144   
-224   0      
-160   -96    
-64    -64    
112    -16    
-144   0      
48     16     
-688   -80    
240    -160   
-32    96     
336    336    
-160   304    
-144   0      
304    -224   
-32    0      
-832   -144   
0      -208   
272    -96    
608    384    
-64    320    
-96    16     
80     -144   
-224   208    
-944   -16    
160    0      
-336   32     
-32    448    
64     240    
-816   -208   
-144   -64    
-1376  -64    
0      -96    
-1104  -16    
0      16     
144    0      
64     112    
-624   32     
96     64     
-432   -48    
-208   -80    
-96    16     
176    128    
48     -64    
-304   -64    
0      -224   
80     48     
-96    80     
-160   64     
-176   -80    
-624   -144   
0      16     
-176   -48    
-16    96     
-128   -32    
192    64     
-272   -352   
-128   -224   
-32    32     
48     176    
32     48     
208    96     
96     256    
-112   208    
-48    80     
-576   16     
-32    -16    
-96    -560   
16     -208   
-64    384    
-192   800    
368    464    
-112   48     
-48    48     
48     -96    
32     -224   
-368   -256   
160    -672   
-384   -336   
-400   -304   
-512   -704   
-160   -208   
-1072  1264   
-272   32     
-480   -192   
-240   -192   
144    -368   
704    -48    
176    16     
368    832    
-48    64     
224    -304   
288    48     
128    288    
-64    80     
608    624    
-544   -128   
-1360  -208   
-144   240    
-112   -112   
208    128    
560    544    
-144   288    
-160   -32    
-208   -256   
-64    -112   
-80    -16    
192    -16    
-48    336    
-304   -368   
464    -288   
32     784    
-288   432    
240    -224   
-80    112    
-144   -368   
0      -208   
-464   -272   
-96    128    
0      128    
-224   -32    
384    -32    
-96    176    
0      112    
-80    -32    
-272   -128   
-288   -16    
48     -592   
-288   -80    
96     304    
-272   128    
272    208    
-80    -208   
-272   -112   
208    288    
-160   -160   
48     -128   
-64    0      
128    -16    
112    80     
96     64     
-16    -16    
-368   0      
-48    192    
192    80     
-48    -80    
96     144    
-48    -32    
224    -16    
64     -144   
-144   -96    
-128   368    
48     160    
32     0      
-112   80     
-48    240    
128    144    
-48    336    
-128   544    
0      240    
112    -80    
128    192    
-160   176    
32     32     
-48    -96    
-48    0      
0      96     
64     240    
240    528    
0      256    
0      128    
32     16     
-144   -112   
-80    -48    
160    -128   
0      -80    
112    0      
-16    80     
0      96     
-96    96     
-32    32     
-16    96     
32     112    
48     16     
-208   0      
48     -64    
176    160    
32     112    
-48    0      
144    48     
-48    16     
144    -496   
-160   -192   
-160   144    
-48    112    
-16    -16    
192    80     
-112   32     
-64    256    
96     144    
-96    -160   
336    16     
112    -160   
0      0      
-400   128    
-320   32     
-160   -32    
80     144    
-176   0      
-96    32     
-96    0      
0      96     
112    -32    
288    -48    
-64    96     
-144   16     
-96    -48    
48     0      
224    368    
80     96     
416    -192   
304    0      
-96    192    
32     144    
-64    32     
-32    32     
48     80     
64     144    
320    -48    
-288   -128   
-336   -208   
288    -288   
160    176    
288    80     
80     16     
240    80     
-160   96     
-32    16     
224    32     
64     0      
80     -32    
160    -32    
160    128    
-80    -112   
-16    -32    
256    -48    
224    -416   
32     64     
16     0      
-160   16     
64     -16    
192    -16    
112    0      
192    64     
80     16     
192    32     
-96    -272   
0      48     
-160   128    
80     -96    
960    720    
-688   80     
64     -96    
-16    96     
-96    -64    
320    64     
96     0      
-16    -96    
320    96     
-192   -16    
208    0      
-416   -448   
-96    -224   
-64    224    
64     16     
-512   -80    
144    -64    
64     -32    
-240   -352   
352    96     
16     -144   
224    -16    
-128   256    
384    208    
96     -208   
208    -48    
-208   -48    
512    80     
80     48     
16     -224   
160    352    
-480   -496   
32     144    
448    48     
-320   -160   
784    544    
-736   -48    
-560   -672   
256    112    
224    32     
736    -112   
64     208    
304    0      
-432   -64    
-96    192    
48     -112   
176    -304   
128    464    
368    -192   
16     -32    
64     -304   
80     -432   
80     208    
-128   -32    
-48    -112   
64     0      
192    288    
64     112    
48     288    
128    32     
64     64     
-16    736    
288    -416   
-256   -992   
224    176    
0      -96    
96     128    
192    48     
16     144    
-16    144    
-144   96     
272    192    
-48    -496   
32     -16    
192    -80    
-112   368    
-96    240    
240    16     
160    16     
0      112    
144    48     
224    128    
32     -32    
112    16     
-160   80     
-80    -48    
128    -128   
176    -240   
160    32     
32     0      
48     -128   
64     -240   
192    -64    
48     112    
208    112    
48     32     
-48    32     
-48    16     
128    -336   
96     32     
208    80     
-96    -304   
16     -160   
96     -1280  
-80    -32    
192    48     
224    -32    
304    144    
-256   -192   
-256   -240   
16     16     
-48    224    
112    16     
64     -80    
48     48     
240    16     
32     -208   
32     -144   
-48    -160   
-160   -112   
128    -80    
-144   -432   
-16    -208   
-80    -32    
-96    -400   
144    0      
16     -384   
112    -128   
144    0      
-144   0      
256    32     
-64    -224   
16     -144   
-64    64     
48     -96    
192    -80    
112    -144   
288    -432   
128    336    
112    224    
384    656    
-96    320    
144    -64    
-256   -336   
224    -144   
0      144    
-256   32     
80     -80    
-16    -96    
304    32     
-96    -272   
144    96     
288    144    
320    112    
-16    112    
-128   176    
112    64     
32     0      
-80    -240   
384    -272   
-96    96     
112    112    
288    16     
-80    -80    
-160   -160   
272    -240   
176    -64    
-128   -448   
-16    -240   
288    -304   
352    -32    
192    -224   
160    96     
176    32     
96     80     
-80    48     
-240   176    
-928   288    
272    48     
400    96     
160    112    
96     160    
-160   -240   
-48    32     
32     64     
144    -272   
0      -96    
128    48     
-176   48     
32     96     
-48    -64    
160    176    
-176   -416   
-192   -544   
0      -144   
48     352    
224    16     
0      -320   
240    256    
-32    -400   
-304   0      
224    -656   
64     528    
-192   -160   
112    -272   
-320   80     
-80    -208   
-368   544    
176    -16    
-512   -240   
-304   -784   
-320   368    
-240   -432   
80     80     
416    -160   
272    -400   
128    432    
-256   -16    
-608   -112   
-16    -48    
-16    160    
224    240    
-880   -1344  
544    848    
-336   608    
-448   -1104  
128    272    
848    656    
128    -256   
112    -384   
-48    -160   
-128   -16    
160    -144   
112    112    
32     432    
1248   816    
-1136  -928   
-704   -1120  
192    304    
16     32     
336    144    
336    528    
-256   -368   
-272   128    
272    -32    
-1648  192    
16     64     
272    80     
16     32     
176    -16    
-176   -64    
16     -64    
-176   0      
80     -80    
112    32     
-640   -32    
128    16     
-400   -208   
64     112    
-176   -32    
-144   -16    
48     -80    
-224   0      
-144   48     
-544   0      
-160   32     
96     0      
-224   -144   
64     144    
16     512    
128    48     
-112   32     
-80    -80    
-32    32     
64     112    
-400   -96    
128    64     
-544   64     
-208   -16    
-592   16     
-80    240    
-448   32     
-96    -16    
0      -128   
-144   -16    
64     -80    
176    112    
64     -256   
0      48     
-32    32     
-80    32     
-80    64     
-128   -48    
224    176    
-480   48     
16     112    
-832   -32    
128    -96    
-320   -400   
48     16     
64     160    
-64    96     
32     32     
112    32     
-96    16     
-144   -16    
128    -160   
-80    -48    
80     32     
-128   -16    
128    80     
-448   -48    
112    160    
0      -32    
0      32     
-176   -16    
-80    -96    
-16    -128   
-160   48     
-128   128    
144    304    
-64    48     
128    -128   
80     112    
-144   0      
-128   -48    
-16    -64    
96     48     
0      32     
-96    48     
-64    -48    
-48    -128   
-304   -176   
-64    96     
96     32     
80     -32    
-16    -144   
-176   -128   
64     128    
-16    0      
-32    -128   
-384   -160   
-128   -32    
-672   -80    
32     16     
80     -48    
80     48     
224    48     
176    -16    
176    96     
-112   -32    
0      -64    
112    64     
208    64     
176    -32    
192    80     
-48    160    
-352   176    
32     64     
-352   80     
-240   -32    
-160   -128   
160    16     
-240   -16    
-96    64     
-80    128    
-160   128    
-176   -32    
240    224    
-96    64     
0      -64    
-128   -64    
176    128    
-592   -32    
-32    0      
288    128    
-432   -48    
-112   -112   
16     16     
32     -32    
-64    -144   
240    -96    
96     -48    
112    16     
-128   -176   
96     -16    
-112   112    
-208   0      
0      -48    
-16    16     
-64    32     
-80    0      
-80    -32    
64     32     
192    16     
-32    0      
384    32     
-304   -16    
0      -64    
16     160    
-208   64     
144    208    
192    128    
96     32     
-16    176    
48     48     
-256   -224   
704    -112   
-176   128    
416    32     
-80    32     
-80    144    
-288   -224   
-80    160    
576    -288   
0      352    
160    -48    
0      80     
512    432    
-432   -288   
416    -704   
336    256    
368    -48    
-128   0      
64     -112   
-496   208    
560    48     
-480   -32    
144    0      
-112   304    
480    336    
-224   -416   
-400   -32    
192    -16    
-80    80     
304    -128   
256    0      
528    256    
-192   -112   
176    304    
-432   80     
-240   64     
240    -416   
160    32     
16     -16    
464    224    
-272   288    
160    -192   
32     240    
-368   208    
64     -112   
-96    48     
192    -96    
96     112    
48     0      
0      -80    
288    -208   
-368   -64    
144    32     
208    80     
-176   64     
-48    176    
-32    80     
128    0      
64     48     
32     -16    
112    112    
160    0      
80     48     
-96    64     
176    -16    
96     -64    
16     0      
16     0      
-48    -96    
32     -64    
16     -176   
96     -736   
64     16     
-96    -32    
16     -16    
128    48     
-16    16     
112    64     
192    128    
-208   48     
192    96     
64     0      
416    80     
-176   32     
-32    -208   
224    -192   
0      -112   
144    128    
192    192    
-64    208    
-16    144    
16     80     
32     16     
64     80     
-16    -64    
80     64     
-96    32     
240    48     
112    -16    
0      -208   
-128   0      
256    -432   
96     -48    
-192   16     
176    -48    
64     80     
-32    64     
32     256    
176    128    
-96    32     
80     112    
-48    16     
176    80     
32     112    
-96    -96    
160    -32    
-16    -176   
-16    192    
128    -832   
16     112    
0      -192   
32     144    
80     -272   
-96    -176   
176    32     
-16    176    
80     0      
96     -48    
160    240    
144    96     
0      -176   
-144   -704   
224    -96    
-32    288    
144    400    
64     176    
80     96     
-112   128    
-80    -176   
-64    -368   
128    -256   
272    -48    
256    -32    
304    32     
-16    -32    
224    16     
-16    -32    
144    16     
400    64     
-96    -16    
48     -16    
256    64     
176    144    
0      416    
-16    224    
544    704    
-560   464    
160    64     
16     -208   
336    -176   
288    -32    
160    240    
32     -112   
-240   -112   
-304   128    
-160   -400   
16     80     
128    224    
336    -16    
-64    0      
96     -64    
-80    -144   
80     -272   
336    448    
-80    -240   
64     160    
-16    -64    
144    112    
848    448    
-704   -784   
64     80     
96     192    
80     -48    
416    -416   
-16    0      
-96    -496   
-352   -1216  
-48    192    
-16    -1168  
208    128    
144    -64    
208    112    
256    16     
-112   -96    
64     -1216  
-256   -272   
48     -80    
96     48     
32     -496   
384    -128   
-1664  -80    
368    0      
-80    0      
32     176    
16     464    
-16    16     
272    -448   
288    -80    
480    320    
144    -128   
288    16     
-144   -144   
-112   16     
80     48     
-240   -128   
-192   -48    
256    -80    
-16    -96    
272    80     
144    32     
192    -160   
240    -192   
320    112    
-176   0      
480    80     
-240   80     
-128   -64    
160    80     
640    432    
-528   288    
-976   80     
-432   128    
-144   448    
-128   -336   
720    -48    
-128   32     
160    -32    
176    -928   
-432   -48    
160    16     
-16    -16    
0      0      
128    0      
-144   -16    
224    0      
-112   -32    
48     -48    
-560   32     
96     -32    
144    48     
-208   -176   
-64    -112   
16     -96    
144    96     
128    -96    
-32    -64    
-112   -96    
240    -176   
96     96     
128    -96    
-160   -80    
336    -16    
-208   16     
272    48     
32     -96    
-176   -160   
-96    0      
16     -256   
384    32     
400    -592   
-160   176    
-256   -48    
272    -16    
-64    -16    
-16    -80    
-32    16     
112    80     
-496   -32    
224    -96    
-112   48     
64     80     
208    16     
80     -96    
-240   -208   
144    -336   
32     128    
-160   16     
224    32     
144    16     
-272   -48    
-672   -160   
416    -16    
-1040  -48    
128    0      
64     64     
80     0      
16     48     
208    -80    
144    32     
-48    -160   
208    96     
288    160    
80     16     
-368   -16    
16     96     
-176   112    
64     -48    
-208   112    
144    -16    
240    192    
-112   80     
-48    160    
160    -144   
96     -32    
-96    -144   
16     48     
-160   48     
96     -144   
-176   -160   
144    64     
-240   112    
-64    -32    
160    -16    
96     -96    
-256   48     
384    -448   
80     -112   
-1072  192    
0      48     
-64    48     
-64    192    
-96    320    
-1216  -128   
-80    160    
0      80     
32     -32    
352    192    
112    112    
-2288  -64    
48     80     
-272   16     
96     32     
-448   32     
-112   16     
-64    -432   
-416   -352   
-288   112    
-608   112    
-160   192    
-720   32     
-64    64     
176    208    
-128   384    
64     336    
208    -192   
-160   -432   
-128   16     
96     -96    
-240   0      
-176   -32    
288    112    
-112   -96    
-144   -256   
-128   -32    
-384   -48    
-272   -320   
-464   -464   
176    -272   
16     -16    
448    128    
16     -176   
-368   -208   
-96    48     
-304   192    
-192   80     
48     -32    
160    352    
704    768    
-336   128    
-48    -464   
16     224    
-656   80     
320    -48    
320    160    
-32    -96    
-96    16     
0      -32    
48     0      
0      176    
0      -64    
-128   -208   
-48    64     
-80    288    
-64    0      
-112   -144   
-272   352    
-512   -32    
112    16     
-192   -176   
0      -48    
-16    112    
-112   -48    
192    32     
160    -144   
-256   256    
-176   64     
-64    -144   
352    -160   
176    288    
224    448    
-320   -192   
-432   -96    
-144   48     
-736   -480   
-80    -208   
-16    -144   
224    96     
160    -32    
-208   -64    
272    0      
-224   32     
16     -48    
-240   -64    
-32    -48    
-624   -448   
128    -288   
-288   -32    
-240   -144   
-112   -64    
-528   -176   
64     96     
16     32     
-256   -112   
-240   -208   
208    -128   
16     176    
192    32     
144    32     
80     96     
-400   -80    
-80    -224   
-16    0      
112    112    
-320   208    
-336   112    
-16    64     
96     -144   
0      96     
160    32     
-192   -64    
80     -144   
-128   128    
-32    32     
-112   192    
16     -48    
0      -64    
-192   16     
144    176    
-288   160    
16     -16    
16     16     
176    -176   
-192   -16    
80     528    
96     368    
80     -80    
112    -224   
48     -32    
-48    -16    
-192   -272   
-16    -400   
-48    -176   
240    112    
-272   0      
160    -80    
48     128    
80     112    
64     32     
0      32     
144    -16    
16     16     
16     0      
-96    -64    
96     -48    
-112   -96    
144    32     
-32    0      
96     32     
-64    -160   
-16    -112   
80     -96    
-96    80     
-112   -96    
192    16     
-16    32     
-48    -64    
144    64     
-80    -16    
-80    256    
-32    16     
160    0      
-208   -192   
160    -32    
128    64     
-176   48     
112    160    
112    0      
16     -48    
96     16     
288    304    
-336   176    
0      32     
-128   32     
96     96     
80     48     
160    96     
-192   -48    
-16    -16    
64     -32    
-32    176    
-96    112    
160    80     
128    112    
96     -128   
112    16     
144    208    
-320   -160   
-144   -48    
0      64     
-144   -32    
128    -16    
-80    -112   
160    96     
112    32     
112    80     
-224   -336   
-64    -128   
144    368    
48     304    
96     176    
-48    -160   
272    -64    
192    64     
128    48     
-352   128    
-272   -608   
272    0      
48     64     
-128   16     
144    -592   
304    -48    
336    80     
16     400    
-384   80     
-288   -48    
192    -192   
384    464    
192    -144   
432    0      
96     144    
-272   -96    
-192   16     
352    -48    
-128   208    
352    -144   
-176   -272   
-128   -256   
0      48     
128    112    
80     -176   
-288   -176   
112    192    
-400   32     
80     32     
256    -16    
224    -32    
272    -80    
160    -432   
-160   -224   
-176   -144   
-192   144    
32     144    
64     48     
272    48     
-128   96     
80     48     
-16    32     
-16    -16    
80     48     
16     32     
208    -96    
-16    48     
-48    -496   
-16    -32    
-176   -224   
416    64     
-80    0      
336    96     
32     -80    
32     64     
-432   -480   
1088   -48    
-592   64     
800    192    
-80    -320   
-416   -352   
256    64     
-240   -128   
112    -32    
416    -400   
16     144    
-288   -80    
752    336    
-576   48     
-176   -64    
-112   80     
176    -16    
-16    -48    
96     -80    
112    -96    
128    -192   
336    -16    
-416   128    
64     160    
80     -416   
-384   -80    
128    -80    
-224   80     
-160   -224   
336    -176   
288    160    
-272   0      
288    16     
-32    64     
-256   -16    
48     32     
-80    0      
208    -288   
256    128    
-272   -336   
624    208    
-128   -80    
32     128    
160    -48    
32     64     
-128   -80    
160    -128   
112    112    
128    -64    
-16    96     
64     -320   
16     32     
0      -16    
32     64     
-16    -32    
96     0      
192    96     
-80    -16    
112    -64    
144    80     
-144   -32    
352    -96    
-48    16     
224    -80    
-48    -144   
16     -80    
144    112    
16     -80    
272    -48    
-48    -64    
112    -96    
-160   -96    
0      32     
32     16     
48     -96    
144    16     
64     -16    
64     -128   
160    -16    
-16    -784   
224    -144   
-16    -16    
32     -48    
-32    32     
144    0      
272    -272   
-144   16     
80     -48    
48     -32    
80     -48    
160    -352   
-224   -224   
96     -512   
0      -32    
112    -416   
128    -80    
-16    -160   
96     -80    
160    48     
112    -48    
-32    16     
144    176    
192    16     
0      -192   
80     -64    
160    16     
-16    -16    
80     -272   
160    -32    
112    -96    
144    16     
16     -416   
144    -272   
144    -304   
112    144    
112    320    
-256   -240   
16     -128   
0      208    
-192   -80    
64     144    
-352   -80    
272    16     
160    -16    
592    672    
-400   -496   
48     -544   
272    160    
112    -176   
96     80     
176    -160   
128    -144   
128    -176   
16     -112   
0      304    
-144   -64    
-496   -32    
16     -16    
112    -16    
32     -160   
272    -80    
416    16     
256    16     
432    -176   
-128   -64    
320    288    
-400   -32    
-432   496    
416    624    
-208   -336   
-224   -16    
-608   368    
80     -80    
-1312  -32    
-128   -128   
64     -32    
256    0      
160    112    
176    -272   
112    128    
256    128    
-32    128    
128    -96    
304    0      
-240   160    
320    -368   
-128   112    
-160   -240   
-320   -160   
32     80     
-112   128    
240    -144   
96     -48    
176    -224   
160    -128   
112    -800   
-208   -240   
-176   0      
96     96     
-192   -320   
192    -64    
240    176    
-128   -176   
-368   -192   
128    -448   
-128   224    
16     -32    
64     80     
160    16     
0      96     
-48    -320   
-16    -496   
-496   -64    
0      -368   
-256   -528   
144    -96    
-32    112    
80     240    
-272   176    
-96    -560   
-512   -352   
0      -160   
288    320    
288    240    
-384   288    
64     -64    
-32    -80    
-48    -144   
-48    -128   
-176   16     
432    272    
-128   208    
-416   160    
-352   304    
0      -16    
240    16     
-272   -320   
240    -160   
-1072  -176   
-544   -208   
-208   112    
-512   32     
-400   96     
-1808  -16    
496    320    
-32    128    
-16    -32    
176    -224   
224    -160   
16     -192   
-48    -144   
-304   -368   
-176   -32    
0      -48    
-400   96     
16     0      
240    32     
-272   112    
-176   -64    
64     128    
-512   224    
-64    -128   
64     -64    
48     192    
-480   -32    
32     64     
-112   80     
112    160    
-80    -64    
304    -160   
-288   -16    
-64    48     
-48    192    
96     16     
-272   48     
-256   -64    
176    192    
-3280  96     
-96    -224   
-208   -176   
240    96     
-80    -48    
400    -64    
-112   64     
-128   128    
-16    64     
-96    -48    
368    240    
-320   352    
-160   80     
-256   -32    
144    48     
-960   -80    
32     192    
48     80     
-80    32     
-16    -64    
-96    32     
-112   -192   
-96    -160   
48     96     
16     32     
80     -48    
-112   -48    
16     32     
-352   64     
16     64     
64     -16    
-16    240    
-208   0      
208    288    
-128   -32    
32     -224   
144    -32    
112    -112   
-80    576    
16     256    
64     96     
-224   112    
-80    -48    
-16    64     
-64    192    
-144   224    
240    -32    
-64    208    
96     176    
64     224    
-160   160    
64     160    
-96    224    
160    528    
-48    80     
-240   -240   
-192   -240   
-64    96     
96     480    
96     272    
-352   -336   
48     64     
-816   -80    
0      -336   
-144   48     
-144   112    
-112   -336   
144    64     
16     1328   
-160   -672   
160    112    
0      64     
112    0      
-304   -16    
224    32     
-640   -208   
-80    -208   
-112   336    
304    144    
128    -144   
-80    -48    
-32    -544   
-256   32     
-160   176    
32     0      
144    80     
112    -112   
-256   -176   
-256   -176   
96     96     
48     160    
80     144    
240    -16    
-96    -32    
0      -64    
256    -208   
288    -128   
160    -16    
48     96     
0      96     
-336   48     
-48    -48    
-64    -32    
-208   -112   
240    96     
64     32     
-80    -192   
224    -160   
128    48     
208    112    
128    64     
272    112    
-320   32     
-368   -112   
16     -32    
32     80     
-176   -240   
608    -128   
32     -16    
144    128    
-432   64     
-96    16     
-16    96     
432    160    
320    192    
-176   -96    
16     16     
128    64     
112    -16    
-16    -16    
208    96     
-144   32     
256    32     
-272   -48    
0      96     
-224   16     
96     64     
-144   -272   
192    16     
0      256    
-256   -80    
144    16     
-240   16     
560    528    
-240   -64    
416    -64    
0      240    
-240   -16    
-160   -128   
32     80     
176    240    
96     -80    
-496   -384   
448    -48    
-64    208    
-208   -32    
448    240    
-448   -16    
144    -144   
-64    0      
-160   160    
-272   -80    
496    336    
-288   240    
32     -64    
224    -16    
-64    -144   
384    32     
-64    80     
-16    0      
176    32     
-384   -32    
80     96     
544    48     
-752   -16    
64     48     
-64    -32    
640    176    
112    96     
-176   -64    
416    160    
-336   144    
64     -64    
48     16     
144    112    
16     0      
176    16     
-48    -96    
112    -16    
144    144    
-128   64     
32     16     
-16    32     
384    80     
-112   -272   
-336   -64    
224    -496   
16     32     
304    208    
48     128    
32     -16    
-128   -32    
-32    32     
128    64     
80     256    
-64    0      
-80    -48    
64     -48    
-96    -32    
96     -16    
0      -16    
80     -720   
368    192    
-208   112    
112    0      
32     80     
272    144    
-32    160    
-32    16     
176    128    
64     32     
32     -16    
-32    -176   
352    16     
80     0      
16     -96    
-160   -288   
128    -48    
144    144    
112    160    
-160   -320   
112    160    
16     80     
64     -112   
288    -32    
-224   -112   
32     80     
144    48     
160    -64    
48     16     
32     16     
144    -368   
-48    16     
-16    -912   
192    64     
-48    0      
-32    96     
368    -320   
96     224    
160    240    
-144   -128   
16     -64    
304    272    
112    416    
-144   -384   
-128   -160   
48     96     
160    16     
-16    -64    
-48    192    
128    -448   
192    544    
144    -48    
0      -80    
-128   -144   
240    272    
-64    272    
160    -752   
-32    512    
-112   -16    
128    -32    
32     -32    
64     32     
112    -320   
288    112    
48     208    
-96    -224   
128    -352   
240    672    
-128   208    
-48    -608   
96     128    
160    64     
-16    160    
-160   -48    
16     -144   
-32    16     
-16    112    
-80    -352   
-160   -400   
-32    -112   
-128   208    
64     -16    
192    -32    
-128   -240   
32     -720   
272    -800   
672    -112   
512    48     
144    -64    
-160   -48    
80     32     
128    208    
64     -64    
-16    144    
208    -32    
32     -1104  
32     -80    
-16    -544   
16     -112   
32     -96    
272    -288   
240    80     
176    -144   
176    -96    
-16    -16    
-32    -160   
160    -480   
128    0      
336    -32    
-80    -80    
96     -144   
-336   16     
-512   0      
144    96     
112    80     
48     -336   
160    -208   
128    -80    
16     -32    
16     -928   
128    -80    
176    -80    
-80    144    
-16    64     
-96    0      
-144   304    
160    272    
-304   496    
-32    -208   
-1392  -16    
240    -64    
80     -96    
144    112    
-16    -224   
192    -48    
208    352    
16     -32    
-32    -160   
192    208    
208    128    
160    48     
-96    -64    
-560   -528   
272    208    
-112   368    
-32    -320   
96     80     
-16    -160   
672    272    
48     -128   
144    176    
-32    112    
-192   -16    
-112   96     
-256   -160   
288    -112   
64     -32    
-96    -32    
80     -48    
-384   128    
720    640    
-1392  256    
-272   -320   
144    -288   
80     -384   
-160   160    
192    -464   
368    64     
-32    0      
48     64     
-352   96     
224    128    
-176   80     
432    16     
-16    176    
320    224    
-1312  -48    
-128   64     
272    -32    
48     -144   
96     32     
-176   112    
336    368    
16     112    
176    -144   
-80    112    
80     -32    
48     -64    
96     -112   
-208   0      
64     32     
-96    240    
320    -272   
-464   -240   
32     16     
-240   -64    
48     -240   
-48    32     
288    -1024  
-16    64     
-32    -160   
144    272    
-544   -32    
-16    -16    
-400   -16    
-96    96     
-96    -16    
144    -48    
-32    0      
112    -192   
-16    -64    
208    -304   
-192   -128   
64     32     
240    0      
-320   -176   
208    80     
-224   112    
16     80     
-128   -96    
432    64     
-176   192    
288    224    
-400   -128   
-144   -464   
32     304    
32     112    
-208   624    
64     -176   
-224   -144   
-192   528    
64     -464   
96     -64    
128    80     
0      48     
-64    96     
-240   -416   
224    112    
-160   -80    
96     -160   
80     80     
160    -224   
-256   576    
-384   -192   
-1312  -80    
-64    -176   
-1520  -64    
160    304    
-208   -80    
-128   -160   
320    32     
-48    -112   
-256   -112   
-16    32     
-272   -64    
144    16     
0      128    
-160   256    
16     352    
-32    32     
-48    160    
0      0      
-112   -48    
-1056  -160   
-80    -432   
-912   -320   
-128   -304   
-240   -240   
-48    176    
-208   16     
288    96     
-240   128    
-352   16     
320    192    
160    80     
160    -96    
-384   80     
-208   -48    
-112   -96    
-144   48     
-272   -64    
96     -64    
48     -32    
96     -32    
-144   -400   
240    112    
0      64     
32     112    
80     16     
-224   -32    
32     -32    
-176   0      
-128   64     
48     96     
-624   -16    
-464   -48    
0      -48    
240    -128   
-208   240    
-320   -48    
112    -16    
368    -16    
320    16     
0      0      
-80    16     
-48    -128   
-48    -48    
128    96     
-176   80     
-16    -16    
-320   -96    
608    288    
-592   32     
16     -16    
48     48     
-48    -80    
224    -32    
160    64     
-464   -64    
-96    64     
16     -32    
112    0      
64     16     
-272   -64    
64     48     
-736   -144   
224    -96    
-1632  144    
288    32     
0      32     
-112   -16    
-208   32     
-560   80     
336    192    
-16    -16    
64     128    
-272   -48    
-720   -128   
-16    112    
144    96     
-656   -176   
432    112    
-1200  208    
-320   -16    
96     -48    
-368   48     
320    -64    
288    96     
192    64     
-96    16     
112    48     
-352   -96    
32     -48    
32     32     
-48    0      
560    -16    
-16    32     
-336   -208   
224    -16    
-304   96     
320    80     
-272   64     
352    432    
-480   192    
-336   -192   
464    -16    
-176   -32    
448    -96    
96     128    
-96    -64    
-192   -256   
144    -16    
-144   96     
160    96     
48     0      
0      96     
16     96     
144    80     
-112   144    
-16    -16    
112    96     
80     -48    
144    240    
-352   96     
240    16     
-208   -16    
224    32     
16     256    
112    48     
-16    96     
-48    224    
-16    32     
-96    -64    
192    192    
-48    16     
-208   112    
240    0      
48     80     
-64    -16    
64     -128   
-240   48     
176    -80    
-224   224    
160    32     
160    -16    
-112   288    
352    -1280  
64     960    
160    -128   
16     -192   
-16    128    
-112   0      
48     320    
272    32     
48     128    
96     208    
32     -48    
224    192    
-160   208    
-192   320    
144    224    
0      288    
-64    -496   
-304   -496   
-32    -224   
480    256    
-224   928    
80     0      
-272   -368   
96     16     
64     -80    
208    48     
112    -80    
80     144    
256    160    
-176   64     
112    384    
16     544    
-96    -80    
-64    -240   
96     0      
160    -96    
-32    80     
-208   -32    
-112   -624   
48     -160   
-112   -16    
-80    -320   
80     48     
112    256    
-224   80     
160    32     
96     -16    
-16    144    
112    -192   
-192   -592   
48     -144   
160    192    
-128   -96    
-16    -160   
-16    -32    
-48    -64    
144    -192   
208    -32    
-16    -160   
16     -192   
80     32     
160    -48    
160    144    
16     -32    
32     -112   
-32    -96    
16     16     
64     -32    
336    48     
-240   240    
-80    -64    
80     64     
64     16     
96     96     
112    192    
48     32     
48     64     
-256   -336   
-32    -112   
-64    160    
-272   128    
16     32     
208    112    
16     128    
112    -48    
-96    -32    
320    16     
48     -128   
176    -80    
-448   -96    
-96    208    
32     176    
336    32     
-80    -16    
-48    256    
-288   32     
-224   -32    
128    -80    
192    -304   
112    48     
48     -32    
240    160    
-128   192    
16     112    
32     304    
-16    -48    
304    -288   
128    -192   
48     -64    
96     -208   
-224   -32    
16     -96    
-64    400    
176    64     
64     400    
112    -48    
64     16     
32     -1856  
-208   -192   
560    -176   
208    -112   
48     144    
64     -96    
-272   -32    
16     -576   
48     -336   
-80    16     
-96    -160   
-64    -16    
-16    -144   
80     -240   
112    240    
224    208    
352    -48    
-368   -368   
-112   -272   
-272   -192   
112    -112   
128    -48    
-288   -704   
-352   0      
-160   32     
-224   64     
-16    -112   
320    224    
80     288    
-16    -208   
48     -208   
688    336    
32     112    
112    32     
32     160    
528    224    
96     224    
-336   336    
128    368    
128    -224   
0      16     
128    -128   
-144   -64    
-192   -16    
240    320    
80     304    
352    176    
208    528    
-16    416    
-32    176    
-16    496    
-64    -336   
64     -32    
-64    -800   
48     80     
320    48     
-32    -48    
16     -80    
-64    -288   
352    -192   
256    -224   
96     256    
-16    480    
-160   512    
112    -144   
-560   -576   
224    -448   
64     288    
48     416    
-160   32     
352    -864   
336    192    
-80    768    
16     -576   
-512   -1200  
256    416    
-48    -112   
192    -48    
336    -320   
-208   -352   
-336   144    
80     -32    
-32    336    
272    -112   
48     48     
32     16     
112    -32    
-240   -752   
32     -352   
48     160    
320    64     
192    224    
-144   -176   
208    -48    
128    -64    
192    -16    
80     -144   
-672   160    
128    160    
128    -64    
32     -400   
-80    128    
48     -320   
16     64     
160    0      
-128   96     
-48    32     
64     48     
112    -32    
16     0      
-48    80     
176    16     
-416   208    
-160   -112   
32     -176   
32     -128   
96     -96    
48     -48    
-32    48     
176    -16    
32     336    
16     -48    
32     -160   
-128   -112   
96     64     
64     -16    
176    -16    
-480   112    
-48    32     
-1232  -96    
192    64     
0      32     
48     -80    
192    -48    
176    -448   
224    96     
-16    -64    
96     48     
16     80     
16     -80    
-32    32     
16     -16    
-112   64     
-80    16     
-480   -96    
368    -64    
48     112    
176    -208   
64     -32    
176    -288   
32     80     
80     0      
400    224    
-608   0      
0      -176   
16     16     
176    0      
-64    -128   
544    -80    
-416   0      
848    -176   
224    -96    
-208   -96    
-576   -224   
240    -176   
0      96     
224    -16    
384    -80    
-496   160    
-240   16     
-48    -16    
-32    64     
-272   -16    
48     16     
-112   64     
-176   -48    
96     32     
48     -80    
256    -16    
176    16     
-416   16     
-768   16     
-240   -96    
-224   -96    
400    16     
-80    80     
-96    -240   
0      32     
0      -16    
-448   0      
0      96     
16     128    
-16    48     
-288   -112   
-512   -128   
-1280  192    
-448   -16    
-832   -48    
-16    0      
144    -16    
-96    0      
-48    -32    
-224   -128   
352    80     
-128   48     
-192   -48    
-16    32     
-336   -32    
576    448    
-1520  16     
-240   -240   
32     80     
208    176    
-176   -112   
320    -144   
-64    48     
736    240    
-336   144    
-16    -224   
320    16     
-48    128    
-80    -48    
-752   -176   
32     112    
80     160    
-448   16     
160    96     
-288   0      
688    464    
-560   432    
-64    16     
-224   -176   
288    -48    
-432   320    
64     192    
32     160    
96     -112   
352    -256   
80     -80    
64     0      
-80    -80    
-32    96     
-272   32     
-176   160    
-208   -96    
-96    64     
0      -176   
-240   -160   
464    -96    
-96    -32    
32     48     
48     96     
-144   -224   
-96    -16    
-128   96     
112    48     
48     16     
-112   0      
128    -224   
-336   -624   
-80    624    
-336   -160   
32     320    
-608   -144   
272    -64    
624    656    
-304   32     
-16    -64    
16     -192   
-208   64     
-208   192    
64     -368   
80     -256   
-416   -224   
-208   -192   
112    112    
-256   112    
256    80     
-336   368    
176    -64    
-16    -96    
96     96     
-208   -128   
176    80     
-224   -96    
112    208    
-32    96     
96     128    
0      32     
-160   64     
64     192    
96     32     
192    96     
-544   -64    
-96    32     
-48    -48    
48     -80    
-80    -32    
32     48     
-64    -32    
128    -160   
-128   -288   
288    -160   
-112   0      
16     96     
16     32     
-304   -32    
112    128    
-304   0      
32     -48    
-576   -128   
0      32     
16     32     
-16    -160   
96     80     
96     144    
-272   240    
-48    0      
16     64     
144    48     
-96    -80    
-240   -80    
240    80     
-352   16     
96     32     
-64    64     
32     16     
48     80     
0      -32    
208    32     
112    256    
-80    144    
-208   16     
224    -32    
-112   64     
160    48     
-128   -80    
96     16     
-80    -32    
64     -96    
160    32     
16     48     
16     96     
-16    80     
-80    32     
-256   32     
-80    -48    
-128   80     
80     80     
-176   0      
272    48     
96     80     
176    240    
-80    64     
-32    -80    
32     -160   
-16    -176   
128    -160   
48     -112   
64     0      
-176   -64    
192    -208   
-16    -128   
112    96     
128    16     
320    224    
-368   112    
80     64     
192    48     
16     -16    
96     16     
48     16     
-272   -144   
32     -240   
352    80     
224    16     
256    -176   
208    -32    
-16    48     
-240   -48    
-32    16     
-304   112    
336    224    
0      16     
384    -64    
-16    64     
-144   -112   
176    -272   
-80    -192   
96     -160   
192    -240   
-128   64     
-32    -32    
0      -160   
128    240    
128    112    
-16    32     
144    -96    
0      480    
0      208    
144    -32    
224    -64    
-320   288    
48     288    
32     208    
-144   96     
16     -48    
-32    -240   
160    368    
208    1504   
544    1184   
-176   -64    
160    -592   
48     784    
560    944    
-544   -560   
-384   -1056  
272    -496   
272    928    
-176   352    
352    -176   
-112   336    
-368   -144   
0      16     
-128   80     
-32    -208   
64     -272   
192    -560   
256    64     
16     96     
-320   -80    
-160   -176   
464    -560   
512    0      
512    1136   
400    272    
-240   -256   
1136   880    
-672   32     
-736   -576   
208    192    
-16    32     
672    -400   
432    240    
-32    464    
112    400    
-224   48     
-16    -512   
-96    288    
64     -16    
112    16     
176    -128   
-80    -160   
16     272    
80     -272   
-176   -16    
64     96     
96     -144   
128    -80    
48     -1136  
-176   80     
48     -144   
224    432    
96     208    
80     32     
-336   -48    
224    -16    
-80    128    
160    96     
48     80     
176    48     
32     112    
192    48     
80     48     
-16    -512   
0      64     
128    -1040  
80     32     
208    32     
-32    160    
16     48     
112    48     
-48    -80    
112    -224   
96     48     
16     160    
96     32     
16     -32    
128    96     
144    352    
-80    -64    
32     -192   
-32    96     
160    -128   
176    192    
-144   -32    
48     48     
80     144    
160    64     
240    80     
-32    -96    
-352   -464   
112    -112   
-48    64     
128    -224   
0      16     
160    -176   
160    32     
-80    -32    
112    112    
-160   48     
80     16     
-160   0      
192    16     
112    64     
224    0      
-112   96     
-48    -48    
176    176    
-16    -80    
0      0      
80     -16    
96     -32    
304    -32    
128    80     
48     112    
16     48     
-48    112    
32     -112   
112    48     
96     96     
-80    32     
64     -48    
336    384    
-224   80     
224    240    
96     -176   
0      64     
96     80     
256    -32    
144    -64    
16     -128   
-144   -528   
-128   -112   
-240   -288   
128    -224   
272    -688   
-16    -240   
112    96     
-32    0      
-192   80     
-144   0      
48     -32    
96     -144   
-80    -176   
-256   112    
-448   -32    
160    -16    
0      -32    
48     -16    
-128   -320   
160    -352   
-416   192    
-144   256    
-208   64     
144    0      
432    -16    
288    -240   
160    64     
0      -144   
464    -144   
-512   16     
-16    -64    
80     -64    
272    -32    
160    -16    
128    48     
-16    -96    
32     -192   
112    -64    
128    -64    
-128   16     
32     -32    
576    224    
-160   80     
160    -48    
-560   -144   
128    -128   
-272   32     
-96    -160   
224    -32    
-112   -64    
208    48     
160    -192   
256    0      
16     -80    
-128   0      
96     -64    
64     -16    
-320   -64    
144    -80    
-576   -192   
256    -80    
-784   -400   
256    -32    
-128   48     
64     -192   
-64    -128   
-112   -176   
352    64     
224    -368   
144    64     
-240   -320   
464    64     
-304   -80    
32     -48    
-240   -144   
-336   -208   
-256   64     
0      -64    
176    -240   
-16    -464   
-192   -16    
272    240    
-32    288    
176    -384   
80     -288   
224    256    
352    240    
-352   -400   
48     -64    
48     176    
80     0      
48     -16    
528    96     
-480   32     
-1296  -432   
816    1344   
-352   -272   
-672   -384   
192    96     
-240   -64    
304    -160   
96     -176   
288    -80    
-128   16     
80     64     
80     -112   
-496   64     
160    224    
48     368    
256    -96    
48     160    
128    -240   
160    -144   
-64    544    
144    192    
-320   96     
96     -336   
-624   -272   
-176   -208   
-256   -144   
288    144    
192    128    
352    192    
-464   -80    
-240   -192   
160    -16    
48     -128   
160    -144   
144    -128   
-112   -16    
-320   -176   
128    16     
-256   80     
128    -16    
80     -32    
64     -144   
-208   -176   
16     -112   
-464   -112   
96     -256   
96     0      
-960   -192   
0      -16    
-304   -80    
-1168  -48    
-288   48     
-240   -80    
-176   -80    
64     -112   
-288   -192   
-32    128    
-64    0      
336    48     
16     64     
-320   64     
144    304    
64     16     
0      -16    
32     48     
-80    -80    
-48    112    
-208   48     
32     -16    
0      0      
-112   0      
-16    -64    
-16    96     
0      16     
16     32     
-112   32     
-32    -64    
304    -160   
128    96     
144    128    
-256   112    
-112   80     
-272   192    
-16    48     
-624   -16    
-224   -80    
-592   0      
-304   128    
80     80     
-96    112    
-144   -80    
16     -32    
160    -80    
-176   32     
128    -80    
-48    -192   
-192   -368   
-128   -160   
-400   96     
-176   176    
16     160    
208    240    
192    272    
-464   48     
-48    112    
-224   -176   
368    -32    
224    96     
-64    0      
0      144    
-384   -32    
192    -16    
-160   64     
64     64     
-80    -48    
-32    80     
-336   -160   
208    -16    
64     32     
80     64     
48     -160   
-80    -144   
32     32     
-416   176    
-160   688    
288    384    
432    608    
-704   80     
-240   -16    
-160   80     
144    16     
48     320    
-160   160    
-1264  400    
160    304    
80     -288   
-112   208    
-240   112    
16     32     
192    -48    
64     -160   
-144   176    
16     0      
-32    -176   
-384   -64    
-16    -96    
-192   -160   
48     -144   
240    -576   
64     -320   
112    112    
-448   112    
-48    -80    
-208   0      
-112   -48    
352    208    
160    -32    
-224   -272   
80     112    
-48    288    
-144   -112   
-176   -112   
32     112    
-512   -128   
16     208    
-160   -304   
176    -64    
288    544    
80     -64    
80     64     
-48    -16    
-80    -352   
-48    32     
-464   -32    
176    128    
-224   -128   
256    -144   
112    400    
-16    -1216  
224    96     
224    816    
-352   -160   
-256   16     
-176   448    
-64    48     
64     -272   
320    -80    
160    224    
320    112    
-80    -128   
-80    -176   
-448   -320   
208    304    
464    416    
-400   -80    
-352   -960   
-464   -672   
-272   544    
-160   384    
128    352    
-304   -304   
240    -688   
288    48     
336    176    
-64    -16    
-32    -48    
-256   -80    
-16    176    
-192   -112   
16     -32    
32     48     
32     224    
48     112    
-64    -32    
272    48     
-128   96     
64     -32    
32     -208   
144    96     
-144   64     
96     64     
-192   0      
-96    -80    
240    0      
-288   128    
-128   -64    
-128   -16    
384    32     
96     96     
-176   -32    
400    112    
-208   80     
64     -32    
224    128    
96     128    
-208   -48    
0      -32    
0      64     
32     16     
144    48     
96     -32    
-64    96     
240    96     
96     -16    
-128   48     
-112   16     
272    256    
-160   112    
-16    -32    
336    64     
256    144    
-224   -224   
16     112    
-64    176    
-240   128    
96     -80    
448    48     
-64    32     
-96    -48    
112    112    
16     -16    
-16    80     
112    -240   
16     -48    
-240   240    
-16    64     
64     272    
128    80     
-48    48     
0      -128   
192    64     
0      48     
128    80     
64     -64    
32     48     
96     64     
80     128    
0      32     
80     16     
-112   -80    
208    -80    
-80    -16    
112    -256   
192    48     
32     160    
176    -48    
-16    -64    
160    32     
208    112    
224    0      
-64    0      
32     16     
-128   -192   
176    64     
0      32     
16     -16    
80     144    
384    560    
48     176    
0      -224   
-32    -16    
-48    160    
-16    96     
-16    128    
176    64     
-256   304    
0      -96    
32     48     
80     64     
96     16     
256    -16    
-32    64     
-112   -304   
48     -16    
224    -144   
96     -16    
384    240    
-224   224    
128    48     
112    -48    
-112   -64    
-64    32     
-112   -176   
144    -256   
-224   -32    
-144   48     
160    64     
32     0      
48     16     
0      -192   
112    96     
-80    -144   
-240   0      
112    -16    
400    -32    
368    80     
192    -160   
-368   -288   
-160   -144   
-80    16     
272    -16    
288    64     
432    192    
112    -16    
-304   -848   
16     112    
32     -256   
-224   112    
64     64     
224    48     
256    -128   
160    -48    
64     16     
-80    -80    
-32    -32    
80     -144   
128    144    
-96    80     
128    80     
176    -224   
-32    -32    
48     -48    
32     48     
176    96     
368    400    
-16    64     
32     -16    
128    80     
176    112    
-80    -176   
256    16     
48     368    
-32    -352   
80     16     
144    -48    
240    32     
320    -224   
-80    -144   
80     -416   
288    368    
-32    16     
304    272    
-48    64     
16     -432   
240    384    
-176   -304   
576    848    
-432   16     
-256   -352   
144    48     
-96    160    
80     -688   
544    96     
-240   416    
272    -496   
16     48     
0      192    
208    -96    
592    288    
-416   -240   
80     -224   
-464   704    
608    416    
-304   -256   
176    -672   
336    -192   
-288   32     
-16    -96    
128    16     
192    -16    
-64    -336   
96     -336   
-160   -400   
-48    -176   
-32    -64    
352    32     
144    -112   
240    320    
-48    -160   
0      -112   
-16    -304   
48     144    
48     304    
112    64     
112    -144   
112    -144   
-1168  0      
304    -80    
-64    -64    
224    -16    
0      -96    
80     -160   
96     -32    
-144   496    
368    -16    
-64    -80    
240    -16    
-96    -96    
-96    48     
-128   -80    
288    48     
-112   208    
-16    0      
-80    0      
48     -48    
240    32     
-32    -80    
176    144    
64     -64    
240    -48    
-48    -48    
32     32     
144    64     
16     112    
-96    32     
176    -176   
-192   32     
32     -80    
-816   16     
-32    -32    
-64    -128   
64     -112   
-80    -208   
288    -368   
192    224    
-64    240    
-48    80     
-128   80     
64     -112   
32     -16    
-16    -144   
-128   -80    
16     -144   
-224   32     
128    16     
-464   -80    
96     48     
-96    -48    
64     -160   
-128   -32    
112    -1248  
128    -16    
368    288    
-64    240    
-208   32     
32     -176   
-208   -208   
48     16     
-608   -48    
96     -32    
-672   144    
-48    192    
192    80     
-32    -48    
256    304    
-160   -64    
0      -256   
96     -464   
160    -208   
16     0      
80     0      
-112   160    
16     336    
-384   0      
-16    -368   
-416   16     
0      32     
208    112    
160    -16    
-224   80     
48     -144   
-96    -272   
-592   32     
240    160    
-432   -48    
160    -160   
80     -32    
240    96     
-512   -784   
-128   -464   
-1408  -320   
-160   -160   
176    32     
64     -16    
1024   1312   
-352   -96    
-240   -592   
64     -208   
368    208    
48     144    
80     -176   
240    0      
-384   -128   
16     -512   
-80    368    
-432   -416   
32     -192   
80     304    
-832   -32    
112    -64    
-144   -112   
-224   688    
-256   -272   
-448   -48    
-256   288    
-624   -224   
304    192    
80     0      
-32    672    
208    -176   
-48    -272   
-448   -240   
32     -160   
-112   -128   
160    192    
64     336    
-416   -16    
-240   112    
192    128    
-368   -48    
-1040  16     
-32    -16    
144    32     
-16    16     
-80    -176   
-16    176    
-512   -720   
-160   -464   
-320   -64    
48     -96    
-144   -48    
16     -64    
0      128    
-96    64     
-400   16     
-144   48     
-16    -224   
-592   -144   
-192   -240   
-16    -224   
176    240    
-592   -288   
208    -112   
112    176    
-16    32     
48     -32    
-240   16     
-336   0      
64     32     
-112   0      
-128   -32    
-32    32     
-512   -96    
96     -80    
400    -368   
320    32     
-176   0      
128    -96    
64     -48    
-48    -96    
112    -16    
-256   -224   
512    -160   
-32    352    
-352   240    
-320   64     
-80    16     
-128   -96    
-80    128    
-128   -64    
304    48     
-256   64     
144    80     
112    -48    
-64    0      
128    32     
-48    -32    
96     48     
-112   -96    
48     128    
-160   0      
176    16     
-48    -32    
288    0      
-944   96     
224    160    
-160   -208   
80     -128   
48     96     
80     96     
-32    -48    
-192   -16    
-80    48     
-96    304    
384    128    
-80    16     
-32    -32    
-352   -80    
16     32     
-544   -48    
0      0      
32     32     
0      0      
224    16     
-96    32     
-48    48     
-128   -176   
96     -48    
-144   112    
0      144    
80     16     
-80    -48    
-448   -144   
0      64     
-160   48     
144    16     
-80    -32    
-80    -96    
112    -16    
48     112    
16     0      
48     32     
208    48     
-48    16     
-32    -208   
-480   -208   
-128   32     
112    240    
32     192    
-144   -48    
-112   48     
208    64     
-160   96     
-112   -160   
128    -16    
96     -32    
-80    32     
80     -144   
64     96     
48     208    
-160   0      
96     80     
-192   -160   
-64    80     
-400   16     
-112   -128   
80     -16    
224    112    
-48    128    
-32    16     
32     -48    
96     -64    
80     96     
-96    48     
48     32     
80     -96    
96     160    
0      256    
-448   -64    
-160   -352   
-48    -80    
64     -32    
160    32     
256    -48    
96     -304   
160    -496   
112    176    
336    976    
16     -32    
0      -352   
-192   -192   
48     240    
-48    160    
112    -192   
-48    0      
0      176    
48     16     
-304   528    
176    512    
-48    -80    
-224   -176   
112    -96    
-48    64     
240    -32    
304    -80    
80     -80    
-192   -80    
144    128    
-208   96     
128    80     
-48    96     
48     112    
112    -208   
112    -160   
-128   176    
192    272    
112    400    
512    0      
144    -272   
-48    368    
-800   704    
352    544    
-16    -96    
-464   -352   
-112   48     
-272   160    
-304   -64    
160    -128   
32     -16    
32     176    
-16    -144   
144    -176   
80     240    
-64    0      
32     48     
96     0      
80     48     
-80    768    
208    -1488  
-80    176    
-64    224    
176    -48    
96     112    
96     80     
48     -96    
112    64     
-32    592    
112    -400   
192    448    
-112   48     
144    -208   
128    -32    
-80    -992   
64     -448   
-48    544    
-224   512    
480    -752   
176    -16    
432    544    
-144   -32    
-112   48     
-240   32     
176    208    
-144   -208   
160    -32    
176    -48    
-304   -320   
272    -32    
160    -272   
320    96     
272    -64    
320    64     
352    192    
-464   112    
-576   -192   
128    192    
240    192    
208    32     
368    176    
-224   32     
-192   128    
496    112    
-128   64     
128    288    
-448   80     
-48    -784   
-16    48     
304    -80    
128    160    
112    48     
-48    112    
-96    48     
48     -432   
80     -112   
-96    208    
176    256    
128    -96    
432    352    
-240   160    
256    -144   
-48    -448   
64     96     
192    -32    
-352   -288   
32     -80    
-128   240    
96     -16    
64     208    
48     48     
-272   96     
288    32     
144    -240   
160    0      
-128   -48    
512    336    
256    -144   
128    -80    
-384   128    
-96    96     
-48    -48    
-128   -32    
160    -224   
112    -176   
112    -144   
64     -112   
240    32     
80     0      
-224   -32    
-80    -32    
16     112    
16     -32    
-128   48     
368    0      
48     80     
0      -80    
176    96     
-128   80     
-48    16     
80     112    
48     -224   
0      -32    
144    -320   
112    0      
-48    -176   
112    -240   
128    -320   
448    320    
-176   -48    
-48    -16    
-32    -64    
64     64     
-160   -112   
176    -32    
-16    -352   
32     -144   
48     112    
80     48     
0      144    
160    -80    
112    64     
16     0      
176    192    
16     64     
-48    -368   
16     48     
64     -128   
64     112    
-256   0      
48     544    
240    320    
128    -208   
16     304    
160    -224   
-48    -48    
192    -352   
-240   -336   
-80    -528   
144    -624   
160    -144   
224    256    
192    400    
16     240    
-304   64     
-176   -16    
-16    -336   
-16    16     
-32    -128   
224    -752   
208    320    
-80    -96    
-64    0      
160    -176   
48     112    
176    -48    
-160   112    
-272   -160   
-80    160    
-880   -112   
416    -848   
384    160    
384    0      
-32    -80    
-224   -64    
-304   -336   
-304   -224   
432    368    
112    64     
464    -128   
416    -160   
288    0      
-304   80     
-48    32     
-592   16     
-208   176    
-320   288    
176    96     
-64    128    
-48    -208   
-80    -192   
-128   -560   
112    16     
144    -96    
-112   -80    
96     -16    
48     64     
-192   0      
256    32     
-304   16     
96     -16    
-784   64     
448    320    
-224   48     
-48    -80    
-64    -32    
112    -240   
-64    128    
16     -192   
-272   -80    
432    -48    
32     0      
-320   0      
128    -112   
16     16     
-16    -112   
-352   -32    
64     48     
-1616  -224   
416    -240   
208    32     
32     -144   
0      128    
208    -160   
-224   -16    
144    -16    
80     -16    
160    -32    
208    -64    
-128   16     
240    48     
-208   16     
96     -16    
-464   16     
-80    -112   
-160   -48    
0      -256   
128    16     
-208   -688   
416    -32    
96     16     
-128   -48    
192    64     
-224   -144   
-432   -64    
256    32     
-80    48     
416    208    
-192   16     
32     -224   
64     -16    
144    -176   
192    64     
768    400    
-624   192    
-656   -144   
48     -64    
-240   -16    
384    80     
-608   -16    
-240   -224   
400    48     
208    16     
-480   -64    
192    16     
-96    -16    
208    48     
128    48     
160    64     
-1616  -80    
32     64     
-336   -32    
64     48     
0      -16    
-48    -208   
368    -32    
-224   64     
-192   -192   
160    48     
-480   -64    
112    48     
48     0      
-96    112    
16     32     
-160   -32    
-160   128    
-336   128    
-208   48     
-640   -32    
-176   -112   
96     0      
-80    16     
-576   -112   
256    96     
-64    -64    
-112   32     
-160   -144   
-240   0      
144    48     
-240   -64    
112    -48    
-144   48     
-48    0      
-80    -128   
-16    48     
48     96     
-144   240    
-16    -64    
80     304    
-160   -64    
-160   -208   
-176   -96    
-144   32     
-48    144    
224    0      
16     16     
-96    -224   
-144   32     
-528   -48    
-224   -48    
-192   -16    
192    160    
-64    0      
16     0      
-208   -80    
32     -32    
-64    -16    
48     -96    
80     384    
-400   -432   
-112   96     
-112   16     
-64    -48    
-400   32     
-176   -128   
-112   -464   
32     224    
-320   -208   
192    224    
-160   -128   
192    0      
176    96     
64     0      
-48    32     
112    -16    
-208   128    
-192   0      
64     16     
-96    96     
64     592    
96     880    
-224   -576   
-928   -80    
-32    144    
32     -80    
0      -96    
464    592    
-368   -144   
192    0      
48     32     
-32    16     
-80    -80    
0      304    
-256   -960   
64     160    
-224   240    
96     256    
-576   -32    
-80    64     
-128   0      
-176   0      
32     16     
48     16     
48     -16    
64     80     
-32    -192   
96     -448   
144    304    
-368   -80    
80     112    
-384   16     
-96    -208   
-352   288    
96     176    
-128   -64    
80     -80    
-32    0      
-176   -176   
-176   -64    
32     -32    
80     -352   
-320   64     
-80    384    
-208   144    
-96    -224   
112    -64    
368    176    
-560   -112   
48     -128   
304    96     
-16    336    
80     112    
-144   -32    
112    -208   
-128   -48    
-80    -192   
80     -224   
-64    -80    
16     -256   
192    160    
-160   96     
112    32     
-192   48     
-48    -32    
-32    176    
-64    32     
16     -16    
-48    -128   
208    0      
-64    32     
48     96     
-192   -16    
16     48     
-160   -32    
-32    -32    
-144   192    
432    48     
-256   -48    
144    48     
128    320    
272    160    
-80    192    
-240   -32    
-48    224    
144    320    
16     -16    
-96    -16    
464    64     
-672   32     
256    64     
-288   144    
80     -80    
176    128    
0      144    
-16    96     
-144   224    
96     432    
176    544    
192    16     
48     -80    
112    -16    
-208   -256   
-64    -32    
-352   -112   
-128   -48    
-160   -48    
224    96     
0      176    
448    272    
-96    32     
80     -16    
112    32     
-224   16     
-112   80     
-128   -48    
208    -64    
-64    64     
208    16     
32     -272   
16     32     
-64    -48    
-64    0      
80     80     
32     -48    
-16    -240   
112    -112   
-32    240    
32     112    
-80    48     
224    32     
176    176    
-112   0      
288    160    
-304   80     
0      48     
-224   -208   
480    -608   
-32    -144   
256    240    
32     -48    
-224   -16    
-48    -112   
-32    160    
336    224    
-336   160    
176    -256   
32     144    
96     240    
-80    272    
-80    -32    
16     -64    
112    -48    
-32    -128   
-160   -48    
-48    -160   
160    -32    
128    -192   
272    224    
64     176    
-176   112    
-64    -352   
-128   -336   
-16    -32    
-272   -80    
144    -128   
80     64     
448    -1648  
32     -288   
32     -80    
-144   -144   
96     48     
-48    64     
160    144    
80     128    
-32    -64    
160    112    
64     256    
128    16     
-80    -128   
-80    -560   
112    -224   
48     -208   
-144   -80    
208    288    
128    448    
80     80     
-80    -144   
-112   -112   
96     128    
-32    128    
16     -256   
16     224    
64     96     
-16    -144   
-16    -112   
96     240    
48     -208   
16     224    
128    -1344  
128    560    
48     128    
-112   -80    
-112   192    
64     -192   
208    80     
112    256    
128    288    
-176   -256   
0      0      
160    -304   
-16    -80    
96     -64    
48     -80    
16     -1024  
96     144    
-16    -240   
32     64     
-32    96     
-16    -48    
128    -128   
288    16     
160    96     
112    64     
48     112    
-144   272    
-304   128    
128    -128   
352    -48    
496    -176   
-32    -128   
176    -224   
-32    224    
-448   -32    
160    -48    
352    144    
-256   -288   
736    -160   
448    -80    
144    -32    
48     -480   
64     96     
160    -80    
32     96     
400    -96    
64     0      
-192   48     
-352   -112   
176    -48    
192    144    
224    112    
-64    -16    
80     64     
176    112    
-384   64     
304    -144   
16     16     
160    -32    
224    80     
16     -64    
336    160    
-240   64     
-112   -112   
272    0      
176    -448   
176    16     
160    -96    
16     -576   
-48    -80    
-32    16     
-176   -192   
336    176    
-320   96     
80     -48    
64     32     
-528   -1312  
736    -368   
192    -128   
128    96     
320    -240   
0      -160   
560    480    
-848   -64    
-656   -352   
688    -368   
-240   -16    
352    -880   
160    -208   
16     80     
16     -64    
-80    -448   
144    144    
176    128    
-32    -32    
352    -144   
-128   -128   
-1216  -64    
416    112    
32     -32    
432    208    
-256   -144   
544    -224   
400    112    
-336   128    
144    -144   
-96    -128   
208    160    
-432   -208   
160    96     
-240   -96    
256    -128   
384    144    
64     -32    
16     -112   
-128   -96    
400    96     
-272   -112   
192    0      
32     -736   
192    0      
176    -32    
-80    -176   
272    -48    
-48    -64    
-160   -48    
336    64     
-608   -288   
64     -224   
-32    -16    
112    -192   
368    -16    
160    -32    
160    32     
-176   -304   
0      48     
-80    -48    
240    144    
-256   -32    
48     -272   
240    48     
-96    -80    
-160   -64    
128    0      
-1072  -32    
48     80     
96     -64    
272    -144   
32     64     
-16    -208   
32     -272   
448    544    
-32    272    
144    -160   
80     80     
-192   -272   
-16    192    
-96    -64    
272    -48    
-80    48     
-192   -80    
-384   64     
-112   -176   
48     -16    
112    -176   
64     96     
96     -864   
32     128    
-80    -384   
16     144    
-336   -112   
0      960    
240    -416   
-16    -48    
-576   208    
128    -192   
-720   48     
-16    -704   
192    144    
0      272    
-16    48     
208    -640   
176    128    
-416   0      
48     400    
-32    -544   
256    208    
-416   256    
-32    -144   
-448   128    
96     -448   
48     16     
240    -32    
0      128    
192    -32    
80     -16    
144    -240   
112    0      
-96    0      
96     -48    
128    0      
368    160    
-96    208    
160    -112   
-32    -208   
48     0      
-96    -128   
176    256    
48     144    
-208   -496   
64     48     
-224   -176   
-928   336    
-304   400    
-512   -16    
-16    80     
192    64     
128    96     
-16    16     
-208   0      
-144   48     
112    48     
-352   -192   
-16    -80    
-64    -160   
-288   16     
-224   -80    
-48    -16    
-80    112    
-448   -64    
-64    -80    
-816   304    
-368   32     
-80    -112   
64     -160   
-64    -240   
224    64     
-112   -48    
112    -96    
-288   -224   
272    448    
16     320    
-16    -32    
-64    -96    
-368   16     
64     176    
64     48     
176    -112   
432    -96    
0      176    
-160   0      
208    64     
160    -80    
144    80     
-48    64     
-32    224    
48     160    
-144   -160   
-128   16     
-80    -80    
-96    -48    
-16    224    
-192   256    
-464   16     
64     -160   
-128   -160   
96     -144   
-112   -192   
32     -96    
96     -160   
128    48     
0      0      
64     16     
-64    320    
16     320    
-80    80     
-416   -32    
0      -80    
160    176    
32     400    
368    768    
0      848    
-192   320    
-128   96     
-176   -16    
48     64     
80     48     
336    48     
192    -80    
112    272    
-272   192    
-688   64     
-80    -32    
320    0      
320    80     
16     224    
-160   304    
-384   -128   
-272   16     
-64    -16    
-80    48     
128    -64    
48     -80    
144    16     
-160   0      
-448   -64    
64     -64    
64     -16    
-1008  -208   
464    160    
-2496  -128   
-192   -48    
-32    -64    
-96    -48    
64     80     
80     240    
-48    256    
-16    688    
336    400    
-112   -32    
288    112    
0      80     
0      208    
0      -32    
16     96     
-112   96     
-336   -32    
144    -176   
-32    128    
-224   -16    
192    -416   
48     -160   
32     -16    
-336   -128   
-64    -32    
-128   0      
-192   -48    
400    256    
-176   144    
16     112    
32     96     
-64    304    
64     96     
-128   48     
-64    -32    
128    32     
-16    160    
16     272    
-192   64     
-272   64     
288    464    
-80    352    
240    240    
-16    -32    
80     192    
144    128    
-80    -16    
-112   32     
-48    16     
112    16     
-208   -96    
-112   -208   
-48    144    
80     -192   
0      -288   
16     448    
16     -240   
96     432    
-64    -32    
336    224    
-80    256    
128    80     
128    -64    
80     160    
112    96     
-160   -144   
-16    512    
-64    -608   
112    784    
-64    176    
-16    -208   
-128   240    
48     -464   
-304   -208   
-96    208    
-144   32     
96     -560   
240    64     
-64    272    
-64    80     
-32    48     
128    64     
-96    -16    
0      80     
-176   32     
16     0      
-112   -32    
128    32     
96     112    
16     16     
0      80     
-176   -608   
-32    -352   
-64    192    
-176   16     
128    128    
48     96     
48     16     
304    -192   
64     48     
160    400    
-384   112    
48     16     
-112   32     
64     16     
240    112    
32     -16    
160    64     
80     0      
192    208    
-288   48     
48     32     
-16    -64    
16     64     
80     -48    
256    80     
144    16     
0      -496   
-192   144    
80     160    
-80    0      
-176   -48    
96     16     
192    -16    
-32    64     
-384   128    
-224   32     
16     -192   
112    -208   
0      112    
16     432    
-416   32     
320    -208   
48     0      
144    -176   
-48    48     
-64    160    
32     48     
272    -16    
32     32     
-304   -80    
96     48     
-48    144    
432    144    
416    112    
-416   -32    
32     80     
-64    -144   
-16    96     
0      -192   
368    192    
-256   -96    
304    32     
-32    48     
32     64     
48     16     
0      0      
16     96     
128    96     
-128   0      
64     128    
320    -32    
-256   -128   
-144   32     
0      -336   
-112   32     
-160   -256   
192    -208   
544    320    
16     48     
144    -128   
672    144    
-208   -96    
336    48     
352    368    
-480   -128   
320    -64    
96     -112   
208    144    
0      -496   
-32    80     
-16    -1152  
-48    -64    
224    -112   
-32    64     
320    112    
-80    96     
-256   -32    
-144   176    
-128   -256   
-192   -320   
528    480    
-192   -64    
288    80     
-32    -96    
-912   -384   
-48    -352   
240    -128   
-304   -256   
176    32     
368    48     
48     -16    
288    160    
-48    224    
96     0      
-64    80     
96     32     
-48    -240   
128    112    
192    -320   
-96    -288   
144    32     
96     384    
112    -32    
96     64     
-64    160    
32     -432   
112    304    
160    32     
-208   -304   
176    80     
-240   -96    
288    80     
176    112    
176    -192   
48     48     
-16    0      
112    -64    
0      192    
-96    -224   
192    -112   
-208   144    
160    -112   
160    -80    
16     -80    
192    256    
288    0      
-96    -272   
32     288    
176    16     
16     -80    
32     288    
112    -464   
-320   -160   
384    -976   
0      480    
208    -496   
-112   -976   
384    352    
240    -368   
352    112    
-80    -512   
-96    -368   
-112   -208   
128    -64    
112    -352   
0      -368   
80     -96    
-64    272    
272    -224   
-48    0      
416    48     
80     256    
-16    -48    
-32    -48    
48     -96    
48     -160   
-32    -64    
128    192    
96     64     
-112   -192   
128    48     
-64    -416   
16     -96    
16     48     
-80    208    
48     640    
208    -32    
-720   -80    
48     -176   
-32    -32    
0      -288   
-32    0      
128    -96    
48     -48    
96     64     
144    -112   
-16    -160   
-80    -176   
208    48     
-192   -176   
144    -240   
80     128    
-1920  80     
16     0      
48     -32    
352    160    
-160   192    
16     -368   
272    -160   
304    -752   
-192   48     
64     -16    
-96    -32    
-16    -96    
16     -48    
-16    0      
96     -128   
-176   -96    
64     -16    
304    48     
144    80     
80     -16    
-80    -64    
112    -48    
80     -160   
32     112    
80     -16    
-16    -16    
128    -64    
-80    -16    
-160   -304   
160    -64    
208    240    
-288   128    
-928   144    
208    -32    
-304   96     
352    96     
288    336    
80     -240   
-288   160    
-128   32     
-16    240    
192    176    
256    -16    
-80    176    
0      -64    
-240   -16    
-112   -240   
-32    -336   
96     -64    
-416   0      
192    -176   
0      -48    
-48    -448   
-32    -48    
112    -1360  
-96    160    
-16    32     
80     -80    
-192   -192   
144    16     
-144   112    
-32    32     
-384   -176   
64     -160   
96     96     
-32    48     
48     240    
400    -32    
112    112    
96     -176   
-16    80     
32     320    
-240   304    
-656   320    
544    80     
-544   144    
-64    -192   
-288   0      
528    96     
32     640    
208    240    
80     144    
-128   64     
128    -224   
-208   32     
-208   -32    
-32    176    
-160   560    
-448   160    
-32    -96    
160    160    
256    112    
48     560    
-128   160    
176    -80    
-464   -272   
48     464    
-400   128    
320    80     
800    592    
-1312  320    
-112   208    
368    -160   
-304   -496   
-48    -128   
-432   592    
256    304    
-112   432    
-2192  -96    
16     -240   
-400   -64    
-48    -16    
-432   -368   
16     -16    
-400   -48    
-432   -144   
48     256    
16     448    
224    32     
-592   16     
-112   176    
64     -352   
64     128    
64     -80    
192    -352   
-208   -80    
-208   144    
32     -432   
-272   176    
48     416    
-48    -144   
-80    -80    
-640   -80    
-48    -16    
-848   112    
-288   -208   
144    -64    
32     224    
-32    -144   
-240   32     
-64    -64    
-16    96     
-48    -208   
80     16     
48     128    
-304   -224   
-64    144    
-48    544    
-48    -176   
-48    128    
-176   256    
-400   -96    
128    -112   
96     -208   
384    352    
-176   -48    
208    0      
0      0      
-288   -208   
160    208    
-144   32     
32     -16    
-160   112    
144    -16    
-208   96     
-16    352    
-352   0      
-112   -64    
16     -256   
176    -80    
-16    16     
-32    0      
0      0      
64     0      
-304   -16    
80     144    
-80    304    
80     0      
-96    224    
-320   208    
-176   0      
-144   -128   
128    -16    
144    -80    
160    0      
-80    -64    
32     -128   
-64    -144   
128    -128   
32     16     
64     64     
96     0      
-64    -16    
0      144    
-336   -48    
96     80     
-208   -16    
128    32     
-368   480    
-352   304    
176    -16    
0      -32    
80     48     
96     128    
48     208    
-96    -64    
-176   -320   
-352   -192   
336    112    
-144   16     
224    64     
-64    32     
32     64     
-672   -64    
0      80     
-32    64     
-192   32     
112    48     
-304   -32    
272    -32    
-480   96     
-336   -16    
-48    0      
0      -112   
288    -96    
304    80     
-128   -128   
288    144    
-192   32     
0      16     
160    80     
16     48     
32     0      
32     -16    
640    224    
-432   128    
-448   -16    
192    16     
112    -32    
-16    -32    
144    176    
-160   48     
64     80     
-16    32     
96     144    
96     80     
-16    16     
192    32     
-64    80     
-16    64     
-16    0      
-208   -128   
208    16     
176    80     
-176   -32    
176    96     
-256   -16    
144    16     
224    16     
-208   -32    
176    112    
-96    0      
48     -16    
48     64     
-192   0      
0      64     
112    32     
64     64     
-96    80     
-144   -80    
176    144    
-64    16     
224    32     
176    80     
-544   160    
160    128    
272    48     
144    256    
-96    288    
304    368    
-464   112    
-48    -112   
-352   -32    
80     144    
-272   -96    
464    96     
-48    64     
-304   -112   
480    -224   
112    -176   
80     16     
144    96     
480    144    
48     112    
208    16     
368    -32    
-208   48     
64     -272   
160    -320   
64     208    
96     -112   
32     -32    
448    432    
-528   -128   
-480   -400   
432    304    
-80    -96    
-128   96     
384    -144   
-144   144    
-64    -96    
208    304    
32     -160   
96     64     
-192   -128   
176    -160   
288    0      
-176   32     
240    96     
-48    -144   
160    304    
-96    -1040  
48     736    
320    336    
-16    288    
-320   -336   
384    -448   
64     448    
352    272    
32     144    
144    -464   
-112   48     
-64    -80    
-64    288    
176    0      
32     256    
-16    -48    
0      -16    
224    32     
-32    -288   
0      -80    
64     128    
-112   176    
-32    -16    
-16    80     
384    16     
48     112    
64     -1632  
-96    -48    
128    -48    
80     -64    
0      0      
64     0      
128    112    
336    -80    
-208   -16    
-16    -32    
48     -160   
64     -48    
192    96     
128    -64    
176    96     
208    -16    
-144   256    
-48    -48    
32     -160   
-64    -16    
208    -160   
112    -240   
192    32     
-96    128    
48     64     
64     16     
64     -32    
144    192    
176    80     
64     -16    
32     -144   
128    16     
0      -528   
144    32     
48     112    
160    48     
64     -80    
144    -160   
-240   -80    
336    80     
-16    112    
80     -144   
176    96     
-16    16     
48     -32    
-48    -144   
272    176    
-128   -432   
176    -32    
272    -160   
-128   144    
-64    -336   
-32    -96    
-352   -32    
32     -128   
208    -16    
112    0      
272    240    
128    -112   
96     96     
-112   -208   
-32    -64    
112    -96    
16     288    
160    64     
96     0      
96     48     
-112   -16    
32     -112   
-48    -112   
-96    -96    
128    -144   
112    128    
192    144    
0      64     
80     96     
64     192    
32     240    
128    96     
-64    -176   
64     64     
48     -16    
240    80     
0      -128   
-48    288    
160    -144   
64     128    
-16    32     
0      -160   
16     112    
-272   -256   
-144   32     
-80    -224   
176    64     
208    -16    
400    80     
32     272    
32     -192   
-240   -336   
112    -256   
64     -48    
-112   256    
272    64     
32     80     
80     0      
208    16     
-128   96     
-32    80     
96     -176   
16     128    
272    160    
-80    -32    
-112   -192   
-16    -224   
64     0      
208    -352   
96     560    
64     -32    
160    -480   
112    -288   
-96    64     
96     -32    
48     208    
-288   32     
288    -208   
160    80     
112    208    
64     80     
-144   -64    
-32    -32    
48     -304   
64     176    
800    160    
-288   -32    
96     -608   
608    -256   
-400   -336   
368    496    
-80    -128   
-224   -128   
256    48     
-96    -16    
-160   16     
160    304    
-1136  -128   
304    -16    
-304   496    
144    -640   
832    -128   
320    -16    
-128   -64    
-80    -192   
448    320    
-272   -48    
128    48     
640    224    
-144   640    
-240   -736   
592    -64    
32     208    
-80    -176   
224    0      
96     80     
-128   -96    
16     -80    
-112   96     
-224   -992   
320    144    
-32    -32    
96     -144   
-112   416    
144    80     
-240   -400   
32     -64    
-224   48     
160    48     
-560   -96    
-176   -32    
-288   48     
-16    -192   
208    112    
16     -560   
240    80     
96     80     
-64    -96    
-32    -144   
-16    0      
-96    -80    
-160   -128   
-16    -192   
160    112    
-368   -96    
-96    -176   
-1568  64     
-16    -112   
16     80     
160    -64    
80     64     
208    -224   
80     -16    
-128   96     
192    0      
-304   0      
208    0      
-64    48     
-16    80     
-480   -16    
240    16     
-192   0      
160    -96    
96     16     
128    -80    
80     48     
112    16     
-80    0      
32     128    
112    80     
-208   16     
32     -176   
-320   -64    
112    -144   
-320   -224   
112    -80    
-16    32     
96     -160   
224    96     
-16    -288   
208    112    
-96    64     
-160   16     
-96    0      
112    -80    
0      48     
16     -64    
-16    -48    
96     -64    
-144   -128   
96     -128   
16     0      
-288   -160   
80     48     
-592   -64    
-800   96     
-160   48     
-144   -96    
-96    48     
-2160  64     
-144   32     
176    32     
-32    80     
32     -16    
400    496    
-528   160    
32     -96    
-112   -128   
80     48     
48     -112   
176    96     
-80    -48    
-464   -16    
-416   -144   
-256   -48    
-224   32     
-240   16     
48     0      
112    -64    
112    64     
-304   32     
-208   80     
-144   -48    
0      32     
-224   -368   
-256   -160   
-160   96     
64     0      
176    80     
-64    80     
64     16     
-352   -80    
-80    -32    
-544   48     
-128   96     
-96    -64    
160    144    
-208   -96    
-16    96     
-176   64     
-208   -64    
64     96     
-400   48     
64     32     
384    64     
48     48     
-96    48     
-240   96     
-848   -144   
384    16     
-224   -64    
464    64     
0      -144   
48     -160   
352    -16    
112    176    
-64    96     
-384   -112   
272    -32    
-144   -48    
-128   32     
112    32     
64     96     
-400   16     
-160   -144   
64     -80    
-64    128    
-128   16     
-80    48     
16     32     
-160   48     
64     0      
128    32     
-480   -32    
0      144    
-208   112    
-352   32     
-192   -32    
16     16     
-80    -160   
128    -416   
240    96     
128    160    
160    128    
672    304    
-368   -448   
160    32     
-144   368    
-160   -304   
-400   -400   
96     256    
160    624    
-96    416    
-512   -240   
272    64     
-464   160    
0      288    
-64    752    
-176   -432   
-464   -1200  
96     464    
304    576    
512    -512   
496    128    
-32    288    
240    -64    
-160   224    
-96    -176   
0      288    
-48    48     
-32    16     
-80    -352   
240    32     
16     -16    
48     528    
496    -272   
-80    -592   
-208   -208   
160    -752   
-368   368    
304    96     
-80    112    
96     384    
224    -80    
64     224    
-96    -848   
-224   -368   
-160   -480   
0      0      
16     -112   
336    208    
192    448    
-480   -256   
208    176    
-16    160    
128    288    
112    -64    
-240   128    
-256   64     
0      64     
144    -256   
-32    -240   
112    112    
-80    0      
336    -96    
-304   80     
-16    144    
-272   -48    
80     -16    
-80    240    
16     160    
16     80     
0      112    
-208   64     
-176   160    
-16    0      
192    -32    
112    32     
-80    112    
160    16     
-80    304    
176    160    
144    0      
176    48     
-160   32     
48     -16    
-112   32     
112    96     
16     112    
-112   64     
96     -16    
-64    96     
144    -64    
-64    -64    
-16    -192   
32     48     
-80    64     
-48    16     
208    96     
-32    32     
160    160    
16     48     
48     32     
80     -16    
160    -80    
48     64     
-128   32     
32     16     
64     0      
-144   -32    
112    -64    
96     16     
112    64     
-80    -32    
0      0      
160    32     
16     80     
-80    -128   
80     208    
160    64     
80     0      
16     0      
240    80     
-128   80     
96     -16    
144    0      
192    64     
-32    0      
96     -224   
-32    -240   
0      -48    
48     0      
224    96     
48     240    
16     80     
192    16     
128    -80    
-16    -128   
192    64     
192    208    
-32    240    
48     384    
-96    -16    
-48    -96    
48     -208   
176    -96    
0      32     
0      -128   
352    416    
-208   352    
-16    -80    
64     128    
0      128    
-64    192    
128    208    
-160   -128   
16     0      
-48    -160   
176    -32    
128    -144   
528    -80    
-304   -464   
176    -128   
-224   688    
-48    -944   
336    80     
-144   288    
224    208    
240    -112   
128    -416   
192    -48    
0      320    
-240   -368   
-256   -32    
16     688    
160    -80    
32     160    
208    -64    
288    -240   
-256   -880   
0      -80    
-80    -160   
176    -32    
352    128    
192    176    
-80    -64    
-16    -16    
112    16     
64     -224   
288    432    
96     -32    
96     -80    
0      -128   
128    48     
-96    -416   
-48    -336   
-192   -1024  
272    80     
64     112    
624    720    
112    -192   
-240   -128   
32     0      
16     96     
32     0      
112    -160   
-208   64     
0      64     
160    352    
-224   160    
128    -112   
-160   -1776  
320    -864   
176    240    
352    480    
64     192    
-528   -240   
0      96     
-96    368    
-144   48     
240    -272   
208    112    
64     -144   
464    16     
-176   -32    
16     -144   
80     -96    
192    128    
448    144    
-64    128    
352    176    
32     112    
-144   -16    
32     -192   
-160   -80    
352    -208   
16     128    
-240   -48    
128    160    
-48    -64    
160    32     
-64    -144   
176    80     
96     16     
80     128    
80     -32    
192    288    
64     112    
80     -112   
96     -80    
-80    -144   
-112   -144   
304    -224   
256    128    
80     -64    
96     96     
-32    16     
32     64     
240    80     
48     -176   
16     -16    
-864   -48    
80     -96    
192    32     
176    -208   
-80    -32    
32     -1392  
272    16     
64     80     
-16    64     
32     -256   
16     32     
0      48     
-112   -48    
160    -32    
48     64     
-192   32     
32     -64    
80     -16    
-112   -176   
112    32     
448    -528   
0      -32    
48     -64    
-32    32     
160    48     
-64    128    
-144   -160   
256    32     
-32    -64    
48     -32    
-640   32     
-16    0      
16     0      
64     32     
144    -80    
128    -16    
80     -32    
80     -224   
48     -64    
288    -32    
-96    80     
-64    32     
32     80     
-128   -32    
192    0      
-224   32
[truncated: 14,011 more chars]
