# Supplementary material for: A Fault Diagnosis Method for One‐Dimensional Vibration Signal Based on Multiresolution tlsDMD and Approximate Entropy
Source: Hindawi journal article supplement (doi:10.1155/2019/3262818), 2019-01-01
Supplement: f1 [file 3262818.f1.zip › 3262818.f1/gear signals/normal gear signal/Data9.txt]

144    0      
64     16     
-32    0      
112    96     
0      96     
208    48     
0      112    
-32    48     
112    32     
-144   16     
-96    16     
464    288    
-480   96     
240    -16    
80     -64    
208    -16    
-256   -16    
16     48     
176    160    
-176   -32    
80     -32    
48     -32    
272    64     
-32    128    
-64    -176   
224    80     
-224   -32    
208    -464   
-64    16     
32     16     
80     0      
-48    -64    
192    64     
48     48     
128    64     
-208   -96    
80     -16    
80     96     
32     64     
-64    -128   
-16    -208   
-96    -304   
160    -656   
16     -192   
32     -320   
-64    224    
176    256    
176    -48    
-80    0      
-64    0      
288    208    
-64    80     
0      -144   
64     -80    
48     224    
64     96     
0      -48    
64     -16    
128    144    
0      128    
32     -16    
80     96     
16     160    
-48    -32    
48     -48    
-144   -240   
32     432    
-80    32     
256    -160   
-64    144    
-176   -256   
144    112    
176    -96    
128    80     
160    -336   
32     864    
16     -288   
288    -160   
32     128    
32     -16    
112    32     
176    -176   
-32    -272   
-96    176    
-80    112    
-192   -32    
-128   -32    
48     -112   
144    96     
144    -896   
224    32     
240    -80    
144    32     
160    112    
-144   -16    
112    96     
-80    -48    
208    928    
144    80     
-32    -208   
-48    96     
176    0      
144    -64    
-48    208    
-64    -32    
176    80     
80     -432   
0      96     
80     -112   
224    240    
32     -64    
-48    -160   
240    64     
144    176    
320    -288   
144    304    
0      144    
-16    -64    
32     192    
-96    -48    
80     16     
128    -704   
-64    -128   
0      160    
64     144    
-32    208    
208    -80    
-176   -320   
-192   352    
128    -112   
192    -32    
64     64     
288    64     
0      160    
64     -432   
32     128    
80     -256   
-16    160    
16     48     
48     208    
128    -96    
144    -528   
-160   -304   
128    -928   
-64    -464   
32     -256   
208    192    
16     208    
-128   -80    
352    -608   
288    144    
64     -352   
-176   384    
304    352    
-48    -144   
256    -176   
48     -608   
288    -448   
304    -336   
-112   -160   
80     -272   
192    448    
272    0      
560    -64    
304    -32    
320    240    
-368   144    
-128   -368   
32     32     
-96    96     
0      -64    
288    -416   
544    -48    
320    -32    
496    -368   
208    -16    
352    -128   
496    400    
-192   208    
448    176    
-160   240    
-160   0      
240    -224   
224    64     
160    -272   
-112   176    
0      48     
80     -112   
-64    -128   
272    -576   
-32    64     
16     96     
528    368    
-160   -288   
128    48     
-80    208    
176    64     
64     -176   
288    48     
-192   112    
16     0      
-48    32     
288    -192   
-128   -96    
-48    -256   
256    176    
0      112    
-64    -144   
0      -672   
224    80     
0      -80    
368    -32    
-16    64     
0      208    
128    -32    
16     -80    
-16    176    
-176   288    
-1216  -16    
0      -16    
288    80     
240    -64    
48     64     
80     -288   
-80    32     
80     -480   
-16    80     
-80    -144   
240    -112   
16     48     
144    -80    
80     32     
96     128    
-288   32     
80     -80    
96     64     
144    -64    
-240   48     
-32    -272   
320    -208   
64     -528   
336    336    
64     208    
-160   -96    
128    -624   
224    -176   
-96    32     
16     -64    
-608   16     
-32    -208   
-2144  -176   
128    -224   
0      -192   
-16    -512   
80     -128   
0      -336   
224    -128   
-128   -80    
96     -432   
176    288    
240    288    
-80    0      
-48    -256   
-304   -144   
144    368    
-240   -16    
144    -144   
240    144    
112    -256   
192    0      
336    112    
-48    0      
-96    -400   
192    1104   
272    496    
-160   -704   
-688   112    
80     -32    
-32    32     
-112   -176   
320    -288   
192    320    
32     128    
144    -32    
-96    -64    
-160   -192   
32     -96    
-128   176    
128    176    
-784   -48    
160    -80    
-144   -64    
96     -80    
112    160    
64     80     
-192   16     
192    -16    
-368   80     
64     -160   
-64    -160   
48     -128   
-656   112    
-496   -16    
-736   32     
-112   48     
192    64     
-16    32     
192    16     
-80    16     
80     64     
-592   -16    
16     -48    
288    112    
-336   -48    
272    96     
-688   -64    
-400   64     
-128   0      
-752   -48    
96     0      
-624   48     
-144   -192   
592    -176   
-96    48     
-736   -16    
-160   -16    
-16    -48    
112    80     
96     16     
320    256    
-304   -80    
-112   -32    
80     16     
0      -16    
-160   -96    
64     0      
-176   48     
-1888  0      
-240   -48    
80     16     
-144   -128   
288    -96    
-208   240    
160    -32    
-16    -112   
0      -32    
-272   64     
-240   -128   
336    -304   
16     160    
304    16     
32     -112   
288    48     
208    80     
-112   -96    
48     48     
-304   -16    
800    336    
-560   -128   
192    -16    
-16    64     
-400   -96    
256    16     
-32    176    
80     16     
16     0      
208    96     
-464   128    
-288   -160   
-368   0      
-288   -48    
272    -96    
-80    144    
192    80     
-208   -16    
480    272    
-912   -112   
192    -80    
224    -32    
96     16     
224    48     
-352   0      
-144   32     
-336   96     
-1008  -16    
320    208    
16     80     
128    -176   
32     64     
-64    64     
-96    0      
-32    32     
-80    -96    
0      64     
-16    16     
-16    48     
336    272    
-608   128    
208    -80    
192    144    
208    48     
160    -96    
-224   0      
-176   -32    
-176   -16    
64     0      
240    96     
224    144    
-432   -112   
112    -48    
-112   240    
208    144    
-160   -32    
64     48     
16     96     
-64    80     
-2160  -144   
-16    64     
-112   80     
80     -32    
16     -64    
48     -16    
-144   112    
32     112    
96     80     
-80    0      
0      48     
144    16     
208    128    
-400   -240   
-192   -64    
144    -160   
112    176    
80     80     
-192   -80    
176    160    
-16    272    
-96    -464   
224    -144   
-80    -112   
240    432    
-48    -48    
-112   32     
16     16     
-96    -32    
128    32     
-144   0      
208    -96    
-112   160    
48     80     
32     -80    
32     544    
176    -320   
176    -128   
-16    368    
-128   64     
-16    -400   
-176   -336   
48     368    
-144   32     
160    48     
-96    0      
32     -208   
352    592    
-256   -176   
64     112    
160    80     
-64    16     
-80    -16    
-32    -240   
80     320    
-176   -272   
-80    64     
160    128    
-80    -32    
-32    128    
128    96     
-160   112    
16     48     
144    224    
-144   128    
32     -720   
16     480    
32     336    
-112   -448   
96     -112   
176    128    
112    192    
160    128    
48     -32    
64     32     
16     112    
128    -320   
16     -128   
32     -128   
-64    -32    
-128   240    
112    48     
-176   -208   
48     -208   
-192   96     
-160   128    
-16    -64    
112    80     
128    32     
0      192    
144    -16    
160    96     
-80    -32    
16     32     
-112   368    
64     112    
96     128    
80     272    
176    224    
-32    -48    
80     160    
-176   -112   
0      -656   
160    208    
144    272    
0      64     
-48    32     
64     48     
80     288    
144    224    
32     96     
192    128    
-16    -48    
32     16     
48     -64    
144    48     
32     80     
96     96     
144    64     
80     -16    
-32    272    
-112   32     
192    48     
-96    432    
208    368    
-208   720    
-112   -112   
0      80     
224    48     
64     -64    
144    -64    
-112   -256   
272    96     
32     240    
-64    160    
-144   -144   
288    -432   
176    -112   
208    -368   
32     -208   
-176   512    
368    160    
128    -32    
336    400    
-288   144    
-224   -80    
-304   -576   
160    -560   
80     -304   
-112   -1808  
304    -112   
-176   64     
-304   160    
192    64     
288    80     
176    80     
-48    -32    
480    -144   
176    -480   
288    -32    
144    240    
-144   224    
-432   -80    
32     -224   
224    192    
48     80     
192    80     
-16    -160   
288    -624   
-96    -48    
64     208    
-176   -48    
-64    -256   
48     -272   
-48    -256   
208    -176   
-80    80     
96     32     
64     32     
416    -528   
-96    176    
64     -1024  
0      -112   
160    -208   
192    -48    
-96    64     
112    48     
-32    0      
32     -16    
-256   -112   
384    -144   
176    256    
256    160    
224    96     
48     -464   
80     80     
16     -80    
208    -128   
-64    -128   
-144   80     
16     64     
96     128    
64     176    
80     80     
32     256    
144    -112   
128    224    
192    -16    
-112   176    
256    -96    
-48    208    
-32    0      
80     -112   
-48    -32    
208    0      
96     96     
192    48     
-96    144    
160    -336   
-80    -128   
272    -368   
128    -128   
80     224    
-96    -64    
-32    -672   
16     0      
48     -48    
48     -240   
112    128    
240    384    
-80    -32    
-64    16     
-16    -768   
32     416    
192    -480   
48     48     
-16    128    
224    -144   
80     -48    
-16    -176   
-16    144    
112    -16    
240    -176   
-192   -64    
272    48     
-32    16     
-32    -176   
352    -352   
112    -80    
-16    -432   
16     -16    
-16    -336   
208    -32    
192    368    
-144   240    
112    160    
272    -32    
80     -80    
160    32     
32     -48    
16     -96    
-176   -224   
64     -16    
48     -32    
0      -96    
32     -32    
-128   -288   
0      -272   
32     -944   
16     -96    
80     -96    
288    128    
48     -224   
288    -208   
272    112    
-80    64     
-192   -48    
176    16     
112    80     
-80    96     
128    -80    
-32    -144   
-48    32     
-16    48     
128    -48    
176    0      
144    32     
208    -128   
64     16     
16     16     
144    64     
-128   0      
-320   -272   
-896   -48    
160    48     
-32    16     
192    -16    
-48    -64    
-160   -64    
-48    0      
64     -976   
16     -16    
176    -64    
128    96     
-96    16     
176    -80    
-224   -32    
-160   -128   
160    96     
-48    -96    
128    -16    
240    -32    
272    -32    
-160   -384   
256    16     
176    -1216  
96     -16    
64     48     
176    80     
-240   -32    
64     0      
-192   0      
144    272    
-240   0      
96     -32    
-1936  -16    
-96    -144   
96     0      
320    -448   
32     16     
-80    -208   
160    96     
-240   128    
0      -208   
-32    -32    
-112   -160   
192    -96    
160    176    
128    64     
-144   -176   
-144   64     
-208   -192   
448    96     
288    96     
64     48     
128    -208   
0      96     
-336   -176   
208    -96    
-608   16     
64     -48    
336    0      
-32    -32    
-288   -208   
384    -32    
-608   80     
160    -112   
-96    -16    
480    368    
-304   176    
-304   -240   
576    0      
-208   -48    
128    -64    
256    128    
192    48     
-480   32     
320    80     
-336   32     
240    32     
-48    96     
144    -96    
-96    -32    
-1376  -192   
-16    -32    
-688   -144   
-944   16     
288    160    
-1328  -208   
32     -80    
32     16     
176    176    
-176   -160   
32     -160   
112    96     
160    -240   
-1024  80     
-240   160    
96     -704   
80     224    
-144   -48    
16     -16    
-432   -80    
160    32     
-240   -16    
-1728  -112   
64     128    
96     -144   
-208   32     
-96    -64    
-128   -16    
-16    944    
-592   -1072  
-48    336    
16     368    
-208   -624   
224    64     
48     96     
-80    432    
-320   32     
272    -368   
-16    304    
-1040  288    
-144   256    
320    -48    
144    384    
0      16     
48     -128   
128    -64    
-384   -848   
-128   -128   
-128   496    
128    224    
16     -128   
-16    -160   
-96    -96    
-160   32     
-1040  -160   
-16    32     
-224   -48    
96     48     
112    144    
-32    112    
176    -272   
-80    -16    
-32    48     
0      -112   
32     -128   
-32    -48    
0      80     
64     144    
-128   96     
-32    288    
-112   160    
-48    -32    
208    -96    
-176   64     
160    112    
-32    0      
304    656    
-80    528    
-128   96     
128    -16    
-128   32     
-64    -112   
32     80     
-32    -16    
128    -80    
288    224    
-576   128    
-16    64     
16     -336   
80     -112   
48     -32    
16     0      
-48    -128   
-160   -80    
-80    0      
-160   -112   
320    224    
-320   112    
-48    -80    
-176   -64    
32     48     
-416   48     
144    256    
48     -48    
96     128    
-80    256    
-48    -144   
32     -32    
-208   0      
0      80     
0      -64    
64     48     
-176   -208   
64     176    
-320   48     
-16    80     
-336   16     
32     -144   
128    -64    
-64    -48    
0      -16    
48     -112   
-48    -192   
-64    -144   
112    48     
-64    176    
-96    240    
16     64     
32     -32    
-160   -80    
208    -64    
-48    -80    
32     -48    
336    368    
-256   256    
128    304    
64     96     
48     464    
144    320    
-144   -112   
-16    -112   
96     -176   
-112   480    
80     -64    
-192   -192   
64     32     
-272   -416   
-352   48     
32     -96    
-96    192    
224    0      
16     -16    
-32    -432   
64     -160   
-128   240    
-16    -64    
32     -80    
-64    80     
320    160    
-336   192    
-416   -192   
-96    -480   
96     -368   
464    -64    
496    -176   
-416   -240   
-208   -240   
48     736    
480    336    
272    16     
272    128    
96     -272   
-240   -480   
80     -512   
160    16     
-240   -336   
528    -208   
384    -96    
192    0      
256    0      
-64    80     
-176   -576   
-80    -448   
-432   96     
96     208    
64     160    
-128   128    
0      112    
-112   544    
448    256    
-112   -112   
416    -432   
-80    -144   
-80    448    
-16    96     
112    272    
224    256    
144    416    
-16    64     
192    192    
-208   80     
16     32     
-304   512    
720    -80    
-32    64     
128    -64    
-16    208    
0      768    
208    304    
192    496    
112    -208   
112    -64    
-64    144    
-192   112    
400    -16    
208    -128   
0      560    
-48    -224   
-464   -896   
304    16     
-96    256    
224    -192   
208    -592   
-16    -32    
48     192    
64     256    
-80    -64    
192    128    
-48    -48    
-16    112    
208    80     
-64    224    
80     -288   
64     96     
-144   128    
-96    -1200  
128    192    
96     -16    
16     16     
64     112    
320    304    
-208   -96    
-32    -144   
112    496    
-16    336    
48     -448   
-32    -16    
64     192    
80     -80    
176    -64    
160    -112   
-128   64     
16     0      
64     0      
-112   0      
-16    32     
128    400    
192    192    
16     -32    
80     16     
32     48     
16     48     
48     48     
96     384    
112    304    
32     -176   
144    -128   
-16    80     
48     96     
32     -48    
128    48     
80     256    
160    144    
0      -224   
208    -48    
-48    32     
-16    160    
80     32     
-112   -64    
-80    0      
112    -128   
192    192    
-112   -208   
64     -96    
112    -272   
32     -96    
176    112    
96     16     
32     128    
64     0      
-64    -64    
-128   -96    
0      112    
32     -160   
64     112    
0      -224   
352    16     
288    -16    
48     64     
16     -432   
48     48     
-16    112    
96     48     
-224   240    
-176   160    
-16    96     
-80    -16    
432    16     
192    -32    
80     80     
-32    112    
-128   96     
64     -128   
192    128    
128    -96    
0      96     
-96    -32    
192    112    
-80    0      
128    112    
64     0      
160    -208   
144    32     
-112   0      
128    96     
0      -16    
-176   48     
288    -192   
192    48     
-128   160    
160    128    
-144   -160   
48     -16    
160    -160   
144    -32    
128    32     
16     64     
-96    64     
32     -80    
80     48     
80     -48    
96     80     
80     -80    
64     32     
240    48     
0      -32    
-160   -80    
96     -1264  
-64    48     
128    -96    
128    -384   
336    288    
144    -304   
240    -160   
0      64     
-144   -144   
-176   -160   
176    96     
-240   -112   
288    112    
-160   -304   
240    -272   
-272   -416   
416    -112   
32     240    
-144   112    
64     -160   
288    -224   
-16    -48    
288    -1104  
-160   -192   
576    48     
160    -416   
-64    -560   
48     -48    
160    16     
176    -224   
64     -208   
16     -256   
-1952  -128   
0      272    
-240   -48    
-176   144    
96     -160   
128    -16    
-64    -80    
272    -400   
128    16     
224    -16    
-128   288    
176    -224   
-128   112    
-80    -64    
192    -64    
-544   224    
0      -96    
16     0      
208    80     
112    144    
-32    -256   
384    272    
-304   -1216  
-256   176    
80     288    
32     -48    
224    160    
256    240    
144    -128   
96     784    
-496   -144   
112    -576   
-1776  -208   
-48    336    
176    256    
176    -208   
-240   -128   
-64    -640   
16     -48    
-32    -224   
240    0      
144    128    
144    32     
-48    -48    
144    48     
-80    80     
128    -16    
-1520  -176   
320    -176   
-32    64     
256    -48    
-32    -80    
80     -64    
48     128    
272    -288   
80     0      
80     -80    
192    112    
128    192    
0      176    
-144   64     
128    -32    
-304   -32    
-64    176    
112    256    
-48    32     
144    -16    
192    -160   
112    64     
96     -272   
-64    0      
-64    -48    
160    80     
-64    16     
176    -16    
-384   -16    
16     96     
-192   16     
-32    -240   
-384   0      
96     -224   
0      -128   
176    -112   
48     16     
80     -64    
16     160    
192    96     
-16    64     
-528   -48    
-32    48     
-352   -32    
16     -32    
-144   -32    
224    16     
32     192    
48     -80    
-128   80     
-112   -80    
-48    0      
160    -112   
112    -64    
-160   128    
32     48     
-128   16     
-48    -32    
-96    -48    
0      -128   
192    64     
160    -80    
-304   0      
64     -80    
160    128    
-688   80     
96     64     
-368   -128   
-1648  0      
-320   0      
-352   176    
16     144    
16     144    
-144   208    
80     128    
-192   16     
176    256    
80     160    
144    -288   
96     128    
-192   -48    
-16    -96    
-32    -16    
-160   -48    
-208   0      
0      -208   
-112   -80    
-576   -304   
16     -64    
272    96     
-176   0      
64     -288   
144    -64    
-400   0      
-32    -48    
-176   -80    
-80    208    
240    224    
-96    32     
208    -64    
-208   -16    
-96    -80    
-240   -208   
-80    -112   
-1120  -80    
224    304    
-80    128    
176    288    
-224   64     
80     112    
128    -80    
-112   48     
128    80     
-352   -96    
-64    -48    
-64    -144   
-256   -160   
64     -384   
208    -80    
-176   -112   
-256   -112   
-112   -48    
112    128    
-800   -432   
0      -1952  
288    -448   
256    592    
-544   -432   
-128   -352   
-416   592    
384    1328   
240    320    
-480   -1216  
-384   -112   
-352   144    
192    -16    
-112   256    
240    -128   
128    64     
528    448    
-112   -176   
-272   -384   
-80    96     
-128   64     
160    -304   
208    0      
176    128    
-1088  -864   
-368   672    
-576   688    
-128   -448   
-400   64     
544    544    
64     -928   
352    96     
-160   384    
-368   -512   
-576   -16    
432    848    
-720   624    
128    -320   
80     -480   
256    864    
48     128    
-304   16     
256    -16    
-592   176    
-32    48     
-224   -224   
-112   352    
128    -128   
96     80     
224    288    
-224   -144   
368    0      
-32    48     
384    32     
-496   -96    
112    96     
80     48     
-208   -48    
192    -48    
-64    48     
16     -144   
-256   -16    
320    32     
-64    32     
0      -48    
-144   16     
48     112    
64     144    
80     160    
112    -16    
64     128    
-160   80     
144    48     
-176   -16    
-64    -240   
80     -64    
-128   144    
144    64     
-80    48     
64     112    
112    448    
-112   16     
-32    -48    
-64    176    
-160   -64    
160    176    
-560   -128   
16     112    
-96    16     
160    112    
160    16     
-224   -592   
-224   -336   
-16    -80    
-160   -176   
144    -32    
-80    32     
128    -64    
64     16     
-112   16     
240    -16    
-144   96     
112    48     
-32    -144   
32     -272   
48     -16    
16     -192   
128    -48    
-32    128    
64     -128   
-128   0      
-64    96     
-128   48     
48     192    
-112   48     
224    0      
48     16     
32     48     
-48    -144   
128    -64    
64     128    
48     32     
192    80     
-48    112    
-208   -64    
0      -48    
48     160    
-48    0      
208    48     
128    192    
-448   32     
32     -16    
-64    -176   
432    -192   
240    144    
160    -96    
32     -32    
-48    112    
-96    -48    
80     80     
96     16     
176    96     
64     48     
-16    -32    
64     -80    
240    176    
176    80     
-32    -16    
96     48     
112    32     
48     256    
-256   0      
96     112    
288    -144   
208    -32    
48     80     
32     48     
0      48     
32     0      
112    96     
-176   32     
48     32     
256    48     
96     32     
32     48     
-64    80     
-112   -80    
224    128    
-32    80     
176    176    
-64    80     
48     0      
-16    32     
192    160    
-64    32     
128    -64    
-32    -48    
288    -1488  
208    96     
0      48     
144    64     
-48    64     
176    128    
80     64     
144    -16    
-32    32     
64     48     
32     32     
96     16     
-64    96     
96     16     
0      -48    
0      -192   
128    336    
192    224    
32     32     
-176   0      
48     32     
144    128    
48     -32    
176    -144   
80     80     
368    240    
16     16     
480    -32    
176    -176   
352    112    
32     -144   
64     112    
-128   96     
16     16     
384    -96    
32     -480   
-16    -208   
320    832    
-192   16     
128    -352   
-96    192    
304    240    
-192   -480   
464    240    
-208   144    
-48    -64    
-96    -16    
-32    -992   
240    -240   
-160   752    
432    752    
400    -32    
16     -560   
560    320    
-240   224    
336    -944   
-320   512    
0      240    
32     -288   
-16    176    
640    176    
32     352    
-192   -592   
48     32     
-96    256    
32     80     
160    320    
336    560    
-144   144    
224    48     
64     16     
-16    -208   
48     -160   
176    -304   
-64    -208   
-16    -832   
-160   -32    
224    -352   
64     48     
-64    -480   
320    -16    
-80    80     
96     0      
16     64     
48     144    
0      48     
176    -144   
112    112    
64     -240   
96     176    
-96    -96    
-32    128    
128    32     
128    96     
96     144    
432    128    
-96    160    
192    16     
-112   48     
-64    -144   
272    112    
-144   -64    
80     144    
-176   48     
-144   96     
160    -48    
64     160    
16     -96    
0      128    
48     224    
192    -464   
-112   -16    
128    80     
96     64     
48     -96    
-32    -224   
112    -144   
144    80     
32     16     
96     32     
112    -96    
-16    80     
32     -64    
-16    -16    
48     -96    
240    -432   
160    0      
80     -272   
32     -224   
-784   0      
32     16     
176    48     
0      -32    
48     -208   
16     -416   
208    -96    
-128   -48    
64     0      
112    64     
48     192    
16     -160   
-80    -128   
-320   64     
176    48     
48     512    
48     176    
272    -160   
-64    -240   
32     -112   
48     -704   
32     0      
240    -480   
208    176    
-16    32     
-320   48     
144    -80    
352    192    
-48    176    
224    -64    
-336   112    
-96    -112   
-48    -32    
128    -256   
128    0      
112    -32    
-16    64     
16     -400   
-64    -192   
160    -288   
48     -48    
176    272    
544    864    
-464   560    
-48    128    
48     -288   
160    -144   
-2288  -32    
-64    -16    
96     112    
-64    -272   
-240   -752   
48     -704   
-128   -128   
-160   240    
176    160    
160    -64    
96     128    
-224   80     
32     -240   
-144   -64    
256    208    
96     80     
272    128    
144    80     
112    -48    
-80    608    
176    256    
-192   -128   
-32    -832   
-16    48     
-112   -48    
32     -48    
32     -336   
368    400    
-400   -256   
48     -240   
-1264  208    
-112   16     
-2320  -160   
48     -80    
32     -192   
0      208    
-64    -336   
272    -480   
320    480    
16     0      
160    0      
-272   64     
48     -464   
96     256    
-416   48     
192    64     
-144   -128   
48     -128   
96     -160   
512    336    
480    704    
208    -112   
112    -480   
-48    32     
-464   -32    
192    -224   
-288   -48    
320    176    
-192   32     
0      -208   
144    -64    
64     112    
368    384    
-80    32     
-80    -336   
144    -192   
-80    992    
304    240    
192    -176   
-352   -272   
-96    -368   
736    640    
-608   416    
-240   -224   
16     -176   
0      48     
608    80     
-640   16     
-2096  -176   
-176   32     
-944   -256   
336    -224   
0      -128   
-272   112    
0      0      
-848   -96    
-80    -48    
112    64     
-192   -16    
-112   64     
0      0      
-768   -32    
32     -16    
-1056  -400   
256    32     
-96    64     
-176   -160   
-32    -48    
-448   112    
0      96     
-272   48     
-48    32     
-272   32     
96     128    
-128   -96    
32     -96    
96     -48    
128    112    
64     0      
-64    64     
-160   -80    
-48    48     
-160   -96    
-240   -64    
-80    80     
48     48     
-144   -16    
64     0      
-64    -80    
-1168  32     
-80    -80    
-48    -32    
-144   0      
128    16     
144    16     
144    256    
-96    64     
16     -16    
-144   32     
64     32     
80     48     
48     -96    
0      160    
-304   -160   
-288   -64    
64     64     
112    0      
32     32     
-64    16     
160    -16    
-16    0      
-32    64     
96     16     
32     -16    
-16    80     
-32    32     
0      96     
-160   -16    
48     32     
16     -48    
112    80     
-1344  -80    
96     -112   
64     -80    
-112   128    
144    -48    
-64    -32    
64     -64    
-176   64     
128    32     
-96    -32    
-48    0      
-16    48     
80     32     
-304   -32    
16     64     
-2352  -64    
528    112    
-96    32     
240    112    
48     -16    
-192   0      
-64    -112   
-16    0      
-16    -32    
-192   32     
-144   176    
-192   -64    
-96    16     
-96    -32    
208    64     
-448   32     
144    128    
-128   32     
-32    -32    
48     48     
-80    -96    
32     -80    
-64    48     
160    112    
16     16     
-48    -16    
-96    48     
304    304    
-288   48     
128    144    
-496   -16    
-32    0      
16     16     
-32    -16    
96     32     
96     48     
64     144    
-112   112    
-224   -32    
-160   -112   
192    -192   
96     -128   
256    112    
-176   48     
80     16     
-496   -80    
64     80     
176    16     
48     48     
96     48     
176    80     
208    64     
-96    48     
-16    48     
-288   64     
-16    16     
-48    -64    
256    112    
-176   64     
48     96     
-16    -192   
16     -48    
176    160    
-112   96     
96     112    
-16    0      
64     48     
0      -16    
176    384    
48     272    
176    64     
-80    32     
-160   96     
-48    -320   
16     416    
48     160    
80     -32    
128    0      
208    16     
80     128    
-176   -496   
64     -176   
160    480    
96     96     
96     288    
-96    32     
-240   -256   
320    384    
-320   -336   
608    656    
-672   -1296  
-368   176    
-32    464    
-96    -544   
208    560    
624    624    
-320   432    
-272   128    
128    384    
-144   176    
336    16     
-400   -480   
96     0      
-160   -96    
496    -416   
-96    -272   
320    352    
0      560    
-32    -208   
-336   -96    
48     112    
-80    96     
16     96     
416    256    
-272   128    
240    304    
-80    144    
304    96     
-128   96     
-16    0      
-96    -64    
288    -48    
0      80     
176    128    
128    304    
-144   -48    
176    -112   
-160   -48    
144    208    
-48    -48    
80     16     
-48    -112   
-80    -320   
176    -96    
64     -128   
352    432    
-208   240    
176    112    
-192   32     
160    80     
144    48     
96     32     
-48    0      
-16    224    
48     144    
160    64     
64     16     
-96    -368   
96     32     
-128   -592   
48     96     
64     80     
-48    48     
-16    -16    
112    -64    
240    -48    
240    128    
192    272    
48     0      
-96    0      
-80    -32    
160    -16    
48     48     
0      112    
64     -752   
32     352    
96     32     
160    -160   
16     112    
16     32     
96     64     
64     80     
-80    -80    
0      0      
-176   -32    
48     96     
112    128    
160    -48    
80     80     
16     -336   
48     48     
-48    -352   
80     -160   
176    -16    
336    288    
-176   352    
48     32     
16     0      
192    -48    
-16    96     
16     16     
64     16     
208    16     
32     192    
64     -64    
0      48     
272    272    
-240   176    
-48    -128   
48     256    
144    -32    
240    -80    
32     0      
16     -192   
80     -112   
-288   -208   
-176   32     
-32    -384   
352    -16    
208    112    
48     64     
80     -288   
-208   -64    
96     -1616  
144    -48    
-144   -80    
32     64     
-80    64     
48     -192   
96     80     
240    -304   
192    -16    
96     -128   
-192   16     
-48    -368   
128    -112   
48     1376   
288    -48    
-144   -512   
-80    272    
80     -16    
160    96     
-176   -144   
192    -416   
-64    -176   
272    32     
240    96     
144    -112   
96     224    
160    -144   
0      96     
96     -240   
64     464    
64     -640   
176    224    
-16    224    
80     -832   
-112   224    
96     -32    
272    -32    
-384   -240   
160    -80    
-112   -224   
160    208    
112    128    
-48    -128   
288    -64    
-32    0      
208    -240   
-16    -208   
32     32     
112    -272   
144    -240   
64     80     
288    -32    
-48    -176   
-80    -608   
528    160    
-512   -96    
32     -272   
64     304    
64     -32    
160    -208   
16     -32    
48     -64    
-208   64     
48     96     
256    -336   
-160   -48    
-240   -464   
256    -64    
112    208    
-384   -320   
176    -208   
96     192    
48     -32    
112    -48    
-32    -16    
-176   240    
-48    -16    
304    64     
-288   -32    
240    -48    
-2240  64     
-224   -288   
32     -96    
272    192    
1024   320    
-560   -96    
-48    -112   
240    -752   
-368   48     
-48    -16    
-48    144    
352    -256   
-112   -336   
-112   -128   
-272   96     
-528   -32    
368    48     
-16    48     
-320   -288   
288    -224   
96     -96    
-80    -16    
176    -160   
-16    80     
112    -16    
112    80     
64     -80    
144    32     
-48    32     
-144   -48    
-96    -256   
64     -384   
304    48     
-80    80     
64     -16    
-96    -112   
32     32     
144    -256   
128    96     
192    -160   
352    288    
-576   128    
80     64     
80     -16    
160    -48    
-48    -32    
128    -96    
-976   -16    
176    -96    
144    80     
-96    -112   
-32    -32    
80     -496   
-96    32     
32     -1600  
64     80     
80     -16    
-144   80     
96     16     
-112   16     
64     32     
-32    -64    
-560   0      
0      0      
32     112    
192    -80    
96     64     
112    -128   
80     32     
128    -224   
176    -64    
128    432    
-240   128    
-352   -112   
192    48     
-208   80     
16     32     
-192   0      
240    32     
16     0      
0      -288   
96     -80    
112    -144   
64     96     
176    -208   
160    32     
-336   160    
32     16     
-176   16     
0      -48    
-192   96     
-80    128    
-256   -160   
112    -176   
-736   0      
-80    -80    
48     64     
80     -64    
80     0      
-96    64     
-1040  -16    
-224   64     
32     0      
336    48     
-304   -592   
-272   -224   
-48    176    
-368   32     
-16    -16    
80     80     
-528   240    
496    720    
-480   224    
-240   -784   
96     -304   
-288   496    
192    336    
-272   -64    
-64    -240   
-1136  32     
16     144    
64     -96    
48     -16    
-304   -320   
240    -48    
80     384    
80     192    
16     -80    
-400   -96    
64     80     
-448   16     
16     -128   
-640   -144   
-208   -96    
-1200  0      
-32    32     
96     -32    
80     160    
-272   -128   
-16    -144   
-176   -96    
80     208    
48     416    
-272   -208   
-96    -320   
64     336    
592    880    
-416   192    
32     -352   
96     48     
112    16     
80     112    
352    304    
-352   -352   
64     192    
-64    -48    
64     96     
48     224    
-112   -80    
16     16     
-160   -48    
64     64     
48     48     
-16    -624   
-336   736    
96     -288   
-144   -192   
0      192    
96     -16    
64     144    
48     -64    
112    0      
16     -176   
-336   416    
144    -144   
-240   464    
80     0      
192    -192   
-208   -176   
-192   -240   
-160   240    
-624   256    
560    -576   
112    48     
288    400    
-160   -416   
-256   48     
-32    -64    
-288   96     
112    -176   
208    16     
48     -64    
176    80     
-192   112    
-304   -112   
96     48     
96     48     
128    48     
-528   -144   
-80    32     
-80    304    
-640   -16    
-448   -96    
96     -32    
32     0      
256    -16    
96     16     
-752   256    
176    16     
-128   -80    
112    128    
-128   96     
-32    -16    
-1312  0      
48     32     
96     -16    
64     -16    
0      -224   
224    128    
-288   368    
112    -96    
0      16     
-48    96     
-208   96     
160    -64    
16     64     
-400   96     
-64    -32    
-160   -272   
-192   -32    
224    208    
96     16     
-192   176    
-64    32     
368    176    
-160   128    
16     32     
-96    -16    
576    512    
-336   624    
-224   224    
-80    -192   
368    -192   
128    80     
96     96     
208    -48    
-304   -160   
80     320    
208    384    
224    96     
160    -48    
128    32     
-96    144    
48     112    
-112   -48    
208    96     
-32    -80    
-32    96     
160    64     
64     96     
16     48     
-16    128    
64     16     
96     32     
0      80     
-160   -80    
176    -48    
-96    32     
-144   -16    
304    -224   
176    64     
0      128    
-96    96     
32     -32    
16     32     
16     96     
-160   -64    
176    0      
-48    -112   
-16    -96    
-16    32     
48     160    
-64    80     
192    16     
32     32     
48     128    
16     112    
-16    16     
-96    -48    
-32    0      
0      64     
80     176    
-80    128    
64     240    
128    32     
32     48     
-48    112    
-96    -240   
16     -16    
-144   -176   
64     464    
128    448    
-80    832    
416    624    
320    320    
16     176    
-144   -688   
0      -144   
96     176    
-128   160    
-176   -512   
448    400    
-96    80     
368    -192   
-96    128    
-64    -336   
96     16     
144    144    
144    48     
0      96     
-48    16     
48     -32    
368    944    
-384   -640   
192    -48    
208    432    
256    -208   
-16    80     
0      -176   
-32    -416   
-272   -240   
112    80     
-144   96     
160    64     
144    112    
192    96     
80     96     
160    272    
-192   96     
0      192    
384    176    
-112   -16    
32     -112   
112    32     
-48    -16    
16     -96    
80     -32    
96     -1168  
16     80     
48     16     
96     64     
-16    16     
144    32     
32     48     
-112   -176   
80     -208   
224    96     
144    96     
48     32     
192    64     
64     16     
288    -16    
-16    -400   
-160   32     
-32    32     
176    112    
-48    48     
112    -16    
16     224    
-16    128    
-48    -112   
192    -80    
64     48     
-64    -64    
-112   64     
144    16     
-176   -64    
96     -112   
112    80     
192    176    
48     32     
-176   -400   
304    112    
16     32     
320    208    
144    0      
16     16     
-80    32     
80     80     
32     16     
384    256    
-464   -32    
48     -560   
368    192    
64     -1216  
368    80     
0      96     
32     192    
-560   -48    
-96    -128   
320    32     
-208   80     
32     64     
64     16     
32     64     
-512   -432   
224    -160   
288    -224   
-368   16     
80     -16    
-304   -80    
128    -16    
528    -16    
-256   80     
288    224    
-48    144    
64     -48    
-96    64     
112    16     
16     16     
48     -384   
32     96     
160    16     
0      64     
176    0      
64     -144   
-16    -48    
192    112    
0      48     
192    80     
144    -16    
-144   -192   
-80    32     
176    -160   
-48    0      
32     -176   
304    224    
-112   -96    
160    -16    
80     -176   
128    96     
80     112    
48     80     
48     -16    
0      -784   
192    -672   
16     -32    
32     -560   
64     -32    
112    32     
112    -80    
96     192    
144    32     
-48    32     
48     -32    
208    -848   
96     -48    
128    -304   
128    16     
16     -464   
112    112    
-64    192    
-48    -560   
176    0      
48     -160   
272    80     
64     -592   
112    0      
0      -96    
48     160    
-64    0      
64     -256   
208    64     
-160   128    
-544   -80    
-64    -64    
0      -224   
64     -112   
64     -160   
96     144    
-160   -544   
64     -688   
96     80     
48     0      
0      128    
-208   -704   
448    -400   
160    144    
-112   -48    
-96    224    
-80    -224   
-1648  112    
176    -48    
80     48     
96     -112   
192    -112   
-80    -240   
-80    112    
-384   -368   
-176   192    
384    -176   
0      -864   
416    656    
-16    -128   
-112   80     
48     -48    
-1024  64     
-144   -576   
80     336    
112    -224   
176    96     
192    -80    
16     160    
48     432    
-240   -352   
256    -352   
-16    64     
32     320    
288    -64    
-240   -64    
-80    80     
-608   -176   
80     32     
-1296  -96    
-96    0      
336    48     
-48    -208   
-112   -416   
240    -16    
144    112    
0      -64    
144    -160   
-48    -48    
80     256    
-208   -48    
128    -368   
-112   -48    
16     32     
-96    -128   
-48    -96    
-16    -208   
320    352    
48     288    
112    -480   
208    -128   
112    208    
-32    32     
-80    -80    
48     240    
-48    32     
48     -96    
-64    -32    
80     -128   
-464   320    
192    64     
48     240    
160    224    
208    272    
80     160    
-16    -320   
208    -1056  
-16    -144   
-48    -160   
16     -144   
-208   -144   
0      -96    
-96    -96    
208    -224   
80     192    
32     48     
112    192    
-112   -176   
0      160    
144    -224   
-128   16     
32     208    
352    -64    
-432   -256   
320    -256   
-176   272    
144    64     
-304   80     
0      112    
-96    48     
16     208    
160    -80    
16     96     
448    16     
-464   32     
-128   -240   
-320   -96    
-1328  -128   
-16    -128   
528    -64    
144    144    
-432   160    
-272   -672   
-80    -512   
368    96     
-1072  112    
320    112    
-576   48     
64     80     
-128   -16    
64     96     
-176   -32    
-352   0      
48     -64    
-48    -144   
-64    -16    
-144   48     
-224   144    
240    -32    
-80    16     
-576   -16    
-112   -96    
-176   -64    
16     256    
-112   -80    
32     80     
-64    -48    
-48    96     
-96    64     
-128   -160   
160    16     
-304   176    
16     0      
336    0      
-112   80     
-256   -112   
128    96     
-32    -48    
16     304    
144    144    
-80    -48    
-96    -800   
-416   -464   
272    -48    
-336   256    
336    48     
176    -128   
32     96     
-384   0      
0      112    
-144   -336   
48     96     
0      -32    
-80    32     
-144   32     
-48    176    
16     64     
-64    -80    
48     64     
-448   -48    
-352   -96    
-256   -192   
48     -64    
-720   -400   
144    112    
224    304    
-272   464    
-160   -144   
0      -192   
192    48     
160    -16    
160    336    
-48    288    
-400   224    
64     192    
160    144    
160    -32    
64     48     
-80    -32    
64     128    
-144   -160   
-128   -304   
0      96     
48     256    
160    256    
-16    64     
-112   80     
-176   64     
80     -336   
144    -176   
224    512    
-176   -48    
-128   -208   
-256   144    
64     176    
-192   336    
80     -272   
32     144    
-64    128    
-112   -240   
0      208    
-112   -16    
-32    160    
128    32     
-16    128    
160    576    
-432   -240   
-144   48     
-208   16     
192    32     
-608   128    
64     80     
-208   -288   
-80    -672   
112    -96    
0      48     
112    -64    
-16    -16    
64     80     
48     80     
0      48     
-144   0      
48     128    
-112   -48    
112    -96    
-208   -48    
64     80     
96     64     
-16    0      
-80    -96    
-272   -80    
32     -32    
192    128    
96     16     
160    160    
176    96     
-192   -32    
-48    64     
-208   32     
-48    0      
288    208    
-288   -16    
240    80     
304    -192   
-80    -32    
-112   32     
-144   -48    
-160   48     
64     96     
0      16     
112    0      
-96    -32    
0      16     
-176   32     
-112   16     
192    80     
96     96     
-96    208    
48     64     
112    32     
48     48     
-240   -16    
96     80     
-32    -16    
176    64     
80     48     
-80    64     
160    16     
-192   16     
32     96     
32     48     
32     96     
160    32     
288    320    
-480   48     
64     -80    
160    144    
32     16     
-32    64     
480    464    
-352   -176   
368    -64    
-112   32     
-48    -112   
112    240    
-624   48     
-80    -192   
176    112    
144    32     
400    -32    
-432   0      
240    80     
-192   -64    
64     16     
0      160    
176    160    
128    -64    
320    96     
-192   -48    
192    -32    
304    96     
-64    64     
640    256    
-288   -128   
368    -32    
480    240    
-304   112    
-64    -64    
-144   64     
112    96     
-144   176    
-160   64     
272    -304   
-48    64     
224    -64    
208    96     
784    272    
-448   96     
-96    -240   
128    -32    
-96    96     
-80    32     
208    64     
-112   128    
112    160    
80     112    
48     48     
64     -448   
32     256    
160    176    
208    16     
-208   -48    
-64    32     
-128   -80    
144    32     
144    176    
48     112    
-64    48     
160    96     
-112   144    
160    64     
-64    -192   
-160   -224   
288    112    
-16    -64    
-64    32     
128    80     
-32    128    
-16    -208   
0      80     
288    208    
96     48     
-80    624    
192    160    
-16    -304   
-128   192    
192    -336   
-32    432    
240    -144   
-320   336    
48     0      
32     288    
64     240    
320    -16    
176    32     
80     -80    
128    16     
-224   -32    
48     -176   
-48    0      
16     368    
32     80     
0      -736   
-112   128    
80     -96    
0      -112   
160    32     
144    160    
240    32     
-192   0      
-128   -480   
128    272    
0      -16    
96     -176   
64     384    
32     432    
112    368    
192    -112   
0      48     
-16    -176   
112    368    
304    288    
32     -464   
80     128    
-16    208    
48     -96    
112    144    
112    -96    
160    96     
80     96     
16     -112   
144    16     
352    384    
16     240    
16     -448   
32     -272   
-64    64     
80     -32    
224    96     
224    -64    
32     -144   
96     -160   
-64    -208   
-48    -224   
-256   -272   
-112   -304   
64     -336   
224    -336   
240    -32    
112    -192   
-96    -80    
48     -384   
224    112    
-48    0      
64     112    
16     112    
96     192    
176    144    
80     -48    
-128   -112   
256    -224   
272    -160   
0      -288   
32     -96    
80     -32    
-192   0      
16     -384   
160    -240   
128    64     
-96    -368   
-32    -208   
32     -80    
32     -464   
112    16     
304    -144   
-48    -48    
16     -1424  
80     -144   
112    -16    
48     32     
272    240    
16     -96    
48     -240   
32     16     
128    48     
48     96     
-368   -288   
64     -432   
64     32     
128    0      
64     -128   
16     -1120  
-32    -416   
208    128    
-32    144    
176    288    
144    288    
64     48     
96     192    
208    16     
-80    192    
-176   112    
-176   0      
-48    -336   
64     -352   
192    -48    
64     0      
176    400    
352    0      
32     -224   
-224   -992   
160    -320   
192    -224   
-176   96     
128    -192   
144    -480   
32     64     
336    208    
-1200  288    
-64    -128   
-288   -192   
16     -304   
272    -64    
928    272    
160    352    
288    656    
-416   544    
-384   32     
-48    -128   
96     -112   
160    -64    
240    -80    
192    -96    
-240   0      
48     -16    
-400   32     
176    -128   
16     -256   
-304   -128   
560    224    
560    -576   
-576   208    
16     -128   
-96    -80    
-160   -16    
240    32     
-288   0      
320    -16    
-832   -32    
160    -64    
592    -80    
-64    16     
320    -112   
32     48     
80     0      
-16    -208   
-16    16     
128    224    
-48    -80    
448    288    
-160   288    
32     128    
16     240    
320    224    
176    -16    
-144   -112   
96     0      
-256   -144   
288    -80    
-16    -128   
64     -672   
96     0      
128    48     
144    64     
48     -96    
-48    -16    
-80    -16    
224    144    
240    64     
208    224    
-192   432    
-96    208    
64     -16    
144    -112   
-32    32     
176    -368   
128    -208   
80     -192   
80     -80    
-112   -176   
112    -16    
-272   -640   
16     -288   
32     -64    
16     240    
-32    -224   
128    -160   
-144   -96    
-32    -352   
176    -128   
112    -192   
160    128    
-352   -32    
16     -80    
48     64     
-64    -192   
-96    416    
16     -624   
-112   144    
-16    176    
-64    -176   
352    224    
-64    176    
-848   -464   
192    144    
-1200  208    
-480   -208   
-112   -32    
-1600  48     
16     128    
112    112    
-160   64     
48     16     
-256   0      
64     -96    
64     16     
-800   -16    
96     112    
-464   -144   
-48    96     
-384   -672   
80     -320   
-128   240    
-320   144    
0      16     
-304   -96    
0      -128   
416    -208   
176    80     
336    336    
-416   224    
-464   -240   
-96    16     
-224   -64    
128    -48    
64     16     
128    48     
176    16     
-96    -16    
-192   64     
-272   -48    
-112   16     
-272   32     
-96    48     
160    0      
112    112    
-144   -208   
192    64     
144    -32    
32     32     
0      -16    
0      64     
16     80     
-112   32     
-80    -32    
-208   -48    
-80    192    
144    128    
-208   -64    
-608   -176   
16     64     
-176   -112   
80     32     
128    0      
160    192    
-272   32     
112    32     
96     48     
48     64     
48     32     
272    272    
-560   16     
-368   -48    
352    96     
-480   -64    
208    32     
112    -48    
80     64     
-48    -32    
32     64     
-48    0      
48     48     
16     64     
0      48     
32     48     
-64    16     
48     16     
-208   0      
128    -16    
-560   -96    
-112   64     
128    144    
64     -16    
64     -16    
-48    96     
304    208    
-256   -64    
192    -16    
-592   -16    
128    -48    
-176   -48    
48     96     
-320   -80    
192    0      
-320   80     
208    160    
-2560  112    
-96    80     
-64    0      
-80    112    
-16    -80    
128    64     
-144   -16    
304    160    
-176   128    
-224   96     
-144   192    
96     -144   
-320   -32    
304    384    
-176   16     
-1392  -256   
144    -32    
-240   160    
-16    256    
-256   -160   
-176   48     
160    176    
-576   -176   
112    48     
-16    -128   
-144   -112   
80     -16    
-208   -144   
-416   0      
32     240    
96     -16    
16     256    
176    320    
-368   -528   
-16    -96    
96     256    
-16    -224   
-128   64     
272    -352   
-368   0      
256    432    
-128   -80    
112    176    
-16    -224   
-160   224    
0      -48    
-32    32     
80     80     
112    48     
-112   16     
304    176    
-288   -304   
288    144    
-144   48     
-272   -96    
160    64     
-32    304    
-112   0      
-80    -256   
16     16     
256    -80    
-304   240    
336    -208   
-112   -288   
96     128    
-224   -480   
336    528    
176    384    
288    224    
-240   448    
-208   112    
-336   -304   
96     -448   
176    16     
-144   -64    
-16    80     
224    32     
80     416    
-272   80     
-48    -176   
-32    -80    
144    48     
-240   -64    
176    -144   
-64    -16    
-16    48     
-80    64     
64     32     
96     0      
-32    -48    
-48    96     
0      80     
0      -16    
96     16     
-128   -80    
-32    -112   
-80    48     
64     432    
256    304    
-160   16     
96     32     
-144   128    
-80    -528   
-16    32     
64     48     
0      16     
-32    -16    
128    -112   
32     0      
-32    -80    
64     -32    
-208   -224   
224    -464   
272    96     
-128   176    
0      80     
64     48     
256    -304   
-208   80     
16     112    
128    32     
128    -80    
48     64     
-96    -32    
16     64     
-144   16     
224    176    
-16    128    
-96    144    
0      64     
48     112    
16     160    
16     -64    
64     -64    
224    16     
48     48     
-48    -96    
208    0      
16     48     
64     16     
-128   96     
48     48     
80     -48    
128    208    
-32    64     
128    64     
48     112    
32     -128   
176    288    
-128   48     
112    288    
160    336    
64     160    
192    288    
-128   128    
64     0      
224    208    
32     112    
0      16     
-48    -80    
0      -80    
80     304    
96     32     
48     -80    
0      -432   
16     -176   
0      -32    
64     80     
80     -144   
32     -128   
80     -272   
128    160    
64     48     
32     -16    
64     -16    
192    -16    
-48    272    
48     -80    
144    -160   
-16    -912   
128    64     
96     288    
-112   96     
16     32     
96     -16    
144    -64    
112    224    
512    512    
-240   144    
-96    96     
48     16     
448    -352   
-32    -64    
80     160    
-32    -400   
-160   -32    
32     -192   
-144   -144   
-320   -160   
64     112    
-288   336    
-144   304    
16     -160   
272    48     
208    128    
480    672    
-160   304    
112    -624   
-528   -144   
144    224    
32     240    
272    -176   
736    416    
-240   -48    
16     16     
-384   -656   
48     -224   
32     48     
16     -416   
-80    -352   
64     -864   
0      -304   
224    -240   
-128   208    
112    -48    
224    368    
-48    -112   
-16    64     
-48    192    
128    -272   
272    -336   
176    96     
-112   -96    
-48    -352   
64     320    
240    -144   
-160   160    
48     176    
400    -336   
448    288    
-480   -48    
-144   -736   
320    400    
272    0      
96     0      
176    112    
-1792  -128   
-48    144    
304    -128   
-80    -960   
-48    -64    
256    48     
288    -64    
-16    -16    
64     -16    
0      -384   
-48    384    
176    -320   
112    256    
416    352    
-224   -128   
-992   64     
176    352    
144    -208   
208    -208   
-16    -128   
0      160    
208    -256   
-208   112    
16     -80    
272    -96    
-16    240    
144    -240   
48     176    
16     -240   
-96    -64    
-64    80     
-96    -256   
-32    -112   
128    -48    
-80    -112   
144    -400   
128    16     
112    -928   
96     16     
64     0      
-224   64     
64     -224   
-16    -48    
0      16     
-32    -656   
96     -64    
64     16     
336    -32    
160    32     
192    64     
96     64     
-48    80     
16     -240   
64     -128   
160    -944   
-16    0      
80     0      
96     80     
-64    80     
64     32     
-96    -64    
80     0      
-1264  -32    
176    32     
416    592    
-256   160    
208    -96    
176    -464   
-208   48     
80     -560   
192    272    
144    48     
-16    -16    
-208   -48    
208    -144   
-96    112    
208    -48    
48     48     
48     0      
-336   176    
192    -80    
-112   -32    
-32    -144   
-112   32     
240    -96    
32     64     
64     112    
-224   -32    
-272   -96    
208    -96    
-80    -48    
432    144    
-128   80     
128    -112   
-2416  -160   
160    -96    
-704   16     
80     -128   
64     80     
80     -160   
-16    32     
-64    -64    
-48    144    
-192   16     
176    32     
-32    32     
32     32     
-512   -48    
80     -48    
-448   -128   
32     -48    
48     96     
80     0      
96     64     
16     -80    
160    32     
224    96     
-32    -128   
64     -16    
-32    32     
-144   -32    
320    16     
-224   -16    
64     -32    
48     192    
-144   48     
144    0      
112    -224   
32     48     
240    16     
-48    -48    
0      32     
-80    -64    
-240   -80    
144    176    
-128   0      
112    -48    
-160   0      
0      -16    
-80    -336   
64     -144   
-32    48     
-704   -192   
-544   -304   
-96    -160   
-208   80     
48     80     
-608   -272   
-16    -160   
-176   -80    
384    16     
32     -64    
-112   32     
688    16     
144    -208   
-672   -240   
208    64     
256    160    
160    240    
240    128    
-16    -96    
-416   -80    
-240   -384   
80     -304   
-16    400    
256    336    
-1328  -32    
16     16     
-448   -272   
16     544    
-336   96     
272    -176   
-160   -144   
-144   0      
-112   112    
-256   192    
-240   -336   
16     96     
-64    -64    
-48    112    
-32    144    
-928   -112   
-240   -80    
16     -64    
256    336    
-432   -352   
-112   704    
96     -544   
-32    -656   
-688   -272   
384    -144   
-112   1088   
240    -304   
-624   -672   
-32    -800   
-240   368    
-32    304    
144    16     
0      -48    
-48    -224   
-208   32     
192    32     
-112   16     
-80    64     
48     80     
48     144    
-48    208    
-16    32     
112    16     
-208   0      
-80    -16    
-224   -80    
160    0      
-720   -128   
-256   -48    
144    -144   
144    128    
-160   32     
-256   16     
176    -16    
32     32     
16     -224   
-64    -16    
-48    16     
-160   0      
0      48     
-208   -32    
224    128    
-1040  48     
48     160    
352    0      
-96    160    
-96    48     
-272   96     
128    -16    
64     16     
-48    64     
-32    64     
-32    -64    
-112   -16    
80     -16    
-240   96     
224    112    
-80    64     
16     96     
-224   -192   
128    0      
-176   32     
-48    32     
192    -16    
-80    64     
224    16     
48     112    
-64    80     
-112   -32    
80     16     
-192   -32    
240    160    
-304   -16    
208    32     
144    176    
-352   96     
-16    -240   
-176   -16    
-336   0      
64     -80    
192    -64    
-176   0      
240    96     
-208   128    
112    176    
-336   -32    
32     32     
-368   -240   
256    128    
0      176    
80     0      
0      -128   
-16    256    
128    80     
-128   48     
-96    -192   
96     -96    
80     80     
-16    0      
16     48     
-176   -176   
-16    -32    
112    -32    
48     176    
64     112    
-16    -64    
96     32     
112    80     
-32    32     
32     -144   
144    32     
-16    -112   
224    128    
-32    80     
16     80     
32     144    
96     224    
-160   112    
-16    0      
96     -48    
0      256    
160    112    
32     128    
288    352    
-96    256    
96     32     
80     320    
96     336    
-16    0      
-32    -64    
-48    96     
176    192    
160    144    
224    224    
16     32     
64     -256   
-16    -224   
16     80     
64     48     
-32    96     
64     800    
-64    48     
-272   -336   
64     304    
0      -144   
-176   -48    
48     -48    
352    -368   
272    416    
144    336    
0      -336   
-240   -48    
-112   16     
192    -128   
288    176    
320    16     
-160   0      
288    336    
-272   256    
528    400    
64     -160   
-256   -768   
256    480    
-80    -224   
240    -272   
16     256    
304    160    
-48    368    
256    -144   
128    16     
-192   816    
-112   -400   
736    -224   
192    240    
-96    -96    
-80    208    
432    -1232  
-224   32     
160    128    
960    576    
-384   320    
-192   -720   
576    288    
192    368    
64     -160   
176    144    
208    128    
-128   144    
-240   -32    
224    -32    
32     -144   
224    16     
-16    16     
112    112    
-16    80     
144    -176   
80     48     
-48    336    
0      32     
128    -48    
32     0      
112    -272   
-16    32     
-192   -16    
112    -208   
-112   -48    
176    48     
64     48     
64     128    
48     176    
32     96     
0      176    
176    192    
-144   -80    
-96    -192   
176    176    
144    80     
48     96     
48     -48    
176    -32    
-144   32     
160    -144   
-64    176    
144    -304   
128    80     
-48    48     
112    -32    
-96    192    
224    96     
-80    32     
96     48     
-32    16     
160    144    
16     -80    
16     -16    
16     48     
80     16     
224    128    
176    112    
-80    128    
48     -96    
240    96     
-64    0      
80     96     
128    128    
144    288    
-16    80     
96     48     
96     48     
112    -96    
-160   -96    
208    -208   
64     64     
80     160    
176    256    
80     -592   
128    48     
-144   48     
224    96     
-64    -32    
256    208    
-96    48     
176    32     
32     0      
16     -32    
-80    -224   
-240   -192   
80     80     
64     -336   
160    -16    
112    -144   
32     48     
160    80     
112    80     
256    192    
-144   48     
64     48     
352    -80    
160    48     
176    -32    
208    176    
128    -240   
224    0      
-224   -112   
-16    96     
-144   80     
-16    0      
128    48     
208    -16    
80     32     
160    224    
-128   16     
0      -112   
64     -16    
-16    -208   
-96    80     
-32    32     
-16    -16    
224    -16    
144    144    
-16    -160   
176    -336   
-96    64     
80     -1136  
-240   -16    
-800   -32    
144    -64    
16     -32    
112    -80    
96     16     
192    224    
96     128    
-208   -64    
64     -64    
192    16     
80     32     
160    -192   
48     80     
208    -80    
-112   -112   
-1072  80     
-48    -80    
112    16     
256    -64    
-128   -32    
176    -112   
160    0      
480    -64    
-304   0      
-32    -224   
80     0      
16     0      
0      80     
64     -112   
80     -144   
-672   16     
208    -128   
32     32     
208    -16    
160    16     
-32    -48    
-32    0      
256    -208   
-16    96     
160    -16    
-48    64     
256    16     
-80    80     
-96    -64    
-32    32     
-448   128    
128    48     
-16    -160   
-256   -272   
448    176    
-272   192    
224    -304   
256    80     
-272   272    
16     -128   
-256   -288   
416    -112   
448    336    
256    128    
288    -240   
96     -48    
-416   -416   
176    1008   
80     -240   
-208   -1216  
640    656    
208    -80    
352    -544   
352    368    
176    -1168  
176    240    
16     352    
240    -224   
-144   128    
16     160    
-64    -352   
256    -80    
-400   -64    
32     528    
-32    -128   
-32    -432   
-96    -336   
128    -912   
-128   192    
240    -256   
64     80     
-48    96     
368    -32    
-64    80     
-112   -640   
-112   -112   
-128   -256   
48     -112   
-64    656    
-80    160    
192    -64    
-192   -176   
272    -368   
-128   -64    
112    -144   
48     -48    
-32    -32    
112    48     
-48    64     
256    112    
-48    96     
96     -128   
-16    -48    
-256   80     
0      -80    
32     -144   
112    64     
-32    -48    
-48    -112   
144    -256   
-32    -112   
384    -80    
16     16     
-464   -112   
144    -48    
-48    112    
-64    32     
-16    -80    
32     -144   
48     0      
32     -64    
0      -16    
160    -16    
160    64     
416    -176   
-816   32     
-128   32     
256    64     
-48    0      
208    48     
-256   0      
-80    -112   
-160   -176   
176    -96    
80     64     
-688   -32    
0      -16    
-80    -64    
48     144    
-96    128    
-448   96     
64     192    
-352   80     
-16    0      
-1664  0      
-96    112    
80     -16    
-16    80     
-32    -16    
192    80     
-256   -16    
-144   -48    
-288   0      
96     144    
-48    -80    
80     -128   
-208   -208   
-16    -96    
-128   0      
-176   96     
32     32     
-112   -176   
160    -96    
-48    32     
-16    48     
-288   -224   
-16    -192   
-304   -448   
0      -48    
32     96     
128    336    
-48    240    
-80    -16    
16     -96    
-48    -128   
-112   -160   
176    16     
48     160    
-160   176    
48     336    
-320   -240   
-80    -176   
192    -16    
-16    0      
32     0      
-48    -32    
96     -32    
-336   -336   
-336   -224   
32     64     
16     80     
-400   -64    
-32    32     
-48    192    
-16    64     
64     96     
176    80     
-176   -16    
-112   304    
64     400    
-240   -256   
112    -160   
240    688    
-112   192    
-352   -144   
-128   112    
-576   160    
224    -32    
-1536  -144   
48     384    
176    -320   
-128   -192   
16     448    
-160   -288   
-112   96     
-128   128    
0      -352   
64     208    
-112   -208   
64     -16    
-96    160    
-208   -144   
160    592    
-496   -64    
32     -32    
-144   32     
-32    -256   
16     400    
-32    -16    
16     -32    
128    240    
-288   -288   
32     -128   
96     32     
0      176    
176    368    
-320   32     
-48    -304   
-736   -96    
80     112    
208    96     
-80    224    
16     16     
32     0      
80     -48    
32     -192   
384    -96    
272    96     
-144   208    
176    1328   
768    736    
-688   -384   
-48    -144   
-48    320    
-208   176    
-16    -240   
16     -352   
240    -48    
-144   16     
-112   0      
144    -48    
16     -80    
384    208    
-32    112    
-96    128    
416    368    
-432   192    
224    112    
-176   80     
-48    128    
64     -16    
-160   -192   
352    32     
-192   144    
-304   80     
224    128    
-48    64     
224    32     
-64    48     
-64    16     
304    160    
-256   48     
304    80     
-208   80     
0      -32    
48     48     
-32    32     
96     112    
-144   32     
48     -32    
288    128    
-176   -48    
-208   16     
0      32     
-208   32     
176    96     
64     48     
0      0      
-32    32     
-128   0      
48     128    
176    -64    
-32    -32    
112    80     
-80    0      
-32    0      
96     32     
-32    16     
160    -80    
48     32     
128    32     
-112   -32    
-64    48     
112    64     
64     64     
96     16     
272    208    
-112   352    
-352   48     
368    144    
112    -48    
144    -16    
-208   -48    
240    176    
-80    32     
-176   80     
48     96     
96     80     
32     -16    
80     96     
208    160    
-224   -48    
80     -16    
64     80     
0      80     
-16    0      
0      -32    
64     48     
16     112    
112    80     
224    208    
0      272    
144    160    
240    0      
-160   48     
16     96     
208    288    
-96    96     
112    144    
112    128    
128    48     
96     144    
96     16     
240    -80    
-16    -80    
128    224    
-160   96     
16     -736   
256    64     
-224   32     
96     144    
256    608    
192    208    
96     -144   
-160   32     
-16    16     
-176   -128   
64     -208   
160    224    
0      224    
-80    -48    
176    -16    
208    -1040  
176    48     
64     32     
0      -48    
224    64     
0      80     
16     16     
0      80     
-352   -320   
-80    -64    
-176   80     
96     96     
64     16     
48     -48    
192    192    
80     -64    
-304   -16    
-80    48     
-48    -128   
0      -32    
32     144    
0      64     
128    -16    
176    -16    
240    176    
-160   128    
80     16     
208    0      
224    -192   
80     32     
0      16     
0      64     
-80    160    
96     -48    
64     0      
352    32     
288    32     
-48    80     
240    144    
-80    16     
32     -32    
-128   -144   
48     336    
272    -32    
112    -112   
16     -400   
-32    -16    
128    -464   
48     64     
48     -720   
-80    -80    
48     672    
160    16     
-48    -352   
-32    160    
16     144    
192    32     
0      144    
160    192    
48     -224   
32     -144   
192    0      
80     -272   
48     288    
-32    240    
-224   16     
32     80     
-272   400    
288    -720   
352    896    
448    -16    
368    256    
-160   592    
-208   -1184  
352    208    
-192   32     
448    368    
-288   -144   
32     -528   
-352   -240   
448    608    
304    768    
-96    -528   
-96    16     
-96    -64    
-160   -272   
-160   -480   
352    16     
192    -32    
160    0      
-144   -144   
-112   -96    
336    144    
-208   208    
240    48     
240    192    
112    0      
-160   -304   
-208   -48    
96     -48    
-16    -32    
288    -32    
224    368    
-16    80     
-48    64     
32     -64    
128    320    
64     -64    
480    80     
-176   128    
160    -368   
-16    32     
-192   -320   
160    -400   
192    320    
32     400    
48     -64    
160    224    
96     -32    
16     -1616  
176    -240   
-16    -112   
0      -16    
112    48     
144    160    
288    16     
-224   16     
-160   -272   
176    -256   
-1024  16     
240    -48    
-128   64     
-48    -224   
160    -64    
144    -672   
256    32     
-32    112    
16     -16    
-32    -112   
-16    144    
128    16     
128    16     
-272   -64    
272    224    
-576   272    
384    80     
304    208    
-128   -16    
-64    -80    
-80    -128   
128    48     
16     -304   
-208   -128   
64     96     
176    128    
288    -144   
192    -16    
-144   32     
-16    -64    
-96    -48    
112    -112   
-64    -96    
144    -112   
288    -80    
304    16     
80     208    
-176   -96    
0      -32    
80     -64    
96     80     
-80    176    
176    16     
-352   -512   
320    -192   
-144   32     
-96    -176   
-96    144    
-112   144    
64     16     
64     -224   
-672   -144   
176    -48    
48     208    
128    288    
-112   32     
144    -160   
144    -128   
16     -64    
32     64     
-112   0      
0      -144   
-352   -224   
144    -240   
368    -160   
112    -192   
-320   -416   
48     -128   
-32    -144   
48     -400   
208    128    
224    -64    
0      -96    
0      96     
32     128    
-176   -304   
32     -80    
-400   384    
80     -272   
-352   -64    
192    -112   
208    208    
-144   -128   
16     0      
240    -352   
160    80     
-16    48     
-96    -176   
-288   16     
192    48     
-256   0      
-80    -192   
-496   -192   
320    288    
-304   0      
160    -80    
-32    -96    
112    32     
144    496    
-272   -368   
288    -48    
112    128    
208    -160   
-96    16     
32     144    
-32    144    
-96    -96    
-80    -192   
80     -16    
-160   80     
16     -96    
464    -16    
0      -272   
-80    -16    
-224   -16    
-304   -16    
-96    48     
-592   144    
16     0      
-112   32     
-96    64     
176    64     
-96    -48    
208    -32    
-32    48     
-176   -128   
208    64     
0      -48    
96     80     
-144   80     
-736   32     
-256   -32    
-1392  -80    
-144   -96    
-608   32     
-112   -80    
336    -112   
-208   -96    
-112   -224   
-176   80     
176    160    
-304   128    
-128   -128   
128    16     
-144   0      
-64    64     
176    160    
64     64     
368    112    
-368   0      
-288   -16    
-912   -240   
-176   -192   
96     -16    
-96    128    
-32    -32    
256    0      
144    -16    
-336   -32    
160    96     
288    208    
-448   224    
-592   -96    
-112   -80    
16     -16    
-224   96     
-992   80     
-288   32     
-224   -48    
-16    64     
112    -16    
16     16     
16     -144   
96     0      
-128   128    
-144   48     
48     48     
-272   -128   
112    -16    
-128   64     
144    80     
-480   -48    
192    272    
48     -112   
80     64     
-336   -112   
128    48     
160    80     
-48    -48    
96     0      
32     96     
0      16     
-64    32     
-176   48     
144    80     
0      0      
-240   -64    
-48    96     
-1344  -16    
128    96     
-96    -16    
0      16     
96     64     
-32    32     
80     64     
-16    -16    
-16    96     
-208   0      
112    128    
-144   0      
32     0      
-272   -48    
176    -32    
-848   64     
160    160    
-64    32     
-48    128    
-80    0      
-112   32     
160    -96    
-32    144    
160    80     
-80    -160   
-208   -224   
-48    160    
-96    16     
-320   -96    
144    128    
-80    32     
192    64     
-96    -32    
-80    0      
48     64     
64     96     
160    112    
-32    32     
-208   -208   
48     64     
16     -32    
-128   -128   
48     48     
-80    -96    
96     64     
-192   48     
0      0      
80     -16    
-96    16     
96     96     
144    16     
64     0      
-96    -96    
80     96     
-16    0      
128    112    
-352   -32    
256    32     
-240   176    
368    656    
-96    160    
-16    -256   
160    160    
-32    -80    
-240   -352   
-96    128    
-176   -192   
-128   -32    
48     288    
48     -96    
144    192    
-112   144    
16     64     
-64    -80    
224    112    
128    240    
64     128    
-112   -672   
-192   224    
-80    192    
160    -112   
240    224    
-32    -32    
80     144    
-48    128    
-368   -112   
-32    -64    
112    48     
144    224    
48     16     
128    -48    
176    880    
-208   -112   
0      208    
224    -32    
80     80     
496    496    
-336   -592   
160    96     
-32    64     
48     0      
0      -32    
176    32     
-16    32     
-64    16     
0      0      
-80    -16    
96     -448   
-80    992    
128    -336   
32     80     
112    624    
-64    -224   
32     -128   
-48    208    
-128   16     
-16    -224   
80     208    
-112   -432   
16     -80    
-96    336    
64     160    
32     -112   
224    64     
192    96     
128    384    
16     752    
-32    -384   
112    -176   
-80    16     
144    112    
0      48     
144    -224   
-64    96     
-128   -128   
-160   -464   
544    -128   
-80    -224   
-16    48     
0      -160   
-96    -240   
208    -80    
192    -96    
288    0      
16     240    
-48    -112   
-32    -336   
0      -256   
80     -16    
224    160    
0      16     
256    48     
-144   128    
-224   -16    
-112   160    
272    -128   
64     -64    
112    48     
192    80     
16     -176   
96     -128   
-32    288    
-80    96     
80     16     
-64    -496   
-32    -16    
-304   -48    
176    -80    
-16    160    
112    176    
208    -208   
128    -16    
192    80     
-16    48     
-96    128    
32     -16    
80     192    
-144   -240   
512    32     
-144   64     
256    176    
64     96     
-288   576    
704    208    
16     208    
16     -336   
112    -128   
32     -112   
80     80     
160    48     
112    -192   
-112   96     
-80    -320   
112    64     
160    -464   
80     240    
-240   -480   
-80    0      
32     -144   
48     -48    
48     -224   
304    128    
-32    192    
-96    -64    
-48    -80    
16     0      
192    192    
96     -32    
32     32     
208    -112   
-128   160    
0      -208   
64     176    
32     112    
-16    16     
432    208    
-16    208    
-192   80     
16     0      
240    64     
16     -256   
16     -16    
32     96     
16     176    
-48    -144   
208    -384   
192    -176   
-32    208    
-16    -16    
64     16     
-112   -128   
80     -32    
192    -144   
240    32     
240    224    
-64    -368   
-32    80     
144    -32    
192    96     
-16    -144   
-80    48     
192    -320   
-144   -400   
-64    -16    
-32    -32    
64     16     
64     368    
96     176    
240    64     
112    208    
-64    -208   
96     -128   
128    -256   
224    32     
0      -112   
-96    0      
128    -432   
208    208    
192    -112   
16     -112   
96     -64    
16     -576   
128    304    
-96    -384   
0      -288   
160    224    
272    352    
-240   -464   
208    -80    
320    384    
-64    -160   
128    -96    
160    -16    
176    0      
16     -192   
96     0      
-192   -176   
80     -288   
256    112    
112    -352   
128    -32    
256    -496   
512    432    
-208   -160   
288    464    
-48    320    
48     16     
256    -208   
112    -64    
96     -32    
32     64     
-48    -64    
48     32     
-288   -64    
272    -80    
128    0      
96     0      
48     -16    
64     -80    
16     -128   
96     -352   
80     64     
176    0      
-32    16     
128    16     
336    304    
-448   -80    
192    0      
-480   32     
16     16     
144    128    
48     -128   
-272   224    
32     -48    
-16    0      
-48    -896   
336    320    
-304   -16    
96     -16    
96     -48    
80     -64    
-192   -32    
96     -160   
-336   0      
80     48     
176    -32    
-96    -128   
-32    -32    
64     -112   
-128   -16    
224    -160   
0      -32    
96     -80    
-64    32     
96     -128   
560    192    
-96    0      
32     -96    
288    176    
-352   -64    
-160   -16    
-32    -160   
-64    -64    
-64    32     
80     48     
16     -96    
0      80     
-64    0      
128    48     
160    80     
-848   -688   
736    -224   
-96    240    
-480   -96    
400    -16    
-1008  80     
-256   -16    
-384   -224   
336    -288   
464    208    
-64    64     
-304   16     
384    -208   
256    80     
-880   -96    
288    -48    
112    48     
-320   -64    
-80    -160   
224    -48    
-192   240    
-32    -16    
-1712  -96    
-80    -224   
64     112    
32     -208   
0      0      
208    0      
16     -112   
112    -16    
112    -32    
-272   -112   
160    80     
-144   80     
192    -32    
-192   64     
32     -16    
-176   64     
368    16     
-32    32     
-144   -144   
144    -128   
-848   -32    
416    -32    
-528   -48    
-128   -64    
-64    160    
64     16     
16     -16    
224    32     
-288   96     
240    -64    
-32    16     
0      -16    
-16    80     
-864   -16    
-16    64     
-240   -96    
-992   -64    
-208   64     
-640   128    
48     -160   
96     -224   
-160   80     
-48    -96    
32     -32    
-320   160    
0      48     
64     -192   
-16    -48    
-336   -128   
-256   80     
32     -48    
-64    32     
208    368    
32     -320   
16     176    
-1168  64     
-240   96     
48     -32    
16     128    
-464   -272   
80     64     
-272   16     
-16    -224   
-112   0      
16     112    
-16    -32    
-160   48     
160    112    
-560   16     
-16    48     
-240   -48    
144    304    
192    -272   
144    -400   
32     32     
-112   96     
-144   80     
112    -80    
64     192    
224    496    
-432   384    
-96    -128   
-32    112    
16     -208   
32     -48    
-96    112    
-16    -320   
-1024  96     
-208   112    
32     -704   
352    352    
224    -64    
0      -128   
32     176    
-208   16     
-96    192    
-32    -48    
16     -32    
-80    16     
-96    80     
-96    0      
-528   -192   
-720   -1584  
208    784    
-16    672    
-64    -320   
-32    32     
32     -32    
-64    336    
48     160    
304    -336   
256    352    
-32    304    
-80    -704   
-32    -112   
-192   416    
-96    112    
-688   -176   
16     0      
-1104  464    
176    432    
-384   -288   
16     -384   
64     -32    
144    112    
80     112    
-16    192    
-48    240    
-144   -144   
-80    -48    
144    0      
-256   -480   
-144   -544   
208    -16    
-1136  -96    
80     -192   
-32    -80    
16     16     
-32    112    
64     176    
16     -16    
-48    224    
192    144    
-96    48     
208    80     
-64    48     
16     160    
-240   -144   
144    64     
-224   304    
-80    -176   
112    0      
0      48     
64     112    
-64    208    
-128   0      
-48    -256   
-144   -128   
-32    160    
-160   64     
-192   -400   
-64    -112   
-160   -368   
-16    32     
-240   112    
448    -208   
16     80     
192    48     
-208   288    
48     0      
-288   144    
128    16     
64     -384   
656    -112   
304    64     
-64    368    
224    80     
-352   400    
464    64     
-48    192    
128    -208   
-64    -144   
-288   96     
32     224    
-352   240    
-80    -32    
-16    -80    
-208   -144   
-32    0      
0      16     
320    16     
-208   128    
-144   -64    
160    16     
-128   16     
128    112    
-16    -48    
-160   -240   
48     16     
0      352    
16     -16    
-208   -64    
128    -128   
-64    16     
336    96     
-320   128    
-192   -48    
352    48     
-144   320    
48     0      
-112   -320   
304    -112   
208    -32    
-112   -48    
-16    48     
-16    -80    
-48    -144   
176    -304   
-192   16     
240    352    
-32    144    
320    64     
-176   -16    
32     16     
-16    0      
0      80     
-176   176    
432    80     
304    96     
48     -128   
-64    48     
176    240    
-112   352    
-64    -64    
80     -32    
112    -64    
224    16     
0      16     
-64    -64    
-112   16     
48     160    
96     160    
80     -32    
0      16     
368    32     
0      128    
-48    -208   
-64    -144   
80     -96    
-272   -128   
128    -160   
-128   -48    
-80    32     
-32    16     
272    -272   
-16    -112   
-32    -128   
80     48     
-48    160    
-160   -64    
80     -128   
-64    544    
96     -96    
0      -80    
112    320    
-144   -112   
96     272    
-80    -64    
-64    160    
16     64     
64     -160   
112    48     
48     -16    
32     0      
160    128    
-80    -64    
48     144    
272    368    
-224   16     
144    96     
224    -336   
32     -416   
-32    144    
-80    -432   
-96    64     
64     224    
-112   160    
224    240    
176    336    
80     0      
80     80     
96     64     
192    144    
-112   0      
0      -144   
16     0      
80     -80    
48     96     
-32    -96    
-96    -160   
320    -32    
240    144    
16     16     
64     32     
0      32     
32     0      
256    224    
-160   112    
112    32     
224    -208   
-128   48     
16     -32    
144    48     
80     -208   
-16    -80    
0      -304   
192    -32    
160    176    
192    32     
0      -16    
48     64     
80     16     
0      32     
-16    -32    
112    -16    
48     80     
320    64     
-96    16     
112    -128   
224    256    
-96    -256   
112    48     
160    -256   
256    16     
48     16     
64     32     
64     16     
0      32     
160    64     
16     -64    
64     64     
-64    -144   
96     64     
80     -112   
304    144    
-144   -96    
256    112    
-112   -928   
240    96     
64     -16    
-112   -96    
-144   -32    
-16    -64    
96     128    
256    -336   
144    -208   
256    -96    
16     128    
-160   -544   
608    -64    
64     -80    
-144   -16    
176    160    
-336   32     
112    32     
128    96     
64     -16    
16     -112   
-32    0      
320    -16    
-16    112    
-192   32     
384    144    
-288   -32    
-96    -48    
96     -112   
240    112    
256    -16    
-48    -704   
528    272    
-288   -240   
144    -240   
-768   -368   
368    -368   
368    48     
368    16     
96     -32    
288    80     
-272   -304   
-16    -16    
-112   -144   
192    -80    
320    112    
-96    -176   
96     -96    
208    -368   
80     -32    
0      0      
96     112    
96     -16    
32     0      
64     -48    
48     -608   
64     0      
144    -48    
0      -48    
160    -96    
-96    48     
176    -272   
0      16     
-32    112    
-16    -32    
-672   -64    
160    -192   
48     -64    
272    -144   
16     -32    
176    -336   
80     48     
64     400    
-96    -288   
48     -144   
144    400    
0      -96    
192    -256   
256    256    
80     -128   
-368   -16    
-80    48     
16     -128   
112    112    
144    -208   
128    -160   
-160   -64    
368    -2096  
-128   560    
192    -16    
16     96     
96     272    
96     -144   
-224   160    
80     -112   
-672   -16    
0      -96    
64     -80    
-224   -464   
-128   -512   
80     352    
144    -32    
-16    -1312  
-160   -32    
224    -320   
128    432    
0      -48    
-96    -400   
0      -48    
128    -352   
-240   -112   
-64    -352   
-448   0      
0      -32    
224    0      
48     -208   
-176   -112   
96     -128   
64     96     
112    0      
-32    32     
-176   -128   
0      -336   
-176   -272   
32     112    
-272   0      
0      112    
-704   80     
160    96     
-1424  128    
96     -16    
208    -48    
144    -64    
96     208    
144    -304   
48     224    
-160   384    
112    416    
-128   -32    
0      -144   
-48    224    
-144   32     
-336   48     
48     144    
-176   112    
208    -144   
208    0      
0      16     
-16    128    
48     -48    
64     144    
-256   416    
160    96     
-448   48     
192    64     
-320   0      
240    32     
0      16     
128    -112   
112    -112   
128    -272   
64     -128   
80     -112   
-48    16     
-144   32     
240    -96    
-192   32     
0      -128   
128    48     
288    16     
32     224    
16     -32    
-288   -144   
64     -304   
-480   -224   
-608   -224   
0      -112   
-208   32     
-64    160    
-240   112    
-128   352    
-288   208    
-800   -16    
-192   -224   
144    -368   
32     -96    
160    -16    
-336   48     
144    96     
112    64     
-96    16     
32     -32    
-144   -96    
-320   -112   
-48    -112   
-800   -112   
96     -384   
112    80     
-96    320    
-1728  432    
-240   -32    
-64    -32    
-96    -208   
-160   -320   
80     320    
128    16     
-128   64     
0      -32    
-160   -288   
256    -400   
32     -304   
80     -16    
-176   -144   
-192   -96    
-1456  -352   
-240   -112   
-256   112    
272    320    
160    896    
-384   656    
-192   0      
208    -160   
16     64     
416    320    
-160   288    
-512   -80    
-448   32     
368    32     
368    0      
-16    -32    
336    64     
-1632  32     
-352   80     
-288   144    
-224   832    
16     384    
128    144    
416    224    
96     -240   
-368   320    
-176   -192   
-32    32     
-112   16     
144    112    
-96    64     
304    16     
-480   64     
0      -48    
-64    -64    
16     -64    
240    128    
-48    464    
80     -32    
-80    -288   
64     -80    
-576   640    
592    400    
-16    320    
-144   128    
-176   192    
224    480    
-208   -160   
-112   32     
-288   -496   
-144   -16    
544    432    
-640   416    
112    128    
-112   240    
-112   352    
-272   144    
-48    144    
-96    144    
192    304    
-592   -144   
96     -336   
-224   -80    
192    -160   
-720   144    
208    -48    
-128   16     
128    288    
144    288    
-288   16     
144    32     
32     32     
64     -144   
-80    32     
-48    128    
-80    -544   
208    208    
-208   128    
64     -144   
-192   320    
-416   -144   
-272   -928   
-32    192    
112    256    
-144   576    
48     -48    
-16    224    
-336   -128   
-128   96     
96     -32    
32     -80    
240    -16    
-176   -80    
96     144    
-128   -16    
-144   -16    
16     48     
-32    64     
96     16     
96     96     
64     160    
176    0      
224    80     
-64    -16    
16     -16    
48     64     
48     32     
-112   80     
48     48     
32     96     
96     -48    
32     -48    
-48    -112   
64     80     
0      96     
480    400    
192    128    
96     64     
-96    -16    
-16    -48    
-224   -128   
-112   -32    
-272   -96    
-176   0      
-48    80     
-176   32     
96     32     
32     64     
192    160    
-64    32     
32     0      
224    48     
-48    16     
-160   -16    
-80    -208   
288    -176   
160    16     
192    112    
48     48     
32     0      
32     176    
-208   224    
-224   -16    
192    144    
208    96     
-16    16     
48     -64    
224    64     
-32    32     
-64    -80    
192    128    
112    48     
112    80     
-80    96     
32     16     
-144   -128   
-32    -16    
272    64     
256    128    
48     48     
112    96     
-192   -16    
-48    48     
-80    48     
112    64     
-96    -32    
128    -1520  
32     96     
32     48     
208    96     
-48    48     
64     0      
-16    64     
128    64     
-128   -80    
256    -32    
-96    96     
176    64     
-32    16     
96     48     
-160   -48    
0      -192   
80     80     
16     -32    
192    64     
32     80     
176    -16    
-16    -16    
32     112    
-32    -80    
320    128    
-48    0      
160    48     
-288   -96    
352    32     
160    400    
80     -128   
624    288    
-624   208    
160    -16    
16     192    
112    128    
-32    -64    
-16    64     
384    304    
-384   32     
-64    -240   
208    128    
-352   -64    
1104   368    
16     416    
-448   -32    
96     96     
-304   -1056  
-112   48     
128    -32    
-16    -144   
128    128    
128    176    
-48    80     
480    432    
-384   48     
80     32     
-144   -96    
-64    -384   
-16    192    
112    -272   
16     -144   
128    -352   
0      -240   
-176   144    
32     48     
16     -64    
128    -48    
-80    80     
208    96     
48     -16    
96     0      
-48    96     
112    240    
192    -256   
224    -16    
-192   128    
160    -736   
-48    160    
112    -432   
-128   16     
48     -176   
240    80     
-144   -16    
304    -976   
-384   544    
448    -128   
0      -336   
320    320    
48     144    
-272   -688   
-16    -240   
224    368    
80     320    
32     -1472  
32     -304   
336    288    
-176   400    
-64    272    
48     -80    
48     96     
208    48     
-16    96     
0      -368   
80     -32    
224    64     
-16    32     
-112   -240   
96     128    
176    64     
80     112    
176    64     
16     -48    
288    192    
-176   96     
-16    80     
-208   -240   
64     -64    
-80    -352   
0      -16    
160    16     
-48    -192   
144    -112   
128    80     
336    112    
-192   64     
32     -288   
80     16     
-32    144    
144    96     
-128   112    
-16    -64    
-144   -96    
336    -112   
16     160    
-16    -192   
-32    -16    
144    -80    
48     80     
144    16     
-112   -1472  
144    0      
16     -176   
128    192    
80     -224   
208    32     
368    128    
-176   -128   
80     -176   
144    -368   
32     -96    
96     80     
256    64     
-192   64     
16     -224   
240    -720   
336    32     
0      -144   
-112   32     
-80    -144   
144    -224   
32     48     
48     -320   
48     -112   
16     -192   
80     -16    
112    -1392  
128    416    
160    144    
144    -96    
80     -240   
48     64     
80     -176   
32     80     
-864   -48    
64     288    
112    128    
32     -80    
144    32     
48     -240   
16     48     
16     -256   
224    48     
-64    -288   
112    96     
80     224    
80     384    
128    80     
32     -160   
-128   192    
128    96     
-416   -32    
176    -144   
-48    16     
-16    -64    
-16    48     
96     -368   
80     -48    
-32    -512   
32     48     
224    112    
-48    16     
-64    -16    
160    -224   
-32    -32    
128    -96    
-144   16     
-32    -16    
80     -16    
80     0      
80     288    
112    -32    
-64    -288   
0      -192   
224    -144   
112    80     
288    224    
48     192    
64     208    
-32    128    
32     48     
-192   -176   
32     -64    
-752   256    
32     368    
-256   272    
528    48     
-144   128    
128    -336   
256    240    
-224   -256   
0      16     
-240   0      
208    32     
-64    -192   
-16    576    
-128   1040   
-416   -1424  
-416   -336   
-80    -432   
-224   368    
176    400    
-160   192    
560    128    
-224   -608   
144    -336   
0      -64    
-80    128    
160    -160   
32     -256   
-320   -640   
-32    752    
48     -32    
-736   -480   
-112   32     
-112   -336   
32     -176   
288    -64    
336    288    
208    160    
-288   -240   
0      -208   
-624   -368   
-96    336    
32     -144   
-400   -752   
-64    -240   
384    576    
-272   -448   
240    32     
-208   -208   
224    -240   
192    -96    
96     -176   
-176   112    
-112   -384   
-288   48     
144    80     
96     -64    
0      144    
352    -416   
-432   32     
672    -736   
-144   352    
656    448    
-192   -48    
-1264  -176   
304    -144   
-256   208    
-704   -256   
-64    -32    
112    112    
-208   64     
-288   -32    
-192   -32    
96     -176   
48     144    
352    144    
-176   -144   
0      -80    
-96    112    
-48    -144   
96     112    
128    176    
-224   64     
-16    -160   
-208   -256   
0      48     
-112   -16    
-128   -272   
-1648  -160   
-256   -352   
256    -640   
-224   32     
-336   -160   
144    -480   
-48    -336   
-32    96     
64     96     
-96    80     
-96    0      
-144   64     
64     192    
-32    352    
64     304    
128    80     
-96    64     
0      -96    
128    -96    
-64    -224   
192    32     
16     16     
16     48     
-224   80     
-224   0      
-32    304    
-64    96     
-16    -80    
-240   -80    
-160   16     
-160   -80    
-144   48     
-2416  -32    
48     64     
-64    16     
64     256    
256    -64    
-144   48     
-240   32     
-160   64     
-288   48     
16     16     
-240   -192   
-304   -144   
-96    240    
-560   -64    
128    48     
-96    128    
112    48     
-80    -64    
48     64     
-48    64     
-16    64     
32     64     
80     192    
-176   0      
64     -64    
96     80     
-48    32     
-32    48     
-32    -80    
-16    144    
-384   176    
16     96     
-16    -176   
16     128    
192    96     
64     16     
64     -16    
96     112    
-32    80     
-208   -240   
192    -96    
208    112    
48     96     
-144   16     
-32    32     
-288   16     
176    48     
-272   -16    
32     48     
0      0      
-128   0      
48     112    
-192   -16    
-32    -16    
-144   64     
-32    16     
-176   16     
112    64     
-256   -32    
-160   64     
-256   -80    
128    80     
96     -48    
240    -32    
0      112    
32     48     
-32    32     
-48    -64    
-16    0      
32     112    
80     128    
272    464    
-368   240    
96     -64    
32     128    
48     -32    
144    48     
64     64     
-64    -16    
176    64     
-176   -64    
64     -288   
-176   0      
272    432    
-112   112    
-240   -144   
-448   144    
-224   -16    
-464   -192   
240    304    
-352   96     
192    304    
-144   80     
16     -224   
-160   80     
64     176    
-240   64     
640    288    
-624   112    
-128   -160   
-80    -224   
-288   80     
224    -80    
-224   16     
80     176    
-192   -160   
0      320    
-48    -96    
624    -16    
-432   144    
48     80     
-384   -144   
0      0      
496    -80    
320    32     
176    688    
-240   -672   
128    176    
-48    544    
-64    0      
352    432    
-160   -304   
-112   144    
128    -32    
176    144    
80     240    
16     -144   
32     -16    
112    32     
-16    176    
80     160    
-224   -160   
-80    -160   
304    352    
-416   112    
272    176    
-176   208    
96     128    
-48    256    
48     32     
176    -112   
-64    -64    
256    192    
-288   144    
-128   48     
160    16     
-192   -224   
224    80     
112    -32    
-48    -768   
-48    176    
160    80     
64     32     
0      16     
-96    64     
48     -64    
96     -64    
32     -192   
112    96     
-48    96     
144    -32    
32     -64    
192    0      
-112   144    
128    -384   
96     48     
-80    0      
-48    16     
0      16     
128    48     
112    -16    
-48    48     
0      112    
-48    0      
48     64     
224    96     
96     64     
-48    -224   
0      96     
128    -160   
-80    -48    
112    0      
16     80     
144    96     
-16    48     
-32    64     
192    336    
32     80     
80     -176   
48     0      
-160   -16    
240    240    
48     16     
96     -96    
16     -336   
-176   -96    
112    -144   
32     192    
-128   -128   
272    -192   
112    -80    
384    16     
-96    48     
192    32     
-64    64     
-96    -32    
192    176    
-224   128    
-144   240    
192    480    
64     624    
96     32     
368    -80    
-160   16     
112    -48    
176    -48    
112    64     
208    112    
32     0      
0      -64    
80     -16    
-128   112    
-176   -32    
128    96     
176    96     
-32    80     
48     -144   
64     64     
-128   -544   
-96    -368   
16     -128   
-224   -112   
-16    0      
144    16     
-80    272    
128    64     
-32    128    
64     128    
240    112    
-64    16     
-48    16     
160    -240   
80     -96    
-96    -208   
-48    -96    
128    -352   
0      -112   
240    64     
208    64     
48     224    
16     144    
48     80     
80     -112   
80     128    
128    -144   
-208   -256   
16     -304   
-32    208    
-64    -64    
96     16     
80     128    
112    -336   
-176   -432   
160    208    
80     224    
256    -48    
16     160    
272    96     
-80    -176   
-160   -112   
320    -224   
-64    64     
128    -224   
64     -16    
-80    -160   
-160   32     
160    112    
224    48     
-48    -496   
64     -1312  
-416   16     
-16    80     
-96    48     
480    -16    
128    512    
240    -304   
160    -112   
-128   16     
416    -16    
176    -720   
112    -176   
352    576    
16     -624   
-400   -672   
80     432    
240    -16    
-496   -720   
640    448    
224    -672   
272    -80    
160    288    
32     -80    
112    -256   
208    -48    
-400   752    
640    1056   
288    -144   
-640   -272   
-816   -256   
-64    -352   
256    144    
640    -640   
144    -240   
96     -256   
160    144    
-192   288    
0      0      
112    -592   
-16    112    
160    -128   
-208   -32    
160    -64    
96     32     
-384   32     
64     -48    
128    -64    
-96    -16    
256    0      
128    32     
160    -64    
-128   -32    
48     -80    
208    -64    
0      112    
112    -80    
64     64     
112    176    
16     64     
-96    128    
-256   -16    
-992   -64    
112    -64    
-32    -32    
224    -128   
144    48     
-32    16     
192    0      
32     -48    
400    192    
-144   96     
64     32     
-224   0      
80     -96    
-368   -80    
80     -48    
-32    -144   
-32    -16    
48     80     
48     -64    
-64    0      
-16    -80    
-96    -16    
240    -96    
272    -176   
16     -160   
-128   -208   
80     -32    
0      96     
-96    128    
144    0      
-80    32     
-128   -16    
-208   -128   
96     -32    
48     96     
-80    96     
0      16     
192    -112   
0      -240   
176    -128   
-16    -144   
112    128    
-80    -48    
-32    0      
256    128    
-288   64     
-32    -16    
-144   -32    
176    -160   
112    -96    
176    64     
0      64     
32     -192   
-48    0      
48     144    
96     -16    
32     32     
-32    0      
-176   16     
592    640    
-880   320    
240    -240   
-80    -64    
48     -112   
64     -32    
208    -224   
128    304    
144    -176   
48     -176   
-304   -48    
-80    32     
-240   16     
80     48     
-272   -16    
160    48     
16     16     
96     0      
-48    64     
96     -64    
48     -32    
224    -64    
192    112    
176    -80    
32     0      
-80    96     
-1760  32     
144    0      
-144   -16    
16     -48    
-64    -96    
64     96     
-16    -80    
-208   16     
-1072  -80    
64     144    
-464   -64    
112    48     
-32    -32    
-336   16     
-112   0      
-192   -32    
-128   0      
-96    64     
64     16     
-32    -16    
-96    48     
80     64     
-32    96     
-208   80     
-128   112    
-128   32     
32     96     
-64    48     
96     32     
-128   -16    
16     16     
-16    64     
16     32     
48     64     
-656   0      
-128   0      
-32    48     
-64    48     
-112   -16    
64     176    
-16    -16    
-128   -16    
96     224    
144    304    
-96    304    
-80    128    
0      80     
-240   144    
-48    48     
-432   -240   
-96    -16    
64     -32    
144    -64    
0      80     
96     -16    
144    448    
-976   -704   
368    1088   
-384   -720   
-48    288    
-480   464    
48     224    
-560   -1376  
-176   288    
-144   32     
-192   48     
-2784  -208   
208    480    
-208   -512   
512    176    
-16    176    
336    -48    
-352   -64    
-224   -448   
32     192    
-256   -304   
96     64     
-112   -256   
-16    -96    
-288   48     
-224   -496   
-1088  -16    
448    -176   
96     48     
256    400    
400    208    
-16    240    
-352   -256   
96     -240   
-256   144    
-16    -80    
400    -112   
-368   -64    
256    48     
-448   160    
80     16     
-112   -64    
-160   -80    
272    192    
0      208    
240    0      
-48    16     
-192   80     
-224   -208   
-80    -32    
-48    64     
-64    128    
-112   16     
-80    -192   
-160   -48    
64     160    
-336   96     
352    64     
-384   0      
-144   32     
16     -16    
-96    80     
48     224    
352    -16    
-144   -256   
48     16     
-192   32     
-224   -80    
128    16     
-144   -16    
160    112    
-144   96     
-96    48     
96     64     
32     16     
336    64     
-96    32     
16     -112   
176    -112   
-48    96     
16     48     
224    160    
-112   144    
0      96     
-80    32     
192    112    
-304   144    
-224   -32    
16     -16    
-16    160    
192    64     
16     -16    
-48    80     
-208   240    
208    -48    
16     -32    
208    240    
-96    80     
64     0      
-304   -112   
144    80     
-64    48     
-32    -16    
256    -48    
16     48     
-16    -48    
0      -64    
240    160    
16     144    
16     0      
96     -160   
-32    -144   
32     -32    
112    144    
-128   -32    
48     256    
16     96     
-224   -160   
48     32     
-48    0      
80     128    
-80    -48    
128    -64    
320    192    
336    336    
-336   176    
272    320    
-96    464    
208    480    
-64    48     
128    0      
160    -224   
-32    -144   
-80    -128   
-304   -208   
-16    -32    
32     96     
96     240    
-64    16     
0      96     
-16    0      
-80    144    
208    -112   
-160   -80    
-256   64     
192    128    
-16    112    
32     0      
80     304    
176    -208   
96     -240   
-176   560    
64     160    
48     -64    
-80    112    
-48    48     
240    -400   
160    128    
208    352    
-80    -288   
80     -432   
32     80     
96     128    
128    -320   
80     400    
-64    -80    
0      -160   
192    48     
112    192    
16     -64    
-160   -288   
160    704    
-96    -16    
208    0      
48     -80    
64     -592   
-32    352    
432    416    
-160   -272   
272    -96    
160    128    
-32    -80    
144    -48    
-160   -192   
272    208    
-240   64     
448    256    
-416   -192   
-48    -272   
96     160    
160    -128   
128    144    
48     -224   
32     -16    
-96    96     
80     224    
144    592    
160    400    
208    -32    
128    -128   
416    0      
128    -64    
336    96     
-48    160    
-48    16     
-80    -176   
-352   16     
32     -448   
80     16     
0      -64    
192    32     
-112   -112   
32     -96    
224    160    
256    128    
-32    48     
-400   -160   
320    -80    
448    128    
-576   96     
-304   -704   
176    -272   
-848   -368   
512    -400   
544    0      
912    480    
-704   112    
496    -16    
-80    0      
-176   -96    
304    -16    
192    128    
176    64     
96     64     
64     112    
-80    -144   
32     48     
32     -320   
128    96     
16     -960   
64     -16    
160    32     
64     -16    
144    128    
144    80     
-272   -96    
304    -112   
-48    128    
160    -48    
112    48     
-64    160    
-80    16     
128    -624   
-64    -240   
32     160    
-16    80     
160    48     
160    48     
208    80     
64     -96    
-288   -96    
112    -112   
128    -32    
80     -176   
80     0      
32     -96    
-224   0      
160    -64    
320    32     
208    48     
-32    0      
-96    -160   
-96    0      
0      112    
-64    112    
64     48     
176    -16    
-48    0      
16     -64    
288    112    
-176   -48    
-16    32     
368    80     
16     48     
112    96     
16     -16    
96     32     
176    -176   
176    64     
-160   0      
16     -480   
160    192    
192    -1136  
48     -64    
32     96     
16     144    
144    64     
-16    -16    
64     -496   
32     0      
368    0      
-128   128    
-64    -176   
80     80     
-1616  -32    
128    48     
80     80     
-16    -432   
16     -80    
80     -304   
224    -32    
0      -80    
-16    -32    
32     -512   
-48    48     
656    528    
-384   656    
192    -64    
176    -208   
-976   -144   
304    32     
-48    96     
96     32     
208    -112   
96     304    
96     192    
-176   -1040  
-160   -80    
144    0      
48     128    
96     48     
-16    32     
80     -128   
96     -64    
-336   -128   
32     -80    
272    64     
288    -16    
96     32     
112    -16    
96     112    
-32    -672   
336    -32    
-80    -96    
-128   -256   
64     -48    
80     112    
-160   -48    
64     -144   
16     32     
48     -16    
-752   -64    
144    32     
64     -16    
320    112    
-80    224    
256    240    
176    80     
208    -1568  
48     -48    
-64    -48    
16     -48    
-128   -192   
48     -32    
-64    0      
192    -32    
-112   160    
464    448    
-224   128    
144    -368   
80     176    
16     -144   
128    -32    
240    -784   
-96    -80    
48     96     
-16    16     
80     176    
32     0      
-224   -48    
176    48     
64     32     
192    -176   
-304   48     
144    112    
-96    -304   
128    -144   
-80    -16    
304    256    
304    32     
0      -224   
-288   368    
-288   -48    
144    -256   
-32    64     
304    240    
-624   720    
160    16     
-720   -496   
80     224    
336    64     
384    112    
560    208    
416    -400   
64     80     
-192   48     
-176   -64    
-96    -112   
0      -176   
-48    -16    
-32    0      
32     -144   
352    -176   
-96    -256   
160    -448   
544    -96    
256    16     
304    96     
640    16     
-176   368    
-384   32     
-32    -16    
144    -32    
64     -112   
256    -64    
0      0      
-176   -16    
0      -112   
32     -32    
336    16     
-224   160    
-752   -192   
16     -96    
128    -480   
-2064  64     
-112   144    
-1104  48     
-48    -16    
368    -96    
-64    256    
192    0      
80     -64    
32     -224   
-16    64     
-704   96     
64     96     
-528   -32    
144    -32    
0      -48    
-16    -48    
192    64     
-608   -64    
-288   448    
-976   192    
16     -192   
192    -96    
-48    16     
-224   16     
-112   -208   
-352   -224   
256    -80    
160    0      
-144   -96    
176    64     
-176   0      
0      48     
-128   64     
-48    0      
-272   -96    
-96    0      
-720   32     
32     0      
-112   -48    
32     96     
16     32     
112    -16    
16     -32    
192    240    
-144   240    
-144   -48    
-80    -48    
0      112    
-16    80     
-240   -16    
16     80     
-816   -32    
-160   -96    
-16    -224   
64     80     
-192   -16    
336    128    
0      128    
-112   -64    
112    -96    
-32    32     
0      0      
48     32     
16     32     
96     240    
176    368    
-176   32     
-80    16     
-464   16     
0      64     
-112   -32    
224    32     
48     16     
-96    -64    
256    224    
96     176    
-64    112    
-160   -80    
-240   -288   
-304   -144   
112    -416   
64     -112   
144    -176   
-544   -208   
32     -16    
-48    64     
64     352    
-160   80     
-224   -144   
256    -160   
160    416    
0      352    
-144   -208   
-144   -96    
16     -64    
-64    32     
-224   64     
-144   16     
-752   -96    
128    -176   
16     160    
-48    48     
-80    48     
112    480    
-64    80     
-96    272    
-336   -272   
96     -160   
336    -16    
128    224    
112    -384   
-48    48     
-64    208    
-576   -160   
240    128    
176    160    
16     -64    
80     -16    
0      288    
-64    192    
0      128    
144    -48    
-80    0      
160    64     
-320   -96    
80     -64    
-224   48     
64     16     
-96    -16    
144    144    
208    0      
-176   -64    
-32    -160   
-192   -80    
-48    -32    
48     32     
48     32     
48     64     
-160   48     
-112   16     
-32    32     
-48    -16    
48     32     
-48    16     
96     64     
16     0      
48     64     
-48    0      
32     -32    
-16    -112   
32     96     
192    48     
-32    16     
144    64     
112    384    
-176   48     
176    80     
32     -112   
80     416    
272    496    
-480   -80    
32     -48    
112    0      
128    96     
208    16     
80     -64    
-144   16     
448    144    
96     0      
-32    64     
-144   16     
-176   -32    
-32    16     
208    80     
-80    -16    
352    176    
304    128    
48     144    
-512   -160   
416    0      
304    256    
-560   16     
-448   -256   
656    -16    
-240   96     
-16    16     
-64    0      
208    128    
-32    48     
288    144    
48     96     
-256   -96    
336    -16    
0      -320   
208    -192   
-64    416    
-64    48     
112    32     
32     128    
-96    -80    
192    64     
-192   64     
-96    16     
160    -48    
-96    -112   
112    64     
-64    0      
288    16     
-256   -80    
192    64     
112    48     
48     96     
-48    16     
176    64     
-352   0      
480    96     
-240   96     
-144   -128   
48     144    
192    112    
80     0      
-224   64     
368    128    
16     176    
-32    32     
-96    96     
240    48     
176    16     
-160   -48    
64     48     
0      96     
272    80     
-32    80     
16     96     
-16    240    
0      48     
128    128    
192    16     
192    192    
-96    80     
-48    -32    
240    112    
-32    112    
384    448    
-336   96     
-16    48     
240    240    
48     -208   
48     -256   
96     48     
144    112    
80     -16    
80     0      
-96    -144   
96     112    
128    256    
16     -64    
208    64     
112    96     
-144   48     
48     -256   
144    -32    
112    -64    
144    160    
0      -480   
128    -176   
64     192    
128    144    
96     480    
-144   -256   
-64    32     
112    192    
32     -32    
64     224    
64     -32    
224    -32    
176    48     
272    128    
-416   -880   
16     48     
112    64     
208    112    
96     144    
80     -240   
256    176    
16     64     
208    -192   
144    272    
-32    -32    
-144   -32    
-64    64     
-16    64     
0      80     
112    112    
80     -96    
160    16     
208    -112   
32     96     
-128   -240   
-144   128    
96     -464   
240    -352   
16     416    
-48    -128   
192    -144   
176    256    
64     -64    
-224   -144   
80     64     
96     -128   
32     96     
-112   -352   
112    -256   
-64    0      
-16    112    
112    64     
-80    -32    
544    -80    
-80    -16    
80     240    
80     -400   
80     0      
-32    -32    
64     32     
64     -128   
32     144    
-80    -128   
-64    -128   
112    -320   
192    128    
48     272    
-240   -224   
-16    -16    
48     -128   
-48    128    
224    -368   
-128   -112   
192    0      
144    112    
96     80     
96     16     
0      112    
96     0      
48     -112   
48     -736   
96     -48    
48     -32    
128    -400   
112    304    
192    -432   
32     80     
128    -160   
160    -64    
336    128    
-112   -96    
32     160    
192    -96    
64     -192   
-48    32     
32     -176   
-32    -336   
-1984  -144   
32     -352   
176    -128   
192    -160   
80     -336   
656    -608   
480    -80    
480    320    
-256   176    
-224   -256   
80     80     
-96    -32    
-48    16     
0      -224   
512    -144   
272    -96    
448    -256   
224    -96    
464    -64    
528    432    
-176   176    
480    192    
-224   -464   
-144   -16    
224    48     
288    32     
192    -48    
-64    160    
80     64     
96     -96    
-416   -176   
240    -416   
16     32     
0      128    
544    272    
-176   48     
112    -16    
-96    -368   
96     48     
32     -160   
320    80     
-160   144    
-32    32     
-32    48     
304    -80    
-384   -64    
-48    -144   
-368   192    
-16    128    
-48    -144   
48     -160   
240    112    
0      -288   
416    -32    
16     96     
-16    192    
96     -48    
112    -128   
240    224    
-192   256    
-336   32     
32     -96    
-192   112    
224    -48    
96     112    
64     -16    
0      32     
96     -112   
0      64     
-128   -304   
336    -80    
160    16     
144    -32    
96     96     
80     16     
-144   0      
112    -112   
-976   32     
96     -112   
-304   -48    
48     -224   
160    -208   
128    -96    
272    256    
64     -144   
-144   -160   
176    -416   
304    -144   
-128   32     
80     -32    
-208   48     
0      -256   
-304   -160   
96     -128   
0      -384   
80     -464   
80     -80    
16     -96    
304    -80    
-112   -160   
128    -368   
128    368    
208    160    
-176   -64    
48     -304   
-112   -128   
112    288    
-112   64     
144    -160   
176    144    
80     -176   
176    -80    
320    80     
-32    -288   
48     -544   
208    1504   
96     -240   
-80    -512   
-416   32     
96     32     
-96    -32    
-96    -224   
320    -240   
160    368    
-560   368    
16     -144   
-80    -208   
-1200  -128   
160    96     
0      288    
-96    208    
-32    -48    
-448   -16    
-32    32     
96     64     
80     128    
144    96     
-128   32     
208    -32    
-192   96     
-160   -48    
-32    32     
0      64     
16     144    
-368   -32    
-80    -64    
-32    96     
-160   16     
32     64     
0      32     
64     16     
128    32     
-192   0      
-48    -192   
240    -32    
48     -16    
304    96     
-96    -96    
-128   32     
-224   0      
-240   -112   
48     32     
-32    96     
-16    -80    
-496   -96    
-80    -16    
336    -16    
0      160    
-144   -96    
80     80     
80     -96    
128    32     
-224   -176   
-32    80     
-16    -16    
160    32     
-64    48     
0      -48    
-64    64     
-64    0      
-96    16     
-272   48     
-16    128    
-48    -80    
128    272    
-32    -112   
32     80     
64     32     
-224   0      
208    -32    
-288   -80    
224    240    
16     80     
64     -32    
32     -112   
64     16     
16     96     
-16    192    
-32    0      
160    -176   
48     80     
-16    144    
128    0      
-176   48     
-144   -128   
288    -16    
96     112    
32     -32    
448    64     
-224   80     
-176   -64    
-160   -16    
80     -16    
-560   -128   
256    144    
48     32     
-272   48     
656    256    
-800   64     
-368   48     
320    0      
64     32     
256    -16    
-112   -80    
80     16     
128    48     
-512   -112   
160    -64    
-496   64     
80     96     
48     64     
96     0      
16     32     
112    80     
48     96     
32     96     
-80    0      
-128   0      
-96    -240   
288    -64    
-208   80     
-272   -144   
304    112    
-256   -16    
320    224    
-32    112    
-48    -16    
-144   -48    
-32    48     
80     80     
48     176    
-192   -32    
-176   16     
0      16     
-192   -16    
64     64     
-368   -64    
176    48     
-480   -96    
-288   -64    
144    0      
16     128    
224    -16    
-224   -80    
-32    -64    
-16    128    
32     96     
80     16     
144    96     
-144   336    
-32    -48    
272    128    
208    240    
-192   -16    
-64    -32    
160    -64    
224    304    
-160   -400   
64     64     
80     928    
-128   0      
320    -16    
-64    -256   
-160   192    
-160   -128   
240    112    
-160   0      
64     96     
400    208    
-208   48     
-32    16     
48     64     
-128   -64    
-192   -176   
-48    64     
112    144    
240    -80    
-96    -112   
-80    576    
-144   -192   
224    -304   
112    304    
-96    -176   
192    176    
-32    160    
-32    -464   
32     608    
-144   -320   
80     -80    
256    320    
80     320    
-16    -32    
80     48     
128    464    
-32    -240   
144    48     
32     64     
-80    -32    
-16    -48    
0      224    
0      -64    
192    48     
368    512    
-224   -592   
48     -48    
208    368    
96     0      
-176   -272   
128    -80    
-80    144    
80     -16    
32     32     
-80    -80    
208    208    
-176   -288   
144    -256   
48     0      
112    -160   
-32    272    
-176   -112   
0      -592   
304    -112   
432    32     
64     32     
-160   -176   
-64    0      
128    176    
-48    128    
32     -48    
80     48     
-64    48     
240    144    
176    384    
0      160    
288    288    
-176   96     
80     144    
48     112    
80     112    
144    16     
48     -48    
176    320    
-80    -224   
208    64     
0      64     
192    208    
-80    240    
192    192    
0      96     
-16    80     
32     0      
64     -96    
-128   -112   
48     0      
80     112    
0      -48    
16     32     
80     -288   
80     48     
0      80     
240    192    
80     448    
384    608    
176    80     
160    64     
-144   -352   
-16    80     
-32    -176   
80     -176   
208    48     
-96    304    
224    256    
-16    -192   
-112   -400   
160    -1456  
-112   -224   
-32    -240   
592    608    
-416   -96    
-144   -80    
-240   -80    
144    192    
272    240    
224    -160   
32     -16    
16     -272   
64     32     
-304   64     
368    48     
480    -208   
-80    128    
-80    64     
-64    -48    
-16    48     
-416   -288   
320    -80    
-160   144    
-144   -304   
96     -384   
192    192    
16     80     
208    176    
416    -160   
-128   160    
0      -48    
-240   144    
272    -48    
16     192    
416    -16    
144    208    
288    304    
192    64     
-144   192    
224    -64    
48     0      
96     0      
-176   368    
336    -64    
32     224    
112    -448   
96     368    
64     144    
144    0      
-32    -48    
112    80     
-80    304    
208    240    
-176   -272   
304    -160   
64     -144   
-208   -256   
96     96     
-96    368    
368    272    
176    -32    
160    -80    
-64    -256   
-128   -32    
32     -176   
112    -48    
-96    -160   
160    -48    
144    0      
0      -64    
32     -48    
16     16     
192    160    
96     -64    
112    96     
192    -64    
112    304    
-48    -240   
0      -816   
80     -16    
112    -48    
-192   -160   
144    128    
96     560    
496    384    
48     -688   
32     -128   
256    -32    
144    688    
80     160    
-96    -304   
256    -304   
0      16     
16     -16    
-16    64     
144    -192   
288    -32    
48     -144   
96     -336   
160    -48    
96     -144   
-176   -384   
-32    -432   
176    -224   
160    128    
96     -144   
112    96     
96     0      
272    -80    
48     128    
-16    16     
64     -96    
-1264  0      
64     -48    
128    -96    
96     -160   
-32    32     
432    -304   
176    -208   
176    -208   
48     96     
0      64     
64     64     
80     -16    
32     272    
-432   160    
240    144    
-304   48     
80     -48    
144    -64    
144    96     
-32    -48    
144    -128   
144    224    
64     16     
64     0      
-272   -48    
16     16     
48     0      
96     -48    
80     32     
48     0      
-272   112    
256    -160   
-1088  -272   
240    -48    
192    80     
128    0      
160    32     
64     -304   
-48    16     
-64    96     
32     32     
96     112    
-160   -32    
0      0      
176    16     
-464   -128   
48     112    
-128   -48    
80     -64    
256    48     
240    -64    
112    -32    
48     -176   
-16    32     
64     -192   
176    112    
-96    16     
0      -16    
-80    32     
240    -96    
-288   -96    
64     16     
-208   32     
80     -32    
-464   -16    
0      -64    
48     32     
48     -32    
64     96     
112    -112   
64     64     
96     16     
48     -16    
192    -16    
-224   -224   
320    0      
-160   0      
224    -16    
64     -16    
0      -176   
128    -176   
16     176    
128    -112   
64     224    
160    -304   
16     -224   
-256   160    
-80    -128   
112    80     
16     96     
-272   32     
80     -128   
-160   -16    
-112   -112   
-112   -64    
-32    -80    
-144   32     
144    -256   
32     128    
-384   16     
432    128    
-352   32     
-208   -96    
-96    32     
-144   80     
-480   -64    
288    32     
-192   -112   
256    -208   
176    -80    
464    -208   
304    112    
-1040  -64    
0      48     
-96    128    
-240   -16    
112    0      
-816   176    
-240   112    
192    -80    
-144   0      
160    0      
-96    -32    
-176   -224   
112    -32    
-96    -128   
80     32     
96     -48    
-256   64     
48     -208   
-128   -16    
-48    176    
-560   -32    
-48    -288   
-400   -32    
-64    0      
-64    -192   
-528   224    
-256   -80    
-48    -448   
-128   -112   
48     144    
-240   -96    
352    0      
-16    192    
-112   -64    
-112   -144   
-416   16     
32     -240   
-208   112    
160    -32    
-2400  -80    
-48    160    
-128   -720   
80     304    
320    112    
-96    -176   
-96    -400   
-80    -32    
16     480    
240    192    
0      -96    
-64    -208   
192    160    
64     400    
-224   144    
-1104  288    
128    144    
0      208    
-48    -160   
-128   -528   
160    -288   
352    208    
-416   496    
-112   -16    
-208   32     
0      -48    
-192   -48    
0      16     
-352   -80    
160    -16    
128    -16    
-64    80     
-128   336    
16     336    
-256   -176   
-80    32     
-16    -16    
-64    -224   
80     -64    
-32    96     
-224   16     
-80    112    
-96    0      
-80    272    
128    224    
-80    96     
-128   32     
-1344  -48    
16     -48    
32     -96    
32     -176   
0      256    
64     0      
0      -96    
64     96     
-32    48     
-112   176    
256    160    
-160   368    
32     112    
-64    -48    
128    96     
-1344  -176   
64     -16    
80     32     
64     112    
16     96     
-16    160    
-80    -64    
0      -192   
-256   -208   
160    -32    
-16    144    
-368   -96    
128    48     
-320   -112   
64     48     
112    -48    
-272   -208   
352    -352   
208    176    
-160   176    
32     48     
32     0      
32     128    
32     272    
16     48     
-64    160    
-96    -160   
96     -208   
48     16     
272    112    
-400   0      
-144   -80    
256    16     
80     176    
160    192    
96     16     
-96    -64    
-80    -320   
32     16     
-32    48     
-112   -32    
32     0      
48     128    
-80    80     
16     64     
-64    -144   
16     -80    
0      32     
-16    -320   
224    -48    
80     -96    
160    80     
-192   -64    
-112   -256   
-32    -48    
208    176    
-16    176    
304    48     
-560   480    
0      -48    
-224   96     
64     48     
32     -16    
256    640    
0      448    
-176   320    
176    208    
208    272    
128    256    
-64    48     
48     -48    
-48    -144   
464    352    
-640   528    
-304   464    
304    224    
432    448    
-256   192    
-160   624    
-384   -448   
-160   -368   
0      64     
224    16     
304    336    
-304   192    
208    528    
160    160    
512    688    
352    432    
64     112    
96     -112   
640    144    
32     144    
-656   80     
144    368    
-176   432    
16     64     
32     -48    
-160   -48    
-336   32     
224    304    
-16    288    
400    224    
240    624    
-32    384    
-32    -48    
-112   272    
-160   48     
48     -32    
-64    -416   
112    64     
224    16     
64     32     
-112   -64    
224    -480   
-64    64     
416    16     
64     96     
-384   -160   
-144   -688   
-80    -208   
240    -448   
464    384    
-352   96     
-32    -352   
80     288    
144    -96    
304    48     
96     -144   
-112   16     
384    800    
-176   208    
-160   -848   
240    176    
32     240    
-80    176    
64     -16    
-32    -368   
320    368    
-80    -80    
-208   -80    
112    96     
-32    -288   
656    16     
-128   96     
-208   80     
-224   -192   
112    32     
32     48     
-48    -304   
0      240    
-16    -192   
0      96     
192    304    
128    96     
-144   -336   
208    272    
128    224    
128    -16    
-80    -48    
-80    32     
128    208    
160    -80    
160    64     
32     -80    
96     96     
48     -176   
-32    0      
80     -224   
128    -32    
64     32     
64     16     
32     -16    
208    176    
-128   208    
-160   -336   
96     -16    
96     144    
0      80     
112    -224   
144    144    
-48    -320   
64     -144   
192    -16    
128    96     
0      32     
128    -112   
192    16     
256    160    
16     32     
160    48     
-112   0      
-16    -16    
64     -48    
-48    -224   
-32    176    
240    -64    
32     32     
80     -288   
112    0      
352    112    
64     64     
192    96     
64     32     
128    48     
-80    -32    
144    64     
80     96     
-96    -16    
176    48     
256    96     
96     -32    
-80    -96    
256    -32    
176    48     
384    16     
128    48     
-208   -48    
-176   -128   
16     32     
224    -32    
336    48     
64     -96    
112    -16    
-112   -112   
48     48     
-64    -16    
128    64     
48     112    
112    16     
-64    -80    
96     -304   
96     16     
112    16     
112    48     
16     -32    
96     48     
32     -96    
16     48     
128    -144   
64     16     
208    -192   
176    -48    
48     112    
32     -240   
64     48     
160    -144   
80     -336   
144    0      
-48    16     
-16    16     
144    -368   
32     -64    
48     64     
80     -16    
80     96     
48     80     
48     -32    
-64    96     
64     -112   
-208   16     
-528   -48    
48     -256   
256    -224   
192    192    
160    -112   
16     -288   
272    -64    
208    208    
128    -80    
96     112    
-32    -128   
592    160    
-512   144    
720    304    
-496   112    
-576   -176   
48     64     
-336   -80    
-64    -112   
192    -64    
-112   -32    
624    352    
-240   304    
48     128    
352    -784   
416    48     
128    192    
0      224    
368    176    
48     -288   
192    -400   
80     -160   
-208   112    
-16    128    
224    -16    
-176   -128   
128    -32    
-128   -112   
-48    -48    
128    -592   
-16    320    
112    48     
96     16     
64     -176   
-96    -112   
-80    96     
160    16     
-272   -144   
32     64     
-1552  112    
240    -48    
-240   544    
304    -672   
352    -64    
48     -400   
16     64     
32     128    
-144   80     
-272   160    
272    336    
-240   448    
-16    -416   
240    -48    
-16    432    
-1744  320    
-160   160    
176    288    
128    -144   
-48    16     
112    -224   
48     96     
-64    -688   
64     -64    
32     64     
64     16     
64     16     
176    -64    
144    16     
-128   -64    
-256   16     
-112   -96    
176    -48    
64     -16    
-112   48     
-112   -288   
16     -16    
336    -240   
-192   240    
32     128    
144    144    
-96    -48    
160    -16    
-32    32     
-64    64     
-368   64     
224    0      
0      16     
0      -176   
-32    96     
-16    -192   
96     32     
224    -288   
112    112    
-704   32     
64     -80    
-16    144    
16     96     
-64    -48    
48     -96    
16     64     
-16    -16    
-208   48     
16     -32    
-80    -16    
192    48     
-320   64     
-128   0      
-368   -32    
-64    16     
96     48     
48     0      
336    80     
16     256    
-112   64     
-192   -32    
144    -176   
128    16     
192    0      
144    32     
-128   -64    
-48    80     
-304   16     
-240   -80    
0      -16    
-928   -16    
192    48     
240    -64    
-16    16     
-128   32     
-176   -80    
-432   -112   
192    16     
-256   -144   
16     64     
-464   -160   
176    -64    
-32    -160   
32     16     
-128   0      
-112   -48    
32     -192   
-832   -48    
-32    -64    
-16    -112   
-240   -16    
-112   0      
128    96     
-240   48     
144    320    
-256   32     
80     192    
-16    112    
64     32     
-48    192    
-48    48     
-32    -112   
-416   -80    
-112   192    
432    272    
0      208    
16     -32    
176    96     
48     -176   
-96    -96    
80     64     
-224   128    
-32    -32    
-16    -16    
-128   336    
16     336    
-16    208    
80     256    
-112   -304   
-496   -128   
16     64     
0      -128   
48     160    
-96    -80    
-16    -64    
80     -176   
96     -16    
64     160    
208    320    
-208   544    
-224   240    
32     192    
0      112    
-128   112    
-608   -416   
208    -112   
144    576    
400    1600   
32     64     
32     -416   
112    832    
288    208    
-512   -960   
-224   -928   
272    944    
80     336    
0      -96    
128    112    
-224   -208   
-848   -80    
160    160    
-1136  -160   
32     -416   
-16    416    
-144   144    
192    48     
-368   16     
-448   128    
-400   -80    
176    432    
208    640    
-176   -1088  
48     -400   
0      384    
-1008  -1248  
96     256    
-384   576    
-560   -224   
16     112    
-32    640    
0      -288   
560    -1152  
240    752    
336    -32    
-512   384    
80     -816   
-176   288    
-48    -16    
-112   128    
-192   -368   
416    464    
-432   -144   
144    -160   
-64    208    
-208   -64    
80     -208   
96     224    
112    80     
-320   -336   
128    416    
-48    208    
256    -224   
0      160    
0      80     
-288   -128   
160    64     
128    0      
-192   16     
272    176    
-288   64     
96     48     
160    48     
48     -32    
0      -48    
-64    -32    
16     160    
160    32     
-176   -64    
-16    80     
-240   32     
48     176    
320    192    
-176   -48    
160    48     
-80    48     
112    -144   
-96    -320   
112    -128   
208    112    
0      -112   
-32    112    
112    0      
-48    48     
112    -96    
-96    -32    
64     128    
64     80     
0      624    
160    288    
208    64     
80     176    
112    112    
-16    128    
96     16     
-64    16     
-256   -64    
112    32     
-224   48     
0      32     
112    384    
96     192    
128    256    
-208   224    
64     0      
64     -32    
128    -112   
-96    16     
64     32     
-32    0      
304    80     
-80    64     
64     80     
-128   -16    
16     80     
0      128    
48     64     
144    112    
-144   16     
-32    64     
448    576    
-224   560    
112    48     
128    0      
-96    32     
48     -16    
272    80     
256    0      
16     144    
-320   -896   
-32    16     
-224   144    
-96    -16    
96     112    
32     0      
80     64     
80     64     
-240   16     
80     80     
0      64     
64     16     
-208   48     
-128   80     
-128   -64    
112    -96    
-16    -80    
256    -16    
256    288    
128    128    
-160   -208   
-272   -192   
112    0      
160    224    
-64    48     
0      -48    
32     64     
64     96     
288    128    
-160   32     
16     -160   
-32    32     
128    -48    
160    112    
112    64     
16     96     
128    80     
80     96     
32     80     
96     32     
-16    32     
-144   16     
48     48     
96     32     
96     -32    
-16    -224   
0      64     
48     -96    
192    80     
-32    64     
16     32     
16     80     
16     48     
112    -16    
80     64     
32     -64    
128    16     
-48    -16    
0      -96    
0      16     
176    -32    
-112   128    
128    16     
0      16     
80     -80    
128    64     
-64    16     
-64    64     
-64    -16    
192    96     
-96    -16    
224    208    
-304   176    
224    -32    
-16    112    
144    -96    
304    160    
320    192    
208    416    
-512   -992   
16     -576   
80     -336   
144    528    
112    448    
-144   -352   
0      48     
-64    448    
112    -368   
-48    -16    
400    48     
256    192    
16     0      
96     160    
-784   -1568  
400    -992   
-480   880    
-704   384    
272    -448   
16     176    
1344   800    
-544   -336   
304    32     
0      -96    
-112   272    
64     0      
-176   -880   
-80    560    
288    -16    
208    80     
0      48     
160    -448   
96     -128   
-64    48     
128    -96    
64     80     
240    -160   
-96    0      
-144   16     
-192   -112   
176    224    
272    160    
480    304    
-304   16     
-96    192    
128    -96    
48     208    
160    -80    
112    -48    
-128   -48    
-16    -752   
176    -368   
0      64     
144    -784   
144    -144   
64     -112   
80     -128   
64     176    
-32    -16    
0      32     
112    -96    
-192   -256   
176    -48    
80     80     
16     -16    
160    16     
-112   -288   
208    -144   
96     -128   
-48    -80    
288    -48    
0      -16    
224    208    
96     -96    
32     -32    
112    -64    
-16    -112   
288    32     
272    -96    
-48    -32    
-432   -112   
96     32     
-96    -16    
96     16     
176    -16    
0      16     
48     -80    
64     -704   
-16    -224   
112    32     
416    304    
-192   272    
64     48     
16     0      
224    -128   
16     -128   
80     -176   
-112   -64    
112    -16    
144    288    
16     80     
208    -80    
16     -304   
176    -48    
112    64     
112    -32    
-192   -192   
96     -112   
64     -144   
0      -384   
320    -176   
128    176    
-800   192    
-32    96     
32     -32    
-32    48     
48     112    
288    80     
48     32     
-48    -896   
-288   16     
-48    -96    
112    48     
96     128    
80     -176   
-48    0      
-48    -112   
-1216  -128   
64     -32    
-960   -32    
128    32     
16     48     
-16    -32    
-96    -96    
80     -144   
64     48     
336    224    
288    464    
-448   -80    
-208   -336   
128    -496   
224    -144   
32     0      
0      -96    
-32    -64    
-16    -384   
-384   -400   
208    -256   
-32    128    
-224   -240   
128    32     
144    -48    
192    64     
-240   48     
64     -288   
-32    144    
192    160    
-320   -48    
256    64     
-80    -32    
64     -176   
-1232  432    
96     -240   
-80    -448   
32     192    
-48    -16    
-224   -208   
-32    112    
32     -224   
240    432    
-432   -400   
128    -32    
-160   32     
-48    16     
-528   -80    
128    32     
32     -128   
-64    32     
-112   -80    
176    -576   
224    448    
-256   16     
96     -80    
-112   80     
80     -208   
-256   -176   
-16    -176   
-32    128    
-16    -208   
112    -144   
-32    32     
352    -656   
0      -16    
256    688    
-1184  -160   
-48    -64    
-160   464    
-736   48     
-256   -384   
-384   -16    
-112   128    
160    -160   
-112   -192   
-16    -48    
16     128    
-384   112    
208    0      
-368   -272   
-784   -336   
-304   176    
-288   384    
-192   96     
-160   -240   
272    96     
-688   480    
224    240    
-112   -176   
352    -80    
336    160    
-160   64     
-208   -80    
-176   32     
-96    0      
352    48     
-32    -160   
0      80     
-48    64     
-384   -32    
-32    -48    
-224   144    
-176   64     
-320   0      
144    0      
16     16     
-32    -32    
64     -448   
160    -64    
160    80     
-32    -176   
0      -160   
-288   112    
-32    128    
-48    48     
-80    32     
-128   16     
16     112    
-1328  -64    
-80    -64    
-1568  -80    
48     64     
16     -48    
0      80     
-256   -176   
176    48     
-96    -32    
-176   -80    
80     112    
80     96     
-80    16     
96     112    
32     0      
-224   -64    
-192   -96    
-256   0      
-144   64     
-48    176    
272    112    
32     176    
-304   -64    
32     -32    
-64    -16    
32     64     
-64    0      
128    16     
-16    160    
-176   -80    
-208   16     
80     0      
-176   -48    
16     -80    
128    -64    
224    96     
-144   -16    
-16    48     
80     -16    
16     32     
-96    80     
16     32     
-176   -96    
-128   32     
16     16     
-80    -48    
80     48     
-576   16     
128    64     
-1280  0      
48     112    
192    -80    
-80    -48    
128    32     
128    80     
176    -16    
-48    16     
-16    0      
16     48     
128    48     
-144   48     
48     64     
-416   32     
592    304    
-432   32     
192    48     
-16    0      
-112   48     
0      -80    
16     16     
64     -48    
-240   80     
-96    144    
-112   -64    
-128   16     
-144   -48    
224    64     
-176   48     
128    128    
-112   16     
0      -16    
-16    16     
-96    -80    
48     -64    
-32    48     
176    96     
-48    16     
-32    -16    
-48    80     
208    256    
-240   64     
112    80     
-208   -64    
176    80     
96     48     
48     -16    
128    48     
128    64     
96     160    
-32    176    
-208   -32    
-48    0      
256    -48    
160    -16    
160    160    
-80    192    
48     112    
-272   -16    
32     208    
224    64     
48     0      
128    16     
176    160    
64     112    
-96    16     
-112   -80    
0      -16    
16     -32    
16     -96    
144    80     
-224   48     
32     96     
-160   -208   
0      -48    
176    96     
-48    96     
64     80     
48     80     
0      0      
32     -160   
96     160    
144    192    
160    176    
-208   -16    
-112   160    
-160   -512   
32     400    
48     320    
-144   -16    
208    64     
96     48     
-16    144    
-64    -544   
320    -80    
272    480    
160    192    
-32    256    
-176   0      
0      -16    
320    96     
-80    -128   
160    -368   
-544   -720   
-176   528    
-96    352    
128    -448   
256    576    
48     -16    
96     -64    
-528   240    
-176   -208   
-288   -432   
224    -192   
-416   80     
368    16     
-32    48     
-96    -576   
-240   -16    
784    -144   
224    80     
-176   624    
64     64     
48     -80    
-224   -32    
-64    48     
176    -96    
-272   -96    
496    -80    
-256   16     
112    -112   
-32    0      
-80    -992   
0      288    
144    144    
176    -48    
112    -32    
176    64     
-400   144    
112    96     
-144   -16    
240    -16    
-256   64     
240    80     
-272   32     
64     48     
32     176    
224    -96    
256    -208   
-112   -448   
-176   -32    
-224   112    
32     144    
16     32     
224    48     
-144   -32    
208    -80    
-144   -16    
80     144    
-48    -112   
256    16     
-64    16     
96     64     
64     32     
256    -1328  
-144   0      
-32    112    
160    128    
16     144    
64     32     
80     -288   
80     96     
-96    32     
272    144    
-192   96     
-80    -96    
144    -16    
80     -272   
144    -112   
256    -48    
-96    112    
-32    -880   
16     112    
48     16     
16     0      
-16    80     
80     96     
0      0      
240    -48    
144    112    
-64    0      
112    -16    
48     0      
32     48     
240    64     
-64    224    
-96    -144   
-48    0      
224    -176   
144    96     
-32    128    
-16    -80    
48     32     
48     16     
-32    96     
32     192    
0      176    
128    -128   
160    112    
64     128    
160    144    
-128   -1104  
96     -192   
0      -48    
-48    32     
-64    32     
208    -64    
144    -64    
240    -144   
160    64     
128    -128   
-352   176    
-112   -64    
240    96     
240    -112   
464    368    
-208   48     
48     96     
224    48     
208    64     
0      192    
-64    48     
384    800    
-368   -32    
112    208    
208    16     
240    192    
144    -224   
-224   -768   
320    624    
112    416    
-32    -544   
320    288    
-128   -32    
96     -800   
384    192    
-272   -560   
112    -560   
-208   -144   
112    -720   
0      -400   
64     -528   
112    -192   
160    240    
-64    -368   
320    512    
-160   -192   
288    -288   
-16    320    
160    -208   
32     192    
-528   -144   
192    304    
0      -32    
-160   -400   
48     -304   
160    -112   
0      96     
144    48     
112    48     
-64    48     
0      -80    
112    -208   
-16    16     
32     -96    
48     -32    
-320   -16    
112    -16    
304    -48    
16     -32    
272    336    
176    144    
144    32     
-64    -32    
-16    48     
16     -80    
48     -128   
240    -48    
80     48     
-64    0      
256    48     
-896   -160   
416    -176   
-1136  -64    
256    64     
240    0      
-16    -64    
-48    -128   
160    -208   
96     -96    
368    160    
-208   32     
480    144    
-400   80     
32     -16    
80     112    
-544   -96    
-448   -608   
-496   -192   
288    320    
-496   128    
80     -48    
144    -272   
-32    -208   
416    416    
-640   -16    
176    -96    
544    -80    
80     -96    
352    144    
-288   -32    
320    80     
64     -64    
-496   -96    
560    -224   
16     -48    
48     -96    
-448   48     
32     -112   
112    48     
128    -112   
-112   32     
160    0      
144    0      
64     32     
16     -16    
112    -144   
-128   -208   
-592   0      
96     192    
-1184  -16    
112    -48    
128    48     
16     -144   
-32    32     
0      -288   
-96    224    
448    144    
-32    80     
-176   -48    
64     -48    
-240   -32    
0      -32    
-608   -16    
16     -16    
112    48     
256    16     
-240   64     
128    -80    
48     -32    
112    -112   
-64    112    
-144   80     
128    16     
-832   0      
112    -80    
-144   96     
160    0      
32     48     
16     -112   
0      192    
-16    -48    
-16    16     
96     -192   
16     32     
64     16     
176    16     
-352   448    
240    192    
-208   -336   
-80    -240   
-16    -32    
160    112    
-128   -16    
64     -128   
-240   -80    
192    -144   
112    -16    
320    -16    
64     192    
-1184  -288   
-1024  -112   
-128   112    
-512   0      
-224   -80    
320    -224   
32     -80    
240    112    
-272   -16    
-16    32     
-80    64     
-304   16     
128    0      
-512   -112   
-16    -16    
-416   -32    
-400   -32    
-112   -48    
-192   64     
-192   128    
256    240    
32     -336   
112    -480   
-32    -48    
-240   0      
0      -80    
-352   -352   
-224   -592   
-176   48     
304    1072   
-400   -128   
-96    -544   
48     -16    
80     256    
-208   144    
-448   -128   
-64    -48    
0      96     
-16    48     
368    528    
-128   96     
-80    -432   
256    -80    
-288   -96    
16     80     
-48    -176   
-16    -16    
-48    144    
-128   160    
-16    96     
-208   -32    
-64    16     
96     32     
0      -96    
96     48     
-176   208    
32     -48    
256    -112   
64     -288   
-160   256    
-112   192    
-144   -336   
-336   -736   
80     -64    
-384   336    
-48    16     
256    240    
-16    -96    
48     -288   
-1120  160    
128    -32    
-144   -64    
176    16     
96     -32    
0      192    
-32    -32    
-448   16     
16     48     
-160   16     
-192   576    
128    -672   
-176   240    
-496   112    
96     16     
-528   -160   
16     -48    
160    -32    
48     48     
-144   368    
224    -304   
-112   368    
-256   -432   
96     32     
-96    272    
176    400    
288    464    
-368   80     
-336   -624   
288    464    
0      192    
-16    -192   
-800   -32    
-256   -256   
16     -80    
-16    -16    
384    272    
80     64     
-80    144    
384    208    
-176   224    
-480   -32    
0      128    
-48    0      
160    80     
-192   48     
128    -64    
272    32     
-768   80     
-336   112    
-176   16     
16     64     
368    48     
-96    64     
-272   400    
-32    128    
-16    128    
224    304    
-192   -48    
-16    48     
-320   -64    
48     48     
128    48     
160    48     
-80    -176   
368    -64    
-192   352    
160    80     
80     48     
-48    128    
-208   128    
288    -16    
64     32     
-288   96     
-80    -16    
192    -272   
-64    -32    
240    192    
80     0      
-144   128    
-64    80     
432    240    
-160   128    
32     -48    
-144   -64    
544    416    
-272   656    
-240   176    
-32    -288   
400    -64    
-96    80     
80     96     
224    -112   
-336   -224   
-16    80     
128    288    
240    32     
80     -48    
-32    48     
64     128    
176    64     
-48    -48    
160    128    
160    128    
-176   80     
128    -32    
96     80     
-80    -16    
160    -64    
176    16     
96     96     
32     48     
-16    32     
-64    320    
-16    160    
128    0      
256    304    
128    304    
-288   -192   
304    -240   
112    96     
-32    112    
96     48     
320    80     
-64    128    
112    160    
-176   112    
-208   0      
16     -16    
160    -32    
192    80     
-48    0      
80     16     
-128   -112   
16     176    
-80    176    
32     128    
160    -32    
16     -64    
-16    16     
-192   -304   
160    96     
-16    0      
-48    -48    
176    240    
32     160    
224    480    
-208   -224   
-112   -224   
176    -1056  
-16    -768   
144    -304   
-64    -96    
32     528    
256    304    
-192   176    
64     -224   
0      256    
64     96     
176    -416   
224    464    
-208   -176   
-64    64     
96     80     
48     -64    
16     0      
-48    48     
-112   -48    
-16    240    
-32    -544   
384    528    
256    320    
80     -320   
-64    112    
-192   64     
-64    272    
272    336    
-16    208    
144    160    
192    -448   
112    64     
160    -80    
-64    0      
16     -16    
-272   -80    
80     -64    
304    16     
64     -80    
48     -48    
64     96     
240    160    
-112   144    
192    -48    
-16    176    
0      -240   
144    64     
-16    -688   
160    80     
-96    -16    
80     -48    
-48    64     
80     48     
0      128    
64     144    
-16    64     
48     16     
32     32     
-16    16     
32     -64    
96     -96    
112    80     
208    -64    
16     32     
80     -96    
0      32     
128    96     
-80    16     
160    48     
-48    -240   
16     -32    
32     96     
176    32     
48     -16    
48     16     
96     -64    
192    48     
-128   64     
96     -48    
144    -64    
64     -32    
-32    64     
352    400    
-512   -16    
48     80     
-16    32     
272    64     
-80    96     
128    -112   
96     96     
256    -32    
208    16     
-368   -48    
80     112    
-192   0      
80     0      
656    80     
96     96     
96     -48    
416    128    
-160   0      
576    -48    
-160   160    
304    272    
-384   128    
-192   -96    
272    32     
16     48     
448    208    
-368   -64    
-272   -208   
464    112    
-128   96     
-288   -48    
160    96     
-48    -64    
208    64     
16     0      
208    0      
0      48     
48     -96    
64     16     
32     48     
-160   32     
96     -432   
144    368    
240    -112   
16     -176   
-208   -32    
-304   -128   
368    -80    
48     -64    
160    208    
48     -16    
-16    -48    
224    -256   
-32    32     
48     -64    
16     -208   
-96    -32    
224    16     
64     96     
96     -208   
-144   -32    
-448   0      
272    -272   
48     -16    
16     -176   
48     -48    
96     -272   
-32    -80    
112    -32    
176    -112   
-64    -160   
-32    -80    
208    64     
144    128    
-16    16     
64     144    
-224   -320   
192    -112   
96     -16    
352    0      
-208   -224   
128    -464   
-176   -128   
48     -336   
16     0      
320    -240   
176    304    
-80    32     
0      -192   
-64    0      
80     64     
-160   224    
176    -16    
272    112    
-80    -240   
304    32     
192    128    
112    -112   
-16    -256   
-16    0      
224    -448   
-128   912    
48     -112   
-16    48     
-16    -272   
368    208    
-80    -32    
96     16     
-784   -64    
64     -128   
-16    0      
-96    112    
-96    80     
272    -208   
-80    0      
256    -272   
208    1040   
-176   -576   
-240   32     
-128   -32    
144    32     
-96    -80    
496    560    
-720   -480   
304    160    
160    16     
64     -144   
-304   -64    
96     -880   
64     544    
144    -272   
144    -240   
208    -320   
208    176    
-176   112    
-96    -192   
0      48     
32     0      
-480   240    
32     -64    
-512   -112   
64     64     
80     432    
304    -368   
16     -96    
96     112    
64     64     
-16    0      
48     -288   
0      -16    
16     176    
416    144    
224    112    
96     128    
-80    -32    
-224   -64    
48     -432   
144    -80    
192    240    
16     352    
0      -512   
-96    -80    
-800   208    
192    -224   
-384   -96    
144    176    
0      96     
96     64     
-192   -272   
80     -160   
-64    -160   
-48    -96    
160    -64    
128    -176   
64     528    
144    224    
32     128    
32     208    
176    192    
-112   32     
64     -64    
-112   0      
240    64     
-16    112    
48     224    
-176   112    
-144   64     
32     288    
-288   96     
0      416    
32     352    
160    464    
-336   224    
-1152  336    
160    208    
-1648  -128   
-176   48     
0      -160   
48     400    
144    160    
-128   16     
-768   -32    
400    0      
-528   0      
-112   -272   
-240   -48    
-224   -208   
64     -32    
-384   -112   
144    224    
-976   112    
-224   -560   
144    -528   
320    64     
384    208    
224    -16    
-416   48     
80     16     
-32    -16    
128    80     
-160   -16    
-304   16     
32     -48    
-112   -80    
-16    -16    
-96    48     
-240   144    
-112   48     
-176   16     
0      0      
-64    -144   
-80    -16    
48     224    
-64    -112   
-80    96     
-16    -16    
-32    64     
-32    64     
-64    -192   
224    -48    
-448   144    
-48    80     
-208   16     
-112   64     
-272   -80    
128    144    
-64    -96    
96     192    
64     128    
0      -32    
-160   -768   
-112   -112   
304    192    
-368   224    
144    192    
-16    -144   
0      128    
-464   -192   
16     -80    
-128   -304   
64     32     
16     -112   
-144   -224   
16     -64    
16     176    
-80    96     
80     -16    
96     64     
-208   80     
-256   304    
336    288    
144    -48    
-16    -144   
160    -80    
32     160    
-288   256    
-144   16     
-144   272    
160    160    
-32    -160   
560    -416   
-144   -224   
-304   -96    
-224   -64    
160    -48    
-32    176    
192    160    
-128   32     
48     0      
-528   48     
144    288    
-32    -144   
-464   -240   
-96    -240   
64     -80    
-16    -16    
-240   -16    
208    416    
-224   352    
16     -416   
-384   -128   
64     192    
-464   -288   
-80    -224   
-32    -32    
16     112    
32     -176   
0      -16    
-64    224    
0      -80    
16     112    
-80    -128   
-80    144    
112    -592   
112    64     
-32    368    
-160   -144   
-176   48     
80     -32    
-192   -80    
-144   48     
16     -64    
64     496    
16     240    
240    112    
-32    192    
-64    32     
160    -32    
-32    -64    
128    -16    
-80    32     
160    64     
0      48     
-16    144    
-192   -48    
96     0      
144    64     
96     80     
-48    112    
0      160    
-304   80     
-96    -48    
0      -64    
160    -80    
176    96     
112    64     
96     32     
-224   -48    
-16    64     
64     0      
-320   -96    
0      144    
-64    112    
208    64     
-48    16     
48     48     
64     -16    
-48    0      
128    32     
224    160    
-272   80     
32     48     
-256   -112   
-16    64     
96     96     
-32    -48    
224    -48    
48     128    
96     80     
64     0      
16     32     
80     48     
144    96     
-96    -48    
0      64     
16     32     
64     64     
48     16     
48     16     
-64    0      
0      16     
0      112    
-16    -96    
-80    32     
-48    64     
16     16     
64     64     
-128   -176   
224    -384   
64     288    
64     -16    
224    64     
-240   0      
224    176    
-544   32     
-256   16     
416    48     
-16    96     
160    0      
432    128    
-64    64     
336    272    
-432   32     
-144   -176   
256    48     
16     144    
208    32     
320    144    
32     -128   
-64    16     
-144   -160   
224    -144   
688    480    
-480   80     
32     -192   
384    16     
0      48     
96     32     
-192   -64    
112    32     
-192   -64    
-16    -160   
48     80     
-240   -624   
64     32     
-336   -240   
512    32     
48     304    
-32    192    
48     -80    
64     -64    
16     80     
128    -96    
-16    -80    
96     96     
-16    -32    
-160   -32    
224    -224   
96     -192   
144    208    
288    16     
-272   -32    
-96    48     
32     80     
240    -16    
16     48     
128    -112   
-112   -112   
16     -48    
336    320    
-48    224    
192    -128   
64     48     
112    0      
96     -48    
16     -816   
192    32     
0      208    
160    -16    
0      -144   
-304   80     
464    -944   
160    896    
-16    64     
80     -48    
0      -32    
48     -96    
-48    -80    
336    192    
48     16     
-336   -464   
144    -224   
48     240    
0      -48    
64     -80    
96     112    
0      80     
96     304    
48     16     
32     -464   
-48    16     
-128   560    
192    -272   
-80    -320   
48     400    
144    -64    
144    0      
48     -1760  
320    144    
-80    464    
-16    -64    
144    64     
176    288    
-208   -128   
64     -608   
208    0      
160    -128   
-96    -32    
-144   256    
0      -128   
-48    -672   
32     288    
112    96     
48     -32    
112    144    
192    -48    
112    192    
80     176    
16     -48    
-112   -288   
112    80     
320    48     
-208   -368   
-64    -304   
16     80     
96     48     
16     160    
160    -864   
288    96     
-32    48     
128    -160   
64     -64    
-192   -224   
-48    128    
-112   -128   
-32    -352   
176    -16    
224    -80    
272    -80    
128    112    
0      -32    
160    16     
48     -240   
128    -1264  
32     80     
128    -32    
192    176    
-144   64     
-208   -352   
256    -336   
368    -240   
32     -144   
128    -480   
32     -80    
-176   -80    
32     -208   
144    -96    
128    -32    
-32    -160   
48     -48    
96     336    
32     32     
-512   -80    
224    -144   
-16    -96    
16     -48    
96     -80    
128    -240   
48     96     
224    224    
-16    -160   
64     -144   
32     16     
144    -48    
-16    112    
-112   -240   
80     -144   
-880   80     
80     -144   
64     -112   
96     -176   
-96    -256   
192    48     
-16    64     
176    -464   
192    208    
16     96     
160    128    
128    80     
-16    224    
-144   144    
-96    -112   
-304   -416   
16     -400   
-224   -288   
64     -176   
224    -368   
0      -256   
160    -272   
-400   -1312  
32     -592   
64     -544   
-16    16     
160    -192   
128    272    
-96    -304   
0      192    
-416   160    
-272   -144   
-1552  -272   
528    -272   
608    112    
720    112    
0      304    
-96    -144   
-304   256    
0      -464   
272    -176   
448    -112   
432    -112   
112    16     
112    0      
-160   32     
16     -48    
-960   -352   
144    -288   
-160   112    
-560   -432   
352    -80    
-144   -368   
-208   -160   
-64    -528   
-48    -32    
48     96     
160    128    
48     352    
144    544    
208    352    
-112   -128   
16     112    
208    -32    
-48    208    
176    -32    
16     80     
304    -80    
-416   -16    
288    -416   
0      48     
48     -48    
176    -112   
16     -160   
-64    -528   
-1136  -144   
96     -64    
-288   96     
96     -48    
-144   96     
-160   -272   
-32    112    
128    -48    
-16    64     
32     -144   
64     -64    
-176   112    
-16    16     
0      64     
-96    -64    
-416   32     
0      -48    
-144   -336   
224    -112   
-1040  96     
176    112    
176    160    
-16    96     
96     -16    
-1328  -128   
-2368  -208   
-256   -80    
224    48     
48     -96    
256    448    
80     352    
48     160    
-48    -192   
0      -64    
32     -112   
-176   -704   
-128   -384   
80     -64    
-256   -176   
-112   64     
-272   -80    
-192   16     
-928   -256   
224    336    
-368   -256   
16     208    
512    608    
-400   -320   
-432   32     
96     64     
-192   -448   
256    304    
-192   32     
-480   -432   
-160   -144   
16     112    
112    128    
-64    80     
-48    48     
64     0      
32     80     
-32    48     
64     16     
-224   -32    
48     64     
-288   -112   
208    80     
-304   -272   
-48    -512   
272    112    
176    176    
-32    96     
-144   32     
0      -16    
-560   -128   
-112   -32    
-464   32     
272    160    
80     -112   
352    32     
-16    -32    
-96    -160   
0      -48    
-112   128    
-176   -32    
-272   -32    
48     16     
-112   0      
96     48     
-160   48     
16     64     
-304   -32    
-208   -32    
-144   -96    
224    144    
-304   -112   
-48    64     
96     -16    
-96    0      
-16    160    
-256   0      
32     -64    
208    64     
256    192    
-96    256    
-208   32     
-32    -208   
192    -48    
-784   16     
272    128    
-128   -32    
-96    -32    
-128   16     
16     64     
-176   -16    
-128   48     
48     16     
48     80     
64     48     
-32    32     
16     112    
-416   16     
192    16     
-368   32     
80     96     
48     -48    
32     80     
-80    -64    
160    32     
-64    32     
32     80     
-32    0      
-144   -16    
-48    32     
-80    48     
-80    -32    
-16    48     
0      -144   
-240   -80    
-112   64     
128    16     
-64    48     
320    336    
-272   192    
400    32     
-176   -48    
320    -16    
-16    -32    
112    16     
16     16     
-128   -304   
192    144    
48     176    
128    32     
128    16     
-320   -32    
224    0      
144    224    
0      112    
48     16     
176    32     
-48    80     
-32    112    
80     160    
-144   -16    
-368   -224   
-160   -32    
352    144    
-416   -32    
352    0      
640    384    
-720   256    
-448   -272   
96     0      
96     80     
-288   -96    
112    -80    
192    16     
80     -80    
-288   -80    
448    -112   
-160   -288   
144    256    
96     144    
32     -64    
-64    368    
48     48     
48     -368   
32     80     
-112   32     
128    -176   
208    304    
-544   -464   
592    304    
-432   336    
288    64     
-240   -144   
208    -48    
240    336    
-32    -96    
48     64     
-80    16     
-16    -400   
224    528    
-144   208    
128    -544   
-160   240    
80     -80    
224    -48    
-224   144    
192    192    
64     64     
-80    -176   
96     80     
192    176    
-176   192    
-64    -16    
48     -416   
-320   -320   
208    -768   
-320   -192   
112    -96    
-48    112    
336    320    
192    -176   
272    -304   
-208   -448   
-128   -192   
112    -32    
48     96     
-64    0      
128    192    
368    32     
64     16     
64     0      
32     0      
16     -160   
-80    -192   
288    32     
-16    80     
64     128    
-112   -32    
112    -48    
160    64     
192    64     
176    16     
-128   0      
256    -80    
32     -16    
144    0      
432    416    
-288   400    
-64    -32    
32     16     
144    32     
128    32     
160    80     
96     80     
80     96     
32     16     
-96    -32    
64     -96    
32     48     
32     -48    
240    -176   
-304   -272   
240    -144   
-256   160    
16     128    
64     80     
-144   -48    
240    48     
144    -944   
-16    64     
0      -32    
128    -48    
80     48     
96     112    
112    80     
112    32     
-80    64     
176    224    
64     48     
144    160    
192    96     
160    -32    
48     80     
-80    -224   
64     16     
32     -64    
-16    32     
-16    32     
16     -16    
176    64     
-64    64     
32     -160   
144    -32    
16     80     
-48    208    
48     160    
128    -32    
80     96     
208    96     
128    176    
0      -1536  
-48    32     
-128   144    
128    160    
32     224    
112    0      
80     176    
48     96     
16     -32    
128    -32    
256    272    
-128   192    
80     -16    
96     -64    
224    -16    
96     -320   
32     64     
16     -368   
144    -32    
-32    160    
176    432    
-96    256    
64     0      
16     -96    
80     -80    
128    -16    
32     -112   
48     0      
112    224    
32     224    
-192   -64    
128    160    
208    -112   
128    64     
64     464    
448    432    
-384   96     
16     32     
384    -64    
208    64     
-240   -64    
368    464    
-80    528    
-16    -80    
160    224    
-144   -128   
240    272    
320    64     
96     400    
-16    592    
512    176    
176    48     
-48    240    
32     16     
-160   -272   
128    -384   
-208   -192   
672    96     
240    -336   
512    -240   
288    -240   
-320   -80    
304    -688   
64     -96    
432    208    
-16    720    
-176   240    
-176   -768   
384    -1328  
112    -160   
64     352    
-16    320    
112    160    
96     -48    
32     128    
208    -112   
0      -336   
-48    0      
16     -464   
0      352    
320    160    
208    -96    
112    -192   
32     0      
-16    -192   
224    -160   
224    -320   
-96    -1440  
-160   224    
128    -336   
-32    -192   
192    544    
144    -272   
32     -192   
-416   112    
64     -320   
80     -80    
-496   -192   
192    240    
176    -32    
-112   96     
-128   -224   
240    -256   
-128   -32    
16     256    
224    176    
80     -112   
32     -16    
-272   -384   
400    -112   
0      240    
176    -432   
-128   256    
144    -48    
-256   80     
-144   -672   
16     352    
208    0      
-96    96     
272    -400   
144    -96    
-32    32     
0      -64    
176    80     
-16    16     
32     128    
112    272    
-304   0      
64     -128   
96     -272   
-80    -208   
112    0      
160    -80    
48     -32    
32     -688   
-16    32     
160    144    
48     64     
160    -48    
160    320    
-48    80     
192    -80    
-672   -16    
208    -96    
-800   -80    
-32    16     
16     16     
-16    80     
96     128    
112    -96    
112    112    
112    -368   
0      144    
96     32     
128    -192   
-224   -112   
0      -96    
112    16     
128    -16    
-32    -352   
624    -576   
-352   64     
144    128    
-48    0      
272    -368   
-272   0      
208    -864   
-96    -96    
-320   -208   
368    32     
-112   -160   
224    -32    
80     64     
-32    64     
-896   -176   
128    32     
-1264  -16    
-80    -96    
128    32     
80     -80    
16     -96    
-112   -96    
-176   -160   
-64    -32    
192    -16    
128    16     
368    96     
-64    -32    
208    80     
-400   -128   
128    32     
-416   48     
16     -48    
112    16     
80     -112   
96     -32    
64     -272   
-128   -48    
-48    -16    
272    48     
-16    16     
64     -16    
-240   -32    
112    0      
-208   -48    
48     -80    
-496   112    
64     0      
80     -32    
-480   -176   
128    64     
112    80     
-832   -16    
-208   -32    
-240   -48    
-128   16     
160    -48    
-208   16     
112    -16    
0      -16    
112    0      
-32    48     
-576   -224   
-32    64     
32     16     
-48    64     
-16    48     
-304   -80    
80     16     
-656   160    
0      64     
-288   -16    
-160   -16    
32     0      
-16    64     
-1344  -32    
304    -32    
-448   -48    
128    -384   
-240   -336   
48     -16    
96     128    
-288   96     
-144   0      
-416   -16    
176    128    
16     16     
-112   -192   
800    192    
304    224    
-96    -224   
48     -80    
-112   160    
48     272    
-64    64     
16     144    
-368   0      
-64    224    
-32    -256   
-48    -352   
-96    176    
-352   192    
352    336    
-1296  -240   
-304   -352   
304    304    
80     -96    
-384   -224   
368    -64    
-224   192    
16     0      
-16    256    
208    -64    
-16    -160   
160    96     
80     256    
-240   128    
-336   -208   
-80    256    
240    112    
-512   256    
-96    576    
240    -560   
80     464    
-768   -752   
-80    -80    
256    384    
480    352    
-432   544    
-240   -432   
-288   -80    
192    -144   
192    16     
-224   -224   
0      -160   
-752   -336   
32     16     
0      48     
48     64     
96     176    
-112   112    
-48    64     
0      -80    
-48    -48    
16     -96    
-128   -80    
-96    -128   
144    -160   
-128   -32    
-208   -96    
-1456  -112   
96     128    
-80    32     
-160   -128   
16     -112   
176    128    
32     0      
-80    -16    
-16    16     
-64    96     
-32    0      
-224   48     
64     208    
-16    32     
160    -144   
-256   -32    
-96    16     
-80    -176   
-208   -16    
96     32     
96     80     
-112   32     
80     64     
64     160    
-272   80     
-160   96     
-192   -96    
64     64     
-16    -32    
64     -16    
0      32     
-256   96     
-128   48     
-272   64     
320    160    
144    -16    
48     16     
-64    64     
-224   -32    
-48    -48    
-16    48     
48     96     
-80    16     
112    -16    
-16    96     
-576   -208   
96     0      
288    384    
-240   176    
336    -48    
320    80     
80     176    
16     32     
-160   -80    
-32    -64    
48     16     
-224   -128   
160    96     
-80    128    
-128   -112   
304    -48    
-144   0      
-48    160    
-16    -80    
-176   -64    
-80    16     
0      96     
128    144    
144    208    
112    96     
-16    -16    
-48    64     
48     128    
-192   144    
48     -48    
-32    -64    
0      16     
64     64     
80     16     
-64    16     
-112   192    
240    144    
32     240    
-80    48     
-224   -96    
96     0      
-480   -160   
-16    -32    
-80    -64    
128    112    
48     48     
272    304    
0      176    
-16    112    
-112   -80    
96     -416   
80     -16    
-64    384    
160    128    
-128   0      
96     112    
160    256    
32     208    
16     208    
-160   160    
-32    -32    
-112   -272   
-32    -224   
256    64     
16     112    
80     112    
368    448    
-256   272    
192    -512   
224    208    
-48    288    
144    -560   
80     -240   
48     -400   
-416   240    
96     -96    
-48    192    
272    80     
304    -48    
-176   -16    
-16    -256   
-352   160    
192    -352   
96     80     
-16    160    
448    384    
-384   432    
320    -304   
160    -640   
-96    -592   
400    240    
-416   -272   
96     64     
-368   -48    
160    368    
-32    -16    
-416   -544   
736    960    
240    528    
-320   -16    
-128   48     
96     -224   
224    208    
-288   208    
32     -544   
-48    112    
-672   288    
336    368    
192    -400   
-816   -16    
144    288    
-64    -128   
-48    -16    
240    32     
48     64     
176    32     
128    128    
-80    -336   
96     -32    
16     -288   
160    384    
-128   176    
32     -160   
144    -128   
112    192    
128    128    
-208   -192   
96     -176   
0      80     
32     -32    
128    16     
16     16     
0      -128   
16     16     
64     -64    
128    32     
144    -1264  
80     32     
208    -64    
0      144    
128    192    
-32    48     
-64    16     
0      96     
208    0      
96     48     
32     -16    
288    32     
-208   0      
0      -16    
144    16     
-32    -240   
224    96     
80     160    
112    48     
0      -128   
0      -48    
80     -16    
16     0      
48     160    
48     -112   
192    80     
32     -112   
64     64     
-16    -336   
16     64     
80     -400   
48     0      
-32    -128   
64     -16    
-64    96     
48     -400   
-128   -256   
48     -16    
224    48     
128    64     
144    96     
320    16     
16     208    
-176   -224   
64     64     
96     -320   
208    80     
-80    -64    
240    -32    
80     32     
176    96     
-96    224    
48     -64    
144    144    
32     16     
240    144    
128    128    
128    224    
-128   -96    
112    -16    
112    96     
0      208    
144    -112   
80     -368   
32     48     
80     -544   
-160   -1264  
-192   144    
-48    -208   
80     -64    
64     -1552  
80     -288   
320    192    
192    -48    
160    128    
64     -16    
-112   -736   
-256   80     
-96    -160   
16     -16    
160    -64    
160    0      
64     16     
80     32     
-224   -160   
304    -48    
96     -16    
64     -448   
-160   -32    
32     -64    
112    -32    
-80    -128   
208    16     
144    -112   
80     -16    
-144   0      
128    -144   
-1040  32     
128    -128   
-48    -96    
32     -176   
240    -96    
256    -416   
-80    -32    
-16    176    
-160   0      
160    16     
48     16     
160    16     
144    16     
-656   -128   
208    0      
-800   -64    
112    -16    
64     -32    
-64    -80    
48     -48    
112    -352   
176    -176   
-48    -992   
96     64     
16     32     
0      64     
0      -32    
272    160    
-416   64     
80     32     
-192   -16    
160    48     
96     -16    
208    48     
48     -96    
80     -272   
64     -64    
-48    -176   
0      -80    
128    -64    
112    64     
64     -96    
128    16     
96     128    
0      -32    
-112   32     
-64    48     
-624   176    
-16    -144   
-256   -160   
0      64     
16     -112   
-160   -384   
160    192    
480    624    
-192   256    
-272   -336   
192    64     
256    272    
-16    16     
-80    -64    
176    -992   
-912   512    
96     736    
-208   -1088  
672    304    
432    736    
-32    -912   
128    0      
-48    -1280  
48     16     
-48    80     
-384   -224   
256    160    
-464   304    
-576   -32    
-256   -272   
416    -144   
-128   160    
144    512    
448    144    
-160   672    
352    -208   
-144   -176   
0      -112   
240    -64    
-480   96     
48     -112   
-640   336    
176    256    
288    176    
-352   -112   
192    -368   
-96    -160   
64     288    
576    64     
-224   96     
48     -80    
-80    80     
-160   48     
256    224    
-208   -16    
32     -192   
-288   -288   
160    -64    
-48    224    
-176   -32    
-48    -144   
48     -48    
64     80     
160    -48    
208    -48    
-560   -112   
-32    96     
0      -48    
-1440  -32    
96     -16    
144    64     
-128   48     
32     -16    
64     -64    
32     32     
-240   -224   
-768   -208   
-48    64     
-432   -64    
16     48     
-752   -112   
-144   -16    
32     48     
-224   -32    
-160   96     
-368   0      
-112   0      
-352   -96    
-80    -128   
80     -96    
-48    80     
-176   -16    
16     16     
160    -32    
96     64     
96     112    
-48    48     
-32    32     
144    0      
-96    -80    
-624   -16    
-304   80     
-592   32     
-32    -64    
-96    -176   
32     -128   
-80    -48    
240    32     
64     -48    
16     128    
48     16     
144    0      
-192   64     
32     80     
-160   80     
-16    48     
-48    144    
-96    -112   
256    32     
-864   112    
-96    32     
16     -96    
96     64     
96     256    
208    256    
-176   176    
-320   -96    
-32    -272   
-128   -144   
16     -48    
-64    -48    
64     128    
32     320    
-288   352    
-256   0      
192    16     
224    176    
112    64     
64     32     
-272   -144   
16     -80    
-208   80     
-80    80     
-80    496    
112    112    
64     -32    
-112   208    
-96    240    
-128   96     
-144   0      
112    96     
192    -48    
-16    192    
-80    224    
-160   -128   
192    -432   
144    -80    
80     -208   
-48    -688   
-16    -80    
112    144    
160    80     
-80    224    
-160   192    
-112   128    
64     -32    
-288   224    
-48    -144   
96     -512   
-128   416    
128    -336   
160    144    
272    224    
-368   -400   
112    16     
-128   -32    
-32    -96    
160    288    
96     -32    
-224   224    
32     -32    
-1088  -32    
-144   -96    
112    224    
64     208    
48     -80    
-160   -64    
192    96     
-144   -32    
-112   -192   
-80    176    
48     144    
-224   128    
304    64     
-368   -336   
16     48     
-368   -32    
16     80     
32     112    
64     96     
-128   32     
-48    -16    
-432   -304   
-112   32     
144    496    
704    1408   
-544   80     
64     -640   
304    -208   
128    -16    
432    64     
256    -160   
-48    -256   
16     -80    
-96    32     
-48    112    
96     0      
-144   -176   
-48    32     
144    32     
160    64     
192    272    
-96    112    
64     32     
176    208    
-48    160    
48     0      
-192   -112   
-96    -16    
320    48     
-176   80     
624    176    
-384   32     
80     32     
-224   80     
-48    80     
48     80     
-80    144    
32     96     
-80    48     
112    48     
144    0      
-64    96     
-80    96     
224    112    
144    272    
176    48     
0      -32    
-176   0      
176    64     
176    0      
0      0      
-112   48     
0      64     
128    80     
16     80     
176    128    
16     32     
80     16     
-48    64     
176    64     
80     48     
-32    -32    
96     -96    
48     -64    
-112   48     
32     64     
-48    112    
176    80     
96     112    
16     0      
80     112    
-192   48     
144    144    
352    48     
0      80     
32     -32    
-32    128    
160    272    
-160   96     
-304   -48    
272    -16    
-208   -96    
144    -304   
192    128    
0      144    
-112   -128   
176    -80    
160    240    
-80    64     
0      -32    
160    48     
-64    64     
-176   -96    
320    -64    
-128   -32    
-64    112    
128    112    
-48    -80    
-32    64     
48     16     
64     16     
-48    -64    
80     -240   
128    96     
-32    144    
-128   64     
192    80     
-80    -96    
112    272    
-256   48     
16     -48    
160    -80    
112    -224   
0      48     
144    -1360  
96     48     
304    -64    
-416   -272   
-32    144    
96     352    
-112   32     
336    160    
-320   112    
160    -96    
-64    -16    
352    48     
272    400    
16     64     
-64    0      
-48    -368   
16     -16    
48     -32    
32     80     
-112   64     
-16    32     
320    160    
-48    112    
224    96     
192    80     
16     -32    
32     0      
32     32     
0      -32    
32     -80    
336    160    
368    256    
-32    -560   
96     48     
160    32     
112    80     
16     80     
112    176    
0      -16    
160    32     
64     80     
-128   -80    
-64    176    
80     -32    
48     0      
112    -336   
48     80     
80     -480   
-32    -32    
-112   -224   
48     80     
-144   -112   
32     -160   
-48    -16    
224    96     
336    48     
-48    -240   
16     -64    
48     96     
0      96     
-48    -64    
48     32     
112    -112   
64     16     
384    448    
-176   -608   
64     -144   
160    352    
112    -128   
16     96     
256    48     
-112   0      
208    -64    
-48    -144   
-16    16     
160    32     
144    416    
112    -224   
80     -64    
304    0      
176    240    
176    -624   
-64    912    
-96    -368   
-192   80     
48     -48    
224    -672   
-208   496    
336    -160   
0      -64    
400    -384   
96     -288   
544    592    
-48    704    
-256   112    
64     -1616  
224    64     
64     -928   
32     -240   
656    496    
-192   -240   
-32    32     
-112   -304   
96     0      
48     16     
160    -560   
320    -368   
-32    192    
-208   0      
-192   48     
96     32     
240    112    
-96    -16    
448    -144   
-64    -64    
80     -48    
-32    192    
272    160    
96     -16    
144    -560   
32     208    
64     48     
192    64     
0      80     
208    -32    
48     -80    
-160   -320   
-496   -208   
160    208    
80     -80    
0      224    
-64    -128   
64     -336   
-80    -112   
256    -176   
112    -80    
176    -176   
-112   80     
-16    16     
-16    48     
272    144    
208    -16    
-160   -112   
-80    -16    
-1472  112    
304    48     
-64    -112   
192    16     
32     0      
176    64     
64     128    
208    -720   
320    32     
-32    16     
32     64     
-48    0      
560    0      
-400   64     
-128   16     
-592   320    
224    -48    
304    96     
256    -112   
288    0      
48     96     
-160   -16    
208    -816   
-112   160    
-16    -80    
-160   -96    
16     0      
288    -16    
-32    0      
32     -192   
-288   -80    
96     -16    
-1312  0      
-96    -144   
-336   80     
128    144    
32     -48    
112    -272   
112    32     
160    -48    
0      16     
-320   -208   
208    -608   
-96    -112   
208    96     
-144   0      
0      272    
-384   160    
-16    -16    
-1104  -64    
304    64     
-144   208    
32     -48    
176    48     
96     -448   
-16    -224   
-64    -96    
64     -144   
240    32     
80     80     
-128   -64    
-192   -304   
-208   -208   
64     -208   
160    -112   
224    -400   
80     0      
-112   -704   
-80    -400   
-64    -304   
0      -160   
80     48     
48     -16    
-288   352    
128    -144   
-272   -192   
192    304    
-32    192    
32     -64    
64     0      
144    -96    
64     48     
144    -320   
-192   80     
-32    -80    
48     224    
0      -32    
-240   80     
-336   -80    
32     -64    
176    384    
-176   -192   
192    -48    
64     -80    
-160   176    
-1488  -224   
128    0      
-432   160    
-1088  112    
-80    -32    
-1024  0      
16     80     
-2160  -176   
-80    -32    
160    16     
-32    48     
32     160    
-128   -32    
-608   -144   
-16    64     
-144   -16    
64     64     
-32    -48    
-448   32     
-128   0      
-304   80     
16     48     
-336   16     
-208   -64    
-256   -16    
-144   -32    
112    -48    
-96    16     
-624   -48    
112    96     
-64    -112   
64     64     
64     0      
0      -64    
-16    16     
-96    48     
-32    -32    
-224   80     
64     96     
-112   48     
-80    -16    
-704   48     
144    112    
-48    -64    
32     -160   
-176   -80    
128    144    
64     128    
-464   -48    
-416   -256   
224    -144   
144    160    
-32    -176   
256    -16    
-16    176    
-288   96     
-416   32     
240    0      
16     -48    
0      96     
128    -48    
144    -16    
80     48     
-272   -32    
-288   -256   
-112   -96    
-384   112    
-464   -128   
80     -96    
96     32     
-160   64     
-208   -32    
-192   80     
-320   -160   
272    16     
16     144    
48     256    
80     64     
96     0      
-144   -48    
-160   32     
48     64     
-144   96     
80     -16    
96     48     
-80    -192   
-64    -272   
96     96     
96     64     
0      32     
48     64     
128    32     
80     0      
-96    16     
64     64     
-48    0      
0      16     
64     0      
-48    96     
32     80     
-96    16     
-400   -64    
192    144    
-1120  80     
-96    -80    
96     -32    
-112   112    
-96    48     
48     0      
-48    48     
32     16     
-48    32     
-80    64     
-224   16     
-128   -16    
80     -64    
-96    -288   
192    64     
-1424  -32    
64     -48    
16     0      
-176   -32    
192    80     
-80    160    
48     -48    
64     32     
-80    64     
48     240    
176    96     
-224   64     
112    176    
-96    0      
48     16     
80     -16    
0      16     
32     -16    
0      -96    
16     0      
48     -64    
-64    -64    
-48    256    
80     128    
-192   -64    
128    80     
-32    48     
96     176    
-160   32     
-80    -48    
-96    48     
-80    48     
16     96     
-16    0      
80     -32    
48     32     
48     144    
32     -16    
112    96     
80     -64    
-208   112    
304    800    
-544   192    
-240   -640   
320    32     
240    288    
144    -208   
0      -192   
48     144    
-80    128    
-288   -576   
112    624    
-96    -176   
48     64     
128    144    
32     64     
-192   0      
208    -16    
160    0      
144    64     
48     0      
-48    -432   
-176   416    
-192   64     
128    -16    
208    128    
80     16     
112    160    
-96    -128   
-448   -128   
64     -16    
-16    48     
288    304    
-80    -80    
176    624    
192    448    
-192   -128   
-16    320    
128    -144   
160    128    
336    176    
-272   -592   
64     224    
32     16     
-80    80     
64     -64    
32     -80    
64     -480   
32     -48    
48     -32    
-48    16     
240    -48    
-144   880    
96     -304   
96     128    
-112   576    
96     -368   
64     48     
96     288    
-224   -112   
208    80     
-160   -64    
-80    -208   
176    656    
-96    384    
64     -304   
32     160    
80     0      
272    176    
176    448    
-384   -576   
96     -240   
192    160    
112    368    
48     -16    
96     112    
-48    272    
64     -224   
-128   0      
224    16     
176    256    
224    480    
-32    192    
0      160    
32     0      
-96    224    
240    16     
-16    -80    
336    -96    
32     -48    
-1824  160    
-32    144    
176    -384   
144    112    
128    -16    
-16    0      
368    352    
-256   384    
16     256    
-336   -96    
192    -80    
352    112    
96     16     
-176   -96    
128    -144   
288    0      
224    -80    
336    0      
-80    80     
48     -864   
-224   -80    
48     -112   
-16    80     
-16    64     
48     512    
192    -64    
224    64     
160    -80    
80     112    
16     16     
64     -64    
-64    -112   
320    -416   
-96    144    
128    32     
16     112    
-96    -528   
464    320    
64     32     
224    608    
-240   0      
208    0      
208    64     
-16    304    
128    80     
-144   -16    
48     112    
224    -112   
288    0      
48     -256   
-192   144    
-80    -800   
48     128    
0      16     
112    304    
384    336    
-80    352    
-80    96     
-208   -144   
176    -48    
160    48     
160    128    
112    -304   
240    128    
-144   32     
-64    16     
192    -160   
-112   240    
80     80     
160    -144   
112    -144   
32     112    
-144   80     
48     -320   
-192   176    
176    -272   
320    -16    
16     -144   
176    256    
96     144    
256    -32    
176    -128   
80     80     
-112   96     
-48    336    
80     96     
16     -48    
192    32     
-16    -336   
208    0      
112    -112   
112    80     
192    -80    
16     16     
112    -64    
-208   272    
176    288    
320    -368   
-96    96     
80     -1328  
-144   -320   
48     -512   
80     -208   
288    -48    
48     -208   
-160   64     
48     -1440  
208    -32    
80     64     
256    256    
-160   256    
-48    -304   
144    -128   
272    240    
-16    -48    
-16    -224   
80     0      
304    288    
-112   -416   
128    -336   
128    160    
0      -32    
-32    -160   
-48    -192   
256    112    
80     80     
112    144    
112    -16    
112    64     
192    208    
32     -64    
-368   -208   
-64    -96    
352    -16    
-64    -80    
-32    112    
32     112    
128    176    
-272   -432   
-160   -224   
112    48     
-272   0      
144    -112   
224    32     
160    -16    
224    32     
-96    -16    
-80    -64    
-128   32     
-32    -80    
176    -16    
176    -16    
-32    32     
176    -256   
0      -64    
64     96     
64     64     
64     32     
-16    16     
-176   80     
224    -64    
-144   -16    
192    80     
-336   -16    
176    -48    
80     -16    
80     -160   
128    128    
336    192    
-256   64     
240    -432   
32     80     
16     -112   
16     48     
-80    -48    
96     32     
-48    -80    
16     -64    
-960   -64    
112    -16    
-1952  -16    
336    16     
-112   -16    
208    -128   
-96    -32    
80     -240   
96     96     
208    -32    
-80    64     
32     64     
80     32     
-32    -112   
-176   -48    
-144   16     
-48    -160   
0      32     
368    -16    
-80    -48    
272    -128   
64     48     
32     -192   
160    -32    
208    80     
-592   -432   
320    -224   
-64    288    
-480   96     
416    -64    
96     96     
320    160    
-544   -80    
432    -112   
-64    -176   
304    -160   
-16    416    
-336   -32    
320    32     
384    176    
-256   -48    
-192   0      
208    -48    
-176   -96    
368    -16    
192    240    
-192   0      
-176   -80    
176    -80    
-48    32     
176    -96    
160    64     
-112   -16    
144    0      
-256   112    
320    32     
-192   -32    
96     192    
160    128    
176    -32    
-144   0      
16     -48    
272    160    
-144   0      
112    -32    
-288   -32    
-128   -48    
0      -128   
-896   16     
-128   -96    
-112   112    
-48    96     
-1472  -32    
-32    -16    
-160   -96    
128    0      
-144   -96    
32     32     
-144   0      
128    0      
-512   -144   
160    80     
-16    -16    
0      112    
0      96     
208    -64    
-400   -368   
-272   -48    
-272   160    
-368   -16    
64     64     
-352   160    
192    -32    
-240   -112   
80     48     
-224   -80    
336    416    
-128   -256   
224    208    
-160   160    
-176   -224   
-96    144    
-368   -48    
176    32     
-272   -112   
112    48     
-256   -160   
32     48     
-80    -96    
288    -256   
-16    224    
-96    64     
-48    -80    
32     48     
-48    -32    
80     32     
96     64     
-144   -128   
-32    192    
-608   -912   
-320   240    
-432   -96    
0      112    
-16    96     
240    0      
-80    -48    
32     0      
288    -224   
144    -96    
160    192    
-96    -80    
-128   320    
-288   176    
-32    -144   
-208   208    
-16    32     
-192   -512   
80     816    
-384   -272   
192    0      
-48    144    
-80    -192   
224    336    
16     -128   
-64    48     
-48    128    
64     -32    
-32    96     
0      80     
-192   -160   
96     1376   
-368   -384   
96     -608   
112    224    
-128   -160   
96     272    
-16    176    
-96    -96    
-160   592    
-160   -32    
-416   -432   
64     320    
-352   416    
-176   -48    
16     -64    
224    144    
-224   64     
-32    48     
-1920  -448   
48     -128   
48     16     
-16    -64    
-144   0      
32     16     
-160   64     
32     -192   
112    16     
-80    32     
32     -128   
0      32     
48     64     
-128   -80    
0      -64    
-16    96     
48     96     
160    176    
0      144    
16     -96    
0      336    
80     112    
-64    64     
64     112    
-32    32     
80     240    
-112   -16    
160    112    
-176   352    
80     0      
64     80     
-16    0      
64     32     
-16    64     
160    160    
-224   -144   
272    -464   
16     160    
64     208    
32     -304   
-160   -496   
-224   -704   
128    160    
-16    32     
-240   -80    
-32    -192   
-128   -192   
16     432    
208    0      
-288   224    
144    -112   
128    80     
-208   -640   
-64    -80    
-192   32     
-64    208    
432    592    
96     -288   
-112   96     
-416   -112   
208    -240   
144    96     
160    96     
112    272    
192    128    
288    -80    
192    -96    
96     -32    
64     -64    
-144   -16    
96     80     
96     96     
48     16     
160    -16    
-80    32     
-112   48     
224    -160   
-32    96     
160    112    
-96    128    
48     96     
48     -208   
-16    0      
-64    -16    
-32    240    
96     80     
48     -208   
160    48     
-32    160    
64     -144   
112    -560   
-16    -272   
64     -96    
144    80     
-208   -224   
160    -64    
-224   -320   
64     -128   
112    192    
-320   224    
-16    16     
-160   -80    
96     -400   
80     -48    
176    -192   
0      -144   
160    -80    
-304   -96    
32     64     
96     192    
128    272    
16     -160   
-144   -96    
-32    -96    
-112   -192   
160    96     
144    144    
0      -256   
96     32     
48     128    
64     16     
144    80     
-80    80     
176    144    
-192   304    
0      64     
176    256    
32     208    
-32    80     
208    112    
96     192    
64     112    
64     -304   
128    144    
-112   192    
80     128    
240    64     
144    -32    
144    -64    
48     192    
-272   -16    
208    -128   
144    272    
16     -32    
-48    -128   
96     -160   
96     144    
-32    96     
48     -32    
0      -768   
80     288    
32     64     
160    48     
-96    96     
48     192    
0      -32    
48     -16    
-224   -352   
176    144    
-176   176    
16     256    
272    176    
240    -256   
128    32     
16     -144   
-64    -192   
-144   -64    
-256   -144   
-208   -144   
-16    96     
-80    -64    
96     -32    
16     -32    
256    112    
112    32     
128    -80    
128    -16    
96     -32    
32     80     
128    0      
-128   -80    
160    -512   
224    144    
48     80     
128    48     
32     48     
-64    -96    
-112   0      
48     16     
-176   -48    
112    -64    
80     64     
64     0      
288    96     
-96    -96    
64     112    
-64    -208   
288    80     
256    48     
128    -16    
16     64     
64     64     
-48    48     
112    96     
-16    64     
32     -80    
208    64     
-96    -160   
128    80     
288    80     
-256   -48    
64     -96    
80     16     
224    -16    
112    80     
48     -64    
128    48     
48     48     
144    -96    
-32    16     
144    -80    
-112   16     
128    -64    
32     64     
336    -96    
-64    -16    
144    -112   
-64    0      
256    64     
96     16     
0      -48    
112    -1120  
-208   160    
112    -32    
112    0      
96     -64    
224    96     
64     32     
112    16     
320    -128   
-48    0      
80     16     
304    -192   
-464   -48    
160    -144   
112    32     
-864   0      
-32    -16    
64     -32    
-96    -720   
176    -16    
-192   -1136  
240    -144   
-48    160    
-112   112    
-224   -400   
0      -80    
304    0      
-288   -48    
432    -144   
-160   -16    
-464   160    
-400   -32    
-272   -176   
288    -48    
576    32     
32     -192   
336    32     
-176   -368   
224    0      
-176   -176   
16     48     
544    -80    
-272   -32    
-48    -272   
304    16     
112    64     
-16    16     
64     32     
48     -256   
80     -32    
96     -160   
64     32     
48     -224   
144    -48    
0      -112   
-112   32     
-64    -48    
128    -64    
-96    0      
144    48     
-336   -144   
-64    -144   
-1248  -80    
0      -80    
288    64     
64     -128   
160    -288   
64     -16    
-288   352    
16     -1264  
-48    -32    
176    304    
-48    16     
48     -288   
336    272    
-144   -64    
176    -80    
-560   288    
96     -128   
96     256    
112    -176   
80     64     
-80    -176   
288    -624   
192    -96    
208    64     
48     128    
128    160    
-16    -160   
80     224    
-16    -112   
176    48     
-208   -16    
304    -32    
-1328  -256   
-192   -720   
-80    224    
256    32     
80     -32    
-144   -480   
32     -256   
144    48     
208    -160   
-176   -128   
48     -224   
-16    32     
160    240    
-512   -192   
80     -144   
-560   -320   
32     -48    
64     -32    
-160   -400   
-96    -112   
192    -96    
64     112    
-48    48     
240    464    
-128   -48    
-32    -64    
-256   -32    
-16    -112   
-640   -80    
96     -144   
-208   -96    
32     -96    
80     272    
0      -384   
160    -352   
32     -208   
-144   -224   
-192   -112   
-208   -352   
-96    -128   
288    128    
-352   -176   
-80    -160   
-80    -112   
224    -16    
-160   16     
0      -240   
288    -48    
-96    -48    
-256   -32    
96     -208   
-448   -128   
-112   -32    
-192   -32    
-32    0      
192    -32    
-128   -48    
32     -64    
64     16     
80     -16    
-352   -32    
-480   -32    
80     112    
-912   160    
-128   128    
144    48     
-144   16     
64     160    
-256   -96    
160    -224   
-512   -176   
-128   -48    
-32    -272   
-224   16     
32     48     
0      160    
-16    112    
256    -48    
-64    112    
32     64     
0      -48    
-288   -128   
96     112    
-240   192    
16     32     
16     -96    
32     -96    
-256   -208   
-176   -144   
48     -112   
-48    -48    
160    -32    
96     128    
-304   -176   
-128   -224   
-96    -128   
-80    32     
-192   -80    
32     240    
32     -32    
-368   -144   
48     32     
-992   128    
-64    160    
0      -240   
32     0      
-144   -368   
64     304    
-16    -208   
-160   -128   
-16    -80    
64     -592   
96     -32    
-128   -64    
-144   32     
80     368    
-304   -112   
-256   -144   
224    16     
-608   -80    
112    -480   
-144   -176   
496    -16    
240    0      
128    -16    
192    32     
-256   512    
-320   208    
-640   256    
160    832    
112    416    
560    32     
-544   96     
-304   -96    
-1120  -64    
144    -96    
-448   -400   
304    -304   
-144   -336   
-32    -336   
-192   144    
-352   -208   
-96    48     
-16    96     
224    48     
224    176    
-80    -176   
-96    -144   
-256   -160   
-976   16     
32     -64    
-224   48     
-48    -304   
336    -608   
-16    -208   
224    -160   
-80    64     
-432   368    
576    448    
80     416    
-224   -128   
-208   144    
192    176    
304    272    
-384   32     
112    -96    
-208   48     
496    400    
-480   688    
96     112    
128    400    
-48    416    
-288   288    
-64    176    
-112   208    
288    432    
-352   96     
-48    -208   
-32    48     
16     -128   
-80    160    
272    0      
-144   0      
224    288    
128    320    
-208   48     
32     16     
80     0      
-160   -176   
48     48     
-160   0      
176    -432   
16     176    
-32    176    
-432   -256   
160    336    
-224   -368   
-208   -880   
160    304    
128    192    
-160   544    
112    -48    
-80    32     
-304   -32    
-112   64     
-48    -112   
176    -16    
16     -112   
112    48     
32     80     
-208   -144   
32     80     
-64    128    
-80    0      
-16    32     
112    160    
48     128    
336    16     
208    80     
-80    16     
-176   -96    
176    -32    
-208   -112   
176    192    
-32    64     
32     112    
16     -16    
0      -80    
-80    -16    
16     128    
16     32     
464    80     
240    -32    
80     144    
48     32     
-208   -80    
-48    -128   
-192   -80    
-224   -160   
-96    0      
-80    64     
-144   48     
80     64     
48     80     
256    208    
-80    64     
0      -16    
128    -32    
-64    0      
64     128    
-112   -80    
256    -240   
112    64     
480    64     
128    16     
160    96     
96     16     
-256   64     
-272   0      
96     176    
48     48     
-32    -32    
96     48     
160    32     
144    48     
-128   -48    
272    -16    
-128   112    
80     16     
16     -16    
144    16     
160    256    
-176   32     
64     32     
80     80     
192    48     
160    32     
96     32     
-48    16     
16     -48    
-16    -16    
128    144    
32     80     
-80    -1360  
224    -16    
144    112    
80     32     
-16    -16    
16     64     
160    96     
128    64     
32     32     
64     112    
32     80     
0      32     
32     -64    
-48    48     
176    144    
-32    -80    
208    80     
16     -16    
64     64     
208    96     
-32    32     
112    32     
0      32     
112    -128   
32     160    
-112   -48    
240    272    
-256   -96    
336    -144   
48     80     
448    -224   
-240   48     
-192   -128   
224    -144   
224    192    
-176   32     
144    -32    
-128   -272   
320    96     
-240   160    
16     -32    
64     80     
-816   -448   
48     -560   
256    112    
-32    -16    
160    -80    
80     -624   
32     160    
272    176    
-16    -128   
256    -160   
336    0      
224    -256   
16     64     
144    128    
-352   80     
112    336    
64     -208   
-176   32     
352    -96    
160    0      
224    256    
128    -96    
-64    -80    
0      160    
-48    64     
224    -144   
-80    176    
208    32     
16     160    
112    -368   
112    384    
144    -160   
96     -128   
0      -128   
64     -96    
96     -64    
160    -32    
-144   -384   
48     160    
32     -16    
656    720    
-448   32     
336    16     
-176   368    
32     160    
48     -464   
-80    -144   
-16    688    
304    -352   
112    -368   
-48    -112   
368    48     
16     320    
-48    -384   
-80    -144   
128    -80    
-192   64     
32     176    
32     -32    
128    0      
224    272    
96     16     
272    32     
32     -48    
224    0      
80     -144   
48     -16    
64     -64    
-16    224    
112    32     
144    -832   
-48    -16    
-32    -64    
64     32     
80     96     
176    -464   
240    64     
-96    112    
16     32     
-64    64     
-32    -80    
-64    -304   
368    48     
64     -96    
-48    -16    
208    -272   
-16    -32    
-944   48     
-16    -240   
192    32     
80     32     
208    -32    
144    -624   
128    16     
-80    80     
64     -96    
96     -336   
128    96     
-80    -64    
112    -112   
160    -16    
288    -32    
-864   48     
-64    -128   
288    -144   
-32    112    
16     16     
48     -48    
32     -64    
32     -336   
32     -224   
64     -128   
112    176    
-48    192    
64     -16    
272    -64    
-32    0      
-624   16     
0      -80    
128    -32    
64     0      
32     0      
0      -592   
32     -272   
0      -864   
64     -96    
240    0      
-96    48     
32     -112   
80     48     
-256   16     
64     -176   
-112   -80    
208    -32    
16     -16    
112    256    
-16    48     
48     -16    
96     0      
144    272    
112    256    
-32    -272   
96     -256   
128    -224   
192    -128   
16     -16    
32     -48    
16     48     
208    160    
-1296  64     
160    -64    
80     48     
-64    48     
-16    160    
160    32     
-48    -48    
-48    -1360  
128    -32    
128    48     
32     128    
-144   48     
96     16     
-224   16     
112    0      
-608   -48    
-32    0      
-1472  -160   
128    -224   
64     192    
176    80     
272    208    
-256   -384   
384    160    
-160   -128   
-32    -272   
-176   -192   
80     -160   
-64    -112   
-64    192    
64     -16    
288    -352   
-336   -576   
400    -352   
-16    176    
256    0      
192    80     
48     -304   
-192   256    
0      -32    
-64    -160   
-384   0      
496    -224   
-256   -656   
48     -768   
-320   1600   
784    304    
16     -272   
0      -272   
-352   -800   
-112   128    
-352   160    
-144   272    
-224   -192   
-1328  -272   
16     80     
-336   32     
336    256    
0      208    
384    -608   
-384   128    
288    272    
80     0      
-368   288    
-80    64     
-864   -64    
64     -224   
-1952  -256   
-352   304    
176    48     
-544   368    
192    -160   
-192   272    
-48    496    
288    416    
-528   -592   
160    272    
-16    112    
-416   64     
320    336    
-592   -32    
64     96     
192    -80    
-256   352    
96     -48    
-48    -64    
-208   112    
-816   -176   
-16    432    
320    240    
32     480    
192    -224   
336    -224   
-640   -192   
384    240    
-256   80     
-192   -256   
144    320    
-16    144    
-208   -112   
144    80     
-176   0      
-560   16     
-144   0      
96     48     
-48    16     
-32    32     
32     16     
-272   -96    
96     128    
16     16     
192    -48    
-256   -160   
-128   224    
0      160    
96     80     
-176   48     
160    256    
80     176    
80     608    
-160   544    
-160   80     
272    240    
-80    176    
-32    304    
64     80     
-80    32     
0      -16    
-192   0      
192    128    
192    80     
-256   -400   
-64    -352   
-160   -80    
-128   -80    
96     208    
0      96     
112    256    
48     -16    
240    48     
-32    48     
-208   -48    
-144   0      
16     64     
48     16     
-128   112    
-32    0      
-320   -48    
-208   -80    
-400   -80    
32     112    
-992   0      
-32    128    
144    208    
176    48     
64     -80    
64     16     
-64    32     
96     400    
-64    160    
-16    224    
-128   112    
-48    80     
-224   -80    
80     -64    
368    128    
-208   -16    
96     16     
0      64     
-96    64     
48     80     
32     48     
128    224    
-368   -32    
48     -64    
0      32     
48     80     
-16    0      
144    0      
-288   80     
-144   224    
-848   -48    
96     -64    
-64    96     
176    96     
48     16     
0      -32    
32     112    
-32    80     
-144   -192   
96     -96    
240    80     
-80    32     
-128   48     
-384   -64    
16     80     
-272   -48    
96     48     
96     64     
32     0      
-80    0      
80     96     
-48    0      
64     0      
-48    80     
32     32     
-48    16     
-80    64     
128    48     
-272   0      
144    32     
-32    48     
48     -16    
160    0      
-80    80     
32     64     
-32    16     
-64    -64    
80     0      
16     96     
64     144    
352    464    
-416   144    
320    16     
-48    128    
112    -16    
128    32     
-16    64     
32     0      
112    64     
-64    -16    
96     -128   
-96    -176   
-144   128    
-112   144    
-336   -176   
-320   112    
-256   -32    
-272   -224   
-160   32     
-48    144    
208    176    
-48    224    
0      -80    
32     -32    
144    64     
-176   96     
544    224    
-400   160    
80     144    
-272   48     
-144   -144   
-112   16     
-144   -128   
-96    80     
-80    80     
-336   -288   
144    288    
224    32     
-496   160    
240    448    
-240   -304   
336    112    
240    320    
0      -544   
464    96     
-176   -80    
-400   -624   
-32    256    
-32    160    
80     -80    
208    720    
16     -304   
64     -192   
128    192    
144    -112   
-16    112    
0      208    
128    160    
96     128    
-224   -80    
464    144    
-432   112    
64     -96    
112    -48    
-16    -80    
96     -64    
-16    -64    
64     -80    
160    112    
336    224    
-112   192    
144    64     
-96    64     
176    -80    
0      -16    
368    176    
-160   -160   
-48    -192   
-32    16     
-112   -928   
-32    32     
48     64     
16     32     
48     64     
256    112    
-112   144    
96     176    
-304   64     
112    0      
-128   -96    
192    80     
96     144    
48     -128   
272    16     
64     -384   
64     48     
80     64     
176    80     
0      0      
192    160    
-128   0      
32     -16    
16     -128   
-16    48     
48     32     
192    96     
368    240    
-80    128    
-240   -64    
0      -112   
-32    192    
224    48     
-32    0      
80     64     
96     128    
16     -352   
96     16     
-48    128    
-192   48     
96     32     
-208   -288   
176    -144   
16     192    
-192   96     
160    64     
-32    -16    
224    -672   
128    80     
16     672    
192    336    
-144   -112   
272    144    
-400   64     
-32    -16    
48     -16    
64     -304   
224    -352   
288    -256   
64     -48    
-32    -496   
-96    96     
-320   -160   
256    192    
112    -560   
16     -160   
144    -32    
-32    160    
-112   48     
16     64     
64     80     
16     -80    
208    -48    
80     -112   
64     -96    
48     -176   
112    -48    
-32    -16    
240    432    
-48    96     
-80    304    
272    176    
128    96     
192    16     
-64    -144   
48     -48    
160    -256   
208    -176   
-288   -224   
64     -48    
-16    224    
272    320    
32     176    
112    96     
48     16     
80     576    
256    144    
-112   -96    
64     -16    
80     -208   
32     -112   
208    -320   
96     128    
176    16     
128    192    
-64    272    
-48    304    
80     -304   
144    -128   
-64    -240   
112    -80    
240    400    
-144   -224   
16     -288   
320    -128   
-80    -864   
160    -128   
-16    -224   
160    320    
-208   -32    
112    80     
272    -176   
-160   80     
160    -976   
80     192    
-48    -416   
112    96     
176    -144   
-144   -144   
-944   240    
0      -624   
144    304    
368    -112   
144    96     
208    -1056  
-176   144    
-48    240    
-160   16     
96     80     
64     -32    
272    336    
-800   -976   
448    608    
-80    688    
-704   -928   
336    224    
608    736    
-64    -496   
192    -368   
0      -208   
272    -128   
144    64     
496    224    
-112   -96    
-832   -1280  
-304   -960   
32     720    
-624   400    
-240   -64    
144    0      
544    -144   
544    352    
128    96     
176    -304   
-224   -416   
-160   -144   
16     -240   
-80    -32    
144    -48    
224    112    
176    64     
64     128    
0      64     
64     -112   
-480   -80    
96     -128   
-624   -128   
208    16     
128    0      
208    0      
-208   -48    
96     -528   
208    80     
48     16     
96     0      
112    32     
96     -112   
-192   -80    
160    112    
-432   48     
256    -64    
-64    -80    
-80    -128   
128    16     
144    -160   
-496   0      
304    -416   
-32    96     
416    -416   
-272   96     
-112   -64    
32     32     
-144   -64    
64     -32    
-160   -96    
112    -96    
-656   -64    
80     48     
-2288  -32    
192    -48    
32     16     
-64    -208   
240    -64    
160    -1024  
16     -64    
-192   -240   
224    16     
-80    192    
112    64     
-80    -32    
208    -48    
-672   0      
160    -176   
-64    80     
208    48     
-112   240    
-32    -144   
112    144    
96     -496   
64     -160   
-656   -48    
224    160    
-256   -16    
0      -96    
-432   0      
-144   -48    
-416   48     
48     -64    
256    -128   
224    -192   
128    64     
80     -48    
48     112    
0      -160   
128    112    
-48    32     
160    16     
-304   16     
48     32     
384    656    
-576   256    
16     -160   
224    -64    
-880   -96    
384    -208   
112    -112   
-1584  208    
144    48     
-80    -176   
-720   -144   
-336   64     
-544   64     
-32    -16    
144    -64    
64     64     
240    80     
-64    -48    
128    16     
32     64     
-464   -32    
176    112    
80     -32    
160    48     
-240   48     
-336   -208   
-336   -128   
-320   -80    
-128   -48    
-368   32     
-112   96     
288    -16    
-144   -32    
-48    -80    
64     0      
-128   -80    
-112   48     
-160   -80    
-192   32     
48     0      
112    16     
-112   -48    
-80    16     
16     48     
-464   -48    
-160   0      
-560   48     
-64    -32    
48     -48    
320    160    
-176   -48    
64     16     
-160   32     
16     -32    
96     48     
32     16     
32     32     
-160   -16    
96     32     
-256   16     
16     16     
-800   16     
48     32     
-80    -64    
-32    0      
0      -112   
144    64     
-32    0      
96     -96    
96     -16    
-160   -192   
-64    -112   
-160   96     
-48    -80    
0      80     
-288   0      
64     64     
-96    80     
-1088  -96    
272    -32    
160    224    
-224   -416   
128    736    
48     -896   
-208   608    
-208   -288   
-128   -560   
320    64     
-96    960    
432    -272   
240    144    
-704   -192   
96     416    
-1680  -576   
304    272    
400    128    
-96    32     
-256   160    
-160   16     
288    528    
-384   -64    
96     64     
96     112    
208    96     
-48    176    
496    192    
-688   320    
160    224    
-1072  240    
-112   32     
304    -336   
-112   16     
48     -160   
288    336    
-304   128    
64     -64    
16     192    
-544   224    
80     -144   
-304   -160   
208    -64    
-160   64     
80     112    
-512   0      
80     -128   
-208   -48    
-16    96     
176    0      
48     -32    
16     256    
32     112    
16     -80    
0      0      
-16    0      
-48    208    
224    64     
-48    -80    
144    0      
-176   32     
-64    0      
176    32     
-16    32     
96     -16    
-80    -16    
-288   96     
288    176    
112    32     
-16    -16    
176    128    
-32    32     
128    80     
-160   -64    
16     -64    
80     16     
16     16     
-32    80     
-208   32     
32     16     
336    208    
-208   144    
0      -48    
-48    0      
-32    -64    
160    -16    
-80    16     
48     32     
-272   -224   
112    -96    
80     160    
-64    16     
64     -48    
-48    80     
32     16     
-32    -64    
96     -48    
48     80     
144    48     
-64    -176   
64     48     
-48    96     
192    64     
-160   64     
0      80     
208    144    
-96    48     
16     64     
16     48     
192    176    
-112   64     
144    -48    
160    16     
-16    48     
-80    -128   
0      -48    
64     16     
208    48     
-16    416    
80     80     
272    -96    
-32    64     
32     16     
-128   -80    
128    -112   
160    336    
-304   416    
-224   288    
160    0      
-112   -96    
144    32     
-208   144    
112    -96    
48     48     
64     144    
-16    128    
160    0      
64     -224   
96     -128   
16     -80    
128    48     
112    -144   
0      0      
224    176    
-80    320    
64     80     
64     -160   
32     -320   
-96    256    
16     240    
336    336    
-240   528    
256    176    
32     -480   
176    240    
0      32     
176    368    
-32    -160   
-240   192    
-240   -352   
112    -336   
0      352    
64     -304   
256    16     
-160   -512   
64     176    
32     -368   
0      272    
96     288    
80     -96    
48     -48    
80     208    
80     64     
336    -576   
-384   -48    
144    336    
-80    208    
80     -144   
176    -256   
16     112    
-32    304    
0      240    
80     80     
-16    96     
320    192    
-16    160    
112    -128   
-16    48     
-32    96     
-80    448    
304    384    
-48    64     
48     -48    
96     64     
-96    112    
224    144    
160    -192   
48     -16    
-48    -320   
-160   -336   
0      -48    
-224   -48    
208    80     
0      256    
336    176    
-144   -112   
112    32     
16     -128   
0      -80    
144    -128   
-112   16     
80     -448   
416    160    
-288   288    
256    96     
-112   0      
-240   0      
-80    0      
0      -16    
432    32     
-48    -32    
-64    -16    
240    -176   
480    272    
-64    16     
1520   736    
-480   16     
-384   -32    
-672   -336   
528    -48    
-144   96     
-80    96     
400    240    
-512   48     
32     -96    
32     -64    
144    16     
272    -160   
160    144    
-48    -160   
32     32     
-16    64     
64     64     
64     128    
80     112    
240    -16    
128    48     
-16    64     
384    -432   
-368   16     
0      -80    
288    176    
96     -96    
128    96     
-96    -192   
-32    288    
256    -144   
96     64     
-64    48     
-176   -16    
64     64     
128    80     
208    80     
368    240    
-80    320    
-128   -48    
240    144    
128    -32    
0      -16    
208    48     
32     208    
-208   -96    
176    128    
48     0      
240    -784   
144    16     
64     -240   
96     -256   
16     -16    
80     -512   
176    -32    
176    -208   
-16    -144   
80     16     
304    176    
-224   48     
0      -64    
144    -272   
48     -16    
0      -16    
-160   48     
112    -96    
128    -240   
48     -96    
-80    -208   
48     48     
128    -16    
208    -128   
224    -800   
32     48     
240    144    
-96    -48    
144    -256   
-80    80     
176    48     
64     16     
-784   -112   
112    -128   
-2208  -256   
80     32     
176    96     
32     -48    
80     -64    
48     -112   
112    16     
224    16     
-128   16     
112    0      
-240   -592   
-192   -528   
-160   144    
-272   160    
144    16     
192    112    
-176   0      
96     -128   
192    -112   
384    -208   
256    -304   
-16    48     
-32    -592   
-64    16     
96     -48    
0      16     
112    32     
32     0      
0      32     
176    112    
-288   32     
224    48     
-96    -48    
288    -64    
208    -64    
80     -64    
-224   -160   
-48    -752   
48     -176   
64     112    
-96    272    
176    0      
80     -32    
-80    48     
144    0      
-224   112    
-160   64     
-1040  -112   
112    -128   
304    240    
-112   -80    
96     -272   
256    -240   
96     -80    
208    128    
-16    -64    
-64    -80    
208    208    
-176   240    
80     80     
128    144    
16     112    
-96    -32    
-224   -656   
-368   256    
128    -160   
80     -48    
48     -112   
96     -176   
112    -256   
144    -16    
-240   -16    
160    -64    
-192   -80    
-48    128    
-208   -80    
112    -144   
-272   96     
352    -256   
-192   -96    
48     -64    
-80    -80    
32     -128   
80     96     
224    -640   
176    96     
-592   -288   
-128   -96    
112    -32    
176    144    
144    544    
-432   -480   
-192   -32    
-128   192    
-176   96     
224    -144   
272    -272   
544    -272   
288    -400   
-144   -112   
-48    144    
-288   -48    
240    128    
-176   16     
432    112    
-272   160    
192    64     
-32    -224   
496    -192   
0      -16    
-336   -176   
496    80     
-384   32     
768    384    
-416   256    
-576   32     
-256   64     
-432   128    
-112   -48    
496    0      
-144   -96    
48     48     
-96    -64    
-80    48     
240    16     
-496   -64    
96     64     
-352   -256   
-112   -272   
0      -64    
-64    160    
32     32     
-192   16     
-160   -144   
-656   208    
-16    96     
304    -32    
-80    -128   
-544   -176   
-16    192    
-512   -64    
176    192    
80     112    
32     -16    
16     -64    
96     -128   
-224   -64    
-320   352    
48     336    
16     -144   
80     -144   
-960   -64    
-176   16     
-96    -272   
-96    224    
208    -96    
224    -64    
32     -112   
-80    48     
-144   48     
-208   -80    
176    128    
-192   -16    
64     0      
-480   -96    
0      48     
-1424  -128   
48     128    
-64    -16    
48     96     
-48    -96    
0      32     
192    240    
-96    176    
-144   -16    
0      0      
128    96     
-96    -32    
-144   16     
-80    48     
-192   16     
-400   -128   
176    -80    
-32    48     
-48    32     
256    -16    
-144   48     
-48    -64    
144    16     
-16    80     
-48    -32    
0      16     
-80    32     
80     272    
96     320    
48     64     
-288   -32    
96     64     
-2288  -96    
48     64     
112    0      
-32    -32    
32     64     
288    272    
64     160    
-176   48     
-288   -208   
-256   -288   
-192   -224   
96     -512   
64     -80    
-208   -224   
176    -208   
-1184  -128   
176    224    
192    512    
-144   0      
-96    -128   
112    224    
176    304    
-16    -96    
-112   -432   
112    -128   
176    96     
-80    112    
96     112    
-384   -64    
16     -16    
-352   288    
128    16     
-16    48     
-64    64     
176    128    
32     48     
-128   -96    
-368   -96    
32     16     
240    160    
176    -112   
0      0      
208    240    
-112   0      
-208   0      
-16    -112   
-16    48     
256    224    
-128   240    
176    256    
-144   -32    
32     -80    
16     0      
0      32     
-128   -160   
-64    -96    
-112   64     
-48    144    
16     48     
160    0      
128    96     
144    0      
-80    -48    
-16    -32    
-32    16     
-80    112    
48     16     
0      -16    
64     32     
-96    48     
144    96     
-80    -16    
144    48     
-96    -32    
64     32     
96     64     
0      32     
96     32     
-48    80     
240    128    
-192   -64    
96     80     
-48    -16    
80     48     
48     48     
432    464    
-672   32     
512    -64    
-352   -32    
400    272    
256    352    
-304   0      
0      -160   
0      -144   
208    80     
208    112    
80     -48    
80     112    
464    192    
16     -32    
64     48     
-304   -32    
48     16     
-96    16     
96     -48    
-96    -128   
496    192    
224    240    
64     160    
-176   80     
64     -16    
784    304    
-704   128    
-224   96     
0      -96    
752    128    
-608   -32    
304    112    
176    64     
-208   48     
176    80     
-112   16     
192    48     
-112   64     
-208   96     
432    128    
160    -112   
-208   32     
64     128    
-128   -16    
176    176    
-16    64     
192    48     
-112   80     
-112   128    
352    32     
-128   48     
176    80     
-96    64     
112    16     
48     80     
-64    32     
48     16     
176    64     
-160   64     
240    112    
80     32     
96     -240   
-64    -112   
-32    -624   
240    64     
16     112    
240    -32    
-80    -16    
112    -128   
-144   -80    
16     64     
64     -96    
0      144    
128    32     
96     48     
32     16     
32     -128   
16     0      
208    -64    
-32    -32    
32     96     
-96    -16    
64     16     
96     -128   
-112   32     
128    48     
-96    -128   
112    128    
-112   -400   
-96    -192   
96     -80    
-160   -400   
368    416    
64     80     
-128   -32    
80     80     
112    64     
16     144    
80     64     
64     -112   
48     -80    
144    496    
-64    -144   
96     -48    
128    -32    
32     192    
80     32     
176    -16    
-32    -80    
80     128    
112    -704   
-48    -64    
208    -400   
160    368    
144    80     
-16    -192   
-144   144    
32     -80    
80     176    
32     48     
-112   48     
128    -16    
304    992    
32     -784   
16     96     
-128   0      
16     0      
224    -528   
-208   -224   
-48    -16    
288    256    
64     -80    
208    176    
272    -32    
208    -160   
80     192    
32     16     
-64    16     
-64    -144   
-16    32     
-64    -240   
144    16     
48     -16    
208    -48    
592    784    
-368   0      
32     -528   
288    352    
96     160    
-128   -272   
192    240    
128    -208   
144    128    
-16    -64    
64     0      
176    -336   
-64    160    
-112   -272   
272    -48    
-64    80     
96     -912   
-128   -1216  
-112   -192   
320    96     
-16    352    
192    -96    
128    0      
96     64     
48     -32    
16     32     
288    192    
-16    -64    
256    16     
-144   -496   
48     -80    
304    464    
112    -560   
-16    -160   
176    -112   
-64    96     
80     -768   
64     -336   
80     48     
0      -128   
128    224    
160    16     
32     0      
-64    -160   
16     -320   
96     80     
-112   -352   
272    -80    
224    464    
176    336    
80     336    
112    -224   
-144   -400   
-32    -1104  
0      80     
368    16     
-144   -128   
32     -432   
-160   80     
176    -160   
-64    -48    
-112   -80    
160    -48    
-768   -176   
144    -240   
16     -224   
-272   -144   
-352   112    
-240   -272   
224    112    
336    -48    
144    -96    
240    -144   
144    16     
272    160    
-160   -128   
-416   -256   
-512   -192   
-1248  -32    
-16    -416   
-96    -112   
96     160    
-432   -32    
544    -272   
96     32     
144    -1376  
-272   -32    
-96    -48    
128    -32    
-272   48     
160    -32    
-320   -48    
-96    -128   
-448   48     
160    -64    
-368   80     
288    160    
-64    144    
272    -80    
-32    80     
192    -208   
-160   -112   
224    -208   
-32    64     
80     176    
-80    -144   
48     256    
224    -16    
96     0      
128    -32    
-1024  -64    
160    -128   
-272   -112   
224    -128   
-208   -16    
272    -256   
192    32     
0      -48    
-48    0      
-256   -128   
352    -256   
-64    80     
48     64     
16     32     
64     -16    
-816   -128   
96     -208   
-576   -48    
-80    -96    
96     32     
352    -80    
-192   160    
0      -272   
96     -64    
16     16     
96     -128   
-112   0      
48     32     
-144   -32    
96     -48    
-128   16     
48     48     
32     288    
144    32     
16     -192   
208    -208   
160    -16    
-32    656    
64     208    
-16    -32    
-48    0      
-272   -32    
224    112    
-224   176    
144    240    
320    272    
32     448    
16     80     
64     -80    
16     272    
80     -16    
-16    480    
128    -80    
-928   -240   
-160   96     
48     192    
-160   288    
16     -64    
48     -272   
80     128    
-288   -160   
176    -32    
-32    64     
-1040  -336   
-80    -64    
-304   256    
32     240    
-560   -1232  
-128   432    
-272   -16    
-192   -64    
-48    -48    
32     32     
-288   272    
96     48     
64     320    
-1104  -448   
96     -128   
96     160    
208    160    
-176   208    
-16    48     
-16    -32    
-336   0      
48     16     
-256   208    
-16    96     
-864   -96    
-304   -96    
-64    -176   
96     -16    
128    64     
368    400    
-304   48     
80     96     
-32    0      
0      -32    
32     16     
-64    64     
32     0      
-224   0      
-192   48     
-1200  -32    
-96    -48    
-496   16     
0      -64    
-96    -48    
-96    32     
-96    -112   
0      16     
96     48     
144    80     
64     80     
-48    -48    
-16    32     
-192   112    
80     96     
-128   16     
-64    16     
-176   96     
144    160    
-256   -144   
96     -64    
32     -64    
80     128    
112    32     
-96    48     
-32    48     
-208   48     
80     -16    
-80    -16    
0      64     
16     48     
0      48     
-352   80     
256    -80    
-144   -112   
224    160    
-144   16     
96     48     
-192   -16    
-176   368    
-128   0      
-304   -64    
-32    48     
-112   -16    
-16    -16    
-400   0      
32     160    
-720   -224   
-208   -96    
112    -32    
64     144    
-80    -32    
288    208    
-448   32     
-192   -208   
-32    -64    
160    160    
-288   -16    
384    80     
-224   64     
-656   32     
320    80     
-448   0      
224    80     
-1392  -96    
-64    48     
-224   -112   
912    80     
32     80     
64     0      
48     48     
-176   144    
-144   80     
-768   -176   
176    -16    
80     64     
-48    -144   
64     -144   
224    240    
-832   32     
64     16     
-64    0      
-16    32     
48     112    
-80    64     
64     16     
64     16     
-160   -144   
-32    -208   
0      112    
-16    -96    
192    48     
-480   0      
32     80     
-96    96     
96     48     
320    48     
16     48     
64     -16    
-96    96     
112    192    
112    -112   
144    -80    
32     64     
128    144    
-32    -32    
80     32     
-336   -112   
64     -16    
176    48     
32     48     
-48    48     
-32    -64    
192    -32    
32     16     
80     64     
64     -16    
-16    48     
-112   128    
272    240    
-240   80     
-176   176    
0      192    
176    -96    
64     176    
-16    -112   
-144   224    
32     -432   
128    112    
160    768    
32     272    
-352   -144   
352    -176   
-80    192    
80     48     
-160   16     
112    0      
48     96     
-176   272    
336    192    
-32    -48    
-16    -64    
144    144    
256    -96    
192    160    
-272   256    
-96    -96    
112    -208   
176    512    
16     240    
-112   -16    
0      48     
144    -128   
-96    -48    
0      192    
96     -432   
128    288    
192    48     
-80    -48    
-128   -48    
0      -112   
-176   64     
112    -384   
144    352    
-16    64     
-112   -320   
-16    -1440  
16     32     
208    48     
192    0      
80     176    
-208   -112   
128    -240   
160    688    
-144   176    
-32    -272   
64     144    
208    208    
-304   80     
16     -80    
-192   32     
80     -80    
32     160    
-128   112    
48     304    
-112   384    
-96    -48    
128    320    
96     16     
544    256    
-80    672    
-208   112    
288    48     
64     16     
208    64     
32     112    
-32    -96    
16     112    
144    80     
16     32     
48     128    
144    -48    
-48    -240   
64     -96    
-48    -160   
48     -16    
32     -80    
-64    -128   
16     128    
-64    -16    
48     16     
-32    -272   
128    16     
-64    -272   
96     16     
0      -112   
32     -80    
128    -64    
64     -80    
-128   240    
80     48     
-32    240    
128    144    
-32    -32    
80     -144   
160    -16    
-32    -64    
96     -80    
176    -128   
16     16     
288    -80    
-240   -416   
192    -800   
192    176    
160    16     
224    144    
80     32     
32     176    
144    400    
-112   -288   
240    -448   
112    -80    
-48    144    
-48    192    
320    416    
-16    368    
16     352    
64     -544   
-64    -464   
-32    -208   
-224   16     
288    -272   
240    48     
736    576    
-144   416    
32     432    
16     224    
-256   592    
32     -480   
-48    -240   
224    -336   
0      96     
112    0      
144    32     
-288   176    
800    720    
-512   336    
-352   -240   
192    -112   
-32    -32    
16     224    
224    -208   
368    80     
-32    -96    
80     144    
-80    288    
48     192    
176    -96    
176    176    
224    64     
320    432    
-176   256    
160    -16    
-16    144    
144    0      
-80    -144   
80     -112   
176    -112   
160    48     
-80    96     
176    -32    
48     272    
64     80     
48     112    
-48    -96    
-16    -800   
96     -928   
-144   576    
512    -1056  
208    -368   
80     -48    
-32    -144   
112    -144   
64     128    
464    304    
-128   64     
-144   -384   
-64    128    
176    112    
-48    -112   
-800   -144   
80     -320   
128    -48    
96     -256   
-16    -112   
64     -192   
128    0      
176    -96    
-80    -144   
176    -144   
112    0      
16     192    
96     112    
128    -16    
48     -144   
-432   240    
48     -144   
288    0      
272    -32    
176    -336   
-160   96     
416    480    
-160   -720   
-32    -320   
160    32     
64     48     
96     -256   
-96    32     
32     -80    
80     -96    
-272   -544   
16     144    
80     -64    
48     80     
160    -16    
-96    320    
32     -464   
48     -208   
80     -80    
368    288    
-208   -48    
208    -128   
192    144    
128    -192   
272    0      
-112   96     
-32    16     
-704   -32    
32     -160   
224    16     
-80    -448   
208    -720   
176    -304   
464    32     
-32    -240   
64     -48    
160    -144   
192    16     
48     -48    
-16    -176   
-240   -112   
0      -160   
-272   96     
16     -64    
208    48     
-32    16     
-368   32     
224    -144   
160    0      
0      -384   
208    96     
0      64     
-16    -112   
-96    32     
224    16     
-240   -48    
160    -112   
-192   304    
-160   -16    
-304   -16    
96     -48    
16     16     
32     -144   
208    -16    
128    -224   
80     64     
32     32     
144    -16    
-368   -48    
-128   32     
-160   96     
176    -48    
-240   -32    
-128   -48    
16     128    
-80    -32    
48     -32    
272    -96    
128    80     
48     -144   
144    64     
48     0      
32     -16    
-368   16     
80     -32    
-144   32     
192    80     
32     64     
48     -64    
-96    -32    
0      -96    
240    80     
368    32     
-80    16     
112    -144   
-64    -16    
-112   -32    
80     48     
-80    48     
-32    -16    
0      96     
-32    32     
-128   -16    
80     -48    
-208   -32    
528    176    
-256   112    
272    -144   
-240   -32    
-304   -304   
-1248  144    
-256   80     
-592   -64    
48     32     
80     32     
96     -128   
-144   -112   
80     128    
-48    -96    
272    48     
-1152  64     
64     80     
-32    -96    
-16    80     
0      -288   
-64    -48    
-48    16     
-80    0      
256    32     
-1328  -96    
-112   -160   
256    32     
-256   176    
208    -32    
-224   0      
448    400    
-416   192    
-576   -240   
448    48     
-96    0      
-192   -80    
288    96     
-128   32     
-336   48     
-240   48     
-288   0      
-1104  -16    
-64    96     
80     -144   
-192   -64    
-240   -272   
48     -16    
-144   -144   
0      48     
304    112    
-272   -176   
-16    -48    
-96    48     
160    208    
-272   -112   
0      -144   
-128   32     
128    -208   
-208   272    
-256   -32    
160    -480   
160    80     
-176   -96    
112    16     
-384   -80    
-48    32     
-112   48     
160    -96    
128    160    
-32    -192   
-224   32     
-464   -112   
-176   -32    
-896   912    
-464   -992   
-16    32     
96     816    
-96    -384   
144    -224   
240    -64    
-176   592    
-272   240    
48     -272   
-64    -64    
-64    0      
-80    400    
208    112    
96     496    
-320   96     
32     16     
208    96     
-176   -448   
-32    64     
112    496    
192    512    
192    64     
-64    112    
128    -16    
-112   0      
48     16     
0      -64    
-304   16     
112    80     
-144   112    
32     224    
-16    112    
-272   64     
80     32     
48     -32    
80     -80    
-64    -32    
80     32     
96     160    
16     48     
192    208    
-48    80     
-176   -32    
192    16     
-336   160    
160    112    
80     -32    
400    704    
-64    448    
-128   224    
16     48     
-160   -96    
-48    -80    
-96    48     
-48    -48    
64     -144   
240    192    
-352   64     
48     144    
-160   -192   
160    -32    
128    32     
32     0      
-48    -112   
-16    -48    
0      48     
-16    32     
320    240    
-304   144    
-128   -48    
-80    -64    
32     48     
-16    32     
176    224    
-16    0      
176    112    
-16    480    
-48    -96    
32     -80    
-128   16     
32     64     
-16    -64    
48     16     
-240   -192   
192    48     
-16    128    
64     176    
-80    112    
64     -80    
-224   -208   
112    0      
112    64     
80     -64    
-16    -112   
16     -32    
112    112    
-96    176    
-48    128    
-16    96     
16     16     
-80    64     
224    16     
-48    -64    
48     80     
336    272    
-208   -64    
112    64     
32     192    
48     48     
128    208    
-64    -32    
64     288    
192    288    
-16    192    
128    -208   
48     0      
192    288    
-96    -432   
-256   176    
112    -96    
-80    96     
272    -80    
64     -224   
0      -288   
-16    -512   
96     -400   
192    -32    
256    320    
-64    96     
144    -64    
-320   -144   
-96    -96    
-112   -112   
-80    -176   
384    192    
464    -96    
-592   -192   
160    784    
-80    560    
256    288    
192    -288   
208    208    
128    -176   
-368   -448   
192    -64    
304    128    
-128   -80    
416    128    
304    -976   
176    -112   
400    -32    
-80    32     
-368   -624   
-96    -400   
-400   288    
176    256    
-48    96     
-128   80     
-32    96     
-112   496    
480    272    
-32    16     
480    -224   
-80    -288   
0      608    
48     192    
144    448    
224    352    
112    304    
-80    -48    
224    112    
-160   144    
16     -16    
-240   416    
720    -192   
16     -16    
144    48     
-48    208    
16     816    
208    240    
224    416    
112    -192   
64     -16    
-80    80     
-128   -160   
368    176    
288    32     
0      400    
-48    -256   
-416   -752   
144    -16    
-64    464    
256    32     
176    -576   
-96    -176   
32     -368   
64     288    
64     -224   
192    112    
80     32     
-80    64     
224    16     
64     512    
128    -240   
96     -32    
-288   336    
-96    -384   
160    304    
96     -48    
64     -176   
128    192    
208    -32    
-112   -336   
48     80     
96     640    
-16    32     
32     -160   
16     32     
96     48     
48     48     
224    -64    
208    64     
-112   64     
0      -272   
80     0      
-128   -512   
16     112    
144    48     
160    160    
32     -96    
112    32     
0      0      
0      48     
-48    64     
96     464    
48     272    
0      -208   
176    -64    
16     -272   
16     80     
32     -272   
96     32     
16     -80    
112    112    
32     -96    
288    -64    
32     128    
-32    112    
32     80     
-112   -256   
-80    0      
96     208    
208    160    
-80    -48    
176    -16    
96     -160   
64     -112   
224    32     
64     48     
64     96     
96     16     
-32    -16    
-16    32     
0      96     
48     -128   
48     144    
32     -144   
320    16     
272    0      
32     64     
-32    -48    
32     16     
-16    -208   
112    0      
-224   128    
-176   80     
16     112    
-368   -16    
448    -240   
224    0      
64     -208   
-32    0      
-144   64     
128    -48    
128    112    
144    -16    
64     80     
-80    -224   
224    -608   
-32    16     
144    -256   
48     -16    
-128   0      
96     -32    
-80    32     
144    -240   
-16    -32    
-32    -304   
240    16     
112    80     
-32    48     
96     96     
-80    -48    
80     -64    
144    16     
144    0      
0      -96    
-320   64     
48     -112   
64     -112   
80     -128   
64     -64    
112    -272   
80     -80    
64     -1088  
160    0      
16     -96    
32     -96    
96     0      
16     64     
176    -48    
96     48     
-480   224    
128    128    
-416   -144   
0      80     
48     -128   
48     -176   
-128   48     
144    -400   
-112   64     
112    -128   
240    0      
-272   -32    
608    -16    
240    304    
-32    16     
-176   -112   
96     32     
-176   16     
176    32     
80     -32    
464    48     
160    -256   
176    -592   
-208   -208   
144    352    
208    -16    
192    -144   
-160   -320   
-544   -224   
-32    128    
-368   160    
-64    64     
-192   -144   
128    48     
0      -128   
176    -96    
-160   -96    
448    160    
-256   240    
192    -368   
-192   -48    
64     -48    
192    160    
-224   128    
80     96     
-32    -112   
208    96     
-416   128    
-80    -32    
-1248  -32    
-288   -912   
80     464    
176    192    
-128   112    
160    -96    
304    -80    
480    608    
-272   -16    
-80    64     
224    -288   
-256   -208   
208    256    
-160   144    
176    -544   
-576   -208   
64     -240   
48     -48    
16     -128   
128    32     
304    -80    
0      80     
-64    -32    
192    -48    
64     80     
0      -208   
-496   -224   
288    -240   
-176   48     
176    -32    
-64    -32    
80     -96    
0      96     
192    -32    
80     32     
32     -256   
256    -128   
48     128    
32     192    
-336   32     
128    0      
-336   -48    
-48    208    
288    160    
-48    16     
-384   -64    
112    -48    
176    96     
144    -16    
-96    64     
-496   -80    
-736   -48    
16     0      
-1712  16     
-112   16     
80     64     
-48    64     
-32    -80    
160    16     
160    16     
-304   -48    
-112   -16    
32     -16    
-144   -112   
208    112    
-64    16     
-112   0      
-208   -80    
-96    32     
-48    80     
-560   32     
-192   64     
-320   64     
32     96     
-512   -144   
112    -32    
-448   16     
-128   -16    
-96    -80    
32     0      
160    112    
-112   112    
32     64     
-192   -96    
-112   32     
-176   -64    
-32    16     
-1840  80     
48     48     
0      -16    
64     -48    
-48    -112   
192    0      
-128   -16    
-96    -48    
-192   -64    
16     -144   
-16    64     
-64    -64    
-144   -128   
-304   -64    
-160   -80    
-16    -64    
144    -80    
16     96     
160    32     
176    64     
-96    160    
96     112    
112    160    
0      128    
-128   160    
96     80     
-176   112    
-112   -144   
0      -96    
224    144    
-400   256    
-32    224    
-1856  -128   
-32    96     
-208   -112   
176    64     
-32    -32    
96     16     
48     64     
-224   0      
112    192    
-112   368    
112    304    
-64    176    
0      48     
-272   -256   
240    -48    
-560   80     
64     -80    
16     112    
-32    48     
64     -224   
-352   -304   
112    16     
-96    240    
-80    -96    
400    592    
160    272    
-64    -96    
-48    256    
-208   32     
-64    -720   
-432   -1136  
448    352    
0      832    
-32    -352   
16     48     
-208   688    
-272   448    
272    -736   
160    -752   
-224   800    
128    80     
-224   -288   
208    208    
-64    32     
240    -16    
-176   16     
304    -64    
-112   -528   
-32    96     
-304   128    
48     -432   
464    -32    
368    64     
-144   -592   
-80    640    
-304   240    
-368   -1008  
336    144    
-608   -208   
720    -1232  
288    800    
304    528    
432    -320   
-272   144    
-96    528    
48     224    
-736   -1088  
-160   400    
0      464    
320    288    
48     -480   
-80    176    
256    144    
-64    176    
-160   -416   
-208   320    
-192   -80    
48     -96    
176    160    
80     -48    
-288   -272   
144    96     
-128   48     
352    -528   
-80    192    
32     272    
-336   -272   
32     64     
-144   -112   
128    16     
-272   -128   
80     80     
64     32     
144    128    
80     80     
-48    96     
0      16     
80     32     
112    96     
16     16     
-64    112    
-128   -16    
128    80     
-48    -176   
176    -48    
32     144    
0      240    
96     48     
-16    32     
96     80     
96     -80    
-128   -176   
-96    -160   
112    224    
-160   -64    
96     -16    
-208   -32    
0      0      
-64    -96    
128    -80    
64     32     
-176   -128   
32     384    
-32    32     
-80    0      
112    96     
-16    80     
-48    32     
48     48     
48     -112   
192    0      
128    64     
128    144    
-16    112    
0      272    
-32    96     
112    256    
128    96     
176    -16    
-304   -240   
272    -96    
112    64     
-64    0      
96     160    
-192   48     
64     16     
32     96     
208    112    
64     256    
-80    -528   
96     0      
128    48     
224    64     
48     96     
272    640    
-176   192    
64     -32    
0      48     
176    48     
-16    -224   
-240   -80    
48     96     
64     80     
32     -80    
304    -48    
240    160    
176    16     
192    96     
-288   -16    
112    48     
48     48     
160    64     
112    64     
128    48     
-16    192    
304    128    
176    112    
32     -80    
48     32     
-80    -304   
240    432    
-448   176    
-80    -208   
176    -144   
176    48     
176    96     
128    0      
64     -32    
64     64     
176    48     
-176   -32    
-32    -32    
208    32     
160    48     
144    -64    
0      96     
-48    48     
160    32     
16     64     
144    112    
-64    -64    
0      -16    
32     0      
352    192    
0      80     
96     80     
16     32     
64     -112   
176    96     
-48    -160   
96     64     
112    -320   
192    112    
-64    -16    
128    -16    
48     48     
80     80     
32     32     
176    80     
-48    64     
96     48     
64     128    
-64    -48    
192    176    
144    -16    
80     48     
32     -336   
48     48     
-32    -848   
-160   -16    
272    96     
48     16     
192    -80    
-64    64     
224    -16    
96     32     
240    -48    
32     -64    
128    48     
-304   -496   
160    -112   
-64    -400   
400    592    
160    336    
0      -288   
-224   -368   
80     272    
-256   48     
128    -288   
144    576    
-96    -416   
288    16     
16     -208   
-48    96     
-80    -576   
1744   1568   
-1040  -224   
-240   -1056  
-448   -448   
-192   688    
560    -224   
560    -384   
-32    800    
208    -128   
-144   -256   
-80    48     
128    -144   
112    64     
-320   -400   
240    -112   
144    64     
-32    -352   
80     0      
96     -176   
144    -1184  
48     -32    
96     -208   
464    176    
-480   368    
-112   -480   
-96    80     
-16    -144   
304    80     
576    192    
-320   160    
-16    -32    
32     -64    
144    -16    
176    -48    
64     112    
-96    -96    
-80    -160   
64     -144   
-1904  80     
128    -192   
192    -96    
48     -400   
0      -112   
80     -624   
-16    -48    
32     -112   
96     -176   
-144   -144   
144    -32    
48     -16    
-64    0      
144    16     
-80    64     
-768   -16    
112    16     
-16    -32    
288    -32    
16     32     
192    -144   
160    -48    
16     -1024  
112    -80    
112    -64    
400    80     
128    -80    
128    -64    
-224   0      
144    -64    
-64    -16    
112    32     
128    -64    
112    -112   
64     48     
128    -80    
16     -64    
96     -32    
48     112    
-144   48     
-272   16     
192    48     
160    144    
80     128    
48     80     
-448   -32    
144    -128   
-144   -176   
208    32     
-32    48     
240    0      
-16    80     
48     -208   
-256   -96    
96     -1552  
48     80     
176    -192   
0      -192   
96     -432   
432    -48    
-240   48     
128    16     
-576   48     
-80    0      
416    16     
160    160    
0      -96    
0      -224   
-64    64     
-176   -512   
-208   -160   
224    -80    
-80    64     
176    -96    
64     32     
-192   -48    
32     -96    
160    128    
208    48     
-240   32     
-16    -144   
128    160    
-96    48     
-160   48     
240    -448   
-208   -816   
-64    -480   
192    -144   
-336   288    
144    176    
-512   -16    
176    96     
-32    -176   
16     368    
-128   880    
192    368    
-112   -240   
-32    -416   
64     32     
112    -16    
192    -208   
0      -128   
64     272    
-16    -48    
0      -176   
-144   16     
160    -176   
-288   16     
112    -176   
80     -256   
288    336    
32     208    
-128   -704   
288    320    
-256   -272   
144    192    
-192   -48    
256    64     
-32    64     
96     112    
80     -160   
176    0      
-272   -32    
112    0      
-32    48     
240    64     
176    720    
-1456  -512   
-80    -352   
112    160    
-128   16     
16     32     
-256   272    
64     -160   
-2192  -128   
-96    16     
208    128    
-160   -16    
592    368    
-624   -144   
-112   -672   
80     16     
-48    -112   
-80    -48    
-128   48     
240    352    
-160   208    
-416   -144   
-112   -80    
-416   176    
0      48     
176    0      
-144   -160   
-288   -128   
224    192    
-16    -64    
560    -688   
160    -656   
256    64     
208    304    
-400   352    
-624   -640   
-272   -448   
-352   224    
-144   160    
-96    -48    
-560   32     
-16    32     
16     -16    
48     48     
192    160    
-208   304    
240    -32    
-48    0      
-48    48     
144    48     
-128   32     
-16    16     
16     48     
-96    32     
-240   -16    
-816   -64    
416    176    
-320   96     
-48    16     
112    80     
528    176    
-368   -48    
-32    -112   
0      32     
64     16     
112    32     
-64    0      
112    32     
-112   224    
-80    64     
-368   -64    
288    48     
-832   48     
80     48     
0      -112   
-48    80     
176    144    
-16    -32    
-144   32     
-112   80     
208    224    
-208   192    
-160   -48    
272    -16    
240    64     
-80    -64    
256    224    
-640   224    
-208   -64    
32     -128   
272    -64    
32     -48    
-64    -48    
80     112    
-208   48     
-16    160    
-160   256    
208    144    
-32    64     
-160   0      
-400   -128   
16     -112   
-832   -144   
0      192    
144    32     
-16    16     
-48    0      
-16    64     
-112   48     
-96    -48    
112    -96    
144    96     
48     48     
0      48     
32     64     
48     192    
-16    352    
-256   16     
176    0      
144    32     
48     112    
-208   80     
-96    64     
176    -32    
32     32     
112    16     
128    16     
-112   32     
-64    -16    
48     112    
384    528    
-400   272    
160    -64    
96     -64    
16     80     
96     192    
-48    80     
96     112    
144    0      
80     64     
-16    16     
-192   -48    
-112   32     
-224   16     
-192   64     
0      64     
64     32     
-144   -16    
32     96     
-32    0      
288    256    
-112   112    
32     32     
0      32     
112    64     
176    144    
-144   32     
96     -112   
64     32     
128    80     
-240   16     
128    48     
-32    80     
-16    32     
-16    48     
48     -48    
144    80     
48     112    
-48    32     
80     320    
-208   192    
80     48     
160    32     
96     208    
32     160    
-144   -80    
0      160    
-64    96     
80     48     
64     48     
-64    96     
112    64     
48     32     
80     -96    
-32    -16    
112    16     
-144   0      
160    32     
-272   0      
16     144    
-208   0      
112    32     
64     -16    
48     64     
64     32     
-32    32     
128    32     
-32    -176   
-48    -80    
-16    -32    
-16    -96    
64     -176   
496    528    
-224   -432   
352    -64    
144    320    
-96    32     
80     128    
-48    -368   
-96    944    
128    -384   
-176   -64    
128    80     
224    -256   
-96    32     
336    -48    
-16    -256   
256    528    
160    80     
48     864    
64     -672   
112    -192   
32     400    
-128   -208   
-192   -64    
-112   80     
256    128    
224    -16    
-176   384    
-160   336    
-288   112    
544    0      
16     160    
576    144    
-288   -144   
288    160    
-528   -416   
-80    -64    
480    -464   
400    80     
48     224    
32     16     
-64    80     
-256   208    
384    208    
-144   224    
240    -96    
-112   192    
144    48     
32     -320   
176    -64    
-64    -32    
48     176    
32     112    
-16    -64    
224    -144   
-112   32     
48     48     
32     96     
112    32     
48     0      
-16    -16    
48     32     
112    64     
32     0      
-144   192    
384    -256   
-64    -32    
224    -800   
-48    96     
-48    80     
16     0      
288    160    
-80    208    
-80    -80    
16     32     
-96    64     
192    -112   
48     128    
240    -48    
-32    128    
224    -400   
-16    -32    
160    -640   
64     64     
-96    -16    
0      64     
-96    176    
96     64     
48     16     
320    16     
-128   80     
-32    64     
208    160    
272    176    
-176   144    
48     -304   
64     -176   
-16    16     
48     112    
48     -224   
-16    -16    
0      16     
144    32     
144    48     
160    16     
80     16     
0      -32    
64     16     
128    -192   
80     0      
192    -16    
-16    -32    
-128   -160   
-48    224    
144    -352   
224    32     
-80    64     
48     -80    
96     16     
128    96     
0      32     
160    -112   
-80    144    
112    -96    
96     32     
160    80     
144    128    
80     32     
128    96     
80     -144   
32     -32    
0      -32    
64     -256   
288    -192   
320    -80    
160    112    
128    -240   
-192   16     
-96    16     
32     -32    
112    -16    
256    -80    
-176   -240   
160    -160   
32     -96    
256    -176   
-32    0      
48     -192   
-96    -32    
-464   -576   
-32    -784   
32     144    
208    -512   
64     -272   
368    544    
-48    784    
-80    -224   
192    -640   
192    448    
-192   -160   
96     -112   
352    16     
-288   -528   
224    -512   
-1984  288    
48     -192   
32     -368   
32     64     
64     0      
176    32     
-16    -272   
352    592    
-208   -208   
240    -64    
0      336    
224    -160   
256    160    
-16    -112   
208    224    
-496   -32    
-144   -320   
48     -288   
192    -208   
-16    48     
192    -128   
160    112    
-16    -1312  
-16    32     
128    -96    
-80    16     
64     32     
32     16     
-256   -64    
96     -16    
16     -16    
48     -112   
480    400    
128    288    
96     -48    
-96    -80    
32     -80    
16     -272   
48     -48    
224    -32    
32     48     
-112   -32    
96     16     
-320   -32    
368    -16    
-144   64     
256    96     
-592   96     
-160   -32    
-96    -128   
144    -128   
176    -80    
464    64     
-272   32     
496    -32    
-368   64     
272    -112   
112    48     
-336   -32    
-480   -352   
128    -32    
368    144    
-528   192    
-32    48     
-448   -224   
240    -16    
800    528    
-896   -64    
-48    -192   
320    -144   
-96    -160   
592    272    
-416   16     
224    16     
48     -48    
-528   -240   
496    -256   
-16    -64    
256    -96    
-800   48     
16     -32    
16     -16    
176    -144   
-160   -16    
160    -320   
-16    64     
176    16     
32     -208   
224    -224   
-128   -96    
-160   128    
112    32     
-160   -112   
112    48     
128    48     
32     -112   
-32    16     
0      -80    
0      400    
416    240    
-16    -16    
-96    -32    
0      16     
-608   32     
80     -48    
-112   -32    
32     0      
64     64     
224    -16    
-704   48     
176    -64    
144    32     
48     -64    
-96    0      
-160   48     
-672   16     
-336   -32    
96     0      
-272   64     
48     0      
112    48     
32     -32    
-96    32     
-96    -96    
-256   32     
-256   32     
-16    96     
-576   -144   
192    -16    
128    288    
64     96     
48     -32    
-400   160    
80     112    
432    64     
-304   64     
64     -96    
-160   0      
-160   -144   
-32    -16    
0      -144   
48     64     
-528   -80    
-64    160    
48     80     
-272   32     
0      80     
32     80     
96     80     
-720   0      
-48    -16    
-32    -112   
-32    -64    
96     -32    
96     144    
-112   -32    
64     96     
-64    -144   
-112   16     
128    96     
-288   -64    
-112   -224   
-16    -368   
-16    208    
-208   240    
48     112    
-1120  32     
-144   160    
-32    288    
112    528    
-208   -336   
-176   -848   
-64    368    
-48    464    
-64    0      
-64    -288   
-192   -32    
64     256    
-304   -64    
160    -48    
64     48     
-560   -528   
32     320    
-80    368    
48     32     
32     -80    
48     32     
224    48     
112    -64    
-32    -80    
-272   -160   
96     64     
-96    32     
96     64     
-32    96     
-16    64     
-416   -256   
96     80     
128    192    
32     176    
208    -192   
176    -208   
144    208    
-272   64     
256    32     
16     -400   
80     0      
-176   160    
-176   160    
-208   0      
-224   -272   
-160   112    
96     128    
-544   -16    
176    176    
-64    -80    
-16    32     
-16    -32    
-32    -16    
16     16     
-48    -224   
432    896    
-176   -640   
32     -80    
-144   224    
-32    32     
-16    16     
0      80     
-80    -48    
176    64     
-112   480    
0      -368   
16     496    
112    -208   
48     -48    
-48    224    
0      80     
32     368    
368    432    
-192   -528   
-256   160    
-240   224    
96     -320   
-176   96     
112    -272   
32     80     
-16    0      
-256   128    
64     -16    
-160   16     
-128   128    
80     80     
176    0      
-112   32     
-48    64     
-112   64     
-432   -16    
240    32     
-448   -64    
672    240    
64     160    
224    64     
-400   128    
-304   -80    
928    432    
-480   352    
144    192    
-96    240    
-96    176    
176    -144   
224    96     
16     32     
96     64     
-32    96     
-144   -112   
128    -320   
-160   16     
-192   144    
160    128    
48     -48    
384    336    
-224   272    
144    -160   
-48    0      
-160   64     
48     -352   
-192   -352   
112    80     
-320   -48    
128    -128   
80     80     
-96    96     
-32    224    
80     192    
288    16     
-16    144    
-144   528    
272    320    
16     64     
-192   -256   
240    -240   
-240   96     
-224   0      
416    64     
224    304    
-16    304    
-240   160    
-16    32     
-64    -64    
-16    48     
64     96     
-48    16     
-16    -80    
-16    -80    
176    64     
-112   96     
-144   32     
96     0      
16     224    
112    64     
144    32     
0      64     
64     0      
-80    -224   
96     -112   
64     144    
-176   -256   
0      -240   
96     128    
-400   416    
304    80     
272    16     
0      16     
112    48     
-16    16     
64     -32    
48     -80    
176    -48    
64     80     
32     208    
64     0      
-16    48     
-96    -16    
80     160    
-224   -224   
176    -176   
96     -96    
176    -112   
32     144    
96     144    
320    304    
-192   -32    
-32    48     
80     128    
96     0      
64     -16    
64     -256   
192    48     
208    320    
144    688    
448    864    
-176   384    
-240   -208   
112    -496   
-48    -160   
48     64     
192    384    
208    -128   
-16    -80    
144    688    
-304   -464   
-80    128    
-80    0      
112    64     
0      112    
16     -176   
-112   64     
80     -704   
64     -128   
96     208    
160    -576   
144    80     
128    432    
-176   -96    
-80    -96    
-32    -224   
-32    -160   
272    -208   
96     0      
240    240    
112    -64    
64     32     
-112   -288   
80     144    
-112   -592   
144    160    
192    432    
-192   -32    
-16    -80    
160    96     
48     32     
-32    80     
128    64     
-80    -80    
-48    32     
160    16     
32     48     
96     96     
64     0      
112    -256   
-16    -16    
48     -176   
32     32     
-16    0      
16     80     
16     -16    
96     96     
0      64     
-48    -144   
160    -16    
32     32     
256    80     
16     -272   
48     48     
16     -160   
128    176    
-64    -96    
208    48     
16     -304   
-16    16     
32     48     
224    64     
80     64     
96     64     
64     -48    
96     -256   
-176   64     
176    -176   
48     128    
112    -64    
-160   64     
208    128    
-48    80     
176    32     
224    48     
48     96     
-16    64     
96     48     
-272   -192   
480    32     
288    112    
-592   16     
256    -32    
-336   -48    
96     -112   
560    128    
0      -336   
304    -16    
128    160    
-64    -16    
496    176    
-352   -16    
-144   -352   
144    -160   
80     -48    
192    -80    
128    64     
272    0      
-128   16     
16     -240   
192    -512   
16     288    
-352   -192   
352    32     
-80    -160   
224    -32    
96     -16    
192    -144   
-16    -64    
192    -352   
-32    -48    
128    -208   
-96    -80    
80     144    
240    -32    
128    -160   
-128   0      
-16    -64    
144    -16    
288    -48    
64     -16    
-192   -128   
112    -176   
-64    -16    
192    -48    
32     -16    
48     -256   
64     -32    
-128   16     
224    64     
112    80     
80     64     
0      -144   
-96    48     
128    -48    
64     -32    
-608   -16    
80     -112   
96     80     
0      -64    
96     -64    
272    -480   
-96    -80    
32     -640   
80     16     
176    64     
-192   32     
144    112    
128    -192   
0      -160   
144    -16    
-160   96     
-160   -80    
128    -96    
-192   -240   
16     -208   
96     80     
288    -304   
240    -160   
-96    240    
128    -176   
112    32     
96     48     
112    -112   
-48    176    
224    -256   
-448   160    
240    -656   
336    320    
80     -48    
0      112    
128    -144   
-336   -400   
-64    -784   
-96    352    
96     -80    
-16    112    
256    -288   
112    208    
-240   -112   
48     16     
-208   -48    
-32    16     
-624   -96    
112    -48    
144    0      
304    -176   
-352   -912   
48     -624   
-192   944    
-80    -704   
80     96     
112    -48    
224    -112   
144    -80    
128    400    
-16    -288   
112    128    
-304   -16    
16     -80    
-224   400    
160    -832   
96     48     
32     208    
96     272    
32     -496   
0      128    
-128   16     
256    -64    
-336   160    
128    -112   
16     16     
48     -96    
-512   -192   
128    -112   
-144   432    
-160   -176   
176    -384   
-16    0      
16     128    
112    -96    
80     -224   
-512   -192   
112    96     
48     0      
-16    64     
-224   -32    
176    16     
-336   352    
96     -96    
-64    -288   
16     -224   
-144   224    
-2144  -64    
32     -64    
256    256    
-320   -80    
0      -128   
80     -64    
-160   -64    
256    176    
-304   -32    
128    112    
64     0      
-192   80     
160    96     
-1872  -416   
-128   -256   
-208   -144   
-64    -160   
64     -48    
32     0      
-96    112    
-432   -64    
-224   -112   
128    -16    
-64    -112   
16     48     
96     -160   
48     -144   
-16    -208   
48     -400   
160    -224   
-576   -464   
-192   -416   
-368   -640   
-384   -64    
-128   -16    
-128   16     
64     0      
-336   -144   
192    64     
-192   -224   
-128   64     
-192   -96    
96     0      
-64    112    
320    176    
368    208    
-176   0      
-224   112    
-176   -208   
176    -96    
-80    -32    
272    400    
-336   128    
-64    -112   
-416   -64    
-32    80     
-464   96     
-112   128    
-224   16     
80     -16    
192    192    
-80    128    
432    224    
-128   48     
96     -32    
-32    -32    
-208   32     
-160   32     
-80    -32    
-416   -32    
-16    80     
32     -48    
176    -144   
-64    -16    
-144   -16    
-112   -64    
80     16     
48     64     
-240   16     
96     -144   
-128   192    
-352   32     
-192   -16    
32     80     
-128   0      
128    80     
-592   -256   
0      -64    
-112   -32    
224    192    
112    496    
-352   288    
144    16     
-176   368    
-128   -48    
-32    112    
0      -144   
-176   -208   
464    -80    
-128   192    
0      -112   
-1344  -224   
240    -192   
128    -16    
-80    192    
48     32     
-112   16     
128    48     
400    336    
-144   352    
-224   160    
-64    112    
-128   -64    
-48    -80    
16     -48    
176    256    
-112   160    
16     144    
-64    -32    
-288   -336   
-208   -272   
208    -48    
80     -96    
64     -144   
64     160    
32     64     
-96    288    
-256   -64    
48     64     
-224   144    
0      80     
32     -144   
32     -240   
-80    -144   
16     -32    
80     -96    
112    -32    
112    320    
-32    352    
16     -320   
48     -224   
16     144    
0      -16    
-64    -640   
-176   144    
176    32     
-80    -320   
160    368    
16     -80    
80     0      
96     -32    
96     16     
256    592    
-512   -816   
64     176    
48     48     
144    -128   
128    96     
80     32     
-144   -112   
80     160    
-64    -32    
240    352    
48     192    
-48    96     
160    144    
-32    32     
-160   -48    
-112   -48    
0      32     
-96    -16    
128    64     
-176   16     
112    128    
-352   -16    
-112   -48    
-48    48     
-16    16     
96     48     
256    112    
192    80     
64     64     
-160   -96    
-96    -32    
-64    96     
-160   0      
224    0      
112    64     
-64    -208   
320    0      
240    224    
96     144    
-208   -112   
160    128    
48     112    
-32    16     
48     -48    
32     -16    
0      112    
112    208    
-80    -32    
144    32     
32     -32    
144    16     
80     80     
112    -64    
-96    0      
-48    80     
-16    16     
112    16     
0      80     
96     -48    
64     80     
-32    -48    
192    32     
-192   -48    
80     80     
-80    0      
144    64     
80     48     
176    128    
-144   -80    
256    -16    
32     112    
256    80     
0      48     
16     32     
-256   -112   
192    48     
-208   192    
176    -48    
96     224    
-224   -80    
400    16     
320    224    
112    -32    
144    0      
-160   272    
48     -16    
-48    16     
-176   -32    
480    128    
16     0      
112    -176   
288    96     
-192   -48    
128    0      
48     64     
0      -160   
208    32     
-320   -448   
160    32     
464    96     
-272   144    
-144   -48    
176    -48    
-112   32     
160    240    
-512   -48    
240    48     
-192   -208   
368    -80    
560    192    
64     -80    
48     16     
0      -272   
352    208    
-416   64     
48     32     
128    64     
112    80     
64     -80    
16     0      
224    80     
-32    0      
-128   0      
208    -128   
-48    -16    
272    256    
-368   16     
288    -192   
96     96     
48     144    
192    0      
32     0      
0      0      
32     -80    
112    64     
-160   224    
208    128    
-224   -192   
160    -80    
32     64     
-128   -192   
208    -48    
-128   -272   
192    32     
-160   -576   
288    48     
96     96     
-160   -768   
112    1104   
64     -160   
-64    -80    
256    48     
-128   -128   
224    0      
-176   256    
32     -240   
320    64     
32     -224   
176    368    
192    -368   
64     48     
112    224    
-16    96     
272    256    
-336   -144   
128    -288   
32     160    
368    448    
-96    -992   
-80    96     
192    304    
96     -144   
128    -112   
112    80     
-208   464    
-16    160    
224    -144   
128    64     
-64    -16    
176    -144   
-240   -608   
128    240    
208    400    
-64    -96    
256    208    
32     -464   
240    -112   
112    240    
144    112    
32     -224   
-16    16     
0      -80    
80     224    
96     -128   
160    -1296  
224    64     
96     32     
96     -304   
224    -96    
256    80     
80     96     
112    176    
32     -80    
80     96     
112    224    
112    -496   
32     192    
64     -160   
336    336    
-176   160    
128    -48    
240    240    
224    -160   
192    144    
32     -16    
-176   -32    
192    96     
208    112    
64     176    
0      -16    
112    -176   
0      -112   
0      -112   
16     -16    
32     -32    
64     336    
224    176    
224    16     
-160   -16    
96     -112   
48     32     
112    0      
128    96     
96     -304   
16     48     
64     -112   
-352   -208   
0      -96    
176    96     
0      32     
-96    80     
-560   -208   
112    -112   
80     -96    
32     -208   
176    -128   
80     -128   
16     32     
16     -352   
144    112    
272    208    
-48    320    
48     144    
96     -160   
16     -160   
48     -144   
64     64     
-96    208    
160    32     
-16    -64    
112    16     
208    -240   
-320   32     
256    -672   
-16    80     
32     208    
-48    240    
-192   -64    
176    -400   
-160   -336   
80     -368   
-256   -192   
176    -656   
-1072  -320   
224    -288   
-576   -528   
0      -768   
-160   -608   
112    -448   
-16    -160   
112    320    
96     -352   
-288   160    
-16    -96    
-256   -128   
64     -176   
80     0      
592    192    
-704   80     
-80    112    
-208   -208   
-192   -48    
144    32     
400    -160   
480    48     
448    -576   
192    -32    
16     64     
-80    48     
-96    16     
-48    -400   
-48    -336   
224    80     
-848   -352   
208    -256   
-288   -288   
-80    -400   
-192   -96    
16     -240   
192    144    
160    32     
80     288    
80     608    
448    352    
-320   -80    
416    160    
-80    32     
96     176    
80     -16    
96     80     
192    -32    
-368   -208   
256    -32    
-16    -144   
144    32     
-160   64     
304    -144   
-240   -416   
192    -48    
16     -64    
-176   80     
0      -16    
16     -160   
-304   -288   
96     -112   
-48    16     
48     -240   
-48    0      
-1024  -48    
192    176    
-272   -96    
-224   -256   
-192   -208   
224    -48    
16     -80    
-160   -288   
16     -352   
96     -192   
48     -208   
-672   -208   
112    160    
352    320    
16     416    
-192   0      
-288   192    
-16    96     
208    432    
-288   32     
-144   -96    
-192   -192   
-2080  176    
-16    -16    
-32    -16    
-144   480    
64     576    
48     256    
-176   -192   
64     48     
-272   64     
128    32     
48     288    
64     -304   
144    496    
-448   -144   
-176   -432   
-608   176    
0      -32    
-208   0      
192    352    
80     -224   
48     -112   
-128   368    
-16    224    
-16    -80    
-16    -80    
16     -96    
-144   16     
-16    48     
-64    -64    
80     -16    
-240   -16    
112    112    
-1312  -48    
16     48     
80     -48    
560    576    
-432   240    
-128   -64    
160    -64    
-16    -48    
-16    32     
-208   0      
64     128    
-112   112    
-176   0      
-176   -192   
48     144    
-304   16     
160    96     
144    96     
96     64     
64     -80    
-128   0      
48     48     
-192   16     
-112   16     
64     -32    
96     128    
48     -16    
128    64     
-48    0      
-208   -32    
-560   -32    
80     32     
-96    -64    
112    112    
96     16     
-80    16     
32     80     
-176   80     
-144   0      
-80    -96    
112    48     
-192   128    
-96    96     
-224   -64    
80     32     
-288   16     
160    80     
-32    -80    
32     -128   
48     96     
-160   16     
0      -32    
64     48     
-208   -64    
16     0      
48     96     
-176   -64    
80     112    
-96    -32    
48     0      
-208   32     
48     80     
-480   -96    
-288   64     
-80    16     
128    64     
16     48     
48     32     
48     48     
-48    16     
-48    48     
208    128    
-176   -32    
224    64     
48     96     
-32    -16    
-80    32     
16     -80    
-192   -192   
128    128    
-240   144    
208    -64    
-240   0      
-16    112    
-96    112    
32     -64    
-128   112    
240    48     
-176   -96    
-160   -144   
32     -64    
368    176    
-48    -32    
176    176    
-272   96     
-96    0      
-176   -16    
48     -32    
16     -192   
96     -112   
-64    48     
176    -192   
256    -16    
-352   48     
464    240    
-320   96     
-672   -368   
64     -288   
256    -96    
-96    -112   
64     48     
320    -32    
-16    48     
96     256    
-176   96     
432    336    
-512   176    
32     -144   
48     -16    
64     48     
48     -272   
256    288    
-208   432    
-16    -192   
176    -48    
144    160    
-176   -160   
32     576    
80     -320   
-96    160    
320    272    
-192   144    
80     -48    
-176   -128   
80     304    
48     -16    
128    80     
368    400    
-224   -480   
128    448    
112    592    
-176   -160   
64     48     
-112   64     
-48    -128   
304    160    
-64    128    
16     240    
-160   -96    
112    -1184  
-32    80     
96     368    
16     288    
48     -64    
272    -80    
-320   -864   
-64    -464   
0      -288   
-128   -208   
-112   16     
64     176    
-176   384    
144    160    
144    48     
80     -256   
-48    -16    
64     -96    
128    144    
-16    160    
-32    176    
-16    80     
-48    48     
64     144    
208    112    
-160   48     
96     32     
-80    64     
352    64     
16     128    
-128   -48    
176    48     
-80    48     
288    160    
-208   176    
112    32     
96     32     
-48    -320   
160    -96    
-16    112    
-112   112    
48     64     
-16    -48    
128    80     
48     16     
0      -112   
128    32     
224    -416   
-48    80     
64     64     
160    240    
112    240    
480    512    
-224   144    
304    -96    
-48    -144   
-32    80     
80     32     
-48    -32    
96     -112   
304    -96    
240    288    
-160   -400   
144    64     
-64    32     
0      0      
-96    16     
192    48     
64     -112   
-48    80     
0      -112   
192    -16    
48     96     
48     -96    
-32    112    
112    16     
0      112    
32     0      
16     48     
-48    0      
208    16     
-128   -256   
0      112    
64     0      
320    80     
-272   -32    
112    96     
0      16     
64     -192   
272    -80    
-16    -448   
-48    -240   
48     -448   
-176   -256   
208    -304   
96     16     
16     32     
224    -96    
-96    64     
32     80     
160    96     
48     -16    
-48    -16    
48     96     
192    288    
288    160    
48     144    
64     0      
32     32     
208    224    
0      224    
48     240    
16     16     
-48    -32    
64     192    
32     -16    
112    -528   
112    -144   
112    144    
240    272    
-256   96     
-144   -64    
32     -208   
176    176    
160    -80    
112    320    
272    -80    
-272   -448   
-16    -320   
240    160    
288    256    
-224   192    
368    400    
-240   -368   
-48    -272   
160    -112   
-80    224    
224    496    
160    64     
-160   -336   
32     -144   
192    -224   
352    -1312  
-48    -80    
96     -448   
-272   -864   
128    -368   
288    -736   
272    320    
128    -272   
480    48     
528    176    
112    -16    
-48    352    
64     96     
752    432    
-288   -32    
-160   -224   
-464   592    
-208   496    
336    320    
-64    96     
-16    -352   
-64    -288   
-64    -80    
128    -336   
240    -1888  
-240   -128   
-16    -176   
64     160    
160    448    
160    32     
144    -112   
-176   240    
-432   -304   
80     96     
224    -176   
176    -256   
192    336    
-112   -176   
176    -368   
-128   -480   
48     64     
352    32     
-32    -288   
-112   96     
80     80     
-16    -272   
176    -112   
-48    208    
240    0      
-704   96     
-32    -160   
192    16     
-112   -80    
-64    256    
208    -400   
48     0      
224    64     
-256   -272   
480    -160   
0      224    
208    -320   
80     144    
-32    48     
-240   48     
-992   -576   
-16    208    
240    -80    
-80    16     
240    0      
160    -144   
-48    32     
64     -976   
96     176    
64     0      
112    48     
32     240    
64     64     
-272   -128   
224    -32    
-320   -192   
112    -32    
-208   80     
64     -32    
96     -32    
112    -176   
112    304    
64     -176   
128    48     
128    480    
128    96     
112    -32    
32     32     
144    16     
16     -144   
-128   -16    
48     -32    
-384   32     
112    16     
-128   112    
144    16     
128    64     
0      -160   
96     -16    
128    -976   
-48    -176   
-176   -16    
240    -48    
-160   48     
-64    -464   
496    -448   
96     64     
-112   256    
80     -112   
-320   -80    
-256   -352   
144    -48    
0      -32    
-256   -48    
112    160    
128    -144   
-112   16     
32     80     
-144   0      
80     -256   
-128   32     
64     80     
-288   -48    
160    -32    
0      48     
128    -80    
-320   112    
-32    -128   
224    64     
-48    -48    
336    -32    
160    96     
80     -64    
0      96     
-64    -80    
-112   64     
48     -16    
-208   64     
144    -80    
32     64     
-336   -208   
-112   64     
-1424  -80    
-176   -16    
144    16     
-352   -16    
-176   16     
-848   -48    
-96    32     
-80    -32    
-16    -16    
80     80     
-176   16     
-1216  -208   
96     -32    
-1024  -96    
112    96     
-208   -64    
-192   32     
-64    -16    
-112   16     
-32    0      
-416   48     
0      32     
96     16     
0      48     
144    48     
-32    -64    
-304   -32    
224    128    
-272   -48    
112    80     
-96    -32    
-64    -32    
-32    192    
-176   16     
-16    -16    
-416   0      
-32    -32    
-208   -176   
-224   -48    
-464   -64    
-64    0      
-128   -304   
16     -112   
-64    0      
-16    16     
0      -64    
-112   -64    
-48    16     
16     16     
-48    -16    
-256   -64    
464    0      
-848   -256   
-128   -144   
-848   -48    
256    224    
48     144    
320    192    
96     -128   
-384   -64    
64     -272   
80     -416   
192    272    
224    432    
-192   96     
48     64     
-512   -272   
-112   576    
-160   288    
-256   -368   
-144   -128   
16     -64    
16     240    
64     240    
-304   -240   
224    48     
-32    -96    
240    224    
-32    112    
-16    16     
-272   -192   
192    192    
112    240    
-336   -128   
-800   544    
400    -448   
16     -576   
-528   -320   
256    -224   
16     752    
368    -96    
-608   -112   
-144   -688   
-320   64     
256    48     
64     -112   
96     -80    
-288   -304   
-48    96     
-176   -16    
0      96     
-800   0      
48     80     
176    112    
16     256    
176    96     
208    64     
-144   80     
-96    -32    
64     0      
64     16     
80     -64    
-528   -16    
272    32     
-96    48     
-64    48     
-192   160    
176    80     
64     64     
32     -144   
80     -16    
-16    32     
-48    -32    
16     48     
-16    16     
32     16     
64     96     
-96    128    
432    48     
-240   64     
-112   112    
-240   80     
16     0      
80     0      
-16    16     
-16    32     
16     -48    
-48    16     
-16    0      
-112   96     
16     16     
272    80     
-112   32     
-48    -112   
-48    -48    
-144   -64    
80     80     
240    0      
-48    48     
240    16     
64     160    
-80    48     
-96    -16    
0      16     
-64    0      
128    96     
32     16     
96     16     
160    144    
-320   0      
96     -96    
-128   112    
-320   32     
224    -96    
144    -48    
0      48     
256    160    
64     192    
112    112    
-160   0      
-112   0      
96     -96    
32     240    
0      160    
160    -32    
-16    -176   
32     272    
176    128    
-160   112    
-48    -80    
96     -48    
112    96     
16     -80    
64     -32    
16     -80    
-192   -112   
304    -32    
-32    64     
176    192    
-144   -32    
80     -80    
192    32     
128    128    
112    208    
16     160    
80     16     
256    112    
80     0      
48     48     
224    0      
32     112    
-80    80     
-64    0      
64     -400   
16     464    
96     224    
80     128    
160    48     
-80    -288   
272    176    
-80    400    
16     64     
64     80     
-144   48     
112    336    
64     240    
256    208    
-512   -48    
16     -704   
144    -368   
32     -32    
80     272    
144    64     
32     48     
-80    864    
48     -336   
-368   -112   
144    464    
-240   -368   
-32    -144   
-48    96     
416    -112   
288    128    
144    -528   
-16    -64    
-144   -144   
96     144    
112    0      
288    -224   
160    -48    
-240   208    
128    -176   
32     304    
240    288    
240    480    
-480   -416   
160    -48    
64     0      
-48    -112   
176    -176   
368    -368   
-32    96     
224    80     
32     -32    
-112   48     
-16    320    
464    96     
176    16     
-48    -112   
-16    128    
288    176    
-48    -224   
256    160    
496    320    
-48    512    
-208   -1856  
448    -224   
512    512    
16     -32    
160    -16    
64     32     
-208   -16    
-32    128    
80     -16    
-32    -160   
288    80     
-48    -32    
144    0      
16     112    
144    -16    
32     -240   
-16    240    
32     -272   
176    -48    
0      -64    
224    0      
-112   16     
-64    48     
112    -64    
-80    -32    
176    64     
16     -16    
128    144    
48     64     
32     64     
-16    96     
176    224    
-80    -464   
-16    -64    
96     32     
256    64     
48     128    
32     -32    
176    32     
-192   -96    
224    112    
-80    16     
144    64     
80     48     
-16    128    
80     -160   
-144   0      
208    -304   
-80    128    
32     48     
32     96     
48     32     
0      -64    
-16    16     
16     -240   
48     48     
240    112    
160    160    
-112   -32    
48     144    
192    0      
-16    80     
64     -928   
272    320    
32     352    
0      80     
128    96     
80     32     
112    80     
-80    -176   
192    -16    
128    64     
96     48     
240    112    
96     48     
128    16     
-16    176    
160    16     
-16    112    
176    64     
-48    48     
112    96     
-1632  -80    
32     -96    
-112   -384   
-160   -464   
80     -64    
64     -672   
160    -176   
128    -128   
48     16     
96     96     
48     -48    
384    16     
-240   80     
96     -144   
304    64     
-272   0      
192    -112   
192    112    
128    -32    
240    -64    
-176   -80    
-32    -16    
-144   -32    
-16    -48    
176    -224   
160    64     
176    -112   
80     112    
-96    -16    
32     0      
-224   -32    
16     -192   
-96    16     
0      48     
16     -48    
240    0      
160    32     
64     -848   
112    112    
-48    48     
-352   32     
-80    -32    
128    32     
176    80     
16     -96    
-400   -80    
112    -80    
-384   160    
48     144    
-160   -128   
144    -128   
288    -48    
16     -96    
48     -32    
0      16     
0      48     
16     -48    
-32    48     
-144   -32    
112    0      
16     64     
-80    -48    
80     -32    
128    16     
176    -32    
-80    48     
128    -80    
128    -80    
-48    48     
96     -208   
-16    -16    
240    -128   
128    16     
64     32     
-16    -80    
0      80     
32     -64    
-288   -48    
64     -32    
-400   64     
128    -208   
-112   96     
144    -96    
96     64     
64     -272   
-16    16     
-16    -272   
16     -144   
-16    64     
144    -208   
-304   -112   
32     -160   
-64    -64    
288    0      
-176   32     
240    48     
-160   192    
-16    -400   
144    -624   
400    -176   
336    256    
48     -48    
96     -112   
-304   -656   
-112   256    
48     784    
-240   -832   
160    -96    
288    736    
-80    -608   
240    -224   
144    496    
176    -96    
48     576    
192    -96    
112    192    
-512   336    
256    -304   
208    -48    
192    32     
-80    624    
576    176    
-32    0      
-112   -240   
-128   -224   
-160   -224   
144    -192   
96     -48    
96     -16    
304    0      
368    16     
-416   -608   
-16    -240   
-288   -176   
144    -48    
-192   640    
480    160    
-96    -48    
-208   -304   
48     -240   
-32    -112   
112    128    
-288   -176   
-48    -16    
-1072  -80    
-320   64     
16     -48    
-640   -48    
-16    -32    
-16    48     
-304   0      
128    -96    
-240   -16    
-48    16     
-96    48     
-480   -272   
0      48     
-480   -176   
144    -80    
0      64     
-560   -80    
64     48     
32     128    
-112   16     
-304   -112   
-304   -48    
480    -224   
-16    160    
80     -64    
96     -16    
48     -16    
16     0      
-112   -80    
-144   -48    
112    64     
48     -32    
-48    0      
-288   0      
-144   -128   
-480   -192   
128    -32    
-320   32     
176    32     
-176   -64    
-16    96     
-128   -16    
-64    176    
-48    -48    
64     0      
-112   32     
16     -32    
160    48     
-144   96     
-16    16     
32     -16    
96     -208   
-16    -16    
-288   96     
-544   -80    
-16    160    
-48    -64    
96     32     
64     80     
-64    32     
32     80     
-224   112    
-48    144    
-16    -16    
16     -96    
80     64     
128    192    
-224   -80    
48     -64    
-144   64     
-160   64     
0      80     
128    192    
0      -208   
-48    -176   
64     -80    
16     -144   
128    48     
-32    48     
-16    400    
-208   240    
-144   32     
-544   16     
32     192    
-32    64     
112    -112   
32     -144   
-80    32     
0      64     
144    352    
-176   416    
-48    -80    
32     96     
-64    176    
-144   176    
0      160    
-96    -64    
-128   48     
144    32     
32     320    
144    384    
-208   -816   
-448   -320   
240    -16    
-480   -752   
144    -176   
32     64     
-256   48     
-176   -336   
32     368    
336    272    
-16    -16    
0      -48    
112    80     
-448   32     
32     -464   
32     304    
-224   -320   
-16    48     
16     192    
32     0      
-112   -80    
-48    112    
64     -96    
-80    352    
-112   -272   
-16    176    
-192   128    
0      -80    
-64    -320   
-96    -128   
240    112    
16     128    
144    128    
-80    96     
0      64     
48     -336   
80     -16    
32     -80    
-96    32     
-224   176    
16     128    
-128   -16    
80     48     
-112   -48    
208    48     
160    96     
160    64     
32     32     
-64    -96    
80     -16    
-112   -256   
-448   0      
544    1328   
-480   672    
-336   96     
352    256    
-288   272    
320    240    
96     128    
-32    112    
-48    -96    
-272   -48    
-48    224    
128    64     
336    176    
-272   160    
-128   16     
32     272    
-208   112    
-128   -112   
-64    16     
-80    80     
288    -16    
224    0      
16     112    
-384   48     
176    0      
-192   64     
288    64     
0      -48    
-32    -112   
64     16     
32     -64    
144    32     
96     -16    
128    32     
-96    64     
48     32     
48     48     
-48    0      
-128   -96    
224    -80    
352    144    
-112   16     
144    112    
-48    32     
-64    64     
128    80     
176    48     
-160   -48    
-32    -16    
-192   48     
16     80     
160    -64    
-64    -32    
128    96     
-32    32     
-32    -16    
160    0      
64     80     
160    0      
96     64     
-64    0      
80     0      
-176   -48    
128    96     
144    64     
96     -544   
288    208    
-16    448    
-304   96     
304    128    
112    -32    
96     -16    
-96    32     
208    176    
0      80     
-256   16     
272    128    
32     48     
80     -96    
112    112    
240    -80    
-176   -16    
48     -32    
144    80     
32     80     
-32    16     
-16    -16    
192    64     
-112   96     
240    160    
160    272    
-32    320    
96     128    
224    -112   
-96    16     
-32    -352   
272    352    
-48    -384   
144    144    
64     112    
112    48     
80     176    
176    48     
160    -320   
0      -64    
0      192    
-112   128    
32     16     
192    -112   
-176   80     
96     -224   
208    560    
144    -224   
112    -144   
-176   16     
80     16     
-240   -288   
96     -80    
-16    240    
16     16     
32     0      
288    -64    
288    32     
160    -16    
64     0      
80     -32    
288    144    
16     -384   
32     32     
-96    -480   
-32    -192   
-96    -32    
-16    64     
96     32     
176    96     
-48    0      
48     -96    
144    176    
-304   32     
-16    -96    
64     -272   
-48    -112   
112    -128   
48     32     
176    -176   
160    0      
176    -16    
-80    48     
0      16     
176    48     
144    0      
48     -96    
-48    80     
-16    -192   
32     48     
160    -304   
176    80     
304    -32    
272    80     
-112   -64    
288    256    
-208   112    
80     48     
-48    32     
32     224    
224    144    
112    0      
64     -48    
32     -64    
16     32     
-16    -16    
128    32     
-16    -80    
96     272    
96     128    
16     -112   
16     -80    
96     272    
112    64     
-32    -480   
224    -976   
32     -336   
0      -144   
144    -144   
96     16     
64     -240   
-176   528    
-16    -144   
-96    -176   
192    -16    
288    -1552  
320    128    
192    -240   
-32    176    
-224   560    
-64    -576   
240    -272   
-48    -272   
368    432    
0      -48    
112    80     
-48    -912   
-80    -208   
528    480    
-368   480    
-176   240    
-80    0      
320    -224   
-96    -704   
-1024  -64    
128    -48    
-80    32     
48     -272   
-144   16     
0      528    
-112   192    
352    -160   
32     144    
240    0      
-256   -80    
-272   -128   
-48    16     
-48    80     
336    32     
-448   208    
176    16     
-48    -64    
-32    -176   
112    -16    
160    -400   
368    64     
-112   64     
128    -16    
16     -64    
-320   -16    
368    -400   
-64    320    
112    400    
16     -16    
32     208    
112    -96    
144    -128   
224    -144   
32     -80    
32     0      
64     144    
224    160    
352    32     
-80    32     
-224   -160   
176    -144   
48     112    
144    64     
-96    32     
-176   0      
192    64     
-176   -48    
272    -16    
-64    112    
80     -32    
-624   -64    
-80    -192   
-16    112    
240    -288   
-48    -48    
256    272    
112    224    
208    -48    
336    -96    
-432   -16    
-64    -96    
-368   -32    
112    32     
-480   272    
-160   -160   
-32    96     
192    -288   
272    -32    
160    -592   
-80    64     
0      -64    
-16    -32    
-32    -32    
16     -112   
-64    -32    
304    80     
-224   64     
80     192    
-1456  16     
112    -176   
48     0      
32     -48    
-128   80     
192    -192   
-32    -448   
64     -336   
112    32     
-192   -32    
352    272    
-272   272    
112    -16    
-208   -16    
64     -144   
-32    224    
144    128    
96     128    
-80    -128   
96     -160   
112    -528   
304    -48    
-304   -48    
32     32     
-176   -160   
96     -224   
-240   -304   
256    -176   
-128   -112   
-272   -432   
-64    -144   
16     -208   
0      -48    
208    -112   
320    -32    
0      -128   
32     0      
-16    144    
-64    -320   
-208   16     
176    320    
-128   -208   
96     -16    
128    -16    
256    192    
-400   -112   
-800   80     
128    0      
-640   128    
0      -64    
-160   48     
-96    -48    
32     112    
-800   16     
-176   -272   
-640   80     
256    304    
-48    -96    
32     -16    
48     -240   
-144   176    
-16    240    
-352   -256   
224    -128   
160    96     
96     32     
-336   48     
-176   0      
-496   80     
-192   16     
-32    -112   
16     32     
-1376  0      
-160   16     
96     -160   
-96    -32    
-16    -80    
80     48     
-48    -80    
-64    -16    
-144   64     
-144   -32    
-144   32     
-16    48     
80     96     
-336   -32    
16     0      
-368   16     
-144   -64    
160    16     
80     48     
0      32     
0      96     
-128   64     
-80    -16    
-32    16     
-160   -112   
128    48     
-144   -80    
112    0      
-208   -48    
-176   -80    
-432   0      
192    160    
-112   48     
320    -16    
-48    -80    
160    -16    
48     48     
240    128    
144    64     
288    16     
-384   -48    
-80    48     
-400   -144   
-32    -160   
192    64     
-192   112    
64     32     
-1728  -112   
240    80     
-208   -96    
-80    -96    
160    -144   
-160   112    
-512   160    
-336   -176   
368    -48    
-96    80     
96     112    
-144   48     
-272   64     
-480   -112   
464    16     
-528   32     
0      224    
128    48     
64     -32    
-96    32     
-240   0      
16     32     
-160   48     
80     16     
144    48     
-80    -192   
304    -240   
0      64     
-192   80     
48     16     
-320   0      
224    80     
128    48     
-128   64     
80     32     
-80    16     
-48    0      
96     16     
-96    64     
208    144    
-224   -64    
-96    -48    
112    96     
-48    64     
16     -32    
-240   -96    
0      128    
-80    48     
176    16     
-16    64     
16     0      
0      48     
48     80     
-144   16     
-32    0      
-48    -48    
-32    -368   
224    32     
64     64     
112    -32    
-96    -16    
-224   -80    
160    48     
-112   96     
80     -16    
144    32     
-32    0      
144    224    
96     144    
-288   48     
128    144    
-80    32     
0      16     
-64    -112   
64     16     
-48    -16    
32     -112   
64     -48    
176    -80    
-64    -48    
-48    256    
64     144    
-144   -208   
48     32     
-16    96     
80     176    
16     96     
32     -32    
-192   16     
-32    80     
0      80     
80     0      
160    -16    
112    48     
64     128    
80     0      
96     48     
144    -32    
-224   64     
496    832    
-512   -176   
-112   -528   
400    240    
80     48     
64     -192   
48     -160   
80     128    
-32    128    
-336   -592   
112    672    
-144   -208   
32     32     
208    144    
-16    64     
-160   -32    
192    -32    
112    0      
208    64     
-32    -32    
16     -208   
-224   336    
-208   32     
64     0      
192    96     
80     32     
176    128    
-96    -192   
-384   -96    
-16    0      
-96    64     
240    272    
-128   -128   
304    848    
208    192    
-128   -64    
-32    352    
128    -176   
176    144    
304    32     
-192   -496   
112    272    
-64    -64    
0      80     
80     -48    
112    -80    
48     112    
-48    -112   
64     -16    
-48    16     
208    192    
-176   800    
160    -288   
96     144    
-112   608    
64     -384   
80     32     
80     272    
-176   -80    
224    64     
-32    32     
0      -160   
16     688    
-128   16     
48     -288   
64     -112   
112    16     
320    160    
192    448    
-336   -288   
48     -336   
208    80     
48     304    
112    160    
96     80     
-112   112    
48     32     
-288   -96    
160    -160   
272    256    
192    32     
48     208    
48     144    
0      -80    
32     240    
224    -64    
144    -48    
160    16     
0      -128   
224    240    
-64    16     
160    0      
192    96     
96     -64    
112    16     
240    240    
-304   352    
0      16     
-128   -112   
224    -144   
304    112    
64     48     
-160   -128   
112    -192   
288    160    
96     -16    
256    80     
0      0      
48     -224   
-272   -64    
144    -256   
-16    112    
32     0      
128    320    
208    -976   
224    16     
64     -128   
16     192    
-16    -48    
64     128    
-208   -240   
448    -320   
-128   208    
176    32     
64     64     
-208   656    
640    336    
64     -336   
128    224    
-16    -848   
160    16     
96     32     
128    192    
96     -160   
-144   112    
16     -96    
160    -256   
240    112    
16     32     
-176   -16    
-80    -192   
48     96     
32     -304   
144    -48    
320    64     
0      320    
-144   -48    
48     -32    
-48    96     
64     -16    
112    80     
80     -112   
224    128    
-96    16     
-16    -48    
80     0      
32     192    
16     -128   
496    192    
-48    176    
-144   128    
-96    -80    
208    16     
-112   -288   
80     -128   
112    -320   
-16    96     
-64    -944   
240    -368   
272    48     
-32    32     
16     48     
32     -80    
-48    144    
80     -64    
272    -352   
208    16     
224    32     
-48    96     
-224   32     
128    -288   
224    -32    
-16    -496   
-96    -32    
128    -544   
-112   -384   
96     -64    
-32    -192   
256    144    
-32    400    
128    96     
-48    96     
176    144    
-80    -192   
112    -208   
144    -176   
256    -32    
80     32     
-80    -32    
64     -512   
224    96     
208    96     
-32    -160   
192    -208   
-144   256    
208    80     
-96    -336   
-176   144    
96     112    
-880   208    
-272   -400   
176    0      
256    32     
-16    -208   
144    -224   
128    -240   
304    -96    
112    64     
96     -240   
-240   -80    
32     80     
160    144    
-48    -48    
144    -96    
-64    80     
608    560    
-1136  112    
480    576    
-128   368    
64     -144   
240    -64    
144    -272   
48     64     
112    0      
16     96     
64     48     
-176   -48    
112    48     
80     32     
-96    0      
32     -32    
-1920  -48    
112    -32    
32     -128   
96     -64    
224    16     
112    -80    
96     48     
352    -128   
-240   -16    
112    16     
-16    -64    
96     32     
112    96     
-96    -32    
112    224    
-368   32     
-16    -144   
-192   32     
160    48     
-96    -16    
160    -224   
-16    80     
144    -240   
-80    144    
80     -48    
128    16     
48     112    
176    -80    
144    -16    
32     -48    
-128   0      
0      0      
160    80     
-16    -64    
96     96     
0      -112   
64     -32    
192    -464   
64     -32    
32     128    
272    -16    
-416   -48    
272    -48    
-464   -112   
48     -208   
-80    112    
64     -48    
-400   -48    
112    -16    
-224   16     
96     -112   
160    48     
-800   -576   
896    32     
-80    96     
-192   -176   
256    -48    
-208   48     
-160   192    
-480   -144   
32     -224   
256    -144   
-768   256    
-32    32     
-96    -32    
-288   -16    
-304   48     
-32    64     
-1824  -80    
-256   -16    
-736   -80    
112    48     
368    32     
-256   16     
288    48     
-128   -48    
80     0      
0      -16    
-144   -48    
112    32     
-80    -64    
128    160    
-64    -80    
-112   -16    
-80    160    
-368   80     
-64    16     
-368   16     
-192   32     
-32    -32    
112    48     
-496   -48    
192    -16    
-528   -16    
96     256    
96     -128   
-176   -16    
-64    0      
-80    96     
-64    0      
-112   -64    
-160   -32    
96     0      
-80    -16    
176    -16    
-16    -48    
32     48     
16     144    
-272   -128   
144    112    
-16    80     
-160   -48    
80     -240   
-160   0      
192    288    
-224   -176   
-208   48     
-64    128    
-80    -32    
-592   16     
-112   -96    
32     96     
0      416    
48     -464   
144    256    
80     64     
-224   -176   
-112   -32    
-32    16     
-160   32     
-208   -48    
-64    -48    
-64    0      
-16    -160   
-640   112    
-160   -496   
-112   336    
160    -16    
48     -80    
-32    112    
-128   -16    
32     48     
-320   16     
-16    80     
-32    112    
-176   0      
240    -1008  
32     608    
-16    -160   
-368   96     
-64    16     
-80    80     
160    96     
80     144    
-400   -112   
-64    -160   
-176   128    
176    -80    
224    -16    
144    320    
-64    -176   
128    64     
-608   -112   
304    -496   
80     656    
112    -176   
-800   -96    
128    128    
-176   -256   
0      432    
-48    -112   
96     -128   
-48    80     
-160   64     
-64    48     
-384   -416   
464    -352   
64     960    
48     96     
-208   -480   
32     208    
-208   -144   
48     352    
-48    240    
480    -48    
256    528    
96     -16    
128    -368   
80     176    
240    384    
-208   -96    
16     128    
-256   112    
224    336    
-368   176    
-176   -368   
-80    -256   
16     16     
288    48     
0      96     
112    0      
-144   128    
-112   -176   
-16    0      
160    48     
-80    -192   
80     64     
-48    -32    
64     -32    
-80    -48    
240    96     
-48    272    
-16    16     
48     -16    
80     208    
-80    144    
112    80     
-48    16     
144    64     
64     80     
-288   48     
-64    0      
-112   64     
144    432    
-176   -16    
192    -32    
16     112    
80     -32    
-80    160    
-96    -64    
-144   -432   
0      -144   
-112   144    
-272   -48    
80     -608   
-224   -144   
160    -64    
-112   -96    
-16    192    
288    -272   
-80    128    
272    96     
-208   256    
224    112    
-64    240    
80     160    
-128   -560   
448    -144   
16     -128   
96     384    
96     -64    
-64    -16    
320    -160   
48     176    
-144   -432   
-16    -224   
-192   144    
144    384    
-400   352    
-256   -128   
-32    -112   
-240   -64    
112    0      
-80    112    
288    32     
-208   80     
-48    32     
-112   -128   
128    -32    
48     -16    
-64    -400   
144    0      
16     64     
96     -16    
-48    80     
64     64     
-48    80     
128    -80    
-64    -208   
144    0      
-288   784    
432    432    
-32    -160   
-80    96     
48     720    
480    592    
256    160    
-16    0      
288    48     
-384   224    
512    336    
-496   304    
80     -144   
0      -160   
-64    112    
64     -16    
144    64     
32     32     
112    64     
-112   144    
-32    112    
64     192    
128    -32    
48     0      
16     -64    
256    0      
-368   -48    
-96    112    
-160   176    
256    192    
336    -160   
48     128    
-208   0      
-80    -208   
144    -16    
144    -528   
-16    80     
0      -32    
128    -336   
128    -96    
-192   48     
80     64     
128    16     
-96    208    
176    32     
-80    -96    
0      0      
112    -32    
-80    -112   
96     -32    
80     -128   
240    192    
0      112    
-112   -96    
64     -144   
128    144    
-16    -272   
240    176    
-64    48     
-16    16     
-48    -16    
-320   -192   
-48    32     
-80    -128   
96     -176   
64     -16    
160    160    
-32    -1280  
48     -208   
16     160    
48     80     
16     16     
-128   -64    
-112   -352   
336    144    
80     336    
240    48     
-16    -16    
-32    0      
0      176    
-208   -112   
32     -16    
-128   -656   
80     -144   
80     -592   
144    -16    
176    16     
128    80     
80     0      
80     48     
112    32     
64     64     
32     80     
-16    -144   
112    -160   
272    -64    
208    144    
32     -144   
128    48     
0      -192   
96     16     
-192   32     
96     32     
-160   -160   
144    16     
48     80     
112    16     
224    32     
-64    -496   
0      32     
16     -176   
256    160    
288    0      
96     0      
-32    -304   
64     48     
-112   32     
112    48     
0      16     
64     -16    
288    16     
-80    -160   
64     64     
288    80     
-272   -48    
112    -48    
128    48     
240    -112   
128    96     
48     -32    
96     16     
-48    0      
176    -304   
-80    -480   
128    64     
-64    -1104  
128    -16    
112    240    
320    32     
-80    0      
192    -32    
-32    48     
224    -48    
64     -528   
-96    -64    
48     208    
-176   64     
128    16     
192    -32    
144    -224   
240    -112   
32     16     
64     -432   
320    -144   
48     -160   
-32    -112   
128    144    
-256   -112   
224    -48    
96     112    
208    -80    
-320   0      
96     -16    
64     -192   
-160   48     
-144   80     
288    -32    
-48    -64    
-32    128    
-272   -448   
80     -144   
320    176    
-192   -48    
448    -80    
128    16     
128    144    
-192   112    
-736   -144   
256    -64    
336    96     
-16    -112   
272    -48    
-128   -176   
352    112    
-160   -64    
0      -16    
352    -512   
-336   -128   
32     16     
112    112    
144    -16    
64     -16    
-64    32     
16     -128   
-208   -16    
48     -64    
-1408  16     
-16    -64    
208    -144   
-16    -176   
-64    -32    
-176   -576   
80     -16    
32     -16    
96     -64    
48     -112   
16     0      
-256   0      
112    96     
-32    -64    
112    -256   
-112   192    
0      480    
112    -240   
-32    -288   
0      240    
80     -80    
-112   -224   
304    -320   
256    16     
32     -48    
320    304    
-432   -448   
32     272    
48     32     
16     -80    
-80    32     
-48    -224   
-944   -112   
160    -16    
160    256    
256    -288   
-176   272    
240    -1600  
-16    80     
-128   32     
80     -208   
-208   -48    
192    -272   
-928   -416   
16     -112   
-384   64     
80     -80    
-368   -336   
-112   -160   
304    -320   
80     80     
112    128    
-144   -512   
224    128    
80     -112   
-48    -240   
-32    -192   
80     -176   
-288   80     
192    48     
-64    0      
-128   32     
80     288    
32     0      
144    -32    
16     -224   
224    -416   
80     -192   
160    -80    
-160   0      
-16    32     
-192   32     
192    112    
32     288    
-320   64     
32     -256   
304    256    
-192   320    
208    48     
80     96     
-608   -64    
-16    384    
0      288    
-944   -128   
-224   -16    
-2384  32     
-368   -32    
160    -48    
-80    96     
112    144    
-32    16     
224    -160   
-96    48     
-624   -80    
16     128    
-80    48     
-112   224    
-16    48     
-96    48     
-16    80     
-528   32     
80     32     
-240   48     
-32    -80    
128    -112   
-240   -208   
-480   -224   
80     32     
-352   -64    
-48    48     
112    -176   
-288   64     
-160   -48    
-160   112    
128    80     
-32    240    
-64    0      
-400   -176   
32     -128   
64     -256   
128    0      
-112   -192   
240    128    
48     64     
-112   192    
208    336    
-352   80     
-208   -16    
-96    -160   
0      -256   
64     0      
-80    64     
-448   80     
-64    144    
-32    0      
128    32     
48     -48    
0      80     
-96    -48    
32     -80    
-240   0      
144    -416   
336    224    
-96    320    
-80    288    
-144   -96    
-272   -64    
-128   -112   
16     -192   
-336   416    
416    16     
-512   -16    
208    144    
-144   -304   
304    208    
144    -64    
48     96     
112    -80    
-304   -272   
-240   96     
144    48     
48     160    
336    288    
240    928    
-1088  368    
0      192    
-320   -16    
-32    96     
240    288    
-176   -48    
-432   -208   
-400   -208   
384    -368   
336    -96    
64     48     
304    -16    
-400   128    
-416   0      
-48    288    
-384   752    
352    640    
-1376  224    
464    336    
80     -256   
-432   336    
-208   -160   
0      -32    
0      48     
208    80     
-64    144    
240    -48    
0      160    
-176   -128   
48     16     
-208   -128   
224    80     
-240   448    
-64    -48    
112    -144   
48     -80    
-288   688    
528    336    
80     272    
-240   112    
-224   128    
144    432    
160    -80    
-304   -16    
96     -416   
-240   -16    
576    400    
-816   288    
96     160    
-160   208    
-64    240    
-288   48     
-32    80     
-160   96     
256    192    
-368   -288   
-16    -432   
-112   -48    
16     -176   
-16    176    
48     -176   
-64    256    
224    384    
112    96     
-128   16     
96     -16    
32     -128   
0      -192   
192    96     
-16    -80    
192    -352   
80     304    
16     144    
-128   -256   
112    208    
-304   -688   
-240   -384   
256    400    
32     48     
-80    304    
176    -16    
-96    -272   
-256   80     
-160   -32    
0      -32    
144    0      
144    -96    
96     48     
96     48     
-80    -96    
-64    48     
-80    64     
-48    48     
-32    80     
80     144    
80     96     
272    -16    
224    64     
-80    32     
-64    -64    
48     -96    
-208   -128   
144    192    
-176   0      
80     112    
80     -32    
64     -16    
-64    -32    
32     96     
32     80     
464    352    
240    112    
80     64     
-32    0      
-80    -96    
0      -16    
-240   -64    
0      -48    
-192   -16    
64     160    
-112   64     
112    32     
112    80     
80     96     
32     0      
32     0      
352    96     
-112   80     
-16    16     
-288   -272   
528    -48    
0      32     
304    176    
-112   112    
-48    -176   
0      160    
-128   192    
-128   -64    
288    0      
288    128    
-96    32     
48     -64    
112    64     
48     80     
-128   -80    
208    176    
-32    0      
96     -16    
-144   16     
-16    -112   
-176   -128   
32     -992   
336    112    
272    112    
80     48     
64     80     
-64    0      
-80    64     
48     48     
-16    32     
48     64     
-96    -32    
112    80     
-16    80     
160    48     
48     48     
80     -752   
32     64     
112    48     
-32    -48    
112    0      
16     112    
80     64     
80     0      
0      -32    
144    16     
-96    -16    
160    80     
0      32     
176    -16    
64     112    
48     -544   
0      0      
64     0      
96     48     
-112   288    
144    80     
-48    -352   
-48    -96    
16     -32    
-48    48     
192    128    
-192   -112   
16     -176   
224    -16    
-32    64     
160    -192   
96     64     
64     -896   
208    224    
-528   -16    
352    48     
-48    -16    
208    32     
640    496    
-224   496    
-240   80     
-160   -224   
-32    -176   
208    -64    
208    48     
128    -112   
96     -176   
-304   -464   
-144   80     
-208   -352   
-48    272    
-32    112    
464    320    
-288   208    
192    -288   
64     16     
128    -128   
-16    -32    
-80    320    
-80    -160   
112    -256   
48     224    
128    -288   
-64    -144   
144    112    
144    96     
-48    176    
64     -16    
32     304    
64     128    
48     -112   
-80    -96    
320    208    
-256   -304   
48     -96    
144    -96    
96     192    
176    -112   
160    112    
-224   432    
16     -320   
352    400    
96     416    
-96    -352   
224    -144   
544    208    
-480   -400   
-144   -240   
160    -112   
-80    80     
176    320    
-32    -96    
288    -96    
32     -80    
192    64     
64     -208   
144    64     
-16    -560   
256    -80    
-96    32     
48     -288   
-64    -16    
64     -1328  
-192   -160   
208    48     
48     0      
304    80     
-112   64     
0      -336   
176    64     
64     -384   
432    64     
-416   48     
272    64     
-208   48     
96     -192   
160    16     
176    -160   
224    16     
80     -64    
80     -144   
32     48     
0      80     
48     -320   
16     0      
208    -48    
64     96     
48     64     
-112   -48    
-944   16     
80     -176   
96     16     
240    32     
32     64     
48     -256   
48     -80    
48     -16    
-16    -128   
48     -128   
-16    -96    
112    -32    
0      48     
-256   -192   
128    48     
-832   32     
144    -32    
112    32     
-64    -128   
336    -112   
16     -160   
112    -16    
16     -784   
0      16     
128    -128   
0      144    
0      -16    
96     -96    
0      -64    
96     0      
-32    48     
80     144    
-16    -176   
96     -320   
80     -96    
176    0      
-112   64     
128    -224   
128    144    
-32    16     
16     16     
-96    -176   
128    -96    
48     128    
80     0      
-96    240    
240    48     
-752   -32    
240    -16    
-160   400    
32     96     
128    -256   
-48    -320   
112    -96    
48     0      
-128   32     
288    208    
64     64     
-80    176    
64     -112   
-448   -80    
96     112    
-192   128    
-48    32     
-464   -128   
192    -192   
96     -32    
-16    -448   
144    -48    
144    -1104  
128    0      
-208   112    
48     96     
-208   -112   
112    -16    
-16    -64    
16     -96    
-368   192    
-16    352    
-16    -160   
128    144    
48     -160   
-144   -240   
176    -192   
160    -384   
32     -16    
-80    -176   
128    240    
-336   -32    
-400   -496   
-208   -608   
176    -368   
-272   304    
256    368    
-288   -336   
48     -352   
320    48     
48     -112   
304    240    
-512   -400   
-208   -144   
-384   -720   
0      -528   
672    1600   
-480   -32    
-384   0      
-160   -832   
-48    -304   
816    -80    
48     128    
320    736    
112    -128   
-96    -160   
-96    48     
128    160    
-704   96     
384    240    
-1200  -992   
-16    368    
-496   336    
-352   -320   
160    512    
320    -272   
-96    -128   
0      -256   
-784   16     
352    400    
-560   32     
-80    288    
-224   -464   
384    592    
-208   288    
-624   -400   
48     -656   
-480   624    
96     -96    
-16    336    
32     384    
-16    32     
192    0      
-352   -224   
272    352    
-240   -80    
-16    -160   
160    208    
-320   -160   
-160   272    
-416   -320   
-272   224    
-416   -112   
-64    -112   
32     -64    
-240   160    
-16    0      
112    -96    
-64    224    
-48    -16    
80     -16    
-32    0      
-128   -48    
48     48     
-128   128    
48     48     
-16    16     
-32    112    
-288   -16    
-1184  -64    
128    128    
48     -112   
-112   -112   
-16    -144   
272    256    
-48    160    
-208   -32    
96     32     
112    192    
-32    64     
-112   0      
32     608    
32     -64    
-112   -128   
-384   352    
384    368    
-160   -32    
-48    -32    
128    -64    
-176   32     
128    -32    
-304   -128   
48     -576   
-32    -208   
-16    -208   
-32    -64    
-176   32     
-160   176    
32     160    
-112   0      
-48    64     
-688   -16    
0      32     
128    -16    
192    -144   
-192   -176   
-32    320    
-80    192    
144    -16    
64     64     
-96    -80    
64     32     
32     48     
192    96     
144    64     
-368   160    
-528   -64    
-16    80     
32     -64    
288    128    
-144   16     
96     320    
64     368    
-176   -144   
240    -16    
-32    -32    
16     32     
-192   48     
-208   -16    
-384   -64    
112    80     
-640   16     
64     64     
-80    -112   
240    -80    
224    160    
-176   0      
0      32     
-32    0      
48     32     
-160   -16    
192    16     
-176   -80    
128    80     
-144   0      
-16    32     
-48    16     
-48    16     
16     64     
-192   -64    
-16    -16    
144    256    
48     176    
64     32     
-144   -64    
48     32     
128    32     
-240   -32    
80     48     
-176   -16    
128    64     
64     64     
48     48     
176    96     
-48    96     
16     16     
80     32     
336    128    
-272   -16    
-32    32     
-96    0      
144    96     
-128   -32    
64     -16    
-288   0      
-32    96     
32     -16    
-32    32     
0      32     
0      96     
144    80     
-16    0      
-176   -208   
208    -144   
32     80     
144    64     
64     32     
-112   -16    
-48    16     
-16    -32    
-256   96     
208    64     
-64    128    
288    224    
-112   -32    
-48    -32    
256    208    
16     16     
224    -32    
320    272    
-80    112    
240    32     
-96    16     
176    -208   
-80    64     
336    192    
192    80     
80     16     
-160   32     
288    16     
0      64     
-48    80     
0      144    
-304   32     
-64    224    
48     -160   
-176   16     
-16    32     
-288   -544   
-368   384    
-16    80     
176    -96    
464    272    
272    -48    
48     -272   
48     576    
-128   -352   
304    512    
-208   96     
-464   -544   
0      16     
-160   -96    
128    -608   
112    352    
256    400    
0      -272   
144    112    
-96    -128   
-16    -80    
112    -32    
64     -32    
-48    -112   
128    112    
240    208    
-336   -16    
368    -96    
-96    96     
272    0      
-112   -192   
128    -16    
-16    -128   
176    192    
64     -32    
-128   -176   
240    -352   
128    112    
-64    176    
416    272    
-64    352    
-64    80     
0      96     
128    128    
-176   -32    
-16    -208   
32     48     
128    -784   
128    144    
96     0      
16     -32    
-176   0      
0      64     
-80    -80    
32     128    
16     -16    
256    32     
0      0      
80     -64    
128    0      
16     0      
320    64     
0      -112   
32     -16    
112    -48    
48     80     
-32    -48    
144    32     
16     -16    
64     96     
80     112    
224    528    
-240   288    
-48    -80    
128    -64    
256    -16    
-32    64     
16     48     
160    112    
256    -320   
-160   176    
48     -112   
-48    -16    
64     16     
-48    -192   
-112   -208   
-96    128    
-80    -64    
288    -32    
32     -32    
192    -208   
80     160    
-112   144    
208    144    
-96    -288   
192    160    
-288   48     
32     -48    
112    -128   
48     -160   
320    -384   
144    -16    
0      368    
192    272    
-160   432    
-208   -272   
256    272    
128    -48    
160    -176   
128    -192   
-112   208    
-48    48     
80     0      
16     -80    
208    -112   
144    0      
80     144    
32     -80    
-48    -560   
224    -16    
-64    48     
176    208    
80     224    
64     80     
464    -96    
80     96     
64     -80    
160    32     
-144   -96    
160    112    
240    -544   
-224   -512   
-176   -256   
48     -464   
16     -304   
-16    -192   
80     80     
176    -80    
-16    48     
288    240    
-48    272    
-128   32     
224    -144   
32     -112   
224    -384   
96     -48    
128    -32    
32     -416   
48     0      
192    -416   
112    128    
320    336    
-64    -176   
80     176    
64     -368   
208    864    
112    -96    
240    -112   
-208   32     
80     -272   
-64    -112   
32     -32    
-32    -48    
80     256    
208    -352   
-80    64     
64     -1200  
272    -80    
64     208    
288    -80    
-96    -48    
-144   32     
-48    -224   
64     160    
32     32     
160    176    
-96    -400   
144    176    
-192   -352   
160    -176   
-48    -144   
96     -624   
-240   32     
112    -176   
416    512    
-800   -944   
-80    -320   
48     800    
-80    -432   
288    -496   
160    544    
-2416  -32    
-96    -192   
16     48     
256    16     
-208   -80    
-32    144    
1200   1312   
-640   320    
-352   -512   
224    -464   
192    64     
-192   -160   
416    32     
-32    -160   
-176   -256   
-160   224    
-272   352    
144    208    
160    80     
96     48     
256    -208   
-256   0      
32     -384   
-128   0      
80     0      
176    64     
-432   -48    
112    80     
-64    16     
128    -16    
-288   32     
64     -96    
-1968  -112   
96     -16    
-32    32     
176    -112   
16     64     
80     -272   
320    576    
-224   -144   
128    -128   
224    208    
-160   -160   
32     160    
192    96     
-176   -64    
-16    -64    
-352   -48    
-16    -160   
96     48     
-144   -272   
272    -80    
-32    -112   
192    16     
144    -16    
176    32     
-64    32     
32     96     
-416   80     
80     -64    
-80    16     
64     -192   
-16    48     
64     -48    
-48    128    
192    144    
64     224    
-160   -272   
128    288    
-784   16     
160    -224   
-288   -112   
64     -64    
-48    64     
-64    -48    
64     48     
32     -96    
0      -64    
208    64     
-112   80     
0      -48    
-32    224    
384    64     
-128   48     
-32    -32    
-512   32     
-176   -192   
160    -320   
-112   48     
208    80     
-64    128    
144    176    
-640   -48    
32     -64    
-16    32     
-432   -64    
80     -16    
-144   -32    
-480   16     
-16    16     
-768   -48    
-304   -160   
-1264  -256   
-96    192    
288    144    
-144   0      
32     -80    
-400   -176   
16     -128   
-64    32     
-48    -64    
32     -32    
-48    64     
112    96     
-112   0      
-112   -144   
-80    -48    
-160   80     
-160   32     
-544   -16    
-128   16     
32     -64    
128    112    
-128   0      
-48    48     
-128   -48    
64     -96    
144    -96    
0      32     
-64    -16    
-48    32     
288    176    
-256   32     
0      16     
-144   48     
-48    -48    
32     -32    
160    0      
144    80     
112    48     
-64    -64    
-288   -32    
0      0      
-32    16     
16     16     
-96    16     
16     16     
-176   -16    
16     0      
-112   -16    
-80    -16    
-416   -32    
176    64     
0      -64    
128    -16    
-128   -80    
-32    -16    
-112   16     
80     32     
-80    16     
-304   -16    
-96    16     
-176   -48    
48     32     
32     32     
-32    16     
-224   -80    
-80    32     
-64    -144   
48     64     
-176   32     
224    -48    
96     -32    
128    80     
-80    96     
-32    32     
-48    -16    
-96    -128   
0      144    
-240   32     
80     64     
-512   -112   
0      416    
640    64     
-304   432    
288    -480   
48     256    
288    288    
-432   -432   
352    48     
-176   512    
160    -32    
-32    160    
272    32     
-320   384    
96     -304   
-688   -96    
-16    256    
-1520  -48    
288    -64    
-16    -240   
-32    352    
608    560    
-352   272    
336    672    
-448   112    
-304   192    
16     16     
272    432    
-112   112    
336    32     
0      -96    
-400   -224   
-256   -16    
64     -48    
-176   368    
416    160    
32     112    
112    96     
336    208    
-112   0      
32     -160   
-64    48     
64     112    
-64    64     
-160   -144   
288    -96    
-32    128    
-96    16     
160    -48    
-80    176    
-48    48     
64     32     
32     -80    
-16    80     
96     144    
-96    96     
-48    -112   
96     -80    
-224   -16    
224    96     
-352   -64    
-32    0      
-80    48     
96     0      
512    112    
-224   272    
-48    64     
-128   16     
16     96     
-64    48     
48     -16    
-128   -16    
96     16     
-96    -48    
-96    48     
-80    16     
144    80     
224    32     
-80    128    
-80    208    
32     48     
192    -48    
-32    0      
64     -16    
-16    -48    
0      64     
-128   -48    
128    -48    
-48    64     
144    112    
160    -48    
80     0      
96     128    
-48    16     
112    -128   
32     48     
-16    176    
-288   -128   
160    -160   
-32    112    
32     96     
-128   -16    
176    32     
-80    0      
16     176    
112    64     
128    96     
-48    48     
-144   -64    
176    -16    
-96    48     
-32    128    
64     192    
32     96     
-80    0      
32     160    
32     -240   
-80    32     
32     32     
-80    96     
32     64     
16     -80    
368    96     
96     128    
-144   -64    
144    -128   
128    -96    
-48    -272   
176    -416   
80     -448   
240    48     
16     -16    
192    416    
-112   336    
48     48     
80     160    
208    32     
0      0      
-80    -80    
80     -16    
-112   -112   
112    112    
112    -96    
128    320    
112    304    
0      48     
160    -32    
112    -64    
128    208    
-48    -320   
160    544    
-176   288    
48     -512   
32     -64    
128    -16    
-48    208    
480    -160   
400    480    
-144   64     
-160   -656   
80     320    
-208   -96    
16     -32    
224    64     
160    112    
-160   -320   
240    -144   
32     576    
48     48     
-16    -160   
-16    32     
16     240    
80     16     
288    -432   
16     -80    
16     256    
96     144    
-48    -192   
64     -336   
112    -480   
112    144    
16     96     
16     -80    
-16    112    
48     240    
-80    48     
192    16     
-144   -176   
96     -176   
-16    48     
208    -16    
-80    32     
80     -160   
176    96     
-176   -16    
192    96     
-80    -176   
256    48     
48     -1504  
96     208    
80     -32    
-112   -144   
-64    -32    
-128   80     
112    -96    
112    -64    
240    240    
176    -32    
240    32     
160    16     
-128   16     
80     192    
192    112    
224    -256   
176    64     
192    -16    
16     -16    
416    272    
-208   176    
-240   -32    
144    -80    
720    496    
-544   112    
32     64     
544    320    
-224   192    
-16    -448   
848    -128   
64     96     
48     96     
48     32     
448    80     
0      0      
64     160    
-48    -32    
96     -128   
-160   -16    
112    -128   
192    64     
32     -112   
192    80     
-48    -176   
96     128    
16     16     
48     64     
-144   -64    
-80    240    
0      64     
256    -192   
304    -368   
-320   -192   
-16    -544   
224    16     
448    304    
-400   -80    
144    -32    
128    32     
320    48     
80     -192   
32     -304   
128    112    
-192   -128   
-32    144    
-96    192    
48     -144   
-80    -64    
176    -96    
64     -80    
48     -1184  
144    128    
240    64     
-96    -80    
160    -240   
-112   0      
16     -192   
160    48     
16     48     
32     48     
-1120  -128   
-144   -224   
80     -96    
128    -224   
96     16     
-16    0      
256    96     
192    -608   
-48    -240   
96     -288   
224    112    
144    -16    
32     0      
96     -112   
-96    -224   
-48    -128   
80     144    
-1072  64     
-144   -192   
64     48     
96     -96    
-80    -80    
160    -528   
144    -144   
-128   -16    
48     144    
176    -80    
96     -48    
-272   -272   
-64    -80    
-80    96     
80     -96    
-448   -96    
176    64     
-16    112    
-80    -112   
304    32     
80     -336   
-64    -320   
304    -1360  
0      -112   
320    112    
-64    64     
-192   0      
160    -64    
16     0      
48     -80    
-1104  -240   
-288   -272   
-96    -80    
192    16     
192    -16    
160    -176   
-16    32     
128    -256   
0      64     
128    -96    
-16    -48    
144    144    
176    224    
-368   -16    
-112   -16    
-496   -80    
-32    -64    
-2336  -192   
64     -208   
-16    -176   
32     -192   
256    336    
96     -176   
64     32     
80     -16    
16     48     
32     0      
240    48     
128    240    
0      -80    
-256   -16    
352    48     
-352   -32    
32     -320   
-240   -192   
0      -240   
16     48     
224    -240   
48     0      
80     352    
240    112    
-96    -16    
-48    32     
-224   -80    
192    -592   
-48    272    
0      16     
-416   -240   
16     -96    
16     -64    
112    176    
-80    -80    
240    -16    
-16    32     
-288   -64    
208    112    
-416   -48    
0      -192   
0      32     
-16    -80    
-320   160    
0      176    
48     -176   
192    -80    
48     208    
64     -224   
-32    256    
-2128  -192   
-1600  -32    
32     48     
-256   208    
-256   -80    
224    -800   
256    208    
448    240    
-208   -128   
-208   -128   
-464   -304   
-512   -96    
-48    -48    
-304   -32    
48     48     
-112   -144   
-240   128    
160    144    
-688   -32    
80     -128   
-1280  64     
0      80     
-128   144    
112    240    
0      224    
-16    -48    
48     -224   
-224   -16    
-80    -560   
112    -80    
224    -64    
272    112    
192    144    
-464   96     
-272   -16    
-560   -32    
-176   -16    
-288   176    
64     112    
160    -96    
-16    160    
-32    0      
240    544    
-112   0      
80     -144   
-32    0      
-240   -16    
-144   112    
-176   -96    
256    -96    
-304   96     
160    272    
-384   48     
48     -64    
-96    -96    
96     -96    
-64    -64    
96     144    
32     16     
48     128    
16     112    
-304   -400   
96     -320   
32     176    
0      160    
-160   96     
0      -48    
-336   176    
80     -48    
-1056  -16    
-48    112    
-192   0      
-32    -16    
112    160    
16     -32    
-48    -16    
64     16     
32     192    
208    96     
-96    48     
-80    -16    
-80    -48    
-160   -16    
80     -16    
-288   80     
80     0      
-256   -208   
48     -176   
96     16     
-192   96     
-96    -32    
256    16     
-32    64     
-80    -64    
128    96     
-80    -32    
16     240    
-48    48     
160    0      
-256   -64    
336    -16    
112    -16    
-192   128    
192    64     
-48    32     
-16    16     
-64    -16    
-80    -144   
-192   -80    
-96    -96    
-208   -32    
-48    -16    
0      -96    
352    128    
-512   0      
-16    16     
-576   80     
-320   64     
-128   0      
-128   -16    
144    -96    
224    48     
80     96     
16     -272   
224    176    
-64    -16    
-144   -32    
-96    96     
160    128    
-400   128    
112    -112   
112    112    
64     400    
48     80     
-96    -320   
-80    -416   
16     -64    
-80    96     
48     144    
-160   16     
80     -48    
224    80     
48     256    
-96    -80    
-176   -16    
128    32     
80     112    
-192   -128   
-160   16     
320    -128   
368    240    
0      160    
-128   16     
-240   -16    
-176   192    
-208   -112   
80     0      
144    32     
176    80     
-288   -128   
144    240    
16     80     
96     -224   
176    -32    
112    80     
-48    112    
32     -16    
32     -16    
16     128    
144    64     
16     48     
16     64     
-112   80     
32     32     
-128   80     
96     192    
-16    144    
96     160    
144    32     
32     64     
32     48     
-64    0      
32     16     
-32    0      
64     112    
-32    32     
80     32     
-176   -32    
32     64     
80     48     
64     112    
-48    32     
144    240    
144    16     
16     16     
32     0      
-16    16     
0      16     
208    192    
-48    32     
0      0      
-112   128    
-400   64     
224    128    
48     16     
304    -256   
-112   64     
-32    80     
-16    -16    
240    240    
-384   80     
96     0      
64     80     
0      32     
48     0      
-32    -32    
128    -80    
176    -32    
112    -640   
-176   80     
48     208    
272    240    
-464   -80    
272    -48    
192    240    
544    464    
-656   -16    
288    -48    
-256   -32    
160    0      
64     -112   
160    48     
32     80     
64     -1040  
96     16     
-80    -16    
64     -80    
-128   80     
304    48     
80     -64    
144    176    
64     16     
176    80     
-224   80     
208    -48    
64     16     
192    -64    
-64    160    
144    -512   
64     80     
48     64     
192    64     
80     128    
-32    48     
48     16     
16     48     
-160   -112   
608    320    
-512   64     
224    0      
96     -48    
160    -80    
-160   16     
-16    32     
272    176    
-112   -464   
32     -16    
16     -48    
352    32     
-48    144    
48     -160   
192    144    
-144   32     
192    48     
-80    0      
64     0      
80     -80    
-16    -64    
208    -48    
112    32     
128    -784   
-80    -48    
64     -32    
160    96     
-32    -80    
64     -112   
-176   -144   
112    -400   
128    -208   
48     -128   
80     -240   
-48    320    
176    288    
192    -112   
-112   64     
-16    -64    
272    288    
-32    -224   
0      -32    
0      -160   
48     368    
-32    -32    
80     144    
32     -128   
96     144    
-48    144    
-32    -128   
208    64     
-48    -96    
16     320    
240    192    
-192   -288   
80     -96    
128    224    
112    -176   
48     96     
96     -128   
160    160    
112    16     
0      96     
-80    -208   
256    64     
112    -240   
352    -192   
-48    160    
16     -160   
128    176    
64     16     
112    96     
-336   144    
-64    -208   
-160   96     
32     96     
112    48     
144    0      
192    64     
240    -112   
160    96     
144    48     
96     112    
-128   -112   
240    160    
-16    -688   
16     16     
192    848    
-192   -1312  
-112   -256   
-128   256    
0      -592   
-16    144    
64     -992   
272    16     
48     112    
32     0      
192    -16    
256    256    
160    128    
-32    -144   
256    -32    
128    32     
64     432    
-112   -288   
-576   -144   
-16    288    
112    0      
64     -32    
176    -144   
192    -416   
-128   32     
112    -64    
176    192    
112    592    
16     224    
-48    -272   
-224   -368   
208    144    
208    80     
144    -80    
144    192    
176    32     
96     336    
16     -320   
80     -80    
-16    -112   
-16    -400   
32     32     
352    240    
112    192    
-32    -32    
224    448    
128    176    
-48    -320   
-176   -368   
-16    -416   
-32    48     
224    608    
128    96     
112    -144   
-160   -224   
64     -624   
112    16     
80     240    
176    208    
320    448    
-16    432    
0      128    
-224   160    
-192   -224   
400    -240   
-1808  112    
-96    -160   
-160   -128   
320    -96    
256    -32    
-32    -112   
160    -144   
240    -64    
496    208    
-128   -64    
-224   -224   
-320   192    
-16    64     
-400   -272   
48     -400   
-112   -96    
-304   -208   
464    -208   
224    -176   
-336   16     
-48    -144   
-64    128    
-16    -272   
112    32     
16     -64    
-64    -16    
-80    400    
256    112    
176    -256   
16     -176   
-80    -240   
0      -144   
-656   0      
16     -144   
16     144    
-32    -48    
128    32     
32     -624   
32     -80    
-48    -32    
128    0      
-128   128    
80     -144   
176    -176   
-16    16     
-784   64     
48     -48    
-16    80     
96     64     
192    192    
256    -352   
0      16     
-16    -96    
-128   -32    
160    -224   
0      -176   
-304   48     
224    -32    
-320   -48    
0      -80    
-176   -64    
32     -48    
-16    -48    
128    -16    
208    32     
-32    -64    
-144   32     
144    -48    
128    -64    
-288   16     
112    -48    
-80    80     
128    -16    
16     48     
-32    144    
-192   16     
304    128    
-880   48     
288    -224   
96     128    
144    -160   
176    192    
-176   16     
-400   -32    
-224   96     
-448   -96    
-144   0      
-64    -64    
16     160    
400    464    
-144   336    
80     16     
-304   -32    
176    -80    
-128   -64    
-144   -272   
208    -576   
128    0      
-112   208    
-256   112    
-32    -240   
-64    -352   
-128   80     
-16    64     
-192   -48    
80     112    
144    144    
144    0      
-192   352    
48     288    
-336   -1264  
192    1136   
-112   176    
-416   -48    
16     48     
-144   96     
-48    80     
-688   48     
0      -208   
-400   -336   
-272   96     
0      272    
128    48     
-32    -160   
224    -288   
96     -160   
-80    0      
0      64     
-144   -80    
96     -112   
-96    16     
-240   -48    
-384   -64    
-32    16     
-944   -48    
96     48     
48     -128   
-224   -64    
-240   -144   
-160   16     
-32    32     
144    32     
144    32     
80     -32    
48     0      
-64    96     
-176   80     
-144   -48    
96     32     
-144   160    
96     128    
-400   -80    
16     16     
-16    -16    
128    32     
96     64     
32     128    
-16    16     
-144   -16    
-48    48     
96     208    
-176   16     
-160   -144   
192    48     
-176   0      
48     32     
-592   -16    
96     32     
160    16     
96     32     
0      16     
-128   32     
-64    48     
-80    0      
-16    16     
-112   32     
-16    0      
-176   -64    
0      16     
-528   -112   
224    64     
-608   -16    
16     -32    
-16    16     
-336   0      
432    -48    
-304   -16    
352    0      
-128   -16    
-32    48     
80     96     
-16    16     
-32    -80    
-192   -64    
96     176    
-176   48     
176    -64    
-176   64     
-48    -96    
80     64     
80     224    
144    -16    
176    16     
112    80     
-352   80     
-192   -112   
96     96     
-352   -144   
272    0      
-128   112    
272    144    
-608   -32    
864    496    
-1088  128    
-80    -208   
416    -16    
0      0      
320    16     
-272   -144   
400    0      
-320   96     
-400   48     
352    -80    
-32    -64    
-288   0      
160    160    
-320   -80    
-128   16     
160    16     
-32    96     
48     80     
96     -48    
-32    48     
320    32     
-160   -64    
-96    176    
48     112    
112    64     
272    112    
-160   -80    
80     64     
16     48     
-128   16     
160    80     
112    -48    
-112   48     
-16    64     
48     -144   
32     -128   
-112   -16    
32     32     
48     16     
-112   -32    
352    144    
-352   64     
192    48     
32     64     
224    160    
-128   16     
-96    -128   
48     64     
-16    32     
96     -32    
16     -32    
96     160    
-192   -144   
416    -16    
-96    96     
64     240    
-160   -176   
80     160    
352    112    
-64    240    
-192   -624   
272    48     
48     384    
368    352    
-112   -192   
-256   -128   
64     64     
-16    48     
176    256    
-16    -32    
288    -48    
-112   384    
-112   128    
144    -16    
160    464    
-240   -800   
48     336    
144    544    
144    -336   
64     -96    
-256   336    
144    496    
80     -32    
384    -112   
-240   32     
48     -80    
144    272    
-192   -736   
64     0      
-80    176    
-32    -16    
96     -48    
208    144    
16     96     
96     -288   
32     480    
80     112    
-112   -192   
224    112    
-80    -112   
-16    -192   
-128   -16    
112    -864   
80     16     
336    112    
-176   480    
112    -176   
128    -208   
128    160    
-112   48     
16     64     
208    -64    
-32    96     
192    48     
-144   64     
496    320    
-144   240    
288    -160   
224    -144   
48     -160   
80     -288   
-272   -224   
112    -224   
256    -352   
160    -48    
-48    48     
-144   128    
-64    32     
192    160    
144    208    
16     -112   
-64    128    
80     -224   
64     -64    
240    -784   
-48    80     
240    128    
-128   160    
96     -112   
144    -48    
-48    96     
304    0      
-32    16     
192    304    
-64    176    
256    -80    
64     48     
176    -96    
-32    112    
144    -304   
16     0      
0      -16    
112    16     
-32    16     
-16    -16    
16     48     
112    112    
-16    96     
80     32     
160    128    
128    -16    
80     96     
128    64     
288    480    
320    432    
208    192    
64     -960   
-144   -96    
-96    32     
80     -112   
96     -224   
288    16     
-160   544    
208    128    
-32    -48    
16     -480   
96     -480   
-96    -512   
0      -240   
512    240    
-192   576    
-16    -144   
16     -160   
-48    368    
288    112    
-208   -272   
224    -400   
-16    -192   
128    -464   
-64    -528   
272    -128   
512    240    
-304   -48    
0      -32    
-112   -64    
80     48     
-80    -80    
-96    -496   
96     -240   
64     -96    
-64    96     
288    64     
208    80     
80     -16    
112    -48    
16     32     
-48    0      
-96    -384   
144    -112   
64     176    
352    64     
0      -208   
256    -1104  
176    -192   
-160   -928   
240    -16    
0      -80    
80     -560   
-224   -32    
304    240    
32     -48    
224    -48    
-80    -64    
64     0      
48     -208   
16     -512   
-16    48     
64     192    
224    256    
128    -576   
-144   -272   
-1424  32     
-224   -32    
16     -64    
-112   320    
368    -16    
48     -272   
208    -368   
16     0      
-48    -224   
64     -288   
96     0      
-128   -96    
240    240    
128    -112   
0      32     
-528   -16    
-16    176    
272    48     
80     240    
256    -32    
112    -176   
64     16     
128    -592   
-48    -96    
32     -48    
96     240    
-96    -256   
0      80     
-400   -32    
272    208    
-272   416    
160    -208   
-16    -272   
288    -304   
32     240    
-32    -448   
144    -272   
32     80     
-144   0      
144    48     
176    80     
432    224    
-176   -64    
-144   64     
304    0      
-592   -96    
-32    16     
-32    -192   
240    224    
144    -96    
-112   0      
256    -32    
112    96     
80     -16    
32     -192   
-48    32     
-128   -16    
96     -128   
64     -32    
256    -48    
-128   48     
80     -64    
-688   544    
224    400    
48     160    
-80    0      
96     16     
16     -336   
-48    0      
-128   -880   
-96    -144   
96     160    
-16    -144   
-48    -16    
192    16     
-192   -80    
176    -96    
16     0      
-96    -144   
-1424  -32    
-16    96     
-192   -224   
-48    -224   
64     160    
208    -336   
160    80     
-240   48     
80     0      
-80    -32    
176    -176   
112    144    
144    16     
-208   0      
80     -48    
-272   -64    
0      -96    
32     32     
64     -48    
32     48     
16     -144   
272    -16    
352    -48    
-192   -160   
-128   96     
80     -32    
16     16     
320    32     
-32    16     
48     -64    
-272   -32    
80     -80    
0      16     
128    16     
-64    80     
0      -240   
160    -96    
-96    16     
-176   -48    
-16    64     
48     32     
-288   -64    
144    -48    
-112   -96    
-48    -32    
-48    16     
48     -48    
96     80     
-1872  -128   
128    64     
-80    32     
-160   192    
-304   16     
384    32     
-336   -16    
224    0      
-256   -16    
-96    -80    
32     32     
-384   0      
208    16     
-592   -144   
48     -16    
-144   -96    
-32    144    
144    -64    
-624   48     
-48    -16    
-512   -128   
160    96     
-2032  -112   
304    64     
64     144    
-96    64     
-96    -160   
176    96     
-304   -128   
80     -128   
80     16     
-256   64     
240    160    
-448   -112   
-336   -128   
-112   -112   
32     32     
-48    -64    
496    16     
-160   32     
432    96     
-272   -112   
208    64     
-320   -192   
-144   48     
0      -16    
-224   16     
-448   16     
0      64     
304    0      
-112   -16    
112    16     
-128   96     
-96    -48    
-96    -96    
16     -32    
-80    -144   
112    0      
-80    0      
112    -16    
16     -80    
-32    112    
-16    -112   
-112   -48    
80     -112   
-64    16     
-128   -96    
-448   64     
16     112    
-64    -336   
-208   -288   
80     48     
-64    0      
112    -176   
0      192    
-48    -32    
-64    -32    
-256   -80    
48     -128   
-16    48     
64     -16    
176    -48    
-192   -112   
-80    336    
-96    -432   
416    -176   
-1104  656    
-80    -224   
-272   -288   
-32    48     
240    320    
272    352    
-256   -368   
-16    -64    
128    144    
-272   320    
-224   96     
-48    368    
160    288    
64     -64    
-32    608    
-112   -64    
368    384    
-224   400    
-64    208    
-64    16     
-48    -16    
32     -64    
-16    -32    
16     80     
32     -16    
288    112    
-208   0      
192    416    
-288   336    
-192   192    
-224   -80    
128    -224   
48     -272   
32     16     
-32    144    
-208   64     
-48    96     
-96    16     
-96    192    
80     96     
-16    16     
-448   -160   
128    -80    
-160   -96    
80     16     
-224   -368   
-128   -64    
224    -192   
80     -16    
144    224    
-48    80     
0      160    
160    64     
-64    304    
-64    -64    
128    -112   
32     -80    
-64    16     
-48    16     
160    64     
-16    64     
-16    64     
16     144    
-64    -64    
96     -80    
-144   -192   
176    -16    
-32    128    
-64    16     
-16    16     
-32    -48    
-32    -32    
384    32     
-416   -192   
384    -272   
240    256    
-192   112    
96     32     
0      -16    
16     112    
32     192    
-16    -16    
-160   -48    
80     -48    
-48    -144   
160    128    
224    208    
-208   128    
-272   -16    
256    144    
112    240    
192    240    
144    160    
-16    48     
-160   -288   
48     -96    
128    160    
-96    64     
96     144    
64     160    
112    240    
-176   96     
16     -448   
-128   -352   
80     -128   
-48    -192   
272    -272   
64     -160   
144    240    
-96    64     
-112   80     
80     -384   
240    192    
224    448    
176    96     
-176   480    
-160   -48    
-48    192    
-16    16     
112    0      
272    464    
16     384    
-144   368    
256    256    
208    336    
128    320    
16     16     
-16    -144   
80     -112   
160    144    
-272   512    
-192   368    
336    192    
400    320    
-384   32     
-80    624    
-112   -576   
32     -256   
80     64     
176    -48    
144    304    
-144   144    
160    592    
304    256    
448    704    
256    336    
64     160    
16     0      
496    160    
-48    -960   
-528   352    
256    480    
-96    304    
80     32     
144    16     
-160   -16    
-96    16     
208    128    
96     224    
320    256    
160    576    
-80    208    
-112   -464   
-64    240    
-192   -560   
-16    -96    
-32    -384   
112    48     
192    48     
96     -48    
-144   -80    
384    -464   
-208   96     
496    96     
-48    224    
-304   32     
-80    -656   
-96    -304   
288    -560   
448    416    
-320   288    
-128   -448   
128    -48    
176    -128   
416    336    
-64    -208   
-128   -224   
288    672    
96     352    
-192   -400   
336    -80    
80     544    
-112   272    
80     16     
-96    -464   
448    96     
-32    -448   
-16    16     
48     48     
48     0      
592    -224   
32     416    
-288   -80    
-272   -224   
80     368    
96     -80    
-96    -32    
64     0      
16     -48    
0      -240   
192    192    
128    144    
-112   -336   
176    -992   
192    320    
16     -48    
48     -32    
-64    80     
112    192    
112    -64    
144    -32    
32     192    
48     -128   
48     16     
-144   -144   
80     -192   
160    -192   
176    208    
0      -176   
96     64     
208    128    
-16    192    
-240   -384   
128    -80    
144    256    
-16    0      
128    80     
160    144    
0      128    
16     -128   
208    -16    
144    -80    
128    144    
32     16     
240    16     
224    48     
80     0      
80     160    
-128   -224   
-32    0      
112    -192   
0      48     
0      96     
240    272    
32     -96    
80     -32    
48     -112   
368    80     
32     -128   
272    -544   
-16    0      
96     -768   
-64    -128   
128    -64    
96     0      
-96    -96    
192    -336   
256    -64    
112    -224   
-80    -176   
288    -32    
128    16     
336    32     
128    96     
-176   -160   
-96    -160   
80     -256   
256    -128   
304    16     
96     -224   
112    0      
-80    -400   
16     -80    
16     -1120  
80     16     
112    96     
32     -32    
16     -80    
48     32     
112    -16    
0      48     
-112   -32    
64     -16    
-1616  -32    
16     -32    
0      -64    
160    16     
48     -80    
208    -480   
192    32     
96     -416   
-32    -48    
96     -32    
64     128    
96     -112   
64     16     
-144   48     
16     -16    
-80    -32    
96     -32    
64     0      
112    16     
80     32     
64     48     
0      -64    
-16    -160   
-96    32     
32     -64    
-64    0      
160    -192   
96     -256   
32     208    
112    -112   
-64    0      
64     32     
-640   96     
176    -48    
96     16     
-32    -128   
-32    144    
-208   -224   
448    272    
-112   64     
-48    -32    
176    32     
64     0      
-272   0      
240    0      
-336   -16    
752    352    
-1424  368    
-224   -272   
496    -336   
560    112    
16     288    
16     -112   
336    -112   
-80    -2224  
224    -32    
-144   112    
544    224    
-240   160    
192    -32    
-304   -240   
144    16     
-1008  32     
-16    16     
-496   480    
176    -336   
96     160    
128    -176   
64     -64    
-64    -432   
272    -384   
-96    272    
160    96     
-48    -16    
160    48     
-176   -32    
112    -688   
288    304    
48     448    
176    144    
368    16     
-256   96     
-64    -240   
-224   560    
416    -352   
-64    -432   
-416   80     
464    -80    
-1008  64     
-48    -480   
-192   -400   
96     -256   
-352   -80    
336    -144   
-64    48     
-16    -192   
-32    32     
144    -96    
144    64     
-48    64     
-224   -80    
208    -16    
-64    -64    
80     -64    
32     -16    
32     -32    
80     32     
-80    0      
192    -112   
0      112    
-1616  -32    
-96    -224   
-144   -112   
128    32     
-304   -96    
-368   32     
-112   0      
-544   -64    
-128   16     
224    -32    
-192   64     
80     -32    
-96    0      
-464   -64    
112    112    
64     16     
64     -32    
16     -128   
-544   0      
-192   48     
-304   -240   
160    -16    
176    176    
-368   48     
-848   -144   
-16    0      
16     16     
64     48     
-192   -16    
64     0      
-144   -64    
-96    64     
0      32     
-128   16     
-96    -16    
32     48     
48     -16    
-128   -64    
-288   -112   
-64    96     
-464   48     
-448   -32    
208    96     
48     96     
32     96     
-224   -128   
-16    -32    
-32    48     
48     112    
32     176    
176    96     
288    48     
-32    -48    
144    32     
-304   0      
112    64     
-320   -16    
-16    48     
-80    16     
-96    128    
-16    -48    
-16    144    
160    -48    
32     48     
-64    0      
96     96     
-96    16     
-192   64     
128    16     
80     112    
-16    128    
-576   -192   
128    -128   
-32    -224   
80     96     
-160   -192   
-112   -16    
-96    -96    
-64    -96    
240    240    
144    208    
-192   -16    
-16    -192   
96     -176   
-304   -96    
-80    -16    
-416   -64    
-16    96     
-496   128    
80     48     
160    -16    
-144   112    
-128   -144   
0      -304   
-32    -224   
-16    -112   
176    -64    
-160   272    
144    240    
-288   -96    
96     128    
-160   -112   
32     144    
-144   128    
-96    304    
-80    0      
32     -208   
16     -192   
-160   -752   
208    96     
-16    128    
-256   -272   
-96    96     
176    560    
-688   -272   
-256   -1648  
288    -480   
240    720    
-1328  -432   
144    -304   
96     64     
160    1184   
160    48     
-336   -848   
-64    512    
192    64     
-192   -160   
112    -128   
16     288    
176    -16    
160    128    
-112   448    
-48    80     
-80    -208   
160    192    
16     48     
96     96     
336    624    
-880   -656   
-320   -304   
64     896    
-80    -160   
256    -32    
224    1296   
-64    -848   
304    -352   
-576   352    
112    112    
-672   -672   
32     192    
-32    1152   
160    -528   
208    -208   
176    -144   
-16    704    
-80    -80    
80     16     
0      -80    
256    400    
-432   -448   
176    208    
0      144    
64     -64    
144    160    
-128   208    
368    -80    
32     -16    
400    368    
-480   -272   
160    -112   
176    272    
-224   -144   
192    -16    
-48    96     
16     -64    
-208   0      
240    16     
-48    0      
32     -16    
-96    0      
112    80     
80     128    
80     176    
144    80     
16     80     
-16    112    
96     16     
-32    48     
16     -192   
32     -64    
-32    112    
112    32     
-16    64     
96     96     
128    448    
-16    -48    
-32    64     
-64    96     
112    0      
96     176    
-192   -64    
-32    96     
32     64     
256    176    
-32    -144   
-80    -752   
-288   -368   
-96    -80    
-128   -288   
160    -144   
-96    0      
336    -48    
112    0      
48     80     
304    -64    
-192   112    
64     80     
-128   -176   
80     -416   
-48    -64    
80     -528   
96     -128   
48     48     
96     -96    
-160   48     
32     192    
16     192    
0      48     
48     32     
192    0      
160    48     
0      32     
-96    -64    
240    -48    
-16    96     
112    -160   
96     48     
0      128    
-320   -640   
-16    -336   
48     176    
48     32     
96     -16    
176    304    
-256   112    
80     -144   
160    0      
384    0      
192    64     
144    -128   
-80    -128   
-128   48     
64     -768   
112    80     
160    32     
160    96     
128    48     
-160   -80    
96     -112   
160    112    
0      -64    
-32    16     
64     16     
240    240    
-208   -128   
160    -304   
368    144    
384    208    
128    208    
32     -128   
-64    32     
64     32     
32     16     
-64    32     
-16    48     
48     80     
272    80     
-80    -48    
-16    -112   
-48    32     
-48    -80    
176    48     
112    16     
64     48     
0      -256   
96     96     
16     -176   
-16    -80    
112    -48    
32     112    
-16    48     
80     112    
80     32     
160    -96    
48     112    
96     -64    
0      -48    
160    -160   
112    144    
-16    -144   
48     -16    
32     32     
96     80     
64     48     
176    0      
16     -16    
176    64     
112    -176   
0      -144   
32     64     
160    128    
-48    80     
64     -176   
256    80     
96     64     
96     96     
-96    -144   
240    128    
-112   64     
32     96     
-112   -48    
-176   -96    
144    112    
32     -160   
112    -48    
96     -208   
80     336    
96     0      
32     -192   
336    -240   
160    272    
128    112    
-48    -240   
256    384    
-160   -160   
64     80     
-112   -144   
112    -432   
80     -272   
-272   -112   
1104   -624   
-288   -800   
784    160    
928    800    
-816   -512   
-96    -1680  
-400   928    
336    -1024  
-80    112    
224    -64    
384    -144   
-368   -176   
640    -688   
-160   464    
0      -240   
48     -288   
80     0      
-96    -432   
-176   -368   
192    -112   
32     -112   
-144   48     
240    176    
96     464    
-352   144    
496    64     
-400   64     
-32    -352   
-32    288    
368    160    
304    -32    
-48    -592   
-48    -48    
32     112    
128    48     
240    -80    
240    0      
-48    -32    
-64    0      
-784   -96    
64     -48    
-1728  32     
224    -80    
96     48     
80     -64    
64     -192   
-32    -336   
256    -16    
16     -96    
192    16     
304    48     
0      32     
176    -80    
32     -112   
128    -80    
304    32     
-368   48     
96     -192   
-16    -16    
64     -160   
160    -64    
-64    -16    
64     16     
-80    -528   
-304   48     
0      -96    
32     -32    
112    48     
48     16     
-32    0      
16     0      
-624   -80    
160    -80    
-1680  -32    
256    -16    
-64    32     
-112   -80    
96     -32    
128    -352   
-128   -64    
80     -80    
128    -144   
0      -32    
176    128    
-160   32     
48     32     
-112   -112   
96     -64    
-272   0      
64     -16    
64     48     
32     -128   
240    -128   
256    80     
-16    304    
160    400    
-256   304    
-112   -112   
112    -128   
64     -16    
160    -64    
48     0      
-32    -112   
-144   -112   
32     -96    
-816   80     
176    32     
-96    64     
-80    32     
-160   0      
272    -272   
32     -112   
16     16     
80     -32    
0      32     
48     -112   
80     48     
112    48     
-352   -32    
96     -320   
-848   -208   
160    -128   
-176   208    
240    704    
320    576    
-432   400    
-304   -272   
-48    -144   
128    96     
80     80     
208    400    
-464   -544   
208    -480   
-208   -384   
208    -144   
-320   496    
-96    160    
208    32     
-336   48     
-96    80     
-144   -128   
432    64     
-320   128    
144    -32    
-176   64     
32     144    
32     32     
192    496    
320    432    
-64    -768   
48     224    
160    80     
-144   -208   
-368   112    
-896   -240   
32     432    
-80    -256   
-144   -48    
-1392  -48    
-48    16     
-160   -96    
-32    64     
80     -16    
96     96     
-400   416    
-272   -736   
-240   -400   
224    256    
-144   -48    
80     48     
64     112    
-80    -176   
-48    -80    
-320   48     
144    -16    
-256   -32    
288    -80    
-240   -544   
128    -352   
-368   16     
336    96     
-48    0      
16     272    
256    32     
-304   -64    
-224   16     
-48    -32    
0      -48    
-144   -48    
160    32     
-544   0      
-304   -16    
-1248  16     
-288   -496   
112    -320   
192    240    
336    48     
80     0      
-144   -256   
-464   112    
48     480    
64     0      
-384   -48    
32     48     
-240   32     
-656   16     
-32    32     
-784   48     
416    208    
-320   -112   
-32    -176   
-16    -112   
-16    112    
80     -48    
0      -16    
96     80     
-32    112    
48     80     
-96    16     
-288   -16    
-16    -224   
96     -256   
-416   -32    
16     64     
48     -224   
320    64     
-48    -16    
-240   0      
336    192    
-128   80     
80     32     
16     -32    
112    48     
-464   -96    
112    48     
-176   32     
48     16     
-128   -32    
16     64     
-2256  -16    
112    -64    
112    0      
-16    32     
-32    48     
144    32     
-336   -176   
-80    48     
128    176    
-144   -48    
224    -16    
240    -16    
-192   -144   
-496   64     
48     272    
-1696  -32    
256    -32    
160    0      
-16    0      
-48    16     
-64    -16    
16     -144   
192    -112   
192    -64    
-64    -16    
-160   64     
-464   128    
176    48     
160    -144   
-16    48     
-144   32     
-112   64     
96     48     
16     0      
80     0      
-80    16     
192    96     
48     32     
32     -16    
-48    16     
0      -240   
-144   -240   
-64    144    
-224   96     
128    48     
32     -112   
-176   16     
-96    112    
-144   32     
48     -32    
240    128    
-176   32     
160    64     
-192   32     
-96    -16    
-80    -256   
-416   -192   
-16    304    
-432   48     
176    -192   
128    -112   
-128   -32    
80     16     
144    32     
240    -16    
160    16     
96     48     
128    96     
-112   -48    
0      -80    
160    80     
16     48     
48     48     
-16    -16    
-144   -96    
64     -224   
128    64     
32     160    
-144   64     
-16    -16    
32     -96    
48     128    
-80    144    
192    112    
16     32     
16     16     
-160   -48    
32     16     
112    96     
-64    32     
-32    48     
160    32     
272    -48    
144    48     
-176   -256   
-160   -112   
-64    48     
-64    -64    
208    -48    
96     0      
208    80     
-160   -160   
16     64     
48     80     
0      -32    
-144   -48    
0      48     
96     80     
48     192    
160    112    
48     48     
0      80     
64     16     
144    64     
128    48     
-16    112    
-48    64     
128    0      
48     48     
64     -16    
32     64     
-48    96     
160    208    
48     128    
64     48     
128    128    
-80    -32    
-16    112    
0      160    
-64    16     
208    -160   
48     112    
16     -272   
-48    -384   
432    688    
0      0      
-48    160    
-64    128    
-176   -144   
272    112    
-144   64     
-48    -208   
0      240    
-144   -256   
608    656    
-64    256    
-48    -160   
128    -512   
-48    48     
32     -1440  
64     -272   
144    96     
96     -416   
320    -192   
0      -32    
464    176    
-304   64     
48     112    
-144   624    
272    448    
-272   -256   
160    -336   
240    64     
-336   -208   
-32    -416   
160    64     
96     48     
32     32     
288    -64    
-224   -128   
192    96     
48     144    
96     32     
64     -64    
-48    -272   
32     -64    
80     128    
96     0      
-96    -224   
240    -1072  
0      80     
144    256    
32     32     
240    16     
-16    32     
144    -16    
64     48     
160    -48    
-32    80     
144    48     
32     -160   
64     -112   
32     -176   
128    32     
144    -224   
48     80     
128    -240   
-80    208    
240    -32    
144    16     
112    48     
-32    16     
64     0      
-16    96     
-32    80     
64     -32    
64     -16    
16     -64    
16     -16    
160    -224   
240    144    
208    -128   
64     64     
16     -544   
-48    -16    
112    80     
128    112    
32     64     
48     32     
32     416    
144    -336   
224    -160   
48     64     
-16    80     
144    -48    
16     32     
64     -128   
-16    -16    
-80    -16    
16     80     
-16    112    
224    96     
-32    48     
16     -208   
80     80     
-16    -80    
160    -64    
160    -96    
304    224    
-144   64     
0      -16    
32     -448   
176    -48    
48     160    
64     -368   
16     -48    
224    -304   
16     -1200  
96     -64    
-16    -288   
256    144    
-240   160    
96     0      
-64    320    
112    -48    
256    -64    
128    -48    
16     -624   
80     -80    
-224   -96    
-208   32     
-16    -272   
352    -352   
224    64     
64     -32    
80     -176   
-240   -416   
192    -368   
128    -80    
-64    -96    
48     48     
-48    -16    
0      -656   
-16    -64    
352    -736   
16     -208   
-48    -128   
-160   -144   
-32    -192   
48     -16    
-48    1312   
304    -736   
-16    -624   
-144   576    
144    -240   
208    -96    
-112   -64    
256    -272   
-192   -208   
352    496    
272    -80    
0      -48    
112    80     
-400   0      
128    -160   
128    -32    
-32    144    
128    -400   
96     -224   
80     144    
0      -1184  
64     -48    
96     80     
48     -240   
-256   -128   
160    -80    
-208   -64    
160    -16    
-592   96     
32     -96    
256    -32    
-32    -80    
192    -128   
-16    -304   
96     0      
128    -928   
128    16     
112    80     
128    16     
-272   -80    
-32    -64    
-192   -224   
-240   -96    
-112   -64    
64     192    
-80    32     
160    -64    
-80    -32    
0      -80    
-144   0      
48     -48    
112    -176   
192    -96    
-32    -48    
48     0      
-48    112    
-240   -224   
240    0      
-144   64     
176    -80    
-1152  -48    
-64    -80    
16     208    
0      -128   
176    64     
-32    -208   
96     16     
192    208    
256    416    
-416   192    
176    -80    
624    144    
-288   224    
-768   -16    
128    -80    
-1024  -128   
672    208    
-224   -32    
208    -272   
176    -96    
32     -272   
128    80     
-160   -32    
368    0      
-32    96     
-480   -32    
-96    16     
80     -64    
-160   -32    
144    64     
-48    0      
112    48     
48     -16    
64     -112   
192    96     
112    -64    
16     32     
-432   32     
336    128    
-176   112    
-48    -144   
-208   -112   
0      16     
48     48     
48     0      
-64    32     
112    -64    
0      0      
-352   -336   
80     0      
-528   64     
-1520  -48    
-208   64     
-2016  32     
0      0      
112    32     
-16    -16    
-64    -32    
0      16     
0      -48    
-384   -16    
-880   -32    
144    112    
-192   -144   
112    0      
-208   -144   
-240   0      
16     -48    
-224   16     
48     48     
-176   64     
-208   -128   
-528   -80    
-32    96     
-48    0      
16     0      
-160   0      
64     -16    
-16    -288   
-176   -192   
-320   -16    
-80    272    
32     192    
-240   -32    
48     64     
-256   -32    
-160   112    
-1120  32     
160    208    
-64    -96    
64     80     
-80    -128   
208    256    
-32    -48    
32     -48    
-16    0      
-80    160    
32     208    
-192   128    
-336   0      
-320   -80    
32     -192   
-352   -32    
64     176    
-624   80     
64     112    
-48    -192   
16     16     
-128   -32    
-32    48     
320    32     
-80    176    
208    736    
-32    576    
-240   -192   
-96    0      
64     272    
-80    320    
192    480    
-704   -576   
0      -688   
128    576    
208    576    
160    -176   
32     -176   
48     144    
96     176    
80     0      
-112   -48    
32     32     
-176   -352   
240    320    
0      320    
16     0      
-624   -96    
-32    -16    
144    96     
-192   0      
-32    -176   
0      -144   
-64    -48    
32     80     
0      0      
48     32     
96     144    
-416   -80    
-80    -208   
-288   -64    
112    256    
-144   352    
-208   -240   
160    -272   
96     320    
624    736    
-464   208    
96     -368   
160    64     
144    -32    
160    128    
288    208    
-224   -192   
-48    48     
48     64     
32     48     
-64    32     
-32    96     
-1280  -80    
-160   48     
80     80     
80     16     
-16    -352   
-176   512    
144    -384   
0      48     
-32    48     
16     -64    
96     128    
-80    96     
144    -16    
-208   -528   
-96    560    
128    -448   
80     448    
176    48     
144    -240   
-48    112    
-416   -736   
-112   -304   
0      176    
128    96     
128    80     
416    -128   
-464   368    
48     96     
-432   144    
272    80     
-48    -240   
80     64     
288    -16    
-304   -32    
208    -112   
96     16     
128    48     
80     64     
48     0      
80     -16    
-336   128    
-432   16     
48     -32    
-96    16     
224    -64    
16     32     
-112   -64    
-16    96     
-576   -320   
432    -160   
-80    -128   
-320   -96    
48     0      
-144   80     
-224   96     
208    -80    
-32    0      
32     0      
112    64     
-240   464    
368    -48    
128    -128   
-48    80     
208    48     
0      -240   
-176   -160   
-176   176    
-112   -32    
32     48     
-256   368    
512    336    
-160   -64    
128    96     
16     96     
240    0      
-16    -112   
304    -16    
-144   32     
16     32     
-240   -240   
160    -544   
-96    -224   
0      80     
192    304    
224    224    
240    -80    
-32    112    
256    -32    
-160   -144   
-96    -384   
112    -16    
-160   112    
-192   0      
80     -80    
352    64     
-16    32     
-16    0      
272    64     
80     16     
-256   -32    
128    48     
-128   -160   
64     -432   
160    96     
128    0      
16     64     
80     -16    
-224   16     
160    -32    
224    48     
-224   32     
144    -96    
-64    32     
80     368    
32     -80    
224    -96    
128    16     
320    -16    
-96    224    
176    144    
-128   144    
16     0      
128    16     
192    112    
128    48     
-48    64     
128    96     
-16    16     
0      16     
0      -112   
112    32     
288    32     
32     -176   
96     64     
-96    -272   
-16    -336   
-48    -144   
0      -112   
160    -96    
48     112    
288    256    
160    576    
96     368    
288    816    
64     48     
-160   -368   
-288   -160   
16     -784   
96     176    
-32    80     
176    144    
160    -272   
64     528    
96     256    
-224   -336   
-112   176    
-32    -16    
16     80     
0      80     
-144   16     
-112   -64    
80     160    
64     -208   
112    160    
208    -960   
224    304    
112    432    
-240   -320   
-80    48     
0      -144   
-32    -224   
336    -80    
32     32     
304    256    
80     48     
16     -80    
-128   64     
112    128    
-112   32     
112    128    
272    464    
-176   -352   
16     -32    
128    64     
96     -16    
-32    16     
224    80     
-128   -112   
-112   -112   
192    128    
32     0      
64     160    
16     -32    
96     0      
32     -432   
112    48     
32     -112   
64     0      
-32    96     
80     32     
-16    48     
16     48     
-64    -64    
160    32     
32     112    
208    -32    
32     32     
96     -112   
64     16     
128    32     
48     0      
208    -32    
96     -240   
-160   -48    
160    64     
144    144    
80     64     
96     96     
64     -80    
80     32     
-144   -64    
160    0      
80     -16    
160    96     
-144   -16    
240    96     
-80    -96    
288    32     
176    32     
96     48     
96     48     
96     32     
-80    -160   
192    -32    
16     -912   
-448   -160   
288    48     
-208   -128   
272    -32    
448    0      
96     -96    
176    -192   
112    -80    
-32    0      
496    112    
-336   80     
-1728  -160   
208    -208   
32     64     
64     -288   
144    -32    
144    -80    
-32    -128   
176    16     
64     -160   
128    -208   
-320   16     
352    -112   
-80    -16    
288    -112   
16     16     
-144   32     
16     -64    
128    -16    
-80    -64    
128    64     
0      -16    
48     -96    
304    -1568  
32     -16    
-160   -64    
48     64     
128    -64    
64     16     
64     48     
48     -144   
-336   -96    
-64    0      
-48    -64    
48     -112   
16     -64    
80     48     
-160   -48    
272    -512   
48     0      
112    -48    
0      -16    
-16    -48    
256    48     
-112   16     
0      16     
-80    -48    
64     64     
-416   -16    
96     -48    
352    48     
-96    -16    
16     -224   
32     -96    
16     144    
-32    -416   
128    304    
160    -80    
160    -112   
64     -80    
272    96     
-336   -48    
160    -64    
-400   -64    
80     -224   
112    144    
256    -352   
304    112    
-80    16     
32     -112   
112    -576   
32     96     
176    64     
48     96     
80     -160   
-80    0      
0      -544   
288    336    
-48    -16    
0      96     
-1136  -112   
32     -576   
-112   -160   
16     160    
-32    -16    
-48    -288   
304    -208   
144    224    
64     32     
-176   -32    
96     -16    
-160   0      
-80    -16    
-128   32     
192    -96    
0      -16    
32     -1008  
144    848    
-80    -192   
-112   16     
16     0      
288    -16    
-64    -48    
288    -176   
-48    464    
144    -304   
-32    128    
0      -32    
-288   0      
80     400    
-32    -624   
80     -160   
0      384    
144    224    
-16    -128   
48     -16    
0      -80    
144    -144   
112    192    
16     -80    
144    0      
-192   -96    
48     -176   
-176   -256   
176    304    
-224   80     
192    -448   
0      128    
-160   -48    
96     176    
-352   -368   
-448   -224   
48     96     
16     32     
-192   80     
-848   -16    
0      96     
-16    432    
48     -96    
-128   -320   
-272   -96    
-672   96     
48     160    
-272   -160   
352    192    
-192   -96    
64     -32    
128    32     
-560   -32    
16     32     
-880   -176   
32     32     
-16    -224   
-64    -16    
96     -80    
-224   -304   
-368   16     
48     0      
0      -48    
176    64     
160    112    
-144   64     
-16    112    
-256   64     
-112   0      
-304   -176   
-16    -64    
-608   -96    
-208   -240   
-1360  -128   
-64    -112   
-96    -288   
0      -96    
-288   -16    
-240   64     
80     -32    
128    160    
-192   -112   
-32    -32    
128    -352   
208    256    
-400   64     
-32    -288   
-80    96     
-256   -176   
288    432    
64     144    
176    192    
-208   -112   
-208   112    
32     0      
-160   -96    
112    576    
80     416    
112    96     
-176   -176   
-112   0      
-1120  -352   
16     -64    
-2048  -112   
32     -32    
-144   -96    
272    -80    
80     32     
176    128    
-256   96     
144    0      
-240   -192   
-144   -160   
-48    -16    
32     144    
-64    320    
-128   -48    
64     16     
-416   144    
160    80     
-112   -64    
0      64     
112    48     
32     96     
0      304    
-96    48     
192    -336   
-64    -32    
-64    32     
-176   0      
96     -32    
-64    16     
-80    192    
-224   16     
144    32     
-96    -224   
-624   -464   
32     -320   
-368   48     
320    -240   
176    80     
48     48     
80     176    
0      208    
-48    -16    
32     32     
-240   80     
208    240    
-448   96     
112    128    
112    -32    
-48    -32    
112    48     
-160   0      
-288   -240   
64     -208   
96     -16    
16     -192   
16     144    
112    336    
-256   288    
-128   -96    
80     -240   
64     32     
144    80     
144    400    
128    384    
-384   192    
112    144    
192    144    
208    -48    
0      16     
224    -48    
-80    80     
-128   -112   
-80    -304   
-48    80     
32     272    
-80    160    
32     64     
-32    80     
-80    96     
96     -192   
160    -224   
256    368    
-96    160    
-128   -64    
96     144    
0      160    
-192   176    
144    128    
-32    80     
48     80     
-320   -192   
112    272    
16     64     
-16    192    
112    16     
112    800    
32     -80    
-192   -144   
-128   160    
-32    -128   
256    128    
-144   80     
96     -240   
-432   -368   
64     -592   
160    160    
16     128    
112    -64    
-16    16     
128    128    
128    64     
80     64     
-32    16     
64     80     
16     64     
48     -48    
0      -32    
176    96     
48     32     
32     -16    
-64    -128   
-192   0      
-48    32     
144    112    
80     -16    
288    48     
224    80     
32     32     
-16    48     
-128   16     
-80    0      
160    -16    
-272   -80    
80     112    
128    -192   
112    -48    
-80    64     
-32    16     
-16    -16    
64     -16    
112    64     
144    96     
-96    48     
-32    -16    
-112   -16    
-64    16     
96     64     
96     96     
64     96     
48     -1648  
64     32     
128    48     
-112   -32    
112    128    
16     0      
16     0      
48     64     
64     64     
80     -16    
48     48     
160    64     
-64    32     
32     64     
48     16     
128    -144   
-224   -32    
144    16     
128    112    
128    48     
-128   -64    
320    -32    
-144   -64    
224    -16    
-112   -144   
-80    -48    
208    320    
-352   112    
128    -224   
16     144    
176    16     
240    -64    
-208   96     
128    16     
-16    64     
48     -48    
80     112    
208    176    
16     -80    
192    48     
-256   -32    
128    32     
64     16     
-112   -96    
688    64     
48     -208   
-80    0      
384    -352   
16     80     
32     112    
-80    128    
48     -32    
64     128    
-160   64     
208    144    
-176   112    
32     0      
272    48     
560    32     
-112   48     
-320   -144   
224    96     
48     0      
-128   -16    
160    -176   
-80    48     
176    0      
32     96     
-16    64     
128    32     
80     176    
112    -32    
128    -64    
48     -112   
-176   144    
-96    -192   
80     16     
176    -80    
32     96     
48     -80    
32     96     
-16    -128   
320    -176   
-208   -80    
-16    160    
160    144    
0      -112   
48     160    
112    16     
0      48     
-64    -128   
176    176    
240    -16    
64     -80    
-48    1040   
192    -816   
32     176    
-64    160    
96     -112   
64     336    
272    64     
-224   -32    
96     112    
-64    112    
-32    320    
272    -400   
160    160    
160    64     
160    64     
-160   -112   
48     -96    
-112   -208   
96     384    
-80    96     
48     -544   
16     -16    
96     16     
32     432    
112    -320   
160    -48    
288    96     
-224   192    
-144   -288   
80     -48    
96     -224   
64     -608   
96     96     
48     -128   
160    768    
-880   400    
-112   -192   
64     -144   
64     -416   
288    -256   
176    368    
160    96     
0      0      
16     -80    
64     16     
64     -32    
176    -384   
128    80     
128    -320   
16     16     
80     32     
112    208    
160    240    
80     -128   
64     64     
32     -320   
144    96     
160    96     
96     -96    
160    -16    
0      208    
320    320    
-448   256    
48     32     
288    160    
-144   288    
176    64     
16     48     
-112   -256   
224    -80    
224    48     
16     32     
16     -656   
64     -128   
80     -256   
-64    -64    
176    -80    
112    32     
0      272    
208    224    
-320   128    
-224   80     
-1392  0      
80     -32    
144    176    
224    352    
16     64     
224    -336   
-48    128    
-48    -192   
-80    -80    
144    -32    
128    80     
-192   -80    
240    -128   
-48    -32    
96     128    
144    64     
-32    -288   
112    16     
32     -48    
0      -16    
80     -96    
96     -48    
192    -496   
64     32     
48     64     
208    -32    
-336   16     
144    176    
-112   -16    
-32    80     
-400   -128   
-96    -176   
-144   -144   
16     -272   
80     -48    
-96    -128   
-64    -32    
16     -1024  
256    -16    
352    144    
144    416    
-112   304    
144    192    
288    480    
-432   80     
-320   272    
320    432    
-1040  992    
416    640    
160    192    
224    -16    
-48    -208   
32     112    
48     -368   
-128   -96    
128    -80    
-160   192    
384    112    
96     -48    
-112   -80    
-48    -112   
80     48     
32     -128   
112    16     
112    80     
176    -128   
112    208    
144    -384   
144    32     
-272   64     
-32    -48    
608    320    
-208   320    
-304   0      
480    224    
-608   272    
-64    64     
-192   384    
320    128    
144    -64    
160    -80    
144    -32    
-192   -480   
32     -560   
-288   -368   
208    -144   
-672   -144   
160    32     
-128   -160   
0      0      
-128   -32    
16     -80    
-240   -48    
-96    64     
208    64     
-656   32     
240    160    
-64    368    
-128   336    
-448   352    
-1792  -32    
64     0      
272    96     
144    -16    
192    64     
-224   -112   
144    -96    
32     -16    
128    80     
0      64     
-96    -128   
160    32     
-144   96     
-128   160    
-224   -16    
-176   96     
96     320    
-896   320    
32     16     
112    -160   
-48    -32    
128    -112   
-80    -64    
-208   -112   
-64    176    
-224   0      
-176   -64    
-160   -32    
128    -576   
-16    -288   
160    -192   
-160   224    
-352   -112   
16     112    
-192   576    
0      208    
-144   0      
-64    96     
-208   -64    
320    128    
-176   -208   
-112   336    
64     -336   
-176   304    
-48    -416   
160    -368   
-128   272    
-48    -32    
48     144    
80     496    
-112   -240   
-1520  -32    
80     496    
80     -80    
144    -96    
112    80     
-96    -16    
-112   32     
-32    0      
-80    0      
-144   -32    
80     112    
-128   0      
0      0      
-288   0      
-208   16     
-2624  -16    
432    240    
80     -48    
144    32     
16     48     
-128   -32    
-64    32     
-96    96     
-96    80     
208    32     
-80    -112   
192    16     
-128   144    
-272   -64    
288    208    
-736   64     
112    48     
48     64     
0      -16    
16     -48    
48     -16    
48     96     
-64    48     
-128   -16    
-112   -48    
-128   48     
-176   -16    
208    128    
-256   -16    
192    80     
-304   96     
-144   -16    
-48    0      
64     -32    
0      112    
80     32     
32     -96    
0      -192   
-80    16     
64     128    
80     48     
-112   0      
48     64     
-96    0      
48     16     
0      -128   
-80    -32    
-96    80     
16     -16    
96     64     
112    80     
96     0      
-192   -32    
-128   -48    
0      48     
192    128    
-16    16     
80     64     
-160   -16    
128    48     
-192   -48    
224    64     
-16    48     
32     32     
32     64     
-96    -32    
16     64     
16     32     
0      96     
48     48     
176    80     
-352   -64    
80     0      
-192   48     
48     80     
-64    -144   
16     -80    
256    208    
-64    -48    
96     64     
176    64     
-32    80     
160    0      
128    96     
-400   -16    
256    -32    
-400   -112   
144    48     
-224   -48    
96     48     
128    -16    
0      64     
160    64     
144    64     
-272   -80    
208    -48    
-128   -176   
304    128    
192    144    
-96    -80    
-400   -112   
48     0      
176    176    
-416   -192   
544    -192   
384    32     
288    -64    
0      -16    
-48    48     
192    16     
32     96     
-64    160    
32     64     
-64    272    
-48    240    
224    -144   
-208   0      
96     96     
-208   -256   
112    272    
128    384    
-128   -48    
16     -32    
160    224    
352    32     
-240   448    
48     -416   
16     48     
-48    112    
352    208    
16     0      
80     -208   
-112   272    
-144   -160   
-96    48     
48     624    
304    -416   
16     144    
256    736    
64     -144   
48     32     
160    224    
-176   -320   
48     -48    
128    96     
-16    288    
-64    -48    
-112   48     
432    160    
128    -160   
336    464    
-256   176    
160    240    
32     16     
128    -64    
-192   -256   
288    -288   
192    176    
208    512    
-80    400    
-16    96     
-224   0      
208    -32    
80     -64    
16     -496   
160    128    
-96    224    
256    144    
-16    0      
464    128    
-96    176    
-48    96     
-32    64     
80     0      
-112   -128   
64     144    
64     32     
176    -96    
-16    64     
80     -160   
-96    144    
192    80     
-48    64     
-176   -176   
64     -304   
128    -16    
272    128    
-48    16     
112    -16    
176    48     
64     128    
48     0      
64     -48    
48     16     
-32    112    
112    64     
160    128    
-96    352    
176    256    
-384   304    
-16    -400   
224    -32    
112    112    
16     96     
-192   -32    
112    -208   
144    48     
-256   -80    
80     224    
64     -176   
256    32     
96     -160   
192    112    
-128   336    
48     -144   
208    -112   
80     32     
-16    16     
0      -64    
-48    0      
112    16     
-32    112    
144    48     
192    112    
0      -112   
224    64     
-16    -128   
144    80     
368    224    
-160   160    
-48    -48    
240    -144   
-16    -32    
144    -96    
48     64     
-112   -16    
208    -48    
32     352    
144    64     
176    -144   
-48    64     
144    -176   
16     80     
-64    -288   
112    80     
256    96     
-128   -32    
16     -192   
144    -112   
160    128    
0      -192   
-16    -48    
48     -176   
48     96     
48     48     
-80    80     
32     -208   
0      -240   
-16    -432   
176    0      
32     144    
-16    128    
80     32     
128    192    
16     -128   
-80    -368   
240    -80    
80     -48    
240    -16    
160    32     
-16    -48    
-48    -416   
-96    -208   
48     -96    
64     -976   
432    384    
-64    -352   
-80    -144   
-448   -544   
288    -896   
144    16     
160    -592   
256    112    
0      -288   
192    -576   
144    -160   
176    -400   
112    -400   
64     112    
64     -256   
0      304    
224    -48    
-128   544    
-1856  -208   
-128   -304   
672    176    
-208   96     
-32    208    
-96    -320   
0      128    
224    48     
-256   -464   
480    -656   
96     0      
304    -32    
48     -560   
-128   -416   
0      -640   
-624   -16    
112    272    
208    128    
64     0      
-48    128    
304    -144   
96     0      
48     -256   
-160   -656   
32     128    
-16    48     
192    -224   
144    176    
-96    -80    
112    224    
320    160    
-320   -272   
-224   -320   
160    176    
368    -240   
192    -224   
-208   208    
272    48     
-736   -256   
144    32     
224    192    
-192   48     
112    -224   
16     176    
224    -144   
-928   -48    
112    -80    
-576   -32    
16     -400   
144    144    
192    16     
-16    -32    
192    -160   
-384   240    
416    -144   
176    240    
-32    -240   
-64    96     
-128   -96    
384    576    
-432   -416   
192    -48    
64     96     
-128   -48    
-16    160    
-32    -240   
48     32     
144    -96    
128    0      
32     -544   
80     -224   
32     -16    
80     96     
32     -16    
224    272    
-224   80     
160    -32    
-96    80     
32     -112   
-960   64     
352    -464   
-160   -112   
112    0      
-32    -528   
64     -624   
112    128    
-64    -112   
48     -64    
-304   80     
-112   32     
-112   64     
96     16     
-592   -240   
16     -256   
-544   -48    
48     -48    
96     -16    
16     -176   
32     208    
-32    -96    
192    -80    
-48    32     
128    16     
-32    144    
352    560    
-288   128    
112    -176   
-272   -48    
80     80     
192    32     
-272   -32    
96     368    
-192   0      
-112   -128   
224    -16    
32     64     
-96    0      
96     -32    
-64    -32    
0      -112   
-96    64     
80     -16    
112    64     
64     -64    
-80    192    
-384   -96    
128    -16    
-320   -32    
128    48     
96     16     
-256   0      
-304   16     
-688   -64    
-144   -16    
128    16     
48     48     
112    16     
0      16     
112    -96    
32     240    
-832   -144   
0      16     
144    -16    
-80    64     
-160   -32    
-80    80     
-176   32     
-16    0      
-64    -32    
96     96     
0      48     
112    -32    
-80    -16    
-16    -16    
-16    96     
-144   -32    
16     16     
16     -32    
-96    0      
96     32     
-272   -16    
-48    16     
-128   64     
-32    32     
-96    0      
0      32     
-832   -16    
-112   -16    
0      -64    
64     16     
16     16     
48     32     
-112   0      
64     -64    
-224   -64    
96     -16    
-32    48     
-32    32     
-64    -112   
-112   -272   
-144   176    
-704   -16    
240    368    
-80    64     
112    144    
-64    -32    
-32    -144   
-112   -80    
32     0      
-32    -112   
0      0      
160    128    
-240   -336   
-80    -256   
-112   32     
-112   48     
80     -176   
112    -144   
-1152  -128   
-368   -144   
-80    -16    
-400   -416   
144    160    
80     560    
-336   -112   
32     -208   
-48    -128   
208    304    
416    448    
144    -464   
144    96     
-368   176    
-16    160    
-464   -208   
128    48     
240    -256   
112    256    
112    112    
-176   32     
64     -80    
144    -80    
-192   96     
-96    -240   
-144   144    
176    -272   
-128   -288   
-592   64     
400    -192   
0      704    
-320   -160   
48     80     
-144   -240   
160    -528   
-16    272    
160    160    
-32    288    
112    16     
-112   272    
320    176    
-256   240    
-208   64     
-80    -64    
320    48     
-208   -128   
-160   -128   
-64    -96    
-176   96     
-208   -32    
112    272    
224    224    
64     80     
96     192    
-112   0      
416    176    
-544   96     
0      -48    
-112   -32    
288    224    
-384   32     
-48    -32    
32     80     
-96    128    
64     48     
32     0      
0      32     
-96    0      
32     -96    
-16    -16    
144    224    
-416   -16    
96     96     
-64    128    
400    192    
0      80     
32     -32    
32     16     
16     96     
32     0      
80     -16    
96     -64    
0      80     
16     112    
-192   16     
112    64     
-80    64     
-32    0      
-64    -16    
160    -64    
-96    -224   
224    144    
-240   160    
80     32     
80     0      
-112   32     
224    48     
48     48     
64     64     
-64    64     
80     48     
-48    48     
-48    176    
-160   -208   
624    -256   
-16    176    
0      16     
0      -128   
-80    80     
0      48     
-240   80     
-160   -16    
112    80     
320    0      
-112   0      
384    144    
-448   144    
112    0      
-96    -64    
352    224    
-256   224    
64     64     
240    -48    
48     16     
48     -80    
-32    32     
112    32     
-48    80     
0      -64    
-16    -96    
-16    144    
-64    64     
16     64     
224    16     
-128   112    
-64    48     
-80    -192   
16     -144   
80     16     
160    112    
-128   80     
208    48     
-80    112    
80     208    
80     160    
176    48     
-16    -176   
48     -560   
16     64     
64     224    
48     80     
64     576    
64     320    
-64    -112   
128    128    
80     144    
96     0      
96     -128   
-32    16     
96     -48    
96     16     
-272   64     
240    240    
48     -16    
144    -496   
80     96     
128    64     
112    -224   
176    560    
48     320    
160    -352   
112    112    
-144   144    
48     -224   
-96    368    
-192   -208   
272    -16    
48     128    
160    272    
320    -144   
-320   32     
144    208    
-96    -48    
304    -416   
560    512    
-288   -272   
160    224    
-48    -576   
192    384    
352    448    
-32    -240   
336    112    
-128   160    
-48    -112   
-208   -496   
176    -224   
112    -160   
-112   0      
48     -848   
480    528    
-48    192    
176    -128   
-176   112    
176    32     
-112   -64    
-144   0      
-48    -64    
-288   -960   
16     192    
144    784    
-288   -256   
32     -480   
336    192    
144    32     
368    160    
32     0      
-32    -16    
-144   0      
288    160    
-48    192    
-48    -16    
48     -96    
224    -208   
64     176    
272    -32    
-112   -64    
144    -80    
-128   176    
0      -368   
240    64     
144    48     
80     160    
-128   80     
112    32     
0      16     
48     128    
192    64     
32     -240   
64     -16    
208    -192   
48     32     
-48    -208   
-80    -64    
48     -96    
160    0      
64     128    
112    112    
112    16     
-16    16     
112    -48    
-144   -96    
240    128    
96     48     
64     80     
96     -96    
-32    80     
368    128    
-160   96     
112    64     
16     112    
32     32     
-16    -1056  
128    0      
48     -32    
48     -272   
240    0      
80     -144   
-32    -128   
96     208    
272    112    
-112   144    
-48    0      
736    592    
-208   48     
-240   -336   
240    176    
80     -64    
224    -64    
208    0      
-80    -144   
32     -80    
48     -176   
304    -160   
256    176    
144    16     
112    176    
128    48     
-16    -352   
160    -256   
-16    -272   
32     -32    
64     -192   
96     -48    
-1184  -240   
-32    -48    
-16    -128   
64     -48    
144    48     
48     0      
176    96     
32     -80    
96     0      
496    432    
-336   384    
48     -208   
176    -32    
16     -16    
112    -112   
-1040  48     
128    -64    
272    -64    
-144   -160   
-144   -160   
-112   -480   
-176   0      
96     -1664  
160    32     
208    16     
96     112    
-64    0      
-48    80     
-288   -64    
48     -16    
-832   64     
32     48     
-160   -64    
192    -32    
160    16     
-32    -192   
160    48     
16     -640   
-32    -16    
-112   -64    
96     0      
176    32     
48     32     
-48    -48    
128    48     
96     176    
96     112    
-896   -128   
64     -64    
160    -80    
64     -64    
64     16     
96     -176   
160    160    
-112   -272   
112    128    
-80    16     
144    48     
160    0      
-128   -80    
-32    -16    
160    -48    
0      80     
-144   32     
-288   32     
112    -96    
-48    0      
80     -80    
32     -64    
128    -368   
80     128    
80     0      
32     0      
-16    16     
128    -64    
-368   0      
16     -64    
96     160    
32     80     
-256   32     
80     -112   
144    64     
32     -192   
64     -32    
-32    -688   
80     176    
-48    48     
0      -160   
-416   -192   
80     -160   
-352   144    
304    -16    
-64    16     
96     224    
32     32     
32     -400   
288    -48    
256    160    
128    80     
48     -144   
-32    -208   
-672   -96    
-32    912    
-224   -496   
112    -608   
352    1088   
96     -432   
160    -512   
192    416    
192    0      
288    192    
-208   32     
80     -112   
-320   -32    
-208   -128   
-592   -144   
-224   -32    
-256   -64    
128    -144   
288    -160   
-384   -464   
112    -144   
-96    -208   
272    240    
-128   560    
-384   -64    
96     48     
-544   -192   
-16    32     
-160   480    
0      192    
96     144    
-272   -176   
112    -368   
-912   0      
-96    80     
544    240    
-256   112    
-256   -80    
80     16     
-112   32     
224    80     
-448   -176   
-128   16     
80     160    
0      64     
-32    176    
-624   -16    
-16    -48    
-992   16     
64     48     
192    -16    
192    64     
-32    96     
112    128    
-112   -48    
-32    48     
48     16     
160    80     
-112   32     
-160   -112   
128    32     
-304   96     
192    0      
-480   -96    
-176   64     
-1248  48     
-96    32     
-64    -64    
64     32     
-32    -64    
224    48     
-80    96     
80     64     
-16    -32    
-32    16     
-64    96     
176    192    
-208   112    
-16    -48    
-128   0      
-208   16     
128    80     
0      -80    
112    -48    
-48    -80    
-16    -112   
176    64     
-176   32     
-176   0      
-16    -48    
80     32     
-208   0      
96     -48    
-272   -48    
160    48     
-416   -160   
160    -16    
96     -16    
176    208    
-160   48     
32     112    
-64    96     
80     -48    
0      -16    
112    -32    
128    192    
-336   128    
0      -48    
96     64     
-16    128    
-16    336    
304    432    
-1264  16     
-32    -112   
80     -304   
0      -48    
0      112    
32     112    
16     176    
128    192    
-192   144    
-48    -112   
144    -144   
192    -48    
96     160    
-112   240    
-144   0      
-48    -48    
48     112    
16     112    
0      368    
192    272    
80     64     
-128   80     
144    128    
16     112    
112    96     
96     0      
64     0      
-64    96     
-304   144    
-176   64     
0      -736   
96     -80    
48     112    
-80    -944   
-80    -208   
208    -16    
144    224    
0      64     
-208   144    
-16    160    
0      -144   
-272   416    
-64    -272   
-240   -464   
48     272    
64     -208   
160    -112   
320    416    
-304   -352   
128    176    
80     -80    
-64    -16    
224    208    
32     -224   
112    304    
112    240    
-16    -176   
-16    -112   
64     -80    
160    80     
16     128    
-48    -64    
96     112    
16     176    
48     -320   
-176   -192   
192    32     
-96    -16    
304    192    
-144   -80    
32     -16    
48     32     
32     112    
-16    64     
-96    16     
-176   64     
-48    0      
-32    -160   
-64    -32    
176    0      
224    -112   
208    544    
336    672    
224    288    
-112   -64    
-32    208    
-128   176    
32     -32    
-64    32     
-224   32     
208    80     
416    272    
-192   -64    
32     0      
192    128    
304    208    
80     400    
-64    176    
48     16     
240    304    
-32    224    
-48    -32    
-144   -192   
160    0      
256    96     
-144   80     
576    224    
-368   16     
208    32     
-160   128    
128    96     
112    80     
32     176    
32     80     
0      64     
128    64     
48     0      
0      112    
-96    64     
224    128    
112    224    
128    0      
16     -32    
-160   64     
128    48     
192    -32    
16     0      
-96    80     
16     96     
-48    32     
80     128    
96     64     
32     -32    
80     16     
-32    96     
208    64     
80     48     
-16    -32    
96     -128   
32     -16    
-80    64     
16     16     
-32    160    
160    80     
80     48     
32     32     
32     48     
-144   -64    
128    192    
400    -96    
48     64     
32     16     
-80    80     
320    336    
-192   112    
-176   -16    
176    -48    
0      -112   
144    16     
128    112    
-48    112    
-240   -208   
304    -320   
256    176    
-144   -128   
160    -32    
224    0      
-160   16     
-288   -224   
432    -112   
-64    -16    
-224   80     
144    96     
-16    0      
-144   -32    
80     -128   
64     0      
16     -144   
16     -240   
144    -32    
-48    96     
0      32     
240    176    
-16    0      
-32    160    
-176   -16    
32     -176   
128    -112   
192    64     
-32    -32    
144    0      
160    48     
480    352    
-448   -112   
-32    -176   
192    320    
0      -608   
336    112    
-208   -272   
240    -48    
-48    -32    
256    176    
128    336    
-32    224    
-80    -48    
-32    -80    
-32    -64    
48     -176   
0      64     
-112   -160   
112    0      
192    -352   
80     -112   
240    -352   
176    48     
0      -80    
80     48     
-16    64     
-224   -48    
224    -96    
320    -80    
208    64     
0      -208   
64     96     
160    -112   
32     80     
-16    -112   
-80    48     
16     112    
208    48     
-64    0      
-144   -144   
-80    -64    
112    -112   
32     48     
96     -80    
112    -64    
0      -176   
0      0      
-128   -96    
96     64     
16     -80    
96     -96    
144    -112   
224    48     
336    176    
-64    -160   
-16    -208   
32     -176   
96     -80    
16     -80    
112    -32    
96     -96    
96     -128   
416    224    
-144   0      
96     -560   
208    -960   
160    96     
16     -160   
144    16     
-32    208    
32     -432   
64     16     
-32    -240   
128    -32    
0      -48    
592    352    
-64    -1072  
496    -128   
64     576    
-16    -384   
-80    144    
-160   -48    
-64    112    
0      320    
32     -656   
-32    -208   
160    48     
64     80     
96     -192   
-16    -544   
112    -192   
0      160    
-64    336    
240    -208   
304    208    
-96    -304   
-256   -160   
496    -272   
-112   240    
0      -160   
80     -16    
-288   -16    
176    -128   
384    -48    
-336   -192   
80     144    
-80    -272   
-112   -64    
240    -1392  
272    64     
-16    -48    
192    -16    
-48    -48    
96     176    
-256   192    
352    80     
-576   -80    
48     0      
32     16     
128    -64    
-80    96     
160    48     
208    -48    
80     -240   
208    -384   
-16    -416   
-64    352    
240    304    
96     80     
-240   -112   
192    -208   
-368   -176   
16     -144   
48     -64    
160    160    
-128   80     
32     -256   
-16    128    
48     -368   
368    -128   
32     48     
80     -16    
-256   -48    
384    48     
-240   -80    
-48    -176   
-240   -112   
-80    -32    
-304   -112   
224    -96    
64     0      
0      -208   
-80    -32    
-64    -448   
720    464    
-400   -16    
-112   -176   
-192   -336   
16     176    
176    32     
192    -96    
128    32     
32     16     
-112   416    
256    -48    
-464   -128   
0      -144   
-96    -48    
96     -160   
112    128    
48     -240   
96     -144   
-240   80     
-16    80     
-16    96     
-96    96     
-112   32     
112    -96    
80     0      
80     0      
32     16     
64     -176   
96     -96    
-48    -128   
128    224    
-80    0      
80     0      
-192   176    
-208   -128   
-272   -160   
48     -128   
-288   -16    
96     -112   
64     -176   
0      -80    
-112   -48    
320    -160   
-176   64     
336    -16    
144    96     
-48    16     
-80    0      
-64    160    
-592   208    
-240   144    
320    144    
32     112    
128    416    
-160   176    
128    352    
-336   320    
-1376  0      
16     128    
-80    96     
-336   32     
-96    -336   
-608   128    
-112   96     
-784   -336   
-32    -128   
208    -16    
128    48     
192    -80    
-256   -112   
-64    160    
-32    -96    
160    -144   
-144   -144   
-112   64     
-48    -112   
-64    0      
16     0      
-32    -256   
-32    304    
144    128    
-880   -144   
-272   -128   
48     32     
16     192    
-128   -144   
-416   -240   
32     -192   
128    64     
176    144    
64     144    
-64    -16    
32     48     
-112   32
[truncated: 116,011 more chars]
