# Supplementary material for: A Fault Diagnosis Method for One‐Dimensional Vibration Signal Based on Multiresolution tlsDMD and Approximate Entropy
Source: Hindawi journal article supplement (doi:10.1155/2019/3262818), 2019-01-01
Supplement: f1 [file 3262818.f1.zip › 3262818.f1/gear signals/normal gear signal/Data10.txt]

-80    16     
32     80     
80     48     
-16    64     
-192   160    
144    48     
-16    -32    
-336   -96    
80     80     
-96    112    
-640   64     
304    112    
192    -112   
-128   -96    
16     0      
32     48     
-144   80     
-160   16     
80     64     
-80    32     
-80    256    
-144   208    
96     -32    
112    0      
-128   -176   
80     -96    
208    288    
-1120  128    
192    0      
-32    -96    
-160   0      
0      128    
128    80     
144    48     
-192   32     
-128   0      
-48    112    
-224   96     
-320   -16    
-128   304    
-144   224    
528    -96    
-384   -16    
-288   16     
-160   16     
208    32     
288    64     
-208   -48    
48     160    
-176   -64    
-64    0      
-112   0      
112    96     
-352   16     
-736   -352   
96     16     
64     128    
-1264  -80    
-336   32     
-224   64     
-48    112    
96     288    
-176   80     
-16    96     
96     128    
32     32     
144    48     
128    -16    
32     -64    
176    16     
-208   -64    
96     176    
-480   -32    
256    112    
-336   112    
272    192    
80     16     
-144   -16    
-176   0      
-272   -96    
208    -208   
-80    -64    
-240   0      
-80    -16    
176    80     
-128   0      
160    80     
80     48     
-16    80     
-208   -96    
48     -112   
400    0      
304    80     
-64    -96    
-80    96     
-304   128    
-352   -192   
192    112    
64     112    
288    -144   
-64    -32    
-32    144    
-48    32     
-80    -80    
-192   -80    
-48    16     
96     96     
16     144    
112    80     
-144   -16    
32     64     
-32    48     
112    80     
-48    -96    
0      128    
-288   64     
80     80     
64     112    
32     0      
48     64     
32     16     
-16    192    
0      192    
-96    160    
80     64     
80     224    
208    -528   
-48    352    
192    16     
176    -272   
-48    80     
160    112    
-208   224    
0      -656   
64     512    
-224   -240   
96     0      
-16    16     
48     112    
96     192    
160    16     
80     160    
96     -80    
-368   144    
432    -912   
-16    416    
-112   592    
-16    -464   
-96    240    
176    432    
288    192    
320    304    
-96    304    
32     112    
-224   32     
368    -32    
-208   -64    
128    -368   
-352   -464   
352    -272   
-368   448    
32     144    
336    -48    
176    -80    
16     192    
96     80     
64     80     
-112   352    
288    192    
-256   160    
192    -64    
-16    144    
160    256    
112    32     
48     -144   
32     -64    
-48    -48    
16     160    
-32    304    
336    -48    
48     -16    
80     64     
0      128    
224    48     
-80    -192   
256    112    
-80    -16    
144    -32    
0      96     
-64    240    
336    240    
208    -416   
256    32     
-48    -32    
0      48     
-80    48     
352    144    
-320   64     
0      -32    
-48    -64    
64     80     
48     -80    
96     -96    
224    0      
-80    -128   
128    64     
96     -96    
176    64     
80     -32    
-160   48     
16     64     
-112   240    
32     32     
112    48     
160    -64    
-16    48     
-48    144    
112    0      
336    336    
-240   64     
64     -176   
144    -256   
16     208    
32     272    
80     80     
-64    -112   
96     64     
128    32     
208    80     
0      96     
96     16     
16     96     
96     -48    
112    80     
48     -64    
144    32     
-64    0      
-80    48     
-48    -112   
192    16     
176    48     
-32    128    
-64    -128   
160    32     
0      80     
0      64     
64     240    
-64    80     
176    16     
176    112    
96     240    
128    -32    
-64    -240   
192    -144   
80     96     
-112   16     
-16    64     
96     -112   
192    32     
192    -16    
224    -160   
272    96     
-400   112    
-112   -64    
160    -128   
208    32     
672    336    
-288   272    
16     0      
176    208    
160    96     
112    208    
64     160    
512    752    
-464   512    
80     160    
208    -624   
224    288    
176    0      
-320   -864   
432    -96    
64     464    
128    544    
176    -432   
-64    32     
64     160    
384    -592   
-208   80     
176    -304   
-176   -592   
224    96     
-16    -624   
112    0      
160    -128   
288    288    
-16    -256   
224    96     
-80    128    
80     -48    
96     -48    
-96    -64    
528    176    
-240   -32    
-528   448    
224    -176   
96     -208   
-80    64     
240    16     
-16    -640   
96     16     
160    -592   
-64    -16    
112    112    
144    48     
-32    0      
64     80     
64     -112   
-64    -32    
-544   32     
208    32     
-1552  16     
-128   -112   
80     -192   
-160   -16    
64     -288   
80     -512   
112    80     
192    48     
144    32     
-112   -64    
-48    16     
80     112    
144    -80    
-96    96     
272    80     
-1664  -112   
-320   -96    
112    -16    
32     -48    
112    16     
240    144    
0      -112   
144    -400   
-128   48     
304    -128   
-32    80     
96     -16    
112    -16    
208    352    
-144   -48    
-80    -16    
144    -416   
-32    -48    
64     96     
32     -32    
64     -208   
-96    -112   
-96    -560   
176    176    
48     192    
-144   -32    
64     -64    
-16    0      
96     -16    
128    0      
-96    144    
80     48     
-432   -64    
208    -16    
-448   16     
64     -224   
16     64     
-32    -368   
128    16     
208    0      
64     16     
-144   48     
-80    0      
0      112    
-48    32     
-32    -48    
64     48     
-208   0      
48     -48    
-80    -16    
144    -64    
96     48     
128    -240   
80     -48    
-32    -528   
-48    -96    
112    16     
0      -176   
-32    96     
176    -16    
0      48     
32     -128   
0      -16    
160    -16    
-32    16     
48     -144   
112    0      
96     -128   
-32    80     
-368   64     
-32    -144   
-160   32     
16     0      
-144   48     
192    -48    
-320   -16    
80     -32    
-48    96     
0      48     
-384   -64    
32     -128   
128    48     
80     -32    
80     -64    
0      48     
0      -96    
-176   -288   
320    -32    
-160   64     
64     -16    
-32    16     
-32    16     
144    112    
288    -80    
-192   128    
-816   48     
-256   0      
-736   -224   
-16    96     
112    112    
-224   -48    
192    -288   
-1376  -192   
128    32     
240    16     
-32    64     
-144   128    
-32    96     
240    -208   
-80    -112   
-256   -128   
-80    208    
96     -32    
-160   16     
160    208    
-1072  -16    
576    -480   
112    -1104  
528    -272   
-432   336    
-208   112    
80     -480   
-608   -400   
-768   -608   
-48    768    
400    1088   
-640   -672   
-272   -672   
-256   352    
-16    400    
-272   -192   
-192   -224   
288    112    
-112   208    
-112   16     
688    816    
-912   -160   
0      -480   
208    64     
48     160    
48     160    
-288   -352   
-128   -304   
-176   144    
80     352    
-176   32     
224    -48    
-80    -16    
192    48     
-224   -112   
0      32     
-800   16     
48     256    
80     -96    
272    -240   
-368   -288   
-224   272    
16     -240   
-144   -624   
64     -384   
-464   464    
-16    -128   
112    192    
-256   -112   
336    256    
-48    -48    
-416   64     
16     0      
32     -16    
96     304    
16     -128   
32     64     
-16    0      
48     48     
32     144    
0      -272   
-176   192    
16     64     
96     48     
0      80     
224    144    
-480   -32    
160    -80    
-1184  -32    
112    624    
48     -336   
272    432    
-272   -160   
80     -96    
-16    272    
-16    -208   
272    384    
-128   480    
-272   -160   
288    0      
288    96     
-240   128    
48     -224   
-464   -160   
144    -144   
-112   80     
112    144    
-32    -16    
-160   96     
336    48     
-64    176    
-80    -80    
-80    80     
64     0      
-352   48     
80     96     
-272   -80    
208    96     
-672   64     
0      64     
64     -16    
0      96     
272    80     
-80    16     
-176   352    
240    128    
-64    112    
80     112    
-16    16     
32     -16    
-16    48     
-64    48     
96     80     
160    80     
-208   -208   
432    -208   
-256   336    
128    176    
128    -32    
-48    96     
-288   224    
224    48     
96     -64    
-48    144    
-240   -64    
416    -320   
-416   -160   
288    48     
16     -144   
-128   96     
-64    112    
368    144    
-192   128    
-32    48     
-112   160    
640    528    
-320   432    
-208   160    
96     144    
48     -336   
224    48     
-96    32     
96     16     
-160   64     
96     400    
352    320    
80     96     
192    0      
144    32     
96     160    
64     112    
96     32     
16     -16    
128    -16    
-208   80     
160    80     
96     112    
80     64     
48     128    
64     48     
64     16     
16     80     
-64    -64    
208    -64    
80     80     
-224   -16    
480    -128   
-64    48     
112    128    
-80    -16    
96     32     
-32    80     
32     64     
-32    -160   
96     -64    
-80    -192   
-80    -48    
-32    80     
-16    112    
32     80     
32     -32    
96     80     
-96    -32    
160    144    
-48    16     
-112   -272   
16     80     
64     32     
48     16     
-32    32     
-48    320    
240    272    
32     112    
-32    16     
112    96     
-80    -48    
256    -64    
-320   -240   
-128   -416   
48     -752   
48     -528   
224    64     
96     176    
0      624    
384    336    
-304   -112   
-48    -48    
-176   320    
0      -512   
320    -208   
432    608    
32     -192   
-400   -208   
64     80     
32     -48    
224    -416   
208    16     
-128   -32    
-240   208    
-368   -416   
448    816    
160    -32    
304    -192   
528    432    
-96    64     
-272   96     
368    656    
-496   64     
192    -32    
112    -48    
160    -160   
304    112    
192    -464   
0      0      
-480   -128   
-16    -176   
384    -224   
528    144    
144    64     
192    112    
208    64     
176    48     
48     80     
144    144    
176    160    
-48    -128   
16     -32    
64     -304   
-96    48     
80     -144   
112    32     
48     -16    
96     160    
32     48     
64     16     
32     32     
80     16     
80     80     
96     16     
-32    48     
80     -112   
176    64     
0      -320   
176    80     
-32    -464   
96     64     
-128   -144   
128    64     
-224   -112   
224    112    
-128   96     
272    16     
48     64     
32     -80    
112    64     
176    -48    
-64    128    
80     -256   
112    64     
128    -144   
-80    96     
144    64     
-144   -80    
112    208    
240    80     
112    80     
-64    16     
128    32     
96     -32    
128    64     
64     -256   
-320   16     
96     -16    
16     80     
96     -160   
224    80     
16     160    
80     0      
16     0      
48     48     
192    96     
-96    -64    
272    192    
-144   176    
224    32     
32     -192   
48     112    
48     -48    
-112   80     
64     -128   
256    112    
-80    -16    
48     32     
80     -48    
-64    -80    
240    -272   
32     -32    
160    -32    
-16    -48    
0      -32    
160    -32    
16     64     
-144   64     
192    272    
-32    0      
352    -976   
144    32     
-240   -304   
-16    48     
288    96     
112    32     
208    64     
-32    -320   
160    -160   
128    -928   
80     80     
160    160    
-32    -96    
80     -16    
48     0      
48     -176   
16     64     
-48    -16    
144    32     
16     16     
48     -176   
32     -48    
80     -320   
80     -160   
32     -352   
80     -16    
16     -528   
48     -112   
16     -464   
224    176    
144    -48    
-32    144    
16     -96    
96     -320   
-48    -16    
128    32     
-1312  -144   
-96    -112   
176    -112   
-144   -144   
64     32     
-64    -528   
304    -96    
416    128    
-208   16     
96     -144   
16     128    
96     0      
128    144    
-32    -96    
192    -32    
-320   -32    
352    -256   
256    304    
192    -64    
-16    48     
48     -320   
96     -400   
-64    -832   
16     352    
-96    -32    
-224   -32    
80     -256   
192    112    
32     -16    
160    0      
-304   48     
-96    16     
-192   -80    
-160   -96    
-80    -128   
608    -80    
176    -1264  
416    272    
-400   288    
-352   -80    
-256   64     
-80    -144   
320    16     
80     -400   
544    528    
-432   -224   
-16    16     
-1408  -48    
0      160    
-144   688    
240    -496   
112    -432   
32     -64    
-112   464    
96     80     
-128   -144   
96     240    
192    -272   
-128   -16    
192    112    
-272   32     
112    -80    
-80    96     
160    -144   
-912   -176   
-64    -224   
208    448    
-32    -80    
-96    -128   
144    -32    
208    288    
-208   112    
64     -144   
-624   0      
-144   -256   
-192   -112   
160    -64    
-256   -288   
0      0      
80     160    
0      48     
-80    -32    
160    -192   
288    192    
-32    16     
48     160    
-160   -32    
0      -32    
-64    -16    
128    96     
-192   80     
112    -32    
-128   144    
-128   32     
80     112    
192    160    
0      160    
-1504  0      
-1744  64     
-224   48     
-1168  16     
80     -16    
128    32     
-176   0      
32     -64    
-80    288    
16     -16    
-176   160    
0      80     
-64    224    
16     144    
192    576    
-512   128    
-112   352    
272    592    
-720   112    
-240   -48    
16     -96    
-48    112    
448    144    
-240   96     
128    256    
-16    -64    
-16    -80    
64     176    
-144   -176   
112    -160   
-128   -16    
-32    0      
48     -32    
-80    112    
-64    208    
48     224    
-80    -288   
-1456  -224   
-128   112    
-80    96     
176    64     
-240   -112   
208    -48    
-176   -176   
16     96     
-80    -80    
32     -64    
-144   -112   
96     0      
-80    128    
-144   32     
96     0      
-176   -128   
-128   32     
-1792  208    
160    16     
48     -96    
48     320    
48     -16    
-16    80     
64     64     
-208   32     
64     16     
-16    96     
-240   208    
-112   -144   
32     -144   
-608   -96    
80     80     
-1584  -128   
-16    64     
64     -32    
16     144    
-16    -64    
-96    32     
-80    160    
288    -80    
-32    -432   
32     -336   
-144   -80    
-192   64     
-32    64     
96     256    
-64    576    
-240   -32    
64     208    
208    32     
32     352    
-64    0      
-32    -192   
-48    16     
-144   48     
-32    -32    
-224   -64    
128    80     
-112   -112   
208    304    
-160   144    
80     176    
-528   -528   
32     -224   
-256   -64    
-240   96     
32     96     
-64    16     
368    -176   
-32    -176   
0      -48    
-368   -112   
-80    80     
-320   -64    
64     112    
-192   -176   
128    80     
-32    304    
176    160    
-560   -96    
-144   -160   
-48    112    
128    80     
112    -80    
-96    208    
144    368    
-224   -96    
0      -368   
32     224    
144    256    
-288   -224   
-80    -624   
112    480    
-16    32     
112    -208   
288    176    
16     -128   
-64    -16    
32     -64    
-112   -48    
-448   176    
112    -1456  
176    336    
432    512    
176    -176   
-96    304    
-256   -48    
-272   -224   
-192   416    
96     304    
304    752    
-112   288    
240    112    
-112   272    
-208   32     
176    0      
16     48     
176    -32    
16     -16    
144    80     
80     32     
-48    144    
-352   0      
32     -64    
176    48     
240    64     
96     224    
416    288    
-368   64     
-304   -80    
-352   -112   
80     -64    
208    80     
80     96     
368    96     
-144   -32    
-192   48     
144    -112   
-416   -144   
-352   96     
-352   112    
448    192    
-48    16     
-144   48     
16     -48    
80     32     
48     48     
192    176    
-288   192    
80     64     
-128   -80    
-64    32     
64     64     
-48    48     
144    0      
16     64     
112    96     
96     0      
-112   -16    
48     80     
96     64     
-48    -48    
48     80     
48     32     
64     48     
-96    0      
80     -16    
-16    32     
32     64     
32     0      
128    64     
-208   0      
80     32     
48     80     
96     64     
-80    -224   
272    -384   
112    176    
0      16     
32     -80    
-208   80     
128    0      
-336   208    
48     -48    
96     112    
0      64     
256    -64    
32     160    
96     64     
128    176    
-48    16     
-16    -32    
176    96     
-48    -16    
112    32     
32     64     
32     -80    
32     32     
-64    0      
144    -160   
144    208    
-80    112    
160    -48    
32     80     
-32    128    
112    96     
-32    -96    
-64    64     
-96    32     
144    -112   
16     64     
112    -224   
160    64     
112    16     
32     0      
16     176    
48     144    
80     0      
32     -16    
-16    32     
96     -96    
128    -32    
80     128    
48     0      
-160   -32    
256    -144   
16     -128   
96     128    
256    32     
-176   64     
-112   64     
64     48     
112    -64    
32     48     
144    -48    
-64    -80    
112    -48    
304    192    
-176   96     
128    -192   
64     80     
112    -80    
112    32     
64     -224   
144    -16    
-16    192    
128    16     
-32    -80    
-256   16     
384    -624   
192    528    
-48    352    
64     -128   
64     -208   
16     80     
16     48     
304    0      
96     32     
-256   -240   
208    16     
-80    192    
48     -48    
96     128    
112    192    
80     64     
144    368    
-16    -496   
112    -48    
-16    48     
-112   96     
240    -16    
16     -224   
0      496    
48     -352   
160    -16    
96     224    
384    416    
-96    208    
-48    16     
-16    48     
80     -16    
-368   -304   
336    -1088  
64     304    
80     48     
208    -48    
-64    240    
-32    -32    
64     80     
0      -80    
32     -336   
80     160    
16     16     
208    80     
64     112    
32     80     
0      0      
-32    -192   
0      112    
16     -384   
-64    -272   
-16    -16    
-32    32     
96     -48    
-16    0      
48     -624   
352    176    
64     96     
80     80     
96     -96    
-224   -592   
112    -336   
-64    0      
-304   -1600  
144    -176   
144    -112   
432    -32    
560    272    
-160   -16    
0      -208   
-16    0      
96     -304   
64     112    
192    -144   
128    80     
-2080  -16    
-208   -192   
224    -176   
256    -160   
48     -16    
240    -448   
96     -144   
-144   -128   
0      -240   
96     -208   
144    48     
32     -64    
64     0      
192    -16    
64     112    
-416   -48    
144    -128   
112    -48    
80     176    
16     32     
48     -96    
80     160    
176    -464   
48     -32    
160    -32    
160    80     
64     -192   
-176   -176   
0      -240   
144    -48    
-32    16     
192    112    
128    112    
0      -160   
144    -128   
96     -256   
128    -32    
80     96     
96     -32    
-16    -96    
32     64     
208    -240   
0      -240   
-32    -32    
0      32     
-320   400    
144    208    
-208   128    
-96    0      
80     160    
560    80     
-80    240    
432    528    
-48    608    
0      -1424  
-48    -32    
-16    32     
224    112    
-192   -32    
240    -80    
-112   -272   
192    432    
-304   240    
-384   192    
-16    -176   
208    -224   
-48    -272   
64     -544   
-96    -112   
-80    -384   
-48    176    
0      176    
-16    64     
-32    -32    
144    -32    
128    16     
-128   96     
-128   176    
224    80     
-320   16     
288    48     
288    112    
368    -128   
-288   32     
176    -112   
-80    192    
-64    -96    
336    -240   
-256   -400   
176    -288   
-288   -112   
528    144    
-464   160    
112    -80    
32     -96    
16     -112   
48     0      
-176   -144   
464    64     
-144   -512   
224    96     
-368   -304   
-64    -208   
-160   -112   
208    -48    
64     96     
64     -64    
-256   -32    
-16    -64    
-224   176    
432    144    
-80    224    
80     -32    
96     112    
176    -160   
112    16     
-16    48     
112    -80    
16     288    
272    -48    
176    80     
0      -128   
64     -64    
-192   160    
-16    240    
-64    -16    
-160   32     
-736   -336   
0      -208   
32     -80    
-512   -64    
-32    80     
-640   352    
-288   -192   
64     448    
-80    192    
80     -416   
80     528    
48     -256   
-336   32     
-752   -288   
48     -272   
-304   -176   
208    288    
-80    -192   
-144   48     
96     64     
-752   -432   
-144   544    
-672   -608   
-80    144    
-16    192    
-128   -128   
112    400    
-80    176    
-240   -304   
144    16     
208    448    
224    96     
-80    -80    
-224   16     
80     128    
-128   112    
16     64     
-528   16     
16     0      
-688   -112   
96     -16    
96     -48    
80     144    
-64    32     
-160   96     
-720   -1168  
320    -416   
-304   528    
-752   128    
-48    -64    
-16    -16    
-64    -160   
320    -256   
96     80     
256    640    
-656   192    
-64    -192   
-304   -16    
-496   -224   
560    -64    
-176   -160   
112    48     
368    -32    
320    128    
-208   128    
-176   16     
-112   -32    
192    160    
-288   16     
48     0      
208    96     
-1072  -192   
192    64     
48     0      
80     -112   
208    -96    
-16    96     
-16    176    
240    32     
0      16     
-560   -16    
-256   160    
192    304    
48     32     
-256   -176   
-96    0      
-672   0      
-16    80     
160    32     
-48    0      
-144   64     
272    96     
48     32     
-16    112    
96     32     
-208   0      
-144   80     
-32    16     
16     64     
-336   -16    
16     -16    
-800   -96    
32     80     
0      16     
-128   80     
-80    16     
-112   16     
64     32     
-96    32     
64     16     
160    96     
32     32     
-32    64     
144    64     
-368   -128   
272    -32    
-160   96     
304    64     
-48    64     
112    -32    
-80    32     
-16    144    
-176   64     
80     -48    
-64    0      
-160   160    
0      128    
-304   -208   
16     96     
-96    80     
160    16     
-256   -64    
112    32     
176    112    
-96    -16    
112    160    
-128   80     
-48    -32    
-128   80     
80     -16    
-128   -256   
-64    -48    
-192   16     
64     -224   
0      96     
-16    160    
-144   16     
-144   96     
-48    -176   
32     -128   
128    -96    
-96    -48    
144    64     
-32    -96    
-112   48     
112    112    
-48    48     
256    160    
-208   128    
-144   -112   
112    112    
-128   0      
32     -112   
240    368    
-224   80     
64     -112   
112    96     
48     -96    
-128   -64    
176    288    
-16    -176   
48     144    
112    208    
-16    352    
-160   -112   
-48    -160   
144    288    
-16    80     
112    -64    
64     368    
-176   -320   
192    320    
32     224    
-32    -208   
112    128    
-224   32     
-48    -96    
-48    -64    
16     208    
-160   256    
208    -272   
112    192    
-80    448    
96     0      
-32    128    
48     -192   
144    -384   
-256   -928   
-80    -560   
32     -192   
-224   -240   
-144   176    
64     96     
-64    400    
0      48     
144    80     
96     0      
-112   0      
32     -96    
96     128    
96     176    
-80    128    
80     160    
-128   -32    
64     176    
128    144    
-16    112    
48     -16    
112    48     
288    64     
-96    48     
-144   16     
144    48     
-16    64     
288    96     
-192   128    
144    16     
144    32     
-80    -336   
96     -192   
-96    48     
-16    96     
-64    0      
128    48     
112    64     
48     -272   
112    48     
160    112    
112    112    
-64    112    
96     160    
-16    144    
256    272    
208    368    
112    48     
208    48     
-16    48     
-192   32     
-48    -144   
240    -112   
96     32     
176    112    
224    112    
64     16     
176    64     
-144   160    
128    16     
-48    0      
160    -144   
96     160    
-192   0      
32     0      
-16    144    
176    -16    
224    96     
-80    -112   
128    0      
-16    -480   
-16    112    
0      64     
-16    16     
192    -32    
-32    64     
-80    -336   
176    0      
32     176    
-144   112    
144    272    
160    -96    
80     64     
272    -112   
48     0      
80     -800   
-16    80     
-176   32     
192    64     
0      224    
112    -48    
160    288    
-32    272    
144    112    
208    176    
224    288    
-160   160    
112    -48    
48     -48    
256    -16    
128    -48    
128    32     
-48    -320   
160    -16    
-80    0      
144    336    
-96    160    
80     -32    
0      -112   
64     -144   
128    32     
32     -240   
32     -80    
112    -48    
96     160    
-176   -288   
176    192    
144    -400   
64     64     
16     416    
432    512    
-320   336    
-16    160    
480    0      
208    16     
-336   -208   
336    320    
16     720    
48     48     
160    160    
-48    -208   
256    64     
352    432    
128    448    
-16    608    
368    192    
80     64     
0      352    
112    -64    
-16    -128   
128    -320   
-160   -144   
624    176    
32     -224   
160    -176   
128    -144   
-176   0      
304    -400   
16     -688   
288    176    
-64    -16    
-160   128    
-64    -576   
304    -32    
48     -192   
272    -544   
-48    112    
32     -64    
0      -176   
16     144    
192    -96    
-32    176    
-80    -240   
16     -448   
48     432    
160    -160   
48     -96    
-1728  80     
64     -176   
96     -128   
80     -208   
384    64     
-336   -32    
-96    -48    
160    -48    
336    -128   
208    0      
-224   0      
128    -128   
-416   -208   
288    48     
192    0      
-1008  -240   
240    -112   
-160   -320   
400    -32    
-96    -80    
176    -144   
64     -96    
160    -1456  
48     32     
-96    96     
32     -16    
96     48     
-80    512    
16     -48    
96     -240   
-512   -80    
-144   -128   
-208   -64    
288    176    
0      -128   
128    -208   
288    112    
-80    -672   
160    80     
80     0      
-48    32     
64     -48    
32     32     
-144   -48    
208    -192   
-64    -48    
112    0      
32     0      
96     224    
-64    16     
128    -144   
96     32     
16     -208   
96     128    
240    -480   
-16    -144   
96     64     
-48    -640   
16     -176   
240    -64    
32     -48    
160    -16    
-480   240    
-128   -16    
192    48     
112    48     
-32    -64    
-16    -240   
-16    -16    
-32    -720   
96     -16    
128    16     
-96    192    
-368   48     
208    -112   
-176   -80    
384    -128   
-288   128    
112    752    
-528   256    
320    -288   
0      -96    
-80    -160   
624    224    
-448   -432   
-336   32     
-128   96     
-192   -192   
224    16     
0      144    
-656   16     
96     -48    
-80    256    
-224   80     
-64    -96    
160    -144   
48     112    
432    16     
-48    144    
-160   -208   
368    -16    
-48    16     
432    0      
-160   -16    
32     0      
-496   32     
-320   -48    
64     -80    
32     -16    
128    80     
304    -96    
160    32     
208    -64    
-64    128    
-96    -336   
320    -48    
-96    -16    
224    80     
-224   0      
96     48     
-48    64     
16     -80    
144    -64    
160    -80    
-496   16     
96     -32    
112    16     
-496   -64    
16     112    
-96    -16    
-480   -96    
224    64     
-384   64     
-48    16     
32     16     
-240   32     
144    16     
-96    0      
80     128    
48     112    
-144   -32    
80     16     
-592   -80    
0      144    
32     48     
-96    -16    
-64    -48    
-112   96     
-272   64     
-944   -80    
-64    96     
144    0      
-48    -144   
240    -176   
-96    96     
112    -128   
-144   -112   
80     -336   
-240   -32    
96     96     
-176   64     
-208   -160   
-288   -96    
-32    48     
-96    -16    
48     -32    
-1424  -192   
-352   -192   
-176   -240   
80     -64    
160    16     
-16    256    
176    128    
-48    48     
64     -48    
64     -16    
-352   -496   
-208   16     
80     432    
160    128    
16     0      
-304   -256   
128    176    
-352   272    
-16    -208   
-16    64     
112    48     
64     304    
-32    -64    
-32    -64    
48     80     
-48    -112   
-80    80     
-48    64     
-128   -48    
32     -112   
-704   32     
-64    16     
-320   -352   
240    464    
-352   -736   
16     -112   
480    304    
-384   -368   
-48    704    
-192   -592   
128    -544   
0      -64    
224    480    
-320   -16    
-144   0      
-304   64     
336    96     
-1056  352    
-176   -16    
-128   -80    
208    0      
-128   -112   
-32    -128   
-48    -16    
-48    80     
-192   32     
64     224    
192    224    
64     80     
80     224    
-64    48     
464    208    
-720   96     
-16    0      
32     -48    
192    192    
-176   112    
80     0      
64     96     
-224   96     
112    48     
-80    16     
0      64     
-80    16     
16     -112   
0      -112   
160    192    
-848   0      
128    96     
96     192    
208    64     
0      64     
-16    -16    
-32    0      
-112   64     
0      16     
0      16     
64     -80    
-80    32     
16     112    
-560   -64    
80     80     
-240   64     
-224   48     
160    0      
-48    -128   
-32    -224   
224    144    
-288   96     
96     32     
96     0      
-80    48     
144    32     
-32    16     
32     112    
-80    96     
80     48     
16     32     
-48    160    
-160   -192   
560    -352   
32     64     
-48    96     
112    -112   
-48    64     
-32    -48    
-272   80     
-256   80     
-224   48     
320    64     
80     0      
480    48     
-320   112    
-320   16     
-224   -144   
448    144    
-416   32     
-48    192    
128    96     
16     224    
208    16     
-80    -160   
160    -64    
-208   -16    
48     80     
-96    -176   
48     0      
-176   112    
-208   16     
256    -112   
112    -16    
-32    128    
-80    176    
176    272    
48     144    
-32    48     
-160   16     
176    16     
-240   64     
16     64     
-64    48     
80     80     
64     -16    
304    256    
64     192    
32     144    
-160   0      
144    -208   
48     32     
-16    544    
176    336    
-80    32     
128    80     
96     160    
16     208    
-112   144    
-80    192    
16     -48    
-128   -176   
-64    -112   
144    96     
-48    80     
80     112    
336    480    
-240   -416   
352    -272   
32     432    
-16    48     
256    -192   
112    224    
16     -224   
-288   96     
0      -32    
-48    -240   
256    96     
160    160    
0      -32    
80     -96    
-224   144    
112    464    
48     -256   
112    352    
144    -32    
-464   304    
288    -400   
-32    48     
-80    -160   
304    -80    
-112   -80    
176    272    
48     176    
16     240    
0      -224   
32     160    
80     624    
-48    -256   
-16    -256   
112    240    
96     -16    
-32    -352   
16     -176   
64     -272   
16     176    
-80    528    
144    -224   
-112   -352   
-80    272    
144    208    
80     80     
64     128    
144    80     
-16    48     
80     80     
80     0      
-64    -96    
208    32     
48     -160   
272    208    
-192   -176   
128    64     
16     208    
32     128    
80     48     
176    32     
-32    0      
80     -32    
-16    0      
-320   -128   
160    16     
48     64     
112    48     
96     0      
0      80     
64     -16    
160    224    
-48    -64    
96     -16    
96     -16    
336    64     
-336   -96    
48     64     
-16    -16    
96     0      
48     112    
224    -32    
128    16     
-16    -144   
-32    176    
128    -64    
16     80     
80     -368   
224    128    
-160   80     
160    16     
0      64     
48     112    
144    -48    
112    32     
144    64     
96     0      
32     64     
-112   -144   
192    64     
144    -64    
-64    80     
64     112    
112    160    
96     48     
0      480    
32     176    
320    192    
-160   0      
48     -224   
64     32     
-224   -224   
96     -32    
384    32     
112    304    
-416   -80    
-144   -16    
272    160    
-80    192    
0      48     
128    -272   
224    -112   
-32    64     
-48    -816   
-64    -176   
-128   -240   
400    -176   
320    -32    
272    -96    
-96    160    
-208   -304   
160    32     
-96    144    
-96    -272   
-32    32     
-64    48     
144    160    
592    -160   
-16    -464   
-144   32     
256    -96    
-400   32     
-368   -832   
-192   -304   
80     -208   
640    -96    
272    -576   
368    112    
336    -128   
-128   48     
-128   -160   
112    -224   
-352   16     
160    -208   
288    -16    
80     -224   
256    16     
144    -720   
240    -96    
96     128    
-304   16     
144    160    
-208   80     
368    208    
128    64     
432    -16    
0      -16    
-96    -64    
32     -16    
64     16     
64     64     
-128   16     
384    176    
304    32     
64     -1072  
-48    -64    
-176   -64    
160    64     
64     -112   
-224   -80    
240    0      
-16    -48    
-96    -144   
-128   -16    
-240   -64    
64     16     
0      -48    
80     0      
48     -16    
128    -288   
-96    48     
64     -96    
64     80     
16     -48    
160    80     
-288   -144   
48     -144   
-352   0      
208    -128   
-144   32     
224    -64    
64     -16    
112    -112   
-208   -80    
32     -560   
-192   -32    
176    -48    
48     32     
112    0      
32     -32    
-64    -144   
64     -32    
-96    80     
32     112    
144    384    
-112   -160   
-336   -144   
-32    64     
0      -272   
-32    -528   
176    160    
272    544    
-160   -496   
-16    -64    
336    176    
160    -16    
-128   -16    
-32    -496   
128    -320   
-352   672    
32     208    
-480   -624   
448    432    
-48    176    
80     -576   
112    432    
112    -896   
48     272    
-16    -32    
-96    -48    
368    240    
-176   64     
-560   80     
16     -224   
-112   448    
-240   112    
64     448    
272    336    
-208   80     
144    -464   
-48    -448   
-32    -128   
192    64     
-448   96     
-32    -48    
-112   -272   
16     144    
-128   -32    
-208   -96    
48     0      
-64    -112   
64     208    
368    -80    
-272   16     
80     -144   
-128   80     
336    -112   
256    240    
-128   0      
48     -144   
-288   -256   
144    -128   
-96    160    
-192   64     
240    -48    
64     64     
-224   64     
-864   -64    
192    0      
-576   -32    
16     160    
80     -16    
-592   -64    
16     16     
-352   80     
-208   32     
48     -80    
288    32     
-64    96     
32     -64    
-688   -224   
-144   112    
-368   -16    
32     64     
32     -16    
-288   -64    
-80    16     
0      -16    
-272   32     
-304   80     
48     0      
-64    -16    
-112   80     
208    208    
-336   80     
-320   -128   
16     32     
64     16     
144    64     
-64    -160   
0      -48    
16     -80    
32     -112   
160    112    
-80    96     
-176   -32    
-272   -64    
-32    48     
-1776  16     
48     64     
64     16     
320    80     
-304   -192   
192    -32    
80     96     
0      112    
-80    32     
-32    48     
80     16     
-96    -64    
-32    -112   
0      -16    
-48    208    
-608   64     
176    -32    
336    80     
32     96     
-48    -64    
128    96     
-144   -32    
0      -32    
272    160    
-144   112    
-16    128    
-16    144    
-48    48     
-208   -176   
160    -320   
-400   -160   
208    112    
-1728  -128   
16     0      
-160   -128   
48     160    
128    144    
96     0      
16     -16    
-176   -352   
-112   -144   
-240   64     
64     -32    
32     -96    
-128   -224   
-112   0      
144    192    
-1264  32     
64     112    
16     -128   
-224   -256   
-96    704    
96     144    
-208   -128   
128    704    
176    240    
-224   192    
112    -64    
-368   32     
-64    128    
-208   -240   
112    -32    
-592   32     
352    -32    
112    -112   
-240   608    
64     -112   
-16    128    
-224   -16    
128    -144   
-16    176    
-64    -32    
32     -16    
-320   32     
96     -32    
-64    112    
208    -64    
-304   32     
-16    32     
-48    336    
32     48     
-80    -64    
144    64     
-16    0      
-160   -80    
288    176    
-80    336    
128    144    
112    176    
-96    16     
-16    -64    
-16    112    
-16    64     
-16    -32    
-32    0      
-16    32     
16     32     
224    48     
96     -16    
144    112    
240    208    
0      256    
208    640    
0      -160   
-320   -48    
-304   64     
96     -208   
-64    -144   
16     -32    
176    -192   
144    -64    
48     96     
-16    -16    
96     16     
-176   16     
144    -16    
-160   0      
0      144    
-96    -32    
-32    144    
-208   112    
-48    64     
64     64     
0      16     
-32    -32    
112    0      
0      64     
-144   48     
320    16     
-160   32     
336    96     
-224   48     
128    96     
112    128    
-144   48     
288    128    
-176   32     
96     0      
16     32     
64     96     
128    192    
32     320    
-256   80     
336    0      
-192   -64    
16     96     
-144   -16    
64     -48    
-48    64     
144    80     
80     80     
128    96     
-112   64     
32     48     
-16    80     
128    16     
128    80     
-304   16     
176    0      
-96    -80    
0      16     
96     112    
144    48     
80     112    
-80    32     
80     32     
80     48     
48     96     
112    64     
192    -192   
-144   -208   
-32    48     
-48    112    
96     112    
0      64     
144    48     
288    16     
-32    0      
32     -16    
-64    -304   
-96    48     
64     -112   
192    48     
32     -32    
16     160    
64     48     
48     32     
112    0      
176    112    
224    240    
-224   64     
-48    -96    
176    16     
-64    -400   
224    -336   
64     96     
-64    -576   
192    80     
96     64     
-192   -400   
16     -48    
96     96     
80     -32    
112    -48    
-400   -256   
-48    128    
-112   160    
272    144    
416    -144   
112    -96    
-48    80     
-112   -528   
0      32     
-320   -144   
96     -736   
384    -240   
368    336    
208    -48    
80     80     
-16    128    
0      16     
624    -112   
432    224    
-80    288    
-176   32     
-32    32     
176    -224   
320    192    
-96    -32    
272    32     
64     48     
112    0      
240    -48    
-576   16     
-16    32     
0      144    
-304   16     
96     -144   
48     112    
304    -32    
-32    -112   
144    -224   
-288   256    
-464   -48    
128    272    
64     96     
0      32     
-176   -160   
224    96     
384    352    
-16    144    
-64    -144   
128    -208   
448    -16    
64     160    
112    224    
64     -48    
-128   -16    
64     -688   
-16    48     
400    -464   
384    16     
64     0      
224    -48    
-224   -240   
64     -16    
-96    128    
32     336    
192    -96    
176    -416   
48     112    
48     32     
64     112    
-64    -176   
-32    -160   
-16    96     
48     848    
64     -608   
128    144    
-112   160    
64     -608   
128    112    
80     80     
48     96     
96     -448   
96     112    
192    -128   
112    48     
48     64     
32     656    
-176   -416   
64     96     
-272   208    
416    -800   
320    624    
336    -80    
192    208    
-160   432    
-48    -656   
240    -240   
-144   -32    
368    288    
-144   -32    
144    -176   
0      -272   
192    208    
288    -400   
-304   -160   
96     304    
-48    -160   
32     -192   
-96    -288   
208    -32    
48     -576   
112    -32    
96     48     
-32    -96    
224    272    
-96    128    
320    192    
16     128    
128    16     
-32    -208   
32     0      
48     32     
-192   -32    
256    -160   
192    256    
-96    32     
-48    16     
64     -128   
96     240    
16     96     
448    -128   
-192   64     
48     -16    
96     -64    
-160   -80    
64     -336   
96     80     
-1136  -16    
176    -16    
112    224    
48     -48    
192    -48    
80     -320   
16     -192   
-32    -128   
112    16     
112    112    
176    48     
-16    -96    
-192   160    
80     16     
288    32     
-128   0      
-176   -16    
208    48     
-80    112    
112    80     
80     -96    
64     160    
32     -544   
-48    -48    
192    -48    
-112   128    
208    16     
-256   -208   
368    -496   
-48    128    
96     384    
16     -208   
-1728  0      
-48    -80    
-160   -80    
176    -96    
-224   -272   
32     -512   
32     192    
48     32     
160    16     
32     96     
-80    64     
-144   0      
80     -112   
-464   -80    
-32    -128   
-672   -64    
208    -64    
368    -80    
144    64     
-160   48     
64     -96    
32     16     
160    -656   
16     176    
112    128    
-240   -208   
208    16     
48     -64    
-272   -224   
256    48     
-304   160    
64     48     
-592   16     
48     -224   
224    272    
112    -48    
128    96     
0      -368   
32     -48    
-144   -64    
432    -32    
-112   -16    
16     -32    
-352   -176   
160    -144   
-336   -176   
368    -160   
80     -144   
-304   -448   
-32    -32    
-96    -208   
-96    -96    
272    -368   
448    -208   
-336   -176   
304    -80    
-208   48     
-112   -288   
-160   80     
144    352    
-16    -112   
144    -96    
-48    -144   
320    64     
-272   128    
32     -80    
32     128    
-176   144    
-816   -48    
-352   -144   
336    144    
80     48     
288    64     
-160   -240   
272    -128   
256    384    
-176   -32    
64     48     
-144   -112   
288    240    
-128   288    
-640   -352   
160    -80    
-608   160    
272    -128   
-912   -32    
-256   144    
240    112    
-400   -80    
-160   -224   
96     -16    
-448   16     
-32    32     
272    -96    
-256   -48    
-160   -224   
80     -16    
-80    0      
32     32     
-144   32     
-224   0      
-224   16     
-688   32     
128    96     
48     16     
16     48     
-272   -32    
-48    -16    
-112   16     
48     80     
32     32     
-48    80     
-144   32     
-32    -32    
-64    80     
-304   -48    
80     80     
32     -80    
192    96     
-1552  -80    
-144   -16    
-144   0      
112    144    
-112   -64    
208    32     
-32    144    
-128   32     
112    48     
-144   128    
48     32     
64     32     
-368   -16    
32     -32    
-192   -64    
-304   0      
-48    64     
0      -64    
128    144    
-80    0      
-16    -32    
-112   32     
160    32     
48     176    
-208   112    
96     -48    
128    -96    
-144   0      
-112   48     
-16    64     
-688   0      
144    80     
-16    64     
176    64     
-96    -32    
-80    -80    
96     64     
16     48     
-32    80     
64     80     
-48    -96    
-32    -16    
0      80     
0      -32    
-48    -32    
96     -32    
16     16     
-480   -16    
16     32     
0      32     
48     48     
16     -32    
32     64     
16     64     
-128   -16    
0      32     
-112   16     
48     80     
-32    128    
-32    16     
-336   -112   
288    80     
-272   64     
-32    16     
48     -48    
32     128    
-64    32     
112    0      
16     32     
-80    80     
-80    64     
64     64     
-176   -16    
-80    -16    
96     80     
-208   -304   
208    64     
-160   160    
16     32     
112    176    
-128   -16    
0      48     
32     -32    
32     112    
80     32     
32     -96    
-32    -32    
80     208    
-352   16     
64     96     
-128   128    
96     96     
144    0      
-32    -48    
-16    -16    
112    -32    
-48    16     
208    16     
-80    -96    
-208   -64    
64     240    
-32    -96    
32     -96    
-144   0      
-96    -112   
64     176    
-32    240    
-112   -96    
-16    -16    
-96    112    
64     128    
96     0      
112    -48    
-64    -32    
32     96     
112    160    
288    272    
-704   0      
176    288    
-176   880    
256    -336   
576    -64    
544    256    
256    -112   
64     -176   
-224   -240   
-176   240    
-128   -112   
-400   -128   
-96    288    
32     -208   
32     240    
48     256    
-160   160    
112    -192   
96     64     
144    336    
192    160    
48     -400   
-256   -576   
-288   512    
144    -96    
208    96     
288    -64    
-96    192    
192    368    
-736   80     
-80    -128   
-224   32     
128    -112   
304    208    
80     -528   
-144   -432   
-112   352    
48     -160   
288    176    
48     64     
176    -288   
32     704    
-32    -352   
240    224    
0      96     
128    16     
-80    -48    
224    288    
48     -80    
-48    96     
80     272    
16     -48    
-144   -240   
96     -64    
160    80     
112    112    
96     -288   
-112   64     
96     320    
-48    -80    
144    208    
-80    112    
288    -48    
-272   0      
80     -192   
128    -112   
192    448    
64     -80    
-96    -96    
-112   -224   
48     -800   
288    304    
-208   192    
0      240    
-64    128    
160    128    
-80    288    
144    -144   
16     224    
-128   -368   
176    464    
288    448    
96     80     
16     256    
224    176    
-16    400    
176    320    
-192   -16    
0      -16    
96     -32    
0      192    
16     160    
0      -48    
0      48     
-16    16     
64     176    
64     -32    
160    -160   
-48    -64    
272    240    
-128   64     
64     0      
64     -48    
352    224    
-256   128    
48     -272   
64     -80    
-96    0      
80     128    
-80    -304   
208    112    
-176   176    
208    64     
176    -224   
208    128    
-112   -16    
-16    208    
-112   0      
64     -16    
0      48     
32     -16    
176    96     
-160   32     
464    96     
-16    -272   
16     80     
240    -784   
-416   -416   
144    -64    
-48    320    
144    64     
64     368    
16     -64    
208    96     
112    320    
112    -32    
240    208    
-272   -32    
-64    0      
48     -176   
224    208    
224    -80    
176    112    
64     64     
272    352    
-160   96     
128    112    
80     224    
128    32     
144    16     
-32    -160   
-16    32     
-48    -208   
0      64     
208    -32    
64     144    
32     -208   
288    48     
80     80     
-208   32     
32     -208   
96     16     
48     16     
80     -176   
336    144    
-80    -64    
16     -208   
128    -48    
144    256    
-160   320    
-176   112    
96     -336   
96     80     
80     64     
240    160    
80     16     
-96    -1408  
112    -256   
0      -144   
80     -528   
64     48     
0      -16    
-64    -48    
160    96     
32     -144   
208    96     
112    144    
-112   -272   
48     -224   
192    -48    
176    16     
160    -432   
32     -224   
-48    -128   
-32    -80    
192    112    
256    -352   
-96    16     
0      128    
48     -96    
160    256    
208    416    
80     -400   
-224   -160   
-128   -320   
64     240    
-432   16     
-208   -160   
-16    272    
240    144    
128    -192   
128    -688   
336    16     
48     32     
240    -384   
128    -16    
16     16     
-336   -160   
-128   -16    
-368   -336   
48     -96    
496    256    
208    112    
-816   16     
112    -48    
-32    0      
-160   -256   
176    160    
240    112    
464    336    
48     -1040  
48     64     
-528   -48    
-192   240    
80     96     
16     -64    
-304   -80    
368    64     
-560   16     
16     16     
-80    -48    
16     16     
192    -32    
-64    -64    
0      -80    
192    -960   
48     48     
-48    -16    
-16    64     
-32    -64    
400    -16    
-400   48     
304    -64    
192    80     
-320   -48    
192    32     
240    320    
-32    -64    
288    -192   
272    -32    
-160   -288   
160    48     
96     -32    
112    32     
16     16     
112    -32    
32     32     
0      16     
-32    -16    
-96    -48    
-48    -48    
80     -32    
240    -64    
-96    -32    
128    -64    
-16    -176   
16     48     
112    -96    
192    -128   
-160   32     
32     0      
-96    0      
176    -48    
-752   -32    
176    -32    
-384   -32    
128    -96    
-400   -16    
64     -112   
208    64     
64     -288   
80     -48    
32     -1360  
96     144    
-256   -240   
384    -304   
-576   112    
272    160    
-80    -112   
112    64     
0      144    
-144   32     
208    -128   
224    -80    
-80    144    
144    -48    
-96    0      
48     112    
192    16     
-80    -16    
224    -32    
-240   32     
0      -32    
32     -80    
64     48     
-160   128    
176    -80    
48     32     
96     -112   
32     -16    
-144   -32    
96     128    
-80    0      
-352   64     
-48    -16    
32     -32    
-64    48     
208    64     
-80    0      
48     -48    
-288   -48    
-960   16     
-176   112    
-320   -144   
96     48     
-192   -240   
-112   -160   
-256   80     
-16    -48    
288    128    
-304   64     
64     32     
288    32     
-320   -48    
288    -16    
-288   -32    
-176   -32    
32     96     
-32    0      
0      128    
-240   -80    
-160   -32    
-112   112    
-256   0      
224    -64    
-272   -256   
-80    48     
-272   64     
64     0      
176    32     
-96    176    
128    -32    
-48    -80    
-48    0      
-32    48     
144    272    
-320   -160   
208    128    
-224   192    
-80    -240   
-416   160    
-80    -48    
-864   -16    
-16    -144   
-1120  16     
-80    -48    
-176   -80    
48     144    
32     -608   
-32    352    
-80    48     
16     -80    
64     96     
-32    -48    
48     48     
48     32     
-32    -80    
-64    128    
-192   -96    
-1120  -880   
-32    448    
-48    -80    
208    192    
144    32     
-128   48     
16     272    
224    16     
0      -432   
-112   -336   
-192   320    
-208   -80    
-192   -64    
-192   448    
-32    -160   
-672   -288   
176    0      
-352   -656   
-448   -480   
-128   96     
-96    48     
128    176    
144    -16    
0      144    
-224   192    
-32    -224   
32     -128   
80     16     
48     64     
-32    -416   
-400   -976   
0      288    
-544   448    
352    96     
48     384    
32     128    
-32    64     
-16    112    
-416   -416   
-96    -320   
16     -256   
-304   -272   
192    -80    
-320   -64    
560    0      
-112   128    
448    80     
-864   -64    
208    240    
32     -32    
-112   16     
80     80     
-176   96     
320    176    
-176   160    
128    160    
-48    80     
0      16     
-160   -32    
256    -128   
-144   0      
-64    128    
-1360  -80    
-64    -96    
32     -80    
16     -128   
144    -32    
-128   64     
0      -48    
-80    -64    
-48    48     
-48    96     
0      64     
-128   -32    
176    0      
-160   -96    
-16    -128   
-224   -80    
320    -96    
0      192    
192    96     
-128   80     
32     160    
16     32     
320    432    
48     192    
96     -112   
528    464    
-304   128    
0      -96    
-208   -352   
-48    48     
176    368    
-384   32     
128    -32    
-64    -288   
96     64     
-224   -448   
-80    -320   
176    96     
48     64     
-320   304    
64     32     
-192   384    
592    480    
-320   688    
-96    272    
16     80     
128    80     
96     96     
112    32     
-80    0      
208    0      
160    -16    
96     32     
144    0      
-160   -96    
-32    0      
-112   48     
224    128    
0      32     
144    -16    
0      64     
-144   48     
304    -208   
-32    112    
224    112    
-128   80     
144    176    
-32    -160   
128    16     
-160   -96    
288    48     
304    464    
-160   736    
96     272    
-48    16     
512    336    
-80    704    
-48    224    
80     -64    
160    32     
-96    16     
336    128    
-192   32     
496    112    
128    -64    
-112   -32    
-128   48     
-96    -880   
-32    48     
176    80     
80     240    
448    336    
-144   256    
-224   48     
-144   -144   
64     -160   
240    16     
-96    400    
288    224    
-32    16     
-32    0      
-80    -48    
-16    -368   
32     32     
304    -16    
176    64     
0      192    
-80    -48    
64     -16    
80     48     
-48    16     
-112   -64    
176    -288   
32     -144   
0      -32    
240    -224   
240    128    
160    -64    
224    80     
-256   -640   
0      -192   
32     -224   
80     -176   
112    64     
304    208    
144    224    
32     -96    
-80    176    
160    -32    
-32    160    
-128   0      
208    -48    
64     -32    
96     -96    
144    -592   
368    640    
-336   -192   
64     -48    
80     32     
-32    -64    
32     -16    
208    112    
96     0      
-336   64     
528    128    
336    544    
-528   -256   
224    -736   
64     64     
288    -128   
288    0      
176    144    
240    176    
-112   176    
-32    416    
-208   48     
-16    32     
80     128    
-64    64     
288    176    
-160   0      
112    16     
0      -80    
176    32     
192    64     
672    336    
-480   -1424  
-432   -128   
256    -256   
144    144    
-80    64     
272    16     
-480   32     
48     112    
192    48     
-32    32     
-16    176    
304    -160   
208    32     
160    -400   
32     96     
144    -352   
-272   -32    
80     -112   
496    336    
-80    0      
352    48     
-240   -112   
368    -80    
240    176    
-64    -80    
48     64     
-224   -96    
256    80     
-64    -160   
16     -128   
176    -48    
-64    160    
-176   -48    
192    96     
80     80     
240    48     
128    48     
144    48     
16     64     
48     -176   
64     16     
-48    -16    
32     80     
-48    -16    
80     -32    
96     48     
32     48     
32     -64    
208    64     
48     96     
176    -208   
272    -288   
-240   -128   
96     -384   
32     -144   
16     48     
144    -32    
112    80     
208    336    
144    16     
176    -192   
128    -912   
112    16     
-144   -336   
-208   -16    
-32    0      
192    112    
-48    -32    
176    -144   
-64    -64    
192    -160   
0      0      
144    -64    
208    -16    
64     208    
-48    80     
256    0      
304    64     
80     -112   
-32    -80    
-144   -80    
-32    -192   
320    128    
-336   48     
288    -48    
240    -368   
16     16     
176    -640   
16     -64    
320    -96    
-256   32     
112    32     
16     -16    
112    -48    
176    -48    
-768   -80    
224    -48    
-144   -32    
64     -16    
96     -32    
0      16     
112    -48    
128    -80    
128    0      
80     192    
32     240    
160    -144   
64     224    
128    16     
64     -16    
-80    0      
80     64     
-752   32     
-112   48     
224    -48    
-80    -32    
224    160    
16     80     
16     -80    
144    -864   
-32    176    
64     -80    
-144   -208   
-64    288    
16     0      
32     -16    
240    -80    
-176   -368   
-160   144    
-704   -288   
16     224    
-80    16     
176    -80    
256    240    
-288   -448   
64     96     
368    0      
32     -112   
-64    -80    
-32    -80    
64     32     
-16    128    
-416   -32    
144    96     
-384   288    
112    560    
16     112    
112    -496   
-96    80     
192    352    
352    128    
144    608    
48     64     
-64    -32    
128    384    
32     -32    
64     176    
32     -16    
160    208    
-144   128    
80     160    
-832   112    
-96    -144   
48     80     
304    -128   
-16    160    
80     -32    
32     -128   
-528   -160   
224    240    
80     128    
16     -96    
-16    -80    
192    -208   
-128   80     
96     0      
-304   16     
-64    -320   
368    288    
-192   -32    
112    176    
-640   208    
80     -32    
176    80     
16     32     
-192   112    
48     240    
-128   16     
-48    -144   
-224   -16    
-128   -32    
96     304    
-48    -16    
176    -112   
-1072  -336   
320    48     
64     80     
-208   -32    
-240   -64    
-1088  48     
-128   -16    
128    80     
-208   -16    
240    -16    
-80    80     
-416   -64    
192    -16    
-576   -160   
0      -64    
-464   -32    
-128   -16    
64     80     
-160   -80    
48     224    
-1312  16     
32     144    
320    176    
144    192    
80     -48    
-192   -80    
-80    -208   
-32    -80    
-96    -192   
96     -32    
192    192    
16     64     
-256   32     
160    16     
-224   -32    
-128   48     
-160   -64    
-272   -144   
48     16     
-80    -64    
-16    96     
-144   48     
32     32     
64     -48    
208    112    
-80    128    
16     32     
-96    -176   
-224   -16    
160    -240   
352    272    
-176   272    
-544   -16    
-192   -112   
-176   -112   
-64    128    
32     16     
112    320    
272    -48    
-384   80     
80     160    
32     -32    
256    592    
112    192    
160    16     
-48    -16    
-224   -352   
-192   272    
128    96     
-512   -32    
400    272    
0      448    
-208   48     
-128   16     
64     224    
16     -32    
-80    0      
-64    -432   
-352   -224   
-224   -464   
-80    -640   
240    -48    
-208   144    
336    16     
-336   48     
96     0      
-208   80     
160    176    
-32    416    
256    320    
224    416    
80     192    
-96    -80    
-128   112    
0      -144   
-96    128    
16     -192   
-160   336    
176    144    
80     160    
208    144    
-544   -48    
96     160    
608    688    
-544   720    
96     208    
-272   64     
0      80     
0      -96    
192    -240   
240    -80    
-208   176    
-240   -64    
48     -144   
-288   -336   
96     -176   
-1264  -32    
-32    80     
0      -240   
-384   -784   
160    -208   
-496   -48    
-144   -512   
-96    -336   
48     -240   
-224   -80    
128    -336   
-160   -176   
208    272    
-256   272    
80     240    
96     -320   
320    -64    
-48    816    
128    -96    
-64    -368   
32     48     
-96    16     
112    -144   
-80    16     
128    48     
16     -240   
208    64     
32     160    
-64    32     
16     0      
-32    -256   
-96    -704   
-288   448    
352    -240   
144    448    
-32    -16    
256    16     
-80    -256   
-272   144    
-240   112    
48     -16    
80     32     
256    -144   
-48    -80    
96     160    
-144   32     
-176   32     
-32    16     
-128   96     
-64    96     
32     176    
16     144    
176    -16    
304    32     
-208   -48    
-80    -96    
112    -128   
16     -16    
208    208    
96     48     
-32    112    
-112   -80    
64     -160   
0      -32    
48     176    
-128   48     
864    208    
400    48     
208    -32    
64     -96    
240    -16    
-144   -48    
-112   -16    
-128   -32    
-240   48     
-240   160    
-384   16     
-80    32     
-112   64     
304    192    
-32    48     
96     -48    
288    64     
48     112    
-160   -32    
-208   -352   
736    -128   
-112   -144   
432    144    
208    64     
96     0      
176    304    
-240   416    
-576   -64    
176    -64    
304    144    
-32    48     
80     -96    
240    32     
32     80     
-96    -32    
-16    0      
-48    -528   
160    -48    
0      64     
-80    32     
-192   -96    
-32    -48    
416    64     
160    96     
128    32     
208    96     
-256   -16    
-64    64     
-96    80     
-80    32     
32     80     
0      -128   
112    64     
-160   16     
208    128    
48     0      
16     48     
32     80     
80     32     
-48    16     
48     112    
0      -64    
112    80     
0      -48    
48     -112   
192    96     
-176   -240   
144    -16    
-16    64     
192    80     
96     80     
32     80     
-48    64     
112    0      
-16    -96    
-176   96     
160    -16    
-16    80     
-48    -32    
0      -128   
64     -288   
0      -112   
-160   64     
224    -1664  
128    128    
96     -64    
48     16     
32     176    
48     48     
96     -32    
-16    -16    
160    160    
80     96     
96     48     
-80    -96    
96     -240   
80     -16    
16     64     
128    -272   
0      32     
-48    160    
112    160    
-64    80     
80     -128   
-144   -96    
32     -160   
-32    -96    
160    160    
224    224    
-176   64     
224    -80    
0      -96    
64     0      
-48    -144   
80     288    
-48    -288   
96     32     
-16    96     
144    80     
-112   -112   
208    128    
32     144    
48     0      
48     80     
96     208    
128    256    
64     -400   
32     128    
176    16     
-176   96     
80     -304   
64     80     
96     64     
192    64     
-16    0      
16     192    
-96    32     
432    -448   
-96    128    
128    -304   
128    416    
16     -32    
-208   -1136  
144    -48    
192    704    
0      -112   
96     144    
96     -176   
96     192    
-32    64     
288    32     
64     208    
192    48     
-16    208    
208    0      
-16    64     
64     -16    
-64    208    
-64    -304   
-96    48     
160    -48    
48     256    
304    96     
-80    -352   
0      -112   
-112   -128   
16     -528   
304    -128   
-64    64     
240    48     
-224   -464   
144    0      
32     256    
208    -48    
208    176    
128    32     
48     -368   
80     160    
32     48     
-96    -16    
-224   -32    
192    -32    
48     64     
224    -400   
-48    32     
-144   -608   
64     -32    
32     80     
224    64     
48     -128   
80     32     
32     -128   
0      96     
-16    -144   
144    -128   
0      -160   
112    -80    
32     -16    
48     -304   
96     0      
0      -128   
208    -80    
160    -576   
-96    -208   
432    -16    
32     112    
176    -48    
-16    160    
-64    -48    
192    -128   
-416   112    
32     0      
-1520  -112   
176    -64    
48     32     
32     -64    
160    176    
0      -48    
16     -192   
192    -288   
208    48     
-96    16     
32     48     
48     112    
-144   -16    
-96    -48    
-80    -208   
240    -80    
128    160    
-48    -16    
-48    32     
144    -16    
96     -432   
0      0      
32     -32    
-48    176    
320    -224   
-112   -96    
-16    -144   
48     -32    
-368   -48    
416    64     
-192   32     
64     -32    
-48    -64    
-48    -144   
-32    48     
336    16     
-32    80     
64     -592   
112    80     
192    -128   
0      48     
-32    -64    
112    208    
0      32     
-16    160    
-544   -32    
96     -96    
-1472  -32    
224    0      
-16    -176   
160    -64    
-16    304    
32     -256   
64     224    
96     -192   
-160   -64    
112    -112   
144    -304   
-304   -48    
0      -192   
-240   256    
144    80     
-544   -448   
-112   -784   
80     -304   
-64    80     
288    432    
-176   -608   
-32    -176   
336    -16    
80     -48    
-272   224    
-304   -400   
-400   -80    
-160   -784   
-112   -448   
720    1424   
-688   -112   
-32    -32    
-112   -624   
272    -256   
416    48     
-80    -112   
400    784    
-112   -144   
304    64     
-48    48     
48     -32    
-160   160    
192    -96    
-384   -816   
352    416    
-528   32     
176    -304   
-32    464    
464    -656   
-16    112    
-704   128    
-1136  -80    
272    272    
-288   16     
-112   192    
-16    -304   
464    608    
-240   -272   
-208   96     
192    -784   
-112   672    
-480   96     
-96    -80    
-96    192    
32     192    
160    32     
-656   -240   
64     112    
-368   160    
0      -128   
-528   -48    
-32    160    
400    32     
-96    -16    
-48    -272   
16     -224   
-144   -64    
176    -16    
-304   -128   
112    144    
-32    128    
96     16     
-112   -80    
112    64     
-128   48     
-224   -32    
-128   16     
-1328  -32    
16     48     
-16    16     
0      16     
-128   64     
128    64     
-32    -64    
16     -16    
-80    0      
-96    -64    
176    144    
-240   64     
-144   64     
-144   -16    
208    160    
-64    0      
-32    144    
-480   256    
208    128    
-16    -96    
-48    304    
112    112    
112    16     
-128   -16    
160    -112   
-80    32     
-64    -112   
-224   -96    
128    -288   
-32    64     
0      32     
-32    16     
-2048  -48    
80     240    
-80    80     
192    48     
-32    16     
16     64     
-176   32     
96     -48    
128    -368   
32     -176   
-112   464    
-544   240    
80     -32    
32     80     
16     80     
-496   16     
144    48     
64     64     
304    -384   
-208   -192   
-592   176    
-240   32     
-256   -80    
176    -224   
-96    -96    
16     384    
-352   288    
-320   -176   
96     -144   
-64    -32    
-112   -80    
240    128    
-512   -128   
-240   -64    
-160   32     
-448   48     
-64    80     
-224   -176   
464    -48    
32     144    
160    32     
32     -16    
-96    48     
-192   64     
-208   0      
-288   -80    
32     32     
-16    64     
432    144    
-80    0      
-176   -16    
-112   0      
128    128    
-272   -16    
-192   -80    
-224   240    
192    224    
288    112    
-432   -96    
176    48     
-144   16     
16     32     
-32    -32    
-192   -32    
16     64     
0      32     
128    96     
192    128    
-48    128    
-64    32     
144    48     
288    192    
-224   80     
-160   -80    
160    80     
0      16     
32     16     
16     48     
-144   -32    
-32    32     
48     32     
-64    16     
64     48     
16     48     
112    64     
32     96     
-288   0      
352    192    
-112   0      
160    80     
16     96     
-64    0      
-32    -16    
160    176    
-112   96     
64     96     
-112   -64    
352    240    
0      352    
-48    32     
304    -48    
64     96     
304    96     
272    128    
-32    144    
96     80     
-64    16     
64     -48    
0      -48    
80     112    
64     96     
-48    176    
-96    -80    
144    96     
80     -32    
240    -208   
-48    208    
80     -64    
-16    -16    
64     352    
-176   -176   
272    304    
-288   80     
-80    -336   
192    128    
96     128    
320    -160   
-304   192    
-112   -80    
-240   -272   
-80    1040   
240    -608   
352    272    
-448   432    
208    -384   
-96    32     
-96    192    
256    -176   
224    -96    
-128   432    
80     0      
-160   -48    
144    -16    
48     -240   
-80    192    
208    224    
-304   16     
528    -192   
-176   176    
192    48     
144    320    
160    240    
0      128    
208    224    
-64    -32    
-16    -144   
80     -96    
-32    0      
144    160    
-32    208    
64     -32    
-160   -144   
176    48     
-64    80     
96     -288   
272    176    
-32    64     
16     48     
80     48     
160    96     
-32    16     
224    -48    
-128   -64    
144    16     
-176   112    
192    80     
-112   -64    
80     -128   
80     0      
-48    -544   
0      32     
80     -32    
80     16     
224    64     
0      32     
-96    -16    
176    32     
16     128    
0      80     
288    32     
32     128    
-112   64     
-192   -112   
160    -224   
-32    -128   
192    16     
240    -288   
64     176    
0      64     
16     48     
32     -336   
288    192    
-368   16     
224    0      
176    32     
-32    112    
528    304    
-400   144    
-32    -48    
320    -32    
128    112    
352    64     
-144   112    
32     -208   
112    -160   
-208   -192   
64     192    
-336   -16    
384    -32    
-48    64     
208    0      
128    112    
-160   336    
96     0      
336    -400   
-144   -464   
208    -576   
336    112    
-96    -704   
416    16     
-112   256    
-320   64     
112    -64    
16     -16    
224    16     
128    -48    
208    176    
368    96     
288    128    
-208   -80    
-16    -32    
-96    -176   
304    -32    
192    -48    
288    192    
240    400    
48     144    
80     0      
-192   16     
-208   -48    
208    -288   
144    -80    
-80    -320   
112    -208   
192    -320   
336    48     
0      -128   
128    288    
64     -304   
32     32     
288    144    
-272   336    
160    48     
48     64     
128    -160   
16     -272   
-32    128    
96     -64    
-16    80     
48     -96    
160    352    
304    96     
32     32     
-144   -352   
192    176    
-48    144    
144    -800   
-64    880    
-32    -320   
-128   -480   
-16    176    
80     -1136  
160    64     
128    32     
208    112    
336    416    
-384   -640   
352    -512   
32     -176   
80     64     
144    48     
32     -160   
-112   -208   
192    16     
272    -128   
112    272    
160    16     
-240   -80    
64     -592   
-80    112    
112    -336   
48     0      
256    -112   
64     0      
320    32     
-368   -32    
96     -48    
112    -528   
-416   160    
336    320    
-208   -48    
96     16     
-112   304    
112    -64    
-48    -192   
144    -128   
-128   -80    
272    80     
16     224    
160    112    
224    -32    
-144   -352   
128    -192   
-160   -16    
256    80     
-352   96     
208    -144   
128    -128   
32     -384   
208    80     
32     -192   
32     32     
80     80     
-48    64     
96     0      
-32    0      
16     32     
-32    16     
-320   -48    
192    -96    
-2064  80     
-160   -64    
0      -80    
64     48     
-32    32     
64     -176   
176    64     
96     -1008  
-256   -48    
192    0      
-16    16     
-176   -16    
176    -224   
-112   -112   
48     -16    
-16    -160   
-48    224    
-1184  0      
144    -16    
0      -80    
-64    -192   
176    48     
0      -208   
128    0      
-192   16     
224    0      
16     0      
-48    0      
-96    -80    
112    32     
-128   80     
48     -48    
-560   -16    
128    0      
-208   -48    
48     -64    
64     0      
288    -240   
-176   128    
-192   112    
208    0      
112    -80    
0      -352   
-48    -32    
128    96     
-368   -48    
80     -48    
-544   16     
16     16     
-48    -16    
192    -256   
48     -16    
80     -32    
32     64     
-240   272    
-304   128    
-144   80     
224    0      
-128   16     
-48    64     
-800   -336   
224    -160   
-1296  112    
-160   128    
144    384    
-336   32     
160    -112   
336    -16    
64     -112   
-128   -32    
192    -48    
0      -16    
304    48     
-272   -16    
96     32     
-288   -720   
-48    -432   
-864   320    
-144   192    
160    128    
-32    -64    
-192   -112   
256    -128   
-336   -48    
-16    -80    
-672   -64    
-128   -64    
-1392  96     
-336   -112   
304    -80    
80     16     
224    80     
0      -32    
-128   -96    
160    128    
32     64     
-48    112    
-16    -48    
64     80     
0      64     
-48    -192   
-160   -160   
-832   -144   
32     -128   
-80    112    
-496   48     
-96    0      
112    32     
-448   -48    
112    32     
-64    -16    
-272   -16    
-288   -64    
-416   -64    
48     48     
-16    32     
-96    -64    
48     -32    
32     64     
-784   -64    
32     16     
-48    32     
-64    0      
208    0      
528    256    
-224   16     
-240   -32    
-80    48     
-64    0      
32     80     
-16    -16    
32     32     
-128   -16    
16     32     
-240   16     
-144   48     
-112   -64    
192    80     
-160   -128   
96     64     
-64    128    
64     32     
32     32     
112    208    
224    272    
-176   288    
-64    128    
-112   16     
-144   112    
-96    -16    
320    0      
-416   -48    
240    -32    
-16    -32    
-96    96     
16     -96    
16     288    
-240   -592   
-160   720    
-64    -272   
-96    240    
0      192    
96     384    
32     -1120  
-336   224    
144    -176   
-288   -208   
144    160    
128    -48    
-32    -96    
-16    192    
80     -64    
160    112    
-352   -16    
-176   -128   
112    -64    
16     -400   
-128   128    
64     -464   
-352   -80    
64     48     
-384   -432   
-96    64     
176    -320   
-48    208    
0      304    
288    208    
240    176    
-288   -112   
384    -192   
-240   32     
48     -48    
240    -96    
-288   -32    
96     16     
-160   240    
0      -16    
0      32     
-160   -112   
288    208    
-48    208    
176    0      
112    0      
-112   144    
-128   -224   
-96    16     
64     96     
-96    128    
80     0      
-96    -192   
192    80     
-48    144    
-256   128    
320    16     
32     48     
16     32     
-48    -32    
0      32     
-16    192    
128    -112   
-304   -320   
16     32     
-336   -16    
0      0      
-48    0      
-32    32     
-176   16     
128    112    
-144   16     
160    64     
80     32     
384    64     
-128   32     
-16    -144   
176    -112   
-112   128    
160    80     
144    80     
0      160    
-192   64     
80     128    
80     48     
-32    80     
-32    32     
80     64     
-80    80     
144    32     
112    0      
-32    48     
-96    144    
144    -80    
144    0      
-112   160    
64     112    
-64    -32    
-48    -32    
112    112    
96     160    
-64    32     
160    -48    
0      48     
16     -32    
-16    16     
176    176    
0      144    
-80    -32    
112    -64    
-160   -224   
192    -16    
0      96     
-32    -32    
176    432    
-64    272    
-112   -176   
128    -16    
-48    80     
-64    32     
112    -176   
256    0      
192    384    
416    736    
-208   160    
48     -112   
-16    -32    
320    240    
224    -48    
400    -16    
432    32     
80     224    
-128   112    
-432   0      
-48    -176   
-64    -80    
96     64     
-48    32     
-80    -48    
144    144    
-176   272    
352    192    
-144   336    
-288   48     
352    80     
80     192    
224    96     
32     688    
336    512    
-224   240    
-48    -240   
-128   -192   
368    288    
-336   -80    
432    -32    
288    192    
-160   -400   
80     -96    
-64    -352   
-16    80     
-32    64     
240    32     
176    320    
-128   -144   
208    272    
-32    32     
-48    112    
240    0      
-96    64     
-96    16     
32     -480   
128    96     
128    176    
96     -96    
16     64     
-32    -256   
176    0      
208    240    
80     256    
128    80     
-96    96     
16     -64    
16     192    
-96    -80    
160    32     
160    160    
64     80     
32     224    
96     -496   
-16    96     
112    -1104  
224    96     
-208   32     
256    80     
-64    -288   
304    -176   
-64    -80    
240    160    
48     32     
-80    -208   
64     80     
-144   48     
144    -112   
96     -64    
176    240    
112    -176   
272    48     
80     80     
-64    16     
32     112    
144    32     
96     32     
144    112    
128    48     
-16    -48    
176    64     
-128   -16    
32     96     
96     0      
416    272    
-272   80     
208    48     
224    -512   
-160   144    
32     -96    
304    -112   
-96    192    
96     96     
64     16     
288    -80    
-64    64     
64     128    
48     16     
112    -272   
-112   16     
64     -176   
128    48     
0      -128   
144    80     
-32    32     
160    128    
-16    16     
176    80     
-48    48     
-112   -368   
192    48     
96     0      
224    0      
-112   -192   
-16    144    
80     -96    
320    -64    
-336   -432   
272    176    
-16    64     
272    112    
48     48     
128    -80    
160    80     
-272   -16    
112    256    
256    176    
0      0      
80     -160   
128    32     
-112   -32    
112    144    
320    80     
240    -64    
-96    0      
48     -176   
-112   -96    
-96    0      
-32    -48    
80     -16    
176    -576   
-32    -128   
0      -912   
208    -32    
-128   144    
32     0      
272    -176   
0      64     
128    -496   
-128   -64    
128    -80    
128    0      
-848   16     
144    -144   
0      -32    
96     -64    
208    128    
128    48     
64     32     
-16    288    
144    112    
32     -64    
32     176    
48     -64    
576    432    
-192   400    
-352   -32    
-176   -32    
144    -16    
48     112    
176    256    
-48    16     
48     -192   
-128   -64    
320    -896   
32     32     
-384   -16    
160    64     
-160   48     
128    -208   
-128   -288   
256    208    
48     -128   
304    -48    
256    -272   
272    -400   
336    -192   
96     -128   
-256   -464   
-192   -1040  
-848   240    
-240   -224   
48     64     
304    16     
336    32     
-256   96     
-32    16     
-96    -48    
-144   -112   
-1744  48     
400    176    
176    -112   
64     -16    
-208   -32    
-416   -224   
-32    -256   
-32    -544   
112    192    
224    352    
368    320    
224    -352   
192    -320   
-160   48     
-48    32     
-608   -16    
256    0      
-96    336    
48     -112   
-64    -96    
416    -224   
-80    -384   
176    -1328  
-144   112    
-288   128    
-32    -48    
-80    -176   
192    -64    
-32    176    
272    176    
-208   -80    
-224   144    
-208   -64    
-16    -576   
48     176    
80     128    
144    -208   
0      -240   
-16    48     
48     160    
0      -80    
-112   32     
0      48     
-368   -48    
160    16     
112    176    
-96    -144   
-160   -112   
48     -32    
-272   -176   
288    0      
48     144    
272    -288   
16     192    
-432   -160   
80     -128   
0      400    
224    -208   
16     -80    
-144   304    
-112   80     
-48    96     
208    -224   
176    -336   
160    448    
-144   64     
-128   -48    
-528   -368   
-2400  -528   
-288   0      
64     16     
128    128    
48     80     
-16    64     
112    -80    
-176   80     
32     32     
-336   48     
-272   -208   
32     16     
-432   -128   
240    -32    
-288   176    
-336   -32    
-16    176    
-368   32     
256    128    
-864   96     
16     208    
-176   -32    
-368   -128   
-608   -16    
0      32     
-240   48     
16     32     
272    80     
-400   16     
48     48     
112    -112   
208    -32    
-432   -48    
-288   96     
-320   0      
-144   -32    
208    -192   
-144   96     
-160   0      
160    16     
-64    -192   
192    0      
-144   -80    
64     96     
-224   96     
32     112    
-16    -64    
-272   -96    
-16    -112   
-128   0      
-272   80     
-688   128    
0      64     
0      -176   
48     80     
-48    -192   
304    368    
-192   192    
-64    -64    
16     -128   
-288   144    
16     48     
-48    16     
-16    -48    
-96    64     
-96    64     
-192   -96    
-32    48     
-224   -144   
16     128    
32     48     
48     144    
0      0      
16     32     
0      96     
-176   96     
16     80     
-112   0      
176    -32    
-160   -80    
80     -64    
-832   64     
32     80     
-208   -16    
-208   -96    
176    -64    
0      96     
-32    -96    
-272   16     
32     112    
-112   -48    
-48    0      
-32    -64    
0      32     
-240   16     
144    256    
-528   80     
80     96     
-192   32     
160    64     
32     144    
-112   48     
-80    -48    
-64    16     
-48    -48    
80     -16    
-160   64     
96     16     
48     -16    
-128   64     
144    80     
304    496    
-432   112    
-400   64     
-16    160    
-16    128    
16     0      
-128   -176   
304    192    
128    32     
160    -48    
-352   -352   
-640   16     
0      560    
96     608    
-48    80     
-288   -448   
416    -16    
-48    0      
256    48     
-224   -16    
-112   -224   
0      224    
-64    -16    
-64    -224   
-192   112    
320    96     
368    320    
256    -64    
-224   -32    
-496   -48    
-64    448    
-464   -320   
0      -160   
176    224    
416    160    
-192   0      
-176   0      
-192   -272   
48     -160   
-272   352    
16     176    
-112   48     
-16    16     
80     -16    
192    112    
192    144    
64     -64    
-96    -48    
80     128    
-208   -80    
-160   16     
176    64     
80     96     
352    48     
112    -16    
48     32     
-224   0      
-64    32     
64     16     
64     64     
-48    16     
80     80     
96     48     
-32    32     
0      32     
-32    32     
128    64     
0      -32    
144    0      
0      -128   
-96    -16    
-160   -16    
-32    64     
0      16     
48     64     
-432   -480   
96     48     
-224   224    
112    -224   
224    -64    
96     -16    
112    80     
-16    144    
-144   -64    
-80    32     
96     128    
-16    0      
368    -16    
0      64     
224    80     
48     16     
-80    32     
64     80     
-80    64     
32     32     
-48    -64    
176    64     
16     144    
48     48     
96     144    
-32    32     
208    -16    
-192   112    
-32    240    
32     -32    
288    0      
-192   96     
272    48     
16     -80    
-32    48     
64     32     
-112   32     
240    64     
-208   96     
192    256    
112    112    
32     -48    
32     96     
-144   -192   
-16    -176   
160    128    
64     -32    
144    112    
-16    144    
48     96     
192    64     
-96    64     
80     80     
-48    80     
32     16     
144    112    
-192   -48    
144    48     
48     64     
-32    -176   
352    -64    
-144   -720   
320    80     
32     -80    
64     -32    
32     144    
112    -32    
176    0      
-48    96     
16     -208   
-48    32     
16     16     
-32    32     
48     112    
224    16     
64     32     
-48    -352   
16     32     
128    32     
64     -64    
64     48     
128    48     
-160   32     
96     0      
-32    0      
48     112    
16     16     
-64    -16    
128    128    
48     16     
96     256    
80     32     
-160   96     
352    -528   
0      144    
-144   -80    
48     160    
144    80     
0      80     
96     -160   
160    -96    
-16    144    
80     208    
-96    32     
96     -80    
160    192    
16     48     
48     -80    
144    -528   
-16    224    
64     -496   
128    -32    
-176   -176   
288    -80    
64     224    
240    -48    
96     -64    
-16    -80    
-48    32     
112    160    
0      16     
-304   0      
32     112    
128    656    
-112   -752   
320    336    
-112   -16    
-112   -64    
272    192    
-496   -192   
-80    80     
432    368    
0      -272   
352    240    
368    144    
256    -48    
224    -48    
192    96     
-48    -64    
-64    80     
-208   64     
-80    -64    
-32    32     
224    16     
112    144    
656    288    
-240   1296   
32     -416   
48     -224   
608    496    
-128   -192   
368    128    
208    96     
48     -160   
0      64     
-112   -384   
160    128    
-64    48     
-48    -208   
208    208    
0      -96    
-80    -528   
272    32     
-288   400    
64     -112   
208    -240   
160    -48    
160    96     
32     32     
48     352    
16     -16    
224    -160   
32     -16    
176    -272   
16     160    
256    48     
176    -96    
240    224    
-144   -96    
-96    -144   
80     -640   
-48    128    
32     -80    
16     112    
176    -112   
80     96     
160    -224   
0      -64    
64     32     
32     240    
-592   352    
272    352    
-192   528    
240    336    
16     128    
80     -976   
144    48     
432    480    
-352   320    
192    -80    
-192   -160   
400    -160   
-112   -48    
64     80     
-160   0      
-608   224    
-80    400    
64     176    
368    192    
-16    -112   
-112   -304   
96     16     
352    -544   
288    96     
112    -176   
-144   -48    
-32    -128   
144    -64    
-176   64     
32     0      
-352   48     
208    112    
368    128    
-256   16     
192    16     
64     -64    
48     -272   
128    -288   
-176   -96    
32     -176   
32     48     
128    0      
112    128    
-48    -96    
272    -80    
-272   -32    
176    -48    
-496   240    
-416   240    
96     -144   
112    -96    
-336   -368   
144    -240   
-32    16     
256    -112   
16     112    
-32    112    
-16    48     
64     -144   
64     -16    
-288   -128   
64     32     
-80    16     
0      16     
-880   -304   
80     -96    
-16    208    
208    -64    
-128   64     
336    -880   
-288   240    
-192   -64    
176    -224   
-128   -32    
224    96     
-160   -272   
160    -256   
96     -32    
-64    96     
-32    -64    
-32    -64    
48     16     
48     0      
256    64     
128    -304   
-16    -176   
16     112    
208    96     
176    -16    
112    0      
-192   -64    
96     -112   
-112   -16    
32     -64    
32     0      
48     -176   
64     112    
528    128    
-256   272    
-192   -64    
-144   -320   
-48    -64    
592    320    
-528   448    
-16    48     
-288   -80    
176    64     
-48    -64    
224    256    
-672   192    
-144   -16    
-48    208    
-1040  128    
48     160    
176    80     
-480   256    
256    208    
64     608    
-304   -80    
16     -96    
0      -16    
464    368    
96     592    
0      32     
-128   -256   
-1296  80     
32     240    
-320   -272   
144    -16    
-16    -320   
-96    32     
336    528    
-192   -1264  
-144   -288   
320    528    
-80    -112   
208    112    
32     -128   
-32    0      
176    336    
-336   -176   
256    256    
288    -208   
192    -144   
-352   64     
-272   416    
-496   352    
-592   32     
-96    -96    
-48    -16    
240    176    
-224   32     
-16    -16    
32     0      
368    16     
544    0      
80     112    
-560   16     
-496   0      
128    96     
16     192    
-304   -16    
-48    0      
-240   64     
-384   48     
-112   48     
112    -48    
128    16     
128    80     
-16    48     
-352   -224   
592    -32    
-208   48     
272    96     
160    48     
96     160    
-272   48     
-400   -176   
240    -32    
-256   64     
-80    -144   
128    -80    
160    80     
-64    16     
-112   48     
0      -128   
-48    64     
208    112    
144    96     
-48    -112   
48     64     
-16    16     
64     0      
-80    -32    
-16    0      
-32    80     
-272   0      
-80    32     
-1920  -32    
-96    -32    
112    -208   
-16    320    
224    48     
-80    -16    
-32    32     
-176   16     
-32    -128   
160    -240   
80     320    
288    144    
-32    -48    
-416   -80    
80     64     
-304   32     
48     112    
-48    112    
160    -80    
-240   80     
192    32     
-80    32     
-64    32     
64     16     
16     64     
64     80     
-64    -64    
80     48     
-400   112    
160    80     
-144   0      
-80    -64    
-32    -32    
-16    48     
48     0      
-64    32     
480    256    
-448   176    
144    -32    
-96    -48    
16     80     
-144   -96    
-32    -96    
-16    -32    
-80    80     
-656   -112   
96     -128   
-32    64     
80     128    
-32    80     
160    48     
0      48     
48     48     
16     112    
-64    96     
-80    0      
16     16     
80     -192   
128    -112   
-176   160    
-128   -48    
208    80     
32     80     
208    112    
112    128    
-16    0      
-96    -16    
-128   48     
48     32     
96     160    
-96    0      
-144   32     
80     0      
-208   -48    
48     96     
-80    16     
112    0      
288    -80    
-208   -96    
160    32     
-80    96     
160    -80    
-192   -32    
96     16     
-48    48     
32     64     
-160   16     
160    160    
-368   64     
0      288    
384    16     
224    304    
-176   -112   
-80    64     
112    -32    
240    0      
-144   -208   
416    624    
-144   512    
-80    -112   
304    -128   
-144   128    
-48    64     
-16    16     
192    96     
16     32     
-32    64     
368    224    
-256   -160   
176    0      
80     112    
-208   -752   
-128   400    
-96    -144   
-64    -336   
208    32     
96     176    
0      544    
80     -432   
96     -224   
272    512    
-64    -288   
160    160    
-80    336    
-112   -768   
32     512    
-112   176    
-160   -336   
288    512    
-48    0      
128    144    
192    272    
160    -240   
-176   -16    
-144   -160   
144    0      
128    -16    
80     -160   
144    208    
-96    128    
-112   192    
352    304    
-160   576    
160    -64    
144    48     
192    256    
-304   -96    
-128   -80    
32     -96    
128    192    
192    176    
16     64     
608    512    
-560   128    
192    336    
160    96     
224    -48    
272    -144   
-368   -240   
112    -368   
272    -112   
352    176    
352    -160   
-160   64     
-16    -944   
80     160    
0      112    
0      0      
-128   80     
128    -96    
128    -32    
288    192    
-128   -32    
240    160    
-256   0      
112    -80    
96     -80    
32     64     
256    -16    
64     -736   
128    208    
-112   64     
224    16     
48     112    
112    96     
-48    -32    
192    0      
-64    -48    
64     48     
32     32     
96     96     
-128   96     
48     -112   
128    16     
0      32     
128    112    
144    -304   
32     128    
64     -80    
-32    -160   
160    -160   
240    96     
112    208    
208    0      
-240   -32    
-32    -80    
64     64     
-32    -96    
144    -208   
-160   368    
192    160    
48     -144   
176    -144   
-96    -304   
-80    80     
-96    -304   
432    80     
-160   464    
112    272    
32     -96    
-48    192    
224    -16    
-144   -96    
208    -352   
0      -64    
48     -64    
32     -736   
0      16     
256    160    
-80    80     
16     0      
0      48     
48     32     
160    -80    
-352   -224   
272    -80    
-16    224    
-48    352    
160    112    
224    -160   
96     -160   
0      -16    
128    64     
-32    32     
48     -272   
-96    -112   
144    0      
0      176    
112    -272   
112    -304   
144    -128   
-64    -176   
208    -96    
16     128    
64     -64    
-160   -192   
144    48     
-16    48     
192    -80    
-16    -304   
-48    -80    
112    -368   
64     -592   
0      0      
80     -272   
240    112    
336    -864   
-432   -320   
48     192    
-224   -16    
16     64     
-16    80     
256    -432   
-48    -32    
176    -432   
96     112    
96     -176   
32     -304   
128    -16    
-160   -176   
192    64     
80     -736   
0      80     
96     32     
0      176    
272    96     
16     112    
288    -224   
16     80     
80     48     
112    128    
-256   64     
-48    -128   
144    128    
-64    -576   
0      -192   
-112   -480   
48     96     
224    32     
128    -304   
-64    -864   
256    -480   
80     352    
0      -128   
48     -288   
64     400    
-672   -144   
144    -64    
-2000  -48    
128    16     
16     144    
32     -64    
256    112    
-64    -64    
240    256    
-240   -896   
240    80     
208    80     
-240   16     
0      -256   
128    -160   
-96    160    
96     0      
-48    96     
-368   16     
48     -144   
224    -208   
384    80     
-32    -352   
-80    32     
-800   -272   
256    -32    
64     112    
-272   -16    
-288   -144   
16     -288   
-224   0      
-208   -128   
-784   -320   
-144   -176   
-1680  -80    
336    48     
-144   48     
144    -96    
352    -16    
-16    -416   
416    -16    
-96    -288   
-496   32     
160    176    
-256   -32    
-144   -80    
304    0      
-224   128    
-176   -64    
-48    -160   
32     -64    
-128   224    
96     48     
528    -32    
-16    -176   
-48    64     
144    48     
-320   -48    
112    144    
-16    0      
-32    -128   
384    -48    
-496   16     
848    432    
-736   -64    
96     -80    
-144   80     
-64    -48    
224    -48    
288    -112   
32     64     
-304   -160   
0      80     
-240   112    
-64    -80    
-576   -48    
176    32     
192    112    
-176   -48    
-128   -16    
96     -160   
-112   0      
176    -128   
64     64     
112    -80    
-16    96     
-224   16     
240    48     
-144   16     
208    -16    
-176   16     
144    64     
-256   -48    
192    -16    
-208   -32    
192    0      
32     32     
-48    -32    
32     16     
-432   -304   
-816   -112   
-288   64     
-1808  -48    
-16    208    
176    -240   
48     112    
32     -48    
160    -48    
304    32     
144    176    
-592   -96    
128    -160   
-304   -48    
208    0      
-240   -48    
-64    32     
-240   0      
-352   32     
-112   32     
-400   -48    
-144   16     
-704   -64    
64     -64    
-48    64     
32     32     
64     80     
-128   48     
-208   -336   
-16    -48    
-96    -80    
-80    -32    
-16    160    
-144   -48    
32     128    
-16    48     
64     32     
-640   128    
-256   112    
144    -128   
-96    -96    
-176   -16    
32     -32    
-192   -176   
32     64     
-32    0      
64     48     
48     48     
-224   32     
-16    -80    
0      -32    
48     192    
-192   16     
-48    -144   
-144   32     
0      176    
-16    -176   
304    304    
-16    64     
176    -208   
-32    400    
-160   -80    
224    144    
-352   -48    
-176   -32    
16     16     
-96    0      
-192   80     
-224   -192   
-496   48     
48     32     
0      -80    
0      224    
-384   -1424  
112    912    
-128   -304   
-416   -288   
192    656    
-16    128    
160    32     
-144   -288   
-352   -144   
-208   352    
-96    128    
-48    16     
112    -304   
496    160    
-176   -64    
-32    -80    
64     -176   
-32    -640   
-192   -128   
-96    -128   
0      -16    
64     -208   
-32    16     
0      -48    
-80    48     
64     32     
-32    0      
-16    -32    
-2560  -64    
112    -640   
-80    16     
0      48     
176    -32    
-192   160    
-64    0      
-48    -32    
112    -128   
16     16     
128    80     
-64    128    
48     48     
16     208    
-144   192    
-1632  -64    
160    -80    
-80    144    
112    48     
128    -32    
-32    0      
112    384    
-160   -48    
368    -144   
0      208    
-160   96     
-144   96     
-64    16     
0      272    
32     112    
80     64     
-160   -368   
272    -160   
208    64     
64     128    
64     0      
96     32     
-224   112    
-160   0      
-16    -64    
-48    -48    
-48    -96    
-32    32     
-32    80     
144    48     
0      32     
-32    -96    
16     -16    
-144   64     
-48    -96    
-64    -32    
-272   208    
0      16     
144    0      
-48    80     
48     32     
-16    112    
-48    -48    
48     -64    
48     64     
96     0      
-272   32     
112    208    
176    176    
160    -16    
-192   32     
32     256    
-80    208    
-48    144    
48     -32    
160    -112   
-64    0      
112    48     
64     0      
-96    176    
112    128    
64     192    
0      -80    
96     -192   
48     -176   
32     -32    
-128   -464   
-144   -240   
64     80     
-64    288    
176    288    
-208   -208   
32     64     
-16    64     
-128   160    
192    112    
192    352    
320    64     
176    -80    
0      32     
192    -112   
-64    624    
112    288    
352    0      
-128   128    
-64    224    
32     48     
-64    80     
96     -112   
128    -64    
16     496    
592    496    
-16    256    
-224   16     
128    352    
496    448    
80     -480   
-112   -32    
96     -240   
-96    128    
96     48     
0      304    
128    352    
-176   64     
240    224    
-288   480    
176    176    
48     160    
-192   80     
128    16     
320    320    
-48    512    
160    320    
-176   -112   
-16    -128   
96     0      
80     176    
288    -112   
-464   -128   
112    48     
-304   480    
240    272    
64     224    
176    -176   
112    224    
-112   -224   
80     -416   
0      128    
-208   -192   
-16    32     
-80    -176   
224    -352   
-112   -272   
272    400    
-208   -688   
0      -160   
288    -496   
-32    -224   
-32    -272   
-16    512    
-16    208    
16     -32    
176    -784   
16     -208   
48     368    
-512   -304   
256    -320   
448    144    
-112   288    
320    96     
-320   -400   
16     112    
192    512    
128    128    
16     -16    
32     -400   
-128   224    
64     -32    
-64    16     
32     16     
64     -128   
-144   112    
272    -112   
144    -64    
400    -496   
-176   80     
48     -64    
240    48     
0      0      
48     112    
80     -16    
16     64     
160    240    
64     96     
160    -64    
32     -64    
192    352    
64     -80    
32     -64    
-64    -176   
48     -16    
128    -144   
0      32     
96     -16    
176    80     
368    320    
-96    32     
-160   32     
0      32     
192    32     
16     16     
-112   256    
192    816    
176    256    
64     -272   
-240   -400   
272    -128   
16     144    
-80    -80    
192    -80    
208    144    
-336   224    
-240   -32    
-96    -352   
192    -112   
-64    656    
-352   128    
240    -496   
64     16     
288    -32    
32     16     
336    -128   
-112   64     
16     -112   
0      -96    
32     -192   
-16    96     
-32    352    
-400   0      
16     0      
-16    -32    
160    128    
32     -80    
400    48     
160    -32    
-240   -128   
208    -976   
-160   176    
-240   32     
64     -160   
640    368    
-464   -560   
464    -16    
-320   272    
32     -1008  
512    -48    
496    -192   
-16    32     
-496   112    
-64    -96    
256    176    
-112   64     
560    -64    
-96    0      
128    16     
144    16     
-1072  -16    
208    -256   
96     32     
256    16     
-192   -32    
80     -48    
208    -64    
-16    -208   
336    -16    
176    -112   
-48    64     
80     -160   
112    112    
-144   -64    
192    -32    
-192   -128   
128    32     
96     0      
-16    -128   
256    32     
0      16     
144    -64    
32     -128   
128    64     
48     -64    
-16    64     
144    -144   
-64    -16    
192    -32    
96     0      
48     0      
32     48     
-592   -80    
48     -112   
304    272    
-224   208    
304    -64    
-48    -160   
240    80     
64     -576   
208    -80    
112    48     
400    64     
-144   112    
176    -224   
-368   -48    
32     -160   
-944   -144   
-16    128    
144    48     
176    80     
-112   48     
288    -240   
-400   16     
352    -768   
-256   -112   
32     -208   
112    0      
32     32     
-48    -272   
-288   -160   
144    -304   
-448   -80    
160    448    
176    32     
272    -48    
-80    -32    
176    -144   
96     32     
48     -64    
-32    80     
32     48     
48     -64    
48     -176   
176    -160   
32     32     
112    0      
-64    96     
320    96     
-784   -144   
80     128    
-128   -80    
176    -112   
-128   -16    
368    -784   
96     640    
-144   -464   
320    240    
64     16     
-128   -368   
-240   288    
80     -976   
-352   384    
96     -96    
-32    272    
-288   -16    
-80    -480   
208    -208   
176    -16    
240    64     
-32    48     
160    352    
-80    -64    
-208   -96    
208    32     
-176   112    
64     -32    
-304   -64    
208    -32    
-48    192    
32     240    
144    64     
224    32     
96     48     
80     -48    
48     64     
208    48     
208    -16    
-128   48     
-96    16     
-16    32     
64     -176   
-96    -80    
80     32     
-80    32     
32     -208   
16     -32    
-224   -176   
-80    64     
144    -32    
-816   -48    
-96    0      
-976   -16    
-64    64     
272    16     
-96    96     
256    0      
-176   48     
-112   -144   
-16    -64    
-1008  -64    
-240   64     
-352   -144   
176    0      
0      64     
-176   96     
-48    48     
-176   -16    
48     16     
-352   32     
80     48     
-48    48     
-208   -16    
-304   -32    
0      -16    
-352   -48    
48     32     
-128   112    
-528   144    
-288   -48    
-48    -16    
128    112    
32     96     
80     32     
-208   32     
-240   64     
-448   48     
-256   112    
160    -16    
576    48     
384    -128   
320    96     
-112   -48    
-16    16     
-96    0      
-128   16     
-16    176    
-336   96     
-144   0      
-288   -80    
80     -96    
-192   -16    
-128   -160   
-784   -112   
16     32     
-352   -96    
176    -144   
-176   144    
-96    96     
-32    -112   
192    -64    
-48    64     
16     240    
16     32     
-240   96     
-144   -64    
16     176    
224    224    
-352   96     
-64    -64    
-224   32     
144    176    
-144   64     
-32    112    
32     48     
-160   -128   
176    -16    
-16    -48    
0      64     
-48    176    
-48    -64    
80     -16    
-16    48     
-320   80     
64     -192   
-112   -144   
96     -80    
-80    -192   
64     -48    
-96    80     
-224   -16    
-32    16     
-96    288    
-48    128    
96     96     
272    -64    
-800   96     
64     16     
-320   -80    
-160   -16    
240    -304   
208    320    
64     1008   
-32    2096   
448    -16    
0      -352   
-96    688    
-16    -224   
-48    -1296  
-288   192    
144    1056   
-416   -80    
-48    -592   
192    464    
64     64     
-1168  -272   
-48    112    
192    -80    
-208   16     
160    -80    
0      480    
176    96     
64     -208   
-112   528    
-144   -48    
256    400    
-224   544    
32     -880   
-64    256    
192    176    
16     112    
-224   288    
208    704    
32     -272   
-304   -256   
448    736    
-416   -336   
-256   -320   
528    -112   
-112   256    
416    128    
-512   -688   
432    80     
-432   144    
96     48     
-176   -80    
192    -32    
128    304    
-16    0      
160    0      
-64    80     
0      -112   
32     0      
240    80     
112    32     
192    272    
-336   64     
32     192    
64     -16    
64     176    
192    304    
16     48     
64     32     
-16    -32    
-16    48     
80     128    
-112   0      
32     32     
176    80     
-128   -64    
112    0      
-128   -96    
208    -16    
80     48     
48     64     
48     48     
-112   176    
0      96     
48     -16    
32     48     
112    0      
0      16     
-32    -176   
-80    144    
-96    96     
80     -128   
48     -176   
160    64     
0      128    
64     -16    
-128   48     
96     -32    
160    160    
0      224    
-208   192    
96     128    
80     -32    
-80    80     
144    96     
0      224    
192    64     
-48    -16    
-32    -304   
-16    -16    
-48    48     
-112   48     
112    256    
128    112    
304    304    
-256   64     
-96    -32    
256    240    
-176   192    
80     80     
-64    -32    
-112   -64    
272    -192   
96     -400   
208    144    
-16    48     
-32    64     
0      192    
32     48     
672    48     
-352   0      
-48    80     
496    544    
-416   -80    
-400   -32    
-144   -144   
256    48     
-256   -256   
608    -256   
-48    224    
256    16     
-384   -48    
432    128    
240    352    
-816   128    
-64    -64    
-160   16     
208    48     
304    144    
0      48     
32     112    
-240   16     
-288   96     
16     16     
-272   96     
-368   -240   
-112   16     
0      -144   
400    -16    
352    240    
320    240    
432    -432   
-304   -224   
-208   80     
32     208    
-336   80     
64     -96    
-112   16     
304    -128   
368    160    
192    -800   
32     96     
-288   16     
-128   64     
160    -48    
176    16     
-112   -80    
80     112    
-96    96     
32     112    
192    16     
64     -16    
-448   -32    
288    -128   
128    48     
272    -80    
-144   0      
-96    -1200  
112    80     
48     32     
48     80     
-16    64     
-16    64     
48     48     
176    32     
96     64     
80     -32    
96     -32    
16     -96    
48     16     
0      -192   
16     -32    
-32    -1136  
112    192    
-16    -64    
208    0      
160    80     
112    128    
-240   96     
64     -48    
16     0      
80     64     
-48    96     
64     -32    
224    32     
256    -304   
144    96     
112    -192   
-16    32     
112    176    
0      304    
144    128    
208    272    
-176   -112   
-112   -176   
144    32     
0      -160   
128    80     
96     32     
48     64     
144    -144   
-32    160    
0      -176   
64     144    
-288   -800   
-176   -1264  
-80    592    
-288   576    
400    -464   
96     368    
688    336    
-544   -16    
272    32     
48     -464   
-112   416    
224    -48    
-128   -560   
-96    336    
256    -688   
160    80     
32     -608   
128    -480   
-144   -320   
-48    -400   
176    -48    
96     -928   
192    -288   
-128   -80    
-160   -64    
-240   80     
192    256    
288    272    
416    224    
-272   96     
-112   192    
176    -288   
32     176    
-320   -144   
64     32     
-112   -64    
-64    -224   
176    -16    
32     112    
144    16     
160    -256   
16     -320   
0      -544   
0      144    
48     -48    
-80    48     
176    -64    
-176   -96    
-144   -80    
32     -112   
-16    -80    
128    16     
-48    80     
192    -176   
80     -48    
-32    -672   
192    16     
0      -48    
288    -48    
112    0      
-96    -32    
240    -80    
-32    -48    
-272   -48    
256    48     
-1136  -48    
160    -192   
80     0      
48     -16    
80     -96    
160    -400   
-144   -48    
112    -80    
16     80     
16     -112   
48     48     
144    128    
-144   128    
-32    -16    
32     80     
-1440  -32    
144    -96    
64     -176   
16     -160   
112    80     
176    256    
-96    160    
288    -560   
-80    48     
160    -96    
128    0      
-64    -32    
-144   -96    
16     -48    
80     -80    
-160   -256   
528    -16    
-896   176    
320    48     
-48    48     
32     -160   
-80    16     
48     16     
240    160    
368    80     
-48    -32    
-416   32     
-240   -16    
-96    48     
192    96     
-80    -192   
176    -16    
-752   80     
-176   -64    
96     -80    
176    -224   
224    112    
-32    -288   
-112   80     
-272   -208   
176    -272   
-32    -144   
208    224    
224    912    
-528   592    
-352   16     
336    -48    
16     96     
416    -32    
-80    0      
96     96     
-160   176    
112    -400   
-64    -224   
-352   80     
16     336    
-288   160    
320    0      
-48    80     
-48    -96    
48     128    
-16    -208   
-176   96     
224    64     
288    64     
240    128    
160    224    
80     128    
-608   448    
-240   224    
160    -128   
-192   112    
112    0      
-80    48     
128    -176   
-64    80     
-80    128    
-400   -192   
-96    -144   
-48    192    
-416   -80    
80     32     
-880   -256   
-752   -96    
48     160    
-160   -624   
192    -96    
-1184  144    
-288   0      
16     64     
48     48     
-208   -272   
96     -112   
0      64     
144    16     
-32    112    
-160   -176   
-16    -624   
-288   -336   
32     64     
-336   64     
-48    224    
-224   144    
-48    160    
-352   -80    
208    48     
208    48     
112    -48    
-176   -128   
48     32     
-96    -48    
-64    16     
208    32     
-368   -16    
-176   -448   
-224   -256   
-224   -80    
-352   -16    
48     -48    
-256   -32    
-256   224    
0      48     
-16    -64    
-32    -192   
192    160    
-96    -80    
176    64     
-160   -16    
-80    0      
0      -48    
-208   -64    
-32    64     
48     64     
-16    -16    
80     0      
64     96     
-1072  -32    
-48    112    
128    -32    
80     80     
-64    -32    
48     -336   
112    16     
16     160    
96     -16    
96     -16    
-128   128    
-256   -16    
48     80     
-480   -16    
-48    32     
-1216  0      
-160   -48    
144    -16    
144    128    
48     0      
48     32     
-112   64     
-224   32     
192    80     
-112   -64    
-208   -80    
-192   32     
-112   48     
-288   -192   
368    16     
-352   0      
16     128    
32     -32    
-16    48     
-192   -96    
96     -96    
64     160    
112    160    
80     48     
48     16     
-112   0      
32     64     
144    80     
-96    -96    
208    -32    
-320   -176   
-64    0      
-64    0      
0      80     
128    240    
-16    96     
32     -96    
48     32     
16     80     
48     32     
128    -48    
0      80     
48     96     
-160   32     
112    96     
-304   -64    
16     -32    
144    32     
-128   -64    
0      -208   
128    -96    
-48    128    
-32    0      
0      -80    
176    -112   
192    96     
0      32     
336    16     
-304   -32    
48     128    
32     16     
256    -16    
0      0      
-48    -192   
1088   -352   
224    -288   
352    272    
192    32     
208    0      
0      -224   
32     -112   
-48    -64    
-112   0      
-416   112    
-16    -16    
-224   48     
-192   16     
272    160    
-224   128    
80     112    
-224   -16    
160    0      
-80    48     
160    -48    
96     -128   
-224   -48    
16     96     
192    80     
16     0      
192    128    
-96    272    
64     112    
112    64     
-144   -16    
128    48     
160    16     
128    -48    
176    48     
128    64     
240    224    
-64    352    
-512   -64    
128    16     
528    -112   
608    -160   
384    80     
96     176    
-160   96     
-336   32     
80     272    
240    0      
224    -48    
80     16     
176    160    
48     128    
48     80     
-416   -144   
288    -32    
-112   -64    
304    -16    
176    0      
64     80     
32     80     
96     -160   
-16    -16    
48     96     
-96    112    
64     112    
128    80     
-64    -80    
80     -208   
-16    -48    
160    128    
32     208    
-112   -64    
-128   224    
-96    -544   
64     448    
-32    192    
-96    -96    
304    32     
-112   -64    
320    592    
32     -832   
-64    112    
272    144    
-112   -368   
48     208    
32     80     
-64    -1104  
64     192    
-96    16     
288    656    
-272   -416   
-16    -416   
288    208    
-16    464    
160    16     
368    160    
-416   336    
64     32     
80     560    
128    304    
256    192    
-96    -624   
64     176    
-144   -80    
416    -352   
-80    -32    
272    368    
-144   368    
112    -240   
-272   -240   
240    144    
-176   48     
144    112    
208    160    
-240   -128   
320    288    
-128   -240   
304    64     
-112   -80    
0      64     
-64    96     
304    -32    
16     32     
224    96     
224    384    
-256   64     
192    -112   
-32    0      
128    192    
-128   -144   
128    32     
-16    -192   
-48    48     
96     -704   
192    16     
432    384    
-288   320    
80     224    
-192   160    
96     16     
176    32     
64     16     
-64    32     
128    48     
16     48     
160    80     
160    -80    
96     -16    
-32    -48    
-64    -112   
80     -48    
192    160    
-144   32     
-16    112    
32     -48    
224    64     
112    16     
224    16     
-16    0      
-16    -32    
0      -16    
128    -144   
-16    80     
-16    -128   
64     48     
176    -192   
208    240    
-112   -64    
80     96     
-112   16     
128    32     
48     32     
-32    -16    
-32    16     
-64    -48    
144    192    
96     -112   
160    0      
144    -96    
32     48     
48     -224   
0      32     
48     -128   
112    128    
240    160    
16     160    
-80    64     
64     -128   
208    64     
-32    -256   
-16    48     
80     -80    
128    48     
48     -32    
16     64     
-16    -64    
208    32     
-192   -16    
208    448    
-288   432    
-16    -96    
272    -1248  
160    -176   
-32    -80    
128    -208   
-144   32     
-352   -64    
-384   -272   
208    -288   
240    96     
256    -16    
352    -208   
-288   -208   
128    -544   
-96    -128   
-928   -64    
208    -128   
-32    48     
-208   -272   
-64    -96    
464    -912   
288    -96    
400    64     
-288   -80    
-16    -240   
-192   -80    
-128   1088   
608    400    
128    -576   
-160   -176   
-352   16     
96     192    
-128   -272   
304    -288   
-176   -304   
400    288    
128    -64    
400    144    
64     144    
288    -64    
64     -64    
336    16     
-64    336    
160    -432   
128    96     
-208   112    
16     -384   
0      -64    
-16    -160   
320    -224   
-416   -544   
32     16     
-32    -304   
128    16     
160    48     
-368   -48    
208    -96    
-48    0      
128    -96    
0      -48    
-480   16     
128    -32    
16     -48    
48     80     
208    -16    
-48    16     
-48    -112   
304    -528   
-384   128    
160    -80    
16     224    
64     48     
176    112    
-112   -32    
-48    -48    
-128   -48    
16     -48    
96     -192   
128    32     
96     -96    
64     -112   
64     160    
-32    -288   
176    32     
192    -816   
208    64     
96     16     
-64    -16    
-224   112    
96     -32    
-144   32     
0      48     
-384   -16    
16     96     
-272   -112   
80     -144   
240    80     
256    240    
-176   176    
320    -448   
0      16     
-192   48     
112    208    
0      -32    
112    -144   
-160   -80    
48     0      
-560   112    
272    -80    
-816   32     
16     16     
-16    -160   
144    -128   
32     64     
-16    0      
144    64     
-96    16     
80     -64    
208    16     
64     0      
-144   48     
96     0      
-304   16     
-80    -192   
0      -160   
192    64     
-128   80     
128    -192   
-80    32     
64     -608   
128    -16    
-192   64     
208    16     
80     192    
-400   64     
-160   -64    
176    -112   
-48    16     
112    48     
-144   0      
176    -144   
112    96     
128    -112   
-208   -16    
-16    -160   
112    96     
-272   -16    
-816   -16    
-96    48     
128    -64    
-256   -80    
240    64     
-112   48     
224    16     
-400   -48    
-672   -48    
-16    32     
-784   64     
160    64     
48     80     
-240   -16    
-16    0      
-704   0      
48     -48    
-32    416    
-224   288    
32     -128   
-16    0      
48     -48    
32     80     
-320   -48    
192    96     
-176   -64    
0      -144   
0      -192   
-128   0      
-192   16     
-32    32     
-16    64     
-336   176    
-192   64     
-112   32     
-272   -112   
-400   -48    
-176   160    
-224   -160   
32     -112   
176    80     
-240   176    
-192   -80    
0      -64    
208    32     
352    352    
-176   160    
-176   32     
-320   -208   
352    80     
-176   -624   
-640   -1120  
-464   112    
-400   640    
-224   176    
-192   -208   
112    -192   
208    96     
672    992    
16     432    
48     -1152  
-32    -592   
208    496    
128    272    
0      -272   
160    -144   
-448   32     
304    224    
-80    -16    
-32    80     
32     -272   
48     -352   
16     128    
-112   128    
96     288    
-336   -224   
-48    -48    
-288   208    
144    208    
-320   144    
-112   -224   
-1168  -160   
112    224    
-288   -96    
16     32     
-256   96     
560    336    
-144   0      
-672   -304   
0      -384   
80     384    
368    64     
-512   -592   
272    -864   
-192   640    
288    0      
-464   -64    
-16    304    
16     -112   
-352   -336   
-32    192    
-96    0      
-32    16     
96     224    
-64    80     
-32    -48    
16     32     
-272   -96    
128    64     
-368   -80    
544    448    
-688   -432   
80     96     
-64    336    
-192   -160   
0      128    
-80    112    
-16    -16    
-112   -208   
64     768    
-96    -400   
-128   352    
-64    32     
-96    -176   
-304   96     
256    -512   
-224   -32    
320    688    
-48    -288   
-464   -48    
-96    -128   
112    208    
256    48     
384    192    
-208   112    
0      -16    
-160   112    
-144   -144   
176    48     
-368   0      
96     -32    
-240   -128   
-96    64     
128    96     
0      -64    
320    0      
192    176    
-16    96     
176    96     
-16    -112   
0      32     
16     96     
-96    -112   
384    64     
-320   112    
112    -128   
16     -80    
-64    -48    
240    32     
-112   208    
48     48     
-32    -48    
0      -32    
-64    -144   
368    144    
-480   368    
80     -96    
-112   -256   
-144   80     
-128   80     
368    -192   
192    112    
-80    144    
112    96     
416    256    
-480   112    
80     112    
48     176    
144    208    
-16    144    
-128   -128   
-256   48     
80     -96    
144    0      
96     -80    
-208   -224   
320    16     
224    -16    
80     -48    
-400   272    
-80    96     
32     -16    
-144   32     
16     -176   
64     -160   
-48    -160   
112    0      
112    64     
144    96     
-320   -32    
-128   -16    
0      112    
-112   48     
-144   80     
400    0      
-32    48     
-16    -16    
80     -48    
-128   -16    
-80    16     
-16    48     
96     32     
80     128    
0      128    
16     -16    
224    144    
-192   160    
64     0      
480    96     
-160   96     
-128   16     
-32    32     
0      0      
-32    224    
80     176    
64     272    
176    224    
0      80     
48     -112   
-32    32     
96     -592   
112    32     
-32    64     
80     0      
0      -48    
64     -16    
-48    80     
64     48     
64     16     
-80    -16    
48     -576   
160    -80    
48     -64    
-48    -128   
0      96     
96     -400   
-48    496    
112    288    
352    752    
-464   512    
288    -208   
288    -64    
80     -336   
-32    -512   
-48    64     
160    464    
-208   -256   
-80    -128   
224    928    
-128   -384   
384    -1088  
272    192    
272    256    
-64    0      
48     80     
192    64     
304    192    
320    -80    
240    144    
592    368    
-768   -432   
-176   96     
128    48     
112    -352   
608    -16    
336    -192   
96     -416   
-192   -208   
-96    240    
-368   -16    
-80    0      
80     16     
352    80     
208    64     
480    416    
-304   208    
-352   -48    
576    304    
-96    -80    
80     0      
96     -192   
0      -16    
16     -224   
144    -144   
288    -256   
80     144    
-32    16     
96     64     
32     48     
64     96     
-16    48     
-64    -256   
304    -16    
224    -48    
80     80     
128    -80    
112    96     
112    -352   
304    176    
-176   -416   
64     96     
-16    32     
160    64     
-16    32     
96     32     
48     144    
32     112    
-64    64     
176    -224   
80     96     
-48    32     
-48    64     
64     -256   
0      -16    
304    32     
96     96     
256    64     
-96    -64    
-16    32     
96     112    
240    112    
0      -128   
-80    16     
-32    -144   
-32    64     
112    -128   
128    80     
-48    -64    
368    -144   
-160   -64    
176    272    
208    0      
-272   64     
48     -80    
128    -32    
16     144    
224    -112   
-16    -224   
0      -144   
112    32     
48     -48    
192    0      
224    -176   
-208   16     
112    160    
112    -416   
96     16     
32     -272   
0      -176   
80     0      
-16    -288   
96     -32    
144    -768   
-48    -16    
96     -416   
80     16     
0      64     
96     -80    
64     0      
96     64     
128    16     
32     16     
16     -208   
144    -224   
-2032  -48    
96     128    
224    -48    
80     48     
-112   -16    
48     -144   
160    0      
-48    48     
-32    -112   
304    128    
-16    48     
192    -64    
16     96     
-160   -16    
176    48     
-432   -32    
128    -48    
16     48     
160    -32    
64     96     
48     48     
80     -32    
112    16     
96     -32    
112    160    
80     144    
-48    -144   
-48    80     
0      -64    
112    -160   
48     -48    
224    16     
80     -80    
112    160    
-64    96     
0      0      
144    48     
16     0      
192    160    
128    48     
64     144    
-32    -144   
64     80     
-240   -112   
80     -256   
-400   128    
112    0      
-480   -144   
-64    -176   
64     16     
48     -128   
128    -64    
64     -80    
-208   -304   
64     384    
64     32     
128    80     
16     0      
-288   -752   
352    -288   
-128   192    
32     -16    
32     96     
-160   -144   
-784   160    
96     -96    
64     80     
80     -160   
208    -80    
192    -512   
224    384    
-688   -32    
-368   -128   
16     -1664  
336    288    
224    288    
272    32     
-144   112    
144    16     
-416   -48    
-496   -736   
32     384    
48     -224   
208    128    
112    -128   
336    176    
-176   736    
-128   -544   
-848   -592   
80     160    
160    432    
272    -16    
-160   -64    
0      192    
-144   -432   
192    16     
64     64     
-192   -64    
160    96     
-32    -288   
64     -80    
-80    -80    
368    -64    
32     560    
144    -64    
-64    -336   
-48    64     
-112   160    
112    80     
-240   -80    
-32    -16    
528    176    
-2400  -416   
-112   -224   
80     -208   
-928   96     
128    256    
304    -64    
112    80     
96     -48    
-32    64     
-32    256    
-80    -16    
144    -64    
-48    32     
-448   -64    
48     288    
-544   -96    
128    112    
0      320    
-48    176    
16     80     
-496   16     
32     -32    
-1280  64     
0      32     
112    64     
-96    -64    
-384   -96    
112    -48    
-112   -336   
224    256    
-176   80     
128    192    
-224   -16    
-192   208    
-16    96     
-320   144    
80     256    
336    160    
-272   -192   
-144   -64    
-128   320    
-32    -96    
-48    32     
-128   -80    
0      144    
-16    224    
16     -32    
-128   64     
176    -80    
-304   80     
-320   -240   
-144   -64    
-16    32     
128    -16    
-944   -80    
128    32     
-400   -80    
32     -448   
-16    -160   
320    80     
-32    160    
-48    32     
-64    176    
-16    176    
80     64     
16     64     
0      -16    
-256   96     
-32    -32    
-912   -64    
192    32     
-176   -32    
112    208    
64     176    
-48    -16    
48     -256   
-64    -144   
0      48     
-80    -32    
32     -96    
-80    -32    
64     80     
-48    -16    
-48    -16    
-80    16     
208    -48    
-592   0      
-96    288    
208    0      
-112   -32    
32     96     
48     64     
-128   0      
128    -192   
-80    32     
-32    96     
-192   736    
560    368    
80     160    
64     32     
-80    96     
-608   80     
112    -96    
176    64     
-80    -16    
-112   400    
-96    -48    
288    -80    
-256   -32    
-64    -32    
-32    -80    
-128   96     
-32    96     
-48    -48    
-624   -64    
96     272    
-480   112    
256    240    
112    256    
64     16     
64     -368   
-176   -288   
-80    0      
-192   240    
64     128    
32     16     
464    -256   
-208   -240   
-16    -80    
-416   -176   
160    96     
-336   48     
208    160    
32     0      
0      16     
128    272    
16     272    
32     -16    
-176   -256   
-96    -160   
-32    -80    
80     -112   
-320   112    
256    496    
-304   -32    
112    -368   
-240   144    
96     272    
-80    -144   
-208   -176   
320    48     
-32    240    
176    -272   
160    -32    
-144   144    
-256   -176   
48     112    
-320   -96    
-304   176    
112    -448   
0      -640   
496    368    
144    224    
-176   144    
-48    -128   
-224   -32    
-416   -144   
-80    -384   
176    272    
-48    320    
128    176    
48     256    
-224   -48    
320    -64    
-32    -96    
432    -96    
64     80     
64     64     
240    112    
-128   112    
-112   0      
0      -48    
320    0      
192    32     
96     48     
192    192    
-400   160    
-256   32     
-288   -128   
320    -112   
192    80     
208    80     
304    144    
-208   48     
-464   -32    
624    32     
-592   -64    
-288   64     
-48    -240   
576    112    
-352   -16    
-256   -32    
-208   -96    
128    64     
0      64     
128    80     
16     48     
144    48     
-48    64     
-208   0      
144    96     
128    96     
-192   96     
64     48     
208    16     
16     32     
-176   0      
80     96     
48     16     
96     32     
64     80     
64     80     
16     32     
32     48     
128    48     
32     64     
-16    80     
112    64     
-32    128    
-48    0      
32     0      
208    112    
96     -16    
-48    0      
160    480    
32     176    
64     -112   
-288   48     
48     -128   
48     0      
-16    -16    
192    -32    
-16    96     
288    32     
16     32     
-192   -16    
160    32     
-224   -96    
192    -80    
112    160    
112    0      
112    -16    
-48    32     
-16    16     
48     32     
64     112    
-48    64     
176    256    
-176   -96    
224    -144   
0      112    
-48    128    
240    -160   
-64    -48    
192    144    
-240   0      
48     64     
128    32     
96     48     
208    32     
144    112    
224    80     
-240   128    
48     -256   
96     -32    
-64    64     
-48    64     
192    112    
-112   32     
160    160    
16     32     
32     32     
144    -176   
0      192    
112    224    
288    96     
-256   -112   
128    0      
-128   -96    
160    64     
48     128    
80     48     
16     64     
128    -128   
64     224    
112    -160   
-48    -80    
-96    -336   
288    96     
16     0      
-32    48     
80     32     
32     80     
48     -128   
-48    -32    
240    160    
112    64     
-32    160    
144    448    
64     0      
-128   -320   
192    -208   
64     240    
224    -64    
-288   -96    
48     80     
144    224    
64     128    
192    32     
192    -32    
208    208    
128    64     
-160   16     
96     -96    
-128   -336   
96     352    
32     144    
160    -304   
-48    -128   
0      -16    
96     464    
64     -416   
208    112    
144    64     
-192   160    
-128   -64    
240    -320   
96     64     
0      -192   
176    -48    
-64    -592   
208    992    
224    160    
-48    -112   
160    192    
80     -336   
160    -80    
160    -1168  
96     160    
48     -80    
0      -240   
32     -64    
32     -176   
144    -192   
160    64     
256    -16    
80     192    
32     -144   
224    -160   
208    336    
128    16     
112    0      
48     -208   
48     0      
144    176    
192    -256   
0      64     
48     -64    
240    240    
-272   80     
32     80     
240    144    
240    240    
400    16     
-160   -80    
-256   -304   
-464   -48    
-112   0      
256    32     
160    -80    
160    -32    
144    16     
-192   -48    
0      -80    
96     -64    
0      32     
336    -80    
160    192    
-304   32     
-256   -80    
64     -240   
112    -80    
112    0      
192    -80    
-368   -64    
-144   -128   
144    176    
-80    0      
144    32     
144    -80    
80     -144   
240    -752   
-240   112    
192    16     
256    192    
-32    192    
128    16     
-288   -80    
48     -48    
-608   -32    
-16    -112   
32     -256   
80     -224   
64     -96    
176    -96    
-144   16     
48     -128   
16     -272   
96     -176   
208    192    
-96    128    
112    144    
-160   144    
112    208    
-192   128    
128    128    
-256   -112   
288    112    
160    0      
208    -144   
0      -48    
160    -112   
432    592    
-336   640    
-208   288    
272    -176   
96     128    
176    48     
176    384    
80     -192   
-32    -160   
-272   -144   
160    128    
-672   304    
112    -96    
-16    48     
224    -368   
96     48     
-176   -80    
-32    272    
208    272    
144    512    
48     272    
80     -240   
-464   -128   
96     -176   
-1120  -80    
16     -64    
-448   32     
32     -176   
240    112    
48     -112   
-32    32     
448    -768   
-192   480    
-224   32     
-144   240    
304    112    
224    -48    
-96    16     
272    64     
-192   160    
160    112    
-384   -16    
240    -272   
-336   48     
-176   -304   
144    64     
-464   0      
144    64     
-368   -96    
384    96     
-176   176    
0      96     
96     -144   
-16    304    
96     320    
160    -144   
80     240    
80     -208   
144    224    
-496   16     
16     -48    
64     -32    
-560   16     
-208   -160   
-288   -240   
0      64     
64     48     
-128   48     
192    -32    
-272   32     
-624   -240   
-112   32     
-336   -64    
208    128    
48     0      
-160   -80    
-64    -192   
-208   0      
224    176    
-208   288    
-160   352    
-768   16     
-80    16     
-144   -176   
-224   -352   
-272   496    
176    -176   
-112   -224   
-96    384    
-192   -624   
-112   496    
48     -240   
304    336    
-80    0      
-352   112    
-32    -272   
-592   192    
112    -16    
0      176    
-96    -16    
96     -144   
-16    640    
-80    -336   
32     112    
-192   176    
-64    -432   
-144   -16    
32     240    
-288   -32    
-272   -576   
352    96     
-672   96     
16     16     
-1536  -96    
64     -64    
-176   -32    
16     64     
-208   -64    
16     112    
192    48     
128    -16    
304    96     
-384   -48    
-144   80     
-688   736    
32     304    
576    -80    
-352   -48    
-592   48     
-176   -128   
240    64     
32     112    
336    96     
352    -240   
-32    80     
-560   -160   
-32    0      
-400   32     
-48    -64    
80     32     
144    80     
336    96     
128    -16    
-272   -32    
-32    112    
-16    -16    
224    112    
-352   32     
-96    0      
128    48     
-208   -176   
224    -80    
320    128    
144    0      
-32    -48    
16     32     
48     96     
16     32     
-16    -64    
-176   16     
-816   208    
160    192    
-96    -96    
-272   -144   
32     96     
-272   -32    
0      0      
80     96     
480    336    
-688   16     
272    -48    
80     48     
112    112    
80     -16    
384    208    
-880   -32    
-288   -64    
-16    128    
240    32     
128    -16    
112    16     
48     48     
-112   48     
-128   64     
-144   -16    
-32    48     
-16    48     
16     48     
-144   -32    
160    80     
-160   -32    
-16    16     
144    48     
-192   -96    
176    -96    
-80    96     
224    48     
-144   32     
144    0      
-16    176    
112    192    
-400   -32    
16     -64    
-512   -144   
16     272    
-48    128    
-144   -128   
0      64     
-32    112    
160    0      
-32    0      
32     0      
208    96     
-64    -16    
128    176    
-32    128    
-128   -48    
-32    112    
48     -32    
0      -192   
32     16     
-144   -32    
-32    -368   
256    176    
-208   176    
176    32     
-64    96     
-288   -272   
96     -144   
-80    -112   
-96    -80    
-16    0      
0      -96    
-176   -16    
64     128    
-112   16     
272    128    
-240   80     
48     -96    
48     128    
0      48     
16     -64    
144    352    
-288   -96    
-112   -144   
160    176    
-32    -144   
-64    0      
64     0      
-96    -224   
144    256    
192    224    
-16    400    
32     -176   
-112   -144   
96     320    
-32    -64    
64     0      
128    160    
-208   -80    
384    336    
-256   -288   
272    160    
-16    96     
-80    32     
48     -48    
112    272    
-128   64     
0      -144   
144    0      
176    -48    
-256   384    
288    -320   
-80    -240   
16     32     
-144   -720   
208    -48    
176    -192   
336    224    
-80    512    
-256   128    
-224   -336   
-48    -480   
112    -112   
32     -80    
-32    -16    
192    -96    
16     224    
-96    96     
-144   -48    
0      0      
80     96     
-208   -304   
176    -128   
112    -208   
-80    64     
96     128    
0      64     
224    0      
16     -48    
-96    64     
96     64     
-112   -16    
400    192    
-256   128    
96     64     
-16    32     
48     192    
256    288    
-112   -288   
80     -32    
16     224    
0      16     
32     64     
64     16     
-80    48     
128    0      
112    -32    
16     0      
-16    -48    
224    80     
-176   -160   
544    -176   
-112   192    
192    -896   
80     -48    
16     96     
336    304    
-400   224    
160    -160   
320    -48    
336    240    
-64    64     
48     -16    
-144   -64    
-240   -48    
-32    144    
48     -32    
64     -80    
-16    -32    
-80    16     
96     -608   
-16    128    
16     -208   
160    64     
112    160    
-16    16     
80     -16    
-16    96     
32     80     
48     0      
48     16     
16     288    
-16    96     
208    -256   
0      -112   
16     -480   
-32    16     
128    -400   
48     112    
176    304    
48     192    
48     -16    
336    112    
-128   48     
176    32     
80     16     
144    -192   
0      -176   
16     -480   
96     -144   
-128   -240   
160    -48    
-32    -16    
160    64     
48     64     
-64    -32    
-16    -16    
192    -48    
128    -96    
0      -240   
96     -112   
64     -256   
-32    96     
64     -48    
224    208    
0      176    
160    272    
160    -48    
192    -112   
-128   -176   
48     48     
-128   -64    
0      -48    
16     -32    
192    -576   
128    -208   
320    -64    
-80    -16    
-48    144    
224    16     
288    -224   
16     -416   
-80    -160   
96     -624   
0      -160   
48     80     
32     -480   
-208   -368   
64     -1008  
48     -144   
32     176    
192    -144   
112    32     
96     -48    
192    608    
-160   64     
304    -400   
-384   -288   
208    224    
-48    80     
160    -192   
352    96     
-320   -144   
80     -224   
16     -720   
-32    -144   
192    -16    
-16    -1216  
16     -384   
128    -656   
-96    -80    
320    112    
-160   288    
144    -112   
144    208    
-128   -160   
48     -96    
-672   64     
144    -400   
288    32     
96     -400   
-128   -160   
80     -448   
16     0      
288    304    
-320   -176   
112    32     
336    -112   
320    112    
-448   -320   
-176   -208   
304    144    
-272   -16    
192    80     
80     -224   
-16    -48    
64     16     
320    -288   
-96    -64    
160    -432   
-288   112    
192    -112   
-160   16     
256    -128   
-144   -48    
48     144    
192    96     
-864   -80    
144    -192   
272    -48    
-64    144    
192    -288   
96     16     
48     -96    
-32    -688   
16     224    
144    -112   
-48    32     
-112   112    
208    64     
-16    -32    
32     -160   
-48    48     
112    -112   
-496   48     
160    -208   
48     -112   
-32    -208   
32     0      
-80    -368   
112    48     
240    96     
96     16     
-80    32     
112    -32    
-320   -80    
112    -144   
-304   -96    
80     -112   
-240   -512   
224    192    
32     0      
112    -224   
48     112    
208    -64    
128    176    
-48    -640   
-48    -64    
-32    -144   
416    -64    
-112   48     
96     32     
192    64     
-32    48     
-368   16     
272    -96    
64     144    
-288   -32    
-16    64     
656    976    
-672   832    
160    -368   
384    -224   
-240   96     
32     -16    
272    288    
176    96     
32     -320   
208    -160   
208    48     
-144   64     
16     -16    
400    -16    
160    96     
-80    128    
64     80     
-80    -96    
48     -16    
-368   0      
112    -16    
-288   0      
432    16     
-560   48     
-320   -128   
-48    96     
0      16     
272    16     
-1920  -96    
448    112    
-608   -256   
240    80     
-384   64     
-192   0      
-64    16     
-640   0      
-400   -128   
656    16     
-304   48     
-384   -48    
-32    16     
-128   48     
16     48     
-1184  -128   
176    48     
-576   -48    
-144   -112   
-16    32     
-464   64     
-160   -64    
-80    -96    
144    48     
256    160    
256    112    
-304   -80    
-80    0      
-48    -16    
64     16     
-128   -32    
112    96     
-48    -48    
-32    -48    
-48    80     
-144   -16    
-224   32     
-160   16     
-144   0      
-672   80     
-368   -80    
32     32     
-64    64     
80     16     
0      80     
-48    -80    
48     48     
368    336    
-352   192    
304    -32    
-320   16     
304    -64    
-320   16     
144    -16    
-320   32     
0      192    
-1680  128    
224    160    
-64    112    
144    96     
-96    -112   
112    512    
192    448    
-48    0      
-160   32     
-80    32     
48     0      
-96    16     
-112   256    
-208   32     
144    544    
-816   -128   
-32    -352   
-144   48     
96     16     
128    64     
-272   48     
48     -464   
176    128    
0      48     
-208   80     
32     -256   
-176   112    
96     -32    
-16    336    
96     -32    
-560   -128   
144    0      
-304   144    
320    208    
-368   -112   
224    256    
128    48     
-224   304    
-208   512    
256    -400   
272    784    
-688   -576   
-144   96     
240    144    
576    624    
-656   400    
-64    -560   
-320   -304   
208    112    
240    240    
-112   -176   
80     32     
-224   -304   
-128   16     
-80    112    
144    32     
64     224    
-80    112    
-272   -96    
208    -48    
-416   -80    
192    -48    
-688   -96    
-160   -80    
128    -160   
128    96     
-224   -112   
-80    -48    
32     96     
-112   16     
-96    -144   
-144   -160   
128    96     
-112   0      
-32    48     
-144   -32    
-64    96     
-32    32     
-80    144    
-32    160    
96     32     
144    -144   
176    16     
-48    0      
-112   -160   
-64    0      
0      0      
160    96     
-160   32     
128    64     
-112   64     
-16    144    
-96    96     
48     -80    
64     48     
112    32     
48     -16    
192    80     
-192   112    
-208   32     
-176   64     
288    144    
272    -16    
0      0      
0      64     
-272   -64    
-16    0      
16     80     
192    64     
-112   0      
272    64     
-112   96     
-64    -112   
48     64     
-64    96     
48     -176   
384    -112   
80     144    
-160   -48    
208    32     
-288   -160   
96     32     
-96    288    
-352   112    
176    160    
240    16     
192    -176   
144    48     
-368   144    
-304   -16    
288    64     
-400   -96    
-32    160    
-48    240    
208    192    
304    128    
96     -128   
144    -48    
-144   -32    
-32    64     
-32    -128   
160    -16    
-224   128    
-272   -16    
176    -96    
128    -16    
-240   80     
-144   160    
48     256    
160    -1072  
48     80     
-144   32     
128    16     
-160   160    
-64    32     
128    112    
160    96     
64     -80    
256    176    
-144   144    
80     192    
-304   -48    
240    -16    
0      0      
-80    -592   
208    432    
-16    80     
80     -64    
176    80     
-48    48     
32     144    
-48    208    
-48    80     
16     0      
-80    -208   
256    -96    
-64    32     
112    48     
352    400    
-256   224    
208    -320   
224    32     
-48    224    
336    -192   
32     112    
-16    -384   
-352   224    
80     -48    
-32    48     
256    0      
304    -16    
-240   -80    
64     -96    
-304   -176   
336    -64    
80     144    
48     -608   
272    336    
-448   208    
368    32     
32     -512   
-16    368    
352    96     
-208   -208   
0      -48    
-80    16     
48     208    
-32    -160   
-128   -304   
368    208    
32     368    
-80    -368   
80     96     
64     -64    
112    272    
-64    224    
-112   -160   
32     176    
-160   96     
192    384    
96     32     
-304   -240   
384    176    
64     -144   
80     -96    
144    128    
-48    -256   
48     32     
96     -48    
112    -16    
48     -144   
160    96     
-64    16     
144    80     
-16    32     
240    -64    
0      48     
176    -32    
-144   -16    
160    -96    
112    176    
48     -48    
160    112    
-48    -32    
64     16     
-80    -16    
160    -16    
96     64     
128    64     
32     -64    
128    -96    
128    48     
112    160    
-80    48     
32     -128   
16     80     
176    -16    
112    112    
112    -112   
144    80     
-224   16     
0      80     
160    16     
-16    -32    
144    16     
80     -144   
64     48     
240    -288   
-112   -32    
192    0      
-80    64     
80     32     
128    80     
112    -32    
64     0      
-32    96     
112    0      
-64    -32    
112    48     
128    288    
0      -336   
16     80     
48     0      
144    -288   
-64    -288   
-16    64     
112    -48    
176    80     
64     -32    
320    192    
-32    176    
-128   -496   
-32    -80    
128    -496   
160    -32    
-16    -80    
176    0      
128    -128   
144    352    
-128   -48    
144    64     
112    -32    
32     0      
240    96     
144    32     
288    240    
0      -208   
48     16     
-32    160    
-176   240    
112    0      
0      -208   
0      16     
112    -464   
-96    -224   
-448   384    
-352   48     
48     16     
-128   64     
32     -128   
416    256    
-32    64     
176    80     
-336   -32    
240    -48    
-112   0      
-480   -160   
-160   -144   
96     -176   
96     -112   
224    -672   
272    0      
-288   -80    
352    128    
-32    16     
112    160    
-208   32     
-208   -80    
-128   -32    
-320   -32    
-176   -112   
80     -208   
336    -48    
32     -32    
64     48     
48     -112   
192    -32    
-128   -64    
-64    -128   
416    -128   
192    -32    
144    64     
-48    64     
-592   -48    
208    -32    
-448   -16    
224    -32    
448    80     
-304   -176   
288    112    
-304   48     
112    64     
64     -560   
-96    32     
0      -32    
112    32     
416    32     
-208   -112   
-192   16     
16     48     
-192   0      
0      0      
-1392  -48    
48     -32    
64     144    
192    -176   
64     96     
160    -128   
32     80     
16     -64    
-16    48     
128    144    
48     32     
-32    0      
96     48     
64     32     
-32    -16    
-224   -96    
-16    112    
-16    192    
32     -112   
-48    -112   
-80    -480   
160    96     
-96    240    
304    -208   
224    128    
160    224    
-352   48     
128    -496   
-192   304    
224    -64    
96     -48    
80     64     
-80    -112   
64     0      
0      784    
-48    -768   
176    -464   
-144   976    
128    -256   
-576   -368   
-16    496    
-144   -256   
48     288    
-272   -32    
160    -128   
-448   -128   
160    -224   
-192   -16    
176    -144   
-208   16     
256    -416   
48     -80    
-352   -320   
256    -80    
0      -112   
368    224    
-192   560    
160    32     
-16    48     
144    -80    
-208   0      
-16    448    
304    208    
-832   160    
-304   -128   
-352   -576   
-288   -80    
-96    208    
-1168  224    
-304   128    
-112   16     
32     16     
96     112    
192    128    
48     -64    
-64    -64    
-176   -128   
96     48     
-32    144    
-112   48     
48     -96    
-224   64     
-32    32     
-192   -32    
128    0      
-464   32     
-192   112    
-2304  -48    
-304   -16    
176    0      
160    112    
-208   -32    
0      -80    
-48    -192   
-80    128    
16     -80    
-192   -176   
-224   48     
-176   64     
-128   16     
-160   64     
-80    -16    
-96    16     
160    -32    
-192   64     
160    64     
-256   -80    
128    16     
-112   -64    
-16    64     
-144   128    
-128   -16    
-32    32     
-48    32     
0      48     
-192   48     
48     0      
-96    -80    
96     -80    
-2016  -16    
48     128    
-224   -48    
96     0      
64     -64    
-192   -32    
32     -96    
-80    64     
144    32     
-160   -80    
32     -16    
64     64     
112    160    
-352   48     
0      96     
-400   64     
96     16     
0      -64    
128    -16    
224    240    
-320   144    
0      -80    
368    128    
32     112    
112    336    
256    384    
-288   64     
-160   -160   
-144   -320   
96     0      
-96    160    
144    160    
-80    112    
0      48     
-128   0      
160    -144   
224    -160   
304    -112   
144    128    
32     304    
-208   144    
-80    32     
-16    64     
-48    0      
-112   112    
-144   224    
-64    208    
-784   -240   
-160   -224   
-128   -96    
-48    0      
176    -80    
192    144    
-80    -64    
-320   -96    
-288   -208   
-208   -336   
160    160    
-240   448    
112    208    
-352   -352   
0      -208   
160    80     
-160   -192   
-160   -240   
-96    -112   
32     32     
16     -176   
176    160    
464    592    
-128   -304   
48     128    
224    -64    
-192   -32    
0      416    
-256   -48    
224    176    
16     48     
80     -224   
64     144    
64     -208   
176    160    
-48    -16    
-16    32     
0      16     
128    -144   
-224   112    
160    144    
-336   -144   
96     32     
208    352    
-288   -144   
256    -160   
64     -80    
128    48     
192    128    
-64    16     
192    48     
-64    128    
-32    -32    
-144   -16    
-368   32     
176    80     
0      176    
80     48     
176    -144   
0      -320   
176    -608   
80     -48    
32     -32    
-128   48     
-304   128    
64     0      
-64    128    
-32    272    
32     16     
144    0      
176    80     
96     32     
64     64     
96     128    
96     48     
-96    -160   
-48    -112   
368    80     
16     -64    
-64    -48    
-48    80     
-48    0      
96     96     
16     112    
-32    0      
160    96     
-240   64     
80     16     
-64    0      
80     32     
80     -16    
-112   32     
144    0      
-80    16     
32     16     
-16    80     
-16    0      
160    -32    
160    0      
-48    -128   
-160   -32    
-432   -48    
208    -1312  
144    96     
64     112    
-32    96     
64     32     
-48    -32    
240    -16    
80     48     
128    0      
48     0      
-48    0      
176    80     
-80    16     
256    80     
144    144    
32     16     
-32    64     
80     32     
-64    64     
96     -32    
32     32     
144    48     
-112   96     
-32    16     
144    48     
-240   96     
416    176    
112    -32    
-240   -48    
112    0      
0      -464   
96     -16    
-96    16     
416    160    
80     96     
-160   32     
80     32     
16     64     
-80    32     
64     96     
32     -16    
96     32     
-16    32     
64     -32    
96     48     
272    -224   
-80    128    
-64    -320   
64     64     
32     -96    
160    -32    
32     96     
64     64     
112    112    
208    144    
-48    320    
64     240    
80     32     
0      -128   
96     -64    
-144   112    
-160   0      
96     -192   
304    48     
-48    256    
224    96     
192    -176   
-32    -16    
320    80     
256    208    
-80    560    
16     320    
272    -400   
288    -144   
192    -48    
416    -96    
336    224    
112    -576   
-48    -128   
-32    -784   
-432   -112   
-64    16     
-16    80     
32     16     
240    288    
-528   16     
-192   -224   
240    96     
0      -80    
656    80     
16     -64    
256    64     
-48    -448   
-144   64     
48     -128   
-48    -32    
224    112    
512    240    
144    -80    
48     -208   
32     -128   
-64    -80    
64     96     
-16    160    
48     176    
-176   -208   
352    0      
-80    16     
256    304    
208    288    
240    -16    
384    -80    
144    32     
176    128    
16     192    
-224   80     
160    -48    
-96    -16    
288    -272   
0      -192   
144    -192   
96     272    
-368   -144   
208    -240   
-64    -1568  
272    304    
48     96     
240    64     
80     -48    
96     176    
-16    -128   
-80    48     
64     -720   
192    192    
144    192    
-176   -256   
160    -64    
64     128    
128    352    
-128   -576   
128    -1392  
192    -48    
208    48     
112    96     
-1152  352    
256    -576   
-192   -96    
48     -592   
-416   -176   
256    -256   
48     304    
496    -208   
160    96     
-224   -288   
80     -432   
176    128    
-160   96     
272    -208   
-288   -224   
-1104  -432   
-160   272    
528    176    
48     112    
-128   -400   
192    -192   
0      -80    
-80    -192   
-16    224    
192    -96    
16     80     
160    -96    
-272   64     
0      -288   
416    -208   
-992   96     
288    288    
160    48     
16     16     
-32    -288   
96     80     
-16    -128   
112    -144   
192    32     
240    176    
-288   160    
0      -48    
48     112    
64     272    
0      32     
400    -48    
-176   0      
-944   -64    
80     -80    
-144   -144   
304    -480   
160    240    
-288   -144   
96     -32    
128    400    
-48    112    
176    -48    
96     -96    
-96    -192   
32     -96    
-368   -16    
112    112    
-736   -16    
-32    -80    
-160   0      
256    -80    
240    0      
160    -96    
-224   128    
96     -256   
16     128    
144    16     
240    48     
-176   144    
16     -48    
-336   -112   
64     64     
-16    112    
224    32     
-1152  -64    
384    -48    
-128   272    
336    112    
240    176    
-96    -144   
-64    -16    
-32    -64    
144    -48    
-96    176    
-112   -272   
-48    160    
112    48     
0      -64    
224    -48    
-496   16     
0      -96    
-944   -16    
160    -64    
16     -48    
112    -240   
208    -32    
176    32     
96     208    
-480   48     
112    -64    
-336   -48    
48     0      
-352   -32    
176    -64    
-576   -432   
128    -400   
80     128    
-64    -128   
304    240    
-64    -304   
64     32     
0      -48    
96     16     
-224   64     
208    144    
-160   32     
-96    -112   
-144   -288   
96     -304   
-80    0      
-48    0      
-32    112    
144    16     
64     112    
416    -208   
-64    64     
-128   192    
-256   224    
-208   32     
-224   -144   
144    -240   
320    -144   
448    240    
-48    128    
-176   64     
-1328  -128   
-16    272    
-112   -208   
96     -288   
-16    272    
-448   208    
-112   112    
-1200  -80    
-288   -96    
-1600  48     
-112   -160   
16     -16    
256    16     
64     96     
-64    -224   
-368   -16    
240    16     
-352   0      
-272   288    
-208   -272   
-400   -32    
32     16     
320    352    
-288   -208   
-192   -336   
320    192    
-432   176    
368    -96    
-96    80     
-64    64     
-336   -208   
16     64     
-80    16     
304    176    
-304   144    
-48    -16    
144    80     
-176   -48    
64     -16    
-144   128    
48     64     
-224   48     
224    160    
-208   0      
64     48     
-16    48     
192    48     
16     -112   
-80    0      
-16    32     
-192   16     
16     48     
-96    -32    
-160   0      
-432   16     
0      32     
-560   -16    
-112   -16    
256    -112   
64     -128   
-80    -64    
160    64     
-96    -32    
-144   -80    
32     -32    
48     128    
208    64     
-208   176    
128    48     
-240   -64    
-48    32     
-208   0      
272    256    
-1584  -80    
256    48     
-96    48     
80     64     
208    -48    
-16    -96    
16     128    
0      48     
48     -32    
-208   80     
-16    -32    
80     112    
48     80     
-176   -48    
224    208    
-688   -32    
176    -32    
16     -48    
-192   80     
80     16     
64     80     
-112   16     
16     48     
-80    80     
-112   48     
192    -16    
-112   112    
128    96     
-208   32     
-32    80     
16     -64    
0      48     
160    112    
-64    0      
-16    -32    
160    -32    
-336   -96    
16     48     
192    96     
80     112    
-176   32     
0      -32    
-48    -16    
-128   48     
-64    48     
-32    0      
192    0      
-48    32     
80     112    
-48    80     
208    64     
-48    -16    
-112   64     
48     96     
-64    16     
64     0      
-32    -16    
16     64     
-128   -16    
160    112    
-192   -32    
-96    16     
176    48     
0      -16    
0      32     
-48    -272   
-64    -96    
-160   32     
-64    -16    
-112   80     
160    32     
-80    80     
-32    32     
112    -16    
-16    -48    
-336   -32    
-16    256    
-96    288    
80     -16    
160    48     
176    240    
-48    112    
32     -32    
32     -112   
32     48     
-32    -144   
112    -96    
48     -64    
-144   -96    
192    -48    
96     176    
16     96     
48     -16    
32     0      
64     64     
-112   144    
144    176    
-16    0      
48     -96    
208    0      
176    176    
-80    48     
-80    0      
-288   0      
160    128    
-16    112    
-16    -128   
432    32     
32     32     
656    656    
-16    -528   
160    -32    
-320   208    
-496   -208   
-320   -112   
16     48     
192    224    
-112   -352   
752    32     
80     400    
96     -224   
208    256    
0      -16    
224    48     
256    -48    
-16    176    
-16    160    
-288   -80    
-512   -768   
432    560    
528    528    
336    -208   
112    176    
-144   32     
-96    288    
-352   -64    
368    -192   
544    -32    
304    224    
48     48     
-48    192    
144    -144   
-128   848    
0      80     
64     -32    
128    48     
-64    -320   
-112   304    
-16    -208   
144    -320   
112    256    
80     -32    
96     112    
64     128    
-272   -112   
32     80     
-112   192    
128    48     
144    -32    
64     -240   
288    736    
-192   48     
-64    -704   
96     512    
-16    -224   
112    -176   
160    240    
224    112    
-176   -272   
16     -224   
144    -320   
144    368    
128    368    
-16    -240   
0      96     
128    48     
-112   352    
304    848    
-16    256    
-16    -96    
64     -288   
64     -112   
-32    -112   
-32    -224   
176    -32    
64     -112   
288    112    
-256   -720   
-160   -272   
-176   -80    
192    0      
64     48     
80     -704   
32     -64    
-160   -416   
224    112    
-176   -432   
-48    -32    
-80    96     
208    32     
-176   -144   
160    32     
-64    -144   
224    112    
-64    352    
288    256    
-112   -48    
384    -208   
16     64     
-64    -48    
-16    -48    
224    -368   
96     112    
-176   -448   
-96    32     
-96    64     
224    0      
112    0      
16     -160   
144    -48    
112    112    
80     144    
0      304    
32     -80    
0      16     
112    160    
48     -96    
112    16     
112    -176   
-224   -272   
320    -96    
-144   288    
0      -16    
736    528    
-704   -208   
0      80     
192    352    
-16    416    
304    176    
160    -384   
-48    336    
144    128    
208    272    
240    -576   
-80    160    
-64    -176   
-48    0      
112    -16    
304    160    
192    96     
0      -16    
272    224    
-16    176    
64     448    
288    128    
192    144    
272    -128   
-64    -32    
-32    -48    
0      80     
16     16     
128    -656   
112    176    
224    -176   
96     -960   
176    176    
-208   -16    
64     -240   
160    192    
64     -16    
96     32     
144    -128   
112    -64    
128    -64    
64     128    
112    256    
-176   16     
-96    32     
-336   -144   
80     -176   
32     -128   
272    -96    
48     -112   
-192   -96    
16     -208   
32     80     
128    -240   
48     -176   
0      -64    
-128   -272   
-96    48     
112    -48    
128    -64    
96     32     
-16    32     
96     -400   
224    -80    
128    80     
144    -48    
-16    -96    
-32    -400   
-48    -176   
176    -112   
192    288    
-48    -16    
32     144    
176    -32    
336    272    
-240   384    
16     -240   
-128   -96    
-192   -320   
304    144    
-176   -144   
-64    16     
-176   -512   
144    16     
-16    -224   
176    -432   
400    224    
32     48     
-80    -288   
80     -16    
-752   -96    
-224   -80    
-768   16     
-336   -336   
48     32     
384    48     
176    16     
96     -160   
-48    -112   
176    -96    
-224   -48    
432    -288   
128    -128   
624    32     
208    176    
176    80     
-304   112    
-1008  128    
-48    -48    
-128   -112   
-64    -144   
480    144    
368    16     
96     32     
32     -864   
-64    80     
64     -80    
0      -80    
-192   96     
208    -16    
80     48     
-80    -112   
-256   0      
-128   -160   
0      -32    
-192   64     
368    64     
480    -240   
-368   -48    
80     -912   
400    480    
-352   -144   
288    64     
144    -176   
-112   -112   
-32    -48    
96     -96    
-368   32     
64     16     
64     32     
96     -144   
-48    160    
80     -192   
-144   32     
80     -544   
48     112    
160    -32    
32     32     
-304   -48    
160    48     
-224   64     
80     80     
-48    -80    
64     -64    
-352   -96    
32     -48    
0      112    
144    -48    
144    96     
-16    -176   
16     -64    
80     -16    
48     64     
-128   -80    
160    96     
-16    96     
176    -32    
-160   -112   
224    208    
-304   192    
224    -176   
80     32     
144    -96    
304    16     
240    -208   
-2112  160    
-464   80     
-128   -240   
96     -16    
96     208    
-320   96     
256    -80    
-96    -32    
-80    -32    
112    16     
-1216  -112   
336    112    
-720   -80    
224    -64    
-192   -32    
-448   48     
96     16     
-48    32     
-16    -16    
-912   32     
-48    32     
144    32     
-256   32     
-320   -48    
-128   48     
-384   32     
32     48     
112    0      
-192   0      
0      -16    
96     -16    
-96    80     
-240   0      
-208   64     
-304   32     
320    240    
-624   0      
0      -16    
96     -16    
80     32     
64     -64    
-16    -32    
-64    -96    
48     0      
-128   0      
0      64     
-240   -16    
-112   0      
-160   -32    
32     64     
-144   112    
-288   32     
-176   16     
-256   -304   
48     208    
-128   224    
-80    -80    
272    176    
64     144    
-32    -16    
80     -32    
0      -64    
-80    256    
-16    32     
48     -48    
-80    160    
-208   -96    
-48    -160   
128    128    
-64    80     
32     -64    
96     -48    
-32    16     
64     -32    
-96    80     
-208   144    
96     -256   
240    448    
64     -16    
-192   -32    
0      112    
-368   -48    
48     80     
-208   -80    
208    128    
176    -64    
-48    32     
-192   -944   
16     1136   
-176   -80    
-160   80     
80     48     
16     -64    
-176   -32    
-528   -352   
176    -800   
48     -128   
368    720    
-416   -128   
-48    320    
-432   224    
-160   -256   
-208   160    
-96    192    
-48    -512   
208    816    
-608   368    
-144   -336   
-160   128    
-48    -144   
432    176    
80     144    
-96    -128   
-640   -96    
128    64     
96     192    
208    80     
-112   -448   
160    720    
-48    656    
-240   32     
256    160    
-64    -176   
208    96     
-48    80     
160    -32    
-672   -144   
-224   128    
-864   -64    
-48    176    
48     384    
-208   -16    
368    64     
16     128    
560    272    
-224   160    
448    272    
-48    80     
48     48     
-160   -16    
-336   96     
48     176    
-128   160    
-32    176    
176    192    
0      16     
0      -112   
224    -320   
224    -64    
-144   176    
-176   64     
96     16     
-80    -112   
144    0      
0      0      
64     64     
-16    48     
144    -32    
16     80     
-32    64     
16     112    
-32    64     
112    16     
160    -48    
-16    -16    
-176   48     
304    -80    
-112   80     
208    144    
-160   80     
160    240    
-80    -32    
400    272    
-32    176    
48     -80    
448    400    
-320   112    
-80    -176   
-48    -240   
-16    48     
48     288    
-320   32     
-16    -96    
64     -224   
-48    32     
-80    -448   
-288   -368   
144    160    
80     240    
-176   320    
64     0      
80     288    
496    208    
-160   784    
-176   192    
96     -16    
80     320    
176    96     
176    48     
-144   -304   
192    -128   
-48    96     
160    128    
240    48     
-48    96     
-16    0      
-112   16     
224    64     
32     80     
0      144    
208    112    
-96    80     
0      368    
304    96     
-80    -48    
80     224    
96     -96    
192    32     
-208   64     
48     96     
-192   288    
16     -96    
288    -624   
48     -240   
96     96     
-208   -256   
32     -480   
-80    -240   
176    32     
-32    32     
80     -64    
-208   48     
160    -64    
-416   80     
32     80     
-32    -32    
-96    32     
64     -32    
144    -32    
32     96     
112    -96    
-176   -80    
128    -192   
-144   -48    
160    0      
48     224    
48     144    
176    -512   
-240   -160   
-80    0      
0      144    
240    160    
288    128    
-48    32     
-48    128    
-96    -240   
192    -48    
144    -16    
-32    144    
16     0      
-80    -240   
112    -16    
-80    96     
144    272    
48     208    
48     304    
64     64     
0      -80    
-32    -160   
176    96     
-80    144    
112    288    
128    288    
144    80     
16     0      
-128   -192   
96     -112   
32     -208   
144    16     
144    -1488  
-128   -128   
-32    432    
-16    -128   
-64    -32    
-80    192    
-96    -48    
80     -208   
-16    -80    
144    80     
48     112    
160    192    
-32    32     
16     16     
176    400    
-512   -320   
-16    -208   
192    -1072  
-48    -64    
400    400    
32     208    
-224   32     
32     240    
-416   112    
192    48     
-112   160    
-32    -208   
-160   96     
-64    -240   
224    48     
-16    -320   
512    16     
48     -64    
144    96     
-80    96     
48     48     
-352   -240   
704    -96    
192    208    
48     -80    
416    48     
-32    208    
-176   -80    
688    176    
-352   80     
208    -32    
624    0      
-400   -128   
-256   -64    
112    -32    
112    32     
128    80     
-208   -272   
336    -32    
-160   0      
400    96     
-32    -144   
-144   48     
208    16     
-48    -16    
-32    -128   
160    96     
-96    -544   
368    176    
0      48     
160    -320   
-48    -192   
320    -208   
96     -912   
64     0      
-144   240    
336    0      
-112   -48    
-64    -48    
32     112    
-16    -48    
176    -880   
-112   -16    
208    -64    
128    64     
144    -400   
96     -48    
-64    -112   
80     32     
176    -32    
0      -224   
48     -64    
96     384    
-112   -64    
144    64     
192    0      
176    -224   
64     112    
80     80     
-64    0      
16     112    
-32    -144   
-304   -48    
-128   32     
128    80     
208    -288   
128    -16    
112    -192   
-112   -16    
208    128    
48     0      
96     -112   
-128   -16    
112    80     
-80    32     
-160   -48    
48     112    
-80    160    
16     80     
32     -48    
0      -160   
-80    -160   
112    -272   
192    32     
80     -800   
-48    160    
352    112    
16     -208   
-96    -48    
16     48     
16     48     
-112   80     
-32    16     
128    16     
-608   -64    
80     -48    
240    96     
-48    -16    
96     32     
-16    -352   
-96    -64    
192    -64    
-80    96     
224    -16    
80     16     
-176   -16    
64     16     
-32    96     
48     -48    
-288   16     
16     112    
176    16     
80     -128   
-48    64     
64     -240   
144    96     
144    -32    
80     -32    
224    32     
112    112    
-128   -48    
-144   -400   
48     -48    
-16    208    
-160   -256   
224    -64    
-800   256    
64     -192   
-80    32     
-224   -240   
416    48     
128    -368   
96     -16    
0      32     
64     -96    
-272   32     
192    288    
-32    -224   
16     0      
-560   -192   
352    -160   
-1408  -80    
64     -16    
16     96     
160    -16    
176    304    
48     -304   
496    208    
-208   608    
0      -480   
-32    144    
416    256    
-352   272    
-48    432    
-32    -48    
96     176    
224    32     
-208   192    
0      208    
208    -240   
-16    320    
176    -192   
128    384    
-208   80     
64     48     
0      128    
32     96     
-304   -96    
-16    16     
-32    16     
-48    -320   
-656   128    
-48    -16    
64     32     
-1296  -176   
16     -80    
-32    16     
-720   112    
112    0      
-1424  -224   
-48    -48    
80     192    
-80    240    
32     208    
-192   224    
-1600  96     
-160   32     
-608   32     
192    464    
-336   48     
224    -16    
96     -96    
192    16     
144    96     
-592   192    
-128   48     
-272   -32    
-224   -32    
-144   32     
-240   -32    
304    -240   
416    -48    
80     0      
32     80     
80     -80    
-240   -160   
-32    80     
-400   128    
-112   -48    
-128   0      
16     -16    
-464   -32    
-16    0      
-224   0      
-256   -16    
32     -208   
240    256    
128    368    
96     144    
-464   160    
-480   -32    
-128   -16    
32     32     
336    -48    
80     16     
-256   -80    
0      0      
-256   0      
-576   176    
80     48     
32     -224   
160    48     
-32    80     
160    288    
96     192    
-48    -48    
224    48     
-16    0      
-32    -96    
-224   64     
-96    48     
-432   208    
112    192    
-496   -80    
192    160    
-240   48     
-32    112    
32     -80    
-16    -160   
32     -320   
48     48     
160    336    
-64    224    
-224   256    
-272   -320   
240    160    
-48    256    
48     64     
-320   672    
224    384    
-656   64     
-48    96     
32     -192   
320    352    
80     48     
48     48     
16     -80    
-208   -288   
320    -432   
64     80     
-48    368    
-32    -80    
-160   112    
0      -240   
48     80     
-528   -192   
144    112    
208    96     
192    144    
-288   32     
-64    -32    
-96    -64    
48     -48    
0      -656   
128    -416   
-96    -224   
-336   -192   
32     240    
-208   -336   
80     304    
-192   -32    
272    144    
160    -48    
-48    -80    
224    -160   
-496   -96    
-16    0      
-96    64     
-208   144    
-400   -320   
224    -704   
-304   -256   
352    32     
-352   48     
-160   -304   
-96    80     
32     368    
-224   -160   
-32    -32    
256    -16    
352    480    
-144   224    
112    416    
-80    -32    
240    128    
0      496    
16     224    
384    352    
-80    352    
-64    464    
64     368    
-64    192    
304    448    
-192   224    
-16    48     
-16    -128   
144    -80    
-208   -32    
32     464    
96     -480   
-32    -160   
80     432    
-176   128    
-80    32     
272    368    
192    112    
-80    -32    
16     256    
-160   160    
176    -64    
-48    112    
-48    -32    
240    208    
32     672    
-64    -624   
-320   496    
-48    -288   
80     -368   
-192   -128   
64     304    
-128   16     
64     16     
176    32     
160    64     
80     192    
16     64     
-96    16     
-96    80     
-176   -48    
-80    -16    
80     32     
-32    -48    
208    16     
64     -32    
144    0      
144    128    
-96    -16    
-32    16     
320    160    
16     64     
256    64     
96     80     
-240   48     
64     -96    
-64    -144   
112    -240   
-80    48     
112    160    
608    464    
176    160    
384    -112   
0      -112   
96     48     
-80    144    
-256   96     
-144   48     
-288   48     
-256   160    
-336   16     
-64    16     
80     80     
64     80     
128    32     
32     -32    
320    112    
-16    96     
112    32     
-224   -288   
784    -80    
-128   -48    
416    112    
272    48     
128    0      
176    288    
-208   416    
-400   -32    
80     -112   
304    16     
0      80     
176    -544   
208    16     
112    80     
-48    -48    
-32    48     
-48    48     
208    -96    
32     32     
-128   48     
-224   -64    
-96    -192   
320    80     
160    96     
288    -176   
208    80     
-144   -560   
-112   48     
-64    96     
-176   32     
16     64     
-32    0      
48     32     
-208   -32    
288    48     
16     0      
-80    0      
16     96     
176    64     
64     -48    
96     112    
-16    -80    
96     64     
48     -16    
80     80     
192    112    
-112   -32    
144    32     
-16    144    
128    80     
144    112    
0      48     
-32    16     
128    16     
80     0      
-176   176    
240    80     
-48    48     
112    -240   
112    80     
32     -560   
80     96     
-272   0      
176    -224   
144    96     
96     -16    
112    16     
32     0      
32     64     
128    -144   
-80    0      
240    16     
32     80     
80     -336   
-48    -16    
16     -640   
80     -32    
-48    -32    
128    -144   
48     0      
0      112    
80     160    
-80    -112   
-80    -272   
16     -96    
-96    -96    
-16    -288   
80     112    
336    -112   
-240   160    
160    -144   
64     96     
96     112    
-64    -64    
96     352    
-32    -16    
112    32     
80     64     
160    128    
16     -96    
128    32     
80     -80    
0      32     
0      0      
48     -160   
80     416    
-16    -64    
-16    -144   
432    1088   
-304   -528   
80     -160   
208    144    
80     48     
176    16     
-64    -240   
-96    960    
288    -432   
112    176    
80     240    
-112   -784   
176    352    
624    704    
-656   -688   
-16    -800   
336    32     
-80    192    
128    128    
-128   -288   
336    -656   
16     -272   
288    176    
32     0      
208    160    
-16    32     
304    -208   
-176   176    
-16    -128   
-32    176    
144    -64    
-80    -288   
112    -64    
80     -464   
256    -16    
0      112    
-80    -96    
256    -64    
32     32     
416    112    
-112   32     
288    -48    
-208   144    
96     112    
80     144    
-48    -80    
192    -80    
-1856  -64    
128    -144   
64     224    
48     48     
64     -112   
16     -176   
160    -96    
48     -752   
288    48     
-128   64     
-192   32     
80     -32    
0      48     
-448   -16    
80     -48    
-736   -16    
112    -16    
16     32     
80     -128   
-48    -304   
32     -288   
32     -160   
32     80     
208    80     
-80    144    
112    48     
144    -112   
128    -32    
-192   -48    
144    208    
-16    272    
80     0      
-256   -48    
208    -208   
0      48     
-144   -96    
-16    -48    
176    -416   
-80    144    
-64    48     
-48    -16    
-48    -48    
0      -80    
160    64     
48     80     
-464   80     
-144   -112   
-2224  -16    
48     -96    
-144   -64    
448    -80    
592    80     
64     -128   
-144   80     
-64    -832   
16     -112   
32     96     
240    -64    
-128   -16    
80     -160   
-112   -224   
96     112    
-144   208    
-160   96     
-928   16     
304    -160   
-128   16     
128    -96    
-96    -32    
240    -672   
96     96     
256    -16    
80     -160   
-208   -32    
96     -16    
-64    48     
144    96     
-96    0      
96     32     
-432   -128   
48     -48    
96     -48    
0      -96    
160    48     
96     -272   
96     -16    
-96    160    
-128   128    
-928   -80    
48     0      
-112   -240   
96     48     
-96    -240   
-64    -80    
96     160    
48     -32    
128    176    
320    80     
-192   -272   
144    -240   
272    336    
352    928    
-64    544    
-416   -64    
192    0      
-240   0      
-48    48     
-208   -192   
-272   -464   
80     -272   
208    -160   
224    -64    
-1072  272    
-48    800    
256    -1040  
-1088  -96    
416    -160   
-1376  -160   
-240   496    
224    -240   
-208   288    
272    -416   
-240   112    
-528   96     
-16    -96    
-80    -80    
-128   -352   
304    -432   
-272   288    
144    -272   
-112   -64    
-64    96     
-480   -544   
-80    272    
-432   272    
-256   -112   
-32    -32    
16     -160   
-224   32     
352    -96    
-304   32     
64     -336   
224    192    
-128   -624   
16     512    
-112   -224   
-208   -32    
0      448    
-368   -256   
-96    -176   
112    32     
-608   80     
240    16     
-80    -224   
64     80     
-128   64     
0      80     
-256   -144   
256    -560   
-272   -64    
32     320    
-208   32     
64     96     
176    176    
-304   -32    
96     -128   
-2432  -32    
-16    80     
-144   -96    
96     48     
128    16     
80     0      
-128   -64    
-160   0      
-96    112    
64     160    
-32    -16    
0      -48    
-224   -96    
-176   16     
-48    -48    
-304   -48    
160    144    
-32    -64    
128    64     
-304   -112   
112    -80    
-80    16     
288    -272   
-272   -368   
-144   128    
320    432    
-336   192    
-80    80     
-48    16     
-32    -64    
-80    -32    
16     -32    
-320   -48    
-96    -432   
-32    -64    
-192   -32    
-32    64     
96     80     
224    176    
-240   48     
48     128    
-208   48     
128    -32    
32     64     
64     16     
-384   -368   
304    -464   
-768   0      
160    368    
80     64     
288    -16    
-160   48     
-48    16     
176    -48    
-208   48     
-432   -336   
608    -208   
64     0      
112    16     
496    48     
-384   -192   
608    -176   
-416   -112   
368    320    
224    96     
-16    -112   
-160   -96    
-80    -16    
144    32     
0      32     
416    32     
304    -16    
288    -80    
96     48     
112    64     
32     -80    
-176   80     
-736   -48    
240    16     
144    80     
-160   16     
64     32     
256    16     
80     0      
-320   16     
-192   64     
144    16     
-16    48     
48     -112   
288    48     
160    16     
432    112    
128    240    
-416   96     
96     96     
-160   -32    
368    16     
-16    -48    
240    16     
-272   -32    
176    0      
16     16     
-48    -16    
-144   0      
32     128    
-304   0      
-112   32     
112    128    
-16    -32    
-320   32     
224    144    
288    96     
-336   16     
96     16     
64     96     
64     -16    
144    -64    
48     144    
-16    48     
16     32     
-208   -80    
-16    16     
48     112    
96     112    
384    448    
-288   272    
240    -32    
-48    64     
112    16     
96     16     
48     48     
0      -64    
176    128    
-208   -48    
80     -112   
0      160    
64     400    
-48    176    
-240   -144   
-400   32     
-32    16     
-32    -192   
80     64     
80     112    
160    224    
64     240    
-16    -176   
144    -112   
-32    -64    
16     96     
288    144    
-80    272    
48     144    
-80    -256   
48     192    
-80    -80    
-48    -64    
128    304    
64     -144   
0      176    
176    304    
32     -288   
-192   48     
32     48     
-16    -176   
192    32     
176    48     
240    -336   
48     816    
-144   -656   
64     -112   
176    752    
16     -64    
336    320    
-240   -224   
-128   64     
128    -192   
176    160    
64     224    
-48    -288   
48     -32    
64     -144   
-48    160    
48     144    
-80    -96    
-112   -176   
496    416    
-352   288    
256    208    
-208   112    
144    112    
-64    288    
48     64     
240    -144   
-112   -304   
336    176    
-304   -928   
-16    96     
176    -64    
0      -176   
128    16     
192    32     
-128   32     
16     224    
112    32     
144    48     
-32    32     
-96    0      
48     -80    
32     -160   
112    -96    
48     -64    
-32    112    
16     -48    
128    -32    
144    -16    
32     128    
208    48     
160    96     
-112   16     
32     32     
-96    -32    
64     -112   
176    16     
-64    0      
144    96     
16     -48    
16     80     
144    -1040  
208    64     
32     -320   
-96    -304   
32     -48    
64     96     
16     32     
32     112    
80     32     
64     -32    
128    16     
16     -96    
304    0      
32     -112   
-32    48     
-112   -176   
304    352    
48     -64    
272    -48    
-112   -16    
-144   48     
64     144    
48     160    
-64    -192   
384    -352   
128    0      
224    128    
-64    -96    
112    -16    
-144   128    
-192   -16    
592    512    
-544   176    
-256   -16    
176    -144   
-128   16     
288    -64    
96     -48    
-256   -80    
176    224    
0      240    
128    -160   
416    -16    
16     -80    
-64    16     
128    -16    
-224   112    
-368   -64    
-32    80     
160    256    
272    288    
96     112    
160    0      
-16    -656   
-256   -480   
-240   64     
-432   32     
80     64     
272    -144   
-32    128    
208    -80    
48     -32    
64     -48    
32     -144   
96     384    
-16    -272   
192    144    
176    48     
-112   -480   
-80    -128   
240    -1152  
-80    -288   
304    -112   
176    -144   
64     32     
-64    80     
112    -32    
64     0      
112    16     
128    -48    
-496   -256   
16     -368   
-64    0      
32     -320   
64     -96    
160    -160   
80     -416   
-112   -1872  
160    -192   
32     480    
240    -80    
0      0      
336    176    
-128   -464   
-128   32     
-112   16     
-128   192    
-240   -256   
32     112    
-16    -240   
-80    96     
192    -32    
192    -32    
80     0      
128    -112   
-304   32     
64     -32    
-16    128    
384    -208   
176    480    
48     -320   
48     -272   
-1392  -144   
416    -16    
32     -176   
112    -80    
144    -224   
160    -384   
0      -32    
-144   -288   
64     0      
-288   192    
448    480    
16     -64    
144    -192   
-208   -96    
288    -16    
-624   32     
224    112    
368    608    
112    256    
96     -208   
-80    -320   
-624   -48    
-208   -496   
160    96     
224    -192   
48     -80    
-32    112    
80     48     
-272   -64    
80     192    
-32    32     
48     0      
-2176  -80    
176    16     
-112   0      
32     -96    
160    0      
256    224    
-160   48     
32     -112   
32     16     
-32    0      
48     -96    
208    48     
80     -32    
-240   -80    
192    -64    
-112   0      
-48    -272   
176    -112   
112    -64    
80     96     
288    -320   
-128   192    
0      -1408  
224    64     
-112   -80    
48     -48    
64     16     
0      -16    
-224   -16    
-64    32     
-32    48     
64     -64    
16     16     
16     -160   
128    80     
144    -256   
0      -64    
288    0      
112    80     
-80    0      
144    96     
-144   -48    
320    112    
-416   -32    
144    0      
-32    96     
0      -384   
160    -80    
208    0      
128    256    
-80    -80    
32     16     
224    16     
-48    32     
-144   16     
16     16     
96     64     
96     -96    
-80    -48    
96     -192   
-128   -80    
112    -32    
-96    128    
-224   -80    
96     64     
-176   96     
-400   64     
-32    -16    
-1328  -160   
-432   -192   
-2272  -32    
-224   80     
112    -48    
32     32     
224    112    
-256   80     
-464   -160   
80     -32    
224    0      
80     96     
-752   624    
112    192    
368    -336   
-608   -144   
-192   -32    
208    -64    
-176   240    
-160   160    
-96    -80    
-368   -64    
304    32     
240    16     
368    48     
288    160    
-160   160    
-80    64     
-480   -96    
0      64     
-176   48     
64     -16    
-80    0      
-256   96     
-704   -80    
16     -80    
48     16     
400    336    
-128   32     
496    16     
112    -48    
48     -64    
160    -128   
-16    112    
80     16     
192    64     
-112   -48    
-16    48     
0      0      
-32    -96    
240    48     
-784   80     
16     16     
368    48     
-16    48     
-208   -128   
192    112    
16     128    
-16    64     
80     144    
-192   64     
-352   16     
0      112    
48     64     
16     96     
-80    96     
-96    16     
208    32     
-128   -48    
112    64     
32     64     
80     0      
80     32     
-64    0      
0      128    
-96    48     
80     32     
-128   16     
48     144    
-112   32     
32     112    
-848   96     
96     256    
-256   80     
16     -64    
80     144    
-272   -64    
16     304    
-32    -16    
80     16     
-208   -16    
272    -32    
-64    -448   
-384   -16    
176    -832   
112    960    
-256   -160   
-128   -176   
-560   -304   
-224   784    
-176   -336   
192    112    
16     -48    
-176   -208   
96     432    
0      -304   
176    80     
-64    32     
-128   16     
-208   240    
320    160    
80     384    
-208   -64    
-384   -128   
-80    112    
64     -112   
48     192    
432    144    
-304   272    
336    224    
-368   176    
-128   96     
-32    -304   
32     -48    
-176   -192   
400    320    
-656   0      
224    -16    
48     160    
-432   320    
144    -64    
-32    -64    
208    -16    
0      32     
-16    64     
224    208    
-224   -32    
-96    -144   
-16    208    
-144   -176   
240    -96    
-160   32     
112    240    
32     -32    
160    16     
32     32     
32     160    
80     112    
-64    -32    
256    0      
-224   80     
112    80     
0      48     
288    96     
-80    112    
-160   32     
-160   272    
112    96     
176    32     
112    16     
192    -32    
32     80     
128    80     
-64    80     
-80    32     
320    16     
-128   32     
-144   -32    
-176   144    
-48    -16    
144    -128   
32     48     
-48    80     
-64    48     
-16    176    
128    112    
176    128    
-32    64     
-48    -96    
96     16     
96     48     
48     32     
-256   0      
-48    16     
-48    -96    
160    48     
-16    32     
16     -64    
240    80     
-112   112    
0      16     
192    80     
160    80     
-96    144    
16     112    
80     16     
0      32     
-32    32     
80     64     
112    176    
-224   -112   
144    -32    
160    32     
0      16     
80     -64    
-32    -48    
32     16     
160    -16    
-64    368    
96     32     
304    -112   
16     144    
-64    0      
-16    -80    
-16    -160   
48     -16    
-384   400    
-224   352    
304    -144   
-112   -480   
-32    -448   
-224   32     
-192   -64    
-112   192    
-48    336    
64     336    
304    80     
112    -128   
192    48     
-48    -48    
32     -192   
208    -32    
176    64     
-16    16     
144    256    
128    192    
48     144    
16     16     
-192   -112   
144    64     
-176   -160   
0      256    
224    304    
256    272    
96     -160   
96     -336   
-112   400    
208    -752   
-448   -48    
-240   256    
112    -176   
16     -32    
240    128    
208    -16    
-32    16     
-32    -16    
-48    16     
0      -64    
368    400    
-16    -48    
-80    -224   
0      160    
48     -240   
816    144    
-672   -656   
112    80     
-32    144    
-16    64     
96     -144   
-48    -48    
-80    -112   
-112   112    
176    144    
-16    -112   
272    240    
48     -32    
144    112    
80     -128   
-32    0      
-48    -1584  
160    112    
-48    144    
160    -48    
80     32     
80     0      
128    240    
128    96     
-16    16     
128    -112   
-224   -112   
224    144    
-32    176    
144    96     
128    -80    
208    -336   
48     48     
32     16     
48     80     
-64    112    
16     96     
-80    -32    
64     -64    
160    80     
-96    80     
256    144    
-32    -224   
16     96     
16     -112   
96     16     
416    128    
-192   32     
160    -160   
160    48     
-448   320    
224    192    
672    288    
-640   320    
16     -16    
464    -240   
-160   112    
64     -80    
128    32     
160    -96    
-224   80     
176    -96    
160    96     
0      16     
192    32     
-16    -32    
48     128    
32     -32    
112    48     
16     0      
96     -160   
128    48     
208    -16    
32     80     
176    32     
336    160    
-368   -32    
128    256    
160    80     
128    -320   
128    32     
-416   32     
-16    112    
400    -64    
-16    -96    
0      -192   
-208   -896   
160    -16    
16     96     
224    64     
416    336    
-224   176    
48     -368   
160    0      
112    16     
-48    0      
-352   48     
64     48     
-208   -96    
112    -240   
160    0      
128    32     
240    16     
48     -240   
16     -176   
48     -64    
80     48     
176    -32    
144    80     
16     -160   
16     -128   
32     192    
-224   16     
144    16     
128    -160   
64     -32    
0      -240   
-144   16     
144    -976   
96     -80    
80     -32    
32     -240   
64     -32    
64     96     
208    -192   
208    -48    
-400   0      
112    16     
-800   -48    
112    -96    
-128   -192   
160    -176   
144    16     
-32    -96    
-144   -96    
144    -288   
32     0      
160    80     
-48    -48    
-16    -64    
48     16     
16     48     
480    80     
-832   -32    
64     0      
-96    -560   
-336   -736   
-336   96     
-304   176    
-112   128    
544    192    
-256   96     
-208   -352   
32     -64    
496    -448   
576    -256   
272    112    
16     -96    
-720   -128   
-112   -128   
-832   -48    
112    -48    
0      96     
240    -64    
320    224    
-224   -320   
-32    192    
32     -48    
480    -80    
352    0      
512    96     
-304   -320   
-96    -608   
-464   -336   
-128   224    
-768   560    
144    -96    
-128   -272   
144    -320   
144    96     
128    -80    
-400   112    
-256   272    
128    -112   
544    432    
-144   416    
144    -112   
272    -352   
-16    -144   
368    112    
-240   192    
-48    -176   
0      -176   
-32    -32    
144    160    
160    -96    
384    288    
752    320    
-128   144    
-432   -384   
16     224    
-224   0      
224    32     
144    240    
16     -208   
-288   80     
64     -240   
176    144    
128    32     
-32    -80    
-160   -144   
-480   32     
64     32     
-16    432    
-176   -304   
-224   -272   
16     80     
0      128    
-80    -144   
320    128    
-640   -224   
-592   160    
-48    144    
-576   -352   
-32    80     
-512   -512   
-384   432    
224    304    
176    80     
64     -128   
-352   -224   
-64    208    
352    224    
80     464    
0      80     
-32    -80    
-320   -80    
48     -112   
-464   -128   
-144   -16    
32     -16    
0      -144   
128    80     
-304   -64    
-16    -144   
-288   -16    
-160   112    
-960   -48    
160    128    
16     192    
-208   0      
-208   -32    
208    -48    
-64    -96    
224    -80    
0      144    
-144   -48    
-192   -64    
96     -176   
48     176    
-544   96     
-64    -32    
-304   -128   
-80    -224   
-320   64     
0      96     
96     -48    
64     16     
-32    -16    
48     288    
96     64     
80     -96    
-64    -144   
-16    128    
-16    224    
-16    32     
-128   16     
-576   -128   
-32    -16    
-160   -96    
288    144    
-144   0      
16     400    
80     -112   
80     -144   
80     -112   
-176   32     
64     32     
-240   -176   
-48    -240   
-128   -176   
128    144    
-576   -64    
192    64     
-304   -16    
128    96     
96     0      
64     80     
128    -96    
-144   32     
64     0      
16     32     
16     -16    
-64    96     
32     64     
-32    -32    
-32    32     
32     144    
16     352    
-416   -96    
80     16     
0      96     
144    192    
-96    0      
80     32     
48     32     
-48    -32    
160    -112   
-16    80     
-128   32     
160    112    
176    96     
-112   32     
192    -16    
-320   -16    
64     32     
-352   16     
16     16     
-32    80     
224    128    
-80    80     
-160   -48    
48     32     
-32    112    
128    16     
176    48     
64     48     
-336   -240   
160    80     
-128   16     
-96    32     
176    160    
-176   -48    
16     64     
80     208    
272    144    
-16    0      
96     112    
-64    48     
-176   32     
0      32     
-48    128    
-416   -160   
304    -432   
80     -16    
304    368    
176    512    
-192   240    
48     -256   
-32    -32    
-368   144    
-288   48     
-144   80     
32     -368   
64     240    
0      64     
-96    64     
-240   144    
176    608    
-16    240    
-544   -256   
80     -192   
320    -64    
400    208    
208    -224   
128    -96    
-80    192    
-416   0      
16     224    
64     272    
-48    -160   
416    -128   
80     240    
-128   272    
-80    112    
112    -32    
32     -16    
384    192    
-320   -32    
-192   -128   
-64    32     
-96    -32    
384    16     
80     112    
464    80     
-160   -48    
16     -96    
-416   -96    
0      0      
144    32     
160    64     
176    96     
-128   80     
96     32     
-48    32     
80     32     
-16    48     
96     80     
80     80     
48     16     
-32    48     
16     -32    
-112   -64    
80     -80    
-16    144    
320    48     
-32    48     
96     32     
144    288    
-112   32     
272    224    
64     -80    
160    192    
-32    96     
-224   16     
-80    64     
128    160    
208    0      
224    -160   
-16    48     
-96    16     
176    64     
-192   48     
-80    64     
0      48     
-16    32     
-16    32     
160    112    
-192   64     
304    208    
0      -144   
80     -64    
-208   -96    
448    -1408  
144    176    
-400   48     
-176   -368   
400    -16    
-144   224    
16     -16    
192    160    
48     112    
-64    48     
208    16     
64     96     
16     64     
240    -16    
-128   -224   
176    -208   
-176   112    
32     0      
208    80     
0      80     
32     -16    
112    32     
0      32     
-160   48     
48     -48    
128    64     
0      96     
-112   16     
64     -112   
-48    48     
112    -384   
96     16     
208    272    
48     96     
80     112    
-160   224    
432    96     
-144   32     
-144   -112   
80     160    
240    80     
32     80     
80     64     
160    -64    
160    32     
-96    -96    
-96    16     
176    160    
80     -16    
-16    0      
176    48     
16     -64    
208    80     
-80    48     
224    32     
-80    0      
16     96     
32     16     
144    80     
192    -48    
-144   -16    
80     32     
48     -176   
96     32     
0      -944   
-144   -176   
96     -64    
-112   -128   
176    -64    
112    112    
-64    112    
112    -48    
160    64     
64     -64    
16     240    
128    0      
16     -112   
208    96     
-16    32     
176    -320   
48     64     
-48    64     
144    96     
144    16     
-32    128    
80     80     
224    112    
-48    -32    
144    -448   
144    192    
128    128    
0      -128   
-48    32     
48     -128   
112    -272   
48     176    
-128   0      
112    112    
160    832    
64     -224   
16     -96    
-240   -48    
-32    -96    
176    128    
-320   32     
-32    -208   
384    176    
128    -128   
608    240    
288    -16    
224    112    
192    0      
96     -48    
-208   -112   
-48    -896   
-144   160    
-48    -208   
64     -112   
256    -80    
112    256    
240    -288   
-32    1040   
112    256    
0      -432   
608    192    
64     -144   
272    -224   
288    -144   
-80    -96    
-112   -64    
-48    32     
128    80     
-32    -96    
-48    304    
160    48     
48     -32    
-160   48     
112    -176   
-144   464    
-32    -144   
384    -384   
112    0      
192    -416   
96     128    
-32    64     
48     -176   
160    16     
48     -368   
-48    -288   
144    -224   
256    -48    
224    192    
304    256    
-144   80     
-144   -48    
80     -240   
-80    240    
48     -224   
64     128    
-64    -112   
96     -16    
128    -112   
176    -160   
64     0      
32     288    
80     304    
336    240    
-240   416    
272    336    
-288   224    
112    -240   
224    112    
256    368    
-384   304    
-368   -144   
-80    -192   
-1552  -144   
-64    -80    
368    144    
-192   -16    
96     176    
-112   256    
-96    272    
416    112    
16     0      
-128   -240   
16     80     
208    -32    
176    -32    
-128   -128   
48     -144   
-320   48     
192    -64    
-64    64     
-48    -208   
-64    32     
144    -144   
208    112    
-224   -64    
240    144    
-144   -16    
48     -272   
64     -144   
-208   80     
-80    -96    
192    32     
-416   16     
64     16     
-2976  -64    
96     -96    
-16    -48    
64     0      
384    -48    
-240   -688   
48     192    
32     -192   
-112   -144   
112    -128   
208    96     
0      -80    
48     16     
-192   -48    
-32    336    
-48    96     
160    -128   
-80    -16    
48     -304   
304    64     
80     -48    
-160   176    
416    48     
64     16     
0      -32    
-160   32     
-112   -176   
-176   112    
-128   144    
-16    -16    
80     16     
80     -80    
0      400    
288    112    
368    16     
32     -368   
-128   -64    
48     0      
80     64     
-112   16     
112    32     
-144   16     
144    -64    
0      -96    
32     -48    
-256   0      
0      -208   
-16    144    
128    -80    
144    32     
-592   -128   
-320   48     
-32    96     
48     64     
-368   -320   
96     -144   
-80    64     
-48    352    
-144   224    
-32    -512   
-400   -304   
-1824  -96    
64     80     
-64    -16    
-48    32     
144    -176   
-448   -144   
-192   48     
-1184  -240   
-32    -144   
-480   -128   
-16    -16    
112    -192   
48     -256   
-32    -432   
-160   192    
-176   32     
32     80     
-208   -496   
0      -368   
144    224    
-128   128    
16     -176   
-624   -80    
16     208    
-864   32     
-208   368    
-240   272    
-240   -832   
400    992    
304    464    
-112   -480   
288    160    
-32    -144   
-112   128    
384    432    
-464   -160   
-320   -176   
80     -176   
256    96     
112    240    
48     32     
288    -208   
-368   -192   
-368   -128   
48     160    
-144   0      
272    80     
-288   -176   
-336   -48    
64     -16    
16     192    
-80    32     
32     -96    
128    -112   
128    -144   
96     -128   
256    32     
256    144    
-1328  0      
48     48     
-352   -80    
0      96     
-96    -48    
-128   -80    
32     48     
0      64     
288    336    
-816   -80    
288    80     
-144   80     
112    16     
-368   -112   
-16    -16    
-976   128    
-304   48     
0      -16    
720    480    
-624   -64    
176    -32    
160    48     
400    144    
-544   -96    
48     16     
48     48     
-96    48     
-144   -16    
-336   -32    
32     64     
-128   16     
240    160    
-32    -16    
64     32     
32     16     
-32    0      
32     64     
128    240    
-208   -128   
128    -16    
-80    48     
16     80     
-16    32     
-288   -48    
384    352    
-592   112    
608    16     
-112   48     
16     -16    
128    0      
-64    16     
144    112    
-96    112    
160    144    
-160   -96    
64     0      
-288   64     
160    32     
-64    64     
48     0      
-64    -144   
-32    16     
80     80     
96     16     
112    16     
352    144    
32     -48    
240    144    
-304   64     
-48    16     
-48    64     
-112   80     
-240   -352   
16     -112   
-208   256    
-240   -48    
192    80     
112    32     
336    192    
32     80     
-64    -16    
96     16     
-256   112    
80     32     
112    -48    
32     64     
-64    0      
176    48     
-208   -80    
128    -16    
-48    80     
-128   48     
16     32     
-80    112    
288    80     
-80    -160   
-240   -16    
48     16     
-16    16     
304    64     
-80    128    
-64    0      
-32    48     
-256   0      
112    112    
288    80     
-112   16     
-32    128    
0      128    
64     48     
0      32     
-80    48     
192    32     
0      -64    
-112   -48    
192    128    
-112   0      
176    -64    
-128   -48    
192    96     
-80    96     
32     48     
64     96     
160    160    
-176   160    
48     256    
320    -48    
144    160    
-208   -80    
-160   -64    
144    128    
144    -288   
16     176    
144    432    
-272   -176   
80     -16    
176    -80    
0      384    
-48    -48    
0      112    
128    64     
-16    32     
-64    32     
320    128    
-272   -176   
240    32     
-64    112    
-176   -720   
-112   448    
-144   -256   
96     -272   
192    160    
176    176    
-16    336    
112    -480   
224    -208   
208    464    
-16    -208   
240    224    
-112   160    
64     -320   
32     560    
-96    64     
112    -192   
288    272    
80     112    
16     48     
336    496    
192    64     
-112   -160   
-96    -32    
160    32     
32     48     
96     -16    
160    144    
-128   160    
-48    32     
384    240    
-128   128    
16     -528   
176    -144   
80     32     
-208   -224   
-80    64     
0      112    
112    208    
128    288    
-192   -64    
480    416    
-464   -128   
64     320    
-16    -128   
64     -384   
336    -48    
-304   -480   
160    -448   
320    -1248  
400    192    
352    144    
-96    64     
-48    16     
160    192    
0      144    
64     -16    
-128   64     
64     -128   
240    -32    
240    128    
-144   64     
256    160    
-208   80     
80     -192   
160    -80    
96     96     
352    -16    
0      -16    
128    256    
-256   80     
272    32     
64     48     
176    -32    
16     80     
144    -160   
16     -16    
0      -16    
96     64     
96     -32    
-144   96     
48     -1072  
64     0      
-32    16     
160    96     
96     192    
32     128    
32     -96    
16     -240   
224    -112   
240    0      
208    192    
160    -224   
-176   -48    
0      -240   
48     64     
0      -288   
240    -176   
-144   496    
240    208    
-48    -112   
80     -288   
96     -368   
-96    -48    
-48    -272   
544    112    
-272   160    
32     80     
0      -80    
48     128    
288    224    
0      -192   
176    -256   
-64    -208   
128    -32    
-128   -240   
288    16     
288    112    
-192   32     
48     -16    
-16    -176   
112    112    
-192   -368   
256    -208   
32     -80    
16     -224   
-48    -272   
176    80     
-112   48     
96     368    
208    -112   
0      144    
112    -16    
-192   -48    
320    -320   
-16    112    
416    -16    
160    176    
352    304    
144    16     
-32    -656   
144    32     
64     -1280  
16     16     
0      448    
288    128    
112    128    
32     -416   
96     160    
64     -64    
144    32     
64     -800   
32     -16    
0      224    
96     16     
-192   80     
416    112    
240    -272   
-240   -144   
96     32     
32     32     
-720   176    
384    -16    
-64    304    
-48    -16    
-48    80     
144    -96    
16     -128   
0      -1104  
96     -96    
160    -16    
32     -48    
32     -32    
32     -128   
-32    48     
160    -192   
-288   80     
208    16     
160    -128   
-32    16     
112    -112   
176    -96    
64     -208   
-32    400    
48     64     
224    -64    
96     -128   
240    -384   
-208   224    
288    448    
-112   -288   
48     -64    
160    240    
-528   -288   
176    96     
-80    16     
16     -128   
112    16     
192    -736   
112    112    
112    -384   
48     16     
176    80     
-160   -160   
-144   -48    
112    -128   
-352   0      
320    80     
-1376  -32    
64     -160   
208    -144   
208    -48    
-256   96     
128    -176   
-192   160    
16     -1584  
32     0      
336    64     
-192   -384   
464    -816   
432    -400   
144    304    
128    112    
-96    -64    
320    -48    
-928   16     
656    96     
-64    32     
64     -288   
-208   32     
-400   -496   
112    0      
272    240    
-272   -32    
-160   -96    
384    16     
-96    144    
288    -80    
-256   32     
-16    -160   
-96    0      
-160   -160   
-32    -32    
208    -176   
256    96     
272    96     
-352   0      
16     48     
16     -64    
-416   -16    
224    0      
64     -16    
208    -32    
-288   16     
-48    -64    
-80    16     
-320   -64    
-192   80     
-288   -48    
336    64     
704    96     
-656   0      
-160   -80    
80     -16    
-80    16     
384    16     
160    128    
-16    16     
-192   -32    
208    0      
-800   32     
-64    -48    
-64    80     
-944   -96    
256    96     
-240   32     
-1008  -16    
0      48     
-784   64     
0      112    
368    96     
-240   0      
160    -16    
-96    -64    
80     16     
96     48     
-784   -64    
-80    -192   
-256   -48    
-16    -16    
-96    0      
0      64     
-48    48     
-176   48     
-256   0      
-1792  96     
-224   16     
240    112    
112    96     
-176   16     
128    48     
-592   -96    
192    48     
-272   -32    
-128   16     
128    224    
-128   144    
-224   -80    
-240   -48    
-176   -16    
-160   96     
0      0      
-384   32     
-240   144    
-16    -32    
-64    -16    
-384   -64    
320    64     
144    128    
-448   112    
16     -32    
384    288    
-624   240    
0      -144   
-192   -80    
80     80     
80     16     
-576   -64    
240    -32    
-192   -48    
16     96     
96     -160   
128    48     
-192   192    
64     128    
32     0      
-64    96     
-80    64     
-32    80     
-176   48     
-336   -48    
-112   0      
-384   48     
-112   240    
-768   16     
112    48     
160    48     
-16    112    
-16    -32    
32     64     
96     -16    
80     -128   
-192   64     
-16    112    
160    -160   
-320   96     
240    -80    
-320   48     
224    64     
-560   0      
48     0      
144    112    
-224   -112   
-48    80     
-112   80     
-96    -32    
800    928    
-848   -480   
16     64     
144    128    
-160   -240   
304    32     
32     64     
80     464    
-944   16     
304    -320   
80     192    
32     320    
16     400    
192    16     
176    336    
-80    80     
-64    16     
192    256    
-144   -400   
-48    16     
-80    496    
-240   448    
208    160    
-208   64     
176    48     
-64    16     
-64    0      
128    80     
-272   48     
0      48     
256    160    
-32    480    
160    320    
-48    16     
-80    -96    
-16    -160   
80     -224   
112    144    
-80    160    
128    16     
80     112    
208    128    
-160   240    
-32    0      
272    -16    
-112   -48    
80     -32    
16     -16    
-288   -352   
48     -112   
80     -208   
96     -32    
-80    224    
-528   32     
80     32     
-64    80     
96     240    
-64    96     
80     32     
-208   -384   
192    -16    
128    112    
-48    128    
96     -32    
-64    16     
-160   112    
-320   -16    
112    -16    
-16    -32    
208    -64    
-48    32     
128    128    
176    16     
32     32     
64     -48    
-64    -16    
-112   48     
-256   -192   
16     -48    
-384   176    
-64    112    
-48    -32    
256    48     
32     96     
48     128    
-144   144    
336    -16    
176    -32    
48     -48    
-384   -48    
16     240    
32     144    
272    -128   
80     -32    
-240   128    
-240   64     
-272   32     
0      -32    
192    64     
64     48     
96     0      
64     -80    
-32    80     
-16    144    
48     16     
80     0      
0      0      
-48    -48    
208    -64    
-336   -320   
48     -160   
-80    0      
80     112    
80     240    
16     -304   
-64    160    
-80    80     
-144   -16    
288    320    
32     224    
288    160    
272    -112   
-16    80     
304    16     
-112   592    
160    368    
352    -32    
-32    96     
-112   64     
192    64     
-32    64     
16     -80    
160    -64    
0      528    
624    448    
-160   208    
-128   112    
32     336    
448    496    
144    -528   
-80    -96    
80     -144   
-16    -1088  
48     112    
96     368    
96     528    
-96    -16    
256    160    
-256   256    
176    240    
48     48     
-176   112    
-16    -128   
448    464    
-320   496    
128    16     
-192   -240   
16     -544   
128    -64    
80     144    
64     -416   
-288   -384   
128    -32    
-288   512    
288    -16    
-144   -448   
240    -272   
80     -304   
-64    -160   
384    -112   
-48    128    
-64    -192   
48     -16    
-128   144    
192    -16    
272    1008   
16     272    
-192   -576   
0      -208   
320    -64    
208    528    
128    640    
-80    -176   
16     -112   
32     -48    
208    272    
368    688    
-336   -528   
176    -256   
336    576    
-288   144    
32     -144   
160    -224   
48     64     
176    496    
-128   -144   
192    32     
-16    -32    
48     144    
32     64     
16     -176   
-16    96     
176    -112   
-128   80     
64     -112   
128    0      
208    32     
432    480    
-320   -192   
192    128    
32     -128   
160    64     
64     80     
-16    -112   
64     192    
256    240    
-96    -64    
64     -320   
80     144    
144    96     
96     48     
80     -16    
-32    80     
32     32     
160    96     
-144   -32    
112    64     
96     128    
288    -112   
-96    -32    
16     -112   
16     112    
144    -112   
32     32     
-64    96     
320    672    
48     352    
48     -32    
-112   -256   
224    -48    
-48    -96    
64     -112   
176    -16    
288    32     
-224   160    
-112   -80    
-32    -192   
224    -144   
16     560    
-496   16     
208    -16    
64     -64    
304    -48    
-64    -16    
368    -432   
-64    80     
-16    -80    
-64    -544   
0      -320   
96     -384   
-112   304    
-384   16     
-64    -80    
-32    32     
112    64     
16     48     
288    -16    
192    -80    
-288   -112   
368    48     
-112   -240   
-1632  -16    
80     -128   
496    208    
-512   -128   
336    304    
-256   -1040  
64     -64    
464    0      
448    -144   
-80    16     
-432   32     
32     -208   
80     112    
-64    0      
592    112    
-2208  -64    
32     -128   
272    -32    
80     32     
144    16     
128    -96    
160    -48    
-96    -192   
96     48     
176    -112   
-64    0      
352    0      
16     -48    
80     32     
-64    -32    
-1344  -128   
160    -48    
224    -16    
416    -48    
144    144    
-64    -176   
-32    -144   
256    -480   
-112   96     
128    16     
80     16     
144    32     
32     -80    
-304   -32    
112    -32    
-832   -32    
112    16     
-256   -64    
64     -16    
-16    0      
16     -144   
-224   -112   
192    -400   
48     64     
256    192    
-16    0      
304    0      
48     -64    
-64    48     
144    0      
-96    64     
-32    -64    
-192   48     
-240   112    
512    288    
-256   -32    
16     0      
160    112    
16     48     
16     -1040  
240    48     
-160   32     
592    320    
-384   384    
-128   -320   
32     -288   
544    224    
-112   128    
48     -272   
-560   -96    
-208   -528   
352    192    
128    32     
320    -32    
-48    -240   
176    112    
-48    -80    
64     0      
-176   48     
64     -32    
-448   240    
176    -368   
-48    64     
176    -32    
-432   -32    
-48    128    
272    -96    
-112   -176   
96     208    
-64    -160   
144    160    
32     16     
112    -624   
-48    320    
-96    304    
-32    -224   
208    352    
-352   80     
48     -256   
-336   672    
320    -560   
-128   -608   
144    272    
240    192    
-288   -384   
-16    -832   
-32    -512   
240    -400   
-304   80     
400    128    
-176   272    
48     48     
-160   -32    
80     -144   
-208   -16    
-16    -32    
-64    16     
-272   -128   
-112   -96    
80     -112   
-992   -80    
-144   -96    
-1280  0      
0      -48    
208    80     
-160   64     
80     32     
-208   -256   
-1472  -192   
128    112    
-288   -96    
-32    80     
-32    -96    
336    64     
-336   16     
-256   32     
-208   64     
80     0      
-64    0      
-176   0      
0      112    
112    -32    
-32    -112   
160    -208   
-32    144    
-240   -32    
112    -80    
-80    -32    
-176   96     
-288   128    
-48    -80    
96     64     
-16    64     
-32    0      
-816   -16    
80     16     
-160   0      
0      -16    
0      -16    
64     16     
-80    -64    
160    144    
192    96     
-96    32     
-144   -64    
-48    80     
-352   -32    
-96    -112   
64     64     
48     80     
16     64     
-128   64     
-272   0      
-192   -112   
16     0      
48     -208   
544    0      
432    32     
192    80     
-240   48     
-64    -48    
-192   -32    
64     -80    
-176   -64    
-32    224    
-240   48     
32     -80    
128    -96    
16     16     
-16    112    
-80    16     
0      -128   
-112   -32    
-32    -48    
-48    16     
-480   -32    
16     0      
32     80     
-48    160    
-208   176    
-160   -80    
-240   32     
-144   32     
-1552  -80    
-16    96     
80     160    
256    -32    
-224   -16    
-464   144    
32     240    
-80    304    
144    176    
48     64     
128    -64    
-352   -176   
32     48     
-448   96     
112    32     
-176   -48    
48     320    
128    272    
-80    160    
192    320    
0      -16    
0      112    
-16    0      
48     -64    
-64    0      
-48    16     
-176   -112   
96     -176   
-32    -32    
160    128    
-240   256    
-224   32     
-160   256    
80     272    
-16    176    
16     224    
-32    -288   
80     16     
192    1024   
336    1360   
16     80     
-96    -384   
192    928    
64     -64    
-432   -976   
-560   -960   
80     1040   
112    224    
-64    -32    
112    176    
-288   -480   
-64    256    
128    112    
-208   -240   
80     -208   
32     480    
-64    80     
112    -96    
-448   144    
-112   112    
128    144    
224    640    
-32    -304   
16     -608   
160    416    
-32    32     
-336   -352   
256    896    
96     -96    
-400   -272   
496    592    
-400   192    
-128   -480   
400    -432   
112    560    
352    160    
-496   -240   
336    -320   
-240   288    
128    32     
-192   48     
160    -176   
208    256    
-16    176    
32     -80    
0      112    
-64    -128   
128    -32    
64     16     
144    80     
-16    64     
-160   -16    
-80    208    
192    -80    
96     160    
128    320    
-16    80     
-16    16     
32     -64    
-160   16     
224    80     
-240   -16    
112    32     
-16    16     
48     -16    
80     -16    
48     0      
192    -16    
96     48     
48     48     
16     48     
-64    144    
-80    80     
144    -16    
-48    32     
208    32     
-160   16     
160    -96    
-96    176    
80     144    
64     -160   
208    -112   
128    80     
-64    128    
96     -16    
-128   64     
192    32     
160    112    
64     192    
-352   64     
128    128    
-96    -192   
-32    -64    
80     96     
96     144    
64     80     
16     -16    
48     16     
-64    64     
96     64     
-112   16     
128    48     
-16    32     
256    112    
-224   16     
32     48     
240    208    
-256   -112   
128    32     
96     240    
-112   -64    
176    -80    
160    16     
176    144    
-16    48     
-32    -48    
336    -16    
16     16     
512    32     
-64    48     
-32    96     
-192   -592   
-96    -624   
-256   112    
-208   -320   
240    48     
80     48     
-16    32     
32     192    
96     -32    
288    320    
176    48     
608    16     
-416   192    
-496   -128   
208    48     
-128   32     
304    -176   
208    64     
224    -224   
-192   -64    
-48    -176   
160    48     
0      32     
-128   0      
-160   -32    
288    256    
-528   -208   
976    -96    
176    -32    
352    304    
128    256    
-64    -160   
-336   -128   
16     -208   
64     192    
-448   -192   
128    -64    
48     -224   
528    176    
80     -16    
160    80     
-144   48     
-192   32     
-64    -16    
320    -16    
80     -16    
208    -80    
288    96     
-48    -64    
-16    -80    
256    0      
-224   96     
64     -272   
-240   32     
96     64     
352    16     
-112   48     
336    80     
-112   -64    
320    16     
112    64     
-16    -144   
96     32     
32     -368   
48     80     
32     0      
128    48     
96     -96    
176    96     
16     -192   
-96    -112   
-48    16     
192    -64    
-80    48     
128    -224   
256    48     
64     16     
16     96     
-32    -352   
144    80     
-32    -112   
-32    48     
-112   -32    
-144   -96    
176    32     
96     -32    
48     -176   
144    -224   
-96    -64    
144    -96    
80     320    
272    -112   
64     0      
48     -64    
96     -32    
192    80     
-96    144    
-80    -128   
-16    -608   
128    128    
176    -368   
-160   -272   
736    -704   
-144   -1488  
528    192    
480    -144   
-528   -480   
64     48     
-160   768    
336    -192   
-160   -176   
160    -880   
256    32     
-304   -64    
800    -288   
-256   160    
0      -128   
80     -224   
-48    -304   
16     -544   
16     -240   
160    0      
128    -448   
-256   -64    
304    -96    
32     -144   
256    144    
304    32     
-272   -80    
-256   96     
-112   0      
240    112    
-736   -160   
96     32     
-32    -96    
112    48     
160    -16    
128    -160   
128    -128   
96     -128   
48     32     
-32    16     
80     0      
-32    -80    
0      112    
-48    -64    
112    16     
-336   0      
400    16     
0      -64    
128    -48    
-64    16     
64     -160   
256    16     
-144   -512   
128    144    
-48    64     
-176   -16    
176    -144   
-48    144    
-64    0      
-48    16     
-560   16     
304    32     
208    -16    
48     16     
96     -32    
48     112    
-144   0      
192    -528   
32     32     
0      -64    
144    0      
32     128    
0      -32    
-64    -32    
48     -96    
-416   -48    
448    -16    
-144   64     
336    -32    
0      64     
0      16     
-192   144    
208    32     
144    0      
16     -128   
112    -32    
-400   96     
192    -64    
-320   0      
64     -48    
-96    -32    
432    192    
-1088  144    
0      -256   
-928   -96    
-80    -256   
208    -64    
-16    32     
32     48     
112    -128   
96     112    
128    -48    
16     64     
-464   -32    
96     96     
-224   16     
432    -80    
-464   -64    
464    -160   
496    224    
-416   0      
192    16     
144    -144   
272    80     
240    -96    
-48    32     
-368   -64    
-64    -80    
-96    32     
160    192    
-32    192    
32     -272   
-288   -512   
96     -496   
16     -240   
48     128    
528    176    
80     -64    
-160   -64    
-656   -112   
-32    288    
768    912    
-576   400    
16     -144   
464    80     
0      272    
432    -32    
-320   -176   
48     -176   
96     80     
-2064  32     
16     -96    
-992   -336   
192    -48    
-48    -176   
-304   0      
-272   -544   
-1408  -496   
-208   -192   
112    160    
48     48     
96     64     
128    80     
-1424  224    
-144   -128   
-304   -16    
144    320    
-240   -112   
-176   -160   
48     112    
-128   64     
112    128    
-528   -208   
16     112    
-1264  928    
-64    -96    
0      -240   
-448   0      
-352   -64    
96     128    
-176   160    
256    256    
-16    48     
32     -48    
-272   160    
-352   80     
-304   512    
-16    224    
-48    -224   
-768   -112   
-64    -176   
-768   -192   
-176   -48    
16     128    
160    192    
96     0      
48     160    
-176   144    
64     32     
-224   -32    
256    16     
240    160    
-432   80     
704    576    
-672   0      
-208   -128   
-800   -48    
288    304    
-144   -48    
560    -368   
64     -208   
224    0      
64     80     
-32    16     
-48    -32    
-64    96     
-32    0      
-112   32     
-144   160    
-96    80     
80     0      
-624   -16    
240    80     
-112   -16    
80     112    
-192   -112   
128    0      
32     64     
-48    0      
16     64     
-208   160    
0      32     
16     -32    
-176   16     
-224   -80    
80     64     
-336   -80    
80     32     
-2160  -80    
128    32     
96     64     
-80    32     
-32    0      
208    64     
-80    48     
-112   -48    
64     64     
32     48     
-48    0      
0      32     
-80    96     
-192   0      
224    80     
-320   0      
-160   0      
64     64     
112    128    
-416   -48    
0      16     
160    112    
-240   -96    
288    80     
144    128    
-288   -16    
-288   32     
208    128    
-256   -16    
48     -16    
-400   -64    
-176   -96    
-128   -16    
0      -32    
128    -16    
80     64     
48     96     
96     176    
112    112    
-144   16     
-64    -32    
-352   -64    
112    32     
-48    80     
128    80     
-208   32     
-224   -32    
96     32     
96     112    
-32    96     
80     32     
-96    -64    
96     -64    
160    -16    
-208   64     
-80    112    
-96    -80    
128    32     
-128   128    
-176   0      
80     128    
32     -32    
-48    16     
192    32     
0      96     
-112   -16    
-768   -336   
224    0      
16     192    
-464   -16    
-160   96     
-272   0      
64     112    
-64    224    
-144   96     
0      96     
48     96     
48     80     
112    48     
112    -16    
80     -80    
96     -16    
-16    0      
96     128    
0      -16    
272    80     
-560   -64    
400    176    
-48    32     
-112   0      
-112   16     
-208   -160   
192    -192   
-144   16     
-240   48     
144    48     
112    64     
32     48     
48     32     
-48    48     
64     80     
-320   -112   
112    -96    
512    -48    
464    112    
-144   -304   
-64    -128   
-336   112    
-432   -176   
112    -48    
384    96     
464    0      
128    -96    
16     128    
-208   16     
144    96     
-272   -32    
-96    -864   
112    48     
-304   32     
288    128    
-160   -80    
32     64     
128    192    
48     64     
0      -80    
-64    112    
-144   128    
144    96     
32     96     
80     0      
-112   -64    
64     -592   
16     208    
48     352    
-48    240    
80     -176   
96     240    
224    -528   
-80    336    
144    16     
128    -192   
-160   64     
176    64     
-304   304    
80     -864   
16     528    
-256   -400   
80     -128   
112    208    
176    16     
160    272    
144    -176   
144    224    
80     176    
-80    -48    
288    -832   
0      -80    
48     736    
-144   -80    
-128   272    
192    224    
192    160    
448    256    
-32    -160   
16     176    
0      112    
256    208    
-96    0      
64     -352   
-32    -368   
288    240    
-480   304    
80     96     
144    -112   
240    -256   
0      208    
96     0      
80     32     
-64    -784   
144    192    
-160   208    
64     -48    
192    48     
176    304    
160    144    
48     0      
16     -96    
-32    64     
16     160    
0      368    
320    64     
96     -96    
48     48     
16     -80    
256    96     
48     -176   
304    128    
-48    -208   
112    -48    
-128   -16    
64     416    
208    352    
352    224    
192    80     
0      -176   
32     -16    
0      -32    
352    80     
-112   -112   
-32    80     
-16    -112   
80     16     
-64    -80    
224    -48    
160    -16    
48     64     
16     128    
208    80     
112    80     
48     -224   
-96    48     
0      -16    
-96    16     
128    0      
112    48     
-16    -192   
144    -16    
80     112    
32     -16    
240    112    
-224   48     
-240   160    
288    -176   
208    64     
80     80     
96     0      
80     32     
112    16     
96     -48    
304    80     
-80    80     
-16    -32    
96     -16    
80     144    
48     16     
144    -688   
-64    -112   
208    -80    
0      256    
80     96     
16     112    
176    -96    
0      -32    
96     0      
128    48     
112    0      
64     192    
128    0      
32     -864   
-64    48     
32     -816   
224    -320   
224    80     
208    336    
96     208    
64     -912   
-16    -224   
32     -16    
-80    -336   
368    -304   
416    -64    
464    -16    
352    -112   
16     -256   
-384   96     
-224   -96    
80     -32    
464    -64    
16     -416   
64     -64    
-80    -128   
160    -64    
240    -560   
240    32     
368    224    
-640   -208   
-128   -176   
-144   160    
320    -16    
208    -192   
-32    176    
-64    912    
-176   208    
-16    -592   
416    176    
-32    -144   
0      16     
640    -304   
-448   -384   
160    -608   
-96    288    
-272   -448   
-80    32     
64     64     
-16    64     
-96    -256   
64     -16    
-320   544    
-336   -368   
272    64     
-80    80     
384    48     
160    -112   
80     -64    
320    -688   
64     16     
-32    -144   
80     -208   
64     -112   
32     -16    
160    128    
32     -160   
48     -16    
64     -64    
64     -64    
112    -112   
0      -16    
144    32     
-80    -48    
128    -256   
224    -48    
112    -16    
336    224    
-96    144    
224    -32    
-208   80     
16     32     
-704   -96    
80     -160   
-304   -48    
192    -96    
-352   -32    
144    -48    
-304   -32    
368    -528   
0      80     
272    128    
16     32     
-240   16     
-48    -64    
-176   16     
128    -64    
224    224    
-96    0      
80     32     
-160   32     
368    0      
128    -64    
-224   16     
-448   -208   
240    80     
320    144    
-96    208    
-160   32     
320    -208   
-16    96     
720    432    
-1040  32     
112    -240   
176    -32    
0      -112   
416    256    
-256   -112   
288    48     
16     -96    
16     -64    
64     -128   
32     -16    
-144   -32    
-96    -16    
-160   -32    
64     0      
-16    0      
48     -96    
-368   32     
-64    -80    
16     -16    
160    -160   
256    -16    
-80    -32    
192    96     
-32    -16    
192    -16    
-48    64     
112    32     
16     48     
0      -16    
-288   -32    
128    32     
-64    -32    
80     -96    
128    64     
-512   64     
160    80     
-80    16     
-624   -16    
16     -32    
-656   -64    
-48    32     
-208   48     
128    64     
160    16     
-208   -16    
144    -112   
32     48     
-240   16     
160    48     
-96    -96    
0      -16    
-192   -32    
-496   -32    
32     48     
-400   -144   
-96    48     
-304   0      
-96    16     
-2160  -16    
-64    64     
-112   -112   
128    -176   
-32    -48    
176    288    
-304   -64    
80     16     
144    0      
-32    32     
-16    96     
48     112    
-256   144    
-208   -32    
16     32     
-240   -208   
64     96     
-144   0      
128    -48    
-32    -80    
144    208    
-160   176    
-48    -48    
224    48     
-64    80     
-48    -48    
-128   -32    
0      48     
-80    80     
32     96     
-144   -16    
16     -32    
-592   -16    
288    96     
-576   -128   
672    800    
-416   1136   
16     384    
-48    -368   
48     -128   
256    0      
176    304    
96     -256   
336    -896   
16     -368   
64     1168   
288    400    
-672   -688   
0      -336   
96     368    
96     272    
16     -256   
-96    -32    
-112   224    
32     80     
-160   800    
96     48     
0      -576   
-304   -112   
112    240    
-272   16     
208    -32    
-272   -208   
288    80     
-224   320    
-64    -128   
-48    -112   
-64    208    
-192   -16    
32     -16    
-256   96     
592    304    
-112   48     
-848   -384   
32     -288   
-48    400    
320    -80    
-560   -752   
304    -608   
-1136  688    
32     -128   
-32    0      
-16    32     
-16    80     
-16    -352   
-208   160    
80     -16    
-80    80     
48     192    
-64    -176   
-96    32     
80     64     
-352   -128   
96     192    
-80    -272   
240    560    
16     -432   
96     128    
-32    464    
-176   -144   
32     -16    
-64    -32    
-64    112    
176    16     
-64    544    
-160   -208   
112    80     
0      80     
80     -96    
32     160    
0      -128   
128    192    
416    464    
-128   -128   
-336   32     
-96    0      
64     -128   
256    128    
128    -128   
48     64     
-272   -32    
-192   128    
16     -16    
16     -16    
-32    -32    
48     112    
128    -32    
-192   64     
176    80     
-16    80     
96     96     
-32    -16    
80     0      
64     176    
0      80     
160    -32    
-224   112    
-224   -48    
752    272    
-496   192    
304    112    
-176   32     
-48    112    
160    -112   
80     16     
64     144    
-16    48     
0      48     
-176   16     
96     -432   
80     -64    
-176   256    
160    144    
32     -48    
448    240    
-400   336    
192    -112   
64     -80    
-32    96     
-160   -272   
208    -144   
-16    64     
-176   -176   
128    -48    
224    96     
-272   -16    
192    144    
-48    224    
256    112    
-128   128    
48     96     
176    144    
-128   208    
-144   32     
240    -112   
16     -48    
-208   112    
560    224    
-64    320    
-16    16     
-384   -96    
-144   -272   
-64    -64    
16     32     
144    48     
-16    48     
32     -48    
32     -96    
160    64     
-144   96     
96     96     
96     0      
32     208    
16     80     
176    32     
-240   64     
64     -176   
-16    -240   
48     -144   
112    144    
-272   -208   
64     -176   
96     112    
-224   336    
176    80     
240    16     
-32    -16    
80     32     
32     -224   
112    -16    
96     -96    
160    -320   
112    96     
-32    192    
96     32     
-16    48     
112    32     
64     112    
-64    80     
160    80     
112    -32    
80     -16    
48     128    
48     112    
528    368    
-192   352    
16     -208   
128    128    
80     16     
160    -32    
-64    -336   
336    -96    
96     160    
32     -64    
448    992    
-288   832    
-192   304    
256    448    
-192   -384   
128    -496   
272    368    
448    112    
16     -640   
0      448    
-288   48     
-304   -224   
16     80     
256    160    
144    80     
96     208    
-256   96     
-192   64     
176    -16    
16     -16    
64     656    
80     -160   
320    -32    
-160   352    
-208   -336   
-32    -16    
-144   -512   
480    -304   
240    -64    
272    16     
240    96     
-48    224    
-384   16     
-112   96     
80     48     
-48    -32    
416    -256   
32     -192   
-560   48     
-64    -544   
48     48     
0      -336   
144    32     
336    192    
-112   -32    
-96    -96    
80     96     
64     96     
304    16     
-80    48     
80     -64    
112    96     
448    -16    
-288   0      
-16    -112   
192    48     
192    16     
-64    96     
-64    -32    
-224   176    
288    16     
176    48     
-192   96     
80     -80    
48     64     
80     -144   
112    -80    
112    0      
208    208    
32     -112   
96     112    
-16    -256   
96     80     
16     -16    
112    176    
-96    0      
192    -720   
112    -736   
32     -96    
-16    -752   
176    -80    
-48    128    
320    -112   
80     48     
96     32     
-48    0      
96     -160   
-64    144    
304    224    
-304   176    
128    -96    
-144   -176   
-96    -224   
656    80     
-48    -240   
-416   -176   
128    -512   
-288   32     
32     -160   
400    -32    
-192   0      
320    80     
48     80     
0      336    
160    128    
544    -96    
-528   -32    
0      64     
96     32     
144    -112   
-96    -80    
192    -240   
176    -96    
0      144    
208    -80    
32     64     
48     16     
16     -144   
-256   16     
80     -192   
80     0      
-160   -16    
96     0      
192    240    
-224   176    
80     -144   
176    -64    
0      -96    
352    -16    
0      32     
-48    -32    
-192   -16    
128    -64    
64     16     
-32    -160   
128    -48    
-128   48     
208    -80    
-32    -80    
-32    -128   
160    16     
32     -64    
176    0      
208    -96    
-288   16     
160    -1648  
-112   64     
272    16     
-64    0      
112    -32    
48     48     
-320   -64    
128    -128   
-16    32     
-48    80     
-352   144    
208    -80    
-80    80     
96     -384   
-192   -128   
96     -912   
-176   64     
112    16     
96     -96    
0      -112   
144    -192   
-112   144    
-48    -192   
-352   16     
96     192    
-80    0      
64     -96    
-48    16     
144    -16    
0      288    
-16    64     
192    96     
48     -272   
48     336    
-32    -176   
112    -48    
96     32     
0      -176   
240    768    
80     112    
176    -64    
96     0      
-512   16     
-80    48     
16     -96    
112    -320   
32     0      
-32    -16    
240    32     
-64    160    
352    -16    
-528   96     
16     -48    
-496   1056   
-16    -432   
16     -224   
256    -16    
288    32     
-80    -304   
64     112    
-208   160    
-128   -304   
-160   96     
16     0      
64     0      
688    240    
-496   -848   
32     144    
-96    720    
112    288    
-608   -304   
304    -96    
-32    208    
64     -336   
-112   240    
128    -224   
320    48     
16     -32    
-912   -16    
-304   -240   
-80    -272   
-32    128    
400    256    
-32    -368   
320    -48    
128    176    
-624   240    
128    192    
-96    -224   
32     -64    
16     -208   
32     -80    
-64    -32    
-912   16     
-16    272    
-528   288    
-48    16     
320    -160   
160    -32    
-480   -64    
-176   -128   
-528   80     
80     64     
-208   -112   
-16    32     
0      48     
32     368    
16     176    
112    208    
80     288    
16     224    
16     112    
-1392  -176   
32     -128   
-624   -32    
64     80     
-160   -64    
0      0      
-80    -80    
-64    -96    
80     -192   
48     144    
-48    96     
0      96     
-144   -48    
-64    96     
-16    32     
-864   -144   
320    144    
112    -208   
-32    -336   
416    -112   
-64    336    
-32    -112   
-176   -64    
-32    48     
-176   -208   
0      160    
-32    80     
-160   64     
0      -112   
-160   32     
-784   -80    
-32    -80    
-1552  80     
144    32     
-64    -112   
160    -80    
-304   -96    
-64    -272   
0      -32    
240    32     
-80    80     
-128   32     
48     128    
-80    240    
144    32     
16     64     
80     -16    
-528   64     
144    0      
-320   -64    
176    32     
-96    32     
16     192    
160    256    
-64    0      
112    -192   
-160   -160   
16     32     
-128   48     
64     -112   
-208   -64    
96     96     
-592   -80    
16     48     
32     -192   
224    -160   
-48    144    
-208   288    
304    48     
-192   32     
-64    32     
80     80     
-160   -16    
16     -16    
32     128    
-192   -48    
-112   -336   
-96    128    
384    512    
-336   240    
224    352    
144    -128   
48     96     
-48    -256   
-16    -304   
-112   -112   
0      -32    
176    16     
-352   -336   
0      -16    
-32    144    
-80    176    
0      -32    
144    176    
-160   96     
-304   288    
384    336    
48     -48    
144    -64    
112    -80    
464    336    
-448   368    
-80    80     
-160   128    
160    208    
-48    -160   
560    16     
-320   16     
-480   64     
0      48     
48     -112   
96     -16    
48     -32    
304    128    
-48    16     
-80    -176   
-160   -160   
48     64     
-128   176    
192    -96    
-160   -176   
-16    48     
-496   -240   
32     -112   
224    224    
208    400    
-64    -144   
-160   -144   
176    80     
-48    0      
-16    320    
32     -64    
64     160    
-64    80     
0      -16    
-32    128    
0      64     
-16    128    
144    16     
-160   -80    
592    1008   
-176   96     
-512   -400   
0      32     
0      128    
0      64     
432    384    
-160   -32    
-224   -80    
192    -208   
-144   -320   
368    -16    
160    -16    
-48    64     
288    48     
176    96     
-160   48     
-48    96     
-192   -16    
96     -96    
160    32     
64     32     
176    112    
48     0      
240    -32    
-608   -128   
-144   -80    
144    128    
176    32     
240    192    
336    128    
224    0      
-224   64     
-160   144    
-208   -16    
576    448    
-544   32     
320    0      
864    -16    
-64    96     
-240   -48    
-208   -64    
-112   96     
-144   112    
-16    0      
240    -48    
496    32     
-16    -64    
32     160    
-176   0      
240    80     
48     32     
-304   48     
320    -32    
0      32     
112    64     
-224   -752   
112    112    
-48    64     
64     0      
96     96     
48     16     
-16    48     
-32    32     
0      16     
64     80     
-16    48     
208    192    
-192   -16    
-96    -272   
64     80     
272    64     
112    64     
48     80     
-48    512    
240    272    
-112   32     
-128   144    
160    0      
-176   -48    
288    -64    
240    160    
128    -48    
224    48     
-176   112    
16     16     
64     -128   
-240   32     
448    -64    
-80    80     
32     -112   
256    0      
-176   32     
80     16     
64     -32    
144    144    
32     16     
-160   16     
-112   48     
656    -64    
-32    144    
-240   -272   
224    -112   
-80    -672   
288    256    
-496   80     
16     32     
32     -160   
208    -32    
384    16     
192    80     
160    32     
-112   112    
208    -32    
-128   -96    
32     96     
16     -32    
208    112    
-48    -48    
128    160    
176    -48    
0      -16    
64     80     
16     112    
144    160    
320    224    
-352   -48    
176    -128   
0      -16    
96     -48    
112    160    
80     112    
0      32     
128    -160   
64     240    
112    -64    
-16    -64    
-112   -80    
336    112    
-16    32     
-16    48     
32     48     
16     -32    
48     -112   
-32    -96    
256    160    
96     -48    
-48    352    
208    80     
96     -48    
-112   -112   
192    -64    
16     368    
192    -176   
-192   -48    
32     80     
64     240    
64     80     
320    -80    
160    -16    
176    192    
80     -176   
-112   32     
32     -496   
64     288    
-48    192    
64     64     
-16    -624   
-80    160    
-32    128    
32     -1040  
224    -480   
144    48     
288    -320   
-192   -48    
-48    -432   
128    144    
16     32     
96     -304   
112    352    
-16    416    
224    160    
144    208    
32     -144   
-112   -144   
-1072  32     
384    64     
48     -32    
16     -368   
-16    -304   
48     96     
80     16     
128    -64    
112    16     
176    -272   
32     48     
144    -432   
288    160    
48     432    
112    96     
-1056  -32    
80     -32    
-80    -112   
240    -32    
272    -48    
240    -64    
208    -32    
96     -512   
272    192    
-384   -192   
-336   -32    
48     -112   
176    32     
416    32     
384    0      
-384   16     
80     -144   
-96    48     
0      32     
80     32     
192    16     
112    -96    
256    -48    
32     -16    
-176   -192   
288    32     
272    0      
320    -48    
32     -48    
112    112    
-416   80     
-80    0      
-32    -32    
176    96     
96     -32    
144    -352   
-288   -96    
-128   -336   
-64    16     
288    176    
-160   112    
16     -144   
112    -48    
-304   -112   
-96    -64    
16     -48    
64     -96    
-1040  -16    
0      -64    
208    -32    
240    144    
-96    112    
64     64     
64     16     
160    -672   
112    -64    
80     16     
-16    256    
-32    144    
32     -160   
-112   -160   
240    -144   
-272   -16    
144    -160   
-96    -64    
-32    112    
-112   128    
-16    -336   
144    -192   
48     -672   
112    -16    
48     -32    
192    -464   
-256   -368   
192    -400   
-656   -672   
32     -448   
-144   -352   
48     64     
-160   -16    
128    448    
48     -320   
-16    -192   
-64    144    
-16    -192   
16     -112   
272    -16    
352    208    
128    176    
-112   176    
-288   0      
-64    272    
16     16     
240    -192   
-352   -80    
112    -160   
48     48     
96     -64    
32     64     
64     -112   
-80    -208   
32     -112   
128    16     
-720   -112   
416    80     
160    64     
-112   32     
-144   -48    
-32    -176   
-96    96     
112    160    
0      352    
272    240    
96     320    
-32    -272   
-1584  64     
-80    0      
336    16     
-16    112    
112    16     
-208   -64    
-240   -96    
144    256    
-128   -144   
416    240    
-576   272    
224    176    
-144   -80    
272    288    
64     16     
-432   0      
96     48     
-240   -160   
-80    64     
-672   -112   
-112   -192   
80     -128   
-32    160    
-432   48     
160    96     
-672   -48    
128    -112   
-208   -32    
208    64     
64     144    
-224   288    
112    48     
-368   -48    
96     48     
-128   32     
16     288    
-96    240    
64     -192   
-320   -208   
112    -128   
-48    -304   
448    496    
-336   -496   
-112   -224   
176    336    
-176   -352   
256    272    
-560   -192   
-192   352    
32     224    
64     576    
-336   -240   
-208   320    
-240   -256   
96     112    
0      16     
-64    -240   
512    672    
-208   -224   
-64    -592   
96     192    
-80    -80    
-96    -32    
112    336    
176    128    
-176   -416   
-128   128    
-48    96     
-656   -96    
192    -96    
80     -48    
144    80     
48     64     
48     16     
96     0      
-96    48     
112    80     
-96    -32    
80     16     
-48    16     
848    848    
-800   464    
-496   -240   
-608   -224   
48     48     
0      0      
-336   -32    
176    192    
-112   48     
-112   -240   
80     -176   
0      272    
-304   80     
320    32     
-352   64     
160    32     
160    -16    
-224   32     
-432   16     
-144   32     
-96    -80    
-128   0      
-32    -32    
400    -16    
144    64     
208    64     
-48    16     
-224   48     
-64    80     
16     80     
-320   128    
-64    0      
256    -48    
-384   32     
-352   64     
-64    -16    
96     -80    
128    -176   
0      64     
-112   304    
-400   16     
272    32     
-192   -64    
208    64     
-208   -48    
288    16     
-352   -32    
320    16     
-96    -64    
-128   0      
-224   0      
256    80     
208    96     
336    32     
-192   -80    
-32    16     
-80    -48    
-16    96     
-16    64     
-48    0      
-160   0      
-176   -96    
144    96     
-32    -16    
16     64     
144    32     
16     32     
16     16     
-16    -48    
112    16     
0      144    
304    96     
-240   32     
48     -80    
-112   48     
224    240    
-400   96     
208    -96    
0      64     
128    -32    
-80    -64    
96     0      
256    160    
-80    -48    
416    80     
-224   80     
224    144    
-16    32     
-256   -16    
80     32     
64     32     
48     48     
64     112    
128    -64    
48     64     
176    352    
32     272    
-96    -144   
-272   32     
-176   208    
464    -32    
-288   -48    
224    0      
528    352    
-592   304    
-112   -160   
-80    -80    
48     32     
0      32     
0      32     
288    48     
48     -64    
-64    0      
192    -96    
48     -80    
16     176    
32     80     
96     48     
-96    304    
80     -272   
144    -64    
-48    240    
-48    -128   
128    32     
112    48     
-272   -384   
400    352    
-240   192    
176    208    
-144   -208   
208    -16    
208    320    
-64    -176   
48     96     
-192   -16    
240    -16    
48     256    
-144   -48    
160    -336   
-256   240    
176    -32    
160    -64    
16     208    
192    272    
240    -80    
-144   -272   
16     128    
64     400    
-192   -416   
-48    96     
96     -112   
-32    -256   
288    -336   
-64    384    
144    480    
208    352    
368    464    
176    -128   
224    -256   
-48    -352   
-176   -128   
192    48     
0      16     
-32    208    
80     240    
352    16     
64     -64    
16     -480   
16     -16    
0      -128   
-32    -160   
224    32     
80     112    
16     112    
-112   -16    
112    -176   
192    32     
144    -32    
208    96     
-240   0      
192    -32    
32     32     
144    -288   
288    160    
-176   -112   
64     128    
64     -48    
128    96     
-32    -96    
176    80     
64     -64    
144    112    
-16    -64    
32     32     
48     16     
16     -128   
208    -16    
-96    32     
96     48     
-192   -544   
-304   16     
176    32     
256    96     
-32    128    
-128   208    
64     -48    
192    80     
-368   32     
-160   144    
32     -64    
416    -48    
208    16     
288    0      
-48    80     
0      -608   
240    -96    
80     -240   
192    144    
-80    -96    
16     80     
32     80     
-48    96     
96     80     
256    32     
128    112    
208    -80    
32     -48    
176    -640   
192    48     
-64    -272   
176    -80    
128    80     
144    288    
80     80     
160    160    
-160   -96    
-272   -128   
-32    -336   
192    -224   
288    112    
176    -304   
192    32     
-160   -160   
-176   48     
16     -32    
-32    128    
0      -176   
-80    80     
336    96     
96     176    
224    80     
-192   0      
-48    144    
80     0      
128    48     
64     -80    
112    224    
224    128    
128    128    
112    -32    
80     48     
-64    -112   
128    -176   
-16    -128   
144    -96    
-80    96     
0      16     
400    -272   
192    80     
16     -1024  
-16    48     
240    336    
-240   256    
112    352    
464    16     
-320   176    
-32    -160   
16     -144   
288    384    
96     496    
-112   256    
-2080  16     
-64    64     
240    -80    
-80    256    
-32    128    
464    -432   
-256   192    
-96    80     
48     64     
80     112    
16     64     
224    -144   
-80    -48    
-112   -48    
-432   16     
-112   -432   
-160   -16    
176    -96    
80     -624   
-16    -288   
-32    -240   
-224   192    
368    176    
64     -48    
128    -384   
-160   -160   
192    -192   
224    400    
64     192    
32     -80    
-128   144    
0      -176   
0      -128   
208    -32    
48     16     
416    -176   
-64    352    
48     -1200  
0      -112   
128    224    
-80    -256   
192    112    
-432   -288   
208    -96    
144    224    
-32    -240   
-224   -416   
-752   112    
96     32     
64     -32    
416    -176   
112    32     
0      -192   
176    -128   
80     32     
0      -176   
32     368    
160    -80    
0      0      
-96    -64    
-16    -160   
80     -128   
96     160    
144    -16    
80     16     
400    384    
-160   -160   
48     -336   
0      240    
208    -256   
80     208    
64     -32    
208    -16    
-176   64     
16     16     
-160   80     
16     -48    
-208   16     
96     -64    
16     -16    
-16    -160   
0      32     
64     -144   
0      -48    
144    -816   
-112   0      
-224   336    
176    112    
0      -16    
-16    32     
0      0      
128    32     
-576   -160   
160    112    
-112   128    
128    -224   
112    -128   
208    48     
-208   64     
192    -208   
96     128    
-64    -16    
208    48     
-240   0      
96     -80    
-368   -96    
192    -112   
-32    48     
48     16     
64     -32    
80     0      
0      224    
128    -176   
224    144    
-304   -160   
160    16     
368    560    
-464   368    
-720   -176   
448    -144   
-144   -16    
-464   -256   
608    -176   
272    160    
-528   368    
512    112    
-80    -80    
-1008  -96    
-80    160    
96     16     
-416   -160   
208    -80    
-496   48     
-80    -16    
288    32     
-208   -128   
304    -32    
32     80     
144    -48    
288    64     
-960   32     
-80    16     
-304   -32    
48     112    
-16    128    
-784   -16    
160    64     
-48    -96    
-176   -48    
-736   112    
-192   0      
-112   -64    
16     48     
32     32     
592    80     
-160   0      
-240   -16    
176    -80    
-32    -16    
16     48     
-224   16     
80     64     
-80    -16    
-96    64     
-800   -48    
16     64     
-2400  -128   
0      -16    
32     -48    
-208   16     
128    -16    
-80    32     
-256   -128   
80     32     
48     32     
-48    -32    
240    128    
-336   -16    
-48    -16    
-48    16     
-64    32     
-288   0      
32     0      
32     -32    
128    160    
-256   -192   
272    32     
-32    48     
96     16     
16     32     
-128   -16    
-304   -208   
48     48     
-208   96     
160    48     
-96    352    
128    288    
-192   160    
240    -192   
-144   -240   
224    -80    
-224   32     
80     -128   
-112   -16    
-320   -224   
112    -288   
-64    96     
128    336    
-112   80     
112    -224   
-160   -240   
96     -208   
144    32     
-592   -192   
144    288    
64     384    
224    -160   
512    96     
-208   64     
-336   -320   
16     336    
-112   -160   
-240   -128   
144    96     
-32    304    
-208   -32    
-208   -64    
32     -176   
-144   320    
48     32     
192    128    
-208   -80    
-160   -176   
-32    288    
224    16     
0      112    
64     -256   
64     112    
208    512    
-368   -320   
-64    864    
592    -64    
-160   64     
-304   -352   
-16    480    
448    912    
-336   32     
80     -128   
-144   -272   
-64    160    
-80    -32    
16     32     
128    48     
128    80     
-320   -96    
80     0      
-48    96     
112    16     
-336   -128   
48     -32    
-80    -96    
-80    -96    
-32    -16    
16     -16    
-160   0      
-256   -32    
304    -16    
32     80     
32     48     
-48    -144   
400    -48    
-288   -64    
0      160    
-160   48     
16     128    
176    0      
80     80     
240    32     
48     112    
-160   48     
-112   -112   
144    -80    
-144   80     
240    -64    
-128   -208   
112    64     
-368   32     
80     32     
144    32     
64     64     
64     128    
160    112    
0      -48    
64     -32    
48     32     
-48    16     
80     16     
64     144    
64     96     
176    16     
32     112    
-432   64     
256    -48    
-48    64     
144    -64    
176    48     
64     144    
-64    -16    
64     96     
32     -32    
-16    96     
0      16     
144    -96    
0      48     
-256   224    
224    -96    
144    160    
-336   80     
0      48     
192    32     
-16    0      
208    0      
240    128    
96     176    
-32    64     
-304   -48    
64     -144   
144    128    
304    144    
0      -16    
448    -208   
256    16     
208    80     
160    96     
-240   176    
-128   0      
-208   80     
336    16     
32     176    
192    208    
-192   112    
192    -48    
368    -16    
64     224    
-352   0      
48     -16    
368    144    
96     320    
-144   64     
-32    0      
-16    -32    
112    -16    
224    0      
256    32     
320    -32    
128    32     
32     112    
-192   144    
-96    16     
-192   16     
176    16     
32     -192   
176    -144   
480    352    
-416   -48    
112    -32    
-48    128    
64     128    
64     144    
160    176    
144    144    
-16    -128   
128    -240   
224    80     
-32    96     
144    -48    
96     64     
-32    -64    
48     -608   
80     -144   
-96    464    
96     112    
-240   256    
0      192    
-32    -64    
64     320    
384    16     
-32    -400   
160    96     
160    112    
-224   48     
240    160    
128    -144   
240    288    
560    -736   
-144   336    
16     -400   
400    -176   
-256   -240   
432    432    
-64    -48    
160    16     
48     128    
-320   96     
64     -16    
96     0      
224    32     
16     80     
-208   -320   
464    -368   
208    80     
352    -320   
-112   112    
0      -160   
112    -64    
-64    144    
-64    0      
448    -160   
-432   -464   
-32    224    
208    80     
96     -96    
400    32     
32     32     
224    -464   
-64    160    
-48    -16    
-32    -16    
96     -16    
64     176    
-16    48     
80     0      
144    -64    
48     -96    
192    176    
-112   -16    
112    80     
16     -112   
48     80     
240    -400   
112    80     
0      80     
96     64     
-80    48     
112    16     
-64    112    
240    32     
48     80     
48     0      
144    64     
80     -80    
0      -16    
-96    -160   
112    32     
160    0      
112    112    
0      -208   
272    96     
-176   -32    
144    -48    
-64    -32    
112    -64    
96     112    
32     32     
208    32     
-128   -192   
224    176    
-144   -80    
64     96     
48     0      
0      64     
-16    -16    
96     -16    
-32    48     
112    -384   
192    64     
96     -96    
-112   -144   
176    80     
208    -672   
-64    -64    
96     32     
368    416    
-128   144    
64     -144   
192    -400   
16     64     
96     -400   
96     32     
128    0      
16     -48    
112    -48    
192    -208   
160    -32    
112    -544   
48     96     
160    -304   
0      -112   
144    -144   
80     -48    
80     -160   
16     48     
96     -64    
-128   -160   
16     -48    
32     -128   
-560   -32    
144    -112   
-32    -224   
288    32     
-32    0      
208    -208   
816    672    
-592   704    
-352   -160   
192    -208   
16     64     
16     -240   
528    48     
-272   -96    
672    -48    
-608   -160   
-16    -48    
-160   64     
-480   16     
-48    -128   
112    -304   
256    0      
192    -48    
-64    96     
-64    16     
-144   16     
-384   -96    
0      16     
-48    64     
-80    -64    
-48    96     
48     80     
-752   -16    
96     32     
160    112    
80     -16    
-192   32     
96     -16    
96     128    
48     16     
160    80     
-32    48     
-64    208    
144    304    
-288   -48    
-288   -160   
480    48     
-816   -32    
480    0      
-48    80     
-32    -80    
48     0      
-160   -416   
128    0      
144    -992   
464    160    
-16    64     
416    -32    
-128   0      
-48    -80    
-288   0      
256    16     
96     96     
-64    -48    
-272   -48    
-48    -160   
432    -16    
160    -304   
224    96     
80     -240   
-16    32     
0      16     
-80    -112   
112    16     
-64    -96    
80     -144   
128    16     
-16    -16    
32     -96    
-336   -128   
32     -96    
144    -16    
0      -272   
176    -16    
272    -48    
16     176    
-256   208    
288    -448   
96     160    
-16    112    
-96    -240   
16     -224   
-144   128    
64     224    
-304   -288   
96     0      
-80    0      
48     128    
448    496    
-752   -992   
224    96     
192    848    
-352   -608   
-112   -480   
-64    656    
-368   -32    
96     -384   
-288   288    
240    -512   
16     112    
336    -16    
-32    -192   
-1152  208    
48     144    
192    48     
-1008  -688   
-48    48     
-336   208    
-304   224    
240    304    
-32    144    
128    128    
-16    -32    
-160   -64    
48     112    
16     16     
432    320    
-672   -48    
-432   128    
-96    128    
-32    -352   
-32    -160   
80     64     
-432   0      
-368   192    
0      240    
160    96     
48     -16    
-720   -32    
-48    144    
-224   -160   
144    -160   
-48    -256   
0      176    
-112   208    
128    -160   
-176   64     
-48    96     
-224   -48    
-80    -80    
80     128    
-800   160    
80     32     
-256   -96    
208    16     
-336   48     
32     144    
64     48     
-96    -144   
-32    112    
-400   16     
224    -128   
0      112    
256    64     
48     32     
-48    16     
-464   -64    
-48    32     
-48    -80    
48     16     
96     80     
-144   96     
0      -48    
32     64     
-96    48     
64     128    
-32    80     
192    -16    
-272   0      
-416   -64    
-160   -64    
-576   -112   
96     -80    
-80    -80    
-64    64     
-128   -96    
-64    -32    
64     -48    
-48    64     
80     32     
192    128    
-240   32     
-160   0      
-16    96     
-64    -128   
-48    16     
-112   16     
-64    80     
-672   32     
-48    96     
-32    0      
32     -112   
-48    -64    
32     192    
-64    80     
-32    -80    
16     16     
-320   64     
80     -32    
-112   -80    
112    -160   
160    -96    
96     368    
-768   224    
16     128    
-48    80     
-208   48     
64     -32    
-64    -256   
-16    -176   
-240   80     
-432   32     
-256   -160   
192    -16    
-48    0      
32     112    
-416   -16    
48     -48    
-816   -208   
224    -384   
336    -96    
224    16     
240    -32    
112    32     
64     -32    
144    128    
-224   112    
0      96     
-96    -32    
-80    48     
688    352    
-352   560    
0      32     
192    -176   
176    912    
272    240    
-32    0      
304    80     
400    272    
-16    208    
32     -128   
0      192    
-176   -16    
-240   -112   
0      -128   
144    352    
48     96     
192    16     
144    -112   
-336   -224   
64     112    
-144   -128   
48     64     
176    16     
112    192    
-144   -48    
-32    -64    
64     96     
48     -144   
16     368    
64     208    
-112   -176   
-64    0      
272    144    
-64    -32    
-96    -288   
-48    176    
64     224    
-32    240    
224    144    
-80    -256   
-64    0      
80     32     
96     112    
-32    96     
144    112    
-304   0      
-80    -32    
96     -176   
-208   16     
-16    208    
432    368    
-144   656    
432    400    
336    240    
64     -80    
336    192    
-256   144    
192    -80    
-16    -48    
-128   32     
80     144    
432    240    
-224   -48    
-48    -32    
272    128    
240    208    
32     320    
-96    80     
80     -32    
368    256    
-112   208    
-16    0      
-112   -112   
-16    -32    
224    128    
-48    64     
464    112    
-304   32     
336    48     
-224   112    
96     48     
32     0      
-16    128    
64     80     
-32    48     
192    48     
16     32     
32     112    
-112   64     
192    32     
64     128    
240    16     
-48    0      
-64    64     
208    48     
192    -32    
-16    -32    
0      64     
-16    96     
-48    32     
128    96     
128    0      
112    160    
-80    -64    
-48    -208   
224    48     
32     48     
64     -48    
32     -80    
48     48     
-80    48     
0      48     
0      80     
160    80     
16     -48    
0      -16    
64     16     
-144   96     
128    96     
320    -144   
0      64     
64     -320   
-32    48     
256    288    
-176   144    
-96    32     
368    -32    
-96    80     
128    32     
176    144    
48     144    
-160   -112   
160    16     
208    160    
-32    -16    
96     32     
96     -80    
-48    64     
-48    -256   
320    0      
-112   80     
-80    144    
208    240    
96     176    
-144   -32    
96     -32    
0      -32    
16     -64    
32     -32    
96     48     
0      144    
-16    -192   
240    224    
0      -304   
-64    128    
-64    -32    
64     -48    
80     -112   
160    144    
-96    -64    
288    48     
64     0      
768    512    
-336   -16    
-176   -192   
144    416    
64     -144   
416    320    
-448   -288   
272    32     
-112   -224   
48     160    
192    368    
96     352    
-208   -16    
-160   -48    
-144   -48    
112    -112   
160    96     
-288   -224   
80     32     
240    112    
-16    16     
528    144    
80     112    
304    -144   
304    112    
0      160    
-240   -16    
112    -208   
384    -32    
400    208    
208    -80    
112    192    
272    -112   
48     48     
-48    -80    
-112   144    
-32    144    
-64    32     
-96    -304   
-304   -144   
-336   -32    
112    -16    
-80    0      
64     16     
160    -160   
64     -112   
112    112    
-432   -144   
96     32     
144    96     
208    -32    
224    -224   
256    -32    
560    368    
-48    -400   
-32    -192   
-144   -368   
224    -688   
64     176    
16     -672   
240    48     
208    -352   
256    0      
-80    736    
-32    -560   
160    176    
160    192    
32     -112   
128    -64    
192    320    
-160   48     
-288   0      
-32    -304   
-240   32     
-176   -288   
464    -240   
-32    304    
304    -32    
-16    160    
48     192    
-448   -944   
-176   -16    
160    496    
256    128    
272    80     
64     48     
-160   192    
192    -112   
-560   288    
224    96     
-160   48     
304    -304   
16     -128   
144    304    
496    80     
-16    320    
112    -144   
80     -144   
144    -192   
-32    -64    
176    112    
-240   -64    
400    -80    
208    400    
-432   240    
240    -160   
-16    -48    
16     -96    
224    -32    
224    80     
112    -112   
240    0      
32     112    
48     96     
-16    32     
288    -176   
-64    0      
48     -128   
-304   -176   
112    -48    
-1264  208    
240    16     
144    -96    
80     -32    
-272   -224   
-144   -320   
-96    272    
224    368    
96     0      
-208   -48    
192    -112   
-160   -128   
-48    0      
-160   -32    
160    256    
-1312  48     
64     -128   
144    80     
48     -144   
352    -160   
48     -128   
96     64     
0      -720   
368    128    
-160   -80    
48     -96    
-32    -64    
-16    -32    
48     16     
304    -32    
96     96     
-80    32     
-432   -16    
-80    -128   
784    416    
-448   112    
-224   16     
-48    -576   
208    144    
192    80     
176    -160   
208    48     
48     144    
-128   304    
224    48     
-304   -16    
0      -112   
-96    -80    
128    -192   
144    48     
112    -80    
0      -64    
112    -416   
48     48     
-224   64     
-64    -16    
-240   96     
80     256    
16     -80    
128    0      
64     32     
160    16     
0      -32    
-48    -240   
0      -400   
48     -128   
64     96     
-224   -48    
96     256    
32     208    
16     -16    
-16    -32    
352    144    
-192   240    
0      48     
96     16     
160    -208   
-400   -192   
-640   -208   
96     -80    
112    16     
-240   64     
32     -80    
-720   -192   
-80    -128   
-1552  -48    
144    -112   
352    -240   
96     48     
-128   -464   
-192   -464   
-816   -336   
-272   -64    
-144   -160   
96     -64    
-288   -48    
64     -48    
-256   -128   
-112   336    
64     320    
-176   112    
0      -80    
-1168  -32    
32     112    
64     -192   
-80    96     
-64    -80    
64     240    
-32    -96    
-304   112    
-272   -48    
-448   -32    
432    528    
-384   -304   
144    -96    
-96    -16    
-320   128    
-272   -256   
-96    -160   
-112   224    
-96    208    
-304   -128   
64     0      
-80    -96    
208    -64    
112    0      
16     16     
-64    -16    
-80    112    
-16    32     
-96    -64    
-256   48     
-688   128    
96     112    
-640   48     
0      128    
-240   -128   
144    96     
48     -80    
320    48     
-112   -32    
-64    16     
0      0      
-16    16     
32     48     
-16    32     
112    64     
-16    -48    
48     48     
-304   -48    
48     16     
32     -32    
-32    112    
32     -16    
-112   64     
48     112    
-16    0      
-48    -16    
80     160    
112    96     
80     16     
96     -64    
-304   -48    
-48    128    
-112   -32    
-224   -32    
-240   -112   
432    -96    
48     208    
16     -96    
192    -16    
-128   128    
-240   32     
-48    16     
496    128    
-368   0      
-32    -112   
-96    -16    
144    32     
-336   -32    
-160   -32    
-1120  -352   
192    32     
-384   128    
-208   32     
192    80     
144    16     
-208   -32    
224    32     
-288   48     
-160   -16    
96     16     
-208   80     
160    160    
-160   48     
80     -48    
-688   -32    
0      48     
80     64     
-112   96     
144    -16    
0      16     
96     -32    
-112   -64    
224    144    
-64    64     
80     48     
-64    0      
176    112    
-144   96     
-64    128    
64     -48    
48     16     
16     -16    
160    48     
-128   96     
192    0      
-304   -64    
112    32     
32     96     
112    80     
-16    16     
-48    -32    
0      48     
-224   0      
240    64     
32     80     
48     -48    
112    64     
-32    96     
-96    0      
-32    32     
80     -128   
32     -112   
192    96     
0      -48    
160    64     
-208   -96    
-80    16     
176    128    
-160   160    
80     -80    
128    48     
-64    96     
272    272    
208    128    
-80    112    
64     160    
-64    48     
16     32     
-80    -112   
80     32     
-48    -80    
64     -80    
-80    -32    
32     -48    
-64    -144   
-112   96     
64     160    
-96    -48    
112    -16    
0      -16    
-32    16     
112    128    
48     128    
-192   0      
16     -48    
-112   32     
96     96     
128    32     
112    16     
0      64     
80     64     
144    96     
272    128    
-544   32     
432    768    
-640   272    
80     -368   
480    208    
272    16     
304    -64    
-96    -272   
-32    -1056  
-96    288    
-320   -720   
-80    432    
-240   48     
16     -96    
112    320    
0      192    
-224   80     
64     -160   
240    96     
320    272    
-32    32     
-192   -1200  
-192   512    
-544   32     
32     -144   
272    96     
160    -96    
288    320    
240    336    
-640   -64    
-240   -192   
-16    128    
272    144    
0      80     
-208   -496   
336    880    
-160   32     
-208   -112   
544    80     
64     -96    
1040   912    
-512   -304   
16     -96    
304    272    
0      144    
224    -16    
224    256    
288    -112   
48     192    
64     192    
-128   48     
-64    64     
96     -320   
96     368    
48     256    
256    -752   
128    288    
48     160    
160    -144   
-80    192    
64     368    
-16    -176   
-16    -112   
-208   -592   
96     -192   
80     272    
64     -304   
96     32     
-16    -272   
-64    -240   
336    -192   
224    512    
48     256    
-64    -64    
-112   16     
80     -48    
32     80     
128    64     
0      -16    
-160   384    
352    272    
96     144    
192    -112   
-64    64     
240    176    
80     272    
160    416    
-32    -1584  
-64    16     
128    -112   
0      176    
-64    144    
80     64     
-16    16     
-16    112    
32     112    
80     -144   
288    -96    
16     -64    
288    240    
-32    80     
-32    -16    
-16    -672   
352    256    
-304   96     
16     -272   
48     -224   
-80    144    
-32    112    
-176   80     
224    64     
-112   16     
256    16     
160    -240   
240    176    
-112   -32    
-32    224    
16     -112   
80     16     
32     16     
16     48     
128    32     
-192   192    
416    -96    
0      -112   
-16    80     
240    -480   
-384   -320   
96     -176   
-128   240    
240    -64    
64     368    
128    -64    
176    64     
48     80     
112    16     
192    128    
-208   32     
-32    96     
112    -192   
192    -656   
192    -96    
160    0      
112    16     
208    304    
-112   48     
112    -32    
48     48     
176    128    
64     -16    
0      -96    
-32    0      
0      0      
-16    -80    
176    -32    
64     48     
16     -144   
272    -928   
112    16     
-176   32     
64     -336   
96     -32    
64     -16    
80     -160   
288    112    
-48    -64    
-48    -256   
-80    -80    
160    304    
-208   256    
-160   144    
144    -208   
112    48     
80     -112   
272    -208   
96     -96    
-160   -96    
16     16     
0      -64    
96     -208   
96     -48    
-32    -224   
-384   -208   
96     -112   
-480   -16    
64     -96    
176    -16    
-16    -304   
128    -352   
224    -752   
160    272    
176    160    
-16    32     
32     -48    
-160   -80    
176    64     
160    80     
-384   -80    
64     0      
-304   96     
112    0      
160    336    
16     -128   
-176   -160   
0      -320   
128    -96    
-48    -112   
-288   -96    
144    -32    
144    176    
80     -32    
16     -352   
288    -144   
96     240    
-352   -496   
48     -112   
-1760  240    
-288   -80    
-112   0      
-320   -304   
64     -144   
544    -240   
80     192    
48     -64    
128    160    
-80    80     
-144   -144   
-64    368    
288    192    
32     368    
-32    224    
432    64     
-624   0      
-320   96     
144    -48    
-80    0      
16     -192   
336    160    
336    112    
64     48     
-304   -80    
-48    0      
-64    -16    
-144   -16    
-336   -48    
256    16     
-240   32     
-64    -96    
-320   -48    
0      -256   
176    112    
32     -16    
288    32     
432    -656   
-528   -80    
128    32     
272    400    
-608   64     
432    128    
608    320    
-512   0      
-608   -80    
64     16     
16     -80    
240    32     
48     32     
208    0      
96     32     
0      -16    
-48    -96    
-112   64     
192    32     
240    128    
-112   -80    
176    -16    
-96    -144   
-16    -80    
176    -16    
192    96     
-16    64     
112    144    
-912   -144   
272    -16    
-224   -96    
-48    32     
-256   32     
112    96     
64     112    
-32    -112   
-48    80     
80     0      
176    -32    
-80    16     
48     128    
-1696  -304   
944    240    
-1072  -208   
112    32     
464    64     
-240   16     
-16    -112   
-128   -192   
368    240    
736    368    
-896   80     
16     -384   
448    -144   
-480   32     
-96    -64    
64     -48    
256    112    
-16    48     
-192   144    
32     80     
-288   -32    
-96    0      
-384   32     
-64    0      
-464   0      
16     16     
128    -32    
-32    96     
-160   -160   
80     16     
144    -80    
-64    0      
176    -16    
-160   -112   
-112   -48    
-112   -48    
16     80     
176    48     
-80    96     
-208   -64    
-16    0      
480    16     
-416   16     
-32    -144   
48     80     
128    -64    
-64    -16    
-128   64     
64     80     
-176   48     
-16    80     
0      176    
-96    160    
0      -16    
-240   -16    
-128   -176   
-224   -32    
240    144    
-96    -80    
96     32     
192    160    
-272   224    
16     64     
80     -48    
16     160    
-48    32     
-80    -176   
-256   -64    
-16    80     
-192   0      
80     0      
-16    64     
240    112    
0      -80    
32     -160   
-272   368    
0      -240   
-16    112    
192    16     
144    144    
-96    -32    
48     128    
-112   -176   
64     192    
-160   16     
32     -144   
-528   -32    
48     48     
-1392  -48    
16     64     
-16    64     
160    48     
-32    96     
-112   -32    
576    816    
-576   -144   
96     -336   
224    64     
96     -16    
0      128    
-48    0      
-160   16     
128    624    
-608   320    
-144   -208   
80     160    
-176   -288   
-16    -240   
-208   160    
64     -176   
-16    -96    
432    736    
-608   -688   
-224   -352   
-304   240    
80     -208   
0      176    
208    48     
-32    -16    
-224   240    
160    -16    
144    -128   
272    16     
64     48     
496    464    
-704   -752   
-176   -672   
192    64     
224    112    
-112   176    
80     48     
-64    64     
-144   128    
-208   192    
-384   -272   
400    96     
-192   -16    
288    -192   
272    -192   
320    128    
304    -64    
208    -208   
128    -272   
-288   -192   
80     112    
-272   48     
-368   -32    
-16    -16    
64     0      
208    -160   
240    -224   
48     0      
112    32     
-32    112    
128    400    
-352   208    
32     -32    
-112   -112   
176    208    
128    128    
32     128    
-80    32     
16     -112   
64     112    
-32    80     
-16    32     
-16    -32    
-80    -32    
112    -32    
-16    112    
16     160    
256    208    
-272   -176   
128    240    
16     96     
96     -32    
32     -128   
-128   -112   
64     32     
-128   32     
304    -16    
-96    32     
-144   -48    
256    48     
496    272    
-320   288    
-32    -48    
16     -80    
-112   144    
224    64     
96     0      
-96    -32    
208    -32    
-272   -64    
-96    112    
256    272    
-208   -48    
128    80     
112    -224   
224    -32    
-128   -128   
64     0      
112    -128   
-16    256    
240    160    
144    -432   
32     -192   
-96    -144   
16     240    
96     96     
144    96     
32     48     
16     0      
-128   16     
128    32     
-96    32     
-16    128    
192    32     
-96    64     
48     432    
304    -144   
48     32     
96     128    
96     -48    
224    64     
-240   80     
64     96     
-208   240    
-32    -128   
352    -592   
-16    -144   
128    128    
-192   -208   
80     -528   
48     -192   
80     -192   
96     112    
16     -528   
-160   -16    
-16    -80    
-272   -32    
32     112    
-48    80     
-128   -32    
0      -32    
80     -48    
80     64     
80     -272   
-144   -304   
192    -144   
-240   -160   
208    64     
64     -944   
96     240    
16     -240   
-112   -64    
-16    -128   
-32    -48    
176    64     
160    192    
-96    48     
160    176    
0      128    
144    -64    
224    208    
-112   32     
128    160    
-144   -704   
16     208    
208    400    
160    320    
-16    32     
224    224    
16     112    
80     144    
32     112    
128    144    
-48    240    
80     -96    
208    -96    
96     -144   
192    96     
0      -16    
-64    64     
256    -352   
208    160    
32     -272   
-64    144    
-32    -272   
96     128    
-48    208    
-32    -208   
-16    -48    
112    240    
-32    144    
160    -144   
-64    144    
128    -352   
16     64     
48     16     
32     -64    
-336   -96    
192    -112   
48     352    
304    576    
240    16     
160    -112   
32     32     
-112   -608   
-48    48     
-240   -192   
-176   -320   
-288   -160   
-112   48     
-128   -112   
144    48     
128    64     
288    16     
192    0      
128    48     
32     96     
-32    -192   
-32    -128   
320    -240   
400    176    
0      160    
192    16     
224    -32    
-144   64     
320    96     
-240   96     
-128   -64    
48     -608   
160    -32    
-304   -480   
32     -896   
272    -96    
144    48     
0      -48    
48     -32    
-80    -64    
416    16     
464    -32    
-160   32     
160    32     
-176   -480   
176    -80    
192    -720   
-256   48     
-1328  96     
-224   -80    
256    -48    
288    32     
-256   -80    
256    -224   
256    0      
0      96     
160    48     
16     -32    
176    64     
-144   -208   
160    32     
160    -224   
48     64     
-144   80     
144    16     
144    -32    
304    32     
-48    -32    
192    -256   
32     0      
96     -80    
160    32     
-112   -32    
-192   -80    
112    -64    
64     96     
336    0      
96     -48    
16     32     
48     -80    
-256   -32    
-80    -16    
336    80     
-176   -32    
-80    -160   
128    -656   
80     -48    
192    -48    
-448   -32    
192    0      
-32    0      
448    272    
-224   0      
-176   -144   
160    48     
-1248  -80    
96     -144   
496    32     
384    256    
384    160    
160    -96    
128    240    
-496   -528   
176    80     
-336   -128   
688    256    
-48    16     
112    -208   
224    32     
48     32     
-128   96     
-320   -64    
240    16     
192    -112   
128    16     
128    -48    
240    112    
32     -352   
16     128    
-48    -32    
128    -128   
0      16     
-64    0      
16     0      
80     -32    
-288   -48    
48     80     
-2320  128    
48     -64    
-16    -16    
-16    32     
112    48     
128    -176   
48     112    
80     0      
144    128    
48     112    
80     -32    
0      64     
128    272    
-128   128    
-128   -368   
0      -128   
48     352    
160    -192   
144    -256   
256    432    
32     -240   
-32    32     
-192   16     
416    -96    
96     192    
176    -128   
-32    32     
80     -80    
-256   48     
176    256    
-16    -224   
16     0      
-336   -128   
352    -336   
64     16     
48     -64    
0      48     
-208   0      
224    224    
-528   -32    
496    288    
-256   672    
48     -512   
64     112    
352    208    
-384   288    
-32    64     
64     -32    
160    144    
144    -48    
-928   0      
-560   240    
16     -16    
-672   288    
-48    80     
112    304    
-176   0      
80     48     
48     224    
128    208    
-560   48     
-992   -96    
48     16     
-352   -400   
-48    -240   
-448   -80    
-592   80     
112    0      
-112   160    
-96    96     
-528   112    
112    256    
256    0      
16     0      
-384   208    
80     272    
-352   -16    
-16    128    
352    48     
-32    432    
-224   48     
-144   -336   
32     -16    
272    -80    
160    16     
224    96     
80     128    
-336   -112   
-32    -64    
-96    128    
-224   80     
-96    -144   
128    -32    
416    208    
112    224    
48     16     
-80    -32    
0      32     
32     160    
-272   80     
-496   -128   
64     0      
-64    -16    
-224   -16    
-48    -48    
-128   80     
0      -64    
112    16     
128    16     
-384   48     
336    -80    
-448   0      
-272   -128   
-144   32     
96     16     
208    -32    
112    48     
-176   -64    
-128   -32    
-592   32     
-64    48     
80     -128   
144    16     
112    256    
-48    96     
96     -112   
-224   -304   
-16    -288   
-96    -16    
-80    112    
-80    48     
-112   128    
-272   -96    
64     48     
-304   -256   
160    -80    
-48    0      
80     96     
256    32     
-432   -112   
-112   -32    
144    48     
48     432    
304    64     
16     -112   
-112   -208   
-16    -128   
-48    112    
-160   -64    
-16    -64    
0      -32    
-48    -256   
-352   -336   
16     -128   
-48    224    
240    80     
-48    368    
256    16     
-240   48     
-192   128    
-288   -384   
-144   -112   
64     -208   
-32    128    
-192   -176   
176    128    
-2384  80     
96     240    
496    320    
272    800    
-576   640    
-208   -160   
112    -96    
-80    64     
400    128    
-96    -32    
-32    -96    
-320   -16    
176    -160   
-208   -496   
48     -16    
192    -208   
-32    368    
304    -64    
-208   176    
0      -80    
-112   112    
-16    -176   
48     0      
64     80     
160    -240   
112    144    
-32    -16    
-224   -688   
-96    -224   
-128   -208   
64     -64    
352    288    
64     592    
-224   256    
112    -80    
304    256    
80     176    
-144   336    
128    160    
-80    176    
48     -320   
-240   -64    
64     816    
224    480    
-128   224    
208    16     
192    608    
144    304    
80     112    
80     128    
-144   256    
240    16     
-144   -304   
-96    -240   
-160   -80    
240    624    
-608   -416   
416    -528   
48     560    
144    48     
16     128    
224    128    
-384   64     
0      112    
224    176    
240    224    
48     -48    
-80    48     
208    16     
-32    16     
-80    576    
16     112    
400    -416   
112    368    
-208   -528   
320    48     
128    176    
272    16     
-32    80     
-48    -16    
-144   0      
-96    -16    
80     64     
144    64     
192    16     
256    64     
-80    0      
-80    32     
48     0      
-112   32     
-80    -16    
32     -64    
80     0      
176    96     
48     80     
-16    144    
-48    16     
64     32     
224    48     
-160   0      
144    16     
-48    -16    
192    -160   
-32    144    
-96    96     
-16    -176   
176    -512   
480    0      
304    240    
288    272    
80     -32    
64     -80    
160    -16    
32     64     
16     -80    
-16    48     
16     64     
-128   -48    
-80    32     
48     16     
-176   64     
-32    112    
-144   -16    
192    48     
176    112    
480    672    
-704   208    
192    -160   
272    -48    
224    0      
416    0      
320    -96    
-112   -832   
-400   96     
-448   128    
-304   -64    
48     16     
64     112    
96     64     
240    64     
-16    0      
288    -16    
240    80     
96     128    
112    -80    
272    -192   
480    320    
-256   0      
-48    48     
64     -1184  
192    64     
448    96     
272    32     
0      48     
-80    -48    
16     16     
-32    48     
192    80     
-48    32     
304    96     
112    -16    
128    64     
32     -80    
48     48     
160    -96    
-32    -80    
240    -64    
0      128    
48     0      
80     48     
80     0      
32     -16    
-16    96     
64     112    
48     -16    
160    -128   
48     112    
176    -128   
32     -16    
80     -80    
64     0      
-48    -416   
64     64     
48     -48    
-80    -128   
96     0      
-32    256    
272    112    
-112   -48    
-256   -48    
416    -32    
-96    144    
208    -192   
48     0      
64     -144   
400    352    
-496   -64    
304    -32    
-64    48     
80     48     
1136   672    
-240   656    
-304   0      
-32    -448   
-128   16     
48     -144   
240    -32    
-48    -352   
128    -112   
-160   0      
-32    208    
240    144    
-240   240    
64     32     
-112   -128   
-16    -208   
64     160    
64     32     
112    -240   
112    224    
-64    -336   
-80    32     
48     -48    
32     -48    
176    -96    
-32    48     
160    -32    
48     -16    
48     16     
16     272    
144    496    
-160   -464   
192    -784   
-48    96     
32     -992   
-48    304    
96     -64    
-16    -48    
160    48     
160    -48    
-16    -816   
48     -384   
-160   -48    
512    -256   
-80    -400   
160    272    
-64    160    
-176   -736   
16     -816   
256    608    
176    656    
32     -720   
96     -224   
176    96     
-48    256    
0      32     
192    -32    
80     176    
272    80     
-16    128    
144    -80    
-688   -128   
64     16     
-48    112    
-64    -352   
-32    -48    
192    16     
16     48     
336    -1088  
-128   112    
176    -32    
144    64     
48     -48    
16     -128   
-80    -176   
144    -16    
-592   64     
320    208    
16     160    
224    16     
240    -32    
208    -32    
-112   16     
128    -448   
64     48     
-48    -16    
-64    -32    
144    -112   
0      96     
16     -48    
160    0      
-304   80     
96     -64    
-1248  -32    
256    -48    
0      128    
112    -32    
-32    -80    
160    -32    
-240   80     
144    0      
32     -48    
208    32     
176    80     
-128   -144   
224    -80    
-304   32     
96     -80    
-544   0      
-48    -176   
496    -208   
-48    -64    
-480   -96    
208    -96    
-272   48     
96     -1168  
176    128    
0      80     
224    0      
32     -112   
144    -144   
-160   -16    
128    192    
-240   -16    
16     -64    
-160   -64    
272    -48    
-96    -16    
16     -80    
96     144    
-112   -32    
-80    64     
-96    -32    
352    -224   
96     96     
-16    -16    
-320   160    
128    48     
-96    -16    
272    -96    
-384   224    
80     16     
304    -192   
0      -96    
208    -64    
128    16     
-336   48     
176    80     
-32    16     
-176   96     
32     -32    
-160   -96    
48     64     
144    112    
16     -16    
-288   -144   
112    -48    
144    -32    
0      16     
128    -16    
192    16     
144    48     
-240   176    
48     64     
-96    -112   
96     48     
32     0      
48     -80    
-48    -16    
16     208    
-96    -64    
96     -48    
48     -64    
-2592  -144   
80     -144   
-2032  -368   
-528   -48    
-96    -112   
-336   240    
0      -16    
-768   -448   
-224   -576   
-64    -128   
-64    208    
256    -112   
-192   -288   
-736   -320   
256    112    
-352   -80    
320    0      
-272   -304   
-480   0      
-336   -656   
-784   -528   
352    960    
-1904  -32    
-192   320    
80     -304   
96     -128   
576    -272   
-160   -16    
32     432    
64     -16    
224    112    
304    -16    
96     64     
-160   224    
224    -16    
-544   -928   
64     352    
-624   224    
-144   -208   
192    448    
-112   -320   
-384   -240   
16     -144   
32     112    
432    400    
-320   32     
-64    192    
-272   -320   
352    512    
-176   96     
-128   -288   
48     -528   
-80    592    
0      -80    
-336   64     
48     448    
-16    112    
192    32     
-208   -160   
208    160    
-288   176    
-80    -240   
112    -32    
32     160    
96     128    
-144   32     
-224   -224   
-112   -208   
-160   -80    
-432   -32    
-64    96     
-144   112    
144    144    
-16    -32    
-16    16     
80     64     
32     64     
-32    -16    
-80    48     
0      -32    
48     48     
-32    -16    
-128   -48    
0      80     
-16    16     
176    32     
-656   -112   
0      64     
-128   -144   
192    240    
-112   128    
-112   32     
240    64     
208    64     
-128   -80    
-128   64     
128    272    
144    96     
64     0      
-368   32     
208    208    
-1152  -32    
-32    32     
208    -64    
-16    64     
80     -128   
-192   -272   
208    -224   
-144   128    
96     48     
80     32     
-112   80     
0      80     
16     64     
-192   -64    
-32    80     
-416   16     
-16    32     
80     -16    
-16    -320   
-48    -112   
16     384    
-272   144    
224    -96    
128    112    
-64    96     
16     0      
-80    0      
144    80     
64     -368   
-80    -32    
-464   192    
-112   48     
0      -96    
112    -320   
-80    16     
-32    464    
-240   272    
-320   -176   
304    -64    
-208   -64    
112    -48    
-32    80     
-368   -16    
-240   -80    
-48    32     
-672   -16    
-96    64     
-256   -176   
464    -48    
192    192    
32     48     
352    48     
-80    48     
32     80     
-320   -48    
368    16     
-160   0      
-48    32     
320    112    
-16    48     
-256   -16    
-112   0      
240    112    
-320   -16    
-176   -96    
-272   144    
352    224    
320    176    
-336   -16    
48     16     
192    112    
-176   0      
64     0      
-240   -80    
-16    64     
96     64     
144    96     
240    144    
-96    80     
64     32     
128    48     
384    224    
-288   96     
0      -48    
176    64     
208    96     
-32    -32    
16     64     
-224   -96    
16     16     
112    96     
-16    0      
112    48     
32     -80    
64     16     
96     80     
-32    112    
224    496    
128    160    
-256   -32    
-16    16     
-176   -96    
80     80     
-112   0      
96     32     
-64    96     
112    -112   
32     -48    
144    256    
112    400    
208    -64    
432    -176   
272    32     
144    -112   
-48    -112   
-32    -16    
-48    -16    
208    496    
0      128    
-112   -608   
0      -176   
-176   32     
240    208    
-176   208    
320    160    
496    144    
-272   -272   
624    304    
48     -16    
32     0      
80     224    
-240   -192   
224    16     
288    96     
96     -1328  
400    0      
-16    144    
-160   -32    
256    128    
-416   272    
112    -1056  
-160   672    
112    -160   
448    -416   
16     448    
112    -80    
16     112    
-64    64     
112    32     
0      -416   
-48    144    
0      112    
256    144    
0      288    
-64    64     
272    176    
-80    -16    
160    16     
240    -64    
-224   192    
368    112    
32     224    
128    16     
272    96     
-32    -96    
16     -64    
-48    -304   
160    176    
-32    496    
192    208    
208    -16    
-288   -256   
96     -304   
32     64     
-16    16     
256    0      
144    64     
80     -16    
128    112    
32     -48    
-16    -48    
128    -336   
80     176    
240    48     
0      64     
240    -64    
32     -16    
-48    -48    
-112   80     
-96    -48    
-80    32     
32     160    
176    -48    
0      64     
64     -208   
32     112    
48     -128   
144    96     
112    -1712  
144    48     
0      16     
-48    64     
-64    16     
112    160    
320    -208   
208    -80    
112    288    
-144   -64    
112    -32    
192    -96    
32     128    
-208   -160   
272    -144   
-112   96     
272    160    
144    -16    
96     -16    
144    -272   
272    48     
176    208    
-16    -432   
256    96     
-48    -256   
112    16     
416    256    
-288   384    
144    -48    
112    -64    
192    -736   
208    112    
32     -48    
-16    0      
-320   -416   
176    -384   
-48    224    
-256   -48    
384    224    
0      192    
528    128    
-80    -32    
-272   -128   
96     -256   
208    208    
160    -16    
224    -384   
192    16     
32     -528   
176    32     
-432   -32    
-176   -592   
128    -192   
-112   -448   
320    -128   
256    128    
0      336    
176    416    
64     -48    
-176   -16    
-240   -32    
-192   -512   
224    16     
304    224    
-112   16     
-336   -16    
512    -112   
96     -480   
160    -400   
128    -368   
368    -1264  
-16    32     
16     48     
-64    -80    
96     80     
304    176    
384    -192   
0      224    
64     112    
-96    80     
-1232  -96    
0      -80    
208    -336   
-64    -64    
96     -16    
-96    0      
80     112    
80     -48    
112    304    
80     -512   
-96    0      
224    64     
-32    352    
240    32     
-16    -144   
-16    144    
-128   -352   
-32    -16    
320    -32    
-112   336    
240    -704   
-16    224    
-64    -1248  
-96    64     
128    16     
208    64     
-16    -32    
16     -224   
-624   0      
80     0      
-304   112    
416    -192   
-1712  416    
144    -256   
-16    -64    
-128   -176   
256    -160   
160    -144   
112    -128   
400    576    
-32    -208   
16     -704   
-208   208    
224    304    
-672   -768   
304    128    
368    224    
-1328  -16    
160    96     
-240   -80    
64     -288   
224    -112   
-672   416    
416    912    
352    -176   
-560   -112   
-688   -192   
192    -272   
208    80     
672    32     
112    16     
48     -96    
-48    96     
-176   -16    
-432   -16    
160    0      
-64    48     
160    -224   
128    32     
192    -144   
80     96     
0      80     
80     -64    
64     64     
16     -16    
96     -48    
96     -32    
-224   -144   
-144   -64    
-288   32     
176    -48    
-32    48     
80     -272   
80     80     
48     192    
160    288    
32     -16    
-256   0      
-64    -64    
112    -16    
-192   -32    
224    112    
-224   0      
-16    48     
352    -16    
112    32     
144    32     
-160   -112   
160    64     
80     -96    
192    -48    
-432   -32    
160    -96    
-16    -32    
-112   32     
32     64     
32     -16    
0      -48    
0      -96    
-240   -16    
192    -128   
144    -16    
-592   -64    
64     -112   
-208   32     
-736   176    
-208   16     
-1568  -16    
112    32     
-48    16     
-224   -64    
112    -32    
-208   48     
-208   80     
16     -32    
32     -48    
96     -80    
-240   -176   
32     -16    
32     144    
-208   64     
0      0      
112    208    
-288   144    
16     48     
0      -80    
128    -128   
96     -48    
-480   96     
48     64     
-176   -32    
16     64     
-416   -48    
16     16     
0      80     
0      16     
-32    48     
528    576    
-688   416    
-304   -144   
256    -176   
-1168  32     
-32    -16    
288    16     
-144   304    
160    -16    
240    -112   
-240   80     
-400   64     
-352   -80    
-224   -32    
-336   64     
-288   32     
128    -80    
-64    32     
-16    128    
-352   -64    
-32    -176   
-128   -160   
256    96     
112    -112   
112    32     
80     304    
-464   192    
528    272    
-544   112    
-304   -64    
32     -32    
48     -32    
-208   80     
-240   16     
-496   96     
0      128    
-160   0      
384    208    
160    112    
-176   -96    
80     16     
16     112    
-432   32     
-80    -32    
256    128    
-400   -16    
-16    -64    
-80    -32    
-80    16     
-416   -144   
160    -96    
-832   -32    
160    80     
-64    -176   
-32    -16    
-112   64     
-208   -16    
-16    32     
0      16     
-48    32     
-112   -16    
-80    16     
-32    -16    
48     48     
-208   -16    
128    -32    
-752   -64    
80     48     
-64    -160   
-352   -192   
80     -336   
64     0      
240    80     
-80    -128   
-16    80     
32     64     
-240   64     
16     32     
-16    192    
0      -16    
-112   -16    
-672   -352   
752    416    
-560   -944   
288    608    
144    112    
144    -224   
-16    -400   
576    1072   
-496   -288   
64     80     
32     272    
160    -288   
48     368    
-256   -64    
-320   -64    
160    -16    
64     336    
160    64     
-144   -176   
176    304    
672    704    
-432   160    
432    528    
-592   96     
-304   32     
160    256    
-48    160    
64     304    
32     -112   
128    -320   
-304   -288   
-96    -16    
80     -80    
-144   416    
240    112    
-32    96     
160    240    
320    224    
48     -16    
0      -192   
-32    48     
-80    48     
48     128    
-256   -80    
544    -48    
0      48     
-144   32     
192    -48    
-176   128    
-64    32     
32     80     
144    -48    
-128   64     
144    176    
-256   64     
64     -64    
32     -128   
16     96     
96     80     
-144   16     
48     -16    
-176   96     
112    16     
624    160    
-176   368    
-32    16     
-32    32     
-64    48     
-80    48     
-80    0      
64     48     
32     16     
112    -16    
-304   -48    
128    48     
240    112    
144    32     
-48    32     
64     160    
-80    128    
240    -16    
48     16     
16     48     
48     32     
-64    144    
64     0      
16     -160   
64     80     
96     128    
-32    -48    
224    48     
112    32     
0      -32    
-112   -112   
176    -32    
-16    64     
-256   -16    
176    -64    
192    96     
-96    48     
112    128    
16     -112   
32     48     
112    128    
64     64     
96     32     
-32    64     
-80    64     
96     64     
0      16     
48     144    
16     48     
-64    -16    
32     64     
-192   0      
144    16     
-192   80     
240    0      
-32    64     
0      -1616  
-64    -96    
304    32     
80     96     
-96    96     
224    144    
112    -48    
32     -304   
240    -592   
304    -432   
320    32     
240    64     
288    480    
-176   288    
80     272    
-16    -32    
304    112    
64     272    
64     64     
160    96     
-160   16     
16     64     
224    -128   
0      80     
160    160    
-64    -32    
352    -224   
112    -272   
208    -80    
-160   -560   
176    -320   
-320   -32    
-16    368    
176    48     
-64    -288   
80     176    
480    -128   
528    304    
80     560    
48     -112   
-96    -224   
-112   32     
32     -80    
224    -128   
144    224    
-240   -208   
192    -64    
80     0      
160    112    
208    -144   
-48    64     
-32    112    
-48    320    
160    -384   
288    -48    
-224   176    
128    48     
32     -192   
32     -224   
192    -96    
32     144    
64     128    
-32    -112   
16     144    
80     -48    
-16    64     
160    -64    
-48    -144   
128    -144   
32     144    
208    16     
-112   0      
80     -64    
144    -208   
-176   80     
128    -496   
0      64     
224    112    
64     -32    
48     -208   
96     112    
-192   -96    
-64    0      
-320   0      
304    -16    
64     16     
160    80     
320    112    
352    -160   
176    48     
-80    -112   
-144   16     
336    -16    
48     160    
-96    112    
288    0      
80     16     
672    464    
-656   112    
-32    -336   
528    256    
16     128    
-304   -32    
560    64     
-592   208    
-112   96     
528    -208   
416    64     
-528   48     
304    -16    
176    -480   
-64    96     
240    -192   
-32    -160   
64     -80    
112    -224   
-32    -160   
176    -288   
144    -64    
64     32     
144    -64    
64     32     
80     -208   
-48    -304   
-48    80     
0      -16    
64     48     
-48    -64    
432    -32    
-752   80     
-352   -96    
304    -32    
128    64     
288    80     
-32    0      
-80    -112   
288    80     
144    32     
256    -128   
-96    64     
112    -160   
-208   64     
-480   -80    
400    -48    
-80    96     
-112   -48    
160    16     
80     -48    
-16    -64    
80     -464   
224    0      
-32    -256   
208    112    
0      48     
-144   112    
272    -16    
32     0      
-160   16     
192    0      
-704   -16    
-16    -80    
192    -32    
176    -144   
-176   -144   
304    48     
192    64     
-64    -288   
-112   32     
256    -16    
48     48     
-16    -16    
112    32     
-112   16     
112    -208   
-816   -160   
48     160    
-2400  -176   
-64    -80    
144    32     
32     -112   
-96    -48    
-32    -352   
32     -96    
144    -176   
64     96     
80     48     
48     80     
-160   -32    
128    -144   
32     32     
208    32     
-416   48     
96     -112   
256    -16    
128    -112   
48     48     
-32    -240   
416    880    
240    464    
128    16     
-144   -96    
16     -80    
-320   208    
176    288    
176    -16    
160    560    
-848   304    
-64    -160   
-944   -16    
416    64     
240    144    
128    -160   
288    112    
144    -1344  
32     80     
-272   32     
-112   -224   
-48    -32    
-160   144    
-416   80     
-160   160    
-416   64     
208    224    
-128   80     
528    -224   
208    -304   
128    -560   
64     272    
-112   192    
96     -96    
16     -80    
16     -64    
48     -192   
400    -32    
-256   288    
-96    32     
-416   272    
112    528    
32     416    
-256   -224   
48     -192   
64     -96    
224    224    
288    32     
-112   -304   
0      -48    
-144   64     
-400   -320   
-32    128    
-576   336    
224    336    
-48    -352   
112    48     
-576   16     
-2384  -80    
-128   192    
-416   -176   
144    208    
-128   -96    
-64    80     
-192   0      
-1056  -64    
-96    128    
112    144    
-80    -176   
240    432    
144    272    
-1216  -336   
16     80     
-704   96     
0      -128   
-80    16     
16     -160   
96     -112   
-576   96     
-64    80     
-112   -80    
112    -496   
-832   -352   
-64    -336   
-336   208    
256    112    
0      -144   
192    -64    
176    -320   
48     144    
208    -128   
-272   -80    
-128   192    
-144   96     
-112   128    
-32    -48    
112    112    
-352   96     
-192   240    
112    224    
-16    400    
-576   -64    
464    144    
-400   -64    
16     -192   
80     -192   
-240   16     
-80    64     
-160   32     
192    144    
48     96     
256    0      
-16    16     
160    256    
-688   -32    
-48    -80    
-112   -192   
128    176    
-272   96     
-192   240    
64     -32    
80     -64    
-16    80     
176    80     
-64    64     
-48    -128   
48     64     
0      160    
-32    192    
-208   32     
112    -144   
-1328  -112   
192    0      
-64    0      
-80    128    
112    112    
-176   112    
-144   -144   
0      -368   
-96    -80    
-176   160    
-96    128    
64     16     
48     112    
-720   96     
176    176    
-2640  128    
192    64     
464    32     
-64    0      
-96    16     
-48    32     
32     -80    
96     144    
-288   32     
96     176    
48     64     
-80    48     
16     0      
-224   -48    
64     16     
-512   64     
64     -16    
160    -224   
-80    -96    
16     48     
-160   0      
128    -144   
-176   -32    
224    96     
-32    16     
-112   64     
16     16     
-16    112    
-64    -48    
16     0      
-336   -80    
-176   32     
32     -64    
48     96     
-112   80     
16     -16    
16     16     
32     32     
64     176    
0      176    
-16    0      
-80    16     
32     64     
-272   -64    
32     80     
-128   -80    
64     -16    
112    144    
304    256    
128    160    
-48    32     
-160   -192   
-160   -128   
-176   -208   
48     -448   
80     -48    
80     -112   
192    -144   
-144   -48    
160    224    
160    352    
-96    -144   
-160   -240   
352    160    
384    528    
112    240    
48     -416   
0      -320   
176    128    
16     96     
192    176    
-624   0      
-288   0      
-480   224    
144    96     
64     0      
-160   32     
96     720    
0      64     
272    -32    
-592   -192   
-208   -96    
192    16     
352    128    
224    -480   
288    96     
64     336    
-192   208    
-112   80     
-160   32     
48     -80    
240    48     
240    464    
-176   176    
128    96     
128    -64    
32     0      
384    176    
-336   -48    
-224   -160   
0      96     
-80    48     
432    80     
192    112    
448    112    
-160   16     
48     -16    
-256   -48    
0      -64    
160    0      
240    80     
96     80     
-240   -16    
112    48     
-112   32     
112    48     
-96    32     
80     80     
144    64     
0      -16    
32     64     
96     -16    
-176   -32    
240    16     
-112   32     
256    64     
-112   16     
-16    -16    
-96    -256   
384    -336   
-96    240    
384    144    
-176   -912   
-224   -128   
-80    16     
80     32     
0      96     
400    48     
224    48     
-176   96     
-48    -112   
-144   -144   
-176   128    
-64    80     
96     144    
-80    80     
-32    48     
208    -80    
80     48     
-96    -544   
352    48     
128    16     
224    -32    
16     144    
-384   -64    
672    16     
816    384    
-576   -80    
-240   -160   
608    0      
-192   48     
176    -96    
384    32     
96     64     
112    -592   
-16    96     
80     16     
336    336    
-480   144    
224    0      
128    0      
64     48     
-96    -96    
240    144    
-288   16     
-48    32     
176    48     
384    112    
-368   -16    
304    -112   
64     96     
288    320    
-64    48     
128    80     
64     96     
16     80     
208    48     
-96    16     
320    -48    
-416   -64    
112    0      
0      128    
128    -176   
-80    -48    
48     32     
48     -64    
0      -176   
32     -112   
-16    -112   
352    112    
0      80     
176    32     
48     -16    
-96    48     
176    32     
16     -80    
64     -16    
-16    -176   
48     -80    
144    -304   
128    32     
144    -224   
-64    -80    
32     16     
208    128    
0      64     
32     0      
0      -192   
64     -64    
112    -16    
192    -256   
80     -192   
-48    64     
160    208    
208    -144   
-16    16     
-16    -32    
304    192    
-96    32     
64     -96    
32     -32    
176    176    
-16    160    
64     -240   
80     144    
128    96     
16     48     
64     -96    
128    80     
80     80     
48     -160   
-16    -304   
0      64     
16     144    
-48    -144   
256    32     
0      -192   
80     48     
128    -64    
208    -112   
160    32     
272    592    
-304   192    
-32    -432   
320    144    
32     -128   
144    -96    
304    -96    
144    -256   
352    -624   
-368   208    
-144   -352   
-112   -112   
-160   32     
-112   -96    
0      48     
64     -624   
368    -112   
368    128    
240    16     
320    96     
-208   -176   
288    -384   
-288   16     
-192   480    
304    976    
-80    -608   
-96    -272   
-288   416    
-16    -576   
-112   256    
-48    -336   
368    32     
240    -496   
96     48     
176    0      
256    384    
96     112    
-112   -16    
352    -48    
176    16     
-592   336    
416    -96    
-2304  -352   
-112   -208   
-80    -48    
-16    -32    
208    64     
176    -288   
-16    -48    
16     -432   
48     -48    
-64    -64    
96     96     
64     96     
48     0      
-80    544    
192    -64    
-160   -32    
128    -80    
176    16     
160    0      
0      -144   
0      -80    
32     -64    
32     -400   
48     -32    
336    256    
112    416    
-32    256    
288    384    
144    544    
16     176    
192    32     
32     -240   
-224   48     
176    368    
32     32     
112    -48    
-160   -352   
64     -528   
0      -96    
0      304    
176    112    
96     400    
-48    240    
32     -48    
-144   -112   
-256   -288   
336    -272   
-1328  64     
-176   -16    
-144   -96    
352    -48    
224    144    
-64    -160   
128    -224   
256    112    
400    224    
-208   -128   
-176   -288   
-432   128    
-112   32     
-624   -272   
160    -240   
80     0      
-416   0      
464    -80    
192    -208   
112    144    
-48    -144   
0      96     
32     -224   
-16    16     
0      0      
-80    -64    
-256   352    
256    -32    
160    -208   
-80    -96    
224    -64    
-16    -96    
16     16     
-32    -240   
160    160    
-96    -128   
176    -64    
-224   -80    
112    -32    
-192   -32    
160    160    
-160   112    
48     -80    
176    -224   
16     0      
-208   64     
16     -16    
-1184  64     
64     0      
224    240    
224    -304   
-144   -16    
-256   0      
-96    -32    
96     -288   
-16    -176   
-160   32     
256    0      
64     16     
0      -32    
-112   16     
32     -32    
-80    16     
-656   -64    
240    48     
-192   -16    
-704   32     
-16    112    
-96    -80    
16     -48    
-304   -16    
-112   96     
144    0      
-112   -32    
0      160    
-64    80     
272    144    
32     112    
-160   -208   
144    96     
-240   -160   
0      320    
32     224    
-64    32     
-192   160    
-496   -96    
32     48     
-2176  48     
64     224    
352    320    
-80    528    
-208   -48    
0      -96    
-224   -144   
48     -144   
48     272    
160    -240   
112    -96    
-48    176    
-176   272    
-320   208    
-48    -272   
112    -128   
16     240    
-832   240    
96     0      
-128   -48    
0      16     
-192   -336   
-208   -16    
208    400    
-736   -800   
16     592    
-176   -224   
96     -32    
-176   144    
-128   -32    
-400   96     
16     -32    
-320   624    
-512   -192   
-368   -416   
128    160    
288    0      
-352   400    
240    176    
272    16     
-240   -80    
-240   0      
-224   32     
-32    128    
400    80     
-736   -64    
-480   -128   
-944   -176   
80     96     
368    384    
32     256    
-64    32     
-80    0      
144    -112   
192    0      
-16    -16    
176    80     
48     48     
-96    80     
-48    0      
-144   -48    
16     64     
-192   -208   
288    48     
-2128  -64    
-16    16     
-48    48     
80     48     
208    80     
80     -64    
64     -16    
-192   96     
-576   -80    
256    32     
-48    64     
-128   0      
-112   144    
144    96     
0      -64    
-1152  -160   
112    -16    
16     80     
144    48     
0      32     
-176   32     
-144   -16    
-96    -16    
-16    16     
48     32     
64     0      
-32    0      
-16    16     
64     160    
-304   96     
0      -80    
-176   48     
208    96     
192    16     
-640   -208   
624    112    
-560   144    
-80    0      
144    32     
-144   -48    
-80    128    
-160   64     
304    176    
-560   -208   
432    112    
-256   144    
160    16     
176    112    
-352   -16    
224    -48    
-256   0      
-64    112    
-32    0      
352    352    
-240   224    
-48    -48    
-32    -112   
-96    -112   
240    64     
-64    -32    
-16    -32    
96     16     
304    256    
-96    64     
352    -32    
-288   48     
-80    128    
-304   -96    
-288   -224   
192    -48    
192    144    
0      -80    
80     -80    
-64    48     
-208   160    
208    0      
-80    64     
64     96     
64     112    
0      80     
144    16     
80     64     
-128   -32    
96     -176   
-128   32     
240    144    
-16    48     
-144   64     
64     80     
-128   80     
192    16     
240    32     
0      64     
128    16     
-80    96     
112    144    
144    -128   
96     -80    
80     32     
80     96     
96     48     
-96    -16    
-32    -16    
32     -48    
128    -48    
32     96     
-48    16     
64     48     
160    48     
32     48     
-32    -32    
96     0      
-80    -16    
48     -80    
-80    64     
256    416    
-384   -80    
128    -368   
224    128    
0      -32    
64     64     
-144   0      
80     -96    
176    192    
48     368    
32     192    
-256   -160   
352    48     
144    112    
-48    64     
-16    160    
64     -32    
-16    0      
-112   304    
272    80     
16     -32    
32     16     
192    -192   
192    112    
208    176    
-272   16     
-16    -16    
0      -144   
224    640    
-48    16     
-80    -288   
0      288    
112    -272   
-80    -48    
-112   496    
208    -720   
96     400    
208    160    
16     -224   
-112   80     
32     -16    
-32    96     
96     -208   
128    400    
-48    64     
80     -112   
0      -16    
48     -96    
224    -32    
32     -496   
288    144    
-192   112    
96     96     
256    576    
96     240    
-144   64     
96     272    
160    -32    
-224   48     
-112   -272   
-176   -64    
96     112    
32     -80    
-112   448    
128    32     
-48    480    
-384   64     
-48    0      
-64    -48    
752    208    
-32    496    
-592   160    
-288   112    
144    0      
384    -16    
192    0      
-144   0      
-16    16     
128    144    
-96    -208   
64     32     
64     112    
32     0      
272    -128   
-16    -80    
0      -80    
80     80     
-256   -144   
-16    144    
-16    112    
64     -32    
64     -112   
128    -208   
-160   16     
80     -144   
64     -64    
96     32     
128    32     
64     32     
48     112    
0      80     
16     144    
144    64     
80     16     
112    96     
112    -208   
-32    32     
32     -688   
208    80     
16     32     
448    352    
-240   -32    
272    64     
192    64     
144    16     
160    64     
32     -96    
-64    80     
224    -160   
-64    48     
288    -528   
128    0      
16     112    
-160   112    
256    64     
-32    -80    
0      -144   
256    -176   
-144   -240   
144    -32    
-224   -48    
448    -352   
192    -176   
592    336    
-160   -448   
32     112    
48     192    
-208   384    
80     0      
112    -384   
192    -32    
-16    -48    
176    176    
16     80     
-288   -80    
640    512    
-336   -208   
-160   -784   
224    -240   
0      -288   
0      144    
96     -528   
320    -16    
0      32     
96     32     
0      320    
96     112    
240    -336   
96     144    
320    32     
176    416    
-288   192    
176    -96    
-32    80     
176    -64    
-64    -240   
112    -352   
144    -192   
144    -1200  
-80    32     
160    48     
16     144    
48     32     
144    80     
32     -128   
-32    -128   
-176   -64    
-160   544    
-1248  176    
240    -208   
0      -128   
32     16     
80     -64    
208    224    
368    128    
-64    128    
-288   0      
-16    48     
128    256    
96     -128   
64     0      
-80    -64    
112    -16    
-1360  -112   
-16    -80    
96     -32    
144    80     
160    -48    
48     -160   
-48    -96    
176    -1488  
-192   -208   
32     -176   
144    48     
-48    -144   
-112   192    
-128   240    
96     752    
-304   112    
128    -352   
32     288    
224    48     
80     160    
64     -224   
-96    320    
128    -176   
32     -32    
80     112    
32     48     
48     -32    
368    288    
-272   -48    
80     128    
96     -80    
-16    48     
-2096  -176   
-208   80     
160    -32    
240    -48    
16     -32    
240    -128   
112    144    
208    144    
64     16     
-80    -144   
-64    -144   
-112   -32    
144    16     
-256   -16    
48     -16    
-304   112    
304    624    
-288   352    
48     -160   
112    -48    
-64    -256   
-16    32     
64     16     
-176   -32    
-448   16     
448    400    
-880   32     
192    -176   
-352   96     
-64    -96    
208    -64    
384    32     
-592   -112   
192    -208   
48     208    
-384   -208   
0      80     
-480   32     
240    16     
224    96     
-240   48     
-288   -32    
320    -80    
144    -80    
-32    48     
192    -32    
400    -48    
-80    48     
-208   -160   
128    128    
-48    -48    
-176   32     
-272   0      
-208   -32    
208    32     
816    144    
-416   -112   
-240   -160   
432    -48    
0      64     
-32    80     
-1056  -48    
32     -16    
-496   -112   
48     96     
0      -112   
-96    0      
-80    16     
-352   0      
112    -16    
-176   192    
-608   -48    
48     -96    
-64    16     
192    -32    
80     -32    
-160   48     
-384   16     
-128   -64    
0      48     
-32    -16    
-96    16     
-64    0      
64     0      
48     16     
-64    -48    
-16    112    
-112   -16    
-96    48     
128    -48    
-96    64     
-128   256    
224    160    
-288   -80    
32     -16    
0      -128   
-144   272    
-48    112    
304    64     
-544   -16    
-160   -96    
-176   -112   
-752   288    
-288   192    
288    128    
-160   128    
-96    -96    
288    48     
-96    -48    
-272   -48    
352    128    
-400   64     
208    0      
192    176    
-304   -16    
-16    -48    
320    208    
-144   -48    
160    32     
-1600  48     
16     128    
-560   -384   
-176   128    
336    80     
-384   16     
112    128    
-16    16     
-320   80     
336    96     
-160   -32    
-96    -16    
32     80     
0      64     
64     -48    
-224   16     
16     64     
-48    0      
128    128    
128    96     
-176   64     
-32    -96    
96     32     
-16    176    
-128   32     
-48    -176   
48     96     
48     208    
-224   -160   
336    304    
-832   32     
288    -224   
208    400    
-16    -32    
288    80     
-192   32     
-208   -48    
32     16     
-64    -32    
304    176    
-176   -224   
128    128    
-112   -48    
-272   -96    
-32    208    
-464   -1440  
208    1056   
-480   -464   
-240   -128   
192    640    
-64    -48    
240    0      
-144   -336   
-80    16     
-160   576    
-144   -80    
-144   -304   
80     -336   
256    112    
-192   -224   
-80    -192   
240    48     
-16    -432   
-80    432    
-80    -48    
80     -432   
144    -256   
16     -64    
-16    64     
80     -16    
112    16     
192    64     
-96    32     
-176   32     
-32    96     
-400   -368   
80     -448   
144    -80    
-48    96     
80     176    
208    224    
-224   144    
-192   0      
48     -80    
0      32     
-16    -48    
-96    -64    
64     -48    
-240   -64    
64     0      
-208   96     
128    144    
32     64     
496    752    
-112   208    
-16    272    
80     48     
96     -112   
-64    -48    
-16    48     
-64    -32    
112    -128   
272    224    
-176   48     
-16    144    
112    -288   
336    -96    
224    16     
64     80     
80     -64    
-96    -16    
-64    80     
-112   -96    
304    176    
-304   96     
-16    -32    
-160   -16    
16     32     
48     32     
96     176    
80     -48    
160    0      
-416   -96    
64     -64    
0      48     
-336   144    
48     16     
160    48     
64     128    
-128   -32    
-48    336    
80     -16    
240    -96    
48     -80    
-288   -928   
80     208    
-80    128    
160    -160   
144    -96    
-48    0      
-272   -128   
-128   -16    
-80    -64    
96     160    
-48    16     
128    -16    
48     -80    
96     80     
-176   80     
-32    -960   
240    48     
-80    128    
144    208    
208    -80    
-80    80     
80     -16    
-32    0      
48     -160   
64     64     
96     -304   
-32    128    
-192   -96    
-112   -160   
288    544    
-176   -208   
288    272    
272    -128   
80     160    
256    80     
-48    416    
48     464    
304    0      
-32    80     
-144   -64    
112    -32    
16     48     
-176   -112   
144    -32    
64     512    
608    352    
-48    160    
-96    208    
32     368    
224    400    
272    -464   
32     16     
192    -16    
-96    64     
96     176    
80     400    
-64    448    
64     -48    
112    112    
-448   208    
-16    112    
80     96     
-352   256    
16     -32    
448    480    
-272   560    
368    192    
-192   -240   
-16    -256   
176    -96    
16     80     
192    -176   
-416   -272   
144    -32    
-304   576    
272    -64    
-16    -80    
224    -528   
144    -112   
-128   -400   
304    -272   
16     208    
-144   -208   
-48    -64    
-112   32     
144    -304   
176    848    
208    384    
-176   -256   
-16    -224   
192    -752   
208    208    
112    112    
32     624    
32     -288   
-128   -384   
192    -208   
320    784    
-240   -16    
48     -592   
368    800    
-176   240    
0      -320   
144    -304   
48     160    
176    464    
48     0      
176    -416   
48     -64    
0      192    
48     64     
32     -80    
0      128    
176    48     
-112   96     
32     80     
112    -192   
96     0      
432    336    
-272   -160   
112    -304   
48     96     
80     -80    
160    64     
-64    -64    
80     144    
192    272    
-96    -48    
-48    -128   
64     0      
128    192    
176    32     
144    16     
-112   -80    
32     32     
128    -96    
-64    0      
80     -176   
128    112    
320    -16    
-64    0      
-32    48     
64     -1232  
144    32     
80     -1088  
-32    -208   
288    688    
80     -928   
32     -128   
-48    -272   
160    -112   
-32    48     
128    -48    
256    -112   
112    32     
-176   -128   
-16    -16    
64     -112   
-112   -48    
-512   480    
-224   48     
272    -112   
64     -272   
256    -48    
16     -288   
256    -128   
32     128    
0      -176   
-112   -352   
-32    -288   
32     -128   
-64    288    
-320   -32    
-80    -16    
-288   -32    
112    80     
16     -48    
256    -80    
176    -32    
-224   -32    
416    32     
16     -752   
-320   -32    
48     -192   
368    144    
-192   304    
272    512    
-304   32     
16     -272   
96     -112   
192    -208   
480    144    
-544   112    
-240   -128   
320    160    
-192   0      
496    -208   
208    -16    
400    256    
-144   32     
96     -80    
208    -16    
-144   32     
400    32     
-352   -16    
-16    -64    
-1088  0      
-16    -128   
288    -16    
400    32     
-208   -16    
128    -112   
336    176    
-416   -1168  
32     -64    
80     -112   
240    -16    
-208   -80    
-112   -32    
128    64     
0      48     
-32    -32    
112    -16    
-272   0      
48     -32    
32     16     
144    -16    
-48    -32    
144    -224   
80     48     
176    -48    
16     64     
-16    -48    
48     -112   
176    272    
-240   144    
-48    -96    
-32    -32    
-368   128    
32     -144   
272    -80    
-32    -80    
608    176    
-256   -144   
256    -176   
192    48     
144    -16    
-144   -208   
-352   -16    
-256   16     
304    144    
-672   32     
336    112    
-320   16     
720    48     
-144   0      
-400   -416   
-16    -16    
288    32     
-32    -160   
-336   -160   
304    -208   
-288   -208   
336    384    
-112   64     
736    0      
-240   96     
48     -32    
-432   -128   
128    -80    
-64    96     
0      0      
0      144    
112    -208   
144    -224   
-176   64     
144    48     
-144   80     
336    128    
-160   -176   
96     272    
-208   -64    
144    -32    
-240   -32    
352    -704   
256    720    
-160   -48    
320    144    
-560   -16    
-2448  -336   
-128   80     
-1920  -384   
80     48     
48     -448   
0      368    
-32    112    
-432   -512   
32     -672   
48     -384   
-464   -80    
-144   112    
-160   192    
-144   160    
-144   0      
-416   -48    
16     0      
-144   -16    
-256   0      
-816   -80    
96     0      
-96    -80    
144    -80    
-128   -64    
64     -64    
-208   -16    
144    0      
160    -16    
32     96     
16     96     
-64    -208   
-48    -96    
-160   0      
-176   -48    
-416   -16    
48     32     
-544   112    
-208   96     
0      0      
-144   80     
-96    -112   
0      32     
-64    -48    
-16    112    
80     16     
80     -96    
48     -176   
-128   64     
-96    -32    
-192   0      
-16    64     
-480   32     
-320   48     
-48    -96    
64     112    
-16    32     
64     32     
-64    -80    
128    32     
-304   -16    
-48    -16    
-64    48     
128    0      
16     64     
112    80     
208    112    
-208   80     
-192   0      
-1008  -16    
-16    -48    
96     -80    
208    128    
112    32     
-48    -32    
112    112    
-208   32     
16     -32    
-16    -48    
256    -160   
160    -96    
160    16     
-96    16     
-224   80     
-528   -112   
-80    16     
112    -32    
-320   -64    
-112   80     
-160   -48    
240    -32    
176    0      
-32    112    
-112   128    
-64    128    
-48    80     
-112   64     
128    64     
-16    160    
-1184  -272   
128    32     
-176   -64    
-224   160    
256    160    
-144   -64    
16     32     
-144   -64    
32     0      
-48    -48    
176    -64    
32     -96    
-336   96     
-512   -144   
80     -32    
-128   48     
272    -48    
240    80     
288    64     
-176   192    
-128   80     
-192   -64    
-64    -80    
144    0      
-192   -32    
192    -64    
-96    -80    
176    -32    
-272   240    
128    144    
-176   176    
160    384    
0      16     
-48    64     
-16    0      
64     64     
96     0      
-112   -96    
-32    -32    
112    -288   
-432   -64    
-160   -288   
96     -48    
-96    -64    
-16    288    
64     -144   
80     -1280  
-352   -1168  
80     -48    
-176   240    
272    -704   
384    368    
16     1168   
-96    640    
-48    -864   
336    -160   
-208   -80    
-16    16     
-128   448    
-96    -144   
-224   -112   
32     176    
-192   144    
64     -448   
192    -16    
272    288    
-128   -64    
-400   -96    
-208   -288   
528    -624   
704    656    
192    720    
400    -464   
-416   -48    
752    368    
-720   -1024  
-432   176    
160    464    
-320   -368   
1040   -272   
288    544    
-144   800    
128    -480   
-176   160    
-80    -96    
-16    816    
-64    -288   
32     112    
-80    0      
-144   96     
160    -64    
32     -64    
48     176    
64     32     
-96    48     
144    208    
0      64     
-144   16     
-96    208    
16     -64    
208    -32    
112    16     
80     80     
-32    16     
32     -192   
-32    64     
144    128    
64     96     
-160   80     
288    48     
-16    16     
80     16     
16     64     
-32    112    
0      32     
-80    -80    
-32    64     
128    144    
-80    -16    
352    -1120  
-112   32     
-48    -16    
192    96     
-32    80     
32     32     
-32    0      
48     384    
16     272    
240    -16    
-208   -336   
64     -80    
-48    48     
160    32     
256    176    
-80    -816   
-32    64     
80     -80    
256    112    
208    96     
80     64     
64     48     
64     64     
64     32     
-32    48     
-32    -16    
128    64     
16     80     
80     -80    
160    48     
160    -80    
-48    -16    
16     -160   
192    64     
64     96     
64     80     
128    240    
-16    80     
112    -80    
112    96     
-32    -112   
80     64     
-256   16     
16     -192   
128    0      
192    -240   
-128   80     
-32    -64    
176    48     
48     48     
32     -192   
288    -704   
144    176    
-32    128    
32     16     
48     -16    
-336   -80    
400    240    
-16    -80    
272    688    
-624   176    
96     -96    
208    -304   
144    96     
576    288    
-96    96     
-48    64     
-80    32     
-144   16     
256    0      
416    256    
-48    96     
160    80     
416    48     
192    128    
32     -48    
-224   -64    
752    32     
-656   256    
-736   -288   
16     -32    
16     144    
432    -32    
480    -48    
192    16     
0      112    
432    -64    
48     -32    
-288   -128   
-112   64     
176    -560   
304    160    
80     16     
128    0      
176    -272   
-96    16     
112    64     
32     48     
-192   -48    
144    48     
480    208    
-128   -32    
208    64     
-32    -448   
240    48     
400    48     
-96    32     
128    -96    
-64    64     
272    112    
0      80     
144    -48    
64     48     
0      16     
96     64     
144    16     
0      -80    
128    128    
32     -112   
48     32     
144    272    
176    192    
-32    -64    
-32    16     
16     -320   
64     160    
144    -16    
288    -240   
112    80     
-160   -48    
368    -432   
224    48     
176    -432   
112    80     
-80    176    
16     0      
-144   128    
0      176    
336    304    
640    288    
-224   -16    
-16    -288   
224    96     
-64    80     
-1184  64     
48     -176   
320    144    
96     -224   
-224   0      
-80    -704   
-176   -64    
-64    -240   
-528   -192   
1248   -1744  
48     544    
768    544    
704    256    
-384   -336   
-96    -304   
-640   944    
224    -224   
-144   64     
192    -368   
304    -112   
-288   -288   
736    -384   
-224   -304   
0      -64    
16     -368   
-272   -160   
-32    -512   
-112   -320   
208    -16    
80     32     
-912   -64    
304    64     
-224   272    
192    160    
464    128    
-304   160    
-48    -32    
96     208    
304    192    
320    0      
-16    0      
0      -16    
48     64     
32     32     
240    -48    
16     -80    
-96    16     
-944   -64    
-64    0      
96     -32    
64     -16    
176    -144   
96     -48    
80     48     
96     -288   
32     -64    
272    -48    
16     32     
0      -16    
256    -16    
-16    32     
128    -80    
-128   -16    
240    -64    
304    0      
-16    0      
80     -128   
64     0      
-32    0      
128    -304   
32     64     
-16    -32    
-112   -32    
-208   0      
-32    -144   
-16    -16    
96     16     
-176   0      
64     -128   
-464   -16    
16     -144   
80     0      
144    -64    
208    32     
-112   -176   
-16    112    
-80    32     
224    128    
-240   -64    
16     -16    
-32    -192   
96     -96    
0      48     
16     128    
-496   208    
48     -128   
144    -48    
80     -96    
80     0      
192    -272   
32     -32    
160    -144   
320    144    
-80    144    
48     96     
-544   160    
-144   -112   
0      -16    
192    -16    
80     -32    
176    -64    
-96    -48    
96     -224   
-32    -16    
272    -80    
288    144    
-80    32     
-176   96     
-576   -112   
336    -16    
-240   48     
288    16     
160    80     
16     64     
-848   -208   
240    -64    
96     160    
96     -48    
128    -112   
-48    -96    
-144   144    
-496   256    
-896   640    
288    368    
544    384    
-528   -80    
-240   -16    
-336   80     
240    48     
80     368    
-880   -480   
480    -256   
-256   16     
288    304    
96     112    
-512   48     
-96    -16    
-224   48     
224    160    
-400   -176   
128    144    
48     192    
-112   64     
-96    256    
-112   160    
192    144    
96     544    
368    320    
-192   -112   
-80    64     
-160   -112   
-80    -32    
-80    240    
-224   -224   
-608   208    
0      -16    
-2960  -224   
112    0      
128    176    
-128   16     
-64    -128   
-48    -160   
-32    -48    
0      352    
-208   -608   
-16    112    
176    112    
-96    -32    
-80    -48    
-80    144    
32     -208   
-256   -128   
-128   80     
64     48     
-112   -80    
496    400    
-352   -320   
160    -592   
80     160    
240    48     
-96    -128   
-160   240    
256    176    
0      80     
-656   -144   
80     16     
-272   80     
48     32     
-2160  0      
-112   -128   
-320   -192   
288    240    
-240   -112   
736    -528   
304    -272   
416    176    
176    272    
-160   80     
-816   -512   
32     -64    
-272   64     
-448   32     
-96    48     
-1232  16     
80     32     
48     -64    
256    96     
256    208    
-384   64     
96     -80    
-16    32     
-32    96     
160    0      
-80    0      
-32    96     
-64    64     
-160   -32    
-32    48     
-480   0      
416    -16    
-240   -240   
-416   -96    
80     160    
176    -192   
-80    -32    
-16    112    
32     16     
176    128    
-80    48     
-144   -48    
160    48     
16     112    
-176   -16    
-256   -16    
32     48     
-48    16     
48     -48    
64     16     
-64    96     
160    48     
96     16     
-48    0      
-208   0      
288    272    
-480   0      
80     -144   
112    -16    
48     48     
-352   -64    
336    176    
-320   48     
-64    -80    
-32    32     
160    -16    
64     -64    
-16    16     
-48    64     
-112   96     
32     96     
-16    352    
272    144    
-64    -32    
32     16     
-240   -144   
-80    -112   
-16    32     
16     48     
0      48     
-16    16     
32     -32    
-64    64     
16     80     
80     16     
112    -16    
-48    0      
80     32     
-160   -32    
112    96     
240    160    
-48    192    
-256   32     
-16    32     
128    -32    
48     160    
-224   112    
-32    0      
64     -48    
-48    -48    
160    48     
-272   -48    
160    160    
-160   32     
112    128    
400    592    
-400   592    
32     48     
96     -64    
192    -16    
256    304    
-80    112    
0      -96    
112    -80    
320    -16    
80     32     
96     -128   
352    128    
-16    0      
128    144    
64     176    
32     80     
80     -16    
224    80     
-256   -64    
464    -48    
16     0      
-32    128    
-64    128    
-80    0      
480    240    
-96    432    
-464   112    
-16    -32    
-64    48     
64     64     
80     -48    
-160   -48    
144    128    
-240   48     
-304   -80    
112    -32    
272    48     
416    80     
256    64     
-352   -80    
-400   -224   
-64    48     
304    16     
208    208    
416    256    
64     0      
-240   -80    
-16    80     
160    224    
-256   112    
64     -16    
224    32     
32     -160   
176    -64    
32     0      
-112   -96    
-32    -80    
16     112    
-16    -48    
16     -128   
32     0      
80     48     
48     64     
112    160    
-32    0      
176    -16    
-96    -416   
-80    -32    
-128   112    
-16    64     
112    -144   
352    336    
-224   -768   
352    -192   
-16    32     
-96    -64    
112    240    
-96    -240   
-160   528    
304    32     
-288   -304   
-64    176    
208    -240   
-32    -192   
288    48     
240    -80    
208    48     
224    144    
-16    512    
128    256    
-96    -1280  
48     -480   
-96    96     
-224   -48    
-224   288    
192    176    
288    -96    
-176   400    
-112   96     
-480   -192   
448    -80    
-96    32     
560    -80    
-240   -176   
288    288    
-496   320    
64     -64    
432    -928   
256    64     
-96    208    
176    0      
64     48     
-160   288    
288    144    
-240   80     
240    -80    
-32    48     
192    144    
144    -192   
128    -32    
-32    -64    
-32    160    
-48    -528   
-32    64     
320    -128   
-32    80     
16     32     
-16    128    
80     -32    
-16    -64    
160    64     
16     16     
160    -16    
16     80     
-96    368    
368    -464   
96     64     
272    -16    
0      32     
-16    32     
64     16     
336    144    
-128   176    
32     -48    
0      -32    
48     96     
128    -304   
64     48     
208    -112   
-48    96     
208    32     
112    -16    
144    -288   
64     -48    
-192   16     
16     112    
-96    176    
48     -144   
128    64     
176    -144   
0      -64    
32     -96    
128    96     
416    176    
-272   112    
-96    -224   
224    -64    
-16    -48    
32     -1232  
48     16     
32     -272   
16     48     
32     -16    
256    -176   
0      96     
16     -480   
80     -64    
-16    128    
96     -16    
112    64     
16     -192   
128    -128   
-80    160    
96     208    
64     96     
208    32     
-48    -256   
-160   -16    
176    -288   
96     32     
32     -304   
176    16     
-16    -416   
16     -32    
32     -48    
160    -128   
224    32     
208    544    
112    256    
48     -144   
0      -96    
16     -96    
-1536  -320   
288    -336   
304    -16    
192    -64    
32     -288   
-112   -480   
-96    16     
-16    304    
144    32     
368    -160   
-144   -144   
48     -176   
-224   -16    
-144   -128   
160    -80    
-272   -16    
240    80     
-528   -416   
-144   -272   
-176   32     
240    -400   
192    -256   
624    256    
-160   928    
-176   -176   
-64    -624   
464    352    
0      -64    
-112   -32    
592    64     
-528   -192   
240    -480   
-1056  192    
-192   -528   
-16    -32    
80     96     
16     112    
32     -352   
-80    -32    
672    736    
-384   -272   
256    -48    
-80    128    
144    -48    
320    -32    
-240   -32    
208    32     
-192   -80    
-32    -288   
-272   -368   
96     -144   
-112   112    
352    -32    
-16    -16    
32     -288   
-32    32     
16     0      
96     -64    
-208   32     
32     -80    
-80    -48    
112    80     
336    80     
64     -48    
-96    384    
80     208    
48     -16    
-112   -80    
16     0      
64     80     
144    -48    
96     -16    
80     -64    
-208   -32    
160    160    
-560   16     
560    64     
-176   48     
176    160    
-336   144    
-96    -176   
-112   -16    
32     32     
208    160    
144    -176   
-48    -128   
480    208    
-400   -96    
192    96     
0      80     
-432   -112   
-112   -720   
-64    -224   
-176   192    
-1072  -320   
480    -256   
288    112    
-352   -144   
176    64     
-288   -560   
352    160    
208    160    
224    256    
-272   -128   
320    0      
-64    32     
-112   0      
32     48     
352    176    
-80    96     
176    -32    
16     128    
-2000  -112   
48     16     
64     112    
-544   0      
112    32     
-320   0      
-96    0      
400    48     
-144   112    
224    96     
-64    16     
-464   -32    
0      64     
-16    -96    
64     48     
-304   -96    
-80    0      
-48    0      
-240   -128   
16     -48    
-272   48     
-368   -16    
-592   -48    
-144   -112   
16     32     
16     0      
-160   -64    
16     -48    
96     -96    
144    176    
-128   -96    
16     -64    
80     -48    
-112   128    
-112   80     
48     112    
-128   -48    
-80    0      
-80    48     
-368   64     
16     0      
-336   -112   
96     48     
32     32     
-16    112    
32     -48    
-112   0      
64     32     
-64    96     
0      -192   
32     -16    
-96    -64    
-128   -192   
32     48     
-608   48     
16     0      
32     -32    
-64    80     
48     176    
176    128    
-128   48     
-128   -96    
-128   -48    
-80    -144   
112    32     
-32    -32    
-96    -32    
-96    -32    
-16    -80    
-112   48     
-96    160    
80     -16    
80     -96    
-48    -64    
80     144    
-128   64     
-80    48     
-32    -80    
64     80     
-176   16     
-96    80     
-48    -16    
224    560    
336    656    
-32    224    
-80    0      
-1472  -48    
304    448    
-480   64     
96     -256   
-576   -832   
48     256    
-16    1184   
-80    144    
-144   -496   
16     -80    
16     368    
64     208    
288    -48    
-272   -112   
160    96     
-976   -256   
368    608    
336    400    
64     -288   
160    -112   
-144   64     
176    16     
-352   -16    
-64    -272   
0      -144   
48     176    
176    -16    
32     -128   
-128   64     
192    96     
-560   -176   
-112   -144   
-160   256    
208    208    
480    256    
-496   -448   
-224   -192   
-16    384    
1024   480    
-304   -528   
-176   -64    
-112   16     
320    -48    
64     208    
672    272    
-160   -320   
128    112    
96     32     
0      16     
-16    96     
-16    224    
96     -80    
16     32     
80     64     
64     16     
-48    -64    
-208   352    
112    -240   
0      -176   
96     160    
208    16     
-16    144    
0      96     
112    -112   
16     -464   
-160   192    
96     -160   
32     288    
144    -48    
80     -32    
272    240    
-576   -144   
48     -128   
-256   -272   
96     112    
208    112    
176    48     
-192   160    
16     48     
-176   144    
352    -32    
-128   -96    
32     -32    
336    144    
-400   -64    
352    96     
192    32     
272    128    
80     -48    
64     -32    
272    128    
-416   64     
-432   -48    
16     64     
176    128    
128    32     
240    32     
-160   -48    
-96    160    
-224   -208   
288    -48    
-224   80     
-416   32     
-128   -128   
-80    224    
112    -16    
176    0      
32     32     
-48    48     
96     224    
-320   112    
528    -176   
96     96     
16     96     
16     -16    
160    -256   
-336   -64    
-96    160    
112    -64    
32     48     
-96    352    
480    256    
-48    0      
32     16     
48     48     
304    48     
-16    -80    
256    -16    
-48    64     
-16    32     
-176   -192   
80     -480   
0      -464   
48     128    
144    368    
176    208    
176    -96    
96     144    
320    272    
-192   -208   
-128   -432   
128    -16    
-240   96     
-176   32     
128    -160   
400    48     
64     48     
-48    -208   
288    64     
48     -144   
-112   32     
96     48     
80     48     
64     64     
160    96     
64     0      
16     64     
32     0      
-144   -64    
112    -80    
256    80     
-288   -48    
160    -352   
64     32     
-48    320    
208    112    
176    -64    
80     0      
272    80     
0      160    
176    48     
48     112    
48     16     
128    48     
0      112    
128    48     
-32    64     
80     -32    
80     64     
16     -208   
144    0      
64     -112   
160    48     
16     80     
80     128    
304    256    
-128   -32    
-64    -16    
32     80     
16     -48    
112    -96    
48     -240   
352    160    
176    304    
192    208    
448    928    
-208   -528   
-208   64     
80     -304   
-48    -176   
-16    32     
224    272    
160    -160   
16     -176   
-32    656    
-304   -256   
-160   -48    
0      -16    
224    128    
80     -48    
192    256    
-288   80     
-176   160    
-48    -944   
48     96     
112    -16    
128    -176   
400    416    
-64    208    
-224   -64    
-64    -288   
-288   -112   
448    -992   
176    -208   
448    144    
432    112    
144    48     
-256   32     
-112   0      
-224   48     
-224   128    
224    240    
192    0      
48     96     
-112   80     
0      -672   
-128   -112   
240    -96    
160    -112   
-112   -288   
112    64     
-48    -32    
-32    80     
304    176    
80     112    
-48    -16    
80     -96    
304    -32    
-128   -128   
-128   0      
32     -112   
192    16     
-64    -48    
-16    16     
0      144    
64     16     
288    -96    
-32    48     
0      32     
128    -208   
16     -48    
144    -448   
160    -288   
304    336    
-64    -400   
272    32     
32     -496   
176    -32    
80     96     
112    64     
-208   112    
128    64     
48     -128   
128    48     
-32    -160   
160    -96    
-128   -80    
288    -64    
576    144    
80     -48    
-64    -224   
336    0      
-144   -48    
368    -64    
-208   0      
-400   -16    
192    -240   
-16    16     
432    128    
240    -96    
-464   -144   
192    144    
-192   64     
-672   -224   
496    -32    
-176   -112   
240    16     
64     48     
448    288    
128    80     
304    -800   
384    64     
80     -16    
160    112    
448    144    
-480   96     
96     -144   
240    -128   
-144   -48    
176    -96    
0      112    
96     -48    
-16    -16    
96     -48    
128    -48    
-48    -1008  
192    -32    
112    0      
336    176    
-160   0      
-112   -112   
-160   16     
128    -80    
0      64     
64     0      
-416   16     
-64    -32    
192    16     
112    -224   
-368   -112   
240    -208   
-96    112    
208    -32    
32     -80    
-240   -48    
224    32     
-320   -80    
256    96     
-96    -16    
-112   0      
-496   -64    
32     0      
-32    -48    
-96    -144   
160    -16    
48     -32    
80     -16    
96     -592   
208    224    
-144   144    
-32    128    
112    0      
128    32     
-96    -256   
16     -176   
-768   96     
-176   -16    
-496   -48    
176    -224   
112    -32    
128    -192   
128    144    
-16    -880   
-112   -112   
-96    160    
160    0      
-48    -16    
80     -48    
-128   32     
48     208    
-288   96     
144    -48    
64     -128   
48     288    
48     -176   
144    -256   
160    112    
0      -672   
384    752    
-16    176    
208    -96    
-112   32     
-64    32     
-288   112    
48     -128   
0      48     
64     -32    
-16    -16    
288    -48    
192    176    
272    -144   
-224   112    
-96    400    
-1216  1264   
-304   -672   
352    -32    
48     16     
224    48     
-112   -192   
80     240    
-144   -16    
-64    -160   
48     128    
-880   -160   
64     0      
128    -512   
-80    -160   
-96    656    
-336   64     
-304   -320   
-2064  -192   
-32    144    
16     -272   
48     112    
48     64     
-160   -240   
-928   -96    
128    0      
-160   -96    
128    272    
-768   256    
-80    128    
-208   -384   
128    -160   
256    480    
-64    336    
-96    -416   
-544   -176   
128    128    
-192   112    
48     224    
-80    -16    
144    304    
208    336    
-176   112    
-112   -112   
-112   -368   
80     272    
176    160    
64     -48    
-320   -112   
176    -144   
48     64     
-64    48     
256    -32    
-48    0      
112    -16    
-16    160    
-80    -160   
192    -80    
-144   16     
48     0      
96     -80    
-48    -16    
0      -32    
-192   16     
-176   -32    
-96    64     
32     96     
-368   64     
16     128    
-16    -256   
64     48     
-128   -176   
0      32     
0      -128   
-80    0      
64     -256   
0      -224   
-48    64     
416    0      
16     -16    
-32    -64    
-112   176    
-432   -80    
128    0      
-448   -208   
192    -176   
80     16     
96     64     
-160   64     
448    -80    
-160   176    
-288   16     
48     16     
96     192    
-32    64     
-304   -144   
528    208    
-80    640    
-288   192    
-800   -64    
32     -48    
48     32     
80     -96    
160    -32    
96     -32    
96     64     
48     64     
128    0      
-496   -64    
-64    48     
-208   112    
32     -80    
-48    -128   
112    64     
-592   0      
64     48     
112    144    
64     48     
-48    -64    
80     128    
32     64     
96     48     
-176   -16    
-16    -16    
112    288    
-160   144    
160    -112   
-144   -64    
160    0      
-96    0      
-16    32     
32     48     
-48    -32    
160    -48    
-48    -16    
64     112    
-272   704    
576    240    
-80    -288   
224    -64    
-224   -96    
-64    176    
-256   -144   
256    240    
-48    256    
-96    272    
64     80     
272    -64    
-112   208    
-32    0      
16     -128   
-80    -16    
-16    112    
-96    -96    
-96    -16    
-32    32     
144    16     
32     208    
96     272    
0      144    
-96    -448   
32     -304   
-32    16     
-144   0      
48     96     
144    112    
272    -80    
48     0      
32     0      
-160   32     
-112   144    
-80    -16    
48     96     
-112   -144   
96     48     
176    288    
224    80     
-16    48     
-64    48     
-48    464    
112    288    
144    48     
-48    112    
-160   -144   
-112   -320   
32     48     
112    256    
32     64     
-96    -32    
32     -448   
272    592    
0      16     
64     -160   
32     144    
80     -208   
0      48     
-48    32     
-32    16     
-224   176    
288    -896   
-144   -272   
208    240    
-16    144    
-176   208    
112    -208   
32     16     
-64    192    
-112   -96    
128    464    
-112   368    
304    208    
-160   320    
-128   32     
288    -80    
192    32     
144    -16    
144    -512   
80     96     
160    64     
-80    96     
-144   48     
-16    -48    
192    0      
256    64     
48     160    
368    320    
-368   112    
-160   -16    
-496   -224   
448    -80    
48     -80    
224    -272   
464    96     
-112   0      
-352   32     
112    32     
-224   -96    
-528   128    
-480   -80    
704    128    
-48    32     
-256   -16    
48     -64    
16     -144   
80     64     
64     144    
-256   208    
160    80     
-32    -128   
-80    -16    
64     64     
96     80     
192    80     
-48    96     
112    0      
128    16     
-128   112    
160    96     
0      -32    
96     0      
112    96     
48     -48    
80     48     
0      -112   
144    80     
0      32     
32     48     
64     -32    
256    160    
-272   -144   
160    32     
48     16     
160    48     
-304   -160   
832    -144   
-64    -96    
368    -96    
0      -128   
-144   -336   
288    320    
-672   128    
-16    -224   
176    144    
-112   32     
464    -192   
-240   64     
48     16     
16     -48    
-176   -112   
208    0      
144    240    
208    -128   
288    32     
-112   -288   
160    16     
336    -704   
-80    64     
544    272    
-224   -128   
368    -48    
480    208    
-336   96     
16     -176   
-112   32     
192    96     
-256   224    
-96    16     
96     32     
64     -144   
336    -16    
192    -320   
624    144    
-528   96     
208    -160   
-64    -64    
32     128    
-112   32     
176    112    
-48    96     
96     160    
160    144    
-16    -272   
160    64     
16     -288   
144    128    
304    96     
-320   -32    
224    -64    
-16    -16    
48     0      
160    112    
48     96     
16     -48    
128    32     
64     176    
96     288    
80     -160   
-128   -48    
256    16     
0      32     
-16    -32    
144    -16    
-96    -16    
192    160    
-192   -160   
224    -464   
160    -432   
-48    -496   
96     80     
176    112    
-16    -240   
128    -112   
16     96     
336    240    
-256   -256   
0      32     
320    -592   
80     -16    
272    -336   
128    -128   
144    -96    
128    -176   
-144   -80    
208    -16    
-240   -608   
224    -240   
80     32     
432    432    
-144   -592   
-80    96     
160    352    
80     -560   
128    176    
0      -96    
-112   368    
-464   352    
304    -144   
-176   16     
-80    -80    
192    -256   
-96    -832   
48     -224   
-32    -560   
16     -16    
336    -64    
96     -192   
96     -224   
48     288    
80     64     
96     80     
-112   -80    
64     -112   
-400   96     
112    -48    
128    16     
208    -96    
48     64     
-80    -416   
144    -384   
176    -256   
-64    16     
144    -64    
0      96     
-16    -144   
-64    -96    
-160   160    
-80    -112   
-304   -128   
-64    -400   
304    -304   
208    -96    
144    -192   
160    -432   
80     -80    
-208   -1008  
-224   -32    
-176   -16    
128    -16    
240    -16    
48     64     
-16    64     
112    80     
-944   16     
64     -64    
-1152  -16    
288    -160   
48     -208   
-272   -112   
-224   -160   
-32    -48    
128    80     
320    -16    
128    -112   
32     -128   
0      -16    
-240   -144   
352    112    
-128   192    
336    -80    
224    -64    
176    -32    
192    160    
-48    -128   
176    -144   
208    -16    
-64    160    
96     -400   
288    -80    
16     -32    
128    -48    
-96    -48    
192    -80    
-48    -48    
0      -128   
-160   64     
-16    -96    
-416   -128   
352    -112   
-96    48     
144    -80    
-16    16     
64     -1200  
128    -16    
-144   -32    
112    -16    
80     144    
272    112    
-16    32     
0      -160   
-16    -272   
-48    -176   
64     -96    
-112   -336   
-48    -112   
16     -384   
144    -400   
-96    -608   
-224   -496   
-224   -240   
96     176    
32     288    
-128   -96    
-48    16     
176    -96    
0      160    
368    -256   
224    -16    
-352   32     
-592   32     
-1536  -80    
96     64     
0      48     
448    16     
16     64     
-80    -192   
-528   -208   
-48    0      
-432   80     
112    -32    
96     -48    
128    -208   
256    -96    
-608   -144   
80     96     
96     -144   
128    16     
-256   -336   
592    -112   
-48    112    
-368   0      
-16    96     
128    352    
240    544    
-208   224    
48     224    
-496   -64    
-384   -64    
240    0      
-192   96     
16     32     
-368   -64    
144    176    
-48    64     
-224   192    
-224   -304   
-288   256    
-400   16     
-48    -160   
176    -208   
0      -128   
-16    48     
224    128    
-112   -112   
272    -128   
-48    64     
-176   -160   
-80    -144   
-32    -80    
0      48     
-272   0      
-16    48     
-976   -112   
-80    -208   
-3040  -128   
64     -160   
-144   -288   
208    -112   
-176   -272   
-144   -192   
-240   -192   
160    16     
-80    304    
0      592    
80     288    
144    240    
-192   16     
-112   -352   
-144   624    
-528   80     
64     -144   
-96    144    
80     -160   
-112   160    
-208   -96    
208    -256   
-256   0      
288    320    
48     -112   
-80    112    
-96    -64    
-16    -304   
-400   224    
96     -336   
-448   192    
192    752    
-144   -736   
96     128    
224    240    
-96    -432   
-96    112    
-96    144    
112    -32    
48     -48    
-128   64     
-176   80     
32     0      
-112   96     
-48    32     
-416   -32    
0      80     
-432   -80    
208    16     
48     48     
160    128    
-128   16     
-32    64     
-272   0      
192    -16    
-16    304    
-336   64     
160    -16    
-288   -144   
272    -80    
-128   -144   
368    192    
0      -96    
-144   112    
-368   -128   
-32    -32    
-288   112    
-64    -128   
224    64     
64     96     
448    160    
32     -80    
160    48     
-240   32     
48     48     
-32    32     
-240   64     
-544   -32    
16     -32    
-144   -112   
48     -112   
352    112    
160    64     
-16    0      
64     16     
176    64     
-128   -16    
368    -64    
-384   -80    
96     304    
-144   48     
32     -80    
-48    -80    
48     112    
-224   -16    
48     -16    
96     96     
528    416    
-656   48     
224    -80    
80     48     
0      64     
240    16     
352    256    
-560   48     
-336   -128   
80     96     
144    32     
160    -16    
224    64     
-16    16     
-16    80     
-64    32     
64     0      
-80    0      
96     80     
-128   0      
128    48     
-64    16     
80     32     
-224   -16    
144    64     
-256   -128   
288    -80    
0      128    
256    32     
-32    48     
80     -32    
112    256    
64     176    
80     -48    
-368   -160   
-64    -112   
-32    288    
-144   48     
-416   -256   
592    160    
-272   144    
224    128    
-80    32     
-32    48     
272    80     
-160   32     
352    256    
-176   160    
-64    -32    
96     128    
-176   -16    
-144   -80    
-32    176    
32     -288   
-160   -416   
896    544    
-352   160    
176    -48    
64     64     
-848   -192   
0      32     
48     -288   
-192   -128   
256    160    
-496   -176   
304    48     
-16    -16    
-160   -464   
256    96     
-304   0      
80     -48    
48     160    
96     32     
16     64     
160    272    
-304   -320   
32     -32    
48     192    
80     -176   
-176   0      
240    64     
-128   -288   
176    -688   
160    144    
-48    272    
112    -224   
-96    112    
48     -16    
32     32     
128    112    
48     16     
-144   32     
336    256    
-96    -112   
208    -16    
32     144    
-64    0      
32     -336   
176    272    
-96    -464   
-16    -32    
144    -176   
224    64     
-288   480    
320    -352   
-160   -192   
144    -16    
-240   -912   
208    176    
80     160    
-224   80     
-80    512    
-224   128    
-128   -320   
-32    -1488  
208    -112   
32     -96    
-16    0      
128    -128   
112    272    
-160   96     
32     48     
-112   -80    
176    144    
-304   -80    
160    -272   
160    -32    
-48    -32    
64     144    
32     -32    
224    -16    
16     -1008  
-64    96     
96     112    
0      16     
240    144    
-112   112    
16     16     
-16    0      
128    304    
288    288    
-32    112    
96     -112   
64     208    
-32    -192   
0      48     
32     -144   
0      64     
48     16     
160    -32    
-48    -80    
48     -112   
80     48     
-224   -272   
448    -144   
-16    128    
48     64     
0      -368   
176    64     
352    288    
-256   240    
64     -960   
320    -64    
96     96     
-80    64     
-80    -64    
64     -16    
-128   32     
48     32     
32     128    
-16    -288   
32     32     
-32    -64    
128    -80    
48     -80    
48     -16    
96     -176   
160    176    
-16    0      
128    -16    
-16    0      
32     64     
-32    64     
0      -112   
-64    352    
-64    0      
272    -160   
48     -176   
-16    -80    
-208   -96    
-16    80     
48     0      
288    256    
64     160    
224    -32    
128    0      
-272   -784   
112    -1152  
64     -112   
352    -784   
192    -240   
48     -32    
160    -224   
-112   -176   
112    -128   
-128   144    
112    -48    
176    -448   
-64    -96    
128    -320   
80     192    
-64    -96    
-16    -192   
128    -144   
48     -224   
0      16     
112    112    
240    64     
0      208    
192    176    
240    0      
112    -96    
-144   -560   
-32    -16    
-144   -160   
-32    0      
48     -48    
272    -416   
96     -320   
288    -144   
-96    -160   
-112   -144   
256    0      
208    -336   
0      -544   
0      -592   
-16    -32    
16     -304   
32     112    
96     -208   
-96    -192   
-768   -304   
-64    -448   
-704   32     
288    -112   
272    -96    
224    -112   
16     160    
-192   288    
416    96     
-304   -240   
-48    496    
272    64     
448    224    
768    320    
-304   464    
-160   176    
224    -224   
-880   -464   
96     -32    
-48    464    
128    -16    
320    64     
-160   -592   
0      -208   
-112   -144   
-64    32     
304    16     
32     112    
-320   0      
32     -112   
-32    112    
320    -432   
208    400    
-16    32     
-640   -256   
176    128    
176    -224   
176    112    
32     144    
512    -208   
-16    224    
-176   272    
-304   -176   
96     -16    
384    176    
-176   112    
48     80     
-464   -96    
-112   208    
-336   -32    
-80    64     
-64    48     
-240   -32    
112    0      
112    -272   
64     224    
-128   -32    
112    -96    
208    48     
112    64     
-320   -160   
192    -64    
-64    48     
352    208    
-240   -48    
288    48     
-240   -32    
-16    -352   
80     208    
48     -128   
-80    -64    
-16    16     
288    16     
-32    0      
64     -32    
-176   96     
-32    0      
-32    288    
-96    80     
-112   32     
160    -16    
160    -144   
-16    -256   
16     0      
272    48     
-32    32     
-576   0      
112    -48    
-224   352    
32     96     
16     32     
16     288    
-16    -96    
368    -48    
-304   -16    
288    -112   
-80    -80    
-64    -128   
0      64     
-1248  -128   
160    64     
-144   32     
32     -32    
-64    32     
-80    16     
16     -48    
144    48     
-464   -32    
32     -80    
-384   0      
-1136  -16    
0      -448   
320    -656   
272    480    
-464   32     
-544   -128   
16     -16    
-992   -272   
512    -16    
-32    160    
-624   -48    
528    0      
96     -80    
384    16     
32     112    
-112   -128   
-96    -224   
160    -32    
16     192    
-384   16     
112    -32    
-304   -48    
336    64     
-400   160    
-576   -32    
-48    0      
-272   -144   
320    -48    
384    32     
336    -32    
272    128    
-272   80     
-192   -160   
96     64     
-32    64     
112    16     
-32    -32    
480    -32    
-160   176    
-928   -32    
96     -80    
144    16     
0      80     
16     0      
-48    48     
48     96     
-240   128    
-48    32     
-80    64     
-16    32     
-240   -128   
368    16     
-128   32     
-48    96     
192    144    
-336   32     
-48    -16    
272    96     
-1600  -80    
80     48     
64     64     
-208   -80    
336    -80    
-48    48     
80     80     
-208   0      
-16    -48    
-96    -96    
80     128    
-224   48     
0      32     
-208   -128   
-80    -64    
-832   -32    
64     16     
64     32     
112    64     
-64    -144   
112    192    
-112   32     
560    624    
-400   400    
80     128    
32     16     
-16    -160   
-240   0      
-32    64     
-144   -304   
48     -64    
192    272    
-1104  -576   
16     -144   
-16    496    
-544   160    
-48    -192   
48     -176   
192    -16    
-656   -240   
-16    144    
-656   -464   
160    256    
-32    384    
-304   -208   
-144   -16    
-128   -48    
-1248  -16    
448    512    
96     -176   
144    -112   
-16    128    
-112   432    
-80    -32    
-32    16     
144    -288   
128    192    
16     -16    
-144   96     
144    48     
0      -176   
96     64     
-128   -48    
-256   -16    
288    -256   
16     -304   
-160   208    
176    -448   
352    528    
-368   -176   
48     144    
32     -384   
336    -208   
-80    672    
208    352    
-240   -64    
144    -160   
-64    240    
384    112    
-48    272    
-272   0      
-32    -16    
224    16     
32     -128   
-32    -80    
0      -64    
-224   48     
-128   16     
32     192    
224    224    
-32    32     
64     224    
64     112    
240    176    
-416   128    
-160   -32    
128    0      
256    224    
-208   128    
-80    -48    
48     64     
-336   16     
160    48     
-112   -32    
64     80     
0      32     
16     -112   
80     -32    
96     224    
-304   48     
112    144    
112    160    
320    176    
-16    80     
-48    -48    
96     16     
-64    32     
96     16     
80     -16    
144    -32    
48     144    
0      128    
-208   48     
96     96     
-16    64     
96     -80    
128    48     
208    48     
-144   -64    
0      96     
-176   80     
48     0      
160    128    
-240   32     
208    112    
-64    32     
64     -32    
-112   48     
144    0      
32     96     
-80    0      
-16    -128   
576    192    
-144   272    
112    -96    
16     -96    
-192   32     
224    240    
-416   80     
-96    -288   
224    -144   
240    -16    
48     128    
224    176    
-384   144    
208    -16    
80     64     
288    192    
-176   144    
96     -96    
352    -96    
96     -64    
192    16     
-144   96     
-48    -16    
80     208    
144    -64    
272    96     
-288   96     
-144   32     
64     32     
352    96     
-160   176    
-224   16     
-80    -336   
64     -224   
-32    -16    
80     32     
-192   96     
80     -352   
0      64     
0      -112   
240    48     
304    16     
192    48     
-64    -32    
-160   -64    
-192   -64    
64     32     
-144   240    
176    208    
112    -384   
-96    -608   
96     -32    
16     -336   
96     -16    
-32    -416   
128    -48    
48     -160   
-96    0      
304    240    
128    272    
96     96     
144    96     
80     48     
-32    -208   
48     -416   
64     384    
16     176    
128    -368   
-224   400    
48     48     
-48    96     
-128   368    
288    -176   
96     -400   
192    464    
272    224    
-304   16     
16     160    
32     -192   
96     240    
736    240    
-288   -32    
-112   -480   
592    -320   
-272   -304   
656    816    
-128   -432   
160    -32    
-80    256    
16     80     
-192   -96    
288    -192   
240    160    
288    176    
-240   -720   
464    -96    
144    352    
416    -80    
-16    128    
32     -384   
64     -80    
-32    128    
-64    0      
352    -240   
-448   -272   
16     272    
176    112    
-16    -192   
560    -128   
80     32     
352    0      
-32    128    
-128   -192   
-64    -64    
128    -64    
80     208    
16     -48    
96     -16    
128    -112   
96     32     
144    192    
-128   0      
96     64     
16     -16    
16     96     
240    -224   
128    64     
0      0      
96     96     
-80    -96    
96     16     
-80    -96    
176    96     
16     32     
80     -864   
48     80     
112    48     
32     -816   
-80    -208   
80     -96    
240    -32    
80     96     
16     -144   
144    80     
-80    -96    
160    176    
-32    0      
96     -192   
128    64     
-16    -144   
112    16     
-640   -112   
128    -160   
48     16     
80     -368   
96     -96    
64     -288   
-16    -80    
48     -96    
-48    -112   
144    -48    
224    112    
256    112    
-240   48     
96     -16    
224    -32    
-688   -32    
96     16     
160    48     
80     -96    
128    -32    
80     32     
80     -80    
80     -320   
-128   -176   
192    -160   
80     80     
96     112    
64     144    
208    -80    
112    -16    
-448   64     
176    32     
224    -64    
192    32     
80     80     
64     -32    
80     0      
64     96     
-80    -208   
-160   -224   
-32    96     
96     -144   
128    -48    
16     -192   
32     32     
-144   16     
64     -48    
-528   224    
-208   -160   
96     0      
256    -48    
144    32     
240    -160   
208    128    
128    -432   
240    -32    
-32    32     
-32    96     
-336   32     
-208   -112   
-192   -96    
112    -192   
-576   64     
208    96     
-32    48     
-128   -64    
-272   -48    
-432   -384   
-96    32     
32     -560   
-96    32     
176    64     
48     80     
-64    -32    
96     112    
-96    96     
80     128    
-848   -16    
112    -48    
-224   64     
16     -32    
144    -16    
-96    -80    
-64    256    
272    112    
-240   -32    
32     -80    
448    -80    
-208   -32    
416    -32    
-192   128    
-32    0      
-160   16     
-80    -128   
64     16     
160    -80    
480    176    
32     -64    
336    32     
128    -336   
0      96     
-624   16     
128    -64    
80     64     
-80    0      
-192   -96    
-48    -48    
48     -176   
208    -192   
112    32     
64     -96    
32     80     
48     -128   
-208   -16    
144    -160   
0      -32    
48     -144   
144    96     
64     16     
96     -16    
-240   -96    
-16    -16    
0      -192   
48     -176   
-736   0      
368    64     
16     192    
-2736  -448   
128    -176   
-1632  368    
-336   -160   
320    -96    
-656   32     
16     0      
400    -688   
240    96     
416    224    
-32    -32    
80     -128   
-112   -400   
-848   -560   
208    1200   
-544   -96    
-112   -1088  
144    576    
-160   720    
-256   -960   
-272   176    
-192   192    
-1184  -32    
-96    128    
208    112    
-272   176    
192    128    
-16    -16    
176    -32    
-80    -16    
272    128    
160    368    
-240   -96    
16     432    
-272   -96    
128    -304   
-80    -16    
80     -48    
192    96     
-1136  112    
-272   -576   
-144   -368   
-144   -128   
64     0      
-64    448    
304    160    
-48    64     
-384   -240   
160    -144   
-80    16     
64     160    
32     -160   
-416   -48    
-64    144    
-320   32     
160    -64    
96     -64    
112    -48    
80     0      
-224   112    
32     -192   
-112   -16    
16     80     
-144   32     
-16    -208   
-144   -16    
-176   -32    
32     -32    
-128   32     
-272   -96    
96     0      
-64    64     
-96    112    
-48    -176   
80     32     
48     128    
0      0      
16     0      
176    80     
160    48     
0      -32    
64     48     
-112   80     
208    32     
-64    32     
224    48     
-448   -16    
-96    0      
64     -96    
32     -16    
96     64     
16     16     
16     -16    
16     16     
-48    32     
-80    48     
96     80     
0      112    
32     80     
-256   0      
256    16     
-656   -32    
80     80     
-16    48     
48     128    
144    16     
-160   16     
-256   -16    
32     48     
64     144    
-112   -64    
128    -112   
-336   -160   
32     -80    
-432   -32    
32     112    
-176   32     
-128   -112   
288    -112   
192    96     
0      32     
-32    -80    
-64    -192   
-160   -272   
-16    16     
-16    128    
144    272    
-32    160    
160    -48    
32     -128   
128    -48    
-128   -112   
272    192    
48     256    
16     176    
160    336    
-144   16     
-128   -176   
240    -176   
240    -80    
112    16     
48     48     
160    256    
-320   80     
-432   -224   
176    192    
-272   192    
-112   160    
80     128    
16     112    
32     32     
80     32     
144    288    
-64    336    
-80    48     
128    288    
64     -144   
-384   -768   
128    528    
-176   208    
-96    16     
-144   32     
-128   320    
336    336    
16     -32    
80     208    
192    48     
-272   -96    
-16    -144   
-64    32     
-16    0      
-64    48     
-192   -128   
320    -144   
-144   -64    
32     -48    
64     240    
-144   -80    
112    496    
16     0      
80     -48    
-80    112    
-16    -256   
-16    336    
128    128    
-80    -144   
272    192    
-368   -48    
128    -256   
32     -192   
32     176    
192    288    
-256   64     
112    -128   
16     16     
96     112    
368    64     
-224   128    
-32    48     
80     64     
-32    -32    
176    -144   
256    -16    
368    112    
-336   0      
-96    752    
736    1088   
-592   32     
-320   -128   
448    320    
-320   144    
144    32     
160    -144   
272    80     
-192   16     
-160   -32    
128    160    
-128   0      
528    176    
-256   112    
-112   -640   
272    384    
-448   48     
192    -48    
-128   112    
0      144    
176    -80    
176    -64    
224    96     
-432   96     
80     16     
32     96     
-32    64     
240    64     
-32    0      
144    -416   
128    0      
32     16     
112    16     
64     48     
-16    80     
64     32     
48     -16    
-32    -32    
-80    -96    
192    -208   
256    224    
-144   -32    
96     -48    
0      64     
-48    -80    
224    64     
192    16     
-32    -32    
-48    48     
-80    16     
96     48     
144    -80    
-64    160    
160    112    
-144   0      
32     80     
96     112    
80     80     
224    0      
80     -16    
112    48     
0      -688   
16     16     
128    128    
256    112    
112    -192   
256    208    
-224   240    
-128   96     
192    -48    
272    0      
64     32     
-80    -160   
160    112    
48     48     
-336   48     
256    -592   
208    128    
64     -16    
112    32     
144    48     
-80    64     
112    -96    
64     80     
-80    80     
112    -48    
48     48     
16     48     
48     96     
288    -144   
48     -128   
-32    -272   
128    16     
80     -1504  
-112   80     
-16    80     
96     -16    
48     112    
208    64     
16     -48    
-16    -144   
48     -176   
160    -176   
208    112    
-208   96     
-32    96     
64     -112   
128    32     
48     -560   
32     48     
32     16     
32     -480   
32     -32    
0      208    
-208   -128   
64     -208   
48     64     
-96    144    
-144   48     
0      -208   
192    -304   
384    -448   
320    -112   
192    -688   
-80    96     
96     16     
48     96     
192    64     
160    144    
-352   48     
624    320    
-384   256    
-224   -208   
224    0      
16     -16    
112    0      
96     -224   
384    256    
-560   192    
-32    272    
448    128    
-64    -912   
48     -160   
64     -128   
352    -272   
192    64     
368    -928   
240    -352   
176    -48    
160    80     
48     320    
16     128    
-208   -112   
-176   -208   
160    -128   
-112   96     
288    -48    
48     -112   
-256   0      
-144   64     
-192   -240   
-80    -336   
-144   144    
224    -720   
272    -288   
-16    -96    
-160   16     
64     -32    
-16    128    
-160   -208   
-288   0      
16     -96    
32     96     
-480   176    
-96    -784   
160    304    
80     -80    
160    -224   
-32    -224   
288    192    
-48    128    
224    -64    
0      0      
-192   48     
160    -32    
0      112    
256    496    
-16    -272   
-272   -80    
320    16     
112    -368   
112    -112   
-112   656    
-224   -112   
-16    -96    
240    -384   
-112   -416   
80     -192   
208    96     
64     160    
128    208    
-304   -368   
80     -96    
-640   -160   
192    272    
-896   320    
80     272    
-96    -384   
272    -576   
-128   -32    
-112   -176   
32     144    
-48    -624   
400    32     
1104   416    
-592   256    
-16    -32    
-112   224    
-240   -96    
336    -80    
-560   64     
96     64     
-1728  -64    
-64    48     
-16    128    
-16    0      
240    80     
256    -288   
16     64     
48     -176   
112    -48    
-208   192    
176    64     
0      -32    
80     48     
144    -320   
-128   -352   
-240   336    
240    432    
-160   32     
-32    -160   
192    -80    
64     -480   
0      -64    
16     -48    
144    224    
-368   64     
80     -144   
-176   80     
-16    -160   
96     -208   
16     16     
-224   48     
-48    -112   
288    48     
32     -256   
-48    -64    
0      -128   
-144   0      
-208   -64    
272    64     
80     64     
0      64     
-256   -48    
-32    -64    
496    336    
-384   384    
-288   -160   
-16    -400   
-16    256    
336    -32    
128    -32    
160    16     
176    -32    
-48    416    
224    16     
32     -80    
-16    -112   
-80    16     
64     -48    
48     112    
80     -64    
-304   0      
64     16     
-48    176    
-128   16     
-64    176    
-336   16     
-1840  -224   
-32    48     
-576   16     
-32    48     
-256   -80    
-144   -32    
0      32     
-80    304    
272    64     
-48    144    
-320   240    
-144   -128   
-528   -224   
64     0      
-96    16     
-112   -64    
160    -224   
-224   -80    
-96    -48    
-592   96     
-304   144    
144    144    
128    192    
-176   64     
48     -32    
-80    80     
0      288    
-272   112    
144    80     
176    144    
-64    384    
-16    224    
256    480    
-464   432    
-304   144    
-64    160    
256    304    
-64    160    
-208   -224   
-64    176    
-256   -32    
48     -256   
16     -160   
208    -16    
192    128    
160    16     
-192   -160   
32     288    
-192   -144   
256    0      
-192   -112   
-64    256    
-288   -32    
-80    32     
128    48     
32     -320   
624    512    
432    192    
32     -32    
-384   -144   
-192   240    
32     256    
160    -144   
-688   -208   
80     16     
-144   176    
-128   192    
352    160    
-768   -80    
112    160    
-144   80     
-384   -96    
224    112    
-288   64     
-144   0      
352    -80    
16     -48    
-96    0      
-48    -32    
-288   0      
-160   0      
-112   48     
64     48     
-480   16     
-16    64     
224    64     
-112   -80    
80     16     
-80    32     
-32    0      
128    128    
0      16     
-112   16     
-64    64     
-304   0      
80     32     
-144   96     
96     16     
-320   -48    
32     -96    
320    112    
112    80     
-64    -16    
-240   16     
80     144    
-288   -80    
288    80     
144    240    
-48    128    
240    32     
-80    160    
80     48     
368    208    
-688   -112   
96     -16    
48     48     
80     112    
-208   16     
-48    -128   
192    64     
-160   -16    
192    16     
-96    32     
320    272    
144    368    
-752   96     
-144   -208   
272    -32    
-128   32     
-128   0      
496    176    
-576   16     
-32    -48    
-112   -16    
-96    48     
112    64     
64     -208   
-32    0      
-64    48     
-400   -96    
240    96     
-384   -96    
208    48     
-96    32     
128    80     
-96    128    
0      128    
144    128    
0      48     
-112   -16    
160    -16    
96     48     
-176   0      
112    32     
16     16     
96     48     
0      80     
-128   96     
208    80     
-112   -160   
128    -64    
-32    144    
192    64     
144    0      
80     16     
-240   48     
112    80     
0      16     
32     48     
32     16     
96     32     
-288   -16    
-32    96     
48     48     
64     32     
80     48     
96     240    
80     224    
48     96     
-224   -16    
32     -80    
16     112    
-32    48     
240    -32    
-64    64     
192    112    
112    -32    
-224   -224   
-48    0      
-32    16     
48     -96    
144    0      
96     128    
144    128    
-64    48     
32     48     
144    192    
48     144    
240    176    
-48    112    
-80    -48    
48     -64    
176    48     
-32    32     
16     96     
32     -32    
16     16     
-48    32     
96     0      
208    80     
-80    -32    
112    48     
48     16     
80     32     
-144   -256   
32     16     
112    96     
80     208    
-176   0      
-80    -448   
288    -608   
256    320    
496    576    
-64    -96    
144    0      
48     288    
-336   -112   
-224   -144   
400    624    
-496   -528   
176    224    
112    -64    
0      -1488  
80     224    
48     80     
288    64     
208    32     
-16    224    
128    224    
352    352    
-432   -704   
-112   128    
224    -80    
288    96     
272    0      
-176   -32    
128    432    
-576   -48    
-112   -96    
112    0      
128    -96    
208    192    
32     -704   
-80    -320   
-96    400    
-16    -304   
544    256    
96     -32    
496    48     
-96    736    
-48    -640   
320    256    
160    -16    
256    112    
128    -544   
320    144    
16     0      
-48    192    
-112   80     
-32    112    
96     -640   
160    544    
-48    240    
192    -608   
96     256    
80     32     
160    -112   
0      -64    
80     400    
64     -1344  
0      -64    
-176   -864   
32     -160   
112    256    
112    -288   
48     0      
96     -48    
-64    -176   
304    528    
192    464    
128    192    
-16    -128   
-48    -16    
48     -80    
96     0      
-32    128    
16     -576   
-288   0      
576    -32    
-80    -32    
160    -80    
64     0      
80     240    
240    -272   
96     48     
64     -160   
-96    240    
-192   -528   
192    -320   
160    -80    
32     64     
144    -304   
-80    32     
144    80     
-192   64     
-144   -176   
32     0      
480    -48    
128    -32    
96     64     
176    -64    
224    0      
-48    -96    
-80    336    
-80    240    
96     -112   
32     -320   
-64    128    
-224   96     
160    48     
-16    192    
160    96     
144    -512   
64     -272   
224    -80    
-32    208    
0      48     
48     -32    
16     112    
-96    -208   
352    176    
-80    208    
304    -656   
16     -16    
-144   -32    
384    80     
64     64     
-96    -752   
272    -160   
96     -128   
-48    16     
320    -96    
32     -240   
-96    -16    
-16    -240   
32     -192   
144    128    
144    -64    
-16    -96    
0      -48    
64     -176   
-320   -112   
176    -304   
144    -64    
80     -16    
-96    -224   
128    -208   
-48    80     
144    192    
96     -16    
64     -16    
128    32     
0      -144   
0      -48    
-160   112    
144    0      
-160   -32    
528    96     
-64    176    
-128   -128   
0      -112   
224    -48    
112    -176   
0      -96    
-32    176    
16     64     
-288   -208   
224    -416   
208    48     
-208   176    
0      -16    
-112   0      
-16    -112   
64     -64    
256    -112   
176    -96    
272    96     
-32    176    
-16    -672   
240    32     
192    0      
0      96     
-64    80     
272    -192   
-240   -368   
-32    -48    
-720   -32    
80     -176   
-1152  64     
160    112    
224    192    
48     160    
-320   -208   
176    -288   
208    0      
112    -16    
-96    -32    
-32    -160   
176    -480   
128    192    
192    -64    
-48    32     
96     352    
-208   -176   
80     112    
-80    -256   
-80    -288   
-16    16     
96     32     
48     32     
192    -1072  
464    416    
32     -128   
144    -288   
-128   -16    
384    64     
48     -16    
416    112    
-1824  -160   
-240   -224   
-768   -32    
160    -160   
112    144    
240    128    
384    224    
-368   -96    
-112   384    
-192   -96    
720    128    
128    -16    
432    16     
-16    48     
-112   80     
-304   32     
80     48     
-400   -48    
192    -32    
336    128    
208    -144   
144    16     
176    -320   
-112   -80    
256    0      
32     16     
-112   16     
144    -16    
-16    0      
672    368    
-912   -144   
224    32     
16     32     
32     0      
176    112    
256    -192   
-448   512    
128    48     
48     16     
-272   96     
304    176    
-272   -64    
128    -96    
-128   -48    
48     -16    
-48    32     
112    -96    
-400   0      
-2208  -80    
176    96     
-816   -128   
16     64     
-144   96     
-208   32     
-80    -64    
-784   -96    
-96    -32    
-16    64     
-96    32     
400    256    
-208   64     
-1824  -144   
192    -16    
-256   -64    
272    128    
192    64     
-368   112    
-400   -48    
48     48     
-384   48     
-240   -144   
240    48     
-288   80     
-112   -16    
432    -176   
-336   -64    
-544   -32    
32     96     
-256   96     
-352   -32    
-432   -432   
480    64     
-288   128    
-368   224    
-288   -192   
0      -352   
256    80     
-304   176    
-448   -112   
-640   48     
32     16     
-288   -32    
528    144    
-352   -32    
112    -80    
96     48     
-48    -16    
-96    48     
80     32     
16     32     
-128   0      
0      32     
-144   -80    
-32    48     
-368   -48    
-112   64     
32     -80    
-32    16     
32     -48    
-192   -16    
16     0      
-16    0      
208    80     
-16    48     
-272   80     
-16    96     
208    32     
-16    48     
-64    -16    
-400   -80    
224    64     
-976   -32    
-48    48     
144    80     
-96    16     
112    128    
-80    16     
-208   -16    
-224   -128   
32     -64    
144    64     
-128   64     
160    -32    
-96    32     
-384   96     
288    384    
-1728  48     
-64    48     
256    160    
112    64     
32     -96    
48     -96    
16     176    
-64    32     
96     128    
-96    208    
0      128    
-32    -112   
64     -304   
144    416    
-144   -144   
-176   -48    
-32    80     
0      -16    
144    -16    
-32    208    
-160   0      
256    48     
32     288    
128    -80    
-288   -48    
-32    32     
-160   0      
144    48     
32     -16    
112    32     
-96    48     
32     -80    
0      96     
-144   592    
-112   -112   
-160   32     
80     -128   
96     48     
16     -48    
-192   -320   
112    -416   
176    64     
240    320    
-144   48     
32     -112   
-480   -16    
-16    32     
-80    -160   
48     0      
304    496    
64     272    
-192   -304   
-48    320    
-32    -80    
64     -208   
208    304    
48     -272   
32     144    
-352   304    
-48    16     
112    48     
144    64     
448    1040   
-32    320    
-272   -512   
-192   -400   
-80    -160   
-32    -96    
256    -48    
272    272    
160    64     
-48    576    
-128   192    
-592   144    
224    288    
-432   -48    
-80    0      
-176   96     
80     96     
-48    -112   
64     -64    
304    -192   
96     128    
304    64     
-208   -128   
-96    0      
-448   -128   
-96    16     
-192   -128   
96     80     
0      48     
64     -80    
-32    16     
288    -64    
64     96     
-16    112    
-96    128    
-48    80     
160    192    
16     176    
144    0      
0      192    
96     0      
144    16     
-16    48     
32     96     
-16    160    
64     64     
96     0      
0      272    
80     160    
80     32     
-32    -64    
160    144    
-32    64     
208    240    
-144   -64    
432    -16    
16     176    
144    16     
352    96     
-288   -96    
-192   -288   
160    -16    
144    112    
-128   80     
-160   -64    
-144   -80    
32     112    
176    16     
-384   -48    
160    -176   
160    -224   
-32    -176   
-176   240    
-176   64     
-192   240    
624    512    
80     352    
-96    304    
-384   -64    
352    -32    
208    64     
288    96     
-96    144    
176    0      
240    -144   
144    -96    
240    64     
-16    -656   
-16    16     
16     32     
208    112    
-32    0      
192    96     
96     144    
-128   96     
224    -80    
32     112    
144    16     
-80    224    
128    64     
32     -368   
16     16     
-112   -896   
32     304    
-48    -48    
272    -288   
160    64     
0      144    
16     -224   
144    -592   
-112   -352   
128    -48    
32     48     
-96    -176   
80     -64    
-208   -464   
-16    -160   
80     -80    
-208   240    
-64    -1248  
-32    -32    
176    80     
48     -32    
176    -192   
-48    -144   
112    -112   
-256   -96    
176    48     
80     176    
112    288    
0      -352   
-96    -64    
-16    -208   
-16    -48    
224    -176   
192    176    
-64    -16    
80     144    
-16    64     
192    -16    
144    128    
-96    112    
128    128    
-112   48     
80     144    
96     240    
192    352    
16     0      
160    320    
32     -80    
16     32     
16     32     
256    176    
-80    304    
128    160    
176    80     
176    -128   
128    64     
-48    -144   
32     112    
112    -384   
176    272    
48     -384   
-96    0      
16     -64    
-32    -80    
-32    160    
-80    -16    
-96    -160   
96     272    
-64    80     
176    -176   
0      96     
224    -112   
-48    -32    
112    -48    
128    160    
-128   -96    
32     -144   
176    -32    
160    640    
192    -16    
-16    80     
-80    80     
48     -704   
-112   80     
-112   -256   
-32    -816   
-48    -192   
48     272    
-48    -80    
176    0      
160    -48    
224    0      
160    16     
96     32     
48     -64    
32     -432   
32     0      
176    -64    
336    160    
48     64     
96     -400   
224    -96    
-16    -688   
128    32     
-176   48     
-208   -64    
-272   -288   
432    -256   
-128   -208   
-96    32     
352    0      
-112   32     
144    32     
-144   -144   
-160   16     
352    -224   
528    -32    
-64    -304   
64     16     
-208   -144   
240    0      
80     -32    
-64    0      
400    32     
-208   -32    
240    48     
480    432    
-1056  -32    
240    -208   
-2160  -96    
320    -48    
80     16     
144    -288   
224    -48    
-96    -288   
160    -48    
48     -64    
256    128    
-112   0      
112    32     
112    -96    
288    80     
-400   -32    
256    -16    
-448   32     
192    112    
192    -16    
-144   -144   
-96    -80    
16     -208   
64     64     
288    -336   
48     -144   
320    -64    
-128   64     
-32    -448   
640    -32    
-16    224    
-192   -32    
32     -64    
-176   -160   
288    64     
32     -16    
80     -16    
112    -48    
-128   112    
496    -96    
-96    80     
-176   -80    
384    144    
-512   -48    
-112   -272   
224    -48    
352    80     
112    64     
32     -112   
-368   240    
-400   80     
224    80     
-640   -256   
720    112    
144    -496   
16     -16    
352    -144   
144    96     
-160   48     
-224   -64    
-112   -64    
224    48     
-144   80     
64     208    
144    -16    
80     -16    
96     96     
-64    -128   
112    -16    
160    -16    
-96    80     
192    -144   
96     -112   
-48    0      
48     208    
-96    160    
32     -208   
-112   112    
32     128    
96     32     
112    -112   
-224   80     
32     -96    
144    96     
96     -32    
160    -32    
-144   48     
128    48     
-320   -224   
-112   -384   
-16    144    
-48    144    
16     -304   
240    64     
0      144    
144    -224   
-608   48     
-208   -272   
416    240    
64     -208   
144    160    
16     -32    
-64    64     
-192   -16    
256    -48    
112    64     
64     -48    
-448   -160   
336    -96    
-80    48     
48     -16    
64     -32    
-896   160    
80     192    
-208   -64    
256    416    
-288   -208   
-208   16     
240    272    
-48    96     
-208   -416   
-1408  288    
-80    32     
64     -176   
144    272    
-144   -96    
64     288    
-80    16     
-176   -400   
-112   -224   
-176   -16    
-128   128    
-80    -16    
-288   -272   
-688   -240   
-32    -112   
-448   112    
-80    48     
272    448    
-160   224    
-272   -16    
32     16     
-368   -112   
0      -80    
16     -64    
-16    -80    
-48    -96    
16     240    
-144   -192   
160    -272   
-64    -144   
-304   -80    
-80    -64    
-688   -320   
-64    -208   
32     32     
-160   0      
-160   -80    
-48    48     
176    96     
16     -16    
-128   -160   
112    -176   
16     160    
-272   32     
48     96     
-256   -80    
-96    16     
-608   0      
304    48     
176    -16    
96     96     
-48    -96    
-32    0      
0      -32    
32     -32    
-192   80     
-80    80     
144    208    
-160   48     
16     -16    
-320   -48    
32     160    
-816   -160   
464    -304   
224    -256   
272    0      
-16    -336   
-272   64     
-304   48     
-112   160    
144    208    
384    80     
-32    160    
-176   -32    
-16    -96    
-160   -80    
256    256    
-336   112    
80     -48    
-560   -144   
224    144    
128    80     
-80    16     
144    16     
-16    -32    
112    64     
-16    16     
-176   -48    
48     -96    
-16    160    
32     112    
-160   48     
-16    192    
16     128    
-384   -128   
144    128    
-176   128    
-16    16     
80     -96    
-112   -64    
-192   -240   
-144   48     
224    -32    
-112   96     
0      -80    
0      -240   
160    240    
-256   112    
-64    128    
-208   256    
-96    208    
96     64     
128    64     
-48    -96    
128    -496   
48     -208   
560    -16    
176    144    
176    112    
144    128    
-288   320    
-160   80     
-640   128    
320    736    
224    384    
560    -144   
-256   160    
-480   -112   
-512   16     
-16    -128   
-480   -464   
448    -320   
-16    -320   
-288   -352   
-80    256    
-416   -160   
32     128    
-32    48     
320    112    
272    128    
-80    -112   
288    -64    
-304   -144   
-64    48     
0      -80    
-192   96     
-64    -352   
304    -496   
-48    -208   
256    -160   
-144   -96    
-288   576    
400    464    
-32    336    
-96    -96    
-176   192    
416    416    
240    144    
-176   32     
-16    -416   
-144   -112   
512    528    
-512   304    
96     -16    
-48    -16    
-176   16     
-224   -176   
-240   -160   
-160   -128   
272    -288   
-240   -336   
144    -128   
-144   224    
208    112    
-144   96     
416    -272   
-16    640    
192    224    
-64    -416   
-32    -64    
-304   -80    
272    -240   
-32    16     
368    240    
0      -208   
144    -16    
16     160    
-112   -16    
32     80     
80     -160   
-128   -592   
-256   368    
208    -464   
-48    544    
32     624    
-48    -176   
128    -736   
-224   160    
-48    48     
16     64     
112    16     
192    -112   
160    32     
208    144    
-16    96     
-176   16     
-64    0      
0      128    
-64    80     
144    112    
32     128    
208    16     
208    80     
-112   -32    
-48    -96    
208    0      
-48    -16    
192    112    
48     16     
-32    64     
0      -32    
48     -96    
16     -64    
-48    64     
48     32     
480    192    
64     -80    
176    -32    
48     -1440  
-32    16     
16     48     
-80    32     
-160   16     
-80    32     
-208   -16    
-128   32     
16     -48    
-16    80     
320    256    
-288   80     
16     -80    
176    -144   
96     80     
32     -112   
-112   -272   
352    -304   
288    112    
432    176    
400    0      
464    -48    
416    256    
-288   208    
-752   -80    
-192   0      
48     -48    
-64    16     
128    -64    
352    48     
192    -224   
-16    -96    
480    -224   
96     32     
144    96     
224    80     
112    -96    
272    128    
-336   -32    
208    48     
-16    32     
224    32     
448    112    
96     -64    
0      48     
-144   -560   
0      16     
-64    -176   
272    64     
-96    16     
224    112    
144    16     
96     48     
-96    -48    
-16    64     
176    80     
-48    -192   
368    -16    
-48    0      
128    80     
80     -80    
16     48     
32     -160   
96     144    
-64    96     
80     -16    
336    128    
32     96     
176    -16    
128    -96    
96     80     
96     -240   
240    352    
-128   -96    
240    -48    
-192   -240   
368    48     
-464   48     
304    144    
288    32     
-656   -64    
368    16     
-192   80     
144    208    
160    -208   
16     48     
400    288    
-672   80     
256    -112   
0      32     
80     -48    
1072   672    
-320   448    
-240   32     
-176   -128   
-160   -80    
80     96     
272    -592   
48     -1008  
128    -304   
-176   -288   
-144   96     
0      16     
-144   144    
144    144    
224    -16    
-176   -144   
16     -144   
96     -960   
64     -112   
144    16     
-48    -48    
-80    -336   
128    -336   
16     32     
144    -432   
-64    -80    
240    -416   
80     -80    
64     16     
32     -48    
144    608    
96     -256   
176    -32    
-128   96     
64     -432   
-144   144    
-496   -336   
64     -16    
96     64     
240    -128   
16     -128   
-80    -144   
32     -80    
384    -1536  
-16    80     
64     -656   
128    448    
256    272    
-624   -1264  
80     -256   
336    592    
-272   128    
112    256    
-2608  -480   
304    -256   
0      -224   
336    128    
48     128    
208    48     
0      144    
320    -160   
-224   208    
-16    -16    
-64    192    
128    0      
-112   -96    
16     -48    
80     -80    
-336   -32    
48     32     
-144   -96    
272    -112   
-16    0      
464    -144   
-320   112    
352    -1008  
-240   128    
64     -32    
240    112    
-16    -16    
192    16     
-288   -80    
144    -128   
-448   224    
32     48     
-1296  -112   
16     -64    
304    -48    
80     0      
304    112    
-160   -288   
-64    -16    
64     -64    
96     48     
-32    48     
96     48     
-144   -32    
80     32     
-208   32     
144    -176   
-992   -240   
48     -160   
-32    -128   
16     -128   
208    64     
-48    32     
32     48     
160    -272   
160    16     
-128   -32    
288    240    
96     320    
32     80     
-496   112    
176    -192   
-864   -16    
-80    96     
-80    16     
144    -208   
128    128    
-16    -48    
48     96     
272    -112   
-16    -64    
-112   -64    
96     -96    
-256   80     
-128   0      
-144   64     
160    48     
-336   0      
400    -96    
304    -128   
160    -192   
-128   112    
-144   -304   
144    -128   
32     48     
224    0      
-112   -80    
160    -192   
-176   -240   
224    80     
-80    -64    
-128   96     
-320   48     
112    -112   
-128   -32    
80     -128   
-80    -48    
432    0      
-640   64     
176    -32    
-2128  -128   
-320   -48    
-16    -32    
48     64     
112    80     
32     32     
80     48     
-112   -80    
-1312  -64    
128    -64    
-400   -160   
160    64     
-128   16     
-304   -32    
-16    160    
-592   208    
-16    32     
-288   16     
-160   -256   
-112   32     
-192   -208   
-96    -224   
-160   112    
-976   32     
80     144    
-32    128    
-160   -272   
80     -480   
208    48     
528    960    
80     880    
-288   128    
256    32     
0      144    
-400   32     
48     -112   
-576   -592   
32     -480   
-80    -112   
96     -448   
96     16     
128    880    
432    -672   
80     -192   
560    -560   
-112   -80    
-352   128    
-208   -80    
-224   368    
-416   -320   
-224   80     
-224   -16    
-48    32     
-64    -32    
-320   -464   
336    -624   
48     320    
448    32     
432    -160   
224    192    
-496   -560   
-224   -48    
-416   -32    
-256   176    
-208   32     
96     -80    
-784   160    
336    -256   
-80    -16    
-192   16     
256    -352   
16     -624   
-112   368    
-16    -16    
-256   32     
272    512    
-144   -128   
-224   -208   
176    -32    
-80    32     
208    224    
-400   -224   
0      -16    
-32    128    
-16    144    
-64    -80    
512    -48    
-576   -256   
176    -32    
-16    256    
-176   -96    
272    208    
-272   48     
112    0      
-272   -64    
112    96     
-240   16     
176    48     
64     -16    
304    -80    
-192   -16    
-64    16     
-160   80     
48     32     
0      32     
32     80     
-96    -80    
96     16     
48     -32    
-320   -96    
96     224    
-96    80     
160    96     
-784   -32    
128    64     
80     80     
400    352    
-416   96     
-112   48     
336    224    
-208   48     
16     64     
80     32     
-16    16     
-160   -32    
-16    -32    
64     -32    
32     -288   
-144   0      
-112   -16    
16     80     
112    64     
224    224    
-160   16     
80     32     
-48    -32    
192    48     
80     64     
96     32     
-176   -192   
224    -192   
-336   64     
112    256    
-48    0      
192    48     
-144   112    
48     16     
144    16     
-240   16     
-144   -176   
320    0      
48     112    
208    -80    
208    32     
-304   -96    
192    16     
-224   48     
256    320    
48     112    
-64    -160   
-128   -32    
-112   0      
112    32     
176    64     
272    48     
224    -48    
272    -64    
176    48     
96     64     
-32    -144   
16     144    
-576   16     
144    0      
112    48     
-128   0      
144    48     
256    -64    
112    -48    
-192   96     
-192   64     
176    -48    
0      48     
-16    -64    
256    48     
224    -32    
368    64     
352    480    
-512   208    
-48    -16    
32     -80    
320    0      
112    -16    
272    16     
-80    32     
48     16     
144    48     
32     16     
-16    32     
112    32     
16     16     
16     128    
80     96     
-32    -32    
112    48     
192    128    
64     96     
32     0      
-80    16     
64     -16    
320    80     
-48    32     
192    32     
112    32     
208    96     
160    160    
-208   -240   
64     112    
32     0      
96     -368   
-128   -144   
-80    112    
-96    32     
96     128    
-16    48     
320    32     
48     112    
224    16     
160    16     
-256   80     
384    144    
192    -464   
288    -16    
64     256    
48     208    
-112   112    
-160   192    
352    176    
-304   32     
-272   -240   
64     -240   
0      320    
-128   368    
16     96     
-96    -64    
272    32     
-384   -288   
-288   -320   
368    80     
-144   80     
400    -64    
-16    384    
48     -144   
160    32     
272    384    
16     -528   
512    80     
-320   16     
-320   -240   
-352   96     
-64    16     
432    -480   
608    560    
-112   -160   
-80    -112   
240    160    
48     416    
48     0      
320    304    
-240   -592   
-192   0      
96     272    
224    32     
80     272    
48     -304   
80     -112   
128    -144   
-16    144    
96     -416   
-128   -144   
-16    -64    
448    304    
-416   32     
272    160    
-176   144    
128    128    
-32    128    
0      48     
144    -96    
0      -176   
272    -32    
-288   -160   
-48    64     
96     -32    
16     0      
192    16     
256    80     
-64    32     
96     192    
176    64     
160    32     
0      0      
-48    80     
-80    -48    
96     -192   
144    -144   
240    -16    
0      144    
160    -320   
32     64     
80     -384   
64     128    
32     0      
128    0      
-48    32     
-48    48     
-48    32     
80     -144   
96     0      
16     -32    
176    128    
-96    -304   
128    96     
128    -96    
128    96     
-112   -176   
112    304    
192    48     
-16    -64    
64     -32    
48     80     
176    48     
16     16     
-16    96     
192    128    
112    64     
96     -240   
112    96     
-176   -112   
400    288    
-16    -160   
144    -96    
-16    -144   
-160   -944   
96     32     
48     224    
-80    -432   
320    -336   
176    -240   
352    -64    
-112   -112   
224    16     
-32    128    
-128   0      
400    288    
-352   96     
-160   -48    
208    160    
112    304    
144    -96    
-448   16     
-160   -144   
112    -176   
192    -496   
16     -64    
272    -112   
48     -96    
16     -128   
16     -208   
-16    96     
-304   -64    
64     -256   
336    224    
32     48     
112    96     
-624   0      
-128   -288   
-112   -368   
48     -112   
-544   32     
-96    -192   
32     -112   
128    0      
288    144    
-96    32     
-112   208    
496    128    
16     -80    
144    -352   
96     -336   
208    16     
-80    -16
[truncated: 284,011 more chars]
