# Supplementary material for: A Fault Diagnosis Method for One‐Dimensional Vibration Signal Based on Multiresolution tlsDMD and Approximate Entropy
Source: Hindawi journal article supplement (doi:10.1155/2019/3262818), 2019-01-01
Supplement: f1 [file 3262818.f1.zip › 3262818.f1/gear signals/normal gear signal/Data11.txt]

48     128    
144    0      
256    144    
-80    16     
256    -64    
-112   -208   
96     -160   
16     144    
320    -48    
16     368    
48     112    
160    -32    
-16    48     
160    128    
208    32     
-128   16     
208    80     
-176   -176   
208    -352   
-80    -288   
240    240    
240    64     
-336   -240   
112    0      
-240   128    
112    -384   
144    16     
80     176    
384    128    
240    32     
224    0      
0      48     
-176   -320   
384    48     
-128   -208   
16     16     
112    -80    
160    96     
0      -128   
-48    -144   
352    -112   
272    176    
-304   -224   
704    -176   
288    112    
-624   -800   
624    -624   
96     368    
-1328  48     
272    -96    
160    -48    
-48    -16    
0      16     
-96    -96    
0      176    
-64    -160   
64     -32    
176    0      
208    -592   
16     -16    
32     -176   
96     -640   
0      -16    
112    -256   
48     32     
208    0      
16     -64    
144    112    
416    80     
-288   48     
64     -64    
160    128    
160    64     
160    -224   
-208   16     
-448   48     
528    64     
-80    -64    
16     -64    
-208   -64    
224    -176   
160    -48    
80     -160   
32     -192   
112    -256   
-16    -96    
176    -160   
96     48     
48     -112   
-256   -32    
96     -96    
208    16     
240    -16    
0      16     
-32    -208   
-96    -128   
176    0      
-112   -48    
32     -48    
224    64     
0      -48    
0      -112   
128    16     
0      -32    
48     64     
-16    48     
256    16     
336    -96    
48     -208   
80     -32    
224    -64    
176    32     
64     -416   
64     -32    
0      -496   
80     -144   
80     64     
-16    144    
-288   -240   
-48    -80    
-224   32     
16     -176   
-368   -48    
0      -144   
32     -256   
208    -288   
128    -32    
80     -112   
-16    208    
-64    -768   
64     16     
112    48     
112    64     
-144   0      
144    -128   
-64    -16    
128    -48    
-112   32     
16     0      
-1328  528    
224    288    
-80    -272   
-80    -192   
32     64     
-160   -176   
-16    -128   
160    80     
-64    -240   
112    -32    
368    32     
240    -48    
96     -48    
-144   -64    
16     -112   
-48    -16    
80     80     
32     -48    
128    0      
16     96     
-208   -416   
0      -96    
80     -32    
288    -160   
176    48     
160    -48    
-416   -48    
-160   -320   
-496   -176   
32     112    
-368   128    
144    -16    
32     -48    
64     -192   
64     64     
32     -416   
-128   48     
48     -16    
96     32     
288    352    
-64    128    
-32    -64    
240    -96    
-64    -80    
176    -16    
-176   -32    
48     -176   
80     -96    
-16    -64    
64     128    
240    -144   
128    240    
352    688    
-192   -64    
64     -496   
112    144    
-144   160    
224    -32    
192    32     
0      -80    
-480   16     
-32    -112   
96     80     
-496   48     
0      -128   
-320   -48    
-144   144    
-64    32     
-1600  288    
-224   -288   
-1488  -256   
144    144    
-32    160    
80     -144   
160    240    
-400   -160   
-544   16     
64     176    
-192   208    
-96    -256   
-480   -288   
208    -144   
128    208    
0      192    
160    -368   
-192   16     
-224   -48    
-1184  -224   
-208   256    
-32    80     
16     0      
272    0      
-32    176    
-64    80     
-336   64     
112    48     
-192   176    
-48    80     
-208   32     
-32    272    
-640   128    
96     -128   
-1344  32     
-192   -48    
256    -16    
304    -16    
496    96     
48     208    
64     160    
-688   -48    
64     -64    
-240   48     
64     0      
-224   -192   
-96    -80    
-240   160    
128    16     
-32    -64    
64     -336   
-1344  16     
16     112    
-192   48     
16     -32    
-32    -96    
176    176    
-288   80     
32     -112   
-240   -128   
-144   -32    
-112   96     
-32    128    
64     -32    
-64    -80    
112    -32    
-560   48     
176    64     
-240   96     
112    -48    
96     -176   
-96    -96    
-96    112    
-96    128    
64     16     
-16    144    
32     80     
96     64     
16     128    
-176   16     
464    64     
-432   -64    
-48    16     
176    16     
32     -32    
80     144    
-192   0      
32     128    
16     48     
80     64     
-80    -16    
-32    -16    
-160   0      
-128   48     
-320   -64    
144    -192   
-64    -96    
80     64     
-48    -64    
-64    -144   
-144   0      
128    64     
80     16     
-48    64     
208    64     
-48    80     
32     -16    
-256   -64    
256    -64    
-176   32     
112    -32    
0      32     
-32    96     
32     0      
-96    16     
48     32     
32     208    
208    304    
-16    32     
32     16     
-112   32     
-80    0      
0      80     
160    16     
-32    -32    
96     0      
-96    192    
128    96     
-96    -16    
-16    -48    
-160   -176   
-64    0      
128    -32    
112    64     
64     0      
80     32     
32     80     
-192   16     
80     96     
-320   -48    
-112   0      
-32    -448   
80     48     
80     336    
112    432    
-64    160    
80     -96    
-32    96     
-304   -16    
16     0      
144    48     
288    -48    
-176   0      
144    80     
-128   -32    
80     -352   
-192   -224   
-80    32     
144    240    
256    128    
128    128    
-160   -32    
-80    272    
-80    208    
-16    -144   
-112   -128   
224    -96    
16     -96    
0      96     
16     208    
80     64     
80     -176   
144    -16    
48     96     
-80    48     
-16    -96    
128    -64    
96     144    
96     112    
32     80     
-176   -32    
-112   -32    
-144   -80    
32     0      
-48    -16    
96     128    
80     112    
160    32     
-80    80     
48     48     
112    144    
0      0      
96     80     
32     48     
144    16     
-32    0      
32     48     
-16    32     
160    96     
-128   -96    
144    -624   
-32    -128   
64     -32    
-144   80     
128    16     
0      80     
16     96     
-272   160    
480    48     
-432   144    
96     -224   
240    -112   
-224   32     
448    96     
272    528    
-432   -512   
0      16     
-32    32     
-176   -64    
464    64     
-176   64     
192    32     
32     0      
96     80     
176    48     
-96    80     
-128   96     
-256   -144   
16     112    
144    96     
16     -48    
272    256    
-352   16     
544    80     
-192   112    
64     304    
-240   -64    
704    128    
-432   64     
64     64     
48     -16    
-144   112    
48     32     
-144   -16    
240    16     
-144   -176   
-576   -128   
544    -640   
320    32     
-448   160    
64     112    
-64    -32    
16     48     
176    -32    
80     16     
-112   0      
-16    -112   
192    80     
-80    -96    
-32    16     
144    -288   
-160   16     
128    -352   
112    -16    
96     112    
96     80     
112    -240   
-256   -128   
288    16     
-176   112    
-128   -16    
96     64     
224    112    
48     -64    
-208   -96    
336    -32    
-48    0      
16     -240   
144    176    
160    -272   
224    176    
-128   -96    
32     48     
80     80     
96     -16    
16     -32    
-400   -288   
48     -32    
144    16     
144    16     
192    -80    
-112   -80    
80     -560   
144    112    
16     -144   
48     -32    
-32    -192   
80     -176   
176    -80    
128    -160   
32     -176   
-80    208    
128    256    
192    -144   
-96    64     
-32    -144   
208    192    
-16    16     
80     176    
32     -208   
-32    48     
-64    112    
64     144    
0      -192   
64     0      
-32    144    
-16    -96    
160    0      
-16    -64    
-64    224    
96     -208   
64     320    
80     -256   
288    -32    
112    -224   
80     -32    
0      144    
80     80     
32     16     
-144   -48    
0      208    
256    160    
32     -1040  
224    208    
-112   128    
-96    -112   
240    16     
-240   -272   
16     112    
48     64     
32     -944   
112    112    
336    -32    
256    32     
-1440  64     
96     -336   
-64    -160   
-112   -960   
-80    -32    
-48    -208   
128    -160   
144    112    
112    -176   
592    -192   
-272   640    
160    -752   
160    176    
336    192    
-176   -160   
-1200  0      
112    16     
-16    0      
48     -80    
96     64     
96     -48    
-64    -80    
32     272    
112    128    
-16    -320   
-80    128    
128    -320   
-16    464    
80     -288   
336    -496   
-96    320    
32     -176   
-128   -80    
0      192    
64     -176   
80     -48    
-64    -400   
-80    -304   
256    -304   
208    192    
-272   528    
-80    -720   
-48    160    
80     96     
-32    -176   
-144   -256   
-112   -416   
-336   48     
128    64     
128    48     
64     -160   
16     160    
96     -416   
-16    -288   
176    -576   
-208   -352   
144    -448   
-112   -496   
-224   -256   
144    -16    
-176   80     
-80    64     
-272   -192   
160    48     
208    -32    
-224   -32    
32     80     
128    -112   
144    80     
192    -160   
336    432    
-32    272    
64     112    
-272   208    
32     -368   
224    -272   
0      16     
-544   16     
-320   -144   
80     32     
272    112    
-112   -32    
272    -400   
256    80     
304    128    
-80    -16    
-208   -112   
-576   -160   
-224   -80    
112    -192   
-384   -96    
32     304    
-1040  16     
416    112    
-1584  48     
112    -112   
-176   -48    
0      -128   
320    128    
-96    -176   
240    32     
-112   -16    
176    -288   
-208   -96    
32     208    
-240   -48    
-32    16     
0      -96    
176    16     
-304   -48    
64     -64    
144    96     
-32    240    
304    48     
96     -384   
-16    -64    
-112   -48    
192    112    
32     0      
-48    -112   
64     64     
32     208    
64     112    
-112   -48    
160    80     
-256   64     
64     -32    
192    -208   
0      80     
288    -176   
-288   -320   
-128   -176   
64     0      
-128   128    
48     -48    
-432   -48    
176    -128   
-192   16     
160    0      
-48    0      
-576   -48    
-96    144    
-336   -128   
80     0      
-592   -96    
-16    112    
-16    -32    
-480   0      
-96    -32    
-752   32     
-208   -80    
32     -128   
32     -80    
-624   -128   
112    64     
-560   64     
32     144    
-544   -192   
304    -304   
160    48     
-144   96     
-192   -16    
-400   0      
-144   -192   
-432   -144   
112    -64    
400    272    
-112   80     
-80    -96    
-16    -16    
0      -176   
-80    -48    
0      -272   
-64    -432   
96     -48    
-16    144    
-224   240    
-176   80     
-80    -304   
64     -192   
-48    272    
-512   128    
-160   -128   
-48    0      
0      -80    
-128   -176   
80     432    
-16    288    
-544   -1184  
32     448    
-144   16     
-32    -144   
0      176    
-80    -64    
-176   -112   
-112   16     
-96    272    
-80    96     
-192   -144   
272    80     
80     0      
-224   32     
64     32     
-48    112    
-64    -64    
16     64     
-32    -48    
-224   16     
144    192    
-320   32     
32     128    
-144   128    
32     -32    
-176   -192   
224    -64    
48     -144   
304    0      
80     112    
-64    32     
0      32     
-176   -16    
-64    48     
-240   -64    
-64    -64    
32     32     
48     80     
-208   80     
-16    0      
-560   0      
160    80     
-112   -112   
64     64     
-144   0      
-80    0      
-32    32     
32     112    
96     112    
-16    -64    
80     16     
80     80     
112    176    
-272   -16    
80     48     
-32    -16    
96     -16    
64     -64    
48     96     
48     32     
48     16     
48     -16    
-32    -64    
16     112    
80     48     
-48    16     
-128   0      
-80    -48    
-176   -64    
16     208    
-16    16     
-48    0      
32     0      
-80    16     
-144   -128   
176    -144   
-96    112    
384    48     
-112   -32    
-144   32     
48     80     
-144   -64    
-16    -144   
-240   -144   
576    336    
-448   -32    
256    -64    
-240   80     
96     -48    
80     32     
-304   0      
160    -80    
256    128    
-352   -32    
144    -128   
-80    0      
-448   112    
224    176    
-272   48     
32     32     
128    -64    
-16    80     
-160   -192   
768    32     
304    144    
-64    -64    
224    96     
0      128    
-192   112    
-672   -96    
64     -64    
128    64     
-240   -208   
224    -96    
320    336    
-480   96     
48     -64    
48     48     
64     64     
80     96     
-64    112    
112    -32    
-16    -16    
-160   64     
16     -96    
0      48     
-32    176    
16     80     
-496   0      
0      16     
176    -112   
64     64     
176    80     
-32    96     
-96    -16    
0      -144   
256    48     
16     144    
-48    -16    
0      48     
240    112    
-176   16     
48     96     
16     32     
-112   -16    
144    48     
48     48     
-32    -16    
48     -112   
-16    16     
192    128    
-80    128    
48     32     
64     96     
48     128    
-144   208    
-144   96     
464    160    
224    144    
-192   -64    
-64    -16    
128    64     
288    160    
-64    -144   
176    128    
-32    560    
-48    64     
112    -32    
-16    -352   
-304   160    
48     -80    
160    80     
128    64     
64     64     
288    -128   
32     80     
-96    48     
144    32     
352    656    
-304   -368   
96     224    
112    288    
96     -16    
64     64     
-128   -400   
96     496    
-48    176    
112    -400   
64     112    
0      -96    
208    -80    
352    512    
-160   -320   
-16    192    
32     224    
-32    -176   
64     -144   
16     -304   
144    560    
-128   -784   
128    256    
64     224    
-64    -288   
16     48     
112    32     
-112   112    
32     -80    
128    192    
-192   112    
-16    -768   
128    336    
144    416    
-128   -272   
112    -208   
0      -160   
112    176    
160    112    
96     0      
144    -32    
48     -128   
144    -176   
-48    -992   
-16    -208   
-128   -80    
32     32     
192    48     
112    -64    
-256   -768   
-160   -256   
-224   -128   
192    -16    
144    144    
128    -16    
-80    224    
128    0      
304    272    
-128   -288   
144    -48    
80     -272   
-48    128    
96     -80    
64     0      
64     -32    
144    0      
0      -80    
-32    16     
-32    32     
0      -128   
-16    16     
144    -64    
-48    32     
112    -272   
32     -112   
64     -736   
80     -32    
64     -112   
0      112    
16     16     
48     144    
16     80     
128    -80    
96     48     
128    -48    
-16    32     
96     -288   
192    80     
-32    -64    
432    480    
-256   -128   
224    160    
272    -64    
96     16     
128    32     
16     -32    
-32    -48    
224    -288   
96     336    
144    -240   
160    112    
-16    80     
-160   -416   
224    -192   
-112   -272   
32     -240   
592    448    
-320   96     
-112   -752   
-272   -32    
80     -176   
352    64     
192    -176   
208    -304   
64     -256   
16     -192   
-160   -336   
400    32     
512    192    
-64    128    
-64    64     
-160   -480   
-80    -32    
96     -400   
-240   -320   
-1024  -336   
112    80     
-16    224    
192    -80    
352    -160   
240    -144   
0      -32    
-16    48     
-32    -48    
176    -544   
-208   -16    
192    -320   
-48    144    
192    -160   
16     -416   
-288   304    
176    -176   
16     0      
112    32     
0      -16    
192    -448   
-288   -304   
176    -368   
16     -32    
80     32     
-80    80     
32     112    
64     48     
-288   -48    
256    -80    
-656   -272   
384    128    
-208   80     
32     -288   
80     -112   
128    80     
448    128    
-288   -896   
0      32     
-304   -16    
16     -48    
480    -128   
-64    -16    
-80    -80    
272    -176   
-528   -80    
112    -112   
-1136  64     
112    -64    
256    112    
-160   16     
208    96     
-112   -112   
64     96     
48     64     
-80    48     
368    -160   
96     16     
32     64     
-96    -32    
144    -176   
144    0      
-368   176    
160    64     
16     112    
0      -208   
-256   -688   
16     -192   
160    224    
48     -464   
112    160    
192    160    
-64    -80    
-112   96     
0      -160   
-96    288    
128    -80    
-304   32     
16     32     
-1136  -144   
-64    160    
-80    -128   
96     -96    
48     32     
416    -944   
-144   -96    
-48    -208   
224    144    
0      16     
224    112    
-112   64     
-48    32     
-544   -64    
80     -48    
0      48     
-112   -272   
416    -480   
224    -400   
272    160    
48     -160   
80     112    
48     112    
112    96     
-256   272    
-160   80     
-528   176    
-272   -16    
-16    -80    
224    0      
16     112    
64     -144   
160    32     
-16    -128   
-16    96     
96     -16    
-208   -96    
-288   -32    
-32    48     
-64    -32    
128    16     
-320   32     
80     64     
-48    -128   
176    -176   
-1888  32     
160    -160   
16     0      
64     -64    
0      -16    
-928   -32    
-1536  0      
-80    32     
-112   0      
-112   0      
320    48     
320    96     
-304   -80    
-128   -96    
208    -48    
0      96     
-1376  32     
144    48     
-48    -96    
-80    32     
-32    80     
-1040  -48    
-128   -16    
-1008  16     
-32    48     
112    32     
-64    32     
48     -32    
-96    -16    
-672   -16    
96     112    
16     -32    
160    176    
-336   -80    
-272   -16    
64     80     
-416   -32    
96     16     
-288   -32    
-112   16     
-400   -160   
-32    -80    
224    -32    
144    80     
-128   -16    
-32    48     
-352   -128   
-176   -208   
32     -224   
-160   160    
256    48     
-48    160    
-192   -272   
48     64     
-176   -16    
96     -64    
96     144    
-208   192    
-240   0      
-144   -304   
-144   -64    
320    0      
192    128    
192    96     
0      -32    
0      96     
-304   -144   
112    -32    
-224   -16    
80     32     
160    0      
0      -32    
-176   -112   
112    48     
-672   64     
480    256    
-544   128    
352    416    
-656   208    
-64    -240   
160    -48    
-32    -32    
432    -64    
80     112    
-48    -64    
304    -128   
-16    16     
-656   128    
208    144    
-336   -112   
80     64     
48     80     
144    112    
-96    160    
-48    64     
80     64     
48     16     
112    64     
-80    128    
64     0      
-320   80     
176    -64    
-192   96     
160    -32    
-512   -16    
-16    256    
-128   -128   
-304   -272   
160    272    
-96    16     
-192   -16    
416    144    
-32    144    
-96    -32    
-64    -208   
-288   -16    
80     -192   
-192   112    
304    16     
-128   -96    
80     112    
-16    -32    
64     -16    
304    -112   
-176   176    
-64    -400   
-256   -224   
-32    144    
16     160    
176    304    
-416   -576   
80     16     
-16    80     
-48    288    
-656   -320   
-336   48     
208    240    
336    240    
-80    800    
32     256    
-144   -64    
64     -336   
0      128    
0      176    
64     128    
16     64     
240    32     
64     64     
-48    -32    
-192   0      
-16    112    
-160   -304   
-48    -544   
176    48     
-176   176    
32     64     
112    80     
-48    96     
-144   48     
160    -48    
-64    80     
64     -32    
-16    160    
-32    32     
0      -32    
208    -16    
-64    208    
48     176    
32     -48    
176    208    
144    720    
-112   128    
144    -144   
-96    16     
0      0      
-112   96     
0      32     
0      288    
-16    144    
-64    112    
-48    -32    
208    -32    
144    192    
-96    48     
0      112    
96     96     
-112   144    
64     80     
32     224    
-48    -80    
208    -80    
32     80     
48     0      
32     64     
32     16     
16     -80    
-48    48     
-64    160    
400    400    
-384   144    
-48    0      
256    -80    
96     96     
-96    -64    
80     -48    
128    -112   
224    112    
-320   16     
-16    80     
48     112    
32     -32    
96     -16    
-64    -224   
-160   16     
-80    -96    
32     -112   
80     -112   
32     -96    
0      -96    
192    -16    
-144   160    
112    112    
-48    -32    
128    80     
-32    80     
80     80     
0      -32    
-144   -160   
32     -128   
80     0      
-32    -192   
256    -160   
160    -80    
128    192    
-32    112    
-48    112    
-16    -208   
192    128    
144    352    
240    176    
-176   -80    
-288   -208   
-32    -32    
-96    0      
224    -16    
32     -208   
-192   -160   
240    -352   
-144   -48    
176    -64    
48     -192   
-32    0      
272    96     
-240   -1120  
-288   -96    
208    -336   
144    -192   
128    -224   
224    -112   
-240   -128   
-304   -624   
320    -416   
400    -128   
352    224    
336    48     
192    16     
192    160    
-192   64     
16     -448   
160    -32    
-256   -16    
128    144    
64     208    
-336   80     
-64    -32    
448    448    
-400   640    
384    240    
-144   -240   
0      -80    
272    -64    
176    64     
768    624    
-688   32     
96     192    
-272   -576   
160    224    
288    496    
96     144    
256    432    
112    208    
-112   48     
224    -16    
-288   64     
80     16     
16     -32    
448    224    
-368   -48    
-320   -112   
-32    -112   
16     -560   
560    352    
-128   80     
272    304    
-224   288    
-112   -288   
32     -400   
560    624    
-400   256    
-176   -32    
224    -272   
144    112    
48     752    
256    -80    
-32    -352   
96     -624   
176    640    
-16    272    
-144   -80    
-16    96     
-48    -336   
336    208    
64     32     
32     -64    
96     -128   
64     128    
496    144    
0      432    
-144   -288   
-352   -256   
96     496    
80     32     
32     0      
96     -176   
64     368    
272    -112   
-112   -128   
32     -96    
-16    368    
-64    112    
80     -224   
-48    -304   
112    352    
128    -16    
288    -48    
96     -112   
-32    48     
16     -320   
112    64     
-112   0      
48     -48    
-64    -80    
176    -144   
112    -496   
32     0      
96     96     
48     -80    
144    -112   
176    -528   
128    -208   
16     48     
48     -816   
112    192    
48     -704   
32     16     
144    -224   
192    -208   
16     -80    
-80    -320   
-32    -160   
0      -288   
128    288    
-144   -1040  
144    -128   
176    -16    
176    32     
64     -208   
160    32     
112    16     
-128   -64    
-112   -208   
32     -288   
-512   -16    
64     16     
-48    0      
192    -160   
64     -48    
160    -384   
64     -112   
240    80     
64     16     
48     -192   
-176   48     
-96    -128   
-32    16     
-144   0      
128    48     
-400   -128   
160    -288   
320    -352   
176    0      
64     -80    
96     176    
-208   -64    
96     48     
336    96     
96     -96    
32     -48    
16     -32    
-48    -80    
-32    80     
64     -16    
-48    16     
16     -112   
-208   -64    
64     -80    
48     16     
160    32     
64     -32    
80     -144   
-208   32     
32     48     
-48    112    
208    48     
144    0      
-96    32     
112    0      
-528   -176   
80     -96    
-816   -64    
176    -64    
-16    48     
-16    16     
-16    -32    
16     -480   
48     32     
80     16     
80     64     
96     0      
48     -64    
0      0      
0      -128   
-64    -64    
96     -32    
32     32     
160    -16    
-176   -16    
-32    -208   
64     176    
-32    -160   
16     -32    
96     -240   
-16    112    
-272   64     
368    16     
-416   -224   
400    32     
-80    368    
96     96     
-464   -16    
-96    -208   
-400   -176   
160    32     
-64    -48    
256    -128   
-160   -80    
272    -368   
-496   -272   
-240   128    
192    416    
-608   208    
-272   -272   
-272   -112   
64     112    
-368   208    
496    416    
-352   144    
352    -48    
-32    0      
80     -304   
-112   32     
288    -528   
320    96     
0      0      
16     160    
-176   -224   
96     -288   
-96    0      
144    -96    
-32    64     
-80    176    
368    0      
-32    -144   
160    240    
-1664  -64    
128    112    
-32    32     
-496   -432   
400    16     
-1424  416    
32     -288   
256    224    
-304   208    
-32    -128   
-224   880    
-160   -208   
-160   160    
-528   -496   
688    -144   
-128   752    
304    448    
-224   240    
-112   176    
-96    -208   
-1008  -192   
-80    -240   
-1040  -16    
-144   112    
112    0      
-240   48     
-1088  -16    
224    32     
-576   48     
384    304    
-256   80     
64     96     
-224   64     
80     48     
-128   48     
-240   0      
-128   0      
-240   80     
48     -32    
176    -32    
-48    -96    
-16    -256   
144    112    
0      32     
-48    32     
80     32     
-304   16     
-48    0      
48     -16    
-16    48     
96     16     
176    80     
-464   16     
-112   -64    
-1616  -272   
112    64     
48     -16    
0      48     
16     -64    
-80    128    
-176   16     
112    -16    
96     80     
-112   -112   
112    32     
-128   -112   
-128   0      
-400   0      
64     48     
-400   -16    
80     32     
-112   -32    
-80    32     
-176   -144   
-112   -64    
112    32     
144    128    
48     96     
-272   48     
-240   -16    
-16    -16    
0      32     
0      16     
-64    16     
-256   -64    
0      32     
-96    48     
32     144    
96     80     
272    48     
192    -32    
96     32     
-96    32     
-112   0      
-48    -64    
-192   32     
64     224    
-288   96     
144    0      
-176   -256   
224    -16    
-944   -80    
0      -128   
64     -128   
-16    -128   
-32    -64    
-144   -48    
-240   -16    
16     32     
112    64     
-16    224    
112    288    
-400   -112   
192    96     
-112   -96    
176    0      
-544   0      
96     -48    
-48    -80    
-192   0      
-96    -32    
96     -32    
48     208    
240    -16    
96     96     
80     80     
-240   128    
-240   48     
-48    -48    
-32    -80    
160    -16    
-192   -128   
80     -112   
16     -16    
32     -112   
64     432    
96     160    
80     112    
64     336    
16     -32    
-96    32     
48     32     
-48    304    
208    144    
-208   -64    
-192   -224   
288    16     
-288   -176   
48     -256   
16     -32    
176    -144   
48     -80    
80     784    
816    1680   
-800   -80    
-272   -720   
176    400    
64     560    
-320   -544   
-80    -1536  
240    -224   
96     832    
160    656    
64     -112   
-256   -16    
112    16     
160    48     
48     96     
-128   -48    
-64    -368   
64     400    
128    336    
-480   -384   
128    -96    
208    144    
400    176    
-160   -176   
160    704    
-240   -272   
-336   -880   
352    240    
-656   -288   
608    -1104  
688    1072   
240    512    
272    -432   
-160   -144   
-432   496    
368    864    
-1120  -752   
0      272    
-192   -224   
688    1120   
-224   -400   
-80    208    
208    -64    
112    112    
176    0      
-112   -64    
32     144    
-64    -112   
160    128    
16     320    
-80    32     
336    -128   
160    224    
368    320    
-464   -176   
64     -112   
176    208    
-80    0      
320    32     
-32    32     
32     64     
-208   48     
96     -32    
112    96     
-176   -48    
96     16     
160    32     
48     -64    
48     -32    
-16    -48    
208    -48    
112    -16    
48     80     
-80    0      
-80    144    
-96    96     
320    96     
-240   -80    
272    16     
-208   -16    
80     -352   
16     -464   
160    -528   
192    192    
-32    160    
64     176    
112    0      
96     64     
144    -32    
-144   -16    
-80    0      
0      -128   
48     -496   
272    0      
144    112    
160    -208   
0      48     
80     -624   
48     80     
-48    32     
-16    192    
48     64     
64     16     
112    16     
160    -128   
-80    -16    
48     48     
32     16     
128    80     
48     112    
144    224    
48     160    
80     -240   
64     96     
-112   -176   
16     32     
-160   32     
128    48     
144    64     
256    224    
-304   80     
32     -32    
128    16     
112    -32    
48     48     
320    0      
32     80     
80     -160   
48     48     
80     -672   
-96    -240   
-96    16     
32     112    
-32    112    
48     -160   
176    112    
288    176    
176    80     
160    -96    
-160   16     
128    -64    
64     48     
192    -32    
128    64     
96     -80    
160    80     
240    128    
304    112    
-64    -16    
32     0      
0      -32    
192    416    
-352   144    
16     -128   
288    -160   
208    16     
144    176    
48     -128   
128    80     
-16    -336   
160    192    
-208   -352   
96     80     
272    80     
48     32     
16     16     
-16    64     
32     32     
160    96     
64     96     
96     -288   
48     96     
80     -240   
80     16     
-112   -256   
192    32     
-16    64     
80     48     
0      80     
80     80     
48     128    
64     64     
64     16     
-16    -128   
192    80     
96     -80    
16     96     
48     -112   
32     16     
48     0      
112    160    
144    96     
128    -496   
96     160    
320    -288   
-208   -1216  
128    -16    
112    -96    
-16    16     
112    -1648  
48     -256   
112    96     
-80    64     
112    48     
-96    -128   
160    -368   
-256   112    
240    -96    
32     112    
240    80     
288    80     
256    224    
80     64     
-384   -336   
192    -576   
160    64     
-32    -128   
112    -32    
-80    -144   
-48    -64    
-192   288    
160    -48    
32     -240   
288    64     
176    80     
96     -48    
-1056  144    
-448   -1424  
32     -1296  
-384   1088   
-800   256    
32     -608   
96     80     
1008   32     
-272   352    
208    -112   
224    -272   
-80    320    
64     128    
-80    -192   
-384   -528   
-320   -208   
144    80     
32     -320   
64     416    
192    336    
224    -416   
-48    -96    
128    -1152  
304    208    
-128   16     
-16    176    
192    -128   
-80    -256   
-240   -224   
-80    -192   
160    -208   
80     -80    
-32    -96    
240    -192   
-48    0      
80     -448   
176    144    
96     -432   
64     0      
96     -144   
0      64     
-320   -96    
144    -80    
-288   -112   
96     32     
48     16     
80     32     
-2560  -176   
160    -144   
-96    -80    
32     16     
48     32     
240    -64    
16     96     
176    -736   
-64    64     
160    -32    
256    96     
-96    32     
128    -144   
-128   16     
128    -48    
-16    0      
-80    32     
-32    16     
-16    -32    
-224   16     
112    -112   
16     16     
16     -768   
32     -16    
64     48     
32     32     
-176   -32    
80     16     
-528   -48    
144    64     
-448   -16    
-48    -112   
-32    -144   
-160   -128   
144    -32    
112    -96    
320    304    
32     -576   
-80    -48    
-128   -144   
80     -176   
-480   96     
-16    48     
-16    64     
160    64     
-32    -48    
0      -160   
0      96     
64     -112   
208    -96    
-64    -352   
320    -304   
0      96     
128    192    
-288   16     
96     48     
-240   48     
144    176    
80     192    
272    -16    
-320   -96    
-208   -96    
-208   0      
224    32     
96     176    
256    -224   
16     80     
-240   0      
-2240  -80    
16     -64    
-48    -48    
32     96     
-32    16     
-240   32     
-32    -192   
-48    -144   
272    -64    
0      48     
80     32     
-144   288    
-624   -288   
112    368    
144    256    
-368   48     
-144   -32    
-144   -112   
-144   448    
480    592    
-624   400    
160    272    
224    -176   
96     160    
288    0      
-256   -176   
112    64     
16     -112   
-256   224    
0      -16    
0      -208   
-48    16     
-672   -80    
-176   0      
-496   112    
-272   -336   
-128   -432   
80     480    
96     32     
-32    -208   
208    64     
-32    -224   
-176   224    
0      -144   
32     -32    
-64    -80    
0      192    
64     80     
-240   -96    
32     -16    
32     -128   
-384   -80    
64     144    
-368   -736   
32     176    
128    96     
112    32     
96     -64    
0      144    
80     -144   
-80    -48    
-64    32     
208    48     
-144   0      
448    592    
-192   16     
-304   -560   
64     64     
304    48     
-112   -48    
-176   -272   
416    208    
-112   480    
-432   -160   
0      -192   
-32    256    
160    128    
96     0      
208    208    
-480   224    
-80    -80    
-496   -128   
224    864    
112    512    
192    -96    
-240   -160   
-368   -160   
624    608    
-608   320    
-112   -176   
-368   -128   
96     48     
80     0      
16     -16    
-144   -64    
0      32     
-112   0      
432    -112   
-864   -384   
128    80     
-16    112    
-208   16     
16     -16    
80     240    
-288   128    
112    -16    
80     0      
0      32     
-16    32     
64     0      
-48    -64    
-160   -32    
-192   128    
-608   32     
64     80     
224    0      
-16    -64    
-64    32     
-64    -32    
0      16     
-16    -96    
48     0      
-32    64     
96     64     
-304   -64    
160    80     
-144   64     
-32    64     
-96    -80    
16     48     
192    48     
16     0      
-16    16     
-32    -112   
-336   -80    
144    48     
16     144    
-128   0      
208    0      
272    -16    
-176   -16    
-176   -80    
16     272    
32     0      
64     -144   
112    -16    
48     64     
-16    112    
64     64     
32     400    
304    112    
32     -96    
-272   -16    
-48    -112   
-80    -160   
0      0      
-112   128    
96     64     
128    32     
0      64     
16     64     
-16    32     
-32    -16    
160    48     
144    96     
-80    16     
0      80     
-16    0      
64     -64    
-112   -48    
64     16     
-112   -64    
-32    64     
112    32     
-48    -64    
128    48     
192    80     
80     0      
-64    16     
176    144    
-96    -32    
144    48     
-96    16     
16     -32    
176    -224   
80     48     
240    208    
80     32     
32     -48    
-16    -48    
64     32     
16     16     
-192   32     
-208   80     
-48    -112   
-32    0      
176    64     
224    208    
16     160    
-32    80     
0      48     
160    48     
48     32     
224    144    
-16    160    
128    48     
80     16     
16     0      
-64    32     
-80    -16    
-144   -96    
16     -80    
-128   -64    
144    0      
-16    80     
16     -496   
112    0      
96     32     
16     48     
-32    -32    
48     -32    
272    32     
336    112    
-160   -240   
-96    -80    
-208   48     
0      -32    
80     -112   
224    96     
128    96     
16     -160   
-32    48     
0      48     
48     80     
-144   32     
32     32     
112    48     
-16    -16    
48     32     
32     -16    
-64    0      
160    80     
-16    64     
32     -32    
16     -128   
64     -64    
144    80     
64     -720   
128    32     
0      32     
112    32     
-80    -192   
-32    -32    
-80    48     
48     -176   
112    -64    
416    592    
-144   -480   
336    -144   
96     432    
-128   -256   
32     80     
64     -368   
-80    448    
128    -240   
0      336    
112    -32    
272    80     
-80    -480   
160    -16    
112    32     
416    -112   
64     208    
-112   -1104  
-240   1184   
16     -176   
-224   -512   
176    592    
192    32     
-80    -1008  
144    -192   
-544   -16    
-80    16     
-176   -320   
208    -64    
-464   80     
432    240    
-288   -16    
496    -672   
-160   -256   
720    624    
0      576    
-16    -80    
-240   -96    
-32    0      
-64    16     
64     160    
448    240    
-144   176    
144    272    
32     128    
224    160    
32     -48    
-16    -176   
0      -288   
96     16     
32     144    
64     -128   
-80    -144   
288    -288   
64     144    
96     80     
0      48     
176    -64    
0      96     
160    96     
176    0      
160    80     
-96    -96    
-208   -160   
256    -352   
-48    96     
512    112    
80     0      
64     -64    
32     0      
-32    96     
176    -48    
64     -208   
0      128    
32     48     
96     48     
-64    0      
240    -160   
144    0      
64     0      
96     160    
192    48     
64     48     
0      -176   
-48    -16    
16     112    
-16    -208   
64     128    
96     -432   
112    -352   
16     -144   
80     -1216  
112    -16    
336    432    
-240   64     
16     -144   
96     -240   
32     208    
-16    0      
144    -128   
-32    -32    
144    -160   
96     112    
-608   -48    
96     0      
96     -16    
-64    -128   
128    -80    
96     -96    
144    -96    
256    64     
-144   144    
-32    -208   
-80    -96    
224    -192   
80     48     
96     64     
-64    32     
-160   0      
-16    -64    
-96    16     
-80    -160   
80     -128   
32     -128   
64     -48    
16     -320   
48     -32    
80     144    
-160   96     
-32    16     
-64    80     
96     -48    
112    64     
-64    -16    
64     64     
-2384  48     
-96    -224   
176    -176   
240    0      
192    -16    
192    -64    
-128   -256   
272    -368   
-160   -112   
0      -176   
48     48     
-64    -32    
-80    -144   
-192   -128   
336    -400   
-512   -32    
144    -144   
-16    -48    
-48    -208   
96     -144   
0      768    
112    96     
-32    -720   
-64    80     
96     -80    
192    192    
-176   -96    
96     -128   
-64    -192   
192    -304   
-16    240    
48     -384   
-976   112    
64     -144   
-624   144    
80     -304   
48     32     
48     304    
64     -144   
16     -176   
80     96     
-352   -160   
0      -224   
64     64     
112    304    
80     128    
432    160    
-768   -32    
144    -192   
-896   16     
-112   -176   
160    96     
80     -96    
32     16     
64     -560   
208    -96    
-208   16     
256    64     
-112   64     
32     16     
-416   32     
16     -160   
-16    -240   
128    -160   
368    80     
16     -48    
96     64     
32     -112   
32     48     
144    64     
304    48     
-144   -96    
112    -160   
-560   -32    
272    -112   
-64    48     
192    -176   
144    32     
-16    -16    
-80    -64    
144    -192   
32     -144   
528    112    
-320   96     
464    128    
-368   48     
224    -32    
112    64     
-624   -32    
-384   -592   
176    -176   
48     304    
-832   -112   
480    -176   
256    32     
-1776  -32    
416    464    
-1024  -288   
-32    -64    
544    192    
-80    208    
-304   -96    
-800   -16    
96     112    
-144   -16    
48     -16    
480    80     
-32    48     
-992   -32    
-64    128    
-240   -96    
-48    32     
-256   0      
-464   -48    
32     32     
-128   -48    
-80    48     
-176   64     
-160   192    
-720   176    
-192   -64    
128    -128   
-128   16     
-32    16     
16     64     
-64    -16    
80     80     
-96    -16    
-16    -256   
-352   -208   
-192   64     
-96    224    
-272   16     
-64    48     
-208   0      
64     -32    
-144   -16    
112    16     
-240   -112   
112    48     
-256   -128   
-96    48     
-64    64     
144    96     
-32    -96    
-64    -64    
128    32     
-160   48     
80     48     
-192   -16    
16     16     
-832   0      
112    96     
-32    48     
144    80     
48     0      
-96    -32    
-48    32     
144    96     
-96    176    
-240   208    
16     80     
-96    -320   
16     -16    
-112   80     
0      -64    
-160   -16    
80     32     
128    48     
-80    48     
-80    144    
48     64     
160    144    
-48    -96    
-192   -32    
-128   -80    
0      -64    
48     160    
-208   0      
-128   -16    
192    112    
-432   0      
112    -16    
-16    -32    
112    96     
144    48     
-16    80     
16     16     
-48    -32    
64     80     
208    48     
-304   -64    
240    128    
-96    368    
-32    400    
352    144    
-48    48     
256    80     
-432   272    
128    352    
80     400    
-128   -208   
-144   -480   
-80    224    
-64    352    
-64    48     
80     -48    
-128   48     
64     48     
-320   -112   
192    48     
-16    48     
32     -272   
-1472  -368   
-192   -16    
144    144    
-80    0      
64     -48    
-16    240    
272    224    
-224   32     
-64    144    
-144   -16    
-32    -96    
-160   -16    
144    0      
-160   -80    
224    256    
-208   144    
112    -32    
208    -192   
128    -336   
-48    320    
-80    224    
-48    -224   
-208   -800   
144    96     
-352   368    
80     48     
176    240    
-16    -176   
-16    -320   
16     336    
144    224    
-128   -112   
176    96     
0      128    
0      -64    
32     16     
-16    -64    
16     32     
96     112    
-48    -608   
-96    592    
-112   -64    
144    -208   
-256   96     
80     80     
128    160    
128    144    
64     32     
144    -400   
-192   560    
240    -448   
32     496    
96     -48    
208    0      
-192   -208   
-240   -1024  
-256   -272   
112    464    
128    128    
240    -32    
352    -208   
-240   528    
64     192    
-208   48     
336    112    
-112   -80    
32     144    
288    96     
-432   48     
160    -128   
288    160    
320    96     
176    16     
224    112    
128    272    
-336   96     
-304   -208   
272    64     
464    208    
160    208    
432    96     
-352   128    
-400   -32    
896    416    
-528   256    
144    192    
-224   240    
-160   -848   
304    -112   
160    32     
144    128    
32     -16    
80     0      
-176   -240   
288    144    
-528   208    
48     0      
48     -176   
-80    96     
-112   -16    
432    -256   
-128   -32    
-16    -240   
192    80     
416    336    
-336   336    
32     112    
144    -16    
48     176    
32     32     
-96    -80    
-48    -176   
64     -64    
96     192    
-64    80     
160    -80    
-208   -384   
144    -128   
-48    352    
-32    -48    
144    -32    
128    112    
-48    80     
-144   176    
112    224    
320    224    
64     128    
80     -16    
240    32     
-64    192    
96     96     
112    0      
176    -256   
160    16     
-112   32     
64     0      
128    112    
32     16     
96     -16    
144    64     
-32    16     
96     80     
-48    -16    
96     256    
16     96     
64     -64    
352    208    
16     96     
-144   -160   
320    -1408  
96     144    
32     80     
80     32     
368    96     
-80    144    
144    128    
-64    160    
-96    32     
64     16     
256    16     
112    -32    
-16    32     
128    0      
64     -16    
16     -48    
80     -64    
32     -432   
256    16     
0      0      
128    128    
224    144    
-64    -32    
-64    16     
48     144    
80     48     
64     -16    
16     -240   
320    -144   
176    80     
80     -416   
416    848    
-240   -208   
-32    272    
208    496    
-16    -112   
32     -304   
224    16     
192    288    
-128   -464   
-192   -464   
-64    400    
-96    -32    
256    -224   
256    32     
-48    -16    
32     32     
112    -448   
160    -112   
384    224    
-16    -16    
-144   -640   
-32    368    
-176   -32    
0      -496   
320    176    
192    -16    
160    112    
-80    -16    
16     176    
-16    16     
-160   -96    
128    -96    
144    96     
208    -16    
224    224    
240    224    
-256   112    
0      64     
448    176    
-112   -48    
96     -160   
160    -16    
-32    -224   
80     16     
192    -176   
160    32     
64     112    
16     -512   
48     16     
16     -352   
32     64     
-368   48     
48     -16    
192    -48    
144    -272   
0      -96    
128    176    
32     -48    
128    16     
96     96     
64     -880   
112    48     
208    16     
32     32     
176    -144   
-64    64     
96     0      
-80    -256   
144    0      
-64    -304   
80     -96    
32     -96    
304    0      
32     -1056  
96     32     
80     -128   
48     -32    
-48    0      
112    16     
144    48     
48     -144   
-576   -16    
256    -96    
-32    -80    
208    16     
224    -48    
16     -64    
112    -96    
128    -1168  
-352   -400   
352    -80    
-64    352    
-480   -112   
176    48     
-32    -160   
112    -176   
-320   -112   
368    112    
-880   64     
-240   -192   
448    -48    
-96    -64    
128    -48    
48     -160   
416    176    
320    -192   
304    0      
336    -32    
96     96     
64     -16    
80     -144   
-144   -96    
240    -48    
240    -16    
-16    -160   
448    -96    
224    32     
112    32     
-32    -128   
96     80     
-32    -768   
96     0      
80     32     
32     32     
32     -80    
0      -96    
32     -16    
32     -144   
-368   -48    
224    -80    
-2000  -32    
-32    -64    
240    144    
-32    -144   
-32    -16    
336    32     
-80    64     
176    112    
128    80     
-96    -64    
208    48     
-208   16     
96     -128   
-208   16     
-48    48     
16     80     
144    0      
-16    -64    
64     -176   
-16    32     
128    -208   
-16    32     
32     -16    
144    -64    
-96    -112   
-48    -64    
-352   128    
112    48     
-208   64     
144    192    
-176   -64    
240    -224   
96     -48    
240    -112   
-64    176    
32     0      
-80    32     
0      -208   
240    -48    
-1008  48     
64     -144   
-224   -32    
112    112    
64     48     
80     -144   
96     64     
-32    -352   
112    160    
32     -176   
176    592    
-160   -352   
176    -224   
-80    112    
144    -32    
-128   -176   
352    672    
-128   -80    
208    -64    
-352   32     
-48    -112   
-352   144    
0      -176   
48     64     
-160   -96    
112    64     
-480   -144   
-448   -128   
208    144    
-672   0      
-304   -128   
-1744  -1568  
32     400    
320    288    
-32    -48    
112    32     
0      144    
-352   -128   
-208   -160   
-32    224    
16     16     
80     -80    
-16    0      
192    192    
-192   592    
-352   -608   
96     -48    
-128   -112   
96     288    
144    -64    
-352   -112   
-144   112    
-224   -80    
80     -16    
-288   -128   
-96    112    
112    96     
-32    240    
-144   -16    
96     -96    
16     -80    
-128   288    
48     112    
-16    -144   
-16    -48    
-112   -128   
0      160    
32     64     
176    -48    
288    240    
-192   32     
-16    -80    
-128   -320   
96     -192   
-96    80     
-144   320    
-64    -16    
-144   -32    
-240   -32    
192    -16    
-1280  -208   
96     -128   
112    48     
96     48     
160    16     
-256   -128   
-16    32     
-96    16     
-208   -32    
16     64     
-112   -352   
-288   -336   
-32    -160   
-832   -304   
0      -112   
-1488  -160   
176    16     
-32    -128   
-176   -48    
-64    32     
-144   256    
-96    64     
80     128    
256    160    
-64    160    
112    240    
80     432    
-256   208    
48     400    
416    720    
-464   96     
-64    -48    
48     -192   
48     80     
208    -80    
-336   -16    
160    -80    
0      -32    
80     112    
-256   -64    
464    96     
-304   144    
-192   112    
-176   -32    
112    240    
-352   -112   
96     -288   
288    -160   
-208   320    
-352   384    
-16    -80    
224    -128   
48     32     
432    128    
48     192    
256    80     
48     64     
80     112    
-432   48     
0      32     
-704   -80    
192    64     
-64    0      
-64    192    
192    144    
80     32     
224    16     
-176   -144   
0      64     
-128   160    
64     -16    
-64    48     
64     16     
-96    64     
48     96     
-64    -176   
176    112    
-112   144    
64     -176   
160    16     
-160   112    
-96    -16    
64     0      
96     32     
-112   128    
208    48     
-48    -16    
320    112    
-736   -368   
-96    -288   
-384   -112   
176    -128   
160    176    
-64    -16    
128    80     
-160   192    
544    368    
-96    16     
-160   -112   
-64    -48    
-128   32     
64     -192   
144    16     
-96    112    
96     32     
-144   48     
528    192    
-288   336    
-96    16     
-192   160    
112    -64    
-16    0      
240    176    
80     288    
112    48     
48     160    
-64    -80    
-16    -128   
-416   112    
336    32     
192    80     
-16    48     
-80    -16    
48     64     
-16    16     
-160   80     
96     16     
-16    -288   
224    32     
128    112    
-16    240    
-32    160    
96     160    
-16    64     
-48    16     
-128   -176   
-96    -288   
112    240    
176    272    
-16    -48    
-96    0      
240    -224   
48     400    
96     -64    
-16    -48    
80     144    
-32    -160   
112    144    
-80    -272   
-32    -592   
-208   0      
176    -656   
256    288    
144    80     
-64    80     
64     256    
16     -176   
96     -32    
-16    288    
-160   -160   
80     384    
-64    288    
304    112    
0      256    
-48    -496   
192    32     
112    16     
192    -32    
48     48     
80     80     
96     64     
-16    32     
80     48     
144    32     
80     16     
144    96     
-128   -32    
-112   64     
-144   80     
96     -544   
16     0      
288    96     
224    112    
16     16     
-64    32     
-80    64     
-80    0      
192    112    
-176   0      
160    80     
528    -48    
-240   -48    
80     -32    
-144   0      
-48    -32    
32     128    
128    -160   
32     0      
160    -48    
0      -48    
112    144    
0      32     
128    -16    
144    64     
-160   -64    
160    80     
-64    48     
16     -96    
48     112    
48     0      
32     64     
0      208    
160    80     
80     -16    
-16    16     
0      16     
112    48     
32     64     
112    64     
32     96     
-48    -80    
144    -16    
112    16     
240    64     
0      -64    
64     64     
-208   -528   
160    0      
-192   -816   
160    -64    
112    96     
-48    128    
256    192    
384    112    
80     -160   
-160   0      
-16    -16    
336    64     
-272   112    
48     -96    
-32    64     
272    -128   
304    80     
-224   -160   
0      0      
32     64     
-160   48     
-96    -128   
144    96     
112    64     
-16    32     
-640   -80    
304    16     
208    176    
-160   -32    
48     80     
112    -64    
576    0      
128    -208   
192    128    
-112   32     
-48    64     
-32    -16    
16     64     
-144   192    
-240   -144   
624    -192   
160    -272   
64     144    
224    48     
16     64     
224    -80    
-192   192    
176    -256   
208    16     
-160   -48    
192    -80    
64     96     
144    64     
256    -448   
-64    -160   
-128   32     
64     -48    
192    -16    
16     -32    
176    0      
-128   -224   
144    -112   
320    96     
-128   -464   
112    16     
112    -512   
112    48     
-544   -48    
96     -192   
112    -32    
-128   0      
224    160    
112    -1520  
32     -208   
-16    736    
224    -656   
112    -64    
-144   64     
192    -96    
0      208    
176    -208   
-144   -64    
-960   -80    
0      176    
32     208    
288    -336   
176    16     
208    -368   
64     0      
-144   -64    
48     144    
-128   -448   
96     592    
32     -144   
112    288    
-112   -512   
-16    96     
-256   416    
128    -464   
144    192    
32     -96    
-64    464    
-32    80     
368    -176   
48     0      
-144   -160   
192    -320   
-160   -816   
96     304    
-16    64     
-32    -240   
320    160    
-112   -304   
176    -192   
-512   448    
64     -16    
192    -128   
0      80     
16     -144   
0      32     
-128   96     
96     -112   
176    64     
112    80     
-80    16     
-64    -496   
160    -144   
-80    0      
112    80     
-592   176    
48     -192   
-80    -192   
-16    -256   
-352   -224   
192    -560   
-224   96     
464    -1120  
144    80     
144    -224   
32     -384   
-336   -208   
-16    -224   
-128   80     
0      -128   
-304   -144   
112    96     
304    80     
112    64     
64     -16    
112    16     
80     80     
-64    -176   
288    160    
-96    160    
-208   -160   
128    80     
160    96     
16     144    
240    288    
-448   160    
32     48     
-720   80     
224    128    
-96    96     
272    -368   
48     16     
-16    -224   
-80    16     
-112   -48    
160    -16    
0      176    
16     48     
-800   64     
128    -144   
-368   -112   
144    32     
16     48     
96     -48    
0      -240   
0      -240   
160    48     
48     -144   
192    160    
-192   128    
-48    -16    
-80    -400   
128    64     
-144   144    
144    192    
80     336    
64     80     
32     208    
176    0      
-48    112    
32     -96    
-208   112    
-128   -384   
112    -160   
-32    -96    
-1280  -32    
64     96     
112    64     
32     -208   
-304   -768   
80     -544   
112    -448   
-160   96     
-512   -160   
80     320    
-80    -128   
-16    128    
-176   96     
-640   -272   
-176   -16    
80     -16    
320    240    
-992   -16    
-80    -64    
-144   -288   
-224   -352   
288    -96    
256    160    
176    272    
384    192    
-320   -48    
144    80     
-272   64     
-336   32     
496    304    
-208   256    
-208   0      
304    288    
-624   64     
-1184  80     
-304   320    
208    192    
368    0      
208    -16    
128    80     
-320   -368   
-112   -304   
-288   -96    
48     -48    
-304   48     
-272   -64    
16     0      
-368   0      
-32    144    
-976   -80    
288    80     
96     96     
0      80     
64     -272   
-304   128    
112    -80    
-176   -240   
192    -112   
-32    -96    
0      160    
128    64     
-240   -48    
-16    16     
80     304    
-448   64     
32     192    
16     -16    
128    16     
-144   -64    
64     80     
112    96     
112    224    
176    128    
192    64     
-112   32     
16     48     
-272   304    
-80    240    
-80    288    
-352   0      
112    -96    
-288   -352   
256    -160   
80     -192   
64     -128   
64     160    
-288   -480   
-112   -176   
0      -16    
-16    208    
48     -80    
176    96     
-176   -16    
-192   272    
-288   -16    
32     112    
0      -144   
-16    80     
-64    32     
208    240    
-96    176    
-272   -544   
400    528    
-320   -528   
96     112    
-48    80     
16     -128   
-256   160    
112    208    
-64    32     
-112   -416   
-224   128    
0      320    
-48    -48    
96     -16    
0      0      
80     64     
32     64     
128    80     
64     48     
0      48     
-64    32     
-144   32     
48     80     
128    64     
48     176    
-304   -288   
320    80     
304    208    
-80    80     
144    80     
112    64     
-272   -16    
-208   0      
-128   96     
32     208    
144    48     
160    64     
80     48     
0      -64    
-48    64     
-320   16     
-112   32     
-48    16     
144    80     
192    48     
128    32     
16     112    
-144   -16    
-32    16     
-128   96     
-16    80     
80     144    
-80    80     
-112   0      
416    208    
-384   0      
48     -32    
208    16     
96     128    
112    64     
-32    -112   
80     -144   
16     0      
256    112    
32     144    
80     112    
-224   -32    
48     48     
-32    48     
336    176    
-256   64     
64     16     
48     64     
112    48     
64     -16    
208    176    
-240   48     
-96    48     
176    96     
16     48     
48     64     
16     32     
80     32     
-64    16     
128    112    
32     64     
-32    32     
48     96     
-32    48     
48     80     
80     48     
0      48     
-112   64     
144    96     
-400   -176   
256    0      
-144   96     
352    96     
-240   32     
192    0      
-96    -80    
176    192    
-208   128    
208    -32    
-160   32     
-96    144    
48     144    
-32    -16    
-64    176    
160    80     
-48    -96    
-80    -48    
160    -64    
320    208    
32     96     
32     -96    
-80    64     
-32    112    
-240   -144   
352    96     
272    336    
176    256    
-144   -64    
256    352    
-384   128    
560    -64    
-176   -32    
144    96     
832    464    
-688   -896   
-416   -128   
96     80     
64     80     
-64    -64    
48     16     
320    -16    
176    -32    
0      -16    
512    -64    
-32    -144   
240    272    
-16    208    
64     -208   
80     208    
128    304    
96     -256   
16     0      
-32    240    
112    -128   
416    320    
-416   144    
304    -336   
-112   384    
0      -16    
256    192    
64     -96    
224    0      
-144   176    
128    -64    
-128   -80    
64     384    
144    -368   
32     -160   
80     352    
336    -80    
-64    112    
160    144    
32     80     
-112   16     
-192   -208   
160    64     
-80    160    
64     -128   
80     -400   
192    -240   
80     -144   
96     -480   
-208   144    
464    608    
240    688    
256    -208   
-160   448    
-272   -32    
-240   -240   
0      -400   
224    -176   
48     -32    
-16    -176   
96     -16    
208    80     
-64    288    
48     -176   
-16    144    
48     64     
-96    16     
48     0      
192    0      
-48    80     
96     80     
-48    32     
304    16     
0      176    
-80    -80    
208    48     
16     0      
240    80     
-48    -160   
128    160    
176    0      
192    -64    
-144   -352   
64     0      
-160   80     
176    -16    
144    16     
192    80     
96     96     
144    -336   
176    128    
-32    -352   
112    0      
48     -128   
96     -16    
288    -80    
-144   -240   
240    -192   
-48    160    
-48    80     
128    112    
-48    128    
112    64     
112    208    
0      -144   
-48    -48    
144    -128   
-32    112    
224    -32    
192    112    
304    -256   
-112   176    
32     -96    
304    -128   
128    80     
16     -32    
32     -704   
64     -128   
160    -528   
-48    -16    
80     192    
240    48     
32     80     
176    64     
0      16     
96     112    
208    -864   
-144   0      
144    -144   
144    112    
80     176    
-16    112    
32     -16    
-80    -576   
-160   -128   
96     -304   
160    -48    
128    160    
48     -96    
-64    -80    
-32    48     
112    -32    
-16    112    
16     32     
128    -16    
-2464  -16    
112    336    
64     -32    
96     -208   
16     -208   
80     -304   
16     -176   
32     -528   
128    -16    
112    -112   
48     -128   
144    -128   
96     48     
-128   32     
96     16     
-192   96     
0      80     
192    224    
256    -32    
176    -176   
-160   -352   
-64    -128   
-48    -1072  
0      0      
80     -16    
48     -128   
192    -272   
-96    -416   
-192   -192   
32     64     
-128   80     
32     480    
16     -240   
-144   -288   
16     -176   
64     -64    
-128   0      
240    -176   
96     272    
-16    -112   
-16    288    
352    -304   
368    32     
-48    176    
112    48     
-304   -192   
80     -448   
-576   32     
608    128    
272    -288   
560    -304   
128    -96    
-224   -144   
304    -416   
144    -96    
336    -80    
16     288    
-80    128    
-128   -704   
384    -384   
-96    -512   
32     -320   
-416   -16    
224    384    
64     112    
128    80     
-112   288    
384    -192   
48     32     
112    -288   
-176   -400   
-208   -224   
96     160    
0      160    
240    -240   
-272   -32    
208    -96    
-320   256    
0      400    
-1792  -240   
96     -240   
304    592    
112    -288   
-224   -320   
-16    -144   
320    288    
-64    0      
240    -112   
-528   -144   
0      272    
-176   -64    
64     192    
48     32     
0      0      
64     -80    
176    -160   
352    288    
-80    -272   
48     256    
48     -288   
320    -112   
-1072  -80    
112    16     
-176   -64    
176    128    
144    64     
64     208    
-240   -304   
64     -48    
-416   192    
48     -176   
64     272    
-240   -96    
96     -48    
16     96     
-208   -64    
-240   48     
304    16     
-288   -224   
-64    -80    
-96    16     
-80    -192   
-160   64     
288    80     
48     16     
-544   -32    
80     32     
-176   -112   
80     0      
64     -144   
128    112    
80     -208   
-240   112    
32     80     
-256   112    
32     32     
96     -48    
-160   48     
-768   96     
-64    80     
-272   -32    
48     160    
-544   -64    
-64    32     
-32    64     
-16    16     
-16    -32    
-416   0      
-144   -32    
16     80     
0      80     
48     -480   
368    -560   
96     256    
16     224    
-80    -112   
160    48     
-336   -352   
80     -48    
-128   304    
-544   48     
32     48     
-48    16     
-48    48     
-112   80     
-80    -16    
-1328  -288   
-32    0      
-144   0      
-16    64     
112    -48    
16     64     
-32    288    
-272   32     
-16    -48    
256    64     
96     48     
96     48     
-16    48     
-208   96     
-240   -64    
-768   -112   
128    160    
112    64     
144    64     
-32    -16    
128    112    
128    240    
-336   -32    
32     16     
16     80     
96     96     
-240   16     
-48    64     
-144   0      
-64    16     
-192   -64    
208    48     
-1168  32     
48     64     
64     -32    
-80    0      
-80    96     
-64    48     
-112   -64    
128    64     
0      64     
-96    32     
-48    16     
-144   64     
96     32     
-128   0      
16     144    
-1200  48     
0      16     
-64    -48    
80     80     
0      144    
32     96     
64     16     
-32    -32    
48     176    
-160   80     
112    48     
-16    96     
176    64     
-208   -16    
160    128    
-368   -48    
240    32     
-272   -272   
160    -192   
-16    -32    
-64    96     
0      144    
-16    128    
96     80     
128    288    
-32    224    
-208   -80    
480    576    
-928   416    
-16    16     
-32    -80    
320    144    
-208   64     
-128   -48    
16     80     
32     80     
544    224    
-16    400    
80     160    
-96    -304   
176    -176   
-272   -16    
-96    320    
-208   112    
-16    -672   
-432   -144   
80     320    
432    256    
-256   -144   
96     -48    
-16    -64    
-192   320    
-144   64     
144    144    
-144   0      
0      -48    
32     -96    
208    128    
16     -16    
0      -288   
-224   96     
304    -496   
-240   368    
16     -96    
160    304    
304    448    
-224   -704   
-336   -496   
208    -96    
-48    720    
112    304    
32     176    
48     -112   
-112   32     
32     80     
80     64     
304    192    
-80    -32    
-32    16     
32     -80    
160    80     
16     272    
128    160    
288    112    
-240   128    
32     128    
-160   0      
96     144    
-128   -112   
-192   64     
272    96     
176    112    
-48    48     
-224   80     
256    96     
96     64     
128    -176   
80     0      
16     80     
-176   0      
64     64     
-64    80     
144    224    
16     64     
32     48     
384    32     
-112   80     
-64    -176   
-208   80     
208    64     
160    96     
-32    64     
16     64     
80     128    
-176   96     
-48    144    
0      0      
64     64     
208    32     
-16    -16    
208    112    
-224   112    
-64    48     
-192   64     
352    96     
256    48     
0      64     
-208   -16    
-32    32     
-96    0      
64     112    
128    32     
-96    -112   
240    144    
-16    48     
16     -16    
80     160    
-112   -144   
416    -288   
288    -32    
-16    176    
64     -16    
-16    48     
16     -16    
-160   -16    
-96    112    
-48    64     
288    -48    
96     48     
272    -592   
-192   128    
16     64     
-16    -32    
368    176    
-272   192    
48     48     
288    -48    
0      0      
112    -16    
-128   -48    
160    64     
-16    176    
32     -272   
144    0      
-80    -144   
-16    96     
112    64     
112    144    
-192   192    
-48    16     
112    -176   
16     -240   
-64    -16    
160    64     
-112   32     
224    96     
144    -32    
64     48     
192    -16    
112    -304   
128    96     
-80    -304   
-16    -112   
32     -80    
128    64     
-64    -112   
32     32     
144    64     
-176   -224   
176    -64    
48     80     
64     160    
112    16     
160    144    
128    -112   
-16    -160   
272    -432   
272    112    
128    416    
176    128    
32     16     
64     112    
-128   -224   
96     -496   
-112   448    
96     384    
-224   -256   
-144   48     
-64    80     
400    -208   
320    448    
160    -48    
32     -272   
-272   -752   
80     16     
-16    -144   
400    160    
240    -112   
-112   192    
320    -352   
0      480    
96     256    
224    448    
-448   32     
96     -496   
144    256    
32     160    
320    -224   
208    -32    
-32    -176   
32     176    
16     16     
176    -704   
-256   -160   
-48    448    
-208   -176   
288    32     
-48    0      
-48    -144   
400    160    
96     80     
-192   -592   
544    -448   
336    496    
32     256    
288    -256   
208    -976   
-208   -240   
-64    -144   
-64    -768   
208    -144   
304    -336   
112    144    
-64    208    
96     -160   
112    64     
208    -240   
-224   -224   
176    160    
128    -464   
48     16     
112    -256   
256    144    
96     -32    
192    -48    
-16    -48    
112    -336   
240    -128   
0      -592   
128    -112   
144    128    
0      96     
192    0      
96     128    
48     -288   
0      144    
224    -128   
192    96     
-624   128    
32     -80    
160    0      
208    -128   
-48    -48    
368    16     
-160   80     
80     160    
32     -112   
32     -224   
16     80     
112    80     
112    48     
112    -48    
-96    -160   
-496   -64    
-112   -96    
96     64     
64     -48    
176    112    
64     -272   
32     -32    
96     -1216  
-320   -144   
64     -64    
80     208    
48     16     
-16    32     
-288   -80    
336    192    
-720   -64    
48     -80    
336    112    
160    32     
96     -16    
96     -192   
32     -112   
64     -224   
16     96     
192    96     
176    96     
144    -32    
48     96     
32     96     
16     0      
80     16     
96     112    
-128   64     
64     -64    
32     16     
-32    -288   
-368   0      
80     64     
64     96     
208    16     
96     -48    
-208   -48    
208    -32    
-80    64     
80     -256   
-96    -416   
176    64     
-64    128    
160    -32    
-848   0      
-80    -160   
192    64     
-16    -176   
-48    192    
96     -832   
-128   0      
176    48     
320    128    
16     -16    
64     0      
-32    -16    
-112   -16    
-208   16     
224    16     
96     160    
-64    32     
32     48     
256    -128   
224    80     
112    -320   
176    48     
368    144    
-144   64     
-656   -80    
128    -64    
-256   -16    
32     32     
16     64     
112    -32    
-176   80     
64     -32    
-144   -16    
144    -240   
128    64     
48     -432   
128    0      
-320   32     
112    -16    
-240   32     
80     0      
64     80     
32     32     
-80    0      
-48    -96    
-272   32     
144    -192   
-32    112    
48     -96    
-64    160    
-48    32     
-944   -16    
-96    -16    
-272   -32    
0      16     
128    -16    
-224   -16    
64     16     
-272   0      
368    -64    
16     96     
-144   -80    
96     32     
-304   16     
-544   -80    
-80    -16    
-512   -96    
64     64     
-560   -16    
16     48     
-1904  32     
96     160    
32     -48    
-32    80     
-112   32     
288    256    
-112   160    
-176   176    
32     -128   
128    -112   
-240   -192   
-256   -176   
368    528    
-272   640    
-224   -384   
-176   -16    
368    480    
-96    -16    
-16    928    
-320   -944   
-256   -976   
32     480    
384    400    
512    -416   
416    272    
-32    128    
160    32     
32     304    
-240   -272   
112    416    
-304   -128   
-16    -16    
-736   -208   
224    80     
-368   -64    
112    16     
400    -416   
32     -640   
-48    64     
80     -464   
-192   432    
-16    368    
32     -16    
-208   304    
384    -160   
32     240    
-144   -688   
-608   -224   
-128   -192   
48     -32    
-112   560    
368    144    
112    240    
-336   -192   
96     -80    
-144   80     
-160   144    
80     -80    
-256   80     
-128   160    
-16    0      
80     -240   
-1008  -304   
112    176    
-192   80     
320    -16    
-176   96     
16     112    
-144   -16    
-144   -32    
-16    256    
-96    192    
176    144    
-32    128    
48     80     
-320   80     
64     0      
-32    -16    
144    64     
-384   144    
208    32     
0      336    
112    64     
240    48     
112    80     
-96    32     
-32    32     
-80    32     
-48    80     
-160   48     
-272   0      
112    0      
-128   48     
128    16     
-432   -96    
-16    -128   
64     0      
-128   64     
0      0      
96     96     
32     64     
96     176    
16     144    
-192   32     
128    48     
-32    -32    
32     48     
-336   64     
96     112    
-208   -80    
-128   -96    
112    -112   
112    128    
288    80     
64     16     
32     96     
16     64     
224    128    
-160   96     
144    144    
-144   80     
80     32     
-128   -48    
176    -16    
128    208    
-112   144    
64     16     
288    112    
-48    80     
80     160    
192    192    
-192   64     
32     -32    
176    80     
-48    96     
-160   64     
208    208    
-160   -16    
-32    -112   
208    -224   
144    -64    
80     176    
48     80     
-208   -16    
-128   -256   
208    48     
96     112    
16     0      
-96    -16    
128    -48    
-448   -256   
-192   -208   
32     96     
48     176    
-96    144    
64     64     
-32    208    
-48    80     
176    48     
304    272    
0      272    
0      -320   
-128   144    
112    -80    
-192   -752   
144    432    
192    176    
-352   -32    
-16    -272   
96     64     
272    544    
16     64     
176    -240   
32     384    
-144   128    
-112   -512   
0      320    
-112   -160   
-80    48     
96     496    
80     -160   
32     304    
-64    48     
176    -16    
64     128    
-32    -240   
16     0      
-48    176    
48     48     
288    352    
-160   -32    
112    -224   
96     144    
0      128    
320    0      
-192   -256   
112    64     
0      352    
0      -16    
-96    -16    
128    -16    
-48    32     
0      96     
-32    -48    
144    16     
96     192    
48     48     
-16    64     
-128   16     
-80    0      
-192   16     
160    16     
672    1040   
-352   -144   
128    -672   
208    -48    
176    48     
432    16     
240    -48    
0      -144   
64     16     
-80    80     
80     160    
368    352    
-192   16     
-48    -32    
208    112    
288    224    
-32    -48    
-128   80     
80     -16    
240    240    
-224   176    
64     0      
-272   -224   
608    64     
-256   -208   
-16    80     
624    208    
-576   160    
336    -32    
-256   -160   
272    -32    
192    -656   
-176   16     
96     -80    
-48    64     
16     16     
16     128    
-96    -64    
288    16     
128    -16    
240    0      
-448   -48    
-80    -16    
208    32     
112    16     
48     96     
48     -32    
128    64     
-16    -416   
192    128    
128    256    
32     16     
80     112    
-48    112    
176    48     
80     64     
-192   16     
176    -64    
-16    48     
48     -48    
160    128    
64     -96    
240    144    
-192   -624   
64     16     
32     16     
64     96     
80     80     
368    -112   
-240   -240   
32     48     
80     192    
80     64     
144    112    
48     128    
464    176    
-160   -96    
96     -32    
128    -176   
-80    32     
48     80     
176    96     
96     -96    
-128   80     
-48    -48    
144    0      
96     96     
-16    -400   
48     -48    
224    -208   
0      128    
176    -80    
288    336    
-48    256    
128    128    
208    0      
48     32     
-48    32     
240    272    
-48    64     
80     -32    
96     176    
128    -304   
48     176    
240    -128   
192    -160   
96     -112   
96     240    
-112   32     
48     48     
144    112    
-112   -16    
32     64     
0      -896   
176    176    
32     -192   
-240   -704   
128    -80    
-48    -32    
32     -32    
-80    192    
-64    -192   
144    -80    
144    -304   
272    -528   
80     192    
48     -112   
176    96     
160    112    
64     -144   
0      -64    
-80    -112   
352    240    
-112   -192   
128    -64    
224    -208   
160    16     
64     96     
-16    -48    
32     96     
-80    -16    
304    80     
112    256    
-816   64     
112    0      
-704   -96    
144    96     
32     16     
-32    80     
48     -48    
112    -336   
80     -96    
-112   -144   
-80    96     
144    16     
-160   16     
112    -80    
-16    -16    
-176   -64    
16     -32    
-592   -32    
128    48     
48     32     
96     -224   
144    -112   
240    -288   
368    224    
-16    -272   
128    0      
16     -144   
80     112    
16     -64    
128    16     
64     -64    
128    -80    
112    400    
-64    64     
128    -192   
176    -240   
208    224    
48     112    
-64    16     
32     -304   
-160   -128   
16     -80    
0      48     
0      0      
-128   -272   
432    432    
-144   16     
336    -16    
-48    -80    
-832   368    
-224   -800   
0      368    
96     -176   
-16    400    
176    16     
-16    -592   
128    224    
176    112    
-320   288    
256    304    
-640   -656   
320    -784   
-304   160    
224    880    
352    208    
160    48     
304    -128   
-224   -112   
80     -336   
32     -192   
320    192    
128    -496   
320    160    
208    96     
-224   144    
96     -208   
160    -160   
384    0      
240    -16    
-400   0      
352    -96    
-288   80     
112    -208   
-96    16     
176    -432   
-304   48     
144    -768   
80     -96    
-784   160    
-144   144    
0      -128   
-64    -64    
-192   -16    
96     -48    
-112   0      
128    -80    
64     16     
-400   -336   
48     112    
112    -80    
-144   208    
64     -48    
80     -96    
-176   -160   
16     16     
16     48     
96     96     
96     48     
-48    -32    
-304   -48    
240    -80    
48     96     
304    -32    
-128   96     
-2112  0      
160    48     
48     32     
112    16     
-128   -16    
-1008  -48    
-240   32     
-176   112    
112    80     
224    -16    
144    0      
-208   464    
352    112    
-32    -288   
400    16     
-304   -16    
-80    32     
0      32     
-512   48     
48     16     
-464   240    
-112   -128   
-48    -64    
-80    48     
64     32     
-128   96     
-304   -144   
48     64     
-96    -112   
224    128    
0      48     
-96    16     
-144   -64    
-128   -64    
80     -80    
-80    112    
16     48     
-224   48     
144    112    
-160   80     
160    0      
-384   -32    
-32    64     
144    -208   
64     32     
144    0      
-208   176    
-112   64     
-160   -32    
272    144    
-352   160    
-48    64     
-176   -64    
-32    -96    
-976   -192   
32     -48    
16     -128   
144    112    
-48    0      
0      -16    
-304   -144   
-112   -48    
-64    64     
128    32     
144    -48    
-80    48     
-304   -272   
-416   -432   
-176   -208   
-1120  112    
288    112    
-96    64     
96     224    
16     -80    
-128   -64    
192    -32    
128    320    
80     96     
64     160    
32     -224   
-64    144    
112    0      
-128   0      
176    -112   
-400   112    
64     144    
-416   -96    
64     64     
16     0      
256    352    
16     224    
144    -336   
80     128    
-288   32     
128    288    
-48    -80    
-32    -368   
-416   48     
112    192    
-128   64     
224    288    
-640   0      
-64    -112   
48     80     
-144   128    
-208   16     
-16    128    
-160   32     
-48    48     
176    -80    
-144   -80    
96     80     
-320   -48    
16     64     
-336   -32    
0      80     
-464   -32    
-64    48     
-48    64     
160    112    
-128   -16    
128    32     
32     48     
-16    32     
128    144    
-48    -16    
-16    64     
-240   48     
-64    48     
16     16     
144    192    
-112   64     
-16    96     
-32    -32    
64     96     
208    224    
-160   48     
32     80     
-208   -16    
112    -144   
-144   96     
-16    -80    
176    -80    
400    192    
-128   0      
112    16     
-336   16     
-192   -96    
0      80     
96     240    
-16    112    
-144   -48    
144    112    
-112   32     
32     96     
-304   -16    
80     96     
-112   -16    
-272   -240   
176    -48    
464    272    
192    144    
-128   16     
208    144    
-288   -48    
384    80     
0      48     
336    96     
-48    -48    
96     0      
160    400    
-592   224    
112    -64    
192    112    
-160   0      
240    -32    
48     80     
144    64     
-96    32     
-96    -48    
336    0      
-448   -112   
80     16     
192    128    
128    128    
-304   -16    
192    -16    
-176   -48    
32     80     
-32    80     
112    16     
176    96     
-48    96     
80     48     
-32    -48    
-48    80     
160    80     
-256   32     
32     -64    
208    96     
-64    64     
-80    16     
16     64     
80     -1424  
-32    -64    
112    -32    
224    128    
-48    96     
-16    48     
-16    96     
144    -112   
64     96     
176    208    
64     -96    
272    48     
-96    -224   
-48    32     
192    160    
-240   -384   
48     -32    
128    48     
-48    240    
320    224    
208    144    
-96    96     
80     272    
-96    48     
48     16     
48     -32    
64     80     
-64    -16    
144    -64    
64     32     
176    -96    
-48    -80    
-128   -64    
112    224    
32     -64    
64     -32    
16     32     
-16    -80    
48     96     
0      144    
0      32     
160    16     
-192   -64    
144    80     
160    32     
64     -64    
-16    -16    
32     -480   
96     48     
64     112    
-128   64     
-240   -480   
432    -1040  
128    -288   
464    560    
-32    192    
64     -96    
64     288    
-304   224    
-48    -96    
320    432    
-176   -96    
192    -464   
288    304    
-16    -112   
64     -48    
192    48     
224    -16    
-48    -16    
-112   -112   
-16    -96    
80     16     
176    240    
320    80     
192    -32    
16     96     
32     96     
-64    -224   
-112   -112   
240    -432   
304    176    
176    80     
0      128    
32     -288   
544    608    
-352   704    
64     -480   
240    496    
-80    0      
16     -144   
-160   -64    
96     -512   
240    -32    
32     176    
80     -368   
80     80     
48     160    
-64    -112   
96     112    
64     64     
128    96     
48     48     
240    -272   
80     560    
0      -32    
112    -288   
112    736    
16     -224   
32     -240   
32     -240   
272    112    
-96    -112   
144    16     
160    -400   
176    64     
80     144    
-144   -176   
160    -112   
-48    80     
64     48     
32     -448   
-48    800    
176    -240   
160    -128   
192    -176   
64     96     
128    224    
-48    -144   
64     112    
240    352    
240    656    
-368   -176   
192    -128   
-16    -32    
112    16     
32     304    
0      -64    
176    112    
112    48     
208    -560   
272    336    
144    240    
32     -1168  
128    48     
160    -272   
208    -304   
-16    -32    
448    -128   
-304   224    
0      240    
-320   -64    
224    -32    
336    16     
208    16     
-160   -192   
304    -480   
272    160    
176    -64    
-16    96     
-304   -160   
176    -32    
-288   16     
128    -512   
-224   -32    
96     -736   
112    -368   
192    16     
304    -144   
48     128    
-48    48     
80     -304   
-240   128    
16     -192   
144    352    
-240   128    
272    -128   
48     -160   
-128   -512   
112    -272   
80     -16    
-144   -288   
336    -448   
-32    48     
64     80     
224    -64    
48     176    
80     64     
240    112    
-176   -32    
-368   -112   
16     -160   
160    32     
288    -16    
176    32     
112    -16    
256    272    
-80    16     
64     160    
160    80     
48     80     
272    -16    
-96    -64    
0      0      
-16    -32    
-336   -48    
144    80     
16     80     
256    -48    
64     64     
160    176    
-144   -80    
96     -224   
192    128    
160    -80    
48     0      
16     -144   
192    -160   
80     128    
-96    208    
-32    -16    
-128   -352   
-432   -64    
176    80     
-448   80     
32     -128   
-208   -112   
112    -16    
16     -64    
16     -512   
-96    144    
80     192    
48     32     
288    96     
-64    0      
-32    -16    
192    32     
-256   -48    
128    -192   
-32    -16    
208    224    
16     80     
-16    -192   
32     112    
0      -464   
0      96     
144    192    
128    -96    
-144   -96    
64     -160   
-64    -128   
144    -80    
-480   0      
-80    -240   
-128   -160   
80     128    
176    32     
16     -128   
192    -80    
272    -160   
336    336    
-240   -144   
144    -64    
-560   -160   
-64    272    
-336   -128   
-64    16     
112    192    
48     0      
-16    96     
192    0      
160    80     
128    48     
-80    160    
32     -80    
16     64     
48     32     
64     -64    
-192   -48    
352    -64    
-352   -272   
352    80     
-240   192    
48     -144   
-96    48     
80     -112   
192    0      
-464   -64    
144    96     
-160   16     
-720   -48    
-64    80     
-384   -80    
-16    48     
176    16     
16     -16    
112    16     
-64    64     
64     0      
-48    48     
-304   -64    
96     80     
32     -32    
-352   -80    
-592   -128   
-304   -16    
64     32     
-160   80     
48     32     
-64    352    
-208   64     
-1024  -48    
-96    64     
176    80     
-128   32     
-240   -96    
-32    64     
-112   -112   
-48    96     
64     -96    
48     48     
64     160    
48     0      
-192   -16    
-640   -16    
-80    64     
-592   16     
112    32     
0      -48    
128    64     
-192   -32    
32     112    
160    80     
-160   0      
16     16     
0      32     
-160   -48    
16     32     
-128   16     
-32    128    
-208   -80    
-48    80     
-240   64     
-2688  -208   
160    32     
-144   -64    
64     64     
336    -304   
-224   -96    
-400   80     
32     128    
-416   144    
-448   -80    
-160   -240   
480    144    
-464   192    
-112   144    
-80    -128   
-688   -336   
192    128    
-208   176    
80     32     
-224   144    
-272   0      
-208   32     
416    240    
-560   96     
-16    -256   
368    -16    
-400   96     
-48    0      
-368   -112   
96     48     
-368   48     
96     112    
160    32     
-96    64     
32     -48    
-192   16     
16     176    
-16    96     
208    96     
-240   -16    
-128   -32    
80     16     
-304   32     
-112   -32    
32     144    
-352   -16    
432    224    
-672   -96    
80     -80    
256    160    
32     80     
144    64     
96     -48    
-240   -48    
224    0      
-240   -64    
48     32     
-112   96     
-32    -16    
64     128    
-160   -16    
112    32     
-48    80     
48     64     
320    96     
-288   -320   
32     -96    
-80    112    
144    -16    
80     64     
-96    208    
112    16     
-32    16     
-192   -64    
-32    112    
16     32     
0      -176   
288    160    
16     192    
-176   -16    
-64    0      
-144   144    
208    16     
96     80     
64     96     
96     64     
32     -192   
80     240    
-272   -336   
96     32     
-112   32     
16     -64    
128    128    
-16    32     
-48    144    
128    16     
-64    96     
-64    -16    
432    704    
-400   -160   
32     -48    
64     -16    
128    -64    
16     192    
32     -16    
16     -16    
-96    -160   
-144   224    
-144   80     
64     288    
-160   -80    
240    -16    
-96    48     
160    -176   
112    112    
128    272    
-336   112    
160    -80    
0      288    
144    -16    
16     -128   
32     240    
-32    -192   
16     112    
176    128    
64     0      
80     112    
0      112    
128    192    
-160   1392   
96     -960   
96     -368   
48     688    
-128   -304   
80     128    
112    144    
-144   -128   
320    464    
-16    -192   
384    -160   
0      464    
144    288    
192    -176   
-80    -64    
96     240    
-176   224    
160    -112   
-352   -144   
-160   -256   
-32    -832   
32     32     
304    0      
48     80     
96     -96    
-32    0      
-64    -64    
64     48     
160    48     
-16    -144   
80     112    
160    64     
-80    -64    
96     -112   
-384   0      
80     -208   
80     64     
80     112    
128    112    
-64    208    
192    128    
-32    16     
208    128    
0      32     
16     80     
-128   -160   
32     -64    
192    112    
112    -176   
48     80     
0      -368   
32     240    
96     144    
-32    160    
368    480    
-384   240    
176    16     
64     0      
-176   752    
144    112    
128    -176   
160    128    
32     -96    
96     368    
224    32     
-160   -80    
240    -192   
-272   -560   
592    -112   
64     224    
208    336    
-240   144    
224    80     
96     -224   
-208   16     
-192   -416   
-208   144    
256    -176   
224    0      
-192   272    
-48    -336   
-144   -32    
448    -288   
400    320    
-160   240    
336    224    
-144   -48    
320    160    
-80    32     
240    112    
96     48     
128    64     
128    0      
32     -192   
96     32     
96     32     
-16    16     
64     -752   
80     -48    
144    32     
-48    288    
208    0      
16     -80    
224    -128   
560    560    
-576   432    
176    16     
-32    0      
496    288    
-80    464    
-80    -96    
96     -48    
128    -80    
16     240    
336    32     
-176   64     
496    0      
112    0      
-128   16     
-48    192    
-80    80     
0      0      
128    0      
128    48     
368    208    
-64    176    
-160   48     
-16    -192   
128    -16    
64     112    
-160   240    
144    16     
112    -64    
-80    -96    
96     96     
-32    48     
32     -208   
272    0      
128    -144   
96     96     
64     -16    
0      0      
240    96     
-160   400    
-32    -624   
192    256    
96     176    
-48    64     
272    48     
48     144    
80     80     
16     -48    
208    208    
-96    112    
64     192    
208    160    
208    80     
128    -128   
-64    -176   
0      -112   
192    -256   
112    176    
128    16     
-176   -288   
-1984  128    
-64    -640   
-16    -48    
-48    -192   
-128   -160   
176    192    
16     -16    
224    112    
-16    -32    
112    48     
-96    -32    
112    0      
176    256    
-304   -112   
-144   -192   
-1056  -272   
96     -16    
272    272    
-48    0      
32     -80    
0      0      
-160   16     
192    0      
48     0      
224    -272   
80     128    
160    -80    
96     80     
-16    -96    
176    -128   
-128   -16    
96     16     
48     64     
64     -32    
-80    -144   
384    -80    
176    32     
96     48     
32     16     
32     48     
-16    -48    
288    64     
-160   -96    
272    160    
400    272    
-416   32     
128    -128   
-1232  -32    
-32    -64    
48     48     
96     -144   
208    64     
208    -16    
-288   -128   
-64    -208   
-48    16     
160    -32    
160    160    
-208   0      
160    64     
-112   16     
0      -96    
-640   -16    
144    -16    
96     -16    
96     64     
256    80     
48     -96    
64     0      
-16    112    
16     80     
-16    16     
112    64     
-32    0      
80     -96    
-16    -16    
144    -64    
-160   48     
-16    0      
-528   48     
-16    -48    
0      32     
48     -48    
64     112    
-64    -160   
64     -16    
224    16     
176    -96    
-48    48     
-80    0      
-208   -80    
-96    32     
-80    32     
48     -128   
-1360  -96    
-224   0      
272    48     
288    -48    
-32    -48    
144    -256   
-96    64     
-96    -80    
224    32     
-160   0      
192    144    
-272   112    
-32    -96    
-32    -80    
-208   -64    
96     -64    
288    48     
-192   176    
-160   112    
-16    0      
176    -128   
-176   -80    
128    -32    
-16    -192   
1072   480    
-992   240    
-608   -128   
304    -64    
-144   32     
64     -64    
-32    -16    
688    256    
-304   80     
-32    -224   
-112   -208   
48     -384   
112    48     
128    80     
256    -32    
-112   32     
64     16     
-320   -96    
96     -16    
-80    32     
80     64     
-144   64     
48     -304   
-32    -80    
-1856  -48    
-48    0      
-720   -208   
-128   16     
48     128    
-1248  -64    
-304   -80    
-640   -16    
-144   -64    
288    64     
32     80     
-752   -336   
112    -352   
-240   224    
48     304    
-432   -432   
208    48     
208    400    
-192   -112   
64     -96    
-528   64     
-304   -96    
-192   64     
-48    32     
416    -80    
-16    144    
-352   -208   
-96    96     
80     352    
160    -208   
-80    16     
-480   -64    
176    -224   
-48    16     
-112   -48    
-64    144    
-48    -48    
-400   0      
-224   0      
-1184  -32    
-80    528    
-64    96     
-16    -368   
96     -240   
-80    368    
-192   -336   
-48    208    
32     144    
-32    -64    
-112   -48    
-80    -240   
80     64     
48     -16    
-16    240    
-464   160    
32     -32    
-224   -48    
272    48     
64     240    
-160   144    
48     -64    
0      -16    
80     112    
-128   -400   
48     -80    
-176   128    
128    48     
-144   336    
-32    -16    
-128   -16    
128    112    
-192   224    
-112   112    
-256   -512   
96     64     
-16    -64    
16     -96    
176    -48    
-64    -32    
-128   144    
0      -112   
208    -304   
48     0      
80     64     
-336   -32    
-32    -16    
-560   -224   
-112   80     
-128   -32    
160    -128   
144    96     
-48    -16    
-224   -256   
-16    -256   
-128   -48    
80     32     
-48    -16    
0      16     
-32    -80    
96     96     
32     144    
-96    112    
64     80     
16     -80    
-16    -16    
-64    -16    
-48    0      
-64    0      
208    208    
-208   192    
112    272    
416    304    
-16    192    
32     48     
-352   -224   
16     -96    
-160   -128   
128    -112   
32     -112   
112    144    
0      112    
-192   80     
256    272    
-144   64     
-96    48     
-208   -160   
-80    -320   
-128   -64    
80     64     
-96    0      
160    208    
-112   -16    
32     64     
-16    -32    
48     -144   
16     -32    
80     -32    
-192   -32    
144    -80    
144    16     
-112   64     
192    432    
-320   112    
-48    160    
0      -240   
-64    -112   
-192   -176   
-32    208    
208    48     
-32    -64    
0      -48    
96     -544   
128    64     
16     64     
-128   128    
160    416    
-128   48     
-16    80     
240    -64    
-224   -64    
160    -416   
144    -240   
272    -16    
-16    208    
32     48     
-128   -16    
-16    16     
32     0      
-384   -112   
-32    -80    
208    208    
336    224    
-752   64     
-64    -16    
-384   -240   
272    16     
464    -384   
96     -272   
-224   192    
-848   320    
-192   16     
-96    128    
256    80     
192    0      
320    96     
-128   -112   
256    160    
-288   64     
-32    160    
-192   -128   
-32    64     
272    -112   
-48    160    
-64    784    
336    384    
0      16     
160    -224   
640    400    
-688   192    
-128   192    
-48    -80    
416    336    
-32    240    
-160   0      
128    -96    
-112   -112   
144    -48    
-96    -64    
96     672    
176    320    
-48    192    
320    112    
288    416    
-16    192    
256    128    
64     224    
-16    400    
48     16     
32     -256   
-16    -80    
192    -576   
48     352    
-272   0      
240    -288   
96     336    
192    352    
-32    96     
160    16     
-256   64     
128    96     
-16    80     
304    256    
-304   -464   
80     48     
192    64     
48     -144   
192    848    
-128   272    
656    -384   
-160   144    
-32    -256   
256    224    
128    272    
272    144    
32     -32    
-80    32     
-64    80     
-192   0      
112    -48    
128    64     
208    -336   
224    80     
48     48     
0      48     
64     16     
-80    16     
-112   -80    
80     -64    
0      -208   
208    144    
-48    80     
16     112    
32     -64    
192    0      
240    96     
-112   -160   
128    16     
-16    -720   
192    160    
-16    96     
0      160    
-48    -400   
544    -304   
160    -192   
304    240    
96     64     
64     0      
-32    -48    
-64    -112   
-192   0      
-48    -80    
-96    32     
-128   -144   
112    64     
112    144    
224    256    
-176   -48    
96     0      
144    -16    
48     112    
16     64     
-64    -336   
336    -176   
192    -32    
368    176    
32     0      
32     32     
128    -16    
-96    208    
-208   -656   
208    16     
224    112    
-16    32     
112    -32    
256    96     
32     64     
-32    -112   
128    112    
160    -160   
48     -48    
80     16     
-32    64     
-160   -112   
48     -16    
272    16     
304    128    
48     16     
80     112    
-48    0      
-48    64     
80     64     
0      -144   
64     96     
16     -48    
144    80     
-32    -192   
144    112    
-32    -160   
48     64     
64     -208   
128    48     
16     16     
48     -256   
48     64     
96     -64    
48     96     
64     0      
176    176    
-96    -128   
144    -48    
0      -32    
160    112    
112    0      
0      96     
-48    -48    
144    -1216  
-48    48     
-144   -720   
256    64     
-128   32     
208    16     
48     0      
224    -400   
-160   -16    
-80    -688   
240    -144   
144    144    
208    -112   
-48    -624   
128    96     
288    -96    
-128   -64    
112    -416   
80     96     
48     -16    
208    -240   
-464   -400   
416    -816   
544    -48    
160    -32    
624    240    
48     -112   
-144   -64    
256    112    
-240   304    
336    192    
-320   96     
-96    96     
-16    -272   
-336   -272   
64     -32    
176    -112   
320    80     
64     48     
336    224    
-256   16     
32     -1680  
272    48     
192    80     
208    -32    
96     -80    
128    128    
-304   64     
0      -144   
-80    64     
-32    -80    
-80    464    
-384   -320   
128    96     
224    128    
-96    -416   
320    64     
-240   -80    
336    192    
48     144    
32     -192   
-144   -16    
-128   -544   
224    -192   
-96    48     
-272   -192   
-560   -416   
0      496    
-64    32     
336    -1024  
0      304    
160    448    
96     208    
0      -160   
80     -240   
-48    48     
304    32     
32     96     
160    16     
-160   192    
64     -16    
-672   48     
256    80     
-992   176    
240    64     
-32    16     
320    -272   
-48    16     
64     -544   
16     48     
-16    128    
192    48     
-64    -144   
32     -128   
-256   -32    
-16    80     
-272   192    
144    224    
32     176    
-32    -96    
16     160    
80     -176   
-32    0      
96     -368   
256    48     
-64    224    
0      -64    
16     -16    
240    48     
-928   48     
16     -32    
-160   64     
304    -112   
160    64     
48     -112   
16     16     
16     -176   
112    64     
208    -240   
-64    -64    
-864   -96    
64     -16    
-432   16     
32     80     
-48    -64    
336    128    
-336   144    
-16    -144   
-1456  -64    
80     -160   
112    80     
336    112    
-288   48     
288    -208   
64     -192   
112    -16    
-16    96     
-112   0      
240    -96    
0      48     
80     80     
-144   64     
112    -112   
-208   -32    
-32    -128   
-32    80     
-480   224    
112    96     
96     -32    
-832   -160   
16     64     
-656   -160   
16     80     
-1904  16     
-64    416    
192    48     
-32    -48    
160    80     
-80    32     
-208   112    
32     -64    
128    144    
-64    128    
0      112    
-288   0      
-48    336    
-560   -16    
-96    -64    
-816   112    
48     208    
64     112    
48     80     
-48    -80    
-64    -16    
-192   64     
192    160    
-208   -48    
-48    -48    
64     32     
80     -32    
-224   96     
64     -16    
-48    64     
-16    48     
-64    128    
-176   112    
32     -48    
-208   -16    
224    64     
-96    -272   
64     -80    
0      144    
-144   -16    
0      304    
-64    16     
-208   192    
-64    128    
96     -112   
-80    16     
-32    -80    
-496   -176   
272    640    
-272   384    
-224   -32    
48     -800   
-432   -640   
240    -96    
-352   48     
-96    32     
16     80     
112    400    
176    704    
-208   464    
-192   32     
-272   752    
-304   336    
32     -928   
-544   80     
240    -16    
-48    480    
336    208    
224    208    
-336   -80    
240    -576   
240    176    
256    128    
192    96     
-96    -144   
-48    32     
-160   176    
-112   944    
-48    0      
0      -432   
464    208    
176    -304   
256    96     
80     240    
-160   384    
-144   16     
-224   -144   
224    -432   
-160   -32    
320    256    
-256   -32    
192    -480   
-16    192    
160    16     
-448   160    
160    64     
-176   -160   
176    80     
-240   -160   
-144   48     
128    96     
-128   112    
176    -112   
-16    64     
16     144    
-48    -16    
48     304    
-752   -400   
400    -400   
-1168  96     
240    144    
-144   -160   
144    224    
208    144    
-336   -128   
128    64     
-128   -32    
144    112    
16     128    
240    -32    
-112   48     
288    80     
-304   16     
144    112    
-144   192    
144    128    
144    0      
-176   48     
16     -16    
112    32     
240    32     
-112   -64    
-48    160    
-112   96     
96     128    
-384   -16    
80     304    
-32    192    
240    464    
-32    512    
-32    384    
32     -48    
192    -208   
-144   -112   
112    48     
48     96     
-96    0      
-16    96     
-144   256    
464    688    
-352   208    
240    176    
-80    -32    
128    32     
16     -32    
48     -80    
64     -32    
144    -48    
96     64     
80     112    
-80    128    
-48    32     
80     304    
0      48     
144    -80    
-256   -80    
-16    112    
-96    48     
-64    48     
80     80     
16     48     
144    80     
-128   -384   
192    -96    
-32    272    
-288   160    
-64    32     
-160   -400   
112    -112   
96     160    
-288   -176   
96     -64    
-64    16     
48     96     
192    80     
-16    80     
-208   -32    
-16    -32    
-64    -32    
-176   48     
48     144    
-64    -144   
240    -32    
240    192    
16     96     
-112   0      
80     48     
64     48     
-64    48     
224    48     
128    32     
64     32     
112    144    
-64    32     
-80    0      
-16    32     
48     96     
-48    48     
-32    -32    
112    128    
-16    144    
96     128    
0      16     
112    -528   
192    112    
-112   48     
128    32     
-112   0      
32     48     
128    48     
80     96     
64     64     
64     48     
48     -16    
144    112    
64     80     
-64    -80    
32     16     
64     -1232  
160    128    
32     48     
64     128    
-32    -32    
16     -16    
96     80     
0      48     
80     32     
128    -32    
-48    -48    
192    80     
-128   64     
192    272    
160    176    
-96    -160   
0      32     
80     -64    
64     80     
-16    64     
64     80     
-112   80     
160    -16    
-48    -144   
128    -112   
80     128    
240    112    
256    -96    
304    -48    
48     16     
-96    -128   
192    -96    
-96    -576   
96     192    
176    192    
96     -64    
-48    -48    
0      -32    
288    128    
-416   16     
128    32     
144    -16    
48     192    
752    128    
192    64     
-112   -336   
272    144    
-304   -688   
480    -352   
576    96     
256    208    
-48    -32    
-272   560    
-320   -160   
-176   -64    
-160   384    
304    -16    
-320   -384   
192    432    
448    256    
112    -256   
128    -32    
-16    -144   
-48    -32    
16     -112   
-64    496    
80     -16    
160    64     
-64    0      
224    -256   
160    192    
48     80     
144    160    
-128   -304   
-64    -48    
528    288    
-288   352    
256    32     
-128   256    
64     64     
64     256    
0      32     
288    -80    
-144   32     
368    224    
-272   256    
0      -32    
208    -48    
80     -448   
0      -128   
128    -112   
-32    32     
-64    -128   
80     32     
-32    -336   
-32    64     
16     48     
320    80     
-128   144    
64     80     
-176   -688   
80     -48    
-32    112    
176    -16    
176    192    
128    -80    
288    48     
128    -160   
96     144    
80     112    
272    -240   
0      16     
128    64     
112    16     
-304   -64    
64     -384   
32     -32    
144    -400   
80     32     
272    -432   
128    528    
-240   336    
-32    -32    
96     -112   
256    0      
16     -128   
-64    48     
80     48     
368    64     
-816   160    
160    -128   
112    -48    
64     48     
352    96     
-304   -304   
-176   -128   
160    -32    
208    -32    
368    -16    
-144   80     
80     -80    
-176   -320   
-240   -144   
16     96     
-960   -48    
352    -144   
112    16     
240    -16    
128    -16    
-16    256    
112    64     
240    -480   
-112   -352   
176    -448   
176    48     
-112   -80    
112    0      
0      144    
-144   -16    
-288   -32    
0      -144   
192    -80    
80     -128   
208    192    
240    0      
48     0      
-64    -304   
80     -64    
-32    -112   
160    -48    
192    80     
144    256    
-48    400    
-48    0      
-304   -48    
0      -16    
-1888  -64    
272    -192   
96     -128   
-128   -272   
-80    -224   
224    -288   
32     -240   
32     -256   
208    64     
272    -64    
-32    0      
64     64     
-128   336    
128    240    
256    144    
-272   96     
64     48     
192    48     
-16    -16    
-16    48     
32     -144   
240    -16    
128    -96    
64     336    
-224   48     
112    64     
16     160    
128    112    
-32    -160   
48     448    
-208   432    
-64    -240   
-288   -48    
64     -48    
256    -112   
32     32     
64     -16    
48     80     
-48    -224   
128    112    
-32    -16    
-240   -16    
-64    16     
-688   -64    
128    -32    
-176   -16    
160    -192   
-448   16     
128    64     
-48    112    
368    -592   
128    400    
128    -288   
16     64     
-368   -80    
256    -224   
-80    64     
208    -112   
48     1040   
192    -128   
-288   -960   
-144   96     
32     528    
-144   -720   
208    -112   
256    32     
-32    -160   
464    208    
-816   80     
224    -80    
-896   -272   
-1376  -816   
320    464    
32     1088   
-544   -48    
-160   32     
368    -96    
352    -32    
-848   80     
144    128    
-16    -240   
-224   -400   
-80    -16    
-1024  144    
-176   0      
-1616  -48    
0      64     
32     128    
-64    64     
80     80     
-32    -64    
-336   -160   
0      16     
-144   -112   
224    176    
-208   -48    
-128   -32    
-48    -16    
-240   16     
80     64     
-352   16     
32     48     
-160   48     
272    64     
-800   -448   
-64    -176   
-32    64     
-192   -64    
192    64     
0      144    
-224   -224   
-224   -16    
64     -48    
-144   -32    
128    96     
-272   -128   
208    -80    
-688   96     
96     0      
-848   96     
64     64     
-96    0      
0      112    
-32    -16    
64     32     
-64    0      
-112   -48    
80     16     
-32    0      
-48    -112   
-144   -64    
32     80     
-896   -32    
-16    240    
-448   96     
192    16     
-176   -208   
0      48     
-80    -96    
-48    -64    
96     96     
96     32     
-48    256    
48     176    
-112   64     
-144   -16    
-32    -144   
80     -80    
0      0      
-512   80     
240    64     
-544   16     
64     176    
80     96     
96     0      
112    -64    
-320   -160   
-112   48     
-144   64     
112    0      
-32    32     
112    128    
-112   32     
64     32     
-288   -112   
96     80     
-400   16     
-112   176    
224    48     
-16    32     
-256   16     
-48    80     
112    176    
-288   48     
144    48     
64     96     
112    96     
128    48     
80     16     
-80    -32    
160    160    
-528   -32    
32     48     
48     16     
-32    80     
32     48     
16     48     
-80    -32    
-64    0      
64     48     
208    32     
64     96     
-144   80     
-16    80     
-48    32     
256    144    
-192   -64    
0      0      
128    48     
112    64     
32     32     
-16    32     
48     48     
-128   80     
-112   16     
-192   -32    
112    48     
48     96     
192    112    
-112   -16    
64     80     
-96    -48    
32     64     
0      -16    
-96    -112   
144    32     
-16    -80    
-48    -64    
-32    16     
-128   -32    
0      16     
64     64     
-48    -16    
32     32     
-336   -64    
160    64     
144    96     
128    64     
-16    80     
-16    16     
0      32     
-32    0      
64     32     
128    48     
32     16     
112    0      
288    144    
-176   16     
112    0      
-80    160    
96     64     
144    208    
-256   -144   
256    64     
-128   112    
160    -32    
112    112    
208    288    
-48    192    
-48    608    
-64    -160   
-112   48     
-272   -160   
-160   80     
304    -240   
-48    688    
0      192    
-112   -160   
-160   304    
128    192    
0      -192   
-48    400    
768    0      
-336   176    
-64    -224   
-480   -400   
464    560    
-288   144    
-176   176    
288    16     
-224   608    
176    -16    
64     32     
-240   176    
-208   -64    
224    64     
-64    -256   
272    288    
240    96     
320    128    
-304   -64    
336    -112   
-288   304    
96     64     
272    -240   
-288   -64    
224    32     
-64    176    
96     96     
-16    16     
-144   -112   
336    96     
-48    176    
240    64     
208    112    
-192   192    
-48    -144   
-160   -80    
32     -352   
64     128    
80     48     
64     -160   
144    48     
32     160    
-64    160    
256    48     
144    64     
16     32     
-16    16     
0      112    
-80    304    
448    32     
-352   -224   
80     -224   
-112   80     
-16    -1200  
80     64     
-16    48     
64     96     
208    144    
-16    16     
80     0      
160    32     
240    -64    
32     48     
-128   -144   
288    0      
-80    176    
192    64     
160    80     
-16    -256   
32     64     
-32    96     
48     48     
144    -80    
-16    96     
0      -32    
16     0      
176    -48    
176    96     
-48    -32    
-128   -144   
176    0      
0      -112   
-288   -48    
160    -576   
176    112    
0      -1024  
48     64     
128    96     
0      32     
64     16     
96     96     
128    48     
32     80     
-112   64     
128    -64    
-48    16     
48     0      
80     144    
64     -80    
16     48     
32     -288   
80     -144   
-96    -128   
320    144    
-112   144    
80     112    
0      -112   
352    96     
80     144    
-128   -176   
128    -256   
224    -64    
48     -96    
192    -512   
160    -256   
144    -160   
32     112    
160    -80    
-96    192    
128    64     
240    80     
160    160    
80     240    
-112   144    
128    -32    
-48    80     
128    -256   
208    -144   
-112   -480   
176    -96    
80     -144   
224    -64    
16     -208   
128    80     
-128   -336   
-224   -496   
-176   -288   
144    384    
368    320    
-208   -176   
368    -240   
144    240    
-64    -16    
-48    -160   
32     448    
32     -272   
-48    32     
224    144    
64     -96    
0      -112   
48     -336   
160    256    
176    -320   
32     -944   
48     -16    
-16    80     
144    0      
192    32     
112    448    
0      -32    
-48    -128   
144    -704   
80     224    
160    -208   
0      448    
-16    80     
-16    -256   
0      -16    
160    -112   
80     -256   
64     -672   
192    144    
-16    128    
64     368    
176    224    
-80    -144   
48     -16    
16     48     
-48    -192   
112    144    
112    16     
48     -128   
-80    -96    
-32    -224   
96     16     
-224   -16    
288    -48    
-48    -112   
336    0      
32     -128   
0      80     
0      -128   
-176   -112   
144    -32    
-128   48     
-96    16     
384    -16    
-224   0      
144    -80    
48     -48    
-288   -16    
-80    -32    
48     -384   
544    32     
-112   -448   
-192   -48    
336    -144   
704    320    
-208   0      
1504   544    
-624   224    
-640   -144   
-608   -432   
448    -192   
-480   160    
32     -64    
416    160    
-400   -272   
-112   -80    
16     -240   
144    0      
176    -112   
48     128    
-32    -80    
16     0      
16     96     
0      -64    
-160   -64    
96     -128   
-2528  0      
64     32     
256    0      
336    128    
-112   32     
112    -144   
112    208    
240    16     
80     -48    
-192   32     
-128   48     
400    112    
-112   -48    
-176   0      
-112   -48    
-432   16     
224    16     
0      0      
48     -272   
96     -160   
32     -432   
112    80     
128    336    
32     48     
-288   -32    
208    -96    
16     0      
208    0      
-656   -32    
0      -96    
-16    32     
176    32     
-224   -16    
112    -224   
176    80     
-48    -160   
160    32     
304    -192   
-224   0      
-192   -64    
336    -64    
-496   48     
80     -16    
-80    48     
112    48     
-96    0      
192    -32    
-160   16     
32     -64    
192    176    
208    160    
128    176    
-64    32     
-16    208    
96     96     
48     0      
-32    160    
144    48     
192    208    
-64    224    
-112   96     
144    -128   
-16    32     
16     -208   
32     64     
-1088  -96    
16     -32    
-176   -80    
-128   80     
-80    192    
-240   -16    
160    0      
64     -48    
-368   -320   
288    -880   
80     -64    
336    272    
16     112    
-480   -96    
128    112    
-32    -80    
-320   -80    
-128   96     
-336   -32    
-48    -48    
-208   176    
80     64     
-768   80     
-80    64     
160    32     
0      32     
-352   16     
-16    80     
-144   48     
80     192    
-496   0      
-128   96     
-32    80     
-160   -16    
80     48     
-656   32     
128    -16    
-240   -96    
64     -144   
80     32     
0      128    
0      -96    
48     16     
-32    16     
144    112    
128    128    
-80    96     
-160   0      
-176   112    
-272   112    
-112   224    
-176   112    
-16    128    
48     80     
-1232  -32    
80     32     
-160   -320   
64     -48    
-160   -96    
-64    -320   
-128   0      
-176   512    
64     592    
-64    -368   
48     -48    
-32    320    
-128   128    
-224   -48    
64     48     
-512   -64    
16     48     
32     32     
48     48     
-48    -128   
-48    80     
-96    240    
-16    -112   
64     288    
240    -96    
-16    -144   
-80    192    
-16    64     
-144   -16    
0      160    
-176   -208   
256    48     
-368   -16    
96     -80    
224    48     
-112   -800   
-224   304    
-272   128    
-352   -272   
80     32     
-48    32     
16     96     
320    -80    
-48    416    
368    64     
-480   -128   
16     272    
-2336  -16    
-32    240    
336    112    
224    192    
80     304    
-48    160    
320    272    
-112   432    
-304   48     
480    144    
-160   128    
352    144    
-176   -80    
-576   -80    
-112   160    
-1200  112    
32     176    
368    -16    
80     0      
32     96     
-80    0      
48     16     
80     0      
-304   32     
32     32     
-64    -96    
-240   -288   
-32    16     
-384   128    
176    48     
-192   32     
0      -64    
80     272    
112    48     
112    -16    
0      -208   
-64    64     
48     128    
-16    48     
-96    48     
80     -96    
-80    -16    
48     0      
96     144    
-48    64     
-128   192    
240    -112   
176    32     
80     16     
-128   144    
192    16     
-272   -16    
128    -208   
-48    32     
-96    128    
-288   0      
32     -144   
48     160    
16     80     
48     -48    
160    80     
16     64     
176    144    
16     16     
32     48     
32     -48    
16     16     
48     0      
96     80     
-32    -32    
-32    -112   
-16    -128   
192    48     
-192   96     
-144   -96    
224    64     
-80    96     
-32    0      
112    80     
0      32     
-112   176    
96     64     
48     0      
-176   -64    
176    -48    
192    96     
-384   48     
176    80     
32     16     
16     32     
80     64     
176    208    
-160   208    
16     48     
-48    96     
32     32     
208    -48    
176    144    
-32    112    
-80    -32    
160    64     
-160   304    
-96    112    
80     16     
112    -64    
240    -144   
64     112    
16     -272   
-176   -368   
16     -48    
-208   80     
64     64     
80     176    
-144   160    
0      144    
160    32     
-192   -576   
0      16     
112    400    
16     448    
272    256    
-240   -240   
16     -128   
272    112    
256    64     
112    16     
-272   -240   
-32    160    
80     80     
48     112    
128    96     
-16    432    
240    -304   
288    128    
16     -96    
-208   16     
-176   16     
288    320    
-208   -352   
256    80     
144    240    
208    240    
-224   -16    
48     48     
16     -176   
16     -96    
64     304    
0      -80    
-80    32     
64     -528   
224    32     
48     144    
192    160    
-16    -80    
-112   -96    
160    160    
-80    -16    
64     80     
160    160    
-32    16     
208    -112   
80     16     
48     -112   
32     32     
32     -272   
160    32     
0      32     
96     32     
-96    32     
112    80     
-80    -48    
208    80     
-32    32     
160    48     
-80    16     
64     -64    
320    288    
-272   -48    
272    48     
-64    -288   
192    48     
32     96     
512    128    
-624   16     
416    -16    
-128   96     
368    272    
368    208    
-176   32     
-80    -144   
32     -96    
112    144    
240    48     
48     -48    
-208   -112   
416    160    
-80    -48    
0      64     
-80    -16    
48     48     
-112   16     
160    32     
-80    -80    
384    112    
288    144    
0      48     
-304   -32    
416    -112   
368    336    
-768   -256   
-320   -224   
544    -160   
336    208    
-432   32     
384    128    
80     144    
-192   48     
304    64     
16     0      
-16    0      
272    -208   
-384   -384   
752    -144   
-384   256    
-176   -48    
144    80     
-32    -80    
96     -16    
192    16     
-16    48     
-80    96     
80     -128   
32     48     
0      -208   
16     48     
208    -192   
-144   32     
144    -80    
128    0      
112    32     
144    80     
144    0      
-272   32     
464    144    
-176   144    
-128   -48    
80     -272   
304    -128   
0      -192   
-128   -1040  
384    32     
64     192    
32     -64    
0      96     
192    -160   
256    112    
-208   -192   
160    -176   
32     160    
272    -304   
-80    64     
-368   -96    
80     80     
16     16     
144    -16    
160    -160   
160    0      
32     0      
80     64     
240    48     
32     32     
272    288    
-32    272    
-80    224    
336    160    
112    352    
-64    -48    
160    -160   
192    80     
48     -208   
32     16     
144    -400   
-80    -128   
96     -784   
64     208    
240    -240   
16     0      
128    16     
48     160    
128    16     
48     -144   
-16    -32    
112    80     
-1104  -64    
80     -352   
-48    -304   
64     112    
-48    256    
-96    -592   
352    -64    
32     -1104  
144    -32    
208    32     
144    -32    
128    48     
128    304    
-224   688    
-32    -528   
-304   -80    
64     32     
96     -16    
160    160    
144    -224   
128    -192   
-160   304    
-16    -640   
-176   128    
-112   32     
0      -16    
32     32     
192    -16    
176    -64    
240    -16    
-48    80     
176    112    
-848   -80    
208    128    
-224   -80    
64     304    
160    768    
-176   -656   
-32    -80    
32     304    
16     -64    
-192   16     
112    -96    
96     0      
32     0      
-64    48     
208    -32    
-1184  -96    
128    64     
-816   128    
192    -112   
144    192    
-112   -592   
48     224    
0      80     
-64    -304   
-128   16     
112    -16    
32     96     
176    80     
-608   -96    
128    -288   
-848   -128   
32     -384   
-96    -128   
96     112    
160    0      
160    -288   
224    160    
240    -96    
-96    -240   
-224   -176   
208    -192   
-800   352    
32     -32    
-272   16     
112    112    
0      -96    
48     -192   
32     16     
160    80     
-64    -48    
240    -320   
128    528    
-32    480    
80     336    
-144   -32    
-176   -672   
-352   -144   
0      112    
224    160    
-64    208    
-256   -64    
16     -256   
-16    -48    
-144   -512   
64     -448   
-256   -112   
-464   -224   
-32    240    
-464   128    
-128   -32    
-304   112    
16     -16    
-32    128    
48     -48    
176    16     
0      240    
-2000  -96    
-112   -128   
16     112    
-64    352    
-640   -160   
-272   -160   
240    256    
-1728  160    
-400   160    
-352   -32    
-32    224    
-880   48     
48     0      
-32    32     
-192   0      
32     48     
-32    48     
80     -32    
0      80     
128    -144   
-304   -128   
-80    176    
-224   -144   
-176   -96    
-16    -144   
-48    96     
-1776  -128   
-160   48     
112    0      
-112   352    
48     -16    
128    -64    
-272   -192   
-16    -64    
160    144    
-16    32     
-176   -32    
192    48     
-112   192    
48     128    
-336   96     
160    48     
-400   240    
-752   -48    
160    -64    
-144   -64    
96     80     
-432   -176   
128    -128   
352    80     
-128   80     
-144   -48    
-256   -48    
-16    -64    
-32    -32    
160    80     
-32    0      
-80    0      
-400   -16    
128    96     
48     -112   
80     0      
-48    -128   
32     32     
96     48     
-112   32     
-48    -16    
-176   48     
-32    128    
400    256    
-352   176    
192    0      
-320   -128   
-352   -80    
560    432    
-304   320    
64     -16    
96     -32    
160    96     
32     0      
96     320    
96     288    
-192   16     
-160   -64    
176    80     
0      64     
-16    -16    
128    224    
192    144    
48     720    
-912   256    
-112   -96    
80     -64    
368    256    
128    576    
-32    256    
-32    -192   
32     -16    
176    272    
-144   -96    
144    -112   
-32    -80    
112    -304   
80     96     
176    896    
-1056  -1088  
-32    128    
-144   112    
32     -176   
64     32     
-144   -192   
304    64     
-80    80     
96     416    
-144   32     
-32    -128   
-448   -16    
64     -112   
-208   0      
112    208    
48     32     
96     16     
-64    -32    
112    -128   
112    160    
-48    128    
0      64     
96     128    
-48    96     
-64    -16    
64     -128   
-240   -48    
-16    96     
-352   -32    
80     96     
80     80     
176    32     
64     32     
128    48     
176    112    
-80    80     
-128   0      
-16    32     
176    208    
0      80     
96     48     
-304   -64    
112    80     
-112   -32    
32     64     
144    128    
80     48     
-80    0      
32     32     
128    144    
-144   16     
-48    -112   
192    32     
64     80     
-32    16     
208    112    
-80    -16    
192    48     
0      32     
80     16     
-32    80     
-64    64     
16     0      
32     48     
-48    64     
80     80     
0      0      
80     80     
64     -112   
-48    0      
128    96     
-112   32     
96     64     
-144   48     
272    144    
-32    16     
192    -48    
-112   80     
48     64     
112    96     
-48    64     
0      -32    
-144   -96    
144    176    
16     32     
208    16     
-288   48     
224    -256   
-16    64     
-304   -48    
160    -32    
192    160    
-224   -16    
144    -144   
-112   0      
-336   128    
160    144    
-256   64     
48     48     
192    -32    
128    112    
-416   -384   
592    -880   
320    208    
-80    -80    
384    80     
96     112    
-96    208    
-576   80     
-32    -80    
240    32     
-240   -80    
384    160    
256    144    
-400   -16    
-16    64     
64     32     
-48    -256   
144    80     
-32    96     
64     32     
128    80     
16     -96    
-48    -176   
112    128    
64     -80    
240    96     
-288   -16    
64     80     
-208   48     
176    64     
240    48     
32     -272   
144    32     
-64    272    
96     160    
96     -96    
96     -64    
96     16     
160    64     
-32    16     
112    32     
-160   -96    
48     64     
112    32     
32     0      
48     96     
32     -160   
208    80     
48     -960   
-48    -64    
208    48     
-48    48     
-32    -240   
-32    144    
96     64     
-80    80     
144    -16    
192    48     
64     144    
64     -112   
-48    400    
64     -240   
32     -432   
-32    224    
160    96     
-160   144    
240    -320   
112    288    
16     32     
-64    -48    
80     112    
0      64     
-32    -144   
176    160    
208    0      
-16    64     
176    704    
48     -288   
-144   -160   
64     272    
64     -1520  
-48    64     
112    -624   
208    176    
272    544    
16     -176   
-32    176    
-48    -96    
-144   -16    
80     592    
128    -352   
-64    -48    
48     144    
288    -48    
32     48     
0      -496   
224    752    
96     -352   
-32    48     
80     208    
176    -64    
-32    -16    
128    192    
192    208    
0      -176   
144    208    
208    96     
-128   -704   
-16    80     
256    560    
160    -400   
-128   -240   
96     -48    
16     176    
-16    -48    
144    128    
32     32     
304    288    
-144   -160   
160    -336   
144    -32    
144    -464   
96     224    
-176   -176   
192    -496   
272    -1024  
368    -272   
16     -32    
-80    -928   
-80    16     
176    -432   
144    112    
0      -32    
-16    -48    
96     -144   
80     -160   
256    208    
32     96     
240    80     
-48    128    
64     -240   
160    -1056  
16     176    
256    -352   
-96    48     
-352   128    
0      -48    
256    32     
112    -112   
32     -112   
64     -240   
64     -48    
0      16     
48     16     
96     16     
80     256    
-32    192    
-240   32     
128    -32    
-96    -176   
-944   0      
-32    -176   
96     -96    
176    -64    
-128   -96    
176    -608   
-112   -368   
-48    -880   
-16    0      
-64    80     
16     64     
256    192    
16     48     
-80    176    
48     -496   
-752   -368   
272    -16    
-1872  64     
0      176    
160    -128   
176    192    
16     112    
128    -384   
96     -144   
240    -64    
48     96     
-192   16     
-80    -32    
-352   48     
208    -96    
-64    16     
240    0      
-736   112    
-128   -144   
144    -16    
80     48     
288    80     
112    -80    
-48    -80    
144    -1552  
-288   -336   
592    -288   
352    -32    
-80    -16    
-160   144    
-464   -48    
80     -64    
-400   -48    
160    -32    
-1376  -80    
336    -144   
-112   96     
-80    -112   
-160   48     
-32    -896   
-16    -96    
112    -208   
80     0      
-112   16     
64     64     
-48    96     
368    0      
-192   208    
144    -48    
-160   -128   
160    -224   
144    -112   
-16    -64    
32     64     
112    -80    
48     160    
-224   -144   
448    -144   
0      208    
304    208    
112    80     
96     -160   
-128   -48    
96     -96    
-592   -128   
-48    -96    
-256   64     
64     -112   
144    160    
160    112    
64     112    
-80    160    
128    -112   
-672   80     
176    -64    
-240   0      
240    -128   
-208   0      
0      -96    
-112   -128   
128    -208   
48     240    
144    64     
112    0      
32     -384   
-112   96     
-336   -80    
448    -496   
-48    -240   
288    -80    
-464   0      
288    288    
-416   -560   
-32    -240   
64     288    
80     -224   
208    -64    
-2032  -48    
-64    16     
-64    16     
-1232  -528   
-32    96     
-256   16     
-144   96     
-400   64     
-320   64     
-48    -144   
48     -96    
160    48     
240    112    
-400   -112   
96     48     
48     -176   
80     16     
64     176    
-272   128    
-224   96     
-192   32     
-80    -64    
-1248  32     
-240   -80    
480    -288   
96     -256   
80     64     
-160   48     
-336   -32    
112    96     
-16    0      
144    352    
-192   208    
112    160    
-352   64     
-240   -80    
112    32     
-48    128    
-64    48     
-112   0      
-80    144    
-112   96     
144    96     
-400   -80    
32     0      
-64    80     
80     -16    
32     48     
-336   -16    
16     160    
48     -144   
64     -192   
144    80     
48     48     
-304   -32    
-48    48     
-320   -32    
80     64     
-32    -48    
64     64     
-32    16     
-208   0      
112    64     
80     -160   
-208   -48    
-32    0      
-16    -16    
-304   0      
16     80     
-624   -32    
-32    -16    
-1136  -64    
128    32     
-112   -128   
48     64     
-48    64     
-80    16     
128    -16    
240    96     
-240   64     
-80    32     
-32    48     
0      -32    
64     16     
-64    -32    
-176   0      
-352   -16    
48     64     
-48    -16    
48     48     
48     64     
0      32     
192    112    
-128   -16    
32     64     
-16    -16    
-32    96     
64     -16    
-80    96     
-80    336    
160    176    
-464   -112   
-32    -64    
32     -144   
16     352    
64     64     
96     96     
-400   32     
80     -80    
-128   -112   
176    224    
0      208    
304    128    
-96    96     
-208   -64    
256    96     
-192   -32    
48     16     
272    144    
-240   112    
208    -16    
208    224    
-160   32     
144    -16    
352    256    
-80    0      
160    -16    
-144   48     
144    112    
-576   -128   
128    192    
176    48     
-256   160    
-80    128    
-208   -16    
-224   64     
272    -32    
64     48     
-320   112    
48     224    
-128   0      
-32    -64    
-128   48     
64     80     
-16    112    
208    176    
0      48     
-240   32     
-96    48     
160    224    
-48    112    
32     96     
-48    -128   
48     144    
0      176    
-80    -80    
240    320    
-208   -112   
400    -96    
-128   576    
48     -96    
96     112    
-112   16     
-128   64     
128    16     
16     16     
304    128    
-160   -224   
304    96     
-64    32     
-64    16     
-16    192    
-336   -1104  
80     416    
-80    -160   
-256   -208   
160    144    
144    224    
368    384    
-176   -80    
-288   -16    
80     32     
-48    320    
-32    208    
128    -80    
496    288    
-64    144    
-208   -16    
64     -272   
-144   -544   
-144   -464   
-16    -96    
144    320    
128    32     
160    48     
32     -80    
144    64     
0      32     
144    0      
0      48     
-352   -16    
112    48     
16     144    
80     304    
112    -64    
-32    -240   
64     32     
-16    -48    
160    -192   
32     32     
112    160    
176    128    
96     128    
208    256    
-128   304    
-80    64     
288    -16    
-96    80     
128    144    
144    -16    
-48    -848   
304    528    
-64    112    
192    -112   
48     96     
-32    64     
144    192    
-48    64     
80     288    
-32    80     
-16    80     
-16    -224   
224    -32    
160    112    
-64    112    
-48    -352   
64     128    
-96    160    
16     32     
160    160    
-128   -128   
224    -64    
-32    80     
96     96     
96     48     
-48    -32    
96     -80    
-208   -16    
-112   -64    
192    256    
-240   -144   
-96    112    
336    96     
128    64     
96     64     
-16    -48    
208    96     
64     -208   
16     -16    
80     176    
0      96     
-128   32     
-80    48     
128    16     
112    192    
-240   0      
144    128    
96     80     
32     144    
208    176    
176    144    
32     -16    
128    64     
192    144    
-96    128    
-16    -80    
144    48     
16     144    
128    -32    
80     32     
16     -224   
80     208    
-144   -224   
48     32     
32     240    
160    160    
64     416    
16     -192   
0      16     
16     176    
-272   -160   
576    -224   
128    -80    
160    32     
-80    -112   
-112   -128   
-16    -480   
80     -528   
48     -64    
-80    -688   
-128   -16    
-80    32     
48     0      
240    80     
240    192    
32     -320   
-80    -352   
176    -224   
-400   -112   
240    -272   
320    -352   
-96    384    
32     48     
-192   240    
128    -272   
-16    32     
-16    -320   
432    -176   
-320   64     
-96    -64    
-64    -256   
-176   -64    
0      96     
32     -192   
-32    112    
-48    -224   
688    -224   
208    -416   
352    288    
208    -176   
48     160    
112    64     
16     -192   
48     -224   
160    -320   
160    -176   
-208   -368   
336    -208   
-144   96     
128    -288   
192    -48    
-64    176    
32     64     
112    80     
160    -48    
256    176    
224    224    
96     -336   
-480   96     
-352   -160   
96     -896   
224    -48    
32     -64    
272    48     
-32    -1056  
0      -272   
64     -160   
544    480    
-336   -304   
-128   208    
192    -432   
80     144    
128    528    
-16    -64    
-784   -416   
192    -352   
48     640    
-48    -64    
-48    -400   
96     -1216  
192    208    
48     208    
48     0      
-16    -240   
80     144    
128    -144   
208    304    
112    -496   
-144   32     
-336   384    
128    -448   
-96    176    
144    -176   
32     160    
-32    -432   
-16    240    
240    48     
16     -16    
-64    -464   
176    176    
256    240    
-48    -288   
-32    -80    
-64    64     
-208   112    
144    -48    
192    -96    
128    0      
80     64     
128    -96    
-96    -64    
112    -480   
48     -48    
128    96     
-96    16     
128    64     
240    160    
-144   224    
-64    -224   
-400   -16    
48     144    
-576   -16    
48     32     
192    -16    
16     -176   
96     -192   
192    -128   
32     112    
112    -880   
208    -224   
144    64     
128    256    
-144   -16    
32     32     
-304   -48    
-16    16     
-560   -32    
-112   16     
-224   -192   
176    -208   
32     -160   
256    0      
128    48     
256    -112   
32     32     
48     -96    
32     -48    
0      112    
32     16     
32     80     
80     -112   
-144   -80    
336    16     
-176   48     
128    -48    
64     0      
64     96     
96     96     
-144   -192   
-48    176    
-144   -16    
-32    -96    
272    -16    
256    16     
-208   48     
32     -48    
-384   64     
128    32     
0      64     
160    0      
-48    0      
-16    -128   
80     64     
-64    -128   
128    96     
64     16     
128    -16    
-512   -32    
-48    0      
-112   48     
-16    -32    
-176   -80    
320    112    
32     48     
-32    -128   
48     96     
-32    -80    
16     32     
160    -112   
96     80     
-176   32     
-48    32     
-64    0      
144    -64    
0      0      
128    64     
0      48     
80     -48    
-144   -32    
224    -32    
-16    32     
96     -80    
32     48     
-1056  -64    
-256   -32    
-160   -32    
-2176  -96    
-16    144    
-272   112    
-80    -64    
80     -80    
-112   80     
-160   -16    
304    48     
-752   -192   
256    48     
-272   128    
80     112    
-32    32     
-512   -80    
64     -160   
-32    128    
-240   -32    
-96    16     
-304   -96    
288    128    
-592   272    
-240   368    
288    400    
-624   0      
-192   96     
-80    208    
192    368    
-352   400    
272    16     
-336   -240   
-32    -16    
-304   -192   
-528   -16    
16     -48    
-736   48     
192    32     
240    32     
-144   -112   
80     -240   
-144   224    
128    -16    
96     48     
192    -16    
64     -128   
-160   -16    
-128   64     
-128   -192   
-240   0      
96     32     
-224   -32    
320    752    
-544   -400   
-48    -304   
16     32     
176    -144   
128    -64    
-384   48     
432    -688   
-208   352    
16     544    
192    96     
-560   -272   
32     -160   
160    224    
0      160    
192    448    
-1184  112    
352    368    
-192   -80    
-64    -128   
96     80     
-48    64     
0      32     
-304   -48    
80     0      
128    192    
-112   208    
32     -32    
16     64     
-256   -96    
16     144    
-496   -32    
240    96     
96     32     
-48    64     
-128   -224   
-32    -80    
32     16     
-208   -112   
-64    64     
-96    16     
256    96     
-576   0      
16     48     
-400   0      
32     32     
-432   -32    
-32    48     
-272   0      
176    16     
96     -64    
176    -80    
-128   96     
16     0      
144    96     
0      128    
-48    -32    
-176   -48    
96     80     
-176   48     
112    48     
-336   32     
80     -48    
160    128    
-224   48     
128    16     
-32    64     
112    16     
-32    80     
112    -32    
96     16     
64     176    
-160   80     
-48    0      
128    -48    
64     128    
-176   -48    
64     -32    
64     0      
80     64     
-16    48     
48     -16    
64     16     
96     48     
-112   176    
-208   -16    
-176   48     
-256   -96    
64     112    
-160   16     
112    160    
0      128    
160    16     
240    0      
48     144    
224    160    
-224   48     
80     -16    
48     -64    
144    96     
48     96     
192    64     
-208   -80    
304    160    
-96    16     
0      80     
80     -80    
0      -64    
96     32     
-144   -32    
368    128    
16     144    
224    64     
-32    128    
-224   192    
32     -16    
416    160    
-208   0      
80     -32    
112    64     
64     48     
-16    48     
32     -144   
-160   -48    
224    80     
-32    144    
32     80     
160    112    
-256   128    
96     16     
-336   64     
144    -272   
-144   -64    
160    -112   
-272   -320   
64     64     
64     48     
48     48     
96     -80    
48     144    
224    112    
-192   160    
208    240    
240    304    
144    368    
128    16     
160    128    
-48    -64    
0      -128   
240    128    
176    1792   
-64    624    
144    -656   
304    624    
-176   352    
-176   -16    
192    -912   
144    -560   
-144   1008   
304    176    
-208   -160   
352    224    
-16    -336   
208    160    
-64    48     
160    -1264  
-32    -176   
16     416    
-304   -208   
64     -288   
496    192    
384    32     
-128   -240   
32     624    
-208   -16    
-384   -1008  
400    224    
-592   -352   
704    -1088  
608    1152   
208    -320   
448    -416   
-144   48     
-160   656    
272    560    
-864   -880   
80     384    
-128   192    
496    624    
80     -416   
-192   176    
224    64     
128    336    
0      -352   
32     224    
-32    -192   
96     -64    
224    -16    
128    112    
-240   -384   
400    416    
-96    -48    
496    -384   
-400   -112   
80     176    
128    -48    
-240   48     
288    0      
32     -64    
0      -64    
-144   -160   
224    48     
-32    -640   
32     0      
-80    -16    
112    64     
112    -208   
32     160    
64     160    
144    128    
-80    160    
160    80     
32     48     
16     -64    
160    96     
-32    -96    
96     16     
64     -784   
48     48     
48     -160   
48     400    
0      352    
48     -96    
208    -32    
128    -96    
16     96     
64     -64    
-32    112    
64     -16    
144    112    
48     320    
-208   336    
192    128    
112    -80    
48     -80    
224    112    
-32    208    
128    48     
16     -32    
-112   -64    
16     32     
-32    48     
-80    64     
112    352    
160    192    
208    -48    
-128   128    
96     -224   
128    0      
0      -16    
48     64     
32     -16    
32     64     
208    80     
128    128    
96     112    
-16    -144   
0      64     
64     -48    
128    48     
176    112    
-208   64     
128    0      
384    512    
-176   -608   
224    16     
96     -160   
112    80     
-16    -64    
320    112    
176    16     
0      16     
-224   -384   
-16    -128   
-240   96     
-64    -32    
192    96     
32     -160   
208    128    
32     -32    
-96    -432   
16     64     
80     16     
-80    -48    
-160   -48    
-128   -128   
32     -48    
160    -864   
16     -48    
272    -144   
80     -16    
96     144    
-80    -48    
-176   0      
32     -80    
208    96     
-16    48     
144    -336   
144    16     
-2544  32     
224    64     
-176   0      
64     -192   
64     -144   
176    -528   
176    0      
128    112    
-96    -64    
128    -240   
0      -48    
80     80     
48     64     
16     -176   
128    -160   
-272   0      
96     0      
224    112    
-64    -48    
112    -80    
-16    -400   
32     -32    
80     80     
96     16     
-32    0      
-192   32     
160    0      
16     32     
-112   -16    
96     -64    
-32    0      
96     -48    
32     -48    
-128   -112   
112    -208   
96     -368   
176    32     
112    -208   
32     64     
64     -160   
-352   96     
288    48     
-64    -64    
96     -64    
-96    32     
-320   -32    
176    -144   
-848   -160   
64     -32    
80     16     
-112   -160   
208    -80    
16     -320   
160    -32    
0      -240   
96     144    
-240   16     
160    96     
-240   32     
272    -288   
-96    -144   
144    144    
-112   -96    
-16    0      
-608   -64    
80     -288   
1872   1984   
-1200  736    
-208   -1136  
-160   -672   
-288   704    
592    -368   
224    -688   
-32    720    
0      -528   
0      -352   
-64    432    
48     176    
496    352    
-1376  -592   
-16    -288   
80     32     
-32    -176   
96     672    
208    32     
224    112    
-192   -112   
144    -96    
192    64     
-128   -64    
-208   48     
160    -96    
-368   -192   
96     -192   
-48    -192   
224    -224   
16     -48    
-64    -144   
192    -80    
64     -16    
48     -64    
-112   80     
48     128    
-240   64     
176    -64    
-208   32     
96     -64    
-128   32     
-32    -32    
80     96     
160    -16    
64     64     
160    -112   
256    128    
112    -224   
160    32     
-128   80     
64     -96    
-112   32     
-80    16     
-192   144    
-48    128    
-144   -16    
112    -16    
-192   112    
-1760  -96    
-112   48     
-816   -208   
256    16     
-112   80     
-192   0      
-64    -16    
-384   -16    
-176   32     
64     32     
-80    16     
0      0      
80     -48    
-704   0      
48     16     
-48    -112   
128    32     
-496   -64    
320    304    
-32    112    
48     80     
-304   32     
-352   -32    
-176   16     
-272   -48    
224    80     
16     160    
16     176    
-176   -64    
288    32     
-112   -16    
32     16     
48     -96    
96     0      
-208   16     
-64    -48    
-160   -128   
-336   -208   
-128   48     
-832   32     
-32    48     
-2496  -32    
-32    32     
48     64     
-96    48     
-96    -48    
-16    -80    
256    -128   
144    96     
-160   0      
16     112    
-336   -80    
272    -96    
-128   0      
32     96     
-32    16     
-352   0      
-48    -32    
176    0      
96     112    
-32    0      
48     -80    
-80    -96    
192    112    
-288   256    
336    672    
192    384    
-256   0      
-320   -160   
-272   -128   
-48    144    
-32    64     
96     128    
-2656  -720   
272    -624   
-32    -192   
224    112    
-64    -96    
-176   -48    
16     112    
-96    176    
-32    128    
-96    -224   
80     112    
-176   256    
-32    16     
-416   160    
0      112    
-1488  304    
-128   448    
160    16     
96     -64    
144    112    
48     -48    
128    16     
-112   -176   
-176   64     
48     48     
112    -128   
80     96     
96     272    
-16    -112   
-16    -16    
16     -48    
160    80     
64     64     
-32    -640   
-208   192    
-16    352    
-80    16     
48     32     
64     -48    
-16    48     
0      144    
48     32     
-224   -16    
-64    -48    
-128   16     
-544   -720   
-80    -144   
176    368    
0      240    
208    240    
96     16     
32     240    
176    -80    
-48    -256   
-352   16     
-96    -80    
-368   -192   
-64    32     
32     48     
-224   -160   
-896   -224   
112    208    
-336   -512   
272    -224   
112    240    
480    64     
240    160    
-32    -208   
-304   112    
-16    448    
-32    16     
-160   0      
48     96     
-224   96     
-48    64     
-32    48     
32     80     
400    384    
-352   96     
160    -176   
64     0      
16     128    
160    -32    
-16    0      
-32    128    
96     144    
80     0      
-128   16     
-208   -32    
464    80     
-224   -160   
-176   -80    
128    176    
480    176    
-416   -64    
32     -80    
16     32     
48     16     
192    32     
-96    -16    
192    64     
-48    112    
96     80     
-208   -32    
192    64     
32     48     
64     48     
112    48     
-32    128    
208    160    
48     64     
-64    16     
-32    32     
144    0      
-64    32     
16     112    
128    64     
352    128    
-208   32     
96     0      
-48    48     
-64    160    
80     -96    
384    176    
0      64     
-112   48     
144    80     
-32    32     
-64    48     
-112   -240   
240    96     
-112   224    
-80    80     
-16    64     
288    208    
-240   0      
-400   0      
160    64     
96     32     
128    128    
-16    -48    
-32    -16    
-256   0      
160    96     
144    96     
112    64     
-112   128    
144    -176   
0      -64    
-48    -224   
64     64     
144    48     
96     112    
176    80     
0      -48    
96     64     
160    48     
96     0      
80     64     
176    32     
-32    0      
64     -16    
-48    -32    
128    -368   
112    -1264  
256    96     
256    288    
16     64     
160    -144   
16     0      
144    48     
0      48     
-112   -208   
64     176    
-208   32     
-32    96     
16     -16    
16     -288   
112    32     
112    -192   
-32    80     
96     16     
32     32     
-32    -160   
16     -80    
32     208    
176    112    
80     0      
48     -48    
80     -32    
400    304    
-48    192    
160    16     
-48    32     
144    -208   
96     96     
32     -384   
160    32     
144    64     
128    96     
-144   0      
-128   0      
-112   -80    
336    -144   
256    -32    
208    96     
-16    96     
0      -16    
-128   64     
48     -64    
240    48     
112    -48    
128    80     
224    240    
176    64     
-64    -16    
-16    0      
-16    32     
64     16     
80     -32    
112    -16    
48     112    
-16    -32    
64     -192   
16     -288   
176    144    
-64    -320   
64     48     
32     -112   
48     0      
64     -112   
112    48     
64     0      
176    144    
-192   -160   
-32    0      
-128   -64    
32     -272   
0      192    
-32    64     
352    32     
-224   -208   
352    240    
-16    -288   
48     416    
32     -480   
-80    -32    
48     -144   
32     -112   
-80    16     
32     -64    
-32    128    
240    160    
-32    1024   
-16    -912   
240    -64    
-96    576    
144    -592   
320    224    
-304   272    
144    -144   
160    -480   
320    432    
192    128    
208    -208   
-288   -304   
96     -160   
128    416    
272    112    
-272   -480   
240    -192   
160    -176   
-368   -240   
32     48     
64     -896   
32     48     
144    -112   
224    -48    
-96    -80    
272    -32    
80     32     
160    -304   
32     -224   
48     -144   
16     32     
48     160    
80     48     
-16    -352   
288    -192   
48     112    
160    192    
16     -240   
336    -96    
-160   0      
192    -144   
80     -48    
208    -400   
-96    80     
-48    -352   
192    -256   
0      -48    
224    -64    
128    -16    
48     80     
80     32     
64     48     
-368   -48    
352    -80    
-288   -16    
64     -112   
144    0      
-32    64     
176    176    
-16    -432   
16     -144   
96     -1568  
128    80     
48     0      
16     48     
96     0      
-144   -32    
-144   -144   
192    32     
-288   16     
-80    32     
368    16     
160    32     
-32    -64    
64     -304   
-32    -64    
-80    -160   
96     -32    
384    -112   
80     96     
128    -48    
144    -48    
0      0      
80     -48    
32     80     
-32    0      
-896   -96    
128    -96    
112    64     
144    -64    
48     32     
-48    -256   
160    16     
-16    -144   
64     80     
-144   32     
160    -64    
-160   -80    
176    16     
-64    16     
144    -48    
-1248  -144   
224    -128   
-16    16     
32     -16    
-32    -96    
240    -384   
128    144    
256    -80    
48     224    
32     -144   
48     -192   
-32    48     
-96    -160   
144    -208   
272    -48    
-288   -16    
48     -192   
-624   16     
-112   -112   
-64    16     
176    -144   
192    -128   
-64    -448   
160    -16    
-64    48     
160    -32    
-112   -48    
160    32     
80     80     
-336   -320   
-352   -64    
32     224    
-48    32     
-48    -304   
416    224    
64     800    
32     272    
112    -960   
192    352    
-1056  -96    
80     -32    
64     -96    
-272   -256   
96     -288   
-224   224    
-256   -384   
32     -320   
-304   160    
160    -80    
160    176    
128    -368   
288    544    
-368   -64    
-848   -80    
-224   240    
144    -176   
192    96     
16     -16    
-96    512    
-16    -160   
-496   -288   
32     -240   
256    -32    
-256   -16    
176    80     
-240   64     
-320   -32    
-144   80     
-464   16     
-80    0      
-400   64     
-32    -48    
384    -64    
-32    80     
272    0      
-64    48     
-288   -128   
16     -16    
-128   -32    
0      -80    
-240   -128   
-208   32     
48     16     
-48    64     
-192   16     
-160   -16    
-112   256    
-1232  -32    
0      144    
176    48     
64     -32    
-400   32     
16     80     
-80    -208   
32     96     
80     -16    
-112   -64    
320    96     
-352   -48    
224    -64    
-144   96     
-160   -32    
-16    0      
704    688    
-1136  176    
-128   -192   
224    -272   
32     48     
-432   192    
-240   -176   
0      -336   
656    208    
-96    80     
-80    16     
160    16     
-176   -112   
464    128    
-416   -16    
384    48     
-784   32     
-416   176    
128    64     
-80    -144   
48     -32    
-64    80     
-80    -16    
16     32     
-48    -16    
-208   16     
144    96     
-16    48     
-16    16     
-512   -64    
160    96     
-688   32     
-80    -80    
-112   -160   
32     96     
-80    -80    
-48    0      
80     48     
48     16     
384    208    
-448   96     
-16    -48    
80     32     
64     48     
-80    16     
80     80     
64     -32    
96     96     
-576   16     
-128   16     
16     48     
-128   32     
-96    16     
0      0      
128    112    
96     -16    
-176   -32    
-16    16     
-160   64     
16     32     
16     32     
-176   16     
-16    0      
-416   16     
160    -224   
64     80     
80     32     
64     -16    
-48    64     
176    96     
80     416    
-528   304    
-16    -16    
-80    -272   
-16    0      
208    176    
-448   -192   
144    32     
-848   -64    
96     32     
-32    -112   
32     112    
32     80     
176    224    
96     -80    
-80    64     
-16    -48    
64     -32    
96     96     
-368   -80    
-16    48     
-32    -32    
160    48     
208    160    
16     192    
32     80     
80     -48    
48     32     
16     48     
-16    80     
80     32     
176    -16    
-192   64     
464    608    
-528   544    
64     48     
0      32     
128    80     
208    112    
240    160    
16     -208   
112    -496   
-16    -128   
304    816    
160    176    
-192   -192   
-64    -96    
-240   -80    
32     80     
-128   32     
64     96     
-80    16     
16     0      
-48    256    
80     432    
-64    96     
-16    -48    
128    48     
-48    96     
128    -112   
16     -240   
32     -64    
-160   -32    
96     64     
-112   80     
128    96     
-176   64     
0      32     
112    -160   
80     32     
48     320    
-32    224    
224    -48    
144    -256   
144    0      
-256   176    
416    224    
128    -672   
64     128    
-368   96     
-48    64     
-64    160    
-128   -208   
176    16     
48     272    
-16    16     
48     80     
48     128    
-32    -16    
32     16     
48     -32    
48     64     
-336   -80    
656    112    
-304   0      
48     96     
32     -16    
96     -16    
32     64     
0      240    
48     160    
-144   -176   
160    608    
0      -384   
-16    576    
64     -176   
-112   368    
-432   -192   
224    -1056  
240    80     
224    304    
96     256    
-352   -144   
32     -240   
112    592    
272    -96    
320    208    
-176   -48    
0      -160   
32     -80    
-240   -240   
240    48     
-160   0      
112    -80    
-48    -32    
-32    -128   
0      80     
-80    -496   
336    48     
160    176    
80     144    
144    -160   
176    0      
-272   0      
368    -32    
192    80     
-80    -80    
336    -160   
-160   -32    
528    -144   
144    -160   
208    256    
-32    -112   
96     96     
16     -32    
48     160    
224    192    
-32    224    
-160   -80    
256    -144   
-240   -96    
0      64     
-144   -192   
368    -48    
-144   288    
240    -144   
128    -48    
304    -16    
-16    336    
-80    -320   
240    -160   
0      -16    
80     0      
-144   48     
80     -192   
-48    -48    
64     176    
-64    176    
128    -320   
-176   -352   
192    80     
0      480    
-160   -80    
160    -96    
144    -1056  
-176   96     
-16    192    
80     16     
272    -32    
64     160    
192    16     
288    16     
-32    16     
-80    32     
48     112    
144    -128   
-80    -32    
240    -48    
16     192    
32     -304   
224    144    
-32    -272   
64     32     
80     32     
48     96     
-16    -64    
224    -112   
96     112    
-64    -16    
176    -144   
160    -272   
448    400    
-304   160    
16     -80    
16     -112   
112    112    
-224   32     
160    48     
-64    48     
128    16     
64     0      
96     48     
-96    80     
112    -144   
96     64     
32     -32    
176    128    
16     -32    
-32    -32    
48     -48    
0      80     
32     80     
-32    80     
128    512    
160    16     
80     160    
0      16     
32     192    
32     -192   
80     -320   
-192   -272   
-16    -352   
112    -400   
272    480    
240    48     
272    64     
16     512    
224    0      
-176   -416   
16     128    
-192   -272   
240    -832   
352    176    
288    544    
-16    -464   
-160   -16    
64     -16    
112    -48    
80     48     
32     16     
-32    64     
-32    32     
128    -208   
-112   416    
-640   -208   
208    0      
272    256    
-80    0      
-32    80     
368    368    
-192   -208   
208    -352   
128    0      
160    80     
144    64     
48     -80    
-256   -16    
-208   -144   
-144   -160   
-160   -128   
592    144    
-496   -16    
176    32     
240    0      
16     -160   
176    32     
224    -96    
96     16     
80     -112   
-144   0      
112    -32    
-32    48     
144    0      
112    0      
-32    48     
176    0      
-48    48     
-32    -96    
112    -48    
48     -96    
144    32     
208    80     
-96    -16    
160    -768   
32     64     
80     -16    
160    80     
16     16     
96     -128   
-320   -48    
80     48     
-272   96     
192    80     
-752   16     
192    -48    
16     -32    
48     -80    
-272   0      
128    -224   
32     80     
64     -48    
112    64     
-112   -80    
32     32     
-160   16     
-224   -96    
64     160    
128    0      
-528   -64    
-48    0      
-208   -48    
256    0      
0      96     
16     -400   
48     112    
-224   -480   
-64    -144   
16     16     
416    -32    
192    256    
-144   -32    
0      0      
-80    -112   
-208   -16    
192    -48    
768    640    
-928   80     
-336   -160   
208    -144   
-128   112    
272    -352   
-288   -16    
-272   -288   
464    80     
-640   -32    
0      -48    
-320   -80    
-96    -64    
-208   48     
48     -80    
208    80     
48     -96    
0      -32    
208    -64    
-80    96     
-320   48     
144    288    
-240   112    
352    -80    
-160   -16    
-144   -32    
-144   -48    
304    32     
0      -16    
224    -64    
-272   48     
80     -224   
144    -96    
304    -144   
128    96     
-112   -32    
-672   -16    
-32    48     
-288   48     
16     32     
-64    -64    
32     32     
304    64     
-80    48     
-80    -80    
32     0      
-784   48     
-32    48     
48     -32    
128    32     
-240   -32    
-352   -224   
-80    0      
-784   32     
-224   -32    
16     224    
32     32     
224    -112   
0      -64    
160    -80    
-96    96     
0      48     
-144   0      
-112   -208   
16     96     
32     -144   
-64    -144   
-176   176    
-224   128    
0      -48    
-64    32     
-48    -176   
-464   0      
192    -192   
-192   144    
144    -352   
128    -80    
16     336    
-96    -128   
-32    32     
160    240    
-352   -688   
-32    48     
-64    -16    
48     96     
-512   -144   
16     64     
-112   48     
48     48     
0      80     
32     112    
-144   16     
128    -160   
-32    -96    
320    64     
256    688    
-752   -1200  
-64    -368   
-160   448    
-96    -48    
-80    -32    
144    128    
-1488  -416   
384    64     
-272   160    
80     32     
-192   112    
-112   -80    
112    560    
144    0      
-64    -224   
-176   -48    
-64    240    
-176   96     
-112   -144   
144    96     
160    -16    
-448   -32    
64     144    
48     -32    
112    -32    
-16    224    
144    -176   
-64    -160   
-144   144    
144    304    
-192   -112   
-80    -96    
-16    112    
128    272    
-176   32     
-16    -224   
-368   -288   
-144   144    
-752   -272   
192    128    
-64    -176   
-144   368    
-32    320    
-176   -208   
-160   -48    
80     -16    
192    112    
-112   -80    
32     208    
-16    160    
-32    32     
-256   16     
96     -16    
-832   96     
32     16     
32     64     
-48    -16    
-80    64     
272    352    
48     272    
48     128    
32     144    
-144   80     
-32    64     
0      -64    
48     176    
-144   112    
-16    80     
-272   64     
-80    32     
80     128    
192    32     
0      256    
96     176    
128    368    
0      80     
48     592    
320    544    
-128   224    
-160   -96    
96     -160   
-48    32     
208    -176   
-288   176    
176    -144   
64     0      
128    80     
-160   32     
368    64     
-256   144    
-48    128    
112    -16    
48     224    
80     48     
-240   -64    
528    256    
-288   528    
-320   192    
-208   0      
112    -48    
80     -32    
416    -64    
144    -32    
176    48     
96     64     
32     128    
64     64     
-304   0      
-16    80     
-64    64     
48     -16    
160    -80    
0      160    
-64    16     
16     -64    
144    96     
64     64     
-32    -96    
80     128    
64     64     
128    32     
-16    32     
-16    -16    
176    288    
-96    48     
176    -16    
-128   128    
160    16     
128    -32    
32     64     
48     48     
-176   -16    
224    -64    
-64    80     
80     64     
-320   640    
688    480    
-176   144    
272    144    
-144   48     
144    48     
96     -48    
64     -64    
0      -240   
-128   240    
64     -96    
288    -48    
-160   -192   
160    32     
64     96     
-224   96     
96     32     
16     0      
-80    128    
-144   224    
256    -400   
128    -16    
48     16     
208    -64    
384    176    
-336   176    
-208   32     
-112   160    
96     64     
96     -112   
560    -240   
48     0      
-384   80     
0      64     
-16    -96    
-48    -272   
144    64     
192    192    
48     16     
-16    -96    
0      160    
16     32     
-32    -32    
-32    -208   
160    -32    
0      80     
-48    -32    
96     64     
192    128    
160    304    
-32    -160   
0      -64    
32     -32    
16     240    
-64    -304   
112    80     
176    160    
-32    16     
16     192    
80     160    
0      80     
-64    112    
-32    -80    
272    896    
-16    -272   
80     80     
-80    64     
-64    -704   
272    176    
-64    144    
96     -224   
-208   -96    
64     -576   
96     -112   
96     96     
64     -144   
16     64     
112    80     
128    0      
160    80     
-112   -48    
0      96     
-80    -704   
128    -96    
192    48     
160    128    
-16    288    
-32    48     
-80    16     
-224   -64    
112    -80    
272    112    
208    64     
64     80     
160    80     
-64    -64    
-192   0      
144    -176   
112    80     
48     -272   
176    48     
288    80     
560    336    
-336   16     
208    64     
-48    16     
0      48     
64     96     
48     -48    
48     32     
288    64     
80     -16    
208    -32    
80     64     
80     -208   
128    48     
-48    -160   
64     48     
-32    32     
64     48     
16     64     
48     80     
16     16     
64     -320   
176    80     
160    -160   
-48    16     
48     -192   
48     32     
96     -160   
80     48     
112    112    
-64    -16    
64     -64    
64     96     
208    16     
64     -80    
96     48     
-224   -64    
240    176    
-144   64     
112    64     
144    -16    
-112   0      
336    32     
432    224    
80     -128   
96     -1008  
-176   112    
144    -640   
16     16     
-48    48     
272    -64    
48     -48    
112    -640   
48     -64    
-128   48     
240    16     
32     128    
16     -32    
336    -784   
-432   -208   
288    -192   
256    176    
-544   32     
80     -320   
256    16     
-112   -240   
80     48     
-384   -1248  
288    -48    
16     -96    
304    -144   
496    208    
-32    -16    
-96    -144   
208    -64    
352    256    
-512   288    
-592   -96    
240    -80    
-32    -128   
176    -64    
-16    -224   
256    32     
-64    64     
-48    -944   
368    -48    
-272   -416   
80     -16    
-80    -16    
208    80     
336    48     
96     32     
16     -64    
-112   -112   
80     48     
-32    -96    
256    -160   
-240   -272   
96     48     
336    -48    
-64    -32    
48     128    
64     176    
176    0      
-144   16     
240    -16    
112    176    
-288   -48    
112    -112   
208    640    
-480   -880   
64     -112   
208    176    
112    -112   
16     -16    
-80    -352   
144    -336   
-144   16     
208    96     
432    96     
-368   -288   
48     160    
-224   32     
16     -272   
-352   -96    
96     -80    
-1104  48     
-32    224    
320    -224   
-192   -288   
384    176    
240    0      
64     -96    
64     -80    
-64    352    
-16    -144   
208    -32    
-16    -432   
128    0      
-256   96     
0      -256   
-368   256    
448    432    
-160   816    
-64    -560   
192    -208   
32     128    
176    48     
0      240    
64     144    
-160   -288   
32     -272   
-80    288    
144    32     
-272   -32    
-32    -224   
-400   -112   
32     96     
-560   0      
-32    -240   
-64    112    
96     256    
128    208    
-192   -32    
128    -160   
-96    -64    
-128   192    
-16    48     
208    32     
-144   176    
80     -144   
-336   256    
256    32     
128    304    
-16    304    
-144   176    
32     160    
176    96     
-512   224    
-128   -32    
-416   -96    
160    -32    
32     -64    
80     -32    
-32    -64    
128    -64    
-496   96     
48     -16    
48     160    
-80    144    
128    272    
-1040  -80    
-96    -80    
-192   -96    
-816   176    
-32    288    
80     16     
-48    96     
16     128    
-256   -192   
80     -16    
-224   32     
-624   -128   
144    -48    
-432   64     
-48    144    
-480   -32    
-368   224    
48     -96    
-128   0      
16     96     
-32    32     
-80    -32    
-160   -224   
-96    -96    
208    0      
-48    64     
-48    48     
32     160    
-384   -160   
128    -176   
32     16     
16     96     
48     160    
16     96     
-128   -16    
-496   96     
128    -96    
-112   -208   
16     16     
-224   80     
-240   304    
96     176    
144    336    
-96    112    
96     544    
528    352    
-192   208    
48     416    
-96    384    
-48    544    
-320   -112   
-128   16     
64     -368   
-192   352    
-2528  0      
-64    32     
-48    80     
-32    -48    
-16    64     
128    -64    
320    224    
-192   48     
80     544    
-288   304    
-176   80     
80     -16    
-32    -144   
-256   -16    
80     -32    
-672   -16    
192    64     
-48    0      
-320   32     
128    160    
-48    -144   
-400   16     
192    144    
256    160    
-432   80     
-80    -96    
-288   -96    
32     96     
-144   176    
-64    192    
32     208    
32     320    
32     -160   
432    32     
-16    0      
32     112    
48     128    
-16    144    
64     -64    
-352   -96    
144    48     
-240   -64    
272    128    
-256   96     
240    16     
-672   -400   
192    64     
-1952  -128   
-240   80     
96     64     
-64    -144   
-144   -144   
96     -32    
-16    112    
-128   -96    
-64    0      
16     0      
192    224    
-256   -80    
96     -96    
-272   -256   
-80    64     
-1216  -128   
-96    -368   
256    -192   
32     48     
192    112    
-32    0      
-128   160    
288    240    
-32    368    
-80    16     
48     112    
-112   96     
512    304    
-448   608    
176    272    
-32    16     
32     272    
112    -112   
-240   48     
-64    -352   
-112   -32    
96     128    
-160   80     
160    -32    
-144   -16    
-80    -16    
-80    -288   
400    608    
-288   -368   
256    624    
192    -176   
-32    -96    
-80    176    
0      -304   
32     -48    
272    304    
0      -16    
-272   -576   
-96    96     
-48    160    
224    64     
-48    0      
96     16     
32     16     
64     32     
32     64     
-32    80     
16     48     
48     32     
16     16     
144    32     
16     272    
-256   -176   
272    32     
192    144    
80     80     
80     48     
112    -96    
-304   -144   
-144   48     
-160   32     
256    16     
64     -16    
384    48     
0      80     
-64    -112   
80     -80    
-96    128    
-112   32     
-128   80     
112    80     
-144   -16    
192    48     
64     64     
96     80     
64     32     
32     32     
0      0      
128    64     
-176   -16    
-96    48     
80     48     
64     64     
112    176    
-224   32     
112    -32    
32     48     
208    -80    
80     160    
-64    0      
144    0      
-32    0      
144    48     
112    32     
0      80     
0      64     
32     96     
144    64     
-16    32     
-144   32     
80     0      
-64    64     
144    -176   
400    144    
16     64     
-144   -48    
48     -16    
-16    16     
16     128    
64     64     
80     32     
-96    -48    
-48    -32    
96     64     
-32    -48    
80     48     
80     48     
16     -736   
112    80     
-32    -64    
128    80     
16     -32    
224    96     
-176   80     
144    -16    
-144   48     
288    320    
-368   176    
320    -80    
-96    0      
352    0      
0      32     
112    -400   
256    80     
64     -112   
160    160    
-16    96     
160    80     
80     112    
-224   32     
64     -208   
96     176    
80     96     
208    64     
224    48     
-176   -64    
0      48     
32     -128   
80     16     
-384   -1104  
272    16     
160    192    
-208   32     
384    32     
448    384    
-624   160    
-256   -288   
288    -176   
176    48     
-112   -48    
176    -128   
304    64     
160    -96    
-16    32     
496    -672   
112    -192   
112    -400   
96     176    
160    -48    
-80    288    
96     -112   
144    -240   
0      128    
0      -48    
112    -48    
176    -112   
-240   -224   
512    224    
-256   192    
256    288    
-224   -208   
256    -288   
208    240    
64     -160   
80     144    
-96    0      
224    -144   
-16    304    
-112   -208   
224    -560   
-224   192    
240    -16    
176    -480   
-32    240    
192    -32    
240    48     
-80    -640   
48     64     
160    352    
-240   -176   
-112   -32    
128    -416   
-304   -272   
288    -528   
-128   64     
176    96     
112    208    
400    432    
208    -160   
336    -320   
-48    -416   
-144   -272   
64     -48    
32     -48    
-48    0      
96     128    
432    176    
96     176    
128    -64    
-32    48     
176    -192   
-16    -160   
208    -48    
96     144    
0      32     
-96    -48    
80     -144   
224    32     
160    16     
128    -400   
-48    -16    
224    48     
96     -1024  
48     -160   
64     -272   
-80    16     
160    272    
224    -128   
112    112    
32     -48    
144    0      
96     0      
128    -208   
80     0      
16     -304   
-112   64     
-1280  -64    
192    -304   
-80    208    
160    160    
-176   160    
-176   -176   
192    -128   
208    112    
0      0      
0      112    
144    0      
144    -176   
-176   0      
80     64     
64     -48    
112    -16    
144    -32    
224    112    
-96    -64    
48     -192   
256    -416   
32     -32    
48     -192   
0      -112   
64     64     
144    96     
-16    0      
112    128    
192    32     
64     16     
-224   32     
0      -112   
16     -32    
192    16     
-112   -80    
144    -224   
224    96     
192    304    
0      48     
64     -32    
-192   -192   
-176   -176   
64     -368   
48     -112   
176    80     
-720   -192   
-16    -32    
-720   -80    
32     80     
176    16     
16     112    
64     16     
-48    -96    
240    208    
64     -432   
192    96     
-112   -16    
48     144    
-16    -16    
80     -32    
32     -80    
112    64     
16     144    
176    208    
80     128    
48     -240   
-800   -160   
176    -432   
-128   -32    
128    -672   
48     64     
16     48     
352    80     
-16    112    
-80    16     
-224   96     
224    112    
-368   384    
176    368    
-176   304    
-368   16     
-64    -192   
-48    -48    
464    16     
64     416    
128    336    
-96    32     
-96    96     
96     -96    
-48    304    
-272   64     
368    240    
-560   512    
-80    96     
80     -16    
96     128    
48     48     
256    160    
16     48     
-96    96     
-496   160    
-320   -144   
-96    112    
112    -16    
288    -16    
-400   -256   
-64    -128   
-640   -224   
240    96     
-48    -112   
32     -592   
-48    -288   
96     -688   
32     48     
272    0      
-80    112    
0      80     
160    224    
-256   -16    
96     -32    
-256   160    
208    -352   
80     -80    
208    32     
-448   -112   
16     -416   
-32    224    
560    -64    
-144   -32    
-576   64     
-384   -352   
256    272    
-1792  32     
-384   -480   
352    288    
160    0      
-32    320    
48     -224   
16     32     
96     288    
-80    -64    
0      -16    
-144   -304   
48     176    
240    0      
-368   -16    
48     80     
-608   -32    
64     208    
-32    -48    
64     48     
304    64     
-16    80     
-320   -208   
272    128    
16     -64    
208    16     
-304   -336   
16     496    
96     -64    
-256   -128   
-176   160    
-96    -80    
-16    208    
-176   -16    
-192   -80    
-912   16     
-256   -48    
240    144    
-48    192    
-208   -96    
128    -32    
-80    -464   
-112   -128   
128    96     
144    16     
-16    48     
-32    0      
-112   16     
80     112    
0      32     
-416   64     
80     128    
48     96     
240    96     
-352   -32    
240    48     
-32    -64    
-144   -16    
16     80     
-128   0      
-32    80     
-144   112    
32     64     
16     16     
-32    112    
32     -16    
80     -48    
-240   -80    
-80    32     
128    -32    
112    112    
16     -480   
320    -544   
144    368    
-160   240    
-112   -16    
128    -32    
-368   -144   
160    -96    
-64    32     
-464   -80    
256    240    
-672   -128   
80     32     
0      48     
-96    -16    
-48    -176   
144    96     
-48    144    
-144   0      
96     -32    
-48    0      
-48    64     
-272   80     
-304   -64    
-16    0      
208    0      
176    -16    
240    96     
-16    -32    
0      96     
-144   16     
-112   16     
80     32     
-16    80     
96     16     
-32    16     
192    48     
-288   0      
-160   0      
16     48     
240    48     
-240   -16    
64     80     
-80    64     
16     80     
-144   32     
32     96     
48     96     
-16    32     
-32    -48    
96     48     
16     80     
-96    16     
112    64     
-240   32     
64     48     
-160   -16    
48     16     
64     48     
64     112    
-64    -48    
112    -32    
64     80     
16     48     
-96    16     
-48    -16    
-16    -48    
32     96     
16     64     
-96    32     
48     -64    
-128   -32    
0      80     
16     32     
0      64     
272    240    
-144   176    
208    96     
-144   16     
432    384    
-192   272    
240    112    
-64    -16    
64     -16    
-288   96     
176    80     
-208   -224   
96     0      
160    192    
-112   -144   
160    -48    
-96    144    
-192   32     
-64    -320   
160    -176   
-48    -80    
-208   -48    
-240   48     
-288   -192   
-160   112    
224    512    
-192   32     
240    -160   
64     -128   
192    288    
368    512    
256    -336   
-16    -48    
32     288    
64     256    
-144   -128   
112    -48    
160    -64    
144    112    
176    144    
-96    64     
32     -64    
176    16     
-144   80     
0      -144   
-144   48     
224    -112   
80     -560   
-160   528    
288    -352   
64     624    
-320   -176   
32     -112   
176    -192   
80     -128   
80     864    
96     128    
-112   -80    
160    -192   
-64    256    
384    112    
-112   240    
-256   32     
-32    -16    
272    32     
-48    -176   
0      -48    
-96    -128   
16     112    
-160   32     
176    -720   
224    224    
128    96     
112    256    
48     96     
400    192    
-320   160    
-16    16     
64     16     
304    208    
-240   128    
112    0      
16     32     
-16    96     
144    48     
64     16     
32     96     
-32    32     
32     -128   
80     -48    
160    240    
-288   64     
112    112    
128    208    
352    160    
-32    -32    
96     0      
0      -16    
16     -16    
64     16     
80     -240   
96     -16    
32     144    
48     144    
-240   48     
112    80     
-16    32     
160    -48    
-32    -16    
336    112    
-256   -64    
48     128    
-208   32     
144    -112   
128    128    
16     -192   
240    48     
-64    -1232  
96     -16    
-144   0      
144    -16    
0      144    
32     0      
96     -96    
480    464    
-224   224    
336    -64    
-128   80     
-144   0      
256    240    
-224   -16    
48     -80    
256    -192   
128    64     
32     -80    
144    160    
-240   -80    
240    80     
128    144    
64     128    
64     0      
160    -208   
272    -16    
0      -272   
-96    96     
-32    -32    
0      176    
256    -624   
80     96     
176    -864   
-144   80     
48     16     
320    -16    
16     256    
-80    160    
-48    -48    
272    -96    
-96    -160   
-48    -64    
144    80     
64     -16    
224    32     
144    -16    
96     64     
176    -272   
96     16     
96     64     
-80    32     
-80    -240   
64     -48    
112    32     
-64    -240   
64     144    
144    -304   
-160   -448   
192    -288   
64     128    
48     -32    
48     16     
160    -96    
80     -64    
-128   -96    
384    128    
128    272    
144    224    
176    96     
96     48     
-64    -128   
128    -688   
80     368    
-48    160    
144    -288   
-208   288    
96     128    
-32    -784   
-64    -528   
240    -176   
96     -1648  
16     320    
64     64     
-272   -224   
240    224    
32     32     
240    272    
624    112    
-224   32     
96     -336   
336    -320   
-160   -640   
464    560    
0      -320   
112    96     
80     -112   
-64    96     
-224   -160   
80     64     
240    -80    
-32    -16    
-320   -144   
496    -432   
208    -96    
416    304    
-144   -32    
32     -160   
80     -112   
-64    160    
32     128    
480    -112   
-640   -848   
-1216  224    
176    272    
64     -288   
416    208    
0      -96    
384    112    
-64    0      
-144   -720   
-192   -144   
288    64     
64     224    
-32    -80    
-80    -32    
-128   -192   
96     48     
-272   256    
-144   -96    
128    0      
-80    144    
96     32     
128    -64    
176    -32    
32     80     
-80    96     
80     -16    
-16    32     
64     -96    
160    16     
-80    0      
64     -128   
-32    -16    
96     16     
-1136  -128   
-64    -176   
160    -80    
208    -80    
160    144    
0      80     
192    48     
-96    -96    
144    64     
-128   -48    
224    16     
0      144    
48     112    
160    -64    
-112   -144   
-176   80     
-48    16     
-752   80     
32     16     
-272   0      
32     -304   
64     32     
0      -1536  
80     64     
192    96     
192    96     
-304   -16    
112    -96    
-160   80     
-16    16     
-176   -16    
256    320    
-560   320    
16     -80    
112    48     
112    -32    
128    0      
-80    -224   
144    -160   
112    64     
48     80     
96     224    
224    -48    
-96    -32    
-64    16     
112    96     
48     -80    
-752   64     
80     -32    
80     128    
64     -32    
-32    -32    
-48    -480   
-144   -80    
-80    112    
96     48     
-48    -112   
128    -176   
-272   -16    
160    16     
-176   16     
240    16     
-2176  -224   
160    -80    
304    112    
144    -32    
112    48     
80     -48    
208    -80    
-16    -32    
-80    80     
-112   208    
-96    64     
-224   -64    
208    0      
-32    64     
192    48     
96     48     
-48    48     
-96    64     
-1504  -96    
-64    -176   
-208   -16    
-192   96     
-64    -16    
-352   32     
64     64     
-864   0      
-32    -16    
-16    0      
-48    80     
-80    0      
-16    16     
-32    -16    
-16    16     
16     -112   
112    64     
32     224    
-80    192    
-256   -80    
-336   -48    
96     16     
-1648  -16    
144    48     
16     64     
-48    -16    
-96    -128   
-80    0      
-128   -144   
64     32     
112    -48    
-96    48     
160    32     
-16    16     
-80    16     
-112   64     
-32    16     
-96    48     
-160   32     
-160   -32    
-128   -16    
48     -128   
144    16     
32     48     
-16    32     
-16    48     
-208   -32    
-128   0      
-160   0      
-48    32     
-64    -112   
64     112    
16     16     
32     48     
-320   -112   
0      32     
-48    -192   
16     -80    
48     -80    
160    0      
-144   112    
-64    144    
48     -32    
176    32     
-96    -96    
80     -80    
-224   128    
-192   64     
-64    -352   
-320   -64    
32     384    
-176   -96    
16     -432   
-144   -544   
-32    -96    
288    1184   
-320   -320   
208    -384   
0      480    
-32    -384   
128    -48    
112    240    
0      0      
16     464    
-128   -320   
240    384    
-528   80     
416    -64    
-80    -80    
160    64     
-64    784    
384    -288   
-80    -224   
-240   -496   
-80    -544   
-256   96     
208    -208   
-32    240    
96     96     
144    64     
144    192    
-528   -832   
32     -240   
-160   -272   
-48    64     
-112   352    
288    272    
32     96     
-480   -272   
272    -96    
-144   64     
112    192    
64     -128   
-192   48     
-448   96     
64     112    
-224   -304   
96     -144   
128    80     
-32    192    
-16    -96    
-64    0      
-16    96     
-64    64     
-32    -16    
96     -80    
-176   128    
-144   -64    
48     -16    
0      0      
-128   96     
-96    64     
16     80     
32     -32    
-32    48     
-192   32     
288    -192   
128    176    
224    64     
64     -32    
-64    16     
-16    16     
-208   0      
-16    -16    
-80    -16    
192    96     
-432   48     
0      -32    
160    112    
-160   80     
128    96     
0      96     
272    48     
-80    32     
-144   16     
-96    -48    
-32    48     
0      -112   
144    0      
-272   16     
48     64     
96     0      
144    -16    
0      96     
176    32     
224    64     
-80    32     
-240   16     
-48    80     
0      -80    
-16    16     
64     96     
-112   96     
304    96     
-208   48     
64     -128   
96     -80    
16     -64    
160    160    
-48    176    
96     0      
0      0      
-96    160    
80     144    
-48    272    
-16    48     
368    -64    
-48    16     
-48    48     
-112   112    
-32    112    
32     80     
64     48     
-160   -224   
80     -112   
0      48     
-224   -32    
64     -48    
176    48     
16     192    
-48    96     
-16    64     
-96    -48    
-16    -128   
144    -192   
336    96     
-16    -16    
112    -112   
0      -112   
0      0      
48     32     
16     32     
80     176    
-48    -128   
176    -16    
560    464    
-272   304    
48     48     
416    480    
-16    656    
240    112    
-16    -96    
176    224    
256    16     
-128   -144   
128    -176   
-16    240    
-96    -192   
-272   -64    
288    640    
16     -128   
64     256    
96     -32    
112    -704   
-112   352    
128    -1392  
-48    32     
144    160    
192    -144   
128    352    
-112   -320   
-64    48     
144    176    
96     80     
80     480    
48     -80    
80     -128   
-160   32     
288    -96    
-64    -48    
16     -240   
0      336    
-16    64     
-32    64     
192    16     
-16    -64    
48     112    
48     0      
128    -32    
96     144    
16     16     
-64    64     
-64    16     
-96    -112   
0      96     
144    192    
304    656    
-64    -48    
208    -256   
112    64     
112    32     
80     -48    
64     -64    
-112   -224   
-64    -80    
16     96     
-32    192    
192    48     
-144   -176   
-176   48     
224    -80    
272    64     
240    -496   
32     160    
-80    80     
384    256    
-144   144    
112    32     
-400   -304   
432    -32    
256    144    
-256   16     
736    160    
-464   -160   
240    128    
-432   -80    
128    64     
272    -96    
0      192    
64     0      
112    128    
32     0      
176    80     
-48    96     
64     64     
256    176    
48     16     
128    0      
-144   -80    
-32    16     
256    16     
208    64     
-96    -80    
144    64     
-64    -32    
208    -16    
32     64     
144    128    
32     -48    
128    16     
32     64     
128    -80    
144    112    
96     -64    
64     -48    
-32    -144   
-64    32     
32     -128   
16     0      
128    -496   
208    96     
-144   0      
80     16     
-32    64     
0      160    
464    320    
96     -48    
-128   -16    
64     -32    
112    80     
32     -16    
-128   80     
528    0      
32     64     
-64    -192   
144    -896   
-32    144    
0      -800   
-48    32     
160    -80    
128    -288   
192    -16    
64     -512   
-48    -48    
320    -224   
256    16     
-288   192    
-48    80     
112    304    
192    208    
64     -144   
-16    -48    
176    -112   
144    -112   
-272   272    
128    -16    
96     -48    
16     -416   
192    -160   
-48    -880   
-80    -96    
144    -112   
224    32     
48     -128   
96     48     
192    -128   
-144   -16    
224    32     
64     -160   
-1168  -144   
240    112    
192    -272   
112    -64    
144    -64    
256    144    
112    96     
144    -272   
-112   -336   
-96    -192   
-288   -144   
128    -48    
80     176    
64     96     
96     48     
-528   -64    
160    -144   
288    32     
64     32     
192    192    
64     0      
-32    -48    
-48    -256   
-160   32     
128    -48    
144    -48    
192    -80    
112    64     
-432   -32    
64     48     
-624   32     
0      0      
-1552  32     
16     -16    
192    32     
96     32     
160    -32    
-32    -112   
128    64     
224    48     
32     48     
256    0      
48     0      
-96    0      
80     32     
-176   80     
160    16     
-1712  -64    
112    -16    
16     -128   
112    -16    
80     80     
-112   -48    
160    -16    
112    -368   
160    48     
-64    80     
192    0      
64     80     
160    48     
-80    176    
-16    160    
-528   -496   
64     -336   
-384   144    
-144   80     
176    96     
32     -128   
192    128    
-32    -336   
176    272    
-48    32     
32     -32    
-32    112    
-48    320    
-448   -224   
-304   0      
48     64     
-144   480    
64     128    
112    -224   
384    416    
48     -528   
-176   -416   
176    320    
64     -128   
-208   0      
240    -320   
-688   -144   
432    128    
-368   592    
512    0      
-160   -496   
-48    -368   
16     -32    
32     16     
-128   -64    
-80    272    
224    96     
64     64     
-192   -80    
-240   -128   
32     -224   
352    -96    
-48    96     
208    144    
208    176    
-144   48     
-112   -288   
-80    80     
-512   -64    
0      144    
96     32     
192    416    
-320   96     
-208   32     
-208   -32    
-400   208    
0      -48    
480    80     
-400   64     
128    -32    
-208   -32    
-528   -192   
320    -336   
-192   272    
80     496    
-464   -160   
-192   208    
-64    -112   
-48    -48    
128    -80    
-64    0      
-32    80     
-208   208    
80     48     
256    0      
-192   64     
-48    -192   
48     -64    
-288   0      
144    64     
-336   -48    
-336   16     
208    -64    
80     48     
224    32     
-368   -128   
-80    -32    
-352   48     
-256   128    
-752   16     
144    0      
96     -48    
-256   544    
240    -32    
336    -144   
368    -16    
-224   64     
0      48     
-16    32     
-112   80     
0      -16    
-368   240    
-288   -112   
160    16     
-144   16     
48     32     
-128   -80    
16     80     
-80    -64    
128    0      
176    176    
16     80     
-16    128    
-32    64     
-176   -128   
128    -64    
32     80     
32     112    
-128   32     
-192   -16    
0      96     
528    208    
-368   304    
-32    -64    
80     -16    
-16    -64    
96     -192   
-48    32     
-80    80     
-32    64     
-80    -112   
32     -80    
-192   -16    
16     64     
-400   176    
240    368    
-976   64     
176    0      
16     16     
-32    0      
-32    16     
32     144    
-224   -64    
-112   -96    
160    -32    
-16    -16    
128    0      
-336   400    
224    384    
-432   -80    
48     -192   
-336   -128   
160    16     
96     -192   
64     368    
80     144    
-224   -240   
80     -176   
-96    -176   
-48    -32    
-48    96     
224    80     
-208   0      
16     80     
-64    -192   
288    16     
-368   192    
-128   -48    
-80    128    
-48    -16    
32     0      
-176   176    
80     -176   
-16    64     
320    96     
-256   192    
144    48     
176    -336   
240    128    
-224   128    
-144   0      
-384   64     
96     192    
-32    -48    
160    16     
32     64     
-112   -16    
32     128    
48     0      
-128   -64    
0      -16    
64     48     
-224   0      
-16    48     
-256   -96    
96     16     
80     144    
144    48     
64     48     
16     48     
-16    16     
48     48     
-16    16     
80     64     
160    96     
-208   -16    
144    32     
-128   16     
192    112    
-16    16     
144    64     
128    80     
-96    16     
144    48     
-144   -16    
-128   -32    
160    112    
128    48     
224    64     
-192   32     
128    0      
-96    64     
-48    176    
0      -32    
0      144    
-176   -16    
368    112    
-64    240    
128    -32    
32     -80    
80     48     
32     176    
64     16     
0      -80    
48     128    
-32    0      
80     32     
128    32     
240    160    
80     96     
-16    -48    
336    -64    
336    160    
-96    96     
128    -80    
48     64     
192    48     
144    48     
160    240    
-384   96     
-128   -272   
128    -80    
272    128    
160    96     
144    112    
208    0      
-48    16     
0      64     
-64    48     
0      16     
416    240    
-448   112    
240    48     
224    48     
32     96     
-192   -64    
192    64     
-112   -48    
-144   -192   
48     48     
128    64     
192    112    
-48    80     
48     48     
-16    0      
16     112    
160    16     
-288   0      
32     16     
256    112    
-80    -32    
-48    0      
16     80     
16     -64    
64     -32    
128    -1664  
256    128    
0      48     
80     -16    
-32    16     
304    384    
-16    176    
64     48     
32     112    
208    80     
-144   128    
128    48     
192    32     
-32    -160   
-112   208    
-128   -352   
176    -144   
288    -208   
320    32     
128    -32    
-48    -96    
-144   0      
64     64     
-112   96     
48     128    
352    240    
-160   128    
-128   160    
-64    -48    
128    96     
304    -448   
32     -16    
112    -336   
80     64     
-48    16     
112    -48    
-16    -80    
224    96     
-64    48     
96     144    
-16    32     
-64    -48    
80     32     
176    -48    
160    64     
64     32     
96     48     
16     -992   
224    144    
-432   -784   
-432   -848   
-256   -224   
128    592    
64     32     
144    -80    
224    416    
240    64     
128    -16    
32     496    
112    -416   
-144   32     
16     96     
0      -240   
64     64     
-144   -144   
32     48     
80     -80    
144    32     
32     96     
208    448    
-64    -16    
-96    -208   
-48    112    
144    -96    
144    -16    
208    -288   
128    192    
80     192    
-176   112    
16     -256   
-48    -240   
-288   224    
288    -768   
320    80     
96     384    
-128   -400   
-48    144    
192    48     
-16    48     
128    496    
-32    -240   
-112   112    
192    32     
-16    -16    
32     144    
32     96     
64     96     
112    64     
0      64     
128    208    
96     -1488  
-16    80     
-32    80     
-48    -656   
208    400    
64     128    
64     -80    
224    96     
-32    -240   
96     192    
64     -304   
80     -560   
160    16     
-128   -64    
112    -368   
-48    -256   
128    -192   
0      -704   
-16    16     
208    416    
128    -160   
192    -112   
16     -16    
160    -32    
-176   64     
96     -32    
112    208    
240    480    
-336   -144   
176    -192   
16     -176   
96     -48    
16     416    
-16    -128   
192    -112   
160    0      
176    -32    
240    240    
128    16     
16     64     
160    -112   
32     96     
-160   80     
-144   -128   
-336   -160   
-96    -288   
192    -96    
-176   192    
160    96     
192    -368   
-48    0      
64     48     
48     48     
144    -304   
160    -64    
352    16     
176    96     
-240   64     
336    64     
-320   80     
64     -128   
-48    -112   
-32    224    
208    144    
80     -160   
224    32     
192    -416   
-368   48     
160    -144   
144    208    
-96    -112   
112    -32    
-48    0      
-208   32     
-272   -112   
80     80     
-1984  0      
192    304    
-272   144    
176    -48    
96     64     
-80    -240   
-16    224    
-96    -144   
96     208    
176    16     
320    -176   
-64    -144   
-112   16     
-224   -32    
48     64     
-176   64     
80     176    
128    320    
-128   16     
-16    128    
-160   -384   
208    -32    
192    -64    
96     96     
-128   -80    
256    -48    
-384   48     
-16    -48    
144    -64    
-112   208    
-48    80     
208    -192   
-2304  -128   
-80    -80    
-32    96     
144    -144   
-256   16     
160    -560   
320    32     
-160   64     
96     0      
32     -16    
320    -32    
32     0      
48     64     
-512   -144   
-48    -48    
-16    -32    
96     -208   
272    96     
112    -144   
96     16     
-80    -48    
208    -144   
288    48     
16     64     
-48    32     
-144   -224   
-256   -160   
240    -112   
-144   -112   
240    272    
-512   240    
96     128    
240    96     
240    -16    
-64    64     
-304   32     
32     0      
176    48     
80     208    
-80    0      
-16    32     
16     160    
192    48     
32     -112   
288    -96    
-320   224    
-1312  -128   
-144   -64    
-528   -16    
-672   48     
0      32     
-288   -224   
-32    48     
-1184  -240   
-240   -64    
128    -32    
64     -160   
336    80     
-16    80     
-192   -288   
-272   -48    
-64    112    
160    176    
-144   0      
0      48     
112    16     
176    464    
-448   -32    
-160   464    
-208   288    
-736   16     
224    80     
176    -128   
-64    64     
48     -112   
32     96     
0      32     
-176   96     
128    112    
-128   0      
-80    -16    
-128   16     
32     16     
-224   0      
-48    32     
-128   32     
0      48     
176    0      
-16    32     
192    -48    
-256   -32    
32     0      
-48    0      
64     0      
-16    64     
16     16     
16     320    
-96    80     
-32    -112   
0      32     
-224   48     
-192   -16    
-368   -48    
-16    96     
-16    -48    
-64    112    
-16    -80    
-32    0      
64     96     
96     -16    
-48    0      
-32    16     
-32    32     
-160   -32    
64     32     
-208   16     
144    96     
-288   -48    
16     80     
16     16     
64     -16    
16     -16    
64     32     
-160   0      
16     32     
-144   -32    
-160   -16    
-224   48     
-48    48     
-96    16     
-192   0      
32     -16    
-672   -48    
128    112    
-2768  -832   
688    -128   
-256   352    
-32    -16    
176    128    
-576   48     
-288   -96    
-96    -240   
208    -112   
416    272    
-80    96     
-496   -144   
480    208    
-128   16     
-528   -64    
-160   96     
-16    96     
-400   80     
-112   -192   
32     -48    
-288   240    
16     64     
160    -32    
-80    64     
32     80     
48     -16    
-352   -32    
176    16     
-272   -48    
160    16     
-160   0      
-160   0      
64     -48    
-96    32     
96     16     
-160   16     
32     32     
-176   32     
336    80     
-144   16     
-288   -48    
-16    -112   
96     -64    
80     96     
-32    16     
-160   -16    
176    96     
64     64     
-80    48     
240    144    
-48    80     
208    128    
-32    16     
-112   32     
-144   -16    
176    80     
64     64     
-64    0      
-16    -112   
-16    0      
64     304    
240    192    
-16    -64    
-48    48     
128    0      
48     -80    
144    112    
32     16     
304    176    
-112   -80    
272    288    
-432   32     
80     64     
-368   -176   
224    -96    
448    320    
-144   -128   
48     128    
-240   -32    
-96    64     
96     -32    
-32    288    
-96    -48    
256    144    
-64    208    
176    -80    
-304   -64    
48     32     
-16    48     
96     32     
192    112    
64     -16    
208    128    
64     -32    
-64    -160   
16     752    
-48    -96    
-144   112    
96     -112   
32     16     
64     32     
-160   -128   
208    -448   
288    -112   
176    208    
112    96     
-16    48     
-128   96     
32     80     
-48    -80    
-16    64     
176    -16    
-144   480    
-160   -256   
32     192    
32     32     
-16    -224   
224    96     
144    -224   
-96    128    
-16    160    
64     -48    
112    112    
128    112    
48     -96    
32     1248   
-176   -416   
0      -704   
160    432    
-48    -208   
176    336    
0      256    
-48    -480   
-144   592    
-112   -144   
-128   -352   
240    496    
-32    528    
-256   -192   
352    -144   
176    256    
224    256    
-144   -32    
368    -224   
0      -112   
80     16     
32     0      
-128   -64    
160    144    
-80    -208   
64     -144   
96     32     
-64    -32    
32     -144   
112    -320   
32     -80    
112    16     
-96    -224   
96     -96    
16     -144   
160    304    
144    176    
0      -80    
64     288    
32     -448   
16     128    
16     16     
32     128    
64     96     
144    16     
160    96     
48     -64    
-288   128    
368    -80    
-96    64     
208    32     
-48    64     
128    160    
80     48     
288    32     
96     128    
144    -80    
496    496    
-128   320    
80     96     
-160   -400   
-48    96     
240    288    
-304   208    
160    32     
0      -448   
32     80     
-48    -560   
-160   -240   
48     16     
144    496    
-128   48     
-48    112    
96     -80    
368    -32    
-80    528    
-32    64     
144    -32    
0      256    
320    176    
272    -128   
-64    -320   
96     -272   
48     208    
48     -48    
256    112    
-64    -128   
96     0      
-128   112    
240    80     
16     48     
-112   112    
208    32     
-64    0      
80     400    
352    -80    
48     48     
144    -48    
96     -32    
224    0      
-272   80     
144    -160   
-224   160    
32     -144   
400    -336   
-128   -32    
208    112    
-208   -112   
96     -256   
128    240    
128    0      
176    64     
96     -208   
-192   -16    
208    48     
-464   144    
128    -48    
-128   -48    
-48    -96    
48     -48    
48     -32    
64     96     
224    -480   
-144   -112   
256    32     
-176   16     
176    16     
32     64     
112    32     
176    -384   
-224   -64    
-112   0      
16     -896   
144    112    
368    -480   
-80    96     
-16    -416   
-64    -16    
144    -96    
192    -16    
-32    -16    
48     -720   
32     -304   
192    -64    
-112   112    
96     128    
64     -48    
32     48     
48     80     
-64    -304   
-80    64     
112    0      
32     -96    
16     -112   
96     32     
208    128    
32     -80    
-112   -16    
64     -672   
96     32     
32     -192   
208    192    
-32    64     
-208   -80    
176    160    
0      -80    
-368   96     
-32    -32    
-1856  -416   
80     16     
176    32     
0      112    
176    -144   
-16    -704   
64     -32    
208    112    
-640   -16    
64     -336   
208    -160   
144    48     
288    304    
-320   -96    
-64    -112   
-544   240    
-112   0      
208    96     
64     48     
176    -144   
128    64     
32     -48    
160    -576   
-16    64     
160    -16    
-32    16     
-48    0      
16     -32    
-48    32     
-48    -240   
160    -64    
208    32     
0      -32    
112    -128   
-16    16     
16     -112   
320    160    
-160   -80    
192    144    
368    112    
-304   80     
-112   -48    
144    -80    
-96    32     
64     16     
-176   -64    
224    -112   
-1472  -16    
32     -160   
-208   48     
64     -96    
80     48     
80     -560   
-128   -16    
192    -96    
96     16     
64     32     
32     0      
-64    16     
96     -176   
-256   -112   
128    64     
-400   16     
-32    96     
144    16     
-64    -160   
32     64     
48     -112   
48     80     
208    272    
-32    -48    
64     16     
128    16     
0      -16    
128    -80    
0      -16    
32     48     
96     32     
0      -32    
32     48     
80     16     
-208   -16    
224    -64    
176    64     
96     -32    
96     64     
-384   144    
80     -64    
-208   96     
-64    80     
16     -32    
-176   32     
-304   -48    
192    -96    
-400   80     
256    -96    
-96    96     
256    -64    
16     -16    
0      48     
80     -16    
16     48     
-64    16     
-16    -32    
112    48     
0      96     
176    192    
-192   48     
-112   16     
-208   80     
-448   -144   
224    16     
-272   -128   
224    176    
-32    48     
-320   -160   
288    96     
-480   128    
-16    96     
-160   48     
176    -48    
144    -32    
112    80     
-32    16     
272    112    
-384   -144   
32     96     
-240   0      
-352   -96    
112    64     
-192   128    
96     -16    
-592   -32    
-112   0      
-1568  64     
32     160    
0      32     
-32    32     
-224   80     
176    80     
-128   -176   
-16    80     
16     64     
112    96     
80     128    
-192   -96    
0      0      
-64    352    
48     224    
-336   -400   
96     -112   
-592   400    
128    -272   
32     -96    
240    480    
-112   -288   
-128   32     
-208   128    
192    -336   
48     368    
-144   -288   
96     160    
-160   -128   
-144   128    
144    416    
-112   -192   
-1296  32     
-288   -80    
272    -272   
80     64     
-32    -128   
0      128    
-48    -48    
16     48     
-208   16     
336    176    
80     736    
-64    -144   
-32    -272   
16     0      
-208   400    
-880   144    
80     160    
64     208    
160    -32    
-272   176    
-64    80     
96     -32    
-16    192    
80     208    
32     304    
-80    16     
-96    64     
304    272    
-112   224    
-64    112    
-176   -32    
64     48     
-624   -416   
-16    16     
-48    112    
-64    144    
240    112    
80     112    
-16    96     
-64    96     
160    192    
-64    -144   
128    96     
-128   480    
80     384    
-128   192    
-32    272    
-848   288    
-160   304    
16     64     
160    96     
-16    256    
256    16     
48     0      
80     80     
16     128    
-320   112    
32     -32    
32     80     
-80    80     
-336   -32    
144    96     
320    240    
-64    112    
0      80     
16     32     
96     80     
-64    96     
-144   64     
-96    16     
112    -48    
-112   -128   
-32    -48    
-16    -96    
0      96     
-32    48     
-80    -80    
224    80     
-192   144    
208    -16    
-192   112    
0      32     
0      48     
208    48     
112    -160   
48     -32    
-272   -288   
16     -112   
-160   64     
-64    160    
-16    48     
80     96     
128    176    
96     112    
96     -32    
-144   -384   
48     -272   
16     -96    
48     160    
32     112    
-144   128    
-176   0      
48     32     
-144   -32    
176    -48    
-64    -16    
160    -128   
48     -160   
-112   -368   
80     336    
192    368    
48     144    
208    176    
128    -64    
80     -64    
256    96     
-240   208    
48     160    
96     0      
0      112    
-112   -192   
-128   16     
96     -80    
-80    -128   
32     -176   
416    -400   
48     224    
-48    -48    
16     48     
-112   352    
224    608    
64     304    
96     -176   
-208   176    
48     -1072  
128    96     
208    32     
288    32     
-80    -592   
-272   -416   
-304   80     
-112   48     
144    48     
304    48     
96     192    
768    640    
-848   384    
-80    496    
-752   160    
-64    -704   
272    240    
288    -80    
160    96     
112    -96    
-80    144    
224    -16    
-208   256    
128    16     
-144   80     
-16    80     
208    -80    
-112   208    
16     848    
240    416    
48     0      
96     -160   
512    16     
-672   -240   
-144   -80    
16     80     
320    128    
-16    144    
-128   -272   
64     -32    
-48    -256   
160    112    
-144   -304   
272    -256   
-96    32     
128    -224   
160    -64    
224    -320   
-32    -48    
176    0      
-224   -256   
128    -560   
-96    -224   
224    64     
144    80     
64     160    
-320   -288   
208    96     
-144   240    
-48    16     
240    -288   
-160   -80    
128    -400   
128    -80    
208    128    
-320   32     
-112   -336   
64     352    
160    128    
-32    -128   
64     176    
144    -752   
160    -32    
-64    160    
-128   -32    
528    240    
-304   0      
-112   -272   
240    96     
272    16     
416    64     
-96    32     
112    32     
-160   96     
-240   80     
48     48     
128    -48    
320    64     
272    0      
64     128    
64     32     
80     176    
-144   -272   
-112   64     
-64    -1440  
160    16     
144    -192   
-64    -80    
-96    32     
80     80     
112    64     
-272   -96    
80     32     
128    -240   
80     -32    
32     -16    
272    368    
-368   48     
-128   64     
192    -128   
256    -48    
64     16     
336    96     
0      -48    
464    64     
16     48     
320    -48    
48     32     
0      -80    
48     32     
-112   -208   
208    48     
-16    32     
32     96     
80     0      
96     32     
-64    -240   
-144   -32    
16     144    
-128   64     
240    64     
128    -48    
96     112    
224    -112   
-16    -32    
-128   -96    
64     96     
144    -96    
0      64     
-80    -480   
128    32     
256    80     
-224   64     
32     -32    
64     -304   
240    -272   
160    -80    
176    -928   
96     -32    
-224   64     
64     -64    
16     80     
80     32     
240    80     
144    0      
256    -1248  
-32    16     
336    -240   
-144   48     
160    64     
-64    -80    
48     -48    
176    -224   
32     48     
144    -416   
-64    -96    
192    -144   
-64    -64    
208    80     
48     0      
112    -16    
0      -16    
128    -112   
32     96     
-464   32     
112    -160   
-112   0      
160    -16    
64     -64    
80     -208   
96     -80    
368    -80    
-112   176    
256    -48    
-112   0      
224    -224   
-352   0      
176    -192   
112    96     
-96    -176   
288    48     
-48    80     
-48    -96    
352    -64    
-208   -16    
224    -16    
96     112    
224    32     
-80    -80    
112    -32    
224    16     
-416   256    
112    32     
240    -48    
-384   -320   
64     -272   
-896   48     
-112   -144   
240    -16    
48     -192   
96     -48    
208    -112   
32     -96    
176    -1520  
192    32     
96     32     
192    224    
-80    -48    
-176   -32    
48     -272   
96     -96    
-480   16     
128    -80    
-192   48     
48     64     
-416   48     
160    -384   
-128   208    
160    -960   
48     80     
192    -192   
112    256    
0      96     
160    -352   
-272   96     
96     -224   
-16    208    
144    -208   
-1040  0      
48     32     
16     32     
592    224    
-336   464    
336    -192   
-144   96     
160    368    
128    -752   
-288   16     
0      800    
64     -400   
64     -560   
-528   -16    
464    -16    
-112   384    
48     -464   
-208   -352   
48     -304   
-256   96     
80     -128   
0      -112   
-176   -144   
128    96     
320    80     
320    -96    
-192   -80    
0      -48    
-112   -16    
0      -160   
-144   -32    
-48    -352   
112    -64    
400    -32    
-256   96     
112    -288   
-416   112    
16     -48    
-64    -48    
-96    -96    
192    -64    
-304   -224   
112    -80    
-192   -16    
352    80     
-384   128    
80     -288   
80     32     
-400   0      
80     48     
-1008  -112   
-1600  -16    
-80    -64    
-912   48     
-176   16     
-32    -64    
-240   -48    
224    32     
0      112    
112    48     
-192   -48    
-768   -32    
0      320    
-336   112    
32     96     
144    -64    
-192   192    
-336   -96    
-800   -128   
-208   16     
-208   0      
-32    48     
-48    -48    
64     -224   
-32    -192   
-160   -128   
-224   16     
-192   208    
-112   -208   
288    48     
-96    96     
-48    128    
0      -32    
48     -80    
-16    -16    
-48    128    
-32    48     
-208   32     
-80    -16    
112    -192   
0      16     
-64    -96    
80     48     
-80    16     
-192   -16    
-48    160    
-96    -96    
32     96     
0      32     
-64    192    
64     96     
32     -16    
-480   96     
-48    336    
-48    144    
96     -96    
-32    96     
160    -48    
-32    -128   
-368   32     
208    192    
-128   96     
0      128    
-128   -48    
-192   -80    
-80    80     
144    128    
-240   32     
-32    -80    
-1312  0      
128    -64    
-176   -48    
144    16     
80     128    
64     80     
-48    80     
0      32     
-32    -64    
-48    64     
64     32     
-144   -192   
-48    -176   
-16    64     
0      32     
-336   288    
96     64     
-272   160    
160    96     
96     -96    
0      16     
-32    -144   
-64    -64    
224    640    
-464   368    
-240   -304   
-16    -752   
-432   -528   
-64    -112   
-288   32     
-608   -64    
208    160    
176    304    
288    704    
-240   320    
0      176    
-352   416    
-80    0      
336    -864   
-144   832    
208    224    
-128   192    
144    384    
80     -288   
-272   208    
192    -400   
96     288    
192    -48    
96     80     
-64    112    
-16    32     
448    880    
-480   384    
-80    -48    
48     -16    
-16    128    
80     -32    
480    560    
-176   272    
-160   -48    
-208   -160   
112    -144   
32     208    
160    144    
-64    224    
-144   -432   
640    320    
-16    416    
-368   480    
272    -320   
-96    112    
-144   -112   
0      48     
-96    -32    
160    240    
-352   64     
-144   -160   
336    128    
-128   112    
176    -80    
64     48     
48     -208   
32     464    
-496   384    
192    -224   
-336   -80    
-112   80     
256    -112   
-288   -32    
16     144    
-352   -80    
128    208    
-224   -144   
208    0      
-32    144    
112    48     
112    112    
0      -112   
-16    -32    
-16    0      
160    80     
-112   80     
240    -80    
-288   16     
-48    192    
64     64     
96     32     
288    -144   
-64    -96    
16     48     
-112   -208   
96     -48    
64     80     
32     -592   
-240   -464   
-16    320    
0      -48    
-128   -112   
-32    -160   
192    112    
144    208    
64     64     
0      -32    
64     16     
-352   -128   
208    -80    
-80    160    
-64    0      
128    96     
-112   -144   
0      -16    
-96    80     
48     112    
-80    -16    
192    0      
96     80     
32     -112   
-16    -192   
208    48     
288    192    
-32    128    
176    80     
0      128    
-32    48     
80     -32    
-16    64     
-176   -288   
240    -304   
96     96     
192    -96    
176    96     
48     -176   
96     -336   
128    -16    
224    112    
0      -32    
-64    -96    
0      112    
-48    80     
32     -32    
304    96     
64     16     
64     -16    
160    -32    
112    -512   
96     80     
-32    -112   
-48    112    
-128   96     
32     16     
0      0      
16     64     
128    80     
64     -160   
-96    -272   
160    192    
-192   -32    
304    -256   
128    112    
144    -16    
80     32     
160    -16    
160    64     
176    384    
-208   112    
16     -48    
192    -16    
160    128    
96     48     
-16    -32    
128    80     
16     32     
128    48     
80     48     
64     -64    
32     0      
48     -752   
112    96     
64     96     
-32    48     
64     -16    
256    112    
-80    -16    
112    64     
-48    0      
112    -16    
256    128    
-32    -48    
112    32     
64     -208   
144    64     
192    0      
-112   32     
96     80     
48     16     
-80    -496   
32     -16    
-96    48     
48     32     
48     64     
96     80     
64     -16    
0      -64    
144    64     
304    -16    
-144   16     
192    -400   
128    -64    
160    -128   
128    32     
-32    0      
-96    192    
-128   32     
304    16     
-112   96     
80     -112   
112    96     
80     -16    
-64    32     
192    -272   
240    160    
-192   -352   
96     -48    
80     -144   
160    32     
720    432    
96     96     
-160   -320   
240    96     
-480   -80    
448    -624   
480    592    
208    -160   
64     0      
-192   416    
-144   -304   
-64    48     
-240   256    
256    -640   
-192   208    
80     192    
528    -416   
-16    96     
144    192    
64     -688   
-96    560    
160    0      
-80    -272   
-112   272    
144    -400   
112    192    
96     208    
48     -144   
112    -432   
128    -16    
-144   192    
464    -304   
-208   -304   
-368   -240   
-48    -816   
80     -176   
96     -1312  
32     -96    
16     224    
-160   64     
256    160    
-64    -112   
208    -48    
192    64     
-128   0      
-80    240    
144    192    
0      32     
-656   -128   
288    -96    
160    0      
160    -256   
80     -144   
64     -192   
-64    112    
160    96     
208    48     
224    -112   
160    32     
224    -96    
-128   112    
-144   -32    
112    -80    
-1552  0      
48     -80    
160    32     
-64    0      
96     0      
128    144    
-48    32     
176    -256   
160    -64    
32     -96    
48     -16    
64     16     
0      64     
112    240    
400    48     
-96    32     
96     16     
-272   -32    
128    -80    
208    0      
64     0      
-208   -128   
272    -112   
-64    64     
320    32     
80     16     
32     -32    
176    -256   
128    0      
176    48     
-256   -80    
224    32     
-640   -64    
80     -80    
384    352    
-272   48     
112    -64    
208    -192   
160    112    
240    -480   
-32    -96    
48     -160   
-384   -368   
-160   -288   
80     224    
-432   64     
384    80     
-864   160    
320    16     
-288   0      
-160   -128   
160    -160   
320    48     
96     128    
128    -512   
64     32     
48     16     
208    0      
-64    0      
-64    -176   
-32    -224   
-112   -192   
-192   -96    
96     96     
-320   384    
160    320    
32     -64    
48     -240   
-112   112    
-64    -624   
288    -64    
80     48     
-96    64     
-144   -80    
224    -192   
-144   -352   
-16    -272   
-160   -80    
240    -112   
-208   -48    
288    64     
-304   384    
192    -32    
128    128    
128    -16    
32     32     
-192   -32    
48     -16    
80     48     
48     -80    
32     288    
224    176    
-80    160    
-80    -48    
-32    -112   
16     -48    
128    -32    
80     720    
272    128    
-192   -352   
48     -176   
-448   48     
176    -80    
-48    80     
240    96     
256    352    
-400   -464   
-16    208    
0      -144   
-112   96     
224    -16    
64     -48    
-720   -32    
112    112    
-464   -64    
-2080  96     
80     208    
-96    -288   
-48    48     
-272   272    
-160   -496   
208    144    
-80    -128   
128    96     
-16    144    
-320   -96    
-16    -192   
-256   -304   
240    640    
320    288    
-320   -304   
-160   -32    
-256   240    
-112   -64    
-688   48     
80     96     
-352   -80    
64     160    
0      112    
-352   -432   
448    -1040  
240    -128   
0      416    
288    96     
624    592    
-816   224    
-256   -64    
-288   128    
-176   -16    
256    -224   
-16    -160   
-752   16     
160    96     
-144   -16    
80     112    
-144   -48    
256    64     
-128   0      
-64    -16    
144    -16    
32     16     
-368   -96    
-336   -16    
-112   64     
-144   0      
-16    32     
-272   96     
-128   -48    
-320   -160   
112    0      
-64    -32    
-160   -176   
256    -144   
-32    -64    
160    -48    
144    -112   
-144   176    
-64    64     
144    32     
-80    80     
-16    -32    
-240   32     
-96    0      
-432   16     
-96    128    
256    80     
64     32     
-16    16     
-112   -48    
64     64     
32     32     
64     -96    
64     64     
48     112    
-176   16     
16     112    
-288   0      
304    176    
-1152  48     
80     64     
64     0      
-32    -320   
16     -224   
-160   48     
144    352    
-208   112    
48     -16    
-64    16     
-64    32     
-368   -16    
-144   -272   
-16    -80    
112    32     
-816   -80    
160    16     
-288   16     
-32    80     
80     -32    
64     80     
0      80     
-304   -64    
32     -80    
48     0      
-144   80     
32     272    
-144   96     
-64    -48    
272    48     
-464   -80    
-32    16     
64     -16    
80     32     
160    80     
-176   0      
32     80     
-416   -704   
16     -192   
-304   384    
48     272    
80     64     
256    64     
-480   -128   
208    -112   
-208   -16    
-96    0      
80     80     
0      16     
-16    48     
-96    -32    
32     -32    
80     48     
112    80     
32     0      
96     16     
-96    16     
-32    96     
-208   -16    
208    32     
32     96     
48     64     
-176   -224   
-96    -160   
-128   48     
144    16     
0      80     
32     128    
176    64     
-32    0      
-32    32     
-192   -32    
16     -16    
-112   64     
80     80     
-112   48     
112    -32    
160    64     
-48    32     
64     -16    
80     48     
96     16     
16     32     
96     128    
-176   -112   
160    0      
160    48     
-16    32     
-48    -16    
-48    16     
160    16     
64     32     
64     32     
48     32     
48     64     
64     48     
80     96     
-32    16     
-32    48     
-64    -32    
32     32     
-112   -16    
128    80     
-144   -16    
16     32     
144    48     
304    256    
-32    144    
64     48     
-32    160    
64     64     
32     160    
-112   -240   
208    48     
-16    144    
208    32     
32     128    
144    208    
-96    384    
-112   272    
112    160    
-96    80     
-48    -112   
-160   512    
256    -512   
-64    112    
32     464    
-176   -208   
96     208    
144    80     
96     128    
-208   64     
480    -112   
-256   208    
32     -112   
-224   -144   
400    352    
-32    64     
-144   64     
272    64     
-336   448    
208    -48    
-144   64     
-96    0      
-256   -48    
336    0      
-64    -208   
272    320    
272    112    
208    -272   
-208   -96    
336    -144   
-192   320    
96     64     
256    -224   
-240   -64    
224    0      
-160   176    
80     112    
-48    0      
-96    -160   
320    48     
-128   64     
240    64     
176    -288   
-176   224    
-80    -96    
0      -48    
112    96     
96     112    
64     80     
64     -144   
160    -64    
112    144    
-80    144    
384    64     
-16    32     
16     -112   
0      0      
0      -176   
64     208    
240    -736   
-32    -272   
16     16     
-128   64     
-32    0      
112    48     
-80    16     
128    144    
80     80     
-32    0      
112    16     
128    -96    
384    96     
-48    -144   
-32    -128   
240    -544   
-96    160    
192    -336   
160    80     
-32    112    
80     96     
-80    96     
64     32     
64     -80    
-48    0      
128    128    
-48    -16    
240    32     
128    -80    
0      16     
-96    -80    
192    -16    
48     -272   
-192   32     
128    -112   
176    112    
-64    32     
112    48     
96     64     
-16    -16    
128    96     
48     0      
144    48     
-48    -144   
32     80     
144    -128   
0      16     
48     -96    
80     64     
64     -16    
16     48     
-48    32     
160    80     
-96    80     
240    64     
0      112    
16     16     
32     -112   
352    -96    
112    96     
-48    0      
304    160    
-48    -416   
80     -288   
160    -432   
288    -288   
176    128    
-32    -32    
224    352    
-160   224    
16     144    
16     -160   
240    -96    
0      64     
-16    96     
-32    -64    
-96    0      
160    0      
112    32     
112    288    
96     304    
-96    -16    
320    -256   
32     -304   
224    -96    
-64    -1040  
96     224    
-64    240    
96     -96    
144    48     
160    -208   
-32    208    
448    -64    
384    304    
-208   384    
0      -336   
-16    -272   
-2288  80     
112    -256   
176    16     
224    240    
-128   -320   
256    -704   
96     352    
64     16     
-48    -192   
0      0      
32     144    
80     256    
192    -448   
96     -192   
0      96     
-48    96     
16     -176   
64     -336   
144    -720   
32     64     
0      16     
0      -176   
0      352    
80     144    
-16    112    
192    -16    
-128   -144   
96     -288   
-48    -144   
128    16     
-272   -16    
64     -96    
96     -144   
0      0      
176    64     
112    -96    
160    272    
64     -752   
-112   0      
96     -64    
-112   144    
-64    -96    
64     0      
-16    32     
144    16     
-272   16     
224    0      
-912   -16    
48     -48    
32     16     
96     -96    
208    -32    
-80    -176   
112    64     
80     0      
192    48     
112    48     
-208   -80    
192    -32    
432    0      
-48    128    
-80    -176   
288    80     
-912   -208   
416    -96    
544    0      
-496   192    
-272   -176   
448    -16    
16     -400   
-208   112    
240    48     
64     -32    
-160   -32    
48     32     
-96    -32    
176    0      
-480   -32    
128    -96    
-288   0      
32     -160   
96     -16    
-80    -192   
-16    80     
-64    -688   
96     48     
-320   16     
288    64     
-48    -16    
-144   80     
-32    64     
96     -48    
-224   -128   
272    -96    
-368   144    
368    -16    
96     96     
224    -80    
-48    80     
-48    -176   
128    -192   
-16    -272   
16     -240   
-320   64     
-48    16     
-272   -80    
224    -96    
32     48     
-48    -80    
-32    48     
48     -48    
128    48     
144    -208   
-128   96     
256    -80    
272    -16    
-288   -64    
112    -32    
-192   80     
-16    32     
-112   48     
256    64     
-96    -240   
-96    -128   
-720   64     
-384   -144   
48     16     
-544   -80    
16     96     
-112   80     
-240   48     
80     48     
-592   272    
-128   208    
96     0      
144    272    
-96    -80    
-80    -48    
208    64     
-112   64     
-368   64     
208    208    
16     96     
128    128    
-64    128    
-656   160    
-32    240    
-720   0      
80     32     
-560   128    
-160   16     
48     -48    
128    0      
-224   -64    
96     96     
-80    0      
-32    304    
112    208    
-368   -208   
-240   -128   
-144   64     
-208   -112   
-112   -128   
64     208    
-912   -208   
-80    32     
-2384  16     
128    -112   
-80    -96    
-16    -16    
-112   -128   
192    64     
-112   -96    
-48    -48    
-32    48     
-160   -256   
-272   -48    
-96    16     
-80    0      
128    48     
64     32     
-176   0      
-48    32     
-112   272    
352    336    
-176   48     
-64    -32    
0      0      
16     48     
16     80     
-64    32     
-96    -48    
-224   -112   
-80    -48    
-128   64     
0      -176   
-320   -176   
-48    0      
-336   -32    
128    224    
48     32     
48     64     
-48    80     
16     112    
-144   -96    
-368   -64    
-96    -128   
-160   -208   
-224   -192   
96     976    
-32    -96    
-208   -352   
80     288    
-608   80     
80     160    
176    -48    
96     0      
-48    16     
16     96     
-48    80     
0      -112   
0      112    
-64    256    
112    -64    
-48    224    
256    -384   
-464   -160   
144    384    
-128   -128   
16     224    
-80    96     
160    -96    
160    112    
-144   32     
240    -240   
240    208    
208    80     
-96    384    
-368   64     
-112   -224   
-176   384    
-64    -96    
64     480    
-528   576    
64     -96    
-48    0      
-96    -48    
128    -112   
-192   -16    
288    -112   
-208   -80    
-16    -112   
-256   -128   
0      -32    
-384   -176   
160    -144   
-400   64     
-64    -96    
-464   -64    
-416   16     
336    208    
256    96     
-160   -64    
-48    -128   
144    -112   
16     144    
80     64     
160    32     
-32    -192   
-176   -32    
-96    64     
48     80     
96     -112   
-16    -32    
112    80     
-32    208    
48     64     
-16    -32    
64     16     
144    224    
-336   32     
160    -112   
-144   -32    
112    32     
-176   144    
32     112    
-128   -80    
0      -48    
64     -64    
16     48     
32     64     
-144   112    
320    128    
-208   144    
96     -80    
-16    -32    
32     192    
-192   -16    
304    80     
-240   -176   
160    -32    
-128   -32    
96     208    
160    -112   
32     0      
32     96     
16     112    
-144   32     
64     -80    
-16    16     
32     48     
-32    144    
-176   -48    
160    112    
-32    32     
32     48     
-16    32     
64     64     
-32    240    
64     112    
192    16     
240    112    
-112   112    
144    32     
160    96     
-80    32     
32     16     
-96    -112   
96     0      
16     80     
256    32     
-192   128    
0      96     
32     -16    
-112   -16    
144    -16    
64     64     
-32    80     
48     80     
-176   -112   
48     -128   
272    16     
64     128    
64     160    
-336   -192   
16     -16    
-16    48     
64     128    
96     -96    
64     64     
240    32     
80     64     
-32    192    
64     144    
320    544    
-384   256    
16     144    
32     0      
96     16     
16     -96    
-16    -192   
320    80     
64     0      
144    160    
-288   -336   
-80    -48    
112    160    
256    368    
0      496    
0      64     
112    -336   
224    80     
-96    -80    
-192   -96    
96     -208   
144    48     
80     64     
48     -304   
80     224    
288    144    
224    240    
-64    -128   
-160   -16    
-176   -16    
320    368    
-320   -384   
304    64     
32     160    
192    240    
-112   0      
16     -80    
32     -144   
32     -416   
64     384    
48     -704   
-48    16     
64     16     
176    -16    
80     -32    
272    128    
-48    -16    
-64    0      
64     160    
-128   -96    
32     16     
128    -16    
64     0      
240    -176   
96     -32    
128    -192   
-64    64     
32     48     
192    128    
-16    -48    
160    96     
64     48     
144    48     
-32    0      
-32    -64    
32     48     
128    -16    
48     16     
176    -32    
16     -96    
96     -272   
-128   80     
0      16     
32     80     
32     80     
-256   144    
432    128    
-320   144    
192    -96    
128    -144   
64     128    
272    64     
176    336    
-256   -288   
96     32     
0      -304   
-16    64     
336    -48    
80     80     
240    96     
64     32     
32     64     
80     0      
112    80     
16     112    
288    288    
-400   -240   
-32    -208   
-16    -352   
320    128    
-32    32     
-368   -192   
256    -464   
304    80     
-96    240    
-192   -96    
288    16     
32     96     
-224   16     
208    48     
-96    0      
112    -96    
144    64     
-464   -416   
752    -64    
160    32     
48     80     
304    -16    
112    -352   
-80    -96    
64     -496   
128    -272   
112    16     
-16    -304   
304    -80    
-96    -704   
192    -80    
-80    -16    
272    -80    
48     176    
64     -176   
-32    -960   
-32    48     
16     -320   
208    64     
64     32     
64     -96    
448    96     
144    -96    
32     -32    
-48    -448   
320    64     
-48    -384   
0      0      
160    176    
112    128    
96     -144   
-160   16     
176    -80    
96     128    
-304   32     
-32    -144   
-592   -80    
288    -96    
-16    160    
224    -48    
176    0      
-32    -160   
-16    -16    
-48    -960   
224    128    
48     -32    
-144   112    
176    32     
-16    496    
336    336    
-128   160    
-512   208    
48     -320   
48     -320   
80     16     
128    -32    
160    -224   
-32    -224   
224    -304   
128    32     
144    304    
-32    -208   
-32    0      
-32    -128   
64     208    
-16    -48    
-288   -112   
112    -192   
-880   112    
32     -48    
-96    -320   
32     -160   
112    144    
192    160    
272    -192   
32     32     
0      80     
48     -32    
48     48     
-96    32     
-160   64     
-208   -48    
272    624    
-672   -672   
160    240    
-176   -16    
-32    -64    
224    48     
-208   -608   
-48    32     
224    -576   
-48    -128   
128    144    
320    -128   
96     -16    
96     128    
-144   -32    
0      -64    
-144   48     
0      0      
-864   -112   
160    -176   
80     96     
208    -352   
672    896    
-352   -160   
96     -544   
208    400    
176    64     
-48    -192   
256    160    
-144   0      
144    16     
0      64     
64     -112   
16     -32    
-64    64     
-80    -96    
272    -144   
-48    16     
0      -160   
224    416    
-96    -320   
272    16     
-96    448    
176    -112   
-176   96     
112    -64    
-144   -192   
32     16     
-1200  64     
0      112    
320    240    
-64    160    
-112   16     
160    -320   
176    576    
-384   -224   
0      -128   
-16    224    
16     336    
-208   144    
48     -448   
-128   64     
128    0      
144    96     
-368   -16    
32     144    
-1552  16     
-48    -128   
96     80     
-1024  128    
48     -464   
-896   -432   
-144   -336   
432    32     
160    784    
-336   144    
-16    -32    
-64    -320   
384    -64    
-432   16     
432    272    
-512   -48    
-272   224    
-176   496    
-64    256    
176    352    
-208   -48    
-240   -256   
96     48     
112    16     
256    112    
-16    -144   
-704   -128   
-48    -16    
-192   -160   
-64    16     
-16    -32    
-224   112    
128    -48    
336    80     
-336   160    
-160   -80    
144    -112   
-240   -96    
-32    48     
-1184  -208   
-192   -80    
-128   -64    
112    80     
16     48     
32     32     
256    32     
-320   80     
160    -80    
144    256    
-288   304    
-48    -192   
32     -16    
-64    96     
-112   144    
-848   -112   
176    80     
16     48     
48     96     
144    -304   
128    -48    
-112   128    
-32    112    
16     96     
-288   -16    
-32    16     
0      -32    
-400   0      
-368   -192   
-128   -16    
-416   -176   
64     48     
-48    -208   
32     -64    
-128   -16    
-48    112    
80     -16    
128    16     
-224   48     
-144   96     
-64    48     
96     96     
-48    32     
-16    64     
-64    112    
-240   -32    
112    64     
-1056  -48    
-112   128    
272    32     
64     64     
112    96     
176    96     
64     32     
-112   0      
32     -48    
-64    16     
16     0      
-128   -112   
128    -16    
-112   -160   
112    64     
-512   0      
16     112    
-160   -160   
240    -304   
272    16     
-96    144    
-112   -16    
-32    32     
-144   -192   
-16    -96    
112    -16    
-144   -240   
64     -112   
-352   -64    
16     96     
-432   -128   
-240   -16    
96     -448   
160    80     
176    96     
208    16     
-64    -128   
0      -352   
0      -80    
-32    64     
-16    0      
-32    -288   
112    112    
64     208    
288    64     
-256   48     
-16    -240   
48     256    
192    832    
-160   -576   
-96    304    
48     -16    
48     144    
-144   16     
176    -208   
96     144    
-256   -416   
-16    192    
-160   288    
32     -112   
-64    -272   
96     -144   
80     48     
-16    64     
80     -16    
-128   -16    
192    -96    
-32    16     
-96    16     
-272   -32    
112    144    
-160   -16    
160    48     
-48    -64    
-208   -80    
-32    -64    
-48    16     
48     112    
160    80     
176    48     
80     -64    
128    48     
64     80     
-96    96     
-160   -16    
96     64     
-96    128    
144    128    
-224   0      
-64    0      
48     48     
160    32     
160    64     
48     128    
32     16     
-64    64     
-32    112    
192    160    
-64    64     
-112   -96    
192    64     
-64    16     
32     -16    
128    16     
64     64     
160    80     
128    64     
16     32     
-16    96     
-96    80     
0      16     
16     32     
-48    32     
96     80     
-112   32     
96     144    
0      -176   
0      -16    
128    112    
-64    16     
128    32     
-112   64     
256    272    
-48    -48    
96     -64    
-112   64     
64     48     
16     80     
32     96     
-96    -16    
0      -48    
64     144    
96     -272   
192    48     
-192   64     
272    -32    
-112   80     
0      16     
128    -16    
64     96     
-128   16     
192    -96    
-272   -96    
0      112    
16     112    
96     96     
-80    -16    
352    -48    
0      96     
0      -96    
-48    -112   
352    144    
32     -96    
320    80     
272    64     
-64    160    
-304   224    
-272   -96    
176    -16    
-80    48     
256    192    
96     -112   
-48    -224   
-96    96     
16     -384   
80     16     
48     -64    
64     80     
48     48     
80     80     
240    128    
-224   160    
208    -48    
128    -16    
160    32     
96     -112   
16     144    
-144   32     
64     32     
80     -64    
208    80     
144    16     
-208   16     
128    -64    
160    288    
176    128    
64     96     
-16    48     
336    112    
-160   48     
-112   -160   
208    64     
0      -48    
96     0      
32     -336   
112    0      
32     -384   
112    160    
144    112    
16     32     
-112   0      
368    144    
128    16     
0      -80    
-240   0      
96     -304   
176    224    
48     -48    
-160   -64    
192    -208   
48     368    
0      -672   
448    -272   
-96    -272   
288    464    
-192   -48    
192    64     
48     32     
192    0      
192    96     
-176   -64    
192    -176   
-176   -320   
96     160    
96     -224   
192    672    
208    -496   
192    -160   
-16    384    
80     96     
0      -288   
16     -400   
32     208    
0      -80    
240    -16    
-48    -160   
128    -208   
480    448    
-208   -48    
64     -144   
224    128    
-48    -48    
80     80     
0      -528   
128    304    
-176   -400   
128    112    
144    208    
-48    -208   
48     -112   
144    32     
-128   128    
64     -32    
176    272    
-128   -80    
32     -640   
176    464    
144    464    
-80    -240   
176    -352   
80     -48    
240    -128   
112    -720   
144    160    
144    -592   
16     -32    
320    -608   
112    -208   
288    320    
192    80     
-96    608    
80     32     
-64    -96    
240    432    
-80    96     
-16    80     
-368   -96    
144    -160   
-80    -80    
128    -64    
96     -160   
32     -272   
192    48     
0      16     
-176   144    
144    -80    
-48    32     
240    -192   
-112   144    
128    -48    
32     48     
-80    96     
96     -80    
-896   -16    
176    -224   
16     -48    
112    32     
48     32     
176    48     
80     144    
0      -800   
112    144    
80     -16    
16     -112   
192    -160   
144    -48    
-64    48     
32     16     
-112   -80    
160    -192   
64     -48    
0      224    
112    0      
-48    272    
128    272    
-304   -560   
-304   -32    
80     -80    
64     192    
208    -112   
112    -192   
-352   0      
144    48     
-480   -240   
128    -112   
-720   144    
80     -192   
128    -144   
240    -320   
-368   0      
112    -112   
96     -16    
224    -96    
0      144    
-384   0      
-16    -64    
-336   112    
320    16     
-160   48     
384    144    
-1456  96     
-32    -160   
80     -128   
64     32     
80     96     
-16    -64    
144    16     
48     -48    
-224   144    
352    -224   
160    -320   
32     -32    
256    80     
-224   256    
16     -192   
-336   16     
128    -80    
288    304    
-48    48     
176    32     
-304   -544   
160    144    
-176   -544   
-96    304    
288    160    
-128   64     
64     -96    
16     0      
0      -48    
-336   -160   
-112   -144   
48     80     
128    160    
-48    -48    
-32    144    
208    -208   
-64    32     
240    -896   
48     -128   
416    480    
-560   368    
-288   -160   
-64    -80    
-16    80     
176    -272   
-208   -64    
32     -48    
-208   416    
224    144    
416    96     
32     -96    
32     176    
-176   80     
288    -16    
96     -32    
-16    -112   
0      48     
-64    -176   
128    -16    
16     -112   
0      144    
144    -80    
-384   -192   
208    128    
-80    288    
-432   16     
-144   -128   
128    128    
-784   -208   
-432   -512   
-1488  -352   
0      -320   
128    112    
16     32     
96     -544   
-144   -272   
-368   -144   
-112   80     
-112   -208   
64     96     
-464   -320   
112    16     
-176   -96    
-16    272    
-32    -64    
80     224    
-208   0      
-1024  224    
-224   -288   
256    64     
32     48     
-384   48     
80     -16    
-112   0      
-112   -128   
-96    80     
-176   144    
-144   -16    
160    64     
112    -32    
-64    0      
-176   48     
-448   0      
-352   -640   
-256   -336   
-96    176    
-112   -80    
96     0      
0      -128   
-160   48     
0      48     
-80    -80    
-64    -128   
192    -32    
0      48     
112    16     
-128   -32    
-240   96     
0      96     
-256   128    
-304   48     
-256   -96    
320    208    
-160   -128   
128    -64    
112    64     
16     96     
-64    0      
48     -48    
-160   -64    
32     256    
176    112    
0      16     
-224   16     
-304   0      
112    144    
-240   -80    
208    112    
48     32     
-32    -64    
192    80     
0      32     
208    272    
-368   -64    
144    64     
176    80     
96     48     
-64    -80    
-64    0      
-304   -32    
-64    32     
96     80     
176    128    
-160   -32    
-176   0      
16     64     
96     64     
-48    48     
-64    -32    
16     32     
-272   -16    
16     48     
-256   -64    
160    176    
-656   0      
96     64     
-1440  -16    
-16    0      
64     16     
-112   0      
48     48     
32     -48    
96     -64    
-48    128    
192    32     
-144   80     
32     16     
-192   16     
-64    256    
96     176    
-144   48     
-624   -112   
-112   -96    
-32    240    
144    112    
96     176    
-224   16     
224    -32    
-128   -32    
208    224    
-16    144    
272    112    
-64    -80    
128    -16    
-16    64     
-32    48     
48     -32    
80     128    
-144   144    
256    0      
96     176    
-144   16     
32     0      
304    208    
-16    16     
80     -32    
112    96     
-64    16     
-160   32     
-160   128    
368    32     
-288   128    
-96    64     
-96    0      
-256   64     
112    -144   
144    -16    
-160   288    
48     288    
-32    -32    
-144   -80    
80     144    
-160   0      
176    128    
32     80     
112    32     
-80    64     
-80    224    
304    208    
-48    16     
80     128    
-128   192    
224    208    
-64    48     
16     208    
-48    -16    
16     -224   
496    368    
-368   320    
112    -224   
272    352    
-304   0      
16     -80    
16     80     
144    96     
48     112    
-80    160    
256    48     
80     48     
160    32     
-192   32     
-16    -576   
48     784    
16     48     
-112   -464   
208    720    
-32    160    
128    -112   
-48    -352   
0      -112   
-176   624    
-128   -64    
-96    -176   
48     -304   
432    128    
-224   -224   
48     -192   
32     -16    
-64    -640   
-112   256    
-80    -96    
128    -320   
64     -320   
80     -96    
0      0      
176    16     
16     -16    
272    48     
-160   32     
-128   48     
-144   32     
-16    -48    
-208   -432   
240    -416   
-32    176    
64     80     
112    48     
32     0      
-16    32     
144    16     
160    176    
32     32     
224    256    
-144   32     
16     16     
64     -96    
0      256    
112    176    
48     -208   
384    544    
64     624    
-80    160    
160    -64    
32     32     
32     -16    
64     160    
-64    0      
208    240    
80     128    
-16    96     
-48    -16    
352    -320   
240    -32    
-16    -128   
-32    112    
32     -416   
0      112    
32     48     
48     -96    
128    -32    
-48    -80    
-48    -384   
128    128    
0      16     
64     96     
48     64     
-16    -160   
112    64     
-256   -544   
48     -48    
0      96     
-48    176    
128    -48    
144    112    
-16    -160   
96     112    
-112   144    
224    -16    
0      -16    
176    -16    
-208   -16    
256    176    
144    224    
112    -208   
-128   -64    
32     16     
-96    112    
16     -1504  
96     -80    
80     -96    
-32    48     
112    48     
240    32     
-80    128    
128    208    
80     160    
-32    -176   
128    -224   
48     -160   
224    0      
-128   -432   
-48    -144   
16     -320   
32     336    
160    240    
0      -112   
-80    0      
160    144    
-192   144    
80     16     
256    128    
320    -208   
272    0      
-32    -128   
176    -144   
-32    320    
160    -144   
240    -400   
0      -80    
-64    -64    
160    224    
-192   -64    
224    -128   
80     -144   
-16    32     
416    240    
96     128    
-272   16     
240    48     
656    160    
-80    560    
112    224    
-64    -160   
48     112    
0      -80    
64     96     
320    -80    
-208   -16    
240    -528   
-32    144    
-48    -592   
-32    -128   
64     -64    
-112   16     
-32    -112   
320    -256   
352    240    
0      144    
176    -160   
48     224    
112    -272   
544    448    
-384   240    
208    -240   
-96    -608   
-16    -320   
496    64     
-96    -608   
272    176    
176    288    
-160   176    
224    0      
-176   160    
176    -80    
64     96     
464    240    
-704   16     
-592   -160   
-32    -48    
144    128    
576    416    
-160   528    
224    208    
-176   0      
-144   -128   
304    -80    
320    192    
-368   -672   
48     0      
-240   464    
160    -128   
160    -192   
-304   -448   
304    -80    
-480   560    
-192   -208   
-32    -384   
176    -400   
144    -64    
176    -192   
-144   -240   
80     64     
112    160    
80     -48    
144    176    
-176   -144   
160    -96    
-160   224    
272    48     
-336   -224   
-128   112    
288    32     
-144   -384   
80     240    
176    208    
-80    -16    
-80    -704   
128    144    
304    192    
0      -256   
128    -32    
240    240    
-320   -32    
-112   -48    
-816   16     
304    -16    
144    -32    
96     -16    
176    32     
-32    -224   
-144   64     
32     -400   
208    176    
-32    -48    
48     48     
160    -128   
16     -512   
-272   -368   
128    -64    
144    384    
-176   64     
-48    0      
128    128    
-80    48     
-64    -224   
256    -80    
176    -288   
128    208    
32     64     
192    -128   
96     16     
32     -64    
-16    0      
-64    -80    
-144   64     
48     -112   
-512   0      
0      32     
-272   96     
64     -304   
32     -48    
176    0      
352    128    
-128   16     
144    -128   
0      16     
96     16     
-368   -16    
128    32     
-96    64     
-96    -80    
-464   -16    
192    -16    
128    64     
16     -96    
272    64     
192    64     
160    304    
-496   144    
-192   -96    
-320   -176   
208    -64    
96     160    
272    0      
-96    48     
48     80     
-368   -32    
112    -80    
96     112    
48     -32    
64     80     
-608   -176   
-96    16     
0      48     
176    64     
32     32     
-16    -48    
-288   0      
128    32     
-320   0      
-16    64     
64     64     
288    -16    
96     64     
-1200  -96    
-64    -16    
-768   -176   
-176   -32    
128    0      
16     32     
-96    -16    
-400   48     
-208   16     
144    48     
16     32     
144    32     
-16    16     
-176   -48    
32     48     
-640   -80    
-64    80     
32     96     
-304   0      
-32    0      
-48    48     
128    16     
-448   -80    
96     16     
-576   -96    
-32    64     
96     0      
0      96     
-400   -96    
128    96     
-96    16     
128    -160   
-80    -80    
-176   -128   
160    16     
-304   144    
-64    -48    
128    -48    
-112   16     
-112   16     
-224   -128   
-496   -448   
64     48     
-16    176    
80     0      
-160   -272   
-112   0      
-304   -48    
224    336    
96     368    
-48    0      
96     -64    
80     -16    
-112   128    
-384   48     
-272   96     
16     32     
0      80     
176    -240   
-64    -256   
0      -96    
-176   48     
96     64     
-64    -16    
0      -16    
-48    -208   
-144   224    
-64    -32    
16     -112   
-160   0      
-96    -352   
-144   624    
368    -256   
-80    64     
-208   -32    
-96    -208   
64     192    
16     -768   
-208   144    
240    -80    
-48    512    
-96    192    
304    -384   
112    0      
-320   400    
256    432    
-176   224    
-96    304    
16     -48    
-112   -16    
256    -160   
-80    80     
-80    80     
48     32     
240    -32    
-256   144    
352    224    
-208   256    
240    64     
-288   64     
160    96     
-352   0      
-48    80     
-496   0      
-64    144    
80     -32    
-96    -32    
0      -112   
64     -208   
144    96     
0      64     
-64    -16    
144    -32    
-224   -32    
-48    -32    
144    48     
-176   0      
160    32     
160    80     
-144   0      
-64    16     
-176   -128   
112    80     
-32    80     
-16    -64    
-48    -112   
-112   32     
-208   160    
96     0      
-16    32     
-128   128    
-80    -80    
112    96     
-96    -32    
160    0      
32     16     
192    32     
-112   32     
128    16     
64     128    
-224   48     
-32    0      
48     -16    
224    96     
-16    80     
272    -16    
-208   16     
-256   32     
-16    112    
-48    0      
240    16     
112    80     
112    96     
-208   -48    
-32    16     
-256   -16    
-16    48     
112    112    
64     64     
-32    16     
-32    -64    
-16    -176   
224    80     
32     192    
80     16     
-32    -32    
48     -112   
-48    48     
-32    -16    
-48    -144   
32     -112   
-128   32     
16     -96    
352    112    
-240   208    
96     16     
256    48     
-48    128    
96     144    
48     80     
192    128    
16     208    
272    32     
48     240    
-160   112    
176    -32    
448    208    
-288   192    
128    96     
64     176    
0      32     
32     32     
128    -96    
-176   -80    
288    80     
0      96     
32     80     
192    -16    
-96    64     
96     0      
-272   32     
144    -208   
-96    0      
128    -96    
-64    -224   
32     -640   
48     -32    
0      96     
64     208    
64     320    
96     80     
-256   -64    
416    288    
-96    -80    
-16    -32    
-64    -128   
144    -96    
-16    -272   
128    736    
1024   1680   
-656   304    
-160   -512   
160    176    
176    640    
-304   -960   
304    -944   
272    400    
-128   1264   
208    -528   
64     -272   
-192   448    
288    -128   
80     208    
-16    32     
16     -48    
48     -224   
224    512    
48     32     
-80    16     
144    416    
192    80     
32     176    
-48    496    
32     -384   
240    -528   
16     608    
192    48     
432    432    
-352   1248   
-112   -480   
240    -832   
304    416    
96     240    
176    -416   
112    -368   
-112   816    
-240   -288   
96     -176   
48     -192   
432    256    
-64    16     
240    48     
-208   -176   
-208   192    
192    -176   
32     160    
80     32     
16     -1104  
224    352    
80     16     
-272   -64    
96     224    
176    96     
96     -112   
160    48     
-208   192    
96     16     
96     16     
-80    48     
288    16     
192    0      
-128   32     
368    -16    
-16    16     
128    -448   
80     64     
-160   -48    
176    96     
-144   16     
112    128    
64     128    
-96    -48    
432    272    
-96    -144   
48     -64    
176    -112   
-32    80     
32     -16    
0      112    
64     -32    
48     320    
32     16     
-16    -272   
-80    -176   
16     192    
112    0      
432    240    
-304   144    
-176   -384   
112    80     
496    48     
288    32     
288    -80    
112    128    
16     -96    
256    0      
-192   -16    
-144   48     
96     192    
112    128    
192    0      
352    -112   
256    96     
-16    -160   
-48    -16    
96     16     
48     112    
0      -144   
240    240    
0      -160   
192    64     
128    32     
16     -464   
-32    -16    
-96    -1008  
96     -880   
144    -144   
192    144    
-96    16     
-48    32     
176    -112   
48     64     
64     -320   
240    -544   
160    -64    
80     -288   
-16    -32    
224    -704   
-368   -80    
-1296  128    
-48    0      
144    416    
-240   -64    
32     -208   
320    -224   
224    64     
192    48     
16     32     
48     80     
-32    32     
64     -176   
208    0      
224    -96    
-48    -32    
16     48     
304    -16    
80     16     
-32    -160   
48     0      
-32    -512   
-224   -16    
-80    -48    
16     208    
96     80     
192    0      
128    -48    
176    16     
112    48     
96     -112   
-352   -80    
-112   -96    
-64    -16    
112    -112   
208    16     
80     -48    
64     0      
-16    -336   
48     -128   
64     -128   
-96    64     
96     16     
-16    -48    
32     -16    
48     -64    
-224   -64    
176    16     
-896   16     
192    16     
16     -80    
32     16     
96     -16    
128    -160   
-176   16     
128    64     
112    48     
128    0      
112    80     
-64    -32    
32     -48    
32     80     
48     -32    
-448   -48    
144    -192   
112    0      
192    -128   
-368   48     
48     -48    
48     -48    
-208   -240   
240    96     
16     -48    
240    -96    
-272   16     
272    -64    
-32    0      
288    -144   
-800   -48    
112    -96    
-3344  -240   
64     -112   
-48    -176   
160    -176   
-64    -144   
64     -432   
-80    64     
304    -16    
32     176    
80     -144   
-80    -16    
-96    176    
128    -80    
-320   -32    
-32    -80    
-272   -80    
1600   1776   
-1552  64     
96     -1296  
-112   -144   
-144   224    
592    -256   
320    -208   
-240   608    
48     -448   
256    -208   
-352   400    
112    -48    
208    16     
-304   -416   
-32    -64    
144    80     
0      -320   
80     112    
64     -32    
112    -624   
48     -96    
-560   -16    
528    128    
-864   256    
-32    336    
-208   48     
-64    0      
96     0      
416    -48    
-368   80     
48     -368   
-128   80     
272    -48    
64     128    
-608   -160   
-656   -64    
-192   112    
-1104  96     
0      64     
112    -48    
64     64     
128    176    
-384   112    
-48    -128   
-256   32     
-1040  -16    
112    176    
-192   16     
-112   112    
-304   -128   
-240   -16    
-272   0      
-240   -128   
-160   96     
-944   -64    
-208   0      
-112   16     
-32    16     
-144   48     
-16    48     
-16    16     
80     240    
112    -112   
-16    -16    
-48    64     
-272   0      
-16    208    
-112   64     
-32    -64    
48     0      
-176   48     
-1088  0      
-16    80     
-288   -48    
96     48     
-160   0      
-48    -16    
160    -112   
-64    32     
208    16     
-112   64     
16     144    
-112   208    
-16    96     
-384   -16    
-16    -96    
80     -32    
-240   128    
80     -48    
-64    96     
-224   -48    
64     32     
256    80     
-224   128    
-48    -128   
-80    -112   
-112   -64    
0      -64    
-160   96     
-32    -16    
32     144    
-16    48     
96     16     
-240   16     
-64    32     
80     0      
128    96     
272    16     
192    -16    
64     -64    
48     112    
-368   0      
128    -32    
96     0      
-80    64     
-64    32     
-384   0      
-48    -64    
-816   -80    
176    96     
-32    192    
112    112    
96     -48    
-320   -240   
160    -480   
16     144    
-128   -16    
16     64     
-96    16     
-160   -64    
-144   0      
-128   -384   
272    144    
-208   -80    
304    -256   
288    -176   
-112   -288   
80     -112   
-144   64     
64     224    
64     32     
-16    48     
-80    16     
0      -48    
-144   -16    
-208   -32    
-144   16     
272    176    
-496   -208   
64     -208   
0      128    
144    -32    
48     32     
208    48     
-64    -208   
-272   272    
80     -288   
0      96     
32     160    
16     112    
224    -112   
-144   -32    
160    -16    
-256   96     
64     0      
80     -464   
-176   528    
80     288    
-192   -128   
96     0      
-16    -32    
32     -16    
48     288    
240    112    
-224   -32    
144    80     
-304   0      
-160   -576   
-16    368    
144    480    
0      96     
240    112    
240    128    
-144   80     
96     -112   
-80    -192   
-48    80     
-16    48     
64     -16    
-96    0      
80     48     
-176   96     
80     224    
-176   -16    
192    368    
-144   576    
96     448    
48     -80    
80     -224   
128    0      
528    432    
112    32     
208    -80    
-352   0      
-240   80     
-176   -48    
-144   -16    
128    80     
-80    32     
-16    -272   
-16    -144   
-144   144    
32     64     
176    64     
-16    64     
48     32     
144    0      
-48    16     
128    96     
0      0      
-48    16     
-240   -16    
352    64     
-240   80     
-128   0      
-48    -32    
336    48     
16     128    
-96    0      
352    144    
-208   48     
112    0      
144    16     
176    16     
-208   -16    
144    48     
-192   0      
32     16     
192    96     
-32    16     
112    80     
96     -16    
176    48     
-48    32     
0      48     
112    48     
-256   -64    
32     -64    
208    144    
-144   16     
224    -32    
464    96     
-128   -912   
-144   16     
-64    144    
-128   -80    
240    -128   
176    48     
64     128    
-48    80     
144    32     
144    144    
160    -16    
368    -48    
-256   -128   
-224   -32    
-224   -96    
128    -176   
336    128    
-128   16     
80     32     
48     48     
112    128    
0      48     
16     -32    
96     -32    
192    80     
-48    -224   
128    64     
32     48     
288    240    
0      336    
-272   -528   
64     16     
128    -16    
160    144    
-192   96     
32     64     
128    -16    
80     64     
-80    -48    
176    -16    
-96    64     
112    32     
0      96     
512    416    
-432   480    
240    -160   
240    -208   
144    -1248  
192    240    
80     144    
112    112    
96     64     
112    96     
160    16     
32     32     
64     112    
32     80     
-176   -32    
192    -96    
48     16     
64     32     
16     96     
0      -144   
176    272    
-112   112    
48     16     
32     -64    
176    80     
80     32     
-48    -64    
112    -128   
80     16     
64     48     
-80    -112   
144    112    
0      -32    
-16    32     
80     -176   
96     80     
32     -224   
-64    16     
-112   64     
128    176    
-176   96     
144    112    
96     16     
32     -48    
64     0      
-96    -112   
16     -16    
64     -128   
128    80     
48     -224   
96     16     
288    -112   
144    48     
240    96     
-96    48     
96     16     
-16    96     
96     32     
-32    -32    
48     128    
112    -96    
144    96     
64     -64    
32     80     
144    -16    
0      32     
160    -32    
112    144    
-48    32     
112    48     
0      0      
208    -112   
304    224    
160    -112   
160    112    
96     32     
-112   160    
-32    -32    
192    272    
-48    112    
128    -320   
16     464    
96     -272   
256    -112   
-16    80     
224    -128   
128    -48    
272    -608   
144    -64    
128    -736   
-144   1248   
80     -480   
48     -288   
0      448    
112    -688   
-64    -912   
320    0      
-128   -816   
32     112    
96     176    
-64    112    
-896   -80    
144    -256   
560    224    
-384   432    
-64    128    
144    -1456  
32     -352   
96     -80    
240    48     
64     -64    
32     0      
64     0      
-32    -256   
224    -128   
192    -208   
-640   -80    
-144   -32    
128    -192   
-48    -112   
192    -80    
-48    64     
144    -48    
48     -624   
112    -464   
-96    -64    
-32    144    
64     -80    
0      -64    
-400   -96    
128    64     
-208   -48    
80     48     
64     128    
208    48     
32     -400   
160    -208   
-240   -208   
64     -528   
-64    208    
32     -16    
128    16     
80     -64    
96     48     
-48    64     
32     64     
-80    -32    
272    0      
-1088  32     
144    -48    
80     16     
288    -48    
-80    -48    
96     -304   
32     144    
0      -720   
-16    32     
128    -16    
32     16     
0      32     
288    -16    
-400   16     
-64    -64    
-352   -32    
32     -160   
240    -144   
272    -32    
-880   -32    
-96    -544   
-64    64     
64     -976   
64     16     
64     32     
96     80     
-224   -16    
224    -208   
-96    16     
-32    48     
-224   -48    
48     96     
-1408  -32    
240    -16    
-144   176    
32     -96    
-48    -96    
208    -336   
32     112    
-48    16     
-48    -128   
-64    0      
0      -32    
-32    48     
-32    16     
-96    -16    
112    -112   
-384   16     
0      -144   
112    96     
-80    -384   
-48    -128   
-32    -208   
-96    112    
-80    -48    
288    48     
-144   192    
208    224    
-32    32     
128    208    
-976   -48    
80     -208   
160    64     
176    -48    
368    368    
-224   96     
0      -32    
240    -400   
320    32     
-288   48     
-32    144    
272    352    
-288   512    
64     80     
304    -64    
-16    176    
224    -32    
-512   -560   
368    -784   
-64    -48    
-1264  256    
128    48     
-176   112    
-320   -96    
288    352    
-720   112    
-32    -304   
-160   -208   
64     -48    
-48    -320   
16     192    
112    -48    
64     192    
-880   -448   
320    560    
-352   -208   
192    64     
-96    240    
-112   -176   
112    176    
-384   -144   
-96    448    
-1488  -144   
-208   -160   
64     -144   
64     -96    
-16    -64    
112    64     
-608   32     
-48    64     
-48    80     
64     0      
-112   -16    
-144   48     
-80    -48    
-96    0      
0      48     
336    128    
-192   -16    
144    144    
-272   80     
-368   -48    
-64    -16    
-32    16     
80     80     
96     -64    
0      32     
-160   0      
-192   -64    
64     224    
-176   16     
304    80     
-288   64     
128    80     
-1072  48     
-112   48     
0      -48    
96     144    
208    64     
0      -80    
80     -144   
-128   112    
16     0      
176    48     
-112   64     
-144   -48    
-176   -640   
-96    -352   
-192   352    
-992   -336   
400    -128   
-1264  128    
-240   192    
384    336    
-640   -144   
240    -80    
352    112    
96     208    
0      32     
-32    0      
80     64     
-208   32     
-160   -192   
512    -96    
-48    16     
32     192    
-432   0      
96     32     
-144   -64    
112    48     
-32    64     
16     16     
-32    16     
96     16     
32     -80    
176    -176   
-176   -80    
112    112    
80     112    
-304   -80    
128    80     
-352   -80    
16     48     
-32    0      
-96    80     
-32    304    
352    144    
-128   -96    
-144   -32    
-96    0      
32     96     
-32    64     
-336   -96    
0      64     
-208   -48    
192    32     
-192   16     
112    64     
144    0      
16     16     
-144   -32    
48     128    
64     32     
0      32     
96     32     
-96    96     
64     64     
16     0      
0      -32    
96     224    
-64    144    
-144   -48    
-32    -48    
0      32     
-32    32     
96     32     
-160   512    
208    352    
64     -304   
-256   -256   
0      16     
80     176    
-192   -32    
128    -32    
-176   -80    
336    80     
-112   -128   
16     112    
16     176    
-208   0      
16     -16    
64     112    
16     32     
-96    -64    
224    -256   
112    -80    
192    112    
-128   16     
0      160    
-304   128    
176    96     
128    -64    
-80    -48    
-16    0      
48     160    
80     0      
16     -48    
144    80     
-336   112    
560    -32    
112    -640   
192    -352   
-32    32     
-48    32     
-224   -400   
-272   -288   
-224   -288   
128    464    
160    608    
-496   -528   
-32    -368   
0      192    
160    304    
-16    48     
80     -48    
-32    -64    
112    144    
-64    48     
368    512    
-288   -160   
-64    -464   
256    32     
-64    112    
32     48     
-32    16     
192    208    
-64    192    
16     224    
128    128    
-48    -32    
-192   -48    
144    -16    
-96    -96    
208    176    
-256   112    
144    80     
256    -176   
32     -352   
-32    304    
32     272    
-16    -32    
-256   -544   
304    336    
-384   400    
32     -128   
256    304    
-48    -208   
32     -176   
208    448    
16     -96    
-96    -144   
128    64     
80     -48    
192    224    
80     16     
0      64     
-16    48     
64     48     
-272   736    
272    -512   
-128   192    
32     272    
48     -112   
96     -208   
0      -96    
80     -1392  
16     48     
48     -336   
288    336    
-144   -352   
-96    224    
0      -336   
-32    272    
224    1104   
192    -176   
-272   -384   
144    -80    
-48    -32    
208    32     
112    -272   
240    368    
48     160    
16     144    
0      256    
368    272    
-32    208    
96     176    
256    96     
-160   48     
-80    -128   
-16    112    
48     16     
48     144    
96     176    
144    48     
272    -256   
-224   48     
144    336    
-32    48     
272    128    
336    176    
-272   -128   
352    112    
-192   192    
320    160    
48     240    
64     -48    
80     -80    
80     -128   
-16    80     
64     -96    
256    144    
-304   -528   
416    -384   
-144   208    
16     256    
96     -112   
-80    32     
-160   336    
208    64     
224    -112   
-32    0      
-80    -16    
320    -448   
-96    -64    
224    0      
48     -144   
-16    -80    
-80    128    
432    144    
-160   144    
-32    0      
-48    64     
624    464    
-192   560    
-208   112    
64     -224   
352    -240   
48     -16    
160    160    
240    -208   
-160   -64    
64     160    
336    384    
160    48     
224    -16    
64     48     
160    208    
112    32     
160    -16    
144    80     
176    -416   
-96    112    
160    -224   
160    96     
-32    -256   
128    16     
160    -128   
48     64     
16     128    
48     0      
144    80     
64     160    
-96    -64    
496    -32    
16     240    
-112   -224   
272    -176   
128    64     
-32    128    
80     -64    
128    -112   
80     -80    
32     -96    
-64    -480   
-32    224    
-16    32     
176    -1200  
144    16     
64     -16    
64     -576   
144    16     
112    -192   
-48    96     
80     64     
64     0      
80     48     
-16    32     
-32    224    
144    80     
144    -448   
-64    -32    
144    -96    
-16    -96    
-496   -16    
-240   -496   
-96    -304   
80     -896   
80     -544   
208    -1056  
-32    -304   
32     0      
352    224    
-160   96     
-16    -112   
-32    16     
224    160    
96     -640   
256    -224   
-2464  160    
-176   -112   
128    -80    
80     64     
64     -160   
-16    32     
-32    -96    
48     -288   
-144   -576   
496    272    
48     304    
144    -224   
-48    144    
-240   -144   
32     80     
-240   240    
144    96     
0      -48    
272    -144   
160    112    
144    -384   
-96    -160   
64     -96    
-288   -80    
240    -96    
304    64     
192    -96    
192    -208   
-80    16     
192    32     
-352   80     
176    112    
80     96     
-48    -16    
160    -32    
48     -176   
-16    32     
0      -496   
-16    -48    
0      -48    
16     48     
16     80     
80     64     
-112   32     
96     32     
-48    64     
32     32     
-480   -144   
176    -144   
-160   64     
288    32     
64     -32    
96     -144   
16     48     
192    -656   
-160   -16    
80     16     
64     -272   
-48    -32    
112    -16    
32     0      
64     -16    
-576   -16    
80     -96    
-816   -48    
-80    48     
80     -32    
176    -192   
48     32     
-112   -352   
240    128    
-144   16     
272    16     
-16    -32    
48     32     
64     16     
160    16     
-80    96     
144    -48    
-256   208    
-288   -208   
272    -16    
-48    -240   
32     0      
432    256    
-112   -64    
0      -96    
192    112    
-352   -32    
496    192    
-400   80     
-192   -224   
-112   -80    
128    192    
-160   -16    
224    -96    
96     0      
32     -16    
288    80     
-48    -48    
128    160    
-784   -16    
416    16     
-208   16     
240    32     
128    -16    
176    64     
-304   -32    
192    -48    
-128   80     
80     -48    
32     32     
-752   -256   
272    -64    
-256   112    
-256   -80    
-48    16     
-928   -48    
64     -16    
128    64     
-192   -16    
160    -64    
-352   32     
-224   32     
160    192    
-512   -32    
80     32     
-336   -96    
-16    16     
-48    48     
-32    64     
80     32     
-96    16     
96     64     
-528   48     
-48    64     
144    0      
-80    32     
-144   0      
96     80     
48     16     
-128   160    
-336   -288   
-160   -144   
32     16     
-208   -16    
128    -16    
64     304    
48     176    
-352   -80    
-128   -32    
112    160    
-64    272    
-48    -16    
192    160    
112    -160   
272    384    
-96    0      
-144   -224   
-112   64     
-96    144    
-32    -48    
112    -16    
-224   -256   
-240   144    
-48    -48    
-896   528    
-144   -240   
-128   -192   
112    48     
0      -16    
208    112    
176    688    
-176   -352   
128    48     
-64    48     
-48    336    
-160   -16    
-96    -48    
0      0      
-160   -32    
-304   -112   
160    64     
208    192    
384    -48    
-272   64     
-112   176    
-160   1296   
-272   -560   
320    0      
176    48     
192    48     
-176   -224   
-32    96     
-208   592    
-256   -368   
-240   32     
48     -48    
-1072  0      
288    112    
-240   -768   
-16    448    
-48    224    
-192   64     
-144   -256   
176    128    
64     0      
0      32     
-256   96     
-96    -128   
32     64     
-192   -96    
128    -16    
-864   -112   
32     432    
16     -80    
-128   -368   
128    -16    
176    320    
-16    160    
-48    -192   
96     -48    
-16    256    
-112   176    
-32    48     
80     48     
-192   144    
320    368    
-480   -176   
32     -208   
176    -112   
256    304    
144    208    
-32    -48    
-176   16     
-16    -112   
96     16     
-80    -64    
-16    16     
-128   0      
144    32     
-160   -32    
16     -112   
-64    -16    
-16    -80    
0      -192   
48     -144   
80     208    
32     0      
-16    32     
0      16     
16     160    
-64    80     
32     0      
-176   -96    
176    -128   
-144   -112   
16     -96    
-80    -96    
-16    -240   
-144   -128   
-80    -416   
96     -128   
128    -384   
0      -592   
368    -336   
48     64     
-80    176    
0      -48    
-144   240    
16     -352   
-80    128    
288    96     
-32    80     
240    16     
-16    -32    
-80    16     
-48    -160   
64     192    
144    -64    
-80    48     
160    -64    
-416   -112   
0      -240   
-64    -64    
272    64     
-128   48     
-32    32     
144    160    
0      240    
144    48     
96     48     
80     -32    
-16    96     
80     0      
-272   -16    
160    48     
-240   -16    
112    192    
48     208    
96     0      
-96    -256   
16     -112   
16     112    
-48    16     
80     -64    
16     32     
80     80     
96     16     
16     64     
48     0      
240    -80    
0      112    
-16    352    
224    0      
16     -32    
32     80     
80     80     
-96    0      
224    -80    
16     128    
48     48     
-160   480    
592    400    
160    352    
240    80     
64     192    
32     -48    
128    -16    
-64    -288   
-32    -224   
-96    144    
80     -64    
288    0      
-224   -224   
144    32     
32     96     
-112   144    
64     -16    
80     16     
-288   64     
-80    336    
128    224    
192    -48    
16     -80    
208    -96    
384    272    
-352   224    
-96    32     
-80    128    
208    80     
112    -96    
608    -176   
-16    -48    
-336   80     
-112   48     
176    32     
-48    144    
192    96     
240    208    
32     -128   
-32    -112   
-32    -640   
80     64     
0      0      
-32    -224   
128    -80    
48     96     
-144   -64    
176    64     
112    80     
176    320    
-80    -80    
32     0      
-16    32     
-48    64     
-32    -304   
128    16     
160    16     
-16    -32    
16     256    
16     64     
128    144    
-144   -128   
48     16     
176    -144   
144    -48    
32     208    
-160   -192   
32     128    
272    -48    
-48    -16    
-48    -448   
-256   -112   
0      -16    
144    400    
176    160    
160    96     
32     96     
288    32     
48     -48    
288    64     
-112   32     
32     0      
96     128    
-16    16     
112    80     
128    -112   
224    32     
80     80     
-48    -32    
-112   -48    
-128   128    
112    48     
80     -16    
320    0      
240    80     
96     48     
16     0      
-48    32     
-112   -208   
192    -16    
-336   -576   
80     160    
80     -256   
176    48     
-64    -400   
-16    32     
-64    -32    
80     32     
112    16     
176    32     
0      176    
-16    -272   
48     0      
-48    -176   
176    80     
64     -48    
112    64     
96     0      
32     16     
64     48     
-48    16     
96     80     
128    16     
32     0      
32     -112   
112    48     
32     -16    
80     48     
112    32     
32     32     
16     -16    
64     0      
160    0      
-160   16     
112    16     
64     -144   
128    32     
-80    -448   
240    -976   
80     48     
128    -736   
-32    -160   
-16    -80    
144    256    
-320   96     
64     -288   
128    160    
-16    -208   
288    -384   
0      144    
128    -16    
208    176    
-32    -288   
160    -16    
160    48     
112    -176   
96     -64    
32     0      
48     -64    
16     -880   
-16    -128   
256    -160   
464    368    
-352   32     
48     -192   
288    -160   
32     96     
-96    -64    
-160   -96    
-80    48     
80     -48    
-96    -96    
0      96     
-272   80     
80     -208   
-224   -208   
528    -32    
240    288    
-80    64     
-16    -64    
96     -96    
-64    48     
16     -128   
16     -48    
-528   -48    
176    -48    
-144   -48    
240    -320   
64     -32    
112    64     
224    0      
-96    -1504  
-128   48     
64     -64    
144    -16    
80     -16    
192    16     
-240   -160   
128    -48    
-144   192    
-16    64     
80     -112   
80     32     
160    96     
96     -192   
-160   -144   
192    -304   
32     224    
160    -64    
-16    0      
-288   64     
448    -752   
16     464    
64     128    
16     -128   
80     -128   
-16    -160   
16     160    
352    16     
112    -128   
-432   -64    
144    -368   
-16    272    
80     -208   
112    -32    
-112   64     
80     64     
-192   336    
80     -432   
-160   -112   
-32    -64    
-1040  736    
224    -224   
-2176  -400   
96     416    
64     -96    
112    -192   
0      -208   
368    -320   
-32    464    
-240   -176   
176    16     
-48    240    
-208   -96    
-336   -976   
192    32     
-256   96     
32     -112   
-448   320    
16     -256   
-80    -352   
112    32     
48     272    
80     -208   
112    -48    
112    -80    
160    256    
-144   96     
32     -96    
-496   -48    
112    48     
144    -80    
-144   -512   
-112   48     
0      -16    
128    192    
48     -32    
128    -96    
224    192    
80     96     
-64    -16    
272    80     
-320   -160   
80     176    
-256   32     
-80    -160   
16     48     
224    -192   
-368   -16    
-1840  -112   
-64    80     
-1072  -128   
64     -48    
-32    32     
-1104  64     
-64    160    
368    80     
-128   64     
-160   -128   
160    -224   
352    -64    
-368   -112   
-784   -144   
48     0      
-496   -112   
0      -208   
32     -256   
-128   -48    
-192   -32    
-224   -128   
-96    256    
-272   96     
-16    -16    
-1120  -80    
-80    0      
48     160    
-64    -16    
-176   -64    
96     256    
160    80     
32     -16    
-80    -32    
0      16     
-32    0      
-112   -128   
-224   -336   
-112   -192   
-96    160    
-896   112    
-96    32     
-112   -160   
0      -432   
16     48     
112    256    
16     144    
144    352    
-64    112    
0      192    
160    144    
-80    112    
-32    32     
-320   80     
-224   -160   
-48    -80    
128    80     
-592   64     
288    672    
128    288    
32     112    
-352   -464   
144    0      
208    240    
-176   144    
80     -64    
0      -320   
-64    288    
64     96     
-208   176    
-64    -48    
-32    -32    
-592   -48    
160    64     
352    112    
-192   160    
112    464    
-224   320    
-80    128    
48     -128   
-80    -112   
-144   -48    
-32    -16    
-64    16     
144    64     
-64    0      
-240   96     
-112   -48    
0      -112   
-544   64     
448    176    
384    272    
-368   192    
0      -64    
-160   -80    
-80    48     
80     80     
-208   64     
272    -32    
-208   160    
-96    -48    
400    64     
-64    0      
304    -16    
-352   144    
128    48     
-32    32     
-208   -48    
96     272    
-144   -48    
432    176    
-224   224    
176    96     
-224   64     
320    160    
-112   -96    
-128   -80    
-96    64     
-208   -208   
-304   -64    
32     -208   
-64    -176   
-48    -112   
-32    80     
64     64     
128    64     
-176   -16    
-16    -176   
-64    -32    
112    -32    
16     32     
-176   128    
-32    -208   
128    -112   
-480   -272   
0      -112   
96     176    
352    368    
48     256    
-144   160    
128    192    
16     64     
464    320    
-304   -192   
16     -128   
-80    16     
16     160    
32     16     
-80    176    
-128   400    
96     368    
48     416    
144    0      
32     96     
-112   -16    
64     -48    
192    640    
-96    -320   
400    416    
-128   -128   
-144   -416   
80     176    
-208   -192   
-32    -48    
160    352    
224    96     
-144   -448   
-112   224    
-16    304    
-16    -48    
176    -64    
16     -80    
80     16     
-64    32     
160    48     
-96    -64    
32     96     
-96    48     
-48    16     
0      32     
176    32     
496    736    
-480   592    
-96    96     
480    -32    
32     0      
176    64     
-32    -128   
-272   128    
0      272    
-304   -192   
192    -160   
-16    16     
336    64     
208    96     
-192   -16    
272    0      
-48    96     
-176   16     
-48    96     
0      32     
-32    -32    
176    64     
32     64     
176    80     
-48    -32    
64     -1104  
-16    16     
112    64     
-208   -32    
-64    48     
48     96     
80     64     
80     144    
-176   32     
64     -32    
80     32     
272    192    
-48    96     
-16    0      
-16    -144   
-32    -128   
160    80     
144    48     
-32    48     
-16    48     
48     128    
192    80     
-32    16     
-32    80     
32     0      
-64    32     
192    96     
336    224    
96     96     
-224   -80    
64     -48    
0      0      
112    -128   
80     32     
64     48     
-64    0      
32     0      
96     32     
80     32     
96     64     
64     -80    
64     32     
-48    -32    
32     -16    
128    48     
48     32     
304    96     
-176   -176   
128    -32    
16     64     
192    192    
-304   112    
224    -96    
0      64     
192    -16    
-208   -112   
160    48     
208    80     
16     -144   
336    112    
-160   -64    
208    112    
144    -336   
-176   0      
144    -16    
48     80     
64     80     
128    64     
160    -64    
32     128    
144    208    
0      176    
-32    -32    
-64    -192   
96     32     
256    32     
-128   -16    
352    -64    
656    448    
-576   352    
-272   -240   
112    -320   
160    0      
-16    -16    
32     48     
272    0      
176    -16    
-32    -16    
416    -288   
176    -144   
80     80     
96     112    
144    -80    
-160   272    
80     -864   
64     -208   
16     48     
32     -96    
96     -32    
224    -80    
-336   -320   
512    320    
-224   208    
256    96     
-208   -144   
208    -176   
208    368    
64     -208   
80     16     
16     -16    
160    -176   
32     256    
-96    -224   
176    -320   
-176   176    
128    32     
192    -96    
32     192    
240    160    
208    -112   
-48    -368   
64     160    
192    352    
-272   -432   
48     -16    
144    -112   
-80    -208   
288    -112   
-144   160    
176    272    
176    304    
304    368    
208    -160   
272    -416   
-32    -384   
-96    -288   
64     -32    
48     -96    
-64    32     
112    80     
400    352    
32     0      
144    -144   
-80    0      
176    -336   
-32    -128   
192    -64    
96     -384   
48     64     
-128   -544   
96     -48    
192    0      
176    -32    
160    144    
-32    -96    
208    -256   
80     64     
80     -304   
-48    -80    
-112   -16    
112    -160   
208    -32    
96     -304   
48     0      
176    -48    
112    0      
112    -1216  
80     -80    
16     -64    
-32    80     
112    -16    
256    32     
-80    304    
0      160    
-688   160    
-144   -208   
208    -128   
224    32     
16     0      
-16    -64    
176    -160   
128    -192   
-176   -64    
0      96     
112    -48    
240    -16    
64     48     
208    48     
-48    -16    
-256   -176   
256    -144   
-544   0      
80     160    
-64    -160   
64     16     
144    0      
-16    -624   
160    80     
224    -448   
16     96     
192    -32    
-16    -16    
112    -112   
272    32     
-224   16     
112    -112   
48     64     
144    128    
64     48     
64     0      
-96    -176   
-48    -192   
96     -272   
160    -448   
112    80     
-32    -144   
48     -16    
-112   32     
-80    -80    
48     -112   
64     -64    
-240   32     
-80    -160   
-784   -80    
48     64     
80     128    
-96    -64    
0      192    
128    -336   
80     80     
80     176    
128    224    
32     208    
96     64     
-208   48     
160    32     
-432   -80    
160    -160   
-128   -144   
176    112    
-112   96     
96     96     
320    48     
192    -80    
80     16     
-32    -336   
240    208    
-416   96     
128    -80    
192    -352   
-176   -112   
-368   -32    
176    192    
-96    480    
144    -112   
80     16     
96     -160   
32     48     
208    64     
-32    80     
-464   208    
416    -112   
-512   -400   
-16    -32    
-240   160    
48     -80    
-272   -48    
112    -560   
-48    32     
-320   -128   
-496   -80    
-64    -96    
-80    -128   
32     -64    
-144   -208   
-160   96     
-48    96     
-64    352    
448    160    
224    272    
-160   560    
0      240    
0      560    
176    240    
0      16     
256    0      
-1664  -16    
-224   -320   
-176   -112   
-1008  208    
80     -128   
-176   384    
-352   -80    
-768   -48    
0      192    
128    96     
-288   -64    
176    -176   
-192   96     
192    144    
-160   320    
32     -336   
400    464    
-16    96     
-400   -592   
-160   144    
48     96     
-64    32     
-96    -128   
-128   -160   
-1664  288    
-192   -144   
96     96     
144    16     
-304   -160   
64     0      
0      64     
240    160    
-32    -160   
-32    128    
-160   -144   
0      -448   
-352   224    
-80    -240   
-208   0      
-96    176    
224    288    
-144   -400   
336    64     
-240   240    
48     -16    
80     112    
-368   -208   
80     -64    
-32    240    
-16    -80    
-192   0      
96     128    
-240   64     
-80    240    
-128   80     
-240   -32    
-1888  -80    
192    16     
-64    -32    
16     96     
80     0      
32     0      
-208   96     
-48    16     
-176   208    
80     304    
0      336    
-144   208    
-288   48     
-304   -144   
64     -32    
-224   -192   
272    -64    
144    -48    
176    -16    
32     144    
-48    32     
16     32     
-112   16     
-16    -160   
224    16     
176    144    
-64    128    
208    64     
-416   -48    
-160   48     
-320   -656   
64     -448   
-1152  80     
-32    64     
144    -64    
-176   -192   
256    -144   
224    224    
240    320    
208    240    
-336   -16    
32     -96    
48     80     
0      32     
16     -80    
-224   -160   
128    128    
48     16     
64     32     
48     -48    
0      0      
272    96     
0      0      
-112   80     
-192   -32    
-192   -32    
-144   48     
-48    32     
-272   -64    
160    128    
-432   0      
64     -48    
-704   -48    
16     112    
-32    16     
-144   -16    
176    32     
160    144    
112    64     
-80    -32    
-64    16     
160    80     
64     32     
-128   -16    
112    96     
64     80     
80     32     
80     80     
0      80     
0      0      
-192   -16    
128    64     
-16    64     
64     80     
96     96     
-64    16     
-112   0      
32     32     
-80    48     
64     64     
-48    -112   
48     0      
-16    64     
-16    -32    
32     32     
-48    -48    
112    96     
64     64     
112    48     
-208   -16    
64     -80    
-64    128    
176    64     
0      16     
48     96     
-288   320    
112    128    
64     16     
-160   -64    
192    48     
144    96     
-48    96     
16     -32    
-32    192    
128    96     
64     128    
16     112    
80     64     
16     224    
-96    352    
192    144    
96     32     
208    96     
-32    -16    
80     -144   
-48    -80    
48     112    
320    224    
32     304    
96     48     
160    -208   
-80    -224   
48     -64    
-32    192    
32     -128   
-64    -160   
112    384    
112    48     
-16    -288   
48     -128   
0      144    
16     160    
80     -144   
-192   224    
192    -96    
-144   0      
-192   96     
240    112    
-160   16     
32     -912   
0      448    
768    32     
-448   432    
-256   -368   
304    -448   
352    704    
64     -352   
-32    672    
-32    -64    
-64    -608   
336    -112   
-144   400    
-96    208    
-64    -240   
-80    -64    
192    -208   
160    160    
32     16     
48     16     
16     288    
144    176    
-32    176    
-32    32     
32     0      
-192   -176   
336    -16    
0      -16    
64     -160   
-64    -16    
-16    -256   
208    -32    
64     -224   
64     128    
128    48     
288    -80    
-160   32     
-32    48     
0      -96    
48     96     
128    32     
128    48     
112    48     
240    144    
-176   160    
-32    -304   
64     -16    
-48    -736   
144    -80    
256    -96    
176    64     
-48    80     
48     64     
80     80     
160    64     
144    64     
208    144    
-96    -48    
112    -48    
-32    48     
-32    -80    
32     16     
272    -352   
48     160    
448    144    
-80    336    
-272   48     
208    -64    
-16    -48    
160    96     
96     32     
176    128    
-80    16     
112    -48    
-80    -48    
64     -64    
32     80     
144    -400   
96     96     
-48    304    
80     -16    
208    80     
-304   144    
-128   -48    
256    48     
-144   -64    
240    0      
288    192    
-16    64     
80     16     
-64    -144   
96     -96    
128    0      
192    128    
-112   -80    
368    -160   
208    48     
176    112    
-48    160    
-160   176    
-80    0      
0      32     
320    48     
48     112    
176    160    
-48    -400   
192    0      
352    -16    
-112   144    
-80    -32    
144    0      
272    80     
-64    208    
-80    32     
160    96     
112    0      
80     -96    
128    80     
128    -128   
144    -16    
32     -80    
96     96     
-32    48     
16     0      
-32    -256   
112    48     
-112   -224   
0      -144   
272    208    
-192   -1040  
224    -896   
48     48     
64     192    
112    32     
112    192    
160    0      
-64    -144   
272    -192   
240    128    
128    208    
192    144    
96     144    
-16    -352   
-16    -624   
-208   -256   
-32    272    
128    -16    
-224   64     
0      192    
-16    -448   
176    352    
352    -64    
48     -336   
80     80     
160    16     
-176   -48    
144    128    
224    288    
176    256    
176    48     
-80    80     
16     -432   
352    -176   
-224   -448   
336    -144   
-16    96     
112    80     
96     -160   
-32    320    
16     -48    
64     96     
192    -208   
48     32     
-224   528    
-80    -496   
160    -224   
-288   176    
-80    -144   
-32    -32    
208    -128   
16     16     
64     0      
464    384    
-464   -560   
160    -336   
400    304    
48     -112   
256    64     
-128   0      
-112   0      
-96    80     
-1088  -64    
-16    -256   
176    0      
144    160    
-64    16     
112    -208   
-224   -32    
176    48     
64     192    
-64    80     
32     16     
-144   48     
32     48     
-208   -96    
96     -32    
-128   -48    
112    -16    
-80    -64    
128    -32    
192    -48    
80     0      
64     80     
96     -336   
48     128    
144    96     
-64    -112   
-192   -128   
176    160    
-16    32     
128    96     
-352   -96    
208    16     
-624   -64    
192    32     
-128   64     
160    -32    
128    48     
-16    -192   
208    64     
-144   -96    
128    64     
-16    80     
64     -64    
32     0      
64     32     
-64    -80    
80     -16    
-304   -16    
112    -16    
-80    144    
304    128    
-192   80     
-16    -352   
208    160    
-112   48     
144    -48    
176    304    
-96    320    
256    -16    
0      -208   
-96    -32    
240    -16    
-448   -144   
288    -160   
-512   48     
48     32     
192    96     
240    -304   
80     16     
-464   -64    
192    64     
-208   16     
112    256    
-256   144    
272    32     
-80    32     
112    80     
-16    272    
-368   -80    
176    112    
128    -48    
208    0      
176    80     
0      -48    
176    -32    
128    16     
-160   -240   
224    -368   
160    48     
240    96     
176    48     
96     -32    
-864   -128   
64     -96    
-160   144    
-256   80     
64     128    
-224   -112   
-64    64     
112    48     
48     -32    
-96    -48    
-256   16     
-240   -48    
112    0      
16     16     
96     160    
-160   176    
-288   -96    
240    64     
-32    -48    
64     -16    
48     48     
128    128    
-320   0      
-96    -80    
64     0      
80     32     
-96    32     
-1824  16     
-32    -48    
128    48     
-16    -32    
-160   -144   
80     0      
16     -16    
192    64     
0      80     
-32    112    
-32    0      
-16    16     
128    32     
-176   64     
32     48     
-912   48     
16     -48    
112    32     
176    128    
-64    -16    
-128   0      
16     -144   
48     32     
-48    48     
80     48     
48     48     
-96    0      
0      160    
-96    80     
-96    -32    
-656   0      
-64    -16    
-1440  -48    
-32    128    
-16    -16    
-80    32     
32     96     
112    112    
48     48     
-144   -48    
-16    48     
-48    16     
208    192    
-112   112    
112    80     
-80    16     
32     -48    
-896   -384   
208    80     
32     128    
-64    16     
-80    304    
64     128    
-64    -192   
-336   -224   
16     512    
-416   -16    
0      -304   
80     352    
272    112    
-304   752    
16     -656   
144    -592   
32     608    
-272   -240   
-64    208    
128    224    
-144   -128   
-64    48     
-16    96     
112    -64    
-160   16     
192    -32    
-288   -240   
80     48     
-192   -48    
0      -128   
-576   -720   
192    160    
-1312  608    
32     -272   
160    784    
0      224    
128    80     
96     256    
-256   -528   
80     128    
320    112    
-224   640    
208    192    
-224   16     
560    336    
-656   -304   
48     -16    
-16    80     
-304   96     
336    -32    
80     0      
48     32     
-48    16     
-16    -80    
16     -80    
64     304    
-160   288    
16     176    
-16    -192   
384    208    
-304   32     
64     0      
32     -64    
0      112    
64     240    
16     16     
112    -32    
-128   16     
64     144    
-80    32     
32     -48    
0      -32    
32     176    
-384   -48    
336    -32    
-320   144    
192    112    
176    16     
112    32     
-64    64     
-48    0      
-80    64     
96     112    
-80    64     
-48    16     
32     -16    
-112   48     
192    0      
-112   -80    
-48    -64    
64     0      
-80    96     
48     16     
16     48     
64     48     
144    128    
96     176    
-64    80     
176    48     
-16    -16    
48     32     
-144   80     
32     112    
-16    -32    
-32    -80    
16     32     
64     80     
144    16     
208    112    
-64    64     
32     0      
224    32     
-128   0      
128    64     
-192   64     
160    144    
-64    112    
-32    -32    
112    48     
-208   144    
-112   -16    
224    0      
96     96     
192    272    
288    256    
-240   96     
-96    -112   
16     -272   
128    -48    
-32    80     
32     48     
16     96     
336    304    
-368   304    
96     -464   
144    -112   
160    80     
128    96     
48     144    
-240   -96    
80     -16    
64     112    
64     96     
64     400    
176    160    
128    64     
-176   -48    
336    112    
16     128    
192    -816   
112    -16    
176    48     
-128   0      
-176   48     
-192   -80    
272    -560   
192    96     
32     256    
-64    -576   
-208   -224   
192    -160   
16     32     
64     -224   
-32    -176   
80     16     
-16    32     
160    80     
128    208    
224    256    
-16    -480   
128    192    
224    32     
96     112    
-112   256    
16     0      
240    128    
-112   48     
128    -144   
-16    64     
208    -224   
160    192    
48     -640   
48     112    
64     -160   
144    -144   
-80    160    
144    192    
-144   -320   
96     16     
224    304    
-224   -192   
320    -112   
96     -192   
256    112    
192    -256   
-16    48     
208    48     
-16    96     
80     -64    
-80    -16    
-128   64     
176    64     
64     96     
96     48     
208    -112   
32     -256   
80     -432   
128    96     
-16    64     
-112   -96    
-192   144    
96     -320   
64     176    
144    256    
0      32     
272    16     
176    32     
208    112    
0      64     
0      96     
176    128    
-352   -48    
-16    -48    
304    96     
48     -112   
-48    32     
48     -16    
-48    -80    
432    -96    
-176   64     
80     -16    
464    224    
-528   144    
352    -16    
-224   32     
256    -208   
144    -16    
-128   -208   
144    -48    
-48    -176   
80     48     
32     16     
-48    16     
256    -80    
128    32     
48     -96    
-176   -64    
-208   80     
224    32     
144    96     
96     0      
-16    80     
160    -64    
-48    -32    
192    -160   
96     64     
128    -80    
64     0      
0      -160   
160    48     
32     80     
160    48     
112    96     
112    -272   
0      -656   
80     -32    
-16    -704   
80     -160   
16     32     
208    -32    
-96    80     
48     0      
96     16     
-192   -144   
336    -176   
112    64     
-272   -400   
160    0      
-2000  -192   
224    -320   
-80    -112   
576    -592   
80     32     
-288   -816   
0      -112   
0      80     
-16    -64    
-96    -48    
128    16     
416    80     
48     80     
-64    -16    
80     -48    
-928   160    
-128   0      
-272   -48    
64     -64    
-80    -160   
320    -96    
112    0      
-16    -656   
176    32     
176    -48    
-48    192    
48     128    
80     80     
32     -192   
144    -288   
-512   16     
-16    -48    
160    -48    
240    64     
-48    192    
160    -272   
144    -64    
-80    -480   
336    112    
64     -128   
48     80     
176    112    
208    -240   
-80    -96    
128    -144   
176    48     
80     112    
-1120  48     
-96    -464   
-80    -320   
-288   -496   
-16    16     
96     -80    
48     112    
96     32     
-256   -16    
176    -128   
160    96     
-144   -16    
384    96     
-96    16     
96     32     
-528   -48    
-16    -64    
32     -112   
0      -80    
160    64     
224    0      
-192   -64    
96     -1056  
128    -112   
64     32     
-16    16     
-64    48     
64     -144   
-160   -80    
288    -48    
-160   48     
192    160    
-304   80     
176    -176   
80     16     
32     -112   
192    160    
32     -416   
0      32     
0      96     
32     32     
-64    -48    
80     0      
-32    64     
128    48     
-560   -128   
160    -32    
-848   -48    
64     16     
80     -64    
144    -160   
112    0      
160    -96    
176    -80    
-64    -304   
32     208    
-80    336    
288    208    
-144   -32    
112    -80    
-96    48     
112    -32    
-944   288    
80     -304   
128    112    
96     -16    
-176   -112   
576    -304   
-144   96     
32     80     
-192   -416   
48     -272   
-160   -480   
-176   592    
240    -240   
0      656    
160    -64    
-96    -624   
80     352    
240    -240   
-160   -32    
64     288    
-592   -640   
-80    256    
-144   336    
336    112    
272    -48    
80     -16    
-240   -208   
288    -496   
-16    64     
96     -192   
-144   96     
-1824  -128   
192    -32    
16     288    
-448   336    
64     176    
-192   128    
-176   -48    
0      -112   
96     48     
-336   32     
48     -32    
16     80     
-16    192    
-608   112    
256    16     
48     -16    
64     0      
-272   -144   
80     -48    
-224   176    
0      80     
48     48     
-288   32     
160    -240   
-560   -288   
-144   320    
256    448    
48     32     
-320   -160   
176    -64    
-112   -176   
-16    0      
16     -80    
-16    288    
-272   64     
-48    -112   
-144   128    
-144   -80    
288    -144   
-272   80     
64     48     
-1168  -48    
112    16     
-240   -128   
-16    -32    
-96    -80    
-112   16     
80     -192   
64     96     
224    96     
-48    32     
-80    0      
-80    -48    
608    384    
-624   320    
-160   -144   
-672   -304   
-48    176    
112    48     
144    16     
0      -32    
-32    80     
160    272    
0      64     
64     -96    
-112   -32    
32     0      
-64    -16    
80     128    
-272   -48    
64     48     
-240   64     
-96    160    
-64    32     
-96    160    
-80    -80    
-112   -208   
192    96     
16     32     
32     80     
-80    -96    
80     48     
-192   64     
0      336    
144    48     
-96    -96    
-176   48     
-160   -176   
-480   -192   
48     96     
-160   -80    
-16    -32    
272    -128   
-32    0      
-16    80     
0      192    
-128   256    
0      272    
208    16     
32     0      
16     0      
-208   32     
32     112    
-432   16     
336    -64    
208    -32    
-96    -16    
96     64     
224    368    
-352   416    
-32    160    
144    -208   
64     -80    
160    -112   
-400   -224   
64     -96    
-304   128    
192    192    
-240   -288   
96     -32    
80     -176   
144    -32    
-176   0      
0      80     
16     80     
176    80     
-128   -224   
-80    208    
-128   -16    
-192   -48    
192    32     
-80    -160   
304    384    
48     -48    
-80    -16    
-128   32     
112    272    
64     16     
16     -144   
-368   -96    
144    96     
112    0      
96     144    
48     176    
-96    -80    
96     48     
-144   48     
-48    32     
112    192    
-112   64     
-16    48     
192    -64    
-48    -48    
112    96     
32     32     
0      64     
48     128    
-80    80     
48     16     
-144   48     
48     80     
32     0      
-48    -32    
144    32     
16     80     
-32    -16    
208    64     
0      32     
48     48     
-16    96     
-128   64     
48     0      
-48    16     
16     -48    
-112   0      
48     -32    
-48    -48    
240    -16    
-112   -32    
-64    80     
128    160    
-176   -16    
256    48     
0      128    
48     64     
336    48     
32     192    
-32    32     
128    128    
-368   -64    
224    32     
-48    16     
64     112    
-16    64     
48     48     
32     64     
-64    32     
64     16     
-48    80     
288    224    
272    432    
-544   192    
112    -160   
368    0      
-176   -48    
64     96     
336    240    
-352   144    
16     -48    
32     16     
192    144    
96     32     
144    -160   
48     16     
-112   128    
-80    0      
192    96     
-192   -80    
288    32     
16     0      
128    48     
-48    96     
80     48     
192    176    
80     0      
-96    -16    
144    16     
208    96     
-224   80     
144    64     
32     32     
80     32     
80     160    
-144   64     
128    48     
-80    -160   
176    -32    
48     176    
112    64     
176    0      
80     0      
-144   96     
224    80     
64     80     
32     48     
128    -128   
16     0      
-144   -16    
32     160    
-128   -16    
80     -80    
128    16     
96     336    
16     272    
0      -176   
-128   16     
-32    -192   
160    96     
96     -16    
192    144    
-128   -32    
192    80     
336    128    
-256   0      
-288   -144   
-48    -80    
16     32     
304    -560   
256    80     
208    -864   
32     48     
0      80     
-256   48     
112    112    
224    0      
-64    0      
144    256    
-32    96     
176    -32    
32     192    
80     48     
304    256    
-160   48     
80     -48    
64     -64    
112    16     
224    0      
96     64     
80     48     
-32    80     
-32    64     
144    64     
16     64     
-16    0      
208    96     
-32    -64    
768    912    
80     -544   
-144   -512   
-144   176    
-288   0      
-112   -560   
0      144    
256    272    
32     -352   
496    144    
240    368    
96     -256   
128    128    
80     0      
160    -288   
240    64     
-96    -32    
64     80     
-112   -128   
-176   -400   
352    224    
384    304    
64     16     
-80    160    
48     144    
48     112    
16     112    
416    -320   
256    -48    
80     48     
16     128    
128    -96    
368    192    
-112   784    
96     -416   
256    208    
-80    304    
-16    -128   
-80    -96    
64     -464   
176    -144   
48     352    
96     -112   
112    272    
48     48     
-80    -112   
160    -48    
32     48     
128    0      
0      -32    
256    368    
96     -624   
-16    64     
144    -208   
64     384    
-1616  -320   
48     -96    
128    16     
176    -304   
-16    96     
80     -576   
256    -160   
224    624    
128    -112   
112    -368   
48     256    
32     -96    
-208   240    
208    432    
-48    0      
-224   -288   
128    -224   
144    80     
16     -352   
16     -448   
144    -528   
176    -16    
160    80     
-80    -576   
-176   -64    
-192   -176   
16     -112   
80     0      
80     -336   
64     176    
-480   -64    
272    96     
-128   64     
32     -192   
-64    -176   
208    -160   
-64    -48    
144    -1344  
128    -48    
-48    -16    
128    -224   
208    -224   
64     -80    
-112   32     
96     128    
-224   0      
-144   -48    
-384   96     
96     208    
0      144    
144    -32    
176    -128   
288    -256   
-112   144    
448    272    
-208   144    
144    -96    
-112   -208   
-16    -320   
64     48     
-128   64     
80     0      
-144   -64    
16     -32    
112    80     
480    144    
-448   144    
208    -336   
0      -16    
-144   -864   
384    -224   
-16    -208   
112    -16    
80     -304   
-192   176    
-224   48     
144    -240   
-1184  -128   
-96    -144   
-224   -80    
224    96     
64     144    
240    -288   
32     -64    
32     -752   
-80    32     
-96    16     
0      128    
-64    32     
80     -16    
-224   -144   
48     -16    
-608   0      
192    -128   
192    32     
144    -16    
80     48     
128    -224   
-80    64     
0      -304   
160    -96    
-144   64     
160    96     
16     -192   
192    -160   
-352   48     
-16    64     
-32    -16    
-128   128    
128    -80    
304    -192   
0      112    
240    0      
64     272    
272    -176   
224    -48    
-288   16     
0      -16    
-464   80     
224    0      
-144   -32    
224    0      
-96    -192   
176    -96    
-2144  -96    
208    -160   
240    96     
0      0      
-16    48     
-320   -32    
-1168  32     
240    -48    
-96    -80    
48     208    
-80    128    
-64    144    
176    80     
16     80     
64     -16    
-192   48     
-880   16     
288    128    
0      112    
192    112    
-224   208    
-368   128    
96     64     
-512   -192   
176    -112   
-1424  256    
176    -80    
160    128    
-112   64     
96     -128   
0      -320   
-288   -96    
96     96     
-224   -320   
-176   0      
-32    -64    
-96    -64    
128    48     
-32    32     
-128   -128   
-352   -16    
-128   112    
240    48     
64     16     
-16    -80    
128    -16    
352    272    
-416   -240   
320    192    
-256   240    
0      -16    
320    112    
16     16     
-16    48     
-64    -48    
-128   48     
0      112    
-912   32     
224    128    
16     -32    
128    48     
-96    -64    
144    48     
-16    0      
48     48     
32     80     
0      48     
-16    0      
-144   0      
288    128    
-464   -128   
160    80     
-384   -32    
80     64     
-64    -64    
96     16     
-32    352    
-208   48     
-32    -48    
16     32     
16     48     
-320   16     
96     -48    
-96    48     
32     0      
-176   64     
-64    -96    
-128   -48    
128    144    
-464   -48    
-64    16     
-96    -48    
32     64     
-48    -16    
128    48     
-112   32     
112    80     
-16    0      
-16    32     
192    96     
-144   -96    
48     48     
48     -16    
-80    48     
288    16     
-48    -32    
0      -16    
-176   96     
32     80     
-160   0      
-32    64     
-32    -48    
128    48     
-96    48     
-240   -224   
304    -96    
-288   224    
-128   -48    
224    96     
-480   0      
160    192    
-80    -64    
112    -192   
64     -48    
128    208    
0      160    
16     80     
64     -16    
-416   16     
96     96     
-64    -80    
-112   32     
-448   -144   
288    112    
-736   48     
-272   48     
160    48     
-16    48     
-16    48     
48     16     
-64    80     
32     16     
0      112    
176    112    
16     -48    
176    112    
-96    176    
-96    80     
112    80     
144    32     
-64    64     
-112   -16    
160    48     
-80    32     
64     -32    
-96    32     
16     192    
288    16     
-144   0      
32     48     
-256   48     
48     0      
-64    -80    
64     16     
96     48     
80     0      
96     16     
16     -16    
112    144    
-16    112    
-144   16     
80     96     
-16    64     
-192   -80    
80     -224   
-80    0      
224    176    
-16    -144   
-160   48     
160    224    
0      64     
-16    48     
16     -144   
160    224    
64     -80    
-32    -160   
32     96     
64     240    
-144   -208   
112    0      
192    176    
-48    64     
-240   16     
-112   16     
-64    -80    
64     -112   
176    112    
-128   -432   
48     304    
144    0      
112    0      
0      96     
-48    32     
128    96     
-192   48     
-80    96     
80     112    
-128   176    
112    -1296  
240    544    
160    -112   
48     144    
-144   160    
32     16     
32     64     
240    368    
-240   112    
-16    -240   
96     96     
240    -80    
64     -16    
224    208    
96     -176   
160    80     
-208   80     
256    -656   
368    544    
128    -48    
16     -176   
144    256    
-96    -128   
0      368    
64     -48    
-32    -208   
16     80     
-80    16     
32     16     
-256   -192   
256    -1504  
208    912    
48     432    
-96    -320   
-48    272    
192    -256   
16     352    
144    128    
304    -176   
368    448    
-96    0      
176    -432   
-32    -112   
128    352    
-128   -48    
-176   -304   
-32    32     
0      496    
192    400    
-224   -128   
224    -176   
96     -16    
208    176    
0      80     
96     256    
32     256    
64     -80    
32     -16    
240    -96    
-224   -432   
128    -576   
208    0      
48     64     
48     -176   
-32    -80    
16     -32    
-64    128    
128    256    
80     16     
48     256    
208    112    
-432   -80    
224    96     
32     -64    
16     112    
0      -192   
144    16     
208    160    
-16    -48    
128    -400   
16     64     
112    48     
48     288    
-96    64     
16     -192   
-208   -128   
-64    48     
-128   32     
64     -352   
-48    -16    
304    -432   
-32    128    
-16    -32    
336    -48    
-16    -224   
240    -96    
-96    240    
96     -80    
-16    -16    
144    -80    
-48    0      
352    -32    
-32    256    
160    192    
-16    16     
32     304    
192    144    
96     -256   
192    -96    
-208   -112   
80     48     
64     64     
0      128    
0      -96    
-80    -80    
-16    -32    
-48    80     
112    0      
176    -272   
-96    64     
32     -160   
224    96     
-128   16     
240    176    
48     96     
-208   -176   
0      0      
96     336    
0      -64    
-32    -192   
240    -96    
0      112    
352    176    
-272   -32    
-128   -368   
400    -208   
-48    400    
80     -80    
-48    -464   
48     -432   
224    -16    
-160   64     
32     -32    
224    -176   
-80    -224   
416    -416   
-112   128    
240    336    
224    176    
320    0      
112    -128   
80     64     
-32    -240   
-48    -1712  
-80    -64    
352    -272   
240    112    
112    48     
-48    -16    
-64    -16    
208    -176   
192    -64    
112    -160   
112    -32    
80     -80    
-64    -112   
160    160    
-80    32     
32     64     
96     -16    
208    48     
-80    64     
272    192    
-48    128    
-144   64     
-160   -64    
176    16     
-80    -320   
-32    -112   
-16    -144   
32     -64    
80     64     
336    96     
64     192    
96     48     
-64    -112   
-160   -176   
-416   -80    
112    64     
-224   -64    
32     96     
32     -112   
128    -240   
224    64     
16     -272   
128    -80    
160    80     
-80    16     
112    -32    
64     112    
64     -64    
96     -16    
32     -32    
112    16     
-368   -32    
64     -352   
160    -112   
144    80     
80     464    
240    160    
-288   -224   
-128   -224   
96     96     
144    -32    
176    -112   
176    -144   
336    -128   
-80    -144   
368    0      
-288   -144   
144    -128   
-480   0      
-304   -96    
96     16     
-32    -64    
-32    -48    
32     -352   
80     32     
-160   -608   
80     -32    
-16    112    
-160   96     
-16    -16    
0      32     
-208   -48    
400    -48    
-272   144    
16     -160   
-2000  -208   
176    0      
16     48     
-16    -112   
32     -32    
112    -496   
128    80     
80     224    
-336   -128   
-16    32     
96     -16    
-576   32     
208    160    
-48    -32    
112    -32    
-176   16     
-32    -96    
96     80     
128    -64    
16     32     
80     -496   
144    16     
-112   16     
32     -48    
-368   0      
144    -16    
-144   -16    
208    -64    
-96    -64    
32     -160   
208    0      
96     -16    
176    80     
-16    -192   
16     64     
0      -432   
144    48     
-160   0      
144    112    
-272   -80    
144    -64    
16     0      
176    -16    
96     64     
-128   0      
16     -64    
-96    -64    
64     112    
-352   -240   
112    -112   
-272   128    
-272   112    
272    -16    
-2256  -80    
32     48     
-16    -16    
-80    -16    
208    16     
-48    16     
-496   64     
0      128    
-368   -64    
112    -48    
-400   -48    
-16    -64    
16     -32    
-160   48     
-272   16     
-160   -48    
-32    0      
-368   208    
-32    80     
176    0      
-160   -336   
-64    -160   
-240   320    
-352   -80    
224    32     
16     -16    
96     64     
-16    -128   
16     0      
-112   144    
-352   128    
-16    80     
-128   32     
-48    32     
-576   -32    
-144   16     
-192   -64    
224    48     
-144   64     
64     80     
-32    16     
128    80     
-288   -16    
192    -32    
-64    48     
256    160    
-192   48     
-672   -32    
48     160    
0      64     
112    32     
-144   -32    
192    -32    
-176   64     
144    112    
-336   -112   
-112   -416   
16     48     
128    352    
-48    -320   
-224   -112   
-144   464    
-384   -288   
16     112    
-544   48     
48     -400   
-192   240    
48     -224   
-176   112    
-48    -32    
80     144    
384    192    
-336   -64    
-16    64     
176    0      
-96    -144   
-160   -80    
-16    -48    
128    128    
-160   0      
80     -48    
144    96     
96     -48    
-64    448    
-64    528    
64     -464   
-176   16     
48     224    
-160   -32    
240    224    
-112   -160   
128    224    
-368   -112   
240    -96    
-368   64     
16     -208   
-1248  160    
64     32     
-80    176    
0      80     
-64    0      
-208   144    
112    224    
-80    80     
112    -64    
-80    -64    
16     -352   
-272   -320   
160    -80    
-256   -32    
-16    112    
-720   48     
-128   192    
80     240    
-352   112    
-16    -144   
144    48     
80     176    
144    144    
80     -64    
-64    16     
-128   240    
-144   288    
16     -32    
-144   -352   
64     192    
-464   -32    
112    48     
16     112    
-96    -16    
240    -80    
208    48     
-64    96     
-16    48     
-64    48     
-80    96     
-96    368    
16     64     
160    64     
64     16     
32     144    
224    128    
-48    -48    
80     -128   
-16    32     
160    32     
16     128    
-80    64     
-16    16     
-160   -16    
192    80     
-272   0      
80     -304   
224    -176   
-288   -192   
16     -176   
-80    -16    
-64    112    
128    128    
48     240    
192    48     
-16    144    
-64    32     
64     -64    
-32    -64    
112    112    
-112   160    
-160   -64    
128    0      
-32    96     
64     48     
-32    -64    
176    48     
0      -48    
96     48     
80     48     
-192   -32    
192    -64    
-16    48     
128    96     
-256   -80    
128    432    
-272   32     
112    -192   
160    -192   
-96    192    
0      64     
128    160    
16     96     
-176   -240   
-96    32     
352    -16    
-64    96     
80     -80    
-64    240    
16     272    
-16    112    
-224   208    
224    128    
80     416    
112    -48    
176    0      
0      16     
-16    -400   
272    -368   
160    16     
-32    320    
-16    -48    
-208   128    
208    -176   
-32    64     
-48    -144   
-48    -208   
208    -144   
224    192    
-224   64     
128    16     
-48    -80    
112    -16    
144    -528   
-48    -416   
0      -32    
-464   256    
80     128    
-48    -16    
128    96     
48     -16    
112    80     
80     -336   
240    144    
48     -864   
-208   192    
-48    -80    
-32    208    
-16    -16    
-64    -48    
112    400    
144    288    
176    272    
-96    160    
32     -800   
-352   -624   
96     -48    
-128   -32    
240    -160   
-64    -816   
208    -112   
-80    64     
160    96     
96     160    
-96    -112   
256    -704   
-112   -96    
224    -48    
64     -160   
144    -352   
48     -160   
176    0      
-160   -352   
160    -384   
16     -384   
272    224    
112    32     
32     96     
-304   -272   
400    176    
-272   192    
-16    -176   
112    -192   
-80    0      
64     -48    
128    -64    
192    112    
-288   -192   
-64    -64    
80     352    
176    64     
-16    -1184  
16     128    
144    -928   
368    368    
-208   32     
-96    48     
512    208    
-432   -32    
-208   -240   
240    144    
256    -48    
448    -32    
-16    64     
96     -192   
-96    144    
-240   -256   
112    80     
-64    -832   
304    112    
240    80     
160    144    
80     128    
160    128    
-176   16     
-112   -48    
-48    -16    
112    -336   
80     -256   
96     -272   
-64    176    
-32    16     
224    80     
-32    -64    
-48    96     
-144   -48    
256    96     
48     144    
-48    -384   
-112   -112   
-480   -608   
-192   64     
112    -256   
64     -32    
176    -272   
32     -80    
528    -256   
144    32     
480    -32    
272    80     
144    160    
0      0      
-224   32     
208    16     
96     -32    
64     -64    
-32    96     
80     -176   
32     -384   
0      -336   
-144   192    
-208   32     
128    0      
32     64     
224    -240   
320    144    
80     -464   
-96    -1232  
112    48     
128    -176   
-32    0      
-48    -1200  
112    -48    
320    112    
-192   -32    
64     -48    
0      -32    
224    -144   
80     -32    
176    -240   
-80    16     
-192   -176   
64     -80    
0      32     
96     -32    
208    -64    
160    -128   
240    16     
-48    -32    
304    -48    
0      32     
192    16     
-80    -240   
-48    0      
160    -112   
48     64     
-96    16     
-16    -32    
-1232  -96    
0      -128   
160    -16    
64     -64    
80     32     
48     -192   
96     -96    
96     192    
64     96     
96     -176   
-144   32     
112    0      
48     0      
-32    -32    
80     -96    
272    96     
-128   96     
272    -96    
16     -96    
80     -176   
176    -272   
-80    16     
272    -496   
-224   96     
416    48     
48     160    
-176   48     
384    -208   
-272   -64    
160    48     
-144   160    
160    -144   
144    -48    
-32    -96    
224    -48    
-64    224    
0      272    
176    -272   
-64    -64    
16     -112   
96     -32    
-288   -80    
128    -64    
32     -16    
-48    96     
-192   32     
128    192    
-1984  128    
-32    -112   
208    -160   
192    -144   
64     48     
0      -272   
96     64     
128    160    
144    -160   
0      112    
192    80     
-80    16     
48     -256   
-80    48     
-16    112    
-992   -80    
0      -48    
512    288    
-320   144    
-16    -304   
208    -224   
-288   272    
320    -256   
-16    -80    
208    240    
48     16     
-304   -64    
-64    -112   
-144   -112   
80     -480   
-352   -240   
-208   96     
272    -320   
0      480    
-240   -224   
512    -1296  
80     944    
48     -112   
112    -272   
-320   32     
208    -320   
-144   544    
432    256    
-48    144    
208    -16    
-208   96     
80     96     
-48    32     
224    -128   
-64    64     
144    160    
-16    -32    
176    -16    
-128   16     
-256   128    
-16    64     
0      224    
64     48     
-128   144    
192    16     
-160   -96    
304    -240   
16     -16    
272    -112   
176    96     
-240   224    
32     16     
-176   80     
-2000  -32    
-208   80     
-288   0      
-32    -64    
80     -80    
-96    16     
96     -176   
-48    32     
-1360  -112   
144    64     
16     112    
192    48     
-528   -160   
64     0      
-192   64     
112    32     
0      16     
-304   32     
-256   -16    
-752   -192   
-16    -16    
224    -48    
-160   48     
-352   -96    
288    64     
-448   16     
80     32     
-48    48     
-112   32     
304    128    
-368   32     
-16    160    
-128   304    
-208   -80    
-592   -96    
208    160    
-128   80     
128    -80    
32     -128   
48     144    
-16    96     
-16    80     
-16    96     
-48    -48    
-32    -192   
-128   -16    
0      112    
-48    96     
-32    16     
0      160    
-16    -32    
-784   -240   
272    -256   
-32    16     
80     208    
-80    -96    
32     -16    
-32    -32    
0      128    
48     -144   
-128   16     
112    32     
-240   -304   
144    -256   
0      112    
-176   48     
-272   -304   
32     -80    
32     -80    
32     128    
64     0      
-80    32     
-128   -128   
-32    128    
112    48     
-96    -32    
-64    0      
64     -176   
32     80     
-304   32     
-16    176    
-32    -64    
176    0      
224    -16    
96     64     
-128   96     
-192   -96    
96     -256   
-64    -176   
96     96     
224    256    
-96    368    
192    176    
-48    240    
-144   48     
32     -112   
-560   64     
16     -96    
-2080  -208   
160    704    
240    576    
-256   -656   
96     -784   
208    -368   
-64    208    
96     -48    
-64    80     
-288   176    
176    272    
-80    720    
256    224    
208    496    
48     352    
-752   -96    
-160   -624   
160    208    
-32    528    
192    -96    
-80    688    
-144   -176   
-160   -128   
-176   -160   
0      32     
-16    160    
-64    -160   
48     128    
-160   -32    
-96    784    
288    224    
-144   -64    
80     48     
80     -64    
0      16     
-48    352    
80     272    
112    -128   
80     80     
-48    -416   
144    -32    
-256   80     
144    208    
-208   -480   
-144   176    
368    272    
-64    384    
112    -208   
112    -32    
-96    -288   
320    80     
-16    -16    
224    224    
-48    16     
-112   -192   
-16    80     
0      144    
-32    -64    
-32    -80    
176    64     
-32    192    
576    192    
-304   -96    
736    288    
-320   16     
0      -368   
192    256    
-96    -32    
112    112    
-48    192    
176    -128   
-112   64     
16     96     
-128   -80    
-16    -16    
-16    48     
272    64     
-128   -96    
96     -48    
48     160    
96     16     
48     64     
-32    112    
-128   32     
80     112    
-32    -128   
-80    -96    
208    64     
32     -240   
128    -96    
-320   -272   
576    -624   
-16    -288   
368    160    
432    32     
160    144    
-272   16     
-112   48     
-48    96     
-16    0      
-80    -176   
-64    -480   
256    -208   
96     16     
192    128    
144    80     
-96    0      
160    80     
-16    64     
144    208    
0      48     
0      112    
-144   16     
144    16     
-208   -608   
336    -144   
-176   384    
-352   -128   
96     32     
208    176    
-96    112    
48     16     
48     32     
80     64     
256    -528   
64     -304   
-304   272    
-512   112    
-128   48     
64     -416   
96     -112   
80     416    
-144   -144   
-208   -192   
336    -48    
32     -32    
144    -32    
96     112    
-336   -32    
-96    16     
-48    0      
-160   48     
-48    128    
-48    -80    
304    -48    
384    208    
64     32     
96     0      
0      32     
16     -768   
-64    0      
208    32     
128    0      
32     32     
160    112    
-80    -112   
-32    16     
-32    32     
128    80     
-128   -16    
80     -128   
80     192    
80     -80    
96     80     
-112   -128   
128    48     
80     48     
-16    48     
0      -16    
-80    0      
-16    -48    
128    64     
48     48     
192    112    
-96    48     
48     -96    
128    64     
288    64     
-80    80     
0      -432   
128    80     
112    -1424  
32     16     
80     48     
-48    -16    
96     32     
160    64     
-80    32     
128    64     
48     0      
112    16     
128    112    
-32    80     
288    368    
64     -208   
48     48     
-32    -48    
64     -16    
16     48     
144    224    
-96    80     
64     64     
-80    -96    
176    48     
128    320    
96     144    
240    -80    
240    -336   
336    96     
176    -352   
-64    16     
80     -128   
-32    -64    
64     192    
128    112    
0      -48    
32     -32    
-48    -112   
160    -32    
32     336    
208    -144   
160    96     
96     0      
160    -192   
112    -272   
96     128    
0      128    
80     -144   
0      352    
112    144    
96     -192   
240    32     
112    -416   
-112   416    
160    48     
-160   -416   
272    224    
0      224    
160    -528   
224    160    
192    128    
-64    -320   
144    1008   
112    -704   
112    176    
-112   128    
16     -832   
-32    -864   
288    176    
64     -208   
-32    64     
240    -720   
-112   -16    
208    192    
128    -416   
-48    192    
336    208    
16     80     
80     96     
304    -64    
112    160    
-144   -48    
-64    -144   
256    128    
0      384    
208    80     
240    -176   
-256   -240   
32     -176   
48     -80    
80     -320   
96     -64    
272    -112   
64     48     
128    80     
48     -112   
-16    -16    
-16    112    
304    128    
240    80     
176    -16    
240    -144   
176    80     
16     -400   
-128   48     
96     -64    
-160   48     
128    -48    
96     96     
-48    16     
64     -64    
-32    16     
-16    16     
-2288  -96    
176    -112   
-48    -80    
160    -112   
96     -16    
112    -256   
-80    352    
352    -640   
112    160    
64     -160   
32     -32    
112    -80    
224    16     
-112   64     
-144   64     
16     208    
-64    0      
208    -112   
176    0      
-160   -64    
432    -288   
-16    128    
160    -528   
48     -96    
-32    -64    
96     32     
-64    64     
80     -64    
-16    -64    
272    -160   
176    16     
-48    -16    
144    -16    
32     -32    
-304   -48    
144    -256   
-224   32     
-224   -48    
96     176    
192    272    
96     -16    
224    64     
-272   -96    
-48    -128   
256    16     
-96    160    
208    -32    
-592   -64    
112    -160   
-448   -176   
0      -144   
-112   48     
112    -208   
176    304    
-16    -48    
64     208    
-144   -48    
-32    -288   
-144   -352   
80     -32    
-768   32     
64     32     
-272   -80    
64     176    
208    128    
-32    -32    
80     128    
320    96     
0      336    
-16    160    
224    192    
-16    64     
-112   48     
-528   -112   
176    -368   
-336   -128   
272    -144   
96     -48    
32     -80    
-48    144    
96     -192   
48     0      
80     -128   
48     -112   
-320   -176   
64     -208   
-272   80     
48     -16    
-144   -80    
176    128    
-160   -352   
-128   -480   
112    -128   
64     384    
176    0      
-592   -80    
256    192    
-448   -416   
-192   80     
304    -240   
-672   416    
112    -320   
-240   288    
-224   -240   
-96    48     
80     224    
224    16     
-256   -80    
-288   -336   
-352   240    
-112   -240   
128    336    
288    -208   
-240   320    
0      -64    
-736   -32    
-208   176    
-160   -288   
128    96     
0      -80    
-32    784    
16     -208   
-272   -480   
-256   -48    
256    256    
-224   -480   
288    80     
64     128    
-240   -112   
128    80     
-304   16     
80     -112   
-464   -128   
-320   368    
-1600  400    
-160   192    
-304   -288   
16     -16    
208    -352   
144    -32    
144    -48    
-224   -32    
-208   -64    
144    144    
-144   112    
32     48     
64     32     
-192   64     
-48    -48    
-32    -16    
96     32     
-544   0      
64     112    
-64    -96    
112    96     
-192   -48    
48     0      
80     16     
192    112    
-272   16     
-112   -80    
64     64     
-160   48     
64     48     
-16    32     
16     416    
-640   272    
32     112    
-368   -16    
304    48     
-16    32     
0      -80    
176    144    
-208   16     
-128   64     
80     -16    
-64    80     
224    -32    
-192   -16    
-64    -16    
0      64     
-224   0      
32     32     
64     -112   
112    16     
-144   112    
-80    80     
-64    48     
112    64     
-48    96     
-112   -16    
192    -16    
-48    -208   
128    16     
-368   -272   
-16    128    
-240   256    
0      48     
-144   0      
144    64     
-144   -16    
80     -48    
-32    48     
80     208    
-208   256    
-128   -80    
112    -32    
-192   -192   
144    -112   
-176   -240   
272    128    
-320   80     
0      48     
400    384    
-432   208    
-240   -48    
16     -176   
80     -192   
512    -80    
176    288    
-320   32     
48     32     
-192   0      
-144   80     
-96    0      
48     48     
-256   -16    
-112   48     
240    64     
-336   -128   
480    144    
288    32     
0      128    
128    32     
80     256    
-80    0      
320    0      
0      160    
-224   336    
-400   -16    
-16    -64    
-112   -16    
-256   -48    
176    48     
128    -32    
96     96     
-224   80     
-48    -48    
-64    -48    
96     16     
64     32     
0      128    
-208   -16    
80     -16    
-272   -112   
320    304    
-352   -32    
48     96     
272    96     
-112   -16    
0      0      
-16    64     
-16    16     
64     -16    
48     32     
288    112    
144    112    
-80    -96    
-16    32     
-96    48     
-32    32     
80     16     
48     64     
-80    0      
48     16     
80     -64    
-32    -32    
-48    -64    
64     -80    
160    16     
0      16     
96     -32    
-96    0      
112    80     
-64    0      
160    80     
16     32     
16     16     
0      32     
16     32     
160    64     
16     80     
48     48     
64     -48    
16     32     
-32    16     
0      -80    
-192   -96    
96     -208   
48     -32    
240    -944   
48     -16    
64     96     
320    192    
-352   80     
240    80     
-96    64     
80     -16    
-192   -16    
-80    -400   
352    336    
-352   -448   
128    -32    
192    144    
0      -560   
-16    -512   
448    768    
-304   -528   
304    48     
48     384    
192    -112   
32     -160   
0      320    
-288   -32    
272    160    
96     304    
16     224    
-192   16     
432    -304   
176    496    
-304   -64    
304    -32    
-320   -160   
32     16     
-96    512    
256    -224   
-208   384    
352    144    
-96    -304   
128    0      
-112   -112   
192    224    
-208   304    
288    -144   
0      112    
224    128    
336    288    
-16    -96    
32     -64    
-32    0      
48     48     
0      96     
-224   -80    
448    -368   
-16    48     
-192   -96    
240    16     
-112   128    
0      -16    
48     48     
80     -192   
-16    96     
208    -576   
-64    128    
48     -32    
160    -64    
-80    112    
128    32     
-64    -48    
48     32     
-112   16     
160    -80    
352    48     
48     32     
-80    112    
48     -96    
128    128    
-48    -32    
80     0      
16     -112   
64     -16    
128    16     
-48    128    
48     32     
16     16     
240    16     
16     224    
-128   208    
144    -192   
176    0      
-32    -96    
176    16     
-16    -16    
64     -16    
-80    -1296  
96     208    
16     -48    
176    96     
240    -32    
32     80     
-64    16     
48     -48    
320    96     
-112   -176   
-32    96     
32     -192   
80     96     
-16    -48    
128    48     
80     -192   
96     48     
48     32     
-96    32     
32     48     
112    32     
-96    0      
16     -96    
-16    64     
-32    -64    
-16    0      
256    16     
0      144    
-96    -32    
144    48     
176    -192   
128    -64    
64     32     
128    64     
208    -80    
128    128    
16     160    
160    32     
176    -64    
-288   -240   
224    0      
-160   80     
240    400    
144    336    
96     16     
32     -128   
-16    -160   
16     -208   
144    -864   
256    192    
-432   160    
128    -16    
-80    16     
240    -112   
32     -48    
64     176    
320    -16    
-208   -208   
112    -224   
192    -48    
80     96     
96     -352   
80     240    
128    -112   
-400   -432   
-800   -304   
128    48     
288    96     
-224   -112   
400    -272   
208    320    
-80    32     
0      -32    
64     176    
128    -96    
-48    0      
224    16     
16     48     
80     -224   
0      112    
-1056  -288   
160    -64    
-80    -32    
-32    -48    
16     -128   
112    -80    
96     512    
224    -880   
-16    -272   
-64    -144   
144    96     
112    176    
80     -64    
-224   -288   
32     -128   
-464   -32    
16     -112   
-2096  -48    
112    -80    
16     64     
208    48     
-144   -96    
128    -512   
32     -176   
80     32     
-16    16     
80     -64    
32     -64    
-80    32     
176    48     
64     32     
128    288    
-688   352    
-32    -272   
-96    -48    
32     80     
-224   80     
176    -80    
16     64     
176    -576   
-112   16     
192    -48    
-16    48     
-112   -16    
80     -64    
32     -128   
32     -176   
-176   -16    
112    -96    
-1696  48     
48     32     
64     -80    
192    -352   
160    48     
128    -256   
-80    -160   
368    -240   
-64    48     
-112   -384   
160    -400   
-16    208    
-400   112    
48     -96    
320    16     
-272   48     
80     -32    
-624   -48    
32     -112   
32     0      
112    112    
192    64     
144    48     
80     -48    
-16    -16    
64     16     
-32    0      
128    32     
-288   -16    
96     -32    
-144   16     
160    -32    
-32    -32    
64     -144   
-48    -32    
80     -96    
240    144    
176    -32    
48     -256   
48     -96    
-240   112    
224    32     
64     -32    
-176   -16    
0      -32    
-528   -80    
304    -192   
336    128    
-192   -128   
32     -32    
112    -160   
-752   -32    
-80    -64    
304    224    
-192   96     
-224   16     
-80    -16    
96     -112   
-144   -176   
112    16     
-144   16     
272    176    
-48    80     
-96    -176   
208    64     
-1088  -96    
-416   0      
208    64     
496    144    
-720   -48    
-2240  -48    
-192   -80    
32     -32    
-144   96     
-416   -16    
-48    -48    
-128   -112   
160    32     
-352   -240   
0      192    
-32    112    
-160   -16    
176    224    
-48    144    
48     144    
-864   48     
-32    -112   
-208   160    
80     240    
320    -80    
-176   -80    
-176   -224   
160    -64    
16     -32    
208    64     
32     -80    
80     0      
-48    32     
-16    128    
240    96     
-400   0      
-16    80     
-336   -592   
-272   -736   
-256   -80    
-304   256    
16     96     
448    304    
-272   32     
-144   -176   
-32    -16    
320    -320   
304    -176   
96     192    
-48    96     
-384   -32    
0      0      
-304   64     
0      16     
-128   16     
112    112    
192    176    
-128   160    
80     128    
144    0      
192    32     
144    32     
80     144    
-176   -48    
96     -256   
-416   -224   
-192   -224   
-528   96     
64     160    
-208   -64    
48     -32    
16     16     
80     96     
-208   -16    
64     176    
32     48     
288    272    
-128   272    
160    208    
144    144    
-16    96     
32     -16    
-256   -32    
112    32     
-160   -128   
64     -112   
-16    -48    
-32    -96    
144    32     
432    496    
0      608    
0      -512   
16     -64    
-176   256    
144    48     
144    80     
-32    -32    
-160   64     
0      -16    
-192   -16    
80     192    
-240   -160   
144    -64    
160    240    
160    208    
-64    160    
-208   -144   
-240   -544   
224    320    
-112   160    
80     -64    
64     256    
-112   -64    
-320   48     
-128   16     
96     -112   
-96    48     
-224   -288   
160    544    
224    80     
224    -192   
208    -32    
192    0      
64     240    
208    176    
-112   592    
-32    32     
-192   -128   
48     64     
-144   -224   
96     -16    
-240   -112   
176    -224   
16     -80    
96     176    
-16    96     
176    -80    
80     112    
-160   160    
304    -48    
-256   32     
288    -96    
-208   16     
144    -64    
16     -128   
-16    0      
-144   -16    
-96    80     
-80    -80    
-160   64     
96     64     
64     176    
192    -80    
-192   112    
144    80     
16     432    
80     80     
0      -144   
64     16     
32     48     
-48    144    
0      -112   
288    -80    
-176   96     
224    352    
-96    48     
96     32     
-80    -32    
0      -48    
0      32     
0      144    
112    112    
-112   64     
256    128    
0      -288   
16     -144   
16     224    
16     128    
48     -16    
32     32     
0      112    
256    272    
-208   160    
-144   -16    
64     -32    
-368   192    
128    96     
-112   -112   
32     -48    
0      32     
-16    144    
240    0      
-16    96     
0      -64    
0      112    
80     48     
64     80     
64     -16    
32     32     
16     80     
-128   -96    
96     64     
-144   -64    
112    -32    
16     -80    
96     16     
16     96     
48     64     
16     32     
-176   64     
224    80     
112    48     
-96    -176   
-48    -64    
224    128    
-128   80     
64     80     
160    16     
32     -512   
96     80     
240    304    
-160   160    
64     96     
160    80     
112    32     
160    48     
32     80     
-64    48     
-96    80     
144    64     
-64    208    
-144   32     
80     -32    
128    -480   
208    -48    
96     112    
0      -144   
-96    -272   
-32    80     
-240   96     
80     48     
144    160    
-208   112    
176    224    
208    80     
-208   -320   
-48    -464   
16     224    
112    -176   
384    384    
-176   -64    
-16    -224   
160    -144   
224    80     
64     -112   
-160   -224   
208    80     
64     304    
48     16     
144    128    
-32    496    
224    -64    
288    128    
16     -112   
-192   -16    
-160   -160   
176    0      
-224   -288   
256    256    
96     64     
224    128    
-128   -48    
48     -64    
-64    -112   
112    128    
144    528    
48     112    
-16    -48    
32     -224   
176    -16    
112    -288   
240    80     
16     -608   
-64    48     
96     176    
-128   -32    
-48    -32    
160    64     
0      -48    
256    -48    
96     -32    
144    -16    
-64    96     
32     -80    
176    112    
0      16     
128    96     
64     -16    
112    48     
32     -16    
64     48     
32     48     
160    112    
0      -16    
192    32     
32     -112   
32     -80    
-32    32     
48     16     
64     96     
48     32     
-224   16     
400    -48    
-368   144    
176    -208   
208    -80    
64     32     
320    112    
176    352    
-240   -432   
80     16     
32     -128   
-16    64     
368    -128   
48     64     
176    -112   
16     16     
16     -144   
128    48     
-16    32     
48     144    
16     0      
-128   -112   
96     240    
48     -304   
304    176    
-96    0      
160    -144   
-96    -192   
272    112    
-64    -48    
336    -16    
-144   16     
208    16     
-48    -48    
144    -144   
-48    -16    
-896   16     
192    -432   
-256   64     
432    192    
-80    64     
192    -1520  
80     -128   
32     16     
-32    0      
176    -176   
32     80     
160    0      
-16    48     
176    -176   
96     0      
-464   -16    
0      48     
32     -32    
96     -336   
128    -64    
-96    -304   
64     -96    
112    32     
0      -240   
384    -192   
-128   192    
416    144    
48     -32    
112    -176   
64     144    
0      -144   
160    -48    
-32    32     
128    80     
-16    16     
144    -48    
-128   32     
64     -576   
256    48     
96     -32    
-48    0      
16     -128   
208    48     
-64    32     
144    32     
-112   -32    
-112   -16    
-1152  -48    
-32    16     
240    128    
192    -112   
-144   32     
80     -288   
-80    528    
496    480    
-192   96     
-160   224    
112    112    
-176   -128   
-144   -176   
-160   48     
208    -80    
-416   -32    
320    -144   
112    -208   
16     128    
192    -16    
-80    -416   
-16    -80    
208    432    
-16    128    
64     -176   
192    -96    
-208   112    
32     112    
-272   -272   
-16    -96    
-160   -48    
176    208    
112    -176   
144    -192   
0      48     
-16    -112   
32     160    
80     -128   
-288   48     
80     0      
368    992    
-16    -480   
144    -16    
-176   80     
16     -144   
-32    144    
-384   -320   
-640   -48    
480    272    
-64    -112   
288    112    
288    0      
320    -496   
144    144    
-48    16     
-64    -128   
-112   32     
-80    80     
-320   -144   
192    -80    
-208   48     
256    -80    
496    624    
-288   560    
48     -624   
224    16     
240    400    
-192   -784   
304    224    
-16    16     
96     32     
-272   16     
64     16     
-32    0      
-48    128    
-208   48     
224    -48    
-128   -48    
0      0      
288    352    
-208   -144   
224    -16    
208    224    
224    96     
-144   48     
240    -32    
-128   -96    
64     96     
256    16     
0      224    
240    320    
-64    64     
-16    32     
176    -384   
160    560    
-464   -288   
-32    -112   
64     240    
-224   240    
-160   144    
-768   -592   
-64    144    
176    80     
80     80     
224    32     
-176   32     
-672   -160   
32     -272   
-752   -144   
-304   -144   
-224   -864   
16     -304   
-64    -128   
80     192    
0      352    
-432   -224   
-128   -80    
-48    112    
192    240    
-784   272    
128    32     
-352   -96    
48     16     
-304   0      
32     128    
112    240    
-96    144    
-320   144    
-80    304    
144    16     
80     0      
-160   -192   
-496   -192   
-48    80     
-1056  16     
-64    80     
-80    -128   
16     112    
16     128    
112    80     
-320   -96    
144    160    
-272   48     
-64    -176   
208    -112   
-384   144    
0      -96    
-32    64     
-64    48     
-512   96     
144    32     
-1056  -64    
64     0      
-96    -16    
352    -32    
-288   -64    
16     144    
-32    -96    
-320   -144   
160    -96    
-32    96     
64     -80    
-16    64     
96     48     
-416   400    
208    48     
-1392  -128   
0      -32    
-96    -144   
240    144    
-16    48     
-336   48     
256    48     
-128   64     
176    48     
-336   96     
192    -16    
-272   304    
-32    80     
-272   -144   
112    32     
-1168  0      
-112   256    
256    32     
320    -32    
-144   -48    
-208   -32    
32     -16    
-112   96     
160    32     
64     32     
-64    16     
-272   -112   
48     -32    
-336   0      
48     64     
-416   -96    
16     64     
-16    80     
0      32     
-80    48     
48     48     
112    192    
32     224    
240    32     
-304   80     
48     -16    
-384   112    
48     16     
480    304    
-272   192    
-448   -96    
112    48     
192    64     
64     0      
240    112    
80     272    
-192   112    
-176   272    
112    96     
-80    0      
272    32     
-64    64     
480    240    
-368   288    
-224   -96    
-368   16     
80     48     
352    336    
48     304    
48     48     
-176   48     
208    64     
-272   208    
32     -96    
16     48     
-32    80     
384    240    
80     32     
16     -976   
288    832    
-32    -288   
64     96     
64     128    
80     16     
384    448    
-288   32     
-112   -224   
144    -384   
352    48     
128    480    
-112   -32    
160    48     
-480   -224   
-240   -288   
224    192    
64     144    
432    336    
-192   -16    
-80    -208   
320    16     
48     80     
192    48     
32     -16    
-96    64     
128    80     
224    32     
16     0      
-32    -48    
-128   16     
32     80     
-128   32     
-16    -16    
0      0      
16     -16    
224    96     
16     48     
-16    0      
-64    -16    
160    128    
-64    48     
48     32     
-16    32     
-48    0      
-144   0      
16     80     
112    160    
288    240    
-144   -16    
192    80     
160    128    
192    128    
-240   16     
16     48     
128    64     
-16    -32    
32     16     
-32    48     
64     64     
176    48     
32     -32    
48     32     
144    64     
112    16     
16     48     
32     80     
80     176    
-112   -48    
96     144    
32     16     
48     128    
64     48     
-256   64     
416    304    
-352   128    
544    -240   
32     80     
176    0      
112    -64    
32     48     
208    144    
-80    160    
112    128    
32     -160   
32     112    
-64    32     
192    32     
-80    80     
48     -112   
208    -32    
64     -576   
144    32     
192    64     
-128   112    
144    160    
-16    16     
176    32     
-64    -16    
176    -48    
96     64     
-48    48     
368    0      
-144   64     
0      64     
96     -32    
112    -32    
144    0      
-16    -192   
160    -32    
64     64     
-32    32     
-32    96     
48     48     
64     -48    
32     96     
128    48     
112    16     
48     48     
64     -112   
64     128    
-80    -208   
96     48     
-32    -720   
432    0      
-208   64     
-208   -96    
176    0      
32     64     
176    112    
96     160    
32     -64    
-96    -176   
0      80     
64     -112   
224    192    
-112   -128   
0      0      
80     -272   
-80    -16    
48     48     
-64    16     
128    16     
416    64     
-240   -32    
176    32     
-48    112    
304    16     
-64    80     
-16    -112   
192    80     
0      -128   
48     0      
32     -112   
144    48     
-128   -16    
352    96     
32     80     
16     256    
-96    -96    
144    32     
336    288    
0      -288   
-80    -384   
240    160    
-144   96     
336    112    
64     -224   
-224   -160   
32     -16    
80     64     
256    208    
0      -48    
208    -32    
32     112    
-128   16     
128    80     
400    464    
-368   -272   
144    80     
224    208    
144    16     
48     96     
-80    -512   
80     544    
64     304    
128    -320   
80     192    
0      -272   
176    -16    
208    368    
-96    -736   
-16    208    
48     -624   
0      -400   
208    -96    
160    -112   
48     -32    
-80    -368   
64     224    
112    144    
128    -928   
96     32     
144    64     
-256   -384   
-224   -16    
48     -128   
16     -160   
80     -416   
240    480    
96     432    
-32    -272   
96     64     
48     -176   
352    -160   
16     -16    
160    -144   
96     64     
192    -272   
224    -16    
-2064  -128   
368    320    
368    272    
-112   192    
-48    0      
-48    -64    
384    752    
-160   96     
-48    64     
16     -64    
160    32     
80     -80    
128    -160   
-16    16     
0      -176   
240    160    
-48    32     
-144   -48    
176    -176   
-48    -48    
208    -560   
32     64     
128    -656   
32     -48    
80     80     
80     0      
64     -16    
80     -176   
-224   -64    
112    -48    
-448   0      
176    -16    
80     80     
-16    -128   
128    0      
80     -64    
112    -160   
176    -208   
160    -16    
96     -32    
0      80     
64     -144   
144    -112   
-64    -64    
16     224    
-64    16     
-32    480    
-304   256    
-288   -304   
-48    -32    
64     -112   
16     192    
192    -336   
48     -80    
0      -704   
96     208    
-256   -240   
144    -48    
-16    176    
48     -96    
-32    -16    
208    -32    
-32    112    
160    -176   
-224   -16    
240    -144   
-48    16     
-144   -48    
-48    -16    
-80    32     
304    64     
-16    80     
400    80     
-128   96     
16     -176   
-144   -32    
64     112    
-16    80     
-48    -64    
-1536  -80    
96     -256   
-272   48     
464    -384   
144    -160   
48     -128   
80     80     
-80    208    
112    0      
-256   -32    
96     0      
-96    112    
128    48     
-288   48     
-176   -224   
0      96     
-112   112    
-112   16     
432    48     
-112   32     
176    -128   
48     -32    
112    288    
48     288    
-16    0      
0      144    
176    176    
-16    192    
80     -128   
112    -176   
-48    80     
272    192    
-48    416    
-912   -368   
384    -432   
-160   -64    
-880   -16    
-16    64     
128    304    
-336   160    
48     48     
-320   -336   
160    -256   
128    -192   
-32    -48    
64     -80    
-208   -64    
-80    16     
-672   -112   
0      112    
80     96     
304    192    
-288   128    
-272   160    
-352   32     
-1152  80     
-48    32     
-96    48     
288    -160   
-32    -16    
144    96     
-272   -48    
176    -128   
192    32     
-208   320    
64     240    
-128   208    
-64    -64    
-640   -592   
-80    272    
-384   192    
-64    -96    
128    224    
64     112    
-128   -16    
48     256    
-240   -144   
-80    240    
288    -208   
-144   -16    
-112   -96    
-48    48     
192    -176   
-112   416    
-112   -144   
-352   -80    
176    -96    
-1648  -96    
16     64     
-48    80     
48     -112   
400    -112   
96     -48    
-64    -16    
-96    16     
-128   48     
96     16     
336    464    
-128   704    
-48    640    
128    48     
-64    -16    
-368   -64    
176    64     
32     -128   
432    -288   
96     -128   
-352   -96    
80     0      
-80    112    
-288   32     
192    -64    
16     96     
-528   -96    
416    -176   
32     -96    
-48    -80    
352    -96    
0      96     
-1280  -32    
-16    16     
-64    -32    
48     -64    
48     16     
208    368    
-304   48     
-80    -16    
48     32     
-32    0      
-48    16     
160    -32    
16     80     
-176   0      
-16    48     
-608   -96    
-176   0      
-80    96     
112    208    
64     -48    
144    16     
-224   0      
48     32     
-96    0      
0      0      
208    48     
64     96     
32     16     
-80    -16    
144    64     
-384   0      
0      32     
16     64     
-32    48     
96     64     
-48    64     
-16    48     
-64    -16    
32     64     
160    112    
320    144    
-256   -16    
96     -16    
-256   -80    
80     48     
-64    48     
-48    32     
-80    -160   
48     96     
-64    -16    
-144   -48    
112    64     
32     32     
384    192    
-416   16     
208    80     
-480   -80    
304    96     
-48    48     
80     112    
-96    -16    
-144   64     
240    48     
-96    32     
-112   32     
192    192    
32     176    
-144   -48    
-64    -64    
-112   0      
48     128    
96     -16    
176    64     
-128   128    
272    48     
-144   16     
-80    0      
96     48     
48     176    
-144   144    
160    -16    
128    16     
-224   32     
144    -144   
-64    -208   
320    144    
-64    32     
128    112    
-64    -16    
-176   32     
32     80     
32     80     
-48    16     
32     32     
144    112    
128    -80    
-32    0      
48     32     
160    80     
-160   128    
96     0      
0      -32    
176    32     
-80    192    
-64    208    
240    16     
48     32     
160    160    
32     256    
80     96     
80     320    
64     96     
-80    -112   
-64    336    
192    -32    
-144   80     
-224   96     
400    80     
16     32     
160    80     
-80    208    
240    -48    
-48    224    
-144   -32    
0      96     
0      64     
176    -544   
176    992    
-64    -656   
176    112    
112    656    
32     -144   
-16    -64    
160    -304   
32     16     
272    400    
144    -224   
-32    -176   
-64    -320   
-96    -32    
176    -352   
16     80     
-112   0      
-160   -48    
272    560    
144    288    
-112   -336   
16     -560   
0      -112   
48     16     
16     208    
-16    0      
-112   48     
64     112    
112    80     
128    48     
64     -64    
32     -480   
0      -336   
208    48     
160    160    
-64    112    
-208   64     
224    64     
80     -480   
96     32     
16     -32    
32     80     
128    -128   
96     64     
-32    32     
352    256    
-128   160    
32     48     
128    208    
-128   656    
272    352    
-256   -32    
128    -48    
256    -240   
96     112    
112    32     
128    144    
-112   -128   
-144   144    
144    256    
-128   -16    
-32    -208   
224    -32    
-96    48     
-16    -128   
176    32     
128    -64    
48     112    
32     -192   
48     160    
272    -80    
256    112    
-32    64     
112    48     
64     192    
-80    96     
32     0      
256    96     
-96    144    
256    -240   
256    64     
0      32     
-32    32     
112    -96    
48     -32    
240    64     
-224   112    
128    -272   
80     16     
0      -48    
96     -48    
-64    -160   
-48    80     
-64    0      
128    -208   
224    -48    
32     -144   
96     32     
208    48     
112    0      
80     -208   
96     128    
-80    -624   
48     -48    
48     -192   
96     32     
32     368    
208    320    
-64    128    
288    224    
-96    352    
80     -16    
160    -224   
64     -224   
160    -32    
-48    -128   
192    96     
0      -224   
16     0      
336    -240   
80     432    
0      -80    
-16    -128   
-96    32     
48     -384   
80     64     
-96    144    
-48    192    
-48    -80    
-48    -48    
80     -112   
144    288    
192    208    
176    -384   
-368   -448   
128    -624   
-288   -368   
208    -496   
32     -976   
-64    -352   
-160   112    
0      128    
32     -160   
64     0      
144    -224   
240    -208   
-80    -976   
-80    -80    
224    -736   
-400   -80    
16     -544   
112    112    
64     -16    
-80    -80    
352    -208   
96     -240   
288    32     
128    -96    
80     128    
128    64     
192    -96    
160    -208   
96     -192   
80     -560   
-208   -336   
240    -224   
-160   240    
-528   -160   
208    16     
-80    176    
144    -464   
0      160    
176    -128   
208    176    
320    352    
-336   128    
-400   -256   
-16    -240   
192    112    
544    432    
-240   672    
208    208    
-1520  -80    
-128   -416   
288    -192   
352    512    
-368   -576   
-16    -384   
-112   192    
176    -1568  
0      80     
112    -576   
256    64     
48     496    
-256   -272   
-384   -432   
240    -112   
-144   -32    
192    416    
-144   -192   
96     112    
96     48     
64     -32    
288    64     
-144   -480   
160    48     
144    224    
160    112    
256    -304   
-80    144    
176    112    
-192   -336   
-96    304    
160    304    
0      -160   
32     -576   
96     192    
256    32     
-16    -240   
288    -144   
240    256    
-192   16     
-128   0      
-272   -32    
304    -64    
176    -32    
112    -64    
64     -16    
-32    -272   
-1072  96     
0      48     
-1136  64     
-32    -80    
48     16     
224    -208   
-16    -560   
-160   -336   
0      80     
240    480    
-272   128    
64     -64    
160    144    
-160   160    
-208   -48    
128    -64    
192    16     
176    304    
-128   64     
112    -144   
528    -192   
-48    16     
400    -320   
-32    -32    
48     64     
-96    -16    
-176   -32    
112    192    
-240   224    
144    96     
-128   -32    
176    -48    
320    -16    
208    -48    
224    96     
256    -64    
240    16     
-416   64     
80     -48    
-336   256    
-480   -96    
-176   -144   
208    32     
80     112    
-64    -160   
288    -64    
112    0      
144    0      
288    -112   
-208   0      
-128   -224   
32     32     
16     112    
336    0      
-64    32     
176    32     
-144   0      
48     -32    
-64    80     
64     -32    
-304   -32    
-1232  -128   
-16    0      
-144   0      
96     128    
-160   -32    
-608   -80    
-48    48     
-160   0      
-48    80     
-432   112    
144    80     
-368   16     
64     32     
112    -32    
-80    -16    
-32    -80    
96     0      
96     -80    
32     80     
-144   -160   
-400   48     
-192   16     
-176   16     
0      16     
-176   16     
-128   -16    
-352   32     
-144   -16    
16     32     
-144   16     
48     16     
64     32     
-112   -112   
64     96     
176    128    
112    -32    
144    0      
-96    -64    
-128   16     
-96    0      
-96    128    
-480   -48    
-16    80     
-960   32     
160    -144   
-272   -128   
80     -64    
0      -16    
-80    224    
16     -48    
64     -48    
-80    48     
-96    64     
-80    -96    
-80    -288   
16     -16    
96     208    
96     32     
-464   -208   
96     32     
-16    -80    
160    240    
-16    352    
-16    96     
16     48     
-112   -32    
-48    64     
-208   -32    
-16    32     
64     80     
16     96     
-96    -272   
-240   -240   
-272   32     
-16    224    
-112   -16    
16     -112   
48     208    
-48    -240   
-96    160    
-32    16     
32     -144   
16     112    
-208   -112   
64     672    
272    -448   
-160   288    
-160   -208   
-176   -48    
48     336    
64     -1280  
32     960    
256    96     
-112   -64    
128    -32    
256    64     
288    544    
-224   608    
176    720    
-16    -176   
-256   80     
16     -304   
-48    -80    
-64    -96    
48     48     
-304   64     
128    80     
240    -64    
-176   160    
368    272    
-240   240    
160    80     
-208   112    
32     80     
-128   16     
-96    64     
-240   -32    
-16    128    
-144   -80    
16     48     
-288   -208   
128    -176   
128    112    
64     80     
-80    -32    
112    -48    
-192   -16    
80     16     
112    32     
-48    32     
128    16     
64     48     
16     48     
-256   -32    
-64    -112   
160    80     
112    96     
64     -80    
48     -96    
-48    32     
-48    240    
128    48     
224    112    
-192   112    
32     -80    
64     64     
-208   -64    
208    16     
-64    -16    
224    48     
-64    32     
112    0      
80     144    
-224   32     
16     -16    
96     0      
176    64     
32     80     
176    -32    
-320   0      
-144   16     
-240   0      
32     16     
48     0      
112    112    
80     96     
-192   -176   
-48    -32    
-128   32     
-16    64     
176    128    
80     16     
112    48     
16     -64    
32     -80    
208    16     
-80    32     
128    0      
-112   0      
96     0      
-32    176    
80     96     
-64    144    
48     128    
-144   -16    
144    32     
80     64     
64     -32    
128    16     
192    192    
-128   96     
-16    48     
256    -32    
-16    80     
-16    0      
128    64     
-32    -16    
32     -48    
288    48     
144    112    
-80    16     
160    96     
-48    64     
64     144    
-16    -48    
224    112    
-32    -48    
96     -80    
96     80     
16     0      
240    208    
-128   176    
176    176    
-16    128    
176    320    
-32    -32    
208    160    
-112   96     
80     -112   
-48    -64    
80     16     
48     -192   
-64    -400   
160    -16    
-48    208    
-16    96     
480    400    
192    320    
144    176    
96     208    
32     208    
-48    -528   
-256   -864   
528    240    
-16    800    
240    -16    
176    -16    
-128   560    
-192   560    
176    -1328  
96     -1072  
-224   592    
336    304    
-16    -160   
288    336    
32     -224   
192    96     
-112   -112   
288    -48    
-144   -528   
64     80     
-112   96     
144    -336   
320    -96    
208    -368   
-96    -368   
-64    176    
48     720    
16     -640   
112    48     
-320   0      
336    -864   
96     144    
224    432    
16     -80    
80     -384   
-160   512    
464    480    
-480   -320   
256    240    
64     -192   
368    144    
-240   -192   
96     -96    
192    144    
80     -32    
256    144    
-112   -240   
32     208    
128    64     
112    -80    
144    272    
-144   -224   
384    32     
80     128    
432    -64    
-384   -560   
48     -48    
144    112    
-240   -80    
304    16     
112    112    
-32    -48    
-80    80     
224    48     
-16    -32    
16     -16    
0      -144   
96     80     
128    -480   
-16    128    
176    -96    
96     192    
0      128    
208    48     
-32    -32    
32     16     
128    32     
-112   -320   
160    48     
64     -144   
128    64     
112    192    
48     320    
-48    128    
-48    -144   
272    -176   
320    80     
-112   80     
-48    32     
-48    240    
80     160    
304    -16    
416    400    
-560   96     
-96    -208   
-128   64     
0      -80    
192    96     
304    16     
-32    48     
192    -192   
-64    144    
-336   48     
192    -160   
-208   0      
240    -192   
80     -464   
384    192    
-32    -512   
-176   -128   
368    256    
-176   96     
32     64     
112    -16    
-176   -192   
320    -96    
288    -400   
192    176    
-16    -336   
16     16     
-208   80     
96     -112   
624    -16    
-240   -288   
-32    48     
272    -16    
16     -288   
-256   -528   
-112   32     
256    16     
-160   -256   
400    -112   
-16    272    
272    -80    
-336   208    
-496   32     
368    160    
-560   80     
-288   -288   
80     -32    
96     -224   
432    -64    
96     -912   
96     32     
-224   -96    
-288   48     
160    -16    
-336   48     
-128   -192   
32     32     
-96    -64    
-16    -48    
208    96     
336    0      
176    -144   
-176   -176   
-16    16     
32     -128   
-64    80     
144    0      
-288   -16    
256    -144   
208    48     
64     -16    
-32    -16    
-48    96     
48     -16    
-512   -32    
96     -112   
96     -48    
96     -32    
80     16     
144    -80    
80     16     
96     -352   
-240   144    
96     0      
64     32     
-80    -64    
96     -16    
-208   32     
80     -48    
-464   32     
-64    -32    
-304   -16    
64     -16    
176    32     
128    -80    
-64    -32    
80     -384   
48     48     
96     16     
64     64     
-48    32     
320    224    
-416   64     
192    -16    
-208   48     
80     -16    
-64    64     
48     -96    
32     -16    
-64    -80    
144    80     
-80    -192   
144    16     
-208   -448   
256    64     
-32    96     
240    -80    
176    96     
112    192    
-32    96     
-128   -16    
192    240    
144    48     
-64    -16    
48     -128   
-48    -64    
112    -80    
-96    352    
160    -224   
64     -192   
-432   208    
176    -96    
-64    128    
-128   -64    
-480   -368   
1024   720    
-784   624    
32     -192   
208    352    
32     -368   
80     -864   
-144   640    
304    -464   
-256   -128   
352    480    
-240   -48    
-272   448    
352    -384   
80     64     
-96    256    
352    32     
-176   784    
-144   -80    
80     -432   
-48    -256   
-32    -144   
-2624  -192   
-48    0      
-48    176    
-240   16     
64     -176   
-176   -128   
-384   -368   
240    -16    
64     48     
-48    0      
16     80     
-688   -64    
80     96     
-240   0      
144    160    
0      -96    
-192   -16    
-48    0      
-896   160    
16     96     
-1136  64     
-80    -80    
208    -16    
48     96     
-144   0      
-144   96     
-512   -144   
160    48     
48     -48    
32     -16    
96     -16    
0      48     
96     0      
176    80     
-96    0      
192    48     
-160   96     
-128   48     
-128   112    
-432   48     
144    16     
-64    -48    
-128   16     
128    80     
80     176    
-16    48     
-176   -64    
16     48     
-160   48     
80     64     
-112   48     
128    32     
-512   16     
-96    32     
-928   -144   
0      -64    
-272   0      
208    -16    
-16    48     
176    224    
-112   80     
-208   16     
0      -96    
0      -224   
176    64     
-240   96     
96     -48    
-416   16     
0      0      
-1184  -48    
256    208    
-144   -64    
176    48     
-48    16     
-144   -64    
304    -32    
16     80     
64     -16    
-48    48     
-208   -48    
0      64     
32     64     
-16    16     
32     160    
-208   64     
-112   -48    
-624   -128   
128    -16    
-64    256    
128    96     
80     0      
-160   -32    
-32    -64    
48     80     
224    112    
128    0      
16     16     
80     128    
-208   176    
-560   -96    
128    -208   
-320   -496   
176    -96    
160    192    
-336   16     
80     48     
-48    0      
64     80     
224    0      
-96    320    
208    640    
16     16     
-352   -256   
64     144    
-272   -48    
176    -64    
-816   -112   
-208   -272   
-32    176    
16     48     
-80    -144   
-48    -16    
16     -64    
32     -48    
48     -256   
256    -320   
208    48     
-64    80     
-16    -96    
64     96     
-128   16     
64     224    
-80    80     
192    -80    
-16    240    
96     32     
192    -240   
176    128    
-272   64     
32     16     
-224   80     
192    16     
144    704    
-80    -240   
-144   -416   
368    96     
192    80     
32     48     
128    240    
160    -112   
-112   -64    
32     32     
160    144    
-144   16     
592    480    
-336   -16    
256    -432   
-64    -144   
304    16     
-320   -48    
-96    -32    
400    192    
-112   192    
-64    96     
128    32     
16     96     
16     48     
128    16     
32     -64    
-160   -48    
160    112    
-80    16     
48     -704   
64     -192   
32     128    
-64    96     
-144   64     
-16    -128   
64     48     
-64    112    
32     32     
-96    48     
144    96     
-48    32     
80     96     
-80    0      
224    176    
-256   16     
240    -32    
96     0      
-48    96     
144    0      
-80    -16    
96     112    
16     64     
192    80     
-144   48     
-16    32     
240    -48    
-128   -224   
-512   -176   
128    144    
288    -32    
-240   -576   
64     32     
96     64     
96     96     
96     64     
48     16     
224    64     
144    256    
-64    32     
-48    -16    
80     64     
32     32     
80     16     
176    0      
-96    64     
224    -752   
112    16     
-144   32     
0      96     
224    272    
-32    96     
-48    32     
336    64     
192    80     
-144   -16    
176    144    
-96    224    
-144   144    
48     -112   
352    112    
-32    -112   
-96    0      
144    128    
0      32     
0      144    
-160   0      
336    128    
48     192    
-256   32     
-112   -16    
160    64     
0      48     
-352   16     
176    48     
256    32     
64     16     
32     32     
0      -1024  
-112   -32    
240    80     
176    96     
224    80     
112    128    
32     -16    
144    96     
-272   192    
-64    32     
192    -144   
192    80     
464    240    
-112   0      
-64    48     
144    -464   
224    128    
48     48     
400    144    
-240   -96    
336    64     
-64    -64    
256    -32    
-416   -352   
656    144    
640    0      
192    128    
192    16     
112    0      
176    208    
48     -832   
-48    16     
352    -656   
-96    160    
-96    16     
-48    16     
-528   -320   
192    -48    
32     -48    
144    144    
-112   64     
32     -80    
-176   -32    
-16    -80    
96     144    
112    -144   
256    32     
48     -352   
208    -32    
496    48     
16     32     
304    64     
-160   16     
96     64     
48     64     
0      80     
128    -64    
144    64     
96     -144   
-96    -32    
-160   -112   
-64    -160   
128    -352   
288    -16    
240    96     
0      -16    
32     -32    
-144   80     
-48    -112   
144    -272   
96     64     
96     -240   
240    -16    
256    -32    
96     80     
80     -128   
-96    80     
32     -112   
16     32     
80     32     
48     80     
-32    -16    
80     -32    
112    64     
128    0      
-48    32     
128    0      
48     48     
64     -32    
176    96     
32     -144   
160    80     
128    -32    
112    352    
-48    -80    
112    -208   
-144   128    
64     -416   
-128   -448   
144    80     
64     -384   
144    -240   
16     -832   
176    -576   
192    432    
192    208    
96     272    
48     128    
16     -176   
64     -32    
-80    -80    
-32    224    
-576   -1424  
272    1008   
-16    -16    
336    -640   
192    704    
176    -960   
-224   -112   
-176   352    
48     -144   
-112   -416   
192    -176   
-160   -32    
320    256    
-208   -64    
448    -624   
-320   -144   
480    480    
-32    320    
0      128    
-32    -112   
208    -16    
0      -16    
96     -880   
304    112    
-272   -224   
416    176    
-96    -32    
240    48     
-96    96     
64     16     
-384   192    
320    -160   
80     -32    
256    -64    
256    416    
-240   -64    
240    -160   
-16    -416   
144    144    
-80    48     
16     -16    
48     16     
-112   64     
-96    -192   
176    -80    
128    336    
-272   208    
-256   128    
-224   48     
192    -48    
192    -112   
80     -80    
0      -176   
0      128    
80     -432   
128    48     
176    -64    
-32    -64    
-128   -48    
-16    -144   
-64    64     
96     112    
-176   -32    
0      -80    
-1280  -48    
256    -32    
64     48     
256    96     
0      -32    
48     -224   
-16    0      
192    -48    
16     32     
-48    0      
128    64     
48     288    
176    -16    
-256   -144   
160    64     
-960   16     
128    -16    
-176   0      
16     -112   
32     -48    
0      -256   
64     128    
64     80     
272    -176   
-16    80     
64     -112   
-368   -32    
0      -32    
-336   -144   
144    -16    
0      144    
-64    160    
-1808  -80    
96     -272   
96     0      
32     -96    
32     16     
-128   0      
240    96     
-448   144    
128    -64    
-304   -48    
288    176    
-416   80     
192    -48    
-256   -80    
224    -128   
128    0      
112    32     
16     -80    
192    32     
-288   -32    
-640   -96    
-48    -176   
16     80     
176    96     
192    -32    
-32    -64    
-208   32     
64     128    
-80    256    
80     -48    
-144   64     
-640   -96    
96     32     
32     -64    
-1120  640    
64     304    
-672   16     
-240   0      
-624   -32    
96     -80    
-48    -768   
-32    -176   
288    -64    
-304   16     
-720   192    
112    48     
-144   16     
-96    240    
144    144    
-240   -448   
112    224    
16     -16    
0      -224   
-304   240    
-96    -192   
48     128    
-16    -208   
0      608    
96     -160   
-144   -144   
96     256    
-368   -272   
-48    16     
272    208    
-48    192    
192    -32    
288    112    
-256   -112   
-176   -144   
-16    80     
-144   -16    
160    96     
160    176    
-32    32     
-16    -64    
176    64     
-112   -16    
0      -64    
-32    16     
-144   0      
-160   96     
-192   -128   
-64    -192   
16     128    
192    -48    
-240   -64    
48     -16    
-1632  -16    
-48    0      
-112   -16    
288    96     
160    112    
-112   -16    
240    208    
-384   64     
48     -144   
96     48     
160    128    
96     48     
-112   16     
-304   -64    
-96    144    
-1120  -128   
16     32     
-64    -16    
176    -32    
-48    112    
16     -64    
80     64     
-224   272    
-128   64     
-64    -144   
144    -112   
-384   112    
48     128    
-192   -96    
176    -112   
-112   -96    
64     288    
16     -48    
224    -16    
112    80     
-336   -48    
-48    80     
-48    32     
96     144    
-192   160    
144    -16    
-16    -64    
-80    32     
-144   -16    
32     32     
-464   -32    
64     16     
-624   16     
-80    0      
-32    64     
400    208    
-272   176    
144    0      
80     0      
-32    96     
-16    16     
16     16     
64     64     
16     80     
112    32     
-480   -240   
176    -112   
0      144    
192    160    
96     16     
-48    -32    
96     128    
80     64     
-96    64     
-32    -32    
176    64     
-96    -16    
96     32     
-128   0      
144    112    
-448   -96    
208    80     
-32    64     
48     80     
96     16     
96     0      
-48    -32    
-256   96     
96     48     
80     16     
-16    -96    
-176   -16    
144    128    
-144   -48    
-32    96     
-48    32     
-320   -112   
496    -272   
256    0      
272    368    
224    80     
-112   -48    
208    80     
-176   96     
-112   112    
192    192    
-416   144    
-144   16     
128    -16    
208    -144   
256    304    
-272   112    
-16    -48    
-144   64     
64     192    
32     288    
192    80     
144    -16    
64     48     
-112   -64    
16     -112   
-16    -32    
48     176    
-64    80     
144    96     
144    -80    
0      48     
416    240    
-240   -32    
-320   -336   
-96    -464   
192    560    
352    624    
272    96     
192    -16    
-80    80     
112    304    
-48    672    
-96    -112   
-224   -1088  
-32    96     
-208   560    
-64    144    
-48    -160   
-96    -48    
32     160    
-288   32     
144    -48    
64     16     
48     -560   
-176   -272   
-352   384    
208    256    
-160   -64    
80     32     
144    256    
432    288    
32     96     
-160   -32    
112    -32    
-32    -16    
64     128    
80     32     
112    80     
288    160    
-176   -80    
-64    -256   
272    144    
272    592    
208    -368   
48     -96    
-80    64     
112    864    
272    736    
-336   -464   
-160   -176   
48     -96    
-32    224    
-16    384    
16     -240   
0      -64    
-176   16     
64     -16    
192    -32    
144    -704   
48     80     
0      80     
0      80     
-16    16     
32     -368   
240    448    
-48    0      
-144   -16    
240    128    
32     -64    
0      -176   
0      80     
-112   112    
192    -608   
96     528    
-16    -656   
-112   480    
0      -128   
-48    320    
160    480    
144    -720   
-128   -352   
128    416    
-96    -272   
112    416    
208    16     
144    512    
144    64     
-96    48     
-16    64     
304    -80    
-192   -224   
128    96     
48     -144   
-112   -64    
-208   -560   
80     16     
-16    32     
112    32     
112    160    
192    160    
224    32     
-128   -240   
192    208    
-144   -32    
384    80     
272    -208   
-336   0      
416    -1056  
-240   144    
416    -80    
64     96     
64     112    
48     -80    
80     80     
-48    -80    
96     208    
288    160    
32     256    
-32    -64    
240    -160   
-192   -784   
16     128    
-128   -208   
384    64     
-96    256    
192    16     
64     -80    
304    256    
-64    256    
-64    16     
320    -112   
64     -16    
64     -16    
-144   144    
0      -224   
16     -176   
48     128    
48     32     
144    -224   
-272   -480   
208    96     
-96    368    
-96    112    
160    -96    
240    32     
-144   112    
-16    112    
16     -48    
368    -192   
32     176    
256    -96    
256    16     
-112   -624   
-16    112    
-16    96     
176    -16    
-64    -112   
192    16     
80     240    
48     -144   
208    240    
-48    64     
64     16     
128    32     
64     80     
-48    -160   
272    -144   
48     -48    
-144   -192   
272    -224   
144    -64    
304    336    
-400   16     
64     -368   
16     -48    
80     -240   
-128   -48    
208    -256   
-16    -96    
32     -16    
64     -96    
80     144    
-64    80     
192    -112   
128    32     
48     -240   
96     96     
-608   -80    
-32    -192   
64     16     
16     -64    
144    128    
-80    -336   
176    288    
112    272    
80     -32    
0      -32    
0      -96    
32     -160   
-160   -208   
-48    -240   
96     -224   
-112   64     
416    560    
272    272    
336    176    
-32    224    
-48    -448   
64     -176   
-112   -32    
-144   -240   
96     -352   
144    240    
592    400    
144    144    
-112   -192   
-16    64     
-304   -64    
240    32     
240    16     
224    -112   
-32    -16    
368    688    
-448   -560   
160    -64    
16     128    
288    -272   
144    -48    
-16    -224   
-16    -320   
-304   208    
48     176    
-896   -272   
144    -80    
-944   32     
224    -32    
128    48     
128    240    
-112   32     
-16    -48    
464    304    
-80    -368   
160    -16    
192    -96    
-16    -128   
-16    -32    
192    -144   
16     -16    
80     16     
-240   0      
112    32     
-688   0      
128    -144   
-288   -32    
16     -352   
176    -80    
176    -528   
0      64     
128    0      
128    -48    
-144   -64    
368    64     
-368   -80    
96     80     
-288   -16    
128    -48    
-656   -32    
96     -112   
16     80     
48     0      
-16    48     
176    -416   
16     80     
-192   32     
-16    -80    
-16    48     
16     -64    
304    48     
80     16     
160    80     
-112   -112   
-128   48     
128    32     
176    96     
96     -64    
-112   -64    
32     -224   
0      32     
32     32     
144    32     
-160   16     
320    -144   
-256   80     
64     144    
80     -32    
-256   -32    
-16    -16    
144    32     
-16    80     
288    -144   
0      144    
0      -32    
144    -80    
-48    112    
192    -48    
-64    -320   
-64    -160   
-144   128    
48     16     
-128   -32    
32     -128   
-96    64     
384    -144   
-32    32     
-1184  -128   
112    80     
-80    16     
-96    64     
-64    16     
-1008  0      
-64    -16    
-64    16     
-48    64     
112    32     
0      16     
-752   -176   
64     -192   
-560   -48    
32     208    
-144   -32    
112    32     
-192   32     
-544   -32    
48     144    
-800   -16    
-16    -32    
-448   160    
-96    48     
-1072  48     
-48    128    
-320   -112   
224    112    
-160   -32    
80     0      
-80    -48    
0      -48    
0      128    
-224   32     
-96    -16    
-256   -64    
-16    -16    
-272   112    
-160   32     
-1824  -48    
-336   0      
80     48     
80     0      
112    -112   
128    64     
-128   -208   
-96    80     
-144   208    
-64    80     
208    32     
-112   64     
272    176    
-80    160    
80     288    
-320   -160   
-144   240    
-320   48     
112    -192   
48     -112   
192    160    
0      112    
-224   -80    
-96    -208   
192    144    
-128   -80    
176    480    
-304   -224   
-224   -192   
128    144    
0      16     
-32    64     
-288   0      
192    -656   
48     32     
-208   0      
192    368    
-160   -128   
160    64     
0      32     
-96    64     
-192   -48    
128    -32    
-112   80     
-256   48     
-144   0      
-224   80     
-128   1264   
160    -912   
192    -64    
-192   112    
-144   48     
-208   32     
-224   208    
80     -144   
-80    -288   
144    192    
160    80     
48     112    
-368   -304   
-64    0      
0      560    
80     -176   
80     -352   
560    -16    
80     320    
48     -96    
-160   0      
0      -48    
-16    -16    
48     224    
-144   0      
32     32     
-176   160    
64     416    
96     -192   
0      -160   
-48    176    
32     128    
-16    -64    
-32    -208   
0      -80    
-80    176    
240    160    
144    112    
224    144    
-192   64     
-96    -80    
-208   -464   
208    -128   
0      128    
32     416    
-320   -32    
-80    -80    
80     128    
144    -176   
-128   -96    
80     32     
128    144    
0      80     
48     -160   
-96    -208   
32     -192   
-128   -256   
112    -224   
-96    -112   
80     208    
-160   496    
-32    192    
80     224    
192    240    
160    192    
-16    80     
96     112    
80     176    
0      0      
48     -144   
128    -80    
-80    -48    
64     -208   
-48    16     
0      -112   
-96    -256   
0      -224   
-176   32     
-144   -80    
208    -144   
80     160    
-112   -96    
-32    80     
128    -336   
32     112    
-96    -80    
-160   -112   
-32    160    
-144   -128   
144    304    
160    112    
176    224    
-112   -80    
-80    176    
0      -128   
96     -160   
-16    176    
272    368    
32     48     
48     -112   
80     64     
48     16     
-112   96     
0      16     
-64    -16    
144    -16    
48     240    
-32    112    
320    128    
-32    32     
160    32     
240    112    
-288   32     
0      112    
-256   -96    
272    -96    
-80    64     
144    32     
80     -192   
48     64     
80     64     
-32    0      
80     48     
80     16     
-160   -64    
208    -96    
112    336    
-288   80     
112    16     
16     64     
112    112    
-16    16     
192    -32    
-112   -80    
-16    -96    
160    48     
352    432    
-208   256    
272    176    
-160   320    
0      -48    
-32    48     
-96    -128   
0      -176   
304    -320   
128    240    
-64    -128   
-112   -160   
224    -224   
80     -256   
0      192    
48     32     
64     16     
144    64     
512    336    
-128   288    
-112   128    
-96    -160   
176    -32    
0      48     
192    384    
16     256    
224    -144   
48     80     
48     -160   
-112   -128   
-288   -48    
320    112    
128    64     
32     64     
-32    16     
48     112    
-96    -16    
-64    160    
-96    -32    
80     -208   
176    80     
272    -16    
-16    48     
64     -576   
48     64     
144    -848   
80     -16    
-112   -48    
-64    32     
64     112    
320    96     
16     112    
32     -32    
544    656    
-176   -256   
112    112    
112    208    
-16    -160   
384    192    
16     32     
208    272    
-16    128    
384    288    
-560   112    
-96    64     
224    112    
144    -112   
128    -64    
0      144    
-16    -64    
432    -480   
416    -256   
-336   -256   
160    80     
16     48     
-224   -112   
336    240    
-256   -656   
128    0      
-240   -32    
288    64     
192    48     
80     -32    
32     -48    
-16    -32    
-48    176    
-96    -80    
128    0      
464    -208   
400    -16    
128    -80    
-320   0      
160    48     
-368   64     
112    16     
368    80     
48     32     
128    32     
176    48     
80     112    
-224   64     
-144   -48    
144    80     
48     -96    
96     16     
224    -112   
304    176    
-48    16     
96     80     
48     -16    
16     32     
32     32     
48     -96    
48     -48    
16     48     
-16    -48    
192    -144   
112    128    
16     -144   
80     64     
128    -32    
32     80     
208    -128   
-96    -400   
16     -16    
112    -592   
-208   64     
336    -16    
64     -32    
80     -64    
64     -400   
128    48     
160    -112   
16     32     
-48    48     
16     -96    
80     -160   
112    16     
32     -160   
352    304    
32     48     
336    144    
128    -32    
-32    -368   
-288   0      
-96    -80    
176    -80    
48     144    
112    -16    
272    128    
-32    -16    
192    -32    
-96    48     
128    -144   
64     -16    
144    80     
80     -80    
-464   16     
-16    -16    
48     -48    
112    -48    
64     -144   
384    112    
-176   -32    
48     -624   
160    -32    
-48    -144   
112    64     
144    0      
-48    0      
-176   -48    
-80    -112   
-352   32     
80     16     
-400   64     
0      -144   
272    -16    
112    64     
-80    0      
96     -176   
64     64     
32     -16    
176    32     
-32    16     
256    -112   
48     16     
-128   -64    
128    0      
48     128    
-992   32     
112    -48    
80     -80    
-48    -64    
-128   64     
48     -64    
112    32     
128    -880   
32     -16    
96     144    
208    192    
96     -16    
64     -144   
-160   -48    
160    -16    
-96    -80    
80     -144   
96     0      
144    -16    
80     -48    
0      -272   
-272   -176   
448    -1072  
80     496    
-64    240    
80     -112   
-128   -400   
16     144    
-304   80     
288    -16    
-176   -64    
-256   -32    
-368   32     
-80    64     
80     -32    
128    -48    
80     144    
160    -32    
80     368    
64     -560   
96     48     
-208   -32    
-128   656    
48     -224   
16     -320   
-128   608    
64     -336   
48     0      
112    -416   
304    240    
-16    288    
-96    -160   
160    -64    
176    48     
-1040  -176   
96     -800   
-128   -64    
192    0      
-224   -48    
-160   272    
-256   -224   
-48    -496   
-1472  128    
208    96     
16     64     
112    -80    
144    -64    
-464   64     
-624   128    
-224   -32    
-96    -48    
-16    32     
352    176    
-400   -400   
-80    -256   
-240   -144   
80     -32    
-80    16     
320    -208   
352    112    
-208   -64    
144    -128   
-16    -112   
-1008  -320   
-48    -48    
-400   -48    
-192   -304   
-1184  -208   
96     -192   
384    -80    
144    32     
0      16     
64     -16    
-80    -112   
48     96     
-288   16     
-176   112    
144    96     
-112   32     
-272   -128   
-32    -288   
144    -112   
-512   -96    
16     -32    
64     -16    
-208   0      
-272   -256   
80     -240   
-64    -128   
-128   32     
-80    -208   
-48    320    
16     128    
-48    -48    
112    -64    
-160   -16    
-160   192    
-112   -16    
32     64     
80     224    
80     160    
-176   -96    
80     32     
-16    -16    
112    48     
32     -64    
-288   -320   
0      -176   
-224   128    
0      128    
-112   -16    
-64    -64    
-96    -336   
64     112    
-224   160    
80     224    
96     208    
48     144    
64     80     
192    176    
-128   160    
-128   32     
-240   64     
-176   -240   
-32    -176   
48     -64    
-48    -32    
-64    416    
16     272    
-912   -144   
-192   -544   
-528   -304   
192    -48    
-192   48     
64     -128   
48     -240   
-96    96     
96     160    
-128   256    
-48    -80    
-48    -128   
112    -64    
64     112    
368    192    
-448   176    
160    512    
-560   320    
64     160    
96     -176   
-112   -96    
16     -32    
32     -16    
64     32     
48     64     
0      -16    
-224   32     
224    -16    
-64    -48    
-176   80     
352    144    
368    192    
-640   64     
48     -16    
-112   -96    
-48    80     
80     208    
-144   288    
144    256    
-176   208    
-16    -64    
352    32     
64     32     
64     48     
64     160    
-208   16     
112    -16    
-656   -128   
288    -48    
-80    0      
368    96     
-128   176    
160    16     
-176   -288   
208    80     
112    -16    
-224   64     
96     64     
-304   -240   
-32    -96    
-96    -128   
64     64     
-96    -144   
-80    16     
64     -16    
112    128    
-176   -96    
48     -144   
0      -144   
-80    -48    
64     -96    
-304   -368   
272    -240   
-112   -64    
224    -80    
-96    -112   
-16    192    
432    368    
-32    400    
-160   80     
32     192    
80     176    
592    384    
-144   480    
32     80     
-112   -80    
-48    352    
240    -64    
-224   96     
-16    128    
-80    288    
208    496    
64     64     
48     0      
-128   -16    
-16    -96    
304    416    
112    112    
304    400    
-304   80     
-32    -496   
-32    112    
16     0      
-112   -224   
192    400    
208    96     
-96    -512   
-16    352    
16     416    
-144   -112   
80     -128   
48     -96    
112    112    
96     80     
128    -16    
224    32     
-176   64     
48     80     
-320   -64    
80     64     
-64    -48    
976    864    
-288   768    
-544   -48    
352    -144   
0      0      
112    48     
-208   -16    
128    384    
0      224    
-208   -384   
144    -256   
-32    240    
32     96     
432    96     
-144   144    
224    80     
240    64     
-384   0      
-128   80     
-80    32     
48     16     
16     64     
96     -16    
320    32     
96     48     
112    48     
-16    32     
-128   32     
-48    -64    
-112   48     
-208   128    
96     48     
80     112    
-144   32     
32     0      
160    32     
160    80     
80     48     
-128   -32    
80     32     
-64    96     
208    64     
80     16     
-32    -80    
-48    32     
64     -1312  
208    64     
-16    0      
32     48     
16     -16    
-48    16     
128    96     
368    112    
16     0      
-48    -64    
48     16     
32     0      
64     144    
0      -16    
64     32     
-80    -432   
96     16     
160    48     
96     64     
64     48     
160    64     
32     -80    
80     64     
0      -32    
96     32     
0      160    
320    112    
-112   80     
64     -128   
144    128    
48     -112   
-176   48     
32     -752   
160    160    
-16    112    
-32    -64    
112    80     
256    112    
-128   32     
432    32     
-240   0      
160    0      
176    96     
-48    64     
48     64     
-16    -128   
0      48     
32     -528   
112    -48    
112    -480   
128    400    
0      160    
48     -64    
-16    176    
0      128    
64     -96    
-16    0      
96     32     
400    16     
-240   224    
160    -176   
96     32     
112    -112   
240    112    
-80    64     
208    -32    
-16    32     
32     -16    
128    -128   
176    0      
-32    144    
64     -48    
192    96     
-176   304    
112    -144   
80     -256   
128    112    
64     -80    
16     80     
80     -448   
-64    -240   
288    288    
-96    96     
192    336    
-240   -320   
192    -112   
128    144    
176    -16    
-16    -192   
96     0      
128    64     
-128   144    
80     -416   
-16    160    
-64    -544   
96     176    
112    80     
64     -208   
208    -112   
176    -240   
80     -848   
-48    -128   
112    64     
-96    -256   
144    64     
64     80     
544    224    
16     1104   
-80    480    
-48    288    
288    112    
208    96     
192    -176   
80     -976   
16     144    
64     -176   
272    256    
16     -208   
-32    288    
256    -48    
288    -240   
96     -80    
0      -48    
128    -240   
-160   -32    
48     -160   
-144   32     
144    16     
64     -144   
-1536  -16    
144    -208   
128    -32    
208    -128   
192    -96    
-80    -96    
272    -176   
48     -16    
160    -96    
368    160    
-304   400    
96     -16    
48     -48    
16     96     
64     48     
-544   16     
144    -48    
144    16     
112    -160   
0      -48    
80     -256   
32     -96    
224    32     
-80    112    
80     -80    
-144   96     
-288   -32    
64     -16    
224    80     
48     -32    
-512   128    
208    -112   
128    -16    
-240   -80    
-96    128    
48     -128   
336    -80    
192    -224   
208    96     
-48    48     
32     -128   
272    -112   
112    -80    
-176   64     
-32    -192   
-272   -64    
128    32     
-1280  32     
160    128    
224    0      
16     -112   
-32    0      
32     -288   
96     32     
256    16     
-128   -32    
0      -80    
224    48     
-32    256    
16     80     
-112   96     
-80    -176   
-368   -192   
112    -368   
-304   -208   
192    64     
-48    -64    
80     -96    
16     32     
-16    -672   
160    -32    
-48    32     
48     112    
-144   32     
336    0      
-32    112    
160    32     
-480   -32    
96     80     
64     16     
128    -16    
48     176    
144    128    
96     176    
160    -528   
144    -80    
-16    32     
-48    -128   
16     -224   
-16    -240   
-880   -32    
0      32     
-176   176    
368    -16    
48     96     
96     -96    
-64    112    
304    144    
-304   368    
176    48     
416    -112   
-432   32     
0      -160   
-288   96     
240    464    
-352   336    
144    144    
-16    32     
-32    48     
-384   16     
0      288    
-96    352    
464    160    
-304   128    
-176   64     
-544   128    
-32    80     
-272   -48    
32     -336   
144    -96    
-288   16     
-288   128    
32     -368   
-96    -160   
48     -16    
-592   -544   
-16    -128   
0      -240   
-784   400    
288    192    
-288   -32    
-112   -112   
-416   -80    
0      32     
304    448    
-32    208    
144    -144   
48     144    
-1120  -320   
-16    96     
-144   -48    
64     80     
48     96     
-240   320    
-144   -288   
-272   -224   
64     464    
-144   -240   
0      128    
-384   -224   
208    -272   
-80    368    
112    -224   
-304   -448   
272    384    
-176   -48    
-80    112    
336    -304   
-48    304    
48     -16    
-96    -208   
64     -16    
-96    0      
-112   320    
80     0      
16     64     
-304   -112   
80     -96    
320    96     
-96    -32    
0      -80    
112    256    
256    192    
-416   -304   
0      272    
-160   -96    
48     16     
0      80     
-160   192    
-80    -336   
-48    64     
-352   176    
48     -32    
-128   48     
-64    -80    
-80    -160   
48     112    
-192   -112   
64     160    
-32    -176   
-208   -368   
-224   112    
-112   144    
-368   240    
64     224    
160    32     
-448   -96    
240    64     
-928   32     
-208   -128   
96     96     
-16    -64    
128    -192   
-80    -496   
160    0      
-272   128    
336    32     
96     0      
320    64     
-96    64     
-80    112    
-624   -64    
0      -32    
-1344  -48    
64     32     
80     64     
128    96     
-128   48     
-160   -48    
0      -32    
-160   128    
-160   48     
-64    32     
176    560    
-592   384    
240    256    
-48    -32    
-64    176    
-112   -16    
-224   304    
192    112    
64     -512   
-160   -320   
416    176    
-208   48     
144    -32    
352    112    
-32    64     
-336   208    
-16    64     
224    -32    
-192   48     
-160   32     
-368   -32    
-208   -64    
336    128    
-544   80     
-224   -32    
64     64     
112    48     
368    32     
208    48     
432    128    
-160   -32    
-64    16     
-64    64     
-304   16     
112    80     
32     64     
-64    -96    
144    32     
-192   0      
32     -32    
32     16     
16     64     
-192   -16    
-64    -16    
96     48     
-96    0      
-128   -96    
96     112    
-224   32     
48     0      
64     -48    
192    64     
112    112    
96     48     
-144   16     
-16    0      
64     96     
64     0      
48     64     
32     48     
80     16     
-64    -32    
176    112    
16     -16    
-32    64     
176    80     
-112   48     
112    64     
-192   -32    
208    64     
-32    80     
208    112    
-32    32     
0      0      
-128   0      
496    384    
-352   208    
272    -48    
-272   -32    
192    -160   
-208   -16    
160    48     
112    80     
176    224    
-32    176    
144    112    
-32    160    
48     64     
64     -32    
96     336    
272    368    
-96    0      
-96    -16    
-48    80     
128    -32    
32     -80    
-48    48     
32     48     
208    432    
96     256    
-96    -192   
-64    -192   
-80    -64    
208    80     
-112   144    
128    -320   
48     32     
96     -112   
-32    -32    
96     -160   
96     176    
96     96     
-16    128    
224    -48    
0      64     
96     48     
96     112    
112    192    
-80    -80    
160    128    
224    224    
-384   -96    
-16    624    
336    -592   
128    -320   
-512   -272   
112    112    
0      672    
224    -48    
-208   -496   
96     -176   
32     544    
240    64     
160    -16    
-112   -416   
96     -128   
-96    -32    
32     -208   
64     192    
144    -768   
80     224    
-16    96     
48     -64    
192    16     
0      0      
128    -48    
-16    -112   
-48    -80    
240    -96    
144    96     
-96    -128   
-32    -64    
48     32     
-48    -32    
-32    -656   
-48    -128   
224    112    
176    192    
-32    80     
80     48     
-160   48     
0      -16    
-112   64     
-16    112    
112    16     
192    -208   
32     0      
0      -208   
-32    0      
32     -368   
80     80     
112    -784   
-64    0      
48     32     
48     128    
-96    -32    
-48    16     
112    -64    
64     48     
-64    0      
48     -128   
256    208    
-272   -48    
32     0      
-176   -368   
336    -48    
368    -608   
-80    112    
-16    -96    
0      -16    
16     16     
64     96     
192    48     
-48    32     
304    96     
-48    32     
80     -80    
144    64     
0      32     
224    -400   
416    -64    
0      -304   
208    -16    
160    32     
-144   -80    
32     48     
-64    272    
-272   96     
224    112    
176    32     
64     48     
208    0      
-96    -128   
-64    -32    
160    -240   
-176   -112   
0      32     
48     192    
112    240    
160    128    
48     -112   
192    -80    
-96    112    
32     -16    
-16    -32    
112    -96    
-80    64     
-96    -80    
144    -48    
144    -112   
-16    96     
-16    192    
160    272    
32     128    
-32    80     
-96    0      
160    -160   
-32    -672   
48     32     
144    -976   
144    -16    
80     224    
240    64     
32     144    
80     96     
-128   16     
208    -288   
96     -240   
48     464    
160    -112   
-48    32     
128    -48    
192    -240   
-16    -48    
32     32     
-48    80     
16     -16    
-48    -80    
-16    -192   
160    -160   
32     -32    
48     -176   
272    80     
-192   -400   
384    -144   
16     368    
-112   -112   
384    112    
96     96     
16     -336   
-240   320    
-48    16     
-32    -512   
256    48     
224    0      
96     64     
64     160    
-176   224    
-16    304    
-64    -192   
160    400    
-192   -64    
-448   -192   
-272   -352   
32     352    
-16    -208   
224    -160   
-48    0      
288    -160   
128    96     
-64    -352   
-48    -80    
288    448    
-128   64     
-160   -352   
128    -224   
-272   96     
272    112    
-192   -128   
16     -336   
160    144    
16     -160   
-64    368    
128    -704   
-96    -176   
-32    -112   
144    -48    
96     192    
0      -64    
144    80     
128    80     
-144   -48    
112    -160   
-496   -80    
272    -48    
-2144  32     
304    144    
-320   -144   
144    -96    
112    192    
80     -208   
80     -16    
176    -48    
-16    48     
80     0      
32     -32    
-32    -48    
304    -112   
-80    32     
144    -64    
-176   48     
0      16     
-304   64     
112    -16    
-16    16     
144    -48    
80     0      
320    320    
-240   -112   
-96    -48    
160    -96    
-160   -48    
48     16     
-288   0      
96     80     
-464   32     
-80    -96    
128    -112   
64     -16    
48     48     
256    -48    
-112   80     
96     -192   
176    160    
-368   -32    
272    -48    
-80    32     
192    32     
-80    32     
96     64     
-400   -32    
304    16     
176    -48    
-48    -32    
0      80     
256    32     
256    32     
-384   544    
-32    288    
160    32     
-224   -80    
48     64     
144    0      
-352   -176   
288    -144   
160    144    
96     336    
-752   80     
-16    -128   
304    208    
-352   -80    
96     64     
96     -192   
-704   -144   
-272   80     
0      48     
-160   -16    
32     -352   
272    -224   
512    0      
-32    144    
-144   -96    
-128   -208   
-144   -192   
-176   144    
-240   -128   
-272   0      
-624   80     
112    160    
432    48     
-1024  -32    
-464   -16    
496    208    
-752   128    
-80    -64    
-320   -112   
-112   -224   
656    176    
-288   -64    
368    48     
64     80     
-336   80     
-256   -32    
-112   32     
176    112    
-288   -64    
-80    -240   
-528   -336   
352    64     
48     0      
128    64     
-304   -64    
-336   0      
-208   -192   
-64    -64    
240    240    
112    64     
208    160    
-144   -16    
-144   -80    
-224   64     
-144   48     
-176   -16    
-96    0      
-1824  64     
96     80     
-240   -80    
-48    80     
-48    -64    
-16    0      
80     32     
-112   -80    
32     16     
-16    -16    
-16    -16    
-32    64     
-96    0      
-288   16     
-112   32     
-512   -32    
32     32     
64     16     
144    48     
-64    -48    
-32    0      
-32    32     
48     32     
-144   -32    
-32    16     
-32    32     
0      0      
16     80     
-96    -96    
16     0      
-16    16     
-16    -16    
-16    -32    
-80    0      
16     32     
-112   16     
80     64     
-32    -64    
144    -144   
-64    16     
16     112    
-192   48     
272    304    
-256   16     
-48    32     
-336   112    
-48    -240   
-2496  -304   
80     160
[truncated: 116,011 more chars]
