# Supplementary material for: A Fault Diagnosis Method for One‐Dimensional Vibration Signal Based on Multiresolution tlsDMD and Approximate Entropy
Source: Hindawi journal article supplement (doi:10.1155/2019/3262818), 2019-01-01
Supplement: f1 [file 3262818.f1.zip › 3262818.f1/gear signals/normal gear signal/Data12.txt]

144    224    
-160   -224   
192    96     
-32    -48    
48     -32    
-304   32     
48     128    
384    640    
-624   -1072  
448    48     
208    816    
160    -368   
304    -384   
-112   464    
-64    -160   
-32    32     
48     256    
32     32     
-224   -96    
96     -672   
560    400    
-208   464    
176    16     
176    -304   
-16    48     
64     -112   
-16    112    
-48    -176   
16     -32    
192    176    
32     272    
144    32     
80     -752   
-48    64     
192    -320   
96     -240   
32     -32    
-16    -32    
64     -80    
160    -240   
-240   -64    
96     176    
192    -16    
224    64     
48     32     
-16    -256   
80     -32    
48     48     
-16    64     
-224   32     
80     -16    
64     -16    
448    -320   
-432   -320   
176    -288   
320    32     
-160   -128   
208    0      
16     144    
-16    -112   
32     0      
-16    0      
32     -32    
96     64     
-336   -32    
240    -80    
-32    16     
256    -96    
128    64     
144    -288   
-64    -16    
112    -768   
32     -80    
-32    -624   
-64    16     
48     -96    
160    16     
32     -32    
64     0      
-208   96     
32     32     
-1344  -48    
144    80     
-16    -80    
208    -64    
-16    -208   
32     -144   
224    -16    
-32    -432   
176    96     
80     -32    
80     80     
240    64     
-16    0      
-240   64     
112    32     
32     128    
-32    0      
128    -32    
160    -160   
32     -224   
352    -432   
160    112    
112    -304   
160    160    
-16    16     
64     0      
-48    -16    
-80    32     
48     0      
288    -16    
-272   16     
-160   -64    
-2272  -48    
240    -48    
-240   -192   
1280   -144   
-144   16     
336    -368   
256    -32    
-192   -32    
-336   -416   
608    144    
-160   256    
-352   -128   
96     -144   
0      -64    
304    112    
-112   80     
400    32     
-128   128    
-32    32     
-256   -32    
80     -320   
-64    80     
-48    32     
272    112    
-96    128    
-96    -32    
-416   -64    
48     -48    
336    160    
-32    -128   
576    -64    
320    -32    
80     -64    
288    -192   
96     160    
64     -112   
192    64     
-128   -16    
192    -32    
-832   -16    
80     -144   
16     32     
-64    0      
-32    -16    
400    112    
-272   32     
64     -144   
-64    64     
144    -64    
16     -48    
-64    -176   
-112   96     
-320   -192   
272    -96    
-144   32     
-144   -128   
64     16     
160    48     
48     16     
-64    -48    
-336   -16    
112    -128   
176    48     
-432   -32    
16     96     
-160   -112   
-144   -48    
-128   -48    
-464   -32    
48     32     
-560   0      
48     -64    
256    -48    
-224   -112   
112    -144   
0      192    
-128   -48    
112    176    
-336   -352   
272    80     
-496   -32    
-464   -80    
96     96     
-48    208    
-144   176    
-448   560    
-48    -160   
-688   -32    
-272   -176   
-528   0      
400    -224   
-352   480    
32     176    
-272   -240   
16     224    
208    96     
32     -64    
-80    272    
400    -160   
-368   192    
-208   -320   
-240   -112   
80     464    
-176   -96    
-160   160    
208    144    
-400   416    
304    -128   
-16    -48    
-32    160    
0      -48    
80     112    
-208   -240   
-16    0      
16     32     
128    -128   
-160   64     
176    -64    
-208   240    
-768   144    
192    -224   
-304   -128   
176    -112   
0      48     
0      80     
-128   16     
-320   -240   
352    -112   
-352   128    
208    16     
80     64     
-288   192    
-320   -48    
-64    -48    
-592   64     
112    80     
0      16     
96     -128   
176    32     
0      64     
-192   80     
208    16     
16     -16    
32     16     
-64    48     
-64    32     
-128   128    
-80    -192   
-16    -336   
-272   0      
-112   48     
-80    -48    
128    16     
-48    16     
-96    80     
160    160    
-224   16     
160    80     
-48    -16    
320    16     
-368   -32    
-16    -112   
80     -176   
-16    112    
-176   48     
208    128    
-2496  96     
-128   64     
16     64     
112    64     
-48    144    
-144   -16    
-32    16     
-160   64     
176    32     
32     -16    
-32    32     
-224   96     
256    -32    
-304   -80    
96     224    
-48    112    
96     0      
0      0      
144    64     
48     128    
-96    16     
208    -32    
-16    64     
80     -32    
-32    16     
272    160    
-160   80     
48     -16    
-112   -96    
48     -96    
160    16     
32     128    
-64    -16    
96     432    
-144   208    
-128   -192   
80     -32    
-32    128    
-16    -32    
112    -160   
208    48     
-112   288    
576    752    
-288   0      
32     -320   
64     -480   
368    -160   
320    112    
224    64     
320    352    
-160   352    
-96    128    
-224   -48    
80     -144   
-368   48     
144    128    
-192   32     
-80    32     
-96    32     
-16    -16    
80     176    
48     224    
-16    -80    
320    -224   
96     -288   
224    32     
-208   -448   
32     -112   
-224   -192   
-64    -112   
160    96     
-80    -96    
160    48     
416    112    
320    112    
96     432    
-16    80     
-16    -96    
-64    64     
160    80     
-32    -32    
-16    -144   
-320   256    
208    -224   
64     144    
192    96     
-160   -48    
-16    64     
-64    112    
16     688    
176    -416   
96     16     
-48    64     
160    160    
-80    -176   
16     -112   
176    -240   
-32    160    
0      144    
-208   -128   
32     176    
32     0      
-80    -256   
176    -48    
-144   -160   
144    -192   
-80    16     
112    32     
-144   0      
80     -48    
64     32     
-80    160    
112    80     
80     96     
16     240    
-16    -144   
-32    -96    
64     -32    
-48    64     
-160   0      
0      32     
144    -16    
112    48     
16     128    
240    96     
112    48     
0      16     
-112   -48    
112    64     
160    -48    
32     240    
96     128    
-32    -592   
-32    -48    
128    160    
-96    176    
176    32     
208    32     
-48    96     
80     32     
64     64     
-176   32     
128    -64    
192    80     
-112   176    
16     -96    
224    16     
32     -288   
-96    112    
176    -1424  
-16    16     
80     80     
64     48     
16     -16    
144    96     
112    0      
80     48     
80     64     
64     48     
48     16     
-144   -176   
-16    112    
-16    -16    
192    96     
-128   -112   
336    64     
-32    144    
-208   64     
144    -160   
160    32     
96     96     
144    80     
-240   80     
304    48     
128    112    
192    -96    
-80    64     
0      -80    
32     16     
-80    -272   
112    -64    
112    -1488  
-160   48     
144    0      
208    48     
16     -16    
-48    -32    
0      48     
32     16     
160    160    
96     16     
-48    128    
208    -48    
112    -48    
-112   -16    
192    80     
0      -96    
-16    32     
192    32     
176    96     
-240   -176   
208    64     
160    112    
-48    144    
112    64     
224    64     
144    64     
-48    48     
64     80     
16     -32    
96     -48    
64     -80    
32     128    
-48    -112   
-48    -48    
80     16     
64     -48    
128    32     
-48    -304   
80     -224   
208    -256   
192    64     
96     16     
16     160    
-176   -144   
48     32     
0      -112   
224    144    
-256   32     
48     -48    
128    -16    
32     160    
432    -464   
64     32     
448    176    
192    224    
192    -192   
96     -144   
0      64     
-272   80     
96     288    
320    32     
0      560    
-384   336    
-16    -64    
304    -112   
-128   32     
272    -160   
32     -64    
288    -320   
144    16     
0      -800   
32     -16    
-80    -288   
-48    -288   
-144   48     
-160   64     
-64    64     
32     80     
144    -144   
-128   96     
-656   336    
320    192    
192    -176   
-192   -272   
-176   -48    
144    -224   
16     -48    
-64    96     
96     -176   
192    -176   
64     48     
-32    80     
-576   -352   
32     -240   
-80    192    
-368   192    
48     240    
-32    96     
336    -96    
64     32     
80     96     
-32    -160   
-240   -176   
208    -16    
-192   -320   
-256   -592   
304    576    
32     64     
0      -320   
160    96     
-192   96     
48     144    
-736   -160   
112    -80    
-32    -128   
176    -112   
16     64     
16     -16    
32     -112   
48     -832   
-16    64     
288    256    
304    464    
-64    -416   
32     16     
-304   176    
32     -192   
-560   64     
176    -224   
240    -144   
-32    -112   
32     144    
368    -352   
-32    -416   
-240   -336   
-160   -128   
-240   256    
208    32     
-272   -64    
288    -112   
176    -128   
-16    400    
64     -48    
-80    -112   
-2336  160    
128    0      
16     160    
224    -112   
32     96     
48     -112   
64     352    
160    160    
32     224    
-304   16     
352    96     
-304   -32    
112    -272   
-160   -240   
-16    -112   
-448   48     
-32    -128   
128    160    
0      32     
272    80     
240    -176   
176    288    
-224   -128   
-96    -272   
-32    -176   
112    144    
-224   240    
-80    208    
-544   0      
256    -224   
-528   48     
256    0      
48     112    
112    -224   
96     64     
128    112    
-32    192    
-208   64     
112    -128   
-256   -128   
176    -96    
-256   32     
48     112    
-32    80     
-112   160    
16     -128   
144    -304   
112    -160   
0      -32    
-96    208    
96     -64    
160    112    
-48    80     
80     -96    
-208   144    
192    176    
288    -64    
16     -112   
-80    16     
16     96     
-80    -32    
-848   -48    
-224   0      
0      0      
32     96     
-112   -48    
-192   -112   
-80    16     
-1376  -48    
-256   16     
-2096  -96    
-64    -192   
128    -48    
96     96     
128    -80    
-304   -64    
-96    -16    
224    80     
-352   -64    
-32    32     
240    112    
-288   128    
-112   -48    
96     64     
-176   0      
-128   0      
224    80     
48     32     
-240   -16    
-640   -16    
32     80     
-96    -176   
128    -64    
-80    -64    
32     80     
64     64     
-352   -80    
-208   -16    
16     48     
0      96     
-272   16     
96     160    
-256   -64    
64     32     
-80    0      
-112   64     
0      64     
64     0      
-384   -112   
-96    -32    
192    32     
32     80     
32     -32    
192    -16    
-144   -80    
32     -16    
192    256    
-1008  480    
-128   -208   
-960   -336   
0      -336   
80     -448   
192    288    
336    352    
400    0      
-80    80     
-368   256    
-432   208    
160    -288   
-64    -80    
-128   16     
160    -560   
176    -64    
352    224    
-496   144    
-352   144    
-496   -160   
304    64     
128    320    
240    -160   
288    32     
240    144    
-352   0      
-304   96     
400    176    
-240   -176   
32     -576   
-240   -112   
-272   288    
-896   144    
224    160    
-256   -96    
112    160    
240    192    
-416   -128   
208    -16    
-128   16     
96     80     
0      64     
48     32     
-144   144    
-160   176    
-464   -64    
112    0      
-720   -80    
256    112    
176    -80    
-112   0      
-32    -32    
-16    32     
-48    0      
96     64     
32     80     
48     32     
-32    16     
-176   64     
176    192    
-288   -48    
224    112    
-144   -16    
160    32     
80     48     
368    352    
-576   48     
432    -48    
-128   48     
384    272    
208    288    
-496   -80    
-32    -48    
-272   -48    
208    176    
80     32     
48     -32    
-352   16     
112    96     
-208   16     
-80    16     
-64    48     
-64    0      
-32    32     
64     32     
-32    32     
64     144    
96     16     
-96    16     
-16    0      
-16    -96    
96     224    
-576   -32    
96     -112   
208    48     
-48    176    
16     -32    
144    112    
0      80     
-64    0      
208    80     
-96    32     
96     64     
0      -64    
-96    -208   
192    -64    
-64    144    
-32    80     
112    128    
16     0      
32     48     
160    80     
-32    -32    
-96    80     
-64    0      
304    80     
-80    32     
64     48     
-144   -16    
48     64     
-32    -48    
128    48     
144    112    
64     32     
48     112    
-160   208    
400    96     
-112   -32    
-64    -48    
-112   112    
304    128    
-240   -32    
32     64     
-112   -32    
160    64     
-272   -32    
-128   -16    
144    144    
64     -64    
-80    -32    
176    48     
32     80     
256    80     
-80    16     
128    96     
-16    96     
-160   32     
80     0      
64     32     
304    144    
-208   0      
-64    -144   
176    16     
-32    32     
304    224    
-256   -80    
-16    144    
32     192    
96     48     
-16    -96    
48     80     
32     80     
176    48     
48     48     
-64    -48    
80     64     
112    -320   
0      -80    
192    0      
112    0      
64     96     
32     -80    
80     -48    
128    64     
80     80     
48     48     
48     -192   
160    224    
32     304    
176    192    
-96    -336   
-112   80     
-32    144    
96     48     
-64    240    
64     -64    
240    64     
192    16     
976    928    
-672   -976   
-80    -112   
-144   144    
96     -112   
80     80     
160    -352   
288    96     
160    96     
320    -336   
240    352    
176    16     
-32    -16    
-48    112    
-128   144    
-224   64     
-32    16     
320    0      
160    -112   
432    -80    
160    160    
112    -48    
-416   -112   
16     640    
32     -528   
272    -768   
-128   160    
16     -96    
160    -16    
-48    -160   
-192   -32    
-48    -48    
240    208    
0      64     
192    -32    
320    368    
176    16     
-256   -80    
272    -224   
192    64     
32     400    
496    -128   
-112   -1088  
-80    128    
-144   80     
0      16     
112    64     
208    -16    
16     128    
64     -320   
176    -64    
-48    -144   
48     288    
-128   192    
16     -416   
96     112    
224    208    
208    -208   
-64    -224   
160    -208   
224    48     
-16    256    
32     128    
-48    0      
16     80     
-32    -128   
128    -432   
80     192    
112    224    
48     112    
368    -16    
32     640    
160    336    
64     256    
32     64     
-48    -48    
-80    -32    
0      96     
432    0      
-112   -144   
-16    -16    
-64    0      
144    48     
-80    -272   
64     -144   
112    -96    
64     -192   
64     0      
-160   -80    
-144   -112   
-128   -80    
32     -48    
96     48     
208    0      
144    -48    
16     -48    
112    -112   
16     16     
160    -16    
-64    80     
-240   -160   
112    0      
176    -32    
-304   -800   
80     272    
144    -192   
-32    160    
-944   80     
208    -128   
-64    -112   
16     -80    
240    0      
-224   -224   
176    16     
-48    -16    
32     -432   
208    -112   
64     304    
-112   48     
-48    304    
160    96     
320    32     
-1088  -64    
96     -160   
32     -176   
32     16     
128    128    
208    -96    
-96    -32    
48     -944   
304    -80    
112    96     
-144   160    
384    80     
-16    32     
160    0      
-176   -32    
-112   -112   
-224   96     
96     96     
112    -96    
144    16     
96     -256   
-160   160    
336    -128   
448    48     
-32    -64    
-192   -16    
96     -32    
64     112    
-128   0      
144    -16    
-96    -32    
0      -128   
-1488  -64    
48     112    
0      0      
64     -288   
32     -16    
32     -288   
176    48     
0      -48    
-16    64     
192    112    
-32    176    
96     -96    
-144   16     
-64    -48    
-176   208    
-1264  0      
384    32     
-160   -48    
-128   -48    
144    112    
176    -64    
32     0      
288    -1024  
112    176    
-48    96     
48     416    
128    176    
96     64     
112    64     
64     -80    
64     0      
-192   -240   
-784   -336   
-32    64     
112    192    
304    32     
16     176    
32     -672   
-128   16     
368    192    
-224   112    
-16    -208   
32     80     
-208   32     
656    304    
-224   -96    
144    -1344  
64     992    
32     -320   
192    -48    
128    -144   
80     16     
352    400    
-224   -16    
-208   -256   
224    -528   
160    -160   
400    512    
-80    48     
432    336    
-736   -240   
-112   -400   
80     96     
16     32     
480    464    
-112   48     
-64    -64    
368    -224   
320    -16    
-224   -48    
224    48     
-640   144    
-304   96     
192    224    
224    96     
-416   -128   
64     -128   
-1168  112    
0      -16    
160    80     
144    -32    
-48    -80    
-528   -48    
-1664  0      
-480   -240   
560    -144   
-192   0      
480    112    
-64    0      
192    48     
-624   -32    
-336   -192   
112    16     
-576   16     
-32    -176   
208    -160   
96     112    
-64    64     
-160   80     
-128   0      
160    112    
288    128    
-752   112    
-320   -208   
48     16     
32     64     
160    -16    
32     -16    
-192   -64    
-32    112    
-512   -96    
-112   0      
32     64     
-288   -32    
224    16     
-416   192    
144    48     
-272   -64    
-16    -16    
-208   32     
-48    -112   
304    -272   
-32    224    
304    -32    
-80    -48    
-96    -32    
-96    32     
64     16     
-288   -128   
-320   0      
-128   112    
-288   16     
32     -128   
-256   80     
-624   -64    
-48    0      
-320   64     
144    32     
-32    -96    
-96    32     
16     16     
-256   -208   
32     80     
-112   16     
64     0      
-16    64     
80     -16    
-16    48     
128    48     
-528   -112   
192    64     
-416   -80    
112    144    
16     -32    
-80    32     
32     160    
-224   64     
-48    64     
128    48     
-16    48     
-48    -96    
144    48     
-272   0      
-48    48     
-288   -80    
64     0      
-1408  16     
16     -16    
48     0      
272    208    
-400   64     
-32    0      
32     144    
240    80     
144    16     
-160   -64    
-32    -32    
-272   48     
-224   16     
80     0      
128    0      
-880   0      
64     64     
-112   -192   
128    16     
-144   64     
48     32     
112    32     
-16    16     
240    240    
-208   144    
48     0      
16     64     
288    160    
-208   32     
0      -48    
-208   0      
32     32     
80     32     
32     -128   
96     -32    
-112   -80    
240    288    
80     64     
-64    48     
-128   16     
144    -32    
128    288    
-64    -160   
-192   16     
64     512    
-272   64     
336    64     
0      -336   
-224   224    
-32    -192   
80     192    
-32    16     
-80    32     
352    160    
-160   64     
-64    64     
-144   0      
96     384    
-464   -352   
16     160    
-128   272    
272    -112   
32     -96    
-208   480    
0      304    
128    -288   
224    64     
-32    0      
32     -32    
0      192    
-48    -576   
-112   208    
-48    -48    
-96    -64    
112    -80    
240    64     
64     416    
-64    -608   
160    448    
32     32     
-48    -80    
192    176    
32     0      
16     -80    
-352   -176   
64     112    
-208   -176   
288    -64    
-96    736    
160    -176   
144    -400   
64     240    
-48    352    
-48    80     
384    -96    
176    192    
176    -32    
-128   80     
416    144    
-224   400    
368    256    
256    160    
528    272    
-128   -368   
-304   -144   
32     336    
352    416    
272    128    
112    48     
-400   48     
-48    0      
-112   32     
368    48     
112    112    
-112   80     
496    128    
-208   -80    
-48    -304   
-160   16     
-32    -80    
112    -144   
128    -112   
144    48     
64     -80    
176    16     
-32    -16    
16     -32    
64     16     
224    32     
32     80     
-16    -80    
32     -128   
48     16     
-16    64     
112    160    
64     112    
80     224    
-80    128    
64     -48    
64     64     
-32    64     
80     128    
-64    32     
112    -48    
-80    -48    
-144   64     
144    -400   
-112   -64    
32     -16    
-48    -576   
-144   128    
-32    32     
192    336    
80     96     
-48    240    
-48    -288   
-96    -96    
128    64     
432    240    
-288   448    
160    272    
48     240    
32     -32    
96     176    
16     -672   
112    128    
-112   16     
48     0      
-192   0      
128    96     
16     288    
32     96     
80     -48    
-16    112    
208    112    
96     -32    
-16    16     
-32    -112   
32     16     
240    -352   
-464   -16    
256    64     
-32    336    
-80    256    
112    48     
208    -128   
80     -224   
-64    160    
144    -16    
-112   48     
32     -384   
-16    -16    
96     -128   
144    272    
80     -96    
144    -304   
192    -432   
-128   -144   
288    -48    
-16    112    
64     112    
-160   -16    
176    288    
64     48     
112    -96    
-64    -48    
80     32     
128    -64    
16     32     
80     -128   
32     336    
192    272    
0      -608   
-128   -720   
32     32     
-304   16     
112    80     
-96    464    
352    128    
16     -112   
208    -448   
64     -128   
-64    -208   
-16    -64    
112    -128   
-224   32     
176    -16    
128    16     
-80    -144   
112    16     
-64    224    
256    96     
64     208    
224    64     
128    32     
64     48     
128    -48    
-64    -208   
-48    0      
160    96     
-80    -240   
48     -64    
-80    32     
80     272    
208    400    
128    -256   
0      -192   
304    -384   
96     320    
48     112    
32     -352   
32     320    
64     -48    
144    128    
192    96     
384    304    
-208   -64    
80     48     
224    -112   
-48    -48    
16     144    
-192   -352   
208    208    
160    -160   
-160   -256   
208    -48    
48     -16    
144    80     
32     112    
-160   -400   
-224   -16    
-176   -288   
96     0      
336    48     
32     -144   
80     96     
32     640    
192    576    
-1904  32     
-48    -192   
32     -16    
-16    -80    
224    -16    
-256   -1008  
-288   -128   
192    336    
-320   0      
256    0      
144    176    
0      -336   
288    -48    
336    -288   
-256   -368   
-256   -208   
-64    128    
-352   -112   
-64    -384   
-464   -32    
304    -560   
384    128    
-272   96     
-64    -16    
400    32     
448    80     
-80    -64    
160    0      
208    -64    
0      32     
-592   -96    
32     32     
-16    -16    
80     -16    
-224   -48    
128    -48    
288    48     
960    -16    
-352   -128   
-368   -272   
368    -16    
-80    16     
96     96     
272    16     
128    -48    
-976   -64    
32     -32    
208    -48    
-144   -96    
144    -16    
160    32     
368    -48    
-16    -224   
-64    0      
128    -48    
0      80     
240    64     
192    -64    
96     176    
-240   -16    
-144   0      
160    16     
-192   -16    
176    -32    
-16    -48    
128    -224   
-144   -144   
224    -592   
0      128    
272    -1216  
-32    48     
-208   -48    
-64    -32    
-416   -128   
320    0      
-288   112    
352    48     
-896   16     
-48    -224   
-1280  112    
-16    -16    
32     -64    
304    -16    
192    224    
64     -960   
64     -96    
-144   32     
192    -128   
-16    16     
208    48     
-352   0      
96     0      
-320   80     
48     -64    
-512   64     
32     -80    
352    -32    
-32    -48    
48     128    
176    -80    
-16    -144   
-112   -208   
224    -32    
-448   -144   
32     -48    
-208   112    
32     -144   
16     128    
96     0      
224    64     
256    80     
-224   96     
144    -320   
-80    -144   
96     -288   
-16    -80    
-96    -16    
64     0      
-320   -32    
160    0      
-144   -16    
-80    -48    
-48    -160   
80     -176   
-48    96     
0      -240   
-48    -256   
-80    -384   
0      48     
48     -144   
256    144    
-176   160    
-288   -96    
-80    96     
80     32     
32     -96    
160    160    
-304   -32    
400    -160   
-16    48     
-144   0      
16     -48    
-176   -32    
144    176    
-256   -64    
-576   48     
-288   -672   
-496   272    
-48    -224   
-864   128    
128    160    
112    16     
160    32     
-416   -192   
-64    288    
-176   192    
-32    -192   
-176   -112   
-48    -96    
512    320    
-432   -240   
-96    -96    
-64    -224   
-64    -544   
-976   384    
-352   80     
-816   -16    
-128   -464   
64     -288   
80     112    
64     0      
0      32     
80     -16    
-144   -32    
-224   32     
-96    0      
-64    0      
-80    -352   
96     -224   
-64    128    
-16    32     
-1488  -32    
64     0      
-96    -32    
144    64     
-80    80     
64     48     
224    272    
-176   96     
-96    48     
112    -48    
-96    224    
0      96     
48     -32    
176    368    
80     736    
-560   176    
240    -128   
32     0      
-48    16     
0      128    
-240   -16    
112    288    
-32    128    
-144   96     
-400   -240   
160    -384   
128    -96    
112    32     
96     112    
64     16     
-592   48     
-160   16     
-2768  -144   
-16    -128   
160    -288   
16     16     
32     96     
64     48     
-32    32     
64     -80    
-80    -32    
-208   112    
64     16     
-416   -112   
-464   112    
-208   -48    
176    48     
-576   80     
48     -48    
192    112    
-304   -240   
224    32     
-64    96     
0      128    
-368   16     
-128   32     
160    96     
256    160    
-592   32     
64     176    
-176   192    
32     144    
32     96     
272    48     
16     -112   
-112   0      
176    208    
-224   80     
80     -64    
64     48     
-80    64     
48     -48    
0      32     
-192   -32    
128    192    
-320   96     
16     32     
-608   16     
64     -64    
64     240    
32     0      
176    128    
32     32     
-224   -112   
576    -384   
-48    16     
80     128    
-96    -80    
-224   64     
16     -368   
-160   -288   
32     -48    
-400   -16    
-64    144    
-48    144    
16     16     
224    128    
160    176    
16     -384   
-192   -368   
128    -272   
-352   -80    
224    -304   
96     -240   
-96    208    
-256   -64    
-80    240    
96     -192   
-48    96     
64     -272   
224    -208   
-160   -48    
-128   -112   
160    -320   
-336   -64    
-16    32     
-48    16     
48     80     
-336   -176   
288    -48    
-112   -160   
288    128    
128    96     
0      80     
48     16     
80     -208   
160    -192   
96     -256   
96     -176   
-320   -416   
288    -336   
-288   80     
176    -288   
0      16     
-32    144    
16     272    
48     64     
160    80     
224    192    
160    240    
-16    656    
-496   -128   
64     -352   
176    -144   
224    128    
96     784    
96     432    
-128   480    
-160   -544   
208    -240   
544    800    
-400   320    
-144   -144   
112    -416   
192    640    
32     320    
80     -608   
144    -160   
-16    368    
-304   -80    
-64    -288   
96     -144   
112    160    
48     544    
-112   -48    
48     128    
16     48     
32     128    
256    16     
-32    32     
144    -128   
-64    192    
32     112    
224    -144   
-80    256    
352    96     
-272   -128   
0      240    
0      352    
80     -96    
-16    -272   
96     -192   
224    192    
16     -176   
32     -48    
32     128    
-48    32     
32     32     
64     80     
208    16     
176    16     
16     -80    
208    48     
-32    -144   
16     96     
16     176    
176    -688   
-144   0      
16     32     
144    -64    
-16    -288   
-176   -96    
96     96     
144    384    
-224   288    
80     64     
16     128    
128    64     
-144   -48    
320    -128   
144    128    
208    -336   
-96    176    
192    -320   
432    64     
64     -16    
320    144    
-96    -176   
0      80     
-48    -16    
240    -32    
-208   192    
80     128    
-32    -48    
256    -160   
48     64     
352    -32    
176    0      
400    -272   
192    64     
96     64     
-240   -32    
128    -64    
32     160    
-96    -32    
432    128    
-96    80     
224    -64    
64     -16    
144    0      
-32    304    
352    320    
176    336    
-304   -1600  
-368   -256   
320    -1040  
-16    32     
400    80     
432    80     
-240   224    
-224   48     
160    80     
-64    16     
-144   64     
192    -16    
288    112    
-240   -16    
16     48     
-48    -432   
256    48     
240    -288   
-160   16     
96     48     
-48    48     
-384   0      
448    112    
144    64     
-208   -240   
256    128    
-80    -304   
64     16     
112    -96    
128    80     
80     -64    
-48    128    
96     64     
80     -32    
48     0      
112    96     
64     32     
80     -32    
32     0      
192    -96    
0      64     
96     -160   
48     64     
128    -112   
176    16     
64     -32    
-32    32     
64     112    
-48    304    
-96    -32    
96     -240   
80     -208   
-192   64     
320    32     
-192   -176   
240    -256   
80     144    
112    160    
288    32     
-112   48     
144    -448   
112    -432   
-16    64     
224    -112   
-64    -16    
176    0      
0      192    
368    304    
-16    -432   
-128   -224   
112    112    
112    272    
208    416    
-176   144    
288    -320   
-80    -192   
160    -400   
-96    48     
176    -16    
32     -32    
-464   -48    
160    -96    
-1968  -112   
112    -192   
-32    320    
112    -16    
32     -48    
96     -320   
64     -128   
16     80     
-16    64     
0      -128   
144    -16    
16     112    
-32    144    
128    224    
-256   -688   
-320   448    
80     -96    
80     320    
0      -400   
272    -48    
512    848    
-384   -1120  
208    -256   
368    544    
-336   -16    
480    -160   
-48    -272   
48     -192   
-80    32     
240    528    
-16    -160   
96     64     
-160   -16    
320    -352   
0      128    
64     -32    
-96    -32    
256    -144   
-224   48     
224    112    
-32    128    
192    -32    
64     64     
0      32     
48     -64    
-336   -16    
64     32     
-1424  48     
16     -224   
112    -224   
64     -224   
0      -96    
144    -112   
0      64     
-32    -96    
80     160    
32     32     
0      48     
-128   -64    
48     -112   
-304   -32    
208    80     
-208   48     
-32    -64    
80     -224   
144    -128   
96     48     
16     -128   
128    -16    
-16    -256   
-16    112    
192    32     
256    80     
-208   16     
160    -96    
-48    -16    
0      -32    
80     64     
96     -144   
96     -32    
-32    -208   
96     32     
48     -16    
-192   96     
32     -96    
224    0      
-80    0      
80     -16    
160    -64    
-80    96     
-560   -32    
-128   -16    
-320   -96    
304    -80    
-48    48     
208    32     
-240   -128   
-144   -128   
-592   64     
-496   48     
160    80     
-16    16     
272    48     
-112   -80    
160    -128   
80     -32    
64     64     
16     -32    
-64    -80    
-96    -96    
-16    32     
160    64     
-2000  -192   
160    -80    
-288   -32    
-1056  -64    
144    80     
-736   176    
32     -48    
368    112    
-208   80     
48     80     
96     -32    
256    96     
128    112    
80     -32    
-64    336    
-736   -80    
-96    -80    
432    240    
-560   272    
80     256    
48     224    
-144   224    
224    -112   
144    -112   
-32    -96    
208    112    
-672   -64    
64     -32    
-96    0      
-208   272    
-16    -16    
-144   208    
96     80     
-80    64     
16     48     
-176   -80    
-80    -128   
-48    96     
-16    32     
240    -64    
-32    -32    
-144   -112   
-144   32     
112    144    
400    304    
64     192    
32     48     
64     240    
-240   176    
-160   -240   
240    80     
112    1728   
-240   416    
16     -176   
-832   352    
-208   96     
-48    -336   
240    -624   
64     -576   
0      800    
208    432    
-256   80     
-16    208    
160    -512   
-80    368    
-96    160    
0      -608   
-32    208    
-32    352    
-960   -16    
208    -32    
288    288    
208    192    
-128   128    
64     528    
-176   -784   
32     -432   
160    432    
-128   -496   
288    176    
-96    576    
96     -448   
112    144    
-208   464    
-16    -400   
128    -736   
-592   288    
64     -208   
-48    432    
-48    -800   
128    240    
-128   -192   
224    176    
-176   -192   
-128   208    
64     -48    
-96    -128   
48     128    
0      16     
-96    -144   
112    256    
-192   -176   
96     -80    
208    512    
96     160    
32     -16    
-432   32     
96     32     
-208   16     
0      -16    
-16    -48    
240    64     
-368   48     
336    160    
-400   -32    
16     48     
-976   -16    
-48    -64    
160    -16    
16     0      
-192   -160   
48     96     
0      112    
160    128    
96     128    
-176   64     
192    64     
-256   16     
80     0      
-224   -128   
32     -64    
-112   80     
32     240    
144    -80    
-272   -64    
0      -64    
48     32     
32     96     
-64    48     
-48    80     
64     -80    
112    464    
16     96     
32     80     
-192   32     
144    64     
0      144    
-240   32     
0      0      
96     -32    
-16    0      
208    48     
128    96     
176    176    
-160   32     
-176   -48    
208    192    
-112   48     
192    48     
-112   144    
80     64     
176    32     
16     64     
-48    -144   
32     32     
-144   64     
32     80     
80     16     
192    192    
-208   160    
-272   -64    
224    0      
-96    0      
32     -464   
608    -912   
192    -64    
224    288    
0      48     
320    16     
-528   -240   
720    176    
-64    96     
320    768    
-848   240    
176    -96    
112    96     
128    112    
464    0      
-32    112    
-80    128    
-160   -16    
-160   0      
208    0      
448    224    
-80    32     
128    32     
384    96     
224    144    
0      -32    
-272   -48    
672    384    
-912   288    
-720   -416   
32     -192   
320    112    
448    32     
432    -16    
80     16     
-96    80     
560    96     
-304   16     
-176   -64    
-160   32     
176    32     
288    128    
32     64     
48     -32    
240    32     
-272   -128   
224    208    
-80    112    
-48    -48    
176    16     
-96    32     
304    16     
240    128    
-240   -16    
368    64     
-176   -64    
336    128    
-32    48     
-16    32     
64     -48    
128    -224   
192    112    
0      192    
48     -16    
48     32     
48     80     
16     32     
96     -48    
-48    -64    
176    48     
16     -112   
80     16     
-80    96     
176    -32    
-64    32     
96     -32    
304    128    
96     -32    
96     80     
-32    -64    
192    48     
-96    80     
48     112    
-144   -112   
-144   -48    
96     96     
80     0      
96     32     
112    48     
16     128    
16     -144   
96     128    
256    48     
80     48     
32     64     
32     -240   
192    -16    
-48    384    
0      -224   
176    80     
80     64     
144    -112   
-240   384    
320    -944   
-304   -912   
416    -80    
224    384    
-320   -688   
288    400    
-176   272    
336    -272   
-112   192    
112    64     
144    -176   
-352   -64    
432    -320   
-128   528    
32     64     
96     -480   
-128   -128   
-32    -784   
64     -176   
192    352    
176    368    
-144   0      
208    256    
96     304    
288    96     
352    160    
-336   304    
-112   80     
32     592    
400    304    
272    -96    
-144   0      
-48    -208   
64     -32    
112    -16    
192    64     
272    -96    
-96    128    
-64    -32    
0      48     
0      32     
112    96     
128    -128   
64     16     
96     -16    
48     -320   
-48    -48    
208    -240   
0      128    
176    -128   
208    160    
-64    -160   
128    0      
-48    -80    
288    -64    
240    80     
-80    112    
0      -96    
-16    -80    
64     0      
160    -128   
0      112    
64     32     
-128   48     
-80    -64    
-64    16     
112    -96    
64     96     
0      32     
128    -528   
-32    96     
80     -544   
144    -896   
112    -64    
240    -400   
-64    16     
-112   -384   
160    -48    
96     48     
0      -144   
64     48     
176    -128   
64     -48    
96     112    
-32    0      
-64    -16    
64     -112   
0      -224   
240    -16    
64     -176   
128    -80    
-16    -880   
304    -144   
144    224    
96     224    
224    384    
-320   144    
208    -352   
64     -80    
176    -144   
48     -16    
-288   -96    
160    -64    
-288   -160   
112    -64    
256    176    
128    224    
-240   -80    
-528   -32    
-112   -112   
-192   112    
176    112    
192    -64    
-128   80     
-80    -192   
64     0      
208    16     
432    -64    
336    -32    
336    144    
-272   208    
-192   -112   
272    -256   
-96    -928   
336    -272   
-16    -1280  
-336   96     
112    0      
192    64     
336    48     
256    -400   
-416   48     
-256   352    
-32    -112   
80     -336   
-336   -576   
-48    -128   
-16    48     
336    96     
-144   64     
-48    -752   
32     112    
128    -112   
-240   -128   
-48    -32    
112    -144   
-176   -128   
352    -368   
-208   -160   
176    -64    
-960   -48    
80     -288   
96     -16    
-80    -32    
304    16     
224    128    
-64    -96    
192    160    
96     320    
-240   -240   
80     -112   
-64    240    
32     128    
-80    0      
80     -464   
-144   704    
240    16     
-320   -48    
240    -80    
32     112    
112    -640   
256    272    
-304   -256   
336    48     
-128   16     
336    0      
64     -208   
464    160    
-608   768    
112    -400   
-384   -128   
-80    64     
-656   0      
112    -352   
-112   -96    
208    -48    
32     80     
-400   -112   
128    -48    
-224   112    
128    208    
-336   64     
144    -240   
-208   -96    
-32    896    
48     608    
-64    -224   
-192   -224   
32     -400   
544    352    
-272   336    
128    16     
-16    0      
128    -48    
96     48     
-112   -80    
112    48     
32     0      
-16    -16    
176    -144   
-240   -64    
64     -16    
-32    64     
-256   -144   
128    32     
32     16     
-1136  -32    
-336   32     
-288   -32    
-160   16     
16     -16    
0      -160   
272    128    
-64    96     
112    -128   
-48    -112   
-576   32     
64     80     
16     -32    
80     48     
-240   -112   
80     32     
-288   -80    
-64    0      
80     48     
-48    48     
48     16     
-1328  64     
-144   -16    
272    16     
-112   -48    
-384   -64    
64     128    
-64    -48    
0      -48    
272    16     
-112   -48    
-96    16     
-64    0      
32     64     
-896   -96    
16     0      
-192   48     
176    64     
-240   -96    
48     -48    
-64    -48    
64     96     
32     -16    
80     16     
160    208    
-128   -32    
-144   32     
-112   48     
32     -16    
-256   -144   
96     0      
-384   80     
-112   -16    
-2112  -48    
80     -16    
-128   -112   
-32    64     
-64    -96    
0      -96    
-80    64     
0      -32    
-32    0      
48     32     
-144   64     
-64    192    
48     192    
16     64     
128    -80    
-624   -112   
160    96     
80     0      
320    -64    
-96    -352   
0      -48    
-176   -64    
128    48     
0      32     
64     0      
32     160    
608    928    
16     368    
32     -544   
336    -48    
-416   112    
-80    160    
64     96     
224    -80    
-176   192    
-672   -32    
160    64     
-208   0      
-160   16     
416    320    
-272   224    
-128   48     
-256   -32    
-160   -32    
-16    48     
-128   176    
0      288    
-512   -144   
144    -96    
96     16     
48     32     
-240   160    
-160   64     
272    32     
-208   -96    
16     -48    
32     80     
112    48     
192    -48    
224    64     
112    64     
208    192    
-640   128    
-288   16     
208    -16    
368    288    
352    256    
80     112    
-160   160    
-512   48     
-224   -32    
0      96     
320    176    
144    -16    
112    0      
-384   -48    
32     96     
-48    64     
-288   -48    
432    80     
-32    80     
336    160    
-208   16     
128    -64    
-80    -32    
304    256    
-128   64     
-32    32     
-288   -32    
16     0      
-272   -32    
80     -64    
48     176    
128    80     
48     112    
32     0      
0      96     
-96    -80    
0      320    
0      64     
-128   -192   
64     0      
176    128    
-112   -48    
-48    -16    
272    400    
-16    -416   
-48    544    
-144   80     
-240   96     
160    -16    
-64    -32    
-32    16     
96     96     
-448   -144   
816    -320   
-368   784    
96     32     
32     -512   
-144   512    
-224   -384   
160    -288   
-32    240    
160    -368   
208    -256   
-64    0      
416    288    
-304   16     
0      96     
-384   288    
592    400    
-320   -64    
192    -384   
128    288    
-160   128    
-80    48     
96     -48    
32     -32    
-32    0      
384    -176   
-320   -208   
240    32     
-160   48     
288    -16    
-32    -160   
192    -16    
-160   80     
80     160    
-144   48     
-80    -1232  
304    -208   
-32    176    
208    224    
-64    -80    
272    48     
-96    16     
224    48     
112    -48    
192    112    
-192   112    
-80    -144   
80     -416   
48     -128   
64     -80    
0      -272   
96     96     
-32    96     
128    80     
-176   48     
336    32     
0      16     
112    80     
48     96     
32     64     
16     240    
-48    48     
-144   96     
112    0      
112    96     
16     -80    
48     64     
128    96     
32     16     
144    48     
160    32     
16     48     
0      224    
144    80     
128    -16    
-112   -32    
-48    -16    
80     -48    
224    112    
32     -16    
144    -176   
144    80     
48     -400   
160    0      
96     144    
32     64     
-80    -32    
0      -48    
80     48     
0      -16    
80     -16    
112    112    
-64    16     
112    64     
128    48     
160    -400   
-80    0      
224    -336   
0      96     
96     112    
96     -32    
48     0      
48     64     
208    64     
-32    192    
144    -16    
0      16     
256    224    
-208   48     
32     -208   
144    -416   
256    -32    
144    -96    
112    96     
64     -80    
96     160    
-368   80     
-176   -80    
-240   -16    
160    128    
160    128    
416    -16    
-48    -32    
-176   0      
-112   272    
144    304    
144    128    
-144   -48    
64     -16    
-96    -560   
208    48     
144    528    
416    432    
144    192    
-128   160    
-384   -16    
80     -240   
-128   -448   
512    80     
336    208    
-288   -96    
32     288    
144    -160   
64     128    
-240   128    
144    224    
112    -640   
48     48     
192    0      
176    -464   
128    480    
64     -416   
-32    -96    
32     -256   
-112   576    
96     -448   
-64    -16    
112    32     
-272   160    
-96    -832   
384    416    
-240   -64    
240    16     
480    272    
-160   -368   
112    -16    
128    208    
-160   112    
288    -160   
176    176    
16     -64    
160    16     
144    64     
48     64     
112    -256   
48     -112   
-96    0      
0      -592   
80     -32    
176    -352   
160    -224   
224    -64    
-32    -512   
160    -96    
64     192    
-48    -64    
160    128    
176    -128   
208    144    
-192   -224   
352    -128   
-272   144    
176    -144   
160    96     
-112   112    
240    0      
0      0      
32     -192   
0      80     
144    -336   
80     -144   
-112   -48    
112    -144   
-32    -160   
112    -32    
224    -112   
320    48     
-48    -192   
-16    -160   
-128   -304   
-80    32     
-176   128    
32     0      
64     -304   
160    -384   
-64    272    
16     -320   
176    0      
208    16     
96     16     
-16    64     
-48    48     
256    -16    
-208   32     
80     0      
112    32     
-528   0      
80     -112   
0      -96    
112    -96    
96     -16    
32     -224   
0      -48    
-32    224    
192    192    
-192   -80    
64     0      
0      32     
48     128    
-176   -16    
96     -16    
-592   16     
144    16     
144    -64    
-48    -192   
128    -144   
64     128    
224    112    
128    -704   
64     -64    
144    80     
144    64     
-48    48     
80     -48    
16     16     
-112   -144   
64     -16    
144    0      
-304   16     
-48    -80    
0      48     
-64    -96    
32     48     
128    -240   
208    64     
-32    16     
-64    16     
-128   -32    
160    -192   
-192   -32    
64     32     
-176   16     
112    -160   
-624   -48    
224    32     
-352   -304   
192    -416   
176    160    
112    -272   
48     0      
80     -32    
48     -144   
-48    -16    
144    32     
224    112    
-64    112    
-128   64     
80     -16    
-112   -96    
112    -208   
-48    -48    
48     -208   
112    -16    
176    -96    
-272   -32    
-352   -96    
208    16     
-112   80     
112    112    
-240   128    
32     48     
64     -80    
304    -80    
-16    0      
48     0      
32     16     
240    -144   
-160   64     
896    688    
-656   688    
-544   -16    
-48    -96    
-80    32     
256    32     
240    176    
256    -352   
416    -800   
128    -256   
288    1024   
400    192    
96     -352   
-2032  -432   
-32    -144   
-1776  -96    
-336   64     
-240   48     
-288   32     
-112   -48    
-752   16     
-80    480    
64     320    
-336   -128   
192    -80    
-144   80     
-64    -256   
304    -128   
-192   -128   
-144   -192   
192    64     
-464   128    
-16    112    
-512   64     
-128   64     
80     -192   
64     -208   
176    128    
112    368    
-80    304    
448    -128   
112    -224   
-96    352    
-352   736    
96     368    
48     -432   
-448   -192   
-432   -208   
-128   256    
-560   352    
224    -288   
-160   -80    
-1248  80     
-208   -80    
16     -160   
32     144    
-80    32     
0      96     
-16    -48    
-160   -16    
-96    -288   
192    416    
-64    -80    
-144   32     
160    80     
-80    -112   
-112   -144   
-912   16     
-96    32     
-208   -592   
336    528    
-208   -400   
-128   128    
-48    -32    
-176   -208   
288    1184   
208    336    
-288   -432   
16     -384   
-128   448    
-32    128    
-112   -528   
-48    176    
0      0      
-992   0      
48     176    
320    144    
-64    160    
-80    112    
240    80     
-128   144    
-288   -64    
80     80     
-80    32     
-64    48     
-240   96     
64     -32    
-64    -160   
-272   96     
-752   80     
0      48     
64     -64    
352    176    
-192   48     
208    256    
0      192    
96     112    
80     256    
-64    -80    
0      -64    
48     -16    
-80    80     
-144   80     
304    160    
-496   -112   
448    -400   
-80    128    
-80    304    
176    -32    
-256   -32    
-96    400    
-48    80     
208    -144   
-48    64     
-64    -32    
224    -368   
-208   -80    
-16    -32    
80     -208   
-288   -16    
-112   160    
352    128    
-336   80     
-16    48     
-192   144    
544    400    
-368   192    
-112   160    
-16    128    
144    -256   
16     -16    
80     96     
-144   -32    
-112   96     
-32    304    
368    336    
48     80     
192    -64    
160    16     
48     160    
32     112    
64     -32    
128    16     
0      -16    
-112   64     
96     16     
144    112    
16     32     
112    96     
-96    -16    
-16    32     
48     80     
-80    -64    
192    16     
64     128    
-144   -32    
512    -32    
-48    128    
-112   -64    
160    -144   
32     48     
-16    160    
-144   16     
128    -144   
-144   -128   
-64    -144   
-96    -48    
-80    32     
-32    96     
0      32     
80     16     
-96    0      
48     -16    
48     32     
96     48     
-256   128    
48     96     
-144   -80    
16     -48    
16     16     
-128   -256   
144    32     
96     -16    
-128   -48    
192    112    
-64    32     
320    400    
-176   16     
-48    0      
288    32     
-272   -800   
208    -384   
-416   -368   
-160   -432   
224    240    
-192   656    
64     -80    
32     -112   
144    672    
192    352    
16     -544   
-144   -32    
-304   112    
-224   -240   
208    160    
144    -48    
-112   80     
-368   -16    
-208   112    
-176   -80    
384    -688   
352    192    
416    48     
0      32     
-352   -96    
-368   -64    
-416   -144   
304    512    
-96    0      
448    -320   
352    80     
400    160    
-128   -16    
64     -80    
-576   80     
16     -48    
240    368    
272    16     
528    -208   
-96    -112   
16     16     
-400   176    
112    192    
-144   0      
-96    64     
128    128    
80     64     
16     64     
80     -176   
160    32     
-32    0      
32     16     
16     -144   
16     -112   
-80    112    
-96    32     
80     48     
0      48     
-176   -80    
384    112    
-176   -96    
208    -80    
112    16     
-32    -64    
112    80     
48     16     
-32    -16    
144    128    
336    224    
-256   16     
272    48     
-80    80     
144    64     
-64    48     
192    -16    
-320   64     
48     -48    
64     16     
-32    -304   
64     96     
48     -832   
0      -32    
240    0      
304    96     
112    16     
-32    -80    
112    16     
-80    64     
160    64     
-192   32     
80     -48    
96     -192   
112    192    
304    -80    
128    80     
-320   -400   
240    144    
-112   -80    
-32    -80    
112    -64    
-128   48     
48     -48    
96     144    
-48    240    
240    96     
0      -48    
32     -32    
112    80     
48     -96    
320    144    
-176   -48    
176    -16    
80     -224   
-32    0      
80     -48    
96     208    
32     -16    
16     32     
80     16     
128    -96    
32     80     
192    -208   
32     32     
416    80     
-240   160    
-64    -112   
160    64     
-16    -208   
320    96     
32     96     
-16    64     
0      -16    
144    32     
96     64     
-112   -80    
160    16     
-64    -64    
176    0      
176    -80    
-16    64     
112    -48    
32     32     
192    -32    
192    64     
-176   16     
144    0      
-16    96     
240    -80    
-48    96     
208    -64    
48     128    
16     -64    
144    0      
112    -112   
-16    144    
-96    96     
224    -32    
96     -80    
80     -800   
-144   -80    
48     -880   
-112   112    
-1664  64     
224    96     
128    32     
112    -448   
16     -80    
48     -496   
-160   -160   
80     -16    
240    16     
112    -272   
32     16     
0      -272   
0      96     
-32    -64    
176    96     
-48    -128   
-64    -608   
96     336    
64     -112   
112    -32    
-32    -432   
-96    -816   
352    192    
128    80     
-48    0      
-48    -128   
-112   -144   
48     96     
176    16     
48     48     
-400   -64    
240    -48    
96     -224   
224    176    
-608   -48    
-176   -64    
256    -704   
-96    -3072  
784    608    
256    128    
-32    -32    
80     -16    
-448   -112   
-640   -144   
64     368    
-400   -192   
176    80     
-64    -144   
640    496    
-112   480    
-208   -816   
176    0      
128    176    
-32    352    
240    -224   
144    160    
-16    32     
-112   -96    
-64    16     
208    -96    
-240   16     
208    64     
-400   -112   
-112   -560   
128    272    
464    144    
-160   -112   
192    -208   
240    0      
96     80     
-32    176    
64     -432   
304    0      
-256   0      
592    32     
-96    -80    
-80    -304   
-896   -144   
160    336    
-1600  272    
256    -288   
192    -96    
0      -304   
-48    144    
80     -672   
-16    -80    
32     176    
112    32     
32     32     
64     -208   
-96    -128   
112    -192   
-704   -96    
256    -128   
-112   -112   
96     384    
96     416    
32     -16    
80     128    
224    -336   
144    208    
32     96     
144    144    
96     176    
80     -96    
144    -64    
224    -176   
-80    32     
32     -160   
144    96     
-16    -144   
-96    -144   
336    -160   
-256   256    
-80    112    
304    -192   
-496   160    
-80    -80    
-576   -32    
112    -208   
-48    48     
-16    16     
-128   -208   
96     96     
-1680  -176   
288    208    
0      128    
144    0      
48     -16    
-16    32     
-112   -32    
-144   -80    
96     368    
48     352    
112    112    
48     -160   
96     48     
-304   -192   
128    -96    
-208   -96    
144    -48    
32     224    
-256   -32    
32     96     
-48    64     
-416   -32    
48     -16    
-464   -160   
-48    -144   
-800   -32    
80     192    
48     304    
-176   -32    
112    -64    
48     208    
128    -48    
16     16     
-304   -64    
112    48     
-144   64     
-112   288    
-48    16     
192    -368   
-224   -144   
-608   -96    
-224   48     
-288   -48    
48     80     
-176   -16    
224    64     
-64    -112   
416    448    
-784   -192   
-352   -176   
-256   -240   
160    -208   
144    160    
-96    -32    
-32    112    
-272   224    
112    352    
-16    -64    
-160   80     
224    128    
-144   336    
176    -176   
192    -96    
-32    32     
32     48     
96     48     
16     -272   
-288   -176   
-144   -32    
-176   336    
-176   192    
-96    -256   
-64    -448   
112    -176   
400    -16    
48     16     
32     48     
-288   176    
64     240    
-48    -16    
0      32     
128    64     
96     -16    
-64    16     
144    -192   
-128   32     
0      96     
-576   -48    
-112   32     
-368   32     
304    304    
-16    160    
-96    -16    
64     128    
-16    16     
160    -160   
96     -176   
16     272    
-144   176    
192    -16    
-176   -64    
64     448    
-304   -16    
48     144    
-352   32     
96     -128   
-32    -32    
-96    48     
144    224    
32     128    
224    352    
16     128    
32     48     
-384   112    
-272   -256   
224    32     
-16    192    
480    464    
-224   -32    
-480   -496   
0      -368   
-80    0      
128    -16    
128    -32    
-16    32     
256    128    
-96    48     
-64    16     
-320   96     
-320   -160   
160    -224   
192    -80    
96     48     
64     144    
-544   -64    
96     272    
-624   16     
-64    -128   
112    -48    
464    32     
-112   64     
320    96     
0      128    
-592   -16    
-32    48     
80     96     
-240   -32    
160    -160   
608    240    
752    528    
-576   48     
160    -16    
48     80     
-176   32     
-224   -80    
192    -48    
64     64     
192    256    
-160   -16    
224    -32    
48     48     
144    32     
-112   0      
304    0      
-176   -32    
-272   112    
32     -16    
128    96     
-80    64     
16     -48    
-112   -32    
192    80     
224    112    
-256   -48    
80     32     
-256   -48    
96     48     
-32    0      
96     48     
-80    -64    
176    48     
144    32     
128    32     
-48    64     
64     48     
-112   -560   
-64    -128   
-80    224    
112    -112   
48     112    
-16    96     
384    320    
208    32     
176    -272   
-208   96     
-16    -48    
128    32     
-64    80     
96     96     
80     176    
96     0      
-48    -16    
-144   64     
32     16     
176    48     
-80    48     
0      -80    
64     48     
-176   -256   
208    -48    
-288   256    
-32    16     
224    -80    
112    288    
-224   192    
48     -128   
0      -144   
352    80     
0      64     
112    48     
-80    80     
-128   32     
-32    -48    
160    -80    
64     128    
-128   208    
192    16     
128    0      
-32    32     
128    0      
0      -160   
144    16     
-16    176    
-160   -32    
448    0      
-416   -240   
96     80     
-32    80     
176    64     
208    112    
64     96     
144    -16    
-144   16     
144    16     
-32    16     
208    -160   
-288   -64    
112    112    
112    -32    
0      16     
-64    -32    
-16    16     
208    48     
-128   -960   
128    80     
48     224    
0      32     
144    -16    
304    448    
-384   -400   
0      -336   
96     192    
192    240    
-48    224    
224    -256   
-144   144    
32     -64    
224    48     
256    -240   
0      -32    
48     144    
-80    -48    
112    64     
48     32     
320    160    
-192   80     
144    -224   
224    304    
224    80     
-128   720    
-32    -416   
368    -144   
96     336    
0      -112   
-128   -80    
64     -880   
80     576    
288    80     
-32    32     
-80    272    
176    -176   
160    320    
-176   -1008  
-160   144    
208    240    
304    -176   
96     224    
32     -352   
144    -32    
32     128    
112    -272   
0      48     
48     -320   
-48    -16    
-32    176    
112    96     
80     -48    
80     96     
-192   16     
16     -144   
128    -320   
112    -240   
80     128    
32     0      
112    16     
-160   -560   
-192   -16    
-96    -336   
96     -224   
-208   -192   
544    -336   
192    16     
320    -160   
224    -320   
-160   -240   
-208   -176   
-176   -112   
-48    -160   
224    -320   
112    144    
48     96     
80     144    
16     48     
-16    32     
-32    0      
96     -32    
496    144    
-192   192    
-448   -128   
-32    -240   
0      112    
192    -16    
432    320    
240    80     
-128   80     
-288   0      
128    32     
48     -976   
512    -32    
368    -48    
0      48     
-176   192    
32     -48    
208    -800   
32     -80    
-32    -16    
96     -272   
64     80     
192    -48    
144    96     
48     -48    
48     48     
64     208    
224    -400   
48     240    
-16    -432   
176    -80    
-352   -16    
272    -432   
0      256    
64     -288   
128    -256   
64     -816   
64     -192   
-48    16     
0      -80    
192    -304   
160    -112   
96     16     
16     64     
-64    336    
160    16     
-1056  64     
-112   0      
192    64     
544    48     
32     240    
400    544    
32     544    
0      352    
16     -128   
-64    -144   
176    0      
48     80     
-64    80     
144    -272   
256    160    
-208   128    
-256   64     
64     -144   
160    -144   
16     -240   
16     -240   
-80    -48    
-80    -80    
0      112    
48     48     
0      128    
112    -144   
64     64     
176    64     
-48    64     
-304   192    
240    0      
-96    -240   
160    -48    
400    128    
496    112    
-304   208    
144    -160   
-128   64     
-80    -128   
224    -240   
-96    -272   
272    -384   
-400   -272   
352    64     
-208   -32    
-32    48     
-720   -192   
-16    48     
112    -80    
-112   -96    
144    0      
-16    -432   
-80    112    
304    -32    
-176   160    
80     64     
128    416    
240    192    
160    -96    
-176   -144   
96     16     
-336   -32    
320    192    
-896   -32    
96     -240   
128    80     
160    -64    
112    144    
208    -336   
-32    128    
48     48     
208    64     
208    80     
256    112    
-192   416    
32     48     
-912   -112   
176    -32    
-176   32     
176    32     
240    64     
144    -208   
-96    0      
128    -528   
32     -224   
112    -32    
-208   -560   
-304   -208   
80     304    
-640   -208   
336    80     
-656   80     
-144   96     
-144   512    
64     240    
176    -48    
32     -80    
-96    0      
144    -384   
272    496    
-144   -368   
512    400    
-368   -48    
144    -448   
-192   112    
32     -160   
-176   -48    
240    224    
-1696  32     
-64    -384   
32     384    
-16    128    
16     -96    
80     -160   
144    -112   
96     128    
80     48     
80     -64    
160    -32    
-160   64     
64     0      
-80    0      
128    -48    
64     32     
288    992    
-720   992    
-656   -64    
256    -176   
48     -96    
-32    64     
-288   -112   
-1248  288    
-224   224    
-192   -400   
208    -256   
-144   16     
128    48     
-96    -64    
-240   16     
144    -64    
112    128    
-544   -96    
-352   -48    
32     16     
-272   48     
-128   48     
-272   -80    
208    48     
0      -16    
96     64     
-160   -32    
-208   -32    
-720   -208   
-192   96     
-224   0      
128    32     
160    176    
-592   16     
-80    -80    
256    64     
416    336    
-128   176    
-224   0      
-384   -176   
160    -32    
-528   16     
400    112    
-80    0      
-48    0      
-656   -32    
528    112    
-16    0      
-400   96     
-160   0      
32     32     
-256   0      
336    80     
208    96     
-1184  -32    
160    16     
-128   80     
-48    112    
-80    -64    
288    144    
-144   -112   
320    32     
-64    48     
48     48     
112    48     
-80    0      
-128   0      
-112   80     
-176   32     
-16    16     
160    96     
-448   -16    
112    -16    
-320   48     
64     32     
-112   -160   
48     -224   
208    208    
16     16     
-16    96     
128    32     
-16    -16    
32     48     
0      208    
-80    -32    
144    -32    
-480   -48    
128    32     
-1136  -112   
64     80     
96     0      
-80    -48    
112    0      
-128   -32    
-16    -80    
240    256    
-128   144    
16     32     
496    464    
-464   208    
-160   -384   
16     -112   
-304   128    
-512   32     
480    144    
64     112    
-32    256    
-16    32     
80     64     
-128   32     
112    112    
32     0      
-16    0      
-96    -224   
-144   -32    
208    112    
-192   0      
160    48     
-176   48     
144    -336   
96     -32    
-64    96     
32     -32    
-32    144    
32     -160   
176    -224   
-128   144    
32     64     
-112   0      
128    -272   
112    0      
-64    192    
-128   -48    
-80    0      
-176   32     
48     48     
64     192    
-48    -160   
-16    48     
272    -96    
-144   128    
80     -64    
48     240    
-128   -144   
-288   -16    
208    48     
-288   32     
32     96     
192    -256   
80     112    
160    464    
-192   64     
-144   784    
320    -480   
112    -176   
-48    48     
-176   -432   
144    16     
32     224    
144    496    
192    192    
-304   224    
144    80     
336    192    
-48    16     
-320   -288   
-160   -176   
96     -16    
96     -16    
160    96     
192    352    
-16    224    
-160   48     
96     32     
-160   -16    
0      16     
-32    0      
48     96     
-128   -32    
64     32     
-112   -192   
-16    -96    
-48    16     
-128   144    
160    448    
112    80     
-48    0      
-144   16     
32     64     
-192   0      
-16    16     
-32    16     
0      0      
0      80     
80     -96    
112    64     
-32    0      
96     -144   
-208   -192   
208    -416   
240    96     
0      240    
-144   32     
160    48     
336    288    
-192   176    
-64    64     
144    -96    
336    -32    
112    160    
-144   -32    
-16    48     
-304   -32    
0      96     
0      96     
-32    96     
112    -16    
-128   80     
112    -16    
-160   48     
0      -448   
128    32     
96     -224   
-48    -64    
112    32     
-32    80     
-64    64     
16     64     
-80    -16    
-80    368    
-96    32     
304    -144   
-128   -32    
32     -48    
-400   16     
0      -144   
224    32     
192    -400   
96     0      
144    -16    
-96    -80    
-96    48     
96     32     
64     16     
448    -176   
80     -96    
48     128    
112    32     
32     -176   
-192   -32    
-80    160    
192    128    
256    -48    
0      0      
96     32     
160    128    
160    224    
32     112    
80     80     
-32    144    
-64    -112   
64     16     
48     -160   
192    -144   
80     -112   
80     -64    
192    208    
-208   -304   
-176   16     
64     -1120  
112    176    
192    16     
144    384    
320    256    
-272   -32    
80     16     
192    16     
288    96     
-16    320    
304    304    
-160   -96    
-16    48     
160    96     
-128   80     
224    96     
144    160    
-144   -16    
-48    272    
224    -48    
192    80     
16     64     
144    112    
-176   -256   
96     -400   
192    128    
240    96     
32     -224   
304    -336   
288    -48    
32     -64    
32     96     
48     -304   
432    272    
-384   112    
16     48     
-176   480    
416    544    
256    400    
-16    144    
144    176    
-144   -208   
-64    80     
64     -480   
160    48     
-208   -160   
-64    48     
48     48     
160    384    
240    48     
160    32     
-176   272    
48     -400   
80     80     
256    -112   
144    32     
256    336    
-96    -16    
160    -192   
-192   352    
96     -304   
432    304    
-144   -272   
-80    240    
-16    -48    
-32    -352   
320    320    
64     80     
256    80     
-272   -96    
48     -80    
128    64     
16     128    
-128   112    
240    -256   
144    160    
128    112    
-272   -304   
464    -368   
-96    240    
304    -192   
48     96     
128    16     
-176   -336   
-96    -208   
48     -720   
80     0      
-32    0      
176    -160   
224    -64    
-32    -16    
80     -240   
176    64     
-32    -224   
112    160    
32     -32    
48     48     
-272   0      
240    -64    
-96    -336   
112    -320   
224    48     
48     -80    
32     -48    
112    -32    
176    112    
80     -224   
144    64     
144    320    
96     80     
176    -16    
-64    -80    
48     -48    
-16    -112   
-112   -16    
48     0      
-64    -80    
0      -96    
0      16     
160    -240   
128    32     
64     16     
48     0      
64     -64    
-112   64     
-224   -96    
320    -80    
-304   32     
80     -624   
1008   -672   
400    144    
-16    176    
208    -432   
208    -64    
-624   -624   
416    -112   
240    320    
-608   -32    
32     -80    
224    -112   
224    0      
0      112    
-448   -48    
16     -336   
-2384  32     
-64    112    
-144   -16    
240    0      
-192   -64    
560    64     
-464   192    
-224   -176   
144    48     
-64    -112   
560    -112   
256    64     
336    -96    
144    80     
-192   -96    
-560   -16    
192    -32    
-16    64     
240    -32    
32     -32    
736    -384   
-176   192    
-736   -544   
176    -80    
112    16     
128    0      
-16    16     
32     0      
16     80     
-272   32     
-176   48     
16     16     
-480   -48    
-16    -320   
400    96     
-16    16     
-48    48     
352    -736   
-256   16     
-64    -16    
368    48     
-16    -64    
112    -32    
-128   112    
-96    -32    
160    -64    
80     -32    
-80    64     
48     -96    
64     0      
64     -192   
112    144    
16     -192   
128    -16    
-192   -112   
-32    -64    
-64    32     
80     0      
-32    48     
192    32     
-192   -64    
160    48     
-160   48     
480    416    
-96    288    
208    -16    
160    16     
-240   -192   
224    -48    
0      -16    
16     -256   
-32    -48    
240    144    
-352   -384   
112    -336   
-320   64     
-48    -16    
64     -208   
-16    -176   
176    192    
-464   -352   
-256   -48    
-128   -336   
-288   -32    
256    576    
-432   112    
0      -112   
-976   -176   
32     48     
272    432    
-128   -160   
-112   -144   
64     160    
-672   112    
0      0      
-32    -64    
-192   -80    
96     112    
-112   -32    
-96    16     
-240   32     
80     -176   
-880   160    
128    -48    
-96    -32    
144    80     
-128   -896   
16     208    
208    480    
-144   624    
-96    -400   
208    -320   
176    240    
-192   336    
-160   -144   
-144   -368   
-176   160    
-256   32     
-192   272    
-464   160    
-160   32     
-304   32     
-32    -64    
144    -128   
64     48     
-80    0      
-16    -64    
-80    -16    
-192   32     
192    144    
-48    96     
112    -32    
-112   160    
16     144    
-464   32     
-320   160    
-192   -80    
112    80     
144    32     
-336   112    
96     16     
32     176    
-128   80     
80     80     
-16    16     
-80    16     
-192   -32    
-320   -144   
160    -96    
-80    -16    
-208   80     
-192   -32    
48     224    
128    -96    
-160   64     
-48    -16    
-240   -80    
32     32     
-16    32     
-80    0      
-160   -128   
48     32     
-144   32     
-192   32     
-192   16     
128    112    
-2336  -48    
96     -32    
16     -144   
-64    -240   
208    144    
-320   160    
0      -16    
16     16     
-176   32     
160    32     
48     16     
-32    48     
-16    112    
-80    -32    
80     96     
-592   64     
-112   -224   
688    -144   
-96    128    
48     32     
48     -176   
-80    112    
-64    96     
-304   112    
-384   -80    
64     -144   
320    -64    
208    144    
64     128    
-480   160    
-720   -64    
-272   -48    
416    208    
-384   208    
16     32     
224    -112   
128    -48    
272    -48    
-96    16     
-48    -32    
-144   112    
-96    -144   
208    -16    
-400   32     
-176   96     
-256   0      
320    16     
-80    160    
-240   32     
-96    -144   
32     -128   
48     32     
96     160    
-256   80     
64     0      
0      64     
-112   0      
240    112    
144    16     
288    0      
0      -16    
-144   0      
-80    -32    
-80    -48    
0      256    
96     176    
48     -368   
-48    -304   
112    0      
-80    96     
144    128    
-176   32     
176    112    
-192   -160   
-112   16     
208    0      
16     64     
224    80     
0      128    
128    112    
0      -48    
80     288    
-80    240    
32     -176   
16     -160   
-96    240    
-128   112    
48     288    
-560   288    
160    96     
-16    -432   
224    224    
304    432    
-384   -176   
16     -128   
-64    128    
0      160    
480    240    
-224   -288   
16     -288   
448    -272   
-256   -96    
496    768    
-192   -336   
208    160    
-48    400    
-16    -224   
-32    32     
48     -48    
112    144    
-64    48     
-176   -464   
400    176    
192    80     
-112   -64    
-128   192    
-32    -304   
192    -288   
-96    144    
48     -32    
48     -160   
-352   -528   
336    736    
-64    -16    
-128   -256   
320    144    
-48    112    
96     48     
-48    32     
-144   0      
80     0      
80     64     
48     128    
0      32     
-112   -64    
272    -176   
32     176    
272    176    
-208   0      
112    48     
-128   144    
64     112    
112    0      
208    96     
-16    48     
-16    128    
32     48     
-48    -208   
48     48     
176    -640   
64     0      
48     0      
208    -32    
0      32     
16     64     
-192   -80    
144    -32    
80     80     
176    128    
-48    32     
240    48     
-112   16     
80     -272   
-144   -48    
160    -16    
96     160    
32     16     
192    32     
-240   -32    
256    160    
-176   48     
80     48     
-80    16     
64     112    
-112   -48    
64     -128   
0      16     
112    -48    
192    96     
176    -288   
-80    0      
64     416    
144    64     
-96    -96    
64     64     
304    416    
-96    192    
-80    -48    
144    128    
0      0      
176    -48    
-16    -32    
144    0      
48     80     
0      -128   
192    176    
128    -80    
112    0      
48     80     
192    128    
-96    -112   
208    -48    
0      80     
96     64     
32     -16    
112    -176   
-160   -384   
-48    -144   
0      224    
-16    -208   
48     -48    
0      -400   
176    128    
64     64     
144    64     
592    656    
-544   416    
-80    -64    
272    16     
-16    64     
192    -224   
496    96     
0      -192   
784    -16    
80     -80    
0      128    
-304   -16    
-368   16     
128    -528   
112    48     
272    144    
304    224    
-176   160    
-160   -208   
16     32     
-528   -368   
128    -48    
16     64     
80     48     
144    48     
32     96     
240    -80    
32     -64    
128    -48    
-64    224    
-160   128    
-32    -416   
112    -1216  
-48    -224   
176    -272   
-64    0      
-112   -144   
256    -64    
-208   96     
32     -64    
448    192    
64     0      
480    -144   
-192   80     
-48    -352   
368    48     
-112   -368   
384    -176   
64     -32    
192    -48    
320    -48    
176    -368   
16     -48    
-160   -272   
368    -96    
192    -384   
-48    64     
272    80     
96     96     
128    80     
-48    0      
-16    64     
16     -48    
-848   0      
48     -64    
96     -80    
0      -112   
160    32     
96     -1264  
0      48     
144    64     
-48    96     
0      0      
-160   80     
128    16     
48     -80    
-224   -160   
192    96     
-2416  -64    
128    -144   
128    -432   
-16    -240   
128    80     
-96    -192   
-128   0      
208    -80    
-272   176    
-160   -544   
80     112    
-160   240    
144    -272   
-64    -272   
-16    32     
-400   -304   
240    1200   
48     96     
-64    -496   
-144   592    
48     -992   
32     16     
208    -96    
16     -96    
240    176    
64     -32    
0      160    
144    -112   
32     0      
48     -432   
0      64     
368    400    
-1072  -352   
-224   -352   
400    -736   
16     -112   
160    64     
192    -240   
64     432    
144    64     
-192   96     
-320   -416   
-64    -496   
192    -416   
64     -192   
16     -16    
448    -128   
-1200  736    
-48    -48    
-1024  -176   
48     -224   
-48    -208   
112    -80    
-208   -64    
320    -912   
240    32     
-240   144    
16     -144   
-176   -48    
128    -128   
-96    -32    
-48    -80    
-208   -64    
80     -32    
144    80     
16     48     
176    -80    
176    -256   
-112   -80    
128    -784   
-48    -176   
16     16     
240    -16    
-272   80     
-48    -48    
-16    -80    
96     -96    
-192   -288   
-32    -208   
-64    48     
-16    -112   
0      32     
112    -272   
16     32     
0      0      
224    -48    
-192   48     
208    0      
-224   -32    
144    -48    
-64    -64    
128    0      
-240   112    
-64    -96    
-608   32     
224    -112   
112    96     
-160   -80    
32     -32    
-80    -80    
-1248  -112   
112    16     
-160   48     
-208   16     
144    -16    
32     16     
-96    -48    
-48    -128   
-576   -32    
320    112    
-1664  -176   
208    16     
-32    -16    
-144   144    
-192   32     
-1056  80     
-112   48     
-208   -48    
48     -48    
240    -16    
-96    160    
-48    64     
80     -32    
208    64     
16     96     
0      112    
208    208    
-224   -16    
-176   -112   
112    32     
-224   128    
-16    96     
-160   112    
-128   16     
-1680  -224   
16     -320   
320    -112   
96     128    
192    -80    
32     32     
-208   -176   
16     160    
112    128    
80     -16    
112    0      
-48    -304   
-160   -144   
-464   32     
-80    -16    
-144   -112   
-240   -208   
-720   48     
144    176    
-48    0      
192    176    
-64    -48    
-352   -64    
-160   672    
48     224    
-48    -224   
-112   352    
112    480    
-400   304    
32     80     
-208   128    
-160   304    
-112   192    
32     64     
0      -48    
352    -32    
-160   -448   
-48    48     
0      336    
-48    240    
-304   -112   
-288   -208   
80     0      
64     112    
16     -128   
-272   128    
-32    -208   
-224   176    
144    0      
-112   -80    
16     64     
80     544    
64     -160   
-48    -64    
64     80     
-160   -256   
-144   64     
320    112    
176    192    
144    288    
96     64     
-272   -272   
-208   -336   
48     128    
-624   160    
96     -64    
-80    -80    
-176   -32    
32     32     
160    0      
128    -32    
224    160    
256    240    
-160   288    
-64    -224   
-256   -880   
-320   -368   
-80    -32    
64     -112   
-1248  -448   
-208   -128   
-64    -96    
96     -128   
32     80     
0      -80    
416    -96    
-336   -48    
0      -144   
-192   -112   
32     80     
144    -96    
-96    -48    
-112   64     
96     80     
-80    -64    
48     16     
-320   16     
272    64     
96     64     
-288   -16    
240    16     
-304   32     
320    16     
-176   32     
128    112    
192    128    
-128   0      
64     32     
-128   48     
64     0      
32     0      
160    48     
160    160    
64     224    
-448   -48    
288    32     
-64    16     
16     80     
-80    -32    
112    0      
-208   48     
128    96     
-48    16     
128    96     
-80    64     
32     32     
-48    32     
176    0      
16     32     
-208   -32    
176    64     
-32    32     
16     16     
0      80     
80     48     
32     48     
-128   0      
-64    -16    
64     64     
16     80     
96     16     
32     -192   
-48    -144   
112    80     
-128   96     
128    80     
-64    -16    
128    -32    
112    -48    
112    48     
64     80     
-144   0      
-80    64     
-16    16     
144    16     
-16    -16    
32     128    
80     32     
80     64     
16     -32    
64     32     
208    208    
-144   112    
-32    -80    
112    64     
-128   -192   
96     -64    
48     96     
16     128    
176    80     
144    32     
-80    -176   
32     16     
48     32     
32     -64    
64     -96    
-224   -128   
64     144    
-32    144    
192    112    
-176   -144   
96     -880   
48     80     
-48    -32    
208    144    
-336   -464   
80     -512   
400    144    
288    80     
240    -112   
112    32     
416    288    
16     32     
464    -48    
416    -48    
-176   368    
-224   32     
-32    0      
96     48     
304    144    
-144   48     
32     -64    
128    48     
96     48     
256    96     
-304   224    
-144   128    
224    16     
-432   -208   
96     0      
112    80     
224    -64    
64     -32    
224    160    
-192   192    
-480   208    
80     256    
-80    96     
48     128    
-256   -16    
224    160    
64     48     
112    160    
-160   -48    
64     -224   
432    -80    
240    -80    
240    160    
128    -832   
-144   -64    
96     -16    
-64    16     
448    32     
368    48     
96     -16    
288    32     
-112   -48    
160    64     
-224   16     
-112   176    
208    80     
320    -112   
-112   -64    
96     0      
240    112    
112    -160   
-112   -256   
-16    -80    
-112   912    
0      -256   
48     -304   
-48    176    
112    96     
192    144    
-16    -16    
128    224    
32     -240   
48     176    
112    -336   
80     64     
16     -384   
-160   640    
-80    16     
-64    -160   
48     368    
352    -384   
256    352    
208    -64    
144    368    
-96    560    
-64    -544   
240    -80    
-160   48     
304    176    
-80    48     
32     -448   
80     -624   
-32    304    
320    672    
-352   -16    
32     240    
-112   128    
80     -96    
-208   -368   
224    160    
32     64     
64     -160   
224    16     
-80    -176   
-48    656    
176    224    
208    16     
-16    96     
288    16     
-176   -96    
-176   -32    
96     16     
-80    -16    
288    160    
80     48     
128    48     
-64    -240   
-16    -32    
160    -64    
176    -64    
352    64     
-96    96     
112    48     
32     64     
-240   -32    
304    -784   
64     -64    
192    416    
-32    -832   
208    128    
128    -48    
-48    -144   
240    -112   
48     -80    
16     96     
0      0      
176    32     
224    112    
-64    -160   
-208   -224   
48     -112   
0      32     
144    16     
-64    -336   
-32    80     
272    -528   
160    -16    
240    16     
-96    -80    
16     16     
-64    -80    
-144   160    
112    112    
208    -48    
80     -48    
-864   528    
288    -16    
336    -240   
464    -80    
-144   -16    
-32    -176   
32     -96    
0      -528   
224    112    
-240   128    
32     -16    
240    -112   
32     -16    
80     -128   
64     -16    
-304   48     
32     16     
-1376  -64    
208    112    
80     -16    
128    16     
96     -80    
-48    -224   
160    -16    
112    -16    
64     96     
-32    -32    
144    16     
96     -32    
512    208    
-368   336    
16     -64    
-176   48     
64     -192   
240    -208   
96     -176   
96     64     
16     -96    
-128   -80    
64     -1328  
32     32     
128    -32    
176    272    
32     336    
-240   96     
-80    -64    
128    -128   
-256   -96    
32     -48    
-1904  208    
-208   -48    
-288   -96    
176    -96    
64     80     
288    -672   
-96    448    
352    368    
-80    32     
-160   -192   
96     -176   
-112   -112   
272    -160   
64     384    
272    176    
-368   -288   
80     -192   
-208   -272   
-160   -256   
-48    144    
288    -64    
-32    -112   
32     144    
64     -224   
144    -144   
288    464    
272    -160   
-48    -32    
-256   -16    
-112   128    
-592   64     
-32    -320   
-464   -96    
864    224    
-352   -80    
176    -160   
368    -96    
304    128    
352    -16    
-528   -128   
-96    160    
-464   112    
-176   -112   
32     -96    
-80    -208   
-96    48     
80     192    
160    64     
-112   -208   
128    0      
128    -272   
160    -16    
-336   -64    
48     -80    
-112   80     
48     288    
80     0      
176    -32    
-144   32     
-32    16     
-64    32     
16     -64    
48     0      
288    112    
-144   64     
-1184  -96    
-944   -16    
80     0      
-1120  0      
48     128    
64     80     
-256   16     
128    -16    
-16    80     
-96    -32    
144    144    
-496   32     
192    48     
-224   -368   
112    -16    
-176   -48    
-192   80     
-320   -32    
-544   0      
-48    -64    
-944   80     
-80    -16    
272    -80    
32     48     
-48    48     
-64    224    
-512   -128   
-32    -96    
-48    -16    
192    64     
32     -32    
160    32     
-64    80     
-608   -48    
176    48     
-352   -144   
-208   64     
-304   0      
48     -16    
272    0      
64     0      
-160   -16    
96     64     
-112   -16    
-48    -96    
160    -96    
-368   96     
48     -16    
-16    0      
32     112    
80     64     
-208   48     
-544   0      
-80    16     
-912   96     
-128   144    
256    64     
96     -16    
-32    -112   
-144   -48    
80     96     
32     112    
-256   48     
80     -32    
16     0      
-208   -48    
32     48     
-1152  -32    
192    -32    
-1824  -128   
224    96     
-144   -32    
176    48     
0      -16    
32     32     
-176   0      
-32    80     
96     64     
-80    -48    
48     -112   
64     96     
-160   80     
-208   -32    
16     64     
-128   -144   
32     16     
48     112    
128    -64    
176    96     
-96    -96    
-112   16     
192    128    
-160   80     
-128   -144   
48     32     
-160   144    
352    288    
-48    -16    
-64    96     
-416   112    
-32    32     
-128   -64    
-32    -96    
16     32     
-48    -48    
-64    -96    
-128   0      
-16    -32    
-96    -112   
-48    96     
32     112    
-80    -32    
-144   -80    
96     16     
-144   -32    
160    80     
32     32     
-64    64     
-16    -16    
0      64     
-48    64     
32     16     
128    48     
-16    80     
96     96     
-32    16     
256    0      
-704   16     
608    1040   
-848   1120   
192    -80    
112    -736   
416    0      
288    336    
-208   -496   
96     -96    
-112   336    
-400   -608   
-144   272    
-176   224    
-80    -64    
224    240    
-128   176    
-48    80     
-64    -80    
80     16     
240    256    
16     128    
0      -656   
-256   96     
-416   400    
-48    -224   
160    0      
-48    -16    
128    256    
208    576    
-704   -80    
-304   -288   
-80    -16    
-112   -16    
144    256    
-144   -960   
112    144    
-272   144    
-144   -448   
528    432    
16     48     
608    208    
-128   576    
-80    -256   
192    64     
192    208    
128    -16    
96     32     
384    208    
-96    -32    
0      128    
-48    128    
32     256    
-112   -752   
128    224    
224    128    
192    -304   
48     -144   
128    256    
-208   128    
0      32     
-160   160    
128    0      
304    320    
-144   224    
112    -240   
96     -176   
224    416    
-16    0      
-16    -96    
-144   -144   
64     -800   
224    0      
-80    256    
-144   320    
32     80     
-48    80     
80     -160   
208    0      
-16    240    
64     -32    
-48    400    
400    400    
-112   480    
112    272    
144    -80    
48     528    
160    208    
-144   192    
0      -160   
80     -144   
-160   368    
-32    -656   
96     64     
-96    16     
48     128    
-48    96     
240    -32    
16     368    
128    288    
-80    80     
160    -16    
-48    -48    
-16    16     
96     0      
64     32     
16     -144   
-112   -800   
-144   96     
-64    128    
32     64     
192    32     
-112   -96    
224    -64    
128    128    
48     128    
32     400    
-80    -96    
80     -96    
-112   128    
-752   -304   
96     32     
64     -480   
-160   -336   
272    -112   
-128   304    
16     16     
720    624    
-512   240    
-16    192    
160    112    
-16    432    
288    -32    
112    -112   
-240   112    
192    48     
240    224    
224    -64    
80     16     
-64    128    
-64    176    
96     32     
352    160    
128    16     
-16    48     
128    -96    
0      160    
-96    176    
400    128    
224    112    
320    -96    
-64    144    
-16    -112   
32     80     
48     -192   
-48    192    
208    464    
336    64     
-128   96     
176    176    
-144   0      
80     160    
112    160    
128    32     
128    -16    
-32    -144   
240    -144   
192    128    
-176   240    
144    -304   
-64    -224   
32     -528   
160    176    
-48    64     
64     32     
160    -112   
96     128    
-64    -128   
16     -192   
16     144    
80     160    
48     128    
192    -448   
-64    16     
16     -16    
160    96     
-32    -64    
160    -320   
160    -160   
112    48     
-16    -32    
80     240    
80     240    
-64    -16    
32     112    
64     -64    
96     -112   
48     -144   
0      -32    
96     -320   
80     208    
-112   -432   
112    -112   
-64    144    
-80    144    
160    128    
-16    128    
-96    224    
-224   -128   
368    -192   
208    128    
304    96     
128    192    
192    -48    
64     -64    
-16    -112   
32     -32    
160    192    
-240   -96    
-64    -496   
-176   -32    
16     -848   
464    -720   
96     224    
-96    -208   
176    112    
-224   -96    
-128   -224   
-192   784    
416    336    
-224   304    
-128   352    
-80    320    
-688   144    
-176   -64    
192    208    
-464   -96    
32     -288   
240    64     
176    -192   
-48    -32    
-288   -1120  
48     -48    
256    176    
-208   32     
256    -144   
48     -48    
16     0      
-144   64     
64     -48    
112    0      
-480   144    
336    0      
80     -48    
80     32     
-320   -48    
272    80     
-240   -304   
464    -240   
256    208    
112    -64    
0      -16    
128    16     
80     160    
-48    -64    
64     0      
-208   -16    
32     -16    
-240   48     
-80    -144   
208    -16    
144    144    
272    -16    
208    -400   
-128   -112   
288    64     
-48    -32    
144    16     
112    48     
-16    0      
-16    -128   
-304   -32    
32     -64    
-464   112    
64     -96    
80     16     
-32    -96    
144    -48    
160    -560   
-16    112    
-32    -336   
48     0      
240    32     
-240   64     
-144   -32    
32     -80    
160    496    
224    0      
176    -240   
96     0      
-176   -96    
144    -160   
192    48     
48     96     
208    112    
-128   -448   
208    144    
144    -48    
0      -16    
80     -64    
48     0      
16     112    
-16    -176   
-224   32     
16     -32    
-976   -16    
160    -112   
32     96     
112    -80    
32     64     
0      -400   
64     16     
-80    48     
32     16     
-32    0      
192    64     
-48    -112   
384    176    
-464   -16    
64     -64    
-224   48     
336    16     
0      48     
16     -208   
-16    16     
80     -208   
336    176    
-448   144    
224    96     
16     32     
48     -16    
-160   -80    
-64    48     
-48    -96    
256    0      
-112   0      
192    -208   
16     96     
256    -96    
0      -32    
176    -32    
-16    32     
-288   64     
160    96     
-32    -16    
32     -288   
-16    -96    
64     192    
208    112    
80     -96    
-288   -48    
128    -32    
0      32     
-384   -80    
80     112    
-144   48     
-576   -128   
0      80     
-1984  32     
-48    192    
16     -64    
-32    16     
176    64     
-176   -272   
64     0      
-384   0      
-848   -48    
64     272    
-48    -224   
0      192    
-128   128    
-208   -16    
48     -16    
-464   32     
-128   48     
-400   -160   
-224   32     
-32    -48    
-320   0      
-416   -720   
464    528    
-128   192    
304    48     
-160   0      
-48    -32    
-112   0      
-144   -112   
-48    -384   
-336   -224   
-336   80     
-640   -80    
-112   64     
-1344  592    
-176   -112   
128    176    
272    224    
-352   -416   
128    832    
32     -272   
-128   -16    
256    176    
-80    -176   
-16    32     
-288   -16    
-208   -64    
-96    -16    
0      80     
-240   32     
48     48     
-448   -336   
320    1520   
-32    16     
112    -944   
48     -64    
-16    240    
0      256    
64     160    
-400   128    
320    160    
160    480    
432    -128   
320    -288   
192    272    
320    240    
-1520  -304   
176    160    
-400   112    
176    368    
-336   272    
-336   -304   
-96    -112   
-48    -16    
368    128    
144    128    
288    112    
-16    240    
-80    -80    
-544   -48    
128    16     
-544   -528   
128    -368   
160    -16    
16     160    
96     -64    
-240   -80    
-64    -80    
-160   32     
64     144    
-16    -64    
-112   48     
-176   -16    
-96    64     
-96    -32    
16     80     
-576   -32    
0      -80    
-464   -256   
240    -64    
32     -176   
0      80     
-32    48     
16     224    
32     64     
-112   96     
336    336    
-496   208    
176    -48    
-64    -32    
-96    704    
-160   -16    
240    -240   
32     112    
-48    -32    
192    352    
144    32     
-80    -160   
48     -160   
-272   -160   
304    -400   
0      32     
-80    368    
128    192    
-96    352    
160    -160   
-480   0      
160    288    
32     432    
224    48     
272    48     
-336   80     
-48    -16    
-208   -32    
112    -112   
16     48     
-192   -48    
-128   64     
-80    64     
16     -96    
176    64     
-208   -16    
-16    -16    
160    80     
-192   48     
224    144    
176    272    
-336   -160   
80     32     
32     272    
96     112    
-144   -80    
0      -144   
32     176    
192    160    
-272   176    
-96    -624   
272    -224   
-48    288    
64     32     
-112   -544   
48     -400   
192    -96    
-144   32     
-16    96     
96     -176   
-96    -128   
256    -336   
-96    160    
96     288    
240    272    
224    16     
-32    -48    
32     -16    
-80    -128   
-32    -96    
-96    -112   
352    -96    
192    64     
64     160    
-272   112    
-16    32     
80     -48    
208    -16    
-64    -176   
0      -96    
32     64     
-48    64     
144    160    
-64    96     
-64    80     
80     48     
96     128    
96     48     
224    256    
-48    288    
448    208    
-208   144    
144    96     
-48    -16    
-144   -16    
-16    144    
32     96     
48     64     
272    208    
48     288    
48     80     
-112   -16    
-128   -144   
96     48     
64     96     
48     -96    
-192   -32    
64     80     
48     -160   
208    -1136  
-32    -128   
128    -64    
160    48     
32     -16    
80     96     
80     160    
0      0      
0      48     
96     -48    
-32    32     
96     64     
-80    -272   
288    -16    
208    192    
96     384    
240    400    
-336   -320   
-240   64     
48     272    
32     -96    
288    -112   
176    -160   
368    -32    
304    -32    
352    -80    
208    -32    
112    -32    
128    32     
-368   -48    
64     -80    
-32    80     
48     -160   
16     96     
160    48     
-336   -192   
192    -64    
144    208    
-544   -128   
224    32     
48     32     
-192   -64    
400    -32    
-96    16     
-160   -272   
720    -416   
128    208    
-80    -512   
96     16     
-16    -160   
128    -16    
48     -32    
272    208    
-432   48     
224    128    
-208   80     
48     16     
0      -96    
352    -240   
256    80     
128    -144   
0      64     
-272   -704   
208    96     
-144   -16    
-48    -64    
256    64     
16     240    
-160   64     
-48    80     
176    16     
288    0      
80     48     
192    64     
-32    48     
48     48     
144    0      
-48    -256   
0      96     
-16    -528   
160    -64    
-32    -16    
176    48     
-80    -48    
240    80     
-32    -32    
48     48     
144    192    
-256   -48    
128    16     
96     -528   
96     16     
240    -80    
80     48     
80     -176   
368    -48    
-48    16     
80     48     
128    160    
-352   0      
272    48     
32     64     
128    96     
-32    -384   
128    64     
192    -240   
208    80     
-96    -32    
352    64     
-96    -400   
-64    128    
-256   -80    
192    -48    
256    16     
-160   -128   
384    48     
-48    -160   
16     192    
-448   -176   
-112   -112   
256    112    
352    144    
0      16     
208    32     
-192   -384   
240    64     
-208   0      
112    0      
160    48     
-176   -32    
112    -208   
160    -16    
128    -1360  
32     -32    
48     64     
96     -128   
32     48     
-48    -80    
64     32     
0      16     
160    -208   
-48    -112   
144    -128   
-160   32     
-2592  -96    
48     -64    
192    112    
0      64     
-32    -48    
160    -432   
16     -112   
208    0      
112    -80    
240    -208   
96     -240   
-80    -224   
80     16     
-48    -208   
112    -112   
-80    160    
320    -96    
208    -64    
-96    -144   
-128   -208   
288    -480   
64     208    
144    0      
208    -112   
64     112    
16     64     
176    -464   
16     336    
-272   48     
-160   -208   
-64    -128   
80     80     
112    -112   
-48    -80    
112    80     
48     -48    
144    320    
80     -288   
-176   -528   
208    608    
128    -208   
112    -448   
-64    288    
-80    544    
208    -320   
-256   -480   
192    352    
0      336    
48     96     
96     -48    
-112   -400   
80     176    
96     -80    
-64    64     
64     -336   
64     -112   
16     -208   
112    -112   
-32    144    
32     -64    
48     240    
-80    304    
-528   80     
64     -208   
256    -96    
112    -336   
-112   -48    
32     -32    
224    -144   
64     -448   
160    128    
112    224    
80     -96    
-192   128    
0      48     
16     112    
16     -176   
-176   0      
128    368    
-800   64     
256    -256   
96     -112   
480    -80    
304    160    
-32    0      
0      0      
112    112    
-224   32     
-176   16     
128    48     
208    288    
240    176    
-448   0      
-32    -48    
64     -32    
128    64     
-128   96     
-160   -144   
128    -32    
-48    -128   
-176   -144   
96     -80    
-96    0      
240    48     
240    0      
16     112    
-272   -176   
48     -224   
-304   -176   
-784   -272   
48     0      
272    80     
464    -176   
-32    96     
-64    -416   
-48    112    
-176   64     
16     -96    
16     -160   
208    -32    
-256   160    
112    96     
-64    -96    
-16    -128   
-80    -112   
32     -32    
-80    16     
-464   -160   
16     80     
-64    -16    
-128   80     
48     -208   
-752   -32    
-144   64     
-192   144    
272    144    
-224   160    
96     -128   
-624   -336   
128    176    
48     -96    
80     32     
-224   -208   
160    144    
144    -48    
-688   -16    
16     -32    
-320   -64    
144    128    
-640   -80    
80     128    
-16    144    
144    16     
-304   256    
208    80     
-112   96     
-144   32     
48     -432   
-304   -416   
96     -160   
-336   208    
-80    -48    
16     128    
-192   -32    
80     112    
176    0      
-2416  352    
-432   416    
-112   -128   
96     -112   
0      64     
304    -16    
-272   -192   
-176   -320   
0      -336   
16     -320   
80     -32    
-64    16     
-32    0      
-208   128    
80     -80    
-944   80     
32     -80    
-144   80     
32     -224   
-48    112    
176    -80    
160    -16    
-96    48     
128    80     
-240   -736   
-192   -592   
-320   -272   
-192   192    
-240   32     
368    -48    
-592   0      
240    16     
-1072  -128   
64     -16    
-144   32     
-16    256    
240    400    
-48    160    
-64    192    
-288   160    
272    336    
64     16     
-112   32     
96     496    
192    208    
16     160    
240    160    
-2176  400    
400    400    
-176   0      
-48    48     
-32    -80    
352    96     
-272   96     
96     -384   
48     -80    
96     384    
176    96     
96     144    
-240   256    
-208   32     
304    -64    
-96    432    
-176   0      
-32    -32    
288    0      
-96    96     
-192   160    
0      832    
480    -288   
-48    32     
-176   -208   
288    176    
-112   112    
208    352    
-416   -256   
16     128    
-256   32     
-64    48     
128    64     
16     80     
112    32     
144    48     
0      32     
-80    16     
32     48     
-368   -64    
-160   -80    
-288   -112   
144    -16    
-16    16     
80     144    
-304   80     
-48    64     
48     64     
144    -16    
-128   -16    
96     48     
80     112    
240    400    
-80    144    
-336   -48    
-48    -320   
160    -528   
464    64     
480    144    
304    304    
0      -96    
-80    32     
176    0      
-240   32     
240    -32    
-208   -16    
-192   32     
-240   0      
-128   48     
80     64     
-240   96     
-96    0      
48     16     
-80    -48    
64     128    
240    384    
-400   32     
224    -16    
512    0      
272    -16    
432    48     
352    -96    
-192   -64    
-624   -32    
-256   128    
-208   16     
-208   -48    
144    32     
144    0      
192    48     
16     -64    
480    -32    
208    112    
64     112    
96     -32    
160    -64    
320    160    
-160   64     
96     16     
-48    0      
336    96     
208    64     
192    48     
-144   0      
-64    -32    
48     32     
-96    0      
336    80     
-160   0      
384    80     
64     96     
112    48     
-32    -16    
64     32     
64     48     
-80    -64    
336    0      
48     128    
96     64     
-64    32     
16     16     
-80    -48    
16     96     
48     96     
32     -32    
128    96     
32     96     
32     -16    
16     32     
-16    32     
112    16     
-192   272    
160    80     
16     -16    
-128   -352   
112    0      
-256   32     
432    176    
-160   0      
-48    -192   
288    48     
-176   64     
144    80     
128    64     
80     64     
320    256    
-416   16     
304    48     
-128   16     
160    -448   
416    416    
-416   256    
-80    16     
-128   -128   
-32    -224   
304    32     
208    96     
96     -32    
192    -64    
-464   -304   
48     112    
-320   -192   
-240   -16    
128    160    
432    80     
-128   64     
80     -80    
48     32     
16     -208   
64     64     
96     192    
-80    -96    
112    0      
-16    144    
32     160    
-64    -128   
112    48     
96     16     
80     32     
-16    32     
48     336    
208    -704   
96     -160   
-64    -80    
384    32     
-192   -144   
144    128    
48     112    
96     -112   
64     160    
-208   -64    
32     432    
16     -208   
416    -64    
-80    -160   
-32    256    
-112   -400   
-80    -832   
160    848    
208    160    
-96    -336   
112    80     
48     -288   
432    544    
-288   784    
-128   272    
48     -512   
64     -96    
224    -48    
-64    -112   
96     -80    
-16    -320   
144    112    
-144   -304   
-96    -112   
-32    0      
240    160    
-16    160    
384    288    
-32    144    
80     -64    
16     48     
48     -128   
128    -96    
-48    -208   
96     -32    
-48    -128   
224    240    
48     144    
176    80     
240    80     
176    144    
-112   48     
48     112    
80     64     
-32    -48    
16     0      
160    -16    
64     112    
96     16     
16     16     
-160   -64    
48     80     
16     32     
256    128    
32     128    
96     128    
16     -96    
16     -112   
-64    -96    
96     -48    
96     -96    
144    -96    
112    96     
96     -272   
128    96     
-64    32     
128    64     
96     -96    
-32    -112   
352    -64    
-16    -960   
160    -192   
-48    144    
-16    -96    
176    -80    
32     -96    
16     -32    
192    -64    
224    -48    
48     112    
32     32     
192    -80    
-64    -32    
32     -480   
208    -112   
176    0      
-176   -64    
-96    32     
128    -16    
-192   48     
224    -800   
176    -368   
336    -688   
64     144    
-160   16     
-112   -48    
128    -176   
96     48     
80     -192   
176    16     
96     -80    
400    -208   
-400   -416   
48     -80    
-192   48     
-112   -272   
112    -160   
32     -352   
-96    -64    
208    -1456  
-32    16     
208    -160   
112    -48    
-112   -32    
48     32     
-192   -16    
64     32     
-144   -208   
112    32     
160    48     
32     80     
144    -160   
0      -96    
160    -16    
64     -480   
128    64     
208    80     
-176   112    
160    -208   
16     -80    
-112   0      
80     128    
-64    -144   
-32    -112   
-656   240    
96     0      
80     32     
224    -256   
-144   -288   
160    -208   
176    144    
720    592    
-144   640    
48     48     
128    256    
-64    -16    
-16    240    
112    128    
-192   -304   
-1168  -272   
176    -96    
160    112    
368    336    
-112   304    
528    -912   
-16    -32    
336    -528   
-32    -288   
-160   176    
160    -128   
0      224    
352    -80    
-288   160    
144    -160   
-416   -112   
144    16     
-576   -224   
304    192    
-48    128    
272    -256   
112    16     
80     -416   
64     -224   
144    64     
144    224    
-224   80     
-128   -64    
0      -432   
-48    64     
288    64     
-128   48     
-192   -496   
272    -32    
176    -80    
-160   160    
144    -80    
-96    -192   
288    16     
-112   -208   
-80    -112   
-240   80     
-64    16     
32     -192   
144    -16    
-16    240    
32     -128   
0      128    
-336   -400   
480    -288   
-352   -48    
304    192    
-336   -64    
144    144    
48     240    
-320   -400   
80     144    
0      96     
-16    -64    
64     64     
-80    -48    
80     -64    
304    80     
-160   -32    
80     80     
-752   96     
128    144    
32     -64    
-576   0      
-80    -64    
-128   0      
144    0      
-368   -144   
-48    208    
64     48     
96     64     
-896   -32    
192    192    
-176   48     
480    528    
-464   192    
-656   0      
32     -16    
-80    64     
-144   0      
-176   48     
-128   -96    
-1168  -32    
-144   32     
192    144    
224    240    
-560   -64    
128    -96    
-336   -80    
128    32     
-64    16     
-128   48     
32     48     
32     -16    
96     -80    
16     96     
-128   -48    
-192   16     
288    96     
-32    96     
-80    -16    
-80    -144   
-48    96     
-368   -144   
112    32     
80     96     
-336   -16    
-128   96     
112    304    
96     16     
352    -80    
112    -16    
-304   32     
64     352    
-768   160    
80     0      
-128   128    
160    256    
-464   -80    
-16    -64    
288    48     
16     -80    
352    16     
0      96     
-96    64     
64     48     
-16    0      
16     304    
-576   48     
-624   -160   
64     64     
-448   0      
224    0      
144    -16    
-128   144    
-608   128    
32     64     
128    -64    
-352   -96    
272    64     
96     80     
-144   32     
-224   -32    
-64    -16    
-208   16     
384    0      
80     -64    
416    48     
-224   -32    
-224   16     
-416   -80    
208    48     
-64    48     
-48    64     
160    64     
-416   16     
32     -16    
-96    0      
272    192    
-400   -48    
80     -32    
160    0      
-176   32     
-304   -16    
128    48     
-64    16     
64     32     
0      -80    
-256   0      
-48    112    
-32    -48    
-96    16     
-176   16     
-16    96     
-144   -16    
64     48     
-1264  -192   
304    0      
16     0      
208    128    
0      32     
-96    -16    
-80    -32    
112    160    
-192   64     
128    -16    
-80    48     
176    240    
32     368    
-256   -32    
288    -32    
16     144    
304    48     
336    160    
-112   112    
-16    48     
-128   -64    
272    -48    
-16    -16    
80     96     
144    64     
-128   64     
-416   -224   
416    80     
80     -64    
384    144    
-112   0      
-176   -112   
128    112    
368    400    
-272   -112   
336    160    
-400   464    
-32    -368   
16     -256   
-16    128    
256    -304   
-320   368    
64     -128   
-304   32     
0      624    
160    -560   
208    -304   
-112   624    
128    -144   
0      -112   
0      128    
192    -64    
32     -16    
-192   96     
0      32     
-80    48     
192    160    
48     -240   
-256   -240   
128    160    
-288   0      
400    -656   
-144   160    
224    720    
256    416    
-112   144    
64     32     
-32    80     
-48    -96    
-16    -256   
128    -48    
-80    -96    
96     176    
80     80     
-32    -160   
-80    -272   
128    -160   
-64    64     
0      112    
256    128    
-96    96     
16     16     
48     48     
144    96     
-96    -32    
224    -112   
-128   -112   
160    -48    
-64    48     
192    144    
-64    -112   
32     -96    
64     0      
-96    80     
0      64     
64     112    
128    0      
96     32     
80     32     
-160   -48    
192    64     
-16    32     
-64    -80    
320    64     
0      128    
-112   32     
-192   -64    
128    -432   
80     -192   
160    16     
192    80     
-48    176    
-112   48     
80     48     
16     -112   
160    16     
-256   -160   
144    -16    
256    64     
-48    -400   
384    192    
-224   256    
96     -64    
320    112    
64     192    
208    192    
-160   64     
-16    -320   
368    208    
-368   48     
48     160    
-128   32     
416    -96    
144    144    
160    -336   
32     32     
-304   -176   
224    -272   
192    80     
-336   -304   
320    -144   
80     192    
336    176    
112    80     
-352   -48    
-64    -240   
176    128    
96     -48    
240    64     
176    0      
48     80     
288    -208   
16     16     
-240   -112   
80     -144   
-192   -112   
336    -48    
176    144    
32     368    
0      256    
64     -176   
-224   -32    
-256   16     
-160   -32    
256    -128   
256    240    
-192   -480   
-96    160    
496    -96    
48     -240   
96     -352   
112    -208   
224    64     
-32    128    
-80    80     
-32    -16    
192    336    
320    48     
320    0      
128    -80    
-96    160    
16     -144   
16     -16    
-48    -304   
240    -176   
-48    80     
96     96     
-192   -80    
144    96     
80     80     
160    224    
48     -320   
0      -192   
160    224    
-32    80     
256    64     
32     -208   
352    400    
-144   -464   
0      224    
32     544    
-176   -192   
288    -336   
48     80     
112    0      
-272   -624   
192    -304   
288    176    
0      160    
96     480    
-128   -464   
-304   192    
-96    16     
128    -656   
32     320    
128    -320   
176    16     
-128   -112   
432    16     
48     -848   
192    64     
96     -304   
48     -656   
496    912    
-576   -160   
192    -432   
-320   80     
608    432    
240    0      
208    -48    
0      96     
224    -640   
-32    -384   
288    240    
192    576    
176    352    
416    -720   
-512   -96    
-80    32     
144    -80    
0      352    
496    -112   
64     -32    
16     256    
240    128    
-144   -80    
-688   -80    
144    -16    
144    -48    
112    -176   
112    -64    
128    -64    
112    -48    
160    -192   
96     -32    
160    176    
-144   0      
160    -48    
144    32     
112    -272   
-48    0      
-64    64     
32     0      
-864   16     
48     -16    
112    0      
208    176    
176    -64    
-16    -192   
80     -32    
128    -112   
64     32     
32     -96    
352    32     
-192   32     
288    -16    
-48    48     
208    32     
-288   -144   
16     -240   
176    80     
-32    0      
0      -16    
112    -16    
240    32     
64     -960   
0      48     
160    16     
0      0      
64     -48    
80     -112   
-288   -32    
176    -64    
-480   0      
240    -80    
-80    288    
-80    32     
64     80     
32     -384   
-592   -176   
144    -208   
-112   32     
128    -48    
48     16     
64     112    
-96    48     
-336   32     
208    112    
-32    80     
-16    -80    
-736   -96    
288    96     
-160   -16    
-16    -144   
192    -48    
-80    -160   
-32    208    
16     -416   
192    -80    
32     -144   
208    -64    
-32    80     
48     32     
-48    -16    
112    0      
-928   -16    
160    -48    
-64    -16    
16     -80    
624    832    
-544   256    
-16    -208   
432    -864   
160    -80    
-112   -48    
336    -96    
-272   320    
128    16     
-672   -368   
32     -48    
-1152  -32    
-336   -144   
16     -48    
48     16     
48     112    
256    -96    
288    32     
160    -208   
-80    0      
-96    -96    
144    0      
80     48     
272    -32    
16     16     
240    272    
-592   176    
336    32     
-576   32     
-192   -240   
-176   -80    
320    -96    
-240   96     
-208   48     
176    112    
-224   128    
-288   -48    
0      48     
80     -16    
-224   0      
240    96     
112    48     
-224   -80    
-176   32     
-528   0      
-288   48     
-256   -144   
-320   64     
-160   80     
-1200  -96    
-336   -112   
-2096  0      
32     64     
-80    -16    
112    32     
16     -80    
-112   -48    
-704   -96    
64     32     
-48    -112   
-64    48     
-112   -80    
80     32     
-64    16     
-224   32     
-32    -48    
-272   32     
-16    16     
-288   -176   
-352   -192   
-848   -368   
64     -80    
-16    0      
32     -80    
-48    -16    
208    80     
-256   96     
64     0      
-176   64     
16     -32    
-144   -48    
-224   -208   
688    544    
-1136  -672   
112    112    
0      -208   
208    -240   
-112   -112   
448    896    
-352   -432   
240    128    
-80    256    
224    -48    
-48    -224   
-16    384    
-560   -304   
-32    224    
-64    208    
112    160    
-96    352    
176    -368   
304    528    
-336   -128   
304    368    
-432   -128   
-48    0      
-48    480    
208    -80    
-176   400    
272    0      
-144   -336   
-64    -112   
-112   -128   
128    224    
-144   528    
128    -16    
-48    96     
112    112    
336    304    
-32    -48    
0      -96    
-16    -16    
-16    16     
-80    96     
-368   -64    
512    -64    
-80    0      
-80    0      
160    -112   
-176   112    
-384   -64    
16     80     
-1168  -112   
16     80     
144    160    
-208   80     
-16    -64    
0      -128   
-128   32     
96     32     
-80    48     
-48    -32    
-176   32     
-80    -112   
384    64     
-352   192    
0      80     
-416   -32    
0      128    
-128   64     
-32    0      
-80    -32    
16     -32    
176    32     
-144   64     
80     32     
-48    0      
160    16     
-160   144    
-32    320    
-64    -80    
224    -64    
-368   -96    
0      -96    
-64    -64    
-80    -64    
-16    -16    
96     128    
64     48     
-32    64     
224    -64    
-160   0      
96     112    
-80    48     
272    -16    
-240   -16    
-16    160    
-192   -48    
128    -64    
0      96     
32     80     
0      -32    
32     -16    
-16    0      
-192   64     
48     16     
48     16     
0      32     
-240   -80    
48     -16    
-416   16     
-48    48     
272    208    
16     192    
-48    64     
64     80     
64     -96    
16     -256   
144    80     
-48    192    
176    -16    
-16    0      
128    208    
-80    112    
128    -224   
-352   -592   
192    -208   
-144   256    
336    512    
256    320    
128    -32    
-32    80     
-144   -176   
-80    -256   
128    -160   
256    48     
240    224    
288    128    
-128   80     
192    32     
-224   32     
0      -16    
368    16     
-160   -240   
96     -208   
224    -32    
208    160    
64     224    
32     224    
368    400    
-608   -96    
-352   -32    
-16    224    
272    208    
-48    48     
464    -336   
0      192    
32     96     
-96    -432   
-96    48     
96     176    
-80    128    
336    112    
-96    80     
-112   32     
32     -224   
48     320    
304    -176   
352    32     
-272   -624   
-112   0      
80     64     
80     -384   
384    496    
-208   96     
-208   -64    
0      -80    
224    256    
240    112    
-64    480    
80     80     
-128   -240   
-176   128    
-48    -160   
-48    -496   
96     -16    
160    144    
-32    96     
16     368    
192    32     
-144   -64    
48     64     
0      -16    
-96    64     
144    64     
128    80     
0      -80    
-96    -288   
-64    128    
112    192    
-208   -48    
160    128    
32     64     
384    160    
-48    0      
96     80     
-128   0      
0      -64    
48     32     
-240   -48    
112    96     
304    128    
-176   64     
272    80     
32     -128   
-320   16     
-16    -1104  
-176   -16    
656    -48    
176    16     
-112   32     
192    -16    
640    -16    
-176   0      
1456   544    
-496   176    
-544   -64    
-208   -272   
352    -112   
-144   144    
16     144    
192    -768   
-256   48     
208    -64    
64     64     
112    -160   
160    32     
-32    80     
0      16     
16     0      
96     96     
64     64     
64     -48    
48     48     
192    -96    
32     48     
96     -32    
464    96     
-336   -688   
16     -48    
224    112    
160    96     
144    48     
-80    32     
-80    128    
416    64     
16     64     
-32    -96    
-256   -32    
192    32     
128    112    
144    224    
288    224    
-112   80     
-16    96     
176    -16    
176    96     
-32    -16    
144    48     
32     96     
-240   -48    
80     -32    
128    48     
64     128    
224    -144   
96     96     
-32    -432   
96     64     
96     -48    
64     64     
208    96     
0      -96    
-96    -32    
288    256    
-208   -96    
0      -48    
128    48     
96     -96    
-32    80     
-96    -160   
144    16     
128    -96    
16     64     
80     -240   
16     -16    
96     80     
176    -160   
128    -16    
112    96     
80     16     
48     -80    
112    -176   
-64    -272   
192    -144   
96     -64    
-48    32     
112    -16    
192    -48    
80     0      
96     16     
-32    16     
112    -800   
32     32     
128    -48    
288    64     
-336   -64    
96     -64    
272    240    
-208   -1008  
-160   128    
96     32     
256    -160   
528    384    
-288   176    
-160   -432   
176    16     
336    96     
288    144    
-432   -64    
-272   80     
-224   -96    
-96    -128   
-80    -32    
0      -96    
48     32     
16     -256   
192    -240   
64     -304   
-32    -32    
432    32     
208    160    
320    0      
144    -80    
-288   32     
672    400    
-1232  288    
-128   -224   
80     -208   
112    -80    
208    80     
224    -352   
16     -16    
112    -16    
80     -48    
-176   -176   
48     64     
-16    -224   
144    -336   
96     -48    
0      192    
192    256    
64     96     
-352   -80    
256    144    
-144   128    
352    -160   
96     -48    
272    -176   
480    -32    
-304   -800   
576    -368   
-224   832    
32     64     
-240   -352   
192    0      
-320   32     
128    160    
-128   -64    
176    -112   
-48    16     
80     -112   
176    144    
144    -480   
-16    -128   
160    -32    
0      -144   
-144   352    
-112   192    
144    -128   
208    -160   
-32    160    
0      -320   
-528   240    
0      -80    
192    -32    
240    -208   
-304   272    
-144   -528   
0      -352   
448    -96    
368    -64    
64     320    
-192   32     
-240   -224   
-240   -304   
-320   -592   
128    -16    
-208   64     
304    -32    
-336   64     
128    -256   
16     64     
32     -32    
32     96     
-16    -592   
16     -304   
-192   -96    
32     -32    
16     -128   
-192   128    
0      -64    
-16    320    
-48    48     
336    80     
-96    64     
208    80     
-80    48     
144    -80    
-128   96     
-416   -16    
-48    -160   
-240   -16    
224    384    
192    0      
112    -80    
-48    -384   
192    -80    
-1312  -32    
-80    48     
48     32     
16     -128   
240    128    
-688   -16    
48     -64    
-160   -256   
96     -64    
0      48     
16     192    
-16    112    
-128   -32    
-80    -144   
48     -80    
-176   -112   
16     -48    
432    352    
-1392  224    
-16    48     
-96    -304   
-32    48     
-144   48     
192    -32    
-112   -176   
-432   -128   
-128   -96    
128    144    
16     0      
16     0      
80     80     
-176   -16    
-144   128    
-672   -272   
-16    0      
112    0      
-336   112    
-64    -32    
-272   32     
-32    32     
-480   32     
0      16     
-192   0      
0      304    
144    112    
96     0      
16     0      
-112   160    
64     0      
160    96     
-64    32     
-160   -32    
-96    -64    
-272   -48    
-160   48     
0      32     
-224   128    
-192   64     
64     32     
-688   -160   
32     0      
-128   -32    
-16    96     
-16    -208   
-32    -160   
-32    -176   
160    48     
64     80     
-160   64     
-272   32     
-48    -32    
-80    96     
-336   48     
0      -80    
-768   -144   
240    0      
-32    48     
-80    192    
-112   112    
16     128    
-272   320    
0      64     
256    64     
48     80     
0      -160   
-16    -80    
64     -80    
-176   64     
336    400    
-448   288    
-16    -288   
0      -448   
-32    -288   
128    -96    
64     464    
240    128    
240    -128   
-64    80     
-480   208    
-400   48     
112    -400   
-16    0      
-208   16     
160    -560   
-80    -112   
336    240    
-928   128    
-288   144    
-336   -96    
224    80     
128    272    
208    -176   
240    0      
400    160    
-336   32     
-176   144    
352    144    
-384   -224   
32     -544   
-288   -32    
-256   352    
-672   128    
208    96     
-192   -32    
192    160    
224    192    
-448   -144   
256    32     
-80    48     
144    96     
64     112    
80     80     
-160   160    
-16    272    
-304   -64    
48     -32    
-112   0      
144    48     
176    -48    
-16    0      
0      0      
-16    32     
-32    0      
80     80     
48     80     
-16    0      
64     16     
-272   64     
240    176    
-304   -48    
192    96     
64     32     
64     0      
80     32     
400    384    
-576   80     
480    -48    
-128   48     
352    272    
240    368    
-560   -80    
80     -96    
64     48     
80     144    
176    48     
128    -80    
-448   0      
304    128    
-32    0      
-64    16     
-80    32     
-112   16     
-48    -32    
128    96     
0      0      
176    144    
272    32     
-96    16     
-320   -112   
240    -32    
160    256    
-528   -16    
-368   -368   
576    80     
-64    224    
-112   32     
224    64     
32     96     
-64    -16    
240    96     
-128   0      
64     64     
-16    -96    
-64    -208   
144    -32    
-176   208    
96     -16    
192    80     
32     32     
16     -32    
160    64     
-128   32     
-48    32     
96     -96    
64     32     
0      64     
0      32     
16     -80    
-144   -288   
128    -16    
128    -16    
96     96     
80     48     
128    64     
-304   144    
592    160    
-288   64     
-48    -16    
-48    96     
352    160    
-80    -48    
-80    112    
208    48     
80     0      
-48    48     
-128   -32    
192    128    
176    -32    
-176   -16    
144    48     
-16    96     
224    64     
-96    16     
-112   48     
32     176    
-144   -16    
80     16     
144    0      
224    -672   
-112   80     
-16    -32    
208    32     
48     80     
256    320    
-256   48     
-96    160    
128    160    
128    96     
64     -16    
80     64     
96     112    
144    48     
96     16     
-112   -608   
64     16     
112    208    
32     32     
192    -16    
96     -64    
16     96     
64     -80    
64     -16    
144    32     
48     32     
48     80     
16     -224   
112    32     
160    320    
128    112    
-96    -48    
-16    -896   
48     192    
160    112    
-48    96     
0      16     
224    32     
144    64     
304    368    
-464   -1024  
-16    80     
-16    336    
176    -128   
64     32     
16     -240   
256    320    
32     -592   
528    -96    
384    0      
240    -32    
128    208    
32     64     
-176   80     
-224   160    
-176   96     
0      -96    
192    16     
336    160    
368    176    
-144   -320   
-448   128    
192    -1264  
96     -320   
384    480    
48     -112   
464    -304   
320    288    
288    -16    
-256   64     
-176   48     
-48    0      
-16    80     
-32    -64    
128    -256   
0      -160   
-112   32     
64     -192   
-80    64     
480    -448   
176    256    
96     224    
160    64     
64     64     
-80    0      
-64    0      
80     208    
-80    -128   
16     -144   
128    240    
32     256    
192    -48    
-96    -400   
-128   352    
96     96     
176    64     
96     48     
304    304    
32     240    
160    160    
-16    -32    
80     -448   
-48    80     
-32    -256   
80     160    
320    224    
144    160    
-176   -16    
368    432    
-48    0      
-16    16     
0      -160   
48     -240   
-96    64     
320    -608   
128    240    
160    0      
-208   -256   
176    -128   
128    0      
80     -80    
192    208    
320    336    
-32    336    
0      48     
-144   -512   
240    0      
560    -288   
-224   -32    
-1488  -32    
-144   -208   
240    -80    
192    16     
-128   -48    
160    -160   
80     -80    
368    112    
-80    0      
-16    -80    
160    112    
96     16     
-144   0      
272    -528   
144    -144   
-368   -48    
416    -16    
96     -80    
16     -112   
32     -16    
96     -320   
-112   -160   
192    -128   
16     48     
-80    -48    
80     432    
32     -32    
272    -208   
112    -240   
144    -224   
-512   -160   
-32    -64    
-64    -128   
112    -32    
-48    32     
144    -96    
48     -128   
128    -448   
96     -32    
128    48     
-320   160    
48     -224   
336    -144   
-208   48     
128    96     
-704   -32    
240    -16    
-1792  80     
208    80     
256    -160   
16     -48    
0      -48    
-80    -336   
192    -240   
16     -112   
-48    64     
192    32     
96     80     
-112   -96    
112    -160   
-48    -64    
-64    -32    
-384   16     
320    112    
-208   96     
16     -160   
80     -32    
48     -176   
16     -48    
112    -320   
0      80     
80     -16    
64     -112   
-208   -160   
96     48     
-144   240    
144    96     
-400   -192   
224    -336   
-2992  -48    
-160   352    
-176   144    
256    -144   
-16    -32    
96     -624   
112    80     
-80    192    
112    192    
48     -160   
128    -48    
-16    48     
80     80     
-80    112    
128    160    
-112   336    
256    480    
160    32     
-32    -176   
-32    -64    
-32    112    
192    400    
176    128    
48     -192   
48     -16    
96     320    
-192   -288   
-48    -128   
-272   -112   
-32    -64    
576    1120   
-528   -720   
80     -192   
160    176    
-48    -208   
144    80     
0      32     
-224   -80    
160    96     
-256   272    
-144   32     
-368   -432   
288    -96    
224    256    
-160   416    
224    192    
176    -240   
-304   -48    
160    -160   
-352   -16    
-176   48     
256    416    
-592   16     
-16    -80    
-160   -48    
-32    -16    
16     -112   
400    0      
-272   144    
320    112    
128    144    
-64    -80    
-160   -64    
-416   -64    
-16    160    
-1024  -64    
-464   -128   
-64    48     
-528   64     
624    368    
-1024  48     
-96    -80    
16     -64    
-64    48     
-336   -96    
144    0      
272    160    
-496   0      
0      -48    
672    208    
-656   -192   
-96    -64    
64     16     
32     -64    
-64    -64    
-256   80     
-288   -16    
-368   176    
-32    0      
-208   -144   
-96    48     
-128   -16    
336    112    
-336   -144   
160    16     
32     48     
96     32     
0      48     
160    96     
-432   -160   
96     -80    
-128   96     
16     112    
-64    0      
-16    16     
368    176    
-672   -112   
480    -32    
-160   -16    
48     16     
192    32     
-96    32     
112    112    
-192   16     
176    128    
-384   -144   
432    32     
-128   112    
16     32     
-736   0      
-192   -48    
160    -144   
192    80     
32     96     
64     -80    
320    -16    
-16    112    
-160   -64    
96     128    
-400   -32    
64     64     
-80    16     
-720   -16    
96     -112   
-1168  -144   
-336   192    
-16    -80    
160    96     
160    0      
-64    0      
32     16     
-16    16     
-144   -48    
32     -32    
-32    64     
0      48     
-192   32     
-192   -16    
128    48     
-272   16     
128    64     
32     80     
-160   0      
32     16     
-128   -256   
352    -48    
-240   48     
-176   -96    
80     48     
0      64     
64     96     
32     128    
-80    -64    
-32    0      
-416   32     
112    64     
-2048  96     
-288   -32    
-96    48     
-16    -32    
-32    -32    
16     64     
-192   16     
128    -16    
160    -144   
-272   -144   
160    48     
-160   64     
208    -32    
-448   -80    
112    16     
32     80     
-48    32     
64     -16    
112    32     
-64    160    
-96    384    
224    128    
224    96     
-144   -64    
-48    32     
160    80     
0      -112   
48     -16    
16     352    
-256   64     
-32    96     
288    0      
96     96     
-192   48     
16     -64    
48     208    
-32    -48    
64     64     
304    224    
-240   -112   
96     32     
-176   -16    
-16    -352   
-272   48     
-32    -80    
64     32     
64     64     
80     -48    
-192   624    
48     -272   
144    -256   
192    288    
-96    -112   
112    64     
-192   80     
-80    -592   
-112   432    
-64    -144   
32     -96    
144    64     
192    208    
-48    256    
-64    -640   
176    704    
80     -240   
112    -32    
32     224    
-64    -80    
0      -80    
-224   -80    
80     96     
-128   -224   
288    16     
32     736    
96     -288   
112    -416   
16     416    
48     416    
-32    48     
448    -96    
80     96     
128    16     
-192   -16    
352    -32    
-32    384    
320    272    
224    192    
528    400    
32     -224   
-208   -96    
-32    416    
384    704    
144    224    
-80    64     
-352   32     
-96    -32    
-96    -16    
320    -144   
160    128    
-128   -32    
528    224    
-112   96     
-272   -1040  
64     -16    
-96    -64    
304    -112   
160    64     
192    224    
64     -80    
48     112    
-64    -16    
32     -32    
144    -96    
112    48     
128    144    
-48    0      
128    64     
16     96     
16     144    
144    112    
96     80     
16     -96    
192    -32    
112    0      
48     80     
0      80     
64     -16    
80     -160   
80     -16    
-96    192    
96     -32    
-64    624    
176    -80    
-304   80     
-80    -48    
48     -112   
80     96     
96     -192   
64     -16    
-32    -128   
32     432    
0      16     
-64    -96    
16     64     
96     -448   
32     -128   
176    -320   
-112   -352   
-32    256    
224    -1184  
208    -32    
144    192    
-144   48     
-32    16     
-80    -192   
128    -176   
64     -112   
0      -272   
240    32     
-176   32     
48     80     
160    224    
208    32     
160    0      
-80    -192   
320    -208   
-224   -384   
352    -80    
128    64     
-48    48     
-160   64     
128    -16    
160    112    
-80    0      
112    96     
48     -224   
224    -16    
80     -80    
-48    80     
-80    -336   
-112   16     
-96    -1952  
304    0      
-48    32     
112    -16    
0      80     
320    288    
80     256    
32     -32    
16     128    
288    32     
0      288    
224    -272   
48     -80    
96     -112   
240    304    
-32    80     
-224   -144   
432    -480   
0      0      
128    96     
128    96     
432    400    
-288   48     
64     176    
-112   -640   
192    -176   
272    -208   
-80    -32    
144    -208   
224    16     
0      -112   
16     32     
-32    64     
144    80     
224    112    
-240   112    
208    224    
-96    -128   
64     128    
80     -128   
-160   64     
320    -368   
64     32     
144    16     
-16    32     
128    -288   
320    208    
-96    400    
160    320    
0      96     
-144   -80    
-16    -288   
16     208    
240    -304   
32     -368   
192    352    
160    96     
-16    96     
16     16     
-80    -32    
-48    336    
288    -288   
-16    80     
32     -96    
160    64     
-608   -176   
32     -160   
-48    -96    
112    -272   
160    -144   
-64    -992   
240    128    
208    128    
32     -128   
400    -192   
96     -112   
0      -48    
32     32     
0      -16    
240    0      
-784   304    
-336   320    
160    336    
320    64     
0      -64    
96     -256   
64     -64    
16     -1088  
256    -304   
192    -16    
-112   -48    
272    -48    
224    160    
-272   -32    
-32    -208   
64     -48    
-256   -144   
320    -320   
448    32     
-160   -208   
864    -400   
192    160    
-64    -240   
144    -96    
16     32     
-32    112    
64     -48    
464    352    
-448   160    
-320   -240   
128    -16    
80     -16    
-1232  -48    
448    -96    
48     -16    
240    -96    
48     -32    
160    -176   
176    32     
-576   -880   
208    64     
-48    -64    
544    -160   
-32    32     
-112   208    
-464   -64    
-96    -192   
144    -32    
352    64     
32     -48    
128    -64    
32     0      
48     -336   
-224   0      
112    -1568  
-272   -48    
560    48     
96     32     
-224   0      
-16    -64    
-384   -16    
80     112    
176    176    
-144   0      
-736   0      
0      -144   
-32    16     
112    -192   
96     64     
96     -432   
-96    0      
112    16     
-80    -192   
128    64     
96     -32    
-48    -112   
96     -192   
-128   272    
80     -80    
-576   176    
112    -240   
80     -32    
96     48     
-208   0      
336    16     
-112   128    
-320   32     
32     -224   
-96    0      
-112   -48    
-272   -144   
-32    48     
-624   0      
288    -80    
-320   64     
-224   -112   
432    144    
-240   -96    
-288   -112   
192    -160   
-16    128    
-448   -48    
320    32     
-80    -112   
128    -144   
16     -80    
624    -176   
112    64     
-48    -16    
-96    -32    
96     112    
-176   0      
-464   -112   
-64    160    
144    -96    
-416   -208   
-16    -32    
-672   48     
-192   -32    
48     -32    
-48    -48    
16     -16    
96     32     
96     16     
0      -32    
-1200  -368   
-64    -32    
-272   -16    
-80    -16    
112    -224   
-240   -80    
0      -16    
-240   -176   
-224   112    
-1424  32     
-64    -176   
64     112    
-96    0      
-48    -240   
80     160    
-448   -128   
32     -64    
-144   -272   
-160   144    
144    -96    
-288   112    
16     144    
-176   -16    
-224   192    
224    -1216  
0      928    
-496   -96    
-160   -112   
-96    -64    
32     112    
-80    176    
384    144    
-48    144    
16     128    
-48    -160   
-112   112    
-272   -208   
-224   672    
160    -96    
-224   -304   
-224   -272   
-416   -720   
208    608    
432    480    
-240   -112   
-160   -608   
-32    -176   
-96    224    
-112   48     
96     -80    
-32    144    
144    -32    
272    0      
-160   32     
-160   64     
-240   -448   
-640   -192   
48     176    
-1872  -128   
-144   -208   
96     -160   
112    160    
-64    48     
-64    176    
16     0      
-96    384    
64     144    
-16    -64    
-96    80     
-128   128    
-32    16     
48     -32    
64     576    
-256   288    
48     96     
-112   -176   
96     16     
-48    80     
64     160    
224    240    
-176   192    
-112   144    
96     -64    
-32    48     
-112   -272   
-48    -16    
-160   -32    
144    128    
-640   -16    
112    144    
48     -32    
128    -208   
-272   -288   
96     -128   
-80    160    
-304   -64    
-16    -16    
-160   -96    
96     -16    
320    64     
-288   -144   
64     -336   
304    320    
-896   -80    
224    32     
-32    -16    
-176   96     
80     128    
-192   -80    
96     -96    
-48    0      
16     64     
144    80     
544    160    
-368   -32    
80     -16    
32     176    
160    208    
192    192    
224    208    
80     160    
-336   -16    
-128   -160   
80     96     
32     96     
16     80     
176    64     
-32    16     
-80    176    
-16    -144   
-96    -176   
-48    0      
-96    128    
-64    -48    
-48    128    
32     80     
-48    80     
208    128    
16     160    
64     112    
48     80     
80     256    
-144   -544   
-304   -64    
-16    -128   
-112   240    
160    -48    
-16    -48    
-32    -192   
160    -272   
0      176    
176    -96    
144    176    
-64    160    
160    0      
-256   48     
-240   -192   
192    -272   
80     -176   
176    -32    
320    -368   
-592   -320   
208    -48    
176    240    
336    112    
128    -48    
96     144    
0      -240   
-144   -240   
144    -224   
176    192    
-80    -224   
432    -32    
240    0      
-192   48     
192    16     
-128   0      
-64    -352   
-16    -256   
-176   320    
48     128    
112    128    
-112   208    
80     80     
-224   272    
480    144    
-80    -128   
208    -496   
0      -176   
-144   256    
128    160    
64     16     
208    192    
128    400    
0      32     
144    224    
-32    96     
-32    16     
-112   480    
656    -240   
-64    -96    
112    -48    
-64    256    
112    928    
192    336    
160    336    
32     -448   
16     -96    
16     240    
-144   256    
352    -176   
208    -112   
16     640    
16     -160   
-592   -832   
256    64     
16     624    
128    -64    
272    -432   
-192   -320   
32     -128   
32     160    
-16    -1584  
192    112    
48     -64    
-16    144    
144    -32    
-96    160    
176    -160   
64     224    
-208   128    
-80    -256   
64     128    
160    -48    
-112   16     
144    -48    
384    272    
-128   -240   
16     -16    
128    96     
-96    208    
80     -208   
-32    -16    
96     272    
176    64     
160    -80    
160    0      
-176   64     
48     16     
64     0      
-112   0      
96     48     
48     208    
176    112    
64     16     
96     48     
112    80     
0      16     
16     -288   
48     0      
80     -48    
112    -16    
128    -64    
112    96     
-32    224    
64     -16    
-16    176    
48     -224   
80     -16    
128    -672   
176    288    
16     -128   
-48    -144   
32     -112   
-160   160    
-112   16     
256    32     
64     240    
-224   -32    
256    112    
64     -176   
-16    32     
16     -48    
208    64     
96     -512   
-16    64     
-272   -848   
-160   0      
-112   -80    
128    96     
-160   96     
176    -32    
160    112    
144    -16    
368    48     
-272   -64    
-96    32     
48     -192   
288    144    
-224   -272   
-352   -432   
0      -640   
64     32     
-32    32     
688    192    
-352   64     
-320   -64    
176    32     
-16    -624   
256    32     
304    -64    
464    272    
-192   -160   
32     -96    
224    -112   
64     96     
320    224    
-176   16     
-112   -48    
144    64     
-80    -80    
224    -112   
496    256    
-192   -80    
80     16     
384    192    
-448   48     
32     -64    
16     32     
176    -176   
32     -64    
-32    -144   
240    128    
-32    -48    
160    -656   
48     16     
160    -32    
80     -368   
32     16     
128    -208   
-48    -128   
192    64     
64     -16    
240    32     
32     64     
16     -16    
0      -16    
480    176    
-528   288    
288    -272   
-64    -16    
-1088  80     
64     -320   
336    -224   
0      -112   
560    48     
-272   -1232  
320    -240   
-96    160    
384    144    
-48    -384   
-432   0      
144    -208   
96     176    
-336   32     
336    48     
-2400  -32    
784    384    
-208   352    
-224   -384   
272    -352   
592    112    
-16    224    
-16    -592   
416    128    
-144   -512   
240    -176   
48     -112   
384    16     
32     144    
192    -48    
-848   -192   
160    32     
-176   -48    
-32    -112   
96     112    
160    160    
96     64     
32     -688   
16     48     
64     32     
224    -32    
80     160    
64     16     
-304   -176   
160    16     
-240   -16    
-64    720    
112    -480   
208    160    
64     -400   
32     0      
-256   -288   
-48    -304   
144    1104   
352    -384   
-64    48     
-16    -80    
608    192    
-400   -160   
208    -112   
-208   -192   
336    -448   
-1536  384    
64     -80    
48     -16    
64     144    
-80    -16    
128    -48    
112    16     
80     -1040  
-16    -16    
-16    -208   
128    -96    
-96    -128   
16     -144   
-224   -176   
224    -160   
-64    16     
0      -80    
-544   -112   
64     -128   
320    224    
-144   -48    
0      192    
160    -656   
48     32     
80     32     
304    -32    
-176   112    
-224   128    
-336   -16    
16     -16    
-448   -32    
32     32     
-400   -16    
192    -160   
128    80     
64     0      
-96    64     
48     -256   
288    96     
-176   80     
-64    -48    
-272   -272   
96     96     
-304   -80    
0      0      
-160   96     
80     0      
208    80     
-96    -64    
64     80     
112    -80    
80     96     
224    -96    
176    -112   
-112   -64    
128    -96    
-128   -48    
32     -80    
336    128    
128    128    
-64    -64    
0      -144   
-688   0      
32     -144   
144    32     
-400   -96    
128    80     
-32    208    
-1072  128    
-352   -32    
-176   -16    
-208   -64    
-80    128    
-144   48     
-64    16     
-144   0      
256    -32    
192    48     
-224   64     
352    128    
-256   -112   
-336   -144   
-160   -176   
-96    -96    
80     -80    
16     32     
-32    -112   
-80    160    
-208   112    
80     0      
112    -64    
-240   0      
-16    80     
-464   -32    
384    112    
0      32     
224    48     
32     224    
-560   144    
-160   -64    
-96    144    
-112   176    
-992   160    
208    224    
48     144    
-80    64     
144    -176   
-128   -64    
224    -16    
-64    128    
0      -64    
192    80     
-176   224    
96     112    
-288   240    
-160   -48    
-96    16     
-112   -64    
-160   -208   
-384   -144   
-64    64     
-128   -96    
48     -144   
-192   -240   
128    16     
-192   96     
144    128    
288    176    
16     112    
48     -16    
176    160    
16     336    
-144   -272   
-80    -512   
-64    1040   
16     544    
32     -32    
288    224    
-144   208    
-96    800    
288    -224   
-272   -1200  
-272   -192   
256    224    
-16    432    
176    480    
176    -352   
-192   -112   
-80    256    
-512   -144   
48     -528   
-1408  64     
-160   208    
-80    -320   
352    16     
256    48     
-416   -368   
160    400    
-160   656    
-272   -384   
0      -576   
-560   224    
416    -976   
112    432    
-144   288    
320    -352   
-800   464    
32     112    
32     -176   
-608   -832   
-32    352    
-64    368    
112    -256   
0      -176   
-176   80     
176    160    
144    80     
-160   -256   
112    352    
-304   -208   
112    0      
-336   64     
144    -416   
-48    -48    
16     144    
16     -96    
256    -112   
0      192    
-32    256    
-160   -192   
16     32     
80     128    
32     -32    
16     48     
-32    32     
-48    80     
-544   32     
0      16     
-32    96     
0      48     
16     -48    
-16    -16    
64     64     
-288   -64    
64     -16    
96     96     
-32    -128   
-96    -64    
-64    208    
-208   0      
48     32     
96     32     
112    80     
160    -128   
-288   -272   
16     0      
128    272    
-96    96     
128    -32    
-80    32     
-96    -64    
96     64     
-48    -32    
208    112    
-240   -368   
48     48     
-48    48     
-192   -48    
96     80     
-96    0      
32     32     
144    80     
112    64     
96     -64    
64     64     
-64    96     
112    0      
-96    -80    
80     32     
-128   0      
64     -16    
0      96     
-272   -208   
144    -32    
80     144    
-32    32     
80     208    
-192   48     
64     -16    
112    48     
32     48     
16     0      
0      -48    
160    96     
-144   -16    
128    112    
32     32     
-64    576    
-224   192    
288    32     
-16    48     
-16    128    
480    240    
-832   16     
0      16     
-336   -400   
832    -224   
208    80     
240    -96    
608    32     
-96    128    
-144   -80    
112    32     
0      -32    
352    128    
160    64     
-48    -128   
320    -48    
288    48     
400    48     
96     -16    
112    80     
96     -32    
-256   80     
-176   -192   
352    128    
336    48     
512    80     
112    16     
-320   -16    
64     80     
0      32     
176    240    
-576   64     
-112   48     
96     0      
192    -32    
160    -48    
-16    -112   
-160   64     
-48    -480   
80     48     
128    -16    
-16    -16    
288    128    
-16    32     
-64    -96    
464    48     
-240   64     
64     80     
-208   32     
48     64     
368    32     
-176   32     
288    32     
-96    -608   
256    80     
64     16     
64     112    
128    64     
-32    32     
-48    32     
96     144    
64     0      
112    80     
48     128    
320    192    
-192   -48    
96     -336   
112    160    
-32    -304   
112    -32    
96     -48    
112    80     
-112   112    
64     -48    
-160   32     
128    -32    
-256   16     
80     112    
-208   0      
160    -144   
240    32     
144    -176   
160    -160   
-368   -496   
432    16     
-48    -144   
272    80     
224    -128   
-48    32     
272    304    
-96    16     
-160   -256   
256    416    
-160   -64    
416    -48    
416    144    
0      -160   
-368   1504   
544    768    
-32    -704   
-32    -352   
-432   640    
96     -912   
112    -608   
144    832    
144    -224   
176    -272   
416    592    
-208   64     
-240   240    
384    -208   
80     -208   
32     320    
320    -368   
-112   464    
-304   -448   
160    -560   
0      -224   
64     -144   
-304   64     
512    160    
-64    208    
96     48     
192    -96    
112    -352   
-160   -288   
256    -192   
208    208    
-48    -112   
16     96     
128    0      
128    96     
128    160    
144    144    
48     -16    
32     16     
64     16     
16     96     
192    272    
272    16     
96     16     
48     16     
96     128    
-144   32     
48     160    
32     -176   
176    48     
96     16     
48     -208   
112    -32    
160    -128   
208    -528   
256    -64    
32     -736   
192    -48    
-80    96     
272    0      
176    224    
-224   32     
144    0      
48     -304   
-112   -544   
128    48     
80     -64    
32     48     
64     -224   
128    32     
-128   32     
128    -32    
144    32     
176    64     
96     0      
48     -800   
-160   -224   
80     -144   
-128   -16    
176    -176   
64     144    
336    -80    
-64    112    
-512   32     
80     -144   
-624   -240   
336    -80    
-144   80     
288    -128   
48     0      
80     -272   
-48    32     
304    176    
112    128    
176    224    
-32    352    
-240   96     
240    -96    
16     -48    
144    -32    
-208   -16    
-64    -160   
112    -112   
80     -352   
0      16     
64     32     
80     160    
-256   -896   
-416   -96    
0      -176   
-128   288    
192    80     
160    0      
-208   32     
-144   -112   
-368   0      
256    0      
-624   -48    
192    -16    
336    224    
-224   176    
-560   -144   
144    -656   
-272   -544   
544    -192   
192    144    
-416   112    
16     -16    
-32    -32    
368    -48    
160    -192   
-16    240    
-176   688    
256    -48    
80     -304   
-176   -256   
-208   -64    
96     -432   
272    16     
32     -96    
-80    128    
-144   16     
64     -240   
-400   -208   
64     -224   
-96    -192   
-80    -304   
32     -656   
80     -432   
-1440  -176   
-240   -432   
96     32     
-128   0      
-48    16     
320    208    
144    -80    
-144   -80    
208    304    
-16    80     
-48    -304   
-48    112    
16     128    
-464   288    
144    -144   
-464   -64    
144    672    
144    -352   
256    16     
192    -16    
48     -112   
208    192    
368    256    
-416   16     
192    -80    
144    224    
0      -16    
384    -256   
288    912    
240    -48    
-16    -512   
288    160    
-176   -16    
-208   -480   
400    208    
-576   272    
16     32     
-48    -64    
16     128    
-128   160    
224    48     
-112   -48    
-112   -160   
-256   -96    
336    32     
208    640    
-832   -384   
32     -624   
-2288  -432   
-192   192    
816    736    
-800   -160   
-496   -288   
352    64     
-224   48     
656    48     
-240   -64    
208    80     
-192   -16    
-528   -176   
192    -80    
-160   -48    
48     112    
64     -32    
-416   -16    
-16    0      
-160   0      
-16    -32    
-496   64     
16     16     
-672   0      
0      112    
48     -64    
96     80     
208    -112   
256    64     
-160   -16    
-80    80     
0      48     
-64    -16    
16     32     
-96    -32    
32     48     
-352   -144   
112    64     
-368   32     
80     48     
80     0      
-144   32     
-128   -32    
144    80     
-48    -80    
-32    16     
-96    48     
-32    16     
-112   -176   
336    -64    
0      112    
-48    144    
160    48     
-192   -48    
-320   -208   
-960   -96    
48     176    
96     160    
240    160    
-128   -64    
-80    16     
80     16     
48     64     
-48    -80    
192    -160   
-80    -128   
-416   0      
-112   48     
80     48     
80     160    
-272   48     
112    -112   
-128   -64    
32     112    
16     -32    
16     -96    
-16    48     
16     32     
16     96     
-80    32     
-112   -16    
-208   -80    
112    48     
-208   -96    
32     -144   
-608   -96    
64     208    
-768   -176   
64     -48    
112    16     
128    96     
144    -16    
-48    0      
-96    0      
-48    0      
64     32     
96     48     
16     96     
-176   80     
464    400    
-208   160    
112    32     
0      -80    
32     112    
0      -48    
-48    80     
48     -96    
-240   80     
-432   16     
80     16     
-128   64     
-128   -16    
368    336    
-432   144    
64     128    
-352   -48    
192    48     
-272   -32    
192    192    
-64    192    
-368   -128   
176    -80    
160    16     
48     96     
-240   144    
-320   16     
112    -48    
-288   -80    
-176   -128   
256    112    
32     48     
336    32     
-160   -64    
112    64     
176    144    
-208   112    
-96    48     
208    -32    
192    256    
320    272    
16     96     
-272   32     
-352   16     
-32    16     
96     16     
64     80     
304    112    
32     16     
-224   -112   
16     0      
-32    64     
-112   32     
304    144    
64     128    
256    192    
-80    112    
128    -48    
144    0      
176    224    
-112   160    
-256   -16    
48     0      
80     48     
96     32     
80     96     
-96    80     
16     192    
-48    160    
0      0      
128    336    
-80    128    
0      -544   
-16    464    
-160   -48    
240    -352   
-208   112    
176    48     
-224   320    
240    -384   
-48    16     
-144   304    
96     -80    
-128   128    
240    144    
0      144    
64     208    
-16    -272   
-32    144    
48     -784   
448    400    
224    96     
0      -96    
-16    144    
-144   144    
272    496    
144    16     
480    224    
0      32     
0      -176   
-128   -112   
208    208    
-192   64     
-64    -528   
-16    -304   
368    160    
-352   528    
48     176    
224    160    
144    -80    
80     0      
96     96     
48     32     
-64    320    
96     128    
-336   64     
176    -16    
64     80     
256    352    
112    112    
-16    -528   
80     -176   
-64    16     
48     176    
-32    400    
320    32     
48     -80    
64     48     
-128   80     
240    80     
-48    32     
288    112    
-48    32     
80     -64    
-112   -16    
-64    240    
320    336    
256    48     
256    96     
-64    -80    
0      -16    
-48    32     
400    144    
-160   80     
32     16     
-64    32     
112    32     
-80    -64    
144    -16    
176    -64    
-32    -80    
112    144    
64     -192   
144    48     
16     -112   
-112   64     
-16    48     
-80    224    
64     48     
128    64     
80     -128   
-32    0      
-32    112    
144    48     
416    336    
-272   -32    
-32    -160   
96     -1200  
16     176    
0      128    
96     80     
32     16     
80     96     
48     0      
176    80     
48     16     
48     48     
-16    64     
48     -16    
80     48     
80     -64    
224    80     
-112   0      
-32    48     
-48    -64    
208    -16    
64     -416   
32     144    
-144   -80    
112    32     
0      32     
16     80     
32     192    
-16    0      
144    16     
128    -80    
80     224    
144    48     
-96    -384   
32     -768   
32     112    
-112   112    
-48    80     
176    64     
176    224    
176    96     
144    80     
192    304    
-384   16     
-32    -144   
320    -16    
288    48     
528    352    
-272   288    
-16    -144   
256    -80    
416    64     
112    144    
-64    128    
144    288    
-592   384    
208    -432   
352    -64    
432    144    
464    128    
-752   -384   
128    -1024  
-96    -448   
240    256    
240    32     
48     272    
-96    -192   
128    144    
160    224    
416    640    
-384   -592   
416    176    
-80    192    
0      -400   
256    368    
336    -96    
80     32     
48     -400   
256    384    
112    -144   
192    16     
-128   -112   
656    -992   
-128   48     
-128   -160   
48     80     
-48    -224   
-48    -112   
128    -192   
192    -80    
-64    -64    
368    320    
-64    32     
-48    176    
336    96     
-208   -624   
-32    32     
16     -304   
176    144    
48     64     
208    -352   
0      -64    
0      -480   
-224   -432   
-176   -528   
128    -32    
-64    -1024  
224    -48    
112    32     
48     96     
-176   -48    
-112   48     
144    -224   
240    -96    
-624   -192   
304    -96    
384    48     
-400   -304   
224    0      
128    -112   
16     -176   
224    -256   
-96    -96    
112    176    
-176   0      
512    32     
-64    -80    
256    0      
336    112    
-144   192    
-144   128    
-624   64     
960    336    
-448   96     
-96    -160   
288    -96    
-208   -144   
368    112    
-192   -304   
256    -144   
96     -208   
112    -32    
-64    64     
-112   -64    
272    -32    
-64    0      
-368   -48    
176    -176   
80     -32    
32     -48    
80     48     
112    -80    
-48    16     
128    -16    
32     48     
176    80     
64     16     
-272   -32    
-48    -192   
-32    -112   
192    64     
-832   32     
112    -160   
-576   -64    
96     -112   
48     -16    
208    -16    
160    16     
288    32     
-432   144    
96     -80    
224    -64    
64     -16    
144    -32    
-80    0      
128    32     
-128   -32    
144    96     
-1024  -64    
-48    48     
112    16     
-48    -176   
32     -48    
96     -32    
240    64     
-144   -336   
224    -16    
-64    64     
256    -16    
-176   -16    
48     -32    
-368   -16    
128    -16    
-112   80     
112    -32    
128    -32    
80     -256   
-16    16     
256    16     
-176   -48    
-336   16     
176    48     
-336   -224   
80     -96    
-192   16     
-16    -16    
-16    0      
128    -64    
-48    -96    
0      -48    
64     112    
48     -48    
160    80     
128    -208   
-96    48     
-240   -48    
144    -48    
0      -64    
-128   -176   
-112   16     
160    32     
-64    16     
224    160    
-224   144    
16     -64    
128    -80    
-1296  -48    
144    160    
-992   -64    
-656   -80    
32     -80    
-256   96     
96     128    
-1584  -128   
-176   -80    
-48    96     
-112   -16    
128    -32    
336    -272   
16     -608   
464    32     
-384   352    
448    128    
-112   -720   
208    -256   
0      -80    
0      48     
48     -16    
-144   -112   
192    64     
-208   64     
-32    0      
272    336    
48     -192   
-160   -512   
-64    16     
-16    32     
-112   -80    
-16    112    
-240   128    
64     0      
112    320    
-272   96     
-320   -112   
-144   16     
-400   -48    
-16    -64    
-448   64     
704    512    
-256   176    
-576   -320   
0      -608   
-80    -32    
448    304    
-512   -400   
512    -816   
-304   -304   
448    368    
-64    96     
-176   208    
-160   -112   
-176   -464   
-624   144    
176    128    
80     16     
336    224    
-16    -96    
-16    64     
-32    -32    
-64    -48    
-96    0      
-128   -224   
432    928    
-192   -672   
-32    -32    
-208   240    
-80    -96    
-1392  0      
16     272    
-48    -48    
0      -240   
-112   448    
-64    -592   
-48    512    
64     0      
-128   -160   
-272   160    
96     -928   
96     -96    
224    640    
-224   -208   
-400   -64    
-304   -176   
144    256    
128    -48    
400    192    
-208   80     
-64    -112   
-192   96     
-80    -144   
160    32     
-272   48     
144    -48    
-144   -112   
-160   80     
-48    32     
-176   -112   
336    -32    
288    192    
-512   48     
288    48     
96     -144   
0      -16    
-32    64     
-128   -96    
208    -16    
-160   80     
-16    -208   
128    -128   
-32    -32    
-64    -48    
16     224    
-304   -48    
80     -16    
-832   -144   
-64    -112   
352    192    
-512   352    
32     -64    
64     -208   
-208   32     
112    160    
256    -192   
176    16     
-80    112    
-48    64     
368    208    
-640   -16    
112    80     
-16    224    
144    80     
-48    144    
-80    -64    
-384   96     
272    -48    
208    -32    
112    -96    
-128   160    
208    192    
240    16     
-144   -336   
-224   128    
-272   128    
-16    -112   
-96    -128   
192    -160   
16     144    
-144   80     
80     -64    
224    80     
-16    80     
-288   96     
-176   -48    
-80    0      
-160   112    
-80    48     
256    96     
-208   -64    
32     48     
48     -80    
-32    32     
48     48     
0      32     
48     48     
368    208    
-176   304    
-80    -48    
304    96     
-320   304    
48     128    
-64    -336   
160    -80    
48     112    
-112   96     
-48    -16    
208    16     
-112   64     
144    48     
144    112    
64     -16    
-64    -80    
48     48     
16     64     
-48    16     
64     -32    
-128   16     
208    96     
128    160    
-64    32     
32     16     
64     -96    
80     -176   
-32    -96    
112    -64    
144    -32    
64     -48    
64     112    
48     144    
-272   96     
96     80     
-128   -96    
-496   -1120  
0      -656   
144    -208   
112    -304   
32     160    
192    416    
96     -16    
64     -112   
352    752    
-176   160    
-432   -832   
240    240    
160    112    
272    -96    
-80    96     
16     -208   
144    -48    
176    -112   
608    208    
32     112    
-144   -800   
-80    224    
-320   96     
-176   -176   
144    112    
256    32     
496    256    
-32    624    
272    112    
-192   -272   
-352   -240   
-192   160    
-192   128    
128    -16    
496    -32    
832    -32    
336    224    
-496   -48    
-480   -352   
-80    -192   
16     32     
160    336    
-128   160    
192    240    
0      160    
16     -176   
96     -32    
112    -352   
112    0      
80     -32    
192    48     
112    80     
-96    -32    
32     112    
176    224    
304    112    
-96    64     
64     16     
0      -48    
208    -128   
288    -80    
-288   112    
-80    -64    
160    112    
-80    -16    
112    48     
16     -32    
-48    80     
-48    -128   
192    -16    
-16    112    
16     48     
-80    80     
96     -48    
-128   -64    
304    -64    
-16    96     
304    -448   
-64    0      
64     -608   
144    112    
208    -16    
-48    0      
-160   -64    
-48    112    
-288   -32    
32     16     
176    80     
-192   -96    
496    -16    
64     -128   
-64    16     
736    -224   
-336   -32    
16     -160   
272    176    
-288   64     
560    144    
-48    96     
-192   -16    
240    32     
-224   -128   
352    32     
928    240    
-656   80     
-400   -256   
16     32     
16     0      
144    64     
-64    -64    
-16    128    
80     112    
48     -80    
112    0      
-16    80     
-16    32     
128    -368   
32     0      
112    -208   
48     32     
-32    -96    
192    48     
32     -96    
-176   80     
160    -48    
-32    64     
272    112    
304    32     
-288   48     
-16    0      
272    80     
80     -176   
176    64     
0      0      
224    -16    
96     -32    
80     144    
128    0      
-32    -64    
112    -64    
0      80     
80     48     
64     -160   
-112   -16    
224    -128   
128    -560   
64     -16    
64     -176   
16     0      
112    -544   
48     0      
80     48     
-80    -160   
176    48     
16     192    
336    224    
64     -32    
-32    -192   
-288   -128   
-240   -144   
112    0      
128    80     
384    -176   
-32    -128   
64     -128   
-48    -112   
16     192    
-64    -224   
224    -64    
224    16     
-32    -176   
80     -16    
64     -96    
64     0      
-144   128    
240    272    
80     0      
-16    -208   
192    -288   
192    432    
32     -48    
32     -128   
112    112    
96     -480   
0      192    
64     160    
32     0      
112    -64    
400    -176   
112    224    
80     -192   
272    48     
16     -160   
-32    80     
-128   -80    
-16    -144   
176    -304   
192    0      
48     -80    
-544   -1344  
-64    -368   
-80    560    
-176   -144   
304    -80    
-80    -144   
160    -256   
-32    448    
144    -256   
160    32     
80     -16    
-112   -144   
-64    480    
48     -912   
240    -672   
-80    272    
192    528    
128    -176   
-272   -144   
64     64     
-48    -48    
176    80     
-128   16     
96     32     
-624   -112   
96     -32    
160    -496   
224    -80    
-80    176    
96     64     
-192   -48    
-128   -288   
176    144    
32     352    
-80    -224   
-32    -224   
96     48     
-320   -192   
-48    -160   
-416   16     
0      -400   
-16    432    
48     416    
-80    -64    
-176   -640   
48     -144   
176    128    
-64    -192   
32     128    
352    80     
0      64     
96     -32    
-576   -128   
32     -208   
-64    -80    
96     -48    
-16    -176   
32     -208   
256    144    
176    160    
-32    256    
112    96     
0      144    
-96    80     
160    112    
-176   112    
48     240    
-272   48     
48     -192   
-464   -80    
16     -160   
80     -16    
48     -224   
-160   -32    
176    -240   
224    -304   
-64    160    
320    -48    
-208   -32    
80     -192   
-48    128    
144    16     
32     -48    
-112   -112   
48     -272   
-96    16     
112    32     
-896   -80    
400    32     
-224   176    
-480   -80    
-176   16     
-1184  128    
-176   -16    
-1104  -272   
256    -96    
-96    480    
-400   160    
64     -64    
-128   -160   
-432   -64    
480    0      
-304   0      
192    32     
-128   -32    
-80    96     
-112   80     
-320   0      
-144   80     
128    64     
-128   -32    
-1392  16     
-48    240    
16     -80    
80     -160   
-176   -16    
96     96     
-304   -240   
48     -32    
-16    -32    
-16    48     
32     -32    
-16    0      
0      32     
-256   -128   
0      32     
-1376  224    
320    80     
-224   -48    
16     80     
32     -32    
-112   16     
128    -224   
-224   64     
32     0      
-240   -48    
384    288    
112    368    
0      144    
-32    192    
128    -80    
-144   32     
-32    -176   
-352   -368   
-128   -80    
-144   -160   
176    48     
-192   -224   
0      16     
0      160    
-112   144    
16     -80    
-32    112    
-224   0      
-304   112    
320    128    
-80    -80    
176    -224   
-432   -96    
480    480    
-416   432    
16     144    
0      -80    
112    96     
160    -64    
128    144    
64     288    
-480   144    
112    160    
128    112    
96     -32    
-304   -48    
336    32     
-592   0      
16     -96    
-128   -336   
0      80     
32     224    
-80    192    
-32    80     
-80    96     
-32    160    
0      -256   
80     -320   
0      240    
16     208    
-496   -64    
208    16     
-656   -128   
32     720    
-480   -336   
-288   160    
-80    144    
-64    -144   
64     208    
16     16     
48     208    
80     32     
256    592    
-144   -32    
-32    96     
-224   0      
16     -96    
96     80     
-16    128    
352    336    
-448   -176   
-208   -544   
128    -272   
96     176    
208    -112   
32     -32    
-112   64     
240    96     
0      48     
32     48     
-240   96     
-208   -160   
-16    -272   
208    -48    
256    144    
48     128    
192    80     
-32    224    
-608   16     
-112   -144   
160    -48    
368    16     
-64    32     
192    64     
128    160    
-928   -64    
-32    32     
-176   0      
-272   -48    
320    -144   
608    224    
816    496    
-560   96     
160    0      
80     96     
-192   64     
-96    -64    
288    0      
-48    48     
64     208    
-224   -32    
304    0      
192    32     
80     16     
64     48     
320    16     
-176   0      
-288   48     
64     -48    
192    80     
16     96     
0      -16    
-16    -96    
0      -32    
64     160    
-256   16     
192    48     
-32    32     
32     64     
160    48     
-32    -32    
32     -32    
144    176    
192    -32    
-64    48     
-112   48     
-96    -32    
400    -176   
-544   -128   
288    -16    
16     64     
-48    -80    
304    32     
-32    80     
192    -32    
544    128    
-656   64     
352    -160   
176    16     
-144   64     
144    -32    
-336   -144   
432    80     
48     288    
-512   32     
48     32     
-192   -48    
0      -16    
80     -16    
-80    112    
576    384    
-432   96     
-592   -336   
448    16     
-16    224    
-160   -64    
32     -64    
192    64     
592    144    
48     128    
112    80     
-240   -384   
-64    80     
16     -64    
-112   64     
-64    160    
48     32     
160    -176   
112    80     
16     80     
64     96     
-64    0      
240    224    
-400   -32    
256    -48    
176    80     
-80    -320   
96     176    
-16    192    
192    32     
48     64     
208    -64    
-48    48     
16     80     
-32    64     
192    48     
-32    0      
128    64     
-16    160    
160    192    
192    64     
-48    -48    
32     0      
160    80     
80     16     
32     -32    
128    64     
112    -16    
128    -16    
-144   96     
-96    -192   
272    0      
80     368    
-16    240    
112    -96    
-16    -240   
-16    -480   
80     48     
208    -624   
128    16     
-128   -96    
32     304    
-128   -400   
112    64     
48     112    
176    128    
48     32     
192    -192   
96     432    
144    -80    
-80    32     
0      -448   
384    80     
144    32     
-96    48     
32     144    
16     32     
-16    304    
256    304    
-128   -176   
48     -240   
80     64     
112    -256   
-64    -256   
368    16     
112    688    
-64    -128   
128    96     
-64    -224   
16     16     
16     560    
64     -304   
-64    -32    
176    80     
64     96     
112    96     
-48    -144   
48     -144   
-16    112    
-48    -144   
48     112    
0      -816   
-96    464    
16     -96    
64     112    
208    0      
96     -96    
-64    192    
288    208    
80     112    
32     304    
144    304    
-48    128    
320    336    
80     304    
-208   416    
-176   96     
-80    96     
352    -64    
704    432    
-32    -288   
-16    -48    
-32    -80    
32     -48    
-48    32     
192    0      
272    -48    
112    64     
-160   -96    
32     -176   
208    144    
128    64     
496    32     
208    -144   
-48    -144   
-160   -336   
-144   -992   
64     -64    
144    -192   
0      96     
64     64     
-32    -192   
-176   -160   
-32    -832   
112    -192   
48     352    
16     0      
112    128    
0      144    
128    -608   
-32    -48    
96     -112   
0      48     
48     16     
-80    -240   
-976   -352   
160    -288   
48     32     
160    96     
96     0      
-64    -48    
176    -416   
96     -912   
64     144    
128    112    
144    272    
48     -48    
80     192    
208    48     
-16    -112   
-176   0      
-128   32     
-128   0      
160    -128   
144    -48    
48     -480   
192    576    
512    -608   
16     112    
32     80     
176    -48    
160    16     
-160   -112   
-192   -144   
144    -560   
-192   160    
288    -48    
-1424  48     
144    -64    
-64    -80    
64     -64    
160    -64    
512    192    
-64    80     
160    336    
-288   336    
-288   -48    
-32    -96    
-160   -80    
128    32     
-64    -32    
144    -32    
-528   -32    
32     -64    
-176   80     
256    80     
48     -192   
-112   -16    
400    176    
560    -240   
-368   208    
112    -96    
-32    -48    
-96    0      
176    -112   
-288   -112   
320    -256   
-384   32     
224    16     
224    80     
0      -16    
240    -176   
16     -32    
0      -16    
-32    -832   
32     48     
112    304    
16     -48    
224    144    
-144   144    
-112   48     
64     304    
-176   224    
160    -32    
-432   -128   
112    -112   
-320   -176   
304    16     
48     -96    
80     -544   
48     16     
48     112    
176    96     
-96    -80    
-48    48     
-144   16     
192    176    
112    96     
240    144    
-544   400    
32     96     
96     16     
176    0      
16     48     
176    -176   
192    -176   
-64    -240   
32     -144   
64     -176   
128    -112   
-96    -384   
-96    -480   
-96    -160   
48     240    
16     -256   
240    64     
-80    16     
-128   112    
32     16     
-96    -352   
16     -112   
-128   -48    
0      16     
304    208    
-128   80     
-304   -176   
240    -160   
-384   -608   
144    512    
-16    -32    
-448   32     
-48    432    
-592   -320   
112    -96    
-16    464    
-192   256    
-64    -112   
-384   -32    
-16    48     
-272   -16    
-64    80     
80     64     
32     -16    
-304   0      
0      16     
-560   -64    
0      32     
-336   -48    
48     96     
208    -112   
-480   -240   
-352   48     
-144   -32    
16     -48    
-544   -48    
-16    160    
496    96     
80     48     
-96    -144   
-176   -160   
128    160    
-336   96     
112    -80    
352    96     
-96    -16    
176    0      
-144   -16    
32     192    
-432   -48    
-224   -16    
-48    -80    
-704   32     
112    -80    
112    0      
304    48     
-48    -32    
-160   128    
-16    48     
-80    -48    
-256   -48    
-16    32     
48     -32    
80     96     
-368   160    
-368   -32    
-272   -272   
-624   -208   
48     160    
-368   272    
-352   -16    
176    -16    
-176   -16    
208    80     
-224   -160   
416    -64    
-240   112    
208    0      
48     -96    
-96    32     
-528   -64    
272    32     
208    128    
-16    -48    
-272   -64    
-128   48     
-112   -192   
-208   64     
-192   32     
16     -16    
-224   -16    
-80    -16    
48     0      
-64    0      
0      16     
16     32     
32     32     
-128   -16    
-16    -32    
-112   -48    
-32    48     
96     -80    
-208   80     
128    -48    
-128   96     
272    448    
-528   192    
144    -176   
-112   16     
464    80     
-240   32     
128    -32    
0      96     
-192   -208   
320    96     
-288   160    
144    64     
176    112    
-336   -32    
112    -64    
112    224    
-112   96     
64     -32    
320    112    
-240   48     
-256   -144   
16     -48    
-256   -16    
-480   -384   
128    -96    
32     272    
-256   32     
496    -16    
-96    48     
-304   -48    
0      -240   
512    -176   
32     80     
-416   -80    
256    -16    
-64    48     
16     80     
-112   16     
144    240    
-224   0      
16     -16    
0      64     
16     -16    
-32    16     
128    224    
112    32     
-48    32     
0      96     
32     -80    
240    368    
-480   240    
288    -160   
-240   48     
176    -64    
64     288    
48     144    
64     -128   
-96    144    
80     -32    
-48    48     
112    32     
48     -48    
-176   240    
64     0      
-32    240    
96     -80    
80     112    
-96    -272   
64     224    
144    -16    
-96    32     
-32    112    
128    -48    
112    272    
48     112    
64     -432   
-448   -48    
288    -912   
-48    576    
288    368    
-400   -304   
416    544    
-144   64     
304    -112   
-176   -512   
-112   -144   
-64    -176   
96     64     
16     -240   
64     -96    
208    416    
80     320    
192    144    
-112   16     
400    96     
-224   -160   
0      -224   
-64    -64    
16     32     
-48    -32    
0      192    
128    96     
64     32     
-48    80     
48     32     
-32    256    
176    224    
-16    240    
-336   -160   
128    -480   
48     -160   
208    160    
-48    32     
48     -192   
64     16     
0      96     
32     64     
16     128    
16     96     
-32    144    
192    160    
-64    208    
-64    128    
0      304    
-256   208    
192    -160   
208    32     
16     32     
112    -128   
0      -224   
32     -80    
32     176    
-192   80     
48     -96    
208    -16    
-16    112    
-32    64     
0      48     
128    -112   
144    128    
-144   48     
32     32     
112    64     
-192   -208   
-16    32     
-32    -32    
240    -32    
128    -32    
80     16     
128    -32    
80     48     
80     32     
16     80     
-48    96     
256    -64    
-192   112    
-48    -80    
224    -32    
64     -240   
-64    -48    
96     80     
-288   80     
64     336    
208    304    
128    112    
464    192    
-400   -32    
16     128    
-112   -32    
112    128    
160    -96    
144    -128   
160    -80    
-96    -272   
176    -16    
-128   -1456  
80     32     
160    96     
-48    32     
16     0      
160    160    
32     -144   
0      -80    
80     -64    
64     48     
32     96     
80     32     
224    176    
-48    48     
144    176    
208    -64    
128    -32    
-144   -224   
-48    -48    
-144   -64    
64     48     
-16    0      
272    -160   
64     -192   
48     -272   
32     -128   
-112   -64    
336    80     
64     16     
96     -528   
-48    -752   
-48    0      
16     -512   
-128   64     
128    -144   
0      64     
-128   -96    
48     -176   
160    48     
192    -48    
128    48     
96     -64    
-160   -128   
-48    -208   
432    144    
64     -16    
80     -64    
400    -16    
592    32     
384    64     
-240   304    
64     96     
576    288    
-384   -48    
-96    -176   
-64    592    
352    464    
352    384    
64     368    
144    256    
-144   -80    
-96    96     
16     -528   
160    32     
-208   -96    
16     -96    
-16    176    
160    32     
288    0      
112    -16    
-48    160    
0      -336   
80     96     
224    -176   
144    -32    
240    288    
-144   48     
176    -224   
-80    -112   
-16    -80    
384    16     
-64    -240   
-1664  32     
80     128    
-64    -304   
224    -336   
144    32     
208    -368   
-176   -80    
0      -32    
208    -16    
-48    -160   
-48    160    
160    -304   
64     32     
128    64     
-144   -144   
-160   -320   
160    288    
224    -224   
64     16     
64     48     
-112   -256   
-16    -416   
-96    112    
208    144    
96     -128   
32     160    
272    -176   
-144   0      
-48    80     
160    -48    
-784   16     
32     -128   
96     -160   
64     112    
80     48     
288    -112   
-80    -176   
32     -320   
128    32     
64     -80    
32     32     
128    0      
176    80     
-160   -112   
208    48     
-768   192    
112    -16    
-944   -48    
48     -96    
208    -32    
-80    -80    
-144   -64    
96     -32    
-144   -32    
16     0      
64     0      
112    -32    
160    -48    
-80    -16    
80     -128   
-16    96     
-32    64     
-64    -32    
208    16     
48     0      
-48    -240   
496    32     
-144   -160   
176    0      
192    -864   
-48    112    
48     -320   
48     -128   
-48    432    
-256   -96    
-80    -160   
464    0      
-624   112    
-128   -48    
-1072  -128   
304    -112   
-128   48     
-64    -176   
32     0      
256    -800   
80     -32    
-64    176    
-368   -48    
96     -64    
192    0      
208    -80    
352    -32    
-384   -16    
-48    64     
-256   -128   
144    -192   
0      80     
352    16     
208    48     
192    -208   
288    64     
272    336    
-464   -144   
-48    -64    
96     32     
-160   32     
160    -80    
-112   64     
96     64     
0      -16    
224    -192   
160    0      
224    -144   
160    80     
288    -96    
-192   -96    
-288   64     
16     -48    
-640   -208   
512    64     
-32    16     
96     16     
0      32     
-80    -48    
-1568  -80    
272    -128   
-112   48     
304    48     
0      0      
0      0      
-1296  48     
-176   80     
-64    32     
16     -16    
96     -48    
80     160    
-64    96     
-48    -32    
48     0      
128    32     
-1904  -96    
400    176    
-592   -128   
400    0      
-656   -448   
-288   -320   
-96    -128   
-192   96     
-32    208    
-496   80     
-80    -48    
384    320    
-336   112    
-496   -208   
560    400    
-528   256    
-48    -96    
-80    -272   
192    336    
-368   288    
-192   64     
-304   64     
80     112    
672    480    
-368   48     
-480   -528   
32     -272   
-176   80     
96     -48    
240    224    
-304   -480   
-96    -16    
-96    240    
-80    -80    
16     -192   
160    -64    
64     128    
-80    144    
-128   -144   
-432   144    
176    -64    
-320   -64    
48     192    
64     -32    
16     144    
-160   -240   
32     544    
688    -96    
-496   768    
-240   -672   
64     -656   
176    960    
-48    -464   
-112   560    
-256   -496   
112    -16    
-160   192    
-80    80     
-272   -16    
48     -240   
-96    -48    
192    -160   
144    128    
-48    16     
-16    0      
-112   256    
-16    -32    
-160   64     
32     16     
-96    -48    
-288   -208   
-224   -144   
96     96     
-544   -272   
-144   32     
-32    -224   
208    -80    
-16    -80    
16     32     
96     -32    
272    -112   
-160   0      
-80    0      
48     -64    
-256   16     
80     80     
-224   -64    
224    96     
-192   112    
-128   256    
-80    -64    
-96    -96    
-128   64     
64     -96    
256    -80    
128    16     
-48    80     
-80    64     
48     48     
16     0      
144    96     
144    128    
0      -16    
-272   -48    
-48    32     
-64    -32    
-64    -32    
240    32     
16     144    
368    160    
-208   288    
-368   64     
32     -144   
-48    0      
48     48     
192    48     
-128   64     
-48    0      
-192   -32    
-272   -48    
-32    48     
-16    32     
192    -96    
16     48     
-176   320    
80     -32    
128    48     
-240   160    
-16    64     
96     0      
32     -16    
80     -112   
208    112    
-128   96     
-16    48     
-112   -32    
160    -176   
80     96     
96     96     
-112   -32    
416    -224   
240    64     
192    96     
160    160    
-464   96     
-64    0      
-288   0      
368    16     
112    224    
96     192    
-160   80     
144    -112   
448    16     
-32    176    
-144   32     
-32    -64    
320    144    
-48    176    
-176   32     
-224   -48    
80     -16    
-32    -48    
256    48     
256    16     
272    -16    
112    0      
16     112    
-160   128    
-80    32     
-64    64     
176    48     
-80    -48    
64     -96    
448    256    
-368   -48    
96     64     
-80    96     
32     48     
96     80     
80     112    
176    128    
-48    -112   
288    16     
128    16     
48     48     
16     -32    
64     -16    
-96    -64    
144    -464   
16     112    
-48    384    
-16    -128   
-288   208    
-16    192    
-48    96     
224    176    
336    560    
48     -64    
48     -448   
160    64     
-336   176    
192    112    
-32    -192   
112    336    
256    304    
-32    400    
-16    -224   
464    -256   
-240   16     
304    -112   
-368   432    
-192   -416   
320    208    
-128   256    
192    80     
48     160    
368    -64    
208    192    
-448   192    
320    -448   
576    -192   
304    80     
-64    -176   
-80    32     
208    -48    
-240   -16    
-96    96     
992    736    
-960   -640   
-32    -48    
368    416    
-176   -32    
384    176    
176    144    
224    32     
-64    -112   
-96    96     
80     -1056  
80     48     
16     224    
-32    16     
0      96     
144    -144   
80     -16    
160    256    
-240   -112   
64     16     
-48    64     
80     160    
272    -16    
64     -128   
-112   32     
16     -368   
-64    16     
80     -128   
32     48     
160    96     
16     64     
0      0      
112    96     
32     16     
0      -80    
-128   -48    
-288   -16    
192    16     
32     32     
48     -16    
192    32     
-160   -16    
240    -432   
-96    64     
160    240    
112    112    
-16    16     
208    16     
-160   0      
272    144    
-192   16     
80     -64    
0      48     
32     32     
0      -16    
80     -32    
16     64     
32     -336   
176    80     
96     -768   
-80    -16    
32     160    
176    96     
-176   0      
80     64     
176    304    
-80    96     
16     -16    
176    -16    
96     64     
128    -224   
-80    -32    
128    -64    
80     96     
48     96     
240    160    
144    64     
112    0      
-80    128    
144    112    
-16    -80    
256    -144   
64     160    
16     -192   
64     0      
16     -240   
-64    -144   
-128   -16    
112    144    
48     48     
160    -48    
32     -224   
64     64     
80     64     
80     112    
416    416    
-288   -48    
64     -64    
320    -96    
80     64     
176    -144   
256    176    
48     -112   
512    -32    
-64    -896   
-48    112    
-320   128    
-320   112    
64     -16    
112    -32    
336    -736   
256    112    
-144   144    
-112   -64    
-16    16     
-496   -176   
112    48     
16     16     
-32    -960   
112    144    
16     -80    
96     16     
48     64     
144    -64    
64     48     
-192   -384   
80     -112   
160    -432   
16     16     
144    -496   
-144   -48    
-112   272    
256    240    
-160   -80    
-16    0      
496    160    
-240   0      
464    -80    
-64    -112   
-576   -112   
144    -64    
-144   -96    
208    -32    
160    -80    
464    -528   
64     -64    
416    48     
0      32     
-112   -112   
-128   0      
320    -64    
144    128    
-304   -32    
272    -48    
-192   0      
400    192    
128    -48    
176    -32    
80     -112   
-112   -160   
32     32     
-80    -96    
432    96     
-80    -192   
192    16     
144    -32    
208    -64    
-112   16     
32     -64    
-320   32     
336    192    
16     128    
176    -160   
144    112    
0      0      
-240   176    
496    -544   
-208   -16    
16     48     
256    160    
160    -272   
96     -208   
-288   528    
-112   -144   
-912   -512   
-144   240    
-1120  304    
896    352    
-256   432    
-304   -1664  
656    -128   
-208   672    
-480   -624   
-400   416    
-144   208    
128    -272   
80     32     
48     -192   
144    -80    
80     -96    
256    -128   
-416   -160   
320    176    
192    -48    
-64    -496   
-320   -464   
368    -64    
-80    752    
160    -480   
192    720    
-112   240    
224    -224   
-16    128    
-144   -464   
96     128    
480    384    
-624   672    
208    240    
-416   48     
496    288    
-288   -416   
96     -176   
-48    144    
-192   -304   
416    0      
-272   -64    
80     -32    
-176   -32    
32     -112   
-32    -128   
112    240    
-576   208    
16     48     
-16    -144   
352    192    
-64    144    
192    -208   
-16    -128   
0      -480   
144    128    
-32    0      
208    32     
-64    64     
112    192    
-240   -48    
80     -144   
32     -32    
48     144    
-64    16     
272    -80    
-112   96     
-880   64     
160    -32    
80     -48    
-368   48     
-16    0      
224    16     
-80    32     
32     -16    
-160   -16    
144    -32    
-16    96     
320    -144   
0      -64    
-592   -320   
128    16     
-224   -96    
-768   -64    
32     48     
-464   32     
16     144    
-1200  96     
-160   48     
288    48     
-32    -64    
64     0      
-240   48     
-1104  -16    
64     -16    
-656   -208   
48     0      
-96    0      
176    0      
160    144    
-256   96     
-112   0      
48     -48    
-160   -16    
-16    32     
-112   96     
-304   96     
-144   96     
-304   -160   
240    32     
-304   64     
-112   16     
192    -32    
-112   0      
80     224    
192    224    
-224   112    
-128   -96    
0      -288   
-64    -96    
-64    16     
-1440  -80    
16     112    
256    272    
-288   256    
96     -112   
240    -144   
224    64     
64     80     
48     320    
-400   16     
-80    -16    
-320   48     
-16    48     
-512   160    
192    176    
-288   80     
-176   -80    
80     -192   
-48    16     
-112   -144   
16     -128   
224    144    
-16    -32    
-160   -64    
-304   -144   
-96    -432   
16     112    
-80    528    
0      144    
-64    -336   
-176   -304   
208    128    
-496   -272   
-160   -208   
-96    -240   
-64    16     
16     -144   
256    -144   
336    320    
-224   480    
48     -64    
-80    -176   
-112   32     
0      16     
80     336    
-32    -80    
64     192    
-1440  -288   
112    96     
112    -128   
208    0      
-128   16     
-112   80     
-112   416    
-32    -256   
-144   48     
96     96     
-160   -320   
-240   192    
320    96     
-64    96     
272    192    
-368   -128   
-384   -352   
96     64     
-32    192    
160    144    
144    -80    
144    -80    
-160   96     
-208   48     
48     -32    
-64    -64    
160    112    
608    320    
0      304    
304    -560   
-144   -976   
-192   -160   
-80    144    
-256   -272   
-304   -336   
-208   -16    
-192   -112   
256    -48    
16     128    
-208   -144   
416    -96    
-288   -16    
176    -128   
32     -96    
176    128    
416    48     
-240   16     
256    176    
0      112    
-96    -16    
32     0      
-320   -96    
240    -16    
16     96     
-288   0      
320    96     
-304   32     
288    80     
-352   -64    
112    64     
288    48     
-144   48     
288    16     
-112   80     
32     -48    
16     80     
-48    0      
160    112    
-64    128    
-112   -80    
416    112    
-256   -48    
112    112    
-112   16     
-48    -16    
112    64     
192    64     
32     16     
0      32     
-112   80     
64     64     
64     -16    
0      16     
160    80     
-368   -48    
96     -16    
-80    -48    
112    32     
48     32     
192    64     
48     48     
-64    -32    
-32    0      
128    80     
128    128    
48     -48    
432    320    
-368   176    
-240   0      
112    64     
128    0      
0      -64    
-16    144    
336    224    
-144   48     
-128   -32    
192    144    
16     64     
32     0      
160    64     
224    112    
-208   -48    
0      -48    
144    48     
-64    80     
32     48     
0      -112   
256    -432   
-80    144    
144    96     
240    176    
-128   112    
160    96     
240    -32    
-64    32     
-80    32     
224    272    
-112   16     
160    112    
80     176    
144    144    
-144   80     
176    -448   
160    -144   
96     -656   
160    288    
-144   112    
-16    16     
160    32     
-208   48     
0      128    
208    560    
112    144    
48     -128   
-288   -128   
96     48     
-352   -208   
320    -368   
64     288    
-48    -1184  
-48    -112   
128    -112   
320    16     
336    144    
144    32     
80     -16    
352    80     
0      16     
256    16     
-96    64     
-336   -288   
112    -64    
-448   128    
48     80     
16     -720   
-112   16     
96     48     
304    128    
-368   128    
-320   -128   
16     -144   
-48    -96    
-16    80     
-48    32     
192    -64    
256    -112   
496    32     
64     -160   
176    48     
176    -208   
352    144    
64     -1392  
-176   -16    
-112   -48    
16     32     
-32    -112   
304    80     
208    48     
512    128    
-288   32     
96     32     
-304   176    
0      -32    
-64    48     
-32    -480   
304    32     
32     64     
224    112    
-48    -16    
32     48     
0      48     
256    272    
-320   112    
64     -752   
16     -64    
16     272    
96     160    
192    -96    
-32    -80    
16     -48    
48     -336   
176    80     
0      -64    
16     176    
112    0      
128    416    
-240   -592   
192    0      
-16    144    
336    -192   
320    0      
-16    240    
-32    -208   
-192   -80    
-16    -624   
208    176    
-192   224    
352    -16    
-160   -224   
416    -128   
-16    -224   
640    992    
-272   320    
-288   -80    
48     -672   
64     -160   
112    -80    
128    -64    
544    624    
-160   48     
-48    96     
-240   -48    
128    112    
-128   80     
0      -608   
416    -384   
48     -96    
-304   -1232  
-144   16     
160    -240   
176    16     
-64    -672   
288    -128   
-112   -16    
48     -48    
80     256    
256    224    
112    -208   
144    128    
96     96     
0      16     
224    -304   
0      -192   
144    0      
32     -400   
-192   -288   
272    -288   
128    0      
256    -288   
-32    240    
-16    80     
-16    -64    
-48    -48    
240    32     
160    -176   
144    -224   
-448   -16    
-32    64     
-48    -48    
368    176    
-48    144    
48     -336   
-64    0      
224    96     
144    -48    
0      -48    
208    48     
16     0      
288    80     
-16    96     
96     48     
-112   -160   
80     -48    
-896   48     
32     32     
-16    -528   
128    -368   
48     144    
-192   -64    
176    -112   
96     48     
96     112    
144    -80    
16     16     
160    -384   
176    -32    
-320   64     
-32    -96    
-240   0      
176    16     
208    -16    
144    -144   
0      -64    
208    -128   
96     32     
-48    -112   
-112   -32    
48     -48    
48     96     
-112   0      
128    -64    
-128   16     
224    32     
-112   80     
48     -160   
-1024  -224   
-16    0      
112    -144   
32     -144   
160    96     
16     -96    
-16    96     
128    -80    
256    112    
-256   192    
0      80     
112    64     
96     -128   
0      -32    
-16    -144   
48     -96    
176    0      
-272   48     
112    -224   
-112   -96    
16     -416   
-112   -64    
208    -272   
192    -272   
64     48     
-208   -320   
-144   -208   
-160   -240   
-416   -352   
144    -32    
-176   -80    
192    0      
-416   -304   
160    -48    
-64    496    
224    64     
-112   192    
32     -400   
96     -32    
112    64     
-32    80     
-656   -112   
-80    144    
48     -112   
48     -16    
-144   416    
-240   -144   
-224   -16    
48     -400   
-368   64     
96     176    
-112   0      
304    -96    
112    144    
-80    32     
160    -16    
128    112    
112    160    
-464   -352   
-192   -144   
16     432    
-128   -176   
0      -32    
-128   -160   
336    -320   
80     -192   
256    80     
-352   -32    
-224   -16    
48     -32    
112    -112   
-96    -96    
-80    -208   
-32    -208   
48     48     
208    16     
-32    -160   
32     80     
-240   0      
48     96     
-688   -272   
-320   -32    
80     128    
-560   16     
64     0      
-96    48     
-80    -64    
-752   -16    
-128   64     
176    160    
-176   80     
-176   16     
272    224    
-448   -48    
304    176    
32     96     
-16    -32    
-192   -256   
48     -32    
-160   144    
-224   48     
-336   -16    
-1024  -112   
144    -64    
272    144    
-80    -96    
304    -160   
304    144    
-176   0      
64     208    
112    0      
-64    -128   
32     112    
-96    16     
16     -80    
80     16     
-320   -16    
-912   -160   
80     -48    
-400   -224   
-32    48     
-160   -80    
304    16     
-272   -112   
160    64     
-144   32     
-128   16     
-48    32     
-16    16     
160    -48    
-192   80     
160    0      
-64    32     
-96    80     
-528   -16    
-128   64     
-32    0      
64     48     
80     -32    
-208   80     
208    160    
-192   -32    
16     -32    
-48    -64    
144    144    
48     144    
-192   48     
0      -96    
-32    -16    
-192   -48    
240    112    
-64    48     
208    -48    
-288   -48    
96     64     
-176   32     
64     0      
128    32     
32     80     
-224   -48    
-224   16     
0      48     
-192   -112   
128    -48    
-208   64     
-32    96     
-2336  -96    
-80    64     
176    48     
-176   112    
144    176    
64     -32    
80     64     
-128   -192   
-128   0      
224    176    
-240   -32    
-16    -32    
160    128    
-160   128    
336    32     
-624   -80    
-208   48     
16     112    
-80    -48    
64     32     
-96    48     
48     96     
0      80     
-144   48     
-32    -16    
64     32     
-144   -128   
112    48     
-160   -16    
16     128    
80     64     
16     -16    
112    48     
0      0      
80     112    
-160   16     
-64    64     
32     112    
-32    64     
32     16     
128    96     
-80    128    
48     80     
-128   -32    
48     -64    
80     144    
208    528    
-592   -208   
-96    -448   
96     -176   
304    0      
160    112    
80     64     
176    288    
-160   0      
-272   256    
32     112    
-112   -144   
-48    64     
128    -32    
16     0      
-240   0      
-32    -16    
0      -96    
352    -64    
144    0      
128    656    
-144   272    
-304   -256   
-400   -48    
16     80     
0      16     
432    -64    
-208   -560   
0      48     
-304   336    
-208   96     
128    32     
-256   -160   
64     1264   
368    -80    
96     -64    
-336   336    
-224   -336   
32     160    
352    -192   
-208   -416   
96     368    
-192   -32    
-96    80     
-64    -16    
208    -80    
112    16     
208    32     
144    16     
-112   -32    
48     -272   
-224   864    
128    -288   
0      -48    
160    784    
32     -272   
96     -240   
208    240    
-192   -64    
96     -176   
-16    224    
-112   -336   
16     -144   
-48    352    
112    144    
32     -240   
128    112    
160    144    
-96    96     
192    1008   
-48    -96    
0      -256   
-96    -240   
0      -32    
32     -32    
128    -160   
-112   176    
32     -112   
-288   128    
432    -16    
-144   -336   
112    -272   
0      -80    
-80    192    
160    -304   
-256   -96    
160    -208   
-160   224    
32     16     
112    -336   
48     64     
-48    32     
128    -32    
-80    48     
96     96     
-176   -48    
16     -496   
80     -160   
512    96     
0      144    
0      -16    
80     16     
352    160    
-224   -592   
-240   32     
80     240    
128    -48    
-112   -96    
-48    112    
-80    96     
64     192    
0      112    
144    0      
144    -288   
-32    -336   
144    32     
-96    224    
-16    -64    
80     -128   
0      48     
32     96     
64     336    
192    192    
208    -160   
-48    -96    
-32    -560   
-112   -208   
128    80     
-400   -304   
320    -272   
-80    176    
64     80     
272    -160   
32     64     
32     -112   
112    128    
-192   32     
-48    48     
112    0      
96     128    
192    64     
80     -16    
176    80     
160    176    
-144   -32    
160    -208   
-48    32     
144    80     
16     -208   
0      -64    
-16    -528   
-32    80     
-64    0      
256    0      
0      32     
32     -64    
176    -64    
32     0      
-144   32     
48     -224   
96     -48    
48     80     
80     64     
384    -48    
-128   192    
-16    -320   
160    -48    
64     112    
-144   400    
-240   112    
112    -128   
32     16     
128    -96    
208    128    
128    -112   
-32    112    
32     -80    
48     -80    
96     -320   
64     96     
-80    -80    
-128   32     
128    48     
64     -16    
160    32     
176    240    
-96    144    
128    -176   
224    0      
192    -32    
144    32     
0      -112   
-16    -32    
-16    -192   
160    192    
160    176    
-80    80     
64     128    
80     -160   
144    256    
224    272    
48     -368   
-128   -272   
-96    -1504  
144    -16    
-112   160    
-32    -112   
192    256    
96     -128   
0      -112   
16     -544   
352    -32    
-48    0      
144    -480   
-208   32     
-736   -64    
-320   -144   
-64    -48    
-336   -208   
112    -112   
576    -224   
192    96     
32     96     
48     -176   
-16    -256   
-192   0      
112    176    
304    -96    
272    144    
112    352    
-176   192    
-528   32     
-144   128    
80     -192   
48     -224   
-16    -432   
288    192    
304    -768   
0      112    
-208   -32    
-48    32     
224    80     
-192   48     
80     -48    
144    -80    
-368   32     
-48    -16    
-1840  -32    
32     -80    
64     64     
64     32     
240    -80    
432    -48    
-576   -80    
128    -560   
-256   96     
-112   0      
448    272    
672    272    
-544   16     
-16    -80    
144    16     
-912   -64    
208    -16    
96     32     
176    0      
272    80     
-96    -608   
-352   0      
160    -688   
176    80     
448    32     
-192   32     
256    -32    
-176   -160   
64     -16    
128    48     
-16    64     
16     128    
-912   80     
64     -64    
224    16     
-368   -368   
224    48     
-208   -512   
208    160    
336    96     
96     -112   
-48    0      
16     -272   
144    -64    
-16    -48    
-192   160    
-256   -176   
688    320    
-16    -240   
-128   -176   
544    -80    
-128   32     
224    -432   
288    16     
304    224    
448    112    
-832   -32    
288    -272   
560    -48    
-192   32     
-400   -176   
576    48     
-1168  48     
-128   -160   
96     96     
0      48     
-48    -32    
176    -176   
128    80     
112    -16    
144    0      
-176   32     
96     0      
-128   64     
32     -48    
-32    -16    
192    0      
-48    -48    
384    112    
-224   80     
96     -224   
80     80     
304    -240   
0      48     
16     -32    
48     16     
-112   -16    
384    160    
-656   80     
224    64     
-16    64     
32     0      
-16    -32    
-96    -80    
64     -64    
-48    -176   
-80    -16    
-896   -176   
-608   48     
144    32     
-144   -80    
16     112    
-224   80     
-208   -32    
224    128    
-32    16     
-16    -240   
-96    -256   
-624   -96    
256    128    
-80    -192   
-176   -16    
-592   16     
-192   48     
-64    64     
-240   -32    
144    128    
-240   -144   
-48    -32    
224    48     
-128   128    
48     -16    
-96    -80    
112    80     
-16    -16    
-32    -80    
-16    96     
-64    -80    
-160   80     
-48    -32    
-240   -320   
-32    384    
-304   -48    
-48    16     
-880   -16    
-192   64     
-48    -16    
-128   64     
-48    -80    
16     176    
-272   -240   
48     -768   
16     496    
64     -176   
0      224    
-128   -64    
-80    96     
0      0      
144    320    
-848   16     
-16    -48    
-208   -32    
176    128    
128    -192   
144    336    
-32    -192   
112    176    
-288   -48    
224    -400   
224    384    
-144   -160   
-48    64     
-144   0      
-128   -96    
-192   256    
32     -32    
-768   -272   
-16    112    
-192   -32    
-48    48     
-512   -560   
320    -912   
368    1552   
-160   96     
-256   -832   
-224   352    
-16    48     
-208   240    
-16    240    
240    -448   
576    400    
-976   176    
448    -608   
-16    -144   
144    464    
-48    48     
-240   -16    
-304   -48    
-368   480    
160    480    
-288   0      
160    -144   
128    48     
176    208    
16     48     
80     288    
-176   192    
32     80     
-400   -32    
144    32     
-208   -240   
-48    -400   
96     32     
80     144    
144    0      
-80    -128   
-32    -192   
-144   16     
32     48     
-192   -48    
96     0      
80     -16    
80     112    
128    -32    
-112   32     
48     -48    
-128   -80    
-176   -112   
272    -288   
144    -128   
-224   64     
-112   32     
-224   80     
128    -32    
-128   32     
416    288    
-672   192    
256    -64    
48     -16    
-192   608    
48     32     
192    160    
112    16     
48     -64    
64     224    
192    48     
-176   -32    
128    -208   
-192   -32    
608    -352   
176    272    
-96    288    
-96    96     
176    160    
144    -224   
-224   48     
-256   -144   
-208   240    
192    -144   
512    256    
-336   272    
-192   0      
-368   -144   
384    -176   
224    208    
-192   176    
64     160    
-160   -64    
208    -16    
-16    96     
-32    0      
-80    0      
48     112    
-208   0      
208    80     
352    320    
-320   192    
-48    -16    
32     0      
-80    96     
0      -16    
128    96     
48     192    
336    192    
-224   96     
192    -640   
-272   -496   
32     0      
48     144    
48     -304   
-272   -480   
-48    -80    
-352   160    
-48    80     
320    -144   
-128   -32    
464    64     
-128   176    
160    32     
288    64     
224    -16    
48     -16    
80     64     
-112   -112   
-80    -96    
0      -304   
160    -80    
112    32     
112    272    
-160   192    
-128   -496   
320    -288   
176    32     
160    32     
-128   80     
-48    16     
-32    112    
256    224    
-128   48     
-16    -112   
-32    -160   
128    176    
48     64     
32     64     
64     0      
464    -1296  
-128   256    
112    144    
352    160    
-224   256    
64     0      
112    16     
80     0      
128    256    
96     288    
176    288    
-128   208    
-112   -16    
176    16     
64     -80    
112    0      
-48    -240   
48     80     
16     -16    
240    -16    
0      48     
48     -208   
304    240    
0      -48    
144    -416   
-16    192    
0      64     
-80    32     
-624   -128   
112    48     
32     -224   
80     -80    
272    -112   
32     80     
32     304    
128    352    
-144   -64    
-80    -80    
160    64     
208    128    
160    -224   
144    -112   
160    -176   
48     -272   
320    96     
64     -192   
112    -16    
80     -256   
-320   -32    
112    64     
-16    64     
48     32     
0      96     
48     -32    
-320   -128   
224    -16    
208    144    
-336   96     
176    -64    
80     80     
-240   -192   
624    -144   
112    80     
-144   -224   
544    -176   
384    160    
-192   256    
-112   112    
-176   -128   
112    48     
32     80     
656    400    
-544   -32    
-240   -160   
144    64     
-96    -64    
224    144    
-160   -224   
16     16     
336    -736   
-32    -16    
-16    -656   
112    96     
-16    16     
-240   80     
160    0      
304    -80    
160    96     
-400   -96    
32     112    
32     -176   
160    80     
80     -272   
-144   -128   
208    32     
-16    64     
272    96     
-32    32     
16     32     
-208   112    
192    112    
-32    -144   
112    16     
16     32     
96     128    
272    -32    
208    -16    
-144   -80    
0      48     
112    176    
-80    96     
32     16     
192    0      
432    448    
-400   32     
400    -80    
352    64     
-16    -80    
32     -160   
-144   0      
64     -176   
288    128    
-144   -32    
256    144    
-336   -256   
-64    -176   
160    -32    
-208   -512   
304    -16    
-144   160    
-240   -96    
-288   64     
-64    -176   
144    -112   
-256   -48    
256    -96    
-32    -112   
1184   416    
-1008  256    
-416   -320   
288    -208   
64     64     
128    -144   
160    64     
192    176    
-272   -512   
-96    -48    
16     -720   
48     -16    
112    -560   
96     16     
192    -160   
80     -32    
128    -128   
32     16     
96     48     
32     16     
112    64     
32     -144   
-576   -64    
64     192    
128    -48    
48     -160   
224    0      
48     -272   
80     -144   
48     -320   
16     -144   
-48    -96    
48     80     
48     0      
128    48     
144    0      
144    304    
-96    224    
-128   -48    
-448   112    
-128   -96    
32     -224   
112    112    
128    16     
288    -144   
304    288    
-176   -160   
-32    -64    
208    -80    
64     80     
80     -128   
128    -96    
-80    240    
160    -176   
-864   -128   
48     208    
-128   -128   
208    -128   
176    48     
-32    -160   
64     -160   
-16    -1376  
96     -384   
-128   336    
-112   304    
0      -384   
128    384    
-176   176    
-64    -816   
-96    208    
144    96     
-400   112    
-160   -272   
304    -176   
176    528    
-16    144    
80     -176   
-32    -240   
48     32     
160    224    
-96    96     
-48    400    
0      176    
16     64     
-144   -80    
32     -176   
-288   -464   
160    176    
128    224    
48     -96    
-96    240    
48     -208   
144    256    
96     400    
-256   144    
-16    -192   
256    16     
-560   480    
192    256    
112    208    
0      224    
-256   416    
80     352    
-96    -144   
48     -224   
0      160    
-112   -288   
160    32     
-80    128    
-16    -48    
-880   -144   
336    -80    
-80    64     
144    96     
-272   32     
0      16     
-432   336    
96     -48    
224    48     
256    -128   
-112   80     
160    -64    
128    -128   
64     -144   
80     -32    
32     48     
256    208    
-208   64     
112    0      
-640   -64    
192    96     
-336   -96    
448    -384   
272    -192   
-144   -192   
160    -192   
-1440  -112   
-1584  64     
-160   160    
-448   240    
336    144    
304    176    
-192   -64    
112    -160   
-48    -48    
144    96     
-112   64     
-208   -96    
80     48     
-256   176    
96     208    
-112   -16    
64     -32    
-48    -112   
-32    0      
-176   -32    
-576   -32    
0      -16    
16     144    
80     112    
-352   32     
64     464    
-176   64     
80     -208   
-96    -304   
-64    48     
-32    -32    
128    224    
-80    80     
-336   0      
-224   -112   
96     0      
-64    192    
-96    -32    
32     320    
-144   288    
16     160    
-192   16     
176    64     
112    240    
32     64     
128    16     
-176   -128   
0      -480   
208    -336   
352    80     
112    368    
80     0      
-976   64     
-96    -32    
-112   -48    
-320   -176   
0      192    
400    160    
448    64     
-560   -16    
-368   -96    
-464   -64    
128    -96    
-144   -640   
368    -432   
-304   144    
-672   112    
-352   48     
-128   -176   
-1136  144    
48     32     
224    64     
112    -96    
64     112    
16     -80    
-320   96     
-48    -80    
-112   128    
-80    0      
-176   -144   
16     96     
64     176    
176    224    
-160   224    
-32    -576   
-400   -560   
-48    -176   
-256   32     
176    -272   
-256   -336   
256    -96    
-144   48     
144    240    
-144   160    
-208   -64    
160    -752   
-96    -96    
192    -96    
32     -160   
-704   -384   
48     -160   
80     -80    
-128   -304   
112    -96    
32     224    
208    256    
64     256    
-112   16     
-464   -320   
432    208    
-320   144    
-64    -368   
-144   -128   
-80    80     
-512   -96    
192    48     
80     144    
-288   -160   
-16    256    
0      368    
112    -64    
-48    -32    
-48    -16    
240    -656   
400    704    
-320   96     
-64    64     
208    -64    
-336   -48    
-240   -240   
256    320    
160    -16    
288    48     
-80    64     
32     -64    
-16    144    
-224   48     
80     80     
-96    -48    
160    48     
64     48     
144    128    
0      32     
160    48     
-288   -32    
-160   64     
-80    -32    
-16    -16    
0      -224   
0      -96    
32     128    
-48    64     
64     -16    
-144   160    
-144   32     
-64    0      
240    64     
-112   32     
-112   -320   
-240   -176   
-352   272    
-128   128    
64     -48    
96     -80    
128    0      
112    -160   
368    -96    
160    32     
304    48     
176    64     
160    80     
0      32     
-176   32     
240    80     
48     -32    
-32    32     
-16    80     
48     16     
-256   -304   
96     -64    
-256   352    
-672   96     
-112   -16    
-144   -16    
80     128    
352    96     
576    32     
-224   -96    
-96    16     
64     144    
-80    64     
-272   32     
-80    -16    
496    208    
-448   64     
-32    32     
-48    -16    
176    96     
128    -48    
320    16     
256    48     
-400   64     
-224   0      
-176   32     
-128   48     
272    96     
320    64     
304    128    
48     32     
480    144    
-256   48     
160    128    
-208   16     
-80    -32    
304    48     
-64    32     
16     64     
-32    -48    
448    -624   
-240   -16    
112    16     
112    64     
-16    32     
96     64     
-16    48     
96     0      
-128   -32    
272    128    
-160   -48    
176    80     
144    128    
-48    -32    
128    -16    
-96    -1168  
128    -80    
128    176    
-64    80     
368    240    
-368   -64    
592    0      
-128   32     
448    80     
-32    160    
-576   -80    
448    -48    
32     96     
-288   -112   
96     0      
0      -720   
240    96     
-288   -16    
240    80     
-288   -32    
256    -224   
320    -208   
-192   160    
192    320    
-96    176    
-192   -96    
160    48     
-176   -32    
112    32     
352    160    
272    16     
672    432    
-256   80     
32     -16    
-464   -160   
128    -80    
-48    -48    
80     32     
128    176    
128    224    
-80    -176   
16     176    
112    64     
-16    -192   
64     -96    
64     -208   
112    192    
32     -672   
96     80     
-32    -320   
192    224    
16     -208   
176    -96    
-48    256    
80     -464   
16     64     
80     432    
-80    -272   
272    112    
96     64     
-176   -192   
128    -560   
-96    80     
464    240    
80     -464   
-48    512    
-112   -416   
-80    -656   
144    1040   
128    80     
0      -528   
160    96     
112    -112   
464    832    
-304   448    
-128   16     
16     -480   
32     -128   
224    -48    
-48    -144   
32     -96    
16     -288   
224    64     
-112   -32    
-112   -96    
96     48     
208    336    
64     208    
272    0      
-64    48     
192    -16    
0      160    
32     -96    
64     -80    
-128   -288   
80     32     
-96    0      
256    192    
0      32     
-16    -96    
272    -16    
160    -16    
-32    80     
32     80     
96     80     
-32    -80    
-64    -32    
112    -128   
32     80     
160    80     
0      -48    
-112   96     
48     -720   
112    16     
144    16     
80     -576   
48     -16    
112    -400   
64     0      
0      -192   
0      -176   
80     -96    
80     -64    
112    -112   
160    -48    
96     0      
-16    64     
112    -144   
144    -16    
-544   -64    
272    192    
128    288    
32     -16    
-128   112    
160    -144   
176    -128   
-64    208    
32     -48    
64     -400   
80     64     
48     80     
-160   64     
224    80     
-48    -48    
-288   -112   
96     -192   
16     80     
-176   -128   
112    48     
160    -16    
-96    16     
368    -192   
320    -304   
160    -64    
-96    96     
-128   -96    
64     -112   
80     32     
192    -96    
-112   -144   
160    -288   
64     -208   
224    -32    
16     -192   
-64    -48    
-192   0      
64     -320   
-432   -160   
96     -32    
-112   0      
272    80     
16     96     
80     -80    
224    -128   
-432   -80    
96     -48    
-208   48     
128    80     
96     -112   
48     -112   
-96    -64    
32     -368   
64     -64    
-16    -112   
112    64     
80     -64    
112    -16    
-112   80     
-144   144    
-64    -16    
16     32     
-560   -128   
64     48     
-128   -272   
-48    -176   
192    224    
80     -48    
80     96     
272    -944   
-96    -304   
208    -336   
176    -144   
576    752    
80     752    
-176   32     
256    -16    
48     0      
-64    -48    
-480   112    
-224   -320   
32     -384   
240    -112   
32     -224   
352    -32    
-176   256    
512    -672   
-32    -144   
416    -288   
32     -272   
-1200  -272   
64     -240   
-800   224    
272    -96    
-160   240    
112    -144   
-16    -16    
64     -288   
-352   -368   
464    -656   
176    80     
400    144    
496    -32    
-128   48     
32     -400   
-176   -224   
-48    -96    
-368   48     
-16    128    
-64    -160   
-64    -48    
384    -224   
16     32     
-96    -208   
224    -224   
192    -336   
-400   352    
144    -96    
-352   -16    
304    128    
-320   -288   
-80    -32    
144    176    
-96    -16    
208    -160   
128    -80    
16     256    
-64    -160   
64     96     
-432   -240   
-992   -528   
-512   16     
-2240  80     
-176   176    
0      192    
-16    -64    
-288   -400   
64     208    
-16    -176   
-128   0      
-64    -64    
176    48     
-320   -48    
304    112    
-192   -48    
-144   0      
-96    160    
144    112    
-16    -80    
-656   64     
-432   -96    
304    0      
0      -80    
-368   -48    
192    288    
-80    -16    
112    80     
-160   -80    
-64    80     
64     -16    
352    256    
-384   -400   
-208   -144   
256    272    
-672   112    
-48    80     
-1504  0      
16     -48    
-64    -64    
32     -64    
96     -144   
-32    -192   
-208   -272   
-112   -48    
-48    -16    
96     112    
128    64     
-336   80     
-112   48     
-160   16     
128    0      
-128   16     
-16    16     
-336   -208   
256    -96    
-48    -16    
0      240    
16     -48    
128    64     
-176   16     
-16    0      
32     32     
-304   -16    
-128   -48    
384    112    
64     -16    
80     -16    
96     32     
-816   -80    
224    144    
-48    144    
192    288    
-16    112    
-176   -112   
-208   -64    
-128   -128   
368    32     
64     32     
352    0      
96     16     
112    -80    
-144   0      
128    64     
-752   -48    
-256   48     
-560   -144   
176    -16    
-48    80     
-240   -32    
96     0      
304    80     
16     64     
-464   -80    
-160   -64    
-64    0      
-16    48     
-64    -160   
272    32     
-48    0      
368    112    
-64    64     
-368   0      
144    192    
-32    16     
400    0      
-16    -48    
80     32     
-192   -16    
192    -32    
144    32     
-48    16     
-96    16     
128    112    
-528   -32    
-64    32     
144    128    
-112   -16    
-272   64     
128    64     
288    80     
-416   -16    
16     -16    
-64    32     
128    -48    
240    -48    
112    144    
-288   -16    
112    48     
-560   -160   
-80    16     
32     96     
96     160    
496    592    
-576   240    
208    -80    
-128   16     
128    16     
112    48     
96     80     
-320   -32    
304    112    
-432   -176   
112    -112   
-128   112    
80     400    
-16    48     
-128   -112   
-384   144    
-192   -32    
-368   -224   
240    144    
-144   80     
304    160    
-96    80     
-176   -144   
-48    0      
-96    -16    
-112   -48    
784    368    
-448   112    
144    0      
-176   112    
-304   -176   
-16    -208   
-144   128    
32     288    
80     -32    
-400   -80    
352    544    
240    0      
-560   -96    
176    176    
-288   -160   
208    96     
320    -112   
128    -64    
160    624    
-48    -704   
-144   -624   
-48    576    
-144   96     
192    96     
-320   -48    
32     96     
80     -128   
272    208    
-144   -16    
80     -48    
-112   256    
64     176    
128    64     
-32    160    
256    224    
-480   -528   
480    64     
-176   512    
208    400    
32     320    
96     64     
16     240    
112    128    
288    -128   
-192   96     
288    304    
-240   448    
16     80     
80     -64    
112    -192   
-64    -240   
112    -64    
-128   -32    
-64    -80    
64     16     
64     96     
-176   0      
32     48     
208    -48    
-48    -144   
0      80     
-112   128    
-48    0      
-112   64     
160    -112   
240    96     
0      96     
240    32     
160    112    
-112   80     
112    32     
-32    -64    
96     -64    
224    112    
-96    -192   
32     0      
80     64     
-96    112    
192    128    
240    -16    
240    -144   
-208   -576   
-160   -208   
32     144    
-80    96     
96     112    
64     0      
80     -64    
96     -48    
-128   -304   
352    0      
-32    160    
-80    0      
16     80     
96     224    
96     144    
192    16     
-160   80     
-80    96     
-32    144    
128    96     
-80    -96    
304    -320   
64     128    
32     -320   
16     -96    
-64    -688   
-80    48     
-64    144    
400    320    
-352   160    
192    -112   
96     -304   
-112   -416   
80     -144   
-256   -80    
192    -80    
128    32     
-32    128    
144    -160   
128    -64    
-48    -1056  
-48    96     
128    96     
-288   128    
-96    -96    
96     64     
192    -16    
224    64     
-96    -112   
0      -80    
240    384    
-288   400    
-352   192    
320    -16    
192    64     
352    -144   
-80    -176   
16     -240   
144    0      
144    -128   
-272   -304   
-240   -256   
-416   112    
224    96     
16     -32    
80     -144   
96     -32    
80     400    
320    -160   
-16    48     
-64    64     
64     192    
-32    -48    
208    80     
16     32     
208    64     
128    112    
-32    288    
64     256    
224    -32    
128    48     
80     -288   
32     144    
288    64     
-144   608    
256    224    
112    -208   
-96    -160   
96     -144   
-240   -32    
400    -48    
-192   112    
176    496    
256    -496   
-80    272    
112    352    
48     -240   
32     240    
176    288    
-32    368    
-80    -176   
-224   -128   
-16    -448   
-144   464    
320    0      
240    -16    
160    -288   
-96    -80    
-16    -144   
-64    -160   
-16    -1120  
128    -48    
112    416    
-512   -1344  
320    592    
-96    624    
-368   -1264  
16     160    
1024   592    
-160   -192   
128    -608   
0      -64    
160    -128   
208    -288   
320    256    
-32    240    
1008   80     
-912   -1760  
-496   -624   
112    448    
0      16     
592    240    
320    272    
304    -224   
-32    144    
-272   192    
-192   -208   
-704   -144   
0      48     
80     32     
176    -160   
96     -32    
80     -304   
-48    48     
48     208    
176    48     
-144   -32    
-224   160    
208    -32    
96     48     
-64    32     
48     -64    
-320   -96    
32     0      
160    48     
112    -80    
64     -32    
64     -400   
448    320    
-352   -848   
0      -128   
336    16     
-240   -64    
256    -48    
48     96     
-80    -112   
0      48     
-112   -48    
16     16     
-352   0      
-192   -80    
272    -80    
-80    48     
-64    -32    
224    -160   
176    96     
-48    -48    
64     128    
80     32     
32     -32    
48     -16    
0      -64    
-48    -48    
64     -48    
-224   -16    
224    48     
80     112    
-192   -80    
128    176    
48     -304   
112    -80    
16     -176   
32     112    
48     32     
-16    -48    
32     16     
48     -96    
-16    -32    
176    112    
-464   32     
64     -48    
-736   -32    
240    -48    
-80    32     
80     -208   
160    48     
64     -816   
144    -96    
-64    64     
144    -16    
-400   48     
32     -32    
-352   32     
48     16     
-416   -16    
128    -16    
144    -16    
16     16     
32     16     
128    -64    
160    48     
-16    -336   
560    432    
-912   32     
240    -224   
-80    -80    
0      64     
-240   -240   
208    224    
-80    128    
32     -240   
272    -96    
416    -32    
144    64     
112    -112   
320    128    
-304   96     
-48    80     
-288   -48    
128    -16    
-288   32     
-32    -112   
-96    32     
-112   112    
-400   -48    
0      -96    
-112   48     
48     64     
-80    -64    
-752   -192   
256    16     
112    -64    
48     -80    
-32    144    
16     0      
112    32     
-240   -48    
16     16     
240    48     
-16    -16    
-336   -48    
-32    80     
-784   -128   
400    192    
-32    0      
-64    -16    
80     96     
-368   64     
-64    -96    
-528   -64    
-32    64     
-944   -192   
96     -48    
160    80     
-240   -96    
-16    -64    
112    32     
272    -64    
-48    32     
144    -16    
-192   -128   
16     -48    
16     -32    
-80    80     
-352   -48    
128    48     
-272   -48    
-80    -48    
-4528  -112   
-64    -96    
64     -208   
224    -80    
-48    -224   
48     -16    
-32    128    
64     -48    
96     128    
-768   -224   
608    128    
-80    208    
-224   -64    
-64    -32    
96     336    
-864   256    
-320   384    
192    -64    
0      16     
-112   -160   
-288   288    
112    -384   
-528   80     
112    352    
-176   -128   
-272   176    
-112   32     
-80    -32    
-368   -96    
656    -32    
-224   160    
144    -128   
-208   -464   
176    -368   
-96    512    
-192   -208   
208    -272   
-208   -112   
128    -48    
-192   240    
-320   -512   
-352   112    
240    -160   
0      32     
48     560    
32     32     
96     320    
-880   -400   
352    -352   
-224   128    
144    -144   
448    80     
-320   -112   
160    64     
-224   160    
48     16     
0      32     
-96    -16    
48     368    
288    176    
-96    -16    
0      48     
-224   -112   
-176   -160   
-48    0      
-64    48     
80     144    
-48    0      
48     0      
32     32     
32     144    
48     -16    
160    96     
-32    64     
-128   32     
-128   -64    
-112   160    
-176   112    
592    240    
-288   192    
-96    -64    
-176   32     
-112   -16    
0      48     
-48    32     
0      32     
-16    0      
16     -32    
-336   -96    
192    48     
96     32     
144    80     
-496   -64    
96     96     
-128   112    
176    -16    
64     0      
16     32     
0      -16    
-64    96     
-48    -16    
-64    -208   
96     96     
48     80     
64     -16    
64     -32    
144    80     
-32    -48    
-80    -160   
128    0      
-32    96     
-288   -80    
112    -112   
96     112    
-176   32     
16     32     
48     48     
48     32     
-112   112    
112    80     
-96    16     
-64    48     
-128   16     
112    -32    
-32    32     
-32    96     
80     176    
-32    80     
-48    16     
-16    96     
80     -192   
-144   -96    
336    112    
-272   112    
112    96     
-208   -144   
288    112    
32     112    
-112   -128   
128    -272   
208    -80    
0      -128   
192    -176   
96     -272   
96     96     
-64    112    
16     240    
-80    144    
32     32     
288    64     
208    144    
64     256    
-96    176    
96     32     
-176   48     
16     -16    
224    -176   
-64    -48    
144    -48    
48     -112   
336    -144   
0      -272   
224    112    
-176   -448   
0      -416   
-400   -400   
-160   80     
208    192    
-256   -80    
448    -160   
368    192    
304    96     
80     176    
-80    192    
-128   -48    
-64    48     
192    96     
32     80     
-160   -256   
-32    -16    
144    32     
160    -112   
384    176    
-160   -144   
-32    48     
32     96     
-80    96     
480    560    
-128   -192   
-256   -96    
144    -48    
144    304    
272    -48    
-48    320    
-80    -208   
-80    -160   
-160   -16    
32     -16    
0      -112   
80     128    
160    208    
-32    96     
-80    96     
224    -112   
-176   16     
32     48     
-64    -80    
-160   -128   
416    80     
64     -64    
256    32     
-240   -160   
192    576    
-272   80     
-352   -384   
128    64     
-224   176    
400    208    
16     0      
80     0      
16     -32    
64     -48    
64     -16    
-80    16     
-16    -32    
272    48     
16     -128   
32     -128   
96     -896   
-304   144    
144    80     
-256   -112   
288    -304   
384    64     
-80    80     
-16    -96    
912    96     
80     -96    
752    128    
240    -336   
-352   336    
-1056  -400   
352    0      
192    -112   
-80    112    
160    144    
-144   -64    
80     128    
80     -48    
32     48     
288    -32    
80     96     
0      -128   
16     48     
-16    -64    
96     32     
96     48     
-48    80     
144    -464   
64     16     
64     -448   
288    16     
-288   -48    
-64    -80    
272    16     
176    160    
112    64     
-16    -80    
256    96     
-32    -176   
256    96     
-32    -144   
-192   0      
64     -336   
-112   32     
336    16     
464    336    
-224   80     
64     48     
80     32     
80     32     
48     -16    
288    112    
16     192    
-224   -80    
112    16     
128    -112   
176    -16    
176    -32    
112    32     
128    96     
0      64     
16     -32    
208    -496   
64     -16    
-96    -176   
176    64     
384    32     
-368   32     
64     -192   
144    32     
32     -208   
-48    96     
-64    -16    
48     -48    
32     -32    
144    -832   
-64    32     
80     -400   
144    -48    
176    -16    
192    -48    
64     0      
208    0      
-48    -48    
144    -16    
-48    64     
128    192    
160    -32    
-16    -128   
48     48     
192    -304   
16     48     
-128   0      
32     -144   
-256   -80    
80     -80    
80     48     
224    -368   
-144   -32    
128    -368   
-288   -768   
80     -256   
-128   320    
-176   96     
-32    -16    
208    -176   
-144   -48    
0      -16    
64     -96    
112    -240   
464    -160   
112    80     
96     -32    
-128   -16    
32     -224   
0      -80    
80     -320   
112    16     
224    16     
240    384    
-224   224    
32     256    
-656   -48    
336    -128   
-960   -64    
448    128    
-32    32     
-160   -432   
192    -384   
-112   -80    
-240   128    
112    -128   
-48    16     
96     -80    
256    64     
32     80     
-272   64     
-16    112    
-64    -64    
640    512    
-304   272    
-640   -48    
368    -240   
224    -128   
496    -128   
-80    16     
-208   -464   
112    -96    
-160   128    
-112   32     
-80    -80    
176    320    
1088   1088   
-480   -320   
-144   -816   
80     304    
-464   240    
112    -176   
672    -320   
112    48     
128    48     
-112   -256   
128    112    
96     -704   
-144   64     
64     112    
160    -160   
80     -112   
144    -192   
-176   -256   
16     288    
-192   -32    
64     -192   
-176   288    
256    -320   
112    96     
-192   -112   
-112   -16    
240    -656   
176    240    
256    592    
-352   -160   
-240   96     
-80    -208   
-96    112    
304    32     
208    -128   
608    -64    
256    -608   
272    -208   
-96    224    
-208   -96    
176    80     
-144   -128   
448    32     
-736   144    
112    112    
-64    -240   
464    -112   
-144   -64    
224    -128   
48     16     
0      112    
-144   272    
-224   -16    
-416   -16    
-16    -32    
0      160    
-64    -32    
-432   0      
-160   -48    
64     96     
32     -48    
144    192    
144    -48    
-304   64     
-144   -16    
-64    -224   
-16    -256   
-496   -160   
-32    224    
-192   -64    
-240   16     
-112   -208   
-368   176    
-96    144    
-64    -48    
-112   -144   
432    -128   
-80    112    
16     -16    
48     208    
96     32     
128    0      
-80    -160   
208    -80    
-416   -176   
-368   448    
-16    288    
-224   -112   
16     -192   
16     -80    
-320   -64    
-992   -272   
-176   80     
256    -112   
208    -32    
-64    -176   
160    160    
-176   -64    
80     48     
192    80     
-64    48     
128    -32    
-96    -32    
64     32     
-48    -48    
-80    80     
48     80     
0      112    
96     -48    
-32    0      
32     128    
-16    224    
-160   -96    
48     16     
160    96     
-112   0      
-80    16     
-64    48     
-48    48     
32     -48    
112    -80    
-64    64     
-160   16     
-1040  -32    
0      80     
-80    -128   
288    16     
-16    16     
-48    -48    
-16    32     
-144   0      
-32    192    
-16    224    
-32    -32    
-48    0      
48     64     
-320   0      
-32    16     
-240   -128   
112    32     
-64    -192   
224    192    
48     96     
-128   -16    
16     48     
-192   -144   
-48    16     
128    96     
144    64     
-64    -64    
32     32     
-192   -48    
-32    112    
-112   96     
48     96     
-384   -112   
224    -432   
144    144    
-16    368    
64     368    
-64    448    
144    -208   
-112   -176   
-288   128    
-400   -48    
-32    -16    
-80    -608   
144    176    
-112   240    
-48    0      
-1280  96     
-64    512    
-144   208    
-544   -224   
160    -128   
384    0      
304    176    
96     -400   
80     -16    
128    368    
-528   -64    
-80    -32    
-16    16     
-256   -240   
352    112    
-272   544    
16     304    
208    48     
144    -224   
-80    -176   
336    256    
-432   -48    
-160   -208   
48     48     
64     144    
416    32     
-64    -32    
384    48     
-352   -96    
-80    -160   
-16    -160   
-112   -48    
144    48     
144    80     
112    48     
-240   64     
96     80     
-64    32     
80     32     
-64    32     
0      32     
-64    -32    
32     48     
-96    16     
16     -48    
-160   -48    
176    -16    
-80    48     
224    80     
-80    48     
80     32     
-464   -304   
608    -224   
-224   288    
336    64     
-256   -416   
-240   -272   
32     144    
-192   64     
-192   48     
288    48     
192    -16    
-80    176    
272    -16    
-400   -112   
-112   64     
-64    96     
0      112    
-112   -16    
-48    80     
32     -48    
96     16     
32     -96    
160    32     
64     80     
528    160    
-384   96     
-176   -64    
688    176    
640    464    
-896   16     
128    -224   
128    16     
-144   32     
176    -64    
208    80     
-160   32     
96     16     
16     48     
96     32     
96     32     
-176   144    
352    -16    
-48    -16    
16     144    
48     -16    
176    128    
-208   144    
240    -48    
-32    -16    
272    128    
-272   112    
112    -1072  
96     80     
32     32     
224    48     
0      112    
16     16     
64     48     
32     32     
-96    0      
464    368    
-512   64     
320    0      
32     -48    
272    64     
-224   32     
-16    -80    
320    224    
-256   32     
96     32     
48     32     
320    112    
16     80     
-80    -192   
208    48     
-32    32     
96     80     
-64    -16    
-32    96     
240    128    
-64    160    
192    -352   
96     32     
48     -784   
-32    80     
16     64     
256    80     
0      32     
-16    32     
32     80     
96     144    
384    32     
-64    160    
-48    160    
64     0      
64     -64    
80     -256   
-48    48     
96     -784   
-16    -80    
96     -16    
112    48     
16     144    
-48    -80    
-96    16     
16     0      
112    64     
48     48     
-96    -16    
-96    -176   
64     80     
16     160    
-80    -176   
32     -320   
128    352    
128    320    
288    -64    
-80    176    
80     192    
-80    128    
80     48     
32     0      
-176   80     
64     64     
336    704    
128    -512   
32     -304   
-64    272    
-64    -352   
160    -96    
-192   -928   
48     48     
64     192    
32     64     
16     32     
272    -64    
176    64     
80     112    
112    0      
80     -64    
-96    80     
-80    -32    
-240   -80    
-16    -208   
48     80     
384    -288   
1136   1168   
-464   -80    
-64    -544   
176    432    
336    368    
-336   -176   
96     96     
64     0      
304    64     
128    80     
32     -176   
208    -16    
64     160    
-112   -160   
256    -128   
96     -16    
-16    64     
352    624    
-640   -304   
64     144    
64     352    
160    -240   
64     80     
208    -368   
80     -80    
-32    16     
240    -144   
64     128    
192    384    
-144   240    
128    160    
96     -464   
384    480    
-256   64     
-144   80     
96     -640   
-16    128    
96     -448   
80     128    
160    64     
128    -80    
176    112    
128    -336   
32     128    
-16    336    
64     -400   
256    480    
-80    528    
224    592    
160    -32    
96     32     
96     -128   
336    -208   
-112   336    
336    -656   
-176   -272   
288    -208   
32     -80    
272    144    
-96    208    
128    176    
-48    208    
208    -64    
-32    -160   
-672   -256   
112    -496   
160    -192   
560    128    
464    32     
496    -80    
-192   48     
-352   -320   
160    0      
-16    -144   
-160   96     
-176   -80    
336    -112   
704    -48    
64     80     
-48    -96    
544    -64    
-784   368    
-160   176    
400    -48    
-176   -64    
-144   -64    
240    -96    
240    -16    
80     -80    
112    96     
64     0      
160    -64    
48     -48    
160    -144   
-80    16     
16     80     
272    336    
-128   -32    
96     16     
32     64     
128    64     
32     -128   
112    -224   
-112   -384   
-112   80     
160    128    
192    -64    
-208   0      
32     -144   
-96    160    
-112   48     
-560   -192   
16     -128   
-1104  48     
-32    -96    
288    -176   
-16    16     
-176   96     
96     -496   
48     16     
400    176    
-240   336    
-400   -32    
48     -128   
-32    16     
240    -16    
-544   128    
32     96     
-640   -32    
80     -48    
80     -32    
-48    -224   
192    -64    
128    16     
128    32     
240    -64    
48     32     
-48    0      
64     0      
48     112    
192    80     
-96    192    
-32    -128   
-1040  -112   
16     -96    
352    112    
64     160    
-32    -32    
352    -384   
128    96     
-112   32     
-96    -80    
-224   -32    
48     -96    
-288   -112   
192    -16    
-16    368    
-96    80     
-288   -64    
0      -128   
64     -64    
-64    -256   
0      -320   
224    -608   
0      160    
16     192    
-48    128    
-288   -240   
32     -352   
-32    48     
80     160    
-48    48     
128    -112   
112    224    
176    -48    
0      288    
64     112    
-176   -1264  
-96    448    
32     464    
-256   -192   
-272   256    
-80    -112   
0      16     
0      112    
112    -128   
-32    -144   
-304   -112   
0      384    
-288   -80    
32     -144   
-1008  -592   
80     -64    
-64    16     
-128   80     
-224   32     
96     -64    
0      -64    
-1888  -208   
-304   -48    
-160   48     
-80    -32    
256    0      
288    352    
-768   -96    
0      -80    
-592   -224   
-112   -48    
192    16     
160    64     
32     -64    
-112   -48    
112    48     
64     96     
-208   -48    
-464   -32    
-368   -80    
176    32     
-192   32     
-224   -48    
-16    16     
192    -16    
256    80     
-32    0      
-96    -48    
-160   80     
-768   -80    
416    96     
-192   48     
-176   -16    
-336   0      
128    112    
-32    -144   
-16    -144   
112    -48    
112    112    
160    -64    
-112   -16    
-80    48     
-240   -16    
256    80     
-272   32     
-128   0      
-272   -16    
-208   -48    
-640   -48    
512    320    
-752   0      
144    -64    
-128   -112   
272    128    
96     -112   
-656   -192   
704    192    
-432   80     
-304   0      
160    16     
-96    -32    
-240   48     
-64    112    
144    64     
-304   -192   
96     0      
-240   192    
-160   -128   
256    144    
-336   16     
416    128    
-208   96     
-368   64     
-32    -48    
224    320    
-224   192    
-32    -128   
192    16     
-304   -112   
384    80     
-432   -80    
64     48     
192    -16    
240    224    
-128   80     
224    -64    
-432   32     
-304   80     
-192   -160   
-112   -80    
320    0      
-48    112    
144    48     
-400   -192   
96     48     
-480   64     
224    32     
-1520  -16    
160    96     
0      16     
16     96     
144    -16    
-16    16     
-128   80     
112    0      
-176   16     
96     192    
-48    64     
-336   -32    
48     16     
-64    -112   
176    80     
160    48     
-144   32     
0      -16    
-32    -80    
208    144    
48     48     
-16    -32    
-112   32     
128    64     
-208   -32    
192    32     
-80    48     
-16    240    
-96    64     
0      32     
-48    80     
-16    64     
224    96     
112    16     
-160   -16    
144    0      
-80    48     
32     -256   
-128   -112   
32     48     
-64    288    
-128   112    
160    0      
-160   16     
-48    32     
-16    224    
96     -144   
176    16     
-32    368    
16     176    
-336   -16    
288    -128   
192    240    
-64    -32    
-96    128    
160    -48    
-144   48     
-80    288    
224    -16    
0      -32    
48     16     
192    -384   
176    208    
96     112    
-176   -48    
-16    48     
240    32     
144    656    
-160   -272   
-240   -192   
112    224    
16     -48    
16     352    
-96    -272   
176    112    
64     224    
160    -144   
-32    0      
-128   224    
176    128    
-96    -320   
144    384    
-192   48     
48     16     
-112   48     
48     -112   
-48    96     
112    -208   
48     32     
0      -160   
-112   144    
64     560    
32     -576   
64     -160   
0      608    
32     32     
144    -224   
-240   -144   
144    16     
-128   112    
176    0      
-32    -96    
-80    592    
256    144    
-304   -48    
-320   -160   
-96    -544   
128    80     
528    128    
-96    -224   
-704   -368   
-432   -224   
-16    32     
224    112    
176    80     
-112   112    
16     96     
192    -384   
-176   -64    
80     -128   
16     -64    
-48    240    
256    -80    
-80    32     
176    -16    
48     -48    
-64    -144   
-128   32     
-80    48     
-80    32     
112    224    
224    16     
-144   -112   
48     16     
-16    -48    
112    -48    
112    -32    
192    -96    
48     32     
96     144    
64     240    
128    96     
-32    -64    
144    32     
128    32     
16     112    
0      160    
96     -208   
128    32     
-112   -1376  
0      -304   
32     -112   
16     80     
272    176    
192    144    
64     80     
64     112    
-48    272    
240    -144   
128    272    
80     16     
-48    -208   
192    -16    
16     176    
160    -64    
-16    96     
-176   256    
512    160    
-16    -304   
80     64     
-176   16     
-112   48     
240    -80    
144    -32    
192    64     
-240   -192   
288    -64    
-400   96     
-368   96     
288    -288   
320    0      
320    -928   
-64    0      
368    80     
320    -112   
96     128    
48     304    
-128   208    
-224   -208   
48     -144   
128    80     
64     112    
128    0      
0      -112   
304    -144   
-144   48     
208    -80    
-224   -64    
64     -192   
32     -368   
-112   -208   
192    -32    
-192   64     
112    32     
64     32     
416    -384   
-32    208    
80     -128   
32     -64    
160    -416   
176    -80    
-64    -64    
128    64     
96     144    
32     176    
-304   -144   
544    -304   
16     192    
272    112    
144    160    
288    -48    
-32    160    
96     -144   
64     -288   
64     -272   
-80    -48    
16     -64    
112    -32    
96     272    
48     -448   
-64    144    
112    -1008  
112    32     
304    64     
-208   -192   
336    48     
-160   144    
48     0      
96     -16    
-80    64     
336    -160   
64     0      
192    -480   
-112   80     
224    -352   
-32    16     
-144   192    
176    16     
64     112    
-80    -192   
-64    -688   
-48    -1008  
176    144    
64     -240   
192    192    
224    240    
-80    16     
48     -304   
-16    0      
16     464    
224    -80    
-368   48     
-16    -112   
224    -96    
64     -176   
-16    48     
32     16     
96     -96    
224    128    
-160   -240   
256    -16    
224    96     
112    -80    
384    32     
160    -176   
-32    -192   
-224   -64    
-16    -48    
-128   16     
208    240    
-176   352    
112    128    
336    -48    
0      -192   
144    0      
112    -48    
160    -80    
224    -352   
-112   0      
-448   -224   
96     -48    
-112   32     
-224   32     
-656   -144   
112    16     
-240   -192   
320    -336   
384    -16    
-16    -416   
720    -176   
176    -176   
0      16     
144    -128   
-64    48     
0      32     
64     48     
272    448    
-400   112    
-464   -272   
224    -112   
48     16     
-32    -32    
368    0      
80     0      
192    48     
32     -528   
160    48     
160    -48    
-544   -64    
160    16     
-16    -48    
496    -64    
16     -32    
-192   176    
-352   -64    
-336   -64    
400    -32    
288    112    
48     -288   
128    0      
32     -784   
96     48     
-80    -16    
112    -16    
-416   -64    
496    -16    
32     -16    
48     0      
-576   -16    
-64    0      
-336   64     
448    64     
-240   -48    
160    -176   
-80    -64    
160    -128   
-48    48     
80     0      
64     -304   
-272   -16    
32     -48    
-352   -96    
192    96     
-128   -16    
336    112    
-320   -160   
384    160    
-176   -32    
432    176    
144    -32    
224    -96    
224    96     
-784   -48    
384    32     
-144   112    
-128   64     
-64    -144   
208    16     
-288   16     
48     -224   
-304   16     
-176   -80    
304    -16    
-64    32     
-288   16     
-688   -144   
-432   -32    
-496   -144   
160    16     
-256   96     
-304   -112   
96     16     
0      -160   
64     -176   
256    -48    
560    -96    
-16    -16    
-96    64     
-944   -208   
-80    112    
-368   -16    
-16    -16    
-240   80     
-192   112    
224    -128   
-368   -96    
16     48     
16     -48    
48     -16    
128    -16    
64     32     
-48    -48    
64     32     
-352   -32    
144    -80    
-64    -176   
-160   64     
-64    16     
-64    -208   
-48    -176   
-736   -112   
-64    -272   
-432   -64    
80     96     
-640   -144   
-64    32     
-16    -48    
16     -160   
32     80     
80     96     
-48    -48    
-16    0      
-352   -112   
-160   -32    
-128   32     
-352   48     
96     48     
-624   -64    
-96    -224   
128    96     
48     -144   
-160   -80    
48     -96    
-64    80     
-32    96     
192    112    
16     112    
-16    160    
48     -48    
176    208    
-240   272    
-368   320    
-144   144    
-48    272    
-912   -512   
-176   -464   
112    -352   
512    160    
-176   864    
-224   -16    
-224   -272   
-32    -96    
48     -48    
176    0      
16     -64    
-112   32     
160    80     
-336   -16    
208    560    
-672   320    
-128   -224   
-48    -256   
64     0      
0      -224   
-80    -64    
-64    96     
-144   64     
-32    -48    
-240   -32    
-96    16     
-144   192    
0      336    
-432   -112   
160    -80    
-384   -96    
0      0      
-48    -912   
-112   48     
224    112    
32     32     
128    160    
-48    48     
-64    112    
32     -160   
64     160    
128    -192   
208    -64    
192    32     
0      416    
-544   96     
160    128    
176    144    
-96    16     
160    64     
32     -32    
0      304    
192    192    
-192   224    
-192   32     
-32    16     
-80    -16    
96     16     
-64    -32    
288    112    
-80    -32    
64     496    
96     -48    
96     -144   
-144   16     
-288   0      
-64    -16    
-32    -32    
-208   -80    
176    -32    
-16    176    
-64    0      
96     64     
-224   -128   
160    -112   
-304   -32    
48     32     
208    -96    
-32    -208   
-160   -176   
32     0      
-144   112    
0      256    
32     64     
-32    -48    
-128   -96    
48     -64    
-32    32     
-128   -224   
368    144    
-256   272    
80     320    
160    0      
-112   256    
128    112    
-48    -96    
160    -208   
-112   -32    
128    -192   
-192   0      
-32    -32    
-208   -208   
416    528    
-368   96     
288    368    
192    -128   
-32    96     
272    112    
-48    272    
112    496    
272    32     
-32    96     
-208   -176   
176    -48    
-48    64     
-80    80     
0      -64    
112    464    
448    416    
144    112    
-160   288    
-16    368    
176    384    
624    -192   
240    48     
288    32     
0      80     
0      96     
160    384    
-192   400    
-48    -144   
160    96     
-400   208    
-208   176    
16     0      
-256   64     
-80    -16    
448    512    
-416   432    
336    16     
-192   -240   
64     -64    
320    -128   
80     160    
48     -96    
-368   -144   
-48    80     
-240   608    
304    368    
32     64     
240    -64    
128    160    
-128   -80    
128    -256   
48     80     
-224   -192   
32     48     
-176   -32    
192    -368   
-288   -256   
304    48     
-256   352    
96     192    
176    -288   
0      -832   
-160   -384   
-48    -112   
96     640    
80     256    
224    -784   
-160   464    
80     160    
-384   -320   
224    -48    
400    0      
-16    736    
192    32     
-288   -480   
176    272    
272    288    
224    176    
48     32     
0      -480   
-128   224    
112    -32    
64     -32    
0      112    
-160   -352   
-192   272    
144    -80    
336    0      
384    32     
-272   -160   
160    64     
160    -432   
176    240    
-64    -1568  
64     -240   
32     80     
272    400    
0      -16    
16     -16    
96     368    
64     176    
-64    -144   
32     -32    
-80    112    
96     -16    
48     80     
0      -96    
112    112    
144    -1040  
368    288    
-192   -224   
96     0      
80     -16    
128    -16    
32     48     
48     128    
208    288    
160    288    
0      -48    
32     -208   
64     -128   
0      16     
176    32     
144    -528   
112    192    
-144   -64    
64     64     
48     -208   
-48    -32    
48     320    
32     80     
144    -80    
176    16     
112    32     
-16    -64    
224    32     
16     -144   
96     0      
-80    -48    
96     64     
-160   -224   
16     80     
-64    -32    
288    80     
32     16     
112    144    
32     0      
304    -64    
16     128    
48     -176   
-80    32     
-288   -48    
160    16     
112    -64    
144    240    
-368   -112   
208    -128   
128    48     
448    224    
496    112    
560    432    
-704   16     
-80    -464   
128    80     
112    -48    
288    32     
320    96     
-240   48     
-112   -272   
352    -32    
-16    112    
16     112    
176    16     
32     -432   
-64    -64    
160    -80    
176    -208   
160    -80    
240    -128   
-128   -176   
320    96     
-64    -80    
-256   -80    
240    -208   
304    32     
480    96     
112    -144   
-80    48     
-112   -144   
208    -16    
-336   32     
144    -176   
208    0      
80     32     
96     -32    
-16    -576   
96     -32    
16     64     
64     48     
48     -128   
16     80     
0      -224   
32     0      
-48    -208   
144    -80    
-256   -16    
320    224    
-48    -96    
256    0      
208    -48    
384    -432   
-96    -64    
448    -192   
-208   -80    
704    128    
-352   144    
688    416    
-400   32     
-640   -288   
208    64     
-288   80     
-256   -96    
224    -64    
-160   -192   
720    400    
-192   320    
-48    48     
416    -448   
624    240    
64     272    
-16    128    
384    208    
-16    -112   
240    -224   
96     -128   
80     -112   
48     48     
-976   16     
-208   -144   
240    96     
-96    -16    
-32    -176   
-48    -272   
128    368    
112    96     
0      -48    
144    16     
-32    -80    
112    -32    
48     0      
0      -16    
48     -112   
128    80     
64     -16    
-144   736    
288    -512   
64     144    
48     -464   
48     224    
-64    -896   
-48    -128   
96     1088   
352    -464   
-272   0      
-32    16     
496    224    
-256   -144   
0      -224   
-112   -336   
-1360  -576   
-48    288    
112    0      
64     64     
16     288    
-48    -496   
48     48     
-32    -32    
80     64     
-112   16     
304    -208   
-144   -144   
32     -144   
-560   -144   
-48    -224   
-16    -128   
144    0      
16     32     
-64    -96    
0      -48    
256    -192   
-144   96     
-400   160    
64     96     
-288   32     
192    -16    
272    144    
-160   128    
-176   144    
64     32     
-144   48     
48     -64    
-32    96     
48     -80    
96     16     
208    -304   
192    -80    
-304   80     
64     -96    
-128   48     
48     64     
-144   -32    
0      -64    
-160   -16    
-16    16     
-176   0      
32     -128   
0      -80    
-64    -32    
-256   80     
-48    -16    
64     64     
-32    -32    
240    48     
-96    -32    
304    80     
-32    224    
-80    144    
-272   -64    
288    -112   
0      0      
-400   -16    
160    -16    
-304   -48    
176    192    
-192   48     
-432   -64    
-32    -16    
96     -208   
64     -16    
-448   -16    
-128   32     
-80    -48    
-32    -64    
-176   -64    
208    160    
-224   16     
-16    -48    
32     -192   
48     -16    
128    80     
-128   80     
-128   128    
-144   176    
128    176    
-304   96     
176    96     
-2352  112    
-320   -224   
-32    -48    
32     64     
-224   112    
256    144    
-432   -208   
-32    -32    
-64    -32    
128    16     
32     32     
48     48     
16     -48    
-544   16     
-432   -16    
112    64     
16     128    
128    32     
224    80     
96     -112   
-96    32     
32     128    
-384   64     
96     0      
-16    -32    
-144   240    
-112   96     
-48    -32    
128    160    
48     112    
-16    160    
-32    192    
-320   96     
0      48     
-80    -32    
32     -48    
80     -96    
0      -48    
64     64     
96     112    
-320   0      
-432   -64    
48     -48    
-80    -16    
32     128    
-528   0      
160    -208   
-2144  -848   
128    800    
176    -32    
-32    -416   
224    608    
784    896    
-576   704    
-368   -368   
80     -848   
112    -32    
-48    192    
224    192    
-176   576    
-480   -752   
208    48     
-416   496    
48     -496   
-96    -208   
-16    112    
336    208    
-240   -144   
-448   64     
-368   -208   
416    -240   
784    1264   
0      384    
-112   -624   
-32    -64    
-512   -704   
-80    -992   
-176   736    
-304   160    
-112   -208   
208    592    
128    -48    
112    -640   
144    112    
368    96     
-496   320    
32     -656   
-32    336    
-208   -80    
-48    96     
-96    -272   
480    448    
-304   -160   
80     -160   
32     272    
-192   -128   
80     -160   
144    256    
16     64     
-192   -240   
176    288    
-48    304    
240    -112   
48     80     
80     160    
-208   -96    
64     32     
-144   0      
-240   16     
288    128    
-144   80     
96     64     
144    96     
-16    16     
16     -16    
0      -32    
144    160    
192    16     
-176   -32    
-32    64     
-256   -112   
0      48     
288    112    
-144   -32    
176    48     
-160   48     
64     -80    
-160   -384   
176    -112   
144    192    
64     128    
-80    80     
160    48     
-176   -80    
96     16     
-176   -144   
32     112    
-80    -208   
64     -64    
192    16     
224    -96    
80     80     
96     80     
-64    0      
192    32     
-144   32     
-208   -80    
128    64     
-208   32     
80     32     
-64    -32    
16     32     
0      48     
-64    -16    
128    80     
-16    -32    
224    -64    
-48    48     
112    80     
32     0      
240    144    
0      0      
64     80     
-128   -32    
48     48     
-176   -192   
32     64     
32     144    
-80    32     
32     80     
384    400    
-384   448    
144    -64    
48     -144   
-32    64     
128    80     
224    176    
256    0      
-160   0      
-176   -256   
-96    80     
-304   -272   
48     -48    
288    192    
-160   -48    
256    48     
80     48     
-176   64     
-112   112    
-96    16     
16     -16    
-240   96     
-272   80     
-320   -48    
32     -112   
0      -128   
448    -448   
-400   48     
576    112    
336    16     
-464   -64    
-224   -32    
32     320    
-160   64     
176    -32    
112    32     
-16    -64    
496    112    
16     32     
16     0      
-368   -32    
-32    -832   
288    96     
176    80     
-208   64     
112    48     
-32    64     
0      112    
208    48     
-224   288    
-160   -48    
240    16     
-16    112    
368    160    
-240   -96    
-80    -64    
112    -496   
-112   32     
160    144    
-16    64     
-48    48     
-80    48     
96     -112   
144    64     
16     32     
160    48     
-64    -16    
112    48     
64     112    
-144   -112   
96     -128   
80     -80    
160    80     
80     176    
96     80     
16     -224   
-336   64     
224    16     
-80    -32    
432    48     
-288   32     
160    -64    
224    -160   
448    -16    
176    -160   
32     -64    
-96    -256   
144    -80    
0      -704   
208    0      
48     -1280  
240    160    
-336   48     
80     112    
-176   128    
512    272    
-384   -416   
224    -64    
272    256    
-112   -144   
-176   16     
48     -208   
1152   912    
-1024  1664   
304    -352   
304    -320   
-96    48     
736    96     
-240   -272   
480    48     
-240   -144   
-64    -32    
-16    128    
16     48     
608    352    
-64    16     
-128   -288   
80     -32    
-64    384    
144    560    
240    336    
160    192    
-128   -384   
80     -256   
112    -112   
32     -240   
96     -80    
240    -160   
-128   -208   
-32    -272   
-160   -192   
256    -496   
96     -48    
-32    -112   
240    -80    
-16    -176   
48     288    
32     64     
96     -704   
32     0      
144    -96    
80     -736   
0      -128   
144    -80    
-32    -96    
16     160    
160    0      
96     128    
96     -80    
400    -32    
-16    112    
144    -240   
-64    64     
80     -80    
192    32     
-576   -16    
16     112    
-32    112    
-48    -448   
112    -64    
-64    -544   
48     -80    
-64    16     
64     -144   
288    -192   
-128   16     
-16    0      
-96    0      
-48    -64    
16     -48    
-1344  -48    
64     -16    
-16    -48    
144    -64    
64     -16    
32     -688   
48     -144   
112    -144   
-112   -48    
384    304    
-64    160    
336    32     
-256   80     
-112   -144   
-16    -144   
-48    -80    
272    64     
48     192    
112    144    
-224   -16    
288    -64    
-32    16     
48     -656   
192    -48    
208    -144   
-80    -48    
256    -112   
-48    -208   
-192   -208   
-80    16     
-544   48     
160    48     
80     0      
160    0      
256    160    
-80    0      
-176   -16    
80     -400   
352    -96    
288    128    
-112   32     
48     80     
-224   -48    
208    -64    
-16    48     
-112   -16    
48     -80    
-1760  -16    
48     -160   
80     80     
48     16     
-128   -48    
96     -304   
-192   -96    
160    -432   
-176   160    
-32    624    
448    240    
272    304    
-496   -80    
-480   -80    
-48    80     
160    48     
400    432    
-368   -160   
464    -96    
-16    288    
320    64     
112    464    
-272   -80    
64     -80    
-16    -128   
256    -160   
-112   96     
128    -32    
-304   -16    
-32    32     
-224   16     
0      -64    
-16    -256   
416    -256   
320    48     
224    -192   
-32    -128   
144    208    
-80    0      
-400   48     
64     128    
-240   -80    
80     80     
80     -16    
208    -400   
-208   48     
-160   48     
-688   -112   
-48    -64    
112    80     
224    464    
-160   -464   
160    -176   
320    -32    
112    128    
80     -112   
64     368    
336    -336   
-352   -160   
-80    32     
112    0      
-304   -192   
384    912    
-496   -416   
96     -656   
-976   272    
288    -112   
64     -176   
-288   336    
400    336    
-720   80     
-448   -208   
256    -16    
48     208    
96     -32    
80     -160   
-384   -304   
-256   144    
-288   144    
-16    16     
-144   -1056  
-224   -768   
160    464    
304    528    
-288   352    
-448   -736   
-80    -560   
-2224  112    
-16    192    
-32    -16    
400    48     
-416   -160   
48     128    
-320   -144   
-32    -64    
-128   0      
160    80     
-112   32     
-16    48     
-80    -48    
-240   -16    
0      -32    
48     48     
-96    64     
-688   -32    
0      -48    
64     48     
-80    272    
96     80     
320    80     
368    176    
-400   16     
-64    -64    
-128   32     
-48    32     
160    48     
-64    16     
-160   -16    
-176   -112   
-1104  -32    
-128   96     
208    0      
128    64     
-32    -48    
16     80     
0      48     
-80    -48    
-80    0      
-160   48     
0      32     
-224   -160   
256    -144   
-240   48     
-112   144    
-736   0      
-80    48     
-320   -272   
256    -16    
-112   -16    
208    224    
160    80     
16     -32    
-160   0      
32     32     
96     64     
-80    -96    
208    -144   
-160   -128   
-96    16     
-128   32     
144    64     
-912   64     
16     112    
-16    -160   
-16    0      
48     96     
32     64     
64     -48    
-128   48     
16     48     
-48    96     
96     64     
0      16     
-32    -16    
-208   -16    
-16    -96    
-256   -256   
208    32     
32     192    
48     -32    
80     -80    
-32    -64    
32     80     
80     0      
80     0      
-144   -32    
112    64     
-160   -16    
32     16     
-496   -80    
-32    -112   
-80    -128   
0      -16    
160    96     
128    -48    
0      48     
-32    -16    
16     64     
32     -16    
-176   0      
-144   160    
-80    -48    
-288   0      
160    32     
128    48     
48     128    
-80    112    
-288   16     
0      -48    
-48    0      
16     -80    
256    -16    
-240   32     
80     48     
224    0      
-64    -48    
288    96     
32     176    
128    112    
192    112    
-160   64     
64     -16    
144    48     
112    -16    
240    48     
128    80     
336    208    
-208   160    
-544   -80    
-256   -160   
496    -160   
464    16     
336    128    
272    240    
-176   144    
-432   16     
-80    144    
160    64     
96     -48    
240    32     
224    144    
80     80     
0      48     
-224   -144   
112    0      
48     -48    
336    -64    
208    48     
16     128    
-208   0      
160    -208   
64     -80    
96     128    
-160   96     
0      0      
96     16     
48     -32    
48     -160   
160    -64    
144    -16    
64     48     
-128   -304   
-176   48     
-96    -112   
-48    16     
0      240    
-64    80     
352    -16    
-240   -112   
528    384    
-192   -304   
-64    336    
80     -352   
-32    -112   
128    -144   
-128   32     
64     16     
-176   -16    
-176   256    
64     144    
-128   1216   
-160   -752   
96     -160   
48     768    
176    -624   
416    96     
-256   208    
96     -48    
-48    224    
416    416    
112    240    
288    0      
-352   -288   
96     -96    
0      512    
208    144    
-384   -384   
320    -208   
144    -64    
-416   -192   
16     64     
32     144    
128    96     
32     32     
224    48     
-144   16     
304    144    
-80    96     
48     -352   
-16    -176   
16     -1712  
144    32     
32     128    
112    160    
-48    -80    
144    -176   
64     -48    
80     64     
0      80     
192    32     
-32    -64    
160    16     
-16    -16    
224    -192   
-16    96     
208    144    
-96    48     
208    -96    
-48    -48    
176    48     
160    32     
80     80     
80     48     
-112   208    
192    112    
64     -16    
224    64     
-80    -80    
80     -48    
-96    -80    
32     -96    
32     64     
-32    -112   
0      -48    
64     -32    
256    -32    
192    48     
272    256    
-64    -80    
32     32     
-144   -48    
128    -112   
48     112    
32     0      
32     64     
96     224    
128    80     
192    -544   
64     112    
-96    80     
80     48     
-16    32     
16     80     
-80    -64    
-16    16     
48     96     
48     32     
224    48     
64     -128   
32     32     
16     -240   
0      32     
96     -368   
192    48     
272    240    
-112   240    
-80    16     
96     0      
160    -32    
32     144    
32     16     
64     -48    
208    64     
0      32     
80     16     
-32    -64    
256    144    
-272   -96    
128    208    
-176   256    
176    48     
208    -112   
128    64     
-48    -128   
96     -304   
-224   -80    
-176   -160   
-80    -208   
384    -64    
208    160    
64     -80    
96     0      
-240   -288   
224    -128   
96     160    
16     240    
-64    80     
80     64     
-160   -64    
32     -240   
384    -160   
240    64     
144    128    
-160   144    
0      -80    
32     -208   
-80    1040   
576    544    
16     160    
-176   -144   
-112   -1392  
128    128    
-48    -560   
304    -16    
-192   -560   
304    32     
112    -96    
496    -336   
96     208    
320    -208   
176    0      
336    80     
32     176    
144    -608   
32     240    
272    16     
-224   -96    
32     -272   
32     32     
160    -352   
-256   -320   
-16    112    
-224   -208   
288    368    
240    112    
-192   -352   
432    -96    
-80    -128   
256    -384   
-112   0      
48     48     
-64    16     
-240   -48    
112    128    
-1888  48     
48     -176   
-96    -128   
464    320    
-432   -208   
80     -704   
112    96     
96     80     
176    48     
48     -192   
-112   0      
0      64     
-80    128    
176    -176   
240    -128   
-784   -272   
224    -176   
16     304    
-288   -352   
256    -80    
208    48     
160    -128   
144    -1808  
-112   80     
-144   112    
-48    80     
416    16     
32     -80    
32     32     
192    48     
-848   -272   
80     -160   
352    272    
960    272    
-592   96     
-80    -416   
272    -48    
-208   -384   
-112   16     
-48    96     
144    -192   
-48    -112   
192    -80    
-464   80     
32     -48    
192    48     
-64    0      
-560   -80    
224    -256   
-16    64     
32     -16    
112    96     
112    -176   
32     80     
128    -16    
32     48     
48     80     
80     -16    
-176   16     
-16    -160   
-128   -208   
192    16     
-256   96     
160    -48    
-288   -16    
160    -64    
64     48     
192    -48    
160    48     
320    -128   
-368   16     
80     -16    
240    -80    
-48    -48    
144    -112   
-592   -16    
144    -16    
-464   -32    
176    64     
-224   -32    
-32    -144   
96     64     
-80    -224   
32     0      
160    48     
256    -32    
-512   -32    
208    0      
-256   0      
272    48     
-256   -80    
64     64     
-96    0      
96     32     
160    16     
128    -96    
128    32     
144    -32    
48     48     
64     16     
-176   96     
-400   224    
128    -64    
-96    -176   
48     -64    
0      96     
0      -32    
48     16     
128    -144   
96     -96    
-160   -176   
32     144    
-64    -32    
192    112    
-144   -96    
-1728  48     
-240   -48    
-912   -64    
-32    -96    
-96    -128   
-240   16     
80     -64    
-224   -32    
-848   176    
-32    160    
-80    -80    
112    -48    
-304   -144   
80     160    
-192   64     
-320   -48    
96     -48    
-16    96     
0      64     
-944   -128   
-352   -48    
32     144    
-48    32     
-128   -32    
288    -144   
-32    -496   
192    -112   
-48    224    
256    144    
32     -320   
-80    -208   
-64    -144   
-208   16     
32     16     
-880   -96    
272    112    
-32    112    
-64    48     
112    128    
144    -272   
-48    -432   
16     80     
96     192    
-96    -64    
-48    112    
-416   112    
64     0      
-112   288    
-192   128    
-48    -80    
-48    32     
-1744  -128   
0      -48    
-336   48     
608    480    
-176   176    
-544   -272   
64     -544   
32     -96    
320    256    
-496   -288   
432    -816   
-192   -160   
400    336    
48     80     
-304   176    
-368   -96    
-16    -512   
-176   192    
224    176    
48     32     
224    240    
-96    -48    
-32    64     
-32    16     
-64    -48    
-96    16     
-304   -176   
528    784    
-640   -576   
16     32     
-320   80     
96     -64    
304    48     
16     256    
-64    0      
-384   -224   
128    448    
-16    -240   
-16    288    
144    160    
-240   -96    
-416   160    
96     -784   
-128   -368   
112    96     
16     400    
-480   -224   
-1088  -448   
96     528    
192    0      
368    400    
-192   48     
48     0      
96     -64    
-192   -128   
224    64     
-272   -80    
48     -96    
-224   -80    
-96    32     
-416   -16    
-64    -128   
112    -112   
224    112    
288    176    
144    -144   
128    48     
-480   -48    
240    -32    
256    48     
-240   -64    
608    -192   
-112   32     
384    -80    
208    16     
-80    160    
-16    -16    
-400   0      
-80    -32    
48     176    
192    208    
-80    192    
-48    -96    
160    -176   
-384   0      
16     32     
-160   -176   
224    208    
-464   112    
288    -80    
-240   -112   
112    80     
160    48     
-128   0      
240    -144   
0      -144   
-16    -64    
-144   80     
176    -80    
-112   64     
32     144    
-144   176    
432    208    
-512   -224   
32     112    
-96    256    
96     -160   
112    -48    
128    64     
-64    64     
-160   192    
112    272    
352    224    
64     144    
112    -48    
176    -32    
-160   96     
16     144    
-16    -16    
240    16     
-112   -96    
-48    48     
160    64     
16     80     
64     64     
16     128    
96     32     
80     32     
-16    64     
-160   -112   
176    -16    
-64    96     
-128   -16    
368    -144   
80     128    
32     64     
32     -80    
112    16     
-16    112    
112    96     
-16    -144   
64     -64    
-64    -160   
-96    -48    
-32    32     
32     128    
32     64     
176    48     
-80    32     
48     -896   
160    112    
64     64     
-64    176    
48     48     
32     32     
64     32     
-48    32     
32     368    
176    304    
96     144    
32     112    
32     80     
16     -32    
-32    -272   
-320   -528   
-144   -416   
112    -656   
112    -160   
224    128    
128    160    
-16    624    
240    224    
-240   -112   
16     -16    
-272   272    
32     -336   
64     -176   
256    544    
-176   -128   
-160   -32    
128    48     
64     96     
112    -16    
-64    -32    
-96    -48    
0      288    
-352   -688   
560    512    
160    320    
224    -208   
240    160    
-272   16     
-208   224    
80     464    
0      32     
-80    -224   
192    -272   
272    288    
400    176    
144    -32    
96     112    
-640   -192   
48     -304   
224    -128   
288    -176   
592    -208   
64     80     
272    64     
-128   240    
0      -112   
-80    160    
-32    176    
144    32     
-64    -80    
112    96     
-144   16     
128    -48    
-80    -16    
32     48     
-256   16     
144    112    
-48    48     
-16    -96    
0      64     
48     -48    
-160   -80    
352    -288   
-32    80     
272    -384   
128    32     
96     -64    
48     64     
224    192    
-64    -16    
144    32     
208    -16    
-160   -48    
352    32     
128    48     
80     16     
144    48     
64     -224   
144    64     
-384   -288   
160    -80    
32     -112   
272    256    
-352   -32    
0      -64    
-32    0      
288    144    
480    48     
-32    -64    
240    32     
16     -128   
-224   -128   
208    -240   
-128   352    
-464   -208   
256    80     
32     -32    
224    -48    
-304   -112   
352    208    
16     48     
-368   -144   
400    48     
-112   -336   
96     16     
64     -192   
528    176    
304    0      
176    0      
320    -816   
32     96     
256    32     
224    144    
-432   80     
368    -32    
192    32     
64     -48    
208    -192   
16     160    
64     16     
-80    -32    
160    48     
112    -48    
64     48     
144    -352   
48     -16    
384    272    
-224   -416   
-16    -64    
160    -64    
-16    0      
336    32     
16     -608   
-112   -48    
48     -416   
96     -96    
112    64     
-80    -208   
80     0      
-16    -80    
192    -208   
192    32     
-32    -176   
-80    16     
-992   -48    
144    -144   
240    16     
-160   -48    
144    -32    
64     -176   
224    -64    
-16    -976   
176    -32    
80     32     
0      16     
112    -160   
64     0      
48     -96    
-96    208    
-16    -48    
128    96     
112    64     
-48    -112   
32     -64    
0      80     
0      80     
256    -304   
160    0      
128    -32    
48     96     
48     -144   
-240   -64    
80     -80    
208    -16    
-96    32     
80     0      
-240   -144   
16     -64    
-64    -16    
208    48     
-32    -272   
-80    -608   
144    288    
112    -1744  
-272   -16    
-48    32     
-112   -448   
288    -64    
128    144    
-320   0      
-16    -48    
-768   -128   
112    0      
-80    0      
80     112    
176    -16    
224    -32    
128    -32    
192    -560   
-400   0      
64     192    
624    800    
16     -864   
352    -608   
-16    368    
-64    -160   
-112   48     
-208   -256   
-480   -176   
80     384    
-560   -144   
176    -112   
192    32     
416    -144   
-144   640    
-64    -720   
272    -112   
-160   112    
128    240    
0      -192   
240    48     
-192   96     
-32    -144   
-112   0      
96     -176   
-144   -48    
240    -80    
-128   -192   
-48    -496   
112    416    
352    -208   
80     -112   
48     -192   
256    -32    
144    400    
32     32     
-128   -496   
224    0      
-192   -48    
480    -128   
-48    0      
-64    -304   
352    480    
160    176    
176    -240   
-416   -352   
288    32     
32     80     
80     0      
-48    288    
144    -48    
-240   16     
0      -64    
-16    0      
32     160    
256    112    
128    48     
-32    224    
288    -16    
144    128    
-48    272    
224    64     
-128   128    
112    -16    
-192   64     
16     -64    
-96    0      
176    16     
144    -80    
256    80     
-64    208    
-1760  -96    
-176   80     
-832   80     
-144   160    
-112   320    
-400   240    
400    480    
-208   256    
-80    320    
368    48     
112    -144   
-64    16     
-240   -192   
-128   224    
128    112    
-416   32     
16     -48    
304    -16    
-608   -32    
-64    -32    
-480   48     
-64    -96    
-80    0      
112    16     
-816   336    
-416   208    
-128   16     
48     -224   
208    48     
272    144    
240    -160   
-208   32     
-144   -96    
-336   16     
128    64     
-272   112    
-96    -80    
48     0      
0      -16    
-592   16     
-128   -16    
-224   -128   
160    -112   
-16    -16    
320    272    
-240   48     
-160   -16    
16     96     
0      128    
64     80     
32     -48    
80     96     
-144   64     
-16    -64    
-176   96     
-208   112    
-960   -240   
224    96     
-160   -16    
-48    -16    
-32    -16    
-64    -16    
0      256    
144    128    
96     16     
-144   -704   
-432   -432   
96     -160   
-256   272    
304    -16    
240    -16    
-64    32     
48     96     
-80    -16    
-96    -208   
-48    48     
16     80     
16     80     
-192   -32    
16     144    
-128   -16    
32     -32    
48     64     
-128   48     
-400   -160   
96     -128   
-576   -144   
96     -304   
-304   32     
384    464    
-336   400    
112    16     
-32    -192   
128    0      
32     -32    
224    320    
32     304    
-320   224    
80     128    
-16    80     
208    -32    
-368   -16    
400    64     
-384   64     
-64    -128   
-144   -288   
-96    112    
-32    224    
64     192    
48     64     
-64    96     
-32    112    
-176   -288   
160    -224   
-112   352    
32     96     
-288   -208   
208    96     
-48    32     
-176   432    
16     -192   
0      128    
-64    48     
16     -80    
128    256    
-64    16     
-64    128    
-32    -48    
176    784    
-160   -80    
-64    -64    
-192   96     
-48    -208   
256    160    
-96    192    
48     -224   
-240   -208   
-48    -640   
128    32     
16     176    
32     -96    
-32    64     
144    144    
144    16     
112    32     
-48    16     
-96    48     
-80    -144   
0      -48    
64     64     
240    96     
224    -48    
144    0      
-16    -208   
-336   0      
-352   64     
96     112    
-80    0      
480    112    
160    48     
208    -16    
-112   -16    
-240   96     
-352   16     
528    256    
-592   48     
-48    -16    
576    -144   
160    -16    
-128   80     
-368   -32    
16     48     
-192   32     
-48    0      
-240   -80    
288    0      
96     48     
80     128    
-176   16     
192    64     
128    48     
-336   80     
128    80     
224    0      
48     64     
-240   -64    
96     80     
-48    16     
160    144    
-48    0      
144    0      
144    16     
-176   96     
-16    0      
32     64     
-48    96     
352    160    
-96    112    
-160   -48    
192    96     
96     48     
160    16     
0      48     
-192   608    
32     80     
448    -1408  
-240   224    
-80    64     
-432   -304   
336    -64    
688    288    
-544   -80    
528    -16    
128    240    
-592   -64    
176    -48    
-320   -48    
528    192    
-16    16     
-496   -224   
400    -768   
-112   80     
16     -16    
160    32     
32     80     
176    64     
-208   16     
-96    16     
640    64     
-112   176    
-240   -16    
320    -48    
-192   -112   
240    224    
-544   -64    
208    -80    
16     -112   
320    -32    
544    176    
-48    48     
48     16     
-80    -32    
288    112    
-272   112    
96     96     
16     -112   
176    80     
-80    -16    
-32    -160   
320    96     
-64    -128   
-32    48     
192    -112   
-80    -112   
160    192    
-304   32     
272    64     
112    96     
0      48     
160    0      
-128   -48    
32     -32    
-64    -32    
64     -160   
-64    16     
80     32     
64     16     
64     -432   
-16    48     
-64    80     
240    0      
-96    -160   
208    176    
-96    160    
80     0      
144    0      
224    192    
-336   -400   
64     -256   
160    304    
112    144    
0      112    
176    -496   
-80    192    
0      0      
224    32     
208    -80    
-16    -16    
-16    80     
-32    -80    
32     48     
80     32     
288    176    
-128   -80    
160    -224   
208    144    
96     -112   
48     656    
0      -496   
256    -800   
96     400    
-64    -64    
-64    -16    
64     -464   
64     432    
208    128    
-48    48     
-64    224    
176    -320   
480    736    
-256   -1072  
-16    160    
208    128    
256    -304   
128    160    
-16    -368   
160    64     
32     96     
128    208    
48     32     
32     0      
-80    -16    
48     144    
112    -16    
144    80     
80     -48    
-48    48     
0      -240   
80     -224   
96     -80    
112    256    
0      32     
64     -96    
-176   -256   
0      -16    
0      -48    
272    -192   
-112   160    
368    -496   
224    48     
112    -288   
0      -256   
-192   -208   
16     -160   
64     32     
0      -832   
0      -64    
128    -400   
96     112    
-224   80     
64     80     
16     -16    
64     -464   
16     -144   
432    -48    
-304   -128   
-336   -304   
128    -192   
128    -272   
112    224    
336    -32    
96     32     
-80    -160   
-192   64     
64     -112   
224    -336   
400    16     
432    -160   
48     -48    
-96    -16    
32     32     
176    32     
64     -144   
0      -352   
48     -224   
80     0      
176    16     
192    48     
144    -32    
-320   -32    
0      224    
32     160    
-16    80     
-32    -112   
160    -224   
0      -160   
304    -480   
-48    160    
96     -112   
-64    -192   
32     -160   
16     -112   
-32    -160   
64     -112   
-368   -256   
208    -64    
-624   32     
48     -16    
32     176    
112    144    
64     48     
-224   -64    
192    -304   
352    -80    
0      240    
464    352    
-96    592    
-160   96     
96     48     
-48    -32    
96     384    
-80    16     
256    -144   
320    -128   
656    -48    
48     320    
-736   96     
-512   -48    
-320   -592   
256    -160   
304    -528   
208    -144   
-80    176    
-272   160    
-352   208    
-256   16     
-384   -96    
240    -16    
96     96     
-96    -48    
272    64     
112    -64    
-448   -176   
704    -512   
48     112    
528    48     
-272   48     
-144   16     
-16    -32    
-384   -80    
336    -384   
-544   -192   
160    -176   
-288   -224   
400    128    
-48    96     
64     -48    
288    -48    
32     -208   
96     -32    
-144   64     
336    112    
-208   -32    
112    64     
272    -16    
-176   32     
-256   32     
192    336    
144    192    
112    -112   
0      -48    
64     -160   
-208   128    
416    176    
32     112    
-560   -128   
96     48     
-112   64     
128    80     
-32    -128   
32     96     
-16    160    
256    80     
32     96     
192    32     
0      416    
-128   240    
48     112    
176    16     
-912   0      
-128   -144   
0      -272   
128    -272   
112    -112   
-16    -128   
144    32     
-368   -480   
-96    -368   
-80    -144   
64     176    
144    -144   
-528   -16    
-128   32     
-1488  -176   
-192   -240   
-16    -96    
176    48     
-112   -48    
-608   -32    
192    240    
-144   -240   
-48    144    
112    -352   
-176   -368   
-32    560    
32     -48    
0      80     
16     416    
-128   -272   
0      -96    
64     592    
32     144    
-208   -160   
-592   -64    
-96    16     
-96    -48    
16     64     
96     16     
48     -16    
-144   -160   
64     64     
-144   -144   
0      64     
48     32     
0      64     
224    0      
-400   -208   
-368   64     
-160   16     
-32    -48    
-32    0      
-48    112    
160    96     
48     160    
-400   -192   
-128   -208   
128    192    
-128   64     
112    16     
-32    128    
0      0      
48     16     
-144   -16    
-16    208    
-208   -32    
-160   -48    
-64    -48    
-208   -16    
368    -48    
176    48     
304    64     
-112   64     
-352   32     
-96    64     
-352   -32    
-288   -48    
0      0      
112    0      
-176   64     
-448   64     
-224   -64    
-64    -176   
-672   -208   
96     96     
-48    320    
-272   -16    
192    16     
-128   -48    
160    64     
-208   -48    
224    16     
-192   64     
256    -32    
-48    -96    
-144   16     
-512   -32    
288    80     
128    112    
80     -48    
32     -80    
-224   32     
-112   -96    
-32    128    
-96    48     
80     32     
-272   -32    
-176   -32    
96     0      
-96    0      
-16    16     
96     16     
112    48     
-320   -48    
0      -80    
-256   -48    
-528   0      
480    128    
-160   16     
0      -64    
0      80     
448    512    
-784   64     
128    -208   
-96    80     
304    160    
-480   -96    
144    0      
-144   64     
-240   -288   
608    176    
-320   176    
80     80     
96     128    
-464   -32    
176    -80    
112    224    
96     112    
80     16     
320    128    
-256   16     
-240   -256   
32     -160   
96     96     
-464   -384   
416    -96    
-384   192    
-144   48     
384    48     
-448   -128   
160    -160   
384    0      
496    0      
-112   112    
-496   -112   
400    16     
-48    96     
48     144    
-48    48     
16     192    
-32    160    
96     -64    
-96    16     
32     64     
0      -64    
144    160    
112    208    
-96    0      
-16    96     
-80    128    
176    96     
-96    384    
80     96     
-256   -144   
-112   -48    
272    -128   
96     336    
96     144    
-176   -64    
224    16     
-128   48     
96     144    
16     112    
-64    -64    
48     192    
224    -320   
-176   16     
192    112    
128    128    
-128   -256   
-64    160    
160    288    
48     -160   
-96    32     
352    112    
0      -96    
144    528    
-240   -224   
-80    144    
192    -416   
368    -176   
-384   48     
-32    -176   
240    288    
192    256    
64     576    
48     -144   
-176   0      
64     96     
272    -80    
-96    -208   
-192   -160   
-160   32     
192    64     
-96    -96    
288    224    
-96    416    
-48    304    
-16    48     
112    32     
16     48     
-80    16     
64     80     
80     144    
-96    -64    
96     32     
-80    -192   
32     -48    
48     128    
-192   112    
208    464    
160    0      
64     176    
-16    64     
-48    -32    
-48    32     
-80    -16    
48     80     
16     32     
32     112    
-16    -144   
192    176    
-112   96     
80     -96    
-192   -96    
112    -512   
304    16     
32     -176   
-32    64     
192    112    
240    144    
-96    16     
-16    112    
0      0      
48     -208   
0      32     
-96    0      
-32    32     
-64    16     
160    80     
96     -32    
-112   208    
64     -144   
48     48     
48     -448   
48     32     
64     -64    
224    -32    
16     80     
-32    -80    
144    -32    
96     48     
80     32     
0      112    
16     48     
160    -112   
-80    176    
-16    -16    
240    -16    
80     -368   
-48    -32    
80     240    
-256   96     
160    304    
224    320    
112    112    
480    144    
-384   0      
-32    112    
80     96     
80     224    
96     64     
112    -144   
96     64     
-96    -560   
176    16     
-48    -736   
-48    -32    
0      -80    
0      16     
-32    -32    
128    0      
-32    -192   
64     -176   
128    16     
112    -48    
-32    64     
96     -32    
224    240    
-96    -16    
176    176    
192    -144   
16     -160   
32     -32    
96     48     
-240   -16    
64     16     
16     -64    
208    -272   
48     -48    
528    -112   
-256   16     
-112   -48    
80     -80    
288    -432   
-96    -128   
128    -176   
16     -16    
-208   -256   
112    16     
-32    -16    
-48    -80    
80     48     
-304   -304   
-128   208    
176    -176   
256    80     
272    -112   
384    496    
-128   288    
112    128    
-576   -1568  
208    480    
0      208    
320    32     
688    288    
-144   -1088  
-32    -368   
-336   -352   
0      -128   
96     -16    
32     -208   
0      -368   
32     -256   
0      -512   
160    -208   
-96    -128   
160    -640   
208    336    
-64    -112   
-112   144    
-544   -48    
208    -400   
240    -80    
192    -192   
-96    -96    
48     -512   
64     288    
240    0      
-208   -16    
0      -352   
288    -384   
432    224    
-464   -240   
48     -576   
240    240    
-592   -208   
160    -160   
128    32     
96     -256   
-64    176    
304    -608   
-32    -80    
-48    32     
272    96     
288    -128   
-48    -48    
192    -176   
32     -144   
16     416    
128    -256   
0      208    
416    432    
-240   -432   
-32    272    
112    -64    
144    -160   
240    -112   
0      32     
144    0      
112    -176   
-320   96     
48     -144   
144    240    
-48    64     
128    -144   
-128   96     
-32    -160   
-992   16     
176    -224   
-96    -288   
0      64     
96     96     
-32    0      
224    112    
144    -32    
-16    -16    
208    32     
32     48     
-336   -144   
176    32     
-592   32     
48     -208   
-224   -240   
160    0      
-48    -32    
144    -96    
80     -48    
224    -320   
96     64     
48     -176   
48     -32    
32     -32    
176    -64    
-176   -16    
80     0      
-32    0      
80     16     
-464   160    
32     16     
-688   0      
-208   -128   
64     32     
592    384    
-528   208    
64     -416   
208    0      
16     16     
-48    -224   
384    16     
176    144    
64     256    
80     48     
-656   -112   
128    -16    
-816   48     
160    0      
0      -112   
192    -144   
48     112    
160    -352   
96     64     
-208   -176   
336    -112   
-112   128    
352    16     
-448   16     
-336   0      
-432   -48    
-256   -112   
-112   16     
160    80     
-112   -64    
272    -192   
-16    0      
-176   -544   
32     32     
-208   16     
16     0      
-112   32     
144    16     
352    80     
-64    48     
-400   -96    
272    64     
-1008  48     
144    -64    
-32    32     
176    -32    
0      48     
0      16     
240    -32    
320    160    
-1344  -80    
-64    -48    
320    -16    
-384   0      
400    48     
-96    16     
-96    -80    
-144   16     
-1344  -96    
-64    0      
-32    112    
-384   48     
-64    -48    
-416   16     
-192   0      
-1072  -16    
-208   -48    
-1280  -16    
0      112    
-64    -144   
48     0      
-1296  -128   
160    48     
-272   -112   
-16    32     
-448   -480   
432    32     
-336   144    
-16    64     
-592   112    
272    176    
-256   0      
64     -48    
-352   -336   
-816   -96    
-272   -48    
208    -160   
48     -16    
-400   -144   
640    -144   
-208   -368   
64     0      
128    112    
352    64     
64     96     
384    128    
256    -80    
-528   -64    
16     -416   
-784   -272   
272    384    
288    432    
-64    96     
-160   -288   
-272   -192   
112    592    
-496   176    
288    -224   
-64    -48    
-96    112    
-128   80     
-144   64     
-720   -272   
96     112    
-320   -160   
160    96     
-32    96     
-16    -176   
-128   16     
192    -96    
96     304    
-208   -272   
-144   64     
208    -224   
80     -560   
-576   656    
352    -448   
-464   416    
48     -736   
-176   -16    
80     240    
-1328  -16    
400    128    
64     -368   
48     48     
-48    -160   
-144   48     
96     64     
-144   -64    
-112   128    
-16    -256   
160    112    
-64    160    
144    64     
-160   -64    
-64    112    
-432   48     
16     -64    
160    0      
80     -112   
-272   -16    
-16    -16    
16     112    
-176   0      
-288   0      
224    0      
64     48     
-16    -240   
-48    -16    
-288   -32    
-16    0      
-432   16     
80     64     
176    144    
16     128    
0      128    
368    48     
-112   144    
-96    -64    
-208   96     
48     -16    
96     48     
-112   80     
32     48     
-80    -32    
-16    48     
-320   0      
16     128    
112    80     
208    48     
-16    48     
-16    -176   
176    64     
-192   96     
0      240    
176    128    
-96    0      
208    -48    
80     208    
-256   32     
48     0      
-256   -48    
-144   -32    
112    0      
96     -48    
128    64     
-128   48     
0      -64    
240    368    
-352   384    
-224   -48    
432    48     
-48    16     
80     144    
-96    160    
96     80     
48     -176   
-128   -144   
-16    -48    
160    112    
-128   128    
192    16     
-32    16     
32     144    
-112   80     
-16    32     
48     -32    
-256   -288   
288    -32    
-48    48     
288    272    
-112   32     
80     112    
-48    64     
80     272    
16     144    
-80    -144   
96     0      
64     176    
256    112    
-96    -96    
64     -192   
-16    -208   
32     0      
-64    32     
176    32     
-144   32     
-80    -16    
-80    16     
-160   -16    
-32    32     
32     80     
160    -112   
192    -32    
-16    -80    
-48    16     
-64    128    
-160   -80    
240    -288   
-48    -176   
16     80     
-32    160    
112    80     
48     112    
-128   32     
192    -128   
16     48     
-112   64     
-16    144    
-16    80     
-16    32     
48     80     
16     -304   
96     160    
288    320    
-144   -304   
368    80     
0      256    
288    240    
112    352    
144    480    
-272   80     
-80    -432   
128    -64    
16     416    
256    0      
192    -176   
80     80     
-48    176    
-240   272    
224    -768   
-368   -480   
-16    -48    
128    -16    
-64    672    
112    -352   
-208   -160   
288    480    
-64    32     
400    192    
-480   -192   
-96    0      
352    528    
-160   -576   
-720   -352   
-128   -384   
96     176    
16     320    
-128   -208   
480    -160   
304    208    
240    16     
304    -288   
224    -64    
-160   464    
192    64     
96     -16    
-256   96     
-192   -48    
48     128    
192    -320   
48     -96    
96     16     
-32    112    
224    0      
32     112    
176    -96    
-240   -240   
32     0      
160    304    
32     -80    
96     16     
256    160    
-128   -112   
192    -112   
-16    -256   
112    -16    
192    -496   
-32    96     
80     16     
112    48     
-64    144    
144    64     
112    160    
-16    0      
176    -16    
128    -64    
272    176    
-272   -128   
32     0      
96     16     
96     32     
32     -224   
304    16     
-16    -368   
64     144    
-80    -64    
144    16     
48     96     
128    64     
112    16     
-48    -32    
48     -16    
112    0      
-16    0      
192    64     
80     48     
128    -240   
80     32     
48     96     
-112   32     
112    160    
192    96     
-96    0      
48     0      
64     48     
96     -192   
-144   192    
144    16     
112    48     
-80    -624   
112    128    
32     -192   
112    -96    
128    -96    
-16    160    
-16    224    
-64    32     
32     0      
80     48     
80     48     
128    -16    
320    192    
-192   16     
112    192    
80     -96    
32     -16    
208    -80    
224    96     
208    0      
-160   96     
32     -160   
112    -32    
0      -16    
-16    -64    
48     -720   
64     -64    
-160   -1872  
32     -192   
-64    272    
-208   48     
128    16     
224    224    
-208   176    
224    64     
64     -256   
224    112    
272    192    
-32    32     
0      -32    
-144   -544   
-32    -80    
80     -224   
176    -16    
240    -496   
160    -96    
-272   -288   
368    -512   
304    -512   
240    208    
-96    64     
-304   -16    
-16    -224   
-192   -272   
-352   -224   
192    -208   
256    -32    
192    16     
96     0      
32     -16    
176    -80    
-32    -144   
-176   -320   
192    -304   
288    160    
272    128    
-112   128    
-640   -48    
96     -96    
-208   -64    
96     16     
224    -112   
32     -48    
208    16     
-48    -352   
-144   0      
-208   -352   
0      32     
-112   0      
0      32     
320    -192   
96     -16    
-320   32     
-144   -80    
-192   0      
-96    96     
192    0      
-224   -96    
32     0      
144    -336   
192    64     
208    -368   
-48    80     
32     0      
-80    64     
208    64     
-16    80     
-48    0      
128    112    
-96    32     
16     -16    
-2400  -112   
-208   -224   
80     64     
80     48     
-16    -192   
-144   -608   
80     -176   
-256   -768   
336    128    
144    32     
32     272    
-256   256    
-16    -304   
256    -816   
592    176    
96     592    
48     -480   
16     -320   
-240   -624   
-96    64     
384    1360   
-416   -512   
176    -1024  
128    720    
-112   -384   
176    -112   
-208   144    
96     -48    
-176   336    
32     -352   
-672   272    
-112   -16    
-240   144    
128    -160   
272    144    
-80    80     
400    368    
160    240    
-224   -496   
-224   48     
-128   -720   
128    -480   
80     240    
32     -208   
272    464    
-80    128    
64     -336   
-368   -512   
-112   -352   
112    160    
-64    -400   
368    288    
224    48     
-336   -256   
112    16     
128    144    
16     208    
176    -96    
-400   64     
16     96     
-32    80     
224    -448   
16     -144   
144    -32    
48     224    
-832   -336   
-16    16     
-16    64     
192    48     
-16    -64    
-112   -128   
-128   128    
112    -112   
-176   -96    
144    -32    
-336   16     
96     16     
-96    80     
-800   -160   
80     48     
-480   -240   
288    -272   
64     144    
96     96     
32     -64    
-400   16     
-160   -16    
-480   16     
-192   -112   
96     16     
64     32     
-432   48     
64     -16    
-480   -64    
-16    32     
-160   64     
-128   80     
272    0      
-288   16     
-224   32     
-368   -64    
-192   0      
-784   -160   
112    -64    
0      64     
-48    32     
-16    -96    
80     -32    
-48    -48    
160    32     
176    -128   
-272   -32    
-240   16     
-144   80     
-192   -96    
-96    -80    
-32    80     
-336   128    
176    160    
-1728  64     
-208   16     
-80    -192   
32     -32    
80     32     
0      256    
64     16     
-48    -48    
-112   144    
32     224    
-112   288    
-16    112    
272    -48    
-32    -128   
-144   -96    
-160   48     
-48    192    
-144   64     
112    160    
-256   -256   
0      -160   
0      -64    
-304   -224   
32     -48    
160    80     
48     272    
64     128    
-112   80     
-128   -48    
48     -64    
-144   -64    
352    224    
-864   -64    
176    -144   
-64    -224   
-16    32     
-80    -32    
-208   -16    
-48    144    
-48    -144   
128    -80    
240    240    
-464   -208   
-80    128    
128    848    
-160   80     
352    80     
-1168  -304   
240    48     
192    0      
-16    -288   
96     -128   
-96    80     
-192   -224   
-272   -144   
64     672    
192    208    
-176   32     
0      -192   
176    -96    
-272   288    
-64    112    
-400   -64    
256    224    
208    -192   
192    240    
-112   -128   
-192   32     
112    80     
176    384    
-128   -192   
208    80     
48     112    
-272   -272   
336    224    
-304   16     
48     320    
-528   272    
-176   -144   
-208   -256   
-80    -16    
-208   240    
96     176    
-320   -80    
-48    -240   
256    -16    
144    128    
144    80     
-160   -32    
-400   64     
-176   112    
320    352    
-352   -464   
-736   -1344  
-96    -144   
-48    256    
48     -48    
192    -272   
320    96     
-96    256    
-192   112    
-80    224    
-256   64     
-480   -256   
96     64     
-272   -32    
16     -96    
64     -80    
80     -176   
208    -16    
-64    -32    
400    16     
80     -48    
128    160    
64     128    
-480   16     
208    -32    
208    64     
-96    112    
256    -96    
-320   96     
-144   0      
0      144    
-144   80     
208    64     
-128   112    
176    32     
16     0      
144    64     
-16    48     
-208   80     
48     16     
256    128    
-16    80     
128    -32    
-320   0      
48     32     
112    -48    
144    32     
-32    64     
-48    80     
-48    48     
48     32     
192    64     
80     64     
16     32     
-80    0      
336    112    
-96    32     
32     48     
96     -16    
32     48     
-64    48     
-64    0      
160    32     
80     64     
80     32     
64     16     
144    64     
-288   -128   
256    -112   
0      -16    
112    80     
64     32     
-16    64     
192    128    
-224   -16    
16     0      
-32    -32    
48     -32    
272    16     
144    128    
48     64     
-80    -64    
16     -64    
240    192    
-160   -16    
64     64     
16     -64    
-48    -128   
-128   144    
256    -112   
144    -32    
-96    -48    
128    -112   
32     0      
-32    144    
-80    48     
48     32     
-80    -224   
144    -64    
96     -16    
32     0      
-48    16     
96     -288   
128    0      
160    80     
-224   80     
-32    -112   
112    -80    
80     32     
80     112    
96     0      
48     80     
16     -688   
-64    -96    
-80    208    
-64    144    
0      64     
240    -32    
-208   256    
0      -144   
0      0      
288    -16    
272    320    
32     128    
-48    -32    
-112   80     
48     80     
-80    -16    
128    64     
-224   64     
-736   -192   
608    464    
-304   128    
192    0      
160    -128   
160    16     
192    -1728  
128    96     
-16    -16    
-224   -16    
272    128    
416    304    
0      288    
112    128    
128    -96    
144    16     
48     64     
144    48     
96     80     
-48    -128   
96     16     
-320   -256   
-176   96     
32     48     
-112   16     
32     32     
-48    -32    
96     -32    
112    16     
-224   0      
32     0      
-96    16     
192    -224   
32     -64    
304    -256   
672    416    
-224   0      
-80    -144   
-80    -16    
112    144    
-144   64     
-48    48     
-96    -112   
96     32     
784    768    
-224   -112   
208    -224   
96     -448   
208    176    
-16    0      
192    192    
-96    192    
160    -352   
-64    256    
16     -144   
128    96     
80     80     
752    640    
-288   -320   
208    -112   
176    480    
-16    -400   
-16    448    
-240   -112   
-304   80     
-48    352    
112    -928   
-48    -32    
400    16     
144    192    
288    -224   
32     -144   
256    48     
0      704    
-224   -432   
224    -512   
512    288    
64     -272   
-144   -224   
528    -240   
-208   368    
-96    -48    
-48    -608   
-48    0      
288    -208   
768    192    
-112   -176   
-80    112    
-192   144    
-224   -96    
272    -80    
400    -208   
-32    0      
336    -464   
-80    -48    
64     48     
-96    224    
400    -64    
192    80     
96     -48    
-48    112    
112    -112   
-48    160    
-592   112    
128    -128   
48     0      
160    -800   
-16    -288   
-32    128    
272    384    
64     128    
-48    -64    
208    -192   
16     -176   
48     -176   
112    -64    
-32    128    
-160   80     
-544   -112   
80     80     
96     -112   
368    -288   
16     -48    
80     -112   
0      16     
368    -592   
-176   -48    
32     -160   
-16    -16    
32     0      
192    0      
48     -16    
400    64     
-320   16     
0      -16    
-80    -80    
768    384    
-416   272    
-208   -160   
-80    -112   
144    -192   
208    128    
208    -144   
272    96     
64     64     
224    368    
32     32     
0      -160   
-224   -96    
16     -64    
-704   -32    
176    -32    
208    16     
96     -64    
-32    96     
32     -256   
80     96     
-64    96     
-48    144    
-128   48     
224    -64    
-32    16     
128    32     
0      -112   
144    -160   
-640   16     
192    -48    
-1264  -32    
32     64     
-64    176    
-112   -160   
128    -32    
112    -1648  
16     32     
0      32     
96     -144   
-112   -16    
112    -32    
-128   -96    
-112   -112   
-256   -32    
144    112    
64     0      
96     -32    
176    224    
-80    64     
80     112    
256    -848   
272    80     
16     304    
96     96     
16     128    
-336   -112   
-240   0      
0      256    
240    176    
64     96     
-112   16     
128    80     
-80    -48    
160    -400   
128    144    
144    -16    
256    144    
-240   -32    
-64    -96    
-96    48     
-80    0      
80     -208   
-80    128    
32     320    
-432   -368   
-1488  64     
16     -160   
368    416    
-512   -96    
352    -176   
208    64     
-1040  16     
112    -192   
-192   32     
-48    -112   
-336   48     
-384   -48    
128    160    
-160   256    
320    -272   
240    -32    
-128   -48    
192    128    
-608   336    
0      224    
-304   -96    
-896   -48    
-160   -16    
-64    0      
192    256    
-1216  144    
-96    32     
64     224    
64     32     
272    -16    
-176   96     
-144   -16    
112    -32    
-192   -144   
-208   -32    
0      48     
-208   -16    
160    0      
-112   -16    
-16    32     
-512   16     
-160   64     
128    -32    
-48    -16    
-128   -144   
176    96     
-400   -304   
432    -32    
64     48     
-96    -48    
-176   64     
112    224    
-592   -32    
80     -16    
32     -32    
-384   32     
224    80     
112    128    
208    80     
144    64     
-624   -48    
-112   -80    
144    16     
176    144    
-176   80     
-240   -32    
32     -80    
64     32     
-352   -32    
-48    64     
320    208    
-48    304    
-944   0      
144    -80    
448    -144   
-288   64     
-32    0      
80     -32    
-208   -16    
80     32     
48     64     
-432   -160   
112    96     
176    0      
-256   -32    
-176   80     
-64    0      
-576   -48    
-96    96     
-160   -32    
112    96     
128    80     
-96    16     
-112   64     
144    -64    
-64    112    
-48    16     
128    0      
-64    16     
-160   64     
16     80     
240    64     
-272   -64    
96     48     
-864   -128   
160    80     
-48    -16    
-16    -48    
128    96     
-48    48     
96     -16    
-16    16     
-224   64     
112    96     
144    32     
-208   -32    
80     48     
0      -48    
-80    0      
-784   16     
48     96     
64     16     
-16    32     
-64    144    
-64    96     
0      32     
-288   -96    
-48    -64    
64     0      
128    64     
-272   96     
208    -112   
-320   -128   
176    128    
-816   192    
-176   64     
48     48     
112    48     
176    96     
-16    64     
32     -32    
16     -16    
0      48     
-48    -32    
192    32     
0      -96    
32     0      
-64    16     
96     48     
96     48     
48     48     
80     0      
32     80     
-160   80     
0      0      
128    96     
-16    -48    
128    -48    
0      48     
80     80     
-256   -16    
16     48     
-48    -16    
96     128    
16     -16    
128    96     
0      48     
224    592    
240    752    
-160   336    
-144   48     
-80    48     
-160   -96    
-80    -384   
336    0      
-80    16     
240    -192   
-32    112    
32     128    
-32    96     
32     176    
0      96     
96     128    
-144   48     
144    176    
-80    160    
-224   -64    
48     -336   
128    96     
272    304    
-288   -96    
80     -16    
-32    80     
-48    176    
496    208    
512    -256   
288    -48    
-64    48     
-176   352    
-352   -576   
224    -512   
-16    720    
224    -208   
160    304    
-272   32     
-336   -192   
-128   736    
272    -224   
-16    -224   
-128   176    
48     48     
32     160    
-304   64     
32     0      
-128   112    
192    128    
64     0      
16     -736   
144    240    
-96    16     
-352   -304   
-48    -320   
16     400    
0      -16    
112    -112   
304    240    
-112   -112   
128    160    
32     224    
64     -512   
144    -240   
-128   384    
128    -64    
-144   64     
144    -176   
-48    -672   
-112   -16    
224    464    
144    272    
160    -96    
32     96     
128    128    
-144   16     
128    208    
80     48     
400    688    
-304   352    
272    368    
-176   -32    
0      48     
80     656    
-80    112    
240    352    
224    -112   
256    -128   
480    352    
144    160    
-64    32     
112    0      
80     96     
288    144    
-304   -64    
384    16     
-160   -96    
80     0      
-384   288    
128    -96    
336    0      
64     -240   
-96    144    
80     -16    
256    -368   
288    -128   
336    160    
16     112    
64     96     
192    48     
-96    112    
0      0      
64     -80    
-48    448    
240    208    
64     96     
192    -16    
160    -64    
-32    16     
80     -48    
160    160    
-32    -32    
64     -64    
96     16     
-208   48     
304    -48    
-48    192    
144    -96    
176    384    
-272   96     
160    -32    
256    112    
-48    192    
16     192    
-128   -64    
48     -480   
208    16     
272    -112   
96     -80    
-352   96     
-64    48     
80     128    
96     -48    
80     240    
384    304    
-128   288    
-32    80     
-144   -80    
160    -176   
192    64     
128    112    
80     -16    
192    128    
-144   160    
-64    -16    
208    32     
-80    288    
64     112    
352    16     
32     -416   
-160   80     
-64    -80    
208    0      
-112   -208   
96     -96    
144    160    
-16    176    
-112   -16    
224    -272   
240    48     
32     16     
0      80     
16     -272   
-64    -32    
96     -176   
224    -160   
240    -112   
176    144    
-32    -32    
-64    64     
80     -64    
192    0      
-64    96     
-32    -256   
144    -368   
-80    -480   
64     -320   
0      -144   
144    176    
-16    304    
144    176    
240    16     
128    224    
-96    -112   
96     -864   
112    -48    
224    -192   
0      112    
-272   -96    
144    -528   
224    112    
224    -416   
16     -16    
176    32     
64     0      
192    -512   
-160   -432   
64     144    
112    144    
272    560    
-224   -384   
288    -64    
160    128    
-448   -224   
144    -112   
-1584  -160   
256    -240   
48     -32    
144    -144   
-288   -160   
-32    -1200  
272    96     
112    -16    
256    -96    
160    -96    
544    816    
-368   176    
208    480    
-512   336    
144    144    
-864   160    
352    32     
192    32     
208    -80    
-64    -112   
-16    -240   
-336   80     
96     -272   
336    96     
192    -112   
64     16     
352    32     
-144   -64    
144    -32    
80     -16    
-1152  -32    
160    -128   
64     -48    
624    304    
-688   -16    
160    -48    
224    0      
96     -96    
160    96     
224    -32    
-432   224    
32     128    
64     -16    
-544   64     
384    128    
-896   -64    
176    -80    
-1792  0      
-32    -48    
-304   -32    
64     -144   
64     -16    
96     -352   
208    64     
-112   -32    
0      48     
-112   48     
16     -32    
48     -16    
48     -96    
-256   -48    
-64    0      
-160   48     
528    192    
-160   64     
-32    -256   
400    160    
-176   -128   
448    144    
144    -352   
-16    32     
-352   -48    
240    -64    
-96    48     
-144   -80    
112    -16    
176    32     
-160   0      
272    -432   
-176   -240   
-464   112    
-16    64     
-80    64     
-512   0      
-208   -1456  
608    0      
-288   64     
144    288    
-752   -144   
112    -272   
144    48     
-96    96     
-496   -96    
80     -32    
32     64     
-144   -112   
400    128    
-176   -176   
144    -32    
64     -48    
16     32     
-208   16     
128    16     
-256   16     
32     -16    
-208   0      
128    -96    
16     0      
80     -48    
-128   32     
-640   -96    
16     -32    
-80    0      
-1392  -112   
0      16     
-896   -64    
64     16     
-432   0      
-224   96     
112    128    
272    112    
32     32     
-128   -16    
-1440  -176   
192    64     
0      -96    
-48    16     
-160   -16    
-144   -48    
-48    48     
0      32     
-304   -16    
-960   -80    
-80    -64    
256    64     
-208   96     
256    -64    
-256   0      
-272   0      
240    320    
-336   80     
-112   -48    
208    128    
-48    64     
-80    -16    
48     -64    
32     -32    
-128   48     
96     160    
-112   128    
-48    112    
304    0      
-96    -208   
144    16     
-64    32     
-112   -288   
-16    160    
16     48     
-16    0      
0      176    
-64    -128   
240    368    
-128   -112   
64     -32    
-688   -64    
-80    -16    
-1168  32     
160    16     
16     -80    
128    16     
16     -64    
-96    0      
128    832    
-144   -320   
-80    160    
-272   0      
0      -128   
-80    0      
-80    -80    
-416   -176   
64     -128   
-304   48     
384    -80    
-96    -160   
160    192    
-272   -816   
80     576    
-112   -112   
0      -256   
208    752    
32     -496   
0      256    
-224   32     
-64    -144   
-64    96     
48     -32    
-16    -16    
48     96     
-144   16     
48     -16    
48     64     
48     64     
528    1456   
-480   -416   
-208   -944   
-16    400    
96     208    
-144   -208   
128    -192   
48     -240   
192    240    
-464   -96    
-144   -384   
-928   416    
176    544    
-320   -240   
-208   -176   
-224   304    
16     144    
-192   -400   
160    -240   
240    -224   
160    240    
192    160    
-320   -208   
-32    -32    
-496   -256   
-64    -112   
-1232  -128   
144    96     
-16    128    
144    96     
-144   480    
160    176    
208    -32    
32     0      
-208   160    
-112   192    
160    112    
-96    96     
112    -64    
-32    208    
32     80     
112    -32    
-48    64     
-16    -16    
48     176    
64     128    
96     80     
-48    400    
192    176    
-176   80     
-128   -96    
16     -96    
0      64     
288    112    
-272   -64    
256    -304   
0      112    
112    160    
96     -432   
-160   -240   
-128   -128   
64     160    
352    80     
-432   -224   
-32    -80    
-320   -32    
48     336    
64     -32    
-80    480    
-144   -144   
176    -128   
-176   -400   
-64    -32    
-128   208    
-256   80     
288    416    
96     -288   
-32    224    
-448   -128   
272    -160   
160    80     
224    112    
-80    192    
160    48     
208    -192   
176    -112   
160    48     
-48    -80    
-80    0      
0      48     
160    112    
-16    0      
208    32     
0      128    
-144   48     
224    -208   
-48    128    
128    64     
-80    96     
144    128    
0      -240   
0      16     
-144   -32    
96     176    
48     112    
144    -64    
128    16     
0      64     
64     -80    
112    -288   
-128   -192   
112    -48    
80     96     
-192   -656   
256    0      
-272   -384   
256    -144   
128    192    
-256   320    
-64    64     
0      16     
32     80     
16     -96    
16     -80    
208    16     
0      48     
-208   -16    
-32    32     
128    -336   
160    256    
-176   192    
144    96     
96     -128   
-64    -144   
80     -16    
-48    0      
-32    -16    
288    -16    
96     192    
112    176    
-16    16     
16     32     
160    176    
-224   -448   
-96    112    
256    64     
80     112    
-32    0      
240    -96    
80     176    
64     128    
112    96     
32     112    
-64    -48    
80     64     
32     -112   
80     -48    
192    -32    
80     -176   
-48    128    
176    -80    
144    240    
-32    -80    
-160   -112   
112    32     
16     16     
-16    224    
64     -32    
-64    -64    
144    384    
-48    0      
160    -16    
0      32     
80     32     
48     64     
48     -544   
-128   -368   
48     96     
112    192    
112    336    
240    192    
160    -368   
112    32     
-96    96     
-16    -160   
-208   -48    
-160   -208   
-96    -128   
-80    -128   
-32    -64    
64     -48    
176    64     
176    -880   
80     32     
80     80     
96     16     
-48    0      
64     64     
-16    16     
0      -16    
320    144    
224    48     
-80    80     
240    -80    
160    80     
112    -64    
-96    16     
-272   -48    
-368   -320   
368    -16    
64     112    
-160   96     
288    80     
-16    112    
-80    64     
-192   0      
112    -32    
320    64     
544    -432   
0      48     
64     80     
-144   48     
160    -112   
0      0      
-32    48     
432    176    
-272   -48    
192    16     
320    304    
-416   -176   
128    -48    
176    -256   
416    64     
48     -48    
112    -16    
224    -96    
-80    16     
208    -144   
128    0      
-16    48     
-32    96     
16     96     
144    48     
384    240    
-192   -48    
240    80     
-16    -96    
64     80     
352    0      
-112   96     
-384   -352   
288    0      
-48    16     
432    16     
272    64     
192    -144   
-112   -48    
416    -192   
-160   -608   
48     64     
-192   -448   
-176   -240   
224    -80    
128    -16    
192    16     
96     -32    
160    160    
-112   -48    
400    48     
-240   0      
336    96     
80     32     
-144   16     
272    32     
256    32     
160    -16    
272    -32    
400    176    
-368   -144   
-96    -192   
192    -48    
256    -320   
144    128    
128    -64    
320    -144   
160    16     
-272   64     
-320   -32    
-288   -48    
272    0      
48     -16    
176    -128   
160    -272   
224    -16    
-144   -320   
64     16     
16     -80    
128    48     
48     -16    
0      32     
256    -32    
32     -16    
-288   -16    
96     -368   
-1024  -112   
112    192    
-16    -64    
48     -112   
64     -64    
-16    -192   
80     -112   
208    0      
48     32     
240    32     
-80    64     
64     -32    
-32    -96    
-304   -80    
80     192    
-448   128    
304    -128   
128    144    
144    -208   
64     -304   
-64    -208   
-208   0      
64     -832   
48     432    
240    -240   
32     64     
-368   -144   
128    128    
-192   -16    
128    -416   
-496   176    
160    0      
-1504  -96    
224    272    
-32    16     
0      -144   
176    112    
112    -112   
80     -96    
128    16     
-64    -272   
256    -240   
352    576    
-240   -560   
80     -176   
-256   528    
224    -288   
-320   -336   
64     -32    
0      464    
352    -256   
-224   -656   
112    -128   
144    -16    
160    320    
112    -208   
0      -96    
224    -16    
-384   -288   
144    -272   
-288   -176   
192    64     
-240   96     
112    128    
-48    48     
224    -320   
128    -224   
96     -144   
96     16     
-112   16     
96     -16    
32     -368   
160    -64    
-304   352    
16     -304   
-48    -448   
96     -256   
-224   -256   
64     -304   
96     -304   
32     -192   
160    224    
192    -240   
-48    32     
-224   -32    
-112   -112   
-176   -144   
208    -80    
-160   112    
48     -32    
192    -96    
192    16     
-80    -32    
-176   -352   
0      -272   
-96    -96    
80     64     
-1168  -192   
-976   -48    
-208   -112   
-1824  64     
-112   96     
416    80     
-80    0      
96     -144   
-32    -32    
-16    -80    
48     0      
-704   -16    
432    352    
-672   112    
96     128    
272    272    
432    160    
144    48     
-144   -80    
-256   -112   
-864   -96    
-128   -112   
-688   -96    
208    112    
-48    112    
-176   80     
-64    -48    
96     -32    
-400   0      
-176   -128   
-48    -144   
240    0      
240    96     
-128   16     
128    144    
-240   -32    
-16    16     
-1312  0      
-64    48     
-32    -64    
-16    -192   
-192   -224   
192    -304   
224    0      
-288   208    
80     320    
-224   48     
-304   -32    
-208   -176   
-160   -192   
16     96     
160    64     
-496   32     
-16    -64    
-2304  -288   
368    -352   
0      -288   
160    48     
-64    -64    
16     16     
-432   -160   
16     -64    
-32    128    
240    336    
256    736    
-544   288    
48     -96    
-16    -256   
64     80     
-304   176    
-176   320    
-464   -32    
-432   176    
672    144    
160    32     
272    0      
256    32     
-416   80     
-432   -16    
-112   192    
-512   480    
64     208    
-16    -320   
448    -16    
-320   -48    
-288   288    
-224   -192   
112    80     
16     -32    
48     160    
-64    -96    
176    16     
-16    -64    
-128   0      
-16    48     
-336   -32    
64     -80    
-16    -208   
192    -208   
-112   -320   
48     64     
-752   368    
528    528    
80     416    
-160   -16    
-80    208    
368    384    
176    160    
-256   32     
48     -272   
-208   0      
608    352    
-528   672    
176    176    
-192   144    
48     432    
-192   272    
-64    208    
-32    96     
352    464    
-304   304    
-112   -48    
-48    -32    
16     -128   
-128   48     
112    176    
96     -176   
-240   -112   
304    400    
-496   -16    
144    112    
288    208    
16     16     
-32    16     
-96    160    
-64    -224   
64     -192   
-112   112    
-16    -32    
336    272    
-288   592    
-160   -672   
-432   -144   
160    288    
-80    160    
-96    -64    
240    512    
-288   -240   
48     144    
176    -32    
160    0      
144    144    
80     32     
-112   0      
-96    128    
-272   -80    
128    32     
-128   0      
160    -32    
48     32     
128    16     
144    32     
112    96     
-48    64     
-48    -16    
256    288    
-32    48     
112    48     
16     -16    
-48    0      
48     -64    
-48    -64    
-32    -32    
80     32     
48     96     
288    304    
144    256    
32     -80    
-96    0      
-80    96     
80     160    
-368   96     
80     128    
-240   64     
96     64     
-176   16     
176    32     
-112   -32    
48     48     
96     -32    
48     64     
288    144    
-32    80     
32     32     
-96    -128   
544    64     
128    -16    
144    32     
96     16     
16     64     
-320   176    
-80    320    
-320   112    
208    -576   
496    144    
112    48     
128    -16    
160    32     
192    96     
-176   -32    
-112   64     
96     32     
144    -64    
-128   0      
16     96     
-448   -80    
32     -32    
224    64     
288    -976   
192    0      
16     48     
-160   -48    
-144   64     
-160   80     
-224   48     
144    96     
-176   0      
48     64     
-288   -16    
368    128    
-48    -48    
32     32     
48     112    
160    -736   
48     -80    
160    144    
-96    96     
128    32     
48     -16    
80     80     
352    192    
-336   -64    
208    -32    
-80    96     
32     64     
192    80     
64     -16    
-64    128    
80     -128   
144    64     
-464   224    
224    144    
192    16     
64     112    
-64    64     
-464   -416   
464    -160   
-544   32     
256    -144   
304    96     
-336   -208   
272    -192   
48     192    
144    -80    
-112   -64    
-144   -576   
288    240    
-128   16     
352    64     
-528   -304   
128    -416   
528    48     
64     144    
528    64     
256    112    
-160   48     
320    64     
-176   256    
80     -64    
-112   -48    
-240   -624   
32     -176   
112    -176   
208    128    
-48    48     
320    96     
-80    32     
288    288    
-272   96     
48     -320   
80     240    
48     16     
128    -48    
48     -128   
160    144    
-16    -160   
112    -64    
48     -240   
32     -16    
272    32     
-256   -288   
-16    -16    
144    352    
128    -400   
64     320    
16     320    
272    -288   
64     352    
0      -800   
-80    -16    
48     -960   
368    336    
-80    64     
-96    -112   
-32    512    
144    -560   
272    128    
176    1056   
-112   -784   
80     -320   
80     352    
-96    -528   
128    368    
96     -208   
64     -256   
160    -656   
176    224    
0      -64    
16     -112   
32     -80    
48     -256   
-96    -64    
64     -112   
144    32     
208    -112   
-80    32     
128    -128   
-80    0      
160    -256   
-64    48     
32     144    
192    176    
112    -320   
208    -32    
128    -64    
144    -432   
-16    -112   
-944   -448   
64     -592   
-48    -144   
32     -880   
96     144    
48     -160   
80     -176   
208    128    
48     -112   
32     96     
208    32     
160    -32    
-48    -144   
96     -80    
-64    32     
-1056  -32    
48     -48    
16     -80    
32     -32    
80     -64    
144    -144   
240    96     
-48    320    
64     80     
96     16     
-96    32     
0      64     
-48    -32    
224    -176   
-16    -144   
-368   -32    
32     16     
-208   -208   
288    -256   
32     -192   
-64    -704   
160    112    
-48    -464   
0      -48    
160    -80    
-128   192    
-48    -64    
128    -48    
-64    -96    
128    -64    
-96    -96    
224    112    
-192   192    
-32    -128   
192    -160   
48     -144   
-32    -48    
240    -416   
256    -32    
400    176    
-192   176    
128    -48    
144    -64    
0      208    
0      48     
-272   0      
112    -32    
-1136  272    
208    128    
-224   -32    
336    304    
-192   112    
128    -112   
320    112    
-80    -224   
208    144    
192    32     
176    -32    
64     -48    
288    -32    
-416   48     
128    -16    
80     96     
240    32     
-336   -192   
144    -80    
144    -32    
48     -32    
-32    -32    
144    -784   
48     160    
144    16     
192    -48    
-240   16     
-32    -112   
0      -160   
160    -16    
-80    112    
320    96     
-1328  -160   
352    -16    
-64    304    
0      -144   
-16    -80    
80     -144   
112    -16    
-160   -80    
336    480    
320    512    
-176   -304   
-240   -608   
192    -192   
-352   336    
176    96     
64     272    
-288   -32    
96     0      
-192   416    
0      128    
704    240    
-64    496    
160    208    
-656   -480   
-128   192    
80     448    
-240   -96    
48     560    
-480   176    
208    -32    
0      -208   
32     0      
-176   -48    
-160   -304   
-160   -16    
240    -144   
-288   496    
160    576    
-112   0      
-240   -224   
144    -144   
-544   -96    
-16    272    
48     192    
320    112    
-512   144    
0      -528   
272    -80    
-1232  32     
32     288    
-544   -624   
-560   224    
384    528    
-304   208    
-32    -32    
-32    -368   
-128   208    
464    -400   
-16    256    
192    80     
-96    -160   
-1504  -176   
-64    64     
-160   176    
-80    -80    
32     16     
160    0      
-272   32     
224    128    
-160   32     
-48    288    
-464   0      
144    -352   
96     480    
-48    -192   
192    -32    
-96    144    
160    -32    
0      64     
-240   -48    
-208   -80    
-368   -160   
-64    112    
16     80     
-144   -96    
-512   -32    
-208   -16    
-576   -16    
-16    96     
128    80     
-176   64     
-208   -256   
-16    -176   
-80    -48    
-16    16     
-128   -192   
48     0      
-240   -256   
192    -352   
-144   144    
-160   80     
-64    -336   
-368   -64    
-160   64     
-128   80     
48     64     
-144   -32    
16     16     
96     48     
96     0      
32     96     
16     32     
-16    16     
-208   32     
80     -80    
-240   -16    
112    64     
-400   64     
96     48     
-1264  -16    
48     48     
-144   -288   
96     -48    
96     160    
-192   96     
-64    0      
176    64     
-144   48     
-32    48     
16     32     
-96    0      
-16    -384   
-384   -208   
-112   272    
-1136  0      
64     -16    
-16    -320   
0      -32    
32     256    
-16    96     
-16    -160   
144    -48    
0      -16    
16     -16    
-128   112    
-304   -64    
-32    -16    
-144   -96    
-112   64     
-336   32     
-80    -128   
192    -144   
368    208    
-96    32     
32     0      
-48    16     
48     96     
-224   -32    
240    -144   
48     0      
-160   112    
272    128    
-256   -32    
-224   16     
-352   0      
144    80     
-352   -112   
-192   -80    
-144   224    
224    208    
176    224    
-432   0      
-16    -32    
80     16     
-112   0      
-160   -48    
-80    -48    
-176   48     
80     48     
-432   0      
224    144    
-192   48     
64     16     
176    64     
368    272    
-320   112    
-160   -128   
192    32     
96     80     
160    48     
-80    112    
-240   -16    
-160   -80    
96     128    
-272   0      
-48    0      
160    -64    
128    48     
32     128    
-240   96     
-80    400    
112    160    
112    -96    
-144   16     
32     0      
-96    32     
-96    64     
-144   16     
32     80     
192    -48    
64     -144   
48     -112   
-32    64     
208    32     
160    -112   
304    0      
176    -96    
112    -112   
32     -144   
-32    -16    
-208   64     
176    176    
-32    -144   
16     -32    
0      -48    
288    128    
-592   -144   
128    16     
32     -16    
48     80     
880    384    
160    48     
-176   -272   
128    -48    
-240   112    
336    -432   
448    128    
160    208    
48     80     
-432   464    
-272   -208   
-176   -16    
-288   224    
384    -48    
-224   -304   
224    592    
416    -160   
80     128    
0      112    
16     -816   
-144   704    
160    -352   
-224   16     
-32    192    
112    -160   
-80    0      
112    -16    
144    -160   
32     -16    
32     -32    
-240   -304   
272    464    
80     112    
-288   -304   
192    -208   
-240   -272   
112    80     
0      -96    
0      -1568  
-64    112    
64     -96    
128    -224   
-160   -224   
-48    -32    
0      0      
-32    48     
208    224    
288    128    
-16    80     
64     256    
80     16     
48     -160   
80     32     
-96    144    
-48    -128   
64     -176   
80     -240   
96     48     
-16    160    
80     -96    
80     -48    
96     -64    
64     128    
80     0      
64     96     
-144   -16    
-48    -80    
32     -16    
144    -224   
128    32     
-112   64     
64     96     
16     64     
32     112    
176    80     
160    32     
-32    -448   
-64    -336   
0      -112   
80     112    
128    48     
48     48     
64     32     
64     -160   
96     -32    
-16    -192   
336    48     
0      64     
-32    80     
-64    176    
160    352    
-16    160    
240    0      
-32    112    
-80    112    
48     208    
64     16     
-32    -144   
288    -320   
128    32     
160    256    
0      -32    
-64    -576   
-48    64     
-80    32     
384    352    
-240   304    
160    -96    
112    -352   
-144   -560   
112    -160   
-256   -96    
176    -80    
144    112    
0      112    
128    -144   
80     -16    
-128   -576   
48     96     
80     96     
-96    112    
48     -64    
160    48     
112    -96    
64     -32    
96     -112   
48     -16    
240    400    
-32    288    
-192   176    
448    -288   
80     16     
256    48     
16     -32    
-80    -112   
128    80     
272    144    
-256   -224   
-256   -256   
-320   -320   
128    -256   
16     -288   
32     -64    
32     80     
-32    240    
432    272    
-128   272    
-160   64     
144    160    
16     16     
240    144    
0      48     
160    -112   
64     -128   
32     128    
96     64     
256    -128   
224    96     
64     0      
48     240    
96     -224   
112    528    
240    288    
128    -640   
-96    -208   
128    -240   
-256   144    
128    -384   
-16    160    
144    400    
208    -320   
-80    -320   
64     368    
128    -48    
-96    256    
-128   -96    
128    -176   
64     0      
-288   -112   
-112   -352   
-240   416    
368    -96    
-1088  -96    
576    -128   
-80    -80    
-320   -336   
-160   -144   
-48    -448   
160    -48    
240    272    
-416   -1264  
288    416    
-176   592    
-352   -944   
16     336    
944    608    
-16    -304   
-576   -368   
16     80     
32     -192   
256    -144   
384    352    
-80    0      
752    -192   
-736   -800   
-496   -464   
80     400    
32     96     
560    224    
240    272    
-128   -224   
-32    48     
-960   144    
-240   0      
144    -176   
0      -48    
80     -16    
176    -32    
96     -48    
96     -352   
-96    128    
96     -16    
128    32     
-160   -112   
16     80     
96     0      
192    48     
64     80     
32     -176   
288    -112   
16     -48    
144    64     
160    -16    
160    48     
96     -112   
304    464    
-336   48     
144    -144   
400    112    
-208   -96    
160    0      
80     80     
-160   -112   
-48    -32    
-128   -96    
-48    -48    
-848   32     
-128   -112   
128    -176   
-80    -176   
208    16     
160    -464   
112    112    
-144   -32    
48     176    
-48    32     
48     -80    
-16    -16    
0      -80    
64     -48    
48     0      
-384   0      
192    32     
80     112    
-144   -160   
128    288    
16     -208   
160    -96    
-96    -160   
16     -96    
48     48     
-16    -48    
96     48     
96     -48    
48     -16    
192    96     
-256   32     
-48    0      
64     96     
304    80     
-96    32     
144    -16    
160    -64    
128    -208   
224    -224   
-256   112    
176    48     
-112   80     
48     -32    
-272   -16    
-16    -128   
-240   0      
160    -96    
112    0      
32     -80    
-64    16     
304    -224   
112    0      
-224   -112   
592    -96    
-224   240    
240    -48    
-192   -128   
0      16     
-272   -256   
272    96     
-128   96     
0      -128   
32     -48    
-1664  -96    
304    128    
-112   -16    
-352   -112   
-48    48     
-224   48     
-272   16     
32     -64    
-16    64     
-48    -64    
144    144    
-16    96     
-160   48     
-272   -112   
-48    -96    
400    -96    
0      -80    
336    -48    
-48    0      
128    96     
-176   32     
0      80     
-1104  0      
-32    -80    
336    -16    
96     0      
48     -32    
224    -48    
448    144    
-240   112    
-192   -192   
336    -16    
16     48     
-256   0      
208    48     
-240   16     
-16    96     
144    176    
-176   16     
-752   160    
-96    176    
-240   -80    
320    208    
-400   -16    
96     16     
16     64     
160    128    
-96    48     
-144   32     
-16    64     
32     0      
96     32     
32     96     
80     64     
-32    96     
-288   48     
-16    16     
32     128    
32     48     
80     96     
64     112    
-304   -16    
-192   -128   
-128   -48    
-112   -160   
288    352    
-192   -64    
320    -128   
-400   0      
-416   -96    
64     -448   
-528   -320   
640    -368   
-48    64     
48     128    
-320   -256   
512    -112   
0      384    
48     -208   
464    -224   
240    352    
-384   -208   
-352   -16    
-112   112    
176    -48    
352    352    
-1392  -48    
-48    128    
112    320    
112    384    
-464   -448   
16     192    
112    512    
-80    160    
176    0      
384    0      
-384   528    
-176   -48    
-128   112    
-464   -80    
400    -480   
-448   0      
272    -112   
128    384    
-96    368    
-32    0      
-64    272    
-240   48     
-96    -112   
-32    -80    
96     -96    
48     144    
-112   0      
16     -80    
16     -272   
-176   48     
-208   -96    
304    112    
-224   128    
-48    272    
-32    0      
128    0      
32     32     
48     32     
64     96     
208    0      
48     -32    
-240   0      
256    64     
-128   -80    
192    48     
-96    0      
64     -48    
48     32     
-304   -208   
336    -16    
48     80     
32     0      
80     160    
128    16     
-80    -48    
128    16     
-128   -16    
-64    64     
48     32     
48     144    
48     -16    
-128   -32    
256    160    
-80    80     
96     -16    
16     0      
96     0      
-96    32     
-80    -16    
0      0      
160    112    
-176   144    
-80    80     
-272   -64    
48     112    
112    64     
64     80     
0      128    
64     208    
160    96     
16     16     
272    144    
-32    64     
-48    0      
-48    -32    
176    48     
32     16     
32     0      
96     -48    
0      48     
32     -16    
-48    -96    
368    144    
-48    96     
32     0      
-32    -176   
16     -112   
144    32     
96     112    
-128   -32    
80     272    
-240   128    
-128   -176   
-96    -64    
48     48     
32     112    
16     -80    
96     -48    
208    288    
256    480    
-304   128    
272    144    
96     304    
240    352    
-80    -96    
192    0      
-16    -208   
0      64     
-48    16     
-272   -32    
80     -80    
-16    -160   
112    96     
-112   32     
-32    0      
128    48     
-48    240    
208    80     
-64    208    
-224   96     
352    240    
-48    192    
192    48     
144    704    
368    336    
-80    240    
-128   -16    
64     0      
384    352    
-368   -128   
176    -112   
368    64     
32     -448   
352    32     
-80    -16    
32     32     
-176   112    
80     -128   
192    -48    
0      -16    
-32    272    
-96    -384   
-32    144    
448    -16    
-32    -48    
-544   -288   
336    -304   
-32    640    
336    -32    
160    -160   
-128   -112   
-192   256    
112    -64    
80     256    
240    -144   
352    -80    
80     160    
208    -16    
-240   -208   
0      -64    
-32    112    
528    592    
-64    224    
256    64     
64     -48    
320    0      
224    192    
496    16     
-432   -64    
0      16     
-368   -336   
192    -432   
176    288    
656    544    
384    -16    
-352   -448   
64     16     
-384   192    
0      -80    
-48    -64    
144    80     
224    64     
416    -64    
304    80     
-80    -336   
64     160    
224    -528   
160    176    
80     32     
208    16     
-80    -160   
720    432    
-368   160    
-288   -64    
352    0      
640    320    
-544   224    
224    0      
-544   176    
-336   112    
224    -304   
768    0      
-352   144    
128    64     
128    80     
-128   -96    
112    288    
48     -48    
-16    80     
160    64     
-80    -32    
192    128    
208    -496   
0      96     
176    48     
0      48     
112    -144   
-96    -32    
-32    48     
-32    48     
160    32     
-64    64     
336    48     
32     208    
-208   16     
160    -608   
176    48     
80     -144   
224    80     
-144   48     
288    0      
128    -64    
224    64     
-160   -128   
-64    0      
64     -32    
32     -288   
-32    -176   
128    32     
-128   48     
144    -112   
224    32     
128    -48    
-96    -80    
-32    -128   
32     32     
112    0      
144    32     
-32    112    
288    -224   
176    -80    
-112   -400   
64     -432   
64     80     
-32    -384   
144    64     
272    -640   
0      -288   
-32    -240   
176    48     
-16    0      
64     0      
128    -48    
16     80     
-80    32     
-160   64     
160    -64    
48     0      
112    32     
96     0      
144    0      
-80    -160   
128    -128   
176    -352   
0      0      
32     144    
112    -16    
160    -32    
32     112    
96     -80    
-16    64     
32     64     
80     -16    
-512   -16    
128    48     
-64    -64    
144    -80    
160    -32    
112    -256   
128    32     
32     -560   
-112   16     
192    -48    
-128   -48    
-96    -48    
16     112    
-176   -192   
32     -192   
-128   192    
-96    -304   
192    -176   
336    0      
208    0      
128    -32    
-16    -80    
16     -1104  
160    64     
96     80     
16     16     
112    32     
144    64     
-448   16     
80     -192   
-192   -80    
320    -80    
-16    16     
192    -176   
-32    -96    
-464   -352   
-80    -64    
144    64     
-336   128    
32     16     
0      16     
-416   -16    
96     -64    
-128   96     
-176   224    
-96    -80    
-80    -64    
-464   160    
-128   16     
-576   -272   
320    -352   
144    -80    
464    -80    
288    16     
-272   -144   
112    80     
-336   160    
-144   -32    
80     -16    
64     336    
976    1168   
-352   -352   
-128   -1024  
112    32     
64     432    
176    -80    
352    -208   
80     -96    
64     32     
-128   -176   
208    48     
-80    -64    
-32    -32    
-32    208    
192    -16    
-224   -256   
112    -16    
-352   -368   
-16    48     
96     48     
-16    -288   
240    272    
272    -208   
64     -224   
-224   96     
-160   64     
48     -368   
64     208    
-128   64     
-176   608    
96     144    
160    -416   
48     240    
368    -80    
-1184  256    
480    208    
272    64     
16     -48    
-112   16     
-352   0      
-688   -176   
-240   -160   
0      -144   
-160   -144   
224    -240   
368    16     
304    -112   
160    -336   
560    -96    
-16    112    
-208   -80    
368    112    
0      144    
-64    32     
-192   -80    
112    -160   
-64    -112   
-1840  -112   
-288   128    
-176   -112   
-304   0      
240    -192   
-64    128    
-800   -80    
-32    16     
112    -48    
144    256    
-496   112    
-16    -112   
0      0      
-16    -32    
-80    160    
-48    96     
240    -80    
-864   -16    
-96    144    
32     128    
32     64     
-16    0      
80     -128   
-112   -176   
0      96     
-272   -48    
48     144    
64     224    
-208   -304   
160    -256   
-80    96     
-32    128    
-496   48     
176    0      
-32    208    
288    64     
-208   0      
-32    64     
-256   -80    
-96    32     
16     128    
48     -48    
-32    -48    
64     -16    
-128   160    
96     16     
-208   0      
-320   -32    
-16    32     
-768   -48    
96     0      
-64    -32    
80     -16    
-144   -144   
0      -256   
128    16     
-112   128    
-128   -64    
80     -48    
-48    16     
-48    -32    
96     64     
-16    48     
-128   192    
-512   -16    
128    0      
-592   -144   
240    -64    
144    32     
-112   144    
80     80     
-32    -32    
-16    -16    
32     32     
80     0      
-112   0      
-16    -64    
-288   0      
-16    16     
-400   -160   
256    144    
-384   16     
0      32     
112    160    
-464   128    
-208   -16    
-208   0      
112    -112   
256    -64    
112    64     
-272   -576   
64     -160   
-336   -192   
-192   -96    
-96    0      
176    160    
-752   208    
64     -528   
48     160    
-80    -16    
0      272    
96     144    
-80    -160   
48     -272   
-208   -256   
-80    208    
-96    32     
192    0      
256    48     
16     -32    
32     480    
-288   -240   
96     -32    
304    592    
-272   176    
16     -112   
112    -192   
224    160    
-80    96     
-256   48     
-336   -544   
-80    336    
-208   -16    
64     -128   
-128   -32    
432    64     
-560   80     
-208   400    
96     208    
112    -400   
112    -320   
64     -48    
-112   176    
-224   48     
352    -160   
160    32     
192    224    
-48    176    
-192   -48    
-432   -176   
-176   16     
-64    -32    
80     0      
0      80     
192    176    
272    144    
-96    80     
-64    32     
208    192    
-96    32     
-32    0      
80     64     
-32    -32    
240    96     
-224   0      
-32    32     
144    96     
64     64     
-64    16     
-400   -176   
496    64     
-208   48     
0      32     
-80    32     
96     128    
-608   304    
768    128    
-128   -96    
112    320    
-448   128    
-176   -32    
320    48     
688    192    
-368   160    
-32    -32    
-32    -80    
-160   48     
112    32     
-208   112    
208    -16    
-32    0      
304    80     
16     32     
272    128    
-96    192    
80     208    
-464   -80    
-80    -144   
-160   -192   
560    144    
-80    80     
-272   -96    
112    -192   
576    288    
-352   64     
288    96     
0      16     
-160   112    
-128   -48    
80     32     
-48    -16    
-32    0      
208    160    
-256   64     
288    336    
-176   176    
336    -96    
-32    32     
-32    16     
-32    64     
-32    80     
96     96     
-32    -80    
-48    48     
-32    160    
304    48     
-144   80     
64     48     
-96    112    
112    16     
80     96     
-16    32     
160    80     
16     16     
32     128    
16     -128   
112    48     
176    -96    
-80    -192   
0      80     
224    -816   
0      96     
224    0      
-48    32     
160    -128   
-128   -80    
-80    64     
144    80     
-64    16     
128    0      
48     16     
64     32     
128    80     
32     -80    
128    -48    
0      -288   
48     96     
-64    32     
128    96     
160    -64    
-80    32     
16     144    
80     -32    
48     -16    
48     -400   
-144   -128   
80     -96    
-176   -32    
160    -112   
96     64     
-112   -144   
112    64     
160    -240   
64     16     
-48    96     
176    176    
32     -160   
128    64     
-32    0      
224    176    
-64    -48    
80     -112   
48     48     
176    64     
-32    64     
80     -272   
208    224    
48     -1232  
208    160    
32     -224   
48     -32    
16     224    
-96    -16    
176    64     
16     16     
0      32     
96     16     
112    64     
-80    -880   
-80    -288   
-48    272    
-16    288    
176    -224   
144    48     
-32    160    
176    224    
160    0      
176    144    
208    -240   
192    80     
112    256    
-32    -96    
-16    48     
-112   -32    
16     64     
-32    -304   
160    96     
128    176    
224    48     
-96    48     
-192   -448   
144    -512   
288    672    
80     -224   
208    -192   
272    272    
208    -96    
368    80     
-96    -64    
-176   -96    
-48    -48    
112    160    
-160   -128   
-16    48     
64     144    
32     320    
-208   -32    
-256   -176   
512    -224   
-48    -240   
272    -400   
240    -32    
208    -112   
-16    0      
-96    160    
0      -144   
96     304    
-176   -320   
-224   -416   
336    -368   
336    240    
160    464    
-176   -544   
-80    48     
0      -64    
-80    -592   
208    -336   
-96    -960   
192    -176   
144    192    
112    -32    
32     0      
-32    80     
112    -256   
16     -320   
160    -592   
-96    -368   
-480   -576   
0      -432   
-336   -208   
176    16     
48     128    
-48    -336   
400    -512   
256    -464   
48     0      
-224   208    
224    288    
-16    -16    
160    -256   
80     -272   
336    -336   
-16    -144   
-64    -128   
-432   -112   
208    416    
400    272    
416    -288   
176    -48    
48     -224   
-192   -32    
64     0      
-96    -32    
-16    96     
144    0      
640    -192   
240    80     
-336   0      
464    -160   
-800   48     
-80    48     
336    -112   
96     -144   
176    -64    
80     -80    
224    -32    
128    -336   
-16    112    
96     -112   
-288   -16    
320    -96    
-16    112    
-272   -48    
272    208    
-1168  64     
240    -160   
-944   -272   
64     -144   
96     -96    
-96    -80    
112    -48    
80     -96    
64     256    
-16    96     
80     -32    
80     -160   
192    48     
-32    -32    
-80    64     
-64    -32    
336    -112   
-224   80     
112    0      
48     128    
144    -128   
272    144    
48     -64    
192    -64    
80     -192   
0      16     
16     -16    
48     -128   
-144   -224   
-48    0      
-64    0      
240    -80    
-464   -48    
144    -96    
-464   -80    
-16    -208   
64     80     
160    -144   
-80    32     
48     -1264  
96     80     
-96    -112   
80     0      
-176   -16    
16     128    
-16    32     
160    -32    
-336   112    
0      16     
256    176    
16     0      
176    -96    
160    -96    
96     -32    
-256   320    
96     192    
-256   16     
-64    112    
-64    -16    
160    0      
-192   80     
192    144    
224    256    
32     384    
-112   160    
64     -48    
-48    224    
-384   -208   
0      384    
48     -112   
160    -208   
-96    80     
0      160    
-240   368    
48     80     
-80    -288   
80     64     
-64    208    
64     -128   
80     -16    
-1712  -208   
-112   -64    
-288   320    
16     240    
-448   -1056  
-32    560    
-224   -144   
-48    16     
-48    0      
64     48     
-80    208    
112    32     
80     480    
-688   -496   
32     -208   
-352   288    
240    192    
-128   320    
-176   -112   
-16    -128   
-400   32     
-32    0      
-784   304    
16     224    
-624   80     
-384   -112   
-112   -192   
96     -16    
64     -16    
352    368    
-112   224    
0      272    
16     32     
128    -112   
48     16     
-272   -80    
160    64     
48     32     
-80    48     
-992   -80    
-160   -32    
-624   -32    
288    -64    
-176   -112   
-304   0      
-144   -80    
0      64     
48     0      
96     80     
448    80     
-368   -48    
-224   48     
-96    -224   
0      -64    
-96    80     
-96    32     
-592   -16    
320    96     
-160   -48    
-144   32     
-96    0      
-144   -96    
64     -32    
-128   16     
-48    96     
176    32     
-128   -16    
-288   0      
80     48     
160    64     
-16    32     
-208   -96    
-128   -32    
32     -144   
48     96     
144    64     
-32    48     
192    64     
-16    -256   
-192   -96    
-432   32     
-176   -176   
144    80     
-96    160    
-192   0      
32     -128   
-416   -160   
304    352    
-880   80     
208    -96    
144    -32    
-288   16     
384    32     
80     208    
-144   96     
-112   -48    
176    144    
-400   -304   
480    -128   
176    240    
-80    16     
368    176    
-272   32     
-96    -48    
-96    -32    
128    96     
-848   -400   
464    -48    
112    240    
-560   0      
80     16     
160    0      
464    208    
-128   80     
-160   -64    
432    32     
-672   16     
128    32     
-464   -32    
-96    32     
32     0      
-16    -32    
32     0      
64     -16    
48     112    
-176   48     
48     32     
-336   -176   
352    0      
-368   -144   
-208   -96    
16     0      
48     48     
272    176    
32     128    
64     -16    
-144   -16    
-32    96     
64     80     
160    160    
-208   -48    
-112   32     
-144   -64    
-32    -16    
16     80     
-16    32     
-32    -64    
384    32     
-240   -64    
160    0      
-16    112    
240    48     
-144   48     
-80    -48    
128    64     
-96    16     
96     0      
-48    -144   
128    0      
-352   0      
288    240    
-80    16     
-32    80     
-80    0      
160    -64    
176    336    
-48    -80    
-32    -112   
0      496    
-96    -32    
224    128    
96     -336   
-256   176    
96     -128   
-64    80     
64     160    
32     48     
240    112    
0      32     
-80    96     
48     48     
224    592    
-304   -272   
64     96     
160    288    
208    -16    
96     -48    
-272   0      
80     512    
16     -240   
128    48     
-16    128    
32     -144   
128    288    
0      -352   
-16    -48    
48     416    
16     -64    
112    -192   
160    208    
-128   128    
-96    -560   
128    320    
128    -128   
32     112    
64     -224   
48     -32    
-16    32     
-128   -128   
64     160    
64     -112   
208    -16    
-48    640    
32     -144   
128    -304   
-112   384    
64     288    
-16    -64    
368    0      
-240   -64    
48     -624   
48     -16    
176    -96    
128    160    
272    224    
304    272    
256    272    
-160   -48    
-208   -64    
32     416    
352    800    
-64    208    
-144   64     
-64    112    
64     16     
-32    -128   
240    -96    
48     -160   
16     -48    
336    192    
-176   128    
-272   -272   
112    -48    
-112   -80    
288    -128   
0      48     
160    208    
-32    -112   
0      -48    
0      -48    
48     -192   
272    -144   
96     -1312  
176    48     
-160   0      
48     48     
-80    208    
-48    128    
80     -48    
128    112    
-48    -144   
208    -16    
48     -32    
80     32     
16     96     
64     -112   
112    -96    
80     -160   
-32    224    
144    -176   
-32    656    
176    368    
-256   16     
-128   16     
80     -128   
32     112    
176    -176   
112    0      
-16    -64    
96     96     
-96    -208   
96     16     
32     96     
48     -208   
128    -864   
240    -224   
-160   0      
256    -128   
96     -112   
416    64     
224    80     
-112   160    
-208   -32    
-592   -80    
112    -80    
80     -112   
288    16     
96     -16    
-96    -80    
80     -720   
32     192    
144    96     
96     16     
80     -112   
160    -192   
-272   -256   
544    -320   
400    -32    
-48    -400   
-112   144    
-128   48     
80     32     
-64    -96    
176    64     
128    304    
272    0      
144    112    
-96    0      
-64    96     
-96    32     
-128   -256   
288    -240   
-16    48     
96     -176   
48     96     
288    192    
208    192    
0      -16    
48     112    
192    -176   
16     128    
224    -176   
32     16     
64     48     
240    -208   
-16    224    
-272   -240   
480    -976   
-48    -64    
224    64     
144    -80    
368    240    
-208   160    
80     80     
-64    -400   
160    -656   
96     -240   
-32    -144   
160    -208   
-400   80     
16     -16    
-32    96     
64     -64    
112    64     
288    -624   
-224   64     
272    160    
-128   0      
80     160    
16     -64    
-112   -48    
288    -240   
128    -208   
64     32     
0      0      
192    -80    
320    112    
-32    304    
112    400    
32     -432   
64     64     
16     -288   
-16    384    
224    192    
32     -336   
208    336    
-48    64     
64     112    
32     128    
-944   -176   
-80    16     
-736   -240   
-48    -112   
16     -176   
128    -16    
288    -352   
48     352    
-144   -224   
80     -64    
-80    -144   
-80    -48    
224    224    
0      -48    
96     -128   
-32    -16    
112    -144   
-640   0      
-32    64     
32     -16    
80     -128   
496    496    
-304   336    
16     208    
224    -128   
80     48     
144    64     
-16    -16    
0      -64    
256    -240   
-96    128    
144    48     
-16    64     
64     -16    
-144   -32    
-48    -192   
32     -80    
-32    -144   
144    -224   
336    -128   
-32    -48    
304    -160   
224    288    
-352   32     
16     -240   
64     0      
224    96     
-784   0      
368    64     
-1568  16     
-432   -96    
-192   -96    
144    -32    
-32    -16    
288    -224   
144    0      
240    -16    
96     -16    
16     64     
224    48     
-736   -176   
352    -80    
-160   16     
368    -80    
240    48     
-48    208    
-848   -48    
-160   -176   
144    16     
320    -80    
64     -80    
288    -16    
32     0      
64     16     
16     -80    
-320   -16    
-144   64     
224    48     
192    -48    
-16    64     
-32    -144   
-160   -16    
320    -144   
352    160    
-144   -112   
48     -16    
-816   -64    
144    -32    
-336   48     
96     -32    
-224   -128   
160    64     
-160   -32    
80     -144   
-144   48     
160    -144   
768    560    
-624   -16    
336    16     
-64    -208   
192    32     
224    208    
-1008  64     
272    -16    
-112   0      
128    0      
400    0      
-240   -16    
48     16     
-48    96     
-80    -160   
-32    -96    
-512   -32    
-192   96     
-464   -192   
128    64     
-320   128    
208    64     
-192   -48    
-1024  -128   
112    64     
0      160    
-720   -16    
-80    -64    
128    -16    
-384   -160   
96     -176   
288    -336   
496    224    
-320   -32    
-96    -32    
64     128    
-640   -32    
48     48     
-144   144    
-336   16     
-528   -176   
-32    0      
176    16     
-80    -80    
-64    -160   
144    -16    
-288   -80    
-16    16     
48     -32    
0      -16    
96     -208   
-112   -64    
112    96     
-272   -16    
112    -224   
-176   -64    
48     16     
-16    -224   
-48    208    
-128   64     
80     -160   
-32    128    
-64    -16    
-160   -96    
48     96     
0      48     
-224   -64    
-16    -192   
-304   128    
224    -112   
-464   240    
112    48     
-1200  -112   
-160   304    
352    -1296  
0      1072   
192    -272   
-64    -208   
-80    176    
-96    16     
-32    224    
240    -32    
64     208    
-64    96     
-80    -192   
-304   48     
-224   -176   
-1600  528    
160    -144   
-208   -400   
-240   -112   
192    -560   
144    656    
352    528    
-256   -320   
-144   -528   
-16    -48    
-48    288    
-96    80     
-16    -80    
-128   160    
240    -16    
-16    -64    
48     80     
-464   -192   
-208   -528   
-144   -112   
32     208    
32     0      
-144   -64    
144    -48    
-48    80     
-16    80     
-272   128    
16     64     
-48    352    
128    176    
-336   -192   
48     112    
-1952  64     
16     16     
112    -16    
32     832    
112    256    
-64    16     
-64    -48    
128    -16    
-80    48     
-32    32     
176    240    
-208   64     
-48    304    
32     96     
-80    64     
-80    -288   
16     -96    
80     -16    
96     32     
144    96     
-32    80     
-80    16     
48     -240   
-176   -240   
240    -80    
48     160    
-320   -64    
160    48     
-112   -32    
32     16     
336    0      
-208   -208   
320    -352   
272    192    
-80    144    
32     -16    
48     16     
16     112    
16     224    
-48    -16    
-16    48     
-32    -112   
80     -96    
-32    96     
352    272    
-368   128    
-224   -112   
272    0      
32     176    
224    304    
224    128    
48     64     
-304   -256   
-80    -96    
-96    32     
32     48     
0      80     
80     128    
144    224    
-48    176    
-48    -208   
-176   -352   
32     -64    
-128   -64    
336    -288   
80     0      
128    256    
-160   144    
176    272    
-80    -32    
192    208    
16     192    
160    256    
-96    -288   
-336   -208   
80     -48    
-128   112    
320    96     
-32    -160   
-64    -80    
96     -352   
-64    -32    
112    -128   
224    96     
-112   176    
192    -48    
-368   -16    
-256   -288   
80     -128   
0      -192   
336    32     
416    -256   
-496   -336   
-16    176    
-48    272    
352    352    
224    -80    
224    112    
160    -272   
-272   -336   
320    -208   
224    160    
-144   -560   
528    -192   
416    48     
128    48     
224    32     
-32    0      
-160   -400   
96     -304   
-368   272    
-32    176    
80     160    
-288   224    
80     48     
-368   96     
688    192    
48     -336   
240    -416   
-64    -224   
-112   176    
32     80     
128    80     
224    128    
240    352    
-48    0      
224    224    
-160   112    
16     48     
-144   496    
704    112    
32     192    
96     -464   
0      144    
112    464    
208    320    
256    544    
-16    -32    
128    -256   
-96    -32    
-240   448    
496    -64    
0      -240   
80     368    
256    112    
-736   -560   
64     -432   
32     -288   
224    496    
272    -1552  
-224   -352   
64     32     
112    32     
-144   480    
320    -96    
16     48     
32     160    
96     -16    
-144   384    
112    -272   
80     208    
144    144    
-48    -80    
32     -128   
176    -64    
0      336    
144    -224   
304    288    
-96    96     
32     -160   
112    -288   
48     176    
-80    -48    
-32    -96    
48     80     
224    48     
208    128    
0      -128   
0      48     
32     -240   
-16    64     
-32    -400   
64     96     
-16    -384   
96     -64    
-64    128    
32     128    
16     0      
96     -96    
96     16     
176    -272   
144    -192   
48     80     
96     288    
144    64     
16     32     
0      -160   
144    64     
48     -160   
80     32     
-48    0      
32     176    
-16    -80    
64     96     
-64    80     
-80    -432   
192    32     
112    32     
48     -16    
112    -80    
288    144    
64     112    
32     80     
-64    -112   
48     32     
-48    96     
-128   64     
16     0      
32     -128   
128    32     
96     -144   
80     -48    
160    -64    
-32    64     
160    -112   
-16    64     
-224   -128   
64     32     
400    128    
-64    352    
240    512    
-288   -784   
112    -1008  
272    -208   
224    -640   
320    80     
-528   176    
-112   -208   
272    160    
-80    -128   
512    80     
32     -32    
224    -112   
32     0      
96     -192   
32     32     
-240   0      
272    -256   
-272   -32    
32     -80    
208    16     
0      -240   
352    -32    
272    272    
-144   -16    
80     -272   
128    208    
-288   32     
160    -64    
272    -144   
224    80     
-608   0      
-176   -368   
448    112    
-80    -32    
112    -176   
288    -352   
64     16     
64     -384   
-32    16     
96     -48    
-32    -16    
128    -96    
-64    0      
176    -80    
-48    64     
-272   -64    
-16    -32    
528    224    
-416   96     
416    64     
-80    -160   
256    160    
144    -432   
544    -16    
-64    -144   
448    208    
-336   -176   
512    128    
-240   112    
608    384    
-368   -16    
-496   -272   
-1552  48     
96     -16    
-304   0      
272    0      
-192   0      
736    224    
-224   528    
0      -752   
384    16     
624    240    
0      352    
-48    80     
336    128    
-208   -160   
480    -416   
-496   -128   
320    -96    
96     64     
240    -80    
16     -160   
176    -320   
-96    16     
-32    -896   
-16    -320   
208    336    
144    112    
-208   -176   
176    144    
-224   -192   
160    144    
-96    -64    
48     -16    
-2720  -112   
128    -160   
-32    -16    
-176   224    
176    400    
368    -432   
-16    416    
-80    -368   
-16    80     
-96    -16    
192    -1008  
112    1168   
144    -112   
-448   -736   
352    -32    
-64    544    
320    336    
-224   224    
176    160    
80     -400   
-176   -176   
144    -144   
-48    -144   
192    96     
-448   -64    
64     112    
-432   80     
272    -144   
-464   96     
352    80     
-320   160    
208    32     
-160   96     
192    -128   
16     112    
-64    -96    
-144   -128   
-144   32     
272    96     
-224   224    
48     -64    
80     -80    
208    80     
0      48     
32     -64    
-32    -128   
-320   -144   
224    16     
256    -32    
-64    32     
320    -48    
-448   -16    
0      -16    
-1376  48     
-96    160    
64     -16    
0      64     
176    -96    
-16    16     
0      -32    
80     -16    
-832   -48    
80     64     
-240   -80    
48     48     
16     96     
-224   0      
-144   -64    
-448   -32    
48     16     
-1120  16     
160    0      
208    16     
-336   -32    
96     -128   
-64    -112   
-416   -160   
208    192    
-16    -48    
128    16     
-240   16     
-160   48     
-240   -64    
16     -80    
64     32     
-96    80     
-176   144    
-1088  48     
-304   32     
-256   -16    
128    80     
-32    48     
144    64     
-240   -176   
48     -240   
176    80     
-48    160    
16     48     
-112   -80    
32     -128   
-368   -64    
-112   -80    
-1296  -208   
-32    -96    
-144   -64    
176    -96    
64     -80    
-16    176    
-16    0      
224    96     
-176   96     
80     128    
96     32     
-64    48     
-112   64     
16     32     
-160   208    
-112   -16    
320    -16    
-640   144    
64     256    
16     144    
64     192    
-32    256    
-64    -80    
224    -32    
-64    -16    
160    80     
-16    48     
32     -64    
256    240    
-256   208    
48     80     
-32    160    
-304   160    
48     32     
112    144    
-64    208    
-32    -32    
0      64     
-16    0      
-32    -192   
-80    -192   
48     -64    
-160   96     
48     96     
416    160    
-208   48     
208    -16    
-144   48     
96     384    
-64    -272   
-192   -704   
432    368    
-160   432    
112    32     
128    -16    
-112   352    
-32    944    
368    224    
-320   -928   
-384   -608   
-288   -224   
-48    352    
-160   608    
240    -224   
144    -288   
-64    304    
128    160    
-128   -704   
32     0      
-208   176    
-192   -304   
288    -128   
320    -16    
-416   -464   
-16    64     
-272   1184   
-160   16     
-128   -864   
-224   288    
672    -960   
400    -256   
432    768    
256    -96    
-320   -208   
-288   448    
416    704    
-1136  -800   
-32    -16    
-144   192    
368    384    
80     -288   
-176   80     
16     96     
160    288    
-240   -336   
-48    224    
-48    -144   
96     64     
112    160    
128    48     
-352   -288   
304    96     
-64    80     
288    -576   
-256   128    
-176   288    
208    -144   
-336   -112   
208    48     
80     -32    
-160   -160   
0      64     
144    64     
0      0      
96     0      
-64    64     
128    96     
144    128    
-112   96     
224    16     
-304   64     
64     80     
144    32     
-48    -48    
80     -208   
16     16     
0      144    
80     32     
64     64     
144    96     
256    304    
-224   -144   
16     -96    
-112   144    
128    48     
64     80     
-192   64     
16     0      
32     112    
176    -16    
32     32     
-160   -480   
-144   -160   
0      32     
-288   -64    
64     48     
-208   -80    
144    0      
0      64     
80     80     
112    -32    
-32    80     
128    80     
-32    -112   
32     -272   
64     16     
96     -32    
48     -64    
-80    96     
16     -48    
-48    -32    
-16    112    
112    112    
0      96     
48     0      
192    0      
176    64     
-32    80     
16     -80    
208    -16    
0      128    
112    0      
-48    16     
48     96     
-448   -624   
192    -160   
-80    208    
-48    112    
-128   -176   
176    224    
-208   -16    
208    -176   
256    16     
416    304    
128    16     
32     -64    
-224   96     
-192   -16    
160    16     
96     96     
224    32     
0      -192   
112    48     
-288   -144   
128    -144   
80     112    
80     -144   
-64    32     
48     0      
272    320    
-464   -320   
736    -112   
368    32     
448    432    
16     208    
-48    -80    
-352   -144   
96     80     
16     128    
-144   0      
-112   64     
16     -144   
384    80     
80     -592   
160    80     
-128   64     
-160   16     
48     48     
192    48     
-16    -64    
96     -16    
208    80     
16     32     
-32    -128   
432    -112   
-96    80     
48     -112   
32     96     
-80    -368   
384    48     
-80    -48    
128    -16    
-80    -176   
256    80     
64     32     
48     96     
80     0      
16     -48    
64     80     
96     -48    
144    64     
112    -64    
176    128    
304    -64    
-160   -80    
32     -1488  
256    192    
-144   96     
-16    -144   
176    -48    
192    144    
-48    96     
-128   -304   
208    64     
-208   -64    
16     48     
-80    -208   
-192   -64    
48     -320   
16     -16    
112    -400   
-32    -256   
-128   -144   
304    176    
-176   -80    
384    64     
224    48     
128    -432   
304    224    
32     -448   
-128   -64    
208    352    
-240   -128   
336    -288   
272    -32    
64     -144   
-240   1936   
128    384    
144    -800   
112    -464   
-640   496    
-160   -320   
-224   -688   
464    576    
48     -160   
160    -144   
448    272    
-192   240    
-288   256    
416    -304   
80     -512   
80     352    
352    -16    
-64    -16    
-240   128    
144    -480   
0      -496   
48     -320   
-208   -272   
496    -80    
48     192    
80     -48    
176    -128   
80     -144   
-176   -368   
240    -64    
176    -208   
-64    0      
64     -48    
32     32     
-1232  0      
144    -128   
112    48     
96     -192   
-16    -112   
112    -864   
-32    64     
208    112    
256    48     
80     -400   
32     64     
80     -80    
-192   80     
16     16     
112    -80    
-656   -48    
144    0      
80     -80    
128    -48    
224    80     
192    48     
208    32     
96     -816   
208    48     
-32    32     
160    64     
192    96     
-208   96     
-80    -64    
176    -128   
-816   -64    
208    -48    
80     176    
96     -48    
48     -80    
128    -304   
32     -48    
128    -976   
32     112    
176    -16    
-96    64     
96     32     
-64    -80    
-208   -176   
-160   -64    
-64    0      
176    80     
-1904  208    
32     0      
-128   -64    
64     -160   
112    -304   
320    -304   
-48    128    
272    -464   
64     128    
80     -48    
-32    -32    
112    208    
112    96     
32     144    
48     192    
-1472  -80    
352    -160   
64     -96    
144    16     
96     32     
-96    -272   
128    16     
96     -1216  
-32    48     
112    96     
16     64     
-240   -80    
-240   -144   
-16    -80    
32     224    
-112   48     
112    -16    
-304   48     
48     -96    
192    64     
208    -128   
176    48     
0      -400   
176    144    
-208   112    
-96    -176   
-64    -256   
-128   -592   
-352   -224   
192    -16    
-592   64     
160    0      
-80    -32    
128    -192   
176    -192   
32     96     
48     768    
336    -144   
48     -352   
-256   -128   
-16    -64    
-112   -64    
368    -16    
-208   -160   
-80    112    
-208   32     
16     -224   
-48    -272   
128    -240   
96     -128   
-16    -368   
320    -544   
96     -512   
272    -128   
-416   -160   
144    32     
-192   128    
0      -48    
144    272    
144    -128   
-208   -112   
224    208    
16     144    
-32    -384   
0      112    
-768   96     
-48    272    
-272   -96    
16     -192   
80     800    
-464   -240   
64     16     
160    0      
-160   64     
144    16     
480    448    
-672   16     
224    -96    
32     176    
-80    16     
-224   -496   
480    1104   
208    16     
80     -624   
288    448    
-240   -96    
-432   -448   
-672   112    
-224   240    
96     128    
32     -48    
-80    32     
224    224    
-352   32     
288    96     
-480   -160   
-112   -192   
192    64     
256    864    
32     -144   
-144   -864   
-304   -416   
-544   112    
928    1088   
-720   208    
-272   -384   
0      -176   
0      128    
560    32     
-160   0      
160    -48    
-144   -32    
-64    -80    
-16    -256   
-112   -64    
-144   64     
48     32     
-160   -48    
-16    -16    
-608   48     
-160   -32    
-336   -32    
160    48     
-16    -48    
-32    -16    
48     -368   
112    -16    
96     144    
-80    -112   
-16    -144   
-160   208    
32     96     
80     48     
-160   64     
-464   -48    
176    176    
-160   16     
128    16     
208    0      
-176   32     
64     -16    
-160   64     
-128   -96    
176    64     
-32    48     
-224   -128   
80     128    
-80    32     
-48    32     
-80    160    
208    112    
-1168  -64    
-192   -80    
144    -32    
-112   64     
-48    224    
288    48     
192    -48    
-256   -176   
-64    32     
0      16     
-80    64     
-48    32     
176    144    
-240   128    
-16    192    
-624   128    
160    16     
208    48     
-144   -192   
208    -16    
176    208    
-144   48     
-16    -64    
0      -64    
32     48     
80     112    
64     48     
0      -64    
-368   -32    
112    0      
-112   0      
48     96     
48     96     
-48    320    
64     256    
48     -96    
80     -16    
-208   0      
96     224    
176    32     
112    16     
-256   -64    
48     80     
-352   -160   
192    64     
-272   48     
-64    64     
-32    112    
160    624    
32     112    
-16    -192   
-80    48     
-144   112    
16     64     
-160   32     
64     32     
-512   -16    
0      -96    
0      96     
80     48     
-128   16     
224    128    
-176   32     
-48    0      
0      16     
160    128    
48     48     
160    112    
-48    128    
0      16     
144    0      
-96    32     
48     64     
-272   -16    
-64    -224   
48     -96    
-208   -96    
160    0      
192    80     
160    80     
176    16     
64     -16    
16     64     
-112   -16    
-192   -64    
304    128    
272    0      
80     192    
48     128    
-64    32     
-336   -48    
-192   -96    
176    16     
160    -80    
240    16     
208    80     
-80    48     
-160   -160   
32     -16    
-160   64     
-80    64     
80     128    
48     112    
96     96     
-80    64     
208    0      
96     16     
208    192    
-144   128    
-112   32     
176    32     
128    64     
144    48     
48     96     
-144   48     
112    256    
-96    144    
16     32     
208    400    
-112   144    
176    -544   
-112   400    
144    176    
272    -304   
48     128    
208    0      
-288   256    
304    -272   
16     -176   
16     464    
80     64     
-352   272    
336    96     
-96    144    
-128   208    
-112   -272   
-304   128    
336    -1296  
576    832    
432    128    
128    -336   
-48    496    
-336   32     
288    384    
16     -48    
608    128    
-48    112    
16     -352   
-80    -160   
288    -752   
-112   144    
48     -448   
-16    -448   
528    64     
-704   576    
-256   -16    
464    -112   
368    -80    
160    176    
96     64     
32     48     
-336   256    
320    96     
-240   256    
208    -240   
-64    160    
208    80     
64     -160   
192    -96    
-16    -32    
0      112    
16     128    
-64    -48    
288    -128   
-208   16     
96     48     
-16    64     
144    -144   
-32    -16    
96     -224   
16     16     
112    80     
64     128    
-160   80     
336    -144   
-128   -192   
304    -112   
-112   32     
-16    112    
-16    -16    
320    144    
-96    208    
16     -96    
16     48     
64     64     
144    -64    
16     -288   
208    48     
-32    160    
240    -32    
-16    -64    
160    16     
-16    32     
-64    48     
-64    48     
-48    192    
96     16     
96     16     
272    16     
-112   -16    
32     96     
160    -80    
368    240    
-208   -368   
96     -192   
32     -128   
32     176    
-64    32     
144    80     
32     -16    
80     16     
80     32     
144    -64    
128    32     
16     -144   
16     64     
48     -128   
96     64     
64     -624   
192    64     
-144   0      
-16    32     
-64    64     
192    16     
144    48     
32     -288   
-48    -96    
80     -16    
64     64     
16     0      
64     224    
-32    -32    
128    0      
96     192    
96     240    
112    96     
-32    -416   
64     -272   
80     -112   
-64    128    
-48    -64    
208    64     
144    144    
224    48     
128    -112   
112    240    
-352   16     
-16    -80    
272    64     
208    112    
384    384    
-160   96     
0      48     
288    -112   
272    -128   
-80    48     
-96    -480   
320    224    
-208   544    
304    48     
304    48     
176    176    
240    -32    
-592   -416   
320    -1568  
-16    -160   
336    336    
80     -160   
-1088  96     
112    -80    
240    224    
48     288    
288    304    
-304   -1392  
288    336    
-64    32     
-16    -192   
112    128    
368    160    
16     -208   
144    -64    
144    160    
208    -80    
-528   -16    
-16    -160   
624    192    
0      -224   
48     608    
96     -272   
-96    -240   
-16    32     
64     -304   
96     -240   
64     208    
240    304    
-80    32     
-112   240    
336    80     
-1296  -112   
-32    -64    
-32    -80    
240    -64    
112    0      
304    16     
48     -48    
-64    -560   
-144   -272   
-192   128    
64     -32    
-64    -96    
288    0      
0      176    
96     96     
-944   -64    
-32    -48    
-1504  -176   
464    -128   
-208   -48    
240    -32    
48     -144   
-544   -368   
16     224    
48     -96    
-176   -64    
256    -32    
-80    -96    
32     256    
-160   -192   
384    64     
64     -64    
-208   16     
384    64     
96     288    
-192   48     
48     16     
1008   -16    
-304   128    
-160   -544   
160    -32    
-416   32     
480    96     
-432   32     
80     -224   
-128   -224   
144    -128   
-512   48     
-240   -112   
-1024  -48    
64     -16    
-624   -256   
336    -128   
32     0      
-16    -544   
128    96     
-80    32     
128    48     
-16    48     
64     -16    
80     96     
96     0      
-224   -32    
-160   -192   
-176   -112   
176    32     
-112   80     
96     -208   
-176   0      
112    -224   
112    0      
-32    96     
144    0      
368    192    
-528   0      
-112   -48    
208    -32    
128    48     
144    48     
-144   32     
192    -96    
32     48     
128    -112   
-144   -16    
-32    48     
96     32     
-736   -16    
32     -32    
16     16     
48     -96    
-128   -64    
144    16     
-160   16     
192    -48    
-800   -96    
208    -128   
-48    16     
-752   -16    
160    16     
-16    32     
-624   32     
-112   64     
-960   80     
-64    -144   
304    416    
-352   192    
16     -128   
-512   96     
-192   -32    
16     64     
-336   -48    
208    96     
-112   -32    
-704   -256   
64     -144   
64     -48    
-32    112    
48     48     
144    144    
-1696  160    
-48    48     
80     -16    
-80    -80    
-32    16     
-80    160    
-96    -144   
80     -16    
112    80     
-176   64     
-192   -64    
-32    -48    
80     -32    
-48    128    
-256   0      
-432   -16    
-48    -64    
272    112    
-416   -576   
-352   -640   
-80    -48    
-304   -80    
16     48     
-32    -96    
112    -176   
256    -32    
144    304    
-160   160    
144    -368   
-80    -320   
-32    0      
-48    64     
-208   128    
64     32     
-160   -128   
128    48     
-112   0      
-64    48     
240    -272   
16     -304   
-96    -16    
-80    96     
16     0      
-96    64     
-96    160    
-96    240    
144    144    
-544   48     
-32    80     
-32    -64    
0      32     
-64    -64    
-96    48     
64     112    
96     -192   
16     -160   
-656   -176   
-176   128    
-32    320    
-16    128    
-32    -304   
-208   -96    
-288   288    
304    -16    
-1296  -176   
224    -32    
-144   -272   
432    592    
-368   0      
272    -144   
0      176    
240    32     
-48    -112   
48     -16    
-80    32     
-160   64     
80     80     
112    256    
-32    -704   
-272   336    
240    48     
16     96     
-240   176    
64     -96    
-48    -176   
-32    80     
288    560    
-288   -640   
-144   368    
112    -400   
0      64     
112    224    
64     -272   
-160   880    
-80    448    
288    64     
-80    -304   
-48    160    
-176   400    
32     -528   
80     112    
32     -304   
128    -16    
-112   144    
-384   64     
0      176    
-160   0      
-208   48     
240    160    
-464   16     
-80    0      
128    128    
-112   144    
-224   112    
0      -96    
224    -64    
624    224    
160    192    
416    80     
-400   144    
-560   -96    
1040   400    
-656   256    
208    176    
-160   160    
-96    96     
224    -160   
176    32     
80     112    
-16    32     
-32    16     
-160   -96    
176    -320   
-112   32     
-176   160    
80     64     
64     -32    
288    336    
-208   288    
304    -176   
-112   0      
0      112    
-16    -320   
-192   -304   
0      80     
-208   80     
160    -80    
32     112    
-256   16     
-144   272    
-48    64     
272    -64    
-32    -16    
-96    576    
464    352    
80     -64    
-32    -416   
-96    -96    
-192   192    
-128   -112   
0      -128   
288    -64    
96     336    
-272   144    
112    -80    
144    48     
32     128    
-272   48     
-144   -64    
64     32     
-208   128    
80     64     
192    64     
-32    -16    
16     48     
32     -64    
-128   -16    
48     48     
-64    0      
96     80     
240    160    
-144   256    
-64    -32    
224    96     
-224   256    
32     80     
-32    -336   
80     -128   
32     144    
-64    80     
-80    -32    
160    -32    
-32    48     
144    0      
208    128    
-32    -256   
-96    -384   
80     64     
-16    32     
80     32     
48     -32    
-16    96     
176    128    
96     160    
-32    32     
48     -16    
96     -48    
272    -32    
-144   160    
160    80     
112    16     
80     16     
176    112    
-32    32     
0      -224   
48     -112   
-112   -512   
-288   -880   
-80    -224   
112    -112   
384    208    
-16    576    
160    240    
-16    -448   
192    176    
192    544    
-400   -864   
16     32     
-16    -48    
272    -192   
192    112    
-64    48     
48     -80    
112    -16    
48     -48    
304    176    
-240   -224   
-96    -432   
-160   352    
-48    -96    
64     -80    
272    80     
224    80     
112    -96    
-32    592    
128    -240   
-48    -256   
-240   160    
-64    192    
-128   -128   
160    0      
384    -64    
480    -176   
144    176    
-464   -144   
-208   -288   
-16    -272   
96     160    
128    224    
-96    176    
128    256    
16     144    
-16    -176   
160    0      
80     -16    
112    32     
32     -64    
240    32     
48     80     
-32    -160   
-16    48     
144    128    
304    112    
-48    -112   
128    80     
16     -416   
160    -144   
288    -416   
-320   80     
-176   0      
240    80     
-128   0      
96     16     
192    176    
-16    16     
-16    -96    
176    -240   
96     96     
0      -416   
-128   80     
224    64     
-288   -96    
208    -48    
112    112    
160    -32    
112    16     
-112   16     
336    -80    
96     80     
176    32     
112    64     
-64    -192   
-80    32     
-32    0      
160    96     
144    96     
-80    -80    
144    80     
256    192    
320    -16    
160    0      
-80    96     
240    128    
-560   -16    
176    -256   
352    192    
-432   -112   
208    48     
-160   -80    
128    16     
96     -400   
0      -256   
-128   176    
-224   176    
32     -32    
-144   -192   
272    -112   
224    144    
-240   -384   
-80    -144   
176    -416   
32     -64    
-160   16     
112    -32    
48     -16    
48     -32    
96     -768   
32     80     
128    -32    
-32    -16    
-112   -320   
160    -304   
-16    -32    
224    -160   
336    16     
-128   16     
-144   -32    
256    -1472  
64     -64    
160    48     
-80    32     
256    -48    
96     96     
144    80     
48     128    
-368   -208   
144    -160   
-2016  0      
96     -16    
16     -16    
-80    -160   
208    -48    
128    -736   
48     -96    
32     -16    
16     48     
128    -144   
16     48     
80     -80    
-48    -80    
0      -32    
16     160    
160    224    
112    -48    
16     0      
0      -224   
128    -176   
176    -16    
96     96     
416    -592   
-112   -32    
112    -240   
-112   -48    
64     -32    
-16    -208   
160    -96    
304    32     
-192   16     
80     -112   
144    -64    
80     -32    
112    160    
256    240    
-16    64     
-16    -304   
144    -144   
224    416    
-32    0      
-80    -32    
144    144    
-128   -384   
-80    -96    
-416   208    
112    -16    
-864   -48    
352    -160   
-80    208    
80     -128   
-112   32     
48     -480   
-48    96     
-64    96     
-16    -144   
48     64     
272    -32    
64     96     
-608   -784   
-384   -1120  
48     544    
-768   0      
272    -128   
-1312  -64    
144    -528   
320    544    
96     -64    
64     32     
16     0      
-112   -144   
-32    800    
144    -608   
-256   -400   
-32    112    
-80    416    
64     -32    
-368   -144   
112    -160   
96     0      
176    -144   
48     80     
160    -96    
128    -16    
64     -192   
192    -272   
-192   -128   
0      -32    
64     320    
-16    0      
-544   -240   
64     16     
-256   240    
0      -48    
16     -224   
16     -160   
-224   16     
-32    -352   
112    0      
-208   -368   
16     320    
-144   416    
-16    -32    
-304   -208   
176    -64    
64     96     
-32    -144   
64     160    
304    128    
-32    144    
-2016  -64    
16     0      
-464   -176   
-656   -48    
32     48     
-288   -96    
-112   0      
-240   224    
-64    448    
16     160    
160    176    
32     144    
-16    144    
-432   -32    
16     176    
-272   48     
-16    64     
-16    -32    
-224   -48    
-48    0      
-160   -32    
-208   48     
-944   0      
0      160    
-1360  -64    
48     480    
544    384    
-384   -16    
-160   -320   
48     -80    
-16    -16    
256    -80    
-352   112    
-64    -272   
-80    -48    
64     48     
-144   -16    
384    0      
-192   192    
-496   80     
-208   -80    
-1008  192    
-16    48     
-96    -160   
608    144    
48     608    
-304   352    
-400   -64    
-64    -192   
0      -48    
464    -32    
176    64     
176    32     
-16    -32    
-64    96     
-112   112    
-1488  -96    
-128   64     
96     64     
-16    0      
160    -128   
-48    208    
-96    -48    
-48    -224   
32     16     
16     96     
-144   -144   
-48    -48    
-176   -64    
-96    16     
-16    0      
-544   -80    
96     112    
96     -128   
96     80     
-272   144    
288    48     
-64    -32    
-32    64     
80     32     
-208   -16    
112    -112   
-64    64     
48     32     
-352   224    
528    352    
-176   272    
208    112    
32     112    
192    0      
80     32     
32     -144   
-32    -256   
-288   32     
32     -80    
144    -64    
-240   -304   
0      -32    
64     128    
-192   128    
80     0      
-368   -32    
-64    96     
-560   224    
320    288    
112    -96    
48     -176   
160    -80    
240    304    
-448   288    
-128   48     
-96    128    
112    96     
48     -128   
160    -112   
64     80     
-608   48     
64     112    
-256   -80    
-112   96     
32     32     
208    176    
-48    32     
-32    -192   
-112   -80    
112    48     
-16    208    
-32    -64    
48     -48    
-144   32     
-64    32     
16     -208   
240    0      
176    496    
-64    -48    
-96    -208   
96     112    
0      112    
-112   208    
80     -80    
-96    96     
-112   96     
-192   -112   
128    288    
-64    32     
32     240    
-64    -80    
256    768    
0      -160   
-32    176    
-80    -48    
-32    -112   
304    160    
-160   96     
48     -80    
-336   -272   
-96    -736   
48     16     
96     240    
32     -128   
0      48     
-96    80     
112    48     
96     64     
-32    16     
-16    112    
-48    -64    
64     -144   
48     -16    
176    128    
-64    64     
0      32     
-112   -80    
-272   -96    
48     -96    
320    112    
80     16     
160    192    
176    128    
64     -32    
-192   16     
-80    64     
-64    0      
480    368    
-400   96     
288    16     
752    0      
-112   -64    
-128   80     
-432   -80    
48     112    
0      112    
-48    -16    
64     -48    
320    -16    
0      0      
-16    144    
-160   48     
176    64     
176    48     
-528   -32    
160    16     
-64    -64    
16     80     
-288   -32    
80     -960   
80     80     
32     112    
16     32     
160    -16    
128    -16    
-160   80     
-48    0      
128    64     
-48    96     
192    128    
-96    -16    
32     -64    
144    144    
176    48     
0      -400   
48     64     
-576   480    
416    256    
-32    16     
80     128    
0      96     
-464   -240   
464    -48    
656    352    
-496   -144   
688    16     
-224   336    
-192   -32    
128    0      
-352   -256   
512    224    
-32    -208   
224    -192   
288    32     
-240   64     
144    -16    
-32    64     
-192   0      
304    48     
-544   -400   
352    64     
128    160    
-336   64     
96     -112   
368    144    
-80    224    
64     -352   
-272   -144   
384    32     
32     -64    
304    48     
368    208    
-112   0      
-352   -144   
192    -96    
400    240    
-560   176    
256    -48    
192    -16    
-32    -32    
208    16     
-80    -432   
208    -32    
-80    224    
-32    -16    
432    128    
-352   -160   
-48    -128   
-32    80     
64     64     
336    112    
48     80     
144    -16    
-144   16     
96     -160   
-96    0      
240    -384   
-288   -32    
80     -288   
336    96     
-144   -48    
0      32     
-80    80     
224    96     
-160   32     
112    0      
208    176    
-48    -16    
80     -64    
368    384    
-208   0      
16     -512   
224    -32    
96     16     
32     448    
-64    -208   
128    32     
0      112    
160    0      
272    208    
-96    -144   
-32    144    
-48    -32    
80     -64    
208    -272   
160    -64    
240    304    
16     -256   
320    -192   
-208   -304   
352    240    
64     96     
128    32     
112    144    
-128   -16    
-96    -528   
112    -128   
16     -528   
112    144    
64     176    
48     32     
160    160    
576    464    
-256   192    
-32    -544   
240    176    
128    -16    
160    208    
-32    368    
112    -720   
48     176    
80     176    
112    -64    
96     80     
-64    -160   
32     80     
96     0      
112    64     
80     16     
0      -176   
0      208    
-16    -736   
48     -80    
80     -48    
80     -656   
192    96     
-80    -272   
-64    -240   
0      -304   
240    -32    
-96    304    
320    -448   
224    -128   
96     -272   
0      -688   
-208   -128   
48     -416   
0      112    
-144   -96    
16     -96    
80     -64    
144    -144   
64     -16    
80     -608   
32     -16    
80     304    
16     -80    
320    64     
-240   -144   
-272   -512   
112    -128   
176    96     
80     224    
64     160    
-32    -192   
16     -352   
16     -32    
144    -112   
224    -112   
192    128    
224    -240   
-48    -208   
0      32     
64     80     
112    -176   
48     -48    
32     -128   
48     -272   
-160   112    
176    -64    
-592   -16    
112    -16    
32     48     
176    272    
192    176    
-32    -368   
-48    -80    
128    -160   
-48    -64    
368    240    
-48    320    
-144   -16    
80     -208   
-240   -208   
112    -112   
-240   -128   
64     -256   
128    -192   
256    -48    
64     -32    
48     -160   
64     80     
80     -368   
32     112    
-272   -256   
128    -448   
0      -176   
48     -32    
288    96     
-128   304    
-144   -64    
96     192    
-64    112    
-144   448    
-112   -48    
192    -176   
400    48     
720    -224   
144    240    
-576   48     
-528   -48    
-576   -176   
224    -80    
144    -496   
400    -272   
-160   160    
-224   -48    
-336   64     
-224   48     
-288   64     
208    -112   
320    64     
-128   -288   
320    -48    
192    -416   
-256   -48    
624    -64    
160    -32    
-480   -400   
400    -176   
-304   112    
-32    16     
-176   -16    
240    0      
304    208    
-112   -48    
-32    64     
368    -144   
-320   48     
-48    96     
16     96     
-160   -144   
0      0      
-144   -112   
272    16     
-256   -176   
208    16     
-464   -192   
128    -304   
-176   0      
336    -256   
96     128    
144    16     
112    144    
-576   -64    
-80    160    
32     288    
-48    160    
64     192    
80     48     
80     16     
48     -80    
-176   64     
160    -112   
96     224    
-432   -80    
272    64     
-320   -272   
-880   -160   
-368   64     
-384   192    
-256   160    
-1072  96     
-192   64     
0      -48    
160    16     
416    -144   
-144   -64    
-272   48     
-80    320    
96     448    
144    320    
32     -272   
-96    320    
-16    -192   
-416   -288   
256    -304   
-304   -16    
128    96     
-624   128    
-144   64     
112    0      
-80    -160   
-336   -80    
208    96     
-224   -16    
80     672    
-144   -416   
-48    112    
272    16     
-272   -496   
-128   224    
-544   176    
16     -592   
64     -144   
80     256    
-16    32     
48     32     
-48    -80    
-64    16     
-48    16     
-160   32     
-32    32     
64     -16    
-80    -32    
80     32     
-256   -16    
-112   48     
-208   32     
-48    96     
-80    128    
-2592  -80    
96     32     
-144   -128   
224    -32    
128    -176   
288    112    
128    160    
-288   80     
-176   -176   
-16    -16    
-64    112    
96     -112   
64     64     
-48    -16    
64     0      
-384   -128   
0      128    
-32    16     
48     32     
160    80     
-272   -16    
144    16     
-16    32     
-96    -64    
112    -16    
224    64     
-144   -16    
-96    32     
-384   16     
48     96     
-336   0      
144    0      
-464   -32    
-16    272    
128    160    
-96    -112   
-208   -112   
32     32     
-240   16     
-32    -16    
0      80     
112    160    
-384   -48    
176    -80    
288    144    
-304   112    
176    16     
-480   48     
-496   32     
-192   -112   
256    96     
192    80     
240    0      
112    0      
-64    16     
-96    16     
-144   16     
64     0      
-96    16     
80     112    
-256   -64    
96     32     
48     80     
-32    -16    
96     64     
144    80     
-240   -112   
192    -80    
-64    96     
256    48     
-128   64     
144    -48    
-240   192    
-16    192    
-128   0      
-400   -272   
-240   -160   
192    288    
-128   32     
-304   -272   
352    176    
-336   80     
176    -80    
-288   -80    
-48    -64    
416    160    
-256   -96    
176    112    
-464   0      
-32    32     
-496   -144   
208    0      
288    16     
208    -16    
-112   48     
592    192    
-288   -160   
272    16     
448    224    
-368   96     
368    -32    
-64    -32    
96     432    
-400   112    
112    16     
624    208    
-448   80     
80     -112   
-16    32     
-240   -128   
224    -192   
336    144    
-48    128    
144    -16    
32     64     
-240   192    
-48    -304   
128    -32    
32     64     
32     -112   
64     96     
112    -384   
-160   -160   
368    416    
-240   64     
240    272    
-224   -160   
128    -176   
64     240    
-16    0      
48     -32    
-80    48     
96     -32    
-208   96     
-64    -176   
128    -96    
-192   144    
240    48     
144    -80    
48     -32    
160    288    
208    0      
-144   -240   
-32    272    
192    256    
16     -192   
-96    240    
112    -432   
-224   -240   
352    -720   
-32    464    
64     368    
16     -32    
400    320    
192    -128   
176    -160   
-96    -464   
-112   -112   
48     32     
16     -16    
16     80     
16     224    
352    272    
-528   112    
176    -128   
-32    32     
176    -160   
-96    -336   
32     -80    
64     48     
-64    32     
-64    -48    
16     128    
160    32     
-48    -48    
48     176    
-80    -112   
64     320    
256    208    
-16    -528   
-208   -224   
48     -544   
160    16     
240    160    
-32    32     
64     -64    
64     32     
-16    96     
128    64     
16     80     
64     48     
-48    192    
208    48     
64     96     
-176   -96    
144    320    
-304   208    
128    -112   
192    -48    
64     -16    
80     64     
-32    -256   
0      -240   
128    128    
-224   80     
64     16     
80     -80    
48     -64    
32     48     
-16    0      
176    -80    
96     -112   
-80    96     
0      192    
64     16     
-144   -240   
48     80     
0      -48    
240    0      
32     -80    
48     48     
192    0      
64     -64    
80     -16    
0      16     
16     48     
128    -272   
80     176    
0      -112   
160    48     
48     128    
64     16     
192    240    
-80    96     
48     384    
-112   144    
80     144    
304    144    
-112   16     
160    64     
192    32     
112    -304   
0      -16    
80     -96    
128    -16    
-32    32     
176    32     
-64    0      
112    -32    
32     -16    
-96    -80    
64     32     
112    16     
80     -112   
-64    -656   
128    -80    
48     -144   
-16    112    
96     -48    
208    176    
-144   128    
192    208    
192    16     
176    -48    
-208   -80    
-16    -128   
-96    0      
16     -64    
16     16     
240    -384   
128    -192   
96     -288   
48     -128   
-80    -1056  
368    112    
32     304    
128    -544   
-64    -336   
16     16     
32     -416   
-160   -32    
176    -176   
48     0      
-176   -144   
-32    -304   
192    -16    
320    16     
240    48     
144    -64    
-192   -352   
-112   -112   
448    32     
32     64     
-2352  -224   
448    -352   
544    -64    
432    -288   
-208   240    
64     -64    
608    208    
-240   32     
-192   -224   
-192   528    
288    512    
496    496    
-64    416    
64     -48    
-240   0      
-864   48     
96     -160   
240    -48    
-176   -112   
32     -32    
-16    144    
240    160    
288    352    
96     96     
-16    32     
16     -192   
176    0      
64     -64    
80     -176   
512    288    
-304   208    
112    -240   
-112   240    
96     -32    
320    -224   
32     -288   
-80    64     
64     -208   
32     -128   
176    16     
-144   208    
208    -48    
-208   -16    
64     -48    
192    64     
-368   -32    
-32    288    
-160   -288   
96     16     
128    -112   
-240   -320   
464    -80    
0      -80    
-32    -304   
112    -96    
0      32     
-160   208    
-128   -544   
-112   272    
208    32     
-432   -64    
144    112    
-1360  -272   
-16    32     
48     0      
176    16     
176    64     
64     -128   
48     -16    
144    480    
96     128    
368    192    
-96    -240   
-64    -112   
144    32     
-80    16     
32     -96    
32     48     
176    0      
-16    -64    
192    0      
-320   128    
160    -160   
160    64     
64     -352   
112    0      
-48    -32    
-96    -48    
-64    -48    
16     -224   
-144   -48    
64     -16    
-192   -32    
128    -32    
-480   -64    
64     -96    
96     80     
-32    -16    
64     -32    
176    -224   
48     64     
-144   0      
640    96     
-256   16     
176    -112   
64     -64    
16     80     
-384   -208   
-64    -16    
-80    368    
0      112    
16     -160   
208    -32    
32     112    
-48    -208   
64     -16    
128    -48    
0      16     
0      48     
64     -32    
-112   48     
16     -96    
-160   128    
-128   -32    
128    -32    
384    32     
192    -16    
176    -144   
80     16     
-48    -128   
0      -176   
80     -48    
-16    64     
80     32     
128    -16    
-160   -64    
144    -16    
352    336    
-528   -48    
-336   -112   
400    -96    
96     32     
-832   -160   
64     144    
-48    -32    
-144   64     
-240   -16    
-480   80     
-112   32     
-688   0      
64     32     
112    128    
-112   48     
-368   -112   
-48    -32    
-800   -32    
208    32     
240    16     
80     48     
-32    -16    
-560   -16    
96     32     
-592   96     
48     64     
96     -16    
-80    16     
-1360  -32    
-80    96     
-288   -64    
112    0      
-144   -112   
160    80     
-272   -80    
64     -96    
-112   64     
0      0      
-336   -304   
192    -256   
-80    176    
96     16     
-320   -80    
-1936  -112   
-112   -64    
112    -32    
192    -16    
-16    -192   
160    -48    
96     -128   
-144   -80    
144    48     
-96    -176   
-128   -160   
-112   16     
-320   -80    
448    272    
-32    336    
-480   320    
-432   -32    
112    -16    
448    192    
-336   -416   
-128   -192   
-144   192    
-240   144    
32     32     
256    -176   
288    -112   
-144   384    
64     96     
-224   -96    
-224   -208   
144    224    
48     32     
-1280  0      
208    -112   
-256   -16    
128    -48    
-112   16     
32     96     
64     -192   
-272   144    
-128   -96    
-176   208    
704    448    
-544   -384   
-160   -160   
-128   -576   
208    784    
-304   -80    
-96    96     
-48    -400   
64     -464   
224    400    
-128   192    
-288   16     
-16    -288   
-96    80     
160    -144   
176    112    
32     48     
16     0      
-256   288    
96     16
[truncated: 98,011 more chars]
