# Supplementary material for: A Fault Diagnosis Method for One‐Dimensional Vibration Signal Based on Multiresolution tlsDMD and Approximate Entropy
Source: Hindawi journal article supplement (doi:10.1155/2019/3262818), 2019-01-01
Supplement: f1 [file 3262818.f1.zip › 3262818.f1/gear signals/normal gear signal/Data13.txt]

176    -80    
-32    -192   
224    112    
-96    64     
-16    288    
-256   80     
112    -96    
-16    -112   
-32    -528   
-16    -112   
16     -192   
16     -80    
240    64     
144    80     
96     304    
-160   -48    
160    -288   
96     160    
112    -48    
16     112    
-896   480    
-48    272    
-32    -432   
208    -32    
96     -64    
240    -144   
0      32     
256    -352   
-160   368    
16     -592   
256    144    
32     112    
128    -16    
-112   -112   
160    -432   
160    160    
48     32     
96     656    
-64    -528   
-320   272    
-96    -336   
112    -128   
-32    -144   
272    -96    
176    -240   
64     -112   
384    64     
64     -96    
-144   192    
32     -1344  
304    112    
560    1152   
-2560  -656   
208    -160   
-528   560    
592    144    
144    -208   
480    -160   
-224   96     
48     -160   
0      64     
400    288    
672    624    
0      -928   
544    -672   
-384   448    
-192   160    
-1728  176    
-192   224    
240    -368   
352    80     
16     432    
320    208    
-64    -48    
-160   -944   
-16    32     
80     -48    
80     -96    
192    32     
160    64     
-32    32     
192    32     
-352   -16    
144    48     
-1040  96     
160    -16    
48     -16    
112    -320   
-32    -48    
160    -592   
-32    80     
160    64     
16     96     
-64    16     
192    496    
-128   112    
16     -176   
-144   80     
240    64     
-352   32     
-32    -288   
240    48     
-96    -256   
128    -16    
192    -64    
48     112    
112    -144   
-128   -256   
16     -16    
-32    48     
-80    0      
64     48     
-96    -48    
128    -32    
-112   32     
112    -96    
48     16     
176    -64    
16     0      
-32    -144   
240    -176   
-176   -240   
96     -96    
-320   -192   
224    -96    
-112   224    
112    112    
0      32     
240    -16    
-1584  -32    
144    -64    
112    64     
96     -48    
-80    64     
-672   -128   
-1296  -48    
-224   -208   
160    -128   
-48    -80    
48     32     
-304   0      
16     -32    
32     288    
-112   112    
-144   -80    
-128   -96    
112    -80    
-160   -192   
64     192    
-96    0      
-128   -48    
-16    16     
-160   32     
-16    48     
-1168  -32    
-64    -32    
96     32     
176    -160   
-32    -96    
240    256    
-656   -80    
-16    64     
-640   -112   
160    288    
128    -160   
-80    16     
0      224    
-368   96     
-208   -48    
-512   -32    
0      96     
-112   0      
96     0      
288    -48    
-16    64     
-192   -32    
48     -32    
16     -112   
16     32     
16     80     
-352   0      
-256   -32    
-352   -96    
-80    -48    
-176   208    
-160   -16    
-816   64     
128    128    
-288   -160   
64     0      
-96    -32    
64     32     
0      -96    
0      0      
192    96     
16     96     
32     -48    
-160   -16    
0      64     
-128   -16    
-160   -16    
-240   0      
-48    0      
-240   -48    
144    48     
64     -16    
-32    0      
48     32     
48     48     
16     16     
48     -64    
-112   0      
0      48     
-96    16     
-80    16     
-80    16     
-400   0      
80     80     
-1808  -64    
112    32     
32     -64    
-64    32     
160    -16    
-144   -16    
48     0      
80     112    
-176   64     
128    208    
-32    112    
-32    48     
-128   96     
-96    32     
-64    16     
-672   -240   
-32    176    
0      16     
32     112    
-128   96     
32     544    
336    -48    
-64    416    
32     64     
176    -256   
784    672    
-240   -128   
-80    -640   
-16    880    
-16    112    
-80    -464   
352    400    
112    208    
-224   -112   
-144   0      
-464   -128   
128    0      
176    -224   
160    96     
-144   384    
192    -240   
-192   304    
-80    160    
-256   128    
208    -16    
-48    -448   
496    432    
176    -256   
-336   -96    
464    336    
-976   304    
-192   64     
-48    -176   
176    -192   
48     -128   
80     96     
-352   -224   
32     -176   
-128   160    
80     176    
-160   80     
128    32     
112    0      
304    256    
-528   112    
112    -32    
-112   176    
-32    -80    
384    -16    
208    -48    
176    96     
-160   48     
112    0      
-144   64     
64     16     
-144   128    
-96    -16    
144    80     
-304   16     
128    112    
64     64     
272    80     
-48    80     
-176   0      
-224   240    
176    96     
32     -16    
192    64     
-16    -64    
112    96     
80     80     
-96    48     
-80    -16    
256    0      
-96    32     
-64    -16    
-288   80     
64     16     
144    -64    
-112   64     
48     96     
-128   16     
32     96     
-80    -32    
224    144    
0      48     
-48    -128   
128    -16    
144    80     
32     48     
-32    16     
-64    32     
64     -48    
96     32     
-48    -32    
112    0      
96     64     
0      48     
-96    -32    
112    80     
160    48     
-48    80     
32     96     
112    48     
-48    16     
32     32     
96     64     
176    208    
-160   80     
80     -64    
224    48     
-160   0      
64     -64    
-16    -48    
96     64     
176    0      
0      368    
112    64     
272    -64    
16     96     
16     16     
-64    -80    
-32    -96    
80     192    
-368   176    
0      288    
224    -144   
-128   -384   
-48    -448   
-32    -320   
16     -32    
-16    176    
64     304    
80     352    
96     16     
64     0      
80     -16    
32     16     
112    48     
144    -112   
96     32     
-64    0      
64     176    
144    112    
48     -528   
48     32     
-128   -96    
144    32     
16     -208   
80     240    
352    368    
128    224    
-48    -160   
112    -272   
16     368    
-16    -96    
-368   -128   
16     240    
96     -80    
48     -448   
192    160    
192    176    
-176   32     
80     16     
16     64     
-48    16     
160    384    
64     -128   
112    80     
80     144    
112    64     
336    64     
-400   -720   
208    240    
-16    128    
96     -32    
192    -448   
-48    112    
-48    112    
-64    224    
112    16     
-32    -32    
208    304    
32     128    
48     -144   
-80    -144   
-32    48     
16     336    
272    352    
-112   -144   
128    32     
80     224    
-32    112    
192    112    
96     48     
0      -48    
-48    -448   
-272   -432   
320    512    
-224   128    
272    0      
0      0      
240    32     
-128   32     
64     -336   
32     -48    
-112   -224   
64     64     
-176   -720   
80     32     
384    176    
-288   128    
432    208    
-64    112    
-176   -80    
-128   -96    
64     48     
544    176    
-176   96     
0      -176   
144    -48    
224    128    
-48    256    
1360   784    
-656   656    
-496   -16    
304    -208   
272    -192   
-272   208    
-32    48     
416    64     
-352   128    
48     -272   
144    128    
160    0      
160    0      
80     -16    
-48    80     
-32    -128   
80     64     
64     32     
64     -224   
80     -80    
160    0      
112    -720   
80     -96    
384    96     
-176   -64    
48     48     
192    64     
160    64     
80     -128   
-112   32     
-128   160    
496    -160   
-80    -80    
0      -128   
-240   -96    
-1760  -32    
208    112    
96     64     
48     -320   
128    -128   
-96    -864   
272    -16    
176    80     
16     -16    
-96    -272   
160    0      
128    -304   
0      16     
96     -208   
32     -64    
-384   112    
80     16     
-144   -240   
144    -400   
176    80     
-16    -480   
240    48     
176    -64    
-160   -48    
96     -80    
192    -32    
-80    -32    
64     16     
0      32     
16     -32    
-928   -16    
176    -48    
176    16     
-48    -80    
192    96     
-64    -224   
96     -192   
128    -208   
64     -208   
144    -80    
-192   0      
160    -144   
0      112    
-96    -224   
64     -192   
-928   -96    
0      0      
448    0      
176    32     
112    0      
16     64     
32     -64    
112    -304   
176    -16    
48     -112   
32     144    
-32    -80    
16     -32    
512    720    
-352   496    
32     -128   
128    -176   
-128   -16    
208    64     
-32    96     
112    -80    
-224   -192   
64     -192   
16     96     
-144   -864   
-208   16     
128    0      
48     0      
-176   -32    
32     96     
-32    64     
96     32     
-592   -224   
144    -224   
-1968  -176   
304    -96    
-32    0      
64     -80    
-64    80     
0      -1088  
416    288    
-368   128    
96     -128   
0      64     
96     -32    
-64    -16    
112    0      
-416   32     
80     -32    
-544   -48    
128    48     
64     80     
160    -80    
-80    0      
192    -160   
112    144    
144    96     
112    48     
-416   64     
176    -16    
-448   0      
112    -176   
48     32     
128    -32    
80     -112   
240    -288   
96     432    
144    144    
112    176    
144    -80    
160    112    
128    112    
-16    -112   
-208   48     
-32    -160   
-48    64     
112    112    
-32    -64    
144    -144   
-416   112    
128    -16    
-48    0      
-96    -208   
-144   -480   
128    304    
32     176    
-32    -144   
-720   208    
-144   -160   
-272   16     
16     64     
48     -144   
-224   176    
-32    -320   
-16    976    
-672   -336   
352    -256   
96     304    
320    -176   
48     304    
-128   240    
192    160    
-544   -96    
32     -160   
-928   -64    
80     -176   
80     -272   
-224   -160   
-480   -272   
256    -176   
448    -32    
256    -96    
112    -512   
384    -144   
-48    64     
224    -32    
272    144    
-272   352    
-336   64     
-800   -80    
96     -240   
32     -176   
32     -96    
-304   96     
-96    -48    
-368   -96    
272    -80    
16     80     
-96    96     
-32    -96    
32     -32    
80     -32    
-176   256    
-96    -32    
144    32     
0      -32    
-384   80     
-32    208    
224    -16    
80     -16    
-192   -224   
32     160    
-32    160    
-16    0      
0      32     
64     -112   
16     0      
0      -32    
208    192    
-192   32     
-144   256    
-144   -64    
176    -64    
32     -112   
-80    128    
112    -48    
-192   -48    
16     -208   
-64    -64    
-32    112    
-480   -96    
64     -112   
-192   16     
48     96     
32     -16    
48     64     
-272   -144   
64     128    
-1856  -64    
64     80     
0      -160   
32     80     
112    48     
112    0      
-32    0      
48     48     
-48    208    
80     32     
-32    16     
-160   112    
80     208    
-480   -64    
80     16     
-240   -16    
-16    -16    
224    16     
-80    80     
-64    32     
0      128    
256    112    
16     48     
80     32     
16     0      
0      16     
-192   -16    
96     0      
-272   -160   
208    -96    
-512   -64    
-112   -48    
-48    -32    
112    128    
160    0      
128    64     
-16    48     
-96    -80    
-96    -160   
-128   -16    
-160   16     
160    176    
-48    288    
-48    32     
240    624    
-272   272    
-48    64     
96     112    
48     48     
-96    -144   
-80    -288   
-32    64     
-32    -16    
112    48     
32     -208   
16     -16    
16     208    
64     384    
-96    160    
16     -160   
-496   -48    
48     32     
208    112    
192    -80    
-96    -160   
32     144    
-64    0      
-32    -352   
16     128    
-16    96     
48     208    
176    -112   
192    16     
-80    -16    
-48    224    
16     -192   
-144   80     
-128   0      
192    160    
208    112    
-256   -112   
128    -288   
-64    -272   
112    224    
48     256    
176    160    
-320   -16    
176    112    
-192   112    
48     64     
160    -64    
16     -48    
48     112    
-16    112    
96     64     
-112   48     
176    208    
-112   64     
80     -16    
-16    -64    
208    96     
-80    32     
32     -48    
0      0      
0      -16    
64     96     
-32    64     
32     32     
0      16     
32     0      
0      32     
112    64     
-272   0      
240    256    
-96    -16    
176    32     
-96    -16    
96     32     
-96    -160   
336    -48    
-240   48     
480    176    
-304   -48    
-336   -160   
400    16     
-96    -64    
192    -112   
160    16     
32     64     
-96    48     
448    240    
-800   -80    
80     -48    
0      128    
160    80     
-64    16     
128    64     
-16    -80    
160    -48    
48     -64    
16     80     
128    96     
432    176    
-432   64     
-80    -112   
672    208    
624    416    
-688   -16    
-32    -160   
224    -176   
-80    0      
144    -80    
224    0      
32     48     
112    32     
64     48     
-16    32     
384    272    
-672   144    
256    -16    
224    32     
16     96     
208    -64    
192    112    
-208   -336   
208    -80    
64     32     
192    96     
16     128    
96     80     
48     48     
-48    0      
96     0      
16     160    
-48    -48    
64     48     
-32    48     
-96    -208   
384    352    
-240   -208   
176    16     
240    -352   
240    176    
-48    96     
-48    32     
224    176    
-80    144    
16     64     
176    160    
144    240    
32     -64    
-144   -16    
96     -208   
112    112    
128    -16    
-48    -16    
0      -48    
288    80     
-48    224    
176    96     
64     0      
-80    -32    
-64    48     
32     192    
112    128    
32     -112   
-16    64     
176    32     
144    496    
320    112    
-16    96     
-96    -688   
128    -64    
-32    -464   
-16    16     
32     48     
176    128    
-96    -80    
112    -16    
-16    -112   
16     176    
64     64     
-32    -48    
48     -128   
160    128    
0      128    
32     -448   
48     -96    
48     -112   
80     272    
-48    -256   
32     -128   
48     -64    
192    256    
288    160    
-112   -208   
64     64     
0      -96    
32     0      
80     -128   
-176   48     
112    64     
112    640    
288    432    
-48    -160   
-176   -192   
160    48     
272    272    
-224   -128   
48     -112   
256    -32    
-80    -192   
288    -80    
224    176    
256    -192   
96     112    
16     -96    
-16    -16    
-208   -352   
-48    176    
0      48     
112    -32    
240    80     
112    48     
352    288    
-96    880    
144    -176   
192    -80    
304    368    
-224   -128   
256    -32    
192    -80    
16     -528   
-32    -32    
144    -208   
176    112    
-16    -96    
80     -160   
144    0      
0      0      
-80    16     
160    -416   
0      288    
144    208    
240    -272   
144    272    
32     -64    
128    224    
-96    0      
96     -16    
-144   -208   
-528   128    
-48    -384   
-2000  192    
224    0      
-16    -304   
144    -144   
-96    304    
-48    -304   
-32    -224   
160    176    
16     80     
32     400    
48     -432   
80     -128   
48     192    
-208   -112   
128    -32    
-448   320    
32     464    
208    96     
48     144    
176    560    
160    16     
80     -96    
32     -896   
272    -144   
64     320    
304    96     
-128   -368   
160    -144   
48     -240   
128    -64    
-336   64     
112    -80    
-272   -48    
224    -144   
0      -272   
144    -208   
224    -160   
144    -704   
448    32     
480    0      
416    304    
-208   192    
-256   0      
-16    32     
-128   -80    
-352   -32    
-64    -176   
-720   -128   
448    -64    
352    -96    
240    -160   
352    32     
608    176    
-288   256    
512    112    
-224   240    
-176   16     
208    -16    
-144   -48    
144    -96    
-560   64     
176    16     
48     0      
-96    -80    
160    -368   
-80    0      
0      240    
496    64     
-96    64     
192    -272   
-128   32     
128    -16    
32     -128   
160    176    
-112   128    
-272   0      
160    -128   
-208   -16    
-48    -176   
-192   -48    
160    -16    
208    48     
-48    -48    
16     16     
192    -96    
112    -160   
16     80     
-16    224    
32     -32    
128    -48    
-224   0      
272    64     
-480   48     
-64    -240   
-96    -16    
240    -80    
224    32     
16     -64    
48     80     
16     -208   
32     -80    
-128   64     
80     -80    
-80    -32    
96     -16    
-48    0      
208    -64    
-80    80     
96     -32    
-176   96     
112    16     
144    96     
-800   80     
-64    16     
192    64     
-1184  32     
224    48     
-240   144    
-96    -32    
320    -16    
-80    160    
112    -32    
-112   64     
96     -64    
-112   -48    
-528   -144   
160    112    
0      336    
-512   304    
-32    80     
-448   -32    
-64    96     
-304   -64    
-96    144    
-16    -272   
112    -16    
112    144    
-176   176    
-560   48     
-64    64     
-480   -240   
32     0      
-192   0      
96     32     
16     16     
-80    -32    
-224   144    
-128   320    
-208   -752   
-208   -320   
32     640    
-176   -320   
0      160    
-176   -192   
80     160    
-144   192    
96     0      
80     288    
-592   -400   
-32    0      
-16    192    
112    64     
32     144    
144    -144   
-128   -64    
-160   96     
-2352  0      
208    304    
-64    16     
64     -96    
-272   -128   
16     -48    
0      32     
16     96     
240    320    
-320   96     
-32    64     
32     0      
-80    -128   
-224   -32    
-80    16     
-720   -48    
128    32     
-48    0      
-48    48     
-80    -80    
48     16     
-16    -64    
-48    -48    
-112   32     
-32    16     
-16    32     
80     64     
80     16     
0      96     
-112   -48    
-160   48     
-112   144    
-448   0      
-16    112    
-128   -48    
48     80     
160    112    
-128   -48    
16     -80    
-48    16     
32     96     
64     48     
-32    32     
-96    80     
-48    64     
-144   -64    
0      32     
-288   -48    
80     48     
80     64     
-48    144    
160    -48    
-400   -96    
160    64     
-336   0      
192    32     
-96    16     
192    400    
-192   -32    
-224   -16    
-416   0      
0      0      
-816   -64    
-48    144    
80     192    
64     -32    
-240   -192   
240    32     
-112   160    
-48    -64    
448    256    
-496   0      
-80    -192   
-304   -144   
48     176    
-368   -80    
592    256    
-224   112    
-496   32     
336    32     
-528   0      
272    0      
64     -16    
208    112    
-320   -112   
960    112    
-128   48     
32     32     
-48    48     
-16    160    
-320   80     
-592   -112   
112    -96    
160    96     
-336   -160   
384    0      
272    272    
-464   64     
-32    -32    
-32    -16    
0      48     
64     32     
-48    64     
-16    16     
176    64     
-240   -160   
-16    -128   
96     144    
96     -96    
208    48     
-112   48     
-32    80     
-112   128    
48     16     
256    0      
48     64     
160    80     
-96    112    
-32    64     
176    -16    
-32    -32    
48     64     
64     112    
176    48     
-16    64     
-208   -128   
192    -64    
16     -32    
96     112    
-80    -64    
64     -32    
48     16     
32     96     
-48    -32    
112    64     
-160   48     
32     144    
320    224    
-80    144    
-240   -32    
64     176    
160    -32    
-16    -16    
16     112    
-64    -224   
144    192    
-16    496    
304    16     
-256   0      
-128   -304   
320    240    
96     -32    
0      144    
-16    48     
112    16     
-32    48     
-48    80     
288    -16    
-64    -16    
-160   64     
368    -432   
48     176    
272    256    
-272   -240   
-16    -64    
320    368    
32     304    
-112   -288   
-96    176    
144    192    
96     80     
16     368    
-48    -480   
160    544    
-48    -112   
256    -176   
-96    64     
-96    352    
-32    -208   
96     -640   
96     864    
-80    -448   
128    160    
-96    80     
0      -80    
64     112    
48     96     
-16    -32    
80     -80    
-80    352    
-64    -528   
-16    0      
80     96     
-32    80     
64     -272   
176    -128   
-32    -32    
192    32     
48     48     
96     16     
-32    16     
112    16     
32     -256   
96     -192   
-144   80     
32     64     
128    48     
-48    -224   
0      -480   
-80    224    
-112   352    
144    -192   
192    176    
160    64     
16     288    
144    -64    
160    64     
0      -320   
96     48     
-96    336    
96     80     
32     112    
144    144    
128    272    
96     -128   
80     256    
-16    -320   
80     64     
80     -48    
128    128    
-48    -16    
48     0      
-32    64     
112    240    
48     224    
32     144    
176    176    
48     -80    
32     -32    
176    -336   
96     0      
48     -224   
48     96     
160    -400   
160    -80    
-96    160    
-48    144    
128    48     
-48    544    
224    416    
-224   480    
-32    -144   
64     -80    
144    96     
96     -80    
128    -80    
-64    -208   
304    560    
-48    -96    
-16    112    
-64    -32    
176    -416   
0      -160   
160    -272   
-64    -144   
-112   352    
240    0      
288    -496   
288    400    
-208   80     
-272   32     
-432   -432   
176    -128   
96     -320   
208    -48    
112    160    
-112   -128   
112    128    
48     160    
160    -32    
112    -128   
80     -32    
128    -256   
-304   -96    
560    -352   
368    -112   
-16    -192   
48     192    
-160   144    
0      -48    
-32    0      
192    240    
240    144    
128    -1184  
224    -576   
-256   -288   
64     -304   
-192   208    
-80    0      
464    96     
-112   48     
192    -144   
0      96     
384    208    
-112   336    
48     -96    
16     32     
368    256    
-96    48     
208    -176   
144    -160   
96     -304   
224    64     
-64    -768   
-16    -176   
224    -512   
16     -144   
160    80     
80     -16    
448    272    
-368   144    
96     -48    
-288   -160   
-16    -192   
368    -144   
-112   -144   
80     -144   
208    -80    
-48    -80    
0      -64    
16     240    
128    -16    
304    64     
-256   112    
192    96     
-192   -16    
96     64     
32     96     
-272   -16    
288    -304   
-400   -80    
160    -16    
32     48     
160    16     
368    160    
-128   48     
80     256    
32     16     
-176   0      
-48    -320   
48     448    
240    224    
32     -160   
-240   160    
208    -48    
-256   80     
80     224    
-176   -96    
-96    -112   
256    -208   
-64    -320   
-144   -192   
96     -224   
400    -192   
48     544    
-144   -144   
-80    48     
128    -32    
-288   -16    
256    96     
-496   32     
96     -112   
-1136  64     
64     -192   
288    64     
-48    16     
112    32     
96     80     
544    640    
-240   448    
112    128    
48     0      
144    -48    
32     144    
16     -80    
-96    80     
384    112    
-480   176    
224    192    
-208   0      
112    -64    
-80    16     
-32    -496   
80     -48    
0      -592   
48     -144   
160    112    
160    -112   
160    -144   
336    96     
-816   32     
16     -128   
-80    32     
144    80     
-1008  16     
112    -224   
-32    -96    
-64    -176   
-32    0      
128    -1024  
144    -64    
-128   16     
160    -80    
-400   -16    
96     32     
-48    48     
32     32     
-480   -176   
336    -48    
128    128    
64     -80    
32     -16    
32     16     
-208   0      
-112   32     
176    0      
-64    16     
80     -112   
16     0      
128    32     
48     32     
32     -80    
-176   -16    
64     0      
112    80     
80     -48    
64     48     
-304   -112   
-96    -48    
144    -16    
80     32     
-256   -64    
80     0      
-144   -16    
112    -32    
-160   80     
96     -48    
-240   144    
-208   32     
-128   16     
-112   -48    
-96    32     
-32    -128   
16     64     
-336   64     
96     -128   
-160   -16    
64     -144   
192    224    
-1360  64     
96     -128   
224    -64    
80     0      
96     -208   
32     0      
32     192    
16     0      
144    48     
-80    16     
128    48     
-64    16     
-112   16     
-640   -144   
64     64     
-1488  -96    
176    16     
0      64     
144    -16    
240    -32    
-80    176    
-464   -64    
608    304    
-736   192    
240    224    
-656   32     
304    -80    
64     -16    
-64    -48    
544    -16    
-560   48     
-32    -16    
-1840  -160   
-128   -16    
-272   64     
176    160    
144    -144   
32     0      
32     32     
96     48     
-160   96     
-80    0      
16     16     
96     -32    
64     192    
-208   192    
128    -48    
-720   0      
224    -64    
-64    80     
160    80     
-128   192    
-112   208    
-80    64     
-304   -288   
144    240    
-160   16     
-224   112    
368    64     
-64    96     
-208   -112   
32     -176   
-496   16     
224    -48    
-192   144    
224    48     
96     32     
-256   336    
336    -1440  
-96    976    
192    -192   
32     -224   
-176   288    
-240   -144   
-112   384    
96     -112   
96     -16    
-448   368    
80     -64    
-352   -96    
-192   32     
-224   704    
96     -128   
-128   -192   
-208   -368   
16     -848   
176    272    
480    368    
-416   208    
-96    -320   
-160   -272   
32     128    
-272   -32    
144    -64    
-320   32     
176    0      
288    16     
0      64     
144    208    
-128   -336   
-144   -240   
0      112    
16     -80    
-128   -224   
176    -64    
-96    96     
-32    80     
-336   112    
64     32     
80     432    
16     208    
32     -32    
-192   16     
-80    48     
-144   -16    
64     -80    
-80    336    
128    480    
16     208    
-48    -80    
-128   -32    
-16    48     
-288   32     
256    112    
-32    272    
-32    112    
256    64     
96     256    
-160   -160   
-48    -48    
80     -80    
144    160    
0      160    
-128   144    
64     48     
-96    -176   
-80    -160   
16     -112   
-48    80     
-32    -64    
-16    -16    
16     -64    
64     -64    
288    48     
-160   -80    
304    32     
32     192    
-80    -80    
-96    0      
80     0      
-144   112    
160    96     
-336   -48    
176    -160   
64     0      
48     128    
32     160    
288    192    
-96    80     
80     64     
192    240    
64     80     
80     128    
80     128    
144    176    
-272   96     
16     -64    
96     160    
0      80     
32     112    
224    80     
112    64     
-32    192    
240    80     
-208   -208   
96     16     
-80    112    
144    16     
48     192    
32     48     
-80    144    
176    -800   
16     256    
96     -80    
64     -80    
64     208    
16     -400   
-352   0      
192    -160   
-128   160    
320    64     
-64    -240   
16     -320   
16     -288   
-48    208    
48     -176   
48     -256   
48     80     
192    128    
-240   208    
-320   -80    
240    -288   
112    -176   
144    -176   
208    -128   
-288   -144   
-272   -656   
480    -64    
320    -144   
416    304    
304    32     
96     -176   
176    16     
-160   -32    
64     -32    
16     -240   
32     -288   
192    96     
112    288    
-384   64     
32     32     
496    528    
-384   400    
-176   -304   
-128   -128   
-112   -112   
96     -384   
240    -32    
32     -1136  
-48    -400   
-144   0      
-272   528    
144    256    
-112   -224   
144    -112   
160    -160   
-160   -176   
368    -192   
-128   -80    
-144   -336   
-16    -32    
-176   -304   
32     -352   
176    -368   
240    48     
-176   64     
64     -320   
-16    -384   
208    -304   
-208   -224   
32     -96    
96     48     
-48    64     
128    -48    
208    352    
-176   208    
32     -480   
368    272    
16     16     
-64    352    
176    48     
-144   -432   
208    128    
112    288    
320    176    
-16    192    
-192   -304   
32     208    
160    96     
80     -32    
128    -80    
-192   -544   
-144   -528   
224    336    
400    528    
352    -288   
-208   0      
224    -32    
96     -48    
160    192    
128    -176   
-16    208    
16     48     
80     -160   
-16    -272   
64     96     
-48    -416   
32     16     
176    -208   
112    176    
0      -128   
96     48     
-16    112    
0      96     
-32    32     
112    64     
112    -224   
-112   -496   
64     128    
16     -304   
96     16     
64     -144   
48     208    
288    352    
96     0      
80     -144   
-32    80     
176    96     
-16    0      
48     -64    
208    -80    
144    80     
-112   -240   
-32    144    
-48    -432   
-16    -112   
144    256    
-48    112    
176    -112   
192    16     
80     -64    
0      -16    
176    -16    
48     48     
32     -32    
-16    -352   
80     -816   
-80    -128   
48     0      
-128   -80    
112    -112   
64     -80    
192    96     
48     -160   
160    0      
32     -144   
-32    -656   
-48    16     
-64    -80    
-112   -48    
-688   -64    
320    -16    
-192   32     
384    160    
96     192    
224    -80    
192    -64    
48     -160   
-224   -96    
-32    16     
128    16     
304    16     
32     48     
192    -176   
-192   -48    
-192   -32    
128    -48    
112    96     
160    16     
32     -16    
64     -208   
-64    -80    
112    -528   
144    -16    
80     32     
144    80     
176    16     
-32    0      
16     -32    
176    48     
-112   0      
176    -80    
-32    -208   
32     -112   
32     -112   
-32    -320   
224    32     
-16    -512   
144    -32    
64     64     
-352   48     
64     -176   
-64    48     
32     -32    
-16    -64    
-48    -32    
48     -32    
-592   -80    
-16    80     
32     -160   
32     0      
320    320    
-224   160    
256    -48    
-80    0      
256    96     
64     -144   
192    -48    
-32    64     
592    48     
-384   80     
112    -448   
-80    0      
288    160    
-96    32     
-144   -32    
-208   -80    
304    -48    
-304   96     
352    -96    
-256   -16    
464    48     
-80    -64    
-592   -352   
224    -160   
240    32     
0      -48    
-224   -256   
320    -176   
-1552  -304   
32     -128   
16     -32    
336    -32    
-160   112    
144    -128   
-48    -48    
176    -48    
16     -64    
-160   -16    
128    320    
-176   -32    
176    -352   
-448   -32    
80     0      
-672   112    
304    -128   
48     32     
112    80     
-96    96     
112    -288   
0      32     
-208   -720   
352    288    
-128   208    
288    -80    
144    128    
-144   80     
-208   -192   
-336   736    
256    -640   
-16    -432   
112    608    
240    -112   
-352   -416   
0      -976   
128    -352   
48     -240   
-144   128    
192    192    
-112   176    
-112   96     
-96    -128   
-96    -48    
96     -112   
-32    32     
-96    -128   
256    -48    
240    -352   
144    -80    
-1840  -272   
-96    -128   
-64    -64    
-912   -48    
-192   -16    
-160   0      
-208   -32    
144    -80    
-96    -32    
128    128    
-304   32     
-1392  -96    
112    32     
-192   80     
-192   160    
-16    16     
-416   32     
-112   0      
-560   -64    
-112   16     
-672   48     
80     16     
-96    -64    
-16    -80    
-96    -64    
0      -64    
176    16     
48     144    
0      -112   
-80    -32    
-48    -16    
-208   32     
-32    32     
-288   16     
-64    -80    
176    32     
-352   0      
-1648  -128   
-208   -48    
-416   -80    
48     80     
80     16     
288    112    
-256   64     
-304   32     
-144   -48    
-16    -112   
80     -32    
128    80     
80     16     
-96    -32    
96     112    
-592   -32    
-32    -48    
-48    -64    
256    -32    
112    -48    
192    0      
-48    -64    
-320   64     
64     -16    
-80    16     
160    -32    
-240   -112   
-80    16     
-240   -32    
192    -32    
-80    -112   
48     48     
-1344  -16    
16     16     
80     -224   
0      -48    
96     0      
-80    16     
-144   -80    
-240   0      
32     0      
-160   160    
144    240    
-432   -128   
176    112    
-112   -48    
32     16     
-848   -64    
48     -16    
-128   -256   
-64    0      
-64    32     
192    208    
-16    240    
128    48     
16     48     
112    -48    
-176   0      
96     112    
-256   16     
-160   -112   
144    -32    
-288   192    
256    208    
48     96     
192    224    
-48    128    
-144   96     
0      96     
0      64     
16     -112   
-48    64     
-16    -48    
-144   -272   
96     -112   
-256   -96    
176    288    
-208   -112   
-272   176    
-1232  32     
-80    96     
64     288    
-192   -32    
128    -528   
112    -1728  
-48    304    
16     432    
-160   -496   
224    80     
688    1024   
-448   960    
-320   -320   
48     -1072  
192    256    
-64    272    
224    -64    
-112   528    
-208   -528   
64     80     
0      320    
-144   -544   
-48    -240   
160    160    
240    80     
-80    -160   
-560   32     
-272   -240   
256    -448   
736    1232   
128    496    
256    -560   
-144   16     
-288   -656   
-336   -1264  
-48    864    
-288   288    
-224   -432   
368    592    
288    80     
336    -400   
176    -400   
496    240    
-496   496    
-144   -640   
80     368    
32     -48    
-208   -16    
-160   -128   
496    48     
-192   16     
112    -16    
-32    96     
-112   0      
-320   -208   
160    -80    
-336   -32    
-272   112    
208    -112   
128    144    
192    32     
0      -112   
-48    -16    
64     -80    
0      -80    
336    176    
-256   -32    
-32    -16    
0      208    
-16    0      
160    32     
-64    32     
32     160    
-64    64     
-16    -48    
176    144    
0      64     
-64    -32    
272    -48    
-208   -272   
64     -96    
80     224    
-96    128    
64     80     
16     80     
192    240    
-64    -64    
208    32     
-112   -160   
-128   -96    
96     208    
160    16     
304    176    
-208   16     
-48    -128   
-48    0      
192    -704   
224    -160   
128    -96    
-32    -80    
80     16     
144    80     
-96    -272   
96     -16    
80     176    
32     32     
64     -16    
112    64     
96     -80    
-176   -304   
64     -48    
192    16     
96     -16    
48     128    
112    160    
32     64     
128    80     
128    -256   
-64    -128   
64     32     
-112   32     
64     64     
80     0      
208    48     
-96    48     
-128   -16    
256    64     
-112   -16    
144    -208   
224    -592   
32     -48    
48     176    
0      -160   
144    48     
-208   -128   
128    112    
-80    32     
128    432    
-256   48     
144    0      
192    -32    
272    96     
32     16     
-128   16     
-16    32     
16     -48    
96     16     
208    -224   
192    128    
0      -448   
240    112    
288    64     
32     64     
-48    16     
-48    -32    
128    240    
-336   176    
-112   -272   
192    -64    
128    64     
128    -32    
160    -16    
80     -112   
32     64     
224    -224   
-176   0      
0      -144   
192    112    
64     -272   
144    144    
-96    0      
32     -48    
144    32     
0      64     
192    112    
-16    -64    
32     -32    
160    -80    
192    112    
80     -16    
64     96     
-48    -784   
80     16     
112    32     
48     32     
48     16     
80     32     
112    80     
32     -112   
192    -16    
48     -64    
-16    48     
48     16     
48     -16    
-48    -112   
128    64     
0      -256   
80     16     
96     96     
160    112    
-80    32     
32     -32    
0      16     
96     -112   
176    32     
224    48     
144    64     
32     80     
192    -32    
160    -80    
96     112    
128    96     
-128   144    
0      32     
-128   32     
-32    112    
352    208    
224    96     
-96    -224   
-64    -64    
192    -64    
64     48     
192    -192   
0      -160   
384    288    
144    384    
-240   -464   
-112   112    
-128   224    
-48    -1344  
-304   128    
1280   -1264  
-144   -1248  
848    128    
1104   32     
-624   -352   
-144   176    
-720   272    
272    32     
-64    -96    
144    -1328  
240    80     
-288   -592   
288    -400   
16     192    
80     -96    
-272   -336   
96     -64    
0      -592   
-272   -768   
192    -80    
48     -112   
-32    32     
16     272    
368    416    
160    -96    
192    80     
-16    -144   
16     -176   
-160   -144   
320    -48    
-96    16     
-80    -208   
32     0      
48     -304   
96     16     
240    -48    
112    32     
48     -1264  
0      -144   
112    -80    
-336   112    
192    48     
208    176    
112    -112   
80     0      
-224   32     
-112   64     
-1280  64     
160    -80    
160    -48    
128    -64    
96     -80    
64     -240   
224    160    
192    80     
96     64     
208    -160   
64     80     
-128   -32    
208    -64    
32     16     
-32    -80    
-272   -48    
224    -112   
32     -32    
160    -96    
224    112    
128    -192   
-48    16     
80     -512   
64     -32    
80     -64    
32     -64    
-16    -32    
32     -80    
-32    32     
336    176    
-592   160    
-32    -176   
-1040  112    
272    -48    
-80    -144   
96     -320   
-96    -64    
128    -832   
48     304    
-32    80     
256    -80    
-160   0      
144    -192   
-96    -32    
16     -32    
-688   -240   
96     -144   
-368   48     
32     -144   
400    128    
0      80     
192    80     
-16    -288   
64     -64    
-48    16     
80     -32    
48     -96    
240    32     
-80    16     
-224   -96    
48     16     
432    128    
-48    96     
384    -32    
-240   112    
96     -160   
-16    48     
192    -224   
0      96     
-384   0      
-96    -32    
-304   0      
0      -128   
-144   -160   
208    -16    
-208   -64    
368    96     
-656   272    
160    -160   
304    416    
352    112    
-128   48     
-32    -160   
80     -32    
-144   480    
432    272    
-448   144    
64     160    
96     160    
192    240    
16     32     
-96    -208   
-288   -160   
304    80     
-32    48     
-1264  -176   
112    64     
-144   -80    
-448   -96    
0      48     
-384   -368   
-160   -96    
-560   176    
-16    0      
144    -64    
0      160    
288    0      
-32    272    
-144   -336   
128    240    
-208   32     
-128   -64    
-64    -64    
-144   16     
48     80     
32     80     
-128   -64    
-800   0      
48     880    
-80    48     
-80    -288   
-576   0      
32     0      
-304   -128   
0      320    
-48    224    
112    64     
-48    -48    
-80    160    
-256   80     
-400   -176   
-96    816    
-320   -208   
-208   -256   
-32    256    
192    16     
-352   -288   
-80    0      
-240   128    
144    80     
-144   -192   
-144   48     
16     208    
-112   144    
-32    -64    
-208   -160   
-48    80     
416    432    
208    832    
-496   16     
240    -528   
-352   -656   
208    -144   
416    784    
96     368    
336    -160   
-544   -48    
-80    160    
-352   -48    
-32    -16    
32     16     
-64    48     
-16    -128   
-336   -400   
-816   -128   
112    64     
-480   16     
160    16     
-48    -128   
160    64     
-96    64     
32     80     
16     -16    
-64    -16    
32     -224   
96     -352   
-400   -80    
-32    32     
64     -288   
-128   -176   
80     208    
-304   48     
336    160    
-192   16     
0      -96    
208    16     
208    224    
-192   -80    
-32    -64    
-16    48     
-128   -16    
32     -16    
-64    -80    
-32    96     
64     -16    
176    16     
-304   -16    
32     32     
272    144    
-256   64     
-112   -112   
304    0      
80     32     
-160   -96    
336    144    
-384   128    
-304   -128   
-16    -16    
256    16     
-448   -208   
64     -16    
-720   -16    
-48    128    
80     128    
80     112    
144    128    
0      64     
-192   0      
-96    -32    
0      0      
-32    -32    
-96    128    
0      -16    
144    0      
-224   -48    
48     32     
-128   -16    
-16    -16    
208    16     
32     80     
-64    16     
-112   48     
64     0      
32     -16    
-16    96     
-48    0      
144    -32    
-112   48     
144    64     
-176   -16    
144    96     
-32    0      
64     0      
-16    32     
112    64     
-112   -64    
160    32     
-48    32     
208    -288   
-224   -560   
176    128    
224    48     
-176   48     
176    -112   
-112   -16    
160    112    
112    64     
-96    -48    
64     32     
-144   80     
-48    32     
16     16     
-128   -208   
128    -16    
32     -16    
-80    64     
48     32     
-32    0      
80     -64    
-240   -16    
48     112    
160    0      
144    16     
16     -96    
32     -64    
368    96     
-16    32     
176    -16    
-160   -16    
144    80     
0      48     
0      64     
-32    -64    
144    112    
-144   -64    
-160   -48    
-128   48     
-48    -128   
96     -160   
128    0      
192    48     
-128   -64    
48     -48    
-176   0      
80     -48    
-16    -16    
96     32     
-96    -16    
208    0      
80     -128   
48     64     
112    80     
-112   64     
32     16     
-64    0      
48     48     
16     32     
16     48     
-32    -96    
80     -48    
48     48     
-16    48     
0      80     
16     32     
32     16     
96     -592   
-32    48     
48     16     
80     -48    
48     224    
0      112    
-112   -448   
0      -96    
-128   -80    
-160   80     
80     64     
32     -160   
160    304    
-144   -432   
176    -416   
96     -1072  
80     160    
80     368    
-64    64     
-48    -16    
176    16     
-80    -48    
320    272    
-864   -1744  
96     1024   
-208   80     
224    -256   
96     832    
224    -176   
-112   -96    
-496   16     
-16    48     
-208   -640   
288    -128   
-400   320    
400    256    
-304   -128   
320    -768   
-320   -160   
944    736    
80     416    
-192   320    
-32    0      
-64    -80    
-112   -16    
32     -128   
336    144    
-256   -528   
464    112    
-192   80     
240    -48    
-176   48     
0      128    
-112   272    
352    0      
-16    -64    
256    32     
256    496    
-368   80     
224    -112   
-64    -160   
176    176    
-144   -496   
128    -32    
-32    -864   
-48    16     
48     -64    
208    0      
336    368    
-224   240    
64     144    
-224   48     
176    64     
176    -112   
128    0      
-16    -240   
0      160    
96     -64    
160    32     
176    48     
-48    -80    
80     0      
-64    -144   
0      80     
32     64     
-32    -16    
16     -80    
64     -48    
192    -96    
192    64     
224    96     
48     64     
48     -112   
-32    -48    
128    16     
80     96     
-16    0      
80     80     
-32    352    
192    -32    
272    -128   
128    -368   
-16    32     
96     -80    
16     32     
64     -64    
16     0      
-48    -176   
16     -16    
32     -1024  
256    96     
0      16     
96     0      
0      64     
-48    -160   
160    112    
160    -160   
320    176    
-144   160    
64     -16    
48     -64    
128    -16    
16     -16    
80     -16    
64     -96    
272    -64    
-64    240    
176    -416   
-48    16     
-128   176    
-224   16     
64     -160   
0      -448   
192    -64    
224    -48    
80     0      
0      -112   
128    -64    
-304   -64    
-176   -208   
0      -400   
320    48     
160    112    
112    -432   
-560   -160   
-96    -144   
112    80     
224    -32    
-80    112    
-112   -432   
176    -80    
112    112    
192    16     
160    512    
224    336    
-48    -64    
-320   224    
-32    -96    
144    -144   
-448   -800   
272    480    
224    672    
-176   -272   
128    0      
272    -80    
-80    160    
-176   -80    
272    -224   
0      -432   
208    224    
16     -176   
32     -208   
32     160    
48     -144   
-656   64     
64     -352   
48     480    
128    -224   
32     -128   
128    96     
-64    -192   
-64    -240   
304    112    
48     96     
176    -48    
368    176    
-192   -96    
-64    -224   
96     0      
-528   -80    
240    32     
-944   112    
48     -80    
96     -32    
176    -144   
-224   0      
160    -304   
-48    -16    
-32    -224   
-80    208    
64     -160   
160    -144   
0      256    
272    -112   
-192   -144   
208    -48    
-416   96     
-48    -16    
-16    48     
224    -80    
160    80     
-48    -224   
320    320    
-288   -80    
64     -160   
144    144    
160    144    
256    -80    
208    128    
-224   64     
48     96     
-208   -160   
240    -224   
-864   -48    
240    -32    
-208   32     
-64    -272   
384    64     
272    -144   
-48    32     
-352   -288   
736    -144   
-32    48     
-32    48     
48     -32    
176    -320   
-16    -112   
-160   320    
-688   32     
-112   -144   
368    208    
-96    -272   
-128   32     
128    -240   
80     32     
-272   112    
80     48     
128    -64    
80     -64    
-192   16     
-16    -80    
-48    80     
-80    -48    
-48    80     
0      -144   
96     16     
160    -80    
80     -32    
16     -48    
48     112    
-272   -112   
32     -176   
-112   32     
208    32     
-64    16     
-32    -64    
-64    16     
16     176    
384    224    
-208   -192   
-16    -48    
-464   -80    
48     0      
-176   16     
-320   -48    
-240   16     
-368   -64    
80     -48    
64     64     
48     32     
160    -112   
-224   -96    
-496   -16    
48     96     
-400   -48    
-64    -16    
32     -96    
-128   96     
96     48     
64     -48    
-112   -112   
-160   160    
-64    112    
-272   32     
-80    -96    
176    -96    
-64    16     
-192   48     
48     256    
-48    96     
48     -160   
-288   -432   
-80    -32    
-48    96     
-48    -96    
32     32     
-368   -16    
80     144    
-48    -64    
-80    112    
-1376  16     
-160   32     
64     -192   
144    32     
-80    -96    
-16    -48    
32     -144   
-16    -96    
96     80     
-176   96     
-128   16     
-176   -144   
-96    -48    
-48    112    
-112   48     
64     48     
-32    -160   
-64    -96    
-96    64     
-128   -64    
240    16     
112    256    
240    560    
-64    224    
-256   -32    
-208   -32    
-48    128    
-208   192    
352    576    
-144   -64    
-288   -512   
176    64     
-976   336    
224    176    
32     80     
16     48     
112    32     
48     0      
32     -64    
-64    32     
-160   -96    
96     -336   
112    -96    
-144   64     
-64    48     
-352   -144   
176    176    
-896   80     
96     112    
144    80     
16     32     
16     64     
-80    16     
-64    16     
-80    -32    
16     32     
16     128    
112    -96    
-320   -224   
-304   -192   
-336   -112   
96     64     
-480   32     
96     -144   
-112   160    
-128   560    
352    112    
-48    -144   
-48    -16    
48     -112   
96     80     
-160   144    
192    -80    
-112   64     
240    336    
-160   -272   
80     -48    
-128   -16    
80     -80    
64     96     
128    48     
64     -96    
32     176    
144    -32    
-128   64     
-80    176    
-80    32     
32     -160   
-48    48     
288    432    
-448   -576   
128    384    
-48    -576   
48     224    
80     -208   
112    -16    
-48    880    
32     192    
288    240    
-64    -272   
-352   -16    
-192   48     
80     -528   
-64    16     
400    -96    
-464   16     
192    -128   
-224   64     
-32    -64    
80     -144   
-208   224    
160    -128   
-16    112    
-160   0      
-128   48     
-208   -224   
224    -176   
576    192    
0      96     
400    -48    
80     -176   
-176   0      
176    -64    
192    0      
-64    -128   
288    -256   
-80    -176   
400    -304   
240    -144   
240    192    
-48    -48    
16     16     
-16    0      
-112   80     
224    240    
-176   96     
-32    -16    
208    -208   
-256   0      
-48    0      
-112   -192   
224    240    
-96    208    
192    -144   
-16    -48    
16     48     
-16    -64    
-128   -16    
144    -176   
80     -144   
-80    -96    
-160   96     
240    0      
-192   96     
64     96     
-48    208    
544    352    
-336   80     
-80    128    
-32    80     
240    -256   
80     32     
192    112    
48     -16    
-112   32     
112    320    
272    320    
96     80     
240    -16    
224    32     
80     192    
64     80     
64     -48    
176    64     
144    16     
-112   48     
80     -32    
144    112    
-144   -336   
128    0      
144    32     
32     112    
96     64     
-16    0      
16     224    
16     112    
48     -32    
320    224    
48     272    
-256   -256   
352    -192   
-64    48     
48     112    
-64    -16    
336    -128   
-96    128    
192    -1024  
-160   128    
-80    16     
0      -32    
240    -32    
144    64     
32     16     
144    96     
-64    -80    
48     48     
-96    -64    
48     32     
208    0      
0      32     
112    80     
-32    -1152  
-32    -304   
-32    -112   
-16    32     
96     -96    
32     80     
32     -80    
304    240    
112    160    
320    592    
368    944    
-144   288    
-160   224    
48     -352   
-96    -352   
32     -624   
192    368    
224    -32    
-160   -512   
256    864    
-288   -16    
-144   -480   
112    240    
128    -96    
0      112    
-32    64     
-96    -16    
96     96     
176    -160   
112    96     
96     272    
48     -272   
64     -752   
-224   48     
96     -272   
160    128    
-48    -160   
272    -480   
176    64     
160    400    
16     80     
-64    -112   
-48    16     
64     32     
128    16     
112    -64    
64     -240   
-320   -208   
-16    224    
64     -64    
-64    -16    
16     -112   
128    -32    
128    32     
-80    -64    
144    -64    
80     32     
32     64     
192    -176   
0      0      
112    -400   
96     96     
128    80     
-64    96     
32     -144   
160    32     
-16    32     
64     96     
-48    0      
32     -32    
176    0      
-32    -32    
0      48     
96     -80    
32     48     
32     -208   
112    16     
64     32     
-16    -144   
112    -128   
64     48     
64     -64    
-32    112    
64     0      
-144   -80    
176    -48    
48     -96    
224    48     
-32    -80    
64     32     
192    -16    
192    64     
112    32     
-96    64     
-144   -16    
-80    -864   
0      32     
160    -32    
32     -608   
80     -224   
80     -160   
160    -48    
448    -272   
-64    -80    
16     16     
224    144    
-464   48     
224    -240   
128    -672   
-320   -16    
224    -304   
-496   -32    
224    -176   
304    -160   
-240   -240   
0      128    
-160   -64    
16     0      
-80    -128   
160    -128   
-48    112    
-80    48     
-80    -80    
160    -48    
-128   32     
-16    -96    
-32    32     
-288   -96    
48     -48    
-96    0      
64     16     
192    48     
144    -96    
-192   -32    
160    -800   
-48    -64    
176    32     
272    16     
-144   -32    
-112   0      
288    64     
48     -48    
16     48     
-48    16     
-64    -208   
160    -96    
32     -48    
160    -96    
-48    -176   
-16    -128   
112    32     
96     -768   
-544   32     
-80    -144   
96     32     
224    -48    
96     -32    
-96    -16    
64     -48    
-64    64     
-16    -128   
-1504  -80    
272    -16    
-112   -80    
-16    -240   
64     0      
128    -80    
-160   -112   
192    144    
160    192    
176    -48    
208    -96    
112    64     
-64    -80    
-144   96     
-16    -48    
-272   -144   
304    -16    
0      32     
128    -256   
-80    0      
16     -128   
96     96     
96     -112   
192    -80    
-208   -144   
160    -144   
-192   0      
160    112    
-224   -496   
96     144    
-160   -48    
160    -144   
-1696  384    
-112   -608   
-48    -240   
208    -32    
160    16     
128    -608   
-32    -176   
-128   128    
-80    -144   
-48    64     
48     48     
-48    -48    
256    112    
-112   -192   
336    64     
-128   512    
-256   864    
128    784    
112    -688   
272    96     
192    -64    
112    -32    
-32    208    
128    -768   
-240   112    
48     80     
-80    16     
0      80     
-48    -608   
128    896    
-96    96     
-16    -320   
-80    -384   
64     176    
-96    16     
-16    -160   
320    -16    
-112   128    
112    32     
-112   -144   
112    -16    
-336   64     
224    288    
-224   -32    
-16    16     
-288   -112   
-1568  0      
64     192    
-816   -272   
48     -112   
96     -128   
192    464    
-304   368    
-800   -272   
-192   304    
48     -208   
96     400    
-112   -400   
-128   -240   
-448   224    
224    96     
-112   -112   
80     -32    
-368   64     
-352   -320   
128    -96    
-240   64     
-144   112    
-32    144    
64     -16    
-1440  -144   
-64    -176   
0      80     
-16    -160   
-160   -352   
144    144    
48     -32    
96     64     
-32    128    
-208   -80    
-192   112    
-240   -64    
-112   -64    
-256   -256   
144    -112   
-256   -96    
-160   -144   
-784   -208   
-112   -256   
-80    -224   
-48    -384   
80     -48    
256    -336   
-160   -528   
240    -400   
-16    96     
-16    112    
-112   -48    
-80    256    
-80    -256   
-240   160    
112    -32    
-528   16     
368    16     
-112   64     
-288   -64    
-400   -272   
-208   0      
112    -160   
112    0      
336    80     
-448   80     
-304   -576   
-272   -448   
352    48     
64     144    
272    48     
-112   160    
96     160    
-48    64     
176    128    
-80    -208   
-272   32     
112    0      
-240   -96    
16     -16    
-192   0      
-160   112    
48     -96    
112    48     
192    144    
-176   0      
-400   -64    
16     160    
-2240  0      
80     112    
-16    -64    
-32    112    
32     48     
80     -48    
-16    160    
-208   80     
64     -272   
112    0      
-80    80     
-224   -48    
128    -16    
-48    -32    
-64    176    
-448   16     
128    0      
272    16     
-672   -464   
-80    -352   
-400   -64    
240    -160   
128    144    
32     0      
112    128    
-64    320    
48     240    
-16    0      
-208   -32    
288    208    
-352   176    
112    -112   
128    -96    
-32    80     
48     32     
48     32     
208    -208   
-272   -80    
-80    -48    
-272   304    
-48    128    
-320   -368   
320    -448   
-16    -128   
160    208    
-304   -48    
0      64     
-416   -96    
-16    16     
80     -96    
48     -32    
288    -32    
80     64     
64     -16    
-80    -128   
112    0      
32     144    
-128   352    
-272   -48    
144    -96    
256    -16    
-128   112    
-16    0      
96     -96    
112    112    
224    208    
-16    64     
-80    -176   
48     -80    
0      -80    
160    64     
-160   -432   
-48    256    
-80    -160   
-128   -224   
256    352    
-48    -224   
128    96     
48     -256   
96     64     
-128   -400   
-64    96     
-240   -112   
112    -48    
32     80     
80     16     
-208   -16    
32     -160   
-128   0      
0      -224   
272    528    
0      144    
-192   -96    
112    128    
64     112    
-144   -80    
48     0      
-16    32     
112    32     
64     16     
80     112    
-96    96     
-16    64     
32     -32    
16     32     
64     -96    
192    -64    
208    -16    
-32    80     
-64    96     
0      112    
-224   -48    
-32    -16    
208    64     
-32    -16    
160    64     
-48    0      
208    144    
16     -16    
-320   -176   
176    -144   
32     112    
160    48     
80     32     
256    64     
-80    16     
-32    0      
-192   -128   
96     -48    
-48    96     
176    64     
-96    -32    
-32    -176   
112    80     
-64    32     
176    64     
32     32     
96     64     
144    80     
0      0      
208    80     
-128   0      
-32    0      
144    48     
112    64     
144    0      
-128   0      
96     -144   
-64    48     
144    0      
0      48     
240    96     
-128   32     
-32    16     
64     32     
432    400    
-400   272    
352    -16    
-48    96     
224    0      
176    0      
-80    -256   
-144   -16    
-96    256    
48     -656   
64     192    
-208   -16    
608    112    
-144   -48    
368    112    
-352   -32    
-80    -96    
-112   -128   
128    160    
-224   -96    
464    96     
32     192    
-160   -128   
32     -112   
-144   -368   
736    416    
-432   176    
-48    -176   
448    48     
160    16     
128    -32    
-160   0      
128    -32    
0      96     
80     48     
80     112    
-320   128    
64     -224   
192    -128   
320    -224   
-304   240    
144    64     
224    -80    
-176   -128   
144    64     
-192   -16    
176    16     
-80    48     
96     96     
112    32     
128    64     
128    -32    
208    -256   
-64    16     
-112   -32    
-48    -48    
64     -96    
144    144    
48     80     
64     64     
96     64     
128    224    
128    80     
-16    -160   
-160   -64    
224    32     
32     0      
-64    -48    
144    -16    
-32    -80    
128    -64    
-192   -368   
240    80     
128    128    
-80    -368   
96     576    
192    224    
-176   -176   
192    -336   
-32    -16    
320    192    
-208   -112   
-48    -16    
224    0      
112    -224   
240    160    
80     -208   
16     48     
112    0      
0      128    
288    240    
-256   -720   
128    -48    
128    112    
384    224    
-128   256    
-80    -272   
352    -112   
48     144    
-16    -144   
-160   -16    
96     -704   
32     336    
224    112    
32     -448   
-48    144    
128    -48    
688    432    
-288   -416   
0      -128   
256    256    
128    -992   
224    128    
-32    -16    
80     -560   
-16    32     
48     80     
96     -320   
16     128    
-112   -320   
-64    0      
32     -48    
80     -64    
16     112    
-16    -208   
64     528    
-80    -160   
32     0      
48     -912   
80     -48    
176    176    
-112   192    
160    -32    
160    -160   
0      -192   
80     -240   
-128   576    
256    144    
336    16     
-144   16     
-96    -128   
48     -96    
208    16     
352    -320   
-80    -112   
-16    -96    
0      -112   
96     -176   
0      -48    
144    -80    
160    -64    
-352   80     
-48    -48    
-1392  -96    
208    272    
128    128    
208    16     
64     -128   
0      -192   
80     80     
176    -528   
48     96     
128    48     
32     176    
96     192    
64     -16    
-128   -96    
160    -96    
16     -80    
64     208    
160    0      
96     -48    
64     224    
176    -16    
-96    -64    
96     -416   
16     32     
144    -64    
32     16     
-256   -336   
64     -208   
-32    144    
96     -128   
-160   -64    
96     -240   
-1376  -176   
192    -128   
-256   48     
144    48     
112    80     
48     -368   
144    0      
32     192    
0      112    
-224   112    
32     -16    
128    -112   
16     -144   
-240   -272   
48     -192   
-48    -576   
-272   -464   
128    -64    
-128   128    
-144   112    
64     -208   
176    -272   
96     144    
144    96     
32     -64    
-16    -208   
-400   -352   
48     -48    
-432   112    
240    224    
448    32     
-32    -144   
128    -240   
32     -240   
112    -96    
240    -272   
160    96     
-32    0      
176    112    
-32    -64    
80     -80    
-256   16     
-128   -80    
400    240    
-160   304    
-416   -80    
720    -32    
-544   336    
-64    -112   
-32    336    
704    16     
400    -64    
-128   16     
-720   64     
-336   -16    
80     80     
-384   -48    
192    48     
-304   16     
-192   -208   
-32    0      
-144   -48    
144    176    
-1152  -144   
288    64     
-976   -160   
-848   -16    
16     -240   
-784   48     
256    -48    
-528   -176   
144    -192   
64     -144   
-64    128    
208    0      
-128   -64    
192    -80    
128    320    
-320   0      
32     144    
0      -112   
16     -16    
-48    16     
48     48     
48     48     
-528   96     
-32    64     
-368   -32    
-224   -64    
96     -64    
-304   240    
-112   112    
-80    272    
-240   -64    
96     -96    
-32    -352   
240    -160   
96     -48    
0      -112   
-80    80     
-416   -640   
-208   -272   
48     -208   
-64    64     
-80    -80    
144    80     
-400   0      
-32    240    
-144   -144   
-128   -256   
256    32     
-224   -48    
-160   64     
208    -96    
-144   288    
-144   -336   
224    448    
-384   -640   
-64    352    
-736   -48    
288    256    
-144   32     
112    80     
128    -208   
64     384    
-16    240    
-176   -128   
-224   -192   
-144   -32    
-32    -96    
80     160    
-16    64     
-96    -144   
-48    -16    
-672   -32    
48     48     
-64    -48    
96     80     
112    16     
496    672    
-352   576    
-16    176    
208    -80    
0      -112   
96     0      
-144   -160   
-64    112    
-128   192    
-256   -176   
-160   -256   
144    112    
-480   32     
112    96     
-48    -32    
0      -32    
-32    32     
-240   32     
-32    0      
-16    0      
80     16     
-96    16     
64     16     
-80    -16    
112    48     
-144   -32    
48     48     
-1488  -80    
-432   -64    
-128   16     
32     0      
-16    16     
48     176    
-192   -16    
-16    -64    
176    64     
128    144    
-64    176    
-240   64     
208    -64    
-128   -176   
96     48     
-112   64     
-128   48     
48     0      
-96    -64    
32     0      
-208   0      
-160   -16    
64     48     
80     80     
16     -64    
64     32     
-112   -16    
-48    48     
0      16     
0      48     
48     80     
112    32     
96     16     
96     -32    
192    80     
-96    16     
32     32     
16     32     
-64    0      
-160   0      
96     32     
-208   -16    
48     16     
112    192    
-224   32     
80     -16    
-96    32     
64     16     
-176   -64    
208    -208   
128    80     
176    64     
-176   32     
192    64     
-224   -112   
112    160    
-144   176    
-96    -16    
-32    -48    
-128   0      
224    96     
32     -32    
-48    80     
0      48     
-128   -144   
320    32     
-32    -32    
224    80     
144    256    
-304   128    
-48    96     
288    112    
-512   32     
624    240    
-256   48     
-224   -176   
224    -48    
128    240    
0      176    
-352   -192   
-16    -16    
144    144    
-464   -176   
256    64     
48     -16    
-192   0      
288    112    
-304   -32    
-208   -176   
48     64     
0      96     
16     -80    
368    256    
-192   256    
0      -128   
16     16     
112    -32    
-208   -144   
112    288    
-128   -112   
0      0      
16     16     
-96    -544   
-96    144    
16     -80    
96     -48    
96     208    
112    64     
176    -96    
-64    -16    
-96    -128   
352    480    
-336   -64    
256    32     
-192   -32    
96     112    
48     -32    
208    -208   
80     0      
0      240    
0      -80    
-32    -384   
-224   336    
208    -368   
96     416    
784    688    
-240   864    
-288   -64    
-48    -368   
96     80     
176    -208   
160    16     
48     -608   
-16    384    
32     32     
288    304    
-16    240    
-80    352    
192    160    
272    -256   
-32    -128   
16     -16    
-32    -144   
-96    -96    
-48    -32    
224    128    
144    112    
0      -192   
-80    0      
112    -800   
192    48     
208    64     
128    16     
-128   32     
176    -112   
16     -112   
160    -128   
272    112    
-112   480    
0      128    
80     -112   
176    128    
16     64     
176    80     
160    -80    
160    48     
64     -32    
0      0      
16     -144   
16     -128   
160    -144   
-16    48     
-16    -32    
-32    96     
-272   80     
64     -96    
208    80     
0      -80    
16     224    
80     -112   
48     0      
-176   -496   
32     176    
16     32     
208    0      
96     -16    
208    32     
-160   -16    
64     -128   
192    -112   
64     -48    
48     160    
-48    -240   
64     32     
96     -304   
16     32     
160    -32    
192    16     
32     160    
144    16     
-96    -64    
176    64     
-16    -80    
16     -320   
144    -48    
112    128    
144    208    
-64    -240   
64     48     
-32    -176   
-160   -32    
64     -416   
176    112    
48     48     
160    80     
-144   64     
64     64     
96     256    
96     64     
-16    112    
80     -208   
16     128    
128    176    
48     112    
128    -144   
0      -96    
80     -1696  
32     -16    
0      96     
128    -80    
16     0      
160    -464   
128    -288   
144    -48    
16     -240   
96     -128   
208    64     
-80    160    
112    64     
128    -256   
-32    -208   
96     -176   
128    -496   
-176   80     
64     0      
32     -48    
-80    -112   
112    -176   
528    448    
-208   -304   
-48    80     
112    -336   
400    -448   
16     -48    
80     -16    
128    48     
-16    -144   
80     -48    
32     -144   
-192   -320   
-48    -128   
-1312  -144   
-48    16     
192    -112   
240    -176   
208    -48    
176    16     
-144   304    
416    -672   
-352   -208   
160    528    
160    128    
384    -16    
672    384    
-288   384    
64     160    
128    -80    
-192   -352   
-16    -144   
-160   544    
272    256    
240    464    
32     16     
0      -304   
-208   -144   
-32    -224   
16     -224   
256    -128   
-256   16     
48     -160   
48     208    
144    240    
304    256    
-544   112    
-16    -32    
32     -176   
112    -96    
160    -32    
80     -480   
208    144    
-176   -1248  
48     -336   
-32    -96    
112    624    
64     -208   
64     -304   
-400   160    
96     -64    
-240   -32    
-112   -304   
544    80     
208    48     
-224   -16    
-64    -320   
160    16     
-112   -464   
-48    -208   
272    608    
112    -64    
-128   48     
16     -32    
-48    -496   
160    368    
-112   -48    
0      -448   
-608   320    
0      144    
-32    -48    
-336   -448   
272    128    
16     -112   
0      96     
240    16     
-112   -240   
-32    80     
48     -32    
160    192    
-48    -96    
-64    -400   
176    224    
-16    224    
336    32     
-288   32     
0      -256   
16     32     
96     -240   
-32    80     
16     48     
320    -288   
-384   -208   
128    176    
16     -272   
-80    -192   
-240   48     
144    80     
-272   80     
64     0      
-64    32     
224    -48    
176    176    
80     -336   
64     32     
-320   -16    
96     16     
64     144    
-80    32     
-368   -112   
208    -48    
-160   -64    
48     32     
-368   32     
48     32     
-336   -480   
208    -320   
-32    352    
-112   32     
-48    -96    
-240   48     
224    -336   
16     0      
368    -112   
16     224    
-192   0      
32     -160   
128    48     
-80    160    
-1088  -240   
80     -160   
-256   -32    
144    96     
-80    -96    
-224   -64    
-96    -96    
-288   112    
16     16     
-1744  -16    
-320   -16    
-64    -64    
-224   -64    
144    0      
-320   0      
-1088  -48    
0      0      
-64    -96    
32     32     
16     80     
-128   -32    
-160   0      
-80    96     
112    48     
80     32     
-112   0      
-1600  -32    
80     48     
-272   -48    
64     64     
-240   -48    
80     48     
-144   -32    
32     80     
-48    16     
-64    32     
-128   0      
64     32     
112    32     
-224   -16    
48     0      
-688   0      
-112   32     
48     0      
64     32     
32     -80    
192    128    
-256   -96    
16     -48    
32     16     
-64    0      
112    32     
-112   -32    
-64    -32    
-176   0      
-288   -144   
-368   32     
32     32     
-1984  -48    
-32    0      
-176   -112   
-64    -320   
-96    -64    
-16    64     
96     0      
-176   -128   
-64    -64    
-128   48     
80     32     
48     -112   
96     -16    
-16    0      
224    32     
-320   -112   
-80    -32    
480    144    
304    128    
48     -112   
112    -32    
-64    176    
-240   64     
48     64     
-64    16     
-192   -16    
48     272    
128    160    
-256   -384   
-80    -240   
-496   -48    
480    320    
-256   192    
-384   -656   
352    -80    
-256   352    
-240   -112   
176    -32    
-224   -32    
-32    16     
176    112    
64     -48    
112    -16    
-144   48     
96     -16    
-96    -32    
-192   -80    
-1104  160    
-80    -272   
96     464    
-112   -1152  
112    1040   
400    432    
-400   -32    
-208   -16    
272    -656   
-64    640    
224    560    
-256   96     
128    -544   
-112   48     
176    96     
-144   368    
224    128    
-64    96     
-240   112    
-48    -80    
256    32     
0      -128   
-112   -16    
16     0      
-160   48     
-112   16     
-32    176    
336    240    
-144   -48    
96     192    
0      -48    
336    144    
-240   128    
-80    -16    
64     16     
208    208    
16     64     
-272   -32    
-64    -112   
-64    -128   
112    0      
-128   16     
112    64     
-192   -16    
176    128    
-144   192    
-48    96     
-96    -48    
-144   96     
112    -128   
288    -32    
80     -32    
-48    64     
48     64     
-32    48     
112    48     
0      64     
272    192    
-80    -80    
80     16     
-32    -16    
-80    -48    
64     -16    
112    160    
64     96     
208    32     
0      96     
-384   64     
304    -48    
-240   16     
128    -80    
64     16     
80     128    
0      -48    
16     112    
144    96     
-160   96     
48     -48    
336    48     
-144   160    
-336   -368   
176    -304   
-176   160    
-176   64     
-64    -32    
80     -80    
176    -112   
224    -64    
128    288    
-128   112    
-48    96     
-96    -160   
368    80     
-80    208    
128    -16    
0      -176   
144    144    
96     144    
-32    112    
-48    16     
64     -64    
0      64     
32     -192   
-16    -16    
-32    -160   
-64    -144   
352    -64    
80     96     
0      144    
-64    -96    
96     16     
160    112    
-64    16     
160    -144   
112    -64    
80     -64    
176    144    
32     -704   
0      -32    
144    176    
64     80     
-160   16     
0      -16    
-16    -80    
80     -176   
112    -112   
32     -32    
192    64     
48     400    
-256   -80    
224    -672   
48     -112   
16     -272   
-32    80     
128    -96    
16     0      
-128   -64    
144    -160   
64     48     
-80    208    
16     304    
64     128    
-96    32     
64     32     
-32    -304   
-48    -656   
448    416    
-64    160    
240    -336   
208    -16    
208    176    
48     -208   
-208   368    
-144   -112   
16     -352   
128    -192   
192    96     
0      48     
48     384    
-304   -112   
32     96     
-96    -160   
80     208    
304    320    
-416   80     
528    -192   
192    -320   
-64    304    
240    -208   
-224   -144   
0      -16    
-224   64     
32     304    
-16    -48    
-336   -352   
640    784    
160    384    
-208   -16    
-80    16     
288    -416   
304    352    
-256   -496   
16     -48    
-192   64     
-736   -256   
416    752    
336    -320   
-848   -80    
64     32     
-48    -64    
64     -48    
336    48     
192    -64    
80     112    
32     192    
160    -176   
-96    -144   
16     32     
0      -160   
384    336    
-160   -128   
224    -176   
-48    128    
112    -64    
-240   -144   
192    176    
-16    144    
208    -64    
64     112    
-128   32     
96     16     
-16    -208   
0      32     
128    -16    
80     -112   
-64    -64    
256    176    
-32    64     
-16    -112   
-112   0      
112    -128   
160    -96    
48     -48    
48     -80    
160    -96    
-160   -16    
240    144    
-160   192    
144    16     
160    -720   
-96    64     
128    -624   
-144   -928   
192    -16    
-16    -1088  
16     -80    
-48    208    
208    64     
48     -80    
48     -64    
32     -32    
16     32     
96     16     
128    96     
-64    -96    
80     16     
-1104  -96    
112    -224   
80     -80    
-64    -608   
208    -320   
16     -240   
80     -96    
64     -80    
-32    -48    
-64    -304   
32     256    
80     64     
288    32     
64     -288   
0      -48    
-1184  -16    
112    -48    
0      -64    
16     -64    
-64    -160   
192    -160   
128    -80    
0      -1152  
128    16     
0      -256   
144    96     
160    -128   
160    48     
-48    32     
48     -64    
-96    -32    
144    0      
-48    -32    
32     48     
304    384    
144    -160   
144    -144   
-48    -544   
-144   32     
176    -80    
-160   96     
-16    -48    
-48    -128   
-160   -240   
352    -64    
0      0      
144    -64    
-320   -32    
-32    -96    
16     -48    
176    -144   
160    48     
128    -48    
-32    -208   
80     -128   
128    16     
160    -32    
-112   80     
-224   -16    
-48    -96    
-288   -160   
96     -64    
-1392  32     
112    -80    
128    16     
80     -48    
-16    0      
128    -112   
-64    16     
32     -1056  
128    -96    
272    48     
0      -16    
-64    128    
-96    -64    
-16    32     
-32    -128   
-224   16     
192    -80    
-320   -16    
224    -32    
-80    80     
112    -160   
0      80     
-64    -816   
64     48     
112    16     
368    0      
-288   -48    
112    0      
-208   -48    
32     -48    
-288   32     
64     -128   
-176   -112   
128    -96    
144    -16    
32     -144   
96     80     
112    -272   
-32    32     
-112   32     
192    80     
-256   16     
176    -32    
-80    32     
224    48     
-144   16     
48     -64    
-224   -192   
-16    -224   
16     48     
112    -208   
16     16     
16     -48    
112    -96    
208    32     
-48    -64    
144    -64    
-128   128    
-32    16     
192    -320   
64     -384   
208    -64    
-240   128    
64     -336   
208    -288   
48     -48    
192    816    
-16    -576   
-2416  -752   
-160   432    
-208   -352   
-48    -384   
160    64     
-208   96     
272    48     
-192   -160   
320    16     
-176   -48    
-64    384    
256    16     
-304   -80    
-48    -496   
-320   848    
-96    448    
-368   -304   
-528   528    
48     -720   
-1296  224    
-16    -144   
160    -288   
-96    144    
-608   -64    
496    832    
-544   320    
48     400    
-240   -128   
384    288    
-240   -432   
-112   -224   
-80    144    
-800   -96    
224    32     
-272   -128   
16     64     
-1136  -48    
-48    -32    
-96    -192   
32     304    
-208   128    
-32    144    
64     -224   
144    128    
0      64     
-80    -96    
-48    -80    
-192   112    
-16    16     
-32    -112   
-16    -112   
-400   -112   
-272   80     
-96    -144   
80     -32    
-32    -48    
-32    176    
48     -128   
128    -48    
-272   -240   
16     32     
-32    -48    
-32    -64    
-48    64     
-128   -16    
-48    48     
-144   -48    
144    -16    
-256   -80    
176    64     
-16    -32    
96     -16    
16     -96    
-64    -80    
-128   96     
-176   -32    
-16    0      
160    64     
80     64     
-112   32     
-64    -16    
-368   -112   
128    -80    
-224   -32    
16     96     
-192   -80    
-16    -64    
32     0      
-144   -16    
128    -16    
32     32     
240    32     
-336   -128   
176    -48    
-192   0      
80     128    
-288   -32    
48     96     
-288   -112   
80     0      
-80    -208   
176    32     
-128   64     
-16    -16    
176    16     
112    48     
-96    0      
0      -224   
32     -128   
-32    -16    
16     -16    
112    400    
0      208    
-448   -16    
208    48     
96     -80    
-80    -160   
256    -96    
64     80     
0      240    
-48    288    
-144   -48    
-208   -272   
256    -96    
16     -32    
80     -32    
-208   -48    
208    160    
-528   -160   
-176   -256   
208    144    
-32    160    
-112   208    
-16    112    
-80    112    
-112   32     
112    0      
240    240    
-16    304    
-128   -480   
-80    128    
48     -80    
-272   -832   
-112   192    
64     80     
-272   144    
0      -176   
32     0      
304    432    
32     80     
160    -128   
96     304    
-192   176    
-144   -672   
-176   176    
-80    -160   
-144   0      
112    448    
128    -224   
-32    160    
0      80     
128    -64    
-64    304    
-32    -400   
-80    112    
-48    80     
64     16     
48     128    
-208   -400   
176    96     
0      192    
0      -80    
192    192    
-48    80     
-16    80     
-64    -48    
-80    -192   
-128   -144   
48     208    
-16    288    
-16    16     
-64    -80    
-16    -48    
208    0      
-48    48     
64     96     
-256   -48    
-128   -64    
-96    192    
128    304    
144    16     
-672   -1280  
-176   -272   
80     256    
16     -32    
176    -336   
256    -32    
-96    96     
32     144    
-192   48     
-48    96     
-64    -64    
-256   -224   
0      16     
80     -32    
288    48     
144    160    
80     80     
80     -16    
384    288    
-80    224    
16     -48    
-336   -288   
336    0      
240    112    
-208   112    
752    272    
-576   160    
160    -112   
-368   32     
160    32     
224    48     
-128   128    
16     16     
16     32     
16     16     
128    16     
-256   0      
240    16     
160    -16    
48     -128   
-48    -64    
-208   -176   
64     32     
160    48     
128    128    
-64    48     
128    32     
-32    0      
240    32     
32     32     
0      16     
64     -48    
-16    64     
112    32     
0      -96    
80     32     
128    -272   
112    80     
-16    96     
64     32     
80     64     
32     -32    
-96    -48    
128    16     
-80    -96    
0      64     
96     -16    
16     -240   
-224   -208   
176    -128   
-144   16     
112    -48    
16     -16    
208    -1120  
272    16     
-64    -16    
224    16     
-112   0      
-80    16     
-80    -16    
192    64     
-144   -192   
-80    80     
96     96     
144    -144   
128    48     
32     -144   
128    16     
48     -1744  
0      32     
112    64     
176    80     
-16    -16    
144    64     
80     -32    
96     16     
-16    0      
192    32     
-32    -48    
112    0      
144    128    
96     160    
-32    208    
160    -560   
160    -64    
96     -112   
192    144    
-208   32     
80     48     
128    32     
-144   16     
64     112    
256    480    
112    112    
48     -304   
-128   64     
80     -224   
-192   -224   
80     -224   
0      208    
-48    -464   
64     -64    
96     -192   
304    -16    
96     208    
48     16     
96     80     
176    16     
80     48     
64     -144   
-80    64     
176    -128   
-96    80     
16     -112   
192    48     
112    -144   
64     0      
48     -80    
160    64     
-240   176    
160    32     
336    208    
-64    -80    
128    0      
160    -80    
224    64     
80     32     
112    64     
0      -80    
112    64     
128    -256   
-48    48     
-80    64     
64     -496   
-64    -16    
96     -128   
16     -1168  
48     -32    
0      -144   
-48    -64    
32     96     
-16    -192   
0      -112   
32     -176   
192    128    
336    240    
-16    -80    
-48    -32    
32     -512   
-96    32     
-2416  -80    
48     -48    
64     -176   
112    -48    
352    48     
-64    336    
176    128    
176    112    
176    96     
48     -272   
128    144    
32     32     
0      128    
64     -272   
160    -144   
-96    32     
-144   -272   
528    64     
-160   -176   
416    -32    
-128   -336   
16     -768   
-96    -384   
-64    560    
176    -592   
16     752    
144    -64    
-32    -288   
-32    400    
144    -208   
-912   144    
288    160    
-272   -688   
272    -384   
128    384    
192    432    
400    -320   
208    -800   
272    112    
-240   -112   
48     -544   
32     -240   
272    48     
0      48     
208    288    
-112   48     
-176   160    
-352   -256   
112    -160   
448    -96    
192    -80    
80     32     
336    -448   
-288   128    
64     -128   
-64    -16    
192    -320   
-320   0      
-32    -96    
112    -32    
-64    192    
-112   64     
304    -96    
-80    -48    
16     -64    
112    -144   
-32    -96    
208    -448   
176    96     
-416   -912   
160    32     
112    128    
32     32     
-32    -144   
96     -128   
-208   -224   
48     -48    
-496   -16    
112    0      
-1360  80     
-80    -48    
-176   -192   
160    -400   
32     80     
192    -272   
-80    48     
-256   32     
256    -32    
0      0      
256    32     
-144   -144   
16     -96    
-976   -32    
-224   32     
224    -16    
144    -96    
224    16     
-416   64     
528    -64    
288    -416   
208    -208   
-112   -48    
16     80     
208    64     
80     -48    
-96    -208   
0      -80    
96     -80    
112    32     
16     96     
-32    0      
96     128    
192    -128   
160    0      
0      -368   
224    -112   
-224   48     
-64    -80    
-272   -192   
32     32     
-112   0      
112    32     
-16    -32    
112    -32    
-864   16     
0      -16    
-128   -128   
96     -448   
-64    32     
144    16     
-640   -32    
-32    128    
-960   192    
-224   -32    
96     -48    
240    144    
-144   192    
-160   0      
176    -48    
-48    -144   
-1184  -272   
80     -96    
-96    -64    
144    80     
-80    96     
-224   32     
-288   -112   
-400   -80    
80     96     
-32    192    
80     64     
80     48     
-112   -112   
-256   -416   
-96    -208   
-352   176    
304    96     
-176   -32    
-96    48     
-16    160    
-464   -16    
112    -288   
-64    208    
96     -64    
-368   32     
-112   -96    
-512   -160   
128    176    
-192   -192   
224    16     
-240   -224   
16     336    
-288   -368   
0      64     
80     -48    
112    -160   
208    304    
144    0      
-96    48     
-384   -96    
0      208    
-208   -112   
48     112    
-432   -208   
224    0      
-48    16     
208    -80    
80     128    
-80    32     
80     48     
-304   -80    
-96    -288   
-304   -192   
64     144    
-96    32     
368    80     
-464   -32    
112    16     
256    -192   
0      -16    
16     -256   
-160   -144   
-32    16     
-144   -48    
-32    0      
-112   64     
-48    0      
-80    16     
-16    32     
-80    16     
-32    32     
-304   -64    
-64    32     
-496   -96    
64     -16    
-48    -64    
112    64     
48     32     
16     128    
64     32     
-112   64     
32     16     
-64    16     
0      96     
-64    -48    
48     32     
-160   48     
64     48     
-96    -128   
192    48     
176    -16    
-400   -128   
-272   80     
160    32     
-144   64     
192    80     
48     -48    
-208   -80    
320    240    
-352   -16    
-32    64     
-224   -64    
0      64     
-352   -64    
192    -80    
672    -32    
208    16     
160    208    
192    112    
-48    48     
-128   -96    
176    0      
-16    16     
48     16     
240    96     
-384   128    
-448   -272   
304    -128   
-128   64     
-80    16     
160    16     
128    64     
0      32     
-144   16     
-96    48     
0      32     
176    128    
-176   192    
272    128    
64     -32    
48     -32    
-176   -96    
176    160    
32     80     
-144   64     
144    0      
32     16     
-48    -48    
96     16     
-128   64     
208    48     
-192   -32    
0      16     
80     96     
-32    64     
-16    -80    
-80    -32    
0      96     
-48    32     
208    -16    
16     80     
0      64     
-128   32     
-32    32     
-144   0      
16     -32    
64     96     
-96    -256   
208    96     
-32    128    
0      -64    
16     144    
-48    -48    
16     64     
144    -80    
80     208    
112    112    
144    -144   
-176   -144   
-32    80     
-80    0      
-96    -144   
-48    0      
176    144    
48     80     
16     0      
-16    48     
64     192    
96     160    
176    112    
144    80     
-16    144    
0      -96    
176    96     
-48    128    
48     32     
240    112    
-224   32     
80     0      
64     0      
144    80     
-128   -16    
0      -16    
96     112    
-96    80     
-16    96     
48     16     
16     16     
-80    0      
160    80     
-48    16     
576    912    
224    496    
-112   -32    
-464   -272   
-48    -96    
-64    -80    
80     -224   
288    16     
64     160    
176    -240   
224    176    
-16    80     
-112   -16    
0      144    
32     48     
80     128    
-240   32     
64     144    
-96    128    
-32    32     
256    -224   
32     -544   
16     144    
-160   80     
144    -32    
16     -160   
144    -32    
192    320    
208    368    
-256   -32    
-16    -128   
-192   -528   
-112   352    
176    -16    
272    -864   
96     368    
-192   -656   
-96    -64    
240    368    
-96    -64    
112    272    
0      224    
-240   -96    
112    112    
-160   -448   
112    48     
-80    -32    
128    64     
96     -32    
-16    -112   
336    928    
-160   -1488  
32     416    
160    160    
-112   -304   
96     -160   
160    304    
32     -144   
0      -16    
80     272    
64     -112   
0      368    
-208   -32    
32     48     
-48    16     
16     32     
80     -112   
208    80     
224    336    
-320   -432   
128    -48    
176    16     
-32    96     
176    16     
0      32     
80     16     
-112   -80    
-144   -256   
0      -384   
352    352    
0      -64    
192    -16    
64     0      
48     -592   
64     224    
64     -1200  
96     16     
-96    256    
112    64     
-32    -368   
144    32     
32     16     
144    -208   
-96    96     
192    -16    
-224   -16    
192    -816   
80     -192   
608    -96    
-32    240    
-96    32     
-48    0      
400    288    
-240   256    
-224   -224   
32     -144   
-96    80     
-64    256    
-288   176    
112    -448   
-160   128    
352    -272   
288    16     
272    208    
-80    400    
-80    112    
16     -48    
-48    80     
48     -16    
112    -80    
96     -80    
-144   -304   
288    -176   
-144   240    
16     -144   
736    496    
-384   336    
16     112    
112    -48    
-32    208    
272    -288   
64     -48    
-224   -48    
192    -336   
176    80     
160    -80    
208    -208   
16     -16    
-32    -112   
96     -80    
256    80     
112    -80    
16     -16    
-32    -240   
-32    -1568  
-80    -320   
272    -224   
176    -32    
112    -112   
96     16     
112    -32    
144    -32    
64     -16    
-80    -400   
160    -80    
96     96     
-112   -224   
16     -96    
176    -48    
-64    -144   
256    -48    
240    -16    
16     16     
-64    -32    
0      160    
-432   -32    
192    -368   
112    -32    
320    64     
16     240    
224    -496   
144    -240   
128    176    
-48    48     
-16    144    
160    16     
16     -224   
144    32     
-240   -240   
176    -128   
-544   -48    
208    -96    
256    0      
-32    48     
-16    -64    
-64    -448   
-32    -352   
224    -64    
-208   -160   
224    80     
-208   320    
80     48     
208    -16    
112    176    
-48    -32    
-352   -160   
128    -240   
128    -96    
64     32     
-96    -96    
208    -416   
-32    -64    
224    80     
-32    16     
208    -272   
48     176    
144    192    
-112   -352   
-176   -64    
144    128    
-32    448    
-128   -368   
-368   -128   
368    256    
80     -48    
144    -96    
112    -128   
208    -176   
-32    16     
144    64     
-144   -176   
32     -64    
336    112    
-160   0      
96     -32    
32     0      
352    176    
-112   448    
112    272    
-176   32     
96     80     
272    -16    
80     -96    
48     80     
-32    -208   
-96    32     
-64    -96    
96     -112   
112    16     
160    16     
-384   32     
64     -16    
-208   16     
64     -80    
-432   -16    
144    -128   
64     32     
-32    -112   
80     64     
112    -368   
16     -112   
-224   48     
256    -32    
-336   -16    
128    -48    
-160   16     
208    -240   
-400   -240   
112    -96    
160    -144   
-32    -272   
112    16     
144    -80    
160    64     
-16    -272   
240    64     
-224   16     
48     64     
-96    16     
-32    -48    
-288   -48    
128    0      
-32    -16    
96     -64    
80     112    
144    16     
32     48     
-448   -112   
80     -16    
-64    -64    
-688   0      
-80    32     
192    -112   
-160   48     
80     -16    
-48    -80    
112    -96    
272    0      
112    -48    
128    0      
80     -80    
-32    48     
128    -224   
-288   80     
-720   -432   
352    -160   
-272   272    
-256   64     
336    -32    
-1136  32     
-64    -48    
-64    -208   
512    96     
-96    -48    
-112   32     
-752   -128   
160    -64    
64     144    
-240   -192   
496    -16    
128    160    
-224   0      
0      -32    
416    16     
-304   -16    
-288   128    
-848   16     
-128   -48    
-112   -80    
32     64     
32     -48    
96     112    
-96    -64    
-96    -80    
96     -64    
-320   0      
272    176    
-240   -32    
-48    -48    
-240   16     
48     80     
-1664  -112   
64     -32    
0      -16    
48     48     
400    160    
-400   224    
112    0      
0      48     
-96    16     
32     -48    
-128   80     
-144   -48    
48     -64    
-432   -96    
48     -16    
-384   -64    
224    64     
-16    -112   
96     128    
-128   -32    
-192   0      
32     -16    
-48    16     
-96    112    
144    -144   
64     -208   
16     -80    
-48    48     
-192   -32    
112    -32    
-272   176    
16     128    
-208   -144   
-32    -80    
160    128    
-400   48     
80     -64    
-208   -64    
272    176    
128    96     
-144   -112   
-144   -16    
-128   96     
-80    -16    
192    48     
-320   112    
-16    -64    
-432   160    
32     32     
144    -16    
-176   -16    
-48    32     
0      48     
0      32     
64     -64    
32     0      
128    80     
80     -32    
-192   -112   
-112   256    
-432   -96    
-64    192    
-64    -192   
112    112    
0      0      
-160   -16    
256    -288   
48     0      
304    128    
64     192    
0      16     
-256   384    
-48    -112   
-176   -32    
-32    96     
-32    -544   
-48    544    
-496   -64    
64     -48    
-16    96     
-32    -16    
256    224    
128    -48    
-32    64     
0      0      
128    112    
0      64     
48     64     
-352   -1328  
128    528    
64     1088   
128    -672   
208    272    
-16    96     
16     -48    
48     736    
-144   -384   
-192   208    
-64    288    
-256   -720   
-16    -48    
96     496    
-32    -16    
240    -448   
128    -48    
64     112    
-96    160    
48     304    
16     -112   
-240   -176   
32     48     
-112   48     
128    112    
-16    64     
192    224    
0      128    
0      0      
32     128    
176    416    
-80    64     
-256   80     
-32    96     
96     256    
192    112    
32     -272   
0      64     
80     16     
-16    -80    
-32    -128   
32     -272   
16     64     
-48    -176   
160    48     
-160   32     
64     160    
256    416    
-80    48     
-32    224    
208    -144   
-112   16     
112    -64    
-176   48     
-112   -96    
-144   -736   
48     -160   
-64    144    
-288   -16    
96     -688   
-208   -160   
240    -272   
-16    -32    
-48    240    
336    -240   
-80    144    
176    -304   
-48    272    
-112   -224   
176    -496   
288    -144   
-32    64     
528    304    
-112   352    
208    256    
-192   176    
-192   592    
16     288    
48     176    
608    288    
-352   272    
-224   80     
-304   -240   
208    -224   
352    32     
-176   384    
96     176    
-96    0      
272    160    
-48    160    
32     -80    
32     -304   
128    48     
48     -16    
96     -80    
128    -48    
64     160    
-96    -64    
0      -112   
-16    -144   
128    80     
-112   192    
272    32     
-160   -208   
288    -80    
368    480    
-240   320    
160    240    
-80    -1232  
240    32     
128    48     
-64    -176   
80     -112   
160    48     
-112   -64    
320    -32    
-272   -352   
176    -128   
-16    144    
-192   288    
-80    64     
-48    -80    
128    32     
32     -144   
256    -208   
-80    -144   
176    -96    
-288   -112   
144    32     
0      224    
112    176    
16     -352   
-32    -80    
-128   -32    
-16    32     
160    112    
288    -48    
-32    96     
-32    -192   
-48    16     
160    -1008  
192    32     
-80    64     
0      -16    
-16    -304   
144    -96    
-272   0      
96     80     
48     -48    
-32    128    
160    80     
-112   -240   
-80    16     
80     -176   
128    -48    
48     -512   
16     48     
176    112    
16     208    
-192   -64    
48     -48    
112    224    
16     16     
160    -160   
112    272    
-16    80     
160    224    
-16    32     
-64    -112   
-16    144    
-112   -240   
160    -96    
0      0      
96     16     
240    144    
-64    -128   
96     352    
240    144    
32     176    
48     -416   
192    -304   
272    -48    
-128   144    
-128   -192   
-32    64     
64     -256   
112    64     
144    48     
432    96     
112    240    
272    16     
-16    48     
32     0      
-80    -48    
-96    -32    
96     96     
-16    -96    
64     32     
48     -80    
112    64     
-80    -48    
16     16     
0      96     
-64    -1184  
144    0      
32     80     
-32    -1024  
304    -48    
176    -288   
-32    -176   
192    -1504  
208    -32    
0      64     
-16    -96    
96     -80    
64     -80    
96     -176   
32     128    
-160   -176   
-32    80     
96     -112   
48     -176   
80     0      
144    -96    
160    -80    
0      -464   
0      -80    
0      176    
128    -32    
0      32     
0      -112   
96     -96    
32     96     
32     -16    
-16    48     
-96    0      
224    -64    
64     0      
128    80     
16     -64    
80     -80    
64     -32    
-32    -128   
80     0      
16     -1056  
64     0      
32     -160   
16     16     
16     -80    
208    80     
-48    -32    
112    -48    
-1088  160    
-176   -128   
128    0      
80     -16    
96     -64    
256    -80    
32     -16    
48     -1056  
352    -48    
64     64     
-48    -32    
160    80     
-176   -160   
16     16     
64     -48    
-176   16     
-16    -160   
-96    0      
432    0      
-96    64     
-112   -400   
384    64     
-352   -688   
-32    -160   
304    0      
176    336    
-64    -48    
336    -32    
-96    160    
-432   64     
-64    -64    
-208   -208   
-1088  112    
176    32     
-304   -160   
352    -96    
-128   112    
160    -48    
-336   96     
176    -224   
-16    64     
-192   -208   
192    -176   
368    144    
-160   32     
-32    -16    
32     -96    
-112   0      
-16    -80    
0      0      
160    -32    
48     64     
-16    -208   
272    0      
-144   -1216  
208    32     
-208   -48    
272    -208   
-352   -64    
96     16     
-272   -32    
128    -48    
-720   -96    
48     -32    
48     -64    
-144   -64    
64     0      
-224   -352   
144    -192   
48     -256   
256    224    
-224   -352   
64     0      
-384   432    
-112   -224   
-80    96     
272    96     
80     -368   
-128   112    
-16    -224   
32     64     
16     0      
192    0      
224    160    
-256   -96    
96     96     
272    -16    
192    -96    
-224   -176   
80     -32    
80     112    
-32    -192   
32     -80    
-32    0      
64     -240   
-80    304    
-32    592    
64     -624   
32     192    
-48    416    
-2064  -320   
96     -288   
320    -32    
0      464    
-144   -272   
48     -560   
192    0      
-176   -96    
-1856  224    
-16    -96    
-272   -224   
16     32     
-288   -240   
-384   -192   
-64    64     
-304   64     
0      -32    
32     48     
-144   224    
224    -384   
-304   -160   
-720   128    
-48    16     
-192   48     
32     -144   
-144   -320   
64     -112   
96     144    
-80    240    
0      -496   
-176   -384   
-16    -208   
-400   -112   
-32    -112   
-496   -480   
208    160    
-32    496    
-240   -64    
112    -288   
96     -144   
176    -208   
144    0      
-64    64     
-16    32     
80     176    
-224   48     
-208   16     
-48    0      
176    128    
-288   0      
-48    48     
-608   16     
160    -16    
-208   -32    
-48    48     
-288   -80    
48     -48    
-112   -160   
-96    -80    
16     -144   
-128   0      
128    80     
-112   -64    
32     80     
-240   -160   
16     -240   
-560   -96    
64     -160   
32     112    
208    0      
112    -64    
-176   16     
-32    -176   
-144   192    
0      112    
-160   -16    
80     -48    
48     -112   
32     208    
-224   128    
144    -32    
-64    0      
-128   16     
80     -48    
-64    -96    
-128   -112   
64     -112   
-128   32     
48     80     
224    80     
-96    128    
0      64     
-256   16     
160    -32    
-240   320    
368    112    
-448   -112   
32     -288   
-2464  -128   
-32    -32    
-224   48     
80     288    
16     -16    
256    48     
-192   -32    
80     96     
48     32     
128    416    
192    256    
80     -80    
192    64     
-240   -480   
-192   336    
-400   -80    
-16    128    
336    320    
192    640    
-208   480    
-16    -48    
176    -80    
-160   -48    
336    352    
-240   272    
-352   112    
-448   128    
576    480    
-32    16     
368    -32    
64     64     
-400   0      
-416   128    
0      48     
-496   160    
320    0      
32     -144   
176    -272   
0      32     
-368   48     
-64    -48    
-160   64     
240    16     
-16    144    
64     -144   
272    -32    
-256   -80    
-96    112    
32     48     
-192   128    
-112   -240   
384    -720   
-48    32     
336    112    
-352   240    
-112   -544   
-128   -224   
176    0      
-256   -32    
80     -192   
32     -320   
272    208    
-208   80     
160    336    
16     48     
0      -48    
224    -560   
-160   -112   
288    48     
-96    -144   
224    -144   
-112   -112   
160    0      
-320   -288   
96     -528   
-16    -112   
224    96     
96     96     
48     112    
-288   -160   
96     80     
-256   208    
-336   -16    
272    64     
-272   48     
80     -144   
-48    -144   
208    160    
-240   96     
-128   -416   
-48    -224   
208    176    
0      272    
208    0      
-32    112    
-192   -400   
448    -192   
-208   240    
336    -80    
-32    288    
96     48     
112    -144   
128    -16    
96     0      
-80    -80    
16     144    
-128   32     
80     48     
144    208    
192    -160   
112    -16    
96     192    
-32    -176   
-112   -16    
-224   64     
64     80     
-160   -160   
144    -368   
112    112    
112    160    
-32    192    
32     64     
160    -16    
-96    -32    
48     -32    
80     96     
240    224    
-128   64     
-16    64     
-64    -368   
272    -448   
208    -160   
480    -256   
224    144    
80     64     
32     80     
16     48     
-208   64     
-80    -32    
-128   -64    
-112   16     
0      64     
0      -64    
272    144    
-176   80     
96     16     
128    -32    
16     -192   
16     112    
16     -880   
128    -240   
224    16     
528    128    
112    0      
176    80     
80     192    
-144   224    
-368   -128   
176    128    
112    64     
-64    -160   
128    -64    
192    -208   
80     80     
-96    -288   
224    112    
64     64     
96     0      
-80    48     
-16    32     
-304   -256   
80     -32    
224    80     
240    96     
-48    -48    
32     -80    
-80    -32    
-96    -80    
48     64     
48     -160   
-96    64     
-16    -160   
176    80     
-48    -64    
144    64     
32     0      
48     64     
16     64     
80     32     
64     0      
-48    96     
176    96     
80     -32    
80     0      
80     -96    
192    144    
-16    -448   
128    0      
-16    48     
64     16     
48     16     
32     48     
-80    32     
96     -16    
0      32     
144    -304   
16     -32    
80     128    
224    64     
0      -240   
304    368    
-336   16     
320    -144   
-48    176    
288    96     
160    128    
-320   48     
288    -144   
0      -16    
208    112    
400    -64    
16     -80    
272    -176   
-208   80     
320    -32    
128    448    
128    272    
240    -96    
-96    -144   
-128   16     
288    -16    
-128   16     
80     -32    
208    -32    
-112   128    
64     -176   
-32    112    
144    176    
160    -32    
0      -64    
192    288    
96     -64    
-176   32     
304    -208   
16     -288   
336    192    
192    -272   
0      -528   
16     16     
0      -96    
128    -272   
-16    -32    
96     80     
112    -16    
-32    -32    
208    -304   
48     208    
208    -256   
-144   -208   
144    464    
64     192    
-1440  -304   
-208   -176   
240    -48    
144    -160   
-128   -128   
368    -944   
-256   320    
256    -80    
224    -240   
112    -128   
-96    -32    
-160   -1184  
128    864    
176    144    
-96    -512   
-208   208    
160    -432   
176    160    
0      576    
-16    288    
144    -144   
80     176    
240    -544   
0      272    
256    32     
-144   144    
80     32     
-256   176    
80     -16    
-160   -144   
-16    0      
48     48     
-1856  0      
-32    0      
-160   -192   
208    -128   
144    -64    
448    -416   
-96    128    
240    -768   
-416   208    
-64    -192   
240    32     
48     -48    
176    32     
-176   -112   
192    -48    
-848   0      
144    0      
80     -32    
0      -80    
96     112    
240    -144   
64     64     
-128   -688   
80     -64    
48     -32    
208    16     
0      0      
112    -144   
-80    16     
96     -112   
64     0      
256    208    
-896   240    
32     64     
48     32     
-96    -48    
-112   96     
176    -400   
176    -16    
0      -16    
64     -32    
-160   16     
-160   -320   
-16    -224   
48     -320   
-48    -48    
-16    144    
-288   -48    
288    -96    
-128   32     
80     -112   
-16    0      
192    -176   
80     128    
16     112    
64     48     
-160   -160   
96     -336   
-192   -16    
192    176    
-272   64     
48     80     
-224   80     
80     16     
-272   -128   
272    -336   
176    128    
80     -64    
48     -208   
0      -112   
-16    -80    
-400   112    
208    -208   
-288   -448   
288    0      
-400   224    
224    144    
0      208    
48     -128   
144    224    
144    64     
-112   -112   
112    -256   
-48    -64    
-128   -96    
64     176    
-96    -32    
0      16     
-288   -48    
144    -16    
-64    144    
-80    80     
48     0      
176    -128   
48     48     
-464   16     
-16    128    
-608   -160   
-544   32     
128    0      
-384   -144   
64     160    
112    320    
-112   -48    
80     176    
-16    -176   
-144   80     
-208   48     
-1328  -256   
0      -16    
-336   -224   
96     64     
240    624    
-672   336    
-320   -400   
-192   -752   
-560   -544   
-528   0      
-224   240    
-784   96     
32     128    
112    304    
160    560    
-336   448    
96     48     
-160   736    
352    512    
-368   -1008  
80     -336   
-16    -272   
-96    496    
304    64     
-96    448    
-208   0      
-864   -848   
96     -192   
-208   144    
160    304    
-112   -336   
32     -80    
-512   -400   
336    -288   
48     400    
272    -48    
432    -160   
320    208    
-192   -448   
48     -336   
-144   -160   
-304   64     
-32    112    
-480   384    
64     208    
160    -336   
224    32     
-400   592    
112    -320   
-16    -256   
-288   -368   
160    80     
-320   480    
256    -160   
80     608    
-160   -32    
-288   80     
576    -304   
-320   512    
240    -128   
-160   32     
-128   -32    
-32    -112   
208    448    
-80    112    
336    192    
-48    16     
352    64     
-528   -160   
112    -80    
96     304    
-240   -176   
320    160    
-528   32     
256    -80    
-208   224    
48     -16    
-80    -64    
160    -64    
-32    64     
288    64     
-224   -32    
128    64     
-256   -64    
192    -32    
112    32     
-176   96     
-96    16     
-160   -112   
-16    -64    
-144   160    
192    80     
32     -144   
-144   -256   
-96    64     
64     192    
112    -464   
-16    -240   
-64    192    
48     160    
-16    0      
-336   -64    
240    32     
-144   -16    
256    -16    
-208   -64    
-64    -432   
-16    -256   
-80    -320   
-16    -160   
-32    96     
-48    80     
-32    64     
32     48     
-288   0      
-80    0      
-48    -64    
192    64     
80     272    
-80    320    
-32    -96    
224    -16    
0      -48    
112    32     
96     32     
0      16     
80     0      
0      96     
-320   -272   
48     -272   
112    112    
224    80     
208    96     
-160   -112   
112    -96    
80     -16    
176    96     
32     64     
-96    -64    
-192   -64    
-80    -96    
208    48     
112    64     
224    16     
0      -16    
128    -32    
-96    32     
16     64     
-128   32     
-256   -64    
-32    -80    
176    80     
0      48     
-16    0      
64     0      
32     192    
-128   176    
-64    -48    
0      -112   
-192   96     
192    48     
-176   -64    
96     32     
96     96     
80     64     
-96    -176   
208    -48    
256    16     
32     80     
-160   0      
16     0      
0      64     
80     64     
64     64     
-32    16     
112    64     
-208   -16    
176    48     
-16    -32    
32     64     
-64    32     
16     16     
112    -80    
-96    16     
48     32     
0      48     
64     64     
-16    -32    
80     16     
-32    96     
16     112    
-16    32     
-32    -928   
16     64     
0      96     
160    80     
32     -64    
-144   -144   
208    -128   
-16    80     
112    64     
-16    48     
-96    -32    
-32    0      
96     112    
-144   80     
112    32     
-128   -1632  
176    80     
48     192    
16     128    
256    -112   
240    16     
288    48     
208    -16    
-96    -32    
-16    16     
-16    -144   
224    240    
64     48     
-16    -80    
96     -64    
-96    -400   
320    64     
-240   256    
208    176    
112    -112   
224    208    
592    384    
160    0      
-144   -288   
224    -64    
-400   192    
384    -64    
320    384    
208    -176   
16     -32    
-256   304    
-128   32     
-224   -96    
-288   224    
432    336    
-496   -544   
176    800    
480    -16    
96     -48    
224    16     
-128   -768   
48     544    
-96    -384   
-32    272    
144    64     
80     -80    
-48    48     
144    -416   
96     -80    
64     96     
112    32     
-256   -416   
48     -112   
464    528    
-320   336    
224    96     
-96    192    
112    128    
-16    128    
64     16     
192    -256   
-96    -16    
368    304    
-256   288    
-64    -272   
160    -160   
64     -272   
80     -144   
112    -64    
-16    -32    
-160   -128   
144    48     
16     112    
-64    -112   
32     32     
288    -16    
-96    176    
64     0      
-224   64     
0      -736   
-64    64     
48     48     
144    160    
176    16     
208    32     
48     -64    
80     -80    
48     80     
288    -48    
32     32     
-16    -224   
128    -16    
80     -96    
-32    32     
176    32     
80     16     
-16    96     
-80    -32    
192    16     
-64    416    
-32    80     
272    -656   
128    128    
-32    -96    
-32    32     
64     -240   
256    112    
-272   16     
176    -16    
224    0      
-16    128    
416    304    
-272   304    
-16    -144   
320    64     
128    192    
304    144    
-112   128    
32     -176   
304    112    
-256   -112   
64     128    
-224   -32    
432    0      
128    16     
208    112    
-32    32     
-256   -176   
96     -352   
-288   -32    
-208   -480   
304    -192   
32     96     
176    96     
-48    -240   
-160   -160   
96     -112   
256    80     
96     96     
80     64     
144    48     
-16    -96    
192    -32    
-144   -32    
-480   -128   
224    -368   
-144   -96    
192    -176   
48     96     
-64    -320   
96     64     
112    -128   
-96    -48    
112    64     
-32    -32    
160    144    
192    128    
-112   80     
-32    144    
128    48     
-80    -240   
-32    -208   
128    -352   
144    -48    
-96    -240   
-80    -224   
176    -896   
-32    -208   
272    -144   
160    -48    
80     48     
-16    96     
-288   -96    
80     -96    
-352   -48    
144    176    
48     -176   
-32    -192   
64     -48    
32     -288   
0      -96    
160    -304   
304    592    
-272   -448   
96     -416   
256    96     
16     -96    
0      96     
-32    -208   
64     336    
-192   -64    
-768   176    
256    -288   
-128   240    
96     -320   
32     96     
32     16     
80     -32    
0      -480   
-144   16     
80     304    
-48    -336   
80     544    
368    -160   
0      -32    
176    96     
-864   -352   
112    32     
-2272  -240   
64     16     
-352   -240   
32     64     
400    176    
-720   -992   
176    528    
-96    416    
-96    -1088  
464    -48    
96     544    
-432   -32    
-128   -16    
-304   80     
144    80     
-896   -320   
-32    32     
704    1168   
-368   1056   
-400   -672   
352    -896   
464    304    
-16    -464   
208    -32    
-176   384    
-320   -256   
-1008  -208   
272    80     
-144   384    
272    80     
16     -16    
80     -144   
-16    64     
-112   -112   
-48    -48    
0      -192   
112    64     
80     -32    
384    0      
-864   -176   
96     -16    
-224   16     
48     0      
-96    192    
192    -48    
-256   -64    
-128   -336   
64     0      
48     -144   
-224   32     
96     -672   
-336   -288   
-112   96     
160    -208   
-144   -32    
32     32     
-80    -64    
240    0      
-432   -144   
272    -32    
-336   112    
272    -16    
-128   -208   
-176   -80    
112    160    
-1824  -112   
-784   -32    
-80    0      
-384   0      
-16    112    
-1584  48     
-48    16     
32     -80    
-32    -96    
-224   -128   
-16    -48    
224    -96    
-128   -144   
96     -208   
-48    -96    
-16    96     
0      256    
-64    -16    
64     -96    
-16    -16    
-496   -32    
-176   -16    
80     0      
32     112    
-336   96     
-80    32     
32     -80    
0      -112   
-256   -240   
-128   -192   
-32    -48    
32     48     
-80    32     
224    352    
-256   112    
-320   -64    
64     -32    
-96    -64    
144    0      
-128   48     
0      64     
-256   -160   
48     16     
-64    -128   
80     32     
-96    32     
-80    16     
-64    0      
-160   -512   
256    -528   
32     320    
224    352    
-256   0      
48     0      
-64    -16    
288    -176   
-96    -80    
16     144    
-64    -48    
-192   -48    
32     96     
-160   -16    
48     -112   
-128   -16    
0      96     
-352   -32    
-32    0      
-144   16     
-48    -16    
-1680  48     
-80    112    
-144   -128   
96     0      
16     16     
288    144    
-96    -16    
128    -32    
112    -32    
48     -64    
-96    -48    
-48    128    
-80    -16    
-64    -16    
112    32     
-112   48     
80     80     
-128   -112   
-16    16     
-16    48     
-16    48     
160    96     
-96    16     
0      16     
-80    0      
64     64     
-256   -112   
-32    -64    
-96    16     
0      -128   
-752   -144   
96     64     
-32    -160   
80     32     
32     64     
96     16     
-64    32     
0      16     
32     -16    
64     16     
64     32     
-80    32     
32     16     
-256   -64    
-16    16     
-304   -80    
96     80     
16     -16    
208    16     
224    144    
-128   96     
16     0      
-48    160    
80     64     
80     176    
-192   -192   
96     32     
-48    160    
-64    -112   
224    128    
32     128    
112    544    
-128   -160   
-112   256    
-96    272    
-96    -176   
-16    640    
240    -288   
-176   -640   
16     528    
-288   -160   
-320   -48    
160    112    
-112   32     
80     -208   
240    -144   
80     160    
-32    -128   
-352   -96    
16     -144   
80     288    
80     -352   
0      -272   
112    -128   
-272   -16    
-352   16     
-288   -304   
0      128    
16     208    
400    352    
-176   -496   
288    160    
-160   128    
-32    -128   
-160   384    
320    -208   
-32    96     
192    192    
256    128    
-160   32     
144    -96    
-128   32     
96     16     
-144   64     
-112   -272   
320    -64    
-160   64     
32     -48    
96     240    
96     160    
32     80     
128    0      
-128   -32    
32     96     
-16    -128   
0      32     
-48    -96    
64     112    
-176   32     
-208   32     
48     32     
-16    80     
224    32     
96     112    
-256   16     
48     -48    
-64    32     
128    -16    
128    32     
32     -64    
112    96     
-32    32     
-32    96     
-240   -160   
288    0      
-48    32     
32     -32    
-256   48     
112    32     
272    32     
-64    96     
-16    64     
-64    16     
32     32     
112    -48    
176    64     
-64    -64    
96     -96    
112    -112   
32     -464   
-128   48     
48     -16    
0      80     
16     32     
-16    -16    
192    0      
112    160    
-64    16     
320    -112   
-80    0      
0      80     
-32    -16    
16     -144   
64     -32    
144    -640   
112    80     
32     48     
0      16     
32     -96    
336    32     
-48    112    
32     16     
-112   -144   
80     -96    
128    48     
128    112    
-80    16     
64     48     
-96    240    
-176   -432   
112    -32    
16     -224   
-16    48     
144    -112   
176    -16    
64     288    
400    656    
-144   48     
144    -256   
144    -304   
256    -64    
128    0      
144    -208   
256    272    
-144   272    
48     240    
16     -32    
176    0      
-80    208    
-48    0      
0      48     
-32    48     
48     16     
160    -144   
-128   -32    
192    32     
112    -64    
192    -256   
32     -288   
112    -192   
-128   -480   
-272   -1408  
-64    -272   
144    688    
336    320    
-320   -112   
384    -320   
128    336    
-16    160    
-176   -512   
96     208    
64     112    
-48    -80    
272    96     
-80    -128   
0      96     
128    -640   
128    192    
128    -448   
32     144    
-16    -64    
64     112    
96     32     
192    -576   
-112   432    
96     128    
-16    16     
48     -32    
208    -16    
16     192    
32     272    
-16    112    
80     -80    
-80    -192   
256    112    
-16    112    
128    -160   
64     48     
0      48     
48     160    
192    -176   
-96    128    
96     -464   
48     96     
64     -64    
80     240    
128    -208   
48     16     
144    48     
-288   -272   
240    -320   
16     176    
128    64     
112    -160   
96     -688   
160    -80    
48     96     
80     -96    
-64    160    
-208   -16    
-64    112    
-48    -128   
0      -96    
64     -64    
-80    -752   
48     -32    
368    144    
384    176    
-144   -16    
-240   -736   
192    -224   
192    96     
-352   16     
272    -64    
-64    -288   
-320   -80    
880    -240   
448    -784   
-336   -48    
656    -352   
288    144    
256    -160   
-16    -128   
-736   -80    
112    -224   
64     112    
112    -32    
16     -96    
-192   -704   
96     -32    
288    48     
48     0      
256    -208   
-16    0      
128    -128   
-160   -48    
48     32     
-128   -64    
-192   48     
0      80     
288    -16    
96     -96    
-176   -32    
176    -64    
256    -16    
0      -752   
256    -112   
-80    80     
48     0      
112    -64    
144    64     
-176   32     
-128   -128   
-16    -32    
400    -16    
-112   -144   
80     -96    
112    80     
64     -80    
160    -32    
304    -96    
-448   128    
-256   -64    
0      32     
96     -128   
192    -80    
16     -16    
112    -48    
-288   -16    
0      -96    
-192   -16    
128    16     
208    64     
-64    -320   
-128   -112   
224    96     
-192   96     
-64    -48    
128    -16    
80     -48    
32     -32    
-320   -16    
176    -16    
-80    16     
16     -16    
96     160    
-64    -176   
208    -304   
144    16     
32     -96    
160    -144   
16     64     
112    -240   
48     80     
336    176    
-64    144    
-192   16     
48     32     
96     48     
80     64     
-176   128    
-32    -96    
-1120  -112   
112    -176   
192    128    
0      -48    
-176   48     
288    -80    
-32    16     
-160   -400   
272    -608   
176    16     
352    288    
-624   -16    
96     -16    
-80    32     
192    112    
64     -48    
80     48     
-256   96     
80     -208   
192    160    
240    -304   
128    0      
64     48     
160    32     
0      0      
128    48     
-160   -16    
-16    -208   
-208   -112   
-144   48     
-400   64     
112    -64    
64     48     
208    -64    
-112   96     
208    80     
272    144    
-112   -80    
-80    -96    
-288   64     
128    -48    
-80    32     
80     48     
0      0      
-16    -80    
-400   -48    
-624   -32    
-16    -144   
-16    -224   
-32    0      
-64    -32    
-176   48     
-160   -48    
-1952  -64    
-208   64     
-80    240    
-160   16     
-16    -80    
16     192    
-272   16     
176    208    
-368   -672   
192    -144   
-96    -176   
64     -112   
-16    -48    
-224   -160   
-64    32     
48     16     
-176   160    
-384   96     
-112   -80    
144    -64    
-64    80     
-272   48     
80     -144   
-48    -48    
-48    -352   
-240   96     
-128   208    
-144   -304   
96     320    
128    32     
0      -192   
-400   64     
-48    32     
-48    -192   
-1552  128    
-48    -128   
-80    704    
272    -368   
256    -160   
272    336    
144    -320   
-48    352    
144    208    
80     464    
-224   -80    
-128   -352   
-64    48     
-352   -336   
96     -48    
-816   -208   
192    -336   
16     0      
272    64     
-160   144    
400    224    
-16    336    
32     48     
224    192    
-256   -48    
400    -352   
144    -224   
416    16     
64     208    
224    400    
-576   144    
96     0      
-1504  -80    
48     -16    
-80    0      
80     32     
224    176    
16     16     
0      -64    
80     -272   
128    -32    
0      96     
-80    112    
-64    32     
-16    -80    
-224   160    
-288   80     
-352   -96    
-64    -128   
144    -32    
-112   32     
-64    160    
-192   -128   
-64    -80    
-32    -64    
-80    112    
32     96     
-240   112    
-160   -160   
144    -384   
-336   -64    
-48    176    
-464   48     
240    0      
0      112    
-16    112    
-64    368    
144    128    
224    -80    
384    -16    
16     176    
-128   0      
-128   -80    
-64    16     
64     64     
-64    0      
32     32     
-304   -48    
144    64     
32     32     
-16    144    
48     48     
96     0      
80     16     
96     224    
-48    256    
-128   32     
0      -16    
-96    112    
192    176    
-352   -32    
80     16     
-304   -64    
-48    -16    
144    96     
16     96     
0      32     
-80    112    
256    0      
0      16     
-48    80     
112    48     
32     32     
-64    -32    
160    16     
-112   -48    
-16    128    
-32    16     
-112   48     
-48    0      
208    -144   
256    128    
-64    96     
-48    0      
144    160    
-96    240    
-128   48     
16     32     
-64    -144   
304    -128   
-16    48     
0      -544   
96     -368   
0      -112   
-208   -32    
16     16     
128    240    
-272   288    
112    16     
192    80     
-48    -352   
-128   80     
128    416    
-224   256    
208    160    
-336   -272   
0      -96    
224    96     
144    0      
96     -16    
-208   -224   
160    48     
32     176    
16     -32    
-16    -32    
-64    224    
112    -96    
288    352    
-208   -144   
-160   32     
-320   -112   
288    496    
-224   -336   
256    160    
208    192    
160    16     
-208   -64    
16     32     
192    -112   
-160   -256   
80     -96    
-48    240    
-16    224    
64     112    
256    64     
-48    112    
112    256    
80     80     
-176   -112   
320    96     
-48    80     
144    96     
48     96     
48     64     
64     192    
64     176    
-96    0      
32     0      
-208   0      
160    96     
16     -16    
112    80     
16     16     
96     32     
16     16     
80     48     
64     64     
0      16     
80     48     
-128   48     
160    96     
-160   32     
144    128    
16     -48    
48     -48    
160    48     
224    192    
-192   96     
272    144    
48     -80    
144    80     
80     64     
-176   -16    
112    128    
0      192    
336    112    
48     -16    
0      80     
-272   -336   
224    -128   
-176   160    
64     -368   
0      112    
-80    32     
128    80     
112    112    
144    160    
-96    -16    
304    -144   
-48    -80    
512    80     
-16    112    
-288   -16    
672    96     
592    64     
-288   64     
-288   -544   
352    48     
-48    -368   
144    -64    
288    -16    
96     48     
-32    -16    
128    64     
-112   -32    
256    304    
-608   96     
336    -112   
176    -16    
96     -16    
192    48     
160    -208   
-96    80     
256    -448   
112    48     
16     -96    
224    -16    
-96    96     
176    32     
-96    -16    
304    -16    
-48    128    
64     -112   
-80    -16    
-16    32     
0      64     
112    -96    
192    16     
-16    -384   
368    144    
48     -144   
96     -64    
-96    160    
208    -128   
32     -16    
-16    80     
160    112    
-112   96     
176    -32    
-64    -320   
48     64     
144    -240   
48     0      
0      -128   
0      -32    
128    16     
112    -112   
0      48     
96     64     
-208   -48    
64     -176   
112    -144   
0      0      
96     16     
0      -208   
64     64     
-16    -560   
-176   -128   
112    -144   
-80    -128   
128    80     
160    240    
-112   128    
112    -16    
96     16     
80     -80    
-32    -480   
192    192    
160    -224   
16     -352   
192    80     
192    176    
48     -16    
96     -144   
176    64     
96     48     
160    304    
16     -48    
176    -112   
96     -64    
128    176    
112    -176   
-176   -304   
-64    -1056  
144    96     
112    16     
96     96     
48     32     
256    -96    
160    -416   
608    752    
-304   -144   
-144   -496   
288    -64    
80     48     
-32    -96    
192    -208   
128    -224   
112    -288   
0      64     
64     0      
-128   -48    
-176   -192   
-32    0      
112    -64    
128    -16    
272    -80    
160    48     
-48    32     
176    64     
-752   -128   
256    128    
-32    16     
64     192    
192    656    
-128   -688   
-112   -48    
80     400    
112    144    
-128   -192   
-128   80     
272    -48    
-16    32     
-160   -32    
144    -16    
-176   -288   
64     96     
112    16     
96     -16    
160    -64    
-192   -912   
32     208    
144    -608   
-96    -224   
160    0      
16     -96    
176    0      
160    224    
-48    -112   
192    112    
-304   -176   
176    304    
-1088  -784   
48     32     
208    656    
128    -704   
96     -48    
64     32     
0      96     
48     -128   
32     -176   
-16    0      
0      304    
16     48     
192    -240   
-32    192    
48     64     
-336   -256   
112    -160   
224    64     
-144   -192   
-80    -432   
128    -672   
32     0      
240    320    
368    976    
-416   320    
64     -240   
-192   -288   
320    -448   
-272   48     
400    112    
-560   320    
128    112    
-160   368    
256    112    
-32    -48    
192    -144   
192    -176   
80     -544   
432    -112   
16     -48    
272    240    
-720   224    
0      144    
-208   80     
-32    96     
-336   -80    
256    -256   
336    80     
160    -32    
576    -208   
304    -16    
160    288    
384    48     
-16    64     
-240   -16    
80     144    
112    16     
272    -112   
-80    32     
64     -32    
-544   -128   
208    -128   
-112   80     
0      -80    
0      496    
144    -112   
224    -224   
-240   -128   
224    -192   
-208   16     
128    80     
-256   0      
160    64     
-448   -96    
288    -160   
-192   -16    
128    48     
-80    0      
-272   112    
224    64     
-144   -208   
-32    128    
128    -176   
16     -16    
-32    -144   
-448   -16    
-304   -192   
160    -80    
-16    176    
32     96     
32     16     
-432   -80    
64     336    
-192   112    
368    48     
-352   -128   
-352   -16    
96     32     
-160   128    
64     64     
-48    -16    
-48    16     
-848   -96    
144    0      
64     16     
-80    0      
-32    -160   
-48    32     
-32    -32    
208    48     
-64    -48    
-144   -48    
-48    96     
-256   96     
240    144    
-560   112    
112    -32    
-800   -208   
-32    -48    
-4224  64     
-208   304    
-176   -176   
48     -32    
112    0      
80     48     
-80    96     
48     48     
-144   0      
-64    -336   
-16    -272   
112    -80    
-128   32     
64     -64    
-320   -80    
-864   -432   
240    80     
48     160    
224    16     
-176   -192   
-128   -480   
-96    -224   
-48    -16    
32     144    
64     -96    
128    80     
-112   240    
112    -16    
-464   224    
-80    -16    
-512   -1184  
80     512    
-144   176    
-208   -176   
-32    64     
-64    -112   
16     144    
-32    224    
32     0      
128    464    
-512   -336   
-112   -112   
128    208    
64     48     
80     352    
-32    -80    
144    -16    
-1584  -32    
64     32     
0      240    
-112   80     
160    112    
-224   112    
48     -16    
-32    0      
16     -48    
-112   -80    
112    -80    
32     96     
352    128    
-80    64     
48     64     
-832   -96    
-32    16     
32     48     
-224   16     
16     -16    
128    80     
112    80     
144    272    
-208   48     
160    32     
64     48     
-192   -32    
80     16     
-352   -144   
80     112    
-288   0      
48     96     
384    336    
-384   32     
80     64     
64     80     
128    64     
-224   -32    
64     32     
-144   -16    
-32    -48    
-272   -112   
128    96     
-128   0      
160    32     
-272   16     
16     16     
80     48     
64     16     
-48    0      
64     64     
-80    32     
96     -16    
0      272    
32     -32    
-32    -32    
-32    16     
-144   32     
-80    -80    
176    -192   
48     224    
320    80     
-16    -80    
-16    64     
48     96     
48     -16    
-16    -48    
-240   -48    
208    208    
-224   0      
304    -16    
-272   32     
48     -48    
-112   0      
-336   96     
0      -144   
208    96     
-272   32     
80     -112   
-32    -32    
-336   160    
96     128    
-112   80     
-208   -32    
240    -96    
272    128    
-400   -192   
736    -16    
16     112    
16     -80    
224    80     
80     128    
-192   112    
-432   -64    
48     -80    
208    80     
-224   -192   
336    -48    
240    304    
-512   96     
192    -16    
-64    -16    
128    80     
112    96     
-16    96     
176    16     
-32    16     
-128   64     
112    -48    
-16    48     
240    224    
0      64     
-160   48     
-64    0      
80     -144   
144    96     
96     32     
-16    80     
-64    48     
-32    -112   
256    32     
-64    80     
-32    -16    
32     112    
160    96     
-80    0      
-80    80     
48     -16    
128    -48    
-224   -128   
144    96     
-80    -32    
224    -288   
-128   -96    
48     -32    
-32    32     
96     96     
96     96     
48     -16    
96     96     
-192   32     
320    32     
-96    -16    
128    176    
-144   -64    
176    0      
-16    208    
48     -96    
-64    -176   
192    -64    
112    -112   
32     144    
256    288    
-176   -64    
128    96     
-64    -48    
208    48     
48     112    
-48    -32    
48     -96    
-96    112    
-16    96     
-128   -448   
256    336    
160    -368   
272    -48    
-80    80     
16     32     
272    352    
0      -336   
-80    -208   
-96    336    
-32    -16    
96     160    
-80    176    
-16    -432   
192    432    
144    -128   
240    -144   
-16    -16    
-128   96     
176    -208   
-80    -464   
256    288    
-96    -80    
-96    64     
64     32     
32     -128   
128    112    
80     -16    
208    48     
112    96     
-80    -224   
192    800    
80     -464   
-48    128    
16     -16    
128    96     
144    304    
-64    -128   
-112   -16    
80     80     
16     80     
80     160    
-128   -432   
80     336    
-96    368    
-32    -256   
176    480    
128    128    
112    64     
80     -112   
176    656    
464    336    
144    112    
0      128    
32     16     
112    192    
-32    -80    
-48    -224   
32     -144   
0      -112   
208    -208   
224    416    
48     208    
240    352    
-144   32     
32     160    
96     -64    
48     96     
224    -64    
144    16     
128    160    
-16    -48    
256    224    
96     -48    
32     -32    
80     -256   
48     -16    
-16    -224   
48     64     
64     -672   
160    160    
32     208    
64     64     
80     -16    
16     -480   
64     -1184  
64     -128   
64     96     
48     16     
48     0      
-160   -208   
-48    -192   
-240   -960   
-32    -16    
0      -96    
80     96     
112    80     
112    -336   
-112   96     
320    208    
-112   -160   
80     -80    
-80    -96    
176    -512   
64     -256   
176    -272   
96     -16    
-128   848    
384    208    
96     -144   
208    -128   
-96    -64    
48     -288   
-48    -496   
-160   -240   
80     -336   
-272   -528   
288    -352   
-176   0      
-304   -192   
336    -48    
288    -160   
240    96     
0      16     
416    96     
448    -176   
-320   64     
-64    352    
-192   288    
-640   -256   
-64    -256   
-288   -48    
192    0      
64     -80    
112    -112   
32     240    
-16    -64    
240    -112   
96     224    
192    144    
272    80     
-112   272    
208    32     
-32    48     
-96    -112   
32     -80    
-336   160    
256    -48    
16     176    
48     96     
144    320    
16     64     
160    -112   
96     -368   
128    16     
-16    336    
144    208    
-80    -464   
144    -352   
-224   -112   
-192   -224   
16     96     
-128   384    
-384   96     
32     -240   
192    -304   
80     -160   
-176   -64    
32     -144   
80     48     
-144   176    
192    288    
-80    -32    
16     48     
-48    -48    
-32    -32    
112    -48    
16     -32    
-1296  16     
128    -96    
-96    -288   
240    64     
-112   240    
-80    -288   
-32    -32    
336    16     
-112   -64    
-128   -288   
-224   -304   
-80    -464   
96     224    
96     208    
32     256    
-176   -240   
160    -256   
-480   272    
48     -352   
64     32     
160    -256   
80     -192   
-112   -720   
288    -112   
-16    320    
16     0      
-352   112    
96     -128   
32     288    
48     -208   
-112   144    
48     -64    
-192   112    
32     -192   
-48    32     
-96    -112   
48     224    
-400   -64    
64     -32    
-672   32     
-48    -16    
-96    -32    
-32    -16    
480    576    
-368   128    
-80    -288   
96     -240   
-704   -144   
96     -96    
-32    -16    
48     -128   
336    80     
-64    240    
-256   128    
-384   0      
96     64     
-192   -16    
64     -32    
-144   0      
-96    -64    
96     -256   
304    -112   
16     -32    
-112   -16    
-16    112    
-496   -80    
-208   -64    
16     16     
-352   -128   
32     -32    
-272   256    
-208   80     
-224   48     
112    32     
112    -80    
-32    16     
-64    -112   
80     64     
-64    -32    
-64    32     
-128   -144   
-608   -64    
0      48     
-80    48     
-16    64     
-112   160    
-416   -32    
-240   -48    
-64    0      
224    16     
144    32     
16     -16    
-32    32     
-288   -96    
96     112    
-96    16     
-96    16     
0      32     
160    64     
-208   -48    
-176   32     
-64    16     
-160   -48    
64     16     
-192   -112   
-144   -32    
-112   -32    
0      16     
-48    -16    
32     48     
112    64     
-64    64     
192    192    
-384   -32    
112    112    
-160   -16    
112    64     
-64    32     
-160   -16    
-816   144    
0      144    
-96    -160   
-144   -128   
32     -112   
-16    272    
-48    80     
16     48     
-432   -48    
112    -80    
-64    -16    
16     80     
48     144    
-48    32     
-224   -80    
-704   -160   
240    128    
-176   -80    
192    48     
192    224    
-304   96     
256    -48    
-352   -112   
400    48     
16     144    
-112   0      
144    -16    
-32    -16    
-656   -320   
240    0      
-272   -256   
-64    16     
-960   176    
80     -80    
-64    80     
-208   16     
288    64     
176    128    
-224   32     
608    144    
-368   -16    
-176   -64    
-16    80     
-48    48     
64     80     
-48    48     
32     32     
-816   -32    
-16    0      
288    192    
-224   128    
-64    -128   
80     64     
0      -32    
16     208    
-48    208    
-16    -16    
64     208    
-144   -16    
-48    -128   
-288   320    
304    16     
-736   -64    
-160   144    
432    96     
-64    80     
80     -48    
-48    -48    
-64    0      
64     96     
-208   64     
96     48     
176    112    
-400   176    
640    -1232  
-432   688    
272    -48    
144    -48    
-16    192    
16     -64    
-32    432    
320    -16    
-32    -144   
80     368    
96     32     
272    48     
-256   192    
-224   432    
-112   96     
0      224    
-96    -368   
-192   -368   
224    -272   
304    -32    
-32    768    
-64    224    
-160   144    
48     -32    
48     -32    
160    96     
64     -160   
-192   64     
240    96     
-336   0      
-48    -128   
-32    320    
16     320    
-96    -32    
48     80     
256    192    
-112   272    
-96    16     
48     0      
96     16     
-80    48     
16     -176   
-96    -160   
0      -128   
32     0      
80     160    
160    144    
-48    64     
400    880    
-144   272    
-64    -208   
160    -48    
0      48     
-48    -48    
48     0      
-112   -16    
192    192    
16     272    
-48    224    
-160   64     
224    -272   
112    -80    
-32    -112   
48     32     
144    96     
-96    208    
0      128    
16     80     
-112   -112   
256    -176   
-96    64     
144    -32    
16     32     
96     32     
-64    -160   
-32    -816   
-80    112    
352    432    
-272   112    
-96    16     
288    -64    
80     64     
-16    -32    
64     -96    
144    -32    
160    64     
-160   48     
-48    64     
64     240    
-16    -48    
96     -80    
0      -272   
-80    -16    
-16    -96    
48     -192   
208    -64    
80     -144   
48     -48    
224    80     
64     240    
-16    64     
0      -96    
16     -160   
0      16     
80     -80    
32     -352   
-80    80     
96     160    
64     160    
16     -128   
272    48     
112    -16    
224    96     
-144   -64    
32     -128   
-32    -128   
240    144    
16     368    
256    112    
-192   144    
-192   -416   
-32    96     
-32    -256   
256    -96    
176    96     
-32    -192   
80     -368   
144    -368   
112    160    
256    352    
-48    160    
256    160    
-256   32     
-288   -128   
224    -416   
80     -304   
192    -208   
192    -160   
-176   -80    
-48    -512   
416    208    
224    0      
176    352    
96     16     
96     16     
192    224    
-96    -80    
128    -48    
80     -304   
-208   -112   
144    16     
80     256    
-352   16     
-16    64     
432    -1056  
-400   688    
288    160    
-208   -224   
-32    -112   
240    -48    
64     96     
688    512    
-688   16     
80     80     
-256   224    
256    192    
288    496    
128    224    
240    480    
128    -80    
-80    32     
192    -16    
-208   112    
32     64     
64     -80    
384    272    
-464   -224   
-224   -48    
-64    -176   
96     176    
624    416    
-144   528    
256    176    
-240   160    
-160   -352   
320    -80    
464    608    
-288   -272   
-128   144    
-48    144    
144    80     
128    416    
208    -192   
0      -480   
48     -352   
0      448    
128    224    
-80    -32    
96     320    
-48    -272   
368    144    
32     32     
32     160    
-16    -160   
-112   -944   
416    -432   
80     -224   
-144   80     
-432   0      
128    112    
32     -80    
16     128    
160    -288   
80     384    
112    -256   
32     -1104  
112    272    
32     272    
0      -128   
-1056  -48    
32     -496   
128    48     
-32    -784   
224    -80    
160    -256   
-144   -128   
96     -48    
16     -16    
0      -336   
0      -16    
112    192    
144    240    
64     -144   
-64    -64    
-528   -48    
-32    -48    
80     -240   
128    -576   
160    -256   
80     -192   
-32    16     
192    -320   
-16    -64    
16     -16    
48     32     
192    -80    
-192   48     
16     -64    
-144   -256   
-240   -224   
128    224    
-1536  64     
96     -96    
240    -48    
96     -96    
48     -48    
208    -16    
32     0      
96     -32    
-32    -64    
144    -80    
-128   0      
80     48     
-16    0      
16     -48    
112    -48    
-400   16     
112    -96    
160    0      
16     -32    
80     0      
-128   -160   
-464   -32    
240    -256   
48     64     
80     0      
-32    -128   
-16    -272   
432    -288   
-64    -96    
64     -192   
-1200  144    
-208   -128   
304    16     
256    0      
-160   -32    
96     -208   
-160   -48    
96     -720   
-16    96     
96     0      
32     64     
-112   -48    
32     -192   
-112   32     
96     -48    
-256   32     
80     -64    
-368   0      
96     0      
-80    -32    
0      -144   
192    112    
176    -128   
16     144    
80     -32    
-64    -144   
-48    -48    
192    -32    
32     16     
112    32     
-32    80     
144    -64    
-128   0      
16     -128   
16     48     
96     -96    
64     48     
112    -160   
128    96     
-128   -80    
208    -112   
-112   0      
192    -48    
-32    32     
64     -48    
-304   -448   
-16    -48    
-528   96     
48     -208   
80     144    
64     144    
-48    112    
272    -208   
-256   -80    
-64    -16    
0      64     
0      -96    
-96    -160   
-464   -160   
384    32     
-96    -16    
240    -112   
-80    -64    
96     -16    
-48    48     
-304   -432   
-48    -400   
-400   -368   
-48    -32    
128    -96    
-96    -256   
-336   -192   
176    -288   
-96    160    
-96    240    
-32    0      
224    112    
-192   96     
-240   -160   
-144   -16    
-864   -144   
-96    64     
-112   -128   
-176   224    
48     368    
-96    -48    
-224   -144   
-1728  -48    
-192   0      
176    -64    
48     32     
48     -16    
-32    -96    
-432   -128   
96     144    
-544   288    
112    416    
224    -400   
-192   224    
-320   -144   
-112   -80    
-128   128    
-96    -752   
-192   144    
-48    -32    
-176   320    
-480   -16    
560    -400   
-64    416    
-32    192    
32     112    
176    272    
-32    80     
-144   96     
0      128    
64     -208   
-64    144    
-96    -112   
64     -16    
-448   32     
-160   -128   
-304   -256   
272    -192   
-32    -16    
208    -64    
-80    -240   
-48    48     
-96    80     
128    -16    
112    -64    
-48    16     
-96    224    
-16    160    
-176   16     
-416   48     
-16    0      
-64    -96    
-48    -112   
144    -144   
176    -64    
-208   -144   
16     64     
64     48     
-96    -16    
96     16     
16     64     
-96    -48    
-48    -16    
96     32     
-144   48     
-48    -176   
-512   -96    
224    208    
-352   80     
-32    -48    
80     16     
96     112    
32     -16    
-192   32     
64     -48    
-288   -48    
0      -16    
-64    16     
160    16     
-80    48     
144    96     
0      48     
80     304    
-304   64     
-192   -16    
112    -112   
16     16     
96     64     
16     -48    
16     -48    
16     144    
-80    64     
-16    -32    
-64    -16    
-304   -112   
16     48     
-640   -144   
-144   48     
-1760  -112   
-64    80     
0      64     
-48    80     
48     160    
128    48     
144    48     
64     176    
144    144    
-176   48     
64     -96    
-112   -96    
112    64     
16     -32    
32     16     
-16    -192   
224    160    
-80    224    
-32    16     
208    16     
-144   48     
144    80     
-64    64     
128    112    
-240   112    
256    112    
-160   96     
-16    -16    
64     -64    
288    32     
-16    160    
96     272    
-32    16     
-64    64     
-16    32     
96     160    
32     80     
-80    -16    
112    32     
-128   -32    
128    64     
-128   -48    
112    128    
-192   -16    
192    448    
-16    128    
176    208    
-48    176    
80     -80    
32     -32    
-16    48     
176    288    
-192   32     
-32    -80    
112    -112   
48     -48    
-272   -496   
160    -96    
-80    0      
-176   -160   
48     0      
320    576    
-160   640    
-336   496    
400    -1040  
192    -160   
-256   704    
32     -784   
-64    -1136  
-240   80     
416    1008   
-320   544    
-96    -720   
224    16     
64     320    
-128   -224   
-48    0      
240    128    
-336   -112   
112    -176   
-16    544    
160    -64    
160    0      
-160   192    
-560   -32    
-240   0      
224    240    
528    800    
-64    -736   
304    -480   
-176   336    
-400   -1088  
-112   -400   
-112   912    
-304   48     
-304   -368   
480    368    
272    256    
16     288    
384    -448   
256    -96    
-80    576    
-400   -192   
96     160    
112    -112   
-48    -48    
-160   144    
400    -144   
48     272    
-16    -64    
-48    -32    
16     96     
-64    400    
176    -144   
-448   16     
176    96     
80     -96    
208    -928   
64     16     
-192   176    
160    80     
80     -16    
-112   -32    
176    0      
112    144    
-288   -16    
432    -112   
64     176    
0      96     
-240   -16    
-16    -144   
112    0      
112    96     
-112   -160   
96     -64    
96     112    
112    -80    
240    240    
-48    240    
176    80     
48     -16    
112    -48    
-80    -160   
128    -32    
-208   -176   
-80    -64    
144    144    
96     176    
96     144    
-144   -512   
-32    0      
96     -48    
176    -32    
144    -48    
-192   -752   
-320   -96    
80     144    
-208   -176   
64     64     
96     144    
176    -64    
112    -32    
32     48     
112    0      
-160   -128   
112    0      
-48    -128   
64     -176   
80     -208   
224    112    
-192   -32    
16     32     
272    288    
-80    320    
-16    0      
144    -96    
-32    -144   
256    -272   
176    48     
128    80     
-48    112    
48     -848   
-16    80     
48     -16    
176    128    
-224   -16    
48     16     
416    528    
-160   576    
176    80     
128    -48    
48     0      
0      -64    
368    176    
192    -144   
0      32     
-256   -416   
-176   -16    
-208   -80    
96     -48    
208    176    
64     -32    
16     48     
16     -48    
-144   32     
48     -128   
128    32     
80     -160   
-128   -32    
80     -112   
176    32     
128    -160   
0      80     
48     144    
-48    -208   
-352   -112   
-32    112    
48     208    
96     64     
112    0      
144    -64    
176    48     
160    -32    
160    -32    
-64    -176   
-80    0      
160    -96    
208    64     
144    96     
48     -1312  
0      -32    
160    -256   
-32    -944   
144    32     
16     -592   
16     -128   
112    -48    
240    64     
64     64     
112    48     
0      16     
128    -16    
176    -688   
16     0      
96     -176   
-80    32     
-80    48     
112    -32    
176    -64    
-16    -80    
16     -64    
48     -880   
80     -64    
0      80     
96     -48    
48     -48    
80     0      
64     -416   
16     16     
-16    -16    
128    -144   
-784   -16    
128    -16    
256    -16    
144    -80    
96     -48    
-32    -128   
288    32     
-48    -560   
32     -32    
-16    -144   
-240   -112   
128    0      
96     0      
224    -32    
-16    -208   
-704   -144   
256    -48    
-624   16     
352    16     
192    16     
160    -144   
256    160    
-48    -352   
-224   -384   
176    272    
48     368    
320    -208   
432    240    
-368   -176   
-1216  208    
544    1376   
-192   240    
-2240  -800   
0      400    
-144   -384   
224    -848   
96     336    
240    -480   
-144   0      
272    176    
-96    -128   
-144   -48    
160    320    
112    224    
224    -80    
-208   32     
112    -240   
-672   -256   
-128   624    
160    64     
64     0      
144    -224   
16     -336   
-128   -80    
-176   -416   
192    352    
320    112    
512    336    
-320   192    
-160   112    
-16    -32    
96     128    
-112   -96    
64     -128   
-768   -48    
-64    -208   
16     128    
128    -48    
80     -16    
320    -400   
32     144    
-96    16     
-32    -64    
-80    -48    
48     -64    
-192   48     
224    -64    
-1104  0      
144    -32    
-320   16     
-112   0      
80     -144   
-48    -160   
-80    -16    
-96    -176   
-128   80     
16     16     
16     64     
-80    -32    
-16    16     
-192   96     
288    -64    
-272   -80    
48     32     
-768   -80    
16     -48    
0      0      
176    -80    
-16    32     
-32    -80    
128    -80    
-768   48     
80     -64    
-176   -32    
160    -48    
-176   16     
288    272    
-96    160    
240    -80    
-224   16     
-16    -160   
-32    -240   
-16    -176   
224    112    
-1392  -16    
-448   176    
-368   -96    
-208   -80    
-16    -16    
80     -16    
0      16     
32     16     
128    -80    
224    64     
-80    256    
-832   384    
-368   256    
-320   -224   
96     -80    
64     -32    
-80    -96    
-112   -128   
112    16     
-16    -80    
-208   -16    
-128   144    
0      48     
-320   -16    
-928   -160   
128    -80    
-288   -16    
256    -32    
-528   -96    
0      16     
-16    -48    
96     128    
96     48     
-48    16     
-176   -48    
-176   0      
-64    160    
-1264  48     
272    224    
96     208    
-352   -80    
-416   -288   
256    -288   
48     -160   
64     32     
-48    -32    
-48    96     
-224   -256   
-448   -608   
-224   -480   
-432   -320   
-256   464    
96     112    
16     0      
-144   -64    
0      -32    
-80    48     
16     -144   
-16    32     
208    208    
64     -64    
48     -48    
-32    144    
-112   -256   
-128   272    
16     480    
48     -400   
-352   0      
80     368    
-832   -176   
32     352    
-144   -352   
160    336    
48     64     
-208   64     
16     80     
-16    -112   
80     80     
64     0      
128    128    
-176   -32    
80     -32    
-672   384    
0      -144   
-336   64     
96     32     
-32    -80    
48     -96    
-32    272    
224    48     
-160   -32    
96     -96    
-160   96     
-304   -800   
-176   -112   
128    656    
48     -16    
80     -128   
320    64     
-352   320    
192    -192   
-224   -336   
-16    160    
112    96     
64     -176   
-48    -160   
64     -32    
0      208    
-352   144    
224    -16    
-272   -288   
288    -976   
256    80     
528    976    
192    464    
-16    128    
-560   -1152  
-96    -608   
-336   336    
-16    160    
16     -48    
240    0      
-112   0      
64     112    
-48    -64    
-112   -240   
240    32     
-48    256    
192    160    
48     -80    
112    -32    
-48    -32    
-32    32     
-64    -96    
-224   96     
16     -16    
0      32     
-16    -48    
80     -240   
176    0      
-176   48     
-48    -128   
-304   -304   
-96    80     
-128   112    
160    32     
-128   64     
32     80     
32     16     
-80    112    
48     208    
336    112    
-96    -32    
-128   -32    
96     64     
-80    0      
16     -48    
16     16     
-48    176    
0      0      
112    16     
16     32     
-304   -240   
-96    -64    
224    208    
-192   96     
-32    80     
256    64     
112    -192   
-80    -128   
-16    80     
48     160    
-240   0      
96     0      
208    0      
0      32     
-16    -64    
160    48     
-96    208    
320    96     
-32    -160   
-224   -64    
-256   -96    
-288   -272   
288    16     
-80    176    
-80    16     
-64    -32    
16     96     
112    48     
-48    16     
-64    -16    
192    48     
112    96     
64     0      
16     64     
16     48     
16     0      
-64    96     
32     16     
-16    -112   
128    80     
-48    -16    
32     32     
160    96     
240    64     
80     32     
16     80     
144    160    
-16    -48    
176    80     
16     -16    
32     -176   
256    -480   
96     32     
224    272    
0      -48    
96     -48    
-48    -272   
96     0      
-32    -16    
-208   -32    
-176   96     
48     -64    
-48    16     
112    64     
240    208    
-32    144    
-80    16     
-48    48     
48     -80    
48     32     
256    112    
16     -1264  
96     32     
128    16     
16     16     
32     96     
-80    -32    
-48    -96    
-80    -96    
-64    16     
144    0      
48     -16    
80     80     
96     16     
96     -48    
-32    32     
-32    -272   
96     -16    
256    -16    
288    112    
-128   -208   
-112   -112   
-112   32     
-16    0      
192    0      
192    96     
160    144    
32     -32    
-192   -48    
32     -176   
80     160    
-128   -320   
112    48     
144    64     
0      -80    
80     0      
-16    -48    
-16    32     
160    64     
-48    48     
48     48     
-96    -32    
112    48     
96     64     
32     -48    
80     64     
-32    -208   
144    48     
64     -1152  
32     64     
64     -16    
32     16     
160    -160   
240    -16    
128    320    
256    256    
-64    112    
-48    16     
-48    16     
112    176    
80     -208   
-32    -16    
144    272    
192    208    
304    64     
80     -448   
128    48     
0      176    
256    -144   
-96    176    
-80    -992   
-128   672    
80     -208   
-64    208    
288    256    
192    176    
64     -496   
-64    -192   
-544   80     
0      96     
-128   -896   
304    128    
-400   160    
336    304    
-272   -256   
544    -912   
-112   -400   
400    624    
112    592    
112    -320   
-400   -112   
48     64     
64     -16    
80     80     
320    160    
-16    240    
-32    208    
192    176    
112    176    
112    -144   
0      -16    
128    -304   
-48    -128   
64     112    
32     64     
-80    -192   
336    -160   
64     240    
192    64     
-16    0      
144    -48    
48     128    
128    96     
272    -528   
0      64     
-96    -64    
-208   -1104  
208    -112   
48     192    
528    128    
96     80     
16     -112   
0      -48    
-48    -64    
272    -16    
-112   -128   
48     -272   
-48    -16    
96     -240   
-128   -16    
-1136  -208   
176    -16    
16     -32    
96     96     
144    -80    
128    -288   
96     -208   
-112   64     
0      -16    
-64    144    
48     80     
80     -208   
304    0      
-64    -80    
48     -48    
-128   32     
240    128    
-128   32     
160    -240   
-32    -192   
0      -352   
0      48     
80     -480   
32     -32    
48     48     
128    80     
64     -64    
80     -48    
-64    16     
0      0      
32     -80    
32     -16    
64     -80    
144    -80    
-64    32     
64     32     
80     -176   
176    -160   
-144   -32    
80     -144   
-112   144    
0      -16    
-64    48     
-64    -48    
0      -160   
-496   -112   
48     -80    
-2720  -64    
128    -64    
-144   -32    
176    240    
-144   272    
112    -144   
112    -96    
160    -96    
-16    -160   
160    -96    
-240   -144   
-272   -160   
-48    -256   
64     0      
176    80     
-256   32     
-16    -96    
-80    0      
0      0      
-240   256    
32     112    
-176   96     
224    -208   
224    192    
224    96     
64     496    
-32    352    
-64    16     
-224   -48    
96     176    
-64    256    
96     -576   
-2400  -1008  
96     -416   
48     592    
192    -240   
-80    16     
144    -192   
-80    -176   
-16    224    
240    336    
-144   -112   
-80    192    
-96    192    
16     -112   
-656   48     
-16    -240   
-240   288    
144    -400   
-96    48     
240    -16    
-112   -112   
336    48     
-192   -240   
-80    64     
208    -576   
-320   304    
-96    -16    
-208   -192   
112    208    
-80    144    
96     0      
16     -80    
0      -64    
-64    -48    
112    -160   
-80    32     
96     -80    
64     -48    
-368   -48    
112    80     
80     96     
48     -96    
-48    288    
80     336    
-272   -32    
-48    -96    
-288   0      
176    -96    
64     32     
496    -176   
-112   0      
-112   -16    
96     192    
-64    -32    
160    192    
-32    80     
48     -80    
-528   48     
112    96     
-16    -80    
160    -16    
160    64     
-1968  -96    
240    208    
-240   -160   
448    32     
0      -16    
-576   -64    
48     128    
-416   368    
-256   192    
-1280  0      
752    336    
-272   192    
-224   -16    
-16    -64    
-256   0      
400    144    
-80    64     
0      -208   
-64    -224   
-128   -128   
-320   112    
-144   -48    
160    32     
-80    48     
-368   -192   
-224   -304   
-48    80     
-320   48     
0      -16    
144    48     
-16    -32    
48     16     
-144   -96    
16     0      
-32    16     
-176   32     
224    48     
-224   -48    
-80    -112   
-240   96     
48     224    
-400   -16    
96     -48    
-32    0      
112    96     
-80    -80    
-144   -112   
144    -208   
-128   16     
208    48     
32     32     
-16    48     
-80    96     
32     64     
-304   -32    
-80    -48    
192    80     
-16    16     
-1232  0      
144    80     
96     48     
-256   -96    
0      -96    
112    32     
-80    64     
-160   -80    
80     48     
-304   0      
-48    80     
80     0      
0      16     
-480   64     
-96    64     
-2432  -80    
0      64     
-112   64     
-16    96     
128    16     
-32    496    
-16    320    
176    -352   
-480   -144   
0      112    
32     80     
-80    -96    
144    -32    
-256   -64    
400    80     
16     -48    
112    144    
-16    80     
-352   -32    
-16    -128   
-16    -32    
80     0      
-64    -64    
192    96     
0      48     
32     176    
-416   32     
-32    0      
-112   -160   
32     0      
-96    128    
-32    96     
0      64     
32     -128   
-64    16     
-144   64     
-16    64     
272    32     
-240   -112   
-144   224    
-128   272    
-400   -48    
-16    32     
-192   -80    
-32    128    
0      416    
64     304    
-208   -304   
208    -480   
160    144    
240    288    
16     112    
128    48     
48     16     
-32    0      
96     32     
-48    32     
-48    64     
80     -160   
48     -240   
-272   -80    
16     80     
112    64     
32     16     
64     144    
-48    224    
96     48     
0      160    
0      128    
16     0      
32     48     
-192   -80    
96     0      
-144   96     
384    288    
-96    176    
-240   -96    
176    -208   
96     -48    
128    -144   
-400   -272   
192    -672   
-80    -256   
128    304    
-208   208    
-80    32     
-288   -64    
0      -32    
-192   -192   
96     32     
48     0      
0      -144   
112    176    
48     176    
-80    -48    
80     -16    
0      16     
-128   160    
352    -544   
-112   176    
64     240    
-112   -160   
256    128    
-80    -224   
-16    96     
32     192    
-288   176    
112    -384   
48     368    
48     -272   
16     160    
-64    112    
-192   112    
128    320    
80     -480   
64     16     
64     144    
128    -112   
160    736    
128    -288   
192    416    
-64    80     
32     -256   
-80    272    
368    224    
-128   320    
16     208    
208    272    
-128   64     
-144   -96    
144    208    
64     -32    
-48    176    
16     32     
208    -96    
192    0      
-400   176    
-160   -48    
64     16     
-64    48     
272    16     
48     -16    
-400   272    
336    96     
-32    -32    
144    272    
-160   160    
32     -176   
-160   96     
32     -320   
112    -80    
0      -32    
240    -224   
0      560    
64     176    
288    -240   
80     128    
96     0      
-112   -336   
-32    -176   
-176   224    
-16    0      
48     -96    
-64    448    
480    -304   
-64    16     
48     0      
-16    32     
240    -16    
-96    -96    
352    -16    
-96    128    
48     352    
-144   80     
-80    -112   
160    64     
-16    176    
0      -128   
288    -96    
-16    -400   
-144   32     
352    16     
208    336    
48     320    
-224   224    
-144   -160   
96     32     
-64    32     
-32    96     
-64    -64    
128    0      
-112   96     
32     -96    
160    48     
-16    -144   
64     48     
80     -208   
16     -32    
-48    -112   
16     32     
-16    -32    
336    176    
-112   208    
48     -32    
192    176    
-272   -16    
48     16     
432    -96    
-160   144    
-64    -112   
0      16     
48     -416   
-48    176    
80     160    
-48    160    
96     16     
128    64     
64     128    
-48    48     
128    16     
96     -48    
32     160    
176    0      
-16    48     
0      -192   
64     112    
-16    -336   
96     144    
-96    48     
96     512    
160    288    
96     112    
-48    96     
144    0      
-32    16     
176    -304   
-272   -176   
-48    -384   
48     -752   
112    -432   
272    32     
96     -128   
80     368    
336    512    
-176   224    
-32    -224   
0      128    
80     592    
16     -1008  
208    -80    
-16    304    
-128   -144   
80     -48    
64     -32    
16     -48    
-112   96     
-16    -32    
48     112    
16     -144   
208    -464   
176    400    
80     -1152  
-336   -112   
-80    -48    
0      -560   
-80    -384   
432    384    
160    128    
256    -64    
112    -176   
48     32     
-144   32     
80     -592   
-32    32     
128    -32    
160    -16    
-272   -192   
-32    112    
-208   80     
-48    -96    
32     -160   
112    -544   
208    -16    
-96    -1008  
144    -48    
48     96     
-16    -16    
240    0      
32     -32    
144    48     
64     96     
160    80     
-32    96     
-2480  -16    
144    -16    
32     -16    
80     -80    
112    -64    
48     -320   
80     -80    
-32    -96    
-16    32     
128    -16    
-64    48     
128    -80    
-32    64     
-192   0      
-32    -128   
-192   -144   
48     16     
64     0      
-48    16     
128    0      
-128   -352   
272    -80    
64     -624   
384    -48    
-16    -112   
64     80     
112    32     
144    -32    
-64    16     
-192   -112   
-64    64     
16     -32    
176    -96    
32     -144   
-48    16     
464    -32    
-224   -32    
64     -544   
432    80     
-352   0      
128    -48    
176    16     
144    16     
240    224    
-192   -48    
-32    -80    
16     -80    
-992   -112   
240    -80    
400    400    
-624   64     
-464   -80    
64     -224   
-144   32     
256    -80    
-448   64     
-80    -192   
368    -32    
-256   144    
-224   -112   
32     160    
-176   -96    
-640   48     
80     -48    
-1184  112    
-32    -128   
272    96     
-96    -128   
112    64     
48     -240   
32     -224   
208    -80    
-128   96     
-320   -16    
208    -96    
304    48     
80     48     
32     64     
-48    96     
96     64     
96     -256   
-176   48     
208    -128   
-96    144    
128    -224   
240    -208   
-64    16     
144    -16    
-416   -16    
240    16     
0      32     
-176   -48    
-48    -16    
16     -96    
272    16     
32     -144   
144    112    
64     -32    
-96    32     
-400   16     
96     -224   
-144   -80    
-80    16     
160    16     
144    32     
96     320    
-96    176    
-352   -128   
224    -48    
-112   48     
528    96     
-80    64     
-592   144    
-208   -80    
-608   -32    
-560   128    
176    32     
16     -48    
96     -16    
-32    64     
-160   -16    
32     160    
224    96     
-448   80     
64     -176   
-304   400    
32     -64    
-96    -192   
-240   128    
-48    -64    
-64    0      
-192   528    
-336   -144   
-208   16     
-2320  -192   
288    0      
128    128    
-16    -48    
-208   16     
-32    16     
-496   -80    
-112   48     
-192   -208   
48     32     
272    16     
432    656    
-720   -720   
-352   -880   
-16    496    
-288   32     
208    -80    
48     208    
-32    -208   
64     -464   
-48    400    
-80    -96    
32     112    
-80    128    
-112   -384   
32     912    
-272   -176   
-128   -160   
-240   -336   
-32    272    
-288   -64    
192    -112   
-464   -32    
-32    208    
0      -64    
96     -32    
16     -32    
64     16     
-16    112    
-192   336    
-160   -64    
-192   -400   
16     -208   
96     320    
32     128    
-64    -224   
-160   80     
-304   -352   
96     208    
-64    64     
144    -160   
-192   144    
64     -240   
48     640    
64     -16    
160    -240   
176    208    
64     0      
-176   16     
-96    -80    
-432   304    
-32    176    
-320   -80    
144    -240   
-1056  -224   
16     96     
96     240    
-32    176    
16     -144   
192    224    
112    192    
-112   -48    
16     352    
-112   -64    
-16    144    
16     16     
112    32     
-96    -32    
128    80     
-368   64     
32     -80    
16     -64    
80     -96    
64     -16    
32     -144   
16     -48    
-96    -208   
112    -96    
-480   -208   
-16    -464   
-336   -560   
-240   -240   
-384   -208   
112    -128   
-176   -64    
0      224    
48     48     
-16    32     
-96    112    
-48    -80    
-32    256    
112    -64    
64     -160   
32     -128   
32     -96    
16     -64    
80     112    
-144   208    
480    352    
0      224    
-208   -224   
-336   144    
-224   32     
-48    -144   
368    -192   
192    -112   
288    0      
48     -96    
-128   -16    
-32    112    
-432   16     
-96    160    
-32    64     
32     -48    
192    16     
16     240    
0      -16    
64     -192   
-32    -48    
48     64     
-128   0      
-32    -144   
-48    -48    
-144   32     
128    48     
-160   64     
64     -192   
80     -64    
-48    208    
0      16     
320    96     
-112   80     
-48    32     
128    48     
48     -16    
-48    192    
192    96     
96     0      
48     -352   
-528   -656   
0      -352   
-272   -16    
208    -208   
224    96     
64     64     
112    192    
-32    496    
336    336    
-48    48     
-144   -48    
144    112    
-96    128    
304    -80    
128    -112   
32     144    
-48    -48    
192    176    
368    48     
-304   320    
-48    16     
-240   240    
112    -32    
-80    -80    
288    128    
16     224    
240    128    
-80    96     
32     -16    
-288   -176   
-224   288    
-16    -96    
208    144    
32     96     
-16    -32    
64     64     
-80    -32    
-112   112    
80     0      
96     -192   
192    -64    
144    48     
-96    176    
96     256    
-48    112    
160    32     
-80    112    
16     48     
-112   -160   
16     -160   
96     96     
48     -32    
-16    0      
-16    -288   
256    320    
-16    144    
48     -304   
16     288    
0      -96    
16     -32    
32     -112   
-208   -288   
-112   -384   
352    -32    
-96    208    
192    -80    
-64    208    
64     -80    
128    48     
-64    -176   
-64    -80    
-160   -128   
128    240    
80     256    
80     -176   
80     128    
32     176    
160    -144   
176    16     
160    -176   
16     32     
0      80     
0      -32    
96     -32    
112    64     
96     128    
48     64     
16     -32    
16     16     
-384   -96    
192    -80    
304    96     
224    0      
128    192    
144    32     
-96    0      
-192   -16    
160    96     
112    64     
-16    64     
240    -64    
368    176    
496    288    
-304   128    
48     48     
-16    -48    
0      32     
64     -16    
64     0      
-32    -160   
192    192    
32     -304   
144    48     
144    96     
64     0      
32     48     
144    -16    
-240   -80    
64     80     
-32    -48    
224    -16    
80     48     
80     -128   
96     -16    
0      -144   
192    128    
-64    -336   
208    64     
16     0      
96     64     
64     32     
16     16     
64     -16    
128    192    
288    -32    
-48    -32    
-32    80     
0      -208   
560    208    
-496   -80    
320    -112   
-16    16     
96     48     
208    -32    
48     -128   
-64    -32    
0      272    
-128   -128   
320    -96    
-176   80     
400    -288   
0      0      
192    -16    
-112   32     
48     -176   
-32    -48    
224    -128   
-128   32     
384    128    
64     208    
-272   48     
224    0      
-432   -96    
768    208    
-352   64     
-80    -176   
416    0      
256    -80    
240    -32    
-48    -144   
176    32     
48     -64    
128    16     
32     112    
-256   -432   
48     -96    
64     -800   
416    -960   
-160   224    
16     -304   
272    -128   
-32    -960   
64     -16    
-48    -32    
160    -96    
32     112    
48     64     
96     16     
128    144    
128    -144   
192    -48    
-16    -208   
-80    -16    
-48    -112   
112    -160   
144    32     
96     96     
48     -48    
160    32     
96     224    
112    192    
-16    -192   
-176   -352   
160    48     
64     -32    
-240   -16    
-240   -144   
-48    32     
-992   64     
-224   -96    
208    -160   
80     -48    
-96    -720   
-80    144    
176    208    
16     -240   
224    352    
-96    -432   
304    352    
-32    -144   
-80    128    
128    -48    
368    -16    
-880   -144   
48     -64    
-96    -48    
48     -112   
144    0      
128    -128   
144    208    
-32    -1840  
16     -48    
-176   -304   
384    432    
96     64     
144    -96    
-256   112    
16     -160   
-304   0      
128    256    
-112   -480   
32     -48    
112    0      
32     -176   
-368   128    
96     -880   
176    992    
64     -288   
-96    -144   
-80    384    
48     -208   
-208   224    
32     352    
-368   -144   
-64    -80    
-208   48     
80     -96    
256    176    
48     -208   
48     16     
-16    -48    
-96    48     
80     80     
0      -384   
-160   272    
80     144    
-16    80     
176    112    
-144   -144   
80     -96    
-960   128    
96     160    
-1168  256    
144    224    
-144   -400   
96     32     
-112   176    
-32    -240   
160    272    
48     0      
256    96     
48     80     
48     0      
-368   -48    
32     -96    
-160   0      
80     32     
-32    128    
160    0      
-32    48     
-128   -512   
176    -80    
288    -656   
32     -160   
-272   -128   
112    48     
-576   96     
-16    -272   
-112   -224   
160    0      
-160   -96    
48     -256   
-112   -288   
16     0      
176    240    
304    -16    
-160   144    
-32    -128   
192    -80    
-352   -16    
112    -224   
-128   -256   
160    32     
-32    224    
0      -48    
-144   48     
112    -160   
112    224    
32     -32    
48     96     
-336   -48    
-224   32     
-160   176    
-1056  -160   
-240   144    
480    -96    
-192   -64    
80     0      
-176   -96    
96     80     
-704   -96    
-400   -128   
96     -160   
-112   0      
144    48     
-80    -32    
-96    144    
-16    240    
-32    368    
-320   464    
-208   128    
176    -368   
-672   -288   
16     16     
192    480    
80     16     
-192   240    
-48    -16    
-112   176    
160    352    
-16    160    
160    -144   
-176   -368   
-384   96     
-240   -16    
-320   128    
224    -32    
-192   -144   
256    -16    
0      160    
-128   32     
-384   -128   
-80    112    
-160   0      
96     64     
256    48     
-240   -16    
224    -32    
16     16     
-416   -32    
208    -208   
208    32     
80     32     
-256   96     
-1712  0      
-208   80     
-288   -160   
208    -336   
-160   -272   
208    -352   
-176   -192   
224    96     
112    64     
-96    0      
160    -112   
-160   144    
-32    -48    
-96    -16    
0      32     
-752   192    
0      -32    
320    16     
-160   288    
192    -32    
-192   -112   
192    0      
16     0      
-272   -48    
-48    32     
16     -96    
-224   -48    
64     -80    
-160   96     
-48    -16    
-352   -128   
128    0      
64     112    
-48    112    
80     16     
-352   -64    
-288   64     
-336   32     
64     -256   
80     128    
48     192    
-16    288    
0      208    
-352   -80    
112    -176   
-320   -320   
-16    -144   
-496   -112   
80     -80    
-160   -192   
192    -464   
64     -80    
128    0      
-96    -128   
-16    112    
64     32     
288    320    
-144   -32    
-112   -272   
-256   -128   
-176   -208   
288    320    
-480   -384   
-32    224    
0      -64    
48     208    
0      -80    
272    -352   
0      288    
-64    -16    
96     192    
-48    224    
-16    -80    
-176   -48    
160    368    
-96    -32    
80     -96    
16     -16    
-48    -48    
0      0      
48     80     
-16    0      
-144   0      
16     48     
-48    16     
64     32     
176    96     
-176   0      
-176   32     
-32    592    
-240   336    
64     0      
-96    -96    
64     -48    
-48    -48    
80     -160   
96     -128   
256    144    
304    272    
-192   256    
-80    -128   
-240   -16    
16     -32    
32     -112   
144    -16    
96     48     
64     32     
160    128    
-240   48     
-16    0      
0      0      
144    64     
16     48     
192    64     
80     96     
-64    -32    
-80    64     
112    80     
-224   -48    
64     96     
0      0      
-64    -16    
-80    32     
-48    80     
0      16     
32     -64    
0      -112   
0      -32    
32     224    
-144   -32    
208    32     
-16    0      
32     64     
-96    32     
112    128    
144    32     
-48    16     
-64    32     
0      0      
96     32     
112    128    
272    112    
96     96     
-192   -16    
32     0      
16     32     
-16    80     
128    64     
64     96     
32     -912   
272    32     
0      32     
80     80     
80     32     
-32    16     
-32    16     
80     80     
-48    32     
64     80     
112    0      
-160   48     
-32    -64    
32     112    
-128   -16    
-80    -416   
128    -144   
272    192    
128    48     
-32    48     
256    96     
-64    -48    
96     128    
-48    224    
0      -32    
-80    -16    
0      96     
-48    240    
112    -64    
176    128    
80     0      
-96    -112   
128    48     
-80    -16    
240    128    
-80    64     
-80    -32    
-64    160    
-16    -176   
-144   -256   
528    400    
-272   64     
208    0      
0      112    
-688   -224   
240    -160   
352    -64    
-96    -544   
176    112    
448    176    
-240   128    
32     96     
-32    96     
128    64     
-144   176    
368    256    
-80    48     
16     -96    
320    96     
-272   32     
64     -640   
48     112    
144    80     
0      -48    
64     128    
128    -240   
-208   -80    
368    336    
-368   -96    
288    112    
-176   -80    
192    -32    
48     192    
112    0      
48     -80    
16     -48    
0      -208   
288    32     
-80    320    
224    -1056  
-64    160    
176    -48    
208    192    
-48    -304   
80     32     
160    160    
-96    144    
112    -16    
-80    -176   
368    352    
128    -304   
208    496    
-176   144    
-144   512    
240    -768   
256    -400   
-128   -112   
-64    -272   
160    96     
-16    160    
224    448    
224    288    
-96    272    
48     64     
384    320    
32     160    
-288   -112   
-80    -480   
0      -80    
176    -272   
-128   -96    
112    -272   
160    -32    
-96    48     
112    80     
-16    -32    
320    96     
-32    32     
-64    -144   
144    16     
0      -128   
352    144    
-64    96     
112    240    
144    -656   
96     -176   
-48    -528   
64     -32    
-96    16     
144    -48    
144    64     
128    -112   
96     16     
128    -96    
144    112    
-32    -144   
112    -32    
16     64     
96     -32    
192    -272   
-128   -464   
176    -224   
-80    -448   
16     144    
176    -16    
-48    -48    
80     256    
96     -784   
-32    -128   
-64    -992   
128    -48    
48     112    
192    -176   
160    64     
208    16     
-80    0      
32     -112   
288    -256   
-32    112    
-912   48     
-32    -64    
64     -32    
96     -48    
16     0      
160    32     
208    -80    
64     -944   
112    -128   
48     -416   
96     32     
0      -160   
32     -224   
160    -208   
-16    256    
-208   144    
0      224    
-208   -16    
144    176    
-96    32     
96     -176   
192    384    
64     -752   
224    304    
-96    32     
256    208    
208    96     
16     0      
0      -96    
32     -128   
-48    -128   
-64    -336   
-240   -112   
16     -224   
192    -64    
160    -16    
-64    -128   
80     -208   
64     96     
208    352    
-80    112    
80     -112   
-160   -80    
-112   -16    
64     144    
-128   0      
96     -240   
-1424  -288   
128    -32    
160    208    
-16    224    
-144   32     
112    16     
64     48     
144    -560   
16     304    
400    352    
-144   464    
-48    240    
464    -112   
-64    -176   
-176   -400   
-368   -240   
240    192    
-16    432    
160    224    
128    112    
-32    -608   
32     -368   
288    -672   
112    -224   
80     96     
128    -16    
-160   -176   
32     -80    
-128   -80    
-112   48     
256    48     
-320   -96    
-672   -288   
-464   48     
-240   -80    
-144   -208   
-304   0      
304    -80    
-32    352    
48     256    
368    0      
176    0      
-224   448    
-112   224    
16     464    
208    528    
32     -112   
-352   -160   
160    -48    
-80    -32    
-16    -160   
208    64     
0      0      
288    64     
-416   96     
32     -144   
-304   -176   
128    32     
64     144    
192    -16    
-592   32     
48     -112   
-80    -448   
480    240    
-400   80     
-144   -432   
288    -32    
336    144    
-32    160    
16     -128   
112    128    
-112   16     
416    272    
-336   -160   
32     -128   
-208   -96    
256    -96    
-112   80     
64     -96    
-144   560    
-2176  -560   
-16    64     
-304   -336   
-944   -224   
400    64     
-384   48     
-64    -160   
-496   128    
-80    0      
-160   144    
-128   -368   
-128   96     
192    48     
-1168  -32    
128    224    
-384   -192   
-64    -48    
-48    48     
-256   112    
176    336    
-416   -368   
0      -320   
-768   368    
-48    208    
-528   224    
0      -16    
-224   -368   
-16    112    
-64    -96    
48     160    
-32    -48    
352    -144   
-256   -80    
0      208    
32     -64    
-304   -224   
-80    0      
-528   208    
-160   144    
-208   64     
-240   -32    
16     -48    
176    224    
96     0      
224    240    
-80    16     
-48    -80    
-32    144    
-96    -16    
48     -32    
192    0      
-64    32     
16     48     
-224   -16    
-288   48     
-64    -512   
-688   -384   
-176   256    
-64    128    
80     -16    
-304   -336   
240    -48    
160    224    
208    480    
48     192    
-224   -160   
112    64     
-48    96     
-16    16     
-80    -16    
96     112    
-48    -16    
80     32     
-64    -32    
-80    -16    
160    64     
-64    32     
-32    96     
-352   32     
-176   -48    
-80    16     
-64    16     
-48    48     
64     48     
48     48     
-80    -64    
-544   -32    
-16    96     
-96    -80    
112    16     
32     32     
96     -80    
-48    48     
-224   0      
16     -48    
112    64     
-96    64     
0      48     
-48    48     
-16    64     
-64    80     
-96    32     
32     80     
-608   -48    
32     -48    
208    80     
-160   96     
-80    32     
-96    -32    
0      32     
-16    32     
224    64     
-64    16     
0      16     
-160   -16    
32     64     
-112   64     
80     80     
-16    32     
-112   -16    
0      0      
-48    64     
-16    48     
48     -16    
-48    -16    
112    96     
-192   0      
-48    -64    
16     96     
-48    16     
-32    -144   
-32    -176   
16     80     
240    32     
-208   -256   
96     -208   
-48    32     
128    96     
48     144    
16     -48    
-32    -16    
80     176    
-208   32     
96     -112   
48     176    
-112   320    
-96    -16    
32     -48    
352    288    
-272   176    
48     48     
-176   32     
80     64     
640    416    
-48    336    
0      -64    
64     -192   
-144   -288   
144    -160   
0      208    
80     16     
-256   -416   
-80    256    
144    128    
192    -80    
-16    -192   
64     0      
-80    0      
0      368    
-448   -48    
224    64     
-160   80     
-64    -112   
144    240    
-96    -64    
48     192    
-16    -448   
-128   416    
320    -672   
-64    816    
32     656    
224    -528   
-128   288    
32     -624   
-48    48     
48     784    
-112   48     
32     -480   
224    240    
-32    32     
224    192    
-16    160    
96     -16    
288    256    
-96    -96    
-64    -64    
96     -160   
176    80     
32     288    
192    64     
112    64     
-128   80     
-160   64     
16     -64    
48     16     
176    -112   
-256   -128   
160    -64    
80     96     
-64    -16    
-192   -192   
144    -32    
176    96     
128    -32    
-16    -48    
-128   16     
-96    80     
-128   -16    
48     80     
-112   128    
144    -336   
176    -144   
64     -16    
32     -32    
-64    -32    
48     -48    
64     96     
80     64     
-144   -32    
112    64     
32     64     
16     80     
-80    32     
192    -16    
32     48     
-64    -144   
80     32     
96     96     
-128   112    
64     -64    
64     -144   
-64    -256   
320    144    
-272   160    
112    32     
32     -32    
16     64     
112    0      
32     -96    
64     32     
-80    -32    
96     48     
48     -208   
-96    48     
0      -96    
544    192    
-112   272    
64     -32    
-80    -224   
-32    80     
64     208    
-240   208    
-192   -112   
192    -304   
176    -48    
96     -176   
96     160    
-224   -1744  
160    -16    
208    144    
-32    64     
240    -144   
224    -32    
144    16     
128    80     
-224   128    
32     16     
-32    144    
304    96     
96     192    
160    240    
-64    64     
208    -496   
368    -32    
-160   -832   
-16    -32    
16     -128   
320    192    
-128   272    
-32    112    
48     48     
192    -64    
96     -32    
160    -16    
160    -80    
96     -112   
-80    64     
0      -288   
96     192    
-16    -128   
112    224    
32     112    
144    -80    
-144   -272   
320    192    
-80    560    
160    144    
80     48     
-16    -96    
96     256    
144    96     
176    112    
256    32     
48     0      
32     -416   
0      -224   
16     112    
112    80     
-48    48     
128    784    
16     368    
-272   -960   
80     176    
192    288    
-128   -368   
224    -112   
192    -304   
208    96     
16     32     
48     208    
-176   112    
80     -80    
368    208    
-112   -224   
224    192    
-384   -528   
-64    64     
240    -240   
-272   -176   
208    -48    
-48    160    
-208   112    
80     -32    
64     -96    
144    160    
192    -400   
64     112    
-112   -752   
-16    0      
-1216  656    
-64    -656   
-544   -304   
-80    -384   
32     -32    
208    -208   
96     -240   
112    -304   
256    32     
192    -272   
48     544    
176    -1120  
96     64     
-224   -192   
128    192    
-144   -32    
-16    128    
96     -176   
272    -80    
16     -80    
192    -688   
-112   -160   
160    16     
64     80     
304    352    
-128   -32    
48     -208   
112    208    
80     112    
128    -224   
-960   -272   
272    -48    
-80    -48    
144    -96    
112    0      
-32    -112   
64     -80    
0      -640   
-16    -80    
144    -80    
-48    0      
32     32     
288    -80    
-32    -128   
160    224    
-576   -48    
112    -208   
-480   -64    
144    64     
80     32     
144    -16    
-64    -96    
208    -608   
-288   -16    
256    -16    
64     240    
96     -32    
80     -32    
-144   -32    
272    80     
-272   128    
96     16     
-112   32     
112    -192   
-48    -192   
128    -192   
64     -32    
16     -256   
208    160    
208    -32    
-192   16     
48     -48    
176    -160   
-128   -48    
128    96     
-144   -96    
256    112    
-304   112    
48     -192   
-1360  -144   
80     -64    
-160   16     
128    0      
0      96     
208    -48    
48     -32    
-64    -112   
96     0      
-16    -48    
80     -64    
-224   -128   
-80    -192   
-384   -144   
96     -96    
-224   -48    
112    64     
-48    -16    
176    -144   
144    -16    
208    -192   
-48    96     
0      16     
144    32     
48     128    
-48    -112   
64     80     
112    256    
16     16     
64     -128   
-176   -16    
-32    -48    
128    144    
-304   -144   
112    64     
32     -288   
256    0      
48     240    
112    16     
-272   -64    
-112   -80    
-240   0      
96     -16    
0      48     
176    64     
-2000  -64    
-176   -272   
224    -176   
128    -128   
-16    192    
-176   -32    
-128   -128   
-352   -48    
96     16     
80     -32    
128    -96    
-80    -32    
-64    0      
-128   32     
80     -16    
-176   48     
16     -112   
80     0      
-240   0      
160    64     
-416   -96    
-960   -96    
-128   -32    
16     0      
64     48     
-256   32     
48     96     
-80    -16    
-64    64     
0      -80    
-32    48     
144    -32    
-64    32     
-128   -96    
64     48     
16     96     
-704   32     
16     32     
-192   16     
-160   32     
64     -80    
-144   48     
176    16     
-32    48     
32     -16    
16     -16    
-176   -112   
48     48     
-224   -208   
64     32     
-96    -32    
112    16     
16     96     
-96    -32    
-208   -16    
-192   -16    
-80    32     
128    160    
-48    176    
0      48     
32     64     
-144   -192   
64     -224   
-112   -96    
32     16     
0      -48    
-304   32     
176    192    
-208   -64    
-112   -16    
-320   -192   
-32    32     
-160   144    
144    -208   
-1504  -272   
256    -144   
288    704    
-16    -192   
-64    -256   
-160   448    
256    336    
-112   -288   
-112   -16    
-304   96     
-112   -256   
-160   144    
-48    -256   
-784   48     
400    336    
-1168  128    
-16    128    
-400   -448   
688    416    
-48    256    
-16    544    
480    -368   
-240   304    
208    0      
-336   -112   
-112   160    
32     -528   
0      208    
-128   -160   
-112   672    
128    384    
64     400    
-144   -112   
-128   368    
144    208    
-128   -416   
80     16     
128    -288   
-80    -64    
0      -128   
-64    -16    
-208   -64    
64     192    
-128   80     
192    96     
-48    64     
112    64     
32     64     
-416   -128   
0      -64    
-64    48     
-80    80     
-80    -48    
-32    -32    
-288   96     
64     16     
-80    -48    
192    48     
-288   80     
16     112    
-656   -80    
160    -32    
-96    160    
32     48     
112    272    
208    64     
240    64     
128    128    
-112   -32    
-16    16     
0      48     
32     96     
-80    96     
-256   32     
64     -16    
-80    0      
64     -32    
48     -48    
-80    -112   
112    32     
-144   48     
-16    -48    
64     80     
144    48     
80     208    
64     96     
-176   -32    
112    16     
-32    -96    
64     96     
-304   0      
64     16     
32     0      
-208   -16    
64     -80    
-16    16     
240    80     
-128   -80    
208    0      
-48    16     
80     128    
-224   -48    
48     80     
0      -96    
80     48     
80     -48    
192    48     
-176   -32    
192    -96    
272    48     
80     48     
32     0      
-48    -240   
-144   -272   
-160   -80    
112    144    
96     208    
144    176    
-16    -64    
128    -128   
112    -32    
-32    -32    
96     336    
96     304    
-48    32     
64     112    
48     176    
-48    224    
64     -64    
128    -64    
48     96     
-16    64     
320    272    
-272   336    
80     256    
-32    48     
48     -80    
48     -32    
96     192    
-48    -112   
0      -96    
-32    48     
64     -96    
176    -96    
464    560    
-288   64     
-112   80     
320    704    
-80    176    
144    -128   
80     0      
320    448    
192    80     
-192   -320   
80     -32    
16     320    
-96    -96    
-176   -48    
240    -112   
-160   208    
240    32     
80     16     
240    192    
-208   -288   
112    -208   
128    -16    
-64    -80    
224    256    
-32    -176   
224    272    
32     176    
128    -112   
-48    48     
128    -304   
32     -48    
-16    240    
64     -112   
-80    -176   
128    176    
272    144    
-208   -192   
256    -192   
80     -192   
80     -96    
256    336    
0      160    
224    48     
-144   0      
96     16     
-144   -128   
32     16     
176    0      
112    -160   
288    176    
288    -416   
16     320    
16     16     
48     -608   
-400   -384   
80     -48    
96     -112   
-272   -352   
-32    -176   
48     -176   
144    -48    
0      16     
-16    -32    
208    -128   
144    -128   
352    -16    
-16    16     
96     0      
224    304    
-240   208    
80     64     
-96    -96    
96     192    
192    -48    
368    32     
-80    64     
-336   64     
192    32     
-240   -96    
384    64     
-64    -128   
160    -144   
64     -512   
32     -96    
176    -880   
-32    32     
112    -48    
-16    64     
32     32     
128    48     
-368   16     
48     -160   
288    192    
192    -16    
128    -16    
-112   -224   
96     48     
144    -320   
32     16     
16     80     
-16    80     
112    32     
64     96     
96     48     
32     0      
48     0      
64     80     
160    64     
64     -176   
16     0      
112    -592   
-16    16     
-32    48     
112    96     
16     -32    
64     32     
112    -16    
-16    32     
-64    32     
128    16     
-144   -16    
112    -64    
224    48     
-288   -160   
144    64     
-32    -240   
320    -80    
128    -96    
208    96     
112    272    
-80    96     
-64    -16    
32     32     
112    48     
-16    -224   
112    -768   
80     48     
16     48     
160    -48    
80     80     
80     -64    
-32    -96    
208    -48    
112    -16    
272    32     
80     -224   
112    48     
176    -80    
-16    16     
-16    -112   
224    -176   
0      -144   
128    -704   
112    64     
160    -304   
64     192    
208    16     
176    -192   
32     -592   
128    160    
-112   -128   
-16    16     
176    32     
-112   -176   
128    32     
128    192    
48     96     
128    -192   
-144   -96    
112    -944   
-48    -192   
-16    160    
-80    112    
-80    -176   
160    -32    
272    -176   
112    0      
32     -64    
-16    -64    
-512   32     
96     64     
112    -16    
-16    -80    
-96    -48    
384    192    
-96    32     
240    80     
160    64     
144    -80    
64     64     
80     0      
-80    80     
-16    -96    
336    48     
-160   32     
64     -96    
96     -32    
176    -80    
0      16     
-16    -96    
-128   -48    
16     -272   
320    96     
-16    16     
-80    48     
-64    -64    
144    48     
16     16     
32     -32    
-288   -32    
-16    -48    
-544   -16    
-32    0      
32     0      
128    -32    
-144   0      
288    -128   
0      48     
-64    -672   
80     -16    
16     -32    
128    32     
-64    -16    
160    -16    
-144   -32    
208    80     
-48    80     
-32    -32    
176    -208   
32     -112   
176    0      
-128   -208   
112    128    
64     -272   
256    80     
-208   -320   
224    -16    
-112   48     
64     -64    
16     192    
32     64     
-256   -224   
-128   128    
-144   16     
176    -80    
-48    336    
64     -272   
432    304    
32     -992   
-16    -224   
32     320    
80     -272   
-352   144    
208    -272   
-448   -64    
448    224    
-368   304    
496    -304   
-256   -384   
-48    -144   
0      240    
-32    -96    
-176   -320   
-96    80     
272    16     
-160   144    
64     -48    
-128   -272   
112    -160   
-96    304    
96     240    
32     -48    
80     288    
-912   64     
-160   64     
-304   -112   
32     -96    
-144   64     
272    -80    
160    144    
256    -48    
16     32     
-144   -128   
112    -208   
0      -128   
96     -48    
112    -48    
80     -48    
0      32     
-1200  -96    
-96    640    
-112   -112   
528    -272   
-48    64     
-288   -256   
-96    64     
-352   -32    
-224   208    
304    256    
-112   16     
128    -160   
80     -64    
-496   -64    
80     -64    
-288   144    
-160   224    
-256   -144   
-112   32     
64     80     
-192   32     
-96    16     
-96    32     
-80    64     
288    144    
-128   128    
224    -48    
-16    -64    
-272   -16    
32     64     
-144   0      
560    -16    
-464   -64    
-416   80     
-288   240    
-32    64     
96     128    
96     -112   
224    16     
-384   192    
208    192    
-1712  48     
-192   -16    
-64    -112   
-96    -64    
96     -64    
192    96     
-48    64     
-96    -48    
-32    160    
-64    32     
32     96     
-208   112    
-160   32     
-112   -32    
48     0      
-176   32     
16     16     
-80    -112   
112    -16    
-240   -64    
80     432    
208    128    
-64    -32    
-48    176    
-128   -208   
-48    -144   
-16    32     
-176   48     
-80    -48    
272    -64    
-208   32     
64     48     
-272   96     
-32    256    
-96    160    
208    0      
64     0      
16     -48    
-64    -96    
-128   -160   
-48    -80    
80     -144   
16     -64    
-288   -272   
32     -64    
-432   -224   
80     -192   
-608   -160   
416    -32    
-160   -192   
-16    -16    
-32    112    
-272   -144   
-112   -48    
0      112    
16     304    
-96    64     
128    192    
-112   -32    
-112   144    
-304   -176   
112    -80    
-512   96     
176    288    
-64    -16    
224    -160   
240    192    
64     -32    
16     112    
-96    176    
0      -80    
-208   32     
128    -64    
0      192    
-208   -128   
-80    -192   
304    176    
144    96     
128    32     
-160   192    
-128   -16    
-16    -240   
48     80     
80     112    
240    128    
-16    256    
32     128    
128    16     
-208   -96    
80     -32    
0      64     
96     112    
-480   32     
128    144    
-64    144    
32     96     
80     80     
96     48     
48     48     
-144   -48    
0      16     
-224   -32    
32     16     
32     64     
-128   32     
-240   -32    
96     80     
128    64     
32     32     
128    80     
64     48     
-80    80     
64     64     
-64    -16    
-176   -16    
240    144    
64     80     
288    32     
-208   -192   
192    -32    
-240   64     
80     112    
-48    16     
-48    32     
272    0      
192    144    
-48    -64    
160    -48    
64     80     
-160   112    
192    256    
16     -64    
192    -48    
-64    80     
96     48     
112    -80    
112    48     
-208   0      
-368   -288   
128    -32    
-240   96     
-128   -112   
272    -32    
112    64     
112    112    
-128   48     
-272   16     
-96    -64    
272    -32    
160    144    
-160   192    
128    80     
256    -48    
-160   80     
-112   64     
32     -32    
32     64     
144    48     
192    64     
-288   -32    
272    96     
-128   16     
80     96     
-112   48     
160    64     
128    48     
-64    32     
144    48     
112    80     
64     0      
64     96     
-144   64     
176    64     
-112   -96    
128    -64    
48     192    
128    32     
176    -32    
-80    -160   
-176   -368   
192    144    
96     -736   
-64    0      
80     64     
80     -32    
-128   -48    
48     96     
192    64     
128    96     
0      64     
-32    -256   
-192   -112   
48     176    
-176   -80    
16     0      
112    -32    
160    -736   
-112   -80    
352    -16    
16     48     
-352   -48    
112    192    
-16    128    
192    64     
272    -16    
176    144    
-48    128    
80     -16    
-80    16     
-48    80     
432    256    
-128   -32    
-96    144    
-80    128    
112    128    
192    -224   
80     -80    
16     224    
112    144    
-160   -144   
192    128    
0      -128   
224    64     
-32    112    
-16    0      
0      48     
0      -352   
80     0      
144    -1168  
96     144    
112    112    
80     0      
64     -48    
-160   48     
400    560    
-208   736    
128    -32    
240    -384   
240    0      
128    -64    
96     -240   
-160   -288   
0      112    
112    144    
-208   -128   
144    -64    
96     -32    
112    16     
64     176    
96     16     
240    32     
80     32     
-48    0      
48     96     
208    288    
-64    -96    
176    -144   
272    144    
16     -384   
32     16     
-112   -480   
0      -192   
-32    160    
384    384    
192    160    
32     0      
112    -304   
656    704    
-320   560    
48     -528   
208    288    
48     -288   
-64    -224   
-208   -64    
80     -336   
192    -48    
160    256    
112    -64    
64     48     
-48    144    
-224   -160   
-16    16     
16     -16    
96     80     
-32    -32    
272    304    
96     16     
80     -48    
64     -160   
80     544    
-32    -32    
32     -192   
-16    -32    
304    496    
-80    -352   
112    128    
208    -288   
240    384    
32     -480   
-32    144    
64     -192   
-48    -144   
112    144    
32     -512   
-144   464    
112    -416   
272    -16    
144    224    
64     -320   
208    128    
-176   208    
48     -144   
32     0      
192    -288   
-64    -368   
240    320    
144    128    
48     256    
16     -48    
48     -896   
32     -128   
160    -432   
-48    -64    
64     -304   
224    -48    
-1248  -48    
128    -128   
128    -16    
-112   -64    
192    -32    
-112   -176   
48     -32    
-80    64     
368    -48    
-32    -320   
0      32     
64     48     
272    144    
-304   0      
-80    -272   
-736   208    
-48    -80    
16     -128   
-208   128    
160    64     
-192   288    
176    -32    
320    -1888  
320    160    
-96    0      
-80    128    
48     -16    
-48    16     
-224   -16    
96     -128   
-160   -32    
-192   -416   
304    -48    
-144   16     
0      -16    
720    -224   
-432   448    
32     -640   
16     -16    
48     64     
176    -176   
32     -112   
-96    -224   
-144   -192   
128    112    
-48    -32    
224    16     
-1424  32     
96     144    
96     0      
112    -48    
-16    -32    
48     -144   
-48    96     
-16    -64    
64     -192   
-16    -128   
96     -64    
-304   64     
240    -128   
96     16     
160    -48    
-400   -16    
224    -32    
-576   96     
-32    -80    
224    32     
-128   -80    
32     64     
352    -1392  
48     32     
-192   48     
-16    32     
-160   -80    
-144   -288   
-128   -176   
80     128    
-400   64     
0      -48    
128    -368   
176    -64    
-128   160    
0      -112   
112    32     
-32    -224   
80     -16    
96     96     
96     -32    
-112   112    
0      176    
-192   -64    
32     80     
-96    96     
96     -64    
-80    -32    
464    32     
48     544    
-304   80     
112    176    
96     -176   
288    -384   
-96    -160   
128    -192   
-272   -96    
32     -96    
80     176    
224    176    
-208   112    
0      80     
-528   -208   
160    240    
224    336    
0      16     
-144   -96    
-640   -320   
-144   480    
-336   0      
-16    -224   
96     288    
128    0      
-320   -48    
112    -592   
32     256    
-96    -64    
32     -160   
-1408  -144   
64     112    
-528   -288   
0      -96    
-112   0      
-416   -128   
192    112    
-608   96     
-272   -32    
-544   16     
-464   -64    
-64    64     
-16    736    
32     128    
-160   48     
-304   112    
80     256    
-464   -48    
-176   16     
240    80     
16     16     
96     16     
-128   -64    
-256   0      
-736   -16    
-128   -96    
224    80     
48     96     
-48    -96    
176    128    
-144   -96    
32     0      
96     -16    
0      16     
48     16     
-112   -128   
-144   -80    
-96    16     
-256   -80    
128    -16    
-16    48     
-336   0      
80     160    
-224   -64    
-48    -32    
64     -96    
80     64     
-96    16     
16     32     
-80    -16    
-32    -16    
-64    32     
80     -48    
128    0      
-48    160    
80     -48    
-496   -64    
-32    16     
-80    32     
64     -16    
80     16     
-64    -64    
48     48     
-176   32     
-32    64     
160    176    
-16    144    
-112   16     
0      48     
-304   -96    
48     96     
-80    32     
-16    192    
-368   -32    
80     16     
-64    -32    
-112   -32    
80     80     
-144   32     
16     -16    
1008   752    
-1120  272    
-272   -320   
48     80     
-752   -144   
320    16     
96     272    
32     352    
-1200  -208   
-240   -240   
320    16     
432    400    
-560   80     
176    -48    
256    208    
-464   48     
144    -32    
192    -32    
-48    -32    
224    -64    
496    320    
-464   32     
-64    0      
-224   -64    
0      96     
80     -16    
32     48     
80     112    
-96    -64    
-32    -16    
32     -16    
-64    80     
112    64     
-96    -144   
-144   -80    
80     -32    
-240   48     
96     -16    
-64    -80    
-208   32     
48     16     
352    208    
-512   48     
96     -32    
80     112    
48     80     
80     -32    
-160   96     
-32    -112   
-96    -64    
-64    16     
0      -96    
-32    96     
288    32     
0      -96    
144    64     
-32    144    
-160   0      
176    96     
0      32     
-64    32     
16     -176   
-48    -112   
224    176    
-48    -96    
-128   80     
16     128    
96     144    
64     160    
48     -272   
128    80     
192    48     
-352   -16    
64     144    
-208   16     
176    272    
320    -176   
48     112    
32     80     
-192   96     
-32    0      
-80    96     
16     16     
-64    16     
112    352    
-112   -176   
192    64     
32     32     
-48    -48    
-16    64     
-16    32     
80     -16    
-16    0      
240    96     
0      -64    
144    352    
-352   112    
-48    -48    
-96    96     
112    -144   
224    128    
-16    0      
-64    0      
240    -320   
208    32     
256    64     
32     176    
0      48     
-64    560    
-144   -240   
48     160    
-16    160    
48     -640   
-48    544    
-256   -176   
80     -64    
-64    208    
64     160    
224    -32    
80     128    
-48    64     
128    -80    
0      32     
112    112    
-32    0      
-256   -272   
-224   -1776  
304    1008   
160    464    
64     -352   
80     304    
-48    -160   
48     -48    
-96    512    
-192   -720   
0      352    
368    544    
-240   -896   
288    80     
192    224    
224    304    
160    -144   
112    -320   
64     144    
-176   192    
96     256    
-192   32     
16     -96    
64     -32    
80     -80    
16     -144   
192    -16    
-16    240    
96     192    
48     64     
112    320    
64     576    
48     -832   
176    128    
208    400    
256    176    
-16    96     
0      -112   
32     -256   
160    416    
-64    128    
160    96     
-48    -96    
144    16     
48     16     
-48    -288   
-32    -112   
48     -336   
224    416    
80     -208   
96     32     
-32    80     
48     144    
64     496    
-32    64     
192    432    
-272   48     
-16    96     
160    176    
-160   896    
176    -112   
144    -128   
240    0      
48     -144   
64     400    
272    -112   
-224   -32    
352    -192   
-128   64     
320    256    
64     208    
96     256    
-224   128    
256    0      
112    -144   
-64    16     
96     -672   
-112   -240   
192    -96    
-192   -528   
160    80     
80     -112   
80     96     
320    80     
112    320    
0      -240   
320    16     
-32    48     
240    16     
0      -16    
240    0      
128    112    
16     -560   
192    -80    
-64    -80    
-128   0      
288    -320   
-64    112    
128    112    
0      -48    
80     224    
0      -64    
208    16     
-96    -224   
192    128    
176    64     
32     240    
224    160    
-48    48     
160    -192   
112    -336   
-80    -240   
128    -96    
144    96     
-96    -128   
224    32     
-208   -480   
128    -96    
64     112    
-224   288    
-64    -48    
-32    -32    
112    -16    
48     -32    
208    -288   
-16    -112   
176    -240   
-224   -96    
96     32     
48     32     
-16    -1232  
112    -400   
-32    -1152  
-80    -80    
16     128    
144    64     
288    80     
-32    -16    
0      64     
-64    -112   
176    -240   
160    -16    
-64    -336   
-64    -32    
144    -592   
144    -512   
-192   -144   
80     -48    
192    -80    
-128   0      
240    -80    
-96    -640   
-48    -128   
16     -368   
224    -144   
32     -336   
-32    -80    
160    -64    
-16    160    
-304   -16    
64     80     
256    208    
-16    -16    
0      -176   
192    -176   
-48    128    
192    -960   
48     144    
-16    -128   
-16    144    
16     240    
144    -128   
32     16     
80     16     
0      192    
-80    -224   
-1872  32     
272    48     
144    96     
160    -32    
176    -288   
288    416    
-224   -32    
-112   -912   
192    176    
128    -128   
112    32     
192    -96    
384    -16    
-64    64     
256    0      
-1072  -80    
16     -48    
-48    -48    
-128   -64    
80     0      
16     -96    
112    -16    
112    -288   
0      32     
-96    -240   
16     -48    
16     80     
-128   -64    
-32    -16    
48     -80    
-176   -112   
304    -32    
-816   128    
-32    -208   
224    -224   
272    144    
0      64     
32     -128   
80     -64    
80     -48    
64     48     
-192   32     
-48    -160   
144    80     
128    -96    
-32    -48    
64     -64    
-1120  -80    
192    -144   
-384   -96    
16     -112   
-32    80     
112    -144   
0      48     
144    -496   
-96    -80    
-192   64     
0      -80    
16     48     
128    64     
48     -64    
80     0      
-240   16     
80     0      
16     32     
112    -48    
-112   0      
128    -96    
-16    16     
288    -672   
-96    -176   
112    48     
16     -48    
224    64     
112    -112   
-400   -80    
-64    0      
-160   96     
48     16     
176    48     
96     -320   
176    96     
48     -160   
128    -256   
-32    -32    
112    176    
-416   -32    
16     -64    
-544   -96    
176    48     
-96    -16    
48     -32    
-32    16     
16     0      
240    192    
-16    -96    
128    0      
0      -64    
-160   -32    
32     -112   
-336   64     
80     320    
224    64     
256    64     
-208   48     
-352   -64    
96     -48    
-160   -64    
736    80     
128    96     
-336   -208   
256    48     
-352   64     
-32    64     
-352   64     
-272   -32    
-96    80     
-544   -176   
160    -160   
512    96     
-336   96     
48     0      
-96    -16    
-192   0      
0      48     
-80    -48    
144    96     
-112   -48    
-352   32     
112    -32    
-768   -128   
112    80     
-144   0      
176    -96    
-1264  -48    
-112   48     
112    16     
64     64     
-48    -64    
0      48     
-48    -128   
-208   112    
96     112    
-288   -48    
80     -320   
16     48     
80     352    
-224   -272   
-272   -176   
-560   416    
-208   -112   
-160   48     
240    144    
32     -208   
-160   128    
-112   -224   
64     128    
-80    128    
144    -16    
112    -144   
-208   368    
96     -224   
16     64     
64     144    
-560   192    
112    -96    
-336   -64    
0      272    
48     -240   
-32    48     
128    -208   
-448   -592   
16     -208   
-96    528    
80     -144   
16     -432   
-144   320    
-96    160    
48     -224   
-32    -432   
0      192    
-480   416    
112    -368   
-48    -80    
-64    -128   
112    272    
-16    96     
-112   -16    
-16    16     
48     -32    
-48    -192   
32     16     
-16    160    
-32    80     
-176   -160   
0      656    
-320   64     
16     -64    
-192   32     
96     -160   
-16    192    
-64    112    
272    192    
0      16     
144    -144   
48     560    
112    496    
-272   272    
-64    256    
0      288    
16     560    
-160   64     
176    -272   
16     0      
-80    112    
160    112    
-128   192    
16     112    
-112   0      
-48    -80    
-144   -32    
32     -112   
-48    -16    
96     80     
-208   -208   
80     0      
-240   -96    
128    0      
-832   -128   
32     0      
-128   48     
320    80     
-16    160    
192    208    
-32    192    
0      32     
32     -16    
-112   -16    
160    0      
-48    48     
352    256    
-384   128    
192    368    
320    272    
160    288    
0      112    
-176   -176   
32     -96    
-128   -224   
128    -48    
-48    -144   
208    128    
-16    192    
-16    48     
96     448    
-128   368    
-352   -16    
-16    -192   
128    -208   
64     -144   
-96    -192   
0      -96    
-48    -112   
112    64     
80     112    
-128   16     
144    0      
-176   0      
128    48     
-256   -80    
32     448    
-192   64     
80     -128   
16     -224   
-32    -128   
-32    -80    
160    288    
176    288    
-112   176    
-144   -256   
272    -16    
48     288    
-32    -48    
-64    656    
80     304    
-16    320    
0      32     
-16    -240   
496    112    
0      112    
-32    224    
48     16     
-128   400    
192    896    
208    384    
0      0      
32     192    
192    0      
32     464    
208    224    
560    256    
272    816    
-688   64     
-368   -80    
224    48     
96     128    
496    160    
64     48     
-336   -144   
-144   -160   
112    -400   
352    -272   
112    16     
240    -48    
-240   64     
192    -1072  
-304   192    
-16    -64    
-80    128    
64     0      
48     160    
368    48     
160    176    
16     64     
192    96     
464    640    
-496   304    
0      336    
-176   96     
-80    -32    
112    -240   
416    48     
224    16     
-192   208    
-96    176    
96     160    
0      -208   
-80    -160   
48     -272   
-64    -144   
464    464    
-448   272    
-16    176    
64     128    
-16    480    
-208   112    
64     208    
-96    256    
400    464    
-224   624    
32     48     
48     128    
208    -16    
-144   0      
48     160    
32     -192   
-32    -144   
160    48     
-112   16     
48     0      
304    128    
128    240    
16     96     
-176   -80    
32     480    
240    384    
0      -32    
112    -192   
-160   48     
240    -112   
304    576    
-224   320    
-32    -224   
368    128    
-208   -272   
-96    -64    
272    240    
96     -240   
336    80     
48     -16    
96     16     
-112   -416   
-112   48     
-128   -96    
112    144    
160    144    
224    -32    
96     176    
48     -16    
-16    128    
-80    -48    
-96    272    
-32    -112   
80     -16    
208    128    
-192   64     
48     -304   
176    112    
64     160    
80     112    
32     80     
240    224    
-96    -112   
-16    -96    
144    256    
96     0      
80     192    
448    -192   
240    64     
112    -352   
160    96     
96     128    
-48    176    
-112   64     
-48    -64    
-128   48     
-32    -176   
112    160    
240    208    
-128   80     
64     -112   
144    16     
48     -64    
112    144    
-80    -240   
352    -224   
224    96     
512    176    
0      48     
80     64     
80     160    
-48    176    
-208   16     
240    -80    
256    160    
-16    -128   
160    -16    
208    -32    
64     144    
-80    -192   
128    128    
32     -16    
32     -32    
-80    16     
32     -832   
-208   -576   
128    -64    
304    -800   
240    -16    
32     -128   
-48    -128   
-32    -16    
-48    64     
80     112    
48     -96    
-80    -464   
16     48     
240    -336   
48     -32    
-432   -80    
112    -256   
32     0      
112    -304   
80     -48    
96     -320   
-48    16     
192    128    
64     -16    
80     48     
64     -16    
112    -48    
96     32     
144    144    
32     32     
-528   -112   
0      -64    
64     -16    
48     -224   
80     64     
16     -416   
384    -48    
-176   -544   
256    -112   
16     -208   
64     -80    
64     80     
0      48     
160    16     
-80    -240   
-240   -48    
-112   48     
-32    0      
368    96     
-208   -64    
272    -32    
32     -144   
192    -560   
-144   64     
112    -96    
160    160    
-640   -336   
-32    -336   
288    64     
-80    -112   
128    -32    
80     64     
-368   112    
288    -16    
-32    -80    
416    -240   
384    -32    
496    -224   
-128   -224   
320    -288   
-480   -112   
112    -192   
-176   96     
-160   -16    
224    256    
-144   128    
128    -240   
-400   112    
0      16     
-320   -144   
32     -192   
-288   128    
176    -16    
64     -64    
176    -544   
-80    -16    
224    288    
48     -112   
160    -144   
-16    288    
-96    -624   
16     -144   
-320   304    
64     -112   
-128   16     
144    64     
-80    32     
16     224    
-32    -144   
432    -288   
-80    128    
48     80     
112    112    
112    480    
-272   -1104  
-48    272    
160    624    
-256   -272   
80     208    
-352   -400   
336    -656   
-32    -256   
272    -16    
64     288    
176    16     
32     80     
272    -112   
-144   192    
-528   16     
-16    -96    
-192   112    
0      -16    
-224   -80    
112    -240   
-400   -144   
192    -368   
-160   32     
96     -16    
192    128    
176    -64    
192    -16    
-336   -96    
160    -224   
0      -80    
96     -96    
-48    0      
-32    0      
-224   32     
-48    176    
144    48     
144    -192   
144    96     
64     16     
-16    -32    
-80    -112   
-1984  -96    
80     32     
-480   128    
176    80     
208    48     
-48    0      
-64    16     
0      16     
128    -48    
128    64     
-912   -80    
144    -256   
-128   -192   
112    -32    
-176   -192   
80     -16    
112    128    
-336   112    
-64    -16    
-928   -16    
-176   -16    
512    240    
-352   256    
80     208    
96     144    
-112   -144   
128    -16    
-416   -32    
48     16     
128    -16    
96     32     
-96    64     
-144   0      
-176   -112   
112    -16    
0      128    
-112   480    
16     80     
-496   -128   
112    -48    
-176   -64    
80     -80    
0      -64    
-112   80     
-16    400    
0      176    
-32    -48    
48     64     
-16    80     
32     192    
32     -64    
16     256    
-128   256    
112    16     
48     -80    
-48    96     
160    16     
32     -80    
-304   64     
144    192    
-272   208    
-16    144    
-128   -16    
-80    16     
-64    112    
160    176    
-464   0      
-64    -80    
-1712  -16    
144    -48    
-96    -80    
144    32     
-48    80     
48     80     
-48    -80    
-96    16     
80     48     
-48    80     
32     64     
-48    -80    
-272   -368   
-64    -272   
48     256    
-176   320    
128    400    
-304   64     
80     192    
112    240    
16     16     
48     160    
16     -32    
16     -288   
64     384    
128    800    
208    656    
-304   0      
-320   -352   
128    -32    
-320   16     
-96    160    
240    -176   
-384   -416   
80     -272   
80     -80    
192    -416   
144    288    
-32    1120   
208    -896   
-96    -208   
352    -608   
-272   -96    
-336   48     
272    0      
-320   640    
80     -304   
-752   -272   
-224   160    
-64    208    
-160   -64    
80     -16    
272    -640   
288    -240   
320    400    
368    128    
304    288    
-400   144    
-176   -64    
16     -80    
-80    -224   
144    -32    
-64    464    
320    208    
-16    288    
192    -64    
-128   208    
144    560    
272    480    
-304   -624   
-16    416    
-144   -64    
128    256    
256    32     
0      192    
-112   336    
288    -448   
16     496    
-96    -16    
-32    128    
-176   0      
-16    -96    
400    48     
-336   224    
688    0      
-80    80     
432    464    
-352   -64    
-128   -80    
384    176    
-480   16     
208    -32    
-96    336    
256    -288   
-96    320    
32     64     
-96    -64    
64     0      
0      112    
336    128    
-176   -96    
80     112    
-64    96     
0      -48    
192    48     
16     -32    
48     160    
304    240    
-80    -208   
80     144    
144    224    
176    16     
-176   -176   
0      -48    
-48    800    
240    -224   
112    -464   
-112   288    
-160   64     
-16    112    
-176   128    
336    80     
48     64     
432    160    
-272   112    
-80    -176   
48     -176   
-32    -432   
0      -240   
-64    160    
-32    0      
-144   48     
144    80     
-304   32     
-16    -128   
160    32     
176    64     
208    416    
-64    368    
64     -64    
352    32     
32     -16    
112    48     
112    32     
-128   32     
192    48     
-64    112    
-176   -208   
128    -176   
96     -528   
288    128    
160    96     
32     -64    
176    -144   
48     -32    
256    -16    
64     -16    
-96    -16    
-112   16     
-128   -80    
224    48     
208    32     
256    48     
80     0      
128    -704   
160    128    
-16    80     
64     16     
-192   -16    
-48    0      
80     64     
48     64     
-16    16     
160    48     
48     48     
-48    160    
-96    -112   
0      -32    
48     160    
176    16     
144    -16    
96     -160   
128    144    
96     96     
-112   -176   
160    -32    
272    176    
16     96     
-80    32     
0      -16    
48     112    
32     32     
48     -32    
112    64     
48     48     
-64    16     
144    -160   
-32    -16    
32     48     
-64    64     
48     48     
80     -32    
-16    -16    
160    32     
-80    48     
128    112    
48     16     
-16    -80    
96     128    
-48    -48    
80     64     
-32    -944   
-48    96     
48     -80    
160    80     
48     -96    
-48    -240   
96     -288   
160    176    
208    80     
80     112    
48     48     
-80    -80    
272    -16    
-192   -48    
208    96     
0      32     
272    240    
-64    -256   
-80    16     
112    16     
112    -16    
208    80     
352    224    
0      96     
128    32     
0      32     
192    0      
96     160    
96     -144   
112    16     
32     -16    
-112   -112   
384    -288   
256    16     
288    256    
64     112    
-32    -416   
112    -176   
176    400    
-176   240    
496    400    
-432   592    
-16    -256   
80     -320   
400    192    
224    -384   
32     96     
288    224    
-512   -160   
96     -528   
-208   800    
-112   -368   
448    -272   
288    96     
48     0      
208    576    
0      -256   
48     304    
-32    -192   
-48    80     
96     -224   
112    48     
32     160    
128    64     
80     16     
160    -880   
-112   320    
480    96     
-112   -1952  
-48    -560   
80     -464   
0      -272   
128    112    
-16    -176   
96     80     
-144   32     
128    16     
144    -240   
-64    -448   
-48    -32    
64     -208   
-96    80     
-256   128    
256    80     
16     48     
96     32     
176    -32    
96     -640   
32     -112   
-48    80     
16     -176   
80     -192   
80     -208   
112    -64    
80     112    
64     -112   
64     -144   
112    16     
48     80     
288    16     
112    64     
-32    -48    
80     -80    
80     -48    
128    -336   
192    112    
-48    -16    
0      -16    
128    -144   
-48    32     
208    48     
176    -32    
16     96     
-112   -176   
-112   -240   
64     0      
-32    208    
208    -112   
48     -32    
128    -48    
112    96     
80     -80    
-32    32     
-16    16     
-128   32     
32     16     
-96    -304   
-416   -208   
-176   -48    
-880   -160   
288    -160   
144    -32    
208    -208   
32     96     
-112   -144   
-80    -48    
-32    -160   
-144   0      
64     -16    
48     -16    
-64    -16    
144    16     
-32    432    
96     272    
-48    -64    
96     32     
48     -224   
320    -192   
-208   -240   
176    -160   
64     240    
-192   -256   
192    0      
32     -112   
176    -48    
-64    -32    
192    112    
208    64     
112    16     
-464   -112   
160    -112   
-880   -128   
192    -144   
96     64     
128    208    
144    496    
-32    -224   
16     96     
-160   16     
-48    -176   
144    -160   
128    16     
-464   -64    
-64    -112   
80     -112   
0      -416   
-176   -352   
192    -128   
192    48     
-80    -160   
64     -16    
64     -288   
224    320    
208    320    
224    80     
-176   160    
0      128    
-256   32     
112    -16    
-96    16     
144    -208   
-272   -144   
128    -176   
-96    224    
32     80     
176    -16    
160    240    
-96    -656   
-256   -208   
240    288    
-304   64     
288    240    
-112   -64    
288    160    
-96    -144   
-144   48     
144    -496   
0      352    
48     -144   
160    112    
-48    -64    
-496   -128   
-1840  416    
32     112    
-1584  -160   
-192   96     
16     -256   
-96    -128   
368    240    
-16    128    
224    -528   
-176   320    
-1712  -224   
48     0      
-352   32     
-32    32     
-48    336    
-128   -1088  
-176   416    
-48    752    
-288   -608   
-96    -144   
688    752    
-48    -48    
-240   -240   
-896   -32    
-16    64     
64     -192   
-16    112    
-368   336    
1280   1104   
-1360  -496   
-704   -1296  
336    368    
112    160    
160    128    
-272   496    
-32    -96    
-3056  -208   
0      176    
-64    352    
112    384    
80     -80    
144    32     
64     -64    
-96    48     
-112   -16    
-80    -16    
-96    32     
-144   16     
-224   48     
32     0      
-240   -80    
-288   144    
-144   -16    
-112   0      
96     128    
16     -32    
32     48     
-128   -112   
-16    64     
80     32     
-240   -240   
160    112    
-96    496    
176    48     
16     -96    
-16    -48    
-64    0      
16     48     
-1520  -96    
64     80     
48     128    
-96    48     
208    -16    
-208   160    
224    208    
-80    96     
-80    64     
-144   -32    
80     32     
176    80     
32     32     
-384   -32    
64     128    
-1344  -32    
48     -96    
0      -32    
-128   64     
-144   48     
-576   80     
160    16     
160    112    
-192   224    
-96    208    
-32    -80    
112    -208   
208    -16    
-656   -80    
96     112    
-48    -16    
160    256    
-272   64     
-112   48     
80     32     
0      -112   
96     -144   
0      -128   
-64    -112   
32     16     
-96    80     
48     256    
-112   192    
-80    -64    
192    32     
-32    -80    
240    80     
32     96     
-80    32     
-32    -48    
80     32     
16     -64    
-32    64     
-128   64     
-64    48     
96     48     
-240   -304   
512    -416   
-128   176    
304    320    
-480   -32    
48     80     
-160   -240   
256    80     
-96    80     
-96    -32    
-32    -128   
80     32     
128    112    
48     48     
176    64     
-128   32     
48     144    
-320   -80    
128    48     
-80    16     
0      16     
32     80     
-128   112    
-96    -64    
160    16     
80     112    
304    288    
-80    48     
192    32     
240    32     
-128   -64    
160    -64    
-16    80     
208    80     
-16    48     
32     16     
32     80     
-32    32     
-32    48     
-32    -32    
96     64     
96     144    
144    128    
-144   -32    
32     48     
-112   -16    
176    112    
-112   -32    
-32    -64    
144    48     
16     -48    
-48    -48    
0      0      
-64    0      
192    64     
112    64     
16     16     
16     0      
-144   -16    
192    96     
-32    96     
80     64     
-112   32     
64     16     
-80    0      
-16    32     
80     128    
192    96     
128    80     
112    144    
192    208    
-144   176    
48     128    
-16    -16    
128    32     
-48    0      
336    -64    
-320   32     
176    -80    
80     80     
-16    112    
0      -112   
-16    -144   
-32    -96    
-416   -112   
176    -16    
112    272    
64     -400   
-16    448    
160    288    
-464   -864   
320    512    
-80    32     
352    -992   
16     -160   
128    144    
-336   256    
320    -16    
96     288    
-208   -96    
0      176    
352    -224   
480    496    
-448   -32    
480    -48    
-592   -128   
0      16     
-128   448    
432    -816   
-96    208    
416    272    
48     48     
-256   -272   
-192   -256   
112    320    
-96    0      
336    272    
64     160    
-208   -32    
592    192    
-176   -16    
224    80     
-16    48     
80     32     
80     -16    
48     -160   
-128   16     
-32    144    
48     16     
32     208    
272    160    
192    96     
224    32     
-64    96     
144    48     
-112   0      
16     -224   
64     80     
-64    -272   
192    48     
-192   -816   
112    96     
64     96     
224    64     
32     96     
-128   0      
-176   192    
288    160    
48     32     
224    96     
192    80     
112    -16    
96     80     
64     -192   
-16    -64    
112    -448   
96     16     
-16    192    
-144   32     
32     64     
400    272    
-80    160    
128    -32    
-48    -32    
80     -112   
48     32     
0      -64    
80     48     
224    112    
-32    160    
-128   -160   
-48    16     
16     -240   
144    80     
80     64     
80     128    
-80    192    
224    48     
-32    -16    
240    128    
32     144    
32     -48    
-16    -32    
160    -256   
128    160    
-48    -400   
224    -16    
32     -16    
96     0      
-32    16     
224    144    
0      112    
64     16     
112    16     
-48    -80    
112    -64    
48     -96    
-48    -48    
144    96     
-64    176    
144    -80    
64     64     
-16    -48    
0      -64    
224    -80    
160    96     
-96    16     
320    272    
64     -16    
80     -352   
192    -512   
144    -416   
224    48     
96     -16    
208    368    
-144   272    
96     192    
160    -144   
208    144    
32     256    
-80    -432   
128    0      
-32    0      
96     -480   
176    -336   
-80    -832   
176    -256   
112    -32    
192    -112   
0      -176   
32     -64    
-48    -304   
-368   -704   
-32    -848   
64     400    
416    -48    
-496   192    
192    -432   
144    160    
-16    192    
-128   -800   
144    128    
80     -64    
-48    -192   
256    112    
-112   -208   
64     -112   
96     32     
128    16     
-48    -208   
64     32     
80     -112   
-1184  0      
176    -48    
224    -672   
-80    144    
128    288    
-32    -336   
96     -96    
240    -208   
48     352    
16     400    
-160   208    
48     -80    
-176   32     
-80    0      
0      48     
48     -224   
128    80     
-16    -16    
16     176    
288    288    
-64    -176   
112    -48    
112    -480   
0      96     
176    160    
144    16     
48     -80    
0      -112   
-448   -576   
272    -64    
-656   96     
240    48     
-1040  -64    
272    64     
96     -16    
32     -16    
128    16     
-32    -32    
-16    96     
16     80     
48     80     
272    96     
-176   16     
176    320    
-80    208    
-96    16     
-80    -224   
-48    -16    
32     240    
-80    80     
272    -128   
-416   -48    
-544   -64    
80     96     
-80    -368   
-208   160    
80     480    
1008   224    
-768   208    
240    -80    
-176   -48    
96     -80    
-16    48     
96     -16    
-96    -32    
96     0      
-16    32     
-112   -192   
80     48     
48     -736   
48     64     
-160   -48    
32     -144   
-64    -32    
48     32     
32     96     
192    64     
-480   -160   
240    -128   
-304   48     
208    -128   
-64    -32    
-32    0      
48     32     
480    -48    
-320   -320   
-176   96     
0      32     
160    -32    
128    48     
32     48     
96     -64    
-320   -32    
-32    112    
112    208    
64     -64    
-48    0      
192    -48    
-16    -32    
16     -288   
96     0      
32     16     
0      0      
16     160    
-32    -16    
-320   32     
224    -32    
-224   -64    
64     -32    
-496   64     
-80    -64    
-112   32     
-272   -160   
0      64     
-848   -224   
-368   80     
224    128    
-1312  -16    
-176   -112   
16     32     
-96    80     
-16    64     
80     96     
64     32     
16     16     
-288   -144   
80     48     
-144   32     
-64    -112   
96     0      
-192   64     
-112   16     
-1200  96     
0      32     
-320   0      
32     96     
64     112    
0      208    
160    128    
32     80     
-192   -80    
144    128    
-80    -48    
0      -32    
32     32     
-48    -16    
-64    16     
-432   32     
-368   -400   
-32    -32    
-208   80     
-3088  -144   
-144   48     
-288   -288   
-80    -80    
-64    -32    
-16    -192   
176    -336   
240    64     
-32    80     
-224   0      
-176   16     
32     0      
-16    32     
-16    64     
-80    16     
-720   0      
144    256    
-192   160    
208    240    
32     0      
272    48     
48     64     
-112   80     
-192   32     
48     -224   
-32    -64    
-112   -48    
-128   64     
-352   48     
-80    16     
-336   -64    
144    112    
112    80     
-64    0      
112    48     
32     64     
160    224    
-144   64     
112    96     
32     160    
-16    112    
16     64     
-272   64     
48     48     
48     16     
-160   -96    
176    80     
-688   -32    
192    -112   
80     -352   
128    320    
80     368    
-64    208    
-32    112    
96     128    
176    128    
-48    -16    
-48    128    
16     -112   
80     0      
-240   16     
112    192    
-368   -192   
96     32     
112    352    
-32    48     
112    288    
-272   -384   
224    -80    
-144   448    
16     -256   
-48    128    
128    256    
-368   -112   
192    128    
0      64     
-160   -176   
-224   -304   
432    -48    
272    96     
256    -192   
64     -112   
-176   224    
-80    -464   
-240   -160   
64     576    
-80    384    
0      208    
-96    -32    
-96    64     
-32    128    
-64    -16    
-240   32     
-160   224    
32     48     
-112   48     
80     432    
-160   368    
128    -16    
-64    240    
-128   -16    
240    112    
160    -96    
320    144    
-48    240    
64     288    
-288   176    
-32    -160   
-176   64     
80     16     
-48    -32    
80     16     
80     272    
192    16     
-16    -32    
160    -288   
48     32     
96     96     
-208   112    
48     16     
-240   -96    
256    256    
-384   144    
128    -80    
-112   -176   
112    0      
-32    80     
0      224    
64     -16    
-48    -64    
80     -64    
-96    64     
176    80     
-384   160    
256    16     
-176   -192   
96     -80    
-32    32     
-16    272    
80     48     
192    224    
0      48     
128    64     
16     176    
160    192    
480    64     
-128   16     
0      48     
-144   16     
176    0      
48     144    
-160   64     
112    128    
64     80     
160    80     
-64    32     
48     -16    
32     64     
16     96     
32     16     
128    -96    
-64    -80    
64     32     
-80    16     
176    -48    
-48    -16    
32     64     
80     64     
-96    64     
144    -16    
64     -32    
96     64     
-96    48     
304    16     
-48    96     
-32    0      
96     -16    
48     96     
0      -32    
96     48     
96     32     
-48    64     
240    96     
-32    32     
-48    -16    
96     32     
64     192    
144    0      
192    64     
-16    32     
-16    -112   
-16    -112   
32     32     
-208   32     
240    112    
-16    288    
64     -144   
144    544    
384    416    
48     96     
0      64     
96     96     
-64    -96    
-112   -240   
0      -48    
128    96     
64     496    
80     0      
-144   -320   
-16    -496   
-16    -368   
48     208    
144    400    
-208   -96    
208    32     
192    144    
288    432    
-80    64     
32     -144   
144    -80    
144    208    
-256   -288   
-32    144    
288    -144   
304    128    
32     144    
-96    -288   
-64    -144   
-128   224    
-16    -256   
128    128    
224    224    
112    128    
-48    80     
32     448    
160    288    
16     -336   
176    -208   
16     -112   
-16    32     
32     -16    
144    -432   
144    96     
112    32     
32     128    
-16    -160   
-160   -48    
-64    -80    
64     -16    
48     -80    
256    16     
64     -32    
192    16     
-64    96     
32     -64    
160    112    
32     -32    
128    144    
16     144    
96     32     
-48    -624   
16     64     
-48    -32    
160    96     
0      -32    
224    48     
192    0      
-96    -160   
80     64     
-32    0      
64     80     
48     -192   
112    -384   
-32    -240   
-16    208    
-16    -128   
240    -16    
208    0      
-16    48     
-48    -16    
-16    -80    
-32    96     
208    272    
48     32     
256    176    
112    144    
64     -112   
-32    48     
-80    -96    
96     80     
-208   -208   
112    -32    
-208   -160   
528    176    
160    256    
144    96     
-272   48     
48     -16    
544    320    
-624   -48    
-304   16     
288    -256   
352    96     
-160   0      
128    160    
112    32     
0      -800   
160    144    
96     -832   
-208   -96    
304    -64    
-32    -256   
448    -112   
-288   -352   
-96    -80    
160    0      
64     0      
128    -32    
176    16     
-112   -656   
-48    0      
256    -496   
-224   -96    
240    -16    
0      48     
352    48     
-208   -256   
224    -16    
96     -368   
112    48     
160    -768   
64     0      
-80    -176   
64     -96    
-48    -48    
-16    176    
176    -96    
-176   -48    
0      64     
-96    -256   
-368   -128   
-48    -368   
16     -192   
288    96     
48     32     
176    -64    
160    -32    
-128   -432   
160    -48    
0      -96    
-112   -16    
64     -16    
-48    -112   
-112   16     
96     -32    
-224   -48    
-64    -16    
128    -96    
208    80     
16     -96    
96     -128   
-48    -144   
176    -896   
368    -16    
128    0      
-32    -112   
-208   -288   
-32    -112   
-48    128    
-48    -64    
0      -32    
-48    -160   
-672   0      
192    176    
96     112    
-48    -448   
-192   -64    
0      144    
80     112    
-16    -32    
-96    -16    
48     -112   
80     32     
-192   -64    
16     -320   
-176   -128   
160    48     
-2016  272    
224    -176   
-144   -176   
80     112    
-80    -80    
128    -208   
-64    80     
-128   -1408  
0      64     
64     784    
176    80     
-192   -304   
-16    160    
-128   -64    
288    176    
-1136  96     
80     -160   
-48    -16    
96     -32    
352    96     
192    -64    
224    96     
32     -272   
-48    32     
-160   64     
-32    -64    
-96    -48    
192    48     
-624   208    
192    16     
-352   64     
-128   -368   
16     -544   
272    496    
0      -256   
208    -240   
128    144    
224    -272   
208    -128   
-368   64     
32     -32    
-848   -16    
48     -16    
-208   48     
112    -208   
-128   -48    
-64    -144   
48     80     
80     -64    
368    -368   
32     176    
0      192    
-128   -96    
48     176    
-224   -96    
96     -144   
-144   176    
48     -112   
-64    400    
160    -192   
-32    768    
32     -416   
-48    -288   
32     624    
176    48     
-304   -320   
256    176    
80     240    
-1904  176    
-48    80     
-400   -480   
16     288    
-32    192    
-208   -240   
48     -128   
48     336    
-496   384    
0      384    
-16    -64    
96     464    
-320   144    
-32    -512   
-112   -224   
-208   -160   
48     592    
-32    464    
-208   176    
448    -96    
-464   -528   
96     -272   
-128   -192   
-48    0      
-64    -256   
-304   -224   
48     112    
0      -480   
16     144    
-352   -160   
-144   -176   
-208   80     
-224   0      
-96    208    
16     64     
0      112    
112    208    
48     -32    
-352   -192   
160    32     
-128   288    
-48    80     
-208   -16    
128    256    
-528   192    
-448   -176   
304    -32    
-400   64     
-16    -96    
0      16     
64     16     
-1088  32     
32     0      
64     -32    
-48    0      
112    32     
496    288    
-448   224    
-144   -160   
-32    -128   
-320   -240   
0      -48    
-224   -16    
144    16     
-176   128    
-80    64     
-896   -256   
128    -80    
-128   48     
64     96     
16     96     
-176   32     
-80    32     
160    0      
-352   -48    
16     -112   
-32    -64    
144    -48    
-176   -32    
80     -128   
-80    -64    
-240   112    
48     144    
-48    -32    
336    176    
-368   64     
-304   64     
-48    0      
80     80     
144    32     
32     192    
16     144    
-176   -32    
0      48     
-208   16     
-48    -32    
32     -112   
64     176    
-416   -96    
208    32     
-16    112    
0      0      
-16    80     
48     112    
96     96     
-176   208    
-208   -16    
192    48     
-48    64     
112    -48    
112    192    
-96    -48    
176    272    
-528   112    
80     -16    
-96    96     
16     0      
160    144    
-128   176    
64     192    
192    192    
0      224    
48     112    
64     64     
-96    192    
80     112    
-272   464    
320    432    
16     -48    
-48    32     
-16    0      
-96    288    
80     288    
96     80     
16     48     
-80    -64    
128    176    
-32    -112   
-64    -16    
-288   -192   
0      112    
464    992    
-448   -544   
80     -272   
96     416    
-80    -160   
32     192    
-64    -64    
-128   -272   
-64    192    
-32    -16    
160    608    
-112   -384   
224    -64    
-32    160    
-16    -192   
-176   208    
0      80     
-64    -16    
48     64     
-64    -176   
-128   -32    
144    160    
64     96     
96     240    
0      112    
-48    -64    
-208   -192   
224    -64    
128    -48    
320    80     
-48    112    
-80    16     
-80    64     
-112   16     
32     80     
-80    0      
96     0      
192    96     
32     80     
16     112    
-80    64     
144    112    
160    80     
-96    -32    
128    32     
-336   -80    
32     80     
16     64     
144    112    
400    304    
-256   48     
144    64     
144    80     
160    128    
-240   -16    
128    48     
-32    0      
64     -16    
-144   -32    
64     96     
48     80     
144    48     
176    128    
-32    16     
128    64     
96     64     
48     32     
64     80     
128    208    
-176   -64    
288    112    
-112   -16    
176    96     
-64    32     
-160   -64    
352    112    
-320   160    
432    160    
32     112    
192    -16    
112    -32    
80     48     
176    160    
16     128    
-80    64     
112    -144   
-96    240    
128    144    
64     -32    
0      32     
64     -16    
64     48     
80     112    
16     -16    
208    80     
-224   240    
32     -32    
128    48     
-160   -112   
32     -64    
256    256    
80     128    
-304   64     
864    448    
-960   -288   
-160   -80    
320    -320   
80     80     
272    0      
-48    -144   
528    32     
-96    160    
-368   64     
432    0      
-96    -16    
16     48     
112    144    
80     48     
-80    80     
128    -16    
-32    16     
112    -192   
144    16     
16     48     
432    272    
-368   80     
64     16     
112    -80    
208    48     
224    0      
16     32     
-160   -48    
-32    -80    
32     32     
240    -64    
208    80     
-288   -272   
176    0      
96     -1184  
224    96     
48     -80    
48     96     
256    48     
-48    80     
-192   -112   
224    96     
-128   64     
176    -80    
16     -96    
128    -128   
32     128    
80     -80    
160    144    
80     -240   
0      144    
224    224    
352    224    
-80    -128   
-112   -32    
64     64     
224    0      
128    144    
-80    -32    
0      -128   
128    336    
112    528    
464    -240   
-256   -48    
-128   -272   
224    192    
160    -64    
176    176    
0      -16    
192    64     
-128   32     
-96    176    
288    16     
16     -352   
0      128    
272    -800   
144    336    
272    112    
-144   -144   
-32    -128   
256    240    
64     528    
-96    -240   
-160   -352   
16     272    
160    -48    
-32    80     
-48    -128   
176    -512   
144    496    
224    -96    
0      -64    
-128   -192   
208    352    
-112   -128   
208    -592   
-16    608    
-32    -336   
128    -80    
64     -384   
80     -848   
160    -48    
208    -544   
112    144    
-96    -928   
240    368    
96     320    
-112   -48    
80     -144   
96     320    
208    192    
-96    -128   
-64    -80    
32     -48    
96     112    
48     -208   
-112   -336   
96     384    
-80    352    
-80    -352   
112    256    
128    -400   
320    32     
80     592    
-16    544    
480    224    
112    96     
128    -32    
-96    64     
-32    -128   
-48    -208   
-560   -208   
112    -64    
16     144    
352    176    
16     -288   
16     -304   
96     -32    
-80    0      
16     0      
32     16     
64     16     
64     -128   
96     -160   
-144   -192   
32     -208   
-192   -160   
80     -32    
192    80     
0      48     
176    64     
48     16     
0      48     
64     -192   
-80    -160   
32     -96    
48     -48    
80     48     
16     32     
-112   -288   
112    -64    
-1040  -48    
0      -32    
384    336    
96     384    
192    448    
304    -672   
304    -192   
0      -992   
-64    -96    
48     -176   
112    -224   
16     32     
-48    608    
16     208    
-16    -32    
-384   -400   
-16    -496   
-816   -320   
48     -272   
400    112    
-80    640    
-32    320    
16     -208   
-32    352    
240    -336   
-208   -96    
192    -480   
-48    -144   
-48    -192   
32     -592   
-64    32     
384    80     
-128   16     
64     -64    
-96    0      
112    -96    
192    48     
-384   -288   
272    -208   
0      -1216  
0      240    
-64    32     
352    -80    
-48    -240   
-16    48     
-448   -16    
-16    -16    
-720   -304   
-128   -160   
144    -176   
0      96     
128    -80    
32     -464   
48     96     
48     -1152  
144    32     
16     128    
32     48     
-128   -224   
-48    -208   
-352   -32    
160    -112   
-272   -272   
80     -128   
-112   128    
160    80     
32     32     
144    -400   
96     -176   
592    448    
-592   368    
16     0      
-80    96     
-256   64     
192    -464   
-112   -144   
96     -32    
-192   448    
304    272    
464    192    
-144   0      
-32    128    
-80    -208   
-288   -176   
96     -80    
-832   -160   
-48    0      
-2256  -192   
-144   -32    
0      -128   
-144   -64    
224    -32    
-336   192    
-736   -64    
80     16     
160    -128   
48     32     
256    -96    
-192   224    
336    384    
-656   352    
-272   416    
-288   -144   
64     112    
112    288    
16     544    
208    288    
-32    -224   
-64    336    
128    -16    
48     48     
80     320    
-272   -176   
-432   192    
208    -208   
-320   -64    
0      -128   
-144   112    
272    -272   
-400   416    
-176   -144   
-656   48     
176    64     
-176   -48    
304    176    
-112   -64    
48     -112   
272    224    
112    -80    
-48    0      
-112   -64    
-16    48     
96     0      
32     288    
-272   608    
96     384    
16     -96    
-16    64     
-16    -208   
80     -80    
-80    -256   
160    -352   
-144   -192   
-144   -192   
-176   -160   
-96    144    
-64    96     
-32    16     
-128   80     
-176   32     
256    64     
-144   -32    
32     0      
-48    64     
-32    48     
-64    -112   
-96    32     
96     32     
-64    -80    
96     -16    
80     160    
-256   32     
-48    112    
208    64     
16     32     
-16    64     
-112   -64    
48     80     
-144   -16    
0      80     
144    48     
-336   -32    
32     64     
-96    96     
-16    0      
-16    160    
-272   64     
-32    -32    
128    32     
-240   -48    
144    64     
-480   -80    
16     48     
-1472  -16    
160    -464   
-32    48     
-160   48     
-48    48     
192    32     
-160   -64    
64     96     
0      32     
-16    32     
0      16     
-208   -64    
-32    0      
-64    32     
16     48     
-208   32     
-96    16     
112    64     
-48    32     
304    208    
-176   48     
256    96     
-224   -16    
144    80     
-160   -16    
-112   0      
0      176    
16     80     
0      -48    
-160   -112   
16     -32    
-48    224    
-64    112    
176    32     
-416   32     
192    -64    
-112   -64    
112    160    
-32    80     
176    32     
32     48     
0      -48    
256    96     
-272   16     
32     16     
192    128    
-240   112    
176    0      
176    192    
-64    80     
64     16     
304    208    
-96    0      
160    -48    
-112   -16    
160    112    
-656   -240   
128    160    
-96    64     
-208   192    
32     224    
-208   -32    
-48    32     
576    208    
-240   112    
-192   -176   
112    0      
-16    96     
-16    -64    
-80    -64    
16     -16    
-160   -16    
160    64     
0      32     
-112   48     
112    -192   
-128   -64    
16     176    
-128   -48    
208    112    
-256   -128   
80     -144   
-80    -16    
176    -64    
-96    48     
-64    144    
64     -352   
192    160    
-64    64     
208    16     
-272   0      
160    32     
16     160    
48     32     
384    144    
-112   -80    
-80    32     
-240   96     
16     -64    
512    352    
-448   608    
80     -304   
288    112    
-32    -16    
160    -16    
-32    32     
144    -192   
32     48     
144    256    
224    -240   
-112   -48    
-48    -80    
-96    -80    
224    -416   
-96    144    
64     64     
-400   -96    
368    -320   
112    272    
16     -112   
-48    -560   
-32    -160   
16     16     
0      96     
0      32     
-80    -32    
48     176    
240    0      
256    0      
-64    -128   
144    -240   
-16    -464   
0      -208   
96     224    
-16    -48    
-160   -128   
208    -48    
112    144    
-32    16     
-16    176    
48     32     
112    416    
64     80     
64     0      
-128   48     
64     32     
16     32     
64     -128   
32     64     
96     -64    
128    160    
16     -64    
256    128    
0      64     
16     160    
128    16     
0      256    
-16    -112   
272    -48    
208    272    
-64    192    
0      272    
112    32     
160    224    
-48    -448   
160    112    
96     -144   
48     304    
192    272    
-176   112    
-160   -16    
96     48     
-32    0      
144    80     
128    144    
48     -64    
128    96     
64     416    
64     -16    
64     -176   
-96    16     
48     -592   
80     -16    
-16    -64    
-32    -128   
176    208    
176    192    
-48    16     
128    32     
-112   -192   
240    -176   
192    -16    
0      -192   
-16    -64    
-32    -80    
-112   -128   
-16    -336   
16     -64    
32     -112   
16     80     
32     -32    
128    -112   
16     16     
-32    0      
16     -80    
64     -176   
96     64     
128    -416   
224    64     
-64    -288   
-32    0      
16     -208   
64     -16    
64     128    
96     -352   
-48    320    
96     384    
-192   -32    
96     224    
320    176    
272    160    
256    0      
0      -272   
192    -32    
-80    336    
272    -48    
240    -304   
-48    256    
112    224    
112    432    
-64    -80    
256    -112   
192    48     
-48    -224   
192    48     
112    -32    
-288   112    
240    -176   
560    0      
-112   880    
144    144    
-96    32     
48     -144   
-64    -16    
32     -736   
320    -432   
-192   -272   
128    -224   
128    -352   
-336   -432   
0      -208   
144    -624   
-32    -64    
-16    -96    
432    -208   
-48    -272   
336    -336   
192    -112   
-16    16     
128    -160   
-160   -288   
160    -416   
0      -416   
208    -80    
-256   -384   
224    -432   
-144   -368   
64     -480   
16     -688   
-16    -208   
-48    80     
224    -112   
144    16     
112    112    
-16    -128   
480    352    
-592   96     
368    -48    
-816   -240   
-256   -544   
64     -528   
48     -144   
208    -48    
416    -16    
-272   -32    
112    -288   
-48    608    
128    -224   
272    -160   
32     112    
-112   96     
96     720    
96     96     
-1696  -304   
208    -352   
128    176    
-48    176    
32     112    
0      -224   
496    -240   
96     -16    
32     208    
-32    -368   
-32    48     
256    -336   
144    16     
-176   144    
-416   112    
-304   -64    
16     80     
32     96     
144    -320   
32     384    
96     -336   
64     128    
128    -176   
-48    240    
80     -320   
128    176    
0      0      
64     0      
-96    -64    
128    -96    
0      0      
-160   -80    
-768   -80    
160    176    
-304   48     
0      -96    
112    464    
128    -544   
112    -176   
80     -32    
16     -16    
-96    -96    
-48    -224   
-128   288    
80     160    
-336   -96    
256    16     
-224   -80    
16     -16    
-432   -48    
32     -64    
-16    16     
80     -128   
64     80     
208    736    
0      304    
-224   -240   
-80    -48    
-432   32     
128    64     
-16    32     
64     48     
-400   -48    
256    0      
48     112    
32     -32    
32     16     
64     0      
32     -32    
-288   -32    
48     48     
-720   0      
160    -16    
-80    48     
128    -16    
16     32     
32     -80    
-160   48     
-64    -96    
-80    16     
160    -48    
224    112    
-80    32     
192    368    
-176   32     
272    32     
80     -32    
48     -112   
-144   32     
-160   16     
-192   -64    
320    112    
-240   32     
208    -16    
-80    -16    
-656   32     
32     -32    
-1136  -64    
-144   32     
-16    64     
-128   32     
-160   0      
-976   32     
-16    16     
80     32     
-112   16     
208    112    
-144   16     
-336   32     
160    176    
-704   -80    
128    0      
32     -48    
-32    48     
-16    32     
-432   -80    
112    96     
-640   -16    
16     16     
224    -16    
48     80     
48     -16    
-48    64     
-112   -80    
-48    -16    
64     -64    
48     64     
96     16     
-112   128    
-128   -64    
-240   -16    
112    304    
-368   192    
192    -16    
-528   32     
112    80     
-624   -192   
160    0      
-144   0      
336    80     
-336   -32    
288    -16    
-304   144    
240    256    
-208   32     
-48    0      
32     48     
64     112    
-176   96     
176    16     
-272   32     
112    256    
-16    480    
-160   -112   
256    -80    
496    288    
-160   336    
-32    48     
240    80     
-176   -368   
240    -224   
80     16     
16     -64    
-64    160    
-48    -48    
-192   -80    
-256   32     
-96    32     
-80    0      
-208   64     
128    368    
80     224    
-144   -112   
80     -80    
-48    96     
80     -112   
-32    16     
-176   112    
-96    -176   
-96    128    
96     160    
-240   688    
176    -368   
128    -48    
32     -160   
-48    192    
-128   -176   
-64    160    
96     -288   
96     1040   
-128   -112   
-16    -880   
528    368    
-64    656    
48     336    
-224   -128   
-192   -272   
112    -224   
-848   -96    
16     -96    
-32    -16    
32     240    
64     48     
-64    128    
-32    128    
0      -96    
16     128    
336    208    
-192   128    
-32    80     
-160   96     
-240   -64    
16     128    
-1264  -16    
-160   -64    
-16    16     
144    96     
-208   208    
-128   -64    
192    -144   
32     64     
112    48     
-144   -64    
80     -144   
-640   -192   
224    32     
-208   32     
0      32     
96     32     
144    48     
-64    32     
-48    32     
-112   -32    
96     80     
80     80     
-16    -112   
32     -48    
-160   0      
112    304    
-16    32     
304    144    
-288   64     
64     -96    
32     48     
-144   -16    
160    -16    
32     -32    
208    64     
-80    0      
176    16     
-32    112    
-192   64     
-112   16     
256    48     
160    32     
32     64     
-16    -64    
-96    80     
-224   32     
-48    80     
0      16     
208    64     
64     144    
32     64     
-208   -112   
-96    0      
-144   0      
-80    32     
224    160    
-128   0      
160    96     
32     -80    
96     -80    
160    32     
16     112    
80     16     
-112   -32    
144    -128   
0      112    
96     80     
-96    0      
96     16     
-160   -64    
192    0      
-16    -16    
112    16     
112    16     
240    176    
-144   128    
112    176    
208    80     
-16    112    
80     112    
208    80     
0      64     
-48    -176   
336    32     
80     96     
16     208    
16     224    
-32    -656   
32     128    
-16    0      
176    112    
-32    64     
48     48     
128    48     
16     -16    
144    96     
-32    160    
0      160    
48     144    
48     384    
32     64     
48     144    
-80    -144   
32     -80    
112    16     
0      48     
128    16     
-144   -320   
112    -48    
112    128    
-208   -48    
336    -208   
144    0      
112    80     
-96    0      
112    224    
48     -16    
-704   -784   
-112   -1952  
256    -512   
176    592    
-400   -608   
144    -80    
16     704    
320    1200   
32     -16    
-240   -1056  
-16    432    
256    336    
-48    -336   
112    -112   
80     256    
160    -416   
224    128    
-32    -432   
-80    -256   
48     32     
272    80     
-64    112    
48     160    
224    176    
-544   -192   
-96    -896   
224    688    
-48    416    
112    -320   
-16    1264   
256    144    
224    -640   
-352   -928   
448    496    
-624   -624   
-160   -464   
576    720    
288    0      
272    272    
-176   -784   
224    576    
16     -80    
0      112    
16     -224   
352    368    
0      -80    
112    64     
224    32     
0      -64    
-32    -1600  
160    304    
192    48     
240    32     
-64    32     
-32    -16    
80     192    
336    -48    
176    96     
96     128    
-32    96     
208    16     
32     -32    
-32    -272   
224    208    
-240   -288   
128    -16    
208    32     
96     48     
-48    -128   
64     0      
48     224    
192    -32    
80     16     
-64    -48    
-16    -112   
-32    -272   
336    256    
-32    -80    
224    96     
-32    16     
176    -48    
0      -272   
128    -112   
368    144    
-96    128    
32     272    
304    112    
96     -48    
464    0      
-240   -192   
-240   -352   
-112   -416   
384    -352   
272    160    
480    -64    
320    -64    
160    64     
112    0      
-16    -80    
-208   -720   
64     -560   
48     -112   
48     16     
288    0      
96     -208   
0      -272   
-64    -16    
192    -224   
96     -32    
128    -80    
256    272    
112    -32    
64     -352   
224    32     
-416   -192   
32     -384   
-128   16     
16     64     
160    -32    
176    -832   
-128   0      
-48    32     
288    48     
48     -320   
96     32     
464    -304   
-80    -112   
128    -16    
-16    -128   
-32    0      
-16    -560   
-32    64     
96     -112   
32     96     
-32    -160   
288    112    
272    256    
208    64     
208    16     
-208   -16    
128    0      
48     16     
192    -16    
224    0      
32     48     
160    0      
256    48     
272    -64    
-16    -80    
48     -272   
48     -80    
176    -352   
-304   0      
64     -192   
272    -144   
256    -160   
64     96     
80     -32    
80     32     
-704   -80    
176    96     
-2736  16     
112    32     
272    48     
80     -16    
64     -32    
-16    -128   
0      0      
224    -16    
0      96     
144    32     
0      64     
48     32     
128    -96    
-256   -160   
160    -112   
-416   96     
80     0      
64     80     
96     -112   
144    -64    
64     -144   
32     16     
0      -1088  
112    80     
128    80     
16     32     
-192   -80    
16     -48    
-128   32     
96     0      
-48    16     
96     -48    
-144   -32    
208    -96    
-336   -112   
144    -48    
176    112    
-32    -144   
96     -64    
176    -144   
128    80     
-112   48     
64     -80    
-96    -32    
48     -48    
-352   16     
96     64     
-416   -32    
224    -96    
176    16     
160    64     
128    16     
-32    -256   
240    144    
-16    80     
112    128    
80     32     
16     0      
-368   144    
-32    160    
-256   -480   
80     -288   
240    464    
256    48     
368    128    
-192   -32    
-1312  -976   
1392   512    
-544   736    
-864   -320   
496    208    
-688   -80    
480    -448   
-432   368    
272    -432   
-304   16     
288    304    
-80    -208   
-64    -240   
64     400    
240    0      
192    -64    
-32    32     
176    -192   
80     -336   
-16    736    
-16    96     
64     64     
-16    -240   
-64    -192   
-272   -80    
-144   -80    
32     336    
288    112    
480    432    
-880   224    
-192   80     
-384   -32    
-208   96     
48     -96    
-736   -80    
-176   16     
-112   -160   
-32    160    
176    112    
32     -16    
-928   -16    
32     96     
-432   -16    
-48    -16    
-32    -96    
32     32     
-64    64     
-256   0      
-176   0      
-304   0      
-160   0      
-416   80     
-16    -96    
-304   -48    
-256   -176   
-400   -208   
-64    128    
-32    -32    
176    112    
-128   -64    
-80    112    
48     240    
-16    80     
16     -48    
208    112    
64     0      
-272   176    
-128   48     
-224   -80    
80     48     
-80    32     
96     96     
-64    16     
-48    80     
-144   -96    
-160   80     
-48    -48    
320    -96    
32     64     
80     32     
-144   48     
-304   112    
-112   256    
-48    128    
64     -16    
-768   -160   
192    -16    
-304   0      
176    112    
-176   80     
-32    0      
-32    -16    
80     80     
-240   160    
-160   -176   
-96    -160   
-240   -288   
48     0      
-480   48     
0      64     
-1728  48     
144    160    
96     128    
-80    80     
-80    64     
48     -80    
272    -80    
80     96     
-144   -32    
96     144    
-272   -16    
288    16     
-224   0      
-32    -32    
96     32     
-464   64     
32     -48    
224    32     
-80    96     
16     64     
-64    -112   
-112   -160   
32     -48    
-144   96     
160    736    
256    368    
0      288    
-368   -16    
-176   -64    
96     160    
32     48     
272    464    
-240   -80    
240    96     
-48    208    
-16    -160   
32     304    
-64    128    
96     32     
64     -16    
0      -112   
-192   160    
144    64     
-240   -112   
-80    48     
-176   -96    
0      32     
-16    -224   
240    -368   
352    240    
160    560    
-128   -432   
48     -32    
-192   288    
-32    48     
96     112    
128    -272   
64     384    
16     32     
224    0      
-208   -16    
-32    -80    
96     112    
-32    224    
64     16     
80     32     
96     576    
0      -224   
192    112    
176    96     
32     48     
0      0      
400    304    
-544   32     
352    -16    
-240   48     
256    48     
304    0      
240    560    
32     512    
16     -272   
-48    16     
-240   -64    
-128   48     
64     -176   
-80    -80    
-64    128    
80     64     
-256   -160   
192    32     
32     144    
176    352    
32     112    
32     -256   
-16    -48    
-48    1136   
192    800    
-32    -592   
-288   -544   
-240   -368   
864    944    
-784   832    
160    0      
-112   -208   
144    0      
400    160    
-80    0      
208    0      
-80    16     
112    64     
288    -112   
-32    -320   
32     96     
96     128    
-224   0      
64     0      
32     144    
-96    96     
-16    0      
128    32     
96     80     
-96    -16    
176    -256   
16     -192   
144    64     
-176   0      
-48    -160   
-176   0      
80     144    
112    16     
-112   112    
32     16     
80     32     
-240   48     
96     176    
368    112    
-32    -16    
-64    48     
112    96     
16     16     
80     -64    
80     144    
-128   48     
176    48     
192    96     
128    48     
-288   128    
176    176    
272    192    
-432   -576   
128    96     
128    96     
-144   -48    
64     -32    
448    -32    
-336   -128   
32     160    
240    160    
64     112    
-80    -48    
96     112    
-368   -64    
64     64     
160    48     
384    16     
256    96     
16     0      
-112   336    
-336   48     
320    -48    
160    32     
-48    96     
-96    16     
160    96     
-48    16     
160    96     
-192   -48    
176    48     
64     48     
112    -352   
112    32     
112    -416   
96     -96    
-144   128    
-80    144    
96     16     
112    64     
-224   16     
16     112    
-32    -16    
96     -48    
224    64     
-96    -112   
144    160    
-80    -208   
144    112    
416    480    
-368   480    
96     48     
48     -48    
176    -192   
256    224    
-112   96     
144    0      
112    32     
256    0      
64     80     
-64    -192   
160    128    
-32    -16    
-16    96     
240    -128   
48     96     
32     128    
48     64     
-128   -48    
336    320    
-96    96     
80     -48    
-64    16     
176    0      
256    224    
-80    -48    
32     -128   
112    -48    
80     80     
-64    -544   
128    32     
-32    -304   
64     48     
0      32     
128    0      
80     64     
64     128    
-96    -16    
160    368    
-160   176    
96     32     
128    32     
128    -128   
32     80     
-48    -176   
-16    96     
-16    32     
176    64     
16     -16    
80     96     
128    64     
128    32     
240    -16    
-80    -176   
176    80     
-80    -160   
80     48     
-64    -80    
64     144    
48     48     
144    112    
80     -128   
16     80     
48     -32    
-16    48     
96     32     
160    208    
48     -272   
144    -112   
16     -496   
192    -144   
96     -240   
128    32     
96     192    
-16    -80    
-48    96     
-32    48     
176    -272   
64     -160   
0      -144   
160    48     
-720   400    
240    -48    
32     -32    
128    -912   
-48    80     
288    32     
16     192    
-112   -912   
-128   224    
208    32     
-96    80     
320    112    
80     64     
32     -560   
96     -112   
-2848  96     
-32    -560   
0      -240   
224    96     
-208   528    
448    -608   
-32    -448   
176    320    
-208   256    
608    -48    
-64    32     
-80    432    
48     96     
64     -112   
-32    -160   
-112   -112   
192    -112   
-144   -240   
496    -144   
-176   0      
144    -192   
-128   32     
48     -592   
-48    352    
224    96     
128    -48    
224    -144   
256    272    
-480   144    
176    -32    
-128   -32    
240    0      
-464   48     
224    -96    
-128   16     
16     -128   
0      96     
320    -176   
352    64     
-176   112    
-224   112    
-240   160    
80     64     
-16    -16    
208    -16    
-256   -64    
192    -272   
-352   32     
160    -48    
144    -80    
128    -48    
112    -32    
-32    -272   
-32    -16    
192    -1648  
-128   16     
-32    32     
144    -64    
64     48     
144    -16    
-128   -32    
64     -96    
-224   0      
0      -32    
-352   -64    
16     32     
48     -16    
80     -96    
96     208    
176    -192   
176    -16    
32     96     
-32    -16    
-80    -32    
128    -80    
-112   64     
16     -112   
-64    0      
144    96     
-1184  64     
176    -112   
-32    64     
32     -176   
32     48     
0      -288   
128    -112   
-32    0      
352    96     
-272   176    
-16    -48    
-320   -16    
192    -32    
-272   48     
32     -80    
-672   -80    
224    -48    
-32    192    
80     -144   
0      32     
256    -64    
-224   112    
-368   16     
-48    64     
16     -16    
208    -48    
-96    80     
0      -144   
-112   -48    
-256   -128   
-288   -160   
-48    -288   
400    96     
240    64     
-48    48     
320    -272   
-16    -32    
96     96     
160    256    
-112   256    
-96    32     
48     0      
112    16     
80     48     
144    592    
288    368    
-672   160    
-80    320    
-912   -176   
112    -128   
-112   -720   
272    480    
144    672    
-864   -192   
-160   48     
-1920  -192   
-320   240    
-160   176    
224    -208   
-16    -192   
128    160    
-704   -176   
0      -176   
-176   48     
0      -96    
-112   304    
-160   -272   
-128   336    
-208   -48    
-144   -192   
-224   224    
-192   -272   
-64    192    
48     -288   
-144   400    
176    80     
96     -32    
-128   128    
0      -224   
-16    -16    
-192   -16    
-16    64     
-32    32     
-208   128    
64     144    
-368   64     
-112   80     
-880   -32    
-208   0      
0      -48    
0      112    
-48    -256   
192    -352   
-32    -160   
144    16     
-224   -128   
-48    -96    
-64    48     
-32    112    
96     160    
32     32     
-192   -80    
-592   -208   
-128   32     
32     -96    
80     64     
80     -288   
192    80     
-80    96     
-144   -144   
-16    -64    
-48    -16    
304    192    
-144   176    
192    -64    
-304   16     
80     0      
-32    -48    
48     176    
-832   640    
-112   288    
-48    -336   
32     160    
32     176    
-272   -16    
288    48     
704    288    
-608   256    
-384   0      
-176   -144   
-352   -96    
608    368    
-304   16     
96     16     
-224   -64    
-224   -80    
144    -144   
-16    112    
304    -64    
-160   48     
16     16     
-144   0      
112    64     
-240   -16    
64     48     
-128   32     
160    32     
-352   -192   
288    -128   
-816   -112   
176    208    
48     128    
0      -16    
16     32     
64     96     
-128   -32    
-80    16     
0      64     
-128   256    
400    80     
-272   16     
-144   -16    
-160   -16    
32     -32    
-176   16     
-16    48     
112    16     
-64    16     
160    16     
48     112    
48     32     
-16    -112   
144    -48    
-48    176    
-128   80     
-32    16     
-16    32     
-160   -64    
-16    48     
64     64     
208    32     
-96    0      
-32    -80    
32     96     
32     144    
32     -96    
80     -128   
176    -48    
-160   144    
-240   -576   
64     -192   
-288   256    
-80    -128   
16     48     
-576   -48    
240    80     
96     80     
-64    96     
64     240    
256    256    
-48    32     
-64    -16    
-64    64     
80     144    
176    32     
-32    -48    
112    64     
-128   144    
144    192    
-32    144    
-224   32     
0      -48    
224    -48    
-16    80     
-32    144    
0      112    
32     64     
176    0      
-48    80     
0      112    
-192   -48    
432    96     
-544   -464   
-128   -208   
-80    208    
-240   16     
-32    64     
-32    -144   
-16    -16    
288    304    
272    688    
-144   64     
224    -800   
-96    -208   
240    320    
-272   96     
144    112    
-80    -16    
64     16     
144    80     
16     48     
0      80     
304    128    
16     -176   
-96    -144   
32     64     
112    128    
16     -64    
0      128    
32     192    
64     32     
128    240    
16     96     
-32    -32    
48     48     
-160   0      
80     32     
32     80     
352    304    
-80    288    
-192   16     
64     -240   
160    -128   
80     -128   
-320   -112   
208    -560   
64     -528   
96     272    
-112   400    
-80    48     
0      80     
-48    -64    
80     -128   
128    128    
-32    -16    
0      -96    
64     304    
64     112    
-16    -224   
128    16     
-64    -32    
-160   -144   
496    400    
-128   -624   
96     48     
0      160    
80     -144   
64     0      
32     336    
16     48     
-112   -144   
0      576    
96     -464   
32     624    
176    -144   
-144   288    
-208   -240   
112    -848   
272    208    
208    32     
128    -112   
-224   320    
32     -448   
96     416    
256    -320   
320    192    
-192   112    
16     -32    
-32    -240   
-176   -272   
208    32     
-32    -384   
32     -80    
-112   -256   
96     -64    
-32    64     
80     -128   
160    112    
208    176    
192    -16    
-160   -128   
-16    208    
-48    64     
192    64     
352    160    
-240   48     
320    0      
-48    224    
240    160    
176    224    
-48    -272   
64     -32    
48     288    
-16    32     
64     80     
272    112    
-192   -32    
544    -256   
-192   288    
144    160    
128    96     
0      112    
-256   80     
384    -176   
48     64     
32     80     
-16    0      
240    0      
96     64     
128    112    
144    288    
-144   208    
160    32     
384    96     
48     -48    
-32    -80    
-144   -720   
80     -80    
176    0      
-160   -64    
128    -800   
304    288    
112    224    
240    32     
224    0      
128    128    
-224   -384   
16     -272   
256    -32    
-64    -64    
-192   48     
192    -160   
336    80     
208    48     
0      32     
272    -176   
64     32     
-16    -80    
112    64     
16     16     
128    -560   
112    0      
176    -32    
16     -32    
80     -32    
-144   -112   
224    -144   
192    112    
-240   -160   
160    -176   
112    48     
-160   384    
240    64     
288    -304   
48     32     
176    -416   
0      -448   
48     -96    
112    -16    
224    -96    
160    -496   
-16    16     
160    0      
0      -32    
48     -16    
64     0      
16     -64    
192    128    
128    -144   
-64    48     
80     -80    
112    48     
-1072  272    
-224   320    
64     -32    
144    -240   
144    -16    
160    -496   
-32    0      
160    -480   
64     -64    
-64    -512   
-240   -960   
-96    -400   
32     -160   
208    -112   
112    288    
-672   464    
96     -352   
112    -128   
368    448    
-336   48     
-112   -1136  
160    160    
224    -1072  
240    -16    
-48    32     
80     0      
160    16     
128    -32    
-32    112    
-128   -176   
-416   -912   
-128   416    
160    -256   
144    -80    
256    16     
320    -192   
80     192    
32     -304   
48     -80    
-96    -384   
-160   128    
64     112    
112    -32    
-112   -176   
272    48     
400    240    
-80    256    
-624   -32    
192    -176   
-80    -272   
80     -208   
96     208    
0      -16    
128    128    
160    -112   
96     128    
80     -48    
64     -96    
128    0      
48     16     
112    32     
80     0      
-592   -128   
128    -176   
0      32     
128    32     
32     32     
144    -112   
96     16     
304    -656   
-176   -16    
-32    32     
64     -80    
48     0      
16     -32    
-144   16     
32     64     
-864   0      
64     16     
-272   208    
176    -32    
-64    48     
0      -272   
48     32     
64     -592   
272    96     
96     64     
208    32     
-224   -96    
160    32     
-192   -32    
16     48     
-160   -112   
-160   -96    
48     128    
96     -96    
176    32     
32     -96    
-16    16     
336    128    
32     32     
-112   -128   
-96    -32    
-608   48     
80     0      
80     64     
384    32     
48     240    
-160   -128   
-144   -16    
-32    -144   
176    32     
240    -48    
576    576    
-800   96     
-1936  -128   
-224   -16    
0      16     
80     144    
-320   32     
-272   -176   
416    -16    
-608   -80    
-48    -112   
-64    64     
-880   -144   
80     240    
-224   -128   
192    112    
-160   -16    
-64    -32    
64     16     
-160   112    
-208   16     
224    304    
-128   64     
320    -112   
-144   0      
-848   -64    
64     -16    
128    32     
-16    32     
-240   -176   
-240   16     
-96    -64    
32     -160   
16     80     
-272   64     
-64    -48    
-384   -48    
112    32     
112    48     
-16    32     
-64    -32    
64     48     
192    -48    
16     48     
-144   -128   
-64    -32    
0      128    
-80    48     
-32    0      
-112   16     
-336   -32    
-800   -272   
-32    -48    
-1264  80     
-208   -160   
-64    64     
144    320    
-48    -112   
176    -48    
80     64     
-64    192    
0      192    
-96    128    
16     -48    
176    0      
-96    16     
-48    16     
-96    -64    
-496   -16    
64     128    
-128   -32    
336    32     
-144   -192   
80     32     
-64    0      
64     416    
-80    -352   
-240   32     
32     -48    
32     64     
272    432    
-128   -144   
-96    -336   
-256   80     
144    48     
-240   336    
-32    -80    
-96    32     
-128   -64    
-96    48     
-80    0      
80     32     
192    112    
176    -144   
16     64     
-32    432    
-240   1232   
-112   208    
64     -608   
288    208    
-512   16     
32     -48    
32     256    
-48    -144   
-224   -64    
-48    144    
16     -64    
64     96     
64     -560   
-128   48     
80     544    
-144   -128   
-128   -272   
-160   64     
48     96     
48     -192   
224    80     
-112   112    
48     -16    
96     -32    
32     112    
32     16     
112    352    
-160   192    
-176   48     
-64    -208   
96     144    
192    240    
-240   -48    
64     -128   
-688   -144   
-32    416    
-160   448    
0      -256   
-48    368    
-48    -208   
160    384    
-304   -416   
0      -208   
64     336    
224    64     
-32    0      
80     16     
-528   48     
112    -304   
144    -96    
0      192    
32     160    
0      192    
48     -96    
-32    -96    
-80    -224   
128    16     
16     -112   
96     -192   
128    336    
16     208    
128    112    
-112   160    
16     16     
32     176    
-16    -32    
32     -32    
0      -96    
112    -256   
0      -48    
32     -208   
-64    80     
32     -208   
-192   -80    
16     -304   
96     -144   
224    -224   
-80    -656   
368    -304   
64     -128   
-64    -16    
0      -208   
-48    96     
-16    -336   
-32    96     
272    144    
-16    16     
144    -16    
-128   -144   
-112   128    
-112   -96    
96     208    
-32    -112   
16     0      
224    -64    
-288   -288   
-16    -240   
64     -80    
288    32     
160    96     
32     96     
64     256    
48     304    
144    144    
144    128    
-16    -16    
32     144    
144    32     
-240   -48    
176    32     
-112   0      
0      256    
176    208    
96     64     
128    -112   
-32    -144   
16     64     
-48    144    
0      -112   
64     80     
-80    0      
128    64     
-32    96     
16     -144   
272    -48    
-112   176    
48     128    
368    96     
-144   64     
-96    -16    
144    112    
-48    -32    
80     272    
-16    112    
144    -16    
-208   -848   
-336   -640   
320    -128   
-272   144    
432    -16    
272    16     
80     144    
128    176    
-32    400    
32     -96    
16     48     
-48    128    
240    336    
-176   224    
176    64     
128    -112   
96     -48    
160    80     
16     -512   
0      -256   
-112   -256   
112    32     
-32    96     
-16    272    
-96    -144   
224    -224   
112    0      
160    64     
48     0      
112    128    
-288   128    
64     -32    
-16    -32    
48     -320   
304    64     
176    16     
128    64     
128    -144   
112    80     
112    0      
-176   192    
-192   -64    
112    0      
256    96     
0      112    
0      32     
128    -144   
96     96     
272    -96    
96     -16    
48     -848   
-32    -16    
64     -192   
160    176    
-48    -496   
64     352    
32     -112   
16     -96    
96     288    
-32    -368   
96     128    
128    -208   
192    208    
80     -448   
48     112    
-128   -352   
80     192    
112    0      
224    224    
32     32     
176    384    
-32    288    
64     640    
224    128    
-112   -368   
32     240    
176    32     
-64    -176   
-32    -272   
48     80     
-80    -16    
16     32     
160    -240   
176    144    
-16    144    
32     80     
-96    -80    
16     80     
0      32     
176    80     
288    144    
208    -160   
48     80     
-48    -160   
-192   -80    
64     16     
32     80     
144    -16    
256    96     
-128   -128   
384    64     
160    -48    
-128   -384   
0      -224   
64     -16    
192    128    
16     -176   
256    16     
0      -80    
48     64     
-32    -192   
144    32     
64     144    
224    64     
-32    -32    
80     128    
192    144    
-128   16     
160    -112   
-16    -80    
176    0      
128    16     
48     32     
176    -96    
-32    -48    
144    -64    
-16    -784   
160    96     
80     -144   
16     32     
224    -240   
-32    -176   
160    -32    
112    64     
224    -80    
-48    -128   
0      -16    
80     112    
560    80     
-480   -64    
304    -160   
-16    0      
128    -48    
272    -192   
32     48     
-304   -80    
32     144    
-320   -64    
352    -176   
-128   16     
336    32     
64     -64    
48     -928   
-64    -32    
112    160    
-32    -32    
336    32     
-256   64     
256    -64    
32     80     
-304   0      
352    192    
-1168  80     
208    -272   
144    -48    
0      80     
32     -240   
128    -352   
240    80     
368    256    
-176   48     
304    -96    
-224   32     
32     -32    
-96    -32    
-208   96     
-288   16     
-560   -48    
672    -80    
-64    -48    
80     0      
192    16     
0      0      
192    -32    
-16    -176   
160    48     
176    -80    
-176   32     
224    -192   
144    16     
16     112    
272    -64    
-368   -48    
-80    -48    
48     16     
144    -144   
-32    48     
176    -160   
-432   -96    
160    -464   
240    176    
-32    128    
96     16     
-32    32     
96     48     
-176   -32    
96     -112   
-96    -48    
-48    224    
-256   48     
96     -112   
-192   0      
176    -704   
208    -160   
64     -32    
16     16     
176    32     
-64    -272   
-128   80     
176    -64    
-48    -48    
-240   -208   
-160   -48    
272    96     
-352   48     
176    -176   
-1696  -144   
32     -48    
0      112    
208    128    
-96    -224   
16     -272   
80     -96    
-96    304    
16     -32    
-112   -48    
96     176    
80     -80    
272    0      
-320   -640   
64     80     
-96    96     
160    -112   
176    256    
-32    -32    
64     976    
-704   -304   
224    32     
-320   272    
48     -224   
-64    448    
256    208    
-224   -432   
208    -64    
-192   144    
112    -176   
64     112    
128    -224   
-16    -32    
-32    -128   
80     32     
64     16     
-304   -144   
160    496    
-704   176    
-112   -16    
96     -80    
-96    -144   
96     256    
-64    192    
272    96     
80     288    
-1056  96     
144    -128   
-464   288    
48     160    
160    304    
-208   416    
-16    128    
-1200  48     
-192   -48    
-96    208    
16     80     
128    -64    
-112   -80    
-144   -144   
64     80     
-336   -144   
144    48     
80     96     
-192   -144   
-176   -224   
-64    128    
-176   -64    
-80    -80    
48     -96    
-784   -240   
-48    -16    
-48    -48    
80     -128   
-208   -272   
384    432    
-32    272    
112    112    
-128   -96    
16     32     
16     144    
-128   128    
96     -80    
80     64     
0      304    
-96    64     
16     -16    
-864   -96    
96     64     
-144   -16    
112    80     
-80    -96    
-64    -176   
-80    48     
-96    -16    
-80    -96    
272    64     
-48    -256   
-112   160    
-64    176    
-432   64     
64     192    
-400   0      
160    112    
80     -16    
272    192    
0      64     
-128   -96    
16     -160   
-64    -176   
-32    -272   
-496   -368   
-48    -480   
-176   -144   
-64    64     
80     -160   
-320   -368   
-384   -784   
-32    16     
-240   -352   
-112   32     
64     -144   
176    -160   
224    -48    
208    64     
-224   416    
-464   -16    
-160   48     
64     -240   
0      -112   
16     -336   
-48    -64    
-432   16     
0      32     
-48    240    
-16    144    
32     48     
80     48     
208    64     
-240   64     
-112   272    
96     176    
-80    -128   
96     288    
336    192    
304    352    
-416   288    
-320   -48    
-48    16     
-560   -80    
80     -160   
-176   -160   
144    -304   
-336   -112   
144    80     
272    32     
-96    64     
288    -64    
-144   144    
-16    -32    
-288   -48    
-16    32     
-16    256    
-32    0      
-320   128    
-224   288    
176    48     
-112   64     
336    96     
128    0      
-176   -80    
64     48     
-240   -256   
-256   -144   
96     -176   
-112   -64    
0      -144   
-144   -64    
128    48     
160    144    
-176   0      
112    -192   
-48    -128   
-80    16     
-48    -32    
-160   -400   
128    -288   
64     -16    
96     80     
112    64     
-144   160    
368    208    
-336   176    
-144   -112   
-32    -64    
144    48     
368    64     
-32    528    
128    160    
-16    -32    
64     160    
16     64     
32     -48    
-64    -576   
-144   -544   
-128   -448   
-192   64     
-112   144    
-16    -48    
16     112    
96     -96    
320    -64    
-208   256    
128    -560   
576    784    
-144   -240   
-16    112    
112    -80    
-16    -64    
176    80     
32     416    
-112   -160   
-112   -288   
112    32     
192    208    
-64    32     
32     112    
96     -16    
32     32     
-32    16     
192    96     
-128   -16    
112    48     
-16    -16    
-64    64     
-256   -144   
320    -544   
144    -400   
160    112    
0      128    
0      144    
80     192    
80     368    
-96    64     
16     0      
-112   -64    
64     0      
128    144    
-80    0      
480    320    
-496   -16    
-32    -1104  
80     112    
192    96     
48     48     
192    -16    
112    96     
0      96     
-64    16     
-32    16     
-16    48     
16     48     
208    80     
-64    48     
160    112    
256    96     
-160   -208   
-16    -16    
288    32     
80     80     
96     48     
-16    -112   
64     -144   
48     -32    
160    48     
160    160    
16     32     
-32    0      
0      32     
112    96     
336    96     
-304   -128   
96     32     
112    -192   
144    48     
64     0      
256    128    
-368   -16    
-96    64     
192    16     
96     96     
-32    -96    
112    48     
-96    -32    
-1024  -224   
176    48     
96     -80    
0      32     
48     -1424  
0      0      
0      48     
96     96     
80     48     
96     48     
80     48     
-48    -48    
16     -48    
112    192    
144    -16    
48     48     
112    48     
192    224    
48     128    
-64    -480   
-160   0      
64     -496   
0      176    
-32    224    
-48    -176   
-32    -80    
0      192    
192    32     
16     64     
144    32     
192    -64    
-16    16     
96     -32    
-64    112    
32     -208   
0      96     
96     -624   
-112   -224   
48     0      
-16    48     
96     -304   
288    144    
-256   80     
384    160    
-128   144    
-688   -416   
336    -96    
336    -96    
-16    48     
160    -16    
304    96     
-128   -128   
16     176    
-176   80     
480    240    
-288   320    
272    96     
0      -96    
48     -48    
192    -16    
0      -608   
80     112    
112    96     
208    48     
144    128    
-80    208    
80     64     
304    272    
-64    -240   
208    -128   
-128   -112   
-96    48     
80     192    
96     -256   
144    -16    
64     48     
176    -16    
80     128    
-144   16     
192    -144   
-160   368    
112    -48    
32     112    
48     48     
16     -896   
208    -176   
144    -1616  
48     -368   
16     -304   
144    -304   
-192   16     
208    -352   
80     224    
528    320    
32     1024   
-48    208    
-32    -144   
176    -256   
192    -208   
160    -464   
80     -416   
48     -112   
16     -64    
288    240    
64     -192   
-80    304    
224    96     
320    -128   
112    -48    
80     16     
16     -192   
-16    -208   
-16    -256   
208    16     
160    96     
-48    64     
-624   -80    
96     -176   
144    -96    
208    -64    
160    -32    
-32    -144   
224    64     
128    -288   
80     -192   
144    -80    
-96    240    
128    80     
128    16     
176    32     
64     96     
-352   0      
160    -32    
-112   16     
96     -48    
32     -16    
32     -16    
48     -112   
176    -448   
-112   112    
176    48     
-272   224    
-224   0      
160    -48    
256    -16    
32     -80    
-144   64     
176    -32    
32     0      
-112   -64    
48     160    
80     -128   
208    0      
160    -464   
-160   48     
-32    -192   
16     -160   
256    -176   
0      16     
-192   48     
-16    -272   
-80    0      
160    64     
-160   48     
128    -16    
304    0      
48     -32    
272    0      
0      -208   
32     16     
96     -224   
-48    -128   
144    -176   
96     176    
32     208    
0      112    
-64    64     
-64    -160   
-880   -160   
48     -544   
-944   -112   
128    96     
96     -96    
-48    -32    
32     48     
96     -96    
112    96     
48     48     
112    16     
-16    160    
240    240    
-80    96     
176    -64    
-48    -32    
128    -64    
48     32     
96     96     
80     -80    
64     -144   
176    64     
160    112    
160    256    
48     -944   
64     -224   
144    -16    
-80    128    
-224   -176   
112    -144   
-288   -160   
272    80     
-48    80     
-112   -48    
-48    80     
176    -96    
-32    384    
144    352    
352    608    
-992   192    
-48    -304   
-432   -96    
576    -240   
-112   432    
208    480    
-32    240    
-16    0      
-240   -176   
32     -112   
-144   48     
240    192    
-16    496    
-1968  192    
-288   -64    
-112   240    
-960   -16    
144    528    
-96    0      
32     -64    
-384   -16    
112    16     
-32    144    
32     -144   
-240   80     
-240   -176   
-240   -128   
-112   -416   
-224   -192   
-160   -64    
-48    -560   
-304   -288   
0      -592   
-592   -240   
112    -112   
-448   144    
16     16     
224    256    
-112   0      
-304   -32    
-48    160    
-288   -464   
240    -272   
112    96     
-224   32     
-128   -320   
16     304    
96     -32    
-176   80     
-272   272    
496    -320   
352    176    
-544   224    
-256   -416   
288    -160   
320    368    
-272   112    
144    -160   
0      176    
-64    144    
224    272    
-336   -256   
-176   -112   
-336   -32    
304    32     
-240   16     
32     192    
-1440  -224   
80     -240   
0      0      
128    96     
176    -48    
-48    384    
-128   -112   
64     96     
-64    192    
112    -144   
-176   -176   
-272   528    
224    -192   
-432   0      
-192   -80    
-656   -64    
16     176    
-16    -48    
48     -32    
112    32     
-320   -224   
336    352    
-112   128    
-128   -368   
256    128    
-192   -384   
48     256    
-16    224    
-176   -112   
16     32     
-400   -48    
96     80     
-144   0      
160    -48    
-16    32     
-144   -48    
48     -48    
208    64     
16     128    
128    144    
16     160    
-144   80     
-48    96     
-256   160    
0      272    
-96    288    
160    128    
-1456  -80    
-64    112    
16     96     
-80    -64    
-32    -16    
-80    -32    
96     48     
-32    0      
-160   -400   
512    -416   
416    80     
-272   96     
48     0      
-416   -80    
-304   -272   
-1200  -224   
-48    432    
-112   64     
112    192    
96     -16    
96     -48    
-128   64     
-48    48     
96     -160   
-16    48     
-16    160    
-128   -32    
176    80     
-256   -128   
96     240    
-240   48     
112    0      
336    96     
64     32     
144    32     
-96    0      
-64    32     
-80    -48    
80     0      
-32    80     
176    64     
-112   -16    
64     32     
-80    0      
320    288    
-304   16     
-64    0      
176    96     
48     32     
-144   0      
64     96     
64     64     
48     16     
-32    -16    
-48    64     
96     64     
-112   -32    
144    80     
32     80     
-64    80     
-64    32     
-48    -32    
96     48     
96     64     
112    32     
48     80     
-48    16     
-80    16     
16     48     
-64    96     
128    64     
-48    16     
80     16     
48     64     
0      48     
64     80     
64     32     
-32    32     
96     48     
-160   0      
128    -16    
48     96     
32     16     
0      -144   
64     -240   
48     176    
16     -16    
64     32     
16     -112   
0      32     
112    96     
32     96     
-48    -80    
-16    -16    
96     96     
-112   32     
176    -32    
48     48     
-96    144    
-32    32     
64     -16    
128    160    
-80    160    
208    144    
-32    64     
176    112    
512    288    
-112   -96    
16     -304   
-32    16     
-160   96     
112    -16    
368    32     
144    -128   
-32    256    
160    320    
-48    -128   
-64    -208   
256    112    
32     112    
80     144    
96     -144   
-272   112    
32     16     
-128   -48    
112    208    
144    -96    
-64    224    
48     -160   
-80    560    
592    -336   
-272   1344   
-272   -752   
256    -1504  
208    1024   
176    -160   
-112   160    
-128   -96    
208    -64    
160    64     
-192   240    
-112   -32    
-64    -288   
0      96     
48     -208   
304    256    
144    16     
32     -416   
32     368    
112    -48    
0      80     
144    -64    
64     32     
-64    -192   
96     -112   
-64    -80    
128    16     
-128   32     
-160   0      
352    0      
128    0      
80     112    
-32    -224   
288    0      
-16    -128   
48     176    
64     240    
64     96     
80     -32    
160    64     
224    128    
64     32     
-32    -128   
64     -32    
48     16     
80     -48    
192    80     
-80    96     
32     96     
-64    -320   
64     -48    
128    -16    
-16    80     
-32    -64    
32     -48    
144    16     
0      96     
128    32     
224    96     
48     96     
-128   -112   
272    -16    
-96    -144   
160    -32    
176    -384   
-16    112    
192    -752   
128    144    
16     80     
-48    -16    
64     32     
32     0      
144    80     
48     -80    
192    48     
16     96     
-16    0      
368    128    
-288   320    
-224   -128   
352    0      
208    -96    
128    128    
128    240    
64     96     
0      -224   
-64    -160   
0      -48    
96     128    
-64    192    
240    -656   
48     48     
32     80     
-128   96     
32     -48    
64     -32    
-128   -624   
272    0      
48     64     
240    256    
-176   -16    
112    160    
48     48     
208    160    
64     192    
-48    -240   
176    80     
144    144    
208    128    
-32    -160   
80     -144   
224    -896   
-16    16     
-48    16     
128    160    
-80    -32    
96     -688   
32     -1040  
16     -80    
64     -704   
16     32     
144    -224   
96     -128   
16     -64    
32     -192   
160    32     
0      -48    
160    -576   
48     -224   
-16    -176   
-96    96     
-1040  -112   
16     -208   
-96    -144   
96     -112   
64     -48    
-80    0      
32     224    
32     368    
-48    -128   
80     0      
80     -160   
-48    -944   
384    304    
32     224    
96     -272   
-192   160    
192    160    
96     64     
-128   112    
-112   -96    
48     -336   
224    -48    
176    -272   
112    -48    
96     80     
-240   128    
96     416    
-96    -416   
208    416    
176    0      
-608   192    
480    -384   
-16    -128   
-80    -64    
288    -96    
-96    -304   
224    304    
16     -32    
64     272    
16     -144   
-96    -128   
352    800    
-160   -112   
-160   -64    
32     80     
-368   -176   
64     80     
-800   -48    
144    -48    
-16    16     
-208   672    
208    48     
48     -720   
-592   176    
208    32     
-32    80     
144    -16    
272    48     
64     -32    
48     80     
-144   -128   
-16    -304   
-48    48     
48     48     
240    464    
-144   -64    
0      -336   
256    -32    
64     256    
128    -208   
-144   -224   
256    16     
32     -32    
-64    -48    
112    -32    
16     -64    
16     -16    
-128   0      
64     -48    
-1632  64     
176    32     
-64    32     
208    -160   
80     96     
272    -224   
-144   16     
32     -16    
-48    -64    
112    -32    
176    0      
-64    0      
288    16     
-352   -144   
0      -128   
-464   48     
16     -320   
224    -32    
112    -32    
16     48     
192    -208   
-224   -64    
-32    -80    
80     -80    
-352   192    
16     96     
-256   176    
144    48     
-464   -96    
176    -48    
-16    -288   
48     -144   
160    224    
224    112    
-256   128    
-96    -128   
656    384    
-256   -64    
48     -176   
192    224    
16     16     
128    16     
-32    -144   
-128   -16    
96     32     
-32    -16    
384    -144   
304    128    
240    -160   
-16    160    
-768   112    
-752   16     
224    16     
-496   16     
-32    64     
96     -48    
-240   -16    
-64    -320   
-288   -112   
128    64     
-320   0      
-48    -144   
256    -144   
-192   -32    
144    112    
112    64     
-144   48     
-336   -80    
48     16     
240    64     
-16    0      
112    64     
0      96     
16     -32    
-336   -48    
-64    160    
-80    192    
-272   96     
-224   -128   
272    96     
112    32     
0      32     
64     96     
-640   48     
16     0      
-96    16     
-160   -240   
-1776  -224   
-112   48     
176    -32    
224    96     
48     -64    
176    48     
-32    -208   
-384   -208   
-96    112    
-32    32     
80     80     
-80    80     
-112   -80    
-112   -32    
-48    32     
-1088  -160   
-176   -112   
-80    -32    
224    128    
96     -48    
16     48     
-80    -64    
-112   0      
-16    -16    
224    32     
0      48     
32     64     
0      16     
32     -64    
64     32     
48     144    
16     64     
-240   -80    
160    16     
16     0      
16     48     
160    64     
0      64     
96     64     
-304   32     
-32    64     
-288   -16    
64     32     
-160   0      
96     48     
-224   112    
176    112    
-704   -64    
48     112    
48     16     
-48    16     
-64    16     
0      96     
-32    32     
16     48     
-80    -64    
16     160    
-64    16     
0      -80    
-96    -176   
-336   -96    
176    80     
-1072  -112   
-112   64     
176    144    
48     0      
-96    -64    
-176   -80    
-80    0      
160    80     
80     -304   
-80    -96    
224    320    
48     304    
-16    -432   
-208   -48    
-144   528    
-160   -608   
224    -48    
64     192    
-32    80     
64     160    
48     -64    
16     240    
96     -16    
80     0      
-96    -288   
0      128    
128    432    
-336   -80    
-336   -384   
304    -656   
-224   256    
96     -192   
112    64     
-80    208    
16     -16    
-16    608    
-256   -288   
-384   -240   
288    -880   
-272   -288   
288    -176   
-240   -432   
80     304    
-176   -192   
96     368    
0      48     
-320   80     
64     96     
-112   112    
240    128    
256    208    
-80    96     
-16    -176   
-80    -272   
96     -208   
32     224    
-240   -128   
304    -32    
-160   112    
144    160    
48     -16    
144    16     
48     96     
0      192    
48     64     
-112   16     
96     48     
192    128    
-16    48     
-16    -112   
288    112    
-288   144    
352    192    
-432   -16    
-112   48     
-112   128    
48     96     
96     32     
48     16     
64     32     
144    80     
64     64     
16     80     
224    32     
-128   -16    
16     240    
112    240    
-96    64     
-32    -80    
0      32     
128    80     
96     48     
48     -80    
48     0      
128    32     
0      32     
176    144    
-48    80     
64     0      
-128   -48    
112    96     
-112   80     
176    272    
96     0      
112    0      
-176   -16    
128    0      
80     160    
32     16     
128    -48    
-80    -64    
160    -64    
-16    64     
32     48     
176    96     
-144   -64    
192    -176   
336    96     
80     64     
-32    -768   
-48    -288   
-80    -272   
64     32     
-16    112    
144    304    
-48    128    
160    -32    
128    -48    
112    0      
-128   -96    
288    144    
-48    96     
16     144    
160    256    
-80    -336   
-32    -32    
272    -96    
96     -32    
64     16     
16     64     
288    240    
-224   16     
-208   -192   
192    192    
-16    96     
16     224    
16     80     
16     48     
-16    48     
192    -192   
256    240    
48     320    
48     -416   
-112   144    
192    -32    
-240   -848   
192    256    
-32    -112   
-144   224    
-128   -128   
80     176    
320    400    
-16    -64    
208    16     
144    -304   
-128   48     
48     -2160  
32     240    
-80    -176   
-16    16     
32     368    
272    -96    
-112   16     
80     144    
80     -80    
-48    224    
64     -64    
-32    64     
48     32     
0      -128   
128    -368   
-96    -160   
240    224    
-16    32     
240    192    
-128   -16    
64     -112   
-32    -560   
80     32     
0      0      
-272   16     
48     464    
16     48     
112    16     
32     -64    
-32    32     
288    -16    
176    160    
192    -400   
80     32     
-64    16     
16     32     
-144   -256   
-144   -736   
16     368    
32     480    
208    352    
304    -80    
112    224    
416    320    
32     272    
80     80     
208    112    
-304   -192   
-32    192    
48     176    
112    144    
-192   16     
-16    0      
80     0      
-32    -320   
-144   48     
96     -336   
144    32     
272    64     
336    320    
-288   -176   
-144   -112   
336    80     
-240   -80    
336    16     
-32    128    
-16    -96    
80     64     
-32    0      
224    -48    
-48    80     
144    -192   
32     80     
144    -32    
96     32     
-208   -32    
48     -32    
256    -64    
160    256    
80     -16    
0      -736   
48     32     
-16    0      
208    -208   
0      -48    
16     -176   
-32    -48    
48     32     
192    -144   
176    112    
-48    -16    
-16    112    
224    16     
0      -240   
-16    112    
64     -96    
48     64     
-416   -16    
-64    -32    
192    -32    
144    -64    
80     -16    
144    -512   
160    -32    
-224   -160   
256    -240   
192    -304   
96     48     
208    -192   
0      96     
352    80     
-192   -32    
-128   -48    
-256   -160   
32     -64    
480    -16    
272    80     
0      -176   
-240   -304   
240    -432   
288    224    
-160   -16    
-192   0      
320    16     
-240   64     
-384   -192   
416    -176   
-224   -48    
-192   16     
352    48     
0      -112   
-48    -64    
112    -400   
48     -128   
48     -848   
48     -176   
176    96     
-128   128    
16     -80    
256    336    
-272   16     
-112   -32    
-240   -144   
96     -48    
-1968  -32    
128    0      
96     -32    
64     -128   
288    16     
512    400    
-96    208    
32     -432   
176    48     
80     -160   
80     -112   
80     -176   
224    256    
80     0      
16     -80    
-1152  -240   
-240   -272   
-752   96     
80     32     
128    32     
208    -160   
-176   80     
128    -1472  
192    112    
0      -64    
336    64     
32     64     
0      -16    
-304   -80    
32     -48    
-256   -176   
48     -64    
-512   64     
208    64     
-208   -48    
128    -160   
112    32     
0      -368   
0      128    
-96    80     
96     -16    
-144   -48    
272    0      
-192   16     
192    144    
-48    80     
160    -32    
-400   0      
32     -96    
160    112    
32     0      
-16    112    
128    -48    
48     80     
240    -16    
48     -96    
48     32     
80     32     
-240   -16    
224    -128   
-48    0      
160    -16    
-256   96     
192    -64    
112    80     
176    -48    
16     192    
0      -128   
176    -64    
-400   48     
176    -64    
-416   -48    
128    -16    
-128   32     
320    128    
-288   -336   
192    -128   
-128   16     
64     -48    
0      176    
-1552  -48    
80     -176   
-2336  -16    
-416   -32    
-32    -64    
-224   432    
0      -144   
384    256    
-224   -384   
32     -320   
32     448    
80     -304   
-128   288    
-336   -320   
-80    32     
-48    176    
-128   416    
432    -304   
-64    -400   
-80    304    
-528   -144   
-80    -32    
-1296  96     
-128   496    
112    96     
96     112    
-208   32     
-48    -32    
-256   -256   
320    -400   
-160   -112   
-32    -128   
144    112    
-176   176    
-272   -272   
-32    192    
-128   -16    
-592   144    
144    32     
-544   384    
-320   160    
-416   -32    
16     112    
-48    304    
32     112    
400    16     
-208   64     
0      0      
-16    16     
-320   -128   
320    -448   
32     384    
-96    480    
-32    -144   
-128   272    
-16    0      
-272   -160   
224    -128   
-64    -208   
64     96     
0      144    
0      80     
176    96     
-208   64     
-96    -208   
16     -128   
-16    80     
-160   16     
-176   32     
-544   48     
224    -16    
-64    -16    
256    48     
-96    -128   
32     0      
-160   32     
-400   64     
176    0      
96     -32    
176    0      
-560   432    
352    -16    
-16    -272   
272    -144   
-480   16     
16     80     
-656   -16    
-32    96     
0      -208   
-224   272    
0      -128   
240    -32    
64     96     
32     80     
32     96     
-64    32     
-16    0      
-32    -16    
224    128    
-48    48     
0      64     
-336   -96    
16     -64    
176    -80    
-64    80     
96     48     
-112   48     
224    128    
-192   112    
144    0      
-368   128    
-48    48     
160    -176   
48     -32    
-32    -128   
32     208    
-816   0      
32     32     
176    16     
-208   80     
-64    16     
16     32     
16     80     
80     96     
-160   -16    
32     -64    
112    80     
-288   -48    
96     -96    
-288   -64    
-32    48     
-464   -144   
144    -192   
176    -144   
144    48     
-192   -80    
80     32     
-192   -96    
80     -320   
160    -16    
0      16     
16     -16    
-64    -192   
208    192    
-224   336    
240    -80    
-160   112    
-144   -96    
16     96     
176    32     
-144   0      
64     144    
16     176    
96     -224   
96     96     
-224   384    
-64    -144   
-112   16     
80     -192   
-352   64     
288    192    
-16    0      
80     16     
32     128    
128    -16    
128    192    
16     64     
-144   32     
-272   -32    
-112   -208   
144    192    
-32    128    
64     0      
64     -16    
-208   -240   
32     -80    
-16    -16    
-48    32     
32     144    
112    128    
48     32     
16     0      
16     -112   
112    -144   
112    48     
240    48     
-32    0      
-144   0      
-80    80     
-48    48     
32     48     
112    32     
160    144    
0      0      
48     16     
80     16     
0      -16    
128    48     
-16    80     
144    80     
-224   96     
128    112    
-112   16     
80     48     
272    160    
48     64     
112    48     
64     -80    
-144   -16    
80     144    
96     32     
-160   -80    
-16    -32    
336    -112   
128    176    
0      -80    
-48    -48    
-16    128    
-48    96     
192    48     
144    -48    
64     32     
16     112    
80     80     
208    -16    
48     48     
-208   -32    
-112   -352   
-96    -80    
-304   320    
-416   -48    
288    32     
112    16     
160    -32    
-96    64     
-144   -1104  
-64    -80    
320    0      
112    96     
16     256    
160    48     
112    0      
-32    48     
-96    48     
80     -32    
0      48     
160    48     
16     32     
-176   -240   
368    16     
-64    -160   
64     128    
-16    48     
128    80     
80     32     
48     -16    
64     16     
80     144    
48     -32    
64     112    
-192   0      
176    96     
16     16     
144    -80    
-48    128    
224    -176   
128    64     
-16    0      
-64    16     
160    48     
48     64     
96     -64    
208    48     
-16    0      
-80    16     
-16    144    
128    32     
144    48     
160    -32    
128    432    
-144   272    
208    48     
-176   -608   
32     -128   
144    80     
128    160    
256    32     
-64    80     
48     48     
528    128    
-352   -128   
-352   -112   
-96    32     
-64    -144   
352    -48    
288    -128   
224    112    
64     -320   
0      80     
-256   -592   
64     80     
96     -80    
-16    16     
64     240    
64     240    
80     -64    
96     16     
112    96     
240    96     
-80    272    
112    -128   
80     16     
48     -144   
192    48     
48     -256   
96     112    
-96    16     
80     64     
128    48     
32     128    
64     64     
128    -336   
112    32     
464    832    
80     48     
-144   -320   
-144   128    
-112   64     
-16    -192   
0      -528   
352    80     
64     192    
208    -368   
128    240    
-16    -96    
32     96     
0      96     
80     32     
112    160    
-144   64     
112    0      
-32    144    
-32    -48    
192    -464   
16     -208   
96     240    
-176   0      
176    -240   
16     -128   
144    -64    
336    384    
160    96     
-176   -224   
0      -160   
-48    -128   
-176   192    
160    -880   
304    -304   
144    -32    
-176   -400   
32     96     
128    160    
-16    0      
176    128    
-896   -64    
-128   -112   
176    16     
-32    -368   
80     16     
16     -1232  
64     16     
128    16     
-16    -32    
224    240    
0      -656   
32     208    
-16    96     
-288   -560   
176    144    
-544   176    
128    -176   
192    -96    
-32    96     
128    -112   
48     -64    
272    -160   
80     -560   
-160   -320   
80     -48    
-240   16     
224    -240   
0      -272   
-192   -448   
176    416    
48     0      
240    -128   
112    224    
208    80     
-192   224    
64     176    
112    -16    
208    368    
-240   -208   
256    416    
64     32     
64     96     
16     320    
-208   -160   
160    -96    
-224   -64    
160    -208   
-576   128    
160    224    
48     96     
240    -48    
192    48     
160    -208   
-96    48     
304    160    
-160   192    
112    96     
-144   80     
0      -64    
160    -16    
-96    -32    
-32    -16    
-96    -96    
112    -208   
80     -144   
336    -48    
-96    80     
160    -304   
-112   -32    
224    -1024  
-32    64     
-208   96     
32     320    
32     64     
208    -32    
-32    -128   
96     64     
-544   -16    
64     32     
-752   -192   
496    -320   
-112   224    
224    112    
16     64     
-128   -192   
592    352    
0      112    
128    0      
48     -144   
160    -48    
-496   -16    
192    -32    
0      -192   
-176   64     
-112   -160   
128    -112   
176    176    
64     64     
-128   -32    
-48    -208   
64     -16    
-384   -80    
160    -240   
-144   -160   
64     -64    
-704   -288   
144    -32    
-288   128    
144    96     
160    -64    
48     -80    
112    48     
64     -256   
-32    -32    
-16    -32    
256    -96    
-96    -128   
352    112    
-192   160    
-32    -16    
-112   -48    
176    112    
208    80     
-128   16     
-880   64     
48     -176   
96     -96    
-1232  -64    
-16    160    
-192   80     
-800   -16    
112    64     
-1296  -16    
-32    32     
272    224    
-16    128    
224    0      
-144   144    
112    -112   
-64    160    
-304   64     
80     0      
-176   -64    
-288   128    
-240   368    
-1120  32     
-32    112    
-256   -80    
112    -352   
-704   -256   
0      -96    
-16    -224   
-224   -112   
192    -32    
160    160    
-224   16     
-128   -112   
-304   -304   
64     176    
-64    144    
128    -176   
-64    -64    
-112   512    
-16    -224   
-736   -240   
-112   384    
-800   -160   
96     16     
-176   -224   
256    464    
80     -160   
208    192    
-96    208    
16     64     
48     16     
-192   224    
-64    80     
-256   -16    
96     -16    
-416   -128   
160    0      
-624   32     
16     176    
144    -144   
-96    -224   
48     320    
128    256    
384    -304   
64     -80    
48     64     
-144   64     
-144   48     
-304   48     
-160   0      
-32    0      
160    -32    
-272   -16    
112    0      
-128   -64    
48     48     
-144   -48    
16     0      
128    96     
96     48     
16     16     
-112   -16    
0      48     
16     16     
0      -48    
16     80     
144    64     
-368   -48    
176    16     
-288   16     
112    -304   
-176   -192   
-32    160    
-16    -48    
-64    -32    
48     48     
80     80     
224    64     
-112   32     
176    32     
-320   0      
16     96     
-176   -32    
80     80     
-400   0      
144    96     
-112   48     
48     -48    
-64    144    
80     48     
-48    32     
0      48     
-48    0      
-96    -128   
-64    -48    
-240   64     
-48    80     
-64    64     
-32    80     
-912   -80    
-128   -48    
176    32     
0      80     
128    0      
96     80     
0      128    
-16    -32    
32     -32    
-48    176    
-112   144    
48     80     
112    48     
-144   -144   
352    80     
96     240    
-304   208    
-240   -128   
-304   -208   
384    48     
256    480    
-512   64     
16     -64    
320    288    
-480   16     
272    -48    
48     -64    
192    80     
-256   -32    
272    112    
-112   32     
-48    96     
128    16     
-48    64     
32     -48    
16     32     
64     112    
16     64     
-144   128    
176    0      
-80    -32    
-176   128    
128    80     
-48    -16    
-32    32     
0      16     
368    208    
-256   64     
144    -16    
96     64     
-144   -32    
336    32     
-176   48     
-48    -48    
208    112    
48     112    
16     0      
240    80     
-336   -32    
192    0      
-112   -16    
16     0      
-16    64     
144    64     
16     64     
96     48     
96     0      
-48    80     
32     32     
160    -96    
-272   -288   
-48    -80    
64     160    
-96    -112   
96     0      
-112   224    
112    112    
-32    64     
-32    -112   
-16    96     
128    80     
48     -48    
160    32     
48     304    
-256   -80    
112    -64    
-112   112    
368    96     
96     48     
96     112    
64     0      
80     -128   
48     256    
16     -272   
48     32     
-32    64     
0      -32    
144    32     
112    96     
48     32     
192    160    
-128   -64    
-80    -480   
592    944    
-512   -512   
144    -64    
144    32     
96     -16    
48     128    
-48    48     
64     96     
48     240    
-64    192    
-80    -96    
-48    160    
-80    -48    
-176   -464   
-96    -96    
192    -208   
64     -272   
256    608    
-384   -400   
-64    176    
16     64     
208    -80    
96     80     
192    96     
-64    -64    
48     48     
64     64     
128    -32    
128    128    
64     0      
448    752    
-416   -384   
224    -896   
336    784    
0      288    
112    -240   
80     -48    
-160   -240   
-48    112    
-176   -192   
64     -240   
512    640    
-176   128    
192    -496   
304    -240   
176    768    
80     -80    
80     -304   
96     -144   
-80    240    
96     416    
-144   112    
-32    -80    
96     16     
80     -32    
128    -80    
128    -32    
-16    128    
80     112    
-16    16     
240    704    
-48    320    
16     224    
96     -112   
144    496    
208    -208   
-48    -208   
0      -32    
144    -80    
0      48     
16     -144   
-48    -272   
16     -48    
48     -128   
208    -48    
48     48     
80     16     
272    448    
-112   -608   
-32    304    
240    -160   
0      -32    
176    -112   
-96    -176   
-64    -80    
-64    -496   
208    0      
-64    -32    
-176   -416   
320    -672   
96     128    
-64    384    
-32    -208   
-112   -16    
320    -304   
80     176    
368    496    
-256   80     
400    400    
-224   400    
-48    -80    
32     -480   
224    -336   
48     -224   
-64    -16    
16     -144   
-192   -496   
272    -16    
0      -32    
16     -336   
-112   -288   
32     128    
176    288    
-96    304    
48     -16    
-64    -144   
-16    -32    
64     -80    
16     80     
240    -144   
-128   112    
96     -64    
128    -16    
-32    -96    
160    224    
-128   -208   
-96    -864   
32     16     
112    32     
48     -368   
-64    -96    
208    -640   
32     -48    
304    -944   
-192   64     
-160   32     
608    160    
16     480    
80     -64    
-32    -1328  
256    -240   
240    -96    
0      0      
-16    -112   
192    -384   
-160   -320   
384    -416   
-112   112    
208    240    
288    160    
304    -1408  
64     -160   
80     48     
-96    -208   
-48    -496   
32     -208   
224    -272   
0      0      
-640   144    
-48    160    
-2128  -128   
352    -272   
256    16     
240    0      
-64    -32    
-80    -336   
-16    16     
272    128    
16     32     
48     -208   
32     -160   
112    32     
128    -16    
-176   -64    
128    -176   
208    112    
16     -16    
48     -64    
352    0      
-160   128    
240    -160   
208    16     
208    -960   
-416   48     
80     -64    
192    80     
-32    144    
80     128    
112    112    
160    16     
-432   -176   
-16    -288   
-320   -272   
-16    272    
240    144    
-32    -48    
96     -112   
272    -464   
-64    144    
224    -288   
-32    0      
64     96     
32     64     
-160   -48    
176    -368   
-144   320    
96     -208   
-304   -272   
160    112    
48     256    
-96    -80    
-16    -256   
112    -96    
320    80     
208    -144   
192    80     
80     48     
-48    80     
-128   -16    
32     -112   
-48    128    
32     48     
-576   32     
240    48     
-768   -16    
176    -208   
-112   -16    
208    -128   
112    96     
400    320    
-240   80     
-384   -96    
240    -96    
-288   0      
80     -16    
-80    80     
-112   -16    
-368   -16    
64     -112   
-864   192    
160    -112   
-48    48     
160    -80    
256    176    
32     -752   
96     -80    
-240   -112   
320    -80    
224    176    
112    16     
-176   48     
32     32     
-176   32     
192    96     
-112   64     
64     -80    
160    80     
-16    -192   
96     80     
-224   48     
-176   -80    
-64    80     
80     -32    
32     -16    
128    32     
-64    -16    
80     -64    
-80    16     
176    48     
-16    32     
-416   -48    
-96    0      
-864   -112   
64     48     
224    16     
-544   -64    
128    32     
-560   -32    
-16    48     
144    -48    
-176   -64    
-32    32     
-256   64     
-544   0      
224    48     
-384   -240   
240    128    
-208   -32    
-128   -304   
144    -32    
16     144    
-192   -16    
-192   0      
-208   -32    
-352   112    
48     64     
80     0      
-160   -32    
-672   -16    
304    80     
-144   16     
176    64     
208    80     
-272   -32    
32     -144   
-256   -112   
96     112    
-256   -16    
0      0      
48     304    
-448   112    
-192   0      
-448   -272   
624    -192   
224    160    
208    80     
208    0      
-48    64     
-384   -32    
-352   -48    
32     -32    
-32    32     
80     144    
-144   128    
-208   -64    
-48    -48    
-1680  0      
-48    64     
-48    -80    
96     80     
-240   -48    
80     32     
0      16     
-32    0      
-16    80     
48     144    
-32    16     
-112   32     
-192   128    
-112   16     
32     -16    
-288   -16    
64     96     
64     16     
160    80     
-48    -80    
0      64     
16     256    
176    288    
-144   -16    
-32    -112   
32     112    
0      -32    
64     -112   
128    336    
0      16     
-304   -64    
-112   144    
-2096  -288   
304    336    
32     -256   
48     128    
16     -48    
-160   112    
176    384    
-80    -80    
-64    96     
-320   -48    
336    80     
-176   -128   
-16    144    
-240   -16    
-16    -256   
-80    128    
-128   -64    
256    -64    
272    688    
-64    -336   
16     -48    
192    176    
-160   192    
-48    -736   
-16    240    
80     368    
-192   -112   
-96    128    
-256   -400   
160    32     
192    336    
16     160    
64     64     
-48    -64    
0      -16    
288    272    
160    400    
-192   192    
48     -64    
-112   -32    
-16    -112   
-352   -544   
96     -80    
-96    144    
288    32     
176    416    
-128   64     
-32    16     
48     208    
400    288    
-96    16     
-192   -144   
-16    144    
-96    -80    
-80    -32    
272    64     
-96    288    
16     256    
-32    -368   
256    -160   
192    32     
96     112    
-64    112    
16     80     
-64    -112   
-32    -64    
-64    0      
64     -112   
176    -16    
96     0      
128    64     
-64    128    
0      -16    
-64    -64    
-48    -16    
128    112    
-160   112    
272    0      
0      16     
160    224    
-144   144    
48     208    
0      32     
64     48     
224    144    
-112   112    
32     -80    
-144   64     
-304   -352   
208    96     
240    -16    
48     48     
144    256    
-224   64     
80     304    
-32    224    
0      128    
80     -144   
176    -112   
-208   -192   
64     -128   
-112   -80    
176    112    
64     288    
-96    416    
64     288    
0      32     
-80    -16    
144    -64    
-64    80     
208    96     
256    80     
-80    96     
16     112    
-128   64     
336    80     
-144   496    
304    -16    
-96    -208   
48     -272   
96     176    
32     96     
-32    208    
192    448    
176    -288   
0      0      
-80    0      
-16    -48    
400    640    
-80    416    
160    496    
160    -48    
128    -192   
-96    64     
32     240    
64     128    
-112   -128   
320    128    
-192   -144   
-240   -224   
-128   -16    
80     320    
-64    0      
16     -112   
-80    -320   
-80    -192   
-128   -400   
240    -784   
304    -16    
-160   144    
368    0      
-176   96     
96     16     
-32    224    
96     288    
-16    448    
304    256    
304    368    
208    64     
-64    -32    
-16    80     
64     -80    
-80    112    
96     -144   
-80    80     
224    64     
192    208    
112    0      
-48    0      
128    16     
416    288    
-192   896    
112    96     
32     -96    
64     -160   
-160   384    
512    176    
128    0      
-176   224    
-144   -800   
176    352    
48     -256   
-80    -64    
64     -416   
-96    -32    
400    256    
-496   64     
96     112    
-192   144    
-112   64     
-208   -112   
-32    48     
-96    -80    
304    176    
-336   -384   
128    -336   
-112   -256   
160    -80    
0      176    
304    80     
-128   112    
256    304    
80     176    
-48    96     
176    80     
96     -176   
64     -96    
96     -32    
-32    48     
176    -752   
96     -16    
128    176    
16     96     
192    288    
-160   -288   
-288   -656   
176    208    
16     320    
-80    400    
144    -144   
240    144    
-256   -80    
-80    304    
64     -48    
128    -144   
256    -48    
128    128    
32     16     
-160   -208   
16     32     
0      192    
-32    -16    
32     64     
192    -208   
112    0      
272    -112   
240    256    
32     -144   
0      -48    
224    -64    
48     16     
-16    -224   
48     64     
-16    128    
224    48     
-96    16     
96     -240   
176    -16    
32     64     
352    560    
272    592    
-48    128    
-192   -64    
-32    0      
144    32     
-304   48     
256    176    
-144   304    
16     176    
-128   -160   
96     -80    
240    -96    
64     -960   
304    -80    
96     -128   
240    96     
64     -272   
32     -160   
-64    -16    
432    144    
80     80     
-16    32     
16     -400   
-176   0      
-160   -240   
-128   32     
-16    80     
368    -16    
352    32     
80     0      
80     -48    
96     32     
32     0      
-48    -256   
48     80     
96     48     
-64    -80    
0      -288   
16     128    
-192   -80    
208    0      
144    128    
192    32     
16     -80    
-32    -144   
-48    -80    
-32    -176   
96     48     
32     -224   
-64    -16    
96     -688   
160    16     
32     -80    
16     64     
96     16     
48     -48    
-352   16     
64     -64    
-1168  -48    
0      64     
144    64     
80     -160   
48     -48    
96     16     
192    64     
-48    64     
48     -16    
64     32     
-32    64     
-320   -32    
-48    -32    
-320   -16    
112    16     
-48    16     
0      -160   
96     -32    
48     64     
240    16     
0      -144   
240    80     
-304   -256   
192    -96    
128    16     
176    128    
176    -16    
-240   -48    
160    0      
96     16     
-112   32     
256    -48    
288    0      
112    -176   
-128   16     
32     -128   
64     112    
144    32     
96     112    
320    240    
-208   112    
-96    -80    
144    48     
-208   48     
464    160    
-640   0      
128    112    
-1072  -48    
176    -208   
-16    -80    
272    -176   
160    -112   
16     -128   
160    112    
-64    304    
96     -144   
32     -64    
80     64     
48     -48    
32     -64    
-96    -64    
64     64     
-64    80     
128    32     
-48    -80    
432    -32    
-384   -80    
96     -224   
128    272    
-352   -208   
144    144    
-160   240    
256    -192   
-96    192    
48     -80    
-192   48     
80     -896   
256    128    
-64    160    
-64    -144   
80     384    
48     -368   
128    -368   
384    720    
-288   -512   
-320   -320   
-96    128    
-160   -288   
96     192    
160    768    
144    288    
64     -336   
-144   -240   
32     -368   
-80    32     
-1376  -256   
64     -160   
-688   -272   
-336   48     
-80    -128   
-608   0      
-224   112    
-272   128    
-224   144    
128    128    
-192   32     
-16    80     
32     112    
-336   -112   
240    -64    
-336   -96    
208    -48    
-496   -64    
-448   304    
0      32     
-368   144    
-96    64     
-464   16     
272    80     
-2272  -80    
-48    16     
128    0      
128    -48    
48     0      
-48    16     
-16    -32    
48     192    
144    32     
64     96     
0      32     
-144   80     
-64    -32    
-80    -32    
-80    16     
-1040  -32    
112    -208   
48     -96    
224    0      
-224   -64    
64     -64    
192    -48    
-272   176    
48     48     
-48    48     
-48    32     
240    96     
-272   112    
-48    240    
96     416    
-192   0      
160    -48    
-1616  32     
-128   160    
-192   -144   
128    -16    
32     80     
-16    144    
-96    16     
-16    96     
16     -32    
96     -160   
128    48     
0      128    
32     160    
-144   16     
48     160    
-1264  -96    
-272   -80    
208    -320   
112    160    
32     176    
-192   -176   
32     -80    
-368   -112   
-16    128    
16     -224   
-64    -256   
64     -16    
-240   64     
-352   -112   
16     256    
-208   -80    
176    16     
-96    -32    
-16    -144   
96     -32    
-176   48     
-48    -16    
-48    64     
48     -48    
48     -32    
-192   32     
-64    16     
48     192    
-256   0      
32     16     
32     -128   
64     0      
-96    0      
-64    48     
-112   64     
-16    0      
112    16     
16     416    
96     272    
-224   -144   
-144   -272   
96     -432   
-32    16     
0      -240   
160    48     
-336   64     
112    16     
-1344  32     
-48    240    
-32    -592   
-304   -496   
-16    320    
-32    720    
304    672    
-112   -48    
-96    -240   
48     -256   
160    -80    
-240   -176   
288    -480   
-480   -432   
-272   -416   
-112   -432   
144    -80    
176    1296   
-432   -704   
-224   -320   
-192   -16    
256    -544   
320    304    
160    128    
16     672    
128    -160   
-48    -80    
144    144    
-16    -48    
-160   160    
144    -464   
-336   -640   
320    336    
-480   96     
48     -128   
-16    368    
176    -288   
-144   -224   
16     -144   
-16    80     
432    496    
-304   80     
80     256    
-288   -416   
432    592    
-240   384    
-240   -480   
128    -640   
192    800    
144    -144   
-144   368    
96     176    
-80    272    
272    144    
-352   -480   
176    624    
-80    -112   
16     -16    
208    160    
80     0      
16     432    
272    -48    
-416   592    
256    -64    
-272   48     
160    -192   
32     160    
0      320    
48     -96    
32     240    
48     -80    
-208   -96    
256    208    
-32    -32    
96     96     
16     64     
128    80     
-64    -64    
48     112    
-32    80     
32     -80    
160    48     
-128   16     
-32    240    
-64    -144   
208    -128   
80     256    
-48    -1440  
0      -208   
16     16     
144    336    
128    256    
-208   -800   
64     368    
-176   656    
-80    -384   
-112   128    
128    48     
224    -32    
16     32     
160    64     
-160   176    
48     -304   
-96    640    
336    400    
80     432    
-16    48     
128    -112   
96     -48    
112    -144   
80     32     
-32    16     
16     -32    
288    96     
-16    112    
-144   -160   
128    -32    
176    -96    
432    112    
-48    -16    
224    16     
-16    144    
32     96     
208    -32    
64     64     
-448   -368   
304    -288   
144    -16    
288    176    
272    80     
-112   -208   
528    -192   
96     -528   
416    208    
224    -528   
-128   -112   
-176   -32    
-96    -32    
176    32     
112    64     
208    16     
256    -16    
176    -64    
224    128    
16     16     
256    -80    
-320   0      
-192   -224   
208    64     
64     64     
64     16     
208    48     
176    160    
-128   16     
16     -32    
-32    16     
80     128    
176    48     
176    -16    
112    48     
144    32     
144    112    
-64    -224   
112    0      
224    16     
32     80     
-64    -704   
16     32     
64     0      
144    48     
144    32     
192    96     
-80    -16    
-32    16     
128    128    
0      -64    
96     32     
-16    32     
16     0      
-80    -544   
128    96     
112    80     
-80    64     
96     16     
160    112    
16     -32    
240    16     
-64    112    
112    -32    
0      32     
16     -160   
96     80     
96     -64    
144    144    
336    336    
-256   128    
320    -176   
0      96     
96     0      
144    96     
-16    48     
144    64     
112    128    
0      -80    
64     -64    
0      -240   
16     64     
-32    16     
-32    48     
-320   48     
128    -32    
-48    -224   
112    80     
64     64     
128    0      
64     48     
32     -32    
208    -64    
64     -128   
-32    48     
192    -64    
-32    160    
80     0      
-16    80     
32     64     
80     176    
32     -144   
128    -592   
0      64     
32     -192   
80     496    
-2384  0      
96     -368   
368    448    
32     -624   
304    208    
32     32     
-48    -368   
416    -272   
96     928    
-288   -432   
-208   32     
128    -256   
160    -208   
48     640    
16     -416   
-928   240    
96     -416   
176    -16    
0      -176   
80     144    
160    -32    
32     240    
16     240    
544    224    
-144   784    
-304   -464   
368    -736   
-256   -272   
192    -240   
32     -224   
-320   -208   
144    0      
320    336    
48     -80    
-176   -272   
240    -672   
144    -112   
128    -320   
496    320    
-32    352    
-384   48     
80     -16    
48     192    
-192   -144   
48     -16    
-288   -32    
160    48     
-1296  64     
128    -32    
48     -192   
-32    -48    
48     32     
64     -16    
-16    64     
64     -944   
208    16     
80     -64    
80     16     
64     -32    
80     -16    
160    -32    
48     -64    
-384   -128   
224    -96    
128    96     
-48    16     
272    -32    
48     -48    
-240   32     
-112   -640   
160    -160   
-48    160    
96     -48    
80     -160   
80     144    
-112   16     
-16    -96    
-48    -128   
288    160    
-1648  32     
160    -176   
64     -32    
0      -96    
432    336    
-304   192    
-32    -64    
320    -48    
176    128    
64     176    
-80    160    
-160   -128   
208    -64    
-432   -176   
32     112    
-1328  -16    
464    -144   
128    112    
192    -16    
80     96     
-96    32     
176    -64    
176    -176   
-96    -448   
48     -368   
160    48     
-96    48     
96     -48    
-512   32     
-64    -128   
16     16     
32     -64    
144    16     
128    -80    
144    208    
240    -304   
32     32     
-208   -112   
176    -112   
-32    -64    
224    -80    
-144   16     
160    240    
-48    368    
-48    -16    
-32    -32    
-32    0      
-96    -16    
224    -272   
0      -32    
-128   -224   
224    -208   
96     -160   
368    -48    
-176   16     
208    208    
16     -32    
0      16     
256    176    
-240   352    
48     96     
-256   -80    
96     16     
-2112  -224   
-16    -16    
-128   -96    
-352   32     
-48    -32    
-1296  256    
112    144    
-1040  16     
-176   -48    
192    -176   
-96    144    
128    -192   
-96    992    
-192   -384   
-208   -480   
-320   288    
64     -288   
16     96     
-208   -224   
16     272    
192    320    
-528   -208   
-192   -32    
-32    112    
-1792  -32    
-112   64     
-64    -304   
-48    16     
-32    0      
224    144    
32     432    
32     -176   
-432   -16    
-48    -144   
-64    224    
48     -400   
16     48     
16     -112   
-96    -96    
-128   64     
-144   -16    
-192   240    
48     -1088  
224    320    
224    864    
-560   -720   
-112   -304   
-320   688    
336    48     
64     -80    
144    208    
-64    -80    
32     -80    
96     128    
-160   288    
96     752    
-144   -432   
32     -496   
-176   128    
224    208    
-208   336    
-16    144    
336    -208   
48     192    
16     368    
-192   80     
-240   -144   
-96    64     
0      48     
-224   -32    
32     -32    
-608   -16    
80     80     
-64    -32    
192    48     
144    96     
0      128    
-176   48     
0      48     
64     32     
-16    -80    
16     16     
80     80     
-160   16     
32     16     
16     64     
-160   32     
112    -16    
96     -304   
-128   -64    
64     -32    
-96    192    
-32    80     
-96    -32    
304    112    
-208   -16    
240    16     
-96    64     
176    64     
-352   -192   
144    0      
-208   80     
-64    96     
-752   -48    
-208   -16    
144    112    
-160   112    
-112   16     
-48    32     
16     -32    
-32    -32    
16     -32    
-352   0      
-32    96     
-512   192    
272    128    
64     256    
-176   160    
-32    -16    
-128   -144   
288    -192   
224    16     
16     80     
0      112    
0      -16    
368    192    
-288   16     
-288   224    
208    144    
160    352    
-112   96     
-224   144    
400    336    
-176   -48    
-96    -80    
160    -112   
16     -80    
-256   256    
-240   48     
16     16     
-48    0      
480    -16    
-64    96     
0      176    
-352   -48    
80     80     
-352   -16    
96     64     
-96    64     
-48    64     
672    976    
-576   656    
-368   -96    
320    -304   
16     -192   
-64    -288   
496    -16    
-96    336    
176    64     
-48    -240   
-80    -32    
-240   32     
-224   -16    
-48    64     
48     80     
96     80     
160    0      
208    32     
-16    112    
-96    -48    
64     -128   
208    64     
112    112    
192    -16    
-96    0      
192    256    
-192   144    
336    128    
-192   80     
0      -32    
0      -16    
-32    16     
-32    48     
0      48     
112    112    
-16    64     
16     48     
128    80     
80     64     
-80    -16    
0      64     
80     80     
-112   32     
96     48     
112    96     
-144   32     
48     0      
48     32     
-128   -16    
16     -64    
-160   -144   
160    64     
0      16     
48     16     
-112   80     
0      16     
-16    16     
80     64     
-16    48     
64     48     
-16    16     
48     32     
96     64     
-48    32     
80     48     
96     -32    
32     32     
32     32     
32     -64    
-128   0      
96     -608   
96     0      
208    144    
-32    48     
64     112    
224    176    
-224   32     
176    112    
-96    64     
192    32     
-128   64     
-64    240    
464    96     
-176   -256   
240    -96    
160    -304   
304    400    
-240   -320   
352    144    
-64    608    
80     -576   
112    416    
128    -16    
-48    32     
96     224    
-192   -352   
64     256    
112    224    
64     -32    
32     16     
256    -272   
208    304    
-128   176    
304    336    
-176   -176   
64     208    
-32    224    
224    112    
-192   -80    
304    48     
96     176    
-192   -336   
-48    -96    
144    144    
-144   -32    
384    64     
32     96     
-80    -224   
560    128    
-96    -16    
224    80     
-64    -80    
64     112    
32     -112   
-80    -320   
160    -144   
-64    112    
16     -80    
80     128    
176    128    
96     -16    
176    -16    
-16    -32    
64     128    
64     -416   
-96    48     
-32    -80    
48     128    
-48    16     
-112   32     
48     32     
-64    -16    
240    -16    
144    -64    
-224   16     
144    -256   
-64    48     
160    -272   
128    0      
80     -464   
80     48     
128    48     
-48    112    
-32    112    
304    64     
-160   32     
16     -160   
-80    112    
96     -96    
32     -192   
128    -32    
16     144    
-48    48     
48     192    
128    64     
256    160    
-32    64     
32     -96    
80     0      
208    64     
64     64     
-16    -272   
-48    48     
64     -208   
96     16     
48     -320   
48     16     
144    -32    
0      0      
32     -720   
160    128    
112    96     
-48    32     
16     96     
208    64     
0      -112   
48     32     
64     -48    
208    32     
-32    -32    
192    -112   
288    160    
-16    160    
144    96     
0      -144   
176    -864   
-32    -80    
32     -1232  
176    -64    
-592   224    
-48    -224   
64     -112   
112    -224   
-144   80     
-96    -160   
64     -320   
64     -256   
272    -48    
-112   -336   
-256   -256   
-64    -304   
-80    176    
64     0      
-16    0      
-1136  -144   
96     -256   
-32    0      
0      -368   
176    160    
112    0      
224    0      
80     224    
-128   -240   
80     -432   
112    -96    
-32    -288   
-48    48     
-32    -16    
32     -80    
-512   -48    
256    -560   
160    -272   
240    -128   
-224   0      
192    256    
-16    -352   
-80    -704   
-96    128    
144    -368   
144    288    
240    144    
112    -16    
0      -48    
48     -160   
-64    128    
160    -240   
-272   176    
-48    -368   
112    48     
208    -48    
96     80     
32     -80    
-112   -192   
176    736    
0      160    
176    -176   
-32    -48    
-144   48     
-96    176    
160    304    
-208   -480   
-1936  -224   
160    112    
32     -192   
160    0      
-208   -144   
272    -32    
-128   32     
464    -464   
-304   -160   
224    -240   
96     128    
80     -64    
176    80     
-256   -240   
48     -48    
-912   32     
112    -96    
-272   240    
272    448    
320    64     
192    -144   
80     96     
32     -528   
64     64     
-64    112    
128    -64    
64     0      
16     -80    
112    16     
128    -48    
-560   -64    
128    -64    
-352   -64    
112    -208   
80     -48    
208    -112   
-48    112    
96     -880   
16     -128   
0      176    
-80    -16    
320    -64    
-144   -240   
-512   -48    
352    -144   
80     -160   
-160   -48    
-96    -288   
400    -64    
-64    64     
-32    -96    
368    -48    
64     -400   
80     208    
-256   -32    
96     -48    
-304   -64    
128    48     
32     48     
16     48     
-64    0      
32     -32    
-1600  96     
32     -32    
112    16     
80     -48    
-224   64     
288    0      
-256   16     
96     32     
-256   -80    
-112   48     
256    64     
288    176    
-336   -16    
-64    -144   
160    -80    
160    96     
-96    -32    
16     112    
-208   -80    
-176   80     
-240   112    
-560   96     
48     16     
-784   -48    
32     80     
-1648  -32    
-176   -80    
-16    48     
-16    -16    
-400   -48    
176    208    
-208   -48    
-80    112    
-128   -128   
16     -64    
-16    16     
144    80     
-240   16     
-192   -48    
224    0      
-112   48     
-496   -112   
432    96     
256    96     
-208   -48    
-64    -96    
48     0      
96     128    
-96    32     
32     64     
16     64     
112    -80    
-144   -112   
-16    32     
32     32     
-464   -224   
80     -32    
-576   -16    
32     0      
-512   0      
224    -144   
240    -192   
208    96     
256    112    
-16    288    
-64    80     
-176   -16    
-112   48     
48     144    
-320   64     
16     -144   
208    -32    
-800   -96    
144    32     
-144   -96    
-352   16     
-32    144    
-64    -16    
-320   -112   
-128   48     
-320   -384   
-48    -272   
-32    240    
-304   -320   
288    -160   
288    144    
240    -32    
-64    -112   
-128   -32    
-672   -112   
96     -32    
-16    16     
-48    -48    
160    64     
144    352    
-256   272    
48     48     
-48    0      
144    -96    
288    16     
-80    16     
-128   -64    
-256   -384   
96     -192   
-352   128    
-96    208    
48     -32    
-80    -16    
-32    0      
48     64     
-16    112    
-208   32     
48     64     
-80    -16    
256    320    
-176   144    
144    80     
-32    16     
144    80     
-176   -16    
-64    16     
-32    -112   
48     -128   
-16    64     
16     48     
112    -64    
48     64     
512    656    
-80    496    
160    -48    
96     -48    
128    144    
-144   -192   
208    -32    
-496   -32    
128    -112   
-48    160    
192    112    
32     96     
-48    -112   
112    96     
16     128    
64     -96    
48     0      
-48    -464   
-112   304    
96     320    
-304   -400   
272    304    
16     64     
-64    -240   
-256   64     
48     32     
32     -16    
-240   192    
192    512    
-352   -32    
336    368    
-176   64     
208    0      
0      -240   
208    336    
240    128    
80     -672   
-176   -288   
-64    32     
-96    -32    
144    128    
-48    -48    
80     144    
96     192    
288    -16    
64     -48    
48     -208   
16     -208   
96     -208   
80     -32    
96     16     
304    144    
-112   464    
-192   64     
-96    80     
208    -48    
-16    -160   
224    -48    
-32    64     
0      48     
-48    -64    
160    -96    
288    96     
-320   208    
48     -112   
-224   -64    
0      -208   
-80    256    
-32    80     
192    80     
64     -48    
64     48     
16     304    
256    16     
32     -16    
48     -96    
0      192    
96     144    
-96    48     
80     -96    
-96    -160   
80     16     
48     80     
240    256    
32     176    
-176   -96    
256    -192   
160    64     
144    112    
-64    192    
256    48     
-336   176    
288    -48    
-288   16     
32     128    
-192   80     
16     -16    
96     144    
96     0      
48     -32    
112    32     
96     176    
240    112    
-16    32     
48     32     
32     32     
-16    -48    
128    32     
0      -128   
112    0      
-64    -64    
0      -384   
96     0      
-112   144    
-32    -128   
176    -48    
80     80     
-32    48     
112    64     
-64    16     
-128   144    
80     32     
176    32     
-240   -144   
144    -144   
208    96     
-144   -128   
64     80     
144    16     
96     32     
80     64     
192    272    
-192   208    
-16    80     
-32    112    
112    32     
144    0      
208    160    
-32    64     
32     -64    
128    32     
-64    16     
-128   112    
80     0      
160    -112   
192    -112   
144    96     
-80    -288   
-48    -336   
-112   -96    
-176   144    
0      0      
224    224    
-144   224    
160    80     
160    48     
-16    -416   
0      -48    
32     -1152  
64     320    
272    352    
-256   -32    
-64    -256   
128    48     
112    80     
160    0      
-144   -144   
208    320    
-32    160    
176    -96    
320    512    
-160   96     
112    32     
272    -288   
128    112    
-112   -272   
-96    64     
-64    -448   
-64    288    
32     -112   
176    48     
128    272    
80     -112   
-16    112    
96     464    
128    288    
96     -272   
144    -192   
-16    -112   
0      48     
32     -112   
144    -96    
96     48     
144    176    
-16    144    
-16    48     
-80    16     
-16    -96    
0      16     
112    16     
144    48     
80     -112   
224    96     
-32    -96    
80     32     
112    -304   
-16    32     
-16    32     
32     64     
80     96     
96     32     
-16    16     
48     -256   
112    112    
80     -128   
128    16     
16     -144   
224    64     
-128   -64    
128    -16    
-64    -16    
144    112    
-224   304    
528    0      
-400   64     
176    -176   
112    -1488  
112    96     
304    176    
192    288    
-208   16     
128    -48    
16     32     
-48    -112   
304    -64    
128    80     
256    -80    
48     16     
144    -96    
96     -272   
-32    -32    
16     -128   
112    48     
-48    -432   
176    -96    
-32    -736   
224    -176   
-48    16     
-64    -112   
32     -400   
320    48     
-64    -224   
-48    48     
128    -48    
112    176    
-560   -32    
80     16     
96     -16    
192    16     
48     -48    
-192   -256   
432    80     
-160   96     
96     96     
144    -240   
64     64     
-64    -224   
144    -64    
-16    96     
128    32     
-144   -144   
320    -192   
-192   48     
160    -208   
-16    -16    
208    -96    
64     128    
128    -416   
-112   -48    
80     -48    
-32    48     
128    -160   
240    -16    
-144   128    
336    144    
-1088  -80    
64     -192   
-96    64     
192    -176   
144    0      
32     -32    
96     64     
-16    -544   
-240   -64    
-96    -32    
32     80     
256    112    
96     -16    
-208   -16    
16     -16    
-224   -64    
64     48     
-560   80     
176    32     
-160   -16    
64     -112   
-32    -144   
208    -112   
128    0      
-192   -544   
80     176    
-256   112    
160    240    
-96    -16    
-384   -256   
320    368    
48     240    
-368   -144   
256    0      
112    48     
96     -32    
176    128    
144    -176   
-32    -96    
304    -624   
16     128    
48     -96    
80     16     
-16    112    
144    32     
160    96     
-64    -48    
-656   32     
272    160    
-224   -96    
208    -480   
48     -144   
336    304    
-64    -80    
-96    -656   
-16    -64    
-176   -48    
-64    48     
-48    16     
128    80     
-448   -704   
368    768    
-304   112    
-32    -160   
128    160    
160    32     
-96    272    
144    -80    
224    -160   
256    128    
576    -144   
-272   96     
208    80     
-224   -48    
-32    -48    
-240   64     
-80    16     
-192   16     
208    128    
-320   208    
400    -112   
112    112    
-224   -640   
96     -304   
160    624    
-672   -352   
128    -16    
-752   176    
-48    -96    
192    -64    
-272   80     
32     -64    
-16    64     
96     -16    
-384   -32    
-1920  -272   
80     160    
-608   96     
64     16     
-192   -192   
-192   16     
-192   -48    
-608   32     
-32    80     
-496   -160   
-144   -48    
80     144    
-336   -32    
-800   176    
-80    -336   
-112   128    
112    -592   
0      240    
-320   496    
-288   -496   
-224   -144   
96     272    
-416   16     
96     -320   
-560   -144   
64     96     
32     272    
-64    -160   
-32    -192   
32     304    
-32    -112   
128    -384   
16     -432   
-288   -16    
80     -336   
-112   -208   
80     480    
80     448    
-176   240    
-400   -544   
112    -944   
-160   32     
-80    224    
-272   192    
208    288    
-352   -224   
144    -320   
-96    -160   
176    -496   
0      -240   
-176   -240   
-96    -240   
0      400    
320    224    
-224   -48    
-64    144    
-416   0      
0      48     
32     -128   
-32    -48    
-48    80     
48     0      
400    -80    
-176   112    
-48    176    
320    -64    
-32    192    
-160   96     
272    32     
0      -48    
64     -48    
-144   -16    
80     -64    
-816   -160   
144    112    
16     0      
-176   -48    
208    -48    
-272   48     
-176   -48    
-32    400    
16     112    
48     -144   
64     -112   
-32    -256   
-128   -144   
-592   -192   
0      -16    
-832   96     
-176   96     
192    -32    
-48    -16    
-16    -32    
-64    0      
112    224    
32     192    
0      -96    
144    -96    
0      -48    
-48    64     
-16    -32    
80     -64    
-176   0      
64     -176   
208    64     
-80    112    
-128   0      
-160   -64    
224    -64    
32     192    
32     16     
80     64     
-176   48     
80     48     
-96    -16    
128    64     
-128   48     
96     48     
-144   64     
-192   48     
-48    64     
-32    32     
-64    80     
0      80     
-32    96     
0      -32    
-128   0      
-208   -48    
128    -144   
-80    -32    
-224   -48    
-32    -64    
-48    64     
-16    -64    
-64    240    
-288   -352   
80     -112   
160    48     
-32    32     
-16    48     
-48    -32    
16     -112   
80     -176   
64     -16    
-16    -224   
48     0      
-192   -16    
-96    -32    
96     0      
-16    -320   
48     -208   
-64    144    
-16    -32    
-48    16     
-128   -304   
96     -192   
80     112    
0      -16    
80     160    
-304   -32    
128    144    
-304   -48    
80     192    
144    -224   
160    -320   
288    1136   
-128   -400   
240    112    
-32    128    
128    64     
-32    128    
208    32     
-544   -256   
-320   -208   
224    176    
416    544    
-80    -448   
192    80     
-64    -512   
-96    160    
-208   208    
16     -32    
96     64     
240    -160   
-128   -16    
-144   -64    
32     48     
48     320    
80     192    
80     -48    
16     -48    
240    -16    
208    -112   
160    32     
-16    64     
-64    64     
0      80     
-112   16     
-32    16     
0      16     
0      -48    
272    96     
-32    48     
80     16     
-144   -80    
224    128    
176    128    
0      16     
160    32     
-64    0      
16     48     
-16    64     
64     128    
240    192    
-160   32     
128    48     
208    112    
112    112    
-112   48     
-64    -64    
96     -144   
48     -48    
0      -400   
112    96     
64     48     
128    64     
64     128    
0      0      
128    80     
144    48     
-16    0      
112    80     
-80    176    
16     16     
64     224    
64     -112   
96     96     
48     -560   
-176   32     
224    64     
-128   -48    
336    288    
208    144    
192    0      
96     -32    
-64    -224   
192    96     
-80    64     
-16    80     
256    -48    
-176   -16    
272    80     
16     -704   
16     48     
112    32     
0      192    
96     32     
112    0      
-32    -176   
-80    192    
-160   -144   
112    96     
-112   -80    
160    -112   
128    192    
80     -176   
-16    16     
640    -112   
-592   144    
224    -1136  
128    32     
0      160    
112    16     
-368   -256   
512    48     
-160   128    
-144   96     
336    32     
-80    -96    
96     48     
48     0      
64     32     
-16    16     
208    48     
-32    -32    
80     48     
64     -416   
16     80     
368    112    
-224   0      
-48    96     
192    192    
224    80     
272    -96    
16     -16    
0      -64    
0      80     
-112   -368   
240    64     
128    -432   
-176   -16    
112    64     
48     -16    
192    80     
-32    112    
0      0      
224    80     
-32    16     
192    48     
32     224    
96     16     
128    16     
240    -64    
16     32     
-48    64     
208    112    
144    80     
80     16     
-48    -48    
320    -16    
16     -64    
160    0      
-208   0      
256    -80    
112    192    
64     16     
-48    -64    
112    208    
-32    -80    
112    -592   
416    -48    
-48    -384   
64     384    
-112   -80    
144    192    
32     16     
272    -80    
176    -400   
-80    -96    
160    176    
-112   32     
48     48     
-48    -384   
320    480    
160    -224   
240    -1392  
-112   48     
64     -496   
192    288    
16     -640   
-16    0      
-144   288    
48     -432   
64     80     
48     -544   
192    -432   
160    560    
144    -416   
272    -192   
-32    192    
-80    0      
80     48     
128    -544   
0      912    
-160   -432   
96     -96    
-736   96     
32     -464   
112    0      
96     -48    
64     16     
176    -784   
-80    80     
80     528    
-32    -672   
64     -352   
-272   608    
112    112    
160    -192   
-480   -224   
144    -96    
-1104  0      
80     -96    
48     -128   
16     400    
176    -32    
-256   -288   
-176   -176   
0      -624   
16     144    
464    80     
-384   -352   
-256   -528   
-48    -288   
144    16     
208    48     
-320   64     
-16    0      
64     112    
272    176    
-80    -96    
144    -208   
128    -176   
16     32     
96     -80    
48     -128   
96     0      
128    -48    
48     -192   
-32    48     
32     -16    
-272   -16    
80     128    
-896   112    
-48    -16    
272    -48    
16     -128   
48     -64    
80     -464   
128    -112   
64     -32    
96     48     
0      272    
160    144    
-112   -16    
80     -16    
-192   -80    
-32    144    
-208   0      
80     -96    
-160   -96    
160    -672   
-288   -416   
352    -544   
32     512    
272    288    
208    96     
-64    80     
128    64     
-128   352    
-32    -416   
-128   -432   
96     -32    
-176   -64    
80     576    
208    240    
16     128    
-192   160    
0      -784   
-16    -224   
224    -192   
0      -208   
320    -96    
112    -160   
272    480    
-192   128    
-32    384    
16     128    
-304   304    
48     0      
-144   -224   
160    -176   
32     80     
272    16     
96     48     
-224   224    
672    496    
-528   176    
48     96     
80     -80    
0      -176   
-336   80     
96     -16    
48     32     
0      -96    
-80    112    
48     208    
48     192    
32     -272   
16     144    
112    32     
256    272    
-256   208    
-16    48     
-208   112    
208    -48    
-240   -176   
128    -128   
64     -160   
176    32     
-112   80     
-688   -208   
-32    240    
-464   16     
-592   32     
-64    -128   
-320   -240   
-32    -64    
-1168  608    
432    224    
240    -160   
-32    -32    
0      -80    
112    -208   
-448   112    
464    320    
-288   208    
-144   176    
-64    32     
32     240    
32     -128   
-448   -96    
-32    -176   
-352   -48    
-64    -144   
-688   -16    
16     -96    
96     32     
-32    -144   
-288   -80    
208    144    
-144   -16    
-16    112    
16     0      
112    48     
-80    -144   
-320   256    
-96    96     
80     464    
384    304    
32     -64    
-272   96     
384    256    
48     848    
-16    208    
-64    -80    
160    256    
-96    -48    
-128   -16    
-176   112    
32     -176   
176    -112   
-48    -160   
-16    112    
-32    -96    
-320   144    
-256   -272   
-1584  416    
160    -256   
144    176    
-48    -144   
48     -16    
-16    0      
336    -160   
192    48     
-32    112    
-64    -48    
-272   160    
-128   48     
-144   -112   
0      16     
-176   80     
48     -224   
-128   -656   
320    -256   
-80    0      
-320   -176   
256    176    
208    176    
224    384    
-192   480    
272    400    
-400   304    
-288   -144   
128    -80    
16     96     
-48    16     
16     -16    
-288   64     
-896   80     
320    144    
-576   -112   
-256   -80    
0      160    
-112   16     
224    144    
-272   16     
48     144    
176    -32    
16     -192   
192    32     
128    112    
-352   -64    
80     48     
-608   -32    
32     0      
-80    64     
-16    32     
-32    112    
-272   -16    
160    64     
112    -128   
-144   -96    
-112   64     
16     -32    
-288   -64    
272    80     
-288   -32    
64     32     
-208   -48    
48     32     
-32    16     
16     48     
-64    48     
0      48     
80     16     
272    64     
-176   32     
-64    -16    
48     112    
-144   -64    
160    16     
-48    -64    
-160   0      
32     16     
-80    -16    
128    96     
-32    16     
96     48     
48     80     
304    240    
-304   -32    
192    128    
-288   -48    
192    96     
-32    0      
-128   32     
48     128    
-32    16     
96     -16    
-256   -112   
32     -48    
16     176    
-48    112    
176    -48    
-464   32     
-16    -80    
-64    -112   
176    160    
-80    16     
240    16     
48     128    
-112   16     
208    32     
0      32     
-32    32     
192    -32    
-96    64     
80     16     
128    128    
-16    16     
16     -48    
320    32     
32     96     
112    144    
80     16     
64     96     
128    128    
-112   80     
176    0      
-160   32     
-80    -16    
64     16     
-48    96     
0      -80    
128    0      
144    160    
-32    160    
-112   16     
128    128    
-128   0      
80     48     
128    64     
16     16     
96     64     
-128   64     
32     160    
64     -64    
64     0      
80     96     
0      256    
64     176    
112    80     
-224   112    
16     -80    
-96    -112   
416    224    
-240   -144   
144    16     
304    304    
-160   -16    
160    -16    
-16    96     
240    208    
-48    16     
-112   176    
176    -96    
192    64     
160    80     
-32    -128   
112    1040   
176    -656   
48     256    
-80    64     
112    -192   
-160   144    
48     -272   
-64    -16    
304    208    
-416   -192   
144    80     
-16    -16    
128    48     
-160   -304   
-96    -64    
192    0      
272    416    
-16    656    
64     -720   
-64    -96    
128    -544   
48     160    
16     160    
96     256    
32     48     
224    80     
256    160    
-80    48     
-64    16     
-48    96     
-176   -400   
112    -384   
160    320    
-80    -240   
112    96     
288    272    
-160   240    
-64    80     
128    -48    
112    -16    
32     0      
-80    -160   
96     -112   
-48    -64    
-16    -48    
80     112    
176    80     
80     112    
464    624    
-176   -64    
32     -432   
144    176    
-32    -112   
112    -16    
-32    -160   
16     0      
96     -224   
336    256    
0      144    
-32    64     
176    -176   
176    -304   
176    0      
48     -144   
80     -32    
-16    -656   
-16    96     
-16    -208   
224    112    
-208   -16    
64     -80    
96     -16    
128    80     
64     96     
80     48     
-16    0      
112    -160   
-176   -336   
80     -288   
32     176    
-64    0      
80     48     
96     112    
80     112    
80     32     
16     304    
144    16     
-32    -256   
160    -112   
-176   -208   
240    256    
176    32     
48     -16    
-96    -128   
32     208    
-160   -208   
0      80     
96     -112   
144    -64    
-48    64     
80     16     
96     16     
0      -32    
64     208    
80     -80    
32     -128   
112    -288   
64     -32    
160    -160   
-48    -272   
-80    -208   
80     -32    
16     96     
160    144    
-16    -352   
16     -176   
64     -592   
-128   32     
192    -192   
240    176    
304    32     
288    -128   
16     48     
272    -80    
-32    656    
288    400    
384    -528   
-32    432    
80     64     
160    192    
-48    -160   
144    -464   
144    -64    
16     384    
576    368    
16     -640   
-272   -96    
208    272    
672    336    
-112   80     
-16    -128   
16     -368   
16     160    
80     -192   
0      176    
32     288    
-208   80     
320    192    
-128   256    
64     64     
-16    -256   
48     -160   
-64    -832   
64     -80    
320    -128   
240    208    
96     192    
-256   32     
48     48     
144    112    
368    576    
-352   608    
-464   112    
-64    -400   
0      112    
576    368    
-64    400    
304    272    
176    288    
-80    -336   
48     -224   
-64    192    
128    0      
160    48     
400    272    
-672   -176   
-384   -352   
-128   -320   
208    64     
624    560    
-64    784    
224    368    
-288   -320   
-208   -592   
352    -848   
544    864    
-272   -272   
-112   0      
-224   -32    
176    144    
-144   256    
160    -640   
-272   -416   
160    240    
-928   384    
-96    -336   
-160   -432   
80     -288   
176    432    
-32    -48    
16     -48    
112    -208   
48     336    
-144   -240   
352    352    
16     -16    
-224   -256   
128    -48    
160    96     
-1760  64     
176    -208   
-560   304    
-16    -400   
-48    432    
224    -240   
-16    -240   
96     -496   
224    288    
192    -80    
240    -112   
64     0      
-16    144    
-320   32     
-32    0      
-368   0      
96     32     
-96    -48    
112    -64    
-256   -48    
16     -448   
192    288    
352    -416   
112    96     
-96    16     
288    240    
-688   464    
-336   -336   
-496   -288   
-16    32     
112    -80    
128    176    
128    112    
-16    -224   
128    -128   
224    -80    
48     128    
-64    -176   
320    -352   
144    16     
64     224    
-112   64     
32     32     
-272   -16    
-32    0      
-912   -96    
-80    -64    
-160   -32    
128    -112   
0      -80    
-512   0      
-1296  -64    
0      176    
-1504  -80    
48     -80    
0      -48    
-80    96     
48     16     
-64    80     
-176   -208   
272    -32    
0      -16    
144    96     
64     -80    
64     32     
-400   0      
-192   32     
-448   -32    
-656   -48    
-112   -16    
-848   16     
320    64     
-976   16     
-96    16     
-16    -48    
-224   16     
-112   -64    
144    128    
-80    -32    
32     32     
-176   -32    
176    64     
-48    0      
80     128    
16     -16    
16     16     
-128   16     
-560   0      
16     16     
0      0      
16     -48    
64     48     
32     64     
-304   -128   
16     96     
-48    32     
-32    -16    
112    96     
-64    96     
0      0      
-304   16     
32     16     
-464   -16    
-64    -16    
-192   48     
112    48     
-48    -64    
64     0      
32     -48    
-48    -16    
112    0      
-64    16     
48     0      
-80    0      
0      0      
-208   -176   
-64    80     
-176   112    
-48    -80    
-992   -64    
64     176    
-304   -16    
320    48     
-240   -80    
240    80     
-16    224    
0      16     
16     32     
-224   -64    
112    -144   
80     144    
-48    16     
-128   -48    
-64    -16    
-256   16     
0      240    
288    224    
112    288    
-16    208    
-32    64     
64     144    
-16    192    
-112   192    
320    176    
-160   96     
80     48     
-80    -176   
-224   -64    
160    96     
-96    -16    
112    16     
240    -16    
-48    -384   
0      -208   
-96    32     
80     320    
-16    144    
64     -80    
0      16     
0      -128   
-48    -144   
-80    128    
-320   -64    
96     -112   
80     16     
128    800    
-736   -336   
-16    -160   
64     -160   
160    176    
112    0      
-304   -416   
560    -16    
-304   464    
-112   -128   
224    -368   
-368   336    
96     160    
160    624    
-272   128    
-96    -544   
32     128    
112    -144   
64     -48    
32     144    
144    32     
-32    176    
32     96     
-176   -80    
240    48     
-176   128    
144    272    
-160   128    
240    224    
-160   16     
64     96     
144    160    
240    48     
192    32     
-16    16     
-144   80     
112    80     
-16    -128   
-128   -64    
32     32     
-240   -16    
80     -128   
-256   -208   
272    -64    
-320   0      
64     96     
48     16     
-48    16     
64     48     
32     80     
-16    -32    
144    32     
128    32     
-16    48     
-96    -208   
112    -32    
320    256    
-368   144    
-48    -48    
80     16     
96     96     
64     0      
-16    32     
48     -16    
0      0      
-32    16     
16     16     
48     -16    
-80    -16    
144    128    
112    96     
-16    80     
-128   -64    
48     144    
-320   0      
64     -48    
224    112    
208    176    
48     96     
112    0      
-144   -32    
-96    -16    
48     32     
48     112    
432    48     
240    32     
192    48     
-160   80     
16     -224   
-32    32     
48     -80    
-80    -64    
48     224    
-112   80     
192    0      
16     -160   
144    32     
-16    48     
-32    -64    
64     -224   
-32    -144   
80     -32    
-160   -144   
-80    -160   
32     48     
80     16     
176    96     
48     288    
-112   64     
128    144    
-32    160    
16     16     
80     224    
192    256    
144    80     
-176   -144   
0      288    
192    304    
-80    -160   
96     272    
64     48     
-64    -128   
0      -160   
192    64     
-128   176    
64     80     
48     0      
112    304    
0      272    
80     208    
-16    160    
32     -144   
0      32     
0      -400   
80     -160   
48     160    
0      0      
16     -48    
112    -112   
128    160    
144    272    
240    256    
-128   512    
-192   208    
96     176    
0      176    
0      -80    
-48    -304   
256    -352   
304    352    
288    656    
64     64     
192    -208   
256    880    
336    480    
-576   -1104  
-144   -880   
336    1056   
112    272    
-112   -448   
96     80     
-192   64     
-128   -176   
64     -112   
-64    -48    
32     -416   
144    160    
256    160    
0      16     
-112   -288   
-224   144    
-16    -160   
576    -32    
160    1008   
-144   -496   
96     -432   
-64    240    
112    -896   
-80    -656   
256    768    
-128   -352   
48     -112   
272    80     
-64    -32    
-64    -640   
240    448    
256    -192   
-288   768    
112    -768   
16     240    
96     -80    
-80    96     
-48    -192   
496    320    
-48    64     
128    -304   
32     224    
-112   32     
64     -352   
144    272    
80     144    
-272   -256   
208    368    
-16    192    
208    -208   
160    176    
16     96     
48     -80    
80     -432   
224    80     
-240   -192   
304    160    
-112   96     
144    112    
128    48     
96     0      
-16    96     
-16    32     
128    176    
240    64     
80     16     
-80    -144   
48     -224   
-48    -144   
320    304    
-48    -16    
208    96     
-48    -272   
208    -32    
32     -160   
112    -112   
288    128    
-112   -496   
64     -736   
288    -80    
144    -1360  
336    -128   
-160   -176   
-160   -128   
-240   -368   
288    144    
320    304    
448    -16    
336    -176   
240    112    
-48    -240   
48     0      
-2208  -16    
-128   -208   
176    80     
-96    -576   
192    -32    
-16    -560   
64     -48    
-144   -64    
144    -208   
128    -432   
48     0      
432    -320   
112    -96    
80     176    
144    0      
-320   192    
80     16     
0      -96    
-48    -48    
32     -80    
272    -320   
96     -96    
-336   -672   
144    32     
-80    -112   
176    -272   
128    -960   
320    -128   
288    144    
-144   80     
112    48     
-240   16     
704    176    
64     -112   
448    352    
-592   -32    
-496   -320   
416    -192   
192    128    
208    48     
32     48     
-80    64     
-176   48     
-320   0      
208    -64    
368    64     
-128   -112   
32     -16    
192    -96    
208    64     
-16    -96    
48     144    
112    -384   
-736   -128   
-160   -1360  
-32    176    
64     80     
112    -32    
112    -48    
208    16     
-128   48     
112    -192   
-336   -128   
-96    -32    
-48    64     
192    -32    
192    64     
80     -48    
0      48     
48     -688   
0      0      
160    0      
80     16     
0      16     
80     -240   
144    64     
48     -112   
48     32     
112    16     
-464   16     
240    -80    
-64    -48    
64     -192   
112    32     
224    -128   
-32    0      
160    -32    
128    32     
-160   0      
80     -64    
-16    -16    
16     16     
-224   128    
80     16     
-528   -48    
208    -32    
64     48     
96     -176   
-16    64     
64     -128   
32     -32    
-224   -64    
336    48     
-144   0      
176    0      
-192   -96    
336    -32    
-128   48     
224    32     
-208   16     
96     -144   
-128   48     
112    80     
128    80     
176    -144   
-32    64     
-144   112    
16     32     
160    64     
32     48     
48     320    
-64    -176   
32     -352   
48     192    
-112   272    
48     -240   
160    96     
-480   -208   
-400   560    
-384   640    
-752   336    
-96    -32    
-880   16     
-320   -256   
64     288    
-256   -592   
128    128    
-288   48     
112    -32    
400    496    
-848   -416   
-144   -16    
-192   -128   
-16    208    
0      608    
80     80     
64     32     
-304   -160   
-32    -288   
-384   128    
-256   -112   
112    80     
144    64     
-336   -384   
48     -112   
-880   -272   
256    -304   
-80    -64    
-80    96     
336    64     
-240   112    
-16    80     
-384   -32    
-32    96     
-320   -16    
128    -32    
-1232  48     
-64    32     
-16    32     
-96    96     
-128   64     
128    80     
64     32     
-80    64     
256    96     
-272   112    
48     -16    
-224   48     
-80    -80    
192    0      
-384   64     
-384   80     
-368   80     
-288   -32    
160    0      
-80    64     
64     64     
-192   -64    
-16    128    
208    -32    
-128   0      
16     48     
80     -16    
-32    144    
-192   16     
-64    -48    
-704   -32    
-112   48     
-848   -48    
80     160    
-192   -32    
80     16     
-16    80     
-192   -80    
352    48     
64     128    
240    96     
-272   48     
-16    96     
-288   208    
176    112    
48     -48    
32     -32    
-16    -16    
-240   128    
144    -32    
-352   32     
0      0      
48     -32    
336    160    
-352   112    
48     -160   
-176   -176   
-208   -320   
-16    -80    
-272   128    
-208   32     
128    160    
-624   32     
288    192    
-176   64     
-128   80     
48     -80    
304    -80    
208    48     
0      -32    
48     48     
-240   -80    
160    -112   
0      -48    
96     64     
-144   16     
0      64     
-304   -64    
176    0      
32     64     
64     64     
-16    -48    
-48    -96    
240    112    
-352   272    
368    608    
192    384    
16     48     
-384   -176   
48     -48    
-160   80     
160    96     
-112   64     
-128   -592   
256    -640   
-16    -64    
240    144    
-80    -32    
-176   -16    
48     96     
32     128    
32     160    
-32    -128   
0      96     
-48    272    
-96    -16    
-112   208    
-224   96     
304    384    
-32    704    
272    400    
16     -400   
96     192    
160    0      
-32    -128   
-16    0      
-224   -128   
80     368    
32     -320   
160    64     
48     112    
288    32     
-256   -64    
48     16     
48     -96    
192    96     
-32    -64    
-224   -432   
-64    112    
32     64     
144    0      
48     32     
128    -48    
-16    -256   
192    0      
-256   64     
304    64     
-176   -256   
304    80     
-272   -448   
240    -384   
112    320    
224    80     
64     -80    
-64    272    
352    144    
-192   0      
-112   -48    
-144   16     
16     96     
-240   -64    
112    -176   
64     -160   
-80    160    
176    272    
-128   -32    
48     -992   
144    16     
144    496    
112    384    
-144   304    
-96    -640   
48     -320   
-144   176    
48     64     
-32    -16    
176    32     
-48    64     
96     144    
0      16     
96     80     
0      304    
192    48     
16     48     
-64    80     
144    32     
-192   -16    
160    32     
64     16     
16     80     
-80    32     
32     -1264  
416    208    
-256   288    
32     48     
272    128    
496    304    
-352   32     
32     -128   
64     -16    
-16    16     
144    0      
-32    64     
112    -16    
-48    -32    
128    96     
-144   -944   
304    64     
80     64     
16     48     
80     80     
48     64     
144    96     
32     48     
-96    16     
0      64     
-16    -224   
352    0      
-96    144    
112    96     
320    112    
-48    -176   
-256   -192   
224    -112   
176    128    
176    -112   
400    144    
64     208    
-208   96     
112    -16    
128    -16    
-224   -64    
464    -176   
-112   -80    
-240   -48    
-64    144    
48     -80    
288    224    
-96    -368   
48     -112   
144    0      
-64    80     
192    128    
64     -16    
-112   -32    
112    64     
-256   -64    
256    96     
0      0      
-160   -144   
208    64     
-96    -192   
176    -192   
416    -208   
0      176    
352    -96    
-48    -96    
192    32     
224    128    
240    -64    
256    16     
-64    -16    
-160   -64    
480    80     
80     0      
144    112    
192    128    
608    752    
32     224    
-16    -160   
192    -304   
160    144    
-112   0      
160    96     
240    -16    
-64    160    
-480   -64    
128    -64    
-80    64     
16     -128   
416    320    
-96    -240   
160    112    
-96    -80    
240    128    
-48    -560   
544    288    
-80    176    
0      -16    
112    -16    
32     32     
16     80     
-112   -64    
-176   -128   
64     -208   
0      0      
224    -48    
192    128    
80     -48    
128    32     
80     -272   
80     112    
0      32     
96     -16    
160    144    
272    96     
80     176    
64     160    
-80    64     
-112   -176   
16     -32    
128    -80    
176    -32    
112    -48    
96     80     
0      64     
-16    -96    
-96    -16    
16     256    
-64    16     
96     0      
144    -608   
144    0      
16     -656   
80     -112   
160    144    
224    48     
-16    80     
32     -16    
160    64     
48     -16    
144    -192   
32     64     
32     -288   
0      128    
-1392  32     
96     -48    
176    176    
-32    -256   
128    -640   
-144   304    
96     -64    
240    -112   
128    64     
160    -16    
-80    112    
144    -368   
-176   -96    
0      80     
240    192    
-480   144    
288    -128   
0      -32    
80     -112   
96     -64    
-208   176    
448    -1728  
208    1120   
96     -464   
16     224    
-112   352    
-112   -352   
176    -144   
176    192    
304    -48    
-272   -576   
0      64     
240    240    
-176   176    
-48    -336   
-96    -800   
368    272    
128    80     
-160   48     
224    224    
96     336    
0      80     
64     -96    
-176   -128   
-16    -112   
-448   -176   
-96    -176   
-1040  -144   
80     -16    
304    16     
144    48     
224    304    
-96    -192   
0      16     
-16    -192   
16     144    
128    368    
256    112    
128    -48    
128    -32    
16     128    
288    48     
-560   0      
352    48     
48     0      
48     -160   
-144   -64    
80     288    
224    384    
384    -688   
176    112    
-16    -96    
16     -112   
-112   16     
432    112    
-256   -16    
64     -80    
-288   -64    
64     -96    
-224   -16    
192    -144   
192    -32    
32     -160   
16     112    
144    -304   
64     16     
-16    -144   
-96    96     
-80    32     
-64    176    
-48    16     
80     -16    
-176   -96    
-16    -16    
-176   112    
160    16     
336    368    
-240   16     
-32    -160   
160    -160   
128    224    
-144   64     
128    -32    
208    -48    
112    0      
-208   32     
144    -16    
48     64     
112    0      
-368   64     
96     -160   
48     32     
96     -128   
208    64     
-48    -352   
-32    -32    
-224   64     
176    -48    
-96    16     
16     48     
-160   -128   
96     0      
-80    32     
0      -32    
-560   128    
0      -32    
144    16     
-608   -48    
32     224    
48     80     
-288   -432   
64     -256   
-320   96     
-208   112    
-32    32     
144    -16    
144    128    
48     48     
176    -48    
16     224    
-784   48     
-32    -112   
-480   -96    
160    0      
352    400    
-1056  192    
16     0      
-16    48     
224    64     
-1184  48     
-160   96     
336    352    
-352   576    
256    144    
272    32     
192    224    
256    48     
-656   -608   
96     -1008  
-96    -240   
144    320    
96     16     
-224   240    
-160   -80    
-512   128    
-256   240    
-656   272    
-272   -480   
160    288    
-32    0      
-192   -224   
112    16     
128    112    
-80    -128   
160    -48    
16     160    
-64    -16    
-32    0      
-160   -16    
144    256    
-112   -32    
-272   576    
-64    32     
-288   -288   
-48    240    
112    -80    
80     -96    
80     48     
64     144    
-112   64     
-32    160    
64     64     
-256   16     
16     80     
-48    16     
48     0      
-240   -16    
208    48     
176    16     
-80    -256   
-96    -272   
-112   112    
-32    -208   
-128   -64    
16     32     
-224   160    
48     80     
-288   32     
-64    16     
-160   80     
32     -144   
-176   96     
192    112    
-544   -112   
-368   16     
32     16     
0      -32    
80     80     
-64    32     
-48    -16    
64     80     
-80    16     
176    -16    
-144   0      
-224   -48    
-64    0      
112    384    
-144   240    
272    -32    
176    -208   
-160   -144   
112    160    
-16    48     
-48    -80    
192    48     
-208   64     
160    192    
-80    208    
-208   0      
208    -80    
-48    48     
112    32     
128    64     
-640   144    
96     208    
-144   -32    
96     32     
0      80     
-32    -16    
16     -48    
-32    -64    
-16    32     
112    48     
16     48     
0      0      
-192   176    
16     160    
32     32     
-512   -208   
-32    64     
112    96     
16     80     
-32    -32    
48     128    
-32    16     
368    -112   
-384   -240   
48     128    
-48    144    
80     80     
32     48     
-240   48     
240    48     
-16    48     
16     0      
-64    48     
32     32     
-32    64     
-96    32     
32     112    
144    48     
-16    -16    
16     0      
96     32     
-272   -16    
208    0      
-64    16     
192    80     
-32    48     
-32    32     
128    -32    
32     64     
32     64     
32     112    
208    112    
-192   -176   
576    112    
-432   -64    
-544   -80    
80     432    
-128   256    
-48    -80    
224    48     
176    128    
-32    64     
-256   -48    
144    96     
16     -80    
32     64     
80     -144   
256    256    
208    240    
96     0      
96     64     
-272   0      
48     288    
-240   240    
-288   -96    
-80    -64    
400    112    
-32    192    
-80    64     
-64    144    
16     176    
224    112    
-128   32     
-112   80     
-336   -80    
720    96     
-656   -528   
16     -32    
-448   560    
-400   176    
-256   64     
-144   -32    
16     192    
464    704    
192    608    
-288   -448   
256    -752   
96     192    
432    464    
0      160    
272    -80    
-128   -144   
48     64     
384    96     
144    16     
-288   16     
384    -640   
80     -272   
48     240    
128    176    
32     32     
112    192    
-160   80     
80     224    
48     96     
96     112    
-16    0      
48     -64    
48     80     
-96    0      
48     32     
112    240    
304    32     
-96    -160   
-288   -240   
48     112    
144    320    
48     96     
80     -288   
-176   -144   
240    576    
304    16     
16     -352   
0      16     
80     -368   
176    352    
-96    96     
272    -96    
64     208    
176    192    
-160   -272   
64     32     
-32    128    
160    112    
32     16     
400    496    
-144   -672   
112    208    
144    240    
0      -288   
-16    272    
80     -656   
112    -160   
32     64     
176    368    
-192   -384   
16     336    
80     -176   
80     64     
256    128    
416    608    
-368   224    
80     -288   
288    224    
-192   240    
128    -496   
-160   96     
-32    240    
96     -144   
-32    -96    
384    -48    
-16    416    
-80    48     
352    272    
-432   48     
272    -304   
80     80     
240    -96    
-96    -80    
160    0      
80     272    
-208   -800   
16     -192   
160    -288   
288    192    
-160   160    
272    128    
-416   48     
-80    112    
512    224    
-368   96     
304    336    
-112   192    
32     64     
48     -224   
176    -32    
32     -96    
112    80     
-32    144    
0      64     
16     -448   
160    -48    
-176   224    
176    256    
128    -32    
496    272    
-272   368    
208    -592   
-16    -32    
80     32     
32     -336   
-96    -400   
112    64     
-304   -32    
240    -112   
16     128    
48     144    
-112   240    
208    256    
304    16     
112    -16    
-80    704    
528    304    
32     80     
32     -368   
-16    -208   
-160   -16    
-160   -96    
112    -480   
384    64     
96     416    
-176   -16    
80     -80    
128    32     
48     64     
-64    80     
-48    -144   
112    -80    
-144   128    
112    -16    
144    112    
-16    -160   
96     -1056  
32     -32    
96     -48    
48     64     
32     -192   
96     -128   
464    144    
-160   -16    
-16    -64    
288    -64    
-240   240    
48     48     
-16    -448   
208    -64    
64     64     
0      32     
-80    0      
240    16     
-240   64     
224    -48    
176    -48    
-608   -64    
-16    -176   
96     0      
16     -288   
64     -48    
64     -176   
48     -32    
144    144    
144    96     
16     -64    
80     0      
80     -160   
-160   -208   
-16    -480   
112    -96    
-208   -32    
48     -80    
16     64     
96     -48    
-32    384    
224    208    
304    576    
-320   -208   
32     -400   
192    -96    
-80    -240   
32     -448   
0      -144   
192    432    
-16    -192   
-80    96     
128    608    
-784   672    
240    -208   
192    -304   
256    272    
-176   -64    
80     -448   
160    32     
288    48     
432    176    
-96    48     
192    -496   
-672   -176   
-112   48     
-304   -96    
304    -96    
-48    -144   
80     48     
-32    128    
-48    208    
-240   -464   
-176   -496   
80     176    
176    -528   
224    -32    
176    16     
352    384    
-352   192    
-32    224    
144    -64    
-64    -256   
-432   -48    
96     128    
-1600  80     
96     -32    
80     64     
112    -32    
48     64     
80     -320   
160    48     
-32    -16    
144    -80    
-32    32     
-16    -96    
-256   -48    
160    -32    
-400   16     
80     -80    
32     0      
128    -64    
272    80     
-80    -112   
32     64     
32     -448   
128    -96    
-48    16     
128    -16    
0      144    
32     16     
-240   -16    
160    0      
-160   16     
16     -48    
-128   16     
144    -16    
-16    -64    
304    -160   
96     64     
320    -144   
-48    -80    
0      48     
112    96     
-128   32     
0      -80    
-448   -160   
32     64     
-80    16     
240    -64    
-256   48     
160    -80    
352    96     
-1904  -64    
128    -48    
32     -16    
-368   64     
48     64     
-1936  -32    
-32    -16    
160    176    
-64    16     
160    -48    
-80    16     
-1328  -144   
-16    80     
0      48     
-256   96     
-16    -112   
-208   0      
-80    80     
-272   0      
-320   0      
-736   32     
32     96     
-400   -112   
-64    0      
48     -32    
-256   -80    
-144   48     
-16    -16    
-224   -16    
16     64     
-96    -80    
32     48     
-32    32     
-240   48     
176    192    
-128   16     
272    0      
-64    32     
-368   0      
-1488  -48    
176    128    
-256   -128   
272    80     
-112   64     
112    -128   
-16    -80    
-144   0      
16     64     
-96    -64    
-64    -16    
80     48     
0      64     
-272   16     
-176   -48    
-448   0      
160    48     
64     -48    
0      80     
-48    -48    
80     64     
-48    32     
-16    16     
96     -48    
-64    -48    
-144   32     
-80    96     
16     80     
-576   -48    
-32    80     
-128   -160   
160    0      
192    -48    
464    96     
-384   -224   
160    16     
-352   -112   
-32    -176   
16     -32    
224    -48    
384    -48    
-48    96     
-96    80     
-80    64     
-32    48     
-112   -208   
64     80     
-896   -112   
-64    192    
64     -544   
352    128    
112    272    
-64    -48    
-16    48     
0      -304   
0      -384   
-144   224    
0      -32    
-16    80     
160    -192   
-128   -16    
128    144    
-448   -16    
128    160    
-96    80     
-304   -16    
-32    -112   
-96    -96    
704    64     
704    992    
-704   -64    
-304   -1200  
-96    464    
-224   16     
224    -16    
112    160    
64     -208   
-384   -272   
-272   368    
-16    -80    
-96    128    
-96    48     
-176   -128   
432    896    
48     -64    
-112   -416   
-336   -160   
-80    352    
-464   -112   
160    -16    
80     80     
64     64     
-224   112    
80     -80    
64     16     
16     272    
288    400    
-160   -336   
-144   256    
-32    176    
96     144    
-32    -32    
-16    -160   
16     144    
224    208    
-48    96     
-240   32     
-48    -32    
-112   176    
112    -240   
48     -48    
-192   -320   
16     16     
64     400    
-64    -80    
128    0      
80     64     
-256   0      
-32    -272   
224    48     
-272   272    
96     128    
-48    96     
112    -208   
-16    -16    
48     -64    
32     -160   
-80    -16    
224    48     
128    272    
80     320    
128    112    
32     192    
-176   -48    
48     80     
-80    -16    
48     -16    
16     192    
112    -224   
48     128    
16     -96    
48     128    
16     -96    
-32    0      
0      -192   
256    -224   
-96    -80    
240    -400   
32     -80    
128    -48    
-128   -48    
112    -144   
-48    -48    
-96    -144   
64     -80    
240    192    
96     0      
16     -48    
304    -16    
-320   240    
64     32     
-80    160    
224    144    
-32    -32    
192    -64    
80     -288   
-64    224    
-16    240    
128    0      
192    -48    
32     48     
224    112    
-32    256    
160    128    
-128   64     
96     96     
-16    80     
64     112    
-224   192    
208    -112   
-32    -32    
112    160    
176    304    
-16    32     
128    -208   
16     32     
96     48     
-144   -144   
64     -80    
-48    -80    
128    112    
16     48     
16     16     
-80    -80    
224    -320   
96     96     
-80    96     
416    80     
-144   0      
0      80     
80     64     
-96    16     
144    -16    
80     192    
48     0      
-144   -352   
128    32     
368    480    
16     256    
256    208    
256    -96    
112    -432   
32     -112   
-32    -224   
-176   -224   
32     -32    
160    64     
-64    -128   
64     48     
32     144    
0      128    
80     -96    
160    144    
-32    32     
-256   16     
320    0      
48     -256   
160    -272   
64     -32    
352    448    
-272   400    
48     16     
-16    -496   
272    96     
48     -16    
288    400    
112    320    
-320   144    
176    144    
160    -16    
176    -48    
32     -224   
320    -16    
64     -544   
-16    -48    
-96    -384   
-48    64     
-48    192    
192    288    
48     64     
-16    96     
-16    192    
64     -96    
208    -112   
224    -160   
32     240    
-112   0      
240    112    
-16    -368   
16     608    
112    -800   
0      64     
-80    400    
0      -400   
128    384    
160    64     
192    448    
16     -64    
336    720    
272    -160   
272    400    
-192   -160   
-176   -32    
432    -176   
0      352    
416    -112   
-256   -368   
-208   -560   
32     -160   
-80    320    
208    -224   
32     -80    
-16    -48    
384    208    
0      -144   
128    32     
-192   -16    
-240   -112   
96     -320   
208    -32    
176    96     
80     96     
144    32     
-96    272    
-464   -128   
256    -128   
336    48     
352    -64    
-80    160    
176    -32    
-64    32     
-224   -160   
160    80     
144    -160   
-32    0      
336    -48    
320    -144   
448    288    
-288   -512   
160    -144   
0      32     
-64    -256   
64     -48    
64     -240   
-16    -80    
304    176    
32     -80    
192    96     
96     0      
144    -128   
112    64     
0      -160   
0      32     
16     96     
48     -240   
160    -16    
32     -320   
32     -96    
64     -80    
144    -16    
160    -208   
-16    -48    
32     48     
16     -208   
112    -240   
16     48     
240    112    
-176   -32    
-160   -96    
32     16     
-816   -16    
64     0      
96     -16    
-192   128    
304    192    
-272   160    
176    -144   
128    -112   
-176   -112   
528    16     
224    256    
192    -160   
64     16     
-288   192    
96     -160   
-64    32     
-32    -16    
288    176    
64     -32    
96     -160   
-32    -368   
-32    -16    
192    -304   
0      128    
128    80     
96     32     
-32    -128   
80     -96    
-80    48     
48     0      
-240   -64    
176    -48    
-160   0      
176    -16    
-160   -64    
304    -192   
48     -80    
128    -960   
192    176    
-112   -48    
-32    -32    
-160   -80    
272    160    
-368   64     
160    32     
-240   -64    
64     -16    
-1760  -80    
-16    -160   
240    64     
-16    0      
-48    0      
