# Supplementary material for: A Fault Diagnosis Method for One‐Dimensional Vibration Signal Based on Multiresolution tlsDMD and Approximate Entropy
Source: Hindawi journal article supplement (doi:10.1155/2019/3262818), 2019-01-01
Supplement: f1 [file 3262818.f1.zip › 3262818.f1/gear signals/normal gear signal/Data14.txt]

-192   224    
-80    -64    
144    -80    
-256   64     
224    -112   
112    -144   
176    112    
112    48     
-144   -80    
-16    48     
0      -16    
240    -48    
112    -288   
-32    64     
48     -80    
-112   64     
336    400    
-16    -240   
-128   -16    
-128   -96    
-256   16     
32     -208   
-16    80     
96     -144   
-16    -208   
224    64     
-112   -144   
384    128    
80     704    
48     -656   
64     208    
-48    224    
-112   -80    
-672   -656   
64     208    
-192   400    
112    -128   
-128   32     
-16    -432   
112    -80    
128    208    
64     0      
96     -960   
32     64     
48     -48    
320    288    
16     320    
-112   144    
-256   -96    
96     -16    
-80    -256   
-96    -480   
64     16     
80     240    
64     64     
176    240    
0      96     
48     -96    
176    336    
400    112    
144    -160   
-208   144    
144    400    
-160   176    
-16    160    
416    320    
80     560    
-368   192    
112    -400   
192    48     
368    -64    
288    48     
336    -352   
176    176    
-336   -64    
0      -128   
-192   80     
-192   -16    
-304   -32    
288    -48    
64     352    
128    176    
-192   32     
-32    -112   
-48    32     
192    16     
-144   112    
112    -384   
64     -16    
-320   112    
-208   64     
-48    96     
-16    16     
-256   -32    
272    80     
-144   112    
0      -208   
112    -272   
-192   -368   
80     -208   
176    -80    
160    16     
256    160    
-80    80     
-64    96     
32     208    
-224   96     
64     -128   
48     -128   
144    -144   
-16    128    
160    16     
-144   -48    
80     -48    
-112   16     
-848   -64    
-16    -16    
-544   -144   
-432   -48    
-352   -16    
-336   48     
0      -192   
16     -64    
-128   -48    
-32    160    
208    96     
-208   240    
-96    -272   
-960   -544   
192    48     
80     -16    
48     128    
-144   -16    
0      160    
112    -128   
-176   0      
-48    -48    
-208   -144   
176    448    
-1392  -128   
-112   96     
144    96     
192    128    
-64    448    
256    -48    
-288   -32    
-144   -16    
0      -320   
-336   -896   
-96    -320   
-48    -16    
-32    -48    
-560   64     
-144   -240   
-224   64     
176    64     
256    48     
16     368    
112    -48    
0      64     
112    32     
-96    -192   
32     16     
-288   -384   
256    -592   
-272   -400   
96     64     
-192   -144   
-176   224    
-352   -256   
32     96     
-560   16     
-64    -32    
-320   -176   
16     -80    
-32    288    
400    -48    
176    272    
-64    128    
96     208    
-96    176    
-608   -544   
-16    -48    
-256   224    
-304   -96    
384    -576   
-576   -336   
288    48     
-160   -240   
32     -80    
-32    -288   
-176   96     
240    96     
-272   576    
144    144    
-288   -560   
144    -224   
144    -208   
-448   -32    
-224   -320   
128    -48    
-1040  -112   
112    -80    
96     -96    
288    160    
0      480    
-64    208    
-192   208    
256    -368   
32     32     
-16    240    
0      -192   
-224   -240   
64     -16    
-240   96     
-80    144    
-416   128    
368    -112   
240    48     
-64    608    
-128   -224   
96     -32    
-32    288    
-224   -672   
128    208    
192    800    
160    -272   
-144   -16    
144    -416   
-48    320    
128    -240   
-464   80     
-48    64     
-112   160    
-32    -16    
128    80     
80     16     
304    -96    
224    208    
32     112    
-192   -160   
160    288    
-320   -64    
-192   -224   
48     112    
128    -96    
-48    -144   
64     272    
-64    112    
-32    64     
-48    96     
224    -48    
-80    -128   
64     -128   
-112   64     
192    352    
16     384    
-464   -32    
-112   -624   
144    -896   
448    -288   
320    144    
352    144    
256    0      
-160   -32    
96     0      
-480   32     
-80    -160   
-192   -80    
-144   80     
-144   128    
-176   80     
160    224    
-256   96     
-112   -64    
240    32     
112    48     
32     64     
-176   -208   
384    -288   
272    16     
656    112    
304    32     
256    48     
528    336    
-224   368    
-848   -112   
-176   0      
192    144    
-160   0      
240    -96    
352    48     
160    64     
-160   -144   
224    48     
-144   16     
160    48     
-96    48     
-112   -32    
-224   -128   
-192   -128   
608    96     
-16    64     
240    48     
96     80     
-224   -16    
-80    48     
-144   64     
-128   64     
80     80     
-16    0      
16     80     
-144   32     
112    64     
0      -48    
-32    64     
64     128    
32     32     
32     -16    
-128   0      
-16    80     
96     48     
64     -16    
80     80     
144    112    
-112   -48    
160    -32    
-16    128    
96     64     
160    64     
-48    80     
0      96     
-64    -32    
96     80     
-208   48     
176    -240   
-32    80     
144    96     
32     80     
48     -320   
-128   96     
-176   0      
256    -128   
64     112    
192    -96    
-208   -32    
128    128    
-32    -64    
48     -224   
80     -48    
176    -80    
80     48     
-16    16     
-192   -176   
80     -320   
16     -48    
112    192    
240    160    
-176   112    
16     32     
64     -16    
16     176    
160    32     
-80    0      
80     80     
-32    -496   
80     -64    
16     -16    
16     -80    
176    64     
16     48     
256    208    
-144   176    
0      -384   
64     96     
0      32     
112    48     
64     -32    
64     -112   
-16    64     
128    -336   
64     80     
-32    -832   
208    -128   
-272   -144   
-16    80     
32     -32    
144    -32    
16     112    
112    320    
160    -112   
64     96     
32     16     
-32    16     
-32    -992   
448    32     
-80    480    
-80    -128   
-96    160    
128    -208   
384    64     
48     864    
-48    -688   
96     -256   
48     432    
-80    -64    
48     432    
96     -240   
16     -304   
208    -496   
112    208    
16     -16    
-32    -688   
64     16     
-48    -432   
-64    -32    
16     -160   
160    48     
192    80     
-96    48     
32     -32    
-96    -112   
160    -176   
-64    -16    
16     128    
208    -240   
144    112    
208    -416   
80     -48    
128    -416   
144    -48    
-48    -80    
128    64     
-176   0      
-16    96     
0      256    
192    -128   
112    -112   
208    -96    
80     64     
0      -192   
224    48     
48     -112   
144    -192   
64     -480   
128    112    
112    112    
96     48     
-80    128    
80     -16    
80     128    
208    -112   
16     128    
80     80     
64     32     
224    48     
-80    176    
-208   -112   
384    -48    
-80    -128   
-48    -720   
-32    80     
32     64     
-48    -224   
-64    -192   
-16    -608   
16     80     
-208   -80    
160    -160   
464    112    
-176   112    
-96    64     
-64    -208   
112    -432   
96     96     
80     -16    
0      64     
80     -112   
144    -368   
-160   -160   
160    16     
80     64     
128    -128   
192    144    
160    -240   
-240   -352   
176    -208   
-16    -32    
64     64     
128    0      
208    -80    
64     -32    
32     -64    
112    -336   
-480   -96    
192    32     
-192   -352   
256    -352   
144    64     
-32    -48    
176    -240   
-32    -272   
128    -64    
96     64     
64     112    
16     -48    
-96    -144   
-192   0      
208    -96    
-528   0      
32     0      
48     -80    
80     -144   
-32    -48    
112    -464   
0      -96    
160    -416   
208    16     
32     -16    
-96    48     
16     -128   
96     96     
-96    -192   
80     -224   
-304   -16    
224    240    
-2112  96     
320    192    
128    176    
80     208    
48     128    
48     -304   
16     -192   
112    -432   
224    656    
-16    240    
-112   -48    
400    -128   
-32    -272   
0      112    
240    160    
-288   -208   
192    -16    
-224   -192   
208    128    
176    -176   
128    224    
16     992    
-128   -2256  
-288   -16    
-32    -576   
-80    368    
112    416    
64     -32    
-192   224    
-192   -768   
-224   64     
96     80     
-1984  -80    
128    -160   
-64    -176   
144    -656   
80     752    
160    -656   
-144   -368   
-96    240    
48     -384   
-128   112    
208    -128   
16     384    
224    0      
-112   -144   
-80    -160   
-1232  -384   
-80    224    
352    160    
-400   -912   
-32    0      
464    160    
-32    -320   
-208   176    
-192   -32    
-32    -336   
96     32     
96     -64    
-64    0      
64     -32    
-256   -80    
64     -96    
144    192    
112    128    
144    -304   
-16    -16    
208    -736   
-96    32     
224    112    
192    -32    
-272   320    
272    -448   
-128   96     
176    128    
-160   -128   
224    64     
-704   -16    
-304   -176   
16     96     
-2096  -32    
96     0      
144    112    
-304   112    
-112   -32    
-576   16     
-160   48     
144    -48    
-320   -144   
16     -112   
352    432    
-592   112    
-32    -112   
-208   -32    
176    224    
-336   -96    
-192   -128   
0      560    
-96    -240   
-96    -304   
-688   112    
128    144    
-1072  64     
-96    0      
320    32     
-112   48     
304    -96    
-320   -128   
64     -768   
-32    -432   
160    -480   
96     -128   
-64    176    
-208   176    
-80    160    
-96    -64    
-224   -32    
-304   80     
-240   -96    
16     -48    
544    160    
-576   -304   
-336   -208   
-64    -32    
352    112    
-80    -96    
240    -128   
192    -16    
0      96     
256    0      
992    896    
-624   592    
-640   -48    
-224   -112   
-416   -144   
576    512    
-416   368    
64     80     
-48    96     
176    64     
272    64     
464    192    
16     288    
-576   -48    
48     48     
-320   16     
-32    176    
-240   32     
96     48     
112    16     
-224   80     
-864   -16    
384    96     
-448   -64    
0      0      
-48    -32    
128    -16    
-144   -32    
208    48     
448    96     
-240   -128   
-32    64     
0      144    
16     128    
-352   -128   
272    0      
-1408  16     
640    400    
-560   -80    
-336   -256   
224    -48    
48     144    
176    32     
112    -48    
16     64     
-80    64     
160    80     
64     -16    
64     80     
-208   -64    
112    48     
-288   48     
128    96     
16     -16    
-32    16     
192    80     
-32    32     
-176   0      
-96    -32    
96     80     
64     -16    
144    0      
-240   32     
64     64     
-336   -32    
80     -16    
-400   0      
64     48     
64     48     
256    240    
-384   64     
144    -64    
-48    96     
48     -16    
128    64     
32     32     
-144   64     
-96    0      
32     -32    
-192   -160   
144    256    
-16    256    
-48    32     
-112   -16    
-400   128    
-96    -48    
-48    -64    
144    144    
-32    64     
160    160    
-112   64     
64     16     
-96    -32    
208    32     
-160   16     
384    192    
-288   -48    
64     0      
-64    160    
-128   -32    
-48    -304   
-48    -80    
176    368    
16     144    
0      304    
80     -64    
96     -16    
-288   128    
224    -224   
-240   96     
160    -64    
224    -208   
96     224    
32     624    
-80    -752   
-32    -96    
-64    176    
32     208    
32     304    
-80    -608   
96     304    
128    128    
-80    -16    
96     48     
-352   16     
32     -160   
16     16     
112    -96    
-32    0      
-128   -288   
-160   -784   
576    752    
-320   992    
208    96     
-16    16     
48     -32    
32     96     
-80    -16    
304    -96    
-256   32     
336    320    
-192   432    
-64    128    
160    -208   
64     -224   
32     -208   
64     -80    
-48    0      
-128   -192   
64     64     
-112   64     
-16    80     
-64    0      
288    64     
-48    112    
-16    160    
-192   128    
-16    -32    
-48    64     
176    16     
176    192    
48     32     
240    16     
-16    32     
96     112    
-16    48     
208    80     
-80    -32    
160    160    
-32    48     
16     -48    
48     16     
-80    16     
144    16     
192    80     
368    272    
-112   304    
-240   -32    
-144   16     
-16    192    
144    -128   
64     32     
-32    32     
64     112    
80     -64    
0      -192   
-32    64     
-128   48     
176    32     
-176   -272   
64     -160   
-176   160    
-176   0      
80     -64    
32     -48    
320    -96    
144    176    
-176   384    
208    96     
-80    -112   
112    64     
-448   176    
-128   -64    
128    -80    
16     -208   
704    -256   
304    256    
128    464    
432    544    
-352   432    
-336   -96    
128    208    
128    48     
432    -192   
32     64     
-224   -352   
-112   64     
112    112    
-112   -32    
224    -64    
208    112    
288    16     
272    160    
-192   -16    
224    176    
-336   160    
-80    -176   
320    -192   
352    -320   
448    64     
192    80     
16     -32    
272    16     
-224   224    
32     208    
256    144    
48     288    
-32    336    
240    64     
-96    80     
-64    -160   
0      112    
176    96     
0      -352   
48     -208   
16     -160   
-176   -80    
176    -224   
160    128    
112    -1552  
96     48     
-16    -64    
-16    0      
16     -192   
224    -48    
128    96     
224    -112   
32     144    
48     -192   
-96    48     
272    -688   
144    192    
144    240    
-80    -208   
64     0      
96     112    
-128   -48    
320    112    
-16    -384   
144    688    
128    -512   
-80    224    
304    -256   
96     128    
288    16     
-384   -336   
160    64     
-48    -256   
304    496    
416    -560   
192    304    
-96    -288   
32     48     
-112   336    
32     -496   
16     128    
48     -224   
-240   192    
48     -192   
448    816    
-512   -608   
336    -608   
192    256    
256    448    
-80    -624   
128    -704   
-160   288    
-112   -1120  
160    -240   
-16    96     
-80    -144   
80     -240   
176    -624   
176    656    
176    672    
288    0      
0      -32    
80     -640   
-96    -480   
48     160    
-16    -272   
0      0      
224    -176   
96     240    
-240   80     
48     -208   
96     -32    
112    -336   
-96    -64    
64     -928   
16     -32    
144    96     
-96    64     
224    -64    
32     -48    
112    64     
-80    0      
-32    -32    
176    -16    
-1520  16     
64     32     
64     -32    
16     -32    
96     -32    
-32    -272   
208    208    
32     384    
448    128    
-144   -48    
-32    -16    
160    16     
48     80     
-368   -96    
336    0      
-512   -64    
48     0      
-48    48     
144    32     
144    -80    
32     -160   
144    -48    
64     -400   
-64    64     
32     -80    
96     0      
224    16     
112    -32    
-112   -16    
112    -80    
-48    -80    
176    0      
-944   -224   
192    -176   
32     -32    
-48    -160   
32     -32    
144    128    
64     -80    
48     0      
-16    -16    
192    -80    
96     -64    
-128   32     
-80    128    
64     112    
144    -48    
-1296  -208   
64     -224   
-384   -256   
208    -64    
-128   32     
288    -80    
80     64     
112    -1408  
-144   32     
144    48     
96     -208   
-336   -288   
-64    16     
-576   80     
128    -48    
-48    -16    
240    96     
-544   64     
160    -48    
96     -32    
224    -80    
80     112    
-768   -512   
336    96     
464    80     
-368   -112   
16     -48    
576    256    
-1584  80     
0      -16    
144    -16    
288    32     
128    224    
288    -144   
336    16     
32     -144   
-32    0      
176    -128   
160    0      
-304   16     
192    -48    
0      32     
0      -16    
-400   -32    
-48    -16    
224    32     
176    -64    
-192   -176   
240    -208   
-400   -16    
144    -48    
176    80     
-336   96     
-112   -32    
80     16     
96     -48    
-96    -16    
64     -16    
-192   80     
-208   -48    
-688   -64    
224    -80    
0      80     
-672   -96    
288    16     
-432   0      
-48    -48    
80     64     
-944   64     
-192   -80    
-128   0      
368    224    
-64    16     
-80    -32    
-16    -32    
48     32     
128    16     
112    32     
-80    -32    
32     48     
-176   -96    
-592   16     
-144   16     
-96    0      
48     16     
-80    -48    
-64    32     
-784   96     
-48    16     
96     -16    
80     176    
144    144    
-96    208    
-192   -32    
32     32     
-96    32     
-64    -64    
256    -112   
-176   64     
96     -80    
-96    -32    
-208   80     
-752   -96    
0      80     
-496   -448   
-208   144    
-80    48     
160    176    
-80    -96    
80     560    
-64    -624   
-176   -336   
128    544    
-176   -480   
304    320    
-320   -144   
80     -224   
-336   272    
128    -80    
-1520  -32    
-128   -64    
64     -64    
272    16     
0      -144   
-208   -176   
224    -368   
-256   160    
-80    -128   
-144   -160   
80     80     
-48    176    
80     192    
-224   -368   
96     320    
-464   192    
0      -240   
-96    272    
112    -80    
-32    -112   
448    224    
-48    80     
48     128    
-160   -64    
-112   32     
32     32     
-64    128    
-160   256    
384    32     
48     96     
-304   0      
240    -112   
-784   16     
16     32     
-16    0      
-48    0      
16     16     
16     144    
-48    64     
-48    48     
128    -64    
-176   48     
192    48     
-240   0      
64     -16    
-272   48     
144    -32    
112    0      
32     304    
-112   48     
-80    16     
64     112    
-80    80     
-16    -16    
-144   -48    
-16    -64    
-16    -16    
-112   32     
0      0      
32     80     
0      -48    
-32    176    
-1152  176    
-96    -32    
144    -48    
-32    -32    
80     -64    
-64    0      
32     -80    
-48    16     
48     192    
96     80     
144    32     
208    -32    
0      96     
-176   32     
80     112    
64     128    
-240   80     
-80    64     
0      16     
-16    144    
-64    48     
80     -16    
64     -32    
48     64     
-32    64     
-128   -48    
-160   -80    
80     -16    
-256   -32    
144    96     
-160   160    
-128   16     
-64    -64    
176    -32    
-32    32     
-160   -16    
64     -32    
368    304    
80     192    
-208   -48    
304    -96    
0      -48    
112    80     
-304   0      
192    0      
320    304    
-416   368    
-112   192    
0      144    
64     64     
256    352    
-64    176    
-112   -112   
-112   -80    
-96    -64    
-64    48     
144    16     
352    -112   
128    -32    
-128   -160   
64     32     
64     -16    
160    64     
192    224    
-48    224    
96     160    
272    192    
0      32     
-144   208    
16     96     
496    352    
-512   672    
256    368    
96     96     
240    80     
112    -192   
16     272    
112    -32    
-400   -192   
-256   176    
-32    -176   
-80    0      
16     96     
240    -16    
-112   32     
112    96     
-288   80     
112    -112   
272    384    
-128   -48    
16     80     
128    128    
144    112    
400    256    
-416   -720   
192    192    
-32    208    
-16    -16    
144    -176   
-160   48     
-16    -192   
-192   96     
144    -32    
48     -96    
256    320    
32     -32    
64     -16    
96     -32    
-96    16     
64     -208   
112    48     
16     192    
64     -16    
96     80     
0      0      
112    304    
64     64     
0      -224   
208    336    
-336   -64    
256    -144   
-112   32     
192    0      
208    -96    
224    48     
48     16     
-48    16     
0      -160   
-32    128    
-64    48     
64     80     
160    80     
112    -80    
-64    -32    
112    -848   
-16    144    
160    128    
96     -16    
80     32     
16     272    
-96    0      
176    32     
-240   -16    
-16    0      
96     -112   
-48    -80    
192    -112   
112    16     
432    160    
-400   112    
304    32     
-16    -176   
112    80     
96     -32    
112    0      
128    16     
16     176    
16     48     
-48    0      
-48    16     
-16    -64    
80     80     
16     -96    
32     -32    
192    -224   
32     -16    
160    -256   
128    80     
-176   -336   
272    -64    
-32    112    
144    16     
32     -16    
-48    80     
-96    0      
224    -304   
-80    -160   
96     128    
-32    32     
240    -96    
64     80     
224    -304   
48     0      
-208   -48    
112    48     
160    -32    
32     64     
-16    -32    
128    48     
-80    0      
96     112    
288    96     
192    128    
-48    32     
80     -128   
-144   -128   
80     80     
96     96     
64     144    
160    112    
16     -112   
-128   0      
176    64     
0      -96    
48     112    
48     16     
144    112    
144    -112   
-16    -96    
112    -48    
224    128    
176    -144   
64     -16    
0      0      
-32    -144   
192    -32    
32     224    
16     144    
-144   -256   
-16    -96    
80     48     
-224   -64    
192    -64    
176    16     
-304   96     
0      128    
160    -224   
208    -128   
-16    -192   
-224   -976   
32     128    
64     -112   
32     -464   
176    64     
-128   -416   
-240   -32    
288    -400   
80     -32    
32     -144   
976    -736   
416    -304   
544    240    
160    96     
80     80     
336    80     
-16    208    
-368   -208   
480    160    
-496   96     
-288   -160   
160    144    
272    -160   
400    0      
192    -1312  
208    -80    
112    16     
96     96     
-224   -112   
-160   -304   
128    -176   
-288   192    
-752   144    
-128   144    
-1456  -32    
112    192    
128    128    
432    128    
208    -224   
272    -544   
96     -128   
-112   112    
144    48     
48     -112   
-80    64     
160    -208   
192    -224   
64     32     
64     96     
-1168  -160   
48     -176   
-96    192    
-304   16     
48     160    
32     128    
224    16     
128    -208   
-160   192    
16     -64    
-256   0      
320    176    
-192   -208   
-416   -960   
48     48     
-464   496    
80     -272   
-224   -128   
16     64     
48     64     
160    -176   
-176   48     
-48    -688   
176    16     
48     -48    
0      192    
0      -80    
0      -160   
-224   112    
176    -64    
144    528    
32     -272   
-240   -128   
128    256    
-80    -224   
160    -144   
32     128    
112    -288   
-32    80     
0      64     
192    -96    
-192   -304   
-320   -192   
-304   -48    
-256   -64    
224    -128   
48     192    
288    -272   
400    -320   
-2000  512    
352    128    
-160   80     
80     160    
144    48     
-16    192    
288    -16    
-96    16     
64     112    
128    80     
368    304    
-320   336    
-16    32     
0      96     
-208   -64    
-64    32     
-304   -512   
-112   0      
96     -256   
32     240    
-32    304    
160    32     
144    -32    
192    80     
96     192    
96     208    
-176   16     
-176   -160   
-80    176    
-80    -176   
-112   64     
160    -320   
80     96     
16     -16    
96     112    
-80    -128   
128    -64    
-144   208    
224    -64    
-176   80     
240    -208   
-144   48     
16     -32    
80     272    
192    160    
64     96     
-304   -160   
128    -192   
-432   -112   
-272   288    
-32    368    
-176   -16    
-128   -224   
-704   -128   
-400   -128   
96     -192   
-208   144    
320    -48    
-208   -160   
-400   -240   
176    128    
-384   0      
32     0      
-48    32     
-192   32     
32     32     
-208   -48    
80     16     
-48    -48    
-16    112    
-144   96     
-16    96     
112    -96    
-48    32     
0      176    
16     224    
-112   -48    
64     0      
128    96     
-240   -80    
-48    16     
16     80     
-48    48     
0      -32    
112    -96    
-512   16     
-176   16     
464    -48    
-16    96     
-96    -96    
240    16     
0      -16    
-176   -80    
-80    16     
-208   -32    
0      176    
144    224    
32     -32    
-96    -48    
-64    32     
-672   -16    
0      32     
-1168  -64    
64     32     
-96    -160   
208    208    
0      -32    
-160   -48    
16     48     
-208   -96    
-144   16     
0      -144   
32     32     
128    -48    
48     0      
-16    16     
-80    160    
96     240    
32     144    
-416   -224   
272    -512   
288    -32    
224    480    
208    352    
-144   336    
96     -224   
-208   -272   
-208   96     
-464   -16    
-144   -128   
-64    -480   
176    176    
-240   192    
-128   0      
208    512    
160    32     
-32    192    
-496   -112   
0      -80    
336    32     
224    144    
256    -464   
272    320    
0      80     
-528   -336   
-160   16     
64     64     
-160   -128   
336    256    
96     688    
-80    144    
128    -144   
16     -304   
-32    -112   
288    208    
-288   -176   
-160   -288   
64     64     
-160   32     
320    0      
-64    32     
352    64     
-240   -96    
32     -96    
-208   -176   
-144   -80    
96     32     
96     64     
96     96     
-64    32     
144    32     
0      16     
48     48     
-112   16     
32     64     
-16    16     
64     16     
-96    16     
16     -16    
-208   -16    
128    64     
-64    48     
240    80     
-80    16     
16     16     
-208   -272   
304    -208   
-288   112    
432    160    
-288   -256   
-384   -240   
96     32     
-416   -64    
304    -160   
96     0      
-64    96     
-32    32     
272    112    
-336   -32    
-48    -16    
64     128    
144    0      
80     16     
48     48     
96     -16    
-48    -80    
48     -64    
-272   48     
32     96     
240    112    
-80    128    
96     0      
112    160    
96     304    
-272   96     
256    -112   
-48    32     
128    16     
-112   -16    
64     -16    
-208   -16    
128    48     
96     80     
80     48     
128    64     
-304   192    
240    0      
48     32     
0      96     
96     -16    
208    160    
-208   128    
96     -48    
-32    16     
288    224    
-336   32     
224    32     
32     144    
160    128    
48     48     
64     64     
-32    96     
64     32     
48     16     
-96    16     
464    112    
-544   -112   
272    32     
-80    16     
256    -64    
-288   -112   
32     -128   
112    32     
-144   -48    
16     -80    
16     16     
336    144    
-16    112    
112    -80    
112    80     
-160   64     
192    16     
-16    32     
48     -16    
48     -16    
-144   -128   
96     -288   
80     -16    
176    96     
-96    -16    
112    16     
160    96     
-80    0      
-16    -48    
-112   -192   
64     -240   
96     -48    
128    -144   
-144   -512   
-48    160    
144    256    
192    -192   
-48    32     
-16    -192   
320    208    
-64    192    
80     48     
16     -160   
32     256    
-48    176    
-16    16     
-64    -96    
112    160    
-128   112    
-208   96     
128    0      
32     192    
0      368    
240    672    
-464   -336   
-224   -432   
192    512    
128    -32    
272    -64    
272    160    
80     -128   
144    32     
64     64     
-560   -192   
176    -1440  
224    464    
432    240    
288    -144   
64     -720   
-160   -272   
112    0      
-48    416    
-480   -528   
-80    368    
-560   0      
-32    -48    
96     32     
80     80     
384    64     
304    -16    
128    48     
48     -96    
-352   -64    
-96    -240   
-160   48     
416    -864   
1072   784    
-304   -544   
-32    -144   
144    352    
48     144    
-336   -144   
48     96     
32     -48    
336    0      
192    80     
96     -16    
96     -32    
-48    32     
-160   -80    
176    -160   
0      -16    
-112   16     
272    608    
-320   -320   
160    224    
48     400    
160    -192   
32     128    
112    -304   
48     -160   
0      -144   
240    -112   
-96    64     
176    32     
-16    320    
224    176    
80     -464   
256    576    
-192   112    
-112   -112   
-48    0      
64     176    
96     336    
48     -32    
144    -128   
96     -192   
112    128    
160    -224   
80     176    
-16    0      
64     272    
240    144    
-16    320    
112    192    
112    -912   
0      -400   
144    -208   
480    560    
-176   816    
208    160    
-192   -528   
256    -160   
-32    -160   
304    192    
-128   256    
96     -320   
-32    432    
256    32     
64     96     
208    -112   
96     -448   
80     -272   
448    16     
256    -160   
192    112    
-160   16     
-16    0      
144    80     
-64    -256   
80     16     
-112   -192   
272    -144   
352    -368   
-64    128    
-192   -176   
336    -160   
192    192    
-176   -32    
176    0      
-192   64     
-16    0      
112    -480   
128    -48    
96     -224   
176    64     
32     48     
224    -32    
128    32     
112    -128   
-128   -64    
16     -96    
-288   208    
-160   32     
112    128    
48     224    
176    96     
16     -576   
352    -112   
-144   -48    
-80    48     
112    208    
304    96     
-176   64     
32     -208   
0      112    
-192   64     
-224   -208   
-16    -80    
224    32     
-32    -160   
400    -128   
-64    -368   
48     96     
112    240    
48     16     
432    144    
-240   352    
-416   0      
0      -48    
96     48     
288    -48    
-320   112    
64     0      
-48    -32    
16     -48    
16     0      
48     -256   
64     -64    
112    -176   
112    32     
176    -80    
0      32     
16     32     
0      112    
16     96     
176    32     
-384   192    
-16    -80    
-976   128    
80     0      
192    -96    
176    -96    
96     -64    
112    -64    
16     192    
192    -16    
-64    16     
-16    -32    
240    128    
-288   144    
128    112    
16     144    
64     272    
-272   64     
64     0      
-16    176    
128    -176   
32     528    
304    144    
176    -16    
-64    48     
32     -32    
-160   352    
96     272    
-176   16     
96     -64    
-176   48     
192    208    
-224   -240   
64     -64    
-96    0      
-160   208    
608    912    
-448   -1376  
256    688    
-304   -144   
16     -48    
-528   -144   
112    32     
-336   -16    
336    208    
368    592    
-560   -288   
-480   -624   
288    368    
64     224    
0      384    
304    -48    
480    -272   
144    -32    
-208   32     
-368   288    
-128   96     
304    128    
-480   64     
-96    -144   
-256   -80    
48     -176   
-176   -48    
272    0      
-112   288    
-272   48     
496    176    
-96    -224   
-384   -128   
-144   -16    
-512   112    
-256   16     
-80    -32    
0      48     
272    112    
576    416    
-1760  32     
32     -64    
-288   -16    
128    80     
-480   -144   
144    -48    
192    208    
-592   -64    
16     64     
480    336    
-656   -64    
-512   -48    
64     32     
304    -32    
-304   -128   
-32    0      
48     32     
-160   -32    
-16    32     
-128   -112   
16     64     
32     0      
272    80     
-176   -16    
-32    16     
-80    16     
-32    -32    
-80    16     
-384   144    
-320   -112   
224    -96    
-96    80     
96     80     
-32    32     
-128   -80    
288    176    
-464   176    
464    64     
-80    128    
112    0      
128    -16    
16     0      
64     112    
-144   16     
64     96     
-1552  -192   
96     96     
-160   96     
208    0      
64     112    
-96    -96    
160    -64    
-144   0      
48     48     
80     32     
-112   112    
-16    48     
-64    -16    
-288   16     
-128   16     
-1120  48     
96     80     
-64    16     
304    -32    
-336   -16    
-16    144    
-48    -64    
-64    64     
128    16     
-96    -32    
80     32     
-256   -48    
-80    -64    
-224   -96    
64     80     
-160   -32    
-16    96     
-16    -80    
0      32     
48     64     
-96    80     
0      112    
0      16     
16     16     
-96    -224   
176    -64    
-336   96     
-208   -64    
112    64     
80     80     
112    64     
80     96     
-672   -80    
-352   -16    
16     64     
64     80     
160    176    
-208   -16    
-64    16     
-64    -80    
-80    -16    
32     64     
-16    32     
-80    -32    
352    48     
-736   -96    
176    -48    
32     144    
208    96     
-144   64     
-64    -64    
64     48     
-80    16     
32     -32    
-32    -64    
80     0      
-176   80     
272    160    
-208   -96    
96     208    
-160   16     
144    -48    
176    352    
-16    -96    
-80    -128   
144    240    
-80    -16    
240    272    
96     -192   
-192   32     
64     -16    
-80    -16    
160    176    
-48    -16    
208    32     
-16    224    
-224   -16    
128    64     
304    656    
-288   -288   
48     224    
80     288    
272    48     
-16    0      
-448   -336   
0      720    
16     80     
16     -416   
64     272    
64     -144   
176    -32    
544    608    
-192   -416   
-96    384    
-96    144    
-80    -320   
224    -320   
-96    64     
112    432    
-304   -864   
-80    304    
-48    208    
0      0      
-48    96     
288    128    
-272   -48    
-16    160    
-48    336    
-96    -336   
112    -384   
64     704    
16     304    
-176   -656   
80     -48    
112    224    
496    240    
192    80     
304    -16    
-112   64     
-32    0      
368    -448   
-64    -176   
368    128    
176    112    
-96    400    
0      48     
-272   -112   
512    160    
-112   176    
-592   32     
48     -48    
-144   16     
240    48     
-16    64     
112    -1424  
96     32     
96     80     
-64    96     
-160   336    
32     80     
64     128    
224    208    
80     256    
128    112    
-80    144    
-32    32     
-208   -128   
144    112    
224    48     
112    -480   
64     16     
0      32     
112    272    
80     224    
0      112    
160    176    
80     16     
32     -80    
208    -176   
48     -48    
64     96     
-32    96     
64     16     
128    -112   
-80    32     
-32    208    
176    128    
-112   736    
176    432    
-400   -272   
-112   -256   
48     -48    
80     160    
160    -80    
16     -176   
16     16     
192    592    
-144   -64    
48     32     
-64    -192   
144    -352   
96     -496   
176    -128   
80     16     
-112   432    
160    0      
80     -112   
112    368    
-192   80     
-80    48     
-64    -272   
80     -112   
16     -320   
112    -256   
208    -16    
-64    -96    
32     -336   
160    128    
144    48     
0      0      
-80    -144   
304    -176   
-112   -400   
368    -176   
0      0      
0      16     
-144   176    
112    0      
160    96     
-80    -48    
144    32     
16     -368   
240    -80    
16     -480   
32     144    
-176   32     
-32    -144   
-160   -176   
240    -64    
-16    0      
48     -80    
80     48     
208    128    
336    128    
-80    16     
48     96     
96     -528   
176    112    
208    -176   
32     -32    
64     16     
160    144    
-16    304    
-256   -96    
416    -416   
48     48     
160    176    
176    -64    
224    32     
-32    48     
48     48     
96     -336   
64     -192   
-48    -400   
-80    -64    
64     -112   
112    240    
48     -16    
16     208    
144    32     
96     112    
240    80     
-160   16     
288    32     
-96    96     
48     96     
64     -192   
16     32     
224    -624   
144    192    
128    32     
-96    160    
192    -256   
-32    -384   
256    -1632  
32     -400   
96     240    
-32    -240   
-96    -656   
-48    -384   
128    112    
0      -64    
144    -128   
192    80     
-32    -800   
32     128    
0      -192   
-96    432    
-2032  -96    
32     -64    
-32    0      
192    -208   
48     -144   
64     -176   
48     -96    
176    48     
448    -112   
-224   -160   
80     -64    
144    128    
96     -32    
512    -160   
288    0      
-400   -144   
-64    -96    
-80    80     
80     0      
416    384    
-80    944    
224    672    
240    -16    
144    192    
96     -48    
0      -112   
16     -240   
352    -400   
240    -272   
-192   -192   
-240   -176   
240    80     
-240   0      
64     -80    
16     0      
-416   -192   
432    -288   
416    -752   
-144   -144   
768    -160   
16     96     
112    -112   
-16    -32    
-240   0      
96     -80    
48     -32    
432    400    
-1728  160    
-224   -112   
112    -48    
160    -32    
-32    -16    
464    -32    
160    32     
160    -272   
-144   32     
176    -64    
80     48     
-560   48     
-16    64     
-80    32     
720    -64    
-512   -32    
-176   96     
-128   48     
0      -112   
256    -32    
352    16     
-128   48     
32     -336   
112    32     
112    16     
-144   -64    
-144   0      
-48    -80    
64     -48    
96     64     
-96    0      
80     -16    
-976   0      
112    -64    
16     80     
-32    -176   
64     64     
16     -528   
48     112    
176    -64    
80     -96    
-128   -208   
-160   -208   
80     0      
-128   0      
-192   -16    
80     32     
-368   -192   
96     -224   
32     224    
80     -64    
80     240    
48     -160   
160    -128   
0      208    
112    -48    
-144   96     
-80    48     
-480   16     
272    -160   
-432   -128   
128    -96    
-64    16     
32     16     
160    32     
288    -96    
-112   80     
144    -432   
160    -64    
-176   32     
128    16     
-224   0      
80     -64    
-304   -112   
192    0      
-208   -64    
128    -160   
-496   64     
288    -112   
-48    80     
48     -96    
-32    -64    
128    48     
-400   -64    
16     0      
-720   80     
-112   48     
368    -96    
-112   -16    
112    32     
-32    32     
128    -16    
-96    -16    
-2000  -80    
112    64     
-864   -32    
-16    16     
144    -208   
-256   -96    
64     112    
-256   -48    
-64    -144   
0      -208   
16     -48    
-32    -224   
-176   -80    
144    32     
-128   -96    
-144   -128   
64     64     
-80    -144   
96     112    
16     112    
-256   -128   
-32    -96    
-336   -64    
80     -48    
-48    80     
96     144    
-2960  -80    
-304   48     
-320   -1040  
80     544    
-64    -96    
48     -32    
-96    -128   
-64    80     
-80    160    
352    192    
-112   -48    
48     256    
16     0      
160    128    
-368   208    
-1072  368    
64     96     
-240   224    
-16    -400   
-288   -720   
208    -176   
304    96     
-352   688    
-48    16     
-240   -64    
80     -96    
-64    -80    
64     0      
-288   -128   
80     0      
-32    64     
-112   80     
-320   496    
-16    432    
-128   -224   
-48    0      
-64    -16    
0      -240   
32     -16    
-16    64     
-240   48     
-112   0      
-208   16     
-128   64     
96     208    
-128   224    
-224   -16    
-448   -176   
16     -48    
-80    -128   
32     -816   
-128   -96    
240    -48    
-32    16     
48     144    
-96    96     
-128   96     
0      -80    
-48    176    
80     -160   
0      -144   
352    208    
-672   368    
-32    176    
144    96     
288    96     
160    48     
192    32     
80     0      
-96    288    
224    272    
-352   224    
-256   48     
-256   -16    
-144   16     
-80    -32    
224    112    
176    32     
256    112    
-128   512    
-144   -80    
64     -112   
-368   -16    
-144   32     
0      -16    
48     16     
-304   -112   
80     80     
-48    128    
80     -32    
-80    -80    
-96    -192   
-176   -80    
16     48     
0      -112   
96     -80    
-16    -128   
-96    -160   
32     -48    
-48    -32    
-32    160    
-96    32     
-64    -80    
-80    -144   
144    64     
-80    112    
0      -144   
-32    -192   
-80    160    
64     160    
144    -16    
-32    -32    
0      -48    
-16    16     
-16    -144   
-32    80     
16     -416   
-32    272    
-160   352    
-96    -96    
-48    288    
144    208    
-96    208    
256    -32    
0      48     
304    128    
-128   624    
176    464    
288    -32    
-112   336    
0      256    
144    144    
-80    64     
-96    -192   
160    -48    
-224   400    
592    480    
-16    320    
-272   0      
144    304    
512    416    
-64    -160   
-32    16     
16     -304   
16     144    
48     -32    
-16    224    
336    576    
-400   128    
320    256    
-240   560    
176    176    
48     128    
-96    -80    
-48    0      
96     48     
208    144    
352    464    
-80    192    
48     64     
0      32     
0      96     
544    576    
-608   288    
224    272    
-304   48     
112    432    
272    512    
16     32     
160    496    
32     48     
-144   -128   
240    -144   
-224   256    
-32    112    
0      -208   
160    160    
-448   -768   
-208   -128   
48     384    
160    352    
496    816    
-320   -80    
-128   -144   
-192   -688   
-32    160    
416    480    
160    480    
-512   -736   
96     -192   
-96    848    
80     -192   
192    -624   
48     -64    
256    400    
-80    -32    
-208   -688   
-64    -240   
240    64     
80     32     
176    544    
-192   -128   
-16    192    
96     80     
48     32     
240    112    
-144   -240   
272    80     
-160   48     
64     32     
224    -304   
-64    208    
208    96     
-208   -32    
16     64     
16     480    
96     -64    
-48    -272   
64     32     
112    352    
128    -192   
-32    -208   
96     48     
-112   128    
48     -16    
48     128    
208    -272   
112    96     
48     32     
144    0      
-112   -208   
64     48     
144    304    
400    336    
-160   48     
16     48     
240    144    
112    -64    
-528   -464   
-48    -224   
160    320    
-96    -304   
304    64     
96     -144   
80     144    
-32    0      
336    -32    
208    -48    
208    112    
-80    48     
288    -16    
448    48     
160    -16    
304    208    
-112   -48    
-160   64     
32     -208   
128    16     
-256   -80    
112    192    
-96    -560   
256    -64    
-16    -64    
272    224    
48     -16    
448    32     
64     16     
64     0      
-112   -16    
160    -16    
-224   -64    
320    -176   
288    128    
80     -96    
288    32     
32     -32    
-128   128    
112    256    
-112   512    
-160   288    
-240   48     
-304   -64    
416    -352   
144    32     
448    112    
48     96     
-448   -80    
144    16     
64     128    
176    64     
48     80     
0      -16    
192    144    
-208   0      
96     64     
112    0      
208    16     
80     0      
-240   64     
192    -16    
-208   0      
-32    -336   
320    96     
0      16     
-80    -96    
112    -320   
-48    80     
-32    48     
64     -752   
0      96     
128    -80    
-32    -400   
192    32     
256    -256   
-32    -64    
96     80     
64     -48    
80     48     
112    16     
144    224    
32     -128   
208    -1008  
-16    48     
240    -272   
96     48     
-288   0      
-80    -656   
-16    0      
-32    -64    
32     -176   
96     16     
96     192    
-96    112    
272    -32    
-96    -320   
176    0      
32     64     
112    -32    
128    16     
-96    -192   
-304   -208   
48     0      
32     -144   
80     -176   
0      -96    
160    -96    
0      0      
256    176    
48     192    
48     96     
-160   0      
128    0      
80     160    
-352   176    
400    240    
-288   96     
240    96     
0      -224   
144    -32    
176    32     
80     -96    
64     -64    
0      -384   
-48    80     
128    -336   
48     -32    
160    144    
0      176    
-48    -48    
64     -160   
-32    -32    
160    -160   
-656   96     
0      -32    
112    -96    
112    -288   
160    288    
16     256    
-96    -352   
208    48     
192    32     
176    144    
-320   -384   
272    -864   
-64    1072   
-320   -176   
368    -560   
-2736  304    
208    -224   
192    800    
112    -32    
-96    -464   
80     -208   
272    -16    
0      -976   
32     0      
128    0      
48     304    
0      16     
-64    -48    
64     -96    
-48    80     
-944   224    
128    96     
-64    240    
160    64     
32     128    
208    -64    
240    96     
192    -144   
80     96     
-144   -112   
176    -32    
-16    -160   
0      -144   
0      16     
16     -16    
-80    -112   
-16    -224   
-176   -112   
-80    -48    
-16    64     
48     -240   
-64    0      
144    -336   
48     64     
-80    -128   
192    -128   
-16    0      
64     -16    
-304   -224   
192    16     
80     160    
-224   80     
-704   -96    
96     -96    
80     96     
80     -160   
16     64     
176    -224   
-64    -128   
-416   -48    
0      -16    
-144   -64    
64     96     
-16    112    
352    128    
-64    144    
-176   -80    
-752   0      
-112   -144   
240    -48    
272    16     
336    128    
-16    32     
-128   128    
-240   32     
-144   -80    
-64    -80    
448    -176   
256    -80    
448    -48    
48     32     
-208   -32    
48     -48    
-160   -80    
272    96     
-112   -144   
-64    0      
-96    -96    
-64    -32    
240    48     
-96    96     
-208   112    
-304   144    
32     128    
-64    48     
240    144    
-224   176    
-224   -176   
-736   -128   
96     48     
-304   32     
160    144    
-176   -96    
64     32     
-32    -64    
16     -16    
-144   -16    
-400   -96    
-64    -128   
-96    48     
-80    -80    
-112   -48    
96     160    
-32    -96    
144    64     
112    -32    
-176   64     
32     160    
-320   -16    
-16    -48    
-128   -80    
-96    176    
160    112    
48     48     
-1088  160    
-48    240    
-16    112    
48     256    
16     144    
16     -64    
0      128    
-144   -48    
16     -208   
-32    -144   
-64    48     
-48    192    
16     -160   
-512   -16    
-80    -112   
-496   16     
64     224    
-240   32     
176    -544   
-64    -1840  
-320   -1072  
-80    0      
-272   16     
272    -400   
512    944    
-112   1280   
-304   -16    
-32    -1392  
224    544    
-192   448    
-256   -512   
-64    336    
-416   48     
-48    -16    
-80    -32    
-288   288    
192    -320   
48     -96    
-32    160    
-160   64     
-240   -144   
-160   -176   
128    -480   
112    48     
96     976    
-160   -288   
-128   -96    
0      560    
-624   -752   
16     64     
48     368    
-304   -272   
512    -416   
64     656    
-304   912    
176    -672   
-128   224    
80     -64    
-240   864    
112    -240   
-208   96     
48     -16    
-416   176    
304    -288   
96     208    
64     256    
-16    -16    
-112   64     
80     192    
16     -96    
-192   112    
-176   256    
0      -432   
112    -64    
96     128    
-288   -240   
112    64     
-16    0      
-32    0      
256    112    
-144   16     
64     16     
32     -64    
32     -32    
96     48     
0      96     
32     192    
-32    176    
-176   64     
272    128    
-192   -32    
-64    0      
64     -224   
-240   -272   
192    48     
-144   96     
64     64     
-96    48     
112    112    
128    112    
96     -96    
16     -64    
-176   80     
-272   -96    
176    64     
-80    0      
368    112    
-224   -96    
-64    -160   
-144   -272   
192    -720   
288    -48    
208    -112   
32     -80    
0      48     
-64    -128   
-128   -32    
48     112    
-32    -32    
224    144    
-384   0      
64     64     
-176   -480   
-64    0      
-64    16     
64     -160   
144    -48    
80     -80    
624    -144   
32     -112   
96     224    
144    -64    
96     272    
0      80     
-16    -32    
-336   -80    
-144   -48    
160    -240   
112    -32    
-368   96     
32     80     
-192   48     
-48    -432   
224    -752   
288    -80    
384    336    
-96    128    
256    48     
-480   80     
624    224    
-144   -64    
480    432    
-688   192    
-512   -320   
416    -32    
96     112    
288    96     
176    64     
-64    160    
-176   64     
-240   32     
64     -48    
432    80     
-160   -48    
0      128    
208    64     
224    96     
-16    16     
-272   128    
32     -192   
112    -64    
-608   240    
-176   224    
-160   176    
64     -96    
560    16     
96     -16    
224    128    
-96    -80    
336    -208   
-352   48     
-80    -32    
32     16     
272    96     
160    96     
112    64     
0      -64    
-48    -16    
48     32     
-48    16     
-112   48     
-64    -80    
640    208    
-240   48     
96     -224   
32     16     
64     -640   
272    128    
-64    16     
128    48     
16     16     
144    128    
-16    0      
160    0      
16     -16    
48     80     
48     16     
128    32     
0      112    
80     48     
32     16     
16     -272   
192    288    
96     128    
0      0      
-96    -48    
16     48     
-16    112    
112    -16    
240    0      
160    112    
-48    160    
16     -192   
176    32     
112    0      
128    160    
-128   -32    
80     48     
-96    -1376  
112    192    
128    -48    
64     80     
-112   -32    
80     64     
64     16     
112    48     
0      -64    
128    0      
176    272    
-80    -64    
-64    -288   
96     96     
96     160    
176    32     
-240   -528   
464    -1568  
-192   -144   
544    528    
-32    -128   
-192   288    
32     -32    
208    -448   
64     656    
32     -224   
64     96     
32     -96    
48     -768   
416    576    
-256   -544   
64     144    
48     160    
160    -240   
16     128    
336    640    
-16    -112   
96     0      
-128   -64    
192    -544   
-16    -192   
368    -384   
112    128    
-400   -400   
-128   -160   
240    128    
256    0      
32     -304   
64     -16    
-128   -96    
80     -96    
96     112    
80     -112   
224    0      
-128   16     
48     48     
-32    -32    
64     -96    
48     -256   
128    -144   
144    -80    
64     64     
32     -144   
96     -80    
256    -48    
0      -112   
64     -32    
192    -32    
0      -1376  
64     0      
-32    32     
256    -96    
272    112    
-64    -32    
48     -80    
-80    -80    
48     -160   
128    -96    
48     -16    
-16    48     
-112   -96    
-48    -32    
-112   -112   
112    -256   
96     48     
16     -176   
80     -128   
16     -48    
16     -224   
96     32     
112    -64    
240    -176   
-80    80     
-48    -48    
16     64     
96     0      
48     -112   
-464   -64    
160    -224   
64     -80    
160    32     
-16    -32    
32     -192   
192    -128   
64     16     
192    -16    
48     -80    
96     96     
0      -176   
288    -80    
128    176    
192    352    
-64    512    
-496   112    
-16    -176   
48     -112   
256    -80    
208    -176   
64     -64    
48     -208   
176    -224   
32     -64    
256    272    
208    240    
-160   -32    
-656   -64    
-176   -224   
-1264  128    
128    0      
336    32     
112    64     
-96    -144   
96     -64    
80     -16    
384    -800   
0      0      
288    160    
-240   192    
-112   -96    
272    -208   
-352   -816   
272    -320   
-544   -144   
-224   -16    
-464   0      
224    48     
256    -32    
208    -480   
112    176    
-144   576    
368    160    
-80    -640   
-144   -400   
-16    -32    
80     0      
160    -32    
-80    48     
32     0      
128    16     
-112   -48    
-64    -224   
-1104  -32    
144    -224   
32     0      
112    -128   
48     -128   
64     -1488  
-240   112    
-160   -80    
-64    -16    
-192   -144   
352    64     
16     128    
-112   -432   
-352   32     
144    320    
-336   -144   
16     -160   
16     128    
48     -80    
-48    80     
0      -1184  
368    224    
112    320    
192    -144   
48     112    
0      32     
-400   -544   
192    144    
-416   96     
304    96     
-304   -32    
352    -320   
208    272    
256    -16    
80     400    
144    208    
-96    80     
-240   -128   
-80    96     
-16    -192   
-32    -208   
80     32     
144    16     
16     -112   
160    -80    
-160   32     
192    144    
16     240    
272    -304   
-64    -96    
-48    704    
-1232  720    
-272   144    
272    -80    
-112   -320   
416    208    
-352   400    
256    -80    
-208   -112   
160    -32    
112    80     
-2016  -160   
256    80     
-96    -96    
-192   32     
-64    -224   
-336   -160   
-96    32     
-96    16     
-96    -16    
-16    16     
-16    112    
-64    0      
-336   32     
-16    -64    
144    64     
-240   -80    
192    -320   
48     -176   
32     112    
-80    -112   
-48    -144   
-192   160    
128    128    
64     96     
-1328  -16    
-80    0      
16     16     
-240   48     
80     -48    
320    80     
-32    -16    
80     16     
-112   80     
-336   -96    
160    48     
-80    0      
-240   -80    
-144   64     
16     64     
-272   0      
96     144    
-224   -32    
-96    -16    
-208   -144   
80     -16    
-256   -64    
0      272    
256    80     
192    192    
-240   -128   
112    -16    
-16    -112   
-64    32     
0      32     
96     112    
48     176    
-400   16     
-32    192    
-16    -176   
272    -16    
-160   -256   
208    -16    
288    224    
-208   16     
-32    -16    
-128   -112   
112    -16    
-64    64     
176    96     
48     -160   
-48    -16    
-336   -32    
16     16     
-880   16     
-48    96     
128    208    
-16    192    
240    -112   
272    -96    
-320   -96    
-176   0      
240    32     
224    -64    
-112   16     
-240   48     
-320   -208   
-224   -80    
0      112    
-1264  -16    
-96    64     
-496   544    
16     512    
32     -224   
-176   -96    
-272   112    
-192   192    
-32    112    
96     192    
-208   208    
-256   64     
64     80     
0      0      
160    112    
-128   -96    
64     -80    
64     -80    
16     -16    
80     128    
96     0      
208    16     
-336   -64    
352    128    
-80    48     
-176   32     
-336   -64    
-32    -112   
160    -160   
-272   80     
-544   0      
-64    48     
-80    32     
32     16     
16     -16    
128    96     
-144   48     
-352   -48    
96     -48    
336    -96    
432    144    
-128   -304   
-32    -240   
-496   -32    
-224   -16    
272    0      
352    16     
544    192    
160    -80    
-144   -48    
-80    80     
128    192    
-304   32     
-96    -16    
192    48     
-160   -80    
96     0      
0      -48    
-288   -80    
128    64     
32     80     
32     0      
-32    -48    
-32    32     
80     48     
16     32     
64     32     
-16    0      
128    32     
-112   -144   
32     32     
-160   16     
64     -144   
16     -80    
400    496    
-32    -48    
288    -32    
96     80     
-176   32     
48     48     
0      32     
16     304    
128    -176   
-32    352    
-112   -400   
208    -128   
-112   -48    
272    -112   
-48    -64    
288    320    
128    -48    
80     224    
-160   640    
-32    -304   
48     -64    
-48    64     
32     -352   
-64    -32    
352    96     
-224   -160   
128    144    
16     496    
-64    -64    
128    -400   
96     304    
512    640    
-368   560    
-48    128    
96     -560   
-48    -304   
0      -192   
304    96     
-16    32     
80     32     
-48    112    
-64    -144   
-16    32     
320    -880   
-48    32     
-128   -16    
128    -192   
-80    -32    
192    16     
-32    192    
80     48     
32     -64    
48     -384   
-160   -80    
-112   240    
-128   -16    
208    -16    
-336   32     
128    -96    
-144   16     
80     160    
80     288    
208    112    
48     -400   
96     -128   
-288   -176   
-48    -16    
16     160    
-16    64     
192    48     
-144   -48    
192    -64    
-48    144    
112    0      
48     16     
224    -400   
-64    0      
48     208    
128    80     
288    0      
-80    0      
-16    96     
160    192    
-48    16     
64     64     
96     -176   
32     112    
16     32     
192    0      
-64    80     
-144   -864   
80     -32    
-48    -304   
288    -176   
272    256    
-160   272    
-112   112    
-64    112    
-32    -32    
112    32     
-64    -16    
0      0      
0      0      
176    -96    
80     32     
16     -48    
144    96     
-16    -32    
16     16     
48     -80    
0      80     
48     32     
176    -48    
96     64     
-112   96     
-32    -48    
112    80     
-32    112    
-80    -16    
32     0      
-16    -160   
256    -16    
-32    -16    
-16    32     
-32    -208   
-16    16     
112    464    
-320   448    
-208   -16    
240    -32    
160    -16    
32     -32    
112    -16    
-64    64     
-224   128    
-384   -352   
112    -112   
176    -32    
256    80     
400    112    
-80    -208   
144    -320   
48     -96    
-80    48     
320    128    
-48    96     
-240   -48    
-144   -176   
528    -816   
192    -32    
304    -96    
-144   -96    
64     -112   
-112   64     
-208   1232   
560    480    
-48    -160   
-112   -112   
-96    -272   
112    112    
-32    -80    
240    -128   
-96    -304   
240    432    
112    -176   
448    48     
96     288    
320    -176   
176    144    
256    -416   
32     -400   
144    -272   
64     -224   
208    -960   
-16    -144   
0      -1440  
48     16     
176    -112   
-272   -80    
0      176    
-208   -272   
288    416    
96     -32    
0      -256   
176    -48    
-32    -160   
224    -128   
-16    -224   
64     16     
96     -64    
96     -288   
80     0      
224    -464   
-64    -48    
-64    -144   
320    208    
-256   -432   
240    -144   
64     192    
176    160    
192    80     
0      -128   
-448   -112   
48     -256   
-880   32     
384    -80    
-32    112    
288    -128   
-192   80     
128    -256   
128    -144   
240    -32    
272    96     
176    80     
32     48     
-48    -16    
-64    112    
-128   -32    
-64    48     
-1088  -48    
32     0      
-16    16     
64     -320   
48     -544   
112    -96    
144    208    
-64    -224   
64     16     
80     -64    
-96    32     
48     -32    
272    -112   
-144   -16    
80     0      
-176   -96    
144    96     
176    -64    
96     32     
-32    -16    
112    -144   
112    -160   
160    -112   
-80    64     
176    -80    
64     32     
-48    16     
176    48     
16     0      
144    0      
-240   0      
-112   -16    
-1520  -144   
-32    -304   
-64    48     
-32    128    
160    32     
-64    -368   
48     -16    
160    16     
128    96     
80     48     
304    256    
-624   208    
80     -80    
-160   -96    
96     -32    
-96    -80    
208    -16    
32     48     
96     -144   
32     96     
-64    -256   
-80    -16    
144    288    
-32    32     
-144   -80    
64     16     
112    0      
-208   -32    
80     0      
0      64     
-48    48     
-64    -80    
64     -80    
-16    -128   
128    80     
128    64     
96     64     
144    -432   
112    -80    
-352   16     
288    64     
-368   -16    
96     160    
32     160    
32     -384   
-112   -96    
112    -80    
-32    32     
208    -64    
160    16     
112    -208   
80     -64    
-512   64     
-16    -16    
-176   128    
64     -272   
-80    0      
-96    -32    
-288   -32    
112    -160   
-416   -288   
-176   -80    
-128   0      
144    -112   
96     128    
-688   -112   
-48    96     
64     -128   
-144   -128   
192    128    
-400   48     
-144   0      
176    -128   
-80    80     
688    288    
-640   -176   
-1856  -672   
-192   -192   
-352   -128   
112    -16    
128    -432   
-624   -672   
592    -336   
-112   608    
432    768    
-512   -592   
224    -512   
112    -160   
48     288    
112    112    
64     -160   
32     -48    
-144   176    
32     -144   
-64    656    
128    288    
112    -288   
-352   -144   
-16    64     
-352   -96    
-96    -16    
-64    -144   
-32    -96    
-144   64     
16     -16    
-208   -32    
-144   32     
-160   112    
-160   -112   
48     -144   
320    112    
-304   336    
-96    176    
80     -32    
176    -288   
608    144    
-256   336    
112    528    
-336   -320   
-160   -224   
-368   80     
-320   -192   
32     224    
-576   304    
112    -240   
-48    48     
-96    0      
32     -64    
80     128    
96     -32    
-144   64     
-128   32     
-336   0      
-192   96     
-208   -1024  
128    784    
0      32     
-16    -192   
192    32     
-16    -144   
-112   -80    
-48    208    
-240   128    
80     -528   
64     704    
-224   -640   
-176   304    
-240   32     
-112   128    
-160   -48    
272    -640   
-208   -208   
240    368    
-208   -208   
96     304    
128    144    
208    336    
112    112    
-208   -48    
-32    192    
144    -224   
-208   -32    
48     16     
0      -240   
-400   -176   
-160   -272   
-1008  -112   
64     32     
32     -48    
144    176    
80     144    
80     112    
-208   -192   
0      80     
-160   64     
288    64     
256    160    
-416   -48    
368    -224   
-624   -32    
336    -64    
-784   -128   
-256   80     
0      -96    
32     96     
-48    -32    
0      176    
272    240    
-208   128    
0      -128   
64     -240   
-304   80     
-352   -32    
-144   -160   
-160   224    
32     224    
192    -64    
16     -32    
0      -16    
160    -16    
-240   48     
304    -160   
-16    -176   
48     -64    
-176   64     
96     -48    
-128   80     
-80    80     
32     256    
304    160    
-336   -160   
-32    112    
-176   256    
80     -160   
80     -80    
192    48     
0      80     
-144   208    
-16    288    
256    240    
-112   112    
240    48     
112    -48    
64     112    
-128   64     
0      0      
144    16     
-32    -80    
-64    96     
176    80     
32     96     
-16    16     
-48    96     
0      -16    
32     16     
-48    64     
-16    -16    
64     -16    
48     112    
-400   -16    
432    -32    
80     160    
-32    0      
160    -96    
64     48     
0      96     
64     80     
64     -112   
-16    -32    
32     -112   
-112   -16    
-48    32     
-192   16     
144    64     
144    80     
48     48     
32     -48    
112    64     
96     96     
-112   176    
16     48     
64     16     
80     -32    
16     0      
-192   0      
208    128    
144    48     
-224   -80    
64     -176   
-32    0      
304    320    
-224   -16    
-160   -144   
144    -304   
-96    -896   
272    -352   
-224   -288   
-176   -256   
96     288    
-192   624    
-144   -240   
64     0      
80     624    
240    176    
112    -656   
-64    96     
-272   144    
-176   -96    
224    112    
176    32     
-128   96     
-336   -16    
-208   224    
-304   -208   
480    -832   
368    192    
416    80     
-208   -16    
-400   -320   
-384   -112   
-384   -192   
480    736    
64     -16    
480    -464   
448    160    
416    256    
-288   0      
-16    64     
-464   -96    
-224   240    
80     496    
192    96     
144    -208   
-112   -352   
128    0      
-320   -752   
176    112    
0      -32    
-144   32     
128    112    
48     112    
-48    64     
224    80     
112    160    
16     16     
-80    16     
304    -112   
-112   -96    
-32    -112   
64     32     
96     -432   
-16    64     
0      48     
128    224    
96     48     
128    16     
0      -32    
80     80     
48     32     
80     32     
-16    -64    
160    80     
304    320    
-176   48     
272    80     
-48    -112   
112    32     
80     -624   
192    96     
-224   160    
208    64     
-64    32     
0      0      
-48    0      
144    -48    
0      32     
304    -96    
208    80     
0      -128   
-16    -64    
80     -272   
-64    32     
304    -384   
-272   144    
48     -112   
256    -96    
-64    64     
384    80     
16     160    
-80    -144   
-48    48     
64     -48    
160    -32    
-16    -288   
-16    32     
208    -48    
48     144    
0      16     
224    32     
16     16     
0      32     
144    80     
96     32     
48     -48    
48     -224   
64     96     
176    -128   
-48    64     
208    -16    
-48    64     
96     128    
-16    -32    
96     -160   
0      16     
160    -32    
-16    128    
96     64     
304    112    
-80    192    
208    -96    
64     80     
32     -32    
304    -48    
-48    -112   
-160   80     
176    -240   
-80    -32    
80     -240   
192    176    
-112   0      
160    -704   
64     48     
192    -752   
96     -80    
48     -16    
64     -336   
48     -16    
208    16     
-32    32     
64     64     
64     -32    
144    16     
96     -112   
112    -176   
112    112    
-64    -256   
32     64     
-128   0      
96     -224   
96     16     
208    -208   
32     -176   
64     -192   
-32    112    
16     128    
160    32     
48     80     
208    96     
80     -48    
96     288    
-48    0      
-32    96     
-16    112    
160    -48    
48     -64    
96     -128   
48     -48    
16     -160   
0      -64    
304    -544   
-128   32     
192    -560   
-112   368    
32     -560   
-32    112    
0      -128   
48     64     
-112   688    
-48    -176   
-1680  -160   
-192   -48    
16     -176   
256    256    
208    -176   
176    -144   
160    -48    
208    -80    
208    48     
-112   240    
-480   96     
240    32     
-320   -80    
-368   -816   
1072   1232   
-528   800    
-368   -832   
-192   96     
-96    -48    
48     -112   
720    416    
-480   0      
480    -592   
192    176    
160    -64    
-112   16     
-336   -112   
-32    -816   
0      304    
240    368    
-64    32     
304    -144   
416    128    
-80    -48    
-112   -128   
80     0      
64     16     
80     -368   
80     80     
112    -368   
256    -416   
224    400    
-80    -64    
-32    -128   
-208   -80    
-448   -112   
160    352    
-448   16     
-96    -352   
-736   -32    
80     -224   
-176   -32    
112    -336   
80     144    
32     -128   
80     448    
-80    144    
-16    -400   
-176   32     
192    0      
16     64     
128    0      
-304   192    
304    128    
-16    -96    
176    -48    
128    48     
16     96     
32     112    
208    208    
-80    144    
208    144    
192    288    
-400   -176   
80     -208   
-112   48     
0      -64    
-48    -16    
176    -256   
0      96     
-64    -112   
-144   80     
64     192    
-16    96     
-64    240    
304    112    
-240   320    
160    272    
-80    400    
32     208    
-64    448    
448    848    
-1584  208    
-96    -16    
160    48     
96     224    
208    64     
-752   128    
-272   112    
-160   -144   
-784   16     
-128   16     
432    112    
-144   32     
64     64     
48     -16    
128    96     
-96    80     
-800   -112   
400    480    
-128   224    
-48    48     
-592   -80    
-272   -32    
-144   -144   
-416   -176   
-48    -192   
-48    -32    
-144   0      
-480   -144   
-208   -80    
-112   -128   
160    80     
-416   112    
64     -16    
48     -304   
48     -128   
-176   48     
-128   256    
160    112    
160    64     
-64    96     
-16    48     
-112   80     
-448   -48    
-112   48     
288    -16    
224    304    
-192   176    
80     -160   
-208   -304   
-208   -16    
176    80     
16     -32    
-32    64     
-96    -32    
-64    96     
-144   -96    
32     96     
-592   336    
368    32     
-400   -496   
128    -256   
-256   -240   
-128   96     
-16    -64    
208    288    
-112   416    
-80    -32    
-64    160    
-144   -16    
-64    288    
-48    -48    
32     -128   
-48    -16    
-144   80     
-1984  -176   
-96    0      
32     64     
176    96     
240    304    
48     240    
-48    96     
-128   -512   
-176   -272   
-144   0      
-208   208    
112    80     
48     0      
336    -288   
0      -192   
-528   -112   
-160   -80    
64     32     
-64    96     
160    144    
-80    -16    
-16    32     
-16    144    
48     320    
48     32     
-64    -160   
-272   -256   
96     -80    
-336   -32    
-48    -96    
16     160    
64     304    
96     -96    
-112   -96    
32     16     
-192   -112   
-128   176    
128    -512   
0      288    
96     -80    
32     -144   
-224   288    
-32    -240   
-128   48     
-240   -304   
-416   112    
112    -992   
-272   80     
336    -64    
112    160    
160    240    
-144   -112   
-112   -80    
-512   -128   
0      -192   
432    1072   
-128   320    
272    -256   
0      320    
-32    128    
64     -208   
96     -112   
464    48     
-32    64     
128    32     
256    256    
-144   256    
-192   0      
-48    -64    
192    48     
256    112    
32     128    
368    304    
-624   80     
-176   32     
-640   -176   
224    -96    
256    32     
192    128    
288    64     
-224   -32    
-336   0      
416    16     
-416   -144   
-544   32     
-352   -48    
208    -48    
176    0      
-576   -80    
-96    -48    
-48    -16    
-32    16     
144    160    
-128   112    
48     0      
0      -16    
-144   0      
128    64     
96     80     
0      112    
-16    48     
32     16     
96     16     
-208   -16    
128    80     
0      48     
48     0      
48     64     
32     96     
16     32     
-16    0      
112    64     
-16    0      
48     96     
-16    -16    
160    208    
-304   -64    
208    16     
64     96     
144    48     
-32    80     
192    512    
-80    -64    
128    -64    
-208   80     
16     -96    
-112   -16    
-48    -48    
192    0      
-96    32     
336    16     
-96    0      
-192   0      
16     0      
-144   -144   
240    -32    
128    176    
160    128    
48     -32    
-80    16     
-16    0      
64     32     
0      96     
48     64     
176    288    
-112   -32    
32     -176   
48     240    
-112   96     
224    -400   
-48    64     
176    160    
-208   96     
176    96     
144    32     
64     32     
240    16     
0      96     
192    112    
-320   80     
224    -160   
-80    -80    
48     144    
-16    80     
208    -272   
-112   64     
32     128    
80     128    
-64    -32    
128    64     
32     192    
128    112    
224    96     
-304   -32    
-48    -128   
32     16     
-48    48     
-1088  16     
48     128    
16     -208   
144    16     
-16    -64    
160    272    
16     -32    
-96    -16    
256    96     
16     16     
-192   80     
160    0      
-64    48     
176    0      
-176   -96    
240    0      
144    144    
-112   -496   
80     448    
144    -352   
-96    -112   
160    -256   
-32    -176   
336    448    
-208   -80    
-32    -32    
224    240    
64     48     
288    112    
64     -80    
80     0      
144    176    
-144   -176   
176    112    
-160   -592   
176    368    
0      32     
176    288    
-160   -160   
-48    160    
128    96     
96     16     
48     -32    
224    96     
-64    736    
-32    -336   
336    96     
0      -80    
-48    -176   
128    -448   
-176   -896   
112    -16    
160    176    
-48    -112   
224    240    
80     -432   
368    128    
112    288    
176    -96    
224    -128   
16     32     
48     16     
64     -352   
112    -112   
176    -144   
368    96     
192    32     
32     -192   
272    64     
416    528    
112    272    
128    64     
-112   -80    
-32    208    
192    288    
144    -32    
0      240    
48     112    
208    320    
-192   384    
112    96     
112    304    
368    496    
240    240    
-80    176    
-272   48     
-96    288    
32     64     
192    -64    
112    -32    
208    -144   
160    32     
-176   -160   
80     -16    
144    96     
-96    112    
304    -384   
128    176    
-304   144    
-64    -800   
96     -192   
144    -80    
208    -272   
16     48     
272    -1392  
-96    -48    
224    336    
32     16     
112    32     
48     -64    
160    -752   
128    128    
-80    -112   
144    112    
304    128    
-144   272    
-2176  0      
96     -96    
96     -64    
96     -480   
0      -80    
176    -592   
64     -304   
48     -16    
112    -16    
-112   -224   
32     64     
128    -512   
-16    -144   
208    32     
-32    224    
-208   128    
80     128    
64     192    
32     96     
112    96     
128    -288   
256    64     
144    -1376  
208    -32    
0      -48    
32     224    
432    304    
-352   704    
-144   80     
320    -352   
64     128    
352    64     
208    608    
240    -304   
-16    32     
0      -288   
176    272    
96     256    
80     16     
96     16     
64     -384   
112    -96    
-272   -96    
-176   304    
368    272    
0      592    
240    288    
80     -240   
48     -192   
80     -192   
240    -144   
0      0      
32     -64    
-256   -112   
240    -1568  
-48    144    
32     -32    
336    -80    
-256   256    
-32    0      
-464   160    
544    80     
-112   -64    
176    16     
-544   48     
-64    240    
112    160    
-400   -160   
192    -96    
-240   -352   
-240   -160   
224    16     
-192   -16    
32     48     
-112   -144   
224    64     
144    64     
-112   128    
240    -240   
-800   336    
208    48     
96     -80    
144    -240   
16     -96    
192    -128   
208    80     
-176   -128   
336    -240   
-208   -48    
0      -192   
-544   -224   
160    -80    
-112   0      
16     -64    
-336   -32    
32     -128   
128    -208   
32     -160   
128    -128   
48     -512   
224    -224   
-192   -224   
-32    -208   
-320   -240   
288    0      
-176   160    
0      416    
-80    272    
400    224    
-240   160    
64     -176   
-32    720    
240    128    
32     16     
192    -288   
80     96     
-64    96     
48     -144   
224    -80    
16     80     
160    144    
144    32     
-208   -16    
208    96     
-160   -416   
-32    288    
160    -160   
-720   176    
16     576    
-432   -496   
-1088  160    
16     -176   
-1008  -336   
-304   208    
-1040  -48    
-208   -688   
352    96     
0      400    
32     80     
-16    0      
-384   -224   
-96    -32    
-336   -112   
-32    96     
-16    48     
192    32     
48     0      
208    112    
-368   48     
-640   96     
-1040  -368   
128    0      
80     240    
-816   -224   
-32    -64    
-256   -128   
64     -256   
224    -480   
528    112    
752    704    
-672   320    
-192   -144   
-816   -64    
-272   -128   
400    -112   
0      -112   
-1520  16     
304    -32    
352    96     
-272   112    
-160   -64    
112    -32    
128    0      
-240   0      
144    32     
-48    112    
-128   -80    
-128   48     
144    32     
-64    -32    
-112   -64    
-352   32     
-288   32     
160    -32    
-96    192    
-528   -80    
-400   -112   
224    64     
176    240    
-48    160    
-400   -64    
96     -16    
-256   0      
112    64     
-368   -256   
608    -80    
-240   96     
144    96     
-752   -80    
32     80     
-560   -160   
432    48     
144    160    
80     -96    
48     -16    
-80    48     
16     -16    
-192   48     
-32    80     
-128   0      
-176   -32    
96     16     
192    48     
-192   -48    
48     80     
48     -80    
-64    32     
-32    0      
-224   -32    
80     0      
-160   160    
176    64     
-288   0      
16     -48    
-48    48     
144    176    
-608   -16    
272    -48    
-800   -48    
224    0      
-128   -112   
112    16     
272    96     
-96    -144   
144    112    
-208   96     
80     64     
176    144    
-288   -16    
64     -32    
80     144    
-112   32     
192    64     
128    16     
-64    112    
144    -64    
-112   -80    
144    32     
-112   -304   
96     -80    
0      256    
48     80     
112    16     
-128   16     
-208   -128   
96     -128   
16     -192   
-16    112    
-256   -96    
48     -96    
80     160    
-48    80     
-48    80     
128    208    
0      96     
48     -48    
-48    80     
-16    -16    
-96    -80    
-16    208    
160    208    
-208   -16    
32     112    
-192   -16    
256    336    
-224   272    
176    -96    
-48    64     
16     -48    
272    80     
48     240    
80     0      
-240   80     
160    64     
-144   -16    
144    192    
16     16     
-64    112    
144    240    
48     -64    
96     32     
96     176    
48     -208   
-80    64     
112    16     
-64    112    
32     64     
64     -176   
288    288    
16     48     
80     -128   
-448   -80    
160    -688   
112    96     
288    32     
-208   -176   
208    448    
208    352    
256    336    
-96    96     
-64    -320   
-208   -176   
64     80     
192    -336   
-256   -448   
32     96     
-272   224    
224    176    
16     -32    
432    256    
0      352    
-112   32     
-48    32     
48     16     
16     0      
-48    96     
160    112    
0      96     
-80    -16    
0      32     
-80    -208   
48     -128   
-64    160    
-160   112    
80     160    
176    -112   
128    96     
-16    80     
16     -48    
16     64     
-208   0      
16     96     
-208   -16    
-32    80     
32     -64    
224    112    
-16    80     
16     32     
-208   -96    
144    -400   
320    64     
128    272    
0      96     
96     48     
304    240    
-336   112    
-96    128    
0      -112   
288    -80    
128    160    
-128   -48    
0      64     
-272   -896   
96     176    
32     112    
-32    128    
80     64     
-80    80     
16     32     
-48    48     
16     -48    
224    64     
80     224    
0      -80    
-16    0      
-32    0      
64     96     
64     -96    
48     -32    
-80    400    
-32    112    
144    -176   
32     -112   
16     -144   
-144   0      
16     -64    
176    80     
80     80     
176    96     
144    -32    
-32    -144   
-96    32     
80     -272   
0      -16    
336    -1040  
112    -160   
0      64     
224    32     
16     -272   
-80    -48    
-240   64     
224    208    
160    192    
80     112    
144    64     
128    64     
176    256    
-16    -32    
80     208    
-80    -160   
0      0      
48     -128   
96     -112   
32     -160   
128    -176   
16     96     
224    304    
-112   224    
-192   48     
80     112    
160    96     
128    32     
96     528    
448    464    
-336   224    
32     96     
288    -368   
208    144    
-272   -256   
416    640    
-80    560    
48     208    
144    272    
-112   -176   
208    16     
336    240    
80     400    
-16    448    
384    208    
112    -272   
16     272    
96     32     
64     96     
-32    -176   
-112   0      
560    48     
128    0      
176    -144   
128    -112   
-224   16     
304    -560   
-16    -16    
176    -208   
0      352    
-48    -96    
16     -528   
240    -672   
16     -320   
256    240    
32     336    
32     128    
-144   -64    
-48    192    
144    -112   
64     176    
32     -64    
-16    -208   
80     32     
224    304    
160    -144   
160    16     
0      160    
128    -272   
96     144    
352    -736   
-336   -320   
-368   -112   
176    0      
224    -368   
192    16     
-128   -320   
160    240    
-304   -352   
256    176    
176    96     
-288   -240   
128    -80    
64     -272   
176    -16    
-176   -224   
144    64     
-1344  0      
16     -368   
112    32     
144    -64    
-96    -272   
128    336    
-144   416    
384    -224   
112    208    
-16    -208   
-144   16     
160    -112   
320    528    
-32    -240   
64     -224   
-112   144    
-112   -400   
144    112    
64     -240   
-32    16     
112    -272   
160    -192   
96     -1488  
80     80     
48     -304   
112    -64    
-48    -144   
144    288    
-32    176    
64     -64    
-208   -32    
80     -80    
192    0      
352    -64    
-144   -160   
112    -272   
256    0      
-256   -1056  
-288   -80    
96     112    
-80    208    
192    192    
-256   48     
-144   96     
336    256    
80     80     
208    96     
-640   -80    
48     -112   
176    224    
-192   -32    
-144   -48    
144    -240   
336    16     
80     -80    
176    64     
0      0      
-976   -32    
256    -32    
288    96     
-240   16     
96     32     
-192   624    
-720   112    
-192   -432   
288    -480   
528    -32    
-16    80     
-416   0      
288    -640   
-112   96     
-144   0      
128    -112   
144    96     
160    112    
-64    -64    
400    32     
-768   -192   
480    -112   
-80    16     
432    -48    
96     16     
-272   -272   
-256   64     
-224   -848   
-112   -64    
-128   128    
112    0      
48     -96    
144    -48    
-512   32     
-48    -16    
-384   -112   
464    32     
-16    112    
368    -48    
272    -64    
-272   -224   
128    80     
224    16     
208    -80    
80     64     
144    48     
-512   -16    
16     -32    
-160   48     
304    32     
-256   -32    
80     -16    
96     48     
-208   -176   
208    80     
0      -112   
-80    48     
176    -96    
80     16     
-224   -64    
224    48     
-352   -32    
144    -32    
-32    -16    
80     16     
-240   -48    
32     -96    
-784   -16    
176    16     
-128   -96    
-96    -112   
0      112    
16     32     
-464   0      
-192   -16    
-688   -48    
96     160    
-48    80     
160    80     
96     336    
160    208    
-144   48     
-48    -128   
-384   -144   
256    80     
-800   -160   
80     -64    
-144   48     
-128   -48    
64     -224   
-32    -32    
64     128    
-880   -32    
-32    -192   
-144   -80    
128    -16    
144    -48    
-48    -112   
-128   -144   
96     256    
0      128    
0      64     
-160   80     
-32    -80    
-48    112    
-512   -176   
-240   -224   
-688   48     
0      128    
-160   16     
96     -80    
-112   -48    
16     128    
-304   -64    
224    -64    
-144   64     
0      -112   
0      64     
-48    96     
-96    16     
-96    -208   
-144   176    
96     -976   
-128   496    
-48    1488   
160    -1008  
-400   432    
48     32     
-176   416    
352    -128   
-192   -32    
32     32     
-64    176    
-144   32     
-16    -288   
-144   144    
304    320    
176    32     
-144   16     
-112   -64    
80     304    
-192   -64    
112    -128   
80     -32    
-64    -112   
-128   -96    
-144   -192   
-16    80     
-208   48     
-240   0      
304    16     
16     32     
-144   -80    
-208   -208   
64     -160   
0      48     
-496   112    
96     224    
-16    16     
112    -16    
64     32     
272    16     
80     96     
-176   32     
-48    -96    
80     -128   
-48    -32    
128    -96    
-80    -112   
-32    32     
-80    128    
-16    -48    
208    16     
48     48     
0      112    
112    96     
16     -32    
48     -16    
-16    -16    
-16    -16    
-16    16     
48     224    
64     48     
224    0      
-112   0      
-272   96     
-624   -96    
-32    80     
112    -80    
128    64     
32     128    
-32    -48    
32     96     
0      16     
-176   96     
-16    -32    
352    16     
-224   96     
-432   -192   
80     -288   
80     240    
-704   -48    
32     16     
64     -112   
240    -160   
288    32     
224    336    
0      208    
-128   80     
-368   -192   
368    -96    
0      160    
176    0      
192    -64    
240    -208   
352    160    
144    128    
112    320    
-240   80     
-96    -48    
-96    -96    
224    -64    
80     80     
-16    -96    
224    0      
80     -32    
384    160    
-288   -96    
48     -48    
-48    32     
304    240    
192    416    
-64    112    
-16    48     
160    -16    
64     -16    
240    80     
224    16     
176    48     
-128   48     
-240   -16    
64     128    
-160   272    
112    176    
-32    80     
144    -144   
-80    -224   
304    368    
-208   544    
144    208    
128    -16    
0      -16    
96     64     
64     176    
224    160    
-32    80     
176    -112   
48     -192   
96     -16    
0      0      
64     48     
32     64     
16     112    
96     -384   
-240   192    
192    464    
-208   -176   
-48    240    
-48    -96    
432    96     
256    288    
96     -128   
16     -96    
-128   -32    
-112   112    
112    -96    
320    288    
272    240    
160    96     
160    144    
-112   272    
272    272    
-96    -16    
-208   -464   
80     400    
-32    -272   
-16    -176   
-192   176    
160    16     
64     336    
192    -32    
-32    80     
16     480    
96     -176   
256    32     
48     176    
32     -144   
-64    208    
160    64     
-16    -32    
144    192    
304    112    
0      640    
-80    -448   
336    -160   
64     464    
-144   -144   
80     160    
32     32     
-48    64     
64     64     
256    48     
-176   -96    
144    16     
-48    32     
64     -80    
48     384    
128    144    
0      -256   
0      144    
16     -224   
176    -48    
80     -112   
0      16     
-64    48     
-48    80     
128    32     
-144   -32    
176    160    
112    64     
-144   32     
160    64     
-32    48     
-16    -80    
96     176    
-32    -16    
112    16     
144    -880   
208    144    
64     80     
-48    -32    
0      -48    
80     80     
-16    64     
256    0      
-64    80     
96     -224   
-112   -112   
64     16     
0      112    
0      -32    
224    -48    
96     -400   
32     0      
144    64     
128    112    
-32    16     
64     32     
32     32     
112    32     
-16    -64    
32     16     
64     48     
96     -112   
144    48     
64     -48    
-80    -96    
208    -752   
80     -32    
176    -240   
-16    -80    
-112   80     
16     96     
-112   240    
160    224    
208    -64    
32     -192   
-32    0      
-16    32     
256    48     
-16    -160   
-80    -16    
-304   -608   
336    -240   
48     48     
16     -32    
32     176    
-240   -16    
128    64     
144    -48    
464    -80    
112    -112   
-224   32     
48     -160   
224    128    
-112   -48    
80     112    
224    336    
80     208    
528    -128   
240    -32    
-192   64     
176    -80    
-336   128    
-432   -112   
-288   -288   
48     -384   
608    32     
304    -144   
384    96     
304    16     
-128   48     
-176   -192   
128    0      
112    32     
208    144    
80     -176   
128    -560   
320    80     
208    -96    
256    -128   
-128   32     
-400   -448   
-16    -128   
-128   16     
240    176    
128    112    
320    32     
48     -240   
0      -16    
128    -16    
0      96     
-112   -112   
64     -400   
352    192    
352    -112   
112    -16    
-384   -48    
-112   16     
-96    -272   
16     -16    
112    -80    
176    -48    
208    0      
64     16     
-96    32     
-368   -80    
-400   -32    
-64    -144   
-1056  -16    
256    -112   
96     -80    
-48    -256   
-96    -16    
80     -464   
-128   16     
208    -64    
-64    112    
80     16     
-192   -16    
128    -48    
80     16     
-128   64     
16     32     
-368   -16    
256    32     
16     16     
160    -112   
112    32     
240    64     
16     -16    
96     -752   
-112   -80    
32     32     
-16    80     
80     -176   
-48    -112   
-64    -80    
48     -128   
-48    -16    
-16    -144   
-368   48     
32     128    
80     0      
176    -336   
336    -96    
0      -176   
-208   176    
0      -432   
160    -272   
0      256    
128    400    
-240   -464   
224    -192   
-576   384    
-16    -496   
-320   -96    
96     96     
-368   -64    
144    176    
-48    -336   
224    128    
-160   -64    
224    -704   
64     64     
0      16     
-48    528    
32     -304   
128    208    
-192   -608   
128    32     
-448   -80    
288    -400   
-96    368    
208    -224   
160    704    
176    -112   
16     -432   
-272   -992   
-64    -528   
-80    208    
176    -576   
192    416    
336    320    
-288   -96    
240    352    
-80    288    
128    144    
-16    -48    
-192   112    
0      176    
144    -64    
144    -288   
32     -688   
160    48     
-240   -32    
400    -192   
-528   112    
80     112    
-464   -16    
128    -128   
-144   224    
-48    48     
128    80     
16     -96    
112    64     
-112   -16    
-272   48     
-48    -48    
160    -64    
-96    176    
160    32     
-208   288    
288    0      
-48    32     
192    112    
-144   16     
16     -16    
32     32     
-1520  16     
-160   32     
-336   0      
-64    -16    
80     64     
-528   64     
-160   64     
-720   0      
-32    -16    
128    0      
0      -32    
64     48     
-16    32     
32     -64    
48     192    
-96    16     
128    80     
-144   -96    
-96    -64    
-32    128    
-416   96     
-80    0      
-656   -96    
-224   80     
-464   48     
16     -80    
432    160    
-416   48     
-800   -128   
144    -80    
-112   -64    
96     0      
-112   -32    
80     144    
-32    160    
-160   -80    
288    32     
-288   160    
-352   -16    
-208   -80    
64     32     
-32    208    
304    256    
-400   112    
-208   -112   
-64    -416   
272    -48    
-16    48     
-112   0      
-128   112    
160    368    
-352   368    
-96    -32    
96     -224   
16     16     
208    96     
-208   288    
-304   32     
0      -16    
-48    112    
-16    -48    
-64    336    
224    288    
-16    144    
-224   -64    
80     -112   
-112   -32    
-256   -80    
32     -112   
-16    96     
-80    -32    
-832   -128   
-96    -144   
32     -368   
256    144    
-160   336    
64     368    
-48    -240   
-112   -208   
80     80     
-144   -208   
-176   -128   
-32    -224   
80     48     
-32    -128   
224    -128   
176    224    
-48    464    
48     -80    
112    -160   
-64    48     
128    80     
16     160    
16     -32    
32     48     
-208   -128   
112    80     
0      -192   
192    64     
-192   -16    
32     48     
-288   384    
128    -128   
-752   -32    
176    112    
-144   -336   
-160   192    
320    368    
32     352    
208    128    
96     -64    
-224   -272   
-16    -272   
-80    176    
-128   80     
48     -32    
-160   48     
16     64     
-352   0      
208    16     
48     -112   
192    128    
176    176    
-16    352    
64     608    
16     -368   
-560   -544   
-144   -240   
-48    -112   
-320   -368   
64     -304   
48     -288   
144    -64    
-192   16     
-64    -32    
96     -144   
-48    -16    
96     -96    
-112   -80    
-16    96     
112    80     
-112   96     
32     48     
-64    80     
-32    32     
64     16     
-304   -96    
176    -32    
0      64     
-160   32     
256    64     
-128   32     
288    96     
-272   64     
96     112    
96     144    
-128   48     
240    96     
-80    96     
-80    -80    
96     80     
-240   0      
160    144    
-64    192    
-80    16     
352    144    
-112   -48    
48     80     
-32    16     
-32    -32    
80     80     
176    64     
-32    -16    
160    96     
-208   32     
112    96     
-16    -48    
48     0      
144    64     
-224   0      
64     -32    
64     0      
96     -80    
128    48     
112    96     
176    80     
-64    0      
-192   -48    
208    128    
-64    64     
112    16     
464    384    
-256   176    
-224   -64    
256    208    
0      -48    
144    -32    
-80    176    
304    240    
-176   0      
-48    -16    
192    128    
-176   -16    
128    16     
16     64     
304    112    
-208   -96    
32     48     
144    80     
80     64     
0      32     
-48    -80    
192    -16    
-64    144    
160    112    
160    336    
-48    320    
80     80     
272    16     
-64    -16    
-16    -112   
368    304    
-112   16     
64     0      
80     192    
224    384    
-64    320    
0      -80    
0      -192   
304    -112   
432    192    
-192   80     
-272   -176   
224    64     
-336   -48    
-80    -64    
176    256    
304    -208   
144    48     
-112   240    
-144   96     
-464   -240   
240    -144   
224    128    
-32    336    
-192   16     
128    16     
48     0      
400    16     
176    -16    
160    -176   
368    128    
-16    -1040  
304    16     
-48    96     
-208   -224   
48     -48    
-416   48     
112    64     
128    144    
-144   16     
176    80     
416    272    
-496   80     
-352   -128   
96     -176   
-192   -144   
80     -272   
-16    16     
288    48     
192    -48    
368    -112   
128    -112   
144    80     
208    128    
192    176    
80     64     
-272   -96    
-192   -80    
0      80     
32     -96    
288    80     
224    -192   
464    128    
-192   -464   
-16    48     
-272   -64    
-96    144    
-16    48     
112    -224   
160    0      
-32    144    
144    128    
0      16     
-48    64     
16     -80    
192    144    
-64    -16    
240    -208   
-80    -752   
176    -48    
-32    0      
224    0      
-64    192    
-64    -192   
-32    -448   
272    464    
16     192    
48     -48    
128    32     
192    32     
-304   -240   
400    -80    
-112   144    
352    304    
256    -208   
-48    -352   
-16    368    
-128   -704   
192    224    
96     608    
-32    -688   
160    560    
112    -224   
208    112    
32     208    
240    -96    
-368   -592   
48     0      
-240   528    
0      -192   
-32    -16    
240    416    
48     96     
-32    -288   
-32    -176   
16     32     
384    176    
-192   176    
-160   -96    
304    -144   
144    48     
-176   -224   
320    96     
64     -272   
-160   160    
-16    -48    
32     -544   
-48    -128   
0      -1344  
336    -208   
80     0      
-16    -144   
96     -304   
160    -624   
-48    -112   
224    16     
16     0      
96     64     
0      -48    
-144   464    
208    -128   
432    -448   
160    -64    
-160   -256   
96     112    
-96    -96    
80     16     
208    160    
64     -208   
96     -48    
176    -352   
32     -112   
80     -160   
288    144    
-208   96     
-256   0      
-64    -112   
240    0      
-256   -160   
192    48     
-1552  32     
96     -80    
224    -16    
-96    64     
-32    16     
-80    -144   
192    -112   
112    -16    
80     112    
-368   -320   
384    -208   
224    -64    
16     -416   
-80    -80    
48     -48    
-144   112    
16     -64    
80     -272   
48     -48    
96     -176   
176    -384   
48     48     
48     -768   
96     128    
96     48     
80     -16    
96     -32    
272    -112   
-64    64     
0      -48    
-112   -32    
0      -208   
112    -208   
48     32     
80     -16    
32     -272   
240    48     
-16    32     
336    160    
-224   320    
-144   0      
96     -176   
80     -80    
176    -224   
32     16     
-464   48     
-16    32     
-1344  -160   
-64    -48    
48     -64    
96     -16    
144    240    
352    272    
-192   112    
128    -112   
128    -48    
48     -32    
32     -240   
0      48     
-144   -48    
-384   -192   
144    -320   
32     -160   
416    0      
-112   176    
336    112    
-240   -32    
-16    -864   
16     -64    
160    -1136  
288    -304   
128    48     
320    304    
-224   144    
144    -224   
-448   -160   
-80    -240   
-288   176    
432    64     
-128   -128   
96     0      
-192   64     
256    -480   
96     304    
64     -64    
-176   -48    
-624   -48    
0      -336   
-752   80     
64     112    
-192   32     
640    -16    
-480   48     
304    -160   
-160   -272   
368    144    
160    224    
-352   -544   
-224   48     
-112   512    
-160   -176   
144    -192   
-48    -160   
224    -48    
32     112    
128    32     
-48    -112   
-96    16     
128    -64    
96     -48    
-144   -176   
96     -64    
-400   -144   
-496   160    
16     -32    
-1264  0      
-16    48     
-1424  48     
32     48     
16     -80    
-64    -32    
224    96     
-240   32     
-16    -32    
64     64     
-624   -176   
80     16     
-336   -112   
-160   80     
-112   48     
96     32     
-64    16     
-368   -48    
64     16     
-176   64     
192    16     
-80    -160   
112    -48    
-224   16     
112    128    
-352   -64    
32     112    
16     0      
176    80     
16     128    
-80    -80    
-48    -32    
-688   -32    
32     288    
64     -32    
-48    -96    
-144   -16    
48     64     
-96    -96    
64     48     
-80    0      
96     160    
-32    0      
-176   -144   
-16    80     
-144   -16    
0      -32    
-192   64     
-48    32     
-224   0      
16     0      
-1248  -32    
80     -96    
160    -160   
-160   80     
80     0      
64     32     
32     96     
-16    0      
-192   32     
-48    32     
64     80     
128    176    
-160   272    
96     96     
-32    -16    
-112   -96    
32     -32    
80     112    
192    128    
-256   0      
32     -16    
16     -16    
16     16     
160    80     
-144   128    
160    -64    
-368   -112   
176    96     
-496   -16    
128    -48    
-48    32     
112    96     
-144   -64    
192    96     
0      80     
-112   -96    
128    -48    
176    112    
-80    96     
-128   -16    
-112   96     
-208   -80    
-64    64     
96     208    
64     0      
-112   16     
-32    -144   
-976   -64    
208    176    
-224   -32    
-48    -48    
48     112    
64     112    
240    -32    
144    0      
-144   -16    
0      112    
-80    -48    
-96    -16    
96     64     
-272   32     
112    128    
-368   -32    
-48    48     
64     0      
80     144    
128    304    
-48    -48    
-96    32     
-32    112    
32     80     
-16    288    
192    144    
-16    -176   
-80    48     
-384   16     
80     112    
32     16     
64     0      
64     16     
16     144    
144    48     
32     -96    
96     -160   
-304   144    
576    976    
-1168  -448   
-240   -464   
0      240    
416    0      
208    -176   
-96    -176   
256    128    
48     304    
-544   -736   
32     256    
-240   128    
32     16     
256    208    
-32    128    
-208   80     
-208   -144   
272    16     
256    144    
192    144    
-288   -608   
-96    336    
-464   448    
-160   -320   
224    -16    
48     64     
320    288    
240    432    
-688   -192   
-368   -176   
-224   16     
160    192    
144    240    
-320   -1072  
288    528    
-304   176    
-304   -160   
512    384    
96     16     
848    496    
-224   336    
-48    -320   
192    128    
96     128    
208    0      
112    144    
320    112    
0      48     
-192   48     
-16    128    
32     304    
-16    -832   
160    464    
192    -32    
96     -384   
80     32     
32     224    
64     64     
32     144    
16     224    
160    -48    
128    224    
-48    464    
48     -256   
48     -672   
288    320    
-48    -112   
80     -112   
-160   16     
32     -240   
352    -304   
-208   288    
0      272    
-16    -80    
-48    48     
80     160    
80     144    
80     80     
64     -208   
-16    288    
192    -80    
-144   432    
144    128    
-32    64     
64     144    
64     -64    
-144   -16    
176    32     
-192   -64    
-80    -96    
32     160    
112    48     
-112   0      
176    80     
32     -240   
160    112    
-48    208    
304    224    
-64    -48    
352    -144   
64     96     
-16    96     
-240   -80    
256    -96    
48     144    
-48    432    
-16    48     
-96    -96    
304    -32    
-96    -240   
288    -112   
-112   -240   
48     224    
-144   -64    
224    -144   
32     -112   
-32    144    
48     -48    
128    0      
48     0      
32     176    
176    64     
-416   16     
80     64     
0      0      
112    -160   
256    -144   
-16    0      
112    -96    
128    -464   
-96    -208   
-48    224    
-96    -272   
64     -64    
-144   -256   
112    112    
224    -16    
64     16     
64     64     
112    -64    
112    16     
-16    -32    
64     16     
-32    -1408  
-16    0      
16     -256   
32     -80    
48     -32    
-192   80     
128    -96    
192    80     
192    48     
96     48     
112    -48    
0      -64    
-32    48     
48     -240   
-96    0      
144    -48    
-16    -144   
160    -144   
144    64     
-80    48     
48     48     
-208   160    
160    -112   
320    -96    
64     112    
144    224    
128    160    
240    -64    
192    -192   
32     80     
-112   -144   
-64    96     
48     -64    
96     -80    
176    32     
64     -144   
112    -112   
-48    16     
192    -80    
272    -48    
0      128    
-16    -48    
-176   -256   
-32    -176   
208    -128   
-96    -400   
240    208    
-128   288    
96     176    
160    48     
288    -32    
-80    0      
-32    -176   
112    -80    
352    0      
160    368    
-16    -80    
-32    -80    
128    -48    
224    256    
112    -240   
448    -240   
96     352    
368    -112   
-144   -320   
160    -96    
-16    16     
176    400    
-320   -752   
96     -64    
240    -1088  
-144   -272   
160    -176   
144    -336   
480    48     
208    -48    
512    -48    
-368   -16    
-288   -144   
-304   160    
-288   -96    
416    -272   
288    16     
1200   880    
-304   128    
272    -64    
-144   224    
176    -464   
400    112    
528    -16    
208    96     
32     -128   
-304   32     
-80    -160   
-240   -64    
-48    32     
304    48     
240    64     
128    -224   
0      16     
-112   -224   
192    -96    
176    -240   
96     32     
112    -48    
-48    64     
352    224    
-496   0      
288    0      
208    48     
-544   -16    
368    32     
-2464  -112   
-336   -512   
144    -224   
-128   192    
-32    64     
176    -16    
128    0      
176    -496   
128    16     
-16    -32    
224    32     
-48    48     
96     48     
-288   -48    
128    80     
-784   -48    
112    48     
-16    80     
208    -48    
-16    16     
192    -80    
-128   16     
64     -464   
16     80     
160    0      
0      -16    
-144   48     
-64    16     
32     0      
64     16     
0      96     
-48    64     
-560   32     
32     -112   
-32    -32    
112    -96    
80     112    
48     -224   
96     0      
432    432    
-416   208    
128    -144   
80     -80    
-160   -16    
288    -64    
-16    0      
160    64     
-848   32     
144    -176   
-48    -64    
192    16     
-176   16     
192    -112   
64     32     
-352   -112   
288    176    
-96    16     
336    112    
-560   48     
256    -160   
-288   -80    
-16    64     
-272   -16    
112    0      
112    -16    
32     -16    
128    144    
96     -128   
-160   48     
-480   -48    
-112   -32    
112    160    
48     -16    
32     48     
-128   -112   
-96    -32    
224    -96    
-96    64     
192    -64    
-64    128    
48     0      
384    240    
-112   -160   
48     -32    
-48    16     
304    48     
-80    0      
-16    -64    
-224   -16    
96     -48    
-272   -48    
128    16     
-208   -16    
160    -128   
16     32     
-192   -48    
-128   112    
-352   -112   
-176   32     
-96    -144   
-544   112    
-160   224    
-848   -64    
144    96     
144    144    
-32    32     
192    -48    
-96    -96    
-736   96     
48     112    
-80    -96    
-16    96     
160    0      
-320   -368   
208    208    
-80    112    
64     -64    
-224   0      
-16    32     
-560   0      
-64    128    
0      0      
192    -80    
96     288    
128    -64    
-64    -32    
32     128    
16     32     
-176   48     
96     -96    
0      16     
144    96     
-144   -96    
-208   -32    
-480   720    
-240   -176   
-672   16     
80     -144   
128    16     
96     -80    
-368   -544   
256    -560   
352    224    
336    128    
144    208    
-32    -96    
-336   112    
-48    -80    
-304   -144   
-592   -208   
128    352    
-144   32     
16     96     
-80    112    
-80    -144   
-224   -144   
80     112    
176    -48    
-16    -80    
-64    304    
-240   -32    
-32    64     
-144   48     
0      768    
-64    1184   
-176   -976   
-880   -528   
176    608    
-48    -256   
288    -32    
160    176    
112    -176   
-256   624    
-336   -176   
-608   -400   
80     704    
-224   448    
-384   -304   
144    -16    
-96    144    
240    144    
-1136  -160   
400    -384   
-64    -176   
160    64     
-16    -64    
-256   -16    
16     16     
-192   16     
32     -176   
144    16     
-144   0      
96     -96    
-48    160    
-112   32     
144    -48    
-224   -160   
16     144    
-496   128    
128    176    
16     176    
-32    -144   
64     320    
16     80     
80     16     
-16    96     
0      0      
-64    208    
16     48     
48     64     
0      464    
32     32     
-48    144    
0      -48    
-112   -80    
32     48     
208    32     
-128   -128   
208    -432   
32     128    
-96    128    
-32    -544   
-320   -432   
0      -240   
-16    208    
368    80     
-576   -432   
96     -48    
-176   -32    
80     416    
272    -16    
-32    656    
288    144    
48     -96    
-64    -432   
80     -240   
32     112    
-64    -176   
144    112    
-224   -752   
-48    -32    
-400   -160   
176    -192   
16     48     
32     80     
48     352    
48     256    
80     -64    
128    -48    
64     64     
160    0      
-48    -16    
64     64     
96     144    
-240   -80    
224    -80    
-208   -128   
0      -128   
240    -240   
-160   48     
80     64     
-112   -160   
64     208    
-32    64     
208    32     
-128   -176   
208    -160   
320    512    
-288   768    
-96    144    
32     64     
592    528    
-144   816    
-80    304    
0      -16    
160    16     
16     128    
368    128    
-80    80     
544    64     
0      -112   
-112   -64    
-176   144    
0      112    
-96    64     
176    112    
32     240    
464    304    
-176   288    
-192   80     
-80    -144   
176    -176   
256    0      
-48    384    
272    176    
96     160    
-16    96     
-144   -80    
-16    -64    
0      -96    
208    -896   
160    32     
-32    128    
-144   -96    
96     32     
16     -16    
-80    -80    
-128   -80    
144    -304   
16     -128   
48     -48    
128    -192   
144    80     
176    96     
208    112    
-272   -608   
-64    -160   
32     -176   
48     -96    
128    32     
256    192    
176    240    
48     -32    
-16    256    
176    -32    
-96    64     
192    384    
48     -48    
80     192    
176    -64    
128    16     
480    512    
-192   -144   
32     32     
32     16     
80     32     
160    -192   
208    176    
96     64     
64     144    
-80    -304   
144    -480   
-320   -32    
112    192    
16     -144   
272    -320   
336    64     
288    32     
288    144    
-32    144    
0      112    
-16    -16    
-48    176    
-16    64     
-32    144    
32     96     
-96    80     
32     -32    
-96    -96    
224    48     
160    -48    
608    192    
-352   -496   
-544   -48    
112    -96    
272    64     
-96    272    
144    96     
-464   176    
-48    192    
192    -16    
32     128    
64     288    
48     -64    
224    -64    
240    0      
32     -48    
288    -64    
-256   -64    
112    -160   
400    288    
-80    32     
320    48     
-64    -144   
368    32     
256    112    
-128   -96    
48     48     
-224   -48    
208    64     
-48    -96    
240    0      
-64    -96    
-144   144    
-160   -784   
432    144    
64     80     
208    0      
128    -16    
96     80     
-48    48     
0      -32    
144    64     
-176   -176   
96     48     
64     -48    
256    -80    
-128   -352   
208    64     
-32    32     
288    112    
80     -16    
-32    32     
-80    128    
-112   64     
128    80     
208    -160   
208    -112   
208    0      
48     128    
32     -464   
288    -48    
0      -32    
-80    32     
64     -112   
-144   0      
112    80     
144    -96    
-16    -48    
112    112    
32     80     
256    -16    
48     192    
112    -64    
240    64     
-160   -144   
112    -96    
64     -128   
128    96     
16     -160   
-80    -480   
80     208    
-192   -336   
144    80     
-1104  -128   
320    -208   
112    96     
176    -64    
-16    -64    
96     112    
-48    -64    
32     32     
80     -96    
96     80     
224    144    
-144   -144   
112    -16    
208    16     
112    16     
-352   -16    
64     -208   
96     -16    
32     -304   
48     32     
112    -32    
64     64     
144    -896   
-96    -112   
112    -272   
0      112    
96     -16    
48     32     
208    112    
0      -16    
-512   -64    
176    -80    
64     32     
192    -112   
112    -16    
176    -496   
64     -240   
-96    -1136  
112    -176   
-32    -80    
48     -48    
144    48     
208    160    
-272   -96    
-160   -64    
-400   0      
224    -208   
-1808  224    
144    64     
176    -112   
0      -16    
-48    -32    
304    -176   
16     32     
32     -240   
-256   -112   
352    -192   
16     64     
-96    -48    
16     -80    
16     160    
112    96     
-1296  64     
352    432    
-192   -304   
240    80     
112    192    
160    -352   
-160   -32    
112    -720   
96     96     
64     -160   
272    96     
-336   112    
16     640    
-32    32     
-144   -176   
-672   -112   
112    80     
-2272  192    
64     32     
144    176    
32     -256   
-16    32     
0      -80    
16     16     
64     -336   
48     560    
-112   320    
32     16     
48     128    
80     -256   
-288   80     
64     32     
112    32     
208    -208   
288    -112   
80     272    
160    400    
0      224    
-80    240    
400    384    
-16    192    
16     -32    
208    32     
48     224    
336    16     
80     -32    
528    64     
272    144    
-80    -16    
0      -16    
144    -16    
-304   192    
64     -160   
192    -80    
96     384    
144    176    
-304   64     
-32    -48    
-320   48     
192    160    
-448   48     
-96    -208   
-224   -96    
48     -80    
-192   64     
80     -32    
-96    80     
224    -144   
-528   80     
-144   96     
-32    -240   
-224   -208   
-272   -240   
-80    -320   
160    16     
0      -16    
368    208    
-320   128    
-720   96     
-48    384    
-336   0      
144    -128   
48     -128   
-320   -112   
-192   -96    
64     48     
80     80     
-2080  208    
-208   320    
80     160    
-48    0      
-832   -64    
176    -64    
-320   -32    
128    64     
-144   -80    
-80    160    
-16    144    
-32    160    
176    128    
-288   448    
80     16     
-432   -240   
-48    -368   
64     32     
-32    32     
-448   112    
144    352    
-176   -288   
128    112    
-256   0      
32     96     
288    480    
-16    544    
32     432    
48     0      
64     112    
-176   -144   
-48    336    
176    112    
-208   -128   
160    48     
-224   -176   
-336   -256   
0      16     
64     256    
-32    -80    
-96    -176   
-176   -384   
-144   -192   
-144   -480   
144    -496   
224    -16    
-192   160    
176    -16    
-272   0      
-224   -80    
-160   32     
240    -256   
-80    192    
256    304    
16     176    
-32    240    
-16    -304   
-80    160    
-16    -96    
-176   96     
-208   -208   
-160   288    
-176   128    
320    176    
-1152  48     
48     16     
96     96     
576    656    
-592   720    
64     304    
-192   96     
32     80     
32     16     
176    -144   
128    -192   
-400   128    
-144   -48    
-80    -192   
64     -304   
-272   -272   
112    -96    
-64    -32    
64     -48    
-448   -656   
112    -176   
-320   -16    
-240   -416   
-272   -352   
-240   -336   
-160   -80    
176    -400   
-192   -304   
32     -160   
-96    48     
-624   0      
48     224    
320    -208   
-176   352    
160    528    
0      -320   
-144   -160   
-80    0      
32     -288   
-112   -160   
288    192    
-48    -224   
224    -368   
-224   368    
-16    0      
-224   -208   
128    368    
-256   -688   
-272   -544   
240    352    
64     128    
-112   496    
176    -80    
-32    80     
-272   -16    
-128   64     
-80    -128   
208    16     
32     -80    
96     64     
-32    48     
-128   -208   
32     80     
-96    96     
-80    -64    
48     160    
208    272    
80     0      
240    0      
176    192    
-48    -112   
-208   -144   
256    -64    
16     -112   
144    240    
-176   80     
-128   160    
-48    -32    
-96    -192   
112    -320   
224    80     
-48    176    
544    496    
368    416    
-80    48     
-32    -80    
-160   -32    
80     16     
-448   -16    
128    64     
-336   160    
-240   272    
-368   80     
48     -64    
144    48     
32     -32    
304    -16    
32     0      
240    160    
-64    64     
144    16     
-192   -144   
576    224    
-160   -16    
0      32     
128    48     
-80    80     
-496   -16    
-112   -32    
384    64     
224    208    
496    64     
368    16     
64     48     
-80    48     
128    96     
-304   -32    
-528   64     
48     16     
0      64     
-64    -32    
16     192    
-480   -32    
-16    32     
-160   96     
496    96     
64     -48    
-208   -80    
16     0      
-384   0      
96     64     
64     16     
-80    0      
-48    32     
256    16     
240    -32    
-240   -48    
-16    96     
-16    32     
112    64     
64     32     
32     80     
-96    -32    
176    96     
-16    0      
112    64     
0      64     
112    16     
80     48     
96     -720   
64     16     
-32    -32    
48     32     
-16    64     
0      -16    
80     112    
-32    48     
192    -112   
-80    16     
64     0      
160    32     
-80    -128   
304    272    
-336   224    
208    -656   
0      144    
240    112    
256    160    
-288   112    
288    -80    
-112   -48    
64     80     
192    176    
96     16     
32     -32    
-96    64     
0      -32    
-16    176    
144    240    
144    -160   
96     144    
-64    96     
96     -64    
16     -16    
48     -64    
240    176    
-32    208    
176    176    
160    320    
0      32     
48     16     
64     -32    
112    -112   
0      32     
112    -128   
64     128    
48     -480   
144    -64    
-16    112    
160    32     
-32    48     
80     -64    
32     -16    
48     112    
16     0      
0      64     
432    256    
-368   -16    
48     -144   
112    -80    
-144   0      
208    -144   
48     240    
208    -736   
32     -96    
0      48     
0      -32    
144    -352   
16     -592   
-80    96     
-128   96     
96     240    
128    -336   
48     -144   
416    144    
-64    -160   
-48    -416   
128    -16    
-112   -208   
192    288    
0      640    
144    -224   
16     -752   
160    208    
0      -32    
0      16     
80     -32    
16     -672   
-32    -112   
48     -256   
64     -80    
352    -80    
-112   112    
48     -256   
-80    64     
96     -144   
-16    64     
-32    128    
288    192    
96     48     
208    -608   
48     -80    
192    -304   
192    -32    
32     -32    
112    16     
-112   -96    
-32    96     
-96    128    
272    32     
32     -160   
176    80     
16     0      
0      -160   
192    176    
32     -192   
192    -208   
112    128    
160    64     
160    -96    
96     64     
-112   -32    
64     48     
112    16     
272    -272   
-64    80     
112    -256   
-144   32     
-768   96     
-48    -224   
-144   -128   
432    -160   
-32    96     
-32    -1360  
-80    -64    
32     64     
-32    -304   
224    -208   
0      -96    
16     192    
-416   160    
160    -160   
416    -80    
-512   112    
-80    16     
-32    -80    
176    -304   
96     -32    
32     -768   
32     -32    
64     -64    
64     -352   
144    -128   
160    80     
96     -80    
112    -16    
96     64     
64     64     
-544   -224   
32     -176   
96     -128   
64     64     
176    96     
144    -32    
128    32     
96     -944   
96     144    
128    160    
-96    64     
-48    -416   
0      -80    
176    -64    
112    0      
-192   -160   
160    -112   
-416   16     
80     64     
160    16     
128    -16    
-176   -32    
48     -432   
16     144    
208    -32    
-128   -48    
128    -144   
128    0      
-176   48     
-16    -48    
-48    32     
112    48     
-240   16     
176    -112   
-32    16     
-48    -320   
-320   -208   
96     -224   
128    224    
336    208    
-272   -96    
416    -32    
-112   -80    
-368   -288   
0      -160   
-176   -112   
256    -48    
-304   144    
304    48     
-1360  -288   
-96    -720   
400    -304   
16     64     
240    144    
288    -768   
16     -96    
-352   176    
112    48     
-192   176    
304    80     
160    64     
-112   -592   
-304   -912   
-224   1216   
672    80     
-80    288    
-32    144    
-112   -752   
-144   96     
144    -624   
-64    704    
-112   -16    
-64    -64    
-144   16     
48     -16    
-480   336    
-128   -160   
-16    -496   
48     304    
-16    224    
304    -48    
-272   288    
128    -272   
0      -128   
112    -304   
144    112    
-368   416    
272    64     
-112   144    
288    -112   
-384   656    
224    -176   
16     80     
-336   -336   
16     336    
0      -176   
208    320    
288    112    
-144   176    
-48    -176   
-864   128    
-176   336    
-1088  32     
-192   -240   
-32    48     
0      128    
32     48     
352    464    
-240   -96    
240    -272   
-752   -160   
-208   -112   
240    192    
-160   208    
-16    -112   
-208   128    
-112   -32    
-720   -96    
112    112    
-672   16     
80     32     
-32    -96    
-112   96     
-640   -112   
128    80     
80     -48    
-48    32     
-192   -64    
48     48     
128    -16    
-400   -112   
-160   128    
48     208    
80     112    
-384   48     
-160   224    
-576   96     
112    384    
-48    432    
64     160    
128    -64    
80     224    
-336   160    
-64    16     
0      -16    
-16    32     
-32    96     
16     192    
208    368    
-464   -288   
64     -176   
-1264  -176   
144    -48    
32     96     
-48    192    
16     112    
48     -16    
128    -16    
-48    112    
-16    16     
-160   48     
224    -48    
0      -208   
-176   0      
0      -16    
-304   128    
-912   -80    
96     -48    
128    -16    
-288   64     
-288   0      
288    384    
144    80     
352    -48    
208    16     
-224   -16    
16     496    
-176   240    
48     80     
64     336    
128    224    
-704   -192   
16     -128   
-944   16     
176    -16    
560    -48    
240    128    
0      96     
0      16     
48     16     
336    368    
-704   32     
-96    -128   
272    16     
-224   80     
0      0      
-128   -96    
320    272    
-1520  208    
-240   -48    
128    -208   
-448   32     
240    80     
64     -48    
16     -48    
-128   96     
96     112    
-336   -208   
384    -160   
-144   -48    
128    64     
-192   0      
-160   32     
-928   -48    
160    112    
32     32     
-128   80     
80     32     
-224   16     
48     16     
-16    -48    
176    64     
-256   -16    
-80    0      
48     -128   
0      48     
-272   0      
144    48     
-96    32     
-64    32     
64     -16    
-80    96     
-32    96     
32     16     
-64    -16    
-128   32     
48     128    
16     48     
48     -32    
-272   -288   
256    -240   
-256   64     
272    80     
-560   -16    
-32    48     
-80    -16    
240    64     
-272   64     
160    48     
-128   128    
160    192    
-144   0      
-128   -48    
272    144    
-112   -48    
304    48     
48     160    
32     128    
144    80     
-16    80     
144    -112   
16     64     
96     192    
16     48     
-32    80     
-80    16     
160    -112   
-80    16     
176    -16    
-176   -64    
160    80     
16     224    
256    304    
-224   -224   
416    224    
-448   -224   
-48    -144   
128    128    
32     -192   
192    304    
0      -208   
0      -160   
-176   384    
-96    224    
240    -704   
336    624    
-400   -208   
112    80     
-96    208    
32     -928   
48     768    
112    -272   
-128   80     
128    144    
-80    64     
16     -352   
-32    -240   
-176   0      
208    -32    
-224   -176   
608    80     
-624   496    
256    128    
-64    -352   
64     -336   
-16    -112   
48     16     
0      16     
96     -80    
96     -64    
-112   -96    
144    -208   
144    0      
48     -320   
-32    -128   
208    176    
-112   80     
0      240    
336    192    
-80    128    
64     -16    
32     32     
128    96     
-128   -32    
208    -128   
-112   -96    
144    -32    
-96    64     
240    128    
-240   -336   
48     -368   
16     0      
-96    240    
16     80     
32     144    
80     0      
80     32     
48     -16    
-32    0      
112    96     
96     112    
32     16     
208    -144   
32     160    
-224   -16    
-176   -128   
96     -368   
208    -592   
256    -80    
240    256    
-128   144    
16     16     
128    16     
80     -16    
-16    -80    
-160   -272   
144    64     
160    128    
64     112    
288    96     
-96    64     
224    -32    
304    -112   
48     224    
304    144    
-96    32     
48     -96    
416    336    
-352   256    
80     160    
-224   32     
432    48     
176    128    
256    16     
64     32     
-480   -416   
224    -320   
144    -528   
-320   -304   
352    -368   
32     256    
352    192    
80     112    
-432   -208   
0      -160   
128    128    
160    128    
144    -16    
208    -16    
48     16     
272    -80    
-160   -32    
-176   -256   
112    -128   
-80    -832   
304    -32    
160    96     
-16    352    
112    304    
96     -48    
-288   -16    
-160   64     
-176   -32    
144    16     
256    208    
-128   112    
-160   240    
512    -48    
-16    -144   
192    -416   
16     -336   
288    16     
-48    96     
-96    -32    
176    -112   
0      160    
432    192    
272    -16    
96     192    
-64    192    
-48    -192   
32     0      
0      -32    
160    -208   
-64    -96    
128    -16    
-144   32     
80     96     
32     -48    
160    320    
-32    -528   
-32    -128   
160    96     
-16    112    
320    144    
-64    -192   
272    464    
-64    -464   
-96    0      
304    80     
-144   240    
224    -672   
0      400    
-128   -240   
-80    -64    
128    -96    
320    32     
-16    -768   
144    -368   
-496   -832   
-48    48     
-16    176    
352    -64    
112    576    
224    -272   
16     80     
-48    16     
448    -720   
64     -16    
176    -272   
96     1232   
-48    -416   
-272   -864   
32     448    
256    -304   
-80    -688   
400    48     
112    80     
32     -224   
160    -48    
96     32     
160    80     
-192   -368   
-128   -880   
48     -208   
144    400    
128    144    
128    16     
160    -192   
112    -208   
176    80     
-96    -256   
144    -384   
-32    -528   
144    -48    
96     32     
-128   0      
80     -48    
32     64     
-64    32     
64     0      
-672   64     
96     -96    
-16    -64    
48     -160   
144    -128   
144    -416   
96     -16    
144    -688   
-176   64     
128    -48    
112    0      
96     -16    
128    -16    
-128   -32    
368    -432   
-752   -432   
144    16     
80     -192   
-32    -208   
272    -64    
-64    -256   
192    16     
128    -528   
-208   32     
176    -64    
0      32     
64     -80    
96     80     
-240   64     
240    64     
-96    -16    
160    -64    
-560   -64    
112    128    
64     16     
-16    16     
0      0      
80     -192   
112    96     
16     -112   
48     192    
256    288    
-16    48     
-272   -64    
176    0      
-208   -96    
80     -128   
-304   0      
128    16     
-112   64     
-64    -64    
224    -32    
-32    -448   
160    -176   
176    96     
0      -16    
-96    112    
112    128    
112    240    
-112   0      
-192   -32    
128    48     
-32    -176   
176    -384   
-1392  -80    
240    -128   
80     176    
144    112    
-96    -48    
256    -656   
-16    16     
0      -16    
112    -112   
-32    0      
-96    32     
-208   0      
160    0      
-576   -448   
1264   -512   
-64    -48    
320    304    
240    160    
-96    16     
-576   -304   
896    -400   
128    96     
-560   48     
-112   -176   
192    -16    
384    80     
0      64     
400    -48    
-320   64     
-80    80     
-752   -48    
64     -64    
-48    96     
-560   -208   
208    128    
-256   128    
16     -64    
-208   -32    
16     0      
288    144    
-64    -112   
352    -144   
304    -48    
32     -32    
240    -80    
80     128    
-672   -64    
224    48     
-80    -128   
-240   -16    
112    80     
-160   -32    
0      -48    
-288   48     
-80    32     
496    160    
-96    64     
80     -16    
0      80     
80     48     
96     -32    
-848   -176   
32     112    
-368   -192   
-96    -64    
80     48     
-288   -128   
96     32     
0      32     
144    16     
-880   -32    
160    48     
128    -32    
48     0      
-32    -64    
-16    64     
-48    -96    
64     48     
-80    0      
-144   -64    
-64    32     
-256   -112   
48     -48    
32     -16    
-112   -112   
-432   -64    
-112   96     
64     0      
96     176    
-336   -272   
256    128    
-192   -32    
224    -32    
112    128    
64     224    
-80    304    
-80    256    
16     160    
-112   80     
-192   -192   
-384   448    
64     -448   
-576   144    
32     432    
-208   -352   
64     352    
192    -80    
-96    16     
-48    256    
288    -224   
-256   208    
-48    -208   
-160   176    
160    80     
-224   -16    
-304   112    
64     112    
-352   336    
272    -240   
-208   80     
128    112    
-112   -176   
192    -80    
-144   -208   
32     336    
128    16     
96     -112   
-352   80     
256    -240   
-256   304    
0      208    
128    -192   
-576   -144   
224    -128   
-1120  64     
128    64     
-64    48     
-208   -176   
448    -112   
-256   144    
192    -48    
128    32     
-272   160    
-144   -48    
16     -32    
128    112    
64     128    
-256   0      
112    -64    
-176   -16    
144    -32    
-64    176    
288    -32    
64     -32    
-16    0      
-48    0      
-16    -80    
32     96     
-64    -240   
112    -336   
-160   0      
-80    0      
-160   0      
128    32     
-176   -32    
96     96     
144    96     
-256   32     
144    80     
-64    64     
272    -16    
-128   16     
112    -64    
-16    -112   
0      0      
-208   16     
256    176    
-208   112    
-32    64     
48     48     
96     96     
-80    208    
-112   -32    
-32    -16    
-16    144    
176    64     
80     0      
-16    96     
-176   208    
272    -32    
32     -48    
192    240    
-48    112    
64     0      
-32    -32    
80     64     
112    144    
-80    32     
240    -16    
-16    48     
48     -64    
-128   -32    
240    192    
-64    128    
48     -48    
-16    -128   
-16    -176   
-48    -96    
32     96     
-80    -48    
160    448    
-80    256    
-208   -192   
80     -48    
-80    80     
-112   0      
64     -160   
192    0      
112    384    
592    784    
-432   48     
176    -112   
-224   -64    
256    224    
240    -32    
352    -16    
384    48     
48     272    
-128   112    
-416   -16    
-64    -160   
-80    -80    
192    64     
-160   16     
32     -16    
-48    96     
-160   320    
304    192    
-64    368    
-208   96     
240    128    
48     160    
240    -16    
48     800    
512    480    
-64    304    
-320   -48    
-96    -160   
320    336    
-368   -16    
288    -224   
608    272    
32     -272   
192    -96    
-64    -32    
-32    80     
-80    112    
192    -16    
176    336    
-176   -224   
144    384    
-272   -80    
-16    96     
288    112    
-80    -16    
-288   -96    
128    -752   
128    432    
176    128    
64     16     
48     -48    
48     80     
256    64     
256    336    
96     144    
176    -112   
-96    176    
128    -32    
-32    48     
16     -32    
96     32     
208    64     
144    384    
16     96     
192    -32    
0      160    
96     112    
240    144    
-288   16     
144    16     
-112   -64    
64     -496   
32     -320   
96     0      
144    64     
-48    48     
16     80     
-128   128    
112    -176   
80     48     
128    160    
112    32     
208    16     
64     48     
-96    -64    
144    208    
112    32     
96     96     
80     0      
128    -32    
-48    48     
160    -96    
-80    0      
32     48     
96     16     
448    -288   
-224   272    
240    112    
288    432    
-112   176    
32     -48    
192    -256   
0      96     
32     48     
-16    48     
384    96     
-48    -80    
80     192    
16     -144   
96     32     
-96    -112   
144    112    
144    96     
-16    80     
112    32     
0      48     
80     96     
16     80     
160    48     
-16    -48    
-176   -16    
176    -96    
112    80     
304    -272   
-224   -64    
-128   -96    
144    64     
416    -128   
-448   -112   
144    0      
80     80     
256    16     
96     32     
64     96     
160    -48    
-176   48     
-16    240    
304    272    
0      -80    
-64    -16    
160    -96    
32     -16    
-16    64     
176    208    
208    48     
-48    32     
96     -96    
-96    -496   
-32    64     
240    -80    
32     112    
32     16     
208    32     
-144   -80    
48     32     
144    -96    
112    112    
-144   96     
208    -16    
176    -16    
-32    -928   
112    -464   
240    0      
80     -640   
-16    -80    
144    64     
-80    -160   
176    -176   
0      -176   
48     160    
-144   -352   
-48    -592   
64     32     
-48    -464   
128    -64    
32     -528   
-144   -304   
112    -64    
208    -64    
160    -112   
-112   -528   
-224   -336   
80     112    
80     48     
128    -32    
80     112    
-64    -176   
-240   -16    
240    -304   
96     32     
-80    -16    
976    -352   
512    -416   
576    128    
160    64     
64     -208   
256    192    
160    -192   
240    -160   
400    400    
-656   64     
-192   -304   
128    208    
368    96     
384    80     
80     32     
240    -64    
-512   -112   
96     -48    
-256   -112   
-112   -480   
128    -96    
-176   -224   
32     112    
-128   272    
-144   0      
80     80     
80     240    
480    112    
272    32     
-240   -368   
32     -224   
-1472  48     
160    0      
96     -48    
-80    -16    
144    -208   
208    -192   
64     0      
48     240    
-560   -112   
32     -48    
-112   304    
-432   160    
16     112    
-144   80     
272    0      
-160   128    
112    176    
-288   -48    
-208   -208   
240    128    
-240   -464   
-320   -832   
80     0      
112    496    
64     -320   
128    80     
-432   48     
16     -48    
64     -32    
176    -64    
-320   -96    
240    -48    
-400   -64    
0      32     
-64    -176   
80     -192   
-16    176    
240    -160   
272    352    
80     -896   
-48    -96    
16     128    
160    -96    
48     -16    
128    48     
-384   -112   
-96    -16    
-176   224    
224    -128   
-368   32     
-384   -512   
-112   192    
-304   -16    
384    -336   
48     -368   
368    -304   
448    -192   
80     288    
64     80     
-144   0      
-48    240    
192    80     
-112   256    
288    80     
-160   48     
96     32     
16     192    
336    176    
-80    384    
-240   96     
384    96     
-544   0      
224    -144   
-496   -464   
-64    -64    
-32    48     
32     176    
-32    304    
112    32     
-128   -32    
240    -128   
256    304    
-608   128    
-16    0      
-416   -256   
-1088  208    
-288   -96    
-64    128    
0      -240   
176    32     
-48    80     
176    48     
-352   -192   
384    -208   
-96    224    
-560   -32    
-64    208    
-736   -256   
-560   -32    
-176   0      
-848   192    
32     240    
-80    48     
32     16     
448    -272   
-304   -64    
208    208    
-64    368    
-256   -48    
112    -192   
112    -160   
-192   -64    
-80    -192   
-160   48     
192    -96    
-48    -112   
-80    -160   
96     32     
-224   32     
-1760  -32    
48     64     
48     -16    
128    16     
-112   -96    
176    48     
-64    -144   
64     80     
0      96     
32     80     
64     -32    
0      32     
192    304    
-128   304    
-144   -16    
80     -32    
64     192    
0      48     
-64    32     
-208   -32    
16     32     
-128   -112   
144    -144   
32     112    
-128   48     
192    112    
80     80     
-128   16     
64     -64    
16     16     
0      0      
32     80     
-1072  -64    
-16    16     
192    -16    
-32    64     
-144   -80    
0      -16    
16     144    
32     -80    
80     16     
-144   0      
-96    -144   
-16    -128   
16     16     
-624   -32    
128    192    
-640   80     
144    64     
80     592    
416    400    
96     96     
-16    80     
-80    48     
-320   -224   
32     -320   
-48    144    
-80    32     
128    336    
64     -384   
-48    -448   
80     0      
-400   64     
224    608    
-128   112    
-496   -272   
-32    0      
16     80     
640    576    
-32    -336   
-32    -16    
-16    48     
32     -480   
-32    -112   
-608   16     
-320   -32    
448    96     
112    96     
256    -48    
-1408  432    
-144   -16    
-224   -224   
-144   128    
-32    -16    
416    128    
128    96     
128    -80    
-448   -480   
64     -480   
192    128    
224    480    
32     304    
-432   -80    
64     128    
-704   144    
192    160    
208    16     
-192   32     
-64    96     
-48    -16    
-320   0      
0      128    
0      208    
192    256    
304    80     
-160   -16    
-32    16     
-176   48     
-16    16     
80     32     
16     80     
96     48     
32     32     
-16    16     
-48    32     
80     80     
80     80     
48     32     
-112   0      
192    64     
-368   16     
112    16     
-128   16     
64     112    
-160   384    
352    48     
-304   -16    
144    144    
-16    128    
112    224    
240    64     
112    240    
-304   -32    
-48    -32    
64     -16    
-192   64     
256    -80    
-16    -32    
208    80     
16     32     
112    48     
48     0      
48     96     
-16    192    
112    176    
-128   -32    
80     -32    
-48    -112   
96     -96    
0      48     
-64    -80    
48     -80    
160    160    
-256   32     
368    144    
-240   32     
192    160    
-16    0      
112    32     
-48    0      
64     16     
-32    16     
-208   112    
224    160    
-128   64     
-16    0      
96     128    
-48    0      
-112   16     
224    32     
32     64     
160    144    
-96    48     
64     96     
-16    -32    
48     112    
-32    64     
32     80     
-48    -64    
224    112    
-320   -176   
96     -1136  
160    64     
-96    -96    
400    -64    
-144   112    
336    48     
-32    -144   
80     -16    
96     192    
64     -16    
176    -64    
-16    96     
48     -112   
-80    0      
0      32     
-48    -64    
16     144    
256    48     
80     48     
-32    32     
16     16     
128    -16    
128    -64    
32     32     
128    48     
-192   64     
128    48     
16     -64    
32     80     
112    48     
-64    -144   
112    96     
-48    -224   
-112   64     
112    -64    
-192   -208   
288    80     
48     304    
-176   32     
96     48     
-32    -256   
64     64     
0      192    
176    80     
16     -96    
192    112    
0      48     
208    -736   
-16    16     
48     96     
144    144    
208    128    
-32    0      
16     48     
272    256    
16     -16    
240    -224   
80     -368   
240    384    
48     112    
-304   -176   
-32    64     
-48    -224   
-128   176    
32     64     
32     64     
-272   -1568  
496    624    
-400   608    
-288   -272   
48     208    
64     64     
-16    224    
112    176    
64     -192   
592    144    
576    -176   
256    -80    
192    144    
80     -432   
-64    32     
-224   64     
-144   160    
-208   -48    
128    80     
144    176    
432    160    
-128   -208   
-400   0      
128    -1056  
160    -32    
192    208    
208    -448   
528    -96    
336    48     
416    80     
-224   48     
-192   32     
-224   -16    
32     96     
-192   -48    
160    -368   
48     -32    
16     -192   
48     112    
-240   -272   
704    -304   
-32    272    
240    304    
256    -336   
224    144    
-208   -16    
-80    -112   
0      272    
-48    -96    
0      272    
64     -272   
48     240    
192    -304   
48     -288   
-208   400    
80     -144   
144    -128   
112    144    
224    192    
-16    272    
16     -288   
80     -192   
112    0      
-48    -272   
-16    0      
48     80     
240    400    
128    -352   
-128   -64    
224    176    
-48    -112   
-112   -656   
48     -320   
-16    0      
16     -288   
320    544    
144    16     
128    -48    
-1520  -128   
160    -384   
80     80     
128    128    
304    208    
368    288    
-48    352    
64     96     
-240   224    
208    -272   
416    32     
-160   128    
-64    -48    
-112   -208   
160    -112   
-432   -64    
-16    -144   
144    -144   
80     -80    
320    80     
-192   0      
16     -304   
96     -592   
192    16     
-16    -224   
128    -224   
208    -160   
-256   -64    
448    -272   
80     -112   
-192   32     
32     -16    
-944   80     
16     -192   
64     -64    
-32    -112   
-64    -80    
16     400    
304    160    
256    -288   
-224   -32    
256    -288   
-80    -64    
64     -128   
0      -128   
64     144    
-176   -32    
0      -128   
16     -128   
128    -48    
0      -96    
160    192    
32     32     
-256   -64    
304    -672   
-48    80     
192    16     
-48    16     
160    48     
-64    48     
32     -48    
224    -224   
-544   0      
32     -64    
-928   -64    
304    -336   
16     -48    
-16    -128   
128    16     
128    -496   
64     32     
112    -96    
80     -48    
-288   0      
96     0      
64     112    
-144   96     
-416   0      
96     32     
-848   32     
16     -112   
0      -16    
64     -192   
64     32     
32     -128   
96     -208   
80     -112   
-144   192    
112    96     
-32    -128   
96     -288   
64     160    
-400   160    
96     112    
-352   -80    
0      -288   
16     48     
128    -80    
-112   176    
144    -208   
48     -208   
48     -368   
0      -176   
-368   80     
-48    -32    
-128   192    
-16    -32    
-48    400    
176    224    
-368   -160   
-32    -272   
-160   -256   
240    -16    
160    304    
80     -80    
-272   -224   
-128   160    
80     96     
-208   -160   
-96    -96    
-288   -320   
752    800    
-384   272    
-64    -864   
128    496    
-32    -128   
160    160    
-272   -112   
-144   -288   
-1312  16     
-800   112    
-80    544    
-144   -272   
64     -352   
-304   224    
-256   192    
320    176    
-32    64     
-64    -48    
48     16     
-1664  -304   
64     144    
-256   256    
-288   96     
-272   -16    
-64    32     
-48    -80    
-320   -288   
176    -48    
-2240  16     
208    64     
544    192    
32     64     
-48    -96    
-400   -64    
-288   -112   
-192   48     
-208   -144   
160    96     
144    128    
544    480    
-752   64     
48     -80    
-160   16     
80     48     
-96    -64    
-48    -80    
272    224    
-608   -80    
16     32     
544    272    
-512   0      
-16    -64    
-16    16     
288    0      
-400   -176   
-160   16     
-240   0      
-192   128    
80     16     
-160   -16    
-304   -48    
-112   32     
112    16     
-16    16     
176    0      
96     48     
64     -96    
-80    0      
64     112    
-352   -112   
208    -112   
-128   80     
144    144    
-176   -32    
-16    0      
-576   192    
-480   112    
544    -80    
-32    64     
80     -80    
240    80     
64     32     
112    48     
-96    -32    
208    80     
-144   -16    
96     16     
-208   32     
32     -16    
112    80     
-32    -32    
256    -16    
-160   -48    
112    80     
-48    -112   
64     32     
16     112    
-112   48     
176    96     
-256   -16    
176    64     
0      32     
-32    48     
0      -224   
48     -96    
-80    224    
-32    -16    
-496   0      
144    48     
240    80     
-80    96     
16     0      
16     -16    
-208   80     
-48    -32    
32     -64    
-112   32     
0      16     
32     32     
-48    0      
-272   -144   
144    160    
-848   -48    
48     16     
-2480  48     
208    80     
-16    -144   
-304   -32    
16     0      
-64    32     
304    80     
0      128    
128    64     
-176   -32    
-112   32     
-192   -16    
320    80     
-272   0      
32     80     
-48    96     
48     32     
-80    32     
-80    32     
176    48     
-16    -48    
16     16     
-80    64     
-16    -16    
-128   -96    
48     0      
64     64     
-96    80     
-128   -16    
64     16     
176    160    
-320   112    
0      -32    
176    -128   
192    160    
-208   -128   
-96    0      
0      96     
176    -208   
-128   192    
176    160    
-416   -432   
96     -32    
-80    -64    
0      288    
48     -96    
48     144    
16     -80    
-64    96     
-16    48     
128    -224   
-80    -64    
208    32     
32     144    
-32    112    
-16    160    
-384   32     
144    -80    
112    176    
32     240    
48     -576   
192    96     
256    448    
-48    -288   
96     240    
144    -16    
-112   -64    
64     800    
112    -352   
-160   224    
0      112    
96     16     
0      -192   
-80    -128   
144    656    
144    -608   
-16    80     
128    144    
32     16     
-16    96     
48     80     
256    32     
-64    0      
128    336    
-32    -480   
96     -272   
-64    512    
144    128    
112    -560   
-160   -64    
-64    288    
-240   192    
-32    48     
-32    -48    
32     112    
64     0      
-224   -432   
-64    -352   
-64    192    
48     48     
208    272    
-272   -48    
-144   -496   
176    -288   
640    -32    
512    64     
256    32     
-128   0      
64     208    
-160   96     
-96    -32    
-32    48     
-128   -32    
400    96     
304    304    
-64    144    
272    320    
-320   -560   
80     112    
192    64     
80     160    
368    48     
80     64     
144    320    
-208   128    
144    48     
144    80     
160    -128   
16     144    
-16    -80    
16     -80    
-16    64     
112    -112   
64     128    
-64    96     
32     32     
96     64     
-16    32     
96     128    
144    176    
48     48     
112    -48    
-128   -256   
320    -80    
176    112    
224    496    
224    0      
-160   -80    
0      -32    
64     -752   
-16    96     
80     -336   
-128   496    
160    208    
16     -32    
224    -112   
-48    -256   
-128   80     
16     -176   
416    32     
-144   416    
16     240    
-16    -352   
-32    288    
192    -320   
-176   -64    
240    -608   
-48    48     
64     -400   
16     -448   
-112   32     
352    176    
-144   64     
32     -16    
-64    80     
64     -96    
112    0      
-352   -464   
240    -208   
-32    80     
-64    336    
144    -464   
256    0      
16     -176   
32     48     
112    48     
16     64     
32     -288   
-96    -272   
144    -160   
0      112    
144    -80    
64     -512   
128    -32    
-16    -416   
176    16     
-64    0      
16     64     
-144   -288   
32     -80    
-16    16     
208    -48    
-144   -320   
0      -208   
-16    32     
80     -208   
16     0      
112    -448   
160    -64    
608    160    
-672   288    
0      -128   
-96    176    
-16    128    
128    -352   
0      -160   
64     -112   
-32    224    
240    240    
304    208    
48     144    
16     160    
32     80     
112    -16    
112    16     
-16    -32    
96     -32    
64     -96    
128    -48    
0      -1488  
32     32     
-720   -64    
-128   -656   
240    96     
-48    -112   
-16    16     
48     -224   
368    64     
-64    -16    
16     -272   
-304   -448   
-80    -512   
80     -256   
224    112    
-80    -64    
80     -352   
-288   -16    
-144   144    
32     -496   
160    -240   
160    -224   
112    -464   
-176   -112   
304    -32    
16     80     
64     128    
48     192    
128    -400   
288    240    
112    -448   
-48    192    
-464   -96    
48     80     
96     -96    
-144   -192   
-80    -16    
-64    144    
-112   -96    
0      -112   
368    -32    
176    64     
64     32     
-96    0      
-208   -976   
-464   -864   
-400   -160   
-576   80     
16     -48    
-448   208    
-496   96     
160    368    
-64    336    
128    64     
640    -224   
128    -16    
320    -32    
160    0      
-144   48     
32     -96    
176    240    
-384   208    
-592   -48    
288    -16    
-592   -16    
736    64     
-16    16     
80     0      
336    -96    
208    -128   
-272   48     
-144   -656   
240    -256   
48     112    
-288   64     
-192   0      
240    128    
-144   0      
208    -80    
-400   -96    
240    -32    
-32    32     
224    -80    
-416   -288   
512    -160   
-80    128    
-112   -272   
592    32     
144    -32    
-432   -80    
-304   64     
48     96     
224    -32    
128    -192   
224    16     
0      -32    
-208   32     
0      -96    
0      32     
-128   -64    
160    144    
224    -608   
64     0      
-128   -80    
-64    -176   
208    32     
320    0      
-176   -48    
144    -112   
-304   -48    
128    -48    
-256   48     
144    -32    
-96    -160   
80     -208   
-48    80     
48     -208   
112    112    
64     16     
320    80     
-736   -32    
304    128    
-400   -48    
256    144    
-112   32     
112    0      
128    112    
-64    -144   
96     64     
-96    -32    
-112   80     
224    -64    
32     16     
-304   0      
64     -96    
-256   0      
112    64     
160    16     
-16    32     
-80    0      
288    -32    
-1136  0      
96     -224   
0      32     
-272   -16    
0      32     
-240   -192   
-1328  -144   
-240   -176   
-832   0      
144    -160   
96     48     
-144   64     
0      -112   
-80    112    
-80    -32    
-32    -32    
-480   0      
-16    96     
-16    -192   
-32    -32    
-32    32     
-448   -32    
48     0      
-16    0      
-48    16     
0      32     
-16    0      
0      -32    
112    -208   
-176   -144   
128    144    
-176   -48    
64     -48    
-80    -256   
64     -48    
-160   -192   
-224   -128   
80     96     
-112   -16    
-240   -64    
-128   0      
-80    -176   
192    80     
144    144    
-64    -32    
144    48     
-432   -160   
96     16     
-144   -48    
112    64     
128    32     
-128   -64    
32     208    
32     -256   
-64    48     
-544   -48    
-32    -144   
-480   64     
-64    48     
64     0      
-16    -16    
-256   -80    
160    96     
96     64     
-80    448    
-304   -272   
-48    368    
64     448    
128    -192   
-352   256    
112    -624   
128    -192   
-192   608    
144    464    
-1344  32     
128    -192   
-32    -96    
240    96     
112    -96    
-160   48     
128    96     
-448   64     
16     64     
96     672    
-32    160    
-192   -160   
16     96     
-192   0      
-48    208    
-688   16     
48     32     
64     -96    
-144   32     
-160   -352   
-16    -80    
-32    48     
-192   32     
48     -16    
48     64     
-176   112    
112    64     
-336   -592   
-32    -208   
128    208    
-416   -16    
16     64     
-176   -192   
-304   -128   
32     -352   
352    16     
80     -64    
-48    -160   
16     -16    
192    -112   
256    64     
160    -32    
160    -96    
16     -128   
-64    48     
-608   -32    
368    304    
-352   304    
-176   -16    
-96    32     
-32    -32    
160    96     
96     192    
96     -16    
160    80     
-304   16     
64     -80    
-16    80     
-544   32     
32     96     
-144   -80    
16     96     
-16    -144   
-16    352    
160    80     
-64    -176   
0      -128   
-368   -224   
80     112    
-64    80     
112    -112   
-144   -80    
16     80     
-560   -224   
-96    0      
-176   -160   
128    32     
80     80     
16     -32    
96     -80    
0      96     
-32    208    
0      16     
64     -144   
48     -112   
64     -48    
0      -96    
-64    -336   
-128   -224   
32     64     
-48    96     
32     256    
-32    -256   
-64    128    
-16    208    
-128   96     
160    144    
112    192    
336    32     
160    -128   
48     32     
112    -176   
-48    496    
32     -80    
304    -256   
-112   -16    
-112   -64    
112    160    
-96    -64    
144    -144   
160    -96    
-80    368    
432    352    
-32    272    
-384   -64    
224    320    
592    320    
-64    272    
-160   48     
-48    -272   
16     160    
-16    -96    
16     208    
432    288    
-288   192    
288    176    
-128   464    
32     144    
48     0      
-48    -96    
-48    -16    
32     -16    
288    48     
144    304    
-64    224    
96     80     
48     80     
128    96     
528    656    
-480   448    
144    288    
-192   -48    
112    400    
368    560    
-16    144    
224    512    
-96    128    
-112   0      
272    -208   
-288   192    
112    112    
0      -160   
272    144    
-576   -832   
-64    -112   
-64    400    
192    336    
464    768    
-320   -192   
-240   -272   
-176   -640   
-176   192    
480    336    
176    400    
-448   -1184  
144    -160   
-240   960    
48     -496   
320    -752   
160    544    
240    192    
-128   64     
-240   -304   
32     -256   
208    320    
64     -16    
176    384    
-208   -256   
80     208    
16     -160   
32     32     
176    160    
-112   -256   
288    352    
0      128    
48     -96    
176    32     
-160   96     
320    272    
-224   -160   
96     352    
80     256    
64     -240   
16     -336   
112    -48    
224    112    
128    -1264  
144    80     
16     32     
-96    -64    
-32    -160   
96     112    
160    -16    
112    -32    
16     -32    
192    96     
128    32     
16     224    
48     128    
208    -352   
0      0      
48     -784   
16     -144   
-16    -480   
32     304    
-48    304    
352    -48    
-256   -32    
208    -64    
128    64     
160    64     
-16    240    
-176   64     
112    -16    
272    160    
-144   112    
-224   -224   
352    -16    
160    -208   
304    -16    
32     -16    
176    64     
48     160    
-48    32     
336    -16    
-64    -144   
352    176    
-240   112    
-128   -48    
80     0      
272    160    
112    -64    
192    -32    
240    -96    
208    128    
-160   32     
368    112    
-560   -16    
-320   -96    
336    64     
192    -112   
-16    16     
80     -192   
48     -496   
688    -464   
608    -16    
368    48     
224    528    
-768   96     
144    -64    
96     16     
192    -16    
560    -16    
-16    64     
-144   80     
-208   -368   
208    16     
-64    32     
32     32     
192    -64    
-96    64     
144    -48    
64     128    
64     -416   
304    160    
-32    -16    
80     -624   
128    -32    
-160   -64    
96     -784   
448    -144   
80     -816   
128    80     
-112   32     
160    -16    
128    144    
-80    -224   
192    -528   
-64    96     
-32    -128   
80     16     
64     -80    
112    16     
-1328  -64    
48     -80    
64     16     
48     -32    
-64    64     
80     -576   
16     -32    
32     48     
64     32     
208    -368   
128    0      
224    -224   
-160   -144   
32     -128   
64     32     
-304   80     
-160   -80    
80     16     
48     -16    
80     -208   
16     -496   
48     -144   
192    64     
16     80     
16     0      
-208   -32    
48     -32    
-64    48     
-208   -112   
96     -272   
-96    32     
64     208    
112    0      
64     -320   
0      -48    
64     -336   
192    256    
64     -128   
64     64     
80     -112   
-48    -64    
48     16     
32     0      
-80    64     
176    48     
-192   32     
240    -112   
-2448  -384   
128    -48    
64     160    
160    160    
128    -80    
0      -288   
-80    -192   
80     0      
176    192    
128    -144   
-32    -128   
-208   0      
240    528    
144    -368   
16     144    
-192   -160   
64     16     
-144   64     
80     -1248  
144    1216   
96     -368   
-176   -816   
496    -608   
-64    128    
368    624    
-272   -240   
0      -240   
144    -16    
-320   -16    
144    -112   
-368   32     
112    64     
-2592  80     
80     -64    
48     112    
96     -256   
96     16     
320    -624   
-160   -32    
-80    64     
-96    -32    
112    -32    
80     48     
-176   16     
-112   -160   
-368   -80    
336    160    
-1392  208    
96     64     
192    96     
144    -16    
112    64     
224    -256   
0      64     
-928   192    
240    -16    
-192   64     
0      -16    
-64    64     
0      -64    
16     -48    
176    32     
-96    208    
-32    -48    
32     16     
304    -32    
-144   112    
-16    -272   
176    -192   
-192   112    
16     -80    
-112   -64    
-16    32     
-176   -64    
192    96     
-176   32     
112    16     
-608   -16    
64     -96    
96     64     
-1872  -224   
-32    -32    
0      16     
-176   0      
-144   -80    
576    0      
-112   96     
336    -48    
-96    -64    
-16    0      
-128   -16    
-1024  -48    
160    -16    
16     -128   
352    208    
-336   96     
-112   0      
-416   32     
-528   -96    
-304   80     
-288   32     
-96    128    
-1072  96     
208    48     
304    0      
-64    112    
-112   48     
-160   48     
-64    -176   
0      -80    
112    -64    
32     0      
128    0      
-208   -144   
272    160    
-368   80     
-48    64     
-160   -128   
-64    -64    
-464   16     
-336   -64    
240    16     
160    160    
272    80     
64     288    
-704   128    
-208   -112   
336    160    
16     144    
-16    32     
160    96     
-48    48     
-304   32     
64     -128   
-544   -96    
352    96     
-96    96     
96     64     
160    0      
-128   144    
112    96     
-288   176    
32     -144   
32     16     
0      -192   
-208   -400   
-16    -96    
-256   -32    
0      32     
-272   48     
96     192    
-848   16     
-176   -32    
272    144    
0      256    
64     224    
176    192    
192    128    
-112   -192   
-112   160    
512    800    
-160   1920   
-176   272    
144    -288   
-96    672    
-336   -64    
-1520  -1008  
208    -816   
16     304    
96     752    
48     112    
-192   -128   
96     112    
128    0      
-48    80     
-128   -48    
160    -320   
32     272    
64     256    
-368   0      
272    -144   
-48    256    
208    160    
-48    96     
64     688    
-224   -880   
-48    -208   
96     336    
-336   -480   
480    64     
-80    560    
80     -192   
0      -112   
-160   640    
16     -288   
64     -720   
-464   160    
112    -208   
-112   608    
0      -848   
32     -16    
-80    48     
112    80     
16     -64    
-96    0      
-48    192    
-256   -224   
-240   -64    
128    48     
-80    -144   
48     160    
-240   32     
0      -144   
176    224    
128    240    
64     144    
-192   0      
224    144    
-32    96     
32     32     
-48    0      
224    32     
-240   48     
336    176    
-32    96     
32     80     
-64    16     
-128   -160   
176    -32    
0      48     
-128   -96    
64     0      
48     112    
80     32     
208    176    
-128   144    
272    0      
-144   16     
112    32     
-208   -128   
80     -384   
0      16     
-96    208    
224    -80    
-208   48     
-64    -112   
-64    32     
-32    -64    
0      32     
16     32     
128    48     
32     544    
-80    320    
16     144    
-352   48     
112    64     
32     144    
-32    64     
64     64     
128    -96    
112    48     
192    64     
80     128    
240    304    
-32    320    
-176   16     
160    256    
-80    80     
176    -16    
-288   -80    
208    -32    
64     0      
-64    -48    
144    160    
-256   80     
-48    16     
112    96     
288    144    
-160   128    
16     64     
-80    -16    
144    80     
304    -16    
48     16     
208    928    
-288   432    
208    80     
16     -16    
0      -16    
464    192    
-768   -80    
96     32     
-352   -336   
624    -368   
400    192    
-16    0      
656    -32    
-16    96     
-192   -32    
144    48     
0      16     
352    64     
192    64     
-48    -144   
256    -64    
256    128    
320    48     
192    -32    
80     64     
400    256    
-384   64     
-176   -144   
336    16     
256    -96    
576    96     
160    -432   
-352   16     
80     112    
0      -32    
160    176    
-480   128    
-160   64     
208    64     
176    -48    
320    16     
-96    64     
-144   32     
-224   -32    
32     -80    
112    16     
32     -288   
272    144    
-48    48     
-112   -80    
352    16     
-176   80     
64     64     
-112   64     
-64    -176   
272    0      
-144   64     
288    80     
-48    32     
160    -32    
32     32     
-16    -224   
96     32     
48     -80    
64     64     
128    144    
128    96     
64     -16    
144    144    
256    208    
-144   64     
160    -16    
96     128    
16     96     
64     -96    
80     -80    
64     48     
-96    112    
96     -224   
-96    -16    
96     -48    
-256   64     
112    16     
32     96     
192    32     
224    128    
48     192    
96     -112   
-208   -176   
288    -128   
96     112    
64     128    
32     48     
-32    -336   
128    144    
-48    -1232  
192    -304   
32     48     
160    208    
128    -32    
80     144    
-160   -112   
-256   -352   
880    800    
-464   288    
-16    -144   
208    192    
32     -240   
64     -848   
-144   512    
256    -320   
32     80     
304    240    
-112   -32    
-224   336    
448    -352   
96     336    
128    304    
256    32     
-16    528    
-80    320    
64     -592   
64     0      
48     -240   
-176   -208   
352    -144   
-112   176    
-128   -32    
304    -368   
112    16     
-96    -640   
16     -176   
48     64     
80     192    
0      -16    
144    96     
160    -96    
48     112    
-48    -96    
224    -64    
-64    -64    
80     -1376  
0      -48    
96     -368   
192    64     
80     32     
64     16     
48     -80    
64     -896   
-224   -128   
256    16     
64     -48    
64     48     
192    32     
-64    -576   
256    96     
144    -192   
0      48     
256    32     
64     48     
240    -80    
112    -112   
-16    -224   
160    -432   
-16    -16    
272    -832   
208    80     
112    48     
112    -48    
128    -32    
-16    32     
112    -48    
80     48     
-112   -32    
64     -48    
-2032  -80    
32     -144   
64     -16    
288    -176   
-112   128    
112    -176   
-16    -80    
208    -112   
-48    -176   
128    -288   
80     -48    
80     64     
96     320    
-336   32     
304    -128   
-304   -64    
112    -32    
96     64     
0      -16    
-128   -176   
96     -240   
-16    128    
144    -640   
336    432    
96     208    
352    -48    
-16    -192   
-64    -224   
-256   -48    
-32    -96    
352    -80    
272    160    
-368   128    
-272   -48    
-112   -80    
400    128    
128    160    
608    -416   
-176   176    
0      0      
-160   48     
144    -144   
128    32     
112    64     
-160   64     
-272   -32    
-80    -208   
-256   -208   
272    -128   
256    0      
496    192    
-352   272    
80     -464   
112    320    
496    -1024  
160    80     
-208   0      
-64    -48    
-240   544    
768    432    
-752   144    
-32    128    
-400   352    
208    336    
-672   96     
-96    -208   
-32    -192   
304    -32    
-16    64     
0      -432   
272    -32    
176    -64    
112    -128   
-80    -64    
-80    -656   
-1024  -464   
-176   -256   
80     16     
208    64     
-400   144    
336    -112   
80     256    
-112   -64    
128    -80    
240    208    
-160   0      
-624   -400   
128    80     
-336   32     
224    80     
-144   -160   
144    144    
-64    992    
-96    -208   
-48    -48    
-208   -80    
48     -16    
80     -16    
0      464    
-32    336    
64     16     
-48    -32    
0      192    
-144   240    
-208   368    
32     544    
0      -224   
-400   -176   
240    -192   
112    -32    
-192   -272   
96     272    
-400   96     
80     16     
-256   32     
-368   112    
128    144    
-672   48     
48     -256   
32     -160   
-224   176    
576    784    
-496   -160   
48     -832   
192    -112   
-480   -64    
96     320    
-272   -240   
-832   -352   
96     -32    
-432   112    
48     64     
-336   -80    
-144   48     
-1104  -64    
-192   -80    
32     -128   
48     96     
-80    -16    
16     -16    
64     -112   
-96    128    
-64    -144   
32     -144   
80     64     
-16    112    
-48    0      
-144   -48    
-368   176    
224    320    
-80    48     
-528   -80    
-160   160    
272    32     
208    -16    
-480   -112   
176    -16    
-16    0      
16     64     
48     -48    
-96    -144   
-64    32     
-208   -16    
-160   0      
64     64     
176    144    
-1376  -48    
128    -32    
-96    32     
160    80     
144    -64    
-48    16     
-176   -256   
-160   -176   
80     112    
-192   64     
-128   32     
192    16     
112    -240   
-304   -208   
-16    208    
-576   -48    
-96    112    
80     64     
144    -16    
-112   -96    
-48    -112   
-16    -64    
-176   -192   
160    -80    
112    16     
32     -16    
16     144    
-16    256    
-256   -48    
64     -80    
-432   32     
32     64     
-416   16     
160    80     
16     64     
64     112    
-128   -16    
48     80     
64     80     
-80    16     
32     0      
-272   -336   
96     -208   
-32    144    
-208   80     
-32    80     
64     -96    
-256   -16    
-32    192    
-224   0      
0      16     
208    112    
-288   -48    
208    0      
-208   48     
-32    0      
-848   -1040  
144    -640   
-432   512    
-768   272    
-608   -144   
128    -336   
-848   -160   
80     176    
-16    32     
384    64     
-48    -16    
144    -16    
288    80     
0      -80    
432    -144   
112    0      
80     32     
-208   -16    
304    32     
-352   -176   
128    -288   
208    32     
32     272    
-144   96     
-272   -64    
224    -96    
112    192    
-608   96     
-16    16     
0      80     
-112   48     
96     -64    
-288   -112   
176    144    
-336   32     
-224   -16    
160    -16    
320    -64    
384    96     
80     -272   
-240   -272   
-288   0      
-224   32     
256    32     
208    0      
304    192    
160    -16    
-336   -112   
-16    80     
80     192    
-288   64     
-64    -16    
192    16     
-208   -144   
336    16     
-48    -80    
16     -80    
0      48     
-64    80     
-32    48     
-96    -112   
112    32     
48     48     
128    64     
-144   16     
-64    -32    
64     0      
-48    -176   
-16    0      
-64    48     
-16    -224   
112    -48    
432    496    
-272   -384   
400    -144   
128    320    
-112   0      
-48    80     
-112   -336   
-64    416    
208    48     
-160   -304   
192    0      
112    -160   
-48    96     
176    -16    
-64    -192   
224    336    
176    -80    
32     1328   
64     -1584  
-112   672    
-160   64     
0      -608   
-16    352    
144    288    
336    80     
160    128    
-64    432    
0      -16    
-272   -192   
464    -272   
-80    368    
272    304    
-400   -480   
192    -272   
-272   272    
-80    64     
368    -304   
272    16     
32     160    
96     80     
-16    96     
-176   336    
384    256    
-240   160    
224    0      
-112   224    
224    192    
32     -64    
80     -80    
0      -80    
-96    64     
0      32     
-32    112    
320    -192   
-112   -80    
128    32     
-16    80     
240    -16    
-32    0      
160    48     
-48    16     
32     -48    
48     96     
-160   448    
432    176    
96     144    
272    -48    
-64    0      
-16    -880   
16     0      
448    208    
-176   144    
-16    -32    
-64    0      
-32    0      
64     -64    
112    0      
240    -48    
-64    0      
-48    -80    
176    48     
96     -112   
80     -176   
-144   -48    
32     80     
-144   224    
128    128    
80     32     
96     -128   
80     -144   
160    160    
16     32     
368    352    
-384   64     
-272   -208   
240    -64    
144    48     
112    80     
16     -416   
16     64     
80     -96    
128    32     
208    32     
16     208    
-32    -48    
80     64     
-64    48     
144    48     
112    64     
80     -192   
80     -96    
-48    32     
32     336    
96     -112   
208    16     
-64    80     
16     -16    
128    -16    
160    80     
-32    -16    
176    224    
-128   96     
128    64     
128    64     
96     128    
144    128    
0      -336   
176    16     
112    -208   
-48    0      
-64    -64    
144    -176   
176    -208   
352    -112   
320    -64    
400    -16    
-352   208    
-320   -416   
64     -32    
176    -528   
656    288    
-176   16     
16     112    
144    128    
176    0      
128    -48    
64     128    
480    720    
-736   384    
16     336    
160    352    
368    336    
320    -304   
-224   -704   
112    -16    
-80    432    
272    368    
528    48     
-32    -256   
0      96     
496    160    
-192   144    
80     -560   
-112   -576   
96     -96    
-352   -656   
128    -336   
-176   -144   
240    64     
-16    -256   
560    480    
-224   -240   
240    112    
-64    128    
208    -32    
352    128    
96     -48    
16     256    
144    -112   
-240   -64    
80     -624   
80     -336   
16     192    
256    -144   
64     64     
48     -16    
-48    -80    
160    -976   
-64    -112   
-32    112    
64     -112   
80     -80    
0      112    
384    96     
-80    32     
-272   272    
144    400    
-672   32     
-32    -112   
16     -48    
80     -128   
112    -96    
192    -256   
-144   -16    
16     -64    
32     176    
176    -48    
128    240    
176    80     
48     -64    
-384   192    
32     0      
-1184  -160   
96     64     
240    48     
48     -224   
96     -128   
-48    -112   
192    -48    
64     -1552  
-352   0      
96     -80    
624    464    
-304   32     
96     -96    
-272   -256   
-64    -304   
-224   -64    
-64    0      
80     -256   
448    -64    
48     0      
272    32     
192    240    
-176   -880   
176    -64    
-48    -32    
224    112    
0      0      
64     192    
-80    112    
-64    -208   
-144   0      
96     64     
-496   -64    
144    16     
-16    -16    
64     -128   
176    16     
64     -176   
96     48     
-16    160    
160    64     
-144   -64    
96     -80    
-32    96     
144    16     
-16    32     
0      -64    
-112   64     
32     -48    
-1328  -224   
128    -336   
32     128    
-112   -144   
176    48     
-32    -1136  
-128   -48    
32     0      
112    0      
-64    -16    
176    0      
-1152  16     
16     -112   
-336   -96    
144    -80    
-48    128    
-16    -128   
160    96     
64     -240   
-128   48     
128    -576   
224    32     
-32    0      
0      0      
-144   -128   
176    -16    
-208   80     
96     0      
-112   -16    
192    16     
80     96     
96     -512   
-96    -128   
-96    -112   
160    144    
-16    160    
-32    16     
-80    16     
192    -48    
-144   64     
64     80     
192    192    
32     -32    
-32    32     
16     -160   
112    144    
-512   -80    
48     32     
-336   16     
-192   144    
-32    208    
-1872  112    
-432   16     
-784   -96    
0      -144   
32     32     
-128   144    
16     128    
-496   96     
-1168  -256   
64     48     
-448   0      
-176   -16    
352    -80    
-192   80     
224    736    
32     704    
-400   48     
-176   32     
-112   336    
-1136  496    
368    816    
-256   -224   
-576   -1024  
-304   96     
272    976    
128    176    
256    -128   
64     -192   
144    -16    
48     176    
48     -80    
288    0      
-528   -352   
320    -384   
-528   176    
-32    352    
32     160    
-80    -80    
368    256    
-304   144    
-160   -176   
0      48     
48     -128   
-16    -48    
144    160    
-128   32     
-128   0      
-496   64     
16     16     
-928   -416   
224    -96    
-1440  80     
-144   464    
-224   208    
-160   -304   
-96    -464   
-192   -96    
320    432    
256    80     
448    -128   
176    -96    
-352   -192   
352    384    
-352   -16    
272    -64    
-16    224    
-320   64     
-64    -160   
80     -16    
64     32     
96     96     
-32    48     
144    48     
-96    80     
-32    -64    
48     -192   
-16    304    
-192   112    
96     16     
-128   -96    
-32    80     
-176   64     
-192   176    
128    -336   
112    336    
144    16     
-64    0      
-96    -336   
48     288    
96     688    
320    432    
-16    -592   
-416   176    
-128   80     
-272   -336   
192    -32    
48     -208   
-80    64     
-544   -224   
-224   112    
16     -64    
-112   -64    
-112   256    
208    16     
0      160    
-64    96     
64     80     
-48    -160   
224    -48    
-48    128    
0      0      
96     112    
64     -128   
-688   -96    
-128   32     
-32    -96    
288    32     
-112   256    
0      -208   
240    -80    
-80    48     
176    -32    
-176   208    
112    -16    
-112   -16    
96     -16    
-240   -224   
448    272    
-496   384    
0      -112   
96     -256   
-208   48     
16     48     
272    -288   
64     96     
-128   112    
112    80     
336    336    
-400   320    
-144   64     
144    96     
-320   192    
80     64     
-32    -128   
-208   -128   
192    -96    
64     0      
64     -64    
-112   -576   
64     -336   
288    -48    
0      96     
-416   336    
0      32     
-32    32     
-160   112    
-176   48     
32     -304   
192    -272   
-16    64     
176    32     
112    64     
-192   -80    
-112   32     
-16    112    
-16    -48    
-144   0      
192    0      
48     144    
-208   -112   
208    128    
-96    80     
-80    0      
64     80     
32     32     
0      -16    
64     -160   
16     0      
0      16     
16     -176   
16     -160   
480    336    
-432   224    
-64    -64    
-128   -96    
96     80     
-96    144    
112    80     
-16    112    
112    48     
80     48     
96     144    
-112   64     
80     0      
112    48     
-48    144    
160    80     
-64    -32    
0      -128   
-16    32     
-32    -736   
64     176    
-192   64     
192    16     
128    128    
80     128    
0      128    
-48    -96    
-16    32     
-48    -32    
48     176    
192    368    
-144   736    
320    736    
128    352    
256    -176   
0      -192   
-176   -480   
176    -16    
-160   336    
-368   -432   
48     -384   
384    1024   
384    0      
224    -112   
-16    64     
64     -64    
-128   -112   
160    0      
304    128    
96     -96    
96     -64    
528    1120   
-512   -336   
80     -160   
144    304    
352    -64    
480    208    
0      -144   
272    -80    
-784   -480   
96     368    
-336   224    
-80    -160   
304    -48    
464    96     
144    -16    
-256   -400   
-256   -144   
-64    -144   
816    384    
96     384    
336    112    
176    -320   
192    -192   
0      -112   
112    0      
176    -16    
32     -64    
-80    32     
144    -96    
-192   48     
-80    -880   
64     0      
64     48     
80     208    
64     304    
-16    -48    
80     -16    
32     80     
96     64     
96     0      
-112   -32    
160    0      
176    96     
32     -48    
144    48     
-16    -112   
128    -32    
-32    -800   
112    80     
-160   -288   
192    32     
-32    64     
176    48     
64     32     
80     80     
64     112    
192    -80    
-64    80     
160    -48    
144    80     
16     -80    
-64    64     
112    -112   
-160   -64    
144    -400   
240    112    
112    64     
48     80     
16     0      
48     96     
128    80     
80     -192   
-336   0      
144    224    
0      64     
128    -160   
304    112    
-64    -288   
80     -16    
128    96     
0      32     
224    96     
-144   112    
-96    0      
112    -160   
-48    32     
208    -64    
64     96     
80     -160   
-80    16     
64     -256   
112    48     
80     -544   
-144   -16    
288    16     
-64    32     
112    128    
96     48     
144    96     
-48    -16    
192    48     
0      -32    
96     144    
-112   -32    
80     144    
176    32     
240    -16    
-208   -16    
-16    -560   
32     -48    
288    -96    
0      32     
-1008  -160   
80     -176   
-48    -96    
160    -208   
32     -48    
80     -752   
48     -64    
-128   16     
224    0      
96     80     
64     -80    
16     -352   
-16    48     
320    -224   
16     48     
-304   -32    
48     -208   
96     48     
-16    16     
128    -32    
288    -128   
-64    -48    
-16    -704   
128    -32    
144    -96    
-112   -64    
176    16     
192    48     
160    -96    
128    32     
64     80     
-96    -112   
-176   -32    
-144   -144   
64     -144   
128    -240   
192    -160   
272    -32    
-96    32     
64     -272   
16     32     
80     16     
80     80     
208    144    
80     -144   
-240   -64    
240    -368   
-736   464    
128    96     
-16    -16    
32     -96    
64     -528   
32     528    
-48    128    
96     -48    
-144   -64    
448    -144   
-32    192    
-240   -96    
32     -64    
-80    -32    
-32    64     
-784   96     
-176   -16    
304    -16    
256    -160   
64     -1680  
64     -320   
-224   1360   
-352   -608   
-272   -112   
64     -64    
176    -144   
416    320    
224    176    
224    -256   
160    128    
-144   -32    
-144   -96    
-96    384    
64     -896   
144    -192   
112    272    
160    368    
208    -416   
-32    112    
-16    0      
96     -64    
-32    112    
128    -128   
-160   -48    
96     -32    
-144   -304   
224    -512   
-160   448    
-64    -128   
96     -192   
-160   -400   
-224   0      
192    112    
128    -32    
-288   -400   
-80    -96    
128    -96    
-208   -64    
208    -144   
96     144    
-176   288    
208    432    
-624   -128   
-80    -624   
-224   192    
-32    16     
144    0      
448    128    
-208   80     
-512   -48    
112    -160   
-112   -16    
320    176    
-272   288    
160    192    
0      256    
-144   224    
0      176    
-96    -80    
-64    -576   
144    -288   
16     -80    
32     -224   
64     -112   
-32    -96    
96     -144   
-272   -160   
128    32     
-176   112    
32     16     
-144   0      
288    64     
-288   -96    
176    -80    
208    144    
-1088  -64    
192    -272   
-720   -352   
-1472  -64    
-256   -32    
-112   192    
128    64     
-832   512    
-64    -176   
-48    80     
-64    192    
0      -112   
64     240    
-272   -240   
352    -80    
-464   -240   
-16    80     
48     -176   
-416   32     
80     208    
-416   -288   
48     -400   
-320   -224   
-144   0      
224    16     
224    272    
-144   80     
160    176    
-160   -192   
112    80     
-80    48     
48     -48    
80     -96    
192    0      
-112   64     
112    176    
-320   192    
-288   80     
-144   -128   
-288   -224   
-16    96     
48     -96    
48     -64    
-240   -32    
96     0      
-112   -16    
48     0      
0      -16    
-144   -288   
32     -80    
0      288    
-112   192    
-112   16     
192    32     
-560   64     
-160   -48    
-1600  -80    
-160   -48    
-112   64     
-80    -240   
464    -48    
-320   80     
240    464    
-256   368    
-96    16     
16     64     
-64    -96    
-96    -272   
176    -320   
64     224    
-16    -144   
-560   -144   
304    -272   
48     128    
16     192    
-16    -16    
-144   -16    
80     96     
432    320    
-80    288    
-288   176    
-48    -208   
-192   -160   
-32    -48    
-32    384    
224    368    
-192   16     
32     224    
-128   -160   
-80    -144   
-320   32     
288    32     
208    48     
0      48     
-160   -64    
-16    112    
-144   96     
-96    192    
16     0      
-32    -208   
128    96     
-160   16     
-16    32     
-976   -224   
0      -16    
80     80     
-16    -208   
-160   -144   
-48    368    
32     128    
96     -112   
80     80     
-32    64     
336    688    
-368   -480   
176    192    
-320   256    
-16    -240   
192    272    
-48    -16    
144    336    
-48    80     
224    544    
-448   64     
-80    -176   
176    272    
176    -192   
-80    -16    
32     192    
-304   -272   
448    -496   
64     -352   
-256   -224   
176    320    
-144   -80    
-144   -144   
256    288    
-320   192    
96     48     
-272   -16    
176    16     
160    48     
-224   -80    
64     0      
-80    16     
48     160    
-416   -64    
-112   -192   
384    -160   
368    -64    
256    112    
-208   80     
256    304    
-560   80     
-256   -112   
192    -16    
160    48     
64     -32    
320    48     
-272   144    
-48    224    
-448   -208   
64     -224   
-272   48     
128    64     
464    16     
416    176    
-256   112    
-16    32     
32     -112   
-80    -112   
-176   96     
-128   48     
112    16     
-320   -32    
-112   0      
208    -32    
304    96     
0      32     
64     32     
208    64     
-48    32     
272    144    
-288   32     
-16    -16    
144    32     
96     64     
64     32     
112    48     
-160   -48    
-32    -16    
80     160    
64     -64    
64     112    
-160   64     
64     0      
0      48     
-80    -176   
320    -272   
128    288    
176    32     
256    80     
-176   32     
64     80     
-512   0      
-48    -704   
192    16     
-112   112    
176    0      
176    64     
16     80     
144    144    
-112   32     
80     -64    
128    32     
-96    80     
160    32     
-80    32     
96     128    
-96    16     
16     -464   
144    -176   
496    384    
-368   144    
64     -112   
128    32     
0      80     
112    96     
-16    0      
0      48     
0      16     
16     16     
0      16     
160    96     
208    96     
32     -544   
112    16     
32     176    
16     144    
80     -16    
128    0      
16     48     
112    -128   
48     16     
96     80     
64     -32    
-96    64     
112    -208   
32     -144   
128    112    
240    -320   
-144   48     
-80    -656   
64     32     
96     -32    
-48    48     
80     16     
-128   0      
112    -64    
256    0      
-176   80     
112    -16    
0      32     
80     -64    
96     64     
96     -64    
144    16     
-80    -1104  
160    160    
112    48     
-96    16     
128    -80    
256    -256   
-32    -144   
-16    112    
144    384    
48     224    
32     -240   
144    96     
64     112    
-176   -176   
-16    0      
272    -192   
112    128    
160    -192   
16     -80    
-64    48     
48     80     
32     240    
-96    -256   
-64    96     
32     -304   
16     512    
16     -160   
16     -16    
16     -16    
112    48     
192    -432   
-64    -512   
96     -160   
16     0      
128    144    
144    288    
-112   32     
96     1072   
128    -400   
192    48     
-64    288    
0      -256   
80     528    
208    -64    
128    -240   
176    0      
-16    160    
96     -208   
48     64     
64     -144   
144    144    
48     48     
96     -16    
144    80     
352    -144   
32     368    
64     -224   
80     -208   
-64    -160   
64     -112   
256    144    
176    -48    
144    -320   
160    16     
-80    -128   
336    192    
-400   -144   
-192   -720   
48     -368   
144    -496   
512    32     
208    -32    
-272   -16    
-80    -384   
96     64     
0      -80    
16     96     
64     -224   
144    96     
96     -48    
80     -272   
0      -112   
-2144  240    
352    -112   
512    96     
-192   16     
-112   64     
-160   -96    
16     64     
304    432    
176    128    
352    -320   
0      240    
-288   -416   
-224   -128   
16     -240   
192    -128   
-272   -80    
304    -176   
48     48     
48     32     
240    0      
-32    -320   
48     48     
48     128    
-16    0      
112    -128   
64     -48    
208    -16    
-224   0      
64     80     
240    0      
-608   64     
144    128    
0      -304   
80     -208   
208    -112   
0      -176   
64     80     
48     -496   
96     128    
-64    0      
-320   -32    
48     -304   
224    80     
224    96     
144    208    
-224   96     
160    144    
-768   592    
-368   496    
-144   240    
368    112    
48     352    
368    16     
160    352    
256    -256   
16     -160   
96     0      
112    160    
-96    336    
128    -112   
-48    16     
240    -320   
-96    -48    
-128   -112   
0      240    
272    176    
176    448    
176    -80    
48     -128   
96     -912   
48     -112   
224    -48    
0      -96    
-144   0      
0      -192   
80     32     
32     176    
-80    0      
432    -64    
-2208  256    
-64    -128   
-400   128    
528    -80    
176    0      
192    -240   
208    80     
-48    176    
208    256    
-624   0      
224    -48    
-368   32     
-224   -208   
-160   -32    
-192   64     
-880   32     
-112   -80    
336    112    
208    96     
-80    144    
240    -496   
-176   208    
144    48     
16     -160   
208    -112   
48     -128   
320    80     
256    -16    
-432   -144   
256    -224   
-32    64     
16     -128   
0      -32    
144    -272   
48     0      
32     -528   
112    96     
32     -80    
112    -176   
-368   -48    
208    -208   
-256   -336   
192    -384   
-304   -272   
-48    -96    
-304   -208   
224    -208   
-144   160    
0      160    
192    352    
384    176    
-160   192    
-144   16     
144    592    
-32    224    
0      -64    
80     -80    
96     240    
-64    16     
-96    -32    
96     -400   
-192   -32    
336    192    
-1520  -48    
0      64     
112    32     
-208   -288   
-272   208    
-1456  -256   
-32    352    
-896   592    
-144   -400   
112    224    
32     -224   
-96    -464   
-176   272    
-288   -80    
128    -592   
224    16     
48     320    
-160   48     
-208   -64    
-32    -80    
-336   -48    
-32    48     
-160   16     
-192   32     
480    -48    
-80    -32    
304    48     
-208   48     
-112   16     
-688   320    
0      144    
256    16     
-320   -176   
-112   -32    
-112   -48    
176    -224   
32     -96    
304    176    
560    288    
-240   192    
-384   -176   
-352   -16    
-304   -80    
64     -224   
96     16     
16     -64    
192    -96    
448    80     
-160   144    
-128   64     
-304   -48    
160    48     
-752   -32    
240    48     
192    144    
-48    -96    
112    -80    
256    32     
48     -80    
80     0      
-48    48     
-224   112    
176    48     
0      48     
-672   -16    
-880   48     
224    288    
-16    144    
-96    -128   
-320   -64    
-112   16     
-992   -64    
160    112    
-192   -272   
576    -112   
208    176    
32     80     
192    32     
80     96     
-528   -144   
192    64     
128    128    
-144   -80    
272    64     
-416   -64    
16     16     
-672   0      
112    64     
-320   -64    
0      48     
-80    0      
-48    0      
64     16     
48     32     
160    64     
80     48     
0      48     
-32    32     
-80    16     
-32    128    
144    80     
-272   -32    
16     32     
128    48     
-272   -368   
-176   -64    
-192   144    
240    96     
-144   48     
-80    -112   
-64    80     
128    64     
-384   32     
448    -16    
-336   -16    
64     48     
-80    -48    
-16    128    
0      80     
48     -112   
-80    -16    
48     96     
64     -64    
80     48     
176    368    
-32    128    
-144   -48    
192    480    
-320   192    
128    -192   
96     64     
-320   0      
704    224    
-384   112    
64     208    
64     256    
-64    48     
240    112    
-208   80     
160    -48    
16     16     
16     -48    
0      -144   
112    0      
-272   96     
64     80     
-16    48     
-192   16     
80     -192   
64     64     
80     48     
48     0      
-112   160    
32     -272   
112    144    
128    224    
-64    -96    
-176   32     
-224   -288   
-16    -16    
176    240    
160    16     
32     32     
96     -80    
16     112    
-96    48     
176    -16    
-144   288    
128    -16    
0      112    
16     128    
-32    112    
80     -112   
144    -32    
-80    112    
112    -16    
64     -288   
-256   176    
224    32     
0      224    
784    512    
-528   -176   
-176   -192   
0      32     
192    -160   
-144   16     
208    304    
-80    480    
48     368    
48     16     
128    -48    
-192   80     
-144   -224   
160    -240   
208    16     
0      160    
-128   32     
160    48     
-240   336    
96     272    
48     32     
160    48     
-80    0      
112    16     
0      32     
32     64     
192    96     
96     0      
-48    -96    
160    -176   
64     0      
192    192    
368    368    
-288   -64    
96     -128   
-112   96     
272    48     
-32    -112   
192    0      
96     32     
48     -32    
160    128    
-16    32     
64     0      
-32    112    
0      64     
288    0      
-160   -192   
208    -176   
32     128    
-128   80     
128    128    
-304   -48    
240    -144   
128    192    
16     -224   
32     -64    
112    -112   
-64    0      
128    96     
272    128    
240    80     
32     80     
-64    176    
160    80     
0      80     
160    48     
176    112    
160    0      
48     -48    
-32    -352   
-48    -64    
0      -32    
0      64     
80     16     
112    112    
-64    16     
272    96     
48     16     
-96    64     
-32    -32    
64     -96    
256    48     
224    -16    
176    304    
448    416    
-16    352    
-256   208    
-96    48     
96     256    
288    96     
160    -128   
48     160    
-160   48     
256    96     
-112   -144   
128    16     
-64    128    
240    -144   
64     -80    
48     -112   
80     0      
48     -48    
-32    96     
-176   -800   
-32    -64    
-80    -176   
32     -48    
80     32     
176    128    
-144   128    
80     112    
128    288    
0      -32    
-96    0      
272    -160   
16     16     
176    -240   
224    16     
0      -240   
0      -368   
-160   -400   
64     -288   
-208   -16    
544    -48    
-288   96     
16     32     
-384   -480   
176    -592   
176    -48    
0      -560   
288    -16    
-48    16     
128    -240   
128    -192   
192    -320   
-16    -272   
128    -32    
-80    -128   
96     48     
144    0      
-64    384    
368    48     
-240   -80    
560    0      
-240   144    
32     176    
-32    -112   
32     528    
256    208    
-144   144    
208    -320   
176    -16    
304    320    
-176   16     
16     224    
-224   -208   
48     -464   
48     -208   
224    160    
144    -160   
-144   336    
432    -48    
80     112    
144    176    
-224   -1216  
-144   -288   
16     144    
176    208    
288    -192   
-96    -160   
96     -80    
352    -192   
-192   304    
-208   -160   
160    272    
544    240    
16     -496   
-352   208    
224    0      
0      -96    
224    -32    
400    208    
-256   -144   
-192   -192   
0      -496   
256    -128   
-64    -96    
96     -16    
128    -256   
128    128    
80     -432   
-16    96     
-64    -160   
96     -80    
176    -32    
-80    160    
-320   -336   
0      352    
-224   -160   
240    -48    
192    -96    
304    192    
32     -48    
256    -176   
-16    -176   
-112   96     
224    240    
48     -32    
64     48     
96     -48    
128    32     
-160   192    
80     32     
32     -64    
-128   -112   
208    -320   
144    -192   
-32    16     
96     -192   
112    48     
96     -240   
176    192    
-80    -32    
0      176    
304    368    
-240   -160   
-176   -160   
16     96     
-272   -16    
112    -32    
-2528  -144   
176    -64    
224    80     
192    160    
64     304    
0      -96    
-128   16     
48     -1184  
-128   32     
128    -48    
416    -64    
96     32     
96     -128   
-400   -16    
-112   32     
-1472  -1120  
240    -720   
-672   288    
-112   96     
-96    16     
-240   -256   
32     -144   
368    -560   
400    -144   
672    288    
-448   48     
-16    -320   
208    -64    
-352   112    
-96    -208   
208    -192   
64     128    
-32    80     
272    -128   
48     -64    
144    -208   
272    48     
80     -352   
480    64     
-224   16     
-112   -32    
-496   -32    
-32    32     
-64    -32    
-112   32     
0      64     
144    -144   
-592   -64    
48     -32    
-160   16     
-16    -144   
128    128    
-96    -256   
656    -64    
-192   16     
-272   -96    
32     16     
112    32     
-144   -16    
-112   0      
-160   -80    
0      32     
-544   96     
96     -64    
336    176    
-288   -112   
80     16     
432    0      
-240   -176   
128    -16    
16     64     
-240   -16    
368    16     
-160   -16    
0      -96    
224    240    
-304   48     
64     -16    
-912   -80    
16     48     
-176   -32    
-64    64     
16     -16    
-176   -64    
-16    -32    
-432   192    
-32    32     
-1088  -48    
-224   -32    
0      -64    
272    -96    
-880   -64    
176    0      
-320   -144   
-16    -384   
-720   -336   
32     32     
176    96     
192    96     
-128   64     
-192   32     
-80    144    
-464   16     
-48    -96    
352    336    
64     224    
-288   -144   
-16    -16    
-160   128    
48     176    
80     80     
144    256    
-336   -16    
-288   192    
-208   -96    
-288   -448   
-48    48     
0      160    
448    336    
-1712  -192   
-32    -176   
16     272    
0      0      
-32    -176   
144    -48    
0      176    
-48    0      
-160   64     
176    -80    
-112   48     
144    16     
16     128    
-480   32     
-304   -128   
-1504  -96    
128    288    
-304   -320   
192    1200   
320    96     
-240   -368   
-304   -432   
48     -80    
-176   432    
240    -352   
-192   -96    
48     -64    
-144   256    
224    64     
-80    -304   
-32    32     
64     -192   
-560   -16    
96     -80    
-128   -16    
-160   176    
80     -80    
-64    48     
16     48     
48     64     
64     -48    
-160   -80    
-96    -64    
-240   -32    
160    -48    
0      -48    
-192   -192   
-736   -272   
96     64     
-80    -112   
-256   -208   
80     -96    
80     64     
32     -80    
-176   -16    
-64    0      
-240   64     
-80    -16    
-16    112    
80     224    
-160   32     
112    -144   
-352   -96    
-64    16     
-48    -224   
-16    -32    
128    48     
96     112    
-160   48     
64     48     
64     160    
-96    112    
-96    128    
-128   -80    
48     48     
-144   -112   
80     -48    
16     128    
-336   144    
-80    32     
-224   16     
352    144    
208    -32    
16     32     
-48    48     
-112   -16    
-32    -16    
0      64     
32     64     
-64    48     
192    48     
-16    128    
-64    -144   
-96    64     
-32    16     
-128   -240   
384    -96    
80     96     
144    64     
48     32     
-160   -192   
-144   -112   
-240   208    
-464   48     
272    240    
64     -32    
368    -112   
16     64     
-416   96     
-320   -80    
256    80     
-336   0      
-96    144    
-16    112    
32     96     
240    64     
0      -160   
208    -80    
-224   -48    
0      48     
-112   -224   
112    0      
-224   128    
-320   32     
288    -112   
80     48     
-160   112    
-320   0      
96     208    
80     128    
128    224    
-272   32     
96     16     
-384   144    
-112   48     
-176   64     
192    32     
240    -80    
224    144    
-64    192    
-16    96     
-160   0      
48     240    
48     128    
-96    32     
208    256    
-112   32     
96     -48    
-32    -64    
-64    -16    
-16    48     
32     -16    
-16    160    
144    176    
-48    0      
176    -48    
-16    48     
80     64     
256    0      
-64    624    
64     -64    
112    -336   
48     176    
-32    -224   
64     48     
32     64     
-432   -368   
112    -96    
16     560    
256    -64    
320    -48    
-192   -48    
-16    -112   
-288   48     
112    -384   
192    272    
-208   -368   
416    96     
-144   144    
272    64     
272    -80    
-112   96     
352    32     
-320   -48    
160    -32    
-224   -32    
224    -32    
-32    160    
-240   -160   
112    -192   
352    496    
-144   176    
128    0      
-240   -80    
144    -176   
-16    144    
-16    -1200  
-16    144    
-48    -800   
160    480    
272    400    
-304   -336   
64     48     
256    0      
-80    64     
256    -64    
-64    48     
64     16     
48     224    
208    -48    
0      32     
96     -112   
-16    -192   
256    48     
32     256    
176    16     
-128   -64    
160    96     
-160   144    
80     -16    
160    160    
64     32     
128    160    
-96    128    
112    -80    
-48    48     
80     -16    
176    64     
48     -720   
0      -48    
160    -32    
64     -32    
0      160    
-32    -96    
-16    -144   
112    64     
80     128    
64     112    
224    48     
-48    -80    
32     -80    
-80    -128   
224    112    
0      -704   
144    48     
80     -96    
-32    48     
256    112    
-96    32     
112    96     
16     48     
80     80     
0      32     
144    64     
16     -96    
64     64     
208    48     
32     -160   
16     -64    
144    176    
128    -240   
-112   64     
-32    -32    
400    336    
-224   -128   
-32    -32    
192    192    
64     -32    
96     48     
80     -112   
16     96     
-32    -16    
32     -32    
192    -176   
112    144    
16     -464   
128    208    
112    192    
0      -32    
240    -144   
-192   -256   
160    16     
16     -96    
16     -16    
-256   -480   
-16    32     
16     16     
-16    80     
48     -80    
32     -144   
208    80     
64     128    
176    64     
688    272    
-544   560    
-144   -192   
288    16     
16     16     
176    96     
528    16     
64     -48    
736    -128   
64     -48    
64     48     
-336   304    
-384   0      
160    -96    
112    0      
304    32     
288    -288   
-144   32     
-144   -224   
32     -16    
-480   -1440  
48     -256   
-32    112    
112    -160   
208    144    
32     32     
304    -112   
0      -64    
144    -304   
-304   176    
-144   -32    
48     -112   
-816   80     
-32    -80    
192    48     
-112   -96    
-176   -64    
192    -16    
-288   16     
64     16     
512    128    
-16    -272   
400    112    
-96    -16    
-128   -80    
304    -16    
-192   -112   
-1184  -32    
128    -176   
336    -80    
336    -96    
352    144    
16     -112   
-256   -160   
288    -720   
208    80     
64     96     
192    80     
240    32     
0      -32    
-160   208    
144    0      
-208   -128   
48     -48    
-192   -48    
144    -16    
0      32     
176    -304   
-48    -48    
144    -848   
48     112    
112    16     
-80    -16    
144    32     
64     0      
0      144    
48     112    
-288   32     
80     32     
-1824  -80    
32     -384   
160    32     
96     16     
-128   -96    
-64    -48    
304    208    
32     -304   
-160   -352   
-16    416    
-224   32     
-80    -240   
160    -48    
96     0      
272    432    
-784   272    
208    -1008  
-1312  384    
-336   128    
-16    -352   
240    -16    
80     64     
96     -1536  
80     320    
0      -336   
-96    272    
176    -144   
-112   -272   
-112   -112   
48     -32    
-672   192    
-272   -1072  
-320   160    
272    272    
-16    -320   
288    688    
0      32     
224    -368   
80     80     
-384   -624   
64     -144   
80     -160   
128    688    
-48    272    
80     224    
496    800    
-288   16     
-384   -16    
96     -256   
-240   -144   
288    -368   
96     -32    
16     -48    
176    -32    
-144   -144   
112    -144   
-96    288    
-112   272    
0      176    
160    -80    
192    288    
48     32     
-560   -96    
80     -240   
-16    128    
128    -32    
112    16     
64     0      
-2160  80     
-32    208    
64     -64    
-16    -192   
160    0      
-96    176    
16     -32    
48     -64    
-128   -192   
176    176    
-1488  -128   
128    0      
-304   -48    
-48    -32    
-192   48     
-192   32     
-160   64     
-560   -32    
32     -16    
-864   80     
0      -80    
16     -160   
-192   -224   
-912   -48    
-96    80     
-128   -80    
128    96     
-64    -16    
-208   144    
16     160    
-368   16     
128    96     
-256   -80    
-64    -16    
-1248  96     
-16    128    
128    -112   
-128   -144   
-48    -160   
176    112    
176    -112   
272    176    
-176   64     
-32    -32    
96     -32    
-160   64     
-32    64     
-272   96     
0      64     
-160   112    
-144   -80    
-944   -16    
-240   160    
-336   -96    
192    -32    
-32    -80    
160    288    
336    272    
-240   144    
-208   -144   
0      -336   
144    -96    
-64    16     
-32    0      
-64    144    
192    384    
-336   336    
32     -32    
32     -240   
304    160    
144    128    
80     288    
-336   -64    
-128   -80    
-128   96     
-128   48     
-32    432    
240    224    
112    32     
-240   48     
112    64     
-400   32     
96     32     
112    -128   
288    96     
0      -48    
-304   -16    
-368   -96    
-64    -704   
48     96     
0      560    
-48    -368   
-176   -400   
-16    -368   
-256   64     
-80    -192   
-672   -432   
16     -16    
-2224  0      
112    -144   
208    112    
544    656    
-160   -144   
96     -80    
128    -160   
-48    112    
-64    256    
-64    32     
240    144    
-64    160    
32     -192   
-80    128    
208    -208   
-304   32     
0      32     
-16    128    
-112   -144   
176    96     
-128   160    
176    -16    
-224   -208   
64     288    
160    400    
-32    -64    
112    -160   
160    -176   
-208   -256   
176    256    
-672   96     
0      48     
-64    -64    
-32    0      
-80    16     
-144   -16    
208    -32    
64     48     
288    240    
224    240    
-96    304    
-112   -784   
-32    -1040  
-560   -496   
0      -32    
-80    -240   
-144   -336   
-32    64     
96     48     
128    -32    
48     96     
80     -64    
400    32     
-288   64     
-16    -144   
32     -80    
-208   -48    
288    -160   
-144   -80    
96     80     
0      -48    
48     -80    
32     64     
-16    96     
96     16     
64     32     
-112   48     
240    48     
-144   96     
192    16     
-16    96     
-112   32     
192    128    
-224   -32    
208    144    
-240   16     
-16    0      
48     0      
48     64     
256    144    
32     240    
-400   32     
176    0      
-32    -48    
-128   48     
0      -16    
-32    -112   
64     80     
-32    32     
64     48     
160    64     
-112   64     
64     96     
0      96     
128    0      
128    32     
-320   16     
48     16     
48     48     
64     -48    
208    160    
16     48     
304    112    
-128   16     
-48    -16    
176    96     
0      112    
112    64     
496    48     
-288   -192   
-208   0      
192    192    
-48    32     
160    32     
-64    128    
480    192    
-336   -64    
112    -32    
64     96     
-144   0      
64     32     
192    96     
128    -16    
-272   -96    
80     80     
160    16     
128    96     
-64    32     
48     -16    
-32    -96    
0      112    
-16    -16    
224    240    
-16    112    
144    64     
176    16     
16     0      
48     32     
112    16     
-80    -80    
112    0      
128    112    
32     256    
32     144    
48     -112   
192    32     
128    -32    
176    -112   
-128   48     
-48    -512   
176    48     
-144   16     
-112   128    
160    -368   
352    -240   
160    240    
48     160    
-192   -144   
-144   0      
96     -96    
672    0      
224    432    
-224   32     
48     80     
48     -240   
320    -32    
272    0      
0      -64    
400    48     
-16    32     
112    -80    
208    112    
-704   -224   
224    -144   
-352   128    
-128   -112   
112    48     
-96    -64    
208    160    
368    -80    
-288   0      
-432   112    
-240   -272   
-176   -208   
64     176    
-128   16     
192    0      
208    -64    
416    0      
16     -16    
240    -32    
272    80     
368    -16    
144    -32    
-160   -16    
-176   16     
-64    -960   
32     32     
240    -16    
256    80     
432    112    
-128   96     
-112   0      
-256   160    
-112   144    
80     -48    
80     -240   
192    -96    
-16    176    
80     -128   
-16    128    
-160   -96    
-16    16     
80     48     
-48    160    
272    -96    
-80    -384   
80     0      
80     144    
192    -96    
-64    -112   
80     -48    
-96    -592   
288    288    
-16    -32    
64     48     
176    32     
192    464    
-112   -352   
240    -48    
64     112    
240    320    
224    -256   
-80    80     
0      96     
-176   -256   
96     -400   
192    144    
-144   416    
304    -160   
-32    -64    
256    -48    
32     0      
304    672    
-368   -352   
-112   -384   
96     128    
64     320    
0      -128   
160    -1232  
416    496    
-128   64     
160    16     
-16    64     
224    -16    
-144   192    
-80    -784   
112    -1872  
32     -48    
-128   -384   
112    96     
144    144    
32     16     
-112   -128   
192    -240   
-96    -192   
16     -160   
192    48     
208    192    
96     -64    
96     32     
64     96     
-64    -192   
224    64     
16     -80    
64     -48    
-256   -128   
-208   -192   
288    -16    
192    48     
288    -256   
-16    16     
0      -16    
0      -400   
-80    80     
336    96     
96     128    
160    -272   
176    -16    
-16    48     
32     16     
-48    224    
32     96     
-1296  -112   
-80    -112   
240    48     
160    -176   
-16    -112   
224    -208   
0      96     
256    0      
-48    176    
128    -112   
160    -80    
16     -48    
96     32     
-112   128    
256    -336   
-768   -224   
-32    96     
-272   400    
256    -112   
144    48     
224    96     
144    -112   
64     -144   
128    -272   
192    16     
-96    224    
-160   -64    
-48    -80    
48     64     
288    -32    
80     0      
16     -160   
-592   -96    
128    -16    
48     -48    
-64    -176   
-80    64     
112    -80    
128    0      
96     16     
96     48     
64     32     
64     -32    
-432   -208   
176    -480   
-160   -96    
192    80     
-128   -64    
32     256    
-144   144    
48     -160   
48     -64    
288    -368   
-80    160    
16     32     
160    -32    
-96    -176   
-80    -224   
-80    -144   
48     16     
-208   64     
80     112    
-304   176    
-192   -32    
-48    -64    
128    16     
288    240    
256    192    
64     144    
352    -336   
-256   -304   
-560   -144   
-208   272    
48     192    
144    128    
-256   80     
96     208    
-336   -80    
64     -512   
16     160    
256    -48    
336    192    
352    -256   
-16    -96    
48     176    
-192   -64    
144    -144   
-144   96     
16     464    
-496   -336   
-176   80     
-16    -80    
176    208    
240    112    
240    -144   
416    32     
-512   -64    
48     -224   
16     32     
-144   -400   
-336   160    
-320   -48    
-192   -240   
64     528    
336    192    
128    -320   
176    -48    
32     208    
-576   192    
192    320    
-1120  -128   
-176   48     
32     -128   
-432   -176   
0      48     
-432   32     
-48    96     
-752   304    
176    320    
176    -48    
-256   48     
-16    64     
-16    16     
-624   -144   
160    16     
-16    -48    
16     -16    
144    -64    
-112   0      
-64    64     
-496   32     
-224   48     
-80    0      
-112   0      
-1008  -64    
16     16     
32     -96    
32     0      
-144   -112   
-128   -48    
-208   16     
64     112    
-128   -32    
80     -16    
-112   -48    
128    48     
224    96     
48     336    
0      112    
-208   32     
-576   -80    
-992   -96    
48     -32    
256    16     
-128   64     
-96    -48    
-208   -96    
64     16     
-112   -64    
-112   80     
256    176    
-80    336    
-608   192    
160    -80    
-368   -96    
-96    0      
-672   80     
32     32     
-80    -32    
112    48     
96     -112   
-128   16     
16     0      
144    -144   
-112   -144   
-176   192    
-96    0      
48     48     
-192   16     
96     -32    
32     96     
-304   48     
-96    64     
-208   176    
144    96     
-16    16     
-144   0      
192    16     
0      -16    
-112   64     
48     32     
160    32     
-16    0      
32     64     
-224   32     
224    96     
-432   -176   
256    -48    
-96    112    
160    -96    
128    -32    
64     16     
-224   64     
96     80     
80     48     
-128   0      
96     48     
64     -16    
-112   0      
-176   80     
144    80     
-240   -48    
112    32     
-112   272    
-240   160    
112    0      
-272   -32    
16     -144   
112    80     
-16    48     
16     96     
64     -80    
-64    16     
144    48     
-640   -32    
-96    -16    
-192   -32    
112    32     
-160   -32    
0      96     
48     32     
-32    0      
16     48     
0      48     
128    48     
80     -96    
0      -48    
16     160    
32     160    
0      16     
32     112    
16     32     
240    192    
-160   240    
-16    64     
80     16     
16     -32    
144    16     
16     64     
32     96     
-208   32     
-16    0      
-48    32     
80     128    
-144   -80    
352    80     
-224   -32    
528    416    
-32    -352   
96     -144   
-240   176    
-400   -96    
-240   -368   
-160   -96    
224    352    
-160   -144   
592    -224   
96     336    
112    -48    
-32    112    
-16    32     
-32    -48    
240    144    
-96    32     
96     192    
-192   112    
-432   -432   
224    -48    
464    464    
416    -16    
0      48     
-16    144    
-208   128    
-176   224    
224    -208   
624    -96    
400    144    
96     0      
-64    352    
-400   -544   
160    16     
-16    752    
208    -160   
192    352    
-192   -112   
-256   32     
-176   544    
16     -368   
128    -64    
-144   64     
160    64     
128    224    
-336   0      
80     64     
-176   144    
192    112    
144    16     
-48    -880   
224    576    
-112   -112   
-304   -400   
-32    192    
-48    208    
32     -80    
0      -32    
336    -1184  
-80    -112   
96     192    
48     176    
32     -464   
96     -272   
-112   416    
48     -128   
-112   64     
80     -128   
-16    -640   
-32    256    
128    320    
160    128    
176    -144   
-16    -160   
176    224    
-176   64     
144    128    
176    176    
272    672    
-352   -144   
192    64     
-64    -64    
64     32     
-80    384    
32     -96    
64     48     
144    48     
144    -112   
176    160    
64     192    
16     240    
192    64     
32     112    
176    80     
-144   0      
336    128    
-256   32     
192    80     
-320   240    
256    64     
0      -32    
32     -80    
-96    112    
192    -16    
128    -176   
192    -800   
320    160    
-32    224    
96     64     
128    96     
64     96     
48     -16    
64     0      
-144   560    
256    160    
16     64     
192    16     
144    0      
-32    -32    
96     -32    
128    -112   
128    -112   
16     -48    
96     -32    
-96    16     
48     176    
176    128    
128    -16    
128    608    
-192   208    
144    0      
320    32     
-80    272    
80     112    
-96    -32    
48     128    
240    16     
288    -752   
80     -32    
-272   112    
-80    -16    
-16    64     
64     48     
64     192    
448    384    
-144   384    
-80    0      
-112   -64    
144    -64    
176    96     
160    -16    
64     -16    
240    -32    
-160   192    
-64    -32    
240    128    
-64    320    
96     112    
336    64     
16     64     
-176   112    
-48    -112   
208    32     
-112   -464   
64     -96    
128    112    
-16    224    
-112   -96    
224    -352   
240    0      
0      160    
-48    96     
64     0      
-96    -16    
48     -192   
256    -144   
208    -64    
256    240    
-16    -32    
-32    80     
80     -80    
192    128    
-16    48     
-48    48     
256    -144   
-112   -224   
-160   96     
0      -240   
48     -592   
128    224    
160    -448   
288    112    
112    240    
-32    -144   
144    -112   
144    -176   
144    16     
-80    -144   
-112   -768   
208    -368   
176    -144   
176    272    
-16    0      
144    -192   
64     -64    
288    -16    
-48    -368   
-160   -1088  
32     256    
272    704    
-208   -240   
128    -144   
416    368    
0      -160   
224    -64    
112    -128   
432    -16    
-160   0      
448    192    
-352   -160   
-368   -432   
144    16     
160    48     
384    0      
320    -752   
736    320    
-80    768    
-176   240    
128    -16    
112    240    
400    16     
448    128    
-544   96     
-32    224    
-624   -32    
-96    -144   
-128   -16    
64     64     
304    -32    
288    -48    
112    -64    
-64    -48    
-64    64     
192    -80    
96     32     
96     -48    
48     -144   
-144   0      
128    32     
-752   -32    
256    -32    
192    64     
-176   -144   
384    -32    
-64    -512   
160    -496   
32     -704   
-208   256    
-272   -128   
272    -16    
-208   32     
128    -16    
-32    0      
-48    32     
-112   32     
16     -48    
80     32     
-32    -144   
-480   -16    
-112   -80    
80     64     
48     -592   
144    -32    
-64    64     
160    16     
-144   64     
80     16     
-64    -32    
16     -208   
-480   -208   
-64    -16    
-912   80     
144    64     
-96    80     
112    -64    
-64    -96    
288    -320   
0      48     
176    -64    
64     16     
0      128    
64     -80    
0      -112   
400    304    
-832   304    
16     80     
96     0      
-48    -160   
112    48     
528    192    
-128   192    
-240   -608   
-160   -288   
176    -64    
272    448    
-704   0      
240    -128   
-912   48     
-64    -112   
-16    32     
64     -32    
-112   -16    
96     -96    
64     48     
-128   -176   
32     64     
176    -224   
64     80     
-64    -64    
80     16     
-128   96     
128    32     
-352   32     
288    64     
-272   -48    
144    144    
-352   32     
160    -160   
-48    16     
48     -64    
368    176    
-400   0      
-2144  -112   
0      32     
176    -224   
144    -80    
-128   64     
-48    -48    
400    48     
-192   32     
192    -48    
0      48     
-720   -128   
288    32     
-400   -80    
112    80     
-208   -112   
-960   -16    
-160   32     
-96    48     
96     -16    
-496   16     
-96    -48    
304    64     
-608   -352   
64     -256   
-16    112    
64     -176   
144    0      
-192   -64    
80     32     
-48    176    
-192   -48    
-64    16     
144    32     
-64    -96    
-272   16     
-112   208    
-1120  0      
32     -208   
32     176    
336    128    
-256   -112   
128    128    
-224   -192   
64     -32    
0      208    
16     -400   
0      256    
-208   0      
-80    -128   
96     16     
0      32     
160    144    
224    80     
-32    -112   
-16    112    
-112   112    
-384   -1040  
-16    336    
48     -48    
144    208    
0      -48    
-192   96     
-128   32     
272    528    
-96    -64    
80     -64    
-432   -144   
-224   112    
-2720  -720   
-48    416    
-80    -16    
-80    -128   
320    192    
-256   -352   
-656   64     
-272   -288   
-192   112    
80     144    
272    16     
64     144    
-128   160    
-112   -272   
208    -16    
-480   32     
208    64     
144    -16    
-352   -1632  
240    912    
160    512    
80     -704   
48     352    
96     -80    
-176   -224   
-48    496    
-688   -432   
-400   -240   
224    672    
-208   -32    
48     -608   
384    -160   
464    384    
160    -80    
288    -320   
-64    -192   
-176   256    
128    544    
-336   160    
-272   -48    
-192   -16    
-16    -48    
128    -128   
192    -128   
96     208    
-96    80     
80     192    
-464   480    
-240   384    
-160   80     
16     16     
144    384    
304    208    
-32    0      
0      64     
64     -176   
48     144    
-16    48     
-128   -80    
16     32     
-208   -80    
176    48     
16     80     
32     144    
288    272    
-224   -112   
-32    272    
112    0      
-48    -16    
80     -96    
-96    -144   
-64    -64    
-144   -352   
128    -96    
-96    80     
-448   -384   
384    -368   
256    112    
-208   528    
-96    -192   
-144   -32    
240    -176   
64     112    
224    432    
-272   64     
368    448    
-560   336    
16     224    
-208   -544   
272    -112   
-176   -192   
-48    160    
0      -48    
-144   -416   
224    -16    
-16    64     
-48    -288   
-16    -224   
-48    96     
144    304    
-160   288    
-32    -96    
32     -48    
-112   -16    
128    0      
-32    80     
160    -64    
-192   112    
-16    -16    
80     -64    
-32    -16    
144    64     
-160   -272   
-96    -224   
-96    -32    
128    352    
-128   -16    
-16    -32    
16     -128   
64     -32    
208    -16    
-208   96     
-224   224    
592    480    
16     528    
0      64     
16     -144   
288    144    
240    80     
-80    -176   
48     -48    
0      -208   
32     -192   
64     -432   
-160   -32    
160    352    
192    176    
272    128    
48     80     
48     48     
-80    -128   
-16    0      
-144   -32    
448    -48    
256    96     
144    48     
-256   80     
32     96     
-64    112    
112    -480   
96     -128   
176    -144   
112    16     
-64    0      
112    48     
-96    112    
16     112    
80     176    
208    128    
32     80     
272    368    
-96    240    
400    208    
-208   112    
112    -176   
-48    48     
-96    64     
-128   192    
48     112    
-16    48     
368    240    
48     288    
-64    64     
-112   -80    
-240   -368   
80     48     
64     192    
64     -304   
0      128    
16     -16    
32     -256   
224    176    
-112   -240   
112    -16    
160    80     
16     -16    
112    -272   
64     96     
0      144    
-64    80     
96     -16    
96     176    
32     -112   
48     -128   
176    -416   
208    208    
-80    272    
256    368    
-160   -96    
-224   0      
208    160    
96     80     
352    -176   
304    -176   
432    -192   
272    -320   
464    48     
112    -320   
128    -16    
96     -32    
-400   -160   
80     -464   
-64    144    
0      96     
16     48     
128    0      
-192   -304   
256    -160   
-16    240    
-512   48     
288    32     
48     48     
-224   -144   
416    64     
-48    80     
-144   -240   
672    -640   
288    144    
-48    -32    
64     48     
-16    -128   
96     -48    
-32    48     
384    240    
-496   -32    
160    96     
-48    112    
48     0      
64     -80    
256    -16    
224    16     
160    -48    
-48    48     
-192   96     
192    96     
-128   -768   
-112   0      
224    0      
208    256    
-80    160    
-192   -112   
176    -16    
224    80     
96     80     
192    -96    
-48    48     
128    16     
48     16     
-32    -368   
32     112    
-80    0      
112    -48    
-32    -80    
64     96     
16     -96    
256    16     
48     64     
112    48     
160    208    
-240   -80    
80     16     
64     48     
64     128    
160    -80    
144    96     
64     -16    
336    -272   
-16    16     
144    -16    
96     -640   
-240   -80    
192    304    
32     32     
128    64     
0      -32    
128    64     
160    -208   
240    176    
-128   80     
336    -208   
-160   64     
-48    -96    
-96    -64    
-2224  -80    
240    -304   
-112   -176   
400    -160   
-112   -16    
128    -48    
-480   -224   
112    -112   
240    48     
240    -288   
176    32     
192    -240   
-64    -48    
128    -144   
-32    -112   
-208   -32    
240    16     
-160   16     
176    -128   
208    -32    
112    -96    
48     -16    
80     0      
64     -48    
96     -32    
16     80     
80     -64    
32     80     
176    -176   
-64    -160   
-16    48     
-16    -64    
192    -112   
48     -176   
160    80     
0      -64    
-64    -32    
128    -128   
32     -32    
240    -48    
-16    -16    
224    -192   
32     -240   
-48    -64    
48     48     
-352   -80    
64     32     
-272   112    
208    -176   
144    -96    
-16    -176   
-80    -240   
288    -144   
-640   144    
160    -64    
144    -96    
96     32     
-160   48     
80     -400   
96     352    
-320   64     
-128   -96    
-16    -16    
64     80     
-208   32     
-16    32     
176    176    
0      -144   
128    320    
-112   -288   
-80    -336   
128    624    
256    -448   
112    -144   
-64    368    
-144   64     
224    -384   
64     -192   
80     240    
-224   176    
80     -544   
64     0      
-144   -384   
112    192    
80     -144   
-16    -64    
-128   -96    
-32    -432   
-240   -304   
176    -96    
-80    112    
32     64     
-32    400    
-48    224    
-784   -144   
16     -320   
0      -112   
48     -224   
32     -80    
80     -320   
176    -176   
-208   -112   
96     80     
96     -64    
80     -176   
-336   -144   
-16    -160   
-144   -352   
48     -480   
176    64     
96     528    
-160   -80    
144    -128   
64     -32    
384    -448   
320    -112   
208    112    
128    80     
176    128    
-128   -48    
-464   -48    
-144   -112   
96     -320   
384    -192   
144    16     
32     -32    
112    -32    
-544   -208   
48     64     
-944   64     
-1280  16     
-208   -16    
-2128  -160   
-224   -160   
112    -80    
-32    32     
-96    -144   
288    -96    
-80    208    
224    272    
-960   32     
-384   208    
-800   -208   
16     32     
144    -176   
208    -112   
-112   -176   
-416   -320   
0      96     
-752   128    
0      160    
208    64     
0      224    
-208   16     
96     -16    
-208   -464   
-32    -336   
-240   -192   
-128   48     
32     80     
-240   112    
-32    16     
-208   -16    
-16    -176   
-240   -176   
0      -16    
-2416  -144   
160    -32    
-464   -336   
-16    -64    
176    -96    
112    432    
272    32     
-208   -144   
-112   -208   
48     -256   
48     304    
-272   -80    
80     -112   
-112   -112   
-208   -464   
-1264  -464   
-16    -304   
-144   112    
208    96     
-112   304    
224    -64    
-272   -80    
-176   128    
-64    -288   
-80    -48    
144    -176   
-144   64     
-16    -192   
80     32     
-112   224    
-80    288    
432    304    
-288   784    
-416   608    
-352   -192   
224    -48    
-16    80     
336    112    
16     -32    
80     -16    
-96    64     
0      -208   
-48    -416   
-128   -48    
208    -176   
-96    352    
304    -48    
-1760  32     
64     -48    
-80    48     
-96    -176   
80     -80    
-64    32     
144    -256   
-80    80     
16     -32    
-320   -800   
96     -192   
-208   -288   
-16    -80    
-272   64     
320    384    
-320   192    
208    112    
336    112    
96     176    
-208   320    
48     240    
96     384    
-128   -112   
-64    32     
-32    480    
480    608    
-64    256    
64     -48    
0      624    
240    352    
48     240    
208    240    
-80    416    
336    304    
-112   -16    
-144   -64    
-64    -192   
304    224    
-320   112    
0      -576   
80     48     
-272   384    
192    32     
-48    64     
-128   320    
-272   -16    
240    -192   
304    448    
-256   -80    
-64    -16    
224    0      
-64    128    
-80    176    
48     800    
288    -128   
80     -80    
-304   -96    
336    96     
-32    32     
192    400    
-432   -224   
-128   128    
-80    96     
-48    64     
112    64     
80     64     
208    0      
192    128    
48     64     
-112   -32    
48     96     
-224   -48    
-16    -128   
-48    32     
96     -16    
160    32     
96     144    
112    192    
0      128    
80     64     
144    -96    
-64    -16    
64     -64    
96     96     
160    256    
0      160    
-384   -64    
128    -96    
-32    -416   
256    32     
576    80     
368    160    
176    16     
16     160    
112    80     
-144   160    
80     -96    
-64    -96    
16     80     
-288   -16    
-96    64     
-112   32     
-208   96     
-208   -16    
-48    -16    
160    32     
48     128    
224    368    
-320   64     
160    -80    
688    -32    
368    -32    
448    128    
480    -32    
-160   -16    
-752   -160   
-256   96     
-144   80     
-144   16     
96     -32    
368    48     
144    16     
0      -176   
560    -48    
64     80     
160    144    
80     48     
-80    -32    
64     -32    
-336   -112   
416    32     
-32    96     
320    112    
400    192    
-128   32     
-16    48     
-112   32     
-96    32     
-32    0      
192    32     
-128   64     
0      96     
112    96     
96     -16    
0      16     
32     64     
48     -64    
-16    -96    
416    16     
-112   -480   
96     64     
64     0      
112    48     
160    32     
-96    -16    
144    64     
-32    48     
128    64     
96     112    
-64    64     
48     32     
-16    32     
96     -48    
-128   272    
176    32     
0      0      
0      -80    
112    32     
-272   -64    
352    176    
-176   -32    
0      -176   
288    32     
-16    0      
64     0      
128    64     
32     112    
176    16     
-240   0      
400    32     
-48    16     
176    -16    
320    304    
-416   144    
16     32     
-144   -144   
96     -224   
176    -160   
208    80     
80     80     
48     -32    
-288   -288   
-16    -80    
-288   -224   
-48    -304   
144    176    
352    -192   
-112   288    
256    96     
0      -48    
32     16     
-48    -96    
48     208    
-32    32     
96     0      
0      96     
128    112    
-32    80     
48     -112   
96     32     
48     48     
0      16     
-16    -144   
96     -432   
32     224    
-80    -128   
512    416    
-304   -96    
96     -272   
224    288    
-48    -176   
160    -16    
-80    0      
-48    496    
512    -384   
-32    32     
-48    -32    
-192   -352   
16     -16    
656    544    
-400   -448   
144    192    
320    336    
-80    96     
80     288    
-320   -416   
352    -608   
128    128    
320    816    
64     -224   
96     160    
-16    0      
240    96     
-128   352    
-32    160    
-16    144    
224    240    
-208   32     
64     -48    
80     -112   
128    0      
80     144    
-256   -160   
208    -32    
112    -48    
448    160    
-48    112    
272    192    
-112   128    
-16    -32    
240    -32    
48     0      
112    16     
48     -80    
192    -432   
-16    144    
96     -1312  
128    -96    
48     16     
176    64     
176    96     
304    128    
-256   96     
64     -112   
32     -288   
144    -16    
32     -304   
160    -144   
224    32     
64     0      
32     -64    
304    -208   
-128   -112   
96     -80    
-16    -128   
-48    -64    
112    128    
-48    80     
192    -32    
-16    -112   
96     32     
32     32     
-144   32     
32     16     
-32    -96    
-128   -368   
256    16     
-16    128    
16     -416   
240    -96    
-16    -1408  
-224   0      
-16    -128   
-128   -80    
176    -80    
16     64     
32     208    
-128   288    
-464   -96    
144    -224   
96     -128   
48     -96    
272    -224   
208    -352   
576    320    
-144   208    
64     16     
96     -160   
-16    272    
128    0      
112    16     
-32    32     
16     304    
-224   240    
-272   -32    
304    208    
-176   80     
112    -128   
272    0      
-80    160    
160    -32    
240    112    
160    32     
192    16     
224    -32    
-144   16     
-16    80     
112    96     
64     -16    
-96    -208   
-128   -80    
128    -80    
96     96     
0      -48    
128    64     
128    0      
48     48     
208    -464   
-96    64     
-32    -96    
192    -224   
32     -32    
192    96     
64     272    
-160   16     
128    64     
64     192    
-272   0      
80     -208   
0      48     
128    -464   
-80    -112   
288    592    
448    624    
-288   -512   
32     -944   
-32    -432   
-48    128    
-192   -128   
144    80     
-400   16     
192    160    
80     736    
336    128    
416    480    
128    464    
-96    368    
-96    -1104  
128    160    
-272   320    
144    -240   
-80    816    
0      -16    
-160   -176   
-304   -544   
0      -64    
16     16     
16     -48    
80     -96    
160    -128   
-16    496    
368    624    
-64    -496   
144    -112   
-160   -112   
128    -208   
-160   352    
224    272    
32     112    
112    -48    
-48    -400   
96     -192   
-656   -160   
128    240    
16     -608   
-560   32     
416    192    
-48    336    
-1344  -272   
96     96     
-32    -304   
96     -288   
112    -64    
0      208    
96     -160   
-32    -320   
-64    -48    
64     352    
-240   -176   
64     0      
-432   -128   
-192   -112   
432    -208   
-544   384    
560    320    
-448   -96    
-128   -240   
-736   -96    
-144   208    
208    -144   
48     -32    
208    48     
-32    64     
-64    -80    
-16    -16    
-80    -160   
-160   -16    
240    144    
-352   -32    
-80    -96    
-656   32     
-112   -64    
-1120  -64    
16     48     
48     32     
96     160    
-320   -288   
80     16     
-64    -64    
96     -96    
-64    -208   
-144   -160   
48     -496   
0      -432   
-16    -32    
-64    -128   
112    176    
-80    32     
-32    64     
-1472  32     
-96    -32    
-144   -288   
-64    -448   
128    -416   
32     -160   
160    16     
-128   -32    
-16    64     
-176   112    
64     160    
0      80     
-16    -16    
-336   48     
-48    0      
-464   -80    
160    -272   
-192   -224   
-32    256    
-48    48     
176    48     
0      96     
-112   16     
-32    -32    
0      64     
128    -16    
560    -32    
-464   16     
-688   48     
-368   48     
-544   -96    
736    528    
-784   288    
-64    320    
-208   368    
-160   -96    
384    -96    
128    -32    
144    112    
-384   96     
-224   0      
-272   -32    
-48    176    
-272   48     
32     16     
-96    -16    
352    160    
-384   -96    
432    -16    
-48    80     
-80    64     
-32    0      
-64    16     
432    384    
-224   80     
224    -240   
432    192    
-272   160    
-176   0      
32     -48    
-80    96     
-64    144    
-912   -112   
-48    -192   
176    -80    
-304   80     
64     96     
-16    80     
480    256    
-384   0      
288    32     
-256   32     
-176   -32    
160    0      
80     32     
-240   -16    
0      -32    
80     -48    
96     112    
-112   -48    
160    -32    
224    64     
-144   -32    
352    192    
-48    48     
-160   64     
144    192    
-192   0      
-128   -48    
112    96     
32     32     
336    80     
-208   -112   
32     -48    
-32    32     
-176   -256   
32     16     
-192   0      
64     0      
96     32     
112    96     
-96    -32    
32     80     
-96    16     
288    160    
-288   96     
208    -160   
112    -160   
144    128    
80     0      
16     -16    
-128   192    
-144   64     
320    -16    
-288   64     
-208   -176   
16     16     
112    160    
-304   32     
144    16     
48     96     
-464   -336   
80     -192   
-80    80     
96     -16    
640    256    
80     224    
-112   -112   
224    -128   
-160   96     
608    -256   
192    -32    
512    208    
-304   32     
-64    336    
-176   -176   
0      64     
48     272    
336    -128   
-368   -512   
96     768    
432    -224   
-64    192    
96     80     
80     -752   
64     912    
32     -480   
-16    208    
-48    80     
128    -96    
0      64     
80     256    
96     224    
64     0      
80     32     
-80    640    
400    352    
-272   -768   
-32    -576   
0      -192   
-32    -48    
-16    -32    
32     64     
-96    -48    
-144   192    
240    160    
0      -352   
-32    -144   
144    -16    
-112   384    
-64    576    
224    32     
208    160    
16     80     
128    112    
192    144    
16     -32    
176    0      
-48    128    
-128   80     
144    -64    
128    -704   
208    32     
-32    96     
176    0      
0      112    
80     -16    
-16    112    
16     48     
-16    -32    
16     48     
-192   -32    
16     32     
48     -16    
48     -224   
48     0      
144    -320   
-96    16     
96     96     
208    64     
112    80     
-112   -240   
-16    128    
208    192    
-96    -64    
160    -32    
0      48     
96     96     
-16    16     
32     -80    
128    240    
192    -208   
96     -112   
64     80     
-144   16     
288    464    
48     224    
80     -208   
32     -80    
-160   0      
96     176    
-112   160    
-160   -240   
368    -400   
128    -96    
336    192    
-80    -144   
64     48     
-48    -816   
-80    80     
496    608    
-368   576    
-176   0      
240    -96    
-208   -256   
416    -160   
-96    -32    
-144   -288   
176    96     
32     224    
224    0      
304    -320   
-32    -48    
-112   -1088  
224    224    
-336   -192   
-224   -32    
-128   0      
240    176    
176    96     
48     64     
160    0      
112    -32    
-320   96     
-448   -48    
-224   112    
48     -48    
320    96     
-96    -240   
128    -32    
128    -64    
160    -320   
-368   -128   
-16    0      
-336   368    
320    480    
16     176    
32     -160   
64     -64    
160    336    
256    48     
-32    -176   
32     144    
-32    -16    
-16    -80    
96     -112   
128    128    
144    64     
192    224    
-96    128    
-16    80     
224    48     
64     -96    
32     48     
32     -64    
368    304    
-176   400    
144    144    
176    -576   
-48    240    
96     -128   
-208   -176   
288    176    
-144   -416   
160    480    
256    -640   
-112   -96    
128    -32    
48     -224   
16     64     
112    336    
-32    144    
-128   -64    
-224   96     
48     -1152  
-32    192    
432    128    
208    0      
256    -688   
16     -64    
-16    96     
32     -144   
0      -112   
32     -144   
80     240    
0      -1792  
176    896    
-208   448    
-144   -944   
432    160    
576    624    
-192   -528   
-48    -128   
-128   272    
80     -320   
-384   -48    
464    224    
-208   32     
336    -560   
-528   -1120  
-32    -560   
0      288    
80     -32    
288    272    
208    -80    
-160   32     
-16    80     
144    32     
-336   -256   
192    -192   
-1008  -32    
-16    -64    
80     -112   
112    -16    
160    16     
64     32     
112    112    
80     -448   
-256   -48    
64     -48    
112    -16    
176    80     
176    32     
32     128    
-48    -48    
-160   -96    
176    -80    
-704   16     
96     -48    
64     -32    
368    -496   
-352   -352   
144    -144   
0      -112   
48     -32    
240    32     
-32    48     
96     -32    
-176   -48    
-32    -32    
-224   16     
64     -64    
-672   32     
80     0      
80     0      
240    -48    
144    0      
160    -224   
-64    32     
80     192    
0      32     
-192   -16    
160    48     
-80    64     
112    64     
-96    0      
96     128    
16     304    
-64    48     
-672   -48    
224    -32    
-96    0      
80     -256   
-16    32     
128    -352   
176    32     
-176   64     
272    -112   
-80    -80    
192    -224   
-288   -48    
16     -176   
-400   80     
80     32     
192    256    
-144   -32    
112    -16    
144    -128   
144    -64    
144    -432   
144    -80    
240    128    
64     80     
-160   144    
32     -112   
-288   0      
32     -64    
-64    -16    
80     -176   
-240   16     
-48    -160   
32     48     
160    -240   
-224   -384   
704    -624   
176    208    
96     352    
144    32     
-368   0      
-368   -208   
480    -176   
160    64     
-320   208    
-176   -112   
112    -16    
240    64     
0      128    
-656   -144   
64     16     
-80    128    
-720   -48    
-128   -48    
-2160  16     
-336   -48    
272    64     
48     144    
-48    16     
-368   -16    
-672   -224   
448    80     
-400   -192   
496    -80    
176    -80    
80     80     
-96    48     
16     112    
-272   0      
-112   -64    
192    -16    
-592   -32    
-80    -32    
288    -144   
320    144    
-672   0      
-128   -80    
192    16     
80     96     
-384   -144   
224    32     
-80    80     
-80    96     
112    128    
-144   48     
-368   64     
-32    144    
-80    16     
224    32     
-304   80     
16     16     
256    80     
-96    32     
16     96     
-48    0      
-48    32     
96     48     
0      32     
16     96     
64     0      
-16    16     
-224   -16    
32     112    
0      -64    
112    -16    
-32    -208   
16     48     
-144   -16    
-176   -192   
48     -16    
-80    -112   
0      352    
-16    16     
-96    16     
-416   -176   
208    -112   
-48    -32    
-304   -352   
64     0      
128    -48    
-208   -160   
-240   -96    
32     -560   
256    512    
-48    496    
160    -176   
-128   128    
-432   -96    
-32    112    
16     -144   
128    96     
432    304    
-256   0      
-400   64     
112    272    
-128   192    
-240   -160   
160    272    
160    336    
-96    64     
48     -16    
288    -16    
-320   528    
192    -160   
-48    112    
-224   80     
32     -592   
32     176    
-208   -256   
176    304    
-1072  272    
80     -80    
-16    336    
-416   -80    
-208   -64    
-16    -16    
112    -32    
96     112    
-48    -32    
-160   -112   
240    -336   
-464   -128   
160    0      
128    48     
-176   32     
-640   80     
-304   16     
80     -16    
16     64     
16     16     
112    128    
160    32     
96     0      
-144   64     
160    -16    
16     -112   
32     16     
16     0      
-80    -128   
64     16     
-608   -352   
192    -176   
80     80     
-16    -32    
96     96     
64     16     
0      0      
32     48     
112    64     
-160   48     
208    64     
-112   96     
208    0      
-336   -64    
272    96     
32     32     
32     -16    
96     16     
144    80     
-96    96     
-160   16     
48     16     
112    96     
-32    240    
-224   0      
0      -16    
-256   64     
208    80     
-128   -48    
80     32     
-64    272    
240    -16    
64     -32    
96     176    
-16    64     
0      0      
0      -32    
128    96     
96     160    
-176   0      
224    -32    
-112   16     
96     -16    
-48    16     
192    208    
32     160    
-64    -64    
112    -48    
-128   -224   
144    -112   
32     64     
-16    -96    
96     368    
-112   256    
-176   -144   
96     -16    
-160   64     
0      -32    
208    -144   
128    0      
0      304    
448    720    
-112   80     
-16    -400   
128    -560   
304    -176   
384    16     
336    -16    
400    400    
-208   432    
-32    304    
-272   96     
176    -96    
0      128    
96     32     
-16    80     
-112   -16    
0      80     
0      32     
80     224    
64     288    
-16    0      
256    -288   
160    -224   
192    0      
-144   -400   
240    208    
-400   -80    
-16    -32    
144    160    
80     -176   
48     144    
576    32     
544    144    
96     560    
16     -64    
-16    -112   
-112   48     
32     -32    
96     160    
160    112    
-336   -112   
176    -272   
128    448    
96     0      
64     96     
-128   0      
-96    96     
-176   688    
384    -496   
176    -80    
-304   112    
144    224    
-160   -192   
-48    -304   
256    -224   
192    192    
64     64     
0      -176   
-32    -1456  
96     144    
-80    80     
160    -32    
-96    -80    
144    -256   
0      -64    
112    48     
-224   -64    
128    0      
-144   -48    
128    160    
208    144    
48     -16    
224    720    
48     272    
-224   -224   
-32    -48    
128    128    
-240   48     
64     -48    
-16    -160   
80     96     
-48    16     
256    80     
64     48     
-16    -80    
0      64     
-48    -288   
144    -64    
-240   -368   
80     -96    
-128   -720   
160    144    
16     -224   
-240   -80    
208    16     
288    112    
-256   -192   
720    -160   
80     -64    
-224   -800   
208    -720   
-16    272    
-496   192    
-32    -80    
176    64     
80     -304   
48     32     
32     -1216  
48     96     
32     64     
112    80     
192    48     
176    16     
48     48     
32     -48    
64     80     
80     32     
128    128    
-112   -272   
112    32     
16     -368   
176    128    
128    -96    
-48    -64    
-176   -32    
256    -48    
176    160    
32     112    
-48    -96    
448    -96    
-208   128    
304    -256   
-64    -32    
-80    -144   
-16    80     
-80    -80    
352    -48    
432    192    
-256   -48    
-32    -80    
160    192    
-16    -64    
128    0      
304    256    
80     64     
-320   -96    
128    -64    
96     -64    
288    -192   
128    64     
96     -16    
192    144    
-112   -16    
80     48     
176    80     
128    -432   
-16    -144   
128    32     
400    -432   
-304   -64    
64     -96    
176    32     
32     0      
0      48     
-48    96     
48     -96    
80     -32    
64     0      
-16    -112   
-80    112    
128    64     
160    -432   
192    -48    
80     -16    
160    -16    
-48    -256   
128    -80    
-16    -16    
128    -16    
128    16     
-64    -192   
128    -160   
144    -128   
96     -32    
-16    112    
-528   -96    
80     -96    
-672   32     
128    0      
272    32     
-112   -16    
64     -32    
-272   -1312  
-160   -672   
-144   112    
-304   240    
80     64     
400    240    
-288   0      
-144   -272   
-208   -112   
528    -384   
368    -144   
464    144    
112    80     
-208   -240   
-64    -96    
-80    -144   
64     -64    
96     -640   
240    112    
208    112    
-192   272    
48     368    
-176   -16    
272    -96    
448    -32    
-96    192    
0      -32    
112    -432   
16     -416   
-240   -160   
-144   80     
160    160    
-48    -560   
80     -48    
320    0      
-128   32     
-464   -64    
-96    224    
-224   112    
576    464    
-1168  224    
272    144    
-1344  144    
336    32     
400    -64    
-112   -16    
80     112    
-80    -352   
64     -128   
224    -112   
144    0      
464    -192   
112    -128   
288    624    
96     32     
-224   -224   
-96    80     
-112   64     
400    128    
-112   -96    
0      -144   
-32    -32    
64     -208   
64     192    
96     16     
176    -224   
-128   96     
192    288    
-96    96     
32     0      
-352   -128   
288    128    
-272   224    
176    -272   
128    176    
80     -32    
-416   -96    
144    -64    
224    368    
-256   -272   
-368   -304   
128    -192   
272    240    
304    16     
192    -432   
-80    160    
96     -64    
-144   -64    
160    432    
-368   128    
144    -48    
208    112    
-32    -112   
16     48     
-416   -80    
272    -224   
-32    16     
240    144    
-176   144    
320    16     
-128   192    
-16    80     
272    -128   
-80    32     
288    -208   
-752   -16    
144    -160   
-1328  -224   
-1632  -96    
-192   -32    
-864   96     
-192   -64    
-1488  0      
-144   -48    
160    64     
-96    -208   
-16    96     
80     80     
-432   432    
16     176    
-368   -320   
16     0      
-528   -256   
-48    160    
-64    -80    
320    -112   
-320   48     
-112   272    
-208   48     
96     16     
-32    16     
112    -144   
-96    -64    
-416   48     
64     112    
-80    64     
240    192    
-96    -464   
16     -336   
-16    128    
-304   176    
-192   64     
16     -64    
-192   240    
368    272    
-256   240    
-416   -32    
-64    0      
-272   -48    
208    112    
64     -112   
48     -16    
32     -16    
-96    208    
192    32     
-240   64     
-48    -48    
-16    96     
-48    -32    
-112   0      
-128   0      
-800   -144   
-48    -64    
-64    -352   
96     0      
-144   80     
-128   -144   
192    -80    
-16    48     
-96    -32    
80     64     
-16    32     
-176   208    
-16    80     
-128   -80    
-224   -96    
-80    -96    
176    64     
-128   128    
160    112    
-32    -16    
-112   -32    
80     32     
48     -32    
-64    0      
-144   -64    
-144   0      
-64    -16    
192    -80    
176    96     
-48    96     
-752   -16    
128    176    
-80    0      
-96    32     
-96    32     
128    -64    
208    16     
16     64     
-48    -400   
-48    -16    
-96    -64    
-416   -128   
128    96     
64     48     
-304   112    
-800   -288   
128    144    
-2448  272    
208    336    
16     -208   
-240   -448   
-96    -384   
-224   16     
-32    464    
-320   -112   
192    -48    
368    32     
704    368    
-160   176    
-192   -176   
-64    -32    
384    416    
-1040  -224   
-416   -32    
144    -256   
304    192    
224    160    
-128   0      
-368   -240   
-144   336    
-176   -240   
-176   0      
32     96     
256    -48    
176    176    
-384   368    
32     160    
144    -656   
144    -320   
112    32     
-144   208    
-272   -16    
176    -112   
128    112    
112    208    
112    144    
-400   -48    
-96    32     
-224   -80    
-144   -32    
-112   -64    
80     96     
224    176    
256    128    
-48    64     
-96    16     
224    176    
-128   32     
112    48     
-32    48     
16     0      
48     16     
-64    32     
-128   32     
112    96     
-144   16     
32     0      
0      -16    
208    32     
-96    64     
48     0      
16     64     
48     112    
-176   480    
336    32     
-352   -48    
80     208    
16     208    
-32    160    
288    64     
176    96     
-432   0      
-64    0      
48     -96    
48     192    
-144   128    
-16    32     
272    -32    
48     0      
240    48     
112    -16    
48     32     
80     160    
64     160    
-576   -16    
0      48     
-160   -16    
64     -128   
176    -16    
-448   -96    
-96    -352   
560    -80    
-32    224    
-176   32     
240    -64    
32     144    
-320   -64    
128    96     
-144   32     
112    -112   
32     96     
-256   -32    
448    0      
-192   48     
64     192    
80     -112   
80     96     
-128   -80    
208    -64    
-32    32     
128    112    
-160   -96    
352    0      
-288   32     
144    -384   
-64    -16    
208    -32    
-64    16     
176    32     
-112   0      
32     16     
64     48     
80     -144   
224    16     
-176   176    
368    208    
64     64     
32     -48    
-48    144    
208    -384   
48     80     
16     64     
112    176    
0      128    
144    -16    
-192   96     
96     -32    
176    128    
112    112    
-80    0      
-32    32     
176    48     
16     112    
160    112    
96     -64    
-80    32     
64     -304   
48     144    
144    128    
32     -32    
-64    16     
176    160    
112    528    
320    192    
-48    112    
-16    224    
48     64     
-16    -160   
-16    16     
0      32     
128    80     
-64    -688   
64     -64    
80     -32    
80     176    
-32    -96    
-48    16     
-32    -128   
160    224    
-192   -32    
32     32     
-64    -160   
32     0      
64     192    
-32    -336   
-32    -128   
160    -144   
112    464    
240    -1600  
-32    -176   
32     240    
0      32     
48     80     
80     64     
-192   32     
96     112    
320    944    
64     -208   
-80    -336   
-32    80     
-112   -16    
336    -48    
-352   -32    
-192   -224   
416    432    
-208   -48    
256    96     
176    -80    
352    64     
176    16     
208    16     
32     0      
-192   -80    
-272   96     
-256   -416   
-96    -192   
176    -160   
320    96     
832    160    
-288   1024   
-64    -224   
32     64     
560    448    
-144   -16    
256    -48    
192    0      
192    32     
32     -384   
-64    0      
144    16     
0      96     
-144   160    
176    192    
96     -48    
-96    64     
192    240    
-368   -64    
-80    0      
288    -128   
160    144    
96     -96    
240    0      
-112   80     
-16    -16    
144    -48    
-48    -64    
-144   -192   
304    288    
240    112    
16     -32    
208    -96    
-64    288    
-144   32     
-16    -704   
96     -960   
32     -112   
112    16     
144    -128   
144    -592   
112    -80    
112    32     
16     -112   
64     112    
-16    352    
256    -32    
-32    128    
192    160    
-192   336    
-192   208    
64     -80    
144    -304   
128    -128   
384    16     
-96    -336   
64     48     
176    -64    
0      -128   
64     -272   
-32    -112   
144    -448   
80     -48    
-16    -320   
176    -304   
-96    112    
160    -144   
368    -96    
112    -128   
160    144    
-176   112    
96     80     
128    -80    
-16    128    
48     -80    
160    -96    
144    -48    
32     48     
512    -128   
48     0      
-352   112    
384    272    
-1856  64     
320    32     
-64    176    
16     -16    
112    -96    
160    -336   
128    -112   
-64    -144   
288    -16    
64     16     
-112   -96    
208    -304   
-80    32     
-272   112    
528    144    
-656   144    
192    32     
-80    16     
224    -32    
16     -176   
304    -48    
-272   208    
32     -512   
112    -48    
272    -48    
-144   -80    
-192   -112   
208    32     
64     128    
-64    16     
-224   -48    
240    160    
-64    -16    
448    32     
-64    176    
96     -48    
80     -16    
48     -48    
304    160    
-64    224    
-64    -192   
-240   -80    
272    -112   
176    -16    
96     32     
-336   32     
-64    -64    
-1920  -112   
96     0      
48     -176   
16     -144   
48     32     
176    -240   
80     -16    
80     -64    
96     32     
-112   96     
128    80     
-96    -32    
-16    160    
-880   -16    
256    256    
-240   80     
112    -224   
192    -48    
144    -224   
16     528    
96     -48    
128    80     
-16    144    
48     -16    
64     112    
0      160    
-48    240    
256    0      
-48    336    
112    192    
80     128    
0      128    
16     96     
64     320    
144    384    
176    -272   
0      -112   
-224   0      
-48    368    
-192   368    
112    -48    
-208   -144   
48     160    
-80    32     
16     -192   
-272   -64    
-80    -368   
-32    192    
512    1024   
-528   -1056  
-368   -208   
-208   208    
-192   -112   
-192   -48    
-16    80     
16     -160   
80     224    
112    384    
-464   -64    
-176   -544   
-32    128    
-368   224    
-96    576    
400    80     
272    -48    
-240   -32    
-480   0      
-416   144    
-416   192    
256    320    
-704   16     
-240   -48    
-1392  -64    
-208   -32    
256    -80    
272    128    
-112   192    
240    112    
256    64     
144    32     
-176   -112   
-80    -16    
-64    128    
-304   64     
16     -32    
-160   16     
32     80     
-448   304    
-544   80     
-80    -112   
-48    16     
-176   -96    
-48    -32    
-80    -208   
400    240    
-448   -32    
16     48     
640    288    
-720   -64    
-96    -80    
-16    48     
304    -32    
-192   -80    
-160   16     
-784   -32    
-80    208    
32     -32    
-80    -16    
-208   -48    
-32    32     
304    160    
-272   -32    
192    32     
-160   0      
64     -16    
-32    0      
128    208    
-416   -80    
224    32     
-880   -96    
192    176    
-32    -16    
-96    0      
272    144    
-384   208    
400    96     
32     144    
32     -32    
208    -80    
-16    0      
144    144    
-96    112    
-160   16     
64     -176   
-736   48     
-48    160    
176    -80    
80     128    
-192   -144   
288    -80    
144    112    
-128   0      
480    64     
-80    112    
-96    32     
-32    48     
16     -64    
-432   -112   
288    128    
-272   48     
-176   32     
384    224    
-688   112    
-368   16     
320    0      
64     32     
288    48     
-176   -112   
112    32     
16     32     
-384   -64    
208    -80    
-144   32     
96     112    
-144   48     
160    16     
-32    16     
48     32     
48     96     
-32    80     
0      -16    
-80    0      
96     -144   
-192   -160   
-224   192    
-96    0      
304    80     
16     48     
128    32     
-320   -48    
-32    16     
-160   16     
160    64     
80     -32    
-64    80     
-32    32     
-48    -144   
96     -32    
-128   48     
64     16     
32     16     
48     64     
96     144    
-112   192    
-80    0      
0      16     
272    144    
-32    96     
-112   16     
128    112    
0      0      
0      32     
-16    -32    
240    -64    
48     -176   
-32    -48    
-32    48     
-48    -32    
48     112    
-16    32     
0      64     
-16    240    
-144   -208   
112    -240   
112    -80    
80     144    
192    160    
-96    -80    
80     112    
32     -96    
-16    112    
96     16     
-64    -48    
208    176    
-128   16     
80     112    
176    304    
-240   48     
144    -16    
176    0      
112    224    
32     128    
-128   -576   
-48    336    
112    240    
-48    -240   
160    320    
-96    -176   
160    -32    
320    576    
-128   -352   
64     480    
48     48     
32     -272   
208    -112   
16     192    
-64    -16    
112    -496   
48     368    
0      96     
-32    80     
80     64     
0      96     
-272   -288   
96     160    
-96    128    
-16    -480   
224    480    
160    496    
-64    -288   
-64    -192   
80     384    
32     208    
368    -32    
224    112    
128    16     
0      160    
64     -192   
208    -672   
144    96     
480    368    
480    304    
-48    272    
-96    32     
-176   224    
480    832    
64     416    
-336   192    
-352   16     
32     16     
-64    -48    
336    -128   
144    48     
160    -160   
352    160    
-128   208    
-304   96     
0      16     
-32    64     
320    48     
160    208    
80     96     
64     80     
-208   -208   
16     -32    
0      64     
208    -48    
64     -16    
96     -208   
-64    48     
32     144    
80     256    
-16    96     
176    176    
80     0      
32     -128   
96     -320   
128    48     
-48    16     
64     96     
16     -16    
176    -128   
-48    224    
-16    -208   
160    32     
-96    -352   
224    352    
-272   528    
-80    -144   
32     -112   
176    32     
48     -64    
160    -64    
-80    -288   
320    608    
-16    112    
-48    64     
0      -32    
144    -464   
32     -144   
176    -272   
16     -80    
-144   208    
320    48     
144    -112   
240    352    
-192   96     
48     64     
-224   -208   
320    -96    
-32    -112   
224    -256   
160    96     
-64    -224   
160    160    
112    -128   
192    160    
-32    -656   
16     -64    
176    -192   
-208   -32    
400    -336   
128    -96    
-128   -112   
48     48     
80     256    
112    -112   
-80    16     
128    -336   
208    224    
64     32     
208    240    
-192   -240   
80     224    
-240   224    
-32    320    
496    320    
-144   112    
256    -48    
-16    48     
480    336    
-240   144    
80     -144   
-48    -96    
320    352    
-64    272    
144    80     
160    -144   
80     144    
208    144    
-48    192    
32     -48    
144    -48    
-32    -160   
176    -128   
96     80     
352    160    
-336   16     
-16    32     
-240   160    
320    -64    
448    -48    
-80    -768   
128    -464   
224    -224   
-32    -608   
64     -160   
-912   112    
176    -320   
224    -16    
-128   -288   
112    -32    
-64    48     
160    -32    
0      288    
-96    -96    
208    -1168  
96     -48    
96     -144   
224    -48    
80     288    
432    464    
-688   544    
-64    -48    
16     -336   
208    -32    
0      480    
80     224    
160    -240   
32     176    
96     48     
208    -160   
64     160    
48     128    
-208   80     
-64    -320   
224    -16    
-640   -224   
128    -144   
80     64     
464    -256   
112    560    
-176   -368   
32     -48    
48     -1280  
-32    -16    
208    112    
-16    16     
112    -144   
160    32     
-240   -176   
208    64     
-416   -32    
96     32     
272    -48    
624    624    
-288   352    
240    80     
-32    0      
240    -128   
-32    320    
-224   -64    
48     112    
224    64     
224    288    
96     256    
176    16     
384    -16    
-64    -112   
-768   -144   
240    -192   
-112   -96    
-48    -240   
384    128    
-80    -192   
544    -144   
640    -128   
-256   144    
192    -80    
208    16     
-16    128    
-80    32     
-224   -80    
32     -192   
-928   -16    
-64    -32    
64     -48    
80     -48    
304    -16    
160    -288   
176    16     
112    -304   
0      80     
400    0      
-464   -176   
208    0      
-176   48     
32     -96    
448    -80    
-352   240    
-448   -16    
-1408  0      
256    -64    
272    16     
48     -336   
192    32     
48     112    
112    48     
-160   -64    
112    -96    
-288   48     
320    112    
96     -32    
48     32     
-288   -48    
-96    -80    
-64    -32    
400    96     
-64    -32    
208    -96    
-48    0      
80     -288   
-48    64     
160    -16    
-48    -192   
-416   16     
48     80     
-144   -32    
96     -16    
-304   -32    
368    112    
-368   64     
432    80     
-160   16     
288    -32    
288    192    
-96    -192   
352    16     
-352   -96    
304    48     
-112   32     
-48    80     
-336   -16    
224    112    
-416   -128   
-48    -96    
0      -16    
112    80     
144    -16    
-112   -48    
-288   112    
352    144    
-608   0      
-416   -128   
-976   32     
-144   160    
-704   -32    
160    16     
16     -96    
48     -48    
-368   -160   
496    -240   
432    -64    
-96    112    
-256   -112   
48     240    
-208   -16    
-160   -32    
-208   96     
-160   32     
32     -144   
-576   -16    
16     -16    
-64    -64    
0      -64    
-64    -144   
16     48     
-64    -64    
96     32     
-96    -112   
160    -256   
-144   -96    
112    144    
-128   -32    
32     -240   
0      -112   
144    16     
-112   -160   
-656   16     
-32    112    
-160   -240   
32     160    
-80    -32    
-80    -128   
80     80     
-32    48     
-32    -48    
-128   -160   
-208   96     
80     -112   
-176   176    
48     96     
32     -48    
-1632  224    
352    -1280  
-144   816    
272    -64    
32     -160   
16     208    
-32    -48    
-176   208    
304    64     
32     96     
96     160    
-96    -80    
64     80     
-432   -224   
-224   624    
-32    -32    
-208   -256   
-1840  -432   
80     -688   
64     336    
576    544    
-320   272    
-96    -464   
-192   -368   
-32    176    
-48    16     
112    -16    
-112   32     
128    -16    
256    48     
-192   32     
272    448    
-864   -256   
-176   -352   
-64    -64    
-48    -112   
-32    -224   
80     -96    
32     80     
-224   32     
-48    0      
-128   -48    
16     240    
80     240    
112    288    
-416   -96    
112    -64    
-704   -96    
48     -32    
-16    -576   
-112   96     
160    16     
-32    -32    
80     176    
-128   48     
-80    144    
48     -64    
-32    288    
-112   -144   
304    0      
16     208    
-80    416    
-608   144    
208    112    
320    160    
16     96     
256    128    
96     16     
16     240    
112    144    
-224   96     
-272   64     
-160   16     
-272   -16    
144    -16    
96     -16    
352    128    
32     48     
-32    560    
32     0      
64     -176   
-80    32     
-192   -16    
16     32     
96     -48    
-336   -64    
144    -128   
32     192    
48     144    
64     128    
-80    -80    
96     -160   
-176   -64    
-16    -16    
208    -64    
-16    -240   
-160   -160   
0      16     
-192   96     
-176   224    
48     48     
-48    -32    
-48    -112   
112    -80    
-32    0      
-336   -256   
288    128    
-144   368    
144    352    
224    16     
16     304    
96     80     
-96    -96    
112    -256   
-32    -112   
144    -144   
-112   80     
-64    96     
-208   -256   
288    544    
-288   48     
272    336    
224    -48    
96     112    
400    320    
-32    384    
176    608    
288    48     
0      256    
-80    96     
240    48     
-32    96     
0      -16    
-64    -96    
96     512    
432    480    
-64    192    
-160   176    
144    352    
336    464    
160    -464   
-96    48     
64     -96    
16     80     
48     64     
32     368    
-48    576    
-48    0      
128    160    
-432   432    
32     176    
16     32     
-240   32     
-48    0      
176    208    
48     352    
368    384    
-144   -64    
48     32     
-16    -16    
32     144    
400    352    
-464   96     
112    176    
-224   320    
240    432    
144    384    
144    -32    
144    496    
32     -80    
-32    -240   
240    16     
-336   -64    
48     48     
-112   -224   
336    -112   
-400   -544   
240    96     
-208   640    
80     32     
256    16     
-320   -1408  
-112   -560   
-80    -256   
-16    672    
240    496    
96     -384   
-400   -720   
272    96     
-496   752    
112    -832   
432    -704   
32     912    
96     0      
-160   -96    
-144   -320   
112    -224   
224    416    
48     -96    
112    240    
-176   -96    
96     112    
48     160    
16     32     
144    112    
-96    -208   
240    320    
16     48     
144    -16    
192    16     
-48    96     
240    96     
-192   -96    
48     -336   
16     336    
96     32     
0      -400   
32     192    
272    256    
-80    -240   
176    -48    
-48    80     
-80    -48    
48     48     
48     -48    
240    32     
128    -336   
80     80     
128    -112   
0      -176   
80     64     
64     112    
96     0      
-32    64     
0      16     
240    0      
-96    -128   
-208   -368   
80     -16    
144    160    
-80    -32    
160    -160   
128    176    
32     -176   
0      -48    
176    -560   
96     16     
16     64     
80     32     
160    -96    
352    64     
-48    32     
144    176    
-80    64     
-112   -160   
32     -16    
128    -32    
-112   128    
144    96     
-48    64     
96     -128   
64     -16    
432    112    
80     32     
384    48     
256    48     
176    96     
-208   -592   
176    48     
32     80     
-144   -16    
288    -16    
16     64     
176    -176   
112    -16    
272    -144   
80     352    
304    416    
80     384    
-400   -48    
-464   -464   
384    -144   
64     16     
512    128    
320    -32    
-224   320    
-208   -112   
192    128    
-48    -48    
-48    96     
144    64     
320    -1008  
-224   -16    
80     -704   
-96    -16    
272    -16    
176    -272   
-176   -16    
128    -208   
-96    -144   
-224   240    
384    64     
192    80     
-272   -48    
256    -224   
-112   -64    
80     -208   
96     64     
128    -32    
208    -16    
-1984  48     
112    -112   
176    -96    
-16    -160   
128    -64    
80     -272   
128    -32    
112    32     
176    -48    
16     -80    
96     -32    
32     -48    
128    -16    
192    -48    
80     0      
-1040  -256   
256    48     
-112   32     
-32    -128   
48     -32    
304    16     
-320   64     
352    -1376  
-448   -208   
256    -32    
272    384    
-176   48     
368    176    
-256   32     
352    -224   
16     -16    
-176   -80    
304    0      
-128   -112   
352    112    
-144   288    
192    320    
400    -368   
-432   -160   
-32    112    
64     416    
544    272    
-368   112    
16     -256   
-256   -368   
-64    80     
-160   -128   
-240   16     
208    -48    
96     32     
128    -288   
288    -48    
-16    -384   
112    -96    
48     256    
32     192    
64     -128   
96     -80    
-64    32     
48     -192   
-16    -16    
96     112    
-448   -240   
128    64     
32     32     
208    736    
-288   -448   
112    -80    
48     -192   
288    -576   
128    -96    
-192   -512   
512    480    
-272   32     
-16    -208   
160    -240   
-320   224    
240    0      
192    320    
-352   192    
-64    -848   
112    272    
192    -256   
48     -48    
64     -320   
176    -80    
-16    144    
64     0      
-384   -160   
288    -64    
-576   -112   
208    144    
-208   80     
256    128    
-16    0      
32     -48    
64     160    
288    -288   
176    0      
112    -416   
-32    192    
144    160    
0      0      
-256   -16    
80     16     
-160   0      
-16    -96    
224    16     
144    -80    
-224   -32    
160    -96    
0      32     
-32    -64    
0      -32    
32     -32    
-400   96     
-144   160    
224    48     
-80    0      
-96    64     
80     -32    
160    -128   
-128   -48    
-32    0      
-80    -96    
112    80     
144    144    
-112   0      
0      64     
16     48     
-1488  0      
-144   -16    
-1264  16     
-144   -32    
-128   -80    
-128   -112   
48     -80    
-192   0      
192    16     
-208   112    
-112   -64    
144    64     
-192   -96    
-208   48     
-160   -64    
-64    -16    
-64    16     
-80    80     
-128   32     
-544   32     
160    -32    
336    -48    
304    32     
-64    32     
208    112    
-192   -32    
80     144    
-48    96     
-320   96     
-128   64     
-272   16     
224    -64    
-64    -32    
-48    -128   
-592   -64    
16     -32    
-1360  -112   
144    -176   
-64    224    
-48    112    
-144   -288   
224    -80    
-48    64     
-16    176    
112    80     
-320   112    
-336   -112   
-160   96     
224    224    
-80    144    
48     -80    
-352   128    
16     272    
-320   32     
-80    176    
-48    -32    
-64    -96    
192    -64    
80     -16    
-144   128    
-80    96     
-64    -32    
112    160    
0      176    
128    256    
0      48     
-672   -240   
-32    -16    
-144   -304   
160    -208   
-16    0      
-64    -48    
16     0      
-112   112    
0      128    
48     112    
304    64     
-368   288    
32     240    
-208   256    
-224   160    
-208   -16    
208    -160   
-800   464    
208    2064   
592    832    
-96    48     
-96    -64    
-64    432    
96     -368   
-512   -1120  
96     -672   
-112   1200   
32     192    
-256   -112   
144    320    
-400   -656   
-32    336    
-576   96     
-112   -256   
16     -32    
-144   400    
96     192    
432    80     
-176   240    
-192   64     
-80    288    
-256   640    
128    -480   
-96    -816   
464    128    
-336   96     
-576   -464   
144    1040   
-64    -176   
-400   -288   
416    624    
-336   -128   
-224   -512   
528    -464   
-16    512    
144    240    
-432   -592   
464    -336   
-304   240    
176    -32    
-464   -112   
320    -64    
-224   400    
0      -224   
224    -64    
-48    80     
-16    -80    
32     96     
112    0      
112    -48    
48     32     
-112   320    
-32    256    
16     -96    
176    224    
-96    96     
48     64     
112    112    
-16    -80    
-112   -48    
208    144    
-176   48     
112    64     
192    80     
32     -32    
64     -32    
-80    -96    
160    0      
-48    -32    
96     64     
-48    16     
-16    288    
32     224    
96     -16    
-128   -64    
144    -32    
-48    16     
80     -208   
-16    -16    
32     112    
80     -16    
-16    -176   
208    32     
-32    96     
80     16     
-128   -64    
-16    -48    
112    208    
0      144    
0      560    
48     224    
224    -48    
-48    80     
48     96     
-192   96     
192    48     
-144   0      
-64    16     
64     -48    
-112   48     
-48    0      
80     416    
112    240    
80     208    
-96    208    
112    16     
48     -96    
112    -96    
-48    64     
96     0      
80     16     
256    64     
80     80     
-112   16     
32     16     
-16    48     
48     112    
128    0      
112    112    
-96    -32    
-16    32     
384    560    
-288   608    
48     336    
192    32     
48     64     
-304   -144   
512    64     
-112   -240   
448    48     
-448   -496   
320    -176   
-592   256    
-368   -48    
112    80     
-240   -64    
272    64     
224    128    
-160   64     
-112   48     
-96    64     
-272   -112   
-32    192    
-352   48     
-288   -256   
0      -16    
-32    -448   
416    -80    
-336   208    
544    144    
320    -112   
-384   -128   
-192   -16    
64     384    
-352   0      
240    -48    
32     -32    
160    144    
528    160    
32     -32    
16     96     
-368   -432   
48     -48    
288    96     
208    80     
-160   80     
80     96     
-128   64     
-16    96     
192    32     
0      128    
-320   -96    
384    48     
0      96     
320    -32    
-256   16     
-176   -64    
144    16     
-80    -192   
160    80     
-96    16     
-48    48     
-144   -64    
128    32     
16     32     
112    80     
32     -16    
0      -112   
48     48     
112    -16    
-224   -48    
64     -304   
96     16     
96     -816   
128    80     
112    48     
80     -32    
-272   96     
272    96     
-32    -48    
224    0      
-240   0      
304    -64    
160    80     
272    -128   
128    -32    
64     -112   
-272   -208   
144    -272   
144    -80    
208    304    
160    336    
96     -16    
-256   -192   
0      80     
-128   208    
192    -272   
48     -128   
32     208    
272    -288   
-32    32     
-192   -128   
80     -96    
1856   1728   
-1552  816    
240    -960   
0      -128   
-384   448    
640    -336   
64     -336   
-128   560    
80     -464   
64     -336   
-160   432    
96     -208   
416    304    
-272   -544   
96     -16    
128    112    
0      -320   
-80    256    
160    32     
80     -448   
0      80     
96     32     
560    240    
-176   192    
0      160    
-32    128    
0      32     
352    288    
384    144    
-64    432    
-32    48     
0      160    
304    192    
112    128    
0      48     
32     -32    
0      -176   
-80    16     
208    -560   
144    -144   
256    -816   
96     128    
-144   208    
-32    -160   
-48    80     
96     -64    
128    64     
288    112    
-80    -48    
112    0      
-112   -288   
-112   16     
384    -208   
-128   -16    
48     -64    
-160   -208   
-112   48     
144    -864   
96     -16    
32     -16    
64     144    
128    256    
208    32     
0      -96    
112    64     
-16    -80    
112    0      
-240   48     
96     -112   
96     -16    
0      -64    
96     -64    
80     -160   
0      16     
80     -80    
32     96     
32     -128   
112    0      
128    32     
176    64     
-304   48     
0      112    
-512   176    
208    32     
96     -80    
16     -112   
176    -64    
-144   80     
208    64     
-96    -944   
-256   16     
112    -128   
304    176    
-160   160    
64     -160   
-128   -128   
-128   -400   
-320   -160   
-160   64     
-384   64     
112    160    
176    192    
304    96     
-48    144    
-64    -176   
64     -96    
288    -176   
304    64     
240    -80    
192    -48    
-336   -176   
208    -224   
-80    -128   
240    -48    
176    112    
176    96     
-208   0      
48     -144   
-176   -16    
192    -80    
48     48     
160    -160   
288    240    
-672   112    
224    0      
48     288    
224    -144   
-160   -160   
-224   -160   
-1856  16     
80     -32    
-672   -16    
-144   -848   
400    -608   
-16    -160   
384    256    
256    -960   
-144   -16    
-224   32     
-48    80     
-192   144    
144    -144   
48     112    
-48    256    
-544   0      
-112   160    
-48    144    
192    64     
112    576    
512    384    
32     -64    
128    -544   
176    -128   
-144   16     
112    160    
-432   -192   
224    160    
-128   96     
128    -256   
64     -192   
272    240    
-192   -32    
160    -80    
-112   -128   
192    48     
80     608    
-176   -672   
48     80     
160    32     
256    -32    
-192   -32    
176    320    
16     -336   
-128   -128   
-96    32     
272    32     
-224   -144   
224    464    
-192   -192   
-528   -960   
208    256    
320    48     
-192   -224   
-192   128    
208    432    
-256   112    
-224   -192   
128    64     
144    304    
0      80     
-1312  -192   
-272   -512   
-768   -144   
176    480    
-224   -80    
368    -864   
0      -704   
-96    144    
240    352    
-944   304    
-448   -640   
-384   -352   
-336   224    
96     64     
-112   -48    
32     -80    
144    64     
80     32     
0      32     
-16    0      
-304   144    
32     64     
-272   16     
-32    64     
32     16     
-96    16     
-160   -48    
32     0      
-1104  -16    
-128   0      
64     -64    
320    208    
-288   288    
128    160    
224    48     
320    288    
-384   48     
16     -80    
0      16     
-64    0      
32     -16    
-320   0      
-32    16     
-480   -208   
256    80     
-224   32     
304    48     
16     -16    
-208   0      
-16    96     
32     48     
32     16     
-160   32     
-48    32     
-160   -32    
-160   -160   
256    -176   
32     0      
-464   80     
176    32     
-48    -64    
-192   -80    
208    -112   
32     -32    
192    304    
48     64     
-32    0      
-224   0      
16     0      
32     0      
80     -128   
176    96     
-192   -160   
-320   -96    
64     80     
-2016  -96    
32     -32    
80     80     
192    32     
-64    -16    
-48    64     
48     -32    
16     -16    
32     96     
112    64     
-48    -32    
-192   -16    
96     32     
-208   -80    
176    80     
-256   32     
160    32     
112    96     
-32    96     
128    -96    
-112   -80    
112    16     
64     80     
192    0      
-64    0      
-48    0      
-288   -64    
176    48     
-48    32     
96     96     
-544   144    
512    448    
0      192    
32     -48    
160    -144   
0      64     
32     -80    
80     48     
80     -64    
-288   16     
-464   32     
-128   0      
-176   64     
-320   -32    
352    272    
-304   160    
48     96     
-240   -16    
176    16     
-16    32     
336    96     
160    48     
-336   -96    
64     0      
80     16     
160    80     
-80    208    
-144   256    
64     48     
-32    -64    
-64    -64    
128    80     
240    48     
272    -16    
176    48     
48     32     
240    160    
-272   160    
-160   48     
96     -16    
480    272    
224    176    
176    160    
-352   128    
-400   176    
-224   32     
32     112    
208    128    
208    -16    
80     -16    
-144   0      
-80    16     
-32    64     
-224   -16    
384    80     
48     112    
272    128    
-16    80     
0      -96    
32     -64    
512    304    
-176   144    
-80    0      
112    32     
0      -16    
176    16     
64     80     
-16    128    
128    80     
-32    80     
128    32     
48     192    
-96    -64    
128    -64    
-64    368    
-32    32     
176    -336   
64     160    
128    0      
-176   16     
368    64     
-80    -128   
-64    592    
64     0      
-240   160    
336    48     
-144   32     
-48    -416   
112    -64    
-416   48     
576    -1008  
48     1248   
96     -48    
160    -512   
-64    784    
-144   -320   
368    -160   
-32    160    
432    -176   
112    -400   
-112   -192   
208    48     
-144   320    
0      144    
-512   -528   
496    256    
128    192    
-176   48     
224    320    
0      320    
-32    64     
128    -112   
16     -32    
0      -32    
144    -176   
-144   -160   
-336   -96    
-80    -128   
352    32     
112    0      
272    368    
-208   80     
64     32     
-112   -32    
16     80     
144    336    
112    272    
256    240    
16     0      
32     160    
176    144    
160    96     
352    -16    
48     96     
-64    -160   
-224   -144   
128    -16    
32     304    
432    112    
112    48     
-32    16     
-16    0      
-32    32     
192    -96    
112    -144   
32     80     
-32    48     
128    -128   
-64    224    
336    -304   
-16    48     
64     -96    
32     112    
304    112    
0      96     
-64    48     
48     80     
-128   -96    
112    -176   
128    96     
96     48     
-80    96     
288    -16    
112    -48    
-48    -112   
48     -288   
64     32     
-32    368    
112    48     
224    -32    
0      32     
48     -16    
128    16     
192    80     
96     80     
96     -64    
-32    16     
0      -112   
96     64     
112    -208   
96     112    
16     -464   
-48    0      
112    -320   
0      32     
32     -112   
96     160    
48     0      
-176   -144   
176    144    
160    64     
96     80     
32     -208   
160    -176   
80     -288   
-16    64     
-112   -608   
208    -176   
224    128    
288    608    
16     288    
32     0      
16     -32    
80     -464   
-112   -128   
336    -128   
400    192    
176    16     
48     -128   
16     -192   
-224   80     
-208   -48    
112    112    
208    -240   
64     -208   
16     -32    
-208   -608   
48     16     
224    -144   
352    144    
240    -240   
-384   -480   
-336   -368   
-288   128    
272    -272   
176    -96    
928    704    
-160   1232   
-320   176    
64     -1312  
288    128    
96     -272   
80     -80    
480    -96    
-416   -192   
112    -352   
-32    224    
-272   -464   
-96    64     
96     144    
-144   96     
-144   -256   
64     224    
304    80     
-192   -160   
288    144    
-176   -16    
496    256    
-80    -304   
176    -240   
288    -496   
176    96     
-32    64     
80     -448   
64     224    
-48    192    
192    48     
-64    -256   
-192   -16    
0      -96    
0      -16    
-64    -64    
-16    -128   
-928   -48    
-96    -128   
112    64     
288    -48    
32     -96    
352    208    
112    112    
208    -128   
-192   192    
32     96     
-32    16     
64     -208   
224    -144   
-112   -48    
-80    0      
-240   176    
-400   16     
528    0      
64     -64    
176    80     
144    0      
-256   -128   
-64    -112   
160    80     
224    -16    
368    256    
-192   -48    
336    48     
-464   16     
336    16     
-160   176    
-304   -160   
-544   -736   
224    -368   
256    368    
-432   80     
-144   80     
96     -560   
-80    -48    
480    240    
-640   -160   
96     -80    
464    -16    
-64    -192   
336    -144   
-448   48     
320    64     
-720   -80    
-16    -96    
128    -160   
16     -64    
-16    32     
32     -160   
0      64     
112    -208   
144    64     
-176   -16    
112    32     
-48    48     
208    64     
-384   -48    
256    -112   
-160   -192   
112    48     
-192   112    
160    -32    
112    48     
144    -208   
-32    16     
16     -416   
-16    16     
-48    128    
384    32     
-672   96     
-112   -64    
96     -32    
-16    -64    
-256   -32    
80     -48    
16     -16    
128    -144   
208    16     
128    0      
64     64     
-192   -112   
144    -160   
-784   128    
80     80     
16     48     
0      -48    
-80    -48    
32     48     
16     32     
192    -192   
-512   -112   
128    -64    
16     112    
-272   0      
-32    -64    
-128   -64    
-320   0      
-64    128    
-16    -144   
16     32     
-16    -96    
-224   -288   
112    32     
-256   32     
128    -48    
128    48     
-816   -16    
112    192    
-304   -48    
-608   96     
16     -16    
-896   32     
96     -32    
-512   32     
-112   -80    
208    -112   
64     0      
128    -128   
96     112    
-160   16     
-16    96     
32     -160   
80     32     
48     0      
-448   -32    
-112   -16    
-208   -48    
-64    0      
-496   -80    
-96    16     
-688   64     
592    416    
288    64     
128    -80    
-160   -112   
-96    48     
16     -80    
-448   -208   
-304   -752   
-320   -288   
384    1296   
-528   416    
-320   -752   
-368   -288   
48     176    
-352   192    
0      16     
144    -32    
-128   144    
-240   -80    
768    768    
-432   256    
-80    -528   
288    -144   
-48    32     
96     96     
-272   -240   
64     -112   
-32    80     
16     208    
-240   80     
144    32     
-704   -64    
336    0      
96     -192   
400    208    
-352   160    
64     48     
-112   -240   
208    -448   
-80    -80    
-336   288    
-48    -128   
-96    -864   
384    -480   
-816   16     
16     368    
-208   144    
0      16     
720    0      
-176   0      
240    208    
-256   -144   
80     112    
-128   160    
-128   -80    
64     16     
32     -96    
0      48     
-96    64     
-256   -496   
-96    432    
-48    64     
128    -192   
-688   96     
144    96     
64     192    
-96    0      
176    32     
128    -320   
-160   560    
128    -352   
-32    528    
0      -48    
192    -112   
-240   -416   
-144   -720   
-336   16     
-64    512    
-2000  -464   
32     80     
368    160    
-272   144    
-80    80     
-160   96     
128    112    
-112   -320   
112    16     
176    -96    
-208   -96    
48     -96    
192    -80    
-144   -48    
208    80     
-1456  -96    
208    -32    
-432   80     
-240   128    
-48    0      
-112   16     
208    -128   
96     -16    
-32    -64    
16     144    
-352   -272   
144    -256   
-16    -144   
-384   -160   
272    -48    
-64    64     
-16    144    
16     -80    
0      16     
-64    -32    
96     128    
-208   480    
368    -144   
208    -112   
-160   32     
240    96     
-192   -288   
-96    -128   
-272   160    
-16    -16    
32     16     
-160   336    
544    352    
-160   32     
80     -16    
0      64     
256    -16    
-144   -112   
272    -48    
-320   0      
144    112    
-432   -176   
144    -512   
-352   -368   
0      80     
16     208    
240    176    
112    -80    
80     192    
432    336    
-96    128    
-144   -336   
-48    -32    
-176   144    
-208   -64    
112    -16    
192    0      
112    48     
16     -32    
48     -96    
192    64     
-192   48     
80     48     
112    32     
-16    208    
0      48     
112    0      
-80    64     
80     0      
-64    -224   
64     -144   
-64    80     
-112   -176   
-16    -144   
96     112    
-288   256    
208    96     
192    0      
64     16     
-48    -16    
128    -128   
16     -96    
64     -192   
176    -48    
-64    64     
0      128    
-48    -48    
0      -256   
16     -16    
80     48     
-32    96     
224    192    
112    80     
16     64     
48     -32    
128    48     
448    256    
-272   560    
128    208    
96     128    
128    288    
128    32     
-48    -32    
128    -464   
32     -128   
-112   -640   
-160   -608   
-176   0      
80     0      
416    512    
48     336    
112    160    
-16    -384   
224    224    
176    432    
-416   -864   
-208   -32    
-144   336    
240    -144   
416    256    
-128   16     
-48    -16    
64     -48    
112    -128   
528    240    
-96    16     
-240   -656   
-96    400    
-304   32     
-320   -176   
-784   -176   
320    0      
464    224    
0      688    
320    -1072  
-128   -272   
-336   -96    
-192   96     
-160   64     
128    -80    
432    -32    
1024   288    
80     352    
-352   16     
-208   -224   
-112   -352   
96     48     
16     224    
-16    192    
48     -48    
48     96     
96     128    
112    32     
96     -208   
96     -16    
144    32     
160    64     
-16    48     
-96    -176   
288    -112   
224    -112   
256    128    
0      -96    
240    -16    
48     -416   
544    224    
-208   -1296  
-176   32     
16     -32    
144    64     
-80    16     
144    48     
-96    128    
80     112    
32     80     
64     160    
112    256    
-96    -112   
-16    0      
96     -128   
-32    0      
304    -256   
128    64     
304    64     
-32    -32    
144    -16    
96     64     
208    64     
-32    -176   
-208   -160   
-32    272    
-64    32     
208    -160   
-32    64     
-208   -128   
800    192    
0      -48    
-32    -144   
432    0      
-336   112    
-48    80     
192    112    
320    0      
400    128    
-192   16     
176    -448   
48     16     
144    -32    
208    96     
752    560    
-800   336    
-480   -288   
208    16     
-32    48     
416    208    
-352   -16    
-176   96     
320    -448   
0      -128   
-112   -176   
224    16     
-32    32     
176    16     
16     32     
160    -32    
-48    32     
48     -96    
96     -688   
80     96     
-96    -256   
160    192    
-1152  32     
272    -208   
-48    -48    
-128   -352   
96     -64    
304    -800   
64     -32    
160    -32    
16     -16    
-16    -672   
192    -80    
64     32     
16     16     
64     -32    
-368   0      
-768   -80    
80     -48    
96     16     
48     -32    
-16    -64    
304    -128   
16     -112   
16     -256   
80     -64    
80     -32    
-64    16     
160    -96    
288    64     
-96    -80    
16     -256   
-112   -64    
176    144    
-144   -128   
160    112    
176    80     
160    -48    
160    -80    
208    -112   
-80    96     
128    96     
-112   48     
80     -240   
160    80     
160    -48    
208    -80    
-128   -16    
16     -80    
-1184  16     
96     -48    
176    -176   
64     32     
192    -112   
48     16     
-64    -512   
192    -1040  
32     368    
64     -144   
112    160    
-96    -192   
-144   -784   
-320   240    
176    -128   
-464   96     
240    -240   
64     112    
32     -16    
-256   -48    
16     -272   
-160   48     
16     -992   
80     -128   
144    -80    
368    80     
192    608    
-560   -496   
-352   -1008  
176    480    
-224   -32    
240    -96    
-2448  80     
-160   -496   
592    64     
-128   128    
80     -64    
96     -320   
16     144    
-112   -48    
448    864    
-32    -224   
-160   -640   
-144   -48    
-48    320    
-496   -112   
288    -144   
-208   80     
96     -80    
64     160    
208    -112   
208    -48    
112    80     
272    304    
-304   -432   
-176   96     
-464   256    
32     144    
-144   0      
-64    -272   
-208   208    
224    224    
0      -64    
-128   144    
-16    -32    
-192   -48    
64     -96    
272    -320   
-448   -416   
-240   144    
96     624    
-96    -144   
224    -128   
32     -16    
-272   -48    
80     -144   
304    48     
-80    240    
80     -64    
-80    32     
128    -384   
-80    -16    
0      -352   
224    -240   
-128   -112   
-256   -256   
-80    448    
80     336    
64     96     
32     144    
-128   96     
96     224    
-32    112    
-560   0      
-64    80     
-192   -320   
64     0      
-128   -272   
-448   -80    
-96    -224   
-384   -144   
-128   -400   
-448   -336   
-80    -144   
288    -416   
64     -112   
64     -208   
-192   96     
-320   -160   
-32    160    
-400   -352   
32     -80    
64     144    
-48    0      
-48    -32    
240    -32    
-384   192    
-144   -160   
-208   128    
-656   -48    
-64    -16    
32     -192   
0      -256   
-320   0      
-96    112    
48     -48    
256    -16    
96     48     
80     176    
48     240    
96     96     
-32    112    
-384   -32    
-112   96     
-160   -48    
-288   -32    
96     -64    
-64    16     
16     192    
224    288    
0      -80    
32     -240   
-144   -160   
-96    -16    
-112   32     
-64    -144   
-144   -32    
-192   64     
-16    -32    
-208   0      
-48    -176   
288    -240   
16     176    
-208   272    
432    80     
-176   64     
16     0      
64     80     
-80    0      
96     0      
80     144    
-16    0      
-224   -560   
176    128    
208    448    
0      304    
-432   272    
256    -96    
-80    48     
48     -192   
-32    -224   
-176   -128   
-48    -48    
80     -80    
-160   -304   
-64    -64    
32     160    
-160   160    
128    0      
-32    96     
-128   64     
-592   208    
448    352    
96     -80    
112    -176   
64     -160   
160    320    
-432   368    
-224   128    
-80    224    
112    192    
32     -160   
272    -96    
-48    0      
-768   0      
48     64     
-160   -128   
112    112    
-1232  -64    
80     160    
-16    32     
-48    -176   
-96    -64    
48     0      
-48    144    
64     -192   
-64    -160   
-96    0      
-176   -112   
64     -112   
240    288    
80     368    
-16    -176   
-80    -128   
48     128    
32     96     
-160   -32    
112    96     
32     128    
-64    0      
-160   -48    
80     288    
-144   16     
-16    192    
-64    -64    
256    1072   
-304   -368   
-16    112    
-176   48     
-160   -288   
496    320    
-112   96     
32     -336   
-336   -304   
-304   -912   
64     48     
-16    272    
176    -144   
80     64     
-48    128    
320    80     
-64    -16    
-32    32     
-16    128    
-224   -64    
32     -160   
112    -32    
224    80     
176    32     
256    0      
128    -112   
-448   -96    
-336   -128   
128    128    
-80    -16    
352    192    
320    144    
176    -16    
-96    48     
-176   144    
-288   -16    
480    448    
-448   160    
224    -48    
960    32     
-32    32     
-64    64     
-448   -112   
-32    96     
-224   48     
-64    32     
160    -96    
528    48     
-64    -48    
16     144    
-160   16     
240    64     
112    64     
-480   -80    
384    16     
-160   0      
96     96     
-288   -16    
48     64     
-48    0      
96     80     
64     48     
160    -32    
64     -48    
-144   96     
-16    -16    
80     48     
-48    16     
240    192    
-240   -96    
192    -48    
16     128    
256    48     
80     64     
-128   -64    
-336   -576   
336    112    
-400   208    
144    -160   
256    288    
-432   -64    
768    96     
320    256    
-96    -96    
272    16     
-352   240    
176    -16    
-144   -16    
-112   128    
432    208    
-32    -880   
192    -176   
144    32     
-192   48     
160    32     
-96    80     
-208   0      
208    48     
-512   -368   
336    -16    
112    320    
-320   80     
16     -144   
304    32     
-128   176    
96     -32    
-304   -96    
320    16     
96     -64    
256    0      
432    192    
-64    64     
0      -32    
48     -64    
112    160    
-304   160    
208    32     
128    -16    
-16    -80    
160    32     
-48    -128   
256    48     
-112   -320   
-48    0      
336    -32    
-192   -144   
160    96     
-160   80     
176    -112   
224    128    
-32    80     
176    0      
0      48     
0      -112   
16     -16    
64     -224   
-96    -32    
112    -160   
48     32     
48     32     
-16    32     
-96    -384   
192    0      
-192   -80    
256    144    
-96    176    
64     -16    
160    16     
96     -256   
-320   -448   
128    -64    
144    352    
144    96     
-16    -256   
288    -1200  
-128   256    
-80    -32    
256    32     
256    -96    
48     64     
-16    -48    
-96    -64    
160    96     
16     0      
304    224    
-192   -80    
208    -96    
144    -144   
352    224    
-288   -48    
32     -208   
304    -16    
64     176    
-16    32     
-128   -80    
48     -96    
0      416    
288    32     
-16    -96    
-32    80     
208    -416   
96     288    
-176   -1392  
-80    336    
128    240    
304    -160   
112    256    
128    -544   
64     512    
112    -80    
144    80     
16     -96    
112    -16    
-48    96     
0      48     
112    -32    
208    144    
64     -96    
-48    0      
32     -592   
160    176    
16     64     
112    368    
32     176    
-48    -400   
0      -272   
16     208    
0      -112   
208    32     
-96    64     
272    -128   
224    208    
224    144    
320    288    
-112   176    
-176   -672   
-160   16     
-80    0      
-32    128    
48     -96    
160    -416   
96     -80    
64     -480   
-240   -96    
32     -848   
64     96     
256    -144   
32     -416   
-352   -80    
-240   -160   
-16    -240   
32     -32    
272    -176   
192    -288   
-528   -272   
48     -64    
-192   -336   
464    112    
192    288    
320    16     
80     -160   
96     -96    
80     32     
48     -176   
176    -176   
96     -64    
96     176    
112    32     
192    -128   
-224   -80    
128    -16    
0      64     
128    176    
176    80     
-32    -288   
-16    0      
48     -1536  
-32    -96    
448    224    
-16    192    
64     112    
-48    -112   
-224   -144   
160    -96    
-96    -128   
64     -128   
-736   -48    
304    128    
48     0      
16     -272   
112    -112   
16     -560   
48     -64    
-272   -320   
32     -464   
240    -288   
-16    -48    
224    -160   
-240   64     
-240   -304   
96     272    
-1968  96     
-144   336    
144    -224   
256    -192   
112    112    
416    -112   
48     352    
-592   -528   
-208   48     
-208   -304   
272    -128   
16     -544   
352    -208   
-192   192    
-160   -96    
-400   0      
-16    32     
-464   112    
208    -16    
240    16     
-144   -256   
240    -48    
64     -688   
-192   128    
448    -144   
96     -48    
-48    -416   
160    -272   
32     80     
48     48     
-176   0      
304    -48    
-688   208    
-48    128    
-144   112    
496    -144   
-384   112    
256    -336   
32     96     
-80    -112   
64     -48    
-336   16     
448    48     
-448   -208   
272    64     
-288   -288   
0      -272   
-768   -144   
288    -336   
160    112    
80     -80    
176    96     
-32    -80    
-64    160    
-64    224    
0      192    
80     192    
96     64     
64     16     
96     -16    
-16    -16    
96     -64    
-1120  272    
256    -16    
320    192    
-128   32     
0      208    
-1760  112    
-400   192    
-160   240    
-16    64     
-96    -112   
32     -368   
-32    -320   
176    -224   
-112   -192   
160    128    
-480   -480   
-96    16     
192    176    
-208   -192   
32     -32    
-16    -96    
-240   -224   
-144   336    
144    -320   
-112   112    
-288   -32    
-208   -16    
-64    -16    
208    192    
-48    -128   
-16    80     
-256   -256   
-112   -448   
-224   560    
112    -96    
224    208    
-112   544    
-96    -272   
-448   -32    
32     496    
-144   224    
-48    -144   
-928   -32    
16     32     
16     -80    
96     160    
-16    0      
144    16     
64     -80    
0      0      
64     64     
-176   -16    
-32    16     
-160   16     
96     -144   
-384   -176   
-176   144    
-448   96     
-80    -96    
-144   -192   
-64    64     
288    48     
160    112    
-128   -176   
-176   -144   
144    240    
-304   48     
112    32     
128    208    
48     96     
272    16     
-256   -16    
-192   112    
-192   48     
-224   -64    
0      32     
-128   0      
384    16     
80     16     
48     -16    
-16    32     
-304   16     
0      80     
-176   48     
-304   -32    
-224   -112   
240    48     
-384   16     
-384   48     
-1888  -48    
304    0      
-48    -272   
-32    -64    
-128   272    
-336   32     
256    48     
32     0      
16     32     
-240   0      
-176   112    
-96    32     
256    -48    
-160   0      
-224   -32    
-592   -32    
48     112    
304    96     
480    128    
-416   -80    
16     32     
0      32     
0      96     
-16    80     
272    144    
-336   -96    
144    16     
48     48     
-176   0      
48     16     
-208   -64    
64     64     
32     64     
-112   -48    
128    112    
-64    -192   
16     0      
-176   48     
144    32     
-128   48     
208    176    
-352   112    
496    160    
-336   -96    
336    64     
288    112    
-80    96     
112    -48    
512    -64    
-400   32     
-96    16     
-32    -144   
80     -16    
-240   -32    
0      -48    
48     16     
-368   -32    
176    48     
128    -16    
-272   -48    
128    -48    
-32    -128   
240    128    
368    288    
0      48     
-432   -224   
80     16     
-48    128    
-320   -48    
752    16     
608    224    
-128   224    
0      112    
32     48     
0      144    
-80    80     
-64    16     
48     32     
-80    -128   
64     80     
224    144    
-48    48     
80     32     
-32    160    
-48    -336   
64     -176   
-48    176    
96     -16    
-96    32     
16     -16    
288    -320   
-272   208    
240    224    
-112   -16    
192    0      
16     -240   
-16    128    
-128   32     
48     -48    
-48    0      
112    -48    
-80    48     
272    0      
-304   -336   
368    352    
-96    48     
96     -16    
128    80     
-32    320    
-176   -240   
48     -112   
176    288    
192    -128   
-144   -16    
144    192    
16     -336   
-112   240    
-16    64     
160    704    
112    336    
208    -208   
-224   224    
-192   -128   
-400   -224   
192    -400   
192    384    
80     112    
64     160    
288    192    
-16    432    
-128   160    
-256   -320   
64     -48    
112    112    
-240   -128   
96     -256   
112    112    
-48    112    
96     96     
112    48     
256    48     
-16    -32    
-112   -32    
96     80     
-160   -16    
384    256    
-256   144    
96     -64    
96     -144   
-96    -288   
224    224    
-80    160    
112    -48    
48     144    
64     144    
-16    96     
-16    -32    
-32    32     
208    32     
176    64     
0      32     
32     -80    
112    -48    
112    48     
400    16     
-32    192    
176    -64    
32     -80    
-32    -32    
-32    -112   
-16    -144   
64     -80    
240    0      
208    240    
-128   64     
256    64     
-48    96     
96     -144   
-176   -96    
144    -352   
176    144    
-80    80     
16     -80    
80     96     
288    64     
176    112    
-32    16     
80     0      
32     64     
-192   0      
16     80     
-48    -32    
256    -32    
-144   96     
-80    -304   
208    -32    
144    -592   
-160   192    
32     160    
144    96     
160    48     
400    160    
272    240    
112    -64    
-304   144    
-288   32     
96     192    
224    192    
320    -32    
144    224    
-32    176    
176    80     
32     0      
272    256    
-192   256    
144    -112   
80     -128   
128    -176   
128    -48    
16     -32    
32     -80    
-32    -192   
-48    -192   
0      -80    
-32    -208   
112    48     
112    -80    
0      176    
64     -224   
32     304    
-144   -64    
-48    -16    
208    -208   
-16    -32    
208    -16    
240    -128   
32     16     
-32    -432   
-64    -336   
32     -352   
-192   32     
560    -128   
-192   96     
-32    128    
-320   -544   
96     -416   
208    -48    
0      -272   
352    32     
-32    -16    
80     -320   
176    -144   
144    -368   
96     -272   
48     -16    
-112   -96    
-16    -128   
128    -32    
-224   144    
336    64     
-192   -32    
576    -64    
-512   336    
-208   16     
-144   -1344  
-160   288    
336    384    
-16    112    
400    -48    
160    -176   
512    416    
-304   160    
-16    192    
-208   352    
96     -112   
-32    -208   
336    -384   
64     -176   
-1424  -112   
416    -48    
128    112    
240    64     
-80    0      
-288   -1168  
-64    48     
304    384    
208    -304   
-80    208    
48     -192   
176    -96    
16     464    
-224   -272   
192    80     
176    480    
-16    -448   
-352   -16    
176    -320   
96     208    
192    -368   
368    0      
-144   288    
48     32     
32     -256   
336    48     
64     48     
-48    32     
32     -64    
176    272    
-480   -416   
0      -48    
-48    -64    
112    -352   
128    -384   
-48    224    
80     -416   
-32    -32    
-80    -32    
224    -112   
96     -160   
368    96     
-64    224    
16     -64    
112    16     
-800   -320   
192    176    
-144   64     
80     -64    
112    64     
208    16     
32     16     
80     -384   
160    32     
-80    -80    
64     -336   
208    -128   
16     0      
-48    -32    
128    -48    
-16    -48    
144    176    
-208   48     
16     112    
240    320    
-144   -64    
-160   -48    
0      -16    
0      32     
144    -688   
64     -96    
-96    -80    
176    0      
-80    48     
160    160    
-160   16     
48     16     
-192   32     
16     -112   
-1616  -112   
224    -144   
-16    0      
144    -112   
-64    16     
-16    -848   
-256   -656   
32     -352   
-240   192    
-128   128    
64     -128   
-384   -96    
192    -224   
-832   -64    
448    -144   
384    256    
-448   64     
-64    -224   
144    -128   
-128   176    
-16    -240   
160    -176   
144    176    
128    96     
-320   -32    
320    32     
-432   -144   
464    -96    
-32    -16    
496    48     
80     64     
-240   -16    
-144   80     
-272   -192   
-160   -80    
0      64     
112    -16    
-32    -80    
240    -80    
-240   48     
16     0      
-512   -160   
592    -32    
-144   176    
208    -32    
-16    -96    
-240   -208   
-64    32     
256    -112   
160    32     
80     96     
80     96     
-128   -80    
-528   0      
-192   32     
256    48     
-224   -48    
0      48     
-64    16     
-112   -48    
224    160    
-192   -128   
-96    32     
-224   -48    
176    112    
-112   -32    
-352   32     
-320   -64    
-1152  -32    
80     32     
-320   48     
48     32     
80     -112   
-48    -16    
-544   16     
-112   -80    
112    -96    
64     80     
16     -96    
-176   16     
-208   -32    
-880   -320   
496    128    
-192   96     
192    128    
-960   304    
112    256    
-208   16     
-32    -128   
-512   -288   
240    0      
-368   -224   
304    -32    
-208   -128   
-288   -112   
224    -288   
96     -80    
192    144    
-80    32     
304    -128   
-176   -96    
320    -64    
-368   -192   
-208   -176   
-48    -288   
208    480    
208    288    
512    -32    
-176   -16    
-384   -288   
-32    352    
64     224    
-384   -480   
-80    144    
176    208    
-48    160    
112    -80    
-208   -96    
-48    208    
-32    -64    
224    96     
-80    48     
-144   -128   
32     64     
-64    48     
16     96     
-80    -480   
-288   448    
160    -1136  
-128   816    
160    1216   
272    -848   
-1040  464    
32     -528   
-2768  496    
240    128    
-192   -208   
96     -16    
48     48     
-112   320    
64     -48    
-144   192    
240    48     
240    160    
-208   -32    
-48    -240   
64     272    
-128   -48    
144    16     
-272   32     
144    48     
-192   64     
-160   -128   
80     208    
-208   48     
-112   80     
304    160    
208    240    
-96    -48    
-112   -64    
-80    -16    
112    160    
-224   112    
128    272    
-128   -32    
128    16     
32     16     
128    16     
-16    16     
-128   -128   
16     -32    
48     -48    
-80    -64    
32     -64    
-176   16     
-160   16     
-48    80     
-112   -96    
240    48     
-272   -16    
16     96     
64     32     
96     0      
0      0      
128    16     
-16    -16    
96     16     
-48    240    
64     16     
64     -96    
-32    -224   
-160   32     
16     16     
16     80     
-112   -144   
128    64     
0      112    
0      -48    
32     128    
112    128    
-112   128    
48     -96    
368    80     
-160   176    
-272   -272   
-48    -320   
-32    176    
-400   -48    
176    48     
144    -144   
240    -112   
176    80     
64     304    
-144   80     
-96    96     
-144   -144   
352    32     
-32    160    
-96    -48    
16     -160   
16     -48    
336    240    
-144   96     
-48    192    
-96    -48    
96     0      
0      -144   
160    -48    
-32    -64    
-96    -192   
288    -112   
208    64     
192    224    
-240   -144   
144    -48    
64     32     
224    160    
176    176    
48     112    
32     48     
192    96     
176    48     
192    32     
352    128    
144    192    
-192   96     
-240   -64    
-32    -80    
-176   176    
272    64     
80     64     
608    304    
-192   208    
-144   -64    
32     224    
80     240    
128    -32    
-48    -144   
32     -48    
144    -32    
-48    -96    
176    144    
96     96     
-64    96     
16     16     
-160   -32    
80     80     
-32    0      
96     368    
144    528    
-192   -240   
32     -192   
240    208    
-192   -240   
128    -96    
128    0      
208    -224   
208    272    
-192   352    
-128   -80    
-96    -144   
160    0      
224    0      
272    -336   
-272   -176   
80     -400   
64     112    
-112   160    
352    384    
-368   400    
144    -592   
-32    384    
16     416    
144    -560   
304    32     
-16    -160   
64     -64    
-48    -16    
160    -1024  
-320   336    
-96    304    
-32    112    
48     80     
-160   -224   
48     96     
144    112    
240    32     
-272   -336   
656    -64    
272    640    
0      -304   
576    -176   
-32    144    
-160   -1280  
-80    32     
-32    48     
16     0      
320    160    
-240   144    
224    32     
16     48     
80     -48    
96     48     
80     224    
-16    32     
32     -96    
128    -96    
48     128    
240    -32    
-224   32     
128    -16    
0      128    
224    32     
-16    32     
192    -96    
144    144    
-192   -64    
208    -32    
-160   -16    
64     -288   
-96    0      
64     -144   
128    128    
144    -80    
112    -16    
32     -48    
0      64     
-48    -688   
128    32     
-64    -16    
384    0      
0      32     
112    144    
16     0      
0      -16    
64     128    
64     32     
112    48     
80     -48    
96     144    
80     -16    
144    64     
48     -320   
48     64     
80     0      
96     48     
-48    -112   
256    -48    
128    16     
32     -304   
112    112    
128    16     
64     80     
96     -32    
64     -64    
208    128    
-144   64     
-16    0      
96     48     
-144   0      
224    144    
208    0      
32     -112   
-160   -16    
32     -48    
160    144    
-128   -48    
-16    96     
128    -240   
64     -192   
16     0      
112    16     
-64    16     
64     -144   
208    -96    
272    -672   
-48    64     
16     16     
48     -656   
112    -224   
-80    -512   
32     -32    
32     96     
16     96     
208    48     
-96    -160   
-112   -848   
-80    32     
448    -624   
-576   128    
16     -80    
-144   -304   
240    -304   
592    -208   
176    -80    
368    -144   
80     64     
-144   128    
-112   -64    
208    64     
144    -32    
288    -128   
-176   -288   
336    -400   
192    -16    
-208   0      
16     -48    
-2336  -64    
-192   -176   
-80    -256   
-32    -240   
224    0      
176    -240   
256    128    
-32    32     
-80    -32    
208    -16    
-48    80     
-128   -320   
48     -208   
176    160    
320    96     
-176   48     
-464   -48    
96     32     
-112   -64    
80     16     
272    -272   
16     -32    
288    -112   
-192   32     
-48    -32    
-176   0      
-16    -112   
-96    -80    
48     0      
368    -128   
-144   -48    
-96    0      
-128   -48    
160    -80    
-80    80     
144    -32    
-256   96     
64     -432   
128    0      
192    16     
144    48     
272    64     
0      -16    
-160   16     
240    96     
-688   96     
192    -48    
-416   16     
240    -48    
-32    48     
96     -96    
-496   -224   
64     -416   
-32    128    
0      -224   
-176   -192   
-32    -160   
-176   112    
144    128    
-80    -160   
-32    80     
-48    240    
-160   -80    
416    -528   
592    -32    
240    96     
16     -128   
80     -352   
128    -272   
-336   -832   
304    1152   
-224   272    
-16    -1168  
-96    480    
-16    -192   
-48    -368   
144    240    
-384   -96    
288    -48    
-928   -80    
400    -96    
-80    48     
368    320    
96     64     
288    -592   
-64    -448   
80     688    
464    544    
-272   -96    
-48    528    
-144   -880   
112    -304   
-576   -80    
176    -320   
160    496    
272    112    
352    576    
-320   -240   
-32    32     
-32    -192   
64     -720   
-48    -208   
256    -112   
-352   176    
32     320    
144    288    
160    48     
-80    64     
-144   48     
-352   32     
272    -112   
160    -32    
-2464  -144   
32     64     
-224   48     
-208   -32    
-256   192    
288    80     
-224   -80    
112    -96    
0      272    
0      96     
208    160    
48     32     
192    192    
-496   0      
-32    16     
-448   -224   
48     -16    
-160   160    
144    16     
-176   288    
-16    16     
80     0      
0      -16    
-128   16     
48     -48    
-80    48     
-368   -48    
-160   64     
-288   -112   
-32    0      
-96    -48    
192    48     
-128   48     
-208   -80    
-48    -32    
-336   32     
-64    -48    
48     80     
0      32     
192    80     
32     192    
-224   80     
128    112    
-32    -64    
96     -16    
-16    144    
-96    80     
-32    -16    
-256   -144   
-64    -96    
32     64     
208    -16    
48     96     
-176   128    
-2160  -64    
160    -48    
-112   0      
128    32     
-80    32     
128    112    
-48    128    
-144   -96    
192    0      
-192   144    
-208   -16    
16     -48    
-32    32     
-160   288    
112    288    
-752   96     
-96    -80    
0      -448   
96     -96    
-144   -80    
-64    16     
-32    160    
192    320    
-224   256    
176    -80    
160    -224   
304    32     
112    176    
-16    384    
-272   48     
-32    -16    
32     96     
-288   0      
48     272    
272    336    
-64    192    
-272   -64    
96     -128   
-32    -32    
-80    -16    
128    -176   
208    80     
48     -80    
-256   -32    
-240   -64    
-176   -544   
208    112    
-528   496    
64     16     
-64    -336   
-112   -272   
160    160    
-144   -192   
-208   -336   
-128   -176   
32     48     
-64    -224   
304    -16    
256    432    
-112   288    
-400   -128   
128    -192   
-416   -48    
0      160    
-16    160    
160    48     
80     80     
-112   -176   
96     64     
80     -192   
160    64     
-16    48     
-80    80     
-256   416    
144    -160   
-208   0      
192    128    
-224   -320   
-112   160    
304    240    
48     320    
160    144    
112    32     
-208   -240   
-32    -416   
0      160    
-32    112    
80     -48    
-32    160    
-32    64     
-176   -32    
240    0      
-32    -208   
352    64     
304    176    
-64    336    
432    896    
464    -208   
-352   -544   
-176   -240   
-16    32     
-432   -240   
-208   -384   
-128   -416   
288    -48    
-304   -16    
-48    -64    
192    -144   
-32    -80    
336    80     
32     -16    
80     160    
448    320    
-288   208    
224    128    
-64    144    
-144   64     
144    -16    
-176   -128   
352    48     
-368   64     
-112   32     
144    80     
32     16     
144    32     
-16    16     
128    48     
192    64     
-64    64     
208    -16    
16     64     
-16    0      
64     48     
-112   -32    
112    80     
-80    -16    
128    -48    
352    176    
-144   -16    
80     80     
-64    32     
-96    96     
128    48     
192    48     
-32    -16    
-32    0      
-240   -32    
48     80     
64     -64    
-48    16     
96     128    
64     32     
-32    16     
160    96     
16     96     
112    16     
112    48     
16     32     
128    -48    
-128   16     
112    80     
112    32     
160    16     
-32    -144   
16     192    
-240   128    
192    0      
192    -32    
16     32     
-32    -96    
-32    32     
144    32     
-304   96     
208    96     
112    32     
128    -16    
-32    -16    
192    192    
-128   -64    
96     -400   
-80    64     
-96    80     
96     32     
16     64     
64     240    
0      64     
256    32     
-16    -144   
-32    -176   
32     32     
192    160    
-208   -16    
48     112    
112    32     
48     16     
176    80     
48     -240   
16     -96    
96     -128   
160    112    
192    64     
-192   64     
-48    160    
32     144    
64     -32    
192    80     
-160   16     
112    80     
96     144    
64     144    
48     -48    
-144   -240   
144    32     
-208   -256   
112    16     
-336   320    
-304   -128   
32     -144   
320    -208   
368    -192   
448    176    
-32    32     
112    -96    
128    112    
192    -64    
240    112    
-336   -368   
256    -64    
-192   -160   
-448   -32    
208    32     
32     144    
-64    -64    
160    -80    
304    272    
-512   224    
-144   -96    
352    0      
-160   -48    
80     -208   
48     -32    
336    -496   
224    -16    
400    -528   
240    -192   
160    64     
240    112    
80     240    
32     128    
-192   -48    
-192   -16    
64     80     
-48    16     
288    96     
144    16     
320    128    
-192   48     
-176   -64    
-192   -64    
-128   160    
48     32     
128    -272   
192    -64    
-48    192    
112    176    
-32    112    
-96    80     
-32    -576   
48     80     
-160   48     
400    -144   
-96    -592   
48     240    
80     -48    
128    -160   
-192   80     
48     -48    
-80    -416   
272    368    
-128   -16    
96     112    
128    32     
144    320    
-192   -560   
208    -128   
32     160    
256    -368   
320    64     
-16    -48    
-80    32     
-112   -176   
96     -624   
256    448    
-128   -784   
352    -256   
-144   -336   
480    -160   
144    48     
656    800    
-320   -336   
-144   -464   
-144   -320   
-128   -64    
48     112    
480    32     
336    608    
0      -400   
-64    16     
-192   16     
288    80     
-272   80     
-608   -960   
592    -240   
80     -320   
-272   -272   
224    96     
-16    144    
-80    112    
-64    -96    
128    -320   
-96    -96    
-16    -352   
192    -64    
0      32     
0      -16    
144    -224   
176    -176   
-80    -48    
256    -160   
32     -32    
80     -128   
0      -64    
-112   544    
160    -32    
464    -368   
64     -48    
128    -304   
48     80     
-272   0      
96     160    
144    240    
64     -64    
96     -48    
208    -128   
64     -80    
96     -144   
288    64     
-208   -160   
-240   48     
-80    -80    
256    0      
-64    -112   
240    -32    
-96    32     
96     -144   
112    -112   
-48    -48    
-64    16     
-208   -128   
240    -96    
160    -144   
128    -80    
-416   -128   
432    -32    
224    -192   
192    -336   
-176   -16    
32     0      
-64    64     
0      80     
-192   -160   
-112   208    
-1968  -192   
256    -112   
144    16     
64     32     
160    0      
96     32     
16     80     
128    -96    
176    160    
-64    16     
160    64     
0      112    
0      -144   
-32    -112   
128    -32    
-704   96     
-16    -32    
-32    -80    
112    -96    
416    320    
-208   -272   
-96    16     
144    -304   
128    -48    
96     -96    
144    -48    
96     -32    
16     -16    
-48    -240   
192    -224   
-496   16     
64     -128   
-352   80     
208    -48    
-240   192    
0      -272   
-16    0      
-48    0      
64     128    
176    352    
-112   144    
-416   64     
256    304    
-144   288    
144    48     
128    544    
384    368    
-208   160    
-32    32     
64     -48    
240    -112   
304    128    
-160   256    
192    -48    
-384   -528   
-32    -160   
-224   -96    
-96    160    
-128   -208   
320    80     
-144   160    
16     -240   
32     -176   
224    -160   
176    336    
-576   -336   
-32    128    
-432   -48    
-704   208    
-560   -48    
-176   -336   
-224   -80    
848    352    
-560   -64    
80     -224   
-96    -304   
-512   80     
288    16     
-480   -272   
-128   304    
-416   16     
-480   -160   
48     -96    
-96    64     
16     224    
32     208    
96     48     
-976   -112   
-48    -128   
112    -80    
-96    48     
-304   16     
320    224    
-560   80     
16     160    
-16    64     
80     80     
96     48     
-96    16     
96     48     
-544   -96    
-32    16     
-1360  0      
-192   32     
144    16     
48     48     
176    80     
32     48     
48     -128   
64     -96    
-32    0      
-64    48     
32     -48    
-352   -144   
16     -64    
-80    16     
240    112    
-496   16     
240    16     
-1072  -160   
-80    48     
-112   -64    
304    432    
-672   16     
80     -16    
96     160    
64     -16    
112    -144   
96     -64    
80     208    
16     -32    
-160   -144   
48     64     
16     48     
-592   -32    
208    48     
96     48     
64     192    
-112   144    
-112   -192   
368    112    
-352   -48    
240    32     
-368   -16    
112    80     
-112   -64    
0      -16    
-256   16     
64     -48    
-224   -112   
-144   32     
160    32     
144    0      
-32    112    
0      32     
-256   16     
-48    16     
16     48     
144    96     
-128   224    
96     96     
-64    -16    
-208   -96    
64     -32    
-48    48     
176    160    
-928   -64    
112    -16    
16     -16    
-32    0      
176    80     
-112   96     
224    -48    
-288   -144   
192    112    
-256   48     
144    16     
-128   -48    
176    96     
-320   16     
112    80     
-368   -16    
-96    -48    
128    -64    
128    80     
-32    96     
-80    16     
-48    48     
16     -144   
-32    16     
176    208    
80     -32    
16     0      
-32    -128   
-416   -48    
288    144    
-176   64     
-16    -112   
112    112    
-80    176    
256    192    
112    48     
-80    48     
-48    128    
-48    16     
-64    0      
48     -64    
-320   -80    
48     -48    
-384   -176   
80     48     
128    -32    
-64    -112   
-80    48     
64     144    
-80    -112   
64     -48    
48     0      
16     -16    
112    96     
-112   96     
32     80     
-160   -80    
16     32     
-32    80     
80     32     
96     0      
-64    -64    
80     96     
0      80     
160    112    
-320   16     
336    224    
-48    624    
160    0      
160    -288   
256    224    
16     112    
0      -192   
-320   -368   
-160   96     
256    416    
-320   -224   
48     192    
-16    -64    
48     112    
16     128    
-48    0      
96     0      
224    48     
-112   128    
160    160    
160    32     
-320   -448   
-128   48     
288    208    
208    -64    
240    32     
-176   -32    
112    384    
-496   208    
-128   -80    
112    64     
-16    -176   
464    64     
512    208    
-512   -1184  
-240   80     
32     -592   
416    144    
352    160    
192    -320   
192    576    
-48    192    
192    -112   
272    192    
240    -32    
0      -64    
368    240    
-64    -32    
-208   96     
-16    128    
-112   -64    
16     -576   
224    -224   
224    64     
192    400    
16     -576   
-32    144    
-176   400    
48     -160   
48     -96    
48     224    
32     -160   
128    384    
16     416    
48     -112   
256    0      
-64    -80    
96     -16    
-16    240    
0      416    
192    -704   
-160   32     
96     304    
96     80     
-32    80     
64     -208   
128    240    
160    112    
80     -352   
-112   -304   
0      16     
-48    256    
112    -16    
32     -320   
112    -176   
64     144    
-160   -32    
320    176    
-208   128    
-80    -272   
-48    -16    
160    -80    
-32    -16    
96     -16    
128    -192   
96     128    
-272   -592   
224    -48    
-112   -496   
192    0      
48     128    
-16    80     
-192   -64    
336    64     
144    192    
-80    384    
80     64     
112    -112   
272    -80    
-64    -64    
400    240    
-208   -16    
80     64     
-160   -224   
144    -352   
48     -48    
-48    144    
96     -64    
176    16     
32     48     
64     224    
320    272    
-448   240    
144    -96    
16     -64    
-16    -224   
352    -208   
-32    -144   
128    -112   
112    -512   
-144   -96    
-64    192    
-16    -176   
96     -80    
-112   -240   
112    48     
144    -32    
32     96     
80     16     
112    0      
112    -16    
-16    -64    
64     0      
-48    -112   
-16    -32    
48     -272   
64     -80    
16     -96    
-192   96     
112    -112   
176    80     
96     -16    
112    -176   
80     -48    
48     -144   
-16    32     
80     -224   
-128   -48    
176    -16    
-48    -112   
208    -96    
160    48     
-48    112    
16     80     
-224   224    
192    -48    
272    -128   
144    16     
160    224    
128    224    
176    -32    
192    -112   
80     80     
-80    -16    
-32    96     
96     -608   
112    -16    
176    32     
112    -400   
128    -64    
32     -96    
128    -912   
240    -112   
0      -416   
0      -96    
-128   -160   
-48    -32    
144    -160   
-96    -352   
288    224    
-176   -96    
112    -80    
160    -64    
224    -112   
-256   -16    
-1872  -32    
160    64     
288    -64    
80     160    
-32    16     
96     0      
208    160    
208    -160   
80     -16    
224    -368   
0      256    
192    80     
-240   -272   
48     64     
144    -48    
176    384    
-288   -400   
112    32     
176    -240   
-80    -224   
128    -288   
128    -320   
480    -304   
288    32     
448    -96    
-368   -96    
-304   128    
-128   192    
48     -64    
368    -144   
-112   -16    
1136   848    
-1328  192    
320    496    
-448   416    
-112   -192   
368    96     
480    -80    
240    160    
208    64     
-416   16     
-32    -64    
-448   48     
-128   -16    
256    48     
16     48     
128    -48    
-2240  48     
-112   -80    
192    -160   
144    0      
128    48     
112    -96    
32     64     
480    432    
-640   0      
288    -64    
144    96     
-224   80     
352    48     
-176   -80    
-448   -352   
-336   -112   
-48    176    
-1184  16     
400    160    
-544   16     
160    -160   
176    64     
-176   -432   
80     16     
32     80     
48     -32    
-128   0      
304    48     
-496   -32    
128    -16    
-352   48     
208    -16    
-768   -80    
304    -16    
-272   -64    
-64    -320   
-80    16     
176    -16    
0      0      
96     16     
-96    -176   
160    32     
48     16     
80     144    
-112   96     
-32    32     
128    0      
-288   16     
96     -96    
160    80     
112    -32    
32     -16    
1344   704    
-1168  512    
-176   -256   
112    -32    
-704   -112   
224    -64    
160    48     
672    272    
-912   80     
-384   -288   
272    0      
752    80     
-432   -16    
32     0      
544    192    
-480   -288   
192    -48    
-272   16     
256    16     
-176   80     
272    -160   
-352   -80    
-16    32     
-128   -64    
144    16     
-16    0      
16     -64    
160    144    
-2224  -160   
-272   64     
-1440  -224   
-592   -48    
112    208    
-96    64     
-32    -16    
-16    -48    
-176   -16    
304    64     
-192   32     
160    -16    
48     80     
-1040  -64    
432    208    
-1088  -144   
32     -32    
192    96     
-208   48     
-32    16     
-224   -128   
-304   -48    
-496   -16    
-256   -96    
160    16     
-112   64     
160    -32    
-80    64     
224    -16    
32     64     
-48    32     
-16    32     
-32    -384   
-192   -160   
-208   160    
-288   -32    
96     -32    
128    64     
-80    160    
-592   16     
-144   -160   
-32    48     
-16    64     
32     -176   
-16    48     
80     -16    
-144   128    
32     -288   
-64    272    
-64    32     
96     -128   
-48    16     
80     -16    
-144   0      
-448   80     
-96    -288   
80     240    
48     48     
-96    32     
96     64     
16     -16    
-48    0      
144    48     
96     -16    
144    32     
-96    -32    
-224   -1088  
32     832    
-208   96     
-608   80     
64     -64    
-80    32     
48     -32    
-176   -160   
336    -304   
128    80     
208    208    
0      64     
-176   32     
-96    544    
-176   -464   
-128   160    
-160   48     
96     -272   
-208   624    
-240   -272   
-240   128    
0      -112   
-48    -192   
304    240    
144    -32    
-16    -32    
-64    224    
-32    -16    
-16    64     
-16    96     
0      464    
48     1344   
-256   -816   
-304   -480   
240    608    
-112   -256   
288    64     
96     144    
160    -240   
-192   672    
-368   -96    
-624   -592   
80     640    
-144   640    
-416   -160   
96     -112   
144    128    
192    192    
-368   -192   
368    -480   
-80    -224   
272    112    
48     -80    
-320   -16    
-112   0      
-224   48     
-96    -160   
128    -32    
-64    32     
-32    -144   
0      128    
-48    16     
128    -32    
-320   -160   
0      112    
-96    80     
176    208    
96     144    
0      -144   
48     352    
64     80     
80     32     
64     112    
32     64     
-16    240    
16     80     
-16    64     
0      432    
112    64     
-16    112    
-112   -48    
0      -48    
96     80     
224    112    
-128   -80    
304    -368   
80     128    
96     160    
16     -512   
-272   -384   
-48    -192   
96     192    
352    80     
-368   -320   
176    -32    
-400   -16    
-16    368    
176    -32    
-64    640    
224    112    
80     -240   
-304   -432   
96     -224   
16     240    
-240   -64    
96     80     
-48    -736   
208    96     
-656   -240   
128    -112   
128    96     
64     48     
368    352    
112    192    
128    16     
240    -80    
-32    32     
176    48     
-48    16     
128    80     
80     112    
-128   -64    
224    -64    
-80    -96    
96     -80    
208    -112   
-112   32     
80     0      
-48    -192   
96     160    
-80    176    
256    32     
-80    -144   
256    -192   
336    480    
-336   688    
-144   64     
48     48     
448    528    
-224   800    
-144   256    
0      32     
128    64     
64     192    
320    160    
-80    224    
496    144    
48     -144   
-80    -192   
-192   96     
48     160    
-96    16     
208    160    
16     272    
464    -512   
-192   288    
-128   64     
-80    -128   
176    -112   
208    -64    
32     320    
272    208    
144    192    
-64    144    
-160   -32    
-16    0      
96     32     
272    -32    
192    0      
-64    -288   
-128   -96    
128    48     
-16    -96    
16     -224   
-64    -112   
112    -272   
-16    -128   
96     -32    
64     -144   
176    -16    
208    0      
48     -80    
-304   -288   
0      -176   
64     -144   
16     96     
128    192    
224    128    
32     -48    
128    48     
32     144    
128    -112   
-16    80     
112    80     
64     64     
80     32     
80     -64    
112    96     
336    448    
-208   -336   
80     -32    
64     -1520  
16     -48    
112    80     
80     32     
64     128    
16     304    
112    64     
48     80     
-448   -432   
160    -176   
192    272    
256    80     
208    -64    
96     64     
144    208    
-112   -16    
-48    224    
-32    64     
64     240    
-16    96     
-80    80     
128    96     
-112   96     
80     -32    
-32    -48    
272    32     
128    -80    
640    320    
-480   0      
-464   -96    
192    -192   
112    64     
-112   -880   
224    80     
-464   64     
128    80     
112    16     
-160   224    
-80    160    
304    -144   
240    0      
256    32     
-16    32     
256    96     
-304   -64    
224    -240   
304    272    
32     -528   
352    64     
-48    -64    
336    48     
240    176    
-144   48     
64     32     
-176   -464   
176    48     
-32    -64    
320    -16    
-80    -32    
-128   96     
-160   -128   
368    96     
176    -32    
352    16     
96     -32    
208    128    
-16    48     
-96    32     
320    80     
-224   -192   
80     80     
-16    -64    
288    -16    
-112   -272   
128    128    
-176   -96    
336    96     
80     -208   
-48    -48    
112    160    
-256   -976   
48     32     
272    16     
0      -192   
352    32     
48     176    
-224   -560   
752    -176   
32     16     
-240   -16    
192    -16    
-272   -560   
176    112    
80     -272   
48     16     
16     -224   
16     128    
112    80     
16     -160   
-240   -80    
352    -192   
-336   -64    
-176   -1376  
224    -32    
336    208    
368    -64    
64     -64    
496    288    
-368   96     
144    144    
-752   -288   
816    -64    
-416   -16    
208    -32    
208    -32    
256    -144   
-144   -32    
-192   -128   
160    -16    
160    -304   
208    -16    
-16    0      
-144   0      
112    -80    
48     144    
-176   -32    
112    -80    
-224   0      
-16    32     
176    16     
64     -32    
80     0      
96     -16    
48     96     
48     -368   
-16    96     
16     48     
112    48     
144    32     
32     112    
-112   16     
176    0      
-208   48     
176    -112   
-64    96     
160    32     
128    -48    
-144   -512   
144    -160   
-16    -160   
96     -144   
160    -544   
256    320    
192    -32    
-160   -144   
-288   16     
272    -272   
32     304    
144    -112   
-544   -64    
16     -144   
16     16     
272    192    
0      -208   
0      -320   
-240   -48    
432    -784   
16     -64    
32     0      
16     -64    
-80    -64    
208    208    
-256   -208   
480    384    
-736   496    
128    -688   
-240   416    
208    112    
-80    -416   
112    16     
32     448    
96     -64    
144    -272   
-256   -32    
48     624    
96     32     
64     48     
-288   -240   
96     16     
-176   208    
96     0      
96     320    
144    144    
-144   160    
80     -144   
112    16     
16     -528   
0      -96    
-64    304    
96     272    
-304   48     
112    -32    
-240   48     
64     16     
96     304    
288    192    
-608   -208   
-32    -80    
64     416    
0      80     
112    160    
368    256    
160    400    
-96    112    
80     -432   
48     -160   
288    32     
16     112    
0      160    
-144   128    
-128   -112   
-512   -128   
16     -96    
80     -48    
-448   -32    
256    64     
-64    176    
-1616  240    
-240   32     
-352   -96    
-32    48     
272    160    
-256   144    
160    -96    
-144   -64    
128    144    
-208   112    
64     96     
-16    48     
16     -112   
400    160    
-176   128    
-528   -224   
-272   -112   
-384   -240   
-144   -160   
-336   -16    
144    0      
608    176    
-288   144    
48     192    
-144   304    
-512   -48    
192    -160   
-80    -320   
-160   -128   
-192   -176   
176    16     
48     96     
-96    256    
-240   368    
-96    224    
-176   0      
-560   -48    
64     -96    
-192   16     
160    48     
112    64     
-112   272    
-48    96     
-112   80     
176    48     
-64    272    
256    144    
-336   -64    
-64    -368   
-80    32     
-32    32     
-256   160    
64     192    
-80    -48    
320    144    
-240   -48    
144    144    
144    32     
128    352    
48     -16    
80     -112   
0      -64    
-272   -496   
-256   160    
48     -112   
-128   48     
176    336    
176    832    
-1552  240    
-144   -16    
176    64     
48     -48    
288    224    
-80    -96    
-448   -64    
-416   -112   
544    -400   
400    -16    
64     160    
352    -16    
-480   80     
-560   -64    
-64    304    
-272   832    
384    480    
240    -64    
336    176    
160    -160   
-112   256    
-128   -128   
32     16     
-16    32     
64     64     
-112   80     
64     -80    
48     128    
-144   -64    
80     0      
-720   -160   
208    48     
0      240    
-48    -64    
144    -192   
0      -112   
-320   576    
528    464    
48     352    
-272   32     
-176   240    
208    464    
192    160    
-400   48     
64     -256   
-640   -144   
640    352    
-400   736    
96     176    
144    192    
80     560    
-304   304    
-16    336    
-128   96     
288    448    
-224   304    
-128   -64    
96     0      
-48    -160   
-176   -112   
-80    336    
64     -400   
-16    -352   
192    496    
-224   112    
16     0      
224    352    
96     176    
-96    -16    
-16    240    
-80    400    
16     -336   
-16    160    
-256   -32    
176    16     
64     672    
304    432    
-560   -256   
96     144    
0      -640   
-272   -112   
144    96     
-32    208    
192    32     
192    0      
0      80     
-112   -16    
48     160    
-336   -48    
80     80     
-144   0      
144    32     
96     48     
208    48     
160    0      
112    -176   
-64    -16    
-96    96     
-16    48     
-128   0      
48     64     
48     80     
112    48     
-112   -80    
160    -128   
176    144    
-160   48     
112    336    
96     96     
80     -48    
-304   -368   
16     -272   
-224   48     
-304   -48    
-128   80     
208    272    
-160   128    
320    368    
-96    0      
144    -32    
240    32     
112    16     
384    128    
-96    -64    
352    0      
48     0      
80     16     
112    0      
-16    96     
-128   16     
-304   160    
32     16     
-32    -32    
-512   -48    
-448   160    
-432   -160   
240    -336   
624    -48    
384    128    
352    -32    
336    48     
32     16     
-96    48     
-96    32     
-272   -16    
-96    -16    
16     0      
-192   224    
-48    160    
-16    -256   
-96    -48    
-112   48     
144    -32    
224    64     
-96    176    
-272   80     
-32    128    
-192   48     
288    32     
304    80     
-224   -48    
160    0      
96     32     
464    240    
-608   -1456  
-32    -16    
64     48     
304    96     
0      48     
-176   64     
-64    -64    
112    -16    
-96    32     
64     32     
-32    -128   
64     -48    
128    -48    
-64    32     
144    128    
80     -384   
-96    32     
128    -16    
80     0      
16     32     
112    16     
656    288    
-384   160    
144    -144   
-80    -32    
272    48     
80     176    
-192   64     
448    -48    
-400   -160   
464    80     
272    176    
-464   96     
368    -48    
-160   -64    
288    112    
208    144    
224    96     
112    -48    
-144   -16    
336    160    
-464   416    
-208   240    
288    -112   
-224   -304   
-96    -144   
272    64     
-208   -816   
128    -128   
-80    -96    
32     64     
224    16     
128    -32    
96     96     
112    64     
48     96     
48     16     
112    -64    
-128   0      
192    -160   
80     -32    
128    48     
96     -544   
112    64     
80     -464   
64     176    
144    -192   
-16    176    
112    96     
64     96     
240    0      
16     128    
112    256    
112    -272   
-192   16     
112    -784   
80     0      
192    144    
-64    -48    
32     0      
128    80     
576    464    
-400   352    
16     -176   
-32    0      
240    -144   
352    -32    
-48    -128   
-32    -1088  
224    624    
48     112    
-96    64     
128    32     
32     -224   
-16    -160   
336    480    
144    448    
48     96     
0      272    
64     48     
16     208    
224    144    
128    256    
224    128    
48     96     
304    -48    
64     64     
32     -64    
0      160    
16     352    
160    16     
16     -16    
80     -352   
-64    0      
144    -80    
80     -640   
192    0      
256    -576   
-80    352    
48     144    
-80    48     
-16    48     
-112   -112   
400    -160   
96     16     
96     -80    
96     96     
112    -304   
64     -272   
-1120  -176   
224    -208   
64     80     
192    -16    
96     -16    
96     -592   
-112   -48    
96     32     
96     -48    
176    -96    
-96    16     
192    -192   
-192   16     
224    -96    
-96    96     
-624   -144   
336    -32    
-112   96     
64     -48    
64     -64    
64     -464   
112    -144   
16     -448   
48     -32    
96     240    
-288   80     
144    -112   
304    96     
-192   160    
96     0      
-272   -16    
176    -16    
96     96     
0      -64    
32     -16    
80     -144   
144    -368   
160    -272   
160    144    
80     96     
16     16     
192    160    
48     0      
-288   -304   
16     -288   
-704   -144   
96     96     
-2016  16     
208    16     
80     -32    
80     16     
48     32     
64     -144   
-80    48     
-32    -496   
80     -176   
240    -16    
128    64     
-32    -192   
96     -96    
-144   0      
96     128    
-160   0      
64     -32    
-208   -48    
16     -32    
128    80     
128    -352   
-112   32     
128    -800   
128    144    
-64    96     
16     64     
-48    32     
144    16     
0      48     
160    -32    
-112   48     
-80    -208   
-1264  -256   
80     -192   
128    128    
368    272    
-208   144    
384    -160   
-64    192    
-192   -192   
32     -144   
-160   16     
176    -64    
-176   32     
368    496    
288    416    
-160   -656   
-176   -912   
112    -320   
-32    96     
192    -176   
80     64     
-336   -464   
208    32     
-288   736    
224    176    
416    560    
-16    128    
-368   -352   
-464   208    
160    192    
96     752    
-528   -48    
-16    464    
-416   160    
-80    -592   
-112   -80    
-80    -208   
-192   96     
-304   -96    
-96    -16    
64     0      
-176   864    
128    160    
-80    -240   
128    176    
144    -256   
-560   208    
-880   288    
144    384    
-672   -144   
96     -16    
-48    -144   
16     -48    
-224   288    
320    -16    
-304   -336   
80     656    
224    640    
-160   -464   
32     336    
-304   -352   
96     -16    
176    -64    
-16    192    
160    -32    
-32    -16    
-80    160    
16     80     
-96    80     
-352   -208   
32     -32    
-400   288    
-112   -16    
384    208    
-128   144    
0      -176   
-352   80     
96     -144   
48     320    
-176   -128   
-80    -112   
48     64     
-224   -96    
80     80     
-272   32     
0      32     
-464   -160   
32     128    
-1520  -48    
-32    -48    
-16    0      
-48    -32    
128    48     
128    208    
176    160    
-352   -64    
-176   -144   
-48    0      
112    112    
-272   -96    
-192   80     
-880   64     
-160   112    
-576   272    
-112   512    
16     -192   
144    -16    
-208   -240   
112    48     
-48    16     
-16    -16    
0      48     
-16    304    
288    592    
-144   288    
144    240    
-112   16     
0      -16    
-400   -16    
96     0      
-720   -128   
192    0      
-48    -64    
32     80     
-48    80     
-32    48     
128    480    
-96    160    
-16    -128   
-208   -96    
-96    32     
64     -96    
-16    -32    
-448   32     
32     80     
-2240  -16    
128    256    
256    -32    
0      80     
-176   32     
-320   32     
-304   -64    
-32    -16    
-272   -272   
-96    -80    
160    288    
-304   16     
-80    16     
-80    96     
368    32     
-512   -32    
0      32     
-144   0      
-112   32     
16     96     
-16    128    
-224   32     
384    128    
-96    112    
0      -32    
112    16     
-64    -16    
-144   112    
-592   -16    
192    144    
-112   0      
-288   -304   
320    48     
64     80     
-96    48     
-144   -16    
0      0      
-80    32     
416    -32    
32     -80    
384    16     
-368   -64    
-144   48     
-464   -48    
320    128    
-464   -48    
-176   48     
160    48     
-336   16     
32     0      
32     -48    
304    112    
-384   -48    
-48    -32    
224    -96    
-80    16     
-368   32     
96     16     
-224   -16    
128    32     
80     -64    
-96    80     
-48    128    
112    0      
-112   0      
-112   32     
-112   160    
176    64     
80     0      
-224   -192   
304    -192   
-96    48     
288    80     
-96    32     
16     64     
-32    0      
416    240    
-416   64     
96     16     
-272   -32    
560    368    
16     432    
-240   -16    
192    -16    
80     160    
208    48     
192    240    
-48    208    
16     16     
32     64     
240    -48    
-48    -160   
64     112    
176    112    
64     128    
-256   -160   
496    128    
208    0      
288    64     
-32    48     
-224   -96    
-16    -32    
560    464    
-432   -64    
768    384    
-640   304    
-304   -560   
304    0      
192    112    
592    -160   
-48    368    
48     -112   
-320   -96    
-80    592    
112    -480   
368    -80    
-160   736    
256    -48    
16     -160   
-48    240    
144    -208   
96     48     
-144   112    
80     -32    
-64    112    
208    160    
-16    -208   
-224   -128   
224    208    
-288   0      
416    -608   
-160   -256   
128    736    
288    560    
-48    352    
96     144    
192    224    
-48    48     
-48    -144   
48     -48    
112    112    
-32    560    
128    208    
112    144    
-352   -272   
80     -384   
-208   -16    
0      -448   
192    -112   
192    -1248  
80     64     
144    112    
96     48     
0      -32    
80     112    
160    208    
256    128    
32     80     
256    32     
16     96     
80     128    
-176   80     
16     -64    
-128   64     
32     -32    
96     80     
-96    96     
64     64     
48     80     
-16    112    
112    16     
176    0      
-160   -112   
160    -48    
-80    -16    
96     80     
64     480    
336    320    
224    96     
-32    -160   
-16    -64    
96     -640   
208    80     
0      208    
-176   112    
208    48     
-48    112    
80     -32    
192    16     
-192   -96    
352    -352   
192    96     
16     -112   
-16    -112   
-48    -320   
96     -176   
64     32     
0      32     
128    -16    
144    32     
336    -144   
16     -16    
208    48     
0      96     
-144   -48    
128    -48    
-176   96     
-192   112    
160    528    
64     528    
96     112    
416    -80    
-128   48     
64     -1264  
240    128    
64     48     
304    128    
-16    -16    
64     0      
144    16     
-112   16     
-304   0      
16     48     
176    320    
128    0      
64     192    
48     -416   
-128   -448   
-160   -704   
-192   -16    
-544   16     
16     96     
64     -32    
-80    -160   
224    112    
32     -48    
112    -32    
64     208    
0      384    
-176   208    
208    416    
64     -16    
-16    32     
0      -16    
240    64     
16     -160   
176    -352   
48     -64    
32     -64    
-96    -32    
208    -128   
128    96     
160    48     
224    288    
-112   144    
-16    176    
192    0      
112    16     
0      -16    
32     -672   
240    192    
-144   192    
192    -112   
208    -416   
-16    -608   
144    -192   
-192   -432   
304    -128   
-144   0      
144    576    
256    -592   
-80    176    
176    -80    
16     -160   
64     16     
-352   -80    
192    304    
-80    -176   
48     480    
-96    -720   
-16    448    
464    32     
96     -192   
592    -384   
-336   -464   
32     112    
-160   -208   
-48    -480   
-48    -128   
208    256    
-224   -816   
-304   -304   
112    880    
-2016  -288   
-160   -1024  
1024   704    
0      176    
-16    -320   
-80    -352   
-16    -16    
160    -528   
-16    0      
48     368    
1552   1152   
-1040  -112   
-496   -976   
-128   -128   
144    -32    
-96    80     
336    448    
144    -320   
-32    -16    
16     288    
-144   160    
112    64     
48     -1056  
48     96     
176    -48    
48     -48    
64     -64    
-48    -16    
-112   -16    
192    32     
-560   0      
112    112    
32     -48    
144    -16    
16     -32    
64     -160   
160    -80    
48     -224   
32     160    
192    16     
0      64     
-16    16     
208    448    
-112   224    
144    16     
352    160    
-256   -112   
-720   48     
176    -16    
-320   -32    
-96    -48    
272    48     
-80    -256   
16     64     
-96    -16    
192    -32    
-64    -32    
128    64     
-64    48     
112    16     
-288   -48    
-16    -128   
-352   -32    
208    0      
-1248  -16    
80     -208   
80     32     
64     -240   
32     -48    
-64    -640   
224    80     
-144   16     
-48    112    
-16    32     
176    48     
-272   -112   
-16    0      
-96    32     
128    -96    
-624   48     
16     -80    
-16    304    
160    96     
64     224    
-64    -240   
176    64     
-624   -96    
96     -80    
-192   112    
272    0      
-64    -16    
240    64     
-192   16     
192    0      
-480   -80    
-80    -272   
-48    112    
0      -80    
128    48     
-80    16     
208    64     
-240   48     
128    -16    
-16    0      
144    32     
-144   32     
320    608    
-208   -112   
240    -272   
-368   -64    
288    -64    
160    16     
-672   -112   
16     160    
-144   -64    
-48    -32    
320    112    
80     -32    
160    -96    
464    208    
-384   48     
-16    64     
-224   -48    
-64    16     
0      80     
-208   -96    
80     48     
-400   -32    
-480   -32    
112    -16    
-48    48     
64     176    
-464   32     
0      32     
-2032  112    
-16    -80    
288    -112   
-96    16     
240    -80    
176    48     
-112   -128   
128    64     
64     48     
-192   16     
-288   -96    
-32    -48    
-64    48     
-272   112    
-48    16     
-144   0      
-176   0      
-784   64     
32     -64    
-352   -176   
112    48     
-96    -256   
128    -96    
80     32     
-272   -160   
224    0      
-32    32     
208    48     
-144   -48    
144    32     
48     -48    
48     -16    
-304   -16    
16     80     
-176   -112   
176    48     
-112   -16    
-16    -16    
16     16     
-192   -112   
96     -112   
96     -208   
-112   -240   
-64    -48    
0      64     
-32    -128   
48     64     
-880   -208   
704    224    
-128   64     
-48    -16    
160    -112   
368    352    
-304   -64    
-128   640    
128    -416   
-96    96     
-80    -208   
-528   -112   
32     -192   
-704   816    
96     128    
-352   -160   
-304   208    
-880   208    
-80    -368   
-64    400    
848    0      
-240   160    
-32    -240   
-336   -336   
320    336    
-320   128    
-320   256    
272    32     
-400   352    
352    -48    
-96    0      
-176   272    
-1456  -160   
64     32     
-80    -208   
160    176    
224    96     
112    -48    
-192   32     
240    -112   
-192   288    
0      144    
176    -176   
-416   -96    
208    -80    
-432   48     
112    96     
-320   0      
-208   -192   
416    -80    
-208   144    
176    -16    
112    48     
-320   176    
-128   -48    
-64    -32    
96     112    
16     96     
-176   0      
128    -96    
-32    -48    
144    112    
-496   80     
320    -32    
80     -32    
16     32     
-64    0      
0      -48    
48     112    
-16    -192   
96     -320   
-64    16     
-160   -32    
-224   -16    
176    32     
-96    0      
160    112    
144    144    
-192   48     
208    48     
32     96     
272    -16    
-64    0      
208    32     
-16    -32    
48     0      
-64    -16    
208    96     
-112   96     
-32    32     
-32    -16    
112    96     
-80    224    
-208   16     
-48    -48    
-16    128    
144    80     
48     80     
32     160    
-160   256    
192    48     
-48    -16    
320    224    
-112   64     
16     0      
-256   -144   
96     32     
80     48     
0      -16    
224    -32    
-16    32     
-32    -48    
-16    -96    
224    144    
0      96     
64     16     
0      -192   
0      -128   
80     0      
144    96     
-32    -16    
16     256    
16     144    
-240   -144   
48     0      
-16    -16    
96     160    
-128   -32    
112    -64    
208    144    
304    272    
-368   160    
288    320    
-144   512    
192    208    
16     16     
128    -16    
160    -240   
16     -128   
-16    -80    
-352   -192   
-32    -48    
-16    -96    
96     160    
-272   -64    
48     32     
-16    32     
-160   208    
240    -208   
-144   -112   
-160   128    
192    352    
0      256    
176    64     
144    800    
464    256    
80     32     
-336   0      
-128   -64    
256    320    
-240   -112   
64     0      
384    -48    
176    -384   
336    48     
16     128    
-48    -256   
-144   176    
160    -16    
192    -144   
32     272    
-48    128    
-144   -288   
-64    80     
448    -96    
112    -64    
-544   -416   
240    -48    
32     640    
208    -208   
384    -176   
-112   -624   
-208   304    
256    400    
-144   16     
144    32     
272    16     
0      -64    
272    -64    
-144   -240   
96     96     
-176   0      
368    240    
16     304    
112    64     
160    16     
112    -192   
128    208    
448    16     
-480   -80    
-32    128    
-272   -384   
272    -448   
176    112    
480    288    
352    64     
-160   -64    
16     64     
-160   160    
-80    -112   
192    80     
128    64     
80     32     
320    160    
256    96     
-112   -16    
160    192    
48     64     
272    64     
144    -80    
336    176    
-96    0      
304    -80    
192    48     
-224   32     
-96    48     
1040   272    
-592   400    
48     -160   
704    480    
-192   240    
-400   -176   
576    -208   
384    176    
-80    16     
48     64     
400    128    
-48    -64    
32     160    
32     -64    
128    -32    
-96    -176   
112    128    
240    16     
32     80     
128    64     
0      64     
96     80     
0      80     
48     32     
-80    -240   
-48    112    
80     0      
240    96     
288    -48    
-320   -128   
-64    16     
272    96     
464    192    
-448   112    
160    -160   
96     64     
304    0      
128    32     
48     -80    
176    96     
-208   80     
-96    320    
336    352    
32     -80    
-64    -32    
128    0      
96     16     
0      -112   
144    272    
192    32     
-16    -112   
112    64     
-48    -144   
-48    -144   
256    -32    
32     96     
64     -32    
192    -336   
-144   -96    
16     16     
192    -80    
112    48     
-80    48     
272    -16    
224    80     
-32    -416   
-112   -16    
-432   0      
112    -240   
-16    0      
112    -96    
-48    -80    
160    -304   
16     -128   
64     304    
-32    -208   
-16    48     
80     64     
0      -128   
0      32     
48     -160   
-32    -176   
-128   -112   
144    0      
-272   -48    
-16    -64    
-96    -256   
80     -384   
112    0      
144    -336   
48     80     
0      -16    
0      0      
224    -64    
32     48     
-48    112    
544    192    
-96    0      
192    144    
-64    -48    
0      -80    
112    96     
96     176    
80     -64    
320    496    
-304   96     
-48    -1440  
160    192    
352    80     
208    96     
128    48     
208    -48    
-48    -48    
128    64     
-368   -96    
-64    -208   
-16    160    
-144   144    
48     176    
-176   0      
-400   -64    
128    -240   
-48    16     
624    -144   
112    -304   
32     -272   
272    16     
-256   64     
16     -32    
-96    -48    
-32    -64    
-208   -192   
448    -32    
-592   176    
-16    -208   
-288   208    
48     160    
176    496    
-304   96     
48     -64    
-112   16     
208    32     
272    0      
-48    -256   
-208   -96    
-208   -80    
-752   -352   
-160   -144   
-608   208    
384    640    
-16    -272   
112    -80    
-16    288    
-160   -416   
-176   -16    
224    -144   
240    -16    
-240   -16    
128    -64    
-400   32     
80     -144   
-80    64     
64     112    
32     -80    
160    160    
384    176    
96     -464   
48     144    
-528   208    
0      -240   
-160   160    
384    -176   
-80    -144   
16     -80    
-224   288    
352    -144   
-16    -544   
-240   -224   
-64    208    
-480   -96    
272    -272   
0      -128   
160    -32    
480    -144   
-16    272    
208    0      
-48    -96    
-192   176    
128    112    
-96    208    
416    96     
0      128    
-80    96     
-48    240    
-96    336    
48     576    
-720   80     
-80    160    
-336   32     
-784   -128   
-192   -368   
-1328  -80    
48     64     
-16    192    
112    288    
176    -16    
160    -32    
-1168  -80    
336    240    
-16    96     
64     -16    
-512   -304   
-208   144    
-192   -64    
-368   80     
48     -256   
-64    32     
16     112    
-2000  32     
-224   -176   
304    -96    
-160   160    
-208   -80    
-48    112    
-16    -256   
-32    64     
-160   0      
16     240    
48     160    
64     48     
0      -64    
64     -192   
-272   -80    
-224   336    
-112   336    
-16    -64    
112    -192   
48     -112   
-144   -48    
-160   -304   
-240   -64    
224    -112   
144    -64    
-112   -144   
64     -16    
-96    64     
-144   -16    
208    112    
-416   0      
176    -16    
-1536  -96    
160    32     
16     -112   
48     48     
0      -16    
48     80     
80     -16    
-16    32     
144    272    
-240   304    
-160   0      
-80    -48    
80     192    
112    112    
-160   32     
-288   -32    
32     32     
-176   -160   
208    -128   
96     96     
-64    64     
176    144    
112    96     
-80    16     
32     -80    
32     32     
-16    0      
48     64     
-16    0      
-80    16     
-32    96     
-16    80     
-208   -48    
96     0      
64     128    
48     -32    
144    48     
-96    16     
-80    -192   
48     -32    
48     48     
-176   32     
192    224    
-400   16     
96     64     
-112   512    
336    240    
-320   32     
48     176    
-32    96     
-240   -80    
0      -208   
-64    96     
-32    -80    
48     -80    
0      -256   
-240   -144   
16     272    
-320   224    
208    320    
-96    -48    
-464   -64    
0      -16    
0      32     
480    224    
-32    -160   
48     80     
96     0      
-48    -544   
48     -64    
-528   16     
-272   112    
480    -32    
320    96     
272    -16    
-256   560    
-48    -80    
-272   -224   
-256   64     
0      16     
464    112    
240    112    
208    -96    
-272   -432   
96     -432   
240    0      
240    320    
-48    224    
-368   -48    
16     160    
-208   112    
288    16     
176    0      
-160   0      
-16    112    
-64    16     
-384   16     
-16    192    
-160   224    
176    288    
224    48     
48     0      
-48    48     
-64    48     
-80    16     
-48    -16    
16     80     
64     16     
160    64     
-64    32     
-48    32     
80     80     
32     80     
64     16     
-16    32     
192    48     
-288   16     
96     -16    
-48    48     
144    144    
-288   528    
544    112    
-48    -192   
272    448    
-368   144    
-96    64     
240    16     
736    176    
-336   96     
-128   -16    
-32    -160   
16     144    
-64    112    
-272   48     
352    -16    
32     32     
240    48     
144    16     
224    128    
16     224    
176    272    
-576   -112   
-192   -112   
-256   -192   
256    -48    
144    80     
-464   -160   
160    -256   
512    288    
-432   -1456  
320    144    
-80    16     
-32    128    
-80    -32    
64     0      
-48    16     
32     -16    
48     32     
-176   112    
208    272    
-16    112    
96     -16    
96     16     
-768   -48    
-80    -256   
192    144    
64     48     
144    112    
-80    80     
-48    128    
192    32     
-48    128    
80     64     
-48    128    
32     -32    
208    80     
-160   -144   
208    80     
160    64     
-64    -64    
224    80     
48     0      
144    -80    
-96    -160   
16     80     
208    96     
48     112    
176    -64    
-16    16     
32     -352   
-80    -32    
-144   0      
64     -48    
32     96     
144    -320   
96     48     
48     -880   
160    64     
-16    16     
240    -16    
-32    -16    
32     96     
-128   0      
176    128    
96     -64    
-128   32     
32     16     
48     -64    
96     80     
0      -512   
-160   -192   
128    -384   
-80    -16    
176    -80    
144    0      
-80    16     
144    16     
48     48     
96     0      
-64    272    
176    176    
80     16     
48     -160   
80     64     
160    -64    
0      0      
96     -112   
144    16     
176    -1536  
16     96     
32     -160   
224    80     
32     112    
240    512    
-16    -208   
-16    -256   
64     416    
-128   -208   
176    -48    
16     0      
16     32     
176    -96    
128    48     
-112   -1408  
-128   -352   
-48    560    
16     -64    
208    112    
80     80     
0      -112   
224    224    
144    48     
304    -176   
224    -64    
64     -80    
-48    64     
-64    -64    
-80    112    
-112   80     
0      112    
-16    -80    
208    64     
224    112    
288    160    
-176   -160   
-336   -192   
128    -688   
128    -368   
320    352    
64     -304   
400    -304   
320    128    
384    32     
-240   -16    
-176   80     
-176   0      
32     96     
-144   -32    
176    -240   
32     -208   
-32    -16    
96     128    
-224   -96    
624    -320   
48     384    
176    192    
256    -304   
208    224    
-192   -320   
-96    -1264  
-16    304    
-64    -1280  
16     224    
-208   -208   
144    -352   
304    -112   
64     -432   
-400   384    
96     -1152  
192    -48    
96     192    
432    160    
-144   224    
48     -416   
80     -304   
80     -32    
-16    0      
0      -32    
-560   48     
224    -128   
112    -576   
-128   -400   
176    -208   
-80    -400   
-32    -496   
32     -528   
-16    -112   
-128   -80    
368    -64    
160    0      
144    64     
-288   -48    
256    128    
-272   0      
192    -80    
-112   96     
448    336    
80     224    
-80    -16    
-160   48     
-64    -368   
480    96     
64     80     
-336   -32    
-272   -208   
32     -112   
272    -112   
-48    -144   
224    -80    
352    -16    
320    128    
-144   -128   
-256   -208   
48     160    
-128   80     
-272   -288   
256    -304   
320    -304   
-512   -128   
480    -176   
192    -112   
-112   64     
0      -16    
-176   48     
-48    -208   
-816   -64    
-16    -112   
-64    -80    
-32    416    
288    96     
288    -336   
-80    -128   
224    -1232  
-80    -16    
48     -16    
-48    -48    
32     160    
-128   48     
-32    -112   
32     -96    
-144   -48    
32     -48    
-224   208    
48     144    
-48    -96    
288    -416   
16     64     
192    -64    
-32    32     
272    16     
-32    64     
224    32     
256    -240   
-192   16     
-16    -32    
-512   -64    
304    -320   
-112   -128   
-32    -112   
160    -16    
160    -144   
-16    -16    
96     -256   
0      -16    
-160   16     
144    -192   
128    96     
-128   48     
-400   -32    
80     16     
-192   16     
80     -144   
-448   0      
-32    -32    
32     -48    
80     -144   
64     -64    
96     -96    
-16    320    
-432   112    
16     -192   
96     -288   
96     16     
-320   544    
80     256    
-160   -80    
-48    -112   
-496   -32    
224    32     
-96    272    
144    160    
176    -80    
80     16     
-80    48     
-16    144    
-48    160    
48     192    
48     416    
112    480    
160    -128   
-256   -160   
64     -96    
-176   432    
240    352    
80     -160   
-160   -144   
-16    96     
-288   -192   
-1312  -176   
-112   16     
-272   -320   
-208   -144   
128    1200   
-704   -752   
0      -720   
48     336    
32     -64    
-16    64     
-672   -64    
-64    -192   
-224   96     
80     240    
-160   48     
-176   -368   
224    64     
176    304    
-384   512    
48     80     
128    -48    
-96    -16    
128    32     
-608   160    
80     224    
-112   80     
-464   0      
-384   -192   
64     -16    
64     64     
240    272    
0      272    
-224   240    
-32    16     
-96    -32    
176    0      
-752   -32    
128    64     
-912   -16    
-80    96     
0      -80    
112    48     
32     16     
112    -192   
-32    0      
-544   -64    
-128   -32    
-16    32     
32     48     
16     48     
320    -48    
-672   -128   
-224   48     
-608   -368   
240    -64    
-80    16     
-16    64     
-304   64     
176    64     
-192   -32    
-112   16     
0      64     
-32    -16    
32     0      
-144   32     
-144   64     
-16    -48    
0      32     
-192   32     
112    64     
16     -48    
128    48     
80     -48    
-160   -16    
32     -16    
-32    48     
288    48     
-224   -32    
336    112    
-288   -272   
16     -144   
-608   32     
-80    -160   
48     32     
0      224    
-256   -96    
0      -208   
32     -128   
192    224    
-528   192    
-16    -112   
240    -48    
-384   -32    
256    0      
256    320    
-272   176    
-304   -176   
224    144    
-992   -368   
480    -112   
528    128    
-144   64     
560    208    
-192   -48    
-32    32     
-112   -32    
16     48     
-816   -352   
544    -48    
144    224    
-576   16     
-80    -32    
192    48     
336    144    
-16    128    
32     32     
272    16     
-240   176    
-48    -48    
0      -48    
32     80     
48     32     
80     16     
48     -32    
-48    -80    
160    144    
-304   -16    
32     32     
-128   144    
208    96     
32     -128   
-352   -16    
32     -48    
-96    16     
352    96     
-64    80     
128    48     
-304   -64    
-144   16     
-288   0      
320    80     
-256   -48    
16     144    
-336   16     
48     48     
-64    32     
-80    32     
144    0      
64     -96    
-48    -48    
128    80     
-48    32     
0      -112   
-64    -48    
64     32     
-16    80     
-48    16     
96     112    
0      80     
-208   176    
-16    320    
256    -96    
240    208    
-224   -80    
-48    -112   
0      112    
224    -304   
-64    192    
272    304    
-320   -160   
64     160    
64     -144   
32     320    
-80    -80    
32     16     
96     128    
-48    0      
-32    0      
272    64     
-144   -144   
128    -16    
48     64     
-192   -592   
-80    336    
-288   -144   
144    -208   
-16    192    
128    192    
-32    80     
128    -432   
240    208    
64     176    
16     -32    
208    288    
-144   -112   
112    384    
32     96     
-240   -64    
144    80     
160    240    
80     16     
-80    -240   
224    576    
64     -272   
-32    16     
160    112    
144    -80    
-48    176    
64     0      
80     96     
-16    -32    
96     272    
48     -16    
0      -544   
0      208    
176    448    
64     -448   
-176   -304   
80     96     
-80    160    
112    128    
-160   -112   
-16    32     
224    320    
-320   -288   
64     -368   
64     32     
160    -224   
224    240    
-368   -208   
160    -880   
192    -464   
544    -352   
416    -32    
48     16     
-128   16     
176    208    
32     176    
0      0      
-80    96     
48     -48    
240    -80    
208    336    
-80    64     
208    192    
-240   32     
128    0      
192    -96    
112    192    
384    48     
32     48     
48     256    
-96    208    
208    160    
192    96     
64     -64    
64     -112   
-48    -80    
0      -112   
128    32     
160    -128   
176    304    
-32    96     
32     -32    
80     -1456  
-16    32     
80     128    
-32    64     
64     -32    
144    0      
-304   -112   
224    -592   
-192   -384   
96     -96    
48     96     
-144   144    
-32    -32    
176    160    
64     208    
-48    -528   
-48    -464   
-128   -560   
208    128    
400    240    
-192   640    
128    208    
160    384    
-32    48     
256    -176   
16     -16    
192    112    
32     -192   
80     -112   
0      48     
-64    368    
32     400    
16     -32    
560    496    
-96    64     
176    0      
128    -16    
-32    16     
-32    -16    
-48    -32    
544    336    
-368   48     
-80    416    
48     -48    
224    -64    
176    -208   
560    112    
-176   -176   
-192   16     
-64    -32    
48     64     
256    272    
-128   208    
224    -96    
-272   -112   
240    -32    
-224   96     
-48    224    
320    64     
-96    112    
144    16     
0      32     
256    -320   
-320   -80    
80     -48    
80     0      
80     96     
-48    -1168  
32     432    
160    112    
80     64     
192    -96    
0      -224   
480    256    
-352   464    
-32    -240   
96     64     
64     80     
304    -560   
-272   -144   
32     -176   
-496   464    
-1040  96     
512    -96    
32     112    
32     -336   
288    -176   
-32    -368   
144    -192   
-48    0      
112    -48    
144    -528   
-16    -48    
32     -208   
-48    32     
176    -272   
-96    32     
-608   16     
80     160    
96     -16    
16     -96    
432    48     
-48    -208   
336    336    
-368   -64    
-176   -272   
32     -144   
288    128    
-48    496    
16     -272   
288    -128   
-80    320    
-176   -384   
160    -112   
128    -48    
80     -160   
-176   64     
128    -320   
80     208    
-48    -624   
112    48     
96     -192   
144    304    
112    -112   
-112   64     
-160   16     
64     176    
-528   -16    
-32    -288   
-1856  32     
16     48     
144    -32    
80     -48    
256    16     
-32    -320   
256    -16    
0      -16    
304    -48    
-336   -128   
-16    48     
-192   144    
272    16     
-352   192    
-144   64     
256    240    
224    384    
192    112    
336    240    
-176   -16    
304    -192   
80     16     
-192   -224   
176    -64    
304    128    
-288   64     
-32    32     
208    -128   
208    48     
720    192    
-416   80     
144    -112   
-736   0      
240    48     
-240   80     
16     -416   
240    -128   
-160   -352   
-256   16     
64     -16    
208    80     
-112   32     
192    -192   
48     -96    
224    -16    
-800   64     
288    -80    
-752   -288   
464    -96    
-96    80     
64     -144   
416    -16    
48     -288   
-448   -48    
-336   48     
176    96     
112    16     
80     -192   
80     16     
-16    32     
0      16     
-16    -80    
-64    16     
-144   0      
272    144    
256    -144   
48     80     
-48    -224   
-80    -96    
176    32     
464    192    
-592   -64    
176    -64    
-368   -80    
224    0      
-144   48     
160    -16    
-464   -208   
496    -112   
-336   112    
-48    -160   
128    80     
-32    -64    
384    304    
-928   -32    
656    64     
-544   -80    
432    128    
208    80     
-144   32     
496    128    
-224   -192   
128    0      
64     -96    
-128   112    
-272   -128   
256    128    
-304   -64    
-480   -144   
-176   -32    
-96    64     
128    0      
-576   112    
-480   -64    
464    96     
-544   0      
-752   -224   
32     32     
-544   48     
-240   -32    
-80    0      
-80    -128   
272    -80    
-304   -16    
704    48     
80     16     
-192   128    
-464   -80    
-288   32     
-256   -80    
-16    -64    
-464   -16    
160    176    
224    -48    
-80    32     
0      -144   
-304   80     
-32    -32    
-64    0      
0      -16    
0      0      
-80    -64    
-352   -16    
-160   96     
-704   -96    
0      -16    
-16    -64    
-32    144    
-48    -160   
48     -32    
-128   80     
-128   -208   
32     -64    
304    368    
-416   -336   
48     32     
-16    112    
-224   0      
176    0      
-16    48     
192    160    
-640   -144   
-32    224    
48     -240   
192    80     
224    96     
-112   -208   
128    1376   
144    -1024  
-80    384    
-192   48     
80     -304   
-208   96     
16     -240   
-224   176    
64     -48    
-768   -288   
160    224    
80     -16    
-64    208    
-224   -384   
-224   224    
176    144    
144    320    
-192   736    
-16    -208   
-64    -256   
-144   -208   
64     512    
-400   272    
160    64     
-768   -96    
208    80     
112    -48    
-160   48     
16     64     
-256   96     
-176   -272   
160    336    
48     384    
-80    16     
48     144    
112    144    
-96    240    
-128   48     
64     -16    
-112   -64    
0      16     
-64    -320   
-80    -144   
-16    -48    
-128   48     
96     112    
112    96     
-16    128    
176    400    
-256   -528   
-32    -176   
160    176    
-272   -112   
32     48     
-560   -176   
-48    -16    
112    -304   
192    48     
-48    -112   
-16    -240   
64     -112   
64     -192   
64     0      
-64    -48    
-16    -112   
-64    -112   
0      64     
-304   -128   
304    224    
-576   112    
-112   -32    
96     64     
48     -16    
112    96     
16     192    
16     0      
96     80     
-256   -128   
144    -64    
-16    160    
-432   48     
48     64     
-16    -32    
64     160    
-32    -144   
-32    320    
256    80     
32     -160   
80     -96    
-384   -224   
-16    80     
-48    48     
160    -128   
112    -128   
-32    16     
-464   -208   
-80    -16    
-128   -144   
176    80     
112    64     
16     -48    
80     -64    
-16    48     
-96    176    
-80    -64    
112    -112   
16     16     
64     48     
16     -96    
-64    -224   
-192   -224   
64     80     
-64    16     
48     224    
48     -384   
-48    192    
-64    224    
-128   16     
224    240    
96     208    
320    160    
208    -128   
16     48     
192    -128   
-64    592    
64     64     
304    -272   
-224   -32    
-160   -112   
128    112    
-144   -80    
208    -144   
208    -96    
-160   304    
624    384    
-16    336    
-528   -64    
48     208    
560    320    
368    416    
-32    272    
-80    -128   
-128   112    
-144   -112   
-224   144    
256    160    
-144   176    
16     128    
-576   320    
-240   16     
-48    -48    
-144   -96    
-160   -16    
-96    -112   
352    -112   
512    160    
32     192    
176    64     
96     16     
64     176    
624    672    
-512   592    
208    256    
-192   -208   
48     304    
480    512    
0      304    
272    496    
-16    144    
-80    192    
192    -144   
-240   144    
112    16     
32     -272   
336    224    
-608   -720   
-64    -160   
-96    304    
256    416    
544    720    
-304   -64    
-224   -128   
-192   -720   
-96    368    
560    592    
32     304    
-400   -896   
112    -256   
-288   928    
48     -400   
288    -1008  
128    384    
240    560    
-208   -208   
-256   -352   
80     -80    
96     80     
80     -16    
96     288    
-144   -160   
80     160    
32     -16    
-32    16     
160    16     
-96    -224   
320    -576   
0      48     
128    -48    
128    80     
-112   80     
320    240    
-192   -160   
128    272    
-32    368    
112    32     
64     -192   
48     48     
272    288    
32     -160   
96     -80    
0      -144   
-48    32     
0      -608   
64     48     
176    16     
176    64     
48     48     
160    32     
-16    -128   
16     -16    
64     112    
192    -32    
-80    80     
48     0      
144    -144   
-32    -1088  
-16    -64    
96     -224   
208    128    
-256   -32    
224    -80    
112    144    
144    288    
-112   128    
112    -144   
208    -16    
224    320    
-48    288    
48     -320   
368    -96    
128    -48    
224    144    
-48    -160   
80     80     
0      160    
16     0      
32     80     
48     16     
256    272    
-208   208    
-80    -112   
288    -208   
288    176    
192    -32    
176    -16    
208    0      
144    80     
-64    -32    
336    176    
-528   96     
-176   -144   
240    80     
128    48     
-32    -1264  
160    -256   
112    -240   
784    -528   
560    -80    
192    -16    
80     528    
-624   -160   
176    -48    
144    -224   
272    -1008  
528    -48    
-160   32     
-176   32     
-80    -160   
96     -432   
16     -80    
96     -496   
176    -32    
-80    -64    
144    -64    
48     80     
128    -112   
256    -336   
-16    0      
144    0      
112    32     
-128   16     
160    -176   
384    -64    
144    -80    
48     48     
-80    -96    
160    -16    
224    -800   
-80    -64    
352    80     
-96    16     
-208   -32    
160    48     
192    16     
-96    48     
-224   -48    
-16    0      
-368   -32    
192    0      
-272   -64    
96     -16    
-32    -96    
-80    -320   
192    48     
544    -544   
-48    -64    
368    -128   
-64    16     
-112   -144   
-304   -112   
16     96     
-304   -160   
144    160    
-176   -64    
64     -320   
-96    -272   
192    -96    
624    272    
-96    128    
-48    -144   
320    96     
16     -32    
288    176    
-304   -368   
384    -288   
224    -224   
-48    -48    
-240   64     
80     -352   
-1344  -224   
-208   -352   
256    96     
-32    320    
-80    128    
-112   -304   
-48    48     
96     -16    
48     -80    
-112   96     
224    32     
-144   32     
304    96     
-512   -496   
256    16     
-560   64     
144    -112   
-96    192    
-32    -448   
-96    80     
16     -400   
224    48     
160    -928   
-80    16     
-80    -560   
-16    -176   
0      304    
0      -64    
-272   208    
64     -112   
-240   -48    
240    432    
-1264  -1216  
368    336    
96     688    
-272   -240   
560    -160   
112    -192   
-80    240    
80     336    
160    240    
-240   -64    
144    -48    
-32    -32    
336    -352   
-144   32     
32     16     
112    -48    
320    0      
-208   32     
240    16     
-48    176    
208    -304   
0      48     
-288   32     
32     -16    
-384   48     
64     144    
-336   96     
16     -160   
-112   -224   
80     -208   
-736   -160   
176    0      
112    80     
-128   -208   
48     -32    
-176   -144   
-112   -32    
96     32     
80     32     
0      -16    
240    64     
-240   32     
-16    0      
-160   -128   
144    32     
-160   32     
-2384  -224   
144    -48    
-1488  -80    
144    256    
32     64     
-64    128    
-256   112    
-224   -112   
-80    -16    
-80    16     
128    -64    
64     -32    
176    48     
-768   -64    
128    32     
16     32     
-144   64     
-224   -64    
0      -96    
128    -48    
-544   64     
-16    -80    
-800   -16    
-256   16     
-256   64     
-144   -48    
240    -128   
-80    48     
-368   -80    
-96    16     
-192   -16    
-144   96     
-192   -48    
80     96     
-80    0      
80     64     
-128   -144   
64     -208   
96     -16    
48     96     
-96    -64    
-544   -160   
80     -160   
-160   48     
144    32     
-48    -144   
80     0      
-208   -80    
-64    -64    
0      -128   
80     -16    
192    48     
192    240    
-224   128    
-192   0      
192    0      
-400   0      
192    48     
160    16     
-160   80     
-192   -272   
192    16     
272    96     
64     64     
160    112    
32     112    
-144   96     
-128   -80    
16     80     
0      32     
32     48     
-32    -16    
64     -32    
-1360  48     
-80    112    
-32    -48    
-64    0      
208    416    
48     64     
192    256    
-96    304    
-32    64     
32     48     
0      32     
64     -80    
-176   -272   
-144   -112   
0      80     
-464   -96    
448    -32    
176    -48    
128    -96    
0      32     
16     288    
-64    -256   
-752   -1056  
416    -1504  
-64    192    
288    272    
-208   -496   
-96    336    
-528   832    
528    912    
-480   -576   
-368   -816   
-64    -256   
-16    144    
240    256    
176    80     
208    -176   
16     80     
400    432    
-224   -560   
-128   -256   
-352   0      
-48    -96    
-32    -304   
320    -32    
-464   -240   
-640   -592   
-416   976    
-112   592    
-208   -416   
160    192    
608    80     
144    -720   
352    368    
-80    224    
-192   -432   
-672   128    
368    656    
-400   272    
224    -32    
-144   -544   
352    768    
-80    160    
-48    -16    
240    16     
160    160    
48     176    
-304   -352   
144    320    
0      48     
80     0      
80     112    
-96    80     
224    -80    
144    64     
400    352    
-544   -304   
80     -208   
208    224    
-224   -128   
272    -16    
-128   48     
48     -48    
-224   0      
160    48     
0      80     
-160   -96    
16     16     
-96    0      
0      32     
96     96     
96     80     
144    16     
0      112    
80     32     
48     64     
-16    80     
112    80     
-80    0      
16     0      
80     32     
-64    48     
144    240    
-80    352    
-32    288    
0      -128   
176    192    
176    144    
-128   48     
-32    16     
64     192    
64     208    
272    64     
128    416    
-384   -240   
80     112    
-240   80     
80     32     
48     16     
176    48     
32     32     
0      32     
64     128    
-144   80     
80     16     
-176   16     
160    0      
-16    -80    
176    160    
-336   -64    
-80    80     
144    288    
-144   144    
64     64     
48     80     
-32    -128   
256    -64    
128    48     
160    160    
-32    80     
0      80     
80     80     
48     64     
240    0      
-272   16     
48     32     
192    352    
-192   -32    
64     112    
-16    0      
96     -48    
-80    -160   
352    -64    
80     128    
256    80     
-256   -64    
-32    -48    
-112   208    
-288   0      
64     16     
80     80     
64     -32    
176    -208   
-176   16     
0      -656   
-128   48     
-144   128    
-16    144    
-304   96     
-352   -64    
-48    0      
-16    -192   
336    -224   
-16    304    
336    128    
432    -224   
-384   -208   
-112   -32    
112    320    
-352   -144   
112    -48    
-64    -16    
272    96     
480    176    
128    48     
-16    64     
-320   -16    
-112   -32    
272    80     
128    16     
-192   0      
48     128    
-16    96     
-32    96     
256    48     
0      128    
-496   -1104  
320    16     
80     -208   
304    80     
-144   -32    
-192   -32    
112    0      
0      64     
96     64     
-64    -32    
0      64     
-96    -128   
64     -16    
112    -64    
80     96     
96     -240   
0      -16    
32     -16    
80     64     
-288   -80    
144    -208   
64     -48    
176    96     
192    80     
176    0      
16     -16    
-320   -16    
256    96     
-128   -384   
416    96     
-288   -304   
256    -48    
128    -64    
448    -32    
64     -64    
208    -16    
-240   -192   
144    -176   
96     -128   
288    192    
144    448    
208    -208   
-256   -272   
112    16     
-64    320    
272    -96    
-176   -448   
160    272    
192    48     
-96    96     
-80    -48    
-80    -16    
944    416    
-752   1680   
336    -160   
288    -256   
-112   -320   
752    304    
-272   -96    
592    -448   
-304   112    
-80    192    
16     -240   
0      224    
496    512    
64     -1056  
-240   -272   
48     -144   
-96    528    
144    272    
240    64     
240    336    
-64    -208   
112    -352   
112    -80    
48     -288   
96     -128   
176    -32    
-64    -640   
-112   -272   
-160   -672   
320    -720   
128    -80    
-32    -336   
272    -64    
-16    -720   
32     -32    
96     48     
64     -96    
32     -16    
144    -64    
144    -320   
-32    32     
128    -112   
-160   16     
64     144    
160    0      
-16    32     
96     -320   
384    -48    
48     80     
96     -48    
-16    -688   
96     -80    
192    144    
-128   -32    
32     64     
-48    208    
32     -160   
64     -32    
-448   16     
64     -16    
-2496  -112   
48     -256   
288    -80    
-64    -48    
-64    0      
64     -256   
-80    -112   
16     -64    
176    16     
16     -16    
-16    32     
128    -80    
64     -32    
-160   -32    
80     -112   
-32    -80    
-48    -32    
224    320    
48     64     
224    0      
-96    -144   
-64    -112   
48     -960   
48     -48    
288    64     
0      256    
64     192    
-128   -80    
-96    -128   
64     -32    
-368   -96    
112    -96    
-2032  -128   
144    -320   
176    0      
-80    -240   
96     -16    
-144   -208   
-304   0      
128    -64    
160    32     
16     -16    
208    128    
-192   -64    
64     -32    
-16    -80    
304    -16    
-592   128    
-80    0      
-464   144    
-160   -32    
304    64     
64     -64    
208    64     
96     128    
-32    48     
-48    -128   
272    16     
64     128    
224    -32    
32     -176   
-32    -208   
160    80     
-320   208    
-80    800    
528    352    
416    464    
-432   -352   
-272   -64    
-96    -224   
208    -48    
288    496    
-224   -496   
368    -320   
-48    32     
112    144    
160    272    
-400   80     
48     -80    
-1248  -48    
256    -176   
16     -32    
208    -64    
0      144    
32     -16    
-32    112    
-480   96     
48     -112   
-112   128    
432    368    
32     128    
16     -128   
-16    -64    
-96    -16    
-624   272    
0      -96    
240    -48    
176    240    
176    48     
-80    -416   
-1696  112    
-304   96     
80     -48    
-112   32     
128    80     
96     576    
-32    -416   
-80    0      
320    -96    
320    128    
-448   -48    
208    592    
0      -304   
-656   -128   
-448   16     
-752   144    
-496   -80    
288    512    
-288   240    
-688   -832   
144    -80    
432    112    
-192   -208   
-416   -192   
592    464    
-480   224    
-288   -128   
64     -224   
-16    272    
128    208    
160    48     
-64    -304   
-96    -224   
-224   48     
112    144    
560    224    
192    -448   
144    -352   
-208   -80    
-176   208    
80     112    
-304   -384   
-416   -176   
80     144    
-96    64     
352    0      
-64    -128   
-144   80     
-112   -16    
-560   -160   
112    -128   
-880   112    
0      128    
-16    -64    
80     16     
0      -64    
128    16     
48     0      
-240   80     
-96    -16    
-112   -48    
-64    -32    
-112   64     
160    128    
96     0      
128    96     
-1104  -48    
-64    96     
-96    -112   
48     80     
112    -16    
-80    32     
16     48     
-208   -160   
64     -48    
112    64     
112    32     
112    48     
-80    48     
-384   0      
160    80     
-528   -144   
-32    -16    
80     96     
80     48     
-16    -32    
192    -112   
16     -64    
-224   80     
64     -16    
-16    16     
-208   -16    
-16    96     
96     -16    
32     272    
-64    -48    
-112   -48    
-48    -16    
-1232  -32    
112    96     
128    16     
208    192    
-192   -144   
-96    0      
16     32     
160    -16    
-144   -144   
16     16     
128    64     
-192   -32    
80     96     
-96    -64    
112    32     
-1344  0      
32     48     
0      -48    
-32    32     
96     -16    
16     -32    
80     64     
-128   64     
32     48     
48     80     
80     96     
96     -112   
16     -16    
-32    0      
128    96     
16     -80    
-32    16     
16     16     
-64    16     
112    48     
-16    80     
32     48     
-112   112    
576    400    
-48    128    
224    -16    
-192   -64    
16     96     
-320   -80    
64     128    
64     -80    
-160   48     
-112   80     
-16    16     
-144   0      
-16    16     
336    144    
-96    144    
32     96     
-304   -16    
96     0      
-208   -48    
112    -96    
128    -96    
-176   32     
112    64     
128    0      
32     -16    
176    128    
-48    240    
128    96     
192    80     
-112   64     
0      -16    
112    -32    
224    -16    
208    48     
176    64     
304    240    
-160   272    
-464   -48    
-112   -32    
656    0      
464    32     
448    144    
160    288    
-160   240    
-592   -16    
-80    240    
80     48     
176    -48    
64     -48    
112    160    
32     128    
32     48     
-320   -160   
400    -64    
80     0      
512    32     
144    -16    
0      -32    
-32    -16    
400    160    
-64    -32    
-80    -48    
48     32     
-208   -80    
208    64     
16     32     
-16    96     
112    -240   
160    -48    
144    32     
-64    -192   
-128   -96    
-112   752    
80     -208   
-160   -240   
-64    112    
336    112    
-192   96     
16     -448   
256    704    
-48    64     
80     -208   
32     80     
-192   -256   
320    160    
-80    80     
-160   -208   
-112   384    
-496   -288   
496    1232   
112    -128   
-96    -208   
400    352    
112    -352   
144    -240   
80     -240   
176    96     
80     -240   
416    -160   
48     128    
624    416    
-352   48     
48     80     
-448   528    
304    496    
-384   -224   
0      -560   
160    320    
-240   -48    
-16    -224   
128    -16    
80     -64    
-16    -16    
368    -160   
-336   -208   
224    32     
-112   64     
256    -16    
48     -64    
160    32     
-128   112    
32     64     
0      32     
-64    -192   
272    -176   
-16    288    
272    -224   
-32    -80    
272    112    
16     128    
176    80     
208    32     
64     64     
-112   128    
-272   -192   
272    -288   
-160   0      
416    -96    
48     -32    
32     -96    
-16    64     
48     -160   
32     -96    
272    80     
-16    96     
-16    -224   
80     32     
-80    160    
304    208    
-96    16     
80     0      
-48    0      
208    32     
48     80     
32     80     
80     64     
-16    -224   
112    -80    
176    -400   
64     96     
-112   176    
320    64     
112    -96    
0      64     
-128   -336   
128    32     
144    272    
64     -16    
256    16     
48     -16    
48     32     
176    -448   
96     112    
80     -48    
80     16     
0      -416   
80     64     
0      -16    
144    48     
32     112    
0      -176   
112    256    
144    -48    
96     -112   
0      -832   
96     16     
-32    -96    
112    112    
176    -160   
144    80     
32     32     
128    32     
-80    -112   
176    16     
-32    -32    
16     -208   
144    -96    
192    0      
256    -48    
80     -80    
32     176    
16     32     
256    224    
-48    -48    
80     240    
144    144    
192    80     
-16    144    
192    -672   
80     -880   
-208   80     
32     -1504  
-96    -304   
144    -96    
144    -48    
-96    -112   
96     -224   
240    -48    
144    -64    
-208   -1216  
-128   -320   
0      -368   
-192   -240   
-1152  -208   
160    -48    
960    1056   
-544   -672   
-400   -880   
208    -16    
272    80     
112    32     
112    -288   
64     -240   
-128   144    
128    432    
32     144    
-352   -64    
-176   336    
-240   -96    
-144   112    
-160   -176   
112    336    
128    -512   
-16    -144   
208    112    
-176   -560   
496    384    
-288   -288   
48     0      
400    -576   
64     272    
144    16     
-48    96     
-64    272    
-16    -16    
-608   80     
-16    -304   
-64    -160   
160    -48    
32     0      
288    -16    
80     16     
240    32     
-656   0      
80     -16    
160    -144   
176    -64    
560    176    
-128   80     
320    -32    
-1216  176    
-64    80     
-32    -96    
-64    -176   
256    -112   
256    -16    
-464   -48    
416    -480   
-528   0      
704    64     
64     96     
160    240    
144    112    
-528   -176   
-112   -16    
-624   64     
240    48     
224    32     
-32    -176   
256    96     
-192   -176   
240    96     
32     -240   
-144   -96    
336    -352   
112    -240   
0      384    
-736   -272   
32     -224   
192    -160   
-448   -176   
64     -176   
144    -128   
304    -16    
-32    176    
288    80     
-368   -96    
432    0      
112    80     
64     -64    
240    -16    
-160   192    
32     112    
-144   -16    
112    48     
-592   0      
64     -64    
-784   -16    
96     -96    
48     -32    
240    -96    
48     80     
80     -208   
-224   224    
352    -352   
-32    32     
-128   -160   
96     32     
16     16     
96     -16    
-304   -32    
176    64     
-16    -16    
352    -240   
-256   -240   
80     -80    
-64    176    
272    -64    
32     16     
-144   32     
256    48     
-64    32     
64     -32    
-128   -32    
64     -48    
-160   32     
-16    16     
64     128    
128    0      
-64    0      
48     -80    
64     32     
-80    -176   
64     -64    
32     32     
288    48     
-128   0      
-304   -128   
-48    -64    
96     64     
-32    48     
112    0      
32     80     
-1904  -256   
144    144    
-1440  -224   
-112   0      
-192   224    
-32    144    
-160   -32    
-256   -16    
16     32     
-448   32     
-128   -96    
224    32     
-16    -48    
0      48     
16     -112   
-368   96     
80     176    
-336   0      
112    64     
16     0      
-256   176    
-176   144    
-656   -160   
16     -96    
-352   64     
-128   80     
-784   -16    
-48    0      
96     -176   
128    128    
-160   -48    
32     64     
-16    -96    
352    128    
-416   -592   
-400   -640   
-240   -192   
-288   -32    
-96    -16    
-64    -160   
-80    -256   
-384   -48    
176    624    
-368   320    
224    -816   
-64    -448   
192    320    
-32    192    
96     -16    
16     -224   
48     -16    
320    96     
48     80     
-224   32     
288    -464   
-32    -528   
-48    -32    
80     176    
-384   96     
160    144    
-400   80     
-240   208    
-192   0      
272    144    
-112   -32    
112    32     
-96    80     
-304   -112   
-128   80     
-160   224    
256    -80    
144    -160   
-640   -256   
-496   176    
-16    464    
16     -320   
-304   -800   
144    -576   
240    272    
400    416    
208    -192   
-64    -64    
-352   -96    
256    -16    
-288   64     
320    -48    
-64    128    
288    208    
-848   -320   
128    128    
-192   -48    
16     16     
-32    48     
-304   -304   
320    816    
-160   -576   
80     -160   
48     400    
-112   -64    
64     48     
-96    160    
-272   -96    
-144   -208   
32     576    
112    -304   
-1024  336    
0      176    
-192   -304   
-368   240    
208    -720   
96     -240   
112    400    
128    320    
-544   -384   
-288   -512   
64     448    
80     -64    
464    368    
-352   48     
96     -16    
-16    16     
-144   -128   
224    48     
-240   -96    
96     -32    
-144   -48    
-176   32     
-368   -16    
-128   -128   
176    -48    
384    112    
240    96     
128    -176   
-96    -16    
-368   0      
272    32     
336    112    
-288   -80    
608    -240   
-128   0      
464    -96    
176    -96    
64     96     
-96    -112   
-32    112    
-16    -16    
-16    128    
304    224    
-240   128    
-32    -80    
224    -208   
-256   48     
-16    112    
-176   -192   
288    192    
-96    224    
192    -64    
48     -64    
160    112    
32     160    
-96    80     
64     -224   
80     -48    
-64    -96    
-176   32     
96     -112   
-112   0      
16     112    
-64    176    
256    -80    
-288   -384   
96     80     
-96    304    
-64    -48    
-80    -112   
192    80     
-208   64     
-112   304    
144    176    
320    96     
0      128    
208    32     
192    -16    
16     48     
-80    80     
48     32     
192    -16    
-160   -144   
80     64     
80     80     
112    64     
64     96     
-16    160    
48     48     
48     32     
64     96     
-112   -80    
208    -80    
80     80     
-176   48     
336    -96    
48     64     
-80    48     
128    16     
0      48     
32     64     
-80    96     
-48    -1568  
32     -32    
-32    -176   
32     -96    
-16    0      
32     112    
32     64     
128    48     
0      32     
-16    -48    
48     96     
144    80     
-128   160    
80     80     
48     32     
32     -176   
-16    32     
-16    224    
176    320    
16     160    
48     128    
192    272    
0      64     
224    96     
-208   -336   
-160   -432   
208    -672   
-16    -368   
192    -32    
32     96     
16     368    
288    160    
-240   -224   
32     -80    
-64    304    
32     -192   
224    -304   
288    528    
-80    -208   
-112   96     
16     32     
96     16     
-64    -64    
-16    -64    
-160   -64    
-128   192    
-400   -768   
656    192    
208    288    
272    -256   
288    176    
-240   -64    
-256   144    
-96    64     
96     512    
-176   0      
304    -320   
192    -16    
464    48     
48     16     
80     -80    
-560   -64    
16     -528   
208    144    
208    112    
480    -224   
80     -64    
208    144    
-256   208    
144    208    
-176   48     
-64    160    
208    144    
-48    -80    
48     96     
-80    -128   
256    48     
-32    -144   
-16    16     
-144   -224   
144    -96    
-16    64     
-96    0      
16     16     
32     16     
-128   16     
288    -64    
-128   96     
288    -112   
176    0      
-48    -32    
80     32     
224    -96    
-128   -16    
176    -864   
320    160    
-336   32     
336    96     
32     48     
192    -32    
0      80     
272    -160   
-176   96     
-176   -48    
144    16     
-128   -112   
224    208    
-208   -48    
16     -160   
160    -80    
352    96     
448    80     
0      -16    
192    48     
-48    64     
-48    -96    
32     -48    
-128   320    
-336   -256   
208    80     
176    -192   
160    -80    
-240   -256   
320    192    
48     32     
-304   -16    
256    -16    
-64    -800   
96     -16    
-32    -688   
720    -320   
304    80     
96     -976   
352    -96    
0      112    
368    -128   
368    240    
-496   48     
352    -64    
96     -80    
144    -704   
160    -16    
-64    -448   
256    48     
-352   -48    
176    64     
144    -64    
16     -128   
160    -48    
64     -288   
368    176    
-192   128    
-32    -128   
176    -112   
64     48     
272    -272   
32     80     
-32    -128   
-96    -160   
-112   0      
96     -112   
-80    -160   
128    -272   
-32    -48    
208    -16    
192    -48    
-48    -1440  
176    0      
0      -144   
176    32     
240    48     
-320   0      
160    -32    
-16    -80    
-448   -48    
-48    -96    
416    -96    
64     32     
-16    -48    
128    -192   
128    -144   
-32    -144   
-96    96     
208    -144   
0      176    
112    -144   
-128   -144   
96     -16    
-80    48     
-80    -48    
224    -112   
-336   -112   
128    -176   
128    96     
-16    -288   
-160   -112   
112    -80    
64     96     
128    32     
0      0      
96     -80    
-16    384    
-176   32     
208    16     
-80    -432   
112    464    
-128   80     
80     -240   
-96    224    
-48    -400   
224    400    
160    400    
160    -64    
32     -1056  
-144   -96    
-48    192    
-80    -256   
-32    32     
112    -160   
-64    32     
272    -96    
0      -16    
240    16     
-384   32     
-64    -640   
16     -800   
208    304    
352    304    
272    -640   
128    160    
-32    -160   
80     272    
-176   288    
-48    -320   
-336   96     
0      -240   
-176   32     
192    -208   
-496   -672   
160    560    
48     256    
96     -128   
-272   -224   
112    -48    
144    -16    
176    64     
-32    96     
-256   -144   
160    0      
0      64     
80     -96    
-144   304    
-208   464    
-544   -320   
-128   -560   
112    96     
384    224    
-48    128    
112    -560   
304    112    
-80    416    
-128   -80    
-160   208    
-112   48     
-80    80     
416    496    
-368   -272   
-32    -464   
-288   0      
400    384    
336    160    
144    -160   
-160   0      
-16    -368   
-1136  32     
-112   -80    
48     -32    
-112   0      
272    64     
-16    32     
48     -96    
80     16     
0      0      
-48    -176   
-528   -416   
176    -64    
32     -144   
16     -64    
-112   -128   
-416   -16    
0      80     
-112   32     
0      -16    
-480   -80    
-80    -16    
16     -80    
-144   -80    
64     -128   
-96    -48    
-176   -480   
192    -144   
32     -512   
48     -496   
336    -224   
-128   128    
16     272    
-224   -64    
-144   192    
-656   -352   
-96    128    
-736   32     
32     80     
160    -80    
112    32     
-656   -160   
-288   -160   
-208   0      
32     -96    
128    32     
288    -96    
-336   -176   
-400   -320   
-400   -128   
80     48     
368    48     
272    96     
256    240    
80     208    
224    176    
-64    80     
80     16     
-192   48     
-48    0      
-368   -80    
32     -32    
-144   -16    
-176   208    
192    224    
-96    32     
112    -160   
-416   -256   
0      32     
-1904  0      
64     -96    
32     -16    
80     64     
32     0      
-128   0      
-80    -160   
160    -192   
-128   128    
-80    352    
384    64     
-432   16     
-128   16     
-304   16     
-80    -48    
-1008  -64    
112    176    
16     -32    
-144   -400   
256    192    
176    448    
0      240    
144    352    
208    -112   
32     96     
-32    -208   
-112   -272   
-208   -128   
-240   -80    
256    -32    
-416   -368   
48     -16    
-144   48     
-256   144    
112    -16    
96     144    
-112   80     
-304   336    
384    352    
16     -48    
160    -112   
80     -160   
432    304    
-448   320    
-48    176    
-288   208    
176    208    
48     -176   
480    -112   
32     -64    
-400   64     
-96    0      
0      -96    
-16    128    
-16    0      
256    240    
-48    0      
0      -192   
-416   -80    
96     32     
-624   16     
64     -176   
96     -80
[truncated: 194,011 more chars]
