# Supplementary material for: A Fault Diagnosis Method for One‐Dimensional Vibration Signal Based on Multiresolution tlsDMD and Approximate Entropy
Source: Hindawi journal article supplement (doi:10.1155/2019/3262818), 2019-01-01
Supplement: f1 [file 3262818.f1.zip › 3262818.f1/gear signals/normal gear signal/Data15.txt]

-336   -768   
432    80     
-32    240    
-272   -128   
208    -64    
-144   144    
-16    -32    
32     320    
160    -80    
-32    -144   
112    0      
208    224    
208    160    
-336   -160   
-80    208    
144    16     
-208   464    
-48    160    
400    -48    
368    848    
-768   -624   
-336   0      
336    -160   
512    576    
-336   800    
-160   -96    
-160   -256   
-32    -160   
288    64     
-304   -256   
160    16     
-144   -320   
-144   16     
16     96     
32     16     
48     208    
-208   64     
16     -96    
112    -96    
-48    0      
-32    -144   
-48    -32    
-272   -176   
240    -48    
0      112    
-208   -64    
-128   -16    
-32    16     
-80    0      
-48    -144   
-144   -96    
240    96     
192    192    
-144   0      
32     48     
-240   16     
-16    0      
-160   32     
-64    64     
96     -32    
192    -144   
-48    16     
-48    -48    
-32    48     
16     -80    
64     64     
64     32     
-64    -16    
-48    16     
80     96     
-176   32     
-32    16     
16     -80    
48     32     
-64    -16    
0      -48    
208    176    
-240   144    
0      -48    
-160   -144   
128    -80    
304    80     
-128   64     
-144   -16    
0      -32    
-96    -32    
112    112    
-80    0      
-144   32     
272    96     
-64    96     
32     -96    
112    128    
16     -16    
96     -208   
400    -64    
112    128    
112    96     
48     32     
-112   -144   
-64    -96    
16     176    
-192   -80    
176    240    
80     96     
-16    -208   
224    -80    
-176   96     
-64    48     
96     -16    
-160   -128   
0      80     
112    176    
128    176    
176    192    
-16    -112   
32     -80    
48     -16    
-32    112    
0      80     
64     -80    
-48    32     
-48    48     
176    16     
96     -32    
-32    64     
-64    272    
192    240    
-128   176    
-32    16     
-160   -80    
144    32     
-112   0      
-16    32     
80     48     
96     96     
64     16     
304    352    
48     224    
32     160    
-144   -48    
64     -320   
144    -16    
-64    464    
208    304    
-32    80     
80     16     
208    208    
-32    128    
32     224    
-96    192    
16     64     
-48    -112   
-48    -352   
176    -144   
16     112    
16     96     
368    288    
-96    640    
144    -272   
160    -240   
-80    0      
208    -352   
32     -16    
48     96     
-304   -432   
144    144    
-80    496    
160    -64    
240    0      
-144   -64    
-64    -304   
-256   32     
80     -288   
192    -48    
-16    -224   
368    288    
-304   192    
128    -64    
176    -272   
-112   256    
544    272    
-528   -160   
160    112    
-464   -192   
320    0      
64     160    
-400   -368   
320    -96    
-112   512    
-144   240    
96     -80    
240    -176   
336    64     
-208   240    
-144   -1232  
-64    64     
-848   -960   
432    704    
208    576    
-672   -480   
16     -64    
192    48     
128    32     
320    -48    
192    80     
32     -112   
-64    320    
112    -176   
-144   0      
32     48     
-32    -240   
384    -112   
32     368    
208    -48    
-160   -208   
32     48     
-112   160    
128    144    
144    16     
208    160    
64     64     
-80    128    
96     -96    
-32    16     
64     -224   
240    96     
-16    -96    
48     -64    
128    -32    
96     80     
-16    48     
-64    -48    
80     -80    
176    -304   
64     176    
48     -256   
208    48     
-144   -64    
288    64     
-160   -64    
192    48     
64     240    
16     112    
128    -64    
-32    16     
208    160    
-112   -208   
64     64     
-48    -192   
112    80     
-16    -224   
112    48     
64     -48    
64     64     
224    16     
208    240    
-112   80     
32     96     
192    80     
16     -128   
96     80     
96     16     
160    -352   
48     80     
176    144    
128    0      
112    32     
-112   -272   
240    -80    
64     -32    
96     -848   
192    256    
112    -160   
80     32     
-96    -432   
192    -352   
-208   -16    
208    192    
16     112    
208    -288   
0      -16    
32     -704   
-16    -128   
-176   16     
160    128    
112    -32    
160    -64    
160    -112   
-224   -16    
224    0      
32     -96    
-1024  -208   
112    -528   
176    0      
320    128    
128    -64    
240    -416   
0      64     
208    32     
0      -64    
0      48     
240    208    
-112   -112   
224    32     
160    32     
224    0      
-1120  -48    
128    -80    
-160   -80    
80     16     
176    0      
160    -64    
-80    -144   
80     -1056  
160    96     
240    -80    
48     -48    
240    -32    
240    -48    
-256   -128   
48     -96    
-16    -64    
112    -32    
-576   32     
80     -48    
128    -48    
176    -208   
-80    -144   
-112   -1152  
-64    32     
240    64     
160    16     
128    16     
160    32     
-224   -96    
64     -144   
32     0      
96     16     
-608   16     
112    -16    
144    -176   
160    -112   
160    96     
48     -48    
-144   -32    
240    -848   
176    64     
-128   0      
208    48     
-64    32     
112    64     
-144   16     
128    32     
-240   -16    
112    -16    
-384   -16    
144    -48    
0      208    
208    -32    
48     64     
128    -864   
128    128    
-16    32     
16     -48    
48     96     
64     -16    
-96    128    
48     128    
-512   48     
64     -32    
-64    -64    
-96    -464   
288    128    
96     -64    
80     -112   
208    -384   
560    -16    
-80    -208   
-384   -272   
-544   448    
-432   80     
-576   -224   
-256   -288   
-96    -96    
544    768    
-176   432    
272    -1328  
-48    224    
-480   448    
-416   -688   
-144   -272   
80     432    
-192   -192   
176    384    
-112   -320   
-80    0      
240    224    
-224   -192   
96     -320   
-144   0      
224    464    
-400   240    
-352   -224   
-1328  -640   
32     128    
0      -608   
-1232  -256   
-64    32     
112    -160   
-112   320    
-176   -112   
-208   -128   
432    -640   
-240   -64    
-928   -208   
32     80     
-320   384    
-80    0      
-272   16     
0      -80    
-272   -128   
-224   16     
-288   32     
160    32     
96     224    
-368   64     
-176   -208   
0      -320   
-128   -192   
-208   112    
-208   -16    
224    -112   
16     128    
-176   -32    
64     -16    
144    -64    
-96    16     
-80    144    
32     -16    
-192   -32    
-32    48     
144    112    
16     0      
0      -112   
240    48     
-48    176    
64     -32    
-288   -96    
-208   64     
-208   96     
16     48     
16     16     
-16    -16    
48     0      
112    48     
-80    0      
64     80     
-48    0      
0      32     
-32    144    
208    256    
-208   -48    
96     -32    
0      32     
32     32     
64     0      
-224   -176   
-112   -32    
-272   -64    
-80    -64    
16     144    
-48    80     
-624   -128   
32     -16    
0      -48    
-16    96     
16     128    
176    32     
48     0      
-176   0      
48     0      
-16    128    
-64    -48    
80     -128   
-96    -160   
96     -64    
0      32     
-480   -48    
176    80     
-624   -176   
272    -64    
256    64     
-16    0      
16     -80    
-112   -224   
-192   -320   
-16    -64    
80     112    
48     256    
16     240    
-144   -80    
160    -112   
-256   -128   
0      -112   
-864   80     
144    240    
-112   192    
-160   352    
-176   16     
-64    -144   
160    -192   
64     -32    
-16    -16    
-64    16     
112    176    
-464   -176   
-176   -224   
144    128    
32     224    
-832   64     
-224   144    
48     176    
-112   64     
128    96     
224    224    
-80    208    
-16    -144   
-64    368    
-128   -176   
0      -688   
128    640    
32     208    
-304   -112   
0      16     
-368   352    
160    64     
-16    -112   
80     368    
304    -160   
-224   -160   
144    112    
-80    -144   
-16    48     
-80    16     
64     -192   
80     96     
0      -160   
-80    16     
96     80     
-112   -16    
112    400    
0      -16    
-32    -48    
-64    80     
-48    -544   
-96    336    
96     96     
-16    -48    
208    240    
-208   -96    
-112   -192   
96     -336   
-112   48     
64     96     
-64    144    
32     304    
-48    -16    
16     16     
32     32     
-80    16     
240    208    
128    80     
320    0      
128    -32    
272    -144   
112    -48    
-96    -352   
-608   -528   
176    912    
-336   608    
-320   144    
160    -16    
-176   208    
432    480    
128    384    
-80    176    
0      0      
-352   0      
-496   64     
160    144    
-80    0      
-160   16     
-160   -96    
32     -176   
32     -64    
-128   -80    
96     -160   
208    -48    
256    112    
304    288    
-448   48     
-272   -144   
336    32     
-432   -160   
432    32     
-144   64     
128    -96    
48     48     
-128   -64    
208    -96    
-112   48     
160    -16    
16     80     
208    48     
80     16     
-240   32     
-80    -96    
304    0      
96     128    
176    64     
-64    48     
0      -128   
32     0      
272    80     
48     32     
0      32     
-112   0      
16     16     
128    0      
192    96     
-32    32     
-16    0      
304    96     
-128   64     
80     160    
-48    144    
80     -64    
64     0      
-128   -32    
176    -32    
32     96     
32     32     
160    16     
112    64     
-192   -272   
240    -112   
-144   32     
208    32     
48     -128   
16     80     
128    -16    
-176   -208   
144    -16    
-144   -112   
64     -48    
288    0      
112    48     
64     80     
0      -48    
48     -32    
272    144    
-160   16     
80     64     
112    -16    
0      64     
-96    176    
160    -96    
144    -128   
-96    -224   
96     -256   
16     -48    
64     144    
-80    48     
64     48     
-96    -352   
80     -112   
96     16     
-16    32     
-48    0      
96     -272   
80     -48    
192    128    
-272   128    
-64    -176   
128    -80    
128    -1216  
16     80     
64     0      
0      48     
-16    -640   
-192   -208   
-48    320    
-32    160    
-96    0      
240    0      
-192   256    
48     -192   
-48    -80    
304    -288   
320    288    
128    -240   
-48    48     
-112   -288   
32     64     
64     64     
144    48     
-112   32     
0      48     
416    352    
-144   80     
144    -16    
240    48     
128    48     
48     -96    
48     -96    
48     -48    
-128   48     
224    144    
432    272    
-16    112    
160    32     
128    -32    
176    160    
96     112    
128    -272   
0      -48    
112    -128   
112    64     
-80    -128   
16     176    
0      -48    
-32    -32    
80     32     
80     160    
80     96     
80     32     
0      64     
-16    0      
64     -80    
-96    -128   
-48    112    
144    -64    
160    -208   
0      -192   
64     112    
112    -64    
80     112    
-64    16     
80     -368   
176    48     
32     -368   
240    -624   
-96    -368   
160    -416   
64     16     
128    -176   
-16    64     
64     -80    
64     -464   
272    448    
-48    -240   
64     -128   
96     80     
160    -96    
-480   -480   
176    -80    
-128   -208   
400    -608   
256    48     
48     -688   
-32    -80    
-176   -96    
128    -640   
304    816    
32     192    
128    -128   
64     -368   
320    96     
224    304    
576    400    
-528   -624   
64     -624   
-2160  64     
-272   -256   
64     144    
560    336    
256    240    
48     -512   
16     -128   
-208   -112   
256    112    
-272   144    
-768   -192   
432    -208   
208    -128   
-368   -128   
288    48     
-480   96     
-192   -80    
48     -64    
112    -224   
48     -48    
-16    -256   
320    -128   
48     -624   
-64    16     
144    -256   
96     -64    
-48    16     
320    -144   
-144   16     
48     -32    
-448   -32    
-80    464    
176    -64    
560    -384   
64     -80    
144    -224   
224    112    
-64    -352   
48     272    
320    128    
48     16     
0      -160   
144    -48    
-272   -16    
112    -96    
-528   160    
-160   128    
-2096  -96    
-64    -16    
-32    80     
112    -112   
96     80     
320    -96    
16     64     
288    64     
-80    128    
16     16     
176    -176   
-64    -16    
96     -48    
-112   96     
80     -544   
-224   -256   
0      144    
-640   224    
288    -160   
16     64     
224    -16    
144    -80    
80     -544   
224    -400   
32     80     
-32    96     
-112   -96    
-64    -80    
16     96     
224    -32    
-256   -48    
0      -112   
128    -160   
112    -112   
-112   -80    
-48    -144   
80     64     
112    -1088  
112    32     
144    -32    
128    48     
16     32     
48     64     
-256   -176   
128    -416   
-144   -16    
208    -96    
16     -80    
160    160    
48     240    
-16    -64    
144    -16    
208    128    
-96    240    
-176   48     
208    48     
-80    -112   
64     -96    
-192   -128   
112    -208   
144    48     
16     48     
-192   -128   
-832   -304   
-16    -80    
-816   -288   
-1888  -304   
128    -320   
-464   64     
-208   -384   
-208   -272   
-336   -240   
16     -288   
144    16     
128    -112   
32     176    
-720   -272   
32     -16    
-320   256    
64     112    
-656   -144   
-176   -80    
64     208    
80     -96    
-128   -80    
-400   48     
-96    -48    
0      144    
32     -32    
-192   112    
-160   -96    
-272   -32    
288    240    
-608   -288   
256    96     
0      -64    
-256   144    
64     -208   
-128   80     
-112   368    
-432   32     
-96    -80    
-128   64     
32     16     
32     -208   
-64    -16    
0      0      
48     48     
64     48     
96     -48    
-144   -32    
-176   32     
-96    128    
-80    48     
48     80     
-64    64     
-144   -16    
-256   32     
-64    16     
-1280  -80    
-32    -48    
0      -32    
16     64     
0      -32    
-16    32     
16     32     
16     64     
0      -64    
80     32     
80     32     
-32    -32    
-48    0      
-336   32     
0      32     
-144   80     
176    112    
-32    32     
32     48     
-48    16     
-64    0      
240    32     
-112   -208   
96     -32    
80     192    
48     80     
-448   -64    
-432   -208   
208    -144   
144    176    
-16    -176   
400    0      
144    128    
-240   80     
16     16     
80     -48    
96     48     
-176   32     
112    16     
64     -48    
16     32     
-384   -112   
-112   -352   
64     -32    
-352   224    
-816   -208   
320    -48    
-2320  -16    
-80    112    
48     32     
-352   64     
-208   -32    
336    16     
-96    80     
-112   224    
224    96     
128    -48    
-112   32     
-288   -48    
48     -32    
-256   0      
112    16     
-608   -32    
-144   -48    
240    0      
-128   -48    
16     80     
-160   0      
112    32     
144    16     
-48    -80    
-64    -16    
96     96     
-176   -48    
80     112    
-272   16     
192    80     
-16    0      
96     -16    
-80    80     
128    16     
80     32     
-16    48     
-64    16     
96     32     
-32    48     
-48    16     
96     16     
-112   32     
-112   32     
-80    80     
32     32     
112    0      
80     0      
144    336    
0      240    
112    16     
-176   32     
112    -32    
32     160    
-96    80     
128    -80    
32     80     
80     64     
320    64     
-496   -304   
-144   -48    
32     48     
-64    -112   
144    -64    
128    128    
112    112    
-32    -16    
32     48     
48     192    
128    224    
128    80     
160    160    
-224   48     
0      -160   
32     48     
-112   128    
64     64     
176    80     
-128   -32    
-64    -32    
112    48     
128    96     
80     112    
-32    -16    
144    96     
-224   32     
-16    112    
-192   -96    
112    48     
16     48     
208    64     
-64    128    
672    640    
48     -368   
-128   -544   
-144   160    
-96    160    
-32    -208   
-160   -16    
240    256    
-80    -304   
432    160    
112    304    
64     -144   
16     224    
16     0      
144    0      
96     80     
-112   64     
0      96     
32     80     
-160   -304   
240    144    
144    320    
64     0      
-224   48     
128    80     
-48    80     
32     -464   
448    -208   
224    -16    
16     48     
16     64     
96     224    
80     -288   
128    832    
32     64     
240    48     
-96    240    
-80    -144   
-128   32     
32     80     
192    -192   
16     -208   
32     -32    
144    144    
48     128    
-112   -128   
160    96     
-32    0      
192    48     
-16    16     
240    -304   
32     736    
64     -112   
32     -256   
112    672    
-32    -240   
16     -224   
128    192    
240    -544   
-32    16     
48     -128   
112    -544   
96     192    
176    304    
-48    -80    
64     -112   
-32    32     
16     208    
96     416    
-112   528    
48     -272   
80     -288   
224    64     
-64    -832   
64     -128   
16     -240   
64     64     
288    352    
48     -80    
-480   -352   
112    -592   
-80    -96    
192    48     
16     144    
-64    -32    
64     -16    
208    -32    
80     -16    
400    48     
208    -160   
64     -1248  
144    128    
128    112    
304    208    
-304   -48    
336    -64    
-48    -224   
144    -48    
-304   240    
160    144    
224    16     
48     -64    
-128   160    
48     -48    
256    -272   
272    -352   
544    208    
-80    192    
96     80     
-80    -96    
48     32     
-96    0      
-96    0      
16     544    
288    32     
176    0      
192    -576   
112    80     
0      16     
64     16     
-176   -448   
384    -224   
-192   128    
192    144    
0      80     
-96    688    
512    352    
96     -176   
128    256    
48     -416   
176    0      
112    -128   
144    128    
144    -224   
-192   32     
0      -176   
160    16     
160    144    
80     144    
-160   16     
-64    0      
32     96     
96     -208   
176    -128   
256    -80    
32     160    
-128   -192   
112    -16    
-48    80     
160    144    
128    -32    
64     48     
192    64     
0      -128   
16     -48    
16     160    
176    -928   
16     -160   
352    -128   
-80    112    
-96    272    
0      -192   
192    128    
336    48     
-144   176    
-208   -16    
144    -272   
64     -144   
112    -192   
-16    128    
-352   64     
80     32     
224    -48    
48     32     
80     -32    
192    -208   
64     64     
112    -64    
16     0      
80     -288   
-112   64     
32     -32    
64     -16    
32     -112   
320    64     
-48    496    
-256   16     
112    32     
112    -336   
240    -336   
80     -64    
80     -176   
-48    -592   
48     -48    
256    192    
176    240    
-48    64     
-144   64     
96     -144   
336    336    
-224   176    
80     -304   
-2416  -16    
-160   32     
256    -80    
-160   -144   
64     160    
-32    -128   
160    -272   
-80    -416   
304    224    
272    128    
64     -112   
-144   112    
32     16     
-192   -32    
-96    160    
-576   0      
-16    -64    
160    192    
288    0      
160    -96    
48     -368   
-80    -32    
160    -752   
-192   -208   
160    -640   
96     -304   
288    -368   
304    -160   
32     16     
32     48     
48     48     
-80    -96    
-96    -96    
96     -144   
128    16     
160    16     
48     0      
80     -160   
-16    0      
16     -64    
80     -96    
0      64     
96     -16    
-32    -16    
-16    -96    
-176   32     
-16    -208   
-688   -112   
112    16     
-16    48     
-16    -176   
112    -16    
48     -80    
192    -208   
-64    -192   
80     32     
-112   -128   
112    -96    
-192   -48    
112    -32    
-336   32     
-16    0      
112    64     
-16    -16    
48     144    
64     -144   
-32    48     
-64    -176   
80     64     
-80    16     
208    -16    
96     192    
224    0      
-176   64     
64     -16    
-16    16     
32     -256   
-128   -96    
0      -64    
-144   64     
480    -96    
-64    48     
304    16     
-192   0      
-224   32     
-160   0      
-224   -48    
144    32     
-96    48     
144    0      
-112   -128   
800    528    
-1408  272    
-16    -224   
64     80     
-304   -224   
416    96     
48     160    
-160   288    
-576   -176   
-1216  -448   
576    80     
496    448    
-720   32     
256    -144   
464    224    
-512   -80    
0      -48    
-944   -64    
304    64     
-144   -16    
448    80     
-192   -16    
-384   16     
112    0      
-368   32     
80     -48    
-848   32     
32     80     
-704   64     
-192   112    
240    16     
-144   -32    
16     160    
144    128    
-48    -112   
-96    16     
-96    -32    
304    160    
-240   48     
-240   -80    
-64    16     
-368   -208   
144    -112   
-2032  16     
-80    -64    
208    64     
0      112    
-176   -176   
112    80     
-368   -240   
240    16     
-208   -32    
112    32     
-96    96     
16     48     
-128   80     
0      -16    
32     -16    
-352   64     
48     64     
-944   160    
-304   -288   
-128   -304   
80     128    
-32    -144   
96     16     
-96    160    
-48    -16    
-144   32     
-272   -176   
-64    96     
304    112    
-48    -160   
-128   0      
48     192    
-1232  -80    
96     -64    
-80    112    
368    96     
48     32     
-16    64     
-64    -80    
-80    -144   
-16    256    
-32    -528   
-32    160    
-96    48     
-112   -80    
-256   -32    
32     16     
-704   64     
256    80     
32     -64    
0      128    
96     512    
-448   -1488  
32     384    
80     -64    
96     128    
128    32     
-112   96     
-32    80     
320    400    
-64    32     
176    64     
-80    -128   
-16    192    
-432   32     
-256   32     
16     224    
-16    32     
-48    -448   
-16    320    
-352   144    
48     -304   
48     272    
0      16     
256    96     
-96    16     
-48    32     
-128   -48    
112    48     
48     80     
-32    48     
-272   -1072  
176    288    
144    1152   
-144   -128   
48     -272   
-208   -128   
160    432    
-80    368    
-96    -160   
-352   160    
16     352    
-608   -608   
96     0      
144    576    
-160   96     
368    -320   
64     176    
272    320    
-176   160    
272    -96    
-48    -256   
-16    -80    
-96    -48    
-128   48     
0      96     
-32    160    
-80    -64    
80     -48    
-80    -48    
-96    -160   
80     -544   
-96    -144   
0      16     
-144   -128   
112    -160   
16     -144   
80     288    
0      32     
16     -32    
-80    224    
48     80     
-144   128    
32     48     
16     128    
0      128    
64     16     
192    48     
-48    96     
-160   144    
208    -112   
-112   16     
208    128    
-112   32     
208    320    
-112   -48    
400    32     
-32    240    
144    32     
432    400    
-160   -176   
-144   -464   
80     -160   
64     48     
32     336    
-240   -96    
-272   -240   
48     32     
176    64     
-336   -208   
32     -336   
176    240    
16     -208   
-192   352    
-240   0      
-96    448    
752    752    
0      496    
-160   304    
-400   -16    
336    -48    
128    80     
240    64     
-96    32     
192    -16    
160    -48    
48     -48    
208    16     
-64    -80    
-48    16     
0      80     
192    112    
16     0      
128    48     
48     160    
-128   80     
144    -32    
48     112    
112    16     
-64    256    
128    16     
112    -1360  
-16    32     
-48    64     
-16    288    
-16    0      
272    -336   
144    -16    
0      144    
0      -176   
160    -560   
-144   -256   
128    -16    
112    112    
-64    -176   
144    -80    
-192   -560   
-48    -64    
32     192    
-224   224    
-128   -32    
-32    -48    
128    48     
48     -16    
112    -240   
-16    -112   
80     48     
-256   -112   
80     64     
80     160    
112    224    
-32    -464   
-16    -64    
-80    -144   
0      -48    
144    80     
144    128    
-32    16     
96     48     
-16    16     
160    32     
128    80     
-48    96     
80     64     
-224   0      
112    80     
48     192    
176    240    
-48    -304   
240    176    
-16    128    
48     16     
-16    -64    
208    80     
-112   160    
128    144    
160    192    
192    112    
96     -64    
-16    -80    
-32    80     
128    -336   
128    192    
96     208    
-112   -336   
80     240    
0      -80    
-32    240    
48     -48    
-64    -272   
224    416    
-48    -32    
176    -16    
-32    64     
48     -48    
80     144    
-16    -176   
-144   -320   
-16    -352   
-64    -80    
160    112    
256    480    
272    0      
64     -16    
-128   48     
-48    -64    
-320   -96    
-48    -192   
-176   -256   
16     -208   
16     32     
128    -416   
208    48     
160    -160   
144    32     
80     48     
144    48     
16     64     
48     48     
-112   -192   
176    -176   
256    128    
144    112    
80     0      
112    -480   
0      32     
192    16     
-144   96     
112    -64    
32     -240   
-16    -16    
48     160    
80     16     
112    -16    
-32    -96    
32     -32    
176    -32    
144    -16    
176    -16    
0      -240   
16     64     
144    -64    
-80    32     
0      -160   
80     48     
0      -752   
320    112    
-128   -32    
144    -608   
176    128    
-672   -144   
128    -144   
176    -48    
80     -576   
176    -48    
-32    -192   
48     16     
-32    48     
128    -48    
112    48     
-80    -48    
176    -128   
80     96     
208    0      
160    80     
-1552  -48    
128    -256   
64     -16    
128    -176   
144    32     
-48    -208   
-160   -160   
176    32     
80     0      
288    -112   
160    32     
160    96     
-64    16     
112    16     
-112   64     
-240   128    
-320   -96    
-112   -144   
256    -48    
112    -64    
192    -512   
-144   -176   
208    -736   
-96    -96    
368    64     
-416   0      
336    -64    
-48    0      
-16    -64    
288    80     
112    48     
208    64     
224    -16    
304    64     
-400   -144   
96     -160   
176    -48    
432    16     
-192   64     
352    -32    
224    -96    
-48    -16    
-192   80     
128    -16    
-160   -32    
-192   0      
48     -64    
32     -96    
192    -272   
240    16     
-272   32     
0      16     
112    -64    
-48    112    
32     48     
160    -48    
112    32     
112    16     
-240   16     
320    -128   
-592   -256   
208    -16    
-352   -16    
224    -208   
80     -80    
80     -64    
-224   -64    
192    -112   
80     -32    
64     -496   
-16    -16    
-112   -16    
80     -224   
-304   -336   
352    320    
-176   352    
192    -400   
-96    -16    
64     288    
-272   -240   
-64    -160   
-48    128    
176    -32    
96     64     
96     32     
176    48     
-224   144    
112    -64    
-64    80     
320    256    
-880   -464   
32     192    
0      128    
64     -176   
0      160    
16     -192   
160    176    
0      -96    
96     160    
160    -528   
-96    256    
144    384    
48     -416   
-400   112    
-48    224    
-96    288    
352    -64    
-288   112    
16     80     
96     -112   
160    272    
320    192    
80     64     
176    288    
80     -240   
112    0      
-48    -112   
224    224    
-272   96     
0      128    
32     80     
-32    64     
-160   -48    
16     -160   
-80    -304   
192    288    
224    352    
-528   -160   
-32    208    
-256   -160   
-240   144    
48     368    
-1648  -16    
-96    -256   
16     176    
-64    448    
208    144    
160    208    
48     96     
-48    432    
-208   160    
-64    -96    
32     -112   
-32    192    
-224   80     
-32    16     
-112   112    
-336   80     
64     -112   
-336   -16    
-112   16     
64     112    
-208   80     
-208   48     
-32    464    
-352   16     
128    64     
80     -16    
-112   64     
160    128    
-96    -16    
16     -160   
-48    -16    
80     -32    
-48    112    
-160   48     
-240   -16    
-304   64     
144    -32    
-272   -32    
192    -336   
192    -128   
-176   -128   
-144   -176   
-208   -48    
-128   80     
32     96     
-112   112    
256    -112   
-400   32     
-112   32     
-896   -112   
-80    -32    
160    48     
-96    240    
-112   -128   
80     -32    
112    80     
0      -80    
-96    -112   
112    -32    
-96    -112   
0      -64    
16     96     
-560   -64    
16     48     
-112   64     
64     112    
-1952  -64    
-32    480    
-208   0      
64     -176   
48     -384   
-48    -64    
0      -80    
-32    208    
16     240    
-288   -128   
-240   -144   
352    16     
-64    240    
-64    -64    
-64    720    
-352   304    
-16    144    
-144   128    
-112   -288   
416    448    
48     -16    
0      0      
-48    -48    
64     64     
544    -144   
336    144    
128    192    
32     96     
-352   32     
272    -384   
-32    -96    
240    -288   
-64    -1056  
128    -624   
-336   64     
-432   -80    
32     -16    
304    32     
240    160    
992    656    
-512   480    
-400   608    
-768   208    
-752   -288   
336    352    
-208   -112   
352    64     
144    -96    
-96    128    
176    32     
-272   208    
128    48     
-176   48     
128    -48    
160    -64    
-48    192    
-288   208    
496    432    
-176   -112   
208    -192   
400    464    
-432   576    
-208   272    
32     0      
432    448    
32     256    
-224   176    
144    -112   
-48    16     
64     -240   
-16    -32    
-32    720    
352    384    
-192   224    
352    96     
-64    464    
64     320    
144    160    
160    240    
-80    640    
256    320    
-160   -64    
-208   -48    
64     -64    
160    288    
-224   -32    
64     -336   
112    112    
-208   224    
208    144    
64     112    
-160   240    
32     112    
144    32     
352    464    
-240   -192   
-16    -160   
192    208    
-64    0      
-80    400    
112    672    
176    -176   
160    -64    
-288   -112   
336    96     
64     80     
160    304    
0      -112   
-112   192    
-96    112    
-80    48     
96     -64    
128    32     
320    64     
96     160    
96     96     
-256   -48    
64     64     
-288   -32    
-48    -112   
32     48     
112    -32    
160    32     
64     96     
48     144    
0      16     
176    96     
112    -80    
-144   -32    
0      -48    
64     144    
128    128    
-80    64     
-160   48     
64     -176   
176    -464   
240    -64    
432    160    
256    224    
32     48     
64     48     
64     48     
-176   80     
0      32     
-176   0      
-32    16     
-128   0      
128    64     
128    0      
-80    -656   
48     80     
-48    0      
176    48     
64     128    
256    400    
-304   16     
192    32     
272    -32    
240    112    
256    112    
48     -128   
-288   -80    
-272   -208   
-96    112    
-80    -432   
80     64     
64     112    
128    16     
128    32     
80     64     
-32    -80    
256    176    
80     16     
128    -32    
32     -176   
240    272    
-288   48     
-32    -96    
128    48     
208    -208   
192    48     
160    64     
-16    32     
-48    -112   
160    48     
112    144    
64     64     
-144   -48    
192    -32    
16     32     
80     96     
48     0      
48     16     
176    112    
64     -32    
144    16     
-48    -80    
128    32     
-32    48     
144    32     
-80    32     
192    208    
-128   16     
144    -32    
96     0      
64     96     
208    32     
-16    -208   
112    96     
-48    -480   
192    0      
0      -96    
64     16     
-96    -320   
128    -80    
256    240    
112    48     
576    320    
-496   224    
0      -80    
112    80     
80     96     
0      -192   
-16    96     
368    160    
-320   32     
32     -320   
128    96     
-240   -320   
1088   432    
32     432    
-368   32     
112    96     
-208   176    
-64    32     
160    -96    
0      -128   
144    64     
192    192    
112    160    
560    432    
-240   -32    
16     -16    
-144   -80    
-128   -224   
0      48     
128    144    
32     -16    
160    208    
16     -272   
-80    -80    
80     64     
0      -288   
80     -80    
-16    -64    
192    192    
-16    -224   
112    -16    
-16    -624   
192    304    
80     -320   
288    208    
-272   -32    
0      -1056  
48     160    
96     240    
-144   16     
176    -192   
224    112    
-128   -32    
256    -1008  
-368   496    
464    -80    
0      -416   
320    -912   
32     176    
-176   -640   
-64    -656   
144    160    
176    112    
64     96     
80     -304   
240    -48    
-96    448    
-16    176    
160    -32    
64     128    
240    -240   
-48    160    
112    -144   
-32    -80    
176    -32    
-16    64     
-2160  -128   
-16    -128   
208    32     
48     16     
352    80     
-128   -352   
208    16     
0      64     
16     -128   
32     -496   
-64    -32    
64     -128   
-160   32     
320    128    
0      16     
-816   32     
208    -32    
288    48     
-176   96     
128    -144   
160    -160   
-64    48     
-16    -1376  
48     -64    
64     -96    
0      -32    
224    -16    
-128   80     
-112   -48    
-16    -96    
192    0      
16     80     
48     32     
-32    -112   
208    32     
-32    176    
144    176    
80     -384   
32     80     
272    208    
-240   -112   
304    -96    
0      -32    
-160   -80    
112    32     
-336   -80    
96     -272   
-240   -272   
144    -336   
288    -32    
-160   -192   
64     -160   
288    -272   
-16    128    
48     -96    
32     32     
80     -160   
144    -32    
-96    32     
32     -128   
-176   -80    
128    -48    
-288   -48    
-96    -80    
-160   -48    
128    -48    
16     48     
-32    -80    
-16    128    
176    32     
96     144    
96     32     
0      256    
176    128    
64     -160   
112    96     
32     176    
-32    224    
160    -272   
-192   16     
128    -176   
0      32     
-80    -128   
320    208    
80     -144   
64     192    
-48    -16    
-16    -160   
-160   112    
352    96     
-400   32     
16     -144   
-320   48     
192    -80    
-432   16     
176    -176   
112    112    
160    -48    
-48    160    
64     -448   
48     -96    
80     32     
208    -16    
-256   -144   
192    32     
-224   272    
0      -112   
-64    128    
64     -272   
-80    -112   
224    -128   
144    -176   
80     -128   
-48    -112   
32     176    
32     112    
-704   -400   
-64    -640   
-272   -144   
32     256    
144    64     
-144   -240   
-160   -192   
320    -16    
16     -144   
544    -112   
-48    -304   
-384   16     
-272   -720   
-448   -736   
416    1088   
-384   208    
-768   384    
-336   -544   
224    -128   
576    -288   
176    -176   
240    576    
112    -16    
256    208    
432    -192   
240    112    
-112   -16    
528    480    
-576   -800   
48     -64    
-480   288    
-336   -144   
-96    400    
-480   80     
-112   16     
64     -160   
-64    -80    
96     112    
-224   384    
0      208    
-192   -304   
48     48     
144    736    
-80    -80    
-320   -256   
288    464    
-352   -272   
-48    384    
-208   -304   
-16    512    
-224   0      
-256   -176   
-16    64     
192    128    
-96    -80    
304    -48    
80     160    
-96    -64    
96     368    
-672   304    
160    48     
-368   -64    
-32    -96    
0      -64    
-48    272    
-1184  -32    
-32    -160   
-96    176    
-96    128    
192    -32    
-48    64     
160    64     
-16    -16    
-32    80     
-208   -96    
-48    -48    
32     96     
80     32     
-32    -32    
-160   64     
-432   64     
128    128    
80     -176   
112    -16    
-96    80     
-80    32     
-32    -96    
-128   112    
48     176    
-128   -464   
16     224    
0      320    
-192   -480   
-320   -48    
48     16     
-256   -80    
128    -16    
-448   -32    
32     144    
-48    0      
-240   464    
144    208    
0      224    
-32    16     
16     16     
-112   -224   
-64    -176   
-16    32     
-144   -80    
-16    16     
-32    32     
112    96     
-752   -96    
64     -80    
32     -48    
320    32     
-112   48     
176    112    
-64    96     
-64    48     
48     -16    
-48    16     
-160   -272   
288    -256   
80     48     
64     112    
144    64     
-352   -160   
160    -288   
32     -80    
288    -16    
48     -80    
-128   -64    
16     112    
-208   16     
16     16     
304    64     
160    32     
-160   -96    
144    -48    
-96    0      
96     80     
-224   -192   
-128   96     
-96    64     
16     0      
64     16     
-80    16     
112    80     
32     -144   
-80    -112   
16     128    
-192   32     
-144   -128   
160    128    
0      -16    
96     32     
128    -32    
160    32     
160    288    
-176   112    
80     64     
80     -48    
144    48     
16     32     
48     -16    
16     32     
112    0      
64     80     
48     48     
-64    16     
96     48     
48     64     
48     80     
48     96     
-64    -16    
64     64     
208    96     
0      64     
-96    -16    
32     16     
32     0      
272    32     
-32    -32    
112    112    
-48    0      
32     16     
48     -16    
-64    32     
112    128    
96     48     
304    176    
-448   16     
112    -16    
-240   16     
96     32     
0      64     
160    48     
-240   0      
224    48     
-288   -128   
32     -176   
-32    208    
272    464    
-80    32     
-144   -16    
-288   224    
-240   -48    
-288   -160   
80     176    
-112   112    
144    192    
-48    160    
-128   -112   
0      0      
128    48     
-160   32     
592    272    
-384   128    
96     80     
-208   144    
-224   -96    
-96    -144   
-144   -96    
0      64     
48     176    
-560   -288   
352    592    
-16    -80    
-368   16     
384    496    
-192   -304   
352    128    
192    352    
-32    -496   
608    -80    
-144   288    
-304   -656   
-176   -32    
-64    96     
64     -128   
224    576    
96     -224   
0      80     
176    -320   
224    -128   
-48    -1248  
0      64     
96     160    
80     -16    
-48    -144   
384    128    
-144   272    
-240   -224   
272    -272   
-128   -80    
176    -160   
-16    -64    
80     -176   
48     -144   
256    288    
-16    -112   
-32    -128   
240    -304   
160    -48    
-48    160    
480    368    
-80    240    
-32    80     
0      48     
64     64     
-208   -64    
16     16     
-48    0      
128    -160   
144    160    
112    -176   
64     -80    
-176   48     
32     64     
-64    -16    
16     112    
-32    -16    
256    0      
0      32     
96     32     
16     -32    
48     -112   
272    16     
0      -32    
-16    -32    
208    -416   
64     112    
-64    -96    
288    16     
0      80     
-64    80     
-192   -32    
256    -160   
-112   160    
128    112    
192    -128   
48     112    
0      80     
-32    -16    
112    -48    
256    -32    
-240   96     
176    -48    
256    32     
-16    160    
528    304    
-352   304    
48     0      
256    -80    
160    128    
400    272    
-144   64     
32     -16    
112    -160   
-224   -240   
80     32     
-288   64     
448    -176   
192    128    
144    80     
96     112    
-128   368    
176    96     
128    -288   
-80    -480   
240    -384   
288    -240   
-160   0      
112    -176   
-64    160    
-96    -64    
240    -16    
16     -192   
192    32     
-16    80     
144    224    
240    0      
112    112    
-128   -64    
128    -144   
48     -16    
144    -192   
176    16     
192    144    
240    448    
-80    80     
16     80     
-112   16     
-48    -64    
192    -240   
80     -256   
-112   -160   
176    -688   
240    -464   
272    64     
64     -256   
192    240    
208    -976   
0      -32    
352    176    
-272   176    
224    240    
144    -48    
144    -80    
-16    -96    
-32    -304   
-48    -16    
-16    -272   
-16    -240   
160    -32    
176    240    
128    368    
-128   -384   
80     -160   
64     -800   
64     -96    
96     128    
64     576    
-48    -32    
-48    -224   
224    -160   
32     16     
192    -160   
0      48     
-16    16     
-48    544    
-32    -576   
208    160    
-16    -192   
96     -48    
-96    -48    
160    -320   
176    160    
128    -16    
144    640    
-208   -464   
-304   400    
-288   -176   
224    -48    
-320   80     
176    -416   
256    -176   
16     -192   
464    192    
96     -320   
176    160    
80     -2208  
-16    -416   
512    800    
-272   112    
96     -672   
-448   256    
464    448    
112    -288   
96     144    
0      128    
-992   -96    
16     -272   
320    64     
48     944    
592    688    
320    -544   
-528   -144   
-464   -256   
-288   0      
-208   144    
592    -432   
48     -16    
-32    256    
128    384    
-128   16     
-480   96     
96     48     
-576   16     
80     -336   
112    -48    
176    -256   
64     48     
112    -784   
32     32     
64     32     
-112   -32    
144    -32    
96     48     
16     -128   
-64    -144   
-752   16     
96     -96    
-464   16     
80     -32    
80     64     
112    448    
-16    304    
112    -480   
-224   112    
144    16     
80     -64    
-32    -48    
272    0      
-112   16     
48     48     
-400   -80    
16     80     
400    112    
-192   16     
128    80     
0      -160   
32     0      
96     -288   
112    -16    
-16    -112   
-48    -32    
-208   64     
32     -48    
-176   48     
16     -32    
-48    16     
224    -32    
-160   -64    
-16    -224   
-144   -192   
288    -208   
-144   128    
-240   192    
96     48     
-256   64     
-80    -16    
-176   -64    
144    -16    
-32    0      
0      64     
-96    -96    
112    -224   
-48    -208   
-1200  -240   
16     -64    
-608   -16    
-16    48     
0      16     
-176   256    
-224   64     
-592   -48    
80     -32    
96     -48    
128    16     
128    96     
-288   -32    
-688   -144   
80     64     
-496   -48    
144    48     
-208   -64    
-352   0      
-48    32     
208    0      
-400   -80    
-272   112    
160    64     
-320   32     
-96    64     
192    272    
-16    -16    
-256   -64    
48     112    
-144   112    
-80    16     
-176   -208   
-160   16     
-240   16     
-48    0      
128    0      
-208   48     
-160   32     
-432   -112   
-96    -128   
-320   -64    
48     80     
-80    -16    
-64    16     
-80    -16    
-48    80     
288    272    
-224   32     
0      16     
96     -16    
-192   -48    
-144   16     
-144   0      
-416   64     
48     16     
-576   16     
304    96     
-48    -16    
0      -16    
-128   -32    
-48    64     
-80    64     
16     32     
96     96     
-320   -48    
32     -16    
-64    -48    
-32    0      
-64    -96    
-16    -96    
-256   -48    
160    48     
-80    -96    
64     48     
-16    -32    
0      0      
16     32     
-128   -32    
-64    -16    
-192   -16    
-16    32     
96     48     
-32    48     
-80    16     
-64    0      
-592   -64    
64     32     
-1472  -144   
0      -64    
-64    -48    
16     64     
64     -128   
-128   -160   
-32    -32    
432    144    
-368   112    
176    -80    
-144   16     
-176   -64    
-128   48     
-256   -304   
-160   -368   
-464   -288   
96     -480   
-112   64     
-560   -432   
112    624    
208    -400   
-400   -448   
-144   240    
-144   -240   
-96    16     
224    -208   
-240   -128   
-32    224    
256    -176   
320    368    
-736   272    
-352   48     
384    -384   
336    -208   
-64    0      
320    -336   
-272   -48    
-384   -96    
-256   192    
-80    -224   
96     96     
320    288    
112    -224   
-128   -48    
0      -64    
-608   -96    
-48    176    
80     -48    
64     32     
304    320    
128    160    
48     32     
-80    -112   
-16    -16    
-48    64     
16     96     
-288   80     
560    -32    
-144   0      
-80    0      
192    -80    
-128   128    
-16    96     
0      32     
80     -64    
-128   0      
160    192    
-112   64     
48     -32    
64     -128   
-64    64     
-32    -16    
0      48     
-64    -32    
-176   80     
144    -16    
528    128    
-112   320    
-96    48     
-64    16     
0      112    
-64    64     
32     -16    
-48    -16    
-96    -64    
192    32     
-304   -32    
192    80     
0      48     
176    16     
-32    96     
-16    208    
0      64     
208    -48    
32     -16    
64     16     
16     -32    
-80    96     
0      0      
16     -160   
64     112    
32     96     
64     -32    
208    32     
48     64     
-16    -32    
-96    -128   
192    -16    
32     80     
-240   -64    
144    -96    
160    96     
-96    64     
64     48     
112    48     
16     48     
-32    112    
96     112    
80     16     
-32    48     
-16    80     
192    64     
0      0      
-16    112    
16     32     
-32    16     
-80    32     
-112   48     
192    96     
-192   176    
176    64     
-192   -176   
0      -416   
-16    -112   
320    -48    
96     48     
-32    160    
272    368    
-32    16     
64     -336   
160    -496   
256    -320   
144    -16    
128    -16    
128    272    
-96    400    
-16    272    
0      64     
256    -48    
-16    144    
-32    -80    
16     -32    
16     -80    
96     80     
144    -16    
64     256    
112    320    
-144   -80    
256    -128   
-32    -128   
208    176    
48     0      
160    304    
-192   320    
-16    -2000  
32     -112   
224    16     
-80    224    
480    -64    
464    272    
-208   160    
16     -272   
-64    96     
-32    32     
0      80     
208    -32    
160    400    
-80    -448   
272    208    
-48    -48    
48     80     
48     -176   
-64    112    
-32    48     
112    -352   
144    -112   
128    144    
64     192    
80     48     
-48    -320   
128    -288   
288    416    
64     240    
176    96     
-80    -96    
96     160    
48     -240   
-32    -160   
128    -96    
80     -16    
144    208    
16     208    
160    -96    
-16    96     
112    0      
192    48     
-208   80     
224    -16    
-96    0      
160    -320   
64     -480   
256    -832   
176    160    
-368   -352   
-32    80     
-352   64     
160    -144   
32     16     
192    192    
368    80     
320    0      
224    96     
-16    -224   
-48    80     
272    -80    
0      208    
-16    -384   
176    -48    
80     -32    
592    400    
-512   144    
-64    -144   
480    16     
144    -288   
-160   80     
304    80     
-848   80     
-128   16     
528    -192   
336    -64    
-368   112    
224    64     
160    16     
-304   32     
304    160    
-112   -80    
16     224    
144    80     
16     0      
192    16     
192    -96    
64     48     
96     -176   
48     16     
128    -48    
-160   -32    
-32    -240   
-16    0      
160    32     
-48    -320   
224    -16    
-48    -416   
-48    16     
240    16     
128    -464   
-16    -304   
448    -1008  
-208   144    
352    16     
112    32     
144    64     
-96    -160   
-96    -224   
176    -16    
176    -288   
32     -128   
-320   -64    
-32    -144   
48     -144   
224    -128   
112    48     
-80    -144   
-80    48     
-32    -384   
112    -80    
208    -48    
-64    48     
304    64     
16     32     
-112   -64    
48     -16    
-80    32     
-16    -128   
-240   48     
272    -32    
144    -208   
-128   -224   
160    -32    
48     -256   
64     -64    
96     16     
48     64     
0      -32    
-48    48     
176    -64    
48     288    
-272   176    
64     -48    
-512   240    
16     -48    
96     -96    
272    128    
-96    -16    
96     -112   
128    304    
192    0      
32     64     
16     -48    
96     16     
224    128    
96     0      
128    -32    
80     -16    
-304   -32    
112    -64    
112    32     
160    -96    
16     0      
48     -32    
-416   -704   
80     -784   
-192   96     
-144   -112   
64     80     
-112   -208   
-64    -144   
-96    -16    
0      -336   
-16    -416   
352    -32    
-944   0      
48     -128   
-80    -16    
64     -336   
80     32     
96     -144   
-16    32     
160    16     
96     256    
-272   32     
144    -64    
-48    -16    
336    -112   
16     0      
64     -96    
-416   -96    
-128   -224   
-1056  -128   
32     176    
-112   192    
128    -208   
64     32     
64     -480   
80     -48    
-16    48     
-64    80     
-256   -176   
80     -64    
80     -16    
-80    -144   
-96    -288   
128    -208   
96     -112   
192    -16    
0      -48    
-48    -64    
160    304    
16     144    
32     64     
-256   208    
48     144    
16     -320   
-128   -608   
-96    336    
48     -272   
-160   -48    
32     -64    
112    -176   
112    96     
64     0      
-224   -128   
-32    96     
-96    -128   
-48    160    
48     -48    
128    -144   
-160   64     
288    -160   
-112   -64    
96     192    
-192   -96    
32     -176   
128    160    
-400   -240   
80     176    
-1456  -320   
-1264  -80    
240    -96    
-32    176    
352    688    
-1904  -416   
-48    -96    
-32    144    
144    192    
208    -112   
352    -352   
384    -112   
304    -352   
224    -176   
-80    224    
-304   -64    
-176   48     
-224   -80    
-128   64     
-304   144    
-912   32     
-64    -256   
-624   -256   
-96    -176   
272    -144   
256    64     
64     80     
768    368    
-304   288    
-336   96     
-128   64     
112    16     
-16    -128   
304    -32    
-112   0      
-128   64     
-48    -80    
64     0      
144    48     
-688   16     
16     -16    
-384   -224   
80     -304   
-96    48     
16     176    
96     48     
-64    0      
-48    -64    
0      272    
144    80     
80     -32    
-32    -224   
-528   32     
-64    176    
-1328  -48    
64     64     
96     -160   
144    32     
-96    -112   
96     112    
-208   32     
-352   160    
240    -32    
128    -48    
96     32     
-288   96     
128    32     
-688   -96    
64     -256   
-208   -112   
64     208    
-432   -48    
112    -32    
32     80     
112    80     
-80    -32    
64     64     
48     64     
144    144    
-160   0      
-64    0      
-64    -64    
-32    -48    
144    32     
-16    48     
80     -16    
-672   -224   
80     -176   
96     -32    
-144   128    
-64    -80    
144    16     
-32    48     
-176   -80    
112    48     
-48    16     
-80    208    
0      48     
144    0      
-736   -176   
192    -16    
-2192  -32    
-288   80     
112    80     
96     0      
-16    -16    
64     32     
128    128    
-176   128    
-32    -32    
-48    80     
-32    16     
-48    -160   
240    176    
-464   -16    
0      -16    
-1072  64     
-96    320    
-112   48     
-48    32     
96     -112   
256    -176   
176    80     
-32    -640   
32     -224   
-208   -176   
-240   -144   
-160   -80    
208    176    
-336   224    
96     32     
176    224    
32     0      
48     352    
-16    80     
-48    -336   
112    -224   
-160   -80    
-64    144    
-16    0      
96     16     
208    64     
32     -32    
-16    256    
-96    -64    
144    -16    
208    432    
-272   0      
-32    32     
288    -288   
240    176    
-176   0      
-160   112    
-256   -448   
-224   224    
-96    80     
144    48     
80     96     
16     -48    
-432   -144   
-32    320    
64     288    
192    224    
144    96     
16     -80    
-48    32     
32     -64    
96     -128   
160    -16    
96     128    
-32    128    
48     112    
-288   -96    
0      -48    
32     0      
96     -80    
192    0      
96     -80    
176    32     
-160   48     
48     32     
64     96     
-16    32     
16     64     
96     48     
-48    -16    
96     48     
-208   -32    
64     32     
128    96     
32     -48    
112    16     
-16    -192   
112    32     
-144   80     
16     16     
0      48     
80     64     
-416   -112   
480    144    
-480   144    
208    -240   
0      -80    
-96    -208   
464    96     
288    576    
-320   32     
-112   0      
-32    32     
-208   -64    
480    16     
-64    80     
208    48     
16     -16    
272    112    
128    80     
96     128    
-160   128    
16     -64    
-192   64     
-96    -112   
-48    -176   
496    208    
-256   48     
48     -112   
64     -96    
448    336    
-368   -32    
432    80     
-128   80     
-48    144    
-96    -64    
48     48     
-96    -112   
-32    0      
256    144    
-320   128    
128    336    
0      80     
256    -64    
-64    64     
-176   -32    
-16    64     
80     112    
64     128    
48     64     
-48    -160   
-96    160    
336    -160   
-80    80     
176    -1024  
-112   64     
160    16     
112    96     
-80    32     
176    64     
128    16     
-32    144    
112    32     
176    48     
32     -112   
-32    -208   
32     96     
208    48     
-48    128    
240    -928   
-16    32     
64     -192   
-96    -96    
-32    176    
112    96     
-80    0      
176    16     
0      0      
96     0      
128    32     
-16    -96    
240    -80    
-64    -224   
16     96     
-112   -416   
160    64     
80     -2080  
-48    32     
96     -16    
32     -96    
16     32     
0      -496   
-176   -160   
176    -48    
-128   -256   
336    128    
128    352    
-160   -48    
112    48     
160    -16    
64     80     
48     176    
176    80     
0      -208   
240    352    
-128   -144   
224    80     
16     16     
80     128    
112    128    
176    -48    
-16    48     
80     -32    
240    256    
-48    -192   
176    -384   
144    32     
208    400    
-96    -272   
-48    112    
16     -64    
80     0      
-48    96     
-16    0      
96     64     
144    -16    
224    736    
-144   -384   
-16    -32    
128    -160   
208    144    
-144   176    
48     -144   
336    -48    
96     64     
400    0      
208    368    
176    -48    
0      -80    
-32    0      
-96    -48    
-48    16     
-32    -48    
96     128    
96     -112   
160    64     
-16    48     
112    -640   
96     496    
224    -208   
96     -448   
64     64     
0      -352   
272    -240   
208    -32    
-128   0      
64     -1488  
64     0      
112    144    
-96    -48    
32     -48    
80     144    
-32    -48    
-96    32     
224    -336   
-208   368    
80     -320   
336    -320   
80     368    
64     -144   
16     -160   
-96    -16    
112    -192   
112    80     
-32    -96    
-32    -304   
176    288    
288    -16    
-112   -16    
224    -96    
-96    240    
-384   16     
48     -192   
48     144    
32     -128   
48     256    
160    -128   
128    -16    
144    -80    
176    -272   
80     80     
16     400    
48     304    
320    432    
-112   384    
144    240    
-32    -144   
0      -368   
-992   -192   
448    432    
-288   400    
192    -16    
-128   -368   
352    -720   
0      -80    
416    -208   
-256   144    
176    288    
-128   544    
-144   224    
432    288    
-288   -80    
-192   -464   
-192   -64    
416    48     
480    96     
368    -240   
32     -32    
-192   -304   
-96    -32    
-96    -912   
-176   96     
-336   0      
224    -96    
496    32     
-16    160    
-16    -96    
368    -224   
240    -32    
176    0      
-1920  -192   
-80    -224   
-144   -80    
192    0      
176    128    
128    -208   
320    48     
-48    112    
256    -128   
176    144    
-48    192    
0      -128   
32     -64    
-64    256    
-48    64     
-336   16     
112    112    
64     96     
32     -96    
288    -304   
-16    -304   
-80    112    
-16    112    
272    128    
-400   0      
0      -48    
-432   32     
-256   16     
-480   -224   
32     -96    
-32    -96    
48     -80    
192    -208   
64     -288   
-64    128    
64     -80    
96     -32    
128    -32    
-128   16     
-576   96     
64     16     
-64    64     
48     -16    
-16    48     
32     48     
-32    -32    
112    -32    
-16    48     
-48    32     
352    64     
128    -112   
80     16     
-192   48     
-128   -32    
-352   -16    
96     -80    
48     -16    
32     -112   
-96    -160   
320    48     
-128   -16    
96     -80    
96     -112   
-128   -64    
192    16     
-624   -16    
-64    -64    
-192   -64    
-688   -16    
-64    64     
-272   64     
0      16     
-16    -128   
-368   -560   
144    -352   
-96    -112   
-336   -80    
240    0      
-320   -112   
32     128    
0      464    
-208   16     
48     -144   
-176   -192   
16     0      
-192   304    
-192   48     
-976   -144   
64     80     
-320   0      
224    -112   
176    144    
-32    -400   
-192   -176   
-32    1376   
48     -464   
-112   -368   
-96    192    
-112   -16    
-32    48     
-544   -224   
288    -208   
-352   272    
-64    32     
48     176    
-96    -64    
-176   -176   
32     -144   
48     -32    
80     208    
16     -64    
80     -32    
-176   -48    
-128   -128   
32     112    
-48    64     
32     80     
16     160    
-144   64     
-416   -128   
-16    -192   
-192   -192   
0      128    
-272   -96    
32     64     
32     32     
144    -16    
16     32     
144    32     
160    64     
-64    48     
-160   0      
-176   0      
160    112    
-368   -48    
192    64     
-128   -32    
112    96     
-16    16     
-96    0      
112    -16    
16     32     
-16    -96    
176    -32    
128    144    
-224   16     
-144   -112   
48     -64    
80     80     
-688   48     
224    192    
0      -80    
16     16     
32     16     
-224   -32    
-112   -16    
0      48     
-32    48     
0      32     
-160   -16    
-176   -16    
-144   -80    
-16    -16    
-16    64     
-80    16     
16     16     
-160   -128   
-48    48     
-224   0      
464    -64    
-224   16     
368    16     
-224   -48    
-128   48     
64     64     
-128   -32    
112    -144   
-256   -160   
688    384    
-528   -16    
304    -48    
-224   48     
0      -112   
208    32     
-224   80     
176    -32    
144    64     
-192   32     
-240   -160   
-80    -64    
-256   112    
-16    112    
-96    64     
-176   64     
48     -32    
80     0      
-80    -112   
-16    -144   
368    80     
0      -96    
256    64     
160    32     
-80    176    
-272   176    
-336   64     
-80    -64    
32     96     
0      144    
208    -160   
-208   -32    
0      112    
-16    -16    
32     16     
-32    -128   
-48    0      
48     32     
96     80     
368    144    
-304   192    
224    -80    
-32    -16    
240    80     
-16    -128   
-64    96     
-112   48     
-48    32     
128    -48    
176    48     
240    144    
-272   -64    
192    -32    
80     240    
208    128    
-64    32     
64     80     
176    64     
-32    96     
-176   -112   
208    64     
0      48     
64     -32    
-48    -112   
96     -48    
32     128    
80     160    
144    112    
-64    0      
-32    64     
64     288    
320    -48    
-240   16     
-144   -32    
-144   -240   
192    208    
16     -32    
-160   64     
96     -240   
144    448    
-16    464    
288    -336   
-240   -64    
48     -80    
80     208    
128    -112   
64     96     
-64    -64    
224    64     
-160   -144   
-16    -784   
112    -16    
-16    0      
-80    96     
432    -272   
48     288    
128    64     
-80    -272   
-48    48     
384    464    
-48    -176   
-80    -192   
-256   128    
48     -48    
128    224    
0      -272   
64     -480   
96     672    
64     -304   
160    -96    
0      224    
-48    256    
96     160    
16     -288   
32     752    
-160   -384   
96     48     
-144   128    
64     -144   
128    32     
64     -32    
48     16     
112    -160   
-64    320    
16     240    
-16    -672   
144    0      
0      528    
16     -192   
192    -208   
-128   -112   
176    64     
32     96     
48     -80    
32     16     
16     -128   
32     -80    
-112   -560   
-208   -32    
32     -240   
224    96     
128    -80    
-208   -720   
-240   -336   
-128   -128   
208    16     
192    112    
160    80     
-80    112    
96     0      
240    48     
-128   -48    
128    -352   
48     144    
-32    224    
128    0      
80     288    
144    112    
48     -32    
112    48     
-80    -16    
16     80     
64     144    
112    128    
128    176    
-16    -80    
144    -16    
16     -160   
80     48     
64     -192   
160    -96    
0      -48    
144    96     
128    224    
160    160    
-80    -16    
64     -48    
208    32     
16     160    
64     144    
112    -128   
64     -16    
48     -480   
-128   -208   
160    -304   
32     192    
224    160    
224    96     
80     112    
96     192    
0      336    
16     -464   
320    96     
96     -32    
0      -128   
128    256    
176    256    
64     16     
-16    224    
-176   -624   
160    80     
-64    224    
-176   -240   
80     -64    
112    -48    
640    416    
16     192    
128    336    
-80    144    
-48    80     
-224   112    
-320   -128   
368    -208   
112    64     
256    -48    
64     48     
32     240    
688    576    
-304   176    
-256   -16    
96     -624   
-192   -368   
32     -880   
208    -48    
336    192    
80     -80    
112    112    
64     144    
-48    160    
256    -240   
32     -688   
272    48     
288    48     
-240   208    
-752   -32    
-112   -176   
176    -176   
-64    -464   
96     -96    
160    -608   
128    48     
-80    160    
160    0      
-16    -352   
96     48     
80     32     
0      -32    
-32    -112   
128    -32    
-2576  192    
544    -144   
128    -304   
-32    -96    
64     16     
-32    64     
192    192    
304    96     
48     16     
-16    -288   
-96    16     
160    -96    
48     -112   
0      -288   
112    -80    
-176   -32    
32     -48    
48     64     
48     -96    
160    96     
144    112    
128    80     
144    -944   
64     240    
96     -272   
-144   -96    
112    -80    
96     160    
-432   -48    
112    112    
-432   416    
400    336    
176    320    
112    -240   
64     -304   
256    224    
64     352    
-96    -544   
-240   -48    
16     176    
-48    16     
96     0      
176    32     
368    448    
-128   -208   
-192   144    
272    -224   
-496   -144   
-64    -208   
-192   128    
272    224    
288    -32    
-112   -256   
272    96     
112    -1184  
144    -16    
0      0      
16     16     
-208   0      
0      -96    
32     -48    
256    -80    
-160   64     
128    48     
-480   736    
256    352    
-160   96     
-64    -128   
-48    16     
-32    -496   
-64    -16    
-272   -128   
-96    -272   
64     144    
-80    -176   
64     0      
224    112    
64     -64    
224    -160   
-592   80     
-64    -272   
-96    -176   
-16    32     
-80    -64    
-48    32     
0      80     
-64    0      
192    -48    
-304   -16    
128    -112   
-192   -64    
272    112    
-80    176    
160    -128   
-720   -64    
80     -64    
16     0      
-80    0      
144    80     
48     -144   
32     -64    
-208   32     
256    -16    
352    320    
-320   -96    
-80    -48    
320    -16    
-80    64     
208    -32    
48     16     
-16    -48    
-64    16     
160    -112   
64     80     
-160   -448   
112    0      
0      48     
288    48     
-192   32     
32     -16    
-160   -48    
112    -16    
0      112    
144    -64    
128    160    
-1184  -48    
0      64     
-1312  -112   
0      -16    
80     0      
-96    16     
0      16     
-464   -112   
16     -144   
-960   112    
112    0      
-32    32     
16     48     
-1472  -32    
-64    224    
-320   64     
-112   48     
0      -80    
16     -16    
-96    192    
-16    128    
192    192    
-976   16     
112    0      
-336   16     
144    192    
-288   112    
-16    96     
-96    -112   
16     -96    
256    64     
-128   48     
144    -48    
192    160    
-400   64     
64     -32    
-32    48     
64     32     
96     64     
-48    144    
-208   -16    
-1216  -176   
-544   -160   
-64    -16    
-512   -368   
32     -96    
240    240    
-368   80     
144    192    
-368   32     
-80    16     
608    224    
-368   48     
-64    -128   
-160   -48    
-64    32     
-336   -96    
80     -48    
-80    -16    
0      16     
48     0      
144    112    
-208   48     
-32    -208   
64     80     
16     208    
-32    -64    
-176   -256   
-144   -64    
-144   32     
0      -128   
-160   112    
96     288    
-1648  -368   
336    -96    
-64    224    
16     -112   
80     -64    
-320   32     
128    -48    
-304   48     
224    -48    
-208   -96    
144    -160   
-160   32     
-160   -16    
-304   -16    
-64    432    
-816   -1072  
112    304    
-192   528    
-16    -688   
224    0      
320    176    
-192   496    
-320   208    
112    -496   
-16    144    
144    160    
48     384    
448    128    
-208   320    
64     160    
-592   -144   
272    192    
-208   -640   
-96    -64    
16     464    
80     320    
192    48     
0      -48    
192    48     
-112   32     
32     -16    
-80    -48    
-208   48     
-176   -16    
256    208    
-240   400    
192    112    
-64    0      
-80    0      
-112   -112   
96     -208   
80     48     
32     144    
128    48     
-112   96     
256    128    
-416   208    
48     80     
112    -32    
-16    32     
-176   -32    
160    -32    
-272   -512   
288    64     
32     0      
144    -64    
32     128    
-112   96     
32     112    
-160   96     
160    208    
-176   48     
64     32     
-144   -208   
240    192    
-208   80     
-96    96     
0      16     
64     160    
-64    128    
-16    48     
176    160    
-240   -112   
352    32     
-96    96     
224    64     
-32    -16    
32     32     
-208   -160   
-16    -16    
-96    32     
176    208    
-208   -48    
-128   80     
304    48     
32     -16    
64     96     
-48    -16    
224    224    
-176   -288   
48     -48    
-128   96     
128    80     
-400   64     
80     192    
160    176    
160    160    
-288   96     
112    224    
32     208    
-16    160    
256    160    
128    -16    
32     -48    
0      48     
272    224    
-256   208    
128    48     
48     144    
-48    32     
144    -352   
0      -224   
32     -48    
-144   -352   
-144   -192   
32     -80    
16     480    
160    192    
-48    224    
-128   -240   
80     48     
-112   320    
-16    -192   
416    160    
176    -288   
208    96     
-48    -144   
16     -176   
-64    0      
112    -528   
80     -208   
-112   -272   
-256   -224   
0      64     
-208   -80    
288    -96    
48     0      
-48    -176   
224    -48    
112    240    
-432   -144   
144    -352   
656    -224   
0      1008   
64     352    
-320   112    
-128   -128   
-240   -112   
-112   -192   
320    -352   
-208   176    
-208   -64    
-192   -304   
-304   -32    
-80    -64    
112    -112   
-160   -16    
-80    -272   
672    -480   
320    -256   
256    272    
288    64     
16     192    
240    112    
144    -16    
-224   352    
-32    -192   
0      -656   
-144   -336   
512    -208   
-160   384    
192    -192   
128    192    
-128   304    
96     96     
-48    288    
144    0      
144    192    
352    336    
-272   432    
-384   32     
16     -48    
144    -96    
432    288    
-112   400    
272    240    
-208   416    
-80    -272   
272    96     
464    656    
-384   -560   
-16    208    
-192   128    
208    32     
128    112    
128    -448   
240    -160   
48     240    
-144   176    
-80    -320   
208    -160   
128    -80    
208    656    
-208   -288   
32     64     
16     112    
64     -48    
208    208    
-80    432    
128    -224   
48     -80    
224    480    
208    -352   
-160   192    
224    -128   
-144   -64    
96     64     
80     336    
48     -368   
-16    -400   
0      160    
272    256    
0      -192   
160    -96    
0      96     
-80    -80    
32     0      
64     -32    
272    16     
176    -32    
80     96     
128    -272   
-32    -224   
16     224    
128    192    
240    96     
-64    112    
64     96     
256    0      
-96    -432   
-144   -448   
80     0      
224    80     
-160   -128   
176    -128   
144    208    
16     64     
-112   0      
224    -112   
160    -16    
176    288    
32     448    
64     -192   
352    -128   
64     64     
192    48     
-96    -144   
0      -112   
-32    32     
16     -192   
0      224    
192    160    
96     240    
-64    -48    
112    -1024  
320    -64    
160    -144   
208    64     
0      -48    
128    -144   
-16    -16    
128    -304   
128    112    
-240   -32    
80     -112   
240    96     
144    64     
0      -320   
128    -112   
160    -368   
416    -256   
128    -112   
-64    -48    
-848   224    
-256   -32    
160    -112   
352    -16    
128    -32    
144    -528   
-32    32     
-64    -16    
-64    -128   
160    -32    
208    112    
96     0      
-16    32     
-64    -16    
112    -176   
-1504  -16    
128    -128   
64     -16    
96     -144   
0      -144   
64     -416   
32     32     
16     -992   
160    -64    
192    32     
112    144    
32     16     
16     48     
-160   32     
176    -80    
-624   -32    
-16    48     
-80    -16    
144    48     
64     -64    
32     -160   
64     -128   
64     -752   
16     112    
32     -32    
-32    96     
48     -64    
64     -48    
-160   -48    
64     -192   
80     -208   
224    64     
0      16     
96     -208   
64     16     
176    -16    
16     -16    
-144   -272   
176    -64    
352    208    
-448   96     
464    96     
-336   0      
-256   -144   
32     128    
-400   -48    
160    -128   
-720   -80    
64     -112   
-1280  64     
-192   -80    
272    400    
240    304    
192    0      
144    -272   
-96    288    
16     240    
320    304    
192    -176   
176    -368   
-240   -176   
144    0      
-448   144    
-16    96     
-336   176    
-48    -176   
-48    32     
144    -720   
160    272    
176    48     
16     -32    
96     240    
-64    -320   
96     368    
112    -368   
-256   32     
192    -16    
-48    -96    
144    32     
-608   448    
112    48     
336    -416   
0      -80    
-208   -64    
48     -448   
80     352    
-544   -960   
-80    448    
-96    48     
80     64     
0      256    
416    -272   
-32    80     
-208   448    
-1344  352    
416    96     
-160   304    
224    -96    
-64    16     
-160   -160   
-320   -32    
-224   64     
112    32     
192    -80    
-128   144    
256    192    
-224   176    
32     -16    
-112   0      
208    96     
-1040  -16    
-64    64     
-976   -112   
-80    128    
-32    -48    
-224   -64    
16     -112   
-144   -192   
48     96     
-512   0      
-160   -64    
224    -128   
-240   16     
-96    -48    
160    32     
-160   -128   
112    0      
-128   -112   
-352   0      
-144   16     
-272   -48    
-32    32     
-128   64     
-144   -96    
-1072  -112   
-256   -16    
176    128    
16     32     
80     0      
-192   48     
-176   -176   
64     96     
-192   -80    
144    -80    
32     0      
160    32     
-176   32     
112    -32    
16     80     
-352   0      
32     -64    
-1072  -96    
32     -32    
80     96     
208    64     
-64    -80    
-96    64     
-48    112    
-128   -64    
144    -80    
16     32     
0      48     
-128   176    
-48    96     
-192   48     
-208   16     
-512   -48    
-96    64     
0      -16    
-16    0      
272    -112   
112    80     
64     128    
-96    80     
-16    -64    
-256   -80    
0      -112   
-80    -160   
-32    -112   
-272   -144   
-192   -64    
-592   -352   
336    112    
-64    144    
80     64     
112    -112   
-144   32     
112    64     
-16    80     
176    128    
16     256    
192    128    
-48    240    
-208   48     
80     -96    
384    176    
-160   256    
144    224    
-368   16     
-16    144    
-96    -32    
16     -128   
-80    -64    
80     16     
48     128    
-64    32     
224    240    
-320   304    
128    256    
-304   208    
128    48     
-144   -176   
208    -32    
-752   -16    
48     -96    
16     48     
-176   -32    
64     -240   
-96    -224   
96     -48    
-224   256    
-112   0      
352    336    
176    240    
16     112    
96     256    
-128   64     
-16    -592   
-608   -1136  
512    160    
-48    928    
128    -288   
64     -208   
-64    800    
-160   768    
288    -464   
128    -1200  
-160   720    
288    272    
-368   -304   
336    416    
-112   -272   
240    80     
-144   96     
272    -160   
-96    -512   
32     272    
-304   16     
-48    -384   
400    -48    
400    -16    
-192   -432   
-96    448    
-240   736    
-464   -912   
272    -288   
-496   -64    
672    -1392  
576    256    
272    688    
304    -240   
-352   -48    
-96    496    
192    592    
-832   -1056  
-256   320    
-48    -64    
224    720    
80     -368   
-176   160    
288    96     
48     320    
-64    -448   
-96    256    
-32    -16    
16     -96    
192    176    
144    192    
-176   -336   
336    128    
-48    80     
384    -432   
-384   0      
96     240    
96     -64    
-144   -48    
144    -48    
-112   -16    
16     -160   
-128   -16    
320    32     
-16    -16    
32     -32    
-112   64     
144    128    
32     96     
96     112    
96     16     
64     96     
-176   80     
144    16     
32     64     
-16    -208   
96     -48    
-96    48     
144    32     
-48    32     
96     80     
64     352    
96     112    
-32    192    
-16    -16    
128    32     
192    144    
-288   -32    
-16    32     
96     176    
80     176    
288    48     
48     144    
-384   -448   
48     64     
-64    48     
112    48     
-32    64     
160    48     
128    80     
-80    0      
192    112    
-192   64     
96     -16    
-64    32     
112    -176   
80     -64    
176    16     
-32    -80    
-112   112    
288    384    
-192   144    
96     16     
-16    80     
16     -112   
112    -176   
160    48     
96     96     
-48    32     
0      64     
128    -816   
0      80     
240    48     
-80    0      
0      96     
-96    -144   
-176   -416   
-96    256    
32     304    
112    -16    
-144   -144   
192    -80    
128    192    
224    -128   
80     256    
64     -848   
80     176    
-272   64     
16     -16    
64     96     
112    0      
96     -64    
16     32     
16     96     
-16    32     
0      64     
32     96     
-192   64     
-32    -112   
112    64     
128    -192   
48     0      
496    144    
320    144    
-144   -144   
-160   -208   
-16    48     
64     64     
-80    48     
160    64     
-288   -48    
224    -144   
272    48     
64     0      
-32    48     
-48    -160   
80     64     
64     -224   
32     32     
96     144    
80     48     
80     32     
144    64     
-32    16     
96     48     
-96    160    
64     0      
96     32     
-48    -128   
96     48     
32     -144   
80     32     
208    -224   
-48    64     
80     -128   
32     16     
-16    32     
192    80     
16     48     
64     32     
144    112    
64     96     
80     64     
32     -448   
304    288    
-144   -32    
192    48     
48     16     
48     32     
80     0      
96     -80    
0      0      
-80    96     
128    0      
-96    -208   
176    -16    
-256   -224   
144    80     
80     -80    
224    16     
272    48     
368    352    
64     -112   
-464   -336   
-32    -704   
128    160    
128    480    
160    112    
-160   -384   
192    16     
-144   608    
96     -752   
48     96     
352    -16    
304    160    
240    0      
-48    320    
-1200  -2096  
816    256    
-544   864    
-704   -272   
320    -544   
-144   0      
1104   608    
-336   -736   
320    272    
64     112    
-32    -400   
64     -80    
-96    -1408  
-128   544    
256    192    
192    -32    
32     112    
128    -560   
144    -384   
-48    -112   
240    -128   
32     16     
96     -128   
-112   112    
-176   16     
-176   96     
96     112    
288    -992   
576    208    
-304   192    
-64    80     
128    -144   
64     240    
272    -208   
-32    64     
-224   -96    
-32    -144   
-384   48     
64     96     
160    -64    
240    -96    
48     -96    
-80    -176   
48     32     
-16    -304   
64     32     
176    -224   
-112   16     
80     -144   
48     16     
-96    -16    
48     80     
-592   16     
144    -160   
64     -144   
-64    -64    
208    128    
-16    -160   
272    -112   
48     -656   
-32    -32    
240    0      
-96    64     
304    16     
304    16     
-176   -48    
160    -176   
-256   0      
48     -112   
-704   -32    
208    48     
0      -16    
112    -256   
-128   -32    
80     -448   
-16    64     
288    0      
-96    16     
-48    -48    
-16    -64    
-32    -112   
64     -96    
-112   -176   
144    0      
-288   64     
112    32     
-208   -80    
272    -240   
-144   -32    
128    -96    
112    128    
32     0      
-96    -64    
-128   -192   
-48    144    
80     112    
304    448    
-80    160    
272    -208   
-304   -80    
16     -192   
-32    -64    
64     -144   
112    -128   
176    -96    
-32    128    
-160   -368   
144    -16    
272    176    
112    128    
-144   112    
-208   144    
-480   -64    
32     0      
-208   -128   
64     64     
32     0      
-80    -32    
0      64     
48     -256   
160    -112   
-80    -32    
32     112    
320    464    
-176   528    
-96    48     
320    288    
-16    128    
16     64     
-144   80     
48     32     
-592   400    
240    -192   
-320   -128   
-272   -224   
-48    256    
176    208    
144    16     
-240   16     
80     -80    
-32    144    
32     -256   
48     64     
192    192    
144    0      
224    112    
-304   160    
-1280  80     
16     528    
-256   240    
-160   -304   
-64    208    
-160   -16    
32     16     
-1648  -64    
32     32     
0      272    
-96    -160   
-80    -160   
-160   32     
-160   16     
144    48     
-320   0      
-128   -160   
-32    0      
-304   160    
48     -416   
-112   32     
-272   0      
16     48     
96     144    
-1120  -48    
48     -16    
-192   32     
176    64     
-112   96     
16     -128   
-96    496    
-112   -336   
-160   -416   
-448   224    
-32    80     
-224   -480   
-16    160    
-64    320    
48     32     
-576   -112   
176    240    
-544   128    
176    -32    
-336   -256   
336    -112   
368    -16    
-336   208    
400    256    
-512   -496   
-336   -496   
-80    -32    
-96    288    
-256   -16    
208    -464   
-192   -192   
368    80     
-912   16     
-16    -16    
-224   -160   
0      112    
-160   -112   
-80    0      
-208   256    
96     272    
32     -16    
-160   0      
192    32     
-144   96     
0      32     
-16    -112   
208    16     
-368   16     
80     48     
-336   -32    
-16    400    
64     256    
112    16     
-224   80     
-240   96     
112    112    
160    -96    
-48    -16    
-160   -48    
112    0      
-80    -16    
-80    -48    
-384   -48    
272    96     
-896   -16    
-96    -32    
128    80     
-224   128    
-112   16     
-48    -48    
-48    144    
0      48     
176    32     
-32    0      
-320   -288   
-352   -176   
272    224    
-608   -48    
48     176    
-736   32     
-80    -288   
48     -224   
96     192    
-224   -96    
-48    160    
192    176    
64     16     
-112   -48    
-32    -96    
-48    -32    
-192   -208   
240    -32    
16     80     
112    -16    
-720   32     
-80    256    
32     48     
80     -64    
16     48     
-80    32     
64     64     
-48    48     
32     16     
-48    80     
-112   -16    
-16    16     
128    64     
-192   -48    
176    48     
-16    -288   
80     -256   
-16    128    
-192   80     
32     32     
-48    -192   
-144   16     
-224   144    
-128   32     
-16    -32    
224    128    
-320   16     
320    48     
-304   -16    
112    32     
-304   -640   
-96    -384   
-64    336    
-272   192    
64     -32    
0      -192   
-64    -16    
128    144    
112    64     
112    -32    
240    64     
-80    64     
256    112    
-224   -96    
32     -160   
112    32     
64     32     
32     96     
96     0      
32     32     
-32    -160   
192    96     
0      96     
-80    64     
-160   -48    
16     -112   
-64    -64    
32     160    
-48    32     
80     48     
16     32     
-48    0      
16     -16    
80     32     
-16    48     
-48    0      
96     -32    
128    -64    
208    80     
-320   -272   
-96    -80    
-176   16     
-16    -48    
224    -16    
208    48     
160    96     
0      -96    
0      48     
64     64     
16     32     
-176   -48    
0      16     
32     48     
0      144    
80     80     
16     -32    
-64    80     
96     -832   
48     64     
-16    -96    
32     0      
0      112    
144    64     
48     80     
112    32     
-16    64     
-16    0      
-48    224    
80     160    
-48    96     
192    224    
-176   144    
176    -832   
-112   240    
224    192    
320    -256   
-48    64     
288    0      
-304   496    
128    -912   
32     224    
-64    272    
48     -16    
0      288    
112    -128   
96     112    
-16    320    
64     -592   
-288   48     
352    -1584  
576    816    
384    272    
80     -368   
32     576    
-112   -128   
400    128    
272    128    
496    160    
240    -192   
-128   -368   
-432   -160   
-32    272    
0      16     
-576   -480   
288    -816   
176    80     
-160   208    
80     304    
32     416    
144    0      
160    -432   
176    48     
-128   -32    
240    64     
-224   -80    
-16    -48    
-96    0      
336    -192   
128    208    
224    -64    
-144   16     
96     -688   
-48    -16    
-32    112    
64     400    
160    32     
272    -32    
-48    -32    
96     128    
160    48     
48     -144   
304    96     
-80    -144   
48     -80    
-48    -352   
80     336    
272    -1456  
352    128    
160    112    
0      -48    
-16    -32    
32     80     
352    96     
-80    32     
16     0      
-96    -48    
64     32     
48     -32    
192    -64    
224    176    
-32    32     
80     -112   
128    0      
144    48     
64     -128   
-144   48     
80     96     
-176   128    
96     16     
96     16     
160    -448   
32     0      
32     0      
112    48     
368    240    
-288   96     
-80    -272   
240    -64    
48     176    
32     80     
-16    -48    
80     32     
48     -144   
144    -64    
224    48     
32     -16    
16     -32    
64     -16    
16     112    
112    -144   
112    32     
112    -112   
96     -112   
-112   96     
96     112    
64     0      
240    -176   
-48    32     
80     -16    
128    -480   
96     0      
0      -144   
192    32     
-16    80     
96     48     
32     -16    
160    0      
192    272    
144    368    
112    -688   
64     -128   
64     -192   
16     -272   
-32    -320   
336    -272   
320    -112   
144    -1280  
96     -240   
-176   32     
-160   -16    
32     -16    
112    -112   
336    -384   
-224   -64    
144    -80    
96     48     
-48    -80    
0      -48    
0      -80    
240    160    
-336   -304   
32     -80    
128    128    
256    128    
64     -320   
96     -480   
176    1056   
64     64     
16     -624   
272    416    
-112   -208   
-336   -64    
464    -16    
-448   -304   
144    -368   
-224   96     
128    -496   
-32    -224   
64     -176   
64     -48    
144    96     
64     -288   
352    480    
-208   -224   
240    64     
16     192    
-112   -208   
272    128    
-432   -112   
176    368    
0      -224   
-144   -368   
48     -256   
224    -480   
-48    64     
160    -256   
16     128    
-16    -64    
-16    112    
-48    -48    
0      -16    
-48    96     
48     -48    
-448   -48    
128    16     
-544   96     
16     -32    
-16    240    
128    112    
-80    -32    
-64    -272   
-16    -16    
80     -128   
128    -32    
176    16     
-32    -48    
-96    -16    
144    128    
-336   48     
352    0      
-96    112    
192    192    
-256   192    
-144   -144   
-160   -48    
96     -128   
224    176    
-16    -160   
160    -160   
96     176    
-128   -80    
112    16     
-48    -48    
-336   -80    
416    -304   
-256   -144   
-112   208    
-784   -432   
384    -416   
144    224    
-400   -304   
-32    -176   
256    -1168  
256    -16    
192    176    
256    336    
-608   -224   
608    -16    
-160   64     
96     16     
-672   -64    
0      144    
96     208    
-32    -144   
96     80     
96     32     
32     -16    
160    -16    
112    -112   
-176   -48    
288    48     
-128   48     
96     -16    
-384   176    
384    176    
-160   0      
48     -224   
16     0      
96     -48    
32     64     
-896   -240   
-160   48     
-96    -32    
-352   -128   
-480   -208   
112    48     
-352   112    
288    32     
-208   16     
-48    0      
-224   -16    
48     16     
96     32     
-1248  -192   
48     32     
-688   -96    
-560   48     
16     80     
80     80     
-144   -64    
-64    -32    
-48    -32    
-32    16     
128    -16    
112    32     
96     48     
-240   -32    
-16    -16    
-320   -192   
16     96     
48     80     
-32    16     
128    64     
-448   -144   
0      -80    
-576   -176   
-208   -80    
-752   432    
-16    224    
-96    -48    
-80    32     
96     -64    
-48    128    
-64    -144   
208    112    
32     -64    
-144   32     
-64    -160   
32     160    
-80    96     
-112   16     
16     48     
-96    16     
-128   176    
-48    48     
-96    -48    
-64    -192   
304    64     
-112   -32    
-64    48     
-96    16     
48     -32    
0      48     
-128   -16    
-48    48     
-112   -16    
240    64     
-432   -672   
-384   -320   
-64    256    
-128   208    
-64    -16    
96     -64    
-32    32     
208    256    
224    656    
-272   -112   
272    -784   
96     -80    
224    384    
-224   80     
16     -48    
-320   -128   
48     64     
-176   16     
48     64     
-176   0      
240    -352   
0      -320   
-176   -32    
0      112    
16     16     
48     0      
-128   176    
-48    288    
-16    80     
32     112    
-176   -16    
112    32     
-464   -64    
-64    -32    
-272   -16    
0      208    
192    -48    
-80    -160   
-240   -208   
64     432    
64     336    
48     -272   
0      -336   
-144   -32    
320    512    
144    16     
80     -128   
-256   -224   
16     16     
-864   352    
-144   -144   
304    -32    
-80    112    
0      -48    
-176   -80    
0      -16    
16     64     
128    80     
144    80     
336    432    
-416   -880   
96     496    
-16    16     
64     0      
-64    144    
0      -112   
16     -160   
-80    160    
288    464    
-288   -640   
64     496    
176    -448   
112    160    
-32    208    
256    -80    
-640   752    
128    336    
160    -176   
32     -224   
-48    224    
-128   464    
-16    -464   
64     144    
96     -192   
128    0      
16     96     
-304   -16    
80     96     
-272   -112   
128    224    
48     -16    
288    64     
-128   32     
0      80     
-192   -16    
-128   0      
384    144    
176    -16    
656    208    
160    0      
208    -16    
-304   64     
-176   -112   
720    256    
-464   336    
-128   -112   
128    64     
-224   112    
400    -96    
160    176    
176    32     
32     -16    
-48    -16    
-176   -208   
304    112    
-528   304    
16     -64    
192    -128   
-208   16     
128    176    
64     -208   
224    64     
-64    128    
208    112    
384    96     
-512   -64    
80     80     
16     272    
144    128    
-32    128    
64     -48    
-384   96     
320    -48    
-80    -112   
192    -128   
-368   -112   
496    -64    
288    -32    
16     -144   
-384   256    
-112   112    
16     -96    
-208   -64    
192    -192   
128    16     
32     16     
-16    -96    
224    96     
-32    80     
-144   64     
-160   -160   
64     -448   
-64    96     
-208   48     
288    16     
-112   0      
16     0      
112    -48    
-32    32     
-128   0      
32     32     
-96    0      
224    176    
-112   96     
64     0      
240    176    
-192   -112   
96     -32    
448    112    
-176   192    
-96    0      
-32    0      
32     16     
-16    208    
16     144    
64     240    
96     80     
176    48     
48     64     
-64    48     
64     16     
64     -288   
0      176    
112    -80    
16     -64    
48     -96    
64     80     
0      48     
80     96     
-208   48     
224    -224   
112    -16    
176    32     
-144   -16    
-48    -240   
48     48     
-32    -48    
144    336    
192    -400   
-144   816    
272    384    
240    208    
0      0      
-32    -576   
-16    -208   
176    304    
-208   32     
0      -352   
176    464    
32     32     
368    -336   
160    160    
-32    -80    
80     -464   
160    80     
208    96     
80     112    
16     80     
48     48     
256    704    
-336   -656   
128    96     
272    224    
272    -128   
128    112    
-16    -176   
-64    -560   
-224   -32    
64     48     
-112   80     
144    -112   
208    144    
176    48     
112    96     
0      192    
-208   64     
-64    128    
544    192    
-112   0      
128    -96    
144    -32    
-64    -176   
48     -48    
128    -192   
160    0      
16     -416   
48     32     
48     16     
16     48     
80     64     
96     80     
-96    -96    
176    -96    
192    -16    
48     -128   
96     32     
96     -32    
112    -16    
352    128    
-160   0      
80     64     
48     48     
96     64     
48     48     
64     -48    
32     128    
48     64     
16     -208   
112    176    
48     32     
32     32     
48     32     
128    32     
-64    -96    
288    96     
16     -784   
304    32     
-96    -64    
144    32     
48     48     
128    -208   
-80    -528   
-176   -224   
-48    144    
-48    -112   
64     -48    
64     -80    
-176   -16    
624    -112   
-32    64     
0      -96    
704    -192   
-384   -16    
192    -224   
224    112    
-736   -32    
416    -48    
-64    64     
-80    -96    
176    -80    
-176   -336   
336    -144   
656    160    
-480   16     
-400   160    
-32    32     
-16    -64    
0      16     
16     -128   
-32    208    
-112   0      
-96    -192   
176    48     
-112   0      
-96    -80    
160    -704   
16     16     
160    304    
128    0      
16     64     
96     16     
112    -80    
-224   80     
192    -96    
-16    -48    
144    176    
352    -80    
-224   -64    
-96    -112   
208    32     
112    -240   
224    112    
-64    -304   
176    -240   
128    -16    
-400   128    
128    48     
-80    -96    
16     -64    
64     -16    
-416   -48    
32     0      
-912   -32    
192    48     
192    16     
80     -16    
32     -32    
32     -176   
96     32     
32     -384   
64     48     
96     -192   
16     -80    
-160   64     
288    128    
0      80     
48     32     
-304   -96    
112    -432   
176    -16    
112    -80    
352    -32    
-160   -400   
160    -112   
-112   -912   
32     16     
48     -16    
288    -192   
112    192    
-64    80     
-80    -208   
80     -16    
-496   48     
144    48     
-2800  -16    
160    -80    
-208   -112   
320    -272   
224    496    
128    -560   
0      112    
64     -32    
48     -480   
-96    416    
16     304    
-48    -64    
-16    -96    
320    -96    
80     144    
-320   -48    
80     16     
96     -16    
-16    -80    
-160   -64    
48     -176   
176    112    
256    16     
32     -1216  
416    864    
-208   320    
-416   -288   
16     0      
112    64     
160    -176   
400    336    
-16    128    
224    -192   
112    -32    
-80    -128   
0      -160   
0      0      
-48    -480   
240    240    
-352   176    
144    16     
-128   -192   
0      240    
-176   -64    
224    -32    
-304   80     
112    -192   
64     -32    
32     -144   
-16    -208   
352    -336   
-656   448    
-272   -144   
-720   -288   
-240   -32    
48     80     
-32    256    
112    -144   
-288   -256   
112    80     
-272   -64    
-240   -64    
128    0      
-112   48     
32     368    
-64    144    
-416   -240   
-112   -352   
-624   160    
-16    128    
-496   -48    
272    240    
-48    -96    
0      -80    
0      -176   
0      0      
32     160    
-160   192    
32     64     
160    208    
-288   208    
-80    96     
-224   -208   
-320   -512   
0      -208   
-400   -208   
-224   -240   
-512   -96    
-64    32     
-256   -112   
-112   -32    
-96    0      
-16    80     
-240   -16    
128    -64    
176    144    
-112   -176   
48     -160   
144    -64    
-736   -176   
16     -384   
-304   -480   
-800   -48    
-96    -16    
128    112    
192    96     
-240   208    
192    -64    
-176   -112   
0      256    
-160   -80    
192    128    
-160   -96    
368    -80    
304    0      
-240   0      
-80    -80    
128    -32    
192    112    
-736   -608   
352    -272   
48     -80    
32     144    
-368   64     
80     320    
-448   144    
-112   176    
-208   -48    
-32    -48    
64     208    
-48    -48    
80     -160   
128    0      
-128   112    
-752   80     
-80    160    
32     -64    
0      -32    
-48    64     
-32    80     
96     0      
-128   128    
-48    0      
80     0      
32     112    
-96    0      
-48    -16    
-144   -192   
-64    128    
-192   -16    
160    -32    
-64    48     
160    64     
128    32     
-160   -16    
272    144    
-256   160    
32     -32    
-400   -160   
224    -528   
-240   -320   
192    -112   
-112   -320   
-144   32     
-304   -80    
48     208    
240    192    
-368   400    
144    -144   
16     224    
64     112    
64     352    
-128   96     
-80    -112   
-16    -48    
-160   0      
-16    80     
-208   -192   
256    -176   
-256   -240   
272    240    
-16    96     
-16    144    
-288   -304   
224    -128   
-16    -32    
-48    -112   
-32    96     
160    176    
48     224    
16     -16    
336    96     
-320   16     
-32    80     
-288   -176   
-96    -80    
-112   -112   
144    0      
160    240    
176    -80    
32     48     
-128   96     
0      320    
96     128    
128    -16    
-128   192    
32     32     
-368   -384   
80     -16    
-32    208    
64     16     
-32    16     
112    -240   
48     400    
-16    -64    
32     -128   
48     288    
32     -240   
-80    112    
0      -176   
-368   0      
-176   -288   
144    -240   
240    352    
208    -192   
-16    192    
-32    80     
-144   -144   
112    144    
80     464    
240    464    
16     144    
-48    -144   
160    80     
-16    96     
-48    -32    
160    16     
32     64     
48     -80    
48     48     
112    64     
48     80     
-80    16     
16     32     
144    48     
160    80     
112    48     
96     160    
-48    160    
-240   16     
-256   -80    
112    0      
-112   -80    
176    96     
304    80     
64     16     
-80    0      
32     32     
-64    144    
-352   -96    
-144   112    
-64    208    
96     128    
-48    -48    
176    16     
48     16     
48     48     
-192   16     
176    -880   
-96    112    
48     32     
-48    -48    
-16    16     
64     112    
-48    -64    
224    -48    
96     112    
80     64     
32     -16    
48     48     
-96    0      
192    128    
-32    -16    
16     -272   
192    64     
0      64     
128    64     
96     32     
-48    0      
80     32     
48     96     
112    -80    
-64    48     
-80    112    
48     32     
32     -48    
-64    -336   
304    -304   
64     -208   
96     -32    
176    96     
-48    64     
80     160    
-336   96     
16     48     
160    48     
-272   0      
208    -48    
96     96     
128    96     
368    336    
-464   -128   
64     -96    
208    -160   
16     64     
272    -208   
112    96     
112    96     
112    48     
-272   -48    
528    -80    
256    240    
-224   32     
400    0      
176    64     
16     128    
-112   16     
-48    -96    
144    96     
-112   128    
256    64     
-96    160    
-144   0      
192    16     
608    -16    
-160   80     
-384   -144   
368    112    
0      32     
-320   -192   
160    32     
-160   -96    
224    112    
0      -48    
64     80     
160    -176   
64     272    
128    -1280  
176    -16    
-176   -32    
-32    96     
-144   -64    
144    0      
80     128    
80     0      
64     112    
176    32     
80     240    
160    -160   
-80    -160   
-144   -288   
208    80     
16     -80    
-32    48     
128    80     
16     128    
-16    -240   
32     48     
320    224    
80     -48    
32     704    
160    -128   
64     -288   
-128   0      
192    -384   
48     208    
336    -144   
-288   112    
16     -80    
96     288    
96     208    
176    -80    
176    -48    
240    224    
144    32     
-144   -16    
128    -64    
-288   -480   
176    144    
64     224    
288    176    
-64    -320   
-48    -224   
144    672    
16     -496   
176    -160   
48     112    
-96    576    
-48    320    
272    -400   
48     0      
-96    -80    
160    -208   
-160   -832   
176    592    
64     -16    
32     -576   
256    192    
112    -672   
192    -128   
208    352    
16     48     
-512   -224   
-16    -208   
64     -112   
16     -32    
128    -80    
176    -880   
272    64     
80     112    
-128   -272   
224    -448   
240    448    
128    192    
-64    128    
48     128    
-32    -400   
-1664  48     
112    240    
16     48     
192    144    
64     16     
128    -128   
208    0      
192    208    
128    288    
48     144    
-112   32     
32     -80    
-48    304    
64     -32    
160    -96    
-64    -64    
128    -32    
80     32     
-112   -112   
192    -48    
144    208    
-16    -80    
80     -608   
96     224    
-80    48     
64     -64    
176    -256   
96     -80    
48     144    
-48    64     
128    -32    
-32    -80    
256    208    
16     -256   
64     -64    
48     -16    
80     -96    
256    -128   
-176   96     
144    96     
208    192    
-64    144    
192    -32    
-16    -32    
32     -80    
-192   -96    
-16    -144   
-1088  -384   
64     -256   
32     0      
192    0      
-112   96     
0      -576   
48     -304   
0      -1808  
224    112    
-64    176    
112    192    
-112   192    
64     64     
-272   32     
144    80     
-352   -96    
272    192    
-1408  -96    
288    -288   
-128   -144   
112    -80    
160    144    
-128   176    
-112   16     
128    -528   
256    -816   
-240   -608   
144    -32    
48     -96    
112    224    
-240   -272   
144    176    
-832   112    
144    -64    
304    -176   
208    -336   
-304   160    
-464   -256   
-480   208    
-80    -16    
128    48     
-112   0      
112    32     
-288   -112   
-224   -256   
-816   -32    
-176   32     
-464   -64    
224    -160   
-64    -160   
336    -352   
192    -32    
64     -288   
336    -224   
192    -96    
16     -496   
384    -160   
112    144    
-192   16     
16     48     
-96    272    
336    512    
-224   288    
80     192    
240    64     
-2224  -144   
160    64     
-1456  -64    
-736   -64    
-144   48     
-736   0      
224    -16    
-112   -128   
176    -112   
-288   -128   
96     -192   
-160   -144   
96     -336   
-848   -16    
80     80     
-288   0      
-64    -48    
16     128    
48     288    
-160   160    
-368   144    
-144   -16    
-2304  -16    
-48    16     
80     80     
64     0      
-128   96     
160    48     
-352   -80    
-32    32     
-128   -32    
-320   288    
-112   240    
-160   240    
-64    96     
-240   -48    
-128   -336   
304    -160   
208    -80    
-640   -192   
-208   -16    
-528   -576   
96     240    
48     -48    
64     0      
64     64     
-176   -192   
-320   -16    
-80    -656   
-96    -336   
96     96     
208    16     
-480   32     
-64    -160   
-400   160    
-224   -400   
-32    416    
-32    -608   
-144   -16    
48     368    
-16    -160   
192    256    
-176   256    
-224   -304   
96     96     
240    416    
0      -176   
-144   -144   
-240   16     
-240   0      
128    192    
-64    64     
0      64     
-80    -80    
96     16     
80     32     
64     48     
-48    64     
-16    96     
-112   64     
-112   -848   
-240   -464   
-272   304    
-208   208    
-112   -80    
96     -32    
-400   -96    
368    -96    
0      32     
144    464    
-352   128    
32     -128   
-128   16     
-80    -64    
208    48     
-32    -16    
144    32     
64     -16    
112    96     
-288   32     
-48    16     
-992   -96    
192    128    
-32    -32    
96     64     
144    64     
-256   -96    
64     64     
16     16     
-144   -96    
0      -16    
80     64     
-48    64     
0      48     
-400   0      
-128   0      
-800   -112   
224    96     
-32    144    
-128   64     
-176   -48    
0      0      
-128   16     
160    96     
-32    -80    
224    -112   
64     112    
0      -16    
48     32     
-96    32     
-176   -80    
64     -16    
-32    64     
-16    0      
-16    80     
-16    0      
-32    -32    
32     96     
-32    64     
-32    16     
-240   0      
-80    0      
-112   -16    
96     48     
-48    0      
224    96     
-256   -64    
-64    64     
160    112    
-160   -16    
256    96     
48     64     
176    32     
-144   32     
208    0      
-304   -368   
16     48     
-272   144    
272    0      
-400   -16    
-16    48     
32     160    
48     -32    
-80    192    
304    32     
-64    -96    
-96    -128   
192    -64    
240    160    
48     48     
80     -16    
-208   48     
-144   48     
-272   -144   
128    -32    
320    96     
240    16     
-32    96     
576    272    
-272   -128   
272    -32    
304    224    
-320   112    
240    -128   
80     -80    
352    416    
-160   144    
-112   -80    
816    384    
-480   128    
64     -48    
80     64     
-96    -96    
112    64     
224    192    
16     0      
80     -16    
160    224    
-272   -192   
112    -368   
-80    256    
192    256    
-256   -112   
96     272    
-32    -544   
144    144    
192    320    
-224   -272   
128    96     
-288   -64    
288    224    
64     -32    
240    -32    
-32    128    
-32    48     
96     -64    
-80    160    
-96    -384   
224    -336   
-144   96     
128    16     
176    32     
-64    192    
240    288    
160    -144   
48     -208   
-48    0      
208    400    
-336   -320   
-48    -32    
16     -448   
-80    -208   
192    -384   
-128   -336   
176    128    
160    -1248  
272    448    
224    -192   
256    -400   
-48    -352   
-80    -176   
16     -64    
32     48     
-112   0      
176    160    
320    -16    
96     32     
0      -48    
32     -80    
0      -144   
-16    -688   
256    16     
128    128    
80     128    
-128   -32    
144    -32    
160    64     
176    32     
112    112    
-80    16     
144    16     
80     16     
160    -16    
368    240    
-208   464    
80     -192   
48     -16    
208    144    
64     64     
176    64     
144    0      
160    -16    
112    48     
-112   -16    
112    -128   
-112   -112   
128    -32    
96     -128   
-144   -336   
192    -80    
-336   -32    
64     32     
176    -400   
-80    80     
128    144    
144    144    
-48    -256   
-48    -112   
80     -48    
-16    112    
208    -16    
176    16     
240    96     
-80    -16    
32     -64    
272    -96    
144    32     
48     -320   
64     80     
64     -416   
112    32     
-128   96     
128    144    
160    96     
0      0      
160    80     
-64    -48    
176    64     
368    160    
-144   192    
-16    48     
304    -96    
32     -112   
80     -48    
0      0      
-128   -96    
0      -224   
80     48     
144    -160   
208    16     
-16    -176   
48     -272   
-32    80     
-96    -384   
80     -16    
192    -48    
-64    96     
-80    -208   
224    -128   
64     96     
160    208    
-80    96     
96     304    
-16    0      
112    -112   
32     224    
144    176    
144    288    
80     -144   
208    80     
128    48     
-32    80     
96     -240   
0      -128   
128    -32    
-16    128    
16     192    
384    -992   
112    32     
112    -160   
-48    -624   
240    240    
-288   -384   
96     -16    
320    -320   
-176   -160   
-32    -32    
128    80     
80     544    
80     64     
208    -160   
64     -32    
80     -400   
256    112    
-64    192    
-48    176    
496    144    
-448   -304   
-112   -80    
0      48     
80     -48    
80     64     
336    -512   
416    -192   
-432   48     
-400   -112   
-208   -464   
-288   -272   
80     -16    
-2336  -624   
96     -352   
-48    -320   
-448   160    
240    272    
32     -128   
-112   -288   
-48    -784   
144    -240   
288    128    
96     336    
64     -80    
208    208    
-96    48     
-80    -112   
-288   16     
-32    0      
240    -256   
144    -48    
160    -48    
-128   -192   
16     -160   
48     -784   
160    16     
-224   0      
0      32     
320    -368   
416    320    
-592   -176   
-64    -496   
-256   352    
256    -64    
288    0      
240    -48    
64     -64    
-32    176    
352    -144   
-96    -832   
32     0      
160    32     
336    64     
-32    -144   
128    112    
-240   -432   
32     384    
48     -176   
112    224    
-224   304    
-32    -96    
-48    80     
176    240    
16     -160   
224    -128   
-80    -64    
-16    576    
160    -208   
-256   -16    
48     -48    
208    64     
32     176    
-80    -144   
160    16     
-176   -144   
-112   -96    
-160   208    
-64    -160   
-32    -144   
160    -128   
-96    -304   
112    -320   
96     176    
32     -80    
96     -32    
-160   -32    
80     0      
-400   -112   
128    -48    
-432   48     
112    -272   
-304   32     
160    -144   
-80    96     
240    -144   
0      32     
-16    -544   
48     176    
-80    112    
96     144    
-448   112    
144    80     
-224   16     
16     96     
-128   -32    
144    -96    
-80    -160   
0      -144   
208    112    
96     -32    
-176   -448   
544    -592   
128    16     
-160   304    
48     -112   
-48    -32    
-208   -384   
64     -96    
80     160    
-400   -16    
272    112    
16     -64    
112    -112   
16     128    
144    -128   
32     -272   
-16    32     
96     112    
-288   -64    
160    -32    
-160   -64    
128    112    
-432   48     
0      -160   
0      16     
144    -112   
240    0      
-64    -16    
-48    32     
-400   -80    
-128   16     
0      16     
80     32     
0      48     
144    16     
-48    0      
-528   144    
-352   48     
-80    -64    
80     80     
-48    -16    
-64    32     
-400   -16    
-32    80     
-256   -80    
-384   0      
64     128    
-96    80     
-32    -16    
-304   -80    
128    64     
-720   32     
0      48     
112    0      
-64    64     
-32    0      
176    48     
-64    -128   
64     16     
112    112    
-128   -32    
112    0      
-208   16     
-128   16     
-512   -80    
-112   -48    
-64    -96    
16     112    
-304   32     
-48    16     
-96    -208   
-80    -32    
-112   -80    
48     48     
64     80     
64     0      
-32    -128   
0      144    
-64    16     
304    416    
-96    224    
48     128    
16     16     
-976   -272   
-32    -32    
-96    -32    
-64    -240   
-80    -96    
176    256    
-432   -400   
-144   -400   
32     160    
-400   80     
160    -64    
0      0      
176    160    
-640   -176   
32     32     
-592   -432   
-48    -336   
304    384    
-80    400    
48     -48    
-240   -192   
288    -288   
496    528    
0      256    
80     -480   
-80    256    
-336   64     
64     304    
-80    -32    
64     -208   
64     0      
32     48     
-896   -16    
0      16     
64     80     
112    -208   
-160   208    
-48    -48    
64     -48    
512    576    
-464   -816   
-352   -32    
512    -432   
-224   16     
112    592    
-320   -448   
144    -432   
-416   -864   
464    192    
-128   192    
-176   224    
32     -80    
64     80     
160    160    
-80    -80    
-48    16     
160    32     
-16    144    
32     16     
-16    160    
-336   112    
-64    48     
-736   -64    
352    32     
64     48     
0      -144   
-48    -32    
32     -16    
16     -32    
-112   -48    
32     64     
112    144    
176    -48    
-400   -16    
-64    -16    
-160   -176   
48     80     
192    80     
112    48     
160    80     
160    96     
-256   144    
-112   -64    
16     -48    
-32    96     
112    -112   
176    -144   
160    32     
-192   32     
64     80     
32     32     
160    64     
112    96     
160    144    
-16    -32    
64     -16    
48     0      
-64    -16    
112    32     
96     96     
-32    96     
160    16     
0      224    
-432   96     
352    -64    
-192   16     
128    -32    
160    48     
48     128    
-80    -16    
80     64     
32     0      
-80    48     
-64    -16    
240    -96    
-64    48     
-208   224    
128    -48    
112    128    
-304   112    
-208   -16    
128    0      
16     -48    
224    -16    
176    48     
0      144    
-32    64     
-160   -64    
176    -160   
144    112    
128    128    
-176   -32    
368    -192   
96     96     
128    96     
48     192    
-160   160    
64     -32    
-32    96     
272    32     
0      176    
128    128    
-64    48     
224    -16    
256    0      
-112   144    
-128   16     
160    16     
208    80     
-112   -64    
-96    64     
144    128    
112    -32    
48     -80    
176    32     
144    -32    
144    -48    
-48    32     
48     112    
-64    176    
48     112    
-112   80     
112    80     
-80    -384   
-48    -368   
352    256    
-224   192    
112    -48    
64     64     
16     144    
112    208    
144    240    
224    144    
16     -96    
48     -256   
224    -192   
64     64     
160    208    
80     80     
0      -48    
-32    480    
16     -560   
-208   80     
112    496    
-112   -272   
-80    80     
32     -32    
384    -224   
256    288    
64     160    
80     -208   
-288   -128   
16     64     
64     0      
272    -256   
192    -32    
-160   -128   
208    -80    
-16    384    
224    400    
64     352    
-400   -448   
144    -48    
48     -96    
80     -144   
112    -32    
288    64     
-96    -32    
288    144    
96     -144   
-32    32     
-112   96     
464    128    
128    -1248  
-48    -112   
-160   192    
336    304    
-48    -64    
304    176    
176    160    
240    912    
-288   -368   
416    -592   
544    560    
32     -64    
160    128    
-16    -64    
-112   32     
-80    -720   
416    80     
-208   -384   
304    48     
-64    32     
144    -32    
-64    416    
224    112    
-16    -208   
48     48     
32     144    
160    -240   
80     -96    
-32    -64    
-48    64     
-48    -64    
272    64     
-192   -688   
288    128    
0      -16    
-80    0      
112    -32    
-48    64     
0      -96    
64     48     
-48    240    
112    -112   
160    176    
144    -64    
96     32     
-16    -128   
16     0      
16     48     
0      -16    
320    -96    
112    64     
96     -176   
-48    -208   
64     240    
0      -80    
-48    64     
176    -112   
128    32     
48     -16    
192    96     
80     0      
-16    32     
0      0      
128    32     
64     0      
96     -336   
176    -432   
96     -208   
80     -416   
112    -80    
160    64     
-16    -80    
256    -192   
32     -256   
128    80     
-48    -288   
0      -256   
16     32     
-16    144    
128    192    
192    -272   
48     -224   
-112   -96    
0      -80    
160    48     
-32    -272   
32     -48    
0      -848   
192    -96    
112    -32    
-32    -144   
144    112    
16     96     
96     16     
64     -80    
112    -96    
64     0      
-272   64     
144    -48    
192    64     
-64    -192   
-16    0      
400    -656   
160    16     
288    32     
64     48     
-48    -48    
-272   -224   
-32    -64    
-208   48     
-96    -48    
96     -240   
-384   -208   
384    32     
224    48     
80     -144   
-16    -112   
64     -112   
-16    -80    
240    -704   
64     64     
320    192    
-48    272    
160    -32    
256    -32    
-80    16     
64     0      
-1040  -32    
304    208    
-80    0      
192    -32    
128    -48    
144    -64    
-128   -48    
144    -272   
64     16     
128    0      
128    224    
-112   -32    
272    -64    
-32    -32    
0      -240   
-144   16     
48     32     
-64    16     
128    -32    
-176   16     
176    -48    
-144   64     
80     -224   
-64    16     
96     80     
96     48     
-160   0      
32     -128   
-96    64     
192    -16    
-128   -16    
224    16     
-80    -96    
80     -16    
-400   -272   
16     -208   
48     80     
112    -368   
64     96     
112    -208   
112    80     
-32    0      
144    80     
-112   32     
160    176    
-176   16     
32     0      
-32    112    
96     -32    
-336   -112   
96     -160   
128    176    
16     -144   
160    -64    
112    -560   
64     -48    
-464   64     
-16    -32    
-368   80     
480    304    
-368   -128   
-320   -672   
-176   176    
-416   288    
-192   -96    
-192   -352   
-256   -272   
512    -48    
384    1296   
-96    -288   
-16    -448   
-480   928    
-176   -688   
-400   -288   
96     384    
-352   -112   
96     240    
64     0      
-48    -144   
-32    240    
-288   -256   
-16    -320   
-1968  -16    
176    320    
-208   656    
-480   -160   
-80    -480   
-576   240    
-192   -736   
32     -224   
-16    -160   
32     -96    
-160   368    
-1152  -160   
-192   -16    
-832   -672   
-32    144    
-16    -96    
-160   0      
-64    224    
-896   -112   
-32    208    
-112   64     
-256   -32    
-464   64     
-128   80     
256    -16    
16     192    
-192   -96    
48     -112   
-16    -288   
112    -64    
-48    112    
-416   -16    
128    -48    
-128   64     
0      32     
128    -16    
128    16     
-320   48     
-128   128    
-224   16     
-96    48     
64     -16    
272    112    
-144   -80    
80     -80    
176    80     
-224   144    
352    144    
-368   32     
-112   32     
-176   96     
-64    64     
80     32     
16     -32    
-400   16     
176    96     
64     16     
80     144    
-48    -96    
-208   -32    
-96    224    
160    224    
-64    32     
32     -64    
-48    0      
-16    48     
96     32     
-160   -160   
16     16     
-320   32     
-16    32     
48     64     
16     80     
96     -80    
-112   -48    
0      64     
-112   64     
0      224    
-16    -32    
-128   -48    
-496   -48    
96     64     
32     128    
-64    -80    
-608   -192   
-112   -64    
-224   -176   
64     48     
16     96     
176    128    
-160   -96    
112    -128   
112    64     
-48    32     
48     -80    
-16    -128   
-240   -256   
-320   -112   
96     176    
-96    80     
112    144    
272    -96    
160    -112   
96     -16    
-128   -96    
112    224    
-16    272    
-16    192    
80     320    
-64    96     
-192   -32    
160    -176   
-112   -128   
16     32     
-224   32     
368    384    
-800   128    
-128   -208   
96     112    
-64    160    
-96    256    
48     176    
-64    16     
-32    64     
96     -32    
128    272    
-32    288    
-112   -624   
-128   144    
16     -112   
-288   -864   
112    144    
64     96     
-240   112    
16     -240   
80     160    
336    432    
-64    64     
112    -96    
64     192    
-192   96     
48     -640   
-64    320    
-80    -256   
-176   -48    
80     400    
256    -176   
-80    48     
48     80     
128    -64    
-112   320    
-16    -304   
0      208    
-80    16     
48     48     
112    -176   
-160   -256   
48     96     
0      192    
-128   -16    
-80    0      
32     144    
112    -160   
16     -80    
-64    -144   
-112   -112   
-64    192    
0      208    
48     16     
0      -16    
-112   -80    
240    0      
-144   16     
240    128    
-128   48     
-96    112    
80     96     
-128   -192   
-512   -1136  
-368   -624   
-304   256    
-112   224    
144    -160   
0      -144   
384    272    
-144   224    
-160   96     
176    112    
-320   64     
-352   -144   
32     16     
-128   0      
-128   -128   
32     -176   
112    -304   
224    -16    
-96    48     
288    -144   
80     -48    
176    160    
-32    144    
-368   16     
144    -64    
144    80     
96     -16    
32     -32    
16     128    
-128   80     
48     160    
-16    112    
96     96     
-160   96     
112    64     
-16    0      
208    48     
-48    16     
-112   112    
32     32     
96     -896   
208    80     
80     -64    
-128   32     
144    80     
208    -48    
16     0      
-48    80     
-112   48     
144    80     
16     64     
224    128    
-48    -64    
128    32     
0      64     
144    -96    
144    64     
16     32     
144    -176   
0      -112   
-80    64     
-32    32     
48     144    
128    80     
128    112    
-96    -16    
144    32     
-176   128    
112    288    
416    128    
32     -96    
0      64     
-64    -928   
208    208    
-112   160    
-144   32     
432    64     
-32    64     
16     0      
176    80     
-176   64     
-32    32     
0      -16    
224    0      
0      32     
112    -224   
112    64     
0      -880   
128    -144   
128    0      
-96    160    
-64    176    
192    416    
16     208    
-32    48     
80     -32    
176    112    
112    112    
16     240    
80     192    
32     -80    
0      32     
192    -80    
-16    240    
-96    -416   
64     -112   
128    -368   
48     192    
32     144    
160    32     
-16    16     
240    80     
304    384    
-160   320    
64     48     
240    -368   
96     -32    
208    -96    
128    -96    
176    -32    
112    112    
-128   -112   
-48    -176   
-368   -144   
48     32     
0      48     
80     32     
112    128    
-96    -32    
128    32     
272    -80    
-16    -112   
320    -416   
208    80     
32     -96    
-16    80     
16     16     
32     0      
-96    0      
400    144    
224    32     
-80    -112   
112    -144   
112    -144   
80     64     
-48    -112   
-16    32     
-96    -192   
0      -32    
240    0      
-64    80     
96     176    
16     -64    
96     -80    
208    96     
-32    48     
240    0      
-32    16     
16     -32    
-48    80     
-16    -144   
208    64     
48     112    
304    192    
64     -16    
-32    -112   
16     48     
-16    -1312  
0      -32    
160    -1088  
144    -32    
144    -64    
192    96     
176    16     
-80    -432   
80     -144   
112    416    
208    208    
-128   -240   
112    32     
32     -1136  
128    -288   
-16    -192   
32     16     
-80    16     
32     -144   
-112   -144   
144    -496   
112    -112   
112    -16    
-48    -272   
32     -16    
-208   80     
16     -240   
288    -80    
16     -352   
160    480    
144    384    
-48    -304   
-560   16     
-176   -96    
160    -48    
80     416    
-16    -560   
256    -480   
32     -528   
192    -896   
256    -16    
304    144    
-400   496    
160    -64    
-48    128    
304    -160   
208    16     
-256   80     
-32    -112   
-128   -304   
208    -240   
240    -144   
416    16     
96     48     
64     -32    
320    48     
-160   -16    
144    0      
48     -144   
160    -208   
-288   -144   
64     -96    
-32    0      
112    48     
-240   128    
208    -176   
-16    -112   
0      -96    
112    -32    
448    208    
-192   320    
176    -576   
-512   -496   
128    32     
64     16     
-128   112    
368    96     
-208   64     
-16    -144   
-496   -176   
160    -224   
-1008  32     
128    -128   
-160   0      
-128   144    
176    48     
304    -128   
48     0      
-144   -96    
192    80     
-240   176    
112    96     
-144   -64    
32     128    
-704   -16    
0      -96    
-560   32     
0      128    
208    32     
-240   -288   
448    -192   
-64    112    
272    336    
208    16     
-64    64     
-144   -32    
-80    -80    
16     16     
-48    32     
-288   -176   
64     176    
32     112    
320    -160   
96     -16    
-80    -208   
-48    80     
48     -144   
128    32     
-32    -144   
128    -96    
-192   -64    
336    32     
-208   256    
-160   64     
-96    -32    
48     -80    
-336   -16    
-128   -64    
160    48     
-32    -496   
160    -224   
128    64     
-224   48     
112    272    
-144   240    
-48    0      
176    -48    
-64    -16    
80     192    
-112   192    
144    32     
-272   -96    
144    -336   
80     -208   
80     -48    
16     64     
-2080  -64    
-64    -64    
-64    -96    
-1184  -208   
96     32     
-32    64     
-416   -176   
48     -128   
-368   -288   
320    -480   
192    -176   
48     16     
-160   -208   
-368   -112   
96     128    
-448   -144   
-208   -80    
32     32     
-400   416    
-144   112    
-144   16     
-160   -80    
-48    208    
-80    -224   
176    -32    
-80    16     
-160   64     
-48    -64    
32     -272   
256    144    
48     16     
48     128    
-128   80     
-32    -144   
-288   64     
-16    -64    
112    160    
-176   -160   
0      -176   
96     272    
320    96     
48     -160   
-48    304    
-160   -80    
-32    -176   
64     32     
-160   32     
224    176    
-336   112    
80     32     
0      64     
-16    0      
-272   -16    
-32    80     
-1072  -48    
-32    96     
208    112    
-128   80     
16     -32    
-80    80     
16     0      
-32    -64    
-48    -16    
-32    32     
-80    16     
-32    32     
-112   -64    
-432   0      
-160   32     
-208   -48    
224    64     
-80    -32    
208    -16    
-32    -128   
16     80     
48     64     
-112   -80    
-48    -32    
-96    -80    
96     128    
112    0      
-16    176    
-80    64     
-80    -32    
-48    -176   
256    48     
192    -64    
-320   -16    
-256   -16    
80     48     
-176   112    
80     48     
64     -80    
-128   -64    
144    208    
-240   0      
16     112    
-288   -32    
48     80     
-816   -128   
112    -192   
480    -96    
320    80     
256    256    
-64    -16    
112    128    
-448   -128   
368    48     
-80    -16    
272    112    
96     48     
-208   0      
-304   -16    
-64    160    
-528   -48    
80     96     
-1744  -48    
160    -16    
-32    16     
32     48     
-112   32     
-48    -32    
224    64     
-368   -160   
32     16     
240    96     
32     96     
-400   -64    
192    32     
-208   -96    
80     64     
-48    80     
32     16     
224    96     
-144   16     
96     64     
-64    48     
48     80     
64     -32    
-288   16     
-96    -16    
240    96     
-144   -96    
0      -32    
-32    32     
-112   48     
16     -16    
64     32     
176    112    
0      0      
80     0      
-48    16     
224    368    
-208   0      
16     -32    
-64    80     
176    144    
-96    192    
112    -16    
-48    -48    
-80    -48    
0      192    
-144   112    
176    -160   
160    -112   
176    80     
0      -96    
-48    -112   
-208   48     
64     64     
-48    32     
96     96     
128    176    
-80    176    
-16    96     
-80    208    
128    128    
128    -160   
16     -48    
64     176    
96     80     
-96    -16    
128    -64    
32     -64    
192    112    
-112   32     
48     112    
-128   0      
0      48     
112    16     
160    64     
144    96     
0      64     
64     16     
-48    -112   
96     128    
-272   -128   
-544   -944   
-208   -272   
208    528    
16     -144   
192    -32    
-16    256    
224    144    
48     -32    
-96    336    
64     96     
-208   -304   
16     208    
96     -96    
-16    16     
-96    -16    
128    -16    
80     -96    
176    -64    
-80    -32    
224    464    
-224   112    
-160   -352   
48     144    
160    0      
96     80     
112    -32    
-96    -336   
-160   80     
-48    96     
-32    64     
160    80     
-176   -80    
320    1088   
128    -336   
16     160    
-32    144    
-32    -1040  
144    144    
112    -368   
-144   -160   
128    256    
-64    -80    
96     128    
16     -48    
64     -112   
32     144    
16     -192   
48     0      
-96    -64    
368    144    
-272   336    
160    -176   
176    96     
-80    336    
96     -352   
176    144    
64     208    
-160   -96    
176    192    
-16    -256   
96     64     
144    784    
-80    176    
-80    -400   
32     288    
64     0      
320    -32    
192    320    
-336   -704   
96     -176   
192    144    
80     304    
128    160    
112    96     
-64    272    
128    48     
-208   -32    
256    16     
192    304    
224    288    
-16    224    
64     64     
48     -80    
0      -112   
256    -64    
80     -1168  
208    112    
32     -176   
176    208    
-112   -32    
160    -48    
32     -48    
80     0      
192    64     
16     160    
-256   224    
-64    128    
160    -160   
80     -464   
224    80     
176    -272   
96     -112   
0      -192   
80     288    
16     304    
64     16     
-16    -192   
-96    32     
-240   80     
64     -16    
-96    176    
208    -288   
224    -352   
80     -288   
224    32     
-64    64     
-32    0      
0      -48    
32     144    
0      0      
112    416    
224    96     
176    -224   
32     -32    
-96    -672   
80     -224   
0      64     
-192   -256   
304    -160   
-80    176    
32     -64    
288    -96    
-80    176    
128    -16    
176    96     
-176   80     
-32    96     
80     -240   
144    144    
176    -64    
160    48     
160    48     
208    256    
-96    -16    
160    -64    
-16    -128   
160    96     
64     -32    
32     -1008  
-80    16     
-336   -208   
16     -1024  
240    -64    
80     -240   
96     -128   
288    112    
96     80     
-208   32     
112    -272   
128    16     
64     96     
112    -16    
272    64     
-32    0      
-96    -160   
-1312  0      
112    -64    
-192   48     
-64    0      
128    -208   
48     -880   
0      -96    
224    16     
80     16     
-112   -128   
48     -112   
16     -256   
-80    -112   
32     0      
128    -112   
-288   -80    
96     64     
112    -48    
-48    -96    
224    -512   
224    -160   
128    -192   
128    32     
96     288    
208    144    
-32    240    
48     0      
-80    48     
112    -176   
48     -80    
-224   -64    
96     -144   
16     80     
-16    -448   
144    -112   
32     96     
-80    -144   
80     -480   
-32    48     
96     240    
-128   -48    
368    -256   
112    208    
-32    -48    
80     -16    
-432   -160   
-144   0      
-624   -96    
112    -112   
112    112    
-128   -288   
80     -112   
112    -208   
176    -144   
240    -560   
-128   48     
-64    0      
96     80     
-240   0      
-16    48     
-32    608    
304    304    
-576   272    
-64    160    
0      0      
-320   -208   
-464   -96    
192    -176   
144    80     
192    -96    
176    96     
32     -32    
0      32     
-192   -48    
160    32     
80     96     
-16    32     
128    -80    
0      -96    
-480   0      
80     -64    
64     16     
32     -48    
112    160    
224    -784   
0      32     
208    96     
-112   -128   
48     16     
112    0      
-128   144    
240    64     
-192   160    
-192   -64    
160    -16    
96     16     
-48    -64    
80     -128   
-32    16     
80     -288   
96     0      
-464   -64    
96     -16    
-64    64     
160    -32    
32     48     
-128   -80    
0      0      
-144   -64    
368    -32    
144    -16    
208    96     
-16    -32    
32     96     
80     16     
320    80     
-320   -112   
224    -32    
-160   64     
208    48     
128    176    
48     -48    
-16    64     
160    -64    
-768   0      
16     -112   
32     64     
-128   -128   
752    480    
-80    -224   
-432   -192   
176    32     
-512   -48    
128    -144   
288    32     
96     208    
464    256    
-880   -96    
256    -272   
336    -64    
-384   -112   
64     -80    
416    -64    
112    160    
-208   -80    
-224   32     
-240   144    
-320   -32    
144    -160   
-272   64     
-80    64     
-96    -32    
-144   -16    
-352   -64    
16     128    
-176   -32    
128    0      
-16    -16    
0      16     
320    176    
-384   -16    
-32    0      
-96    96     
176    32     
-224   0      
-64    -48    
-688   -48    
-48    32     
432    112    
-288   288    
32     48     
208    112    
-96    -80    
-192   -80    
-128   48     
0      -48    
192    -32    
-272   -32    
16     -64    
-224   32     
144    32     
-144   -128   
128    64     
-128   -48    
-48    64     
-112   -16    
-16    96     
-256   -176   
80     -192   
80     128    
176    240    
-48    -144   
-352   16     
32     160    
-48    -32    
0      16     
-48    -96    
96     160    
-480   0      
-32    -272   
64     16     
96     304    
16     -144   
32     32     
192    96     
-192   96     
-144   -32    
-160   16     
0      -80    
-48    -224   
64     64     
-432   -432   
64     128    
-736   0      
128    64     
16     48     
-112   0      
128    96     
-400   16     
-64    80     
-32    32     
16     336    
32     -1072  
160    80     
0      0      
-208   48     
-352   112    
48     0      
-128   80     
320    512    
-320   240    
-160   -176   
144    144    
32     -176   
128    -80    
240    208    
16     -208   
80     96     
-208   112    
128    -672   
320    416    
48     16     
0      -144   
-96    192    
-160   -32    
0      256    
-80    -64    
48     -96    
-96    16     
-16    96     
16     48     
-336   -112   
112    -1504  
112    672    
16     720    
-96    -256   
-112   0      
160    -96    
-336   240    
240    176    
224    -272   
224    96     
64     384    
0      -352   
-96    -352   
-208   192    
-80    240    
-352   -176   
-16    -128   
-272   240    
512    352    
-480   208    
304    48     
-224   -16    
96     176    
112    32     
-80    144    
80     16     
64     256    
-16    16     
208    64     
0      128    
-32    -64    
176    112    
-128   80     
128    208    
-304   -144   
-32    -64    
48     32     
48     -64    
-48    96     
96     -160   
32     -96    
80     -16    
64     0      
-16    0      
128    -32    
-96    32     
-80    -16    
-96    -288   
432    352    
-320   0      
48     96     
16     -64    
32     -80    
160    16     
144    128    
-288   304    
224    -96    
-16    -176   
-32    0      
16     256    
192    848    
240    -16    
128    -16    
-80    -128   
160    192    
-160   304    
224    -144   
16     160    
288    288    
112    480    
176    -64    
-400   -16    
240    -288   
-16    -48    
-192   -240   
-240   -816   
-160   -352   
256    -208   
48     16     
-208   0      
48     32     
-48    0      
496    80     
384    304    
-128   176    
352    112    
-144   -32    
320    144    
-64    16     
176    64     
32     32     
80     48     
-64    -64    
96     -80    
144    -32    
16     -544   
16     16     
0      -144   
96     -64    
32     48     
-64    304    
208    32     
0      -128   
192    -176   
560    560    
-672   464    
80     48     
-192   -112   
512    384    
-128   624    
-80    -256   
64     -32    
144    16     
16     224    
336    144    
-160   64     
544    16     
96     -32    
-144   -16    
-48    176    
-64    48     
16     48     
112    16     
96     128    
432    304    
-96    -160   
-208   64     
-64    -64    
176    -112   
144    176    
-80    416    
208    80     
96     -80    
-160   -112   
48     32     
-112   -16    
112    16     
288    -16    
160    48     
16     224    
-32    -480   
0      -48    
176    -1312  
-96    288    
-112   48     
240    -16    
0      -48    
0      0      
208    -256   
192    144    
112    80     
160    48     
-80    -16    
-32    -160   
64     0      
128    -256   
112    -112   
208    -32    
208    160    
0      16     
80     208    
128    128    
-80    -128   
-32    208    
192    -32    
-16    224    
48     -96    
144    80     
272    352    
-144   -144   
144    -48    
176    16     
-16    -304   
80     192    
-32    -1328  
64     80     
-160   80     
224    144    
176    528    
-272   -96    
160    -384   
128    -64    
192    128    
80     -96    
48     -16    
32     160    
-224   64     
-112   192    
-96    160    
-32    -256   
48     64     
48     -48    
240    144    
-64    -32    
192    32     
80     -32    
144    -144   
80     80     
304    176    
-288   48     
112    -288   
192    96     
16     48     
80     48     
176    256    
-128   -80    
-64    -16    
80     128    
-160   96     
128    16     
96     -16    
128    80     
336    176    
-80    32     
32     128    
-160   -144   
336    64     
352    144    
144    0      
32     -256   
32     -336   
16     64     
192    -592   
-64    32     
-128   -80    
176    -560   
-32    -112   
96     -112   
256    16     
-256   -48    
112    32     
48     0      
256    -144   
64     -240   
80     -16    
112    -80    
16     32     
144    -48    
-32    16     
-208   0      
-96    -176   
128    -48    
16     96     
272    -16    
-64    -160   
208    32     
-48    48     
240    -64    
80     -288   
-16    16     
176    48     
-192   16     
176    -176   
144    -96    
-160   -80    
256    16     
64     48     
96     -176   
304    -144   
32     -64    
96     -16    
192    -32    
-208   -32    
160    32     
-80    80     
224    16     
-192   0      
-96    -32    
-144   -256   
16     64     
-192   112    
224    -32    
-80    -16    
-112   -16    
-176   -720   
144    -112   
272    -208   
-368   -96    
544    48     
-272   96     
176    128    
-752   -176   
16     -208   
304    64     
-16    64     
80     0      
-1024  -16    
-144   -208   
32     -128   
48     -32    
208    16     
432    144    
-240   160    
112    -160   
208    48     
80     64     
-80    -16    
32     48     
176    0      
-112   0      
144    -16    
-384   -48    
96     -64    
-544   160    
64     32     
-48    -64    
112    -240   
-48    96     
144    -880   
48     96     
-48    96     
16     16     
-80    -16    
96     -160   
-96    -160   
176    112    
-224   144    
128    -352   
-1664  -288   
224    336    
-64    -112   
224    -528   
224    320    
144    -336   
96     -176   
-176   48     
-176   -96    
272    -160   
32     192    
48     -224   
208    192    
-240   -112   
-48    -48    
-96    592    
144    -464   
0      112    
-288   -208   
288    -240   
64     -16    
-16    -80    
-176   128    
112    0      
-144   96     
0      128    
192    272    
80     672    
-144   -192   
128    -288   
160    32     
-112   304    
-32    224    
128    160    
48     272    
288    -272   
-224   240    
-256   0      
160    -112   
-80    144    
112    96     
-112   320    
-16    0      
-112   16     
416    192    
-256   288    
-96    -80    
-80    0      
-2096  -160   
-80    -304   
-160   -320   
80     0      
-128   96     
224    0      
-112   176    
48     32     
-224   32     
272    224    
112    32     
-352   -64    
-80    368    
-96    272    
-32    176    
-416   80     
496    384    
-48    512    
-544   80     
64     -192   
-432   160    
208    -16    
-1360  0      
96     176    
144    160    
-288   0      
-176   -176   
128    112    
-352   -64    
176    48     
96     -16    
272    368    
-208   256    
-256   0      
-128   -48    
-176   64     
-48    160    
-400   64     
-192   -144   
-816   -112   
-192   -48    
-368   -96    
144    48     
-176   0      
240    96     
-48    -80    
-64    80     
-288   -224   
-96    -208   
-272   -144   
16     -224   
96     112    
-80    0      
112    48     
-688   16     
0      -80    
-96    160    
96     144    
-96    -112   
144    -96    
16     -96    
0      240    
112    160    
96     -32    
-96    -112   
-240   -176   
-128   -64    
-448   -144   
-48    -112   
-80    0      
-48    48     
-320   96     
144    -128   
-64    -192   
-96    -48    
-128   96     
416    256    
-240   368    
-96    -192   
-96    -480   
-80    -16    
176    -64    
-128   112    
-64    16     
-272   240    
208    -144   
-1136  -128   
-32    96     
-144   -256   
368    688    
-160   192    
-32    400    
128    80     
128    128    
-176   272    
-16    96     
0      176    
-112   -144   
352    160    
-416   -384   
-144   -208   
-528   -48    
0      224    
48     64     
-112   -272   
-32    -336   
-288   -272   
-320   -528   
-48    -832   
560    -32    
-64    -48    
624    -16    
-304   -32    
0      -48    
-528   16     
544    112    
96     320    
560    304    
400    368    
48     192    
-208   -96    
-320   96     
-96    -160   
-112   112    
96     -192   
-80    320    
96     48     
0      176    
128    32     
-256   -80    
112    80     
384    432    
-400   896    
128    176    
-128   -48    
144    -96    
-112   432    
592    176    
96     80     
-272   224    
-208   64     
176    368    
-16    -288   
-32    -80    
16     -416   
-32    -48    
160    208    
-576   48     
176    224    
-240   160    
-64    192    
-224   -48    
16     96     
-160   96     
336    240    
-448   -192   
160    -256   
-224   0      
208    -80    
-272   128    
368    80     
-80    112    
160    240    
128    176    
-176   80     
128    48     
32     -32    
48     -64    
-112   16     
-16    160    
32     -448   
176    0      
-176   160    
64     -128   
0      320    
-144   352    
-192   -800   
-80    64     
176    304    
-48    320    
-16    32     
224    384    
-304   -128   
64     144    
160    0      
48     -32    
208    144    
-96    48     
-16    48     
-160   112    
-192   -32    
112    32     
-64    16     
208    -32    
112    -80    
128    -64    
144    16     
64     192    
-16    64     
-16    64     
-16    336    
80     208    
-80    -128   
80     32     
64     0      
240    64     
-160   -32    
64     48     
128    64     
112    16     
-176   176    
64     224    
-96    0      
-272   -160   
-64    96     
0      240    
-96    224    
160    320    
0      64     
160    0      
176    32     
160    0      
208    96     
-96    -48    
288    0      
80     32     
128    144    
-48    32     
-96    16     
80     80     
208    336    
112    112    
-272   -32    
-48    -32    
-112   96     
-208   -1280  
224    -96    
416    128    
336    272    
160    32     
48     16     
-32    48     
96     64     
-80    16     
-16    48     
-64    0      
80     64     
-112   64     
-96    -192   
48     80     
-176   -208   
176    64     
144    96     
176    112    
-48    -16    
-144   -64    
-16    0      
-32    80     
80     -208   
112    48     
-192   0      
96     16     
96     48     
192    -96    
-80    16     
112    -160   
0      32     
112    -48    
16     48     
48     80     
-80    -16    
144    -16    
112    48     
0      -32    
128    64     
32     -16    
80     16     
144    128    
64     -32    
-16    -16    
32     -144   
-16    64     
0      -368   
128    96     
-16    0      
240    -96    
-160   -112   
176    80     
48     -32    
64     -80    
256    336    
-288   128    
272    -128   
-16    64     
256    112    
272    48     
-336   96     
288    -80    
32     0      
96     -1328  
416    208    
-128   -112   
320    -16    
-160   48     
144    0      
480    288    
304    80     
192    -16    
208    64     
-208   144    
176    -208   
-80    -64    
-192   -224   
464    432    
-272   160    
224    176    
-96    288    
208    -16    
-16    -64    
384    -80    
240    -192   
64     0      
48     -32    
32     64     
64     128    
160    -224   
112    176    
176    -96    
-48    -96    
128    -192   
128    192    
-80    32     
192    80     
-128   -64    
448    160    
-352   -16    
96     -320   
160    224    
-208   64     
304    48     
-64    -128   
240    176    
48     -64    
-16    0      
-64    -48    
272    -656   
-240   -768   
240    -576   
-416   96     
16     -704   
64     208    
64     -112   
-16    -96    
192    -592   
256    -368   
16     368    
208    320    
16     -80    
-112   -560   
144    -112   
176    -16    
-96    0      
32     112    
32     -176   
144    112    
272    224    
96     112    
304    -304   
48     -32    
208    -1056  
96     -32    
48     0      
32     -16    
-32    -80    
144    -16    
208    -144   
-80    -32    
-352   -48    
-48    80     
-2016  80     
48     80     
160    48     
-16    -352   
64     32     
64     -320   
-32    -64    
48     -1072  
240    32     
0      64     
-304   -16    
240    -48    
144    96     
-432   0      
-32    -80    
-192   80     
192    -96    
240    16     
16     32     
112    0      
-48    -272   
144    -32    
176    -576   
16     64     
16     -144   
80     -160   
144    -160   
64     -96    
-240   -128   
240    -80    
64     160    
-144   16     
16     -16    
32     -96    
64     0      
528    80     
-880   160    
160    -320   
224    144    
96     -144   
160    0      
112    96     
32     -64    
0      -80    
144    -80    
-336   144    
80     0      
-1728  -192   
208    -144   
80     32     
112    144    
0      80     
144    -176   
32     16     
96     -816   
0      0      
-128   0      
-224   -16    
48     64     
144    144    
-208   -64    
112    -96    
-1040  -160   
-48    -64    
-832   64     
224    -144   
-112   -288   
272    -160   
-48    336    
160    -576   
96     192    
0      -80    
192    192    
-48    96     
-16    -160   
96     -112   
-48    -80    
-48    -32    
32     112    
-224   -80    
80     -192   
-80    112    
96     -240   
192    240    
0      -48    
80     -48    
-480   -176   
64     -64    
-384   0      
80     16     
-304   0      
48     -16    
-80    -16    
144    336    
128    160    
-16    -320   
-176   -96    
336    -560   
16     32     
288    -128   
160    -16    
-64    96     
144    -16    
-160   64     
32     240    
-112   -528   
-160   -496   
-224   368    
-64    752    
-336   688    
-32    -144   
48     32     
-352   -144   
80     -240   
-48    -160   
-960   -656   
-192   -96    
-944   -496   
-240   -224   
144    240    
48     528    
-192   -752   
-416   -832   
-208   128    
224    -432   
272    256    
704    384    
-400   336    
-192   -224   
-32    -160   
-64    192    
224    -64    
-176   48     
-192   -944   
-976   -480   
32     304    
-560   -64    
-144   0      
-272   96     
240    -224   
-176   -480   
48     -80    
-48    -96    
304    480    
-320   32     
16     144    
-320   -320   
400    608    
-512   160    
-912   -528   
160    -576   
-528   656    
176    -32    
-224   192    
112    272    
-48    112    
288    160    
-208   -304   
80     528    
-112   -96    
-144   -80    
224    160    
-176   -96    
-16    400    
192    -224   
-384   480    
-368   -32    
-224   16     
112    -192   
-64    80     
80     240    
48     -144   
80     240    
-96    96     
-144   -64    
96     32     
-224   -16    
80     80     
-64    16     
32     128    
-192   -144   
-352   -48    
16     128    
16     -128   
144    192    
-48    -32    
-176   48     
-32    -80    
192    -144   
-16    288    
-48    144    
96     -16    
0      144    
-32    288    
-112   176    
-176   416    
32     560    
64     272    
-896   -80    
160    160    
80     96     
-80    -80    
208    32     
-128   16     
208    240    
-192   176    
160    688    
-80    256    
-32    0      
-144   32     
16     48     
-256   16     
128    -16    
-864   0      
-112   16     
-64    32     
0      -32    
176    48     
256    528    
-208   304    
-160   -160   
240    -160   
-64    -32    
48     -16    
48     -48    
32     0      
-144   -48    
144    64     
-576   256    
-400   -176   
-32    -32    
192    48     
64     96     
176    144    
-176   144    
64     -32    
80     -272   
48     32     
112    160    
0      144    
-96    144    
-320   -96    
240    80     
-144   16     
112    80     
96     96     
32     32     
96     16     
-112   32     
-48    32     
-80    32     
0      0      
96     32     
-64    0      
-64    0      
192    16     
-112   16     
144    96     
96     -32    
-32    48     
48     144    
48     80     
-48    -48    
80     32     
32     64     
144    32     
-320   -96    
-176   -160   
240    48     
-96    80     
208    128    
-208   -16    
192    80     
-80    32     
32     32     
160    64     
32     32     
48     0      
48     -48    
160    32     
64     112    
-128   -80    
16     -64    
224    112    
-48    -32    
208    96     
-48    16     
-48    32     
176    112    
-96    -32    
160    16     
32     80     
160    48     
208    64     
-160   -48    
80     -32    
16     48     
-128   -144   
192    96     
-176   48     
48     -16    
32     64     
16     80     
16     -16    
32     32     
48     112    
208    144    
-160   80     
96     -240   
96     -112   
112    128    
144    -16    
-32    -16    
-64    176    
-320   -32    
272    -64    
-112   80     
-48    -128   
208    48     
176    112    
-176   32     
16     -32    
208    112    
-464   -416   
64     -144   
-80    32     
128    -144   
512    208    
208    208    
-96    -192   
160    -544   
-96    0      
528    -352   
416    48     
320    272    
-160   32     
-416   128    
-320   112    
-352   -128   
128    304    
288    416    
-224   -592   
16     592    
416    400    
-48    -320   
192    -128   
-112   -224   
-16    192    
-48    -160   
-64    416    
128    48     
144    32     
-64    48     
192    -256   
48     16     
-48    0      
192    48     
-336   -240   
272    224    
336    176    
-288   0      
176    -16    
-160   48     
96     176    
-16    96     
32     48     
32     -48    
48     -48    
128    -160   
-192   -96    
-64    80     
64     128    
-80    128    
240    144    
272    96     
-32    -32    
80     144    
192    112    
160    32     
80     16     
-48    96     
-80    -32    
112    -112   
32     -224   
240    80     
-48    144    
160    -16    
-16    -32    
64     -160   
0      128    
128    -80    
128    32     
-32    -176   
-32    32     
-16    -688   
32     16     
96     32     
-32    80     
48     112    
16     48     
-48    80     
192    96     
192    64     
48     -368   
-128   -368   
80     -112   
32     112    
64     -240   
16     80     
32     -48    
64     32     
64     16     
-64    -48    
288    0      
48     80     
-144   16     
48     96     
144    224    
128    96     
272    80     
-128   -192   
-48    160    
-32    -32    
112    112    
-16    -80    
272    -48    
96     80     
112    272    
-16    -32    
-96    48     
-128   16     
16     -256   
368    288    
-192   -112   
192    -128   
192    -512   
-64    -432   
144    -288   
-240   48     
176    -192   
144    176    
-80    96     
208    -16    
64     -16    
16     64     
-64    80     
208    -64    
-224   -16    
96     -176   
144    80     
160    -48    
112    144    
64     -112   
96     -32    
144    32     
-96    256    
-160   160    
128    96     
96     48     
256    -320   
-144   -752   
80     -48    
144    -816   
208    -320   
-176   -288   
128    48     
32     432    
288    384    
32     160    
64     -48    
96     -160   
112    528    
192    -32    
-16    -176   
112    -208   
64     -208   
-32    -112   
192    -80    
112    64     
144    -304   
128    16     
-64    -1072  
-16    208    
176    -208   
80     -208   
48     -96    
48     48     
320    272    
-240   272    
-576   -416   
368    -48    
-160   -112   
192    -112   
-96    -112   
224    16     
-192   -112   
192    208    
240    -352   
-160   208    
144    -112   
112    32     
-48    64     
144    -224   
-16    -96    
-112   48     
160    160    
-672   -64    
288    448    
288    -272   
96     -224   
128    176    
-176   -432   
144    112    
-48    -1200  
-352   144    
-144   -144   
16     192    
144    -608   
-496   -512   
-160   608    
-64    352    
-496   -992   
848    160    
288    496    
-80    -416   
16     112    
16     -32    
160    -144   
-128   -560   
-96    352    
1408   1216   
-960   32     
-384   -928   
144    -272   
-112   128    
-16    144    
128    288    
80     -240   
-704   -48    
288    528    
-352   368    
64     -64    
128    128    
96     -240   
240    32     
128    -16    
80     32     
-192   -32    
80     -64    
48     0      
-192   -64    
0      144    
272    64     
-720   16     
32     32     
-800   -80    
96     -208   
16     64     
80     -32    
144    80     
96     -224   
96     16     
144    608    
-208   64     
-208   -96    
432    320    
-1200  -48    
128    16     
-960   48     
48     -208   
-176   -48    
272    -128   
-112   -64    
144    -192   
-240   -32    
-144   -112   
32     -128   
-32    64     
144    48     
-96    80     
0      -32    
-320   -112   
144    16     
-32    32     
128    0      
0      0      
144    -80    
-48    -32    
96     -208   
-192   -240   
80     -96    
0      0      
-144   16     
208    -96    
-32    160    
96     -80    
-192   32     
128    -16    
64     -48    
80     -80    
48     32     
-640   80     
144    112    
-624   -160   
-32    -64    
-64    -112   
-928   -208   
-192   -112   
-544   16     
-16    -16    
80     48     
-96    208    
112    80     
-144   -64    
-1008  -208   
-176   -160   
-496   -96    
-16    64     
-64    -80    
-16    64     
0      80     
-80    48     
0      16     
-112   -64    
0      32     
-832   64     
-160   160    
272    -16    
-192   -32    
-496   -192   
176    64     
128    160    
-240   112    
128    80     
16     64     
96     32     
192    80     
80     -16    
144    -32    
112    160    
-832   -64    
-48    0      
-592   -32    
-32    80     
128    -16    
96     48     
-144   -144   
-48    16     
-64    32     
32     -32    
0      64     
-64    0      
-128   0      
-400   64     
112    112    
-576   -48    
16     64     
-1472  -32    
144    64     
-128   -64    
0      0      
-144   -144   
-144   64     
-80    32     
-160   -32    
144    -16    
112    80     
-128   0      
-96    -32    
-144   0      
32     -48    
80     48     
-304   32     
-16    -48    
80     -80    
208    80     
-144   -208   
0      16     
-48    48     
16     -32    
80     32     
-80    0      
0      0      
-64    -16    
128    80     
16     96     
48     64     
-768   -48    
64     0      
208    -80    
80     48     
80     64     
16     32     
-16    48     
80     64     
176    288    
-128   176    
64     0      
-16    192    
32     128    
-208   128    
-144   -224   
-80    -64    
0      80     
-176   -32    
96     160    
144    80     
-80    416    
-160   -32    
0      320    
-128   -16    
-16    -80    
-112   576    
256    -352   
-176   -64    
-320   224    
-112   -112   
-336   160    
80     160    
-448   112    
-128   32     
752    -64    
-304   160    
112    -160   
-432   -416   
208    -192   
-128   448    
-176   48     
32     -224   
-256   128    
-112   -112   
32     192    
-400   -320   
-272   128    
208    -96    
-64    -80    
144    416    
368    112    
208    288    
-304   -240   
320    -176   
-416   176    
16     -112   
288    -64    
-272   -64    
160    48     
-144   224    
-320   -80    
16     32     
-192   -32    
160    272    
240    192    
304    32     
-48    0      
0      -96    
-240   -144   
-160   0      
16     64     
64     112    
128    64     
-32    0      
32     64     
-176   64     
112    -16    
144    80     
256    112    
-96    16     
16     -16    
-192   96     
0      96     
704    224    
-256   304    
48     16     
-224   0      
-16    48     
-208   16     
48     48     
-80    16     
96     16     
128    16     
-96    -16    
112    32     
144    80     
144    16     
-32    64     
32     192    
-80    64     
240    -48    
-192   -64    
80     16     
-96    -48    
16     80     
64     -16    
96     -112   
80     96     
64     96     
96     -48    
112    16     
112    96     
-16    0      
112    -128   
32     32     
0      144    
-304   -128   
256    -112   
64     128    
-96    -416   
16     32     
96     0      
48     32     
-32    112    
144    80     
144    80     
16     64     
-192   -64    
176    -16    
-160   32     
0      144    
112    224    
48     176    
-176   -16    
32     -544   
64     -304   
-64    -192   
288    128    
-80    224    
112    16     
-16    -48    
192    224    
-32    112    
0      -224   
-192   -672   
304    -64    
-160   144    
240    400    
48     160    
112    -80    
0      160    
16     -224   
-32    -240   
80     -192   
224    32     
256    240    
144    64     
-64    144    
240    16     
-112   144    
96     48     
144    -48    
-192   -208   
176    -96    
192    -64    
176    96     
-80    -336   
64     0      
240    208    
-352   -448   
-16    -384   
176    432    
256    128    
-192   288    
192    -496   
96     352    
-128   128    
-80    -512   
128    320    
32     -176   
-32    -48    
224    -128   
-64    -64    
0      16     
96     48     
128    128    
128    -304   
-32    112    
64     64     
-32    -16    
176    80     
80     -288   
64     464    
64     112    
-48    -128   
144    -48    
112    -240   
176    368    
48     432    
0      -16    
-112   -128   
-16    96     
80     -112   
80     -48    
48     -64    
176    176    
-32    112    
80     224    
208    80     
-32    -48    
32     176    
48     64     
-16    32     
96     -48    
144    96     
16     -544   
-16    48     
16     224    
-32    -32    
-144   0      
64     48     
-144   192    
224    -128   
16     64     
144    0      
-32    -32    
176    -480   
128    64     
0      -144   
96     64     
224    -16    
64     64     
-48    -112   
80     -32    
-304   32     
96     -224   
-144   -160   
432    -272   
272    144    
-48    -64    
48     -112   
944    -304   
112    -16    
928    -48    
48     -128   
-416   336    
-896   -128   
416    -80    
-16    48     
-64    80     
288    160    
-352   -32    
32     0      
48     -16    
96     -112   
272    -16    
80     32     
32     48     
48     -112   
32     -96    
32     -16    
96     -80    
-32    64     
240    -240   
96     -48    
80     16     
464    -112   
-320   -96    
0      -736   
272    0      
112    96     
176    48     
-96    64     
-96    128    
304    -384   
16     80     
48     -144   
-224   -48    
-240   -16    
80     -64    
288    80     
352    160    
-96    240    
-48    64     
224    -64    
144    -208   
-48    -96    
192    144    
64     112    
-112   -224   
176    -32    
128    32     
96     80     
-32    48     
32     16     
-240   -192   
80     -96    
112    32     
128    -288   
208    48     
48     -368   
-64    -96    
224    128    
-96    48     
-16    48     
176    32     
96     -64    
32     -64    
-592   -16    
128    -112   
-576   -48    
0      0      
112    -384   
-48    -288   
96     -16    
96     -592   
192    -256   
160    -144   
0      32     
128    -208   
0      64     
-432   -448   
96     -320   
-176   -48    
-64    0      
-288   0      
160    -208   
112    -224   
96     64     
0      32     
112    -112   
64     -32    
64     -464   
96     128    
-112   -80    
64     32     
528    736    
-336   416    
48     96     
112    -32    
-304   -128   
304    -16    
112    144    
160    64     
128    0      
160    352    
32     304    
-144   -144   
-176   32     
112    32     
32     64     
-96    0      
0      -96    
-160   -64    
96     32     
-368   -144   
128    -64    
-288   -16    
336    16     
-16    16     
64     -112   
-48    96     
16     -464   
448    320    
-128   -80    
16     -336   
-32    -144   
160    -48    
-80    16     
112    -16    
-64    32     
80     16     
-368   -64    
128    48     
80     96     
224    -80    
-48    160    
256    128    
144    240    
-368   160    
112    -64    
-288   64     
160    -48    
0      -96    
96     -240   
16     -48    
112    -144   
-160   -16    
448    384    
-64    560    
80     -512   
32     112    
0      96     
160    -48    
32     80     
16     -160   
-176   48     
48     16     
0      16     
96     144    
-256   -240   
144    -112   
-160   160    
144    -96    
96     288    
-752   -192   
-176   -256   
-448   -16    
-1376  96     
80     -32    
64     208    
-112   -176   
-1216  64     
-128   112    
80     96     
-176   -80    
-160   -368   
80     576    
-16    96     
352    -400   
-80    -144   
160    192    
48     288    
-48    16     
112    496    
-464   112    
-96    -128   
128    -32    
-112   -160   
32     -48    
-320   -112   
-128   -304   
96     -64    
144    64     
64     128    
320    -160   
304    176    
-160   96     
384    -160   
-112   48     
16     -224   
-192   -80    
-512   -160   
240    -80    
-544   32     
-240   -48    
-416   -16    
-160   -32    
-336   -32    
96     -16    
80     144    
96     0      
-128   80     
144    32     
96     368    
-96    224    
80     -96    
32     -48    
16     16     
-176   128    
-160   48     
-1040  -176   
-144   48     
16     160    
0      144    
64     -48    
-48    0      
16     -80    
-128   -112   
0      96     
32     80     
128    192    
-64    128    
-176   -288   
80     -272   
32     160    
-160   48     
16     128    
224    -32    
-160   208    
128    -64    
-352   0      
-128   48     
-288   0      
-96    16     
0      128    
32     -32    
-272   -112   
32     0      
-240   128    
288    96     
-480   -48    
80     16     
-80    -64    
64     32     
16     -16    
0      64     
64     -16    
-80    -64    
-64    -320   
0      0      
-192   112    
-96    -144   
144    -96    
-64    32     
32     48     
-160   16     
48     48     
-1152  80     
32     32     
176    16     
-208   -96    
128    -64    
64     32     
-144   16     
16     80     
128    16     
-16    -32    
64     32     
48     208    
-128   256    
-336   -32    
32     96     
64     48     
144    -32    
160    144    
-176   32     
-96    -48    
32     16     
-96    304    
-160   80     
48     16     
96     -144   
208    -208   
-144   48     
-16    -512   
-224   -432   
-48    -96    
-176   16     
96     32     
128    240    
-240   208    
80     64     
192    80     
-16    -272   
0      304    
64     304    
-192   -16    
192    -112   
-416   -320   
48     144    
0      16     
240    32     
144    48     
-48    -224   
0      416    
-48    -64    
176    16     
256    400    
-160   176    
-16    16     
224    -192   
-64    0      
-128   32     
-192   96     
0      -384   
-416   -16    
80     208    
112    128    
160    128    
-48    -64    
-64    -32    
-48    48     
32     144    
64     384    
-32    96     
-16    -48    
-128   0      
160    -32    
-80    -96    
256    64     
-16    32     
-64    64     
64     128    
-128   -64    
0      -16    
64     32     
48     -32    
160    -48    
64     -112   
144    32     
-16    80     
-64    -16    
192    64     
-128   64     
112    80     
80     48     
96     48     
64     48     
0      16     
32     0      
64     64     
0      -48    
144    16     
80     -176   
-32    32     
16     64     
-144   16     
64     48     
-64    16     
-256   -384   
352    112    
-288   224    
144    -288   
160    -112   
80     -96    
192    80     
16     272    
-112   -64    
0      0      
-96    16     
-96    -64    
496    -32    
-32    80     
272    96     
48     -400   
176    96     
176    112    
16     112    
-112   80     
-48    80     
-48    112    
16     -16    
-64    -144   
480    256    
-400   16     
144    -80    
-16    -96    
496    384    
-336   -32    
400    -416   
-176   96     
-32    128    
-112   -64    
32     32     
0      48     
-96    0      
288    144    
-352   96     
336    368    
-32    80     
480    -64    
-176   64     
-80    -128   
-16    32     
48     -288   
48     96     
176    -224   
-32    96     
-128   160    
336    32     
-256   48     
128    32     
-176   -48    
160    48     
48     48     
-16    48     
48     0      
112    -80    
-16    144    
112    32     
208    80     
80     -576   
-80    -80    
0      80     
240    64     
-48    64     
208    48     
48     32     
176    32     
-144   -32    
-32    0      
160    144    
80     -96    
-16    32     
144    -16    
16     32     
256    -128   
-32    32     
176    224    
16     64     
-48    80     
96     48     
112    64     
352    144    
-240   -32    
112    0      
208    32     
32     -128   
352    144    
-384   -336   
64     80     
112    -240   
-16    -368   
160    -224   
0      256    
64     -32    
176    96     
64     -64    
-16    112    
96     144    
144    112    
0      -208   
272    80     
128    96     
64     32     
144    -176   
144    -80    
128    192    
144    -128   
16     -80    
128    -144   
160    256    
208    336    
80     80     
-112   -272   
16     -272   
48     0      
128    -96    
48     160    
80     -64    
288    64     
176    -96    
160    256    
-208   -880   
16     416    
32     -32    
240    16     
48     112    
128    -352   
240    96     
80     -48    
176    -208   
192    304    
-16    -32    
-160   -160   
-16    128    
-32    -64    
32     80     
128    -32    
192    -112   
128    -16    
192    -464   
-64    80     
-16    -224   
-144   -464   
224    32     
144    -656   
80     336    
-64    -560   
240    -432   
160    304    
32     -144   
-176   -224   
112    64     
64     -176   
-48    112    
128    -288   
128    32     
-1008  -160   
16     -208   
240    80     
128    -128   
256    -144   
96     128    
16     -16    
0      80     
80     224    
0      -128   
96     -80    
208    112    
-464   -160   
176    288    
80     -112   
-224   416    
96     -128   
-16    -384   
-32    288    
160    -176   
160    -80    
160    32     
224    -112   
16     48     
48     -272   
-400   -64    
112    -128   
-112   144    
-96    -176   
80     208    
-432   144    
160    -336   
-288   -64    
256    64     
-32    -256   
-64    -496   
64     -208   
-16    -96    
-64    192    
368    96     
112    144    
208    -80    
-208   -32    
192    96     
112    32     
-48    96     
240    64     
144    368    
32     320    
80     160    
-192   96     
176    -48    
496    -320   
-192   144    
-32    -224   
-192   -112   
256    -96    
224    -64    
-208   -64    
208    -144   
112    32     
560    176    
-240   -80    
-208   -288   
-816   96     
-64    -64    
-208   -304   
-32    -448   
208    80     
-384   -400   
512    -112   
112    -128   
128    112    
-304   -48    
-48    32     
64     -96    
-128   48     
-480   -16    
-32    -64    
-1040  -144   
464    16     
224    80     
-144   64     
208    352    
16     128    
352    144    
-208   64     
176    -80    
-128   -128   
192    -32    
-80    96     
224    16     
-896   16     
176    -32    
240    -48    
144    64     
-128   160    
384    -192   
0      -64    
96     -192   
-128   64     
-176   -144   
-48    -16    
-240   128    
64     0      
-80    -16    
48     -48    
-208   352    
304    176    
-736   -16    
0      -240   
-160   16     
128    -224   
-32    160    
208    0      
256    16     
-96    48     
-176   -112   
32     -48    
32     32     
-144   80     
32     -80    
-96    64     
64     48     
-416   -16    
-288   -64    
16     48     
-1760  112    
16     208    
32     -112   
-1072  -32    
-128   -32    
-1760  224    
-80    32     
-608   -32    
-160   -48    
-112   -48    
32     96     
176    0      
-32    -32    
32     -192   
144    160    
-144   112    
0      432    
-16    208    
-256   48     
96     80     
-144   0      
336    208    
-208   96     
-368   -288   
-608   -80    
-192   144    
-16    288    
32     272    
-160   -128   
-32    -32    
-112   -96    
-144   16     
-48    -80    
0      96     
80     -96    
304    352    
-112   208    
-160   -1328  
96     560    
-512   32     
0      -48    
64     96     
32     -32    
-80    112    
128    256    
-112   -208   
112    -32    
32     -144   
-64    128    
-144   128    
-96    352    
-176   144    
-224   -128   
96     96     
-240   48     
304    192    
-176   64     
96     32     
160    -32    
96     64     
128    -32    
-80    32     
-128   64     
-160   112    
80     144    
-256   64     
-336   -64    
-96    -32    
-16    112    
-128   16     
-16    48     
-1360  -48    
128    0      
16     -16    
-32    48     
-64    -144   
208    -80    
32     64     
208    96     
-48    16     
96     96     
-128   32     
-96    -112   
-16    16     
-256   80     
96     -96    
-624   -176   
192    48     
16     16     
-16    112    
-48    -32    
-32    64     
176    80     
48     16     
0      -64    
48     80     
32     16     
0      -32    
16     -16    
-176   -64    
96     128    
-336   0      
-16    32     
-48    -64    
-224   -64    
96     0      
-96    288    
176    16     
-96    0      
80     -16    
-288   0      
-32    -128   
-80    -352   
32     208    
240    48     
16     -32    
-400   -64    
112    80     
160    48     
-112   -16    
-160   32     
272    64     
-256   80     
272    -32    
-160   64     
-240   -112   
224    32     
144    144    
240    64     
112    -32    
224    112    
-480   64     
-224   -144   
160    80     
-240   -64    
304    32     
-160   48     
208    80     
-112   0      
576    352    
-880   0      
144    -112   
144    -80    
224    48     
64     -64    
-80    48     
80     112    
-368   112    
-112   48     
160    128    
-80    80     
32     -144   
80     48     
16     48     
16     64     
112    16     
-80    -96    
-192   -16    
96     16     
-160   16     
480    304    
-352   160    
192    -96    
160    160    
176    64     
240    -48    
-128   -16    
-32    -32    
-80    64     
16     -16    
144    32     
240    80     
-432   -128   
192    0      
64     192    
224    48     
-80    16     
16     32     
288    112    
-96    32     
16     0      
96     160    
16     112    
16     -32    
80     -32    
-64    32     
0      176    
128    80     
112    32     
-16    -32    
-80    48     
336    -112   
80     64     
-80    -128   
-224   -96    
176    -256   
48     176    
80     64     
-240   -64    
208    144    
-96    416    
-32    -272   
160    -368   
-112   -16    
-16    304    
-48    0      
128    32     
0      64     
96     -80    
160    64     
-128   0      
160    -256   
-80    64     
-32    128    
-32    -304   
272    624    
160    -224   
96     -128   
32     192    
64     64     
160    304    
-32    -624   
-32    48     
-144   496    
96     -256   
16     256    
-16    0      
304    16     
-144   656    
64     -336   
192    -128   
32     352    
-112   0      
0      -112   
144    128    
-192   -256   
32     -176   
208    160    
-96    64     
0      0      
144    80     
-112   192    
48     96     
112    -16    
-32    288    
-128   -752   
144    192    
112    384    
-48    -64    
160    -208   
144    -192   
224    192    
48     -16    
80     112    
112    -48    
0      80     
272    -432   
32     -64    
192    48     
208    144    
-112   544    
96     64     
-112   80     
240    400    
-64    304    
-112   0      
112    0      
128    -368   
96     16     
144    -16    
64     16     
0      -112   
240    128    
-80    112    
-64    208    
96     -48    
-32    80     
224    -32    
32     80     
112    144    
32     16     
32     112    
64     -320   
80     64     
112    48     
-48    -16    
16     0      
0      64     
80     192    
64     208    
-96    64     
128    0      
64     96     
80     -240   
192    -96    
128    -96    
48     96     
0      -368   
80     0      
96     -608   
32     64     
-16    192    
176    128    
-128   576    
160    320    
-304   -112   
-80    -160   
96     -80    
96     80     
96     -144   
64     -704   
-48    80     
192    288    
-112   -128   
64     -80    
0      80     
112    -464   
80     -112   
112    -208   
48     48     
-48    272    
240    -272   
208    -112   
192    320    
-240   112    
-80    -192   
-288   -128   
288    -176   
32     -64    
208    -112   
112    256    
-128   -208   
240    96     
0      128    
320    64     
112    32     
48     -160   
64     -288   
-352   -160   
560    -288   
336    -304   
96     -80    
48     160    
-96    320    
-80    -144   
-16    -1424  
128    32     
288    80     
64     144    
112    48     
-256   -592   
64     80     
-192   -736   
-96    48     
512    256    
-160   32     
192    -64    
-16    -32    
400    -208   
-192   256    
96     -256   
-80    176    
336    176    
-80    -80    
-128   -192   
144    -544   
96     0      
272    -112   
-16    208    
-32    -496   
192    -368   
-64    0      
128    -144   
224    0      
480    432    
-288   96     
-112   112    
-208   -272   
208    -208   
-32    -272   
-16    -32    
112    -128   
192    -128   
-32    -112   
48     -368   
-32    0      
160    -192   
288    192    
-128   0      
144    192    
-112   -192   
48     96     
-208   128    
-128   -96    
-112   -256   
192    -128   
176    64     
16     -96    
144    16     
336    -128   
-144   416    
112    288    
-32    96     
112    -80    
-192   -416   
48     400    
208    192    
-144   -96    
128    192    
16     -16    
64     128    
-2240  160    
-144   -160   
-64    64     
336    -192   
-48    -80    
80     -464   
64     80     
384    -464   
16     656    
-80    -224   
144    96     
-32    -128   
-80    -16    
-80    96     
-64    -16    
-176   -112   
304    112    
64     -80    
208    0      
-48    -64    
112    -240   
32     32     
528    448    
-288   608    
-32    272    
112    -160   
80     48     
160    32     
-16    -96    
176    -96    
-272   -64    
48     80     
-352   48     
48     -48    
0      -32    
-80    0      
-96    -128   
112    -352   
0      0      
-96    -32    
288    48     
-144   -112   
336    -176   
144    256    
-128   32     
-288   -80    
176    -48    
-304   48     
-32    -144   
128    -16    
-16    -112   
-48    32     
32     -528   
128    -112   
-304   16     
192    -32    
48     0      
160    64     
-128   -16    
176    16     
-432   -64    
-208   -80    
-720   64     
128    -16    
64     16     
-32    -96    
80     160    
-112   -128   
80     -32    
16     80     
160    16     
0      -80    
160    -32    
-176   0      
80     -16    
-112   0      
32     -16    
-112   96     
-848   -64    
80     64     
-544   -128   
-16    -16    
-96    16     
-16    32     
176    112    
-1040  -32    
-80    -64    
-608   -48    
-176   -32    
80     32     
-48    32     
-640   -160   
112    144    
-960   -176   
16     16     
-576   -64    
48     16     
448    288    
-288   160    
256    32     
-448   -32    
128    -112   
-336   160    
-80    176    
288    -16    
-160   32     
-96    -64    
32     16     
-256   -64    
160    240    
32     32     
-352   -112   
-96    -48    
-224   -16    
-16    96     
-288   -80    
320    16     
-176   160    
112    -16    
-1296  -64    
-416   -32    
192    -16    
288    224    
-432   112    
32     -16    
368    240    
-688   128    
-48    -192   
-208   -192   
448    128    
-32    -32    
272    -16    
-96    16     
-240   0      
-368   0      
144    48     
-256   -112   
144    64     
0      16     
160    -32    
-128   -96    
96     -48    
160    0      
-32    96     
0      48     
0      32     
-16    0      
48     -96    
-192   96     
96     64     
-16    128    
-544   -176   
80     96     
-32    -80    
-160   -144   
-80    336    
-144   -32    
-112   -432   
64     304    
-48    0      
-400   -32    
384    96     
-192   112    
96     -80    
-304   -256   
-128   64     
-576   -304   
-48    208    
192    -128   
160    -64    
-48    320    
160    -1136  
-64    416    
208    192    
-256   -496   
-112   -352   
-32    32     
-48    560    
304    192    
-160   -128   
0      -288   
-352   16     
336    496    
-160   240    
-256   320    
48     208    
0      336    
112    -32    
-144   176    
160    -144   
352    288    
-128   608    
-256   208    
-144   144    
-208   -64    
80     48     
-128   -16    
80     -80    
144    0      
192    96     
-80    64     
112    320    
16     544    
-176   144    
-48    -32    
-16    -80    
96     -176   
-160   -16    
16     128    
-256   32     
80     16     
-256   16     
-192   -48    
128    64     
0      128    
-320   -128   
96     -192   
32     -16    
-112   32     
64     -544   
-400   -432   
240    -144   
-144   112    
112    176    
-176   16     
-16    -32    
-64    -144   
16     -96    
144    -112   
144    0      
208    0      
0      384    
-48    80     
144    112    
80     0      
-144   -64    
208    -16    
-80    -16    
96     208    
128    160    
-256   256    
-112   16     
80     48     
48     32     
144    80     
112    160    
-32    32     
144    96     
-144   304    
64     -80    
48     -48    
-96    96     
-144   32     
144    -16    
-272   -48    
-112   -192   
144    272    
144    160    
-16    -80    
32     -32    
-208   -176   
192    32     
112    16     
64     -128   
-32    -96    
-224   -160   
-144   -176   
-128   -80    
48     -16    
-16    144    
16     48     
80     -48    
64     -112   
96     0      
-80    96     
0      -144   
160    -64    
16     256    
64     224    
208    -16    
-144   80     
96     64     
-112   16     
96     -224   
16     0      
144    -304   
0      288    
-96    224    
-112   -208   
272    432    
32     80     
224    304    
240    0      
-32    96     
304    288    
-48    432    
240    768    
240    128    
32     336    
-48    256    
144    32     
-64    112    
32     -112   
128    -64    
16     512    
576    512    
-80    320    
-224   0      
16     208    
624    496    
-96    -80    
32     128    
-224   -336   
0      -368   
32     -16    
-48    -1200  
176    288    
-160   112    
0      256    
-512   400    
-176   176    
-176   -16    
-80    -128   
-192   0      
-64    -144   
352    -320   
640    240    
96     352    
240    -48    
208    192    
208    -80    
560    480    
-528   672    
160    144    
-128   -512   
-64    -64    
560    112    
-112   448    
192    32     
192    288    
-224   368    
176    -48    
-80    320    
144    -80    
160    176    
320    48     
-224   352    
-448   0      
0      -240   
144    -16    
480    208    
-128   656    
272    288    
-304   400    
-80    -320   
176    -128   
528    624    
-288   -272   
-112   192    
-16    -16    
160    -128   
80     480    
256    -1104  
128    -384   
112    32     
-112   480    
-144   -32    
80     -240   
64     -64    
192    384    
-16    272    
32     -48    
32     -96    
80     176    
-16    -240   
320    480    
176    -176   
-176   -96    
128    288    
112    -1408  
-32    240    
64     -144   
-80    128    
-16    -96    
80     368    
208    128    
16     -224   
-16    -224   
240    64     
208    -16    
176    -240   
-16    32     
-144   16     
48     192    
16     -960   
128    32     
32     176    
128    80     
16     -48    
-80    -272   
128    -304   
128    -320   
128    192    
0      -96    
80     64     
208    64     
16     432    
-80    -256   
80     16     
32     0      
128    96     
-16    224    
96     48     
-128   -128   
224    -208   
96     80     
112    96     
0      -32    
240    -384   
176    160    
0      176    
80     48     
16     -32    
-64    0      
-16    16     
240    -240   
-128   48     
48     -272   
144    -736   
64     -304   
288    -32    
112    -16    
208    -768   
48     -176   
96     -144   
16     -176   
48     112    
-32    -144   
128    -448   
32     -48    
160    -288   
112    80     
176    -176   
96     0      
-192   -32    
160    96     
160    96     
-64    96     
16     80     
-144   -560   
-64    -128   
368    16     
256    -32    
192    -32    
-32    0      
-16    64     
48     32     
16     48     
144    -32    
-1536  0      
32     16     
96     -32    
-16    -96    
176    48     
80     -176   
80     -48    
48     -416   
-64    0      
160    32     
32     48     
0      48     
272    96     
-48    -48    
32     -32    
-272   -32    
-32    -240   
96     -64    
176    32     
144    -64    
-16    -384   
-16    16     
32     -400   
-96    -48    
144    -16    
80     64     
144    -16    
96     -32    
-224   -32    
160    -32    
-176   -16    
16     0      
-1776  48     
96     -32    
128    -96    
96     -80    
112    288    
64     -80    
96     -32    
0      -64    
-16    -80    
-96    -160   
-80    0      
-48    -32    
-32    0      
16     16     
256    -192   
-1072  32     
528    -80    
96     304    
-96    64     
80     -64    
160    -16    
32     32     
208    -1328  
-96    -128   
224    -80    
160    -448   
-48    -448   
16     -96    
-48    -128   
208    -320   
-960   -480   
80     -368   
-432   240    
0      272    
-48    208    
32     -96    
64     -64    
16     -160   
-96    64     
96     112    
80     -16    
96     400    
-224   -336   
-368   -80    
-80    64     
-144   -112   
160    320    
-352   -368   
0      240    
0      96     
256    -192   
128    48     
-80    -256   
176    -640   
-208   -96    
192    512    
-80    0      
-240   32     
-32    128    
336    -400   
480    784    
-368   -848   
192    -160   
224    0      
-208   -112   
496    64     
-96    -208   
-80    -688   
-2336  -448   
0      32     
64     -128   
-32    336    
96     16     
224    -48    
-48    -32    
-176   -16    
192    -80    
16     112    
-672   -256   
-64    -80    
80     -240   
-16    0      
-96    -16    
-288   -64    
-112   32     
-64    80     
80     160    
-864   80     
-208   -96    
256    -272   
-32    16     
-544   64     
64     96     
-240   -16    
-48    16     
-272   96     
-48    128    
-128   16     
0      -80    
64     64     
-192   16     
16     48     
-1104  -16    
-224   -80    
48     -208   
80     48     
48     16     
0      16     
-32    -144   
-80    96     
-160   48     
192    32     
176    160    
-272   32     
-32    -80    
-64    -32    
-240   -48    
-320   0      
-32    0      
-976   0      
-144   -48    
-64    -112   
128    144    
-368   -96    
16     48     
144    0      
208    64     
32     48     
160    -64    
-96    64     
-352   32     
-64    80     
-32    -32    
240    -16    
-160   16     
112    80     
-240   -32    
0      80     
-304   0      
-112   32     
208    112    
-176   32     
32     48     
-112   -144   
176    -176   
176    64     
32     192    
-48    32     
-96    -96    
-528   -160   
0      -80    
-48    -160   
0      -176   
48     -128   
-160   -48    
16     -176   
112    96     
-144   192    
-48    0      
208    16     
-144   80     
32     80     
-304   16     
80     112    
-496   160    
288    96     
-2192  224    
-176   80     
192    -64    
400    192    
-144   304    
32     176    
112    96     
-32    176    
-80    -16    
64     -144   
-192   -96    
48     16     
32     128    
-16    48     
320    256    
-1024  256    
144    192    
-208   208    
-48    -256   
16     -144   
144    -112   
-32    -48    
-112   -64    
64     64     
-128   -16    
80     -272   
-144   -48    
272    128    
-384   192    
144    176    
-224   480    
0      224    
112    -48    
48     240    
80     -96    
-176   -288   
32     -80    
128    1520   
-144   672    
192    -368   
160    672    
-400   288    
-96    -672   
48     -784   
224    -144   
-432   848    
192    -80    
-112   -176   
256    304    
64     -224   
112    128    
-64    32     
48     -432   
48     -112   
48     448    
-320   -32    
-144   -432   
480    272    
224    80     
-128   -144   
288    784    
-224   -512   
-352   -816   
416    368    
-560   -512   
528    -592   
480    1136   
144    -48    
576    -304   
-240   592    
80     80     
-176   -464   
-480   -624   
-272   160    
-64    592    
144    -224   
-48    -432   
48     192    
112    80     
144    192    
-144   -352   
64     368    
-224   -112   
32     -80    
-16    16     
160    -96    
-192   -176   
208    160    
-224   -80    
320    -416   
-48    144    
48     320    
-96    -272   
-16    48     
96     80     
48     -16    
-96    -48    
-32    80     
80     16     
32     0      
160    48     
-112   80     
80     80     
176    128    
32     112    
208    0      
-48    128    
48     64     
48     32     
32     -48    
32     -224   
64     0      
-80    176    
160    48     
-48    16     
144    96     
-16    304    
-16    -560   
0      -64    
-32    176    
128    -144   
144    192    
-128   -96    
-64    112    
48     -48    
144    64     
160    -32    
-224   -832   
-176   -272   
-112   -176   
-80    -176   
-32    -80    
-80    -240   
208    -80    
128    64     
48     80     
224    -32    
-96    144    
112    48     
16     -176   
64     -336   
32     -16    
16     -240   
128    -96    
-80    48     
144    16     
-80    64     
0      80     
80     192    
48     -112   
16     32     
144    -32    
192    64     
-16    16     
0      -144   
112    -176   
128    160    
-32    -288   
176    64     
-48    48     
-288   -608   
48     -64    
-32    80     
-16    16     
16     -720   
208    304    
-256   64     
192    0      
112    -16    
432    176    
80     -144   
112    -144   
-176   -48    
-112   64     
32     -32    
112    -96    
128    32     
112    -112   
48     32     
-128   -288   
192    -48    
128    112    
-32    0      
-48    48     
64     48     
208    208    
-272   -176   
352    -144   
464    96     
176    352    
0      112    
16     -64    
-96    -64    
48     80     
64     80     
-208   -80    
176    -16    
160    16     
160    -64    
-32    -16    
-32    64     
16     32     
-32    0      
112    0      
192    32     
16     -64    
128    -48    
160    -32    
32     48     
0      -240   
0      112    
-48    -528   
128    64     
-112   -16    
112    48     
32     0      
96     64     
96     48     
-32    48     
128    64     
80     -32    
48     80     
128    -16    
16     32     
32     -160   
96     112    
128    64     
112    64     
64     112    
304    256    
-192   32     
160    32     
32     224    
16     -64    
96     16     
48     -432   
80     80     
-80    64     
96     0      
-96    -128   
160    -80    
-160   -16    
176    80     
-48    16     
240    16     
176    112    
160    192    
128    64     
-320   -592   
272    -432   
144    144    
240    336    
160    -16    
-48    -176   
256    176    
-192   320    
96     -736   
80     -16    
256    32     
368    -80    
320    208    
-96    16     
-1328  -1808  
960    960    
-480   160    
-704   -224   
320    -352   
-176   176    
624    656    
-64    -896   
416    -208   
-96    400    
192    -656   
64     -64    
-144   -240   
-80    608    
-464   240    
240    -256   
-32    240    
176    -768   
192    -336   
-96    176    
208    -128   
64     -368   
192    -288   
-48    112    
-176   -32    
-176   -16    
112    256    
272    176    
592    368    
-720   112    
-80    80     
-816   -80    
128    208    
208    -176   
48     -48    
-80    -192   
-48    -368   
48     64     
96     128    
256    -32    
272    -128   
0      0      
-96    -144   
32     -64    
-96    0      
64     32     
-1328  -32    
80     -80    
16     -96    
96     -64    
-16    -80    
-32    192    
112    -48    
-16    -400   
-112   -128   
-64    -208   
-32    144    
64     -16    
304    -48    
-160   32     
128    -96    
112    112    
48     0      
-64    -48    
288    64     
160    80     
208    -112   
-144   32     
96     -432   
80     16     
128    80     
48     96     
16     16     
-48    -80    
-144   0      
-32    16     
-128   -96    
336    -256   
-912   0      
192    -96    
-576   -32    
32     0      
-160   112    
208    128    
-16    -16    
64     -432   
128    -144   
-224   112    
96     -96    
-224   48     
16     48     
-32    32     
400    176    
-608   128    
0      -192   
96     -64    
-64    -304   
208    -80    
-16    0      
0      32     
96     -768   
80     -64    
112    32     
0      112    
16     0      
160    -80    
-32    16     
336    -64    
48     -144   
240    -160   
-32    0      
16     -224   
128    -80    
176    -160   
160    160    
-192   0      
-128   0      
-272   -80    
80     0      
-32    0      
80     144    
-208   32     
256    -16    
-448   -48    
336    -272   
128    80     
-144   -496   
-128   -112   
128    -272   
-80    0      
-16    96     
-32    -400   
-96    -240   
288    -512   
16     -176   
464    320    
-112   -208   
16     -144   
-96    80     
208    64     
96     32     
-576   -176   
176    128    
-544   32     
0      32     
-256   112    
-624   96     
304    352    
-48    272    
96     -80    
128    -240   
128    400    
144    -160   
0      -96    
-544   -208   
-112   112    
-16    -16    
112    -96    
48     -80    
-368   128    
112    -16    
-352   -96    
-80    -16    
16     -80    
176    16     
-1344  -64    
-384   -736   
-48    80     
-48    192    
-128   -64    
144    -80    
112    -48    
112    -144   
16     -32    
-208   32     
80     0      
-272   -144   
432    368    
-368   -512   
192    -464   
-64    192    
128    16     
-256   -144   
-16    128    
304    176    
0      176    
-384   -192   
-16    -32    
48     144    
-96    -64    
176    -32    
-64    -144   
-288   -32    
-16    112    
16     64     
-16    -784   
224    -672   
-464   64     
224    320    
-208   256    
-512   -624   
-16    -528   
-320   240    
-48    144    
-112   16     
64     32     
-192   0      
16     64     
-144   0      
32     80     
-208   112    
272    128    
-880   -32    
80     96     
-32    -32    
-64    32     
64     0      
144    0      
-64    64     
-224   16     
80     -16    
336    272    
-304   320    
32     80     
240    80     
512    368    
-304   64     
-144   -176   
96     0      
-160   -64    
256    16     
-32    16     
96     32     
-96    -64    
32     0      
-192   -16    
208    32     
48     48     
-32    48     
64     96     
-192   0      
144    144    
-192   0      
-32    16     
-80    0      
-96    -176   
272    -128   
-128   64     
64     208    
240    144    
-112   80     
-160   -192   
144    -192   
-272   48     
96     96     
-144   112    
32     112    
-288   -16    
176    48     
48     0      
-128   -208   
160    -384   
-160   -112   
-112   -32    
64     80     
64     96     
80     224    
-128   112    
-16    -128   
112    48     
-32    32     
144    112    
80     -48    
16     96     
32     0      
-64    16     
144    64     
-48    16     
-16    -16    
96     -16    
-128   0      
-64    -208   
144    -32    
-32    144    
176    32     
-96    -128   
176    -48    
-112   48     
192    -16    
16     16     
-48    -48    
16     32     
112    48     
0      48     
-16    32     
-160   32     
352    -64    
32     32     
176    160    
80     32     
-128   -64    
32     -112   
-128   -80    
48     -16    
-112   48     
-32    144    
-32    -32    
-80    32     
48     32     
160    16     
16     48     
80     96     
-48    48     
-16    -16    
64     32     
-224   -192   
80     -96    
48     112    
176    80     
128    48     
-48    -48    
224    48     
272    224    
-80    144    
144    112    
-16    -16    
96     0      
112    96     
-112   -32    
176    48     
16     32     
144    128    
-80    48     
-240   -48    
-32    -80    
240    -192   
256    -32    
176    96     
-16    80     
-16    32     
-176   16     
0      64     
240    48     
-16    -16    
128    64     
96     -48    
144    -1440  
-32    48     
-32    -16    
-16    16     
32     -32    
96     -48    
128    80     
-32    96     
-48    48     
32     -176   
0      -48    
208    112    
-96    48     
128    80     
-592   -16    
16     -272   
112    -112   
80     64     
144    80     
112    -16    
-32    112    
-144   240    
-16    -368   
-96    128    
32     320    
-192   32     
304    48     
-192   -336   
320    560    
-96    -560   
144    -576   
160    448    
48     96     
48     336    
-96    48     
16     -128   
32     288    
-80    -240   
256    560    
-352   -1488  
-128   528    
144    224    
-16    -496   
224    784    
416    240    
-320   128    
-288   272    
112    192    
-16    32     
320    -80    
-400   -384   
256    16     
-224   -112   
432    -592   
-128   -272   
736    304    
16     544    
-16    112    
-144   -80    
144    80     
-192   -64    
128    96     
320    -208   
-256   32     
448    64     
-160   128    
256    -128   
-160   112    
-96    48     
-16    288    
256    -32    
144    0      
208    48     
272    336    
-336   144    
240    -208   
-96    -16    
160    64     
-144   80     
80     -416   
-48    32     
-96    -96    
112    0      
160    -32    
480    400    
-384   256    
128    224    
-272   128    
96     -176   
176    64     
208    -80    
-64    0      
64     -192   
16     64     
192    -736   
192    32     
-48    -64    
64     16     
-16    -128   
64     48     
32     128    
-128   -64    
16     64     
96     -160   
256    32     
192    -80    
272    128    
0      -176   
0      80     
-96    -368   
176    0      
0      96     
64     32     
16     16     
192    240    
144    144    
144    -336   
48     80     
-80    16     
80     32     
112    -176   
-32    64     
-48    -144   
-32    16     
128    -272   
96     80     
96     -16    
144    96     
-112   -48    
64     -720   
16     -160   
96     -256   
160    112    
208    32     
16     0      
-128   -64    
112    -32    
160    0      
-16    96     
-16    0      
48     -1360  
-32    -80    
176    -336   
0      112    
-112   0      
48     -208   
16     -112   
96     208    
-208   160    
-48    -128   
112    -32    
112    0      
144    128    
32     80     
48     32     
-16    32     
-48    96     
64     -160   
112    0      
-48    0      
176    0      
-32    -224   
64     -160   
96     -192   
112    -112   
208    48     
-96    -896   
-144   -192   
-80    -240   
240    -560   
224    -320   
256    -64    
-32    -368   
160    0      
-320   352    
-96    -128   
192    -816   
256    -208   
-96    384    
144    -224   
144    -112   
-16    -128   
272    128    
-48    -32    
96     480    
288    -256   
96     448    
96     -144   
208    96     
32     -272   
128    272    
-336   -144   
192    -368   
128    160    
128    -208   
-64    -144   
160    -624   
112    224    
0      -624   
-224   176    
80     128    
-128   96     
-32    176    
112    64     
-192   -16    
240    -96    
-848   -64    
176    -192   
80     -64    
0      -128   
64     -16    
96     -112   
48     112    
192    -496   
16     -32    
-32    -16    
80     -192   
-288   -144   
16     48     
-96    128    
80     16     
-16    64     
96     64     
-560   16     
-96    -16    
-64    32     
64     -192   
160    -80    
-32    -272   
256    -16    
-32    0      
-272   -208   
160    32     
48     -96    
0      -16    
192    -80    
-624   0      
288    160    
-464   -128   
528    -16    
-912   -32    
208    -160   
288    176    
560    272    
-480   192    
-16    -224   
640    -32    
-368   176    
-224   0      
-608   -160   
-128   -240   
704    256    
-208   -64    
-112   -128   
224    -192   
32     16     
272    -128   
-160   -32    
400    -128   
112    112    
-608   -96    
288    16     
-160   -80    
0      -80    
-32    64     
64     48     
-112   0      
112    -64    
-1856  -48    
192    0      
32     16     
0      -64    
-224   -80    
-1280  -144   
-1744  64     
-336   -16    
0      -128   
-160   -64    
128    0      
-16    16     
208    48     
-112   -16    
352    176    
-560   64     
-112   -80    
224    0      
-32    -48    
32     48     
0      -144   
-144   -48    
-16    48     
-64    48     
-240   -32    
-1200  -16    
-160   32     
-64    -32    
-176   -32    
-304   80     
48     -48    
-576   -144   
192    64     
-464   -80    
224    128    
-112   0      
-128   32     
-64    -32    
96     96     
0      96     
-48    32     
-48    48     
-592   16     
-16    64     
96     -16    
256    592    
-576   272    
-32    -96    
-192   -112   
-48    176    
80     112    
-272   -112   
112    64     
-48    -96    
-16    -240   
-400   -192   
0      64     
-288   0      
176    0      
-48    -160   
48     192    
-176   -48    
112    80     
32     -128   
-240   -32    
-192   16     
-192   -144   
32     -16    
-160   128    
-80    112    
-80    -16    
16     -80    
-176   -112   
-32    80     
-1808  -32    
112    16     
16     -128   
32     128    
160    256    
-656   -384   
-272   -592   
-256   -144   
0      -32    
128    16     
224    -272   
-48    -352   
224    -240   
-112   480    
320    512    
-816   -496   
32     -160   
32     80     
80     192    
16     48     
-176   -144   
32     64     
-48    128    
0      16     
-32    608    
64     256    
-336   -288   
-96    -112   
-48    16     
-16    32     
-352   -112   
48     -112   
64     -128   
-112   112    
-32    64     
-128   0      
48     80     
-128   48     
-16    -64    
-48    -112   
96     176    
-160   304    
-160   32     
-32    -560   
256    -96    
-96    224    
-272   -16    
-1104  -368   
16     -448   
144    192    
-176   160    
-48    176    
-96    16     
-176   -240   
64     160    
32     176    
-16    -32    
80     144    
-112   80     
48     0      
-160   -48    
96     -16    
48     48     
-224   -48    
624    144    
-272   -48    
-16    96     
-80    -96    
80     0      
16     64     
0      304    
-80    0      
-224   -64    
64     288    
16     -144   
-64    144    
-16    16     
-96    192    
-336   96     
176    -960   
144    -336   
16     48     
256    752    
-384   -336   
-144   -240   
48     448    
-128   32     
272    320    
-320   -32    
144    144    
64     -80    
-256   80     
128    144    
16     -16    
-32    64     
-208   -48    
96     80     
-16    16     
96     0      
144    32     
192    0      
336    -96    
-224   64     
-80    240    
-192   16     
48     0      
352    128    
-256   -16    
432    128    
-128   208    
288    256    
176    160    
-112   -160   
0      -80    
-192   48     
48     48     
-80    96     
304    112    
-400   -80    
528    -304   
-208   288    
48     224    
160    16     
-80    80     
-224   224    
304    0      
160    0      
-160   80     
-96    -32    
272    -368   
-48    -48    
96     160    
96     -16    
-224   96     
-48    80     
480    240    
-64    112    
16     -80    
-144   -128   
400    208    
-16    560    
-224   64     
80     -320   
368    64     
-16    160    
208    96     
144    -80    
-128   -128   
-144   -128   
144    240    
304    16     
112    -48    
-160   80     
208    32     
304    32     
176    64     
112    80     
320    176    
-112   0      
-16    -64    
144    32     
-128   -32    
192    -64    
176    64     
96     -336   
32     16     
32     48     
-256   208    
176    96     
288    -32    
-112   208    
160    0      
-112   -64    
176    160    
-48    80     
192    -48    
32     -32    
400    -80    
-144   224    
208    0      
-96    144    
64     48     
80     -16    
176    128    
160    48     
-48    48     
96     48     
-64    48     
48     64     
112    -64    
80     0      
112    0      
32     -16    
96     112    
288    192    
-160   -64    
-64    -320   
80     160    
96     64     
128    48     
-48    -288   
336    112    
144    176    
192    256    
416    944    
-160   560    
-96    288    
128    80     
-80    -304   
32     -480   
240    352    
256    -352   
-176   -432   
208    528    
-192   432    
-112   -400   
128    208    
96     -96    
0      96     
-64    96     
-48    112    
128    64     
144    -224   
144    208    
160    272    
-32    -352   
80     -368   
-240   64     
64     -800   
192    144    
-112   -176   
320    -480   
48     -112   
160    256    
48     112    
-48    -16    
-48    64     
96     96     
64     80     
96     32     
96     -112   
-208   -272   
-32    112    
144    -32    
-16    -32    
-16    -656   
160    32     
16     -64    
-80    -96    
176    -32    
64     64     
48     48     
160    -224   
16     96     
64     -256   
112    80     
288    -80    
-96    48     
32     -368   
64     32     
0      -16    
48     128    
-16    0      
32     160    
176    16     
80     -272   
0      64     
64     -192   
80     64     
80     -96    
96     -48    
128    16     
144    160    
0      -608   
176    48     
32     -16    
80     32     
80     32     
80     -1200  
-32    -1280  
144    48     
80     96     
64     16     
32     -16    
160    -112   
32     112    
272    -32    
16     48     
48     0      
-32    -144   
80     144    
48     -96    
272    320    
-1360  -112   
48     -176   
352    64     
-32    -160   
560    16     
32     64     
-128   -112   
-272   -48    
-192   -96    
320    -288   
-32    48     
-48    -176   
304    128    
64     -80    
-544   -176   
-192   -128   
560    32     
-80    -16    
144    -64    
-48    -96    
80     -208   
176    -192   
96     -48    
432    0      
80     -48    
240    -32    
-80    -80    
16     48     
-16    -128   
144    0      
64     -32    
192    -96    
80     32     
80     -128   
400    176    
-176   128    
160    -80    
160    -208   
-16    32     
304    -64    
-224   32     
-96    -32    
80     -144   
-32    -96    
128    -48    
-640   -128   
16     -128   
-1376  -160   
160    -128   
176    32     
-16    -32    
144    16     
32     -656   
224    -96    
288    -144   
-144   64     
144    -32    
0      64     
-32    -32    
64     -96    
-416   80     
128    96     
-368   0      
144    0      
112    -208   
96     -112   
-272   16     
272    -208   
48     160    
304    464    
-224   -112   
-96    -240   
128    -64    
-128   96     
448    16     
-16    -48    
176    -64    
-384   -64    
48     64     
-720   -128   
16     -192   
336    208    
48     -112   
-16    -32    
-32    -48    
-16    -48    
96     -80    
128    -240   
-112   304    
-144   -416   
-160   224    
96     -48    
-880   -16    
48     -112   
-1888  -624   
352    -512   
128    336    
-64    -112   
96     256    
-96    -384   
192    144    
96     16     
112    144    
-112   0      
224    -64    
-160   -128   
32     48     
-496   -96    
-48    144    
96     -80    
0      -912   
336    816    
-64    -240   
-80    64     
64     -272   
-160   16     
-80    -592   
192    512    
-160   -160   
176    64     
48     -32    
272    96     
-128   784    
-112   -496   
192    -304   
80     32     
112    320    
256    -256   
96     64     
-80    96     
112    -176   
-144   80     
-1536  -112   
-400   16     
208    0      
-176   -32    
-16    -448   
160    320    
320    160    
-256   -32    
-2320  -256   
144    -112   
-352   208    
48     160    
-32    -384   
96     112    
-208   -32    
-448   -32    
-304   -128   
-672   -176   
208    16     
176    400    
-208   64     
-1824  -496   
64     48     
-352   0      
48     160    
-16    128    
-32    -16    
0      160    
-368   -48    
0      16     
-160   0      
80     112    
160    16     
-64    128    
-2112  112    
0      192    
-80    240    
128    0      
-112   16     
48     32     
-32    -128   
-208   -144   
-144   -112   
64     -48    
112    -32    
112    240    
-176   160    
80     128    
-304   80     
-672   288    
144    160    
-80    256    
160    352    
288    240    
-208   144    
96     224    
208    288    
176    -48    
-128   64     
-64    -128   
0      352    
-16    176    
-80    -48    
-32    128    
-32    -64    
-352   96     
-944   -272   
-160   48     
-112   -192   
64     0      
80     -48    
240    240    
-368   192    
-208   -576   
0      -448   
224    48     
256    288    
176    -32    
-112   224    
-144   0      
-48    80     
-1568  -64    
32     -16    
-64    16     
144    -16    
-176   -112   
-160   -32    
-80    32     
-320   128    
176    0      
16     0      
192    176    
-288   -96    
-112   16     
-368   64     
16     16     
-432   0      
64     -16    
80     16     
-32    96     
-64    -192   
32     16     
-224   160    
64     -48    
272    112    
-144   64     
-144   -16    
-32    64     
-32    -32    
-224   224    
256    144    
-32    -64    
-48    -848   
-256   -368   
176    -96    
-272   128    
288    16     
240    -48    
48     160    
64     48     
-176   112    
-64    -240   
-96    48     
80     96     
-96    48     
-48    48     
-576   80     
64     16     
80     0      
96     80     
-96    48     
-304   -96    
192    -96    
48     -48    
48     -352   
-48    112    
400    528    
-480   416    
32     -32    
-208   -304   
288    96     
-224   -96    
304    320    
112    256    
-416   192    
144    48     
128    80     
96     0      
32     -16    
288    128    
16     64     
-16    -160   
-160   -256   
80     96     
-144   128    
80     32     
96     -16    
-48    96     
-48    96     
144    0      
144    -48    
144    304    
-48    48     
-80    16     
96     144    
-32    64     
-32    -80    
-64    176    
224    128    
-144   -256   
16     304    
96     64     
32     176    
-128   32     
0      -32    
192    480    
80     -256   
96     320    
-128   -80    
-48    -16    
64     -16    
-112   -32    
-288   -384   
-160   -208   
-144   -384   
128    176    
96     96     
48     64     
-48    48     
192    64     
160    0      
192    80     
-32    32     
16     32     
16     80     
-112   -32    
160    16     
96     48     
240    48     
-32    16     
-112   -96    
-160   16     
-112   0      
192    128    
64     -16    
352    96     
112    64     
48     16     
-128   16     
0      48     
-192   -16    
368    32     
-352   -80    
192    96     
128    -160   
128    -112   
-64    64     
-80    -16    
0      16     
32     32     
64     48     
80     32     
-32    128    
-16    -16    
64     32     
-112   -16    
176    96     
-112   -160   
112    80     
80     96     
128    -400   
160    32     
-80    0      
80     128    
16     0      
64     0      
16     64     
96     96     
32     0      
96     80     
-32    16     
-32    16     
-80    16     
48     -64    
176    96     
-208   -368   
144    16     
64     80     
128    48     
-144   -176   
416    -352   
-48    48     
208    -32    
-176   -96    
-16    16     
80     352    
-256   208    
80     -128   
64     64     
48     48     
240    -688   
-160   80     
144    -80    
-16    48     
16     -64    
160    112    
144    160    
160    16     
96     -160   
-80    16     
80     -16    
208    64     
-128   48     
624    -80    
0      -16    
-32    -288   
464    112    
0      -800   
0      112    
-128   96     
32     -80    
0      224    
-80    128    
176    128    
-128   128    
32     -48    
208    -48    
720    192    
-304   -32    
-16    -208   
176    -32    
0      96     
-160   -272   
224    96     
-192   -512   
192    112    
32     64     
96     64     
144    0      
64     256    
32     80     
192    -112   
-160   -16    
-48    -32    
-48    -48    
144    64     
160    144    
32     -560   
64     80     
80     64     
128    160    
176    -48    
-80    -128   
-160   16     
240    112    
32     0      
-32    -64    
128    112    
32     64     
-32    -144   
96     -128   
256    208    
64     -240   
16     1024   
192    -544   
96     -80    
-144   192    
144    -80    
0      224    
304    32     
-192   48     
64     48     
-48    240    
0      240    
320    -304   
144    96     
224    192    
64     -176   
-112   -32    
-16    -480   
48     -16    
-80    496    
0      -528   
-16    -720   
-64    272    
128    -576   
-48    -304   
176    -1520  
176    32     
240    304    
-208   -64    
-112   -400   
128    16     
80     96     
-32    -544   
144    -320   
0      336    
208    736    
144    176    
-208   -368   
48     -544   
96     -112   
416    -400   
112    128    
64     -544   
48     -368   
16     160    
64     -32    
96     -384   
160    -32    
160    -64    
48     112    
160    -160   
144    -224   
320    224    
224    176    
64     144    
64     -160   
80     -16    
128    -304   
112    112    
96     48     
32     128    
96     224    
288    320    
-144   432    
80     80     
-32    224    
224    352    
-480   144    
-16    64     
-32    -16    
128    176    
160    32     
80     -368   
-16    -144   
128    -800   
32     -32    
-80    -160   
96     32     
192    16     
-160   144    
-32    112    
240    224    
-496   160    
80     -64    
80     -240   
192    -48    
176    240    
-32    -16    
336    -16    
32     48     
-32    256    
-16    -176   
48     0      
48     -16    
112    -192   
160    128    
-16    64     
-64    96     
304    80     
-1600  80     
128    -96    
64     -48    
32     16     
32     -48    
-32    -336   
112    -288   
112    -672   
16     80     
176    64     
-64    112    
-64    32     
176    -352   
-368   -256   
240    0      
-320   160    
128    96     
-672   208    
48     80     
-16    0      
160    -144   
128    -16    
256    -368   
-16    -80    
128    -240   
-16    -64    
-144   -32    
144    -32    
-304   320    
-32    16     
-224   -512   
272    -736   
-656   -640   
144    -16    
160    0      
144    160    
-64    -112   
160    144    
160    176    
80     144    
416    -224   
-208   -240   
-304   48     
-304   0      
-128   48     
-64    -64    
64     -176   
96     -128   
0      16     
-96    0      
-176   -160   
-16    112    
-112   -224   
160    -80    
-48    -48    
-112   -144   
224    -272   
192    -80    
-400   0      
480    -320   
-160   -128   
80     -576   
-528   -208   
128    16     
-16    112    
-1360  -96    
208    96     
208    240    
-272   144    
-96    96     
240    48     
-448   64     
256    -16    
-160   96     
96     -80    
-192   32     
16     -16    
288    64     
-1312  -240   
240    96     
-608   -336   
0      -176   
-240   -64    
16     -144   
112    208    
-96    16     
128    96     
-352   -80    
-128   240    
400    256    
-80    208    
128    80     
0      80     
-144   -64    
32     48     
-160   -112   
-208   16     
32     336    
-112   -16    
144    128    
-224   64     
-160   272    
-848   304    
-96    144    
0      176    
-160   32     
-160   -304   
32     -336   
80     -272   
112    32     
16     -176   
-64    80     
-192   -528   
-192   -416   
-32    -272   
16     240    
16     -208   
64     128    
-160   128    
-1136  400    
0      96     
-192   -240   
352    112    
-208   -112   
-80    144    
304    16     
-144   240    
-112   -384   
208    512    
-304   -608   
-32    272    
48     64     
-80    -16    
-96    224    
-304   48     
160    -128   
48     336    
144    448    
-48    -144   
-160   -128   
-48    -32    
-96    -128   
64     128    
-16    48     
32     -64    
80     16     
-112   0      
-96    64     
-64    -16    
-224   16     
160    48     
-816   560    
-336   336    
-256   -112   
176    -32    
64     0      
0      80     
-32    48     
128    192    
-112   144    
-240   -224   
-64    -256   
112    240    
128    112    
0      48     
128    176    
-464   -16    
112    48     
-224   -16    
0      48     
-64    0      
-32    48     
80     32     
-80    0      
144    -32    
48     48     
112    80     
-80    0      
96     96     
-432   -64    
-64    32     
-1088  32     
128    -16    
-16    16     
-160   16     
-80    48     
-32    0      
48     -48    
-64    -144   
-16    0      
-16    176    
-16    0      
-96    0      
96     -16    
-336   -32    
-16    48     
-544   64     
160    32     
-48    0      
-64    16     
-64    16     
-96    -16    
160    96     
432    160    
64     32     
-208   -80    
-16    0      
-160   -80    
112    128    
-32    48     
96     32     
-192   -32    
16     -16    
80     64     
32     0      
64     48     
64     32     
64     32     
-16    0      
-64    -48    
-64    -16    
-16    32     
128    64     
-144   80     
-32    -80    
32     80     
224    272    
-384   160    
240    -80    
-64    64     
224    -64    
-96    -48    
80     0      
224    64     
0      -128   
144    80     
-80    112    
80     32     
160    144    
-624   -112   
160    0      
80     192    
192    128    
192    32     
272    64     
-96    80     
16     112    
-16    96     
0      -32    
-384   -272   
64     -16    
288    176    
-352   -32    
448    0      
368    384    
-624   224    
-320   -256   
240    -112   
96     0      
-192   -144   
240    -112   
272    80     
128    -16    
16     48     
368    -48    
-64    -192   
112    112    
-80    80     
112    -48    
0      224    
144    368    
96     -272   
-64    -112   
-96    -16    
96     -256   
368    368    
-528   -240   
464    -32    
-272   400    
160    -16    
-80    80     
80     -176   
160    192    
-48    96     
96     -96    
-80    48     
-96    96     
384    64     
-144   496    
192    144    
-80    160    
224    -64    
176    80     
-192   -224   
128    -96    
208    272    
-48    208    
0      64     
-128   -304   
352    528    
16     -32    
224    320    
-288   48     
112    -112   
-16    -96    
160    -304   
-320   -336   
224    -432   
240    192    
240    528    
-32    368    
32     80     
-288   32     
208    -144   
48     -96    
-32    -704   
96     64     
-16    208    
240    144    
-32    32     
400    144    
-64    224    
-64    48     
0      0      
112    16     
-80    -96    
32     160    
144    96     
128    -32    
-16    32     
112    -16    
-80    96     
224    80     
-16    96     
-208   -144   
112    -416   
96     16     
272    176    
-144   0      
112    -80    
-16    32     
-576   -48    
48     32     
64     16     
16     48     
16     80     
240    112    
112    -608   
-96    224    
256    240    
-400   272    
144    -128   
192    48     
-16    48     
128    80     
-96    -288   
176    -80    
112    160    
-304   -16    
16     80     
112    -192   
160    80     
96     -160   
128    64     
0      -208   
128    0      
-32    -144   
0      160    
64     64     
-80    -32    
96     112    
96     -64    
96     0      
160    -96    
144    32     
96     -160   
128    48     
48     -192   
128    80     
-64    -80    
48     -192   
80     16     
112    240    
176    256    
48     272    
64     48     
-48    -208   
-192   -48    
32     -592   
160    0      
64     16     
112    -48    
-96    16     
-16    0      
80     176    
112    32     
0      112    
128    96     
-80    176    
208    128    
48     112    
128    -32    
-96    32     
64     48     
112    80     
64     -80    
96     -64    
96     -32    
192    176    
96     64     
208    160    
32     -48    
32     -448   
48     -784   
-80    -128   
112    -336   
32     96     
-16    0      
432    16     
192    160    
-48    -112   
-16    144    
240    176    
-176   -256   
64     272    
464    -176   
-400   -16    
-32    -320   
128    -416   
336    336    
112    384    
208    176    
80     -528   
-48    16     
224    -496   
-80    336    
0      288    
448    304    
-272   -128   
-128   64     
112    96     
0      -16    
32     32     
272    -528   
352    64     
-368   -336   
-352   0      
-96    -928   
-208   -160   
96     -304   
-48    -624   
160    -112   
-112   -304   
-320   480    
240    240    
128    -80    
-112   112    
-240   -48    
16     16     
-1328  320    
80     224    
144    -128   
240    176    
-32    -304   
0      64     
272    -96    
32     144    
400    240    
-112   256    
-32    -96    
48     -176   
112    256    
-64    -112   
80     112    
-528   -272   
240    -400   
96     352    
304    -32    
-80    -448   
400    224    
-192   144    
-96    -464   
368    -272   
128    304    
112    -80    
48     -176   
160    -80    
-320   16     
-16    128    
192    32     
96     -32    
-2064  -64    
288    -192   
224    432    
-176   -400   
-96    176    
16     -368   
224    -320   
-192   -80    
-16    -144   
-224   -304   
160    240    
144    176    
80     -32    
224    -272   
-16    288    
-1040  0      
224    32     
-1312  -112   
208    -112   
176    240    
128    -224   
-32    144    
144    -544   
-160   32     
-80    320    
240    64     
-176   -112   
192    -432   
272    -80    
96     48     
48     0      
96     16     
144    -16    
-112   48     
0      64     
-16    48     
272    288    
96     32     
32     -112   
-160   32     
32     -112   
192    -64    
144    -240   
-128   -112   
96     -144   
48     -64    
144    48     
-64    -48    
32     -192   
16     64     
80     -288   
144    16     
64     96     
48     96     
-128   0      
-128   -32    
-384   0      
48     -416   
-384   -144   
-256   272    
-96    80     
224    -160   
-752   -128   
320    -288   
256    160    
432    160    
208    256    
-400   32     
-1904  -96    
-32    32     
-16    16     
-80    -128   
144    -176   
-32    128    
112    -16    
-128   0      
160    -160   
48     -16    
272    0      
272    80     
-368   16     
-432   -64    
-320   -48    
-688   -32    
-96    16     
-256   0      
64     96     
-928   64     
-176   -128   
64     -80    
-288   16     
-240   -32    
-80    -16    
16     -80    
224    176    
-80    -112   
-160   -64    
-112   0      
64     64     
64     16     
-192   16     
0      80     
48     96     
-48    -32    
64     32     
32     128    
-128   -32    
-80    -16    
-240   -64    
32     96     
48     64     
128    80     
-64    -32    
-32    0      
-80    32     
-240   32     
-48    16     
-304   -112   
32     48     
-224   48     
32     -32    
32     -48    
0      16     
16     -32    
144    80     
128    32     
-224   0      
32     -64    
-160   64     
-48    -16    
-144   0      
0      48     
-256   320    
0      112    
-896   -80    
-48    16     
-32    -32    
192    160    
-208   32     
64     -80    
-80    144    
80     80     
-64    64     
-16    80     
-64    112    
16     80     
-48    128    
-144   144    
160    144    
-384   -144   
-48    -160   
-176   -208   
176    32     
144    96     
224    0      
64     400    
0      272    
32     -384   
176    -272   
-48    48     
-288   336    
-80    96     
-272   -864   
-16    48     
-96    240    
352    -16    
-1632  -256   
128    32     
-48    -96    
-144   240    
-240   96     
256    -16    
-224   0      
-112   48     
16     352    
48     -80    
-64    96     
-176   -48    
304    -128   
-16    832    
-176   -416   
-1200  720    
720    -144   
-224   -256   
32     48     
0      512    
464    1008   
-112   -112   
0      -176   
-144   -288   
-192   80     
-16    -16    
0      -80    
336    128    
-80    16     
-32    32     
-336   -16    
32     208    
96     32     
80     -32    
128    -96    
-208   -176   
64     -112   
-96    -48    
80     -48    
-128   0      
-208   -16    
240    -80    
64     112    
-240   16     
96     -64    
336    -80    
-80    16     
-32    128    
16     16     
32     96     
112    -16    
96     48     
208    64     
144    112    
-176   16     
-32    -112   
-128   -96    
-32    112    
16     -80    
96     -144   
96     64     
-112   96     
32     0      
128    0      
32     48     
32     112    
160    112    
64     -80    
16     -16    
-16    16     
64     32     
0      -32    
96     208    
-16    32     
176    -32    
0      16     
-320   64     
288    -16    
-128   32     
192    -64    
144    48     
32     144    
-160   -80    
48     112    
-32    64     
-80    112    
0      -64    
416    64     
-208   144    
-304   -224   
176    -192   
-80    224    
-240   0      
128    32     
80     -112   
128    -112   
176    96     
64     288    
-64    144    
-32    64     
-80    -96    
208    -96    
32     160    
112    0      
-48    -64    
288    -80    
224    192    
-48    144    
80     256    
-80    80     
96     0      
-32    -96    
176    -96    
96     80     
-16    -80    
176    -16    
48     -96    
192    -80    
-160   -16    
64     -80    
192    32     
256    192    
48     416    
-112   112    
112    80     
256    32     
80     -16    
128    64     
240    48     
16     96     
-80    64     
-48    -16    
112    -240   
80     368    
96     192    
112    96     
128    -32    
-128   -208   
224    176    
-32    592    
128    224    
64     16     
-176   -80    
112    176    
-32    -48    
192    96     
240    208    
48     -176   
32     -208   
-48    -352   
0      48     
64     64     
0      64     
64     832    
80     208    
-272   -544   
96     352    
48     256    
-96    -448   
240    -16    
272    -432   
160    368    
32     -48    
0      272    
-224   -480   
144    80     
288    192    
0      -80    
64     -144   
-384   -400   
48     64     
160    176    
-32    80     
336    496    
-352   336    
-64    -672   
32     368    
-96    48     
272    -160   
144    -320   
64     -144   
-80    16     
0      0      
240    -992   
-288   384    
-80    320    
-112   16     
144    96     
-96    -144   
-128   -64    
288    160    
224    -16    
-256   -560   
624    -16    
224    464    
32     -240   
480    -304   
112    144    
-112   -496   
-16    128    
-128   -160   
112    -16    
304    160    
-112   192    
272    144    
-16    -16    
128    32     
64     -176   
64     112    
48     -368   
48     -64    
160    -48    
112    176    
304    144    
-208   16     
64     128    
16     112    
160    176    
-32    -96    
256    112    
112    80     
-96    -64    
112    -704   
-80    -16    
112    -176   
-112   16     
128    -224   
128    96     
176    -160   
0      -32    
-16    96     
16     32     
-48    32     
144    0      
32     64     
320    -160   
80     64     
32     160    
64     16     
-48    -64    
128    96     
80     0      
64     112    
96     112    
160    32     
32     64     
160    -384   
144    -752   
48     -64    
160    -1216  
48     -48    
32     96     
352    -16    
192    48     
-48    32     
0      64     
48     -32    
256    -800   
-48    480    
0      144    
176    224    
-1440  -80    
96     -144   
96     -96    
-64    -496   
256    -288   
192    -112   
-80    160    
-176   -208   
16     -48    
192    128    
-16    32     
48     -208   
272    128    
-32    -64    
0      160    
-272   64     
80     -128   
96     -112   
256    -80    
240    128    
-144   -128   
0      -96    
80     -384   
64     -144   
-48    16     
96     64     
96     -16    
-352   -288   
144    -304   
-112   192    
-416   48     
112    -96    
-800   192    
-240   -80    
272    32     
64     -32    
224    32     
368    -144   
32     48     
0      -272   
-80    16     
-32    0      
32     0      
208    -16    
176    80     
16     0      
-192   -192   
-1008  -336   
176    -256   
48     32     
-64    -64    
-32    -32    
16     -288   
-368   -144   
192    -672   
144    32     
128    -80    
0      64     
0      32     
48     64     
-144   -64    
-64    -64    
-672   -208   
224    -144   
-336   48     
0      48     
64     96     
-128   -144   
32     64     
0      -224   
128    64     
208    -32    
-80    32     
112    64     
-80    32     
-80    -16    
32     -48    
-160   16     
64     16     
-80    32     
288    -192   
-512   -96    
96     -192   
-64    80     
96     -384   
-16    96     
240    368    
-80    48     
-112   48     
128    -64    
-16    -16    
112    -48    
-336   80     
64     0      
-1008  -48    
208    -96    
-64    32     
112    -176   
64     48     
176    -64    
32     32     
128    -400   
112    80     
-144   160    
80     16     
-320   32     
208    -112   
-112   112    
-112   128    
80     -128   
336    -16    
-64    -16    
144    -256   
224    96     
208    432    
128    -144   
176    -112   
272    304    
-208   96     
16     880    
-432   -528   
-128   -976   
176    752    
416    -208   
448    -112   
432    384    
-400   -80    
192    -160   
-16    64     
-288   -592   
-16    240    
-448   -240   
-400   -64    
-512   288    
0      -112   
-512   -80    
528    -736   
-176   192    
96     80     
96     64     
-1648  432    
304    144    
-1264  272    
48     -16    
-112   -240   
0      16     
-96    -128   
-400   608    
208    160    
-1056  272    
-336   -224   
192    -80    
-48    32     
176    -96    
272    80     
-304   0      
-16    -48    
-176   -96    
-16    128    
128    -48    
-128   -64    
-48    80     
-192   288    
-16    144    
-272   -80    
240    -48    
-1008  112    
32     -96    
-112   -128   
160    80     
-144   -16    
-48    -16    
112    -128   
-16    64     
112    -48    
-160   16     
-64    -64    
-16    -16    
112    128    
-144   48     
-112   -128   
-240   -64    
-32    16     
16     0      
32     0      
64     -16    
224    64     
-32    -128   
48     32     
-64    48     
112    0      
64     -32    
80     16     
-144   32     
-144   -128   
-144   -176   
32     -48    
-16    48     
-112   0      
16     16     
-192   -16    
64     128    
-288   32     
-112   48     
80     32     
-144   32     
64     32     
128    48     
-64    128    
-176   -32    
64     32     
80     -160   
80     16     
-560   16     
16     -16    
-112   96     
144    0      
32     16     
48     32     
32     96     
-48    96     
-112   80     
-192   48     
48     0      
-16    -64    
96     128    
32     160    
-48    -16    
-608   -144   
112    304    
-144   144    
-64    208    
160    80     
-80    -384   
32     -240   
48     -16    
-64    16     
64     96     
0      128    
-80    336    
-64    96     
-240   -144   
16     -160   
-256   64     
144    240    
-720   112    
96     48     
-80    64     
-48    80     
240    208    
-160   384    
160    224    
-48    48     
80     -16    
-160   112    
96     128    
-288   -192   
48     -48    
-192   -128   
272    96     
176    64     
32     -256   
-400   -480   
192    -64    
-416   -16    
-16    -592   
128    -224   
-272   48     
-32    -160   
-64    -32    
256    176    
-80    96     
128    -208   
-128   288    
-16    192    
-80    -656   
128    448    
-176   -272   
-48    -48    
64     544    
192    -224   
0      160    
-80    -16    
96     -48    
-128   304    
48     -368   
-96    192    
32     112    
-144   -80    
144    -80    
-144   -288   
256    96     
32     208    
144    64     
-16    -32    
-112   48     
80     -224   
16     -48    
16     -64    
-176   -96    
0      192    
-160   96     
128    64     
-144   -32    
-96    -64    
256    48     
80     96     
192    80     
-32    64     
-64    16     
-48    48     
-80    -176   
-288   -832   
-160   -320   
-208   -64    
208    48     
16     -48    
80     64     
352    304    
-16    352    
-176   176    
160    0      
-288   -64    
-352   48     
192    96     
16     32     
-208   -32    
-240   -160   
48     -128   
-128   -80    
-16    -16    
-32    -176   
192    -112   
336    128    
272    336    
-368   112    
-80    -128   
304    16     
-272   -48    
400    0      
-160   64     
0      -96    
-80    112    
-48    -32    
144    -64    
-96    64     
48     -192   
48     -1424  
160    48     
64     0      
-176   0      
-48    -128   
288    0      
80     160    
112    48     
-32    48     
32     16     
-80    0      
256    80     
-16    -144   
32     32     
-112   16     
16     -192   
144    -32    
240    96     
-96    48     
48     64     
224    96     
-64    48     
64     112    
0      144    
128    144    
32     0      
-48    -16    
112    -32    
96     96     
64     0      
160    0      
112    32     
-112   -432   
176    -80    
-64    96     
192    -80    
192    -32    
0      48     
48     -96    
-64    -48    
48     -16    
-192   96     
64     -32    
256    -64    
80     0      
80     -144   
112    112    
16     -288   
224    32     
-96    32     
16     80     
112    -16    
64     64     
-160   208    
32     48     
112    -96    
-32    -192   
-96    -400   
80     -96    
112    128    
-96    -112   
32     48     
32     -736   
80     80     
176    -112   
48     -16    
0      -112   
112    -288   
80     -16    
272    192    
-224   96     
-64    80     
96     96     
112    -64    
80     64     
48     -80    
64     32     
-16    -864   
-80    -96    
16     240    
-192   -144   
-32    -16    
112    112    
-192   208    
-16    0      
-96    -144   
176    -384   
272    -96    
176    -176   
48     128    
-64    -32    
96     96     
112    -80    
64     48     
-48    -640   
-80    32     
304    176    
-112   144    
32     -48    
240    48     
48     64     
64     -48    
32     -144   
128    -80    
-176   128    
176    -96    
288    112    
-64    -64    
128    -32    
128    -48    
208    32     
96     112    
144    96     
-96    -48    
128    48     
176    96     
32     160    
-16    112    
-32    -64    
0      -16    
96     -128   
48     128    
176    48     
144    64     
128    32     
-32    96     
80     48     
-112   -528   
-32    112    
112    -432   
96     -1232  
112    0      
112    -912   
112    0      
32     -48    
-80    -208   
0      80     
176    112    
-48    144    
96     -752   
0      -352   
80     368    
80     -160   
112    0      
-272   -32    
-16    -208   
176    -272   
176    240    
0      -192   
112    352    
128    -48    
112    -48    
-304   -400   
336    -112   
-112   192    
304    -768   
256    272    
208    -560   
-160   224    
-16    -368   
208    48     
112    608    
16     -624   
96     304    
144    -224   
256    96     
48     -720   
224    -304   
-400   -576   
160    -192   
-160   560    
16     -16    
64     144    
384    144    
-608   16     
48     -272   
224    -176   
-176   32     
304    48     
-240   128    
-608   -128   
384    -416   
160    -320   
-224   -80    
176    64     
-80    0      
-240   -16    
96     -80    
32     -32    
-80    -64    
-16    -176   
-48    -160   
16     -160   
-64    -80    
160    -256   
192    -160   
16     -64    
224    -32    
64     -496   
-16    32     
-32    -64    
16     560    
-80    32     
640    -272   
-144   -16    
192    -336   
-112   32     
-128   -48    
-176   176    
224    192    
48     32     
80     0      
176    -32    
80     -1056  
-48    64     
384    -32    
-208   16     
-144   0      
32     -240   
0      -16    
-48    -112   
80     -32    
176    48     
-352   -48    
240    -64    
-64    16     
-48    -192   
-144   -64    
240    -416   
64     48     
128    0      
-432   -208   
384    -192   
144    80     
-304   -272   
128    -64    
-496   0      
224    96     
-16    -32    
80     -256   
48     -112   
160    -192   
96     112    
16     -32    
48     144    
16     128    
160    16     
-176   -16    
32     -16    
-128   -128   
144    32     
-160   -48    
-16    -80    
-144   -96    
208    -272   
-48    144    
128    -112   
32     80     
272    -112   
0      144    
0      0      
-192   96     
-224   16     
224    -144   
-112   -64    
384    -96    
-224   96     
32     16     
-384   -32    
176    -208   
-64    48     
16     -80    
160    80     
-304   -32    
-272   256    
-384   48     
-672   -64    
48     48     
16     -16    
-64    -128   
144    16     
-240   -16    
-80    -224   
128    -208   
-1360  -192   
240    16     
-208   176    
240    336    
-336   -80    
-480   -336   
48     -16    
-48    -16    
64     -224   
-1184  64     
112    176    
-240   32     
64     -208   
-32    -160   
-64    -128   
16     144    
288    16     
-224   48     
16     48     
0      96     
32     -176   
32     160    
-480   -16    
-288   -32    
-512   0      
-80    -304   
-1920  64     
224    288    
160    -128   
64     0      
-272   -288   
176    208    
-80    112    
16     -64    
-112   -64    
-128   48     
-112   -160   
96     32     
-208   32     
112    144    
-96    -32    
-32    -64    
-32    -96    
-192   -64    
-64    48     
-112   64     
64     112    
48     -48    
-32    32     
-32    -48    
-64    -16    
-32    48     
112    -32    
-32    -16    
-32    0      
-80    16     
-256   -32    
80     48     
-2352  -112   
176    128    
-48    -80    
128    48     
32     16     
-48    -64    
32     0      
-128   64     
-32    32     
-128   96     
48     96     
-208   -32    
-80    -16    
-160   16     
64     80     
-992   -16    
96     -96    
-112   -48    
144    160    
96     0      
-256   -64    
-80    -80    
336    -96    
64     176    
16     -144   
80     -16    
-80    144    
-288   48     
-16    32     
272    -32    
-352   -16    
64     64     
64     -64    
128    -16    
64     64     
-304   -48    
-336   -320   
176    -48    
-224   112    
-112   -80    
160    -32    
160    64     
-64    48     
-96    0      
-192   80     
-368   -96    
176    16     
-48    144    
80     160    
0      48     
112    32     
-64    -32    
-240   0      
112    16     
-256   32     
80     0      
16     -16    
-48    -144   
-16    -336   
80     48     
-576   0      
32     32     
48     64     
176    48     
80     -48    
16     48     
48     48     
32     16     
-48    64     
48     16     
48     80     
-32    112    
16     32     
-176   -64    
256    64     
32     96     
-80    32     
48     -32    
0      32     
-48    48     
80     32     
112    16     
0      80     
-112   48     
-48    80     
-16    16     
-64    -64    
112    64     
16     16     
144    208    
0      112    
-160   112    
112    64     
16     80     
-32    128    
224    -112   
0      192    
112    112    
144    -32    
-320   -320   
-80    -16    
-112   -32    
-48    -144   
128    0      
192    176    
144    128    
-48    0      
64     80     
16     240    
64     240    
240    192    
32     160    
-208   -80    
-128   -256   
176    240    
16     176    
64     32     
272    16     
-304   -192   
0      48     
96     144    
160    96     
48     -16    
64     -48    
160    192    
-112   96     
-16    64     
-96    -96    
112    112    
-32    16     
208    0      
-416   -48    
528    -912   
32     -144   
160    432    
-224   -144   
-112   -96    
64     288    
-240   320    
112    32     
160    -192   
224    624    
64     -384   
208    96     
-160   32     
96     -128   
16     -16    
176    -48    
-64    64     
-64    -592   
32     -64    
-80    -352   
240    624    
304    256    
64     -112   
0      176    
32     48     
-48    112    
-16    -16    
272    -224   
192    0      
16     144    
32     160    
176    -128   
368    -272   
-144   912    
64     -384   
256    400    
-112   96     
0      -96    
-160   112    
32     -528   
112    80     
80     128    
-16    -64    
128    144    
-16    32     
-96    -288   
144    80     
16     -512   
112    32     
-64    -16    
336    432    
48     144    
0      128    
128    96     
48     304    
-176   -272   
64     -16    
64     96     
192    -112   
-160   112    
80     -384   
176    -320   
192    224    
64     208    
96     -832   
64     208    
32     48     
0      288    
144    640    
0      -160   
-48    -224   
144    80     
64     96     
16     0      
16     -368   
208    -32    
160    96     
96     -272   
-16    -416   
-128   16     
32     32     
-16    0      
112    32     
96     -304   
64     256    
-128   -128   
288    176    
-192   96     
32     -256   
0      -48    
128    -160   
-48    -16    
176    -112   
144    16     
-32    -176   
-96    -208   
224    -544   
-48    -16    
112    16     
80     144    
-32    64     
-96    -32    
192    64     
80     128    
-32    192    
192    -16    
208    -64    
368    -112   
-64    112    
480    160    
-256   176    
96     -16    
-112   -128   
16     -208   
96     112    
-48    96     
192    96     
160    -32    
0      -96    
80     160    
400    304    
-400   192    
160    -352   
32     -48    
-256   -192   
432    -400   
-16    -240   
144    128    
112    -112   
-320   320    
0      0      
224    32     
-64    80     
-80    -16    
48     -32    
128    16     
144    160    
256    -256   
112    0      
-128   -80    
-32    64     
16     -48    
48     208    
16     192    
224    144    
-128   0      
-80    48     
-192   -224   
224    -160   
192    112    
176    16     
160    48     
208    -64    
-64    112    
-80    -96    
208    -64    
-176   48     
128    -192   
112    -144   
176    -464   
-144   64     
-1088  32     
48     -224   
-192   80     
192    -176   
320    -32    
16     -832   
144    64     
192    224    
288    -80    
176    16     
0      80     
-48    -32    
-160   112    
160    -128   
64     -288   
-288   0      
112    -128   
128    -48    
-64    -352   
176    -224   
256    -384   
-48    -16    
32     -608   
-144   -320   
-32    -304   
128    -64    
-32    -256   
128    224    
-352   256    
96     144    
-192   48     
224    160    
-48    -80    
16     -176   
112    -128   
256    -48    
80     224    
-32    -320   
16     -144   
224    16     
176    192    
96     -176   
304    -160   
32     432    
208    0      
-240   -384   
64     144    
-128   0      
192    208    
-256   -416   
208    48     
224    -16    
-16    -512   
16     -64    
160    -272   
288    48     
48     32     
128    -176   
-464   -256   
64     32     
-96    96     
64     -192   
-272   -16    
224    80     
592    480    
-304   64     
352    544    
-112   160    
-16    16     
352    -432   
96     -16    
128    -32    
128    32     
-112   48     
32     0      
-352   32     
320    64     
-48    32     
144    -16    
-1024  -48    
160    -64    
64     0      
96     -64    
80     64     
192    -112   
48     16     
32     16     
352    32     
-320   -48    
128    32     
0      -48    
208    -48    
-352   96     
96     -80    
-176   288    
-128   16     
16     -112   
176    -32    
80     64     
-112   -160   
176    32     
-304   0      
160    -16    
16     80     
112    -112   
-416   -32    
144    32     
-32    -80    
16     -48    
-80    -16    
144    -80    
-16    32     
256    -128   
-64    16     
144    -272   
32     -16    
-144   0      
224    16     
-336   -96    
96     0      
-112   -16    
-48    -32    
16     0      
-16    -64    
-96    -80    
-96    -32    
80     32     
-80    -96    
48     80     
-576   -80    
-1104  32     
48     64     
-2656  -544   
656    -48    
-48    192    
-240   -112   
384    32     
-400   96     
-96    -16    
-688   -208   
176    -368   
352    32     
32     208    
-160   144    
64     48     
160    -64    
-512   -16    
-32    64     
-80    -32    
-480   48     
-400   -192   
256    0      
-48    144    
-416   -48    
208    32     
-80    -64    
64     64     
0      -112   
-208   32     
-16    -16    
-144   144    
80     48     
-32    -64    
144    16     
-96    160    
-48    96     
-2032  -16    
0      32     
-224   16     
-80    64     
192    0      
-48    32     
-32    -208   
-128   -32    
-16    192    
208    0      
-160   -16    
-128   0      
-96    80     
-144   -32    
64     -48    
-256   -16    
80     48     
80     -16    
144    48     
-48    -112   
192    128    
-48    80     
-208   -16    
112    80     
-64    80     
-256   32     
-80    -320   
0      -80    
-96    128    
16     -80    
-528   -64    
144    208    
-2576  -128   
16     48     
-112   -304   
80     128    
112    112    
-112   -256   
128    0      
-192   368    
-80    -80    
16     -32    
144    64     
-80    144    
-128   -16    
-272   -80    
96     -64    
-960   -256   
144    176    
-336   -432   
-96    64     
128    112    
-144   32     
-16    64     
-208   -48    
144    80     
-336   -16    
0      128    
0      16     
-48    288    
-208   -1520  
272    336    
-160   -16    
0      112    
-112   96     
16     16     
80     112    
176    432    
-336   32     
-96    -304   
64     272    
128    -96    
96     -48    
-144   144    
80     -64    
0      32     
-304   16     
-96    -608   
384    752    
32     -320   
0      16     
96     96     
-80    -272   
0      480    
-48    -160   
64     -112   
-32    128    
-16    48     
-96    32     
-144   -400   
448    160    
208    912    
-320   -416   
-144   -480   
16     288    
64     48     
64     320    
-144   96     
480    144    
-32    416    
160    -400   
-16    -144   
224    448    
272    192    
-176   -176   
-96    32     
-128   192    
-64    32     
-400   -112   
-80    -288   
-48    -112   
16     -16    
144    -80    
-64    48     
16     -96    
-96    32     
-128   -144   
32     0      
-48    -32    
0      -48    
-192   64     
176    0      
80     -64    
112    -32    
176    80     
16     240    
16     16     
48     0      
128    176    
-64    176    
192    128    
-80    -16    
160    64     
-80    16     
32     144    
-112   -32    
272    144    
112    432    
-32    -48    
144    -32    
-112   80     
144    16     
-80    208    
-64    -32    
-128   -448   
-48    -160   
-176   160    
-128   112    
-96    -528   
-160   -112   
64     -352   
-64    16     
-48    208    
256    -240   
-48    176    
240    -96    
-80    320    
96     -64    
-16    16     
144    0      
-128   -272   
272    16     
-32    128    
0      368    
80     -16    
-224   608    
352    80     
32     256    
288    -64    
-208   -48    
-112   128    
48     64     
-112   160    
64     -128   
-128   -160   
-64    -64    
-48    112    
96     16     
144    -48    
-96    80     
32     16     
96     -208   
-128   16     
176    128    
48     32     
-208   -272   
48     32     
16     400    
32     -48    
-112   -64    
256    -112   
-32    32     
400    160    
-400   64     
-272   -352   
464    -32    
-128   -256   
128    32     
-96    -576   
160    -368   
112    -64    
-112   80     
-96    64     
240    -160   
-304   -208   
512    -192   
-240   -16    
256    208    
112    128    
272    -128   
80     -64    
80     -368   
-112   -160   
-80    -128   
48     -192   
208    -144   
240    48     
160    256    
-48    208    
-176   -208   
320    -256   
112    16     
240    48     
0      80     
-80    -64    
-32    96     
256    32     
16     48     
-32    -800   
80     -128   
80     160    
160    96     
-144   -128   
128    0      
352    160    
-80    224    
48     80     
320    144    
-160   144    
144    -192   
128    48     
96     -144   
96     176    
64     -272   
208    256    
-192   192    
-32    80     
112    48     
112    -80    
80     -32    
-32    -176   
-32    -32    
48     32     
240    -112   
-80    -160   
112    -128   
272    64     
32     -16    
80     -784   
96     224    
32     -736   
-16    96     
32     -32    
160    208    
-16    -48    
112    -96    
256    -208   
96     64     
16     272    
144    320    
-48    48     
-144   -144   
272    64     
128    -240   
208    -64    
208    -128   
240    -144   
64     -224   
208    96     
0      -112   
64     16     
64     80     
-112   -176   
128    80     
32     -32    
48     48     
64     -176   
112    16     
-144   -304   
80     0      
-64    -32    
-32    -16    
80     0      
48     80     
-96    32     
112    -64    
112    208    
-32    -288   
208    -144   
224    112    
-48    96     
64     -128   
96     -80    
80     -96    
128    64     
0      128    
-96    32     
240    96     
80     -720   
80     16     
48     16     
176    -656   
160    -80    
32     -1232  
-16    -64    
-32    96     
112    16     
16     16     
-16    -16    
176    -336   
0      64     
16     -48    
-32    48     
112    64     
240    -128   
384    -32    
160    -32    
-48    -128   
144    -416   
32     -80    
80     -768   
0      -80    
0      32     
0      -64    
128    32     
0      -32    
144    -160   
64     96     
128    32     
208    -48    
-368   -80    
-128   -80    
64     -32    
32     64     
0      48     
128    -112   
128    -16    
272    112    
0      -16    
320    -224   
32     144    
144    -144   
-80    48     
-144   -64    
32     -144   
-288   48     
-64    -16    
240    32     
-80    -64    
144    -112   
64     -288   
-64    -128   
384    -16    
-16    288    
-304   48     
-208   48     
112    32     
-64    -128   
-320   -240   
304    -160   
-160   -144   
976    464    
-1616  144    
-208   -320   
304    -112   
-48    -48    
144    -16    
96     -416   
512    304    
-288   0      
-96    -48    
128    -288   
-80    -128   
112    80     
160    32     
-160   -48    
64     -32    
-1376  0      
0      -32    
48     32     
80     -16    
0      32     
0      -304   
208    -64    
0      -720   
224    48     
-144   -64    
336    -16    
-64    48     
128    -128   
-208   -128   
48     -80    
-368   48     
144    32     
320    16     
112    -304   
192    112    
80     368    
80     16     
-64    -1104  
96     384    
-96    112    
-112   -512   
32     176    
256    16     
-496   -96    
368    272    
-416   -304   
48     224    
64     -64    
80     -176   
144    0      
-96    -96    
352    -256   
160    -80    
240    80     
-96    -32    
-96    320    
-160   -224   
32     192    
0      -80    
160    -96    
-240   -96    
272    -192   
-416   -512   
-128   -688   
16     400    
192    32     
64     -192   
-80    -448   
144    -608   
80     64     
208    -128   
-160   -272   
144    -80    
-80    -96    
128    208    
-240   -288   
0      -176   
-384   -288   
64     -48    
112    32     
-112   -400   
-48    0      
-160   -16    
-1360  48     
-16    16     
-880   448    
-240   -256   
112    -144   
-208   48     
-48    -112   
-144   -16    
144    -96    
64     -48    
-368   -208   
64     224    
-528   -384   
224    -240   
-32    -144   
-160   -160   
-144   -176   
-800   -400   
-224   -336   
576    112    
-320   144    
-112   -96    
-32    -16    
-176   -64    
240    -16    
16     -128   
240    96     
-144   48     
-80    32     
-80    -80    
-144   0      
-48    -16    
-176   -304   
112    -128   
-368   -16    
-32    80     
-192   -64    
-128   -112   
-64    -32    
-96    208    
-16    -48    
16     64     
80     -16    
-48    -64    
32     -16    
-32    -32    
-240   0      
80     -96    
80     304    
-288   352    
-208   80     
-1776  128    
-32    16     
-112   -80    
112    -48    
192    -144   
-32    64     
-16    -192   
32     32     
-144   80     
144    208    
0      176    
48     -16    
112    64     
-64    32     
-64    -144   
-256   -128   
80     64     
112    112    
160    176    
-224   -16    
-64    32     
-16    -32    
-192   32     
128    16     
0      16     
176    0      
-112   -336   
-224   -336   
-160   240    
160    416    
-32    0      
256    304    
-16    -208   
160    -48    
96     -208   
-208   112    
-112   176    
256    -64    
-96    112    
-144   -640   
-272   -176   
-80    -304   
-176   -48    
-16    16     
48     -272   
-160   96     
-32    -32    
-1792  0      
-80    -112   
-32    288    
352    64     
16     -32    
32     -64    
64     -96    
-96    352    
192    192    
432    352    
304    784    
-608   656    
-128   0      
-48    80     
80     176    
80     48     
-16    64     
-144   -256   
-64    -80    
80     -336   
32     -320   
48     -144   
64     -192   
-16    304    
240    -48    
-256   192    
-224   -160   
-128   144    
-272   -352   
80     128    
80     -64    
224    -16    
0      144    
96     16     
-128   -528   
-320   -688   
-96    -128   
-128   256    
-80    -16    
288    -256   
-192   -80    
-16    -32    
208    -144   
-128   -80    
-96    -80    
16     240    
320    304    
-32    320    
48     192    
-192   -192   
384    96     
80     -240   
-176   -112   
112    128    
144    64     
48     64     
80     -32    
16     208    
368    368    
-64    352    
-32    80     
-112   64     
352    0      
-160   112    
224    -256   
16     -128   
0      192    
224    -48    
48     176    
-176   240    
32     144    
208    -112   
464    496    
-352   304    
-160   -256   
192    48     
-96    192    
-112   -144   
64     752    
368    352    
0      -336   
-176   80     
160    -160   
64     144    
32     96     
32     -112   
-336   16     
-32    160    
-304   -48    
192    16     
80     48     
256    16     
224    144    
48     112    
-144   -64    
0      160    
-176   64     
-32    -96    
80     -16    
96     -80    
288    64     
-96    128    
32     -64    
80     -80    
112    80     
240    48     
-160   -32    
128    -16    
-96    80     
208    80     
-16    192    
-32    96     
-48    -352   
416    -496   
176    -256   
224    272    
32     64     
0      0      
-64    -128   
-32    -32    
-272   -128   
-96    -64    
-192   -16    
-96    48     
48     64     
64     80     
224    208    
-208   48     
64     16     
48     -112   
128    64     
-48    80     
16     -432   
208    -224   
192    128    
464    112    
80     0      
224    96     
128    128    
-192   144    
-304   0      
96     144    
-16    32     
64     0      
80     0      
192    48     
160    48     
-48    -160   
192    -16    
256    -400   
144    128    
16     48     
112    -48    
112    192    
-144   48     
16     -16    
224    80     
160    64     
224    48     
16     0      
0      32     
-32    -48    
64     -144   
96     112    
48     -16    
-48    32     
144    0      
128    112    
0      64     
0      0      
-16    48     
176    96     
-16    0      
176    16     
-96    80     
80     -96    
-32    64     
112    -64    
-16    64     
160    -368   
-48    0      
144    -1552  
80     0      
80     0      
224    80     
-48    16     
144    64     
-96    -48    
224    -32    
-48    48     
64     0      
96     128    
16     -64    
128    240    
128    -16    
352    144    
-400   80     
176    -16    
64     48     
80     96     
-16    -80    
80     80     
-32    16     
-48    48     
112    0      
256    -16    
-176   -16    
352    -464   
160    -208   
-160   -112   
192    352    
-112   0      
-80    16     
112    32     
208    160    
32     144    
464    -48    
384    -64    
544    -96    
-64    -192   
208    80     
-416   -80    
80     -64    
0      240    
-32    -32    
240    144    
48     -144   
208    208    
-80    32     
0      -16    
112    112    
112    176    
96     -64    
16     -112   
112    80     
96     0      
-16    -80    
256    -224   
176    496    
64     -160   
-80    -144   
0      128    
224    96     
96     -224   
-96    -304   
64     112    
128    -800   
560    -64    
-352   688    
304    -1408  
-144   144    
208    304    
128    -672   
-160   64     
-48    672    
288    -32    
64     -304   
-48    -400   
336    -144   
48     32     
32     -320   
-176   -624   
48     -192   
-208   48     
64     0      
48     -144   
64     -256   
128    48     
176    -400   
352    -64    
96     -32    
48     32     
240    -400   
-16    -16    
128    -48    
-144   -144   
96     -64    
320    -96    
-816   -16    
64     -160   
-224   96     
128    -272   
-64    64     
192    -528   
48     -208   
32     0      
32     -80    
16     32     
-128   -32    
112    16     
-96    96     
-176   -32    
112    -80    
-752   32     
-176   -64    
-16    -96    
0      -96    
240    -80    
224    -256   
-48    -96    
80     -768   
-80    -64    
128    -80    
80     96     
-16    -32    
112    -112   
-176   -112   
160    -32    
-400   80     
0      -128   
320    32     
-16    176    
-128   -80    
272    -128   
80     -32    
64     -352   
544    256    
-336   160    
144    224    
-64    32     
112    -176   
112    -80    
128    112    
-144   32     
208    -96    
-1072  -80    
0      128    
-192   64     
-16    -80    
96     48     
32     -80    
112    -32    
144    128    
64     96     
-64    16     
128    48     
-32    112    
80     0      
-352   -160   
288    -368   
-448   96     
80     0      
-624   -240   
160    -144   
-48    -80    
96     -112   
112    -256   
0      -1824  
224    16     
-272   -192   
240    -336   
-128   144    
-64    48     
-496   -256   
16     -128   
-592   -192   
144    64     
48     0      
16     0      
-64    -208   
48     -48    
208    -16    
-16    -288   
32     32     
0      -32    
80     48     
-672   16     
144    64     
-176   -96    
208    -112   
48     16     
0      32     
-48    32     
16     -80    
144    -16    
64     -304   
128    -112   
128    48     
160    304    
0      112    
192    192    
-352   144    
32     48     
-48    176    
64     -48    
-112   -288   
144    352    
-224   656    
-64    -112   
-48    -208   
16     -416   
-96    48     
112    64     
-96    208    
-256   -80    
320    128    
80     256    
240    288    
160    64     
96     544    
-272   848    
-2576  -1728  
-224   240    
-240   -336   
-32    320    
-432   544    
-272   -128   
112    288    
-880   -672   
64     64     
80     96     
-48    -32    
-496   -96    
-96    -144   
-208   -320   
112    752    
-80    -176   
-160   -368   
-112   112    
-32    -336   
-112   -80    
-192   -144   
80     320    
144    160    
16     -256   
-192   -208   
-224   -336   
-736   368    
96     -32    
-448   -912   
16     -352   
176    512    
-48    -416   
96     112    
-144   -320   
128    80     
96     -128   
128    80     
-144   80     
64     -176   
-464   -64    
16     0      
96     64     
80     96     
-512   -80    
-64    -144   
352    -240   
-176   192    
256    -112   
32     -32    
-176   256    
144    -416   
96     176    
-48    80     
-144   -192   
128    80     
-160   0      
-128   -48    
16     64     
-1136  -16    
192    16     
112    48     
-32    32     
-32    -80    
48     112    
80     -64    
80     -48    
-128   -144   
-144   -80    
288    384    
-96    16     
-16    -16    
-112   16     
176    112    
-384   -192   
-16    -32    
192    16     
208    -368   
176    -128   
80     352    
16     304    
-160   16     
-144   64     
176    64     
16     64     
224    -112   
-240   -240   
-176   -736   
-16    -304   
80     -176   
192    -48    
-848   16     
112    -1184  
32     240    
48     16     
-96    48     
-112   80     
0      0      
144    -32    
160    -144   
-352   -208   
-96    288    
-208   160    
256    0      
-128   -48    
128    -32    
-192   -16    
-32    32     
128    80     
288    432    
-352   432    
-192   -96    
64     -48    
-96    -64    
384    384    
-320   224    
144    80     
-112   160    
112    112    
-224   -64    
112    16     
-1200  -64    
-96    32     
48     16     
48     32     
128    176    
-64    96     
-16    -32    
32     32     
176    128    
80     0      
0      0      
-160   0      
112    80     
-224   -80    
128    32     
288    256    
144    112    
128    -80    
96     48     
-128   96     
-112   32     
64     32     
0      32     
96     96     
-48    32     
80     -160   
-448   -160   
-32    16     
64     48     
96     80     
288    160    
-176   16     
144    32     
-144   16     
32     16     
208    32     
16     48     
48     32     
-80    -64    
-48    -48    
160    128    
-144   -80    
112    -32    
64     16     
80     32     
160    128    
-16    32     
-16    64     
96     48     
-48    0      
176    64     
64     96     
144    32     
176    -16    
-176   -48    
176    16     
-32    64     
16     32     
112    128    
-160   16     
32     0      
16     32     
64     96     
0      -16    
80     32     
0      96     
224    96     
-160   -16    
160    -256   
64     -80    
208    176    
32     -96    
192    0      
-80    160    
-160   0      
208    -32    
-144   80     
64     -32    
0      80     
48     32     
-208   32     
128    16     
64     48     
-96    -288   
-112   -176   
32     32     
-48    -128   
512    -560   
160    128    
32     16     
224    -160   
-128   48     
592    -400   
288    32     
352    320    
-160   48     
-160   96     
-192   16     
-96    16     
64     112    
464    480    
-352   -592   
112    672    
352    672    
16     -256   
176    0      
-160   -80    
64     -80    
-80    -224   
32     448    
128    -16    
112    176    
-128   -64    
272    -272   
-32    32     
64     80     
144    112    
-176   -560   
32     -16    
448    512    
-368   240    
240    112    
-144   160    
112    128    
0      224    
0      0      
224    -48    
-160   -144   
416    176    
-352   112    
-32    16     
144    -48    
-32    -320   
144    32     
240    -592   
-16    32     
16     224    
128    48     
80     0      
0      48     
-144   16     
144    -48    
0      -32    
96     -112   
32     96     
-32    32     
64     -32    
96     -176   
192    64     
0      0      
272    32     
128    -304   
-16    80     
0      -80    
64     16     
80     -16    
256    80     
-176   80     
96     80     
48     64     
-96    -16    
192    96     
256    -80    
208    -128   
-224   -736   
-80    -128   
-48    -1776  
-16    160    
96     -288   
48     -16    
96     48     
176    96     
-208   -208   
288    -48    
-64    192    
-192   -80    
144    112    
-160   -144   
128    -48    
96     -224   
-224   112    
96     80     
-80    32     
240    -16    
176    32     
48     400    
160    240    
-96    -64    
272    272    
-256   96     
-16    -64    
96     -16    
0      -368   
352    -368   
288    -64    
32     288    
208    112    
-112   288    
-288   -16    
256    240    
-32    64     
144    -224   
192    32     
-96    128    
16     -48    
112    -112   
-64    -32    
160    -288   
176    16     
128    -96    
80     -32    
-80    -448   
208    -16    
-112   144    
112    -464   
112    112    
128    -800   
496    -464   
48     -48    
96     -176   
224    0      
-176   16     
128    144    
304    384    
-48    -224   
-160   -48    
112    -464   
-144   -1056  
-64    -240   
64     0      
224    112    
-544   -320   
256    -192   
0      192    
-176   -304   
208    144    
160    0      
240    128    
80     -864   
80     -32    
-16    -80    
32     -208   
224    -144   
176    208    
272    -16    
-80    160    
-576   16     
-128   -224   
96     -528   
160    192    
128    576    
-48    -256   
32     80     
-32    -576   
-64    -144   
304    64     
32     -464   
144    480    
-224   -352   
-16    -32    
240    -144   
-224   16     
368    144    
-2096  -64    
240    -64    
-48    -64    
144    -240   
272    -256   
0      144    
-80    -160   
-128   -96    
32     560    
128    -80    
160    240    
160    -48    
-48    -16    
-48    48     
320    -64    
-992   624    
320    -272   
128    -688   
320    400    
-272   -32    
224    -544   
-240   288    
-64    -656   
0      -208   
-32    64     
-112   64     
-160   -192   
-224   -304   
-400   320    
32     784    
-64    64     
496    -96    
-1440  -272   
-208   -352   
-112   240    
-288   -112   
-272   -272   
336    -960   
80     96     
304    -80    
176    -64    
-80    0      
128    -96    
-224   -16    
128    -48    
-256   0      
64     64     
-608   16     
240    -96    
-144   -96    
96     -32    
-64    -48    
48     -96    
144    96     
112    48     
32     32     
-16    16     
64     0      
144    -16    
-64    -112   
192    288    
-64    400    
336    64     
-112   16     
-464   -176   
192    -32    
80     32     
-160   -128   
288    96     
-512   -16    
64     -32    
-336   96     
144    48     
48     -48    
16     0      
-16    -48    
32     -80    
-224   -32    
16     -144   
96     -128   
192    -16    
80     64     
96     -256   
16     32     
-48    -32    
192    -64    
-208   -224   
224    -80    
-208   -16    
-272   -160   
144    -64    
368    256    
-288   48     
-272   0      
-64    32     
-1120  -176   
256    48     
-320   -80    
-1824  144    
176    112    
-288   -96    
-192   -96    
-2336  -208   
-32    -208   
128    -112   
-80    48     
224    16     
-112   64     
64     160    
144    144    
64     -144   
64     -112   
-224   -256   
-176   -16    
-128   64     
-272   -48    
-112   0      
-512   64     
-112   16     
80     0      
0      -32    
128    16     
-112   16     
-400   192    
208    48     
16     -128   
-160   -48    
80     48     
160    128    
-336   80     
128    80     
16     96     
-16    16     
272    112    
-176   0      
-16    -32    
-160   80     
-64    48     
-112   -48    
80     16     
-16    32     
112    80     
-64    -16    
-160   -80    
-144   0      
-48    16     
240    0      
-16    80     
144    272    
-592   48     
96     32     
48     80     
-32    -64    
96     -144   
160    128    
80     -112   
-144   -16    
-96    -16    
-32    96     
-32    32     
-144   -64    
32     16     
-272   32     
-32    16     
-112   48     
-64    48     
-720   -16    
144    80     
-96    0      
0      -16    
-16    32     
16     64     
-64    0      
112    32     
-32    48     
-80    48     
-128   16     
-80    16     
64     16     
-64    64     
112    80     
-208   -64    
128    -32    
16     -48    
48     64     
64     112    
48     48     
96     64     
-192   32     
-16    64     
-144   16     
0      32     
16     -48    
80     80     
-288   -16    
-32    -144   
-480   -112   
-96    -128   
-272   224    
-80    64     
144    -32    
-240   -32    
176    16     
-64    -400   
-208   208    
400    -640   
0      448    
32     224    
-192   -256   
0      480    
-320   -160   
-96    -576   
176    336    
-608   -128   
-336   -64    
112    -128   
-256   224    
480    -16    
-384   -224   
240    0      
0      32     
192    -64    
-256   -272   
-256   -48    
64     -16    
-48    -352   
192    96     
144    -160   
-32    -16    
16     -336   
144    -80    
-368   -32    
432    64     
-464   496    
128    16     
-240   32     
144    -208   
-208   -208   
144    144    
-176   -208   
48     -80    
-144   128    
176    224    
0      112    
64     0      
128    -16    
336    208    
-496   144    
48     -64    
-96    80     
-224   -16    
352    0      
112    -80    
192    96     
-272   64     
144    0      
-480   -80    
16     -80    
32     144    
-32    96     
160    128    
-256   16     
64     64     
-48    64     
256    32     
112    112    
-272   48     
32     32     
16     80     
32     -16    
176    16     
112    -32    
80     80     
144    96     
-80    80     
-32    64     
208    -16    
-112   32     
-48    -64    
-144   112    
32     16     
96     -176   
-112   -32    
16     112    
-240   -16    
96     224    
144    128    
208    96     
-64    64     
-32    -32    
96     48     
160    48     
112    48     
-48    64     
-96    -16    
-64    -80    
240    128    
-256   32     
48     0      
192    128    
-144   304    
48     0      
160    0      
160    32     
-48    96     
32     112    
48     -96    
-16    -16    
-48    -16    
48     32     
80     112    
-192   192    
48     0      
128    -16    
48     -80    
-64    -320   
-48    0      
96     0      
336    288    
48     336    
48     64     
208    -176   
160    32     
0      48     
-128   64     
176    -64    
320    256    
-336   160    
96     160    
-16    192    
64     -224   
176    400    
-48    80     
64     -16    
-80    -128   
96     -96    
-96    -48    
112    112    
80     -112   
144    -16    
-64    -64    
144    80     
-80    -112   
48     -128   
224    256    
-96    -272   
128    144    
208    272    
80     144    
-32    368    
96     304    
496    624    
-336   368    
112    -32    
128    -320   
96     192    
32     192    
96     64     
16     -64    
-192   112    
-144   -384   
64     -208   
16     576    
96     -112   
224    80     
-112   32     
80     96     
128    -272   
-16    240    
208    144    
-48    -160   
64     16     
48     240    
192    -80    
320    -560   
-256   -208   
96     336    
-64    -336   
96     -112   
144    160    
0      304    
-80    640    
32     240    
-32    -64    
0      80     
224    144    
64     112    
112    -128   
64     16     
-16    96     
-16    288    
240    272    
-80    -80    
96     32     
112    -832   
-80    96     
128    160    
160    96     
32     -16    
-16    -256   
-192   -352   
48     -16    
-192   -64    
224    -64    
-16    64     
288    -128   
64     16     
112    -16    
16     32     
-80    -288   
16     48     
-80    16     
160    96     
336    208    
-144   48     
160    32     
-96    -128   
-256   -16    
-64    -112   
-16    -32    
624    -96    
0      96     
-144   -48    
352    -16    
560    176    
-176   80     
1456   896    
-576   432    
-624   -304   
-16    -288   
352    -16    
-352   96     
80     64     
368    112    
-352   0      
176    -240   
64     64     
112    -224   
192    0      
96     144    
16     -32    
0      32     
48     -432   
32     -16    
-608   32     
96     -352   
224    48     
96     -752   
80     -16    
464    416    
-336   -80    
32     -16    
256    112    
144    -112   
144    32     
-48    64     
-96    224    
256    -96    
-16    48     
-320   -96    
-224   -128   
176    -80    
48     -16    
240    -16    
368    -720   
-128   192    
-16    128    
192    -32    
112    -160   
-48    -32    
208    64     
0      160    
-144   -128   
160    -48    
-576   32     
112    64     
256    16     
16     16     
48     -176   
32     -16    
96     32     
224    -240   
256    -32    
-48    -352   
-32    0      
240    288    
-256   96     
-80    -16    
112    -96    
96     -32    
-64    -32    
-768   -16    
144    -80    
128    -64    
0      -32    
-48    -448   
-32    -1008  
96     48     
208    -176   
224    -64    
144    112    
80     0      
-128   -144   
176    -112   
-224   -400   
128    -256   
-112   -32    
-48    -96    
80     -80    
144    -368   
80     -144   
112    16     
-96    0      
96     -464   
-16    -16    
112    -112   
128    96     
-496   -96    
112    0      
368    608    
-384   192    
-400   0      
80     240    
464    -80    
384    176    
-16    240    
176    80     
208    16     
240    32     
48     208    
-160   -144   
-64    64     
32     96     
48     80     
-16    32     
16     -112   
-400   -32    
64     -32    
-352   -32    
144    -64    
160    -16    
320    -144   
-32    80     
80     -288   
-48    32     
-80    32     
480    384    
-352   144    
-32    -112   
-96    -240   
112    -96    
-32    48     
112    0      
-256   32     
128    -96    
-64    -64    
128    -272   
-32    112    
32     -224   
48     -112   
80     96     
112    272    
0      192    
112    64     
-384   16     
240    144    
-48    96     
144    -272   
48     -128   
128    -128   
208    -304   
80     -336   
272    720    
48     -48    
80     -208   
-144   64     
176    -16    
160    240    
-32    -144   
-128   80     
96     -64    
-192   -64    
144    144    
-96    -112   
128    -208   
128    160    
-320   160    
32     160    
-880   -64    
-784   -224   
32     96     
-1616  176    
32     -160   
-64    208    
-144   80     
-336   -192   
-128   0      
160    32     
-384   -288   
-432   -160   
368    -400   
-464   256    
368    80     
48     -544   
-208   128    
-96    -48    
-96    -48    
-48    400    
-864   112    
-128   96     
448    32     
-240   48     
208    96     
-208   -16    
80     -144   
-80    128    
16     -16    
-368   144    
240    320    
-240   288    
160    16     
-176   16     
-256   -16    
-368   -304   
-96    -80    
-1120  0      
-80    112    
128    176    
-272   112    
80     -160   
-192   48     
-160   -80    
-160   192    
16     32     
240    0      
-128   64     
-64    80     
128    112    
80     -144   
112    -64    
-352   48     
-128   64     
-1760  -128   
192    -160   
-144   -80    
-144   96     
112    -112   
-80    -80    
112    16     
-160   16     
144    144    
-256   64     
80     64     
0      -64    
-144   -64    
-576   -160   
352    240    
-1984  96     
16     112    
-16    -96    
144    -16    
-128   96     
160    -144   
96     80     
-160   64     
-16    -48    
16     -16    
-96    96     
-48    -16    
80     112    
-368   -80    
-112   144    
-160   -144   
96     -16    
16     -64    
-176   0      
-96    0      
-208   64     
-16    64     
-64    0      
64     64     
-96    48     
-96    384    
-160   32     
64     -16    
0      96     
-160   160    
-96    -32    
128    80     
-64    -48    
-48    -16    
32     -32    
-32    16     
-32    64     
256    128    
-400   160    
-144   16     
32     16     
-176   -80    
80     0      
-32    64     
0      96     
-112   -112   
-32    -160   
32     -144   
224    0      
208    144    
-16    64     
-176   16     
-96    -64    
-96    64     
-80    48     
144    -96    
48     -64    
240    0      
-224   32     
-64    240    
-272   112    
336    416    
-368   464    
-16    128    
192    80     
-48    96     
0      -208   
96     -176   
240    -80    
-48    160    
224    352    
-480   -96    
-32    -256   
-128   -240   
112    32     
-32    304    
112    224    
192    -192   
160    112    
-96    32     
-160   144    
-64    -208   
224    0      
-32    32     
-176   -208   
144    -240   
112    144    
144    224    
-240   128    
-48    112    
-96    -80    
304    256    
0      80     
272    -48    
192    48     
80     64     
-224   -32    
0      80     
288    64     
-224   -240   
0      -384   
-144   -16    
-48    96     
16     32     
160    64     
-128   160    
32     192    
64     -16    
-160   -64    
304    64     
-80    0      
144    48     
32     128    
48     64     
32     112    
64     160    
-176   -16    
48     32     
-272   -64    
112    80     
48     -16    
144    64     
-16    32     
112    64     
-80    -32    
144    48     
48     64     
96     32     
64     48     
-16    96     
288    288    
-352   -64    
240    80     
-144   -16    
160    80     
112    64     
512    416    
-512   48     
384    -96    
-160   64     
320    224    
288    288    
-240   16     
48     -48    
-128   -80    
176    208    
16     -16    
96     -16    
-32    128    
224    -704   
-64    32     
-32    32     
-64    32     
-64    -32    
-16    32     
144    48     
-32    -32    
368    80     
224    144    
-128   112    
-240   -16    
224    -96    
496    400    
-608   80     
-368   -560   
432    16     
352    208    
-224   -32    
272    144    
112    96     
-112   48     
256    96     
-96    0      
112    16     
64     -112   
-96    -192   
288    0      
-112   48     
-32    48     
160    48     
16     -16    
16     96     
208    80     
16     -16    
-112   32     
-96    -32    
304    80     
-144   16     
96     32     
-16    16     
16     48     
96     -32    
48     -112   
160    96     
64     -160   
112    80     
-144   144    
432    160    
-160   0      
-144   -80    
-48    96     
320    160    
0      0      
48     144    
96     32     
144    192    
-32    32     
-80    -144   
224    160    
112    -208   
-96    -32    
192    -160   
16     112    
272    -96    
-64    48     
144    160    
16     160    
-96    48     
112    48     
48     80     
240    80     
-112   32     
96     -48    
208    80     
0      -128   
336    208    
-400   -464   
80     80     
112    -48    
-32    -400   
128    -64    
96     288    
16     -64    
128    48     
80     -80    
-176   32     
160    176    
176    96     
-16    -304   
256    -96    
96     64     
32     -160   
112    -176   
144    -64    
176    256    
48     -64    
80     -48    
192    -32    
144    224    
272    512    
64     -288   
-80    -144   
32     192    
-64    -112   
192    80     
-48    16     
32     -48    
272    112    
112    -80    
16     -720   
32     448    
-160   176    
-16    -160   
240    192    
32     -48    
96     48     
224    224    
112    -32    
288    -48    
192    -16    
32     48     
-112   -80    
-48    48     
-48    -240   
32     96     
80     64     
96     -176   
192    64     
80     16     
80     -960   
-128   -272   
-208   -672   
208    -1056  
304    -128   
48     400    
-48    -160   
224    -240   
128    -528   
112    -176   
-224   -128   
48     48     
64     -240   
0      -64    
-2240  -32    
128    -416   
32     -32    
-32    32     
128    -32    
-16    -656   
512    -528   
-48    224    
80     304    
80     -608   
80     128    
-64    -192   
64     -112   
128    192    
16     -112   
-208   -32    
0      -224   
128    -208   
128    -160   
48     -64    
-256   -160   
32     -256   
192    -240   
-32    208    
240    -144   
-112   -16    
160    -432   
48     144    
-80    -32    
32     16     
-80    176    
80     -96    
80     -352   
112    -416   
64     -240   
160    -352   
64     -48    
160    -16    
144    400    
-32    160    
-192   -304   
352    -496   
288    144    
-176   144    
-32    224    
-368   16     
-64    -176   
-448   -160   
32     -144   
192    -464   
144    -240   
-128   -368   
176    -560   
64     256    
144    0      
368    -64    
96     48     
272    176    
-272   112    
128    -32    
-16    -64    
-16    16     
-96    48     
144    -96    
384    -112   
160    -224   
416    -176   
32     -128   
432    128    
400    352    
-176   224    
272    16     
-96    80     
-240   16     
128    48     
-16    -48    
160    0      
-496   96     
272    -32    
16     -80    
-64    -128   
176    -384   
-32    16     
-32    256    
528    -192   
-176   176    
-48    16     
-96    -96    
64     16     
32     -80    
16     -48    
-144   112    
-400   -32    
144    80     
256    -96    
-128   -80    
-64    -80    
240    192    
0      160    
0      -272   
-48    -128   
64     160    
0      -16    
256    0      
-32    80     
-192   80     
128    -80    
-64    -16    
400    176    
-768   320    
-112   -96    
-32    -80    
240    -96    
176    48     
80     48     
32     128    
-160   0      
64     0      
-288   32     
-16    -128   
16     -112   
96     80     
-48    0      
240    -16    
-272   112    
32     -112   
96     32     
-432   -112   
144    80     
-48    96     
-304   -96    
240    -192   
-288   -16    
336    224    
128    160    
-176   -160   
448    -480   
128    64     
48     112    
-64    16     
-112   -64    
-112   -240   
-832   -304   
160    32     
48     48     
-784   -96    
-32    16     
-1088  16     
144    -64    
-528   -96    
96     -560   
48     -144   
96     32     
272    -32    
-48    -64    
-64    -320   
80     -64    
-64    -32    
-128   -48    
96     -32    
-96    32     
80     80     
32     176    
-160   -48    
-432   -288   
-320   288    
-1504  752    
-368   -480   
-144   112    
64     -32    
0      80     
-112   -48    
208    -240   
-16    48     
-192   -352   
-96    304    
-96    240    
-64    -128   
-160   -256   
176    -208   
32     64     
-224   -16    
128    16     
-112   -48    
192    -112   
-64    -16    
-96    16     
-80    -32    
-48    80     
-48    16     
64     32     
144    -64    
-432   -144   
-64    -64    
-400   -80    
48     80     
-192   -32    
192    80     
-2048  -96    
144    32     
112    -32    
-32    112    
-128   -48    
32     0      
-32    176    
-112   80     
-112   -32    
-208   -64    
-16    -16    
32     0      
80     64     
-112   128    
80     32     
-1248  -96    
48     80     
160    112    
-112   32     
-80    -112   
160    16     
112    80     
-48    0      
96     -16    
48     48     
160    80     
80     48     
-48    -16    
-320   -16    
16     96     
-176   -32    
48     32     
-48    32     
-144   32     
-64    32     
48     96     
0      -176   
0      -16    
128    112    
-144   -48    
96     48     
-304   32     
336    272    
-400   -32    
160    -16    
-240   -32    
32     64     
80     16     
-192   32     
-32    -16    
-112   -112   
128    128    
64     16     
112    32     
-336   32     
208    16     
-320   0      
32     -16    
-128   -96    
64     96     
-496   -48    
224    -48    
-192   16     
-96    112    
144    128    
-96    96     
-16    0      
208    0      
-16    96     
-320   -208   
448    -64    
224    192    
16     -64    
96     0      
128    112    
-176   128    
-464   80     
32     -64    
160    16     
-48    -32    
160    64     
128    32     
-192   32     
112    80     
-48    0      
64     32     
-96    -32    
-48    48     
-192   0      
192    112    
96     -80    
-96    -64    
176    80     
48     -144   
144    48     
-80    0      
-16    96     
-160   160    
64     32     
128    -64    
144    80     
16     32     
-112   112    
-80    48     
112    32     
176    48     
112    96     
48     80     
208    32     
-16    80     
-192   -80    
208    -80    
80     -16    
64     64     
-176   -80    
128    -80    
0      -64    
48     112    
32     64     
48     48     
-32    16     
80     320    
288    96     
-96    160    
-144   96     
96     240    
256    16     
-32    16     
-16    32     
-208   -400   
144    96     
128    864    
288    208    
-192   64     
-192   -352   
320    240    
64     -16    
32     48     
-48    224    
160    -96    
-80    48     
-112   384    
192    -16    
-48    -96    
-112   48     
288    -784   
16     400    
368    256    
-192   -256   
-48    -224   
240    112    
208    752    
-80    -16    
-176   -448   
-112   368    
144    -160   
-32    -96    
-112   288    
272    -656   
64     464    
240    208    
-80    -256   
-192   16     
80     64     
-64    -112   
192    32     
128    320    
48     48     
16     -96    
0      32     
0      80     
208    -48    
64     0      
224    192    
-288   -416   
240    208    
32     416    
-48    -192   
0      -240   
80     -96    
176    112    
-176   64     
80     -32    
-32    32     
64     144    
32     0      
0      416    
-32    32     
-112   464    
-304   -192   
128    -112   
64     16     
560    48     
-208   384    
-208   -480   
96     0      
160    -768   
192    80     
48     96     
-48    -112   
-16    112    
224    64     
-48    0      
128    112    
96     -64    
-64    -192   
96     -112   
-48    -240   
64     -32    
80     -128   
-32    -112   
80     -224   
0      48     
32     0      
-32    -160   
64     -96    
-48    16     
64     0      
128    -48    
32     -96    
112    -112   
64     -16    
-32    -16    
16     48     
16     0      
128    32     
64     -96    
80     64     
0      -432   
-32    -32    
48     -80    
240    64     
-64    32     
480    384    
-192   -80    
112    -384   
320    -272   
80     -352   
144    80     
16     -224   
-32    0      
256    -224   
112    240    
64     -160   
208    -16    
-32    144    
-144   -352   
176    -48    
-16    0      
16     144    
528    272    
-272   -256   
-32    -320   
-80    32     
128    -80    
208    320    
112    -256   
64     16     
48     -304   
112    16     
-112   80     
288    32     
176    0      
-160   32     
80     48     
48     -144   
160    112    
-192   -448   
240    -192   
-48    -128   
-16    -272   
48     -192   
160    208    
-16    64     
80     -368   
288    -112   
-16    -240   
-16    -48    
-160   16     
336    -224   
0      176    
400    -336   
112    144    
288    224    
256    -128   
-80    144    
224    -16    
80     -1056  
32     64     
-160   -32    
272    336    
64     16     
128    -112   
-176   256    
32     -224   
144    -112   
32     -368   
128    80     
-32    256    
144    224    
-192   -384   
320    -272   
64     -272   
-192   -128   
112    112    
-160   448    
144    176    
160    -224   
-320   -272   
-16    -400   
-144   -112   
80     -160   
144    -32    
-48    -224   
144    96     
144    -800   
-16    64     
80     32     
-64    192    
208    48     
32     176    
-144   48     
160    -96    
-160   112    
144    -192   
0      -80    
16     -64    
128    80     
-160   -112   
112    -32    
-80    48     
176    224    
112    352    
64     -208   
-48    -384   
288    -416   
-64    240    
48     176    
96     -208   
64     112    
-1056  -16    
112    -32    
192    144    
384    48     
-32    80     
96     -80    
304    48     
-48    -64    
48     144    
-176   -240   
288    288    
16     -80    
-128   16     
-240   -32    
16     0      
-944   48     
16     -16    
64     -112   
-128   -16    
80     -112   
144    -240   
224    80     
-80    -1392  
48     48     
-320   256    
176    336    
-224   80     
-64    -48    
-144   -48    
16     -160   
-592   -32    
-112   -192   
-496   -352   
128    -176   
96     -112   
304    -48    
192    112    
0      -448   
304    -96    
64     144    
64     -288   
-240   -160   
-32    96     
-16    96     
-80    -80    
-96    0      
192    0      
-64    48     
-160   -112   
80     -112   
16     -144   
352    208    
192    80     
160    -112   
-80    0      
96     -48    
-192   -64    
-96    0      
-16    96     
48     32     
-160   -128   
240    -48    
-64    -16    
400    224    
-288   -32    
112    -80    
160    64     
-112   0      
160    0      
-176   -48    
16     -16    
-208   0      
176    112    
-64    48     
-48    -80    
-160   -32    
160    0      
256    128    
112    -32    
48     16     
-16    -112   
64     32     
16     80     
-1488  -48    
112    192    
-1376  64     
-64    32     
128    -16    
-80    0      
224    -48    
-96    0      
0      -48    
-48    -80    
-32    -208   
32     128    
-144   -112   
-240   -16    
-32    0      
-80    32     
-224   -48    
-48    64     
-304   48     
160    16     
-224   16     
-16    -48    
32     144    
-560   -32    
0      -48    
16     -96    
112    176    
-16    -64    
160    0      
-32    112    
-32    -128   
-64    0      
80     64     
-176   0      
-48    16     
16     144    
-272   64     
224    32     
-224   -128   
464    32     
-128   48     
176    176    
48     32     
-80    -96    
-432   -144   
-128   16     
-544   -400   
-32    16     
48     224    
-320   64     
-16    176    
-736   -80    
16     0      
480    144    
-224   112    
64     -144   
-48    -48    
16     32     
-128   -112   
-64    -48    
-112   0      
-64    48     
80     48     
32     32     
-496   -64    
-80    -144   
-944   -48    
96     224    
-48    -112   
80     -144   
-160   -128   
-48    80     
-64    -96    
192    304    
-32    192    
-32    -368   
208    160    
-64    176    
160    -48    
-112   -96    
-288   48     
-112   -64    
0      80     
336    0      
-32    -144   
208    -32    
-240   -48    
-64    0      
-64    144    
-224   -272   
-272   -432   
80     80     
-432   256    
64     -576   
16     48     
464    448    
-352   224    
-288   144    
-320   -560   
-32    256    
32     208    
-48    160    
544    272    
-48    336    
-64    144    
-112   -176   
160    16     
-224   -496   
-64    80     
16     416    
176    368    
-144   64     
64     96     
-320   0      
-208   -32    
144    32     
-16    -80    
-240   80     
48     48     
128    192    
48     256    
224    224    
-144   160    
32     -64    
-208   -176   
192    -128   
-208   -64    
160    112    
-32    160    
32     64     
288    272    
-208   144    
-48    32     
176    -64    
-64    192    
96     64     
112    -16    
-16    64     
176    560    
-272   -16    
288    -144   
-64    96     
-32    96     
64     176    
-144   16     
128    288    
-64    80     
-16    64     
-96    -208   
256    -208   
0      -32    
-80    80     
-192   32     
96     16     
-208   80     
16     48     
-128   -64    
48     -192   
80     -144   
0      -48    
48     80     
80     48     
16     64     
48     -48    
-32    -48    
-16    -16    
-224   -272   
-64    -64    
-96    208    
-16    80     
160    0      
-32    80     
-48    48     
192    192    
-96    32     
208    -16    
-16    -16    
96     -64    
-304   -16    
192    256    
112    208    
176    16     
-224   -16    
80     256    
-304   64     
32     128    
144    -16    
112    -144   
-64    32     
64     32     
176    48     
-64    176    
80     144    
48     128    
-48    -128   
80     -288   
48     -192   
-16    -48    
-80    -480   
-256   -224   
48     16     
32     272    
160    272    
-16    -320   
-16    64     
0      160    
-128   224    
96     64     
224    320    
304    144    
112    -48    
80     64     
112    -96    
-16    592    
144    208    
336    -240   
-48    240    
-48    192    
176    160    
-96    64     
144    -192   
160    -80    
-16    416    
496    432    
0      352    
-336   -64    
144    304    
592    352    
-16    112    
-32    64     
-16    -544   
-16    192    
0      -96    
32     208    
272    192    
-208   32     
224    144    
-176   400    
-16    96     
0      -48    
-64    -224   
-80    16     
-48    -80    
256    -80    
320    304    
-64    -192   
80     32     
48     -160   
128    144    
640    576    
-464   544    
176    224    
-224   -288   
16     384    
496    512    
-32    288    
240    512    
64     224    
-160   224    
240    -176   
-160   144    
144    48     
80     -192   
400    336    
-560   -464   
-256   -176   
-160   -96    
160    288    
608    544    
-160   480    
48     240    
-160   -128   
-288   -64    
416    -16    
224    304    
-336   -752   
96     -176   
-352   432    
160    -128   
224    -1120  
96     -176   
352    256    
-112   528    
-256   -576   
48     -336   
112    64     
176    16     
112    320    
-160   -320   
80     80     
112    96     
48     -48    
208    336    
-272   -304   
224    -16    
192    128    
304    -368   
128    224    
-112   -64    
256    224    
-144   -32    
96     304    
112    -32    
80     -320   
112    -32    
32     32     
176    -96    
32     128    
176    160    
96     -64    
-80    -64    
-48    -432   
64     144    
128    16     
272    -64    
48     -32    
192    192    
176    96     
-112   -128   
16     160    
208    -176   
16     128    
64     -32    
80     -160   
-80    -640   
0      144    
-96    64     
256    0      
-240   -160   
256    -160   
64     0      
144    128    
-112   144    
112    -240   
176    0      
240    192    
-32    352    
48     -272   
400    -128   
80     -224   
272    160    
-64    0      
64     -192   
-32    64     
48     -144   
0      -592   
144    64     
112    48     
16     -16    
112    -704   
304    -112   
64     256    
176    0      
96     0      
96     0      
0      -80    
96     64     
128    208    
-336   -16    
128    -64    
240    -48    
128    16     
-16    -176   
192    -208   
96     -704   
352    -272   
144    80     
-160   -48    
-32    96     
-80    -64    
208    0      
272    32     
16     0      
80     -64    
-352   -32    
16     -32    
-1856  32     
48     -32    
144    32     
48     -128   
16     -80    
64     -96    
96     16     
160    -176   
48     32     
112    -48    
-48    0      
64     -16    
64     32     
-32    48     
64     -112   
-144   -64    
160    0      
128    96     
0      -48    
96     0      
128    -16    
48     -80    
96     -272   
-64    80     
32     16     
96     16     
96     0      
96     -64    
-224   -64    
32     -96    
-912   -64    
32     0      
-48    112    
80     -16    
32     0      
32     -240   
-528   -16    
224    -992   
128    0      
224    16     
-48    -160   
-96    16     
96     112    
-96    48     
-192   48     
-272   0      
0      112    
-864   -208   
16     -192   
96     -208   
192    -240   
-64    96     
48     -112   
208    -16    
16     -784   
64     48     
-256   -176   
112    -368   
96     144    
64     272    
32     16     
48     -240   
-288   64     
-80    -48    
-64    416    
304    192    
48     -176   
96     -432   
128    -80    
112    -1504  
32     -96    
-192   144    
64     -32    
-32    -32    
304    -336   
-144   -144   
176    96     
-560   32     
176    64     
-32    -160   
112    64     
-16    -288   
0      -32    
128    64     
32     -112   
64     16     
-320   32     
144    576    
48     -400   
-32    128    
-416   -160   
32     -272   
16     480    
144    -1200  
-192   544    
384    -32    
16     192    
112    64     
256    -352   
304    144    
-208   640    
224    480    
352    112    
-272   240    
256    -96    
-96    32     
224    -80    
-48    16     
32     0      
-112   64     
-128   -208   
-128   144    
480    160    
-448   208    
192    48     
-928   16     
48     0      
-752   -16    
-192   32     
-80    -96    
-304   48     
224    -32    
-272   64     
-736   -224   
144    -192   
64     0      
112    112    
-352   -240   
-32    -48    
-336   0      
-112   0      
32     16     
-80    -16    
48     -16    
-1200  32     
-144   0      
-128   -32    
-160   -80    
-144   48     
112    128    
-80    -144   
128    -48    
-112   0      
-176   176    
64     0      
208    16     
-240   64     
-416   -96    
-48    32     
-448   -48    
64     -32    
48     -16    
176    64     
-160   -64    
176    16     
64     16     
-176   64     
-64    -48    
64     -80    
96     32     
-16    128    
64     -48    
0      0      
-288   32     
-592   80     
-144   -32    
-272   -144   
208    112    
0      0      
-144   32     
-288   -112   
-240   16     
-64    64     
144    96     
-80    32     
144    16     
-80    -80    
128    -176   
128    48     
0      192    
16     16     
-384   -144   
112    -96    
-160   -80    
64     0      
-80    -192   
16     -128   
-112   -32    
64     -128   
224    48     
-224   176    
64     16     
208    32     
-96    96     
-144   64     
-16    112    
-160   64     
96     224    
352    32     
80     304    
-224   16     
176    -48    
336    192    
-176   304    
80     192    
64     96     
-16    224    
-160   -48    
64     -128   
-544   -176   
160    80     
-272   64     
48     32     
-1056  192    
-176   352    
128    224    
-208   240    
48     -32    
0      -112   
128    -112   
-128   0      
-80    -128   
16     80     
-16    0      
0      -288   
16     -128   
80     16     
-64    304    
-480   -48    
320    368    
144    256    
112    80     
48     256    
32     32     
-112   -592   
-336   -960   
368    352    
-160   768    
224    -336   
-112   176    
-32    704    
-512   176    
304    -768   
160    -736   
-208   912    
208    96     
-80    -368   
288    288    
-16    -32    
128    -32    
-128   64     
224    -16    
-160   -544   
0      160    
-352   -16    
208    -208   
96     -80    
304    16     
-96    -448   
-64    336    
0      624    
-16    -608   
144    -80    
-384   -32    
656    -1120  
112    272    
240    464    
64     -192   
-64    -144   
-368   432    
368    624    
-576   -896   
144    544    
-32    -176   
384    960    
-256   -304   
96     256    
128    112    
192    224    
0      -160   
-48    -80    
16     256    
-48    -48    
192    96     
0      128    
-144   -240   
256    112    
-16    96     
416    -480   
-384   -80    
0      144    
112    -48    
-224   -32    
240    -16    
0      16     
-112   -160   
-96    32     
96     0      
-16    -16    
-32    -32    
-16    0      
112    32     
80     128    
16     176    
160    128    
0      96     
64     96     
96     16     
16     64     
-48    -192   
16     -48    
-80    80     
112    32     
64     80     
-16    64     
112    496    
64     144    
-64    208    
-32    -16    
240    96     
208    192    
-224   48     
-64    48     
-16    192    
96     224    
304    48     
544    400    
-448   -448   
96     112    
-304   80     
-32    -880   
-112   -32    
432    48     
48     64     
144    16     
128    96     
-352   64     
80     0      
-224   -16    
112    -160   
-32    -96    
320    96     
-160   -48    
-96    96     
304    384    
-208   80     
-64    64     
80     96     
-144   -144   
208    -128   
208    16     
176    128    
0      128    
0      48     
240    144    
16     0      
240    16     
-144   -48    
32     96     
-64    -224   
-176   -688   
-32    240    
-16    -400   
48     -48    
-32    -112   
208    -48    
112    208    
256    16     
160    336    
144    64     
-16    -32    
-272   80     
-112   -64    
96     16     
112    48     
96     16     
32     32     
32     -96    
-48    32     
48     48     
64     80     
-176   -32    
-16    16     
16     16     
96     -32    
-144   -80    
624    208    
256    112    
-32    -160   
-128   -96    
0      -64    
0      -16    
-48    32     
96     96     
-192   64     
288    -16    
208    48     
48     80     
-48    16     
32     128    
16     48     
112    48     
80     48     
128    -32    
80     80     
80     -32    
160    64     
32     -176   
80     16     
-128   -336   
80     64     
64     0      
-16    -16    
64     0      
16     96     
16     0      
208    -32    
-64    64     
144    64     
32     32     
32     -384   
96     64     
32     -272   
64     32     
80     -32    
96     80     
48     48     
112    112    
224    208    
-144   80     
80     -32    
64     144    
48     64     
144    -32    
32     -96    
64     -224   
-112   128    
96     -80    
-64    -32    
144    -112   
-160   96     
144    80     
48     64     
176    -48    
208    96     
128    192    
96     -64    
-160   -320   
288    -192   
64     96     
80     48     
16     48     
-32    -80    
192    208    
-80    -96    
224    -672   
96     96     
128    128    
256    48     
240    128    
-96    -160   
-544   848    
960    960    
-288   -496   
-64    -528   
64     592    
-32    -192   
-64    -1040  
96     592    
336    -336   
-48    -256   
352    240    
0      -48    
-400   624    
-480   -448   
96     64     
112    112    
256    -96    
-32    656    
96     272    
48     16     
16     -576   
80     -192   
-192   -384   
368    -304   
16     32     
-224   -128   
304    -320   
64     112    
-272   -384   
32     -224   
-304   -64    
16     96     
128    -160   
16     -192   
128    -96    
64     -560   
0      -16    
240    -112   
-96    48     
96     48     
-112   48     
176    -48    
336    48     
-160   -64    
48     0      
-1552  32     
-32    32     
-192   -48    
176    -80    
112    -48    
80     -32    
80     -48    
96     -1008  
192    144    
192    80     
112    16     
112    -48    
208    64     
-128   32     
288    16     
-1056  32     
-144   48     
160    -16    
160    -64    
48     -16    
256    -32    
16     192    
128    -544   
48     0      
128    -48    
16     32     
96     48     
112    32     
-32    -32    
80     -48    
-240   16     
32     -96    
-288   -64    
-208   -32    
320    -64    
112    64     
272    272    
32     -64    
-112   48     
96     -112   
64     -288   
128    48     
-144   -96    
-32    -64    
112    -16    
-96    -48    
0      -64    
-528   192    
80     -128   
-304   -48    
48     -208   
-64    -96    
432    -416   
0      48     
160    256    
96     32     
-224   -80    
128    80     
-368   64     
16     16     
-128   128    
48     16     
-1136  -128   
-208   -192   
176    -96    
-128   112    
272    64     
80     0      
-64    16     
-32    -128   
272    48     
-224   0      
256    -16    
-48    16     
256    112    
-304   208    
-96    -48    
80     -208   
-240   -800   
112    -320   
64     -288   
-48    96     
224    -96    
128    -80    
-256   0      
128    -352   
-96    256    
80     672    
-16    160    
-80    -64    
-352   -288   
128    0      
32     112    
288    -112   
-64    -64    
-528   -16    
80     64     
-1024  -272   
-480   -96    
160    -32    
-208   -80    
-144   -176   
-1200  -448   
-96    -368   
224    -32    
-304   160    
96     -48    
-176   48     
-336   -160   
352    272    
-544   -352   
-64    16     
80     176    
-192   32     
-144   -48    
-592   -48    
0      128    
-896   16     
-32    48     
-496   -432   
256    560    
224    272    
96     -80    
-32    -96    
-16    64     
32     -224   
192    176    
-272   80     
112    0      
-240   -48    
16     -160   
32     -48    
-128   128    
-80    368    
-160   112    
-208   128    
-320   -112   
-80    192    
-64    -96    
-96    -160   
128    -176   
64     16     
-64    -80    
48     -112   
-112   -32    
16     112    
16     208    
80     -80    
-160   -160   
-576   560    
80     496    
-720   -32    
-160   -80    
-128   -224   
800    768    
-768   336    
-48    -64    
-240   0      
-64    -16    
416    64     
-32    -32    
256    80     
-272   -48    
-64    -160   
48     -224   
80     -16    
-480   112    
80     16     
-80    -160   
64     48     
64     32     
-80    -32    
-256   80     
112    16     
32     32     
-80    0      
-112   -16    
64     80     
192    64     
64     -80    
16     16     
-512   48     
80     32     
-112   16     
96     32     
-96    48     
-32    48     
-112   -128   
96     0      
-16    64     
112    48     
128    16     
-64    64     
-64    64     
-48    16     
48     -80    
-400   -32    
64     64     
-304   -16    
-96    -96    
368    -96    
0      0      
-128   160    
-16    -48    
16     32     
-224   -80    
240    0      
16     32     
160    320    
-128   -32    
64     -64    
-224   -80    
208    64     
176    96     
80     -112   
480    160    
-320   -80    
-336   -112   
-64    32     
176    -16    
96     -48    
128    16     
208    -32    
-144   -32    
-544   -32    
128    64     
-144   16     
0      112    
144    32     
-96    -128   
48     0      
-96    -48    
16     -48    
112    80     
-144   112    
16     304    
48     208    
96     32     
288    16     
-176   -80    
160    128    
48     80     
32     -80    
-112   32     
-64    64     
-112   -144   
144    16     
0      80     
-32    32     
-16    48     
112    480    
208    288    
-144   -240   
-64    0      
-192   80     
48     208    
-240   64     
128    64     
-112   160    
-48    -16    
160    80     
32     0      
96     64     
144    128    
-144   48     
-32    0      
0      0      
80     80     
112    48     
80     96     
32     272    
112    80     
112    -48    
16     32     
-48    48     
-80    80     
-48    -96    
-32    -128   
-16    -64    
176    48     
128    128    
80     64     
-64    -32    
160    48     
-80    48     
48     -32    
64     96     
144    112    
256    48     
224    272    
144    224    
-64    64     
-48    48     
-32    64     
80     64     
32     32     
208    128    
-80    -16    
80     64     
-16    -112   
-80    -576   
-16    80     
-160   0      
176    -16    
64     32     
224    96     
16     32     
48     0      
16     -16    
272    208    
-224   -32    
64     0      
-16    48     
48     16     
160    48     
48     -1008  
0      128    
144    -80    
48     32     
144    112    
-32    -144   
-48    -128   
-96    560    
-48    -48    
-64    -96    
64     32     
304    80     
-64    80     
160    -352   
272    736    
-32    -208   
48     -64    
-112   144    
-80    -176   
192    128    
-64    64     
-80    -208   
48     368    
-240   -352   
768    1056   
-240   -400   
96     304    
16     80     
-32    -560   
0      16     
48     -592   
32     80     
144    -464   
304    -32    
32     256    
400    368    
-336   0      
160    112    
-176   528    
480    400    
-352   -256   
288    -400   
112    192    
-272   -288   
-48    80     
96     -192   
32     48     
0      -480   
320    -112   
-304   -160   
320    80     
-48    208    
288    32     
-16    -80    
144    -96    
-176   64     
96     128    
32     64     
-80    -272   
336    -144   
-48    112    
240    208    
-32    -176   
320    64     
-16    -432   
208    144    
144    32     
208    80     
-208   96     
-128   -160   
208    -320   
-80    0      
368    48     
48     -112   
96     80     
16     -176   
112    96     
-48    -192   
304    16     
0      -336   
-16    48     
80     -16    
-48    160    
176    144    
48     -16    
16     -16    
64     -48    
208    160    
32     0      
16     64     
64     -128   
-48    -48    
96     -272   
176    80     
64     48     
-112   32     
304    64     
176    0      
-80    -16    
112    -224   
0      64     
-160   112    
176    -16    
336    -144   
80     64     
64     -16    
160    64     
112    0      
112    32     
176    224    
-16    48     
-48    -48    
112    160    
32     16     
112    -656   
96     -80    
-48    -176   
240    80     
0      -16    
80     -16    
48     -16    
96     32     
16     -144   
160    112    
128    80     
112    -800   
16     -96    
192    -336   
16     -32    
-864   48     
16     -224   
272    -192   
176    -32    
288    304    
48     -800   
80     -208   
32     -16    
208    64     
-160   80     
240    -64    
320    -64    
160    80     
-32    -272   
128    -80    
-112   80     
-112   -160   
80     16     
0      -768   
96     -240   
160    -560   
-128   -192   
128    -96    
240    -112   
192    112    
-224   -704   
-128   -528   
-80    -320   
-80    -208   
208    -192   
-288   64     
800    976    
-352   -32    
-160   -608   
272    -288   
128    128    
-48    112    
112    -464   
96     -304   
-48    -32    
192    48     
-128   224    
-144   -192   
0      256    
0      -96    
-592   144    
-32    -336   
-2304  272    
208    -192   
-96    -160   
256    112    
-96    -112   
400    16     
-240   -256   
80     -80    
192    -352   
144    32     
-128   -80    
-160   -208   
48     -16    
-160   64     
112    0      
16     -80    
0      -48    
16     -96    
128    -112   
0      -32    
32     -240   
48     32     
32     -784   
64     112    
352    0      
64     -32    
48     304    
96     256    
-48    -48    
-80    0      
-480   -80    
32     -112   
-720   -128   
208    -112   
80     16     
-32    -80    
128    144    
-208   -144   
304    96     
64     48     
240    144    
-224   64     
-16    48     
-112   -32    
96     64     
-304   64     
128    -48    
-176   -112   
128    128    
16     -32    
304    -112   
-48    64     
32     -432   
-288   -784   
224    -240   
48     464    
-640   -48    
304    -160   
-416   -80    
-128   0      
240    352    
-592   -192   
64     -16    
464    -32    
160    80     
96     -144   
16     48     
240    -224   
-16    64     
-224   -80    
464    -192   
-1056  -48    
32     0      
-320   48     
48     -32    
-16    0      
96     32     
-176   -64    
112    -144   
64     48     
176    -112   
-16    64     
224    -160   
160    -64    
-160   32     
320    80     
-128   32     
176    0      
-64    -16    
-48    0      
-80    48     
-16    -16    
-512   32     
112    -32    
-64    48     
-944   -96    
96     0      
-32    -64    
-208   -32    
-128   -32    
-976   16     
-48    -16    
-416   -16    
48     128    
64     -48    
-80    -128   
176    -176   
32     160    
0      96     
224    112    
-368   -208   
-16    -16    
-224   32     
-224   48     
176    32     
-96    -48    
-80    32     
-384   96     
-240   0      
-1472  -224   
-48    -80    
-64    -32    
80     192    
-592   -272   
304    -32    
-112   -128   
-448   -432   
16     -48    
-192   192    
224    -32    
112    0      
-128   64     
0      272    
80     144    
-288   112    
16     80     
-272   128    
112    -144   
-64    -176   
144    -32    
-32    -128   
112    112    
32     16     
-80    96     
-208   112    
-176   32     
-16    -160   
16     -16    
176    192    
-320   48     
-64    16     
-1456  -224   
112    96     
-128   -48    
80     112    
128    -16    
256    544    
288    592    
-256   144    
-192   -64    
-272   -48    
176    304    
-336   128    
96     192    
-624   -688   
0      -256   
-2096  752    
176    384    
144    -240   
80     -112   
48     128    
128    240    
16     32     
-160   -80    
0      32     
-144   -384   
224    192    
192    464    
-32    112    
-320   -112   
0      -80    
-192   192    
-192   -16    
-16    -176   
16     -64    
-16    -96    
48     32     
80     48     
-32    0      
80     176    
-224   32     
-48    -176   
-240   -240   
0      160    
-48    544    
-176   -48    
-496   -320   
192    224    
608    880    
-464   560    
176    -432   
288    16     
32     32     
16     144    
272    192    
-176   -224   
-64    -48    
64     112    
-32    -16    
-80    -32    
-32    128    
-352   -112   
64     80     
48     80     
144    32     
0      -80    
-96    320    
80     -144   
32     160    
-32    -80    
48     -80    
64     64     
16     128    
160    64     
-128   -560   
-32    608    
-80    -528   
-16    496    
176    -160   
144    16     
-16    96     
-416   -928   
-128   -224   
-16    48     
48     176    
224    128    
336    -192   
-384   432    
64     64     
-304   192    
304    64     
-128   -208   
96     32     
304    16     
-352   -16    
208    -160   
32     0      
112    80     
64     16     
64     -16    
-48    16     
-368   48     
-336   -144   
192    0      
-144   0      
32     16     
80     80     
-288   -32    
48     112    
96     -160   
16     -176   
32     48     
-272   -48    
96     -160   
-96    160    
-48    -64    
128    16     
16     48     
-16    128    
64     336    
-176   -272   
528    -240   
-128   240    
48     128    
160    96     
416    48     
-496   176    
80     -16    
-32    -160   
-48    48     
-256   -128   
464    48     
-144   0      
-128   -240   
-64    -96    
224    64     
-176   -16    
256    128    
-48    224    
256    192    
-128   96     
-32    224    
160    128    
-80    176    
-48    -48    
320    -208   
-16    16     
-304   64     
560    176    
0      304    
-48    48     
-176   96     
-96    96     
-32    -64    
-16    80     
96     80     
0      0      
64     -48    
-80    -80    
256    80     
-176   80     
96     144    
-48    -112   
0      176    
112    48     
160    -416   
0      64     
32     0      
80     -176   
0      -64    
80     128    
-96    -272   
80     -32    
0      128    
-304   160    
256    -32    
288    96     
-32    -16    
-48    -128   
176    -80    
-80    -1072  
160    -128   
176    -16    
128    96     
-80    128    
160    48     
-16    48     
16     -16    
-64    -32    
32     80     
160    48     
144    96     
-64    48     
48     -160   
96     48     
416    -16    
-256   416    
96     -160   
176    0      
112    48     
112    -64    
-48    -16    
112    -320   
0      -128   
-112   -496   
-144   -704   
-128   -144   
48     -128   
224    -32    
112    448    
176    256    
96     -336   
176    0      
128    320    
-464   -720   
-16    -336   
48     320    
240    -32    
256    128    
-32    0      
-64    -64    
-160   -208   
144    -16    
336    64     
-48    -144   
-16    -32    
16     368    
-112   -816   
-16    112    
240    240    
288    80     
96     208    
96     464    
80     32     
-48    -112   
-176   -32    
-16    -16    
32     0      
128    -96    
224    -32    
400    -272   
32     -16    
-144   -368   
0      48     
32     -400   
16     64     
80     96     
64     80     
128    224    
0      160    
64     64     
64     48     
80     16     
176    32     
-16    -64    
144    -80    
144    112    
112    160    
-80    64     
80     -16    
144    16     
-16    32     
96     80     
16     -16    
32     48     
240    64     
-64    -320   
-16    32     
96     -192   
80     48     
112    -64    
80     -64    
96     32     
96     -32    
64     -208   
96     80     
-16    -112   
16     96     
80     -16    
16     -16    
80     -368   
112    -16    
176    -64    
16     -80    
16     -32    
144    -32    
48     96     
240    0      
-16    0      
32     64     
-16    -720   
32     144    
80     -112   
80     144    
80     -144   
240    -144   
160    64     
208    -752   
192    32     
-16    -48    
32     -16    
-192   48     
48     -144   
336    -112   
-112   64     
-48    32     
176    144    
64     -64    
-592   -208   
-2176  -128   
576    -128   
-160   -48    
128    -128   
-96    -144   
112    -640   
240    -256   
0      112    
304    0      
16     0      
176    -48    
-64    -32    
0      16     
16     -144   
176    -32    
-240   -16    
208    -16    
80     32     
80     0      
352    112    
-144   96     
176    -80    
160    -304   
0      64     
352    -96    
-160   0      
-96    -64    
80     -160   
-112   -128   
128    -16    
-224   -32    
0      -112   
64     -160   
160    -80    
224    16     
16     -16    
112    48     
16     -176   
48     -48    
272    -16    
-192   48     
128    -64    
64     16     
112    -16    
32     -80    
-288   32     
112    -128   
-336   -16    
144    -144   
144    -160   
128    -96    
144    0      
192    -384   
0      256    
240    176    
-256   -224   
-128   -176   
64     64     
-208   64     
368    64     
-96    -160   
160    -160   
16     32     
-80    32     
-688   -144   
16     -16    
336    224    
80     -224   
16     16     
0      -384   
80     128    
-176   -272   
208    -80    
-160   -16    
-96    -256   
-64    288    
96     16     
160    32     
0      -80    
-1392  -896   
432    -304   
128    320    
-32    -112   
64     48     
-96    -544   
160    128    
32     16     
112    32     
-256   16     
176    -64    
-192   -160   
48     128    
-1040  -144   
-224   -80    
64     -1680  
320    512    
336    160    
112    -48    
-80    112    
0      -16    
-192   -32    
-304   -432   
176    464    
-48    -112   
192    80     
-112   0      
336    128    
-352   672    
-112   -512   
192    -256   
160    176    
144    272    
304    -272   
-176   144    
-272   -48    
16     -144   
80     128    
128    -64    
-336   32     
192    16     
-176   -176   
48     -448   
160    304    
288    272    
-128   -208   
-496   -128   
144    80     
-864   128    
48     144    
32     -384   
-592   0      
-304   -48    
-1104  -96    
-352   -112   
320    -272   
208    368    
144    352    
-48    -112   
176    -400   
0      48     
-304   -64    
16     64     
-304   208    
-304   16     
-16    112    
-48    0      
-64    -32    
-64    144    
-16    80     
64     144    
-48    192    
240    160    
-256   144    
-608   80     
176    -64    
-176   16     
112    80     
16     -32    
-192   -128   
-96    -80    
-176   -80    
112    -64    
48     192    
-48    208    
16     80     
-224   112    
-1696  176    
208    192    
-64    320    
192    352    
400    304    
-176   208    
0      336    
112    224    
16     -32    
-176   64     
-128   -176   
32     368    
16     112    
-320   0      
-128   -16    
-320   -96    
-384   96     
192    -144   
-144   112    
-112   -240   
0      48     
-16    -48    
128    240    
-224   256    
16     -80    
-128   -192   
64     64     
-48    128    
80     -96    
-160   0      
48     -128   
0      32     
-1296  -112   
16     16     
-64    -112   
144    0      
16     0      
-272   32     
32     64     
-320   -96    
80     -112   
-32    0      
256    272    
-128   224    
-32    32     
-352   -32    
32     224    
-416   -16    
32     -16    
48     48     
112    48     
-32    0      
-32    208    
-144   48     
112    -336   
-32    -48    
-128   64     
-96    16     
-32    -64    
32     16     
-480   -32    
288    48     
0      -32    
400    352    
-624   -208   
-288   -336   
-304   -160   
112    -224   
112    192    
16     -16    
160    144    
-112   288    
304    416    
-192   -64    
-64    16     
112    112    
-112   272    
48     -160   
48     -96    
32     96     
0      16     
144    80     
352    -64    
-240   112    
-112   -32    
-160   416    
-160   48     
-160   -304   
192    -480   
144    48     
80     288    
32     96     
-352   -64    
-496   -256   
-96    -160   
160    -96    
48     -48    
240    -80    
64     192    
32     32     
0      160    
16     -16    
112    112    
-160   336    
-48    32     
-112   -176   
176    -128   
-48    -16    
16     0      
112    -96    
128    0      
144    176    
-32    224    
16     -160   
48     -112   
96     16     
224    128    
-16    -480   
-144   112    
176    -16    
-224   -288   
272    400    
-16    -192   
144    64     
96     -176   
96     32     
-32    -288   
-144   -16    
-96    144    
48     -144   
128    160    
-32    -64    
96     48     
-80    -128   
128    16     
-112   -144   
272    480    
32     256    
-192   96     
144    160    
16     32     
-112   -64    
0      -48    
-16    48     
16     32     
96     32     
-208   16     
48     144    
-176   16     
0      -48    
-48    64     
16     -80    
176    32     
256    48     
96     112    
32     48     
16     -16    
-160   -32    
-32    80     
-16    48     
144    16     
96     32     
16     -16    
256    32     
160    80     
-112   -208   
16     -224   
80     176    
64     80     
112    80     
272    0      
-48    -16    
-48    16     
-16    -64    
48     0      
80     176    
96     16     
48     64     
-32    -32    
192    -144   
-160   32     
144    -16    
16     0      
192    96     
64     48     
48     32     
112    -32    
-80    -32    
128    160    
-80    -16    
176    80     
-16    0      
64     96     
80     16     
-16    -144   
112    0      
144    -368   
240    -32    
-16    48     
-32    32     
32     64     
352    -96    
-384   -176   
272    32     
64     -32    
48     -144   
128    16     
144    224    
192    -16    
48     -48    
-192   80     
256    -560   
-80    16     
112    64     
128    16     
48     -16    
112    80     
0      128    
-112   48     
208    -80    
-16    96     
64     -16    
96     -32    
64     80     
256    128    
-176   80     
-336   -800   
304    0      
160    -96    
0      96     
0      80     
48     -64    
368    -112   
224    128    
112    144    
-16    80     
-96    16     
-48    -96    
-96    64     
0      32     
-16    -16    
256    -304   
144    64     
80     -176   
0      64     
112    96     
192    240    
-288   112    
224    -16    
128    48     
128    64     
-96    272    
-96    80     
352    48     
-16    -16    
352    16     
48     -160   
48     112    
-112   -112   
224    80     
-64    -608   
240    240    
-64    176    
48     -96    
352    -96    
-48    32     
0      32     
176    -32    
96     48     
16     -304   
48     48     
272    -256   
-32    64     
-32    -336   
208    -16    
144    1008   
-112   -464   
240    -48    
-96    96     
176    -16    
-96    32     
288    176    
160    -96    
96     -64    
64     -64    
16     448    
-128   -320   
48     176    
-80    128    
160    0      
80     -32    
272    -80    
48     -160   
240    -672   
-192   48     
208    -848   
224    144    
128    432    
-96    -368   
16     -208   
176    160    
176    512    
224    112    
-16    -384   
80     64     
-16    -80    
64     -1040  
-32    -192   
320    544    
112    112    
64     256    
48     -32    
-64    -496   
-48    -672   
160    96     
-16    272    
-48    -32    
192    -112   
112    -16    
128    -272   
-32    -112   
64     -16    
-96    0      
32     0      
32     64     
240    -400   
80     176    
112    304    
-32    224    
208    160    
128    160    
-64    160    
192    64     
160    32     
32     176    
192    240    
32     208    
208    368    
0      320    
-48    288    
-912   208    
112    -112   
272    0      
464    288    
-128   112    
32     -528   
144    -112   
96     -1168  
32     48     
160    16     
48     64     
16     112    
-176   32     
-208   -128   
224    112    
-272   80     
192    -64    
96     -144   
-32    -240   
96     -48    
96     48     
80     -144   
112    48     
-64    128    
176    -32    
0      112    
32     -96    
112    -128   
-80    -96    
80     240    
-64    80     
112    48     
-1440  272    
176    -80    
0      -64    
112    -64    
64     0      
128    -160   
-64    -192   
-80    -336   
112    -144   
-16    128    
192    128    
32     64     
-16    -80    
-16    -416   
112    -16    
-608   112    
144    128    
128    288    
64     32     
96     160    
240    -128   
-112   32     
80     -736   
-192   96     
-192   -80    
160    -192   
48     160    
64     80     
80     624    
352    288    
-288   0      
-96    -560   
-464   -112   
288    64     
-208   144    
176    -256   
112    -176   
64     -208   
176    96     
-192   304    
16     -160   
-288   -240   
288    -80    
48     0      
448    288    
-528   160    
128    464    
-144   240    
80     32     
144    -128   
144    -176   
96     -32    
112    -224   
128    -64    
-656   32     
96     -48    
-560   -128   
240    -112   
16     -16    
-160   -96    
176    80     
272    -32    
-352   32     
16     -128   
-80    -96    
96     32     
112    240    
-256   288    
-848   320    
-176   288    
0      -128   
320    48     
96     0      
-64    32     
96     32     
-208   0      
144    -112   
-304   -32    
-256   96     
-144   -16    
144    32     
-160   240    
112    16     
-384   -208   
208    128    
-208   -80    
-368   -48    
-16    16     
-272   -288   
64     -160   
32     -176   
-16    -80    
48     -112   
-512   -96    
128    16     
-528   -48    
-320   -112   
64     -208   
-48    -96    
32     -64    
-176   -64    
-304   -192   
-1136  -304   
48     -96    
192    -128   
32     -128   
-16    64     
368    416    
-112   240    
-112   128    
64     208    
-16    96     
480    416    
-416   144    
-144   80     
-240   0      
-96    224    
-464   -64    
-192   80     
-1344  176    
48     496    
-144   320    
48     0      
-48    -96    
-64    32     
32     -16    
160    224    
48     -128   
128    192    
-144   368    
-112   -592   
48     80     
0      0      
-192   -240   
-592   160    
224    32     
-176   -560   
0      128    
-32    272    
-64    -64    
96     -32    
-80    -64    
32     -16    
-48    0      
128    32     
-16    0      
-80    64     
-320   -32    
-80    0      
-608   -80    
256    80     
288    624    
-400   368    
16     -192   
288    -192   
-80    80     
80     96     
16     -96    
-176   64     
-176   144    
-288   -208   
80     -224   
-176   80     
240    96     
-112   32     
-80    -48    
-224   -112   
32     144    
-288   0      
-96    96     
-32    0      
80     16     
144    80     
0      0      
96     16     
-16    16     
-32    32     
-64    0      
144    128    
-336   -64    
-48    64     
-320   16     
112    16     
16     64     
-208   -16    
32     -16    
80     32     
208    128    
-64    -16    
-48    -32    
64     32     
16     48     
64     32     
144    16     
-272   -16    
-16    64     
-336   48     
128    32     
-64    -32    
-48    48     
-48    -16    
-144   -16    
96     112    
288    96     
112    80     
-176   -80    
48     0      
-288   -96    
80     144    
-256   -32    
112    48     
-96    -16    
112    16     
32     32     
16     16     
-32    16     
48     32     
-16    16     
80     48     
-48    -64    
96     0      
32     64     
112    48     
-144   80     
32     -64    
-16    80     
208    288    
-384   128    
256    -80    
-96    48     
256    -64    
-32    0      
144    32     
144    80     
-16    -128   
-16    48     
-96    96     
96     64     
144    112    
-448   -32    
96     0      
16     96     
16     32     
128    80     
192    16     
-64    96     
160    224    
-96    176    
-32    -80    
0      -80    
-128   -16    
384    144    
-256   -48    
352    -32    
480    352    
-608   304    
-128   -64    
48     80     
64     -16    
96     -16    
-16    32     
304    -16    
128    -80    
-48    -16    
272    -176   
16     -112   
48     160    
-64    32     
160    80     
-144   320    
160    -224   
112    -272   
96     96     
-32    -128   
16     32     
160    -256   
-208   -64    
416    352    
-288   16     
224    192    
-304   -240   
256    64     
16     240    
80     -576   
64     128    
-32    112    
176    -320   
0      352    
-128   -176   
176    -576   
-224   208    
208    -32    
176    0      
-208   48     
272    352    
0      -16    
-32    -256   
-32    48     
208    288    
-128   80     
-80    64     
144    -464   
-400   -240   
272    -992   
-160   -288   
192    -240   
-112   -32    
368    288    
240    -48    
352    96     
-96    -192   
-96    -112   
-256   -64    
96     -208   
-64    -192   
32     -80    
304    128    
48     256    
208    128    
-64    48     
336    32     
-128   48     
48     64     
-32    48     
80     80     
-96    -64    
96     144    
144    16     
80     -176   
32     80     
64     -16    
0      192    
128    96     
-32    64     
-192   -192   
16     -320   
96     -128   
288    160    
-96    0      
80     -32    
48     16     
80     0      
64     16     
64     -64    
32     48     
32     -48    
176    96     
144    80     
-80    288    
208    288    
-416   288    
96     -144   
256    48     
0      48     
80     96     
-128   -240   
192    -48    
160    128    
-304   32     
32     160    
96     -320   
240    96     
96     -320   
160    80     
0      -48    
64     -32    
96     -144   
16     192    
64     80     
-80    -32    
112    80     
160    64     
48     16     
96     -80    
160    80     
32     -48    
112    48     
0      -368   
128    96     
-32    -80    
48     -208   
48     -64    
144    240    
160    208    
-48    192    
64     96     
-32    -96    
-176   -48    
64     -592   
160    64     
80     -48    
160    -32    
-32    32     
-16    0      
64     224    
112    96     
-32    128    
128    96     
-16    128    
224    224    
64     96     
144    -224   
-96    -48    
16     -96    
64     16     
64     32     
128    -160   
48     -32    
208    16     
112    272    
176    128    
-16    -96    
96     -288   
176    -480   
-112   -64    
64     -880   
96     -160   
-48    -48    
272    0      
192    144    
-80    -224   
48     144    
112    -160   
48     336    
96     416    
576    432    
-432   160    
-32    -608   
-32    -128   
528    -304   
64     304    
176    384    
112    -160   
-32    -80    
128    -272   
-48    -48    
-144   16     
192    144    
16     480    
-48    304    
176    -432   
-16    240    
-256   -16    
240    320    
-80    48     
128    64     
-368   -80    
208    -128   
-64    128    
192    -272   
240    208    
-176   -208   
64     -48    
-16    -496   
-96    0      
112    -112   
-16    -624   
-304   -288   
144    -688   
-1296  -224   
336    -96    
-128   112    
160    -304   
192    192    
-48    -144   
0      16     
16     -80    
-16    -288   
320    -432   
112    240    
-112   -16    
-64    -416   
-128   256    
304    0      
-1344  16     
-64    272    
512    -368   
368    176    
-384   256    
-240   -544   
352    0      
384    -656   
-160   416    
160    -320   
-80    80     
96     208    
384    80     
-160   -96    
128    -160   
-352   -32    
256    -48    
-816   48     
144    32     
-272   -32    
144    -304   
-224   112    
112    -512   
64     0      
240    256    
-112   -176   
64     112    
128    -16    
-80    -16    
-176   -320   
-240   448    
208    -48    
-1072  -128   
-48    0      
176    -240   
112    64     
-16    -48    
80     -160   
112    64     
-144   -400   
352    224    
-64    192    
-80    -240   
48     -112   
-96    -496   
-240   80     
64     128    
-336   -112   
80     -32    
-448   -16    
80     32     
-16    -64    
176    -96    
96     96     
64     -880   
96     48     
96     0      
80     96     
-176   96     
96     -16    
-112   32     
16     32     
-176   128    
48     80     
-176   80     
144    0      
96     80     
64     48     
32     48     
-496   -192   
48     -96    
-128   32     
160    -16    
-224   0      
208    -416   
48     -640   
432    128    
-80    272    
-64    -112   
-784   -48    
-224   -272   
80     -32    
-160   -416   
-192   -64    
192    224    
-640   -80    
32     -128   
176    80     
-288   -16    
-112   -80    
160    112    
96     112    
-352   -32    
96     -96    
-80    -16    
-112   -128   
-128   112    
-352   -80    
-208   -48    
48     -48    
-80    -48    
128    48     
-1088  -80    
144    144    
0      -16    
0      32     
48     -16    
-80    32     
-96    -128   
48     32     
160    -80    
-64    80     
-336   -128   
32     -48    
48     -16    
-496   0      
-48    32     
-320   16     
32     80     
-1344  16     
-160   32     
96     80     
-80    16     
-16    -128   
208    16     
-80    -32    
48     64     
16     48     
-144   48     
16     32     
144    64     
-16    -16    
-128   32     
64     80     
-288   -112   
80     -80    
-224   80     
112    32     
-128   -16    
96     16     
-240   -176   
-64    64     
-160   16     
80     64     
-32    -16    
-48    32     
-80    48     
-256   -32    
-16    64     
144    288    
-224   208    
-560   -16    
-128   64     
288    48     
-224   160    
160    -32    
16     -16    
80     80     
-128   144    
32     48     
-368   -64    
0      0      
-176   -32    
32     128    
112    160    
-32    96     
-592   -112   
80     -96    
-48    -288   
48     -144   
-144   0      
32     112    
32     240    
-64    368    
-32    0      
-176   -368   
128    -112   
288    128    
-192   384    
-368   -544   
320    -160   
-560   368    
-64    48     
-464   0      
-48    16     
16     -32    
16     272    
80     -144   
-80    64     
16     48     
176    48     
304    80     
-432   -96    
224    176    
-272   -256   
16     496    
-240   -512   
288    528    
-656   768    
-640   -416   
-320   272    
272    -592   
400    832    
-128   848    
-112   176    
-144   -592   
16     -32    
176    80     
-176   -48    
64     144    
-112   -288   
-352   64     
64     80     
-544   -96    
80     144    
-128   48     
32     -144   
48     -80    
-144   -48    
176    16     
-80    48     
32     -48    
64     -16    
144    176    
80     32     
-192   96     
-240   -80    
48     16     
80     -112   
-160   -32    
224    64     
192    208    
-112   64     
16     64     
-48    32     
-128   0      
-80    96     
-128   -16    
240    -32    
0      -112   
-144   96     
-240   -48    
-64    96     
160    -48    
32     80     
80     16     
-112   -16    
48     32     
-80    32     
0      0      
-16    -48    
144    16     
-176   32     
-80    48     
-192   -16    
160    112    
-304   32     
144    -16    
-16    -128   
-16    -208   
224    160    
-288   112    
64     16     
64     16     
-64    48     
176    32     
96     16     
-80    32     
64     144    
-16    32     
128    64     
-32    144    
-128   -176   
624    -128   
-128   160    
80     32     
16     -160   
-16    96     
48     112    
-208   112    
-304   -96    
176    -64    
208    -48    
80     80     
272    128    
-304   176    
96     -16    
-16    -48    
368    208    
-272   256    
64     64     
240    -80    
0      -48    
48     -96    
-80    32     
16     -16    
64     144    
-32    -80    
96     -64    
-256   -32    
-48    -448   
0      48     
224    -64    
-96    144    
-48    96     
16     -112   
96     -80    
32     32     
48     128    
-112   80     
160    0      
0      128    
-80    64     
208    160    
160    48     
48     -352   
112    16     
0      144    
144    96     
-64    0      
128    368    
80     192    
0      0      
128    320    
80     144    
80     -48    
192    0      
-144   16     
160    192    
16     64     
-48    -32    
144    176    
-48    -208   
208    -240   
0      32     
96     80     
256    0      
96     928    
32     -16    
192    -448   
-144   -160   
128    -144   
-64    -64    
-96    -32    
-256   -272   
192    -112   
-32    416    
144    -1184  
352    -64    
-240   64     
144    176    
-144   -208   
208    -320   
432    96     
-176   -176   
192    128    
-16    -224   
192    352    
384    112    
-48    16     
320    -16    
-208   256    
-32    -176   
-128   0      
224    -144   
48     256    
-240   -48    
176    -656   
192    528    
16     288    
64     -144   
-96    112    
144    64     
128    0      
-128   32     
96     -192   
-48    -560   
80     160    
256    592    
-192   -2656  
176    0      
0      -160   
64     64     
112    176    
16     -112   
-16    -16    
48     176    
192    48     
48     48     
96     112    
16     -192   
240    -112   
32     -32    
288    -16    
-176   -368   
208    112    
-192   96     
176    96     
112    64     
208    80     
64     112    
-96    48     
96     16     
-32    -128   
96     16     
192    -80    
112    -48    
64     -112   
192    -128   
48     -64    
96     208    
-144   -128   
112    -80    
80     48     
192    144    
32     96     
160    -176   
0      32     
48     -288   
-48    -32    
192    -32    
0      128    
96     0      
128    32     
-112   -80    
320    176    
-224   48     
192    112    
-96    48     
80     -224   
32     -368   
128    -48    
48     -688   
48     -64    
256    128    
144    -240   
-32    -80    
64     160    
304    240    
-208   -96    
-48    -416   
384    448    
0      96     
-96    -48    
-64    96     
48     -64    
176    -64    
80     -352   
-64    -64    
96     -1280  
64     -48    
304    128    
192    16     
96     16     
32     160    
192    -96    
-32    0      
160    -240   
80     16     
-1168  -128   
96     -224   
-32    -160   
-208   -544   
48     -96    
16     -144   
16     -48    
80     -544   
48     -240   
208    -160   
-32    0      
208    16     
496    544    
-320   224    
-80    -80    
64     -128   
48     -32    
-1392  -112   
480    64     
96     -48    
400    -224   
-128   -192   
-128   -400   
-192   -48    
-256   48     
-32    48     
176    -80    
144    64     
144    -32    
0      -16    
-208   16     
32     -16    
-288   64     
-64    32     
0      64     
-32    -192   
208    0      
192    -144   
-192   64     
208    -384   
-208   96     
48     -80    
-128   0      
-48    -48    
160    48     
-192   0      
128    -96    
-704   -16    
160    96     
0      128    
-192   -160   
224    -48    
256    -192   
-208   -32    
224    -224   
-64    80     
64     -64    
-96    -16    
-48    0      
128    -48    
-240   -48    
288    32     
-464   -48    
224    -16    
-1232  0      
112    16     
-176   16     
96     -64    
176    48     
16     -240   
64     -32    
16     0      
288    -144   
64     -32    
144    0      
-144   -32    
48     16     
-16    -48    
0      -32    
-128   16     
16     -96    
96     -144   
144    -80    
128    16     
112    -32    
64     0      
-64    48     
80     -288   
-48    -256   
112    -64    
-48    48     
0      112    
-160   208    
240    -96    
-256   -16    
-48    -128   
128    -176   
-64    -96    
80     224    
96     80     
96     -352   
-416   112    
-176   176    
-272   -352   
208    272    
-336   -1120  
256    768    
-176   528    
16     -880   
-80    432    
48     -224   
32     -224   
160    208    
-80    -112   
-976   -64    
-1632  112    
96     80     
-208   16     
176    336    
32     96     
96     128    
0      -224   
48     656    
384    528    
-144   -160   
-800   512    
-128   -800   
-416   -544   
32     96     
-352   -432   
80     448    
192    160    
-320   176    
-464   -272   
-864   16     
-176   144    
32     -448   
160    80     
288    32     
-352   32     
-560   0      
112    288    
-416   -128   
160    16     
-256   48     
-64    48     
48     -48    
-32    -128   
-208   -96    
-208   128    
-176   128    
240    -48    
-320   112    
-256   16     
-32    -16    
-224   -128   
80     288    
-224   112    
288    176    
-64    32     
-80    32     
-240   112    
-176   0      
32     0      
-48    -64    
-112   208    
-256   0      
32     192    
128    -64    
368    32     
112    0      
-16    32     
0      -48    
-176   -16    
-32    48     
-288   -16    
16     128    
-208   32     
48     -32    
48     128    
-144   96     
-720   112    
-80    0      
-848   -32    
0      16     
-64    -48    
0      0      
112    -48    
0      -16    
-32    160    
32     0      
-16    48     
-48    -64    
96     0      
-16    32     
0      80     
48     192    
-160   176    
-128   0      
112    16     
96     -16    
-128   128    
-80    -32    
-80    -96    
208    16     
-32    -48    
16     -48    
16     64     
-80    64     
-208   16     
80     -64    
-112   -16    
-112   32     
-368   -112   
144    -96    
80     -288   
160    -208   
48     112    
-176   160    
-176   256    
0      -32    
-80    -128   
-272   -64    
80     -64    
192    176    
-176   192    
-320   0      
48     80     
-240   64     
192    160    
-400   -160   
-224   -128   
80     -48    
48     64     
-48    96     
32     240    
128    -32    
112    0      
-64    256    
176    240    
32     192    
-128   -48    
96     80     
32     -80    
-32    160    
-32    144    
-256   -144   
272    -384   
64     -64    
80     -64    
-16    -784   
-16    0      
160    80     
128    48     
-144   16     
-48    80     
-112   256    
0      -80    
-96    224    
-80    112    
16     -240   
-32    -224   
48     0      
160    16     
272    256    
-208   -80    
80     144    
112    -32    
-192   32     
0      -64    
-16    -48    
80     96     
176    176    
-160   -112   
-16    48     
96     -272   
96     -32    
-96    192    
112    48     
-96    -16    
48     80     
224    256    
-352   -304   
272    -144   
16     -128   
272    64     
80     112    
64     48     
176    64     
-80    80     
96     -64    
-80    -16    
-112   80     
96     32     
144    224    
0      48     
288    -64    
-80    -192   
96     -720   
0      -224   
-32    -112   
-336   -32    
-224   -32    
80     -112   
-80    144    
144    224    
64     16     
144    16     
16     -80    
208    16     
-48    64     
32     -48    
-16    -64    
-112   -144   
-160   -336   
384    48     
-48    -32    
-64    -96    
48     16     
-48    128    
-192   176    
112    16     
240    -16    
-256   -16    
320    0      
-112   64     
336    64     
-160   48     
144    144    
32     80     
-80    16     
208    112    
-176   -544   
16     0      
16     -16    
160    48     
144    112    
128    256    
-400   80     
288    -16    
-128   -48    
48     96     
-160   -32    
112    -48    
-48    144    
160    80     
80     80     
144    -784   
-64    64     
64     48     
-32    64     
128    16     
96     80     
-256   16     
160    32     
-80    -112   
112    -48    
112    176    
128    80     
160    112    
-144   -176   
48     16     
128    -576   
64     128    
96     48     
400    32     
-192   -112   
-64    0      
96     192    
96     128    
64     64     
128    160    
400    128    
-176   32     
112    -32    
160    0      
-96    32     
64     96     
224    80     
240    -464   
-64    16     
-256   32     
32     -16    
112    48     
32     64     
-16    -112   
272    -112   
96     0      
128    48     
416    272    
0      128    
112    112    
128    -48    
80     64     
0      -880   
288    176    
-32    -32    
32     80     
80     192    
192    320    
-96    320    
160    0      
32     -224   
144    -144   
320    176    
-336   0      
0      16     
144    -80    
-176   48     
80     16     
208    608    
256    -240   
80     -144   
-176   64     
96     64     
-256   -240   
112    -112   
-32    224    
-64    0      
80     -32    
208    -112   
304    80     
128    -128   
80     -16    
96     -64    
224    160    
32     -128   
16     64     
-144   0      
208    64     
-128   48     
32     -16    
160    48     
128    16     
64     0      
32     -752   
176    176    
-304   -32    
96     -64    
256    -96    
-112   -112   
96     -512   
112    -16    
144    0      
160    128    
112    0      
-32    -96    
128    32     
176    -48    
64     224    
-16    32     
-48    -16    
0      -112   
128    64     
48     32     
208    160    
64     -224   
112    64     
-48    96     
112    64     
-160   -80    
-160   48     
128    64     
192    -336   
80     -16    
80     96     
128    176    
0      -32    
-32    16     
16     -64    
208    192    
-48    64     
208    -720   
-96    -48    
160    128    
16     160    
-352   -128   
0      -304   
32     -128   
128    -560   
192    288    
-32    -1424  
64     -64    
128    128    
160    272    
-224   -528   
320    -16    
48     -48    
224    416    
128    -560   
-16    -272   
-80    208    
-96    -544   
208    -224   
208    512    
-112   -64    
320    -128   
0      -208   
304    32     
0      128    
368    256    
-464   -448   
0      -432   
-48    192    
96     -32    
16     -48    
-144   176    
336    384    
-96    -16    
144    -80    
16     16     
272    -80    
-144   96     
-80    -1184  
240    -304   
32     -16    
-240   -48    
192    96     
64     176    
-144   80     
-80    -112   
-384   -96    
-96    -176   
-1664  -224   
208    0      
144    112    
64     -64    
128    -128   
128    -384   
-192   48     
352    -192   
-80    64     
96     -48    
-32    0      
-384   288    
352    -16    
208    -112   
144    -304   
-256   -16    
64     96     
0      32     
16     112    
432    32     
96     -144   
144    -192   
80     -656   
-64    112    
160    -128   
368    160    
-192   144    
80     -96    
-144   16     
240    32     
-240   -16    
112    -16    
-2192  48     
64     0      
240    48     
-80    16     
64     32     
176    -240   
32     16     
80     0      
32     48     
-128   -528   
208    -224   
-160   160    
-160   48     
-624   -64    
48     -64    
-304   80     
192    -144   
64     32     
192    -512   
208    112    
-32    -112   
-48    16     
-176   16     
144    112    
-112   -16    
128    -16    
-576   -64    
192    -160   
-80    32     
-64    -112   
0      -96    
96     -32    
64     160    
64     -112   
96     -16    
96     -64    
208    16     
-32    80     
-16    -192   
-112   -208   
16     16     
48     -32    
32     -80    
144    272    
32     224    
176    -64    
80     -224   
208    160    
-96    112    
0      32     
-496   -48    
-144   -160   
-192   -112   
-1376  -144   
-208   -96    
144    80     
-96    48     
144    -112   
-320   -128   
96     -64    
-480   -64    
-864   -176   
160    -112   
-48    0      
-192   -320   
-64    -240   
-288   -224   
-160   -176   
-80    96     
-96    48     
-384   192    
-16    -336   
224    -16    
-32    352    
-272   48     
-16    224    
-208   -48    
96     64     
-160   -32    
-96    64     
-80    32     
-192   128    
32     -48    
-208   -48    
-208   224    
-1040  -128   
-112   64     
-592   -208   
-320   -32    
448    272    
-32    -64    
-32    -80    
96     -64    
-80    32     
-64    304    
-80    -48    
-80    -48    
-64    48     
-224   -144   
64     -32    
-496   16     
16     128    
-608   -32    
48     -64    
-80    -160   
0      16     
-288   -144   
-16    144    
-96    -16    
96     16     
0      32     
-16    -64    
64     -16    
16     64     
128    -16    
-112   -16    
16     16     
-176   16     
144    64     
-1104  -32    
80     32     
32     96     
-48    -16    
144    16     
32     16     
16     -32    
-208   -16    
-80    96     
-48    112    
-48    112    
32     48     
-32    0      
-480   -64    
256    144    
-2224  -48    
176    64     
-64    -208   
0      0      
-64    144    
16     0      
-144   -48    
-128   -32    
240    -80    
112    192    
-16    -16    
-128   -64    
-144   48     
-480   16     
176    144    
-416   -128   
-16    -32    
176    64     
80     16     
32     -32    
32     16     
-160   112    
-304   -64    
240    48     
-176   0      
16     64     
-96    -16    
144    -16    
-304   0      
208    32     
-176   -16    
64     16     
-64    96     
0      -16    
208    0      
-208   32     
160    32     
48     0      
-32    80     
-16    48     
-192   48     
48     16     
64     64     
64     64     
-112   208    
-16    48     
112    -16    
32     -16    
-128   -64    
160    112    
96     160    
-240   48     
-16    -80    
-48    -32    
-32    -32    
176    96     
-192   48     
272    -64    
-592   -128   
240    96     
-432   -32    
208    -16    
128    16     
64     80     
-128   48     
48     80     
80     64     
-48    -32    
96     -96    
160    64     
-32    128    
-208   -32    
16     96     
-128   -288   
80     16     
208    176    
112    -64    
144    0      
-32    -224   
-128   0      
208    208    
-384   96     
64     -112   
288    48     
-160   112    
480    224    
176    -16    
-16    80     
-32    224    
-224   0      
-224   -32    
-80    -64    
144    32     
16     -16    
48     -96    
96     -32    
112    -112   
48     -64    
48     352    
-112   64     
-176   -240   
0      16     
64     160    
-96    176    
160    160    
-16    -112   
-32    64     
0      96     
16     112    
80     -48    
112    -64    
144    80     
-48    64     
80     -32    
16     0      
224    96     
-352   48     
592    672    
-512   48     
80     -432   
464    272    
288    80     
176    -80    
-16    -208   
-96    -96    
-128   224    
-288   -640   
-32    416    
-32    112    
16     -144   
304    304    
-160   80     
64     112    
176    -32    
176    -96    
144    224    
64     96     
-128   -848   
-176   240    
-64    224    
80     -160   
160    224    
-64    -64    
16     208    
-16    352    
-304   0      
0      -176   
128    96     
224    64     
48     -784   
-112   -816   
-16    528    
-192   -112   
64     -240   
448    432    
80     -16    
432    352    
-240   240    
128    -192   
160    80     
16     64     
48     -32    
48     160    
256    16     
0      -416   
64     80     
0      144    
-48    176    
0      -880   
128    640    
-16    16     
208    -640   
16     544    
32     64     
80     -208   
16     176    
-16    176    
128    -224   
192    320    
-256   -416   
64     -304   
208    336    
96     112    
144    -160   
-16    64     
-192   -144   
336    -272   
192    656    
-32    32     
-96    -256   
-32    32     
128    48     
144    208    
112    -64    
48     -208   
-48    480    
352    -176   
112    64     
96     -272   
48     160    
80     -48    
96     -48    
128    160    
-64    112    
-80    -64    
144    -80    
-32    320    
32     48     
96     48     
-16    48     
16     64     
-16    64     
160    -32    
80     48     
48     16     
144    128    
80     144    
16     -16    
80     16     
224    128    
-96    80     
96     -112   
0      -288   
-144   64     
-48    -96    
-80    112    
256    -96    
-112   -32    
336    -480   
208    80     
128    272    
0      400    
-160   0      
48     -96    
48     176    
64     64     
112    32     
112    -480   
-240   -352   
384    -144   
-160   208    
32     0      
752    544    
-560   192    
0      96     
128    192    
-48    368    
336    -16    
160    -128   
-176   224    
224    -80    
192    208    
176    -224   
80     0      
48     -112   
-96    128    
128    -32    
320    96     
112    -96    
16     16     
48     -160   
0      -176   
-112   64     
352    -96    
208    -176   
272    -176   
-64    -64    
80     -96    
112    96     
64     -64    
-64    80     
208    -208   
272    -720   
-256   48     
208    -880   
80     -32    
-48    128    
160    -32    
112    -128   
96     -80    
-128   -48    
304    -288   
208    192    
-64    -496   
160    -160   
192    32     
48     -128   
112    16     
64     48     
176    -240   
128    48     
112    -144   
208    0      
-1568  128    
-32    -96    
16     176    
112    -176   
288    -32    
32     -320   
32     -16    
208    16     
112    48     
64     288    
288    224    
208    112    
-112   144    
-208   -368   
0      -320   
-256   -176   
64     -96    
224    -144   
112    -192   
-96    -32    
64     -560   
176    0      
112    -1184  
240    256    
-80    64     
-384   -48    
64     -256   
256    240    
-160   288    
128    -336   
0      -80    
352    368    
-176   -304   
192    16     
-16    -288   
-32    288    
64     -144   
-80    -192   
128    192    
80     -16    
128    144    
192    0      
208    64     
32     144    
-64    -16    
-352   -96    
16     -160   
-1136  -48    
0      -32    
80     64     
192    -528   
-544   -416   
80     -576   
-352   -208   
112    144    
224    192    
16     80     
256    -64    
-112   -96    
192    -144   
-432   -16    
-176   -112   
0      80     
48     -80    
-48    32     
64     -192   
0      -80    
208    -64    
-48    80     
80     -1008  
160    48     
-32    0      
112    -16    
-80    -144   
48     -16    
-288   0      
-48    -80    
-256   0      
48     0      
-1696  -16    
224    -224   
-64    64     
0      -224   
192    16     
64     -192   
-48    32     
-16    16     
64     0      
-32    16     
-16    64     
176    96     
96     -112   
48     96     
176    -128   
-128   16     
0      -80    
112    16     
16     -128   
192    128    
-32    -272   
160    -16    
-240   -32    
112    -16    
-96    -48    
80     -128   
0      96     
208    -32    
-336   -16    
224    -16    
-128   -64    
96     -224   
-160   128    
-224   -208   
-112   0      
-128   32     
-352   -32    
0      32     
-128   64     
-512   -384   
384    -160   
-528   160    
48     -32    
112    48     
-304   32     
48     192    
-1136  -256   
176    -208   
0      -80    
64     160    
-48    144    
-112   112    
64     -16    
-864   -48    
80     80     
-80    -32    
-272   64     
-32    -160   
80     32     
-112   96     
-64    80     
128    -144   
-16    32     
0      0      
-128   -48    
-144   32     
32     -32    
-176   112    
48     16     
0      -32    
-208   -64    
-160   64     
80     64     
-80    -32    
-112   -64    
-16    64     
-224   -32    
320    96     
-160   -96    
-112   -208   
64     -144   
-128   80     
288    -16    
-144   -48    
-112   32     
-16    96     
-48    64     
-400   -64    
16     48     
-96    64     
224    32     
-32    -48    
16     64     
32     96     
-32    128    
-144   32     
-16    -64    
0      64     
-224   64     
32     -96    
-160   -304   
80     -16    
-576   0      
-32    64     
160    80     
112    160    
-48    -48    
32     -224   
-48    16     
112    -160   
-288   144    
-32    -128   
-208   224    
0      176    
208    -160   
-32    96     
-48    80     
-688   64     
-48    -16    
-2656  -144   
64     -96    
-64    -112   
112    336    
-144   -432   
272    128    
-32    128    
-48    -32    
-96    48     
112    32     
-144   -16    
64     48     
144    -32    
-128   112    
384    1296   
-832   -1136  
96     192    
-192   0      
-16    16     
80     -32    
-48    64     
64     256    
-176   448    
208    208    
176    -432   
64     48     
-176   32     
208    -240   
-256   112    
32     96     
-272   -144   
192    432    
80     -672   
176    176    
-208   96     
-32    -96    
-80    448    
0      -400   
192    144    
-64    272    
-256   -128   
-384   -64    
128    16     
-240   32     
176    16     
-144   -816   
-80    80     
32     464    
64     0      
32     192    
-64    -160   
304    -272   
112    96     
96     -512   
-192   -96    
32     176    
-128   -64    
-160   -48    
16     144    
-208   -144   
-240   -176   
-256   96     
512    96     
-96    288    
336    160    
144    96     
48     128    
64     0      
-32    176    
48     -32    
112    224    
-80    16     
256    64     
-320   -48    
16     -224   
160    96     
0      96     
144    64     
-128   -112   
-48    -160   
-96    32     
48     -16    
-224   -16    
128    -96    
48     -48    
96     80     
-128   -80    
-16    32     
-192   -192   
-48    -16    
-192   -80    
224    -304   
256    192    
-160   0      
-96    48     
16     80     
64     -64    
96     112    
320    320    
-496   336    
240    -48    
-48    -176   
0      576    
64     192    
288    592    
256    48     
96     -112   
-16    176    
208    32     
-160   176    
240    -272   
-80    112    
336    -16    
64     368    
32     128    
-176   144    
240    0      
112    -160   
-32    0      
64     -496   
-96    224    
160    -160   
128    64     
0      240    
64     -16    
-144   -48    
192    -128   
48     192    
-208   192    
80     112    
-48    -32    
208    144    
80     128    
144    32     
-32    32     
64     64     
-16    16     
160    -48    
336    128    
-48    368    
-64    -32    
-48    -272   
0      80     
80     -32    
0      336    
192    144    
112    0      
16     -256   
416    -176   
-528   -704   
0      -288   
112    112    
368    336    
-384   80     
-160   144    
-96    144    
16     48     
304    176    
48     224    
240    368    
240    208    
-16    -304   
208    -400   
80     64     
-16    -352   
0      16     
96     144    
-80    176    
320    112    
-128   160    
0      16     
-32    -80    
-16    16     
160    -64    
0      128    
256    240    
320    160    
-128   -48    
-48    -48    
-64    -512   
176    128    
240    32     
128    -48    
32     64     
-96    -48    
112    -48    
-16    -144   
16     -256   
16     -48    
96     -160   
0      -64    
192    16     
0      0      
272    96     
144    -16    
224    48     
-192   -496   
32     -64    
128    -16    
0      -64    
-16    0      
272    144    
144    112    
160    32     
-64    32     
160    -208   
-64    160    
176    128    
64     0      
48     -304   
176    0      
128    -496   
384    240    
-144   -288   
32     80     
16     -32    
64     32     
48     -144   
128    128    
128    64     
112    80     
16     32     
16     -560   
-192   -96    
112    208    
128    -64    
240    -432   
224    96     
208    -1040  
160    112    
16     128    
16     128    
32     80     
48     224    
0      96     
32     32     
208    64     
-48    48     
112    16     
0      -96    
144    16     
96     -48    
256    -16    
-144   -32    
-80    64     
128    -32    
144    80     
-64    64     
96     -512   
0      160    
0      32     
32     0      
192    32     
112    176    
-32    -96    
128    32     
224    -16    
80     16     
80     -112   
-128   80     
16     -128   
400    -1120  
-64    -16    
128    -32    
16     -112   
224    -48    
208    -208   
-112   -112   
16     32     
0      -64    
80     16     
64     16     
144    -1056  
-48    -48    
64     -256   
-80    -64    
256    -176   
128    -288   
224    -32    
96     -400   
112    0      
48     -800   
32     -16    
160    32     
-80    16     
64     80     
-32    -96    
112    -160   
-16    32     
160    -112   
-128   -32    
-432   -64    
80     -48    
-944   0      
208    112    
-240   -80    
144    -176   
64     -80    
64     -672   
224    16     
80     -32    
80     80     
288    -224   
-64    -32    
96     16     
144    144    
-240   -32    
144    -64    
-1392  16     
192    0      
0      -32    
176    -32    
16     -176   
224    -32    
0      48     
272    -544   
-16    80     
128    32     
-32    -96    
272    -176   
176    -16    
-176   -96    
96     -240   
-64    -64    
32     64     
96     176    
-400   -112   
224    -64    
352    -32    
16     16     
224    -272   
-144   -80    
432    160    
-352   64     
80     -48    
160    -224   
-272   -144   
192    80     
-256   64     
160    -32    
-384   -48    
32     -112   
0      -112   
144    -112   
48     0      
96     -32    
-64    0      
256    -176   
-112   -64    
48     80     
-64    -112   
160    -64    
32     32     
-144   -32    
32     -128   
-336   -96    
64     -16    
-1072  -16    
272    48     
96     -80    
224    -336   
80     336    
192    16     
-128   -320   
0      -16    
144    400    
-176   -256   
256    -144   
-32    176    
112    -128   
128    128    
-96    32     
-32    48     
112    -16    
64     -96    
160    -80    
-160   80     
320    -816   
208    384    
96     128    
64     -32    
-848   272    
144    -208   
-304   224    
96     -176   
0      16     
16     -64    
192    -112   
-144   -400   
-256   -656   
64     352    
80     176    
128    -416   
-64    -240   
-160   -304   
112    64     
-176   -192   
48     -48    
-64    -64    
112    -32    
-96    288    
-96    -336   
-64    -48    
48     -368   
-16    80     
-1632  -80    
-256   -224   
-224   -128   
-224   -48    
-64    64     
48     32     
112    560    
-48    -16    
-80    16     
80     16     
-160   16     
32     -96    
16     -48    
0      -128   
16     -16    
-592   -16    
-592   -272   
48     -256   
-272   -144   
-112   -48    
-144   -64    
-448   -352   
-2432  -320   
176    128    
-80    176    
-176   -64    
16     -48    
160    0      
-112   -144   
48     -48    
-64    -112   
-144   96     
-16    0      
-48    -16    
-144   -32    
-320   -32    
-160   -272   
-608   -112   
0      -16    
32     80     
80     -64    
-192   -224   
48     80     
-256   112    
16     64     
-16    96     
80     16     
16     16     
0      -16    
-80    0      
-240   16     
32     -80    
-416   240    
192    448    
-1392  32     
-208   224    
-128   -80    
112    32     
48     -64    
288    -48    
-112   80     
-112   -144   
-16    0      
-240   16     
32     192    
-112   96     
-48    -176   
32     16     
-80    64     
-832   -64    
176    144    
-64    -32    
224    176    
32     64     
-64    0      
-48    64     
-48    -16    
-128   128    
96     80     
32     0      
144    48     
-48    -224   
-160   -208   
0      304    
-176   304    
144    -128   
160    128    
192    0      
64     -16    
96     272    
-128   -128   
-80    208    
176    80     
-80    144    
-64    -96    
-272   64     
64     16     
-416   -240   
0      -96    
288    -464   
48     288    
-624   0      
48     32     
-144   304    
16     768    
176    240    
32     -192   
-32    192    
80     -160   
0      448    
16     48     
400    208    
-48    336    
-432   -32    
-656   -96    
208    -112   
-1008  -48    
352    160    
0      96     
288    320    
-224   528    
112    176    
-96    -384   
-208   16     
192    -240   
-48    288    
272    0      
-320   64     
112    96     
-320   -32    
-48    -64    
16     -160   
0      144    
288    -240   
32     176    
96     0      
-320   -864   
-64    -384   
-128   -304   
16     96     
64     128    
272    320    
-336   -16    
192    48     
144    -48    
80     -16    
-96    192    
64     208    
224    464    
-64    96     
16     240    
-160   160    
400    336    
48     -80    
-128   -32    
-32    304    
256    160    
-144   80     
224    64     
-192   352    
448    432    
-96    272    
-16    96     
-64    32     
320    -32    
-112   80     
160    -176   
64     -144   
-64    144    
224    16     
-48    144    
-112   240    
-80    112    
336    -96    
272    320    
-64    432    
-80    -176   
144    -48    
-48    304    
-192   -400   
96     560    
256    384    
160    -240   
-192   64     
288    -208   
0      64     
112    112    
0      -112   
-128   96     
-256   128    
-208   64     
240    48     
128    48     
336    16     
112    32     
-32    112    
-288   -48    
-80    160    
-224   112    
80     16     
32     -112   
368    16     
80     16     
16     80     
-64    -176   
112    -208   
96     16     
160    208    
-80    0      
128    64     
-64    32     
144    -16    
-32    160    
48     144    
48     0      
400    -80    
320    -64    
0      112    
0      -112   
16     -48    
-80    -160   
-112   -112   
-160   -144   
-112   0      
-144   112    
-192   48     
112    48     
64     80     
128    160    
-32    64     
-32    -32    
336    64     
-80    32     
-64    -112   
-144   -272   
432    -64    
80     0      
304    128    
48     64     
0      32     
16     128    
-160   192    
-144   -32    
240    -32    
368    144    
-112   32     
160    -16    
176    80     
48     -208   
-128   -16    
112    -1264  
144    80     
16     -80    
32     48     
-48    64     
-176   -96    
16     -48    
304    96     
224    128    
112    0      
0      32     
-32    32     
-80    80     
16     -160   
32     48     
16     -16    
48     64     
128    64     
0      16     
112    48     
16     0      
32     -96    
112    96     
48     0      
64     32     
-48    48     
0      -48    
48     32     
64     -144   
112    80     
208    -144   
-128   -48    
128    -80    
-16    112    
112    -96    
112    64     
-64    80     
16     96     
16     -16    
64     64     
-192   -16    
192    -48    
-16    96     
224    16     
32     80     
128    -544   
-112   64     
-80    -864   
240    -96    
144    112    
208    -64    
-48    0      
112    128    
16     16     
96     -80    
32     -64    
144    176    
64     64     
32     -64    
-112   -160   
80     -704   
80     -32    
0      -16    
256    160    
-80    128    
-48    64     
80     48     
32     240    
176    32     
-96    64     
48     16     
32     -544   
112    -80    
32     -240   
0      64     
256    112    
48     48     
256    48     
-128   32     
32     -160   
112    256    
0      0      
112    -32    
64     -128   
160    192    
-48    -48    
96     -352   
80     64     
16     0      
128    -352   
-16    -192   
0      416    
48     -272   
464    224    
-160   -128   
0      160    
384    32     
64     -912   
144    32     
-144   -64    
-96    -160   
544    304    
-80    208    
224    -176   
-112   480    
128    -496   
400    -48    
80     1040   
-96    -144   
16     -336   
32     0      
-64    -320   
64     272    
256    -208   
144    112    
192    -256   
176    -80    
112    -288   
32     -240   
96     256    
-64    -176   
-96    -32    
-32    -48    
160    80     
192    64     
-32    -192   
-96    -32    
-1136  -32    
272    -112   
-80    -16    
96     -48    
112    16     
224    48     
144    -224   
176    -864   
176    -208   
80     -80    
80     -48    
16     16     
0      16     
0      -32    
16     32     
-48    -128   
208    -144   
-112   80     
64     -144   
16     -48    
224    -112   
112    16     
112    -432   
176    64     
48     -464   
208    16     
64     -64    
-32    64     
16     16     
112    -16    
-144   -32    
192    160    
-400   272    
80     48     
144    32     
-32    -96    
-64    16     
176    -224   
-256   -64    
-80    -1328  
-112   16     
80     0      
-256   -160   
240    -80    
-16    -160   
-144   -272   
160    160    
-176   0      
144    -112   
-640   -16    
64     112    
-176   -32    
176    -160   
0      -48    
32     -208   
0      -16    
304    176    
-96    288    
-176   -32    
192    -240   
-96    -80    
-48    -32    
16     -144   
192    80     
304    336    
-208   64     
-192   -48    
192    -208   
32     176    
16     -112   
48     16     
96     -736   
16     112    
-16    -64    
-64    16     
336    544    
-128   144    
288    -96    
384    -32    
-1296  192    
128    32     
-928   48     
112    -144   
96     32     
304    -224   
-144   128    
16     0      
144    -16    
-240   64     
-32    -96    
-80    160    
80     -48    
-240   -64    
-16    -128   
32     80     
48     160    
80     32     
208    -48    
-64    32     
96     -208   
0      176    
80     384    
80     80     
-64    -16    
-224   -448   
32     -64    
-144   -160   
-192   -256   
16     -96    
16     -96    
288    -32    
-144   256    
192    -400   
240    -512   
128    -336   
464    224    
-192   352    
112    48     
-96    0      
-736   -240   
-464   32     
32     -64    
-256   -240   
288    64     
-496   -192   
-672   -672   
240    -720   
-912   1360   
656    112    
-144   -112   
-384   32     
-176   -720   
-288   192    
-48    -80    
-928   592    
-128   -96    
-144   -144   
64     160    
16     -48    
0      272    
-1008  -32    
384    -272   
-48    160    
176    320    
192    -48    
-464   304    
-48    -32    
-272   -80    
112    -144   
-160   -32    
-176   496    
-816   -16    
-112   208    
304    -160   
-240   480    
176    224    
208    416    
-416   -688   
128    448    
-176   -128   
48     256    
176    64     
-144   144    
144    -16    
-192   -80    
-48    368    
-192   48     
-112   -160   
-528   -112   
32     -32    
16     176    
208    464    
-224   -176   
176    -128   
400    352    
-448   -240   
224    -128   
64     352    
-208   -48    
32     16     
-144   -32    
-176   -48    
144    192    
-352   0      
80     32     
-192   -224   
96     208    
32     -96    
-32    -64    
80     80     
-160   -112   
160    112    
-48    112    
256    160    
-272   -80    
-240   -160   
0      80     
192    192    
-720   -160   
-128   256    
48     144    
-80    176    
32     768    
-16    608    
-80    -272   
144    16     
32     -64    
80     -48    
32     -96    
-160   -64    
-128   64     
-272   272    
448    832    
-704   272    
160    256    
-1232  -32    
112    96     
0      -32    
-48    -32    
-48    -64    
80     -96    
144    16     
80     96     
-48    80     
-144   48     
80     496    
-208   64     
48     -208   
-224   -144   
-64    96     
-496   -112   
-48    0      
48     112    
-144   48     
32     80     
-96    176    
288    128    
16     32     
-176   32     
-224   64     
-256   176    
-64    128    
48     -240   
-336   -336   
272    288    
-288   80     
-96    0      
288    144    
128    48     
80     32     
0      64     
-256   -16    
-112   48     
-48    32     
-144   16     
-80    0      
192    32     
176    112    
-304   -64    
80     32     
64     32     
-160   32     
-64    -16    
80     160    
32     32     
-80    -128   
128    64     
16     80     
-16    48     
0      -16    
-80    -32    
-160   16     
320    160    
96     0      
0      -16    
-112   -16    
80     48     
-48    48     
0      64     
0      32     
-112   16     
128    64     
-64    64     
128    16     
-144   -48    
112    64     
-288   -64    
96     32     
112    -64    
-80    0      
48     64     
16     48     
64     64     
-48    -16    
-32    -16    
0      96     
16     112    
16     -16    
-16    0      
-208   16     
80     144    
0      16     
32     -48    
-96    -208   
160    -272   
128    128    
192    80     
112    64     
32     16     
-64    0      
288    -48    
-192   32     
80     48     
0      176    
0      -48    
-144   -320   
-96    -32    
128    -16    
-80    -64    
208    16     
256    160    
16     48     
176    112    
16     32     
96     -48    
-48    64     
160    160    
-16    48     
64     64     
-144   48     
208    32     
-208   -80    
80     0      
-16    32     
16     384    
48     64     
128    -224   
-64    144    
144    -192   
-224   -352   
-128   288    
128    224    
80     -144   
160    240    
-16    -304   
32     48     
-48    192    
0      -848   
416    576    
96     592    
-400   -576   
112    -48    
-176   224    
336    -576   
0      352    
176    240    
128    -128   
80     336    
-80    0      
-64    -224   
176    32     
32     -32    
16     -112   
64     -16    
304    -16    
-416   64     
384    -32    
-128   48     
288    -16    
0      0      
96     48     
32     -48    
48     0      
144    -128   
-192   -160   
240    -400   
64     160    
16     -368   
272    80     
48     -1360  
-112   80     
80     128    
224    208    
-112   0      
-16    16     
0      -176   
208    80     
-16    32     
256    -64    
-64    -80    
80     -96    
-32    80     
96     -96    
-64    -32    
80     -464   
160    32     
0      128    
48     -16    
64     -288   
96     32     
112    16     
32     32     
-64    -32    
224    64     
96     128    
-32    -32    
352    48     
0      32     
-64    32     
-240   -192   
240    -288   
48     -416   
240    16     
144    -32    
-48    192    
16     48     
96     48     
16     -64    
32     -96    
-160   -80    
112    -80    
240    96     
32     -16    
416    208    
-256   -384   
224    -16    
224    -144   
32     160    
336    192    
-128   16     
48     -80    
368    256    
-368   64     
80     112    
-80    0      
400    -64    
176    144    
176    -48    
0      32     
-288   -352   
160    -224   
144    16     
-208   -272   
336    -48    
80     256    
112    64     
16     32     
-176   -80    
112    -208   
272    144    
-16    -16    
128    32     
112    0      
80     112    
176    -112   
0      32     
-80    -240   
224    -128   
-176   -128   
208    -864   
48     80     
64     -144   
128    -80    
48     -176   
-16    -416   
0      -48    
-48    -112   
272    -192   
144    160    
-96    16     
-32    0      
288    -272   
16     -1008  
-64    -384   
160    -432   
64     -64    
-624   -48    
176    48     
-16    224    
208    288    
256    128    
160    32     
64     32     
0      144    
-16    -64    
32     80     
-48    -16    
256    -352   
-16    144    
176    192    
-112   -64    
-160   128    
112    -96    
48     128    
80     -576   
16     608    
32     48     
-32    -272   
256    -208   
-32    -144   
272    -176   
-16    0      
160    -80    
80     672    
-16    -496   
240    144    
-208   -160   
0      -32    
-752   -16    
208    16     
112    16     
160    -240   
128    -288   
-288   -144   
80     0      
48     80     
368    -144   
160    368    
80     -176   
-464   -64    
-64    16     
64     -192   
160    96     
-1104  -144   
112    768    
48     -176   
-240   -544   
-48    -32    
256    64     
-304   -576   
288    -352   
112    144    
32     -176   
224    144    
-16    80     
240    -80    
-192   -176   
-224   -496   
-144   144    
80     320    
-464   32     
112    144    
224    -144   
240    -336   
160    208    
48     -432   
16     -144   
48     -224   
48     -32    
-32    0      
96     32     
-208   32     
96     16     
-224   0      
128    16     
-544   32     
16     -16    
0      -112   
176    -336   
16     -32    
192    -288   
80     -16    
240    80     
-192   0      
-32    -64    
224    16     
-160   0      
160    -16    
-240   32     
16     48     
-176   -48    
128    80     
-352   -128   
352    -48    
96     -16    
32     -224   
240    160    
208    48     
-48    64     
-160   -16    
-16    0      
304    112    
-176   96     
-48    -16    
32     -16    
-64    -64    
80     -64    
80     -16    
128    -112   
-128   0      
128    -48    
0      -48    
-288   96     
-32    32     
-192   0      
272    48     
160    -80    
0      -96    
-272   -208   
112    -272   
-496   64     
128    64     
144    192    
288    48     
-144   -16    
-1312  -192   
304    0      
-80    -64    
-864   48     
-48    -96    
64     -176   
-112   -240   
176    -96    
-80    -64    
64     32     
-80    48     
-704   0      
256    240    
-1232  -64    
112    -16    
32     -64    
-512   0      
320    176    
-144   80     
-128   -16    
-656   -160   
0      32     
32     -112   
144    16     
-176   -48    
160    32     
-32    -96    
64     -448   
32     -912   
512    176    
96     416    
-16    176    
64     80     
-512   192    
144    -160   
-240   -80    
-208   208    
-1024  192    
-224   96     
176    -16    
64     16     
-192   -224   
128    0      
-96    0      
-176   48     
-96    0      
-64    0      
-16    64     
96     112    
-112   16     
-32    96     
-96    32     
-64    -144   
-80    -192   
-336   -112   
64     -48    
-32    -16    
400    208    
-240   48     
-16    0      
-96    48     
-32    -80    
96     0      
96     -48    
192    96     
-48    -16    
160    48     
-480   -80    
-32    0      
-1200  -16    
64     32     
-32    -64    
128    32     
-16    16     
-96    48     
-80    0      
-128   -32    
160    128    
80     96     
-112   0      
-96    -32    
-224   16     
-272   -48    
-32    16     
-16    32     
80     96     
-96    -48    
96     112    
-32    0      
16     32     
112    48     
96     48     
144    48     
-224   16     
-32    -16    
-80    160    
-128   112    
112    336    
128    176    
-32    -16    
-32    176    
-32    -32    
-256   -16    
272    -144   
-112   128    
176    48     
-176   96     
-32    128    
-80    400    
320    -96    
144    544    
96     -48    
0      16     
304    272    
-736   -80    
-48    -592   
144    512    
-128   176    
160    -256   
-192   272    
-16    224    
-176   -352   
160    336    
-272   -240   
192    -16    
128    -160   
80     -224   
-448   320    
176    -160   
-128   144    
128    -32    
160    352    
0      -32    
0      -352   
16     368    
128    -352   
-256   -48    
576    160    
-528   256    
64     160    
-208   -192   
16     -64    
-16    -80    
80     144    
-240   -208   
176    -192   
-32    128    
128    160    
-16    128    
112    48     
112    0      
208    -32    
-368   96     
-48    16     
-80    48     
-224   96     
352    64     
176    0      
208    16     
-272   48     
16     0      
-32    -16    
-64    -96    
48     80     
-64    96     
128    112    
-320   -16    
64     80     
-96    64     
272    32     
-32    64     
-240   48     
-176   0      
0      48     
112    32     
96     -16    
144    0      
112    96     
112    64     
-112   64     
-80    64     
272    -32    
-112   32     
-32    -32    
-208   112    
32     0      
240    -80    
-144   32     
48     112    
-16    48     
0      144    
128    64     
176    112    
-16    48     
-32    -144   
96     -32    
96     80     
16     32     
-16    0      
-32    96     
-112   -64    
64     0      
48     -64    
64     48     
144    64     
-16    -112   
48     0      
48     112    
96     32     
-64    48     
48     48     
176    64     
-48    96     
-96    32     
128    96     
32     80     
-32    -16    
240    0      
224    224    
-32    160    
128    32     
0      16     
112    64     
48     -96    
-16    16     
240    -48    
224    160    
-96    128    
0      -32    
80     -48    
-96    80     
-32    32     
-32    -32    
-80    -224   
320    -128   
-192   -208   
-144   -464   
-32    -112   
0      96     
16     144    
48     336    
96     176    
112    -48    
16     16     
64     96     
0      112    
0      -32    
224    64     
80     -80    
-112   -64    
128    0      
160    16     
-48    32     
-16    -16    
-208   -256   
32     -128   
-240   -352   
256    -576   
160    -64    
336    112    
-288   -112   
144    32     
-96    -80    
-16    48     
-288   64     
160    -1424  
240    464    
48     -80    
224    -16    
144    144    
0      -48    
48     128    
176    336    
-80    -240   
16     -160   
64     256    
192    48     
192    0      
80     -16    
272    304    
-192   -560   
64     -208   
128    -320   
16     192    
160    224    
-112   -16    
192    -256   
-256   -448   
288    -112   
128    48     
96     -32    
192    -144   
16     112    
160    -128   
-80    -32    
224    -624   
-160   -304   
144    -464   
176    64     
96     -48    
192    -32    
-64    32     
160    80     
-64    32     
320    288    
-96    368    
304    0      
96     176    
128    -48    
304    48     
128    -48    
176    32     
-32    -192   
64     -32    
0      80     
0      64     
96     16     
128    32     
64     32     
-32    48     
128    96     
-16    -64    
208    80     
128    -16    
48     80     
48     48     
80     -32    
192    0      
-240   96     
0      -160   
224    -128   
-80    -128   
96     -160   
176    96     
336    -64    
-576   224    
352    -160   
-48    0      
96     -64    
144    64     
112    -96    
160    48     
-32    96     
64     80     
-48    -64    
64     -1200  
-64    -80    
128    -80    
16     240    
64     -128   
240    -544   
64     -64    
160    128    
176    -128   
-32    -16    
128    -240   
-16    80     
112    64     
240    -112   
0      16     
-112   -16    
-32    -128   
528    -64    
-16    48     
0      32     
64     -224   
96     -48    
240    -1248  
0      -112   
-32    -112   
192    -192   
80     -80    
48     64     
128    0      
16     0      
-144   -128   
160    -144   
-96    0      
240    64     
-32    -96    
-48    -128   
16     -128   
160    -480   
-144   48     
128    -400   
176    16     
-32    -112   
0      -16    
368    0      
-368   112    
-144   -48    
432    -64    
-784   -16    
96     32     
128    -32    
256    0      
32     -16    
208    80     
208    32     
-16    -128   
208    224    
208    112    
96     112    
48     32     
-16    304    
32     112    
32     -32    
48     160    
16     -16    
128    432    
-80    320    
-144   112    
48     -32    
112    48     
80     64     
48     320    
-96    144    
32     -80    
-48    -32    
336    48     
-96    112    
-384   -144   
0      -32    
-32    32     
-128   -384   
96     -704   
304    80     
464    -176   
-112   -64    
128    -480   
256    -288   
128    -1040  
64     112    
-224   -608   
-320   -112   
-576   144    
-16    -176   
48     -64    
208    16     
0      32     
80     32     
-1552  -16    
80     -160   
32     -64    
352    0      
208    192    
-48    -336   
-112   0      
-208   -48    
-96    -240   
112    -144   
80     -176   
-224   -16    
80     0      
-16    352    
80     -128   
-80    -32    
96     -32    
0      16     
112    -208   
160    80     
240    -448   
0      -64    
-560   -16    
320    -80    
-640   -160   
64     -272   
-352   -208   
0      -64    
-256   -16    
176    -48    
-128   -16    
160    256    
192    224    
64     -144   
-128   176    
-64    -384   
240    -832   
48     464    
48     64     
-192   -208   
64     -16    
-64    -80    
64     336    
-160   -96    
256    32     
-256   -16    
80     -176   
160    208    
-176   -96    
0      -160   
64     -16    
-592   -160   
-400   208    
-384   368    
0      -208   
160    -16    
-32    128    
48     -208   
-16    112    
48     64     
32     32     
-320   -64    
-192   160    
-16    -48    
112    -528   
272    -48    
-80    208    
-112   128    
-384   -96    
-208   -320   
-1072  -192   
-384   -448   
144    80     
-208   32     
-176   -112   
-64    240    
-144   -16    
16     160    
-192   16     
-208   80     
-176   0      
-32    -64    
0      176    
48     128    
96     -112   
-288   160    
0      -32    
-928   128    
144    32     
256    176    
-64    128    
96     144    
-176   48     
-160   -160   
-368   0      
-48    0      
-112   16     
-16    0      
64     160    
16     16     
-320   -16    
192    -272   
32     -80    
96     16     
-176   48     
48     80     
-128   -192   
256    -48    
-320   112    
-112   0      
0      -176   
-128   -112   
0      0      
-448   96     
32     112    
-304   0      
64     -32    
-80    -48    
-96    -64    
-352   -144   
464    320    
-368   208    
32     112    
48     -96    
96     16     
-192   64     
224    -144   
-32    -80    
32     0      
16     0      
16     48     
-48    32     
-256   -96    
144    128    
-464   -48    
-64    144    
16     -192   
-48    -32    
0      -32    
-112   96     
-96    -16    
64     64     
16     80     
-32    64     
0      48     
-128   -16    
-80    288    
-128   48     
208    80     
-656   48     
-96    160    
64     -80    
-96    32     
-96    64     
-176   -64    
128    16     
-96    32     
-16    48     
144    80     
-304   112    
-480   -48    
224    80     
-256   -64    
48     32     
-224   -16    
16     80     
0      -128   
48     -112   
16     -112   
176    112    
160    96     
-16    -32    
-240   16     
-80    -16    
-192   80     
-16    48     
176    80     
112    -48    
240    96     
-208   48     
-160   16     
64     144    
32     -48    
-112   96     
32     -16    
256    48     
-48    48     
48     -64    
176    32     
96     16     
-160   -32    
112    80     
-368   368    
128    -64    
-160   -240   
-64    -272   
112    -416   
96     112    
144    288    
96     128    
-240   112    
-64    304    
0      288    
256    -128   
-64    -16    
-208   0      
208    -304   
-32    64     
16     -16    
-160   128    
-80    96     
64     16     
272    -16    
112    224    
176    0      
176    -16    
0      128    
-160   -48    
-96    32     
384    336    
-288   0      
112    -448   
-192   -160   
16     -64    
144    80     
64     80     
-96    64     
0      80     
128    96     
-176   0      
288    64     
-64    16     
160    64     
-32    64     
48     16     
-16    96     
64     64     
-112   32     
-16    32     
0      -16    
64     48     
80     16     
96     80     
0      -16    
32     32     
-48    -16    
32     48     
48     16     
-64    -16    
144    64     
-144   64     
208    176    
-448   -240   
112    80     
64     32     
80     48     
96     64     
400    448    
-400   96     
352    48     
-32    -96    
208    208    
176    192    
-240   -16    
112    80     
-80    96     
272    176    
208    16     
-32    -144   
-32    -48    
144    48     
-192   80     
-16    32     
32     64     
-48    32     
112    64     
128    144    
128    176    
-64    64     
144    -80    
-208   -128   
48     -272   
208    96     
-160   -1280  
160    -112   
80     -80    
16     48     
0      96     
240    -48    
-64    128    
48     0      
-32    0      
224    80     
-128   -112   
32     128    
176    0      
128    32     
-160   48     
-32    -704   
192    -16    
112    -48    
16     64     
112    -48    
64     16     
-192   128    
48     32     
240    48     
-288   -80    
272    144    
-32    64     
352    16     
-256   -80    
160    32     
80     -160   
96     80     
112    -16    
96     16     
-176   -208   
208    16     
-144   -80    
-32    160    
64     32     
160    64     
16     16     
-160   -96    
288    80     
16     -160   
48     64     
80     80     
192    16     
256    -368   
-112   -48    
-64    -192   
64     128    
48     -16    
64     48     
-144   -144   
32     96     
-48    48     
96     -96    
176    -48    
48     -144   
112    144    
112    -16    
144    16     
48     32     
80     80     
-48    -1072  
-288   208    
224    96     
416    416    
-32    16     
80     -128   
112    48     
-48    -64    
-64    96     
336    80     
-160   -64    
0      -288   
64     176    
48     -320   
16     144    
80     -176   
96     240    
64     80     
-16    -144   
-48    -80    
128    176    
80     128    
32     -208   
96     -16    
-144   -512   
-32    384    
-80    -224   
272    -32    
48     -48    
240    0      
176    96     
80     -32    
112    64     
-80    32     
-32    752    
0      -544   
368    272    
16     -32    
96     0      
128    128    
112    -32    
160    48     
-352   224    
-208   -432   
-64    160    
-96    -128   
128    224    
112    48     
240    -848   
256    0      
112    0      
160    -688   
80     16     
-96    48     
176    -16    
80     208    
-240   -928   
176    672    
-144   128    
32     -112   
-64    144    
-16    -48    
-32    -192   
192    32     
304    -240   
32     -176   
112    -352   
176    0      
144    -432   
64     96     
208    -624   
80     -48    
160    160    
-240   -736   
48     304    
64     160    
-112   -592   
0      64     
176    -16    
128    -64    
-2064  96     
64     -96    
144    32     
64     -208   
96     -448   
-112   -768   
112    -208   
128    128    
160    -368   
160    -64    
192    240    
-96    -176   
48     -144   
-32    -400   
32     288    
-160   16     
96     64     
176    112    
48     -192   
-32    -208   
48     -368   
160    112    
-16    -1040  
240    -384   
240    304    
80     496    
128    400    
128    16     
-400   -816   
-96    -208   
-336   -16    
464    176    
-48    272    
-80    -96    
16     -272   
0      -112   
-224   -480   
48     -864   
-16    -96    
176    -320   
16     288    
-272   96     
0      0      
-176   144    
128    -112   
-272   32     
208    -16    
-1744  16     
176    128    
64     0      
-48    -192   
16     0      
-16    160    
-208   -64    
-48    -320   
272    208    
-400   128    
64     80     
240    -48    
-48    192    
-112   48     
272    -16    
-16    48     
64     -32    
-928   80     
-80    -48    
144    -48    
0      -192   
272    -144   
-96    -1072  
64     304    
-144   -48    
-32    -96    
96     -80    
192    -48    
-208   -96    
64     -16    
-48    48     
-64    144    
-880   64     
128    -336   
-80    -32    
32     -288   
208    80     
48     -272   
-96    -16    
96     96     
0      176    
-32    128    
-160   128    
144    64     
-288   240    
-256   -64    
208    -176   
256    -16    
160    0      
-224   -112   
304    -240   
128    64     
-80    -160   
-32    -144   
-48    0      
96     -80    
-64    0      
240    -16    
-64    -48    
-16    -96    
-32    96     
160    48     
-32    -48    
-32    -96    
-32    -32    
-1488  -176   
96     48     
-256   0      
-96    -16    
-160   -32    
-928   48     
272    176    
-208   176    
-80    -80    
-192   -304   
-80    -64    
32     272    
-208   416    
-160   -160   
96     -96    
-720   0      
-48    -16    
96     320    
80     272    
-256   0      
-48    -80    
80     32     
-736   -32    
144    0      
144    192    
144    176    
-432   624    
-96    208    
-400   -112   
128    -16    
144    144    
-64    320    
-32    144    
-304   -16    
32     0      
-400   112    
-16    16     
32     -176   
96     -112   
-1456  0      
-16    240    
-304   -592   
160    -272   
128    288    
32     -192   
48     208    
-80    -176   
-128   -16    
144    320    
0      16     
192    208    
48     -256   
-752   -112   
-352   96     
-1488  400    
-176   48     
-32    -96    
0      96     
64     -32    
208    80     
-128   96     
-16    80     
128    48     
64     80     
176    -16    
-176   112    
-176   -32    
-272   0      
-48    48     
-240   144    
-192   32     
16     -48    
64     112    
-48    -48    
-96    48     
160    16     
96     16     
64     80     
-192   0      
-112   -16    
96     -48    
-32    32     
80     48     
-16    32     
-16    32     
0      16     
-2176  -96    
208    -32    
48     -16    
-80    -176   
208    -64    
0      64     
-192   16     
-224   -64    
-16    -32    
-96    64     
176    80     
176    176    
-16    -64    
-192   -16    
128    48     
-592   -96    
0      -16    
112    32     
-32    80     
48     32     
-128   -16    
64     32     
-144   -96    
224    48     
-96    208    
256    64     
-304   -64    
128    -16    
-416   -16    
-16    -128   
176    -336   
64     80     
320    32     
-80    -48    
-16    32     
32     48     
128    32     
-64    -32    
-96    48     
160    32     
-240   64     
128    -96    
-96    96     
-160   -64    
144    80     
-336   112    
16     32     
80     -16    
-128   0      
-144   64     
48     -48    
16     64     
-32    -80    
128    -48    
-64    80     
80     -16    
-192   -32    
432    224    
-576   128    
288    -64    
32     -16    
0      64     
96     0      
-288   -192   
416    32     
-160   96     
-176   96     
208    -48    
-128   -16    
0      48     
96     112    
16     -16    
32     80     
0      0      
64     80     
64     64     
0      -32    
32     64     
272    48     
-112   -48    
-128   192    
96     176    
176    48     
192    64     
-32    -48    
112    32     
-224   -64    
-80    32     
-112   0      
64     -64    
-48    112    
0      64     
-32    -176   
96     -112   
-144   0      
32     48     
16     32     
32     16     
352    144    
-304   48     
144    32     
-160   48     
320    176    
-256   0      
-80    -32    
208    48     
-32    -16    
64     16     
-16    -32    
192    48     
-96    -48    
304    48     
32     80     
16     336    
-128   -128   
144    64     
208    224    
-80    -16    
-80    -480   
256    384    
-160   304    
384    176    
-48    -320   
-176   64     
48     0      
64     32     
160    192    
16     -32    
256    -16    
-64    256    
-112   64     
96     -64    
432    672    
-304   -640   
16     240    
160    496    
96     -112   
48     -32    
-160   -128   
80     656    
0      208    
176    -496   
-64    320    
-32    -144   
128    -48    
176    512    
-272   -624   
-64    -192   
-32    304    
-16    -160   
128    -112   
176    -32    
-32    -112   
-80    -80    
96     160    
32     80     
96     0      
48     64     
80     96     
-272   -208   
176    32     
64     256    
16     -144   
112    -48    
256    464    
176    320    
0      64     
96     208    
-32    -80    
304    48     
16     -32    
112    0      
-48    112    
208    -128   
-16    80     
272    -64    
368    384    
320    304    
-112   272    
-64    -128   
32     416    
352    752    
-128   160    
-32    32     
-32    0      
64     -160   
0      0      
192    -160   
80     128    
-96    -32    
368    96     
-160   16     
-48    -368   
112    0      
-96    -272   
112    -192   
48     -528   
80     144    
32     -272   
176    112    
48     -16    
64     0      
48     -176   
112    16     
128    96     
-64    -80    
144    -112   
-16    -80    
-16    16     
128    0      
48     128    
128    16     
48     192    
96     -304   
80     0      
-48    32     
96     16     
-32    0      
96     -96    
80     80     
-96    -96    
64     -256   
-80    -496   
-128   -448   
-16    -192   
-80    96     
-80    -160   
160    224    
-64    -384   
0      320    
-16    -416   
-240   -224   
160    -64    
256    96     
-80    512    
176    32     
192    320    
-48    112    
240    -496   
80     -224   
176    96     
32     -336   
-192   96     
-64    -96    
-160   496    
336    208    
64     320    
384    512    
-16    -144   
80     16     
288    -128   
-32    112    
80     -16    
-80    48     
240    -112   
-64    256    
-160   336    
432    -32    
96     -224   
128    -592   
240    0      
16     32     
-32    -192   
0      -32    
112    -352   
288    304    
-128   224    
192    -96    
-272   -208   
160    -64    
-224   368    
-112   112    
512    -112   
-208   80     
208    -400   
96     32     
416    -64    
-304   -16    
112    -192   
-16    -160   
272    224    
-80    112    
96     -32    
208    32     
64     48     
272    96     
-96    -80    
272    -304   
-128   128    
32     -304   
48     -128   
0      32     
464    144    
-160   -16    
48     -112   
-240   192    
256    -32    
528    -48    
-48    32     
80     0      
240    -496   
-64    -80    
160    -160   
-160   48     
192    -16    
192    64     
-512   -80    
96     -96    
-1712  -176   
112    -128   
16     208    
-48    -112   
224    -176   
128    -208   
32     -16    
176    -1888  
-192   208    
512    224    
-272   528    
64     416    
0      -160   
-224   32     
16     -80    
-80    496    
224    240    
-336   -288   
144    304    
160    -48    
0      -128   
48     160    
-96    -656   
-64    128    
336    -112   
-96    -48    
-80    -128   
112    16     
208    -240   
64     496    
-304   -144   
176    0      
128    -128   
-48    -128   
480    256    
-128   -128   
80     -112   
448    -16    
32     -160   
240    128    
-144   -16    
-160   -16    
16     -96    
512    800    
-112   832    
-640   240    
160    -160   
-1120  16     
16     -32    
-976   -16    
64     -288   
304    -192   
256    -48    
-80    32     
176    -1408  
176    16     
-320   32     
32     -128   
-64    -16    
-304   -128   
-32    -192   
448    96     
-64    -80    
672    -160   
-160   192    
48     -96    
64     -16    
64     -96    
48     64     
80     -224   
192    128    
-176   48     
-16    -48    
-48    0      
192    -32    
-32    0      
272    -32    
16     64     
144    -48    
0      -32    
144    -176   
-64    16     
-160   -32    
176    96     
-176   0      
224    -80    
-352   -32    
112    48     
-224   -16    
96     -16    
112    48     
160    0      
-240   -96    
96     -16    
-464   48     
144    -48    
-32    32     
-928   -64    
-16    64     
-48    48     
-1152  0      
-224   0      
-768   0      
-96    48     
208    96     
32     64     
-32    -48    
-224   -80    
-1280  -96    
96     32     
-176   32     
80     64     
-432   -224   
-304   48     
-176   -16    
-448   -64    
80     80     
-384   16     
208    112    
-2464  48     
128    80     
-64    -48    
144    32     
128    64     
0      160    
112    -128   
-144   64     
16     0      
-240   32     
-208   32     
80     192    
-80    128    
-320   -96    
-160   -80    
-1344  -48    
-32    96     
224    -32    
96     32     
-336   0      
272    32     
-352   -144   
0      16     
64     48     
64     176    
-208   144    
96     -32    
16     -32    
-144   0      
144    -144   
112    -240   
176    80     
-1120  -32    
48     64     
128    48     
-48    16     
-32    16     
32     112    
-112   0      
-48    -80    
16     48     
-16    -80    
-96    -32    
80     0      
128    0      
-224   96     
-16    0      
-176   -80    
96     -16    
160    -32    
-32    160    
192    32     
-128   16     
128    -64    
-144   80     
16     48     
-48    96     
-32    256    
-128   16     
-240   -304   
-224   240    
-160   32     
-1232  -16    
496    128    
-432   64     
160    -48    
-80    -208   
-176   64     
48     -64    
-192   144    
144    32     
176    0      
-304   304    
432    -1408  
-288   880    
-16    192    
64     -784   
-48    256    
64     176    
-400   416    
304    112    
-48    -352   
-32    128    
240    144    
240    368    
-144   48     
-400   448    
80     144    
-176   80     
-16    -80    
-128   -384   
224    -128   
320    240    
-208   608    
-560   32     
-368   144    
-16    -32    
0      -16    
80     0      
-80    0      
128    -48    
112    16     
-112   80     
224    352    
-32    432    
-304   16     
0      64     
-272   -176   
16     -256   
-224   -96    
48     176    
-112   64     
32     144    
-80    0      
16     192    
96     112    
80     48     
-176   -80    
64     -80    
16     -16    
-208   -96    
16     -464   
-320   -208   
320    -112   
80     32     
64     208    
-64    48     
16     96     
112    -32    
-96    240    
80     -80    
128    -16    
272    0      
-208   240    
-64    128    
-64    0      
240    80     
-144   16     
80     112    
32     -32    
-48    96     
-16    64     
-80    48     
-96    32     
96     16     
48     16     
-64    -16    
112    -16    
-48    64     
16     0      
176    368    
112    112    
-192   -160   
32     32     
-80    0      
-16    32     
64     -48    
-192   -32    
288    -96    
-32    144    
16     176    
-32    96     
128    32     
-16    -192   
192    48     
112    176    
128    -32    
96     -96    
32     -32    
176    112    
-64    224    
-32    176    
-16    112    
16     0      
-96    -64    
224    -48    
-48    -96    
16     -16    
368    320    
-192   240    
-64    288    
160    -1488  
64     480    
112    304    
-96    -144   
160    -96    
64     -192   
80     384    
16     -64    
-96    -208   
16     -32    
112    -96    
-224   16     
32     -16    
64     224    
48     -16    
64     -176   
160    -208   
160    272    
48     512    
128    -32    
-96    -48    
176    -16    
192    256    
-192   256    
-112   16     
128    -48    
352    64     
-48    -208   
80     128    
-64    160    
-64    -576   
464    -384   
144    -176   
144    416    
96     -80    
32     112    
128    176    
-128   128    
-16    -64    
48     -160   
-176   -96    
320    160    
80     160    
-224   112    
160    16     
352    240    
-368   464    
80     -832   
-208   -160   
32     -32    
112    -32    
32     80     
96     -288   
-320   -368   
160    32     
-368   528    
304    128    
-128   -128   
192    -368   
128    32     
-192   -400   
240    -416   
128    80     
-208   -240   
64     32     
-144   -80    
224    -448   
-160   -96    
224    48     
-128   432    
64     176    
224    -144   
-48    -448   
-192   -576   
0      -240   
32     464    
240    416    
176    -816   
-208   224    
192    96     
-432   0      
112    -320   
464    -256   
-64    720    
320    384    
-400   -416   
96     -64    
320    416    
192    128    
80     64     
16     -512   
-144   112    
128    -336   
48     64     
16     -288   
0      32     
-256   64     
192    80     
224    -32    
480    -336   
-176   224    
144    -48    
208    0
[truncated: 404,011 more chars]
