# Supplementary material for: A Fault Diagnosis Method for One‐Dimensional Vibration Signal Based on Multiresolution tlsDMD and Approximate Entropy
Source: Hindawi journal article supplement (doi:10.1155/2019/3262818), 2019-01-01
Supplement: f1 [file 3262818.f1.zip › 3262818.f1/gear signals/normal gear signal/Data16.txt]

-144   -128   
16     -80    
48     -80    
32     -80    
80     -832   
48     16     
80     0      
48     -64    
48     -240   
-48    0      
-16    -112   
192    144    
-256   160    
192    96     
-2512  -128   
160    -128   
192    0      
48     0      
-64    32     
-96    -192   
240    32     
-320   -736   
224    192    
-304   96     
176    48     
64     32     
160    144    
192    160    
256    240    
-256   288    
-304   96     
-128   0      
368    112    
-112   -160   
-96    -528   
-96    -112   
-224   -896   
-448   96     
272    224    
-32    -160   
496    16     
224    16     
-176   -176   
48     192    
-560   -1120  
176    -1360  
-1824  816    
-624   304    
0      -496   
128    112    
1216   384    
-480   -48    
272    -64    
96     -480   
-240   416    
160    -48    
-96    -560   
-368   32     
288    -144   
96     96     
0      -256   
-800   -416   
144    -240   
-144   -112   
176    -64    
48     0      
464    112    
-192   272    
-96    -768   
-128   176    
16     320    
320    96     
496    368    
-288   208    
-256   64     
176    -32    
-464   240    
176    -160   
-112   0      
-80    -80    
-96    -160   
80     -160   
64     160    
144    -912   
240    48     
-96    0      
-80    -80    
-144   0      
0      -96    
-560   -16    
144    -48    
-256   -32    
48     -112   
-288   64     
-16    -304   
-160   128    
64     -288   
-16    -64    
48     -656   
-96    -96    
-256   144    
32     -32    
-48    -64    
-16    32     
-112   64     
192    176    
-112   48     
208    -48    
496    112    
176    -64    
240    16     
0      -16    
0      16     
-112   16     
96     16     
-128   64     
144    -48    
-176   16     
112    32     
-96    128    
112    -80    
96     -272   
160    -96    
-80    -16    
16     -112   
16     160    
-240   0      
176    144    
-160   -16    
-1296  -288   
-64    -160   
-848   96     
-160   0      
0      48     
-256   0      
48     16     
32     128    
-912   48     
-32    -16    
48     96     
64     192    
-208   -256   
96     -48    
-112   -48    
-144   128    
-32    64     
64     -112   
-112   16     
-64    -32    
-16    64     
96     80     
192    0      
304    -16    
192    -96    
-192   16     
-288   64     
-32    -144   
0      -48    
128    160    
-16    128    
-256   64     
-128   -112   
-64    -16    
-448   16     
0      256    
160    176    
16     -144   
-448   -608   
304    -608   
-48    -112   
-16    16     
320    112    
-224   64     
-256   -96    
-448   -64    
-176   -352   
96     224    
-352   -48    
-128   -368   
320    -304   
-416   -352   
224    -96    
-416   -96    
-16    208    
-80    -144   
80     48     
208    48     
-32    48     
-16    80     
-240   32     
-176   128    
432    464    
-512   96     
128    -16    
-176   160    
-240   -16    
96     -112   
96     -32    
16     -80    
-192   -144   
0      160    
16     -160   
-48    -112   
96     464    
240    -48    
-80    -112   
-48    16     
80     -144   
-176   16     
-64    -496   
-464   -384   
48     304    
-1520  48     
80     -48    
16     -32    
-80    -64    
-432   -240   
496    48     
-256   80     
144    -32    
-400   -160   
256    304    
-784   -800   
-160   -272   
288    416    
48     -64    
240    -208   
-720   336    
352    240    
32     -80    
-576   -64    
16     80     
128    64     
0      -48    
256    16     
0      -96    
-416   -128   
208    112    
-80    0      
752    -592   
240    -544   
512    128    
-80    208    
-240   176    
-528   -576   
32     -384   
-304   224    
-80    144    
-208   -48    
128    32     
0      -16    
128    96     
112    48     
-128   48     
16     224    
-32    96     
-48    96     
-656   64     
16     16     
-32    0      
64     0      
128    -32    
-320   32     
-48    -16    
96     0      
208    176    
-208   336    
208    112    
-16    0      
336    224    
-352   -16    
-16    48     
64     32     
-16    48     
144    32     
-96    16     
32     32     
-144   -112   
208    16     
0      96     
160    48     
16     -16    
0      80     
-208   16     
208    80     
-48    -112   
-96    -16    
16     112    
32     16     
-48    -80    
272    -32    
96     80     
-64    96     
160    48     
-80    -32    
-272   -48    
-96    0      
192    96     
80     96     
144    32     
-144   -96    
-80    -16    
32     64     
80     128    
96     0      
208    256    
-144   0      
-96    32     
32     112    
128    -48    
0      -32    
48     -16    
272    16     
-128   -16    
16     64     
112    0      
96     64     
-32    96     
160    64     
0      -32    
32     80     
16     0      
-16    -32    
48     80     
-80    64     
128    208    
64     128    
144    96     
96     -64    
-16    16     
160    144    
144    80     
176    -48    
-48    32     
-16    32     
-80    -48    
224    32     
0      48     
128    112    
0      176    
528    672    
-48    144    
208    -144   
-48    -160   
-144   -32    
64     64     
-16    112    
80     -80    
-160   144    
-144   16     
96     16     
-16    16     
112    80     
432    336    
-320   176    
-32    112    
-304   0      
240    64     
-80    16     
464    96     
0      272    
-192   96     
144    -64    
48     32     
48     80     
-144   176    
-128   48     
208    -16    
-176   -128   
-64    -48    
240    112    
176    48     
336    16     
160    64     
192    -32    
144    112    
-160   -736   
-16    80     
304    16     
208    304    
224    336    
-64    128    
-336   16     
-336   32     
-16    -80    
160    -32    
224    128    
-32    -48    
48     16     
-176   -304   
-32    0      
-16    32     
-112   48     
288    -160   
96     160    
224    224    
-128   96     
144    48     
128    -16    
272    256    
-112   192    
-192   0      
192    -32    
80     16     
160    -80    
80     80     
48     -16    
80     304    
112    64     
-16    -48    
96     32     
-48    80     
208    -288   
-16    512    
-48    -336   
304    -128   
-48    224    
208    -96    
-352   144    
384    -176   
0      -160   
-48    352    
-16    -32    
-144   272    
336    224    
-16    -16    
-32    240    
-80    -208   
-128   -32    
256    -864   
592    80     
544    576    
208    96     
64     -32    
-192   -160   
336    496    
128    -224   
608    320    
240    48     
48     80     
-48    144    
288    224    
-224   16     
-16    -528   
96     -272   
560    144    
-624   480    
-192   -320   
384    -80    
432    -208   
80     208    
144    -80    
16     48     
-160   240    
288    224    
-256   208    
240    -96    
16     112    
224    176    
112    -32    
128    -128   
0      192    
-16    -96    
0      160    
-16    112    
352    -80    
-16    -64    
112    64     
-48    -64    
240    16     
-32    0      
208    -432   
-32    16     
144    -80    
0      -16    
-128   176    
416    -992   
96     -64    
304    -288   
-32    -64    
-32    80     
16     -176   
384    144    
-176   32     
48     -688   
-16    32     
64     128    
-240   -112   
64     -176   
240    -144   
-48    48     
256    -16    
48     -96    
224    -192   
64     -112   
-128   -1136  
-64    -64    
-48    272    
48     0      
128    -16    
224    -48    
-48    -144   
-48    112    
0      32     
352    192    
-1040  96     
32     -304   
96     -176   
16     128    
0      16     
160    -464   
16     -64    
176    48     
128    -16    
160    -48    
-64    32     
48     -48    
0      -64    
-144   -16    
144    -32    
-848   -32    
192    0      
-64    -80    
-64    -112   
-48    64     
176    -208   
192    32     
32     -1584  
-240   -80    
112    -96    
16     64     
48     -48    
48     224    
-160   80     
144    -96    
-592   -64    
80     96     
224    64     
-96    -464   
128    -272   
112    0      
-128   32     
-16    -288   
224    128    
128    192    
192    64     
64     -48    
176    224    
-416   96     
0      -192   
176    80     
224    16     
112    288    
-144   80     
-608   -80    
256    -208   
192    112    
-16    -352   
-80    112    
96     -96    
-48    272    
32     -64    
320    -80    
-96    -80    
384    128    
-784   32     
48     -1040  
-688   -432   
368    -48    
-2464  -16    
16     32     
-128   -160   
-16    -64    
336    160    
368    304    
-256   -336   
256    240    
176    352    
-272   -352   
352    256    
48     -48    
208    256    
-480   -608   
320    112    
96     80     
208    -304   
16     160    
480    -208   
0      48     
-208   -864   
112    352    
-336   160    
-256   224    
176    304    
80     -192   
-176   -128   
384    -64    
-128   48     
0      -112   
96     128    
-192   -32    
-48    -16    
-32    -208   
144    144    
16     144    
176    -96    
-176   80     
368    -112   
-576   -288   
-144   -128   
-80    96     
96     48     
16     80     
208    64     
-496   0      
-2272  -176   
-144   48     
-512   -512   
272    -32    
-464   -128   
176    -32    
-192   192    
-1056  -320   
16     -64    
144    160    
16     -16    
176    32     
-224   48     
-1632  64     
32     32     
-256   16     
-64    0      
144    32     
-240   80     
-416   -352   
-80    -384   
192    288    
352    304    
-720   -144   
-160   -64    
352    192    
-320   32     
-608   -144   
416    -128   
448    32     
-176   176    
-80    96     
-608   -192   
416    -16    
-176   144    
-256   -48    
544    160    
-400   0      
-48    48     
-384   48     
-80    0      
-704   -80    
-16    96     
0      -32    
64     64     
-32    -16    
64     64     
-192   16     
320    160    
-384   80     
160    -32    
32     80     
-64    144    
-96    32     
-64    -80    
32     48     
-672   80     
112    16     
-112   -192   
80     -96    
-224   32     
16     112    
64     -16    
16     -144   
64     112    
96     80     
-144   32     
-16    -80    
48     -32    
-240   -32    
128    48     
-400   32     
112    32     
-176   -80    
224    80     
-96    96     
-80    16     
112    48     
-32    -32    
-96    -32    
-368   48     
-32    16     
-112   -48    
-32    -48    
-80    32     
48     48     
-576   -144   
0      80     
-192   -32    
-112   -112   
240    -192   
80     64     
128    256    
-48    80     
0      -16    
176    16     
-96    32     
-16    96     
80     64     
-304   48     
0      -32    
-192   -64    
112    -144   
112    96     
-96    48     
112    -16    
-112   16     
48     128    
-48    144    
96     32     
176    16     
64     48     
-192   -112   
-112   -160   
-144   -48    
112    144    
-176   -16    
80     64     
-560   -80    
-96    32     
160    96     
-384   -64    
-48    -96    
0      -240   
64     128    
272    16     
80     16     
112    0      
-160   80     
-64    288    
128    624    
-160   -16    
-144   -752   
-48    160    
-64    544    
-16    96     
32     -224   
32     0      
48     176    
-416   -32    
96     -64    
-16    64     
-384   -768   
-16    48     
-272   672    
-64    144    
-192   -112   
48     -32    
240    32     
528    96     
192    48     
-224   -240   
208    32     
-240   96     
96     96     
-96    80     
-16    128    
304    -96    
80     -240   
-272   64     
272    448    
-160   368    
368    -272   
432    0      
-144   464    
-192   864    
-112   224    
128    -400   
-416   -160   
-320   -192   
-144   192    
-416   400    
112    -240   
0      16     
-176   48     
32     16     
208    -144   
16     240    
32     48     
-16    96     
16     32     
-16    48     
-48    -272   
272    400    
-32    -32    
-192   -96    
224    176    
-112   -176   
16     -128   
112    240    
32     16     
-64    -128   
208    32     
-32    -144   
-288   -192   
192    32     
-160   32     
240    656    
320    416    
-208   80     
-192   -528   
208    256    
144    144    
16     -176   
-16    0      
-208   -1632  
112    -80    
0      32     
352    224    
112    32     
-64    96     
448    96     
-112   160    
-352   -80    
-16    80     
80     0      
176    128    
96     80     
64     -48    
48     64     
-528   -928   
-480   -16    
0      16     
-32    48     
384    48     
160    16     
-496   208    
224    0      
-48    -80    
176    64     
-96    96     
32     -16    
-272   32     
64     48     
160    -48    
64     -48    
128    -176   
256    384    
-160   336    
336    -224   
64     112    
0      144    
-240   -80    
384    -128   
0      192    
-112   -16    
0      0      
160    -48    
128    128    
144    176    
144    96     
-96    176    
96     -736   
368    64     
48     -16    
-16    -48    
-112   -192   
128    -64    
16     -208   
-176   -96    
-48    -256   
384    304    
-48    160    
208    -64    
272    -16    
0      -160   
-144   -336   
-16    -832   
272    0      
0      112    
-176   96     
240    0      
336    32     
144    128    
80     80     
320    176    
-32    -16    
-16    -16    
96     -16    
0      48     
112    -160   
160    80     
128    -64    
32     48     
64     -112   
-224   80     
144    -64    
240    16     
-240   32     
192    -80    
32     0      
80     288    
112    144    
144    -208   
96     0      
272    32     
-96    208    
256    -224   
-16    160    
48     -400   
80     16     
64     112    
144    48     
-32    32     
144    48     
0      48     
0      16     
144    0      
80     -288   
176    32     
80     0      
128    176    
448    320    
-192   64     
-64    -64    
112    144    
80     80     
144    16     
-96    -304   
352    64     
80     128    
64     -128   
496    944    
-192   576    
-16    352    
192    144    
-112   -304   
96     -528   
256    256    
288    128    
-144   -688   
-64    64     
-64    480    
-112   -256   
256    192    
336    368    
-48    -48    
80     208    
-112   -48    
48     48     
304    -48    
48     -192   
96     800    
16     128    
-48    -144   
-256   -752   
-16    0      
144    -160   
96     64     
-688   80     
336    32     
48     -192   
64     -352   
-144   128    
-272   -336   
-144   -96    
320    -112   
320    -224   
656    -48    
-288   -96    
-544   -896   
-16    -32    
32     160    
0      240    
-192   48     
272    -80    
-144   160    
-48    -64    
96     -112   
160    -496   
128    -16    
48     -144   
240    -16    
128    80     
0      64     
-80    16     
32     160    
368    32     
-32    80     
-608   -48    
32     -144   
48     -320   
256    -16    
-336   0      
-48    -192   
192    0      
-32    -224   
64     -128   
160    64     
-144   128    
80     -176   
448    48     
-48    -16    
80     32     
-288   -32    
192    80     
-464   -208   
464    64     
48     -32    
400    64     
-64    -96    
96     -48    
-48    16     
176    32     
0      32     
-96    -112   
0      32     
-176   -16    
-80    -64    
32     32     
-208   -160   
112    -192   
288    0      
-240   -64    
784    -32    
-48    -48    
-32    -80    
320    160    
-256   -784   
400    80     
80     112    
-400   -64    
160    -16    
-256   -112   
176    -32    
1104   272    
-880   144    
-688   -176   
-688   -32    
32     0      
192    112    
-128   -112   
-176   0      
208    -96    
-144   -160   
144    -96    
-128   32     
-208   0      
128    16     
-256   -96    
192    32     
-320   -80    
0      -32    
-288   -48    
32     16     
-176   32     
144    144    
48     128    
368    -192   
32     0      
-144   0      
96     -160   
224    96     
112    -96    
160    -48    
64     -16    
-160   -80    
224    -112   
-144   0      
80     -128   
-16    32     
-64    -176   
176    64     
64     -80    
112    64     
-352   -48    
-16    -16    
112    32     
0      -16    
-176   0      
80     -32    
-128   112    
0      -48    
-2144  -64    
336    -48    
-160   64     
-16    -336   
48     -64    
176    -16    
-64    -112   
-208   96     
304    208    
32     32     
192    -48    
-16    32     
0      176    
0      304    
-48    32     
-160   -112   
208    0      
112    80     
-944   -64    
-64    16     
-368   -64    
-1168  -16    
-32    0      
-96    -192   
-96    0      
-320   -160   
-144   128    
144    -384   
16     -112   
112    336    
-48    -240   
-160   128    
176    144    
-304   -880   
32     176    
32     -64    
32     96     
192    -208   
-128   128    
-144   16     
-80    16     
-144   112    
-80    -16    
-112   128    
144    -224   
32     -80    
176    -112   
496    864    
-848   -80    
-160   -1184  
48     368    
64     80     
144    -80    
176    128    
-176   -352   
288    -96    
-224   304    
-64    -64    
-32    224    
-224   -96    
96     272    
64     464    
-48    -224   
-192   -240   
-272   -64    
0      352    
-512   -192   
128    -16    
-16    48     
-64    -16    
-80    80     
240    -16    
32     32     
-32    192    
-2256  368    
-208   -112   
-208   -128   
-32    80     
0      256    
-48    -80    
-192   -368   
-80    48     
64     336    
144    112    
-240   128    
-96    176    
-432   80     
-528   -128   
224    240    
-1824  -624   
80     -112   
48     496    
144    272    
192    160    
128    -80    
-272   0      
192    -144   
176    64     
-80    96     
-80    -32    
-112   0      
64     -64    
-288   0      
-16    -128   
208    -80    
0      48     
-80    -224   
0      -224   
0      -16    
112    -16    
-32    -48    
-32    -64    
-16    64     
-64    80     
112    32     
-80    32     
176    -96    
-80    32     
32     -16    
-624   -96    
48     -80    
-2032  -64    
-128   -320   
272    -112   
-48    -320   
96     -352   
192    -112   
-160   128    
-224   128    
96     -32    
32     144    
-80    -336   
-304   16     
160    160    
-288   32     
240    -48    
288    128    
-448   32     
-288   -160   
-192   112    
-80    -80    
96     16     
352    -80    
-144   -128   
-352   -320   
-352   -192   
256    80     
48     64     
224    64     
160    96     
144    208    
256    96     
96     64     
0      -112   
-272   16     
64     16     
-240   -48    
160    32     
-128   16     
-48    192    
80     48     
128    48     
64     0      
-96    -112   
-208   0      
-80    176    
-16    -96    
-16    48     
0      0      
96     64     
-32    96     
0      -160   
176    -16    
-240   144    
0      32     
240    80     
-80    80     
-160   -48    
144    112    
-192   -80    
32     240    
176    144    
96     16     
-128   -768   
-288   -416   
288    -64    
-288   128    
368    32     
144    -80    
96     144    
0      80     
32     240    
-160   -256   
96     64     
48     144    
80     176    
-64    80     
64     160    
112    32     
32     -32    
160    80     
-144   -16    
-208   -208   
64     -240   
112    16     
-32    -288   
112    192    
48     192    
-272   256    
144    -32    
16     -272   
176    0      
96     48     
0      416    
64     400    
-224   160    
144    128    
256    208    
80     -160   
96     48     
112    -192   
64     160    
-32    48     
-176   -1472  
-80    96     
48     192    
272    448    
-16    288    
-112   80     
112    224    
96     -64    
288    -288   
128    -32    
-48    304    
-64    176    
112    -112   
0      80     
80     416    
-32    -128   
48     -16    
-48    16     
160    0      
-112   -64    
48     112    
-16    -160   
272    176    
-240   -992   
-96    208    
-144   416    
-48    -176   
32     -16    
272    128    
32     0      
192    -320   
-144   192    
0      368    
320    384    
48     144    
48     160    
160    176    
-160   -48    
-64    0      
-96    128    
16     -144   
-64    64     
-64    -80    
128    -160   
208    96     
176    -16    
64     16     
32     -752   
-128   352    
-336   160    
80     32     
256    -48    
528    64     
-80    -96    
288    32     
-176   208    
-528   -16    
80     -64    
336    64     
-272   -192   
608    -240   
544    224    
576    240    
-336   -64    
256    80     
32     176    
-160   96     
0      -64    
256    -48    
80     112    
80     192    
-32    80     
384    16     
192    0      
96     48     
64     -16    
336    32     
-192   -336   
-272   32     
48     -288   
304    112    
-64    80     
96     -16    
-160   -128   
256    64     
96     192    
-400   -80    
224    32     
48     -32    
48     80     
208    -48    
48     -16    
32     -224   
160    192    
208    -80    
32     64     
-112   80     
128    64     
512    -176   
-448   -112   
-288   -96    
160    0      
32     0      
208    -112   
-16    16     
320    -560   
592    160    
-688   -48    
288    -160   
112    48     
-128   80     
112    -96    
-144   -160   
320    80     
96     304    
-496   -16    
224    -240   
-208   64     
176    -128   
144    64     
-160   -48    
608    416    
-560   0      
-192   -288   
288    -1504  
-176   176    
-112   -80    
176    -128   
208    32     
608    -320   
-128   -624   
176    0      
-192   96     
-160   -16    
32     -96    
96     64     
-448   -32    
208    32     
432    -16    
-144   0      
96     -96    
128    80     
16     -464   
176    80     
-1344  16     
304    -144   
160    32     
-192   -256   
240    -64    
32     -400   
208    0      
128    80     
32     -96    
-64    -48    
32     48     
80     -32    
32     0      
192    -96    
-32    -304   
-656   64     
176    336    
96     0      
80     -176   
16     -96    
176    -656   
32     -128   
128    0      
176    -32    
80     0      
96     -64    
32     -240   
-576   64     
352    -656   
192    192    
-128   320    
80     -80    
80     -240   
-16    -224   
48     432    
208    -144   
192    64     
-304   0      
96     0      
16     -80    
-64    -48    
128    -112   
64     128    
160    -16    
48     176    
-80    -416   
0      240    
-768   -208   
0      1056   
272    -560   
16     -16    
-32    480    
80     -816   
0      144    
0      -352   
384    400    
-64    160    
-32    48     
32     64     
64     -240   
-528   32     
128    -1072  
-960   112    
112    -48    
-32    -416   
-128   160    
0      -336   
64     -512   
0      352    
80     -528   
80     32     
112    48     
176    -144   
-16    240    
48     80     
-128   -112   
-80    0      
-192   16     
256    -64    
-1360  -496   
0      -80    
16     112    
128    -80    
0      176    
176    -480   
224    64     
16     0      
96     -272   
64     -16    
-176   -320   
-80    48     
-64    -96    
-304   -288   
160    -240   
-160   -208   
256    -96    
-432   -96    
80     -144   
192    0      
96     -144   
0      112    
-144   48     
80     112    
144    112    
32     -16    
-144   -256   
384    -208   
-352   -176   
272    -224   
64     -16    
80     160    
-304   160    
-32    -176   
192    -32    
176    -16    
16     64     
-144   -128   
-288   -16    
-448   -64    
0      0      
-128   64     
-96    96     
-144   -208   
176    -48    
-976   -64    
0      -256   
80     -112   
64     -64    
0      128    
0      -96    
128    48     
176    144    
0      272    
16     240    
112    -96    
80     -112   
32     -32    
64     128    
-64    144    
-336   -48    
-560   -256   
16     -80    
-128   -96    
64     -16    
112    64     
-272   -32    
-144   -80    
-1600  -64    
32     -16    
352    224    
-80    240    
48     192    
-64    80     
160    256    
-528   16     
-560   240    
176    720    
-464   528    
304    512    
32     -32    
-336   -80    
-64    -352   
-16    288    
-48    16     
-432   -80    
-144   16     
-208   0      
96     128    
544    -96    
-32    -16    
16     -192   
-16    144    
-96    -224   
128    -16    
128    64     
240    64     
96     144    
64     -64    
0      32     
-944   32     
-304   0      
64     240    
-288   304    
-176   -112   
720    112    
-768   -128   
-176   16     
16     272    
80     160    
288    -48    
80     -16    
32     16     
-352   -288   
-160   -432   
-368   -160   
32     0      
-848   16     
-16    0      
-224   -256   
-48    0      
-144   -80    
-48    -32    
240    80     
-32    288    
48     64     
0      -32    
-48    208    
0      304    
224    64     
-112   256    
16     -144   
-128   16     
176    96     
-352   -160   
320    -48    
-176   -144   
16     -32    
32     -176   
48     48     
-64    0      
-144   32     
32     0      
-144   -16    
192    -176   
-112   -64    
64     -96    
-400   -288   
176    -176   
-512   -288   
-80    -144   
-112   -256   
208    -16    
-112   208    
-192   480    
32     304    
256    272    
-128   192    
-48    -128   
-64    592    
-80    32     
-160   -112   
-256   112    
96     -32    
-64    80     
-48    48     
304    -400   
-112   96     
304    176    
16     -48    
-112   96     
96     -16    
0      -240   
-128   304    
64     -272   
-128   176    
80     624    
-240   -528   
96     240    
112    -48    
-128   -368   
-32    192    
-112   160    
192    -208   
112    -192   
-16    128    
-96    80     
64     16     
-48    64     
0      32     
-16    64     
16     80     
-48    -32    
192    48     
-336   -64    
32     96     
-48    32     
-112   64     
-224   -464   
112    -304   
-240   240    
-352   64     
80     -80    
-80    -16    
144    0      
240    -80    
192    160    
-48    272    
-368   112    
-160   -80    
-224   48     
0      -64    
368    -16    
64     -16    
224    32     
192    -48    
256    112    
-272   96     
-144   -48    
32     -16    
-80    96     
-48    0      
160    32     
256    96     
-16    0      
48     80     
224    64     
-32    -80    
16     -16    
-64    64     
-112   -48    
368    64     
-48    176    
-656   -80    
-352   -224   
144    -64    
176    224    
-192   192    
-288   -16    
144    0      
-352   -16    
176    96     
-160   -192   
560    -64    
-32    96     
112    64     
240    -16    
32     64     
-592   -128   
384    32     
128    128    
96     -64    
208    16     
-128   48     
-48    -32    
0      80     
-64    64     
-48    32     
-96    48     
-160   -16    
128    16     
-32    0      
-48    64     
128    16     
128    64     
0      16     
64     -16    
160    0      
-80    176    
336    128    
-112   32     
48     -48    
80     80     
320    256    
-576   80     
32     -128   
64     112    
192    128    
-416   -80    
192    32     
160    32     
-544   -176   
688    112    
-288   -736   
48     112    
176    144    
-336   -64    
272    -16    
192    224    
32     176    
48     16     
336    128    
-272   48     
-304   -176   
32     -80    
-48    -64    
-496   -608   
304    -208   
-80    192    
-144   64     
480    64     
-384   -64    
192    -192   
224    -16    
496    -128   
-16    16     
-304   -112   
400    0      
80     160    
0      160    
128    48     
-16    128    
64     272    
224    -304   
-96    32     
32     48     
-16    -176   
144    256    
176    288    
-96    -64    
32     64     
0      -80    
176    -128   
80     480    
-16    64     
144    -224   
-160   -176   
448    0      
48     -160   
80     16     
-208   -592   
224    128    
-80    16     
48     224    
80     64     
48     -192   
-16    192    
352    -240   
-128   144    
176    -32    
160    224    
-144   -144   
-160   -144   
208    112    
0      160    
80     -448   
368    -192   
48     112    
176    256    
-128   208    
-16    1040   
368    64     
192    32     
-112   -240   
-160   -416   
160    16     
-128   48     
304    400    
192    272    
-112   288    
144    -176   
336    272    
-32    -240   
-272   -128   
-64    -128   
128    16     
96     -64    
192    128    
64     304    
-32    80     
32     48     
80     48     
64     64     
-32    -368   
64     48     
-32    -96    
-128   0      
80     -112   
-48    -160   
-16    -96    
-16    32     
-176   80     
256    528    
208    128    
64     -96    
80     64     
16     0      
-64    48     
-32    -288   
48     32     
16     -48    
48     48     
128    -672   
128    16     
-48    -32    
160    -48    
-240   -240   
352    -464   
192    352    
16     64     
-16    -64    
144    -128   
384    336    
-176   160    
80     -16    
320    -48    
208    128    
-96    96     
-48    -1088  
-16    -48    
-64    -368   
-176   176    
16     48     
16     -416   
-48    -112   
0      80     
176    -176   
16     112    
96     -80    
112    112    
112    -48    
-32    -656   
64     112    
0      -128   
64     80     
224    -96    
-80    -160   
-848   160    
176    -80    
352    -64    
-144   -32    
32     48     
-64    -128   
-16    -176   
368    -16    
96     -352   
112    -416   
32     -80    
-288   -208   
-16    -48    
-320   -64    
208    -80    
-176   -160   
128    32     
48     96     
288    96     
224    -32    
-240   -96    
-160   16     
192    -704   
432    192    
80     0      
-16    32     
160    -32    
128    192    
-288   16     
96     112    
-160   96     
80     -80    
32     -112   
96     -272   
160    -144   
48     -208   
32     48     
160    -96    
-128   128    
-144   -16    
80     64     
224    0      
176    -48    
-112   192    
400    272    
-672   80     
48     96     
-1904  160    
144    -128   
-144   -464   
288    400    
-64    352    
80     48     
128    208    
48     -496   
96     16     
256    32     
240    80     
0      160    
496    224    
112    -48    
-80    -160   
-320   48     
128    128    
-368   368    
-256   -176   
336    -48    
672    80     
144    32     
-16    -720   
-304   32     
208    64     
176    64     
-192   -208   
208    -240   
-144   -128   
224    -352   
-304   -416   
16     -240   
-784   -512   
-144   -368   
112    -48    
176    -176   
112    -16    
-48    -400   
400    224    
-80    -112   
80     96     
-464   -448   
-64    -192   
-80    0      
144    48     
48     -48    
-32    -112   
-752   32     
336    144    
-336   96     
-160   -448   
96     480    
448    -368   
160    -352   
-496   240    
368    144    
-288   -16    
272    -16    
160    336    
-288   48     
-112   -176   
-80    -128   
352    -16    
-128   0      
64     48     
160    -80    
160    64     
-320   -224   
-192   64     
-176   -80    
160    -32    
-16    80     
80     0      
-128   -176   
-16    160    
-112   -112   
224    -240   
0      0      
-1136  -96    
64     48     
-560   -192   
112    32     
-320   -80    
-144   32     
-16    112    
-368   32     
-160   -48    
-400   64     
-160   112    
128    144    
64     64     
-464   -64    
144    -256   
-272   -112   
-96    96     
-160   -64    
-352   32     
48     16     
80     256    
-192   80     
-528   80     
144    480    
-1680  128    
32     -32    
32     80     
-160   -16    
-272   -144   
64     -48    
-16    -128   
144    80     
32     -80    
64     160    
-80    -32    
-80    -32    
-112   32     
-80    -144   
96     0      
-240   64     
-96    64     
64     -16    
-320   -16    
-176   -64    
-176   -640   
-176   -320   
-128   336    
64     64     
112    -16    
-288   -112   
96     -192   
144    144    
80     288    
128    192    
-304   -64    
32     -32    
-192   48     
48     80     
-144   -224   
224    -144   
-48    48     
80     128    
176    16     
-64    -96    
16     -48    
256    64     
144    -16    
288    96     
-224   48     
-496   -32    
-272   32     
-528   48     
0      16     
-160   0      
256    128    
32     -176   
-160   -64    
-96    96     
-112   16     
-144   -48    
80     48     
-128   64     
432    64     
0      48     
-544   -96    
160    16     
-192   -32    
176    64     
-880   -80    
112    80     
-128   -112   
-80    64     
0      16     
304    128    
-352   -32    
0      -16    
176    32     
-304   -32    
272    64     
-96    48     
-112   32     
-16    0      
80     32     
-576   -96    
416    288    
-384   48     
48     -32    
112    32     
-96    16     
160    48     
-144   -32    
64     0      
0      48     
-32    -112   
144    32     
64     16     
-64    -16    
32     32     
-352   -48    
-544   -496   
544    0      
-512   64     
160    64     
-720   -160   
240    -32    
-80    -16    
240    64     
-144   -256   
128    -192   
-304   -80    
416    16     
-192   -112   
-240   -48    
672    -224   
144    -368   
16     -144   
224    48     
352    176    
-32    192    
256    256    
304    32     
-272   -32    
80     -192   
-16    -512   
96     176    
208    496    
-16    64     
320    128    
-384   -240   
-320   144    
-64    320    
224    -176   
-256   -80    
208    -144   
0      256    
-80    128    
-144   -128   
128    240    
0      -288   
144    112    
192    256    
-48    80     
-144   -96    
240    208    
112    272    
-288   -48    
-176   816    
464    -608   
192    400    
-800   -416   
-16    -176   
192    736    
400    208    
-496   -208   
-256   -944   
-48    80     
0      240    
256    368    
16     -80    
64     32     
-80    -176   
-176   16     
32     112    
160    0      
48     304    
-64    80     
96     -96    
32     -80    
-80    16     
80     -80    
-16    -48    
-32    0      
160    -64    
192    176    
0      -16    
-176   16     
-48    -32    
32     0      
96     -48    
-160   -32    
160    64     
224    224    
-208   48     
144    80     
-144   48     
-32    16     
-64    64     
-112   -48    
144    -64    
176    -96    
-192   32     
64     -16    
32     160    
128    -64    
-16    80     
32     0      
32     -16    
0      32     
32     80     
-32    32     
-32    -272   
144    -16    
-16    96     
-96    32     
96     48     
160    160    
-160   128    
96     -80    
-64    -176   
48     -208   
288    112    
-144   160    
-32    80     
80     -16    
-128   -16    
96     -32    
176    32     
-48    -592   
176    160    
-16    64     
80     0      
0      208    
-80    -160   
416    -336   
272    -16    
-64    96     
128    -64    
-16    16     
-96    -96    
-48    0      
-144   0      
16     160    
304    -48    
96     48     
240    -16    
-144   80     
-160   32     
-48    -96    
464    144    
-288   80     
16     32     
256    64     
-48    16     
176    -64    
0      -48    
208    -128   
-16    64     
32     -336   
32     -176   
-80    304    
-128   80     
-96    80     
384    0      
-80    160    
-112   96     
-128   -144   
128    -16    
-48    16     
128    192    
-176   128    
112    -16    
-32    112    
-48    -48    
224    80     
256    -240   
256    0      
96     0      
-112   32     
-112   0      
16     48     
-128   288    
144    208    
96     -416   
32     -400   
128    16     
64     -48    
112    64     
-80    -352   
144    16     
112    -368   
32     16     
256    48     
80     144    
96     96     
64     160    
80     112    
-16    -64    
192    -80    
96     240    
32     -32    
160    -224   
-160   416    
96     -32    
-64    64     
0      336    
240    304    
-64    -688   
208    16     
304    704    
-320   -128   
-16    -96    
-96    -320   
48     208    
688    464    
-256   -96    
-48    -432   
544    -352   
-224   -224   
640    880    
-256   -304   
96     -64    
-48    -16    
-16    -80    
-32    96     
176    -592   
288    32     
288    80     
-400   -240   
400    -288   
352    48     
416    32     
-32    224    
16     -176   
144    -176   
-96    96     
-32    112    
1040   592    
-992   -912   
-192   -448   
576    192    
0      -176   
464    -16    
128    48     
400    80     
-64    -720   
-112   -64    
-80    -224   
64     -144   
112    256    
-32    -48    
176    -176   
16     144    
176    -432   
16     32     
32     -144   
-16    -144   
-416   -48    
64     -240   
80     -96    
16     -320   
-80    -96    
240    -640   
-112   -96    
208    64     
16     -48    
-48    64     
32     80     
48     -32    
-48    -32    
-96    80     
16     80     
-2048  -64    
80     128    
288    16     
64     48     
32     -112   
-32    -320   
64     0      
32     -880   
144    16     
96     0      
64     -64    
-80    -144   
-16    16     
-176   32     
-16    -32    
48     -96    
144    -32    
160    0      
240    32     
0      -16    
16     -192   
16     -48    
96     -416   
128    32     
96     -144   
64     48     
48     -80    
96     -176   
-96    64     
176    -32    
-144   -176   
256    -336   
-304   64     
64     -96    
48     -32    
48     -208   
-32    16     
16     -320   
48     112    
272    -32    
32     -208   
-208   0      
32     -16    
-48    -48    
80     -80    
-128   0      
-64    -48    
-1616  -48    
144    -256   
-704   -80    
144    48     
-16    96     
80     -80    
112    -80    
240    -1792  
-80    112    
-144   32     
224    48     
32     80     
-16    32     
-336   32     
416    192    
80     16     
288    -128   
-496   16     
-112   16     
16     -160   
-48    -128   
-208   0      
96     -944   
160    -96    
176    -80    
304    32     
-176   64     
64     -96    
-432   -80    
0      -16    
64     -48    
320    16     
112    64     
464    96     
-128   272    
160    -192   
128    -80    
304    -160   
160    -16    
-336   0      
368    208    
-592   48     
256    96     
-128   32     
368    -32    
-240   16     
32     -128   
256    32     
240    -32    
224    368    
-336   0      
160    48     
224    16     
112    -112   
-176   0      
-128   -16    
48     64     
16     0      
-368   -80    
448    -32    
-368   -64    
256    -160   
-160   80     
-2128  -80    
64     80     
-240   -48    
-32    48     
-416   -128   
-432   -80    
160    16     
-480   -16    
96     48     
160    16     
368    352    
-272   48     
-240   -48    
-896   -48    
304    48     
96     -48    
384    96     
96     -112   
-752   -64    
-32    0      
-96    -32    
-160   -80    
16     -16    
144    64     
-688   -16    
0      96     
0      336    
-240   240    
-32    -192   
-144   -128   
-496   -416   
496    512    
-560   256    
-48    -384   
432    352    
-192   352    
-240   -144   
-368   -544   
288    48     
-176   272    
352    -176   
-576   64     
192    -64    
-672   -752   
256    1120   
-48    592    
-336   -1152  
448    -48    
176    576    
64     -368   
144    -96    
-32    352    
-176   -112   
96     608    
-96    -320   
256    144    
-592   240    
480    128    
16     -80    
352    128    
-176   80     
368    416    
144    448    
-288   -192   
-144   496    
-208   -224   
128    -464   
-32    0      
80     -208   
96     288    
48     128    
-384   -176   
-240   -256   
-160   -48    
112    192    
-112   -224   
240    128    
160    112    
-656   -96    
128    112    
64     256    
64     128    
112    -64    
-272   96     
-320   96     
96     0      
-416   -320   
48     -144   
-1024  112    
16     208    
192    -160   
-240   48     
64     112    
-208   0      
80     -16    
32     112    
-144   144    
-16    0      
-48    -32    
0      -32    
-176   144    
-80    64     
128    64     
-320   -144   
32     144    
-176   64     
240    -64    
128    112    
320    80     
80     16     
-80    0      
-48    16     
-224   -16    
32     16     
-304   -64    
192    144    
-560   0      
80     -32    
-320   80     
-64    128    
32     208    
112    64     
208    32     
-112   16     
-128   0      
-48    -32    
64     -96    
64     -48    
0      144    
-128   -16    
16     96     
-176   -96    
208    16     
32     96     
48     80     
272    208    
-192   192    
0      0      
-32    -32    
240    0      
-176   96     
16     16     
-80    -96    
160    -48    
-272   -128   
48     -64    
-48    32     
0      48     
-64    64     
112    -32    
-64    0      
-176   0      
-176   -64    
96     -64    
80     -208   
240    -208   
32     112    
-256   80     
-112   256    
-112   -32    
48     -96    
-160   -128   
96     -64    
288    256    
-192   272    
32     128    
64     128    
144    272    
176    176    
32     -32    
-304   -144   
80     -64    
-64    64     
80     112    
16     464    
224    128    
64     -48    
-128   128    
288    160    
-32    192    
80     0      
128    -32    
320    64     
-112   -32    
-240   0      
-384   -160   
176    -672   
80     16     
176    352    
-96    -752   
-80    -288   
128    -80    
96     144    
16     -112   
-96    -368   
16     -16    
-32    -32    
80     -160   
192    112    
496    640    
-160   -80    
144    -112   
96     -144   
-32    112    
-208   256    
64     144    
304    128    
-32    256    
48     -352   
32     224    
112    -144   
128    48     
64     32     
16     96     
-16    320    
64     -272   
-64    96     
64     144    
-160   -208   
-128   128    
288    160    
96     368    
208    128    
256    -32    
-192   -320   
192    48     
-48    192    
240    112    
16     -48    
304    16     
-352   -64    
-144   -48    
0      -112   
0      48     
336    208    
432    320    
320    256    
224    -80    
224    -896   
0      -176   
32     240    
-80    -208   
-64    -192   
-192   -112   
-176   -304   
336    -304   
112    112    
-80    -96    
624    -16    
-32    -32    
176    -64    
160    0      
160    -592   
320    96     
-160   80     
256    288    
48     160    
-96    48     
-64    -48    
-192   -176   
480    -16    
48     176    
-464   -32    
704    96     
-240   32     
384    32     
-32    112    
96     96     
288    96     
-112   64     
256    64     
-64    64     
96     -16    
32     -48    
80     64     
112    112    
-80    64     
32     -96    
304    64     
-128   16     
160    -48    
64     48     
-48    -160   
96     64     
176    -368   
-16    0      
-64    -128   
-48    48     
0      0      
176    -48    
-160   -16    
176    96     
-64    16     
48     -48    
80     112    
64     80     
192    32     
96     -96    
16     48     
64     -336   
64     48     
32     96     
272    96     
64     0      
-16    -64    
16     48     
-144   32     
224    -80    
240    -64    
32     64     
64     -112   
-64    -48    
96     -208   
-224   64     
160    -64    
304    64     
48     16     
96     64     
16     32     
48     32     
144    32     
-32    -16    
-16    48     
176    -400   
-16    64     
-64    160    
224    16     
272    -144   
-48    -96    
64     -288   
48     16     
-48    192    
16     48     
32     16     
0      -192   
16     -80    
208    -64    
-32    -656   
16     -48    
128    -96    
144    -80    
192    240    
-272   64     
-64    -80    
160    -304   
128    -32    
32     96     
176    -400   
48     64     
80     -560   
-160   -608   
-32    256    
-64    -512   
32     32     
240    -448   
-208   240    
32     -96    
-48    -176   
320    -96    
240    224    
192    128    
-16    48     
-64    -32    
16     0      
-544   -48    
176    -320   
-112   0      
-48    -192   
496    384    
-320   64     
208    -144   
192    -1680  
128    -112   
192    96     
64     -16    
0      -32    
-176   -48    
336    16     
368    368    
-560   192    
96     -16    
-1600  -96    
144    16     
0      -32    
80     176    
144    -16    
-48    -576   
64     -16    
-288   -176   
-144   144    
64     80     
-144   -16    
144    -16    
-80    -176   
0      -32    
112    0      
-768   -64    
80     -128   
-64    -48    
224    -288   
48     -192   
400    -48    
672    368    
-176   -1296  
-320   -256   
-80    -112   
80     160    
-208   128    
-32    -32    
-288   -192   
208    -240   
240    752    
-256   -240   
-1328  -416   
128    176    
256    96     
0      -144   
128    -16    
64     336    
32     -352   
64     144    
-96    -176   
-48    64     
-144   -208   
400    464    
-208   128    
272    -16    
-16    288    
32     -48    
-320   -800   
-288   544    
-256   -224   
64     288    
384    272    
48     -528   
64     -64    
224    16     
-272   352    
272    144    
-368   -464   
224    -448   
-208   -144   
176    544    
96     240    
96     320    
-1344  -256   
64     -400   
48     -144   
-96    -208   
144    176    
0      -864   
464    -80    
768    544    
-672   384    
-16    -224   
96     -144   
-352   -80    
320    -80    
-592   32     
304    -96    
0      -32    
48     -80    
-64    48     
64     -432   
32     -128   
48     112    
32     -128   
-64    -224   
-16    0      
-368   -16    
240    -32    
-240   48     
144    16     
464    320    
-384   160    
-64    -128   
64     -64    
112    -96    
32     -208   
112    16     
208    208    
-80    128    
-32    176    
144    64     
-160   -48    
96     -144   
-64    -48    
0      -48    
80     160    
96     96     
288    32     
-560   -320   
96     -16    
64     0      
-528   0      
-112   32     
-528   -112   
-64    -112   
-624   96     
-48    -16    
224    -80    
-192   0      
80     16     
-448   -96    
-368   -208   
-32    -112   
-320   -176   
-96    -96    
16     -112   
16     112    
-160   16     
-64    -64    
-80    -208   
192    32     
112    0      
-800   32     
0      96     
64     0      
-160   48     
-448   -128   
144    80     
-160   -48    
-80    112    
80     -16    
-224   48     
64     -112   
-16    -240   
48     112    
-176   32     
16     64     
-736   -112   
-32    112    
144    48     
-32    496    
336    208    
0      -144   
-64    -48    
-240   -288   
-144   -96    
-112   16     
-112   64     
-48    -32    
240    32     
-272   -16    
-80    16     
-672   96     
-96    256    
-1648  208    
352    80     
-80    -80    
48     -48    
-176   -288   
0      -112   
-48    -16    
272    -112   
48     -128   
-224   -240   
-112   -64    
-192   -176   
-144   -80    
160    -16    
288    -160   
-448   -160   
96     -64    
-112   0      
-96    -224   
-32    48     
80     368    
144    64     
-48    112    
80     -16    
-48    -112   
-144   288    
-192   -64    
288    -96    
64     240    
112    272    
-736   -448   
496    128    
96     -32    
528    192    
224    -32    
192    -320   
320    368    
-400   64     
192    0      
-336   -240   
-48    112    
32     384    
-112   -16    
-128   -48    
208    80     
192    -176   
64     -160   
-736   64     
80     64     
-160   -48    
432    144    
-256   -96    
96     -64    
224    48     
464    256    
-80    208    
-192   16     
160    -48    
-272   -48    
496    208    
-336   -128   
-16    -16    
-432   64     
0      32     
160    -16    
-64    16     
-32    80     
64     80     
32     48     
-208   -80    
192    64     
-352   16     
-48    -16    
64     -32    
-112   32     
-48    -32    
80     -64    
48     48     
48     16     
-160   -16    
96     -32    
-64    -64    
16     96     
-112   -96    
336    192    
-192   128    
-160   -144   
272    -80    
-48    48     
464    160    
-800   -144   
-320   48     
272    80     
-160   112    
144    16     
208    -80    
-16    48     
64     176    
-112   -16    
144    112    
-224   32     
0      48     
48     16     
112    -48    
720    192    
-112   -16    
192    64     
336    160    
-64    64     
-112   -48    
224    112    
16     16     
240    64     
320    176    
-432   48     
80     -128   
-128   -96    
240    112    
-96    -16    
64     112    
208    0      
-16    0      
-32    64     
-64    48     
32     32     
320    208    
-384   128    
176    64     
176    32     
-32    0      
-32    -48    
-32    16     
176    64     
-304   16     
80     16     
112    16     
112    64     
112    112    
-32    48     
160    -96    
-208   32     
208    80     
-208   48     
192    -48    
48     32     
112    96     
-176   16     
128    80     
96     80     
-48    -720   
128    -32    
256    96     
-64    96     
-48    0      
-16    96     
176    32     
0      96     
112    176    
144    -16    
80     0      
-64    -192   
-128   0      
336    224    
-256   16     
64     -880   
160    80     
-64    272    
352    240    
208    64     
-32    64     
-32    128    
-32    0      
-48    0      
48     -48    
0      48     
64     -16    
-144   -320   
96     0      
112    -48    
-32    -544   
-16    80     
128    192    
-64    -64    
128    -16    
16     -16    
16     48     
176    128    
16     80     
32     64     
-80    -112   
32     48     
-32    32     
96     -96    
96     0      
16     0      
128    128    
48     -704   
112    16     
-320   32     
352    256    
-32    640    
336    496    
400    96     
144    -48    
80     112    
48     -48    
-304   -320   
-64    -32    
-16    96     
-176   -368   
144    288    
64     -1024  
176    144    
80     208    
80     0      
208    -112   
128    96     
-48    256    
112    176    
16     -208   
-160   -32    
48     176    
336    -160   
208    48     
96     -64    
-64    112    
288    256    
-640   32     
0      -448   
48     -16    
128    -48    
208    208    
-128   -880   
16     16     
-224   224    
-16    -416   
608    400    
192    -48    
592    192    
-128   496    
-16    -256   
352    0      
128    128    
224    -64    
96     96     
336    144    
-16    64     
-80    128    
-32    128    
-16    272    
-48    -1024  
160    224    
224    192    
224    -496   
176    -256   
144    256    
-48    -32    
16     48     
16     -224   
48     272    
272    144    
-64    224    
144    -64    
112    -176   
240    480    
32     -64    
16     -96    
32     -64    
-32    -576   
304    -448   
-160   0      
32     176    
16     112    
64     48     
80     192    
240    80     
32     -48    
144    -432   
-208   -928   
224    -416   
-128   400    
256    -80    
48     -160   
80     -304   
96     -224   
-224   112    
272    0      
-160   176    
-128   -112   
-32    -800   
240    16     
-64    -304   
0      0      
-1072  -128   
176    0      
-240   -160   
320    0      
-176   -224   
240    -112   
-64    0      
-64    128    
-112   -112   
368    -224   
256    240    
-80    176    
0      32     
208    -352   
512    32     
-336   64     
512    256    
-240   32     
64     -272   
-176   -208   
112    -400   
112    128    
16     -224   
112    0      
256    -288   
-16    16     
128    16     
416    288    
-416   96     
240    -192   
-240   -112   
-256   -288   
48     -416   
16     -208   
160    96     
176    -304   
-288   160    
48     -32    
176    -64    
-48    0      
-128   48     
32     -16    
160    224    
128    64     
272    -304   
-112   -96    
-96    16     
-816   -16    
96     0      
48     112    
64     96     
272    256    
-112   -480   
-16    96     
-192   192    
208    -96    
208    -16    
48     80     
-176   -48    
256    48     
-336   112    
-48    -32    
128    0      
-112   144    
80     80     
288    -144   
-16    -48    
-96    -80    
-112   112    
176    -272   
-208   -208   
128    -256   
224    80     
-144   176    
0      0      
144    -224   
272    -96    
-160   48     
0      -48    
-256   -16    
-32    -96    
-80    -64    
224    -352   
160    48     
256    -48    
-48    96     
-32    32     
144    48     
96     112    
0      -32    
-336   -16    
176    -320   
-1040  -448   
-16    -80    
-336   -32    
48     -64    
64     144    
176    -96    
176    224    
80     -16    
-16    -48    
48     -144   
160    -64    
-96    -16    
-80    -160   
-384   -160   
192    -416   
0      32     
176    208    
-400   -32    
144    448    
32     -192   
64     32     
-48    -48    
-112   -160   
160    32     
-192   -128   
240    224    
-272   -96    
352    160    
-80    240    
64     -192   
-16    96     
192    96     
-128   32     
144    272    
-240   64     
-64    -272   
304    0      
320    -80    
304    -96    
-96    48     
-32    -320   
-128   -288   
-176   -352   
752    -352   
736    -80    
-64    -96    
304    -128   
-272   32     
-608   -64    
-272   -16    
-528   -160   
256    -16    
-48    -144   
-336   -64    
32     16     
-832   32     
-384   -48    
-512   -48    
-128   64     
96     64     
0      16     
-928   0      
-96    64     
-368   -224   
544    -64    
-560   -64    
224    64     
112    -96    
-272   -48    
-224   96     
528    320    
-688   -64    
-432   -112   
400    -64    
-208   -208   
0      96     
-32    -112   
192    112    
-96    -128   
176    96     
-112   -160   
-64    144    
64     0      
-336   -64    
-32    -48    
-208   32     
96     -80    
-416   32     
-256   -64    
-224   -16    
-112   96     
-80    -32    
208    -16    
-48    -16    
-112   80     
-208   -64    
-176   -160   
-128   -32    
176    112    
-112   -64    
144    48     
304    16     
-272   -48    
320    80     
-48    16     
-112   -128   
-1424  -80    
176    224    
-944   -384   
880    -128   
-48    128    
64     144    
432    64     
112    0      
96     -16    
-288   -192   
672    160    
544    400    
-880   112    
-416   -320   
384    -160   
-576   144    
-128   -128   
544    64     
272    48     
-160   64     
-112   64     
192    80     
-400   -80    
96     0      
208    48     
-160   0      
-128   -80    
-80    16     
-208   -64    
80     112    
-336   -48    
128    0      
32     -64    
-112   -48    
368    160    
-224   0      
-16    -16    
112    32     
80     96     
-32    0      
-208   -48    
-64    -16    
16     48     
304    160    
-304   240    
-208   32     
224    128    
-1136  -64    
-144   -64    
-96    96     
0      -64    
192    -32    
-176   -48    
128    -80    
-48    80     
176    48     
0      -112   
144    112    
-288   -32    
-32    64     
-288   96     
48     64     
-32    -160   
48     -112   
16     272    
176    160    
-32    -96    
-176   16     
80     192    
-32    64     
16     0      
-144   0      
192    112    
-288   -192   
96     48     
-208   112    
160    368    
-144   -368   
48     288    
192    16     
-64    -144   
64     112    
-96    -16    
128    0      
80     224    
32     -32    
-176   64     
0      192    
-16    -16    
176    32     
-128   -16    
-112   64     
-96    -160   
-64    48     
-16    16     
-96    32     
0      -544   
384    784    
112    0      
224    96     
80     64     
-160   -80    
-32    16     
-64    -96    
0      -352   
-176   -112   
-192   160    
32     -48    
-32    80     
480    512    
-48    -176   
128    272    
160    112    
-144   -320   
48     784    
224    -144   
-64    -64    
160    288    
-240   -240   
48     128    
-48    -112   
0      32     
176    160    
80     48     
0      80     
48     48     
-96    -240   
304    1184   
0      -16    
32     -624   
64     16     
16     -16    
128    304    
-32    80     
-176   320    
496    160    
176    384    
240    0      
224    -336   
48     304    
224    224    
-176   -160   
32     176    
-192   176    
48     432    
-128   448    
-432   -256   
64     -96    
-64    0      
368    -208   
240    112    
256    176    
48     272    
0      0      
-160   48     
128    32     
-224   -448   
64     -464   
128    80     
-16    176    
224    0      
-64    -176   
112    -64    
-16    96     
80     -336   
16     -32    
16     64     
176    32     
64     96     
224    64     
32     96     
32     16     
-32    -112   
16     -80    
192    0      
48     -208   
80     0      
-32    64     
96     208    
16     -336   
-48    96     
240    144    
-304   160    
80     32     
48     -32    
0      512    
-112   64     
336    -384   
48     144    
-80    32     
448    256    
32     64     
32     -256   
-80    0      
-320   -400   
240    -352   
416    -960   
192    320    
512    208    
144    304    
80     -112   
-128   0      
-176   432    
16     400    
-48    128    
592    112    
-240   144    
-320   -144   
-224   -48    
0      -288   
400    112    
16     -544   
48     128    
-80    96     
240    -48    
144    32     
-96    16     
-16    -32    
192    128    
-224   48     
256    64     
368    336    
-304   32     
112    48     
32     80     
96     112    
-64    -240   
160    48     
48     304    
416    224    
-192   96     
192    -640   
-240   -448   
-16    64     
48     80     
112    -304   
-208   -352   
-48    -16    
-144   192    
-64    -112   
416    -64    
-208   -624   
416    208    
-16    -208   
144    -112   
272    -80    
256    -16    
-16    -32    
80     96     
0      32     
-96    -96    
256    -160   
0      -128   
112    16     
48     -16    
0      160    
0      -176   
336    -240   
256    -16    
256    160    
-176   176    
-80    16     
-64    144    
352    208    
64     48     
32     -320   
48     -208   
32     -48    
176    112    
-48    -144   
128    -112   
384    160    
-48    192    
96     48     
400    128    
-224   288    
272    -80    
176    0      
80     -176   
-48    -1472  
16     -96    
240    336    
-128   176    
80     144    
208    16     
32     -160   
176    -32    
-48    -144   
32     -80    
64     -528   
224    32     
112    -112   
-16    -176   
-1248  16     
160    -256   
320    -64    
-160   -112   
80     -64    
128    -128   
0      -96    
144    128    
48     -32    
144    -544   
-160   96     
368    -48    
-48    -48    
-288   -496   
176    -160   
-384   176    
288    -64    
160    -16    
240    -32    
176    48     
64     -32    
-48    208    
0      112    
-32    48     
48     48     
48     32     
208    0      
-128   64     
144    0      
32     -64    
-48    -16    
128    -32    
400    176    
-336   -48    
-192   -144   
208    -336   
176    0      
-16    -240   
192    -64    
-304   -48    
-16    0      
64     -16    
-160   224    
-80    128    
320    0      
0      -64    
272    96     
-1216  16     
96     96     
-256   -192   
208    -112   
352    256    
32     16     
176    0      
-80    -160   
384    16     
304    144    
-128   32     
-48    32     
-272   -112   
128    48     
-112   -128   
-192   -192   
272    16     
-128   144    
-192   -96    
-416   48     
224    -224   
304    64     
64     -832   
224    128    
64     64     
0      -48    
96     -32    
-64    -112   
-240   0      
0      -48    
-64    -144   
80     -48    
-1968  16     
-64    -240   
272    16     
-48    -304   
16     16     
304    -112   
-432   16     
-224   -80    
160    -80    
-272   -144   
288    0      
-112   32     
-304   -400   
128    -160   
192    80     
-1088  -32    
240    0      
-352   -16    
192    -48    
48     96     
48     -112   
0      -48    
0      96     
464    64     
-208   80     
-224   -64    
96     112    
-368   -128   
-272   -224   
416    -144   
160    288    
384    32     
128    80     
368    112    
-528   144    
176    -512   
-496   -240   
480    240    
144    64     
-240   -112   
368    -16    
-400   32     
64     80     
-656   -48    
336    0      
-896   -16    
240    -64    
-16    16     
464    -48    
-112   32     
-32    -144   
48     16     
-48    -64    
-160   -32    
-176   64     
224    -16    
-48    64     
-32    32     
0      -176   
176    64     
-224   304    
-2112  -192   
64     16     
-768   -48    
64     0      
0      -80    
-224   -48    
-64    16     
-928   -16    
-208   64     
-992   0      
-32    32     
96     176    
-32    368    
32     -48    
208    -208   
32     272    
80     80     
80     -432   
-528   64     
-128   -16    
-272   0      
-144   384    
48     -272   
64     208    
-304   -144   
-96    144    
192    -160   
-96    -368   
-208   112    
96     32     
112    -96    
160    288    
-112   32     
-240   -128   
128    16     
-48    320    
-32    -176   
96     144    
-256   80     
-80    -720   
336    160    
-368   80     
-208   -16    
48     -352   
512    464    
-224   0      
-144   -128   
-224   -96    
272    -32    
-80    352    
-16    -256   
48     -256   
-208   -112   
48     96     
-80    112    
192    32     
-288   -80    
112    -304   
32     -240   
96     128    
-16    48     
80     16     
112    448    
112    48     
160    -144   
-192   -32    
-64    -384   
-160   64     
96     -16    
-176   -160   
-224   -112   
-224   -128   
288    416    
-912   -160   
176    -64    
48     -80    
-64    -64    
112    -96    
-96    -240   
-96    64     
-16    352    
16     64     
-160   32     
16     32     
-32    16     
64     240    
-528   64     
160    -80    
-368   16     
128    144    
0      128    
-112   80     
-80    48     
-112   64     
48     64     
32     80     
-32    32     
176    48     
112    80     
-16    -112   
-32    -112   
-32    -112   
48     -32    
-224   16     
32     48     
-160   0      
160    0      
-224   32     
-112   -224   
256    -112   
288    -48    
320    32     
-240   -80    
-336   -32    
-272   -48    
-32    128    
208    32     
128    48     
-448   0      
112    -336   
-64    -16    
192    144    
-224   176    
64     -48    
32     32     
128    224    
48     144    
-144   -16    
144    0      
-96    -96    
160    32     
16     48     
-64    64     
-80    96     
-144   160    
144    112    
0      112    
48     448    
-144   224    
96     -64    
-112   -336   
16     -160   
-96    -64    
224    304    
16     192    
-32    240    
-464   -272   
288    128    
64     240    
64     16     
-208   560    
160    144    
-144   32     
-80    -96    
-272   -320   
352    -96    
96     16     
32     64     
192    0      
-176   288    
496    432    
-192   224    
160    -128   
0      112    
-48    -48    
288    64     
336    160    
560    48     
16     -448   
0      -528   
-576   48     
-192   -48    
32     32     
480    176    
96     176    
976    816    
-912   704    
-320   320    
-304   -144   
-144   -144   
432    96     
192    48     
368    48     
-80    -64    
-32    144    
16     -32    
-208   144    
96     -96    
-48    176    
112    -192   
208    160    
16     144    
-288   -464   
272    48     
-160   -208   
144    -32    
320    384    
112    624    
-224   160    
160    48     
272    144    
80     64     
-272   224    
144    128    
48     352    
80     -16    
16     192    
-112   352    
352    336    
80     48     
0      -96    
192    480    
240    176    
112    176    
160    96     
-80    352    
480    496    
-128   224    
16     144    
-192   -32    
368    -160   
32     176    
64     -528   
112    -224   
32     176    
208    176    
-16    64     
-160   160    
-48    176    
432    -176   
96     160    
272    416    
-160   -400   
192    96     
-128   128    
-288   -768   
160    320    
0      128    
464    48     
80     96     
-16    -272   
192    0      
192    -80    
-176   64     
-144   80     
-96    16     
96     64     
128    -160   
224    112    
256    112    
64     -128   
-64    64     
-32    -96    
-80    128    
-48    112    
112    176    
64     112    
256    0      
272    96     
-32    0      
-96    -176   
240    -160   
0      -32    
192    208    
0      16     
64     0      
-32    -16    
112    -144   
-16    -96    
48     64     
64     0      
512    240    
128    160    
112    -80    
64     -64    
-32    -48    
32     48     
-192   16     
-64    -48    
-128   32     
-16    -112   
-96    32     
176    -32    
64     64     
128    -48    
0      16     
-16    -112   
256    96     
-128   112    
32     32     
-96    -160   
576    -128   
-16    -80    
224    -48    
208    80     
48     -80    
-128   144    
0      320    
-192   48     
256    -256   
448    208    
-64    16     
176    -32    
160    32     
208    112    
-64    0      
-176   48     
176    64     
176    -224   
32     16     
-16    224    
-400   32     
-32    -160   
32     64     
336    16     
256    -32    
32     -16    
0      -16    
-208   80     
-80    80     
-160   16     
80     128    
-240   -32    
192    -112   
-64    -160   
272    -144   
-32    112    
-176   -208   
112    64     
208    -32    
176    80     
-336   -112   
176    112    
64     -64    
32     -64    
80     32     
208    96     
-32    144    
288    -64    
16     -112   
64     -32    
208    80     
-64    -16    
-48    48     
192    80     
-96    -48    
-128   -352   
256    -768   
-128   176    
336    0      
-384   -224   
800    208    
-560   -208   
-176   -192   
496    -400   
-96    80     
688    80     
-224   0      
48     -32    
128    -32    
-48    -336   
400    96     
-48    -80    
272    16     
48     -16    
32     -208   
-720   112    
256    -320   
176    -80    
352    48     
-192   144    
48     -448   
-192   -208   
-192   32     
352    176    
-192   80     
128    32     
0      208    
192    128    
-304   -192   
416    -128   
-208   -144   
112    96     
-48    -192   
128    -64    
96     112    
192    -320   
80     32     
176    160    
-48    32     
48     -192   
160    80     
-48    112    
128    -96    
-144   64     
368    -96    
-272   400    
96     -208   
192    -208   
-128   208    
144    -624   
48     -192   
128    0      
-16    -384   
-48    112    
128    64     
544    320    
-368   176    
176    128    
-256   -176   
112    64     
-160   -48    
-32    48     
-2752  320    
144    -1008  
240    -272   
-48    608    
352    0      
16     -304   
-128   -640   
-16    -384   
96     -96    
-96    64     
96     224    
-32    -64    
96     32     
-176   224    
208    112    
-704   -32    
112    48     
128    48     
192    -80    
-64    -64    
112    -304   
-96    -48    
208    -480   
192    -176   
-112   -80    
-16    32     
-176   160    
96     96     
144    192    
240    96     
-48    -80    
32     112    
-272   -64    
-48    -112   
-48    -144   
304    -80    
0      208    
-16    -672   
176    -144   
64     48     
-128   -16    
-48    -80    
128    128    
-32    -64    
224    0      
-256   32     
80     -64    
-368   -112   
96     -160   
112    80     
64     -48    
16     -48    
144    -848   
128    -96    
-448   0      
-16    -144   
-32    -32    
128    192    
-320   16     
224    -32    
-80    -32    
48     -48    
352    304    
-304   192    
144    304    
256    64     
80     -80    
0      -80    
-240   64     
-48    16     
176    -96    
64     -48    
0      64     
-208   64     
-48    -160   
112    80     
32     0      
-16    128    
-384   -16    
112    96     
-128   -160   
48     96     
-80    48     
-16    0      
-384   -32    
-608   -80    
-144   160    
-1296  16     
-128   -112   
80     -96    
-128   -32    
-656   64     
112    -96    
-896   -400   
256    16     
-528   0      
112    -48    
96     240    
96     -32    
208    0      
-272   16     
-96    -112   
-224   -48    
-192   64     
-16    0      
-128   0      
-208   -96    
288    16     
-240   16     
32     16     
112    240    
-112   48     
-112   -32    
-112   -80    
-96    -32    
-48    -32    
80     80     
-160   48     
-32    -32    
-304   -48    
-32    240    
0      176    
0      0      
-64    -128   
240    -208   
-32    0      
0      -224   
112    -144   
-64    32     
16     -32    
-144   -64    
16     224    
-336   -592   
-368   -496   
-1776  -272   
-336   176    
64     208    
80     -368   
-112   -272   
-16    -304   
144    -256   
-80    16     
384    -208   
48     -176   
-240   32     
-240   -704   
-304   -448   
656    960    
-336   160    
-224   192    
-208   -272   
-544   -48    
736    -64    
64     -208   
192    336    
-32    -80    
192    16     
416    128    
192    272    
-16    64     
384    336    
-544   -672   
-96    -64    
-416   224    
-400   -160   
160    400    
-1536  96     
160    144    
-160   -192   
-144   -64    
288    128    
-336   400    
112    336    
-320   -240   
64     -32    
160    640    
-80    48     
-288   -384   
288    512    
-176   -320   
16     352    
-336   48     
96     240    
144    64     
-208   -64    
48     160    
-16    32     
-48    -80    
176    -32    
96     96     
32     144    
192    128    
-592   256    
288    -128   
-608   -112   
128    -16    
-304   -240   
16     208    
112    160    
-32    80     
-16    -64    
-80    -80    
-16    96     
-48    80     
48     16     
0      -16    
48     48     
-112   -96    
0      16     
-16    -48    
64     32     
0      48     
-160   96     
-208   80     
-80    32     
112    -16    
48     -16    
32     64     
48     16     
128    32     
-304   128    
-80    160    
-256   96     
128    144    
16     64     
-176   -384   
32     -192   
160    80     
16     0      
192    208    
-16    80     
160    192    
-240   128    
16     480    
32     16     
-16    -48    
-48    48     
16     48     
-32    -96    
-32    -96    
0      112    
-128   -48    
-64    0      
128    16     
160    64     
320    384    
-240   256    
80     -160   
208    -160   
48     112    
0      32     
192    16     
-176   -32    
144    32     
-112   32     
224    288    
-256   -128   
112    16     
144    64     
64     112    
240    64     
-160   -128   
96     -48    
96     -288   
64     16     
-16    112    
192    224    
-272   80     
-96    -32    
304    80     
80     96     
80     32     
128    48     
48     48     
96     32     
0      16     
0      48     
112    80     
-240   0      
224    48     
-128   -16    
112    64     
-144   -208   
336    -16    
384    256    
-208   -48    
96     0      
144    144    
80     144    
-32    -32    
272    -16    
208    112    
560    416    
-576   32     
-304   -240   
160    -96    
224    160    
288    48     
128    -208   
176    96     
-144   80     
112    16     
128    16     
80     48     
64     -32    
160    0      
-32    96     
64     80     
-64    -48    
208    64     
112    160    
64     80     
-224   -80    
-48    -496   
128    16     
288    -1504  
128    32     
176    80     
160    32     
160    48     
112    0      
-80    48     
112    144    
16     32     
800    496    
-688   128    
176    -96    
16     96     
-32    -32    
192    80     
208    112    
-128   16     
368    80     
-160   -112   
48     -160   
-48    192    
-32    384    
-48    128    
-208   -128   
-304   176    
-368   -16    
-368   -448   
80     80     
-64    64     
368    272    
0      -16    
-64    -208   
64     144    
48     -80    
-16    -160   
496    224    
-112   256    
160    288    
-400   80     
-208   -240   
-192   -48    
-160   -256   
48     -32    
80     176    
-432   -592   
288    160    
-160   496    
-288   -720   
432    224    
32     -112   
544    128    
32     304    
0      -112   
416    -480   
-16    704    
-240   -64    
-288   -496   
112    112    
-64    48     
352    112    
64     -208   
128    352    
128    -512   
224    0      
-112   -832   
64     -128   
-64    48     
112    -64    
-16    -112   
208    16     
208    240    
-400   -208   
448    -112   
-160   -224   
256    -64    
-32    -80    
112    -48    
0      -288   
144    128    
0      -112   
-64    -144   
192    -320   
112    128    
-80    -64    
240    0      
112    224    
-96    16     
64     128    
288    128    
-96    32     
32     -80    
112    32     
128    -144   
0      16     
176    -112   
48     -48    
96     -32    
-32    -848   
112    160    
-112   -256   
48     -112   
64     0      
-48    -80    
0      -16    
80     128    
144    -112   
112    64     
32     -96    
0      -192   
144    128    
144    -80    
0      16     
288    -128   
0      -304   
-112   -32    
-144   -208   
64     -240   
256    -1536  
256    -208   
160    304    
-176   0      
80     0      
160    -112   
48     -256   
-144   -112   
112    -464   
-48    64     
192    128    
128    -64    
-592   -48    
48     -272   
304    -80    
240    112    
16     64     
272    -592   
-32    -112   
160    -32    
384    400    
-304   96     
96     80     
112    -128   
272    128    
96     96     
128    -128   
-1056  -80    
-256   -576   
96     -384   
64     -32    
-128   112    
288    144    
-32    288    
384    -928   
-224   48     
-64    -160   
144    -96    
176    96     
112    32     
-144   -64    
128    -144   
-432   -208   
96     -144   
-144   -16    
96     -32    
160    32     
-144   -96    
96     32     
48     -400   
-224   -288   
-32    -432   
80     -32    
-208   -96    
96     32     
-80    -48    
0      176    
32     0      
16     16     
-1424  0      
176    128    
96     224    
-80    320    
256    400    
48     -176   
-80    16     
64     -96    
208    80     
-96    -160   
240    -368   
-16    64     
16     -64    
-160   -96    
224    -128   
-752   64     
160    -64    
-192   224    
-48    160    
48     272    
224    -272   
48     48     
96     -1648  
48     -32    
-32    48     
-112   448    
48     208    
160    -208   
-160   -160   
176    -160   
-688   32     
320    -224   
-160   128    
160    560    
224    -368   
-48    -256   
128    368    
64     -112   
32     240    
-144   -208   
112    288    
-48    16     
144    496    
-512   -720   
0      656    
400    -48    
128    -16    
592    384    
-384   -192   
-368   -272   
-64    -448   
112    176    
-256   -32    
128    64     
224    -144   
-640   -880   
-112   480    
-80    576    
-496   -720   
848    -112   
48     448    
-128   -240   
-576   112    
-112   -112   
208    -48    
-224   -80    
0      192    
1296   1232   
-2720  656    
-544   -336   
240    -272   
32     16     
-128   -448   
304    -96    
80     -64    
-416   -128   
-464   -240   
16     208    
-1200  128    
96     96     
-320   -48    
-336   -16    
-144   16     
-384   -64    
-80    -64    
-304   -32    
16     64     
-208   96     
-16    -96    
-48    -128   
-96    80     
-480   -144   
64     32     
-16    48     
176    128    
-64    -96    
-464   -80    
0      32     
-240   -48    
-176   -256   
-160   -128   
-144   112    
-864   -48    
0      -32    
-224   -32    
-16    64     
80     16     
32     32     
-32    -144   
160    128    
-208   0      
0      -80    
-224   64     
160    112    
-64    0      
-176   16     
-288   -32    
-528   0      
80     112    
-16    -64    
144    64     
-176   -64    
-48    32     
-192   -128   
-48    -16    
160    144    
-176   112    
-128   144    
160    32     
336    160    
-304   -160   
64     0      
16     96     
16     0      
-240   -80    
112    80     
-112   80     
-16    0      
48     -208   
-32    16     
-32    80     
-80    32     
128    224    
-304   16     
16     96     
128    -32    
-32    64     
-128   64     
-128   -240   
-480   -144   
-16    160    
-160   80     
224    144    
-32    16     
80     -80    
80     96     
-112   32     
-48    -32    
-16    32     
-16    48     
32     80     
-224   -16    
-96    -16    
160    272    
-816   128    
0      -128   
-1792  -208   
192    0      
-16    16     
224    -160   
0      240    
0      64     
-32    -160   
-80    -16    
-192   64     
-176   64     
-16    -16    
-128   32     
144    128    
64     32     
144    16     
-1136  32     
-208   0      
0      -48    
64     16     
256    80     
144    -32    
112    64     
64     224    
-368   160    
64     -16    
-272   48     
-416   -80    
-112   -64    
48     0      
-128   64     
-448   16     
-80    128    
-160   192    
-240   0      
128    96     
-96    -16    
-256   -16    
80     64     
128    48     
-288   0      
-64    48     
224    112    
-224   64     
-224   -48    
80     128    
-80    128    
240    80     
-144   16     
16     96     
96     48     
-112   80     
144    80     
-128   -48    
80     48     
-144   64     
48     0      
-160   -32    
-16    48     
-160   16     
224    48     
-144   32     
16     48     
-96    48     
208    64     
64     64     
-240   -64    
-32    -80    
-176   64     
-64    112    
80     -64    
112    -32    
-80    16     
880    352    
-912   112    
176    -80    
-160   -48    
0      0      
-128   80     
-32    -592   
592    176    
-432   -576   
240    736    
-352   -400   
-144   -544   
-192   96     
1248   1728   
-720   -560   
-16    -48    
-128   224    
368    112    
80     -224   
304    160    
-416   -96    
112    224    
-64    32     
176    -16    
-32    -48    
32     336    
832    544    
-208   64     
448    688    
-544   224    
-240   96     
208    -48    
336    384    
64     48     
240    -160   
384    144    
-592   -160   
-192   64     
0      0      
-144   48     
400    240    
80     128    
-176   -272   
416    -80    
-240   -112   
112    -320   
-80    96     
64     64     
80     -16    
128    -176   
-160   64     
16     112    
-32    16     
48     256    
272    128    
144    16     
224    -80    
-224   64     
112    96     
-144   -80    
16     -304   
64     32     
16     144    
16     32     
-256   16     
80     48     
-80    96     
256    -16    
112    64     
-272   -16    
112    -240   
-48    48     
48     -16    
160    16     
80     32     
96     -80    
96     64     
-64    48     
48     112    
192    48     
-96    32     
-48    -80    
16     96     
-32    64     
-128   -208   
128    -112   
96     128    
-128   48     
144    224    
112    128    
208    -256   
-32    80     
32     -976   
112    80     
192    16     
272    80     
-96    80     
-96    -16    
-16    -224   
320    160    
-224   48     
16     -32    
192    80     
-96    48     
-16    -16    
176    -240   
160    16     
-16    48     
64     112    
64     16     
0      -16    
0      -208   
16     32     
144    176    
-144   192    
96     -48    
160    -16    
64     -64    
16     -192   
-48    -48    
96     -80    
320    224    
64     320    
64     96     
288    -160   
112    80     
16     0      
-112   -48    
112    -80    
320    352    
-320   384    
0      352    
112    144    
16     -240   
144    32     
-16    64     
80     -96    
48     -624   
160    112    
-16    -160   
144    80     
80     -128   
128    0      
-64    -128   
80     80     
16     -64    
96     -80    
192    192    
0      32     
192    144    
160    -160   
32     80     
-48    -32    
112    208    
352    144    
-128   624    
272    352    
112    48     
112    -32    
80     -224   
96     304    
160    -128   
-256   -32    
-240   -112   
-48    -368   
32     -176   
160    128    
304    -16    
-96    16     
176    160    
16     -208   
0      80     
432    288    
128    -80    
-160   96     
-48    -672   
80     -112   
576    -1680  
-272   -432   
-176   336    
-64    -48    
48     -128   
368    -320   
224    304    
-384   -336   
0      -1296  
-128   64     
-192   -352   
320    288    
-32    144    
240    -224   
64     -192   
-64    -176   
-80    -128   
160    48     
-48    112    
96     -32    
128    -16    
-208   -336   
192    240    
192    -160   
32     -32    
384    -384   
-384   -560   
-496   -144   
-320   -16    
48     112    
240    -256   
400    32     
176    -80    
128    -96    
80     -1776  
-240   64     
-160   -16    
-240   0      
-16    -32    
128    128    
-224   -96    
368    96     
-560   128    
128    96     
-1856  -80    
112    -96    
-240   96     
-96    -64    
464    -96    
-272   -544   
-1008  -256   
304    -320   
-384   -144   
-512   -400   
336    192    
1424   288    
-976   48     
192    0      
64     -64    
-1472  -16    
128    -128   
48     -48    
240    -16    
64     128    
64     16     
-144   -80    
128    -1040  
-48    64     
128    -64    
0      0      
-16    -32    
224    48     
0      16     
176    -32    
-48    0      
-112   -224   
-608   -64    
16     64     
-128   16     
192    -32    
-144   -16    
-96    -688   
-16    -144   
96     -64    
16     128    
-112   64     
128    -112   
-128   -32    
240    -128   
-176   -96    
-112   -128   
-352   -96    
144    -80    
-192   16     
112    -320   
-16    0      
-128   -160   
128    64     
320    32     
192    64     
-208   -16    
64     -160   
-304   -112   
80     0      
-368   64     
96     32     
-176   0      
-32    -144   
0      -32    
192    -112   
-64    96     
16     -48    
176    144    
96     80     
96     -64    
-304   -160   
96     -48    
-144   48     
176    -16    
-16    0      
80     -80    
-112   -48    
224    0      
32     224    
48     -32    
-16    96     
128    -96    
0      32     
-272   96     
224    -16    
112    16     
-80    48     
-176   0      
176    -96    
-304   -80    
16     -128   
-192   48     
64     32     
48     -32    
96     -176   
112    112    
-144   48     
-336   -80    
112    16     
96     0      
-144   -208   
448    -544   
-64    16     
256    304    
-176   64     
64     -64    
64     32     
-1136  16     
-32    48     
-816   -32    
-256   48     
-160   -96    
-256   144    
144    80     
-336   32     
16     64     
-96    -48    
-32    0      
192    32     
-96    32     
160    192    
48     304    
-784   -16    
-16    128    
-208   -32    
-64    -16    
176    48     
-224   -192   
192    -224   
-272   -432   
48     -16    
-96    192    
-48    80     
-1776  -96    
0      -48    
80     -80    
-32    -64    
304    176    
-32    224    
-144   -80    
-176   368    
-144   400    
128    336    
-464   16     
-160   -192   
48     0      
64     48     
368    -64    
-496   -448   
0      -96    
-352   80     
-336   -272   
-192   192    
-576   576    
80     320    
-144   -272   
-16    160    
-240   80     
-176   96     
-288   64     
240    -32    
0      96     
-208   -128   
-384   16     
-32    0      
-1456  -64    
64     144    
-32    80     
-32    -128   
112    320    
240    160    
-32    -192   
-80    64     
-144   176    
-208   -208   
-80    112    
144    -160   
144    -192   
-416   32     
32     224    
-32    -96    
336    -368   
-416   -544   
0      -80    
-480   400    
64     0      
-48    -160   
192    -224   
448    -288   
128    -80    
400    -64    
-64    64     
-224   144    
-112   64     
-160   64     
208    32     
64     240    
-16    192    
-48    -80    
480    64     
-160   208    
-80    -64    
416    96     
-176   128    
608    272    
-192   64     
-384   0      
-128   64     
-192   80     
80     96     
64     -80    
160    16     
-1184  64     
-64    -48    
80     48     
128    32     
-384   64     
-64    0      
-96    -128   
-32    -304   
-48    48     
-272   144    
80     -16    
-352   -32    
16     -48    
-144   224    
128    80     
208    -32    
16     -224   
0      80     
0      160    
-16    64     
80     80     
64     -128   
96     32     
-64    0      
80     160    
-48    48     
-160   224    
320    -32    
128    -48    
144    0      
-144   160    
96     64     
-224   0      
48     -272   
-32    -48    
0      192    
-352   64     
-16    -96    
32     64     
16     48     
64     -16    
48     48     
144    80     
-80    80     
-80    16     
-16    32     
-48    -64    
48     -16    
80     0      
80     48     
-16    0      
-176   -208   
-64    -144   
112    -32    
-112   128    
-64    -32    
80     32     
0      112    
-160   -128   
176    80     
32     0      
48     240    
96     96     
112    -16    
-176   -16    
256    -16    
144    48     
-128   128    
192    48     
-80    -16    
48     16     
-80    0      
144    16     
-48    64     
16     -16    
-80    48     
-32    32     
208    -64    
224    144    
-64    80     
0      16     
192    208    
-176   208    
-64    64     
-144   -32    
160    -80    
176    -96    
80     176    
16     -512   
16     -240   
-32    -112   
-320   -112   
64     -16    
192    176    
-208   224    
32     -64    
80     112    
-128   -288   
48     320    
48     416    
0      160    
144    0      
-144   -1152  
0      48     
176    64     
240    16     
208    48     
-128   -256   
128    320    
-16    -32    
64     64     
64     112    
-16    640    
240    -48    
288    -48    
224    16     
-144   96     
-400   -880   
240    240    
-496   -496   
96     176    
112    320    
416    256    
16     -112   
-112   -160   
-176   -192   
48     -32    
-256   384    
64     192    
-224   -16    
-16    -160   
208    -16    
-48    -256   
336    224    
-32    -128   
-96    -160   
224    320    
-304   32     
48     0      
176    128    
32     112    
560    48     
0      -16    
64     16     
-272   -96    
0      -112   
128    -16    
272    -112   
192    48     
32     -912   
176    128    
-128   32     
144    64     
-32    32     
160    16     
0      0      
208    96     
400    368    
-336   48     
288    -16    
-160   0      
256    48     
0      -144   
624    -240   
-480   -448   
-336   32     
32     16     
560    240    
416    208    
-16    64     
-288   -288   
112    -160   
-48    48     
192    144    
-112   -32    
352    0      
256    176    
304    -128   
48     32     
-96    -128   
96     0      
-112   -288   
208    -16    
-176   -96    
480    192    
176    144    
80     160    
-464   -112   
400    -48    
560    240    
-768   -128   
-448   -432   
752    -80    
32     144    
-192   -240   
336    48     
160    -416   
-80    48     
480    48     
80     128    
-160   48     
432    80     
128    64     
112    -128   
-448   272    
208    -80    
112    -80    
32     -160   
224    -16    
32     -80    
-160   128    
16     -96    
416    80     
-464   -112   
400    128    
-16    64     
400    80     
-192   -16    
176    -48    
96     128    
16     -32    
176    0      
0      -128   
144    -128   
-256   -288   
16     80     
16     -288   
176    -48    
-48    -80    
64     128    
-48    -32    
32     -352   
16     -704   
32     -112   
384    -224   
64     -32    
96     128    
144    -128   
-112   64     
160    -80    
-32    16     
112    -80    
48     -560   
-16    -64    
192    -144   
32     -16    
-352   64     
-48    -160   
128    -32    
208    0      
16     -96    
32     -512   
-32    -208   
64     -240   
176    -160   
96     -176   
64     -320   
-64    -80    
208    128    
272    -176   
-144   32     
-448   -48    
304    64     
-64    16     
48     -192   
80     -128   
32     -208   
-16    48     
64     192    
0      -208   
64     -96    
-16    80     
48     0      
48     32     
16     -48    
16     288    
48     208    
-224   -336   
-160   -352   
224    256    
224    -32    
96     -80    
128    48     
64     -384   
80     -48    
-16    -16    
-368   -112   
240    -976   
160    400    
112    416    
-96    -304   
-112   48     
0      -112   
32     224    
32     176    
-320   -208   
-16    -160   
-112   -32    
160    -272   
48     64     
192    -48    
256    16     
176    16     
48     -32    
-112   32     
0      48     
-336   -48    
160    -64    
112    112    
-192   -944   
-32    -240   
-16    352    
64     -256   
-64    -528   
-80    384    
-48    -800   
160    112    
320    80     
0      -80    
-48    16     
160    16     
-128   -352   
16     -112   
32     -80    
48     112    
-272   96     
-176   -752   
-112   192    
240    112    
-368   -144   
64     -192   
128    0      
224    48     
288    64     
16     -112   
368    208    
-144   16     
368    -224   
-672   -608   
-32    -512   
64     496    
256    -208   
96     -80    
144    64     
-144   80     
112    -16    
16     32     
80     32     
16     -48    
-368   64     
192    -144   
-960   0      
16     -192   
-512   -304   
176    -144   
-64    -208   
-80    -384   
0      -16    
32     -240   
96     48     
192    48     
128    128    
-592   -32    
16     -16    
-128   64     
288    48     
-320   16     
384    16     
-240   -32    
128    112    
-1120  240    
-32    64     
464    448    
112    0      
-368   -64    
-1120  0      
-2112  -80    
112    16     
272    -224   
112    -80    
32     32     
-48    -128   
-64    32     
-368   48     
-368   -32    
-80    -16    
208    160    
0      208    
-240   -96    
96     -112   
-144   -192   
-256   -32    
-416   -144   
-304   -112   
-176   16     
-208   16     
-32    32     
160    -80    
224    -16    
-480   16     
192    0      
384    224    
-368   352    
-128   -336   
48     -48    
-144   -48    
-192   128    
-96    -48    
32     16     
-144   64     
-80    64     
0      -192   
-576   -144   
-48    144    
0      -32    
112    176    
-352   -80    
0      32     
-224   -240   
-336   -64    
48     96     
-16    48     
-64    -80    
80     48     
-176   -16    
-512   -112   
32     -32    
-192   144    
144    32     
-160   -352   
48     -176   
-64    -48    
-16    192    
64     -48    
-112   16     
0      -48    
-224   -16    
48     -16    
-208   -48    
-112   16     
-112   176    
208    112    
-656   -160   
-48    48     
-112   -80    
96     -16    
-48    -64    
64     0      
96     16     
-128   -160   
-32    -160   
288    160    
-240   96     
144    16     
-16    -208   
-48    -32    
64     0      
-128   144    
256    16     
-1280  -144   
160    32     
48     48     
-160   80     
16     64     
-144   -32    
-112   -512   
32     -160   
96     -48    
-64    64     
240    112    
-368   0      
-64    96     
-144   416    
160    64     
-32    -144   
64     -272   
112    -176   
48     400    
-128   48     
-160   -288   
240    -176   
0      224    
144    -80    
208    272    
-80    176    
-176   -224   
0      496    
160    672    
-112   -480   
-896   112    
48     -16    
32     -16    
-144   48     
288    -96    
176    128    
-112   -512   
-128   96     
-80    320    
-32    -48    
-48    -128   
288    -272   
176    -80    
-128   48     
64     48     
-272   -96    
224    0      
96     80     
-64    0      
-64    -32    
-16    80     
-112   96     
160    32     
320    -32    
-336   -160   
-48    -48    
-224   -32    
-208   96     
-112   -32    
384    96     
-112   -64    
96     -16    
288    112    
0      80     
-208   -64    
-64    -32    
-240   176    
272    96     
16     32     
-224   -16    
-112   -16    
-128   -48    
176    16     
-272   112    
368    96     
-144   -32    
-368   176    
176    224    
-16    0      
-160   -176   
320    32     
160    112    
128    -32    
64     -96    
-64    32     
256    144    
128    48     
80     32     
-32    80     
-176   128    
160    48     
-32    -32    
-144   32     
-112   32     
64     80     
-112   112    
288    -64    
-176   -80    
112    224    
-528   -16    
144    48     
-224   -64    
400    448    
-160   16     
304    -160   
32     160    
-240   -48    
0      -64    
80     96     
224    256    
-64    0      
-464   -256   
240    -32    
144    176    
-400   -32    
560    192    
-416   32     
-176   -192   
-160   -144   
48     176    
-224   -32    
672    336    
-176   208    
-320   0      
272    -32    
-352   -64    
368    48     
32     0      
32     48     
-32    -64    
784    272    
-144   80     
192    16     
-16    80     
-32    192    
-176   -48    
-448   -208   
368    -80    
256    144    
-192   -96    
240    -160   
32     160    
-304   128    
224    0      
-128   48     
112    112    
0      -32    
32     112    
160    16     
112    -528   
-144   32     
48     -128   
-96    0      
224    256    
16     80     
-176   48     
48     32     
-48    -80    
160    48     
48     64     
16     96     
-80    -32    
0      -256   
256    96     
64     -352   
-48    -96    
64     0      
128    80     
-32    80     
80     32     
80     80     
-176   208    
160    192    
80     48     
-32    32     
48     96     
80     128    
208    -32    
-224   16     
144    -176   
48     144    
176    -432   
-288   -48    
16     -240   
192    -16    
16     -160   
0      32     
48     128    
32     -16    
160    -32    
80     192    
112    32     
-304   -400   
160    -160   
80     32     
-32    240    
144    -1104  
0      112    
-32    -160   
-32    128    
16     32     
176    -272   
-32    48     
256    32     
-48    112    
112    176    
0      112    
-224   -16    
112    -32    
144    -16    
32     304    
16     -928   
128    64     
256    288    
16     -112   
96     192    
160    -32    
-144   16     
96     656    
0      -400   
-48    32     
32     128    
240    0      
32     -128   
32     -48    
128    432    
128    -544   
0      208    
96     -112   
176    0      
-16    64     
192    144    
112    16     
80     144    
16     192    
48     -816   
192    352    
-16    352    
64     -64    
80     -496   
0      16     
64     48     
-80    80     
32     -256   
96     48     
-16    112    
-96    -320   
-112   -192   
96     -224   
-16    192    
240    16     
112    272    
0      -16    
96     -352   
240    16     
608    96     
96     0      
48     16     
-112   -576   
176    144    
-112   -32    
16     -80    
32     -16    
-128   -128   
384    -1264  
288    352    
-96    160    
320    240    
-224   192    
32     32     
176    128    
80     16     
352    -96    
160    -16    
128    80     
-336   128    
224    -112   
128    32     
560    -32    
16     16     
160    -80    
32     -272   
16     -16    
96     -864   
48     -32    
-96    112    
64     -64    
128    -176   
-48    16     
144    -208   
-16    128    
48     -96    
160    -144   
-1296  -240   
320    -464   
48     -320   
160    144    
128    -80    
-160   64     
32     -64    
176    400    
32     160    
32     -208   
-144   144    
48     -128   
64     64     
464    192    
-208   384    
-240   336    
32     176    
160    64     
16     16     
128    144    
160    -192   
48     -16    
336    -432   
-48    -64    
272    96     
-16    304    
32     48     
496    128    
-112   80     
272    -48    
-176   -112   
16     -80    
-1792  -64    
0      -192   
528    304    
-304   256    
-48    320    
-16    -208   
-320   -80    
224    -176   
528    80     
16     64     
-240   -32    
-144   -80    
32     -16    
-304   176    
-112   144    
-432   -192   
-224   -96    
240    -64    
-224   224    
-176   80     
432    -48    
-128   80     
240    -304   
32     32     
352    64     
-288   -80    
-48    -192   
32     32     
128    288    
-80    224    
-96    64     
176    -128   
-960   32     
272    -16    
-80    0      
208    -64    
32     32     
64     -672   
64     -96    
-48    32     
416    256    
-496   -16    
48     32     
-384   80     
288    -80    
-80    -160   
-48    -112   
-1408  -112   
272    -288   
-80    -16    
112    -224   
-112   48     
176    -400   
208    112    
-416   16     
160    112    
-208   -80    
96     48     
-192   208    
-128   -32    
176    -176   
176    -96    
-32    80     
80     -160   
64     176    
592    240    
-320   560    
80     192    
48     -272   
-32    224    
48     176    
-176   464    
144    -112   
-240   -96    
128    224    
64     -176   
128    96     
-16    128    
-64    -112   
-96    16     
240    -144   
-80    32     
-112   -64    
-144   144    
112    -128   
-864   272    
-368   -48    
80     -144   
-80    -144   
-64    -64    
0      160    
96     -48    
-416   -16    
-224   -192   
16     -128   
-432   -176   
-32    64     
-80    48     
-240   0      
64     368    
-1104  208    
0      112    
-128   -144   
-80    -64    
192    -16    
-112   -96    
-144   -224   
224    -240   
-352   -144   
-48    -32    
-48    -96    
-224   96     
-160   16     
-272   -144   
-176   0      
-400   0      
272    -80    
192    0      
-176   -96    
464    -64    
-208   48     
-176   -64    
-80    48     
32     -32    
144    -32    
32     -176   
208    624    
-592   -16    
-64    -48    
64     16     
-32    48     
-80    -64    
16     -80    
-112   48     
176    16     
-128   0      
208    -16    
-240   96     
-416   -32    
-208   176    
272    48     
576    240    
-640   80     
-32    0      
-32    -32    
-128   -16    
240    0      
-144   128    
-112   80     
-48    0      
256    64     
-160   -32    
-144   48     
-208   -96    
-32    -80    
448    32     
-32    128    
-96    48     
-208   32     
-96    32     
-288   0      
352    128    
-112   16     
80     112    
-400   -32    
32     64     
-480   -48    
32     48     
336    -64    
-336   0      
48     80     
-608   -48    
176    32     
-80    -16    
-128   -256   
320    -240   
80     144    
-80    0      
-32    -16    
-320   -176   
464    -64    
-656   48     
16     48     
112    160    
-480   -16    
-320   -112   
240    -32    
-368   -272   
320    160    
-112   160    
-224   96     
-64    -112   
160    32     
-272   32     
48     -64    
64     64     
-432   0      
464    320    
-480   -64    
-128   -144   
448    48     
-224   -80    
272    80     
304    208    
176    112    
-240   96     
-352   112    
80     -64    
-256   32     
-240   16     
192    16     
-560   -16    
-16    -96    
176    -144   
-416   0      
64     240    
-32    0      
0      -16    
16     144    
-80    48     
-16    112    
80     112    
0      32     
-64    96     
-224   -80    
304    176    
-496   96     
-32    96     
-48    -112   
144    176    
0      160    
-16    -32    
256    288    
-48    48     
240    -224   
64     480    
32     -64    
256    32     
16     112    
-288   -64    
144    -16    
-64    -64    
352    224    
-112   -240   
288    192    
-48    0      
-32    -48    
-16    208    
-288   -1200  
112    768    
-32    -416   
-208   48     
0      352    
128    -32    
112    112    
-96    -160   
-48    128    
-160   448    
-112   -224   
-48    -240   
80     -48    
608    400    
-256   -32    
-48    -208   
64     -368   
-224   -800   
-64    -144   
-320   -128   
128    240    
-16    -192   
176    -128   
32     -48    
128    -16    
-64    -32    
112    -32    
16     64     
-208   32     
0      16     
48     208    
-32    -16    
112    -176   
32     80     
-16    0      
48     -96    
80     -176   
16     0      
96     112    
144    128    
128    160    
288    368    
-96    240    
-48    80     
224    -80    
-192   112    
80     96     
32     -48    
32     -192   
224    592    
48     192    
112    -96    
16     112    
-32    16     
96     160    
-32    16     
176    304    
-96    64     
-48    80     
-80    -192   
160    0      
176    128    
-96    64     
48     48     
0      -64    
-80    0      
16     16     
160    -640   
-64    -128   
256    -96    
-48    32     
144    80     
112    48     
-64    -16    
64     -112   
-64    0      
-16    128    
64     288    
-192   0      
-288   80     
288    -128   
128    48     
80     -96    
16     -64    
224    128    
-16    -288   
128    32     
16     192    
96     176    
-288   32     
-208   -128   
416    48     
208    160    
-416   64     
96     160    
16     176    
16     112    
304    -80    
256    64     
32     -80    
0      32     
256    208    
-144   80     
64     -288   
128    0      
-64    32     
176    208    
48     144    
-160   -32    
208    384    
-160   96     
32     48     
48     -192   
112    -64    
144    -896   
0      80     
144    144    
0      -128   
-144   -48    
400    -336   
112    320    
64     128    
0      0      
-176   16     
48     -272   
144    112    
-160   224    
-48    240    
176    256    
-80    -128   
112    -64    
64     144    
224    192    
368    -192   
-144   -256   
-144   -192   
-400   32     
192    -64    
176    -32    
-176   -480   
-368   -368   
-192   -112   
-160   -96    
-64    224    
112    80     
336    416    
-288   -16    
-16    32     
576    48     
-80    208    
-96    -64    
144    144    
368    64     
144    -16    
176    400    
-160   -64    
400    -208   
208    -224   
-16    -112   
96     -288   
-448   -208   
656    -400   
-112   144    
480    544    
0      336    
32     144    
-80    -448   
-32    16     
-64    -208   
-16    -96    
-96    -112   
224    -160   
176    32     
240    -16    
-176   -112   
560    -224   
-304   -240   
496    16     
0      -48    
-304   -768   
-16    -640   
-128   -176   
240    -816   
496    320    
-288   304    
-80    -352   
176    208    
144    -176   
464    208    
-32    -96    
-144   -1184  
224    624    
192    -192   
-160   -176   
352    -224   
160    384    
-160   256    
64     -576   
-112   -272   
432    -896   
0      48     
64     -224   
80     -176   
144    128    
336    -192   
64     112    
-16    -16    
-288   -464   
-32    496    
240    -32    
80     32     
-1024  -272   
32     0      
320    0      
-64    -352   
96     80     
-16    80     
-16    208    
112    -32    
-48    -352   
112    256    
0      160    
272    -64    
160    48     
-560   -64    
16     -32    
-784   -48    
-80    -96    
16     -32    
32     208    
112    -16    
128    -224   
128    -128   
112    -960   
-16    16     
80     -144   
-112   -48    
160    -160   
144    -112   
-96    -80    
48     144    
-256   128    
-64    0      
32     64     
96     -80    
208    -32    
144    -96    
96     272    
-32    -272   
16     -208   
48     -96    
-144   144    
32     -96    
176    -80    
80     112    
-48    48     
112    -32    
176    -144   
-1200  32     
336    272    
128    -32    
16     -144   
16     32     
-48    -64    
-80    32     
48     -64    
80     64     
-32    64     
80     -48    
192    -32    
288    -16    
-208   -64    
32     -32    
-272   16     
-176   -240   
32     -144   
-400   -384   
-416   -208   
160    -384   
-80    96     
256    -688   
320    64     
80     16     
-240   32     
-560   -256   
352    -32    
-240   -16    
224    32     
192    -16    
-112   -16    
32     -16    
-16    -176   
144    96     
256    -112   
192    64     
64     -656   
-240   -96    
-16    0      
-192   -112   
32     -160   
304    16     
-160   80     
80     -144   
48     0      
-16    32     
-176   48     
-16    0      
48     80     
320    -16    
-384   -96    
224    -368   
432    160    
-480   -48    
32     -64    
-64    0      
112    0      
-64    16     
64     32     
-304   -144   
448    32     
-352   80     
256    -112   
160    112    
-1104  -80    
-192   -448   
48     -80    
-144   208    
-160   -96    
176    48     
80     336    
-336   48     
352    -32    
-224   -160   
160    -32    
-320   80     
304    16     
-688   -176   
-128   -144   
240    -192   
-592   16     
-16    -128   
-192   -64    
-64    -48    
-368   -16    
-720   -336   
-160   -144   
80     480    
-256   288    
-496   -272   
-112   -144   
16     176    
-256   80     
608    544    
-480   80     
288    -16    
-208   -32    
-160   -128   
-256   0      
-112   -16    
-16    32     
-240   48     
-192   48     
304    -336   
-128   96     
-32    -160   
128    16     
-208   -32    
32     -112   
160    320    
-80    -80    
-80    48     
-240   -80    
0      0      
-240   -64    
288    -304   
-80    592    
-256   -256   
-672   352    
208    -80    
-368   -384   
-80    496    
-224   -1104  
96     400    
48     32     
64     464    
-384   -96    
-304   -640   
16     -448   
224    -176   
256    352    
-400   112    
352    432    
-768   48     
-48    -16    
-80    -128   
80     32     
16     -128   
-128   0      
-128   -48    
128    32     
-192   0      
128    -32    
-64    -16    
-32    -112   
-160   32     
-48    -48    
128    64     
-288   80     
80     144    
-624   -304   
96     -64    
-64    -112   
-112   -96    
-80    32     
-48    48     
320    48     
-224   0      
80     -16    
-240   64     
-96    16     
-80    -16    
-32    16     
-32    112    
112    80     
-512   -192   
192    -144   
32     48     
-16    80     
-48    -192   
144    16     
224    208    
-384   128    
-48    -48    
64     96     
16     64     
64     32     
64     32     
-256   -112   
32     -16    
-640   -96    
-192   16     
16     0      
-48    16     
96     160    
16     80     
-80    -32    
-224   -112   
32     48     
-272   16     
112    -80    
-32    32     
192    144    
-272   -32    
112    32     
-656   -64    
-32    32     
80     32     
144    16     
288    16     
128    0      
64     32     
-128   144    
64     32     
-128   -32    
112    -48    
-304   -160   
64     96     
-176   0      
240    0      
128    -64    
-16    48     
-16    128    
-32    48     
192    -32    
-80    16     
176    96     
-144   80     
-224   -208   
-160   -16    
128    96     
-208   160    
256    208    
-304   -144   
224    80     
16     -64    
96     16     
-80    16     
128    -80    
32     -112   
-256   48     
-240   -80    
80     -32    
0      128    
48     -80    
176    96     
192    64     
-192   160    
-288   32     
-240   -32    
64     -32    
64     0      
-80    32     
224    -32    
16     -80    
128    -96    
16     320    
48     112    
96     256    
128    416    
32     64     
-80    32     
48     0      
112    112    
144    32     
-32    -48    
32     -80    
176    -160   
-384   -80    
64     -160   
0      -80    
96     -128   
32     32     
208    144    
112    -608   
-496   -1488  
-112   -400   
0      176    
128    -656   
112    -176   
32     352    
0      720    
48     656    
608    -240   
48     -704   
-272   -352   
64     -16    
-144   736    
-256   -128   
-224   -480   
-32    752    
112    -64    
240    -592   
32     208    
176    416    
-32    -192   
80     -80    
384    176    
240    -784   
464    112    
384    928    
-144   48     
960    720    
-400   1232   
-672   -848   
288    -176   
144    400    
544    -464   
208    16     
-64    -224   
32     768    
-192   -80    
16     -432   
0      448    
144    -32    
48     240    
224    -80    
-144   -128   
-48    224    
80     -288   
-32    256    
64     32     
16     -320   
144    96     
80     -1168  
-256   -208   
96     16     
208    592    
112    48     
96     -16    
-384   128    
240    64     
-64    96     
64     48     
48     -64    
240    112    
-96    96     
256    -16    
80     48     
16     80     
64     112    
64     -80    
160    -48    
112    16     
-160   -144   
96     -112   
128    80     
48     0      
224    80     
-160   112    
176    -32    
0      64     
80     -32    
112    16     
112    -368   
-96    -352   
64     112    
208    352    
-192   176    
160    -16    
-80    16     
48     -64    
32     32     
160    16     
48     112    
-96    -256   
80     96     
-80    -112   
-144   -16    
128    -192   
-32    0      
48     -64    
160    48     
32     -48    
160    -16    
0      32     
160    96     
48     -64    
48     -112   
96     32     
16     -144   
128    -16    
48     -32    
-96    -208   
80     -288   
112    144    
48     -224   
96     112    
-64    0      
224    16     
112    32     
48     64     
-32    -80    
128    -112   
96     144    
48     -320   
64     80     
48     -48    
-240   -480   
64     -112   
48     240    
-64    0      
112    32     
176    176    
-192   96     
192    32     
144    48     
368    256    
192    -336   
128    -80    
-128   -160   
-208   16     
176    -64    
80     128    
160    -96    
96     96     
48     -240   
-144   -32    
144    -48    
128    96     
0      16     
16     -368   
80     -640   
256    224    
-496   -384   
816    -192   
384    16     
448    384    
-16    288    
-64    -192   
-240   -96    
64     -288   
48     -704   
-368   -80    
128    -160   
64     -32    
496    80     
64     -496   
144    80     
-112   -192   
-160   -32    
-32    -800   
352    -80    
128    -32    
160    -144   
304    80     
-64    32     
48     -256   
208    48     
-208   -48    
96     48     
-464   -32    
192    -32    
256    -48    
-64    -144   
352    -16    
-128   -128   
176    -32    
64     -768   
112    16     
144    48     
-48    0      
48     -176   
-144   96     
112    -48    
32     16     
-272   80     
496    352    
-1744  32     
176    -64    
-48    0      
-32    -48    
192    -16    
80     -240   
160    16     
-192   -736   
192    128    
-448   -208   
320    160    
-368   96     
192    64     
-320   128    
192    0      
-128   112    
432    336    
224    320    
-416   -48    
64     -80    
208    -240   
-320   -112   
64     -256   
-128   -112   
-96    0      
-240   304    
48     0      
16     -256   
96     -16    
288    0      
-272   -112   
32     208    
-784   -1424  
272    -1040  
-256   880    
-752   -16    
-176   -368   
64     -32    
1184   368    
-416   368    
304    -64    
-32    -480   
-144   400    
48     64     
16     -224   
-592   -224   
240    -176   
-352   96     
48     -400   
-128   64     
128    -112   
80     -288   
128    -272   
-16    32     
592    304    
-224   336    
-112   400    
16     64     
-48    160    
320    -16    
-144   80     
-192   176    
-800   -128   
0      -16    
32     144    
192    -32    
-16    0      
64     -112   
-80    96     
-80    -304   
224    16     
-16    -48    
224    48     
-448   80     
-80    48     
-432   -96    
64     -16    
-64    48     
144    64     
336    32     
-64    -176   
112    16     
-96    -176   
-48    0      
48     -112   
-96    112    
-208   0      
-112   16     
-352   -16    
160    -64    
-64    64     
48     64     
-208   64     
112    64     
240    0      
32     -128   
128    64     
288    -112   
112    208    
-192   32     
-1984  -80    
-80    -32    
-32    -32    
32     16     
96     112    
-96    48     
64     -64    
-384   0      
-1072  -160   
432    112    
-272   32     
352    80     
-384   -80    
-432   32     
-272   144    
-720   32     
-48    -16    
-224   -64    
16     -16    
-288   144    
64     16     
-64    -32    
-352   -16    
-368   -160   
400    160    
-368   144    
128    -112   
-64    -160   
-384   -384   
32     -112   
-240   128    
-16    96     
-256   160    
48     144    
48     144    
-192   128    
-48    64     
96     -48    
160    -80    
320    64     
-208   -176   
160    32     
-224   -112   
-16    -128   
80     -48    
48     64     
64     96     
-224   -16    
-272   16     
-160   -80    
48     48     
160    16     
-16    48     
-32    -80    
272    112    
-448   -128   
192    80     
160    272    
-224   -144   
-192   -128   
-368   -176   
-128   96     
-256   80     
-32    -80    
-256   -624   
336    -576   
-1168  -16    
352    224    
-160   -288   
-128   -16    
-16    0      
-48    208    
112    144    
80     -224   
48     160    
-224   336    
-48    32     
-208   304    
-64    208    
144    320    
-176   656    
-304   384    
96     48     
96     160    
48     -64    
-48    -48    
16     240    
-144   -144   
-48    32     
128    96     
128    -144   
208    -96    
128    240    
-176   -32    
-176   -96    
-16    -32    
-288   -16    
192    544    
-912   -736   
16     64     
256    112    
-160   80     
0      -176   
176    240    
96     -224   
192    -48    
-432   48     
208    80     
-464   -112   
672    848    
-416   -16    
0      -800   
224    224    
-1072  112    
-304   -224   
-192   -128   
480    400    
-16    400    
-496   -160   
48     -112   
80     288    
48     80     
64     -32    
288    112    
-400   0      
176    0      
96     64     
784    32     
352    -208   
352    96     
112    112    
-272   288    
-96    -304   
-176   -544   
-304   80     
-64    128    
-208   16     
368    16     
16     -16    
96     128    
48     16     
-464   -64    
-48    32     
416    208    
-128   64     
96     64     
32     0      
-80    0      
0      -32    
80     -64    
-256   48     
64     32     
0      -48    
208    128    
-304   224    
256    160    
32     -16    
288    160    
-32    32     
-96    96     
32     32     
-64    48     
112    32     
-32    64     
96     32     
-128   -128   
224    32     
-112   64     
224    64     
16     -16    
0      80     
-144   48     
144    48     
32     -96    
-112   -16    
32     96     
-16    48     
-48    -80    
320    -32    
96     80     
-176   80     
208    80     
-96    -48    
-208   -80    
16     -48    
144    128    
192    176    
96     64     
0      -32    
-96    0      
64     64     
144    112    
80     -48    
192    96     
-112   -80    
-176   -80    
64     96     
0      0      
112    128    
-144   16     
128    -112   
64     48     
16     64     
112    48     
144    48     
-16    80     
96     48     
16     80     
32     48     
0      16     
0      -48    
160    48     
-144   -32    
112    -96    
32     -16    
32     32     
208    -32    
80     -48    
112    -16    
112    80     
192    32     
16     0      
0      0      
96     96     
112    48     
64     16     
80     64     
-112   -16    
400    -64    
-304   64     
208    32     
144    0      
0      48     
0      -16    
48     32     
16     -32    
-128   16     
-64    160    
-32    -32    
-16    16     
-48    -16    
256    64     
-144   -16    
80     144    
-64    32     
160    -80    
48     32     
48     80     
64     0      
-32    48     
144    64     
128    32     
64     16     
176    112    
160    304    
-64    112    
240    128    
-144   16     
80     -48    
224    48     
160    -144   
208    64     
128    -752   
416    240    
-160   224    
-432   -48    
-192   -112   
624    -144   
416    -176   
496    176    
144    176    
16     208    
-496   0      
-80    48     
224    32     
128    -224   
192    32     
336    -144   
176    112    
32     48     
-192   -112   
-16    -160   
64     -64    
176    -160   
320    48     
-16    112    
0      96     
96     -240   
80     -192   
160    208    
-144   -32    
80     80     
112    -64    
48     -32    
80     -272   
176    48     
96     80     
208    192    
-112   0      
-80    256    
-32    -704   
-240   320    
176    176    
-32    -224   
496    112    
48     -32    
560    544    
-112   -784   
0      -160   
176    96     
80     -112   
256    256    
96     96     
-32    -144   
304    256    
-144   64     
592    672    
-560   -576   
-336   -368   
32     496    
-128   240    
160    32     
640    176    
-352   480    
-128   -144   
192    592    
-16    416    
256    192    
-304   -128   
64     112    
-160   -48    
656    -240   
48     0      
96     176    
-32    272    
48     -512   
-240   -240   
32     32     
-32    144    
160    -272   
368    176    
-48    144    
160    240    
16     160    
240    -96    
-16    -624   
16     -240   
0      -1680  
208    -64    
32     128    
176    64     
96     16     
112    -192   
160    32     
32     16     
80     -544   
112    0      
16     -128   
64     16     
-496   -48    
208    -192   
0      -64    
224    48     
-64    -64    
160    -576   
-48    -144   
160    -48    
144    -48    
48     -128   
64     -32    
-64    48     
240    32     
144    -112   
144    48     
-704   -96    
144    -112   
-32    64     
-32    16     
16     -64    
96     -96    
48     -128   
32     -1232  
176    -128   
192    -16    
208    160    
96     48     
96     48     
32     -176   
160    -64    
-32    64     
96     -48    
-864   48     
16     304    
144    -128   
288    -240   
80     -16    
0      -224   
128    48     
64     0      
96     48     
96     -80    
-64    64     
-16    -64    
64     0      
-48    32     
32     -32    
-736   -80    
112    -32    
-32    0      
160    -48    
144    -80    
256    -16    
-432   32     
208    -1536  
48     80     
128    0      
16     0      
-96    -80    
96     32     
-32    128    
-32    336    
-1120  -112   
-48    -16    
288    208    
-160   224    
-192   -256   
160    -592   
192    -48    
128    -640   
32     112    
176    48     
80     176    
-336   32     
-48    -192   
-48    16     
32     80     
-96    144    
224    16     
-304   16     
64     -64    
-160   256    
320    160    
0      208    
-112   -304   
176    -16    
224    192    
208    -16    
-272   272    
144    304    
-160   16     
64     -192   
-128   192    
288    208    
-128   -720   
-112   -864   
64     -320   
16     304    
144    -96    
16     -432   
128    160    
-272   -32    
336    240    
-304   336    
224    -112   
-304   272    
-16    -112   
-112   96     
16     -96    
-608   288    
-32    -240   
-112   -208   
128    192    
0      -128   
48     -48    
176    176    
-432   0      
-208   -544   
96     320    
240    416    
352    128    
-32    192    
-128   64     
160    -128   
-416   -80    
112    0      
-112   -96    
224    -64    
16     128    
-208   -80    
240    -48    
288    208    
-496   64     
-144   0      
-128   -48    
-176   -48    
576    -144   
-48    -208   
448    80     
-16    160    
-1792  64     
-176   -32    
-400   -224   
112    64     
400    0      
-240   -96    
192    -80    
-672   -112   
-32    -48    
-1072  -48    
32     -192   
480    -16    
48     112    
-576   -96    
128    16     
-256   -192   
592    320    
-592   32     
592    144    
-448   96     
144    48     
-16    96     
-880   -64    
-624   -640   
208    -208   
128    336    
-1568  16     
-48    -80    
160    -144   
-16    96     
208    288    
-656   -176   
304    -112   
592    176    
-32    224    
-304   -144   
16     -16    
288    80     
-288   -16    
-80    0      
432    160    
-656   48     
-272   32     
-320   32     
32     -16    
-32    -32    
192    144    
-160   -112   
80     16     
96     0      
-32    48     
48     64     
-128   160    
160    160    
-160   -16    
48     -16    
-32    32     
160    80     
-448   0      
-64    64     
0      0      
48     32     
80     -208   
-144   -160   
-96    96     
-176   128    
176    0      
-160   -64    
-144   16     
48     32     
48     48     
16     -16    
-16    -16    
-784   32     
0      32     
-128   -32    
112    48     
64     96     
-144   -32    
192    64     
-128   -80    
-224   0      
-144   -112   
16     32     
-16    32     
-96    32     
-224   -128   
208    0      
-768   -32    
80     80     
0      -80    
64     80     
48     -16    
128    288    
-416   64     
-160   -80    
128    224    
-64    160    
-80    32     
-16    0      
208    32     
-288   16     
48     -160   
-144   -112   
80     0      
-48    128    
128    48     
112    192    
-96    144    
-64    0      
0      0      
32     -48    
-96    48     
-64    144    
-192   -112   
112    16     
0      224    
32     224    
-160   -32    
176    -48    
80     -32    
48     144    
-160   64     
-32    -16    
32     -64    
96     160    
128    176    
-528   -96    
-192   -112   
-176   80     
80     32     
-16    16     
336    -96    
-64    -416   
192    -304   
64     192    
336    384    
48     -240   
0      -224   
-16    -64    
-48    96     
16     48     
-64    -16    
64     80     
-80    80     
64     16     
144    560    
80     112    
-288   -336   
-32    -64    
160    96     
-96    -96    
96     48     
-128   96     
160    64     
-32    304    
-112   112    
-48    -80    
112    96     
-224   -16    
64     -64    
-304   80     
624    480    
-96    176    
-576   -384   
160    -512   
176    192    
464    272    
-560   -560   
480    -672   
-304   -224   
464    400    
-224   16     
-192   240    
-160   16     
-64    -512   
-208   80     
160    176    
64     64     
240    160    
-16    80     
-16    16     
0      48     
0      -32    
-48    32     
-208   -32    
608    544    
-192   -256   
32     16     
-112   64     
80     -64    
-48    80     
16     208    
48     -48    
-368   -16    
320    -48    
48     176    
-80    32     
48     288    
-160   160    
-224   -160   
368    -208   
0      -256   
-32    -352   
288    624    
-448   32     
-16    -128   
32     256    
144    80     
304    288    
-144   -16    
112    96     
272    -64    
-112   80     
208    112    
16     -16    
96     112    
-352   0      
-128   64     
-288   -48    
112    -16    
240    64     
272    -480   
432    -80    
-192   16     
-32    256    
-384   0      
272    48     
432    176    
-272   32     
576    160    
-128   208    
352    176    
288    192    
-80    -80    
-16    -240   
-16    32     
-80    -80    
96     144    
288    128    
-224   -64    
480    -336   
-176   240    
16     256    
160    0      
-96    144    
-64    384    
224    -16    
288    -32    
-176   64     
-112   -160   
384    -352   
-128   -112   
208    176    
48     -1344  
-48    112    
-48    96     
496    192    
-160   128    
64     -16    
-160   -352   
496    240    
-288   496    
-208   96     
144    -272   
384    -96    
32     160    
176    -128   
304    -64    
-160   -864   
-32    -96    
128    368    
288    48     
112    -16    
-80    80     
208    32     
304    48     
192    64     
96     112    
384    192    
-192   -16    
96     -32    
112    -16    
-80    48     
176    -208   
224    80     
128    -176   
32     16     
32     32     
-160   224    
112    112    
256    -16    
-112   224    
144    -48    
-48    -112   
160    -48    
144    128    
112    -464   
96     0      
368    48     
-128   240    
224    -464   
-80    176    
-48    16     
112    -32    
176    64     
176    64     
-144   0      
96     -96    
48     48     
48     -160   
112    -64    
64     -112   
224    32     
64     80     
80     112    
160    -16    
-112   -192   
-48    -16    
80     128    
64     16     
128    128    
128    -96    
288    224    
176    272    
192    448    
496    960    
-176   256    
-144   160    
80     -368   
-32    -304   
80     -96    
240    352    
176    -80    
-96    -1056  
-16    624    
-368   -80    
-16    -1296  
128    96     
304    176    
-16    -272   
48     240    
-112   -96    
96     80     
240    64     
16     -144   
160    720    
-80    -640   
-64    -160   
-64    32     
-64    0      
-1056  112    
96     96     
176    32     
176    -336   
64     -144   
64     160    
-224   48     
-80    16     
-16    -64    
320    -336   
64     -48    
512    -240   
-336   -64    
-608   -96    
64     -32    
-32    128    
96     -80    
0      -16    
336    176    
-128   112    
-64    -288   
96     -80    
176    16     
240    16     
-64    -64    
208    64     
192    64     
240    352    
-304   160    
-16    -48    
-240   -64    
80     0      
48     16     
0      -80    
-144   -192   
544    -80    
-272   -48    
-176   -352   
96     16     
-16    -80    
16     -16    
192    -16    
-96    64     
-112   -176   
240    -192   
-224   -32    
112    -48    
-480   64     
160    16     
-128   -48    
32     -112   
224    -16    
176    0      
-160   64     
0      -192   
288    112    
0      -64    
304    192    
-48    48     
64     -128   
-144   0      
64     176    
-112   -32    
528    208    
-592   -32    
208    -128   
288    256    
64     0      
448    -16    
64     -576   
-16    160    
-496   -128   
-80    -208   
352    144    
-256   -32    
-112   16     
64     -64    
-288   -32    
-544   -624   
112    -240   
224    224    
-592   32     
128    -272   
-352   -160   
240    -144   
416    192    
-432   -32    
128    32     
112    144    
-208   -80    
-320   32     
0      -48    
-640   -48    
96     48     
-80    32     
144    48     
112    32     
112    -144   
-32    -48    
112    -368   
96     32     
-112   208    
320    16     
-208   32     
-160   -32    
-96    -16    
192    64     
-16    96     
32     16     
112    64     
0      -80    
80     208    
112    64     
48     -96    
192    -192   
16     -48    
-336   -32    
32     16     
-384   -32    
224    32     
-48    32     
64     -32    
-288   -32    
80     -16    
-1104  -112   
96     -80    
64     32     
-32    -176   
144    64     
-368   32     
-864   192    
-80    -16    
176    48     
-128   -176   
128    -176   
32     112    
144    16     
256    -64    
-32    -208   
-64    -192   
-1744  -96    
-16    160    
-416   -224   
256    32     
128    144    
-640   48     
16     -16    
-80    0      
16     64     
-448   272    
128    112    
-64    -16    
-16    -160   
-96    416    
16     64     
-64    -320   
64     352    
-112   -240   
144    -48    
-16    752    
-64    -112   
-96    32     
-256   -208   
48     272    
-192   -192   
32     48     
48     -128   
16     -16    
-64    -48    
-144   32     
-352   16     
224    96     
-384   -112   
-80    -432   
464    896    
-128   592    
-432   -400   
-48    64     
-64    0      
-32    144    
272    464    
-288   -560   
272    256    
-96    -80    
48     0      
-384   -144   
144    -496   
176    848    
96     112    
32     -256   
-16    -192   
16     288    
-288   -96    
-112   -96    
96     32     
48     -48    
-704   240    
-48    16     
64     -128   
64     224    
16     400    
272    -320   
0      -112   
-32    368    
-64    -48    
-112   -128   
-32    -144   
32     80     
-80    160    
112    80     
0      144    
-16    48     
-112   16     
-160   -96    
128    -480   
80     -80    
192    368    
0      416    
-16    -32    
-96    -144   
-144   208    
96     -160   
-112   -32    
-160   144    
0      48     
-48    0      
-160   -272   
96     -160   
-368   -240   
-80    -208   
80     -224   
-128   -96    
-48    80     
-80    320    
32     32     
-32    16     
160    64     
48     96     
-48    48     
16     112    
176    256    
-160   -48    
128    -32    
-368   -112   
-48    80     
-48    -96    
64     32     
-16    -16    
-96    -96    
352    0      
-448   160    
-208   80     
208    -224   
160    240    
-368   -16    
-80    -16    
-288   -224   
144    80     
-672   -112   
16     -96    
48     208    
-368   -112   
256    288    
-48    112    
288    160    
160    0      
-96    192    
-96    -64    
0      -160   
-96    416    
192    592    
-80    -16    
320    -192   
-80    0      
-224   -96    
-80    48     
-240   -48    
-160   0      
-160   32     
176    192    
-16    80     
576    192    
-224   0      
256    0      
16     0      
-128   64     
-128   32     
16     -32    
160    -128   
0      16     
-16    32     
48     -112   
0      48     
48     96     
0      -16    
48     48     
16     64     
-256   -48    
256    -96    
16     224    
-224   96     
0      -48    
112    112    
32     32     
48     80     
48     -128   
0      -64    
16     96     
368    336    
64     656    
-336   272    
128    -80    
-240   272    
48     -32    
-80    80     
96     -128   
-256   -160   
480    -80    
32     240    
-16    -96    
16     -160   
144    -112   
224    -48    
48     160    
32     80     
-32    16     
192    48     
464    336    
-208   368    
-240   128    
-80    192    
-144   -64    
-80    -160   
368    -128   
112    208    
224    224    
-96    208    
-48    -32    
-400   -368   
-128   -272   
240    -80    
128    -80    
48     -112   
96     176    
-128   48     
0      304    
16     0      
80     -48    
48     160    
16     112    
176    -96    
-32    -304   
-16    -288   
80     -32    
80     -96    
96     -80    
64     304    
-96    448    
80     -272   
96     -224   
96     192    
144    32     
96     192    
-48    -272   
64     144    
-48    112    
48     32     
160    112    
64     -80    
224    240    
-160   16     
432    448    
-176   240    
-32    -384   
256    -112   
176    -32    
32     0      
-48    -208   
-112   -48    
256    -304   
240    48     
-240   -400   
96     -240   
-128   -112   
16     -96    
128    -176   
-160   0      
64     0      
80     128    
112    64     
128    -80    
64     80     
-48    -224   
-16    16     
80     144    
48     48     
64     -64    
288    -176   
208    -192   
80     96     
-192   80     
336    336    
-608   32     
0      -48    
320    32     
112    -32    
272    64     
112    -16    
208    48     
96     -608   
-160   -192   
288    -112   
-320   96     
304    48     
368    48     
432    160    
-144   80     
-112   0      
-192   -336   
272    -96    
0      80     
192    144    
0      -80    
-16    32     
48     -320   
-208   32     
384    -304   
16     0      
-32    64     
304    80     
-144   -16    
352    192    
-400   16     
-16    -176   
208    16     
160    16     
112    32     
64     -368   
192    64     
-48    -208   
96     128    
-208   -80    
464    208    
-240   32     
-144   -16    
112    32     
576    480    
-880   176    
592    -48    
-48    64     
256    -32    
368    80     
32     -304   
48     64     
-384   192    
16     -64    
240    192    
-320   -16    
736    112    
144    64     
464    336    
-432   -32    
-208   -176   
224    -112   
64     176    
96     -208   
400    160    
48     16     
16     32     
-112   -288   
208    -160   
688    176    
-464   64     
96     -160   
432    -464   
-80    128    
48     0      
-144   -320   
192    32     
-64    -112   
176    0      
112    48     
-128   48     
192    32     
480    0      
48     240    
-752   -112   
368    -80    
96     -16    
-128   -480   
208    -80    
-272   -32    
208    -512   
-16    64     
96     -144   
144    -16    
96     -144   
144    -64    
160    0      
-64    -16    
-32    -96    
-80    -64    
192    -80    
-96    144    
96     -32    
16     -128   
-1056  0      
80     64     
208    64     
-48    -320   
-128   -160   
272    -400   
-32    -96    
0      80     
80     -16    
16     32     
-48    -80    
-64    -256   
128    80     
-96    64     
-64    -416   
-80    560    
144    160    
-16    -224   
160    -160   
32     0      
320    368    
-240   -416   
0      240    
304    64     
192    -160   
192    192    
128    -160   
64     64     
64     256    
-80    0      
-80    224    
-240   -608   
-352   336    
80     -16    
592    400    
-256   -48    
-64    -208   
400    -256   
-64    0      
96     16     
-128   -96    
112    -256   
64     608    
128    -32    
16     -128   
-720   128    
176    -384   
-544   80     
-176   -768   
-64    80     
160    -48    
288    -240   
144    -96    
0      -400   
208    80     
0      64     
192    32     
48     48     
-112   -80    
-64    -48    
-176   160    
112    -16    
-16    -64    
160    16     
-1408  -48    
32     -352   
-16    -320   
128    -240   
128    160    
96     -48    
80     -16    
-224   -208   
-16    -112   
-96    -160   
224    -288   
-640   32     
464    -256   
-112   16     
32     -272   
-352   -352   
-144   -288   
-32    -160   
80     16     
-80    -144   
-16    -864   
48     -48    
-224   48     
128    32     
240    32     
80     -16    
-240   0      
0      -144   
192    96     
-160   64     
-368   -192   
256    -64    
96     160    
64     16     
176    272    
128    -192   
32     96     
-192   64     
224    128    
-240   -32    
272    -208   
-176   -80    
-32    48     
-208   16     
176    -48    
304    -48    
-16    80     
-48    -48    
-576   -256   
16     0      
64     16     
-1136  112    
48     64     
-768   -48    
-192   -144   
64     -16    
16     144    
64     -64    
224    96     
144    64     
-96    -48    
-176   -352   
64     32     
-48    32     
96     224    
-32    192    
-384   -32    
-64    144    
-112   16     
-176   -96    
-208   64     
-224   96     
-160   -32    
-240   -112   
-592   -80    
32     48     
208    480    
432    320    
-48    0      
-256   -192   
160    -336   
-80    -32    
-272   -96    
48     -64    
64     -480   
-128   -16    
224    80     
-976   192    
-192   -16    
-656   -272   
144    32     
176    -32    
880    384    
-32    176    
-32    384    
-416   288    
-288   48     
64     -160   
0      -112   
288    -80    
-176   16     
48     32     
-944   -32    
48     -48    
-320   -288   
224    -96    
208    112    
-688   -48    
96     -16    
-176   -144   
-304   -208   
-96    -48    
-48    16     
32     64     
144    112    
-448   176    
0      480    
-48    -16    
-16    0      
64     -128   
176    128    
-224   32     
80     16     
0      0      
224    64     
-272   -16    
-32    -224   
-32    176    
-240   0      
208    -192   
48     -32    
64     112    
-512   -96    
32     112    
-1104  0      
112    48     
352    208    
-176   160    
16     160    
48     80     
-16    240    
-64    32     
-160   48     
-64    -64    
160    64     
-16    144    
-48    320    
-448   -48    
-16    112    
-480   400    
32     384    
224    160    
80     64     
16     160    
32     16     
-176   -144   
-64    -224   
-112   16     
-128   -32    
-112   -208   
-432   -128   
128    -560   
-192   -128   
304    32     
-640   64     
32     0      
160    48     
336    208    
144    384    
32     256    
-96    -32    
-32    96     
160    -32    
64     16     
-64    320    
-176   -288   
144    320    
-144   80     
176    -608   
-80    496    
-256   -32    
0      -112   
-112   400    
80     48     
-128   -224   
64     -64    
224    112    
48     32     
-64    -16    
-32    32     
-128   -112   
32     64     
-160   32     
48     48     
80     144    
-32    16     
32     0      
144    48     
-176   -48    
-48    80     
128    544    
-64    80     
128    -16    
-208   16     
-48    48     
-112   -144   
192    0      
-256   -128   
352    128    
80     -240   
-80    48     
-192   -48    
-16    0      
-16    112    
-144   -80    
128    32     
192    112    
192    128    
-32    -96    
96     80     
-208   32     
32     32     
-48    16     
-128   48     
96     32     
144    32     
-96    -96    
128    -112   
304    80     
192    16     
16     32     
160    64     
176    96     
-64    16     
240    -16    
-304   -64    
256    256    
-16    16     
64     -144   
-48    -16    
48     144    
-256   -64    
64     -80    
48     96     
576    448    
-688   32     
208    -160   
160    80     
80     32     
240    -16    
368    272    
-528   64     
-240   -96    
320    112    
64     16     
192    16     
256    48     
64     0      
-32    -16    
160    80     
32     -16    
112    32     
96     128    
-112   0      
96     80     
-16    48     
48     16     
144    80     
240    64     
-272   -128   
96     -80    
128    176    
160    16     
144    64     
-48    0      
272    336    
-80    80     
272    -32    
-496   -128   
112    -96    
128    208    
-208   -528   
-464   -304   
592    160    
-160   160    
208    128    
-48    48     
-112   16     
240    80     
-160   0      
256    224    
-272   128    
-32    -80    
-208   -128   
-48    -64    
64     -208   
80     -192   
32     -32    
352    -688   
464    80     
-224   128    
512    208    
-272   80     
-448   -352   
144    -240   
496    368    
-256   -32    
128    -48    
512    128    
-16    64     
192    224    
-16    112    
336    144    
-352   -64    
160    32     
0      -128   
144    96     
192    -48    
32     -240   
-32    480    
80     160    
32     -112   
208    272    
-192   80     
48     -16    
352    496    
-144   -400   
144    -128   
-64    -784   
-144   320    
128    -384   
112    -96    
192    96     
48     -16    
80     0      
64     112    
-176   -144   
352    304    
-288   192    
224    -80    
-80    32     
64     112    
64     96     
272    -224   
112    16     
96     32     
-32    -80    
0      -528   
-160   400    
160    -208   
96     320    
912    832    
-432   288    
-192   -192   
-48    -336   
128    -128   
0      -288   
224    240    
-48    272    
48     400    
176    -160   
256    144    
-144   -256   
-48    -128   
224    -64    
128    0      
0      128    
0      48     
144    32     
-96    112    
144    240    
128    -144   
128    16     
64     -224   
192    48     
32     -112   
0      80     
192    32     
96     -16    
80     0      
48     64     
0      160    
192    128    
192    48     
-80    -384   
0      -64    
-80    -16    
144    -80    
160    -160   
128    16     
64     16     
96     16     
160    128    
96     112    
48     112    
112    -1168  
-16    -144   
384    160    
80     -384   
176    -144   
160    -1376  
-64    -32    
16     64     
-80    -96    
288    -160   
80     0      
96     -224   
16     -16    
128    -160   
128    -48    
32     16     
128    48     
0      -80    
96     -64    
176    176    
80     -800   
48     -16    
176    -96    
176    -16    
80     112    
-112   -384   
96     -496   
64     -32    
0      -176   
80     48     
-112   -48    
224    -64    
16     16     
96     -320   
144    -32    
-48    32     
-48    32     
112    -320   
224    -32    
176    224    
192    144    
256    160    
-16    0      
-112   176    
-112   32     
-80    48     
176    -48    
-96    -112   
128    240    
-80    160    
192    48     
80     -80    
288    272    
-288   144    
272    -992   
112    -96    
192    -128   
128    0      
32     0      
32     -160   
-176   -336   
16     -96    
-80    -32    
-32    -80    
160    -64    
176    -144   
0      16     
144    48     
-96    176    
16     -656   
-32    0      
288    -192   
-176   -16    
-64    0      
272    -64    
-112   -16    
-48    -336   
-192   -176   
-64    -112   
-2448  112    
656    48     
-240   -16    
-64    -272   
-48    -416   
-80    -208   
176    64     
96     -288   
288    160    
0      -224   
192    -48    
336    -64    
32     -240   
304    96     
176    -112   
-352   -96    
-80    -64    
-128   128    
-208   336    
-144   -80    
224    -416   
736    320    
-208   560    
-272   240    
-336   -160   
96     224    
-128   112    
-96    -144   
-352   -368   
320    -64    
208    32     
176    -240   
-1072  -48    
-80    -272   
-96    -144   
192    -224   
272    32     
160    -704   
-208   80     
192    -16    
16     48     
-224   64     
-176   -432   
-256   -176   
48     -32    
-96    192    
256    -256   
-144   32     
224    -240   
224    336    
-192   336    
-112   -368   
-208   336    
560    256    
-80    -496   
-240   96     
144    -16    
-32    256    
128    -80    
224    -16    
-240   240    
48     -96    
-176   -48    
416    -176   
-64    208    
-208   -176   
64     0      
-112   176    
-1680  -224   
16     160    
-272   -32    
-64    -80    
96     -304   
-240   160    
96     -272   
-160   208    
-144   -16    
208    -16    
-368   -176   
224    48     
-528   -32    
-144   -32    
48     48     
-272   -144   
-16    -16    
-32    160    
-192   -48    
-272   -48    
-144   16     
0      192    
16     208    
-48    64     
-80    32     
-64    -128   
128    96     
-352   -48    
-144   48     
64     64     
-144   -16    
-96    80     
-160   112    
-112   304    
-560   192    
-128   112    
128    -128   
-192   64     
-32    -128   
128    64     
16     -144   
208    -32    
48     64     
16     -48    
0      80     
-160   -64    
-192   -16    
-176   16     
-48    -112   
-48    32     
0      176    
-368   -32    
208    48     
-416   -112   
80     96     
-48    -432   
-336   -240   
-192   112    
48     -16    
32     64     
-288   -160   
288    -208   
144    192    
128    384    
96     128    
-240   -64    
-624   -112   
128    144    
32     0      
-32    -128   
-16    -176   
-16    112    
48     80     
-80    0      
-48    -80    
32     -16    
288    176    
16     0      
-160   64     
-496   -32    
-96    -16    
-496   -64    
208    80     
-16    48     
32     32     
-32    48     
-144   -80    
-144   -32    
0      96     
-80    0      
-192   -16    
96     80     
-80    0      
336    96     
-208   48     
-272   -48    
0      -16    
128    64     
-2656  -96    
-96    -16    
96     0      
0      48     
-96    64     
32     16     
240    128    
-384   0      
0      0      
224    48     
-256   -64    
176    -16    
16     96     
-336   -48    
288    80     
-880   -80    
-192   -48    
336    304    
-432   112    
96     -80    
-32    0      
32     48     
240    128    
-176   64     
-48    -32    
-48    -80    
-128   -96    
352    256    
-208   -32    
272    32     
-400   -32    
-256   -16    
432    -112   
-224   48     
-256   -32    
-96    -80    
-272   -480   
112    -288   
192    48     
80     96     
176    144    
-240   -16    
176    96     
-80    176    
144    96     
16     -208   
624    384    
400    352    
96     -208   
64     -112   
-288   192    
-96    -16    
-96    -80    
96     224    
-384   32     
-80    432    
32     304    
-16    -544   
-240   -336   
80     224    
448    304    
-192   208    
-208   -592   
560    -80    
-112   368    
32     16     
320    80     
-176   -128   
-96    0      
224    176    
96     -176   
144    224    
112    16     
-128   -48    
224    -144   
-304   160    
112    -176   
-80    -64    
144    272    
-16    -832   
-80    720    
336    -16    
-32    352    
-368   48     
128    -512   
224    208    
112    304    
128    992    
80     0      
-96    -224   
128    -240   
-48    224    
352    80     
-80    192    
-208   64     
-64    -32    
240    0      
-16    -192   
48     -32    
-64    0      
-64    144    
-288   -64    
160    240    
288    224    
128    48     
112    256    
-16    48     
416    208    
-352   144    
-32    16     
112    16     
352    288    
-96    96     
32     0      
-192   -64    
48     0      
0      64     
112    -464   
48     80     
32     32     
128    -48    
-64    32     
16     288    
-224   48     
48     128    
96     48     
384    208    
32     16     
64     16     
16     -80    
48     64     
-16    -32    
160    -240   
192    80     
-16    112    
128    160    
-192   32     
64     80     
-64    32     
272    -128   
32     112    
416    224    
-224   224    
-80    112    
-64    -80    
112    0      
128    144    
16     -48    
256    32     
-64    -560   
144    -48    
-144   -64    
112    -16    
-48    80     
32     -80    
96     -32    
352    560    
-144   208    
304    -80    
-208   0      
-144   -96    
224    256    
-256   -16    
64     -80    
240    -368   
48     48     
48     48     
-48    32     
-80    -80    
192    48     
144    48     
-128   32     
272    -112   
144    0      
32     48     
64     64     
-144   192    
64     -128   
-64    0      
288    -448   
80     176    
144    48     
16     48     
256    -16    
336    48     
-192   32     
16     -96    
112    -16    
336    192    
16     368    
16     48     
96     80     
272    -32    
64     -16    
80     48     
224    0      
176    -352   
-64    64     
-64    0      
80     32     
0      192    
176    160    
48     80     
320    64     
-112   -96    
160    -32    
-16    464    
144    176    
160    -48    
-16    -336   
64     16     
112    -80    
128    -16    
128    176    
96     48     
0      -48    
48     16     
32     48     
80     -16    
-32    -48    
128    464    
112    368    
-224   -608   
32     -64    
192    16     
-144   -272   
192    -432   
144    384    
192    -320   
128    -224   
64     784    
-176   160    
-16    -464   
448    -48    
352    208    
400    -32    
-272   -144   
240    -544   
-32    96     
-208   64     
704    336    
-16    528    
64     -752   
160    448    
16     432    
272    -336   
240    -736   
160    -336   
80     48     
-64    208    
256    -544   
-320   32     
-224   304    
-176   48     
224    32     
-208   -192   
-144   -288   
384    -48    
160    -32    
-160   -688   
352    -608   
-1312  416    
-160   112    
496    -208   
80     -16    
-192   -176   
-64    -464   
-64    -64    
192    -32    
256    -64    
32     -384   
48     112    
96     -192   
112    80     
160    -304   
-224   -176   
32     192    
80     32     
16     0      
80     -128   
240    80     
-80    -304   
176    -96    
-16    -576   
144    -32    
240    -80    
-32    64     
128    -32    
-144   64     
0      32     
128    -64    
-64    144    
0      -16    
-1136  0      
144    -128   
272    96     
-256   -272   
96     -48    
128    -16    
144    -64    
0      -240   
144    32     
-48    -16    
16     144    
16     -96    
144    -96    
-112   48     
144    16     
-832   -16    
-16    -16    
32     -96    
128    0      
-16    -208   
224    -208   
0      16     
240    -944   
64     32     
48     -16    
-112   0      
16     112    
240    32     
-144   -96    
0      -48    
160    16     
96     16     
-48    -128   
160    -48    
-128   16     
-48    -176   
128    64     
160    -576   
192    -80    
128    -128   
-96    48     
-96    80     
32     -112   
0      -16    
16     0      
-304   -32    
128    -96    
-688   96     
-176   -16    
-352   48     
112    -112   
64     32     
288    -80    
144    240    
256    160    
-96    -32    
-32    -96    
96     64     
-224   144    
144    0      
-352   16     
112    48     
-384   -432   
-96    -96    
-176   192    
-112   16     
192    48     
64     -144   
160    -144   
304    16     
144    -16    
-176   32     
64     -128   
-832   -16    
-144   32     
-416   -64    
80     -144   
80     16     
96     -96    
96     64     
48     -48    
-256   -16    
352    64     
32     160    
0      32     
-64    16     
-304   -32    
160    -16    
-496   32     
272    32     
-48    0      
80     -64    
-224   -112   
160    -96    
32     96     
112    -48    
-32    -48    
-688   -112   
-176   -32    
192    16     
-1120  48     
-208   48     
-192   -48    
96     32     
-112   0      
144    -16    
448    144    
-624   32     
-2080  48     
-304   80     
-624   32     
96     48     
-352   -80    
-176   -16    
32     -16    
32     112    
-336   32     
-496   -16    
-96    -48    
144    16     
-256   96     
32     -128   
-208   -64    
80     16     
240    16     
64     32     
224    112    
32     80     
-496   48     
-320   32     
80     192    
-112   208    
-48    80     
-80    64     
-976   32     
-160   32     
16     -112   
-288   -144   
16     96     
96     96     
-272   -368   
-272   -272   
192    -112   
-416   176    
192    64     
176    128    
-176   336    
-304   208    
-384   -496   
16     -656   
544    528    
160    16     
288    -32    
48     -160   
-384   -800   
-48    624    
144    1168   
-432   -880   
288    -448   
112    592    
-144   -336   
240    -128   
-160   400    
96     -144   
0      640    
48     -192   
-240   80     
-176   288    
416    -16    
224    16     
240    112    
-240   288    
464    368    
128    320    
-288   -240   
-304   368    
-272   -144   
128    -448   
0      64     
-160   -192   
256    224    
-384   32     
-16    -384   
-176   -384   
-144   -64    
160    128    
-112   144    
336    192    
0      112    
-368   -192   
272    0      
16     160    
32     144    
64     -144   
-496   0      
0      224    
-400   32     
240    -256   
0      -208   
32     64     
-16    176    
-144   -112   
-16    -48    
-16    64     
-48    64     
-48    -16    
0      -208   
-256   48     
32     -64    
-144   -112   
128    32     
-208   -16    
128    80     
-1200  48     
-288   -64    
48     -32    
-320   16     
400    -304   
32     224    
192    64     
-64    -80    
80     48     
-112   -64    
0      48     
-208   -80    
96     48     
-192   -96    
-144   80     
-16    -32    
64     16     
-48    16     
240    112    
-16    64     
320    16     
-144   32     
-128   64     
-48    0      
-128   32     
64     -112   
-16    -112   
-32    64     
-128   0      
80     32     
96     -48    
16     64     
160    16     
128    0      
-160   -32    
-304   -16    
0      112    
-64    -112   
48     0      
-16    48     
16     144    
112    144    
-32    192    
-128   0      
48     -144   
16     -48    
96     144    
-96    144    
80     -16    
48     0      
-112   160    
80     112    
-80    160    
-80    16     
112    -160   
128    64     
-288   -80    
96     112    
0      224    
-32    144    
96     112    
-128   -272   
128    -208   
16     -32    
-176   -176   
64     -128   
192    32     
16     240    
96     176    
-160   64     
112    -32    
-80    -144   
128    -208   
384    208    
-64    -16    
176    -160   
16     -128   
32     0      
16     16     
-32    0      
-32    128    
32     -192   
64     -48    
576    512    
-416   -96    
112    144    
160    736    
-64    304    
224    144    
-64    -160   
160    192    
176    48     
-112   -176   
16     -144   
0      112    
-160   -240   
-272   -160   
128    512    
128    288    
-176   80     
128    -208   
-64    -336   
-96    -832   
32     112    
-144   -80    
256    240    
208    -256   
240    368    
-112   -96    
-96    48     
128    96     
144    208    
-32    432    
208    -176   
48     -48    
-112   -48    
448    -64    
-80    -48    
-160   16     
32     400    
0      240    
-160   0      
0      -336   
-144   -240   
304    224    
-336   0      
240    -32    
-48    -144   
288    48     
80     -96    
-48    0      
-320   -176   
-160   -176   
144    528    
448    1200   
-336   0      
224    -528   
336    -48    
288    96     
512    160    
128    48     
112    -144   
96     -96    
-32    80     
16     144    
512    256    
-176   -16    
-48    -240   
320    176    
320    -80    
32     304    
-112   112    
80     16     
176    208    
-224   160    
-48    -112   
-256   -176   
576    32     
240    176    
-336   32     
1104   160    
-784   32     
368    -64    
-400   32     
128    -48    
336    -64    
-160   -112   
144    -32    
-80    -32    
80     16     
16     48     
-16    32     
160    0      
240    64     
64     -64    
-96    -160   
-208   80     
128    -96    
208    80     
112    -80    
-48    64     
80     -432   
-64    -16    
176    0      
96     64     
48     0      
96     16     
-128   16     
144    -48    
16     80     
144    -48    
160    128    
32     80     
-48    144    
128    -272   
-48    32     
128    -368   
-16    48     
160    16     
-96    64     
16     96     
176    112    
-160   -176   
208    176    
192    80     
-272   -192   
128    48     
-16    -160   
208    -48    
144    -96    
112    32     
240    16     
-96    16     
-96    -16    
48     48     
32     48     
80     48     
80     128    
64     -32    
80     64     
112    -224   
96     64     
208    32     
-112   48     
96     -128   
128    16     
16     -368   
80     -80    
16     64     
112    192    
160    0      
112    -208   
0      -320   
80     -144   
16     -176   
80     -144   
48     80     
-128   -112   
96     128    
208    96     
224    80     
160    -352   
64     -560   
-48    96     
32     -112   
-64    64     
-240   -224   
128    -608   
304    -32    
112    -16    
208    -16    
16     -368   
176    192    
32     0      
256    -160   
80     160    
-80    272    
96     96     
224    112    
208    -32    
128    -80    
-560   -128   
80     -144   
144    0      
96     -96    
96     -16    
-64    0      
32     -48    
0      -1776  
-144   -96    
112    -80    
144    96     
192    96     
-160   -32    
-64    -160   
-128   0      
-848   80     
160    208    
-144   80     
32     -32    
-48    -96    
176    48     
320    192    
0      -672   
-32    -96    
112    -272   
480    -160   
256    48     
112    160    
-16    0      
-144   -176   
32     -96    
16     -64    
-272   16     
464    -112   
112    -48    
368    -96    
-112   -112   
80     -192   
-208   16     
-64    -1008  
176    32     
304    -224   
-48    -64    
-64    -64    
256    64     
-176   -16    
64     -304   
-400   -192   
-208   944    
-928   -128   
112    -480   
0      256    
32     -224   
128    80     
-96    -1552  
176    448    
80     -224   
80     112    
64     -112   
96     -48    
-208   -480   
-304   400    
-128   64     
-64    -48    
-272   304    
288    -320   
576    -448   
464    272    
144    -112   
192    208    
48     448    
144    -320   
-16    144    
128    208    
128    336    
-96    448    
224    -688   
-448   -480   
448    -176   
-592   496    
-320   -128   
-32    128    
576    256    
80     -112   
192    -128   
176    0      
-384   80     
336    0      
-736   112    
-848   -128   
112    -96    
336    -192   
-528   -144   
208    16     
-464   80     
-128   -192   
16     -16    
160    -128   
96     32     
80     -576   
192    0      
-80    80     
16     48     
48     -16    
64     128    
-288   -16    
336    -96    
-352   32     
128    0      
-64    -32    
-144   16     
336    -32    
-624   -80    
192    -128   
-400   32     
-2016  32     
16     48     
-1248  -32    
128    -48    
112    -64    
32     -208   
-48    16     
-144   80     
160    -16    
192    192    
-368   -64    
0      -80    
-240   -96    
112    192    
240    128    
-112   -96    
48     -64    
-1104  16     
-144   32     
-1232  80     
32     -32    
400    32     
-176   96     
-144   -16    
-160   -32    
240    160    
-432   208    
-304   -32    
-128   144    
144    144    
96     112    
96     -144   
32     16     
0      176    
64     320    
160    112    
-816   -32    
-96    -80    
-384   -176   
96     16     
-16    -64    
128    112    
-48    -112   
-32    96     
-80    32     
-80    80     
-208   80     
-160   96     
32     192    
-48    -32    
-16    48     
-704   -32    
0      -48    
-32    -144   
-112   0      
208    -176   
112    -16    
16     112    
-192   64     
-304   112    
-32    0      
-16    -48    
-128   -32    
32     16     
-80    -160   
-112   -32    
-1168  -192   
48     -16    
-112   -32    
112    96     
-48    64     
16     64     
-16    0      
96     192    
-96    256    
-64    208    
176    176    
112    128    
-96    304    
-144   176    
400    528    
-416   432    
64     256    
-240   96     
208    304    
-32    0      
-176   -192   
16     144    
-128   96     
96     -32    
-96    -288   
80     -128   
16     -16    
224    288    
-272   -288   
192    288    
-176   -80    
288    128    
-992   -240   
-64    80     
80     0      
16     16     
176    48     
-64    -208   
224    176    
192    352    
-320   -176   
-64    -80    
-64    224    
176    272    
288    224    
-912   -304   
272    16     
-560   16     
336    16     
176    160    
-32    96     
112    112    
-128   16     
-192   -208   
16     -144   
-160   112    
-48    -48    
544    -32    
-192   -112   
0      -48    
-208   -64    
32     32     
-112   -176   
32     -80    
-48    48     
-128   -32    
16     16     
208    160    
-48    0      
48     32     
112    48     
-96    -48    
48     128    
-48    16     
128    16     
-96    48     
-128   -32    
16     0      
-80    160    
0      160    
-16    80     
0      -48    
192    144    
272    272    
-256   16     
-96    32     
-432   -160   
336    -112   
-160   96     
-64    -48    
96     -144   
352    176    
-352   -176   
-16    -48    
-432   -16    
112    -32    
-64    128    
128    208    
16     -48    
-80    -80    
176    224    
-128   16     
176    112    
-304   -16    
128    80     
-224   -80    
-16    -192   
736    80     
320    128    
240    128    
144    48     
96     96     
-320   -32    
432    160    
-48    0      
400    144    
176    144    
-256   -32    
-80    32     
-496   16     
192    0      
80     64     
80     96     
240    -48    
-80    0      
48     48     
-160   32     
-48    -16    
368    160    
-416   0      
144    16     
80     16     
96     80     
-240   -48    
192    48     
-96    -32    
-96    48     
16     48     
112    16     
160    96     
0      64     
48     64     
96     -16    
-32    96     
144    32     
-304   16     
64     -32    
256    80     
-32    32     
-64    0      
176    112    
0      128    
-16    -80    
112    0      
304    128    
-32    64     
128    16     
-80    48     
256    256    
-160   112    
144    48     
80     80     
224    64     
-96    -16    
80     -16    
240    96     
-208   -224   
16     80     
-48    112    
112    112    
272    -64    
208    16     
-112   -16    
-16    16     
-192   -32    
80     48     
-32    -80    
80     128    
32     192    
-144   -64    
48     48     
32     -144   
48     16     
208    112    
32     32     
-16    160    
128    96     
0      32     
160    32     
64     -112   
176    112    
-144   -32    
32     176    
-16    64     
-16    -48    
64     48     
176    -48    
144    208    
64     -640   
80     32     
32     -96    
80     144    
304    480    
-496   192    
-96    -288   
144    -208   
96     -144   
160    128    
48     0      
208    112    
80     48     
-144   -192   
80     112    
-176   -1136  
64     112    
144    32     
16     0      
-80    0      
160    0      
48     -64    
208    -16    
0      -48    
144    368    
-128   192    
-96    -176   
0      112    
176    -64    
128    64     
224    -448   
-96    -320   
-80    -224   
-112   144    
16     80     
96     -176   
-128   112    
208    624    
256    -512   
64     384    
-96    -64    
-96    -48    
176    144    
-32    -976   
80     336    
-64    112    
-288   -96    
80     -64    
-64    32     
144    -160   
16     208    
128    -96    
128    32     
32     48     
512    464    
-400   -176   
112    -464   
192    400    
-192   -16    
160    -304   
192    -144   
48     208    
-128   -352   
256    128    
-80    64     
32     144    
160    544    
-80    288    
112    -336   
16     240    
64     80     
352    16     
176    576    
-272   -752   
16     -240   
192    -336   
32     224    
128    0      
80     144    
16     160    
80     -480   
-160   -48    
0      -512   
320    -1104  
176    96     
-144   -592   
32     -64    
-112   -432   
80     -160   
352    -304   
320    32     
336    272    
-32    -112   
112    -208   
0      -32    
128    -336   
208    -320   
-1152  16     
208    32     
80     176    
-336   -96    
-112   144    
64     -576   
208    -256   
272    112    
192    -16    
48     -240   
112    -96    
112    336    
-208   256    
112    -80    
0      -288   
-912   -32    
-320   -48    
240    -80    
-96    -128   
144    48     
160    -480   
144    -112   
288    -448   
-32    64     
16     -112   
-48    32     
32     64     
-96    -80    
240    96     
-48    112    
32     -48    
64     -192   
-208   64     
480    -32    
96     224    
-64    -640   
272    -144   
32     -544   
-64    16     
288    -160   
-16    -160   
-64    16     
32     -128   
-240   -16    
128    32     
-288   144    
-16    -64    
-608   -16    
80     -48    
128    -16    
128    -368   
-48    -192   
176    -272   
-176   -144   
176    -48    
-112   96     
144    -48    
64     -80    
-304   0      
16     -64    
-80    -96    
80     -64    
-352   -16    
288    -192   
96     -176   
80     -128   
-32    0      
64     -128   
48     32     
176    208    
400    288    
-208   192    
-176   -224   
128    -160   
144    -96    
-160   368    
-144   16     
-224   -64    
80     -128   
-384   0      
192    48     
96     80     
128    192    
16     192    
96     -800   
0      -80    
-16    -64    
-64    64     
-208   48     
128    -16    
-80    -96    
384    160    
-416   480    
-208   64     
-176   80     
112    16     
240    -272   
80     -288   
32     -176   
-80    -832   
48     0      
112    256    
224    192    
-160   48     
-16    64     
-192   -80    
352    384    
-80    112    
96     -176   
-192   32     
-160   -368   
208    176    
-144   -208   
16     176    
-16    112    
192    16     
-400   -176   
272    -304   
224    352    
80     -112   
-64    -16    
96     208    
-32    -96    
-128   -16    
-448   32     
-48    -240   
192    144    
288    96     
112    16     
-96    48     
-1120  -80    
-64    -128   
-112   -80    
208    -240   
288    -32    
400    80     
160    48     
-144   -32    
-144   -128   
-256   160    
-448   -96    
-80    0      
-272   -96    
320    144    
32     64     
-400   -64    
-96    -32    
-336   32     
-256   -96    
80     -16    
-224   128    
128    64     
-32    -16    
-400   -16    
-48    48     
-272   -224   
592    -32    
-368   -64    
-32    -48    
240    -96    
-144   -32    
-192   96     
304    432    
-688   -16    
-400   -144   
496    16     
-208   -176   
16     64     
16     -96    
176    128    
-128   -112   
192    80     
-80    -128   
-256   144    
144    32     
-320   -48    
-128   -80    
-368   32     
32     -112   
-128   16     
-192   -64    
-272   64     
-144   112    
-128   -48    
80     -64    
-48    -160   
-48    0      
-32    80     
-288   -112   
64     80     
32     48     
-32    -96    
32     -16    
288    0      
-304   16     
224    32     
-800   -48    
-160   -80    
-256   -112   
224    176    
-784   -368   
416    -192   
-64    288    
16     128    
304    -16    
240    64     
224    112    
-496   -160   
576    -32    
464    256    
-480   144    
-720   -176   
240    -128   
-32    128    
-64    -80    
320    16     
160    -32    
-64    96     
-272   16     
528    112    
-320   -48    
-272   -16    
352    80     
-96    -16    
-128   -80    
-80    48     
-192   -80    
112    112    
-320   -80    
128    -16    
112    48     
-112   -16    
320    160    
-192   -32    
-16    0      
112    48     
96     64     
-16    -16    
-128   0      
-80    -16    
32     64     
240    128    
-272   240    
48     80     
208    112    
-80    32     
16     -32    
-112   96     
0      -80    
160    -48    
-128   -48    
128    -80    
0      0      
160    48     
-64    -112   
192    192    
-400   -16    
-64    32     
-512   64     
-144   32     
-96    -32    
64     -224   
48     0      
112    96     
0      -112   
-224   48     
64     176    
-32    64     
-16    32     
-144   -112   
208    176    
-272   -224   
-48    -208   
-64    144    
64     224    
-16    -96    
48     -48    
256    192    
-96    -16    
0      96     
-48    -32    
32     0      
-16    -48    
64     80     
-288   -480   
64     448    
16     -112   
224    144    
-16    32     
-112   64     
48     48     
-224   32     
-16    16     
-32    128    
-192   -224   
272    -624   
160    624    
128    -144   
112    208    
-224   -80    
16     80     
0      -32    
176    160    
-256   -48    
-112   144    
-48    -48    
96     64     
448    320    
-16    -48    
80     192    
192    192    
-352   -288   
160    48     
304    400    
-64    -352   
144    240    
-240   -128   
-16    -128   
-64    288    
32     -32    
64     -64    
0      96     
-16    96     
32     48     
-240   -448   
432    0      
208    1072   
-48    -336   
16     -496   
-64    336    
160    112    
96     176    
-16    352    
464    -160   
272    544    
64     0      
96     -688   
112    272    
144    496    
-160   -192   
-112   32     
-32    16     
-32    464    
192    496    
-384   -160   
240    -96    
96     64     
224    272    
128    112    
16     224    
80     256    
32     16     
-16    64     
224    48     
-208   -336   
32     -464   
144    64     
-48    144    
144    -16    
-144   -128   
48     -256   
-64    16     
96     -208   
-16    -32    
112    -16    
176    48     
48     96     
192    48     
-16    48     
112    -64    
-64    -48    
-128   -64    
192    -320   
176    -80    
-80    96     
-48    -32    
96     112    
80     -288   
80     48     
336    208    
-416   272    
192    -64    
128    16     
-224   528    
32     32     
304    144    
160    32     
96     -64    
80     144    
192    80     
-208   -112   
96     -160   
-224   -288   
784    64     
240    32     
368    96     
-288   -96    
272    -112   
-16    -96    
-272   -16    
-320   -480   
-192   -240   
304    -208   
96     128    
-96    96     
32     -192   
-16    32     
464    64     
256    304    
0      -1344  
448    16     
-64    -192   
304    128    
-96    -64    
256    160    
112    64     
64     16     
144    -64    
0      -32    
-128   -32    
320    -208   
-64    48     
160    32     
-16    -112   
112    -16    
-64    -16    
224    -480   
-96    -48    
208    0      
320    464    
-240   224    
224    144    
-16    -64    
288    -32    
64     32     
-32    -160   
80     -112   
128    -128   
-144   32     
288    -224   
-224   -256   
432    -80    
128    176    
-256   208    
-64    112    
-48    -32    
64     96     
112    -80    
176    -112   
272    80     
96     -192   
-224   16     
32     -64    
128    16     
128    208    
-80    192    
80     64     
96     -128   
-96    -128   
112    48     
16     16     
0      -48    
272    -16    
160    144    
96     208    
64     -48    
-32    -32    
224    160    
-160   448    
-48    48     
256    160    
80     -96    
-32    48     
304    -48    
112    32     
96     80     
80     32     
144    -256   
-64    48     
48     368    
208    -48    
160    -32    
192    -160   
0      -96    
-80    0      
192    -1536  
64     208    
80     -16    
-96    -144   
112    -208   
0      -336   
-432   144    
-80    -240   
-112   -304   
224    368    
-16    48     
224    -16    
0      -48    
128    -32    
-96    -144   
96     -288   
144    144    
-224   -64    
-32    -176   
-80    -112   
112    192    
-752   112    
-32    -48    
-16    16     
16     -128   
-176   32     
128    -240   
16     80     
160    -128   
48     64     
128    0      
48     48     
32     -16    
80     -16    
-272   -32    
96     0      
-704   48     
80     -32    
-64    -176   
320    -64    
192    -16    
96     -240   
96     -16    
16     -208   
-368   -80    
304    16     
-256   -32    
272    64     
384    224    
-400   96     
64     -64    
-832   -48    
0      -80    
-912   64     
0      -48    
320    -48    
32     -16    
144    32     
-272   -160   
-48    64     
272    -48    
112    0      
-64    -48    
112    16     
-96    32     
224    -48    
-128   0      
128    -80    
-272   -208   
432    -64    
176    96     
16     -144   
-272   -16    
368    -560   
-144   -64    
-48    64     
0      80     
-48    64     
368    96     
-432   -112   
272    -80    
-128   -16    
224    0      
-480   -144   
336    -128   
-1312  32     
192    32     
80     -48    
-48    -272   
160    96     
-48    -880   
96     128    
64     -16    
0      -48    
-160   -96    
80     48     
-128   48     
-80    32     
-704   -304   
112    -32    
-48    96     
64     -128   
96     0      
256    64     
256    80     
-48    -128   
96     -144   
256    32     
-144   -128   
96     16     
48     80     
-112   0      
192    -96    
-256   -144   
64     -272   
384    96     
-112   32     
-176   -128   
352    -176   
304    256    
-176   32     
144    -48    
592    128    
-32    80     
-656   160    
-288   -160   
-64    -16    
80     32     
96     96     
336    -48    
-64    16     
-144   -80    
-384   -64    
-288   32     
416    160    
-80    -32    
32     -16    
96     -16    
-1184  -32    
-16    0      
48     16     
-32    16     
144    16     
-32    -32    
-1776  0      
96     368    
-176   -160   
16     32     
-96    32     
-240   16     
80     -80    
-288   -80    
0      32     
-304   -16    
96     144    
-944   16     
32     -16    
192    272    
-64    560    
-80    -160   
-112   -384   
96     368    
-96    112    
-48    -496   
-32    256    
16     -32    
-64    -16    
192    368    
-688   -368   
-64    304    
-368   -128   
-112   80     
448    -176   
-144   -80    
-48    176    
112    -208   
64     0      
16     240    
-176   192    
16     -144   
80     32     
-96    240    
64     -256   
-112   96     
16     -192   
-544   -672   
-112   304    
-256   -144   
144    -16    
160    112    
-160   384    
112    -560   
80     -16    
0      320    
-368   -496   
96     -288   
48     -288   
-64    -208   
-192   432    
-128   96     
-688   -288   
48     -16    
-304   -144   
-144   -64    
48     144    
80     64     
80     -192   
-64    48     
-80    -144   
-80    -288   
-64    -128   
-240   176    
-144   96     
-192   128    
0      96     
16     -32    
-272   80     
-240   224    
48     -256   
-1248  -272   
64     64     
16     -240   
-16    64     
-208   16     
96     224    
112    128    
-160   -384   
-96    64     
-144   -80    
176    64     
16     80     
-112   -128   
-32    -208   
192    112    
-752   -48    
16     0      
-48    -80    
-32    -16    
-32    128    
160    48     
144    0      
16     -16    
-16    48     
128    48     
48     16     
-48    0      
-32    96     
-144   96     
240    288    
-816   32     
64     0      
-176   -32    
0      160    
-256   -96    
320    -64    
64     96     
-32    -16    
-240   -128   
-288   48     
-16    32     
-304   208    
352    96     
0      96     
32     224    
-320   -128   
-32    -64    
0      128    
-64    32     
-48    -320   
64     48     
96     144    
144    368    
112    288    
-96    32     
160    32     
-96    0      
80     -64    
-64    64     
32     96     
-16    192    
64     32     
80     -48    
128    32     
-80    -144   
-64    -128   
144    256    
-32    160    
96     -128   
-80    128    
240    112    
-32    0      
176    192    
-384   -96    
96     80     
144    16     
-16    64     
-176   -160   
-32    -112   
-80    -96    
-80    -128   
-96    -48    
320    -464   
208    128    
-16    -16    
112    48     
-320   288    
256    720    
-160   96     
80     -368   
-48    176    
48     -112   
160    368    
336    128    
736    272    
240    160    
-288   -144   
-784   -176   
0      48     
-16    16     
592    272    
112    96     
752    720    
-880   656    
-240   176    
-128   -304   
-144   -112   
464    16     
128    160    
416    64     
-176   -48    
-96    80     
-80    -16    
-144   128    
96     -96    
0      192    
144    -192   
192    208    
80     96     
-288   -480   
288    -16    
-176   -160   
144    -48    
304    528    
64     704    
-208   256    
208    128    
336    208    
80     160    
-256   224    
192    16     
-64    336    
80     -544   
16     144    
-64    624    
336    416    
16     128    
192    48     
256    592    
176    272    
176    192    
192    240    
-96    608    
368    320    
-128   -48    
0      -32    
-48    -112   
208    80     
-272   96     
208    -656   
128    112    
192    464    
112    112    
112    96     
-256   224    
-32    64     
208    48     
288    400    
-208   -144   
-96    -144   
304    64     
0      48     
-48    144    
80     784    
560    -928   
16     160    
-112   -336   
336    112    
48     176    
272    304    
-80    -144   
-32    64     
-192   -144   
-32    -16    
48     80     
144    64     
272    16     
240    -64    
96     64     
-48    -144   
64     -16    
-112   -16    
-48    -32    
64     -48    
128    16     
160    32     
112    144    
16     176    
-16    48     
160    48     
224    16     
-80    32     
96     -112   
80     160    
160    -112   
-48    112    
16     -256   
80     0      
256    -496   
256    -128   
336    64     
224    208    
16     0      
64     -32    
80     32     
-80    0      
32     -32    
-64    -96    
-48    48     
-16    -96    
80     64     
144    -288   
-112   64     
80     32     
-48    -32    
32     -16    
80     112    
176    192    
-96    -32    
288    96     
352    -64    
160    64     
256    -128   
32     -16    
-176   -128   
-272   0      
16     -16    
32     32     
0      16     
144    32     
160    48     
224    64     
-160   -48    
320    -352   
256    112    
240    -304   
240    32     
176    -176   
352    240    
-176   -80    
0      32     
48     -128   
256    64     
368    64     
272    80     
0      32     
-32    -80    
96     -80    
48     -32    
288    80     
-96    -64    
384    64     
128    -80    
64     80     
-16    -192   
48     32     
208    48     
0      -16    
320    0      
32     -352   
80     48     
32     -16    
64     -640   
-128   -144   
336    -144   
-160   32     
0      -656   
384    -16    
-64    80     
256    -128   
224    0      
48     32     
-16    -272   
576    256    
-80    -144   
48     -48    
-192   -400   
400    0      
32     288    
0      0      
672    128    
-688   -512   
192    -64    
-16    192    
96     64     
144    -32    
64     -64    
448    176    
-608   16     
176    -112   
16     16     
-432   0      
1072   512    
-320   592    
-336   -176   
-48    -224   
-208   -144   
112    -32    
256    -640   
80     -240   
160    -1408  
-256   -128   
-144   0      
-240   -160   
-112   96     
32     64     
96     96     
-176   32     
-656   -144   
96     -32    
80     -96    
112    -80    
64     272    
-320   -320   
80     -160   
112    -192   
192    192    
0      -208   
144    112    
144    32     
-16    -112   
-160   16     
16     -304   
-272   384    
-64    -240   
48     -64    
656    784    
-256   -608   
32     -176   
176    96     
32     -304   
192    -32    
-48    64     
-160   608    
160    -304   
-16    400    
128    80     
-272   -368   
-128   -80    
752    544    
-3040  640    
-128   -1024  
96     -640   
-64    368    
32     272    
-144   -192   
320    -480   
16     -208   
208    48     
-16    -96    
144    32     
-96    -208   
224    16     
-416   32     
-112   -48    
-432   -80    
192    176    
-208   0      
16     -144   
80     -64    
-32    -272   
128    -192   
-208   -224   
272    32     
48     32     
464    144    
-80    32     
288    64     
-368   16     
-48    -176   
0      -288   
80     32     
-688   -80    
16     -192   
128    64     
-48    -64    
128    16     
192    -272   
32     48     
-160   80     
240    -32    
-64    32     
-160   -80    
-16    -112   
80     -16    
-64    -16    
16     -64    
-32    -128   
16     -64    
112    64     
112    -112   
208    272    
-304   192    
80     96     
-304   0      
-48    -32    
-112   160    
64     -32    
112    -96    
-96    -16    
-160   -48    
64     -64    
-208   -80    
304    -128   
48     -96    
-400   -448   
-1184  144    
-144   80     
-1952  -80    
48     -48    
-64    144    
-112   32     
192    -112   
-64    -48    
64     -80    
-48    -48    
-720   80     
-48    192    
-80    -192   
240    -32    
-256   -208   
-400   -16    
144    -96    
-272   96     
80     80     
-976   80     
16     -32    
-1680  -80    
-32    272    
16     0      
-16    96     
-240   -96    
64     304    
-240   112    
-112   32     
112    -64    
-80    -16    
176    -48    
80     48     
-128   16     
-80    16     
48     96     
-336   96     
128    32     
48     16     
-192   -16    
-112   64     
192    144    
0      -112   
-144   -48    
48     -144   
48     48     
-64    128    
-208   0      
-112   -16    
96     48     
128    64     
64     32     
-80    80     
-928   -112   
160    -160   
-48    -240   
128    80     
320    224    
-256   176    
176    96     
-64    240    
-80    160    
-96    -32    
0      80     
0      -16    
-80    -272   
-288   560    
256    560    
-1792  -128   
-32    -192   
240    -96    
-16    592    
80     112    
176    368    
-368   112    
-112   -32    
-320   304    
64     176    
352    0      
-144   672    
-80    768    
-848   -1312  
-208   -224   
-304   -304   
-144   224    
192    272    
-176   32     
496    416    
-160   -336   
96     48     
-80    160    
-64    96     
64     -240   
-32    -96    
-528   -816   
-240   176    
-64    144    
-320   -176   
-416   112    
-224   -144   
-2208  -336   
288    -960   
112    16     
-16    -16    
416    384    
-336   80     
-160   -112   
-384   -272   
464    544    
-512   -96    
-160   -448   
256    -528   
96     576    
-64    16     
-160   64     
-1200  304    
16     16     
176    112    
-176   -160   
96     512    
-224   -64    
0      -128   
256    144    
48     112    
112    240    
208    -96    
-480   -48    
272    -16    
-512   96     
160    -320   
-16    32     
208    512    
16     -112   
0      80     
-64    80     
-16    -112   
0      128    
-80    32     
80     32     
16     0      
112    80     
-160   -96    
48     0      
-64    16     
64     80     
128    160    
-176   32     
-208   96     
-80    64     
128    -48    
64     -64    
80     0      
0      0      
48     -48    
-240   48     
-32    96     
-144   -272   
-48    -160   
0      96     
-48    -288   
-144   -112   
96     48     
112    64     
32     160    
64     16     
48     32     
-80    0      
-272   48     
96     -64    
-64    128    
-48    32     
96     80     
80     -112   
-128   -32    
-32    128    
16     64     
48     0      
224    64     
80     64     
32     -128   
-64    -256   
160    48     
96     208    
-80    112    
128    16     
16     96     
-160   -16    
160    -16    
-112   64     
-144   -272   
288    -240   
64     144    
224    80     
176    48     
16     -176   
80     -208   
64     32     
224    272    
112    80     
-160   -192   
-64    32     
-240   -64    
128    32     
256    64     
176    48     
80     -32    
128    -80    
144    96     
16     96     
0      -112   
-128   64     
-112   64     
32     32     
128    32     
-96    0      
192    80     
32     -64    
-48    -176   
64     64     
-80    32     
112    16     
128    64     
144    0      
64     32     
176    32     
256    96     
96     320    
-400   96     
160    96     
-64    -160   
368    16     
16     -16    
192    -240   
-64    16     
144    -32    
240    96     
-48    0      
128    64     
80     64     
-16    64     
-48    64     
144    112    
-96    -192   
-96    128    
144    48     
240    96     
-256   0      
32     -304   
176    80     
176    48     
304    -16    
160    112    
96     48     
80     32     
-16    -96    
32     64     
64     96     
112    160    
992    784    
-832   288    
80     -208   
-16    112    
-48    -224   
304    64     
224    0      
-144   -64    
336    96     
-224   -64    
160    -96    
-320   -144   
-32    192    
-16    192    
-176   -224   
-432   16     
-176   32     
-320   -432   
48     -48    
96     32     
304    112    
80     -112   
-80    0      
176    -160   
0      -112   
64     -32    
256    96     
80     240    
48     384    
-384   80     
-160   -144   
-224   -16    
-128   -208   
48     -208   
64     192    
-304   -528   
48     -48    
-384   704    
-112   -352   
352    -16    
304    128    
576    -16    
0      160    
96     272    
144    -672   
48     688    
-128   192    
-368   -640   
96     32     
-96    -16    
304    -272   
144    368    
224    368    
128    -416   
176    208    
-160   -64    
16     -192   
-16    -16    
112    -64    
16     -64    
96     -48    
288    224    
-448   -224   
448    -64    
-112   0      
288    80     
-32    -48    
160    32     
-32    -304   
128    64     
32     -96    
-96    -144   
208    -304   
96     144    
-32    -48    
240    -80    
112    208    
-64    -32    
80     144    
272    144    
-96    48     
16     -112   
80     16     
112    16     
0      16     
240    -96    
32     -944   
80     -48    
-32    -1104  
160    -672   
-112   -256   
32     -1232  
128    -16    
0      32     
16     -32    
48     112    
112    -144   
160    48     
48     -16    
-32    -96    
112    96     
160    -32    
-32    32     
-256   -16    
0      16     
-112   -64    
-160   -288   
80     -448   
160    -592   
272    -224   
192    144    
-112   80     
32     -144   
112    -16    
96     -80    
96     -48    
-80    -416   
48     32     
-192   80     
80     48     
352    80     
-160   -48    
224    -96    
288    -48    
48     112    
384    -272   
-128   0      
144    -128   
336    240    
-304   -80    
16     160    
-112   -32    
464    -80    
-32    160    
176    -48    
-224   -32    
-192   -304   
112    -272   
192    -144   
-208   -480   
336    -608   
96     144    
0      32     
-80    16     
-96    -48    
16     -112   
256    112    
48     -32    
-272   -80    
128    -144   
-1712  -64    
240    -112   
-32    0      
-64    -144   
224    -224   
-112   -320   
-336   -112   
176    -1824  
-48    416    
96     288    
32     -64    
-240   -32    
32     16     
-320   -64    
288    96     
-432   144    
-96    96     
-16    32     
352    -128   
16     -416   
16     -528   
96     -256   
256    -112   
-144   64     
0      -48    
96     -96    
-64    160    
368    96     
128    -32    
112    112    
-144   144    
-16    -80    
-944   -80    
32     -80    
176    -304   
-48    -192   
128    0      
-112   -48    
48     96     
96     -48    
176    240    
-208   -560   
-48    -144   
96     -32    
-48    448    
-96    -64    
-16    -160   
-560   240    
-96    -448   
-192   144    
304    -112   
-224   368    
240    -576   
32     128    
-32    16     
-128   48     
0      -320   
304    96     
-384   32     
96     464    
-656   -400   
0      160    
-304   -112   
304    -48    
32     288    
288    -192   
304    -48    
-192   -352   
416    96     
80     -32    
160    -112   
272    432    
32     -784   
80     -288   
0      608    
128    48     
-576   -640   
352    304    
272    -112   
64     -16    
-224   32     
112    -32    
64     -336   
-384   -96    
-720   560    
-1120  800    
0      64     
-640   -208   
-624   -128   
320    -224   
64     -32    
832    32     
-560   16     
-1552  -384   
320    0      
-832   -16    
-160   48     
32     16     
-336   48     
0      -32    
-544   16     
16     32     
-528   32     
-80    48     
64     -32    
-32    -32    
-112   -96    
176    96     
48     -80    
224    144    
-304   -48    
64     -16    
192    48     
-160   32     
48     16     
-112   0      
0      -224   
-304   -240   
-16    208    
-1360  -64    
144    32     
-64    -80    
0      -16    
64     112    
176    48     
-176   -32    
192    16     
-96    16     
160    112    
-288   128    
-80    -16    
-16    0      
-176   -32    
-160   -64    
-720   -32    
48     48     
-224   -32    
64     80     
-160   -144   
160    160    
-192   -96    
-32    32     
96     112    
352    112    
-176   -16    
-240   -144   
32     -144   
-176   128    
-48    96     
-16    48     
192    80     
-352   -32    
32     64     
-48    -32    
64     48     
-64    16     
96     -80    
0      -48    
-144   -96    
16     0      
-64    -64    
-32    64     
-80    16     
80     48     
112    240    
-208   0      
-448   -96    
112    32     
64     -48    
176    64     
48     112    
-160   -16    
-64    0      
-64    16     
-48    -64    
32     0      
-112   48     
-32    0      
-96    0      
-400   -448   
112    -560   
-576   256    
176    336    
-352   0      
-32    -64    
-128   176    
64     -160   
-144   -32    
16     192    
-80    112    
-48    0      
32     64     
-80    48     
-48    -112   
-96    -96    
96     96     
-128   64     
48     16     
-816   -160   
16     0      
144    112    
-112   32     
-32    96     
-112   32     
48     -112   
-32    -160   
208    144    
-240   -80    
80     96     
160    128    
-96    64     
-176   -48    
-16    80     
32     -32    
64     -32    
96     -16    
224    112    
80     48     
192    0      
-224   0      
-224   -16    
-64    -32    
0      -16    
-16    64     
-144   -80    
128    0      
-160   -32    
96     -16    
-64    -80    
288    0      
176    32     
80     32     
160    -64    
-48    16     
32     128    
-224   -16    
160    48     
-80    16     
48     32     
-240   0      
-64    0      
-64    -48    
112    48     
16     16     
240    -64    
0      -16    
-144   -32    
64     -112   
-240   -128   
224    -320   
208    -208   
416    96     
-144   -64    
128    0      
64     128    
-320   -16    
304    160    
-176   128    
240    0      
-176   -144   
0      304    
1232   544    
-736   -96    
64     -368   
80     320    
528    448    
-432   -624   
192    -96    
-64    928    
-224   -64    
112    -80    
416    96     
160    512    
-64    -352   
-160   0      
-432   32     
-32    -160   
336    -256   
80     -464   
-96    384    
144    16     
-96    240    
-208   -160   
16     176    
80     16     
176    -480   
448    192    
304    -192   
-176   16     
512    368    
-912   272    
-96    96     
-32    48     
112    -304   
64     -240   
144    32     
-16    -96    
-128   -80    
32     256    
80     224    
48     -1312  
144    32     
144    0      
336    272    
-416   96     
144    -64    
-144   144    
-64    -144   
336    -112   
256    -32    
64     144    
-16    80     
16     -112   
32     80     
80     16     
32     -64    
0      32     
288    144    
-272   48     
96     96     
128    48     
224    112    
112    112    
-160   32     
-32    480    
128    160    
192    16     
80     32     
160    -80    
112    112    
128    112    
16     16     
-64    -16    
192    0      
-32    32     
16     80     
-240   96     
128    32     
224    -32    
-112   144    
-96    -32    
0      0      
-16    -48    
144    -96    
160    64     
48     -240   
16     -112   
96     -720   
32     160    
-96    48     
80     0      
-48    0      
0      48     
-144   -192   
272    -16    
32     160    
80     48     
224    -208   
0      -192   
0      144    
48     -304   
-16    -16    
48     -160   
240    128    
48     272    
32     64     
-16    112    
160    -16    
144    -112   
192    80     
192    144    
-32    160    
144    240    
80     112    
160    80     
-80    -16    
32     -432   
144    -288   
-32    272    
-96    -384   
64     32     
192    96     
-160   256    
-96    -128   
240    -240   
64     -416   
16     -64    
144    352    
-192   176    
16     -80    
0      -224   
16     16     
0      -384   
240    -176   
48     -128   
-80    -16    
-64    160    
160    144    
32     128    
96     128    
32     96     
16     -32    
32     -144   
240    -112   
-128   -112   
-48    -192   
128    160    
-32    -192   
16     16     
96     -96    
256    -80    
128    -256   
-192   304    
128    224    
32     -112   
-80    64     
64     -128   
128    -176   
208    -160   
256    208    
64     -16    
80     0      
32     112    
96     112    
112    -560   
32     320    
-48    -208   
80     -160   
112    -16    
272    256    
128    -352   
-224   -400   
176    -672   
32     32     
224    -96    
176    0      
32     112    
-176   176    
496    448    
-352   -144   
240    -1024  
272    160    
-32    -272   
320    -128   
-2272  -336   
208    -48    
-96    80     
544    416    
-96    144    
224    -64    
128    0      
272    16     
368    224    
192    -176   
-144   -64    
-32    -112   
-352   -272   
32     -144   
64     336    
192    16     
416    -288   
64     -64    
240    32     
-16    64     
-64    -192   
16     0      
192    -1648  
-32    -80    
320    -32    
224    96     
-16    -32    
192    176    
48     -64    
288    -112   
-288   -112   
288    48     
256    -80    
720    320    
-320   96     
-368   -288   
400    -176   
832    -352   
-768   240    
272    -64    
-224   384    
-416   256    
272    -352   
784    80     
-608   32     
32     16     
160    16     
-848   -32    
176    128    
96     -112   
16     -32    
80     16     
16     -160   
128    112    
160    -544   
-16    32     
176    -112   
48     -64    
80     48     
-96    -80    
-192   -16    
-16    -64    
-368   -16    
-48    -16    
-576   32     
0      -32    
-176   -16    
288    -80    
32     16     
16     -688   
384    -128   
-256   128    
384    32     
-80    0      
144    -160   
-320   -48    
-112   -160   
-112   -112   
368    -48    
-720   -80    
64     -144   
16     64     
96     -272   
96     0      
288    -224   
-80    112    
-272   16     
96     -32    
-128   -112   
224    -112   
-224   64     
112    -32    
112    112    
-32    32     
32     -128   
224    -96    
96     80     
-48    -256   
176    16     
400    240    
-288   128    
-240   -16    
192    -112   
-768   -48    
16     16     
-192   32     
128    -80    
-128   -16    
96     -48    
-1056  -192   
48     -80    
128    96     
144    -240   
240    32     
80     -208   
160    -16    
-192   -64    
176    -48    
-288   -192   
160    -160   
-96    -32    
-80    -80    
-96    -32    
208    -144   
-48    0      
144    48     
64     0      
-1456  -112   
-48    0      
-432   -176   
-544   80     
-288   -16    
-528   32     
-16    32     
-224   -112   
-288   128    
16     208    
128    -48    
432    96     
-208   160    
-320   -128   
192    144    
48     112    
112    160    
-64    0      
-400   64     
-32    32     
-416   16     
-96    32     
80     -64    
-16    48     
112    48     
112    0      
32     32     
96     160    
96     -96    
144    160    
96     32     
-192   80     
-128   16     
128    0      
-256   16     
-528   -224   
-112   -64    
0      32     
-16    16     
-1280  -32    
16     48     
-176   -96    
-112   -64    
-192   80     
112    160    
240    64     
-256   112    
80     272    
0      304    
144    144    
128    -16    
-320   48     
144    128    
-144   -80    
32     -272   
96     -112   
-16    -80    
496    -96    
208    64     
288    800    
-16    -176   
-144   -80    
-224   80     
160    -48    
368    384    
-128   -224   
-64    80     
-272   -128   
-48    -16    
-432   32     
64     16     
-336   -160   
32     128    
80     144    
32     112    
-112   176    
-368   0      
192    -48    
16     256    
80     -208   
-16    160    
-160   192    
-480   -400   
32     208    
-32    304    
-128   -128   
-1408  -240   
272    -736   
32     -96    
576    480    
320    -48    
-272   -32    
-144   -304   
-336   -272   
-272   -160   
-144   48     
-48    32     
400    48     
-80    240    
32     128    
-240   96     
-176   32     
-128   192    
-112   32     
-288   -32    
32     208    
-272   112    
160    -128   
-208   112    
-224   -64    
288    48     
160    48     
432    176    
16     144    
-16    176    
-464   32     
-16    -80    
-192   64     
32     0      
-32    -16    
32     -48    
160    208    
32     32     
16     -48    
128    -336   
176    16     
32     112    
-448   48     
32     0      
-384   -176   
272    144    
-640   96     
96     -112   
-80    -224   
32     0      
32     64     
-96    160    
160    80     
-96    -16    
48     -64    
-48    0      
16     0      
-256   64     
416    208    
-288   176    
112    -16    
-80    -128   
0      128    
-80    48     
208    64     
-80    -144   
128    -128   
0      80     
-32    240    
240    -112   
-208   -80    
32     64     
-96    96     
0      48     
-32    -32    
-144   0      
80     64     
-16    160    
16     -32    
32     -32    
0      0      
16     80     
-48    32     
-48    -32    
-48    -128   
-16    -16    
240    112    
64     48     
-32    48     
-144   112    
256    80     
32     48     
-32    16     
288    112    
-128   144    
-16    -16    
192    80     
-96    64     
-144   16     
288    112    
-128   48     
16     48     
-144   16     
64     80     
-176   -192   
0      -144   
48     -80    
208    112    
160    96     
-80    -48    
-160   32     
32     32     
16     96     
96     64     
176    144    
64     -80    
240    0      
-112   48     
-128   80     
-80    176    
16     -144   
-48    80     
16     64     
208    16     
0      -32    
80     -80    
256    32     
112    32     
-112   64     
144    96     
-144   496    
192    -16    
-80    -368   
-64    -368   
192    -272   
160    272    
64     144    
96     -16    
-176   128    
-112   -32    
48     448    
288    -160   
-144   64     
-80    80     
240    384    
128    -384   
-16    -32    
-256   144    
0      -64    
240    80     
112    -16    
256    32     
160    480    
208    128    
-208   -96    
-32    -176   
-48    -128   
208    304    
-128   256    
320    256    
-160   -32    
16     -128   
-128   -32    
112    -176   
80     -160   
-32    -320   
176    208    
-208   208    
80     48     
288    -64    
160    64     
208    -48    
128    -64    
-224   -48    
48     32     
-256   32     
208    64     
16     32     
288    16     
32     112    
96     -16    
-32    0      
0      -32    
112    -32    
144    80     
176    96     
96     -16    
80     32     
-288   32     
208    32     
-160   -144   
304    144    
208    64     
112    0      
192    96     
640    544    
-1280  64     
640    -336   
-144   -64    
96     0      
592    304    
-352   -64    
176    80     
-48    176    
0      128    
96     -96    
160    -64    
-320   -112   
656    16     
-48    80     
80     -176   
0      64     
-112   -192   
32     32     
288    -176   
-16    160    
-16    -32    
352    -80    
-48    -160   
0      -112   
464    144    
-416   -128   
224    -112   
384    -160   
192    128    
-528   -16    
544    32     
-16    -80    
64     -16    
304    32     
256    64     
80     64     
-144   48     
272    80     
1296   672    
-688   176    
-432   -112   
336    48     
-80    -240   
160    32     
304    112    
-48    64     
-144   48     
160    32     
384    -80    
-416   16     
352    48     
112    96     
208    160    
-64    -64    
160    -16    
64     -48    
80     96     
160    -96    
-64    48     
352    -16    
-464   -32    
144    -144   
80     80     
144    -144   
-128   -112   
32     96     
160    -976   
-96    -80    
48     -176   
64     -208   
384    32     
0      -464   
80     -224   
192    -128   
-112   -144   
192    32     
-48    -32    
128    -704   
112    64     
0      -336   
128    32     
128    -288   
208    -48    
-640   -32    
112    -80    
208    32     
16     -720   
48     -128   
-16    -576   
64     -448   
336    -80    
96     -160   
64     -224   
-176   -16    
192    48     
256    32     
-64    -16    
0      -96    
-224   128    
-16    32     
48     0      
80     -272   
-80    16     
48     -320   
80     48     
48     128    
16     -96    
16     -16    
48     64     
160    -80    
-16    -80    
-112   352    
208    256    
-784   -128   
16     -368   
240    160    
192    128    
64     -160   
96     176    
112    -128   
64     -720   
-80    80     
-272   -96    
240    -1008  
240    224    
288    432    
-240   -160   
-16    -16    
-400   -208   
112    128    
-688   224    
-240   -336   
80     320    
-176   -336   
-176   -48    
176    -96    
96     -16    
304    80     
144    96     
80     -64    
64     -48    
-240   -16    
16     16     
-112   -128   
240    80     
-880   -816   
-80    -432   
112    400    
112    -304   
-160   -320   
16     -112   
32     -160   
224    -224   
272    128    
-144   -48    
96     16     
48     32     
32     -304   
-112   -112   
304    -16    
-432   144    
160    64     
-1488  -640   
-64    208    
288    144    
-160   -272   
96     0      
192    -336   
96     128    
64     80     
32     -176   
208    256    
0      -96    
-176   -384   
-160   -576   
-64    -256   
224    608    
64     -368   
128    -112   
176    224    
-32    -176   
16     16     
64     -624   
48     -80    
0      -80    
96     80     
-784   -64    
64     48     
-512   -192   
-64    -560   
0      -192   
-112   -448   
-304   -608   
0      -528   
-48    -96    
16     -128   
64     16     
-32    -768   
-128   -192   
-400   32     
384    224    
-160   320    
-176   128    
-48    -256   
48     -112   
-112   -224   
32     -272   
-80    144    
368    192    
112    272    
-464   192    
-336   224    
-336   -48    
-704   -96    
-48    -160   
-96    -192   
64     96     
80     0      
-128   112    
-240   -80    
-448   32     
-224   32     
560    288    
-304   0      
144    112    
-352   -160   
-48    -288   
272    -32    
-544   -96    
-144   -160   
-64    64     
-64    48     
-368   64     
-112   -96    
400    -16    
-320   0      
-448   -48    
480    320    
-752   224    
80     -176   
-240   -208   
-144   -48    
-96    80     
-112   -16    
176    48     
-64    112    
-80    32     
-48    -240   
-128   -112   
-400   144    
0      48     
64     128    
-96    32     
-288   -80    
176    -32    
-304   -32    
-48    -48    
0      -16    
16     -96    
32     16     
-128   -144   
-32    -96    
-448   80     
-48    160    
-160   -32    
96     -96    
-224   -96    
-80    128    
-112   -32    
144    96     
-48    32     
16     32     
-80    32     
-112   -16    
16     48     
-160   0      
-192   96     
272    0      
64     16     
-736   -48    
144    128    
-384   -48    
0      32     
16     -112   
96     48     
0      -16    
-64    -112   
-48    -112   
-16    -192   
48     48     
320    208    
-32    144    
-224   -160   
192    -416   
-32    -112   
48     80     
176    -64    
112    128    
-144   -256   
-96    -144   
128    -64    
-64    -80    
-64    -224   
-96    -144   
-48    0      
80     -160   
-288   -32    
-272   -656   
208    -80    
-32    240    
240    128    
-720   -80    
-16    -528   
0      -192   
-144   288    
0      -80    
128    -160   
16     128    
64     176    
64     16     
-160   320    
-96    112    
-352   -1104  
320    992    
-256   128    
-80    -96    
-320   208    
-144   -64    
-160   96     
128    160    
64     -32    
64     -96    
-352   -256   
48     208    
160    96     
-32    48     
384    16     
128    0      
64     -16    
-256   32     
32     48     
-176   64     
0      48     
16     -80    
-96    -112   
0      16     
-64    -64    
160    96     
224    304    
-176   64     
32     0      
0      32     
-32    -32    
128    64     
0      -16    
160    -16    
-16    0      
96     64     
-48    64     
-64    -48    
32     16     
-320   -32    
272    64     
-272   32     
-80    -16    
-32    0      
144    0      
-80    -16    
16     16     
-32    -80    
-96    112    
-592   -16    
384    32     
-16    16     
-96    32     
-48    96     
304    112    
16     -64    
-80    -144   
64     0      
16     48     
208    48     
-96    0      
64     96     
-240   -80    
336    96     
-208   0      
-32    64     
-64    16     
-16    16     
-208   -112   
704    400    
-576   96     
0      -128   
-48    -48    
80     80     
320    32     
-736   -384   
848    160    
-784   48     
-176   -32    
80     48     
-64    16     
-96    96     
-96    -32    
112    48     
-272   -64    
112    128    
-256   16     
192    -32    
-80    48     
16     -16    
352    288    
-272   192    
-176   -32    
208    64     
-336   -48    
320    -48    
432    144    
-64    80     
464    128    
0      80     
-160   -32    
-64    -48    
224    128    
-928   -288   
464    32     
304    64     
-576   -288   
48     16     
80     -32    
784    320    
-64    160    
-48    -16    
800    208    
-736   144    
-80    -160   
400    16     
224    112    
240    64     
128    80     
64     -32    
-32    -16    
112    80     
-160   64     
16     -192   
-32    0      
368    64     
-80    -128   
-272   -80    
240    32     
-48    0      
288    192    
-128   80     
160    32     
-160   -96    
32     64     
80     96     
224    -16    
-128   -16    
16     -1104  
16     -16    
0      16     
48     64     
-80    -32    
160    16     
304    48     
-192   -80    
96     -16    
16     128    
272    112    
-128   32     
0      -32    
160    0      
-16    32     
80     -304   
16     -48    
256    -496   
-160   -112   
272    192    
128    96     
-64    96     
16     16     
96     -160   
224    336    
-48    -32    
-32    -224   
176    256    
-112   -144   
256    176    
48     -608   
-128   160    
64     -1648  
160    112    
96     96     
48     16     
176    -16    
64     224    
-112   32     
128    80     
224    496    
-336   -448   
144    224    
176    224    
224    -32    
32     16     
-128   -288   
96     256    
96     64     
144    -400   
32     144    
16     -96    
208    208    
32     -128   
-32    -64    
16     240    
48     96     
64     -176   
160    -112   
96     288    
-32    -560   
160    -192   
128    80     
80     48     
96     64     
48     64     
-16    -48    
-96    -112   
48     96     
144    48     
96     -288   
32     720    
112    -48    
80     -496   
0      256    
112    224    
64     112    
352    -32    
0      64     
80     -48    
80     16     
112    -256   
192    64     
192    128    
288    352    
288    336    
-80    0      
-80    16     
-48    64     
336    800    
-96    208    
-80    80     
-16    -272   
144    16     
16     32     
224    -256   
80     48     
48     -256   
272    -224   
-64    112    
-176   -384   
144    -48    
-48    -32    
224    16     
80     192    
128    160    
80     32     
0      -48    
112    -160   
64     80     
224    32     
16     64     
112    -64    
48     -96    
256    80     
64     64     
48     0      
160    -32    
80     -48    
32     -800   
208    -208   
96     64     
-32    -16    
64     -208   
96     0      
160    -144   
-64    176    
-528   0      
176    -160   
-1072  352    
208    128    
-192   208    
-32    -240   
128    -64    
160    -64    
64     -80    
144    -64    
-80    -208   
304    448    
-16    64     
-16    32     
-144   -128   
192    -464   
256    -80    
240    -256   
128    -192   
128    272    
304    -80    
288    -176   
304    176    
-128   80     
-224   -352   
-544   -368   
176    -304   
96     -128   
-64    -448   
336    -96    
-320   64     
-144   96     
-288   96     
320    -144   
-832   -64    
-16    -128   
480    -192   
64     -720   
544    -16    
224    0      
-176   208    
-368   -176   
-48    -256   
272    112    
-32    112    
0      -32    
48     -192   
144    -144   
-80    -16    
-640   240    
-208   -80    
-96    -304   
112    -272   
-176   -144   
224    -272   
-48    48     
160    -16    
32     -48    
288    -176   
-64    -16    
32     -160   
-64    -208   
64     -320   
96     0      
80     176    
96     -16    
-816   -128   
48     -368   
-96    -64    
224    240    
224    320    
352    -784   
192    16     
-208   -240   
224    -368   
-48    -32    
416    208    
-368   192    
-192   144    
-464   48     
144    176    
48     -64    
96     -48    
48     48     
160    -160   
96     32     
80     -256   
16     -112   
48     -80    
96     -80    
-304   -32    
192    0      
-176   -176   
80     256    
32     112    
176    0      
112    -112   
48     176    
-48    0      
368    -656   
16     -240   
272    -208   
-144   32     
96     256    
-160   -528   
-128   -160   
176    240    
-64    -288   
176    -48    
-160   48     
32     0      
-288   96     
-752   -496   
-16    160    
-256   -160   
32     144    
128    80     
-800   64     
-144   -128   
-2368  -160   
-160   0      
320    96     
-176   -16    
144    -48    
128    -64    
160    -96    
16     176    
-128   -48    
-144   128    
-208   -96    
-128   -32    
80     64     
-240   -240   
272    -640   
-304   -240   
224    192    
-656   64     
-16    48     
192    48     
-192   0      
-432   192    
-128   128    
-224   -32    
-224   32     
-48    0      
-32    -32    
32     176    
-256   48     
-32    -16    
-192   208    
16     192    
64     0      
-320   16     
-480   -96    
-16    112    
48     -48    
144    48     
-112   -64    
112    144    
16     -240   
-128   -256   
32     64     
48     64     
-32    0      
48     32     
-160   48     
-288   -32    
-272   -32    
-432   -32    
48     112    
-224   -48    
272    64     
-176   -320   
240    32     
-224   144    
-384   -32    
80     0      
224    48     
240    48     
80     16     
-80    16     
-240   -80    
-144   -16    
240    96     
0      80     
-272   -64    
-64    16     
176    -80    
-128   0      
-80    96     
-112   48     
-48    32     
-128   16     
-96    -128   
32     -48    
16     64     
-80    64     
48     48     
-576   -16    
240    96     
-1088  -64    
640    368    
-560   16     
176    -80    
-160   32     
32     0      
32     32     
-352   -256   
544    -176   
-208   0      
208    64     
-192   -96    
16     -80    
-32    -144   
-144   64     
-1680  -144   
48     144    
-304   0      
-320   -128   
240    16     
-304   -224   
352    144    
-144   208    
-240   64     
-16    -96    
272    80     
-496   -32    
224    -32    
-176   0      
-64    64     
192    240    
-640   -80    
-144   -96    
336    -16    
-48    -48    
80     48     
464    192    
176    96     
112    272    
-544   32     
320    0      
-528   -80    
-192   16     
64     -16    
-320   48     
-272   -240   
400    -80    
-192   160    
-64    224    
16     -48    
-32    64     
-16    208    
-48    80     
32     112    
-48    48     
112    64     
-192   0      
-32    144    
144    160    
-16    96     
32     112    
-144   112    
208    192    
0      96     
48     160    
144    96     
-80    -192   
464    224    
-240   448    
16     -272   
464    400    
-320   -32    
64     -32    
-160   -16    
16     -16    
224    176    
-144   -48    
336    96     
96     64     
128    -16    
-128   80     
-208   -1008  
176    1168   
32     -384   
-208   -144   
208    752    
-192   -192   
208    0      
-192   -352   
32     160    
-272   448    
-96    -336   
-48    -304   
64     -176   
400    304    
-304   -352   
48     -224   
128    -16    
-16    -528   
-256   416    
-64    64     
-208   -320   
128    -272   
128    -176   
16     80     
176    -16    
32     -32    
224    96     
-80    16     
-160   16     
32     32     
-32    16     
-144   -400   
224    -144   
-176   144    
80     16     
112    -16    
112    -16    
48     32     
64     32     
160    208    
-16    32     
304    336    
-96    128    
-16    0      
144    -80    
-48    192    
-32    96     
96     -16    
144    256    
208    816    
-112   160    
160    -448   
0      80     
-32    -48    
64     160    
-48    -32    
208    336    
64     144    
-112   144    
-112   -32    
208    -240   
80     -48    
-16    0      
-48    -112   
96     32     
-320   112    
16     -176   
80     -48    
64     -176   
96     -176   
16     -48    
48     80     
64     64     
0      64     
48     -32    
32     -48    
16     16     
-160   -304   
-128   -144   
-80    224    
16     128    
160    -176   
160    160    
32     -496   
160    176    
-96    96     
240    -32    
48     -32    
144    -64    
-192   96     
224    288    
96     112    
160    -32    
-256   -64    
32     128    
-80    128    
48     32     
128    0      
80     -752   
-64    32     
48     32     
224    48     
-64    192    
176    144    
0      48     
-48    -48    
32     -336   
32     -160   
80     -32    
-80    -432   
-32    -128   
48     -48    
32     384    
224    64     
32     304    
48     -1104  
64     144    
-64    336    
-80    -208   
384    -80    
272    -256   
192    160    
16     -64    
16     -48    
-48    -224   
80     -464   
96     -64    
-80    -144   
-64    -48    
-32    96     
-176   -608   
304    0      
208    48     
-112   -368   
176    -336   
160    -128   
-672   -224   
80     -400   
496    -464   
0      176    
0      112    
-352   -64    
-80    -208   
-176   -16    
-112   -304   
464    -448   
-208   144    
-304   -128   
96     -272   
-272   -112   
-32    112    
0      32     
-64    -112   
-48    -176   
752    -160   
112    -128   
352    96     
224    112    
-32    -144   
144    16     
-288   -608   
272    -368   
64     -208   
256    80     
-176   -16    
320    -240   
-208   -64    
64     -384   
96     -96    
-80    -32    
-16    112    
160    -208   
160    16     
272    -48    
80     112    
320    416    
-432   112    
256    -64    
0      -64    
-64    -304   
48     -1088  
192    -384   
80     240    
176    -176   
-96    -320   
352    -960   
-240   576    
0      48     
320    -416   
64     224    
0      384    
368    400    
-64    -288   
32     -864   
224    528    
-592   416    
-176   -64    
80     -80    
-48    -480   
400    144    
-32    -752   
32     -96    
80     -32    
96     80     
592    32     
-64    128    
-96    -240   
-288   -64    
48     416    
96     -16    
-80    0      
80     -304   
80     208    
176    -368   
96     -144   
80     -144   
16     352    
48     -48    
112    -288   
0      48     
80     208    
112    -16    
224    -16    
304    -16    
-48    -48    
-272   -64    
176    -48    
-704   -128   
0      16     
80     304    
128    80     
112    -192   
128    -208   
96     -64    
0      -64    
16     128    
16     400    
32     128    
144    -384   
288    -272   
-160   -64    
32     64     
-128   -16    
80     80     
32     112    
160    16     
96     -48    
208    16     
-80    32     
64     -688   
80     32     
-64    32     
-64    0      
48     -48    
192    80     
-128   48     
208    -32    
-128   -80    
96     -80    
-768   224    
112    -112   
-48    -96    
32     -64    
-96    64     
0      -400   
-48    16     
128    0      
16     96     
0      -48    
256    -208   
160    32     
16     -80    
-160   0      
48     -80    
-624   -128   
144    -112   
-976   -304   
-208   -352   
32     0      
64     -416   
256    144    
256    96     
-80    -96    
-208   -16    
-32    -208   
-112   -48    
160    16     
-208   0      
336    0      
-320   -32    
-32    -16    
16     -64    
192    0      
192    0      
64     -48    
-16    64     
-112   32     
128    0      
16     -80    
224    -192   
-464   16     
16     32     
-16    -128   
48     -16    
-208   128    
-48    -32    
-32    112    
48     -64    
240    144    
-288   -192   
112    16     
192    160    
-224   -48    
-48    -64    
144    16     
-64    0      
176    48     
-176   64     
0      -96    
-96    48     
-48    -112   
256    0      
-592   16     
176    64     
-848   -512   
-176   -160   
-320   160    
-1440  -112   
112    64     
-48    304    
-368   80     
384    -32    
-336   -96    
192    -64    
-512   -64    
-464   -64    
-384   -176   
-208   -240   
560    96     
-368   -112   
64     -80    
-32    -32    
16     32     
-96    16     
-496   -448   
-64    -432   
-256   112    
-288   304    
-240   -240   
-96    -400   
-496   -80    
16     -160   
-48    160    
0      416    
208    48     
128    32     
-80    -16    
-256   32     
-128   -80    
-464   0      
-208   32     
-384   32     
64     240    
64     -320   
240    96     
-96    -112   
16     32     
-256   64     
256    -48    
-80    -48    
80     224    
-192   16     
-48    80     
16     16     
-160   -320   
352    32     
-176   400    
208    -416   
96     336    
-208   240    
-256   -496   
-176   1344   
320    -480   
-272   -336   
-112   -288   
528    96     
-448   416    
-64    -80    
-144   -352   
0      -368   
-128   -128   
-256   -336   
32     48     
-912   0      
-128   208    
48     -32    
80     32     
-48    96     
-112   32     
112    -112   
-48    -112   
-112   -80    
-80    -16    
-192   -32    
32     -64    
-64    48     
-256   -80    
-128   -48    
-720   -96    
320    224    
-256   80     
112    224    
80     192    
-48    16     
64     16     
192    48     
-128   144    
-224   128    
144    0      
-144   64     
-112   0      
-176   80     
0      16     
64     -48    
224    80     
-1088  112    
-208   0      
48     -48    
208    208    
-16    128    
-96    -48    
112    -160   
-48    96     
-144   16     
-48    -16    
-32    112    
-48    -80    
224    176    
-464   0      
160    48     
-448   -32    
96     16     
64     96     
64     -64    
96     -32    
-80    96     
-96    48     
-192   -48    
368    0      
-64    128    
144    0      
-240   -128   
48     0      
-272   -16    
48     96     
96     0      
112    16     
144    80     
-96    144    
-224   -32    
-208   16     
-144   -80    
32     96     
48     80     
-64    96     
144    176    
-48    -32    
288    0      
-16    144    
208    160    
-192   64     
48     -48    
64     -48    
32     96     
48     64     
144    64     
-64    -16    
192    144    
-64    0      
-272   -16    
80     -96    
-80    -144   
144    32     
-256   -96    
320    96     
-16    112    
128    64     
-48    112    
-272   208    
0      0      
320    96     
-144   16     
-16    -96    
160    64     
-96    -48    
80     64     
-32    -128   
-96    -16    
256    64     
-80    112    
48     80     
176    16     
-64    48     
128    16     
-176   64     
48     -240   
32     16     
48     -176   
-32    -368   
48     -16    
112    16     
-48    48     
96     144    
96     224    
96     112    
-160   80     
368    288    
64     192    
112    176    
160    160    
128    144    
48     -128   
-32    112    
912    1024   
-448   1536   
-96    64     
-32    -304   
256    432    
-192   -144   
320    -864   
272    -864   
48     -16    
400    912    
224    656    
-256   208    
-144   -144   
192    -304   
16     304    
-48    160    
-288   -720   
208    288    
48     432    
-432   -800   
64     -144   
352    272    
400    160    
-256   -112   
368    736    
-80    -224   
-368   -1008  
432    128    
-560   -272   
368    -944   
688    912    
128    240    
560    -336   
-160   304    
-80    128    
240    288    
-848   -1088  
-288   256    
-304   336    
384    128    
240    -240   
-176   -16    
160    272    
192    256    
-240   -320   
16     224    
-128   -144   
-656   -32    
176    160    
160    -80    
-192   -272   
352    -432   
-16    16     
416    -416   
-288   16     
-16    176    
112    -64    
-368   -160   
336    16     
32     0      
48     -48    
-176   -16    
192    -144   
16     16     
48     -160   
-32    -16    
144    -208   
192    96     
0      160    
160    128    
16     80     
48     160    
112    32     
32     16     
16     -128   
144    48     
-80    176    
96     -48    
48     64     
112    16     
272    368    
-48    176    
-64    192    
-16    224    
256    -32    
96     144    
0      48     
-80    96     
112    128    
64     128    
224    32     
96     160    
-224   -128   
80     80     
-96    -128   
96     96     
16     -592   
144    0      
48     -272   
80     80     
128    64     
0      128    
0      -32    
-48    -16    
64     -64    
80     0      
128    48     
-48    -112   
-32    80     
288    -272   
-224   96     
144    -144   
144    112    
0      -176   
144    -80    
112    16     
208    128    
-64    48     
32     -32    
112    32     
48     80     
256    32     
-128   -480   
48     64     
-192   -608   
-64    -304   
-32    240    
0      160    
112    -112   
0      -32    
96     -32    
160    160    
208    32     
256    336    
176    64     
48     -48    
-304   16     
-112   -352   
224    128    
128    0      
144    48     
64     -176   
32     80     
-112   -512   
80     64     
80     80     
-128   -112   
-32    0      
112    -832   
160    -112   
-112   -144   
560    -352   
384    64     
16     -32    
-64    -160   
0      32     
-48    -128   
-48    80     
96     64     
-144   -112   
224    -32    
208    -384   
80     96     
-256   -48    
16     -192   
32     -16    
64     -32    
80     -32    
288    -544   
16     -48    
144    -16    
144    0      
48     0      
144    -32    
-16    144    
-352   64     
208    -48    
-256   -176   
-240   -16    
64     -16    
16     -48    
336    -16    
-144   -64    
80     -160   
96     -64    
64     -912   
96     16     
0      -64    
0      32     
144    16     
-48    64     
16     -80    
32     112    
64     384    
-288   80     
-80    -112   
32     80     
-144   -64    
160    -32    
128    -176   
240    0      
-208   16     
320    -48    
-416   -64    
208    -48    
-304   64     
192    144    
-112   48     
-48    -80    
384    32     
-288   320    
208    64     
-496   -336   
272    -128   
80     64     
64     -336   
80     96     
-144   -1136  
128    208    
-192   352    
128    -368   
-64    -128   
288    48     
32     0      
400    112    
-640   80     
-1232  -1904  
272    768    
-368   592    
-912   -208   
384    -480   
-256   288    
1056   256    
-320   -896   
336    160    
16     336    
-192   -160   
96     -128   
-336   -752   
-16    480    
144    144    
240    -112   
-1616  64     
144    -704   
160    -208   
-80    -48    
224    16     
48     -112   
256    -144   
-96    32     
-128   80     
-320   112    
208    192    
272    176    
544    320    
-624   64     
-80    32     
32     0      
144    160    
192    -32    
96     -64    
-144   -48    
-80    -528   
16     80     
32     96     
144    -16    
-384   -32    
32     -80    
-336   -128   
48     16     
-288   -64    
64     -48    
16     -48    
-64    -80    
48     -48    
64     -208   
-32    -32    
-16    -288   
16     80     
-16    -112   
80     -144   
-368   -128   
112    112    
-224   -32    
304    -16    
-256   16     
80     32     
208    112    
16     0      
192    0      
-1696  0      
96     128    
-288   -96    
-384   96     
0      -16    
-752   -64    
-48    96     
-32    16     
32     0      
-16    16     
32     80     
128    -32    
80     -32    
-272   -368   
160    32     
-256   -96    
128    -16    
-64    112    
-464   32     
0      96     
-544   -16    
-128   -224   
-240   -160   
16     64     
48     -48    
-272   0      
-736   -16    
0      112    
-16    32     
-128   64     
-96    -64    
176    176    
32     336    
-16    -80    
112    -64    
-288   -80    
-48    96     
-320   -32    
32     -128   
-480   -48    
-160   -16    
-48    48     
48     96     
192    -64    
352    64     
-176   -224   
176    176    
-416   64     
64     0      
112    16     
0      96     
-80    80     
-400   32     
-176   -96    
-112   -32    
160    48     
48     240    
176    240    
-144   -288   
-160   -480   
176    -624   
-80    -160   
-48    -16    
32     160    
-128   48     
-272   -192   
-192   -64    
-224   -304   
272    304    
-448   48     
208    -128   
-432   -80    
0      -208   
-96    -256   
-80    64     
32     144    
48     -96    
-48    48     
96     64     
-112   16     
16     64     
-256   -16    
-96    112    
304    416    
-512   80     
176    -16    
-784   -80    
224    80     
16     -48    
176    16     
-48    -112   
-384   -80    
32     160    
-80    -208   
96     -96    
128    480    
240    -32    
-144   -112   
64     16     
-144   -192   
16     64     
-432   -608   
-64    -192   
176    288    
16     48     
-32    -96    
-48    48     
-112   -48    
-416   -96    
576    112    
-256   48     
16     -32    
-384   -96    
-176   -336   
-752   -640   
-16    352    
-64    256    
224    -96    
320    -64    
192    496    
32     -16    
-16    -352   
-256   48     
-96    112    
16     -80    
-144   -64    
272    64     
-224   -176   
-256   -240   
192    160    
-272   -288   
160    -704   
256    -208   
544    80     
272    208    
-16    -32    
-752   -400   
80     96     
-272   96     
-64    64     
-224   -48    
16     96     
-64    16     
176    80     
64     48     
448    256    
-672   128    
256    0      
16     64     
-16    80     
288    32     
-160   0      
48     0      
-16    0      
-80    48     
-128   16     
144    0      
176    192    
-112   416    
-64    112    
272    112    
368    224    
-160   32     
16     48     
0      48     
-64    0      
176    16     
-80    16     
112    80     
-160   -160   
224    32     
0      112    
80     64     
160    32     
-176   16     
-32    48     
224    80     
-32    -96    
-96    -48    
-16    112    
112    64     
-112   16     
288    64     
112    64     
-80    -32    
-160   -48    
160    48     
-336   0      
16     208    
176    96     
160    -64    
-48    -128   
64     -32    
48     -32    
0      80     
48     96     
160    128    
16     160    
-144   208    
-128   240    
16     32     
288    16     
-128   -176   
208    -80    
112    144    
-144   64     
64     0      
64     -80    
64     32     
144    128    
144    128    
-32    -96    
-144   48     
-16    0      
112    112    
-80    64     
64     48     
-80    176    
192    208    
272    -48    
-48    -896   
-128   32     
96     48     
240    64     
32     64     
-128   16     
0      96     
-16    -64    
64     32     
80     80     
-48    32     
16     32     
-256   -176   
256    48     
0      48     
-272   -352   
-32    32     
16     -16    
-16    0      
112    208    
-32    64     
0      -48    
192    128    
64     80     
208    80     
-64    -400   
16     -96    
-96    -80    
112    -64    
96     96     
96     -272   
112    80     
-64    -16    
192    32     
48     64     
-48    80     
16     48     
-64    -128   
-32    -272   
16     64     
-32    -16    
192    80     
48     64     
16     16     
112    16     
80     -256   
0      80     
-64    -16    
128    -48    
272    16     
272    80     
-208   -288   
32     16     
-256   -48    
-80    -144   
144    -64    
288    112    
256    -16    
96     -192   
32     80     
-32    -112   
32     -112   
-96    -496   
-48    80     
-16    16     
80     208    
32     96     
96     112    
-112   48     
208    80     
96     0      
192    16     
-64    128    
-48    -32    
272    64     
96     -64    
160    32     
112    96     
-96    96     
80     256    
176    288    
0      -16    
208    256    
-112   64     
-128   -272   
48     480    
-128   -320   
192    -224   
-16    256    
144    48     
-544   -160   
448    -16    
-64    -496   
112    496    
48     -64    
-176   240    
272    160    
-32    112    
-240   192    
-80    -240   
-288   0      
336    -1296  
640    528    
528    464    
176    -288   
-32    -80    
-160   32     
320    320    
128    112    
592    96     
224    208    
32     -64    
-16    64     
272    32     
-240   0      
96     -432   
0      -416   
528    160    
-656   352    
-224   -32    
480    -256   
496    -48    
128    160    
96     96     
-16    16     
-208   -560   
272    112    
-128   -96    
240    -112   
-160   112    
256    -208   
64     -272   
224    -816   
-80    -16    
32     144    
0      -16    
16     -208   
224    -160   
-96    -272   
64     32     
48     -112   
48     -16    
32     -176   
-48    0      
-1616  -80    
80     -320   
64     16     
-80    -816   
272    -384   
-160   -656   
192    -256   
-80    240    
-16    -32    
144    -224   
144    32     
16     96     
16     0      
16     16     
48     -48    
-848   -16    
-16    48     
208    128    
64     80     
352    -80    
-64    -112   
112    -16    
128    -992   
-48    -48    
32     -64    
-16    16     
48     16     
64     32     
176    32     
-96    -16    
-176   -64    
160    -48    
192    -112   
128    -128   
288    -16    
-112   -32    
-80    -80    
0      -208   
-128   64     
48     -48    
16     64     
64     0      
-48    32     
-16    -192   
128    0      
-96    -16    
128    -80    
-544   32     
32     -80    
224    -16    
-80    160    
-208   -48    
-16    -256   
144    -32    
0      176    
0      64     
0      -48    
64     0      
-160   0      
32     48     
-560   -128   
208    -112   
-1456  -48    
80     48     
400    -144   
64     0      
-16    -96    
-96    -304   
-16    80     
-16    -240   
80     48     
208    224    
96     192    
32     144    
32     48     
-128   112    
16     -128   
-128   -112   
320    0      
-432   128    
-16    -208   
32     -224   
96     -352   
96     -48    
192    -64    
-112   -16    
-160   0      
-64    -496   
224    -512   
256    -208   
96     -64    
-64    -320   
112    112    
-192   400    
-864   64     
96     -672   
48     -512   
-80    240    
144    16     
112    -96    
-48    -176   
176    -48    
-64    112    
-288   320    
240    -80    
176    272    
32     16     
144    -16    
144    -16    
64     96     
-96    -208   
240    -240   
144    112    
16     -16    
16     -336   
144    -16    
-16    192    
160    -704   
-432   -32    
-80    352    
-304   -64    
160    272    
-48    176    
-64    -144   
336    -64    
-32    -32    
320    -160   
-1120  -160   
-16    96     
16     -32    
-1056  -64    
-128   144    
-368   112    
0      -48    
-432   -48    
464    560    
-512   48     
-128   -160   
80     160    
-224   128    
-656   -32    
80     0      
-720   -288   
-96    48     
-176   32     
160    -208   
256    32     
-336   -160   
16     -16    
-1264  272    
-288   -160   
128    -32    
32     144    
64     80     
80     112    
-144   -32    
-464   -128   
208    -48    
-416   64     
48     16     
0      48     
-368   -32    
-288   -336   
368    -368   
176    80     
-192   -16    
-944   -272   
320    96     
-16    176    
-240   32     
-544   -368   
816    -64    
80     240    
-448   176    
-400   0      
-80    -144   
224    16     
-480   128    
-128   -48    
736    320    
-736   176    
-672   -144   
-64    -32    
192    48     
96     16     
-112   0      
96     16     
-48    -16    
-96    64     
-80    -32    
-16    32     
352    160    
-112   240    
48     128    
32     -32    
-32    -32    
-128   -64    
48     64     
0      48     
128    128    
-80    -48    
-256   -128   
64     -80    
32     -16    
80     96     
64     32     
-64    48     
-16    96     
80     96     
-288   32     
64     -32    
16     -48    
16     16     
-544   32     
176    80     
128    64     
-192   -48    
0      -48    
48     16     
-80    64     
-48    -32    
96     16     
-240   -112   
-128   96     
112    16     
64     48     
-208   -144   
-64    -16    
-304   0      
32     96     
-48    80     
-32    -32    
32     64     
240    128    
96     32     
128    176    
-16    112    
80     48     
288    64     
-256   48     
-16    32     
-192   -96    
80     -112   
-496   -128   
160    32     
48     80     
-32    176    
0      128    
48     32     
0      80     
-32    48     
160    48     
128    80     
176    16     
-128   -80    
32     64     
-336   -32    
176    48     
-96    -16    
16     -64    
-32    16     
-16    0      
-32    0      
160    112    
-160   16     
-240   -256   
208    -704   
96     -256   
288    -80    
0      -112   
176    80     
-288   -368   
-16    0      
-208   336    
112    416    
-192   -496   
-240   -304   
-80    176    
-16    192    
112    160    
-16    112    
48     16     
-256   -96    
128    48     
-16    80     
32     -224   
-256   -400   
32     48     
160    160    
-48    32     
64     -48    
112    256    
336    320    
-16    112    
0      48     
64     -48    
-16    -80    
32     48     
80     32     
-48    32     
352    224    
-432   -128   
-64    -288   
224    0      
176    448    
176    320    
-48    -144   
-64    -32    
-272   624    
400    800    
-448   -240   
-112   -256   
96     -32    
-112   144    
-272   64     
128    -192   
-240   -160   
-32    144    
32     -48    
192    -64    
32     208    
64     32     
-16    64     
48     96     
0      32     
-112   48     
368    48     
-144   48     
-80    160    
96     -16    
80     -96    
16     -96    
224    160    
64     16     
-128   112    
272    -144   
-96    -16    
-192   -192   
160    -16    
-80    96     
112    592    
384    496    
-368   80     
-48    -496   
128    208    
272    192    
-48    -240   
160    32     
-160   -240   
96     -112   
16     0      
384    256    
160    48     
-96    96     
480    112    
-240   176    
-256   -16    
-96    128    
176    48     
48     48     
176    -80    
32     -48    
208    -144   
-576   0      
-432   0      
0      -16    
-16    32     
320    32     
112    0      
-560   192    
176    -16    
48     -80    
32     16     
-32    144    
16     -16    
-240   80     
-16    0      
128    -208   
64     -16    
192    -128   
160    496    
-144   224    
384    -240   
16     96     
128    128    
-224   -272   
368    -128   
-208   192    
48     96     
16     -16    
96     192    
272    256    
48     -144   
192    240    
-96    -48    
208    0      
112    -112   
272    -64    
-112   -16    
0      -16    
-272   -240   
240    -512   
-256   -224   
-160   16     
176    384    
288    112    
256    -96    
96     -160   
320    272    
-176   -896   
-112   -400   
96     -96    
-160   144    
-176   -32    
176    -32    
224    48     
144    80     
0      0      
144    -64    
192    48     
-128   32     
64     80     
80     -32    
0      192    
96     0      
224    0      
32     144    
64     -16    
-64    -256   
96     -80    
32     128    
-192   -224   
96     -144   
112    32     
-288   320    
256    48     
256    16     
64     -32    
32     32     
112    -240   
0      -64    
96     -160   
224    -32    
96     96     
-32    128    
96     16     
32     48     
64     16     
96     -32    
0      80     
240    0      
96     80     
48     16     
48     -16    
96     -48    
480    272    
-208   496    
112    192    
128    48     
112    224    
128    -80    
-112   -16    
144    -400   
64     -272   
-48    -544   
-32    -624   
-96    0      
96     -64    
368    528    
16     192    
160    112    
96     -320   
192    -176   
192    480    
-352   -1328  
-64    -288   
96     240    
320    -912   
192    -144   
32     -656   
48     -240   
96     64     
112    -176   
320    64     
32     176    
-64    -992   
-112   336    
-32    -416   
0      -304   
336    -144   
208    -32    
224    0      
-32    16     
48     128    
16     64     
-160   -192   
112    0      
144    -16    
240    -64    
208    80     
416    48     
-272   144    
-16    -48    
304    128    
-96    -80    
96     -32    
48     32     
-64    -208   
64     -96    
160    -352   
128    48     
144    -96    
32     -16    
96     208    
96     -48    
224    16     
-192   16     
-80    -272   
304    -80    
160    32     
128    16     
-1216  -112   
176    -144   
160    -64    
560    208    
-336   -48    
16     -96    
64     -64    
160    -784   
-384   32     
144    -48    
-96    176    
144    32     
112    64     
-224   224    
64     176    
-656   -16    
-80    -96    
-304   32     
-128   -48    
512    96     
48     -32    
320    -64    
0      -128   
32     128    
32     0      
192    64     
16     -304   
-112   -96    
-64    96     
-48    -96    
-144   -112   
160    48     
-352   -128   
768    -112   
-608   48     
-128   -416   
544    80     
-400   -96    
48     0      
288    160    
96     16     
208    176    
-192   -16    
-16    -112   
128    -32    
-128   -48    
336    -48    
80     560    
-1040  112    
-912   -304   
336    -96    
-144   112    
432    16     
-432   48     
-256   -1264  
576    128    
-208   -16    
-208   -80    
80     96     
-240   -64    
-704   16     
144    -48    
-224   48     
16     0      
128    -32    
112    -16    
-80    96     
-48    -192   
-32    32     
288    -240   
208    -64    
-480   -64    
80     -16    
-272   -48    
240    -96    
-112   80     
32     -96    
80     -16    
16     80     
64     112    
144    16     
-48    -16    
144    -160   
-128   80     
160    64     
112    48     
-224   0      
224    -16    
-480   -80    
192    16     
-96    32     
64     32     
32     32     
-64    -128   
-80    48     
80     -80    
208    16     
-608   -32    
256    176    
-240   32     
-352   -64    
-128   64     
-864   -192   
0      -112   
-32    128    
80     48     
-240   -96    
-48    -112   
-2288  -208   
144    -80    
-192   112    
256    80     
-480   -48    
-592   80     
16     80     
-208   -48    
16     16     
-112   32     
144    96     
-592   112    
-80    176    
64     -112   
-48    96     
-64    384    
16     -320   
144    32     
128    96     
-112   -480   
176    768    
-80    112    
64     -80    
-32    48     
-304   80     
-240   80     
-432   -160   
-128   -16    
96     -96    
16     32     
192    -96    
224    112    
-32    -144   
-272   64     
-272   -768   
144    -528   
176    864    
336    0      
64     -80    
-64    80     
-288   -176   
0      112    
-80    752    
-448   -480   
-16    176    
-176   -288   
176    80     
160    48     
-208   -576   
48     384    
64     240    
-16    256    
-288   -272   
128    96     
16     0      
48     0      
-176   96     
64     -80    
-640   -16    
-16    -32    
48     -160   
16     -224   
32     304    
48     -48    
-64    -304   
-32    -208   
160    192    
-176   256    
-80    -112   
112    -96    
128    176    
-256   -80    
-112   0      
-368   -128   
0      144    
-224   160    
96     496    
-48    -176   
80     -592   
240    256    
128    144    
-64    64     
-96    -64    
16     224    
-16    64     
-64    -160   
-112   0      
32     0      
-48    368    
144    128    
48     192    
208    288    
80     208    
-80    112    
16     -400   
160    -224   
-32    48     
-32    -16    
-16    -80    
-128   -96    
-64    -16    
-32    -144   
176    -160   
-16    176    
0      176    
-256   96     
-272   -32    
-48    208    
32     64     
-64    160    
208    336    
320    144    
-368   -112   
224    80     
-208   288    
144    -208   
-144   16     
-80    16     
-432   48     
80     288    
-384   -96    
0      -16    
448    0      
-336   144    
-112   -80    
-256   96     
-128   -128   
80     -32    
240    16     
240    368    
-352   368    
-144   -160   
48     -240   
80     64     
256    176    
288    -80    
-224   -32    
64     -80    
-112   16     
192    0      
-272   128    
80     -16    
128    16     
304    176    
-272   48     
144    32     
-288   -224   
112    -48    
-48    -16    
208    192    
32     272    
-16    -32    
-16    -80    
32     128    
112    64     
0      48     
16     48     
80     -16    
0      128    
-272   192    
176    -32    
112    -160   
-160   -64    
-48    -16    
-32    80     
16     -32    
96     80     
-64    -144   
144    16     
64     80     
576    672    
-432   496    
-416   96     
-48    -272   
-176   -16    
160    80     
-80    0      
160    -32    
-160   0      
592    304    
32     80     
-80    -32    
160    -96    
-32    144    
304    -144   
64     32     
0      80     
-16    32     
224    64     
384    144    
-240   256    
-208   16     
-96    400    
32     16     
-128   -240   
416    -320   
112    112    
240    272    
-112   160    
16     0      
-512   -368   
-80    -256   
176    -128   
128    -80    
80     -144   
128    208    
-64    0      
-16    -128   
16     -32    
80     64     
48     288    
-64    48     
192    -96    
0      -352   
32     -256   
96     -64    
64     -112   
112    32     
112    464    
-144   288    
64     -320   
80     -256   
96     192    
128    16     
48     -720   
-16    -256   
112    192    
-16    64     
32     32     
144    112    
32     -64    
224    256    
-160   -16    
464    544    
-272   336    
-48    -496   
352    16     
176    0      
16     -64    
0      -1504  
-64    0      
240    -320   
224    -32    
-272   -432   
96     -160   
-80    -80    
0      -128   
144    32     
-192   32     
32     -16    
0      48     
144    64     
160    -80    
48     32     
-32    -528   
0      32     
64     112    
48     32     
64     -64    
320    -112   
160    -48    
0      96     
-80    96     
176    208    
-352   -16    
80     -16    
304    64     
96     -32    
176    64     
80     -80    
160    48     
-32    -896   
-176   -128   
192    -352   
16     160    
208    80     
144    32     
272    48     
-80    32     
-96    0      
-80    -208   
80     -16    
64     80     
176    96     
-48    -128   
16     48     
160    -464   
-320   48     
224    -224   
48     32     
16     112    
208    64     
-128   0      
352    112    
-160   96     
-48    -160   
96     0      
192    64     
96     32     
-48    -352   
352    96     
-80    -112   
192    96     
-176   48     
448    128    
-64    0      
-96    32     
64     16     
1088   704    
-1184  352    
160    -272   
112    96     
288    -192   
416    32     
-224   -432   
288    -32    
80     288    
-256   -64    
336    192    
-336   32     
576    -48    
96     32     
224    32     
-64    -32    
-240   -48    
-32    -144   
160    144    
-80    -176   
496    176    
64     80     
-144   32     
208    -128   
-320   -112   
704    288    
-304   -384   
-304   -160   
512    -448   
112    -64    
240    -32    
-32    -304   
32     -32    
96     -288   
-128   -48    
128    80     
-176   -16    
160    128    
-464   -400   
656    -288   
144    288    
-48    -336   
288    -64    
-384   -80    
32     -240   
64     -160   
64     -176   
80     32     
128    -48    
-80    32     
224    -240   
112    -224   
64     32     
272    0      
-208   96     
0      32     
96     0      
128    -48    
-528   -16    
144    -64    
-480   0      
144    -272   
352    -224   
-224   -224   
80     -64    
176    -224   
64     -48    
64     -32    
64     96     
128    16     
-368   -32    
208    80     
240    32     
-224   -128   
32     720    
-192   -288   
80     -256   
-144   128    
208    -96    
16     160    
96     -480   
0      160    
80     -416   
-48    160    
16     192    
304    -160   
160    80     
240    80     
48     -80    
-112   -80    
-336   -352   
96     400    
-16    -256   
16     -32    
64     -480   
-32    -160   
-256   128    
-16    -464   
144    64     
176    32     
240    176    
-224   224    
48     -544   
-96    16     
0      -32    
-480   -448   
80     336    
-688   160    
144    592    
112    16     
48     -336   
-64    -80    
128    0      
336    576    
48     -496   
96     96     
-48    64     
112    -144   
-80    160    
80     -112   
-64    -112   
144    80     
-48    64     
144    0      
-976   -192   
224    416    
160    160    
64     -272   
-48    -112   
96     -800   
128    336    
-32    112    
128    -48    
-144   224    
-32    0      
-80    32     
-240   160    
-320   -32    
256    112    
0      208    
256    32     
-48    80     
-64    -96    
96     48     
176    -464   
0      -16    
-912   -96    
176    -48    
-80    -64    
-48    -112   
-48    -16    
176    -32    
-624   176    
160    80     
192    224    
-144   96     
96     -64    
176    -384   
-32    -32    
0      176    
-16    128    
160    -48    
0      32     
-112   176    
-32    -32    
-240   -48    
64     0      
32     -144   
224    128    
-16    160    
-464   -32    
224    224    
-672   160    
-1584  -16    
48     -16    
-400   16     
16     -16    
-2000  -48    
32     -240   
96     -176   
-48    -96    
128    96     
-128   144    
-240   -96    
256    0      
-384   -256   
160    208    
-384   0      
-240   32     
0      160    
-224   0      
-96    -16    
-224   176    
112    112    
-944   64     
-112   -128   
256    -272   
-288   -144   
-384   -224   
-160   -272   
-208   -256   
-64    -240   
96     -400   
288    -512   
-288   -336   
-160   -192   
-32    256    
32     416    
-336   192    
-144   -32    
-32    -192   
288    96     
624    -64    
-32    0      
-432   128    
-672   -64    
-528   -48    
-16    -128   
-16    -336   
304    -144   
0      224    
-208   -16    
-288   112    
-256   64     
-1040  16     
0      0      
256    0      
-144   -48    
384    -96    
208    64     
-416   0      
416    -192   
256    48     
224    -160   
192    -16    
-256   144    
-256   16     
-368   -80    
96     -208   
-496   -144   
32     -64    
-448   -208   
416    160    
-208   48     
32     16     
48     -224   
-16    -48    
32     -32    
-112   80     
256    192    
-192   48     
-16    112    
192    0      
-240   144    
-48    64     
32     448    
208    144    
96     32     
-352   -176   
64     48     
-288   -32    
272    0      
96     -32    
0      -272   
-48    -64    
-128   -32    
112    112    
80     0      
-112   0      
-48    -176   
112    32     
-384   -80    
208    64     
-1696  96     
96     -192   
32     -112   
48     -224   
-48    -96    
16     96     
336    352    
0      288    
-192   192    
112    208    
-48    0      
272    272    
-256   -48    
-176   -208   
32     -32    
-432   224    
192    16     
-128   256    
-176   -112   
0      304    
80     336    
-48    16     
96     80     
-32    -16    
-80    -64    
192    192    
-32    -240   
160    128    
-16    496    
240    -560   
112    128    
-80    32     
-32    -352   
16     128    
160    160    
0      -144   
-144   -304   
-48    48     
32     48     
128    32     
64     16     
0      0      
160    80     
-80    0      
80     64     
16     32     
-64    32     
32     48     
-48    32     
176    48     
-96    176    
-176   -160   
64     0      
224    192    
-32    0      
240    80     
-48    -64    
-256   -128   
-464   -96    
-176   80     
256    176    
144    -16    
336    96     
0      64     
32     -112   
0      -48    
-128   96     
-48    -16    
-32    -16    
128    32     
176    64     
-32    -32    
64     80     
-176   32     
64     32     
0      32     
16     16     
240    144    
-240   0      
-16    16     
224    0      
-80    48     
48     48     
16     32     
48     32     
192    96     
-16    16     
0      32     
-32    112    
256    80     
128    -48    
64     32     
160    160    
-96    80     
0      -16    
-48    -128   
272    112    
-352   0      
-112   0      
0      16     
176    112    
-64    -80    
256    -352   
-48    80     
-256   48     
208    48     
-16    64     
48     80     
176    32     
176    32     
192    80     
304    96     
-192   0      
80     0      
160    80     
-64    16     
-96    0      
112    -304   
80     64     
-144   -32    
576    320    
-480   64     
64     -48    
-64    96     
80     16     
-256   -176   
432    -224   
240    128    
192    112    
32     16     
544    128    
-64    -64    
144    -448   
464    400    
-304   -64    
304    -32    
-32    64     
304    144    
-64    -16    
-96    80     
-32    48     
-32    -128   
144    -16    
-16    48     
240    80     
80     256    
-208   144    
-80    -160   
272    0      
-384   -1296  
720    368    
-240   64     
-64    -112   
144    32     
-544   -16    
-64    32     
80     -272   
-64    -112   
208    128    
-384   -176   
224    -16    
160    32     
-176   -32    
752    304    
-464   -496   
-288   -240   
80     176    
-32    144    
64     -368   
368    512    
-288   64     
80     -240   
64     96     
144    80     
-176   -112   
112    528    
160    -160   
-64    -384   
336    304    
-96    144    
-32    0      
-80    -992   
160    256    
32     -64    
176    32     
176    160    
-64    -208   
16     48     
272    576    
-208   -112   
304    16     
-48    -64    
-48    -144   
96     -128   
240    -224   
80     272    
192    -64    
32     96     
16     -368   
-112   480    
80     16     
64     32     
752    656    
-656   -320   
-160   -272   
-80    -288   
96     -304   
-48    -352   
208    208    
-96    448    
80     272    
208    -112   
240    112    
-160   112    
-32    -112   
224    -64    
160    0      
-16    64     
-64    0      
160    16     
-80    -16    
144    256    
144    -16    
112    32     
80     -160   
96     16     
64     -160   
48     64     
176    80     
144    0      
-48    -128   
144    -144   
64     -112   
192    64     
416    384    
-176   16     
64     -64    
-16    -64    
224    48     
80     -304   
144    32     
112    -32    
208    64     
112    96     
-32    -384   
64     -80    
64     48     
64     -336   
240    -176   
-144   -624   
224    -240   
-128   -1296  
-16    0      
208    96     
-64    48     
176    256    
144    128    
-32    -112   
-80    -128   
224    -208   
-144   112    
-304   -64    
176    -144   
320    -48    
-64    -16    
96     -160   
224    -720   
160    0      
32     0      
48     48     
96     -64    
64     32     
-16    -144   
-64    80     
144    -32    
-16    -96    
-64    64     
-16    0      
96     -32    
416    144    
-128   144    
-16    -16    
256    -176   
80     -240   
128    -80    
48     -144   
-288   -64    
64     -192   
16     144    
192    -160   
240    -48    
-304   -112   
96     -160   
-416   16     
-128   -352   
96     -32    
160    0      
-80    -48    
-48    -320   
256    -176   
80     208    
144    160    
-80    80     
64     192    
-64    80     
128    -16    
-320   160    
128    128    
-224   176    
128    16     
112    0      
144    -128   
-96    -176   
128    -432   
-336   -160   
128    -576   
-32    112    
48     64     
352    96     
-80    64     
64     48     
-160   32     
224    176    
-848   272    
128    272    
-1760  32     
-368   64     
16     -208   
-32    16     
336    288    
304    352    
128    272    
272    -32    
-64    192    
176    -16    
-192   288    
-336   96     
464    160    
-704   464    
-272   -80    
-256   0      
208    112    
144    96     
576    144    
176    80     
-176   -96    
-624   160    
112    -144   
-160   96     
32     -16    
336    0      
-336   -256   
-16    -112   
-736   -272   
112    -32    
-368   -80    
0      -592   
48     -368   
64     -736   
144    -144   
256    -240   
-176   16     
-48    -16    
96     256    
-288   64     
96     112    
-272   112    
272    -368   
96     -32    
160    -240   
-336   -160   
48     -304   
0      192    
240    -160   
-208   144    
96     144    
192    -368   
400    192    
-384   48     
-320   -352   
368    -32    
192    144    
32     160    
128    -144   
64     112    
-144   240    
320    -48    
-80    -80    
-800   -240   
128    176    
-912   -128   
-1392  -48    
-64    48     
-1520  -192   
-32    320    
-272   0      
-32    -144   
112    -128   
80     208    
-80    -272   
224    112    
-288   -48    
304    -48    
-624   -240   
-48    64     
-48    176    
-160   -64    
-256   16     
-96    -96    
80     32     
-80    96     
-112   -32    
-112   16     
-240   0      
176    224    
-48    192    
-304   -16    
176    64     
96     -176   
-64    -144   
48     0      
80     80     
-32    48     
-192   -16    
-16    0      
-144   352    
-32    176    
-960   32     
-64    496    
64     16     
304    32     
-176   -208   
256    16     
-64    -192   
-240   -96    
16     16     
-112   -32    
-80    64     
-96    64     
-32    16     
16     32     
-144   -80    
48     -96    
0      128    
-1680  0      
32     -32    
0      -48    
96     80     
-128   -432   
480    -416   
16     256    
48     64     
0      0      
16     48     
-272   -368   
48     -64    
48     400    
-672   64     
160    32     
-480   -48    
0      64     
-64    0      
32     0      
0      -224   
-48    32     
-32    112    
-112   -16    
176    16     
-128   -32    
96     208    
-368   0      
-80    -80    
-80    48     
144    -32    
-208   -48    
160    48     
-32    16     
144    80     
-128   -16    
-352   16     
128    32     
-16    48     
80     0      
-64    16     
272    160    
-496   -16    
-224   -48    
-48    16     
208    48     
-320   -16    
48     96     
-16    -64    
-32    32     
-112   16     
112    128    
16     80     
0      0      
-32    -32    
160    96     
-80    64     
-96    -16    
208    112    
-272   16     
112    32     
-16    0      
-32    32     
0      0      
-16    96     
0      16     
272    64     
-32    32     
-16    48     
-80    0      
-16    -32    
96     -32    
-64    48     
48     64     
-240   -32    
112    -96    
-528   -144   
48     96     
0      48     
48     48     
-80    -96    
32     -224   
160    208    
-96    -32    
624    624    
-480   304    
16     -16    
-48    -80    
32     -208   
-352   -144   
96     96     
-208   -304   
96     -96    
192    240    
-544   -496   
16     -416   
-80    192    
-336   64     
224    16     
128    144    
272    336    
-480   -128   
32     -16    
64     -176   
-192   -464   
96     320    
-192   464    
-80    16     
-112   -128   
224    -352   
624    368    
-16    448    
112    -224   
-80    96     
-240   -160   
112    336    
160    -80    
80     0      
480    144    
-288   -112   
-16    48     
-96    96     
-16    128    
144    -192   
-128   288    
48     -128   
0      208    
720    480    
-544   -656   
-224   448    
208    -416   
320    176    
-128   128    
-96    160    
-256   224    
0      -864   
288    -400   
-32    192    
-176   192    
16     -32    
-16    160    
144    -208   
208    128    
48     48     
64     32     
-16    240    
160    160    
-112   80     
112    -48    
-112   -32    
-112   -720   
176    -64    
32     -32    
48     -128   
-112   -32    
-176   -64    
320    -64    
80     32     
16     80     
64     -80    
256    -32    
-64    32     
-96    80     
128    112    
80     128    
176    -624   
128    48     
272    64     
112    96     
-144   32     
-64    -128   
144    -64    
-48    32     
224    -16    
64     -128   
16     32     
-48    96     
-48    32     
208    32     
80     80     
48     -224   
160    64     
96     -32    
48     0      
144    32     
32     0      
160    32     
16     256    
16     16     
208    -80    
0      -192   
-240   64     
240    32     
-48    16     
192    -96    
176    -128   
-32    144    
32     -48    
64     144    
160    128    
-144   128    
80     -48    
432    32     
-192   -112   
-288   -256   
208    -272   
-64    208    
-336   -48    
80     -144   
64     -112   
208    -272   
240    128    
224    -384   
-80    64     
32     112    
-192   -80    
272    16     
-96    160    
112    -80    
32     -160   
192    80     
224    208    
-64    128    
32     48     
-16    -32    
144    -32    
16     -64    
80     -112   
32     -96    
-96    -240   
288    -80    
96     64     
192    192    
-160   -128   
176    -32    
144    32     
112    32     
144    80     
80     80     
96     0      
256    80     
64     96     
32     -320   
192    176    
96     -16    
-96    80     
-16    -48    
80     -112   
-16    128    
176    96     
16     80     
400    224    
-112   272    
16     -144   
176    48     
112    -528   
112    -16    
-80    -256   
128    -48    
144    -176   
0      -48    
256    96     
96     144    
-64    160    
0      128    
-48    32     
48     0      
-48    48     
128    -224   
48     656    
-48    -112   
-16    -480   
384    224    
-128   -112   
224    -64    
176    432    
144    -16    
-32    -416   
96     496    
-16    448    
48     -224   
272    -16    
208    -80    
320    32     
-208   48     
16     -320   
96     -256   
-368   -352   
464    128    
192    448    
-192   -240   
208    128    
-48    336    
320    -208   
-1120  160    
320    -272   
-192   -176   
-80    -1072  
576    -32    
-432   -464   
-528   -112   
-112   288    
144    16     
0      112    
-160   -288   
496    -96    
128    128    
192    -384   
384    -656   
-720   -144   
-32    448    
176    -32    
144    -48    
-176   64     
-96    -288   
-64    48     
240    -32    
144    -96    
240    -128   
-192   96     
160    -64    
64     32     
272    16     
-288   -400   
-48    64     
144    144    
96     -16    
96     -208   
160    -16    
0      -384   
112    -64    
32     -432   
112    0      
240    -48    
-256   64     
96     -96    
96     64     
-224   32     
160    48     
-64    64     
48     0      
-288   64     
176    -80    
160    96     
-192   -144   
48     -16    
144    -144   
208    -48    
-16    -128   
320    32     
-160   0      
32     160    
-32    -80    
64     -160   
32     0      
112    32     
-1344  -16    
64     -112   
16     -112   
160    -96    
-144   -160   
176    32     
80     64     
192    -384   
16     0      
48     -16    
-16    -128   
-112   -32    
176    -64    
-112   -48    
-16    -144   
-112   -32    
32     16     
-240   -448   
0      -224   
-16    -16    
128    -80    
144    80     
112    -128   
320    192    
32     96     
-96    -80    
-144   -160   
144    -240   
0      64     
32     0      
-48    -32    
112    -112   
-1104  -64    
-48    -240   
48     -96    
128    -192   
80     -16    
192    -240   
-64    48     
-96    16     
-48    -288   
-112   32     
112    128    
-288   0      
208    112    
-256   -16    
176    16     
192    384    
-336   224    
0      -80    
176    -176   
80     48     
128    -288   
256    160    
-16    16     
304    -96    
-224   -32    
-96    -16    
-432   0      
-96    -48    
-192   -48    
208    -16    
112    112    
128    16     
-80    96     
-32    -144   
-32    16     
-16    -320   
-64    0      
-208   48     
16     -64    
16     16     
160    32     
-160   -48    
112    -16    
-192   32     
48     64     
-288   32     
96     -96    
144    144    
-592   -176   
112    16     
-592   -96    
-80    176    
-32    176    
-144   -96    
-16    0      
176    64     
-96    32     
272    16     
-112   96     
16     -112   
-272   -48    
-752   -144   
128    32     
-400   -96    
304    128    
-64    32     
-160   -48    
-32    32     
-512   0      
-208   80     
-240   0      
176    96     
-144   -16    
-16    -64    
-16    -32    
304    80     
48     -64    
208    80     
-16    -80    
-224   -48    
-160   -32    
-336   -96    
32     0      
-320   -80    
128    -96    
16     -48    
48     -48    
-1312  -32    
-80    -128   
-48    -48    
480    240    
-32    -48    
48     -80    
96     160    
-176   368    
-528   352    
224    -96    
96     -128   
-160   192    
224    -48    
-128   -416   
0      64     
-336   768    
-80    -320   
-32    -352   
-176   336    
-224   48     
800    640    
-320   256    
-384   -1472  
592    -208   
-208   1120   
-608   -320   
-688   -32    
-240   464    
-336   -432   
16     112    
-96    -112   
192    -256   
-1392  240    
416    -16    
-352   -528   
160    0      
64     48     
304    384    
-640   -592   
-272   -400   
-144   -160   
-144   -512   
96     -32    
-48    32     
192    384    
-160   16     
-128   -48    
-960   -96    
-16    -176   
112    -176   
112    -256   
16     -112   
576    256    
-400   416    
-160   0      
128    -64    
-144   -176   
80     -160   
0      48     
-176   -48    
48     -48    
208    80     
-208   80     
32     -16    
-48    -48    
32     -80    
128    -16    
-128   0      
256    32     
-16    0      
112    48     
-64    112    
144    -144   
-48    -144   
-128   -80    
-176   -128   
-64    -16    
-48    32     
192    64     
-80    16     
-176   16     
224    -32    
16     32     
-128   -288   
-96    -176   
-128   64     
-240   16     
-16    0      
-176   16     
48     32     
-112   -16    
240    -16    
-576   -16    
96     64     
16     -16    
80     16     
112    96     
208    256    
-176   112    
-80    -48    
-32    32     
80     48     
96     64     
-16    -96    
96     -48    
-48    -96    
80     -80    
-16    80     
-80    80     
-32    -32    
64     -48    
96     96     
-128   32     
112    128    
-48    -16    
224    16     
-256   -64    
256    -64    
48     96     
112    128    
-256   -96    
32     32     
96     -16    
64     16     
64     -80    
224    80     
-192   80     
80     -80    
192    -16    
112    64     
-32    32     
-32    -240   
0      -176   
-208   -80    
112    32     
112    384    
0      240    
144    64     
192    96     
0      -64    
-64    -160   
240    -208   
112    32     
80     240    
80     192    
-176   -112   
-192   -320   
272    32     
32     48     
96     0      
16     -16    
64     -144   
-192   -320   
-240   -160   
208    128    
-48    80     
-48    32     
112    80     
112    272    
-112   48     
176    128    
128    80     
-64    160    
0      288    
112    368    
0      -176   
16     -432   
224    656    
-32    208    
-144   -176   
-16    32     
96     352    
160    352    
-48    -32    
16     128    
224    144    
-240   -16    
64     -528   
-64    144    
-16    96     
-64    -96    
-16    -640   
272    -256   
32     96     
48     -32    
64     -16    
-144   224    
80     32     
16     64     
-16    32     
64     64     
128    -368   
-128   -48    
112    272    
-128   -128   
288    144    
-16    -320   
176    144    
64     -64    
48     -160   
-96    -192   
0      64     
16     432    
96     240    
48     -32    
192    32     
-480   -128   
368    80     
-32    112    
288    -80    
304    32     
112    -64    
240    48     
-192   -288   
-416   -928   
-320   -96    
-160   480    
-144   128    
128    -176   
-32    -240   
352    208    
80     240    
-288   80     
288    80     
-304   -48    
-560   -192   
240    -192   
-48    64     
-144   -48    
-48    -112   
208    -208   
272    16     
-96    -16    
288    -112   
176    -64    
256    192    
224    240    
-592   16     
192    -80    
352    -16    
-480   -112   
640    -96    
-224   112    
0      -176   
-80    176    
16     160    
336    128    
-192   -16    
320    112    
16     0      
192    80     
-16    16     
-256   -16    
144    48     
112    64     
336    112    
48     -112   
-128   48     
128    -240   
160    -32    
0      -336   
-16    64     
-80    16     
128    96     
-16    64     
176    112    
80     64     
48     -64    
16     80     
240    -112   
128    80     
96     -144   
48     -144   
32     -240   
-128   32     
16     64     
96     96     
176    80     
160    80     
-144   -32    
80     0      
-48    112    
64     144    
496    208    
48     -96    
-96    48     
0      -64    
160    160    
-32    -32    
-128   48     
544    0      
-32    80     
-48    -32    
176    176    
-80    48     
-48    -144   
80     -80    
192    -80    
32     32     
96     -192   
80     64     
48     -176   
160    -80    
64     -16    
-112   176    
-32    0      
144    -144   
112    96     
0      -576   
-16    -64    
112    64     
144    128    
64     192    
96     32     
112    -80    
0      144    
224    -48    
-64    176    
-112   -32    
32     -816   
144    64     
80     144    
176    80     
240    -16    
32     -64    
-560   48     
256    96     
-192   336    
144    -320   
240    -272   
112    -384   
192    -16    
112    -112   
208    128    
96     0      
-112   -112   
16     -304   
-320   -128   
48     16     
48     0      
-768   -80    
112    0      
-112   -16    
144    -64    
240    48     
-64    -272   
320    -192   
240    -1744  
16     -16    
16     -48    
64     0      
48     -80    
-128   -64    
-16    32     
256    0      
-608   -160   
160    -176   
-48    -128   
48     48     
-16    -48    
0      -16    
-64    -128   
16     -1104  
272    80     
-96    32     
160    224    
64     -80    
112    -144   
80     32     
48     -32    
176    96     
0      -48    
144    16     
16     -48    
0      48     
208    -160   
-128   128    
304    16     
32     80     
-144   -368   
48     80     
-16    128    
80     16     
-16    -48    
208    -64    
-208   -64    
240    32     
-304   64     
-64    -384   
144    48     
80     416    
96     -80    
-48    -320   
64     176    
32     -608   
128    -320   
-160   400    
128    -32    
-16    128    
48     -96    
-240   -80    
224    -624   
-368   -16    
400    192    
-416   -352   
304    464    
-448   -272   
-272   -400   
16     128    
-160   -672   
288    688    
160    544    
-144   -192   
-48    -144   
-320   144    
-192   176    
-144   320    
96     -672   
96     -288   
-304   -64    
368    80     
160    224    
272    48     
-288   320    
144    -496   
-64    0      
368    16     
144    16     
-304   64     
272    48     
-304   0      
304    -240   
-272   -304   
320    -80    
-384   80     
48     -96    
304    16     
-128   -64    
-16    32     
-144   -176   
240    -240   
-560   -112   
144    112    
-16    16     
80     128    
-400   64     
160    -160   
-176   -128   
-32    16     
112    48     
448    192    
-144   336    
-368   -320   
-352   -512   
-80    16     
-304   -96    
-32    224    
112    112    
-144   48     
-960   -80    
-112   -144   
192    -144   
-48    80     
-912   -128   
32     32     
-176   176    
192    64     
240    -80    
48     0      
-256   -16    
-224   80     
-304   176    
-128   64     
-208   -80    
-1840  64     
-80    80     
48     -80    
64     -32    
-416   96     
176    96     
-656   -272   
544    -416   
-192   96     
160    368    
-64    -160   
-48    16     
-160   64     
-368   -16    
80     -32    
-592   -240   
-16    -112   
-608   176    
-112   96     
-48    -16    
144    96     
-320   -48    
0      32     
48     32     
-48    -32    
-144   -112   
-16    -32    
128    -80    
176    -48    
80     112    
-416   16     
-32    48     
-416   -16    
16     16     
-176   96     
112    112    
-208   -272   
384    -16    
-16    64     
-288   -208   
128    144    
-336   192    
-64    64     
16     -16    
-16    -48    
-256   176    
0      208    
-432   32     
-96    -48    
-64    -256   
96     -160   
112    -128   
-48    0      
-48    64     
-32    -32    
-16    -112   
176    -192   
64     48     
-64    48     
-528   -176   
-352   -176   
-352   -192   
208    -528   
224    -176   
-304   128    
-176   -96    
-64    -64    
-64    0      
-128   160    
32     16     
32     -224   
16     400    
-64    128    
-80    96     
-80    -48    
-160   96     
48     -48    
-112   -160   
-32    112    
-368   -160   
112    192    
128    -80    
-16    112    
64     16     
-32    80     
-208   256    
-64    -288   
-64    48     
16     48     
288    256    
-384   -304   
128    -256   
-16    144    
192    160    
-336   -144   
-64    112    
16     -48    
-16    -80    
64     64     
48     48     
320    224    
-176   224    
192    48     
176    16     
160    144    
-352   80     
0      144    
-48    -16    
32     80     
336    256    
-224   64     
0      -16    
-16    112    
96     32     
-16    -48    
64     32     
32     48     
32     64     
-48    64     
-16    -80    
-176   -48    
-16    64     
-48    0      
224    96     
-112   -16    
96     -64    
-16    -176   
16     16     
160    64     
-176   -80    
-16    -96    
16     -32    
-80    80     
176    0      
128    192    
-160   64     
112    -64    
0      80     
16     0      
560    272    
-576   -32    
-16    64     
192    208    
-96    48     
240    -128   
256    0      
80     160    
32     128    
-144   -144   
144    112    
-128   32     
32     32     
48     -16    
176    112    
224    192    
-112   0      
256    -80    
320    176    
-192   32     
48     -128   
-160   -32    
176    80     
176    48     
224    128    
-400   48     
-368   -352   
624    -64    
0      64     
144    0      
272    32     
64     80     
0      80     
-256   80     
48     32     
32     32     
224    96     
-144   80     
336    208    
-16    -32    
96     16     
-144   -64    
160    112    
224    176    
-144   128    
176    -48    
16     48     
0      -32    
176    48     
-64    96     
288    16     
-272   -32    
112    64     
128    96     
128    96     
32     -32    
64     16     
16     48     
-32    80     
208    16     
48     48     
-16    0      
96     96     
-16    64     
-80    0      
0      32     
48     -64    
0      -192   
272    112    
48     -80    
112    64     
16     64     
-144   -80    
144    64     
-48    -272   
16     32     
160    64     
48     -160   
112    16     
144    176    
-176   -48    
32     16     
-80    -16    
112    48     
32     -16    
0      0      
32     32     
112    -224   
16     112    
192    -160   
96     144    
-112   -64    
48     -16    
176    32     
-32    16     
16     64     
112    -48    
32     64     
0      144    
16     -48    
224    176    
-80    16     
80     -64    
224    80     
32     48     
16     96     
-80    -160   
144    16     
32     144    
0      16     
-272   -32    
592    -608   
0      -656   
224    -272   
-80    160    
16     112    
64     176    
-240   288    
64     16     
240    -176   
-48    64     
144    -800   
256    112    
16     -64    
64     -112   
160    0      
224    0      
-80    -48    
-112   -96    
0      -48    
112    96     
144    192    
304    -64    
192    0      
32     -16    
0      64     
-64    -496   
0      -208   
160    -208   
304    256    
96     80     
16     16     
160    -256   
464    896    
-496   -608   
192    -48    
240    96     
176    -528   
112    336    
-192   -352   
160    -96    
128    432    
144    -80    
96     -128   
96     48     
-16    -192   
160    128    
64     -96    
16     -16    
160    96     
16     -576   
-48    704    
176    -752   
128    112    
112    608    
96     -640   
-48    -144   
64     432    
16     -416   
128    -32    
-32    144    
224    -192   
80     224    
224    384    
64     -80    
208    -224   
16     224    
80     -48    
16     272    
64     368    
96     -608   
-128   -304   
96     80     
112    32     
48     -224   
48     -176   
224    16     
96     -464   
256    -176   
-160   -912   
-144   -432   
-160   -928   
256    -160   
112    -96    
-16    -688   
32     32     
-208   -160   
336    48     
-176   224    
16     -352   
0      -80    
272    -208   
16     -208   
-48    -80    
208    -160   
-16    0      
-192   -640   
256    -368   
0      -448   
128    64     
0      160    
48     0      
-32    -80    
224    224    
96     -16    
-48    0      
-48    -48    
384    -80    
-176   64     
-96    96     
528    160    
-240   64     
32     -112   
-160   -96    
48     96     
240    96     
32     128    
176    -80    
176    -80    
-32    -96    
144    32     
192    224    
-224   -64    
-384   -144   
48     -160   
-256   -32    
384    -176   
48     -16    
224    -80    
192    176    
-288   -1040  
16     -48    
304    96     
-96    176    
0      176    
-64    -144   
-64    128    
224    -48    
128    -240   
96     -288   
-400   96     
-48    16     
48     0      
48     -240   
-272   112    
432    48     
-192   272    
-16    128    
-128   -80    
-160   -64    
160    32     
-208   0      
96     0      
0      112    
-128   176    
-592   -80    
224    48     
-160   176    
0      -192   
448    112    
0      48     
-176   80     
16     -496   
192    0      
-112   -240   
80     -112   
-32    224    
-32    32     
-48    -80    
240    -480   
176    80     
-48    16     
-16    16     
160    -64    
-80    -32    
96     -160   
224    64     
160    -496   
288    128    
-144   192    
48     -64    
-80    80     
128    80     
-176   -48    
-64    -16    
-160   96     
-64    -32    
-224   128    
64     224    
-80    32     
256    -448   
32     32     
256    -272   
48     80     
-64    80     
208    0      
-48    -96    
16     48     
-384   -160   
-16    -112   
192    -48    
96     -304   
-688   176    
0      -64    
-80    128    
144    -16    
-112   -48    
48     240    
-208   -48    
-144   -48    
-160   -448   
128    256    
224    112    
96     -16    
96     240    
-16    64     
96     -176   
-272   176    
-1040  -96    
16     128    
64     64     
-336   -16    
144    -16    
-272   16     
-176   -64    
-1184  -112   
-288   -128   
224    -432   
0      -176   
528    -160   
-160   -16    
-384   -176   
-144   32     
-64    -16    
-48    16     
-320   -128   
-336   -48    
144    48     
64     16     
-48    -48    
-144   0      
-64    16     
-592   -64    
-144   -16    
96     80     
-16    80     
32     0      
-48    32     
-48    32     
-80    -96    
-32    -160   
-176   32     
192    32     
-112   -144   
0      -48    
-256   80     
432    400    
-800   -144   
-64    -64    
128    -128   
-176   -128   
224    16     
64     -16    
160    -16    
80     -16    
32     64     
-64    -48    
-112   160    
-96    -64    
-224   0      
-176   -64    
-80    64     
-336   -96    
-96    32     
-1120  -48    
176    128    
-256   64     
32     48     
-208   -224   
48     -144   
16     -16    
-16    96     
-304   -64    
128    80     
-48    32     
48     -80    
0      -48    
224    0      
-144   96     
-144   -48    
192    96     
-368   -160   
224    16     
112    32     
-400   -128   
-48    -160   
-80    272    
-16    128    
16     -80    
416    96     
256    208    
-448   -48    
272    -160   
240    48     
-624   32     
-352   160    
-1104  -80    
320    112    
16     0      
-128   0      
272    -48    
-80    80     
-208   -64    
656    32     
64     192    
-496   112    
272    32     
-256   -80    
64     32     
-208   0      
96     16     
-848   16     
0      -640   
16     -16    
128    -32    
-128   16     
240    64     
-80    -112   
-32    0      
16     -64    
0      80     
-16    -16    
-112   -16    
-16    48     
-80    0      
544    272    
-864   144    
128    -48    
80     96     
48     64     
96     -32    
-128   96     
64     -80    
32     32     
-128   32     
0      -16    
-16    160    
112    -32    
128    -80    
-176   -224   
-112   -16    
32     112    
16     96     
-16    48     
16     -112   
48     240    
0      384    
176    80     
-32    160    
-128   96     
16     -16    
-48    -32    
-112   -144   
32     304    
-80    -80    
16     -80    
240    368    
-16    192    
128    144    
-176   -272   
48     336    
144    -112   
64     -112   
80     80     
-96    32     
96     48     
80     240    
-208   -96    
32     464    
-144   -112   
48     32     
160    16     
16     32     
-48    48     
-160   -176   
32     48     
-96    64     
-64    -32    
48     -32    
128    1152   
-48    -560   
384    192    
-32    -32    
32     48     
-144   -96    
-32    -80    
-80    -400   
-112   48     
-240   48     
16     80     
-112   48     
224    64     
16     32     
48     -64    
208    0      
-48    144    
-176   416    
-16    -480   
208    384    
112    -32    
-16    -112   
48     256    
-16    -240   
0      112    
192    112    
48     -48    
32     96     
16     80     
320    464    
-80    1440   
-16    -1168  
256    -352   
-16    640    
112    -96    
16     -176   
0      -112   
-48    -96    
144    320    
-32    -464   
432    160    
-160   768    
48     -272   
288    -432   
-32    448    
240    80     
-128   -64    
176    -224   
-544   -432   
80     48     
-128   208    
16     -32    
240    -16    
64     -32    
128    -192   
16     -208   
16     96     
32     80     
96     128    
128    528    
-32    480    
-112   -160   
112    -160   
144    208    
288    -64    
0      224    
96     0      
64     -144   
112    240    
-96    96     
112    16     
16     0      
48     32     
192    64     
-96    0      
64     128    
304    288    
-48    192    
0      304    
224    -160   
48     16     
112    -1040  
-112   -16    
16     48     
-112   -304   
240    -80    
-112   144    
-384   -224   
432    -496   
160    208    
-144   416    
-112   -176   
-32    -112   
336    -240   
320    32     
384    368    
-176   -192   
512    528    
-720   144    
-176   48     
-96    -544   
464    -112   
352    -288   
240    320    
192    -48    
96     -48    
368    0      
80     64     
-32    -208   
160    -272   
-112   144    
176    160    
-448   288    
-160   -1536  
0      -80    
-160   -176   
144    48     
-32    64     
384    -48    
-112   144    
-112   0      
96     32     
-64    -48    
192    192    
112    -48    
-128   -160   
64     -160   
80     288    
0      -208   
-80    -64    
240    -80    
32     112    
336    176    
-224   128    
-224   -416   
432    -144   
-80    352    
80     -16    
-64    -464   
96     -784   
112    -16    
-144   -32    
-32    64     
256    -528   
-144   -208   
368    -112   
-96    176    
240    192    
240    208    
272    -48    
96     -112   
96     64     
-32    -352   
-32    -80    
48     -352   
256    -128   
240    0      
128    256    
-80    144    
-48    -96    
272    -208   
272    64     
128    -64    
32     48     
0      32     
0      0      
208    -208   
-48    16     
-32    16     
112    -144   
192    160    
176    0      
160    272    
32     112    
512    272    
-224   192    
176    80     
80     48     
-112   48     
48     -528   
128    0      
64     -992   
256    128    
64     -1104  
160    160    
-144   96     
-32    -112   
128    48     
32     -368   
112    -496   
-64    -128   
64     -208   
-48    -192   
48     80     
-48    -80    
112    -208   
304    176    
48     -160   
160    -560   
160    80     
-48    368    
48     -96    
80     -272   
64     -16    
112    -128   
128    32     
160    16     
144    64     
-208   -416   
-32    -208   
-144   192    
80     -64    
208    48     
208    -144   
256    -48    
208    -368   
256    -48    
96     -224   
208    48     
64     80     
-160   32     
96     -16    
80     -112   
-320   -48    
112    48     
-1024  48     
96     -80    
128    -48    
96     -272   
-144   -144   
-32    -304   
32     -64    
192    -912   
-32    64     
80     -128   
48     112    
0      48     
0      -96    
64     -16    
192    160    
-208   -48    
80     -96    
176    0      
80     -64    
80     80     
-32    -64    
32     -96    
288    -64    
32     0      
112    -64    
32     16     
112    -32    
192    16     
-64    -48    
16     -96    
-192   32     
176    -32    
-288   -48    
16     -144   
80     32     
16     -144   
-80    128    
-64    -112   
128    0      
192    32     
96     32     
64     64     
-32    -32    
-64    0      
48     -160   
-288   0      
32     0      
-368   0      
0      -144   
-1504  16     
-64    -208   
-64    -64    
144    -32    
0      96     
320    -640   
352    80     
-512   -112   
112    -32    
-400   48     
-48    96     
-112   -16    
224    0      
64     416    
-96    -80    
256    -208   
304    -16    
304    176    
-224   -16    
-48    -48    
-112   -32    
256    96     
-464   -16    
240    -32    
-240   -160   
272    16     
-448   112    
224    -112   
-112   128    
-96    64     
-288   -80    
128    -240   
224    64     
-400   -272   
464    96     
-320   16     
96     208    
-752   -176   
224    -144   
32     0      
416    48     
-224   16     
384    0      
-784   -96    
64     -96    
-144   -16    
-368   -112   
752    272    
-1920  -32    
-544   -208   
176    16     
-16    112    
-192   16     
-352   16     
16     96     
0      32     
-16    32     
112    -16    
-16    0      
-192   144    
64     144    
-496   -224   
96     160    
-112   112    
-272   0      
48     64     
-768   96     
-112   80     
-960   48     
16     64     
-336   -96    
144    96     
96     288    
0      -64    
-288   -528   
144    208    
-16    240    
160    -384   
144    64     
144    368    
-112   -144   
-240   -16    
-320   80     
64     -384   
144    496    
-144   -352   
-64    112    
-288   -272   
-96    96     
-64    240    
0      -128   
-32    80     
-144   -32    
192    112    
-128   -128   
-176   64     
48     112    
-64    -272   
80     -64    
-256   -32    
-400   -496   
192    192    
-624   368    
-48    -432   
32     -224   
64     560    
-176   -512   
-304   -224   
-32    -160   
-240   32     
160    -48    
-256   -592   
80     -48    
-48    -144   
16     400    
-384   0      
48     -112   
-464   -96    
112    -128   
176    0      
-160   32     
48     -64    
-48    32     
96     288    
-128   -304   
64     -112   
-32    -96    
-16    -32    
0      256    
0      -48    
-112   -16    
64     -128   
128    160    
-144   304    
-224   -624   
128    -128   
-16    -80    
64     -80    
128    -16    
48     -32    
-64    128    
48     -16    
192    -288   
96     16     
80     48     
-304   -64    
16     -32    
-544   -192   
-64    48     
-1328  -48    
128    -144   
192    64     
32     0      
-160   -256   
0      -192   
-80    -32    
16     0      
-128   -32    
64     32     
-32    -16    
128    48     
-16    96     
-80    144    
0      144    
-64    48     
80     -16    
-128   0      
128    16     
-192   32     
304    208    
-240   224    
48     160    
368    320    
-16    80     
-16    64     
-368   -208   
-32    -80    
-96    -80    
112    -80    
16     -64    
192    112    
0      112    
-112   80     
208    160    
-80    -32    
-128   96     
-144   -112   
-96    -272   
-48    -80    
128    32     
-32    48     
176    176    
32     32     
16     48     
-16    -64    
-16    -176   
16     -16    
0      -64    
-176   -80    
96     -96    
144    0      
-144   32     
176    432    
-272   144    
0      80     
-16    -256   
-32    -112   
-256   -240   
-16    128    
224    0      
-48    -64    
-32    -32    
176    -400   
96     208    
64     112    
-160   160    
224    432    
-96    208    
-80    80     
160    -80    
-272   -128   
224    -560   
320    -336   
592    48     
192    288    
176    16     
-48    -16    
-16    0      
0      0      
-416   -96    
-64    64     
272    224    
592    208    
-688   80     
-160   -32    
-384   -192   
240    -80    
352    -528   
368    -400   
-64    96     
-800   272    
-224   80     
-208   -48    
272    144    
128    -48    
448    128    
-48    -144   
208    208    
-224   16     
-112   144    
-208   -96    
-32    -112   
176    -96    
0      48     
32     960    
272    384    
112    80     
96     -208   
624    192    
-768   -16    
-176   96     
-48    0      
416    304    
-112   256    
-144   -128   
32     -160   
-112   -768   
160    -48    
-80    -128   
64     560    
208    320    
16     144    
352    192    
304    352    
0      224    
256    112    
96     224    
-32    496    
176    176    
0      -128   
0      -48    
96     -192   
208    240    
-272   112    
224    -368   
96     176    
128    304    
64     112    
192    112    
-272   208    
48     96     
112    -64    
416    512    
-320   -128   
-32    -240   
240    80     
-16    -128   
32     320    
144    -624   
480    -368   
48     160    
-112   -128   
272    0      
80     160    
208    352    
-32    -144   
-192   -112   
-64    80     
-176   -96    
192    0      
176    112    
288    -48    
192    32     
48     -976   
-48    48     
32     80     
-128   48     
-32    32     
96     -48    
144    -64    
240    144    
-16    96     
32     0      
96     -80    
144    32     
208    112    
-80    -32    
176    16     
-80    -32    
208    64     
-64    -704   
48     160    
-16    -272   
544    -368   
176    -80    
304    208    
112    16     
64     -16    
-16    -80    
-16    -144   
-160   32     
-80    -128   
-144   0      
-144   -80    
64     96     
48     -64    
224    224    
-224   -64    
112    -16    
96     -64    
64     96     
16     48     
0      -256   
224    -176   
208    -16    
384    176    
80     -144   
128    48     
112    80     
-112   208    
-256   -96    
176    32     
176    112    
-32    32     
160    -48    
256    80     
32     48     
-112   48     
160    96     
160    -112   
64     -32    
80     32     
0      0      
-96    -336   
16     -32    
224    -64    
240    112    
96     0      
160    128    
-48    16     
-32    160    
80     64     
32     -80    
32     48     
0      -32    
96     80     
-96    -48    
240    96     
32     -160   
112    48     
-32    32     
224    -464   
-16    -144   
320    -448   
-96    80     
-448   -32    
32     -208   
112    0      
224    -384   
-48    -80    
112    -608   
16     -32    
208    80     
80     16     
144    32     
48     -32    
96     -384   
112    16     
0      192    
0      80     
-48    -80    
-128   -240   
432    -32    
-448   -192   
416    32     
-80    -448   
-192   -176   
304    112    
-256   16     
304    96     
160    -16    
128    32     
96     240    
-544   -64    
352    -32    
-208   -48    
256    -80    
288    144    
-320   -96    
48     -32    
-128   -288   
128    -288   
384    -384   
96     -32    
304    48     
64     0      
-208   -256   
-96    0      
-480   -336   
-16    -176   
-272   96     
640    224    
-2224  112    
192    -16    
80     -48    
320    112    
-96    -224   
32     128    
-368   0      
96     -208   
144    128    
304    160    
64     48     
-64    -176   
208    112    
-240   -80    
16     32     
-144   -544   
0      192    
-48    64     
96     -176   
640    320    
-240   -304   
16     240    
400    -1152  
-16    112    
160    -32    
-176   80     
-368   -16    
432    144    
-240   240    
272    -144   
-608   448    
208    -656   
-1040  144    
-80    1184   
-160   -496   
32     -928   
48     160    
16     -368   
-32    320    
304    -240   
176    64     
48     -48    
176    -176   
-32    -64    
16     -240   
-480   -64    
-48    -64    
-560   -96    
-16    -96    
176    128    
32     -32    
-32    -32    
192    -304   
-144   0      
80     -192   
-160   32     
112    128    
112    64     
-32    80     
80     -32    
112    16     
16     -48    
-176   -144   
272    -368   
32     64     
112    -208   
-32    16     
176    -48    
-80    48     
-112   -48    
240    16     
-784   -48    
64     48     
80     0      
240    -32    
-272   -64    
144    -128   
-256   -32    
160    -128   
0      16     
128    -224   
-48    64     
64     -128   
80     16     
16     176    
-400   160    
-272   48     
32     16     
-160   -48    
128    192    
-208   -32    
304    -112   
-304   -32    
112    -64    
0      96     
-432   0      
320    32     
-896   -128   
-480   -400   
128    112    
-1680  80     
-160   -64    
-800   -64    
32     128    
-64    -48    
-80    -16    
-464   -144   
112    -64    
-48    -32    
288    320    
-144   208    
-144   64     
0      -160   
-48    -64    
-160   -32    
64     -144   
112    48     
-128   416    
-432   112    
-2080  -16    
32     -64    
48     48     
0      80     
-96    -96    
32     112    
-336   0      
-48    -96    
-144   0      
352    528    
-208   176    
64     0      
272    96     
-288   208    
48     128    
-432   0      
128    -32    
-80    -16    
304    96     
-320   -32    
160    48     
-96    -16    
64     144    
-32    -48    
48     224    
-48    -32    
-208   -96    
-112   -112   
112    64     
-64    128    
-80    16     
96     48     
-384   -96    
160    80     
-128   144    
208    384    
64     -16    
0      -224   
-256   -352   
176    -80    
-320   -128   
-80    -208   
-80    -16    
0      0      
304    80     
-752   96     
352    -352   
-1664  -448   
112    -160   
224    -16    
-160   -48    
304    -464   
96     -64    
-16    -304   
-272   -16    
-256   -16    
-96    -464   
64     32     
144    -240   
-32    -656   
-16    -592   
-112   1072   
400    224    
320    -112   
-32    128    
-448   -544   
-160   32     
-432   -48    
-112   320    
-336   -144   
-304   -48    
-176   112    
-144   96     
0      112    
176    -48    
208    -384   
208    -16    
-64    240    
320    80     
-688   144    
-16    208    
-96    96     
96     -80    
96     -144   
-144   256    
288    192    
-128   352    
96     -160   
-336   160    
224    448    
96     512    
-304   -832   
-160   448    
-16    112    
240    176    
256    256    
-176   -16    
128    144    
176    -160   
-80    496    
96     -32    
-176   -80    
-80    48     
-112   -160   
256    400    
32     336    
-112   -128   
-32    -96    
416    80     
-400   -192   
240    80     
48     272    
-112   -48    
96     128    
80     -16    
96     -16    
160    192    
16     32     
-64    -16    
0      -96    
-224   64     
224    48     
-224   -80    
112    32     
-32    -32    
64     144    
48     160    
160    96     
-208   16     
-80    -160   
-32    -128   
96     64     
32     0      
-320   -208   
160    0      
-320   -272   
352    -384   
16     -16    
48     32     
224    -112   
64     64     
-208   80     
80     32     
-48    64     
48     32     
-80    -48    
-80    -304   
288    -96    
32     128    
224    80     
-16    64     
16     16     
128    32     
32     32     
48     192    
16     48     
48     64     
-80    32     
32     32     
-112   -416   
48     -64    
-48    320    
-208   240    
32     -32    
240    96     
-256   16     
80     16     
48     32     
160    32     
16     -384   
-128   -96    
-176   224    
-176   48     
-16    -64    
16     -320   
-80    -96    
0      288    
16     272    
-96    -160   
256    -16    
-176   -304   
96     -1136  
-32    128    
-160   -48    
0      0      
0      -16    
-112   64     
80     64     
-32    -128   
240    -32    
368    208    
0      16     
112    48     
-144   0      
48     64     
-64    0      
176    -464   
80     -16    
32     64     
128    96     
-48    32     
-48    32     
-16    32     
96     64     
-128   -48    
80     16     
0      176    
128    176    
32     48     
-128   -32    
128    48     
144    -192   
-48    48     
16     -16    
-64    0      
48     48     
64     64     
80     80     
144    96     
-96    80     
96     64     
32     -16    
384    256    
-336   80     
-96    -192   
240    80     
96     -400   
96     16     
80     -32    
-272   -48    
96     16     
112    96     
-144   48     
64     32     
-80    -64    
192    32     
80     144    
-16    112    
272    512    
96     112    
64     -32    
-32    -16    
32     -16    
64     -160   
16     96     
16     48     
-32    80     
0      -128   
160    -112   
-16    144    
-16    320    
0      -96    
288    -96    
320    64     
240    -304   
160    -112   
128    -208   
-48    -32    
96     112    
128    192    
80     -112   
-32    -112   
-32    -64    
400    144    
-560   -80    
288    32     
112    80     
16     48     
816    192    
192    -16    
-128   -240   
304    -16    
-336   -16    
448    -496   
576    592    
192    -128   
-32    16     
-400   464    
-304   -176   
-288   -48    
-224   480    
432    -192   
-400   -304   
176    384    
480    128    
144    -192   
160    -272   
0      -16    
-176   -160   
96     -16    
-128   432    
80     -80    
80     -80    
32     -16    
176    -256   
144    64     
32     0      
144    -16    
-192   -160   
128    -80    
400    240    
-320   16     
240    112    
-144   80     
112    192    
-48    -112   
48     32     
48     -256   
0      -80    
256    128    
-272   176    
-32    -512   
160    -240   
-32    -192   
112    -112   
240    0      
0      -64    
-64    128    
160    -64    
32     64     
-48    32     
32     112    
224    -48    
-16    -336   
48     48     
-864   16     
0      -416   
-48    -48    
192    -656   
208    96     
96     0      
336    0      
160    96     
16     -64    
80     -192   
144    48     
96     16     
144    144    
-16    -128   
48     -112   
-2160  -96    
-96    -208   
176    -96    
192    -176   
400    208    
-64    160    
-272   -80    
-32    -16    
-48    48     
256    -192   
0      16     
96     -32    
-128   144    
176    -160   
-48    -48    
-688   -32    
-80    -16    
160    -16    
-80    -240   
16     -240   
-160   -16    
-128   -96    
240    -624   
64     -160   
208    -144   
0      160    
-64    -64    
176    112    
-144   -128   
96     0      
-304   64     
96     -112   
240    -96    
80     -112   
464    48     
192    304    
112    288    
368    400    
-688   320    
112    -128   
48     0      
176    -32    
240    112    
-288   64     
80     -32    
-208   -80    
272    -224   
-608   -128   
320    -64    
160    144    
208    64     
64     80     
32     -192   
80     192    
-16    -224   
-32    -192   
288    -416   
288    -112   
-144   112    
144    16     
-304   -32    
144    -64    
-144   80     
64     -112   
16     -224   
304    128    
16     64     
464    192    
-16    352    
128    -288   
112    32     
48     -32    
416    176    
-480   -16    
208    -80    
-144   -96    
112    -112   
-192   -112   
0      -112   
-688   16     
0      -64    
-64    0      
224    96     
256    352    
16     -192   
-144   -128   
-16    -208   
16     -128   
-96    -144   
80     624    
-48    400    
-176   128    
-480   -432   
96     -112   
-752   16     
160    -336   
32     272    
400    -48    
-368   544    
112    -1024  
224    416    
-160   96     
224    -96    
-400   -192   
176    -80    
16     144    
144    0      
-32    384    
208    -288   
-352   224    
-48    0      
-48    160    
208    -224   
176    -48    
288    -560   
128    -128   
320    416    
96     -128   
-112   128    
112    -976   
80     -400   
592    816    
-208   224    
80     -288   
-704   272    
-176   160    
192    -144   
-992   96     
-112   48     
48     -64    
-160   -176   
192    96     
-672   800    
240    560    
336    -432   
-544   -96    
-656   -224   
16     -256   
176    64     
688    48     
-544   -112   
-352   -160   
-64    64     
-256   176    
-336   -32    
0      -48    
-176   32     
64     0      
0      16     
-256   48     
0      48     
96     16     
-160   -96    
-96    -96    
96     0      
208    32     
80     0      
48     48     
-432   16     
-16    -48    
16     0      
-16    80     
-160   0      
32     32     
-96    -528   
-384   -384   
-1248  176    
-256   -144   
64     -48    
192    16     
-64    -80    
32     160    
64     32     
-192   48     
48     16     
-16    -32    
80     64     
-80    96     
-208   32     
-80    -48    
-48    16     
-400   -32    
-96    48     
16     48     
0      32     
-144   -96    
96     32     
32     48     
32     32     
-32    64     
48     128    
288    240    
-160   64     
-240   32     
-32    -48    
-96    -16    
-32    0      
48     -16    
-896   0      
64     80     
-224   0      
112    16     
0      16     
-16    -96    
208    48     
-256   32     
-16    176    
-128   80     
224    224    
-192   16     
80     -32    
-64    32     
80     -64    
-240   -208   
176    80     
80     32     
16     96     
128    160    
-48    -16    
-112   32     
-208   -32    
32     16     
32     -48    
16     96     
-144   16     
-16    0      
-368   -80    
-160   -176   
80     -320   
-32    192    
208    32     
-64    -16    
-128   0      
-240   -256   
272    160    
-112   80     
-48    -96    
32     -80    
48     48     
80     128    
96     32     
-48    -128   
32     80     
-176   112    
-64    32     
64     0      
-64    48     
-16    -16    
0      112    
-112   112    
-96    -48    
80     -16    
-64    -32    
256    112    
-240   -112   
224    0      
32     -32    
128    32     
-192   -48    
96     112    
48     16     
32     16     
64     32     
64     64     
64     48     
-96    -96    
160    144    
-256   48     
-32    -48    
112    16     
16     48     
-160   -32    
176    96     
-112   -32    
48     128    
64     128    
0      48     
64     176    
144    160    
-16    48     
176    160    
-160   48     
-32    0      
48     48     
0      80     
64     80     
-240   -32    
128    64     
48     32     
96     32     
128    112    
32     32     
176    64     
-144   48     
80     80     
80     192    
32     176    
112    384    
144    272    
-208   16     
-48    32     
-112   48     
-208   -64    
352    64     
-80    48     
272    -48    
-240   64     
112    192    
-240   -272   
-224   96     
480    -16    
-32    384    
144    -112   
160    32     
384    688    
-512   -304   
304    -944   
336    336    
416    16     
-48    32     
112    -224   
-352   432    
544    48     
-448   -144   
160    16     
0      256    
464    384    
-240   -608   
-384   16     
208    -112   
-144   -96    
496    -272   
288    -80    
496    448    
32     -400   
304    368    
-640   16     
-128   64     
-80    -64    
144    -112   
48     -80    
656    256    
-416   16     
272    -64    
-48    160    
-384   320    
112    -48    
-80    -384   
256    -32    
64     64     
96     112    
208    128    
0      -80    
-112   -64    
-32    64     
128    -32    
64     -48    
-16    240    
112    176    
0      -128   
80     -48    
32     16     
80     -64    
176    16     
64     -80    
48     -32    
48     112    
48     0      
192    32     
64     48     
80     -16    
64     32     
-400   -32    
432    208    
16     -32    
80     -96    
176    176    
96     -176   
96     16     
64     -16    
80     16     
32     64     
112    64     
16     112    
16     32     
-48    48     
416    272    
-224   48     
128    -16    
48     16     
64     -128   
64     32     
-48    -464   
96     32     
144    80     
16     48     
-64    128    
-64    16     
16     -192   
64     112    
0      48     
32     80     
96     112    
160    112    
96     32     
352    -144   
-64    64     
-64    -144   
16     -32    
128    -240   
96     16     
112    -112   
160    16     
16     -16    
80     48     
32     -128   
400    32     
-16    96     
128    0      
16     -64    
64     0      
224    144    
128    32     
-48    96     
16     -240   
48     48     
-224   224    
16     64     
32     -16    
224    224    
-208   176    
32     -96    
288    -112   
144    -320   
-112   176    
224    64     
-64    592    
48     48     
-32    144    
48     -480   
64     -272   
160    -400   
48     -16    
-208   -112   
16     144    
32     0      
144    176    
48     96     
64     0      
48     16     
-32    -240   
208    -16    
-144   -320   
-48    64     
96     -16    
-48    -48    
0      -224   
128    -192   
112    -256   
224    -416   
-240   400    
192    288    
-48    -416   
0      208    
16     16     
96     -400   
288    400    
128    176    
48     -256   
96     80     
64     80     
32     128    
192    -1072  
0      208    
-64    -1152  
-208   64     
192    -80    
160    -160   
16     -208   
0      -528   
48     416    
32     64     
176    -112   
64     48     
192    112    
-128   -432   
368    304    
-96    -576   
160    -96    
272    -160   
-64    -96    
-1200  -176   
-128   -352   
224    112    
-64    -80    
560    336    
-176   0      
352    -96    
112    128    
144    0      
304    176    
-16    -208   
80     -208   
-48    64     
-80    112    
-80    96     
-1296  352    
400    -208   
192    -272   
368    16     
256    80     
160    -240   
-80    64     
-80    -1568  
48     32     
-128   -16    
192    64     
208    0      
-64    -64    
48     80     
-128   -144   
-400   -224   
256    -64    
128    96     
-96    0      
336    -144   
160    -224   
-320   80     
-112   -752   
896    320    
-496   192    
-288   64     
1008   112    
-208   32     
-576   -256   
1248   -96    
-176   144    
144    16     
-736   -80    
608    -16    
112    -80    
80     80     
-112   -64    
96     -160   
-192   0      
160    -80    
176    32     
64     -112   
288    -32    
-96    32     
192    48     
-112   -48    
32     0      
-640   -48    
0      -32    
-512   80     
304    64     
224    128    
-304   -112   
80     16     
224    -800   
320    224    
-288   64     
64     -64    
64     16     
176    -64    
-80    -64    
-48    -80    
-368   -16    
-80    0      
-864   -112   
288    -176   
32     96     
-144   -288   
16     16     
192    -704   
48     -64    
-112   -64    
128    32     
-144   -32    
192    48     
-192   48     
-32    80     
16     48     
176    -80    
-96    -112   
176    -80    
-16    96     
-32    -144   
96     128    
272    -128   
32     -288   
64     -128   
256    48     
-272   0      
64     -32    
96     48     
96     32     
-224   0      
48     -80    
-416   32     
32     128    
0      176    
112    -48    
112    208    
-368   -80    
-1072  -48    
16     64     
-48    16     
-112   80     
144    240    
-16    192    
144    16     
-176   16     
80     -64    
64     80     
128    -48    
176    48     
-1184  -64    
-96    16     
-48    64     
48     48     
-16    -16    
-128   48     
-64    48     
-144   -368   
112    -64    
-32    -16    
-336   -48    
-224   32     
-16    -176   
-256   -224   
96     224    
-208   -368   
96     -288   
336    64     
96     48     
80     16     
-304   -32    
-80    -80    
-672   0      
-96    112    
80     0      
96     96     
-32    64     
-272   0      
-48    -208   
48     16     
272    -96    
112    -16    
32     -32    
-240   -64    
-368   -112   
-336   -112   
-128   240    
-352   96     
64     -32    
-320   -64    
-128   32     
-96    -96    
32     80     
-320   -48    
128    -64    
64     16     
288    208    
-272   16     
-16    -160   
32     -144   
32     -96    
80     -32    
-32    -32    
-112   -112   
-384   16     
-64    272    
-96    80     
304    176    
16     336    
400    480    
-288   -704   
112    -64    
-16    208    
-96    -80    
112    -16    
112    -192   
-16    224    
-224   -80    
-208   48     
-704   64     
32     -48    
-96    -32    
144    208    
80     -112   
64     -224   
-16    -80    
-80    -224   
-48    64     
0      96     
-96    -176   
128    352    
128    -96    
-96    -288   
-368   448    
-448   -64    
160    -336   
-592   176    
240    208    
-256   736    
112    128    
64     -496   
48     144    
320    64     
240    288    
384    272    
272    272    
-112   96     
-160   -112   
-16    64     
-112   -160   
144    0      
-544   -144   
96     -176   
160    -160   
352    160    
112    80     
352    -112   
352    64     
-192   112    
480    -80    
0      16     
256    -64    
-64    -32    
128    -48    
32     -144   
288    80     
-592   -48    
-288   48     
-176   -64    
-224   80     
64     128    
32     112    
288    -128   
-112   144    
96     112    
176    400    
96     -64    
-224   -208   
-16    0      
-496   -32    
-32    64     
-176   -240   
176    -16    
-208   80     
176    208    
-32    -96    
96     0      
-48    -16    
144    144    
-144   80     
-32    64     
128    0      
-240   -96    
256    -64    
192    128    
-160   160    
-16    144    
-32    -32    
96     -48    
-192   64     
256    -128   
96     64     
-32    112    
-128   -64    
16     -16    
-320   32     
112    16     
-16    64     
112    16     
-288   96     
32     -144   
16     0      
48     0      
-80    32     
-48    32     
80     80     
16     96     
-32    -16    
0      48     
32     64     
-176   336    
112    144    
32     0      
288    128    
-352   64     
144    0      
144    80     
32     64     
80     -16    
80     -48    
0      0      
16     112    
256    112    
-304   176    
-48    64     
64     32     
-96    -80    
-112   -32    
80     112    
-16    64     
112    -16    
-96    -128   
80     -32    
272    32     
144    64     
0      96     
-192   32     
64     -16    
0      64     
80     64     
64     -208   
96     -32    
80     -32    
64     96     
-48    272    
64     128    
272    464    
-368   416    
16     176    
176    128    
0      160    
48     -176   
224    -144   
208    16     
0      208    
160    352    
-240   -32    
-176   -432   
144    -368   
16     64     
240    208    
112    128    
144    48     
160    64     
-112   80     
-128   96     
-64    112    
256    -96    
-144   -16    
32     112    
80     -384   
240    -96    
-64    16     
-176   160    
-48    32     
48     -720   
192    -192   
256    368    
208    224    
160    -32    
-144   -144   
-96    -144   
32     0      
208    208    
-32    256    
96     48     
-64    -64    
16     -48    
80     -144   
96     80     
0      -608   
-16    -48    
192    160    
-112   160    
128    16     
160    -32    
80     96     
176    48     
-48    -96    
-32    64     
-16    32     
-80    128    
144    80     
-32    -128   
272    96     
64     -176   
128    112    
0      -112   
0      0      
-16    -16    
96     96     
96     -16    
64     32     
48     16     
-32    96     
16     -16    
0      -112   
112    112    
208    32     
64     32     
144    -96    
416    576    
-688   112    
608    80     
-96    -368   
160    144    
416    256    
-256   -16    
16     32     
96     160    
48     128    
128    -112   
208    16     
-336   -240   
544    80     
-144   -96    
160    32     
-32    -64    
-112   64     
64     -144   
224    192    
-32    112    
-32    -32    
304    -128   
96     -96    
240    -16    
288    192    
-480   -96    
608    -512   
560    224    
-208   0      
-448   -32    
608    -64    
-160   48     
16     -112   
400    48     
128    32     
192    96     
-96    -48    
48     0      
1296   752    
-1120  -48    
-96    -224   
272    -112   
-32    112    
240    -64    
320    272    
-160   48     
96     0      
112    16     
304    192    
-224   64     
256    -80    
144    48     
64     -32    
160    -832   
48     -144   
64     16     
80     0      
64     32     
-144   -176   
480    384    
-448   16     
240    -16    
160    -96    
256    -336   
-208   80     
32     -128   
336    240    
-240   32     
96     -176   
128    0      
304    -64    
-16    32     
-48    -80    
208    -64    
-32    80     
208    96     
-64    -32    
32     96     
288    32     
-112   224    
256    -144   
112    -160   
-224   -48    
-32    -80    
48     48     
224    -112   
-16    0      
32     -400   
96     80     
112    -16    
496    16     
-64    96     
112    96     
-80    -224   
32     -128   
-80    80     
-48    -32    
-320   -16    
64     -176   
80     16     
96     0      
64     16     
-96    -416   
-16    -64    
48     64     
48     -80    
32     -192   
-224   16     
16     -176   
144    112    
-240   -32    
-80    -48    
-704   -48    
80     240    
112    -96    
272    -208   
96     304    
112    96     
-32    -96    
96     -448   
64     32     
-176   -32    
-16    80     
320    336    
48     -624   
-48    32     
-16    192    
-400   -160   
192    -224   
-976   -160   
64     80     
-64    16     
80     96     
-336   -176   
224    -656   
240    192    
144    16     
192    0      
-112   -16    
-32    0      
-304   -80    
-144   -176   
-192   48     
128    -16    
-304   -112   
272    352    
-464   -912   
80     -208   
208    368    
-48    -288   
-64    48     
160    -960   
128    -48    
64     48     
32     -144   
-80    -32    
224    -48    
-160   48     
-80    -304   
-64    -96    
32     80     
-512   -32    
-80    48     
-144   -96    
384    16     
-32    336    
176    -1056  
160    -32    
-32    -32    
112    -16    
-16    32     
336    336    
-272   -64    
288    112    
-416   -416   
96     -208   
176    544    
128    -384   
-48    -160   
144    -32    
0      256    
-224   -32    
64     -128   
-304   -144   
32     -32    
-640   64     
144    -144   
-224   112    
16     -160   
-304   -368   
176    -272   
0      -304   
-112   -608   
-16    -512   
48     -320   
-32    -16    
48     48     
96     -160   
-448   -144   
-64    0      
48     144    
240    224    
-384   96     
336    -144   
-400   -112   
32     -176   
-48    16     
-480   0      
384    416    
-816   128    
-768   96     
-288   224    
-336   -96    
96     -48    
-2192  -176   
176    -144   
128    80     
-96    -48    
-80    32     
-288   -16    
-512   -48    
-48    144    
176    160    
-80    96     
16     -16    
-304   -64    
-160   -352   
-224   -64    
-496   -32    
-320   -112   
-32    48     
-656   0      
16     48     
-32    -96    
304    -16    
-448   -48    
144    96     
432    208    
-448   272    
-32    -208   
0      -112   
-224   -208   
-16    48     
-144   0      
144    -48    
-176   80     
-272   48     
-64    48     
-1072  -144   
-32    96     
32     -112   
16     208    
-144   -64    
0      32     
-32    -192   
-64    0      
16     176    
32     80     
-176   32     
96     48     
-320   176    
-384   -96    
96     -32    
-256   64     
160    80     
-320   -336   
224    -144   
112    -32    
-288   128    
-80    -48    
-112   -16    
16     -64    
-112   -32    
128    16     
-240   -48    
-128   0      
-16    96     
80     112    
-144   -144   
80     16     
-144   -176   
80     48     
80     16     
0      32     
48     0      
-16    -32    
-48    64     
384    272    
-352   192    
144    -32    
-256   -240   
-112   -64    
544    464    
-656   416    
0      16     
-608   -80    
224    144    
112    -16    
16     336    
64     256    
-256   0      
-96    48     
112    128    
112    80     
144    48     
64     224    
-64    192    
-32    736    
-528   -32    
-16    -64    
-368   -64    
400    304    
32     544    
-16    160    
-96    -256   
64     96     
64     352    
0      -160   
32     -48    
-80    -208   
16     -336   
-48    192    
32     64     
-128   -752   
224    400    
-912   -144   
64     -16    
64     -48    
0      -128   
304    208    
48     80     
256    544    
-32    -32    
-64    -272   
-352   0      
112    176    
-64    144    
64     176    
-48    -64    
96     80     
80     48     
-48    -64    
192    128    
176    144    
160    80     
80     64     
-48    48     
-256   -16    
-128   -16    
0      96     
32     128    
-288   -32    
144    0      
-160   32     
112    64     
48     64     
144    64     
144    32     
16     48     
-112   32     
-144   -80    
288    -32    
-16    48     
256    80     
-176   0      
128    96     
-432   -64    
-48    0      
-16    -32    
96     64     
0      -160   
256    -96    
48     48     
-32    16     
-112   48     
96     -48    
80     80     
304    96     
288    176    
-208   -112   
144    80     
0      0      
176    16     
-16    -16    
80     0      
0      96     
32     48     
-96    -16    
-16    48     
-16    -64    
144    16     
0      240    
160    64     
-80    -32    
-48    -48    
-96    16     
-32    -160   
112    -192   
224    240    
240    48     
-16    -48    
176    0      
160    80     
256    16     
-80    -32    
-80    32     
640    144    
-448   -16    
256    -16    
-64    48     
-208   -64    
208    32     
192    -320   
192    48     
240    -16    
208    112    
-432   128    
-96    -96    
224    64     
-288   -48    
224    16     
-80    64     
160    48     
64     48     
496    304    
-736   -16    
32     -208   
272    -528   
208    96     
240    0      
-64    16     
368    224    
-384   112    
-304   0      
512    176    
16     32     
-32    -112   
208    128    
-80    64     
-208   0      
48     64     
-16    -32    
96     -112   
112    -16    
80     80     
368    240    
-368   224    
224    -112   
112    96     
224    48     
128    -80    
-16    64     
-224   16     
-16    16     
-64    -96    
-240   -96    
224    176    
-208   -96    
160    -32    
144    -1376  
192    160    
16     96     
80     64     
320    48     
-16    80     
-208   -176   
240    -112   
-32    -64    
112    48     
-80    -64    
112    -96    
160    48     
-32    -48    
128    16     
48     -256   
0      112    
0      96     
256    224    
32     176    
-224   16     
112    144    
272    -32    
-32    -112   
80     192    
-160   -128   
112    -112   
128    288    
160    -16    
-16    192    
-288   -272   
432    192    
112    -1248  
-16    96     
-96    160    
192    -32    
-64    32     
-96    320    
256    -16    
32     16     
32     0      
256    -240   
224    128    
160    0      
-128   96     
-16    -80    
96     -224   
192    -32    
-32    32     
-128   -368   
128    128    
128    -48    
0      48     
-160   128    
208    -576   
160    512    
224    -144   
16     -96    
-96    -224   
208    256    
-160   64     
176    -560   
32     496    
-16    -48    
64     -64    
64     128    
0      -48    
224    -16    
80     32     
48     -400   
-112   -240   
336    624    
48     96     
-144   -384   
64     -16    
112    256    
176    224    
-160   -144   
16     32     
32     0      
80     112    
-48    -32    
-48    160    
160    400    
-128   384    
-96    -128   
96     32     
96     -16    
512    48     
-48    816    
-112   128    
304    128    
112    48     
192    -288   
-16    48     
64     -656   
-48    -64    
128    -256   
112    -160   
-16    224    
288    -144   
0      -384   
32     -944   
48     -112   
-16    -48    
64     -64    
-64    -16    
32     0      
32     -16    
80     -80    
32     -304   
-48    -48    
-304   -96    
80     80     
208    32     
-16    48     
192    48     
96     -208   
0      -16    
48     -976   
-16    -304   
96     -144   
32     48     
96     -64    
-16    80     
32     -160   
176    16     
-96    -32    
-16    16     
-736   224    
-80    304    
384    416    
224    -240   
160    -80    
80     -192   
-80    -48    
48     -368   
112    -128   
272    48     
-64    256    
192    160    
48     -112   
-224   -432   
288    -512   
-544   -144   
-160   -464   
560    304    
-400   144    
-160   -48    
-192   -208   
144    32     
432    -384   
64     -144   
320    -416   
-48    -160   
-176   -208   
-144   -336   
288    -16    
592    304    
-784   112    
-32    -16    
-144   -80    
48     -128   
-128   -208   
-176   -528   
192    -272   
80     -976   
-224   256    
192    -64    
208    -80    
208    -128   
0      128    
-256   16     
-32    -144   
-736   -288   
-128   -80    
-560   -64    
64     160    
144    -144   
96     -448   
32     176    
48     -368   
144    96     
64     16     
48     0      
-16    -160   
-64    -224   
-144   -80    
144    -208   
-256   -224   
96     -128   
-96    128    
160    64     
-16    -16    
144    -464   
32     -192   
720    320    
-656   400    
144    208    
-96    -96    
-192   32     
192    -400   
-528   -144   
64     -48    
-272   384    
256    304    
-128   96     
0      -64    
-64    96     
80     -96    
80     -64    
192    -64    
-96    -128   
272    32     
32     -272   
-16    -96    
-32    -208   
-48    80     
224    -32    
-320   -16    
144    96     
-176   128    
64     -16    
16     -144   
496    80     
-144   128    
240    -16    
-1392  -320   
-352   -336   
0      32     
192    176    
64     608    
-16    -224   
208    -224   
-240   304    
32     -272   
32     -32    
176    -64    
80     -64    
-1088  -32    
144    -192   
-864   64     
-704   -96    
64     96     
-368   -112   
352    160    
-1872  -96    
-320   32     
-16    -64    
-112   128    
48     -16    
16     48     
-208   -96    
-32    -16    
-288   -144   
-16    96     
144    64     
-48    0      
-48    0      
-144   48     
384    384    
-592   208    
-144   80     
-768   16     
80     0      
0      128    
-112   16     
-160   -16    
144    96     
-48    16     
176    224    
32     48     
-64    16     
-256   0      
-384   -112   
16     -48    
-240   -32    
64     -112   
64     96     
0      -48    
144    -144   
208    224    
-96    -32    
16     -16    
96     -16    
-32    64     
-160   32     
48     144    
-368   16     
-128   -80    
32     16     
16     16     
-64    -48    
-160   -16    
-80    -16    
-1520  -32    
48     32     
96     -32    
-64    32     
-368   -160   
192    64     
48     48     
32     -112   
-160   0      
96     112    
-176   32     
-16    0      
48     16     
-192   32     
-48    -48    
-336   -32    
160    80     
-48    -16    
0      16     
-16    16     
-160   48     
240    96     
64     16     
0      64     
-160   -48    
-48    80     
-112   16     
288    128    
-208   0      
160    0      
-32    -48    
112    48     
-96    -16    
-144   0      
-144   -192   
32     80     
-80    -16    
-160   -48    
80     32     
-112   16     
400    256    
-480   80     
352    128    
-384   -128   
576    144    
-256   64     
-176   64     
-880   0      
-224   0      
416    32     
144    96     
-16    64     
16     16     
32     144    
-352   -96    
16     -128   
32     32     
-144   80     
32     -96    
208    128    
-512   0      
432    144    
-272   48     
-256   -128   
96     80     
-192   96     
-368   -96    
176    32     
-96    -112   
176    -144   
240    0      
512    -96    
272    96     
-480   -16    
16     -48    
-224   48     
-144   16     
128    0      
-400   144    
-48    64     
480    -144   
0      -112   
128    144    
-64    64     
-80    -112   
-80    -64    
-176   -96    
96     -32    
-64    -64    
16     32     
-80    -64    
32     -96    
48     64     
-48    -128   
-16    -16    
144    -96    
96     64     
-112   -80    
-160   -80    
16     176    
176    -32    
-416   -480   
176    192    
-112   -160   
16     0      
80     48     
-96    96     
224    128    
-288   -80    
96     80     
64     0      
304    80     
144    -32    
-48    -112   
0      1456   
320    -1040  
16     256    
-48    352    
-112   -672   
-80    240    
-64    -128   
176    320    
96     64     
-160   -512   
160    224    
128    384    
-80    336    
-288   -368   
32     320    
144    320    
336    288    
-384   800    
176    -64    
-192   -96    
96     32     
64     272    
-32    224    
128    96     
64     48     
192    128    
96     -16    
-16    32     
176    96     
-112   96     
-160   -208   
176    208    
-128   208    
-16    16     
48     48     
368    -176   
-112   240    
-112   32     
48     -16    
16     -112   
0      48     
-96    -320   
112    -64    
0      32     
-64    16     
-32    -32    
144    80     
-144   64     
320    352    
-208   -432   
96     -624   
64     208    
-16    -32    
64     16     
-32    -112   
-48    -32    
112    -240   
240    112    
-64    48     
112    80     
32     160    
128    0      
128    32     
128    -16    
0      -48    
80     -432   
0      80     
32     0      
368    272    
-272   224    
-32    -32    
128    16     
16     48     
80     112    
128    240    
-48    -32    
208    32     
-192   192    
32     -112   
144    0      
-96    0      
80     112    
128    -448   
32     80     
-16    -144   
176    304    
80     144    
48     -64    
64     -16    
-48    -96    
160    -64    
144    64     
-48    -96    
32     -224   
-16    -160   
-112   -224   
96     16     
-32    -1104  
32     240    
-48    0      
48     -32    
16     -176   
160    16     
-48    80     
16     -144   
96     -16    
-48    288    
160    272    
224    -96    
-32    112    
96     -176   
-32    -16    
96     -576   
-16    48     
160    -1136  
-80    128    
0      64     
-112   -192   
272    432    
-80    144    
272    272    
288    -112   
64     96     
336    32     
0      464    
112    224    
320    -144   
-16    0      
-112   -112   
224    -224   
-48    32     
-80    -112   
176    -80    
80     512    
752    592    
64     240    
-80    112    
-160   416    
320    544    
496    -112   
208    -80    
288    -112   
32     -64    
64     96     
-48    16     
-64    368    
-128   -96    
176    208    
-656   416    
-80    144    
-32    -80    
-256   -64    
-176   16     
64     0      
-16    160    
720    256    
-32    -48    
128    -112   
320    64     
112    96     
1104   864    
-944   416    
64     160    
-336   -192   
160    -528   
416    -608   
96     32     
336    448    
80     80     
-48    80     
272    -16    
-304   176    
112    32     
-16    16     
416    16     
-480   -1008  
-64    -112   
-144   -448   
48     448    
352    320    
-112   -96    
16     -32    
-192   -416   
-176   96     
368    -1424  
144    -352   
-320   -464   
208    -272   
-400   304    
80     -160   
352    -752   
0      16     
416    16     
-288   544    
-624   -592   
48     -384   
224    80     
176    -240   
80     192    
-192   -368   
80     16     
96     -48    
80     -64    
272    16     
-304   -304   
272    224    
-48    160    
288    -288   
224    80     
-144   32     
320    80     
-176   -160   
112    240    
32     208    
128    -272   
16     -192   
80     -336   
224    160    
64     -256   
-208   -192   
80     128    
-96    80     
-32    -32    
96     16     
-544   -112   
176    -64    
-2448  32     
176    -128   
32     -144   
16     32     
80     16     
176    -80    
-576   -48    
96     -64    
192    -96    
-48    -480   
-128   -416   
-144   -48    
224    432    
-560   80     
224    64     
-128   128    
96     64     
-48    -96    
288    -224   
-64    -16    
160    32     
-16    48     
240    -624   
304    80     
32     -96    
256    0      
-192   -80    
48     -16    
0      -48    
16     -16    
-32    192    
192    144    
-816   16     
16     -176   
128    16     
368    -64    
160    112    
208    -160   
64     16     
96     -48    
-48    0      
0      0      
176    208    
-288   -32    
128    -144   
-480   16     
176    32     
-512   -112   
272    -96    
144    32     
352    -176   
144    96     
-160   -576   
-160   -48    
-112   -64    
208    0      
240    -16    
64     48     
-224   -80    
-80    0      
-400   -80    
80     112    
-16    32     
112    -32    
80     -48    
-16    -144   
64     80     
128    -48    
64     96     
-240   -16    
80     48     
-704   -16    
0      -32    
-288   48     
160    16     
48     16     
192    -16    
0      0      
96     -80    
16     -16    
80     -224   
112    48     
96     -112   
224    -16    
-192   48     
112    16     
-48    -16    
48     -16    
-64    16     
128    16     
-112   32     
16     -80    
-352   -32    
-288   -64    
48     80     
-320   -80    
0      16     
-32    16     
544    -32    
-64    -112   
48     16     
-64    -192   
272    80     
-112   144    
176    48     
-464   -176   
464    32     
48     144    
-656   -224   
48     -96    
-288   -112   
320    112    
-192   64     
-832   -96    
256    -48    
-384   -32    
208    112    
-512   -256   
-64    -352   
-144   48     
-64    240    
128    -64    
96     -160   
-48    -96    
-192   -192   
176    80     
-304   336    
-64    80     
-272   -80    
112    48     
-96    96     
-128   -16    
-960   -16    
-192   48     
-592   -16    
496    208    
-400   -368   
320    160    
-432   -128   
-16    16     
-96    -64    
-48    -336   
48     112    
-16    208    
144    16     
32     32     
-240   -16    
32     -560   
-224   -80    
32     528    
0      -144   
-1072  208    
32     0      
64     -592   
544    1072   
-400   -816   
32     -208   
144    112    
-384   -64    
320    112    
-368   -288   
0      -784   
-144   -496   
96     -48    
-464   -240   
48     384    
-2112  -16    
304    80     
-48    16     
64     16     
80     -48    
-16    96     
-240   -192   
-384   -160   
112    -160   
-64    -16    
80     -16    
-80    -80    
-112   0      
-240   0      
160    192    
-528   0      
0      -16    
192    -256   
80     80     
-32    112    
-48    48     
32     64     
-80    48     
-32    240    
320    208    
-240   0      
-16    -80    
0      32     
64     32     
160    112    
-416   32     
16     -48    
32     -80    
-16    -32    
48     48     
-48    64     
96     48     
-80    80     
-112   -64    
160    16     
144    176    
-192   16     
112    16     
-112   -64    
0      0      
-288   32     
96     0      
16     0      
-160   -48    
16     64     
-48    48     
-112   16     
-144   64     
160    112    
16     144    
-48    -80    
64     -48    
-80    80     
-448   -96    
80     16     
-240   -64    
48     192    
0      96     
112    16     
-128   -112   
-48    -16    
-144   -32    
112    48     
80     16     
240    48     
16     0      
32     32     
80     224    
-128   -32    
32     -96    
-128   -16    
-96    64     
48     208    
64     112    
144    128    
-48    256    
112    192    
-96    64     
48     256    
32     96     
192    -112   
-240   80     
48     32     
-192   -240   
128    -64    
176    80     
-192   -16    
-144   -128   
-96    -32    
-64    -192   
320    112    
176    160    
-176   0      
32     -208   
-64    -208   
-112   -64    
-192   -176   
64     80     
-160   0      
288    128    
32     0      
176    -16    
-16    144    
-96    -80    
128    -176   
-32    -112   
64     -64    
112    -320   
-80    112    
-32    -32    
32     -80    
144    224    
112    64     
-64    64     
160    128    
-16    432    
-16    144    
176    0      
176    -192   
-208   32     
16     128    
0      -48    
-272   -80    
32     -288   
240    256    
-16    688    
-176   1728   
512    -304   
-16    -368   
-128   672    
0      -224   
-256   -976   
-192   -1232  
224    -64    
-192   1360   
-224   192    
304    -176   
112    0      
0      -448   
-96    352    
272    32     
-384   -464   
128    208    
0      560    
80     -1248  
320    144    
-144   336    
-272   80     
-176   144    
64     656    
256    176    
-128   -1136  
304    -80    
-16    352    
-832   -1072  
128    448    
144    752    
-528   -416   
48     48     
16     688    
304    -16    
496    -656   
384    288    
576    0      
-496   688    
48     -688   
-48    304    
0      -176   
0      128    
-224   -240   
480    80     
-112   96     
96     -176   
48     160    
-96    -416   
-16    -96    
144    -144   
-112   192    
-240   -16    
48     -288   
160    32     
144    128    
-32    -160   
48     32     
-16    -16    
-32    -48    
336    144    
-16    -96    
-32    16     
288    -192   
32     0      
144    -496   
-16    80     
-64    144    
64     144    
-112   -48    
128    128    
16     144    
-16    16     
352    192    
-496   -208   
32     -64    
160    64     
-16    112    
48     -16    
-16    48     
64     272    
80     320    
160    144    
-16    -208   
-32    -176   
48     96     
160    -32    
176    192    
-144   64     
-16    0      
160    0      
112    272    
240    160    
48     -112   
-32    48     
96     -416   
112    192    
-144   -352   
128    48     
80     -64    
80     16     
128    -16    
192    96     
256    288    
-96    48     
64     0      
176    -48    
64     112    
192    -128   
-160   96     
176    -160   
272    16     
-16    16     
128    48     
-112   32     
0      48     
64     -16    
240    96     
176    304    
-144   48     
176    0      
80     -176   
144    32     
48     -16    
448    624    
-32    80     
208    -144   
-16    -192   
64     112    
-16    -240   
-208   0      
96     176    
-32    -80    
160    -928   
320    64     
192    -96    
208    -160   
96     48     
-160   -96    
160    32     
96     -64    
192    32     
96     32     
64     -144   
160    32     
288    16     
208    96     
-656   -48    
64     -128   
80     -112   
112    -64    
-256   -16    
112    32     
336    -224   
192    -48    
112    16     
48     -1024  
80     80     
16     -96    
192    192    
-160   -208   
96     32     
-944   0      
32     -208   
96     -64    
16     -16    
32     -32    
224    -512   
0      16     
128    112    
48     48     
112    0      
96     64     
32     -64    
64     -48    
80     16     
0      -144   
-272   -48    
112    -48    
160    32     
112    -16    
-16    -64    
80     -400   
208    -32    
192    -1216  
0      32     
64     -96    
-224   16     
80     -64    
-16    16     
-64    -64    
80     -64    
64     -32    
48     -272   
144    -176   
32     -16    
160    -96    
-64    -16    
96     -32    
272    -128   
96     64     
144    -64    
-240   -240   
416    0      
-80    -16    
96     64     
-112   -176   
-320   -176   
128    -16    
-1040  -128   
-16    -288   
-16    -256   
80     64     
48     128    
-96    -448   
304    32     
208    112    
192    224    
208    0      
160    -336   
-304   240    
208    368    
-560   -176   
320    -48    
160    -176   
160    32     
288    1840   
80     -592   
64     -752   
432    -128   
-560   480    
-160   -176   
-512   -1024  
240    960    
192    -128   
-336   -560   
352    336    
-256   192    
-304   528    
480    -192   
96     96     
-240   208    
304    -208   
-16    576    
96     192    
16     256    
64     -192   
48     0      
-352   -224   
400    -480   
-480   -16    
-96    -224   
16     -112   
144    64     
-400   -464   
96     -176   
-528   -32    
64     16     
48     -128   
32     -48    
144    64     
32     -16    
0      32     
-656   -112   
16     -16    
-96    96     
32     -64    
-80    -112   
256    16     
-224   16     
0      -48    
-80    -16    
48     -64    
-320   32     
208    -272   
-112   16     
192    -432   
128    32     
-112   80     
272    112    
-80    144    
80     0      
0      -80    
96     48     
64     -32    
208    -16    
32     -32    
-1936  -160   
16     64     
-1152  -64    
160    48     
96     -48    
0      -48    
48     32     
-1056  16     
-160   -32    
96     -80    
-64    -48    
128    16     
48     48     
-528   -128   
96     64     
-32    64     
-224   176    
-32    -80    
-64    96     
64     -16    
-112   -144   
-96    -192   
-224   -96    
-64    96     
-64    288    
-144   96     
256    -96    
-432   -32    
-192   -128   
96     64     
-160   -112   
-176   -96    
32     -112   
32     64     
-96    -160   
368    128    
-80    224    
80     64     
-160   -32    
-352   -48    
-96    16     
-1152  64     
64     0      
128    64     
-64    32     
-208   -32    
32     32     
240    160    
-144   128    
128    -64    
-176   80     
-48    -16    
-128   16     
112    -64    
0      0      
16     80     
-224   32     
-48    64     
-112   -144   
192    -112   
32     -112   
64     224    
400    624    
-464   512    
64     80     
240    208    
224    128    
-352   -32    
-176   32     
-368   -16    
-144   368    
-224   0      
-272   0      
-1984  0      
112    320    
-32    144    
112    80     
-176   -32    
-16    -64    
176    272    
-144   -160   
-80    -80    
160    160    
64     -96    
64     16     
32     48     
-208   -464   
-96    -32    
-1008  96     
112    32     
16     -32    
128    80     
240    64     
-64    256    
-176   -192   
16     96     
80     304    
-208   -48    
80     -144   
0      48     
128    144    
-32    16     
-32    64     
-368   0      
224    896    
-160   48     
-64    -256   
-368   48     
-64    32     
-80    -48    
-96    160    
224    352    
-96    48     
64     -48    
-400   0      
144    128    
-608   432    
176    688    
-320   -368   
-368   -192   
96     208    
368    160    
-272   -240   
128    -32    
-48    224    
304    96     
16     64     
-288   112    
0      64     
-448   -64    
192    208    
64     336    
-176   0      
400    560    
-320   512    
0      160    
-160   -64    
224    -144   
128    112    
704    352    
112    -64    
480    16     
-480   -32    
48     144    
-304   -96    
32     32     
-16    48     
-80    16     
-144   -352   
48     -208   
-256   176    
-96    32     
96     32     
-96    0      
80     16     
32     -16    
-16    32     
112    64     
96     32     
-320   -32    
-32    -160   
-32    -224   
-272   64     
-64    32     
16     -128   
256    -16    
80     160    
-112   32     
272    176    
-160   64     
128    -16    
208    48     
112    112    
-192   -16    
-16    -16    
16     96     
-144   -48    
192    0      
96     -16    
-16    80     
160    -48    
128    16     
-32    48     
-64    48     
240    320    
-288   48     
32     -96    
224    -16    
96     64     
-192   -96    
544    320    
-288   192    
-112   -64    
-32    -32    
112    -80    
48     -64    
32     16     
80     96     
-48    128    
64     176    
16     416    
272    144    
-16    -64    
-48    48     
-144   -144   
32     -128   
16     32     
-16    112    
48     16     
96     32     
32     0      
48     128    
32     80     
0      -48    
144    -64    
112    48     
64     48     
0      48     
112    96     
288    272    
-32    240    
-192   -16    
96     112    
160    0      
176    240    
-144   160    
32     32     
160    -64    
48     0      
64     80     
-32    -48    
64     144    
48     -32    
128    112    
464    656    
-528   432    
272    -128   
128    -800   
144    80     
160    240    
48     64     
80     16     
176    0      
128    32     
112    48     
-64    -160   
64     112    
-208   -16    
-80    96     
240    80     
48     -128   
112    96     
32     112    
-16    0      
256    288    
-112   112    
32     0      
48     64     
128    96     
240    160    
-144   -16    
160    -160   
64     0      
64     48     
-64    32     
144    0      
-32    96     
-16    -288   
-16    16     
48     -192   
128    112    
32     80     
-16    32     
80     224    
-176   224    
-16    16     
128    32     
80     80     
16     32     
16     -48    
-64    -64    
-80    96     
128    -176   
96     48     
-16    64     
160    80     
160    -48    
128    -80    
-112   -48    
128    16     
-64    -32    
160    32     
-64    48     
16     48     
80     -48    
128    -80    
144    32     
80     -80    
96     32     
0      -80    
144    48     
-48    -240   
-16    -48    
-48    -64    
32     -176   
96     -112   
416    608    
-192   -384   
384    0      
208    368    
-128   -160   
176    112    
-16    -400   
-64    624    
384    -416   
-320   -336   
32     112    
96     -208   
-160   0      
240    96     
0      -112   
208    112    
336    -80    
112    832    
416    -1376  
176    96     
112    672    
-112   -720   
-288   64     
-208   80     
192    112    
288    176    
-112   400    
-48    320    
-336   -128   
448    -240   
-64    80     
800    288    
-224   -192   
256    32     
-624   -160   
-64    -192   
624    -480   
448    160    
0      192    
48     -16    
-48    48     
-272   -1344  
320    16     
32     -128   
256    -544   
-144   96     
208    -432   
0      -256   
192    -752   
-96    48     
96     80     
16     -16    
48     -320   
80     -96    
-112   -48    
48     0      
96     -32    
80     -32    
80     16     
-64    -112   
224    -32    
96     96     
96     32     
-64    -448   
224    -368   
-192   -816   
160    -176   
-80    240    
-32    32     
176    -16    
-128   32     
64     16     
-16    16     
-128   48     
32     0      
128    -16    
-16    -32    
176    160    
96     112    
320    -64    
-64    -192   
80     -32    
112    -1536  
-48    32     
0      -64    
112    0      
64     32     
32     48     
80     16     
-112   32     
-208   -48    
144    -64    
-32    -112   
144    -160   
272    0      
-128   -48    
-80    -144   
16     -208   
0      80     
80     -32    
32     64     
32     16     
0      -96    
-16    -144   
112    16     
-432   16     
128    -64    
-832   32     
64     -128   
208    48     
-32    80     
-80    -32    
0      -416   
176    0      
-64    -48    
32     16     
-160   32     
64     16     
-224   -16    
48     112    
-320   -128   
192    -128   
-1248  -48    
48     -16    
0      -160   
64     -80    
16     160    
-112   -176   
-64    48     
32     -144   
48     16     
96     192    
96     48     
16     160    
0      48     
-112   16     
144    -144   
-192   -48    
256    -16    
-432   128    
-80    -288   
64     -256   
96     -368   
48     -112   
160    -240   
-80    -64    
-144   -96    
-96    -432   
-48    -672   
224    -192   
64     -64    
-128   -336   
-144   0      
-80    320    
-160   528    
144    -688   
-16    -624   
-48    304    
128    0      
112    -352   
-80    -128   
-144   16     
-144   16     
-144   320    
240    -112   
64     224    
32     48     
144    144    
80     -240   
-1040  176    
0      -16    
128    -528   
128    192    
0      176    
-96    -208   
-1744  80     
-208   176    
64     -432   
-432   -256   
160    208    
-80    0      
112    80     
48     128    
48     -128   
208    32     
-64    -112   
272    -112   
-336   -144   
80     80     
-80    -16    
-704   -80    
-128   96     
-320   80     
-112   -16    
-464   -80    
208    368    
-192   112    
-48    0      
-544   48     
80     128    
-192   16     
-16    -64    
-624   -288   
-96    0      
-128   32     
224    -112   
32     32     
-96    -112   
-208   32     
-1296  256    
-192   -96    
80     -32    
160    128    
-112   144    
0      128    
-112   -48    
-384   -176   
352    16     
-448   112    
128    0      
-160   32     
-368   -80    
16     -224   
416    -272   
0      -32    
-320   -160   
-256   -256   
304    176    
-192   176    
-16    16     
-368   -416   
688    -64    
-144   400    
-576   48     
-352   -80    
144    -32    
96     32     
-496   80     
-48    -32    
512    352    
-624   208    
-848   -256   
192    -48    
128    16     
96     16     
-48    -32    
96     32     
-80    -48    
-48    80     
-144   -16    
-32    48     
272    48     
48     144    
-48    176    
-112   -48    
-64    -128   
-272   -64    
32     112    
16     16     
112    80     
-80    -64    
-224   -48    
16     96     
80     -32    
16     -32    
48     48     
-112   96     
16     112    
64     80     
-272   -32    
32     32     
-16    0      
96     32     
-352   0      
176    80     
176    128    
-208   -16    
-80    -80    
80     -16    
-16    80     
-48    -16    
80     64     
-320   -16    
-64    48     
-64    -32    
80     48     
-112   80     
-64    64     
-688   -64    
80     48     
-48    32     
32     -16    
96     0      
128    512    
112    224    
64     -224   
-160   -96    
64     32     
160    96     
-208   -16    
80     -48    
-272   -80    
176    32     
-160   -64    
-80    80     
32     192    
-112   -16    
80     64     
0      80     
32     -16    
-160   -48    
208    -144   
32     -32    
176    112    
-288   -16    
32     192    
-240   160    
192    112    
112    -48    
-80    16     
-48    16     
-48    112    
16     64     
-96    -16    
0      16     
-112   80     
656    512    
288    96     
96     64     
-160   112    
-32    80     
0      128    
-304   -32    
-128   -464   
-160   -240   
272    608    
-176   320    
32     -224   
64     -80    
96     -48    
-32    32     
48     112    
-48    16     
-32    64     
32     -16    
256    176    
0      368    
160    176    
192    -16    
-16    32     
0      112    
32     -192   
-160   -176   
32     -16    
48     0      
16     32     
112    128    
-80    -16    
176    48     
32     48     
-32    -64    
-288   -96    
-16    208    
128    208    
112    208    
-288   -368   
-96    -272   
160    176    
384    464    
-336   -256   
-64    -432   
208    224    
96     -80    
160    240    
240    320    
-64    -432   
64     80     
32     112    
-16    0      
96     144    
-64    0      
96     48     
-16    0      
48     80     
144    32     
-80    -368   
-128   736    
112    -288   
176    32     
-112   32     
0      -576   
80     0      
80     160    
160    16     
80     -496   
-16    432    
16     -304   
224    288    
80     144    
192    -192   
240    864    
-480   -320   
-240   -624   
224    -384   
-96    608    
304    -176   
144    -320   
-176   368    
80     64     
-256   160    
320    -32    
-64    64     
-16    0      
288    224    
-496   0      
128    -128   
288    160    
320    176    
224    32     
144    48     
144    240    
-384   80     
-384   -256   
272    16     
512    288    
160    208    
512    160    
-352   80     
-352   32     
800    336    
-416   112    
192    320    
-304   160    
-96    32     
80     -48    
336    -240   
224    160    
80     -304   
96     64     
-128   -64    
176    -272   
-80    32     
-144   160    
176    -176   
96     32     
304    320    
-144   160    
256    -128   
-144   -96    
80     128    
128    -224   
-256   -288   
64     -192   
-128   208    
144    -16    
16     144    
64     -192   
-288   144    
224    -64    
160    -96    
80     -112   
-128   -128   
192    48     
304    -176   
96     0      
-368   240    
-32    80     
64     -128   
-240   -16    
144    -800   
16     -128   
112    -128   
96     48     
208    64     
128    64     
-160   -32    
-48    64     
16     144    
16     -64    
-96    32     
336    16     
-16    96     
48     -288   
192    112    
-112   80     
-48    16     
96     80     
48     48     
16     -32    
192    -144   
0      0      
-80    16     
80     -176   
144    -32    
448    352    
-288   -80    
-48    -64    
16     -144   
48     80     
-160   0      
176    64     
-80    -16    
64     -16    
32     16     
144    144    
-96    0      
144    -144   
96     80     
0      -112   
144    128    
0      -80    
0      -48    
112    -32    
64     80     
96     48     
-48    64     
96     320    
176    240    
64     96     
0      96     
16     -96    
-16    -96    
64     -1216  
-112   -160   
0      -208   
144    64     
416    832    
256    288    
176    592    
-96    -32    
64     -288   
-64    -240   
32     352    
-208   -208   
320    -1120  
352    640    
240    192    
16     -400   
-112   -80    
112    -144   
128    -112   
144    160    
-48    -176   
-32    96     
-16    -48    
80     -160   
208    512    
160    -272   
144    -96    
-144   192    
-64    -160   
80     112    
336    400    
-64    16     
144    -144   
192    -96    
128    192    
160    0      
32     16     
0      16     
-272   -224   
0      -112   
288    -144   
208    0      
48     -128   
176    48     
-288   32     
64     -64    
160    64     
48     -272   
-32    96     
96     -272   
16     -48    
112    32     
-256   0      
112    -64    
-80    16     
64     0      
16     96     
-112   64     
64     -48    
-912   -80    
48     -16    
48     0      
-32    -208   
192    -96    
48     -192   
256    -16    
80     -976   
-16    32     
16     -64    
192    160    
-48    -48    
144    32     
-96    -304   
-48    -128   
-160   32     
240    16     
-1360  32     
144    -16    
0      -96    
64     -320   
-256   16     
128    -608   
128    112    
208    -48    
-160   64     
288    256    
-368   -16    
-160   -32    
128    -160   
-144   112    
32     80     
-112   48     
-272   -176   
288    -80    
400    208    
-736   32     
384    -192   
-320   -96    
48     -288   
592    64     
-192   -144   
352    -240   
-48    128    
16     -48    
240    144    
-352   -32    
-1520  -384   
752    -144   
-1088  144    
-160   -112   
352    16     
144    -336   
208    0      
528    -1328  
-256   192    
160    224    
-480   0      
16     128    
-192   32     
-64    -96    
304    -48    
-672   48     
80     -64    
208    80     
-160   16     
128    0      
64     -112   
96     -192   
-592   -192   
-160   144    
-432   32     
224    -64    
-128   32     
64     0      
-48    32     
-32    128    
128    112    
128    -16    
-192   128    
272    0      
-128   128    
-64    -208   
-48    -64    
-16    16     
-400   48     
-144   -32    
208    64     
-256   -80    
0      -16    
-48    -16    
48     32     
80     48     
-80    -224   
128    16     
128    -16    
128    0      
-128   -144   
160    240    
-192   176    
-160   48     
-96    32     
-1408  -128   
16     -240   
96     48     
128    96     
-224   -80    
-48    -64    
-208   -240   
112    -48    
-256   96     
224    128    
-272   -96    
-128   160    
-64    112    
-480   -176   
32     16     
-176   80     
96     96     
-848   64     
-48    288    
96     -176   
0      224    
-176   208    
64     -288   
128    176    
112    -32    
-128   -192   
192    752    
-192   -80    
80     -32    
32     64     
-240   208    
-224   0      
-288   -128   
-128   -64    
-944   -128   
96     64     
112    -144   
224    144    
-80    -144   
-240   80     
-176   -448   
16     32     
224    1056   
240    -304   
160    32     
-16    80     
-160   -128   
-144   176    
-80    384    
-656   -464   
32     192    
-160   -288   
112    192    
0      -624   
-176   32     
48     336    
0      0      
-128   -96    
-304   -128   
48     112    
16     -144   
176    96     
-256   112    
96     -64    
-160   -64    
0      80     
-16    -128   
176    288    
-112   352    
0      -160   
-48    -224   
-112   128    
80     272    
-160   -16    
-32    -272   
112    80     
80     368    
-320   128    
-16    -16    
-752   192    
32     -32    
208    192    
-160   -480   
48     -144   
64     416    
144    176    
48     48     
64     -64    
-288   0      
128    -192   
144    0      
-112   144    
-208   -16    
0      48     
-224   -256   
48     0      
-688   -224   
64     -192   
-128   -128   
112    -224   
144    432    
-80    320    
240    80     
-80    80     
-16    112    
-48    160    
0      144    
-16    128    
0      176    
-32    -224   
80     -32    
-64    -160   
-16    -48    
-16    -160   
-160   -64    
64     -304   
176    -336   
-48    -32    
192    -208   
64     -64    
-144   -80    
-80    224    
-80    -80    
144    32     
-432   -224   
64     -176   
96     96     
80     96     
-16    16     
512    16     
-400   208    
-272   -112   
-144   128    
32     112    
16     0      
64     -256   
256    -160   
-336   208    
-288   208    
-160   -96    
160    -96    
112    48     
544    96     
160    240    
288    32     
64     16     
32     64     
-80    128    
-64    0      
-368   -80    
64     32     
-48    64     
-208   160    
208    192    
-32    -48    
160    -96    
-32    -112   
0      80     
-128   80     
-16    -112   
-32    0      
48     16     
128    48     
-32    80     
32     -144   
96     -128   
-64    160    
-128   176    
400    96     
-64    32     
-48    64     
112    80     
-80    -16    
112    128    
112    144    
112    -16    
-176   -688   
112    -32    
288    240    
-64    112    
192    144    
288    -80    
32     160    
64     -32    
16     -16    
-144   -288   
16     32     
128    80     
-64    -64    
32     16     
32     176    
-80    32     
128    -48    
80     80     
-80    48     
-352   64     
352    32     
16     -224   
80     -704   
64     80     
368    512    
-352   480    
-16    -32    
-16    -208   
192    64     
160    0      
240    288    
96     352    
-448   144    
192    144    
48     96     
176    -64    
32     16     
304    -208   
48     112    
32     -64    
-96    -304   
32     112    
48     240    
176    304    
32     128    
-96    80     
48     224    
0      -208   
208    -336   
128    224    
128    304    
-160   48     
224    -368   
-64    -48    
32     768    
48     -256   
-16    144    
-16    192    
16     -208   
96     128    
-48    16     
96     96     
80     -160   
-64    -464   
112    624    
-240   -128   
-80    -144   
144    16     
128    -96    
48     288    
304    528    
-144   128    
80     448    
208    96     
0      -128   
80     -96    
224    48     
-112   -48    
128    96     
-48    80     
-32    -16    
-32    80     
0      -288   
192    16     
160    -384   
112    112    
-48    48     
32     32     
32     272    
-64    0      
160    -32    
304    32     
176    64     
-48    32     
64     32     
-112   16     
-128   16     
144    -64    
160    96     
-48    48     
304    48     
320    -1136  
480    320    
-416   0      
256    64     
-16    64     
-32    16     
0      32     
80     0      
32     80     
256    112    
16     -32    
192    -48    
80     80     
112    -176   
96     48     
-48    -528   
48     0      
-48    0      
16     16     
80     80     
48     64     
-16    -48    
64     -48    
112    64     
208    -176   
-64    16     
96     -160   
0      0      
96     -160   
80     48     
128    -64    
-32    -32    
144    -16    
128    112    
112    48     
32     80     
0      16     
-176   -592   
128    -96    
-144   112    
192    -80    
48     -16    
-96    112    
448    160    
480    208    
48     -160   
-48    96     
-192   -80    
352    -208   
-368   64     
32     -112   
32     -32    
304    -48    
304    176    
-272   -16    
16     32     
48     -96    
-208   32     
-80    -176   
208    96     
16     -208   
128    -256   
-720   -48    
288    -800   
304    112    
-1088  32     
96     128    
96     -160   
544    -112   
224    0      
208    -672   
-32    -16    
-112   32     
-48    32     
-80    -32    
240    208    
-432   -432   
400    -112   
416    -160   
80     96     
-176   64     
96     -176   
224    160    
-208   -320   
176    -80    
176    -144   
32     -32    
64     -112   
-32    176    
320    -48    
0      112    
320    -112   
-96    32     
64     48     
-16    -16    
-272   -32    
96     -64    
-880   -48    
128    144    
176    208    
192    -352   
32     -144   
-16    -1216  
112    -64    
128    -112   
0      -64    
176    -16    
80     80     
128    -192   
0      -32    
-832   -32    
544    -624   
-608   608    
0      64     
128    -96    
48     -128   
80     -80    
-32    192    
144    32     
160    128    
-352   -96    
48     -384   
-16    320    
-32    -112   
160    -208   
80     16     
96     64     
-224   272    
80     -336   
-96    -224   
-48    -64    
-80    368    
48     160    
-112   -160   
128    -384   
16     48     
176    -48    
80     -112   
-32    -576   
48     384    
-208   48     
224    -208   
-608   448    
-96    -256   
-1616  544    
208    -704   
160    64     
-96    368    
-80    -32    
80     -240   
-112   -576   
176    144    
192    48     
-128   32     
112    128    
-112   -96    
192    -80    
0      128    
80     32     
-176   -48    
144    -48    
112    352    
-48    -192   
-16    -320   
112    -336   
-32    80     
64     32     
240    -32    
64     -80    
64     -272   
-192   -208   
-32    -384   
32     112    
-272   -208   
-304   -128   
128    -208   
48     -352   
272    -48    
64     0      
-112   -192   
176    -176   
-304   16     
-16    96     
-512   0      
96     0      
-64    -64    
112    -48    
-128   -48    
160    -144   
-304   304    
224    144    
272    160    
-112   32     
32     112    
256    -224   
-928   240    
48     352    
16     160    
48     112    
112    176    
-272   -176   
-80    -160   
-288   -80    
96     48     
-160   -96    
304    -16    
0      48     
-192   80     
224    144    
-304   -288   
-416   0      
16     32     
-368   16     
0      -16    
-2128  -144   
64     -240   
128    -208   
-32    96     
-80    64     
-112   176    
-304   32     
80     -256   
-320   -336   
176    160    
-208   208    
-64    144    
-16    160    
-176   160    
-144   144    
-336   128    
-16    -80    
160    80     
-64    -96    
96     -224   
-48    -160   
-272   -144   
224    144    
-464   272    
-144   0      
176    -400   
16     -544   
-128   -560   
96     0      
16     -128   
-48    144    
-224   -464   
-304   80     
-32    208    
-192   -32    
304    -112   
-80    -480   
-16    128    
-576   -16    
-512   272    
-32    80     
-64    192    
272    96     
-64    -48    
-128   -112   
-352   -240   
-48    48     
-1088  96     
-80    0      
-1216  -160   
-48    -112   
240    -208   
256    16     
96     80     
0      -16    
160    -64    
-80    -464   
576    -128   
240    160    
-192   64     
-272   -64    
-64    208    
16     304    
-160   192    
-880   0      
368    64     
-400   -48    
208    64     
-144   96     
32     -96    
-96    16     
-64    -16    
224    64     
-192   -112   
96     96     
-288   -144   
-80    -160   
-320   0      
304    64     
-16    256    
96     80     
64     32     
-96    -64    
-192   256    
384    240    
0      176    
80     32     
0      32     
-32    64     
-32    48     
32     -80    
32     32     
-32    272    
240    144    
32     64     
224    192    
-320   304    
-144   272    
48     64     
128    96     
-96    0      
96     -112   
64     -144   
112    -192   
-48    -16    
0      -64    
48     -32    
-400   -400   
-112   -592   
-416   -336   
64     304    
48     -224   
208    192    
-128   96     
-240   336    
96     176    
-48    112    
272    -64    
-48    48     
-80    80     
176    112    
-16    384    
-384   -480   
464    368    
-352   -512   
96     224    
80     112    
16     -96    
-16    336    
32     64     
208    -32    
-144   -48    
80     400    
-32    80     
-64    -96    
-32    -64    
80     -80    
-16    80     
144    112    
0      -32    
64     -48    
-16    48     
16     80     
0      16     
16     32     
96     48     
448    512    
-480   304    
-144   -80    
208    -64    
-224   -16    
192    48     
-144   -112   
144    64     
-80    128    
-224   -176   
144    -192   
128    176    
240    96     
112    96     
16     128    
80     -16    
16     48     
-256   16     
112    112    
-128   -32    
80     32     
-32    0      
128    48     
144    16     
80     48     
96     32     
-16    32     
80     16     
-176   0      
-112   48     
-48    80     
128    32     
16     80     
-80    64     
-80    -80    
128    48     
-32    32     
16     -48    
-48    0      
96     112    
0      48     
128    32     
48     -16    
-16    48     
-80    0      
80     96     
224    64     
-64    -32    
48     32     
-96    -48    
-80    32     
16     0      
400    -96    
64     16     
-80    -64    
48     32     
0      -48    
64     112    
0      64     
64     32     
-112   0      
32     -16    
-16    0      
128    48     
16     112    
176    48     
32     32     
32     -512   
64     -16    
96     0      
32     192    
288    96     
-48    32     
112    -32    
112    112    
64     0      
-224   32     
32     64     
112    176    
208    48     
-528   -224   
160    16     
336    176    
-576   -64    
576    64     
-288   96     
256    80     
160    96     
-256   -16    
256    112    
-48    32     
48     96     
-48    16     
192    16     
-80    16     
80     96     
32     192    
48     -320   
-384   -128   
80     -912   
336    96     
-256   0      
448    32     
352    224    
-496   144    
-336   -384   
448    -176   
32     0      
-240   -96    
256    -80    
304    0      
160    16     
128    -16    
576    128    
-48    -768   
304    112    
96     224    
16     -80    
16     -16    
112    416    
32     -208   
0      -48    
-128   48     
160    -160   
432    432    
-480   -112   
400    -272   
-80    96     
80     -64    
224    64     
48     -176   
272    -832   
-112   128    
80     -160   
-32    96     
-48    64     
400    64     
-208   368    
224    176    
64     -48    
128    -48    
160    224    
0      -432   
-16    -192   
208    208    
-48    336    
16     -208   
-32    -144   
352    560    
96     -96    
128    32     
-288   16     
64     -336   
16     -336   
256    -432   
-288   -352   
272    -272   
320    112    
288    304    
32     240    
0      -80    
-160   -256   
176    64     
48     -304   
16     -192   
144    32     
32     304    
224    144    
0      -512   
432    112    
-64    16     
-32    -48    
64     -16    
80     64     
-48    -160   
0      176    
96     16     
144    112    
-64    0      
112    144    
-48    128    
80     16     
0      192    
-208   -272   
96     -416   
160    -160   
208    176    
-80    -112   
48     -112   
80     -128   
48     128    
80     16     
96     32     
16     64     
0      -352   
96     64     
-928   128    
-96    -32    
192    368    
-336   112    
224    -208   
256    -1584  
64     -32    
112    112    
-48    -320   
128    -160   
112    128    
-224   16     
-16    64     
240    -240   
160    -160   
-512   16     
80     112    
80     -128   
112    -304   
64     -224   
0      -528   
144    -32    
-112   -80    
80     16     
112    -112   
48     0      
144    -208   
128    64     
96     -16    
144    48     
-112   -112   
128    -16    
48     -144   
64     -224   
160    -80    
96     192    
208    208    
0      -400   
80     -16    
-48    -240   
-224   -64    
80     -576   
128    -32    
32     80     
64     -128   
-496   -16    
32     -112   
-896   144    
128    -16    
16     112    
80     48     
-48    144    
256    -272   
-128   32     
224    -16    
-144   0      
80     96     
32     -80    
-128   -32    
160    -192   
-176   80     
208    -48    
16     208    
192    80     
32     -96    
32     -320   
160    -176   
-112   -496   
32     -16    
96     -928   
-80    16     
320    48     
240    96     
-320   -80    
16     64     
-64    0      
-16    192    
-592   256    
608    416    
-2160  80     
-16    -96    
-128   -48    
528    -400   
16     624    
208    -48    
80     -32    
-112   112    
224    -128   
-144   224    
-224   -176   
112    192    
-256   400    
-240   192    
32     -288   
-48    64     
224    16     
496    608    
0      160    
48     96     
-496   -352   
160    384    
-144   160    
240    -80    
560    400    
-144   -16    
-464   16     
-336   -560   
-336   -304   
128    -48    
0      -416   
160    -304   
96     -384   
80     -480   
272    -208   
-288   -112   
-80    -64    
-32    160    
-48    48     
-176   160    
80     -80    
-16    -240   
336    -224   
48     -32    
-80    -80    
-176   -240   
64     -32    
176    -64    
-96    -16    
32     368    
448    -272   
-304   -32    
-544   192    
-1072  -224   
192    -416   
352    352    
-80    208    
160    -240   
-48    208    
96     80     
144    192    
-1184  -224   
-48    -192   
-640   -16    
304    32     
-128   48     
-272   48     
-544   -112   
-1072  0      
-16    48     
-704   -112   
-16    -16    
256    144    
-304   -240   
-320   16     
-32    32     
112    -16    
-208   -192   
-352   160    
80     128    
-112   -80    
-288   96     
96     -112   
-32    112    
-128   64     
-240   -80    
-16    64     
-816   -80    
-48    112    
-352   144    
16     0      
128    -48    
128    -176   
-256   -272   
-32    -32    
112    64     
-128   0      
16     16     
-96    16     
48     336    
-256   96     
32     48     
-1552  448    
96     128    
256    0      
-80    0      
176    -144   
-32    -96    
-240   -96    
-64    -16    
-80    -16    
-32    80     
-80    96     
32     32     
-48    16     
-288   -48    
64     -64    
-16    144    
-192   80     
-64    -144   
192    96     
-96    -32    
-64    -336   
528    -336   
-32    224    
80     48     
48     -32    
64     64     
-336   -384   
48     -80    
32     432    
-208   112    
-96    -48    
96     32     
-1696  0      
64     96     
-80    -64    
0      -208   
48     32     
-176   80     
-96    16     
48     0      
-48    -32    
0      176    
-208   64     
-32    -80    
224    96     
-128   -96    
192    48     
-656   -16    
-48    64     
64     -16    
-112   -48    
16     48     
32     0      
-16    48     
16     0      
64     32     
144    192    
-288   -16    
-208   -64    
96     96     
-208   -32    
-32    48     
-160   0      
64     64     
0      0      
16     -16    
48     64     
48     32     
-32    16     
128    64     
48     64     
-48    48     
-144   16     
-176   -80    
176    64     
-32    32     
80     48     
-96    0      
0      48     
96     32     
0      16     
16     160    
96     80     
-32    16     
-64    -16    
0      16     
-160   96     
48     64     
0      -48    
32     -16    
-16    96     
-176   80     
-208   -96    
-32    64     
160    32     
-96    -96    
224    -64    
-144   32     
224    0      
-528   -432   
192    -336   
-80    -96    
240    48     
-32    112    
208    -32    
-208   -176   
400    336    
-224   80     
16     -176   
416    352    
-464   272    
-80    -192   
16     -144   
432    384    
-192   288    
96     96     
-208   96     
112    80     
704    480    
-96    240    
-288   -464   
16     -176   
-144   80     
128    32     
128    208    
-80    -432   
-16    -32    
48     576    
-32    -128   
64     -224   
224    -224   
-64    128    
16     176    
144    48     
-432   192    
32     -208   
-240   0      
-64    80     
160    384    
176    -64    
-16    80     
16     128    
352    -80    
0      688    
-320   -416   
-48    736    
512    -32    
-160   -160   
-80    80     
32     416    
288    1216   
-112   144    
144    -320   
-32    -288   
-144   128    
96     -16    
32     224    
272    48     
320    144    
-192   -32    
32     -128   
16     48     
256    -48    
-16    48     
176    64     
224    112    
-240   80     
32     96     
80     224    
-64    176    
-80    64     
208    128    
176    176    
128    0      
-96    64     
32     144    
192    112    
48     48     
-32    144    
192    -16    
16     64     
64     -576   
112    80     
0      -16    
192    -32    
64     112    
32     192    
352    48     
0      112    
-144   176    
-112   80     
16     -48    
176    0      
-32    16     
0      -16    
64     -48    
-32    -464   
96     48     
16     144    
160    96     
288    96     
-16    48     
64     -160   
144    48     
-240   64     
64     288    
208    144    
-16    0      
288    0      
80     160    
-112   48     
16     -208   
80     48     
64     128    
32     -32    
240    -64    
96     96     
-128   -80    
128    -32    
320    464    
-352   336    
80     -112   
432    112    
80     144    
64     -80    
0      0      
64     -592   
96     32     
-80    -224   
48     96     
144    112    
-144   -160   
224    -224   
-112   96     
-112   112    
48     -48    
-160   -160   
48     -64    
0      176    
192    64     
112    160    
176    -176   
16     -112   
112    -336   
-96    64     
-32    80     
112    -96    
-48    -16    
0      48     
144    -16    
160    -16    
-96    64     
-48    208    
176    288    
112    144    
-16    48     
-64    -112   
144    16     
-144   -80    
32     80     
96     96     
160    112    
48     -80    
304    288    
-80    192    
96     176    
-128   -16    
176    -80    
112    32     
48     144    
160    384    
-16    -96    
96     16     
208    -176   
16     128    
96     224    
-16    224    
-80    16     
16     -16    
-128   -320   
272    -128   
0      16     
112    0      
400    336    
-64    528    
96     -352   
272    -336   
-48    320    
288    -432   
64     112    
48     16     
-304   -480   
64     192    
0      672    
176    -224   
320    -256   
-128   -736   
16     -336   
-304   -560   
96     -240   
32     -304   
-32    64     
448    416    
-368   240    
256    192    
144    -688   
-80    -320   
528    224    
-448   -224   
144    -80    
-496   -160   
256    48     
96     -16    
-544   -1216  
704    32     
432    576    
-80    240    
80     -144   
64     -160   
192    -224   
-128   224    
-144   -144   
-80    -96    
-832   -992   
368    336    
-32    832    
-640   -448   
80     -224   
80     -32    
320    -32    
336    -144   
80     -176   
-96    -192   
-304   96     
352    48     
32     96     
32     -16    
-64    -112   
112    -192   
-16    192    
-288   96     
-176   -240   
96     0      
-16    64     
16     16     
176    -512   
176    16     
0      -432   
-32    64     
32     -16    
-96    16     
48     -32    
48     64     
-176   -32    
80     -32    
-368   64     
144    16     
0      -240   
-16    -192   
144    16     
192    -48    
80     16     
-16    -368   
-48    32     
-80    -112   
144    144    
-64    -16    
112    32     
16     -16    
-64    0      
16     0      
-96    -48    
-368   0      
112    16     
48     -64    
80     -96    
0      96     
48     -256   
0      48     
48     -192   
96     80     
48     32     
192    144    
-224   96     
80     -160   
16     0      
48     -48    
-80    80     
112    -128   
256    16     
112    -16    
-16    32     
96     -208   
96     32     
-96    -416   
192    -16    
-64    0      
144    48     
-48    -48    
144    -80    
-336   -16    
-48    -80    
-96    0      
48     -48    
-1360  176    
80     -16    
16     48     
64     -112   
64     80     
96     208    
-208   80     
-32    32     
192    0      
-64    -16    
144    224    
-208   -16    
272    -48    
-384   0      
-32    -304   
224    -352   
176    16     
368    160    
208    32     
96     80     
-128   -416   
176    -80    
-784   64     
0      112    
16     64     
-16    -112   
224    64     
320    32     
-32    -32    
48     -64    
-400   32     
-96    -112   
80     48     
-112   -112   
224    160    
-192   64     
160    -32    
-16    16     
224    32     
-96    -48    
176    0      
-32    -16    
-144   -48    
-80    -32    
96     -48    
0      48     
-368   -48    
32     32     
-192   -144   
64     80     
-80    -112   
-128   -128   
32     16     
144    48     
48     0      
144    48     
0      96     
0      -32    
-16    64     
-464   -16    
80     80     
-176   -64    
96     128    
-448   -128   
-32    32     
48     128    
-112   0      
-208   -16    
80     -64    
80     32     
-432   16     
64     64     
160    48     
-32    16     
-32    16     
112    112    
-128   -80    
96     64     
-96    -80    
0      0      
-176   80     
-112   48     
-192   -32    
0      64     
64     96     
-192   32     
-160   -32    
-1328  -64    
0      32     
112    144    
-16    224    
112    -16    
16     32     
-32    -48    
-320   -384   
272    144    
64     128    
-64    -64    
160    256    
336    32     
-304   -336   
-544   -96    
-688   624    
-400   -160   
-256   -128   
-160   224    
240    -48    
128    1168   
-96    -544   
256    -1200  
-112   688    
-640   272    
-432   -256   
-240   176    
32     -96    
-368   -96    
48     320    
-384   -544   
0      272    
-224   0      
-288   -336   
64     -272   
-64    48     
368    512    
-672   -592   
-352   -384   
-192   -272   
-208   -480   
96     -64    
48     64     
128    400    
144    48     
-336   -128   
-64    -64    
-1648  -240   
144    -48    
64     -240   
-32    -112   
608    336    
-448   304    
-144   -48    
48     -16    
-208   -160   
144    -160   
64     32     
-160   -48    
240    0      
-224   -96    
0      96     
-736   64     
-32    208    
16     -16    
96     -192   
112    112    
-32    80     
80     -32    
0      0      
-48    128    
16     -64    
192    -80    
-224   -144   
48     -16    
-304   32     
96     0      
-128   -96    
-48    16     
-48    176    
-32    -80    
224    -48    
-368   -160   
160    96     
64     16     
48     -32    
-240   32     
-80    -32    
-304   16     
64     64     
-160   -32    
-80    -32    
-160   -32    
-32    64     
48     -80    
48     -80    
0      -128   
64     48     
-160   64     
32     0      
80     64     
0      48     
176    192    
16     64     
0      0      
16     0      
144    0      
16     64     
-160   80     
48     48     
64     -48    
-144   -64    
80     -112   
112    80     
128    48     
16     -16    
-16    32     
112    48     
96     96     
-112   96     
-64    80     
-80    112    
16     16     
64     32     
64     -48    
192    144    
-208   160    
-48    0      
304    48     
-64    64     
112    336    
208    352    
-192   128    
-304   -144   
160    -304   
-224   -112   
32     128    
80     112    
80     160    
192    176    
-144   96     
112    -96    
160    -160   
240    -80    
0      128    
128    320    
-224   48     
224    48     
-112   80     
80     80     
16     256    
224    304    
96     144    
-144   -16    
224    -64    
-16    0      
144    64     
144    -112   
192    80     
-112   -128   
-160   32     
-256   -32    
224    -560   
112    112    
96     512    
-80    -496   
-112   -336   
112    -176   
128    224    
-48    -224   
-80    -176   
128    240    
-32    32     
144    -48    
32     112    
288    624    
-192   -672   
128    352    
96     -32    
80     -160   
-80    544    
-16    -112   
160    176    
-32    128    
96     -288   
48     192    
176    -288   
128    176    
32     0      
0      0      
80     368    
16     -384   
-48    16     
64     272    
-224   -128   
-48    -112   
352    544    
-48    336    
176    0      
192    -80    
-16    -80    
256    64     
-16    128    
176    80     
-64    -16    
208    -32    
-368   -64    
-64    16     
160    144    
96     0      
160    160    
128    -320   
224    -32    
160    -800   
144    -784   
16     80     
80     272    
-320   -464   
-32    -288   
-176   32     
-96    -64    
224    -80    
160    -64    
32     -96    
608    -144   
16     32     
160    -48    
160    -32    
144    -400   
240    -32    
0      0      
256    304    
0      48     
-32    0      
-112   64     
-432   -144   
608    -32    
176    128    
-608   -64    
800    -16    
-368   -48    
640    112    
-160   128    
-16    -160   
256    128    
-144   192    
368    112    
-144   64     
128    0      
64     64     
64     80     
160    160    
-144   32     
80     -64    
288    32     
-112   -32    
144    48     
64     64     
-64    -144   
160    80     
176    -432   
-16    16     
-96    -48    
-32    32     
48     48     
160    -16    
-48    0      
144    32     
-48    32     
32     -96    
144    96     
96     80     
192    48     
112    -256   
-16    16     
48     -64    
48     48     
32     80     
240    112    
80     -32    
-32    -576   
64     64     
-192   -144   
256    -112   
240    -32    
32     48     
16     -208   
-32    -32    
160    -96    
-272   96     
160    -32    
288    80     
48     -48    
112    -752   
112    -96    
0      -144   
192    -368   
0      -48    
-16    64     
128    -144   
16     48     
-16    112    
144    32     
272    -176   
-16    -224   
-16    -288   
112    -720   
16     128    
-16    -304   
64     -144   
48     -128   
96     -96    
192    -64    
0      -224   
64     -128   
128    -80    
128    -96    
224    192    
-256   96     
-112   -128   
80     -96    
144    -288   
-16    64     
-96    -16    
80     0      
112    -720   
-96    -272   
-16    352    
-80    -48    
48     48     
240    -176   
-176   240    
48     -80    
-80    -144   
336    -176   
-16    272    
176    144    
-32    32     
-272   -64    
80     -144   
-512   -32    
128    -48    
-64    0      
-32    -96    
384    256    
-128   128    
160    -112   
192    -32    
-64    32     
112    -16    
80     32     
16     32     
48     -80    
-160   80     
384    176    
-1568  96     
112    -16    
144    -64    
80     32     
-16    -16    
-32    64     
48     -32    
144    304    
64     32     
-96    -128   
-64    48     
160    -16    
16     -64    
-48    16     
64     -144   
-96    -48    
48     -16    
-272   -32    
112    -128   
48     16     
96     -416   
0      -64    
256    -96    
384    240    
0      48     
-48    -16    
-240   -112   
112    16     
-176   32     
80     16     
-128   -144   
112    -80    
-496   384    
-96    -32    
-144   -288   
176    -128   
208    240    
16     -288   
112    64     
32     -144   
-16    -368   
-96    16     
16     -128   
-16    32     
-48    -208   
352    512    
-128   0      
384    -16    
16     384    
-384   -128   
-128   -288   
-192   208    
-64    32     
192    608    
256    -1008  
-32    -640   
256    256    
224    64     
-656   48     
144    -48    
-416   -800   
304    352    
-192   560    
288    352    
544    80     
96     -128   
-48    -288   
272    -640   
-128   -16    
-176   -96    
128    128    
-496   -48    
496    -32    
640    624    
-544   480    
-176   -64    
0      -64    
-144   -48    
320    -176   
-288   64     
432    -224   
192    16     
-176   -112   
-160   16     
-128   -272   
-256   -176   
-128   80     
32     -144   
-16    -160   
-96    64     
-256   -64    
240    -64    
-432   48     
144    -64    
592    368    
-704   336    
-16    -288   
-576   -496   
-240   -64    
16     -80    
-1136  96     
272    192    
-288   64     
-64    128    
-176   -176   
48     -64    
64     -32    
-16    -80    
-304   -80    
-160   288    
144    -16    
256    64     
-112   -160   
-320   0      
16     64     
-608   144    
0      80     
-48    -16    
-224   112    
-1632  0      
-224   -96    
160    16     
-96    160    
96     -16    
-272   -48    
336    -240   
-80    288    
288    240    
128    32     
-128   32     
-128   16     
-192   -16    
48     16     
-144   160    
-560   -160   
-32    176    
192    32     
288    0      
-144   -112   
-112   64     
-288   -64    
-48    48     
112    32     
-48    -64    
48     16     
96     16     
240    112    
-48    192    
-176   80     
16     0      
16     32     
-1088  -16    
-160   16     
48     -80    
128    -240   
0      -272   
96     96     
-160   160    
112    160    
-224   144    
-128   -80    
96     -64    
-64    32     
-112   80     
0      32     
16     32     
-464   -192   
224    -176   
16     -208   
-16    96     
-112   80     
0      32     
32     96     
80     208    
288    144    
-144   160    
-112   144    
0      432    
-176   160    
-320   -32    
288    208    
0      160    
176    240    
-816   224    
16     -32    
32     0      
-176   272    
96     16     
-80    -176   
0      -224   
-48    32     
-48    96     
-256   128    
-32    -256   
-16    160    
-96    -16    
-192   -32    
128    -160   
-1104  0      
96     112    
0      -32    
-64    128    
-48    16     
-48    192    
-112   0      
-16    -224   
-144   128    
304    112    
-320   128    
-64    -144   
272    -272   
-64    112    
80     160    
-976   -48    
0      160    
160    144    
-16    -64    
208    48     
64     80     
0      -16    
16     144    
128    0      
-112   -48    
64     -48    
-96    -16    
112    96     
-304   -32    
128    -32    
80     -32    
96     144    
128    48     
0      32     
32     48     
-80    32     
64     64     
-48    -16    
80     32     
176    112    
-144   16     
-160   -48    
48     64     
16     32     
96     32     
160    80     
80     80     
-48    32     
80     32     
-16    -16    
-192   -32    
272    128    
80     0      
336    128    
-624   -96    
384    48     
-240   0      
80     176    
-320   -80    
0      128    
-112   -16    
192    80     
-208   -16    
416    -32    
224    64     
16     128    
48     176    
112    -112   
16     -32    
-32    48     
192    64     
48     -32    
208    80     
-208   16     
-384   -128   
304    32     
-128   -16    
-240   -16    
240    64     
240    0      
-208   -16    
256    32     
-368   16     
-32    0      
64     0      
112    144    
144    128    
-32    64     
400    -32    
-32    32     
-96    64     
80     64     
-176   64     
112    0      
96     16     
-80    -128   
224    -224   
112    32     
32     112    
-80    -16    
96     64     
-48    48     
144    -944   
48     80     
64     32     
32     16     
16     48     
128    0      
-16    80     
240    176    
-96    32     
64     -16    
192    64     
208    192    
-144   -32    
160    -16    
-48    0      
-16    32     
224    32     
96     48     
16     80     
-32    96     
64     64     
-144   0      
80     -16    
32     16     
96     -304   
160    16     
112    160    
-32    0      
128    240    
-64    16     
64     -208   
128    16     
-32    64     
176    96     
0      -224   
32     -144   
80     160    
-48    0      
-80    -48    
48     64     
-80    -208   
160    48     
-128   -64    
48     16     
160    80     
16     48     
192    176    
64     -576   
-144   -176   
96     -16    
160    0      
0      -64    
16     16     
-16    -96    
96     32     
-64    80     
112    16     
128    80     
-112   -128   
112    48     
128    -32    
32     0      
-16    -208   
32     16     
96     64     
80     128    
-208   32     
-80    -576   
336    -960   
256    -208   
368    256    
112    304    
112    48     
112    160    
-336   176    
-80    -224   
288    544    
-208   -496   
208    0      
176    -1648  
32     -112   
16     96     
128    96     
176    -16    
144    16     
-128   48     
96     96     
240    448    
-96    -176   
128    -224   
320    80     
48     64     
0      -112   
-64    -128   
96     -128   
-176   272    
320    112    
208    0      
32     -208   
160    256    
-192   -608   
-272   -592   
48     448    
48     -352   
416    288    
16     -80    
272    32     
-16    416    
64     -128   
288    16     
80     80     
64     16     
48     80     
192    96     
32     64     
0      80     
96     80     
32     288    
-96    -1632  
160    736    
-32    -192   
144    -512   
112    240    
64     160    
112    -176   
16     128    
-64    192    
160    -48    
192    400    
-208   -32    
128    -848   
160    48     
176    -528   
80     -304   
32     32     
-80    -256   
288    -608   
304    576    
-64    208    
-80    -336   
-48    -896   
96     16     
144    128    
176    -32    
-1136  -16    
-32    336    
160    464    
304    -64    
96     -16    
80     -224   
224    96     
96     496    
192    256    
-160   -96    
-224   -128   
112    -304   
-128   416    
-80    32     
16     0      
-544   -48    
-32    -48    
-112   16     
240    -80    
400    176    
192    -48    
208    48     
-16    -544   
-48    -160   
-80    -160   
144    160    
-160   16     
-80    -240   
144    -432   
-128   96     
-432   144    
-224   16     
-1056  -32    
-64    -160   
432    -96    
224    0      
192    144    
-112   368    
-64    16     
32     -112   
96     144    
64     -176   
96     16     
144    -128   
-192   -272   
400    -80    
-112   224    
-144   -32    
672    240    
-608   -96    
0      16     
176    240    
-48    336    
160    64     
176    -608   
-96    192    
224    80     
208    144    
208    32     
-16    16     
-192   -176   
-80    -96    
-384   -32    
320    64     
-1072  0      
16     -64    
16     48     
0      96     
-112   320    
320    -496   
128    80     
352    -48    
-128   80     
-144   -32    
32     -80    
-288   -96    
48     32     
-192   32     
288    32     
-448   176    
208    192    
-80    -96    
96     -96    
176    160    
160    -144   
112    0      
-48    -128   
272    -224   
160    128    
-128   176    
48     -80    
-64    -352   
-80    -80    
176    80     
-1504  32     
48     -208   
96     -160   
112    0      
-16    -96    
48     -352   
-96    128    
-128   192    
48     -64    
-48    -32    
-64    -16    
-320   -48    
224    48     
-320   -112   
160    -368   
-208   -176   
144    112    
-16    32     
16     -16    
96     320    
-16    128    
32     96     
-576   96     
80     -192   
-112   -128   
48     -48    
-16    -176   
160    48     
-224   -224   
80     -320   
-112   176    
-16    0      
208    144    
-32    32     
64     32     
-336   -32    
400    -304   
-32    32     
240    80     
48     576    
-16    -80    
-240   -96    
16     176    
-64    -96    
112    144    
-32    48     
-688   -64    
112    96     
-1040  -112   
160    -32    
-400   -144   
-144   -16    
96     64     
-240   -64    
-176   128    
-2016  64     
-96    48     
-288   -128   
-256   -176   
80     96     
-384   0      
-432   -224   
192    80     
-64    -48    
192    80     
0      -32    
-176   -96    
-48    0      
-432   -32    
64     0      
-80    128    
-96    64     
176    0      
-272   -96    
-352   -80    
144    80     
-48    16     
96     16     
-64    48     
240    48     
-208   32     
-320   16     
-128   16     
-160   80     
-80    -208   
32     -96    
48     96     
-288   -64    
16     -80    
64     -16    
80     80     
-128   -16    
96     64     
-48    -80    
-128   -16    
112    96     
-224   -80    
96     16     
-128   96     
144    0      
-208   80     
-256   -96    
-800   80     
-112   -32    
-528   -32    
160    80     
48     0      
-80    -16    
-176   -128   
0      0      
432    208    
-256   -144   
208    32     
-288   48     
32     32     
112    96     
32     48     
-144   0      
112    16     
-160   32     
-176   80     
-160   -48    
-80    -32    
528    496    
128    16     
448    -176   
128    48     
-80    0      
208    -48    
176    128    
-96    144    
320    160    
-560   -160   
416    32     
32     32     
-208   -48    
64     -128   
304    48     
-32    144    
-128   -112   
0      80     
-640   -32    
-112   -64    
384    -112   
-64    96     
48     64     
96     16     
-368   -96    
48     48     
-336   16     
112    64     
-304   64     
96     96     
0      -64    
256    48     
-176   112    
64     80     
32     64     
176    64     
-32    96     
-336   -32    
304    96     
-336   -48    
16     -112   
48     -208   
64     128    
256    -32    
-176   -48    
-144   48     
-32    80     
64     64     
32     0      
208    80     
-144   112    
192    16     
-176   -64    
0      112    
-80    80     
176    240    
-192   -16    
80     -112   
0      -16    
-160   -32    
96     144    
192    -192   
64     -144   
16     80     
-112   -48    
-16    -80    
96     208    
-80    32     
224    -48    
-160   -96    
240    208    
-624   -16    
80     -176   
-192   -16    
368    224    
240    -64    
32     80     
-80    112    
-192   48     
-48    48     
80     96     
48     16     
0      -48    
272    448    
-240   -384   
208    96     
-192   16     
32     48     
32     48     
208    80     
-144   64     
16     16     
144    -32    
80     144    
304    1136   
32     -816   
0      288    
-416   -96    
32     48     
-160   -112   
144    144    
144    144    
-128   112    
240    -48    
176    32     
128    -80    
0      112    
128    -208   
-16    128    
-16    -16    
-80    -96    
176    464    
0      -496   
256    368    
-304   -112   
0      -48    
-64    272    
0      -208   
112    112    
32     32     
-48    32     
-16    16     
96     64     
64     80     
544    1488   
-432   -1056  
-80    -720   
80     720    
48     -80    
-80    -160   
32     -16    
272    -336   
80     384    
32     -304   
-64    -128   
32     816    
0      -32    
-336   -432   
48     128    
-160   448    
0      80     
-96    -432   
208    -208   
240    -32    
208    304    
160    -304   
-32    -128   
0      0      
-48    -176   
-16    -144   
96     -48    
80     96     
-32    128    
160    176    
48     752    
80     224    
192    32     
0      0      
-80    272    
80     320    
128    -256   
0      112    
96     -32    
112    208    
48     80     
144    -64    
16     128    
48     0      
32     224    
64     80     
16     0      
16     512    
160    0      
-112   32     
96     -16    
96     -128   
144    144    
256    -288   
-160   -80    
272    -368   
16     208    
176    176    
160    -320   
-176   -384   
-64    -288   
96     96     
400    144    
-256   -64    
-64    -144   
-192   -16    
32     192    
208    32     
-224   -480   
208    -160   
208    64     
0      -240   
-224   176    
-208   144    
-336   160    
608    592    
0      192    
-176   304    
-320   -64    
304    -176   
176    96     
272    -144   
-48    -64    
240    -336   
288    -16    
112    -656   
320    16     
-176   -144   
112    32     
0      -32    
272    160    
96     64     
-48    64     
112    80     
-160   -48    
112    368    
224    -16    
112    0      
96     48     
128    -48    
224    -144   
-304   80     
80     48     
-176   160    
48     -96    
384    -160   
-160   -16    
192    -64    
-128   -80    
64     16     
192    336    
224    32     
112    32     
224    -416   
-368   80     
384    16     
-480   240    
80     -128   
16     -192   
-96    16     
144    80     
96     48     
112    -32    
176    256    
-80    96     
80     128    
112    144    
208    -16    
32     -288   
96     -96    
336    176    
-368   160    
-32    16     
-16    288    
224    16     
400    -720   
-16    -544   
-48    -32    
-96    -560   
176    64     
80     80     
96     -64    
16     32     
352    -112   
16     16     
-48    -192   
-48    32     
208    -80    
-304   -640   
160    48     
-432   80     
-48    16     
-32    -64    
352    -864   
0      -208   
-16    -1776  
64     -192   
0      64     
-48    -32    
48     368    
64     -48    
-16    -208   
-16    -64    
128    16     
48     64     
-448   -48    
64     160    
48     -192   
16     -96    
160    464    
160    0      
48     -80    
64     -320   
176    -176   
96     -80    
16     64     
96     -240   
352    16     
-80    -16    
288    320    
-144   288    
-208   -240   
-528   -160   
112    -32    
128    -80    
160    -320   
176    -112   
352    -416   
96     -80    
272    48     
-32    -48    
48     0      
-32    48     
-352   -80    
128    -16    
-576   -64    
64     -48    
-1888  32     
128    16     
-112   -176   
48     -144   
-32    -32    
-80    -176   
-96    16     
48     -16    
-16    16     
384    -64    
64     144    
-224   -240   
208    -192   
96     128    
32     48     
-464   -16    
64     -192   
96     -80    
112    -16    
48     208    
-240   -112   
112    64     
96     -528   
16     48     
144    -32    
32     -32    
64     32     
112    32     
-64    16     
32     0      
-144   16     
32     -112   
-800   128    
192    -32    
96     96     
64     -32    
-80    0      
144    -832   
64     32     
160    32     
112    -16    
-144   -80    
224    -80    
-160   0      
176    16     
-384   -32    
64     -32    
-512   80     
192    -32    
-96    -96    
160    -176   
-64    32     
112    -304   
192    80     
224    -64    
-16    -64    
-320   -16    
16     -16    
-672   16     
80     16     
32     0      
176    288    
-240   48     
288    -160   
208    112    
32     -240   
-32    48     
-96    -112   
32     -112   
-112   112    
-96    -64    
80     112    
-352   -80    
96     -48    
48     16     
-160   -32    
368    32     
-656   272    
-448   -192   
-176   -32    
176    0      
-176   -16    
-1024  -320   
-448   -160   
-128   -16    
464    320    
-1136  -32    
48     -176   
416    16     
-64    -16    
-48    -64    
-48    -160   
416    272    
-1584  -32    
-112   -48    
-320   -320   
-96    -192   
-128   16     
176    80     
80     -16    
-80    48     
-48    80     
-400   -80    
-64    32     
64     -16    
-48    32     
-688   32     
176    -144   
-688   -224   
160    112    
-432   -144   
208    -80    
0      32     
-224   96     
-80    -48    
-560   -64    
16     0      
-1040  -96    
144    64     
-304   -48    
112    -288   
112    -16    
144    464    
-144   -224   
-48    -256   
48     352    
-80    96     
48     -304   
256    192    
-80    -16    
-144   -144   
-96    352    
-224   -272   
32     320    
112    -128   
16     128    
-384   -240   
224    -480   
-80    288    
64     80     
-240   -160   
160    112    
-32    32     
-48    128    
-80    -48    
32     160    
0      112    
160    192    
0      112    
-640   -560   
64     272    
64     224    
96     80     
-192   -368   
-64    80     
144    176    
-80    -192   
128    192    
-272   64     
48     128    
-16    128    
-160   -288   
-240   -144   
-16    -80    
-688   64     
64     64     
-1056  -224   
-32    -128   
96     -96    
64     192    
-64    32     
0      448    
-176   64     
-272   32     
-16    -112   
-144   -160   
-96    -96    
-176   -160   
-112   0      
-192   -288   
96     64     
-448   0      
80     -320   
-176   -272   
-80    -192   
-112   -160   
-64    -416   
16     -368   
240    192    
-144   240    
-224   -224   
64     -112   
32     -64    
224    -64    
-48    -96    
256    80     
-400   32     
32     32     
-112   -80    
-160   -64    
0      -32    
112    -352   
160    -144   
48     -48    
-48    48     
16     -80    
32     -112   
16     80     
-64    240    
-208   0      
16     112    
-32    -16    
32     16     
176    32     
-16    16     
-80    80     
-16    -112   
112    288    
48     368    
-96    112    
-224   208    
48     32     
-48    -32    
64     -48    
-96    -144   
-48    48     
-192   -240   
112    64     
-48    96     
96     240    
0      96     
48     -16    
96     48     
80     64     
-16    -208   
144    0      
-16    -16    
-48    80     
192    160    
-160   32     
96     96     
-96    -32    
-112   -16    
112    -80    
-64    -16    
192    -64    
32     -176   
-96    -352   
-64    176    
240    352    
-16    256    
224    256    
-16    -192   
112    -144   
96     -176   
64     320    
-112   32     
96     -128   
-96    0      
-96    -608   
-224   -288   
48     -288   
-144   128    
144    128    
-32    -48    
128    32     
96     16     
-192   128    
-112   -160   
-304   320    
160    -32    
-48    -96    
-96    -64    
96     -16    
16     368    
288    208    
816    400    
480    896    
-688   560    
-736   -288   
144    32     
144    96     
496    224    
176    32     
32     208    
-608   240    
-48    -80    
192    -352   
128    16     
496    -192   
144    336    
368    0      
-304   80     
-112   -48    
-48    112    
-160   -32    
240    0      
-112   96     
272    -224   
144    224    
80     -16    
-208   -736   
144    -240   
-160   -112   
16     80     
176    368    
256    400    
-128   208    
176    80     
400    64     
-80    16     
-80    224    
-48    -16    
160    336    
64     -32    
64     -1056  
-80    400    
432    272    
32     -128   
80     -160   
240    384    
240    160    
176    144    
144    64     
0      480    
416    320    
-96    160    
-32    -16    
0      -64    
288    96     
-144   -208   
224    -288   
112    32     
96     272    
256    80     
144    176    
-288   256    
0      112    
160    -128   
464    480    
-192   112    
-16    -192   
192    0      
-64    -32    
-160   -48    
176    656    
432    -80    
80     -432   
-80    -80    
288    -112   
80     112    
240    272    
-96    -144   
-128   80     
-32    96     
-112   -32    
240    112    
160    96     
240    -144   
160    16     
32     32     
-64    32     
48     -544   
-128   64     
0      -16    
96     -64    
192    -64    
272    112    
16     96     
16     -48    
32     -160   
128    0      
240    160    
-96    -32    
160    0      
-16    96     
208    80     
-80    -96    
0      160    
16     -848   
528    -336   
224    -112   
352    176    
112    0      
80     0      
-96    -96    
-48    -128   
-208   32     
-96    -32    
-176   -32    
-112   -112   
96     80     
64     -144   
288    224    
-144   -32    
96     0      
48     -144   
32     32     
-48    48     
48     -176   
240    -160   
240    144    
384    160    
64     -288   
176    48     
144    -32    
-144   176    
-256   -256   
144    64     
144    112    
-16    0      
112    -48    
240    96     
80     -32    
-64    -32    
224    32     
192    -256   
128    48     
80     -64    
0      -64    
0      -96    
-64    -16    
192    -32    
224    64     
128    176    
208    144    
-32    0      
-32    -16    
-32    32     
32     -64    
64     -208   
64     -96    
32     80     
112    32     
208    112    
0      -112   
48     16     
0      -160   
128    48     
-48    -80    
192    -320   
-32    96     
96     -208   
-192   0      
176    -16    
16     -112   
80     16     
64     -112   
64     -96    
224    -464   
64     -32    
192    16     
48     -96    
96     -64    
64     -16    
16     208    
0      48     
64     -160   
-112   -368   
-400   -80    
-80    80     
336    96     
224    -16    
-464   -16    
256    -416   
-176   144    
208    112    
112    -80    
48     32     
272    352    
-576   -64    
208    -80    
-256   -16    
80     -64    
928    608    
-288   512    
-368   -192   
-64    -416   
-192   -240   
272    -112   
224    -32    
128    -896   
176    -208   
-192   -192   
-448   64     
-176   -240   
-224   224    
-160   64     
512    144    
-832   80     
80     -176   
-1488  -64    
48     -208   
96     -64    
64     416    
-368   -192   
64     -624   
-32    160    
272    96     
-16    -144   
208    32     
160    112    
-160   -16    
32     -32    
-352   -208   
112    240    
-384   -192   
16     -80    
528    992    
-240   -624   
-272   -160   
288    -96    
64     144    
192    48     
-112   16     
-80    752    
384    -400   
-208   336    
224    256    
-464   -576   
272    0      
144    560    
-512   432    
-144   -848   
256    -560   
-96    320    
96     160    
-192   96     
384    -528   
-32    -80    
96     16     
160    -144   
-16    16     
32     -160   
112    48     
-160   64     
-1184  -80    
-48    -144   
-320   96     
-80    -112   
0      -32    
160    -192   
-32    -32    
192    -192   
-240   -32    
208    -16    
96     -16    
128    192    
0      48     
16     64     
-48    -32    
-288   -112   
288    -336   
-64    32     
128    -80    
0      16     
192    -128   
-96    32     
112    -592   
192    48     
-160   -16    
96     96     
32     16     
304    0      
-320   -80    
160    -224   
-80    16     
240    -16    
-112   -16    
64     -272   
-128   96     
80     -128   
64     0      
160    224    
-688   192    
-80    96     
-384   16     
-400   -64    
0      96     
-96    -96    
288    -48    
-128   32     
96     -32    
16     80     
-688   -256   
224    -96    
-864   -192   
-48    -288   
96     224    
-416   0      
-48    -64    
-688   -64    
16     176    
208    -16    
128    -16    
96     -48    
-112   0      
-480   -176   
96     96     
-240   48     
0      -32    
160    -112   
-48    -64    
-144   16     
32     -48    
-64    64     
-16    48     
-192   80     
-32    -32    
-64    -80    
-1168  224    
-304   16     
-96    0      
112    0      
32     224    
128    272    
-240   -144   
112    -96    
-96    -48    
160    -32    
112    112    
-96    48     
32     64     
-32    96     
-112   80     
-784   32     
96     32     
-112   16     
144    192    
-48    48     
64     -32    
-192   -96    
48     -80    
64     80     
-16    160    
-64    64     
-192   0      
32     48     
-192   0      
96     16     
-368   80     
-112   -64    
192    -288   
96     -16    
0      80     
384    320    
-224   176    
288    96     
0      208    
-336   32     
-48    -96
[truncated: 314,011 more chars]
