# Supplementary material for: A Fault Diagnosis Method for One‐Dimensional Vibration Signal Based on Multiresolution tlsDMD and Approximate Entropy
Source: Hindawi journal article supplement (doi:10.1155/2019/3262818), 2019-01-01
Supplement: f1 [file 3262818.f1.zip › 3262818.f1/gear signals/normal gear signal/Data17.txt]

96     48     
-32    32     
176    32     
256    48     
160    0      
160    64     
-160   80     
-1104  -608   
64     32     
48     144    
-272   -192   
-32    48     
-368   -416   
-96    -304   
-128   112    
-352   -336   
432    -256   
528    144    
464    48     
176    -112   
-192   -80    
-80    -48    
0      -48    
48     112    
128    16     
80     48     
384    336    
-368   48     
-32    -144   
-128   16     
240    -80    
448    32     
288    0      
-32    -96    
-352   -320   
288    -96    
32     512    
-224   304    
0      -160   
96     -32    
-64    16     
160    80     
80     64     
-160   -608   
96     -16    
0      -32    
432    448    
-176   96     
128    -80    
208    -144   
128    -96    
96     -16    
-32    16     
-160   -112   
176    16     
-160   176    
80     208    
256    96     
128    -208   
512    560    
-192   -544   
208    -32    
80     192    
32     64     
96     16     
144    -160   
-80    176    
80     -16    
-112   80     
160    144    
-48    -32    
-48    -208   
64     144    
144    -192   
128    -64    
112    -160   
-80    -592   
16     160    
112    288    
-112   -192   
256    224    
64     0      
48     -176   
-368   64     
176    64     
48     -80    
-144   112    
16     144    
-112   160    
320    16     
144    -1104  
240    304    
336    -224   
144    416    
416    304    
112    -224   
-96    -160   
64     -112   
-192   -144   
128    -80    
-16    -176   
-16    -112   
144    -64    
208    -272   
160    32     
112    -928   
48     -304   
192    -288   
-48    64     
224    0      
208    112    
-32    336    
-80    32     
-112   32     
176    -176   
32     -96    
240    -112   
0      144    
16     -96    
-32    -16    
208    -384   
240    144    
-96    -224   
48     -112   
-32    -32    
80     -96    
-96    288    
80     80     
144    48     
96     -96    
80     112    
-32    176    
288    0      
64     -464   
128    16     
80     96     
96     112    
16     -112   
64     -80    
48     -112   
112    80     
-16    48     
272    208    
48     224    
-96    -560   
272    -208   
192    -128   
112    144    
-80    112    
304    32     
-208   80     
272    -32    
-176   176    
-16    128    
-192   80     
16     0      
80     128    
160    16     
32     -208   
144    -160   
48     176    
304    64     
0      16     
80     -48    
48     80     
80     -128   
80     16     
48     -48    
112    112    
-80    -64    
96     -592   
32     0      
-32    -112   
-16    -496   
192    -144   
80     -16    
0      0      
112    176    
48     -112   
-128   160    
128    -64    
176    -784   
-144   -96    
208    -352   
96     64     
-112   -496   
80     16     
-1232  -80    
80     0      
128    16     
240    192    
-80    128    
16     -304   
0      32     
80     32     
240    -64    
224    80     
-64    32     
32     -160   
128    96     
-32    48     
-128   48     
-96    -48    
160    -160   
256    -240   
128    -160   
-32    -480   
48     -464   
48     -32    
-176   -176   
112    32     
288    112    
-448   224    
160    -32    
144    80     
-16    -320   
80     -16    
-416   192    
-16    160    
112    160    
-256   -176   
-48    -288   
208    -144   
208    96     
192    -336   
-224   -192   
192    224    
-144   176    
112    -48    
272    496    
-400   240    
128    -160   
-64    -112   
160    -16    
-720   -64    
-192   0      
-16    -544   
-112   80     
224    16     
144    -256   
208    160    
16     16     
-32    -48    
96     144    
240    176    
32     320    
112    -112   
-144   -192   
48     -128   
-32    -32    
160    -176   
80     -48    
64     -144   
-144   64     
128    -16    
-192   -80    
64     -480   
48     32     
112    -80    
256    -96    
-80    -112   
192    -48    
-192   32     
64     -32    
-96    -16    
0      -64    
-512   -16    
48     -32    
96     16     
96     -128   
16     48     
96     -384   
96     80     
-96    -64    
208    0      
-16    -80    
64     -48    
-224   16     
48     0      
-208   16     
64     -16    
-304   -160   
416    0      
-288   160    
144    -352   
64     -80    
128    -352   
208    96     
-224   288    
-176   -80    
-48    -32    
80     32     
-288   -48    
384    -80    
-96    16     
288    96     
-96    0      
80     -32    
80     16     
32     -64    
16     112    
80     -176   
96     -64    
-48    0      
48     -160   
-144   112    
-128   -80    
64     -144   
-160   -16    
96     176    
-64    -64    
144    -48    
-416   -176   
240    112    
-528   -128   
-16    80     
96     -16    
-832   0      
80     80     
-864   80     
96     240    
80     64     
96     -80    
-64    48     
-272   -96    
-112   -64    
112    160    
-320   -16    
192    64     
-80    32     
-16    160    
176    -16    
-352   0      
-16    0      
-480   80     
112    0      
-416   48     
-112   32     
-96    0      
32     0      
-144   -32    
240    48     
48     0      
192    -80    
-144   -304   
-256   0      
16     16     
-96    48     
144    -48    
-176   32     
16     -144   
-192   -128   
-256   0      
-1552  16     
-112   64     
-64    -64    
144    64     
-128   -128   
96     48     
-128   -128   
80     -128   
-32    -80    
0      64     
-96    0      
-112   32     
-16    -64    
-384   -48    
0      32     
-256   -96    
16     -16    
-240   -720   
-64    -240   
-96    -144   
-144   -352   
176    128    
112    368    
-48    64     
-80    -80    
96     64     
-112   64     
-16    336    
-16    144    
16     -304   
32     208    
-112   -64    
-16    -32    
-16    32     
128    0      
224    176    
256    112    
-144   -48    
-32    48     
80     208    
-144   -32    
128    -128   
80     -192   
48     368    
-16    64     
-720   -80    
-32    -32    
-960   -96    
-16    176    
128    -64    
80     16     
-96    -880   
112    864    
-400   -224   
-112   64     
64     160    
-16    0      
-32    272    
-32    48     
16     -80    
240    80     
480    -208   
16     16     
144    128    
-16    32     
-208   -80    
-272   96     
-176   64     
16     -32    
144    80     
160    112    
80     32     
-80    -128   
-368   144    
240    -1008  
32     -80    
160    448    
-528   -224   
272    -48    
80     368    
0      -128   
-304   16     
32     48     
0      32     
-96    32     
-64    0      
-48    -240   
-32    -16    
-240   -80    
144    128    
-144   0      
336    -224   
-432   32     
-16    368    
16     96     
32     0      
-32    -32    
48     64     
112    176    
-80    -128   
16     336    
-32    -80    
32     176    
0      -80    
32     -272   
-320   592    
96     -240   
-48    -128   
64     272    
256    400    
-112   48     
0      -448   
-16    -32    
144    64     
-96    224    
32     -48    
48     176    
160    144    
-80    -352   
-176   -288   
0      -32    
-176   -560   
-144   -608   
80     -192   
32     176    
-64    304    
256    112    
16     64     
96     -16    
-320   80     
208    112    
-176   128    
144    128    
-64    160    
368    496    
-224   240    
48     144    
-224   256    
160    144    
464    96     
-192   224    
-96    -64    
-96    -80    
256    -80    
80     64     
-128   48     
16     -128   
144    144    
224    128    
-80    48     
-112   -144   
-32    240    
128    80     
-144   -144   
64     -224   
208    -32    
-208   -16    
416    -144   
32     -32    
-64    96     
0      -16    
-32    96     
48     -96    
-96    16     
32     32     
-112   32     
-96    432    
256    112    
304    -176   
-80    -32    
224    -64    
-128   48     
80     48     
-160   16     
176    128    
-208   0      
192    -112   
32     0      
-16    80     
0      16     
176    304    
96     192    
64     -48    
192    -48    
80     -16    
176    80     
-32    -48    
160    0      
-192   16     
240    -128   
272    64     
-192   80     
64     48     
-224   -112   
304    -224   
16     160    
16     -48    
128    80     
0      80     
112    16     
96     -64    
96     16     
-48    96     
96     64     
208    112    
-64    96     
-96    -16    
64     64     
-48    80     
0      -64    
32     112    
0      -208   
16     0      
-48    0      
144    -160   
48     -16    
-224   -32    
96     0      
-48    80     
-48    -256   
32     224    
-320   -400   
80     -128   
144    80     
-32    -96    
64     80     
-32    -352   
32     -112   
80     -1600  
48     96     
112    0      
16     48     
0      -32    
32     48     
32     -80    
96     -240   
-80    -432   
-80    -160   
48     48     
0      80     
32     -16    
32     -192   
64     -32    
-32    -208   
288    224    
-272   144    
112    32     
-176   176    
144    176    
416    176    
144    -592   
464    128    
0      352    
64     -256   
192    128    
96     -80    
0      32     
496    400    
-464   -1168  
-272   -128   
320    -624   
544    432    
352    288    
32     -272   
320    -208   
-464   -64    
-272   0      
144    -48    
64     80     
464    112    
-176   -96    
-64    -528   
240    64     
160    0      
176    48     
240    -48    
-80    -16    
192    16     
256    -112   
240    -112   
192    48     
-32    96     
32     16     
-144   48     
32     -64    
0      -16    
16     -208   
240    96     
80     -16    
80     48     
-64    -112   
208    144    
96     80     
80     16     
128    32     
-80    -16    
64     -64    
16     -96    
144    272    
320    112    
-176   16     
208    -64    
160    128    
256    64     
-176   -16    
48     -496   
112    176    
-16    -32    
16     -672   
96     64     
32     -48    
176    -672   
160    -16    
48     240    
192    -16    
96     32     
48     -48    
80     64     
48     48     
0      -1136  
208    192    
48     -112   
48     80     
64     -96    
-80    -288   
304    64     
-176   -224   
416    176    
176    144    
144    -80    
176    -848   
-16    -32    
272    96     
-48    32     
16     -32    
176    -80    
-128   16     
144    48     
-560   -96    
0      48     
-832   -96    
80     32     
128    64     
144    -320   
80     -64    
-128   -16    
64     -64    
32     176    
-32    -144   
160    -112   
128    128    
208    -96    
-128   32     
80     128    
-368   128    
-32    -80    
128    -48    
64     48     
208    -144   
-96    -128   
208    -32    
-112   48     
-80    -336   
176    0      
16     -64    
64     64     
176    -48    
96     -80    
-48    80     
208    0      
0      48     
112    -32    
-880   -80    
80     -160   
304    16     
-96    -48    
-304   192    
96     16     
192    48     
224    -48    
0      -64    
96     -32    
32     16     
-192   16     
256    -48    
-16    -112   
-80    -64    
-544   -16    
64     -144   
224    32     
-80    -48    
-112   -64    
192    -576   
-128   0      
272    384    
-32    256    
-16    80     
80     -112   
-48    80     
16     -48    
-368   -16    
224    80     
-400   16     
96     16     
-2560  -128   
336    -192   
96     -176   
112    -112   
-160   -32    
192    -368   
112    160    
16     0      
-96    -160   
-16    336    
-32    -80    
-64    -768   
384    -16    
-144   -64    
240    368    
-160   -176   
128    -144   
0      80     
256    -128   
192    64     
-96    -544   
224    -256   
-976   48     
80     80     
-32    -400   
256    720    
16     -448   
192    -304   
-288   352    
48     -96    
176    -160   
0      -640   
-32    112    
-80    336    
144    -192   
-16    -64    
64     -96    
208    144    
-112   384    
0      -208   
256    -96    
-160   208    
64     96     
-128   -48    
176    32     
-128   0      
96     -224   
240    160    
-736   -64    
-80    0      
0      16     
-304   224    
0      144    
-208   -96    
-192   160    
-48    -528   
-96    -128   
144    208    
-48    128    
96     -176   
96     -48    
-16    64     
80     0      
32     80     
-144   -208   
-80    64     
192    -416   
-240   -80    
-592   -336   
-192   -112   
-1744  272    
64     -48    
-16    -192   
-80    -368   
-256   -176   
-240   -16    
-304   -160   
80     112    
64     -32    
-112   192    
0      -96    
64     64     
-160   -80    
-16    -48    
-208   304    
-48    128    
-48    144    
0      256    
-16    160    
-144   -96    
144    224    
-48    -48    
80     96     
64     144    
-32    192    
-80    64     
-192   -64    
64     16     
-64    144    
96     112    
-368   -64    
64     48     
-1248  -160   
48     80     
128    -80    
128    96     
-32    -48    
64     80     
64     112    
-112   64     
-144   272    
-112   -112   
96     16     
-240   -240   
-16    32     
-80    704    
-208   48     
64     80     
208    32     
96     48     
128    80     
-208   -160   
160    -160   
128    240    
-16    192    
-32    -192   
192    32     
-64    -32    
-16    -96    
-240   -96    
-240   0      
288    240    
-32    288    
224    -48    
-672   48     
112    -16    
160    -128   
-160   -144   
80     -16    
-320   -128   
144    -304   
-336   160    
-240   96     
208    -48    
64     112    
48     80     
-32    64     
-64    32     
352    48     
-1344  0      
48     336    
80     208    
-208   -176   
-16    -176   
-32    96     
-16    112    
-48    -32    
-16    -32    
160    32     
-144   32     
32     16     
-160   0      
-192   -128   
192    0      
-752   -32    
288    -32    
-192   144    
64     32     
-192   -192   
208    -208   
-64    -80    
160    -16    
-160   0      
176    -224   
-96    176    
-160   128    
96     96     
-144   -128   
0      -304   
-144   -64    
-128   640    
384    320    
224    0      
112    48     
-48    -96    
176    -192   
-48    112    
432    272    
-320   272    
-176   176    
-80    96     
160    304    
-112   -176   
80     -48    
64     -64    
48     -32    
-32    -80    
-16    -16    
32     -112   
48     48     
64     -144   
-224   -32    
160    80     
-64    -64    
16     208    
-16    -16    
208    96     
-224   -240   
-64    336    
-32    48     
256    112    
272    128    
176    -256   
-176   192    
416    496    
-112   416    
-48    -32    
16     -128   
32     256    
176    -144   
-176   -16    
0      16     
-64    -224   
48     -352   
80     16     
144    -32    
-16    112    
80     192    
-208   64     
-96    -48    
112    -96    
144    64     
208    112    
-80    -64    
128    240    
240    -304   
368    -16    
304    288    
272    176    
-160   208    
-176   48     
-176   -112   
272    96     
-224   -208   
720    -880   
208    -720   
448    -64    
240    32     
-176   -64    
288    64     
32     48     
432    464    
-144   320    
304    304    
-544   96     
-240   -160   
224    -16    
80     192    
-96    0      
256    16     
-320   96     
-16    160    
464    112    
-752   -80    
0      48     
-288   80     
-16    -112   
256    112    
-224   64     
-48    112    
128    -64    
352    -128   
256    112    
112    128    
224    0      
64     16     
-272   0      
160    64     
-144   64     
80     48     
-160   -32    
-48    -288   
288    112    
432    -560   
-224   -64    
-32    -64    
160    48     
48     96     
160    80     
96     48     
-32    16     
-128   96     
144    48     
-32    -64    
48     32     
96     80     
48     -80    
144    -16    
192    -128   
-144   80     
64     16     
16     80     
96     16     
112    16     
128    32     
-208   -32    
48     -16    
112    32     
16     16     
80     48     
48     80     
96     -16    
224    96     
-32    -320   
128    96     
176    96     
16     128    
144    0      
-112   80     
48     320    
176    176    
-48    -112   
-32    -96    
-16    -96    
0      272    
64     48     
128    -16    
-352   16     
176    -592   
-32    -48    
208    -368   
16     192    
304    96     
32     -16    
32     -48    
224    112    
-144   0      
144    32     
48     128    
-64    32     
208    16     
32     -64    
160    -48    
48     -96    
160    224    
80     -16    
48     -48    
-128   -32    
208    64     
-192   -224   
112    64     
-32    144    
-48    32     
144    160    
48     -96    
160    80     
304    80     
-160   80     
64     -272   
16     -96    
80     -48    
-16    -64    
80     -16    
48     32     
-16    16     
160    64     
64     32     
-80    -336   
0      -208   
112    -224   
80     176    
-16    -64    
112    -224   
-48    -368   
64     32     
32     -256   
272    208    
-16    112    
112    -16    
160    208    
32     64     
160    -144   
192    16     
-208   16     
208    -112   
-80    32     
352    32     
-16    -160   
272    -112   
-16    32     
16     -160   
32     176    
-208   -624   
80     -720   
-48    -144   
-176   -656   
208    -480   
112    64     
304    -352   
-144   -48    
-160   -256   
144    112    
-48    208    
0      -16    
128    -96    
608    128    
-64    112    
-32    -32    
80     -448   
-80    -432   
-128   -672   
-32    -304   
128    256    
160    -336   
208    -48    
96     -144   
176    -80    
48     192    
192    -64    
64     0      
-224   -32    
64     -208   
176    176    
80     240    
128    -16    
-96    112    
64     0      
224    -224   
208    -256   
80     -64    
160    96     
160    64     
96     80     
288    176    
-80    -32    
0      32     
256    -144   
-32    32     
128    -16    
176    -96    
-336   -464   
304    -80    
-816   -160   
240    -224   
-32    144    
-80    -16    
176    144    
32     -80    
96     64     
-128   -1520  
-256   32     
-80    -336   
160    192    
160    128    
-16    112    
-352   -112   
16     16     
-496   0      
16     16     
48     80     
-96    -160   
352    32     
-32    -64    
-16    0      
144    -144   
-16    16     
128    -144   
-80    48     
-288   128    
336    256    
-528   -32    
-96    32     
176    -64    
112    -16    
-352   -32    
96     -160   
16     0      
80     -256   
32     -16    
64     -48    
112    192    
-80    -176   
0      -16    
64     -64    
128    80     
-320   48     
112    -48    
-48    48     
48     -32    
80     112    
208    128    
-384   -112   
112    -16    
176    208    
-112   -96    
64     -128   
128    -320   
96     112    
48     176    
144    144    
-240   -48    
240    240    
-816   144    
96     0      
-272   -160   
112    -96    
-144   160    
32     -144   
80     16     
80     -576   
-32    -48    
-16    -160   
16     272    
-368   -32    
32     0      
-416   96     
64     -352   
-64    192    
-80    192    
-160   224    
80     32     
-64    -208   
176    -96    
48     240    
288    112    
304    112    
-592   -128   
64     -144   
-176   -32    
144    -48    
-224   16     
-64    -816   
-352   0      
208    -208   
-384   112    
160    -64    
144    176    
-128   320    
112    -64    
-272   0      
272    288    
-432   32     
-128   0      
-112   96     
-784   96     
-176   80     
-48    432    
16     192    
144    -192   
-240   0      
-608   -176   
-32    -80    
-208   -112   
304    -128   
-464   112    
288    240    
-112   400    
-160   128    
-128   -320   
-64    160    
-304   -128   
-1040  -160   
-96    -304   
128    -16    
160    64     
112    -128   
-176   -48    
-16    -592   
-208   288    
400    224    
16     112    
-400   -32    
-48    -640   
-208   -192   
0      -576   
304    384    
-704   336    
-224   -256   
320    -208   
160    32     
368    288    
-144   -224   
-304   -544   
288    528    
112    496    
-176   -96    
240    -336   
-64    144    
-304   304    
-448   -48    
-288   -192   
-16    -224   
0      176    
-672   0      
-32    -96    
-96    64     
304    -336   
48     368    
-80    -48    
-480   -160   
48     48     
-64    224    
-64    64     
16     -272   
64     432    
-16    -240   
-80    -160   
-64    384    
-1008  288    
-16    -144   
160    16     
-16    48     
-80    -16    
-160   0      
64     -176   
224    48     
-192   80     
-144   -96    
96     80     
-336   48     
-128   -80    
-320   416    
224    176    
-208   -240   
160    0      
304    48     
-112   -16    
-112   -208   
-96    176    
32     128    
144    -176   
288    -208   
32     -96    
-32    192    
-112   16     
-208   128    
-240   -64    
240    0      
-160   0      
112    272    
-1328  -112   
-32    -288   
0      -64    
-432   160    
-80    80     
224    16     
64     176    
-208   -48    
240    112    
-128   64     
-32    64     
-208   32     
176    48     
-176   -176   
-80    64     
-992   64     
-400   -16    
-32    -48    
160    96     
-80    80     
112    -64    
32     80     
128    48     
272    48     
-304   0      
-32    32     
-16    -176   
240    176    
-480   48     
-368   -176   
144    -64    
112    -16    
112    -48    
368    160    
-480   64     
-160   -112   
96     112    
-80    16     
304    32     
-32    0      
208    176    
-320   -80    
96     48     
-112   0      
64     80     
192    96     
-176   16     
0      32     
48     16     
-48    64     
208    32     
192    224    
-16    64     
-96    32     
-16    96     
-48    96     
-16    -64    
128    -32    
0      32     
-32    48     
-16    -32    
112    112    
-16    0      
96     16     
48     32     
128    64     
16     32     
-96    32     
48     32     
-240   -96    
160    80     
-80    0      
128    16     
-144   64     
-64    -48    
-32    32     
192    256    
-192   272    
272    32     
-32    32     
176    128    
-32    -128   
80     -32    
48     96     
176    -16    
-80    96     
144    -96    
-208   160    
304    160    
-112   96     
16     112    
192    48     
112    128    
-112   112    
304    0      
-112   48     
336    272    
-240   288    
16     -128   
32     -176   
272    160    
-144   64     
-32    -512   
128    -48    
-80    -368   
64     -160   
0      -80    
192    16     
-32    144    
112    48     
-48    32     
80     48     
-96    16     
80     64     
32     384    
144    16     
0      -176   
0      -368   
80     16     
-64    224    
256    -64    
-32    16     
96     80     
-80    80     
96     144    
32     0      
48     -240   
80     -112   
-64    384    
0      -224   
96     320    
-16    -112   
0      64     
-160   912    
224    -672   
0      -80    
64     688    
224    -48    
-240   -464   
64     -656   
48     -208   
320    -96    
-224   288    
336    192    
-128   160    
64     240    
-48    -16    
32     -272   
64     -32    
-16    208    
-80    64     
336    -80    
16     -192   
112    -48    
-16    -80    
-128   -160   
128    -32    
64     16     
32     80     
-144   48     
64     -96    
192    48     
-144   -80    
128    176    
64     -144   
0      32     
96     32     
336    112    
-192   160    
-112   128    
48     -48    
32     64     
-16    16     
16     96     
-48    48     
160    -96    
208    32     
96     -32    
-144   64     
64     -272   
256    224    
-16    -1168  
-16    -16    
96     -112   
80     112    
-32    80     
128    48     
-64    64     
16     -32    
176    160    
-240   16     
112    -16    
32     16     
256    64     
80     80     
144    -32    
208    96     
80     224    
-80    -224   
-80    -32    
240    -64    
144    112    
80     16     
128    -112   
80     -16    
112    64     
-32    96     
48     -112   
112    0      
304    -480   
112    176    
-16    -176   
-224   16     
-288   -80    
80     48     
-64    48     
112    176    
-96    176    
0      -64    
256    -48    
160    -144   
288    224    
-192   -48    
112    48     
96     -64    
224    224    
16     128    
336    160    
-96    32     
96     16     
0      -64    
32     48     
0      64     
176    -288   
32     -48    
-64    -192   
336    64     
80     -16    
96     32     
48     -160   
-176   96     
-64    -176   
272    32     
-64    -208   
80     -704   
160    -48    
80     -336   
128    -208   
32     -48    
-80    -1088  
144    -112   
48     -496   
112    -16    
32     -128   
0      -320   
64     -144   
-144   -448   
144    32     
96     48     
32     -320   
-96    16     
-624   80     
96     0      
96     -16    
144    160    
176    208    
32     -176   
-176   -320   
400    -384   
-224   -320   
32     -336   
96     -144   
176    -272   
0      112    
160    336    
480    1008   
-1248  -1216  
-16    -752   
-32    560    
208    -464   
-32    -800   
368    192    
304    896    
-192   112    
432    -608   
128    32     
-224   288    
160    -208   
0      256    
-128   -224   
80     -112   
-272   368    
272    160    
-704   -192   
-48    -256   
96     400    
16     -608   
32     -80    
-64    176    
240    -752   
288    416    
-112   672    
-16    -352   
448    480    
-416   944    
-128   -640   
64     -128   
48     208    
-1296  -304   
224    -256   
384    -176   
-32    544    
32     -160   
80     -288   
-112   64     
304    -832   
-64    -128   
256    80     
-96    -224   
-176   288    
224    -336   
-192   0      
160    80     
-240   -64    
208    -32    
-240   288    
-208   -256   
-608   0      
272    112    
80     32     
128    -512   
-208   176    
192    48     
64     -32    
-240   -32    
144    -208   
0      32     
-112   64     
208    80     
64     0      
-496   -80    
80     -16    
-128   -176   
208    -208   
-64    -64    
-64    -304   
128    128    
32     0      
272    -80    
-64    112    
-96    16     
192    32     
-16    48     
-160   -32    
0      -80    
-256   -128   
16     64     
96     192    
224    -176   
-128   16     
-32    -272   
144    48     
-672   80     
-48    -64    
-304   112    
272    -32    
0      576    
192    176    
-224   -96    
-64    -32    
-32    48     
208    224    
-368   -16    
48     -80    
192    32     
96     -192   
368    -16    
112    48     
496    368    
-144   160    
-128   -80    
-208   192    
-64    48     
208    -112   
-208   -32    
48     96     
304    -80    
-224   -32    
-1920  -272   
-304   64     
-1392  -80    
-240   0      
224    96     
-912   128    
-288   16     
-352   -16    
-208   0      
240    32     
144    80     
432    1024   
-416   464    
-1200  -304   
80     -96    
-416   -16    
416    208    
-608   -80    
-352   -32    
-464   -368   
-32    -288   
288    128    
-832   -80    
560    -16    
192    32     
-256   -32    
-32    -64    
-48    -16    
320    -96    
240    64     
-112   -288   
304    -32    
64     64     
208    32     
0      -48    
-128   16     
240    256    
-704   -80    
16     -160   
-672   112    
32     128    
-16    96     
-16    -64    
-384   -112   
144    144    
-112   -112   
-192   -16    
-240   -16    
-96    128    
288    64     
64     -80    
0      -16    
-144   32     
-16    48     
-528   -16    
-48    16     
-432   -80    
64     -16    
32     48     
32     48     
-320   -208   
-32    -48    
-32    80     
0      64     
-32    64     
-32    0      
48     -48    
-192   64     
-16    0      
-288   -96    
128    48     
-128   32     
32     96     
-16    -80    
16     16     
48     80     
-16    80     
112    48     
-64    16     
32     32     
-144   -176   
-224   -112   
-112   0      
128    112    
-272   32     
64     -112   
-592   -96    
160    112    
-112   0      
16     -128   
48     64     
-80    -48    
-160   16     
-80    32     
-208   -96    
128    -32    
48     -32    
128    16     
32     -128   
-416   -272   
256    -64    
-336   -144   
192    112    
-352   48     
-128   16     
96     176    
-192   -48    
64     -144   
-32    288    
32     -64    
160    0      
16     -16    
-272   -208   
0      1648   
448    896    
-304   -304   
-64    -400   
-304   336    
128    -400   
-64    -240   
-64    224    
-96    -112   
80     144    
288    48     
-208   112    
-320   416    
352    -320   
-96    -112   
32     352    
176    48     
-80    384    
-480   96     
160    -512   
-48    -96    
16     -112   
-256   -16    
464    0      
-48    192    
-16    0      
176    -240   
-80    -144   
-240   -496   
32     -80    
160    112    
-128   16     
64     16     
-144   0      
48     80     
80     128    
48     160    
128    -32    
-16    0      
48     32     
-96    96     
160    64     
192    160    
80     16     
-32    80     
96     96     
-288   0      
-80    96     
-96    -32    
112    48     
96     32     
48     -16    
48     16     
144    160    
128    160    
16     16     
160    0      
144    96     
-32    16     
16     -64    
80     48     
-288   -48    
160    48     
192    48     
48     16     
128    -32    
32     96     
96     32     
16     48     
32     16     
144    -32    
64     16     
0      48     
80     32     
-160   -80    
144    96     
208    240    
-160   240    
32     16     
0      128    
224    32     
64     -80    
64     -80    
-48    -64    
96     80     
128    320    
-80    112    
112    -80    
-48    64     
80     -48    
96     96     
-192   -64    
-208   48     
96     -32    
32     128    
-32    -96    
512    176    
0      224    
384    0      
-80    -16    
-80    -48    
-64    32     
-112   0      
208    16     
112    96     
-32    32     
-240   -16    
-16    -192   
336    208    
80     128    
368    0      
-112   112    
-16    32     
-96    80     
144    0      
0      16     
112    96     
-160   64     
48     80     
-96    -144   
192    -112   
176    80     
-48    0      
480    368    
-240   384    
144    -112   
272    112    
240    160    
-64    48     
-16    32     
80     112    
-48    432    
256    64     
-224   96     
-48    224    
112    416    
176    400    
128    -96    
-144   -144   
-16    -304   
240    144    
-32    32     
16     32     
160    112    
192    -16    
32     80     
96     64     
-240   -288   
-96    -48    
-128   -16    
144    -144   
128    224    
112    -64    
224    96     
80     -736   
-80    -224   
144    240    
144    256    
-176   -144   
96     -144   
16     224    
160    96     
192    112    
16     -80    
176    144    
144    944    
-80    -128   
0      -272   
-272   80     
64     -96    
64     64     
0      128    
208    384    
0      -112   
128    0      
-112   -16    
-16    240    
-224   368    
256    592    
48     208    
-256   -368   
192    -112   
288    -48    
-144   -96    
192    -464   
80     80     
80     -464   
-64    64     
-32    48     
192    112    
0      48     
144    192    
-64    160    
-64    -112   
400    528    
16     256    
192    208    
176    32     
128    -96    
32     -128   
160    256    
0      -144   
208    -64    
-128   80     
128    128    
-48    0      
64     48     
128    64     
0      -80    
64     -128   
48     -192   
80     80     
80     -80    
144    48     
-16    -16    
48     48     
160    -48    
32     80     
160    112    
176    64     
-112   -80    
-112   -32    
256    -32    
-240   -16    
-64    16     
-80    -64    
304    64     
80     -144   
-96    32     
336    32     
-80    80     
128    -96    
256    -416   
128    96     
-144   -560   
0      -32    
-2064  -16    
16     -16    
192    -32    
80     -624   
80     0      
224    -16    
224    -96    
-32    64     
-32    -48    
384    192    
-304   -32    
-48    -800   
400    80     
96     -224   
32     -64    
80     160    
-256   -96    
-128   -48    
-48    -544   
256    -112   
32     -320   
48     0      
192    208    
-96    32     
112    144    
-112   320    
320    112    
48     16     
-208   0      
-240   -240   
-384   -144   
64     -192   
-176   64     
80     -16    
256    -48    
80     -48    
80     0      
-32    -1152  
-128   -192   
288    -176   
160    96     
192    -16    
96     80     
80     -64    
352    224    
-608   464    
-304   -32    
-1520  -192   
192    16     
368    80     
-112   -64    
-80    0      
160    -320   
112    128    
112    -64    
272    96     
-112   -32    
208    48     
-112   0      
304    80     
-640   80     
352    112    
480    -176   
304    64     
128    80     
176    16     
336    176    
128    0      
32     0      
400    -240   
-176   64     
16     16     
-64    -112   
-672   -288   
208    -112   
32     -48    
192    16     
-336   -16    
64     -144   
-1936  -64    
16     -16    
32     64     
80     -208   
144    16     
80     -688   
256    -48    
640    64     
32     48     
320    96     
-176   0      
-400   -16    
48     48     
-640   -48    
256    -64    
144    64     
208    48     
-80    -64    
-224   -288   
-176   -160   
240    -432   
288    -32    
256    96     
32     -80    
-16    -32    
-96    -16    
-80    -48    
176    -80    
32     32     
144    0      
272    80     
176    -64    
-32    48     
-32    -208   
32     32     
48     -224   
112    -48    
-160   16     
64     64     
-288   16     
112    -272   
-128   -96    
192    112    
-336   -16    
64     -80    
-144   -96    
96     -144   
48     -96    
128    -112   
112    -16    
160    48     
-160   -144   
-352   96     
-96    -224   
-112   32     
-48    224    
-192   -16    
320    -16    
-384   -16    
352    32     
-272   -368   
80     496    
32     -544   
-1632  -80    
96     -48    
-224   128    
-1344  -96    
-112   144    
-544   -112   
352    640    
-1376  -160   
48     -240   
288    -160   
-176   272    
240    -80    
272    416    
-448   272    
80     -48    
-48    272    
16     160    
96     -144   
-224   -464   
32     336    
-272   128    
128    -512   
-400   -256   
0      64     
208    256    
16     -176   
-224   -256   
96     160    
-400   -96    
16     176    
-80    -16    
-112   176    
160    288    
64     176    
112    144    
-208   0      
-160   64     
-432   -160   
208    -112   
112    32     
112    96     
-128   160    
-48    16     
-48    -224   
-16    -64    
-16    96     
0      -32    
32     16     
-160   -48    
-160   -32    
-80    -160   
32     64     
32     288    
-128   128    
0      -48    
-176   -32    
-160   -80    
160    16     
16     -32    
112    48     
-96    256    
32     16     
32     -48    
80     32     
-208   -64    
0      -32    
-160   -16    
-144   64     
-144   -16    
-608   -96    
-64    -48    
-208   -96    
192    -32    
144    32     
224    192    
16     64     
16     16     
-144   -32    
64     96     
48     96     
0      48     
-16    32     
-224   304    
0      -96    
0      -128   
96     144    
-432   -48    
176    64     
-160   -48    
-32    16     
-16    16     
-48    16     
0      0      
48     64     
176    96     
-96    -16    
0      -16    
-112   48     
-48    64     
64     64     
128    32     
-288   -16    
-80    112    
64     -160   
-64    80     
112    64     
48     16     
64     -32    
-144   32     
96     112    
-320   96     
176    -16    
-160   -16    
192    192    
-384   96     
48     -192   
-432   -432   
192    -16    
64     144    
48     80     
144    64     
-16    192    
-288   144    
-80    16     
16     96     
32     176    
224    80     
112    16     
-224   48     
-336   -64    
-176   240    
208    160    
96     -48    
-160   -48    
96     -48    
160    144    
48     80     
-80    0      
16     96     
0      -64    
-144   -240   
64     -16    
-16    160    
160    -144   
-448   -720   
0      -400   
-224   32     
112    -112   
64     192    
-16    128    
-272   -256   
144    144    
128    608    
80     -336   
-96    208    
-80    160    
0      -112   
-176   288    
0      80     
-32    -80    
48     -32    
-16    256    
16     -144   
-16    16     
48     -112   
-96    160    
96     -256   
256    416    
64     144    
272    80     
-304   144    
96     -16    
0      -96    
-96    48     
32     48     
64     48     
64     144    
48     112    
144    32     
-16    96     
224    64     
-160   -32    
48     64     
-96    -16    
-16    -224   
160    -256   
96     16     
272    32     
0      -48    
-80    -32    
-80    64     
-16    64     
144    128    
320    96     
-80    -32    
0      -144   
-144   48     
-48    -16    
48     32     
176    -112   
128    48     
80     80     
-240   -128   
48     -32    
-176   0      
336    224    
-160   128    
288    -32    
-128   16     
144    48     
144    0      
48     160    
48     496    
-112   80     
144    -128   
-48    192    
16     112    
32     0      
224    32     
320    208    
-368   -160   
192    0      
96     -48    
0      -64    
176    224    
-288   -16    
192    16     
32     48     
-144   16     
224    -64    
-48    0      
192    0      
-192   80     
160    -16    
16     32     
128    -1456  
-80    0      
48     80     
-48    16     
224    32     
128    -32    
192    32     
-64    80     
64     48     
64     -16    
48     0      
144    96     
-16    16     
32     -128   
-32    -16    
-80    -256   
64     240    
368    -32    
-32    -96    
80     32     
-80    112    
64     80     
16     80     
-112   -32    
80     96     
192    32     
160    80     
112    96     
96     -16    
240    80     
-16    0      
0      -64    
208    -224   
48     80     
32     -16    
112    80     
-48    -176   
64     112    
176    -16    
112    48     
48     16     
-64    48     
64     80     
64     16     
16     128    
-32    -48    
144    -48    
192    -336   
208    240    
128    -368   
-144   -16    
80     112    
304    160    
-208   -64    
32     -32    
-160   -144   
192    -224   
128    -96    
224    -16    
64     240    
-240   -288   
-48    16     
64     64     
96     128    
-16    -336   
320    -272   
176    -16    
240    96     
192    -64    
96     128    
-192   144    
144    80     
240    -112   
-64    -240   
-144   -32    
-144   -320   
80     32     
80     -80    
272    208    
-528   48     
880    16     
304    -992   
608    -592   
240    112    
48     80     
208    -144   
-480   -752   
-448   -688   
-256   144    
560    1296   
-464   -336   
-64    -624   
-144   0      
96     368    
-48    32     
80     -80    
224    -48    
-48    208    
32     112    
608    560    
-160   192    
80     -496   
272    -144   
96     -16    
80     256    
16     -336   
-48    -160   
-48    -96    
32     112    
-32    64     
288    -144   
128    -16    
272    -224   
128    -16    
32     -112   
-112   -1152  
80     304    
176    -544   
160    -224   
-176   -336   
0      16     
160    96     
176    -304   
-112   -640   
-48    96     
160    144    
224    0      
32     -96    
432    176    
-224   -288   
192    48     
0      -96    
96     -320   
32     0      
-32    -704   
112    -96    
32     -16    
80     32     
160    -16    
-64    -672   
-112   800    
-160   -384   
112    -240   
48     112    
-592   -80    
128    80     
144    80     
112    64     
160    -608   
-32    608    
256    -528   
48     -32    
160    -96    
192    80     
32     -48    
-256   -1440  
-144   16     
16     -16    
64     -160   
-144   400    
240    -176   
-256   496    
96     -192   
-144   32     
400    64     
-112   -208   
32     -224   
288    16     
-336   0      
304    -272   
112    -80    
192    16     
-160   -224   
128    -32    
-288   112    
-272   32     
-2048  -272   
176    128    
208    80     
-48    0      
240    -32    
-272   -192   
-80    144    
528    32     
-256   64     
224    176    
-208   144    
-80    -144   
-32    64     
-80    -144   
80     112    
-96    32     
32     96     
-208   160    
-32    -608   
256    -192   
-128   208    
96     208    
160    -592   
496    288    
-560   272    
224    -208   
-48    -128   
32     0      
-144   -400   
176    -240   
16     32     
-192   -272   
-464   -160   
144    48     
-32    96     
48     144    
96     224    
320    -144   
32     112    
-176   608    
448    272    
-64    48     
32     -320   
96     -256   
-160   48     
-576   -144   
208    -160   
160    64     
112    320    
-224   208    
80     -304   
112    48     
48     -400   
-64    224    
-304   -48    
128    32     
-320   64     
32     32     
-128   -32    
48     -64    
-96    0      
96     -80    
240    -16    
0      -48    
0      32     
96     -96    
176    192    
-80    176    
48     -96    
256    192    
-224   112    
-32    -32    
400    -112   
-304   80     
-48    -48    
-16    0      
48     -64    
0      176    
-32    -32    
32     240    
-1008  -48    
128    32     
-80    64     
-368   -16    
-112   0      
-496   0      
-240   96     
128    -16    
-176   -64    
112    -128   
-208   16     
-176   -32    
16     96     
-848   0      
208    96     
-16    48     
-32    32     
-128   80     
-320   -112   
-192   -48    
-96    -128   
-144   0      
-64    -32    
-48    208    
432    720    
96     272    
64     352    
16     320    
-128   -208   
0      -272   
-256   144    
-352   -304   
80     -688   
288    176    
480    592    
80     -32    
-208   -176   
-128   112    
-112   -80    
-1008  16     
208    96     
32     64     
-32    -192   
160    640    
-320   0      
80     -288   
32     224    
368    96     
176    144    
-208   48     
160    192    
-800   -480   
-448   112    
-16    368    
-272   32     
208    -48    
240    -16    
16     -64    
-624   -368   
-80    -112   
16     -208   
432    80     
64     128    
112    128    
160    48     
-144   0      
-32    48     
64     96     
-48    48     
0      -64    
32     0      
-944   32     
-48    32     
-64    -64    
-64    0      
32     80     
-112   144    
-80    112    
-144   -16    
-48    -16    
-144   16     
16     96     
-112   -80    
128    -48    
-608   0      
208    32     
-1696  -64    
128    64     
0      -32    
112    112    
-144   -48    
16     48     
16     -176   
-144   -64    
32     32     
112    32     
0      48     
-128   -16    
-32    -80    
-368   -48    
-144   48     
-80    -80    
112    80     
112    128    
-320   0      
112    48     
-96    16     
192    48     
224    64     
-32    32     
96     16     
-80    64     
-176   -112   
112    0      
-208   240    
-144   -32    
0      16     
32     -464   
112    -64    
-80    64     
64     -16    
-16    -16    
32     144    
80     0      
-32    96     
-128   -32    
-96    -160   
112    -80    
48     192    
-80    0      
160    48     
-176   -80    
-48    -48    
224    240    
-240   80     
256    32     
-160   16     
192    0      
-224   -16    
112    80     
-32    -16    
16     80     
-128   -80    
192    112    
-432   48     
256    -16    
16     0      
128    -32    
16     -64    
-256   144    
-64    48     
112    -16    
144    80     
80     96     
96     48     
-96    160    
176    112    
-112   -48    
-80    0      
-64    -16    
-80    112    
160    16     
112    -64    
-16    16     
16     16     
32     32     
144    48     
64     0      
-96    0      
128    48     
-96    32     
256    80     
-288   -64    
224    0      
-96    48     
-16    0      
80     -64    
80     144    
-96    176    
-144   176    
128    -16    
80     160    
64     -160   
-112   -160   
-16    80     
-272   32     
48     -16    
16     -160   
128    -32    
-16    -192   
128    192    
-16    -192   
-208   0      
0      224    
240    128    
112    -64    
0      0      
0      32     
-16    416    
-208   -192   
192    208    
-96    -560   
-16    432    
16     96     
-32    80     
112    0      
-112   -176   
112    -80    
256    608    
160    -32    
144    112    
-32    -384   
-128   224    
-64    -16    
16     80     
-112   32     
16     48     
-32    -224   
336    64     
528    160    
-672   64     
-528   -576   
128    -1408  
144    864    
352    176    
384    -144   
144    48     
16     80     
-272   -64    
-304   320    
-112   112    
0      -80    
-16    -16    
128    -288   
640    544    
-336   -768   
-144   -576   
144    272    
208    464    
-112   128    
256    -144   
208    272    
32     48     
-112   -48    
128    64     
0      0      
-112   32     
160    112    
-16    -176   
32     -352   
192    -256   
272    320    
-128   -64    
112    -64    
144    0      
96     304    
32     176    
96     -288   
96     -160   
16     32     
256    -16    
-112   -64    
32     -192   
272    48     
160    448    
160    -16    
96     -272   
48     -768   
-32    -16    
0      96     
48     224    
-96    -48    
96     176    
16     0      
96     64     
-32    96     
144    0      
112    128    
48     48     
272    208    
128    16     
112    288    
176    -432   
-32    112    
0      -144   
96     64     
-112   -64    
48     -16    
112    64     
240    -64    
176    224    
0      256    
256    240    
-144   32     
48     336    
288    208    
16     416    
128    432    
528    560    
-320   -848   
112    384    
288    256    
256    -32    
-160   128    
64     -160   
96     464    
144    16     
48     48     
48     -112   
368    32     
-432   -256   
240    -144   
-144   80     
80     -144   
16     -96    
16     32     
96     224    
-80    288    
-64    80     
48     16     
208    128    
96     -64    
128    -32    
-48    -160   
192    -96    
-32    -192   
288    0      
-80    128    
176    -64    
64     80     
176    128    
-272   0      
128    32     
-80    -128   
16     -208   
176    -32    
224    208    
32     320    
-64    -128   
48     -32    
112    128    
192    48     
0      -144   
80     64     
64     0      
112    -928   
-96    240    
144    -288   
256    -464   
-144   -160   
64     -816   
-48    -64    
64     -368   
144    0      
-32    -64    
192    -64    
112    64     
480    272    
-464   -400   
-352   -80    
-64    -432   
80     -112   
208    -16    
16     -112   
176    -16    
-80    32     
528    352    
64     -64    
-80    -80    
256    -544   
-64    128    
272    -128   
176    -112   
112    -16    
96     48     
192    -32    
320    -48    
-656   0      
-16    -144   
-1312  400    
32     64     
-80    -304   
400    -416   
160    -112   
176    -192   
-48    16     
96     -320   
-400   -192   
80     -112   
80     -96    
128    -80    
176    -48    
-144   80     
128    -80    
-208   32     
112    -80    
192    80     
-80    224    
-112   -96    
160    -560   
176    -160   
16     -656   
-32    -48    
144    -208   
32     32     
240    48     
0      96     
-160   -192   
80     -80    
-176   0      
240    96     
-432   -576   
48     0      
176    -144   
-80    -192   
176    304    
16     -304   
112    -16    
48     -368   
256    -16    
-160   -384   
160    112    
-384   -112   
-16    -176   
-288   48     
96     176    
-592   -64    
-112   -448   
160    208    
-144   -352   
176    528    
80     -160   
-336   -176   
208    192    
240    208    
-320   -128   
-16    -96    
-480   -32    
48     -32    
-64    -32    
-16    48     
-16    160    
128    48     
-1664  -64    
-288   -176   
-352   -160   
320    -224   
320    32     
400    -112   
80     64     
112    160    
-432   -80    
-448   -112   
208    16     
48     48     
288    48     
96     16     
16     16     
-144   32     
-256   -400   
192    -224   
16     96     
224    128    
176    -352   
368    -80    
-848   0      
16     -16    
-208   -128   
128    -64    
-32    160    
176    0      
-64    0      
48     -16    
-400   96     
-48    -96    
176    64     
80     -48    
176    112    
-432   -48    
80     -112   
96     32     
-80    -80    
0      48     
96     -16    
-112   32     
96     -112   
-256   -16    
192    0      
-336   48     
352    -48    
64     96     
-560   -112   
-192   32     
-112   -16    
-16    32     
448    432    
-400   208    
160    -144   
-96    48     
-64    0      
256    -48    
-224   -256   
-800   -48    
-144   192    
-416   -128   
256    144    
-560   -64    
336    16     
-48    16     
-272   -64    
-192   16     
-560   -48    
-64    -96    
-1424  32     
-96    0      
288    16     
-48    112    
-416   -64    
224    112    
-304   -96    
320    16     
-160   80     
-32    64     
64     -96    
-192   -176   
16     32     
-80    80     
-128   64     
-544   -32    
-176   -32    
-128   -32    
-112   -48    
-96    0      
0      48     
64     -64    
192    16     
-128   80     
-48    16     
16     64     
-80    16     
144    80     
-160   112    
144    -16    
32     16     
-304   -16    
-496   -48    
32     176    
80     0      
144    80     
-32    -112   
-176   16     
-32    64     
-144   0      
64     32     
32     -16    
16     -32    
-48    160    
48     288    
-96    -64    
-48    0      
-512   -32    
192    96     
96     -48    
64     -48    
0      -64    
0      -32    
48     -32    
-112   16     
-208   -176   
288    -192   
0      432    
-96    272    
-48    -48    
-144   -464   
-48    160    
-160   208    
272    -48    
-2112  -64    
-272   0      
64     -32    
-112   176    
48     -64    
16     80     
0      192    
0      16     
-16    416    
-32    -544   
16     32     
-144   -48    
-64    784    
-48    -224   
-16    -288   
-896   528    
64     -176   
96     48     
48     -288   
288    32     
-176   480    
-160   -112   
-64    -16    
192    352    
-208   -80    
48     -304   
0      -368   
336    -112   
-528   80     
-96    304    
-544   80     
-160   -176   
48     -320   
144    16     
-48    352    
48     -48    
48     -48    
48     48     
0      128    
32     96     
-176   -112   
-240   -96    
480    384    
-480   64     
-16    -320   
-160   -208   
0      -96    
-16    -224   
192    16     
160    -16    
32     -80    
96     -144   
-48    -144   
96     -112   
-560   -368   
-176   -160   
-112   -240   
176    -192   
144    96     
272    96     
-160   16     
144    -128   
176    80     
16     144    
-16    80     
32     32     
48     -48    
32     -16    
48     0      
-96    -64    
128    224    
160    144    
208    112    
-336   -32    
-48    128    
-64    128    
16     144    
224    256    
48     176    
80     48     
-48    0      
-208   -192   
-272   -96    
128    48     
64     144    
-64    48     
16     -128   
80     0      
-288   16     
96     -80    
48     -240   
96     64     
-16    128    
-80    0      
48     48     
112    16     
64     192    
112    160    
64     96     
176    0      
0      48     
-48    144    
16     16     
16     64     
160    -112   
0      -80    
48     16     
0      -144   
32     96     
-160   32     
-80    -64    
-16    -176   
192    16     
256    208    
0      288    
80     304    
16     192    
560    688    
-416   384    
-208   224    
256    128    
-16    576    
320    448    
128    416    
224    0      
16     -64    
32     176    
96     96     
32     304    
-64    0      
48     32     
64     -288   
128    -112   
-176   -32    
-80    272    
304    304    
48     416    
192    320    
128    -144   
32     -80    
0      -192   
208    0      
-176   48     
48     32     
-16    -144   
176    32     
-48    128    
0      -176   
368    16     
-144   80     
-48    48     
-160   0      
512    48     
176    32     
80     48     
224    112    
16     384    
192    320    
-352   144    
112    96     
-64    128    
-368   -160   
208    -96    
-224   64     
176    -416   
-112   0      
256    128    
224    96     
-192   80     
320    -192   
-368   16     
208    -128   
-224   -224   
272    -304   
-80    -144   
48     -48    
192    96     
-48    -112   
112    32     
256    -64    
-48    48     
0      208    
80     0      
160    32     
0      0      
48     96     
160    -16    
80     112    
192    96     
256    16     
-32    -32    
128    -32    
-224   208    
-16    256    
-64    64     
0      80     
64     -560   
-16    -288   
288    -176   
224    -112   
-16    -176   
96     128    
-288   -496   
64     48     
160    32     
64     -48    
112    32     
160    -256   
-112   16     
-48    -448   
-96    -208   
144    -224   
224    0      
-96    16     
-32    -16    
352    400    
-224   -112   
-48    32     
144    -128   
-64    -304   
48     368    
80     16     
272    0      
-64    320    
0      -336   
128    0      
224    544    
112    -48    
48     -320   
-112   -16    
128    160    
160    96     
192    128    
64     -480   
176    32     
176    -112   
80     -32    
160    96     
-144   48     
96     -32    
-64    112    
608    -432   
-112   -480   
-640   -48    
-224   144    
-48    48     
80     -112   
-160   0      
480    -48    
64     96     
-96    -320   
112    -192   
192    256    
-192   96     
272    -64    
80     112    
160    -64    
432    48     
-336   0      
-96    -736   
-160   -80    
112    -848   
-48    -512   
32     -96    
400    -160   
128    -16    
224    -80    
-16    -64    
-128   -48    
-32    -64    
-176   64     
-192   0      
128    -352   
272    208    
-304   -240   
-16    -64    
208    32     
304    128    
192    128    
-48    -80    
80     -224   
160    -160   
176    0      
224    -128   
-80    16     
48     48     
-256   160    
304    0      
-192   -16    
-64    16     
0      32     
-176   0      
48     -16    
-80    32     
128    -48    
-128   -32    
160    -32    
0      -48    
48     -128   
112    -32    
224    -16    
16     -48    
272    -112   
-16    48     
96     16     
128    0      
-160   -48    
32     -80    
-352   16     
0      0      
112    32     
112    -224   
-48    -32    
-48    -256   
80     16     
-32    -688   
224    80     
-16    48     
336    192    
-16    -112   
352    0      
-112   32     
128    0      
64     -80    
144    -128   
-64    48     
256    -48    
-16    -48    
96     48     
-304   -64    
128    -560   
96     64     
112    80     
224    48     
-48    -32    
-48    -96    
0      -160   
-144   -368   
16     80     
96     -32    
-208   -96    
32     -256   
-464   -80    
80     -32    
-96    -80    
256    -304   
80     160    
0      208    
48     80     
-144   32     
96     -16    
-32    112    
-16    64     
-176   -48    
0      0      
-496   48     
272    0      
-64    -48    
112    -48    
-16    16     
128    -240   
112    112    
64     -224   
64     -32    
48     224    
112    -128   
80     176    
-32    192    
-544   -80    
-96    -64    
224    -304   
128    128    
80     240    
-160   -352   
192    48     
-32    -32    
80     80     
-256   112    
80     -320   
-128   144    
352    -272   
-368   16     
176    -64    
-176   256    
-128   -304   
-224   32     
224    80     
0      32     
16     -32    
368    -288   
80     96     
144    336    
-176   192    
16     976    
192    -192   
208    -64    
-192   -224   
-96    -384   
64     0      
-96    48     
16     368    
160    32     
-160   288    
-224   48     
352    304    
-240   -32    
-944   -112   
-288   -160   
-1120  -64    
0      -64    
-384   32     
80     208    
-48    96     
-112   -16    
112    -96    
0      0      
16     -48    
80     112    
-80    -16    
-96    32     
-320   -96    
-624   -224   
-64    -80    
-464   0      
-128   48     
48     272    
0      64     
-2384  -48    
-128   16     
64     -96    
-160   64     
-192   -112   
112    80     
-272   -160   
16     96     
0      -112   
-48    -16    
-128   -64    
48     -128   
-304   -288   
128    -464   
48     80     
-224   144    
-176   0      
-64    -16    
384    336    
-400   128    
-48    32     
80     -176   
64     0      
-64    144    
-128   -48    
0      -16    
-384   -128   
-64    144    
-240   64     
-32    32     
-560   -80    
-96    96     
-1520  -128   
-32    96     
-32    -112   
160    80     
64     80     
-128   -96    
64     32     
-144   32     
-112   64     
-80    48     
-144   -32    
-160   368    
64     0      
128    -144   
-224   -64    
-736   -208   
-48    80     
-16    -80    
160    32     
112    32     
-48    -16    
64     -96    
-96    -96    
-64    0      
48     32     
-64    16     
128    -272   
-32    -160   
-176   32     
112    -32    
-272   -384   
80     -64    
32     160    
224    160    
160    256    
-176   -32    
64     64     
112    208    
144    176    
-32    112    
96     -48    
-240   0      
-112   32     
-288   48     
144    16     
-272   -96    
192    64     
-320   144    
240    160    
-304   32     
-240   -32    
-48    -16    
16     128    
96     16     
48     64     
128    -160   
-448   -432   
64     -112   
-240   -64    
304    48     
-272   352    
272    64     
-1264  -352   
-160   -112   
64     96     
-160   0      
144    352    
80     160    
-240   -128   
-144   -48    
160    -208   
144    48     
-48    48     
16     -16    
-96    -320   
-80    -304   
128    160    
320    304    
-112   -352   
288    -96    
192    -80    
-64    -128   
16     -32    
0      -128   
224    400    
-256   416    
-176   112    
-96    96     
192    384    
240    256    
-160   464    
48     208    
-32    -128   
-144   32     
-64    -32    
144    -32    
-160   16     
-96    -80    
0      -64    
32     608    
192    16     
-48    -176   
144    176    
-256   -80    
48     -32    
64     -128   
192    -112   
-48    -16    
-272   32     
224    -352   
64     128    
32     416    
112    -144   
16     -48    
-336   -160   
128    208    
-128   -80    
-64    -160   
48     144    
240    128    
-32    144    
-256   -176   
192    80     
-144   16     
32     -176   
96     448    
64     -192   
48     192    
48     80     
-128   -240   
320    304    
112    -48    
32     -176   
-224   176    
48     240    
160    48     
-256   -272   
208    160    
144    112    
-32    128    
240    16     
-64    -160   
-160   96     
64     48     
48     32     
-48    48     
48     -272   
112    16     
-176   96     
208    -1136  
32     288    
-48    32     
48     32     
80     80     
-48    80     
64     32     
384    0      
-80    -256   
96     160    
-80    -432   
16     -96    
-48    176    
224    16     
-608   64     
-144   -80    
-192   16     
112    128    
176    112    
48     48     
48     -64    
-80    -16    
-80    96     
160    112    
-112   80     
-176   96     
-48    32     
208    -176   
112    32     
304    48     
160    -176   
-384   752    
-192   304    
560    -80    
-224   -48    
-48    160    
656    480    
-784   224    
-368   -336   
160    -32    
-128   -272   
336    96     
-288   144    
-16    32     
80     16     
208    224    
-272   144    
96     -1312  
224    16     
48     112    
560    272    
-304   -48    
64     -64    
160    32     
304    48     
400    48     
-48    80     
-64    96     
-416   -96    
-336   -16    
224    -208   
16     64     
288    -400   
320    80     
144    64     
160    112    
-224   80     
0      -64    
240    144    
112    16     
128    16     
-48    32     
112    96     
96     -112   
32     -32    
240    -144   
192    32     
160    -112   
96     48     
64     16     
-64    -64    
32     -32    
-16    80     
-112   -48    
320    144    
0      32     
48     0      
96     16     
-16    -16    
128    48     
64     -16    
-16    -48    
96     -384   
0      16     
80     -1152  
96     64     
-16    32     
208    112    
48     48     
144    32     
-112   80     
48     -96    
96     144    
160    48     
224    64     
48     240    
0      400    
112    96     
80     32     
-112   -80    
176    96     
160    112    
-64    144    
-32    -64    
48     192    
160    128    
16     -144   
160    96     
16     -32    
112    144    
-32    -16    
192    112    
96     -16    
96     -16    
0      -288   
-16    -176   
32     -160   
192    64     
48     -16    
48     240    
192    432    
128    -48    
160    -48    
-96    -144   
64     128    
32     128    
-16    -464   
48     -64    
192    192    
96     32     
-16    -128   
64     32     
32     -1344  
32     192    
-176   16     
256    -544   
-48    0      
16     -320   
64     272    
96     32     
48     32     
96     96     
208    -320   
288    752    
-160   256    
-80    608    
592    -688   
-144   -32    
0      464    
-1328  320    
224    -240   
-112   -448   
128    240    
32     -32    
48     -208   
80     -80    
-32    0      
288    96     
320    96     
-160   0      
96     -272   
-144   224    
192    -128   
144    -112   
-272   -48    
176    16     
-96    48     
0      -32    
128    176    
-48    -112   
-96    -16    
336    352    
224    208    
208    -16    
0      48     
80     0      
160    96     
32     0      
112    48     
48     -48    
96     16     
-336   -32    
160    -128   
-16    -96    
240    -224   
96     64     
128    -64    
400    48     
64     -80    
-368   240    
-128   -32    
16     0      
32     -32    
144    32     
-176   0      
64     -224   
-1104  -80    
144    -64    
-32    48     
192    -32    
352    64     
32     -192   
-48    -208   
192    -576   
-224   64     
96     128    
224    80     
-144   16     
320    -16    
-16    144    
-48    -16    
-400   -96    
112    0      
-976   -32    
128    -32    
128    -96    
128    -48    
-64    16     
112    -208   
416    560    
-400   416    
0      -176   
304    48     
112    16     
16     64     
96     112    
0      -64    
208    -112   
-480   -96    
-48    -80    
80     64     
-96    -128   
528    32     
-16    -80    
-128   224    
-432   -48    
32     -144   
-176   -48    
-240   -160   
192    16     
64     96     
160    112    
-16    -208   
-80    80     
-48    -16    
32     224    
144    -240   
-48    -96    
80     -208   
16     96     
-64    -32    
-16    -48    
-208   240    
224    112    
-192   160    
-48    -80    
-272   -48    
112    32     
-1552  -16    
32     -16    
64     48     
128    16     
112    -16    
304    112    
64     96     
-48    144    
-112   0      
96     -192   
80     0      
-144   416    
176    288    
-128   16     
128    -64    
192    96     
-16    -16    
64     144    
-864   64     
-32    80     
-864   -144   
-400   -240   
112    -160   
-336   -16    
-112   -80    
-928   240    
-416   416    
176    -320   
160    -96    
-64    256    
32     -320   
-336   -128   
32     -80    
-896   -368   
144    192    
-128   240    
32     -16    
208    -112   
-288   -64    
-64    -176   
-320   -80    
128    -208   
-32    192    
-208   -224   
368    176    
-128   112    
-336   32     
320    -256   
-208   192    
400    -64    
-368   48     
-64    -208   
-208   16     
32     0      
-16    160    
-608   -272   
240    -176   
-1216  544    
-208   192    
192    -128   
-80    -32    
64     128    
112    176    
-96    -64    
-256   -16    
-288   -592   
0      368    
128    384    
-400   -288   
64     16     
-48    -96    
-208   16     
-384   -48    
-240   -80    
0      -32    
96     176    
80     -96    
16     144    
-80    0      
-128   -96    
224    -144   
-96    96     
224    48     
-288   -32    
-16    64     
-208   96     
-64    48     
-48    -48    
176    112    
-432   16     
-16    80     
-96    -64    
32     16     
-32    0      
96     32     
64     48     
-96    0      
64     32     
-80    64     
-64    -48    
-352   -96    
48     80     
16     -64    
96     128    
-576   -144   
160    48     
-240   -128   
112    48     
-128   96     
80     48     
48     64     
-112   32     
96     32     
-272   -16    
32     48     
-48    32     
-48    16     
-384   -16    
112    80     
-528   -96    
64     48     
-48    -16    
128    48     
112    64     
128    80     
-192   48     
-32    96     
48     -16    
48     16     
112    96     
32     224    
-96    240    
-192   16     
48     -48    
32     -32    
288    64     
-320   -144   
192    -64    
192    96     
-80    128    
144    144    
256    32     
144    -32    
-368   -32    
32     48     
-208   32     
112    288    
-176   160    
336    96     
-48    64     
-16    80     
112    224    
-624   48     
-192   64     
32     32     
368    -80    
288    160    
-128   -80    
240    -64    
16     64     
-352   -416   
368    -496   
224    16     
208    208    
-64    -32    
208    48     
-352   -96    
320    48     
-176   128    
16     288    
-192   160    
-288   -96    
400    48     
320    80     
304    0      
32     -16    
160    80     
-304   -80    
160    80     
-160   -16    
720    512    
-176   416    
-64    -32    
96     -48    
208    0      
288    0      
-48    48     
464    464    
-368   224    
160    -48    
-112   -32    
272    32     
-256   -32    
112    16     
48     48     
224    112    
128    272    
-256   112    
160    0      
128    64     
-32    -192   
64     16     
-144   48     
112    48     
96     16     
-272   0      
272    96     
-224   -64    
96     -32    
-64    96     
-160   32     
128    16     
16     48     
16     0      
0      128    
128    80     
48     32     
80     -16    
0      0      
80     64     
-16    -32    
-96    -64    
-48    80     
-32    80     
160    32     
0      80     
144    -48    
64     0      
112    48     
-32    -32    
48     0      
-176   -48    
80     64     
-80    0      
144    64     
-80    64     
160    -32    
64     32     
80     -1200  
16     112    
352    352    
-80    112    
-64    80     
-32    176    
-48    -272   
-64    -272   
-80    -48    
288    528    
-128   -32    
48     -384   
288    96     
288    208    
-272   -464   
0      -688   
32     -544   
-16    592    
144    256    
128    -544   
304    688    
0      -64    
64     -208   
48     160    
112    -64    
-80    192    
256    -352   
-384   64     
464    -128   
-352   416    
176    -224   
-256   -208   
672    160    
-192   352    
-16    768    
416    -32    
-256   400    
304    -384   
-288   -368   
-32    144    
224    -208   
-80    368    
48     64     
16     640    
208    208    
272    -160   
-432   176    
192    -2480  
-112   0      
64     208    
560    288    
-192   48     
64     0      
16     16     
112    80     
160    80     
96     -64    
96     48     
64     -16    
48     128    
-32    0      
80     48     
0      -144   
128    128    
64     128    
288    0      
48     32     
-32    256    
112    80     
32     208    
48     112    
32     0      
272    128    
32     -128   
144    -32    
128    64     
-80    176    
448    176    
-256   240    
-96    -304   
-64    80     
64     80     
224    32     
96     -16    
208    48     
112    144    
160    -80    
16     112    
240    -160   
-32    32     
-80    -96    
208    112    
48     -112   
128    16     
32     -384   
80     48     
80     48     
80     32     
16     64     
96     128    
16     160    
32     -32    
64     64     
256    -112   
32     112    
64     -80    
16     64     
112    -224   
144    64     
-80    -736   
-48    0      
16     160    
144    80     
-16    -48    
256    -112   
0      112    
160    32     
0      128    
48     128    
128    48     
32     -176   
208    80     
144    144    
16     32     
96     -144   
112    48     
-240   144    
-80    -32    
16     80     
-288   -416   
144    -576   
112    -80    
-32    -608   
144    -48    
96     -496   
32     192    
144    160    
144    -128   
16     -400   
-144   16     
16     -48    
160    16     
304    -16    
64     16     
-528   32     
368    208    
-144   240    
96     -128   
48     -64    
128    -112   
0      128    
80     144    
16     -160   
32     -80    
64     -64    
272    -176   
112    64     
80     -464   
-160   -400   
-96    -80    
-352   -240   
16     -480   
112    -400   
-224   -112   
64     -288   
64     -64    
256    -384   
128    -48    
128    -224   
-80    224    
64     304    
-128   -48    
-80    -352   
-80    -368   
-528   96     
192    176    
-144   0      
80     -32    
0      96     
112    -240   
-48    192    
16     -1104  
-64    64     
64     0      
80     64     
240    -48    
-224   -320   
-32    112    
-32    48     
-528   -48    
176    96     
-1024  48     
144    80     
-48    -176   
-64    -288   
-176   -288   
64     32     
16     224    
96     -560   
-32    -16    
80     -128   
176    -80    
0      0      
160    80     
-32    64     
-96    96     
-560   48     
48     -96    
-320   -288   
-304   -976   
96     -304   
160    -176   
176    0      
160    -1024  
160    -64    
-32    0      
16     -48    
0      48     
-144   0      
-192   -144   
128    -32    
-768   -48    
112    -128   
-272   -80    
80     -224   
-16    -128   
-16    -256   
176    -48    
96     -224   
128    112    
32     112    
-16    -16    
96     -48    
112    -32    
-160   -16    
112    -128   
-128   32     
32     -32    
-224   144    
-32    -48    
240    64     
-80    -64    
160    32     
96     -192   
192    16     
-368   32     
-208   16     
-96    -16    
208    -32    
112    112    
144    -32    
-96    32     
96     -16    
-176   -48    
176    -64    
-32    64     
64     -48    
-16    48     
96     -48    
160    -96    
-32    32     
-112   -48    
-80    -32    
288    16     
-192   32     
96     16     
-176   32     
144    -96    
-800   -80    
48     -192   
96     64     
-304   -64    
-32    32     
-32    16     
-640   -32    
-432   -176   
-304   -160   
-16    0      
224    0      
64     0      
-64    32     
48     128    
-400   -48    
32     -16    
-224   -48    
96     0      
-320   -128   
112    112    
-80    16     
-464   -192   
144    -48    
80     224    
-272   32     
-656   -32    
144    -16    
-16    -32    
-464   64     
144    -96    
384    -64    
-336   -240   
48     -304   
-96    -224   
-224   128    
-48    48     
32     0      
-192   -208   
-112   -272   
-16    -32    
-592   32     
-208   0      
-112   -256   
160    -208   
208    352    
-352   224    
-384   -256   
160    -128   
0      -32    
-32    32     
240    16     
0      48     
384    -368   
-480   -432   
-160   128    
-272   256    
32     64     
224    336    
-720   160    
-160   -240   
-80    0      
64     -96    
272    336    
144    288    
-224   -16    
-304   -32    
-448   -144   
-64    -128   
144    48     
-288   80     
-80    -48    
-16    -80    
-528   -144   
544    160    
-1232  -32    
320    48     
240    48     
-64    192    
-496   -32    
128    -128   
192    -48    
16     -32    
208    96     
-48    80     
80     64     
-256   32     
16     0      
-1168  -288   
-176   48     
-800   80     
-80    16     
-16    -48    
-176   -208   
160    -64    
48     96     
-64    48     
272    80     
-128   -64    
-144   -16    
-176   48     
-320   48     
192    48     
-64    112    
272    192    
-272   16     
-80    -112   
96     32     
-288   48     
80     64     
112    16     
176    -16    
-32    0      
128    80     
-16    80     
-80    -208   
-112   -352   
48     352    
80     304    
-192   -208   
-544   -64    
-32    -32    
144    -192   
-160   272    
144    80     
64     -80    
0      144    
-16    64     
-64    -128   
48     -288   
-64    208    
64     320    
-128   80     
-288   176    
-32    -512   
48     192    
32     -608   
48     288    
96     448    
0      -336   
-64    384    
-176   0      
96     -144   
-16    400    
-16    -432   
368    -112   
-16    96     
240    288    
-48    -128   
320    -32    
-400   400    
224    0      
-176   96     
128    -32    
-64    112    
-32    192    
208    0      
144    -64    
112    -208   
0      -192   
144    -16    
-288   32     
112    112    
224    80     
-80    112    
192    -48    
-128   -128   
160    -272   
-352   -48    
16     64     
48     -16    
-16    -16    
-272   144    
48     -96    
-96    -96    
0      48     
-32    -32    
400    224    
-272   288    
128    -432   
-432   -624   
80     112    
16     0      
48     208    
304    192    
-32    128    
-64    64     
-64    -96    
80     -80    
0      32     
80     -16    
-48    16     
-80    304    
112    48     
224    48     
128    48     
-272   32     
128    96     
-112   192    
80     64     
16     0      
0      176    
-16    64     
16     -16    
32     80     
16     160    
16     16     
-176   -48    
400    -16    
-32    352    
336    208    
256    128    
-144   48     
-112   0      
-48    0      
80     32     
32     288    
-176   -112   
0      176    
-32    0      
320    -80    
-64    -176   
0      48     
-16    80     
-48    -112   
144    48     
48     64     
64     48     
224    112    
224    160    
16     96     
-16    96     
112    -16    
32     80     
-112   16     
16     -48    
80     16     
352    0      
-240   -16    
16     -832   
0      256    
192    16     
64     -64    
160    -48    
160    48     
-16    80     
-176   -128   
112    -64    
160    96     
-16    48     
224    80     
32     208    
-256   32     
0      32     
16     -688   
96     48     
32     208    
400    272    
-208   16     
-128   -48    
16     112    
48     112    
112    0      
80     528    
304    400    
-16    16     
-80    -160   
128    -288   
112    -32    
192    -384   
208    352    
112    432    
-224   -192   
192    -80    
-208   -160   
-160   -160   
64     96     
256    128    
-64    -128   
-80    128    
48     0      
192    -240   
208    528    
-48    272    
-80    -112   
-32    0      
32     -496   
-320   128    
112    -400   
-32    64     
352    48     
-128   80     
176    -96    
304    -80    
176    144    
0      48     
-240   -272   
16     16     
256    368    
-224   -368   
240    -16    
-96    -416   
144    -112   
-48    -544   
272    96     
-96    -48    
32     32     
96     -48    
96     16     
32     -16    
128    -160   
160    -48    
96     16     
240    64     
48     -256   
64     64     
-16    -16    
128    64     
32     -256   
112    32     
128    144    
-80    32     
96     0      
96     64     
176    64     
112    -432   
96     96     
96     64     
0      48     
144    -32    
32     16     
-96    -32    
288    176    
64     112    
288    32     
-144   -96    
224    0      
-64    112    
96     -160   
-96    -112   
-80    -112   
160    -64    
288    48     
32     96     
192    -176   
80     80     
-160   -144   
192    160    
144    -208   
48     -352   
128    144    
176    -288   
-80    -64    
32     -48    
-64    -496   
0      -256   
112    -256   
-48    16     
16     16     
176    -128   
48     48     
64     -208   
80     -208   
-32    48     
96     -112   
64     16     
96     -144   
160    -48    
-688   0      
240    -240   
64     80     
16     -96    
128    -48    
-48    -448   
192    -32    
64     32     
64     -128   
224    -160   
160    112    
48     16     
48     0      
-288   -64    
176    -48    
-608   -48    
0      64     
128    -48    
48     -16    
0      -112   
96     -304   
32     32     
288    32     
-144   -48    
96     -176   
144    80     
192    64     
-96    -80    
64     -16    
64     48     
-608   -16    
240    -32    
96     48     
96     -16    
0      -16    
64     0      
-96    0      
96     -384   
96     16     
80     -384   
224    48     
160    112    
80     -112   
48     128    
16     -96    
-96    -32    
144    -128   
-800   48     
176    -64    
32     -144   
128    -16    
-464   128    
-32    -464   
-128   0      
48     128    
80     112    
160    32     
32     -112   
-80    -96    
208    -16    
-96    32     
256    112    
-144   0      
-128   -400   
-144   -128   
176    0      
-128   -64    
16     -192   
32     -272   
48     -1856  
-144   192    
-208   0      
304    -48    
-400   -96    
80     -32    
0      -32    
96     64     
-320   -16    
-192   -192   
-2864  -48    
64     48     
-48    80     
-320   -448   
624    -1296  
576    -416   
672    672    
-112   -352   
96     144    
64     512    
-400   256    
-512   -128   
144    -96    
-176   480    
128    -624   
224    288    
16     -128   
80     -128   
272    -240   
352    32     
208    -96    
-64    -320   
-208   -112   
-288   -192   
0      544    
496    48     
176    -80    
320    112    
96     176    
-192   16     
-416   -272   
384    -224   
208    32     
480    0      
208    96     
64     -208   
496    352    
-464   864    
64     -480   
-32    272    
-48    112    
-96    -64    
-16    64     
48     -496   
224    96     
-224   64     
-1056  -160   
48     32     
-1440  112    
-80    -160   
112    80     
-1072  0      
-48    64     
-448   -64    
144    96     
112    496    
-16    -64    
160    -128   
32     720    
-1328  -416   
32     -208   
-400   96     
208    -144   
-192   48     
0      -160   
32     -448   
-112   368    
-16    240    
-288   -272   
48     -32    
-992   160    
-128   224    
128    256    
-272   592    
-320   -448   
80     -256   
16     -16    
0      32     
-224   -208   
-48    -288   
-32    -80    
80     304    
-112   -400   
-416   0      
32     -544   
-272   -128   
16     -96    
-1056  -256   
-16    160    
-96    -80    
240    176    
-144   128    
112    160    
-144   -144   
-112   -128   
16     48     
64     -48    
176    96     
-320   -32    
48     -224   
-304   -400   
48     -112   
-832   224    
192    192    
80     -64    
-80    48     
-48    112    
96     144    
16     -240   
128    -16    
256    48     
64     112    
-208   128    
208    240    
-368   208    
-32    -96    
-48    -128   
-400   96     
208    272    
-64    16     
128    128    
64     -160   
-48    64     
96     16     
272    240    
-240   64     
48     -144   
-32    -128   
-336   0      
240    -288   
-48    16     
128    48     
-480   144    
-272   288    
-1040  -96    
336    128    
-96    112    
-96    192    
-112   -112   
0      240    
112    64     
160    -176   
48     -96    
-240   112    
-96    64     
-128   64     
16     128    
-224   176    
336    384    
-1152  128    
-32    160    
-208   -48    
64     -80    
96     32     
-112   48     
16     -32    
192    112    
-192   112    
-208   -48    
176    80     
-464   192    
80     96     
80     -80    
96     80     
-560   0      
48     64     
96     -32    
-224   -192   
80     -112   
144    208    
-112   128    
-64    0      
112    -320   
160    32     
-112   96     
-176   16     
64     -32    
-128   -80    
96     -48    
-256   -192   
64     16     
160    192    
-96    128    
-48    48     
64     32     
144    96     
-112   32     
-80    32     
224    -112   
-48    -176   
-304   32     
64     176    
-272   0      
96     80     
48     0      
144    64     
64     64     
-16    80     
112    -16    
48     -48    
16     -16    
-128   -128   
-144   48     
208    -208   
32     -128   
0      -64    
64     192    
-144   144    
-64    -272   
208    272    
-80    -176   
-208   -144   
0      288    
80     336    
-160   -32    
176    -144   
480    400    
-128   16     
112    -128   
80     -16    
192    32     
176    16     
368    304    
-384   -16    
-272   -80    
112    96     
144    48     
272    16     
272    112    
688    432    
-288   512    
16     272    
32     176    
-48    272    
416    48     
160    16     
176    144    
-176   176    
-336   0      
-64    -128   
-128   0      
112    80     
304    80     
176    48     
-16    16     
-144   96     
-112   16     
240    -16    
-96    -16    
96     48     
-32    -16    
80     80     
224    240    
-416   -16    
256    32     
160    112    
0      80     
224    64     
16     16     
-32    -224   
-48    -32    
-96    128    
16     16     
128    112    
112    80     
16     -32    
144    -128   
-32    16     
208    48     
16     48     
80     96     
80     32     
32     96     
-112   -16    
-32    80     
-32    48     
112    48     
0      128    
80     -48    
32     64     
-144   -16    
16     -208   
112    -32    
-16    -816   
-80    160    
-16    64     
64     80     
16     48     
128    48     
-144   16     
224    80     
-48    112    
96     -16    
0      48     
64     128    
96     48     
112    -144   
272    352    
-240   -368   
304    -64    
48     48     
32     -32    
288    0      
144    192    
-48    224    
-48    0      
16     -208   
208    32     
16     240    
-976   -32    
288    0      
80     16     
-112   32     
240    -384   
64     16     
224    32     
-80    48     
240    0      
0      0      
-144   -32    
240    16     
-32    48     
112    -16    
32     80     
80     32     
144    80     
-192   -64    
160    16     
-64    -176   
80     240    
96     -160   
192    64     
-192   -448   
-16    16     
224    32     
-144   48     
144    16     
96     112    
-144   0      
480    -32    
-192   0      
32     -208   
256    160    
32     -96    
176    32     
144    -64    
-176   -48    
176    -32    
-128   -48    
128    48     
-48    80     
160    32     
64     128    
160    96     
80     -48    
48     96     
48     -112   
224    -192   
-208   -400   
0      32     
-80    16     
192    -32    
128    16     
-32    192    
144    80     
32     -16    
-64    16     
-96    -448   
256    0      
16     -224   
272    96     
-112   256    
0      -400   
16     128    
32     48     
208    -160   
48     -64    
176    64     
-16    -112   
-16    112    
48     -80    
208    -16    
48     112    
-48    128    
16     -96    
192    96     
96     -192   
240    112    
224    -16    
192    -48    
96     64     
-176   -784   
-144   -352   
-208   -640   
-48    80     
128    -416   
304    -160   
-32    48     
96     -272   
400    -240   
288    -704   
192    -64    
-128   -16    
-64    416    
-272   352    
0      -176   
64     -48    
-160   48     
32     -752   
96     512    
-544   32     
96     -496   
-144   112    
64     -144   
400    -80    
192    -16    
-16    -224   
176    -928   
240    32     
192    128    
80     -48    
-224   -864   
96     -624   
224    864    
112    640    
-144   -368   
-16    80     
-1920  -112   
16     -144   
-16    128    
-240   -528   
0      0      
208    -80    
-80    -304   
320    -336   
48     16     
512    -128   
80     64     
304    -96    
-128   -208   
-16    272    
144    96     
-528   96     
48     16     
-32    48     
256    -160   
16     16     
224    -32    
16     0      
128    -16    
32     160    
320    208    
-128   128    
-16    64     
48     -32    
-48    176    
176    64     
-256   -256   
96     -96    
128    -48    
64     -256   
32     -96    
-16    -80    
-16    16     
-16    -720   
64     -32    
176    0      
80     80     
0      -80    
-176   -400   
128    32     
112    176    
-480   -96    
0      -160   
-1360  -272   
160    -32    
128    496    
304    16     
-64    -160   
272    -240   
160    688    
400    432    
-320   0      
-144   64     
288    -128   
-352   400    
384    48     
-96    -224   
-96    -160   
-176   -192   
-240   -192   
-640   -16    
192    240    
-176   64     
80     -96    
112    -240   
224    -544   
48     96     
32     -32    
208    -176   
-368   224    
336    96     
-32    -48    
176    -224   
-608   -160   
64     -16    
-624   48     
128    -16    
-16    64     
80     -112   
-80    64     
176    -576   
176    0      
-480   16     
304    -64    
-320   -96    
32     128    
224    160    
-16    48     
16     -272   
16     -16    
288    176    
-208   64     
224    32     
-176   -144   
208    -64    
-80    288    
64     -16    
32     -304   
-128   -16    
-32    688    
336    496    
112    128    
64     -64    
112    32     
-368   160    
544    400    
-1232  176    
64     -144   
-400   -336   
-1392  -32    
32     -16    
-528   64     
16     32     
-912   272    
-256   192    
-16    208    
64     208    
208    -64    
-128   -224   
-768   -176   
336    256    
-944   80     
-64    80     
-704   -128   
256    48     
320    -64    
-112   64     
-144   -96    
-320   -32    
-32    128    
-192   80     
96     -48    
48     16     
320    16     
-368   0      
32     -112   
-320   -224   
224    0      
-304   -80    
128    32     
-160   144    
-208   -16    
-128   16     
-80    -160   
-64    32     
-416   -176   
-32    -144   
-320   -64    
-176   -48    
-128   256    
128    160    
-16    144    
16     -80    
80     -80    
-112   192    
-64    -80    
-128   112    
-80    -112   
-208   48     
96     528    
0      -16    
-240   -96    
-2112  -192   
32     144    
-144   -144   
112    64     
32     -160   
224    240    
208    160    
-32    96     
128    32     
-160   96     
-304   -32    
-96    48     
-64    -176   
-112   -16    
64     -64    
112    -160   
320    16     
416    32     
176    0      
0      -96    
-16    0      
-464   -160   
-48    16     
-64    112    
-16    48     
-64    64     
-48    -16    
-368   -288   
-176   -112   
-32    224    
-672   -32    
272    32     
-336   16     
-144   -64    
400    48     
-320   144    
-208   -272   
704    -176   
80     208    
-256   48     
-32    -16    
-160   -144   
48     -32    
-128   -32    
144    192    
-688   -80    
368    96     
-560   -32    
-16    -48    
80     -32    
224    -48    
160    32     
16     -32    
-112   64     
-208   96     
128    80     
-128   -64    
-224   -32    
160    48     
-64    128    
-368   -48    
64     64     
-160   32     
96     16     
80     32     
128    64     
-64    16     
32     48     
48     -16    
-32    48     
0      64     
-48    0      
-32    0      
-176   16     
32     0      
-224   -80    
192    80     
48     96     
64     80     
128    112    
-432   -80    
32     -32    
-64    48     
-16    96     
112    80     
96     32     
16     224    
160    -80    
-192   -128   
96     96     
0      80     
-160   32     
80     16     
-48    32     
112    64     
-80    0      
80     16     
48     -144   
144    48     
-112   144    
176    -32    
-256   48     
128    80     
-80    -144   
192    -112   
-48    -16    
-160   -32    
64     48     
-256   32     
128    144    
-128   -48    
224    -176   
48     48     
160    64     
-144   48     
96     32     
-224   -64    
128    32     
-112   -16    
112    64     
192    80     
-256   80     
96     -16    
176    80     
80     64     
-48    32     
-16    0      
112    -16    
-48    32     
16     96     
80     32     
-32    32     
128    160    
-192   16     
64     -64    
16     144    
16     64     
144    48     
144    160    
-32    64     
-80    48     
112    64     
32     64     
160    -32    
128    48     
192    96     
48     -80    
-144   -208   
-16    -144   
-48    -384   
144    -64    
144    96     
256    224    
112    -16    
-96    16     
-224   -16    
336    0      
80     112    
144    128    
80     -16    
16     64     
-240   32     
208    192    
0      -96    
-16    -96    
-288   -80    
256    -160   
64     16     
16     64     
16     -32    
32     -16    
176    336    
-112   -144   
400    256    
-48    816    
32     -512   
32     48     
304    160    
-80    336    
-128   -640   
16     48     
80     272    
64     -128   
-144   160    
-48    -176   
96     -48    
96     80     
32     64     
144    304    
0      -128   
80     0      
272    32     
208    352    
-176   112    
48     -160   
48     32     
112    272    
-96    -384   
64     -256   
32     16     
112    -16    
144    224    
-96    -80    
80     32     
112    32     
528    256    
-176   0      
-304   -416   
64     -48    
-16    -288   
48     -192   
192    -208   
112    64     
-32    64     
112    -288   
208    -272   
288    32     
224    96     
-64    112    
-96    -48    
16     -176   
-192   -64    
-128   -16    
144    -16    
176    -96    
256    -32    
272    -304   
64     80     
-32    -112   
32     32     
-16    -64    
128    96     
-176   80     
256    16     
16     0      
208    240    
-80    128    
128    192    
64     16     
112    -16    
320    112    
-144   -112   
224    -96    
-160   -48    
-96    -208   
160    -160   
256    32     
48     48     
240    224    
-224   32     
144    208    
48     288    
0      -32    
160    -80    
96     160    
16     16     
32     -160   
80     -64    
112    -64    
48     224    
-208   352    
96     224    
0      16     
0      32     
96     -144   
-48    -224   
144    48     
320    0      
-64    208    
80     64     
32     16     
96     -32    
176    176    
384    -1024  
-128   240    
0      -192   
0      16     
-80    -112   
-80    96     
160    0      
64     -128   
352    112    
-192   -16    
192    176    
96     -160   
352    288    
240    -96    
176    32     
128    -336   
-48    -368   
-240   80     
240    -512   
0      144    
352    -128   
272    0      
-176   320    
144    -336   
240    -192   
-32    -560   
288    48     
-192   144    
-128   -96    
-256   176    
352    144    
192    -144   
160    -16    
128    -240   
-432   48     
-256   48     
176    192    
-160   512    
416    256    
80     -160   
480    -192   
160    -208   
-32    48     
16     -176   
96     96     
80     -16    
160    16     
-128   -160   
352    -272   
-48    -32    
80     -16    
96     -112   
-144   -144   
32     -304   
320    -400   
112    -336   
272    -160   
16     -304   
-224   352    
560    496    
112    352    
-64    -208   
-96    160    
416    304    
336    272    
-304   112    
112    -256   
-640   -96    
544    64     
-208   592    
144    -16    
320    224    
128    320    
-144   272    
80     -544   
-160   112    
384    336    
-96    432    
-48    240    
96     -16    
-64    -64    
-128   -160   
-128   80     
272    -32    
-192   -400   
256    48     
-112   112    
48     -128   
384    192    
208    -128   
-48    48     
-80    -48    
48     560    
16     -64    
-48    -272   
-96    144    
32     -112   
-16    192    
400    720    
-1120  -208   
96     48     
-80    -416   
-256   -160   
16     -112   
96     224    
112    -64    
400    64     
64     -64    
-112   -128   
96     176    
-368   16     
96     96     
-400   -96    
208    -96    
-736   -16    
272    -16    
144    -80    
224    -272   
-176   48     
-128   -176   
-80    0      
48     -32    
-128   16     
128    48     
224    -32    
-224   -32    
96     -80    
48     144    
-112   32     
-368   320    
224    144    
368    -144   
-640   -720   
-112   -560   
-64    -80    
-416   224    
-512   80     
96     112    
-224   64     
112    48     
-48    -80    
384    16     
176    16     
240    -48    
416    128    
-64    -64    
144    32     
32     -112   
-80    -16    
256    -160   
32     128    
-288   0      
-480   -144   
224    0      
32     48     
-624   -16    
-272   -16    
-320   -80    
208    -96    
320    -32    
544    -192   
160    -48    
448    -80    
-16    64     
-608   -96    
-432   32     
-224   -64    
-736   16     
-448   16     
-752   -16    
-128   -16    
256    64     
64     -64    
176    -64    
256    -48    
-1776  -80    
-176   32     
-144   0      
-32    80     
128    96     
-48    16     
176    128    
-176   -16    
288    48     
-48    32     
-16    16     
-2304  -48    
-48    16     
160    -112   
-16    80     
80     -32    
16     -16    
240    32     
-80    16     
-32    32     
-96    16     
-32    32     
-16    48     
-96    16     
-480   -80    
-176   -16    
-1456  64     
-288   -48    
0      0      
224    176    
-144   -80    
160    16     
-144   -64    
-32    0      
80     96     
-128   48     
272    144    
-320   -176   
192    -112   
-160   128    
112    -192   
-80    16     
-224   48     
-384   -160   
224    144    
-368   -32    
304    64     
-112   -128   
80     64     
-128   80     
80     -64    
-48    48     
-416   -256   
64     -288   
-128   48     
-48    -16    
64     -64    
96     64     
-544   32     
160    112    
-80    -96    
80     -64    
96     -16    
-32    -208   
-80    -16    
48     96     
-96    64     
32     160    
-112   64     
-176   80     
160    -176   
-464   -208   
128    128    
-656   -144   
80     48     
16     -32    
48     240    
112    -144   
-48    48     
32     48     
-48    32     
64     -16    
32     80     
64     288    
0      -112   
-288   -80    
-80    16     
96     -112   
-64    -64    
-80    128    
-224   -48    
-32    96     
416    272    
-512   608    
48     -16    
-80    -192   
208    112    
240    32     
-96    176    
-448   -176   
224    -160   
0      128    
-48    432    
144    32     
32     -48    
-192   -752   
-112   -32    
128    16     
-128   224    
-16    288    
32     0      
0      160    
64     272    
32     240    
128    -32    
80     128    
0      -16    
144    16     
-256   -112   
112    32     
-112   0      
192    16     
208    -160   
-80    -48    
-80    48     
-96    128    
64     176    
0      176    
160    144    
-96    -144   
48     176    
-240   -96    
-16    48     
-304   -224   
272    64     
-32    240    
-32    0      
144    -16    
160    80     
-192   64     
-112   -48    
64     112    
160    -48    
224    64     
-144   0      
112    48     
-272   -112   
144    48     
-32    48     
-48    64     
-16    -64    
16     -176   
96     -16    
-96    64     
-48    -64    
192    32     
64     208    
-256   -48    
192    0      
-240   -32    
48     48     
304    288    
-384   176    
128    64     
160    -64    
352    -32    
64     64     
-144   64     
80     -112   
256    32     
112    48     
-16    128    
-48    -32    
16     -80    
16     -64    
64     64     
48     304    
-16    48     
160    32     
160    -48    
48     96     
-16    -144   
64     64     
-288   80     
96     272    
16     176    
64     -80    
0      -16    
64     -32    
-112   96     
48     0      
32     64     
-128   -80    
176    128    
-32    256    
112    288    
96     160    
64     -64    
112    192    
96     208    
-80    0      
112    32     
-96    0      
16     -16    
-112   160    
176    -16    
-160   -16    
-16    -576   
112    32     
224    240    
-80    96     
48     0      
176    -96    
16     32     
48     128    
16     112    
0      32     
-16    -16    
176    16     
-48    192    
240    352    
-64    48     
-112   -288   
272    -416   
-48    32     
176    -144   
128    -96    
80     112    
112    -48    
-32    80     
32     304    
-64    -544   
-416   -624   
96     144    
-192   704    
320    640    
80     48     
-80    -224   
112    -160   
144    -240   
80     -128   
256    -416   
-160   -384   
-288   -240   
-192   -640   
0      -432   
416    1344   
-512   -240   
-112   144    
-176   -112   
160    -496   
416    -32    
-16    -480   
256    768    
80     -752   
224    32     
128    32     
64     80     
-96    112    
240    80     
-464   -752   
320    256    
-336   288    
16     -144   
112    400    
192    0      
-128   32     
-16    -432   
96     96     
384    288    
-176   272    
176    160    
-144   -288   
112    -96    
352    672    
-112   -176   
-176   -128   
320    208    
-176   -272   
32     0      
64     208    
96     0      
160    112    
-80    0      
16     -320   
176    128    
-48    -224   
176    -48    
96     0      
112    32     
96     256    
-304   464    
176    -160   
-304   -192   
96     32     
128    -272   
80     48     
112    256    
32     0      
144    -16    
-160   -96    
144    -128   
-16    96     
96     48     
160    64     
48     -16    
48     -16    
16     16     
144    -16    
16     80     
176    -80    
-64    32     
-128   96     
96     112    
160    -96    
160    -112   
-16    -16    
80     48     
-16    -112   
80     -16    
-32    80     
16     -384   
-160   -64    
80     160    
144    -80    
-80    -144   
160    32     
176    -48    
112    160    
112    -64    
16     64     
-48    -64    
-240   32     
16     -64    
32     -800   
-96    64     
-320   0      
208    -96    
144    -160   
48     -736   
-48    -96    
-32    64     
240    0      
64     80     
-176   -336   
64     -272   
224    64     
416    -224   
0      16     
528    -128   
-112   112    
-1296  0      
192    -416   
-16    -32    
-384   -880   
752    -400   
144    0      
304    64     
432    -32    
80     -112   
688    -272   
96     -96    
448    352    
112    112    
-48    -224   
-240   -128   
-336   -160   
320    -16    
32     -96    
544    -48    
416    -64    
208    -400   
240    -112   
64     -608   
400    96     
-416   -32    
-672   -176   
320    -64    
-48    96     
32     -128   
160    -64    
256    208    
-304   160    
-1696  -176   
80     -192   
-96    64     
208    -64    
288    -80    
160    144    
-80    96     
160    32     
-224   -272   
384    -192   
192    112    
16     32     
80     16     
-240   0      
-112   -32    
-1504  0      
256    -16    
208    32     
112    -32    
-160   -32    
64     -48    
-240   -48    
240    -624   
-96    32     
0      16     
80     -176   
-32    16     
48     16     
-304   -48    
64     -64    
-1216  -80    
80     -64    
-864   80     
32     -32    
-80    -16    
32     -256   
-80    48     
64     -720   
128    48     
80     -80    
32     -224   
0      -288   
128    0      
-16    16     
128    32     
-160   -32    
-32    0      
-144   -96    
-192   -128   
160    32     
-16    -64    
192    80     
-80    -320   
-64    -64    
144    160    
32     -144   
160    -16    
384    128    
-112   96     
160    64     
-16    32     
144    -224   
-304   32     
144    16     
48     32     
16     0      
-80    16     
144    -240   
0      -16    
-240   -80    
0      -96    
-384   48     
176    224    
144    224    
-192   -288   
208    400    
-352   -144   
-1616  -512   
160    -48    
96     32     
304    64     
-96    -112   
-16    -336   
-96    368    
-176   416    
400    -784   
304    384    
-336   320    
-80    -160   
80     160    
-112   -800   
208    592    
-192   -304   
-64    -32    
144    336    
-1072  -144   
160    -112   
-1120  -480   
-384   -160   
144    64     
-784   -112   
416    -496   
-1904  320    
224    448    
112    176    
0      16     
32     -48    
80     80     
-432   -272   
80     -176   
-176   -176   
0      -96    
48     -96    
64     80     
-112   -128   
-560   -272   
32     -64    
-976   -32    
-48    96     
288    96     
-128   48     
48     -80    
32     64     
-192   -64    
0      -48    
64     -192   
-48    48     
80     -48    
-192   16     
48     96     
-272   -144   
-80    -48    
-48    48     
-112   32     
-624   48     
-112   96     
-16    -64    
64     96     
-64    -48    
48     80     
-64    64     
0      48     
0      -32    
-16    0      
0      48     
-176   16     
-112   32     
-128   112    
304    -160   
-240   -96    
80     272    
-144   -80    
128    -32    
192    -64    
32     176    
-336   -80    
176    -112   
-160   48     
128    80     
144    32     
-144   -112   
176    -368   
-80    16     
-16    128    
-752   -112   
64     0      
-1104  -176   
80     96     
16     112    
-96    272    
96     -64    
320    -64    
0      128    
256    16     
0      0      
-144   -64    
48     -144   
-176   32     
-480   176    
-272   304    
96     480    
-336   0      
688    64     
-448   16     
-112   -48    
96     48     
-96    112    
368    96     
-48    -48    
16     -16    
-128   -64    
-64    16     
-336   -32    
-64    80     
-112   272    
80     160    
-192   80     
160    16     
-96    -400   
-352   -352   
-176   48     
-624   48     
0      32     
48     -16    
-48    128    
64     16     
48     -48    
16     -176   
-64    96     
-416   96     
-16    400    
-352   352    
16     80     
-32    32     
32     -112   
96     32     
-48    -224   
0      -224   
64     80     
-96    0      
-64    -96    
0      -80    
-112   16     
128    64     
-32    272    
-64    16     
-160   128    
32     64     
-32    -80    
-80    32     
-16    -192   
352    448    
-240   192    
112    -64    
224    -416   
-176   128    
64     64     
-416   -304   
288    416    
-320   -112   
160    480    
-64    -608   
-240   512    
0      -240   
16     160    
-64    0      
96     240    
-32    240    
-144   -80    
-64    304    
-128   -496   
32     432    
176    -112   
208    160    
48     -272   
-48    -32    
144    208    
-64    -112   
-32    208    
-112   -96    
96     304    
-32    -816   
-224   16     
128    656    
-80    32     
224    -304   
624    528    
-400   48     
192    -192   
-160   208    
32     64     
0      0      
-112   112    
0      240    
512    384    
-496   -160   
112    -400   
64     -64    
96     64     
160    272    
32     160    
-48    -16    
-128   64     
256    288    
-304   144    
112    -48    
48     160    
-64    112    
96     -32    
0      0      
-16    32     
-96    32     
80     48     
128    64     
-192   0      
-112   128    
144    48     
-48    -16    
16     64     
0      16     
112    -48    
0      112    
80     96     
112    64     
48     32     
48     0      
304    320    
-160   144    
0      -32    
448    240    
-384   -96    
160    32     
32     96     
96     16     
-112   48     
192    64     
-128   48     
80     16     
-144   48     
192    48     
48     64     
16     -16    
128    112    
32     48     
-16    32     
-48    0      
80     80     
48     0      
32     -128   
32     16     
112    -128   
32     -48    
160    16     
-48    -80    
128    64     
-128   48     
-64    176    
64     80     
192    32     
112    -16    
-128   64     
112    32     
-32    -96    
64     -32    
64     16     
-64    208    
240    256    
-16    80     
-64    -32    
-64    -80    
192    -144   
128    -64    
-80    80     
144    48     
192    48     
224    96     
0      80     
224    80     
112    -144   
-192   -256   
96     176    
-224   112    
-48    -464   
224    0      
368    224    
-80    128    
80     -48    
48     -64    
304    64     
96     80     
-224   832    
112    272    
528    -272   
-352   -208   
-48    32     
384    -272   
-400   208    
-208   -64    
128    -16    
384    16     
352    144    
272    -80    
528    16     
80     112    
-80    80     
16     48     
80     0      
-64    80     
64     -160   
352    80     
32     -80    
-176   -32    
-48    -16    
320    64     
144    64     
-64    -64    
128    -32    
-336   64     
160    112    
112    32     
-96    48     
-64    -80    
288    64     
96     -272   
0      0      
16     -160   
0      96     
-256   -80    
-352   0      
176    -48    
144    64     
-144   -32    
256    48     
144    48     
-64    -80    
336    64     
160    -16    
-176   -96    
208    -112   
304    80     
48     -176   
32     0      
-160   -160   
288    32     
96     -672   
192    96     
48     -16    
64     32     
64     80     
128    -160   
80     32     
32     -16    
48     -16    
48     -32    
48     16     
80     -96    
128    32     
16     -96    
176    16     
240    160    
-64    -944   
96     -32    
32     64     
32     96     
48     128    
-128   -352   
320    32     
-16    -304   
128    -48    
208    -80    
208    304    
-64    -80    
64     640    
192    -208   
-96    -80    
-96    -144   
-144   -528   
384    128    
-32    880    
-48    -224   
-80    -128   
-48    240    
160    -176   
192    -384   
80     -576   
464    -128   
-256   128    
64     -64    
32     -224   
112    464    
-160   -656   
-96    416    
256    288    
-176   352    
-464   -192   
256    -128   
-96    544    
192    -352   
112    224    
-176   -176   
368    -480   
16     -128   
224    -240   
128    240    
32     304    
0      0      
48     320    
-96    -80    
-64    -208   
-624   -128   
112    -144   
16     96     
32     -80    
-32    -160   
416    -608   
-208   -32    
144    -864   
336    80     
-208   64     
-32    224    
64     -64    
128    64     
-128   -16    
64     -48    
-128   -32    
224    -96    
-1008  -16    
-32    0      
288    -80    
48     -320   
-144   -48    
0      -816   
48     -32    
80     -80    
-208   -288   
320    -240   
128    16     
-144   -48    
64     96     
-64    -32    
80     -16    
-880   0      
160    64     
80     -32    
208    32     
48     64     
256    -144   
-80    0      
240    -976   
48     0      
-16    -16    
96     0      
128    64     
48     96     
-192   -16    
144    -48    
-448   64     
-32    128    
-320   -16    
16     -16    
-16    96     
192    -112   
128    16     
80     -528   
-16    224    
80     16     
144    0      
192    192    
-32    0      
-128   -112   
16     -128   
-64    0      
128    64     
-272   -32    
272    -160   
-16    48     
80     -192   
-48    -48    
336    -112   
0      0      
-208   -48    
112    -160   
-224   -192   
176    -48    
-176   80     
-16    -32    
-112   384    
-80    240    
-304   -256   
160    -176   
-32    96     
0      -96    
224    -128   
272    -64    
0      256    
320    736    
-144   -32    
-64    -352   
96     -432   
304    -96    
400    16     
208    16     
368    176    
-96    336    
-208   64     
-272   16     
-272   -256   
-48    16     
-32    48     
-1184  32     
-352   -80    
-272   48     
-112   112    
304    288    
-48    368    
-48    -32    
128    -224   
-944   -208   
224    -16    
-544   -32    
128    368    
-608   -16    
80     -112   
-32    0      
16     64     
-144   144    
272    -64    
400    176    
-288   160    
-144   -128   
-32    -160   
-160   32     
-80    -48    
112    32     
32     256    
-96    -224   
-64    96     
-304   224    
-32    32     
-16    -32    
-144   80     
-320   -32    
16     -320   
-64    -64    
96     112    
-1248  80     
32     80     
-64    -240   
128    -64    
176    240    
96     256    
32     -32    
-208   32     
0      64     
-64    128    
-192   -112   
-16    -80    
-176   -96    
-208   64     
-64    144    
-336   -64    
-240   16     
-80    -176   
176    128    
-368   0      
192    96     
-64    96     
208    128    
-144   -192   
-48    0      
-112   16     
-224   -32    
-208   -32    
-80    32     
32     -32    
-112   -16    
96     112    
-256   0      
128    48     
-16    -32    
-96    -16    
32     -48    
64     -64    
-64    80     
16     0      
-80    48     
-32    32     
80     48     
-272   -144   
112    32     
-528   0      
-112   -64    
-912   -208   
16     16     
-176   -496   
64     -192   
48     224    
-288   240    
80     -32    
160    -16    
-48    -32    
-144   64     
32     -64    
-368   -16    
0      32     
-112   -16    
112    32     
-736   16     
128    32     
32     0      
64     64     
32     -16    
96     128    
-160   -16    
0      16     
-64    32     
32     80     
-80    -32    
64     0      
-32    64     
-144   32     
208    112    
-64    -48    
32     -128   
336    0      
-304   160    
304    32     
32     48     
32     32     
-192   32     
-144   0      
144    -32    
192    -160   
-192   -176   
128    64     
-272   48     
48     -64    
-304   -96    
160    224    
-80    16     
-256   0      
16     16     
-48    -112   
144    -80    
-80    80     
128    64     
176    128    
-144   -16    
-336   -144   
176    96     
-384   -48    
-48    64     
224    96     
352    80     
-352   -32    
96     32     
16     -16    
16     80     
-48    128    
-48    64     
-16    -64    
-144   -112   
208    32     
-288   -144   
64     192    
0      144    
144    -64    
256    176    
-48    208    
128    96     
-208   16     
208    -48    
-272   48     
160    176    
160    32     
-208   -80    
-240   -176   
192    -208   
96     16     
288    192    
-48    -128   
176    -16    
-64    32     
0      80     
448    160    
-384   16     
-32    48     
320    48     
-608   -368   
-384   16     
-400   304    
-96    16     
608    528    
-336   352    
-64    -64    
32     -16    
400    128    
416    0      
176    80     
-240   272    
-304   80     
-176   80     
-144   64     
-16    -48    
0      96     
48     128    
144    -80    
144    -16    
-160   -16    
448    96     
320    176    
224    112    
128    96     
-48    192    
720    464    
-416   176    
-192   -352   
48     -288   
160    160    
208    192    
176    112    
0      0      
144    96     
-208   -368   
-176   -144   
128    112    
-160   -256   
144    -256   
80     128    
-64    416    
144    352    
48     112    
-336   -128   
224    128    
-240   208    
400    -32    
96     -288   
272    16     
128    -96    
-176   -352   
416    -432   
-96    816    
-64    -16    
64     -112   
0      80     
80     -64    
64     288    
-96    -112   
192    128    
-80    64     
64     -64    
96     64     
224    160    
-48    -80    
64     -192   
-16    160    
-176   -1184  
160    432    
32     32     
208    -160   
-32    160    
-96    -64    
-128   -192   
432    288    
96     -48    
192    -48    
-32    368    
224    -16    
48     704    
448    -480   
-48    -48    
48     -64    
-208   -160   
-64    208    
-176   112    
-496   -208   
112    -304   
-64    -112   
192    96     
96     -96    
-16    32     
208    -96    
-80    -128   
32     -112   
-32    -96    
48     -192   
-192   -464   
160    -256   
16     -528   
-144   -112   
112    -272   
-144   304    
400    240    
304    208    
-64    -64    
64     -32    
32     -208   
32     64     
-16    32     
176    16     
16     -288   
-80    -96    
-32    96     
288    -32    
128    -96    
48     -144   
112    112    
-64    144    
80     128    
-80    -96    
208    64     
160    240    
-224   64     
240    -112   
-48    -144   
96     0      
-64    -16    
64     80     
48     -160   
128    -128   
16     -272   
16     112    
80     80     
-144   256    
16     -112   
48     -320   
112    -144   
-32    64     
-96    240    
144    -64    
160    208    
112    32     
176    224    
112    144    
256    64     
464    48     
32     48     
-96    32     
48     48     
176    16     
96     128    
-96    -32    
80     -64    
128    64     
176    32     
32     80     
80     0      
64     64     
0      -80    
64     32     
160    0      
64     -736   
-16    -16    
0      32     
176    -256   
-64    -272   
80     -272   
96     -16    
-32    -464   
144    -96    
144    -48    
96     -96    
-112   48     
304    -144   
48     -304   
-32    -32    
256    0      
80     48     
64     -368   
80     -192   
80     -48    
0      -96    
272    32     
16     48     
0      -80    
80     -208   
48     80     
160    -448   
240    32     
48     -16    
-64    -160   
128    -192   
80     64     
-256   16     
240    80     
-1008  144    
128    80     
192    544    
352    240    
80     -80    
96     -464   
32     -64    
-96    -192   
160    -224   
-16    96     
-352   -16    
240    80     
112    -448   
32     -240   
80     -80    
-352   16     
256    448    
128    224    
-544   -448   
96     -160   
272    -256   
560    240    
48     -1264  
-560   -112   
64     -48    
-112   -496   
32     -160   
-352   32     
0      96     
368    64     
256    -16    
192    16     
-992   512    
-96    -208   
-160   -32    
-112   48     
176    16     
416    -144   
16     0      
240    -176   
-224   -384   
208    -112   
288    144    
144    320    
-48    96     
-272   -96    
48     16     
-144   224    
288    -16    
144    -64    
-80    -144   
-192   80     
48     -144   
-288   48     
176    112    
-32    192    
32     128    
240    -64    
-96    -32    
32     -32    
-80    -32    
16     -48    
-304   -32    
16     -32    
-2016  -32    
96     -160   
0      0      
80     -224   
96     80     
208    -592   
64     96     
-32    96     
208    0      
-240   -32    
112    -16    
-400   32     
112    80     
-144   432    
240    -32    
-528   -112   
80     112    
-144   96     
352    16     
32     96     
352    -544   
-208   -32    
-208   48     
80     -112   
-48    160    
32     -64    
-16    16     
288    16     
-176   -32    
192    -48    
16     -16    
160    -48    
32     128    
128    -64    
-192   32     
64     -32    
48     -96    
32     -112   
64     16     
-304   32     
96     -320   
-192   -144   
-64    144    
0      -16    
48     -32    
-512   144    
-2432  -208   
64     64     
-1888  -208   
128    48     
0      64     
-720   -80    
192    -64    
-192   112    
-192   0      
176    -48    
-64    16     
-16    -64    
-80    -80    
-1104  -16    
64     80     
-992   -144   
240    -80    
-112   96     
-16    0      
-96    48     
-400   -96    
-80    96     
-528   -48    
-112   0      
-1264  0      
32     64     
-176   -240   
240    -96    
-160   96     
384    192    
0      -32    
128    -80    
-96    160    
-96    -96    
-64    0      
-304   16     
32     160    
-160   64     
48     -64    
-368   48     
-96    0      
-32    64     
-48    48     
-160   -48    
-16    64     
112    -48    
0      64     
64     128    
80     48     
-176   48     
-16    -32    
-80    48     
80     96     
-16    -32    
-608   0      
32     112    
-368   416    
288    288    
-112   48     
-48    256    
-64    0      
-80    -80    
-176   -48    
-64    80     
112    112    
-144   -144   
112    -112   
-80    -32    
-64    304    
-176   -288   
-96    16     
-480   -32    
144    160    
-128   -112   
-32    -32    
-128   -160   
-16    48     
-16    16     
-160   -288   
-32    -144   
-32    560    
32     64     
0      -496   
144    336    
32     -48    
-80    144    
-352   -96    
96     32     
-1616  0      
-16    48     
192    752    
-160   -816   
384    256    
-128   112    
-272   -64    
80     -32    
-432   -272   
-208   128    
288    384    
-208   64     
-16    -16    
16     -48    
288    -16    
-496   80     
352    64     
96     0      
-224   48     
-240   32     
-384   -112   
-48    -80    
32     64     
240    -16    
1056   800    
-592   880    
-400   -848   
0      144    
496    608    
-160   -272   
160    160    
-80    -48    
128    48     
-80    32     
-160   0      
64     0      
-80    160    
-128   176    
160    48     
-208   -144   
-176   112    
48     112    
-208   304    
-80    -128   
240    -144   
112    352    
-64    96     
0      -128   
-64    16     
64     64     
208    -80    
-32    128    
160    192    
32     672    
16     208    
32     -624   
160    432    
-96    176    
-224   -192   
80     -48    
0      352    
16     336    
0      96     
96     -48    
96     -112   
80     80     
160    -80    
-96    208    
32     528    
-16    448    
256    448    
-320   560    
144    32     
-144   -432   
-112   -416   
48     -160   
304    512    
-320   208    
0      48     
-96    -224   
272    -96    
-176   -32    
368    208    
-208   128    
0      304    
-128   496    
-176   176    
304    272    
-144   -64    
-96    -160   
48     64     
368    80     
176    64     
96     -128   
-176   0      
-48    -16    
208    32     
-96    0      
80     64     
-320   80     
288    32     
288    160    
-192   192    
96     -80    
192    -112   
16     -144   
-80    -16    
-96    -160   
-112   -80    
16     16     
96     112    
112    96     
-80    -80    
320    48     
-256   80     
256    16     
352    304    
-288   416    
16     -192   
64     -80    
-128   -48    
-16    0      
-48    -16    
176    80     
32     128    
-80    128    
96     -208   
16     -144   
32     144    
0      48     
112    224    
-208   16     
-32    -192   
160    -80    
-208   -48    
32     48     
80     48     
64     -64    
176    112    
-64    -32    
0      -96    
96     16     
-48    144    
224    64     
-80    -144   
32     -144   
-16    48     
-48    -160   
112    80     
-48    -176   
64     -48    
16     32     
192    32     
96     32     
-16    32     
0      208    
320    128    
64     -112   
128    80     
-64    -96    
112    -16    
64     32     
32     -48    
112    0      
-80    -688   
16     -112   
272    144    
-160   80     
160    0      
32     -128   
32     -32    
176    32     
-160   -64    
256    -32    
-112   -80    
144    -64    
112    80     
16     48     
80     32     
-32    -352   
-64    -368   
128    -320   
64     -80    
32     144    
240    48     
-144   112    
80     32     
-32    272    
128    48     
192    -80    
144    -224   
32     -208   
80     -32    
80     -16    
-16    16     
352    -224   
64     -80    
304    64     
208    -176   
-48    -144   
-48    -192   
-16    1312   
-144   -304   
144    -80    
-160   208    
48     -240   
112    160    
-272   -176   
512    -160   
224    96     
48     48     
240    -480   
-128   -224   
-432   -80    
-384   -112   
272    320    
256    368    
-16    -80    
272    -32    
-64    -224   
144    -272   
272    96     
-16    80     
224    32     
272    16     
-208   64     
16     -224   
48     -224   
-240   -176   
-64    96     
-272   64     
-176   80     
-16    16     
416    -416   
96     0      
176    16     
320    176    
48     112    
-208   -16    
-48    -80    
-96    192    
-32    32     
432    32     
-160   -112   
-48    64     
48     -16    
192    -16    
0      128    
208    -64    
112    16     
16     16     
64     240    
16     -176   
-160   -192   
384    -16    
160    128    
112    -64    
176    16     
64     -16    
160    -544   
80     0      
48     -672   
16     -336   
-64    48     
176    -384   
16     -128   
16     0      
64     -112   
96     64     
80     96     
256    -112   
-224   -64    
288    -208   
-128   48     
224    -256   
32     32     
-160   256    
208    -208   
-240   -80    
48     -32    
48     -48    
-16    -416   
-80    48     
128    208    
176    -16    
-32    -384   
176    -16    
-64    128    
48     -16    
208    96     
-160   16     
-48    -96    
-128   -80    
-144   -64    
80     -64    
192    208    
64     0      
176    -48    
128    -640   
-80    -176   
144    -160   
-80    32     
64     -16    
32     48     
128    64     
96     96     
16     -112   
-144   -16    
-1200  32     
-16    -112   
48     -112   
224    -96    
144    32     
16     -544   
128    -176   
176    80     
-160   160    
272    -80    
-48    48     
-112   -16    
48     -32    
-96    80     
224    -32    
48     16     
-16    -96    
112    -240   
16     -32    
160    48     
112    -64    
-176   16     
80     -272   
-64    32     
176    -48    
192    16     
-160   0      
144    -32    
-176   48     
176    48     
-272   -176   
96     -144   
160    0      
160    -48    
-80    0      
160    -112   
16     48     
48     -464   
112    64     
16     -64    
0      112    
-80    96     
240    96     
-64    -32    
-64    -96    
-400   -32    
-16    -32    
-160   -224   
-144   -96    
80     32     
0      -16    
128    -176   
160    -80    
32     160    
80     -32    
128    304    
32     -192   
80     -400   
-432   16     
224    -112   
-224   256    
144    -272   
144    224    
64     -80    
-64    -128   
32     -160   
0      80     
0      -512   
128    160    
-352   32     
32     16     
-608   624    
80     -304   
-624   48     
80     128    
-96    16     
-48    0      
-192   -736   
192    128    
256    496    
64     -448   
16     224    
192    -160   
-112   -48    
-80    720    
-32    -464   
-160   0      
32     272    
240    48     
48     -32    
-240   -448   
320    560    
0      -480   
48     -80    
48     272    
-528   -160   
80     32     
-544   0      
-960   96     
-320   -64    
-192   16     
288    208    
-272   -704   
-112   32     
368    368    
0      -32    
-128   -160   
-96    -32    
-160   192    
64     -48    
-96    32     
-32    -96    
0      96     
-768   -224   
80     -32    
-144   -112   
32     -528   
-112   64     
-496   -336   
-912   -544   
96     -400   
320    -80    
48     64     
-368   -16    
-16    80     
-176   -48    
128    240    
-64    -16    
-80    128    
144    -80    
-224   -176   
80     0      
-272   -32    
-64    -32    
-128   -160   
-32    -144   
-144   -128   
0      64     
0      -144   
48     32     
-64    -80    
-96    0      
160    48     
-32    32     
-128   -96    
-112   -208   
-64    16     
-240   -16    
96     96     
-496   80     
-16    160    
-2112  -16    
96     -16    
16     -32    
32     96     
0      -80    
-48    -64    
-32    -176   
-128   80     
-112   32     
-64    176    
-112   128    
-240   -512   
-128   96     
-336   -64    
-96    144    
-1680  -64    
96     -16    
-80    352    
80     -32    
-272   -224   
112    -48    
32     192    
-48    176    
176    80     
128    144    
-32    240    
16     -224   
-80    -112   
-80    -128   
-16    16     
-480   16     
-32    -32    
-144   192    
352    80     
-16    176    
304    224    
64     256    
-48    -48    
192    16     
-80    96     
112    48     
-256   -48    
48     -48    
-96    -64    
-192   128    
144    -288   
112    -176   
-352   -176   
-48    96     
0      272    
32     -48    
-80    16     
0      0      
80     144    
-48    32     
48     128    
-288   -144   
-16    160    
-304   64     
-112   16     
32     64     
-80    48     
-688   -128   
-16    64     
272    256    
64     224    
-64    32     
-64    160    
96     112    
-16    192    
176    -128   
0      -96    
112    96     
80     176    
16     416    
-448   -192   
480    -464   
-16    16     
112    80     
80     48     
256    160    
-176   208    
16     96     
0      -352   
32     -192   
0      -160   
-272   -112   
160    -96    
-144   112    
80     80     
-160   144    
48     80     
32     160    
176    80     
-240   80     
256    16     
-96    128    
-16    112    
80     -112   
-144   16     
176    -16    
-160   128    
176    32     
-272   64     
224    -176   
-272   -160   
240    -352   
16     -256   
160    272    
-128   -112   
-48    -464   
-176   -512   
64     -144   
80     224    
-16    -192   
192    144    
-176   48     
64     16     
-32    272    
128    176    
128    160    
48     112    
-80    96     
160    -128   
-48    160    
0      -128   
112    96     
32     0      
544    160    
-224   64     
-16    -160   
160    144    
304    144    
288    -128   
400    112    
-32    32     
-96    -32    
-208   48     
304    48     
-192   -448   
240    -544   
224    464    
432    352    
144    64     
64     -16    
336    -64    
80     -64    
720    160    
-80    -272   
96     -432   
-224   32     
-448   80     
32     -48    
320    160    
-336   144    
-112   -16    
80     240    
48     192    
544    -32    
-448   -16    
-80    16     
32     64     
-176   80     
80     48     
32     -96    
80     128    
16     -80    
240    -272   
240    144    
-48    112    
176    48     
272    48     
-208   32     
256    48     
-240   32     
96     64     
0      96     
-400   -32    
272    64     
80     -208   
400    0      
-320   96     
-224   -48    
224    80     
256    48     
368    96     
48     -16    
-64    0      
80     -32    
-112   -16    
176    128    
-112   32     
-32    -80    
96     0      
352    80     
-192   48     
80     -624   
80     96     
96     0      
128    16     
32     -48    
-208   -16    
-16    128    
96     32     
128    64     
80     48     
16     48     
48     -64    
272    256    
-144   -112   
224    96     
64     -240   
128    112    
128    -16    
-96    48     
96     128    
0      80     
80     -80    
-144   -96    
16     -80    
80     288    
-32    48     
192    -80    
-368   16     
112    -160   
0      -80    
240    -528   
-144   80     
368    -624   
0      112    
96     -32    
256    64     
-80    -16    
64     0      
16     -16    
-96    112    
208    0      
144    80     
16     0      
112    -128   
192    144    
0      -336   
96     48     
16     64     
176    80     
0      80     
80     144    
64     -16    
-128   96     
16     16     
80     -32    
48     96     
240    -128   
64     0      
0      192    
-32    192    
32     -80    
160    48     
64     0      
64     16     
48     80     
96     64     
64     16     
32     64     
-64    256    
320    144    
16     48     
96     -176   
-48    272    
272    112    
48     144    
32     208    
112    48     
-32    -512   
352    240    
-224   -144   
176    16     
320    368    
-48    -80    
96     -208   
32     80     
176    160    
32     -64    
-112   176    
384    -112   
112    64     
208    -32    
-48    -112   
128    720    
208    -384   
16     304    
-16    -144   
64     -80    
-1328  -80    
32     -528   
48     16     
176    -48    
-288   -336   
208    208    
128    64     
80     160    
-224   -576   
-16    288    
304    128    
352    416    
-64    864    
128    -144   
-96    16     
-1568  -288   
64     208    
48     80     
160    16     
128    -48    
224    -400   
176    -48    
-32    176    
160    16     
-32    -112   
-176   -336   
144    -288   
192    128    
48     -128   
80     32     
-160   160    
-128   240    
-64    -48    
48     -160   
128    -208   
0      -80    
-32    -304   
144    -16    
80     48     
-48    16     
64     80     
128    64     
-32    80     
544    464    
-112   -80    
-96    128    
0      16     
-480   -160   
128    -112   
-48    -48    
-96    -240   
176    -176   
384    128    
48     112    
-48    176    
-48    -80    
320    -128   
288    0      
112    0      
112    -96    
-464   -112   
-64    -32    
-800   -144   
320    128    
-224   128    
-48    -128   
16     -80    
32     -224   
64     64     
128    -32    
16     -48    
288    -48    
-272   16     
-32    -144   
80     -32    
-432   96     
80     0      
-144   -48    
112    80     
96     -144   
176    256    
48     48     
80     -272   
64     -16    
-64    -336   
224    -16    
144    16     
112    -112   
0      -128   
-16    -256   
-128   -176   
112    0      
-80    -32    
32     144    
-736   -16    
80     -112   
-560   -80    
208    -128   
-16    16     
48     -544   
336    192    
-160   112    
176    96     
48     48     
32     352    
-32    176    
-48    -272   
-352   -336   
16     -320   
-48    -32    
0      -32    
-48    -64    
-64    -304   
256    352    
-240   -448   
208    272    
-176   32     
160    32     
96     320    
96     0      
-32    608    
224    368    
-176   112    
0      112    
80     16     
144    144    
-128   144    
0      -128   
224    272    
496    160    
0      -112   
0      128    
160    144    
-208   -16    
384    -800   
-224   -224   
176    160    
-16    -80    
64     160    
80     304    
-96    288    
-128   -112   
-992   -144   
-192   208    
-16    96     
-192   80     
-336   16     
-800   -32    
192    336    
16     496    
-16    48     
-240   -240   
-96    -64    
80     -208   
-144   80     
-912   -416   
-336   -272   
16     -64    
-304   624    
224    304    
-112   48     
160    -160   
0      64     
-192   -144   
48     -352   
-16    96     
-48    -304   
-80    -16    
-128   -144   
128    -448   
-240   336    
288    320    
-256   160    
-16    -64    
-16    -784   
-80    -480   
-64    -272   
32     496    
160    400    
-464   -48    
192    -576   
-816   592    
-176   368    
-288   -784   
368    112    
160    592    
-112   416    
80     -640   
-336   -160   
176    496    
-32    352    
176    -64    
-48    -32    
-192   -224   
-400   112    
-48    -16    
176    -160   
32     176    
48     -496   
-112   352    
-80    -320   
304    -64    
416    320    
-288   -80    
144    112    
64     -224   
80     208    
-176   -288   
-64    -48    
48     400    
160    192    
-272   -320   
64     272    
-1280  -16    
64     48     
-16    -96    
16     -16    
-48    128    
80     48     
64     64     
-176   32     
-16    96     
-32    -48    
400    304    
-192   -32    
48     -64    
-272   -80    
160    -16    
-448   -48    
-112   192    
160    528    
160    288    
-144   -208   
-336   -272   
-32    -128   
-176   80     
16     -80    
112    -112   
208    224    
-432   160    
-368   0      
-384   -304   
48     -32    
-592   320    
-224   80     
256    -144   
112    32     
144    -32    
16     32     
272    0      
-144   0      
256    -48    
0      -48    
192    128    
-336   32     
-272   80     
-320   -80    
256    96     
-128   32     
160    96     
64     -32    
304    80     
-48    96     
48     -48    
-96    48     
-464   0      
112    16     
16     64     
112    160    
-384   -208   
144    -304   
144    -112   
560    160    
160    0      
496    432    
-832   -32    
-80    -176   
112    80     
64     -32    
336    0      
-96    16     
-144   64     
-272   -96    
144    32     
-176   16     
80     0      
-64    -64    
-96    48     
-208   -64    
32     112    
48     -16    
240    80     
-64    0      
48     80     
-96    16     
-112   48     
144    32     
256    16     
128    48     
48     -16    
0      32     
-80    -48    
112    48     
-32    32     
48     32     
-16    64     
-112   16     
112    48     
16     16     
96     32     
16     48     
48     64     
32     32     
-16    32     
-224   -96    
112    96     
-48    0      
176    0      
128    96     
160    336    
80     128    
48     -64    
-112   128    
32     -80    
48     -112   
-160   128    
16     -16    
-240   32     
80     32     
32     -32    
-144   144    
256    32     
64     304    
-16    96     
96     -48    
16     192    
112    64     
48     96     
128    16     
48     224    
96     -48    
16     -256   
-160   -128   
32     112    
-16    -32    
128    -16    
-224   -272   
112    -320   
80     16     
112    64     
-96    192    
80     0      
64     -48    
0      128    
176    -32    
-48    -16    
208    240    
-208   224    
160    -112   
-160   -32    
176    96     
96     112    
-96    -528   
0      176    
0      -32    
208    48     
16     240    
0      48     
256    288    
-272   -672   
32     464    
96     -32    
-16    272    
32     -160   
-16    -16    
656    704    
-464   -288   
96     -240   
256    80     
-192   176    
112    -192   
-64    -128   
144    -448   
-208   -432   
176    288    
144    64     
-16    320    
176    160    
80     240    
16     16     
64     -160   
160    64     
0      -128   
48     0      
-304   -224   
304    -128   
-48    128    
192    32     
48     -64    
64     96     
-80    208    
256    -16    
32     -64    
112    48     
112    224    
192    112    
16     208    
-48    -176   
80     48     
-48    -1360  
-144   64     
448    144    
32     0      
32     -368   
144    48     
32     -64    
64     64     
48     -32    
80     96     
144    208    
-32    32     
208    96     
48     -112   
-144   144    
192    -96    
192    -16    
0      -48    
-80    0      
128    -32    
144    96     
48     112    
96     80     
-48    96     
288    -16    
-32    64     
144    32     
-32    64     
-16    -48    
128    -16    
16     -432   
48     -16    
16     -384   
64     160    
-528   80     
-112   -48    
160    48     
272    144    
112    80     
64     -112   
-64    -16    
-32    -176   
80     96     
-96    -48    
352    96     
432    -192   
304    16     
160    -16    
48     80     
32     -16    
128    -64    
-112   -112   
48     240    
-224   80     
192    -96    
96     -128   
256    -16    
-32    80     
-16    -192   
48     -128   
32     -192   
144    -16    
-80    -464   
-160   48     
16     0      
224    96     
-96    64     
96     96     
-128   16     
160    -32    
48     112    
160    -96    
80     48     
80     -224   
128    -48    
-224   16     
-80    -32    
80     -64    
96     -320   
240    -16    
160    -368   
320    96     
-208   64     
48     -16    
-128   -192   
112    -1168  
96     -128   
-48    112    
256    -80    
48     -32    
160    -192   
80     -192   
80     144    
112    48     
160    384    
80     -80    
16     0      
-96    -32    
160    -96    
176    -176   
-64    -64    
32     -48    
208    -384   
-352   -224   
144    -144   
64     -96    
176    -112   
-16    304    
176    -336   
-48    -1232  
-512   -1824  
112    -368   
-432   384    
368    -912   
320    368    
112    1360   
-48    400    
-96    -1360  
416    -80    
48     -528   
-112   -160   
32     176    
0      128    
-80    -112   
-16    16     
-320   416    
256    -416   
-160   -192   
-48    -16    
-176   224    
-80    -256   
64     -208   
96     -496   
192    -672   
272    32     
-192   512    
-64    -432   
512    736    
-480   416    
-144   -672   
64     144    
-32    112    
32     -464   
208    192    
-2160  304    
-48    96     
0      -16    
112    -544   
-64    656    
224    -224   
16     128    
192    -784   
-96    -80    
-16    144    
192    -288   
-80    144    
192    32     
-176   -64    
128    -32    
-336   208    
-224   -256   
-1376  16     
272    384    
160    48     
128    -336   
-320   128    
192    -352   
32     48     
-144   0      
176    -32    
96     48     
-144   -16    
16     32     
64     16     
-768   0      
80     32     
-688   -128   
208    -192   
16     -16    
-128   -320   
128    48     
80     -528   
96     -32    
80     48     
-112   96     
64     48     
16     -48    
-192   16     
80     -32    
-64    -208   
-64    -208   
-496   64     
176    -32    
-128   96     
144    -144   
-64    0      
48     -96    
144    -96    
-160   16     
208    -64    
-336   -336   
96     48     
-160   32     
-48    -96    
-48    64     
-48    -48    
-176   -32    
208    -16    
128    0      
176    -128   
160    64     
64     -112   
128    -112   
-192   -80    
48     -48    
-64    -64    
256    -48    
-160   80     
-272   -336   
-48    -96    
176    80     
-640   0      
272    256    
-400   96     
-432   -336   
128    0      
-48    0      
-992   -128   
224    -48    
-128   128    
-96    -80    
-320   64     
-272   16     
-928   -480   
32     -64    
-688   272    
-128   80     
-528   0      
384    400    
-736   -16    
112    0      
-48    -64    
640    224    
-32    0      
192    -160   
-192   64     
-1664  -96    
144    16     
-128   16     
288    -32    
32     0      
192    64     
-288   -192   
0      -48    
-32    -48    
-176   -16    
-176   32     
-288   0      
48     80     
-384   -208   
816    64     
-176   -16    
304    192    
96     -16    
-352   -32    
-512   -224   
-208   64     
-160   64     
-368   -128   
304    -96    
96     -48    
416    96     
-32    64     
-160   96     
-288   32     
-80    -16    
-64    -16    
208    16     
-176   16     
80     16     
-64    -32    
80     48     
128    0      
-416   112    
-96    16     
16     -32    
-208   -80    
32     -32    
-112   96     
0      48     
160    80     
-272   -16    
-48    16     
-272   -48    
16     48     
144    -16    
112    64     
-32    -64    
-48    0      
-48    0      
-64    -16    
-16    16     
160    176    
-160   160    
-128   16     
-128   -48    
-304   -144   
128    112    
-336   -32    
32     96     
-400   -32    
80     48     
-160   -96    
48     112    
-208   112    
96     32     
80     96     
192    96     
64     128    
-32    160    
96     96     
-160   224    
208    192    
80     256    
-16    32     
-736   -112   
64     32     
-48    -96    
-16    64     
208    208    
-48    -192   
192    16     
-128   96     
-16    32     
-304   256    
-352   -1872  
128    -880   
-304   736    
-480   368    
624    -464   
-704   704    
192    528    
-320   -736   
352    464    
-208   208    
-16    -352   
48     -64    
-224   -384   
16     496    
160    256    
160    -96    
-192   192    
240    -384   
-96    112    
-32    624    
-208   208    
112    208    
48     -304   
-80    -288   
-208   -224   
-256   -128   
288    112    
240    224    
96     0      
-432   -304   
-192   -96    
-64    0      
32     -64    
-64    -32    
144    48     
-240   64     
-128   -64    
208    -16    
-48    32     
80     144    
80     -96    
32     -80    
128    -64    
0      144    
-64    0      
32     -16    
-16    -16    
-240   16     
96     0      
64     32     
16     16     
16     32     
-96    160    
240    80     
96     128    
-16    -16    
224    32     
-112   16     
128    -80    
16     -16    
48     -48    
-16    -96    
0      48     
0      -32    
192    32     
96     0      
160    -80    
96     48     
0      96     
16     16     
144    0      
-80    -32    
80     -16    
64     48     
-48    -48    
80     80     
208    176    
-160   176    
-16    -48    
-80    80     
240    16     
32     -96    
80     -160   
-32    -96    
-16    128    
64     240    
-64    64     
256    -48    
-128   0      
-48    -48    
128    128    
-160   32     
-144   -96    
80     -48    
32     192    
80     64     
352    416    
-64    192    
336    -64    
-112   -48    
-32    -48    
-32    16     
-16    16     
256    -48    
48     112    
-112   224    
-400   -48    
16     16     
432    176    
208    112    
656    128    
-320   160    
-64    48     
-112   48     
128    -48    
80     96     
176    112    
-320   32     
-16    32     
-176   -144   
288    -80    
112    48     
-80    -96    
624    480    
-432   -496   
112    -112   
224    48     
336    112    
256    80     
-144   32     
16     160    
-112   352    
208    -112   
-240   -48    
-160   240    
176    672    
96     352    
224    -256   
16     -112   
-16    -624   
192    144    
-48    -64    
80     144    
96     192    
240    64     
160    128    
176    128    
-80    160    
48     400    
-176   192    
208    -32    
32     336    
32     -176   
144    32     
48     48     
144    -160   
-32    272    
80     -80    
-160   -400   
64     208    
32     336    
128    -48    
128    80     
-48    -208   
128    128    
-96    -112   
208    -336   
16     144    
-240   -16    
32     -112   
192    256    
-320   -768   
304    -16    
-16    48     
304    96     
-112   208    
-16    -240   
-112   224    
-176   -288   
-80    -384   
-304   96     
80     208    
192    -288   
0      128    
64     80     
192    112    
208    -176   
144    160    
-64    -528   
160    32     
-192   -128   
256    -48    
96     16     
-160   112    
224    -208   
-352   -640   
0      -224   
160    -208   
192    272    
48     -112   
128    -320   
80     -96    
288    16     
-96    -384   
160    64     
16     0      
96     96     
32     -48    
80     48     
96     144    
0      64     
80     32     
-48    -128   
272    64     
16     -16    
96     64     
-64    -128   
272    16     
0      -48    
96     48     
64     64     
112    272    
32     112    
192    -144   
-112   -16    
-64    0      
224    112    
192    -32    
-32    -32    
-64    -64    
80     0      
64     -192   
-32    -16    
32     0      
288    -752   
-64    -16    
-48    -608   
176    -256   
112    -16    
0      -240   
112    16     
-32    -64    
128    -64    
160    32     
128    -80    
-80    0      
64     -48    
256    -400   
-320   -16    
96     0      
208    16     
-32    -560   
208    -64    
-32    208    
-96    -144   
-32    96     
192    -224   
64     -48    
-16    -1584  
160    -48    
0      -48    
-32    -112   
144    -160   
144    64     
160    -32    
32     80     
-48    192    
64     -32    
-800   -80    
0      -16    
-112   -80    
80     0      
128    -32    
80     16     
208    160    
-128   -160   
144    -16    
144    -112   
-32    64     
160    -80    
-272   -368   
0      -336   
400    144    
-1088  48     
-144   32     
-32    -192   
192    16     
-16    160    
-240   -48    
-96    -16    
240    -272   
-336   -48    
304    -32    
-208   96     
-16    -48    
-720   -1232  
96     -896   
-224   576    
-1136  240    
-144   -80    
-336   -320   
-96    -64    
-32    112    
32     -160   
-208   -16    
32     -464   
160    48     
416    80     
0      -48    
560    -128   
176    -112   
-96    -32    
64     -160   
96     16     
-144   -176   
-560   -304   
224    -80    
80     176    
-48    -208   
-128   -48    
496    -176   
16     432    
-496   -48    
128    -64    
-192   48     
80     -16    
-32    -80    
-112   -80    
-128   64     
-176   0      
-672   -144   
128    -32    
-944   112    
272    -16    
400    400    
-416   32     
-192   -64    
-32    -912   
256    112    
-16    80     
320    64     
-112   208    
-240   -64    
96     -32    
48     32     
-304   80     
224    -16    
64     64     
432    -80    
-112   -32    
112    -112   
-80    64     
80     -288   
0      -64    
-384   112    
80     64     
-304   -16    
80     -112   
-336   -48    
160    16     
-128   16     
160    32     
0      112    
32     -96    
80     -16    
80     -48    
160    -112   
48     -96    
288    240    
-112   0      
112    -96    
-272   224    
-32    -16    
48     272    
32     -48    
-160   -128   
192    256    
64     -96    
160    -48    
64     0      
-304   -112   
128    128    
160    -160   
-1040  160    
-144   -1056  
-1728  1408   
208    -688   
-112   -160   
160    656    
208    -480   
-224   -336   
240    -336   
-320   -32    
-32    -256   
-32    -80    
48     -64    
-288   320    
176    -64    
-336   -96    
-112   512    
-640   160    
400    -224   
-1984  -112   
-208   336    
144    80     
16     -128   
-560   -112   
64     -32    
32     -160   
-192   -112   
176    -320   
-240   0      
16     -112   
-160   96     
-80    64     
-64    368    
-32    96     
-128   -64    
-16    -112   
-64    160    
-384   176    
0      16     
32     32     
48     16     
-288   128    
176    32     
-320   32     
-16    48     
-96    80     
144    -16    
176    32     
-368   224    
-768   64     
-240   208    
-80    0      
128    32     
128    -80    
-144   -16    
80     -208   
-16    128    
80     64     
16     -48    
-16    0      
-160   -32    
-144   -144   
-80    -32    
64     176    
-272   16     
-128   64     
-1152  -176   
176    96     
-16    -80    
208    80     
-80    -144   
-32    48     
-48    -32    
32     -80    
-64    64     
-64    32     
16     48     
144    144    
144    208    
-16    -32    
-16    80     
-464   -32    
96     32     
-496   -16    
-32    64     
32     -16    
-176   -16    
96     160    
-176   48     
144    0      
48     80     
16     32     
-80    -16    
-64    16     
-16    -192   
80     64     
128    192    
-48    192    
-384   -16    
96     -16    
96     16     
-176   64     
-32    0      
0      -48    
176    80     
-64    144    
-16    -32    
-320   -80    
128    160    
-480   64     
112    48     
-352   32     
224    0      
-288   -160   
-192   64     
-112   -112   
240    16     
-336   -32    
-320   -144   
-352   -160   
160    48     
64     160    
272    16     
0      -48    
-288   32     
-96    240    
-208   240    
128    256    
-560   -32    
-16    0      
48     64     
128    48     
32     656    
448    352    
-96    80     
-224   0      
-144   -16    
208    48     
-64    -912   
-64    -624   
80     -144   
-576   -64    
144    272    
192    192    
128    160    
-240   -128   
208    288    
-80    128    
48     -336   
-32    240    
-128   -192   
112    192    
-112   128    
-96    96     
-128   -208   
32     224    
32     80     
-64    -160   
32     96     
-144   -176   
-176   128    
-48    -240   
304    448    
128    128    
432    160    
-48    80     
48     -176   
-96    -80    
-96    48     
-16    48     
32     32     
0      160    
64     144    
160    48     
-64    80     
192    64     
-192   0      
64     64     
-16    -16    
-32    -176   
160    -304   
64     -128   
272    64     
0      -48    
16     -16    
64     32     
0      112    
80     96     
272    64     
-128   -64    
96     -112   
-224   -16    
224    -48    
-48    80     
160    -128   
80     0      
-32    112    
-144   -80    
48     -32    
-144   -64    
336    208    
-64    128    
336    16     
-160   64     
336    32     
64     64     
0      80     
-64    -240   
-48    -32    
96     64     
-128   288    
192    16     
64     -16    
80     32     
160    128    
-320   -208   
224    -64    
208    16     
-64    112    
0      112    
-80    32     
64     48     
32     80     
-48    -48    
256    16     
-16    16     
64     80     
-144   32     
128    48     
-48    0      
128    -256   
-48    16     
96     80     
80     80     
144    32     
-16    0      
272    -16    
-16    16     
32     64     
176    128    
-32    48     
176    48     
-32    -16    
-80    32     
32     48     
32     -32    
-48    64     
400    -416   
-160   64     
-128   16     
80     -16    
-16    0      
-64    32     
-16    32     
208    64     
-80    -80    
192    -16    
96     128    
64     0      
80     -96    
96     -112   
32     144    
16     16     
256    112    
-32    -176   
32     16     
-80    96     
272    128    
80     64     
16     -16    
64     16     
128    96     
-64    112    
16     -176   
48     -32    
128    -176   
48     176    
32     -416   
32     -96    
-112   -288   
80     -16    
32     -32    
-128   48     
96     0      
176    64     
-128   112    
96     224    
256    192    
-32    -80    
64     16     
-48    16     
176    80     
144    -192   
192    -64    
112    -224   
96     192    
144    96     
240    112    
-224   112    
-96    0      
112    -160   
80     0      
80     304    
-64    176    
-32    144    
96     -160   
112    64     
-208   -96    
-208   0      
480    16     
-320   -16    
304    752    
0      768    
-368   -16    
-112   64     
-144   144    
-176   256    
576    928    
-144   16     
-304   -960   
240    -240   
208    720    
336    144    
208    0      
240    -352   
176    -64    
-32    176    
304    48     
192    16     
-288   -128   
368    -576   
240    -16    
144    432    
272    128    
48     -64    
304    192    
-272   96     
-96    32     
32     160    
256    -224   
96     -128   
160    160    
16     -592   
-112   0      
-16    128    
48     -480   
128    -384   
176    -1024  
-416   32     
-64    -32    
0      48     
-96    -208   
432    240    
-304   352    
368    288    
208    -1008  
288    -80    
352    -352   
-240   -112   
208    528    
-288   -288   
352    -144   
32     -208   
80     64     
0      -288   
96     0      
64     -1424  
80     -32    
96     80     
208    48     
32     -208   
-32    144    
256    -240   
-80    240    
-368   0      
96     -96    
-2096  -112   
32     -64    
368    320    
-224   -448   
128    0      
208    -576   
160    112    
112    -144   
48     -400   
96     656    
240    768    
400    416    
64     -688   
-464   288    
-112   80     
-320   -528   
160    -128   
352    -304   
-96    -272   
128    -192   
-160   -64    
144    0      
176    -1104  
-192   320    
272    -32    
32     112    
-64    32     
128    16     
-144   -160   
320    -80    
-320   64     
-16    -144   
320    0      
0      -176   
112    -64    
0      32     
-160   -160   
368    -368   
-96    160    
128    -256   
176    -80    
-112   -16    
240    -96    
-160   208    
176    -32    
-176   -48    
80     -112   
-1040  -224   
400    128    
-672   336    
80     -256   
160    -192   
-96    -288   
144    144    
320    -160   
240    48     
-112   128    
160    128    
272    176    
-432   -32    
16     48     
-16    176    
-192   80     
16     64     
-352   -80    
-240   -112   
256    -64    
160    -400   
160    -64    
-96    -256   
448    0      
64     -48    
80     -304   
-624   128    
-112   80     
-448   -80    
-128   -128   
-128   -256   
64     -208   
-528   -128   
96     -176   
272    96     
48     -128   
-160   32     
-544   -32    
48     32     
-288   -16    
-128   16     
288    16     
0      0      
-416   -112   
160    -64    
-512   -48    
-48    -64    
144    64     
80     -16    
96     144    
16     -128   
96     -16    
-16    112    
-144   48     
48     -48    
528    128    
-400   176    
-64    -112   
-80    -48    
80     -64    
-96    224    
112    48     
48     240    
-816   -80    
112    32     
-192   -80    
-688   16     
0      16     
-176   0      
-128   112    
-304   -32    
-272   -80    
32     -128   
-208   -16    
48     32     
-112   80     
-1216  -32    
192    -16    
-176   -32    
64     96     
-416   48     
-80    -64    
-48    16     
-144   -48    
-128   80     
-272   192    
-272   528    
-320   816    
240    336    
464    496    
0      96     
-400   -528   
80     -96    
-384   160    
-272   -368   
64     -256   
336    784    
384    272    
-32    -256   
0      112    
-448   -64    
-16    0      
-16    48     
144    112    
144    -80    
-32    -96    
656    1200   
-656   -448   
48     -352   
272    320    
176    -80    
368    -48    
-128   -208   
-32    -304   
-592   -64    
-64    416    
-352   -64    
-224   -192   
96     0      
-1104  32     
64     -16    
-160   16     
-480   -80    
-128   -96    
640    416    
-48    224    
176    -32    
144    -176   
128    -176   
16     -64    
128    -96    
112    -48    
0      -16    
-112   32     
-240   16     
-48    64     
-160   48     
96     32     
-96    -256   
-32    112    
64     144    
-48    -48    
96     -16    
-176   16     
48     16     
-112   0      
-48    0      
-16    48     
208    96     
-896   -96    
160    64     
-192   -80    
128    32     
-64    16     
16     48     
-128   -80    
16     16     
-96    32     
96     16     
-16    -16    
-48    32     
80     48     
-32    -16    
-64    80     
-336   -128   
160    48     
-528   -80    
-128   96     
160    80     
-240   -80    
96     176    
144    64     
112    32     
-48    80     
96     0      
64     160    
0      0      
-160   -32    
-320   32     
-80    16     
0      64     
-176   64     
144    48     
-32    96     
-96    -48    
16     32     
-32    16     
240    80     
-128   128    
144    208    
-192   32     
48     16     
-176   -48    
96     96     
-32    64     
-128   64     
64     -128   
64     48     
-80    32     
-48    -32    
80     0      
-80    -16    
160    112    
-192   -80    
16     96     
-384   -64    
0      -16    
-112   0      
32     96     
-288   -32    
160    64     
48     64     
272    -32    
-32    0      
-144   0      
64     -16    
240    96     
-48    -32    
112    -32    
0      80     
-48    -64    
192    -64    
-32    32     
96     80     
-208   -48    
-256   -16    
176    80     
16     64     
96     48     
-96    -32    
32     64     
192    32     
0      32     
0      48     
32     -16    
0      112    
-16    80     
-80    16     
304    32     
-256   -64    
-144   -96    
160    64     
128    128    
-176   -64    
96     112    
128    96     
64     0      
80     0      
288    144    
-96    80     
16     48     
-128   32     
-48    -240   
144    48     
160    -96    
208    -64    
-64    112    
16     80     
32     32     
64     32     
144    -96    
64     208    
160    -112   
-176   144    
208    -576   
128    368    
112    160    
-80    48     
32     -224   
96     -560   
-80    -64    
0      368    
-64    -48    
-48    64     
352    -224   
192    240    
64     -32    
80     48     
80     48     
-64    80     
-256   -64    
16     16     
48     48     
560    -512   
176    -240   
-656   -1744  
-64    704    
-192   400    
-208   -128   
96     -112   
384    48     
-32    -528   
688    496    
-16    0      
64     16     
-16    144    
-64    48     
-112   656    
288    -448   
144    -496   
-128   64     
-64    368    
48     208    
-416   -352   
160    128    
112    0      
16     0      
96     96     
160    16     
288    -16    
-16    224    
368    128    
-80    -384   
-224   -16    
48     528    
-80    0      
-16    -144   
0      -128   
112    224    
64     224    
208    -80    
-144   -32    
-64    16     
-272   -64    
192    -48    
16     -288   
-176   -432   
144    160    
112    576    
-32    80     
112    -336   
240    16     
-208   -80    
176    -16    
272    -240   
-112   128    
0      0      
-16    0      
0      -208   
48     -64    
80     -144   
64     -192   
16     -16    
288    -128   
96     640    
-32    -240   
224    240    
0      -32    
-16    192    
128    144    
96     240    
-32    256    
-16    160    
-48    0      
64     48     
80     16     
208    -48    
0      112    
16     -16    
224    160    
192    -224   
80     544    
560    128    
-112   160    
0      -224   
48     -144   
112    96     
192    -192   
-256   224    
208    -192   
128    -32    
176    0      
-96    48     
448    -224   
-192   160    
16     96     
192    -16    
64     32     
64     48     
-32    -80    
464    192    
-16    528    
-16    224    
-160   48     
128    -480   
-16    -96    
272    -256   
0      -16    
128    -48    
-32    16     
80     32     
48     80     
-64    -160   
160    144    
128    128    
16     -32    
240    -112   
96     80     
-80    32     
32     -96    
176    112    
176    64     
16     -144   
48     -48    
32     0      
128    -48    
48     48     
96     -96    
160    -16    
64     0      
208    -304   
-176   32     
256    -272   
64     -560   
80     16     
128    -208   
-96    -96    
208    -1200  
48     -96    
96     64     
-176   640    
768    480    
64     128    
288    -48    
-112   80     
96     16     
48     -96    
16     -160   
32     -304   
-80    272    
64     -208   
320    -192   
-144   -624   
128    -80    
128    32     
-96    80     
112    80     
48     -32    
-48    -64    
-16    336    
448    304    
144    -144   
-80    -32    
224    -272   
480    160    
-336   16     
-112   32     
-48    -16    
224    80     
160    -752   
592    -240   
32     0      
-320   48     
48     -16    
32     -16    
80     80     
128    -96    
-368   128    
16     -96    
-16    -304   
0      -144   
128    32     
32     16     
96     -48    
112    -400   
-64    0      
-16    128    
32     -128   
208    -224   
144    192    
-208   112    
-128   0      
-64    16     
-64    -224   
-240   704    
144    -144   
32     32     
-80    144    
-128   -288   
48     48     
144    64     
160    480    
144    112    
320    304    
112    -112   
-16    176    
-208   16     
-192   -144   
320    -80    
-112   96     
720    832    
-944   0      
-224   48     
-64    -336   
112    -208   
160    208    
144    -208   
-80    -208   
160    112    
-64    32     
-144   16     
-176   48     
-192   -64    
208    -128   
-368   -48    
176    32     
-1280  -48    
80     64     
-288   208    
-304   -80    
48     112    
352    -288   
544    32     
80     -160   
128    -160   
-240   160    
-400   -80    
-208   -64    
464    96     
-592   -304   
832    -96    
80     208    
288    64     
-352   -176   
304    -128   
208    240    
-96    -48    
240    -32    
-496   -80    
-48    80     
-416   32     
144    -32    
64     48     
320    48     
-112   -32    
80     32     
384    144    
-368   -112   
32     -32    
80     -160   
240    112    
48     -16    
128    -48    
-608   -80    
-64    -96    
-256   80     
-32    -64    
48     80     
32     0      
-96    16     
176    -64    
-368   -48    
160    -208   
64     160    
-496   -112   
-80    48     
-768   -112   
-736   -32    
384    288    
-512   32     
272    -112   
-368   96     
-48    -32    
304    -64    
-256   -176   
-80    -80    
-192   176    
-1120  -128   
304    112    
-192   -64    
448    80     
-144   -32    
-592   -64    
-176   32     
16     -16    
48     -96    
-96    32     
-96    0      
544    0      
-32    96     
80     0      
192    32     
-160   -112   
384    128    
-224   -64    
48     16     
32     -32    
-96    -96    
128    16     
48     96     
-192   -16    
-192   -32    
-352   -128   
-496   32     
-48    0      
16     16     
-16    -48    
80     -64    
144    160    
-272   16     
-16    -16    
144    48     
-64    0      
48     -96    
-48    16     
-32    16     
32     -32    
-224   0      
0      -160   
-16    32     
-1216  -16    
192    64     
-304   -48    
-48    64     
0      0      
64     -48    
32     32     
16     -32    
-128   -128   
48     -32    
128    192    
-96    0      
80     -16    
-272   -16    
80     80     
-1056  -112   
112    -48    
144    -48    
80     240    
112    80     
-160   -48    
-272   128    
-144   -560   
144    -160   
-80    176    
16     128    
-80    192    
-80    -336   
-272   160    
176    96     
-16    -16    
-272   32     
16     -240   
80     192    
32     -48    
176    -176   
-64    32     
64     64     
-32    400    
64     -288   
-192   -48    
-144   32     
-32    496    
-96    -80    
0      -32    
-176   224    
112    64     
-816   -32    
-96    -256   
48     -416   
-80    432    
-112   0      
80     0      
176    384    
-224   -112   
48     912    
16     -656   
192    -80    
-240   352    
-16    -96    
-592   320    
96     0      
32     -352   
128    -32    
-64    352    
16     -128   
0      32     
48     -32    
0      112    
-16    128    
-16    -80    
16     -16    
448    320    
-448   352    
80     -224   
-256   -256   
48     -80    
-32    -256   
208    112    
176    -64    
160    -144   
192    16     
-48    64     
336    160    
-416   -128   
-240   -112   
-112   -64    
208    32     
256    176    
272    176    
-352   32     
64     -96    
144    112    
-80    128    
0      0      
64     0      
64     -80    
80     -32    
0      0      
-16    -16    
-80    288    
224    256    
512    208    
-336   80     
-64    96     
-192   -48    
-64    96     
208    352    
80     176    
240    48     
16     128    
-80    -80    
-192   -32    
32     80     
-128   64     
-96    -96    
64     -32    
48     80     
-96    128    
272    96     
-80    -64    
48     64     
-32    64     
-16    32     
48     0      
32     -16    
144    -176   
96     -112   
48     80     
112    96     
-80    160    
-16    96     
32     -336   
-112   -160   
144    80     
-96    192    
-16    176    
48     160    
64     256    
16     192    
16     192    
96     -112   
112    112    
96     -32    
112    -112   
0      -80    
32     48     
368    288    
-400   464    
-224   112    
192    -352   
112    -256   
112    -272   
96     256    
144    -224   
-32    48     
-80    -368   
144    320    
144    400    
0      32     
240    -80    
-176   -448   
0      32     
-192   -16    
-80    -272   
400    224    
80     560    
256    224    
32     -160   
0      -96    
0      -208   
176    48     
-64    96     
32     32     
-48    -80    
64     16     
48     -32    
80     32     
320    48     
-64    -48    
-64    16     
-176   -80    
480    0      
176    32     
128    80     
224    112    
48     400    
144    416    
-288   160    
112    64     
0      80     
-400   -160   
256    -32    
-256   48     
96     -496   
-176   -16    
256    48     
224    64     
-96    128    
304    -208   
-368   64     
176    -112   
-240   -32    
240    -224   
-32    -112   
112    64     
48     16     
-32    -112   
192    -32    
208    -96    
-32    0      
-32    -192   
64     -32    
112    -16    
32     0      
16     -16    
112    -32    
80     64     
176    64     
240    -80    
-80    -144   
176    -160   
-208   32     
-32    256    
-112   96     
16     32     
16     -208   
-80    -192   
224    -832   
336    -48    
48     -64    
160    288    
-144   -224   
80     368    
64     240    
32     -416   
96     256    
128    -272   
-160   -128   
96     -240   
-112   -288   
176    -928   
208    144    
-112   -64    
0      -48    
320    432    
-272   -480   
32     272    
32     -448   
-144   0      
32     304    
80     -32    
352    96     
-64    224    
-96    -416   
208    176    
160    224    
96     -352   
192    -208   
-80    128    
128    144    
208    240    
32     32     
32     16     
80     64     
48     -192   
192    -16    
128    32     
-32    96     
0      -96    
-112   96     
-176   -1120  
48     -656   
-304   0      
-400   272    
-48    48     
-16    32     
-64    -64    
720    -176   
320    -192   
352    96     
-352   144    
288    64     
-432   64     
80     -128   
448    160    
0      -144   
448    64     
112    -272   
160    176    
-336   -48    
112    -416   
-64    -32    
-240   -64    
304    -128   
224    -48    
320    112    
48     -32    
-192   -352   
48     -48    
-32    32     
-224   -160   
48     -624   
240    32     
-32    -272   
-352   32     
64     -224   
224    -64    
-480   -176   
48     -304   
-48    304    
-208   -32    
368    0      
112    -896   
192    -48    
-96    112    
64     16     
-32    80     
384    -16    
128    -64    
-416   -48    
-64    -96    
64     -48    
-16    80     
464    32     
-224   -160   
32     -64    
32     -112   
-32    32     
48     0      
224    -144   
-80    -112   
224    -80    
-224   32     
96     -112   
-32    0      
-64    0      
80     -16    
-224   48     
-16    -112   
80     48     
0      -160   
208    0      
-144   -96    
192    -64    
-32    -64    
192    320    
-240   160    
384    16     
-96    -96    
368    32     
-16    32     
144    -16    
-80    0      
176    -272   
-272   64     
112    -48    
112    16     
176    48     
-176   -16    
144    -352   
-48    96     
96     -848   
192    64     
272    48     
-96    0      
-48    -256   
-48    -160   
-112   48     
-16    -336   
-160   -112   
-16    160    
-496   16     
160    -176   
-560   -144   
208    -448   
32     -64    
192    -336   
-32    128    
48     -112   
192    -80    
-128   96     
-16    48     
-112   16     
128    272    
-128   96     
144    -64    
-672   -16    
112    -112   
48     -64    
144    128    
112    160    
16     -192   
32     144    
32     16     
240    144    
-224   448    
192    -80    
-32    0      
32     -144   
192    16     
96     144    
-80    0      
-128   -64    
224    32     
-64    -64    
128    176    
208    -272   
-112   96     
-208   208    
144    -128   
-16    -64    
176    176    
-400   -176   
-16    -144   
-368   -16    
64     224    
-1056  -144   
48     -224   
240    416    
112    -256   
112    80     
-256   -192   
96     -800   
-16    -32    
336    -192   
-304   -64    
304    48     
128    144    
416    288    
-176   192    
-32    -112   
-384   -176   
0      -80    
32     -384   
-2304  -416   
176    144    
-112   320    
96     96     
-64    32     
-880   80     
-144   96     
48     -80    
0      64     
64     0      
-80    -32    
48     144    
48     48     
-368   -32    
-16    48     
32     -64    
-64    160    
192    144    
-320   96     
-448   -160   
-672   -464   
16     -128   
-208   128    
-112   -16    
160    -160   
-160   16     
-528   -16    
32     16     
-176   -48    
48     96     
-160   -16    
96     96     
-128   128    
-192   -112   
-128   224    
-544   -80    
304    -112   
64     144    
-288   -16    
-1152  48     
0      -112   
-176   -80    
-80    144    
-256   -48    
144    -144   
64     -16    
-240   -16    
-48    80     
-320   -80    
192    32     
-112   96     
-224   176    
-112   64     
-64    -32    
-288   64     
-32    16     
-16    -112   
240    0      
32     -16    
-16    -96    
64     -80    
-48    48     
16     64     
-16    112    
-80    16     
-128   304    
-128   80     
0      -256   
-64    -160   
-256   -208   
-16    -16    
-336   0      
16     96     
48     240    
-64    112    
64     32     
224    0      
-80    16     
112    64     
-96    -48    
16     -208   
-32    -256   
-48    48     
112    -112   
-288   -320   
112    -64    
-752   112    
208    144    
144    176    
-96    0      
80     64     
32     224    
96     64     
-144   0      
96     -96    
-48    64     
-16    64     
-16    64     
112    16     
-288   -128   
160    48     
-688   64     
272    208    
-208   -16    
-176   -32    
-80    -32    
-160   64     
48     -16    
144    112    
224    -48    
-352   -384   
64     -112   
-80    -32    
208    48     
-336   288    
320    160    
-464   -240   
-64    -48    
0      112    
-272   -128   
112    336    
176    240    
-144   32     
-112   240    
224    -192   
80     32     
-128   128    
-48    -96    
-80    -240   
48     -384   
-32    112    
336    288    
-96    -304   
208    -128   
64     -96    
-208   -80    
224    -320   
-16    -144   
192    144    
-96    480    
-272   112    
-96    -400   
256    96     
96     -160   
48     144    
80     272    
-368   32     
-96    32     
-32    176    
160    112    
-32    112    
-80    -32    
-64    -224   
-80    112    
208    208    
160    -32    
128    -112   
-48    272    
0      -80    
-128   0      
272    48     
-208   -336   
-160   -16    
160    -32    
176    -272   
96     384    
-112   -96    
160    224    
-368   -272   
272    192    
128    96     
-320   -144   
32     16     
32     96     
80     16     
-160   -160   
144    128    
0      16     
48     -192   
16     304    
0      -32    
-64    -64    
96     224    
-160   352    
352    -160   
32     160    
32     -192   
-288   80     
144    16     
224    352    
-112   -240   
80     -64    
288    240    
-96    -80    
128    112    
48     -16    
0      16     
112    160    
0      -128   
-48    32     
-64    -48    
80     -112   
32     32     
-16    -112   
112    160    
-48    144    
32     -32    
48     32     
16     48     
32     0      
336    48     
-160   -64    
32     48     
192    -16    
-144   -192   
-192   -144   
96     128    
-192   256    
128    112    
-192   16     
112    -256   
336    256    
160    176    
208    160    
-144   80     
-32    0      
64     112    
-192   32     
-32    -96    
336    -48    
224    32     
16     48     
64     0      
-192   -64    
-944   -704   
368    -960   
-80    480    
-400   112    
160    -48    
-80    160    
-224   -144   
224    144    
368    -96    
432    304    
-384   64     
48     -304   
128    64     
-240   96     
-112   -272   
368    -96    
176    -144   
0      128    
224    16     
128    -112   
144    -32    
304    128    
64     32     
432    80     
-224   -112   
-176   32     
-400   0      
-48    112    
48     32     
-128   0      
256    80     
160    -240   
-64    -16    
-32    -1024  
-112   16     
-16    16     
96     96     
-80    -16    
656    96     
0      16     
-304   0      
160    32     
144    64     
128    64     
-112   -160   
64     0      
-80    -176   
-48    96     
64     -176   
304    176    
-288   176    
224    32     
208    -16    
-208   -32    
144    -64    
-32    80     
-32    48     
112    -48    
48     16     
80     -112   
176    160    
-32    -96    
176    16     
80     -224   
32     64     
144    96     
-80    32     
96     48     
-16    -16    
160    32     
160    240    
176    80     
32     -64    
-64    32     
0      -128   
400    48     
-288   0      
240    0      
-112   -144   
64     -320   
-112   -192   
176    64     
192    64     
272    240    
-144   144    
176    160    
0      224    
80     -16    
80     -64    
256    368    
256    368    
48     -128   
-96    0      
-80    -128   
128    -32    
80     -784   
-16    80     
-32    48     
224    464    
16     240    
-64    -384   
-48    -192   
64     -144   
208    144    
-32    96     
64     -464   
160    -144   
64     208    
32     -64    
96     -112   
48     96     
96     -1600  
0      128    
256    -1056  
48     80     
64     16     
192    -432   
192    96     
-176   -208   
288    160    
144    0      
-128   176    
32     624    
416    -32    
272    -416   
-592   -768   
112    192    
192    272    
352    192    
-240   -592   
-1216  -304   
144    272    
224    -32    
160    48     
-48    -240   
176    -336   
-64    -208   
-112   80     
32     32     
224    -320   
80     368    
-32    -96    
16     -96    
96     -160   
-80    -80    
-1600  -64    
16     -80    
128    -96    
192    32     
224    208    
160    -80    
-320   -32    
-32    -368   
48     16     
288    16     
-192   64     
192    -64    
112    192    
-192   80     
112    -32    
-224   -32    
80     -48    
-48    0      
0      -272   
160    -112   
160    -272   
-320   0      
128    -272   
-80    272    
368    128    
48     112    
112    -112   
64     -80    
-288   -48    
96     -64    
-192   -48    
144    -112   
-1584  48     
128    48     
-192   -16    
96     -48    
-144   -48    
224    -288   
80     96     
368    -64    
-208   0      
32     -16    
-112   0      
32     -16    
128    80     
-176   16     
272    -96    
-1216  -32    
176    -128   
-880   -80    
208    -16    
-16    96     
-96    -272   
128    -64    
432    -464   
-208   256    
304    -112   
-48    0      
-176   96     
256    240    
-544   96     
-16    -224   
-256   -192   
304    -16    
-144   96     
144    128    
-336   -32    
192    -256   
96     176    
128    -656   
224    0      
240    -96    
400    -80    
0      -112   
-144   48     
-560   0      
-144   32     
144    80     
176    80     
-784   224    
-96    -208   
112    -32    
464    -240   
-48    176    
0      -224   
144    -80    
-112   128    
-64    96     
-176   16     
80     -16    
0      -64    
144    0      
32     64     
144    -96    
-48    -16    
32     -80    
64     48     
64     16     
16     160    
-368   112    
144    16     
-96    -208   
16     -272   
320    320    
-112   496    
16     208    
96     -128   
-112   -80    
128    -64    
160    144    
368    32     
96     144    
-112   -128   
96     -112   
-144   -80    
-64    -128   
-112   -64    
-192   -64    
-64    416    
96     -256   
-432   -112   
192    416    
-224   -304   
-384   -48    
0      -64    
128    -400   
240    416    
-144   16     
-208   -352   
-288   32     
-128   16     
0      -112   
160    16     
224    -64    
-704   224    
192    -368   
-16    400    
240    528    
-128   192    
-432   -336   
-320   -80    
-16    -64    
-256   16     
48     -80    
128    80     
-176   -16    
16     128    
0      -80    
32     -32    
-160   320    
160    64     
-928   80     
-16    -112   
-144   0      
208    160    
-64    -160   
224    192    
128    -48    
112    656    
-304   -256   
-64    -464   
32     448    
-368   -128   
-16    64     
-112   16     
-64    32     
-640   0      
288    80     
-480   -176   
240    64     
-144   -64    
64     -32    
-16    224    
32     112    
-64    -64    
-64    0      
-32    16     
128    16     
64     -16    
-352   -64    
-160   96     
-544   -32    
288    160    
-320   -48    
272    144    
48     32     
-304   -64    
80     -16    
-224   -48    
48     -112   
-80    32     
16     0      
-48    0      
96     -96    
-160   -16    
0      96     
-272   32     
-32    48     
-1072  16     
-16    0      
160    -112   
-32    48     
64     192    
-96    -16    
-144   0      
32     16     
-48    96     
-48    32     
96     64     
-80    96     
160    176    
-192   -48    
80     16     
-720   -80    
112    32     
96     32     
-32    32     
128    0      
0      32     
0      -48    
0      112    
64     80     
-32    -48    
288    -112   
48     -32    
240    112    
-320   -96    
-32    32     
-144   -32    
-32    160    
96     80     
304    -48    
32     -112   
-208   0      
16     96     
48     16     
16     48     
-32    16     
-144   -144   
-128   -160   
240    80     
-320   -48    
256    208    
-688   128    
-144   64     
0      -144   
272    -64    
48     192    
-208   80     
80     48     
240    112    
-112   0      
-240   0      
512    208    
-192   -32    
496    -128   
240    -48    
-48    96     
-80    -208   
16     48     
-688   0      
-272   -176   
-160   -160   
416    -96    
352    128    
320    96     
336    48     
-144   -48    
-80    16     
-32    -96    
192    80     
-32    48     
480    192    
-192   112    
176    32     
160    -80    
288    -16    
80     112    
-400   32     
144    192    
-416   16     
256    256    
-80    32     
448    96     
-96    16     
48     -32    
-208   80     
32     80     
64     160    
-240   64     
224    208    
240    80     
0      -80    
-144   0      
-240   16     
32     16     
0      32     
-192   -96    
400    48     
-240   -80    
192    -32    
-416   -16    
-288   -16    
96     80     
32     64     
48     32     
-112   -64    
224    48     
32     32     
32     48     
32     64     
16     64     
144    240    
-128   32     
-48    -32    
16     48     
224    32     
64     64     
208    32     
16     -32    
16     16     
-16    0      
0      16     
-48    -48    
128    32     
48     16     
80     32     
-64    80     
208    192    
-64    16     
64     -32    
-48    96     
240    176    
0      272    
-176   112    
64     32     
208    -16    
-48    -160   
112    -160   
304    256    
-96    464    
96     -384   
224    -224   
352    688    
-400   -256   
0      480    
0      -1088  
-80    -1232  
192    592    
112    -80    
368    240    
32     16     
-96    -192   
80     192    
48     0      
-64    -48    
192    112    
-224   -192   
384    -32    
-240   400    
144    -208   
-352   -80    
544    -592   
-80    608    
48     576    
320    80     
-96    832    
288    -256   
-384   192    
64     32     
160    -336   
64     208    
-32    -128   
16     960    
304    272    
192    240    
-224   112    
224    -496   
-64    128    
32     48     
432    304    
-208   16     
16     32     
96     -48    
32     160    
176    32     
112    -48    
0      -16    
96     96     
80     176    
-16    0      
128    48     
-80    -256   
112    80     
48     -416   
336    48     
80     32     
-48    272    
208    64     
32     240    
0      64     
64     48     
192    80     
64     -64    
176    0      
48     16     
-48    128    
368    128    
-176   320    
-80    -32    
-32    16     
144    -32    
208    32     
64     0      
192    48     
32     144    
240    16     
48     96     
304    -16    
-64    48     
-144   -288   
112    -64    
144    -240   
64     80     
96     -80    
64     0      
64     -256   
112    128    
-96    96     
80     144    
32     128    
16     -80    
128    48     
288    -48    
0      112    
64     -128   
64     64     
112    -144   
160    48     
-128   -96    
-48    -32    
-96    144    
176    64     
48     48     
240    48     
0      96     
112    -128   
16     16     
64     -48    
64     16     
128    -48    
144    128    
192    80     
64     0      
-16    -128   
80     368    
-192   336    
-128   -272   
192    16     
176    -592   
48     -688   
0      -144   
-80    -608   
128    16     
176    80     
-80    16     
192    16     
112    -240   
-224   -240   
-176   -80    
32     -320   
64     240    
368    -112   
-80    64     
80     -432   
176    -32    
-32    96     
416    304    
-80    -48    
240    -144   
64     -176   
144    -960   
96     -80    
-16    -32    
-128   -16    
176    -240   
128    -112   
576    -64    
-368   -384   
-160   48     
80     800    
-944   -176   
384    -240   
-304   -256   
112    -320   
208    -32    
112    -448   
176    -80    
48     -336   
-176   -288   
-112   -192   
80     672    
240    128    
-224   -96    
-64    -192   
192    -208   
-880   272    
64     -64    
-96    -16    
208    96     
64     -208   
-16    64     
16     -176   
16     -1616  
-176   48     
304    256    
-96    -144   
192    -64    
112    80     
-384   -112   
352    -192   
-592   32     
96     512    
-672   288    
-32    -48    
-32    -160   
128    -464   
-32    -32    
64     -368   
16     16     
208    -80    
64     64     
48     32     
-48    -64    
-208   -48    
-96    -176   
-144   48     
128    304    
-96    752    
-48    -32    
464    -320   
176    -176   
80     16     
96     -336   
-112   32     
48     -288   
-128   -144   
-256   -64    
176    80     
0      0      
48     -144   
-128   16     
160    -32    
-608   16     
0      112    
-1152  80     
128    -48    
192    192    
-16    -16    
96     64     
-32    -736   
144    -48    
16     80     
-96    80     
320    48     
-304   16     
-144   -48    
-192   80     
-304   -32    
112    -112   
-96    48     
96     -112   
80     0      
128    -144   
80     48     
0      -320   
96     -48    
64     32     
48     -32    
-64    -16    
-80    -32    
-224   -16    
240    0      
112    48     
-80    48     
64     16     
16     -96    
128    16     
112    -128   
112    112    
-64    -16    
64     -80    
-208   48     
112    -48    
-16    16     
128    0      
-80    -32    
0      -80    
-96    80     
0      -176   
-256   -16    
-144   -224   
176    48     
-912   -128   
-128   48     
-48    0      
-576   112    
176    96     
-400   0      
-384   -96    
176    32     
-112   -112   
176    -48    
-400   -48    
448    64     
80     64     
-576   -32    
96     48     
-416   -32    
-352   -32    
-112   80     
-384   0      
-32    0      
-384   16     
-16    16     
-1088  0      
192    176    
-112   48     
-192   -48    
0      -48    
-16    -256   
96     -160   
80     96     
-96    16     
0      64     
80     96     
-240   -48    
-112   16     
64     0      
-128   -80    
-624   -304   
-368   -192   
64     96     
80     128    
176    64     
80     32     
80     -208   
112    112    
-272   -80    
144    96     
-320   -512   
80     -256   
224    240    
320    -48    
224    -128   
-208   -48    
336    288    
-832   -48    
560    -48    
64     -256   
16     352    
-496   -32    
-176   -80    
-16    128    
256    144    
-144   96     
-112   -80    
80     48     
-96    0      
288    64     
-400   128    
-48    144    
-560   -48    
-288   -32    
-48    -96    
80     80     
208    48     
-32    -96    
176    0      
-464   144    
-624   128    
-224   144    
-80    144    
-192   32     
-144   -64    
-48    -80    
304    256    
-720   64     
32     -80    
128    -256   
480    -240   
176    -16    
-112   144    
-16    32     
-240   -32    
48     -128   
144    -32    
352    64     
496    160    
-272   -16    
0      176    
-272   160    
-288   0      
-128   16     
-896   -160   
160    128    
16     144    
-64    -48    
-64    -80    
-80    0      
-32    112    
96     160    
-96    0      
-160   -656   
48     608    
-144   176    
80     -224   
-64    112    
64     64     
-608   -240   
64     -160   
48     304    
-32    -144   
16     272    
32     -64    
128    400    
-368   -528   
208    -32    
-208   128    
304    0      
112    48     
32     -176   
-272   128    
-192   -464   
64     -224   
80     576    
-80    96     
288    160    
16     -144   
224    80     
-64    144    
224    560    
-496   -512   
-96    -336   
16     272    
-48    -16    
48     48     
-96    160    
352    496    
-112   48     
160    48     
-16    48     
256    80     
-192   176    
-128   -544   
176    -336   
-64    48     
-128   0      
48     112    
160    208    
-224   32     
-64    0      
-32    -48    
-144   -32    
16     -64    
96     144    
144    224    
-16    64     
160    112    
-32    240    
-32    0      
224    -16    
-64    128    
-112   -32    
32     -16    
-352   -272   
336    -16    
0      176    
192    -128   
-96    336    
-64    48     
-16    16     
-80    -16    
208    -32    
144    64     
176    -192   
-128   32     
-64    112    
-16    64     
240    176    
96     0      
48     -64    
16     48     
64     208    
288    160    
-112   -48    
112    0      
0      96     
144    80     
-16    112    
176    -16    
288    48     
-80    112    
-64    48     
-64    -16    
576    256    
-368   -1472  
-240   112    
-128   192    
160    176    
208    128    
208    -112   
224    48     
48     192    
176    384    
208    144    
-160   -48    
-32    -48    
-144   -96    
96     -16    
32     -32    
48     -224   
80     -16    
64     192    
-48    96     
80     128    
-128   112    
-32    128    
64     96     
192    0      
96     96     
48     32     
96     -64    
64     0      
-64    64     
288    176    
96     16     
96     80     
64     208    
-192   -32    
144    -96    
64     16     
-16    32     
96     64     
128    -128   
16     0      
0      -192   
112    80     
-176   32     
112    160    
80     128    
112    -192   
96     16     
80     -960   
-96    224    
-64    112    
240    48     
352    64     
48     224    
-16    48     
640    496    
-608   336    
-144   224    
-224   64     
240    80     
272    16     
-208   -640   
16     368    
-224   -384   
16     -128   
64     -304   
256    -224   
208    -192   
448    128    
-112   -16    
80     -64    
-80    144    
480    160    
-256   -272   
176    416    
-240   320    
16     -352   
208    48     
80     -336   
480    240    
416    -528   
240    160    
-384   -176   
64     208    
-64    -48    
224    -112   
-560   -112   
-48    80     
0      -240   
304    208    
320    288    
160    -336   
160    96     
-16    -96    
-400   -144   
128    -1296  
-176   224    
-80    0      
560    48     
-144   -144   
96     -16    
32     -16    
16     96     
64     128    
0      -16    
16     64     
-32    48     
16     80     
224    -112   
-32    -16    
128    -160   
96     64     
-48    -16    
192    144    
48     16     
80     80     
-32    96     
-64    -64    
128    48     
96     80     
112    64     
80     -16    
48     -32    
176    -32    
224    144    
-112   -32    
0      64     
-32    -32    
32     -160   
128    96     
64     48     
224    48     
304    -16    
-48    128    
-48    -224   
-80    32     
-96    -240   
176    64     
96     64     
144    144    
0      0      
16     -96    
-32    32     
48     -1488  
-96    -64    
160    -48    
208    -64    
-32    -48    
128    -560   
240    -80    
208    -416   
-144   -48    
224    48     
-32    -32    
64     -464   
48     -48    
176    -112   
-64    0      
176    -16    
192    32     
-496   -80    
128    -96    
64     -48    
128    -208   
-96    32     
240    -320   
144    80     
112    -1360  
-48    -48    
32     0      
224    -16    
32     -32    
-64    16     
160    0      
-128   16     
-816   -64    
128    -48    
16     -16    
16     -48    
96     -16    
-48    -224   
176    -32    
0      -272   
96     -144   
144    96     
80     32     
160    -64    
96     16     
-128   -32    
272    -16    
32     48     
-16    -32    
-656   32     
96     -80    
-64    -128   
32     80     
224    16     
144    -144   
112    0      
80     -240   
0      176    
160    -160   
-96    -48    
144    -160   
208    16     
0      48     
16     96     
-144   -160   
144    -128   
288    32     
-176   48     
-48    -96    
32     -96    
48     0      
256    -848   
-48    64     
80     -32    
0      32     
-48    32     
-16    -32    
0      -48    
160    -160   
-112   -112   
128    -16    
-528   112    
96     -16    
-128   64     
112    -160   
144    160    
-64    144    
48     64     
96     -80    
112    -64    
96     16     
144    48     
-192   80     
-64    -16    
-256   -16    
80     112    
-480   48     
-32    -160   
352    -16    
160    -64    
608    1104   
416    -96    
64     -592   
-272   192    
-272   80     
-384   -384   
48     -464   
160    128    
160    208    
176    -560   
288    368    
-96    -112   
160    0      
-96    112    
96     -128   
192    224    
-144   -112   
32     224    
-592   128    
-128   0      
-112   -944   
384    -112   
336    320    
-192   -48    
-304   -64    
-32    -128   
-256   176    
416    112    
672    16     
272    -144   
-32    -32    
-256   -16    
-384   -272   
-208   -704   
176    528    
64     -272   
224    -32    
-512   112    
96     -32    
-480   624    
272    -64    
-48    -96    
-288   64     
32     96     
-1872  -112   
-160   224    
-1888  -112   
-16    128    
176    80     
-400   -48    
-32    -432   
-256   -336   
-272   336    
-128   -176   
-64    -496   
144    368    
-16    144    
-176   -320   
288    288    
-320   -112   
96     0      
-32    96     
16     -352   
48     -224   
-320   256    
-96    -240   
-336   -32    
-32    -144   
144    -720   
-112   48     
288    416    
-128   272    
-368   -336   
32     80     
-160   -64    
-144   144    
48     272    
80     96     
176    608    
-432   240    
64     192    
-176   48     
-16    32     
-304   656    
-160   -80    
-96    16     
80     64     
48     -208   
240    320    
16     32     
-112   64     
112    0      
-192   80     
48     80     
-224   -16    
240    160    
-272   48     
80     128    
-976   80     
112    -64    
-1520  -64    
32     48     
-112   0      
240    -16    
32     -272   
48     -80    
224    160    
-144   112    
48     0      
48     -16    
32     -64    
-176   -32    
-144   16     
-336   432    
128    96     
-1136  -16    
208    -48    
-16    16     
16     0      
32     32     
-128   -96    
288    -224   
-176   80     
32     112    
-64    96     
-96    576    
288    256    
48     -16    
144    480    
-96    -16    
112    0      
240    48     
-432   160    
192    96     
-176   80     
16     80     
160    -16    
256    -32    
-96    16     
-352   32     
-112   -16    
-32    96     
80     -96    
48     48     
384    208    
-640   256    
-48    32     
-1136  -144   
-80    80     
112    112    
-16    80     
-64    -48    
48     80     
-256   64     
-176   -80    
64     128    
0      144    
-16    -64    
16     96     
-64    224    
-560   -48    
16     -32    
160    48     
16     -64    
-96    80     
-240   208    
-48    32     
16     -144   
112    -272   
80     176    
-144   176    
-112   0      
176    32     
-256   -80    
96     32     
128    160    
96     64     
224    160    
-144   192    
32     -64    
-128   80     
32     128    
64     -16    
-32    32     
336    176    
-96    288    
-400   80     
64     304    
-160   16     
272    -240   
-64    -160   
96     -32    
-80    -96    
-48    0      
144    48     
112    80     
0      80     
-144   -128   
-192   -48    
176    48     
-80    0      
32     -240   
32     80     
-256   256    
144    -144   
-288   -144   
80     320    
-560   -112   
-160   -32    
-224   -208   
288    432    
112    128    
304    160    
112    256    
96     32     
0      0      
-16    160    
112    112    
-272   112    
16     48     
0      -128   
208    -96    
256    32     
-112   160    
384    128    
-176   -384   
32     112    
-336   -128   
672    -192   
432    -128   
496    -96    
-96    -80    
32     80     
-512   64     
-336   32     
-32    16     
336    -48    
240    64     
176    16     
32     16     
-112   16     
-176   -64    
64     0      
0      112    
-32    96     
160    48     
-256   -64    
0      32     
-320   -160   
496    -880   
-64    80     
192    48     
256    -16    
-128   -32    
-48    64     
400    336    
-240   -48    
240    32     
320    48     
-256   -128   
128    32     
0      16     
160    64     
-160   16     
80     -544   
64     64     
-32    80     
0      16     
-144   -32    
80     32     
96     80     
304    80     
-272   -48    
144    0      
-112   0      
80     48     
96     80     
192    32     
-32    80     
0      -512   
-16    0      
160    16     
-96    -48    
144    80     
-64    16     
144    48     
160    0      
80     -64    
192    112    
-48    -32    
176    -32    
-160   -80    
80     48     
-224   -112   
416    -400   
-144   144    
288    -464   
160    0      
0      112    
64     -16    
-144   -128   
208    64     
224    288    
-160   112    
160    -192   
144    -96    
0      144    
80     -64    
160    32     
112    32     
-32    16     
-32    -736   
192    0      
-96    32     
48     80     
208    -80    
0      32     
112    0      
48     32     
32     -64    
80     112    
16     -32    
128    -32    
176    16     
-64    -96    
272    96     
-96    -448   
-16    16     
64     -512   
176    112    
112    -96    
112    64     
-160   -80    
128    32     
384    144    
-512   32     
224    32     
80     -16    
112    32     
64     -144   
-48    96     
112    -448   
144    80     
-16    -304   
160    32     
-64    112    
288    16     
80     -48    
192    48     
-96    32     
32     80     
112    144    
-32    -64    
0      -192   
0      -96    
80     304    
304    192    
96     -48    
-176   -64    
144    160    
-16    48     
64     80     
-32    -16    
208    160    
-32    -112   
-32    -672   
96     80     
128    240    
-16    -256   
64     64     
224    208    
-112   -224   
48     64     
-64    -1504  
32     -64    
48     -16    
144    64     
-96    -432   
32     224    
144    -16    
160    -96    
32     112    
-32    -16    
176    144    
-144   -64    
-16    32     
32     48     
-208   64     
336    -1984  
352    720    
304    0      
160    -336   
-240   0      
-1184  16     
192    -400   
432    512    
-368   -176   
-176   -288   
48     48     
192    -96    
256    -208   
320    384    
192    -144   
224    0      
-208   -224   
208    -944   
240    304    
592    48     
-256   -192   
272    352    
-128   -96    
-144   -224   
-16    -112   
96     -1216  
-48    -112   
-144   160    
-80    0      
-192   -112   
272    -960   
64     -432   
-32    688    
-128   416    
-16    -16    
-112   -224   
-112   -96    
416    -496   
192    80     
512    -528   
96     -192   
48     240    
-64    -128   
-368   -304   
144    80     
-480   0      
32     -80    
-304   -304   
464    -208   
160    -64    
144    16     
304    -16    
-640   -160   
112    -80    
-192   -208   
-16    -256   
-48    -16    
80     -560   
-224   112    
208    176    
-160   544    
224    128    
240    -96    
-176   -80    
-112   48     
-336   144    
96     -80    
-592   48     
128    -80    
144    128    
48     -128   
160    -192   
64     -208   
0      -16    
80     -432   
32     64     
144    -32    
32     416    
112    64     
-80    48     
32     -80    
96     -32    
-144   80     
272    48     
-112   -128   
336    -640   
-128   112    
240    32     
128    -400   
-160   -576   
-96    -432   
224    160    
368    -32    
-352   -240   
80     -192   
-144   -112   
112    336    
96     -48    
-96    320    
-224   -48    
144    -80    
-144   -432   
16     -160   
32     112    
16     -48    
288    400    
-176   -416   
-64    112    
-192   -32    
304    -208   
-368   0      
80     0      
-752   160    
240    16     
-16    -80    
192    -64    
176    -32    
64     -288   
-16    0      
64     -112   
160    128    
-240   -16    
192    32     
-288   48     
-96    32     
-192   -96    
32     112    
64     16     
-96    208    
-848   32     
80     -384   
-16    0      
16     -128   
48     352    
-16    -64    
336    -352   
16     64     
-32    128    
-96    -240   
160    -720   
-32    -288   
96     -64    
48     48     
-96    -336   
-272   -112   
-64    -448   
-96    -96    
-416   112    
-176   272    
-320   -176   
-288   -96    
-16    0      
-576   -80    
128    -224   
-96    -160   
80     -112   
-240   -160   
-80    0      
48     176    
-112   224    
-144   -400   
-64    -96    
-192   -208   
-80    64     
64     96     
112    80     
-112   48     
-176   96     
-96    48     
112    -144   
112    0      
-240   80     
-64    0      
-336   -96    
160    16     
-176   256    
160    256    
-192   -48    
-176   240    
0      32     
-224   -112   
-80    0      
96     -16    
-144   208    
-640   64     
112    304    
48     176    
48     -16    
-128   -128   
64     -208   
0      -64    
32     64     
96     80     
-256   -112   
-48    0      
-144   32     
-80    -64    
-192   64     
-256   -32    
-272   -336   
-16    128    
0      80     
-80    112    
-176   -224   
-96    48     
-240   -128   
208    176    
-320   -112   
-336   -384   
336    144    
-80    160    
272    -48    
-192   32     
-208   80     
-64    352    
-448   96     
-32    80     
-16    256    
-16    -160   
16     112    
32     0      
224    112    
-32    80     
208    -32    
-64    -16    
-160   16     
0      48     
-32    48     
-176   -80    
224    80     
16     96     
-128   -160   
352    0      
-384   16     
-48    -64    
432    176    
-304   -64    
368    96     
384    512    
-576   112    
48     -80    
112    -32    
-96    32     
-208   48     
-256   -48    
144    48     
-128   -16    
32     32     
-832   -112   
48     48     
0      32     
-112   144    
-320   -16    
-64    32     
96     48     
0      -80    
288    32     
-48    128    
0      -48    
192    -16    
-112   96     
16     64     
80     -64    
-416   -64    
-64    64     
-176   16     
16     48     
16     48     
48     32     
48     64     
96     32     
128    0      
-112   32     
-48    -16    
-32    0      
64     112    
-192   16     
48     64     
-528   -128   
16     -48    
144    48     
160    96     
208    80     
-256   0      
-96    -96    
-272   0      
16     128    
-80    -112   
96     -160   
-416   80     
192    128    
-48    -96    
16     0      
-144   16     
-16    48     
32     16     
112    16     
-96    32     
-16    96     
0      96     
-16    96     
144    -48    
-64    32     
112    -48    
-96    -48    
16     96     
-144   80     
208    -32    
224    64     
48     208    
32     80     
-16    -64    
416    80     
-448   144    
16     96     
0      -32    
176    48     
16     64     
160    80     
64     -48    
-80    16     
-32    96     
-32    112    
48     112    
32     0      
-64    64     
160    -16    
64     16     
16     16     
160    80     
-128   64     
16     16     
-16    -32    
240    144    
-160   112    
208    144    
-128   -48    
208    272    
-64    144    
32     -32    
112    96     
112    96     
160    64     
-128   -16    
144    16     
-256   80     
144    160    
-224   48     
224    -192   
32     -96    
64     48     
-96    -160   
-64    0      
-32    240    
-144   48     
192    64     
128    128    
80     -400   
-96    272    
96     -96    
-128   112    
96     128    
80     128    
208    144    
-352   -16    
128    80     
224    224    
-80    -1056  
32     192    
-32    -128   
192    0      
48     240    
16     256    
112    -96    
-16    400    
144    80     
208    -432   
-288   432    
-48    160    
16     -352   
496    96     
-16    176    
-48    -64    
16     -160   
272    224    
64     336    
64     0      
144    384    
160    -224   
32     -32    
64     0      
272    144    
-208   64     
96     -128   
192    -16    
32     96     
80     112    
-16    -256   
240    224    
192    272    
192    272    
-16    16     
16     -48    
48     -32    
192    48     
-64    64     
-240   -96    
-16    -80    
432    416    
-128   288    
176    -64    
256    352    
48     -256   
272    288    
16     -608   
-176   0      
128    416    
64     96     
-176   -352   
-64    16     
-288   0      
-16    272    
-208   128    
304    -96    
176    0      
176    32     
192    160    
-80    32     
-208   80     
-208   -208   
64     64     
176    272    
0      64     
160    0      
128    80     
128    -32    
224    -64    
192    -80    
176    -176   
208    80     
-80    -16    
-32    48     
192    -48    
32     240    
-224   -544   
352    64     
320    -288   
480    224    
160    -64    
-176   -80    
-16    -112   
-112   -48    
16     -160   
144    -208   
112    208    
128    -48    
-64    16     
304    80     
-96    160    
-112   -64    
0      -96    
32     -592   
96     -32    
-32    -64    
80     96     
16     144    
160    48     
144    128    
16     -96    
64     -80    
32     -320   
48     16     
-256   -448   
224    -176   
144    -112   
16     48     
240    688    
-128   160    
-128   64     
96     -224   
-48    -112   
64     -48    
176    240    
80     -176   
16     16     
-128   -304   
304    -608   
96     -160   
128    48     
-16    -16    
144    384    
-368   -272   
176    144    
208    96     
128    -80    
176    16     
-96    0      
368    -624   
0      -304   
64     -144   
208    -16    
-128   496    
-64    -16    
-256   320    
384    560    
144    -160   
304    -304   
-48    -288   
-48    -96    
-128   -96    
224    -64    
-1408  0      
480    -160   
0      -288   
352    -240   
80     32     
32     -112   
32     -32    
80     144    
112    -80    
192    128    
-32    -192   
368    -160   
-192   -144   
32     -64    
112    -224   
-640   16     
-32    -304   
384    -624   
80     -256   
256    -224   
-64    -224   
-288   16     
544    -368   
208    336    
-80    -160   
-96    112    
416    112    
288    432    
-384   128    
176    144    
-160   32     
448    112    
-144   448    
112    -128   
368    112    
128    208    
-32    272    
96     -144   
-144   64     
272    240    
-112   336    
64     240    
160    80     
32     96     
-112   -272   
-320   0      
368    160    
-2640  -480   
176    -96    
16     208    
64     80     
224    128    
224    48     
-80    0      
-64    -624   
80     576    
160    -32    
64     -16    
-16    -32    
-16    -224   
80     -192   
496    800    
-384   -224   
0      64     
224    -192   
-368   -16    
-160   -240   
176    64     
128    -112   
432    -848   
0      80     
64     -96    
0      16     
-480   -16    
96     -112   
-224   -80    
224    -16    
208    32     
208    80     
-1552  0      
160    -128   
-160   -16    
-64    -96    
-64    -96    
80     -448   
-176   -208   
16     -160   
192    32     
-352   -32    
192    -32    
176    208    
-80    64     
-384   208    
304    96     
-576   -64    
-400   -768   
-112   -608   
-288   176    
-496   288    
-368   -336   
48     -128   
-640   -16    
64     -160   
384    -96    
336    64     
416    0      
304    32     
160    48     
-32    -80    
-96    64     
160    16     
48     -16    
112    -144   
-112   128    
-48    -96    
-320   -352   
128    -64    
-80    272    
-768   96     
-144   -96    
-224   -16    
16     -16    
352    80     
640    -32    
-464   -96    
-112   -112   
48     144    
-2208  -112   
-304   32     
-64    -16    
368    272    
-432   64     
-368   -64    
-272   -128   
192    48     
112    -16    
448    48     
352    176    
-976   -32    
-128   -80    
-528   -160   
-48    -16    
240    16     
336    80     
80     48     
-32    0      
240    128    
-816   -48    
-128   -64    
-1056  16     
128    112    
288    16     
-272   -32    
32     -112   
48     32     
240    64     
-16    96     
96     -48    
-16    -16    
-144   0      
-128   -16    
-160   64     
-64    96     
-160   -96    
-224   32     
-48    -48    
16     -32    
144    80     
-176   -80    
160    48     
-192   -144   
192    -144   
-128   64     
-64    16     
16     144    
-144   -16    
80     176    
48     48     
304    128    
-496   128    
48     -96    
-352   -16    
96     96     
-32    -80    
112    48     
-64    -32    
-112   32     
64     -32    
0      32     
-48    32     
368    48     
-192   112    
-224   96     
80     128    
-336   64     
128    32     
-32    -16    
0      -16    
-272   -16    
112    112    
-16    16     
16     208    
-208   32     
144    0      
-144   -96    
-48    -96    
-48    32     
-144   -80    
48     176    
-80    160    
0      -176   
-464   80     
96     48     
-1008  -176   
64     -128   
-80    -16    
112    128    
0      -32    
32     64     
-128   32     
96     112    
-16    -160   
80     -80    
32     256    
0      -384   
0      32     
-128   416    
-64    -272   
-192   96     
112    80     
-176   32     
128    -688   
-160   176    
224    208    
-16    -176   
-112   352    
-48    -288   
-128   -768   
144    1008   
-176   0      
32     -560   
-160   96     
160    -192   
240    672    
-240   592    
-112   368    
-128   -288   
48     -144   
80     -32    
-80    48     
0      -208   
16     -192   
0      0      
-208   -32    
-384   -176   
80     80     
0      112    
48     160    
64     160    
-144   48     
192    144    
-160   80     
32     48     
0      -160   
-32    0      
-48    -112   
-160   0      
144    272    
-48    80     
16     80     
208    80     
128    112    
-80    96     
0      -32    
0      32     
-80    112    
-16    -64    
112    0      
-16    48     
48     16     
64     16     
-144   128    
-16    32     
0      48     
160    80     
48     160    
-176   -32    
48     -48    
80     112    
-144   -80    
112    16     
0      -128   
96     32     
-32    32     
48     -128   
0      64     
-64    112    
112    0      
128    48     
-352   -128   
416    64     
-256   192    
144    160    
-128   176    
32     -64    
144    16     
-160   192    
16     -16    
208    -128   
112    64     
-80    128    
-48    48     
32     128    
32     -16    
-64    -80    
144    -80    
-80    128    
-240   96     
64     96     
0      128    
-176   48     
240    -16    
416    -80    
112    32     
-48    96     
-208   -32    
48     -144   
-48    16     
176    16     
-128   -32    
48     -176   
48     -224   
16     160    
128    112    
-192   80     
-96    48     
304    48     
-160   32     
80     32     
-96    0      
128    0      
112    96     
272    -16    
-16    -64    
-80    -96    
112    112    
64     96     
32     16     
112    96     
80     48     
64     -80    
16     48     
144    32     
-112   32     
80     48     
48     48     
80     0      
176    176    
-80    320    
32     112    
-32    -176   
16     -272   
0      -576   
96     -144   
-112   -128   
160    128    
0      144    
64     112    
240    96     
-192   -304   
272    -400   
288    96     
480    992    
144    880    
-400   96     
224    16     
80     160    
-48    32     
176    -32    
-352   -496   
16     -672   
80     0      
176    -464   
112    0      
144    768    
224    -560   
160    256    
272    -560   
-272   -112   
-112   -288   
176    -192   
32     816    
112    -480   
-224   64     
80     -288   
16     128    
128    160    
-32    -128   
224    -848   
112    160    
160    256    
256    -32    
208    320    
-272   -208   
128    -144   
64     -320   
-16    112    
80     16     
-80    464    
112    -144   
176    -144   
224    48     
-272   656    
192    -224   
144    -320   
-416   -112   
160    -16    
-80    240    
304    160    
176    176    
-160   -176   
240    16     
48     -16    
96     288    
208    -64    
-64    -176   
-32    -1568  
96     144    
-64    96     
448    560    
-320   -240   
368    -112   
336    144    
-336   -368   
320    240    
0      192    
0      -96    
176    64     
144    -64    
32     -176   
224    144    
-32    48     
160    16     
-48    -64    
80     112    
80     0      
-144   -304   
128    80     
-48    -112   
128    80     
192    64     
304    144    
-128   -224   
-64    -112   
-32    -112   
160    96     
-96    -64    
16     48     
128    144    
0      32     
48     288    
0      240    
144    -96    
144    -304   
64     -112   
-16    -32    
32     112    
-64    -16    
-32    96     
112    112    
304    320    
0      160    
176    -1424  
16     16     
80     -848   
-16    48     
160    -208   
16     -96    
320    -96    
64     -768   
112    -16    
-32    128    
-48    -80    
-160   288    
160    128    
464    -544   
-288   80     
-384   -64    
176    48     
-32    112    
-48    128    
-544   64     
-128   -256   
-480   -608   
432    -448   
80     288    
-320   -464   
-80    64     
-368   -544   
176    -288   
-16    112    
-192   -208   
-96    -224   
144    80     
-240   -32    
128    -112   
-1904  -16    
-352   -160   
-32    -112   
-16    -192   
-240   -16    
32     -160   
-224   -336   
496    -560   
256    160    
-16    -32    
272    32     
64     0      
64     112    
-576   -112   
400    -208   
-304   -96    
-32    112    
432    112    
80     -48    
-208   -48    
-80    -128   
176    32     
-288   -800   
-176   -80    
-272   112    
336    208    
480    16     
-336   -128   
-144   -48    
128    0      
96     0      
0      32     
-128   -112   
32     -48    
64     -16    
192    80     
64     96     
-64    -480   
80     32     
224    32     
320    224    
-288   16     
64     -112   
-16    48     
208    -32    
-192   -48    
16     -96    
-544   -128   
32     -192   
288    32     
48     -80    
112    16     
128    -288   
-16    16     
160    -1776  
-64    80     
96     336    
192    80     
-208   -48    
64     -64    
-192   -80    
64     32     
-464   0      
96     48     
0      48     
112    -144   
64     -80    
128    -288   
128    128    
208    -400   
256    -128   
352    32     
80     -112   
-240   -144   
176    -144   
-1088  -64    
128    96     
128    160    
112    -80    
-272   -64    
80     -192   
128    64     
-64    -32    
208    112    
112    -80    
112    -16    
-640   80     
16     -336   
-576   -224   
128    304    
-304   -240   
160    -128   
-48    464    
144    48     
16     -96    
0      0      
-48    16     
192    -32    
-176   -176   
0      -544   
-400   688    
-192   -160   
496    -496   
48     144    
-144   48     
224    384    
-16    -368   
-96    304    
-80    -128   
-80    -96    
240    -112   
272    176    
-416   224    
-32    224    
0      64     
-656   32     
0      416    
-448   -336   
-224   -128   
352    160    
-176   240    
144    0      
176    64     
-16    112    
-32    96     
-480   -128   
240    272    
-416   240    
-96    96     
64     96     
-560   -64    
-48    -80    
-64    48     
-192   -64    
-512   -160   
48     -144   
160    32     
80     96     
-48    -96    
64     16     
-240   64     
128    192    
-16    80     
144    48     
144    -32    
160    160    
-224   96     
-320   64     
-144   -96    
-208   48     
16     -32    
-240   80     
-96    64     
-160   -32    
112    48     
-192   -48    
192    32     
176    32     
-208   -32    
80     -96    
-80    0      
16     80     
-192   400    
272    560    
192    208    
-16    -96    
-1136  -160   
64     -16    
80     -48    
32     128    
-160   -16    
224    240    
-160   80     
80     -128   
80     32     
-304   -64    
288    -80    
-32    128    
-16    -64    
-160   -176   
-272   -112   
-240   -160   
16     144    
-176   -128   
144    -128   
96     -176   
432    0      
-144   16     
208    -16    
-48    96     
-176   -32    
208    128    
-320   208    
-576   160    
-32    240    
-128   336    
-448   -96    
608    48     
-800   32     
96     0      
16     112    
-112   64     
416    48     
0      -32    
80     0      
0      -16    
-128   48     
-560   -64    
-160   16     
48     272    
112    176    
144    144    
144    32     
-528   -464   
-96    -368   
-208   32     
-688   80     
-32    48     
96     0      
-64    192    
144    32     
-32    -48    
-128   -112   
112    160    
-80    272    
-16    352    
-240   288    
48     80     
-592   -64    
-96    -112   
176    -128   
-112   -240   
176    -176   
32     -16    
-128   -64    
-96    -48    
32     -96    
80     48     
80     64     
-64    176    
-80    -64    
-240   -64    
80     144    
-192   -128   
48     -16    
96     -112   
160    336    
-336   -240   
-32    -192   
144    -112   
32     112    
80     176    
-96    -256   
144    432    
-400   -192   
176    -240   
0      -48    
-64    480    
128    -304   
-80    112    
-80    -112   
64     688    
-32    96     
-160   -128   
-240   -304   
-16    0      
-192   -160   
80     192    
304    160    
32     -496   
112    480    
-112   32     
48     128    
48     0      
32     80     
16     192    
0      -512   
144    896    
-176   128    
-160   -752   
400    528    
224    320    
-224   -480   
320    160    
-112   96     
128    -128   
-192   32     
48     160    
-288   -32    
16     -896   
-288   -608   
192    224    
-32    368    
96     64     
336    224    
-16    -112   
144    80     
-128   80     
144    -64    
-224   -320   
128    -64    
32     112    
-32    0      
32     16     
96     64     
96     64     
-32    64     
64     48     
-64    -32    
-64    -64    
-16    32     
144    -32    
32     112    
144    96     
-144   0      
-16    64     
48     0      
208    64     
48     48     
96     64     
64     32     
304    -128   
-384   -288   
96     112    
128    0      
-160   -16    
272    64     
-208   32     
96     32     
-32    -48    
0      -80    
96     0      
96     96     
-64    -64    
80     16     
-112   96     
176    48     
160    80     
128    64     
-32    0      
0      128    
112    32     
-144   16     
160    48     
16     0      
128    -144   
0      32     
-16    96     
256    128    
-48    96     
-176   16     
176    224    
-32    16     
80     -80    
-48    -128   
-48    64     
192    64     
-96    48     
256    96     
32     16     
96     -176   
192    176    
-48    -272   
-16    160    
64     96     
272    304    
-128   96     
32     -48    
0      0      
64     -208   
208    -224   
336    144    
80     64     
64     0      
96     224    
48     -192   
144    32     
-16    -32    
112    64     
128    0      
128    64     
-176   16     
64     64     
160    -64    
-144   -304   
928    -576   
192    176    
80     192    
240    -128   
-176   32     
-528   -384   
752    0      
64     -304   
-192   80     
-144   -192   
176    -16    
336    80     
80     128    
288    -16    
32     96     
-192   96     
-288   -16    
48     0      
-16    -48    
-160   -32    
272    64     
0      160    
-160   -208   
-176   0      
32     0      
560    192    
-128   -128   
656    -32    
272    -32    
160    -16    
176    -64    
176    160    
64     48     
272    16     
64     0      
144    -160   
176    96     
64     -192   
208    32     
-80    32     
48     16     
336    128    
32     80     
0      0      
96     96     
48     112    
64     -432   
-32    16     
32     -128   
-176   -144   
176    -224   
128    112    
-112   -192   
144    64     
112    -112   
144    32     
-96    -32    
112    80     
80     0      
160    32     
96     96     
16     -176   
32     16     
96     -128   
32     0      
80     -80    
96     64     
48     -128   
144    -80    
128    -464   
0      -144   
80     0      
64     -560   
128    16     
144    -448   
-176   -656   
352    16     
-64    -304   
96     -128   
288    -576   
208    304    
-160   -256   
80     480    
144    -224   
-128   -144   
-96    -160   
-64    -624   
384    336    
-208   1072   
-320   -400   
-96    -192   
-48    160    
208    208    
160    -384   
48     384    
496    -96    
-240   32     
32     -208   
0      32     
240    576    
-144   -512   
-32    336    
288    160    
-320   480    
-96    -96    
224    -80    
32     448    
144    -208   
144    144    
-160   -384   
320    -416   
96     -544   
272    -192   
16     128    
224    160    
-48    32     
64     240    
80     -288   
-112   -160   
64     -80    
48     -16    
-1152  32     
0      -64    
-80    -256   
464    -352   
-160   112    
224    -64    
256    112    
-176   -1424  
-432   96     
80     -128   
96     128    
96     48     
48     0      
-144   -144   
256    -64    
-96    -16    
-64    64     
288    -80    
64     -128   
144    0      
0      -256   
-112   -80    
112    -1232  
-48    -288   
128    -400   
48     64     
-192   16     
80     -48    
-144   -32    
32     -80    
-16    64     
208    128    
-736   32     
224    16     
48     0      
336    -208   
-96    16     
128    -416   
192    -96    
48     0      
80     80     
96     112    
-16    112    
-128   64     
112    16     
112    64     
32     144    
-336   -64    
32     -80    
-2032  80     
256    -64    
144    16     
64     -144   
-96    208    
304    -1168  
128    -160   
-80    160    
48     64     
-192   -16    
48     -32    
-1264  0      
112    32     
-448   0      
256    -80    
-320   32     
128    -144   
0      64     
160    -48    
-96    112    
-448   -64    
128    -80    
-208   -32    
64     -96    
-176   16     
-32    -80    
-112   96     
-144   80     
16     16     
-80    16     
0      112    
32     -272   
288    -32    
208    -96    
-160   -48    
208    32     
208    -16    
-224   -208   
192    -576   
176    -448   
432    0      
176    112    
256    288    
-304   208    
96     32     
48     96     
-288   32     
144    288    
-512   48     
-368   32     
-288   0      
-1888  -96    
-16    -208   
-960   -128   
-48    -112   
160    -112   
208    -144   
128    -256   
-144   -32    
-992   -544   
-272   -496   
-368   -512   
64     160    
160    128    
-256   -80    
384    -160   
0      240    
112    176    
-176   96     
-128   128    
-720   0      
-208   16     
304    32     
-176   16     
-576   -304   
16     320    
0      -256   
160    -32    
224    128    
-256   -96    
-144   -32    
-208   80     
-112   528    
288    16     
-16    -128   
-1024  -112   
160    128    
-688   0      
112    -80    
80     -368   
16     80     
-128   -16    
0      -80    
-160   112    
32     -80    
-80    144    
112    32     
-224   16     
-240   -256   
-32    -208   
-672   -64    
-48    16     
-816   -32    
-96    -160   
-48    32     
144    160    
-80    -128   
-96    256    
16     448    
-80    32     
-176   -64    
-16    32     
-272   64     
96     16     
-16    0      
80     96     
-144   32     
-368   -80    
-48    48     
-112   -48    
48     64     
256    80     
-144   48     
128    16     
-144   -64    
-176   64     
-48    32     
-96    -64    
176    -176   
80     32     
-16    112    
112    0      
-128   80     
-112   80     
496    304    
-112   96     
-96    160    
-96    -288   
112    -32    
-80    80     
-112   48     
176    32     
-288   -16    
112    64     
-32    -16    
-240   -80    
224    -48    
-384   48     
16     0      
-880   -32    
0      48     
48     48     
-80    32     
-32    16     
144    16     
32     48     
32     96     
352    80     
-464   -32    
-80    -80    
-16    -16    
128    80     
-48    32     
-48    0      
-352   112    
112    32     
48     96     
-128   -48    
-288   -32    
160    64     
-16    80     
96     80     
304    272    
-352   144    
-32    80     
48     -32    
144    112    
-128   -48    
192    64     
48     128    
-304   -16    
80     -16    
144    80     
16     64     
144    64     
48     64     
-192   -112   
0      16     
-32    48     
96     64     
32     48     
0      -96    
-448   -128   
240    224    
-160   48     
-48    48     
128    32     
80     0      
-112   32     
-128   48     
48     0      
128    16     
-32    48     
32     -176   
-32    -64    
-48    16     
160    -112   
-16    -176   
64     0      
32     32     
80     -64    
-16    96     
-176   -272   
80     -256   
32     0      
-16    96     
48     32     
176    -112   
-16    -64    
128    144    
-160   16     
176    80     
-48    -32    
80     -96    
256    160    
-368   32     
-32    16     
928    1056   
-656   720    
-416   -64    
-208   -32    
32     -96    
432    320    
-432   288    
-16    144    
160    -128   
192    416    
368    304    
0      -80    
-400   160    
-192   64     
-80    96     
-16    48     
-16    16     
-16    48     
-48    64     
128    -112   
208    -144   
-64    -192   
512    48     
160    144    
176    -464   
16     32     
-128   96     
640    592    
-448   336    
-80    -112   
128    -208   
112    -32    
192    128    
160    144    
-16    48     
160    80     
-32    -64    
-160   -192   
16     16     
-144   -1088  
176    -352   
176    16     
-16    304    
176    320    
0      176    
-432   -48    
176    160    
-192   208    
336    -48    
208    -64    
272    32     
144    -272   
-192   -512   
560    -304   
-48    704    
-48    -80    
80     -96    
32     48     
112    0      
16     256    
-96    -64    
208    64     
-16    16     
80     32     
80     -16    
96     0      
-160   -208   
96     -96    
0      -80    
-48    224    
-64    384    
96     -96    
160    -64    
-16    256    
-48    -240   
64     128    
80     96     
80     -208   
256    32     
-288   224    
0      -48    
-48    -208   
432    -160   
272    -16    
32     -64    
-192   0      
-112   -896   
-304   -208   
-368   -576   
144    48     
0      64     
256    48     
-32    96     
96     48     
48     64     
32     176    
-32    48     
-16    0      
32     -80    
32     -32    
96     32     
240    -480   
-176   160    
240    -656   
-16    352    
320    -80    
320    192    
-112   48     
192    192    
-112   16     
176    -48    
-160   80     
48     -80    
-64    -16    
64     -32    
160    400    
208    80     
112    -32    
160    -400   
208    16     
32     16     
-96    112    
32     32     
0      -32    
208    96     
-368   32     
48     -48    
16     -272   
80     0      
112    -48    
0      176    
176    0      
-80    64     
112    -336   
16     -32    
-16    -80    
0      80     
368    352    
-144   352    
-48    16     
80     -240   
160    112    
-96    32     
304    16     
-64    -432   
128    -192   
32     -224   
32     240    
160    -800   
0      0      
64     96     
32     112    
-80    96     
96     -48    
-112   -16    
160    0      
16     176    
48     -160   
96     -32    
32     -64    
32     112    
0      -16    
48     -48    
32     -176   
144    128    
176    80     
192    -208   
-112   32     
-1552  32     
256    48     
64     -64    
32     -432   
288    16     
-144   -768   
16     -96    
224    128    
-128   0      
-96    0      
256    -16    
-64    -320   
-16    32     
64     -32    
32     64     
-464   -176   
96     -272   
48     -128   
176    0      
208    16     
-48    -80    
-64    -32    
112    -304   
16     -16    
64     -320   
128    144    
256    -144   
176    80     
64     16     
-128   -128   
-240   64     
32     -272   
-64    -128   
96     -160   
352    16     
160    -80    
128    -112   
304    -720   
48     -80    
144    -48    
-16    96     
-128   528    
128    64     
112    -256   
16     -496   
-240   -624   
176    -16    
-48    416    
448    160    
-208   -16    
-384   -48    
-176   400    
272    144    
112    -192   
-16    -128   
192    176    
64     -352   
192    -48    
-528   0      
-272   -16    
-176   64     
96     -304   
-96    128    
368    240    
320    -208   
-48    -32    
-80    -128   
-112   -96    
192    432    
96     208    
576    384    
-224   -416   
0      -336   
-96    -48    
48     80     
288    64     
-256   -240   
-800   -144   
-112   32     
-192   32     
416    -64    
128    80     
384    -160   
-32    -96    
-32    -432   
-144   -144   
-96    0      
112    48     
80     48     
160    -80    
-224   0      
128    0      
-176   -32    
128    -32    
-544   -16    
48     32     
32     -48    
48     -208   
32     48     
16     -400   
-112   0      
224    -192   
0      -32    
208    32     
-80    -32    
-16    -32    
-128   -208   
160    -256   
-176   208    
-16    80     
-256   -384   
-240   -144   
16     -112   
112    64     
272    -64    
128    16     
-320   16     
-48    0      
96     -32    
-272   -80    
-16    16     
96     80     
32     0      
112    -48    
-160   16     
80     -128   
224    0      
96     -208   
0      32     
96     0      
160    48     
-288   80     
80     -48    
224    96     
352    352    
-464   64     
240    -240   
-240   0      
80     -128   
-112   -48    
128    -80    
32     96     
-816   -96    
-64    64     
-736   -208   
-1152  16     
-384   144    
144    -32    
-80    -16    
-848   128    
-80    -48    
192    80     
-304   112    
208    -64    
112    48     
48     80     
-80    80     
-320   -96    
16     64     
32     32     
128    16     
-16    96     
-448   -16    
-64    16     
-624   -32    
-272   -16    
528    256    
-464   48     
256    -48    
144    -16    
32     -96    
-144   48     
-96    -96    
336    224    
-288   16     
-16    -32    
-80    0      
32     32     
-208   32     
-304   -208   
96     0      
-800   16     
80     96     
-336   -128   
32     64     
-32    0      
-64    144    
144    -80    
32     48     
-32    -16    
-128   48     
-48    80     
128    48     
-64    32     
-32    -16    
32     96     
-368   32     
288    48     
-1424  0      
128    208    
-176   -144   
64     -128   
-16    112    
-128   16     
16     16     
-128   -144   
32     32     
48     192    
48     112    
-224   -224   
-112   -80    
-240   80     
16     -16    
-144   -112   
0      64     
-48    -96    
112    80     
-160   -64    
-272   -144   
16     0      
-16    496    
64     -96    
176    -320   
112    432    
-160   -144   
-96    128    
-224   -64    
176    0      
-624   32     
-64    64     
80     160    
-176   -912   
432    352    
16     144    
-224   0      
144    -96    
-480   -320   
-272   144    
48     336    
-192   192    
-160   -128   
64     -64    
288    80     
-64    -16    
352    32     
208    -32    
-176   64     
-192   32     
-368   -96    
-96    -128   
-48    64     
256    -64    
1104   928    
-384   800    
-176   -784   
0      208    
192    592    
-224   -256   
0      32     
176    16     
224    96     
-64    16     
-128   0      
32     16     
-144   80     
-192   208    
128    96     
64     -48    
-192   128    
-48    -112   
-240   352    
-368   -176   
288    -352   
-64    272    
112    128    
112    -32    
-160   48     
-32    -128   
96     16     
-80    -96    
-160   -240   
224    320    
224    288    
48     112    
-16    -208   
-48    160    
-224   0      
0      -208   
-128   -48    
-32    -208   
64     288    
64     -32    
112    80     
96     32     
128    64     
32     16     
-16    192    
-128   400    
240    176    
-128   160    
288    800    
32     496    
144    272    
-128   80     
96     48     
16     352    
288    48     
-176   -112   
80     16     
80     -16    
48     0      
-32    96     
-16    -64    
80     -128   
80     -16    
-16    -240   
-112   -208   
192    -64    
32     -64    
352    48     
64     32     
208    224    
-192   144    
48     80     
144    -16    
-80    112    
0      48     
112    -80    
176    0      
0      16     
400    -48    
-128   16     
128    128    
256    368    
-208   240    
320    144    
-128   176    
-64    64     
80     -64    
128    48     
96     48     
-48    128    
176    0      
80     48     
-272   -128   
368    -288   
-240   80     
-32    -64    
464    176    
-144   128    
176    0      
-144   48     
128    32     
16     -80    
272    176    
-160   160    
0      48     
48     -64    
176    -32    
-176   -128   
-48    -16    
160    224    
48     -432   
-80    32     
-16    -16    
256    240    
16     48     
448    48     
-64    224    
64     112    
32     -48    
64     48     
272    160    
-128   304    
-112   -96    
16     32     
224    48     
208    -160   
32     128    
64     112    
-16    32     
48     16     
64     80     
-64    -128   
96     -80    
-16    64     
128    64     
144    -16    
112    112    
-32    -16    
-16    -80    
96     112    
144    -192   
-48    272    
-96    48     
368    80     
-32    32     
304    16     
-48    128    
80     -32    
176    160    
80     224    
64     -16    
-64    128    
48     -32    
96     -112   
-64    96     
144    80     
320    368    
-48    -1184  
112    144    
0      16     
64     192    
64     -80    
160    400    
176    48     
272    -80    
-32    96     
0      192    
32     480    
96     192    
160    -48    
16     -96    
16     336    
128    -400   
64     -224   
-48    48     
32     -32    
-112   336    
480    704    
-576   -1216  
192    656    
-176   -192   
-48    -32    
0      0      
32     48     
-176   160    
240    -32    
368    592    
-560   -640   
-384   -464   
256    384    
416    288    
-128   336    
320    0      
320    -128   
-160   96     
16     16     
-160   256    
80     208    
352    144    
-416   16     
-208   -160   
64     16     
16     -80    
224    112    
288    -512   
-48    288    
128    112    
448    48     
176    64     
-96    -64    
128    80     
32     -256   
-128   96     
64     -144   
176    64     
144    96     
672    208    
-272   -80    
-240   -64    
16     -112   
32     112    
0      -16    
240    48     
560    160    
-464   -80    
-16    304    
496    -160   
-304   -32    
-16    -16    
176    48     
192    -144   
-16    -16    
-128   -80    
0      80     
-80    144    
0      64     
0      -16    
0      -752   
0      0      
112    16     
-64    -496   
192    -32    
112    -80    
192    -16    
48     -64    
208    0      
-304   -144   
256    -224   
-80    192    
304    144    
-32    -224   
16     32     
448    32     
-512   -336   
-112   -96    
32     32     
160    -32    
288    -400   
48     -16    
144    -224   
-48    32     
176    112    
-80    -96    
176    48     
-80    80     
256    -96    
-144   96     
48     -96    
224    -192   
-304   -32    
112    -16    
240    -96    
-112   -48    
256    48     
64     -384   
224    48     
-48    -384   
208    0      
64     -64    
-336   80     
336    -208   
-128   -16    
-80    128    
96     -48    
-688   32     
160    -80    
-16    16     
128    16     
32     -32    
48     -96    
16     -48    
112    48     
96     16     
0      -96    
160    48     
112    -16    
48     48     
0      0      
96     0      
-304   16     
112    -64    
-240   -144   
368    -96    
-96    -80    
-128   -176   
368    32     
-16    -400   
304    128    
48     -608   
32     48     
-32    -32    
-32    -48    
-64    0      
336    64     
-288   -48    
64     32     
-304   -48    
32     -96    
96     -16    
-48    -96    
16     -64    
272    -320   
-128   -80    
176    -368   
0      80     
240    -128   
-96    -64    
-160   -32    
64     -16    
-64    16     
96     -32    
-464   -144   
80     80     
-1136  256    
336    96     
208    48     
-64    32     
-48    0      
224    -272   
192    304    
-96    -160   
160    -48    
0      544    
-64    16     
96     48     
112    -400   
-832   112    
96     -272   
128    160    
80     0      
48     64     
352    -112   
-64    112    
-32    -512   
80     64     
80     624    
-272   -432   
-224   128    
112    352    
80     -192   
64     -144   
-432   128    
128    512    
-32    0      
240    -448   
-32    176    
16     -304   
112    176    
128    -464   
0      -208   
-160   176    
-16    32     
-128   -304   
224    -240   
-32    224    
-16    -288   
0      0      
-16    160    
-560   -32    
160    -16    
144    80     
-1856  -48    
-288   -160   
-48    64     
-784   96     
-96    -320   
-400   352    
160    416    
80     -96    
-64    -256   
112    208    
-96    32     
528    -64    
176    128    
-80    -80    
32     144    
176    -272   
176    176    
48     -96    
336    272    
496    464    
-384   192    
-144   64     
-416   288    
240    704    
-96    80     
-448   32     
-528   -128   
-64    -16    
-128   -128   
256    -128   
-144   -144   
-64    -80    
320    224    
-112   128    
-336   -32    
64     -48    
-256   0      
32     16     
-80    128    
-720   224    
16     16     
-112   32     
0      -16    
-96    -64    
288    -32    
-128   -64    
-32    -48    
-64    32     
0      160    
-16    192    
-256   16     
80     96     
-336   -32    
16     -144   
-224   -96    
80     32     
-48    -16    
32     64     
-32    -144   
192    -96    
-64    64     
-144   192    
96     0      
-304   608    
96     352    
-512   128    
-160   -112   
-96    -96    
64     96     
-144   -160   
48     -112   
-656   -288   
240    576    
-128   0      
32     32     
-16    32     
96     -400   
32     -96    
48     -256   
-64    -48    
-96    176    
160    144    
176    -96    
-16    240    
-592   -48    
-16    48     
-704   -192   
256    -96    
16     -112   
160    -112   
144    144    
-176   -128   
32     96     
48     112    
128    80     
-112   -16    
-64    -48    
32     -208   
-208   -160   
192    -288   
144    -48    
-448   -64    
0      144    
16     112    
-80    0      
-208   -16    
-16    16     
80     0      
160    16     
80     96     
-288   -64    
-112   80     
-272   -48    
-96    -64    
128    -64    
-16    48     
-272   -112   
48     80     
208    224    
96     144    
0      112    
0      96     
128    48     
48     112    
96     -144   
-64    -80    
16     48     
112    160    
32     368    
-416   -144   
496    -448   
-224   48     
64     160    
128    80     
272    96     
-96    208    
16     64     
-16    -368   
-96    -224   
-96    -176   
-144   -96    
176    -64    
-16    176    
80     32     
-288   128    
144    48     
-144   112    
144    64     
-208   96     
208    32     
-160   112    
-32    96     
48     -128   
-64    32     
224    -16    
96     176    
112    32     
-352   80     
256    -256   
-336   -224   
320    -304   
96     -192   
160    304    
-160   -160   
-80    -608   
-176   -352   
64     80     
64     112    
64     -160   
224    208    
-272   -16    
48     96     
-176   112    
112    352    
64     32     
0      144    
-64    80     
128    -80    
-48    128    
-48    -64    
96     144    
80     16     
304    96     
-176   -64    
144    -32    
80     128    
128    32     
288    -48    
160    32     
-144   32     
-96    0      
-128   16     
288    0      
-112   -192   
16     -192   
160    624    
432    256    
16     32     
-16    -128   
256    -96    
96     -144   
736    -128   
208    -192   
-32    -208   
-16    -16    
-352   192    
-176   16     
384    80     
-240   160    
-224   0      
400    176    
160    96     
224    -64    
48     48     
-144   32     
352    -32    
-128   80     
-224   -48    
144    -64    
224    96     
32     -128   
-128   -128   
256    144    
16     96     
16     16     
208    64     
64     -32    
208    80     
-96    -16    
-32    64     
176    64     
-432   80     
-144   -16    
-272   -128   
512    64     
144    -272   
-576   -32    
96     -16    
272    64     
224    32     
192    48     
64     32     
-16    -16    
-160   16     
288    144    
-176   16     
16     32     
-64    0      
464    80     
-224   -16    
48     -272   
32     48     
0      -16    
128    32     
48     -48    
-112   -16    
0      32     
64     16     
64     0      
16     16     
128    96     
80     80     
368    288    
-208   -112   
288    80     
-16    -304   
176    64     
128    -576   
-96    48     
144    240    
-48    48     
32     -32    
-192   -128   
32     -80    
96     304    
-48    48     
208    -64    
-400   32     
208    -176   
-16    -80    
224    128    
-32    128    
336    -208   
0      48     
48     176    
224    64     
-160   32     
128    16     
48     96     
-112   128    
96     -48    
16     -48    
160    0      
80     -64    
304    224    
16     -112   
128    0      
-192   -336   
208    176    
-16    -256   
-80    64     
48     96     
-80    80     
80     144    
112    0      
144    112    
336    96     
-160   96     
64     -192   
16     -64    
96     -288   
32     -48    
64     -160   
48     0      
0      32     
160    80     
64     16     
-64    48     
-32    -176   
128    -32    
112    176    
-32    -160   
96     -208   
-16    -224   
48     64     
32     -480   
256    176    
32     112    
96     -32    
112    160    
112    96     
112    -144   
208    144    
-208   48     
176    -112   
0      112    
288    -80    
48     0      
64     -96    
144    176    
0      -96    
80     80     
-80    -320   
-32    0      
32     -448   
-128   -1488  
160    80     
128    -224   
336    -16    
-80    48     
-96    -112   
-64    80     
-16    -96    
96     -80    
112    144    
640    176    
-128   160    
48     -80    
96     -544   
96     -448   
-48    -448   
64     -16    
128    448    
208    -432   
240    -128   
96     -240   
112    -128   
-16    -352   
80     -144   
96     -224   
-192   -160   
16     64     
208    48     
96     192    
144    208    
112    -96    
-48    0      
-464   -176   
256    -144   
-432   0      
96     96     
176    -64    
112    80     
192    -176   
-48    -304   
48     -144   
192    -336   
96     -112   
48     -128   
160    80     
-208   -336   
48     -688   
48     -192   
0      112    
-400   32     
0      16     
192    -112   
144    -80    
128    -256   
-64    -384   
-16    -96    
48     -384   
-320   176    
16     64     
96     112    
-128   -48    
-176   -64    
-80    -128   
128    32     
-128   -96    
64     48     
-96    144    
304    -16    
512    -48    
48     -32    
176    0      
32     -48    
-432   112    
64     -160   
96     -32    
16     16     
448    -176   
144    112    
192    32     
-128   -64    
160    -48    
-192   0      
448    320    
-176   112    
48     -128   
-32    -176   
272    -144   
400    224    
-80    -96    
-96    -32    
96     -112   
64     -96    
160    -16    
256    -176   
-64    -144   
128    -160   
-208   128    
96     16     
-1584  -96    
176    -128   
-48    64     
160    -16    
0      16     
-32    -784   
96     32     
-80    0      
64     -256   
-96    -144   
208    -80    
0      112    
-48    80     
-384   -80    
16     -304   
-192   0      
160    144    
240    48     
-208   160    
-64    -272   
-64    -336   
32     -48    
-400   -80    
272    224    
-192   48     
48     -112   
16     -384   
208    0      
-160   16     
-48    -48    
-592   -112   
-64    -208   
0      0      
-80    64     
0      128    
368    -32    
432    64     
-544   -160   
208    704    
48     224    
272    224    
-48    -192   
96     32     
-16    -112   
-112   -352   
112    48     
-544   16     
-208   -16    
304    -256   
176    0      
-48    -96    
-192   16     
-80    -16    
-496   -416   
-240   -352   
0      208    
-112   64     
112    48     
-128   160    
112    64     
-144   464    
-608   48     
-128   -48    
48     -528   
-96    -144   
-16    304    
48     80     
64     112    
16     160    
32     368    
-592   -16    
112    192    
16     128    
-128   0      
-464   480    
624    -352   
-304   -128   
64     -64    
-80    32     
16     976    
208    336    
-96    384    
-128   -512   
-80    -336   
0      192    
-208   560    
320    -240   
-416   -368   
48     624    
192    48     
-640   -768   
224    -288   
64     464    
112    112    
128    -320   
-272   -320   
-128   128    
16     0      
-176   352    
240    -80    
-400   -16    
-160   80     
-1600  -144   
-288   192    
-48    -384   
112    320    
176    80     
96     64     
-128   -240   
16     48     
-80    192    
112    -176   
112    112    
-176   256    
0      176    
144    -192   
-192   -192   
-320   160    
80     -64    
96     -96    
176    80     
0      64     
-240   32     
48     64     
-16    16     
-64    96     
-32    16     
48     48     
64     48     
-176   -224   
-96    -16    
16     0      
-272   -48    
160    0      
-2112  96     
352    512    
128    208    
-112   -32    
-32    -144   
-96    -48    
-176   -32    
-176   -16    
32     -192   
176    80     
-272   144    
-336   80     
-96    -240   
-336   -144   
64     400    
-1296  48     
176    -64    
144    -16    
144    -16    
48     -16    
240    0      
-96    0      
176    -16    
-16    -80    
176    112    
-192   80     
-272   128    
-144   0      
-160   0      
32     16     
16     48     
48     -32    
336    80     
-80    64     
48     -64    
-144   32     
-400   64     
112    -16    
112    64     
112    224    
-432   -176   
-32    -240   
224    48     
304    144    
512    96     
256    384    
-784   -64    
-32    -160   
-48    64     
16     -32    
304    0      
128    64     
-272   16     
-112   -112   
16     -48    
-96    64     
-176   -16    
208    16     
-224   -16    
128    16     
64     128    
48     0      
224    80     
16     -16    
48     0      
160    16     
-224   64     
-16    -32    
368    -16    
0      32     
112    96     
-160   -16    
176    32     
-32    80     
-16    0      
96     -16    
-64    80     
-48    64     
112    48     
80     32     
48     32     
64     48     
-96    32     
80     48     
-112   16     
-32    48     
16     48     
80     48     
-160   -64    
32     112    
176    192    
96     -48    
176    -16    
-128   0      
-32    0      
48     -64    
0      192    
-144   -32    
32     144    
-160   -48    
256    -160   
-384   -48    
272    -32    
240    256    
-64    192    
112    -48    
96     112    
-32    64     
64     144    
-32    -96    
32     -176   
32     -272   
80     -144   
64     0      
-160   -224   
32     -208   
-224   -368   
160    -160   
-128   192    
128    256    
80     192    
-48    112    
-16    16     
0      48     
-16    48     
192    16     
48     128    
208    208    
-224   -352   
128    -128   
-16    192    
64     -144   
64     -160   
-48    -176   
-64    32     
-48    144    
176    64     
112    64     
-48    32     
64     -400   
-128   -464   
160    512    
-64    -192   
-48    368    
-16    -224   
224    352    
48     256    
-288   -1248  
256    416    
128    832    
-304   -128   
544    -144   
-32    -48    
0      48     
112    144    
144    384    
-32    -16    
48     160    
112    96     
160    -272   
0      144    
80     64     
128    -176   
240    176    
-160   -224   
96     80     
64     0      
64     -32    
32     -16    
32     -32    
-16    0      
0      96     
112    176    
48     112    
-144   -96    
208    -224   
128    48     
64     -32    
96     64     
96     -352   
-48    16     
16     208    
304    192    
-96    48     
208    -16    
32     16     
208    96     
32     32     
-48    80     
-112   -80    
128    -112   
96     32     
96     -80    
0      64     
96     -80    
-16    112    
-64    -800   
304    64     
128    208    
-48    0      
80     16     
48     -32    
-64    -16    
192    160    
176    48     
80     16     
32     -32    
64     -32    
-32    80     
-96    16     
0      96     
208    16     
256    160    
-16    -112   
176    16     
-240   48     
-112   -32    
32     -32    
160    0      
144    176    
112    32     
80     64     
-240   -240   
-176   32     
-272   -176   
160    96     
224    -128   
416    48     
80     -32    
224    128    
-16    176    
96     0      
-32    -128   
32     -272   
-192   80     
-112   48     
128    96     
240    -16    
64     272    
64     208    
-80    64     
-112   16     
32     96     
336    -224   
0      128    
0      0      
144    -144   
64     -112   
224    -160   
48     80     
-64    -160   
-176   16     
0      -192   
368    112    
224    48     
160    0      
144    -304   
48     -128   
-160   -160   
-96    -800   
-48    16     
-112   -80    
304    -384   
80     -112   
192    -288   
-48    64     
-64    -624   
144    -368   
0      -64    
32     -192   
160    -240   
-112   -144   
176    -272   
-16    -80    
224    96     
-48    16     
64     -144   
208    48     
-144   304    
64     -128   
176    -64    
96     -320   
-48    -224   
144    -112   
0      -32    
-208   -160   
16     -432   
304    144    
-208   528    
-224   112    
352    -640   
112    -240   
-352   432    
48     -704   
-128   -800   
160    208    
464    1184   
-256   -144   
-128   -752   
320    -240   
64     -176   
48     336    
240    -48    
48     -80    
256    160    
-80    400    
-208   -192   
96     -272   
-1424  -16    
-48    -16    
64     32     
288    272    
-512   -240   
128    -1360  
48     400    
160    -1360  
-32    -384   
16     944    
304    496    
64     -608   
-176   96     
96     160    
-448   -592   
-528   -304   
352    592    
80     -224   
112    192    
-224   -784   
384    336    
16     -208   
112    -32    
-32    -96    
336    256    
-32    16     
-64    -160   
208    112    
-96    0      
0      -272   
112    192    
240    -16    
0      -192   
128    80     
-304   240    
16     -80    
256    -64    
144    112    
96     208    
48     -128   
80     112    
-160   -96    
-48    -96    
96     128    
-112   0      
-448   -32    
192    0      
-288   -96    
128    -128   
0      -48    
176    -96    
112    0      
48     -128   
-16    16     
48     -272   
0      112    
176    0      
-112   -80    
0      16     
-32    -16    
-880   -208   
0      -352   
-144   -64    
176    144    
96     16     
144    -64    
144    48     
112    -128   
16     -144   
-336   -32    
80     96     
-496   -160   
80     -48    
16     64     
256    -112   
-32    32     
128    96     
-144   16     
256    -16    
32     -48    
-80    -256   
128    0      
-64    48     
-128   16     
-32    96     
16     64     
-240   80     
-80    -96    
16     16     
64     48     
-32    -128   
64     -32    
-80    0      
48     -112   
144    16     
-176   -80    
192    32     
-480   -128   
-32    48     
-320   -112   
-1024  -32    
32     128    
-688   48     
-64    80     
448    704    
-992   816    
144    256    
-48    -272   
-304   -64    
-16    80     
320    96     
368    -16    
-352   -128   
-112   -256   
-352   48     
-1616  -256   
144    -96    
16     176    
-176   -64    
-1712  48     
-80    48     
-128   16     
-208   48     
-176   -80    
224    16     
-176   -112   
-160   96     
-96    16     
48     16     
-64    64     
-144   80     
-144   -256   
-80    -128   
-736   240    
-1040  176    
-256   160    
0      -112   
512    -32    
128    -64    
176    96     
-272   -176   
368    -64    
-416   32     
-96    64     
-16    0      
144    80     
32     64     
-16    -16    
96     -16    
-48    16     
96     80     
-512   -48    
-160   -32    
-96    -48    
592    224    
-384   0      
112    0      
-32    -32    
144    16     
352    128    
-272   -32    
112    16     
-208   32     
128    144    
-144   -16    
80     -48    
-512   0      
32     80     
0      -64    
112    0      
-16    -16    
-16    48     
-64    -48    
-80    0      
0      208    
48     112    
-64    32     
-80    -144   
-64    32     
-544   16     
80     16     
-752   -112   
144    96     
192    48     
256    -16    
-32    96     
-96    112    
-176   -48    
-224   16     
48     128    
-48    80     
80     96     
0      128    
-32    160    
-320   -80    
112    96     
144    112    
96     48     
-624   0      
-112   -320   
224    64     
-224   368    
-64    -224   
80     80     
144    48     
-48    -32    
-128   352    
224    -992   
-240   -832   
320    224    
304    592    
-624   -608   
240    320    
-576   832    
64     -720   
-160   176    
80     384    
192    -288   
-432   -224   
352    -304   
-240   432    
0      -48    
-16    -400   
-80    64     
-240   -784   
0      -320   
-16    208    
144    224    
-160   176    
160    384    
160    496    
208    80     
384    208    
-352   320    
-48    16     
-32    608    
352    336    
272    80     
-128   48     
-288   0      
112    -16    
-96    -32    
256    16     
288    64     
-144   128    
-32    -16    
-96    -32    
0      64     
32     96     
176    -96    
64     80     
96     -32    
-64    -48    
-80    -32    
16     -64    
-16    96     
64     0      
176    128    
-32    0      
32     -48    
-64    -112   
192    -112   
256    128    
-112   128    
112    -80    
-176   16     
96     48     
-96    64     
-144   144    
-16    32     
0      48     
-336   0      
0      64     
80     16     
16     80     
16     32     
128    48     
-32    128    
96     48     
16     48     
48     -16    
144    128    
-16    48     
-80    -208   
32     -176   
-112   48     
160    -16    
-16    160    
288    304    
0      176    
-80    80     
0      -112   
48     -272   
176    64     
-96    160    
144    48     
144    112    
0      -48    
-16    -32    
-96    192    
-64    -1264  
160    -48    
-128   -192   
208    -336   
400    -32    
64     208    
64     112    
-16    176    
-192   16     
112    64     
80     192    
336    48     
-256   -128   
-208   32     
-528   -16    
-256   -112   
16     48     
-224   -160   
336    -32    
-48    112    
-240   -64    
-112   32     
144    -32    
256    80     
288    128    
-160   16     
-80    -64    
-96    16     
208    -32    
384    256    
736    688    
-368   320    
-432   32     
352    -160   
128    48     
416    80     
96     -16    
128    208    
-160   -176   
-320   -640   
32     -336   
-240   80     
-256   192    
176    80     
112    48     
96     -176   
16     16     
128    -80    
16     -96    
192    160    
112    240    
208    64     
224    208    
48     -64    
32     304    
-48    432    
-16    304    
160    -48    
48     16     
32     16     
144    -192   
64     112    
144    -336   
-16    400    
112    64     
-256   -416   
32     48     
48     368    
160    -64    
240    160    
-48    -288   
224    176    
-192   512    
48     -560   
16     160    
-288   -144   
96     112    
160    160    
-208   96     
224    -560   
-32    32     
160    -128   
-112   176    
-16    -208   
0      912    
-256   -240   
-16    -640   
-224   176    
144    -16    
288    -224   
-64    -32    
144    336    
80     -32    
160    16     
0      -32    
48     192    
176    96     
-48    -48    
96     -176   
96     96     
-256   128    
656    672    
-512   -352   
-16    -704   
208    -32    
-48    16     
224    384    
304    -368   
-48    -192   
320    -16    
-128   144    
112    80     
0      0      
0      64     
128    32     
-16    0      
-16    -304   
112    112    
64     -32    
16     -16    
224    -160   
-48    96     
64     -64    
160    -80    
144    32     
64     144    
80     -16    
80     32     
-112   32     
304    240    
-32    16     
-128   -64    
-144   -128   
400    -32    
176    80     
-192   -64    
288    128    
-80    -112   
160    80     
128    -160   
112    48     
-160   0      
160    -800   
-80    16     
112    -80    
176    -192   
-16    -64    
80     -848   
128    -48    
192    128    
0      -96    
80     64     
208    16     
-288   -896   
0      -80    
304    -576   
-32    48     
160    -352   
432    64     
-656   -48    
-96    -464   
16     48     
96     -240   
80     -48    
160    -112   
112    32     
-16    -1296  
96     16     
48     32     
240    112    
96     -96    
-192   48     
0      -192   
-16    -64    
-368   -96    
-32    160    
368    -32    
192    -128   
0      -128   
16     -160   
48     -112   
-16    -336   
208    -96    
192    80     
-16    48     
80     0      
-16    32     
272    128    
-32    272    
-352   -32    
208    -64    
16     -16    
256    160    
-192   16     
-112   -64    
208    -64    
240    128    
96     -16    
256    16     
-192   64     
224    -96    
16     96     
240    288    
-464   112    
240    176    
560    -160   
-144   128    
128    -96    
-112   64     
176    160    
176    -48    
-16    16     
368    -16    
-48    -592   
-64    80     
16     16     
-528   -288   
160    -128   
96     -112   
-192   48     
-128   -112   
-272   -80    
-304   -176   
-720   -80    
128    80     
-560   -48    
224    -208   
-16    -160   
448    -656   
656    112    
64     64     
528    160    
-320   32     
-32    -144   
-96    32     
32     32     
112    -32    
224    64     
-128   64     
32     -16    
-464   -112   
-320   -336   
560    -256   
576    -176   
608    144    
384    32     
128    -112   
-592   32     
-80    -16    
176    -32    
176    0      
48     16     
272    48     
-48    80     
64     -80    
-224   -128   
288    -128   
32     -32    
336    -192   
80     -16    
-512   16     
64     -16    
112    -128   
16     -112   
64     48     
-16    32     
-272   -48    
144    -80    
-96    -16    
64     -144   
144    -80    
128    -176   
128    96     
-112   -528   
-32    -32    
-352   256    
160    -80    
-208   144    
64     144    
48     -96    
-96    96     
144    -80    
96     0      
-32    496    
64     -560   
-128   48     
-2272  -352   
112    96     
-1408  -32    
-672   -112   
-96    272    
-144   -176   
96     1344   
-1872  -976   
128    -160   
32     832    
-16    -672   
160    64     
-384   -32    
-1056  -208   
128    176    
48     128    
96     256    
96     -128   
-336   -80    
16     -96    
-704   368    
224    96     
-880   -352   
192    -192   
-48    -96    
-384   -144   
32     32     
-32    96     
-288   -112   
48     32     
96     -160   
-128   -128   
208    96     
-128   48     
16     -64    
-240   -256   
16     -304   
-128   80     
-64    112    
-1040  80     
-224   -272   
112    -288   
48     128    
0      96     
0      -32    
176    -48    
-256   -16    
144    0      
-48    -80    
128    64     
-304   96     
-144   -144   
-80    -384   
-48    -208   
-240   -144   
0      -16    
-16    16     
0      80     
32     16     
-96    -32    
240    -128   
-112   16     
16     32     
48     80     
-128   80     
112    208    
-224   0      
-160   -64    
-80    -16    
-208   96     
-64    80     
-1008  48     
112    64     
-176   -192   
96     0      
80     48     
0      48     
-112   160    
224    64     
96     -64    
-112   -32    
-128   -336   
-48    32     
48     288    
0      0      
272    -16    
-368   -16    
80     48     
32     -80    
144    112    
48     32     
16     16     
-48    -64    
-144   32     
-32    0      
48     0      
48     64     
16     32     
-16    112    
-48    64     
64     -32    
-400   -224   
128    128    
128    -16    
96     0      
144    48     
32     112    
0      48     
-48    -96    
48     -144   
64     32     
-16    80     
-160   -128   
32     -176   
-256   0      
352    320    
-320   176    
48     16     
0      -32    
176    160    
-320   112    
160    64     
208    128    
288    96     
144    0      
320    -48    
-128   112    
-480   80     
-80    64     
-256   -304   
272    -144   
64     48     
-256   -128   
-64    -48    
96     -112   
320    80     
-128   -608   
-80    -400   
-320   -256   
-400   -128   
-80    -160   
96     80     
912    1088   
-288   480    
-512   -96    
160    -96    
-32    -144   
32     -32    
64     32     
176    -144   
-192   -320   
32     544    
48     272    
-416   -160   
-32    416    
-112   -112   
-176   160    
-368   -96    
48     320    
-80    -496   
48     208    
-80    96     
-192   -96    
448    368    
-224   -176   
-16    -80    
448    -208   
112    320    
160    -16    
-48    224    
96     208    
-32    -96    
-80    16     
-32    -32    
-192   -96    
80     48     
32     144    
128    32     
-16    48     
160    80     
-176   16     
80     96     
112    -80    
-16    0      
320    -48    
-32    -176   
272    64     
-176   16     
64     64     
-128   -80    
64     80     
160    64     
176    80     
-208   -16    
80     0      
-352   -48    
288    -48    
32     112    
208    96     
-32    48     
-272   0      
0      32     
-96    48     
208    96     
96     -96    
32     -176   
224    80     
-80    80     
304    16     
-16    96     
32     0      
-208   -608   
80     -256   
-48    368    
-352   0      
-64    -192   
272    144    
-64    0      
320    272    
-464   -160   
128    240    
224    64     
144    224    
-48    -16    
96     -48    
160    144    
16     80     
80     -16    
48     112    
128    32     
-112   48     
112    112    
-32    0      
80     16     
80     80     
-32    -208   
48     48     
144    48     
80     80     
32     32     
96     96     
112    48     
0      16     
80     48     
80     64     
96     -48    
80     48     
-208   0      
80     -16    
16     32     
32     -176   
192    -16    
-80    -80    
-144   64     
144    0      
-48    -16    
-96    48     
144    32     
96     64     
48     32     
48     -64    
128    144    
-32    -16    
32     -96    
144    -32    
64     32     
-48    64     
224    -336   
0      0      
-16    48     
-48    48     
240    -80    
192    48     
-128   0      
80     -16    
64     48     
16     128    
80     0      
48     -80    
176    16     
0      48     
96     -368   
-16    -272   
-96    96     
160    -80    
32     112    
-80    16     
112    0      
64     32     
-48    112    
-16    160    
272    176    
16     32     
32     -160   
-48    -64    
176    -64    
128    48     
112    -208   
96     96     
48     -16    
96     208    
-48    176    
-80    32     
0      -96    
288    -112   
-32    64     
-16    96     
-16    96     
48     -128   
192    32     
-80    -80    
-160   80     
-192   -176   
672    64     
-544   -896   
48     -64    
-224   512    
-352   144    
-176   48     
-176   -64    
-80    208    
448    592    
208    720    
-208   -496   
240    -848   
176    32     
464    624    
208    48     
304    -48    
64     -976   
96     0      
384    64     
192    96     
-320   0      
400    -800   
112    -368   
48     160    
208    224    
96     0      
176    160    
-112   80     
-176   192    
32     80     
336    144    
-96    -320   
192    16     
-48    64     
-192   -752   
16     96     
-720   240    
480    -416   
144    -240   
-624   -816   
16     112    
-32    -416   
16     -288   
-208   -608   
224    -656   
304    544    
304    176    
240    -400   
64     16     
-96    -208   
288    16     
-496   32     
288    -320   
80     80     
192    -48    
48     -320   
112    -864   
48     -64    
160    64     
0      -64    
-32    -352   
352    1008   
-96    -880   
80     -64    
48     336    
80     -128   
-560   -48    
16     224    
16     -64    
-80    -336   
192    752    
64     -480   
-32    352    
208    -464   
-112   -80    
-272   160    
128    -1104  
192    -544   
64     144    
192    480    
-416   -464   
-352   -448   
112    512    
-560   48     
320    320    
-128   16     
64     -32    
144    -80    
-160   -576   
-48    128    
80     -112   
-32    -16    
-64    -144   
16     16     
-192   0      
64     -112   
-128   0      
256    64     
-240   32     
-96    -256   
160    64     
-160   -144   
480    -80    
272    64     
-240   48     
400    -352   
-256   160    
384    -64    
32     112    
-80    48     
64     -96    
-32    48     
48     -32    
-256   160    
336    160    
-2608  48     
272    -368   
64     -96    
-160   96     
80     16     
-80    -432   
128    336    
16     112    
288    -176   
32     -16    
32     -80    
160    -192   
-96    -112   
32     -128   
48     -256   
-288   -96    
-96    112    
288    0      
-128   -160   
16     112    
-16    -256   
544    352    
-432   48     
-16    64     
-128   144    
224    -368   
-160   -80    
160    -48    
-80    -32    
-48    -32    
-176   336    
336    304    
48     16     
256    -320   
128    0      
160    -80    
64     112    
-240   -80    
192    32     
-16    16     
-160   16     
64     -48    
208    112    
-144   -32    
176    -64    
16     -64    
96     -112   
16     64     
80     -64    
64     320    
144    144    
192    -128   
0      224    
96     192    
-240   -160   
320    -176   
32     80     
48     32     
-96    -16    
400    -16    
-368   128    
224    80     
-80    160    
-848   -48    
32     -16    
-112   -48    
-1360  -32    
-224   -16    
-320   32     
-48    -64    
-624   0      
-160   -96    
64     -48    
32     -64    
-16    32     
64     48     
32     -192   
-48    -176   
-352   -208   
-64    112    
32     -32    
-192   128    
64     -64    
208    192    
64     224    
-416   528    
432    1104   
-112   384    
-432   208    
0      -16    
-128   -400   
-464   -480   
288    464    
112    -176   
-48    -480   
128    864    
-384   288    
-352   -448   
-272   112    
16     80     
-224   0      
80     272    
-560   112    
-112   128    
-64    -208   
224    64     
-112   544    
128    -192   
288    64     
-400   96     
-144   64     
-256   0      
-224   -112   
192    -672   
256    16     
128    464    
272    128    
-32    -48    
-448   -32    
-848   -112   
144    -16    
-96    -224   
576    -144   
-128   -48    
-800   80     
-288   256    
-192   112    
64     -80    
-96    -48    
336    144    
-160   64     
-192   -112   
-288   -64    
96     64     
16     -32    
-32    -16    
160    0      
144    144    
80     112    
-272   64     
16     96     
160    48     
-96    48     
0      128    
48     48     
-384   -304   
144    -32    
-592   16     
-48    48     
-640   16     
0      48     
32     -112   
-32    64     
-48    112    
-128   -80    
80     -48    
0      80     
-80    16     
-160   64     
-16    0      
-400   -144   
224    32     
-144   0      
352    48     
-928   -112   
112    48     
-64    32     
144    64     
0      16     
-224   -16    
-64    16     
-112   0      
80     -16    
-16    32     
-96    32     
320    -64    
0      96     
-144   0      
304    48     
-672   -48    
96     -64    
288    160    
-224   16     
416    144    
-80    96     
-272   -32    
48     16     
-224   -48    
224    -16    
864    240    
-608   -16    
-304   32     
-160   -16    
0      48     
-96    -16    
-32    64     
48     192    
64     80     
-96    -96    
80     16     
-128   48     
-64    16     
128    64     
-32    -32    
64     80     
-320   -80    
-16    32     
-96    0      
48     0      
-432   16     
160    176    
-96    64     
224    64     
176    16     
-256   32     
0      0      
240    128    
16     -48    
96     64     
-32    96     
-16    -144   
144    -32    
-32    64     
144    112    
-16    -48    
-80    -48    
64     48     
-32    32     
64     48     
-144   0      
176    48     
80     16     
0      0      
-160   -16    
32     16     
32     48     
-16    48     
0      0      
144    0      
-48    -32    
-112   32     
192    176    
64     64     
-80    48     
48     48     
32     -32    
16     -32    
48     32     
272    64     
-64    64     
16     -16    
-160   -32    
-112   -112   
48     -32    
176    -96    
256    -16    
-80    112    
48     32     
48     48     
64     32     
48     -64    
96     160    
128    16     
-48    96     
240    -432   
48     352    
48     208    
-176   -176   
80     256    
32     -560   
-48    48     
32     336    
80     -32    
32     48     
336    -208   
96     272    
16     -48    
64     96     
-80    -32    
-16    80     
-288   -32    
64     -16    
144    96     
448    -496   
256    -160   
-736   -1632  
-224   32     
-192   624    
-224   -128   
80     -112   
400    -48    
16     -448   
624    576    
-16    -128   
112    48     
48     96     
-160   -80    
-80    800    
208    -1728  
176    -480   
-128   176    
96     496    
112    48     
-320   -288   
128    128    
144    -64    
32     32     
64     80     
112    144    
256    -96    
96     288    
288    -160   
-32    -384   
-240   -112   
0      656    
-144   -224   
-48    -176   
16     16     
144    320    
0      128    
176    -208   
-112   32     
-128   16     
-240   -16    
112    -16    
48     -336   
-144   -336   
96     352    
80     464    
-112   -32    
128    -272   
224    48     
-224   -80    
256    32     
272    -176   
16     176    
64     0      
-16    0      
-48    -192   
0      -80    
64     -64    
16     -160   
0      -16    
288    -48    
144    592    
-16    -1008  
240    160    
-32    -48    
16     160    
112    112    
96     192    
-48    288    
0      176    
-64    0      
48     -80    
48     0      
256    -32    
16     64     
48     -16    
208    224    
16     -240   
80     496    
496    496    
-208   64     
48     -160   
96     -80    
112    144    
256    -64    
-272   208    
224    -128   
112    -48    
160    -80    
-128   80     
384    -624   
-80    80     
48     32     
224    -16    
128    -160   
0      64     
-64    -32    
448    240    
-48    448    
-32    144    
-32    96     
128    -208   
32     -80    
240    -336   
16     -64    
96     -32    
0      64     
96     80     
48     64     
-96    128    
192    112    
64     144    
32     -32    
288    -176   
96     -16    
-80    -96    
48     -112   
208    128    
144    16     
32     -112   
96     48     
48     64     
128    -80    
16     48     
112    -144   
208    240    
-48    112    
224    -336   
-144   -96    
240    -160   
128    -1008  
80     -16    
96     -48    
-48    -64    
144    -48    
48     -160   
128    80     
-160   608    
704    48     
-48    -112   
288    -112   
-128   -48    
32     -352   
96     -304   
-288   0      
32     -32    
-48    320    
32     16     
336    -192   
-64    -128   
96     -96    
144    0      
-64    16     
64     96     
0      -80    
-80    -32    
-32    256    
256    176    
256    112    
-288   224    
144    -48    
144    -448   
-96    -448   
-80    -48    
-160   -304   
80     64     
64     -208   
560    -352   
32     -352   
-272   -64    
-160   -192   
128    -32    
-208   64     
192    112    
-160   48     
64     -80    
96     48     
80     128    
80     -64    
-48    -384   
0      -304   
160    -1072  
48     0      
-80    -288   
128    128    
160    176    
112    160    
-256   -128   
80     -96    
-720   -80    
16     208    
-1792  -512   
64     208    
240    -48    
-16    -160   
80     240    
48     -320   
128    240    
-48    -208   
-80    0      
192    -512   
320    80     
112    48     
48     -208   
-208   -48    
320    192    
-144   112    
-160   -848   
-432   -224   
-32    -544   
64     400    
48     -272   
256    -96    
96     -720   
208    224    
16     -128   
368    -64    
-224   0      
64     16     
-320   -96    
-16    -112   
-672   -64    
304    -48    
-1296  -128   
256    -96    
208    -112   
-400   -176   
-224   -32    
48     -64    
32     48     
192    144    
400    80     
32     -48    
-48    0      
-240   112    
-256   -16    
336    304    
-464   96     
-224   -64    
1104   48     
32     80     
-48    -64    
-304   -80    
32     -176   
-160   16     
-512   16     
208    -96    
464    64     
-48    -112   
-192   64     
0      -16    
160    48     
144    16     
-368   -112   
416    -48    
-144   32     
16     -128   
0      32     
80     -272   
112    -32    
32     80     
160    -32    
-80    -32    
-16    -128   
-272   0      
48     -80    
16     48     
96     -48    
-480   80     
144    -288   
192    0      
-1088  -144   
256    64     
-112   64     
-592   32     
-400   -368   
-192   -48    
-320   224    
224    -176   
-80    112    
16     64     
272    224    
-208   0      
144    -112   
-384   -48    
64     -64    
-336   -48    
-160   48     
-64    32     
-352   48     
-16    -32    
-192   64     
-192   64     
-32    48     
48     32     
-16    -64    
-224   -160   
-80    -48    
32     -48    
32     -96    
-576   96     
80     -144   
64     0      
-128   160    
-128   144    
16     -80    
128    -128   
112    32     
-176   80     
-224   32     
-416   0      
-224   32     
-160   -80    
160    96     
-160   -48    
80     0      
144    64     
32     -16    
-96    48     
64     0      
48     48     
-224   32     
-16    48     
-304   -16    
96     80     
-688   96     
-32    -16    
160    0      
-16    32     
144    -112   
48     32     
64     112    
-192   16     
208    80     
-160   0      
256    208    
-464   32     
48     -192   
288    48     
-176   64     
48     0      
80     96     
-512   -32    
-32    128    
-80    -112   
112    -32    
-32    80     
-16    -16    
64     -48    
-64    448    
-160   96     
48     -176   
-16    -96    
-128   0      
-32    304    
-432   -304   
160    112    
-2256  -32    
48     -16    
-128   112    
-80    -64    
64     176    
-224   96     
32     -16    
16     112    
176    -208   
48     496    
176    -64    
-256   128    
-16    -1024  
0      464    
128    112    
-288   -208   
144    80     
32     0      
-96    416    
208    240    
-208   -304   
-16    -64    
-32    -16    
112    -240   
-384   -128   
240    -496   
-176   576    
-48    80     
-64    -304   
-160   112    
-416   -224   
64     272    
-64    16     
-80    32     
64     16     
32     32     
64     48     
32     144    
-32    64     
-144   -32    
-240   80     
-96    48     
128    -176   
-432   -384   
-144   96     
-224   32     
160    128    
0      112    
112    -176   
288    144    
16     64     
96     -176   
80     -64    
-240   -288   
-64    80     
-304   -80    
-288   -352   
80     -176   
128    -240   
512    32     
240    -16    
-32    -64    
160    32     
-48    32     
-16    80     
-64    80     
80     144    
224    112    
80     16     
-192   -192   
288    -96    
64     -176   
272    -112   
16     -80    
112    256    
-192   240    
-112   64     
192    16     
112    144    
32     64     
80     -64    
-288   -144   
-192   -96    
64     32     
144    128    
-160   128    
-160   -224   
208    -16    
-192   -64    
48     -160   
96     -176   
0      48     
-48    128    
-96    -16    
64     64     
208    112    
48     304    
128    240    
64     0      
64     -80    
16     48     
-16    144    
-96    32     
-16    -64    
96     -96    
16     -32    
-16    32     
64     -32    
96     176    
-96    112    
-48    -80    
-48    -128   
144    64     
240    192    
-48    176    
32     160    
-32    144    
512    624    
-448   384    
-208   352    
352    288    
-48    512    
352    384    
160    304    
208    -64    
-32    -224   
0      128    
16     112    
0      304    
16     -32    
48     64     
32     -288   
192    -16    
-144   -32    
0      224    
304    320    
112    432    
160    336    
112    -144   
48     -80    
32     -160   
224    -16    
-80    48     
16     80     
-48    -96    
240    64     
-112   112    
0      -256   
464    96     
-256   -240   
-48    80     
-144   96     
480    80     
176    -32    
128    64     
256    112    
-48    256    
128    288    
-304   48     
80     80     
-112   112    
-272   -112   
208    -32    
-208   16     
128    -480   
-160   -32    
256    96     
176    32     
-96    112    
272    -208   
-256   96     
192    -48    
-176   -352   
224    -176   
-48    -176   
128    112    
224    80     
-80    -192   
192    -64    
144    -32    
-16    32     
-16    -368   
80     -96    
144    -48    
0      -32    
-32    64     
144    -32    
16     64     
192    96     
240    -48    
-64    -144   
160    -160   
-288   48     
-16    256    
-144   0      
-16    0      
32     -144   
-32    -304   
208    -240   
240    -128   
32     -80    
192    256    
-160   -416   
32     160    
112    144    
0      -160   
96     16     
176    -240   
-112   -128   
-32    64     
16     -128   
32     -336   
240    -32    
-80    -1520  
-16    96     
400    192    
-112   256    
-96    -368   
336    192    
-160   -528   
112    352    
48     32     
160    -80    
16     352    
112    -64    
160    -128   
48     64     
192    480    
-32    16     
-16    -96    
80     0      
96     -32    
48     0      
96     96     
160    -16    
160    -96    
64     80     
96     32     
-16    48     
96     -80    
128    80     
1104   880    
-480   640    
-592   32     
144    -224   
32     -96    
160    -32    
-192   -80    
96     224    
32     352    
-176   -416   
400    -240   
-144   16     
240    96     
400    -16    
-176   -128   
416    -32    
176    144    
-480   -160   
-192   -1488  
160    16     
-16    -960   
-48    -224   
160    -80    
256    -32    
144    -112   
96     48     
-48    -112   
176    80     
-160   -112   
-240   16     
80     -176   
64     -544   
96     272    
-256   -464   
240    0      
400    64     
384    256    
-176   160    
-160   -32    
240    -208   
480    -336   
64     -16    
496    -656   
-96    48     
0      -16    
-272   -256   
608    -64    
-272   96     
-304   -48    
48     112    
-208   -32    
96     -112   
-2320  -80    
-80    -32    
-32    -16    
224    -16    
0      -32    
96     -256   
160    -80    
128    -144   
224    0      
208    32     
-96    48     
64     -64    
16     16     
-304   -48    
16     -32    
-192   0      
128    48     
16     -80    
288    144    
-224   0      
192    -112   
-32    -32    
160    -784   
-80    48     
336    -192   
80     0      
256    -16    
-192   -96    
208    16     
16     -128   
-96    144    
16     80     
-112   -96    
16     -112   
48     80     
144    144    
16     -16    
160    16     
-48    128    
0      -144   
80     32     
-128   0      
176    32     
-16    208    
-32    96     
-576   96     
176    -192   
-1328  -96    
656    176    
-496   0      
64     -160   
64     -48    
-48    -176   
-16    160    
176    -480   
-80    -64    
80     64     
-320   -128   
-48    -16    
48     -32    
-368   -112   
288    16     
-736   -128   
128    -32    
48     112    
144    -80    
-32    0      
304    160    
-112   16     
80     -176   
80     32     
-48    -208   
16     -112   
32     -16    
-16    -352   
-416   80     
224    96     
-240   208    
48     48     
-80    -144   
192    -144   
-16    48     
176    -64    
112    144    
-64    -256   
288    96     
-912   16     
112    -192   
-288   -112   
16     160    
-160   -160   
208    16     
-448   16     
0      32     
160    -160   
144    32     
-160   416    
272    -272   
-192   -48    
-16    -144   
80     -752   
-64    160    
144    96     
64     80     
96     400    
-432   144    
-176   -304   
-240   -288   
176    -320   
128    -96    
160    -48    
-48    -208   
-640   -176   
96     304    
-32    256    
-608   80     
-64    128    
-288   -32    
-128   -128   
128    -208   
-96    -16    
128    -16    
64     -16    
272    48     
-16    112    
-336   -112   
144    0      
-64    -80    
-352   80     
-208   240    
-16    112    
16     -16    
-400   -400   
-208   -272   
-2528  0      
-64    32     
128    -96    
32     48     
-112   -80    
64     48     
-256   -128   
112    96     
0      80     
48     96     
32     128    
-128   0      
208    224    
128    320    
16     -64    
272    -16    
-128   16     
-272   -16    
-176   -160   
48     -336   
192    48     
32     48     
176    16     
64     32     
-80    -64    
-176   160    
-64    16     
-16    -32    
32     -32    
96     272    
-320   -16    
0      0      
-864   48     
208    48     
80     32     
0      -64    
16     -96    
-80    -80    
-176   48     
-128   -16    
-80    -32    
96     48     
-128   32     
112    32     
-80    0      
-304   48     
-160   -48    
-544   -192   
272    0      
160    16     
144    240    
288    288    
-80    272    
-272   304    
-80    -32    
32     112    
272    80     
112    -32    
-176   64     
-208   -64    
48     -32    
-112   -128   
32     -16    
0      96     
-640   -16    
96     -16    
-64    -112   
48     -16    
-16    128    
-16    96     
-144   -128   
-96    -96    
-32    -144   
-192   -96    
96     32     
16     96     
-80    160    
-48    192    
80     224    
-1744  0      
-112   0      
256    -96    
16     0      
192    -16    
80     -16    
-80    -48    
-192   -336   
-272   -400   
-48    -336   
-112   -144   
128    -192   
-208   144    
-304   160    
-416   -320   
-320   -672   
96     -96    
16     -96    
208    -112   
-80    144    
-16    -160   
-32    -64    
240    -272   
-144   -496   
80     32     
-144   16     
-176   -128   
64     -96    
-240   -176   
384    112    
-592   48     
192    -160   
-288   192    
-112   -112   
-80    -16    
-96    64     
352    144    
-96    224    
96     272    
128    80     
384    224    
-496   560    
192    384    
-224   608    
304    256    
-80    -32    
208    32     
64     16     
-224   -352   
224    -32    
144    192    
144    -64    
80     528    
-400   -96    
-272   -144   
224    240    
0      112    
0      -48    
-160   -224   
-256   32     
320    112    
-96    320    
112    -256   
288    400    
112    304    
-176   -416   
-64    0      
336    128    
80     176    
80     -144   
144    -16    
-96    192    
-16    -80    
-16    160    
208    96     
16     48     
32     -48    
240    144    
112    160    
-96    -224   
-16    144    
0      16     
112    -416   
-160   176    
-32    -208   
-96    -48    
0      224    
272    176    
48     -96    
192    -96    
64     208    
-48    64     
144    112    
-240   -48    
0      -128   
112    144    
64     0      
-64    0      
176    144    
-208   -128   
0      112    
-192   96     
0      32     
96     256    
192    96     
-32    64     
-32    48     
192    64     
48     48     
-160   32     
96     96     
-96    208    
-64    -64    
0      32     
32     16     
-64    16     
16     -80    
160    32     
176    -48    
96     48     
0      -32    
-16    -64    
32     16     
128    0      
32     64     
-64    64     
112    16     
-16    16     
128    192    
-96    -16    
416    128    
-416   16     
-16    -240   
976    992    
-944   368    
-576   -304   
224    -80    
112    80     
-240   -64    
768    192    
16     176    
96     208    
208    -208   
288    -80    
-64    128    
-64    112    
352    0      
272    -80    
16     176    
-32    -512   
256    -64    
64     96     
-320   -48    
224    32     
-128   80     
464    112    
-320   80     
-368   -32    
128    128    
-288   -32    
384    -16    
240    144    
496    32     
48     -48    
128    128    
-272   32     
-32    64     
80     32     
16     48     
-416   -80    
592    -64    
160    96     
-512   -16    
272    96     
64     80     
-32    -96    
0      0      
160    -64    
-96    -16    
-128   -208   
-16    48     
-16    -400   
-144   -64    
256    -32    
288    96     
16     48     
384    112    
-368   -16    
48     16     
240    112    
48     -80    
32     80     
112    -48    
-176   -80    
192    -192   
128    128    
128    -496   
32     64     
80     -16    
64     -32    
80     128    
-64    64     
144    64     
0      -32    
112    48     
0      0      
32     32     
16     32     
240    160    
-48    -32    
240    176    
-48    -80    
496    496    
-176   208    
192    128    
80     16     
16     -160   
-48    -32    
112    -416   
0      -192   
32     -192   
176    176    
-144   -528   
96     -224   
-48    48     
-48    32     
144    -592   
160    0      
208    192    
-256   -96    
176    -16    
0      -320   
48     -320   
400    496    
-112   304    
144    -160   
-48    -144   
384    -48    
272    464    
-32    -144   
160    -192   
-16    64     
80     160    
16     128    
128    -528   
96     -112   
144    -528   
16     -496   
16     -32    
80     -160   
176    -32    
32     -848   
32     -208   
-112   224    
192    -400   
144    160    
-256   -608   
192    64     
320    672    
-192   -1056  
-80    432    
-928   -832   
320    256    
96     432    
128    -16    
-176   -224   
-48    -384   
-32    80     
272    -160   
80     224    
-16    -96    
-64    -48    
336    -128   
-288   -272   
96     -128   
-64    48     
-432   160    
-32    -64    
-112   32     
384    64     
96     16     
80     -288   
-16    -144   
224    -256   
48     -48    
16     -48    
64     -16    
192    64     
272    -64    
-80    -16    
-32    -128   
64     -96    
48     -96    
128    48     
128    -96    
192    80     
224    32     
-160   224    
-48    -384   
64     -176   
-32    -1568  
-16    -160   
224    -208   
160    32     
-16    80     
80     -32    
-144   -32    
112    -32    
-432   48     
192    112    
32     -64    
80     -96    
144    -80    
-16    -112   
96     -48    
32     -624   
96     16     
112    -96    
96     -176   
-336   -32    
240    0      
-144   32     
160    -128   
-272   64     
-32    32     
-224   -96    
32     -32    
-48    128    
-96    -32    
208    -16    
288    -64    
-160   112    
-64    -432   
96     -256   
-432   32     
64     -192   
160    -48    
64     -16    
208    80     
144    64     
80     0      
-16    -240   
-432   0      
-112   -160   
128    272    
208    -304   
352    -64    
144    -976   
-112   224    
-64    48     
-96    -32    
-464   -288   
96     -192   
-832   32     
368    112    
-128   64     
112    -32    
-96    48     
208    -64    
-16    176    
64     -512   
80     32     
-288   144    
256    16     
-48    -80    
64     -256   
-64    -176   
64     -80    
-208   -48    
176    -16    
-176   32     
-64    -128   
-176   16     
-64    -112   
48     64     
112    64     
352    -32    
-32    48     
112    -32    
-432   -112   
128    -304   
-80    -32    
128    240    
48     64     
-32    -32    
-320   48     
256    -32    
-32    144    
48     -32    
-32    112    
-128   -64    
-432   -96    
-176   -80    
-848   -112   
-160   -80    
288    -16    
96     272    
-176   -416   
96     -112   
128    432    
-656   -224   
-736   -240   
144    64     
-400   -352   
-224   64     
-304   48     
-192   -240   
144    64     
160    -64    
-128   48     
-128   192    
-384   -80    
-512   80     
-256   -336   
32     240    
352    432    
-448   112    
576    64     
0      -640   
-48    544    
224    -96    
-528   -368   
176    208    
-208   48     
144    176    
-320   -48    
-320   -336   
80     432    
64     288    
-32    96     
48     96     
144    -304   
144    320    
-224   128    
-224   -128   
-112   96     
-688   -768   
448    880    
-96    32     
-656   -416   
-144   0      
112    -32    
-16    16     
192    16     
-1536  -48    
16     48     
-96    112    
176    -32    
-144   0      
16     32     
-160   -176   
288    0      
-128   192    
144    16     
-304   -96    
16     80     
-128   144    
-48    32     
160    -32    
-432   48     
16     112    
-208   -32    
16     -16    
48     16     
-16    48     
112    64     
-176   -16    
-16    32     
-32    64     
48     112    
-128   -96    
-48    -32    
-256   64     
224    32     
-704   0      
48     -32    
128    0      
-144   0      
144    64     
-160   80     
-16    16     
-16    32     
-96    16     
160    16     
-176   0      
-64    32     
-48    48     
-256   -128   
-16    -16    
-128   32     
80     32     
-1168  -16    
-80    16     
112    48     
64     16     
192    96     
-160   96     
0      48     
128    -16    
-32    -16    
-128   64     
-48    -48    
0      -64    
64     112    
-48    -48    
80     16     
-368   0      
-240   -64    
176    16     
48     32     
96     144    
64     -48    
32     -16    
-16    16     
-96    -32    
64     -16    
32     16     
-80    272    
64     112    
-80    16     
32     32     
16     96     
96     384    
-336   112    
0      -64    
176    32     
0      0      
160    272    
-240   -96    
496    -16    
-112   32     
-240   -336   
400    -368   
272    48     
-128   0      
512    -48    
256    80     
-368   -176   
400    32     
-432   64     
-128   80     
-160   0      
32     -144   
480    112    
288    112    
224    -32    
96     -16    
-160   -16    
48     -80    
32     32     
-32    48     
656    400    
-288   336    
112    32     
16     -176   
368    0      
128    80     
-128   64     
224    272    
-288   160    
16     208    
80     80     
224    -16    
0      48     
80     -16    
48     144    
96     80     
16     176    
-288   64     
256    192    
224    64     
32     -96    
-112   32     
-256   0      
64     48     
-144   0      
-128   -112   
272    -16    
80     16     
160    -16    
-192   48     
-352   -32    
64     80     
-64    16     
32     48     
-80    -112   
240    0      
64     96     
-272   0      
192    96     
-32    48     
400    368    
-352   128    
-64    -528   
16     32     
176    32     
80     32     
240    128    
80     0      
-64    16     
96     64     
-112   48     
96     -16    
48     48     
224    112    
-80    -16    
112    96     
-416   192    
-16    16     
32     -32    
-64    -32    
48     -192   
96     32     
-192   176    
176    -80    
256    256    
64     304    
48     80     
-64    -400   
336    -64    
32     384    
144    -128   
96     -176   
-16    80     
16     -512   
160    1360   
-96    -192   
-128   -688   
400    432    
192    144    
-32    0      
176    192    
64     -160   
-32    96     
48     384    
48     -256   
192    288    
-208   192    
208    -320   
32     144    
48     -352   
-112   704    
480    -288   
-48    -208   
-16    -336   
144    -608   
-288   -64    
304    -240   
-80    192    
64     112    
288    0      
96     64     
-128   -832   
48     -400   
-160   -304   
64     -336   
-80    320    
464    240    
96     208    
-320   -192   
336    -96    
-128   -80    
128    192    
0      -192   
-96    32     
96     144    
16     96     
240    -64    
144    -96    
144    0      
96     -192   
-128   16     
112    -1184  
16     32     
0      64     
-32    96     
0      -256   
48     48     
-16    -144   
208    -32    
96     32     
-48    -96    
112    32     
96     128    
-112   64     
160    -16    
-160   -64    
384    -656   
64     160    
128    -400   
128    -32    
128    96     
80     0      
0      32     
-48    -128   
160    80     
144    -80    
0      64     
32     144    
-16    -64    
-48    -640   
176    48     
-16    -16    
288    32     
-48    32     
-48    80     
0      -48    
-32    96     
32     -48    
160    -208   
-48    80     
96     -32    
96     32     
112    -144   
64     80     
144    -128   
192    16     
-80    -1152  
-64    80     
16     96     
64     -80    
-48    16     
64     96     
0      160    
320    80     
-16    240    
64     -96    
144    -80    
-16    -160   
80     144    
-16    48     
160    16     
0      -272   
-128   208    
48     -48    
80     -672   
48     -160   
-320   -80    
128    -112   
-336   144    
0      -1104  
48     -96    
0      -48    
144    -128   
32     -192   
64     -160   
-144   144    
-368   160    
-80    -288   
160    -16    
80     -400   
0      0      
-1296  -96    
48     -48    
-144   -128   
208    -528   
240    -192   
272    -128   
160    16     
176    32     
80     -96    
160    -336   
-144   112    
144    -176   
64     112    
160    16     
368    160    
-112   448    
48     -240   
32     -512   
240    432    
240    208    
176    64     
384    32     
336    208    
32     336    
80     112    
-160   80     
176    240    
-256   -32    
64     -720   
96     -48    
112    160    
192    176    
-752   32     
-240   -528   
112    0      
48     -384   
16     -176   
320    336    
64     -256   
144    160    
-48    32     
112    -128   
-112   -240   
-32    192    
80     96     
-96    -96    
64     48     
-560   64     
-48    -224   
16     -416   
-224   -112   
192    128    
128    160    
432    464    
144    -432   
-80    -96    
288    16     
16     160    
16     160    
80     -112   
-320   32     
96     -32    
96     32     
-80    -112   
192    -224   
48     -464   
480    656    
352    592    
160    320    
256    -912   
-208   352    
80     320    
160    32     
-112   160    
-16    -48    
64     -16    
304    128    
80     128    
192    -64    
160    208    
304    112    
-208   -32    
-32    -128   
224    208    
48     -208   
-192   32     
0      112    
-64    -128   
112    32     
48     32     
16     0      
272    -16    
-352   48     
192    -96    
-416   64     
128    -96    
128    -16    
-64    -144   
144    48     
48     -64    
32     64     
-224   16     
-16    -32    
-128   -16    
208    -48    
-176   -80    
-32    -32    
-432   -16    
176    -96    
0      16     
144    48     
-64    64     
80     -64    
-64    -16    
192    -240   
96     -64    
-144   0      
96     -32    
-80    0      
128    0      
-176   -32    
192    -16    
-224   -16    
80     0      
-128   0      
80     -48    
-48    80     
-2048  -256   
-96    -16    
-592   -160   
-448   0      
-16    64     
-192   -16    
-320   48     
112    80     
0      48     
-240   -48    
64     32     
0      -80    
128    -64    
-1376  -128   
256    144    
-256   -16    
-176   32     
-32    32     
16     32     
16     0      
-784   -16    
-48    96     
-1120  -32    
-16    32     
-208   -32    
48     64     
192    144    
-192   80     
-208   -192   
96     32     
-80    -304   
96     -160   
16     48     
-128   48     
48     32     
-16    32     
-208   -256   
-192   -64    
-32    0      
128    -64    
-176   -112   
-304   -352   
96     128    
-48    112    
240    160    
80     -256   
48     -112   
-96    96     
-240   -80    
64     64     
-464   -432   
112    -656   
336    64     
256    208    
-144   -144   
-80    32     
128    160    
48     -32    
640    -160   
352    160    
-224   352    
-240   96     
-96    16     
48     -48    
304    128    
-208   -48    
160    -32    
-128   32     
32     -16    
144    16     
-592   48     
-160   16     
64     80     
-352   -128   
96     -16    
-64    96     
64     96     
0      -64    
0      -32    
-368   128    
-752   -128   
-64    32     
-400   144    
-112   32     
-368   -128   
208    -32    
0      128    
-16    160    
-32    -192   
112    -128   
448    -192   
224    -64    
-112   96     
-32    48     
-208   -16    
48     -112   
128    -32    
256    16     
560    192    
-304   0      
272    224    
-832   80     
32     96     
-208   -64    
-240   -256   
240    128    
-48    160    
128    0      
-176   -112   
-48    16     
-32    80     
128    208    
-304   16     
48     -832   
-288   448    
96     320    
-208   -288   
224    64     
-32    16     
-128   -96    
16     -272   
48     352    
-144   -160   
16     288    
32     -48    
112    432    
-384   -624   
0      -112   
-80    192    
144    -352   
368    336    
-128   -176   
-32    80     
-208   -224   
16     -464   
128    512    
-96    304    
272    32     
-16    -224   
272    64     
-112   -64    
304    816    
-656   -288   
-96    -208   
-112   -144   
0      -176   
-48    80     
32     160    
304    560    
-144   -32    
128    80     
-64    16     
320    144    
-256   96     
-128   -512   
96     -320   
-48    80     
-224   -16    
112    128    
0      192    
32     48     
-352   -128   
32     -32    
-80    0      
-48    -80    
128    160    
112    208    
64     112    
112    128    
32     240    
-112   -16    
224    0      
-176   64     
112    16     
-224   -48    
-128   -208   
256    -80    
80     160    
208    -96    
-32    320    
-64    32     
32     -16    
-96    0      
176    -48    
128    32     
144    -208   
0      96     
-176   80     
128    112    
48     128    
144    -48    
64     -64    
-32    16     
96     224    
288    192    
-112   -48    
48     -48    
16     64     
48     64     
144    112    
32     -48    
400    96     
-272   96     
32     64     
-144   16     
736    368    
-448   352    
-240   80     
-80    16     
80     224    
224    112    
176    -144   
256    80     
-48    144    
192    480    
64     64     
-16    -80    
-112   32     
0      -48    
16     0      
112    -720   
96     48     
128    0      
16     160    
-48    128    
144    112    
-64    144    
-16    48     
16     -112   
192    96     
16     64     
112    64     
-32    -80    
128    -160   
-16    96     
64     160    
288    160    
0      16     
48     272    
-128   -192   
96     -112   
16     16     
-48    48     
-32    -16    
320    -144   
-32    16     
64     32     
0      160    
-112   224    
64     304    
192    -352   
112    32     
16     -80    
-32    -16    
32     32     
-32    80     
368    -96    
208    -80    
-272   -224   
48     16     
-32    96     
-192   240    
-32    80     
304    -304   
256    -112   
176    -176   
-208   -64    
-208   -2000  
-96    96     
128    464    
128    -64    
128    -96    
208    0      
208    -128   
-128   320    
-144   32     
208    -160   
288    352    
80     208    
-304   -416   
432    80     
144    128    
432    -304   
144    -32    
304    -288   
384    336    
-208   -16    
384    208    
-400   -192   
160    288    
208    304    
-224   -144   
256    32     
224    176    
384    -256   
112    -432   
-64    336    
208    -240   
-176   -16    
528    -192   
-288   -304   
96     -128   
256    64     
368    144    
-80    160    
64     96     
160    -64    
16     -32    
288    -112   
-176   -240   
32     -208   
32     48     
80     -96    
144    32     
128    -128   
32     64     
80     96     
48     80     
-48    -48    
160    64     
-48    64     
48     -416   
128    0      
-16    -80    
208    32     
80     -64    
80     96     
112    -208   
-16    0      
64     -96    
-96    -32    
128    112    
112    32     
80     160    
80     144    
48     -16    
16     -144   
16     80     
208    32     
-272   -16    
48     -144   
272    96     
0      -16    
208    0      
48     -304   
64     -288   
96     128    
-16    -512   
-16    64     
-400   -144   
64     -128   
-16    -32    
352    96     
608    80     
48     64     
144    -48    
304    128    
-16    16     
32     -112   
112    64     
64     -576   
112    16     
144    -144   
-144   0      
-240   -64    
112    -112   
112    48     
80     -496   
80     -80    
192    -1088  
16     16     
-16    64     
-16    32     
64     16     
336    240    
-288   16     
112    80     
144    -32    
32     -32    
-368   -128   
208    32     
112    -48    
-160   -16    
128    -112   
112    0      
128    0      
160    -352   
-48    -32    
208    -112   
-400   0      
240    0      
-192   32     
80     -64    
176    0      
-176   48     
-96    -64    
16     0      
144    64     
0      -112   
176    -96    
224    16     
-16    -352   
-128   -16    
-32    -48    
144    -80    
64     32     
176    288    
-64    -128   
160    -32    
-160   -176   
-48    -112   
-32    160    
-160   -64    
32     -128   
160    -32    
144    176    
368    -16    
224    32     
-16    48     
32     208    
0      -48    
48     -144   
-160   -96    
96     -16    
-112   -64    
32     -112   
-160   -80    
112    -192   
-224   -208   
64     -48    
16     128    
-32    -192   
48     -48    
80     -1392  
-48    -16    
192    80     
80     96     
-192   16     
80     -64    
-256   -32    
96     48     
-736   -48    
96     -64    
-224   -48    
160    64     
128    80     
352    80     
-544   32     
192    -128   
-80    912    
352    320    
432    -400   
368    64     
336    80     
-48    -112   
-240   -448   
-400   -64    
320    640    
-704   -320   
128    0      
32     0      
96     -144   
48     160    
96     -432   
288    160    
-112   32     
-32    32     
-144   64     
528    464    
-544   -400   
0      -304   
208    240    
272    0      
-80    -96    
-160   -352   
-48    176    
-464   160    
-16    80     
160    -144   
96     -320   
160    128    
768    256    
-624   -1040  
96     240    
-64    -208   
240    -144   
256    240    
-80    -384   
-144   240    
64     96     
144    -96    
-832   64     
304    80     
-64    -288   
-752   160    
-288   -64    
-1568  -16    
-32    64     
0      -96    
32     800    
208    -800   
16     0      
160    832    
16     -672   
-48    -48    
32     448    
96     -288   
128    -112   
-224   272    
-32    -320   
48     272    
144    480    
-48    -80    
-944   -96    
-96    176    
80     -48    
-176   240    
-608   736    
80     -416   
-352   -304   
32     -112   
-144   -176   
-96    32     
-64    -272   
176    32     
16     -80    
240    96     
-288   -528   
-464   -496   
-224   -432   
-656   -144   
16     80     
-112   -656   
0      64     
-288   -272   
272    176    
-304   128    
-16    -224   
-64    -32    
112    -96    
-160   32     
-112   -96    
32     -48    
-240   32     
-32    -240   
16     -240   
48     -96    
-16    -32    
48     208    
-16    -64    
-160   0      
160    160    
16     192    
-96    160    
-80    0      
32     -96    
96     -48    
-192   112    
320    240    
-272   144    
-432   -96    
-96    -64    
-1456  -416   
96     144    
-80    48     
80     48     
144    -32    
-64    32     
16     128    
272    304    
-544   208    
96     -144   
16     -80    
-288   -240   
320    -336   
-432   -288   
144    48     
-576   -480   
-176   160    
-112   64     
-80    -96    
-32    -80    
-416   -112   
-16    0      
208    80     
32     224    
48     -48    
112    0      
-32    -80    
-64    64     
-160   -32    
-32    96     
-496   -112   
64     -112   
-48    -80    
-304   -64    
-224   64     
48     -64    
176    64     
16     -32    
-16    32     
-256   -160   
-48    16     
-128   16     
16     -144   
-256   -96    
160    112    
-480   -224   
176    -96    
80     16     
-48    112    
-32    32     
-160   272    
96     -16    
192    -176   
32     64     
112    192    
80     368    
48     -80    
208    -64    
-176   -16    
-80    64     
-368   16     
96     16     
64     -32    
192    48     
32     -144   
16     -64    
-48    -16    
96     -96    
224    16     
-32    96     
-32    48     
-384   -240   
-64    -96    
-64    -208   
-32    -240   
240    192    
-160   224    
48     96     
96     32     
128    128    
-160   -96    
-96    16     
112    48     
256    16     
96     256    
-112   0      
-192   -80    
256    224    
48     64     
112    -96    
352    -96    
48     224    
352    128    
-128   -288   
176    208    
0      160    
272    480    
-416   -400   
16     -16    
-64    -96    
-112   -112   
48     -96    
192    -176   
320    16     
288    -32    
448    -112   
-400   -48    
-272   208    
-16    208    
64     48     
352    -160   
160    -64    
1008   912    
-320   0      
272    352    
-320   416    
-16    144    
416    208    
144    64     
112    96     
144    0      
-144   0      
-80    96     
-368   128    
0      96     
224    0      
144    32     
64     0      
176    128    
-256   -16    
256    -32    
-96    -32    
64     64     
96     32     
48     32     
496    336    
-672   -16    
304    16     
176    96     
-304   32     
288    128    
32     -48    
-608   -272   
352    0      
-160   128    
-528   0      
304    112    
16     144    
128    -16    
240    112    
-160   32     
128    32     
64     64     
64     64     
80     32     
64     112    
-144   0      
-16    64     
-32    32     
64     -16    
16     112    
80     -16    
16     -64    
32     32     
0      -928   
144    -48    
0      16     
-48    144    
16     80     
128    64     
-48    48     
144    48     
-240   32     
96     48     
80     64     
16     64     
-16    0      
128    16     
0      80     
16     -1376  
1200   800    
-1056  336    
-160   -336   
144    128    
-448   0      
160    0      
336    96     
464    288    
-736   128    
-384   -208   
432    128    
592    112    
-432   -64    
32     16     
368    0      
-368   0      
112    -208   
128    32     
272    144    
-160   64     
192    -160   
112    0      
-144   48     
160    0      
64     32     
48     -64    
32     80     
48     -48    
176    48     
-160   32     
144    32     
-112   -560   
128    192    
-16    -240   
208    96     
-176   -32    
32     32     
208    -16    
-80    48     
64     16     
-32    -32    
-96    64     
496    96     
-208   -16    
64     -192   
192    112    
80     -32    
128    64     
112    -48    
-64    -32    
144    -16    
-176   -96    
96     32     
-48    96     
144    64     
0      96     
208    80     
112    -80    
32     80     
-16    -560   
240    -224   
-256   -368   
96     48     
-48    64     
160    -96    
112    -48    
-16    128    
80     48     
64     112    
16     48     
-96    -208   
240    -48    
96     -160   
256    128    
48     160    
-80    -256   
80     -48    
80     272    
176    -48    
80     0      
112    64     
-16    -16    
32     16     
48     -96    
192    -384   
32     64     
64     80     
48     -176   
224    64     
80     -80    
224    176    
208    -32    
96     -80    
0      80     
-80    0      
-256   -832   
0      240    
80     -48    
144    80     
256    -784   
-16    32     
128    -256   
384    368    
128    80     
80     -16    
-96    -176   
0      64     
-192   240    
48     112    
96     208    
-80    32     
192    -544   
-48    -96    
-2032  0      
16     -496   
-64    96     
112    -32    
320    -224   
144    144    
-16    -64    
192    -176   
208    -64    
208    -176   
176    32     
208    -208   
-384   -1696  
-368   736    
368    928    
-336   -352   
128    160    
64     -336   
-48    -112   
-16    128    
-448   -560   
-304   -240   
384    256    
-176   80     
336    -256   
256    -80    
432    80     
272    -112   
320    -272   
128    -224   
-368   48     
192    176    
-304   16     
-112   -208   
-16    -64    
192    -400   
192    -128   
320    -544   
160    48     
192    48     
80     160    
320    624    
-192   336    
-176   -32    
80     -192   
-736   144    
304    160    
272    -80    
144    -112   
96     -224   
112    80     
-192   0      
16     -432   
-32    -16    
32     -144   
144    0      
64     16     
96     80     
96     224    
-160   -112   
-160   224    
224    16     
-304   -112   
112    -144   
-48    -208   
32     -160   
-208   -304   
336    -240   
-128   112    
-208   -672   
416    -272   
224    112    
-144   400    
-208   -192   
-32    -208   
16     -160   
160    112    
-208   336    
-176   -64    
-544   448    
-320   240    
-80    176    
112    -432   
80     -176   
96     -880   
-16    32     
-128   -96    
0      -672   
-112   32     
80     96     
-448   -192   
160    -208   
-368   48     
304    128    
-752   192    
128    -208   
-32    -16    
0      -208   
48     0      
16     -208   
224    -208   
-384   32     
144    0      
-48    -48    
16     -32    
-224   32     
-48    -224   
-304   -272   
80     -48    
192    288    
48     -64    
-96    -16    
224    -240   
16     0      
64     80     
-176   64     
-192   -192   
512    80     
-32    464    
96     -48    
-160   -528   
224    -368   
144    -64    
-48    -64    
-80    48     
-480   -384   
-192   -160   
-352   -512   
-96    144    
48     256    
-384   192    
96     32     
-1168  -128   
-96    -32    
-32    -192   
-192   -144   
32     -304   
96     -192   
-32    -64    
64     240    
-768   80     
-128   -16    
-16    -288   
224    -32    
160    -96    
-240   -128   
-224   0      
-144   32     
176    256    
-384   96     
-80    -112   
64     -192   
-32    160    
-240   -16    
16     48     
-160   -16    
496    272    
-240   272    
-192   112    
240    160    
-560   208    
32     -64    
-96    -32    
32     -32    
-416   176    
-48    224    
-1408  256    
-288   256    
-64    -96    
176    48     
-16    -240   
176    128    
-144   -240   
-80    -16    
-16    160    
160    -80    
32     224    
-144   -160   
144    96     
-480   16     
80     -208   
-1776  -16    
-16    80     
-16    0      
32     32     
-112   -224   
32     64     
-16    -48    
80     -112   
16     -48    
64     -400   
-224   64     
-96    240    
-176   -192   
64     0      
288    112    
176    64     
352    160    
-128   112    
64     304    
-160   -32    
-192   16     
-64    144    
-128   48     
256    208    
-336   48     
80     -48    
-176   -112   
192    16     
-48    64     
656    496    
-880   128    
-208   -144   
-2096  -80    
-80    96     
-16    32     
304    96     
-512   -80    
-64    -80    
-96    80     
-880   -16    
176    -64    
320    80     
-128   64     
160    160    
-80    208    
-272   128    
-352   -48    
-1344  -80    
160    96     
496    -48    
192    32     
-32    80     
-224   0      
96     64     
0      -32    
-16    48     
336    176    
-352   -64    
-96    -16    
400    304    
-560   -48    
144    -32    
240    32     
304    64     
-48    80     
-144   -96    
160    32     
-160   0      
176    48     
112    -16    
-48    16     
-144   48     
80     80     
-80    -32    
208    112    
-64    -48    
176    96     
-704   -96    
-96    32     
80     80     
-128   128    
-176   -16    
144    0      
128    16     
32     -64    
16     112    
-304   80     
32     -48    
-160   112    
-80    128    
-224   -112   
-192   80     
32     112    
80     32     
128    64     
160    16     
-112   80     
112    96     
48     -32    
-192   -128   
144    -80    
144    176    
-80    16     
240    48     
64     128    
-320   -48    
0      -208   
144    -144   
-48    80     
-128   -48    
480    64     
16     48     
304    208    
-640   -384   
704    -48    
176    224    
-592   48     
48     -32    
-64    -64    
144    16     
-224   -64    
160    64     
48     80     
0      48     
-16    -16    
-176   64     
16     80     
96     0      
96     64     
-16    32     
208    16     
-176   48     
96     64     
-96    16     
336    160    
-384   -32    
240    -112   
-48    64     
256    96     
-176   48     
112    48     
112    160    
80     96     
128    16     
-176   -16    
144    -48    
-336   32     
144    64     
-224   -16    
240    -240   
48     -96    
80     96     
16     -176   
16     64     
-48    256    
-144   0      
208    64     
128    96     
64     -368   
-160   160    
80     -16    
-144   96     
96     96     
-16    48     
128    -624   
-208   -112   
64     80     
256    224    
-112   -272   
-16    64     
0      -64    
160    0      
-16    80     
16     224    
16     -80    
128    432    
-48    288    
128    -576   
-176   592    
-112   -32    
16     -432   
256    -96    
112    608    
-16    96     
64     -448   
16     288    
304    480    
96     320    
80     160    
16     -192   
64     80     
0      160    
176    176    
-32    128    
-48    176    
288    240    
-48    0      
48     -32    
-48    -128   
112    -560   
96     192    
160    240    
-16    48     
-32    320    
-64    -224   
144    272    
16     288    
-576   -32    
64     0      
128    -80    
80     272    
112    -544   
128    -16    
16     -64    
-240   240    
32     352    
-48    -16    
-128   -352   
-64    192    
-352   -32    
32     96     
-224   128    
-112   -192   
416    -144   
432    0      
0      64     
128    -304   
-112   -16    
-128   -432   
-304   304    
128    48     
272    16     
192    32     
64     48     
144    96     
128    -32    
208    -32    
0      0      
80     128    
192    192    
-80    112    
208    0      
-144   16     
48     160    
-240   -128   
608    -832   
64     -32    
224    16     
-32    -160   
-304   80     
-80    80     
-80    256    
288    32     
320    176    
0      368    
48     -64    
48     -400   
32     96     
16     -400   
16     -272   
128    -16    
112    144    
160    416    
224    304    
-96    16     
224    -272   
32     16     
80     -272   
64     96     
0      -48    
16     240    
112    -64    
80     -32    
160    -592   
-32    0      
32     0      
112    336    
64     176    
176    -192   
16     112    
224    32     
112    32     
160    96     
-112   -80    
80     112    
160    80     
0      0      
-64    -96    
-48    -256   
64     -64    
-112   -192   
32     -944   
304    -416   
80     -288   
48     -480   
16     32     
-80    160    
176    512    
208    -128   
96     -416   
0      160    
144    -288   
128    352    
192    0      
528    -176   
-32    128    
-496   -592   
-320   -160   
176    -112   
128    -48    
336    160    
80     32     
448    400    
-336   256    
240    80     
-64    -352   
-80    -64    
240    32     
-16    112    
272    -160   
-48    -16    
96     -32    
128    -16    
-224   96     
208    -224   
-512   64     
208    -384   
128    16     
112    -160   
-144   -240   
400    -272   
-96    -208   
176    -464   
448    352    
-48    704    
-208   288    
208    48     
496    320    
-192   192    
-160   224    
-848   -48    
48     96     
96     -336   
0      -128   
32     688    
368    240    
0      112    
224    -368   
272    672    
224    288    
192    208    
208    128    
-48    384    
0      256    
-48    -112   
-64    -112   
-16    -256   
160    80     
-208   224    
176    -576   
128    -176   
0      496    
192    -160   
112    112    
-160   160    
-32    144    
224    -224   
352    320    
-96    128    
0      -304   
192    32     
16     48     
-96    -288   
176    544    
208    112    
192    -192   
-16    0      
256    -672   
48     112    
272    80     
-80    -32    
-240   96     
-48    64     
-192   16     
208    -80    
-112   0      
256    -96    
-64    -16    
80     64     
-1104  -32    
16     -96    
-176   112    
32     -224   
32     -48    
192    -320   
256    80     
-16    80     
48     -16    
-112   -160   
144    -16    
-96    0      
-80    -32    
16     80     
64     128    
-144   112    
80     48     
-112   112    
32     -624   
336    -672   
704    -240   
400    128    
-480   224    
272    -144   
-144   -144   
160    -48    
-416   -144   
256    -32    
-432   -48    
-160   -32    
-352   16     
-144   -32    
320    240    
-288   -16    
-16    -32    
-432   -48    
176    -16    
-416   32     
16     -32    
96     -192   
400    16     
384    144    
272    -128   
208    -48    
624    48     
-208   384    
-928   -192   
-96    32     
-1760  -80    
-944   -48    
-16    -128   
-64    16     
144    32     
-704   -112   
320    -16    
-96    16     
-64    -48    
64     32     
-144   -80    
-784   -144   
-48    -64    
48     0      
0      64     
-16    -80    
-112   64     
-112   -16    
-32    32     
-144   80     
-448   -32    
-80    16     
-32    -64    
48     80     
-400   -48    
320    112    
-64    -144   
16     64     
-240   -48    
176    32     
-48    -80    
32     96     
-128   64     
32     16     
-96    -80    
-256   32     
48     128    
-1248  -48    
128    -64    
-64    48     
32     80     
-96    -80    
0      64     
-144   0      
144    32     
0      48     
-240   -64    
128    32     
-128   48     
80     112    
-96    32     
80     -272   
-128   16     
-224   32     
-1008  -160   
80     112    
16     -160   
-64    16     
-48    64     
48     64     
-160   -144   
-96    -112   
16     144    
-32    16     
192    16     
-608   -368   
240    -384   
16     -64    
-32    48     
-48    0      
208    128    
-176   0      
336    240    
-224   256    
-96    -32    
-240   -96    
-416   -16    
48     -224   
80     -80    
256    144    
-224   16     
176    144    
-192   0      
144    304    
-544   -32    
96     -160   
16     112    
16     -32    
0      -16    
-32    -48    
32     192    
-64    16     
64     -32    
32     80     
-80    -64    
32     -256   
-272   -272   
-48    144    
80     240    
32     -128   
16     304    
-112   176    
96     -304   
16     320    
-48    -64    
-48    48     
-112   -816   
384    496    
-240   368    
-48    -144   
-224   192    
96     -80    
368    288    
-224   720    
-368   -656   
256    -352   
-880   416    
-192   64     
-80    272    
160    -832   
-32    -272   
144    -96    
32     208    
-64    80     
-16    -224   
80     80     
-112   -80    
-384   -32    
16     -144   
-176   96     
48     112    
-48    -48    
80     -80    
-128   -128   
128    -240   
-144   -16    
80     160    
112    80     
224    128    
128    48     
80     0      
64     -48    
-240   -144   
224    -320   
-32    32     
64     -64    
16     0      
32     144    
-32    -32    
0      -64    
176    96     
-16    0      
64     128    
208    48     
128    32     
-224   -128   
128    -64    
-48    32     
192    64     
-112   -32    
-16    -80    
-32    96     
-16    32     
96     0      
208    240    
-64    304    
-16    128    
0      80     
-288   -16    
-128   128    
-192   -144   
320    -32    
-256   32     
80     64     
-64    64     
-496   -192   
352    -96    
16     -96    
-80    -288   
16     240    
-176   48     
224    -48    
64     -16    
-192   192    
-144   64     
0      -48    
112    -32    
-96    -32    
32     -16    
176    208    
-160   192    
0      -48    
176    -64    
0      -64    
16     16     
256    -80    
16     80     
384    192    
-192   128    
144    -16    
-64    -96    
144    304    
-80    32     
144    -1392  
112    0      
32     320    
192    352    
-256   32     
80     -48    
-144   16     
112    -64    
176    96     
0      16     
112    32     
272    112    
32     64     
224    32     
16     16     
-224   -160   
64     144    
112    160    
128    -16    
-144   -64    
112    -96    
144    96     
16     160    
-64    64     
0      16     
0      32     
160    64     
64     -16    
0      128    
-64    -48    
192    -368   
96     -128   
96     96     
352    368    
-192   208    
320    160    
32     320    
0      96     
0      -64    
0      128    
-32    -416   
80     -80    
224    768    
432    592    
-192   -336   
-48    -1296  
192    -208   
-128   -176   
160    32     
144    192    
-272   -32    
208    0      
112    560    
176    32     
432    272    
-16    640    
32     592    
-320   -1104  
-32    -48    
16     -80    
-16    -176   
208    592    
64     96     
112    240    
-320   -496   
96     -64    
-48    80     
64     32     
80     0      
64     -128   
-496   -448   
400    704    
-16    80     
-224   -432   
32     176    
-48    -240   
48     -144   
144    -288   
144    288    
192    -464   
176    0      
-48    -416   
-64    -208   
-176   192    
432    336    
-592   -800   
16     -416   
432    416    
-16    -224   
272    272    
-192   -208   
224    128    
48     -112   
160    16     
-48    32     
224    144    
-336   -32    
176    -80    
144    208    
64     96     
48     -16    
80     -96    
112    -352   
-48    -32    
144    96     
272    -144   
-192   400    
352    -288   
80     -32    
192    240    
-48    -64    
160    48     
-48    96     
-96    -48    
64     80     
32     96     
160    -128   
96     48     
-16    -16    
48     144    
128    -16    
208    32     
64     -112   
-32    32     
-32    -192   
288    128    
0      144    
-32    64     
208    96     
304    144    
-64    112    
80     -144   
80     672    
336    208    
48     80     
-192   -80    
112    -16    
144    -176   
-48    -48    
240    -96    
48     48     
240    176    
-128   -528   
208    384    
144    -784   
48     -368   
64     -176   
0      224    
16     -80    
96     -432   
176    -176   
-112   48     
-16    -48    
64     0      
208    16     
384    240    
-144   304    
32     -176   
160    -48    
-416   -48    
-16    -256   
192    -80    
0      -48    
128    16     
240    -816   
560    576    
-496   400    
-144   -176   
192    -16    
80     32     
368    128    
-368   -48    
160    -160   
96     -384   
-176   -80    
176    80     
464    192    
0      144    
-240   -144   
224    -80    
-144   -16    
80     -416   
368    48     
176    32     
240    -32    
-272   -256   
288    64     
-64    96     
-240   -16    
160    -16    
-32    -48    
-1136  -16    
-32    -368   
464    -176   
320    272    
-272   48     
208    -144   
112    0      
176    112    
112    -16    
352    -112   
304    112    
464    544    
-448   144    
-208   -144   
16     -208   
-512   -32    
240    -112   
352    -16    
-32    -48    
176    -32    
336    -144   
-128   -64    
112    -336   
112    48     
32     32     
-128   48     
-32    64     
80     -112   
-416   32     
176    16     
-16    32     
-240   -48    
-976   -64    
160    -176   
-640   -144   
288    -512   
0      128    
96     -224   
16     32     
0      -112   
64     -48    
-96    32     
96     208    
176    304    
-224   160    
0      -16    
96     32     
-560   -80    
192    -32    
-32    0      
192    -160   
32     112    
80     48     
48     48     
32     -304   
-128   -352   
0      144    
-16    -16    
-528   -144   
240    -16    
-528   -48    
16     -128   
32     64     
144    -48    
112    48     
0      0      
384    144    
176    -208   
208    48     
-656   -80    
368    64     
-176   208    
-32    -160   
-160   112    
-240   128    
-320   -48    
224    -288   
-208   -16    
448    112    
-464   -544   
-192   0      
144    288    
224    -416   
160    288    
96     -144   
64     16     
-272   112    
-48    -320   
128    448    
176    688    
-560   -640   
208    -16    
-176   416    
320    -768   
32     464    
-1008  -160   
96     -112   
-880   176    
-592   0      
0      -320   
-704   -80    
-112   32     
-240   -240   
80     -64    
288    320    
-432   64     
400    -352   
-224   -192   
-704   -416   
-32    -96    
-416   -272   
96     0      
160    176    
-224   -64    
-352   -224   
-560   -560   
-48    0      
-112   -80    
288    160    
-1472  320    
-240   48     
112    96     
144    256    
-368   -80    
16     32     
-64    -112   
144    80     
-96    32     
32     -128   
-80    -192   
-16    -48    
-96    16     
-16    48     
-288   -112   
-576   -128   
-160   -80    
-160   16     
64     96     
-16    16     
144    16     
48     -96    
-144   -32    
-128   -64    
-16    64     
80     96     
-144   0      
224    32     
-288   128    
-192   16     
-624   -80    
0      -384   
384    -448   
208    -80    
64     96     
-144   176    
-64    -112   
32     -16    
-16    32     
-128   -128   
0      -288   
-64    48     
144    128    
-192   16     
112    -64    
-80    -160   
224    -32    
-1424  96     
32     144    
64     0      
-80    -48    
96     -64    
416    480    
-336   352    
0      16     
32     -64    
176    80     
96     96     
64     -64    
-16    -48    
-448   -480   
176    -224   
-480   112    
-272   96     
176    256    
-176   240    
592    176    
-336   128    
-288   -112   
16     -176   
64     112    
160    128    
160    32     
192    64     
-48    -80    
-192   -16    
-240   -16    
-528   -112   
144    32     
-304   16     
176    80     
64     96     
-272   -96    
-64    -240   
0      -32    
-560   0      
-272   64     
-48    16     
-240   208    
160    144    
-320   -32    
-16    208    
80     288    
32     336    
-16    80     
-112   80     
112    64     
-144   64     
-144   -64    
288    -320   
-96    -192   
304    -128   
176    -96    
-144   -48    
-80    80     
-64    -64    
96     0      
-32    16     
208    128    
-176   -80    
-64    -96    
16     96     
0      -80    
32     -96    
16     -96    
272    256    
-480   -368   
48     -240   
32     -32    
144    112    
-144   144    
80     -176   
-128   336    
-304   -128   
128    -368   
144    16     
-112   512    
64     -352   
-64    160    
-128   -112   
80     656    
32     96     
-192   -128   
-400   -464   
-16    128    
-336   -352   
304    304    
80     64     
240    -464   
64     496    
80     -32    
32     128    
0      -16    
16     128    
48     160    
-336   -832   
320    1040   
-336   -80    
-320   -736   
416    896    
336    256    
48     -544   
320    112    
-160   16     
224    -144   
32     16     
592    352    
-192   48     
-192   -1120  
-176   -992   
-416   480    
-192   496    
32     -16    
576    96     
400    -64    
272    32     
-80    160    
32     32     
-320   -272   
48     -144   
-48    128    
32     32     
96     0      
144    48     
-16    32     
-32    48     
-144   32     
144    -16    
-240   -64    
48     144    
-32    -80    
128    192    
128    96     
64     64     
-16    16     
48     0      
208    80     
64     64     
64     64     
48     0      
416    64     
-480   -256   
144    80     
112    0      
-96    32     
256    32     
-112   -224   
48     -16    
48     32     
64     0      
16     -16    
96     96     
-144   -96    
208    32     
-144   96     
192    48     
64     48     
192    96     
-192   -160   
80     128    
64     48     
-32    -352   
112    16     
16     16     
64     16     
-16    0      
32     32     
256    160    
0      112    
-256   -16    
192    192    
-112   -272   
112    -16    
-96    -160   
64     0      
144    64     
-64    -112   
208    80     
16     96     
80     -16    
160    160    
-64    32     
0      160    
112    112    
160    208    
-48    0      
32     -48    
160    64     
32     -144   
176    -176   
112    144    
80     32     
96     128    
64     -208   
80     -16    
16     64     
48     80     
112    -208   
96     -64    
-48    32     
0      16     
64     16     
240    48     
-240   -336   
1040   -752   
-16    256    
96     80     
208    0      
-144   -64    
-464   -320   
752    -128   
-64    160    
-320   -80    
-48    -112   
176    -64    
320    160    
16     128    
160    -96    
-32    80     
-96    0      
-240   -16    
96     -96    
-16    80     
-128   -304   
240    144    
-16    -864   
-192   0      
-176   0      
0      -16    
432    144    
-48    -80    
592    -64    
320    -96    
208    0      
224    -224   
176    176    
-16    0      
224    48     
80     -64    
160    64     
160    -80    
176    -64    
352    96     
-64    128    
-64    -48    
480    176    
0      96     
-16    -160   
208    112    
0      -160   
32     16     
0      -208   
-64    80     
-304   -208   
160    48     
112    -704   
16     48     
-112   -16    
128    32     
256    48     
32     96     
80     80     
0      -112   
112    32     
224    16     
32     80     
-16    -80    
160    80     
48     -64    
0      16     
80     64     
0      -80    
48     -48    
64     -1776  
32     0      
-784   16     
32     -400   
144    -96    
48     -64    
16     256    
192    64     
48     -16    
-128   -112   
320    -144   
112    -240   
-288   -128   
336    -880   
96     480    
64     -32    
-208   -96    
-320   -192   
-80    496    
-32    -656   
304    -16    
80     80     
-160   -464   
64     -80    
48     96     
336    -48    
112    16     
-96    -112   
-16    208    
224    320    
64     -48    
-304   -144   
-1296  -288   
48     416    
112    -224   
160    160    
416    128    
-208   96     
304    160    
-176   160    
-96    16     
208    -320   
16     -48    
128    -64    
480    480    
-400   160    
272    -240   
-160   144    
-352   256    
-768   -128   
0      -144   
288    -176   
80     -96    
80     -16    
256    -560   
-112   -96    
0      -128   
-48    112    
224    -112   
-16    -112   
-96    112    
64     144    
-32    -144   
96     -80    
-1888  -96    
96     144    
144    -48    
64     -160   
112    -64    
16     -272   
-16    0      
256    -848   
32     32     
144    -96    
48     -48    
-384   112    
432    256    
-16    -16    
176    -32    
-80    80     
112    -32    
-208   16     
144    -80    
-16    -64    
80     -192   
96     16     
16     -192   
-128   48     
96     -32    
416    256    
-192   112    
144    -144   
-96    -64    
80     -208   
0      -80    
32     -96    
-32    16     
176    -16    
16     -80    
-32    48     
-144   32     
112    -576   
80     96     
-16    80     
32     16     
16     48     
160    96     
-208   0      
352    -48    
-160   16     
0      -64    
-1152  -80    
112    -240   
-16    -32    
80     -192   
176    32     
80     -144   
32     32     
-192   -144   
368    48     
-320   64     
112    16     
-80    -160   
64     -48    
0      80     
160    32     
-1968  32     
48     0      
-96    128    
-160   -176   
112    32     
80     -160   
192    48     
-576   0      
144    -160   
176    224    
352    336    
-304   160    
240    144    
-208   512    
224    320    
32     -64    
384    -160   
384    -112   
-896   -64    
-96    64     
-1248  -304   
-368   -176   
-240   -192   
-112   80     
-240   -16    
-384   -64    
-160   48     
-160   192    
160    128    
-64    288    
-480   96     
-144   80     
-16    208    
64     -80    
-16    656    
336    480    
-144   320    
-208   -80    
-368   -176   
304    304    
-528   16     
272    -208   
752    256    
-32    -96    
208    -160   
-64    0      
-304   -32    
-144   32     
-176   -144   
128    416    
-272   -288   
48     224    
-176   128    
-112   80     
240    -16    
-240   0      
-176   0      
-64    -288   
112    -16    
96     32     
-64    128    
-16    48     
16     -112   
-64    -144   
272    128    
-16    240    
-112   -80    
-208   -48    
-32    64     
-48    256    
-368   -128   
128    -64    
-480   -256   
80     -144   
-240   -32    
208    64     
-208   -16    
80     -32    
-16    48     
-160   144    
96     96     
16     64     
112    464    
-16    -112   
-192   -288   
-336   48     
-112   128    
-896   -48    
48     -48    
-608   32     
80     96     
-96    -16    
288    80     
96     32     
-160   -32    
0      16     
-128   -144   
208    -64    
-400   -144   
-32    -48    
-304   -32    
64     128    
-336   -160   
-176   -160   
176    0      
304    160    
-368   -304   
656    -144   
0      -48    
-208   -464   
304    -480   
-272   336    
-592   16     
-112   -176   
144    48     
-112   -16    
32     96     
-256   -144   
80     192    
-304   -96    
96     48     
176    -48    
32     48     
48     32     
-16    16     
-16    64     
-16    -16    
16     80     
-96    80     
112    16     
64     0      
80     112    
32     -32    
-224   -16    
-592   -96    
288    0      
192    144    
48     48     
-80    -32    
144    64     
0      32     
112    80     
-32    -64    
-272   -32    
112    80     
-288   -16    
288    80     
80     240    
-208   160    
-128   0      
128    48     
48     64     
-64    -48    
208    80     
-80    128    
-240   0      
80     -16    
112    80     
0      80     
128    80     
-208   -32    
-16    -80    
-128   -32    
96     128    
-224   -16    
176    112    
-32    -112   
-144   -48    
128    128    
0      48     
-112   80     
128    48     
64     96     
-112   -16    
-64    64     
80     32     
144    80     
-128   16     
240    112    
-48    -48    
16     -96    
112    64     
16     -80    
128    0      
-64    48     
96     -16    
-96    80     
160    -48    
-48    -80    
-48    48     
-144   96     
160    64     
-96    32     
144    96     
0      80     
0      32     
48     48     
112    16     
0      -64    
-192   112    
-64    16     
-176   32     
592    608    
-608   688    
96     80     
48     -336   
288    -32    
-192   -144   
32     -64    
320    160    
208    -32    
-224   -192   
112    64     
-352   144    
-384   -144   
16     -16    
0      0      
208    80     
-144   144    
-16    0      
0      -64    
96     48     
272    96     
304    -80    
416    -32    
32     -144   
-64    -32    
-352   -48    
32     -112   
-32    -96    
-96    48     
32     336    
272    272    
144    -64    
272    16     
-128   -64    
0      32     
224    16     
128    256    
400    320    
48     48     
-112   -16    
400    176    
32     112    
336    -64    
-128   -224   
-304   -224   
96     0      
-144   -48    
336    -96    
-112   -96    
256    -96    
48     112    
-480   -1408  
0      320    
-464   752    
16     -384   
112    -96    
176    288    
-176   16     
16     96     
-208   -192   
64     192    
144    32     
80     96     
16     144    
-32    -112   
144    -48    
0      -272   
16     192    
96     -144   
48     272    
320    -240   
-16    -80    
-16    208    
-32    -16    
-32    112    
32     208    
272    -368   
368    224    
16     96     
32     -240   
288    80     
224    -720   
-192   176    
-176   -576   
-304   -64    
144    112    
16     32     
192    16     
368    0      
-16    304    
352    -16    
-176   -192   
64     224    
128    112    
16     176    
240    112    
112    96     
48     224    
48     -448   
320    288    
0      336    
-352   64     
464    160    
-320   48     
176    -128   
-128   -256   
-240   -16    
64     80     
0      112    
128    176    
176    64     
272    -112   
144    80     
288    144    
48     144    
144    -80    
-208   -192   
16     208    
-64    16     
-176   16     
176    -160   
16     48     
112    48     
160    96     
-80    -320   
256    -32    
-128   -112   
288    48     
-32    -160   
176    -176   
-32    -192   
-32    64     
16     208    
160    192    
96     32     
96     0      
160    -144   
-160   -384   
160    368    
64     224    
144    0      
128    -288   
176    -32    
-176   -192   
-32    -256   
-96    -96    
288    -80    
256    16     
-96    -80    
208    16     
0      -112   
144    -32    
176    48     
32     64     
288    0      
32     16     
128    -32    
112    0      
64     -96    
112    80     
96     64     
160    48     
16     32     
192    -80    
-160   240    
64     -112   
48     -240   
32     112    
272    -112   
-96    -16    
48     -48    
112    -96    
-16    0      
176    48     
80     -144   
32     16     
16     -224   
304    48     
96     -160   
48     -144   
-1408  -48    
64     -16    
64     16     
128    -192   
48     -256   
64     -560   
-16    -160   
-80    0      
-16    -32    
272    -144   
272    112    
64     -48    
-48    32     
-16    112    
-160   -64    
-192   0      
-16    -112   
176    -112   
256    48     
128    0      
32     -688   
256    -16    
112    -752   
-144   -144   
208    -16    
16     112    
-288   112    
-48    -176   
64     112    
64     32     
-256   336    
48     80     
-176   -272   
48     -416   
-240   -528   
-16    48     
-48    160    
256    -720   
304    -80    
416    -256   
192    672    
-128   -96    
144    -48    
192    496    
-272   320    
-640   -272   
304    -176   
-1408  32     
128    16     
-160   64     
-176   -624   
-208   48     
48     32     
-96    -160   
336    112    
304    0      
16     -160   
-256   -16    
32     256    
-48    464    
16     0      
-16    -400   
-336   -192   
176    -176   
80     -16    
384    -224   
-32    -128   
0      -160   
112    208    
-144   -1168  
-80    -16    
32     32     
64     -112   
320    -112   
128    -320   
0      -48    
-176   16     
-480   -32    
112    -80    
-528   -16    
112    -64    
64     64     
208    -16    
-48    0      
96     -864   
32     32     
0      32     
32     -64    
80     32     
272    112    
-480   -48    
144    -32    
-176   -16    
144    -16    
-112   16     
128    -448   
-32    0      
-32    32     
16     -80    
304    -400   
224    -16    
-128   0      
-64    64     
-336   -208   
96     -32    
32     112    
-160   -128   
512    32     
176    -16    
176    128    
64     -176   
32     48     
192    -112   
-112   96     
-112   -192   
-144   -112   
80     96     
112    32     
-48    -80    
400    256    
-480   -16    
608    48     
-352   32     
16     128    
-1616  -160   
624    -128   
-480   48     
-1200  -48    
112    0      
-272   32     
-640   -16    
-208   -16    
-464   -48    
-144   -16    
16     80     
112    -80    
176    -64    
-528   80     
-1856  16     
32     -32    
-80    80     
144    112    
32     -48    
-496   -32    
-240   112    
-256   -48    
-192   48     
-400   16     
-96    96     
-400   0      
-48    16     
112    -64    
-64    64     
48     -64    
64     112    
-112   128    
400    112    
-208   -160   
-304   -96    
-144   64     
240    48     
-96    16     
-192   48     
-64    16     
-720   16     
-304   -80    
-880   -80    
64     112    
0      -128   
-112   -16    
64     -64    
32     80     
144    48     
-80    0      
160    96     
-48    64     
-96    48     
-32    -32    
-32    32     
16     80     
-176   48     
-352   -48    
176    0      
-224   -64    
320    304    
-528   -160   
16     112    
112    160    
128    64     
16     -16    
-144   16     
16     48     
-48    0      
80     -16    
-176   -96    
64     16     
-416   128    
0      -48    
-128   -112   
112    -16    
64     32     
0      -96    
112    -48    
0      0      
0      48     
-176   -16    
16     -224   
0      176    
112    352    
-32    256    
-240   -240   
-688   -48    
48     240    
-320   -80    
48     176    
-80    -144   
256    48     
112    0      
576    576    
-688   -992   
-80    16     
-64    304    
96     -128   
-16    32     
-48    -352   
192    192    
-32    64     
400    -272   
-336   32     
272    -16    
0      64     
-224   48     
-176   96     
-368   48     
48     160    
64     -80    
160    -64    
112    -80    
192    160    
-208   -208   
-368   96     
0      -352   
16     -720   
-512   384    
-80    -96    
256    -464   
272    304    
288    32     
-320   80     
-192   64     
-64    48     
-96    32     
-128   0      
80     -224   
-80    -48    
-64    0      
-208   64     
-96    64     
48     -368   
192    224    
192    336    
208    176    
64     96     
-176   -128   
-80    32     
0      240    
-96    -112   
-32    224    
80     192    
-16    320    
256    -32    
-224   -528   
-224   416    
96     -64    
128    96     
64     160    
304    256    
-32    304    
48     -80    
48     48     
48     -64    
-64    160    
-80    -144   
32     192    
0      48     
176    -208   
-368   -224   
288    128    
-208   -208   
-64    -416   
-64    -176   
-48    -32    
-144   -48    
288    -48    
96     208    
160    208    
-336   16     
16     -48    
48     64     
-80    -80    
176    208    
192    352    
-64    272    
-64    144    
-208   144    
160    96     
544    80     
-112   48     
-48    16     
-208   -96    
240    -48    
160    96     
-272   -16    
192    -80    
32     80     
416    160    
-144   -16    
-256   -176   
176    224    
48     176    
-96    -144   
176    -192   
208    -48    
-304   -16    
432    -64    
-32    -80    
16     176    
-64    -16    
128    80     
-160   -144   
64     48     
-32    16     
-96    16     
0      496    
208    112    
288    -224   
-48    -80    
192    -128   
-160   -16    
16     16     
-128   -48    
208    192    
-272   16     
272    -96    
-192   -240   
96     -512   
-32    48     
144    256    
32     192    
32     -48    
288    -176   
-32    64     
176    96     
0      16     
256    80     
-128   112    
288    48     
192    -192   
16     48     
-96    0      
-96    -176   
288    -272   
-48    -208   
-48    16     
96     48     
144    48     
16     -32    
128    -48    
16     0      
-64    32     
48     16     
320    160    
-272   96     
16     32     
80     80     
64     -48    
32     -48    
48     64     
-32    80     
64     16     
64     -16    
0      -128   
112    80     
-80    320    
96     112    
-192   -416   
256    -256   
32     64     
-176   448    
64     272    
208    -176   
-16    -64    
48     -32    
128    0      
-96    32     
128    144    
96     -176   
80     -192   
16     32     
112    208    
-112   112    
112    272    
-32    160    
176    464    
144    208    
-96    -224   
-16    -112   
-176   -304   
224    256    
160    400    
0      -192   
-16    -64    
0      240    
-16    0      
-32    -16    
-112   64     
32     -320   
304    224    
-16    928    
-128   -976   
288    304    
-80    0      
224    0      
-160   -32    
32     -768   
-144   64     
-416   -1296  
320    736    
64     16     
272    -480   
208    144    
-80    -240   
96     240    
-144   192    
16     -80    
176    -128   
-64    -336   
-96    -208   
0      224    
-96    48     
0      240    
-32    80     
96     -80    
80     -208   
352    -144   
-48    -176   
272    -416   
416    240    
80     112    
-16    -16    
-192   -160   
16     112    
-80    -112   
-64    -64    
176    0      
256    128    
464    304    
-528   64     
224    -16    
32     128    
112    32     
112    -96    
112    -32    
144    -96    
-272   32     
48     -112   
656    416    
-608   -112   
224    -16    
304    -48    
560    240    
-544   -176   
-16    -480   
16     -16    
16     -528   
224    -128   
-112   -16    
-48    -480   
112    -64    
176    -624   
64     -128   
304    80     
160    -16    
48     32     
16     -352   
48     -1136  
-32    -16    
224    -64    
64     -16    
32     -160   
32     -80    
-128   -112   
176    -464   
-112   -176   
336    192    
256    80     
128    -1520  
128    -64    
112    80     
208    32     
0      -16    
-64    96     
496    16     
-448   32     
-416   -112   
128    -64    
-1840  -96    
208    -80    
272    96     
208    -80    
144    -160   
384    -272   
-464   0      
-160   -256   
256    80     
-256   -224   
192    0      
48     0      
112    32     
-192   -16    
656    352    
-1264  16     
144    -192   
352    -128   
208    64     
304    -80    
-176   -320   
416    96     
-304   -736   
-192   80     
304    0      
-16    64     
112    -160   
192    0      
32     32     
48     16     
-144   0      
-16    -128   
-288   0      
96     -96    
80     16     
432    240    
-464   96     
176    -512   
-16    160    
240    -32    
192    -16    
-16    0      
48     -48    
-192   32     
-16    -80    
32     -16    
208    -80    
-608   -144   
176    -64    
64     176    
192    16     
16     -32    
96     -384   
256    96     
-96    32     
-48    -80    
64     48     
-16    96     
-160   -80    
32     -144   
-240   -112   
48     80     
-496   64     
208    32     
-16    -128   
-16    -48    
112    224    
352    48     
48     -64    
-176   -128   
144    -48    
160    -16    
80     -80    
-256   128    
-80    -224   
-224   96     
208    416    
288    -144   
-112   -64    
-192   -320   
288    96     
144    -112   
96     48     
-64    64     
144    -736   
-16    -176   
-288   64     
288    -32    
-48    -64    
16     32     
-128   -624   
144    240    
-144   176    
-112   -272   
128    -32    
256    128    
144    560    
-80    -448   
-128   -240   
-336   256    
208    -80    
-160   96     
-16    80     
112    -448   
160    400    
32     -16    
48     -192   
-240   -80    
256    256    
-96    128    
432    -576   
48     608    
-2240  -128   
160    -80    
-16    144    
-464   -48    
192    -112   
-80    0      
128    224    
-160   -272   
32     32     
304    688    
-80    0      
-608   -544   
80     320    
-144   240    
-192   144    
-288   -96    
-224   -48    
32     128    
-400   64     
-560   -208   
-208   112    
-320   272    
-896   80     
-96    672    
96     16     
192    272    
-688   352    
-256   464    
336    16     
288    48     
512    64     
-48    -32    
0      -48    
-416   -144   
-224   -96    
-32    0      
-304   144    
192    288    
272    -48    
-32    96     
208    256    
-432   96     
-112   144    
0      176    
128    64     
160    64     
-32    -80    
16     160    
-464   0      
64     -16    
16     48     
224    160    
-320   96     
16     16     
-2240  -144   
-16    16     
-16    -32    
96     0      
-160   -16    
-128   -16    
-32    32     
-112   -32    
32     128    
16     160    
-32    112    
-192   -80    
-240   -256   
-128   -416   
-48    -256   
-64    288    
160    -32    
-256   32     
-16    -16    
-16    144    
-112   240    
-32    -256   
-144   -16    
32     -80    
48     48     
352    192    
-336   320    
32     320    
-32    160    
80     32     
-176   -16    
80     112    
-1024  -32    
-48    0      
16     -32    
-192   16     
80     224    
48     336    
16     160    
208    192    
-144   64     
64     16     
64     0      
-64    0      
-16    32     
-352   -80    
400    240    
-352   272    
64     352    
144    288    
80     -64    
-32    -48    
240    -32    
-128   48     
-160   16     
32     -16    
-64    48     
208    224    
-528   112    
192    -32    
-768   -160   
272    32     
-928   272    
-112   208    
336    272    
-224   48     
128    16     
-16    16     
304    160    
-384   64     
112    -160   
-112   128    
176    304    
-320   176    
80     128    
48     -48    
128    64     
272    192    
-176   0      
64     -32    
-16    -112   
32     -176   
80     -64    
80     48     
320    272    
-368   112    
-96    64     
-240   32     
112    -128   
384    -80    
-160   -64    
160    -96    
208    -128   
-144   48     
16     -96    
-80    96     
112    -16    
224    192    
-256   80     
80     128    
-224   0      
-48    48     
48     192    
-224   0      
320    -160   
-128   -64    
80     96     
-16    -112   
144    48     
432    240    
-80    672    
64     496    
-96    -176   
-32    112    
0      -224   
48     544    
96     -80    
64     -272   
64     528    
176    32     
-224   48     
-64    128    
-80    16     
-80    320    
256    -96    
-128   0      
-32    -96    
112    176    
208    -272   
16     480    
-112   -64    
16     -32    
192    -160   
-320   -64    
208    160    
128    128    
64     -64    
336    16     
32     -144   
16     -48    
-112   -16    
16     48     
96     0      
432    448    
-352   896    
96     560    
64     0      
96     64     
-176   48     
16     -16    
16     -128   
416    -400   
240    -96    
-176   -208   
224    -48    
64     208    
-288   48     
160    -48    
-80    64     
-448   -32    
512    -80    
304    32     
32     -96    
496    -48    
-96    -224   
304    -16    
-64    0      
-160   -32    
80     -80    
256    80     
256    416    
-448   128    
-16    -64    
176    48     
-64    32     
16     32     
320    0      
160    112    
64     64     
-160   -272   
384    96     
-288   -208   
-320   48     
-352   48     
432    80     
560    272    
-768   48     
-112   -64    
176    64     
128    64     
384    48     
48     0      
-48    32     
-144   48     
320    48     
16     32     
-192   -336   
-80    16     
352    48     
80     16     
-64    160    
0      16     
-96    16     
0      64     
-128   -96    
240    -16    
-32    32     
16     -16    
64     64     
-32    0      
192    80     
-16    -112   
400    288    
-320   -64    
368    32     
-80    96     
224    48     
80     32     
-80    -80    
128    48     
-48    16     
176    -16    
-176   -160   
0      -48    
288    -16    
-208   32     
352    -304   
-272   112    
-64    -176   
-64    -96    
464    192    
-368   -80    
320    64     
-128   224    
-256   -16    
256    -32    
224    112    
-192   -80    
304    0      
-112   -144   
-32    32     
448    48     
-400   -32    
32     -240   
544    80     
-64    16     
240    96     
416    144    
208    80     
112    224    
-176   144    
416    -16    
-368   -112   
-112   16     
96     -48    
-240   96     
144    -144   
144    0      
96     64     
32     160    
-32    -64    
176    96     
16     96     
64     32     
64     80     
48     -128   
112    32     
-32    -32    
-16    272    
288    144    
48     16     
96     -80    
-80    288    
224    48     
32     112    
-16    272    
144    0      
-16    -128   
368    144    
-256   -144   
176    -128   
288    352    
-32    -160   
128    -32    
16     80     
160    176    
16     -192   
-144   160    
368    -96    
112    -96    
192    32     
0      -1360  
96     1120   
240    -976   
48     -336   
-16    48     
144    -496   
-48    -48    
32     -144   
96     -32    
96     -64    
-112   -112   
192    256    
128    -48    
0      48     
-272   -368   
128    416    
128    336    
-208   -80    
-160   480    
144    -672   
160    -576   
16     224    
48     -240   
-48    128    
160    112    
144    0      
272    160    
64     -240   
48     -272   
0      96     
-80    -80    
-48    -16    
-240   432    
-64    112    
-80    -160   
112    48     
336    48     
-80    -64    
-32    0      
-16    -288   
48     -320   
-32    0      
-64    -272   
144    -64    
112    176    
-176   -80    
144    -240   
-256   -80    
-16    0      
-336   -400   
-192   -544   
240    -144   
64     112    
16     16     
48     -336   
-32    -160   
-16    -240   
80     -176   
352    -16    
128    128    
-96    48     
-48    336    
-384   -80    
352    0      
96     -64    
160    -64    
208    -160   
32     -32    
-80    80     
304    -32    
-336   256    
-128   -304   
-64    16     
-64    -80    
128    32     
32     96     
192    -16    
144    -80    
-48    320    
-112   -128   
192    -160   
-1616  -48    
-128   -32    
-96    -48    
96     -48    
-128   -96    
192    -224   
16     192    
192    -64    
128    -32    
0      -112   
176    -128   
-32    16     
64     0      
80     -128   
32     -320   
-352   -240   
64     -48    
-512   64     
-16    96     
80     80     
112    -528   
-64    -48    
272    -48    
0      -192   
-48    -192   
416    128    
-368   256    
160    224    
-736   16     
32     336    
48     208    
-48    -240   
-416   -288   
0      -416   
144    -32    
-16    -288   
-80    -48    
-336   -192   
352    368    
-800   64     
272    304    
-32    -64    
160    16     
112    224    
64     48     
48     608    
272    128    
96     224    
-48    -112   
176    0      
176    80     
-160   96     
-176   -32    
240    176    
272    288    
32     -80    
-80    208    
80     176    
16     80     
416    -608   
-224   -176   
192    -16    
0      0      
48     144    
192    288    
-720   288    
-384   -176   
-112   0      
-560   -32    
0      144    
112    112    
-416   -16    
160    0      
224    368    
-288   368    
-128   -192   
-784   -272   
16     -48    
-368   -192   
32     80     
-768   -672   
-288   -384   
-32    -64    
-608   528    
208    160    
-208   -288   
144    -128   
-768   -144   
-256   -208   
352    -288   
-80    80     
-432   -272   
32     -32    
-320   -32    
160    -368   
112    528    
176    272    
-128   80     
-16    -208   
16     -864   
-528   -256   
-80    -160   
-768   576    
144    240    
-272   -208   
304    -464   
-16    608    
-112   336    
-240   -992   
176    208    
144    784    
-272   192    
80     -528   
-304   -64    
64     512    
-96    368    
128    -128   
-352   -32    
-48    -304   
-1536  48     
64     -48    
-176   -240   
16     96     
-176   -288   
-160   320    
144    -128   
176    -96    
400    0      
-336   16     
48     32     
112    -128   
80     160    
-240   -16    
80     -272   
-976   -112   
224    208    
-32    32     
96     -32    
48     128    
0      240    
0      -32    
-304   -176   
-80    0      
-96    48     
128    96     
-128   -80    
32     16     
-288   -64    
272    176    
-640   176    
64     32     
144    0      
32     32     
-64    64     
-80    -144   
-32    -208   
64     160    
-80    16     
64     -96    
-304   -128   
-144   0      
64     16     
-192   128    
16     176    
-224   16     
144    -32    
-1328  96     
-192   80     
-288   -64    
320    -112   
224    48     
272    112    
-16    16     
96     48     
-16    128    
-112   48     
320    16     
-192   0      
256    256    
-656   32     
-48    -112   
-144   -96    
176    144    
160    64     
176    -80    
240    0      
96     128    
-144   64     
336    176    
-528   64     
-304   -160   
336    48     
-64    112    
-32    -112   
176    -160   
128    -384   
800    -464   
624    -80    
80     112    
-352   144    
-400   -96    
48     32     
80     0      
192    -16    
528    16     
-400   -16    
96     0      
-368   -16    
-208   48     
-80    0      
288    16     
-80    32     
-128   48     
-16    64     
48     48     
192    -64    
64     48     
-48    64     
96     96     
-368   32     
-48    16     
384    48     
-160   112    
128    96     
-240   -176   
48     -16    
176    32     
48     -96    
96     80     
-80    96     
-48    48     
64     -64    
0      0      
0      48     
112    64     
-32    0      
96     -16    
32     32     
16     48     
80     -32    
-48    0      
80     32     
144    0      
32     48     
-64    -112   
96     160    
-176   64     
-48    -48    
48     -16    
96     144    
-272   64     
368    64     
-416   -192   
288    48     
-32    336    
16     112    
192    80     
-272   -32    
416    -144   
192    96     
-224   -32    
224    0      
-208   -128   
288    112    
-320   288    
176    432    
384    336    
-432   -32    
-176   128    
16     384    
464    352    
-384   352    
432    16     
-224   -192   
48     64     
-224   -160   
144    64     
128    16     
208    80     
240    64     
16     0      
16     -80    
-80    -64    
-48    -304   
112    160    
32     0      
48     -32    
0      48     
64     -144   
128    48     
48     64     
-48    -144   
96     48     
32     -144   
256    592    
-320   -304   
32     -208   
80     48     
336    48     
80     16     
-208   -320   
432    -64    
-144   304    
-128   160    
368    -288   
-336   272    
208    112    
112    624    
64     416    
-160   -320   
16     -112   
288    -80    
-80    -48    
16     -464   
112    128    
32     -400   
48     48     
-64    32     
192    16     
16     304    
-48    240    
48     -80    
112    160    
144    64     
64     112    
144    0      
240    -32    
160    128    
48     -240   
-128   -240   
112    -240   
80     -48    
-64    -96    
-32    16     
16     96     
352    80     
-176   -112   
272    -48    
-192   48     
48     80     
32     16     
-32    -96    
80     160    
80     48     
96     -80    
208    -544   
-16    48     
48     -48    
128    -96    
80     80     
160    128    
-176   160    
96     -16    
0      32     
144    96     
16     16     
48     -48    
192    16     
-176   16     
80     -32    
-16    32     
176    -16    
64     -16    
160    128    
304    144    
112    272    
-208   64     
-48    16     
48     -64    
192    -48    
208    64     
176    -80    
80     -16    
224    -16    
-128   48     
80     -288   
128    -16    
480    -240   
320    48     
80     -16    
-80    32     
-448   -32    
16     -16    
-80    64     
208    -96    
-32    160    
0      -96    
208    -96    
192    -112   
432    272    
-160   16     
80     96     
32     -768   
272    256    
0      256    
464    192    
-48    32     
288    112    
48     -16    
-64    -144   
-48    -80    
192    -224   
0      80     
-208   -112   
352    64     
160    48     
304    64     
176    -144   
-448   192    
-320   0      
352    -208   
-48    -16    
160    -240   
272    -560   
128    -160   
0      -160   
160    -144   
-128   -32    
384    32     
-32    96     
80     -128   
208    -640   
-144   112    
192    -192   
-192   192    
96     -256   
-32    -32    
-656   -272   
-48    -608   
96     -144   
96     0      
96     -16    
96     -176   
144    80     
144    96     
-208   -64    
320    128    
240    272    
176    96     
208    160    
240    64     
48     -80    
-272   -96    
640    368    
-16    1824   
-48    288    
112    -480   
352    432    
-208   -96    
48     -320   
272    -784   
112    -384   
80     928    
288    416    
-160   16     
96     176    
224    -464   
-176   144    
-32    80     
0      -624   
160    -176   
192    272    
-256   -224   
144    -272   
512    -64    
400    64     
-208   -448   
224    736    
-112   -240   
-288   -736   
144    -16    
-320   -64    
304    -1008  
144    608    
-1072  128    
416    -288   
-112   384    
32     0      
0      -192   
-176   -1168  
16     368    
-16    560    
208    -240   
32     -240   
-112   -48    
160    176    
176    80     
-256   -272   
32     192    
-384   -224   
128    0      
-688   144    
144    -160   
-464   -240   
304    -16    
-32    16     
400    -1024  
-160   96     
96     336    
96     -128   
-416   -112   
240    -144   
-160   -96    
32     -48    
-416   16     
176    -48    
-304   -64    
96     -144   
-96    -80    
176    -64    
144    96     
32     -240   
208    96     
-144   160    
96     -208   
0      -16    
32     -32    
-208   -144   
160    0      
-384   96     
160    -16    
-208   -32    
160    -16    
304    336    
0      160    
-16    64     
0      -208   
48     16     
-592   112    
-48    32     
-192   0      
144    192    
-16    32     
224    0      
0      224    
-288   -96    
16     80     
-80    -16    
160    48     
80     -96    
96     80     
128    -224   
32     0      
80     80     
-80    64     
0      -32    
-80    -80    
-64    -48    
112    -48    
48     144    
-64    -16    
-128   48     
336    16     
-208   128    
-1776  -160   
32     112    
-1424  -256   
80     -48    
64     48     
-656   64     
-224   -16    
-288   0      
-128   48     
96     16     
176    48     
-160   -64    
-32    80     
-368   48     
-16    32     
-144   128    
-144   -48    
288    -144   
-432   -256   
416    -32    
-560   96     
208    16     
-1648  -272   
368    32     
-192   336    
-672   0      
-272   -144   
-240   0      
64     -80    
288    96     
-128   -32    
96     128    
-304   -32    
-352   112    
-208   96     
-512   32     
-384   -64    
-224   -16    
-128   -208   
-96    -176   
-448   128    
336    128    
432    -208   
-448   -272   
-192   0      
-176   176    
-432   48     
32     -80    
-64    -16    
176    80     
416    144    
64     0      
-64    96     
-400   -48    
-464   -80    
192    64     
176    32     
-128   112    
-80    0      
-48    96     
-80    128    
144    0      
-64    112    
-400   -96    
320    32     
-112   48     
224    64     
-496   -16    
-160   -48    
-48    16     
-64    48     
-16    32     
-16    16     
-128   -96    
16     80     
80     0      
64     32     
48     64     
32     -32    
-80    -16    
-128   0      
-112   -32    
-304   -128   
48     -192   
-112   -16    
128    64     
-1472  -48    
112    96     
-32    -48    
-304   96     
160    64     
48     -32    
224    64     
-304   0      
160    -48    
32     0      
352    -128   
96     -80    
16     -48    
-416   -272   
64     -112   
-272   -144   
160    32     
96     -16    
80     192    
-352   32     
-80    32     
-208   96     
192    -80    
-160   -256   
96     256    
256    16     
-272   -96    
-208   -48    
-288   -256   
1792   1904   
-1824  880    
288    -1024  
-16    -224   
-464   592    
640    -400   
-80    -304   
-48    848    
-112   -768   
0      -208   
-304   560    
-80    32     
256    384    
-288   -480   
-96    -96    
112    128    
-240   -208   
32     624    
112    -48    
64     -432   
-16    -208   
0      -176   
480    144    
-160   272    
-16    384    
0      16     
-160   -128   
48     0      
192    -96    
-96    80     
80     -32    
-336   80     
240    64     
112    144    
-48    0      
96     0      
-80    96     
-128   96     
160    32     
112    -16    
160    80     
64     208    
-192   176    
0      -16    
-128   48     
80     80     
80     160    
304    64     
-80    144    
128    0      
-192   48     
-192   -64    
192    -128   
-208   128    
-16    16     
-256   64     
-160   96     
-96    -64    
80     128    
-240   -32    
16     160    
80     272    
208    0      
-64    -64    
96     80     
96     0      
32     176    
-96    48     
128    -32    
80     48     
-128   16     
160    0      
-80    80     
-16    64     
16     -32    
16     48     
-64    -16    
336    96     
16     112    
272    96     
-144   112    
-32    96     
-112   176    
128    32     
112    0      
-80    0      
224    96     
-368   80     
288    128    
-192   0      
-16    32     
48     -64    
336    96     
-256   128    
112    -112   
32     -128   
-128   -352   
64     -96    
-352   112    
48     112    
16     144    
160    144    
208    128    
-80    176    
-192   48     
32     -1488  
400    -128   
560    16     
464    -16    
352    -16    
-64    -16    
-96    -112   
96     -112   
96     0      
304    144    
160    112    
-160   112    
-208   -64    
-96    -16    
128    64     
16     -336   
192    144    
272    64     
-528   -256   
208    -528   
64     96     
-48    -144   
272    64     
-160   0      
-176   -32    
-272   -128   
-16    -336   
224    80     
-192   -224   
224    -336   
400    -432   
128    -336   
240    -64    
-256   96     
-48    240    
48     48     
128    -16    
288    48     
-48    -32    
160    80     
-272   32     
-48    48     
480    416    
-480   0      
144    -64    
0      -48    
192    0      
80     -176   
176    -16    
16     -144   
-144   16     
80     0      
96     -176   
96     -16    
160    512    
208    -128   
-16    -80    
128    96     
48     -64    
0      0      
-80    -832   
-32    96     
0      -64    
160    80     
64     32     
48     -16    
0      -512   
80     0      
224    16     
-128   96     
208    -160   
-208   -128   
48     -64    
-304   -768   
384    480    
224    176    
288    -96    
368    -32    
80     368    
160    -1728  
-80    -272   
-192   96     
16     80     
96     -128   
-16    -128   
32     -16    
-64    192    
-288   256    
352    -96    
-448   -672   
400    -240   
400    768    
432    144    
560    256    
-176   -624   
-656   -496   
144    384    
-48    192    
-320   -80    
80     64     
64     48     
128    -112   
160    48     
80     96     
288    240    
-96    96     
192    0      
-16    -16    
16     160    
160    -48    
-16    16     
128    112    
112    64     
144    32     
-80    -224   
-16    32     
448    144    
-176   -32    
-208   -128   
128    176    
448    -48    
-208   -16    
64     -128   
96     32     
80     -192   
144    112    
-80    -32    
208    -144   
16     96     
-192   -32    
-80    -48    
256    -16    
16     -864   
96     -32    
160    32     
-48    -32    
272    160    
64     -48    
-16    -336   
-48    48     
144    -336   
96     -16    
32     16     
256    32     
192    64     
-128   -48    
-64    -144   
80     -352   
-128   96     
192    -528   
416    96     
0      80     
-128   -112   
144    -16    
64     -32    
0      -48    
144    -176   
160    -112   
-32    64     
-1616  -32    
48     16     
112    128    
-96    -224   
48     -112   
208    -304   
112    -48    
128    -368   
16     -192   
64     -48    
48     48     
96     64     
112    112    
-160   -64    
0      -64    
-304   -16    
16     -128   
112    -240   
176    -32    
64     48     
96     -96    
160    -112   
96     -144   
272    80     
256    64     
128    16     
16     -48    
144    64     
-64    -48    
160    -32    
-160   0      
0      -352   
-256   -736   
480    -176   
128    192    
96     -304   
96     -208   
128    -352   
240    -48    
80     -16    
-96    -112   
0      128    
-32    -48    
-288   32     
-48    16     
-128   -16    
16     0      
-1216  -32    
-208   -144   
128    -80    
48     -48    
-16    -192   
368    -256   
-304   16     
112    -288   
160    -16    
-80    -48    
256    112    
-160   160    
176    -16    
-176   0      
-96    -32    
-176   -32    
256    -16    
-432   -64    
240    16     
176    32     
432    96     
-160   272    
-272   -320   
128    32     
528    176    
448    128    
128    112    
16     128    
-192   96     
-224   -80    
-96    192    
240    64     
208    -80    
144    -160   
-128   48     
16     -96    
-16    64     
-160   -272   
464    128    
-336   32     
432    128    
-352   -32    
176    -96    
-112   -32    
336    208    
-400   64     
-32    -16    
-64    -64    
96     -160   
176    64     
128    -48    
32     128    
160    32     
160    144    
-80    0      
176    288    
-160   -16    
128    -272   
-160   336    
16     -208   
-64    -192   
112    48     
-112   16     
-208   16     
384    -32    
-864   -336   
-112   560    
-144   -16    
-608   144    
144    32     
-608   48     
0      224    
128    -288   
-320   96     
384    -1200  
112    816    
-16    128    
16     -432   
-240   320    
-96    -64    
96     192    
96     80     
384    144    
-80    -128   
-144   -176   
144    80     
-64    192    
-1008  0      
-432   -624   
272    -80    
256    160    
-304   240    
96     208    
-128   48     
112    -32    
-96    -192   
16     80     
-16    0      
0      288    
-32    80     
-416   48     
-128   -64    
-320   64     
160    368    
160    304    
-112   16     
-112   -256   
-32    32     
-256   64     
-16    368    
256    0      
32     -64    
32     32     
-240   32     
192    32     
-192   16     
224    128    
-320   -48    
64     -80    
-1120  -48    
-80    448    
208    240    
272    208    
208    32     
16     -48    
-96    -48    
-112   -16    
288    112    
-272   80     
-48    -16    
-144   0      
0      0      
-160   -80    
-48    -64    
-320   -128   
-16    32     
0      48     
128    0      
64     -48    
0      -176   
-192   16     
-80    16     
-208   224    
32     32     
96     64     
128    -80    
-16    -48    
-64    128    
48     96     
192    352    
-256   160    
-608   -240   
176    -192   
-48    112    
-64    16     
48     48     
-144   -16    
80     80     
96     64     
80     48     
-80    16     
-48    0      
-112   64     
0      32     
-144   -32    
96     32     
-384   -16    
-32    32     
-128   16     
-144   112    
208    -64    
64     48     
-64    112    
-176   -48    
16     -16    
-80    16     
-16    32     
-144   160    
16     96     
-160   -64    
112    32     
-1040  64     
144    -224   
-144   -400   
32     -304   
-32    96     
-160   160    
-64    64     
192    192    
-16    208    
144    112    
96     64     
-48    272    
-160   48     
-96    -176   
368    96     
96     64     
128    16     
-16    -112   
-32    -128   
160    -160   
272    112    
16     16     
-288   32     
-384   -464   
240    -656   
304    -240   
272    -16    
192    -224   
-112   48     
-288   384    
-432   528    
144    -208   
64     -592   
-192   48     
-128   16     
-64    192    
-176   -192   
400    -192   
-144   48     
-64    432    
176    -128   
256    144    
80     256    
224    -144   
160    64     
320    80     
16     224    
128    -384   
32     240    
160    128    
0      -128   
-64    48     
16     128    
288    -112   
-512   -192   
64     192    
-368   -352   
272    384    
16     304    
-176   -208   
352    -80    
-96    -16    
352    -144   
-192   -128   
80     96     
48     16     
64     16     
32     80     
224    80     
-112   32     
-32    -64    
192    384    
-128   304    
48     64     
0      192    
128    160    
160    112    
32     -96    
-176   -112   
64     48     
-32    32     
352    144    
-144   128    
528    160    
-480   128    
-32    -32    
256    96     
144    144    
336    64     
288    224    
-144   112    
-16    96     
-336   -224   
416    -48    
-272   -16    
144    64     
-48    -32    
-272   -80    
400    16     
304    -64    
208    32     
-480   -144   
384    -176   
352    80     
64     192    
64     -16    
-192   -208   
560    -128   
-176   432    
-336   128    
-208   0      
384    112    
32     -32    
-208   112    
-32    32     
208    0      
-176   176    
176    -288   
96     -16    
48     -96    
32     32     
-32    -32    
160    80     
0      0      
16     112    
-112   -32    
96     48     
208    64     
16     176    
-16    112    
224    64     
32     0      
96     -160   
48     112    
80     -432   
96     80     
32     16     
-80    -64    
160    32     
160    48     
-16    -64    
112    32     
-128   112    
128    96     
96     80     
-64    16     
32     0      
272    -16    
48     32     
80     32     
176    64     
240    176    
-48    -16    
-64    -48    
192    48     
-32    128    
112    -16    
144    16     
64     -16    
-144   96     
144    -112   
96     96     
32     -128   
-48    32     
80     -64    
32     112    
-16    -336   
0      -16    
128    -48    
192    336    
144    96     
224    0      
-128   16     
160    96     
160    96     
-128   -64    
32     -64    
64     -160   
64     -80    
16     -288   
112    32     
64     -288   
-64    32     
96     128    
160    144    
16     32     
0      32     
176    -192   
208    32     
208    80     
112    -48    
32     144    
-64    80     
144    96     
96     -448   
-48    0      
48     -48    
64     160    
48     -32    
112    32     
-32    80     
-256   0      
640    -112   
240    -544   
528    -240   
160    -448   
112    96     
144    -416   
-320   -464   
-544   -672   
-64    400    
384    912    
-528   -400   
-288   -816   
-96    64     
-48    304    
-96    192    
64     32     
112    -208   
-64    176    
-16    -112   
864    800    
-256   144    
0      -576   
368    -208   
-16    80     
112    -96    
-128   -192   
64     -96    
32     48     
32     208    
-48    -528   
192    -720   
32     -80    
304    -32    
272    -144   
272    -672   
-240   192    
128    224    
48     -256   
528    -464   
-64    -176   
-224   240    
64     -96    
32     -1024  
448    -608   
-400   16     
160    -32    
320    64     
-96    -32    
656    -48    
-144   144    
288    48     
-192   -1616  
112    32     
-16    256    
-64    -240   
64     -208   
64     -48    
128    -176   
-128   48     
-496   -720   
-128   592    
-1344  -144   
176    -256   
64     176    
144    16     
96     48     
112    -64    
192    32     
128    -496   
-144   624    
256    -208   
32     224    
128    128    
192    -192   
-80    -144   
-128   -720   
-544   -336   
16     224    
304    -288   
192    16     
416    64     
-208   144    
16     80     
-80    -480   
256    160    
-64    -352   
96     64     
336    -48    
-208   -64    
32     -112   
192    -96    
-592   -48    
208    16     
-1200  -128   
288    -64    
-448   0      
-208   -32    
-224   -96    
-16    -272   
208    -16    
128    -80    
-64    -48    
16     112    
-176   -304   
80     -224   
-48    -64    
-416   -16    
224    -64    
-512   128    
80     0      
32     -96    
48     -64    
-144   -16    
208    -48    
-224   400    
528    -368   
224    -48    
-128   96     
208    -64    
-96    -352   
-80    -224   
-256   192    
144    -64    
-128   -16    
-80    288    
-1552  240    
-16    -80    
128    112    
0      -128   
304    0      
80     -160   
288    -144   
-224   -16    
48     -80    
-304   -192   
192    -592   
-304   -288   
112    -32    
-48    304    
256    96     
-256   -128   
160    80     
320    304    
-176   -448   
-192   -400   
96     -608   
-176   48     
-240   -32    
144    -32    
144    0      
176    16     
-272   -64    
224    -32    
-32    0      
-160   32     
-80    16     
128    -144   
-16    160    
176    -32    
160    0      
-160   32     
112    -32    
-256   -192   
160    -192   
-128   80     
-224   -320   
-48    -272   
144    48     
-272   384    
224    0      
-64    -48    
160    -112   
96     48     
-704   -144   
48     -64    
-80    -112   
-304   -64    
-144   48     
-704   112    
-96    -48    
0      32     
-48    -32    
64     64     
-240   -16    
-240   0      
112    -16    
-544   -32    
48     80     
-48    0      
208    480    
-368   432    
-192   160    
0      160    
-224   160    
80     -48    
-784   -272   
160    -400   
112    -112   
-256   -480   
-304   224    
-160   640    
-112   192    
368    672    
-288   -160   
-160   -368   
80     -48    
256    368    
-112   -480   
-384   -400   
-240   720    
-992   -288   
48     64     
528    128    
16     0      
-48    80     
-128   32     
-96    -128   
288    144    
-80    -176   
-112   992    
0      -16    
-64    -112   
-384   256    
-384   0      
-64    160    
-208   -64    
144    112    
-1168  -320   
64     16     
-16    304    
-144   208    
-480   -160   
-192   0      
240    -144   
384    -256   
624    -64    
-304   -128   
-832   -224   
-256   16     
-112   208    
112    240    
-160   48     
32     128    
-16    208    
-80    -80    
128    -48    
0      -80    
64     -32    
48     -32    
128    0      
96     96     
-224   -64    
-32    48     
-16    128    
304    112    
-144   16     
144    48     
-560   -48    
176    -112   
192    -80    
-304   48     
-16    32     
48     48     
-144   16     
0      16     
-32    128    
-48    80     
-112   -16    
64     16     
32     160    
-304   -48    
-80    32     
-240   -32    
-128   -64    
208    -32    
48     48     
256    0      
-256   -16    
16     64     
-32    64     
192    80     
-96    -96    
-144   -80    
-128   64     
-240   0      
-208   -96    
160    96     
-352   -32    
560    -16    
-416   32     
-192   -32    
752    80     
-448   -64    
16     -16    
224    160    
-288   16     
432    96     
-128   96     
-416   -64    
208    32     
-400   -64    
304    -80    
672    160    
-512   32     
-672   -16    
-128   0      
-64    16     
-48    0      
48     80     
-16    160    
-16    96     
-112   -96    
96     32     
-160   64     
-32    -16    
0      32     
80     0      
-272   -32    
48     32     
-64    48     
112    48     
48     -16    
-192   80     
128    96     
-48    48     
208    128    
256    32     
-256   48     
-112   -16    
288    112    
-96    -32    
176    112    
-224   32     
224    -64    
128    0      
32     96     
80     80     
-128   -96    
48     -32    
-64    32     
64     32     
16     48     
-80    16     
0      -16    
176    48     
-160   -64    
32     80     
-80    0      
80     0      
-48    48     
64     32     
16     -48    
-16    -16    
-48    144    
256    240    
96     48     
-176   16     
-32    -16    
-64    -96    
144    48     
0      48     
384    96     
-112   0      
144    -48    
-144   -80    
32     -16    
48     -48    
208    -64    
240    48     
-80    80     
64     0      
16     32     
64     32     
-16    -48    
208    240    
-16    80     
32     32     
176    -320   
128    400    
32     160    
32     -48    
112    192    
48     -448   
-96    48     
-32    320    
112    48     
-16    -32    
416    -144   
80     240    
112    -64    
-48    -112   
-32    -384   
-96    80     
-176   -16    
0      -48    
128    112    
240    48     
-176   -400   
-432   -1456  
-48    288    
-176   432    
-224   -176   
208    0      
144    -256   
240    -192   
256    496    
160    -368   
96     80     
112    -96    
-128   32     
-96    784    
144    -720   
176    -336   
-112   240    
160    544    
192    -96    
-208   -112   
144    112    
32     -48    
96     64     
64     64     
112    32     
240    -80    
64     -192   
288    -336   
80     -160   
-128   192    
-16    512    
-144   -128   
-176   -192   
80     144    
16     352    
-32    -48    
32     -272   
32     112    
-176   -96    
-160   -272   
32     16     
-32    -1328  
-112   272    
48     528    
-32    256    
-240   -192   
0      -208   
176    -96    
-64    -80    
-16    48     
400    96     
-64    112    
96     0      
-64    -48    
144    -272   
16     -96    
64     -320   
64     -128   
16     -192   
256    32     
64     208    
-80    144    
192    64     
32     80     
-16    128    
144    112    
64     160    
64     224    
0      144    
32     -176   
80     -64    
0      -80    
176    -16    
-32    -304   
-32    -16    
160    -640   
224    -224   
-16    304    
560    240    
-96    32     
96     -128   
-16    32     
160    -16    
128    -96    
-160   -144   
224    -288   
96     -320   
160    80     
-112   -176   
464    64     
-288   256    
112    48     
80     48     
160    256    
-64    -48    
-16    -560   
432    -128   
-48    368    
-352   368    
-80    -240   
208    -144   
112    -128   
592    16     
144    -528   
320    80     
-64    -48    
176    176    
-160   -16    
32     32     
-144   48     
208    0      
-16    0      
192    64     
192    304    
32     -112   
96     -240   
48     -96    
112    96     
-48    -272   
64     -64    
-64    -64    
128    -768   
96     -48    
32     -64    
64     -496   
240    -256   
48     -912   
-128   208    
416    -432   
-80    -96    
48     96     
144    16     
-80    0      
192    -320   
80     -672   
48     48     
-144   -400   
176    224    
16     448    
80     160    
176    256    
224    -160   
96     -16    
64     -288   
48     -304   
-64    -800   
-16    -144   
192    0      
-192   -256   
96     -192   
0      160    
-64    96     
80     -48    
96     128    
-64    -96    
-192   112    
416    16     
96     -80    
192    -512   
160    -128   
496    384    
-368   400    
-16    80     
-16    0      
256    112    
192    -96    
400    32     
112    176    
-432   96     
160    80     
-560   32     
176    -64    
64     -32    
384    -208   
64     -64    
16     -368   
-112   -336   
16     240    
16     256    
272    256    
-16    240    
-16    0      
64     208    
-144   -320   
256    -448   
-336   64     
112    208    
-128   16     
208    -272   
-80    -80    
64     544    
128    -112   
80     -304   
16     224    
144    -192   
16     16     
-16    -32    
128    -16    
96     192    
48     -384   
-336   144    
-128   -304   
0      128    
80     -128   
96     112    
128    -48    
256    640    
-176   304    
-192   848    
160    -304   
80     -400   
-16    320    
224    -16    
-288   -368   
48     -48    
-320   48     
64     48     
-848   -16    
32     -80    
112    -64    
224    -208   
144    80     
64     -320   
64     160    
-272   -992   
-256   96     
-48    32     
352    -112   
400    -16    
64     -128   
-112   -64    
-80    176    
-736   -48    
80     -112   
448    64     
-352   -400   
720    -144   
544    96     
208    80     
-208   -176   
176    -48    
-400   176    
-64    -16    
256    -96    
256    -64    
-176   96     
-240   0      
-64    -16    
320    -16    
384    80     
-16    -80    
32     48     
512    96     
-416   32     
-256   -64    
112    -80    
-16    96     
80     48     
32     0      
240    -112   
-192   -16    
-16    -80    
-160   0      
192    0      
-96    0      
-928   -80    
160    112    
-656   -224   
-448   0      
-112   112    
96     48     
-208   0      
-912   48     
-160   -16    
1024   736    
-1264  208    
400    -208   
-240   -16    
-720   96     
352    64     
-1200  -400   
112    0      
-432   192    
-512   -176   
448    192    
-736   0      
512    48     
-112   -96    
240    160    
-128   0      
-304   -144   
144    -128   
144    192    
-288   -144   
496    160    
-32    64     
-192   32     
32     -96    
-224   -144   
624    352    
-608   32     
-368   -192   
288    -16    
-16    32     
16     -48    
-176   -16    
16     -80    
96     48     
-112   -112   
48     16     
-224   48     
96     16     
32     -112   
128    -32    
-64    192    
-16    128    
32     -96    
-80    -32    
-32    64     
-400   -128   
-80    -48    
-1584  -16    
96     16     
-192   32     
208    -160   
0      -144   
-48    64     
192    16     
-368   48     
-128   -16    
48     32     
176    -32    
-80    32     
80     32     
-224   -48    
80     -112   
-912   -176   
-96    80     
64     -64    
160    96     
16     -320   
-160   -32    
16     48     
0      0      
-80    112    
0      128    
64     32     
-416   -96    
16     304    
-64    -192   
0      -288   
-768   -112   
192    272    
-416   272    
32     -336   
48     32     
-32    48     
-128   -32    
-16    64     
224    -48    
-32    160    
32     -112   
-112   -80    
-112   32     
-160   -112   
112    416    
-528   -352   
48     144    
-272   -1184  
-16    944    
-32    -224   
-64    -176   
80     304    
0      -96    
224    256    
-336   -448   
96     -112   
-32    -64    
144    96     
-96    128    
-64    144    
-384   720    
192    64     
-80    32     
-176   128    
-48    -240   
48     384    
160    432    
0      -528   
64     112    
-80    128    
32     -112   
-32    144    
32     -160   
-160   -96    
176    176    
-96    -32    
112    32     
192    0      
160    576    
112    64     
0      -96    
-32    -32    
32     -160   
80     320    
64     64     
80     -16    
-64    224    
48     224    
224    304    
-336   224    
-144   -32    
128    64     
224    304    
272    192    
64     208    
-272   80     
0      32     
32     64     
96     128    
-32    -48    
128    0      
-16    -80    
-64    -64    
-96    -32    
80     48     
-336   208    
272    192    
384    304    
-432   144    
-112   -96    
-48    -192   
64     -96    
240    208    
176    96     
304    0      
-176   96     
-64    208    
-160   80     
-144   0      
208    48     
176    -144   
304    160    
-128   160    
128    160    
272    224    
-144   208    
-16    48     
64     48     
64     32     
96     -16    
64     -32    
112    -272   
112    -160   
-144   -48    
144    144    
-80    176    
0      16     
192    -208   
0      -128   
128    208    
-144   240    
64     128    
32     224    
80     128    
16     80     
176    320    
48     80     
208    128    
-160   -176   
208    -896   
-96    -192   
32     -96    
32     -192   
-176   144    
-96    -176   
112    -496   
176    -672   
-144   -528   
80     -112   
-80    -80    
128    208    
-352   -448   
128    64     
128    128    
128    -208   
240    -192   
64     -224   
-192   64     
-416   48     
-240   240    
144    64     
144    304    
320    128    
80     -48    
-208   -192   
-160   -176   
-80    48     
-144   160    
48     0      
160    -496   
16     -48    
192    0      
112    32     
128    96     
224    304    
32     16     
-160   -240   
464    -96    
160    80     
32     -32    
208    96     
16     368    
336    544    
-320   240    
112    -240   
96     64     
-400   -528   
336    96     
-240   64     
144    32     
-192   32     
192    80     
208    -176   
-128   48     
240    -208   
-320   -96    
32     -256   
-224   -256   
288    -336   
48     -128   
128    32     
224    -368   
-112   0      
64     64     
256    224    
-48    144    
16     208    
64     -96    
176    0      
-48    -32    
64     80     
128    -48    
96     144    
240    80     
272    -48    
-96    -80    
112    -432   
-288   144    
-48    128    
-80    80     
0      16     
32     -80    
-144   -240   
288    16     
240    -64    
160    32     
160    368    
-160   -288   
128    544    
80     80     
64     -384   
96     96     
48     -224   
-128   -352   
96     -80    
-80    -336   
240    -16    
144    144    
-16    -16    
-16    -48    
144    192    
-208   -528   
160    496    
-64    -656   
0      352    
16     336    
112    -272   
384    368    
-80    -176   
-128   -272   
144    96     
208    384    
48     -304   
64     -32    
-160   96     
144    -144   
80     64     
48     -176   
96     80     
80     16     
80     0      
128    -64    
112    48     
64     -96    
32     48     
-16    16     
-128   -624   
-64    -560   
160    224    
-448   320    
160    -448   
-32    32     
0      -384   
576    -304   
528    32     
624    656    
-544   16     
176    -64    
-400   -64    
-176   -64    
528    -32    
32     -1072  
272    0      
400    -592   
352    64     
-320   -16    
0      48     
80     -64    
80     -32    
32     -144   
320    32     
272    -16    
32     64     
16     128    
176    -240   
16     16     
-96    -48    
48     32     
-272   -96    
256    -64    
-144   192    
-432   -96    
-320   -320   
336    -256   
208    176    
16     368    
-400   -48    
240    64     
-192   -16    
224    -16    
-272   -128   
624    -128   
-112   0      
-64    -32    
256    -128   
0      -64    
-288   -64    
352    -64    
336    0      
-16    -128   
256    -688   
-144   -16    
-32    -224   
-32    96     
-32    -80    
16     16     
-144   -80    
-64    -64    
-336   -32    
144    -48    
-1280  -48    
224    32     
96     -16    
64     -112   
0      -80    
224    48     
-288   0      
496    160    
-128   64     
96     -128   
16     80     
368    416    
-544   -16    
96     -208   
0      0      
208    80     
-208   -80    
208    -64    
272    80     
-352   -288   
672    0      
-304   144    
176    96     
176    128    
-304   -32    
256    16     
0      96     
80     -16    
-32    -32    
368    32     
-704   16     
-48    -80    
-1856  16     
32     -160   
-672   -432   
192    -240   
176    208    
-224   -608   
528    48     
240    80     
-464   -16    
-416   -368   
512    -192   
16     0      
-288   -96    
-160   -96    
208    64     
-1072  16     
96     0      
192    176    
64     -64    
80     16     
64     -144   
64     -16    
32     -48    
224    208    
48     32     
16     -32    
-240   80     
144    -160   
-512   352    
-288   112    
192    -256   
-64    16     
48     -144   
272    176    
32     208    
128    -464   
-64    144    
-416   -48    
-48    -48    
-208   96     
160    -96    
-400   112    
208    96     
-128   32     
192    -128   
-64    96     
96     -288   
-48    64     
160    -208   
48     160    
0      -96    
112    -160   
48     336    
112    16     
-48    -224   
-256   -96    
48     -992   
112    416    
192    176    
-176   -288   
128    416    
272    144    
368    240    
96     -144   
-48    -256   
-832   -304   
-720   -16    
0      -384   
-400   -352   
16     176    
32     304    
176    144    
48     0      
352    176    
-48    112    
-128   -96    
-176   -64    
48     32     
-48    -128   
-48    176    
0      80     
16     32     
-224   -32    
48     -16    
-192   16     
-480   112    
-176   240    
-256   -112   
-112   -208   
144    -224   
64     96     
-288   -16    
32     -128   
-224   -128   
-48    64     
-96    48     
-48    16     
-48    80     
-80    -16    
96     128    
-320   160    
-96    -192   
-192   -16    
-176   -352   
144    -80    
128    208    
-192   0      
160    112    
0      32     
-288   0      
-48    96     
48     -48    
160    -160   
-112   96     
-320   -32    
-496   0      
-240   -128   
16     112    
-32    128    
-160   96     
64     64     
-176   -32    
32     64     
-112   32     
-64    -48    
96     0      
48     160    
-128   -160   
-144   -64    
-176   48     
-48    64     
32     112    
-128   -32    
-160   368    
-656   -32    
256    -160   
-64    -192   
0      -96    
-272   0      
-80    -16    
32     16     
-80    160    
80     80     
192    16     
-64    -96    
-176   -32    
-16    0      
-384   -112   
400    -192   
-176   -224   
32     80     
160    -48    
0      -288   
-128   -112   
-176   144    
128    192    
192    240    
16     0      
80     48     
128    192    
16     176    
-80    112    
-272   -16    
-96    128    
-32    -32    
48     32     
64     -192   
-208   -224   
16     -160   
-80    48     
208    224    
-224   128    
-160   32     
-64    32     
16     112    
0      -48    
80     496    
208    336    
-336   80     
-240   64     
256    64     
240    48     
-240   -32    
352    672    
-144   384    
-16    96     
208    400    
-160   -16    
64     96     
192    176    
-32    192    
48     448    
272    208    
272    48     
-288   80     
64     112    
32     144    
-16    -48    
-224   -144   
592    64     
336    128    
224    -128   
32     32     
-416   80     
384    -208   
-128   -16    
128    -160   
-112   -48    
80     48     
-304   -528   
176    -448   
-64    -336   
32     -400   
-112   -96    
48     160    
32     64     
16     192    
-96    208    
304    96     
32     48     
-176   -64    
-160   -528   
-208   144    
176    96     
16     -160   
144    272    
-80    -96    
64     208    
352    288    
-320   -80    
-240   -240   
128    448    
416    -128   
-16    -240   
-352   208    
128    144    
-160   -16    
112    0      
368    208    
-256   192    
32     -144   
-64    32     
240    -80    
-128   128    
48     32     
80     -16    
112    128    
32     -336   
-32    288    
-96    -80    
-32    -48    
176    240    
-80    48     
-32    -80    
0      320    
-160   -128   
240    16     
96     -112   
272    144    
0      112    
112    -16    
16     -16    
-224   -80    
32     96     
96     160    
-48    -80    
64     80     
-96    -32    
16     144    
48     240    
128    128    
-96    32     
96     -112   
176    16     
-112   80     
0      64     
112    48     
96     96     
-112   0      
112    160    
-160   240    
144    128    
-32    144    
48     144    
-64    64     
0      -80    
160    32     
96     -96    
128    -16    
-32    -64    
128    -96    
64     48     
128    16     
-112   -16    
64     80     
-80    -64    
128    48     
160    144    
-16    48     
208    64     
-176   32     
-16    96     
432    352    
-320   256    
-592   80     
304    -80    
112    -32    
-208   -256   
624    -144   
240    192    
80     416    
256    112    
16     -128   
144    -320   
-112   144    
144    0      
240    -32    
208    64     
-16    32     
192    -48    
176    80     
-352   -160   
384    -32    
-160   64     
464    144    
-160   80     
-384   -64    
80     128    
-336   -160   
352    112    
176    -272   
208    -48    
160    -32    
128    96     
-320   -64    
-32    80     
-16    -16    
128    80     
-448   -16    
384    -32    
528    96     
-368   -32    
48     0      
224    -64    
-48    48     
-32    -64    
16     -32    
-64    -304   
-144   0      
-112   -80    
112    112    
-48    0      
0      48     
224    -16    
256    0      
144    16     
-48    -128   
-128   64     
64     -48    
224    80     
-32    -320   
96     80     
-240   -592   
96     16     
272    96     
112    16     
96     64     
144    32     
-32    16     
112    48     
-144   32     
224    48     
0      -16    
112    64     
0      80     
0      -80    
96     64     
256    256    
-192   112    
288    128    
-96    48     
720    528    
-352   272    
144    16     
96     -368   
112    -96    
-128   -288   
144    80     
-192   -448   
192    0      
208    144    
-656   -416   
144    -336   
96     320    
-448   80     
0      -256   
240    0      
272    160    
-352   -96    
96     64     
-320   -384   
0      -352   
240    576    
-192   288    
112    -64    
-96    -240   
336    -128   
688    -144   
144    128    
32     -336   
16     -736   
-96    96     
80     160    
176    -352   
112    -288   
208    -176   
-16    -64    
48     16     
96     32     
128    32     
0      -80    
48     -80    
-112   144    
240    -640   
224    528    
-352   -1040  
-96    64     
-416   464    
-208   -816   
176    496    
0      -944   
320    112    
80     144    
176    96     
-160   -80    
-128   -336   
32     -64    
160    -32    
160    208    
-80    -160   
-32    -160   
304    48     
-368   -256   
96     -32    
0      16     
32     160    
-16    -192   
-32    -48    
384    0      
112    -160   
48     -64    
0      -160   
176    16     
16     -16    
-48    48     
-144   -80    
320    128    
128    -48    
-144   0      
-96    -128   
112    -224   
80     -96    
208    -96    
112    -16    
176    -160   
96     112    
-128   176    
-176   48     
-16    -112   
-80    128    
0      -160   
384    -48    
-112   -32    
16     -32    
-2432  -32    
64     -64    
128    -48    
160    0      
240    112    
-16    -160   
64     32     
-80    -1328  
-48    -16    
80     -48    
320    32     
-64    128    
432    176    
-384   304    
-320   64     
-48    -176   
16     -16    
48     32     
224    16     
192    48     
-64    -288   
48     80     
-16    -912   
16     48     
64     -16    
240    -192   
-16    16     
-80    240    
48     -48    
288    16     
-272   96     
32     -32    
-176   -32    
80     -208   
208    -144   
208    -16    
-32    160    
80     -48    
-176   -96    
144    -240   
160    64     
80     64     
0      -160   
592    -272   
304    80     
-96    112    
208    128    
-480   80     
16     -176   
-128   -96    
288    -176   
48     144    
0      -304   
224    -64    
-48    -64    
400    144    
-368   -48    
112    -80    
0      16     
304    176    
-208   304    
64     80     
-1504  32     
288    -64    
96     0      
272    0      
144    48     
288    96     
-128   16     
-304   -32    
16     -32    
-176   240    
240    32     
0      0      
560    144    
-272   96     
0      -112   
-192   160    
112    64     
128    -32    
-512   -224   
80     -32    
16     -80    
-352   -112   
208    112    
-320   48     
-160   64     
144    48     
-208   32     
64     48     
-208   0      
176    192    
128    496    
-560   -352   
-32    -320   
-336   144    
-192   -80    
192    -16    
-32    272    
128    -224   
-224   -384   
-144   496    
-1216  160    
-48    -240   
288    32     
160    0      
-32    112    
-256   -128   
-304   -416   
144    -48    
-384   -272   
208    160    
-224   480    
-112   -464   
-64    304    
-272   384    
192    -352   
112    64     
160    -80    
-416   -80    
-160   0      
176    -400   
-240   -16    
-384   176    
-96    80     
128    160    
-368   -208   
-288   -224   
176    256    
208    16     
-272   -176   
672    -832   
-48    720    
-464   128    
-1488  -272   
-48    -32    
-448   -304   
-48    -16    
-144   16     
80     64     
64     -16    
-144   160    
80     128    
96     16     
0      48     
32     -368   
-176   -16    
0      240    
-16    0      
-144   -64    
96     112    
-176   144    
-224   80     
32     -128   
-208   0      
96     32     
80     32     
64     64     
32     16     
-16    -16    
-192   0      
-32    32     
48     64     
-112   16     
-64    -144   
160    48     
-720   -16    
-208   -64    
-48    -32    
-16    -32    
16     32     
-16    48     
80     -16    
32     32     
-48    32     
-144   32     
80     16     
-64    64     
48     32     
-32    0      
-48    64     
-480   -96    
144    160    
-32    -64    
112    -48    
32     16     
64     64     
64     48     
0      64     
-160   80     
144    96     
144    64     
-96    32     
0      32     
-160   16     
160    64     
-192   288    
176    208    
160    48     
-144   -48    
80     64     
48     32     
-112   -144   
96     -96    
144    96     
-16    208    
-176   32     
-64    -32    
128    96     
-320   16     
80     80     
176    -16    
-160   32     
-80    160    
-96    16     
0      -32    
48     -112   
208    -32    
192    224    
-192   96     
-128   -144   
-32    -128   
-272   -160   
-32    32     
-240   32     
96     80     
-496   -320   
32     -224   
32     192    
-320   112    
64     -16    
416    400    
-608   96     
144    32     
-304   0      
112    -32    
416    208    
32     16     
256    32     
-368   0      
-144   80     
-64    16     
64     80     
224    128    
336    32     
-336   -272   
512    -304   
224    -80    
112    176    
-160   128    
-288   -64    
32     -48    
-448   -224   
144    -160   
-128   -224   
272    -16    
144    192    
80     96     
0      64     
192    -32    
-176   -16    
-144   -240   
336    -176   
256    16     
208    144    
-160   128    
-480   0      
-48    16     
-224   -16    
0      0      
400    32     
-208   32     
224    96     
-272   64     
-64    64     
-16    64     
-96    16     
-112   16     
144    32     
512    32     
-256   -48    
-192   48     
-176   -32    
112    48     
-144   128    
48     16     
-192   48     
32     144    
240    16     
96     80     
208    80     
144    80     
0      80     
-64    32     
192    160    
-96    128    
192    112    
0      176    
240    96     
-32    64     
0      -64    
-80    -112   
-32    112    
48     96     
16     -112   
-80    -128   
112    -240   
-176   48     
272    96     
112    0      
32     256    
-96    304    
-160   -272   
416    -1216  
528    352    
368    -1040  
16     -432   
176    -80    
-288   -768   
48     464    
224    1376   
-432   -640   
240    -752   
80     768    
16     -320   
112    -192   
48     272    
-96    -96    
192    416    
32     -304   
288    16     
-128   128    
464    240    
32     -16    
208    112    
-80    144    
336    432    
240    560    
-160   -320   
16     416    
-288   -608   
272    -464   
16     176    
128    -352   
208    416    
192    -256   
16     -224   
-240   -736   
-112   -240   
-16    112    
-64    -544   
320    144    
224    160    
-448   -272   
256    144    
32     208    
160    240    
192    -48    
-208   32     
0      176    
64     -96    
192    -320   
80     -768   
128    64     
0      112    
160    -240   
-128   16     
96     128    
-176   64     
112    -16    
16     0      
-64    112    
144    -32    
0      -112   
192    0      
-160   -32    
80     112    
64     -256   
80     -64    
96     -496   
-128   48     
336    -256   
128    192    
256    96     
112    16     
128    64     
0      -96    
32     48     
32     -272   
16     32     
160    -16    
-144   112    
80     -192   
80     112    
-16    -272   
128    208    
16     48     
368    32     
-16    16     
-48    16     
0      -16    
0      -384   
80     -112   
96     -112   
-16    32     
48     -64    
16     0      
144    -192   
48     64     
96     -272   
336    208    
-192   112    
-32    32     
-32    80     
160    -432   
-48    80     
0      -32    
-32    48     
288    32     
0      48     
80     -128   
128    -32    
-16    -112   
16     144    
-16    -16    
48     32     
-96    16     
-112   -256   
-96    -64    
96     -320   
224    -512   
224    -32    
96     -64
[truncated: 344,011 more chars]
