# Supplementary material for: A Fault Diagnosis Method for One‐Dimensional Vibration Signal Based on Multiresolution tlsDMD and Approximate Entropy
Source: Hindawi journal article supplement (doi:10.1155/2019/3262818), 2019-01-01
Supplement: f1 [file 3262818.f1.zip › 3262818.f1/gear signals/normal gear signal/Data18.txt]

144    -80    
64     -16    
112    48     
48     64     
96     112    
-368   80     
16     -176   
464    -96    
-144   32     
224    112    
160    0      
32     112    
48     64     
-256   48     
-16    32     
48     48     
224    112    
-128   176    
272    128    
-224   -64    
0      -16    
0      -32    
144    128    
224    160    
-128   80     
160    16     
64     16     
-16    -32    
48     48     
-96    112    
272    -32    
-208   -112   
128    48     
32     112    
176    32     
80     -880   
128    96     
-128   80     
48     80     
160    48     
0      32     
64     -80    
112    80     
-48    112    
-16    64     
-80    128    
96     -192   
-80    -144   
128    -16    
96     -32    
96     -304   
64     -16    
-144   32     
192    48     
-96    128    
64     -64    
176    64     
0      80     
208    256    
192    160    
-208   -32    
96     160    
-32    32     
0      -96    
128    0      
32     -256   
0      -64    
112    -48    
-16    48     
224    -32    
-48    -96    
-48    -64    
208    272    
-32    -176   
64     -64    
-48    32     
-32    -144   
128    144    
-16    144    
32     -32    
80     -80    
-16    -32    
144    -448   
176    80     
32     16     
-16    -64    
0      -208   
80     112    
48     112    
-208   32     
16     -320   
64     -320   
336    432    
480    240    
0      0      
176    -288   
144    224    
-304   -256   
-64    -48    
144    768    
-224   -256   
160    64     
160    64     
64     0      
96     160    
64     0      
192    -32    
112    80     
-16    -16    
96     128    
160    -48    
-192   -208   
128    -400   
336    208    
32     -736   
32     -16    
-144   -48    
144    240    
-288   272    
272    -64    
112    -96    
176    -96    
176    368    
-208   -960   
-224   -576   
-64    352    
48     -128   
448    384    
48     64     
448    96     
-160   240    
48     -224   
288    144    
-32    -64    
128    64     
112    224    
256    -176   
16     96     
80     -48    
0      80     
-80    -240   
80     -320   
48     352    
0      -32    
224    -336   
112    480    
-112   -96    
208    -1200  
-160   -96    
96     -128   
176    48     
0      -144   
-64    -928   
16     96     
144    112    
64     -224   
224    240    
144    32     
16     -64    
384    368    
64     -352   
-32    -224   
0      -832   
-48    192    
-192   -32    
160    -352   
32     -96    
32     -640   
-224   176    
448    -1168  
-48    80     
224    -256   
32     -48    
96     64     
80     -192   
96     -32    
-64    48     
-112   -32    
224    -112   
-2176  -80    
80     32     
16     -80    
32     -96    
-32    -32    
0      16     
32     -192   
416    -224   
144    -272   
448    32     
-128   208    
-64    -96    
-48    -48    
384    160    
-256   160    
-544   -320   
32     -304   
-48    64     
-96    160    
-208   112    
208    48     
-96    112    
384    -416   
208    -96    
304    160    
-80    224    
-48    128    
-16    -48    
-192   0      
64     -112   
-64    -48    
160    -48    
-240   -64    
544    -64    
-128   32     
16     -144   
496    64     
-544   -736   
0      -32    
80     336    
0      320    
240    224    
192    -240   
-240   176    
208    176    
144    128    
288    32     
-736   -32    
-16    -288   
-96    -176   
208    -48    
-144   64     
240    -112   
32     16     
272    -1248  
-48    192    
16     304    
352    192    
96     64     
368    32     
-352   16     
0      0      
-624   -32    
64     -64    
-1152  144    
224    128    
320    32     
-32    16     
160    192    
-80    -400   
64     80     
160    160    
144    -32    
64     -16    
0      -192   
0      -176   
224    64     
-208   256    
144    -96    
-432   -320   
48     -224   
112    128    
32     -48    
16     0      
272    -128   
64     112    
-160   -176   
-16    -272   
-320   80     
64     176    
-544   48     
256    -96    
-208   -64    
48     -64    
-464   32     
-32    -208   
80     -320   
288    -320   
96     80     
32     -208   
16     208    
32     320    
-64    272    
-112   128    
32     80     
16     -176   
0      -128   
-304   -128   
80     -160   
-256   64     
-16    -368   
176    -64    
-80    192    
-80    -16    
-2416  -176   
-288   -32    
-48    240    
-48    -16    
272    -256   
96     144    
16     0      
96     48     
80     -80    
-80    96     
-384   -48    
-560   -144   
80     144    
-480   -256   
-16    16     
-80    16     
-176   -192   
176    -32    
-128   48     
-208   0      
-896   48     
-224   32     
-64    0      
48     688    
288    336    
-176   272    
-496   32     
16     96     
-656   -224   
-96    -32    
128    48     
64     80     
80     32     
-272   32     
-256   -16    
-368   48     
-224   -64    
256    16     
112    144    
-336   32     
208    16     
-128   -128   
48     32     
48     32     
-48    32     
32     32     
-176   96     
176    16     
-288   32     
-64    32     
-576   -16    
96     96     
-256   -176   
64     -32    
80     32     
128    96     
-128   -128   
144    48     
16     112    
-144   16     
-32    32     
-112   0      
-112   16     
32     112    
-144   -80    
0      16     
-48    96     
-80    -32    
96     96     
-240   -160   
192    160    
-128   -80    
112    48     
32     32     
48     64     
-144   -32    
32     -32    
-16    0      
272    160    
-64    -64    
-112   -48    
-80    64     
-240   -80    
224    144    
-880   96     
112    32     
-32    -64    
192    32     
-208   64     
-48    64     
-48    -16    
208    368    
240    16     
176    -224   
32     16     
-160   -48    
272    0      
96     160    
-112   160    
112    96     
-416   -96    
288    0      
336    64     
-304   -64    
192    16     
256    32     
-160   80     
16     -112   
-192   32     
-464   48     
-160   -64    
384    -96    
-320   32     
144    96     
-880   -128   
-16    32     
0      48     
-64    80     
80     32     
48     112    
80     128    
32     0      
112    -48    
-16    128    
0      112    
-16    32     
160    80     
-176   32     
-144   64     
-48    48     
-144   -16    
-32    -160   
48     -144   
-16    192    
240    -32    
-144   -48    
-160   16     
16     112    
0      80     
128    -16    
-144   32     
64     96     
-96    -32    
112    16     
-144   32     
32     48     
144    112    
-128   16     
0      -112   
-16    -16    
-64    80     
128    112    
176    -176   
-48    -240   
0      112    
-320   -48    
160    -16    
-32    224    
16     96     
224    -80    
-96    -96    
160    -96    
-288   256    
112    -16    
-144   -16    
288    320    
192    -192   
80     160    
-64    80     
-80    160    
-48    -64    
144    112    
-96    -64    
48     32     
160    384    
-208   -336   
176    80     
0      96     
48     16     
-16    80     
160    -16    
-144   -16    
112    32     
96     -64    
192    160    
256    1056   
0      -672   
-144   192    
-304   -80    
80     80     
0      -128   
128    96     
-16    -16    
-112   0      
192    80     
208    -224   
32     16     
144    176    
-64    -528   
112    416    
-320   -224   
80     -64    
-32    608    
192    -496   
128    336    
-80    32     
-32    -144   
0      112    
32     0      
112    -32    
32     112    
-64    128    
32     -32    
-32    32     
128    128    
352    1200   
-192   336    
-160   -1056  
144    352    
48     224    
-64    -240   
192    48     
16     -112   
96     96     
-128   192    
-48    -288   
-64    224    
176    752    
-368   -144   
-80    -288   
96     256    
224    144    
80     -80    
-32    80     
304    -352   
96     176    
112    128    
48     -32    
-80    -32    
80     -16    
-80    16     
-32    -256   
160    96     
-160   16     
112    -112   
48     -32    
80     0      
128    -16    
-64    -464   
48     32     
128    16     
112    288    
128    192    
80     -144   
48     416    
64     112    
-48    96     
64     112    
-32    64     
48     176    
128    -80    
144    -192   
32     0      
-80    -144   
272    -32    
0      64     
192    176    
-32    80     
112    416    
16     144    
320    240    
-16    240    
160    0      
368    640    
-144   112    
-16    -96    
-48    -512   
-32    80     
192    336    
-288   80     
128    -864   
16     -384   
-48    48     
-80    -480   
-48    -336   
-16    144    
-16    544    
-416   320    
-336   -16    
96     -80    
352    -48    
64     480    
0      0      
208    -112   
-112   368    
272    -880   
304    -32    
192    -176   
-32    -112   
-256   -96    
80     112    
80     240    
48     80     
-80    32     
32     96     
128    32     
80     -32    
-80    -16    
240    -288   
-32    -48    
-64    -512   
320    224    
-32    -16    
224    -208   
-96    64     
160    112    
-160   128    
144    -80    
-16    -208   
144    -16    
-224   752    
544    -144   
128    -16    
-96    -64    
-32    416    
480    288    
336    32     
-32    -64    
240    48     
-336   128    
352    -16    
-96    -224   
-16    -16    
144    256    
80     -48    
320    96     
64     -16    
112    -16    
32     0      
80     80     
-160   128    
432    32     
256    -16    
144    -32    
-80    32     
128    352    
-64    208    
128    -80    
32     -1120  
176    -144   
144    32     
48     0      
112    -16    
-128   32     
0      128    
64     0      
208    64     
96     96     
304    320    
-16    336    
448    -96    
-176   128    
144    0      
0      -272   
-16    -80    
-64    -16    
64     -16    
32     -1056  
320    112    
64     304    
128    112    
-128   -224   
-96    -128   
80     -384   
80     80     
64     -288   
48     -80    
-1792  80     
32     -304   
272    -64    
-32    -288   
96     -192   
176    -832   
0      -96    
96     -400   
144    160    
32     0      
0      48     
112    -128   
96     240    
-48    -80    
48     -176   
192    -368   
176    -48    
16     144    
128    128    
-64    -32    
-64    -240   
304    80     
144    -944   
288    -64    
256    -128   
64     -48    
32     -352   
128    16     
-144   -64    
-16    -32    
-416   32     
-48    -128   
-368   -48    
96     -16    
16     0      
112    -112   
128    -112   
48     -544   
-112   -80    
-32    32     
0      -16    
208    16     
48     48     
-112   -80    
208    96     
-240   144    
16     -112   
-576   -96    
240    224    
16     -16    
48     -112   
-16    -96    
80     -320   
96     80     
-16    16     
-48    -64    
240    128    
80     -80    
-96    -48    
48     -64    
112    -32    
224    48     
-640   -64    
48     -32    
-240   16     
80     -112   
-32    -32    
64     -176   
80     0      
80     -128   
0      64     
-128   0      
112    -240   
64     -16    
112    0      
0      64     
0      -96    
-1456  -16    
96     -176   
-752   0      
64     -64    
-64    16     
96     -160   
48     32     
64     -560   
16     -144   
176    32     
64     80     
-160   112    
160    144    
-528   -96    
128    -64    
-224   32     
80     32     
224    80     
128    -16    
64     144    
304    -192   
112    0      
48     -224   
208    96     
-528   0      
192    0      
-224   32     
256    32     
-272   -48    
112    -64    
-160   -144   
192    80     
-384   112    
272    -144   
-96    160    
-16    -16    
-240   -80    
112    -112   
-736   16     
-528   -112   
48     64     
-416   16     
160    208    
-672   -128   
-160   -208   
192    64     
544    96     
-256   0      
-160   -80    
-176   -80    
-208   -80    
-80    -16    
-96    64     
368    208    
-368   144    
-400   -128   
160    16     
-48    48     
-112   64     
80     -32    
-128   0      
-1328  -128   
112    112    
-112   -32    
64     80     
-32    -32    
-96    0      
-16    -16    
-320   96     
-32    -16    
-192   0      
64     144    
-1120  32     
-96    0      
160    0      
-64    0      
96     -32    
112    80     
64     -176   
32     -416   
-208   -48    
-144   320    
-272   -160   
32     -192   
144    400    
-32    -240   
112    -16    
-496   48     
-336   -240   
16     272    
-48    -96    
-16    80     
192    64     
-112   -80    
-96    32     
128    144    
128    -144   
16     -32    
-352   -64    
192    -144   
-176   16     
-96    -48    
-48    160    
16     -16    
-432   224    
96     128    
352    304    
-48    528    
-112   -592   
64     256    
320    448    
-256   16     
-144   320    
0      -96    
64     256    
144    112    
-352   160    
16     368    
240    176    
-528   288    
128    -80    
-208   -128   
-32    160    
0      32     
240    272    
-48    -32    
-32    -16    
-128   80     
-112   0      
-32    -208   
-160   480    
-64    256    
-240   -64    
80     128    
-240   -416   
16     112    
-368   0      
272    0      
32     -144   
48     176    
16     368    
-48    32     
-16    112    
-48    32     
176    80     
-192   -208   
128    -80    
-16    432    
-160   48     
0      -32    
144    -32    
32     16     
160    128    
-96    160    
-112   64     
128    96     
-176   48     
-48    96     
16     32     
224    -32    
-112   -144   
-16    16     
-176   48     
160    -32    
-176   -48    
32     80     
-400   64     
-48    0      
-128   -64    
32     -64    
96     -96    
32     -16    
112    48     
-240   -128   
176    32     
-304   208    
240    112    
-304   160    
0      144    
-400   -32    
144    80     
64     -224   
80     -48    
-64    -208   
16     -144   
96     96     
-160   144    
32     144    
128    176    
80     400    
160    144    
128    -16    
-64    -400   
96     -288   
-160   -192   
80     16     
128    48     
-64    112    
48     16     
-48    0      
-32    -128   
16     -176   
48     -32    
48     -32    
320    64     
-320   -320   
-32    -16    
-48    -96    
176    352    
192    80     
16     -96    
96     -144   
160    -224   
32     416    
-272   -16    
112    -96    
-48    -48    
-80    -576   
-304   -432   
16     -400   
-304   64     
160    0      
-96    0      
224    -48    
-288   -48    
-80    160    
-112   -192   
-144   224    
176    -16    
-48    32     
-16    -160   
80     -48    
16     336    
192    336    
704    416    
368    960    
-560   640    
-656   -208   
304    16     
96     96     
560    208    
112    48     
112    208    
-480   288    
64     0      
144    -320   
48     0      
416    -240   
32     352    
368    -32    
-288   96     
16     -16    
-240   64     
-64    -784   
128    -48    
48     80     
240    -176   
64     176    
96     32     
-256   -800   
16     -416   
-288   -272   
-48    112    
0      176    
464    192    
-272   0      
192    32     
144    -64    
48     -368   
-96    144    
80     224    
288    416    
16     160    
80     224    
-128   32     
432    272    
112    -64    
-48    -80    
144    304    
288    144    
32     32     
224    -16    
-192   192    
496    464    
-80    336    
0      -208   
-32    80     
368    -32    
-64    80     
112    -208   
80     -144   
-32    128    
320    -32    
0      176    
-80    256    
-128   96     
352    -80    
464    304    
0      400    
-96    -144   
144    -528   
-48    384    
-96    -416   
160    528    
320    672    
160    -368   
-112   96     
320    -400   
32     336    
192    0      
-96    -80    
-32    96     
-64    144    
-16    -80    
160    80     
144    -256   
320    0      
240    -16    
80     80     
-32    -192   
32     176    
-256   0      
-32    -144   
48     -32    
176    16     
208    64     
80     32     
48     48     
80     -96    
96     112    
240    -48    
-112   -16    
112    -224   
0      144    
160    192    
0      96     
-80    80     
48     -304   
272    -480   
272    -64    
368    224    
160    48     
16     16     
-64    -112   
-16    16     
-224   -192   
-48    16     
-176   -592   
-64    48     
0      -240   
80     80     
256    144    
-112   64     
-32    -32    
-48    -176   
96     32     
64     32     
16     -32    
160    -352   
208    48     
464    -208   
96     48     
208    -112   
208    80     
-160   160    
-272   -32    
80     160    
128    128    
-80    -192   
128    -144   
272    64     
128    -16    
-48    -80    
272    -128   
112    64     
160    16     
32     112    
32     -64    
-96    -80    
-128   -160   
320    96     
176    80     
176    48     
160    -224   
0      -48    
-32    -608   
-16    -96    
64     -128   
0      -80    
80     48     
48     -96    
48     144    
192    -208   
48     -1104  
48     0      
32     -768   
80     0      
-32    -224   
160    -48    
-32    48     
112    32     
32     -144   
112    -160   
160    -48    
-32    112    
176    16     
-16    48     
144    80     
96     -48    
32     64     
80     -160   
48     32     
-80    -48    
-112   208    
224    64     
16     -320   
-16    -96    
160    -240   
-80    -144   
144    -608   
-256   -112   
128    -208   
192    128    
-16    -96    
16     80     
112    48     
-16    48     
-480   -112   
-352   -144   
-464   144    
-32    -64    
304    -16    
-32    -320   
-272   -288   
160    -48    
-48    -96    
384    -176   
208    80     
16     32     
176    160    
48     -16    
-224   -272   
-560   -144   
-480   -304   
-112   -256   
96     128    
192    -96    
48     -160   
352    160    
32     -32    
448    288    
-288   -576   
16     -176   
96     128    
64     16     
128    -96    
176    -112   
64     256    
-32    -128   
-64    -32    
64     -80    
-208   -64    
160    -272   
-272   -256   
48     304    
48     80     
304    -512   
-48    16     
16     -32    
320    128    
-96    96     
96     -112   
-368   0      
-96    -768   
192    608    
-128   -224   
-320   -256   
0      640    
96     -432   
192    -384   
336    496    
-16    -64    
-160   -48    
144    -384   
-112   -224   
64     144    
160    480    
176    336    
144    -80    
80     16     
32     -48    
-96    48     
80     -64    
-160   -144   
-32    -144   
-16    112    
128    -160   
368    144    
-96    -640   
192    96     
-160   80     
224    96     
-128   64     
-32    144    
128    96     
0      -128   
80     -192   
48     -176   
-16    -128   
224    -48    
-32    336    
128    -96    
-80    176    
-416   16     
-144   0      
-64    0      
80     -64    
-32    32     
160    0      
-64    -144   
128    -96    
-320   -96    
192    -48    
96     176    
256    -64    
32     80     
-1184  -112   
-144   96     
-160   -48    
192    -32    
16     32     
-112   -16    
-48    -304   
96     -80    
-48    -64    
-32    -48    
-160   -64    
320    64     
-192   160    
-512   -48    
16     64     
-384   -96    
-560   224    
-304   176    
96     288    
160    304    
-864   -128   
48     -112   
256    32     
-96    96     
176    -96    
80     -16    
-160   0      
64     112    
-48    -176   
144    112    
96     -16    
-240   176    
48     80     
-176   16     
-64    48     
-928   32     
-160   -48    
-736   -32    
-304   16     
176    16     
-16    192    
-272   -64    
48     -80    
0      -208   
-48    0      
-16    80     
160    -16    
-192   -320   
80     -16    
-176   224    
160    240    
32     208    
-80    -64    
0      192    
-2288  80     
-96    -80    
-128   -160   
-48    32     
-112   -80    
-96    112    
32     -80    
-112   16     
-144   64     
0      32     
176    240    
-144   32     
48     0      
-128   -176   
16     16     
-672   80     
64     144    
-48    -32    
96     16     
64     -96    
-160   208    
64     368    
-192   96     
-144   -192   
48     -336   
-96    -224   
-176   -256   
80     -64    
-224   -128   
32     -48    
-256   -48    
144    416    
-128   -144   
-464   -656   
-208   -528   
-16    -96    
-128   448    
160    432    
-240   -320   
-32    -256   
128    128    
-96    16     
240    480    
-400   -144   
32     192    
-464   -352   
-144   -832   
224    432    
-288   1584   
128    944    
-416   -672   
192    -16    
656    -512   
-320   -128   
496    272    
160    320    
272    -160   
320    -256   
-16    400    
128    48     
64     560    
-272   1040   
-1632  -400   
-128   -176   
112    288    
208    -320   
480    560    
96     272    
-208   96     
-128   -192   
-160   -240   
144    -160   
32     -128   
-64    480    
-256   -256   
336    -704   
96     736    
-1072  544    
80     -320   
-32    224    
-96    -416   
-32    112    
-256   -464   
-96    144    
208    368    
-208   -176   
416    112    
32     112    
-80    112    
32     64     
-144   -224   
-160   -48    
176    -672   
-336   128    
-112   80     
-160   288    
352    192    
-96    -336   
-192   128    
48     -16    
-80    -144   
-144   272    
128    -48    
48     16     
112    112    
128    -16    
-208   -96    
-16    0      
-144   112    
192    16     
48     32     
224    80     
-288   -112   
176    48     
-48    -32    
0      144    
-80    16     
0      -160   
-32    80     
16     96     
-288   -128   
32     -112   
496    368    
-480   -480   
160    -288   
256    224    
-192   -80    
144    -16    
32     96     
128    64     
64     0      
0      -96    
240    -64    
-160   -480   
-112   -304   
16     -304   
-16    -32    
144    96     
208    240    
-112   112    
-16    128    
0      16     
160    -16    
96     64     
0      16     
-48    48     
64     0      
80     -16    
-176   128    
144    0      
-16    48     
-48    -80    
80     -16    
0      80     
-128   32     
-64    96     
272    272    
176    32     
176    48     
-96    -16    
-48    32     
-80    240    
48     160    
-80    -112   
-32    -560   
128    224    
-256   -80    
192    48     
368    144    
112    48     
48     16     
96     80     
-32    80     
-16    64     
-32    16     
176    224    
-256   16     
256    32     
176    96     
0      -256   
64     32     
96     0      
-80    96     
-128   144    
48     160    
96     -48    
-32    -16    
176    96     
32     64     
-16    -16    
128    64     
-80    -32    
-32    0      
256    0      
256    -320   
32     48     
-192   -304   
64     32     
-48    64     
128    96     
-80    32     
0      48     
32     32     
-48    32     
80     32     
32     0      
-48    32     
-944   -256   
64     32     
160    -304   
-64    32     
128    -1184  
64     48     
96     64     
16     0      
16     -16    
48     112    
-16    48     
96     48     
-96    -48    
16     80     
-32    96     
160    -16    
48     -64    
-112   -288   
256    -192   
80     -720   
256    96     
0      16     
48     32     
-64    -32    
304    32     
-256   -16    
256    64     
-112   144    
304    272    
-64    96     
-48    -48    
224    96     
32     -144   
320    48     
400    -128   
-144   128    
192    -1216  
80     128    
176    -112   
48     16     
240    176    
272    96     
96     80     
-224   -48    
544    -48    
112    -64    
288    160    
-112   -176   
-192   -96    
80     176    
496    416    
-368   -224   
832    432    
-832   -352   
-400   -320   
112    48     
160    -288   
784    240    
256    -32    
208    -224   
-112   464    
-304   496    
288    -944   
352    752    
-432   208    
320    -48    
-32    144    
96     -736   
16     480    
240    -320   
-128   96     
144    256    
-144   -16    
144    -608   
16     -224   
-32    -48    
224    224    
-176   -160   
448    -160   
-208   -80    
160    448    
176    112    
160    272    
48     128    
288    192    
-128   -16    
16     -1424  
0      -688   
128    -32    
48     448    
176    160    
160    -16    
-160   -352   
128    -224   
-32    -144   
64     64     
224    -48    
112    128    
48     32     
112    -96    
80     64     
-1344  -128   
192    -112   
64     112    
240    -176   
32     48     
304    -448   
-32    -80    
32     32     
-160   32     
16     16     
-112   48     
80     128    
144    16     
64     -96    
-96    -32    
-96    32     
16     48     
192    64     
64     -272   
160    -80    
32     -304   
-80    -48    
-48    -64    
80     -48    
352    -304   
192    0      
176    192    
-320   16     
128    -112   
240    -16    
-192   112    
-192   -192   
80     -240   
64     32     
272    96     
128    -16    
160    -80    
112    -144   
288    -80    
176    80     
16     112    
272    0      
-16    -48    
128    -80    
416    400    
-544   336    
160    -16    
-544   -48    
352    32     
144    128    
160    -32    
16     -16    
-304   -928   
0      -368   
96     -384   
-224   -192   
320    -16    
-16    304    
64     176    
-64    -32    
-448   -192   
160    -288   
112    112    
112    96     
192    -48    
128    -128   
-224   -192   
192    -288   
-208   -64    
-16    -432   
144    -144   
-112   -128   
96     0      
-192   48     
16     272    
-16    240    
128    32     
-624   32     
64     -64    
-1920  -128   
208    -32    
192    48     
-112   16     
-112   64     
400    -336   
-80    -352   
0      -384   
144    -304   
144    16     
-80    -16    
-16    -80    
160    -80    
-272   272    
400    224    
-48    112    
0      144    
-32    48     
-16    -80    
0      32     
32     -320   
112    -256   
-192   -112   
176    48     
-160   160    
16     240    
-720   -128   
112    176    
-48    -784   
0      720    
-112   208    
-16    -240   
256    320    
-48    -400   
256    128    
16     -400   
48     80     
16     304    
-48    -240   
-304   64     
32     16     
-208   -80    
-32    16     
32     32     
160    80     
-64    -32    
160    -352   
-272   192    
96     -32    
32     272    
80     -400   
-16    528    
-96    -240   
-1232  -160   
-336   -128   
464    -128   
160    -16    
192    -160   
176    160    
144    -736   
16     -400   
-272   560    
208    96     
-512   -688   
560    480    
-272   -64    
-80    -176   
48     240    
-624   -64    
-48    -368   
-1120  -64    
-528   736    
768    1168   
-16    112    
-576   -416   
-768   -336   
-176   -448   
192    48     
480    -32    
-64    -208   
-240   -176   
208    160    
-240   160    
-256   16     
-48    32     
-112   64     
-32    -16    
-1008  -16    
-112   -32    
-160   16     
64     96     
-208   -48    
144    0      
-208   -144   
192    80     
32     0      
64     112    
-224   0      
-80    -48    
96     32     
-400   32     
-16    0      
-832   0      
32     -208   
-176   -128   
144    288    
-320   -96    
240    0      
32     -144   
-128   -48    
64     112    
64     16     
-208   96     
128    0      
-176   -32    
240    192    
-272   176    
-128   32     
-16    16     
-624   -112   
80     0      
-112   -80    
96     0      
-32    32     
-32    48     
16     32     
80     144    
-16    128    
-96    16     
144    112    
368    96     
-96    -64    
-304   -96    
192    -64    
-944   -32    
112    224    
-48    -16    
240    112    
-32    32     
-32    16     
96     0      
-144   -48    
-48    -32    
32     -144   
0      -64    
-112   -160   
96     -32    
-16    48     
-96    32     
-336   -48    
64     112    
256    128    
-176   0      
16     -32    
-208   -16    
-48    48     
112    112    
0      16     
-48    0      
-48    -32    
-224   -32    
-64    -64    
-96    -16    
-48    64     
-128   -16    
96     80     
-2064  -512   
240    -624   
64     256    
256    304    
-80    80     
96     0      
-192   32     
160    -128   
-160   0      
-128   96     
-48    0      
-32    -32    
224    160    
-176   0      
64     -96    
16     0      
-48    80     
-112   32     
16     32     
48     48     
-64    32     
112    144    
-240   32     
-64    -16    
-144   -16    
128    0      
112    16     
32     16     
-176   -128   
112    64     
240    64     
-112   48     
128    112    
32     48     
16     -32    
64     16     
80     16     
112    80     
32     -64    
112    96     
-48    96     
-224   -80    
208    48     
-192   -16    
-32    0      
144    48     
48     64     
64     128    
48     96     
0      32     
80     176    
176    160    
0      16     
128    80     
-272   16     
128    48     
-128   0      
128    80     
32     80     
-32    80     
112    96     
16     -16    
80     32     
96     80     
96     64     
240    112    
-144   32     
0      48     
112    192    
-224   48     
192    320    
-16    176    
0      16     
-64    16     
0      0      
-160   -112   
256    16     
-64    112    
256    -16    
-208   48     
48     64     
16     -160   
-224   256    
352    -576   
-112   256    
192    384    
-416   -320   
384    480    
-368   -128   
256    -576   
416    336    
400    -32    
-224   -64    
80     32     
-464   -32    
608    224    
-512   -128   
176    -128   
160    368    
384    -96    
-32    -448   
-512   0      
208    -672   
-96    -272   
432    -336   
336    96     
560    368    
-96    -384   
208    384    
-416   112    
-224   -32    
272    -176   
80     -48    
128    48     
448    64     
-400   176    
240    -176   
16     -128   
-384   352    
176    -80    
-64    -48    
256    -80    
64     96     
48     80     
176    112    
16     -96    
-128   -48    
-112   32     
256    32     
-128   -64    
80     224    
48     80     
112    -464   
80     48     
64     0      
32     224    
176    16     
96     -32    
64     0      
160    64     
-16    -16    
240    80     
-80    -64    
144    0      
16     16     
-256   -96    
432    80     
80     -48    
64     0      
80     -48    
128    0      
64     16     
160    48     
80     64     
-32    64     
64     16     
48     112    
48     0      
16     48     
224    144    
-48    -80    
96     -32    
48     -48    
144    64     
-16    -64    
-48    16     
48     32     
208    144    
-112   192    
-80    48     
-112   -32    
80     112    
80     64     
144    64     
16     96     
48     32     
224    48     
144    -128   
320    240    
-48    -16    
0      -16    
-64    0      
144    32     
80     80     
0      0      
224    -64    
48     64     
-32    -48    
16     -112   
256    208    
-16    80     
80     -16    
128    -176   
-48    -176   
144    -256   
96     96     
-16    -288   
112    352    
-112   192    
-64    -96    
0      -32    
0      64     
-64    0      
176    -128   
192    -16    
112    96     
432    688    
-144   -240   
112    -240   
160    -400   
272    112    
144    -224   
192    -32    
240    144    
-48    256    
-48    48     
-96    64     
160    -272   
-96    -160   
-16    -64    
-32    -224   
64     -112   
144    -48    
112    144    
160    128    
96     320    
-32    -96    
272    -96    
48     -48    
224    304    
48     80     
160    544    
-192   352    
96     -736   
80     -432   
160    -80    
-16    288    
512    -208   
480    272    
-144   352    
-48    -464   
0      96     
-96    -272   
48     -64    
192    32     
16     160    
-1504  -272   
304    -352   
128    336    
-16    -928   
-48    -240   
-32    -896   
64     48     
80     784    
160    -512   
48     -720   
-64    80     
192    160    
-32    224    
96     -384   
64     -608   
-816   -176   
-32    -96    
16     -192   
-16    -16    
128    -112   
0      -32    
160    -176   
-128   -736   
48     -336   
80     -400   
64     48     
-16    -32    
-32    16     
-16    -352   
112    32     
-96    32     
112    -80    
128    368    
176    400    
-112   -32    
-16    -176   
0      96     
-176   -960   
128    -96    
32     64     
48     80     
0      -112   
256    -16    
-112   -48    
96     -16    
-80    -16    
80     -144   
400    -112   
-112   -208   
80     -176   
-176   -128   
128    80     
-128   -640   
144    -160   
288    -32    
-64    112    
-64    -304   
896    -16    
96     -96    
576    -240   
-112   -384   
-208   288    
-2896  -224   
368    -160   
80     -32    
-64    96     
144    48     
-192   -208   
-16    128    
32     -960   
64     48     
336    -96    
160    80     
-48    -32    
48     -32    
-192   0      
112    -32    
-32    96     
0      48     
-1568  -48    
112    -64    
96     48     
416    -80    
-288   -48    
-32    -672   
272    64     
176    80     
96     -32    
-208   -32    
80     64     
-32    -48    
176    48     
-384   -64    
-256   -128   
-592   16     
48     -144   
176    32     
240    -16    
-64    192    
-64    -224   
256    80     
-96    -16    
16     -160   
-288   -96    
144    96     
-208   0      
176    -16    
-64    0      
80     128    
256    0      
80     16     
-112   -208   
128    -192   
144    160    
16     -16    
272    48     
-320   -32    
-192   -128   
-112   -16    
256    -48    
-240   96     
128    -48    
-144   64     
32     -128   
-272   80     
192    32     
144    96     
-272   -176   
144    368    
144    -448   
0      -240   
16     96     
80     -16    
-48    -32    
16     32     
-96    -16    
32     32     
96     96     
-16    16     
-336   16     
-368   -32    
64     96     
-176   48     
16     144    
-96    16     
-48    16     
-64    -16    
-64    32     
-144   -48    
-736   64     
-64    -16    
-32    32     
432    288    
-576   208    
160    -32    
-304   -304   
144    16     
-352   -96    
16     -96    
96     32     
96     -32    
-336   -144   
-912   -32    
-368   32     
-336   -144   
176    16     
-528   16     
-48    16     
-80    32     
0      32     
-80    -80    
112    32     
256    -80    
32     -112   
48     32     
-256   -112   
-160   0      
-336   -80    
64     0      
176    176    
-336   16     
-1008  192    
-32    32     
-176   -240   
128    80     
0      16     
32     32     
-144   -128   
64     32     
64     0      
-112   -32    
-224   -80    
240    -64    
16     -48    
-48    -80    
-176   -96    
-352   -64    
-16    -64    
192    -16    
48     -16    
-32    160    
176    80     
-48    48     
-224   160    
96     320    
64     -80    
64     -544   
-288   -128   
0      112    
-208   -112   
-80    0      
-416   -16    
0      32     
-1072  112    
16     80     
-32    -64    
-32    -128   
96     240    
-64    32     
0      -192   
-96    48     
-288   -144   
32     0      
-112   96     
64     -112   
-64    112    
-336   -144   
-48    -128   
-144   192    
176    64     
96     -64    
64     288    
176    -48    
-48    640    
432    -528   
-48    208    
0      576    
-320   -240   
-96    160    
-176   -48    
-560   -336   
-288   -304   
48     -112   
-448   64     
48     -32    
-96    16     
112    0      
-144   160    
-112   -64    
-240   32     
-160   -288   
-432   -272   
-112   -288   
96     -32    
-464   -64    
32     -32    
-512   336    
288    272    
144    192    
-112   -16    
-112   0      
-192   -128   
-32    48     
-112   -16    
192    32     
-32    -272   
-32    32     
-160   208    
176    112    
-240   -224   
48     -112   
-32    80     
-16    128    
-208   96     
0      -64    
96     16     
144    224    
-368   128    
160    -160   
-144   -48    
160    -32    
-80    208    
-48    144    
80     -48    
-32    -128   
112    -64    
-112   48     
144    48     
-208   208    
176    -32    
-16    0      
64     -112   
-64    0      
-32    208    
32     16     
160    208    
-16    0      
96     -96    
0      144    
32     208    
416    -16    
-320   -96    
0      16     
-64    128    
48     -16    
144    112    
-224   -16    
80     112    
32     128    
16     32     
32     -48    
-16    0      
-32    48     
0      48     
-144   -48    
64     -208   
-112   -64    
160    112    
160    64     
-16    -16    
-16    144    
240    64     
48     48     
-32    16     
336    128    
-160   192    
-16    0      
32     48     
-112   -16    
-272   -16    
336    128    
-160   32     
0      32     
48     64     
-16    48     
48     -112   
0      -112   
32     -128   
176    80     
208    128    
-48    0      
-192   32     
-64    -32    
16     96     
-64    32     
208    48     
176    -48    
144    32     
48     48     
-176   112    
80     224    
96     32     
-112   336    
48     112    
224    80     
16     112    
80     -64    
176    64     
224    32     
-224   -96    
192    160    
-192   320    
16     -288   
80     -448   
16     -112   
224    0      
192    224    
144    208    
80     -16    
-192   16     
-96    -64    
32     384    
272    -48    
-64    48     
-96    32     
176    -208   
224    48     
-160   -720   
-224   32     
64     80     
240    192    
192    -240   
288    352    
144    224    
144    -96    
-256   80     
-16    -144   
-64    -144   
336    304    
-48    304    
176    0      
-64    -96    
80     -192   
80     32     
64     32     
-48    -128   
-64    -80    
112    144    
-64    144    
208    80     
64     -96    
208    128    
96     -64    
-16    -32    
0      0      
16     -80    
-32    128    
112    0      
0      32     
160    -352   
32     80     
144    64     
64     16     
96     -48    
96     16     
64     48     
128    80     
0      16     
112    -16    
-32    80     
176    80     
-48    0      
128    -80    
144    16     
48     -192   
176    80     
416    480    
-512   112    
416    -80    
-32    0      
288    224    
224    256    
-288   0      
64     -64    
0      48     
128    48     
192    64     
0      -256   
-224   -16    
608    -80    
-48    48     
48     -224   
-80    0      
-96    -64    
0      16     
192    160    
48     80     
224    64     
240    -128   
64     96     
-224   -256   
496    16     
-48    96     
-256   -48    
-272   -576   
624    0      
-176   160    
192    112    
0      80     
208    128    
32     16     
256    96     
176    96     
-144   -240   
416    0      
496    -144   
-240   -112   
-288   -16    
272    64     
16     -144   
64     96     
128    -16    
96     -16    
-208   128    
80     160    
288    -32    
-368   -240   
352    224    
-48    -64    
368    0      
-224   -224   
192    96     
32     -96    
48     96     
128    -64    
48     16     
-64    -224   
16     -976   
-48    48     
16     128    
48     -352   
112    -112   
128    -16    
-80    -224   
208    -96    
0      -176   
64     -192   
256    128    
128    48     
240    144    
32     -112   
-112   80     
176    -336   
-80    32     
80     -256   
-64    -288   
-400   -96    
112    32     
96     -144   
192    -80    
-32    -144   
96     -528   
144    96     
96     -32    
0      -32    
64     -240   
-32    128    
48     48     
192    -64    
112    144    
32     192    
-784   -64    
208    -176   
-32    -64    
-32    -112   
352    176    
-96    -80    
16     -384   
32     -464   
64     96     
48     16     
-32    -16    
112    0      
48     160    
-240   -64    
48     -96    
-448   32     
32     144    
-240   48     
176    160    
-192   -384   
32     -16    
32     -48    
224    -560   
48     80     
160    -144   
144    96     
208    -96    
48     -48    
-352   -416   
288    272    
16     208    
320    -176   
32     176    
32     -112   
48     48     
176    64     
-96    112    
-288   -224   
-64    -48    
-128   -64    
32     128    
144    -80    
144    -16    
144    48     
240    -16    
-96    -128   
80     32     
-736   112    
-80    -128   
-464   -80    
144    160    
-256   -896   
160    160    
-144   208    
32     -640   
-96    112    
-112   192    
-80    -80    
0      -48    
320    48     
-256   -32    
96     32     
-752   0      
112    -272   
-608   144    
160    128    
80     128    
192    -128   
-208   -416   
80     -272   
32     224    
-128   -352   
112    16     
112    -32    
208    128    
-16    96     
32     -96    
32     -272   
160    16     
-176   -400   
-96    -176   
0      176    
48     -288   
128    -80    
224    -144   
272    80     
-656   -320   
176    -128   
-96    -48    
0      352    
-128   -80    
96     -96    
-96    144    
16     -208   
-256   -176   
96     -128   
64     240    
16     -176   
224    48     
64     592    
-656   416    
-144   272    
16     -208   
-352   -752   
-32    -32    
-144   64     
464    96     
-320   192    
-48    -208   
-32    -144   
-848   -160   
-144   -416   
-160   -480   
0      -48    
48     -208   
-192   224    
-352   128    
-1424  -32    
-176   160    
384    -64    
-256   80     
240    -224   
0      80     
-320   80     
16     64     
-384   -224   
48     112    
-416   128    
-560   -48    
-128   -80    
64     272    
-656   208    
-480   -112   
224    -48    
-1232  80     
-192   -48    
208    0      
-240   0      
-64    -48    
208    48     
-192   -96    
96     -32    
-240   -80    
304    32     
-416   -32    
-16    48     
-80    -112   
-272   -256   
160    -96    
-288   -48    
112    -96    
-480   64     
144    144    
-256   192    
320    -16    
-144   -96    
16     -112   
-64    16     
128    80     
-48    48     
-208   -208   
48     16     
-208   192    
128    128    
-208   80     
304    96     
-800   160    
32     -32    
0      -160   
64     48     
112    16     
-144   -208   
192    -176   
64     -32    
-160   112    
-144   -48    
-192   0      
-16    -64    
-48    -16    
48     32     
-80    -16    
-1168  -80    
64     176    
-80    16     
80     -80    
16     16     
-32    -32    
0      -32    
16     16     
-16    0      
32     -32    
-64    -112   
16     -16    
304    192    
-336   32     
160    0      
-208   -192   
80     -16    
-112   48     
-16    256    
144    -32    
-144   -80    
144    32     
-16    32     
-32    96     
32     64     
-80    16     
-272   -544   
64     -256   
-128   -128   
32     80     
-16    0      
-48    16     
-464   -96    
160    512    
80     160    
16     -112   
48     -304   
112    16     
96     384    
-128   96     
-80    -224   
32     80     
32     -16    
64     -112   
336    368    
-272   -288   
48     -320   
-240   1056   
128    608    
-176   -704   
-80    192    
32     0      
96     96     
-192   -112   
288    -272   
96     208    
-144   -352   
48     384    
-240   112    
-48    -224   
-352   -320   
240    -64    
32     160    
48     32     
144    0      
-112   -48    
80     -208   
80     96     
-128   32     
-32    16     
144    144    
-64    0      
128    48     
-32    -96    
-176   -80    
-192   -96    
-80    16     
32     96     
96     32     
96     16     
-16    -64    
96     0      
112    80     
-32    96     
-128   -48    
64     0      
-208   48     
96     96     
-304   -16    
32     0      
-48    -16    
160    48     
112    64     
80     128    
-64    -16    
32     80     
-176   112    
144    80     
-32    80     
-96    -32    
64     96     
16     64     
32     16     
32     -80    
128    16     
-32    80     
16     48     
-64    16     
-48    32     
0      32     
112    48     
-32    32     
32     64     
48     16     
-16    16     
16     16     
240    176    
-240   96     
16     -32    
16     16     
112    96     
160    0      
-208   -128   
288    128    
-384   160    
176    32     
-64    0      
-112   0      
-64    96     
48     80     
256    -16    
-112   -48    
144    80     
-160   128    
160    -32    
-32    176    
-144   0      
432    224    
-208   144    
-144   16     
32     32     
112    272    
-48    128    
192    -16    
64     64     
80     -112   
144    32     
-128   80     
-96    -48    
192    -144   
240    224    
-48    112    
480    16     
-464   48     
-16    112    
-160   -112   
144    -32    
208    96     
16     128    
304    112    
-128   -48    
-80    -112   
-16    160    
192    0      
-16    -160   
128    112    
-32    -624   
48     64     
192    48     
-48    16     
-96    96     
192    192    
-112   16     
352    224    
-256   -80    
-96    -48    
-128   32     
208    -48    
80     80     
160    -160   
-32    48     
-64    -528   
32     -112   
224    48     
32     96     
-80    -48    
16     64     
144    144    
-32    0      
48     96     
240    80     
-112   16     
112    -48    
16     80     
-32    -80    
48     16     
16     -16    
240    112    
-144   -48    
160    32     
-16    16     
272    192    
-448   -80    
224    112    
160    144    
272    32     
-208   -32    
-64    -64    
128    16     
144    -352   
-16    144    
416    480    
-272   -320   
112    -544   
128    -160   
32     32     
16     64     
0      32     
240    112    
-144   -32    
96     80     
336    112    
-208   -208   
240    16     
48     96     
-192   -752   
-112   352    
-96    -224   
80     -480   
208    176    
160    -192   
-48    464    
80     -464   
304    -224   
112    336    
32     -96    
208    224    
-64    0      
48     -224   
32     -64    
-96    -144   
64     -320   
304    288    
144    304    
16     -16    
192    -304   
96     432    
0      -208   
176    0      
96     -32    
32     -304   
0      -80    
-32    -320   
80     -48    
96     -320   
416    576    
-240   -288   
176    -224   
304    32     
112    496    
-192   -48    
80     -176   
176    -16    
16     16     
64     0      
0      -128   
416    336    
-96    352    
336    176    
256    -272   
240    192    
-16    -368   
-112   -128   
48     176    
336    160    
-96    -80    
0      -544   
-128   32     
64     -96    
-16    -352   
288    -80    
32     -768   
-48    -16    
368    -288   
-128   -48    
0      -480   
80     -80    
16     -112   
32     -368   
128    -32    
96     80     
96     -208   
256    48     
-608   -112   
16     -128   
-256   -224   
128    -208   
176    -16    
-48    -176   
112    -208   
32     -512   
-96    -112   
128    64     
64     80     
128    -32    
-32    96     
128    -192   
32     0      
-224   0      
80     -128   
-768   -80    
96     -176   
48     96     
64     -176   
-80    -80    
-48    -224   
-208   -816   
0      -112   
-64    0      
48     -48    
80     48     
96     -176   
32     256    
-48    -192   
-192   -304   
-272   -80    
192    64     
-32    240    
224    -80    
176    208    
16     128    
192    -384   
80     -144   
128    0      
48     -128   
-176   128    
-64    -80    
-256   400    
48     32     
32     48     
-656   400    
-48    80     
-384   -176   
384    -144   
-32    64     
208    -80    
-592   -48    
192    -304   
-160   16     
-352   112    
400    -256   
240    -336   
144    -144   
-48    80     
-48    256    
-368   -128   
-64    -16    
-144   -16    
224    208    
-32    64     
192    48     
-256   -144   
48     -64    
-176   256    
-48    -160   
448    176    
-256   0      
192    -160   
-112   -16    
400    240    
-96    320    
32     -112   
-672   128    
304    64     
-912   208    
272    -240   
48     -128   
128    -304   
224    256    
16     144    
-224   -240   
192    -512   
-48    -80    
-176   80     
176    80     
-96    256    
-208   192    
-832   -32    
-112   -432   
112    -272   
112    -288   
-32    -64    
160    -288   
80     112    
0      -512   
16     160    
-160   128    
144    144    
32     160    
-176   144    
80     112    
-128   48     
-112   96     
80     -80    
-80    80     
320    -272   
96     64     
16     -96    
-176   112    
176    -128   
64     -96    
80     32     
160    0      
-96    288    
0      -128   
-272   -816   
48     96     
144    208    
48     -192   
0      80     
-1072  64     
-32    64     
-144   48     
-480   48     
-96    624    
-32    -176   
-176   80     
-624   -48    
0      -48    
80     -240   
-48    16     
16     48     
-32    -32    
64     -192   
-128   0      
-208   -16    
64     48     
-48    -192   
272    96     
-32    -16    
-176   -96    
-192   -48    
-432   32     
128    16     
-544   48     
-32    32     
176    368    
384    144    
-416   0      
176    -32    
80     -48    
176    -16    
144    -208   
-288   -256   
-192   -176   
-320   -128   
-80    112    
-96    80     
176    0      
-672   0      
-176   -80    
64     -160   
304    80     
-96    -64    
256    32     
-80    -48    
16     0      
-176   32     
-48    16     
-112   -96    
80     -32    
256    352    
-384   -16    
-112   -16    
-176   -16    
0      16     
-48    -16    
224    -16    
-32    -32    
48     64     
-208   -80    
64     -16    
-192   0      
-80    64     
64     160    
64     -16    
128    48     
-320   -32    
-16    0      
-64    32     
80     32     
-208   0      
176    128    
-176   -48    
64     48     
96     16     
-32    32     
-96    32     
32     32     
-80    0      
16     16     
48     48     
-80    -16    
32     80     
-112   64     
112    112    
-96    80     
-48    64     
-528   -64    
-32    -16    
64     64     
16     48     
-16    16     
-112   -256   
-112   -32    
96     48     
-112   -48    
208    96     
16     64     
32     0      
-144   0      
-320   64     
-32    32     
-368   112    
0      -16    
48     16     
112    112    
-80    32     
48     48     
-176   96     
-80    48     
96     -16    
-32    48     
-240   -48    
-160   -112   
-16    48     
-240   16     
176    -16    
-32    128    
-288   80     
272    64     
-320   -16    
-304   -48    
96     64     
-16    160    
-528   -48    
192    -48    
-32    0      
-128   -64    
-128   -288   
688    -176   
224    224    
16     -32    
128    -48    
176    144    
-112   -48    
96     80     
80     176    
-272   -48    
224    -144   
-64    16     
112    0      
-192   -128   
128    -48    
16     -16    
16     64     
-112   0      
176    32     
16     -48    
208    -192   
-48    160    
160    128    
-80    80     
96     -192   
32     -48    
48     48     
-48    -128   
-80    272    
80     192    
-304   -480   
224    320    
-256   48     
-224   32     
528    112    
16     176    
112    -80    
-64    -208   
-176   64     
48     -48    
-96    160    
176    48     
208    48     
-384   192    
608    -1392  
-352   912    
288    48     
80     -544   
96     512    
-16    -16    
-64    288    
304    -48    
-64    -368   
128    384    
176    208    
208    208    
-192   -16    
-240   400    
-32    112    
64     32     
-288   -240   
16     -640   
192    -128   
512    256    
-192   432    
-80    -16    
-144   128    
64     16     
16     0      
144    16     
-16    -16    
112    0      
320    64     
-96    64     
288    448    
-48    320    
-112   32     
-16    96     
32     -16    
-48    -256   
112    -48    
48     112    
-112   96     
0      80     
-128   -16    
64     304    
96     208    
112    144    
-272   -64    
112    -32    
-160   -192   
-48    -1008  
0      -480   
32     240    
208    16     
80     -16    
208    176    
-64    64     
-16    160    
112    -16    
-16    352    
0      -112   
256    -16    
128    96     
-48    80     
16     64     
96     -224   
176    176    
64     80     
144    208    
64     16     
64     80     
-80    -16    
64     16     
-64    96     
32     16     
16     0      
32     -80    
32     -80    
336    128    
-112   -16    
400    -32    
160    272    
-128   -992   
96     48     
16     -32    
0      128    
96     64     
-96    0      
224    -240   
128    32     
-48    -16    
128    176    
288    224    
-144   64     
128    112    
224    160    
176    128    
80     -128   
144    144    
112    96     
-128   112    
16     -176   
64     160    
-112   -32    
80     160    
96     16     
144    64     
0      224    
272    -64    
-144   -288   
112    -272   
-80    64     
176    -288   
128    176    
32     -1168  
32     224    
176    272    
48     96     
32     -96    
96     -160   
48     160    
176    -336   
-352   48     
176    -224   
-32    80     
320    -16    
0      -352   
48     -512   
112    -464   
-160   -416   
176    -320   
-48    -368   
112    176    
224    128    
-208   272    
-272   -64    
208    -416   
160    -160   
96     -480   
192    -16    
-96    -160   
-80    -560   
448    -128   
240    16     
176    192    
144    -32    
96     16     
336    160    
-128   -272   
192    -144   
-144   -288   
-112   -720   
208    48     
128    192    
-352   176    
32     -80    
592    576    
-464   416    
80     -192   
-224   -288   
-64    -48    
128    -48    
192    96     
144    -576   
-192   -560   
0      -112   
-288   528    
288    240    
-144   -336   
272    -160   
96     -176   
-96    -192   
272    -464   
80     208    
-160   -192   
16     -192   
-128   -48    
224    -1232  
-144   -176   
320    -240   
-160   288    
112    192    
224    -320   
-16    -496   
-176   -1584  
-16    -384   
-16    608    
304    384    
160    -672   
-320   -112   
272    -480   
-480   144    
112    -624   
416    -576   
-496   576    
400    640    
-240   -144   
-48    -848   
192    -192   
240    224    
160    0      
80     -144   
-208   -336   
96     -208   
80     368    
112    -224   
256    400    
-320   -176   
112    -112   
-144   128    
240    -128   
256    -96    
-32    -64    
240    240    
-112   -240   
64     208    
0      -384   
64     -304   
112    -256   
192    304    
176    -32    
96     0      
144    -160   
64     16     
-400   -48    
0      -192   
-560   96     
256    16     
144    -96    
32     -80    
144    -48    
-32    -624   
48     128    
128    -288   
224    144    
-80    -16    
16     48     
32     -32    
-64    -352   
-352   -288   
48     0      
-224   160    
-128   -96    
224    -144   
112    112    
-32    96     
-48    -64    
208    -32    
144    -16    
96     144    
48     -48    
128    -32    
240    0      
32     -80    
112    96     
-80    -64    
-224   16     
64     -144   
-352   -16    
0      112    
160    160    
48     -96    
48     -64    
128    -144   
368    80     
96     0      
256    -16    
-32    16     
112    -32    
-304   -112   
160    -32    
-624   0      
0      -176   
-320   48     
160    32     
-1152  -32    
32     -304   
192    112    
176    -240   
32     368    
-144   112    
-144   160    
-384   -224   
368    -32    
-256   80     
192    96     
-208   -48    
-48    176    
-176   -32    
144    0      
80     0      
48     -48    
-48    48     
256    0      
0      32     
112    48     
96     -64    
-688   -32    
80     -32    
-256   0      
176    48     
-128   0      
16     -112   
80     96     
96     -64    
0      16     
80     -16    
-64    -16    
-144   -64    
144    112    
-240   64     
64     -48    
-240   -16    
160    32     
16     -16    
-16    -64    
-144   0      
96     -32    
-672   -48    
96     -80    
144    96     
-608   -96    
160    32     
-896   -144   
-368   0      
96     16     
-368   -16    
-176   -176   
-608   48     
-224   64     
64     -112   
-80    32     
96     112    
-176   80     
176    16     
-176   -80    
64     -128   
32     240    
0      32     
-304   -16    
-224   -64    
-128   -112   
64     160    
-576   -48    
128    16     
-1856  -112   
304    128    
-272   224    
160    432    
16     272    
-256   144    
-368   -96    
64     272    
352    432    
-432   400    
336    32     
-576   -192   
-48    -48    
-624   -304   
32     64     
-416   -64    
192    96     
-48    -64    
160    16     
-336   -128   
176    -320   
-96    32     
160    288    
-32    -48    
16     16     
-144   -112   
-16    144    
0      -32    
16     -48    
-160   -96    
-176   0      
-64    -64    
-752   144    
-48    368    
-192   -256   
224    176    
176    16     
-176   -320   
-240   272    
-128   -1008  
16     448    
-48    160    
160    288    
-512   -128   
-224   -736   
-624   -496   
176    -144   
-1184  0      
-176   48     
416    320    
-96    144    
-96    0      
-48    -48    
-48    16     
-112   -48    
-48    64     
-128   -80    
240    0      
-304   -144   
80     -80    
-208   -112   
96     -96    
-112   -16    
128    0      
-80    0      
-64    96     
16     64     
-64    -192   
-32    -64    
64     160    
-48    64     
-128   32     
48     0      
272    144    
-288   112    
-32    96     
-16    48     
-320   -16    
16     32     
-528   32     
-80    96     
112    32     
144    -48    
112    -48    
-208   80     
16     -16    
80     80     
16     112    
-16    0      
-16    -16    
-48    32     
-32    96     
-272   -16    
0      80     
48     -16    
176    112    
-272   32     
0      -48    
-48    16     
96     16     
32     144    
32     -32    
208    64     
16     224    
-176   128    
-544   -112   
288    -48    
-112   32     
176    64     
144    -32    
16     -32    
96     112    
-128   80     
48     -16    
96     32     
240    -80    
48     80     
-96    -48    
-256   0      
-144   -48    
-112   0      
48     96     
32     144    
0      160    
32     -32    
144    -96    
80     96     
240    224    
-176   112    
80     32     
128    80     
48     192    
-16    192    
48     48     
-32    64     
48     96     
64     -48    
-240   -16    
-64    -128   
112    -128   
-16    -48    
-96    -176   
320    48     
48     32     
16     -32    
-32    48     
-384   160    
0      32     
224    64     
-96    -64    
-144   -272   
240    96     
0      16     
64     16     
112    -48    
-112   32     
256    64     
-32    96     
48     80     
112    32     
-96    -64    
32     -224   
-192   -48    
32     -240   
96     96     
-112   -16    
0      -96    
32     192    
112    -16    
96     96     
112    128    
64     304    
128    112    
-208   -160   
336    384    
80     128    
-16    32     
144    -32    
16     -96    
144    -80    
0      320    
736    1184   
-176   1712   
-208   -80    
272    64     
16     736    
-464   -512   
32     -1296  
352    -32    
112    976    
32     112    
32     -576   
-64    384    
176    160    
96     -208   
144    176    
-64    -832   
112    -320   
-16    -112   
80     432    
-288   32     
128    -464   
496    224    
400    144    
-208   -448   
224    864    
-352   -432   
-224   -672   
352    224    
-576   -192   
784    -1040  
576    560    
304    432    
384    -368   
-112   48     
-128   528    
272    656    
-896   -1056  
-96    448    
-208   128    
528    848    
-48    -560   
-16    272    
192    80     
160    144    
-112   -400   
-96    144    
-48    64     
32     -544   
224    304    
112    128    
-224   -432   
320    160    
-64    48     
352    -656   
-208   160    
0      128    
160    -176   
-208   48     
176    -144   
48     -32    
-64    -256   
-48    32     
208    -544   
32     48     
112    32     
-64    128    
80     48     
144    112    
96     112    
208    32     
-96    112    
48     112    
144    48     
-16    -64    
96     -304   
96     -112   
-16    224    
112    -96    
64     96     
112    -272   
208    352    
-96    -112   
64     -112   
-128   16     
240    -32    
64     128    
-160   -80    
-16    64     
176    0      
176    80     
144    -176   
-128   -624   
-304   -512   
48     -112   
-16    -432   
192    -96    
-144   -304   
240    0      
64     -16    
32     96     
208    -16    
-160   48     
128    48     
-48    -160   
16     -416   
48     -256   
112    -160   
16     -272   
-16    80     
304    240    
-176   160    
32     16     
64     192    
-80    -96    
176    -48    
176    16     
160    -96    
-32    80     
32     -96    
192    80     
80     0      
240    48     
-16    -112   
16     128    
-192   -656   
0      -432   
-48    176    
64     192    
64     -80    
16     -592   
160    32     
64     -48    
256    -112   
256    240    
80     64     
128    16     
-304   80     
-16    -208   
112    96     
112    -48    
192    -32    
-16    0      
64     -16    
-64    -64    
-336   -32    
48     48     
-144   -64    
16     -288   
176    -16    
176    -928   
-128   -144   
608    208    
400    32     
-32    16     
-176   -112   
32     -80    
-48    48     
-16    -128   
64     64     
-272   -64    
240    -96    
224    -16    
160    -96    
-64    -80    
-32    -416   
32     -48    
64     -80    
96     0      
192    32     
32     48     
128    -64    
-64    48     
80     -32    
80     -80    
-224   80     
48     -32    
96     -32    
-80    -128   
96     -32    
80     -336   
0      -16    
208    -528   
-80    0      
80     -144   
96     -16    
64     -128   
80     48     
-176   -16    
80     16     
-384   0      
80     0      
208    -32    
80     -64    
304    160    
-144   112    
192    0      
48     -144   
48     0      
128    -80    
16     -64    
80     -32    
-80    96     
32     -16    
-128   -176   
-112   -160   
-176   -32    
-416   64     
48     16     
208    32     
224    16     
80     208    
208    -112   
-304   -192   
192    -1216  
144    128    
192    192    
224    32     
-240   -144   
288    96     
-400   208    
16     -608   
-272   -64    
304    240    
512    -112   
448    144    
-336   -96    
-1360  -736   
992    1168   
-304   176    
-608   -336   
48     240    
-112   -32    
48     -816   
96     560    
240    -288   
0      -176   
112    416    
-16    -16    
-928   208    
336    -224   
128    272    
208    96     
176    16     
80     96     
96     192    
-112   240    
80     96     
80     16     
-192   -352   
-288   -416   
-64    0      
-272   -240   
288    -160   
80     128    
0      -320   
16     -128   
-48    -112   
0      128    
48     -560   
48     -48    
-80    0      
32     144    
-144   -32    
224    -144   
-368   -64    
80     16     
-176   -80    
160    -96    
96     0      
80     -96    
-48    96     
48     -272   
-32    80     
-256   -224   
240    16     
16     16     
192    16     
-96    -16    
-48    80     
80     96     
160    160    
-48    32     
272    -16    
-704   16     
-1152  -160   
144    0      
-752   -176   
64     -32    
-240   -80    
64     32     
32     16     
-752   -96    
-16    -48    
0      32     
0      48     
80     -64    
48     -16    
-672   -80    
32     16     
-96    -80    
-32    -32    
-48    -16    
352    288    
-432   208    
-128   -64    
-240   48     
128    0      
-32    -128   
-320   -160   
-112   -128   
-1360  32     
-112   272    
-208   48     
272    -32    
-96    -16    
112    0      
-16    -80    
-48    0      
-256   -96    
0      -32    
-16    64     
0      -144   
400    144    
-160   256    
64     32     
-592   -48    
-64    -48    
-144   16     
64     112    
64     -32    
192    160    
-304   -80    
-432   -48    
0      32     
224    160    
96     192    
96     -64    
-112   80     
-320   -64    
-160   0      
-272   -80    
16     32     
128    32     
-32    96     
-144   -48    
-64    -112   
128    -144   
64     -64    
32     144    
384    704    
-336   704    
-192   240    
192    16     
0      -80    
-48    32     
-352   16     
16     128    
-1776  96     
144    -128   
-400   -480   
-176   -336   
64     272    
160    464    
112    192    
-160   -32    
-112   -16    
128    224    
-80    -144   
0      -32    
160    128    
-144   -160   
144    -16    
-480   96     
-128   -448   
-64    128    
-32    528    
16     -320   
16     -80    
96     384    
144    -64    
-16    336    
-176   -336   
144    368    
-144   0      
-128   80     
-304   -64    
112    32     
96     -16    
144    48     
32     0      
-64    112    
96     608    
-80    432    
-64    -176   
-272   -80    
32     -32    
-112   16     
-64    144    
-16    336    
192    80     
-160   -64    
64     32     
-384   144    
-176   224    
208    656    
0      400    
-176   -192   
240    -32    
272    176    
-160   -144   
-16    -128   
-32    0      
128    128    
-208   0      
-16    48     
-80    112    
-16    112    
-16    160    
-32    112    
-80    0      
608    656    
-176   864    
144    272    
-16    -128   
-48    -320   
160    -64    
624    432    
224    -112   
368    -96    
-256   128    
-144   112    
-176   -16    
-256   -64    
96     64     
-48    32     
-48    -288   
-48    -224   
-208   128    
16     48     
64     32     
-16    16     
64     -16    
128    48     
-272   16     
144    112    
-240   -64    
-96    0      
-16    -112   
192    -208   
-352   32     
-16    16     
-16    -160   
224    -16    
16     128    
-48    48     
336    208    
-256   80     
176    16     
80     32     
208    272    
-240   -48    
112    0      
80     112    
-48    0      
80     16     
32     -64    
16     128    
160    16     
192    0      
-128   32     
-16    64     
160    304    
-128   144    
-288   -112   
496    64     
144    64     
-48    -80    
208    176    
-240   256    
-320   16     
64     80     
352    48     
0      -32    
16     -48    
64     80     
-64    96     
-32    96     
0      176    
160    64     
0      256    
-176   0      
-48    -48    
288    144    
-80    -80    
-288   64     
80     80     
160    48     
160    64     
96     -16    
-96    32     
-32    96     
96     144    
144    128    
-144   -16    
0      64     
160    48     
32     -784   
48     -96    
144    48     
112    32     
32     80     
144    64     
-16    -16    
160    96     
224    48     
128    16     
-48    96     
224    128    
-112   -48    
160    -144   
-16    32     
80     -592   
304    -608   
32     128    
288    240    
-112   -16    
112    -128   
-64    -48    
144    16     
-64    -16    
-144   -64    
-144   -16    
-48    0      
-160   16     
112    0      
192    -16    
16     -144   
112    64     
-144   96     
112    0      
48     48     
32     -96    
64     -32    
64     64     
112    48     
112    32     
0      0      
224    176    
224    224    
-80    0      
96     80     
-32    -112   
160    32     
128    -288   
112    0      
128    48     
112    32     
64     -48    
0      224    
-128   -48    
144    32     
320    16     
336    96     
160    144    
-16    -32    
16     128    
-64    -192   
144    208    
256    80     
80     16     
80     -176   
128    160    
0      32     
32     80     
-160   -80    
192    -16    
-32    16     
224    -48    
96     64     
64     -32    
64     32     
288    -64    
0      0      
128    -80    
16     96     
-32    -1104  
144    16     
32     16     
48     48     
64     -64    
80     32     
160    128    
-96    -288   
16     0      
-80    480    
144    192    
-48    -80    
16     32     
304    -48    
-32    160    
160    -336   
224    448    
0      336    
32     -224   
-192   -48    
-16    -272   
192    208    
-96    -288   
16     -144   
0      80     
-96    -384   
608    1440   
-144   -704   
16     16     
176    400    
32     -1200  
112    -112   
0      -272   
240    176    
112    -320   
464    -176   
64     320    
624    416    
-368   -192   
96     -224   
-400   544    
576    432    
-336   -176   
160    -656   
320    352    
-240   32     
-32    -384   
112    -80    
160    -432   
-128   -32    
352    -208   
-272   -336   
160    -112   
-112   -736   
352    -32    
112    112    
224    304    
-176   64     
96     -128   
-16    -512   
-64    0      
192    64     
48     272    
288    16     
64     -80    
-880   16     
160    -144   
96     0      
320    -112   
48     64     
-16    -272   
-160   -256   
144    32     
32     256    
544    -192   
80     144    
64     -32    
-64    -48    
-320   32     
240    -144   
-1536  -176   
0      16     
16     -16    
144    -64    
-80    48     
304    -256   
112    -64    
80     -1728  
-32    144    
256    64     
80     48     
96     -192   
-80    16     
-144   -16    
-32    -144   
-112   96     
128    32     
-240   -112   
192    -128   
128    64     
48     -208   
272    176    
-240   -416   
-224   -32    
272    -48    
112    48     
112    48     
16     -176   
-48    -16    
128    0      
-48    16     
256    -80    
-336   112    
48     -176   
48     -16    
96     0      
16     0      
128    -336   
32     -112   
112    64     
-160   96     
64     192    
96     -16    
112    -16    
0      32     
-448   -112   
128    -48    
-512   -32    
16     -16    
-512   240    
-64    64     
96     32     
176    -32    
64     208    
144    208    
-64    -272   
192    -160   
128    -16    
-192   -16    
-64    -48    
-80    -112   
160    -80    
0      -80    
192    -16    
-992   96     
-320   16     
-144   -48    
224    -160   
160    32     
480    272    
-240   384    
-128   64     
304    80     
160    32     
0      224    
-416   32     
448    496    
-608   592    
288    256    
-288   16     
224    144    
192    0      
-528   -864   
480    -368   
160    496    
16     432    
-176   -416   
0      96     
0      0      
352    240    
-208   32     
176    560    
-464   -720   
368    304    
-112   96     
160    -48    
48     -80    
336    160    
-224   32     
-160   -320   
96     368    
32     16     
160    -208   
-160   128    
400    0      
-128   32     
48     352    
-80    192    
0      -64    
-96    208    
-480   176    
-16    -96    
-816   -96    
112    96     
-128   16     
-496   112    
80     48     
-368   16     
-192   16     
-992   -80    
-80    -48    
144    32     
32     -16    
-96    16     
-80    -400   
-800   -496   
-144   64     
-720   -192   
-32    32     
144    80     
48     192    
-64    48     
-336   -16    
-144   16     
-304   -96    
0      -144   
-16    80     
96     16     
-656   -48    
-224   -176   
0      -80    
128    48     
16     -80    
48     -32    
-144   -16    
16     176    
-288   -128   
32     0      
-96    -32    
160    16     
240    176    
-2048  352    
-384   176    
32     -64    
848    368    
-480   144    
-144   32     
144    -48    
-368   -48    
512    224    
-432   -48    
-64    -160   
16     -176   
64     -48    
-32    160    
-320   -96    
112    -80    
16     112    
-544   -192   
272    -48    
-32    0      
-64    48     
16     32     
48     64     
64     48     
-16    64     
16     32     
112    112    
-64    -48    
-368   -48    
-272   -48    
-256   -160   
160    128    
-32    48     
112    -48    
-320   -112   
32     16     
64     64     
32     48     
128    48     
352    224    
-464   144    
-96    16     
112    -16    
-96    -64    
64     0      
16     16     
224    80     
-1568  -80    
176    128    
-240   -192   
-144   -64    
16     64     
-80    0      
-80    0      
-48    32     
240    32     
-352   -64    
224    48     
-176   16     
208    112    
-448   -64    
16     48     
-352   -112   
112    48     
80     128    
-16    96     
128    -16    
-32    -64    
-80    32     
192    224    
-288   -32    
0      160    
112    272    
-144   -368   
64     -80    
-48    32     
16     -32    
-144   -16    
0      32     
176    64     
-176   -16    
-16    112    
-16    64     
240    192    
-64    -144   
-32    -80    
-80    -112   
32     -48    
-176   96     
-144   -16    
-304   -112   
240    64     
-144   16     
48     80     
0      16     
0      80     
128    16     
64     80     
48     -32    
-48    -16    
96     64     
192    0      
-272   0      
352    576    
-224   704    
-96    160    
176    16     
64     80     
160    96     
304    272    
96     -80    
144    -560   
32     -240   
368    848    
48     304    
-112   -224   
-112   -224   
-32    0      
0      48     
96     64     
-96    32     
64     96     
48     16     
64     416    
80     368    
-48    -32    
-16    -16    
96     48     
-96    16     
64     -80    
32     -144   
32     -48    
-32    80     
-64    -48    
0      48     
-64    64     
-112   64     
48     -16    
64     -48    
256    208    
-96    304    
-176   96     
160    -240   
176    -240   
112    -48    
-320   64     
224    -272   
80     -384   
-160   112    
-112   160    
-272   16     
16     128    
-48    -304   
96     112    
96     208    
0      -64    
176    192    
16     80     
64     48     
64     0      
128    16     
-80    32     
-64    -304   
416    784    
-144   -368   
96     16     
-48    240    
32     -112   
64     112    
0      224    
-16    0      
16     -80    
-48    592    
32     -608   
-64    496    
224    -160   
-224   80     
-96    -352   
128    -320   
224    480    
336    320    
48     -144   
-416   240    
-96    -208   
80     48     
224    -192   
368    -32    
-224   -48    
48     -272   
-304   64     
32     -112   
64     -224   
-32    176    
160    -112   
48     -160   
-32    48     
0      32     
-80    -176   
416    -48    
416    208    
96     128    
384    32     
128    -160   
-48    16     
-48    -80    
80     -96    
352    -32    
-48    96     
32     -272   
304    -304   
144    -64    
368    -112   
80     192    
128    -16    
-16    32     
-16    0      
0      -48    
400    384    
-448   384    
224    -160   
32     -208   
-256   112    
0      -64    
448    -272   
48     80     
64     144    
192    -112   
384    320    
-384   208    
-16    96     
128    -64    
112    160    
48     48     
0      -32    
-224   -272   
128    -48    
-96    80     
64     0      
64     -320   
-96    -576   
240    64     
-16    160    
-176   192    
112    -368   
176    96     
-160   176    
-16    288    
32     -64    
352    -32    
-32    144    
256    48     
256    0      
-16    0      
-80    112    
0      -80    
160    -32    
-64    -432   
144    80     
112    -32    
96     32     
112    80     
16     176    
-16    0      
112    64     
48     64     
-16    -64    
224    -80    
32     -48    
-160   0      
416    -624   
80     80     
128    112    
16     16     
80     -176   
-16    64     
48     112    
-48    -112   
112    -96    
0      -192   
-16    -80    
-16    -48    
48     128    
48     -80    
144    16     
96     -32    
32     -48    
208    64     
96     96     
-96    64     
64     48     
-16    -128   
112    80     
-64    16     
80     560    
160    256    
96     80     
32     16     
144    -16    
0      16     
96     -320   
-208   -352   
-128   -656   
192    -528   
160    240    
336    352    
240    400    
-48    432    
160    -160   
-176   -528   
0      -816   
-160   144    
224    -896   
272    320    
320    -48    
-96    -304   
-96    -16    
80     -224   
160    80     
96     32     
-16    -368   
-160   -64    
16     16     
-128   -560   
432    528    
192    16     
80     -464   
48     304    
-112   -128   
-80    -32    
400    400    
-32    208    
96     -144   
208    -160   
112    80     
208    -32    
-32    -32    
48     -80    
-304   -80    
96     -80    
320    -48    
-256   -112   
80     -336   
160    96     
240    -80    
-48    112    
208    -240   
48     144    
-16    -272   
112    48     
-16    -80    
-96    80     
0      -64    
128    -80    
-192   -48    
80     16     
-688   0      
48     -64    
16     0      
64     -16    
80     -16    
32     -336   
-80    -160   
160    -768   
-48    96     
240    -32    
80     32     
80     0      
80     -16    
-176   64     
-48    -96    
-80    48     
176    -144   
-96    -96    
176    16     
144    -16    
96     -176   
64     -16    
128    -336   
-48    48     
-96    0      
144    -32    
-96    32     
144    96     
-192   -32    
112    -32    
-16    32     
288    16     
-48    16     
0      -144   
128    -48    
-80    -16    
-80    -144   
144    -256   
-48    352    
-352   -576   
160    64     
-144   -144   
192    -224   
-144   -32    
336    64     
-208   -16    
-176   -144   
-80    -16    
-96    -96    
-320   -64    
-64    -176   
576    112    
368    -288   
80     64     
272    -1520  
80     16     
288    -32    
176    192    
-320   32     
384    -128   
-336   -96    
128    -80    
-144   -96    
64     144    
192    16     
-32    -128   
144    32     
96     -96    
0      32     
128    -176   
32     -32    
96     272    
-144   176    
-320   -96    
192    -16    
-80    32     
256    16     
16     32     
-64    16     
80     -128   
80     -176   
-16    32     
16     -192   
-16    32     
-64    -96    
160    -64    
32     -32    
16     64     
-128   0      
32     -48    
-128   -48    
224    16     
-480   -16    
128    -128   
-112   32     
-1216  -144   
64     0      
64     80     
-112   64     
-160   -16    
-192   32     
16     -128   
-864   -96    
-144   32     
256    0      
-16    128    
208    336    
-256   32     
-768   -192   
128    48     
-192   80     
352    144    
-624   -144   
-32    64     
-160   -144   
-320   96     
-176   -80    
-192   -192   
112    224    
-1248  16     
-48    -64    
-48    0      
-64    -192   
-32    96     
-32    -128   
80     336    
-192   -288   
-64    0      
-160   -16    
0      0      
-144   16     
-160   -16    
-400   -576   
-32    160    
-656   -112   
128    304    
-96    -112   
160    48     
48     0      
64     80     
-128   -144   
80     0      
-128   96     
-128   16     
32     32     
-224   64     
336    992    
192    400    
-208   -752   
-304   160    
-112   64     
-752   0      
-16    112    
144    208    
-80    -368   
192    144    
48     0      
16     48     
-272   -96    
16     -448   
-128   624    
32     112    
-16    -160   
128    -288   
64     240    
-96    48     
-848   -128   
128    -16    
-16    -48    
80     224    
-16    -48    
-32    -96    
-64    32     
-80    448    
128    -192   
-112   -80    
-16    -128   
-32    80     
-48    64     
-160   -176   
16     -32    
-432   -48    
176    192    
-1360  144    
208    32     
16     256    
16     -96    
-112   256    
80     -240   
-80    -192   
-112   256    
-96    32     
-160   -16    
48     -16    
32     176    
-192   -192   
-48    -256   
192    128    
-528   -16    
224    -64    
-160   -64    
48     96     
80     16     
-176   32     
96     16     
-256   -320   
-64    -128   
-96    -16    
32     -96    
-16    -16    
240    80     
-96    144    
128    -48    
-1424  -240   
-128   -64    
-80    -112   
-48    80     
144    -160   
96     64     
-96    -256   
-32    -144   
192    48     
-640   -48    
160    -192   
-240   -224   
-240   0      
-416   -112   
208    240    
176    80     
48     480    
32     -80    
-32    112    
-64    128    
-16    -128   
0      272    
16     -144   
208    -96    
16     -144   
64     32     
-48    -192   
80     160    
-192   272    
304    128    
240    -128   
-32    -304   
-336   176    
-368   128    
32     0      
-64    -80    
272    -112   
80     -80    
160    112    
-208   -176   
208    -48    
-464   -112   
176    48     
-192   112    
96     0      
192    -112   
64     -160   
-144   64     
-64    240    
176    80     
160    32     
-32    96     
48     96     
-16    112    
-16    -48    
-16    48     
32     -48    
192    320    
-208   160    
112    -144   
-32    -128   
32     -16    
176    80     
96     32     
48     32     
16     -16    
96     32     
-16    -32    
80     96     
-208   704    
656    304    
-112   -208   
304    16     
-192   -64    
-112   128    
80     -64    
208    144    
16     160    
-48    288    
32     80     
208    -96    
-32    192    
0      -48    
96     -48    
-128   32     
64     128    
-160   -96    
-96    64     
128    192    
192    240    
288    240    
0      272    
128    -32    
-16    -512   
-32    -224   
-208   80     
-112   288    
32     64     
128    -48    
272    -416   
48     -176   
-208   -32    
-192   -144   
112    80     
-96    96     
128    160    
64     0      
48     32     
96     192    
128    336    
112    0      
-64    -160   
-64    -144   
208    16     
0      64     
-32    -80    
272    320    
0      304    
64     -96    
-112   -224   
128    80     
-144   -96    
-80    144    
208    -400   
-16    272    
96     96     
48     -240   
-112   192    
80     -48    
-16    208    
-64    -80    
48     64     
96     -368   
144    -80    
96     -1120  
-144   -144   
16     64     
192    -48    
-112   -32    
-64    -352   
-320   -272   
160    -112   
80     336    
224    224    
64     64     
32     32     
224    80     
128    -160   
160    32     
0      -256   
48     64     
64     64     
32     16     
144    32     
144    80     
112    -32    
64     64     
-128   -128   
-176   16     
-144   16     
192    48     
96     -32    
352    48     
256    96     
48     -48    
-32    48     
0      -784   
-128   0      
272    128    
-256   -16    
144    128    
256    -224   
16     -64    
16     48     
-80    16     
-32    -64    
96     64     
112    -16    
112    64     
32     -368   
-16    16     
0      -208   
-64    32     
192    -208   
112    96     
-32    128    
144    64     
-32    -16    
96     -64    
-64    0      
96     48     
48     48     
112    -272   
80     48     
48     -128   
64     48     
32     -80    
64     64     
32     48     
32     96     
96     48     
144    160    
-160   -48    
128    -112   
224    112    
96     -64    
32     96     
224    224    
-48    -32    
128    -64    
-80    48     
48     -96    
-80    -96    
64     -16    
240    96     
-16    -16    
336    32     
0      48     
-144   -144   
160    0      
-192   -304   
400    32     
32     -16    
192    64     
240    -96    
64     64     
-112   -272   
256    -384   
208    64     
64     -128   
368    240    
-304   -240   
688    -16    
192    176    
-304   16     
-32    -288   
-112   -448   
384    208    
-464   96     
64     -64    
-48    0      
32     -208   
544    -272   
176    64     
544    256    
-384   144    
-160   -352   
64     -160   
-128   128    
-48    -272   
240    64     
-32    -144   
160    96     
176    -384   
16     -160   
96     64     
96     16     
160    144    
208    240    
-352   -208   
48     -80    
-416   -32    
80     -48    
-544   -16    
128    32     
16     -80    
160    -272   
32     80     
0      -704   
80     -80    
-144   -192   
224    0      
48     -32    
-272   -32    
192    -240   
-64    -64    
0      64     
-208   -80    
-1424  -96    
144    -48    
-112   -864   
0      592    
144    144    
-32    -208   
272    240    
-80    -384   
224    224    
-80    -144   
-32    112    
192    -128   
160    -176   
112    128    
144    -144   
-528   -32    
176    48     
160    128    
304    32     
-192   256    
80     -720   
-128   176    
480    -576   
-160   32     
-80    -160   
336    -16    
-32    288    
48     -224   
-480   0      
48     -272   
-320   384    
304    64     
-592   -48    
16     176    
-96    -176   
240    80     
-304   -912   
-80    -208   
112    224    
384    -128   
176    336    
-144   -224   
144    -192   
-96    208    
160    240    
-176   -176   
48     0      
-592   80     
96     80     
-1008  -16    
240    -224   
80     64     
-32    -224   
48     -384   
128    -672   
96     48     
80     176    
64     192    
-656   -208   
-16    -96    
16     160    
-16    -128   
-304   64     
-16    -64    
304    -32    
208    80     
128    80     
144    96     
-48    80     
-144   -160   
48     -80    
-512   176    
112    80     
96     -64    
80     -96    
-160   -32    
96     32     
-288   0      
144    -16    
112    160    
128    -288   
-144   -256   
-160   -288   
-128   -112   
-64    -80    
176    -48    
0      -192   
32     -112   
-320   -80    
224    -128   
-224   -208   
432    336    
0      288    
128    48     
32     -80    
128    -112   
144    160    
-704   0      
-672   -96    
48     80     
-336   240    
-160   32     
-1904  -64    
-64    -64    
96     -16    
-64    48     
128    16     
32     0      
-224   -352   
0      80     
-240   -128   
-48    -80    
192    -32    
-480   -240   
-48    144    
-544   144    
-176   64     
-624   192    
-144   32     
-992   80     
64     96     
288    80     
-32    112    
-224   -224   
160    -240   
-128   -320   
48     -224   
-176   -320   
0      -224   
-96    -112   
-48    -208   
64     -784   
-288   -576   
-96    -560   
-304   16     
16     -48    
-400   -176   
144    160    
80     -64    
256    208    
384    -192   
-272   96     
-480   16     
-352   48     
-240   -128   
176    -96    
-48    -304   
96     -176   
-176   224    
-368   -80    
-400   16     
-640   16     
-80    160    
96     -48    
304    80     
-272   -160   
192    -160   
64     -80    
-336   32     
576    -208   
64     -64    
128    -288   
-336   -272   
-176   80     
-624   64     
-160   16     
-400   -192   
112    -32    
-48    -192   
-144   -64    
400    32     
-256   96     
96     16     
192    48     
-48    -64    
-64    0      
-240   -32    
336    96     
-192   -96    
48     144    
0      -80    
-624   -64    
-112   64     
0      160    
304    240    
48     96     
64     32     
-16    0      
-336   192    
368    224    
-144   144    
112    -64    
32     112    
144    96     
-160   64     
160    -96    
-400   -16    
160    256    
-1184  96     
224    128    
192    208    
-192   464    
-256   256    
-64    0      
-16    0      
-64    32     
160    -96    
80     -176   
80     -160   
-192   -48    
96     32     
-256   -48    
-80    -368   
-752   -688   
-32    -336   
-32    304    
16     -160   
144    208    
-80    128    
-112   592    
48     96     
-112   -208   
112    112    
-96    -96    
-176   96     
416    -64    
-176   304    
16     -336   
192    400    
-336   -688   
16     480    
32     0      
224    160    
-64    240    
48     32     
80     -144   
176    560    
-16    352    
-16    -192   
-192   -128   
48     16     
-240   -128   
-16    144    
0      80     
48     -32    
112    32     
16     64     
112    64     
-128   -16    
16     48     
-32    16     
528    560    
-464   304    
-16    64     
16     -80    
96     -48    
-160   -32    
-16    0      
192    160    
-48    208    
-208   -144   
-48    -256   
64     224    
112    96     
112    96     
48     64     
96     16     
0      48     
-176   48     
-112   32     
-32    0      
80     48     
128    64     
96     48     
64     -16    
96     48     
-16    32     
-48    32     
16     32     
-96    32     
-144   32     
80     80     
-128   -48    
112    64     
-272   -16    
112    -48    
192    96     
208    112    
-16    32     
-64    -32    
32     -16    
64     16     
96     64     
192    80     
-80    48     
-128   0      
32     96     
32     32     
-16    32     
-112   48     
-16    -672   
64     32     
144    144    
304    96     
160    144    
-192   -16    
112    32     
-16    16     
-32    80     
80     64     
32     48     
-32    -48    
224    48     
96     64     
32     -16    
16     -304   
32     32     
0      48     
80     64     
-32    -48    
176    64     
-48    -80    
208    96     
-192   80     
176    -16    
-64    16     
304    352    
-336   128    
400    -48    
-96    0      
304    -448   
0      48     
112    32     
256    64     
64     -224   
64     160    
0      64     
64     32     
80     112    
-288   -16    
112    -128   
160    160    
-16    0      
160    -64    
400    144    
-256   -80    
-48    -208   
-48    -336   
224    192    
-256   -336   
304    -176   
-256   176    
32     16     
432    128    
-272   -48    
-32    -256   
240    -48    
416    -144   
-16    64     
-48    32     
336    -80    
96     128    
-64    -688   
80     80     
-32    208    
0      304    
320    -208   
-144   -64    
-48    96     
0      -128   
16     -160   
288    384    
-32    240    
80     -80    
160    304    
176    -176   
112    224    
-128   -464   
192    -160   
-192   -1328  
528    -32    
-32    256    
144    -80    
-224   -144   
96     160    
-112   0      
176    -32    
80     128    
144    -496   
-48    80     
400    -208   
-112   176    
128    -48    
224    240    
-176   -560   
-96    -240   
64     64     
0      240    
64     16     
208    -560   
192    480    
64     0      
32     64     
-160   704    
560    736    
288    688    
176    96     
-112   128    
-48    -48    
-288   -304   
192    -208   
144    64     
-32    48     
16     64     
352    144    
80     288    
-288   -304   
-64    -160   
64     -160   
192    32     
-64    -96    
192    -80    
-16    -176   
-16    32     
80     80     
32     80     
64     0      
16     -32    
-144   64     
0      32     
0      -112   
240    0      
-96    16     
96     -80    
16     32     
48     160    
240    336    
-32    -16    
112    0      
32     128    
32     -192   
-32    0      
96     -656   
-48    0      
-224   -48    
240    -336   
0      -64    
64     -608   
176    32     
-128   -1712  
496    -32    
0      256    
112    0      
48     -176   
48     -16    
272    -48    
-208   224    
32     -160   
272    -16    
-32    256    
-144   48     
80     -128   
-16    -464   
16     -112   
-48    -992   
112    -16    
80     -208   
-16    -16    
64     -352   
128    -80    
112    80     
-48    32     
0      48     
160    64     
-240   16     
48     64     
48     -16    
-16    -80    
224    -48    
0      96     
-16    -96    
144    -368   
256    0      
-176   -80    
96     176    
48     -80    
32     -16    
320    -160   
-16    -432   
-368   -400   
-16    -320   
-1536  -144   
256    -128   
80     96     
80     -64    
192    32     
-32    -96    
80     -32    
192    32     
176    192    
-96    112    
32     0      
-80    48     
304    -32    
-144   -16    
112    32     
-128   -128   
176    -16    
-48    64     
176    224    
-64    208    
32     -240   
96     -128   
80     -1248  
112    256    
64     0      
-32    -288   
-192   -144   
224    -96    
-304   64     
240    80     
-288   -80    
64     -16    
-2048  -160   
224    240    
-112   400    
-32    368    
464    128    
0      -656   
-240   -288   
-128   -432   
256    112    
160    288    
144    288    
96     80     
-16    -480   
-80    -288   
272    -304   
-224   -144   
192    80     
176    128    
80     -384   
-32    240    
208    -400   
-208   416    
112    -96    
-96    -240   
528    64     
-320   336    
-752   224    
-144   -144   
-288   432    
288    144    
-240   -16    
368    -704   
208    -304   
592    272    
-240   192    
32     -32    
-256   16     
-16    -288   
48     -192   
-128   176    
128    -16    
-384   -32    
448    32     
32     96     
208    96     
-288   208    
-288   -640   
-96    144    
256    336    
176    -272   
-32    64     
80     -288   
-208   144    
240    368    
-336   48     
160    -192   
432    576    
80     32     
-480   -512   
16     -64    
48     352    
144    -80    
96     -32    
-112   -128   
-64    304    
-640   -320   
-576   -16    
-32    16     
-1328  32     
48     -80    
240    224    
-80    256    
-16    -432   
-224   112    
48     -272   
-32    -352   
-496   192    
48     -272   
-304   -224   
80     240    
16     256    
-144   -400   
352    160    
-224   192    
48     64     
-208   96     
-384   -240   
-96    64     
-32    128    
16     -160   
-16    208    
-80    -80    
-48    48     
-144   288    
-128   176    
-96    -128   
-32    -112   
112    -64    
-352   16     
-96    0      
-160   -32    
80     16     
-912   16     
144    160    
-112   224    
176    96     
-160   128    
64     224    
-112   -96    
0      -64    
48     -32    
96     -80    
0      -32    
-288   -112   
-48    -208   
-96    -32    
144    0      
-560   16     
-96    -48    
-1040  -224   
112    64     
32     112    
0      96     
144    32     
-208   0      
16     48     
464    608    
-592   256    
-80    -208   
96     64     
48     16     
-128   -48    
240    16     
176    128    
-912   304    
-16    80     
-128   -96    
128    160    
64     112    
-16    0      
-64    -32    
32     48     
80     16     
32     0      
-32    64     
-272   -80    
144    -32    
-272   128    
80     128    
-832   -48    
-144   16     
128    0      
-80    -16    
240    144    
64     96     
48     -16    
-144   -32    
128    32     
-288   -16    
-48    32     
-320   -32    
-48    0      
-240   16     
160    -16    
-512   -64    
-32    80     
48     -112   
160    80     
-64    16     
0      32     
16     0      
-144   -64    
-64    -32    
-16    80     
-16    48     
64     64     
-32    0      
112    32     
192    96     
-384   -96    
16     -16    
-48    32     
-16    16     
192    64     
-16    32     
16     0      
48     96     
-80    96     
80     -16    
96     32     
-80    32     
256    128    
-304   -48    
112    80     
-256   -112   
112    -96    
112    208    
64     48     
-16    16     
-112   -16    
-112   -32    
80     -256   
-144   -64    
80     48     
80     48     
-272   -320   
32     -96    
-224   -16    
224    96     
0      -64    
80     -16    
32     48     
80     80     
0      0      
0      48     
320    224    
160    80     
32     -32    
16     -16    
144    192    
-128   160    
384    208    
160    80     
-192   16     
192    -192   
16     -400   
192    48     
144    400    
-80    288    
32     80     
-368   -336   
80     608    
-256   432    
112    -320   
-48    -32    
-96    -32    
128    144    
-64    224    
-128   -144   
272    80     
-112   -144   
224    112    
48     192    
16     -128   
-64    192    
144    -160   
64     320    
-256   -416   
-256   656    
304    -592   
-80    -864   
-288   656    
208    -384   
-272   848    
64     -640   
-256   -816   
160    -80    
0      688    
368    256    
-16    -192   
48     16     
-112   -304   
-48    160    
208    16     
32     96     
-64    96     
80     16     
16     80     
48     256    
240    128    
192    16     
-64    112    
-80    -32    
-48    -32    
48     -32    
192    -16    
-240   0      
288    16     
0      80     
-64    16     
-368   16     
336    16     
160    96     
112    -160   
64     48     
-16    16     
-128   0      
-16    16     
48     80     
160    176    
112    128    
0      16     
464    64     
-224   80     
-80    -48    
-304   64     
192    32     
176    64     
16     -432   
16     32     
48     16     
-64    64     
64     80     
-16    96     
160    80     
320    96     
-64    32     
48     -176   
80     0      
-128   112    
0      240    
288    80     
-64    16     
224    -176   
80     176    
-80    -80    
48     -16    
96     32     
64     32     
64     0      
144    -32    
80     -16    
-16    64     
-32    -48    
480    464    
-416   368    
-144   -256   
448    48     
112    -176   
64     112    
80     0      
96     64     
80     -144   
-144   -160   
-16    -288   
144    160    
-176   128    
320    0      
-32    0      
32     192    
-160   80     
16     -112   
96     -32    
-48    -224   
288    64     
64     -704   
240    256    
-128   48     
96     144    
16     64     
160    320    
48     80     
-32    -160   
80     16     
96     160    
224    128    
-16    -80    
64     -16    
224    -208   
-32    64     
-96    -64    
112    80     
-48    -48    
-16    -80    
-32    -32    
64     -32    
-32    -16    
32     96     
128    -160   
64     -112   
-16    -128   
-64    -144   
176    -160   
16     -112   
80     -48    
0      -448   
-16    -16    
32     -176   
128    48     
-64    -32    
-64    -64    
-64    -112   
80     -48    
-96    128    
48     368    
80     272    
-48    -144   
64     -32    
128    -64    
-96    -752   
448    336    
-16    320    
160    -976   
368    336    
160    208    
80     272    
-128   -16    
-144   64     
48     -528   
208    0      
48     176    
208    -128   
80     -16    
-96    352    
-16    288    
-32    -336   
336    320    
0      -208   
-304   80     
272    -400   
-16    448    
-16    -160   
320    -304   
0      -208   
240    144    
96     -816   
-16    -48    
-32    -304   
272    176    
192    528    
-336   -560   
-32    -192   
-144   80     
320    -32    
160    -32    
-16    -576   
288    -16    
-2624  32     
48     768    
144    -448   
32     -848   
-288   416    
-16    -368   
-112   -32    
-32    48     
112    -80    
208    -16    
96     96     
208    -192   
-160   -144   
176    -144   
64     -80    
-32    464    
-208   -16    
80     -288   
160    -32    
80     112    
176    -272   
-112   -256   
224    -320   
-16    32     
96     -48    
208    0      
128    -64    
-112   0      
-160   -48    
80     -96    
-192   0      
160    32     
80     -16    
224    -96    
64     16     
208    -176   
-96    -48    
48     -32    
-192   64     
256    -112   
-32    64     
80     -80    
256    96     
-240   -80    
48     -48    
-224   32     
0      -192   
96     -16    
112    64     
64     32     
224    0      
-128   -112   
128    -224   
0      0      
64     96     
16     112    
224    48     
32     -48    
-112   0      
128    -96    
-144   -240   
16     -160   
0      96     
112    0      
-128   64     
-80    -96    
400    112    
-96    -384   
32     -32    
272    -224   
48     64     
-32    32     
96     80     
-320   32     
0      16     
-48    -80    
336    -80    
-16    64     
128    -80    
-688   48     
112    0      
-144   -96    
256    -256   
-32    48     
160    -192   
0      -80    
-112   0      
-160   -320   
-240   -48    
96     64     
-144   64     
80     -16    
-384   -224   
112    32     
64     -32    
144    16     
416    320    
-176   80     
96     16     
288    -144   
112    -128   
0      48     
272    144    
-256   -48    
240    -48    
-448   32     
32     96     
-400   64     
64     -48    
192    48     
208    -16    
96     64     
160    -112   
-256   64     
48     -224   
128    32     
-224   -288   
-96    -128   
-176   16     
144    -32    
32     16     
96     -16    
32     0      
112    -128   
-240   -144   
-176   16     
-32    64     
-720   -112   
96     128    
-32    -64    
-240   0      
0      32     
-272   -64    
-272   -32    
0      16     
128    80     
416    96     
-96    48     
256    32     
-32    80     
-304   -192   
192    16     
-144   -48    
240    80     
48     0      
-192   -16    
32     0      
-480   64     
-16    64     
-720   -96    
64     -64    
192    0      
-80    32     
160    -48    
112    64     
-16    -32    
160    192    
48     16     
-224   -32    
-80    16     
-240   -64    
-16    16     
-192   48     
128    80     
-832   -64    
-32    48     
-2896  -16    
-80    16     
-256   -112   
96     80     
-80    -48    
304    224    
-224   128    
64     48     
-96    48     
16     -32    
-48    -272   
0      0      
-64    48     
-192   -128   
-192   176    
-64    128    
48     -96    
-160   -208   
112    384    
-320   192    
-16    -32    
-128   -320   
48     -32    
160    624    
64     -128   
192    -960   
-224   640    
-480   176    
-544   -496   
16     32     
-336   80     
32     -16    
-2512  240    
176    -384   
-112   304    
272    -48    
-240   -336   
160    -240   
-176   96     
128    512    
-560   -400   
-368   -304   
96     -640   
-112   -208   
80     -144   
-416   32     
160    448    
-1776  -80    
-128   176    
-208   -176   
-160   -304   
288    -464   
-64    -272   
80     -112   
352    16     
-304   608    
-128   -48    
96     -16    
-96    -128   
-96    -128   
-160   64     
-128   32     
-144   32     
224    112    
-48    176    
-144   -128   
-128   -128   
-16    -128   
96     64     
-224   -48    
336    16     
-16    48     
96     80     
-112   48     
160    -112   
-80    -112   
-64    32     
64     -112   
-352   -32    
112    48     
112    64     
-80    80     
-176   -48    
336    0      
-112   64     
-32    -128   
-464   -240   
-240   48     
-400   32     
112    32     
-160   16     
96     16     
-560   -48    
160    0      
-32    80     
80     48     
112    0      
112    48     
0      176    
224    336    
-240   80     
-64    -80    
-48    16     
80     80     
144    48     
-112   -144   
64     -48    
-80    -80    
-48    -32    
192    160    
-16    80     
64     -32    
-32    -32    
64     96     
-192   48     
96     256    
80     32     
112    16     
-256   -80    
160    32     
-128   112    
64     -32    
144    -64    
-80    -112   
128    -16    
32     64     
-48    48     
96     112    
-192   -112   
240    -128   
224    80     
-16    0      
80     -32    
-128   -224   
-80    -272   
-112   -64    
32     160    
160    192    
112    160    
112    -32    
112    -128   
96     -48    
-64    -96    
192    224    
96     320    
0      208    
-32    272    
16     96     
-160   -96    
224    -176   
16     -48    
48     0      
32     48     
256    304    
-272   80     
-176   -272   
224    160    
48     240    
-80    256    
32     96     
48     80     
-144   64     
224    80     
208    240    
112    352    
-32    -592   
-160   64     
160    -48    
-352   -944   
224    336    
48     176    
-208   96     
-112   -256   
80     272    
176    368    
-16    -96    
160    -32    
128    176    
-192   96     
16     -912   
48     352    
-176   -528   
-32    0      
112    432    
240    -112   
-48    160    
-64    64     
96     -80    
-32    304    
-80    -416   
64     128    
-32    224    
96     0      
160    96     
-224   -416   
224    -48    
16     -32    
160    80     
96     -112   
16     32     
112    208    
32     64     
0      -128   
-64    -96    
0      -32    
80     176    
-48    -112   
48     0      
80     -16    
192    -144   
112    64     
144    -496   
-32    64     
-96    160    
-48    176    
-48    96     
0      192    
-416   -864   
96     -576   
16     -64    
80     -128   
48     -336   
192    -96    
-32    48     
-112   -64    
272    208    
-240   -592   
-96    -208   
-32    -976   
-128   64     
80     -96    
160    -80    
160    -272   
192    0      
-64    -48    
448    48     
0      48     
64     64     
-80    -16    
-112   -80    
448    112    
-144   -96    
400    112    
-160   -96    
160    144    
-208   -16    
64     128    
32     -16    
128    144    
-48    32     
176    80     
64     0      
144    -32    
-32    64     
-112   -48    
288    112    
80     32     
176    -16    
-32    -112   
-48    48     
160    -64    
208    48     
-112   -32    
32     96     
-32    16     
240    16     
48     80     
96     -32    
32     -32    
112    -112   
16     80     
112    16     
128    48     
80     -208   
96     -16    
-32    -112   
-16    64     
64     112    
16     32     
64     -16    
224    128    
-48    32     
16     -144   
112    48     
-144   112    
352    256    
144    -80    
-272   16     
64     -64    
0      -128   
160    32     
-112   80     
480    144    
128    -32    
-256   -64    
16     -192   
0      48     
128    -112   
-80    192    
-16    -80    
336    32     
64     -112   
-32    48     
144    -32    
528    224    
-224   80     
-192   -432   
-16    48     
0      -816   
224    -368   
112    64     
160    32     
192    -16    
176    -208   
-80    16     
80     160    
128    -32    
32     0      
144    -272   
-96    -192   
16     112    
160    -304   
144    80     
112    32     
112    -304   
48     32     
-16    -512   
128    16     
-48    -576   
128    -160   
144    -288   
224    -192   
96     16     
96     -64    
288    -32    
0      32     
240    -48    
-144   -272   
-304   64     
-192   -112   
-32    -96    
96     48     
192    -16    
96     16     
16     -48    
176    -512   
176    -48    
32     -560   
192    144    
80     96     
-80    16     
-80    -144   
16     16     
-224   -96    
96     -96    
-112   -64    
80     96     
-96    16     
64     160    
160    80     
-32    -80    
16     -32    
32     96     
112    128    
112    32     
96     48     
-64    -80    
192    -96    
112    48     
144    16     
-32    64     
48     -32    
96     -32    
64     -64    
0      16     
208    -176   
64     -16    
144    -80    
-32    -144   
112    -112   
32     32     
-144   -16    
224    -80    
-16    -48    
208    -48    
-320   0      
176    32     
-560   0      
80     -32    
-16    -32    
32     80     
80     272    
112    -224   
32     -48    
-80    -256   
80     -144   
32     112    
288    240    
-192   -192   
128    -176   
-160   32     
64     64     
0      16     
-16    160    
-256   -96    
-272   -48    
160    -64    
-32    336    
256    144    
48     -176   
432    368    
-48    -384   
-32    -416   
112    448    
32     -288   
-336   64     
176    -288   
-304   -96    
432    224    
-400   480    
528    -384   
-128   -576   
16     -144   
128    -48    
160    -48    
-256   80     
-64    400    
144    48     
-192   -16    
128    -16    
-288   -64    
-48    -288   
416    -512   
32     -128   
32     32     
368    32     
-80    144    
-16    -208   
32     192    
-144   0      
48     64     
32     48     
272    304    
-384   128    
0      48     
-160   48     
96     384    
-304   0      
480    -80    
-192   96     
-576   -64    
64     48     
-1104  -240   
272    -384   
48     288    
-1440  256    
80     -112   
-1216  304    
-48    48     
64     -128   
96     -160   
32     -240   
-32    64     
-352   16     
144    160    
-96    0      
-96    48     
-272   -320   
-16    -96    
-32    32     
-128   80     
-224   32     
-432   32     
16     -32    
-224   -64    
96     16     
-80    0      
-32    0      
-576   -64    
-144   144    
-112   -80    
160    16     
16     -160   
0      544    
176    272    
288    -176   
304    112    
-576   16     
-144   32     
-208   -16    
-16    128    
-928   272    
-352   208    
-176   -64    
192    -16    
64     -128   
112    -16    
-64    48     
-144   0      
-96    48     
-32    -16    
32     160    
-48    -32    
208    192    
80     128    
-32    64     
-1904  0      
112    -48    
-48    -16    
-32    32     
-48    -128   
32     -48    
288    128    
-496   -96    
-128   -48    
-128   256    
224    96     
-112   16     
64     -80    
-128   -80    
-112   48     
-656   -128   
240    16     
16     -16    
16     -32    
0      -144   
48     16     
-240   96     
-96    64     
16     0      
176    112    
-32    208    
288    240    
-208   144    
-352   80     
96     432    
-96    224    
64     64     
-432   208    
240    192    
-16    96     
-240   160    
32     -80    
32     -48    
80     320    
0      96     
-64    -176   
-288   -304   
32     96     
-80    0      
-96    96     
-96    -192   
192    256    
-848   -144   
48     64     
32     -240   
176    144    
128    48     
0      128    
-128   48     
-112   -64    
-112   128    
-128   96     
32     -192   
-128   0      
368    64     
-640   112    
112    0      
-512   -512   
192    112    
80     176    
-176   -112   
-64    144    
96     224    
-32    -16    
128    -64    
144    48     
16     0      
96     160    
0      -16    
-64    -32    
-128   -112   
128    -16    
0      48     
-32    0      
176    48     
-80    0      
96     128    
80     32     
64     80     
48     64     
-16    16     
-16    48     
-80    -16    
-96    -16    
144    80     
-192   0      
160    64     
16     64     
160    96     
0      0      
64     0      
64     16     
-128   48     
144    80     
-192   -16    
-224   -80    
-32    16     
48     64     
192    32     
-112   16     
48     -16    
-64    -80    
64     128    
-80    0      
80     144    
-64    -32    
288    80     
-16    176    
192    -32    
64     -96    
32     32     
80     240    
144    32     
-144   -96    
192    128    
-144   16     
0      -32    
224    32     
80     128    
-96    192    
-64    -48    
112    -240   
176    80     
-48    48     
192    -32    
-32    32     
144    48     
16     64     
0      64     
-224   64     
64     -80    
480    -64    
-128   16     
256    112    
128    0      
-48    80     
16     64     
-224   48     
48     32     
112    80     
128    64     
-96    112    
272    160    
-80    -32    
64     -32    
64     -32    
128    128    
256    176    
-176   64     
176    -16    
48     48     
16     -16    
208    64     
-96    96     
208    0      
-192   -96    
64     64     
48     96     
112    -16    
48     -80    
192    96     
-144   80     
32     48     
144    48     
32     64     
112    -48    
96     80     
-32    80     
-80    48     
-96    32     
48     -192   
-48    -240   
224    144    
0      -32    
48     -288   
80     -48    
-192   -80    
160    64     
-144   64     
144    -96    
240    64     
-16    96     
128    208    
176    128    
-160   64     
192    224    
-272   32     
-80    -16    
64     -32    
112    -256   
32     -64    
208    -656   
80     32     
224    -48    
-16    -48    
-48    32     
128    272    
-48    -96    
96     -80    
0      32     
0      -144   
80     160    
-48    96     
16     -80    
80     -48    
16     48     
144    80     
192    64     
32     16     
-32    -64    
48     32     
96     80     
96     32     
-160   32     
-16    -304   
304    240    
160    368    
432    -160   
16     48     
192    160    
112    144    
-368   -320   
-48    -112   
304    -512   
-272   -400   
272    160    
192    96     
32     -64    
64     128    
16     -48    
304    96     
80     48     
-64    0      
112    112    
256    448    
-176   -304   
192    -384   
288    288    
-16    -384   
32     48     
-144   -448   
96     -32    
-112   224    
336    176    
144    32     
64     -176   
192    48     
256    432    
-448   -1008  
80     -368   
128    -128   
288    -160   
96     384    
80     -384   
112    368    
80     288    
224    -128   
80     208    
96     -64    
16     -32    
160    80     
16     0      
16     176    
112    176    
128    -16    
-144   -384   
272    -48    
80     16     
32     32     
96     -400   
-48    208    
64     176    
48     112    
144    240    
-16    -96    
240    176    
-144   304    
144    -496   
112    80     
272    128    
-32    -144   
48     -176   
-80    -16    
80     -400   
416    -128   
-144   288    
48     128    
-48    -112   
112    -512   
128    144    
272    32     
32     -960   
144    -80    
16     -368   
272    -240   
-112   480    
176    96     
80     64     
112    192    
128    -64    
-208   -16    
192    -112   
-256   -96    
-96    -32    
0      0      
208    32     
-112   -336   
144    -32    
32     -368   
272    -32    
-48    -496   
288    240    
-176   -64    
352    -208   
96     -80    
-48    64     
-80    -256   
176    -160   
112    192    
-128   384    
48     16     
-96    -208   
352    -160   
64     -16    
256    -176   
-32    -272   
64     112    
-160   -192   
192    -192   
80     -288   
-16    96     
128    -144   
176    0      
-32    80     
16     80     
-528   48     
-448   -16    
128    -80    
32     -48    
160    -128   
224    -144   
-16    -160   
80     -592   
48     -352   
-16    -80    
-80    192    
16     -224   
48     -128   
-384   -176   
112    0      
-48    0      
48     80     
176    -32    
160    -32    
64     -112   
-32    -320   
-656   -64    
-16    -192   
-48    48     
96     -160   
-48    0      
-192   -64    
-176   32     
-64    -176   
160    112    
-112   16     
96     32     
-2048  -80    
-48    -16    
-160   -80    
192    -192   
-160   128    
144    -96    
80     -128   
192    -208   
-16    80     
-176   48     
80     -160   
-288   16     
192    -144   
272    32     
48     16     
-160   0      
192    -80    
336    -80    
160    -96    
0      80     
-48    -192   
-144   48     
112    176    
208    -416   
144    32     
176    -16    
-16    -32    
-48    -32    
-128   -128   
240    -32    
-368   48     
0      -48    
80     -336   
-64    -512   
32     -16    
-48    -288   
80     112    
-288   416    
128    192    
-176   144    
208    176    
-224   -16    
96     -160   
-64    -176   
176    -48    
-80    96     
-64    -96    
96     -368   
224    -16    
272    192    
48     -112   
96     -16    
112    96     
112    240    
-304   -400   
32     -16    
0      240    
304    688    
-288   -400   
208    -176   
272    448    
-32    -192   
-32    0      
-448   -192   
240    32     
-128   -64    
-352   112    
-400   -192   
-1120  -160   
-32    16     
-912   -64    
32     64     
224    144    
240    304    
-96    432    
-32    192    
-720   -256   
128    48     
112    -144   
64     -48    
-128   -128   
-352   32     
-256   -16    
0      16     
-144   -48    
-160   16     
32     16     
160    80     
-240   -64    
-224   -32    
-32    32     
-128   -16    
96     48     
48     -48    
-16    16     
0      64     
-112   80     
-160   -48    
0      48     
192    112    
-256   -16    
80     -16    
-560   -32    
-80    -336   
-208   -192   
32     192    
-16    -64    
144    64     
-96    -128   
-64    32     
128    48     
-144   0      
176    0      
-96    48     
-48    48     
16     -32    
-112   32     
-432   -16    
0      64     
-400   -32    
176    48     
-128   0      
160    64     
-176   -48    
-80    48     
0      64     
16     -112   
-32    -32    
-144   112    
-96    80     
-32    48     
-64    64     
32     64     
-112   0      
-240   0      
32     96     
-48    -96    
64     48     
32     112    
0      -16    
0      -48    
720    800    
-1072  240    
-160   -144   
16     112    
-432   -144   
448    80     
256    288    
-32    336    
-1392  -192   
-272   -304   
416    32     
528    400    
-528   16     
-32    -80    
304    288    
-736   -64    
224    -32    
192    -48    
128    48     
-48    0      
144    80     
-416   -48    
-16    80     
-176   -64    
32     96     
-880   -128   
64     64     
32     112    
0      48     
-208   80     
240    48     
-144   -32    
96     96     
-48    -16    
32     0      
-96    -16    
-144   -16    
384    224    
-256   64     
112    0      
-816   -32    
-144   -224   
0      -176   
-160   112    
-64    -16    
336    64     
-32    80     
-112   0      
160    128    
-304   0      
288    64     
-240   80     
48     80     
-128   -32    
160    112    
-16    -32    
-80    -16    
256    48     
-112   0      
32     -48    
272    288    
-288   112    
-64    -160   
64     -96    
-112   48     
80     16     
-272   -80    
96     96     
-400   16     
-112   -80    
80     0      
112    -208   
256    128    
32     0      
128    -112   
-208   336    
16     -192   
-80    112    
320    -16    
32     160    
48     16     
0      96     
112    -64    
-32    96     
0      272    
48     -192   
-16    32     
32     64     
16     32     
32     32     
-96    -160   
128    112    
-16    128    
-112   -48    
224    528    
-224   704    
16     -512   
272    96     
80     -64    
48     176    
-112   -64    
-48    -32    
-80    -112   
-128   192    
-128   0      
0      240    
-128   -112   
80     0      
-64    32     
-48    -368   
160    -16    
112    416    
-240   96     
96     -144   
96     272    
144    -128   
48     -48    
96     208    
-16    -176   
16     32     
160    112    
64     -48    
-16    96     
80     96     
352    544    
-272   576    
64     -1040  
240    96     
-32    544    
64     -272   
16     -80    
-16    -128   
-80    -48    
-48    144    
0      -432   
464    384    
-192   576    
96     -368   
304    -352   
32     544    
176    96     
-176   -256   
96     -768   
-224   -16    
192    368    
-112   240    
16     -16    
96     -32    
16     -16    
64     -128   
80     -128   
0      224    
32     96     
112    144    
176    512    
-16    432    
0      176    
96     -48    
224    448    
288    192    
-32    48     
32     32     
64     -224   
64     128    
-16    -48    
48     -128   
32     32     
-80    -80    
208    96     
-16    0      
-1184  80     
288    336    
-128   -144   
0      320    
192    -48    
0      -80    
96     -80    
-80    -240   
16     -48    
-64    -240   
240    48     
-112   -16    
-272   -528   
432    -208   
240    192    
-208   592    
-32    -192   
-64    -320   
160    -128   
112    -816   
256    544    
-192   0      
384    464    
-320   384    
0      240    
-64    -528   
240    -160   
0      -208   
0      160    
64     -80    
-16    -608   
400    0      
96     -208   
64     -304   
96     -448   
-128   128    
160    560    
-368   288    
-80    -32    
-32    -112   
-160   -64    
112    48     
-16    16     
272    -16    
-192   128    
16     -96    
144    16     
-48    -16    
224    160    
32     16     
-208   -224   
32     -592   
48     384    
32     -16    
-64    -32    
208    -160   
32     128    
304    192    
-304   48     
-96    -544   
320    -240   
-32    352    
144    -368   
-96    -544   
64     -640   
112    -96    
-112   -128   
-64    96     
288    -144   
-208   -112   
384    -208   
-144   176    
96     160    
336    176    
336    16     
64     -128   
64     48     
-64    -272   
-80    -96    
64     -432   
192    -128   
240    16     
128    304    
-80    192    
-48    -64    
272    -352   
240    16     
208    -16    
0      -16    
-32    32     
16     -96    
224    208    
-80    32     
16     -48    
112    -144   
192    144    
176    -320   
96     -160   
32     112    
496    96     
-160   208    
160    112    
208    -16    
-144   -32    
32     -768   
144    -128   
80     -32    
224    112    
80     208    
160    160    
-144   208    
-64    -240   
176    -288   
96     -96    
112    -208   
16     -160   
-896   -32    
32     -112   
176    -288   
-80    -208   
96     -144   
224    128    
0      -96    
128    -1328  
128    16     
48     -224   
-16    80     
80     -112   
96     288    
64     -96    
64     -256   
-32    -432   
128    -64    
96     160    
144    144    
-48    32     
-80    -144   
288    80     
160    -656   
272    -112   
256    -96    
160    -48    
48     -304   
112    32     
32     -96    
16     -96    
-272   32     
-96    -144   
-1824  -48    
112    -64    
16     -16    
112    -112   
160    -48    
48     -848   
-192   -160   
-96    -32    
-16    -32    
208    -96    
-16    80     
-192   -80    
192    96     
-128   176    
0      -16    
-576   -144   
176    176    
-32    -64    
96     -64    
208    -16    
96     -112   
16     48     
-64    -352   
-48    -80    
384    96     
16     16     
64     0      
80     -32    
112    -48    
208    -16    
-256   -64    
16     -16    
-560   64     
128    -16    
-48    0      
32     -272   
96     -48    
80     -96    
0      64     
96     64     
144    16     
80     -32    
96     -48    
-80    32     
16     -64    
-96    16     
96     -64    
-512   16     
96     -16    
-208   -80    
80     -352   
-32    32     
144    -320   
-16    -80    
272    16     
48     -48    
-80    48     
176    96     
-656   -48    
112    -32    
-176   48     
48     16     
-416   48     
80     -80    
80     96     
352    -112   
128    32     
80     -64    
160    112    
-336   -32    
208    -32    
-448   48     
160    -32    
-240   0      
80     -32    
-48    -112   
160    -48    
-224   48     
320    -64    
-160   192    
-16    -64    
-288   -80    
144    -272   
288    -64    
-368   -112   
512    32     
-336   48     
112    208    
-736   -112   
-176   -224   
128    80     
464    32     
-48    -16    
352    -16    
-144   -80    
-368   -128   
-96    -32    
-1312  -128   
80     144    
-320   96     
-304   -80    
160    32     
-544   32     
-192   0      
48     32     
-32    16     
48     0      
-256   96     
-1104  -64    
32     96     
-704   -144   
-48    32     
64     16     
-352   64     
64     -16    
-96    -32    
16     128    
-432   0      
-128   -16    
112    16     
-48    16     
288    48     
0      32     
0      -272   
32     -384   
-80    64     
96     368    
-192   -304   
-16    32     
-48    304    
-384   -416   
64     96     
-288   48     
-240   -208   
-32    336    
-176   -208   
-144   48     
176    32     
-64    -64    
-80    -16    
240    0      
128    -48    
-32    -80    
-384   -80    
208    -80    
-48    16     
32     16     
-32    128    
16     -16    
-448   240    
-80    80     
416    304    
-80    608    
-48    -528   
176    256    
320    368    
-352   128    
-208   272    
-16    -64    
144    288    
256    32     
-336   112    
-208   160    
96     -16    
-496   352    
144    112    
-1280  176    
16     96     
-16    -16    
384    368    
-16    208    
-208   48     
-112   -16    
48     -16    
-80    -368   
-112   -128   
-160   32     
-272   80     
224    48     
-32    112    
16     112    
-736   32     
224    304    
80     -96    
64     -80    
-80    384    
-32    352    
-48    112    
-16    208    
352    304    
-96    528    
-64    144    
160    -208   
112    192    
192    48     
176    128    
-480   64     
96     160    
-240   -96    
-16    -48    
144    96     
-80    80     
128    32     
80     80     
336    432    
-144   288    
-80    80     
16     -16    
112    176    
-192   144    
-128   112    
-352   -192   
128    -48    
48     16     
-96    0      
96     48     
-160   64     
112    48     
0      64     
-96    64     
-64    -240   
-48    -208   
-240   -288   
80     -208   
-96    16     
192    16     
-32    176    
-144   96     
0      112    
-64    288    
-16    96     
32     -96    
96     -96    
64     -144   
64     16     
64     80     
64     0      
-112   192    
-96    192    
-48    144    
16     -16    
-224   -32    
80     -48    
-128   48     
48     64     
240    96     
-64    144    
80     128    
-144   80     
160    32     
-192   432    
336    48     
-208   -112   
48     -208   
-112   80     
96     16     
-144   192    
112    384    
96     -256   
176    0      
-144   0      
96     64     
208    336    
96     608    
128    544    
112    0      
160    208    
-192   -240   
16     400    
-112   -16    
-32    -48    
400    352    
-48    512    
-240   48     
-64    0      
112    288    
-16    -16    
80     160    
-128   -336   
-208   -208   
-224   -352   
416    -784   
368    -160   
-64    32     
336    -80    
-272   96     
-96    16     
-32    288    
192    640    
128    528    
400    272    
416    400    
240    -128   
-176   192    
-128   -16    
-48    -96    
16     96     
16     -64    
-32    208    
160    -272   
208    192    
128    -48    
-32    0      
-32    -80    
208    48     
32     416    
112    -64    
112    -176   
16     -112   
-352   608    
496    432    
176    352    
-224   -48    
-96    160    
432    496    
256    -1248  
-160   160    
64     -256   
-192   32     
608    352    
-352   768    
128    112    
160    176    
32     480    
-176   368    
16     272    
32     144    
320    480    
-32    560    
32     240    
96     -688   
160    64     
-192   -80    
32     160    
160    -128   
-96    -320   
128    32     
-176   112    
16     64     
320    272    
112    240    
-48    -16    
-176   -48    
16     416    
192    0      
-80    -848   
128    240    
48     -96    
176    384    
352    720    
-512   -144   
64     80     
32     -432   
-256   64     
128    -144   
-112   288    
224    -96    
160    96     
64     -80    
96     48     
48     -64    
-176   96     
32     -112   
-112   -64    
176    -96    
144    128    
240    304    
176    32     
192    -112   
-112   80     
-192   -16    
0      0      
80     48     
-16    -192   
64     -16    
32     -96    
64     -16    
176    -288   
64     96     
-16    -48    
64     112    
240    64     
80     64     
-208   -432   
-192   -400   
-272   80     
-128   112    
16     0      
144    -144   
112    0      
112    -352   
400    -64    
128    -16    
368    80     
96     -64    
80     96     
-128   -32    
80     128    
48     32     
-32    32     
-48    -32    
64     0      
160    48     
-128   -384   
-96    -176   
32     -64    
-176   96     
112    -112   
160    64     
160    128    
304    208    
-16    0      
-128   0      
48     112    
112    112    
-16    96     
-48    0      
128    32     
400    -16    
-208   48     
112    -96    
48     -32    
176    16     
240    48     
160    -544   
80     112    
-320   -48    
80     -16    
-16    -48    
112    16     
256    -16    
128    -64    
144    64     
128    -128   
288    128    
-96    -160   
32     -16    
48     -112   
80     80     
160    48     
16     -64    
64     0      
32     -176   
272    128    
-640   -64    
128    -160   
80     16     
16     -48    
96     -64    
-16    128    
96     -128   
16     0      
304    64     
-80    -160   
176    32     
272    144    
-64    32     
160    -400   
-32    16     
-112   -32    
128    112    
0      -16    
288    -96    
-224   -144   
320    -80    
64     96     
336    -80    
-192   48     
-48    -80    
96     -160   
144    0      
-192   0      
160    48     
0      -160   
-480   16     
0      -128   
224    -48    
-96    -336   
-208   -576   
64     -592   
144    112    
96     -800   
16     0      
-64    -128   
224    32     
224    0      
48     96     
352    -80    
432    -48    
160    -96    
-96    -320   
240    64     
-304   -128   
-16    -256   
-16    96     
-16    -32    
192    48     
-32    112    
208    -240   
-144   240    
0      -16    
32     -80    
-48    -128   
112    144    
-64    -32    
48     -192   
-128   -48    
-16    64     
224    -80    
112    -336   
272    208    
-96    -368   
64     32     
128    -80    
32     112    
-176   -80    
240    16     
-112   -64    
-144   -96    
128    -912   
-368   464    
-96    -112   
160    -384   
-432   576    
0      -160   
-384   -976   
144    48     
208    352    
-48    -448   
64     -48    
128    -464   
352    256    
-208   400    
-16    320    
-32    -64    
80     176    
-160   48     
0      176    
-816   -64    
16     -96    
176    112    
-48    -16    
-64    -80    
-32    -176   
208    160    
-16    96     
368    208    
-176   128    
128    0      
-192   -16    
80     -16    
-240   -144   
-48    32     
160    80     
-160   64     
112    176    
32     48     
144    0      
208    -288   
112    64     
-176   -32    
112    112    
-544   48     
16     -48    
-400   -112   
208    -32    
-96    48     
224    80     
-272   64     
-96    -144   
-32    -16    
80     -256   
112    112    
80     -176   
96     -32    
-128   -80    
48     0      
-208   -240   
96     -144   
-80    -128   
64     -32    
-96    -48    
192    -112   
-208   144    
48     0      
144    32     
-992   32     
-16    0      
192    272    
-944   320    
-208   128    
-2112  112    
112    -112   
96     80     
-176   112    
80     -96    
-16    -112   
-576   -48    
32     128    
-672   0      
224    96     
-496   -48    
176    80     
-144   -128   
-240   64     
-272   48     
-320   112    
16     64     
-1648  -32    
0      -16    
192    -112   
-272   -96    
-272   -64    
-16    48     
-112   -320   
96     16     
-112   -176   
-144   -16    
-48    -208   
0      -128   
0      176    
32     208    
-224   112    
-240   16     
64     48     
-784   16     
48     16     
-192   -176   
208    16     
-144   -48    
256    -16    
-272   -288   
-112   -64    
144    112    
48     64     
-48    64     
-176   -32    
-16    48     
-288   -144   
-32    0      
0      -16    
-128   -16    
48     -48    
64     80     
-64    -64    
192    272    
-176   272    
80     -144   
-112   -176   
-320   -416   
-144   -144   
-160   -320   
-160   64     
0      64     
-48    128    
-480   64     
224    176    
-416   -432   
256    -304   
432    256    
240    672    
64     800    
-272   336    
192    -560   
-160   32     
-176   -16    
0      -80    
-384   -288   
16     -752   
-96    -112   
-96    -800   
-48    -160   
-96    864    
-80    128    
192    -256   
176    -1008  
-240   208    
-240   -368   
48     80     
-144   672    
-16    -48    
-336   -192   
-192   0      
-208   192    
-96    -144   
32     160    
288    -320   
-80    -448   
240    464    
176    176    
288    112    
-512   144    
-80    -256   
16     -128   
48     176    
32     0      
-192   288    
256    96     
-112   176    
256    -96    
-432   384    
256    448    
-512   256    
-368   -480   
112    416    
-48    -64    
288    240    
256    208    
-96    32     
112    0      
32     -48    
-64    448    
144    144    
-96    -272   
-16    272    
-256   -352   
192    592    
-208   96     
64     144    
192    -32    
400    -64    
-448   -96    
336    96     
-48    416    
-80    -256   
192    304    
-16    32     
64     -16    
-48    96     
32     32     
-240   -64    
64     -80    
-144   128    
80     -80    
0      80     
48     32     
-176   -128   
160    128    
48     144    
272    256    
-224   -80    
-256   -352   
64     128    
-48    160    
16     -96    
-272   -112   
192    176    
-176   -160   
320    -336   
-144   416    
112    240    
96     -192   
0      -128   
0      48     
96     32     
-160   0      
-96    16     
32     64     
16     16     
224    432    
96     432    
176    160    
64     176    
-80    -48    
80     -160   
48     -96    
192    96     
-48    96     
112    64     
-240   64     
32     32     
-144   -208   
128    -32    
16     128    
-112   80     
-96    0      
112    240    
-64    64     
96     16     
112    80     
80     16     
48     -544   
-48    -112   
-240   192    
-128   112    
-32    -32    
16     -272   
-16    -160   
-32    224    
64     80     
-16    -160   
256    16     
0      0      
16     -32    
-96    96     
-144   -32    
-32    16     
32     32     
-80    48     
112    80     
-16    -112   
288    -64    
320    224    
-160   -16    
32     48     
80     48     
16     -144   
-32    32     
272    48     
96     0      
80     0      
160    112    
-64    -32    
-16    16     
-16    32     
128    96     
-192   -16    
112    32     
16     96     
-48    32     
112    96     
-48    -400   
128    64     
160    112    
-128   16     
48     -16    
-128   -32    
80     48     
160    32     
-96    64     
208    128    
-192   -80    
128    48     
32     48     
224    -32    
-64    64     
48     -832   
144    64     
144    128    
48     16     
48     112    
-48    0      
-16    -32    
144    80     
-16    -16    
176    80     
80     -64    
32     16     
144    112    
-48    -48    
176    368    
48     -128   
-48    48     
32     -32    
80     16     
32     32     
48     96     
-48    -208   
32     112    
64     -64    
32     -80    
128    -144   
64     -64    
192    96     
192    -176   
256    64     
32     -208   
-160   -80    
192    -592   
-128   0      
16     -112   
64     96     
-80    -80    
0      -32    
0      -16    
368    64     
-304   160    
240    -16    
192    -16    
144    80     
720    416    
112    -96    
-96    -272   
256    48     
-288   -32    
304    -16    
432    672    
112    -160   
192    0      
-176   320    
-96    48     
64     16     
-432   80     
240    -384   
-176   272    
80     64     
560    -800   
64     240    
80     -176   
176    -352   
-48    256    
80     112    
-80    0      
-16    128    
48     -224   
112    112    
64     272    
64     -304   
80     -80    
112    -320   
-144   96     
400    160    
-32    -224   
-64    -368   
32     -160   
-64    -224   
64     112    
-64    -112   
48     144    
-144   48     
176    0      
96     -352   
-48    -256   
80     48     
-32    0      
-48    288    
208    80     
256    96     
0      -32    
176    112    
160    96     
128    -48    
80     16     
-32    -416   
-112   -704   
80     -208   
144    -576   
224    16     
0      256    
160    -96    
80     0      
144    -64    
16     144    
128    -64    
128    -736   
-32    32     
0      -128   
-32    -16    
160    -112   
208    -368   
-240   0      
96     -32    
16     -16    
16     64     
192    64     
192    -752   
80     -496   
-128   -416   
64     -192   
32     -176   
64     64     
48     -32    
-32    -16    
128    -16    
176    -64    
-384   -160   
336    -96    
-16    112    
-112   0      
64     -16    
-16    32     
208    16     
224    304    
-112   176    
-16    80     
-176   112    
176    -64    
32     -80    
144    160    
96     176    
-96    96     
240    -48    
-160   -16    
-48    -64    
16     16     
192    -80    
-32    -144   
304    -512   
-352   -256   
-32    -416   
0      -16    
-272   0      
288    64     
-48    144    
32     -192   
-320   -96    
-32    -128   
-1088  -16    
48     -64    
96     -16    
16     -224   
160    -128   
96     -256   
-32    -128   
48     -192   
144    -64    
-32    80     
224    320    
-176   304    
32     64     
-256   -64    
80     -16    
-224   -112   
144    48     
-256   -160   
112    48     
208    272    
-112   -336   
-192   -64    
112    -848   
-144   -432   
-80    -208   
64     16     
96     16     
-16    -400   
96     144    
112    208    
-624   112    
208    64     
-640   32     
192    -32    
0      -48    
96     -192   
16     32     
96     -304   
192    -128   
-64    48     
240    16     
96     144    
48     -128   
-384   80     
192    -1008  
-208   368    
-16    144    
-16    -240   
32     224    
80     -96    
-16    112    
240    -208   
64     -960   
-64    0      
160    -96    
-64    -32    
48     128    
176    -32    
-32    80     
-272   16     
0      0      
96     -32    
-176   -240   
240    320    
-176   -240   
96     112    
-368   -144   
-32    96     
144    352    
160    144    
208    208    
-96    -80    
48     96     
-64    -368   
240    640    
208    512    
272    -496   
-80    80     
-992   256    
64     -480   
16     -208   
80     416    
96     -160   
-1152  -48    
48     224    
-2080  80     
-800   -848   
576    -1248  
144    0      
320    448    
352    32     
-176   560    
-784   256    
-464   -320   
-192   304    
-208   -32    
304    -272   
-32    -416   
144    -64    
-80    32     
-400   0      
-64    48     
-192   32     
144    80     
-16    96     
-208   -32    
-96    -96    
320    128    
-336   -64    
-16    -16    
-128   48     
-176   -16    
-96    16     
-208   32     
64     16     
-608   -128   
144    16     
-352   -16    
-144   96     
-2704  -400   
48     -416   
-144   -160   
144    -144   
0      112    
16     96     
-32    -48    
96     64     
-256   -32    
80     48     
-128   48     
128    -32    
-272   -128   
-48    -32    
-64    32     
-1760  16     
0      0      
-64    -48    
288    128    
-128   16     
32     48     
48     96     
-80    -32    
-32    -64    
32     16     
80     96     
-80    112    
-240   256    
128    80     
352    352    
-496   0      
96     16     
-32    -128   
208    -176   
-96    -80    
-128   64     
32     128    
-64    -32    
400    96     
-288   -64    
-96    240    
64     80     
176    368    
-176   48     
0      64     
128    160    
-112   0      
-336   -96    
96     -112   
-64    -32    
-160   160    
-64    80     
96     -128   
16     -96    
32     32     
-48    112    
-48    64     
-16    0      
-32    112    
-32    32     
-416   -80    
0      32     
-1120  -16    
608    672    
-576   496    
128    -64    
96     -224   
-96    -96    
-32    64     
208    192    
48     224    
32     0      
-96    -32    
-304   128    
-80    48     
-208   -80    
96     112    
-288   -16    
48     48     
96     -16    
-48    32     
-80    32     
-80    -64    
96     -48    
144    48     
16     80     
-192   32     
-112   0      
-128   -64    
32     16     
96     240    
-112   64     
-288   0      
144    96     
-144   -64    
-32    32     
-16    32     
0      32     
112    0      
-16    64     
224    80     
-32    64     
32     0      
-160   -32    
112    80     
-208   -32    
96     32     
48     48     
-48    0      
32     0      
64     16     
64     32     
-48    -16    
48     -48    
96     32     
64     16     
32     -48    
-48    16     
0      16     
-32    16     
-48    16     
32     64     
-16    32     
32     48     
32     32     
96     32     
128    16     
-32    16     
224    -16    
-144   -16    
96     16     
-32    16     
-96    80     
32     48     
96     80     
0      64     
-32    128    
96     112    
-80    48     
32     -144   
-32    144    
80     96     
-16    80     
-48    112    
32     496    
432    -64    
-80    304    
176    32     
-32    -240   
304    368    
-80    64     
80     -464   
80     576    
128    112    
80     -272   
-80    384    
-32    144    
-48    -176   
144    128    
-352   -160   
256    96     
176    -368   
144    -80    
-192   416    
128    -192   
-32    112    
-128   -80    
192    320    
112    -16    
144    -336   
304    256    
240    -176   
-400   -32    
464    176    
-656   320    
128    96     
-144   -144   
128    -112   
-16    -192   
80     -384   
-144   -176   
64     -176   
32     192    
192    208    
48     128    
144    32     
96     -16    
304    192    
-480   144    
16     -48    
-48    128    
-128   -160   
400    0      
80     -80    
176    -32    
-48    128    
112    -800   
-32    64     
48     -48    
64     160    
-64    32     
208    128    
-288   16     
144    96     
16     32     
272    96     
0      64     
-128   48     
-64    352    
96     48     
128    16     
176    -48    
224    -16    
64     112    
128    80     
-48    32     
-16    -64    
256    16     
-48    32     
-48    16     
-240   80     
64     16     
288    64     
-96    112    
64     -16    
-48    48     
-16    -464   
144    -32    
144    32     
48     16     
16     -128   
112    -112   
-48    80     
-80    64     
-96    -32    
-16    80     
-32    16     
32     -96    
224    -48    
96     -64    
96     80     
256    -624   
0      16     
16     -272   
64     48     
32     16     
32     -16    
192    48     
80     112    
32     64     
64     96     
80     -48    
192    -144   
144    80     
112    -32    
-32    96     
112    96     
112    176    
160    -144   
-80    64     
-80    -464   
224    -48    
-32    224    
0      64     
64     32     
256    160    
-176   288    
-80    -224   
176    -208   
64     -592   
32     176    
48     208    
-176   224    
-48    -256   
-32    240    
0      -48    
64     -80    
208    -144   
112    48     
-80    64     
-32    0      
144    160    
96     -32    
144    160    
48     -32    
-64    0      
16     -304   
240    0      
-160   -272   
-32    32     
48     128    
0      -128   
-112   -32    
176    -496   
32     -416   
272    0      
-224   384    
144    304    
32     -480   
0      272    
-96    32     
160    -432   
272    560    
112    -64    
112    -128   
128    112    
16     -544   
32     160    
160    -352   
96     -896   
-112   -240   
32     -320   
160    -64    
160    -1408  
0      -272   
-96    -416   
144    320    
144    464    
192    96     
48     -592   
0      -96    
0      320    
496    688    
-272   48     
240    32     
224    48     
-32    -144   
192    -160   
-64    -592   
208    48     
16     -304   
464    416    
-96    144    
112    80     
80     -112   
80     80     
176    176    
192    -96    
-336   -64    
128    -192   
-1088  -304   
192    -464   
112    16     
272    -224   
160    -16    
48     -272   
96     160    
-64    48     
32     -80    
96     -48    
128    96     
80     0      
160    16     
-192   -32    
-64    -96    
-288   64     
48     -96    
224    -128   
288    -48    
272    0      
-96    -144   
320    -48    
32     -400   
-192   144    
-80    -64    
768    352    
-448   192    
-32    64     
624    288    
-176   0      
-448   -288   
944    -336   
16     160    
32     32     
-48    -64    
448    -160   
-256   -64    
112    -80    
32     -32    
128    -128   
-160   -16    
-32    64     
240    0      
-48    16     
240    48     
-144   16     
128    -32    
-1328  16     
96     -80    
-128   -64    
-48    32     
16     112    
256    32     
208    112    
-272   -80    
0      16     
160    32     
384    128    
-368   240    
96     -176   
-16    -16    
240    0      
-96    -48    
16     16     
-304   0      
-48    -16    
-144   32     
128    -288   
96     128    
-112   -848   
144    112    
112    -16    
80     -80    
-416   -96    
32     -32    
-400   -48    
176    112    
-144   128    
-112   0      
336    48     
176    -208   
-112   -32    
208    -48    
32     96     
-16    -416   
192    48     
-16    48     
32     -256   
-464   -160   
336    32     
-160   0      
32     -128   
112    64     
0      -64    
-176   64     
48     -48    
192    96     
64     240    
32     272    
-320   -112   
240    224    
-320   -32    
112    -96    
48     192    
-80    112    
-128   -16    
176    224    
-32    224    
144    -48    
-48    96     
160    32     
192    368    
-480   -96    
0      -112   
0      64     
-848   16     
-16    0      
-624   48     
0      32     
64     -32    
-96    80     
-320   -640   
-32    -128   
-912   16     
-112   -48    
-320   0      
80     -64    
-656   -272   
-272   -16    
-96    -176   
-16    -272   
272    0      
-352   48     
-112   -80    
-640   -64    
-144   -80    
160    -32    
64     112    
-32    -32    
128    80     
-64    160    
-160   176    
160    64     
-80    0      
256    -16    
32     0      
-48    64     
-448   -96    
-176   -352   
-544   -256   
-64    112    
16     160    
-16    48     
-240   -192   
16     -16    
-64    -112   
16     96     
-224   0      
96     176    
-96    48     
256    272    
-240   128    
144    160    
144    176    
96     112    
96     32     
-656   -32    
128    48     
-112   -192   
64     -64    
48     -48    
32     -48    
128    -208   
80     -48    
112    800    
-96    304    
112    -160   
-128   -96    
160    16     
-240   96     
-64    -80    
-544   -48    
16     -96    
80     48     
80     192    
16     -112   
16     -160   
-16    112    
80     288    
-80    -16    
-48    256    
-208   -416   
160    112    
-240   288    
-480   -288   
32     240    
-560   64     
-288   -64    
32     64     
160    -112   
-208   -80    
-144   -320   
304    192    
208    48     
368    -224   
144    -80    
0      224    
-128   -80    
-64    -80    
-144   608    
0      176    
-128   16     
224    112    
-1360  -128   
96     112    
-288   -96    
192    -160   
-48    144    
128    144    
-80    192    
224    208    
-64    336    
-32    96     
272    32     
-256   16     
512    -304   
-288   -112   
240    -96    
-1120  -32    
64     192    
-272   128    
80     0      
-240   0      
-240   -16    
-160   208    
-96    16     
288    -128   
-32    176    
80     64     
-32    128    
176    -144   
-160   -96    
-112   -16    
48     144    
-64    -48    
176    -112   
-128   32     
-176   64     
80     -16    
0      -64    
128    32     
-64    -16    
144    160    
-176   96     
-64    16     
80     -48    
-160   -64    
128    -80    
464    352    
-336   256    
0      48     
-48    -128   
112    32     
-176   32     
288    -96    
-80    -128   
112    -144   
-176   -32    
32     144    
-80    -32    
32     -16    
-48    80     
-48    80     
-128   96     
0      -112   
-160   16     
80     16     
-48    160    
-32    -32    
16     0      
-64    0      
-48    48     
-80    0      
96     0      
-128   16     
128    64     
-32    48     
160    80     
-112   128    
32     128    
224    48     
48     80     
32     16     
208    112    
-176   128    
-144   -32    
208    112    
-176   64     
-96    48     
128    64     
-48    32     
0      32     
48     48     
48     64     
64     -112   
80     -96    
0      -96    
208    96     
96     96     
-64    -32    
-192   0      
64     32     
-80    80     
144    48     
0      128    
128    48     
208    80     
0      96     
-208   -96    
-80    32     
-144   -336   
0      -336   
96     -96    
176    -16    
128    -96    
-48    -16    
240    288    
-16    224    
-32    64     
-208   -192   
192    -176   
304    272    
80     144    
-96    -320   
48     -176   
176    64     
64     96     
48     112    
-224   0      
64     16     
80     16     
128    144    
-64    -16    
-32    64     
176    528    
80     -112   
48     336    
-272   -304   
224    -80    
272    0      
160    256    
64     -512   
224    176    
-64    272    
-160   -208   
112    48     
208    208    
-96    -112   
112    -96    
64     176    
-16    -240   
160    224    
176    -1392  
-64    48     
240    192    
-112   96     
16     -96    
80     32     
-48    48     
208    48     
32     112    
224    128    
-224   -32    
160    -16    
-160   32     
80     -208   
128    0      
192    -128   
96     128    
-64    -64    
80     32     
-32    16     
96     64     
32     64     
48     64     
64     48     
64     16     
-16    32     
64     -64    
-144   0      
224    48     
-16    32     
240    -96    
-80    32     
64     128    
-112   -208   
384    -80    
-224   144    
448    176    
-256   -176   
-320   -160   
176    80     
64     48     
256    -128   
128    16     
-16    -16    
16     32     
224    -160   
-336   16     
64     -384   
112    128    
96     96     
128    0      
16     0      
80     -48    
16     -128   
-64    -208   
-80    160    
128    128    
304    224    
-400   -96    
144    -48    
320    80     
432    432    
-528   -96    
208    -96    
-96    16     
272    0      
48     -16    
144    48     
-32    48     
48     112    
208    64     
-48    -368   
-208   -384   
416    -240   
112    144    
-32    80     
240    64     
96     -512   
-16    -112   
-32    -16    
192    80     
96     32     
16     -160   
352    -16    
-192   0      
208    48     
-160   -224   
288    -16    
0      32     
160    0      
-80    -272   
48     64     
-16    -912   
144    -80    
160    48     
16     0      
288    160    
144    -400   
96     -384   
-16    144    
192    -1072  
96     -16    
48     64     
160    96     
-48    112    
160    -144   
-128   112    
48     -112   
224    -32    
112    16     
-16    -128   
-16    32     
-464   -64    
32     -336   
96     112    
144    -16    
-144   0      
32     -112   
-80    0      
240    -288   
144    -64    
-160   112    
112    176    
-96    240    
240    320    
16     -32    
-336   16     
112    176    
32     -160   
-16    -160   
208    -128   
128    -80    
96     -64    
144    -48    
96     -960   
48     16     
320    320    
-32    -32    
224    -224   
-64    48     
112    64     
96     -16    
0      -48    
-16    64     
-2128  64     
224    64     
0      -96    
128    -400   
224    16     
176    -32    
32     -64    
-32    -576   
32     -80    
32     -32    
-64    112    
128    -64    
112    32     
-64    -704   
240    592    
-1168  -160   
32     -80    
208    160    
80     -128   
48     160    
160    -144   
-128   -96    
320    -1264  
208    -176   
96     48     
-32    112    
-288   -80    
-48    -32    
-304   0      
64     -144   
-368   -112   
192    48     
-256   176    
112    -80    
-160   -208   
-288   -176   
112    -960   
304    -16    
48     176    
80     -240   
208    16     
-32    128    
128    -240   
-400   -48    
80     -32    
-192   16     
80     64     
-2144  -48    
96     -352   
-256   -48    
-32    0      
112    64     
-64    -48    
432    -304   
-32    208    
80     224    
0      -256   
112    32     
-48    -96    
128    -16    
-304   144    
96     48     
-336   -240   
48     -128   
160    -144   
176    -224   
128    208    
-224   -80    
64     -416   
0      32     
0      112    
48     16     
-96    -224   
-144   -464   
128    256    
-384   112    
-16    -48    
-192   16     
64     16     
80     -144   
192    -672   
-144   -224   
160    -336   
-176   -480   
-128   -176   
192    256    
-80    336    
-80    176    
-16    -640   
176    -16    
-64    80     
-288   112    
112    432    
64     96     
144    48     
-1296  32     
272    208    
-1120  -64    
-336   0      
-208   144    
-1904  208    
400    208    
-368   208    
-160   -16    
-80    -208   
144    -96    
128    -160   
-288   32     
-224   -224   
64     112    
128    0      
-176   96     
-48    -144   
-48    224    
64     96     
-480   -208   
-16    -272   
80     -144   
-304   -64    
368    -240   
-96    -112   
-272   16     
-80    32     
-368   16     
-32    -144   
-64    -80    
-32    16     
-176   32     
-160   416    
176    144    
144    -224   
-160   -64    
224    -96    
-224   16     
-368   32     
-240   -32    
-96    64     
-176   16     
160    -144   
0      -16    
-64    0      
-192   -64    
80     256    
0      96     
48     -64    
112    -64    
0      -16    
0      0      
-192   -80    
-1136  -48    
-176   32     
-544   -144   
224    32     
-144   32     
0      16     
-240   -144   
144    -176   
-80    144    
-80    16     
96     80     
-272   64     
-16    0      
-192   -80    
-16    32     
-176   48     
16     -16    
-1120  80     
-144   96     
-208   -64    
16     48     
-32    80     
32     32     
-32    96     
96     -32    
-64    0      
-80    -32    
80     -192   
16     0      
-288   -48    
16     -32    
-64    64     
-368   -16    
16     256    
-352   -416   
96     -80    
160    48     
-112   -32    
-32    48     
-176   -80    
0      -144   
0      -256   
64     16     
32     -176   
-48    -80    
-336   -112   
-80    -96    
-784   -128   
48     -336   
80     -464   
-112   128    
-80    48     
-112   32     
-160   -416   
0      -336   
80     64     
-32    176    
64     -16    
-384   0      
-32    192    
-496   -128   
64     368    
0      -112   
96     -688   
400    1040   
16     368    
208    -336   
112    144    
112    32     
-64    112    
192    176    
-352   -240   
-160   -48    
208    -96    
368    336    
-16    0      
0      -80    
-192   -384   
-288   -16    
-64    80     
-16    48     
80     64     
80     -32    
-160   -192   
96     -80    
64     96     
64     96     
0      64     
-32    -80    
-16    16     
48     -16    
256    -16    
-64    -64    
-16    32     
-48    48     
-32    48     
-96    48     
0      32     
-96    -16    
-80    -48    
160    80     
0      48     
80     64     
-192   -96    
240    128    
-112   32     
16     0      
-16    0      
-80    0      
64     64     
16     80     
64     112    
288    256    
-256   0      
176    48     
160    96     
192    144    
-192   48     
-64    16     
160    32     
-160   -96    
32     -16    
80     112    
-16    32     
160    48     
64     96     
16     0      
80     64     
128    32     
16     32     
96     80     
-112   96     
0      0      
16     144    
64     0      
-16    96     
64     48     
-144   -16    
208    16     
-208   48     
304    240    
144    128    
128    0      
112    -80    
0      48     
112    96     
-64    128    
-16    64     
128    -128   
-112   80     
128    128    
96     128    
0      112    
96     16     
96     112    
80     112    
32     -16    
192    64     
-240   208    
-64    -32    
160    80     
-176   -128   
96     -16    
192    208    
144    128    
-288   0      
816    -544   
-752   208    
-224   -48    
384    0      
-16    32     
272    -48    
-176   -192   
544    48     
-16    128    
-288   32     
272    -128   
-96    0      
-64    96     
80     112    
128    -16    
-48    -352   
160    16     
32     112    
80     80     
32     -32    
-16    64     
240    -32    
-48    -64    
-144   224    
80     96     
112    -16    
256    96     
-96    -112   
64     -128   
0      32     
-128   -144   
192    96     
144    -32    
-160   16     
64     64     
48     -112   
176    0      
-128   48     
64     80     
192    112    
-112   -48    
256    96     
-64    160    
96     80     
128    0      
224    -16    
32     112    
-96    288    
176    96     
64     -32    
112    0      
-48    -176   
368    -192   
-80    16     
160    0      
-240   -144   
272    48     
64     128    
80     -112   
-128   0      
240    32     
-80    192    
-32    -832   
272    -144   
-80    -64    
208    416    
-192   0      
128    -16    
-48    48     
160    -64    
96     80     
-96    -112   
240    -176   
-80    32     
16     112    
-32    -416   
304    592    
160    -448   
192    -112   
-16    112    
64     128    
80     64     
-48    -640   
-32    112    
-112   464    
64     -208   
32     176    
32     16     
288    -80    
-32    448    
112    -512   
256    -32    
0      208    
-48    320    
0      -416   
256    -32    
-160   480    
64     -240   
160    64     
-48    128    
-80    -112   
160    -80    
0      240    
48     -32    
192    -128   
-64    144    
16     96     
-80    -752   
112    -48    
-16    384    
80     16     
128    -176   
16     -64    
48     96     
64     48     
96     16     
80     0      
80     272    
96     -144   
-192   -272   
-160   -288   
32     -368   
160    0      
304    96     
-352   -784   
-208   -384   
-144   -160   
272    -800   
160    32     
-256   16     
0      -96    
80     160    
240    -528   
-128   -176   
160    48     
80     -192   
0      176    
112    -96    
16     -848   
112    0      
144    -80    
-16    -128   
64     0      
-64    48     
-1760  -16    
80     -160   
208    48     
-96    -240   
144    -112   
48     -432   
80     -160   
96     -80    
128    -304   
32     -208   
32     32     
80     144    
128    128    
48     -32    
128    -96    
-1088  -80    
-16    96     
80     -176   
144    -96    
64     -64    
288    16     
-224   -464   
208    -1776  
128    80     
208    -112   
144    112    
112    -64    
48     160    
-128   256    
-16    -256   
-80    -480   
160    -144   
-192   96     
-48    192    
256    320    
64     352    
0      208    
192    -976   
-112   -592   
96     -352   
-208   64     
432    -192   
48     128    
192    208    
-128   224    
48     224    
144    256    
-864   544    
160    -240   
112    -192   
-64    -128   
-16    -32    
144    -144   
208    32     
-128   -1200  
448    160    
-256   64     
48     -368   
-32    -288   
96     112    
-400   160    
64     48     
0      -96    
32     80     
320    -48    
-112   80     
352    144    
16     32     
400    32     
144    -736   
288    272    
272    -128   
-96    112    
192    16     
64     -160   
-32    -16    
-192   112    
-16    304    
48     96     
-160   -48    
32     176    
-32    0      
144    -320   
32     -48    
32     0      
0      336    
176    240    
80     -592   
-304   -336   
16     0      
-832   -128   
96     0      
-384   320    
352    16     
-368   -176   
224    -448   
-32    -16    
-64    -256   
-16    -112   
144    -240   
-192   160    
-32    256    
128    -16    
-384   128    
160    16     
-208   144    
272    16     
-80    112    
288    48     
-224   -16    
32     -368   
240    144    
-64    80     
0      64     
80     -176   
160    -192   
16     -144   
-128   -640   
-256   -336   
192    -272   
0      176    
96     48     
-144   -704   
48     -304   
192    -16    
-112   0      
16     -128   
-656   -16    
112    -96    
-944   -224   
-688   -176   
112    368    
-1376  -80    
96     144    
288    176    
32     64     
96     -144   
16     -352   
48     112    
-192   32     
-224   32     
64     96     
-768   -432   
16     304    
-192   48     
-32    -160   
80     160    
-128   80     
-176   32     
-1312  -48    
-240   0      
64     -512   
-528   -544   
-304   -224   
-64    -48    
0      -112   
176    224    
-336   0      
80     256    
176    448    
48     128    
288    240    
-336   0      
64     -32    
-64    -48    
-144   32     
-1120  -32    
16     144    
-256   -48    
128    128    
112    -128   
208    -48    
224    64     
-112   64     
-128   -16    
80     0      
-32    128    
-240   32     
-64    -112   
-64    -96    
-128   80     
-592   -32    
-64    -32    
-96    0      
32     64     
64     -48    
144    48     
32     16     
64     96     
-96    -16    
-384   -160   
224    0      
16     96     
-16    64     
-64    -16    
-16    112    
-704   -112   
32     64     
144    48     
112    64     
-96    -144   
112    32     
48     32     
-32    16     
-48    0      
32     0      
32     112    
96     64     
-16    32     
-224   -32    
-128   -64    
-176   -64    
256    48     
-224   64     
0      -48    
48     -80    
-176   -48    
64     0      
-96    112    
48     64     
-160   32     
16     64     
-208   32     
-32    -16    
-160   16     
80     48     
256    288    
-240   144    
-320   -112   
-128   48     
32     -208   
160    208    
-64    112    
272    64     
-112   16     
128    32     
-128   -16    
-176   16     
192    144    
-48    64     
-32    0      
-192   -96    
0      64     
-368   48     
144    -32    
192    64     
-64    192    
224    48     
-288   -64    
-368   -80    
64     64     
80     208    
-464   96     
96     -48    
48     16     
-304   -16    
-272   -320   
432    -208   
112    208    
-144   -64    
144    0      
160    128    
-144   -64    
0      48     
-32    144    
-208   32     
240    -128   
-32    16     
64     -16    
-272   -96    
144    -32    
-64    -64    
16     64     
-112   16     
96     0      
-48    -32    
160    -256   
-48    48     
144    192    
32     16     
80     -96    
48     -176   
16     -48    
-96    -160   
-208   96     
160    320    
-128   -400   
-96    -128   
96     176    
-192   -64    
208    -16    
176    176    
48     16     
80     -16    
-272   -32    
64     -176   
-48    128    
208    32     
240    -32    
32     80     
64     224    
80     -256   
352    64     
-112   96     
-48    -544   
-64    64     
-16    192    
208    256    
32     272    
-224   -512   
-32    16     
208    272    
-144   304    
-208   -176   
-176   208    
208    336    
32     160    
-96    784    
208    16     
112    96     
48     192    
16     256    
-48    144    
96     144    
64     48     
240    64     
160    48     
-48    64     
192    112    
-256   16     
-64    -160   
32     -16    
-96    176    
16     -16    
64     80     
352    144    
-208   208    
-32    64     
-48    0      
64     -80    
-80    0      
-16    -256   
-32    -112   
128    80     
-224   -64    
176    16     
128    96     
-32    -32    
304    320    
-256   -368   
128    48     
16     224    
0      -16    
48     -16    
-64    -128   
-112   -128   
208    -224   
192    96     
64     80     
16     64     
96     112    
96     0      
176    64     
80     0      
16     -48    
64     -80    
64     80     
32     96     
288    272    
-320   224    
-160   -48    
160    32     
0      16     
160    112    
48     224    
0      -80    
160    32     
-48    224    
112    -80    
144    0      
-64    64     
0      64     
112    -32    
-16    32     
-32    -144   
176    80     
128    192    
-96    -80    
80     80     
-80    -192   
192    -320   
112    -32    
-16    -240   
48     -48    
-48    -144   
-112   -144   
80     -16    
0      0      
48     336    
32     32     
-32    -32    
64     -112   
32     -64    
0      64     
-16    -160   
208    -128   
-32    368    
176    112    
272    48     
-16    -576   
64     48     
-80    -176   
128    -208   
-16    -32    
208    -192   
-48    272    
-32    304    
-176   -208   
240    368    
96     80     
240    272    
304    32     
48     32     
304    288    
-64    320    
288    736    
352    320    
64     480    
-32    240    
160    -112   
-160   -80    
128    -256   
144    -64    
-48    352    
560    432    
0      208    
-288   -64    
176    64     
672    336    
-176   176    
64     -64    
-32    -448   
64     160    
-80    -160   
16     48     
416    176    
-240   320    
288    240    
-64    192    
-16    256    
-80    -128   
48     -128   
-144   -192   
-80    -112   
432    -400   
272    160    
64     272    
224    64     
48     128    
208    112    
560    496    
-464   496    
192    176    
-96    -464   
-16    32     
592    160    
-80    576    
304    144    
192    400    
-144   288    
160    -176   
-96    144    
144    16     
112    96     
448    -528   
-464   -96    
-352   -224   
-48    -1264  
176    112    
608    416    
-128   656    
240    432    
-288   -144   
-176   -480   
368    -208   
464    176    
-368   -336   
-48    -144   
-96    64     
192    -16    
64     48     
-1376  -672   
240    -208   
80     464    
-208   -48    
-80    -464   
80     -16    
128    -192   
256    608    
-112   16     
32     -368   
32     32     
96     48     
32     -128   
224    432    
160    -368   
-352   -208   
208    352    
192    -288   
-48    -144   
160    -80    
-208   -352   
16     64     
0      336    
160    -176   
0      -224   
224    -80    
256    304    
224    -128   
192    -144   
160    0      
-464   48     
-48    -96    
-96    -96    
304    -16    
192    32     
32     -96    
192    -80    
-224   -1232  
-208   -32    
144    160    
192    240    
48     32     
96     32     
80     80     
-48    -32    
-672   -528   
112    -240   
-496   160    
0      -128   
176    16     
96     96     
-32    16     
0      -304   
112    32     
144    0      
80     48     
112    -128   
208    -80    
128    80     
48     -144   
-32    64     
-48    -96    
-400   16     
112    -128   
0      0      
-48    -128   
96     80     
0      -208   
160    -48    
176    -864   
320    176    
-112   -64    
240    -16    
-112   -16    
112    -64    
-256   -64    
128    0      
-1280  -16    
112    -272   
-800   48     
176    16     
80     -32    
48     -192   
128    144    
128    -624   
-128   288    
-224   48     
-112   -32    
-256   -144   
432    -16    
-320   16     
160    48     
-480   -32    
-48    128    
64     -32    
160    16     
80     16     
96     -112   
-16    16     
256    -480   
-16    -96    
112    64     
96     -16    
-544   -32    
96     -48    
-400   0      
176    0      
-176   0      
16     -96    
288    96     
80     -48    
-48    -32    
96     -48    
-32    0      
80     -176   
192    80     
-16    80     
80     -48    
-320   -16    
128    -32    
-16    -48    
-16    -32    
-32    48     
128    -32    
-992   -16    
96     -112   
144    112    
224    -64    
128    0      
-48    32     
-528   0      
32     0      
-448   -16    
-240   -160   
80     112    
-80    64     
48     -64    
-208   0      
-1936  0      
-176   96     
-48    -32    
-176   -64    
112    -16    
112    224    
-80    64     
-272   64     
-192   -48    
-192   -176   
64     128    
-352   32     
48     16     
-32    -80    
64     64     
0      288    
400    464    
224    272    
-176   -16    
-96    32     
-256   352    
320    336    
-672   144    
-16    -528   
-336   -320   
-208   -96    
-352   -128   
-16    128    
176    -80    
64     64     
96     -144   
128    64     
-224   -256   
144    96     
-80    320    
-32    64     
-32    -16    
96     -32    
-32    192    
-144   -368   
-64    -80    
-304   192    
-96    -64    
-848   96     
384    256    
-144   608    
-208   -608   
-96    -16    
80     -192   
112    64     
224    176    
-256   -416   
480    336    
-208   0      
-176   416    
32     -240   
-512   -240   
352    640    
-160   944    
96     544    
-64    48     
64     176    
64     -192   
32     -112   
-32    -48    
128    128    
-32    48     
-32    80     
-144   -80    
176    128    
-224   144    
48     288    
-80    112    
-128   80     
128    64     
-1328  32     
160    112    
208    -112   
160    -16    
32     48     
-320   96     
64     64     
-80    -144   
-64    -64    
32     16     
-32    32     
-112   -128   
64     -64    
-16    -112   
-112   96     
-96    16     
32     0      
-32    0      
16     16     
32     96     
-32    -48    
128    32     
128    48     
-32    64     
-272   -240   
192    -16    
96     176    
-304   160    
-224   -112   
192    48     
-352   48     
128    0      
0      48     
-48    -48    
32     16     
-64    16     
-16    -32    
-48    -32    
0      32     
-80    112    
192    128    
-176   64     
-80    0      
-192   0      
-160   -16    
-416   -128   
144    96     
160    80     
64     48     
160    144    
-160   32     
-16    -32    
-32    -16    
224    -96    
176    -16    
144    0      
16     16     
-160   128    
-96    -32    
-32    64     
192    128    
-144   32     
-32    -48    
80     -128   
144    48     
112    128    
-128   96     
0      128    
160    192    
160    192    
-16    256    
80     176    
-16    224    
-256   -144   
96     -64    
32     32     
-128   0      
208    -32    
-128   -48    
-16    -96    
224    -64    
96     -32    
0      -64    
64     -80    
-480   0      
-80    64     
-112   -160   
-16    -208   
-48    -128   
240    64     
80     0      
128    96     
0      144    
-112   80     
112    0      
48     48     
96     48     
-32    -176   
-32    -272   
-16    -224   
-96    -176   
32     112    
128    80     
-80    80     
112    16     
16     160    
64     -48    
64     48     
144    416    
128    240    
32     -96    
-240   -256   
320    272    
-112   -352   
-48    -128   
32     144    
112    -272   
144    96     
128    1008   
752    1456   
-832   -832   
-32    -768   
80     624    
112    96     
-592   -592   
240    -1040  
288    1072   
-112   944    
192    -720   
128    -256   
-96    544    
160    -48    
80     -240   
48     192    
-16    -96    
192    -208   
48     48     
48     304    
-160   48     
160    -192   
368    384    
192    112    
-112   -80    
320    832    
-240   -688   
-16    -208   
128    144    
-608   -416   
800    -544   
240    880    
96     80     
352    -336   
-128   368    
-112   336    
240    320    
-640   -928   
32     464    
-32    336    
384    512    
-128   -704   
96     368    
208    64     
160    144    
-64    -432   
-64    -464   
-48    112    
16     -208   
176    192    
112    176    
-176   -384   
336    208    
-48    64     
288    -720   
-176   208    
32     192    
160    -160   
-112   80     
208    -192   
32     0      
-16    -304   
-64    16     
240    -48    
16     -16    
112    16     
-64    144    
48     -32    
144    128    
64     192    
160    64     
0      80     
32     64     
128    48     
16     -16    
48     -224   
96     -176   
-64    96     
64     -160   
32     64     
80     -224   
112    336    
64     192    
64     176    
-208   -128   
288    -144   
160    80     
-128   -64    
-32    48     
64     80     
144    160    
496    48     
464    560    
-624   -896   
16     -112   
-112   160    
192    48     
32     -32    
368    160    
80     64     
112    32     
-96    144    
-176   -144   
32     16     
-208   -16    
208    288    
80     -32    
224    320    
-80    -80    
0      96     
64     112    
48     16     
-16    80     
144    -80    
16     0      
304    80     
160    80     
48     -80    
16     32     
-48    -160   
80     96     
80     -48    
144    160    
-96    0      
96     32     
352    336    
-208   352    
144    128    
128    -64    
-16    16     
64     96     
224    160    
256    -96    
32     112    
-224   -640   
-128   -32    
-176   -128   
80     -48    
176    80     
32     -80    
64     64     
64     48     
-192   48     
80     -304   
80     -368   
160    -96    
-80    -128   
-32    0      
128    -416   
192    -48    
16     64     
176    64     
-112   -144   
-128   -208   
48     -352   
-32    176    
80     -112   
176    128    
96     -144   
176    -176   
176    -48    
128    -208   
176    -48    
-192   -256   
144    -32    
80     -144   
192    -64    
144    96     
32     16     
-64    -240   
32     -16    
80     -64    
-16    64     
-368   -48    
-16    -192   
-1008  -48    
96     -144   
128    -16    
208    -144   
-80    -16    
176    -208   
-48    -112   
16     -48    
80     -16    
192    0      
0      0      
160    -128   
64     48     
-240   -48    
128    16     
-336   32     
16     48     
112    32     
80     80     
-80    -96    
208    48     
112    0      
128    -528   
-16    80     
48     -96    
0      -32    
-80    -96    
352    -32    
-16    0      
192    -16    
-128   -80    
272    -192   
96     16     
208    -96    
0      16     
128    -48    
-16    0      
128    -64    
160    96     
64     -144   
-96    -32    
-32    96     
80     48     
0      32     
64     -32    
-48    288    
-48    -144   
-800   -208   
16     128    
-416   -48    
64     -96    
64     176    
-272   -1152  
320    -256   
192    880    
480    288    
-96    -800   
208    384    
-448   80     
160    -704   
-320   544    
0      -48    
-176   -64    
32     -32    
-736   -208   
608    400    
-272   -80    
-32    0      
80     256    
32     -848   
64     16     
112    272    
96     96     
0      112    
-144   -64    
-128   -160   
32     -272   
112    112    
352    -16    
-784   16     
-96    -48    
176    336    
320    240    
208    -16    
64     -832   
-48    -112   
-144   48     
128    -16    
32     -48    
256    -96    
-288   64     
112    -112   
-624   -64    
80     -192   
-16    16     
224    -176   
48     64     
144    -112   
80     -32    
-336   -96    
288    -64    
-224   48     
176    16     
96     112    
48     -48    
-48    0      
0      -112   
-272   -128   
304    48     
-48    112    
128    -176   
-48    64     
-448   -112   
128    96     
-208   96     
-656   16     
-64    80     
-1872  0      
-96    48     
112    -80    
-112   48     
80     0      
128    64     
-672   48     
16     48     
-96    -80    
112    32     
-192   0      
-368   16     
-288   -240   
-16    -112   
-304   -48    
-176   -112   
-144   96     
-736   144    
-176   96     
-16    16     
-176   -112   
-192   -304   
288    16     
-384   -16    
272    32     
48     32     
-32    32     
-128   0      
144    128    
-48    64     
-256   128    
0      208    
-288   -16    
256    -96    
16     -96    
0      0      
-256   -80    
-48    -64    
16     0      
128    32     
-80    -32    
-48    80     
-64    64     
-240   -48    
-352   -112   
32     -64    
-112   176    
-32    -48    
-16    64     
-512   -16    
-48    -96    
224    80     
192    96     
160    -16    
-304   -64    
48     144    
-368   224    
-112   80     
128    -32    
-272   -656   
-320   -512   
-240   -384   
-480   -176   
64     80     
-128   -32    
80     48     
-48    -368   
0      -16    
-224   -112   
176    144    
-32    288    
-400   -192   
32     -64    
-48    -64    
32     16     
-240   64     
-112   -192   
-80    96     
160    208    
-128   -48    
288    160    
-512   16     
64     0      
-64    624    
-32    -48    
-160   -688   
-48    576    
-80    112    
-112   -400   
16     192    
0      -304   
224    576    
-368   -464   
128    32     
-496   -176   
-32    80     
-2544  -48    
112    -608   
64     48     
-208   32     
-16    0      
-128   -784   
240    -128   
-16    160    
-80    96     
-48    112    
144    144    
-528   -208   
96     -96    
-288   64     
128    64     
-432   80     
-192   -80    
-32    -368   
-96    -432   
-32    -224   
-304   16     
-16    192    
96     -48    
80     240    
-80    96     
128    96     
-80    0      
128    96     
-208   32     
112    0      
-496   -160   
208    -144   
320    96     
-352   80     
-272   -912   
-336   -848   
-336   0      
32     144    
64     304    
-176   -176   
-16    -256   
112    288    
208    0      
48     -64    
144    48     
-16    -16    
0      64     
-32    -16    
-16    64     
96     336    
-48    208    
32     0      
-144   -16    
176    80     
-160   32     
80     96     
-112   -48    
256    32     
-384   0      
48     32     
16     16     
16     352    
0      192    
144    0      
-176   96     
-80    112    
160    64     
112    -64    
-32    -48    
-80    64     
144    0      
-96    0      
32     -16    
-112   32     
144    112    
-16    0      
-96    -16    
160    112    
96     128    
-96    -16    
-16    -16    
16     176    
96     48     
224    0      
-64    0      
-128   -208   
-208   -80    
240    144    
-144   80     
-80    96     
240    112    
160    -240   
48     -272   
160    320    
-128   32     
-240   112    
96     112    
160    -48    
32     -32    
-224   -128   
48     -16    
0      -256   
256    -48    
304    32     
-48    -32    
-32    96     
-224   128    
80     64     
432    -64    
-128   48     
-16    80     
0      64     
32     16     
96     32     
-64    -80    
128    -16    
80     112    
48     -448   
96     16     
16     64     
224    112    
16     64     
-176   96     
-48    112    
176    0      
80     48     
-192   48     
-80    48     
96     16     
80     -128   
192    32     
-32    -32    
64     -224   
-48    0      
96     80     
544    784    
-512   608    
256    -48    
16     -176   
192    32     
112    272    
0      112    
96     32     
192    0      
96     -16    
144    112    
-64    -16    
0      16     
-32    32     
-112   -960   
240    112    
0      32     
32     128    
32     64     
-16    16     
288    320    
-48    160    
-16    -32    
64     48     
96     0      
80     -48    
-64    -112   
192    -80    
96     48     
96     -496   
-112   0      
128    96     
32     112    
-16    16     
64     -32    
112    112    
96     16     
-176   -48    
-112   80     
-16    48     
-80    -96    
176    96     
176    -96    
-48    -64    
-32    -240   
-192   -80    
-16    -320   
80     80     
160    64     
48     -48    
48     -144   
304    32     
16     32     
288    176    
-176   96     
144    0      
-80    144    
112    -64    
0      0      
16     48     
32     128    
112    -112   
128    48     
-64    -80    
160    64     
-64    64     
128    96     
128    272    
32     48     
128    64     
80     16     
176    224    
16     -432   
128    0      
32     48     
16     0      
-176   -144   
64     96     
128    16     
96     -48    
-96    -32    
256    -64    
176    608    
240    -208   
16     64     
-32    -416   
-32    96     
176    -304   
-32    176    
-96    -608   
-160   -528   
96     496    
-32    128    
352    -144   
160    496    
80     -128   
-48    -96    
-272   304    
16     -336   
-96    -432   
256    -144   
-224   256    
432    112    
-240   -32    
368    -688   
-208   -32    
624    224    
-16    384    
-16    288    
-80    -272   
128    160    
-64    -672   
160    -1488  
320    160    
-240   -832   
384    192    
-128   16     
256    0      
-144   128    
16     0      
-80    144    
368    -96    
96     -48    
160    64     
192    32     
-208   32     
-144   -240   
-16    -368   
128    144    
-16    -288   
64     -144   
32     -272   
-80    -112   
160    -96    
128    -48    
336    112    
-208   112    
176    -144   
-48    -48    
208    -48    
128    0      
-224   0      
96     -16    
-96    176    
224    -80    
112    -112   
208    64     
-48    -48    
176    -320   
0      32     
-32    0      
-16    -32    
96     -176   
64     -16    
16     -32    
176    -80    
-64    48     
176    -16    
-592   96     
128    -64    
16     -32    
128    192    
176    32     
96     -656   
-32    -32    
-64    -80    
80     -64    
224    48     
80     48     
144    16     
128    -80    
-288   -32    
208    -128   
-560   32     
32     0      
-16    -144   
80     -144   
96     32     
32     -384   
80     -64    
128    -1024  
0      32     
128    144    
64     48     
-192   -160   
32     -208   
-112   -48    
16     32     
-256   64     
192    -32    
208    16     
80     0      
176    -48    
16     -192   
176    0      
-16    -224   
-16    -96    
144    -144   
144    -16    
192    48     
96     80     
-16    80     
96     -16    
176    96     
-80    112    
-400   144    
192    96     
-48    80     
0      -16    
160    -48    
112    -464   
-272   80     
64     112    
-16    -288   
64     -192   
192    -48    
-400   -208   
112    -144   
-160   -176   
160    48     
-512   -672   
-128   -560   
-32    -368   
-80    -288   
160    -64    
96     -64    
800    1232   
-576   80     
-144   -624   
192    -64    
160    240    
-560   0      
80     -192   
48     -192   
-128   80     
96     -320   
-128   512    
-96    -448   
96     112    
64     -32    
64     208    
-160   -272   
0      176    
176    144    
-400   -336   
304    64     
-176   144    
352    32     
-32    -208   
112    32     
0      -384   
96     -128   
-256   -80    
32     -256   
48     16     
-208   32     
-2048  32     
-64    -64    
-2064  16     
-96    -64    
64     -16    
-96    -32    
64     16     
-256   -80    
16     -112   
-192   16     
-1696  -32    
64     48     
-288   304    
0      304    
-720   -272   
-240   -96    
-176   -64    
-64    0      
-16    -96    
-320   48     
-208   -16    
-672   32     
-96    224    
-192   48     
160    160    
-128   0      
112    80     
-528   16     
16     64     
-112   -96    
-96    96     
192    80     
-112   -64    
32     -80    
-736   -16    
144    -16    
-1184  0      
-32    0      
64     -48    
528    480    
-336   -16    
48     -48    
64     -464   
64     -224   
64     176    
-400   64     
-96    -304   
304    -16    
-80    80     
-16    96     
192    320    
-640   -48    
432    -96    
-1584  -48    
192    32     
48     -48    
-128   256    
16     144    
-32    -16    
0      16     
-32    80     
-112   -32    
-48    0      
32     -32    
-16    48     
176    96     
0      32     
-64    -32    
-928   64     
320    272    
-96    -16    
32     -112   
0      16     
32     48     
0      64     
-80    -16    
48     96     
-32    32     
384    -96    
-432   -304   
0      80     
-288   112    
176    80     
-688   0      
0      96     
208    16     
80     64     
-48    -32    
-320   0      
-32    16     
-128   32     
-96    48     
-32    144    
64     32     
-240   -96    
-64    -32    
-160   -64    
-48    48     
-240   -48    
32     16     
0      -32    
-80    16     
-32    96     
64     48     
80     48     
96     80     
16     112    
80     208    
-48    -128   
400    528    
-464   224    
-432   -304   
160    256    
-208   176    
144    64     
-1584  -224   
-16    80     
96     16     
-144   -240   
128    -192   
-16    16     
-96    0      
96     -64    
128    -96    
32     192    
16     96     
-112   64     
-16    -80    
-464   -112   
-128   80     
32     -96    
128    0      
272    176    
-32    144    
-96    -16    
32     -80    
64     -64    
80     128    
-48    96     
-64    16     
160    -32    
-192   64     
112    80     
-752   -560   
-144   -496   
-32    80     
48     16     
48     -32    
176    -208   
32     -336   
320    -176   
176    496    
384    544    
0      -464   
-144   -272   
16     64     
-112   208    
80     80     
-64    -192   
48     48     
32     176    
-32    0      
192    608    
-16    80     
-112   -288   
-48    -48    
176    112    
-144   -64    
80     64     
-176   -128   
128    0      
-112   128    
64     48     
-16    -16    
32     80     
-48    48     
-16    -32    
48     -64    
192    192    
-16    336    
-176   64     
192    -288   
144    -224   
208    48     
-368   112    
416    48     
-48    -464   
96     160    
-192   112    
-112   0      
-16    112    
-80    -96    
128    16     
64     208    
-16    -80    
64     0      
80     224    
32     -64    
64     48     
-16    -32    
80     64     
-352   48     
416    -384   
-144   272    
16     224    
32     -160   
128    32     
32     -64    
-64    176    
48     112    
-320   0      
240    32     
-48    160    
112    80     
-112   48     
-48    304    
-336   -160   
144    -1056  
304    -176   
64     64     
240    144    
-160   -96    
48     256    
128    304    
208    64     
160    96     
-112   0      
-160   144    
224    -160   
-384   -160   
160    80     
16     -256   
-48    -384   
-144   -288   
112    -16    
64     16     
64     16     
144    208    
160    128    
272    64     
-240   -112   
144    224    
-192   16     
352    112    
192    160    
-288   0      
384    -64    
-176   176    
304    96     
48     0      
32     -16    
48     -80    
144    96     
16     16     
128    208    
240    304    
-208   96     
304    -384   
64     16     
-208   272    
112    -160   
-112   -32    
32     176    
112    112    
224    -576   
32     64     
-80    -80    
320    -320   
-240   -96    
256    16     
-32    -208   
0      96     
-192   96     
480    224    
-224   128    
64     -176   
-64    96     
640    288    
-208   640    
-160   32     
80     -112   
368    -112   
32     96     
80     16     
288    -48    
-208   -192   
64     160    
144    336    
256    48     
224    -32    
0      32     
192    208    
224    32     
208    32     
64     -208   
288    176    
-224   -544   
160    -16    
128    64     
-48    16     
80     -96    
176    64     
0      32     
80     -80    
96     48     
-16    256    
144    192    
144    -160   
224    320    
64     48     
-112   -160   
320    -336   
48     128    
-16    32     
128    0      
320    96     
-64    176    
192    160    
-160   208    
-96    32     
0      -192   
240    0      
160    -80    
0      32     
144    16     
96     -32    
64     -48    
-16    16     
-16    32     
240    -16    
-32    -16    
96     64     
-160   -512   
96     -416   
16     -96    
-48    -160   
160    -32    
32     64     
384    448    
80     448    
160    336    
272    560    
96     -48    
-80    -384   
-256   -144   
-32    -672   
112    -128   
16     -32    
144    112    
128    -1792  
80     192    
272    800    
-208   -768   
-32    144    
-48    -80    
48     64     
-48    -96    
32     -384   
-96    128    
96     -352   
80     0      
-1648  32     
112    -672   
208    32     
96     144    
-208   -240   
32     -112   
64     -256   
-112   -384   
320    -464   
176    16     
240    304    
128    -80    
48     -16    
-64    -112   
112    -80    
-336   32     
112    16     
192    -32    
-160   -80    
32     112    
128    -160   
-48    -176   
0      160    
112    -48    
80     -112   
-144   -112   
192    -112   
-48    128    
96     0      
240    0      
-272   48     
96     16     
192    -16    
192    -64    
-96    -96    
64     -272   
80     -32    
112    -432   
48     16     
48     -112   
16     192    
160    -128   
80     32     
-96    16     
80     16     
-16    0      
80     16     
-464   -160   
144    16     
240    192    
-128   -16    
272    48     
48     -224   
16     32     
112    -112   
48     96     
-160   48     
160    80     
-16    -16    
64     -64    
-64    -32    
176    -160   
-112   64     
352    -96    
240    48     
96     0      
-128   -64    
96     -224   
-128   -16    
272    -224   
-240   64     
176    -128   
256    -64    
-176   32     
416    -48    
-288   64     
-128   -224   
-96    32     
-48    48     
-288   -112   
80     -176   
-208   -96    
320    -96    
16     144    
-176   -240   
464    32     
80     0      
-16    32     
-48    0      
80     -32    
-80    -176   
272    -112   
-256   0      
384    -32    
-256   -32    
224    -128   
-128   64     
160    32     
-32    -48    
176    -176   
-32    -16    
-176   -64    
32     96     
-160   0      
368    144    
-336   208    
160    -192   
16     -16    
32     -16    
112    -16    
0      -96    
-128   80     
176    -208   
-48    -48    
96     -368   
64     -160   
-256   -16    
48     -112   
-48    16     
192    0      
-240   48     
160    0      
-288   -64    
128    -32    
96     -16    
-160   -16    
112    16     
-1344  -112   
192    -16    
-1040  -144   
-656   176    
48     96     
-1120  0      
-112   16     
-80    -160   
-112   -112   
-48    32     
176    32     
96     64     
-80    384    
-768   -64    
-112   -112   
-240   -64    
0      144    
384    128    
-336   0      
64     16     
-1008  -208   
80     160    
-880   -160   
-176   -160   
304    288    
48     16     
112    -208   
-160   16     
-144   -288   
112    112    
-48    -240   
16     368    
-368   -416   
-160   16     
-96    -112   
-464   64     
-64    -96    
-384   -240   
32     -544   
-2784  112    
-304   -96    
-144   112    
-96    -160   
16     -48    
160    48     
-128   -112   
-64    -64    
-48    -64    
-272   -32    
-176   16     
-16    -32    
-176   16     
608    1216   
-144   -816   
-320   -48    
-256   16     
-224   -64    
16     0      
-192   112    
240    112    
-224   -400   
64     80     
64     64     
-16    -80    
-240   -48    
-80    -624   
16     720    
-256   112    
-48    -304   
-48    -272   
192    240    
-864   -112   
-144   -96    
64     -128   
32     16     
-32    192    
-80    -16    
-48    -128   
48     80     
-112   448    
144    -352   
-176   -48    
-128   -96    
-32    112    
-192   -32    
16     -208   
-544   -176   
-48    160    
144    32     
48     64     
224    80     
-32    176    
16     -112   
-112   -144   
96     -224   
16     -32    
-144   288    
-80    -32    
-48    -32    
-192   -16    
240    -16    
-800   -336   
96     -96    
144    160    
-32    48     
112    -32    
-128   -256   
32     -112   
-128   -240   
-112   -224   
48     -176   
-48    -16    
-128   240    
0      192    
-208   32     
160    128    
-320   48     
32     112    
80     -48    
-240   -208   
-128   -80    
-176   -336   
0      -32    
0      -240   
64     -192   
-80    -208   
16     -320   
-160   -192   
-448   -336   
-272   -496   
-96    -576   
-560   -208   
0      -368   
32     -144   
160    -32    
-80    16     
144    128    
-128   -176   
-16    128    
-160   -96    
16     80     
-176   -144   
160    -240   
160    16     
-128   -112   
144    -112   
-112   -128   
-48    304    
48     -400   
16     -448   
-48    -192   
-64    -16    
-144   128    
80     112    
-176   96     
48     0      
0      -64    
-48    80     
-16    16     
-160   -208   
-32    -176   
288    -32    
32     128    
176    48     
96     32     
48     -160   
-128   -32    
-112   240    
128    -32    
176    -16    
-48    256    
96     48     
-112   64     
144    48     
-256   -32    
192    32     
160    192    
-144   240    
80     -192   
32     -192   
0      -48    
208    64     
64     -48    
0      32     
112    0      
-64    48     
48     -64    
-128   32     
-48    512    
368    112    
-16    -352   
224    -112   
-208   -96    
-128   96     
32     -64    
224    112    
-32    272    
-32    176    
80     96     
272    -96    
-128   160    
96     -48    
-16    -128   
0      48     
-128   128    
-48    -80    
-144   32     
64     208    
224    192    
256    144    
32     208    
80     -32    
96     -368   
-160   -208   
-112   48     
-256   272    
144    80     
-32    -112   
640    -288   
-32    -208   
-176   64     
-192   -80    
112    -48    
-64    112    
160    80     
160    144    
0      32     
-16    -128   
-80    192    
128    16     
-80    -32    
48     -256   
48     -96    
80     48     
-80    -160   
128    -416   
144    144    
144    432    
0      -64    
-128   -128   
48     128    
-96    128    
-80    -176   
64     96     
192    144    
-192   -144   
16     0      
-32    160    
48     -112   
-16    192    
96     -448   
256    832    
80     -272   
48     288    
-80    -96    
16     32     
256    16     
-64    80     
96     80     
-240   -336   
-144   -720   
144    16     
16     160    
128    -208   
16     -64    
128    -352   
176    144    
48     32     
16     16     
-32    96     
0      -96    
112    -176   
144    -16    
16     0      
32     80     
-16    0      
48     128    
-112   0      
240    -64    
336    16     
192    -160   
0      96     
32     -400   
-80    32     
-144   48     
144    32     
128    96     
-48    -32    
336    -96    
384    160    
384    288    
-352   0      
224    32     
16     -64    
-96    -16    
0      -96    
64     -16    
16     -32    
128    176    
-16    -928   
160    32     
32     -64    
96     0      
48     16     
208    16     
-144   -64    
0      -32    
-16    -32    
160    -112   
48     64     
96     -192   
80     0      
48     -320   
192    80     
-144   -64    
192    32     
0      16     
96     48     
192    48     
32     -48    
80     -32    
96     -32    
176    -32    
-16    -32    
-16    48     
32     -96    
432    16     
-464   -368   
240    -80    
16     -320   
48     -144   
208    0      
112    64     
-16    48     
32     80     
-160   -48    
320    -176   
-128   32     
288    -64    
48     0      
-16    -224   
-80    32     
80     -16    
-32    -16    
288    -208   
-80    -16    
208    0      
128    -256   
-192   0      
336    240    
-384   -208   
192    -272   
224    -480   
-16    64     
32     -112   
128    -208   
208    96     
480    48     
-32    64     
224    -32    
-112   -352   
-96    32     
-32    -496   
-16    -112   
-240   16     
160    -128   
512    -160   
-16    -352   
32     16     
160    -784   
0      -16    
272    32     
-144   64     
192    -128   
128    -32    
-128   -48    
112    -80    
48     128    
224    -32    
-384   -128   
16     -352   
-64    -80    
16     -64    
128    -112   
16     -288   
176    -64    
-112   -1760  
144    -112   
336    208    
0      96     
128    -144   
32     16     
-192   64     
128    -80    
-336   -192   
160    -96    
0      192    
208    -32    
64     -128   
-224   -272   
208    -1008  
304    -752   
96     304    
48     -272   
16     352    
64     -368   
-64    144    
-80    -352   
112    64     
-496   -160   
-80    -96    
-240   0      
48     -48    
176    -96    
48     -304   
-32    16     
-64    -464   
240    256    
-112   288    
-96    -48    
-48    -480   
-48    224    
-160   112    
0      -448   
0      144    
128    -80    
-1248  64     
-160   -208   
144    -528   
32     128    
128    -112   
144    -400   
0      224    
16     -160   
128    640    
224    96     
-16    -320   
16     -80    
144    16     
176    144    
144    80     
-496   -160   
64     -176   
-384   96     
48     -96    
0      -16    
112    -240   
160    -16    
256    -320   
80     80     
-64    -176   
240    -176   
176    336    
96     176    
0      112    
96     80     
-176   -144   
80     96     
-32    192    
-16    -64    
80     160    
64     -112   
96     240    
192    -224   
144    0      
32     240    
32     -80    
112    -160   
16     -160   
-240   160    
80     32     
-80    -96    
80     -112   
-576   -32    
112    -48    
-96    96     
96     -96    
48     96     
192    -448   
-144   -368   
-512   -160   
96     -272   
-96    -48    
176    80     
-48    -112   
-32    -304   
-288   -336   
160    -128   
-496   -224   
384    0      
128    336    
-768   -32    
-48    -96    
-128   144    
-1936  32     
-80    -96    
-112   -128   
-64    -80    
128    -128   
-160   144    
176    16     
-64    -32    
96     -16    
-16    48     
176    288    
208    176    
-272   -96    
-80    -48    
16     -144   
-208   32     
192    256    
-320   384    
-192   -16    
144    -192   
-192   -96    
112    -240   
-128   -144   
-240   -96    
160    -112   
-96    -176   
0      -16    
-352   -192   
-144   288    
48     192    
-16    -32    
-288   -112   
-112   -208   
496    32     
-576   192    
304    864    
-144   384    
-160   16     
-208   -160   
-96    -144   
-48    -160   
0      -320   
112    -80    
32     -256   
128    208    
-224   208    
-336   112    
-240   -128   
160    -96    
-320   -80    
16     -16    
-1328  128    
-144   -80    
-160   0      
48     80     
-144   16     
64     -48    
80     0      
32     -16    
-80    16     
-320   160    
192    128    
-176   -160   
-64    304    
320    176    
336    304    
-880   192    
-64    -64    
-128   -256   
-32    -16    
16     80     
0      128    
48     272    
-32    176    
-112   -64    
432    0      
-32    64     
160    96     
-48    80     
-32    16     
32     -32    
-576   -128   
272    32     
-336   -64    
272    -16    
-160   -144   
80     -160   
-160   -480   
-112   -96    
96     -96    
-256   64     
80     -32    
32     48     
-320   -64    
-224   -32    
160    240    
-192   16     
-32    -64    
-800   -144   
144    128    
-16    32     
80     112    
-224   32     
-304   80     
-128   0      
0      -96    
-48    160    
-16    160    
112    288    
0      144    
-64    -32    
-160   -288   
0      -336   
-576   -272   
-176   -128   
112    -112   
-144   -144   
288    -416   
48     16     
144    240    
-112   -224   
-64    208    
96     -96    
320    176    
-272   -272   
144    -304   
-464   80     
-32    -48    
112    112    
-144   -304   
32     416    
96     -528   
-112   576    
16     -720   
384    0      
-96    112    
16     16     
96     160    
80     272    
-192   -288   
80     336    
-128   336    
112    -240   
-64    -272   
80     16     
-48    -80    
-96    112    
16     16     
-64    -64    
-48    -48    
96     64     
-48    32     
-208   -64    
176    0      
-512   -96    
64     112    
192    448    
176    256    
112    96     
0      -32    
-32    -48    
-32    -128   
224    224    
-32    176    
272    32     
-48    -464   
48     -80    
-288   96     
32     48     
0      128    
-144   -32    
-16    -16    
176    80     
160    80     
48     -112   
112    16     
16     112    
-32    0      
-32    0      
-48    -32    
-32    16     
176    48     
-176   -96    
208    16     
96     112    
144    48     
-352   -112   
48     32     
192    80     
0      16     
0      -32    
-96    -16    
112    224    
144    128    
-96    -96    
-80    -112   
32     64     
-176   -16    
80     -16    
0      16     
192    160    
-176   -80    
208    32     
192    48     
128    64     
48     16     
-32    64     
-160   32     
16     32     
160    96     
112    64     
32     -16    
0      -64    
80     80     
-112   -64    
48     64     
16     16     
0      16     
112    48     
-48    0      
80     -32    
144    48     
64     16     
32     32     
176    64     
-288   -128   
272    -48    
-160   32     
288    64     
-144   32     
192    -208   
-80    -80    
64     112    
-224   64     
96     -96    
-128   -16    
-16    112    
16     128    
-48    -96    
-112   96     
144    -32    
48     -48    
-144   -128   
192    -64    
-32    112    
-16    -160   
64     -32    
-96    -1216  
48     32     
32     -80    
192    48     
240    192    
144    32     
-128   -16    
336    368    
-384   0      
320    -96    
128    128    
-160   48     
544    0      
-144   -16    
144    432    
-160   128    
48     -16    
400    128    
-304   112    
112    -160   
144    -48    
-128   -224   
240    -224   
176    80     
80     160    
-16    -16    
176    -64    
-256   240    
128    -464   
48     -224   
80     0      
16     -112   
48     -1424  
96     -320   
-176   -128   
368    304    
-272   -96    
208    96     
-320   -176   
256    96     
32     192    
128    -288   
64     0      
-16    112    
144    -320   
64     304    
-128   -224   
224    -512   
-192   32     
192    224    
192    -16    
-48    48     
288    352    
144    -128   
-32    -192   
80     192    
224    304    
-128   -304   
-16    144    
96     -272   
-304   -512   
288    -720   
-176   -480   
128    -64    
16     208    
416    464    
192    -160   
384    -16    
-64    -336   
-64    -144   
-32    -112   
96     -208   
-48    -224   
64     -432   
336    176    
80     112    
272    112    
-16    -16    
336    48     
-192   -64    
64     32     
-16    80     
48     80     
-96    -16    
48     128    
160    16     
160    16     
0      64     
112    -80    
-48    144    
240    32     
-16    128    
-192   -368   
144    -416   
112    -96    
240    144    
-80    -16    
96     -400   
64     -16    
32     -96    
48     -1312  
16     48     
48     256    
16     64     
256    176    
-32    80     
-64    0      
32     144    
-240   -32    
288    -144   
176    -48    
-32    48     
144    0      
96     -240   
-16    -176   
64     -128   
-128   -64    
96     -320   
144    -112   
-16    -720   
32     -32    
-96    -32    
208    -80    
144    -16    
-96    176    
64     32     
-16    -64    
-416   80     
48     -80    
-400   -96    
256    -112   
16     -96    
0      -64    
192    -144   
48     -192   
80     -16    
-16    112    
32     -48    
176    32     
128    144    
0      -304   
48     -80    
32     -96    
32     -64    
-784   112    
-16    0      
224    448    
96     272    
80     96     
304    -112   
-32    -16    
224    -1296  
-64    -112   
176    -64    
-112   -160   
32     16     
192    -128   
-272   -336   
64     -256   
-592   -64    
192    -112   
128    128    
-64    -64    
96     -112   
112    -64    
176    32     
-16    -512   
-80    -48    
-16    -128   
-32    32     
80     64     
128    -48    
-176   -256   
96     -288   
-288   80     
208    176    
-1680  176    
-96    -16    
112    -112   
176    -128   
64     -48    
128    416    
416    160    
-256   -160   
-16    -112   
256    -400   
224    304    
-464   -96    
400    288    
-32    752    
96     128    
-544   -96    
-64    -384   
-960   -368   
320    272    
224    432    
16     240    
384    320    
112    -1328  
96     144    
-176   -48    
112    -16    
-224   128    
32     -96    
112    -240   
400    192    
-432   -80    
64     32     
-80    -80    
96     -64    
112    80     
-144   -576   
208    -432   
112    -832   
256    -64    
-160   -384   
-48    -240   
-240   -384   
112    -384   
-272   336    
320    176    
-64    -16    
-96    128    
448    -96    
96     32     
160    128    
-160   -320   
-288   -400   
-192   176    
208    320    
48     -336   
-64    208    
64     -304   
48     176    
16     368    
-128   -16    
48     -192   
480    512    
-1008  0      
-224   -544   
-48    -64    
-560   208    
80     0      
48     -80    
-1072  -160   
-160   208    
-1408  -160   
-160   128    
336    16     
-144   0      
128    -80    
48     -144   
-1408  464    
-192   -416   
-768   144    
-48    -128   
112    -304   
-288   -48    
-160   -176   
-576   -320   
-16    224    
-80    80     
-112   128    
-272   -480   
-160   352    
-48    -80    
64     -112   
-512   32     
32     -128   
0      112    
112    16     
-288   -192   
-128   224    
-32    -272   
-384   -512   
-128   224    
-288   208    
-320   416    
-1024  32     
64     -176   
16     -192   
160    -32    
-80    -16    
-112   0      
-64    -256   
128    -112   
80     16     
-336   -656   
64     16     
0      240    
64     160    
32     96     
-48    32     
-368   80     
-176   96     
-1536  64     
16     64     
16     -48    
96     16     
-64    -64    
-96    144    
0      80     
0      -112   
-48    -32    
-80    -16    
64     32     
0      64     
-48    -384   
304    -624   
176    80     
-192   144    
16     48     
96     -96    
-272   -336   
16     -256   
-48    240    
-176   0      
176    192    
-48    -64    
-48    -64    
-48    48     
-96    -48    
80     -192   
0      -16    
-64    112    
-304   -96    
160    32     
-160   -128   
64     208    
-240   0      
64     -64    
256    48     
32     16     
64     0      
-176   -32    
-144   48     
-240   -112   
48     -48    
-304   32     
64     32     
-816   -112   
96     16     
-1312  -48    
112    160    
-192   -48    
-144   0      
112    16     
0      32     
-112   -48    
112    80     
96     48     
0      -64    
48     -80    
-48    -80    
128    64     
-128   -48    
160    64     
-352   -48    
-240   -32    
0      16     
-176   -64    
144    80     
112    64     
-48    -16    
32     -48    
-64    64     
-64    -48    
80     16     
-176   -144   
96     112    
-128   -32    
96     -16    
-544   -48    
-176   -32    
48     64     
64     32     
96     64     
-112   -48    
32     -80    
-48    112    
16     0      
-80    0      
48     16     
-256   208    
160    176    
-224   -48    
112    144    
112    240    
256    176    
-160   96     
0      -176   
-64    -32    
128    64     
-80    -32    
0      -112   
-32    48     
-64    -32    
160    -192   
-192   -112   
128    112    
-240   -32    
128    -160   
-128   64     
160    64     
96     -48    
-304   -176   
32     -272   
-32    32     
288    384    
336    304    
-176   144    
-304   -512   
48     -80    
112    656    
-272   -160   
96     -144   
0      160    
-96    160    
16     32     
-64    112    
-240   -208   
224    112    
-48    -96    
176    64     
32     176    
-32    -176   
-288   48     
224    -128   
-48    272    
-160   -400   
-32    1024   
240    -960   
48     -880   
-352   608    
240    -224   
-256   544    
240    -288   
-256   -736   
80     112    
-128   608    
416    0      
-16    -176   
80     -208   
-64    -224   
-80    -32    
16     -80    
0      144    
160    64     
48     224    
0      64     
48     -32    
128    -48    
-112   -32    
176    -32    
-128   -144   
80     0      
48     -144   
240    192    
-160   -32    
-224   -944   
-32    0      
-32    -16    
112    -48    
-192   -48    
192    64     
144    176    
-144   80     
16     32     
-64    16     
-64    0      
-32    48     
-160   -224   
208    -64    
48     16     
-240   -160   
80     32     
48     240    
304    96     
32     128    
48     -32    
0      -32    
0      32     
32     0      
128    -16    
96     -112   
112    112    
16     32     
-160   64     
96     64     
-80    -144   
144    -112   
80     -368   
336    112    
-176   -16    
16     80     
-160   0      
144    0      
80     96     
48     48     
160    -160   
-16    32     
80     -64    
-112   -32    
160    -16    
-16    -48    
-16    -96    
128    -944   
192    624    
-144   176    
256    -80    
-176   80     
-48    64     
64     -144   
-96    0      
64     -176   
256    80     
-64    128    
-32    -48    
-144   -64    
208    -304   
112    64     
128    -416   
-112   -48    
400    -160   
240    96     
48     48     
96     160    
-192   64     
112    -32    
-96    -48    
224    -80    
80     80     
64     -176   
208    -80    
208    -80    
208    96     
-128   -112   
80     -128   
112    -224   
112    128    
32     304    
64     112    
32     32     
272    96     
-32    32     
128    80     
192    32     
112    16     
-80    48     
48     -16    
128    -64    
-32    112    
224    96     
64     -336   
352    368    
-112   240    
80     -16    
160    16     
112    240    
-32    -16    
-64    -256   
112    -48    
112    48     
-32    0      
320    -112   
112    176    
-64    112    
-48    96     
-16    -256   
16     16     
-64    48     
64     -528   
80     368    
192    288    
-144   -560   
544    64     
0      304    
304    -16    
-48    528    
64     -176   
-224   -96    
112    -112   
80     224    
-64    -32    
336    64     
-48    -208   
96     -48    
-272   -160   
64     -304   
352    -784   
0      -176   
-208   -1088  
192    -512   
0      384    
0      -64    
256    -224   
-64    -32    
208    80     
-48    -80    
80     -176   
-64    -48    
32     -400   
288    880    
-16    -288   
-32    -48    
-64    80     
192    -400   
128    128    
-176   96     
32     -144   
-16    160    
-496   -96    
400    96     
160    -112   
-704   -256   
-16    96     
0      -352   
144    64     
112    0      
144    -224   
16     -112   
48     -96    
224    -16    
-16    -112   
48     48     
-48    -832   
352    -64    
0      208    
208    -112   
-80    -176   
128    112    
-144   112    
64     -80    
-160   -16    
208    0      
-1888  32     
-64    32     
96     -32    
48     -144   
0      -48    
160    -560   
0      -112   
96     -304   
16     48     
80     16     
-112   -96    
-48    -192   
48     -128   
16     -112   
48     128    
-416   -48    
224    16     
-176   -80    
272    16     
-160   80     
176    0      
16     144    
-16    -608   
96     -16    
-112   -160   
128    48     
-96    64     
96     0      
-96    0      
224    32     
-16    -208   
96     -80    
-1344  -64    
-16    -64    
112    112    
272    224    
-224   128    
-80    -464   
128    -96    
256    -64    
208    96     
-208   -256   
304    -96    
-160   96     
16     -240   
-384   -176   
192    -16    
-480   -32    
128    128    
-176   80     
224    -176   
160    -144   
-48    -576   
-16    64     
48     -112   
32     -32    
-208   -80    
-96    -176   
-112   -112   
160    -16    
-224   -96    
128    80     
-144   -48    
160    -64    
176    -64    
192    -192   
-48    80     
16     -96    
128    64     
96     144    
-48    -80    
-96    32     
176    288    
-144   64     
144    -80    
-240   -48    
-64    -48    
96     96     
-320   -32    
80     32     
-48    -192   
224    -112   
448    48     
176    48     
-176   -64    
-48    -64    
-608   -16    
96     -32    
-16    16     
192    96     
-128   -48    
-160   -272   
-112   -416   
160    -112   
112    144    
-112   -32    
-96    -32    
-720   -304   
-736   -128   
80     -160   
224    -32    
16     -48    
-128   80     
-16    0      
48     -16    
-144   -48    
-16    -64    
-80    -96    
-1296  -176   
240    64     
-288   -128   
-48    176    
-480   -176   
-576   16     
-32    -48    
-80    32     
112    16     
-1264  -16    
80     16     
-32    32     
32     32     
64     32     
-176   -16    
-112   -80    
80     32     
96     -128   
-112   16     
-16    -16    
-80    0      
-64    -16    
-528   16     
-96    -112   
-336   -112   
0      48     
-704   -16    
-32    64     
16     -16    
48     48     
-272   -144   
0      48     
16     0      
48     96     
80     0      
0      48     
32     16     
-192   0      
-112   -80    
-112   -144   
-96    -32    
-64    48     
-128   -112   
-976   -80    
32     80     
-48    -96    
240    32     
-176   -96    
48     -16    
-80    128    
-128   -48    
16     -64    
-64    -208   
-96    16     
-192   240    
-224   -368   
-512   -192   
-112   -304   
-1200  768    
48     -384   
176    -464   
-16    320    
-144   -160   
-64    -224   
0      144    
-208   -32    
48     256    
-112   -416   
112    368    
-336   -128   
96     192    
-208   16     
192    96     
-560   32     
240    544    
112    368    
-112   -512   
-160   304    
-128   -800   
160    -240   
64     176    
160    -256   
64     544    
208    192    
208    384    
-352   -256   
-144   -32    
-16    176    
-128   -592   
128    -80    
-176   -144   
-368   128    
48     240    
192    272    
80     16     
32     16     
-208   48     
-224   -48    
112    -80    
96     0      
-80    80     
-32    80     
0      64     
112    -16    
-192   160    
48     -32    
-128   -80    
48     0      
-32    288    
-80    32     
112    80     
-32    80     
48     112    
-80    48     
-80    -96    
32     -32    
-336   0      
-96    64     
-144   -144   
-112   176    
288    112    
176    -32    
112    -64    
-112   48     
-80    -48    
-16    96     
32     48     
-16    32     
-160   -16    
-48    -48    
48     80     
-48    -128   
80     -64    
-128   -240   
96     80     
-144   48     
-112   -16    
128    32     
48     64     
112    144    
48     16     
-16    -64    
0      -48    
144    -32    
-176   0      
-80    32     
0      -32    
128    16     
-320   -96    
96     -144   
48     48     
208    64     
-96    -96    
160    0      
80     32     
80     144    
-192   16     
-128   80     
16     0      
-16    -80    
96     -64    
144    -32    
0      160    
-144   -48    
144    -32    
240    80     
-48    64     
64     -128   
80     -64    
-48    -48    
48     -48    
256    400    
-80    176    
80     80     
128    64     
80     -80    
-256   -208   
272    -176   
128    16     
16     224    
80     256    
-128   -64    
-80    -272   
192    -64    
80     16     
64     -32    
96     16     
160    16     
-224   -224   
-336   -304   
288    128    
-176   144    
-160   -688   
64     48     
0      176    
-80    48     
80     64     
240    176    
-48    256    
0      -560   
-112   64     
240    0      
-416   -896   
192    384    
-144   80     
-192   16     
-112   -368   
112    -864   
336    480    
-16    -80    
176    -208   
32     288    
-64    32     
-64    -528   
96     368    
-176   -224   
-32    16     
-48    432    
224    -176   
-32    304    
-16    0      
224    -16    
16     -816   
-64    -272   
-96    -64    
-48    96     
96     96     
288    336    
-144   -64    
160    -64    
-16    64     
80     80     
160    -160   
16     -112   
16     512    
80     80     
-32    0      
-96    -352   
144    -64    
-32    16     
48     48     
80     -32    
80     16     
64     112    
16     16     
-96    32     
16     -16    
-128   -240   
0      32     
-64    224    
288    272    
240    720    
304    304    
240    208    
64     -96    
0      208    
-96    176    
-64    -80    
-32    64     
-112   32     
224    48     
368    336    
-112   48     
160    -16    
128    176    
288    144    
-32    256    
64     48     
208    144    
0      -144   
-192   96     
32     -128   
-64    -96    
352    128    
-16    128    
-16    -64    
384    80     
-288   48     
128    16     
112    -16    
48     -112   
128    16     
-80    -192   
64     -80    
16     -176   
-48    -16    
32     -272   
48     -32    
160    -32    
208    16     
32     48     
-384   -16    
48     -16    
176    -16    
48     48     
-64    -176   
96     -32    
16     32     
128    48     
96     -48    
224    112    
-32    -160   
80     80     
-64    48     
128    -16    
128    80     
-192   32     
96     16     
32     -208   
112    -80    
144    176    
112    80     
208    -64    
-64    48     
-32    0      
144    96     
16     -192   
96     48     
528    448    
-224   320    
-304   0      
336    240    
32     0      
144    -240   
-272   48     
224    96     
48     0      
-16    -96    
144    96     
64     -160   
144    -32    
128    -176   
480    384    
-320   96     
96     -112   
0      0      
-48    -368   
128    -672   
128    -48    
112    -128   
-144   48     
384    -192   
80     -272   
-96    -256   
-32    -64    
160    96     
-96    -16    
64     -80    
-32    -176   
96     -432   
160    64     
-400   -32    
0      -288   
96     -368   
48     -240   
208    224    
-272   -768   
-80    -176   
192    -16    
112    16     
80     64     
128    0      
80     -160   
304    -304   
-336   -304   
64     16     
-224   160    
32     -16    
320    48     
-272   -144   
224    -128   
48     -112   
160    -64    
112    64     
-80    144    
-48    -336   
-176   -32    
-48    -288   
32     16     
-96    -48    
0      32     
-32    -16    
-48    -208   
384    -256   
224    -16    
160    -16    
16     -32    
80     -32    
-16    -208   
-80    -64    
368    48     
176    32     
-48    -80    
80     -112   
128    -112   
0      -96    
-208   -48    
16     -96    
-352   0      
16     -176   
224    16     
-80    -112   
160    48     
208    -496   
-288   -32    
256    -128   
-16    32     
160    32     
-16    64     
-240   -16    
208    16     
-240   -80    
128    -64    
-208   -224   
48     -80    
96     -80    
-128   -208   
-192   -32    
128    -256   
128    0      
32     -864   
64     32     
144    0      
64     0      
-192   -224   
-16    -64    
-240   384    
128    256    
-464   96     
0      -160   
-48    -144   
128    -96    
160    144    
208    240    
-32    -304   
80     -128   
64     144    
96     -192   
48     -336   
-144   352    
128    16     
-208   -80    
-48    -400   
48     -32    
272    -128   
-480   -16    
240    176    
-160   432    
80     -368   
112    -128   
-16    -48    
240    112    
-208   96     
0      112    
160    -560   
-240   -128   
-976   128    
-288   336    
-224   -320   
-32    -224   
48     496    
176    160    
-64    -160   
144    -240   
-64    112    
304    -128   
-176   208    
-176   -544   
128    -272   
-160   -80    
-112   -112   
-64    16     
96     16     
-32    128    
-112   -16    
16     48     
-112   -160   
-64    176    
-16    64     
400    192    
-80    -80    
-1488  0      
-128   224    
-2320  -80    
-288   128    
192    48     
48     0      
80     64     
192    -256   
-80    -464   
-176   256    
-256   352    
112    -16    
-272   -96    
224    -16    
-32    -48    
-416   -32    
-208   -112   
-688   224    
-240   0      
-704   -96    
-80    -48    
-32    -80    
-32    48     
-1248  16     
272    64     
-336   -224   
48     -64    
80     -96    
-256   96     
-80    32     
-336   -96    
112    0      
-112   144    
-16    -48    
-128   -80    
-176   32     
-1904  80     
-416   -112   
240    -544   
-64    128    
-16    304    
0      -80    
-272   -64    
-224   16     
-176   -48    
48     0      
-208   -192   
-224   -176   
-16    128    
-176   80     
112    -48    
-240   0      
-80    16     
-64    32     
-16    0      
-16    -96    
-16    -64    
0      -112   
176    80     
224    96     
-16    208    
-224   16     
-192   -48    
-80    0      
-192   -16    
-112   -144   
0      -80    
320    160    
-2720  -64    
-32    -48    
-176   176    
144    0      
48     -96    
112    -48    
48     -32    
-128   96     
-288   -224   
96     -64    
48     32     
48     48     
112    192    
-128   208    
-176   176    
-800   -16    
80     16     
48     -80    
-32    -64    
272    224    
-256   48     
-208   -128   
128    -256   
128    -112   
144    0      
-80    0      
32     208    
-240   0      
-240   -320   
112    64     
-32    -32    
128    -48    
96     -176   
128    16     
-112   400    
0      -48    
-80    112    
-48    -48    
80     160    
128    -32    
48     -80    
-288   64     
64     -112   
-208   224    
176    0      
-720   112    
-16    -32    
-32    -48    
144    416    
-144   -144   
240    -128   
0      -32    
-208   64     
128    16     
0      -16    
-144   -288   
-368   160    
-64    16     
0      -112   
288    384    
-80    144    
48     -192   
112    -64    
-96    128    
-64    112    
96     240    
-96    32     
-128   32     
208    -112   
-128   -144   
128    32     
16     16     
64     32     
-192   -32    
0      160    
-112   -80    
-144   16     
32     32     
128    96     
-48    -16    
48     0      
32     0      
-80    -32    
48     96     
32     0      
-32    48     
-224   0      
-48    -32    
-320   -80    
96     160    
-96    64     
128    112    
48     16     
32     80     
128    128    
-144   80     
48     48     
-32    -48    
128    -64    
-96    96     
64     0      
-16    -80    
96     128    
-80    -112   
-176   -80    
-64    64     
160    -80    
16     112    
96     112    
64     -64    
-32    -16    
16     160    
32     16     
16     112    
-208   -48    
160    64     
-144   -112   
144    -272   
592    -128   
208    16     
240    192    
80     16     
-32    96     
-128   -64    
240    96     
96     16     
96     32     
144    48     
-272   16     
-160   -16    
48     80     
64     32     
96     64     
-96    0      
192    16     
-48    -48    
0      16     
-96    48     
48     32     
384    240    
-368   176    
160    -16    
176    48     
16     -16    
-48    -80    
240    128    
-16    48     
-128   16     
96     32     
48     -128   
160    48     
128    112    
0      80     
128    -64    
-208   -64    
240    96     
-176   64     
192    -48    
176    48     
16     48     
-128   64     
0      -32    
96     80     
16     -64    
96     -464   
160    64     
-96    96     
-64    32     
-80    64     
16     -304   
-32    -32    
272    272    
64     -48    
192    0      
0      -224   
-160   32     
-16    0      
-80    16     
96     -176   
240    -240   
-48    128    
288    192    
128    128    
-96    16     
96     224    
-48    128    
-32    -32    
64     0      
96     0      
-80    -96    
336    -48    
-32    -16    
240    -112   
64     -80    
-192   -576   
96     224    
48     -208   
0      -16    
32     0      
48     -272   
-32    -112   
-16    304    
16     -112   
176    0      
-64    -16    
144    80     
144    112    
-48    -64    
-64    -16    
-16    -272   
112    64     
0      -688   
96     48     
-176   -288   
560    -224   
320    288    
336    -144   
-160   32     
64     128    
-80    128    
-176   256    
48     16     
96     -352   
224    544    
96     -336   
256    192    
-48    -480   
112    -64    
144    -112   
176    16     
-128   96     
-16    0      
0      0      
-80    -384   
288    528    
304    288    
80     -160   
-48    80     
96     112    
48     112    
16     64     
416    -448   
272    0      
16     -224   
48     64     
32     240    
16     -480   
112    480    
192    320    
144    -128   
-48    80     
-128   -128   
48     176    
16     464    
176    -448   
-80    -96    
-80    32     
128    80     
32     16     
-64    48     
-16    -16    
48     144    
64     80     
112    32     
64     -784   
144    448    
32     -160   
-48    -336   
0      -64    
112    256    
16     -64    
80     -96    
288    144    
-112   -128   
144    144    
-16    128    
144    -544   
96     64     
-112   0      
96     -1280  
-80    32     
192    128    
-48    -384   
-112   -384   
160    384    
192    112    
176    -192   
96     -112   
144    112    
-192   -16    
48     80     
48     -96    
192    592    
-48    -368   
224    288    
80     0      
16     -288   
48     128    
16     -880   
144    -144   
128    -16    
160    -320   
96     -448   
160    240    
64     -80    
48     32     
96     -80    
16     -192   
-560   -32    
128    80     
-48    208    
0      144    
112    -192   
-16    -80    
112    -80    
144    112    
112    -144   
48     -272   
32     320    
144    80     
16     48     
-48    -192   
64     -144   
-384   -80    
176    -160   
-64    160    
80     -16    
192    -368   
48     -608   
224    -80    
-16    192    
-16    -16    
80     -48    
80     96     
96     -80    
32     400    
80     80     
176    -192   
-192   -48    
-48    -720   
-2064  -496   
80     -96    
-128   -80    
288    -64    
16     272    
144    0      
48     80     
48     320    
96     -160   
224    112    
-160   48     
-160   -112   
16     -176   
-192   -32    
352    -32    
-848   32     
64     -16    
336    16     
16     288    
-32    336    
368    16     
144    48     
416    -560   
-64    64     
32     -16    
32     -64    
-48    -48    
-48    -32    
64     -16    
304    -64    
-560   112    
240    -64    
-752   0      
-32    0      
160    80     
240    -448   
80     16     
-80    -288   
192    144    
0      144    
32     -176   
-32    -160   
288    64     
-144   48     
112    0      
-240   -32    
144    -128   
-1104  80     
16     -112   
144    144    
-80    128    
32     -80    
0      -528   
160    32     
48     -48    
112    -16    
-64    0      
80     -16    
-160   80     
-192   48     
-176   224    
336    -176   
-432   -96    
224    0      
-176   -144   
48     -160   
96     -48    
256    -160   
-32    -48    
-80    48     
160    96     
288    96     
80     176    
-160   16     
0      64     
32     192    
176    -208   
-48    -32    
288    -16    
48     272    
-432   -48    
-128   -320   
-48    128    
288    96     
80     480    
-208   -480   
0      0      
240    80     
-320   -176   
144    -176   
32     -48    
240    0      
-384   -16    
-688   0      
-224   -128   
-512   -176   
256    160    
32     -16    
32     -64    
176    48     
-96    272    
-208   560    
-848   160    
64     80     
128    192    
176    -48    
-112   -64    
64     96     
-880   48     
-96    16     
-32    -128   
-128   -48    
144    112    
-240   -80    
-48    16     
-736   -48    
-80    -32    
-48    0      
48     96     
240    32     
0      -16    
-288   -80    
48     64     
-160   -160   
176    -80    
96     16     
64     0      
-16    -80    
-208   -112   
-96    16     
144    160    
-304   -128   
-144   -48    
80     -112   
-2704  -176   
16     32     
-96    -128   
96     64     
-32    -32    
144    64     
-48    -16    
-64    80     
-80    -48    
-128   -16    
32     0      
32     48     
240    48     
-416   -64    
32     -16    
-256   -112   
64     32     
192    64     
176    64     
-224   -32    
64     144    
-16    48     
160    16     
-112   -96    
160    0      
-96    64     
16     80     
112    64     
-144   -96    
16     80     
-128   32     
144    -16    
-304   -64    
112    96     
-96    -80    
16     336    
96     16     
-160   -144   
-48    48     
-240   -96    
-16    -48    
-48    96     
-96    96     
96     -80    
0      -176   
-16    128    
224    96     
-704   -192   
240    64     
-128   112    
-128   80     
192    -96    
-208   16     
-368   0      
96     80     
48     48     
-208   48     
208    32     
-80    16     
96     64     
-256   -32    
-16    80     
-64    -16    
16     32     
176    48     
48     16     
-96    -48    
48     -96    
-32    80     
96     -16    
-32    16     
0      0      
-224   32     
32     0      
16     32     
-400   -64    
272    -64    
-128   -128   
112    80     
-96    -16    
-192   -48    
64     96     
48     32     
-32    0      
128    80     
-80    48     
32     80     
16     32     
-352   -96    
-32    0      
-112   -32    
320    128    
-400   32     
176    -48    
-80    -32    
-16    -112   
160    304    
64     304    
-160   -240   
224    128    
80     144    
-96    -176   
144    -64    
64     0      
144    352    
-128   16     
176    -16    
-160   -32    
224    192    
-128   -32    
112    -16    
0      96     
48     32     
160    -16    
-64    -112   
160    0      
-208   -32    
96     32     
16     128    
272    -400   
-96    224    
-96    -16    
-48    -64    
80     80     
-32    48     
64     -16    
160    64     
0      0      
-16    0      
496    832    
-480   -384   
16     -192   
192    64     
-208   -176   
128    208    
-304   -160   
48     16     
-80    -128   
-64    400    
-160   144    
64     128    
-80    -96    
368    800    
-112   -496   
192    352    
160    128    
-160   -288   
32     592    
208    -224   
112    -16    
80     192    
16     -64    
48     0      
-96    32     
16     80     
80     -64    
32     96     
-48    112    
48     0      
-336   -400   
448    -448   
-16    1088   
0      -256   
-32    -528   
32     496    
128    -32    
-48    0      
144    352    
208    -320   
256    128    
96     288    
16     -400   
-48    -272   
-96    160    
-32    304    
-368   -304   
-96    -224   
-128   176    
448    80     
-96    208    
304    64     
176    -352   
0      16     
48     32     
-64    -112   
80     -112   
96     240    
80     96     
48     128    
224    320    
32     576    
144    208    
112    128    
0      176    
-96    160    
16     272    
144    -400   
-32    -32    
96     32     
64     176    
0      80     
64     -160   
48     144    
32     -32    
-32    48     
112    -64    
32     -128   
32     336    
-32    -64    
112    -112   
64     -16    
144    16     
16     112    
64     304    
-16    128    
224    -64    
80     272    
80     32     
416    848    
-224   144    
112    192    
-304   -400   
-320   -96    
272    288    
-208   -16    
160    240    
48     -816   
-208   144    
368    -1024  
-368   -16    
32     -80    
0      336    
-16    32     
96     -16    
48     -208   
96     -144   
64     -368   
256    -192   
48     208    
-112   -480   
160    -64    
80     -32    
272    304    
-144   256    
16     -128   
-48    -80    
-32    -96    
-16    48     
-16    -32    
208    -32    
-128   112    
80     32     
144    -128   
-144   32     
192    -16    
48     176    
-208   -624   
80     0      
32     -80    
96     16     
-112   -16    
256    -96    
-48    128    
432    208    
-288   208    
192    -672   
-144   -576   
-16    -208   
176    16     
160    -208   
-272   -592   
-64    -192   
-96    192    
-80    32     
352    272    
-80    224    
336    480    
176    256    
208    -208   
208    -224   
80     -112   
-16    80     
-16    -48    
192    144    
-32    224    
448    240    
-192   160    
0      80     
-128   -208   
176    -144   
160    0      
-32    336    
192    144    
192    336    
-80    -16    
0      -128   
-64    -848   
80     -96    
288    160    
240    32     
16     240    
-64    -80    
32     32     
208    112    
-112   576    
-96    112    
208    -208   
64     160    
-48    -32    
336    -288   
64     64     
112    -32    
112    -16    
176    -96    
-144   0      
80     160    
224    128    
208    80     
80     -160   
-32    -288   
0      96     
144    -512   
0      16     
224    352    
-64    -368   
-896   48     
0      -192   
-16    -144   
-16    -160   
-64    0      
64     -576   
64     128    
208    208    
-16    -16    
176    -288   
0      160    
96     32     
192    272    
-208   -128   
-176   -368   
-304   -16    
144    0      
-32    -224   
-16    0      
-80    96     
32     -256   
-16    -32    
208    -352   
432    288    
192    144    
208    -16    
224    96     
112    64     
-272   -96    
-32    32     
-448   64     
-48    -64    
64     0      
0      48     
96     32     
-32    0      
-16    -16    
208    -416   
-224   32     
160    -32    
-16    32     
-48    -144   
288    -160   
80     48     
16     -144   
-32    -176   
176    -80    
-1360  32     
-48    -80    
16     -112   
80     -96    
-16    48     
160    -112   
-240   0      
192    -592   
16     -16    
-48    -64    
112    -64    
0      -80    
176    -64    
-160   -64    
32     -32    
-720   32     
128    -112   
-1584  -32    
32     -160   
112    -32    
48     -240   
-128   16     
112    -1648  
64     16     
96     -16    
128    -32    
-48    64     
32     -16    
-240   16     
112    -16    
-288   -48    
80     32     
-16    -32    
224    -96    
0      -48    
192    -64    
-32    -32    
272    -192   
64     -160   
16     32     
16     16     
-208   0      
128    -32    
-160   32     
160    -192   
176    96     
32     -16    
16     -336   
224    -192   
32     176    
-48    -224   
16     0      
-64    -304   
176    48     
-208   0      
16     -64    
-80    -32    
-16    64     
176    128    
-16    16     
-112   -80    
48     -16    
-1120  -64    
144    -192   
112    112    
-320   240    
48     32     
64     48     
-1568  144    
-208   -16    
144    -96    
-16    -112   
608    208    
48     0      
272    -160   
64     -16    
48     -32    
112    96     
-736   32     
192    48     
-432   -64    
-912   -128   
16     -192   
128    64     
-272   64     
-160   16     
-16    16     
-240   -16    
-64    -32    
112    -64    
32     32     
32     32     
-32    64     
96     -112   
-176   -128   
64     16     
-352   -48    
64     -112   
-304   -16    
-16    64     
-208   -48    
-32    -48    
-1472  -64    
-48    -16    
80     -64    
-272   32     
-112   -160   
-256   -208   
80     -224   
0      208    
160    176    
-32    -336   
-48    208    
-48    224    
-208   -256   
-192   160    
64     80     
-272   -256   
-160   192    
-240   -256   
16     272    
-160   -64    
64     96     
272    144    
-336   96     
96     16     
160    0      
16     -176   
-208   -32    
-80    -80    
-32    -16    
-16    192    
-48    -176   
-16    96     
-464   -96    
-240   -16    
-16    416    
64     -240   
0      -192   
-64    -288   
-192   32     
64     -112   
-80    -48    
-48    144    
-288   -304   
80     0      
128    -160   
-352   -288   
-160   -112   
-560   -272   
-80    96     
-128   -96    
64     -48    
-288   -320   
-16    -32    
96     0      
-112   32     
-16    48     
128    496    
-128   16     
-96    -112   
-48    32     
-368   -160   
-32    -16    
-96    -144   
32     -112   
-528   -128   
48     112    
-16    16     
48     -240   
32     -160   
-32    -96    
0      -128   
-192   -368   
-112   -464   
112    96     
-32    352    
-208   -192   
144    16     
-48    -48    
256    0      
-320   -80    
-224   64     
-64    96     
144    64     
-96    16     
-80    32     
-16    16     
112    -48    
0      -48    
-112   32     
-64    64     
0      -32    
-16    96     
-384   -32    
-144   16     
-656   -128   
-128   -112   
-16    -64    
144    -96    
-80    32     
128    64     
-112   -96    
96     64     
-176   -96    
64     -224   
-160   16     
-96    -208   
128    160    
16     -48    
240    48     
-96    48     
0      -64    
-32    240    
-16    64     
-80    -64    
32     -80    
80     -112   
96     192    
112    160    
32     -32    
64     96     
-400   -32    
16     32     
-208   -96    
-48    -64    
80     -112   
-144   48     
96     96     
192    96     
-80    80     
32     64     
-96    32     
208    -48    
-80    480    
144    64     
-80    -48    
-160   -304   
32     64     
-144   -80    
-128   144    
144    368    
64     -208   
288    32     
-192   0      
144    80     
128    96     
240    544    
80     416    
192    -16    
32     112    
-32    -304   
-240   400    
208    48     
16     48     
336    352    
192    832    
-208   560    
32     224    
144    96     
-32    32     
144    400    
-160   96     
-208   16     
-224   144    
112    128    
224    144    
-80    -176   
112    -48    
-112   -80    
-176   160    
192    112    
-256   384    
464    144    
-32    -96    
432    -176   
-16    -48    
-64    176    
0      -96    
-16    160    
-16    -112   
160    224    
-176   -432   
240    -1296  
-208   -112   
-32    96     
0      208    
-176   80     
-96    -16    
176    -432   
-32    16     
320    -64    
-192   256    
0      -656   
-256   -576   
16     -16    
-112   176    
224    -160   
-112   -384   
144    -144   
0      -96    
128    0      
96     80     
-112   -16    
240    -528   
-64    0      
64     -64    
112    -48    
192    -304   
-64    -96    
96     -32    
-96    -240   
16     -144   
32     -864   
112    -32    
16     -32    
208    128    
-80    272    
-160   -144   
112    160    
16     304    
128    96     
0      112    
48     -112   
-64    -64    
48     64     
-16    192    
176    32     
-224   -576   
96     128    
128    80     
80     -128   
112    800    
-80    368    
432    -624   
-16    256    
-80    -288   
336    368    
64     32     
192    464    
32     -160   
0      64     
-96    16     
-64    -16    
80     -64    
80     160    
304    -16    
304    -48    
80     32     
-48    -256   
96     208    
-208   -96    
-48    -160   
32     96     
160    -48    
96     -48    
80     64     
-32    -16    
128    -160   
112    48     
208    -128   
-112   -64    
80     -928   
-32    32     
128    0      
16     144    
-16    128    
96     -64    
368    -144   
464    -272   
112    112    
16     -32    
32     48     
-32    -208   
-208   -80    
-112   -288   
-112   -48    
-64    48     
-240   64     
-32    32     
160    48     
0      80     
224    48     
48     96     
304    -64    
0      48     
80     -176   
-64    0      
416    -240   
112    32     
-112   -32    
-64    64     
-128   -16    
-192   -160   
96     -160   
432    0      
240    192    
256    0      
112    32     
48     -208   
32     64     
-64    -96    
-32    32     
-32    -176   
16     32     
-16    160    
32     80     
32     -176   
-32    -32    
176    144    
112    16     
-48    32     
0      -400   
-16    -560   
80     -80    
96     -400   
176    -64    
224    64     
-80    -128   
288    64     
-16    -32    
256    160    
-176   -96    
112    -928   
128    64     
64     -48    
96     64     
-32    -144   
224    -272   
-32    -64    
208    -304   
32     -16    
48     -368   
48     -16    
64     16     
80     -96    
48     96     
208    -16    
-80    -192   
192    48     
192    80     
-192   -48    
-480   -96    
16     -144   
-32    -64    
96     48     
0      -32    
320    -192   
-208   -128   
224    -1120  
32     0      
416    80     
-368   96     
128    -96    
32     -32    
64     -32    
-32    -64    
-368   64     
96     96     
-2144  -32    
224    -112   
64     -64    
0      -64    
528    224    
-128   112    
96     16     
32     -160   
-160   -48    
96     -48    
160    0      
-80    -272   
96     -176   
-208   48     
-16    64     
-976   -80    
-96    176    
0      112    
320    -80    
-128   320    
240    -80    
-176   -96    
272    -544   
-288   -128   
32     192    
-48    64     
64     -16    
80     48     
-144   48     
32     64     
-704   -272   
176    48     
-1648  -96    
48     -16    
208    -304   
-112   -464   
32     400    
80     -432   
240    0      
16     -48    
-64    -32    
144    144    
16     160    
-160   -128   
-96    64     
-352   -912   
560    704    
-960   -208   
48     -192   
-192   544    
0      -240   
-96    -48    
528    -528   
48     464    
-48    160    
160    -464   
-256   -128   
160    -128   
-96    352    
368    288    
-288   160    
224    192    
-224   96     
96     64     
-432   80     
224    96     
32     192    
192    32     
80     48     
240    -528   
96     -48    
-224   0      
96     0      
-304   48     
240    -48    
-48    -160   
-32    -96    
-128   0      
-160   80     
80     112    
-64    -80    
80     32     
64     -448   
-80    -80    
-160   -96    
48     16     
160    48     
-144   80     
-272   -208   
64     -16    
-240   80     
64     -16    
-224   0      
48     -64    
-64    -96    
224    -48    
-80    80     
240    -144   
-96    32     
48     48     
208    96     
0      48     
-80    -144   
-112   32     
-32    -224   
48     -16    
96     -112   
-32    -16    
-1264  -80    
160    -96    
-160   -80    
-16    112    
-80    -48    
-64    16     
-144   -32    
-464   272    
48     336    
0      112    
-352   32     
240    -160   
-48    64     
-144   -96    
-48    -64    
-864   -112   
-64    64     
-256   -48    
96     -48    
160    -48    
-96    16     
240    320    
-224   224    
-160   32     
-144   -160   
64     0      
-272   -80    
32     -96    
-32    -64    
336    256    
-512   176    
96     16     
32     -128   
128    336    
-128   80     
-96    0      
16     32     
-16    304    
96     352    
-112   -80    
-64    -272   
-80    -192   
112    -32    
-80    -64    
64     -112   
16     -144   
160    176    
-32    32     
-48    80     
-64    16     
-176   -176   
-48    112    
48     -16    
-144   -48    
-432   -16    
-128   -112   
-272   32     
-48    -32    
-816   -32    
32     -32    
-80    -224   
48     16     
-208   -176   
-16    0      
32     -16    
96     496    
48     112    
-224   -272   
-208   -288   
96     -464   
-64    96     
48     -256   
144    -96    
-336   16     
128    16     
-144   32     
80     416    
16     -176   
-448   -768   
-128   -448   
0      -112   
-192   304    
112    464    
-208   -384   
-128   -256   
304    240    
-192   192    
320    672    
-672   96     
64     336    
-432   320    
32     -336   
224    -1040  
-144   1184   
240    592    
-256   -352   
0      0      
144    -256   
-96    112    
288    -288   
48     208    
-304   96     
64     -176   
-384   -16    
208    160    
-656   -528   
320    192    
-128   128    
144    -400   
96     224    
32     16     
-64    -560   
96     208    
112    320    
-336   -48    
-48    -160   
-320   256    
112    240    
192    -384   
144    144    
-384   640    
240    -576   
112    -192   
-400   16     
112    -80    
-64    288    
304    272    
48     192    
-112   0      
32     -48    
160    32     
-96    448    
192    64     
-272   -320   
-64    176    
-48    -288   
176    464    
16     0      
256    208    
96     -64    
416    256    
-496   -64    
80     -256   
144    448    
-144   -144   
240    -32    
-176   320    
256    -112   
-432   32     
32     48     
-64    -32    
48     -64    
48     160    
272    160    
-224   -160   
0      32     
-96    128    
96     -112   
112    16     
-80    -96    
64     128    
208    416    
-48    -304   
-128   -144   
208    256    
304    176    
-112   -192   
-80    -192   
-80    656    
224    -112   
160    -304   
-144   320    
48     208    
-48    96     
-320   -16    
384    128    
-112   64     
480    256    
-272   96     
64     16     
128    -80    
80     -224   
64     -96    
-16    -32    
-160   -80    
-48    80     
160    128    
-320   48     
-48    -32    
-16    -64    
240    64     
-16    288    
-96    368    
32     48     
448    16     
80     -48    
272    16     
112    16     
-80    112    
176    -16    
-48    48     
-384   -304   
160    -320   
128    -48    
256    160    
240    112    
-112   48     
288    -528   
112    -32    
176    288    
64     80     
-80    -32    
-240   -112   
16     -144   
352    0      
80     32     
400    48     
96     80     
96     32     
48     48     
64     48     
-96    160    
-272   -160   
-32    -96    
304    112    
32     96     
-16    16     
80     -48    
-128   80     
-112   96     
-32    144    
112    -64    
-128   -80    
192    112    
-128   -176   
16     48     
16     -16    
-80    -256   
16     80     
288    208    
224    64     
80     32     
-192   -64    
96     64     
-32    0      
16     64     
48     16     
-144   32     
128    64     
-80    32     
112    0      
176    80     
96     128    
48     32     
96     -160   
288    160    
-160   48     
0      32     
160    48     
144    48     
-16    -256   
96     48     
-176   -64    
64     48     
64     48     
-16    -64    
96     32     
96     -160   
32     48     
96     -176   
-32    96     
256    240    
96     96     
-32    -96    
0      16     
-32    -64    
96     64     
-16    80     
64     80     
48     96     
96     -144   
-32    -48    
96     -368   
96     16     
224    -144   
192    0      
224    -128   
0      48     
-176   -64    
288    -32    
-176   48     
80     -16    
48     48     
-144   -96    
-32    32     
112    -32    
144    80     
-32    -288   
112    0      
48     -112   
80     -96    
272    -16    
48     192    
-80    32     
192    -160   
-128   128    
272    -448   
64     -96    
320    96     
-240   80     
32     112    
-96    -64    
-32    48     
176    128    
464    48     
-384   -416   
112    0      
256    992    
64     -256   
144    -48    
-144   -16    
80     -160   
-48    0      
96     16     
224    16     
80     48     
0      16     
112    -368   
-16    176    
128    -128   
48     144    
48     -224   
-304   -592   
512    272    
-144   -208   
176    368    
-16    -592   
80     -1008  
96     224    
176    -848   
352    -16    
-144   272    
224    80     
-48    320    
112    -48    
144    144    
336    192    
-80    -544   
16     -16    
0      -352   
-208   -112   
-688   -48    
32     -192   
-64    -80    
112    -496   
272    -32    
-16    -80    
80     32     
-208   80     
64     -48    
16     -160   
48     128    
48     0      
208    16     
144    -96    
96     0      
-496   -48    
112    0      
320    -64    
-48    16     
-16    -96    
192    -128   
112    48     
-16    -640   
272    -80    
16     -304   
-64    80     
-112   -176   
176    -208   
-32    64     
144    -32    
128    -208   
16     16     
-608   16     
16     -80    
128    -128   
160    -144   
-160   -144   
208    -944   
256    16     
32     64     
288    192    
-208   192    
96     -48    
320    16     
64     48     
96     96     
-64    -16    
-528   -144   
400    176    
-288   64     
96     -112   
-32    -144   
368    -16    
144    96     
176    80     
-48    16     
-272   -528   
64     -304   
-224   144    
-128   96     
-16    384    
-64    320    
-416   32     
-128   64     
0      -192   
224    -144   
144    48     
144    96     
16     48     
96     -944   
16     -48    
16     -32    
-160   -96    
48     80     
192    160    
-160   112    
64     32     
-224   0      
-48    -464   
-448   -384   
64     -144   
-288   -80    
128    -64    
112    16     
16     -160   
224    128    
48     0      
160    -112   
-96    208    
112    304    
-304   272    
256    272    
-352   -32    
16     -32    
-368   -64    
112    -16    
-48    -352   
0      -544   
128    64     
128    -272   
-32    96     
128    -48    
112    80     
-160   32     
160    176    
-368   208    
-48    96     
96     -192   
144    -144   
-192   80     
96     -208   
240    368    
-144   176    
160    -368   
352    -16    
-160   -16    
96     -80    
-112   -16    
-112   64     
-128   16     
32     480    
224    -304   
-224   176    
64     -80    
-64    -32    
80     48     
208    -128   
-80    -176   
16     80     
-480   -224   
-2352  272    
48     -144   
176    176    
-208   -368   
48     208    
-240   256    
96     -160   
-176   96     
112    -208   
-288   128    
256    -96    
400    336    
-608   112    
176    -336   
-272   -752   
-16    416    
-288   -16    
96     -384   
-192   336    
-1520  -64    
-16    -144   
16     96     
16     144    
-144   -128   
-224   -656   
32     -816   
160    432    
-96    272    
48     -16    
624    672    
-832   -96    
0      -144   
-832   144    
-112   -160   
-128   -432   
-64    -320   
-976   -32    
64     32     
-144   -48    
32     48     
-240   -96    
176    96     
-96    -64    
-128   -16    
80     -16    
64     64     
-240   48     
-192   0      
-64    32     
-128   16     
0      -96    
-432   -16    
-16    48     
-368   -112   
176    80     
-192   -48    
112    112    
128    320    
208    144    
-112   16     
-112   64     
48     112    
-32    112    
-112   0      
240    32     
-176   16     
16     -32    
128    16     
-64    32     
240    -80    
-288   -192   
144    32     
-80    80     
-80    16     
-64    32     
0      -80    
48     -48    
-160   64     
64     64     
-144   -16    
80     64     
-48    48     
-80    32     
-128   -64    
416    -128   
112    -192   
-368   -96    
272    -224   
-144   -32    
32     256    
128    128    
128    128    
-224   -64    
-192   48     
-448   -32    
-112   -112   
64     -240   
272    16     
-144   -80    
112    64     
-112   96     
224    400    
-224   176    
0      -32    
-80    0      
-48    -256   
464    -256   
80     -16    
160    96     
160    160    
-32    112    
-144   32     
48     0      
-272   16     
192    48     
160    128    
-96    48     
112    0      
-16    -32    
64     32     
-160   64     
64     544    
-160   -32    
112    -176   
-304   -48    
144    16     
160    272    
-416   96     
-288   48     
192    64     
192    96     
256    176    
80     -16    
64     -48    
-64    0      
-80    -32    
32     32     
32     32     
48     0      
32     -16    
112    80     
-256   32     
96     32     
-32    -32    
176    112    
48     64     
-80    -192   
-64    -144   
-32    -64    
-80    -32    
-16    48     
-80    32     
64     80     
-32    -16    
-208   -32    
160    96     
-64    48     
-80    48     
0      -80    
-128   0      
32     16     
32     48     
32     16     
0      32     
144    64     
160    80     
-96    48     
-32    -16    
48     80     
-96    96     
128    16     
-160   -80    
128    96     
48     48     
-48    32     
-16    48     
-32    16     
64     0      
32     48     
-48    0      
-64    -32    
-48    16     
-64    32     
128    32     
-48    0      
80     48     
-144   -112   
0      16     
32     -16    
48     -16    
-144   0      
224    0      
64     0      
176    112    
-112   96     
16     96     
-112   16     
128    -160   
32     144    
16     80     
16     48     
-192   96     
-48    224    
224    0      
208    -16    
112    176    
176    224    
48     -96    
192    384    
-208   -240   
112    -368   
224    528    
0      -208   
-192   48     
-112   -80    
-128   64     
416    144    
-160   -400   
224    208    
32     48     
208    80     
-128   -208   
-112   -16    
224    -32    
0      48     
64     -272   
32     240    
240    144    
-176   -176   
192    176    
32     256    
-192   256    
272    -1168  
0      128    
144    -16    
144    112    
64     320    
16     -64    
48     272    
-32    -16    
-256   -48    
192    16     
-64    -48    
144    160    
-80    -48    
-112   -176   
368    32     
-112   64     
368    48     
80     80     
-80    160    
-144   -96    
16     16     
-48    128    
112    64     
-16    96     
160    -32    
48     64     
48     96     
-16    16     
112    -128   
240    112    
-96    -176   
112    16     
-144   -576   
160    32     
448    64     
-64    368    
-80    0      
32     16     
16     128    
-96    80     
-112   -64    
64     -32    
32     0      
192    -112   
48     192    
16     -336   
-32    -32    
192    -1312  
0      112    
-192   -16    
208    -32    
48     16     
0      96     
96     160    
128    160    
128    64     
16     80     
48     64     
128    48     
192    32     
128    -16    
0      48     
-112   -496   
16     -48    
64     -48    
80     16     
48     -64    
160    48     
-48    -96    
64     48     
80     96     
80     -16    
-48    48     
32     -128   
288    112    
0      -32    
16     80     
32     -112   
144    -32    
192    -384   
176    80     
80     48     
16     64     
80     240    
160    192    
96     112    
-32    64     
16     -96    
32     -144   
-208   16     
48     -128   
80     48     
144    80     
-128   112    
80     -80    
288    320    
240    304    
-224   224    
192    224    
112    416    
288    384    
16     -176   
176    -16    
224    -112   
32     96     
-48    -160   
-160   -80    
144    -224   
-80    -32    
-32    -128   
-64    -32    
32     -16    
176    112    
16     80     
112    -48    
112    -1136  
0      -48    
256    -272   
112    -192   
176    80     
-144   -688   
48     64     
-64    80     
176    144    
112    -64    
-256   -560   
304    -112   
272    320    
16     -384   
-272   176    
64     304    
48     -336   
-48    176    
208    0      
-16    112    
16     -96    
80     112    
144    32     
192    -464   
48     96     
48     -176   
64     32     
160    -32    
240    -736   
-1024  48     
144    224    
-32    64     
112    -112   
112    -352   
16     -336   
-32    -176   
-32    272    
144    128    
0      -96    
224    272    
48     -144   
112    32     
144    -128   
32     -96    
-224   -560   
-48    -416   
80     -48    
96     -96    
96     -144   
160    -176   
16     80     
128    -144   
16     -32    
208    160    
-16    352    
288    128    
224    64     
96     -48    
256    96     
-304   -32    
96     -16    
-2064  32     
96     -80    
144    -48    
32     -64    
224    32     
112    -176   
-208   0      
144    96     
80     80     
128    -32    
144    16     
48     -48    
16     -80    
96     144    
-64    64     
-224   -16    
80     -80    
816    496    
-544   176    
-208   0      
112    368    
-256   576    
208    -752   
624    -112   
-144   -16    
160    -16    
-128   -64    
-80    -96    
-64    48     
96     -48    
-352   16     
128    -32    
160    0      
144    -64    
128    -16    
96     -224   
80     80     
48     -432   
160    64     
-304   -64    
32     -80    
-192   16     
208    32     
-48    -48    
16     -80    
-720   -96    
208    -144   
-112   112    
96     -48    
-48    -16    
336    -32    
-80    48     
288    -208   
-80    -80    
-288   -64    
80     16     
-288   16     
336    -32    
-240   224    
-64    176    
-176   48     
304    -64    
-32    64     
0      -128   
16     -32    
176    -80    
-128   48     
176    -256   
128    -16    
-48    128    
240    48     
-176   96     
-208   -352   
-128   -144   
144    112    
-160   64     
304    80     
-752   0      
-304   -128   
-352   -128   
496    -96    
-48    80     
272    -48    
-96    32     
112    0      
-96    -16    
-64    48     
176    64     
-224   80     
160    192    
112    160    
176    48     
-80    -16    
-2576  128    
96     224    
-304   -64    
-32    160    
32     32     
-432   32     
-256   144    
-1328  176    
80     0      
-896   -64    
-128   -288   
-32    -48    
0      80     
-1104  -192   
16     -64    
64     32     
-16    96     
-48    -48    
224    32     
-16    16     
-208   128    
432    544    
-192   96     
48     96     
-464   -16    
-160   -32    
176    -224   
-128   144    
80     96     
-16    272    
48     128    
256    96     
-32    -272   
224    96     
-160   64     
-176   -112   
96     80     
16     64     
-112   -16    
-160   48     
64     288    
-1616  64     
64     -128   
-64    -80    
288    -16    
80     -48    
80     -16    
-192   -160   
-256   -240   
64     -208   
-32    256    
-128   336    
-128   -16    
-48    -48    
-224   -64    
112    64     
-224   32     
-112   48     
368    80     
32     64     
224    176    
-80    240    
224    256    
160    160    
32     80     
0      0      
-208   -32    
16     48     
-112   -80    
-48    -208   
112    -16    
-272   -48    
144    -240   
-592   -352   
224    560    
0      384    
48     -96    
-64    -112   
48     80     
112    144    
-128   -16    
-96    64     
48     -128   
16     16     
-48    0      
64     208    
-144   -208   
80     -160   
-176   176    
-16    0      
32     144    
-192   320    
160    -144   
-64    0      
-32    80     
-80    -144   
48     208    
-144   96     
96     48     
144    256    
-208   -96    
-112   16     
208    -352   
208    112    
288    208    
-64    -32    
-320   -64    
-192   -16    
-352   -160   
-416   -544   
32     128    
-16    128    
-32    80     
-16    144    
-288   -32    
320    176    
-224   96     
80     -64    
-672   -32    
-208   -128   
-304   -304   
144    -304   
-48    -32    
-16    -224   
48     16     
-176   -64    
224    240    
16     32     
32     -144   
-144   -128   
192    -192   
-160   176    
176    48     
-16    16     
64     144    
-96    16     
-48    -208   
80     48     
16     96     
-96    208    
-224   80     
48     -16    
96     -144   
112    192    
16     -16    
-96    -64    
48     -128   
-80    176    
272    16     
-128   96     
208    -96    
-96    80     
0      48     
0      160    
48     144    
32     -48    
48     48     
176    -112   
-160   16     
-112   400    
192    256    
64     -192   
176    -80    
-32    64     
16     64     
-144   -160   
-16    -320   
16     -128   
112    160    
-272   48     
192    -80    
64     80     
-64    48     
80     48     
16     32     
160    64     
112    64     
-16    48     
32     16     
48     -32    
16     -48    
80     0      
112    48     
64     16     
-48    -176   
-32    -176   
128    -64    
-160   96     
-48    -96    
160    -16    
80     64     
-176   -48    
48     48     
0      16     
-192   144    
176    32     
160    16     
-112   -160   
48     -16    
128    96     
-336   -32    
64     64     
80     -16    
80     32     
-112   32     
224    224    
-192   112    
48     16     
160    64     
160    32     
112    176    
0      48     
-32    -32    
-32    0      
-32    -48    
32     -144   
16     32     
160    -32    
192    32     
-112   160    
48     -80    
336    592    
-336   464    
0      160    
160    176    
-64    160    
16     -112   
224    -144   
224    -16    
-32    96     
224    368    
-160   128    
-160   -352   
160    -368   
-96    -160   
240    16     
144    240    
192    -688   
144    64     
-144   64     
-112   16     
-32    336    
256    -64    
-80    48     
16     96     
96     -64    
176    80     
-192   -144   
-144   64     
80     32     
256    64     
128    -192   
256    -16    
192    240    
32     -272   
-192   0      
96     32     
96     48     
128    48     
64     224    
176    640    
16     128    
96     16     
176    -80    
48     32     
144    -32    
-80    -160   
16     -224   
80     128    
64     -496   
224    -16    
144    176    
192    48     
-144   16     
144    -32    
-176   -32    
96     -64    
32     -32    
112    -16    
64     112    
-64    -176   
128    0      
48     -96    
144    96     
16     -176   
64     32     
0      -272   
-16    0      
-16    16     
128    112    
-128   32     
208    272    
-48    -48    
80     -144   
32     0      
48     -48    
64     64     
192    304    
16     32     
128    -352   
-48    256    
-224   80     
352    192    
48     32     
336    -16    
-272   0      
112    32     
112    -16    
-16    -48    
160    32     
128    192    
256    96     
32     -304   
192    48     
48     -64    
96     112    
16     192    
176    160    
-240   -80    
160    -32    
-128   -144   
272    -80    
48     48     
16     -224   
-32    -160   
400    -32    
-176   48     
352    -48    
-32    32     
80     96     
-112   -16    
0      -416   
32     48     
-48    -32    
224    128    
-272   128    
208    112    
-64    -592   
304    -208   
32     -784   
0      -48    
-48    64     
208    64     
32     32     
208    32     
-16    -112   
-32    176    
272    -1312  
-64    112    
176    -112   
-32    -80    
144    -112   
192    -592   
32     -32    
192    -1072  
112    0      
0      48     
128    112    
192    32     
48     -128   
-64    -224   
-16    112    
368    48     
-80    96     
112    32     
128    -16    
-880   0      
16     -176   
-80    -96    
176    -304   
160    -144   
-80    -1200  
112    -112   
16     96     
208    32     
-16    -80    
48     208    
32     128    
-160   32     
-144   0      
208    0      
-800   48     
-64    144    
-16    -48    
240    96     
80     96     
400    176    
-144   272    
-144   -352   
160    176    
352    32     
48     -112   
128    -272   
144    32     
-176   -128   
-64    -32    
80     192    
-160   -32    
0      -368   
80     -64    
32     192    
48     -208   
0      -16    
64     -320   
16     176    
48     32     
-48    -32    
192    32     
-16    112    
-144   176    
240    352    
-752   -368   
96     -144   
-2016  96     
80     -64    
128    -48    
128    -16    
48     -16    
144    -16    
-208   48     
-176   -144   
176    -848   
272    432    
224    -32    
-144   -32    
0      128    
-128   -208   
-128   0      
-704   64     
64     0      
48     256    
-48    -176   
224    -48    
288    -304   
144    80     
192    -464   
-32    16     
-128   64     
-96    -48    
-224   -16    
96     -128   
80     32     
128    48     
432    208    
-128   640    
-608   -320   
192    -16    
288    192    
-112   -96    
288    -16    
176    -448   
-32    -64    
-160   -96    
96     -32    
-208   64     
-112   -96    
-96    112    
96     96     
-208   144    
48     -112   
-128   -320   
416    32     
-16    -240   
144    0      
64     48     
144    -560   
-32    -112   
-112   48     
32     48     
-96    128    
-32    -128   
-176   -112   
32     16     
-272   -352   
160    48     
-320   416    
128    -560   
224    48     
-400   160    
176    272    
-128   -80    
-208   -432   
-32    112    
192    192    
-160   32     
32     -256   
-96    144    
288    272    
48     64     
-96    48     
160    368    
-400   64     
-208   -272   
-144   -624   
-16    -192   
-48    128    
208    944    
-32    256    
-432   -32    
-144   -240   
-304   -576   
0      -128   
48     160    
48     80     
-416   32     
80     256    
-352   64     
48     -112   
-224   -80    
-416   -224   
-80    -256   
-176   80     
-112   -16    
-464   208    
48     128    
-128   128    
144    288    
144    -128   
-256   -176   
-128   -96    
0      352    
-192   -80    
-192   -48    
144    176    
-384   208    
16     -160   
96     -112   
-272   -80    
16     -144   
112    48     
112    -48    
0      96     
-1040  -80    
208    32     
-112   -64    
192    32     
432    192    
-320   416    
-16    -128   
-96    -128   
-160   64     
-224   -80    
0      32     
-80    160    
48     160    
-400   -48    
256    -144   
-608   -96    
0      96     
0      144    
272    48     
-320   -128   
-128   -64    
16     144    
-128   208    
-96    -160   
64     0      
160    176    
-64    48     
256    80     
-192   192    
64     0      
-288   -80    
32     64     
48     -48    
48     0      
-144   -256   
-256   0      
176    -48    
-32    0      
64     -32    
-64    -144   
-96    -48    
-304   -16    
128    96     
128    112    
-160   160    
-304   -96    
96     112    
-1024  -48    
48     32     
0      64     
-128   0      
0      0      
-96    -16    
64     -176   
-112   -16    
-272   -144   
-16    -96    
-96    80     
-96    144    
-48    256    
-496   -480   
32     -176   
-512   -96    
64     96     
0      48     
-64    16     
208    -160   
32     -160   
0      208    
-16    288    
80     192    
32     16     
176    112    
-160   -160   
352    224    
-352   16     
-272   -448   
-432   -64    
16     96     
400    512    
-96    416    
-16    -48    
-112   -208   
192    208    
16     64     
32     -144   
32     0      
48     -208   
0      -80    
160    224    
-112   496    
160    -848   
128    544    
-128   -96    
32     -16    
-16    16     
-192   -144   
320    -256   
80     224    
-64    32     
-16    0      
-192   -48    
-144   32     
-192   -224   
208    -48    
64     144    
160    32     
80     -48    
-64    32     
32     -208   
144    48     
-160   -64    
-48    -96    
-64    80     
0      64     
64     144    
288    288    
-256   144    
-48    -64    
112    -32    
-96    -80    
96     0      
96     64     
112    16     
112    80     
-64    96     
-48    16     
-32    -16    
112    64     
16     -144   
-128   -16    
-144   -64    
16     32     
-64    32     
64     64     
-112   -16    
176    -32    
-208   -96    
32     96     
80     -128   
-256   -144   
80     48     
80     48     
128    -32    
-96    -96    
48     32     
-144   32     
32     192    
-176   -32    
48     16     
-16    48     
80     32     
304    80     
-96    -16    
144    64     
64     80     
112    16     
16     48     
224    160    
-336   -144   
320    -32    
-208   16     
256    176    
-96    0      
0      0      
304    176    
-320   240    
448    160    
16     64     
192    -16    
176    -64    
80     32     
144    96     
64     128    
-112   16     
240    -64    
-224   32     
240    96     
-16    -16    
-64    -272   
64     48     
-16    144    
48     48     
128    -16    
16     48     
-80    96     
-80    -128   
-96    48     
-96    32     
48     -32    
-16    112    
144    16     
80     16     
48     0      
-144   -224   
144    128    
64     -1520  
32     48     
176    64     
16     208    
-96    208    
-48    16     
80     -48    
96     80     
96     48     
176    -32    
-144   -16    
144    96     
32     16     
32     -48    
96     16     
-48    -80    
112    32     
128    48     
80     -112   
-64    -144   
160    144    
64     -32    
160    64     
-192   -32    
32     32     
-144   48     
64     -112   
288    48     
0      -16    
96     -32    
0      -288   
112    192    
96     160    
-16    -32    
128    -80    
176    80     
-80    32     
160    -16    
16     32     
-16    128    
112    96     
48     -64    
32     48     
0      -64    
128    144    
208    -352   
-112   96     
160    -208   
0      80     
176    -48    
-336   -160   
144    32     
112    112    
240    16     
-48    48     
-64    112    
96     -144   
208    -160   
16     64     
352    560    
-176   -448   
112    240    
224    -288   
80     96     
-144   -496   
80     -64    
160    144    
0      64     
16     80     
400    160    
-112   144    
-64    -96    
144    64     
208    80     
-208   -384   
16     112    
96     416    
160    -304   
64     -64    
-160   -192   
96     576    
80     208    
80     -288   
32     176    
-48    -80    
80     -176   
464    576    
-128   -192   
64     80     
112    224    
64     -224   
-16    176    
-80    -1248  
224    304    
-112   -112   
32     80     
224    128    
-48    -1424  
-48    -608   
128    -144   
16     80     
16     -32    
224    -112   
-32    64     
144    336    
-48    -624   
128    -272   
-16    368    
64     -240   
176    -80    
-64    -272   
112    16     
48     -64    
80     -208   
48     -96    
48     336    
144    160    
-176   -672   
-176   -208   
64     -320   
112    16     
608    272    
-224   336    
-128   -240   
96     -32    
192    -16    
96     64     
-160   64     
16     -256   
-16    0      
176    -160   
128    -32    
16     112    
208    0      
16     -1296  
80     -128   
48     -96    
-96    -160   
48     -160   
-64    32     
96     0      
32     64     
-16    -80    
48     -256   
-976   -208   
32     -256   
96     -16    
240    -32    
-32    96     
176    -96    
16     64     
0      -368   
48     48     
48     -160   
-48    -80    
64     -16    
80     0      
-224   0      
80     -48    
-848   32     
96     -80    
80     16     
32     -80    
336    80     
304    -128   
144    432    
144    -1248  
-176   -64    
-16    80     
112    64     
-400   80     
48     -256   
-352   -400   
-64    160    
-336   0      
480    272    
-1280  416    
80     192    
144    0      
-112   -432   
256    -672   
64     -272   
128    320    
96     -256   
-208   176    
-128   -96    
-176   400    
304    224    
32     224    
288    576    
128    -48    
-1328  80     
304    -160   
-144   144    
144    -112   
-96    -48    
64     -208   
96     -128   
-176   -256   
400    -352   
-80    -96    
112    -176   
-240   96     
160    48     
-304   -64    
-112   -16    
-560   -128   
0      -144   
272    -256   
16     -112   
16     112    
-192   -192   
16     -304   
-16    -384   
-16    -480   
16     -64    
0      16     
128    0      
-16    -112   
272    -320   
-80    160    
128    -128   
-144   -96    
240    -336   
176    -144   
-64    176    
48     -128   
0      -32    
-176   -384   
16     -48    
-112   528    
416    240    
16     48     
240    48     
-160   -64    
240    -256   
-144   96     
480    112    
-224   272    
-80    0      
-16    192    
160    128    
96     -128   
-176   -48    
-976   -192   
-224   -16    
48     -160   
-144   16     
128    48     
16     80     
144    64     
-112   -16    
0      -128   
48     224    
-1536  -272   
-80    -112   
-288   -96    
-240   96     
-336   -80    
-704   -16    
-224   80     
352    192    
-32    400    
256    -320   
-496   -432   
256    -496   
-144   144    
-320   224    
80     -416   
-304   256    
0      80     
96     -176   
-208   112    
16     -240   
-48    448    
48     -144   
-592   32     
-128   80     
-1936  192    
-80    -384   
-128   -240   
64     160    
-176   0      
64     112    
-80    -32    
-224   -272   
-80    288    
-208   -32    
-96    -96    
32     160    
80     0      
-112   64     
-80    -32    
-848   0      
-32    -624   
-288   -544   
-160   -64    
-320   -208   
112    -48    
32     96     
-272   192    
224    368    
224    512    
176    240    
320    336    
-16    112    
160    -80    
-96    -64    
-304   -80    
128    -96    
-672   -48    
-64    -16    
32     64     
192    -32    
368    -144   
432    224    
-160   64     
-160   -80    
32     48     
-112   64     
-64    48     
32     144    
-128   16     
-176   32     
-32    -16    
-1248  -48    
64     16     
192    -16    
192    64     
64     64     
-128   -16    
32     16     
-240   -32    
-192   48     
-16    144    
48     0      
0      -32    
-320   -32    
-272   -96    
48     32     
-496   -48    
272    80     
128    64     
16     80     
-48    48     
176    48     
-112   0      
-96    32     
-16    96     
80     -32    
-176   -64    
-32    64     
-48    0      
-112   -16    
128    64     
-224   -96    
-16    0      
-960   -64    
-128   16     
96     64     
-128   0      
128    48     
-16    80     
272    208    
-304   0      
192    96     
-224   0      
112    48     
-80    0      
-96    16     
-368   224    
-16    64     
-288   -96    
-192   -128   
64     -96    
-16    272    
-80    80     
64     16     
-400   -32    
192    -64    
0      0      
112    128    
96     112    
-48    48     
32     -16    
-272   -144   
208    96     
-96    32     
96     16     
48     96     
-80    112    
160    32     
-80    0      
224    -64    
-32    80     
112    128    
-64    16     
-32    -48    
-192   -208   
80     32     
-288   -224   
-48    -48    
48     208    
32     -64    
112    192    
-48    64     
112    0      
272    128    
-208   128    
272    -16    
-144   -96    
-48    16     
48     48     
-16    -48    
-16    48     
-80    -16    
16     -16    
0      80     
-48    0      
304    160    
-304   -208   
-16    -128   
16     128    
208    112    
-192   176    
16     -32    
-112   0      
128    0      
0      -192   
-80    -32    
0      432    
256    -144   
-176   0      
-32    16     
240    160    
-16    -32    
64     64     
-80    112    
160    -16    
-144   192    
-48    0      
-80    48     
144    112    
-240   -384   
768    0      
-208   160    
192    112    
208    304    
48     144    
64     -128   
0      256    
288    80     
-48    -368   
176    384    
48     128    
240    16     
-192   112    
-160   400    
-48    32     
-32    -1328  
-32    -160   
-160   -384   
192    -240   
432    128    
-96    592    
-32    160    
-208   112    
48     16     
96     32     
160    64     
112    -32    
0      80     
272    112    
-208   -16    
16     -480   
128    432    
-96    160    
16     -32    
112    16     
288    160    
-128   176    
-64    64     
-32    48     
96     -64    
-144   0      
-16    -288   
-16    -112   
128    0      
0      48     
96     64     
160    112    
16     96     
496    736    
-112   160    
80     112    
64     144    
16     -48    
0      -80    
80     0      
-96    -96    
160    112    
128    192    
-32    112    
-96    16     
160    -576   
128    -80    
-16    -496   
-16    64     
144    96     
-80    144    
16     192    
112    80     
-176   128    
304    -160   
-80    64     
160    -16    
0      16     
48     -96    
80     -80    
0      -112   
-128   96     
384    352    
-304   144    
0      0      
272    -32    
48     -16    
48     -32    
96     -64    
160    -96    
240    192    
-160   64     
64     32     
0      16     
112    -32    
176    -96    
-80    -272   
-128   -208   
112    -96    
64     144    
160    -16    
32     -144   
16     -48    
64     -240   
96     256    
64     32     
-16    -48    
144    16     
32     16     
80     176    
0      -144   
-48    -400   
16     -576   
112    -64    
-32    -304   
320    -80    
80     -160   
256    240    
-128   80     
48     192    
-64    -288   
192    -48    
160    560    
240    48     
-32    -32    
-336   -288   
80     16     
-64    -176   
288    -80    
112    -240   
32     -256   
16     -624   
48     -432   
128    -32    
192    304    
96     416    
256    16     
-224   240    
-240   -16    
320    -320   
208    -288   
96     -240   
176    -16    
48     192    
-32    -544   
448    -176   
128    -96    
128    592    
160    0      
96     -80    
192    -528   
-80    160    
-64    -1328  
208    -176   
-304   368    
320    -48    
0      192    
-128   16     
48     64     
0      -16    
240    -1072  
336    512    
-64    -208   
0      96     
-1888  -32    
144    -304   
576    432    
-336   432    
256    192    
-48    -384   
-64    32     
544    256    
-112   368    
240    -912   
208    272    
-80    352    
-48    -304   
80     0      
128    -32    
-304   288    
144    -48    
160    576    
-432   0      
192    -400   
112    -128   
-48    -768   
224    -1520  
160    96     
112    544    
272    96     
-192   -368   
-272   -528   
160    368    
48     48     
0      -448   
-16    -192   
-288   -80    
304    912    
48     -160   
-80    -304   
352    -80    
64     -640   
-96    272    
96     -160   
-336   112    
192    -432   
16     176    
96     -16    
-80    -160   
80     144    
32     256    
-32    -192   
64     -32    
-144   304    
-240   -528   
96     128    
240    -80    
-64    128    
240    -1008  
320    288    
-144   -96    
-16    -224   
-48    -448   
-48    144    
-32    -96    
-112   -80    
-544   -144   
128    48     
400    192    
48     -112   
96     64     
0      64     
-144   32     
144    -416   
96     96     
320    48     
-208   -416   
-128   -32    
-16    0      
-160   -80    
80     -64    
-512   -16    
224    320    
-688   368    
0      -64    
-304   -80    
-160   -416   
64     0      
224    -400   
160    128    
-64    0      
32     -48    
-32    -16    
384    272    
-368   224    
-32    -112   
32     -64    
144    -64    
112    160    
-32    -80    
-128   64     
-32    -224   
80     0      
-128   16     
128    192    
0      -736   
208    -224   
-80    -32    
384    160    
-16    0      
336    0      
-464   -32    
80     -64    
-400   -64    
64     32     
-160   -80    
416    -160   
240    128    
192    -48    
96     -16    
-176   -16    
-48    48     
-176   -48    
-368   -144   
-640   -144   
112    -112   
-160   0      
368    144    
48     64     
-128   -128   
-128   -32    
64     -304   
48     -48    
-208   32     
-80    32     
224    48     
-176   -80    
0      -32    
176    -16    
-112   0      
224    64     
-272   -16    
128    0      
16     64     
-736   -48    
176    64     
-1024  16     
-48    64     
-96    -32    
-144   144    
-176   32     
-112   -48    
0      -96    
-400   16     
-64    -16    
48     -80    
208    128    
16     0      
-64    -32    
-160   -112   
128    80     
-16    -96    
32     64     
16     16     
-464   -32    
-64    32     
-656   -80    
-176   0      
-288   16     
-80    16     
-1776  -32    
-96    -192   
-80    -304   
224    288    
-256   -144   
160    -32    
-96    -64    
48     208    
64     -16    
-224   0      
-96    -80    
-32    144    
-96    -128   
80     0      
-160   -144   
-480   16     
-288   32     
-272   -80    
208    16     
-112   0      
80     96     
-112   -176   
-160   -240   
-96    -272   
-64    -288   
-16    -32    
-16    0      
-48    -96    
-400   -336   
-32    -320   
-512   -16    
48     176    
-544   160    
-80    224    
32     -128   
64     80     
-112   -80    
144    0      
64     48     
96     64     
-80    416    
-128   -144   
-208   -80    
32     176    
32     -96    
-288   128    
32     -176   
-272   -80    
144    208    
-160   -112   
48     144    
304    208    
-64    640    
-272   -560   
48     16     
-16    -272   
128    80     
160    96     
-480   -176   
592    -464   
-256   384    
16     656    
-240   -368   
-368   -544   
176    720    
144    832    
304    432    
-144   384    
-112   -160   
192    64     
-144   -112   
-96    -336   
-16    128    
48     -48    
16     16     
-304   -48    
-48    0      
-656   -48    
-80    -96    
-1088  -80    
-208   -112   
-16    -160   
-48    -16    
80     -32    
-64    0      
-128   0      
16     0      
240    112    
-352   80     
48     112    
-272   96     
80     48     
-176   0      
176    -32    
-16    32     
-368   0      
176    16     
-48    96     
-80    -16    
64     64     
96     -16    
48     32     
-48    48     
-304   64     
64     48     
-32    32     
64     -112   
0      -64    
16     -16    
80     208    
32     48     
240    80     
-240   80     
160    -80    
-32    48     
-96    -32    
-16    -32    
96     -32    
32     32     
32     -32    
-64    -16    
48     80     
-512   -16    
-80    112    
176    80     
176    192    
-64    -80    
64     -16    
-176   32     
-192   -32    
16     -32    
-32    -16    
0      144    
-96    64     
144    48     
-272   -96    
16     16     
-48    -16    
240    64     
144    -16    
288    32     
16     0      
144    96     
-64    176    
32     96     
32     96     
-80    112    
-48    32     
-208   64     
320    -32    
-64    -16    
128    16     
48     -48    
96     0      
-16    -112   
48     -160   
-16    352    
-32    48     
32     -64    
208    32     
48     160    
-160   96     
160    80     
-208   144    
64     0      
16     224    
112    144    
128    0      
-80    -64    
-80    144    
208    272    
-16    160    
144    32     
128    16     
96     32     
-224   0      
-128   64     
-112   -32    
-32    -80    
144    16     
-128   32     
224    -48    
48     144    
192    64     
80     336    
96     208    
48     96     
64     272    
16     -112   
-16    16     
112    16     
48     368    
208    128    
-64    -224   
-160   -32    
400    128    
-208   -784   
80     -176   
0      160    
256    -144   
80     48     
96     992    
704    1440   
-736   -704   
-128   -880   
144    464    
64     336    
-480   -288   
128    -1568  
368    736    
64     944    
0      -672   
208    -448   
-144   464    
416    192    
32     -112   
112    80     
-112   -176   
240    96     
-160   -480   
80     144    
-208   16     
240    -288   
176    64     
240    -144   
-16    -512   
-128   224    
96     224    
32     -656   
160    48     
-160   128    
112    -352   
160    -80    
208    160    
-32    192    
192    -416   
-400   -32    
448    304    
-224   496    
144    -480   
240    -240   
176    -80    
32     560    
48     -624   
240    144    
0      -176   
352    432    
-144   -224   
96     -64    
96     240    
32     -48    
16     -144   
128    320    
224    0      
208    -208   
64     256    
-80    80     
0      128    
192    -272   
144    176    
64     -448   
48     80     
48     16     
176    -48    
-208   16     
320    192    
-240   80     
160    0      
192    80     
64     -64    
96     48     
-16    16     
80     128    
240    0      
0      16     
-80    -880   
176    -96    
-208   -240   
192    -16    
32     128    
112    144    
16     96     
16     112    
208    464    
80     176    
208    -96    
16     -448   
-144   -384   
-64    0      
176    176    
224    16     
-80    240    
-80    176    
192    208    
288    304    
352    -208   
80     16     
-80    32     
-48    32     
32     -16    
-384   160    
160    -64    
96     32     
288    -128   
416    64     
112    -144   
256    288    
-16    128    
0      48     
-128   192    
192    -32    
96     -208   
-208   -464   
208    -256   
256    112    
-80    80     
224    208    
-400   112    
32     -96    
208    112    
176    -112   
-128   -944   
352    -112   
272    -464   
112    48     
-688   32     
-224   -160   
-400   -752   
80     -1344  
16     48     
0      -96    
80     96     
64     0      
96     -48    
80     240    
144    0      
192    144    
80     80     
448    64     
-368   32     
-560   -112   
80     -256   
48     -80    
304    -368   
-64    -48    
32     -352   
-96    -32    
64     96     
-112   32     
-240   -240   
-160   -16    
64     -176   
-112   -96    
304    -112   
176    288    
-1264  64     
-32    -208   
-176   -256   
80     -80    
208    192    
-48    16     
144    -160   
112    -864   
96     80     
224    0      
-160   32     
128    -32    
0      -32    
112    -32    
144    -32    
-176   48     
-80    -128   
-160   -64    
64     -144   
16     0      
80     -208   
-16    -128   
288    -144   
-144   32     
96     32     
96     48     
-16    -32    
160    48     
-256   -96    
80     -32    
-96    -16    
208    80     
-656   -80    
160    -112   
64     -16    
64     -48    
-32    -32    
112    -368   
-64    80     
112    -304   
-16    16     
64     -64    
192    192    
16     96     
48     -48    
-192   -48    
48     -64    
-80    80     
144    -80    
-128   -48    
160    16     
80     144    
256    -128   
96     64     
112    -320   
-16    48     
-304   32     
96     32     
-48    16     
192    -32    
-96    64     
16     64     
-752   -48    
48     -112   
192    16     
48     -16    
96     32     
80     -416   
144    -80    
-48    192    
112    -16    
-16    -64    
224    -64    
-16    -160   
96     -64    
-352   1440   
256    -192   
-320   -512   
352    -192   
-752   112    
240    -368   
-64    -256   
112    -64    
-32    128    
112    -176   
416    -48    
-624   32     
-144   384    
192    -512   
144    112    
-96    192    
240    -144   
-336   592    
144    112    
-1472  -48    
80     48     
96     -176   
-64    -400   
208    -336   
-80    -144   
-272   -128   
-48    80     
272    128    
336    224    
-272   -16    
-240   -32    
144    -80    
-128   48     
144    -176   
-64    -32    
-336   -48    
-32    -192   
-176   80     
80     128    
-32    -48    
-832   0      
-96    64     
-384   0      
-112   -96    
-416   -48    
-256   -32    
80     48     
0      0      
-768   16     
128    16     
-256   -80    
-96    32     
16     -240   
-96    128    
-48    -16    
-208   -16    
-208   64     
-288   -32    
-96    112    
-176   16     
-160   16     
96     16     
224    -32    
-160   -32    
0      80     
-272   -144   
-32    16     
-224   -128   
0      0      
16     48     
-128   0      
16     -80    
-256   0      
-48    -32    
-16    -16    
144    -16    
-1008  16     
64     192    
-48    16     
160    16     
-160   -128   
-16    -32    
64     -304   
-48    -64    
80     48     
-320   16     
-192   48     
-144   -144   
-32    -32    
80     16     
16     80     
-544   -48    
-112   32     
64     16     
96     80     
64     112    
0      96     
-176   -112   
240    -112   
0      0      
64     80     
-64    96     
-112   32     
80     64     
64     208    
-192   -48    
-320   -112   
-128   32     
-208   -96    
32     16     
80     80     
-176   -192   
64     -32    
-192   -32    
-112   -80    
32     16     
80     -80    
-32    64     
-48    128    
-240   16     
-112   -128   
-144   -224   
144    -16    
-416   -96    
448    400    
-272   368    
32     16     
192    400    
240    304    
-112   64     
-80    48     
-80    -64    
-128   416    
464    608    
-400   496    
32     208    
96     -416   
48     96     
-96    -96    
-112   -64    
112    112    
160    -96    
-128   208    
32     0      
32     -144   
48     96     
-272   32     
-160   -48    
240    272    
-304   -304   
96     -480   
-96    528    
208    240    
-192   -480   
272    224    
-64    -240   
-80    304    
64     -208   
48     96     
64     -144   
64     160    
256    32     
-192   -80    
128    64     
-48    128    
240    -48    
-128   624    
-128   -448   
-96    -112   
112    80     
208    -32    
-32    48     
112    336    
240    112    
-320   -16    
128    -32    
-16    16     
32     80     
336    48     
80     640    
144    400    
-112   -288   
48     160    
-320   -96    
-112   112    
32     -112   
-192   -176   
160    144    
64     80     
96     -160   
96     -48    
-64    -16    
-64    32     
224    176    
80     48     
-160   -48    
-224   -928   
32     -224   
16     336    
0      96     
192    304    
-32    -192   
0      -288   
176    240    
224    -16    
-144   -80    
128    48     
-240   -16    
160    160    
-48    -96    
32     0      
-240   32     
16     224    
80     96     
-64    -32    
240    64     
-48    96     
16     -32    
80     -176   
112    80     
-32    96     
96     32     
-48    16     
-112   -48    
128    -32    
-208   128    
-336   -112   
-48    -112   
288    -16    
48     144    
-48    48     
336    176    
-144   96     
112    -16    
256    112    
112    240    
-112   0      
-48    -32    
144    112    
-96    -48    
128    32     
144    -48    
0      80     
240    144    
112    -16    
-160   32     
-80    64     
160    80     
96     144    
-16    112    
256    128    
320    192    
-144   0      
-176   -112   
80     -240   
0      176    
128    32     
480    -624   
-80    176    
-256   32     
128    80     
144    -32    
0      -176   
624    80     
-240   16     
-448   -176   
-32    96     
-16    -224   
112    -176   
208    -32    
512    -32    
-176   48     
-80    -1264  
64     -16    
0      0      
16     112    
256    64     
272    96     
-128   -64    
-48    48     
-32    96     
-112   96     
-32    0      
-192   -32    
-16    32     
384    -112   
-144   -32    
-144   -448   
-80    -32    
128    32     
-32    224    
-384   -80    
-144   48     
224    208    
-272   48     
256    64     
-256   80     
-16    16     
432    336    
-352   16     
-160   -32    
-176   80     
240    -208   
384    128    
-160   -1440  
128    -48    
112    -16    
208    -128   
192    -160   
64     0      
112    48     
32     64     
-432   0      
96     64     
48     16     
144    48     
-48    48     
-64    -48    
32     176    
-144   -480   
112    48     
112    -880   
192    32     
48     -48    
128    -48    
336    112    
80     64     
96     96     
-96    -64    
160    16     
96     64     
16     32     
128    -96    
112    16     
176    16     
-16    160    
-96    -240   
32     32     
320    -64    
352    48     
96     80     
48     192    
64     112    
-48    -64    
128    256    
128    -288   
48     -16    
64     -448   
64     96     
-32    -16    
0      96     
-80    -320   
256    64     
64     64     
208    96     
0      64     
144    0      
112    32     
224    -64    
0      128    
-16    -16    
128    48     
80     -80    
144    48     
64     -80    
16     64     
0      128    
32     80     
-16    48     
176    48     
-32    240    
320    -112   
-272   -1952  
368    -352   
224    32     
-32    -16    
208    160    
-96    -256   
-64    224    
192    80     
-112   -304   
192    -64    
112    -528   
0      48     
240    -48    
128    -720   
272    128    
192    -240   
192    592    
-16    -816   
-16    320    
80     -1056  
-64    -368   
64     0      
16     -320   
336    -512   
-160   -112   
48     -480   
-48    416    
64     -32    
-80    -32    
-640   -160   
336    -64    
-96    704    
-192   368    
464    -432   
-32    -256   
-16    192    
128    112    
112    -64    
-16    -80    
160    16     
144    -144   
-352   -288   
272    -128   
-144   -64    
128    -96    
-208   64     
32     -32    
-96    176    
304    -32    
112    -352   
224    -16    
208    416    
-192   80     
224    -272   
-64    -64    
112    -16    
-16    -16    
-80    -96    
128    -32    
-608   -112   
240    -144   
16     -48    
112    -80    
32     -144   
144    -160   
112    -96    
64     -288   
-144   0      
32     -64    
80     64     
-80    -128   
384    32     
-208   48     
128    -16    
-592   -48    
-80    176    
-1168  80     
0      -16    
128    -64    
32     48     
96     128    
16     -336   
48     32     
0      -64    
-32    0      
48     -208   
160    48     
-48    32     
32     -256   
16     -32    
128    64     
-240   96     
320    176    
-48    96     
-160   -256   
176    -96    
144    -64    
64     112    
96     -992   
0      32     
-80    0      
96     80     
0      -16    
80     -64    
-64    32     
-64    16     
-816   -48    
80     -16    
-784   -64    
288    -112   
-64    272    
-48    -144   
-80    -160   
224    -544   
-16    -16    
-32    32     
48     80     
-160   32     
-32    0      
-352   0      
-96    -160   
128    -96    
48     -64    
-64    0      
32     -224   
0      0      
96     256    
-160   352    
-32    -112   
144    -112   
-176   -64    
64     -48    
112    -64    
-64    -16    
-432   0      
-112   -288   
224    -80    
208    96     
96     -16    
128    -96    
-176   -16    
192    -48    
128    144    
-176   240    
-192   -32    
-80    80     
208    0      
-16    16     
96     672    
128    400    
-16    64     
-48    192    
32     -16    
-80    16     
-2432  -1264  
-32    -288   
-368   144    
-80    256    
48     -96    
-256   -64    
-128   304    
-1392  -192   
32     80     
128    832    
-96    -304   
-80    352    
-144   96     
-1392  -80    
-48    0      
-656   -176   
160    272    
-80    -352   
-384   32     
48     144    
-656   -160   
192    224    
-400   -272   
64     96     
-368   -416   
48     48     
-192   -96    
-112   -304   
-144   -64    
16     160    
48     80     
96     16     
-160   -48    
-208   -16    
0      16     
-80    -48    
-48    48     
-48    -64    
-128   -32    
-128   80     
128    96     
-512   0      
-16    144    
-48    80     
-48    32     
-240   -288   
-16    -80    
48     48     
48     48     
80     64     
-208   32     
-16    32     
0      48     
64     -96    
-400   64     
96     64     
-176   -96    
-256   -32    
48     16     
80     16     
-96    -128   
144    -32    
-64    16     
0      176    
-48    32     
128    32     
-176   16     
-160   -16    
-16    112    
32     16     
144    80     
16     48     
256    176    
-2128  176    
240    48     
96     -80    
-224   0      
112    304    
-128   0      
48     -192   
-224   -144   
0      -32    
-240   96     
224    -16    
80     16     
-96    0      
-576   -80    
-112   -112   
-1888  -64    
-64    112    
144    48     
-16    32     
0      48     
16     0      
16     32     
0      32     
-80    16     
-48    48     
368    144    
-560   0      
112    -32    
-208   -16    
128    192    
-256   32     
48     32     
48     32     
-64    64     
16     32     
-208   -144   
256    -144   
48     -16    
112    16     
-80    -32    
-64    160    
-144   48     
96     64     
-176   -16    
-48    16     
-128   -32    
0      -16    
0      80     
80     64     
144    128    
0      0      
-96    -16    
80     32     
-160   48     
-80    -32    
64     80     
-176   112    
96     48     
48     0      
32     -16    
-16    112    
-160   112    
-64    0      
-96    -80    
0      64     
16     144    
176    112    
-320   384    
224    272    
224    -336   
-368   -304   
-160   16     
-128   128    
-48    -128   
304    0      
-16    64     
304    240    
288    128    
-32    144    
48     112    
-304   128    
144    -176   
64     -144   
256    -96    
160    -96    
128    256    
-160   128    
80     192    
-480   0      
-48    -16    
208    16     
-64    0      
32     112    
-112   48     
96     96     
160    64     
-96    0      
-64    48     
-96    -64    
224    16     
-304   -624   
-432   -592   
-32    224    
-272   240    
-32    128    
0      -80    
128    -144   
48     -144   
528    496    
96     512    
336    -304   
0      -592   
240    64     
32     192    
-16    32     
144    -64    
-16    -208   
64     144    
16     192    
-16    0      
112    576    
16     304    
-48    -224   
-224   -176   
144    32     
-48    96     
240    48     
16     -160   
96     -48    
-192   -96    
208    144    
-160   16     
64     32     
64     112    
32     112    
208    -80    
-80    -160   
32     32     
208    272    
272    448    
160    -48    
16     -224   
-128   240    
112    864    
128    336    
-288   -224   
-336   -384   
48     -608   
-64    144    
32     16     
160    -64    
32     -16    
-64    160    
80     -80    
80     -160   
112    288    
80     48     
-48    32     
80     48     
-64    144    
-96    864    
128    -672   
-16    0      
48     320    
240    -368   
112    112    
-32    32     
96     -64    
16     -96    
80     624    
224    -480   
64     608    
-176   -400   
256    32     
-112   -112   
240    0      
144    624    
-240   48     
-192   0      
448    -720   
208    -240   
128    256    
-112   -448   
-160   -48    
-48    192    
128    80     
0      -272   
-16    -240   
240    -16    
-208   -272   
224    -16    
128    -144   
64     -32    
16     16     
112    -144   
176    48     
-304   -528   
-64    -96    
192    128    
112    208    
-80    -80    
208    176    
-288   -16    
16     208    
528    208    
-368   32     
240    352    
-176   112    
0      48     
0      -48    
224    16     
-32    -64    
80     32     
-16    -320   
-32    -176   
208    0      
-224   160    
-112   32     
240    112    
-48    -48    
32     16     
288    -224   
176    -64    
16     128    
176    48     
416    352    
-432   48     
32     144    
16     -32    
160    304    
32     -32    
48     -80    
-96    -240   
64     -32    
64     112    
64     -96    
224    -160   
-224   -656   
112    48     
-128   -16    
64     -64    
48     -80    
176    80     
0      64     
-96    144    
112    320    
336    352    
64     112    
256    -96    
160    32     
112    32     
144    48     
176    -128   
176    112    
208    16     
-160   64     
144    -96    
160    128    
-48    -112   
144    -48    
96     16     
112    64     
80     32     
144    16     
-160   96     
192    16     
240    80     
-112   -96    
192    -16    
48     -160   
80     288    
112    -32    
160    -480   
16     -64    
272    -480   
-48    80     
96     -480   
112    -224   
176    -128   
144    -208   
-16    96     
160    48     
0      -48    
64     -48    
80     32     
-16    -368   
208    96     
160    -480   
-32    96     
64     -16    
96     -48    
144    -160   
-16    -208   
144    -80    
144    -160   
144    -64    
96     -160   
96     144    
-32    -480   
112    304    
208    448    
-464   -112   
64     -720   
32     -208   
16     -480   
48     -192   
-512   -128   
208    336    
-2352  -160   
80     -240   
224    800    
16     -192   
352    -480   
192    32     
16     -304   
112    -16    
240    32     
176    -16    
112    144    
16     -80    
32     -80    
64     704    
-208   -448   
-416   -48    
256    320    
240    -96    
64     192    
-32    -112   
240    48     
-400   -464   
176    -240   
128    384    
176    -16    
192    -64    
48     -128   
64     -112   
-384   -96    
128    -208   
16     -272   
272    -176   
-256   -112   
144    0      
288    128    
-32    128    
144    192    
-16    -352   
-64    80     
144    -32    
-48    -32    
0      64     
0      -32    
16     0      
64     -80    
-160   -16    
64     -272   
-1040  -128   
48     -16    
-128   -16    
96     0      
-64    -48    
32     -80    
64     128    
96     -192   
112    16     
-64    0      
32     96     
-144   -32    
80     -16    
-384   -160   
128    96     
-400   128    
-16    0      
144    -32    
16     -144   
32     32     
144    -128   
32     80     
48     -80    
160    32     
32     96     
-16    -112   
-240   -32    
128    32     
-256   64     
224    112    
-368   -16    
16     -176   
-160   16     
32     -144   
96     80     
-16    0      
288    -128   
-544   48     
144    112    
32     -32    
-176   -32    
-208   -80    
96     0      
-240   -32    
272    80     
-400   -32    
80     -208   
-480   32     
96     -128   
192    16     
608    320    
-784   192    
-368   -112   
-48    16     
-96    64     
400    224    
-480   32     
-144   -144   
144    80     
-32    -64    
-192   -80    
176    16     
-48    0      
-1456  96     
16     -16    
-128   -64    
-1088  -32    
96     16     
-592   -48    
80     128    
-704   -16    
-96    -112   
160    -32    
-192   -16    
-224   -32    
128    32     
-240   -16    
64     16     
32     0      
-64    96     
144    -32    
-64    -32    
-64    176    
-176   48     
-256   32     
-384   0      
-128   -128   
-2096  -32    
16     32     
48     -16    
192    48     
-176   -144   
-176   32     
-224   -160   
-32    48     
224    32     
-112   32     
80     64     
-48    64     
-208   0      
-48    -32    
-80    -224   
-112   -96    
-208   112    
-80    -32    
128    192    
48     400    
-224   0      
-336   -272   
160    -64    
-160   80     
432    224    
-128   -32    
176    272    
-288   -112   
-384   -16    
-80    192    
-160   -96    
64     -112   
-640   32     
112    80     
-48    -64    
32     272    
256    -64    
-224   128    
-96    -288   
16     400    
32     -16    
208    112    
-112   -48    
-16    64     
-176   -352   
-304   448    
-128   -16    
-816   -96    
0      80     
304    -176   
80     224    
-64    -160   
-64    -32    
64     16     
-144   80     
-112   -16    
64     -32    
-32    -80    
352    32     
80     400    
-608   -1104  
64     288    
-64    -16    
160    48     
-1120  -64    
144    208    
-16    80     
352    -208   
-192   128    
-16    112    
-48    -224   
-32    160    
-64    -688   
0      32     
80     720    
-224   -304   
128    96     
-448   -192   
80     96     
-752   -144   
16     64     
-64    80     
48     -16    
16     -16    
-272   48     
-16    -160   
-304   -304   
-32    80     
32     144    
144    48     
-240   -144   
208    -128   
-336   96     
48     208    
-800   -48    
-16    -320   
208    96     
-96    64     
384    16     
-224   -144   
-96    -144   
160    -144   
176    208    
16     224    
-32    -96    
-176   -32    
-16    16     
-64    112    
208    -144   
-176   -160   
80     192    
112    144    
0      128    
64     -48    
-128   -208   
96     -128   
-80    -112   
-112   -192   
-96    -176   
-48    0      
-192   -160   
64     160    
-64    -144   
144    16     
112    48     
32     64     
32     -48    
-208   -144   
0      80     
-112   112    
0      128    
32     48     
160    176    
-160   48     
144    208    
32     208    
-112   192    
-80    384    
320    720    
-96    256    
-144   80     
112    208    
144    224    
96     16     
-272   -16    
240    -32    
-32    0      
176    96     
-112   -80    
464    144    
-288   320    
112    192    
-64    144    
96     224    
48     96     
128    -160   
112    -144   
-48    128    
48     400    
80     -32    
128    -32    
-16    16     
32     272    
48     288    
144    176    
-96    192    
112    -32    
0      144    
128    16     
-144   -112   
-48    -48    
-48    -16    
-208   224    
160    0      
80     112    
416    208    
-256   64     
16     32     
-208   32     
80     208    
16     96     
-48    -240   
112    128    
144    0      
96     176    
-80    256    
64     -16    
288    -48    
-240   -32    
96     -16    
-32    80     
-96    -16    
112    128    
-32    -176   
48     -64    
16     48     
208    32     
288    688    
-336   352    
240    208    
-224   448    
32     -16    
0      96     
64     -144   
-32    -272   
80     -400   
-16    64     
112    96     
-192   0      
272    64     
-32    272    
-16    0      
96     -48    
16     -160   
-96    -48    
112    -64    
224    -336   
-64    -80    
208    -32    
-96    128    
16     112    
-352   -192   
272    -128   
-96    -64    
16     -160   
0      96     
80     -48    
256    -160   
64     -704   
144    -48    
-176   0      
80     64     
-128   32     
160    128    
16     48     
80     48     
32     144    
112    304    
0      32     
-64    -160   
-32    -224   
160    -144   
112    80     
-64    -544   
160    112    
112    160    
160    368    
16     -112   
0      -80    
32     64     
64     160    
-128   -144   
128    112    
160    96     
-48    -64    
-16    -16    
112    208    
16     -32    
96     80     
48     -32    
304    416    
144    -304   
112    288    
-16    -64    
-64    -48    
224    16     
-112   112    
336    688    
-112   32     
-64    544    
112    -256   
80     -320   
48     288    
32     -368   
-80    -352   
112    16     
-48    96     
-16    48     
-80    32     
16     48     
144    96     
128    224    
64     64     
96     16     
-192   -16    
-144   -80    
112    -416   
160    112    
320    80     
112    64     
0      -64    
-224   -16    
-80    0      
96     48     
112    32     
160    64     
96     64     
192    -336   
32     96     
-256   -240   
112    -144   
48     -48    
160    48     
192    -48    
320    144    
-80    -176   
80     80     
32     0      
-16    -64    
0      64     
80     -752   
32     -832   
0      -80    
-16    32     
192    -96    
128    96     
48     -64    
112    48     
96     -80    
32     32     
160    48     
-64    -128   
16     32     
192    -688   
-32    0      
160    -544   
112    -144   
-64    -80    
80     -64    
48     32     
176    -384   
-208   -128   
112    48     
96     -16    
96     16     
-112   -224   
512    -560   
-144   0      
352    -64    
-288   -224   
-272   -96    
48     128    
-112   48     
192    -48    
-16    0      
224    -224   
96     -112   
-192   96     
128    -48    
-96    -80    
208    -16    
128    -16    
112    -16    
48     -192   
-48    -16    
-304   16     
80     64     
-384   16     
96     -48    
32     -128   
48     -112   
288    48     
-32    -128   
144    -128   
272    -32    
-112   112    
64     -112   
-112   -48    
288    0      
144    -48    
-208   -48    
256    -32    
16     -16    
-32    -128   
160    -32    
16     16     
-112   144    
240    -128   
208    -64    
-48    -48    
32     -16    
96     48     
-64    48     
-64    48     
80     -112   
-176   16     
-160   -16    
-432   0      
272    -64    
48     16     
384    -64    
64     -96    
80     -16    
-160   48     
208    -336   
-16    32     
208    112    
-32    224    
-112   -16    
304    -160   
-176   -48    
32     32     
-16    48     
96     -64    
-544   -128   
80     -64    
-208   -48    
64     -192   
-16    32     
-176   -176   
576    -112   
128    576    
96     -160   
-48    0      
16     -288   
16     80     
-32    -272   
128    144    
144    -80    
-672   -128   
80     -272   
-512   304    
112    -144   
96     -112   
48     -528   
16     128    
16     -304   
352    464    
-224   -288   
0      -96    
-272   -112   
-16    240    
-288   0      
80     -320   
-48    272    
96     -128   
288    176    
-112   -464   
-64    -304   
16     32     
-16    -160   
-96    -48    
96     144    
-352   -48    
144    704    
-224   64     
32     -384   
16     0      
128    16     
112    96     
208    256    
16     16     
112    -336   
-144   160    
112    -112   
32     80     
-64    32     
-80    -128   
-32    96     
96     -48    
-112   -64    
144    -336   
112    -64    
64     -96    
-528   -16    
-128   -64    
-32    -64    
-704   -192   
-16    16     
-80    -208   
-16    -208   
-400   -320   
-464   -384   
-32    -64    
-448   -224   
-128   -320   
-64    -144   
-208   -112   
32     64     
-208   -160   
-672   -240   
48     128    
32     0      
112    112    
-80    -32    
-304   -48    
-80    -16    
-128   -48    
224    192    
-160   240    
-208   80     
-2016  192    
64     80     
96     -16    
160    176    
80     224    
48     352    
-288   -64    
176    208    
-128   192    
0      -240   
32     32     
-192   48     
-64    -96    
-272   -96    
-32    192    
-1440  32     
32     80     
-80    320    
160    -96    
-144   -192   
96     64     
-128   -96    
-16    -32    
-32    -80    
-160   -208   
32     -160   
-48    144    
-32    -32    
-144   -80    
16     -64    
-720   -112   
128    80     
-1008  -48    
96     192    
-80    -176   
0      112    
144    -48    
-96    32     
-16    144    
-192   32     
-16    -64    
144    128    
-144   208    
-80    32     
48     -32    
176    32     
-432   -256   
-1040  80     
176    544    
-128   752    
352    544    
96     -112   
48     96     
-112   -288   
-304   -112   
32     -176   
-144   176    
80     96     
-80    -112   
128    -112   
-336   -128   
-128   48     
-368   128    
336    272    
80     256    
272    272    
-32    -96    
-208   -160   
-144   -192   
48     -48    
-128   144    
48     -32    
64     32     
-400   -128   
32     -176   
-176   -144   
-128   64     
-240   -320   
64     0      
-1440  -384   
-320   -256   
160    48     
-96    112    
-128   48     
320    -176   
-80    -128   
144    -240   
-240   -160   
304    48     
-16    192    
-96    -64    
240    -64    
-192   -16    
112    -64    
-160   -64    
96     0      
-32    144    
-64    32     
368    256    
-272   336    
96     144    
-64    400    
368    208    
80     144    
-96    -48    
-48    16     
-80    -176   
-336   -224   
80     -80    
64     -48    
-112   -176   
-32    -96    
32     16     
128    112    
-240   48     
48     -32    
-240   -112   
-176   16     
-208   -16    
64     -304   
-176   16     
176    160    
-272   176    
192    128    
-32    -96    
-16    -192   
-48    -480   
-112   -176   
-144   -144   
80     -80    
-192   32     
192    -640   
16     -32    
80     144    
-96    176    
-160   16     
128    192    
304    384    
224    432    
-64    0      
16     304    
-16    -96    
144    0      
176    272    
-112   -336   
-80    784    
-112   -768   
128    816    
0      144    
32     -224   
-160   144    
80     -176   
16     -224   
-176   304    
-272   -16    
-80    -528   
224    80     
144    384    
32     160    
176    64     
160    112    
-192   -48    
-32    64     
-32    32     
64     0      
0      -16    
128    48     
-32    64     
80     48     
-48    80     
112    -528   
-256   -528   
48     0      
-160   144    
64     112    
80     112    
-128   160    
384    224    
48     80     
-160   -208   
-64    -352   
144    128    
64     96     
112    96     
-64    128    
112    64     
240    64     
-288   -32    
-256   -32    
112    -32    
96     48     
0      80     
64     32     
112    16     
96     32     
48     -16    
-48    -512   
272    112    
-368   -48    
-64    80     
144    32     
-32    -16    
-32    160    
0      0      
208    64     
160    80     
-64    -32    
80     -64    
-144   32     
192    192    
256    48     
32     -224   
64     48     
48     48     
32     32     
304    0      
-288   -32    
64     64     
96     80     
112    -16    
144    -16    
128    16     
-272   -16    
-64    48     
128    64     
128    64     
32     -192   
128    0      
16     -544   
64     80     
48     80     
0      64     
-48    16     
80     80     
-80    48     
96     32     
80     64     
64     64     
-48    16     
192    -16    
-128   -32    
240    -96    
64     64     
256    -624   
-48    16     
256    64     
-144   -368   
-112   -64    
-64    128    
192    32     
-64    144    
-128   -96    
144    128    
240    96     
-112   -80    
416    0      
-128   -32    
144    112    
256    0      
-192   0      
80     -16    
64     96     
0      16     
176    64     
224    48     
0      144    
96     -16    
-16    -48    
144    32     
-16    -336   
144    -32    
96     208    
64     96     
208    -448   
-128   -16    
-16    -672   
48     -96    
128    -160   
64     96     
64     32     
208    0      
64     160    
-64    0      
112    64     
64     -80    
16     240    
272    -288   
-64    -32    
80     -208   
16     48     
64     -480   
80     -208   
16     240    
64     16     
-32    32     
0      48     
400    -96    
-224   160    
336    192    
-16    -160   
144    96     
64     -256   
-64    64     
64     48     
-48    -32    
160    -560   
192    432    
-80    -208   
240    224    
32     160    
32     16     
128    -48    
-80    32     
-96    -32    
176    -304   
48     272    
64     80     
240    -48    
80     272    
80     -400   
-224   192    
208    -608   
-16    144    
944    656    
-368   512    
48     -144   
-80    -496   
128    -352   
112    -176   
80     -208   
96     -192   
0      64     
64     64     
288    32     
48     -880   
-128   240    
208    -80    
336    -16    
128    -96    
48     16     
-544   -160   
160    -224   
-16    -224   
160    -80    
96     64     
32     -96    
-32    -96    
80     240    
144    -112   
128    32     
32     96     
144    -32    
-96    128    
224    -32    
-16    96     
-256   -128   
96     -464   
112    -144   
256    48     
-48    -48    
112    -256   
0      32     
0      -224   
16     32     
32     32     
-32    48     
64     -96    
64     32     
-272   0      
112    -176   
-576   -192   
304    -416   
192    32     
32     32     
-32    -48    
144    -128   
352    208    
-160   240    
-160   -128   
304    -208   
208    160    
-80    -32    
-48    0      
-160   -80    
16     -16    
-384   32     
192    -48    
-1184  -144   
16     -128   
80     -96    
128    64     
192    32     
128    -176   
-80    32     
96     -176   
80     112    
0      -32    
48     0      
16     -32    
192    -64    
-176   -48    
176    -112   
-256   -16    
-96    -48    
-464   48     
96     -112   
112    64     
144    -160   
-64    224    
320    -384   
-64    352    
112    240    
176    -112   
-208   48     
144    -320   
-224   -64    
16     -240   
-128   -80    
224    48     
-1008  -64    
-96    -288   
176    -288   
128    16     
128    272    
-96    -48    
16     288    
-48    64     
112    -64    
-16    -32    
112    144    
128    240    
128    352    
64     176    
48     -96    
-1040  -48    
240    -96    
-80    112    
80     -224   
48     -160   
-16    -288   
160    112    
-656   96     
-48    80     
-80    32     
96     -112   
128    160    
96     192    
240    560    
-96    320    
-208   -256   
112    -240   
368    -112   
-16    -672   
-64    -112   
208    -192   
144    208    
-256   320    
128    -272   
-304   -336   
-144   -576   
-208   -368   
128    32     
-64    -64    
96     -240   
-160   128    
-256   -256   
192    -240   
-928   -32    
448    304    
-176   -288   
-240   -160   
32     -144   
-272   -80    
32     -288   
0      -112   
-160   32     
112    384    
-96    336    
-80    -624   
32     -432   
-432   -672   
128    -192   
-288   240    
32     352    
80     48     
-128   -288   
-224   336    
288    -96    
16     48     
-720   240    
-224   -240   
-336   -288   
-112   272    
144    -16    
160    -96    
-192   112    
80     -480   
-160   240    
96     64     
-128   208    
0      -496   
64     272    
160    304    
-192   -336   
-560   -32    
256    -176   
-1248  288    
-96    -160   
-64    -288   
64     -48    
-48    -48    
0      144    
224    -16    
48     16     
-112   -32    
32     -80    
96     -144   
-112   544    
96     -256   
-48    368    
304    304    
-304   -240   
-64    160    
112    224    
144    -96    
128    -80    
-48    -80    
-80    464    
-16    -208   
-144   16     
-208   16     
208    0      
-112   208    
-16    -96    
-128   -16    
0      -16    
-640   -160   
368    448    
-448   384    
-16    -208   
48     -256   
-32    -208   
-240   -208   
-144   112    
112    128    
-240   0      
-64    -32    
-32    16     
128    128    
-64    64     
-80    112    
-368   -16    
80     224    
-1488  -80    
96     -160   
-128   -192   
-128   0      
-192   -48    
144    32     
16     0      
-32    -176   
-64    -240   
-128   -144   
-32    48     
112    192    
-144   64     
-288   -48    
128    64     
-64    -32    
80     0      
-16    16     
-144   96     
-384   -560   
-128   -544   
-48    128    
-288   64     
160    160    
-304   -32    
32     -176   
240    48     
368    -160   
368    240    
-432   208    
-160   -288   
160    48     
-96    144    
-32    -112   
464    -80    
-192   16     
0      80     
240    16     
-304   -144   
304    -48    
-176   192    
-16    48     
80     16     
-528   0      
-16    64     
-304   -64    
304    160    
176    160    
208    0      
-64    -80    
144    32     
-80    48     
-48    32     
0      16     
-48    32     
0      -32    
0      16     
-80    -16    
-32    -16    
176    48     
-208   32     
-80    -16    
-96    -16    
128    64     
-80    48     
64     -64    
48     112    
-32    64     
0      -64    
96     -32    
64     48     
-48    48     
160    48     
-224   32     
64     32     
112    80     
-48    -48    
48     48     
64     80     
-80    -16    
48     -48    
0      80     
-112   32     
-48    -16    
-32    -16    
80     16     
-112   48     
32     48     
-288   -80    
144    -96    
-128   -16    
160    0      
0      80     
112    48     
-64    -160   
208    -192   
-16    112    
192    0      
-128   -208   
48     -208   
16     0      
-48    32     
48     192    
-48    -16    
48     16     
112    224    
0      128    
48     -64    
96     224    
-144   320    
144    112    
112    16     
80     16     
0      -64    
-64    -144   
80     16     
-16    64     
176    0      
32     272    
192    336    
96     -80    
64     -112   
-160   -48    
16     16     
32     336    
-16    -336   
0      -192   
144    224    
128    48     
-96    80     
128    16     
-128   -224   
80     192    
0      64     
160    -1152  
-16    112    
0      -80    
48     -96    
0      16     
176    80     
16     -256   
-80    208    
-64    -784   
176    176    
192    176    
-80    672    
80     -16    
-208   -880   
-80    -144   
48     -128   
64     240    
0      -64    
352    16     
80     -240   
192    224    
-32    -144   
-16    96     
128    96     
80     16     
-32    112    
80     -160   
-48    128    
0      -80    
240    112    
112    -176   
0      0      
-80    -96    
-64    -80    
80     -96    
224    96     
-96    -96    
-64    -80    
-48    -16    
48     -16    
-48    -144   
-96    -80    
208    112    
176    112    
-48    96     
112    16     
-96    32     
-64    192    
-112   48     
-48    -112   
208    -32    
208    32     
-192   80     
80     48     
144    272    
240    112    
32     128    
112    0      
64     -48    
16     64     
48     -48    
160    0      
144    -240   
48     128    
112    144    
-144   48     
-48    16     
-48    32     
160    -128   
64     176    
448    224    
-80    352    
-272   64     
160    -304   
16     16     
112    -96    
176    48     
192    32     
-16    48     
80     -48    
64     32     
-112   16     
64     16     
272    -16    
-16    144    
-240   -160   
192    -304   
96     192    
-208   -128   
96     16     
112    -208   
256    -64    
224    112    
128    304    
-144   16     
48     48     
-64    -96    
352    192    
-32    160    
160    -96    
112    -112   
0      192    
176    144    
-80    16     
-32    -96    
144    -208   
160    144    
128    -32    
-32    128    
0      -608   
-16    -16    
272    144    
32     144    
-64    -16    
160    -192   
112    384    
176    16     
-16    -16    
64     -256   
192    -32    
0      -160   
-64    16     
64     -80    
-16    0      
0      -96    
16     -1136  
-48    16     
96     -864   
-96    128    
80     144    
16     128    
32     16     
-112   -880   
176    -448   
112    48     
0      288    
112    128    
0      16     
128    -192   
208    192    
16     -32    
32     176    
0      0      
-16    -16    
-96    96     
0      -608   
256    -304   
64     -160   
144    48     
176    -608   
208    512    
32     304    
112    -496   
160    -208   
-240   416    
48     -176   
-48    400    
-112   -352   
352    80     
-1072  -112   
112    80     
256    -16    
-224   -80    
48     -224   
352    0      
208    528    
240    -784   
-192   784    
-16    -816   
208    496    
16     -320   
48     -368   
64     480    
128    -288   
-560   -176   
176    112    
112    32     
0      -16    
192    144    
-16    -144   
192    -352   
32     144    
80     192    
96     -176   
192    80     
32     -160   
144    -112   
-64    -32    
208    -80    
-160   -80    
224    -160   
-736   368    
-16    -96    
208    -112   
96     32     
-128   -336   
112    -144   
0      64     
160    -16    
112    -32    
-48    96     
96     80     
-80    -16    
112    48     
96     -208   
-192   -352   
-1472  -64    
48     64     
176    48     
80     -128   
224    96     
48     -96    
64     -48    
48     -528   
112    -16    
-16    -64    
-16    0      
-32    -64    
112    -16    
-304   80     
144    80     
-384   16     
160    -16    
16     128    
272    144    
-112   32     
48     -112   
-32    96     
208    -272   
96     96     
48     0      
240    80     
-128   -96    
-48    -192   
256    64     
-48    -160   
96     16     
96     16     
-16    32     
320    0      
-128   80     
80     -80    
-16    32     
32     -16    
-16    -240   
-544   -16    
112    -48    
-608   0      
256    112    
-32    192    
-112   -64    
-336   16     
128    -64    
-16    64     
160    -48    
48     32     
224    192    
112    208    
-80    -80    
-192   -64    
0      -32    
-224   -16    
144    80     
16     0      
0      176    
224    16     
-352   -80    
32     -96    
-176   -112   
-48    -256   
16     -112   
-608   -224   
192    0      
-16    -64    
-544   -144   
-16    32     
-480   -32    
80     96     
16     -80    
160    -192   
96     16     
-384   -64    
-352   -16    
112    144    
-240   -80    
0      80     
-608   144    
-752   144    
224    48     
-144   -112   
-240   16     
208    336    
-768   80     
-592   -32    
-288   -16    
256    -96    
304    240    
-128   16     
96     0      
-496   -176   
-320   0      
-224   -176   
-16    16     
-16    64     
320    64     
-336   16     
112    256    
-304   48     
48     96     
-432   0      
-496   -16    
144    144    
-272   32     
208    256    
0      144    
160    0      
-192   -48    
64     16     
128    64     
-144   32     
64     0      
-96    64     
-16    112    
-224   208    
-160   -16    
-208   0      
352    128    
-96    -32    
224    80     
-112   -32    
32     -16    
208    -16    
-96    16     
112    64     
-96    64     
-32    -64    
16     -16    
96     144    
-80    32     
-256   -64    
-512   -80    
160    64     
-160   -32    
192    48     
48     -16    
48     32     
-144   -128   
-80    -32    
-112   64     
16     16     
16     64     
-16    32     
-16    32     
-80    -80    
128    48     
-336   -96    
80     96     
-816   -32    
80     80     
-64    16     
-32    32     
-32    -48    
-32    -160   
80     32     
32     112    
16     112    
160    192    
-48    128    
-432   16     
48     96     
16     -160   
-96    -128   
-448   -112   
240    208    
144    400    
0      -192   
240    -144   
160    256    
-144   320    
-64    320    
-208   -112   
-336   -448   
-48    352    
-48    304    
224    -256   
-112   32     
-16    112    
-992   -96    
-16    64     
16     112    
144    240    
48     32     
-288   64     
80     -368   
-32    176    
0      -96    
-176   640    
464    -320   
-80    -192   
-64    -176   
0      -368   
-240   256    
96     -400   
-64    304    
192    48     
96     384    
176    400    
240    112    
-400   -176   
-48    -288   
-80    112    
-48    -704   
16     -208   
48     -208   
-128   304    
-304   336    
320    176    
96     48     
32     0      
-48    64     
-96    -224   
16     -96    
48     208    
-128   320    
16     0      
80     -80    
-48    64     
112    96     
-112   -96    
96     -16    
-192   96     
128    -48    
208    -112   
-64    -160   
48     -96    
-96    -16    
144    16     
240    96     
-48    112    
-96    0      
288    -16    
-96    48     
176    -48    
-288   -192   
-64    80     
-192   128    
16     16     
48     80     
32     -16    
160    112    
160    48     
176    64     
-48    48     
176    32     
-80    0      
-96    144    
80     64     
80     0      
80     -16    
80     32     
-112   -48    
32     0      
144    160    
-112   96     
-32    144    
32     96     
-112   0      
-16    -48    
128    16     
-96    16     
48     32     
0      0      
176    -128   
-208   -80    
-64    112    
-64    96     
32     -48    
32     32     
64     80     
-64    48     
240    80     
-80    -32    
80     48     
112    -64    
-32    32     
-48    64     
16     -80    
32     48     
-272   -48    
-128   -224   
144    -16    
144    -48    
272    0      
-32    144    
-80    -32    
-32    -16    
112    -48    
16     -16    
48     -32    
-48    96     
208    272    
-272   32     
144    -48    
144    -240   
272    -336   
32     -48    
112    592    
-32    240    
64     96     
-32    64     
32     0      
0      -240   
112    -64    
-112   272    
-32    -80    
112    -128   
-96    -256   
112    48     
112    208    
-32    -64    
80     96     
192    -576   
-80    48     
16     240    
176    304    
0      -192   
48     -352   
144    672    
-16    80     
-192   -272   
16     64     
96     192    
288    416    
0      -128   
240    -288   
64     320    
-64    -160   
32     -528   
96     272    
-144   -176   
-64    32     
16     432    
160    -160   
64     368    
-48    -48    
256    16     
0      -48    
-32    -224   
-80    -32    
-80    -96    
160    192    
256    -48    
0      128    
80     -464   
64     -32    
-80    -96    
272    128    
-48    -32    
0      -64    
-32    256    
48     128    
-112   96     
384    208    
32     -144   
80     -48    
128    48     
16     -288   
96     48     
0      -400   
-144   96     
32     32     
96     128    
-32    -16    
288    -128   
-96    -400   
288    -704   
240    80     
96     16     
-48    80     
-256   -304   
64     -96    
-96    -32    
160    160    
176    -32    
192    80     
48     0      
192    -64    
-64    0      
96     -96    
-96    -64    
-16    -16    
144    -48    
-48    -32    
176    144    
-64    16     
48     48     
64     -112   
-80    -192   
256    -160   
-16    144    
-128   64     
224    112    
-48    0      
160    80     
-16    16     
144    -112   
160    -304   
16     -144   
192    0      
128    -48    
64     64     
112    -48    
64     16     
-32    -208   
-128   0      
208    -128   
272    -704   
16     48     
160    -528   
80     -496   
-64    0      
320    -656   
32     -32    
16     -608   
-80    -16    
32     0      
144    -80    
176    128    
-112   -80    
64     -192   
256    112    
64     -32    
-128   64     
32     -112   
128    -160   
-64    -16    
-48    -176   
128    48     
128    -16    
144    -48    
16     -1328  
80     -16    
0      208    
0      240    
496    112    
0      80     
-64    -112   
-96    0      
-720   -96    
64     96     
-1888  80     
528    96     
80     -80    
-144   -48    
-64    -144   
-16    -160   
64     16     
-48    -16    
112    48     
416    -80    
-48    32     
32     -64    
128    48     
352    272    
-368   96     
-352   -96    
64     -144   
-112   -384   
320    -384   
112    80     
-32    -272   
160    -96    
160    -144   
-304   -352   
80     -144   
112    0      
192    -32    
208    288    
-304   -208   
80     -144   
-304   -16    
208    -16    
288    -16    
-176   -96    
-144   -16    
208    16     
-352   -96    
-16    -480   
-32    400    
288    -16    
16     0      
-96    160    
-112   64     
-528   -368   
272    -144   
-432   80     
-320   -48    
-128   -128   
224    -80    
304    -64    
304    -48    
16     -16    
224    -128   
64     144    
224    -32    
256    128    
-432   16     
624    416    
-512   224    
32     -208   
160    32     
64     64     
-160   -48    
224    -112   
-1472  -16    
-208   -176   
208    128    
480    256    
32     208    
160    -320   
240    -112   
-32    0      
-16    0      
-288   80     
112    128    
-496   -16    
-16    -96    
-1296  -176   
-128   -304   
-608   48     
176    -32    
16     64     
224    -208   
-144   -64    
16     -480   
-112   -80    
-112   32     
176    64     
16     96     
336    128    
-240   -32    
-64    -112   
-112   128    
-32    80     
96     32     
176    -64    
160    0      
160    -80    
16     80     
128    128    
-208   0      
-224   -448   
32     -96    
32     208    
-112   -64    
0      176    
16     -128   
144    -32    
-80    -272   
176    240    
-976   -144   
48     0      
-288   32     
-288   176    
0      -160   
-784   80     
-128   -64    
-784   384    
-32    32     
112    16     
272    352    
112    -176   
-336   -304   
-656   -32    
48     112    
-608   -256   
336    -80    
-352   -208   
336    32     
-176   352    
224    96     
-192   -48    
-208   -432   
-96    352    
-880   304    
0      -352   
-272   -272   
112    16     
-672   -16    
144    -16    
64     -192   
64     -16    
-208   576    
16     224    
144    64     
-384   160    
288    -32    
-208   80     
-256   -192   
-592   0      
-192   -32    
-320   16     
-112   -80    
240    -128   
16     64     
-80    -176   
112    -128   
16     -176   
-320   -96    
80     -48    
-80    32     
-32    16     
-192   -16    
-288   400    
0      -16    
256    -176   
-1328  -112   
16     64     
-96    48     
-64    -16    
-192   0      
160    -16    
0      160    
144    -144   
-80    32     
-48    112    
-80    64     
16     64     
0      -176   
-112   -32    
16     16     
-256   144    
368    144    
-64    -16    
16     -48    
-128   -112   
-208   -64    
224    -32    
112    48     
208    80     
-144   0      
-128   -16    
-144   -80    
304    80     
-304   144    
-80    -144   
-656   -336   
-96    -48    
496    -96    
80     112    
-64    48     
16     -48    
-64    -208   
80     16     
48     80     
-160   -16    
64     176    
0      96     
-80    96     
-272   -128   
96     16     
-400   -128   
-80    0      
-48    -96    
144    -32    
272    -16    
-48    192    
-160   32     
-48    -32    
-32    -16    
16     48     
-144   96     
48     32     
-16    -368   
-112   -432   
160    176    
-272   -48    
272    256    
-240   128    
0      -16    
144    16     
-32    16     
-160   16     
192    0      
160    64     
-64    -64    
128    -64    
-48    -80    
-48    96     
-192   64     
32     48     
-48    64     
32     288    
320    320    
-272   96     
-176   16     
160    208    
64     224    
32     -32    
80     528    
192    432    
-224   32     
48     -112   
64     -64    
-112   -16    
192    -208   
-368   16     
320    272    
-224   16     
160    -32    
-112   48     
-48    -64    
32     288    
256    -32    
-112   0      
-80    128    
80     48     
16     32     
144    -48    
-352   192    
0      -80    
-208   -16    
272    320    
-192   -128   
224    -48    
64     -112   
-208   224    
192    -112   
32     96     
-80    -80    
-272   128    
-112   16     
16     -64    
304    368    
-64    112    
80     -128   
-32    -80    
-64    160    
-96    224    
80     240    
-112   16     
-32    48     
208    -112   
-64    -128   
128    16     
16     16     
32     32     
-176   0      
32     192    
-96    -16    
-64    96     
32     96     
128    96     
-32    16     
112    16     
96     16     
-16    16     
96     128    
96     48     
-16    80     
-80    48     
-16    -16    
0      16     
96     160    
32     96     
128    -544   
32     16     
48     112    
192    144    
-192   80     
96     64     
-80    -64    
112    -48    
0      128    
64     -16    
96     -16    
112    144    
-32    -208   
-176   -80    
-240   64     
160    -752   
16     128    
128    144    
112    -16    
32     0      
48     160    
-112   -16    
128    64     
-64    -32    
176    112    
-48    16     
96     16     
32     16     
-64    80     
16     112    
96     -368   
-48    96     
144    48     
128    96     
64     64     
0      48     
128    64     
-144   48     
64     -144   
320    -208   
-80    32     
96     32     
16     16     
112    96     
80     32     
-144   -16    
64     48     
80     -560   
96     16     
16     176    
176    144    
48     16     
80     0      
64     -16    
112    64     
112    48     
-48    80     
96     0      
80     -80    
16     0      
96     -112   
-16    96     
208    -832   
-80    16     
0      -16    
208    96     
96     176    
-32    -16    
16     16     
160    112    
-96    48     
224    16     
48     16     
64     48     
-112   64     
64     16     
16     16     
128    -288   
176    16     
160    112    
0      256    
112    -32    
-128   32     
0      -144   
176    224    
32     144    
160    80     
-112   80     
96     -48    
448    240    
-192   -48    
-192   0      
-80    -16    
128    48     
336    -192   
224    48     
112    -608   
112    -64    
-48    16     
-176   -160   
208    -160   
0      -96    
-128   -64    
48     -192   
208    528    
112    96     
352    -224   
176    -416   
-96    -160   
144    -240   
112    352    
112    -16    
112    -112   
32     32     
48     80     
-64    96     
80     -288   
160    -16    
192    -176   
192    112    
128    -128   
-64    -176   
192    0      
-272   -128   
-480   -848   
-144   16     
64     -176   
240    144    
128    144    
-48    -192   
336    384    
32     0      
-352   -672   
64     464    
-256   -272   
80     16     
176    224    
48     144    
-64    96     
80     -256   
336    256    
160    224    
192    0      
-128   -368   
-112   -208   
-96    64     
272    -112   
224    -528   
96     -224   
-112   -432   
16     32     
-192   112    
224    48     
176    -80    
0      -144   
240    -256   
336    576    
-464   -912   
96     176    
-64    0      
160    -240   
64     32     
-160   -192   
96     -544   
128    368    
80     -64    
160    -432   
32     -32    
0      -240   
0      -48    
144    -256   
48     0      
176    -16    
0      16     
208    480    
96     -192   
-272   80     
176    144    
96     320    
-32    -464   
32     -144   
64     16     
192    16     
-48    -96    
208    -96    
192    -464   
160    464    
112    16     
-48    -240   
-256   -96    
-48    32     
-544   16     
16     -464   
-112   592    
192    -368   
96     -48    
288    -336   
32     -16    
208    336    
-192   192    
144    64     
0      176    
-128   400    
-160   -336   
-96    224    
96     272    
-192   112    
64     112    
48     -288   
144    -144   
160    -80    
160    -272   
64     -176   
192    -272   
32     48     
160    -32    
96     32     
-160   -96    
208    -48    
-224   -32    
128    -144   
-272   -112   
288    -96    
-464   -64    
96     -112   
-32    80     
400    96     
-208   144    
160    -288   
48     112    
-48    -64    
80     -80    
-240   144    
208    160    
-400   288    
304    -96    
-288   -160   
256    96     
-608   224    
-48    -96    
0      -144   
48     -144   
16     80     
96     -496   
64     0      
-80    -720   
112    -64    
-208   144    
32     32     
480    336    
-128   672    
-160   128    
64     -112   
-160   -64    
192    -368   
-48    112    
-48    -496   
32     -128   
64     -144   
64     48     
-16    128    
96     16     
-560   80     
112    -96    
-208   64     
16     -32    
-96    32     
32     64     
-432   224    
240    0      
-176   144    
32     -48    
-288   48     
256    -112   
144    32     
-160   48     
112    -64    
64     112    
-96    128    
-160   -32    
208    144    
-448   160    
32     -144   
144    80     
0      48     
-160   64     
-592   -112   
128    16     
-432   -256   
-752   0      
-304   144    
0      -16    
80     -160   
-576   -48    
-192   160    
-80    112    
-112   0      
256    -64    
0      80     
-16    -16    
80     288    
-272   80     
16     -144   
-32    -144   
-144   -32    
-96    -64    
-336   -48    
32     48     
-192   -64    
-160   -64    
-1280  -240   
0      16     
-112   -304   
192    -80    
-128   192    
176    160    
-192   64     
32     96     
-160   32     
0      -96    
-96    -96    
-176   -112   
-112   -176   
-640   192    
-128   -320   
-656   -320   
-144   128    
-128   0      
240    144    
-336   -272   
64     112    
0      80     
432    -256   
96     -32    
80     96     
32     832    
-64    -32    
-64    -144   
-320   240    
64     176    
-144   80     
-64    224    
-1856  64     
192    112    
-128   224    
176    16     
-64    -224   
-224   -16    
48     160    
-208   96     
-96    16     
-144   -784   
0      -16    
-176   -32    
-496   -304   
-112   -224   
32     0      
-304   -96    
272    -64    
96     -80    
112    128    
-112   96     
-416   -112   
112    48     
-64    48     
96     64     
-64    -32    
48     32     
-240   -48    
-16    -64    
-112   16     
144    64     
-384   -96    
128    64     
176    208    
-256   16     
112    64     
48     32     
-128   48     
128    96     
0      32     
-176   -336   
-144   -96    
-208   128    
-144   -32    
32     -16    
128    64     
-32    16     
224    64     
0      16     
144    32     
0      32     
-64    32     
48     48     
-176   -32    
-64    -16    
-80    32     
144    0      
-128   -16    
32     48     
-144   16     
0      112    
-352   -16    
176    -16    
-128   48     
-64    48     
-32    16     
112    -48    
-176   -16    
64     0      
-96    16     
96     64     
176    32     
32     -64    
96     80     
-224   -32    
128    -32    
-272   -64    
80     160    
-64    32     
208    240    
-48    0      
144    -96    
32     80     
-80    0      
-16    -64    
32     16     
64     240    
64     16     
-128   -80    
0      16     
128    16     
-144   0      
128    32     
112    144    
-192   32     
144    -80    
-64    16     
-16    64     
80     32     
208    -32    
-192   64     
112    48     
-144   -16    
48     64     
-80    16     
0      80     
32     -32    
-48    64     
144    112    
16     0      
16     -128   
96     48     
-16    128    
64     0      
-16    16     
-32    0      
-160   80     
176    48     
16     32     
-352   -32    
256    -64    
16     -64    
144    80     
-32    32     
-80    -32    
144    96     
128    48     
-48    16     
144    80     
-80    32     
16     80     
144    96     
-192   -48    
48     -16    
-128   0      
368    128    
-96    112    
160    80     
0      64     
32     -336   
16     48     
-32    336    
-176   32     
192    64     
160    96     
-16    80     
192    -32    
-176   -160   
144    192    
-352   -16    
400    -96    
-96    32     
464    16     
32     432    
-80    -224   
0      112    
-192   -32    
224    192    
80     0      
80     128    
-96    -64    
128    -32    
-16    160    
176    16     
144    -128   
-80    -528   
-32    96     
32     64     
48     16     
-80    -208   
144    112    
0      112    
-144   -16    
-64    288    
32     1152   
32     -368   
304    144    
64     48     
128    80     
-48    -80    
0      -480   
-128   -400   
-272   -192   
-16    320    
-32    -80    
96     224    
432    208    
-80    240    
112    -112   
320    352    
-272   -464   
352    208    
96     -192   
96     -80    
64     96     
96     -224   
-144   -96    
-32    -848   
48     -32    
80     -80    
-48    -32    
-144   96     
-32    0      
-304   -32    
144    -880   
-16    80     
80     592    
-192   48     
16     -208   
80     -224   
-48    0      
304    -400   
144    -544   
160    -176   
-80    -208   
-16    624    
0      -112   
-336   -336   
64     80     
-160   384    
80     128    
0      -304   
160    -32    
272    -304   
160    208    
176    64     
32     -64    
-64    -304   
80     0      
-80    -1088  
64     -208   
112    16     
-16    64     
-32    -144   
160    -112   
-48    -48    
16     -144   
-80    -160   
96     -144   
80     -64    
64     112    
144    160    
32     -272   
64     288    
96     -80    
0      320    
16     32     
64     144    
32     32     
128    0      
128    0      
48     -448   
-192   64     
256    -144   
64     320    
192    -64    
-80    0      
16     -64    
144    32     
176    720    
192    64     
-64    -240   
192    -32    
256    768    
480    736    
-368   176    
-80    -32    
160    -224   
-48    240    
368    224    
64     240    
-160   -32    
448    320    
-240   704    
-80    96     
32     -112   
112    -352   
112    -80    
16     -336   
64     -96    
16     -416   
160    -320   
48     192    
-48    -592   
0      -160   
48     -96    
160    432    
-64    128    
0      144    
-160   -384   
-96    32     
-32    96     
128    -592   
192    32     
-1280  -80    
80     -544   
192    -16    
-192   16     
272    64     
224    -48    
-224   -64    
16     48     
-16    -128   
128    80     
16     32     
208    -16    
48     192    
272    -192   
-80    64     
-640   -336   
-560   -496   
-32    -560   
144    -192   
464    384    
-352   32     
-144   112    
-16    192    
144    96     
208    400    
320    144    
-48    48     
528    32     
288    -176   
-96    -224   
-80    80     
-64    96     
-32    -32    
160    -144   
160    -80    
304    288    
64     16     
-208   -336   
48     -80    
160    -32    
128    208    
-64    -144   
16     16     
16     -176   
32     -144   
-368   16     
112    -16    
-80    32     
64     -112   
48     32     
144    -160   
224    48     
-48    -48    
-16    -32    
-16    -304   
96     -48    
-96    32     
144    112    
80     0      
16     64     
-64    32     
-32    -192   
-272   -96    
96     -176   
160    -144   
128    -176   
32     -16    
208    -144   
-32    208    
-32    -560   
-16    -64    
112    432    
48     -32    
-64    -288   
192    208    
-144   -32    
208    48     
-336   144    
48     -192   
-400   64     
48     368    
160    -112   
0      -304   
0      48     
64     -128   
-16    32     
144    -176   
176    -176   
64     160    
464    112    
-272   48     
128    48     
-432   240    
-240   -256   
-416   -128   
96     32     
384    -48    
496    -240   
480    -96    
256    -400   
272    64     
-48    -112   
128    -16    
-64    144    
-32    -96    
-336   -32    
48     -80    
-272   0      
176    -128   
224    16     
720    112    
-304   128    
-464   -240   
64     -64    
48     -208   
16     64     
-176   128    
-416   -48    
-80    -16    
112    -16    
-752   80     
80     64     
-32    -16    
96     -80    
-864   96     
0      48     
-80    144    
0      -256   
224    144    
272    -112   
176    -64    
-96    48     
-144   16     
-160   32     
80     -80    
-144   -16    
32     32     
208    80     
-64    -16    
-112   0      
-240   64     
-96    -64    
-2080  -80    
192    48     
-240   -16    
-16    -16    
-144   -16    
-736   -32    
-160   32     
80     48     
112    64     
-64    -48    
96     16     
96     0      
-16    16     
-944   -160   
208    -16    
-160   0      
176    48     
-144   -32    
-368   -80    
-80    96     
-176   16     
112    160    
112    0      
-112   16     
176    -144   
-352   -16    
-400   0      
-128   -96    
-96    -224   
-208   112    
-48    0      
176    -48    
-48    -16    
-144   16     
-112   48     
-48    0      
32     0      
-384   -32    
-48    144    
-960   144    
-32    -32    
32     -96    
-16    16     
112    -16    
80     80     
-160   -48    
-48    176    
240    64     
-80    0      
-96    -128   
-48    -64    
-112   -48    
-80    144    
-528   160    
-288   -32    
224    -32    
-16    -16    
224    32     
-176   -176   
304    176    
-288   48     
-32    -16    
144    -48    
-272   -64    
0      -16    
-128   32     
-32    16     
-192   0      
-16    64     
-112   -32    
64     64     
-1104  -64    
32     48     
-48    -48    
160    80     
-32    16     
64     -16    
-64    144    
-64    16     
16     0      
80     160    
-16    80     
-80    48     
128    64     
-384   0      
144    -48    
-320   0      
112    240    
64     112    
-240   -272   
144    -160   
-48    336    
64     -176   
64     -128   
192    512    
-96    -208   
-64    0      
-288   80     
48     -208   
-80    256    
112    -176   
-368   -48    
96     16     
-32    64     
-96    -256   
-80    416    
-288   -48    
-144   -16    
80     64     
16     176    
-160   112    
96     -336   
-160   144    
48     16     
-176   -288   
-16    -64    
16     -384   
448    -64    
-128   352    
-144   192    
32     -208   
400    208    
-48    208    
-112   160    
-64    -112   
176    -32    
32     352    
-32    -32    
64     336    
-16    -80    
48     16     
-176   96     
96     112    
-48    160    
-16    144    
320    160    
-80    128    
0      0      
-112   -144   
48     -688   
0      176    
160    176    
-64    96     
0      272    
-224   32     
96     240    
-160   224    
-320   144    
0      240    
-32    -256   
176    -208   
32     -16    
16     -144   
-64    -32    
-240   -288   
16     -16    
272    208    
-336   -176   
-96    32     
-240   -128   
112    32     
192    -16    
64     -80    
272    96     
32     128    
80     96     
-96    -160   
-16    16     
-32    16     
192    -224   
16     -128   
96     16     
-208   64     
192    0      
-112   -48    
16     96     
-128   112    
32     0      
-80    -80    
-64    -112   
144    -112   
-32    32     
176    80     
-64    -112   
144    64     
-304   -48    
176    -112   
-272   16     
128    -112   
32     96     
160    32     
224    16     
-144   80     
0      -80    
-64    272    
64     112    
-64    -64    
112    -96    
-64    -144   
48     16     
-48    32     
192    32     
-16    192    
-64    384    
-240   176    
-16    96     
-128   80     
128    32     
-64    16     
128    16     
272    160    
0      304    
48     272    
-32    -32    
-112   0      
176    -304   
416    224    
-160   448    
160    416    
-112   96     
-112   -768   
-64    -48    
-16    -368   
0      160    
272    16     
0      -32    
0      16     
-64    -176   
80     -496   
192    -304   
-96    0      
32     -128   
-64    224    
-64    -688   
64     -64    
240    -176   
16     -160   
-16    -400   
256    -784   
112    -176   
-64    16     
-32    -64    
-160   -112   
96     -416   
96     -160   
-80    -256   
80     -768   
-144   -208   
160    -128   
-48    64     
176    -496   
176    32     
-48    160    
544    336    
-400   448    
64     400    
-352   240    
16     -112   
96     416    
112    -112   
176    64     
160    16     
48     128    
96     -32    
-32    0      
96     -208   
-80    0      
128    -816   
96     -144   
96     96     
-160   -928   
80     -272   
-16    -272   
-32    -80    
176    32     
176    32     
-32    304    
128    -32    
144    -160   
128    -240   
-64    112    
80     160    
288    64     
32     464    
128    288    
-144   -592   
-80    -384   
304    -176   
-432   -48    
-16    -464   
-176   -368   
48     -256   
-80    -224   
224    -304   
-160   -480   
112    -144   
-48    0      
224    -400   
0      400    
288    -1360  
-48    -128   
288    448    
176    240    
-240   -160   
112    -16    
64     96     
112    -96    
16     -96    
80     224    
-112   224    
288    -224   
-32    192    
64     -80    
112    -64    
208    816    
352    480    
-448   -352   
176    368    
96     -640   
-128   0      
-64    -144   
16     144    
112    -80    
400    -64    
160    96     
80     -256   
-80    80     
-192   -16    
-64    -128   
0      48     
320    160    
272    -160   
160    176    
144    192    
64     128    
-208   32     
-128   80     
-128   -32    
176    -112   
560    256    
-176   -80    
-16    -48    
-32    64     
176    208    
-48    -368   
224    -1568  
352    160    
-128   -480   
-272   32     
80     304    
-16    32     
-160   224    
544    -944   
208    -48    
176    -32    
208    80     
192    112    
0      64     
-96    16     
-96    -112   
48     -16    
-160   32     
-128   16     
384    112    
-1696  -16    
-48    -480   
128    -144   
192    -496   
64     0      
-192   -624   
656    -432   
304    160    
528    80     
128    -304   
112    -32    
0      32     
-160   272    
-160   -48    
272    -48    
-304   80     
0      16     
224    -48    
128    16     
128    -16    
-48    -128   
-144   -48    
96     -80    
-112   16     
-16    -144   
-16    192    
-144   -32    
192    112    
32     16     
112    -32    
-352   16     
-64    -80    
16     0      
16     -48    
144    -16    
160    -256   
-112   -112   
272    -368   
128    64     
320    96     
-272   0      
144    -16    
0      32     
-192   -48    
112    0      
-512   0      
176    -128   
-608   -128   
160    -64    
16     -48    
96     -32    
-192   -48    
112    -144   
80     64     
80     -1280  
112    32     
-144   -96    
208    -16    
64     96     
0      -16    
-112   -32    
80     0      
-1056  -32    
208    80     
-160   32     
320    160    
-192   -96    
272    -384   
0      80     
336    -944   
-224   96     
-112   16     
160    -208   
64     96     
-64    -96    
16     0      
0      -96    
-368   0      
96     0      
0      0      
0      -112   
400    0      
-96    -112   
64     96     
144    -400   
48     160    
-80    48     
80     -112   
-80    -160   
96     -128   
-288   96     
64     128    
96     240    
-32    144    
-496   -32    
208    -96    
-176   144    
240    -256   
16     0      
64     -528   
16     -128   
-176   192    
-32    -144   
-96    0      
16     96     
80     192    
-16    -48    
-288   -96    
80     112    
240    -32    
64     16     
-16    -304   
80     -32    
-16    304    
48     -272   
416    224    
-160   -16    
32     -192   
224    240    
32     48     
-112   -128   
-80    16     
-352   -608   
576    688    
-128   32     
208    -240   
-112   416    
-64    -368   
16     -288   
128    288    
-208   -144   
-160   -112   
-432   0      
-304   -336   
-896   128    
-128   640    
400    320    
-16    160    
-960   16     
-32    96     
-1040  0      
0      64     
-368   -64    
0      160    
96     160    
16     16     
176    -48    
-240   96     
-96    64     
-480   64     
-128   192    
224    80     
64     -80    
-112   -160   
0      0      
-320   16     
96     192    
-240   176    
48     128    
-96    -192   
-208   64     
-16    -96    
-384   -96    
112    -64    
-208   -48    
16     128    
-64    -16    
-32    -16    
80     16     
-192   128    
-112   -80    
-96    -80    
224    48     
-112   32     
-112   -16    
-240   -80    
96     0      
-96    80     
48     80     
-352   -80    
-48    48     
-1280  48     
80     128    
-112   -112   
176    96     
96     48     
64     -144   
80     -16    
-80    96     
0      16     
32     64     
-96    -48    
240    128    
0      352    
-64    160    
-368   112    
-144   -128   
176    32     
-896   96     
128    -16    
-32    -144   
-144   0      
-144   112    
-112   -32    
160    -32    
-32    32     
336    288    
-320   112    
-192   96     
-336   -176   
160    64     
-304   -80    
144    -128   
-1200  0      
496    400    
-208   160    
-80    0      
96     -32    
0      192    
-96    128    
-48    -32    
-64    96     
-80    368    
80     224    
-208   -208   
192    -32    
-224   -80    
208    0      
-384   -80    
-16    32     
32     80     
112    208    
64     160    
80     64     
32     48     
-96    -64    
0      208    
32     64     
32     -80    
-176   -16    
112    -160   
-224   0      
-16    96     
-288   64     
48     0      
176    -96    
48     16     
32     16     
-112   80     
-64    -16    
80     -48    
32     -320   
48     -224   
32     64     
32     208    
96     176    
112    0      
160    208    
-96    192    
112    48     
-64    16     
-160   -64    
-32    -512   
-80    0      
48     528    
16     576    
352    384    
-288   -240   
-128   -400   
-176   -304   
256    208    
-144   -128   
384    -16    
-384   -320   
-176   -144   
-368   -560   
80     -576   
512    1408   
-304   832    
16     -208   
-160   -1040  
176    400    
128    256    
-32    -352   
464    208    
128    192    
32     -176   
80     -64    
-96    224    
112    -160   
-32    -192   
208    848    
-96    -368   
256    -432   
112    448    
-64    -288   
-64    -272   
64     192    
128    384    
-176   -64    
0      -112   
-256   176    
-32    240    
272    -320   
96     80     
-304   640    
304    -560   
48     16     
-336   -112   
16     64     
-48    80     
256    320    
96     64     
32     192    
-32    -64    
96     0      
-96    448    
48     96     
32     -160   
-144   64     
0      -240   
288    256    
-160   -96    
576    96     
-112   208    
656    288    
-336   48     
-16    -480   
224    336    
-96    32     
192    -176   
32     144    
320    64     
-144   80     
0      32     
-16    0      
-48    48     
64     112    
288    144    
-80    -48    
-96    -32    
96     176    
-80    -112   
192    -16    
-176   -288   
32     -176   
400    608    
-32    -112   
-64    -176   
80     144    
288    336    
-32    128    
32     -144   
-368   624    
320    304    
128    -128   
-368   -32    
-128   -48    
-64    208    
-224   -80    
320    -384   
32     128    
256    528    
-240   320    
16     688    
288    400    
112    224    
-16    96     
-16    -96    
-48    -304   
32     -160   
112    112    
-208   96     
80     16     
-16    32     
112    -32    
-240   -368   
272    -768   
240    144    
224    192    
96     16     
96     0      
-208   128    
32     32     
320    48     
-480   -64    
-160   112    
176    128    
192    32     
240    48     
272    -144   
-80    -32    
-80    352    
16     272    
-96    -144   
-64    256    
-48    208    
-208   -32    
-32    -64    
240    144    
192    -64    
144    0      
-128   16     
-112   -80    
-176   48     
32     32     
-224   -96    
272    -240   
416    272    
-80    -576   
144    -32    
128    48     
48     144    
-272   -32    
480    -16    
16     -16    
160    208    
368    192    
-112   -96    
-80    0      
-144   -96    
64     112    
-144   32     
16     -16    
16     -112   
48     32     
0      -112   
128    64     
112    32     
288    208    
-176   -32    
192    16     
-64    48     
96     -32    
208    32     
32     -32    
112    16     
32     -160   
176    32     
80     -96    
-64    -16    
16     -496   
160    96     
-112   -16    
112    80     
0      -16    
-96    -208   
224    96     
16     -368   
160    32     
96     16     
160    48     
176    -64    
-80    48     
80     -32    
48     -16    
224    112    
-208   16     
192    -32    
-16    96     
32     80     
128    -256   
176    144    
48     -16    
176    64     
32     -64    
32     -80    
64     -160   
32     192    
-64    -128   
-64    -48    
-384   48     
144    -480   
-96    -160   
96     -288   
192    -752   
64     -144   
176    -192   
-16    -112   
288    -352   
32     -80    
16     -112   
-16    -160   
192    80     
-32    0      
80     -96    
0      80     
80     128    
32     48     
192    -144   
-80    -128   
272    16     
-368   -560   
16     -32    
128    96     
96     -176   
208    -368   
48     -96    
32     -176   
-96    400    
-16    128    
240    -976   
416    -32    
-336   576    
224    64     
-16    0      
128    -384   
-16    64     
144    -224   
-96    -48    
64     -80    
16     -352   
320    320    
-16    16     
-16    128    
176    96     
-192   32     
144    256    
128    -384   
-272   -304   
320    -32    
-1696  32     
112    0      
144    -80    
0      32     
64     128    
-144   -80    
192    32     
-16    -1248  
-384   -96    
144    -192   
-96    208    
-32    288    
256    80     
-48    96     
16     0      
-288   160    
240    32     
-32    -64    
112    -16    
-80    -80    
16     -176   
-144   -128   
128    -416   
-64    80     
64     80     
-32    80     
176    -96    
224    0      
-96    32     
320    -32    
48     48     
96     -48    
-48    48     
240    -80    
-112   0      
160    -32    
-16    16     
96     -304   
0      48     
160    -1024  
32     -16    
-224   16     
32     -112   
64     224    
-144   400    
-304   -32    
192    -288   
-272   16     
16     32     
-80    -64    
96     -240   
160    32     
-144   -128   
96     0      
256    -288   
0      64     
160    48     
-112   32     
96     -80    
304    80     
0      160    
240    80     
-304   -16    
128    -144   
256    368    
-240   128    
16     64     
144    -256   
160    128    
288    -128   
112    -48    
-464   -32    
-64    -368   
-368   -176   
-160   160    
-96    400    
48     560    
-32    208    
416    -64    
-224   -64    
128    -224   
96     112    
48     -64    
192    16     
-176   -32    
-112   -64    
-144   128    
-160   0      
-240   -48    
96     96     
16     176    
128    64     
-144   -80    
112    -176   
-96    160    
-192   128    
-192   160    
-320   112    
48     48     
-32    32     
-752   -160   
-224   -128   
-16    16     
192    176    
-208   -144   
-272   -288   
16     -288   
-336   -464   
-352   -208   
80     64     
-144   64     
-32    -160   
-48    80     
-320   304    
-336   0      
-464   112    
112    128    
192    224    
0      16     
-1360  -48    
-96    64     
-240   -240   
192    -48    
112    -224   
96     32     
96     -16    
-32    -272   
-64    32     
-368   -160   
64     -448   
-48    96     
-144   16     
-112   48     
-128   64     
-464   -48    
48     48     
192    432    
-272   -528   
160    288    
80     0      
-288   -160   
16     192    
-192   -48    
16     -224   
128    144    
160    112    
144    208    
-304   -240   
-144   208    
-64    -112   
160    112    
-432   336    
160    -384   
-80    -160   
-16    96     
208    -96    
32     -64    
112    -160   
32     752    
-64    -400   
-368   -720   
-80    464    
0      224    
-224   -784   
272    208    
48     64     
-624   -256   
208    192    
-64    16     
176    80     
-208   -224   
-112   -976   
-80    -224   
-32    384    
-192   208    
96     128    
112    240    
64     -32    
96     160    
-384   80     
32     -16    
-944   -400   
160    -192   
-1264  0      
16     -16    
96     0      
-16    0      
16     64     
-208   32     
48     64     
144    48     
-224   0      
-48    96     
64     48     
-64    16     
-32    32     
-80    -64    
160    -48    
-368   48     
80     128    
48     80     
-80    32     
80     32     
-176   -128   
224    320    
-128   528    
320    -32    
-336   0      
-32    -48    
-64    -64    
112    176    
-256   -64    
176    32     
-208   96     
-208   -32    
128    0      
-144   240    
288    144    
-16    64     
-64    0      
-224   -64    
32     -16    
128    112    
16     16     
-48    0      
80     144    
-176   -16    
-16    -64    
-320   -48    
32     160    
-128   144    
-320   304    
128    80     
688    368    
-352   304    
-224   32     
-128   -208   
288    -240   
416    -32    
-192   16     
112    64     
-272   -96    
272    336    
-224   224    
-176   160    
112    128    
-16    -32    
144    -96    
-96    -336   
96     -64    
-48    48     
64     80     
272    416    
-304   384    
-256   -176   
224    48     
-48    -192   
416    32     
48     176    
-80    32     
-48    -96    
0      16     
-48    -48    
160    80     
-144   16     
64     -16    
48     48     
-240   -304   
608    -560   
224    -16    
64     400    
-16    64     
-48    224    
-704   -304   
768    -16    
16     112    
-256   -48    
-16    -144   
240    -80    
288    80     
192    48     
448    224    
-208   160    
-64    112    
-272   -80    
112    64     
-48    32     
112    32     
64     48     
-208   48     
-144   -16    
144    -16    
128    64     
32     192    
96     96     
-64    80     
160    224    
-80    -16    
96     0      
-176   -48    
224    64     
64     32     
16     -16    
16     -16    
-80    16     
-48    64     
-128   64     
80     16     
64     64     
0      0      
32     -48    
160    64     
-32    -64    
80     48     
-80    32     
-48    -224   
160    64     
272    224    
-96    112    
96     80     
0      64     
112    64     
128    96     
0      16     
144    32     
-16    48     
112    48     
-32    -80    
-16    48     
64     48     
192    -48    
-64    32     
96     -32    
32     96     
80     96     
48     48     
-32    -16    
-32    -80    
-48    -160   
96     16     
96     -16    
96     0      
-48    -16    
384    128    
-288   144    
256    -16    
-112   48     
32     -320   
0      -64    
-16    192    
576    208    
-192   144    
224    -64    
80     -160   
352    400    
-208   -352   
240    -240   
16     640    
-464   -176   
176    -176   
-64    16     
-32    48     
-96    -1072  
224    160    
-240   -144   
272    80     
224    -240   
128    224    
-192   -144   
48     -32    
144    -80    
0      -224   
224    112    
-48    0      
112    96     
-64    -384   
400    400    
-320   240    
64     -160   
96     -480   
80     -160   
-144   80     
528    128    
-400   0      
288    -32    
64     80     
-416   176    
112    -176   
-48    -64    
224    -64    
144    64     
48     16     
-16    -320   
288    -192   
-208   -288   
160    0      
240    16     
-128   224    
-64    48     
64     48     
0      32     
112    112    
64     48     
96     -128   
176    -16    
128    48     
-96    96     
336    -448   
224    96     
0      32     
80     16     
-48    96     
128    192    
496    208    
-192   -48    
-16    16     
-96    -304   
32     16     
16     -144   
-32    64     
16     -112   
160    32     
128    -64    
-16    -32    
176    0      
256    112    
144    48     
16     32     
16     240    
0      48     
144    -48    
32     -144   
112    -128   
16     -272   
16     0      
16     -96    
96     112    
96     -32    
176    64     
224    -224   
32     128    
-16    64     
80     -1312  
256    160    
-144   -64    
-80    -80    
176    -80    
0      -288   
64     -80    
128    0      
224    -32    
0      144    
0      80     
-64    -368   
-16    -112   
112    -720   
16     64     
192    96     
-176   144    
-512   -160   
208    -320   
48     -48    
80     -416   
16     -96    
128    -208   
112    -192   
16     -1728  
160    -96    
240    -16    
-64    112    
112    -32    
112    64     
-48    -16    
-224   -80    
-432   -368   
32     -272   
448    -128   
32     16     
-224   -224   
-48    -464   
-64    80     
-48    -976   
-48    -144   
272    -160   
96     96     
-48    -48    
0      32     
192    0      
176    32     
-112   48     
48     -16    
-576   16     
-32    -64    
256    -48    
-160   -64    
-80    48     
224    176    
80     112    
160    -96    
-144   864    
352    48     
-224   -240   
-16    -224   
80     -320   
288    528    
-192   -32    
112    -320   
544    432    
-112   -272   
96     -384   
48     144    
0      16     
48     16     
208    -800   
32     320    
-64    -304   
240    128    
-80    368    
64     -32    
-304   -288   
-16    0      
-432   0      
64     560    
-960   -480   
32     -208   
-32    64     
224    -240   
-176   64     
128    -496   
48     -368   
80     -96    
-48    0      
-128   -112   
32     112    
-128   -160   
32     144    
-64    -32    
-48    112    
-64    288    
160    -80    
-96    -128   
32     -64    
16     112    
-96    -192   
160    80     
224    -432   
64     -80    
-176   -432   
-144   -384   
-144   32     
-176   0      
-48    16     
48     -16    
80     112    
64     -144   
48     16     
96     -48    
-32    112    
16     -160   
-80    48     
64     16     
176    0      
-336   -32    
256    112    
-320   96     
160    64     
-112   -64    
96     0      
-208   208    
32     0      
192    -16    
-160   -48    
-64    -144   
160    -304   
-80    -192   
-128   -480   
224    -16    
80     192    
-240   192    
208    -32    
-16    16     
-224   -48    
256    -48    
-80    48     
144    32     
-16    128    
-2336  -64    
-192   0      
-1200  -144   
-480   48     
-16    16     
-400   64     
-80    0      
-912   96     
-112   48     
208    0      
-144   -32    
-128   -16    
112    32     
-1136  -32    
224    96     
-912   -240   
-80    80     
96     -32    
448    224    
-496   80     
-464   -208   
-80    48     
-608   16     
80     -16    
-128   48     
-48    48     
-64    96     
-304   -80    
-224   -160   
128    96     
-272   -128   
96     32     
160    32     
0      0      
-256   -80    
-320   -48    
-80    16     
-32    -32    
48     32     
-208   16     
32     80     
80     32     
-48    80     
-128   -128   
176    96     
-48    -48    
-16    32     
144    96     
384    112    
-528   -64    
-240   -64    
0      48     
-176   0      
-192   144    
-720   -64    
-144   -112   
-48    -224   
144    32     
-80    -336   
-32    -16    
-112   64     
96     -224   
112    -128   
-16    80     
-16    -16    
128    -224   
176    32     
-176   -320   
128    -368   
-432   -128   
-208   16     
-368   64     
144    -96    
112    -224   
112    128    
-32    160    
-48    32     
160    0      
32     0      
-304   64     
-176   0      
-160   0      
144    0      
-48    544    
-80    576    
240    -160   
-64    -80    
176    -272   
176    -464   
256    -128   
176    112    
-32    -112   
-304   32     
-592   64     
-96    -112   
-32    -128   
384    48     
224    96     
144    16     
-112   -16    
96     80     
-368   -96    
-160   -144   
-240   176    
-208   160    
-80    144    
-208   96     
-208   48     
48     192    
48     208    
160    144    
288    160    
16     -400   
-240   -272   
-544   96     
64     128    
-304   -32    
112    48     
-800   96     
-288   48     
16     -272   
48     -48    
192    112    
-224   -160   
48     -272   
192    -192   
0      -48    
-32    0      
-16    32     
-224   -176   
128    -32    
-160   64     
112    144    
64     -16    
64     128    
352    400    
-48    320    
160    -256   
-16    64     
-48    176    
16     -80    
208    96     
-304   -64    
-16    96     
-64    -112   
64     16     
-128   96     
48     96     
64     -176   
-48    -64    
144    240    
-64    -80    
-16    224    
-256   272    
112    -128   
-64    -64    
16     144    
-176   -208   
80     112    
-64    160    
192    64     
128    80     
-128   96     
192    48     
64     240    
464    -320   
128    400    
-64    320    
-272   -272   
-128   288    
-240   80     
-496   -400   
-48    -192   
64     -80    
-16    96     
240    32     
-128   32     
336    48     
-48    -16    
64     -48    
-160   -96    
80     80     
-256   -288   
112    -240   
-112   -16    
48     -80    
0      0      
-224   -336   
144    0      
-96    -48    
112    -48    
-48    0      
112    16     
-112   192    
160    48     
160    80     
240    240    
0      176    
16     -80    
-96    -96    
-96    112    
-128   -32    
-304   -144   
96     -160   
-48    32     
144    336    
80     48     
-16    -16    
192    96     
16     208    
208    -48    
0      -144   
112    -112   
-48    208    
32     -64    
-96    48     
192    -112   
64     48     
96     16     
208    224    
-16    48     
-128   -240   
192    -192   
176    32     
64     208    
-80    160    
224    32     
-176   176    
336    352    
-256   224    
-224   48     
0      -80    
-176   128    
208    112    
96     0      
64     -832   
-64    32     
-16    112    
240    32     
0      80     
48     -16    
-64    112    
112    160    
-32    112    
64     32     
16     -16    
144    128    
-144   272    
80     48     
112    80     
240    -160   
-64    128    
96     -16    
128    48     
32     128    
48     32     
224    144    
-64    144    
-48    32     
224    112    
-160   -32    
-80    16     
160    32     
32     32     
-32    112    
32     0      
16     80     
32     -752   
160    176    
80     208    
128    64     
144    112    
80     80     
-96    -112   
32     96     
32     0      
112    48     
96     32     
256    192    
144    112    
-16    32     
112    144    
-192   -544   
32     112    
112    432    
240    240    
80     16     
160    240    
16     128    
-32    -96    
-32    -256   
96     96     
80     96     
48     208    
32     -160   
112    -640   
16     -112   
80     -96    
-16    224    
64     -96    
-224   -48    
144    128    
240    80     
400    192    
48     80     
-32    16     
240    64     
368    496    
-304   -112   
112    64     
256    -128   
272    128    
-96    -64    
-176   128    
0      -976   
-128   240    
176    192    
128    -32    
272    16     
-64    48     
-64    -128   
32     -544   
96     112    
128    592    
80     256    
-64    80     
48     64     
240    -48    
48     352    
144    -32    
80     -16    
-128   -80    
336    224    
-112   80     
192    16     
160    288    
128    80     
192    240    
80     48     
48     32     
48     -112   
16     48     
112    -112   
64     48     
128    -96    
48     64     
128    32     
64     -1072  
112    64     
-448   -16    
64     -128   
80     16     
16     -480   
64     -64    
0      -480   
64     32     
272    96     
32     32     
160    96     
-16    0      
112    -320   
112    256    
224    -384   
-128   -96    
-560   -192   
-80    -96    
144    16     
208    96     
224    -48    
112    -512   
-128   -32    
320    112    
-288   -112   
-48    48     
64     48     
128    -96    
80     48     
160    -80    
128    0      
-192   -112   
144    -32    
-144   0      
176    208    
160    32     
0      -144   
176    -80    
64     -224   
16     -96    
192    -256   
64     112    
144    -64    
128    16     
48     16     
32     -112   
-144   -16    
48     -96    
-704   48     
96     32     
-208   -48    
448    -32    
-256   48     
144    -32    
112    -80    
96     0      
-224   32     
288    -16    
32     144    
-80    32     
0      32     
-320   64     
80     -64    
-432   80     
112    -32    
-16    -80    
64     -128   
192    -16    
0      -336   
80     80     
192    -240   
-96    176    
176    80     
160    16     
-128   -64    
-48    -112   
-208   128    
384    80     
-288   80     
112    32     
400    96     
160    48     
-32    48     
-48    -48    
192    128    
208    -656   
-160   -48    
176    -64    
112    48     
240    144    
0      48     
-32    192    
32     144    
-336   16     
112    -16    
240    80     
144    0      
16     160    
96     -96    
160    128    
64     -32    
80     96     
16     384    
-48    64     
48     80     
368    240    
-288   128    
80     -176   
48     0      
-32    -16    
-384   0      
416    224    
-176   192    
48     -464   
32     -48    
0      144    
-96    96     
-192   -80    
-16    -176   
-576   128    
-48    192    
-528   -32    
160    -96    
-160   144    
-112   64     
400    192    
-192   64     
-144   -336   
352    32     
96     96     
416    32     
176    160    
-544   -192   
192    16     
-464   80     
-96    64     
-64    -432   
64     -64    
336    432    
160    -400   
-496   176    
288    -16    
-448   32     
-864   -64    
272    304    
-144   -336   
-896   112    
128    48     
-272   64     
32     -48    
144    96     
-368   -32    
-112   80     
-576   32     
0      32     
16     96     
-48    0      
0      160    
-544   -608   
208    -112   
-16    544    
-416   -192   
192    -96    
272    224    
96     -48    
-480   64     
-400   -48    
-96    -16    
-80    64     
-240   64     
-32    0      
-16    -208   
16     16     
-336   -48    
176    48     
-32    176    
304    -464   
-48    416    
-144   256    
-64    -160   
-208   144    
-32    64     
-112   -128   
96     272    
-96    -160   
96     288    
-64    32     
64     544    
48     -144   
-176   -288   
-64    416    
48     208    
0      -128   
32     -48    
16     144    
-144   352    
48     224    
-208   -240   
-48    -32    
-16    0      
-32    16     
-160   -176   
240    208    
80     400    
-16    320    
-16    80     
80     480    
-144   416    
32     -128   
-96    -160   
-48    -288   
-48    48     
-224   288    
16     304    
-528   -128   
-128   -80    
-48    -352   
0      -352   
16     -48    
-224   -544   
16     -320   
-96    32     
208    -160   
32     192    
-352   0      
-336   32     
-128   48     
-320   -48    
0      32     
-512   -96    
48     144    
208    -16    
-80    48     
-96    -80    
-64    48     
80     320    
176    240    
-336   48     
0      48     
-128   32     
-80    -320   
16     -144   
-336   -304   
-48    -160   
-384   -64    
112    48     
-32    96     
-192   0      
304    48     
-64    144    
224    48     
320    144    
-272   320    
-32    -112   
16     0      
80     224    
-144   80     
-64    80     
96     256    
-128   176    
16     48     
384    -16    
-256   32     
32     96     
32     208    
208    32     
-288   0      
-80    -80    
96     176    
-48    288    
-128   -128   
0      32     
32     176    
0      80     
0      0      
0      256    
64     64     
48     0      
-16    32     
112    16     
-64    80     
-96    -160   
-144   48     
160    -32    
208    16     
-256   -96    
128    -48    
-368   -80    
-64    48     
-112   32     
256    160    
-208   192    
-64    -48    
48     112    
-32    48     
0      16     
48     96     
16     48     
16     16     
-16    16     
0      -176   
64     32     
-320   -64    
192    -16    
0      112    
0      160    
-48    288    
-240   -384   
48     -160   
32     0      
48     112    
0      48     
-80    32     
64     -112   
96     -128   
-128   176    
96     272    
-32    128    
48     -16    
112    96     
-48    -160   
320    176    
-128   -32    
-320   -464   
-16    16     
0      112    
320    512    
-48    368    
-144   -144   
0      -176   
144    256    
80     64     
-144   -160   
96     48     
64     -224   
208    32     
240    288    
-32    160    
80     -768   
128    656    
-16    -144   
112    64     
128    16     
-272   -160   
448    -32    
-16    176    
160    624    
96     -160   
64     -240   
-288   208    
-368   -256   
304    464    
96     464    
-64    -112   
224    -32    
16     -176   
160    32     
240    96     
-224   64     
224    144    
96     192    
-160   48     
176    32     
192    -768   
-192   -160   
-128   -48    
-224   48     
-160   64     
192    64     
208    96     
192    16     
128    48     
112    112    
-176   0      
0      0      
-16    32     
-48    -112   
48     16     
-80    -1216  
0      32     
96     80     
96     96     
144    112    
160    -32    
-96    0      
32     112    
-192   -208   
16     -32    
48     80     
96     96     
80     64     
-16    -16    
64     96     
-16    -160   
32     128    
-64    -48    
32     48     
-32    64     
80     48     
192    64     
-48    16     
80     272    
128    112    
144    32     
64     64     
256    96     
-288   -304   
208    -96    
-80    -112   
288    160    
-16    -80    
64     32     
352    288    
-432   224    
400    -224   
16     112    
160    16     
256    32     
16     0      
176    160    
48     112    
128    80     
64     -112   
-16    48     
64     128    
144    -608   
16     128    
48     -64    
160    48     
32     80     
176    48     
128    32     
-80    224    
-48    0      
16     0      
-16    -96    
176    -112   
96     224    
80     -16    
-32    16     
336    64     
-288   96     
288    -320   
144    48     
-16    64     
192    48     
-192   32     
128    144    
-80    80     
64     0      
288    160    
-16    32     
112    -96    
32     -144   
32     112    
16     -80    
144    96     
32     -368   
0      80     
0      32     
128    96     
208    -16    
-144   96     
272    64     
96     -336   
224    112    
0      -48    
-32    128    
-80    -64    
112    96     
256    0      
48     80     
160    64     
-64    144    
144    176    
192    -80    
80     48     
160    80     
160    144    
32     -112   
128    16     
0      -16    
16     128    
256    96     
48     64     
-16    -32    
32     208    
176    176    
176    128    
-112   -32    
208    -96    
-32    0      
96     -144   
-256   -608   
144    -208   
16     -240   
256    -192   
16     160    
-32    -96    
144    48     
96     -256   
32     -256   
160    80     
-128   -736   
96     32     
128    -336   
16     320    
-704   -112   
64     64     
176    48     
-16    -64    
80     32     
480    -128   
-160   -64    
192    -48    
64     112    
-160   -608   
-96    128    
-48    -176   
112    0      
192    -192   
208    -176   
-208   592    
112    -160   
160    -304   
336    -32    
112    -80    
64     -576   
176    128    
128    -480   
16     -128   
0      128    
-16    48     
48     -224   
96     -304   
-48    352    
-32    -112   
-16    -176   
128    16     
96     176    
64     -160   
64     -32    
112    -256   
-160   -96    
128    -400   
-48    144    
-16    -144   
-80    -624   
160    272    
96     560    
-144   -96    
128    -240   
-624   -192   
176    96     
-2096  32     
96     96     
112    -96    
48     160    
224    -192   
96     -208   
-176   -272   
-192   -288   
-16    -96    
192    0      
272    48     
-384   -560   
-224   -384   
-352   -176   
240    -64    
-144   96     
128    32     
0      80     
112    -48    
96     96     
16     -176   
80     176    
128    -992   
-48    -144   
144    -192   
32     -256   
-160   -128   
96     -144   
-320   -112   
96     112    
-176   32     
80     -112   
-1904  -272   
48     -256   
-64    -16    
80     -48    
176    160    
0      -416   
128    112    
-64    128    
0      16     
-96    64     
48     -192   
-272   -80    
96     -16    
-80    80     
16     16     
-80    0      
96     16     
96     -16    
48     -32    
-16    32     
416    -160   
256    784    
176    432    
96     144    
-400   -32    
-48    48     
64     64     
-48    112    
-112   -176   
-16    -448   
-160   240    
208    48     
448    352    
-208   384    
-16    304    
224    -256   
-80    -304   
32     -672   
112    -160   
-304   208    
64     -320   
-448   144    
0      -144   
-352   432    
416    192    
-112   240    
272    368    
64     144    
-2608  -112   
208    0      
-64    208    
32     0      
-224   -48    
-32    -80    
16     -224   
-128   -240   
224    -304   
80     0      
16     -96    
-1424  80     
144    16     
-176   -32    
-80    96     
-64    -96    
-48    -16    
224    -304   
-592   -176   
-64    80     
-496   -112   
-16    -368   
-624   32     
-272   -192   
304    -64    
-224   80     
-112   -32    
-80    -64    
208    -384   
-32    0      
176    -176   
-224   0      
32     -224   
-80    160    
-112   224    
-96    96     
-64    16     
-240   -192   
-176   0      
-1024  176    
352    112    
192    -288   
16     80     
80     64     
0      160    
48     208    
144    -16    
0      0      
-128   -240   
-160   -48    
80     -112   
-64    -144   
-352   -16    
16     96     
-544   32     
48     96     
32     64     
48     160    
48     48     
112    240    
176    208    
-48    32     
32     -48    
176    128    
-160   144    
-304   -16    
-16    64     
-192   -48    
-80    -128   
-128   -592   
-160   -256   
-976   -272   
64     208    
16     48     
-48    -336   
32     -208   
304    48     
-224   192    
-224   -272   
-32    48     
-96    -48    
80     -32    
-272   144    
128    -432   
-304   208    
-64    0      
-976   -32    
16     -80    
400    224    
48     304    
-144   32     
-224   -16    
64     0      
-176   -48    
80     416    
-384   -160   
16     128    
304    192    
48     -224   
32     16     
-64    16     
-400   48     
-64    16     
720    752    
-256   912    
80     256    
32     -176   
-32    0      
-144   -192   
192    -240   
48     -224   
464    -560   
-96    -464   
-96    -320   
-208   -272   
-192   256    
-688   80     
288    240    
-320   208    
-288   0      
240    256    
64     176    
304    -48    
-224   64     
-144   64     
-64    0      
-272   32     
-96    16     
-32    80     
-144   176    
256    64     
-144   -224   
192    48     
32     112    
144    64     
176    48     
-112   0      
80     16     
-80    80     
-48    64     
-176   0      
32     32     
144    80     
496    192    
-448   -32    
0      -96    
144    16     
-16    80     
144    112    
96     48     
-32    0      
-96    32     
80     128    
48     96     
-144   -32    
64     48     
160    112    
112    112    
-32    16     
16     0      
80     96     
32     48     
64     80     
80     64     
-16    48     
16     64     
0      48     
64     64     
-16    96     
112    48     
-112   16     
80     112    
-288   -16    
176    288    
-160   -32    
32     48     
112    80     
-48    0      
80     32     
320    192    
-240   80     
352    -16    
-96    16     
128    -96    
272    208    
-208   112    
320    -64    
-144   32     
192    80     
80     -32    
-160   0      
160    336    
-64    48     
-48    0      
-64    16     
0      32     
0      112    
144    16     
48     48     
-32    176    
64     16     
-48    32     
-80    0      
96     80     
64     128    
-96    128    
208    16     
48     -48    
-32    -48    
144    -32    
192    -256   
112    128    
-48    96     
-112   -16    
128    208    
-208   -16    
144    64     
-48    208    
-16    112    
288    -32    
16     -16    
160    48     
-32    32     
112    0      
112    16     
32     32     
64     64     
112    32     
-112   80     
176    -128   
-16    -144   
144    160    
-64    -112   
-64    0      
160    -64    
64     -576   
-64    -48    
-96    -160   
96     48     
304    352    
-336   -240   
160    16     
128    64     
-112   112    
272    -64    
-112   -16    
240    224    
-240   -48    
16     80     
176    -48    
288    -240   
128    64     
-96    -160   
160    896    
144    -240   
32     224    
-80    192    
16     -96    
-240   112    
96     -128   
-208   -320   
160    -48    
-224   496    
16     -144   
-16    -224   
128    -224   
480    256    
-224   -368   
32     -128   
144    -128   
128    -528   
-192   -304   
-16    -80    
48     192    
208    -144   
160    -64    
80     -48    
144    0      
-32    -80    
80     -16    
-16    -128   
-192   48     
64     112    
256    240    
96     624    
192    160    
16     -64    
112    32     
-96    -96    
256    -96    
64     80     
80     32     
144    -16    
96     -48    
208    -96    
-16    32     
96     32     
112    -304   
176    -48    
-48    -32    
160    80     
-192   -32    
32     -608   
96     -128   
-48    160    
0      64     
80     0      
176    16     
128    -96    
48     -128   
-80    -256   
80     16     
16     -304   
-80    -32    
-80    -112   
176    32     
32     -32    
48     -16    
128    -96    
80     96     
16     -96    
80     -96    
-32    32     
320    80     
256    160    
-80    -16    
160    48     
-16    -16    
-32    128    
288    -64    
-160   -208   
272    -336   
432    176    
-48    160    
64     -208   
80     96     
64     -64    
112    256    
-32    -272   
32     32     
96     -112   
80     -32    
128    96     
336    224    
-224   176    
144    -1232  
192    240    
176    -1200  
-32    192    
224    144    
128    -32    
-96    -32    
16     64     
112    16     
16     96     
32     32     
208    64     
112    0      
80     -752   
272    256    
-128   -400   
96     48     
32     -48    
64     -160   
128    208    
-64    -96    
128    64     
160    -272   
112    240    
64     -608   
-80    -496   
-32    64     
272    -144   
-304   -96    
272    -80    
96     64     
128    192    
-112   -48    
128    -112   
-1696  208    
-16    400    
176    -320   
-224   -560   
224    -272   
112    -144   
-144   80     
80     -416   
80     496    
560    208    
-128   32     
-112   -144   
80     160    
0      320    
128    -800   
-384   -16    
144    -96    
64     16     
96     0      
80     96     
304    736    
-176   48     
240    -400   
-144   560    
112    128    
-32    304    
48     -176   
32     -64    
-64    -16    
384    -384   
208    192    
128    352    
-160   48     
64     -128   
160    0      
496    384    
-304   640    
240    128    
-64    -240   
-112   -16    
528    128    
-128   528    
272    -192   
32     208    
-16    528    
-544   -224   
96     -144   
0      -160   
224    384    
-64    80     
304    544    
-448   -16    
192    -624   
96     32     
-64    -576   
128    208    
16     208    
192    608    
128    64     
-160   -416   
-608   -464   
224    144    
-528   224    
368    -240   
-1184  -96    
-80    -96    
160    848    
144    -352   
-112   80     
368    -80    
160    0      
-144   416    
96     -240   
-176   80     
272    -384   
16     192    
80     0      
-304   0      
272    -48    
32     -80    
208    96     
16     0      
-192   -32    
-160   -304   
112    0      
176    -96    
-128   80     
240    -80    
-112   240    
-112   -192   
-208   -192   
112    -144   
-432   160    
16     -304   
-160   -96    
80     0      
80     208    
416    -48    
-32    -32    
-32    -80    
128    112    
-384   -32    
96     -32    
-32    176    
-32    -624   
112    -64    
-16    352    
-368   192    
32     112    
-16    48     
208    176    
320    48     
-1232  -320   
160    80     
-672   -48    
-208   112    
-128   144    
-720   -16    
64     -128   
320    32     
-304   176    
-224   -16    
-320   -368   
128    -256   
96     432    
-448   176    
16     0      
64     -160   
-368   -96    
128    0      
-608   96     
-240   16     
-96    -128   
-288   -144   
-2208  16     
-320   112    
-112   80     
-144   0      
-32    16     
80     0      
80     -160   
288    32     
-48    -96    
-48    64     
304    208    
-624   0      
-368   -160   
80     32     
-48    80     
-480   -160   
528    0      
-224   -96    
736    -208   
176    -144   
-96    16     
-608   -144   
32     176    
48     208    
160    48     
80     16     
-144   80     
-192   -16    
-32    -16    
0      112    
-288   32     
16     48     
-896   -64    
-16    32     
64     -16    
64     96     
16     -16    
64     48     
-192   32     
-64    0      
-176   48     
-208   32     
160    128    
80     32     
-96    64     
-176   48     
-256   -64    
-384   -112   
144    128    
32     32     
80     64     
-128   0      
80     16     
96     -16    
-96    0      
32     96     
48     48     
16     48     
-16    16     
48     80     
-176   -16    
112    16     
-64    16     
192    32     
-464   32     
112    64     
-128   -368   
-144   32     
-64    176    
-64    -112   
96     96     
-32    208    
-80    144    
128    -32    
-144   -96    
16     16     
-32    192    
112    -80    
-16    -32    
-1856  -192   
176    -32    
0      96     
-16    -48    
-48    -16    
-48    -16    
0      0      
-96    -256   
-48    -288   
-128   48     
128    240    
-144   -160   
48     -208   
-400   -160   
64     -112   
-32    384    
-112   400    
96     144    
144    32     
-32    48     
96     80     
-112   -80    
32     96     
-96    48     
48     112    
112    272    
-128   -320   
224    -80    
-240   176    
64     -16    
-144   128    
256    80     
16     96     
0      144    
-32    48     
0      48     
80     32     
-96    -192   
320    -160   
-80    304    
240    -160   
-288   160    
-64    112    
-192   -128   
-64    1264   
224    -608   
-144   -32    
-16    288    
608    256    
-448   -176   
48     -384   
-128   -224   
160    -432   
-80    208    
-128   -144   
64     176    
-48    192    
16     176    
-48    112    
48     80     
-16    128    
96     -32    
80     80     
400    208    
-160   144    
192    160    
-224   96     
96     16     
-64    112    
-176   32     
-48    -32    
-112   80     
144    32     
-176   80     
-64    -80    
208    -160   
112    96     
80     64     
-64    0      
144    -32    
-160   -32    
112    16     
128    48     
64     64     
128    32     
224    80     
-176   48     
-48    0      
-16    -160   
80     64     
96     48     
-48    48     
112    32     
-96    96     
-80    80     
176    48     
128    64     
-64    -96    
160    64     
-96    -80    
48     64     
-128   32     
256    128    
16     112    
112    32     
-16    96     
-80    32     
-32    16     
-64    -48    
64     16     
144    144    
112    144    
-176   64     
-96    16     
-32    16     
144    64     
0      16     
-16    -144   
-32    32     
-64    48     
64     112    
-64    176    
336    160    
448    80     
352    0      
192    48     
64     96     
-80    -16    
128    -80    
-192   -80    
64     224    
-288   80     
144    -320   
48     -128   
176    64     
-16    48     
16     -48    
128    -64    
0      -96    
128    64     
-176   80     
-144   -128   
32     64     
176    96     
-80    192    
256    224    
-80    -64    
160    -128   
80     -80    
160    -464   
16     -32    
112    -160   
-64    -112   
-96    80     
16     -144   
48     -192   
112    96     
208    -32    
144    80     
112    112    
-64    256    
-16    128    
16     -192   
80     -16    
144    -144   
0      -176   
48     -304   
80     -160   
-64    -224   
144    240    
96     48     
48     32     
160    64     
80     176    
16     0      
64     -96    
128    448    
128    160    
64     16     
-240   -528   
352    432    
32     -496   
0      -48    
96     -160   
256    -64    
112    0      
80     304    
256    832    
160    1952   
-128   192    
208    -592   
32     800    
-160   -240   
-192   -640   
448    -784   
160    128    
-144   624    
256    -528   
-16    80     
400    368    
80     96     
288    208    
-64    -96    
384    336    
-144   -144   
-80    -368   
0      128    
160    96     
208    -304   
240    48     
144    272    
-368   -832   
192    592    
16     96     
80     128    
48     -96    
-176   1056   
336    -752   
64     48     
-80    128    
336    -48    
-368   -464   
-16    -208   
352    432    
-80    -304   
272    224    
-272   -976   
464    240    
-160   32     
192    -64    
-160   160    
208    -160   
96     448    
-16    -368   
240    -16    
16     64     
0      -80    
96     -208   
176    224    
96     0      
-128   -256   
64     32     
32     304    
144    -96    
224    -304   
64     96     
80     -800   
80     -320   
240    -112   
-192   -368   
224    80     
-32    -48    
192    16     
160    128    
32     0      
112    272    
0      112    
48     -96    
208    144    
48     -176   
-112   -48    
320    -160   
-160   -528   
128    -240   
80     64     
112    64     
96     -96    
-16    -48    
160    672    
64     272    
224    0      
80     -64    
-32    -544   
-64    48     
208    -112   
32     96     
-448   128    
-80    304    
32     144    
272    608    
320    -144   
48     -192   
-80    208    
-80    0      
0      64     
-288   64     
128    144    
112    -256   
256    16     
448    -48    
176    32     
256    336    
16     128    
-800   48     
-160   64     
160    80     
176    -192   
-240   -480   
272    -368   
160    144    
-32    -1536  
-240   368    
-464   112    
-32    -16    
224    48     
240    -64    
-352   -336   
432    -128   
-480   16     
208    16     
368    16     
-208   -48    
-384   -768   
48     -832   
-592   -176   
32     -752   
32     208    
16     -160   
192    -48    
-128   224    
240    0      
-320   288    
128    48     
256    144    
-480   80     
-464   -80    
-32    -64    
-128   -64    
480    -144   
-32    96     
80     -48    
-192   80     
-144   96     
-64    144    
-368   -16    
-288   -128   
-80    32     
64     -176   
384    -96    
32     224    
-192   160    
384    -352   
-448   -240   
-64    -128   
160    368    
-224   -48    
112    -112   
224    -176   
96     112    
432    240    
-192   -32    
-16    -32    
-32    -80    
80     -48    
208    -32    
-960   0      
-80    -96    
-624   -32    
48     -208   
-32    80     
64     -304   
-80    -48    
-32    -16    
64     -48    
0      32     
176    48     
-240   0      
192    16     
-368   -80    
48     32     
-112   16     
176    64     
0      16     
160    -144   
0      96     
80     -48    
144    48     
-256   16     
32     64     
-208   112    
64     -48    
-96    -16    
176    192    
-16    128    
16     32     
-512   -48    
64     -96    
48     144    
-80    -144   
240    32     
-240   16     
16     176    
64     -16    
32     16     
-112   96     
-304   0      
-384   -16    
96     128    
-272   0      
208    16     
-288   48     
-432   48     
-16    -48    
-192   -160   
256    64     
-80    -64    
-128   48     
-32    -224   
16     -48    
-208   320    
-544   -96    
16     0      
-208   32     
-32    -128   
96     208    
256    688    
-336   -816   
240    -144   
208    368    
-480   -336   
160    272    
-240   528    
256    -304   
-256   128    
96     208    
-32    -64    
-432   32     
-112   -112   
144    144    
96     -208   
-64    -16    
192    240    
-16    -192   
-464   -64    
192    -256   
-128   -80    
-160   64     
-176   208    
336    240    
-80    128    
-448   -64    
-96    -144   
-816   -192   
-272   -480   
-1504  -144   
160    112    
-240   -48    
32     32     
-112   -96    
96     80     
48     32     
-16    80     
144    -112   
-112   32     
-48    112    
-128   -32    
-48    -128   
48     32     
64     144    
-432   80     
32     16     
-64    -96    
-224   0      
128    128    
-16    48     
-32    64     
-48    64     
-112   128    
-64    -48    
-16    -32    
-144   32     
176    96     
-272   -16    
256    -48    
-672   -48    
112    16     
144    32     
-16    96     
144    48     
208    112    
32     80     
16     -48    
-64    112    
-16    0      
48     32     
48     96     
-112   48     
-160   -16    
-48    80     
-144   32     
-16    144    
-1216  -112   
208    -240   
64     48     
96     -32    
-16    48     
0      176    
-112   240    
144    176    
-64    0      
-64    -192   
64     -80    
-304   64     
112    112    
-240   80     
48     32     
-368   -64    
224    112    
-208   208    
16     -128   
0      -96    
-160   -352   
96     -32    
-320   112    
16     96     
-32    128    
128    192    
160    208    
-80    160    
-352   0      
16     -96    
320    -112   
240    80     
176    32     
64     128    
-384   -112   
240    -80    
-144   16     
64     32     
176    16     
-16    96     
-32    -64    
-16    0      
48     160    
-208   -32    
80     -96    
-64    -160   
96     -16    
-144   32     
96     640    
272    336    
256    432    
-336   96     
96     16     
32     112    
80     80     
288    432    
-192   128    
272    640    
-64    384    
-32    -208   
96     208    
-16    96     
80     128    
128    -32    
-32    -176   
-48    208    
128    32     
0      -144   
-80    48     
-96    -96    
32     -48    
-192   -224   
272    -672   
-32    -256   
208    544    
-224   -96    
16     -96    
-128   240    
-64    16     
176    304    
96     -480   
0      384    
32     32     
144    128    
-256   -16    
0      48     
-48    96     
-48    80     
-64    0      
-96    -368   
272    512    
256    352    
144    -32    
176    64     
32     64     
-16    -288   
16     -16    
-320   16     
224    128    
-80    -16    
240    -96    
-64    -160   
80     -400   
-32    224    
112    432    
-160   128    
-48    64     
16     368    
112    128    
-96    -144   
96     -48    
144    112    
96     -112   
64     -48    
-16    -32    
48     -48    
48     16     
192    -864   
-192   96     
-16    -624   
-176   -512   
-48    -32    
80     64     
80     192    
64     -144   
32     -192   
192    240    
144    -16    
0      -16    
0      -48    
-16    32     
112    128    
0      -432   
96     48     
64     192    
0      224    
112    64     
-80    32     
240    80     
-48    96     
48     16     
80     -96    
144    112    
32     96     
-32    -16    
144    80     
-48    304    
240    192    
-32    32     
-160   -32    
-144   160    
304    80     
160    32     
-176   32     
304    64     
-160   -16    
176    80     
16     -192   
128    -112   
-128   0      
80     0      
-48    48     
32     -240   
240    128    
-96    -1072  
112    32     
144    32     
176    64     
0      16     
-48    32     
144    -64    
-272   -128   
-96    -32    
336    128    
-16    0      
160    -112   
480    176    
-224   -48    
-304   -96    
144    -128   
144    16     
64     -80    
176    16     
160    48     
0      192    
192    128    
-96    336    
320    80     
256    80     
-224   0      
-208   -272   
64     -96    
128    -80    
-96    176    
16     -96    
288    80     
96     -576   
112    32     
-80    -16    
-112   48     
272    176    
144    96     
160    -32    
64     -16    
128    80     
32     -176   
-80    32     
128    -16    
176    32     
80     -496   
240    96     
128    -464   
208    112    
224    80     
288    32     
-64    64     
144    144    
32     -96    
320    48     
-32    0      
80     -192   
832    -336   
240    -464   
336    208    
112    -32    
256    16     
16     -544   
128    -32    
176    -16    
-128   -32    
-400   -64    
144    64     
-96    64     
-16    0      
480    368    
-240   80     
64     144    
-144   -96    
304    64     
-16    0      
592    304    
-96    144    
-16    48     
48     -96    
32     -368
[truncated: 26,011 more chars]
