# Supplementary material for: A Fault Diagnosis Method for One‐Dimensional Vibration Signal Based on Multiresolution tlsDMD and Approximate Entropy
Source: Hindawi journal article supplement (doi:10.1155/2019/3262818), 2019-01-01
Supplement: f1 [file 3262818.f1.zip › 3262818.f1/gear signals/normal gear signal/Data19.txt]

-176   112    
272    -384   
-144   32     
-384   -64    
320    -96    
256    -96    
320    -144   
272    -48    
592    -48    
-128   0      
-160   -80    
96     48     
144    48     
-128   -48    
304    -48    
-144   32     
160    16     
320    112    
-368   -48    
32     32     
80     48     
32     -256   
352    80     
-272   -96    
96     -80    
96     -368   
128    -32    
64     -192   
-32    64     
160    16     
64     16     
96     -32    
112    32     
-336   -32    
208    16     
-2272  -16    
128    32     
80     80     
64     112    
112    112    
64     -16    
-112   -16    
-32    -80    
64     96     
-32    -112   
208    288    
-112   0      
240    -160   
-416   -48    
288    -32    
-224   -368   
-224   -32    
400    -576   
80     288    
64     0      
-176   -288   
208    -64    
-80    -416   
0      -480   
224    32     
-16    208    
-496   -368   
96     -80    
-192   240    
480    -336   
-176   240    
32     -144   
320    192    
288    128    
-32    -240   
-176   -96    
208    -16    
48     -128   
96     -256   
80     48     
448    176    
-304   -64    
384    288    
-272   0      
-112   80     
32     -432   
48     0      
-512   -16    
448    224    
-176   224    
288    -336   
16     240    
-368   -80    
128    -112   
16     64     
272    -128   
64     80     
64     0      
192    48     
64     -208   
-240   -96    
32     16     
128    0      
-32    -96    
-240   176    
112    -80    
80     -80    
112    -128   
32     -16    
112    224    
144    -16    
272    -112   
16     -48    
-224   -16    
96     -128   
128    16     
0      -48    
-128   -96    
64     -128   
-256   -288   
320    -208   
64     64     
48     -192   
144    160    
-112   -48    
16     -48    
-48    16     
208    96     
-272   0      
192    80     
-176   64     
304    -48    
-736   -48    
192    -64    
128    -32    
-672   -48    
96     80     
-560   -16    
-560   112    
-176   32     
-1392  32     
128    96     
176    192    
-112   -16    
16     -64    
-288   112    
240    -48    
64     0      
-144   32     
-96    224    
96     -176   
160    -16    
-32    160    
-32    48     
-48    -16    
-272   -32    
48     80     
-512   128    
-240   0      
16     -96    
-96    64     
-256   -112   
-16    32     
32     128    
64     144    
-128   -176   
32     -48    
-112   -176   
96     -48    
32     112    
-144   -64    
0      432    
-240   256    
-272   -144   
-400   -64    
-80    96     
-112   -64    
208    -144   
48     -96    
80     384    
464    704    
-288   128    
16     -320   
-32    -368   
192    0      
112    -32    
352    0      
368    192    
-64    336    
-192   176    
-320   48     
-352   -256   
-96    32     
0      -64    
-32    48     
-112   -112   
-16    64     
-96    160    
0      208    
-112   352    
-336   -32    
256    -240   
16     -128   
144    -16    
-1280  -448   
32     256    
-1424  80     
112    -32    
48     64     
16     -272   
16     128    
352    128    
256    0      
-192   496    
-64    32     
32     -96    
-160   48     
0      -48    
144    112    
-368   -160   
-96    128    
-240   -192   
128    288    
112    0      
-176   0      
-176   -64    
-128   80     
-192   752    
304    -32    
48     -192   
-224   -48    
176    64     
-272   96     
112    -176   
-80    -336   
64     144    
-208   -16    
64     32     
-928   -16    
-192   -144   
0      208    
96     0      
-112   96     
64     0      
32     -144   
-96    -16    
-112   48     
-32    32     
-128   -192   
16     32     
160    160    
-192   -64    
-32    32     
32     336    
-112   48     
-96    0      
64     192    
-128   160    
192    16     
16     48     
96     160    
-64    16     
-16    -64    
-32    32     
-304   -64    
64     96     
0      32     
-64    112    
112    0      
-112   -64    
-144   48     
48     80     
0      -48    
112    -192   
32     80     
48     112    
48     0      
112    144    
-160   64     
256    144    
-192   -16    
-96    144    
-144   -144   
224    -96    
-160   48     
-32    16     
112    80     
-240   16     
96     80     
32     0      
-16    -96    
176    -32    
-192   0      
16     16     
-112   0      
64     112    
-128   16     
64     96     
32     80     
160    -16    
48     48     
16     96     
416    144    
-336   16     
-48    -48    
128    144    
48     48     
32     32     
-48    80     
-192   176    
400    32     
0      112    
-96    -48    
-240   -32    
160    80     
112    80     
128    208    
160    80     
-96    208    
-128   112    
160    16     
112    96     
-96    -48    
64     -32    
-48    0      
-16    32     
112    16     
96     80     
48     144    
224    48     
32     144    
-176   -208   
128    -16    
48     128    
-32    80     
160    48     
208    32     
-352   -64    
112    48     
48     48     
-176   192    
96     48     
64     64     
32     16     
-48    96     
176    96     
144    96     
-48    64     
192    320    
-16    -16    
0      -208   
128    160    
-96    -112   
192    -32    
16     48     
64     -128   
64     176    
176    -32    
32     -32    
-192   16     
-96    112    
80     96     
208    224    
176    48     
16     48     
-48    96     
64     112    
96     -16    
64     -96    
-192   80     
-96    -176   
-144   96     
464    400    
-384   560    
64     208    
272    -192   
272    -48    
112    -272   
80     -336   
320    -16    
64     -48    
-176   -272   
-160   96     
-496   80     
-272   -192   
0      -400   
144    48     
272    -160   
32     128    
32     64     
80     -16    
-160   -80    
144    272    
352    336    
176    -32    
80     -32    
-64    -16    
-416   -80    
-96    -304   
-272   -416   
368    -272   
64     -176   
304    192    
400    400    
80     -16    
-16    -80    
-32    -176   
0      -80    
-112   -16    
592    528    
-16    240    
-32    -48    
-112   368    
48     288    
304    208    
-288   -320   
-32    -256   
96     -96    
128    192    
432    -352   
-144   -336   
96     32     
-112   224    
-368   -240   
-32    176    
-592   448    
160    320    
144    -144   
176    16     
80     96     
-32    -16    
0      96     
224    -432   
128    144    
-48    -400   
160    144    
-80    0      
80     -32    
32     144    
48     224    
48     -96    
96     192    
432    208    
16     -144   
112    160    
-64    -416   
0      -16    
32     96     
352    -144   
240    16     
0      0      
0      112    
400    32     
80     -624   
-208   96     
-96    176    
-336   16     
272    -64    
0      -224   
256    96     
368    -224   
32     352    
384    -48    
-144   -48    
16     48     
144    112    
-128   192    
288    112    
32     64     
128    416    
96     224    
320    224    
-96    272    
-32    -64    
384    128    
-240   16     
288    48     
-304   -368   
-144   0      
32     32     
112    224    
128    272    
224    -352   
272    -16    
176    48     
288    -752   
192    80     
192    -944   
-272   -80    
96     256    
-128   -240   
-112   -96    
48     -272   
32     -576   
160    96     
144    -16    
0      -128   
288    192    
-224   128    
-1648  -112   
-16    -304   
192    -144   
32     112    
32     -64    
48     -1088  
128    -192   
112    0      
64     -144   
320    -224   
-144   0      
64     352    
16     192    
240    -240   
176    -192   
-448   48     
96     112    
-176   -224   
80     -400   
64     -192   
160    48     
-272   0      
192    -368   
80     64     
192    -16    
32     48     
160    -80    
144    0      
208    -48    
80     0      
-64    16     
80     -160   
128    -96    
144    -128   
112    16     
64     -128   
-16    -208   
64     -688   
176    -112   
16     80     
-128   -48    
336    80     
-16    64     
-96    -112   
192    16     
-560   -64    
-32    112    
-368   -16    
176    -80    
-112   -176   
288    -192   
176    32     
-160   -16    
-96    96     
128    96     
32     -32    
144    32     
288    288    
-368   176    
64     16     
-192   32     
112    32     
-176   -32    
160    112    
-128   -32    
48     -128   
64     -112   
0      0      
-96    112    
144    -320   
176    0      
160    -112   
144    -16    
224    208    
-272   -192   
-288   0      
-112   64     
-192   64     
144    -16    
-656   -96    
272    80     
112    -16    
240    -320   
-224   -352   
-320   -32    
-64    640    
-32    496    
-32    -48    
-128   -416   
384    -80    
224    48     
416    -48    
-1024  16     
-48    -448   
-432   144    
80     -112   
-48    -288   
16     -32    
352    112    
448    112    
144    16     
-208   -16    
-368   -144   
320    816    
-416   -448   
-416   -192   
336    384    
160    -64    
-192   -128   
-192   16     
224    -272   
-112   -272   
-208   -224   
176    368    
-176   192    
32     0      
208    -16    
-96    192    
96     256    
240    -32    
-400   -176   
432    144    
-256   32     
80     -48    
80     160    
80     48     
224    208    
304    16     
-64    0      
-96    -32    
-464   -16    
112    64     
-720   -112   
-32    -32    
128    -48    
48     32     
0      -16    
64     32     
64     -16    
-128   0      
-208   -64    
0      128    
-576   96     
-160   -16    
144    64     
-320   -32    
-16    16     
-336   32     
192    432    
-656   144    
320    -32    
0      -96    
112    192    
-80    224    
-224   0      
-32    -16    
-16    32     
0      80     
-32    -16    
-80    80     
-320   -112   
96     16     
-368   16     
-80    64     
-384   32     
-32    80     
-1552  0      
64     160    
16     128    
-48    112    
160    -144   
-16    -80    
-32    -320   
32     -64    
-352   32     
112    -80    
256    -48    
-176   -16    
-240   64     
160    64     
-288   16     
-1264  0      
-16    0      
80     32     
96     64     
-208   -80    
272    96     
208    224    
-400   -32    
-16    -32    
224    48     
-16    -32    
-112   0      
64     64     
-272   -64    
-160   144    
-144   16     
304    96     
-1152  -112   
368    112    
-192   32     
304    48     
-192   -64    
128    80     
48     96     
-144   48     
96     0      
-176   -16    
16     -176   
-272   -80    
32     64     
-128   112    
128    -64    
-864   -128   
64     112    
-64    -176   
64     16     
-64    -128   
0      -32    
176    160    
-144   48     
64     32     
-64    -32    
-176   64     
0      0      
-128   -16    
-384   -128   
-16    -32    
-656   -176   
176    80     
48     -32    
176    64     
-144   -32    
48     16     
96     112    
-32    0      
-16    -48    
-96    -160   
16     -240   
80     -64    
80     -160   
-96    -368   
-16    208    
-256   208    
192    -16    
-96    64     
-192   -48    
176    224    
-112   176    
0      128    
48     -144   
32     224    
-144   80     
16     64     
-176   -256   
64     144    
-128   144    
-16    48     
-208   -48    
-192   160    
-32    288    
256    432    
-384   -368   
-48    -288   
176    480    
0      -128   
64     80     
64     -144   
0      32     
0      64     
16     48     
-672   -416   
336    -592   
144    672    
304    -192   
256    160    
48     96     
-80    -160   
224    400    
-80    128    
-528   -224   
-192   160    
-448   32     
-176   32     
80     112    
128    0      
144    -64    
352    64     
64     -32    
128    80     
-128   128    
-176   48     
-176   -96    
256    0      
384    -96    
-64    -992   
-128   480    
32     176    
-384   -384   
-304   128    
-176   -128   
-80    0      
448    192    
176    -32    
144    -16    
80     16     
-160   -112   
-96    -256   
160    -32    
-64    80     
144    96     
96     128    
-512   -256   
304    256    
-384   464    
192    -96    
-96    -64    
176    64     
192    -16    
16     144    
304    128    
-32    288    
464    480    
-192   80     
64     -64    
128    -192   
160    272    
-272   -128   
48     -16    
32     144    
64     320    
-80    256    
16     -112   
16     48     
64     32     
112    -16    
208    16     
16     112    
-144   176    
48     -16    
64     96     
-192   64     
0      -336   
96     -320   
-128   -400   
192    32     
288    480    
-400   256    
64     -16    
-32    -128   
336    0      
-160   144    
352    224    
-224   96     
80     240    
-176   432    
144    304    
272    384    
32     48     
-224   -144   
80     80     
320    112    
272    -192   
128    -160   
-64    0      
-32    -64    
128    16     
-80    64     
64     80     
-176   160    
224    16     
432    160    
-320   48     
128    -32    
80     -160   
80     -160   
-32    0      
-48    -160   
-112   -96    
-64    -32    
144    144    
80     144    
32     -32    
352    16     
-80    176    
160    32     
384    288    
-320   304    
80     -112   
48     -32    
0      -32    
-32    64     
16     -368   
128    192    
48     -928   
-16    112    
304    -160   
-64    -48    
-32    320    
64     240    
176    96     
-192   112    
-48    -48    
160    64     
-272   144    
-48    -368   
-16    -64    
176    -496   
-48    -16    
320    -400   
-16    -48    
0      112    
48     128    
32     -48    
416    272    
-288   288    
-128   192    
-16    48     
224    80     
208    80     
16     80     
48     80     
-16    -16    
80     112    
16     -144   
-128   -80    
208    -368   
96     160    
80     -32    
208    80     
64     128    
64     48     
-80    32     
80     0      
176    144    
-48    160    
-64    -32    
304    -272   
16     64     
352    0      
64     320    
-16    -336   
256    -272   
112    96     
112    112    
-144   96     
80     32     
64     -32    
-16    -224   
176    80     
336    368    
-96    208    
48     -112   
48     -32    
80     -64    
-64    -48    
32     -240   
192    -480   
272    -32    
208    256    
-80    208    
32     80     
16     -176   
96     -304   
112    224    
80     32     
112    -96    
48     112    
160    48     
-128   288    
-144   400    
-288   -1440  
-64    -32    
0      912    
-208   -736   
32     16     
-80    -128   
64     -112   
-80    192    
304    -1248  
560    416    
-768   -544   
-320   -144   
112    432    
128    0      
128    160    
240    -160   
608    -288   
-128   160    
16     -144   
-32    272    
16     128    
352    -240   
-448   -192   
-272   -400   
64     -112   
128    144    
352    272    
96     320    
-48    144    
80     -272   
320    16     
240    0      
-32    -32    
224    -16    
32     16     
-80    0      
112    -224   
128    0      
128    -32    
576    80     
-144   -32    
-272   -144   
-80    -1824  
16     80     
-32    -48    
208    32     
592    64     
-432   -96    
-352   0      
352    -192   
-480   -144   
-32    -80    
64     0      
176    -80    
96     -160   
-64    -96    
-128   -80    
-48    -800   
-192   48     
-16    -64    
-96    32     
48     -32    
320    16     
-320   -80    
192    16     
-240   32     
208    0      
-416   0      
192    16     
-224   -192   
272    -208   
-32    80     
304    -224   
-16    32     
112    -112   
320    272    
-480   -48    
512    -96    
-64    32     
176    -32    
64     32     
96     -80    
-80    32     
-64    -96    
-32    48     
-144   -48    
224    32     
-80    -112   
112    16     
224    -272   
0      -16    
128    -80    
32     16     
-16    16     
192    -48    
-192   0      
144    0      
-256   -16    
192    -16    
-32    -16    
256    -16    
-48    32     
-32    -240   
400    -16    
-160   -544   
80     224    
-48    -32    
16     -32    
-16    -16    
0      -80    
-320   16     
48     0      
-352   -96    
176    -64    
-896   0      
144    -80    
-32    64     
160    -64    
80     64     
128    -80    
128    -16    
-160   96     
-32    -80    
-704   0      
128    -240   
96     -64    
-160   160    
-288   -48    
336    -32    
240    64     
160    -32    
112    96     
64     -80    
-112   16     
112    -192   
64     -80    
-208   96     
16     32     
-192   -160   
112    -80    
-288   -16    
96     -16    
-272   -48    
64     -96    
192    144    
-160   32     
80     32     
-432   -80    
224    144    
-96    64     
-720   -16    
112    112    
-880   -16    
-48    -32    
-128   -96    
80     -96    
-32    -272   
80     64     
-16    -80    
160    176    
-32    0      
80     16     
-624   -16    
-496   128    
-144   -272   
-80    -352   
48     0      
-512   112    
80     224    
-80    -144   
32     128    
16     -80    
128    96     
16     -48    
-48    0      
32     -96    
-128   48     
-16    -16    
-112   -80    
-32    528    
64     -448   
32     -176   
-528   304    
-112   96     
-192   -272   
-80    -576   
32     192    
-320   352    
-144   -352   
-48    240    
-176   -96    
224    -208   
-32    608    
64     -304   
80     -176   
-48    368    
-320   368    
-16    128    
-16    -272   
-224   528    
-144   -176   
-384   -128   
-48    192    
-192   -112   
64     32     
48     144    
-16    48     
272    -48    
-192   16     
32     656    
-160   -256   
-16    -512   
-160   32     
-32    288    
-32    -16    
-240   -176   
-784   -48    
-144   -64    
-128   32     
48     -48    
-176   368    
64     192    
-272   272    
-336   -32    
-176   -368   
-176   0      
768    240    
-336   416    
-544   16     
-224   48     
-16    80     
-80    0      
192    96     
-288   -192   
-32    96     
-32    -96    
-48    -32    
48     128    
96     -16    
64     -224   
96     -112   
-144   -176   
-64    -64    
-48    32     
-288   -128   
64     128    
-128   48     
144    16     
-656   -272   
32     16     
-192   16     
32     16     
128    32     
-32    0      
144    64     
-64    48     
-64    128    
-96    16     
-48    -48    
48     -32    
96     32     
-224   32     
64     96     
-592   -192   
48     0      
144    32     
-112   48     
384    432    
-240   368    
288    512    
144    -176   
64     16     
-48    -128   
-64    16     
-384   -240   
144    -272   
-208   192    
-16    416    
-128   176    
-32    0      
-144   -368   
80     -400   
-240   -288   
-16    -256   
480    384    
-240   528    
-64    144    
-80    -96    
-16    272    
80     128    
-112   -192   
128    -368   
-48    -208   
32     -144   
-32    -544   
16     64     
224    144    
-144   32     
0      64     
-80    32     
0      16     
96     -80    
-496   -256   
288    -256   
-176   224    
-32    336    
-32    80     
288    32     
16     -160   
-64    16     
112    48     
-32    32     
32     -256   
-112   -208   
96     -208   
-128   160    
32     -112   
-96    -400   
144    64     
-160   -256   
144    32     
-160   96     
16     64     
-64    -272   
-64    -144   
0      32     
160    -48    
-48    -224   
-48    -112   
-64    16     
32     144    
16     16     
32     -288   
144    -128   
512    432    
-608   448    
-144   80     
-128   176    
-32    160    
112    -400   
-16    -64    
64     -144   
-144   352    
208    384    
352    256    
96     256    
-16    192    
48     160    
48     -48    
0      48     
-48    -80    
128    96     
64     -160   
64     -16    
-96    -128   
-32    -64    
96     -48    
-176   48     
0      0      
32     16     
-32    16     
16     -32    
160    48     
0      304    
320    384    
-304   96     
-192   48     
32     -32    
240    240    
-16    704    
112    64     
96     -128   
0      384    
64     -16    
128    -144   
-16    112    
48     144    
-176   96     
-48    -128   
240    0      
-80    -112   
64     -48    
16     96     
352    -176   
0      624    
-144   -128   
80     48     
112    -64    
-160   32     
208    304    
-208   -32    
96     -112   
288    64     
112    -80    
224    80     
-80    -240   
32     48     
-80    -848   
912    1088   
-368   1024   
-32    336    
-48    -112   
128    80     
0      128    
-16    -16    
-80    -144   
368    -320   
224    -32    
-144   -48    
240    -16    
304    48     
-272   96     
0      -224   
112    96     
-432   -128   
272    -272   
496    48     
-176   -32    
704    -144   
160    128    
80     0      
192    16     
-160   32     
16     -96    
224    32     
432    448    
-352   240    
-256   -80    
160    -16    
80     -848   
-64    -16    
464    -144   
176    128    
112    48     
-144   0      
192    0      
-16    96     
-528   48     
-288   96     
256    64     
688    32     
-512   64     
-192   -128   
96     112    
112    -304   
416    64     
208    -208   
-80    80     
-128   16     
320    112    
-80    0      
-112   48     
-80    80     
256    -96    
16     -80    
-48    -48    
32     32     
32     -80    
112    64     
64     -192   
48     32     
16     32     
64     96     
80     48     
48     96     
144    96     
64     64     
400    256    
-224   32     
320    48     
-144   -64    
208    48     
96     48     
-96    -16    
144    96     
-96    48     
160    -32    
-208   -128   
48     -48    
128    144    
-128   80     
288    -288   
-384   -16    
80     -192   
-16    -80    
272    112    
-128   -32    
336    -96    
48     144    
96     -80    
256    0      
32     64     
-32    -752   
160    -32    
-112   -1040  
160    -304   
128    96     
0      -144   
64     -128   
336    -432   
64     -64    
112    160    
144    64     
112    128    
128    160    
-48    -80    
176    -32    
-160   -416   
64     0      
144    -16    
0      80     
-64    -176   
112    -48    
160    208    
-32    -544   
0      -32    
160    96     
80     96     
80     96     
96     48     
80     -48    
64     32     
16     -80    
64     272    
-112   48     
32     -80    
-672   48     
-48    192    
208    80     
32     -48    
48     160    
64     -416   
32     -160   
448    -160   
-304   -176   
144    -192   
-48    368    
-144   -128   
144    -64    
-176   96     
208    80     
-2544  -48    
-128   144    
336    -160   
144    96     
208    -16    
-32    -112   
32     -224   
208    1024   
32     -256   
-16    -112   
48     448    
-96    -96    
128    -176   
-304   -352   
192    -32    
-960   176    
32     -320   
64     -96    
144    -144   
368    224    
-224   -672   
96     -176   
240    -560   
80     -272   
48     640    
-112   80     
-16    -320   
128    -288   
-128   -192   
48     48     
-176   -80    
80     -64    
-1248  32     
-64    -112   
-320   -80    
48     -240   
-144   -80    
-16    -608   
240    -144   
-16    -80    
32     64     
-48    -32    
80     -96    
-48    -32    
208    32     
112    128    
64     -16    
-816   272    
-80    80     
-416   -16    
272    -160   
-64    224    
160    -16    
64     -32    
64     -896   
256    480    
-128   96     
288    -192   
112    112    
-80    16     
-640   208    
-80    0      
-208   320    
64     96     
-224   128    
-96    -208   
272    -176   
352    -192   
128    64     
112    -160   
80     16     
-224   144    
-64    -16    
-1040  -16    
-64    -208   
-304   -208   
48     -32    
0      32     
224    -32    
64     16     
112    -320   
-64    0      
-192   -128   
96     192    
-416   -16    
-336   96     
112    -32    
192    0      
-176   80     
48     -80    
80     96     
16     -240   
112    -16    
128    32     
64     192    
-1008  -80    
-128   0      
-80    0      
272    208    
-464   96     
-736   80     
-80    208    
-368   64     
224    192    
336    112    
64     -96    
32     -48    
112    192    
-1136  0      
112    -80    
-80    -80    
112    128    
-192   -32    
-112   0      
-224   -32    
-672   176    
-336   80     
-288   16     
-112   144    
-336   -16    
-16    480    
96     -112   
-256   -32    
-224   -32    
-192   -160   
480    -352   
96     -16    
16     112    
-64    -160   
-240   48     
-240   -672   
-80    -384   
-240   0      
-320   -192   
-128   -144   
-240   -112   
128    -16    
128    160    
176    192    
80     -352   
-336   -512   
112    -336   
-352   -32    
0      -336   
192    -80    
-128   128    
-128   176    
-304   368    
-80    -224   
-288   112    
80     -272   
-144   -352   
-48    -288   
-176   -368   
208    -368   
-496   -272   
-160   -160   
32     96     
-16    96     
-96    -48    
-80    32     
-112   -256   
16     -272   
16     16     
-160   -16    
-16    32     
-624   -384   
432    -480   
-256   -336   
256    112    
-400   -464   
160    -352   
-224   -304   
-48    -384   
-208   -304   
-144   -80    
-160   448    
192    -288   
80     32     
128    208    
-64    64     
32     784    
-416   128    
96     -272   
224    -224   
-224   -528   
128    256    
80     304    
-16    608    
192    -176   
-240   -304   
48     -256   
32     352    
-64    224    
-80    -544   
80     144    
-368   624    
240    144    
-1440  -208   
16     -128   
176    304    
-96    416    
-288   -96    
96     -16    
-160   -288   
368    240    
-96    -96    
-48    48     
-48    -32    
-96    32     
496    112    
-304   48     
-144   -96    
-704   -176   
-48    368    
96     -64    
-112   48     
48     -128   
-64    336    
48     -432   
0      -240   
64     32     
-144   320    
48     -144   
128    144    
32     96     
-96    -112   
0      32     
80     0      
176    48     
-80    96     
0      -16    
128    16     
-160   16     
-32    96     
48     240    
96     80     
-16    -80    
96     16     
0      32     
32     80     
-272   96     
160    608    
0      288    
16     -192   
96     -32    
-112   -144   
128    -16    
-48    -64    
128    32     
-160   144    
176    144    
32     -128   
416    -16    
-320   64     
-176   -32    
-96    -112   
-80    80     
-96    32     
80     -16    
208    192    
-272   128    
96     16     
96     -64    
16     -96    
128    208    
48     64     
-128   -128   
304    0      
-272   48     
-160   16     
-176   32     
96     48     
-176   80     
-48    -48    
384    80     
96     16     
336    48     
-64    32     
-128   48     
-352   -176   
464    16     
-576   -336   
-400   -336   
-160   -16    
48     16     
-16    240    
624    208    
-176   32     
-400   -80    
144    0      
0      -32    
96     32     
176    16     
496    224    
-352   -96    
48     -48    
144    48     
64     64     
256    160    
-192   16     
-48    64     
96     48     
-32    80     
208    48     
448    272    
-272   16     
64     0      
288    256    
-352   48     
32     -16    
96     -16    
144    -16    
16     -16    
-192   0      
224    -288   
-16    64     
144    32     
80     64     
144    48     
16     32     
16     80     
112    48     
-64    -32    
160    64     
16     16     
160    48     
-144   48     
16     -32    
-208   -16    
192    128    
-144   176    
272    96     
-64    32     
192    144    
16     -64    
48     -16    
96     112    
240    64     
-48    0      
128    16     
-272   160    
288    192    
-160   64     
32     -32    
128    64     
-16    16     
48     128    
144    -48    
-48    32     
224    256    
16     352    
80     256    
64     176    
176    -64    
16     288    
160    208    
144    320    
0      128    
128    -240   
-32    -240   
80     -48    
0      -784   
80     80     
-48    64     
80     160    
16     -64    
16     64     
112    -384   
64     320    
64     128    
16     16     
80     128    
-64    -288   
80     240    
32     -352   
16     96     
112    -160   
112    -48    
48     176    
-176   112    
112    480    
352    -336   
-48    208    
-64    -176   
-32    64     
16     192    
48     -1072  
96     784    
288    64     
-80    -320   
256    -128   
256    384    
304    560    
-288   -1184  
144    496    
192    -576   
-160   128    
160    -96    
-80    -112   
160    80     
-192   -144   
48     176    
80     48     
320    -48    
-128   160    
416    224    
-208   80     
240    128    
-112   160    
128    144    
-16    64     
16     96     
-48    64     
0      176    
-32    -48    
64     -272   
48     -96    
144    -160   
112    128    
48     -112   
-64    0      
160    0      
32     0      
48     -80    
176    32     
16     16     
224    80     
128    96     
-32    96     
-112   -80    
48     -224   
176    48     
144    -32    
-16    32     
112    -160   
16     96     
-32    16     
304    80     
208    48     
-48    -32    
144    48     
48     -1024  
-48    16     
240    -336   
208    -256   
64     32     
16     -544   
48     32     
-16    96     
-112   0      
-48    48     
224    96     
224    208    
-48    -240   
128    -368   
-208   64     
-80    -160   
-32    -16    
-192   -48    
80     -48    
112    16     
80     -240   
-144   -64    
-192   -240   
-112   -128   
256    -304   
304    -176   
592    -256   
144    0      
288    -48    
-48    256    
64     -64    
-64    -64    
-640   48     
-160   -16    
-176   112    
192    -80    
224    48     
112    160    
-16    112    
32     -288   
-240   48     
160    -128   
160    48     
48     64     
-16    -112   
240    -272   
32     -128   
-80    112    
128    16     
-896   32     
-192   -128   
16     -64    
288    192    
384    32     
208    -640   
48     0      
128    -240   
-224   16     
-128   -32    
-48    48     
-96    -192   
256    -80    
-16    -64    
80     80     
-960   80     
-16    -112   
128    128    
48     48     
128    192    
96     -48    
-400   -160   
32     -1056  
-128   -208   
160    -368   
-16    32     
-112   -32    
48     -48    
-48    -144   
128    -48    
-96    224    
320    176    
-2048  160    
-128   192    
96     224    
16     176    
-32    176    
-96    -752   
208    -448   
272    -1056  
208    1104   
32     528    
64     -1024  
80     656    
800    1024   
-480   432    
-272   -1088  
288    -848   
400    992    
-176   192    
144    -672   
-128   352    
-80    -656   
16     -16    
80     96     
-144   -80    
16     -336   
224    -16    
-64    96     
-128   -176   
-640   -16    
-32    -240   
-288   -688   
304    416    
0      576    
80     -544   
-160   -32    
560    464    
-560   -832   
-16    144    
112    336    
-112   -352   
576    -384   
48     544    
-96    896    
64     -624   
0      176    
-16    -240   
-64    720    
112    -240   
32     48     
112    32     
-96    -64    
256    -64    
-352   -64    
96     256    
-32    16     
0      16     
-32    192    
96     -32    
-336   -64    
32     144    
16     0      
240    -112   
160    32     
-816   32     
128    0      
64     -208   
-1200  -16    
80     48     
-928   80     
-208   48     
240    -16    
-224   32     
96     -80    
-288   -32    
-16    -128   
128    -32    
-512   -144   
-48    -64    
0      -144   
48     80     
-64    112    
-240   128    
-160   16     
64     32     
-192   -16    
-864   -48    
-128   -112   
192    -352   
-32    -32    
-32    208    
16     -176   
-752   48     
-32    -128   
-16    0      
64     -16    
48     32     
-80    0      
48     -112   
-432   224    
32     288    
-160   -32    
-80    -96    
-384   96     
-80    48     
16     -48    
80     64     
0      -96    
160    -16    
128    16     
-48    160    
-16    -16    
-176   128    
-160   16     
-144   32     
32     16     
32     16     
-208   -400   
-160   -96    
-256   96     
-1584  -80    
144    368    
-272   96     
48     -16    
64     -144   
96     -16    
-176   -256   
224    -80    
160    112    
-48    16     
352    80     
-176   80     
-928   -624   
128    -320   
-48    208    
-320   -32    
16     96     
304    384    
-560   144    
64     -32    
-112   -32    
672    208    
-80    -48    
752    -112   
-128   80     
-528   0      
-32    -64    
-160   32     
240    -48    
192    96     
-272   16     
-144   -16    
-32    -208   
16     64     
-96    0      
-192   48     
-96    64     
80     64     
-256   -112   
752    -16    
64     16     
352    128    
-144   -64    
-224   0      
-80    -16    
-768   -16    
-32    160    
-912   -192   
352    -16    
208    -48    
448    64     
48     112    
-272   96     
-320   -32    
-16    32     
112    32     
112    96     
64     128    
-192   64     
0      112    
-64    -48    
144    176    
-576   -64    
144    48     
112    48     
96     0      
-112   -16    
-304   16     
96     32     
0      32     
80     96     
-272   -32    
-16    32     
-288   -16    
128    0      
-48    48     
128    80     
80     -32    
-64    -32    
-32    -16    
-80    -48    
-96    -112   
-16    -144   
48     96     
0      0      
96     -16    
-48    32     
80     112    
-384   112    
176    32     
-176   -80    
96     32     
-96    32     
128    80     
112    32     
176    -128   
32     -48    
112    64     
-160   -160   
32     -32    
-16    32     
64     224    
64     112    
-112   -64    
-64    -16    
48     112    
-112   32     
96     -320   
0      320    
80     -32    
112    48     
-144   16     
-96    -80    
112    -16    
784    1264   
-1040  -304   
256    -624   
-96    -144   
-224   448    
480    -368   
176    -176   
-192   816    
144    -480   
96     -272   
-208   528    
0      16     
336    224    
-416   -576   
64     -48    
48     144    
0      -240   
-176   464    
128    80     
-192   -512   
32     -16    
80     -96    
464    240    
-208   208    
64     352    
16     96     
-144   -160   
112    0      
128    -144   
128    -16    
32     -32    
-80    208    
224    96     
80     240    
-96    96     
48     -352   
48     128    
-80    0      
176    16     
32     32     
80     64     
112    208    
-48    208    
-16    112    
48     96     
-96    80     
128    160    
336    112    
-48    144    
176    32     
-96    -1296  
-16    -64    
144    -16    
-160   144    
16     128    
-96    176    
-128   16     
112    -16    
-176   112    
32     16     
-128   48     
64     144    
192    -48    
-64    16     
32     64     
64     -944   
32     112    
-48    80     
144    0      
48     48     
-32    48     
144    -16    
32     128    
-96    32     
64     -16    
64     0      
-16    16     
272    208    
-656   -32    
352    96     
-208   -176   
-16    112    
-128   208    
224    96     
128    32     
32     32     
128    80     
-256   160    
240    -112   
-80    80     
-48    -64    
128    0      
224    112    
-224   -16    
112    -112   
-16    -256   
-96    -352   
64     -432   
-352   112    
-48    96     
96     112    
144    112    
336    288    
-176   128    
-144   32     
-112   -256   
432    -160   
512    48     
320    -64    
256    112    
-304   -192   
224    -144   
-48    -272   
272    48     
256    304    
96     160    
-240   0      
208    48     
-96    96     
208    96     
32     -112   
144    -96    
256    208    
-480   224    
160    704    
352    352    
432    240    
-288   -336   
-288   -96    
-256   -80    
96     128    
160    272    
-160   -576   
496    -496   
0      176    
304    224    
240    80     
-176   96     
16     -64    
-128   32     
144    -240   
80     -16    
160    -32    
-16    256    
32     -416   
-80    208    
-112   112    
240    128    
48     480    
464    480    
48     -16    
96     -96    
192    -32    
-16    -224   
64     192    
-128   -288   
192    400    
112    -208   
80     -128   
208    -144   
256    240    
-144   -48    
160    48     
16     -64    
224    288    
112    592    
-160   -592   
16     16     
224    112    
192    -48    
112    -48    
208    512    
192    -304   
-48    -80    
0      80     
304    224    
-128   -64    
640    416    
-224   32     
-1088  -512   
112    -592   
304    -192   
16     -608   
-112   -80    
416    480    
-160   48     
32     48     
176    0      
48     288    
112    48     
80     -192   
-16    -192   
-64    -352   
-32    64     
-896   144    
112    -32    
0      -480   
48     -528   
-80    -176   
-112   -704   
320    -160   
-192   -304   
96     -32    
96     -48    
16     32     
256    -32    
-144   0      
192    32     
-16    -64    
-192   -64    
96     -224   
160    48     
32     -112   
80     0      
128    80     
0      -32    
192    -752   
144    -48    
-128   48     
-32    16     
160    -48    
224    160    
-16    288    
208    80     
64     -80    
320    192    
-144   -32    
16     -112   
128    -16    
0      -256   
176    -48    
-32    -624   
80     -48    
-32    -240   
64     32     
-32    0      
176    32     
-48    16     
0      0      
-288   0      
160    32     
-560   -80    
16     32     
32     48     
80     -32    
-64    -224   
416    -448   
-64    48     
32     64     
112    32     
128    -80    
-208   -64    
128    -16    
96     -64    
128    304    
80     16     
32     -32    
-32    -64    
112    0      
128    -96    
-128   -80    
256    96     
-128   -176   
0      -144   
16     80     
224    -16    
48     -160   
16     32     
256    -32    
-144   -16    
32     -16    
-400   -80    
144    -96    
-1216  48     
176    -64    
-64    -96    
16     -96    
32     16     
64     -304   
48     48     
-128   64     
144    256    
48     256    
128    80     
-48    -144   
-128   -192   
-800   -32    
224    48     
224    -48    
0      -48    
64     16     
-160   -304   
496    48     
0      -112   
256    80     
-192   64     
128    768    
96     496    
176    -400   
-192   -144   
-96    32     
-224   208    
32     144    
64     80     
-64    128    
-240   32     
176    -48    
-16    32     
64     -192   
304    64     
-272   16     
128    0      
-128   0      
160    96     
-128   -64    
448    176    
-464   224    
176    48     
-1232  -176   
16     -144   
-80    64     
-656   -208   
144    -272   
-640   -192   
-544   48     
-64    -16    
-864   0      
-16    48     
176    64     
16     16     
144    48     
-304   -48    
80     -144   
96     -64    
-1456  -16    
-144   -144   
-32    -64    
-272   48     
-480   -176   
-224   -128   
288    64     
160    -112   
224    -96    
-16    112    
-160   32     
64     -16    
-272   -48    
-112   -48    
48     48     
-320   -32    
224    112    
-320   -240   
64     48     
0      112    
-176   80     
-80    -80    
-176   -96    
-160   80     
-720   0      
-160   32     
-1344  0      
-64    -16    
48     -80    
-32    -144   
-192   -160   
-48    160    
-192   -224   
48     64     
320    512    
-272   -576   
336    80     
0      352    
-256   -112   
80     96     
-32    -240   
64     592    
176    -256   
-208   32     
192    96     
-32    -240   
-112   -112   
272    -64    
64     -16    
288    240    
-48    -32    
16     -64    
-368   816    
80     -160   
-128   -352   
32     512    
-288   -480   
-96    -384   
-1776  -144   
-192   -176   
-64    -112   
32     224    
-16    64     
-176   288    
144    96     
384    144    
-400   624    
-160   224    
144    -416   
-96    -288   
-144   64     
-96    144    
96     16     
-1584  -112   
112    64     
-48    -320   
16     -96    
272    -128   
-32    64     
-160   -64    
-48    -160   
-80    -16    
96     176    
-16    240    
-144   -64    
0      -80    
-128   -256   
-272   64     
0      112    
-16    32     
128    -48    
-320   16     
128    80     
-304   0      
16     64     
0      240    
208    96     
128    -320   
-128   -64    
-400   -176   
-192   64     
-48    96     
64     80     
-432   -16    
-176   0      
112    -176   
-144   96     
112    80     
32     -48    
160    80     
-224   -32    
-48    0      
-80    -64    
208    144    
-256   16     
-16    176    
-112   -80    
208    128    
-160   -64    
208    -16    
-48    -16    
-80    48     
-48    0      
96     -80    
-112   32     
-48    -48    
-32    48     
192    128    
192    256    
0      64     
48     176    
-208   -48    
112    48     
-32    64     
-64    32     
16     32     
-96    -32    
64     240    
32     80     
112    64     
32     112    
-48    0      
0      16     
-64    16     
-112   -224   
128    48     
224    288    
-80    224    
-16    16     
64     0      
112    0      
-64    112    
-32    0      
32     -32    
224    160    
-48    256    
96     32     
-48    32     
240    272    
-448   160    
0      -144   
-160   -112   
224    -16    
240    -16    
64     96     
-32    -64    
160    128    
-416   0      
-336   -176   
-192   -48    
48     144    
240    176    
240    48     
-96    -16    
-288   64     
-240   336    
96     320    
48     240    
-176   112    
16     -16    
112    192    
256    96     
0      560    
384    368    
-176   112    
-320   -64    
-112   192    
64     256    
256    -816   
-80    -752   
16     -208   
-304   496    
48     -16    
96     -48    
176    192    
-256   -96    
176    224    
-16    768    
64     -192   
-304   272    
48     240    
-96    -48    
-240   64     
-320   96     
-192   176    
-16    -480   
64     256    
160    112    
-176   -208   
432    416    
-288   -176   
48     -48    
352    -480   
192    352    
48     64     
16     16     
144    272    
-144   144    
144    128    
-176   -160   
-48    -48    
48     -80    
64     -176   
64     32     
16     32     
64     16     
-80    0      
112    176    
336    144    
48     -16    
160    480    
112    448    
-48    -128   
-80    64     
-64    96     
80     -16    
80     -64    
240    -480   
-128   32     
-64    48     
80     288    
-48    80     
240    208    
112    160    
112    192    
-384   -32    
0      32     
-48    -64    
112    192    
128    112    
64     -176   
112    -112   
0      -304   
176    0      
112    -112   
16     32     
48     0      
336    288    
-208   -32    
176    112    
-48    -272   
96     -176   
112    64     
-16    16     
16     -96    
240    -144   
16     176    
192    192    
144    320    
-208   -80    
208    -64    
-96    96     
208    80     
48     -16    
80     240    
64     160    
16     32     
48     0      
48     0      
16     -16    
48     0      
64     0      
64     -128   
208    80     
-16    -416   
64     32     
-272   -352   
352    192    
-32    64     
0      -32    
-48    -32    
64     32     
-32    16     
48     -80    
160    80     
128    -16    
416    160    
-400   -480   
96     80     
48     -128   
208    96     
-16    64     
80     48     
192    48     
176    112    
80     48     
-96    16     
80     16     
64     80     
-64    48     
16     160    
160    80     
176    -160   
-96    -16    
256    0      
-48    48     
240    64     
-16    0      
32     16     
-16    32     
16     96     
112    -32    
96     80     
96     32     
80     32     
0      -128   
224    32     
48     208    
-80    256    
96     0      
48     -144   
16     -624   
112    -48    
-48    -32    
224    -720   
96     16     
112    -128   
64     -128   
80     80     
16     -432   
288    64     
96     -128   
64     32     
16     0      
112    -144   
96     -1456  
-192   -128   
-96    -32    
112    16     
160    -32    
224    -96    
160    -16    
48     -288   
224    -192   
256    -496   
224    16     
32     -272   
80     -64    
272    -64    
-16    32     
688    384    
-560   128    
-512   -752   
-208   -400   
0      -64    
208    -208   
-816   -192   
96     -640   
512    -800   
320    128    
480    1200   
368    -224   
144    -784   
96     -16    
64     320    
96     144    
80     -176   
-64    -160   
-96    144    
-112   -16    
-272   416    
-384   496    
64     -80    
-272   -336   
128    -272   
-48    -48    
368    -160   
288    -128   
304    -592   
-144   -128   
352    160    
-208   32     
112    -64    
-32    176    
-16    64     
256    -208   
80     -48    
-32    208    
-880   272    
32     128    
432    -272   
608    48     
16     448    
-16    528    
-416   64     
160    -240   
-368   -128   
-272   -144   
-80    160    
-560   224    
304    -272   
-416   16     
32     -64    
-672   -64    
288    -176   
96     208    
16     -128   
0      -16    
80     -160   
-64    64     
-16    -800   
240    320    
32     -96    
-80    -32    
0      112    
32     -160   
-304   -176   
192    112    
-144   -16    
32     -256   
-1184  224    
-80    -448   
-256   -128   
160    32     
-80    -256   
400    816    
368    496    
-288   -224   
32     -480   
16     416    
240    272    
-208   -416   
176    96     
-368   -144   
112    -112   
-464   64     
384    96     
-16    112    
32     96     
400    192    
-64    -336   
-64    -272   
-272   96     
80     -32    
-128   64     
64     80     
-128   -80    
192    -96    
-496   96     
112    -32    
-192   -16    
80     32     
336    80     
0      -112   
-208   384    
320    -208   
96     96     
160    192    
64     64     
-32    48     
16     -16    
-224   -32    
80     -16    
-32    0      
0      -208   
160    48     
-192   320    
304    -16    
-1168  -64    
-16    112    
-272   16     
-1056  -80    
64     96     
-2032  80     
-256   -48    
304    -112   
-64    16     
208    96     
80     160    
-912   128    
16     32     
112    16     
16     80     
-128   -208   
-96    -160   
240    160    
-176   464    
-400   64     
-384   -288   
224    96     
-1200  112    
-32    48     
320    -112   
-288   -208   
-928   -336   
112    128    
-160   -128   
112    -48    
-192   -16    
160    112    
176    48     
128    48     
-32    64     
240    192    
-240   16     
112    -48    
64     48     
-976   -32    
0      -160   
32     -32    
112    96     
-144   -48    
96     64     
-288   192    
-64    144    
112    -64    
-48    272    
96     160    
-288   -144   
192    -32    
0      64     
-64    0      
-2224  -48    
304    128    
-128   208    
272    256    
-208   176    
-64    64     
-32    -64    
64     -32    
48     32     
-64    32     
32     80     
-144   -32    
-112   0      
-624   -144   
-48    -48    
-224   -64    
16     160    
-112   64     
160    48     
-288   -336   
-128   -48    
0      96     
64     -32    
16     64     
-96    -272   
224    48     
144    176    
112    480    
656    1280   
-304   704    
-464   240    
48     -16    
-224   -496   
128    -400   
176    320    
400    208    
-48    -704   
0      528    
-304   368    
-656   -416   
-80    160    
32     -16    
128    96     
-32    224    
-256   32     
-448   -96    
208    16     
-416   -112   
16     1168   
48     -176   
208    32     
-448   176    
-176   0      
-128   256    
-80    -176   
368    -464   
256    -128   
224    480    
144    320    
-192   16     
-624   -112   
-208   32     
-400   -48    
288    -208   
416    -320   
-208   -128   
-736   80     
-128   256    
-32    96     
160    -16    
16     -16    
224    160    
-144   48     
-320   -112   
80     0      
-32    16     
240    48     
-176   -96    
160    64     
112    112    
96     208    
-224   64     
64     96     
256    64     
-48    64     
48     80     
-48    32     
-192   -192   
256    -48    
-144   112    
-224   -16    
144    96     
-480   -48    
-32    -16    
48     16     
-16    112    
-80    -144   
128    -112   
-16    48     
-96    16     
-64    64     
64     64     
-128   -80    
144    -16    
0      64     
0      -32    
-64    16     
48     48     
80     80     
208    96     
80     208    
-128   0      
-64    -16    
-144   0      
80     64     
48     64     
-144   32     
416    -144   
-128   64     
144    224    
128    0      
-336   -16    
16     -32    
112    80     
-64    80     
160    64     
-48    112    
-112   16     
208    64     
-48    -16    
240    -16    
528    96     
-416   -112   
-352   80     
-16    80     
-16    -32    
0      -32    
16     80     
208    208    
-16    32     
48     16     
96     64     
-32    64     
16     0      
16     64     
-64    -16    
-64    32     
64     80     
-80    32     
144    112    
160    16     
-160   0      
144    -32    
-16    16     
112    208    
336    32     
-160   48     
-144   16     
192    112    
80     96     
144    144    
-112   16     
272    32     
-48    32     
160    192    
96     144    
-32    -96    
160    16     
-16    96     
96     32     
16     64     
-16    16     
128    64     
64     80     
-48    -32    
64     64     
16     48     
80     -32    
-48    112    
0      -192   
-16    -80    
112    -176   
32     160    
288    240    
112    48     
-32    128    
-64    -128   
32     -192   
112    96     
32     48     
320    -16    
-192   -208   
112    -128   
-144   -144   
64     -112   
-32    -48    
240    -496   
256    144    
-80    192    
48     -32    
64     -32    
96     128    
128    144    
160    96     
80     -16    
-64    80     
208    -272   
208    512    
96     -64    
0      208    
80     -80    
0      -784   
-64    320    
-80    208    
64     -32    
16     96     
336    -208   
64     336    
80     16     
-32    -32    
128    32     
-80    64     
-128   -96    
96     80     
112    -96    
496    32     
-64    -976   
-192   -896   
-144   560    
-240   -208   
-80    48     
80     -80    
256    80     
112    -496   
640    320    
80     -80    
16     32     
32     -16    
-48    192    
-176   352    
352    368    
80     -896   
-96    -48    
-16    -96    
16     352    
-336   -352   
272    64     
160    0      
80     32     
48     128    
192    96     
240    -80    
128    176    
352    -16    
-64    -512   
-176   128    
-16    416    
-64    -16    
-64    -560   
16     -64    
160    400    
112    176    
192    -160   
-32    224    
-176   0      
-176   80     
32     -48    
176    -176   
-224   -352   
112    80     
160    720    
0      -208   
128    -16    
192    -368   
-272   -48    
160    -96    
272    80     
-48    192    
112    48     
-144   0      
96     -368   
-16    -16    
16     -320   
128    -192   
-48    -240   
176    -176   
208    272    
32     272    
192    -288   
32     112    
0      64     
64     160    
0      176    
128    -320   
-96    -1200  
160    -256   
64     -384   
0      -160   
0      -1568  
32     -320   
-96    -64    
0      -464   
288    -272   
-16    -240   
240    -1040  
288    -144   
96     -208   
-16    208    
112    -320   
16     -80    
0      -352   
64     -160   
192    80     
32     -96    
144    -80    
192    -816   
-176   112    
48     -128   
48     64     
208    -176   
32     32     
224    -240   
-160   -288   
-208   -64    
64     -48    
-912   -48    
160    -64    
48     32     
144    -48    
96     288    
176    96     
96     48     
96     48     
0      16     
176    -64    
-208   -48    
224    0      
-48    -16    
-304   224    
256    112    
-128   48     
240    -192   
-80    -192   
96     -96    
16     176    
64     -272   
48     64     
64     -144   
-64    64     
48     80     
-16    -144   
288    0      
-96    80     
-176   0      
352    -32    
-304   32     
-16    -144   
128    64     
48     -208   
-16    208    
272    -272   
192    -32    
176    -576   
-624   -624   
192    -368   
-336   64     
432    -320   
320    -16    
-80    32     
160    176    
-240   464    
208    -64    
-2560  -64    
-32    32     
208    272    
-64    144    
192    0      
288    -288   
48     48     
144    -752   
128    32     
208    -176   
-272   -192   
32     -64    
-176   176    
-16    224    
-80    -272   
-256   -432   
176    -336   
-448   128    
80     -128   
0      160    
-384   -336   
-112   -208   
144    -656   
80     -176   
160    -112   
112    112    
-128   0      
48     80     
-688   -48    
96     32     
-400   320    
-64    -32    
192    -176   
112    -528   
-16    -208   
96     -256   
112    -160   
208    -176   
208    480    
-160   112    
80     -336   
-288   -112   
80     208    
16     48     
-48    -544   
-80    208    
176    -128   
-544   -208   
288    160    
64     -32    
96     -224   
160    -48    
368    -64    
592    720    
-608   -656   
-160   48     
-208   -112   
112    -32    
-16    96     
304    -32    
-128   -352   
352    -480   
-448   -736   
48     384    
112    608    
-384   -352   
32     128    
176    352    
-2432  -48    
-112   -48    
-176   16     
64     32     
240    0      
-304   -32    
80     -80    
-96    0      
-80    16     
-320   0      
-32    -224   
368    -112   
-144   -272   
-112   48     
-304   48     
-192   288    
-576   48     
-464   -96    
192    -32    
464    32     
-176   -32    
336    0      
-528   224    
-272   64     
-80    0      
-384   0      
-320   176    
16     -128   
240    -80    
256    128    
-288   32     
112    112    
-224   48     
-432   48     
-1424  -48    
-80    -48    
192    -16    
-64    80     
-304   -192   
480    0      
-128   -48    
48     96     
0      16     
96     16     
-32    32     
-32    48     
-272   -80    
-128   32     
-32    64     
-112   -16    
96     64     
-416   -64    
-96    0      
-96    -112   
0      32     
64     -80    
-240   -32    
112    32     
32     48     
-16    0      
-288   -192   
448    -96    
-240   0      
256    48     
-256   -176   
-160   -112   
-320   288    
-256   208    
16     -144   
-16    160    
48     -32    
176    -96    
-256   64     
-48    -16    
-64    0      
0      -64    
112    160    
80     160    
32     16     
-224   0      
-208   -48    
-256   -64    
240    112    
64     48     
512    304    
-336   -112   
224    -64    
176    224    
-368   80     
48     -192   
-112   64     
208    144    
-560   48     
-144   48     
-80    -48    
64     -48    
-96    -16    
144    112    
-2224  -32    
-192   112    
144    -160   
-128   -48    
0      144    
-48    80     
144    64     
-160   32     
0      80     
144    144    
-64    -48    
32     32     
96     16     
-48    16     
272    224    
-752   -112   
0      -64    
64     32     
-16    64     
112    48     
-64    64     
-48    -48    
0      -32    
-48    64     
-80    128    
144    128    
-224   -32    
192    64     
-240   -32    
-80    32     
-464   -112   
-128   -32    
224    144    
-208   0      
16     -80    
96     80     
-128   -592   
-224   112    
128    368    
-64    64     
64     128    
-208   -416   
368    512    
-352   -144   
-64    0      
224    64     
144    -128   
96     176    
64     -112   
0      16     
160    272    
-80    80     
272    272    
-320   -240   
0      -48    
208    256    
272    400    
-96    -224   
-224   48     
224    208    
32     -16    
16     32     
-128   -96    
0      112    
0      560    
240    -64    
0      128    
-160   48     
176    -160   
-112   32     
-96    -848   
-176   112    
144    256    
112    -128   
0      96     
-32    -288   
32     160    
16     80     
80     128    
16     32     
0      -32    
-128   64     
-96    144    
80     32     
80     32     
112    96     
-176   -64    
80     16     
48     -240   
80     -224   
0      -80    
32     16     
80     -16    
-80    -144   
-224   16     
-144   -48    
-16    -192   
-256   -352   
496    -352   
176    -64    
320    -208   
96     -384   
-96    -160   
-240   -128   
-192   128    
-16    -144   
176    -128   
96     144    
48     112    
64     112    
-48    16     
-16    -32    
-16    32     
112    -32    
320    144    
-240   256    
-464   -48    
16     -368   
80     112    
144    160    
384    320    
240    272    
-208   144    
-224   48     
176    112    
-48    16     
480    -176   
176    -32    
16     96     
-272   128    
144    -16    
64     -160   
32     -80    
-32    -64    
16     -160   
48     0      
96     32     
112    128    
80     64     
0      48     
-48    48     
96     176    
-16    240    
48     -64    
160    32     
80     144    
64     64     
64     64     
64     -64    
112    -576   
96     64     
80     -32    
-16    16     
16     96     
144    -160   
-48    -240   
96     32     
-112   64     
-80    416    
128    256    
48     112    
-48    208    
80     464    
592    320    
0      128    
272    704    
192    528    
80     672    
-96    -64    
-112   64     
224    -272   
0      384    
160    208    
32     16     
-80    96     
16     -224   
-48    128    
160    -240   
368    224    
-128   -80    
32     512    
-128   448    
-48    32     
32     -112   
128    -80    
-32    64     
128    -64    
32     -16    
208    64     
80     64     
-176   16     
320    112    
48     -48    
-128   256    
480    -32    
352    288    
-208   -848   
32     -16    
-32    -80    
16     48     
16     192    
-16    224    
176    320    
96     304    
16     16     
496    16     
32     112    
240    -16    
64     144    
96     -288   
160    -16    
-304   -208   
304    160    
-160   -16    
400    96     
-128   192    
304    32     
-112   -176   
288    80     
192    -16    
-176   -80    
128    16     
-16    -352   
-112   -176   
96     -208   
80     16     
-32    -320   
32     16     
96     -16    
224    224    
-144   -16    
192    -32    
-16    -176   
-32    -256   
-32    -80    
-96    -608   
272    -160   
112    -144   
144    -144   
96     -96    
64     96     
368    80     
80     544    
0      176    
48     224    
144    336    
288    -272   
48     -464   
160    48     
-16    -1088  
96     352    
64     -64    
96     -64    
128    -80    
-192   -768   
96     -16    
-192   -144   
80     -672   
112    48     
32     -64    
-16    -336   
-816   240    
-224   -208   
208    -208   
512    656    
-80    -320   
48     -160   
160    112    
128    -192   
160    16     
208    -288   
-176   -128   
-48    -560   
144    64     
224    -48    
-16    48     
-240   160    
144    -80    
48     -32    
-32    -96    
144    -64    
-96    -384   
48     -16    
64     -896   
208    64     
-240   -576   
560    -1008  
464    -288   
-48    320    
224    128    
240    16     
112    224    
-208   -96    
-1536  -192   
-240   -64    
-320   208    
320    48     
544    -144   
112    -240   
496    128    
-368   -208   
-272   48     
64     -48    
-48    48     
-48    32     
160    -48    
256    -32    
144    64     
-1584  -64    
160    -16    
-192   16     
-160   -16    
432    192    
-144   -160   
48     -48    
464    -176   
-64    32     
-112   -160   
304    -80    
240    112    
16     0      
64     -208   
384    -320   
-272   -64    
256    144    
-576   80     
32     -112   
160    32     
80     -128   
-80    -16    
464    -448   
-64    -16    
-416   64     
-48    -16    
-48    -48    
96     -144   
272    -64    
-256   -192   
-496   -32    
352    -16    
-656   64     
96     -112   
16     -16    
224    -192   
-48    -48    
352    -272   
16     112    
80     32     
112    48     
-160   -48    
64     -64    
-80    48     
80     0      
-400   0      
128    -16    
-928   -176   
96     -144   
80     176    
192    -96    
48     80     
96     -48    
224    320    
96     -400   
64     -48    
-192   -48    
64     -64    
-160   160    
-64    48     
-416   -176   
80     -48    
-192   144    
304    -16    
-48    32     
144    -160   
192    64     
-16    -208   
160    160    
-416   112    
64     -48    
-144   80     
48     -96    
-368   -272   
-32    0      
-64    -144   
-48    -464   
512    208    
-336   80     
-144   80     
96     -80    
-720   -336   
-800   -224   
-352   -176   
-160   -112   
-624   16     
-160   -128   
192    16     
-16    80     
-32    48     
224    192    
-128   176    
-112   -144   
-576   -80    
48     64     
-640   -224   
272    208    
-208   256    
-240   -32    
0      48     
-176   -16    
-176   -80    
-240   384    
64     -176   
-16    -112   
176    144    
16     0      
-128   240    
-304   -224   
176    -80    
-32    224    
144    80     
80     48     
-304   -208   
16     16     
-144   432    
-224   -240   
48     48     
-144   32     
-1152  -48    
16     -272   
176    96     
-32    192    
48     -128   
128    288    
-112   -400   
-192   272    
16     176    
-16    80     
576    336    
-608   -656   
-256   -368   
-80    -192   
-16    -208   
-320   48     
96     144    
-208   560    
80     400    
80     144    
240    96     
-288   32     
-208   -192   
128    -256   
64     -112   
16     80     
-224   -32    
16     -32    
-464   208    
32     240    
-128   32     
112    64     
-432   -48    
48     0      
16     -160   
80     96     
112    -16    
16     -16    
-144   -64    
-16    -224   
-112   -112   
48     32     
400    384    
-320   192    
32     -48    
-96    80     
192    64     
-1088  -96    
160    32     
-64    -112   
144    80     
80     64     
-64    -32    
16     -96    
-80    -96    
48     -64    
64     -160   
-160   -272   
240    -112   
-336   160    
-208   -16    
208    96     
-208   32     
96     304    
-224   128    
-48    -64    
-64    -112   
0      -32    
-256   96     
192    -64    
256    64     
384    112    
-80    176    
-144   -144   
272    32     
-128   16     
96     -64    
-80    32     
80     32     
-16    48     
-256   80     
-16    112    
112    96     
-16    16     
208    48     
-64    -16    
96     48     
256    128    
-288   32     
64     -112   
-48    -64    
144    208    
-128   32     
128    128    
-144   -160   
-368   -192   
-96    -432   
192    -176   
224    80     
224    -112   
32     80     
-208   -16    
-160   128    
-160   128    
-16    176    
-16    128    
0      208    
-64    352    
80     128    
144    -96    
-192   -112   
-32    -80    
16     32     
64     48     
32     -160   
32     -48    
48     -96    
80     128    
80     16     
32     -16    
-128   -16    
208    144    
-336   192    
16     48     
96     -80    
-80    -208   
96     -64    
64     80     
-176   32     
-64    -16    
-16    -80    
112    -112   
32     48     
384    336    
-144   144    
-208   160    
144    80     
368    -384   
0      -192   
64     32     
80     16     
64     -48    
32     256    
48     -288   
-240   -240   
-16    -192   
80     -32    
0      272    
-48    -112   
128    0      
-32    80     
176    496    
-64    272    
304    96     
-304   -240   
64     432    
144    80     
144    128    
416    384    
-288   256    
144    272    
80     -288   
-288   -384   
32     -144   
-80    416    
16     128    
16     48     
-160   -304   
48     -272   
-224   112    
-64    0      
176    -48    
144    128    
-256   16     
-96    -64    
0      304    
96     -48    
336    160    
48     208    
-160   -16    
-64    32     
64     -1520  
160    32     
128    -160   
144    352    
-80    32     
128    -128   
-192   368    
64     -128   
336    304    
-144   -256   
-64    224    
96     -16    
-176   -272   
160    160    
48     128    
176    -160   
-144   -64    
0      16     
160    48     
-16    112    
96     -16    
96     192    
0      -96    
-16    80     
32     144    
-160   -160   
352    240    
16     160    
0      -272   
-16    288    
-48    224    
144    -16    
-176   -192   
128    -16    
256    96     
-16    192    
256    80     
-32    -160   
-96    128    
96     80     
-32    -32    
48     -16    
0      -224   
96     -64    
64     112    
160    80     
112    304    
-64    96     
80     16     
80     96     
0      64     
96     96     
288    -256   
-176   -240   
128    128    
16     -528   
16     -80    
16     64     
112    -16    
-16    112    
0      32     
-80    112    
176    -16    
176    176    
32     48     
96     -16    
-80    -48    
48     48     
96     96     
-48    64     
32     80     
80     16     
240    32     
-32    -64    
192    48     
-16    -32    
-672   304    
352    -192   
432    96     
-272   -368   
-32    96     
304    448    
-720   160    
-64    -272   
320    -192   
224    16     
-208   -16    
-208   -80    
224    -128   
-80    160    
-112   0      
112    -96    
160    -144   
160    96     
112    -272   
368    80     
-176   -160   
528    -16    
16     64     
480    96     
112    48     
-240   -112   
-192   64     
-160   -48    
-112   -32    
-128   -48    
144    128    
112    -176   
128    0      
80     32     
-80    48     
-144   -32    
352    112    
-208   112    
528    64     
240    16     
-288   -160   
192    80     
144    -16    
128    32     
-80    -64    
96     80     
48     -112   
-16    112    
32     -384   
352    176    
-352   -32    
160    -432   
224    64     
-240   -352   
240    -288   
-48    32     
-48    -960   
192    -32    
16     64     
80     -80    
272    240    
-128   48     
192    -16    
64     -32    
48     -368   
192    128    
-64    -224   
128    32     
-128   0      
112    -240   
192    144    
128    -736   
80     -48    
-32    -368   
-16    -48    
272    -144   
-112   -80    
176    -208   
-48    -48    
-80    -400   
16     -144   
96     -16    
160    -64    
-640   16     
16     -16    
144    16     
64     0      
96     -32    
64     -256   
304    240    
160    -1568  
0      -256   
-32    -192   
0      192    
144    128    
176    176    
160    112    
-256   -48    
0      352    
-48    -192   
-64    -560   
48     192    
112    96     
384    288    
-288   -256   
96     -544   
240    336    
32     -128   
-16    0      
176    -224   
48     176    
-16    -48    
16     32     
128    0      
-16    -128   
-272   48     
176    80     
192    80     
-160   -336   
304    256    
208    -80    
-208   192    
32     848    
352    -304   
304    288    
-688   -848   
-96    368    
240    512    
160    160    
-336   -496   
-1104  -592   
64     480    
320    -16    
160    96     
-64    -256   
112    -256   
-160   -16    
-16    -704   
16     192    
192    16     
144    288    
-112   16     
48     -240   
-80    -48    
-32    -64    
-112   -112   
-32    -176   
-1216  -80    
192    -112   
224    144    
16     -256   
-192   -80    
48     -144   
32     -48    
-16    -144   
-128   -192   
144    80     
192    176    
-144   0      
96     16     
-272   64     
16     -48    
-384   64     
-48    -96    
-1024  -32    
256    -272   
-80    -16    
80     -416   
48     64     
144    -48    
48     -16    
-288   -16    
0      -128   
-48    32     
64     16     
-48    32     
32     -176   
-176   -48    
96     -144   
-128   32     
144    -80    
16     96     
-32    -176   
96     -32    
-224   -176   
-64    -288   
112    96     
-240   128    
-16    16     
128    32     
-240   0      
240    0      
-576   -64    
112    -80    
-96    32     
128    0      
64     112    
-592   -96    
-2272  -208   
592    144    
-480   240    
80     -16    
-16    -128   
-224   80     
240    256    
-480   176    
-96    -176   
144    -160   
-384   -128   
144    144    
112    96     
-416   64     
48     -96    
-288   64     
64     112    
-192   64     
48     -144   
-896   -96    
32     -80    
-16    32     
-256   32     
-336   64     
208    208    
-432   -32    
304    352    
-400   0      
48     -48    
320    -48    
144    256    
-256   144    
-352   -128   
176    16     
16     -48    
-256   0      
-256   -80    
-80    16     
-416   -96    
160    16     
-112   -96    
352    -80    
208    -32    
-32    112    
-144   96     
-288   -144   
-192   16     
-96    -16    
-112   -208   
-32    -112   
384    208    
-1072  -192   
16     -96    
-240   48     
16     144    
64     64     
160    160    
240    96     
-176   -160   
128    -160   
-80    -64    
0      176    
-32    48     
32     48     
-112   96     
-96    -224   
-304   -464   
-256   368    
96     272    
-208   -112   
-80    160    
-48    -96    
320    144    
160    144    
-48    -96    
16     0      
-176   -208   
-128   256    
16     -176   
192    272    
144    160    
-160   112    
240    -144   
-560   320    
368    352    
-144   80     
-432   -448   
80     304    
-16    -224   
-80    -32    
64     -16    
112    32     
-192   -16    
80     112    
-176   0      
160    -32    
-160   240    
272    160    
-496   64     
-16    -80    
-144   0      
144    96     
-32    -96    
256    176    
16     -160   
192    832    
-208   -256   
-16    -512   
224    512    
-208   -32    
0      96     
-320   -64    
-32    96     
-432   -48    
336    96     
-240   -64    
240    32     
-64    16     
64     -48    
-64    256    
64     176    
-16    -32    
48     32     
48     16     
16     -16    
96     -80    
-272   -16    
32     160    
-272   32     
304    128    
-96    0      
240    128    
32     64     
-256   0      
128    0      
-80    16     
48     -112   
-32    48     
-16    144    
0      16     
144    96     
96     -16    
80     112    
-96    32     
-192   16     
64     48     
-128   32     
240    -32    
0      64     
112    0      
-32    -16    
-48    48     
-224   32     
-64    64     
-128   -48    
112    96     
-48    80     
176    176    
-336   -48    
-16    16     
-16    16     
80     16     
48     32     
16     -80    
176    -32    
64     -16    
-16    32     
16     96     
112    112    
32     64     
192    208    
-16    -16    
240    224    
-176   32     
-48    -48    
80     32     
-144   48     
208    112    
80     -48    
16     128    
-288   -16    
16     112    
96     160    
-80    160    
-96    80     
128    -112   
-128   -272   
-64    32     
48     32     
16     32     
-80    -224   
304    -16    
128    112    
-32    32     
-80    48     
-48    -192   
160    -16    
-48    128    
32     64     
-208   48     
-48    320    
16     80     
528    -32    
16     0      
-224   48     
400    0      
-528   160    
-400   0      
-272   -208   
128    -240   
640    112    
176    48     
192    0      
272    96     
-304   32     
-128   16     
160    -16    
176    96     
208    96     
16     -160   
96     -192   
320    48     
192    -32    
240    64     
-48    112    
-368   0      
16     -48    
-256   -144   
288    304    
96     96     
400    192    
0      48     
-128   -32    
80     96     
-64    64     
-96    -32    
-64    -48    
272    272    
256    96     
80     16     
-480   -16    
-80    96     
-144   80     
32     96     
-32    -160   
176    -160   
176    64     
32     -176   
-112   48     
-272   -48    
0      96     
-64    48     
64     64     
208    -80    
64     0      
-16    144    
-96    80     
80     80     
-32    96     
144    96     
-128   64     
48     128    
80     -80    
160    96     
112    64     
176    128    
-16    32     
-32    64     
240    48     
16     176    
80     32     
80     128    
128    80     
0      64     
80     -16    
16     48     
32     288    
32     -208   
-80    -144   
-80    -1632  
96     16     
-144   288    
336    -32    
128    144    
144    336    
-32    80     
16     -304   
256    -160   
224    288    
128    32     
32     -64    
-16    -112   
-16    -592   
80     992    
80     -400   
16     -832   
464    -64    
96     144    
16     -160   
112    208    
32     -16    
0      224    
-64    432    
144    -320   
112    288    
-192   96     
208    -272   
48     0      
64     32     
-96    480    
544    -224   
-48    -432   
-48    -336   
32     -656   
-112   160    
208    -128   
64     208    
80     160    
336    -96    
64     208    
-144   -1136  
48     -208   
-144   -528   
112    -48    
-48    112    
432    240    
160    -192   
-272   -224   
272    -16    
48     160    
48     208    
160    -112   
-128   64     
0      -32    
64     128    
208    -352   
96     -144   
160    -16    
0      96     
128    -224   
-80    0      
16     96     
-80    64     
80     48     
80     -960   
-112   144    
144    -208   
48     -1392  
192    -80    
-128   128    
64     128    
48     64     
96     -192   
32     144    
-80    -80    
288    -208   
128    112    
352    32     
64     32     
112    -128   
-208   0      
-816   -64    
64     -96    
-48    -48    
144    -80    
-160   -32    
112    -192   
240    32     
0      144    
48     176    
80     16     
224    48     
16     -144   
-256   16     
32     -192   
112    -144   
-848   -96    
80     0      
64     -48    
0      -32    
32     -96    
160    -256   
64     0      
128    32     
288    208    
-144   112    
32     32     
96     -96    
288    16     
-192   96     
0      -64    
-304   -112   
240    -144   
-16    -144   
48     -176   
128    32     
64     -80    
-32    64     
128    -976   
32     -80    
-112   -48    
-144   -48    
160    -112   
112    -240   
192    -208   
192    32     
-528   96     
-192   160    
-1264  -32    
80     -208   
0      -80    
32     -192   
288    240    
-256   16     
-400   96     
48     0      
160    304    
384    192    
224    -16    
-448   -224   
32     -128   
-416   48     
32     144    
-256   448    
224    128    
272    -64    
-160   32     
128    64     
80     -64    
64     48     
144    -176   
288    64     
32     -64    
-96    -144   
-368   -64    
80     -720   
160    112    
96     512    
-176   -384   
32     -432   
-1072  -272   
160    112    
-64    -144   
-144   -432   
0      -96    
128    -432   
16     -176   
224    32     
544    592    
-240   -128   
112    96     
16     -144   
-64    -80    
-352   192    
16     -48    
-80    160    
112    -80    
0      -176   
160    -80    
144    -288   
272    -352   
-16    48     
-160   0      
32     368    
128    -112   
-64    -32    
-80    80     
-96    -256   
-112   64     
432    432    
-160   464    
256    0      
224    48     
-112   -352   
96     -320   
32     80     
208    64     
-128   -32    
96     0      
0      32     
96     -48    
192    -16    
96     -80    
224    144    
256    176    
-80    352    
144    352    
96     -400   
-416   -592   
0      -160   
-528   -128   
-2112  -240   
-208   -272   
192    -368   
-32    -128   
-32    -32    
-80    -32    
352    -144   
-240   -128   
256    -96    
-480   -80    
-1744  32     
480    192    
-528   -48    
144    144    
-32    192    
-240   80     
-48    -80    
-800   -192   
208    -16    
-432   128    
-240   16     
160    48     
-384   -48    
-432   -80    
16     48     
-208   -16    
224    80     
-128   -64    
48     -48    
-144   16     
-160   -32    
0      0      
16     32     
-16    32     
-240   -96    
160    -48    
288    64     
-192   0      
-16    32     
96     80     
-112   -16    
160    64     
0      -144   
-128   -48    
-128   -16    
-128   -16    
0      96     
64     -80    
-256   -48    
-192   32     
-96    16     
-640   32     
48     80     
-64    48     
160    48     
-112   -48    
-48    0      
80     -32    
-64    48     
16     96     
112    32     
0      -32    
-112   -96    
-96    160    
-304   144    
240    -32    
-320   -32    
-64    16     
-544   -192   
-16    32     
-16    -80    
-224   96     
160    48     
192    80     
32     0      
-96    -16    
16     32     
-48    0      
144    112    
-112   32     
-48    32     
-384   -64    
16     96     
-592   128    
208    0      
224    -144   
-160   -128   
32     -208   
-288   -64    
-96    144    
-208   -16    
32     0      
-96    -144   
64     -192   
-128   0      
-160   32     
-368   -16    
160    -16    
-512   -176   
96     240    
-240   80     
-128   -96    
112    -96    
96     48     
-112   16     
176    16     
48     32     
608    48     
-560   -288   
-320   -32    
80     352    
-112   0      
384    272    
-752   16     
400    96     
-112   64     
-160   48     
96     128    
-176   96     
-112   80     
-272   -64    
-192   -128   
48     -16    
-256   128    
-368   -48    
336    48     
-400   -304   
688    -192   
-224   -48    
-112   32     
224    144    
32     64     
-128   80     
-352   0      
352    96     
272    -96    
128    -80    
208    -272   
112    -160   
-64    80     
-16    96     
-288   16     
-272   -176   
-832   -336   
288    160    
-80    176    
224    352    
-96    80     
128    -176   
336    16     
64     48     
512    224    
16     144    
-160   96     
-320   32     
-224   16     
128    -48    
-80    -32    
320    240    
96     160    
-336   -112   
160    -128   
-144   112    
176    240    
16     64     
288    16     
192    48     
80     64     
48     32     
-176   192    
48     -640   
-80    288    
192    304    
-176   -320   
96     64     
16     96     
112    288    
-80    -336   
112    128    
32     -16    
64     192    
64     0      
-304   448    
224    48     
-464   -32    
304    176    
-576   208    
432    -48    
96     304    
352    32     
176    288    
-240   -256   
32     -432   
144    400    
-256   -160   
304    64     
-304   -48    
208    -416   
-64    256    
304    512    
80     640    
-240   -496   
-48    32     
-80    32     
32     -320   
-224   -128   
224    -96    
0      144    
48     -32    
112    0      
-80    -64    
64     560    
-16    192    
288    96     
-160   160    
288    0      
-128   -80    
-160   -80    
128    48     
-96    96     
192    128    
32     176    
128    16     
-112   32     
-48    -48    
96     -32    
208    -80    
192    96     
-32    112    
0      -32    
-48    -208   
-208   48     
288    -832   
-32    272    
432    192    
-96    48     
208    32     
112    -48    
-112   -16    
192    -16    
-16    112    
96     16     
-96    224    
208    64     
96     -32    
-16    -16    
160    -96    
-160   -1120  
-96    48     
-16    0      
112    16     
-96    32     
288    16     
160    80     
192    -32    
16     -320   
-48    16     
-160   32     
-192   16     
288    -16    
112    -96    
144    32     
-448   -96    
400    -112   
160    -144   
96     -384   
16     -16    
32     96     
16     32     
48     32     
-16    -352   
48     32     
112    -128   
176    144    
32     112    
-64    48     
160    144    
160    -320   
128    16     
64     -1312  
240    -48    
80     176    
-128   -32    
-96    -128   
32     80     
128    -32    
112    128    
64     -16    
32     0      
240    112    
-16    96     
-32    -128   
32     -192   
-48    64     
192    -784   
64     -64    
144    -528   
96     224    
-16    64     
96     32     
240    176    
-128   288    
-32    64     
128    -80    
112    -64    
80     -128   
16     -64    
64     -480   
192    64     
0      -288   
160    -64    
-176   -144   
0      -80    
-48    -64    
272    -80    
256    -272   
288    96     
-128   -432   
64     -528   
-176   -192   
-272   -176   
160    -32    
96     -224   
224    288    
192    -224   
-48    -96    
96     272    
128    384    
-128   144    
112    32     
48     112    
272    128    
160    -64    
-48    144    
-80    -64    
80     160    
160    -112   
-336   48     
-112   16     
-224   32     
432    448    
-368   -256   
176    -144   
112    -48    
-256   -320   
336    -256   
128    16     
-16    -400   
-32    -112   
-272   -160   
-48    128    
80     272    
160    -208   
256    -16    
96     -32    
128    -1120  
-176   272    
224    -240   
-128   -16    
-160   16     
16     -192   
96     -176   
80     -64    
0      -80    
96     -144   
80     192    
144    -256   
128    -80    
-112   -480   
-48    48     
192    -432   
-32    16     
176    -48    
80     80     
48     -128   
240    -32    
-912   -32    
160    32     
16     80     
-48    -48    
96     -16    
16     -848   
-16    -144   
176    0      
0      -64    
256    16     
96     32     
-16    -128   
-192   96     
-256   -16    
-80    -80    
-416   -32    
48     16     
256    0      
288    16     
128    192    
112    -240   
112    0      
-256   -800   
256    0      
48     -144   
112    96     
-80    -48    
-16    -80    
-144   -16    
128    -16    
-288   16     
-48    -16    
352    144    
240    416    
-576   128    
16     -224   
272    -32    
112    -192   
-16    176    
208    0      
-176   32     
112    -48    
144    0      
96     48     
64     -64    
16     -208   
144    -192   
-1552  144    
16     0      
208    48     
-112   -96    
224    -32    
64     -160   
160    112    
-112   32     
160    256    
-16    -32    
160    -32    
-288   0      
176    -96    
-160   -48    
-16    -112   
-64    16     
176    32     
32     -32    
64     -48    
-240   -48    
240    -480   
-96    -128   
224    -1280  
-48    192    
0      -16    
96     -192   
-96    16     
-128   80     
-48    16     
176    64     
-352   16     
144    0      
80     -80    
-112   -160   
48     176    
272    -48    
128    48     
96     -432   
112    208    
-176   112    
160    -64    
-368   -64    
96     -144   
96     80     
80     -16    
-128   96     
128    -272   
48     0      
320    32     
-176   192    
-96    -112   
80     32     
-208   0      
208    0      
-304   64     
128    -48    
-224   -48    
48     32     
-352   -48    
192    -96    
-208   -176   
96     -112   
-352   160    
128    144    
96     48     
-816   -64    
64     64     
160    224    
-128   224    
-16    -16    
-32    -32    
-16    -16    
224    64     
-80    32     
144    16     
-128   0      
32     80     
48     96     
-864   -96    
-144   -160   
-848   -160   
-112   144    
656    -368   
160    -128   
288    384    
-496   -288   
-448   -80    
-224   32     
-320   240    
128    336    
-240   -576   
320    320    
96     160    
-144   -208   
128    240    
-176   -224   
32     -32    
224    -32    
-352   32     
-208   64     
-1040  -96    
-544   -672   
-272   640    
432    528    
464    -304   
-80    128    
-320   -80    
-32    256    
-448   -64    
352    -176   
496    -64    
240    144    
-16    32     
-96    192    
-208   -384   
96     640    
-144   352    
-160   -144   
-48    160    
-32    -192   
-144   64     
-272   208    
160    -368   
80     80     
16     0      
16     96     
-96    80     
-432   16     
16     64     
-96    208    
64     32     
128    -48    
-384   -752   
192    496    
-816   112    
-176   -432   
-64    48     
16     208    
-160   -272   
-64    -16    
192    144    
-176   -64    
32     64     
-64    -48    
-96    -336   
64     -192   
-320   240    
-80    -256   
-64    64     
-304   -128   
80     -448   
-128   432    
240    240    
-16    -80    
176    -64    
-16    32     
64     128    
-176   -112   
0      160    
144    224    
208    576    
-400   176    
128    -208   
32     -48    
-160   -64    
32     496    
-832   -96    
176    144    
96     112    
160    -80    
208    304    
-16    -32    
-16    16     
32     64     
32     96     
176    144    
-192   16     
224    -64    
-208   -208   
-64    -112   
-160   288    
-720   80     
144    -32    
-32    48     
-208   128    
112    64     
-80    -288   
176    -64    
288    128    
-16    192    
-16    64     
144    64     
-256   32     
96     -16    
-240   -64    
-64    544    
-224   96     
32     48     
128    0      
0      0      
-80    80     
64     16     
-32    -48    
240    -224   
-16    16     
-16    48     
-64    192    
-240   544    
416    272    
-48    -16    
208    576    
-96    32     
112    0      
240    48     
-96    224    
144    112    
-208   48     
0      96     
48     -64    
224    16     
-192   -16    
-176   48     
-240   -96    
32     128    
-192   -160   
112    -96    
272    64     
-64    256    
-96    0      
48     -96    
-48    176    
80     128    
48     80     
-32    -16    
160    64     
-192   32     
16     -32    
-112   96     
112    144    
-288   -112   
416    160    
-64    240    
-176   112    
-16    -32    
144    80     
176    -48    
-96    80     
-160   224    
0      64     
48     -208   
48     -256   
128    160    
-224   192    
32     32     
64     0      
-16    0      
112    80     
224    192    
64     48     
160    160    
-48    272    
0      0      
0      128    
64     192    
32     32     
-160   64     
448    240    
-80    144    
-144   160    
112    448    
-48    96     
224    -160   
48     0      
176    48     
-96    32     
32     144    
192    112    
192    64     
-208   64     
-144   -16    
-208   -128   
336    224    
-128   -80    
64     -416   
-64    144    
-320   -16    
272    48     
-192   -160   
64     400    
-400   160    
16     -96    
-288   -432   
288    128    
176    336    
128    -288   
336    224    
112    32     
-80    -32    
-304   -224   
-48    80     
-512   -256   
160    80     
416    320    
272    96     
112    16     
-128   -208   
144    -16    
-320   32     
96     -784   
208    -320   
608    0      
560    64     
304    160    
-304   -176   
-96    144    
-208   -1584  
-32    -112   
-32    32     
320    192    
384    96     
16     64     
-128   48     
32     80     
16     -48    
-80    80     
-176   -64    
144    0      
192    96     
-80    -96    
32     80     
16     -48    
144    160    
0      96     
256    16     
384    208    
-448   32     
112    -32    
80     176    
-224   80     
448    224    
352    272    
-384   80     
304    96     
32     0      
16     -64    
80     -112   
80     32     
112    -640   
176    64     
-48    0      
96     32     
0      128    
192    48     
224    96     
-112   32     
288    48     
-96    -96    
160    16     
64     -80    
128    64     
-64    -464   
96     64     
80     -592   
288    192    
48     -32    
48     48     
0      0      
64     -32    
112    80     
64     160    
32     64     
112    -128   
96     128    
-80    -64    
96     0      
128    -112   
-288   400    
496    288    
80     -160   
-240   -128   
160    16     
0      48     
240    272    
-336   -32    
80     -160   
432    -112   
64     160    
0      240    
-32    -160   
448    64     
-528   0      
144    160    
176    -96    
-192   16     
32     -48    
128    32     
144    208    
-16    112    
128    -16    
-32    -224   
112    144    
0      -192   
32     64     
144    -32    
48     96     
112    -256   
160    32     
-32    -224   
128    96     
48     144    
160    -16    
-32    80     
32     -528   
-32    -368   
336    48     
32     144    
-128   -128   
304    16     
-16    -112   
240    48     
-80    -192   
-64    32     
208    96     
64     -720   
16     48     
256    16     
-48    144    
272    -224   
48     -528   
-16    32     
32     -336   
160    -32    
112    -736   
-16    -96    
192    0      
-16    -16    
128    352    
272    48     
64     -320   
-64    96     
144    16     
48     -32    
-208   -16    
96     -160   
240    176    
-48    -448   
208    48     
-160   -64    
32     -64    
-48    -784   
288    -80    
304    352    
-112   -256   
64     -64    
-224   48     
64     -64    
192    32     
-496   224    
-64    -160   
-864   160    
0      -48    
128    -96    
16     -16    
80     32     
112    -16    
128    64     
160    -512   
-16    32     
272    96     
128    -96    
32     32     
176    1024   
-224   -336   
-96    -112   
-240   -112   
176    0      
80     -96    
-32    -352   
160    -592   
432    -112   
-64    336    
16     -944   
-112   -112   
-112   576    
64     -400   
-304   0      
32     -160   
-64    -16    
368    496    
-432   -336   
128    208    
-96    -272   
16     -192   
288    192    
192    -208   
-112   0      
16     -240   
144    32     
192    16     
112    96     
-384   -240   
304    1264   
-192   -256   
-64    -704   
-64    176    
96     -320   
-560   336    
160    304    
112    64     
-384   144    
-240   304    
-480   -144   
-64    -112   
128    400    
-240   -32    
480    -144   
96     112    
688    336    
-128   160    
432    240    
80     -80    
-416   -16    
48     112    
-512   112    
224    112    
-160   160    
304    144    
176    144    
144    -576   
48     48     
192    -256   
16     -128   
-192   64     
-64    16     
-32    32     
128    0      
-16    -160   
192    -208   
-48    64     
96     -448   
0      -32    
-16    -352   
-48    48     
-64    -48    
176    -96    
-336   0      
96     48     
16     96     
-160   -336   
-112   176    
224    192    
-352   -128   
64     -176   
-112   -272   
48     -80    
-80    -256   
368    -144   
-336   16     
-560   -384   
-1760  -320   
96     48     
-112   544    
-96    -176   
-16    -128   
160    -112   
176    32     
0      416    
-224   -80    
416    464    
-400   320    
-16    240    
-144   -560   
-384   -240   
-128   -192   
-736   32     
-96    -64    
-576   -528   
64     -32    
112    -16    
-320   -288   
96     -272   
-96    80     
-16    224    
-176   288    
-144   -112   
0      -16    
-160   32     
16     -64    
-128   96     
240    -32    
-192   80     
-64    0      
-96    -80    
-1760  -80    
-16    16     
-80    -384   
0      -80    
-144   -16    
96     112    
-352   -64    
-16    0      
32     16     
0      -112   
64     -144   
-160   -32    
-272   736    
592    576    
-48    304    
-256   128    
64     400    
-16    464    
192    176    
-80    -208   
160    -64    
-176   -80    
48     -208   
0      -240   
-208   -128   
0      288    
-320   64     
80     32     
-192   32     
16     16     
-96    -80    
-80    -32    
-1120  -80    
416    -16    
128    -16    
160    48     
-144   48     
-64    64     
0      112    
-48    -64    
0      -192   
16     -160   
-16    0      
0      32     
144    128    
-272   96     
-112   0      
-576   32     
192    208    
96     96     
160    192    
48     352    
320    320    
-208   400    
-48    176    
208    192    
-192   224    
0      48     
-96    80     
0      64     
-112   160    
144    336    
-64    256    
-112   112    
-176   -192   
112    -128   
-48    -32    
-112   64     
-96    -256   
0      80     
16     32     
224    96     
-112   48     
-64    -224   
176    208    
-160   -16    
192    -400   
-144   128    
0      64     
-16    -16    
-320   16     
48     -48    
16     112    
80     16     
144    -240   
0      32     
-64    -208   
-48    80     
-32    272    
-144   -112   
160    -16    
272    144    
144    -16    
384    64     
192    64     
144    -16    
208    0      
-32    144    
16     160    
-192   128    
48     112    
-208   64     
32     0      
-80    -16    
192    16     
-96    32     
672    320    
-672   96     
-496   -48    
192    -64    
64     48     
-128   64     
224    96     
-512   64     
32     16     
112    32     
-512   224    
48     64     
80     -128   
128    16     
16     176    
16     176    
32     192    
-448   -96    
368    -48    
224    192    
240    -32    
272    64     
-96    64     
-32    112    
160    208    
-160   0      
0      32     
80     80     
-96    0      
-16    32     
560    352    
-512   -32    
-64    -48    
240    16     
400    48     
-48    112    
32     16     
208    48     
-160   -16    
160    64     
-144   -80    
192    80     
-336   48     
128    80     
16     32     
336    160    
-144   96     
128    64     
-16    48     
112    96     
112    80     
-160   -16    
-240   -128   
64     16     
32     96     
160    -48    
208    96     
-48    48     
160    80     
-192   16     
-48    160    
192    112    
-208   80     
-80    -32    
96     0      
144    96     
240    64     
-176   -16    
144    96     
0      0      
288    144    
0      32     
32     16     
-64    48     
-96    -48    
96     -576   
416    208    
176    272    
240    128    
272    96     
-224   80     
-320   -80    
192    16     
-32    16     
480    352    
16     64     
272    -160   
176    112    
-64    160    
192    112    
-320   -64    
304    96     
-16    48     
80     -16    
112    -80    
256    112    
-112   64     
64     64     
-32    32     
64     -16    
-96    0      
0      80     
80     -32    
96     80     
-16    64     
80     -336   
48     0      
80     288    
-16    -48    
16     48     
96     80     
0      -32    
48     -16    
80     32     
48     64     
144    80     
0      96     
32     48     
16     48     
64     160    
16     80     
16     160    
192    -32    
192    240    
64     48     
176    -256   
-128   112    
-16    32     
-80    -96    
-32    336    
288    -144   
144    -16    
-192   0      
96     -128   
-96    32     
176    -224   
-48    240    
0      -192   
32     -16    
224    176    
-16    48     
-112   112    
160    64     
-48    -112   
192    -192   
-128   96     
208    -336   
272    -32    
256    464    
-48    -448   
96     -256   
48     528    
-16    -448   
-128   -176   
64     -464   
-32    144    
224    48     
-112   -336   
48     -16    
208    -128   
-16    448    
96     80     
80     -192   
128    -32    
208    -16    
208    128    
-112   96     
96     -192   
96     48     
96     128    
-96    -464   
96     -112   
96     32     
160    -48    
192    384    
-16    32     
32     -144   
128    112    
400    256    
-64    304    
-208   -816   
48     -128   
-16    -208   
80     -144   
112    -368   
64     -80    
-32    64     
176    -128   
112    -400   
352    112    
288    80     
-48    0      
-16    0      
0      -208   
-176   48     
-288   -112   
160    -144   
320    -64    
384    -32    
80     -1408  
112    -112   
-160   32     
0      48     
-80    32     
144    -560   
0      -1104  
352    96     
-80    -1232  
256    144    
0      112    
64     48     
240    -16    
16     -16    
352    96     
-144   48     
560    -304   
-560   256    
-64    -128   
256    352    
-1920  -112   
352    -224   
176    -48    
-208   -640   
32     48     
-16    -368   
128    -48    
336    48     
112    -80    
-128   -752   
48     -96    
48     -336   
-16    112    
16     -32    
-80    192    
-848   80     
80     16     
0      64     
208    48     
32     -16    
144    -96    
224    32     
-64    -1072  
80     64     
48     -256   
-64    48     
224    -384   
224    256    
-48    256    
64     -32    
-384   -16    
-80    -96    
-16    32     
64     -256   
80     288    
368    -160   
-176   -16    
192    -48    
-16    -256   
416    -128   
0      -336   
208    -64    
64     -112   
-208   -160   
-256   -240   
16     -112   
112    112    
-1152  80     
304    496    
-256   272    
192    -96    
192    -240   
-16    0      
176    128    
-176   -1136  
-144   128    
-256   192    
288    576    
16     192    
256    -64    
-272   -32    
-96    -64    
-1552  0      
192    64     
-176   272    
512    96     
48     -176   
416    -304   
64     -16    
-32    -512   
48     -80    
96     112    
96     -96    
64     176    
32     -352   
208    -144   
-192   -192   
-304   48     
96     48     
-400   16     
-80    -352   
256    -976   
-16    -368   
304    -112   
-112   -208   
-224   -336   
320    144    
240    288    
-288   -112   
-16    -64    
192    0      
320    480    
-784   224    
160    416    
-592   -16    
224    -128   
112    336    
80     -64    
368    368    
144    64     
-32    288    
-16    192    
96     64     
48     320    
64     256    
-144   368    
208    128    
-464   128    
-80    -512   
-448   240    
400    176    
-320   -672   
160    128    
0      240    
96     -208   
176    112    
-160   192    
-48    48     
-96    -16    
80     192    
-80    16     
160    16     
-176   -96    
96     -96    
160    -384   
352    848    
-272   96     
96     -96    
240    160    
-208   -400   
-64    -224   
112    192    
336    -80    
96     -64    
32     -64    
-80    -160   
-32    32     
-304   48     
80     -48    
-48    -16    
-2112  -64    
160    48     
-1072  -128   
144    160    
-16    160    
-144   32     
-192   80     
-352   -96    
-96    -80    
400    -128   
-272   -240   
96     32     
-64    144    
144    128    
-128   80     
-192   -128   
48     -432   
-496   -160   
64     352    
432    832    
-608   672    
-752   32     
-448   -96    
176    -16    
-432   -80    
384    -32    
-1328  -128   
560    -32    
32     -64    
352    160    
192    -64    
-16    16     
-48    -80    
-512   -208   
64     -48    
-208   112    
-320   48     
-16    16     
160    48     
640    528    
-944   192    
-1056  48     
-288   -80    
288    -48    
352    80     
16     -176   
80     -96    
-128   0      
-560   64     
-512   -64    
-32    48     
-32    112    
-16    16     
96     64     
144    160    
-32    -128   
432    80     
112    16     
-288   -128   
304    32     
288    272    
-144   160    
-288   -16    
0      0      
224    48     
272    16     
320    -32    
-96    16     
-128   -80    
-144   0      
-128   64     
128    80     
-192   -16    
-784   -16    
128    96     
48     -32    
32     -32    
48     48     
64     80     
-64    -80    
64     -96    
-176   80     
-144   16     
16     0      
-16    0      
48     -32    
-400   -64    
96     96     
-480   -96    
160    64     
16     32     
80     80     
-48    -16    
0      64     
48     0      
-272   240    
144    112    
-80    16     
0      0      
48     80     
-48    -304   
-320   48     
-192   64     
-80    -288   
208    144    
-544   -192   
-96    -32    
48     144    
-48    48     
-48    -112   
-80    -112   
176    208    
-96    32     
192    32     
-752   -448   
96     -416   
112    -32    
96     112    
240    -16    
272    80     
-128   32     
208    256    
-208   320    
48     -32    
-240   -128   
-288   64     
-32    -208   
16     -144   
96     -32    
-176   0      
336    384    
-144   -96    
240    208    
-384   32     
16     -224   
96     272    
16     32     
96     -32    
64     -16    
112    192    
-80    -48    
80     -64    
-16    96     
0      -16    
128    0      
-272   -304   
-16    176    
144    304    
-64    -592   
64     496    
32     240    
288    -48    
80     160    
0      -48    
-112   0      
-96    -800   
352    304    
-144   16     
-32    -80    
-16    608    
64     -480   
-144   -128   
512    496    
-64    -144   
-144   -208   
96     -48    
-208   -208   
144    208    
16     784    
304    384    
0      32     
160    -128   
-80    -80    
0      64     
-224   -96    
192    -16    
-240   0      
128    80     
16     -80    
384    -16    
-80    144    
96     144    
-80    176    
96     304    
64     80     
-16    48     
112    48     
-128   -80    
176    -16    
-96    96     
208    208    
112    208    
-160   304    
64     176    
-80    160    
-48    48     
-144   -128   
400    48     
48     192    
-16    48     
0      16     
192    32     
-240   32     
-48    32     
48     256    
192    64     
48     96     
-16    128    
32     32     
-96    -16    
112    32     
160    48     
-32    64     
-64    -32    
64     -160   
64     -32    
64     0      
-112   -112   
304    64     
-80    -16    
-96    48     
224    0      
32     -496   
80     64     
576    416    
-496   256    
96     192    
160    -80    
400    -16    
224    80     
-192   64     
112    -96    
128    -32    
144    32     
32     16     
112    -144   
0      -80    
112    0      
128    96     
128    448    
32     64     
176    -48    
224    -80    
0      112    
16     -112   
32     80     
-288   96     
-208   336    
160    144    
128    -112   
208    -16    
-80    48     
-64    96     
-48    -96    
288    368    
-32    320    
80     176    
176    0      
32     240    
288    16     
32     -64    
-160   80     
128    112    
-48    208    
32     128    
-16    -32    
-64    -16    
16     -48    
496    224    
-96    -480   
-16    -48    
128    64     
144    -48    
-96    -48    
192    0      
96     208    
144    96     
-32    -32    
48     16     
144    32     
16     16     
176    96     
48     -96    
-96    -224   
112    -304   
32     144    
-32    480    
112    304    
-240   48     
96     256    
112    304    
96     112    
32     96     
80     -176   
144    -144   
16     304    
64     688    
528    448    
-352   -80    
-48    -496   
-16    176    
0      -272   
-144   48     
208    16     
-176   -272   
32     32     
160    -96    
96     176    
368    448    
-192   672    
608    -1200  
-16    -144   
416    -112   
-16    -544   
-208   240    
304    -32    
-112   0      
224    -400   
-144   -48    
144    272    
-80    -64    
128    112    
-112   -368   
400    -480   
16     416    
224    -80    
208    0      
128    48     
-208   -496   
144    -224   
128    -16    
-64    160    
0      96     
0      -32    
16     -176   
272    -288   
144    -32    
-272   544    
384    -608   
160    -432   
-224   272    
144    -208   
-112   240    
320    400    
-16    -16    
-32    -16    
208    -128   
16     -688   
32     240    
208    -576   
48     -112   
-1232  96     
48     160    
-16    -128   
400    336    
-272   -64    
336    -560   
160    -128   
-128   -32    
416    192    
-128   -32    
16     -64    
112    -224   
208    0      
96     -48    
192    32     
-656   -16    
160    -96    
-80    -128   
112    -384   
48     -16    
112    -224   
96     32     
0      -224   
128    64     
128    0      
256    144    
-80    -16    
-48    -80    
96     -64    
176    16     
-1312  -112   
-48    0      
160    32     
16     80     
160    368    
16     272    
112    -352   
160    -1152  
48     -256   
80     -80    
32     80     
0      -32    
-16    96     
-96    288    
336    624    
-400   320    
208    240    
-1184  -48    
112    -64    
0      -96    
128    -304   
32     -224   
224    -240   
80     64     
128    64     
-64    96     
32     -48    
144    288    
0      112    
80     -128   
-144   -64    
-80    32     
-624   -32    
32     -16    
80     96     
0      32     
-272   32     
-272   -48    
416    -144   
288    48     
-320   48     
-32    16     
-464   -352   
160    -192   
-96    -384   
-368   -304   
-48    -32    
-416   48     
-80    -112   
-288   32     
416    0      
-208   -48    
-64    -288   
-112   -32    
-160   -528   
-32    144    
-432   -272   
432    -224   
288    288    
-192   32     
-48    -128   
128    -32    
-240   64     
-304   -48    
-176   -208   
192    -96    
32     224    
320    -48    
48     -16    
-176   -160   
-160   96     
128    64     
-272   -144   
-320   -96    
-224   160    
112    192    
464    112    
-448   -48    
48     -64    
112    48     
-16    -176   
-32    -16    
-64    -192   
-16    96     
128    0      
192    32     
-496   96     
-48    48     
-112   -16    
176    32     
176    176    
-272   80     
-352   -144   
288    -48    
-1792  16     
208    -144   
0      96     
-160   -144   
-16    16     
-1120  -112   
-1072  0      
-160   16     
48     -96    
16     32     
192    96     
-176   112    
320    432    
-112   128    
32     -160   
-128   32     
-560   -80    
80     80     
-320   -16    
128    64     
-96    64     
-688   -176   
32     -128   
-416   176    
80     320    
80     -160   
192    -96    
320    32     
48     -144   
-48    -128   
0      -16    
-48    -144   
80     416    
-256   -32    
-432   -320   
-48    -128   
-272   -32    
64     32     
-112   176    
112    208    
160    96     
-240   -224   
528    112    
0      -144   
-208   -80    
-48    400    
-288   -512   
160    512    
-96    0      
64     -304   
192    -48    
-48    32     
-256   16     
-16    128    
-432   -368   
256    -240   
-128   560    
-432   -544   
336    -176   
-80    208    
-112   -64    
112    560    
0      -464   
96     384    
-160   -16    
-144   -224   
-208   -32    
160    176    
-192   192    
-32    192    
160    176    
-128   32     
-544   192    
192    -208   
-240   -32    
352    96     
-16    192    
80     80     
192    64     
-160   144    
-80    -16    
-144   -16    
176    240    
-192   448    
96     176    
0      80     
-464   -208   
-400   -336   
0      64     
-512   -64    
128    -96    
160    -128   
32     64     
64     80     
32     16     
16     -48    
112    112    
80     192    
208    128    
-64    80     
96     0      
-16    0      
-192   16     
-160   112    
-400   -64    
-128   48     
-144   32     
0      80     
-32    64     
0      0      
0      112    
-48    128    
64     64     
16     -80    
-16    32     
64     0      
-32    32     
-128   0      
112    288    
48     -96    
240    16     
0      176    
-272   -80    
144    -48    
144    16     
-80    192    
-384   -80    
176    -128   
-208   64     
224    64     
32     -16    
-128   -64    
-80    -448   
256    96     
-784   0      
0      -160   
32     -32    
32     -112   
48     80     
80     192    
-96    240    
144    -16    
288    -96    
48     96     
256    32     
-208   -16    
-32    -32    
-240   -224   
-64    -16    
-496   192    
-80    432    
32     576    
-32    128    
624    64     
-400   64     
-64    -80    
96     32     
64     80     
208    80     
48     16     
-176   -64    
144    0      
-208   16     
-416   -32    
-32    64     
80     256    
64     112    
80     160    
64     32     
-176   -400   
-160   -432   
-128   -48    
-640   16     
-128   32     
64     32     
-192   240    
272    144    
-80    16     
16     16     
160    304    
0      416    
-64    288    
160    336    
160    80     
-80    64     
-128   -80    
192    -240   
-64    -272   
256    -288   
224    -16    
-16    -48    
-80    80     
-80    -128   
32     0      
128    96     
272    240    
-144   16     
-64    0      
80     64     
-48    -128   
16     -80    
16     -144   
336    496    
-336   -272   
80     -240   
48     -96    
32     96     
-176   32     
-48    -240   
112    512    
-208   -64    
160    -192   
112    -128   
-128   432    
128    -320   
32     240    
-32    -32    
144    560    
-80    128    
-128   -64    
-272   176    
32     -464   
32     176    
416    144    
240    160    
224    -480   
-32    272    
128    128    
32     -32    
0      -32    
-32    64     
16     336    
-80    -1024  
16     688    
-128   608    
-288   -800   
224    -32    
752    848    
-304   -208   
160    -208   
-112   288    
144    -224   
48     -32    
544    368    
-128   320    
832    48     
-880   -1088  
-336   -528   
0      304    
128    0      
320    368    
336    96     
192    -48    
-112   -1344  
144    176    
-288   -80    
160    -144   
0      64     
0      48     
96     -32    
96     0      
64     80     
16     96     
48     80     
144    32     
-96    16     
32     48     
144    32     
160    -464   
112    112    
80     112    
32     32     
48     32     
160    64     
32     16     
144    48     
32     0      
432    48     
-480   -208   
128    -16    
256    48     
-112   -112   
240    112    
16     160    
80     -16    
-32    -768   
80     -16    
-32    0      
128    64     
-128   -128   
272    -16    
-96    128    
208    0      
-16    80     
144    0      
-96    32     
0      48     
96     96     
32     -16    
144    48     
0      -672   
128    32     
48     -224   
32     16     
16     -16    
144    144    
-224   -32    
96     384    
-16    128    
240    -128   
32     -48    
-16    -112   
112    80     
16     -240   
176    96     
16     -80    
32     304    
112    256    
80     160    
-96    -48    
176    48     
0      -80    
112    -16    
64     144    
208    0      
64     32     
128    128    
64     64     
128    -48    
64     -64    
-128   -304   
-48    96     
-80    64     
160    16     
96     16     
160    144    
0      96     
128    16     
32     -16    
160    -176   
-16    96     
-384   512    
160    112    
496    -240   
-272   -32    
48     -144   
512    144    
-672   -352   
-144   80     
192    0      
352    -128   
288    176    
288    -112   
480    -944   
208    112    
-48    48     
176    16     
144    64     
-96    -32    
80     32     
336    -16    
64     48     
-176   16     
-96    -176   
272    16     
176    -224   
-16    -736   
192    -64    
-176   -224   
192    112    
112    -96    
32     -64    
-32    -432   
384    0      
112    32     
-48    -32    
80     -160   
16     96     
-192   -80    
-512   -16    
256    -96    
112    -112   
-1680  -32    
304    0      
176    -16    
-96    -512   
320    -80    
224    -16    
-160   -144   
144    16     
464    160    
-32    -64    
-16    -48    
-64    -48    
224    16     
-32    32     
96     48     
-496   -32    
96     -32    
128    -16    
160    -16    
48     -64    
48     -96    
176    32     
-32    -288   
48     32     
64     48     
128    96     
160    -16    
112    224    
176    320    
-32    256    
-336   112    
128    -112   
32     80     
32     -112   
400    48     
-208   -48    
208    -80    
32     -160   
-224   80     
0      -32    
16     -208   
-128   -384   
-144   224    
-208   -176   
144    64     
-736   -528   
176    544    
-1264  -144   
-240   -448   
240    16     
16     -224   
64     80     
176    -848   
-16    224    
-240   48     
400    -160   
48     400    
64     224    
-272   240    
352    -464   
32     176    
-192   -32    
-240   -64    
-320   -144   
-224   -160   
-64    336    
192    -224   
-96    96     
384    160    
16     -1040  
64     16     
-80    -160   
144    80     
-160   352    
288    0      
-96    96     
240    176    
256    240    
32     -64    
32     -144   
-32    -128   
96     80     
32     -32    
-224   -144   
528    -1104  
-48    -96    
-192   -64    
272    48     
-192   144    
48     16     
-1056  -96    
48     -144   
-96    32     
160    -16    
-96    96     
64     -208   
80     16     
-96    -224   
-32    -48    
112    -224   
-48    -16    
-16    -64    
160    -96    
-336   -112   
224    -416   
-480   64     
144    0      
16     -32    
32     64     
256    0      
160    -64    
16     64     
112    48     
208    112    
-80    16     
112    -128   
-80    80     
-240   0      
-304   -224   
208    -80    
-16    112    
-16    64     
48     224    
128    0      
176    128    
-1184  -80    
48     0      
0      -64    
240    64     
64     32     
-464   16     
-400   -64    
-496   -144   
64     0      
-16    -16    
-160   -128   
272    -16    
-272   0      
-1152  -128   
112    112    
-160   -32    
-48    144    
-304   -16    
-80    64     
-176   48     
-304   32     
-16    64     
80     112    
-80    -32    
-48    -48    
112    144    
-272   128    
-16    96     
-96    -96    
192    160    
-64    -160   
32     -160   
64     -112   
-48    192    
-144   112    
-48    -64    
112    16     
-224   128    
-224   -80    
-224   -304   
-48    -208   
-32    -80    
16     96     
-384   -416   
-208   -304   
-352   96     
-112   96     
-128   80     
208    -64    
128    96     
-176   128    
-352   80     
-128   144    
-80    0      
-384   64     
48     48     
-848   -64    
-64    -192   
-64    -208   
-112   -128   
-320   -144   
-80    176    
-64    -32    
-16    64     
128    -144   
160    -224   
336    -256   
-336   96     
-288   288    
64     80     
-192   -32    
-480   0      
128    -208   
-752   -288   
352    208    
32     48     
-16    -16    
-208   112    
-128   -64    
128    -192   
-144   256    
-96    96     
-224   -320   
-48    112    
272    96     
96     -96    
-1024  -368   
272    -272   
-1520  608    
208    128    
224    -144   
-192   -144   
-96    256    
80     176    
96     160    
128    80     
112    -112   
-80    128    
-32    -112   
-368   -112   
32     64     
-208   -16    
288    240    
-1008  272    
80     352    
144    -64    
-48    144    
64     112    
192    160    
-272   0      
208    32     
-144   -32    
80     -416   
0      -320   
0      64     
112    48     
-208   -96    
0      144    
-784   16     
-16    -192   
48     -16    
96     176    
272    80     
288    112    
160    96     
-176   0      
-128   32     
128    80     
64     224    
-48    128    
208    32     
-208   -144   
720    448    
-864   80     
-336   -112   
400    32     
96     208    
-320   48     
176    96     
-720   80     
-288   256    
400    -240   
256    64     
-288   112    
-80    64     
96     32     
-352   -16    
208    96     
-16    16     
64     96     
80     96     
-32    32     
144    96     
128    16     
16     -16    
64     64     
64     16     
32     80     
-160   -16    
-224   -32    
48     96     
16     48     
-64    -48    
208    0      
-128   48     
-32    16     
208    96     
16     0      
-64    -160   
544    -176   
-304   192    
304    48     
-96    16     
144    64     
-192   16     
-160   -64    
208    -32    
352    -144   
-176   -240   
-16    -16    
-16    96     
-32    -112   
160    16     
224    176    
-32    32     
-304   -16    
64     48     
-64    -96    
272    -80    
-48    64     
240    96     
240    160    
-160   -32    
64     0      
176    112    
16     80     
0      32     
192    48     
272    32     
-336   -64    
0      48     
144    48     
-48    16     
32     80     
-128   32     
48     -448   
80     16     
80     32     
0      224    
64     288    
96     32     
176    112    
128    64     
-16    96     
240    192    
-144   48     
176    -32    
-32    288    
160    288    
-48    -128   
-64    -752   
80     -32    
144    16     
64     48     
128    80     
0      -32    
-16    -16    
80     80     
112    128    
192    96     
-224   -16    
80     80     
-688   -1200  
-16    -656   
-288   224    
-304   -144   
-96    128    
336    0      
-240   -64    
-256   -208   
-64    -96    
496    -448   
608    -144   
432    192    
112    16     
-240   -160   
-32    -16    
-192   -80    
64     16     
96     80     
192    64     
192    80     
-112   -144   
16     416    
-112   48     
384    -16    
416    16     
512    272    
-80    -80    
192    -480   
-160   -496   
-208   -128   
-160   304    
80     272    
-32    0      
96     -256   
256    96     
-32    -32    
-320   16     
-48    176    
-16    144    
672    448    
-256   480    
112    224    
336    -32    
192    -192   
448    -96    
-128   160    
-16    -64    
-32    -160   
-80    -176   
144    96     
96     48     
448    176    
672    -64    
-112   480    
144    -432   
-16    256    
-176   -16    
368    48     
368    240    
-16    -112   
48     208    
0      -144   
112    176    
64     64     
-16    -64    
192    32     
96     128    
160    80     
48     288    
48     -560   
-208   -192   
144    224    
-32    192    
224    -128   
256    320    
-48    -176   
-416   -144   
48     144    
112    32     
-80    -160   
-320   -560   
240    112    
208    208    
368    80     
112    -368   
32     80     
-80    96     
0      -48    
-16    368    
-48    -48    
80     32     
256    -16    
-64    32     
240    -32    
-240   32     
256    -192   
-64    144    
160    16     
-16    224    
272    240    
-32    336    
64     16     
224    0      
-64    80     
368    -416   
96     208    
288    -96    
-48    208    
224    80     
-288   112    
192    -48    
-176   32     
-80    -80    
-64    -656   
16     -16    
368    -352   
-48    160    
176    32     
336    144    
208    -208   
224    -368   
-96    -96    
64     -128   
-96    -96    
160    -176   
112    -96    
-192   144    
176    -64    
0      -800   
176    -48    
0      -208   
112    128    
-416   112    
160    32     
96     -48    
-80    -96    
272    -160   
256    -96    
-128   -48    
-32    -336   
48     -16    
160    -64    
-32    -16    
160    -384   
384    320    
-96    160    
-64    -64    
-208   -272   
-176   -32    
-688   -16    
112    -32    
80     -80    
-16    -32    
-32    -32    
272    -384   
16     -32    
16     -496   
64     144    
128    96     
96     96     
32     -96    
176    0      
-176   96     
0      176    
-416   80     
32     -64    
208    -80    
-80    -240   
176    -192   
32     -80    
32     32     
80     -1456  
-208   -144   
192    -144   
64     112    
192    -96    
-128   144    
-128   80     
32     -80    
-736   -80    
160    -128   
-336   -16    
32     16     
176    144    
-112   96     
64     64     
272    -464   
160    48     
128    80     
-64    16     
-48    -48    
32     0      
-64    -16    
128    -224   
-208   -16    
224    -128   
-48    16     
80     208    
48     48     
384    448    
-400   224    
-32    -240   
80     176    
0      176    
80     -144   
-48    -192   
304    -32    
-176   -32    
192    -32    
-656   -576   
-304   -48    
-272   528    
224    480    
-1024  144    
96     -560   
368    -80    
304    -176   
320    48     
-240   -224   
-32    -576   
16     192    
96     -48    
-128   -336   
0      -80    
96     128    
496    384    
0      -16    
-160   -80    
-1216  -160   
528    672    
-448   -400   
80     -208   
272    400    
192    -64    
-80    -96    
-368   0      
96     -336   
-272   -272   
-208   32     
-96    288    
-144   240    
-224   48     
256    -32    
-480   224    
272    224    
208    0      
-272   -304   
288    160    
-624   32     
-192   -48    
-32    112    
208    112    
32     192    
64     160    
-208   -48    
-64    -128   
-192   -16    
160    0      
224    -16    
-1600  -112   
0      32     
-208   -112   
-672   0      
-16    0      
-112   80     
-64    0      
-1056  0      
-288   64     
304    176    
-368   -112   
224    80     
-32    16     
-544   0      
144    64     
176    384    
-432   144    
256    -48    
-256   -128   
336    304    
16     352    
-448   -16    
-496   -48    
-64    32     
-1616  112    
240    32     
160    48     
-464   -80    
96     -48    
16     0      
-64    -16    
-64    64     
-80    48     
-48    -16    
192    208    
0      96     
16     80     
-96    -64    
-16    -16    
-368   -208   
416    0      
-480   32     
-176   -16    
-160   -448   
336    -96    
-480   192    
224    16     
-128   32     
64     80     
16     -32    
176    64     
32     32     
-96    16     
272    48     
-48    -16    
-304   -192   
-1536  80     
160    48     
32     -64    
64     96     
-32    -80    
-96    -80    
-176   128    
-176   16     
192    -48    
-304   -160   
224    112    
-272   16     
256    -16    
-528   -176   
160    80     
-48    16     
96     112    
80     -16    
96     32     
-224   -208   
-64    -48    
-128   80     
-112   112    
64     32     
-96    -48    
16     80     
-400   -128   
112    16     
-112   -96    
0      32     
-400   144    
128    16     
-832   0      
0      -16    
-160   64     
112    64     
16     16     
48     0      
-176   -128   
-64    -64    
0      64     
80     0      
176    32     
-176   -80    
112    48     
-64    80     
96     0      
-800   -32    
-80    -192   
48     -48    
96     -48    
64     -144   
-80    -240   
-128   176    
48     160    
208    -80    
-80    64     
-48    -16    
48     192    
-80    112    
-384   -96    
112    -64    
48     192    
-48    160    
0      64     
-64    -96    
0      96     
-48    160    
-80    48     
112    16     
0      176    
-144   288    
144    336    
-576   -496   
32     -80    
-16    336    
176    -224   
96     160    
128    -128   
80     112    
112    80     
-128   0      
-304   -400   
336    480    
128    160    
368    -240   
32     320    
128    -64    
-96    -16    
272    272    
32     112    
-528   -240   
-256   -32    
-480   0      
-192   144    
16     64     
80     0      
336    -32    
368    32     
0      -80    
128    112    
-160   128    
-128   48     
-240   -128   
304    64     
-112   -416   
-16    -992   
-176   608    
0      112    
-384   -384   
-208   160    
-256   -96    
-64    -16    
336    128    
112    -48    
176    -16    
64     16     
32     -80    
-304   -304   
304    -16    
-176   16     
176    96     
192    304    
-352   -240   
144    336    
-144   480    
144    -80    
64     16     
208    16     
144    -112   
-32    160    
208    -48    
64     256    
160    432    
-128   480    
176    224    
112    -432   
320    336    
-208   16     
-144   -80    
32     64     
-48    160    
32     240    
96     144    
32     64     
176    32     
16     48     
176    -80    
-96    0      
16     -240   
80     384    
256    464    
-128   448    
144    480    
64     224    
48     -32    
96     -16    
288    208    
-128   432    
224    80     
-176   -144   
160    -64    
112    -112   
64     32     
-96    -288   
32     112    
-16    80     
160    128    
96     -144   
112    -48    
192    -64    
16     -192   
272    80     
160    16     
160    192    
-144   192    
16     96     
224    96     
-144   80     
-32    -144   
16     -32    
208    -320   
336    -16    
288    -16    
112    -16    
432    112    
336    432    
-208   256    
368    160    
-176   128    
-64    96     
32     -32    
80     -176   
80     32     
-128   -32    
288    64     
48     -192   
-96    -80    
256    -288   
-112   128    
-112   176    
480    176    
-144   0      
208    32     
-192   -32    
192    48     
-112   -112   
208    64     
-64    240    
32     -64    
128    -112   
176    -640   
-32    -96    
-112   -48    
64     80     
288    -80    
-80    272    
48     112    
176    256    
80     96     
336    192    
144    352    
144    -112   
64     -32    
0      -16    
128    0      
64     -176   
-32    -192   
-96    0      
224    -16    
208    -80    
96     -32    
-16    -48    
16     48     
-144   -32    
144    48     
256    48     
-128   48     
0      -32    
80     16     
64     -16    
16     -304   
96     64     
-32    -128   
112    32     
-16    -64    
48     0      
16     80     
48     384    
64     128    
32     -208   
288    -224   
80     -80    
-144   544    
64     16     
208    16     
-16    -112   
32     48     
160    -304   
-80    208    
80     176    
160    -144   
112    128    
64     192    
64     256    
-48    -64    
96     224    
0      112    
208    560    
144    -16    
-48    -208   
32     -208   
-80    240    
192    272    
128    160    
32     -144   
64     80     
32     48     
80     -672   
0      -1296  
-112   -144   
-32    -304   
288    288    
32     1184   
64     -624   
208    96     
-16    -96    
160    176    
-48    -96    
176    -32    
-256   -32    
-336   -752   
144    704    
-1520  16     
256    -464   
272    -80    
48     -512   
-48    64     
-144   -96    
48     -176   
128    80     
16     -240   
-80    -416   
-16    16     
48     -64    
128    240    
-80    -96    
96     -80    
-16    -128   
160    -368   
272    -256   
400    -272   
304    -16    
128    -128   
80     48     
-288   224    
80     0      
0      -80    
-128   -96    
208    -48    
304    80     
48     -128   
32     -192   
48     64     
176    16     
224    -64    
320    -80    
-208   -48    
-224   -352   
96     -48    
64     -624   
192    -48    
64     -144   
80     0      
208    -64    
160    288    
-304   -16    
112    16     
48     48     
304    -48    
-704   -144   
80     80     
48     16     
160    -64    
80     -64    
208    -112   
-112   96     
144    -160   
-128   48     
112    -16    
-96    -48    
128    -48    
32     176    
-16    32     
-48    -96    
-176   -32    
-96    -16    
-48    -112   
384    -400   
0      64     
448    -112   
-32    -64    
32     -320   
192    128    
128    -32    
16     0      
-384   -80    
592    224    
-576   -32    
448    -16    
-208   48     
-112   -256   
-848   -80    
48     32     
0      -32    
288    -176   
16     64     
-240   -288   
-160   -96    
128    48     
-112   0      
80     0      
-160   64     
64     48     
112    16     
-304   -48    
-160   -208   
240    64     
112    -80    
160    64     
288    -48    
-128   96     
80     -192   
-224   80     
48     32     
208    64     
96     144    
112    -192   
-240   32     
48     -16    
-320   -16    
144    -32    
-80    -96    
48     -16    
64     48     
112    -80    
336    176    
-272   -80    
272    -80    
-16    32     
192    0      
-48    -80    
-16    32     
-544   -48    
0      16     
-80    -64    
240    48     
80     96     
-208   -176   
144    -16    
192    128    
208    144    
48     -48    
-48    48     
224    32     
-80    32     
-240   -144   
224    16     
-80    48     
144    32     
-48    -144   
144    -80    
-208   64     
-48    -64    
160    96     
-848   -32    
-32    144    
-80    80     
-224   192    
-192   -240   
-976   -128   
64     -128   
96     -48    
16     144    
-112   -160   
-16    32     
128    112    
-176   112    
-32    -192   
-176   -160   
16     48     
48     112    
0      -48    
-656   64     
-144   -128   
-96    48     
-112   0      
-144   -144   
-96    48     
-3040  -48    
-256   -96    
528    -224   
48     288    
112    0      
-96    -288   
-256   -112   
352    512    
-160   -224   
-144   -288   
-112   160    
-96    -32    
-32    160    
-64    96     
-288   -432   
-400   304    
-16    -160   
128    -96    
48     144    
-192   176    
112    432    
-224   -288   
-16    368    
32     -64    
16     -16    
-48    96     
-144   -112   
-32    0      
0      0      
0      64     
0      80     
-160   -96    
-1328  496    
-48    -32    
-64    -592   
-32    -64    
-32    320    
240    48     
-192   -128   
-176   32     
-208   -112   
0      112    
-32    -96    
-240   400    
128    144    
-448   160    
-384   -176   
-1648  -624   
-32    32     
544    32     
-16    144    
-432   -160   
-416   32     
-48    80     
64     32     
240    96     
-208   0      
-48    80     
80     96     
-208   -80    
-192   -144   
32     -80    
-480   -16    
320    -96    
-112   -96    
16     -80    
32     -48    
-352   -240   
-48    96     
-192   0      
32     80     
0      48     
160    32     
-368   16     
-32    0      
-400   -160   
112    -48    
-80    -48    
176    -96    
-544   0      
-128   64     
0      304    
0      64     
-16    -32    
0      16     
144    32     
-144   112    
32     -64    
-48    0      
-16    32     
-48    -160   
-192   -240   
-224   -512   
144    128    
128    32     
112    208    
80     -32    
-32    208    
224    384    
-128   -224   
208    -304   
48     -112   
-48    128    
-128   352    
272    336    
-80    288    
80     336    
0      -368   
-144   -224   
64     0      
-160   -96    
336    16     
0      -16    
496    448    
-352   240    
96     304    
32     240    
-64    496    
-48    96     
-16    -288   
16     -144   
-48    64     
80     16     
-32    32     
-144   272    
672    560    
-416   224    
-128   -64    
208    -128   
-80    -80    
-96    176    
-16    48     
256    80     
-224   -64    
96     144    
-144   240    
48     256    
80     -160   
32     144    
256    0      
224    368    
-256   144    
176    32     
-112   176    
144    32     
-64    -112   
64     -128   
80     -64    
32     0      
-112   48     
112    -176   
64     256    
80     112    
-16    80     
0      -96    
-112   -272   
32     -80    
-64    720    
512    352    
192    16     
160    64     
-160   -112   
208    -224   
-32    80     
480    256    
-320   256    
-208   224    
-48    224    
48     400    
80     -64    
64     96     
64     -48    
0      64     
96     -48    
-176   -16    
80     -112   
-48    0      
144    -48    
-160   -16    
192    96     
-128   -128   
-64    192    
80     32     
144    96     
96     -112   
-144   384    
112    112    
64     384    
320    144    
112    -352   
-16    352    
256    304    
-16    176    
-96    -64    
96     384    
64     -16    
16     -128   
32     256    
48     32     
176    -16    
224    128    
-48    -64    
-16    128    
144    -112   
-16    80     
-144   -384   
-208   528    
208    -96    
48     32     
80     -336   
240    144    
112    0      
128    -64    
0      80     
-64    64     
-32    32     
-112   64     
64     64     
160    -32    
-64    64     
32     144    
400    496    
400    96     
144    -32    
160    64     
16     80     
48     -160   
240    160    
-80    224    
-240   400    
368    608    
-560   176    
32     -176   
176    48     
-128   16     
96     64     
384    -16    
-368   -64    
240    32     
304    112    
-656   -144   
32     -32    
-288   144    
-48    -256   
288    128    
-192   96     
-144   112    
256    -496   
352    -96    
80     64     
64     96     
320    -16    
160    32     
-256   0      
112    -48    
-80    64     
80     -32    
-192   144    
-96    -304   
304    64     
720    176    
-336   -32    
-368   -208   
496    -32    
-32    80     
192    128    
288    16     
16     -112   
-80    48     
80     32     
144    64     
-176   -144   
64     48     
224    -672   
384    112    
64     -384   
-256   -32    
96     0      
112    64     
144    96     
304    48     
320    272    
-400   -16    
-16    80     
96     -16    
32     -16    
208    -176   
16     48     
96     -112   
-112   -128   
272    -32    
-48    64     
192    16     
32     32     
-32    32     
48     16     
-64    -176   
176    -16    
-96    160    
352    -352   
-16    208    
-304   -544   
352    144    
-64    16     
208    -96    
144    -672   
256    192    
-144   -80    
384    -32    
-304   16     
416    -32    
320    0      
224    -16    
-128   144    
208    -16    
-160   -32    
80     -144   
192    112    
-64    -112   
720    32     
-96    -96    
-32    -1632  
336    112    
-208   -224   
-208   -224   
-192   -64    
208    -48    
-112   0      
-352   -304   
320    16     
48     48     
0      -32    
416    64     
176    -64    
-32    128    
240    16     
-112   -176   
144    64     
0      64     
64     -368   
-624   -80    
96     -96    
48     -64    
64     32     
32     0      
368    -128   
-208   -160   
16     -336   
32     32     
288    208    
-176   16     
80     -256   
-144   48     
176    -352   
144    -192   
-288   -64    
32     -80    
272    0      
-128   160    
160    -272   
-16    48     
144    16     
96     -16    
-32    80     
416    32     
-32    32     
0      -112   
-96    128    
-176   -32    
512    -32    
-528   1280   
160    -928   
144    -16    
-32    176    
256    -224   
-16    -192   
208    -112   
16     -256   
352    112    
240    0      
-64    96     
-64    -128   
-64    96     
256    -544   
-32    256    
-208   288    
32     128    
-1296  816    
144    32     
-176   -384   
176    -160   
-192   128    
176    -96    
16     160    
0      -64    
-160   112    
144    32     
128    96     
16     32     
160    -192   
-128   -464   
32     -64    
-48    176    
176    96     
-944   128    
-32    128    
160    80     
80     -176   
48     48     
48     -608   
48     96     
144    -288   
112    -80    
-160   -96    
304    16     
-192   48     
64     16     
-256   272    
-192   496    
-64    80     
-80    -80    
64     -32    
224    -288   
112    64     
192    -544   
96     144    
-144   -160   
-48    128    
-160   224    
-80    -208   
-400   -192   
-96    -176   
-272   16     
-48    -208   
-608   -64    
176    -48    
80     32     
224    -320   
-304   -208   
400    -304   
176    32     
-448   -80    
64     16     
-192   0      
48     0      
176    -48    
-176   -288   
352    -368   
416    224    
-1376  80     
224    -96    
32     48     
-80    16     
192    256    
-128   -304   
176    -80    
-16    -32    
80     -32    
176    144    
656    112    
-288   64     
48     -112   
96     224    
176    128    
256    240    
320    64     
112    224    
-288   -112   
-96    -144   
-32    128    
-768   64     
-112   64     
-1360  32     
-144   -32    
-528   144    
80     32     
-128   -208   
0      -16    
-560   96     
128    64     
-432   112    
0      0      
-272   32     
208    80     
16     304    
48     -48    
-96    -272   
-80    112    
-16    -416   
-624   144    
48     -112   
-128   240    
160    48     
-592   -160   
96     -256   
-128   -176   
32     528    
112    -64    
-80    48     
-16    48     
48     176    
-320   208    
-432   -96    
256    -272   
0      -96    
48     -208   
-1264  -192   
-192   -80    
-112   -640   
432    16     
176    -272   
112    288    
96     -112   
-192   32     
64     128    
-480   -128   
160    0      
-16    -112   
-160   -112   
-128   64     
16     224    
-352   32     
32     64     
368    336    
-320   528    
-16    -112   
-240   -160   
-96    -48    
32     -96    
16     80     
0      -272   
-320   -320   
32     0      
-416   512    
128    224    
-240   16     
48     -112   
80     160    
-48    -240   
176    -432   
80     192    
-384   -256   
-16    0      
-160   -160   
288    -256   
-352   -224   
224    112    
-336   576    
80     96     
160    -272   
-224   -624   
-240   -640   
-64    80     
-1296  432    
176    384    
144    -576   
-304   -592   
192    272    
-528   304    
112    -800   
448    -128   
-224   736    
208    -112   
-240   160    
-224   -496   
96     128    
-144   304    
64     -32    
-608   64     
-176   -48    
144    48     
-48    144    
-16    16     
32     32     
-192   -224   
272    304    
-32    144    
112    -176   
112    144    
-272   -80    
208    256    
-432   -224   
96     208    
-96    368    
128    160    
48     -176   
-32    112    
240    320    
-80    -192   
64     -144   
0      176    
-112   48     
-64    -16    
0      -16    
16     0      
144    80     
-80    32     
192    48     
-144   -208   
-80    0      
48     48     
64     64     
-128   48     
48     64     
192    0      
-144   -208   
-320   -416   
-96    -80    
80     336    
-256   0      
176    144    
-64    128    
32     96     
-64    -128   
160    -96    
80     16     
48     48     
48     0      
240    -16    
240    128    
32     32     
96     96     
-192   0      
-160   48     
32     -80    
128    32     
-448   -32    
176    64     
-32    -112   
288    -32    
48     32     
224    192    
144    -64    
288    -64    
48     32     
0      112    
-112   -16    
32     48     
-160   -48    
192    -112   
288    176    
-256   16     
320    -64    
112    16     
-224   80     
128    80     
-384   160    
-272   128    
-144   64     
-256   32     
304    0      
144    32     
384    48     
-16    112    
-720   -128   
256    16     
-176   96     
64     64     
256    48     
-64    0      
64     80     
-96    -16    
144    112    
208    16     
160    48     
0      80     
-240   64     
32     48     
-96    16     
192    -80    
208    80     
-16    112    
128    -96    
16     32     
-80    144    
-224   96     
-96    128    
48     80     
224    144    
-288   -96    
160    16     
368    224    
-256   0      
144    0      
-16    -16    
112    48     
144    64     
-48    -480   
128    -32    
176    144    
80     96     
144    48     
16     64     
-48    0      
96     64     
-448   -64    
208    16     
-96    16     
112    64     
-96    0      
128    -416   
112    32     
304    -848   
16     128    
64     -128   
144    -48    
-288   -240   
64     -144   
0      144    
64     80     
240    64     
-96    80     
128    128    
-128   48     
-144   -320   
32     -464   
-288   -32    
-64    320    
-144   -80    
-16    -416   
-240   -32    
64     -176   
128    272    
-16    464    
320    32     
240    48     
16     -32    
-16    0      
208    16     
176    128    
16     0      
-16    96     
16     -336   
32     -128   
160    48     
64     96     
112    64     
32     80     
320    144    
32     -144   
-48    160    
-48    96     
64     -16    
-64    -32    
256    -688   
224    640    
-128   -48    
288    144    
160    48     
-96    -368   
16     176    
-240   -352   
224    -16    
32     -16    
208    752    
-256   -304   
-96    -240   
144    -256   
352    -32    
320    720    
-160   -112   
368    368    
-192   -64    
-16    -144   
-16    32     
64     -32    
32     -1088  
48     48     
-48    32     
336    112    
-128   -16    
240    16     
0      -32    
16     -160   
80     64     
160    -192   
176    96     
16     -16    
96     96     
32     -320   
0      -48    
96     80     
0      48     
-32    32     
144    64     
336    96     
-208   144    
96     128    
16     -96    
32     32     
0      -128   
16     112    
32     -16    
96     48     
160    -256   
144    -48    
-64    -128   
80     48     
192    96     
48     32     
-48    48     
-16    -128   
112    48     
-32    0      
128    48     
0      32     
0      -80    
224    96     
-176   64     
128    -16    
16     64     
176    16     
112    -320   
80     -48    
240    -416   
128    208    
-80    64     
-48    -48    
240    -144   
112    -384   
144    -64    
112    -160   
80     -96    
176    160    
-80    0      
160    -224   
112    -16    
400    -256   
288    0      
96     -288   
-128   64     
-1200  -80    
0      -64    
-48    -16    
240    -96    
-80    48     
48     -384   
208    -128   
256    64     
448    160    
-112   -112   
48     160    
80     32     
176    352    
-80    256    
528    176    
-1072  176    
0      -128   
64     -96    
0      -176   
-176   0      
320    -192   
-16    -48    
-144   -976   
128    -144   
208    -32    
128    -16    
320    -192   
-192   -16    
-480   0      
-48    -336   
-160   -336   
48     -352   
176    -176   
256    -128   
240    48     
-48    -160   
-112   -16    
128    -784   
-208   -16    
80     -32    
16     -176   
96     -288   
64     -224   
-448   -416   
112    -32    
-80    -32    
64     64     
-352   16     
32     80     
96     -128   
112    -160   
128    368    
192    64     
-16    48     
-144   -320   
416    144    
-144   -80    
80     -176   
-16    -96    
240    -240   
112    -192   
96     528    
-256   1648   
-752   160    
-192   -352   
208    0      
240    480    
-160   -784   
224    -944   
256    -880   
-80    1440   
240    -144   
0      -448   
-304   224    
256    -416   
-144   432    
-128   -112   
-816   -272   
16     160    
-480   400    
160    -48    
-192   -160   
352    288    
208    0      
272    -608   
64     576    
-80    -624   
432    -224   
-160   592    
144    -16    
-368   80     
-336   1280   
-80    -576   
128    -304   
-144   304    
32     -256   
176    -80    
256    -384   
-112   672    
64     -336   
144    -384   
-432   -160   
192    160    
-400   -128   
160    -16    
-128   -192   
80     384    
96     -304   
-16    -80    
-64    112    
16     -176   
128    96     
64     48     
-304   -16    
0      -32    
16     368    
16     112    
112    -96    
-352   176    
272    80     
-176   48     
64     0      
-224   -48    
208    -80    
-400   16     
240    16     
32     128    
-384   0      
-32    32     
-224   -128   
-608   -96    
-112   -16    
-368   -144   
48     16     
80     112    
-64    16     
176    48     
-288   48     
-208   -16    
-16    32     
-48    -16    
80     16     
-528   -592   
-544   -256   
0      176    
48     48     
-256   48     
-32    -176   
-176   64     
-624   -128   
-96    -32    
32     -112   
96     0      
-192   -320   
176    160    
-144   -208   
-96    -160   
-16    -16    
-192   16     
-48    80     
32     32     
-48    -48    
-192   -144   
-80    32     
-1104  96     
80     0      
-512   112    
-80    48     
-192   -16    
144    -16    
32     -96    
-160   -288   
192    0      
-32    144    
16     16     
16     208    
-240   80     
16     -16    
144    32     
-80    0      
-128   -80    
-480   -144   
80     64     
-176   -96    
208    80     
-176   32     
-144   112    
-144   128    
80     64     
0      48     
-16    48     
576    352    
-896   48     
64     -80    
-336   -288   
768    -272   
-96    -16    
256    -96    
464    -16    
-112   112    
-80    -112   
-32    48     
-32    -32    
32     48     
48     0      
-240   -208   
272    -208   
160    64     
160    16     
-80    -64    
-32    32     
-64    272    
-656   -208   
-960   -272   
480    160    
288    272    
256    288    
-64    -64    
-528   -112   
64     48     
96     128    
-448   -32    
-288   -32    
-176   64     
240    128    
160    -64    
112    48     
-64    80     
-576   -16    
-64    -16    
336    -16    
-48    -32    
208    -64    
240    48     
-80    64     
32     -48    
-80    128    
-432   48     
144    0      
-480   -112   
256    64     
-224   -48    
32     32     
-240   16     
-224   16     
16     16     
-32    0      
16     16     
16     48     
-48    48     
-32    16     
48     32     
0      16     
48     16     
-128   16     
256    192    
-400   112    
176    96     
-624   -64    
80     16     
144    64     
16     64     
-64    64     
-96    0      
80     64     
-112   16     
160    192    
-272   144    
208    64     
-96    96     
192    176    
32     96     
240    352    
208    336    
-432   160    
80     -208   
80     -176   
16     96     
-32    288    
-176   -192   
-144   -16    
-112   336    
-16    -32    
32     -64    
144    -16    
240    160    
-96    -80    
-64    224    
-592   -1232  
304    -1040  
-608   832    
-544   272    
464    -256   
96     352    
896    368    
-528   16     
192    224    
-160   -368   
-128   304    
-48    -80    
-32    -656   
-496   240    
224    32     
144    112    
-16    -32    
128    -528   
80     -64    
-48    0      
176    64     
16     176    
400    160    
-192   272    
-176   64     
-112   112    
0      304    
336    256    
592    368    
-272   448    
-48    176    
48     0      
160    272    
96     -48    
32     16     
-144   -16    
-64    -32    
-16    160    
160    160    
80     -48    
272    48     
-144   -16    
-112   -16    
0      -16    
-48    -16    
80     48     
96     48     
16     32     
-32    -32    
80     64     
-112   -16    
-48    128    
-16    -80    
0      -32    
-144   -192   
-96    -80    
-144   144    
-16    -144   
272    32     
16     112    
144    112    
160    192    
-16    96     
128    16     
224    144    
144    80     
112    48     
-96    80     
112    0      
32     0      
144    112    
-16    80     
96     32     
-32    80     
48     176    
-48    144    
64     -32    
208    -240   
160    16     
144    0      
0      0      
32     128    
-128   176    
176    160    
-80    -16    
112    -208   
128    -128   
-32    32     
16     80     
-96    -736   
16     48     
16     48     
384    256    
-288   288    
-16    -112   
-32    32     
-112   -272   
96     -192   
-96    160    
-112   16     
-320   -16    
112    160    
288    -16    
-48    240    
-160   -176   
32     -144   
352    -144   
528    16     
352    -32    
304    32     
-272   -112   
224    -144   
16     -96    
304    64     
256    96     
112    48     
-240   32     
96     -32    
-64    80     
176    32     
96     -80    
96     -48    
256    224    
-512   176    
176    704    
304    416    
384    208    
-336   -80    
-256   -112   
-224   176    
112    16     
240    368    
-208   -656   
512    -464   
-96    -32    
336    144    
160    -96    
-176   80     
-16    0      
-16    64     
160    48     
64     -16    
112    96     
-32    176    
16     64     
-48    80     
-48    144    
48     -256   
320    192    
432    176    
176    144    
32     -272   
128    16     
-80    48     
64     240    
-128   16     
224    -16    
112    304    
112    -304   
224    -288   
192    64     
-80    112    
64     -64    
0      144    
144    32     
224    544    
-80    -176   
112    -192   
240    32     
240    48     
80     64     
240    576    
352    16     
-288   -48    
208    80     
96     -64    
96     192    
496    -48    
240    752    
224    -128   
16     -528   
272    -128   
-208   208    
-192   -480   
464    -1104  
-208   320    
64     -176   
80     -416   
-96    -32    
240    -368   
128    112    
384    64     
-64    -160   
-128   -384   
240    -160   
160    1056   
208    528    
192    -720   
-176   -160   
-160   -368   
752    656    
-640   208    
16     -304   
96     -112   
80     -96    
624    96     
-48    -304   
256    -48    
-80    -1456  
16     -64    
144    -240   
32     -80    
80     16     
80     48     
16     -48    
16     16     
-464   0      
-80    -64    
-1264  48     
208    -16    
96     -64    
-32    -32    
192    -464   
160    -240   
208    144    
-16    -208   
160    -64    
-64    32     
-48    80     
192    -16    
-16    48     
-80    16     
176    96     
-1760  16     
176    112    
368    16     
16     -192   
112    0      
80     96     
-48    -96    
272    -432   
-256   80     
-48    -208   
96     64     
192    96     
144    32     
-64    240    
208    -48    
-144   -96    
-240   -208   
-208   48     
-16    32     
-144   208    
400    176    
112    -176   
-176   -288   
-32    80     
176    96     
0      80     
-80    -16    
192    -32    
-320   -96    
16     80     
-288   112    
208    -96    
-160   64     
32     -144   
-160   96     
128    -64    
64     -16    
80     -496   
-16    16     
96     64     
96     112    
-176   -32    
160    192    
-384   -112   
160    80     
-48    80     
32     16     
-352   -64    
-32    -400   
96     -224   
96     -16    
-176   64     
48     -32    
64     -64    
0      -80    
-64    48     
-160   0      
80     -80    
64     128    
-144   -16    
-48    80     
-112   -48    
-464   -32    
-80    -560   
-80    -336   
-176   224    
-448   64     
224    -288   
160    -80    
-176   -672   
32     -96    
-240   -80    
432    -64    
-96    -32    
304    -80    
96     48     
112    -64    
208    -48    
128    96     
16     32     
32     -176   
272    48     
-224   -272   
208    -208   
16     -32    
96     208    
-176   128    
-16    -48    
368    160    
32     416    
-656   80     
144    -48    
-80    48     
48     -16    
96     -48    
-2288  -192   
112    128    
-1760  -48    
-672   -96    
64     32     
-368   96     
176    16     
-112   144    
-528   -48    
-160   -96    
-112   48     
272    48     
64     64     
-144   96     
96     112    
-304   -144   
64     64     
96     64     
-304   96     
-64    16     
0      0      
16     -144   
-160   -112   
32     16     
-1360  -32    
-128   -80    
48     -112   
-256   64     
-528   -176   
160    0      
-48    -128   
48     32     
-48    0      
-192   16     
80     64     
-48    112    
-176   -128   
-112   -208   
-112   32     
-224   -80    
160    32     
80     352    
160    -224   
-64    32     
48     240    
-96    -80    
288    272    
-208   -272   
-448   176    
160    320    
96     -224   
272    288    
-336   -48    
-64    16     
-480   112    
112    -272   
-1632  96     
0      -656   
-176   272    
224    320    
-160   -160   
112    -32    
144    144    
-208   -160   
192    -224   
-640   144    
-352   -352   
-448   -368   
64     -144   
-336   96     
384    80     
-96    48     
96     176    
-352   -16    
560    -160   
-112   16     
-48    544    
48     48     
144    -64    
-128   -48    
48     16     
64     -64    
-224   -128   
384    -112   
-240   48     
96     -96    
-576   -80    
32     80     
-336   240    
176    160    
144    -32    
128    -64    
208    144    
-464   144    
64     48     
-160   -32    
176    32     
-336   96     
176    80     
-384   16     
0      48     
-304   96     
320    64     
-16    -112   
-304   64     
-192   32     
-464   80     
-48    32     
-112   0      
176    16     
-224   -16    
144    -144   
-256   48     
48     80     
-240   -128   
160    48     
-304   -64    
16     -16    
-208   -80    
96     160    
-192   -16    
-64    128    
80     -48    
192    128    
80     16     
224    0      
-80    -48    
-160   0      
-64    -32    
16     -80    
16     80     
-160   -48    
80     64     
112    64     
112    240    
48     128    
0      176    
-16    32     
48     16     
64     48     
-176   16     
-32    0      
-160   -32    
128    224    
0      64     
128    48     
-176   48     
0      32     
-32    -16    
-64    0      
96     -192   
128    80     
256    288    
-144   192    
-160   32     
16     -32    
176    32     
-160   96     
32     32     
-112   -96    
224    80     
-224   48     
32     16     
16     16     
192    160    
-192   96     
0      128    
-144   352    
112    16     
224    -96    
128    64     
-48    -192   
-32    -128   
-288   0      
-480   -64    
-224   -272   
320    -48    
240    144    
240    96     
96     -32    
-288   -16    
-16    -48    
112    96     
16     160    
80     80     
-32    176    
-176   -32    
-64    48     
352    320    
336    240    
336    176    
-80    368    
-320   -112   
-32    -320   
-176   384    
672    928    
128    640    
-240   -432   
-208   48     
224    144    
-144   48     
-208   32     
32     -352   
224    -560   
-48    160    
320    -1824  
160    -160   
80     32     
128    80     
80     -160   
-80    32     
-144   416    
80     -80    
-112   -48    
176    256    
-464   -16    
0      -32    
400    448    
-192   64     
32     -128   
560    -224   
-32    -192   
0      -256   
256    112    
-320   64     
240    128    
304    352    
-176   0      
-32    -16    
160    112    
80     96     
112    -48    
-48    32     
32     80     
-96    208    
32     -288   
96     -96    
112    208    
320    -112   
0      -176   
176    -64    
-16    112    
48     96     
48     160    
288    48     
0      -128   
-64    -160   
128    128    
-256   32     
80     -112   
208    -48    
304    224    
144    -368   
-48    -48    
-16    -48    
-96    0      
272    -48    
256    64     
-208   -48    
192    -16    
-256   -16    
-16    -96    
240    128    
144    624    
-288   176    
-176   -432   
640    -96    
192    0      
32     112    
336    144    
720    176    
-192   176    
-336   224    
-240   -144   
-112   -16    
704    272    
-224   32     
-192   -32    
160    -48    
-32    64     
16     0      
144    128    
176    -192   
-16    96     
112    -272   
-16    0      
64     -208   
-48    -64    
-48    32     
-80    16     
160    16     
96     -32    
384    -32    
-112   -64    
192    144    
96     -160   
160    -48    
80     32     
80     80     
32     -368   
-32    16     
-112   80     
96     400    
256    176    
48     16     
-48    -32    
-32    48     
96     96     
96     -32    
-32    0      
16     224    
176    80     
160    -256   
112    96     
96     -64    
224    64     
-32    32     
-32    16     
176    96     
48     64     
-48    -16    
96     -224   
0      112    
80     32     
224    80     
48     -96    
144    128    
-80    -240   
48     32     
48     -80    
16     64     
0      0      
192    -16    
160    384    
256    64     
112    -160   
0      -64    
144    112    
192    64     
-96    16     
48     -128   
16     -16    
176    -176   
112    0      
80     -32    
80     -16    
-128   -64    
112    -320   
96     144    
-528   -16    
0      -368   
240    -240   
144    -496   
208    48     
80     16     
0      0      
0      176    
144    32     
128    -80    
-48    -96    
48     -160   
32     144    
80     -224   
-32    48     
-80    80     
-320   -320   
496    -432   
48     -752   
272    -432   
160    -800   
-16    -32    
-64    -752   
-352   -592   
-448   -368   
-32    528    
464    976    
-768   -480   
-240   -944   
-144   112    
-512   416    
-80    176    
16     -272   
272    -96    
0      160    
0      -16    
768    688    
-208   144    
32     -640   
288    -320   
16     0      
128    144    
-16    -144   
-32    -288   
32     -144   
-304   -16    
-48    64     
240    -64    
64     -80    
352    80     
272    -144   
-48    -112   
-128   -432   
-48    368    
176    -64    
592    -16    
-320   -400   
-272   -64    
-176   256    
1008   240    
-368   -240   
-160   -400   
0      128    
304    -32    
240    16     
672    160    
-64    -288   
128    -48    
80     80     
112    -96    
-48    32     
-16    112    
112    -16    
-80    16     
128    32     
32     48     
48     -288   
-1008  432    
176    -400   
-432   -16    
0      0      
128    -48    
96     -48    
64     176    
160    -288   
96     -336   
-112   208    
112    -320   
176    128    
224    208    
48     -160   
288    272    
-688   -336   
16     -368   
48     -128   
160    400    
304    48     
304    -352   
-224   384    
80     -208   
-176   144    
384    0      
-96    -160   
-80    -16    
368    48     
-816   0      
304    -80    
-16    144    
176    64     
-80    -16    
192    -128   
176    240    
-416   -224   
-160   -224   
336    -144   
352    240    
-16    144    
272    64     
-848   0      
-160   0      
544    208    
-336   48     
160    224    
-96    96     
-112   -32    
96     -64    
80     -112   
96     32     
64     32     
48     96     
0      0      
-80    -432   
112    -80    
-288   160    
256    144    
16     -32    
480    240    
-480   288    
336    -224   
-688   -48    
64     32     
64     -320   
-1008  -464   
32     64     
-784   -96    
-288   -144   
-128   112    
-288   48     
-288   224    
-1312  112    
32     -32    
192    64     
-208   656    
592    400    
-64    64     
-496   -336   
-128   -192   
-368   0      
-208   -112   
-32    -128   
304    -112   
64     384    
-224   256    
-64    -112   
-16    16     
-96    64     
-128   144    
-128   -16    
96     32     
-176   144    
-368   16     
304    96     
-224   -112   
96     64     
16     -96    
-96    0      
-64    16     
-192   -32    
-48    32     
-144   176    
-144   320    
-352   -64    
304    192    
-1072  192    
-48    0      
240    -192   
-32    32     
-96    -32    
-128   32     
0      0      
-176   176    
-48    128    
-160   240    
48     128    
-64    -32    
-80    48     
-720   0      
-112   0      
-2608  -128   
-16    176    
32     -32    
32     32     
-80    -144   
-16    16     
-64    64     
-16    160    
-144   96     
80     288    
96     208    
0      144    
-160   256    
-256   -160   
16     16     
-528   -400   
-128   -128   
-80    -352   
240    -48    
224    720    
144    464    
80     576    
-208   0      
128    -64    
-272   -192   
-128   160    
-528   96     
0      -1088  
160    160    
544    512    
-224   -272   
-160   16     
0      32     
-64    -32    
48     -64    
64     -96    
-144   -16    
-192   272    
-464   -688   
384    784    
-16    0      
32     -192   
352    304    
-336   -80    
-128   384    
-80    528    
-256   192    
-1712  -384   
96     -96    
208    272    
368    160    
160    -32    
144    96     
-624   -112   
-16    -192   
192    -64    
144    -160   
416    -208   
0      32     
336    208    
-496   160    
96     192    
-128   160    
-80    160    
144    48     
-112   -64    
64     112    
-192   -32    
224    -16    
-80    0      
-32    48     
-256   -96    
112    -48    
-192   0      
-80    0      
-80    0      
0      32     
-144   0      
288    0      
-224   64     
144    16     
96     -16    
-32    64     
96     48     
32     80     
0      -64    
-112   32     
368    288    
-416   64     
304    64     
-128   16     
64     -48    
48     80     
112    16     
-256   112    
96     32     
-16    64     
48     32     
-64    16     
-16    -80    
-128   0      
240    -96    
352    96     
32     160    
32     16     
112    80     
-272   -32    
672    320    
-656   96     
-224   -192   
416    32     
-80    80     
480    128    
208    224    
-352   -64    
-160   -16    
-432   -16    
208    -16    
32     16     
-160   64     
272    160    
-80    80     
-784   -272   
304    -80    
528    48     
-320   0      
16     64     
-272   -96    
16     -48    
224    -128   
16     176    
48     48     
32     48     
-80    -48    
-192   64     
176    144    
-32    16     
160    16     
16     80     
112    0      
-16    96     
128    32     
80     -128   
48     -64    
112    32     
80     112    
-48    32     
240    -48    
-224   -80    
-96    128    
224    128    
-80    -16    
0      -16    
256    224    
-112   32     
128    48     
64     80     
96     64     
144    80     
-128   32     
160    16     
-192   64     
112    16     
96     96     
48     -320   
64     16     
48     0      
96     0      
0      64     
144    112    
0      32     
-64    -48    
112    112    
80     96     
144    128    
160    48     
-96    -16    
-64    -144   
96     -64    
80     -64    
112    32     
224    -128   
-32    -96    
80     -112   
-32    -16    
32     208    
-112   -96    
208    16     
288    224    
-80    48     
128    0      
-16    -16    
0      -64    
96     304    
192    -128   
48     128    
-48    -544   
256    144    
144    464    
128    -176   
-32    192    
16     -48    
128    -144   
0      784    
-80    -16    
96     48     
-112   -128   
384    -176   
64     176    
64     -224   
32     48     
96     -1344  
-48    32     
-144   -16    
-16    144    
208    -272   
256    32     
16     -1168  
400    688    
-240   464    
-160   -128   
-96    32     
128    -48    
224    -128   
352    64     
112    304    
176    -656   
80     32     
160    -1104  
-32    32     
32     656    
128    -784   
128    -464   
128    592    
112    384    
-16    -160   
-48    16     
48     48     
176    -32    
80     16     
80     64     
64     -176   
176    0      
96     -176   
224    -464   
208    64     
-96    208    
0      320    
-144   -192   
-176   -96    
144    320    
176    416    
-176   -352   
96     -160   
48     -160   
-256   -224   
-64    -160   
64     80     
-16    -752   
-96    208    
48     416    
32     304    
-240   -176   
64     -208   
304    160    
-144   -320   
80     112    
384    -208   
-48    160    
96     -48    
0      -32    
96     -288   
-16    -64    
16     80     
80     -144   
-32    -16    
224    32     
160    464    
16     240    
256    208    
-16    -240   
16     144    
96     96     
80     176    
64     128    
-16    96     
96     -160   
32     -16    
0      -112   
80     96     
64     -80    
-32    -176   
16     -256   
448    -400   
-16    -592   
416    -224   
128    -240   
112    -160   
16     80     
192    -112   
64     -16    
-208   -272   
176    -512   
128    144    
208    -112   
-48    0      
528    -288   
-368   176    
-1152  -128   
112    16     
96     144    
96     -144   
32     -320   
400    -400   
-144   464    
-240   272    
16     -64    
256    -256   
144    48     
592    -288   
128    144    
320    -80    
32     -112   
48     144    
-16    32     
-16    -32    
-128   -112   
208    -16    
-32    -336   
224    64     
160    16     
0      -32    
160    -288   
0      0      
112    -32    
-112   -144   
112    -48    
32     -64    
-128   16     
64     -208   
-64    -112   
64     -224   
256    -240   
96     -16    
-64    384    
448    112    
-144   -96    
48     -96    
48     48     
-80    -64    
176    -96    
-96    128    
112    -16    
-496   -432   
320    160    
-736   528    
64     240    
240    368    
224    -160   
208    -16    
48     -448   
-48    -272   
-96    -512   
16     -32    
192    -32    
-32    -336   
-160   -32    
96     96     
-224   112    
192    -80    
176    176    
-64    -96    
-112   -48    
368    -144   
-64    -96    
176    -448   
112    -16    
400    48     
-288   432    
48     96     
64     -208   
-64    64     
208    -128   
64     176    
208    304    
-1120  160    
144    144    
-1504  32     
208    -192   
48     -16    
384    -128   
48     112    
32     -336   
-144   -288   
-112   64     
96     288    
176    336    
96     208    
-192   96     
48     112    
-384   -432   
224    -368   
-96    368    
64     48     
-128   -144   
256    -96    
-80    32     
16     496    
64     -208   
-320   64     
48     208    
-48    -272   
112    192    
-320   -80    
48     96     
16     64     
64     -128   
160    512    
-112   -240   
-96    112    
80     -160   
208    -16    
144    176    
512    464    
-496   16     
-32    -48    
-64    -432   
80     -320   
112    -80    
160    -144   
-128   -64    
272    64     
-304   32     
-304   -112   
-160   128    
-1920  -288   
272    -96    
192    32     
-464   32     
-80    96     
-1120  32     
-240   272    
-544   32     
-80    -112   
224    -48    
352    16     
-416   -32    
272    64     
-592   64     
-464   0      
-384   -64    
288    160    
-432   -160   
112    -272   
560    192    
640    496    
-480   112    
80     16     
16     64     
-64    -48    
-304   -64    
-96    -144   
96     112    
-32    176    
-64    64     
176    -160   
176    32     
-128   -16    
-160   16     
272    16     
-336   16     
-320   32     
-256   -64    
48     32     
-560   32     
-48    -32    
-272   -112   
208    0      
16     16     
-192   16     
-16    -96    
-128   0      
-16    80     
192    48     
-32    -16    
-48    -96    
64     144    
-112   -64    
16     48     
48     48     
16     32     
368    -128   
-480   -208   
-208   -80    
64     96     
-112   -96    
240    0      
112    208    
144    -48    
544    32     
-784   16     
16     -160   
96     16     
-160   96     
0      -48    
-224   -128   
-304   -32    
224    240    
-592   -16    
256    48     
-192   64     
-144   -64    
-32    -48    
-272   48     
464    400    
-544   112    
-576   -336   
304    0      
-80    160    
-800   -208   
128    -80    
-1600  -64    
688    48     
-64    48     
224    128    
-240   -48    
-368   -32    
-80    -80    
-176   64     
-80    96     
80     32     
272    -112   
-80    64     
-32    80     
-144   16     
48     64     
0      128    
-144   160    
256    -48    
-64    0      
-240   -80    
0      48     
-16    160    
160    64     
96     32     
-80    -96    
-48    48     
-256   -16    
64     64     
-80    -16    
160    48     
-160   -144   
112    192    
80     304    
-16    0      
-32    -32    
-48    48     
176    80     
32     -16    
-16    -64    
-96    -16    
0      48     
-128   -80    
16     48     
-336   -112   
448    -160   
-144   336    
0      320    
32     -16    
32     -384   
0      48     
32     352    
112    -112   
80     48     
-304   -16    
80     176    
-64    32     
-48    -48    
128    176    
-176   128    
128    16     
-160   -48    
112    -192   
64     352    
-16    -112   
-96    592    
240    -304   
48     64     
-128   224    
64     -192   
64     80     
-16    -96    
128    560    
-48    -80    
-208   -48    
176    112    
64     -240   
-240   112    
112    -912   
0      240    
0      80     
-112   -128   
-208   320    
-128   -288   
64     -224   
-192   320    
48     112    
-192   -192   
128    224    
0      -128   
192    208    
16     224    
0      -64    
-144   16     
96     48     
304    176    
-224   -240   
-32    -176   
80     -80    
0      -32    
-160   0      
240    -144   
240    32     
96     32     
80     -240   
-48    -160   
-112   -272   
-272   -288   
-288   -208   
-144   -464   
160    -352   
368    -48    
400    16     
-176   -144   
64     -256   
64     64     
-16    128    
-96    64     
128    80     
80     32     
176    80     
0      -16    
-80    -176   
240    112    
208    -16    
512    -64    
16     16     
-64    256    
-320   176    
-64    176    
144    192    
224    208    
80     192    
128    48     
-336   -144   
-240   -208   
16     144    
256    160    
-80    96     
96     -128   
96     -16    
-32    48     
128    -128   
32     -272   
48     96     
-144   160    
-48    0      
-80    -32    
160    -32    
144    320    
160    48     
96     48     
192    -16    
-64    64     
64     192    
-80    32     
0      -16    
240    -64    
-80    -48    
112    80     
-80    -224   
176    112    
-240   32     
-16    -160   
-32    -144   
224    -336   
240    208    
96     240    
32     192    
128    192    
512    688    
-432   448    
-208   368    
224    64     
-32    224    
224    48     
208    272    
208    -144   
-16    -400   
32     -80    
128    -288   
-16    368    
112    -496   
48     32     
240    -240   
96     32     
-320   -112   
-144   336    
176    272    
144    512    
192    320    
112    -192   
-16    -80    
-160   -336   
48     16     
-144   64     
0      16     
112    -96    
144    -16    
128    144    
48     32     
80     -80    
80     192    
-16    -16    
-96    -240   
432    -96    
192    -64    
64     96     
176    -32    
64     480    
320    512    
-272   320    
64     -304   
176    128    
-480   -1280  
304    64     
-176   80     
208    96     
-112   48     
128    144    
192    16     
-144   -64    
320    -96    
-336   -240   
144    -224   
-192   -352   
304    -384   
16     -288   
112    -48    
208    -96    
-32    0      
16     48     
336    192    
-96    112    
48     208    
96     -112   
96     -144   
64     -16    
64     -80    
160    -32    
16     128    
240    32     
272    -16    
16     16     
96     -160   
-192   208    
-16    240    
0      192    
16     0      
48     -304   
16     -288   
224    -176   
176    -128   
80     -160   
160    336    
-128   -512   
32     112    
144    -16    
16     0      
16     -416   
160    -1504  
-192   -320   
0      -160   
16     -240   
48     240    
320    -224   
-64    -32    
-32    -96    
208    80     
64     96     
-112   -336   
416    448    
-176   -688   
144    96     
64     80     
176    -480   
32     416    
208    -80    
224    -176   
0      -160   
112    432    
-64    64     
16     -192   
128    -32    
96     -336   
96     -80    
112    32     
128    -96    
160    -144   
32     80     
80     80     
-16    16     
-368   -32    
176    -16    
-896   672    
-400   448    
-64    -96    
448    -288   
96     -48    
128    -464   
-112   -256   
-64    -512   
32     272    
-240   -416   
272    -256   
-112   -16    
224    112    
192    16     
-208   -176   
240    -48    
176    128    
-368   -48    
-208   -64    
224    -64    
16     -32    
-48    64     
80     -448   
416    64     
144    -64    
144    48     
32     -112   
16     48     
-224   -64    
-256   -16    
-336   48     
192    -64    
416    256    
-400   -64    
48     -96    
480    16     
160    368    
-96    -144   
-96    0      
192    -272   
288    -80    
112    16     
496    96     
-160   48     
32     -112   
-672   -112   
672    -80    
-1200  -32    
-384   -128   
-144   32     
176    64     
-240   -48    
432    -512   
-48    32     
-192   176    
256    96     
0      80     
64     0      
0      -16    
160    -112   
-80    -32    
352    144    
-880   -32    
80     -16    
-880   48     
-64    -144   
-32    32     
96     -112   
112    80     
48     -544   
352    304    
-432   64     
192    -48    
-144   -16    
144    -48    
-400   0      
624    -80    
16     -80    
368    -48    
-928   -96    
336    -112   
128    -48    
96     -16    
-256   32     
240    -304   
176    -16    
-272   176    
112    144    
-336   0      
16     16     
-192   64     
144    -64    
-304   -32    
-48    -80    
496    144    
-144   -64    
-144   16     
-112   48     
-32    -272   
-160   -576   
720    464    
-352   48     
224    -80    
0      64     
-768   -192   
-272   -48    
144    -320   
-512   -160   
176    64     
-336   -112   
272    -48    
112    128    
-816   -128   
224    144    
-272   160    
-544   -192   
16     80     
-784   32     
-32    -224   
352    288    
-288   272    
48     -192   
96     32     
144    48     
-176   -80    
-592   320    
160    32     
-272   -368   
-128   96     
-96    -32    
-288   240    
-80    -80    
-160   -224   
-128   240    
-2080  48     
96     -80    
-32    -32    
-80    -128   
112    400    
-272   -80    
-128   -48    
-64    -32    
-144   16     
48     -144   
144    0      
32     64     
-144   144    
-32    0      
-64    -432   
-640   384    
208    -96    
112    320    
768    592    
-560   0      
-192   -288   
-160   -384   
112    -144   
32     -112   
64     112    
-64    304    
-128   464    
80     144    
96     160    
-96    240    
-368   0      
0      -160   
-1056  -304   
-16    -16    
-96    -64    
192    0      
-144   96     
96     208    
80     64     
32     64     
-64    0      
-144   -32    
16     -64    
-48    48     
96     80     
-16    -80    
-272   -48    
-272   -256   
48     -64    
48     -64    
432    368    
-368   288    
16     -32    
-64    16     
176    64     
-16    0      
144    48     
64     16     
32     64     
-32    0      
-144   -64    
48     -112   
-144   -96    
144    16     
-1232  -176   
-96    -176   
0      -128   
-368   112    
48     48     
160    128    
-32    64     
-48    240    
80     112    
-128   -80    
-80    -96    
112    48     
-80    112    
160    -112   
176    64     
-176   16     
-96    176    
16     -144   
224    -48    
192    48     
16     -32    
-32    -16    
-80    -32    
48     96     
-208   64     
64     160    
96     48     
-16    64     
-288   -32    
-32    -48    
-432   -16    
320    48     
-16    16     
176    -96    
32     48     
96     240    
96     112    
112    128    
-80    -112   
-368   -160   
-192   -496   
-16    -192   
304    112    
160    -112   
96     112    
-368   16     
-128   208    
-48    176    
-208   128    
48     96     
-64    192    
192    416    
32     48     
160    -112   
-320   -160   
0      -80    
-160   -64    
96     64     
-32    -176   
112    0      
128    -80    
16     112    
144    64     
-48    -16    
32     32     
128    112    
-144   256    
-48    16     
48     -112   
-256   -272   
160    0      
16     96     
-128   32     
-144   -32    
32     -64    
112    -96    
64     48     
576    384    
-240   96     
-48    208    
48     0      
368    -432   
-80    -48    
48     32     
-80    -48    
48     -96    
-32    80     
32     -80    
-384   -256   
-64    -96    
-80    32     
-128   256    
176    -80    
208    16     
112    32     
256    592    
-224   384    
208    80     
-464   -160   
16     464    
144    208    
176    64     
832    544    
-448   208    
-64    176    
-48    -304   
-112   -256   
-48    16     
-80    0      
-48    -80    
64     -64    
-64    -416   
176    -224   
-176   32     
-160   -144   
208    96     
-96    16     
-160   96     
32     80     
32     112    
304    -432   
224    352    
-32    128    
-144   -304   
96     368    
256    -128   
-32    320    
-16    240    
448    -16    
0      128    
-192   464    
-352   -448   
288    -144   
368    224    
-208   272    
48     -32    
-80    -16    
-48    288    
400    144    
-48    80     
96     48     
-240   64     
16     -48    
96     128    
-32    -48    
-128   176    
112    -208   
160    -80    
128    80     
-368   -432   
368    144    
-48    48     
208    -144   
48     256    
208    -16    
-256   -80    
-96    -112   
-64    176    
96     176    
-96    112    
240    -80    
160    -96    
-32    32     
96     48     
144    -272   
-16    80     
192    240    
0      224    
0      48     
112    48     
160    -16    
-48    -160   
16     -96    
192    192    
-64    16     
16     32     
112    64     
128    320    
64     144    
128    -112   
112    576    
80     144    
256    48     
-64    -16    
336    48     
16     -128   
-64    -64    
-16    -112   
-64    -16    
-64    32     
0      0      
112    80     
160    -32    
-16    0      
96     -304   
112    48     
-96    -384   
0      48     
176    144    
0      96     
-144   -208   
688    -128   
16     304    
16     240    
96     -80    
176    -96    
-112   -528   
288    -336   
-16    688    
-432   96     
-192   -64    
432    -112   
256    16     
-192   96     
32     32     
224    -112   
-16    -32    
-144   176    
0      32     
192    48     
-16    -96    
240    272    
-464   -16    
208    -32    
208    -144   
336    -16    
400    -16    
176    80     
-64    32     
-192   -48    
48     -112   
32     112    
256    48     
128    -128   
160    16     
224    -288   
592    400    
-688   -80    
16     -64    
224    -32    
32     64     
96     -128   
80     112    
16     224    
32     32     
64     -16    
208    64     
96     112    
128    -48    
240    112    
-16    -32    
-32    96     
80     -64    
-160   -112   
368    -16    
256    96     
128    -48    
160    80     
-96    32     
64     -704   
272    48     
80     -272   
128    -656   
64     -96    
48     -384   
176    32     
32     240    
-48    -16    
192    32     
0      -208   
352    224    
-240   48     
112    -176   
16     80     
176    -48    
-32    -32    
304    -160   
-128   -48    
368    -32    
-448   -496   
352    -432   
64     -256   
176    0      
112    512    
224    64     
96     32     
304    272    
-208   -256   
-16    -112   
640    336    
-560   432    
-384   -144   
192    -112   
192    112    
-80    128    
0      64     
16     128    
96     32     
976    416    
-80    384    
-208   -624   
64     -192   
32     16     
112    16     
48     224    
-128   -368   
-16    -352   
-96    240    
-1024  -112   
288    -160   
16     -288   
208    -16    
144    -16    
0      -48    
-160   160    
336    -1584  
-608   -64    
-48    -16    
160    368    
192    -80    
48     16     
-272   0      
336    -272   
-656   912    
-144   -544   
-176   496    
736    -400   
-192   -256   
80     384    
-64    432    
208    -720   
-32    -720   
96     368    
-16    80     
-160   192    
64     -16    
-144   -160   
336    208    
80     16     
-96    16     
-656   -32    
128    272    
288    0      
176    -272   
176    16     
48     -272   
-32    -32    
64     -192   
112    144    
-224   32     
-160   -16    
336    32     
160    112    
-192   -16    
-16    -192   
-400   -32    
64     16     
-768   160    
80     176    
112    48     
160    -128   
80     32     
272    -320   
48     -16    
-48    -112   
80     -64    
16     0      
112    -128   
0      -48    
-112   -16    
-224   32     
-16    0      
-480   -80    
208    -208   
-96    64     
32     -240   
-16    -32    
192    -96    
-16    0      
-112   32     
208    64     
-192   16     
-144   -48    
16     -64    
-48    -48    
16     -160   
176    -176   
0      96     
208    -144   
48     112    
32     -16    
-128   0      
32     16     
48     -96    
-64    32     
64     -80    
96     0      
96     80     
-128   0      
320    96     
-416   160    
-208   -80    
272    0      
-144   -96    
112    96     
-272   96     
64     112    
-304   -176   
-1520  -256   
-208   -128   
-1136  64     
-256   160    
304    -48    
-144   -64    
16     48     
-544   0      
-368   -112   
-64    32     
-704   -304   
112    0      
-224   -64    
368    256    
-128   48     
32     96     
-128   32     
0      240    
32     128    
-1312  -208   
-32    32     
0      112    
144    64     
0      -128   
16     -128   
-16    -224   
32     16     
-64    -16    
-32    -16    
-80    64     
-192   -80    
-192   -16    
-656   -96    
-80    32     
-752   64     
272    -96    
352    -16    
-32    -80    
-144   -176   
64     -112   
-128   -144   
112    0      
-32    -112   
-112   0      
-32    160    
-48    48     
-128   128    
-416   -16    
-80    0      
-176   -64    
-176   -112   
-1648  16     
96     128    
-176   -112   
80     80     
96     272    
-256   -624   
288    -80    
96     544    
-144   -128   
272    -32    
-48    80     
-96    -288   
-304   112    
-80    208    
-112   -320   
-192   128    
320    64     
-128   -32    
48     208    
-336   -128   
0      96     
-128   -288   
-192   160    
352    464    
-496   128    
352    80     
48     -512   
0      448    
80     16     
-480   -352   
-848   96     
-304   -32    
112    112    
-32    32     
-400   -416   
400    528    
272    496    
-336   96     
-96    48     
208    -160   
304    288    
-400   208    
-176   -80    
-448   -32    
-944   -752   
176    736    
256    208    
-1664  -400   
144    -16    
48     -16    
128    80     
256    -16    
64     64     
80     32     
-32    224    
112    -48    
-160   -16    
48     112    
-176   -192   
320    80     
-208   160    
288    48     
-752   -80    
96     80     
-160   112    
80     80     
144    160    
80     112    
32     128    
-224   80     
112    48     
-112   -32    
32     48     
112    48     
64     16     
-160   -80    
192    -32    
48     -32    
-80    96     
-80    -112   
16     -80    
48     32     
-32    112    
-16    64     
128    48     
-160   -48    
96     -80    
-112   0      
-208   -64    
64     144    
-384   -16    
144    -32    
-112   -16    
224    160    
-112   112    
48     80     
-64    48     
32     96     
-16    -64    
64     32     
0      32     
-64    16     
192    112    
48     160    
-96    112    
-48    64     
144    32     
48     48     
-48    112    
16     -32    
48     32     
80     112    
64     96     
80     48     
0      32     
-160   -112   
48     -48    
64     64     
-32    160    
128    64     
-32    -48    
0      16     
-112   -80    
96     -64    
-64    -48    
16     336    
16     160    
128    144    
-16    32     
-80    48     
32     320    
-336   -16    
176    144    
64     0      
192    32     
112    256    
-32    16     
320    16     
-48    16     
-32    -208   
304    -336   
368    0      
256    176    
224    16     
128    32     
-240   -64    
256    16     
-80    144    
-160   224    
-48    192    
-208   -112   
400    32     
336    128    
304    16     
112    16     
160    48     
-176   -16    
64     80     
96     48     
720    464    
-128   336    
-288   -48    
112    32     
112    -48    
320    -320   
208    80     
544    448    
-192   144    
-16    -96    
16     -64    
48     -16    
-48    64     
16     48     
0      -16    
240    80     
464    400    
-512   64     
208    -48    
128    -16    
64     -96    
304    48     
-160   32     
128    48     
0      32     
-288   -16    
368    48     
-80    -16    
256    0      
-80    64     
-368   32     
64     48     
16     -16    
64     16     
-224   0      
256    -32    
224    64     
-112   -816   
144    64     
96     32     
448    336    
-256   32     
-80    -32    
-144   32     
256    32     
0      32     
336    96     
64     -16    
16     -64    
80     16     
-128   -224   
-32    -32    
112    -784   
192    96     
48     0      
96     128    
128    384    
-64    208    
-16    -64    
-32    32     
-112   -80    
368    528    
-384   -32    
96     -352   
512    352    
-304   -32    
-32    -256   
32     -320   
272    544    
416    -704   
320    16     
256    -32    
256    176    
-352   160    
208    1088   
-224   -928   
-16    -752   
672    1216   
224    -432   
496    -320   
288    480    
208    -128   
224    224    
-144   144    
224    -464   
-144   240    
32     -128   
64     -256   
144    -16    
96     96     
-64    496    
432    -256   
-80    -400   
0      -224   
96     -560   
-80    -224   
192    32     
96     -256   
16     160    
320    -256   
80     160    
-192   -768   
80     -112   
-224   -352   
128    -96    
-96    464    
480    -112   
160    160    
-240   -304   
304    -112   
-16    -32    
128    176    
96     -224   
-96    32     
32     128    
48     144    
192    -144   
128    -112   
128    96     
64     96     
32     -112   
0      -96    
32     128    
-64    -96    
64     48     
48     -128   
-96    128    
160    -192   
64     -80    
128    -144   
-96    208    
-32    80     
112    -400   
48     -112   
96     -64    
-64    -368   
288    -192   
128    -912   
336    -80    
112    -16    
80     -32    
48     48     
32     -48    
48     0      
-96    -208   
208    48     
-160   128    
128    -208   
32     176    
-400   0      
112    48     
80     -32    
256    -112   
-32    -16    
-48    -112   
0      -96    
80     -544   
64     -176   
64     -240   
32     48     
48     -16    
16     -16    
192    -160   
16     64     
-240   16     
304    128    
-432   176    
48     -96    
64     0      
272    -656   
-64    32     
32     -352   
-32    -80    
256    -48    
-16    0      
80     -128   
128    0      
0      -80    
-32    -32    
-16    -64    
80     -32    
-624   0      
-128   -128   
112    -160   
96     -464   
224    -288   
176    -48    
-32    208    
-128   224    
-272   64     
32     -240   
-176   -80    
-256   -208   
304    176    
-400   192    
-160   160    
-960   176    
64     160    
336    64     
112    -224   
-160   -192   
-48    -192   
-48    32     
0      -432   
64     304    
224    -192   
368    -96    
-112   224    
288    288    
-144   176    
96     -32    
-304   -16    
352    -80    
-544   176    
-64    96     
-400   -176   
288    -752   
-16    -64    
192    -288   
48     -880   
16     -144   
384    -48    
0      80     
144    80     
-240   -176   
0      240    
-224   -64    
208    112    
-1040  144    
352    96     
0      -624   
160    -112   
192    128    
176    -96    
-128   320    
80     -128   
240    128    
-160   64     
224    -176   
-192   0      
256    -64    
0      96     
64     -16    
-256   96     
48     -416   
128    160    
-80    112    
208    -48    
-32    96     
48     112    
384    224    
-144   -368   
0      -192   
112    -176   
160    -16    
336    528    
-320   64     
256    -80    
-224   -16    
80     -256   
64     16     
-256   -32    
112    16     
128    64     
208    224    
144    176    
64     0      
416    -992   
-160   -992   
-208   -224   
-16    0      
-832   -496   
-48    -400   
-416   64     
-128   -144   
240    -16    
-2032  -96    
-64    -64    
-2064  -160   
-368   16     
-96    -192   
288    -160   
-48    48     
-688   -96    
-192   0      
336    192    
-160   64     
0      -32    
-112   32     
-1424  -144   
320    16     
-1072  -32    
-272   80     
128    0      
-208   32     
112    96     
-736   32     
-48    48     
-608   144    
-224   16     
432    96     
-144   64     
160    -80    
-64    48     
32     -48    
192    192    
-224   112    
-96    32     
304    64     
-224   -80    
-112   64     
-176   0      
-160   -48    
-48    48     
80     80     
-272   -48    
-96    0      
-160   -32    
64     144    
-32    -112   
96     0      
-16    -16    
-272   -48    
-16    -32    
64     -48    
16     0      
80     0      
128    64     
16     16     
-112   -16    
-592   -48    
0      48     
32     16     
160    16     
336    288    
-208   304    
-512   -64    
128    96     
64     -16    
32     -80    
-96    32     
208    192    
-112   64     
-368   -48    
176    128    
-480   48     
16     -32    
80     48     
272    208    
-320   -112   
144    -32    
-32    48     
-144   64     
-48    -16    
-112   -32    
96     96     
-288   96     
160    48     
-112   -64    
-128   -16    
0      80     
176    80     
-928   -80    
16     96     
32     48     
32     176    
144    112    
64     -32    
0      -112   
16     -96    
32     96     
80     -32    
-240   0      
-16    208    
-64    80     
-144   -32    
160    80     
-528   -16    
96     80     
-80    32     
-64    128    
48     64     
-256   -192   
128    64     
-80    -128   
-128   80     
-480   160    
-208   -256   
128    -208   
288    -176   
96     -176   
240    160    
-336   16     
112    80     
-864   48     
160    32     
48     112    
-416   32     
640    448    
-496   272    
-208   -112   
112    -16    
-80    32     
96     -16    
16     -160   
16     144    
-432   192    
-64    80     
512    368    
-96    208    
0      -96    
112    -144   
288    -16    
80     112    
352    96     
304    -144   
0      -48    
48     96     
-448   128    
-112   320    
-192   64     
-144   -48    
-48    0      
-208   48     
176    112    
32     0      
-160   -16    
32     112    
-240   -96    
-16    -224   
-80    -32    
144    32     
608    192    
-304   -304   
-96    -176   
-128   112    
64     224    
-352   64     
-112   16     
0      -48    
96     -96    
528    544    
-224   -208   
96     -272   
64     304    
144    64     
-48    -112   
192    64     
-144   512    
48     -208   
-256   48     
-64    -112   
96     80     
-176   -208   
656    464    
-192   176    
496    16     
-80    352    
-32    16     
-288   -688   
-160   544    
-112   -96    
208    240    
128    544    
64     -416   
-144   -16    
272    144    
-192   368    
208    320    
-368   -288   
144    -672   
-144   -176   
96     448    
576    336    
112    512    
128    -64    
-192   -80    
48     -208   
-288   -80    
224    128    
-64    -48    
432    96     
640    480    
-512   464    
80     -144   
48     -112   
32     16     
112    0      
192    96     
192    16     
-80    32     
-32    0      
16     32     
-32    -256   
64     -128   
32     0      
16     -1120  
16     -272   
-48    -64    
-208   48     
224    16     
80     144    
80     80     
656    336    
-480   96     
-112   -48    
-80    96     
96     -64    
-96    48     
144    0      
208    112    
-160   -432   
64     64     
80     256    
-16    64     
16     -112   
16     -16    
-48    -16    
224    96     
0      160    
320    64     
-112   -224   
176    -32    
32     -48    
-224   -160   
-48    48     
-208   -224   
224    -64    
112    192    
128    16     
144    -80    
-64    0      
64     48     
-16    -32    
80     -208   
-16    -112   
-144   -144   
-64    -208   
32     -112   
16     80     
-96    32     
80     -288   
-32    -400   
160    -1520  
112    96     
0      64     
96     192    
160    208    
0      96     
-64    -48    
176    48     
-128   -32    
-48    48     
144    -32    
128    -32    
288    -64    
80     -80    
-64    16     
0      -224   
48     64     
96     48     
16     224    
48     48     
-192   -144   
256    96     
112    -48    
-128   -384   
256    80     
-112   112    
64     -96    
48     96     
32     -176   
192    352    
96     160    
160    176    
-160   -784   
48     -128   
48     -176   
320    -32    
0      -32    
32     80     
-16    -48    
96     -192   
272    -176   
128    -112   
32     128    
-304   -192   
-16    -80    
-288   -480   
368    -576   
240    -768   
560    176    
-80    -64    
-64    80     
16     96     
-80    48     
128    -64    
144    -288   
256    592    
-64    -48    
192    64     
-144   -208   
-112   240    
-16    -128   
112    -144   
16     -96    
320    208    
-48    48     
288    -288   
368    112    
320    0      
160    112    
-240   80     
-48    -256   
-112   0      
96     -16    
464    208    
-288   -240   
-96    -496   
448    256    
352    -32    
368    -32    
-112   128    
0      -768   
-272   -224   
-464   -80    
32     192    
320    128    
-112   256    
160    0      
288    -544   
-32    -256   
144    -64    
128    -96    
16     -80    
16     48     
352    -160   
-240   192    
32     -192   
0      64     
96     32     
208    -128   
-48    -48    
192    -208   
-80    -96    
0      -1040  
304    144    
-224   64     
64     0      
64     -240   
128    80     
112    -64    
240    96     
224    0      
0      -32    
-560   0      
176    0      
-304   -128   
352    -48    
144    16     
432    -64    
-320   -288   
416    -96    
16     -96    
-16    -80    
-176   64     
-96    0      
-320   -16    
288    32     
-96    -96    
-384   -64    
384    16     
-16    96     
144    272    
224    -16    
-32    -224   
128    -32    
160    -256   
112    -32    
240    -32    
-144   48     
-176   -144   
48     0      
-144   -112   
96     -48    
-256   0      
416    -16    
-544   -16    
208    -80    
-96    0      
-16    -160   
144    -64    
0      -80    
144    208    
16     -512   
160    80     
64     -64    
-16    -48    
-32    32     
-48    0      
80     -32    
128    -16    
-688   -224   
272    -272   
128    0      
80     16     
-16    -16    
144    -176   
176    48     
64     -800   
0      80     
112    -16    
64     -32    
-64    32     
48     -32    
-112   0      
144    80     
-624   -32    
16     -48    
-592   48     
96     64     
16     0      
64     -160   
160    96     
48     -304   
144    64     
96     0      
48     64     
-192   16     
64     0      
-208   0      
128    -80    
-80    16     
208    16     
-160   192    
224    -32    
-176   0      
144    -240   
64     112    
0      -48    
208    -48    
-48    128    
144    -32    
-240   -16    
-192   -272   
-304   -64    
32     16     
-160   -96    
192    -80    
-528   32     
144    -48    
-32    32     
64     -80    
-16    256    
128    128    
208    16     
-224   80     
32     96     
-176   -80    
224    80     
-160   128    
112    48     
-16    48     
-96    -48    
-1312  -48    
128    -64    
192    144    
16     64     
16     16     
-336   -112   
-1616  -16    
-144   80     
-992   -80    
32     -16    
0      0      
80     16     
-208   -32    
336    -848   
256    48     
160    352    
-656   -272   
-32    16     
-112   208    
-320   352    
-48    -16    
-384   -368   
224    576    
48     -208   
128    128    
-480   -32    
-224   -240   
416    -192   
240    -32    
48     64     
-96    -16    
-544   -192   
-256   -272   
32     704    
496    224    
208    -288   
240    256    
16     112    
-160   192    
-464   -176   
96     -288   
272    -16    
32     144    
48     48     
-96    32     
128    -128   
-160   768    
-80    96     
-48    -128   
0      176    
-32    -112   
-288   48     
-144   128    
-16    -432   
0      128    
-80    -32    
64     96     
176    160    
-384   -64    
-288   0      
-80    176    
176    -16    
192    -16    
-96    -704   
208    576    
-192   48     
-288   -496   
-96    128    
0      160    
-96    -80    
-16    -32    
192    128    
-400   -48    
128    64     
-528   0      
32     -336   
80     -336   
-80    384    
48     -160   
-48    16     
64     -144   
-144   -672   
-160   64     
160    304    
112    320    
16     0      
-64    64     
-224   48     
-96    32     
0      112    
112    80     
352    512    
-304   320    
224    320    
-176   16     
16     16     
48     496    
-112   112    
160    304    
0      -112   
128    -208   
368    320    
-80    192    
32     112    
-400   -16    
176    176    
144    -80    
-400   -32    
448    288    
-400   224    
-48    144    
-496   -32    
112    -64    
112    32     
128    0      
-240   -112   
208    -80    
32     48     
32     -16    
-256   48     
0      32     
80     -96    
-304   -80    
192    -192   
-64    128    
-80    128    
0      96     
80     32     
192    -16    
48     -64    
-32    128    
32     0      
-144   96     
-112   -144   
224    -112   
-80    256    
192    160    
0      -32    
-192   416    
528    336    
-16    272    
-80    -352   
176    -224   
32     -16    
-80    0      
16     -112   
112    -176   
-448   96     
32     -176   
-112   -48    
96     144    
32     240    
-112   -80    
-96    16     
16     32     
96     -16    
112    -240   
-48    -192   
-16    -240   
-208   -272   
-80    -32    
-48    128    
-16    96     
32     0      
16     96     
0      0      
96     -80    
32     -32    
-144   16     
240    -176   
16     -112   
208    80     
-112   144    
-128   -48    
32     0      
64     80     
448    240    
-304   224    
-176   -32    
160    -96    
128    -192   
-48    192    
-96    144    
-64    96     
64     0      
144    0      
-16    48     
96     80     
-16    272    
48     224    
-16    -112   
64     -16    
-96    -80    
-192   -16    
-80    48     
80     16     
32     0      
144    96     
112    464    
-224   160    
144    -64    
96     32     
176    -80    
-16    -80    
64     -128   
-304   -160   
32     16     
-128   16     
160    272    
-80    112    
-16    128    
64     0      
160    320    
112    464    
-32    -80    
-80    -16    
-80    -160   
192    208    
-160   112    
-80    -96    
32     256    
192    160    
-48    0      
-16    -1200  
304    176    
-80    192    
112    -496   
-16    128    
64     -16    
-368   -144   
-16    -16    
-400   -240   
128    -208   
384    176    
224    304    
-48    64     
80     -32    
-96    16     
-224   -1600  
32     448    
336    48     
64     400    
96     512    
96     240    
-624   144    
-256   240    
-16    144    
128    0      
-208   -208   
320    160    
272    160    
-32    32     
-176   0      
-32    -864   
160    176    
-192   80     
144    -32    
144    -32    
96     96     
-96    80     
48     64     
-32    80     
-96    160    
64     64     
272    32     
288    272    
-544   -64    
144    80     
-112   -128   
0      96     
512    96     
512    384    
-512   48     
208    16     
48     -288   
-48    -48    
144    48     
144    64     
64     48     
240    128    
-96    0      
160    -128   
112    176    
256    -128   
256    176    
-144   -592   
256    160    
-144   -128   
128    48     
80     -32    
144    48     
-32    -64    
-16    16     
48     -16    
496    128    
16     64     
-32    -64    
-112   32     
-96    -224   
128    48     
144    -96    
-96    16     
192    -704   
272    128    
-208   0      
32     -16    
144    32     
-368   256    
448    288    
384    -160   
-16    -96    
144    -16    
48     0      
128    256    
-496   -112   
64     -144   
592    -128   
320    352    
-48    192    
-272   -80    
544    64     
-368   48     
48     144    
240    -48    
-112   32     
-64    -32    
144    -256   
128    192    
-32    0      
240    48     
-16    -176   
112    112    
-32    -32    
32     48     
112    -32    
32     112    
96     48     
160    -48    
80     0      
80     -48    
0      160    
144    -80    
112    96     
-32    -32    
-48    80     
288    0      
48     48     
-128   -784   
256    -80    
-64    64     
384    -128   
-96    -32    
-64    -32    
80     -784   
64     -16    
112    16     
160    64     
48     176    
224    -32    
80     0      
-16    -32    
80     96     
144    176    
16     32     
48     -96    
144    -112   
-32    -48    
-816   -96    
256    -336   
96     -192   
16     -48    
0      -96    
96     -592   
112    32     
48     64     
208    -16    
16     -80    
192    128    
-256   -112   
144    -96    
-80    -224   
352    320    
-1312  -240   
96     32     
16     96     
-96    64     
48     -144   
80     -336   
48     -96    
96     -32    
208    384    
16     -368   
80     112    
32     16     
-32    -16    
-64    32     
176    -64    
-368   32     
128    -80    
144    -64    
176    -32    
416    1184   
32     -1104  
96     176    
-128   -336   
-80    64     
112    -144   
0      224    
176    288    
-144   464    
96     112    
288    -288   
-320   -96    
96     256    
-544   -688   
0      256    
48     32     
32     -96    
208    -96    
352    -832   
352    464    
-96    -224   
32     208    
-160   160    
48     -144   
-64    80     
96     64     
-320   -80    
-208   0      
-592   -16    
-64    -32    
464    -336   
48     -928   
-144   464    
-112   192    
-112   -32    
16     -560   
-80    -176   
272    -464   
320    64     
400    -512   
96     -240   
0      224    
-80    -80    
-656   -208   
160    64     
-816   -16    
-80    -208   
-448   -272   
576    -160   
-48    208    
384    -256   
320    80     
0      -80    
176    -128   
-352   -96    
0      -208   
-368   96     
0      -48    
-576   48     
256    208    
-448   432    
208    64     
160    -64    
192    -112   
-192   112    
32     -160   
128    -16    
-272   -32    
96     80     
80     80     
48     32     
-16    -112   
80     48     
-400   -80    
96     144    
-16    112    
96     -48    
0      384    
320    -96    
-256   64     
80     -160   
80     -128   
-176   80     
288    16     
-448   -80    
320    -432   
-128   112    
208    112    
80     -304   
-144   -336   
-224   -400   
64     32     
208    96     
-1072  -224   
-32    -96    
-192   -112   
-304   288    
-64    -64    
-720   128    
192    -160   
160    -16    
-112   -368   
0      144    
-192   96     
-1360  112    
448    592    
-1600  -160   
-16    304    
-800   -240   
288    -112   
208    64     
-80    64     
-144   144    
-352   -16    
256    -128   
-848   -96    
128    32     
48     -128   
-240   0      
-496   -16    
208    128    
-256   -64    
192    48     
-80    32     
-336   16     
208    -128   
-384   48     
224    112    
-176   160    
96     96     
-176   -320   
-96    -16    
-1712  -96    
0      240    
-112   0      
272    -48    
80     112    
16     144    
-16    -288   
-48    -464   
-80    -256   
-112   -144   
144    0      
-336   -304   
32     -96    
-1072  -480   
-144   -192   
-368   192    
-288   320    
-160   -96    
-48    0      
0      -112   
16     -32    
128    -240   
-144   -192   
160    -160   
-320   -144   
64     -16    
-160   208    
32     256    
-160   -272   
-160   -80    
-336   -176   
16     0      
-80    -32    
192    144    
-176   -32    
-160   64     
-48    96     
112    -128   
160    48     
-208   64     
-64    -16    
-240   -288   
128    0      
-144   224    
144    256    
-432   16     
64     288    
-2160  -32    
16     -80    
-96    -64    
144    0      
-64    64     
-240   48     
48     384    
48     192    
-160   -64    
-128   -128   
80     -128   
-144   192    
-64    -96    
-160   64     
0      80     
-448   112    
112    112    
-32    -64    
-352   160    
-16    0      
-64    -352   
48     64     
48     64     
32     32     
128    64     
-144   -32    
-208   144    
192    384    
-352   0      
128    -96    
-160   -416   
192    -304   
0      208    
-128   32     
-128   -32    
-16    208    
-80    192    
176    336    
272    304    
128    144    
-80    80     
-48    32     
96     144    
-160   -32    
256    96     
-768   -32    
-96    -48    
16     16     
-96    48     
-112   32     
160    224    
0      96     
304    -80    
160    16     
-320   32     
80     -64    
-64    -32    
128    -112   
192    64     
320    464    
-656   16     
256    -64    
192    48     
-112   112    
-144   176    
16     48     
16     96     
400    256    
-384   -16    
-528   -144   
176    32     
-160   64     
272    272    
-464   -16    
-16    16     
336    64     
-32    -80    
208    32     
-48    80     
16     32     
-208   80     
160    32     
224    -16    
256    96     
-528   -64    
16     144    
-240   32     
208    64     
-80    -48    
-176   -144   
256    32     
-64    48     
176    96     
-64    16     
-64    16     
-208   112    
144    128    
-32    0      
32     32     
-144   -16    
112    144    
144    32     
256    16     
-240   -64    
-32    32     
128    144    
-176   64     
-48    48     
128    32     
480    544    
-256   48     
384    -160   
400    144    
176    80     
-288   -32    
-32    -32    
-16    -32    
320    160    
-208   32     
176    64     
-384   -128   
112    -16    
64     112    
-80    0      
352    208    
80     400    
-624   -48    
-240   -128   
128    128    
-224   -80    
48     -96    
192    -16    
80     112    
-64    96     
-656   -80    
160    -16    
576    112    
-80    32     
272    48     
-112   -80    
240    128    
-256   0      
-48    16     
256    48     
-256   -32    
160    -16    
-16    -80    
80     -288   
0      48     
96     128    
80     16     
32     32     
48     64     
32     64     
16     96     
144    48     
-64    -80    
112    -80    
16     144    
-16    -16    
96     32     
144    176    
-16    -32    
-32    80     
192    -176   
32     48     
144    -32    
64     80     
128    16     
112    -208   
-128   -256   
160    16     
-176   336    
176    -112   
32     64     
224    224    
224    -16    
-80    -144   
-240   -48    
336    -96    
16     48     
128    112    
240    -32    
16     80     
-96    32     
80     -128   
192    -32    
-64    -64    
-320   -80    
224    -144   
64     -64    
96     144    
-16    -288   
80     128    
128    320    
48     -64    
496    -176   
-144   384    
160    -368   
192    400    
192    288    
-80    -304   
-48    288    
208    192    
32     384    
256    0      
-288   32     
32     480    
256    144    
-48    32     
128    -176   
112    -608   
0      352    
48     -16    
272    288    
32     64     
16     64     
-32    80     
80     16     
16     -304   
0      256    
64     320    
16     48     
288    208    
96     -112   
-32    144    
0      -208   
240    176    
192    -16    
96     -160   
-96    240    
128    384    
-128   96     
48     208    
464    384    
32     336    
-16    144    
144    -304   
208    160    
336    -176   
224    48     
144    48     
128    176    
-208   -32    
32     -64    
-64    96     
-112   0      
128    -16    
240    -160   
528    352    
144    288    
0      48     
-32    -192   
16     48     
112    64     
-176   128    
160    -112   
-16    16     
144    192    
-112   -304   
16     160    
16     -384   
224    -288   
384    48     
16     -352   
96     -320   
-192   -384   
-368   -336   
16     -80    
256    -32    
352    48     
512    176    
-176   -608   
32     224    
-48    208    
-64    80     
320    -240   
160    -64    
-32    -112   
-80    -256   
192    -80    
160    16     
16     176    
-64    560    
128    192    
32     16     
-80    -64    
192    -192   
-64    48     
192    -160   
256    144    
-368   160    
96     64     
16     -96    
160    -64    
80     160    
400    32     
-96    16     
64     -1024  
-16    -16    
-48    128    
-96    160    
144    128    
80     128    
400    64     
-256   48     
-160   0      
96     -256   
-912   80     
240    -224   
176    -96    
208    -160   
-48    -432   
-272   -352   
128    -256   
32     288    
512    320    
256    800    
-528   400    
-16    -128   
272    -144   
-160   -48    
464    336    
-224   224    
-320   96     
-336   80     
592    240    
304    32     
368    16     
368    80     
-352   -144   
-448   80     
0      64     
-576   288    
480    32     
64     -304   
304    -128   
48     -96    
-528   160    
0      -176   
0      80     
208    -112   
112    208    
80     -288   
304    -80    
-192   -624   
-64    80     
80     16     
-224   96     
-224   -288   
448    -976   
-192   -224   
368    -256   
-656   -32    
-224   -368   
-560   128    
288    288    
-368   -96    
16     -128   
288    48     
336    352    
-112   240    
160    -480   
-32    -16    
176    32     
112    464    
-208   32     
384    320    
-48    160    
48     304    
-160   240    
80     112    
-1056  304    
48     96     
-32    416    
224    -64    
96     176    
-80    -432   
-48    192    
400    48     
-256   -768   
-128   192    
-16    192    
48     -64    
240    96     
48     208    
-80    -64    
-160   -16    
32     224    
64     0      
144    16     
0      -32    
-720   -96    
272    -240   
-80    752    
-224   0      
-112   32     
336    16     
-496   -208   
32     -304   
-128   160    
224    -96    
32     -16    
32     -96    
64     -160   
-2464  -144   
-304   96     
-224   -16    
-128   -16    
80     96     
-32    64     
-32    112    
144    112    
-224   64     
-128   -32    
-384   0      
80     -48    
128    -16    
-960   -320   
-144   -176   
-272   -32    
-144   80     
128    144    
-128   16     
16     16     
-1136  -304   
-96    -32    
-160   96     
48     288    
-240   256    
-256   112    
16     16     
224    -64    
-176   -208   
272    -48    
-32    -160   
464    -96    
-48    16     
304    64     
80     -16    
-432   0      
-48    -16    
-672   -64    
240    0      
16     48     
-208   16     
-368   -64    
192    48     
128    -240   
-208   -48    
-368   352    
-560   128    
32     -48    
48     -32    
-208   16     
112    48     
352    128    
-832   -64    
-416   -32    
-1008  80     
80     144    
-304   -48    
112    80     
560    272    
-384   112    
144    16     
-112   -144   
144    32     
224    32     
400    128    
224    256    
-608   -16    
-400   -160   
-80    -96    
-1296  -80    
528    64     
192    16     
64     -32    
160    -48    
128    208    
-240   0      
-240   -160   
320    0      
48     80     
192    112    
-400   -64    
-16    0      
-224   -16    
192    144    
-496   16     
144    80     
-128   -80    
16     32     
0      0      
-160   32     
224    224    
-128   0      
48     -48    
80     -16    
-112   64     
160    16     
48     -48    
0      48     
-128   -96    
512    16     
-32    16     
-256   -80    
-128   -112   
224    0      
128    352    
-96    96     
640    112    
-816   64     
-16    -32    
80     208    
-112   160    
128    -64    
-112   32     
400    320    
-752   -32    
96     -48    
-176   16     
-144   16     
1216   672    
-144   640    
-464   -16    
-96    -96    
-336   32     
-64    48     
144    -32    
-48    -240   
32     -112   
-272   32     
-80    192    
-144   80     
-224   288    
-144   -16    
288    144    
-256   -96    
16     -160   
32     160    
32     -176   
80     144    
0      32     
-80    -80    
-96    16     
-32    128    
-128   48     
-16    -160   
80     192    
96     96     
32     -16    
-64    64     
80     416    
112    160    
112    -272   
-80    112    
192    176    
-320   -112   
64     -96    
-32    80     
48     96     
64     16     
16     -96    
-144   448    
-96    -112   
384    -288   
-272   240    
48     -320   
0      400    
160    352    
-416   -1376  
112    272    
128    800    
-176   -160   
-80    112    
-96    -384   
112    -240   
48     -96    
16     160    
0      272    
176    176    
16     176    
320    192    
-192   240    
-112   128    
-112   160    
96     112    
-272   -64    
80     0      
32     -16    
208    48     
-64    80     
-192   -64    
192    -64    
16     48     
480    160    
-96    176    
320    144    
-160   176    
-64    -32    
128    -80    
48     32     
48     -16    
32     16     
-16    -80    
-16    128    
-160   -16    
160    0      
32     32     
144    144    
160    112    
256    144    
-288   32     
96     -112   
0      16     
240    48     
0      0      
-64    -144   
64     80     
-48    32     
80     48     
192    80     
-128   -64    
96     112    
-32    0      
-96    -48    
96     240    
-112   48     
272    -48    
-64    16     
80     80     
16     64     
-208   208    
288    96     
-128   16     
-64    -240   
208    48     
-96    48     
-80    -80    
176    -48    
64     112    
-144   64     
112    -32    
80     -48    
176    -32    
-112   64     
288    320    
-208   304    
-48    80     
48     -192   
144    32     
-16    -16    
224    -400   
224    64     
512    -224   
-208   208    
32     48     
112    -80    
16     240    
80     80     
80     16     
160    128    
-32    256    
224    336    
-432   -112   
128    -16    
-160   96     
144    -176   
240    80     
48     -112   
112    96     
224    112    
144    112    
176    32     
128    64     
-224   32     
32     144    
64     128    
240    16     
-160   -48    
48     -192   
192    80     
-48    96     
-80    80     
-48    -496   
128    16     
80     -96    
144    80     
-16    112    
-48    -32    
128    -160   
112    -192   
16     -48    
320    272    
-32    400    
256    64     
224    256    
48     192    
48     80     
64     -128   
0      -16    
16     -544   
144    592    
464    592    
-80    128    
-208   -256   
416    -80    
-144   256    
208    64     
192    240    
-144   -240   
128    -32    
176    48     
288    224    
256    -160   
-48    608    
144    1024   
-512   -1168  
-144   -272   
-96    -528   
-304   192    
128    352    
-128   160    
560    576    
-160   -512   
176    -304   
-64    16     
-48    80     
160    16     
32     -192   
-416   -576   
272    528    
-16    160    
-256   -384   
-16    208    
-80    -272   
48     -208   
192    -176   
240    -48    
224    224    
240    -80    
-32    -144   
-80    -224   
-144   144    
464    320    
-512   -736   
-112   -544   
432    64     
0      112    
224    -144   
-112   320    
128    -240   
48     -816   
192    -224   
-176   -480   
336    256    
-304   -176   
80     -384   
224    320    
128    -48    
112    208    
288    -16    
-176   -96    
128    -144   
-64    -800   
192    80     
-544   -80    
192    -96    
144    -32    
64     96     
-32    32     
112    -560   
32     -16    
-16    176    
112    48     
48     0      
144    112    
32     -16    
32     -64    
112    -16    
64     32     
-592   128    
0      -16    
-80    16     
48     -64    
256    -192   
80     -240   
16     16     
96     -528   
80     -64    
0      96     
0      208    
0      -96    
-64    528    
128    128    
-32    -496   
16     -144   
144    -48    
-1392  -64    
224    16     
32     0      
96     176    
-32    144    
32     464    
176    112    
32     -240   
-192   16     
176    -80    
-64    -160   
208    -128   
48     0      
-304   -96    
64     -128   
-544   0      
176    16     
112    208    
16     32     
112    -128   
368    -208   
-464   0      
176    -288   
64     64     
32     32     
128    32     
-192   -48    
-80    -288   
-64    -336   
160    -80    
32     112    
176    16     
64     -240   
320    -544   
-144   -208   
432    -272   
208    -32    
16     -112   
96     80     
-16    -64    
-16    64     
0      32     
192    -64    
32     -144   
368    -80    
-224   80     
96     -16    
-480   -256   
80     -32    
-512   -16    
176    -48    
176    48     
-32    -192   
96     64     
416    -192   
64     -144   
-288   0      
-144   32     
128    32     
112    -48    
320    -128   
320    -32    
-144   64     
400    48     
-64    -80    
32     -80    
128    240    
-32    -128   
304    64     
-112   -64    
112    16     
-128   -32    
384    -32    
-32    0      
0      -64    
-288   -64    
48     96     
-336   -16    
-16    -80    
128    64     
16     -128   
-336   -16    
224    -128   
240    112    
-496   0      
192    0      
-288   32     
96     -48    
224    16     
64     48     
0      48     
80     -16    
-192   -48    
224    -96    
32     32     
272    -112   
304    288    
-704   0      
-1120  32     
-144   48     
-336   -96    
176    0      
-96    -16    
144    -96    
80     80     
-160   32     
224    128    
-464   -336   
16     -640   
-32    64     
-32    96     
-416   -96    
32     -80    
-448   -32    
-208   -176   
144    0      
-32    -144   
-160   -32    
-112   304    
560    160    
16     -64    
208    -144   
-304   -80    
-384   -96    
64     80     
-144   -144   
64     368    
-576   -192   
-256   272    
240    64     
-272   -160   
624    480    
-848   -560   
-656   -32    
-832   160    
-96    32     
416    16     
128    112    
-112   -240   
-160   256    
-384   496    
176    -608   
400    448    
-592   576    
192    -128   
-96    -144   
-208   80     
-192   -32    
192    -208   
-256   192    
32     128    
64     -80    
208    176    
-96    -336   
-64    128    
96     112    
-304   16     
384    -224   
-144   16     
-64    432    
144    368    
-32    320    
-96    144    
160    176    
-320   64     
-112   -144   
-1776  -176   
160    144    
-192   352    
192    256    
80     -32    
-272   -288   
80     -336   
-160   16     
16     -16    
128    -112   
144    16     
-16    48     
112    128    
-176   0      
0      -48    
-384   48     
128    208    
160    96     
64     80     
256    32     
-48    16     
-16    64     
-400   48     
0      -32    
-208   32     
0      80     
48     64     
-112   64     
-144   -32    
64     112    
-560   64     
144    32     
-128   -80    
-144   32     
64     -48    
-96    16     
32     48     
-96    400    
320    432    
80     96     
-48    -80    
-256   -112   
-16    -32    
-224   -48    
0      144    
-464   0      
320    304    
-2272  -16    
-112   -112   
64     32     
-224   -16    
336    -32    
32     192    
0      -48    
-80    -144   
-256   -128   
0      -64    
48     176    
-304   -160   
320    -176   
-208   -96    
400    80     
-160   -112   
64     32     
-48    112    
-80    64     
448    480    
-416   448    
-160   112    
80     48     
-64    -80    
160    -224   
128    -32    
-176   -224   
240    96     
-160   224    
192    -32    
112    -64    
-64    -32    
-128   64     
192    256    
-384   144    
-224   -64    
0      80     
208    176    
176    160    
-160   0      
128    0      
-48    48     
-256   176    
-640   80     
-192   144    
80     48     
320    64     
-128   -176   
48     -48    
112    -80    
192    -288   
-320   -112   
-80    -48    
-448   224    
80     352    
32     160    
-48    -48    
96     -48    
96     544    
320    80     
-32    -48    
-64    144    
-32    48     
-80    -128   
208    -32    
64     128    
112    48     
112    80     
-16    224    
-112   288    
208    80     
16     112    
80     112    
-32    144    
80     -176   
-48    640    
160    352    
160    -112   
-144   80     
112    -160   
-288   112    
192    -320   
-224   176    
208    576    
144    96     
-48    -384   
-112   384    
128    -208   
48     288    
176    -416   
-240   -32    
32     128    
160    256    
-48    192    
352    176    
336    64     
64     -224   
320    240    
-320   -160   
112    -16    
96     176    
-144   -112   
-272   -16    
-48    -96    
1088   1152   
-960   -800   
-96    -736   
96     880    
192    48     
-16    -736   
160    432    
-224   224    
-448   -256   
-16    192    
16     16     
-192   -96    
-64    -272   
32     -144   
-288   768    
0      784    
416    -64    
400    32     
32     -384   
16     -304   
-144   288    
-400   -240   
-96    -208   
144    -16    
80     144    
112    -48    
160    48     
128    48     
128    -16    
-112   48     
80     -16    
-48    16     
112    64     
-32    48     
304    -128   
-96    -112   
-32    96     
16     16     
-64    -48    
176    144    
16     96     
64     -32    
-16    0      
64     16     
64     16     
-112   -1088  
272    48     
64     352    
336    48     
-112   -16    
48     -64    
-112   48     
240    144    
-176   16     
224    64     
32     192    
-96    -160   
96     96     
-96    -64    
288    96     
16     -272   
128    48     
-144   -80    
176    64     
96     80     
80     -48    
96     0      
128    96     
-16    32     
96     96     
64     48     
256    16     
-160   112    
32     64     
144    48     
320    -192   
-32    -288   
32     -1920  
144    192    
-16    -16    
128    64     
128    96     
16     128    
-112   -48    
224    -144   
64     -64    
112    32     
80     32     
224    96     
-144   80     
48     -144   
192    48     
-32    -304   
-64    80     
-32    -192   
128    -32    
-80    144    
-48    144    
144    112    
-16    -240   
224    -16    
144    -144   
-16    48     
-48    -176   
128    -16    
48     -96    
160    112    
-48    -64    
80     80     
-112   -256   
-144   -192   
-176   144    
128    96     
208    0      
128    -144   
-32    -128   
304    -224   
32     0      
-16    -64    
176    -80    
112    -48    
-176   144    
-64    -128   
272    -48    
96     16     
224    320    
96     -32    
368    -896   
224    -384   
-32    32     
48     -352   
96     -144   
224    64     
224    64     
176    -64    
-48    -80    
-272   -96    
-32    -96    
-64    -880   
-400   48     
272    -16    
64     32     
-448   0      
176    -224   
-32    32     
-256   -144   
-96    -80    
-144   -512   
-16    -32    
160    80     
64     -208   
96     0      
-16    96     
304    -144   
-96    16     
-16    -16    
48     -32    
-1104  64     
336    176    
-208   16     
0      16     
128    16     
-64    -64    
144    48     
-64    -848   
128    16     
-128   64     
64     0      
128    -16    
-80    64     
32     -144   
208    32     
-192   16     
64     -32    
-80    -32    
288    -16    
48     -32    
-176   -496   
-32    -144   
-48    -304   
16     16     
224    -64    
-224   -112   
80     32     
592    352    
-864   112    
288    -128   
-480   16     
224    16     
-2416  -144   
-32    -352   
1136   512    
-752   -928   
320    416    
16     -16    
400    16     
-160   -1184  
992    1216   
-432   80     
-64    -96    
-128   224    
496    16     
-112   128    
240    -128   
-1120  -192   
-48    256    
-272   -96    
336    -160   
112    -304   
64     160    
656    432    
-224   -32    
224    480    
-400   224    
-80    80     
144    -320   
464    480    
0      -192   
96     -176   
224    144    
-480   -128   
-352   112    
80     -160   
-112   -96    
384    -16    
0      112    
-64    -816   
368    -80    
-48    32     
208    0      
-272   64     
144    -16    
-80    -80    
224    -144   
-528   16     
80     32     
-864   -48    
0      48     
288    32     
256    -96    
208    32     
-64    -32    
112    48     
-256   -32    
64     -128   
-288   0      
-32    64     
48     80     
-256   32     
-192   32     
0      16     
304    -80    
128    48     
-208   48     
80     96     
0      0      
176    -32    
128    -48    
-192   -80    
144    64     
48     96     
32     96     
-224   0      
304    -48    
-240   32     
48     -96    
-368   96     
144    -48    
192    -128   
-32    -176   
0      112    
-1424  -144   
-1040  112    
-32    16     
-592   144    
-144   -16    
0      -176   
-80    -80    
192    48     
-112   0      
48     -16    
-208   -16    
-304   -240   
48     -48    
-656   -240   
48     -16    
144    48     
-96    -32    
-32    16     
64     64     
-64    32     
-272   64     
-64    48     
256    96     
-96    96     
80     64     
-64    80     
16     64     
-80    16     
48     -112   
288    144    
-96    176    
-48    -48    
-64    -64    
-224   64     
-48    -160   
-352   144    
144    48     
320    112    
-192   80     
-448   -80    
-16    -64    
-128   -64    
0      80     
-112   16     
-144   32     
160    -144   
-304   -352   
-272   -656   
-160   -240   
-48    -16    
-352   112    
-192   272    
-240   144    
-64    112    
-160   176    
-128   80     
-80    112    
32     0      
0      96     
-32    32     
-304   -128   
32     -144   
96     -48    
-48    -32    
-160   -48    
-176   -160   
-176   -224   
-448   -240   
256    -752   
-48    -272   
656    64     
-176   96     
0      496    
-272   -352   
-96    192    
-352   208    
-128   -448   
240    320    
0      224    
32     -128   
-160   -128   
-176   48     
-176   48     
256    -320   
-64    304    
-144   -96    
-144   -272   
80     48     
192    224    
64     -144   
-384   -416   
160    272    
-128   512    
-16    -32    
128    -160   
-176   -96    
-224   320    
-64    288    
16     0      
-336   -64    
304    -32    
48     16     
224    -80    
-48    -128   
32     112    
-80    48     
288    384    
-64    320    
96     272    
144    32     
112    112    
128    240    
224    80     
-448   -48    
-384   -32    
-208   -256   
272    -560   
128    -192   
528    304    
240    96     
-176   -112   
-48    96     
-288   128    
-128   -144   
112    32     
0      192    
256    32     
144    0      
336    128    
-176   -16    
0      96     
160    96     
-32    176    
-16    128    
128    0      
-32    -80    
576    432    
-464   192    
-496   -192   
320    0      
-304   32     
-176   -16    
80     80     
-816   -80    
-320   112    
464    -176   
32     80     
-368   160    
176    80     
48     16     
-80    32     
160    96     
-160   -32    
16     80     
96     112    
-32    32     
208    96     
16     -16    
64     48     
-192   -32    
-32    -16    
96     128    
-192   0      
48     32     
48     80     
112    80     
-32    -96    
-32    -32    
-240   -32    
208    -32    
80     128    
112    32     
-240   -144   
480    -64    
-272   112    
272    64     
16     0      
0      32     
-80    48     
-208   -32    
288    -80    
432    208    
-272   -48    
-96    -48    
160    128    
-80    -64    
112    48     
80     160    
-32    160    
-240   -16    
128    32     
64     -80    
240    -32    
96     64     
128    48     
112    160    
-64    0      
64     32     
0      16     
144    80     
-208   -112   
176    48     
336    240    
-336   64     
32     16     
112    32     
48     -16    
-48    64     
-96    64     
80     16     
96     48     
32     16     
-48    -144   
-96    -16    
112    144    
32     -128   
192    -16    
96     96     
48     48     
-16    -16    
80     32     
-112   -160   
64     -144   
112    80     
-112   -32    
80     16     
0      -176   
112    32     
-32    144    
32     32     
-16    64     
96     16     
96     -16    
112    -1376  
-176   32     
64     48     
512    720    
-320   368    
80     112    
80     160    
80     -48    
224    112    
-16    224    
112    192    
320    48     
-32    480    
64     256    
-224   -48    
-224   -64    
-48    176    
-16    96     
80     80     
-112   80     
0      48     
-96    32     
176    48     
160    -352   
80     -368   
432    -32    
144    96     
-64    64     
-128   -240   
-64    32     
384    560    
-416   496    
16     512    
240    -176   
144    -320   
352    96     
96     272    
0      64     
80     128    
160    96     
-96    -368   
176    -112   
-176   -128   
528    -560   
96     -320   
64     -304   
16     272    
-144   -240   
-256   -80    
128    16     
-16    160    
256    144    
368    160    
176    -96    
64     128    
-240   -128   
320    -656   
-16    416    
64     -32    
224    -240   
32     0      
16     -32    
288    288    
-192   -112   
128    -320   
64     160    
-16    -96    
240    48     
32     160    
-64    -112   
-48    -48    
32     80     
-224   -96    
288    -352   
16     288    
208    -176   
32     64     
-112   -192   
-112   -192   
336    -160   
368    80     
16     -48    
80     -96    
112    32     
0      592    
352    368    
-320   -32    
-48    -192   
48     32     
0      384    
96     208    
-192   528    
0      -128   
16     0      
-48    -48    
272    -32    
-128   -16    
432    32     
-112   -144   
304    16     
48     0      
112    112    
-128   112    
208    -16    
-304   160    
-64    -80    
-112   48     
-464   -416   
192    -128   
128    -48    
-96    16     
-80    -96    
288    -864   
-96    48     
400    -64    
192    -928   
320    128    
-48    -352   
-48    -272   
80     -96    
112    48     
-64    256    
-96    96     
80     64     
176    -128   
64     -384   
160    16     
-64    -672   
128    -144   
-496   80     
224    208    
-16    176    
144    -144   
80     -240   
-16    -656   
240    64     
80     304    
112    16     
144    -352   
48     -128   
-160   -256   
400    -48    
0      -32    
16     32     
-288   -160   
272    -208   
-144   -176   
192    -176   
-16    320    
288    -288   
272    -208   
224    -960   
128    16     
-16    -48    
-80    -64    
240    96     
16     32     
64     0      
-16    -112   
-608   -48    
144    -96    
80     16     
112    64     
80     32     
112    0      
16     -80    
304    320    
-32    208    
-16    -16    
0      -32    
160    176    
112    128    
-272   -48    
128    -48    
-640   -48    
32     -64    
-1520  -128   
112    48     
16     16     
160    112    
240    16     
0      -112   
64     0      
192    -16    
32     32     
80     0      
144    -96    
-144   -192   
240    -176   
-208   0      
-80    -48    
-736   -80    
192    -32    
256    0      
176    -64    
-48    32     
80     -240   
-80    -208   
0      -640   
-112   16     
304    48     
144    288    
-64    16     
144    400    
64     320    
32     32     
-928   -16    
112    48     
-1520  -96    
-128   -320   
64     -80    
128    -48    
128    544    
64     -1328  
-16    -432   
-64    -304   
48     -96    
32     400    
16     176    
-640   -208   
208    0      
-320   0      
832    576    
-336   -224   
-64    -32    
128    16     
304    -256   
-32    -288   
-400   -48    
96     -128   
496    144    
400    96     
-176   -64    
-144   400    
-64    224    
-208   -496   
-320   32     
64     -16    
368    48     
224    64     
64     272    
32     -160   
224    -544   
240    -304   
240    48     
-976   48     
-192   -208   
-368   -176   
208    96     
96     176    
240    112    
-368   -32    
-64    -96    
-240   -96    
-112   -304   
0      -144   
176    -144   
208    -16    
208    64     
-192   64     
-176   0      
144    128    
-288   16     
176    96     
-48    16     
224    -32    
-256   16     
-128   -96    
0      16     
-432   48     
-16    -64    
-256   -48    
96     -192   
16     0      
-464   16     
-128   0      
-448   32     
-32    16     
-2400  -688   
992    144    
-800   192    
-160   -336   
304    -160   
144    -160   
400    0      
-192   240    
-320   -256   
-288   -32    
-16    176    
-688   -144   
576    64     
64     32     
64     112    
-384   -64    
-304   -32    
112    16     
-256   32     
-208   -160   
-224   -160   
144    112    
160    192    
-96    -64    
144    224    
-304   32     
672    224    
-544   80     
-496   128    
-144   -96    
576    48     
-544   0      
352    112    
224    80     
-384   -64    
192    64     
-256   -96    
64     16     
32     -32    
-160   -48    
272    -16    
-176   0      
-160   64     
-16    112    
-48    0      
-176   48     
144    96     
-1200  -64    
-176   -16    
-256   -128   
256    48     
-80    32     
0      32     
16     32     
-192   -16    
0      -16    
-128   -16    
96     96     
32     48     
80     32     
-368   128    
336    96     
-752   -64    
-144   32     
-224   0      
384    176    
-16    -80    
-160   64     
208    80     
-80    160    
-160   0      
-64    48     
176    96     
192    -16    
-256   -32    
0      -16    
-80    144    
48     16     
0      64     
-320   64     
16     240    
-80    32     
32     48     
80     -16    
144    80     
-48    64     
0      0      
144    64     
-240   64     
288    400    
-320   160    
-80    240    
-32    176    
144    288    
-752   -16    
80     -48    
64     64     
-48    -32    
0      80     
80     -160   
-80    -64    
-16    0      
-48    192    
128    -112   
-16    -48    
-32    64     
96     80     
-272   -32    
16     -32    
-560   -96    
-64    64     
64     -16    
80     -160   
-16    -352   
96     352    
-128   272    
-176   -336   
208    208    
32     80     
96     112    
-16    32     
240    -48    
-16    48     
464    656    
-544   80     
-64    -592   
256    288    
-64    -48    
48     32     
112    96     
112    -240   
48     -16    
-192   160    
32     208    
-96    48     
-288   0      
-64    48     
-80    32     
128    48     
272    0      
304    80     
224    48     
288    64     
-192   -64    
144    240    
-288   32     
-256   336    
400    1040   
-304   -400   
-192   -144   
-496   480    
-160   -48    
-368   128    
-64    -224   
272    64     
240    160    
96     112    
144    0      
160    128    
176    224    
32     64     
208    0      
272    96     
-192   -16    
336    16     
-112   16     
-240   -368   
-304   -32    
-32    128    
160    80     
144    112    
144    -48    
208    16     
32     -192   
16     -512   
-128   -304   
-112   -64    
96     416    
32     -16    
176    -48    
176    128    
-112   -80    
112    -80    
32     -224   
32     80     
-32    -32    
64     112    
96     112    
-48    64     
-48    -144   
16     -176   
32     64     
-64    -128   
80     -416   
64     -48    
0      48     
64     224    
96     16     
-176   -416   
-48    -144   
-128   48     
416    160    
-64    304    
-96    32     
-16    -112   
112    -32    
-208   -384   
64     -480   
-32    -96    
176    -192   
256    272    
-144   176    
-288   0      
-400   288    
-96    -32    
-32    96     
288    16     
320    80     
160    256    
32     0      
-176   -144   
-48    112    
-128   320    
-448   -176   
80     -48    
384    272    
-640   80     
-288   64     
288    -32    
-112   192    
32     48     
192    48     
-80    96     
16     64     
96     16     
16     16     
-32    112    
96     96     
272    64     
-288   -112   
32     112    
32     -192   
-192   -224   
224    -256   
96     0      
176    -128   
16     48     
128    112    
-128   144    
224    -64    
64     16     
16     -144   
16     16     
80     32     
16     80     
0      -144   
48     -160   
16     304    
176    32     
-48    32     
256    -608   
-240   144    
-16    -112   
160    -64    
16     16     
192    112    
-160   -304   
192    -192   
0      -80    
-64    -48    
32     16     
-80    -16    
48     -32    
0      -240   
208    32     
96     -672   
-16    48     
16     176    
320    208    
32     -64    
112    96     
32     0      
128    -16    
80     16     
64     -64    
96     16     
-16    -192   
64     -96    
400    48     
-96    192    
208    -240   
16     -224   
16     -384   
256    112    
-64    400    
112    64     
-48    -128   
192    16     
160    64     
48     176    
144    96     
-80    -160   
-48    -432   
176    0      
160    160    
112    96     
256    272    
-32    -128   
128    400    
16     320    
112    -80    
96     -208   
96     -496   
208    352    
80     304    
16     -192   
80     -240   
208    128    
48     -80    
176    -64    
272    96     
0      -80    
-48    -528   
144    976    
368    848    
-112   -320   
-32    192    
32     -192   
80     0      
-128   -240   
336    -272   
240    64     
-64    -368   
16     416    
-224   224    
-224   -400   
-176   -752   
336    -128   
320    -208   
176    48     
320    -272   
-224   -336   
272    -336   
240    -16    
-96    -64    
112    -288   
-64    80     
-48    -304   
240    -16    
384    160    
-352   -64    
64     -288   
-176   -48    
-176   -48    
352    0      
368    64     
176    -48    
-816   -96    
272    96     
0      16     
-96    -240   
-16    -96    
-272   -736   
448    -64    
-208   -128   
-96    -16    
32     -96    
16     48     
256    -48    
16     0      
64     -48    
-32    32     
-1200  -144   
416    32     
160    -48    
-32    -48    
-144   32     
240    -16    
16     -64    
0      -640   
96     -16    
64     -32    
112    64     
96     -64    
16     0      
-192   -64    
336    32     
-352   0      
32     -64    
96     -32    
96     -32    
32     -96    
320    224    
-432   64     
192    -240   
144    0      
112    48     
320    112    
-208   -464   
384    -176   
-800   96     
-128   -224   
-320   32     
-48    80     
-192   -48    
96     -192   
64     -128   
336    0      
-640   48     
144    -656   
224    16     
-224   -16    
352    64     
160    192    
-112   80     
-208   -128   
128    64     
-544   -272   
528    -128   
272    144    
48     -16    
544    144    
-272   -160   
144    48     
64     -112   
-80    80     
-176   -400   
320    -32    
-256   304    
-176   -160   
48     48     
240    -80    
128    0      
144    48     
-848   -80    
16     -272   
-112   -128   
32     -96    
96     64     
32     -96    
160    48     
80     -416   
128    16     
32     16     
128    64     
-384   -32    
144    0      
-112   -256   
224    -192   
-560   64     
-96    -128   
288    64     
144    0      
160    96     
160    -160   
64     32     
-608   -48    
80     32     
0      -32    
144    160    
-192   16     
-16    -128   
-192   -160   
-16    0      
-48    48     
48     0      
-176   0      
400    -64    
-272   32     
160    -176   
-16    128    
224    96     
-720   16     
-160   -80    
-624   32     
-192   0      
144    -64    
-80    -80    
272    -48    
-208   -160   
336    160    
-48    16     
-848   128    
-32    16     
-304   -192   
16     320    
-80    -48    
-496   -256   
32     16     
-1200  -128   
0      240    
-64    -128   
-208   16     
128    -48    
-192   -48    
48     0      
16     -16    
-272   -208   
192    224    
-288   -96    
0      80     
48     128    
-320   288    
64     -144   
-144   -224   
-48    368    
-128   144    
-176   -640   
-192   -176   
16     352    
-112   -48    
224    112    
-112   -96    
112    -64    
224    368    
-384   64     
-16    -16    
80     0      
-16    128    
-112   160    
-128   -352   
-368   144    
-224   -32    
-1168  -160   
176    112    
-160   -32    
80     48     
96     -48    
-48    192    
-112   -16    
32     -48    
-160   288    
-80    -144   
-96    -512   
-64    48     
-144   256    
-400   -224   
128    -112   
-1072  -32    
80     64     
-16    16     
80     -64    
-48    -64    
128    -80    
16     48     
0      -256   
-256   -224   
-96    -384   
-80    -96    
80     -144   
16     -544   
-368   -272   
-656   -192   
-384   16     
96     160    
-416   0      
-64    224    
-48    -32    
208    160    
-224   -80    
64     -144   
-64    144    
-176   240    
208    -16    
-64    112    
64     32     
16     -48    
-112   -48    
-432   -80    
-48    48     
-464   64     
96     208    
192    64     
-256   48     
-32    -16    
-224   -112   
32     -80    
-16    -80    
144    -112   
-64    16     
48     96     
-192   208    
80     96     
-368   -128   
128    64     
-688   -32    
-112   144    
16     -112   
112    32     
-48    32     
288    16     
-208   -192   
160    -240   
80     144    
-16    32     
48     160    
-112   -112   
-48    144    
208    256    
-48    -48    
0      -400   
80     -112   
-32    272    
-304   16     
240    160    
-80    -48    
-16    144    
64     48     
-192   -272   
-304   -176   
-320   -48    
64     -48    
208    128    
400    176    
-80    192    
16     48     
0      48     
-416   416    
144    -32    
320    -176   
48     112    
-128   0      
-160   -48    
-96    64     
-544   -272   
432    -112   
-368   32     
16     -272   
-192   -208   
176    224    
48     160    
96     128    
304    -80    
-16    160    
32     -16    
-208   -16    
256    16     
-80    240    
464    0      
-32    144    
368    128    
96     -128   
-144   160    
160    -64    
-48    -16    
48     48     
-240   192    
336    336    
-64    80     
176    -64    
-112   128    
48     16     
112    -48    
64     -48    
-128   16     
64     224    
80     224    
240    -384   
-416   -304   
-48    160    
-224   0      
-48    32     
-96    160    
240    0      
-48    -64    
128    -272   
64     208    
16     -32    
-32    -32    
-256   48     
-128   208    
0      96     
128    48     
0      64     
80     32     
-48    16     
192    -32    
-16    -80    
160    128    
96     48     
-112   -160   
160    208    
-160   208    
-32    112    
-48    -64    
384    144    
-144   -96    
48     -960   
-336   -416   
-112   -464   
-16    464    
240    96     
-144   176    
160    -112   
288    240    
-256   64     
64     -224   
96     304    
144    0      
0      16     
-144   160    
-96    -432   
64     48     
-96    -160   
112    32     
48     -16    
480    224    
80     208    
-208   0      
16     64     
16     160    
-32    64     
-64    -96    
-80    64     
-48    -80    
192    64     
48     48     
288    64     
-64    32     
112    -272   
-64    32     
448    304    
-416   -48    
16     0      
-16    128    
208    16     
160    240    
-208   -16    
240    192    
64     240    
-592   96     
288    336    
144    -64    
320    16     
-32    -976   
-256   64     
192    -80    
96     96     
-240   64     
240    144    
16     -400   
400    -32    
544    224    
-176   144    
128    -64    
272    -16    
112    208    
-176   -32    
112    -64    
32     -176   
-400   80     
-96    -32    
112    48     
32     80     
240    96     
16     -80    
240    32     
16     48     
128    80     
144    32     
-480   -128   
224    64     
-128   -80    
416    -16    
176    -256   
-80    320    
-384   -672   
-144   -48    
368    16     
384    208    
-64    -32    
96     16     
80     16     
160    96     
-80    16     
-32    -32    
-288   -32    
576    -32    
208    64     
-32    32     
-32    80     
-112   -128   
0      96     
368    192    
-64    64     
96     48     
0      16     
-64    80     
80     -48    
32     0      
176    -416   
-208   -128   
368    0      
-144   48     
240    -224   
96     80     
-208   -576   
368    -176   
48     160    
192    48     
80     96     
16     -48    
416    -336   
16     -80    
-32    64     
144    96     
-320   0      
-224   -240   
336    16     
-144   -368   
272    144    
32     48     
-160   144    
-144   -112   
416    240    
-336   64     
144    -400   
208    32     
-112   16     
432    -96    
-352   -128   
-144   -128   
304    -112   
32     -16    
192    -64    
624    144    
320    64     
288    400    
-384   96     
304    -176   
-352   -96    
-80    -32    
304    -176   
-256   16     
80     -144   
128    -144   
96     -352   
32     64     
80     64     
144    -32    
64     144    
0      -48    
128    0      
64     96     
160    -64    
-112   48     
-256   64     
368    144    
48     32     
48     32     
-32    -144   
224    -48    
48     176    
80     -272   
288    176    
16     16     
272    -128   
80     288    
-16    -96    
384    0      
64     -16    
-384   -80    
144    -112   
-80    -80    
368    96     
-128   -272   
352    64     
16     -48    
64     -416   
16     96     
-256   -1200  
288    592    
0      -272   
-208   96     
176    336    
96     -80    
16     48     
-160   -272   
-736   32     
32     368    
-32    -160   
32     -304   
112    -192   
608    -320   
-256   16     
32     -416   
32     -352   
48     -704   
-80    -128   
-240   32     
96     192    
-112   -368   
208    -240   
-368   -32    
224    -16    
-32    -64    
192    -48    
-80    0      
-176   -64    
48     16     
64     16     
-96    -320   
304    -320   
-32    192    
-16    16     
112    -64    
0      -48    
64     -128   
32     0      
208    64     
-544   0      
304    272    
-112   96     
32     -48    
144    -80    
16     -64    
96     96     
112    -32    
304    320    
64     672    
32     128    
-48    -96    
32     -32    
-432   -80    
128    64     
-464   -32    
240    208    
-384   64     
16     -176   
-128   -16    
256    -576   
144    64     
-16    -1440  
16     -16    
-128   0      
-64    64     
-208   -16    
144    -32    
-208   -160   
288    -192   
-320   -64    
128    -16    
208    32     
112    -64    
112    -48    
-32    -80    
-160   32     
-624   0      
-208   -128   
-704   32     
240    -16    
-48    16     
176    112    
-64    -32    
256    80     
-352   -224   
240    -160   
96     176    
64     16     
-384   128    
-336   -80    
-1584  96     
272    160    
-416   80     
-128   160    
0      208    
-144   144    
352    112    
-64    16     
112    -176   
-496   -32    
288    96     
-192   128    
-320   -208   
80     80     
-480   -64    
64     64     
96     80     
-48    0      
48     320    
-480   160    
-160   0      
64     0      
80     -80    
128    320    
-32    0      
-432   -32    
80     -48    
-864   -272   
464    -336   
64     128    
-32    144    
-64    -64    
-400   144    
-96    -496   
-176   -112   
-176   64     
-1360  144    
0      192    
-96    48     
-16    32     
-48    80     
240    240    
96     -400   
-208   -416   
-96    -320   
-368   -48    
-160   -496   
0      -272   
-496   -464   
-512   -144   
-288   160    
-272   -176   
-128   176    
80     -240   
256    176    
-400   -320   
-128   -64    
496    -48    
-128   96     
-32    0      
0      128    
272    128    
-32    64     
64     448    
-112   48     
288    -288   
48     16     
-112   -128   
-1120  -192   
-352   -208   
416    -672   
-144   64     
368    336    
-272   224    
-80    160    
-192   -480   
-112   32     
-256   -272   
-112   -256   
-176   -160   
144    -192   
0      48     
160    -48    
-512   -96    
544    -256   
-256   352    
480    304    
-64    -96    
-592   -256   
-80    -976   
-240   -224   
336    -208   
368    672    
-448   192    
-352   -704   
-32    -432   
-32    208    
336    320    
-560   -944   
48     0      
48     928    
-16    -288   
-128   64     
272    -32    
208    208    
-240   400    
48     -192   
-192   -64    
416    -176   
-112   128    
32     96     
-16    -96    
144    16     
-112   -112   
0      400    
-1472  -160   
-352   -80    
-48    384    
112    16     
-16    160    
-96    -240   
-16    256    
224    112    
-80    -48    
0      48     
32     416    
-224   176    
80     -272   
-320   -48    
176    320    
64     16     
144    -96    
224    -16    
-192   64     
-16    -64    
-16    0      
-96    -16    
-48    32     
-64    256    
96     80     
32     16     
-240   -32    
96     144    
-208   -128   
112    -224   
64     -368   
96     -48    
-16    -32    
80     -96    
0      64     
-64    112    
-16    144    
0      176    
-16    -96    
-64    -112   
80     64     
-96    288    
32     80     
-16    -112   
-208   -32    
-128   80     
96     128    
192    64     
0      -16    
144    -48    
160    144    
0      176    
-176   64     
-144   -96    
64     -64    
80     96     
-464   64     
-176   96     
-384   -32    
16     0      
-16    64     
32     -16    
208    16     
-192   -64    
272    64     
64     80     
-304   16     
-80    0      
432    240    
-448   240    
352    704    
-608   208    
32     -32    
336    -64    
352    -144   
240    160    
-512   176    
-112   -64    
208    144    
-240   32     
512    80     
48     16     
80     64     
176    16     
0      96     
160    112    
-112   32     
240    -192   
-160   48     
112    80     
176    48     
-64    -16    
368    64     
-32    48     
80     96     
64     96     
-112   16     
-128   48     
288    32     
352    -16    
208    176    
-144   32     
-160   -256   
400    64     
-112   96     
112    48     
112    0      
96     80     
-32    16     
-32    64     
32     32     
-32    48     
-176   16     
16     32     
-160   -16    
16     80     
32     48     
-48    -672   
-128   -160   
336    -176   
208    176    
64     32     
208    -192   
256    112    
-80    224    
-32    32     
-208   -64    
336    -16    
320    240    
-592   -160   
320    -32    
-176   64     
208    -384   
-64    32     
-240   -32    
416    0      
32     48     
272    128    
-352   -272   
208    -336   
192    -96    
16     160    
128    192    
112    -192   
16     -144   
-256   -480   
208    112    
-144   64     
-16    80     
-144   -1056  
16     224    
16     -16    
48     -48    
-288   -16    
208    128    
48     0      
384    320    
-224   -336   
240    80     
-240   64     
80     -144   
128    192    
-80    -240   
0      272    
16     -464   
224    64     
96     128    
-96    80     
256    -144   
-304   -848   
32     656    
80     0      
-32    176    
144    96     
240    -208   
672    784    
-320   -48    
16     -144   
240    -368   
-160   144    
160    432    
-144   -608   
208    -880   
-368   -592   
240    48     
96     160    
64     448    
192    48     
112    368    
80     -16    
112    -128   
128    16     
-80    -128   
128    48     
-320   -336   
304    -64    
-80    64     
272    64     
-32    -128   
96     112    
-32    48     
272    -16    
128    -80    
112    0      
32     288    
176    144    
0      80     
-32    16     
96     48     
0      -112   
-80    -32    
384    80     
144    0      
0      32     
112    64     
64     48     
-16    48     
128    -16    
64     -384   
96     144    
16     -80    
192    48     
64     -16    
-112   -16    
192    -80    
272    80     
-128   -384   
-32    48     
224    64     
64     160    
144    96     
96     -752   
32     -240   
112    -160   
-64    -48    
128    -16    
0      48     
32     -48    
176    96     
160    -128   
-48    -32    
-112   -304   
144    -144   
-336   48     
112    -352   
256    32     
-48    80     
128    -272   
112    -112   
-48    -80    
16     -32    
128    -592   
144    0      
368    112    
272    -32    
160    48     
-48    96     
96     -96    
80     16     
160    -400   
-176   -96    
-304   144    
-160   48     
224    -16    
96     -576   
192    16     
-48    -336   
-64    -128   
128    -992   
0      -144   
144    -352   
0      -16    
-208   -176   
-176   0      
128    48     
0      112    
80     240    
-128   -128   
160    -16    
-80    -192   
112    -128   
16     -272   
192    -96    
256    -416   
-272   -48    
-352   -224   
-272   -96    
64     80     
272    -64    
160    64     
352    96     
-576   112    
16     32     
-2752  -192   
112    -80    
64     -80    
-112   -144   
288    -192   
-32    -272   
-192   -288   
144    -592   
192    128    
112    -48    
176    336    
-80    96     
112    -48    
-128   -48    
128    272    
80     144    
32     -48    
-128   -240   
416    -80    
-416   -32    
80     -336   
32     -16    
176    -896   
96     -240   
160    656    
1056   1712   
-944   208    
-192   -352   
-16    32     
240    544    
-768   -608   
368    -1424  
-2064  -432   
16     928    
480    448    
128    -128   
-256   0      
80     -544   
144    320    
16     32     
-144   -144   
-256   -336   
240    544    
112    240    
-304   -112   
-240   -112   
400    144    
160    208    
-80    80     
400    608    
-32    -992   
-400   -592   
400    384    
-544   -512   
240    -48    
608    608    
240    -144   
640    -48    
-336   432    
144    -112   
-400   -608   
-432   -480   
-176   16     
-16    624    
224    -352   
96     -400   
96     112    
160    64     
144    112    
-240   -240   
64     304    
-464   -144   
112    -96    
-80    32     
160    -48    
-336   -176   
352    -16    
-16    112    
368    -608   
-256   -144   
144    -144   
64     -64    
-496   -240   
-528   -16    
-80    16     
-736   -32    
-368   0      
288    -16    
-144   -16    
48     -32    
-128   -48    
128    16     
-144   112    
-1952  16     
128    64     
-96    32     
32     128    
112    48     
-240   0      
-96    -80    
-1008  -16    
-176   96     
-1392  -16    
-48    0      
112    0      
32     240    
-96    288    
-80    272    
-176   -304   
208    176    
80     48     
-48    64     
-176   -16    
-32    112    
-96    96     
-192   32     
0      544    
-640   -32    
-128   160    
-416   0      
-128   32     
-384   -80    
176    112    
-96    -16    
48     16     
-208   32     
-128   32     
-16    16     
-208   16     
96     144    
0      48     
144    208    
-336   16     
-176   -16    
-240   160    
-192   48     
-48    -32    
80     48     
-304   -224   
288    -48    
-160   -16    
0      112    
-64    64     
-32    64     
80     176    
-96    -32    
160    0      
-416   -32    
16     64     
16     272    
-176   192    
-1344  176    
80     176    
16     -160   
-96    -144   
272    -112   
32     128    
128    48     
-416   -192   
-128   -16    
-224   256    
-640   0      
-80    -32    
-96    32     
0      0      
176    80     
-1280  -80    
16     128    
-240   -64    
-160   128    
-64    160    
-336   80     
-384   -80    
-96    -16    
-96    -160   
368    -64    
-416   112    
496    176    
320    -112   
-736   -208   
-176   -16    
-304   352    
-304   112    
112    -112   
48     -16    
0      64     
480    192    
-80    0      
-80    48     
-336   -64    
32     -16    
256    96     
0      64     
-336   0      
-176   -48    
-96    16     
-176   48     
256    96     
-256   0      
-224   -96    
224    0      
-144   96     
320    240    
-416   64     
16     -48    
-80    32     
-160   0      
-16    16     
64     48     
-272   -32    
0      48     
-112   -16    
96     64     
80     96     
64     80     
-32    32     
48     64     
192    208    
-352   32     
144    -96    
-16    -96    
176    80     
-32    112    
96     128    
-160   -80    
-304   -16    
64     96     
-192   -16    
464    80     
-368   0      
352    -96    
160    -16    
464    0      
0      -64    
144    16     
-352   -192   
96     -240   
16     -160   
320    176    
-128   304    
240    128    
-592   -400   
112    240    
-192   80     
240    -48    
-176   -240   
96     240    
48     32     
-96    -16    
-32    16     
-96    224    
736    304    
-896   1536   
336    64     
-80    -384   
-16    -480   
704    368    
-64    336    
480    -976   
-336   384    
32     112    
-64    64     
-80    64     
416    -96    
224    688    
-256   -336   
0      48     
-176   400    
112    -144   
112    288    
352    672    
-64    128    
160    64     
-64    64     
0      -272   
48     -448   
192    -16    
112    -64    
-256   -192   
-272   48     
144    -240   
192    176    
-96    -160   
160    16     
-144   -32    
0      32     
80     80     
32     -16    
112    -32    
32     -16    
64     128    
-112   32     
64     -64    
-48    -112   
32     112    
0      0      
96     144    
-16    -64    
320    96     
-240   -32    
32     -80    
0      80     
96     32     
144    176    
-64    48     
16     176    
48     160    
64     -16    
-16    -16    
-96    64     
32     16     
-80    -16    
-80    -208   
272    0      
-64    48     
-112   -512   
32     48     
-48    -16    
32     80     
96     48     
0      48     
-64    32     
144    -16    
32     32     
64     32     
-48    -32    
240    -16    
-160   -16    
192    192    
16     144    
256    -96    
-160   32     
-32    -48    
16     -208   
48     -80    
256    112    
16     224    
16     304    
-208   -80    
224    -64    
-96    -224   
48     16     
0      32     
128    -144   
208    -192   
240    48     
-64    96     
80     288    
-256   288    
-176   0      
160    0      
224    -16    
112    -80    
64     -48    
-32    -48    
64     -112   
64     32     
256    160    
96     48     
-128   96     
-240   16     
-64    -16    
144    -448   
128    240    
128    32     
0      112    
-64    -352   
208    -16    
224    80     
288    112    
64     32     
112    -16    
-176   80     
-80    -176   
48     -112   
-176   -496   
464    64     
336    304    
-544   176    
-32    64     
0      16     
272    16     
464    64     
-96    416    
224    784    
96     304    
96     -64    
-32    176    
-192   32     
16     32     
304    -112   
64     -208   
-64    -240   
64     48     
32     -704   
-128   -64    
64     -128   
112    -32    
-80    -272   
512    -544   
-48    -304   
384    64     
-272   -96    
80     -320   
-112   128    
-96    -240   
368    384    
192    -432   
80     112    
144    272    
192    32     
-112   -224   
16     160    
-32    112    
32     256    
64     0      
80     -256   
288    880    
176    -224   
208    32     
256    -128   
32     112    
48     -304   
592    528    
-688   -288   
320    0      
-240   0      
352    48     
128    -80    
480    336    
400    192    
240    -144   
112    -704   
-160   -48    
-176   64     
96     -304   
-176   -64    
384    144    
112    48     
-96    -288   
256    -608   
-80    64     
384    128    
-128   288    
-80    -144   
0      -160   
-608   32     
176    -16    
16     352    
-224   -144   
16     -160   
512    144    
-560   416    
352    144    
-64    -96    
320    -128   
384    112    
-32    32     
192    -96    
-2640  -64    
96     16     
160    32     
-16    -16    
144    -16    
64     -288   
48     -144   
64     16     
112    0      
-128   -176   
208    -16    
192    -80    
-96    80     
16     -64    
96     48     
-704   -64    
192    -16    
-96    80     
32     -80    
48     -16    
208    16     
112    -112   
-160   -704   
224    32     
64     0      
-32    -48    
96     -32    
304    128    
-160   -64    
-48    -80    
128    64     
160    48     
-352   -32    
96     32     
0      96     
128    -80    
256    -16    
96     -96    
-224   -160   
144    0      
176    176    
-272   -80    
32     0      
80     80     
144    -256   
0      -176   
144    192    
-624   -32    
-80    -32    
176    -16    
208    -48    
-160   -48    
64     -208   
64     -16    
0      -1536  
192    -32    
128    -64    
80     -48    
-128   80     
80     240    
-416   -80    
128    -144   
-592   32     
48     16     
336    32     
80     -16    
16     0      
112    -112   
48     48     
160    -1008  
48     0      
96     32     
128    0      
96     64     
32     -16    
-256   64     
48     16     
160    -16    
128    -16    
-880   48     
16     -128   
48     -16    
144    -192   
160    48     
-16    -336   
112    144    
-208   -48    
112    32     
96     608    
-432   480    
-160   0      
128    -144   
-128   -48    
272    176    
-560   16     
144    -160   
144    -16    
272    -160   
128    48     
96     -368   
224    112    
-304   0      
-80    112    
-112   176    
144    80     
16     16     
144    64     
-464   -80    
544    144    
-320   48     
160    -96    
48     96     
64     -48    
256    352    
-16    48     
64     -96    
144    16     
64     0      
16     48     
208    -16    
-288   -16    
16     -32    
-304   16     
48     -96    
-32    16     
96     112    
96     64     
-176   384    
-592   336    
-256   32     
-560   0      
0      176    
-192   48     
-128   -160   
-2192  112    
-352   112    
128    -32    
-160   -80    
-64    -80    
288    64     
-592   -128   
544    304    
-688   -16    
-208   160    
-368   160    
16     144    
-128   -48    
-80    0      
-304   48     
-400   144    
128    80     
-80    48     
48     32     
-160   -96    
64     48     
-32    96     
176    400    
16     144    
0      -96    
-16    64     
-544   -96    
176    -320   
-288   576    
112    -144   
-16    -16    
304    128    
-656   -192   
336    496    
-16    -656   
80     -64    
96     192    
144    -112   
112    -32    
-128   160    
-208   -144   
32     144    
-240   16     
320    560    
-384   544    
-560   -640   
-272   -288   
-1600  592    
176    -272   
464    144    
-368   352    
-16    -160   
16     240    
176    320    
96     112    
192    0      
-256   -96    
48     -32    
80     464    
160    272    
-464   -176   
176    -192   
0      -96    
-368   -240   
-1040  0      
128    128    
-80    -32    
-128   -32    
224    -80    
-224   -112   
240    112    
-64    64     
144    0      
-96    -112   
32     -256   
-144   48     
16     128    
-64    64     
-64    -240   
-848   -272   
-48    224    
128    64     
-64    -48    
256    16     
-128   80     
160    32     
-16    -16    
80     64     
-288   96     
-272   -224   
192    -320   
-128   64     
144    -48    
48     -48    
-368   -64    
32     32     
16     112    
32     -96    
144    -112   
-16    144    
-112   16     
96     -32    
-144   176    
256    16     
-32    -32    
-64    -16    
48     112    
-64    112    
64     80     
-176   -16    
-80    0      
-48    48     
-112   -208   
128    160    
-32    32     
-80    -128   
128    -48    
112    48     
-48    0      
224    64     
-400   16     
-208   96     
48     144    
192    64     
-96    48     
16     -64    
16     48     
48     0      
64     64     
208    48     
-96    160    
-32    -32    
32     16     
-64    128    
32     16     
-16    16     
80     -128   
-64    -144   
-80    160    
32     368    
32     16     
192    16     
-48    48     
64     0      
80     16     
64     64     
-64    -16    
128    208    
-96    128    
112    32     
16     48     
160    256    
-48    112    
64     -80    
144    48     
48     -64    
-16    -48    
-64    0      
112    -176   
144    -128   
240    -48    
48     48     
208    48     
-336   160    
-64    16     
32     0      
224    80     
176    320    
-256   368    
32     64     
272    208    
176    112    
-96    240    
-112   128    
112    224    
-288   512    
176    176    
368    0      
160    256    
336    256    
-880   -112   
144    -1184  
-16    -128   
512    576    
32     -80    
-32    16     
-128   -144   
-112   112    
432    448    
112    384    
-144   112    
320    160    
288    416    
-96    -144   
384    176    
128    -144   
320    416    
-32    -256   
240    -128   
48     176    
160    -48    
-16    -80    
128    -96    
64     288    
144    -368   
-400   -80    
-96    240    
-256   -128   
96     256    
224    288    
-144   -128   
448    -224   
-112   16     
288    -32    
-144   -48    
0      64     
96     16     
80     -32    
16     96     
320    64     
-16    32     
-240   -64    
512    624    
-400   336    
192    96     
-144   144    
112    64     
144    160    
48     -720   
-64    -48    
128    48     
-32    48     
624    240    
-240   176    
480    192    
-368   160    
-128   48     
304    192    
-48    80     
320    80     
432    288    
-80    -16    
-16    128    
-368   -208   
416    -32    
-256   -32    
192    48     
-64    -16    
-256   -96    
352    48     
480    -144   
192    64     
-336   -48    
208    -240   
384    32     
112    96     
160    -80    
-128   -176   
560    -272   
-96    480    
-320   -1200  
-240   0      
384    96     
48     16     
-208   96     
112    16     
96     -16    
-96    144    
112    80     
176    -144   
16     96     
144    -96    
0      -16    
128    -224   
-16    -32    
64     -304   
-112   -16    
208    -64    
80     -16    
304    -48    
-64    128    
176    128    
96     -32    
144    -80    
48     80     
112    80     
16     -96    
-16    16     
-48    -112   
32     368    
288    144    
32     48     
-80    64     
-16    80     
16     0      
96     80     
-32    -16    
0      96     
144    32     
192    -80    
128    128    
112    -240   
192    16     
48     -96    
-32    80     
144    -128   
96     48     
-96    -32    
128    32     
-80    112    
224    80     
144    0      
16     112    
160    208    
-16    0      
48     32     
48     -128   
48     48     
128    -32    
80     32     
48     176    
240    208    
16     -208   
-16    -208   
112    0      
96     128    
-48    32     
64     -144   
-16    -128   
128    48     
176    32     
0      48     
80     80     
-96    -48    
112    -16    
128    32     
80     32     
0      -144   
240    -496   
48     -80    
208    -208   
-16    -48    
-16    64     
80     -112   
112    16     
160    -848   
-96    -128   
0      -32    
-16    -160   
144    80     
-32    -48    
96     16     
-16    32     
560    288    
304    432    
112    48     
0      32     
-528   0      
224    288    
-272   32     
64     -64    
-304   -864   
144    256    
128    992    
288    304    
-128   -432   
112    -288   
48     272    
208    128    
240    -16    
-48    -80    
224    16     
-1184  -448   
384    416    
400    608    
112    -144   
240    -80    
16     -624   
272    48     
-320   -912   
48     -112   
32     -192   
96     -64    
320    128    
32     16     
-176   -112   
224    144    
-1600  -192   
64     -368   
-160   -96    
352    336    
224    544    
-400   -208   
-240   -576   
16     -816   
1184   1104   
-512   528    
208    -192   
160    -256   
400    0      
256    32     
288    64     
-272   80     
-96    -128   
-144   96     
-16    -80    
0      -208   
48     48     
-128   -128   
48     -96    
96     112    
208    -32    
144    464    
-240   -528   
144    352    
96     144    
144    -272   
-64    112    
112    -96    
-80    0      
16     0      
336    416    
-176   -688   
-64    160    
304    -448   
160    -128   
128    160    
384    112    
-560   432    
160    128    
208    -368   
-96    48     
-144   -48    
-16    80     
-864   -224   
176    64     
-16    -224   
304    -208   
-64    112    
-272   -240   
128    176    
-144   -752   
160    -16    
-16    32     
352    64     
-192   -64    
160    80     
-736   0      
-144   48     
16     16     
272    -80    
656    192    
288    -64    
352    64     
-256   0      
-288   -112   
864    80     
-480   288    
-96    -112   
80     16     
-160   128    
480    -160   
64     176    
176    -48    
-32    -32    
48     -80    
-80    -192   
400    -32    
-496   336    
160    -144   
208    -160   
-272   16     
-1024  96     
-48    -224   
208    0      
-224   80     
192    96     
288    160    
-496   -32    
-112   16     
64     80     
112    160    
-1728  16     
64     -64    
-912   -64    
208    -48    
-64    -80    
-304   -144   
-272   -272   
128    32     
192    0      
-96    -96    
-544   256    
-16    64     
-160   -64    
-752   -96    
144    -176   
-144   -240   
112    -96    
-288   -128   
96     16     
48     80     
-624   -16    
-80    0      
-192   112    
-144   32     
-1584  32     
320    32     
16     0      
16     -16    
96     -96    
-64    32     
-160   -96    
64     80     
-48    0      
-16    80     
-80    128    
-80    -16    
144    80     
-416   0      
-16    -48    
-128   32     
-240   160    
-368   -96    
-48    0      
-112   -96    
-80    240    
-112   -80    
0      240    
32     48     
112    32     
16     96     
-224   32     
-80    -16    
32     0      
-64    176    
32     32     
-32    -16    
-704   -176   
80     64     
-96    16     
64     192    
-176   48     
64     144    
96     112    
-32    16     
-160   112    
-224   -304   
-48    -80    
-160   -368   
-48    160    
-32    128    
-32    560    
-448   656    
320    416    
32     144    
-64    -336   
96     -160   
-96    -128   
-176   272    
-416   -368   
320    -640   
128    704    
256    -32    
-64    0      
-192   -144   
-368   -48    
-16    16     
-128   -80    
240    -16    
0      128    
-16    -144   
64     528    
-240   176    
32     -224   
176    192    
416    160    
160    128    
-48    160    
368    416    
-736   -496   
-144   -192   
-160   368    
-160   128    
304    48     
-416   -48    
128    -32    
-336   -160   
-208   -272   
32     -272   
640    160    
64     224    
160    80     
336    0      
80     -96    
64     16     
80     96     
240    48     
-192   -96    
-96    16     
-320   32     
-320   0      
-16    48     
80     -32    
16     48     
-192   208    
-64    160    
-112   -96    
64     32     
-128   32     
144    112    
-256   -208   
160    -64    
-144   -32    
144    112    
96     16     
192    64     
-32    16     
320    144    
-192   -16    
32     32     
16     -336   
32     -48    
-80    144    
144    64     
-32    80     
-208   -32    
32     -80    
112    48     
-336   48     
176    -112   
16     96     
160    240    
-368   -32    
80     -80    
-80    32     
272    112    
384    32     
32     -64    
64     -16    
32     96     
-416   -240   
176    -32    
-368   288    
-400   -144   
80     48     
160    80     
80     -32    
-336   -128   
288    208    
-64    96     
-320   -128   
320    -16    
-224   -64    
96     16     
80     96     
192    272    
112    112    
112    -32    
304    96     
-16    128    
224    64     
112    48     
-240   16     
304    32     
128    0      
-64    0      
128    -48    
-80    80     
80     80     
-64    -16    
80     16     
144    0      
96     32     
48     80     
64     16     
336    224    
-144   256    
64     -48    
176    48     
-48    64     
272    48     
-80    16     
-112   64     
32     -128   
80     0      
-128   0      
-32    -976   
-48    0      
16     -64    
96     48     
192    96     
-16    144    
32     16     
64     32     
-16    0      
208    48     
-80    112    
80     80     
-96    -16    
160    32     
-64    -144   
96     -352   
112    144    
-64    16     
-16    64     
112    80     
64     -32    
144    -48    
208    80     
48     -192   
-16    96     
-48    192    
16     128    
48     -16    
80     -64    
48     64     
32     80     
96     240    
-64    160    
-96    0      
192    128    
240    192    
-48    0      
80     -16    
-48    0      
80     48     
-64    352    
320    80     
-176   96     
128    -160   
176    624    
-16    -304   
128    -48    
0      -128   
16     -96    
304    432    
-64    624    
-32    -224   
0      80     
-32    -256   
304    304    
-16    -96    
176    48     
-16    -64    
80     -48    
-16    48     
-112   32     
-80    160    
208    -80    
96     32     
240    -256   
336    1232   
-160   -384   
-176   48     
-96    -32    
208    128    
64     -208   
480    528    
-96    -48    
160    -64    
128    48     
16     96     
-16    -64    
80     368    
112    -784   
160    -768   
80     432    
48     224    
192    -144   
0      256    
0      64     
112    -48    
96     144    
96     32     
128    -64    
128    64     
96     -176   
160    -432   
272    -192   
-112   160    
32     80     
-112   -160   
-192   -384   
144    432    
48     272    
-192   -224   
-32    -160   
-112   16     
-224   -240   
-64    -64    
32     80     
32     -800   
-128   144    
128    256    
16     336    
-160   -208   
64     -192   
256    112    
-192   -48    
80     64     
400    128    
-80    32     
112    32     
-16    -48    
128    -352   
32     -80    
32     -416   
128    -208   
-80    -128   
144    -96    
144    432    
48     144    
144    0      
64     64     
-16    -16    
80     144    
112    256    
128    64     
16     -768   
208    -288   
32     32     
32     -192   
-32    -48    
48     -336   
-64    -16    
-32    -736   
320    -704   
0      -304   
176    -736   
384    -144   
48     -336   
96     272    
48     -128   
16     -32    
32     -304   
64     -496   
256    48     
64     48     
272    -64    
192    96     
-416   -96    
-272   -464   
-176   128    
96     -144   
128    32     
272    64     
-272   -240   
-256   -512   
-160   -624   
368    48     
384    48     
320    -16    
160    -320   
48     80     
128    112    
176    144    
0      -112   
-208   32     
208    -48    
-160   -112   
-304   -48    
16     -112   
-1536  96     
224    -192   
112    -32    
288    -144   
-160   0      
16     -1040  
64     64     
64     256    
144    112    
16     -144   
16     112    
144    -80    
80     80     
-240   304    
32     64     
-544   -352   
-80    -160   
80     -64    
-48    -32    
64     -112   
112    -16    
-32    -32    
256    192    
112    32     
576    544    
-496   416    
-320   -112   
16     -448   
-112   -160   
192    64     
-496   0      
112    -160   
-528   -176   
576    336    
80     96     
-64    -176   
-144   -192   
176    -368   
224    -96    
144    96     
48     96     
-64    64     
192    64     
160    224    
-64    336    
-624   48     
-32    64     
-832   -128   
48     -80    
-64    64     
192    64     
192    144    
80     192    
-48    -32    
-16    -208   
-208   144    
192    -48    
240    0      
-176   -96    
-16    -96    
16     32     
-48    48     
-432   128    
96     -32    
-1248  -304   
176    -48    
224    96     
-32    -112   
80     -144   
144    -1024  
48     0      
0      -144   
-64    32     
-384   288    
80     0      
0      -96    
112    -32    
-320   80     
400    496    
-304   -368   
288    160    
96     352    
16     -256   
64     16     
192    32     
240    -160   
-320   96     
16     -480   
192    544    
288    208    
176    -288   
128    96     
-80    -32    
-160   -208   
-272   224    
224    240    
288    736    
-256   -336   
-144   -288   
208    128    
-32    -144   
-64    -128   
160    16     
-224   112    
112    -64    
-48    -32    
256    64     
80     48     
-32    32     
-144   32     
-1664  -128   
144    48     
-592   -48    
-96    176    
352    256    
-544   32     
-336   -64    
-2448  -240   
48     -96    
272    16     
224    144    
400    48     
-96    -32    
-192   -144   
144    -48    
-400   -272   
-480   128    
-624   -144   
320    96     
-112   -16    
-448   -32    
-240   -96    
-800   -48    
-64    0      
-336   128    
-384   160    
16     -16    
-80    -48    
-352   -80    
64     96     
16     -16    
144    128    
-240   32     
128    0      
64     16     
-240   -16    
0      80     
-64    -16    
128    -16    
-240   -16    
-192   32     
-272   -112   
128    48     
0      64     
-48    64     
-224   0      
-32    0      
304    336    
-752   -96    
192    -48    
160    128    
64     16     
-48    64     
480    768    
-1184  32     
560    0      
-160   208    
-160   0      
-368   -320   
-16    -144   
368    16     
-464   -96    
368    16     
256    208    
-544   -80    
64     -32    
-432   -80    
336    112    
-144   16     
-144   -224   
304    -16    
-448   -32    
96     16     
-144   -96    
-64    48     
48     32     
-384   -272   
144    0      
192    160    
-384   80     
64     -96    
256    208    
-208   208    
80     32     
-416   -144   
384    32     
-288   -80    
144    16     
240    112    
-80    80     
-240   -48    
304    32     
-16    32     
-320   160    
176    64     
32     -48    
-128   -16    
128    -16    
0      0      
-288   -80    
-32    128    
-640   -128   
384    192    
-1552  32     
-192   -80    
144    96     
-128   16     
288    0      
-48    0      
48     112    
-224   0      
208    96     
-224   32     
128    256    
-544   -64    
64     -224   
128    0      
-112   64     
48     16     
80     80     
64     48     
0      80     
0      0      
224    -48    
-64    80     
-64    96     
64     -240   
128    704    
-80    96     
16     -304   
32     128    
-128   32     
-16    368    
96     -336   
48     192    
96     -32    
-32    -16    
-64    256    
-144   -64    
16     128    
-80    240    
96     -16    
-32    64     
272    -320   
-32    496    
224    16     
-368   16     
-64    -768   
192    336    
64     368    
-128   -384   
48     80     
16     48     
-48    368    
240    336    
-176   -416   
48     80     
-96    0      
96     -272   
-544   -176   
416    -496   
-272   592    
0      192    
96     -224   
-176   48     
-96    -144   
112    432    
-96    32     
-64    16     
144    32     
80     64     
208    128    
0      32     
-16    32     
-272   16     
-64    112    
64     112    
16     -288   
-80    0      
0      288    
16     192    
128    208    
0      0      
16     -48    
336    192    
-32    128    
96     64     
48     144    
-112   16     
0      368    
-32    208    
-96    128    
64     224    
144    -96    
208    16     
256    208    
-112   176    
80     -80    
80     -80    
32     -16    
-32    96     
128    128    
176    96     
80     160    
-416   -112   
208    -512   
224    -16    
144    -16    
448    -16    
208    32     
-192   -48    
-192   -176   
-112   -272   
112    32     
-32    0      
32     -64    
112    304    
-224   112    
0      -48    
112    -32    
16     -336   
-96    256    
-32    16     
128    64     
-16    272    
224    176    
-32    -32    
0      16     
-48    32     
48     32     
64     32     
-112   -208   
-48    -160   
64     144    
112    64     
48     -768   
32     -32    
0      0      
64     224    
-48    64     
128    48     
144    80     
64     96     
96     16     
128    64     
-128   160    
-32    192    
-192   -80    
160    -368   
-48    -96    
80     -480   
64     -48    
192    -464   
-176   -352   
144    -224   
-352   -384   
-80    -80    
32     -128   
96     -96    
144    144    
128    640    
224    0      
-80    0      
-160   -224   
-240   -48    
-192   -16    
416    208    
576    -368   
368    -64    
112    -192   
-176   -368   
-64    -336   
256    -176   
272    176    
560    304    
336    160    
144    32     
176    80     
-160   -48    
-144   80     
384    -64    
-48    80     
0      -208   
80     -16    
-368   -1504  
-368   -64    
272    112    
-16    80     
80     112    
304    32     
-48    -160   
-96    -96    
48     -288   
368    -256   
32     48     
-112   -160   
352    208    
-144   -352   
176    32     
32     -1184  
208    176    
-80    -64    
-64    -48    
208    112    
-208   160    
416    -144   
-16    48     
320    336    
-416   -80    
48     112    
-48    -16    
64     112    
448    80     
-112   352    
-16    -128   
176    208    
96     320    
96     96     
-16    64     
80     16     
32     80     
48     -352   
-32    368    
-160   -112   
16     176    
272    272    
112    448    
240    144    
160    192    
96     176    
32     48     
-32    -128   
-48    -320   
-144   -160   
-32    80     
-32    -176   
-64    0      
272    -624   
80     112    
224    208    
-64    -368   
48     128    
112    -64    
448    272    
48     368    
112    -1120  
-96    160    
112    -704   
208    16     
-576   32     
-32    144    
32     -240   
128    -272   
-32    -16    
128    -2112  
64     352    
0      -64    
0      -144   
112    464    
16     -64    
-48    -448   
32     80     
320    192    
48     16     
-160   0      
0      -48    
-48    -240   
48     -112   
0      -48    
0      -288   
64     64     
32     -16    
80     -80    
240    -240   
-192   0      
176    64     
384    608    
112    128    
160    -208   
-464   -80    
-32    48     
16     0      
176    272    
112    288    
224    0      
112    -480   
272    -432   
-320   96     
160    -128   
400    304    
-320   32     
32     16     
160    -16    
208    32     
-304   -176   
416    -128   
-720   128    
80     0      
-16    -16    
-48    -112   
-176   16     
160    -496   
-48    -32    
128    -96    
272    144    
416    112    
-64    -48    
-208   -128   
432    -32    
-96    0      
288    -112   
-192   -112   
288    -32    
0      -144   
48     -320   
-176   -32    
192    0      
-240   -32    
256    -128   
-48    96     
576    272    
-800   32     
64     -96    
336    80     
-112   0      
224    -48    
-112   208    
-592   -16    
-2560  -160   
272    64     
160    -16    
304    -80    
224    32     
64     -512   
-16    48     
80     -32    
48     -48    
96     16     
80     80     
-192   -48    
176    -48    
-240   64     
32     -80    
0      64     
304    128    
-400   -144   
576    -208   
-48    64     
464    -240   
-64    80     
144    -16    
-416   -272   
160    144    
-304   80     
-368   -80    
-352   -160   
-384   16     
-16    96     
-384   -112   
-48    32     
-112   32     
144    -384   
-96    -80    
160    -176   
320    208    
-32    48     
80     -160   
-448   -96    
48     64     
-464   -192   
400    16     
272    304    
272    96     
-368   -32    
448    320    
-304   144    
464    -224   
96     32     
-384   -64    
624    336    
-528   240    
-112   64     
-240   256    
64     48     
336    64     
-240   80     
16     -176   
176    -64    
-208   -64    
400    -224   
128    -16    
-48    128    
16     0      
-208   -144   
-1008  272    
48     -320   
-160   -208   
0      160    
-1760  -144   
-16    -48    
224    192    
-528   -528   
480    64     
-240   384    
-160   -112   
0      32     
-192   -336   
144    160    
-96    208    
-96    -144   
-112   -16    
-16    -112   
48     96     
-752   304    
-32    -192   
-320   208    
112    -128   
-64    96     
0      -336   
-64    -64    
224    288    
-240   -64    
96     16     
-16    -160   
128    544    
16     -208   
0      16     
-448   48     
-288   -688   
-80    -400   
-448   -560   
-256   -256   
192    -160   
304    192    
176    144    
32     384    
-16    -112   
-256   -64    
112    80     
-16    -336   
-144   -336   
-288   0      
-128   192    
128    112    
-32    -16    
-192   128    
-128   272    
-1440  -48    
0      64     
-16    -96    
16     -16    
0      144    
64     96     
-32    96     
-96    -48    
48     32     
-240   -112   
160    96     
-80    240    
-304   48     
-208   -144   
80     -160   
-576   48     
-48    48     
-16    -128   
0      32     
-32    48     
-96    32     
-48    48     
-96    80     
64     32     
160    176    
-96    176    
-208   -80    
-160   80     
-208   -288   
368    -32    
-320   128    
-16    64     
144    32     
96     32     
-176   -16    
-112   112    
0      -32    
80     -144   
80     80     
-336   -64    
-48    32     
-368   -64    
160    144    
-224   128    
-96    80     
-416   0      
-80    48     
240    -112   
-16    32     
48     -16    
176    64     
48     208    
-112   -96    
16     32     
-80    96     
0      64     
32     64     
0      -16    
-272   304    
16     16     
144    -144   
-64    -48    
-80    -32    
-240   16     
-48    -128   
160    -80    
144    -208   
-48    -80    
112    -80    
-384   -240   
32     -64    
-128   -32    
128    16     
224    -224   
64     96     
-240   48     
176    128    
192    128    
-320   -16    
-160   64     
96     128    
320    176    
48     80     
80     64     
48     -16    
128    128    
-304   64     
96     288    
-352   96     
32     -48    
-128   -96    
80     -80    
112    -32    
16     -80    
-16    -32    
112    64     
48     176    
-192   144    
64     128    
96     80     
80     48     
-160   208    
416    368    
-336   272    
-16    288    
512    288    
48     -48    
-256   -352   
160    352    
-128   448    
0      176    
160    192    
32     176    
96     -144   
96     -48    
288    112    
-32    80     
464    464    
128    -16    
-96    -32    
-144   112    
80     224    
-144   528    
-176   -64    
272    -176   
672    368    
-96    224    
-320   240    
-352   -32    
-48    352    
192    256    
-208   -96    
448    -304   
80     -176   
448    320    
-64    -128   
0      96     
-128   -64    
-80    -208   
32     -112   
240    32     
48     -96    
-160   64     
416    32     
112    48     
240    272    
-224   64     
-320   -384   
-176   -32    
192    336    
176    -208   
-64    208    
64     -224   
-112   112    
176    416    
-176   80     
176    -208   
400    656    
64     144    
-320   -288   
16     -32    
160    144    
144    16     
144    -48    
144    -736   
-16    112    
-48    -32    
80     240    
304    128    
-16    48     
16     -32    
192    -48    
48     304    
-48    -160   
0      64     
64     160    
368    304    
-352   -176   
80     80     
-32    -1024  
192    256    
192    304    
128    32     
160    -32    
112    -80    
-160   128    
48     48     
-128   208    
32     -192   
128    16     
144    192    
-96    -96    
64     16     
16     -128   
-128   -224   
80     96     
16     128    
-48    368    
112    208    
128    64     
-16    -16    
176    32     
16     -64    
-64    -80    
64     -80    
48     -80    
16     -128   
-64    -752   
176    80     
-80    -16    
144    144    
80     -256   
144    192    
48     160    
-32    160    
32     -48    
48     32     
96     -16    
80     48     
-48    32     
112    160    
16     112    
64     -192   
48     0      
32     -48    
32     0      
144    -1072  
192    208    
16     -16    
320    16     
160    0      
-32    80     
176    96     
-16    240    
96     -96    
-48    -336   
-48    -112   
320    144    
-16    -64    
208    -32    
160    112    
0      -288   
-176   -16    
320    -32    
160    96     
-224   16     
0      64     
-224   -32    
256    -16    
16     208    
-480   32     
64     0      
0      -96    
288    0      
368    -288   
304    -48    
688    112    
-240   48     
48     -64    
-32    64     
-64    16     
192    64     
-96    -32    
336    -64    
336    160    
-624   -48    
-16    -128   
288    -80    
64     128    
96     0      
-48    32     
304    64     
-224   96     
16     -224   
0      112    
-48    48     
-128   -112   
496    -64    
-16    -80    
0      -704   
400    160    
-384   32     
-32    -64    
368    144    
-16    -80    
96     16     
64     64     
-112   0      
432    -80    
80     -544   
144    80     
0      -96    
128    -48    
96     -48    
64     -560   
0      -48    
80     -576   
192    -96    
-96    -128   
48     -64    
64     48     
64     -32    
-176   -1040  
400    -240   
112    -192   
96     16     
-16    -400   
16     0      
-2080  -160   
240    -48    
48     -64    
112    -240   
144    -240   
432    -64    
-224   -224   
96     -336   
288    176    
-304   -48    
-176   -256   
16     -256   
496    384    
32     288    
176    240    
-560   96     
96     -80    
1008   528    
-96    -144   
-256   -608   
96     -320   
-144   80     
176    -1104  
112    80     
32     -400   
224    64     
64     336    
-16    -80    
0      -224   
160    -272   
-816   32     
128    80     
-80    -176   
-160   240    
320    -208   
-240   -96    
-16    64     
144    128    
-176   -64    
32     -64    
0      352    
528    -368   
-64    1008   
-256   -512   
-16    384    
480    -96    
-144   -416   
-1072  672    
48     608    
144    -48    
48     -864   
-48    176    
32     16     
-48    336    
48     -160   
64     -112   
320    176    
240    -48    
-224   -16    
96     -32    
-64    256    
144    -80    
-32    -112   
160    -48    
-208   -176   
16     -192   
-96    -160   
144    64     
-96    32     
-144   -368   
416    32     
128    112    
80     -32    
-192   -144   
304    -48    
-96    32     
96     112    
-416   160    
128    -112   
-1568  -80    
112    -96    
208    16     
48     -80    
32     -112   
80     -240   
96     32     
-48    -48    
240    16     
-224   80     
32     80     
-272   0      
80     -128   
-16    -48    
32     48     
0      -64    
32     -128   
208    -16    
0      -80    
224    80     
160    -240   
80     0      
-256   -16    
272    -48    
-544   -80    
112    -256   
-64    -176   
64     48     
32     16     
176    32     
-16    80     
-48    -96    
112    32     
-16    -192   
208    112    
-16    -128   
256    -16    
64     160    
-176   32     
-336   -160   
-96    0      
-592   -64    
256    -80    
80     -16    
112    16     
-368   112    
-944   48     
112    32     
-688   -272   
48     32     
16     -16    
0      304    
-80    48     
112    -64    
-112   -64    
-32    192    
80     16     
-32    16     
-240   -288   
208    -224   
-48    112    
-144   64     
-96    112    
-64    -80    
-16    16     
240    48     
-320   192    
-32    -64    
-32    0      
-32    96     
-336   112    
-16    -48    
192    -400   
80     -176   
96     -224   
160    112    
112    32     
-16    16     
48     -32    
-288   -32    
-400   -32    
-352   -64    
-96    -16    
-80    -240   
224    -80    
-512   -144   
48     16     
-3408  144    
-144   -80    
176    -512   
80     -192   
-32    -96    
-48    144    
64     0      
-32    16     
-272   -48    
64     -192   
-16    32     
-208   96     
-96    240    
-192   112    
-96    32     
-448   48     
96     -192   
-96    -528   
416    336    
-160   192    
208    -208   
176    272    
144    176    
0      -112   
-208   368    
-208   176    
-208   -688   
128    96     
-144   288    
176    -32    
-368   320    
-176   -48    
-2544  144    
-240   -64    
224    240    
208    384    
-688   -176   
272    -352   
-144   160    
-160   0      
-32    -320   
-64    64     
-176   128    
-96    112    
-208   208    
-480   -160   
16     144    
-208   480    
-208   -96    
-256   -144   
-160   0      
240    96     
192    -48    
-128   -224   
160    192    
-48    0      
-400   800    
64     -176   
-16    -560   
-592   176    
-224   192    
0      -32    
-528   48     
192    32     
80     16     
-112   64     
112    -160   
-208   -96    
112    0      
-32    48     
224    416    
-288   32     
16     -96    
-112   0      
64     128    
32     -32    
-64    -144   
-16    -32    
0      80     
48     0      
-64    16     
-32    32     
-48    48     
16     32     
48     16     
16     32     
0      32     
-16    -64    
-16    -80    
64     112    
-32    208    
-48    64     
-576   -128   
-128   48     
144    48     
64     96     
64     -16    
144    96     
-192   48     
-64    48     
112    32     
-128   -48    
208    80     
-48    112    
80     64     
64     -48    
-112   16     
112    48     
-96    96     
80     64     
32     80     
96     48     
-80    -16    
-16    32     
48     0      
32     -160   
-32    -64    
128    160    
-96    -32    
-32    96     
-336   -32    
448    368    
-240   16     
-96    -16    
144    96     
32     32     
96     16     
48     64     
-64    80     
0      32     
16     -16    
80     -16    
128    112    
-128   -16    
144    176    
-32    80     
32     -16    
192    -272   
-32    0      
128    -16    
-16    -16    
80     32     
-128   -224   
-80    16     
0      64     
-16    96     
16     0      
80     -192   
0      64     
96     96     
16     48     
416    416    
-336   320    
0      -80    
224    0      
64     32     
160    -16    
288    160    
96     0      
224    -32    
-160   -48    
-128   32     
-80    96     
-160   -16    
208    32     
176    48     
96     96     
64     128    
-128   80     
-112   48     
-32    16     
-464   -176   
-112   -32    
-32    112    
-96    0      
160    112    
-64    80     
144    16     
-160   -80    
144    48     
0      160    
-224   -208   
80     0      
176    160    
-64    -16    
128    112    
-144   80     
-176   128    
192    240    
-352   16     
80     0      
512    208    
-16    64     
352    32     
-144   0      
-80    -80    
352    -48    
-208   -16    
288    32     
128    -32    
288    16     
304    32     
320    160    
0      128    
-288   -128   
240    -16    
160    16     
48     144    
96     96     
176    -16    
-16    32     
160    -272   
160    192    
16     -64    
80     80     
-192   16     
64     32     
-32    112    
192    96     
-80    -48    
208    144    
48     -16    
192    48     
-80    -16    
176    64     
32     80     
480    192    
-48    368    
-16    -1200  
64     16     
16     48     
-96    -160   
352    112    
96     -112   
64     16     
256    320    
528    48     
80     -272   
-512   -128   
0      272    
-448   0      
-224   -16    
-368   -208   
-32    -48    
560    928    
224    160    
192    -1216  
208    576    
-416   976    
-400   -624   
-176   -384   
32     608    
-176   -416   
160    544    
176    -144   
-144   -160   
384    304    
-224   -80    
128    -1024  
-112   144    
160    -48    
-208   448    
-304   -48    
272    -272   
-48    304    
32     -432   
-48    -304   
128    -224   
-16    -64    
96     176    
-192   -64    
-128   -304   
336    -656   
-64    -560   
288    -64    
-64    -48    
80     272    
-96    -64    
160    240    
272    32     
-176   -16    
96     112    
-80    32     
288    96     
256    128    
32     112    
-16    -208   
16     -240   
80     -160   
112    240    
-176   -80    
304    -48    
-48    96     
144    -48    
96     -48    
224    -96    
32     112    
64     80     
80     -80    
-64    -208   
160    48     
272    64     
-48    64     
16     -160   
288    80     
-128   192    
416    -160   
-352   0      
-80    -32    
-96    80     
80     0      
128    -208   
80     -112   
144    -128   
192    -16    
144    96     
96     48     
240    32     
0      -64    
96     -32    
176    256    
-64    32     
48     -32    
16     32     
96     0      
16     0      
80     -336   
80     -64    
128    -256   
32     -96    
224    -336   
-32    64     
160    0      
-16    -144   
112    80     
-16    96     
144    208    
176    32     
32     -32    
-144   -64    
-352   -160   
112    -16    
32     -64    
160    -96    
-96    -208   
192    -512   
80     -64    
32     -752   
176    80     
-112   -160   
160    -80    
256    -48    
-80    0      
-448   -160   
16     -144   
-272   -272   
64     -48    
112    96     
160    80     
160    48     
96     -336   
112    -256   
128    -400   
-16    -48    
128    224    
96     336    
16     64     
112    176    
-96    96     
48     96     
-112   -112   
176    -176   
-176   -32    
48     -96    
336    320    
-192   336    
48     96     
64     -160   
16     80     
96     304    
128    224    
-208   -176   
16     -80    
-112   -128   
224    96     
-160   -80    
368    -288   
-736   -592   
288    -32    
-528   224    
-32    -736   
208    -144   
-128   -368   
-48    -80    
112    -1040  
208    -160   
160    176    
80     -176   
-272   -64    
-64    160    
-304   416    
288    -272   
-384   32     
32     128    
-304   -112   
192    288    
-80    128    
-224   -176   
240    64     
192    -400   
304    80     
-64    -48    
-144   16     
32     48     
272    368    
-128   -224   
240    -80    
96     144    
48     -144   
304    -176   
16     48     
-32    528    
48     176    
-48    32     
-48    -416   
224    -448   
-16    -224   
240    80     
-544   -32    
128    -128   
32     192    
176    0      
-192   -32    
-32    -128   
-672   -352   
-256   -176   
-288   208    
576    720    
-224   896    
224    160    
592    32     
176    -16    
384    432    
-48    224    
288    -112   
112    32     
-192   -48    
48     32     
592    240    
16     80     
-240   -64    
128    304    
-1456  48     
-128   16     
-352   -112   
-336   96     
-224   -160   
-720   -160   
-64    0      
32     -32    
16     112    
-64    32     
272    32     
-224   -112   
160    0      
-256   -128   
160    32     
-96    -160   
64     -16    
-64    -64    
-176   -48    
-64    16     
-688   -16    
-192   48     
-480   -48    
-32    0      
272    64     
0      160    
-864   -64    
192    0      
-112   -128   
16     80     
-176   -128   
80     -80    
0      80     
-16    16     
0      80     
-32    80     
-208   0      
-128   80     
-32    96     
-272   -32    
80     64     
-640   -96    
112    -16    
-80    -80    
112    -48    
176    128    
0      0      
128    96     
-224   0      
-64    32     
48     48     
-32    96     
-432   -48    
416    112    
-1136  -208   
-112   -16    
96     112    
96     64     
112    -16    
-208   112    
272    144    
-384   -16    
-48    -32    
-16    80     
-96    -16    
-80    -16    
16     48     
-192   -16    
-336   -80    
-768   -96    
128    48     
64     -32    
0      64     
-112   -160   
128    -48    
-176   128    
160    96     
192    192    
-80    208    
96     112    
144    -32    
-256   -16    
-144   32     
176    256    
-272   96     
144    160    
-640   16     
128    -32    
32     32     
112    48     
144    -96    
-96    -16    
0      240    
-208   96     
32     0      
16     0      
-144   64     
-96    64     
128    288    
-240   112    
64     -64    
-1472  -208   
80     16     
-128   -96    
-32    32     
-176   224    
-160   -176   
64     -128   
144    -240   
208    -112   
48     112    
-80    48     
-16    0      
128    128    
-128   -16    
224    112    
-1040  16     
464    160    
-256   160    
-336   -128   
112    0      
-32    96     
32     -16    
64     -128   
304    272    
-528   224    
-96    -32    
240    160    
-144   0      
-64    -192   
112    -48    
176    -48    
176    64     
336    -112   
176    -224   
144    32     
96     128    
-48    304    
-80    240    
-176   -32    
-368   -128   
48     48     
-192   80     
224    144    
-64    0      
96     16     
-112   96     
-368   -192   
-96    -128   
-224   96     
208    112    
448    0      
-128   -288   
-288   -112   
-16    240    
-192   144    
-96    96     
-192   0      
-80    -112   
-144   -112   
800    912    
-432   -560   
64     -176   
96     352    
352    112    
-240   -80    
176    48     
-96    512    
32     -288   
128    224    
-160   -160   
144    80     
-304   -160   
928    640    
-672   160    
448    -48    
112    320    
144    -96    
-224   -656   
-272   592    
-368   0      
-208   16     
288    640    
0      -320   
0      -96    
96     96     
-192   384    
-16    272    
-272   -224   
256    -656   
-128   -208   
48     400    
464    208    
80     480    
128    0      
-128   -48    
-32    -288   
-96    -16    
128    128    
64     48     
272    0      
736    432    
-736   368    
144    -160   
128    -128   
80     64     
192    16     
176    112    
320    48     
-64    16     
160    48     
-32    0      
96     -256   
-192   -160   
160    128    
-64    -112   
64     -176   
-192   -16    
-96    -144   
208    -16    
-48    96     
96     48     
656    400    
-368   352    
-16    -176   
-128   -224   
16     0      
32     -16    
-16    32     
304    224    
-192   176    
48     208    
16     32     
32     -208   
64     -48    
-48    -1136  
16     48     
64     320    
128    176    
320    48     
-48    -112   
-144   -48    
224    80     
-288   48     
32     144    
-112   -96    
144    80     
48     144    
-16    -448   
224    -48    
-80    -384   
144    160    
-304   -96    
400    -528   
-48    48     
96     400    
0      -240   
32     80     
-80    160    
-128   -32    
96     -16    
-192   -416   
32     -112   
96     96     
64     192    
224    -208   
224    128    
-144   48     
-32    16     
-16    -16    
48     0      
-80    -176   
160    0      
192    -32    
336    48     
48     256    
-176   -80    
48     32     
32     -80    
64     80     
-160   -384   
112    80     
-128   -1808  
256    -208   
160    96     
-96    -192   
240    208    
-144   208    
16     32     
112    48     
96     32     
80     176    
176    240    
160    0      
-112   -48    
144    -432   
96     -192   
208    -224   
0      0      
0      -688   
32     32     
-48    -32    
320    -208   
64     16     
16     128    
-272   -64    
-48    -176   
-192   -160   
304    -752   
224    -208   
352    144    
-208   -112   
-48    -128   
208    80     
-144   0      
96     -16    
64     -208   
272    512    
32     160    
64     240    
-144   -16    
-64    -432   
32     -48    
96     -352   
16     64     
304    32     
0      112    
208    -336   
448    224    
208    0      
128    96     
-304   368    
-64    -272   
-176   -208   
0      -144   
576    432    
-288   -304   
-80    -464   
512    128    
416    192    
416    -256   
-96    144    
-96    -48    
-160   -96    
-160   -16    
112    -208   
256    176    
-96    32     
224    -464   
288    32     
0      -704   
144    -128   
128    -1216  
48     0      
96     48     
288    64     
-176   176    
-16    112    
64     -48    
304    64     
192    32     
-48    16     
-320   16     
-64    -208   
16     -32    
240    -48    
-192   -96    
144    -272   
80     -96    
208    -512   
96     -64    
208    160    
144    80     
32     -32    
32     16     
224    -176   
-416   -32    
-32    96     
112    80     
-832   16     
-464   -256   
400    -112   
144    48     
16     80     
-80    -128   
16     96     
-336   -96    
240    112    
-144   -160   
304    0      
384    -48    
176    80     
16     272    
224    -48    
-832   -160   
144    -64    
112    16     
128    -144   
288    0      
-64    -208   
-288   -112   
0      -224   
-16    -176   
192    48     
-176   32     
416    32     
-256   -96    
-32    -16    
-64    -176   
-256   -80    
224    -48    
144    128    
128    64     
-96    -32    
208    -336   
-352   -64    
16     -576   
144    96     
-64    48     
112    -16    
-192   -48    
80     -224   
-128   -208   
160    144    
-480   32     
96     16     
-2496  -32    
192    16     
224    0      
16     -112   
128    64     
64     -96    
16     16     
176    -64    
-32    0      
128    144    
-64    -16    
16     -16    
272    48     
80     112    
-48    -144   
-96    -80    
112    0      
-112   32     
272    -64    
64     48     
80     -144   
-48    32     
80     -1616  
-48    -80    
-32    -16    
64     -32    
0      -272   
224    64     
-432   64     
16     -48    
-496   96     
-16    -64    
80     32     
128    -112   
-32    96     
208    -208   
-16    -144   
80     -880   
160    176    
-144   -32    
64     -48    
-160   80     
96     16     
-48    -32    
16     -80    
-48    -16    
192    -32    
0      64     
224    16     
32     80     
-80    -224   
64     48     
96     -32    
96     -80    
-240   16     
16     -144   
-80    0      
32     16     
16     0      
160    -32    
-112   -48    
112    -16    
-144   16     
-320   -144   
-16    -112   
-256   -128   
-464   32     
48     80     
-768   -48    
-64    -352   
480    80     
208    464    
480    240    
-144   -112   
176    48     
-96    224    
-896   -304   
-80    -128   
-48    576    
-272   -384   
-80    -160   
-64    96     
-144   -144   
-128   80     
64     -16    
192    112    
-48    0      
-736   -32    
-128   64     
-544   832    
-384   -544   
-272   -400   
368    288    
144    -112   
256    208    
-448   -272   
-480   0      
-272   176    
-64    96     
160    0      
-304   -112   
320    -128   
224    624    
-688   -752   
-16    -272   
160    144    
48     -224   
400    224    
-336   -464   
288    -96    
-96    400    
64     -176   
368    64     
160    32     
-288   -288   
16     160    
-208   -80    
-160   -16    
-48    80     
-400   -160   
192    784    
0      -752   
208    -16    
80     704    
-16    -560   
-112   -64    
-48    480    
-32    -208   
-176   -192   
-16    224    
32     -112   
16     368    
144    320    
0      -32    
-144   -32    
16     240    
-208   0      
32     176    
-48    320    
112    -640   
-272   -208   
32     48     
0      -16    
-48    112    
32     -16    
144    112    
96     96     
-32    -208   
-272   -320   
-208   -336   
-144   448    
144    -64    
96     -80    
-32    -384   
-240   -176   
-416   16     
32     32     
-208   96     
-208   -80    
-48    64     
0      -16    
-208   -80    
-272   -64    
32     -80    
-208   64     
-224   48     
-1120  48     
-176   -64    
256    -128   
-112   64     
-144   144    
-192   -80    
400    0      
224    224    
-192   432    
-112   112    
16     -208   
384    -80    
32     64     
336    240    
-224   80     
-528   -32    
-336   -192   
80     -288   
0      32     
-48    128    
16     0      
160    -16    
-96    0      
64     160    
304    272    
-432   272    
16     -224   
32     -48    
-640   -272   
368    -448   
-16    -192   
112    64     
112    -128   
-336   288    
-64    48     
160    32     
-160   48     
-208   0      
-16    -32    
48     208    
192    208    
16     -256   
144    0      
-416   32     
-32    112    
32     32     
16     176    
64     272    
272    400    
-176   144    
-64    128    
-240   16     
160    -96    
176    48     
-32    16     
128    32     
32     80     
-112   176    
-176   -32    
240    80     
-144   256    
32     144    
208    -32    
48     -32    
-80    80     
-96    80     
144    16     
-256   -192   
96     -176   
96     96     
0      192    
-208   64     
224    -112   
304    16     
0      48     
-48    48     
-64    -16    
-80    0      
32     -80    
224    -192   
160    -32    
240    224    
-144   176    
-96    48     
-48    48     
176    144    
-80    64     
-48    112    
320    32     
-160   -224   
-144   80     
16     160    
-48    -64    
176    16     
64     48     
240    208    
-32    128    
-16    -64    
192    -32    
80     -48    
64     96     
-240   -80    
-64    -784   
208    -48    
32     -240   
128    224    
-16    48     
-80    128    
80     -80    
-176   -64    
-80    272    
-144   16     
144    -80    
-96    -432   
160    336    
192    144    
-80    -80    
80     -304   
-32    -48    
48     32     
-96    272    
-96    64     
-224   -96    
240    192    
304    144    
336    -16    
176    64     
-224   -144   
288    -80    
-448   -208   
192    -768   
-48    -400   
944    -432   
688    -176   
288    80     
112    16     
-16    48     
-320   -144   
-176   -32    
-48    48     
272    80     
352    80     
80     32     
160    64     
-80    48     
-160   -80    
112    -16    
-128   144    
112    96     
144    -512   
-96    0      
0      64     
-160   -128   
592    -32    
-160   64     
224    192    
480    -16    
-176   -64    
0      112    
512    688    
-544   -32    
32     -112   
688    -48    
-336   96     
80     -320   
144    -32    
80     0      
128    32     
32     0      
128    -16    
-48    -64    
48     48     
-240   16     
240    0      
-32    80     
528    -16    
-224   64     
224    -192   
-192   -64    
80     -32    
272    112    
240    448    
-48    144    
-128   208    
-128   80     
400    48     
-272   -224   
256    48     
-144   112    
96     96     
192    64     
192    96     
0      0      
160    0      
320    -112   
-128   32     
-80    -544   
80     0      
288    496    
224    208    
304    -224   
288    -16    
-80    0      
224    -128   
304    224    
-304   -64    
-16    -80    
192    -544   
496    272    
96     48     
-304   -80    
416    64     
-80    48     
-80    160    
176    -80    
-112   -16    
-48    0      
96     16     
144    48     
16     112    
192    -112   
32     32     
80     -32    
0      32     
-16    0      
176    32     
32     48     
144    64     
112    -16    
64     0      
16     -32    
64     112    
176    48     
48     48     
0      -80    
-64    -16    
336    112    
48     -16    
-176   -32    
256    -160   
32     -32    
320    -32    
-48    112    
-160   -32    
192    -336   
96     64     
-192   32     
256    -176   
-32    -32    
224    -880   
32     -144   
-32    -272   
-32    -144   
144    48     
192    -48    
-64    0      
160    -144   
-32    -160   
64     320    
320    144    
-144   0      
-688   -80    
224    -32    
128    16     
128    -272   
144    -176   
176    96     
0      -48    
96     -608   
0      -64    
-32    -32    
160    -96    
32     -416   
368    400    
-80    -48    
32     -176   
-368   -80    
32     -128   
176    -48    
32     32     
-16    96     
224    -448   
208    400    
144    -1424  
-32    0      
64     32     
64     96     
128    -48    
80     16     
144    -96    
224    -64    
-224   -64    
-96    -1248  
-432   1040   
-160   -176   
-64    32     
160    -80    
240    -48    
32     -64    
-32    -64    
304    -528   
176    -160   
256    288    
-64    -80    
-176   176    
-80    272    
-80    -272   
-32    64     
-1904  0      
128    -544   
16     784    
-336   -432   
208    64     
0      -16    
96     -144   
320    -96    
128    -96    
-48    -96    
112    144    
96     -16    
112    64     
-16    64     
-16    -592   
-224   1040   
-16    -240   
-912   -528   
192    208    
-16    -320   
224    256    
16     272    
144    -576   
-272   256    
-64    240    
-256   -112   
-80    -144   
96     416    
-352   -48    
544    -224   
-96    112    
672    240    
-960   240    
496    80     
80     -112   
80     -256   
-32    160    
-352   -48    
192    256    
-368   128    
240    176    
-128   48     
128    -16    
-240   -32    
464    -304   
-160   -96    
-240   80     
-448   -16    
208    -80    
144    16     
176    -176   
208    -64    
16     -16    
32     -96    
-256   -32    
-64    -32    
-112   0      
0      -64    
16     -48    
128    -48    
-144   0      
192    -80    
-528   -384   
128    64     
192    256    
80     -160   
112    -64    
-336   -496   
96     -48    
-240   -176   
352    -48    
-176   64     
-240   -320   
240    -160   
336    80     
-560   480    
-32    -208   
-320   -160   
288    -144   
352    112    
-80    272    
-192   48     
112    384    
-912   432    
-320   96     
-752   -480   
288    -256   
-928   -112   
112    48     
336    0      
-16    -576   
496    -48    
-32    48     
-544   -384   
224    -160   
-608   32     
224    416    
-512   288    
-480   -112   
-48    -96    
-496   -112   
16     -64    
-1600  32     
320    -32    
-496   48     
-48    -16    
96     -96    
-96    -16    
-64    32     
-16    -96    
-192   -304   
48     0      
32     336    
-272   -48    
-208   -112   
-128   -192   
-112   0      
-96    144    
-320   128    
-576   -432   
272    -48    
-320   304    
96     16     
-240   -768   
160    -416   
0      -272   
-224   -64    
-208   16     
176    -208   
-288   -160   
416    -256   
-160   112    
48     144    
80     128    
48     48     
-80    -80    
-16    0      
-16    -144   
-160   -208   
128    -320   
-96    -320   
32     -32    
-32    192    
-128   128    
-128   -48    
288    -288   
160    32     
32     -64    
-192   16     
-576   -32    
0      128    
-1024  224    
48     96     
-48    -256   
48     -160   
-16    128    
96     16     
-144   -80    
96     -128   
224    144    
-256   176    
-80    80     
160    160    
-256   256    
-96    -176   
224    0      
-400   -112   
0      176    
-16    80     
112    304    
-160   304    
-112   64     
128    -32    
-16    -16    
128    208    
-144   -400   
32     64     
0      80     
256    112    
-176   112    
96     -208   
16     160    
80     0      
192    -320   
-160   64     
-16    80     
-48    16     
-32    32     
48     -64    
96     48     
80     16     
112    160    
128    80     
-128   -384   
-448   -320   
16     176    
-224   0      
224    144    
160    112    
96     96     
112    112    
-64    176    
-16    16     
-48    48     
32     192    
-80    128    
-32    48     
-160   -16    
-16    64     
-192   -48    
-16    16     
-208   -64    
192    96     
448    112    
-384   96     
-528   -32    
160    -80    
144    64     
-128   96     
160    64     
-464   96     
-112   48     
-16    -48    
-112   192    
-176   112    
352    -80    
-32    -64    
208    160    
-48    32     
160    160    
-336   -80    
240    -96    
320    288    
-16    0      
288    64     
-208   -32    
256    48     
160    224    
-128   32     
-144   -32    
-96    16     
-208   -32    
-128   32     
368    32     
-192   -32    
-208   64     
-96    -112   
352    32     
112    112    
256    16     
48     -16    
128    48     
16     96     
-144   32     
144    48     
-256   -32    
112    64     
-48    48     
368    64     
-192   -64    
48     112    
-192   32     
304    80     
64     -48    
-48    -112   
208    192    
-448   48     
-96    0      
112    96     
-80    -176   
288    80     
-96    48     
-240   -416   
848    -32    
64     224    
-256   -16    
96     16     
-272   -48    
176    128    
48     112    
-144   -32    
176    0      
-208   96     
560    256    
-192   64     
-208   -96    
384    144    
-512   -16    
-64    -224   
400    0      
336    288    
336    144    
240    96     
160    224    
-528   128    
-64    0      
-352   -112   
688    256    
144    160    
48     -80    
336    176    
-48    128    
48     96     
-368   32     
368    80     
64     64     
128    64     
144    -48    
208    80     
-80    48     
0      64     
32     48     
80     -48    
96     32     
-48    96     
176    -544   
96     96     
-80    32     
64     -144   
64     32     
80     368    
-64    -80    
16     32     
0      32     
48     0      
-16    -64    
176    48     
-80    -32    
144    -256   
-32    144    
-16    -192   
32     64     
64     176    
48     368    
-32    16     
224    -176   
192    416    
48     64     
64     -512   
-80    176    
-112   -80    
64     96     
-176   352    
320    -336   
112    128    
-144   -272   
80     96     
-80    -784   
144    -256   
-32    288    
64     0      
80     96     
192    304    
-16    96     
-48    0      
144    0      
32     128    
112    -272   
0      48     
80     -288   
224    -624   
464    608    
-224   -400   
-96    -288   
112    -16    
224    -32    
-128   -64    
0      -256   
-160   64     
416    -256   
-224   -48    
64     -112   
112    -464   
48     96     
144    64     
128    -48    
192    -16    
32     -560   
272    -32    
-48    -144   
192    48     
-80    -16    
256    288    
-112   112    
240    -80    
128    -240   
32     -48    
112    -48    
16     -112   
96     0      
32     -368   
288    176    
-64    48     
-16    -256   
-48    -384   
48     -112   
80     -208   
64     -160   
160    -336   
64     -16    
144    192    
128    -192   
144    160    
32     -32    
-144   -16    
-16    -160   
224    0      
-112   -112   
0      32     
208    -272   
176    128    
80     16     
-160   -240   
32     -272   
-16    -32    
80     48     
-32    -16    
64     32     
96     -176   
336    160    
-48    -96    
224    128    
48     -176   
112    0      
208    -176   
0      80     
208    32     
-16    -1024  
432    256    
-1360  176    
80     -64    
432    272    
496    -288   
336    -32    
0      96     
-128   -128   
-32    48     
16     -128   
192    0      
336    96     
160    -96    
-240   96     
224    -272   
96     -384   
-960   112    
-160   -208   
32     -160   
256    -48    
208    -32    
96     -288   
192    96     
64     80     
80     0      
96     -176   
-32    -32    
112    -16    
-16    -160   
-128   -160   
208    -464   
-816   -32    
0      160    
160    400    
-144   0      
-96    -32    
48     -384   
-16    -304   
48     -880   
160    -64    
128    -208   
80     -128   
-112   -240   
336    -576   
-96    -96    
160    128    
-736   -64    
272    528    
-576   -208   
112    16     
208    -16    
-48    -160   
144    -576   
64     -704   
592    0      
288    0      
240    128    
160    -80    
-128   256    
-224   -80    
-464   -192   
-80    432    
288    304    
240    112    
-448   48     
-272   -96    
-240   -352   
144    -160   
176    -1168  
480    -480   
-16    16     
-624   96     
-160   112    
-80    -224   
-32    160    
208    -96    
256    112    
128    -208   
-432   128    
0      -48    
-224   -16    
-96    -224   
-80    96     
128    -80    
0      -32    
128    -128   
320    320    
208    256    
80     128    
368    -64    
-624   -432   
-304   -160   
16     0      
32     -160   
-112   -112   
-544   -464   
80     -192   
80     -368   
176    -80    
-96    -128   
176    -800   
16     -32    
16     -240   
224    -64    
288    -352   
-64    -176   
80     -144   
-112   -400   
-80    -240   
96     -384   
-160   -64    
96     -240   
272    304    
-256   -272   
-48    -112   
160    64     
-80    32     
96     -240   
-80    32     
288    -64    
-48    -272   
-80    112    
-304   80     
-80    -256   
-64    -304   
-144   192    
144    -112   
96     -16    
128    464    
-96    -448   
624    -400   
-112   80     
-224   -320   
288    208    
-192   208    
304    -48    
-32    32     
64     128    
-320   64     
-16    96     
-512   -64    
96     -112   
224    96     
176    16     
112    80     
-64    -16    
-496   -128   
-272   -64    
-816   -176   
-64    80     
64     0      
96     32     
160    32     
-80    224    
16     16     
176    16     
48     -128   
-48    32     
-240   -144   
112    144    
96     176    
-528   16     
-192   0      
64     -128   
0      -432   
-1056  -112   
208    80     
208    128    
-96    32     
-128   -48    
112    48     
-272   -32    
0      0      
-336   -160   
-240   -16    
-80    32     
-32    64     
176    48     
-416   32     
-128   16     
-144   -64    
112    16     
-816   112    
96     384    
-352   -80    
256    -32    
352    -144   
336    48     
304    48     
304    -48    
-160   -32    
-784   -112   
-336   144    
-384   -32    
-144   -48    
-48    -16    
336    64     
224    48     
-48    -112   
336    -192   
192    112    
80     32     
144    32     
96     -48    
64     48     
-272   -48    
112    -32    
-32    64     
-16    32     
336    128    
-112   32     
-48    32     
-480   -80    
-160   -16    
-2064  -176   
288    64     
-176   -32    
16     112    
160    64     
-16    -32    
0      0      
-176   48     
112    0      
0      -64    
288    80     
-272   80     
-16    16     
-240   -96    
144    80     
-208   176    
-288   -48    
112    -128   
-176   48     
48     32     
80     16     
128    32     
-80    112    
96     48     
48     16     
-752   -192   
128    -32    
16     144    
-96    144    
-240   0      
32     -192   
-144   80     
-464   -48    
576    112    
-96    144    
368    64     
-96    -64    
-48    16     
64     48     
-208   -64    
304    -16    
-240   -64    
272    64     
-96    16     
-96    -128   
352    16     
320    48     
272    -16    
320    272    
-128   224    
-48    -48    
-224   -112   
-224   -16    
432    448    
-256   368    
160    32     
-96    224    
272    112    
-320   -80    
336    -64    
-192   -256   
64     256    
-96    -144   
144    -16    
-16    208    
80     -288   
160    256    
96     112    
-32    -16    
16     -128   
176    48     
-288   144    
160    -48    
-240   96     
288    -128   
-224   416    
48     -176   
160    -192   
-240   288    
16     -512   
-128   176    
176    -144   
-128   80     
-16    48     
-192   32     
544    256    
-592   480    
304    -32    
-336   -96    
112    384    
256    -512   
-176   192    
-64    1184   
160    -704   
48     -592   
16     240    
432    16     
-64    480    
0      -192   
-448   -400   
16     -224   
-416   -64    
144    -80    
0      -144   
64     -176   
-16    -64    
144    0      
272    -32    
32     -96    
-64    64     
144    0      
64     64     
0      -16    
-16    -176   
-64    -176   
432    208    
-352   96     
80     48     
-512   -64    
64     -80    
-128   -160   
32     -80    
240    96     
-80    -192   
128    48     
80     32     
320    144    
-352   128    
64     -224   
48     48     
-32    160    
-128   -64    
16     64     
48     32     
-96    -96    
272    64     
-96    112    
-16    32     
-64    -16    
224    48     
0      144    
128    96     
-16    -48    
208    112    
-176   128    
192    240    
-128   -64    
224    144    
240    224    
-48    -384   
256    -32    
-32    96     
112    48     
48     80     
-80    -112   
304    -256   
-48    -96    
96     -80    
160    48     
-272   144    
112    -96    
80     192    
-80    -16    
32     48     
112    -16    
16     48     
80     128    
144    208    
-112   -128   
64     -304   
32     -80    
128    80     
-288   96     
128    80     
80     48     
-112   128    
128    -16    
192    -400   
16     -32    
0      -320   
-208   -80    
112    -64    
160    -32    
144    96     
-80    -176   
48     -224   
96     -128   
176    176    
128    -16    
-160   96     
-208   96     
96     32     
-160   -96    
16     -32    
-96    -240   
224    16     
128    -336   
400    64     
-16    -96    
-96    -16    
16     112    
176    128    
16     80     
192    144    
0      48     
96     -224   
-16    32     
176    -128   
-16    64     
96     -128   
128    64     
48     -1456  
144    112    
-96    -64    
128    336    
-16    -48    
96     -304   
-176   -288   
256    0      
-336   -192   
16     -320   
0      16     
96     -32    
384    96     
-288   32     
512    -352   
224    -464   
192    -64    
288    -240   
-112   48     
336    -240   
176    80     
112    -144   
-16    192    
-32    176    
-144   -336   
160    96     
384    -80    
80     -592   
80     -896   
-208   1120   
688    304    
336    208    
112    160    
-224   -368   
-368   -32    
-336   -192   
-128   496    
-208   64     
-240   32     
-112   128    
-160   -64    
304    -160   
-32    768    
400    -320   
0      -160   
240    208    
208    -112   
-320   176    
-64    432    
32     352    
272    80     
96     -80    
48     -240   
320    16     
-96    144    
208    64     
-64    -640   
-80    544    
400    416    
-96    48     
112    -112   
224    -80    
-48    -240   
288    -304   
96     64     
208    -320   
48     -96    
128    -400   
-80    -736   
112    256    
-64    -944   
96     128    
320    -48    
-80    -128   
400    -320   
-128   -16    
576    -608   
-64    -144   
-64    -48    
224    -192   
128    160    
176    -208   
144    -128   
224    48     
-80    -32    
-16    -160   
32     -48    
0      -352   
112    -32    
208    176    
-64    -32    
64     -208   
48     144    
144    -288   
32     -48    
-176   -96    
0      -160   
-672   224    
-16    -16    
64     0      
208    -64    
240    64     
-80    -208   
0      -64    
144    432    
160    -160   
64     -128   
-32    448    
208    240    
-32    32     
-112   -48    
176    -112   
-32    0      
224    -240   
-112   -240   
208    -400   
16     -80    
144    -112   
112    16     
-16    -16    
-496   128    
112    112    
32     32     
16     0      
0      0      
-96    -16    
176    -96    
-992   -208   
-176   -384   
-1168  192    
-16    64     
352    -144   
80     -48    
-48    -112   
112    -176   
80     80     
176    0      
320    400    
-352   240    
-48    -112   
-96    -48    
64     -32    
-80    336    
-128   320    
-544   160    
144    96     
208    -96    
320    0      
128    32     
-96    -224   
-128   32     
80     -592   
16     48     
128    240    
0      16     
-16    -96    
96     -48    
16     160    
112    -80    
-64    0      
-80    0      
-816   0      
0      -240   
80     48     
320    224    
48     144    
368    -560   
384    96     
-448   128    
48     -96    
-128   -48    
64     32     
-432   80     
-48    -32    
-112   -320   
-32    -256   
-752   -80    
224    -32    
128    160    
560    112    
-192   16     
384    -384   
-144   32     
-256   -64    
400    0      
-160   0      
80     32     
-240   -112   
416    -80    
-80    96     
-80    -96    
320    -48    
304    32     
-32    0      
400    0      
96     64     
-176   32     
160    160    
-128   -16    
80     -32    
-176   64     
240    16     
272    80     
-192   -80    
0      -96    
16     16     
-720   -320   
-320   0      
-192   32     
144    -240   
144    64     
-80    64     
-256   -48    
160    80     
-1344  -48    
432    208    
-384   96     
144    -256   
240    -352   
272    80     
-1216  -48    
208    16     
-288   -32    
64     160    
-464   -64    
-480   32     
-400   -352   
-160   -160   
32     368    
-768   224    
16     64     
-64    -16    
-112   -80    
-224   -176   
-560   -240   
160    -128   
48     64     
144    -64    
96     336    
-224   -192   
48     -96    
256    560    
-272   -896   
672    176    
-384   -32    
-256   -128   
-528   32     
-224   -16    
736    -432   
432    480    
-16    544    
-64    -432   
96     16     
160    592    
-192   -32    
192    160    
-224   -160   
-304   80     
160    -160   
96     128    
-16    208    
-224   -192   
-64    64     
128    0      
64     208    
-64    112    
176    64     
-512   -384   
480    320    
-304   400    
208    256    
-112   256    
48     16     
0      288    
48     112    
256    -112   
-336   16     
352    336    
-512   368    
64     112    
0      -160   
96     -176   
-160   -256   
16     -112   
-96    -48    
-144   -32    
80     32     
-208   48     
-96    32     
-144   -32    
192    0      
-80    48     
16     128    
-416   64     
32     32     
-480   -32    
192    -64    
192    -16    
0      48     
336    32     
0      80     
-48    64     
-80    16     
48     0      
-112   -64    
176    160    
-256   48     
-96    -48    
-560   -128   
-128   48     
-640   -64    
256    48     
368    208    
-400   0      
-352   -176   
-96    48     
-176   208    
160    -16    
-16    -32    
96     64     
32     128    
-240   -240   
160    -48    
-96    112    
-160   48     
-64    48     
-416   -336   
64     -176   
-96    160    
-256   48     
80     64     
-128   -16    
176    -96    
144    64     
-240   320    
224    224    
-272   -96    
288    128    
-384   80     
0      -16    
-176   -112   
-144   -272   
320    -464   
192    -32    
-16    272    
192    224    
-240   400    
-352   0      
112    208    
-48    80     
112    -160   
-64    -80    
-80    176    
-176   16     
144    48     
-48    -16    
160    -128   
176    64     
128    32     
64     16     
-64    -64    
256    96     
-192   144    
-48    -32    
96     -64    
304    -160   
496    -48    
240    80     
-128   -80    
304    32     
-224   112    
16     208    
352    384    
-16    240    
-192   144    
160    -240   
-112   -240   
-96    -272   
-80    48     
64     112    
-48    -336   
0      -128   
-64    32     
-560   -112   
32     0      
176    192    
80     160    
80     16     
-48    -48    
-64    16     
-32    -176   
192    -176   
112    -112   
128    -16    
-144   -16    
0      -128   
-224   80     
144    -352   
-64    -272   
96     -336   
-64    304    
64     160    
128    -32    
-144   400    
352    -240   
64     48     
-192   -560   
192    592    
-112   -320   
32     96     
272    112    
688    480    
-496   176    
-304   -144   
320    32     
272    -608   
624    512    
112    -32    
48     96     
-768   -160   
48     96     
144    288    
96     80     
352    224    
-48    -16    
16     192    
-368   -576   
176    352    
256    864    
192    -736   
144    -64    
-128   784    
-160   -224   
-16    -96    
48     320    
208    -112   
-304   -144   
80     176    
112    432    
-224   48     
1152   -512   
32     -992   
320    -384   
256    304    
736    560    
-800   304    
-288   -96    
-112   192    
240    256    
192    192    
80     16     
160    -96    
0      96     
32     80     
-48    -96    
32     -16    
192    96     
48     -16    
64     48     
176    -448   
112    176    
16     144    
-48    112    
96     64     
96     48     
32     -32    
176    32     
0      -80    
-80    16     
32     48     
32     96     
96     112    
192    352    
80     240    
-16    -512   
-64    96     
96     48     
96     80     
0      0      
352    80     
-176   -128   
128    80     
64     -32    
112    176    
256    48     
-176   -80    
128    128    
-32    -144   
112    32     
16     -544   
144    -32    
128    -1216  
-96    64     
48     160    
32     32     
80     0      
-16    64     
-48    16     
256    96     
304    -16    
0      -80    
-128   -192   
208    -160   
-48    96     
16     144    
32     144    
192    -16    
-80    64     
16     48     
160    64     
32     -32    
16     -48    
64     -64    
112    -64    
0      -48    
64     -64    
160    96     
-48    -208   
48     32     
80     -144   
192    128    
-16    -368   
144    48     
128    48     
80     96     
192    160    
144    64     
-80    48     
-16    -176   
112    64     
80     -224   
128    64     
-48    0      
160    32     
80     -160   
-32    -352   
368    -816   
48     288    
208    288    
-16    80     
48     -64    
-96    -16    
224    -160   
-64    -32    
16     128    
0      -64    
80     48     
192    64     
96     64     
32     -224   
112    -48    
64     64     
-128   80     
64     -336   
112    208    
-112   16     
208    -48    
112    -1008  
-48    -16    
-128   -624   
-32    -208   
448    -1312  
32     -240   
384    -32    
256    -144   
336    128    
0      16     
272    -656   
-160   16     
192    -384   
176    -16    
256    -16    
272    0      
208    -208   
480    160    
-144   32     
-80    -672   
496    48     
48     -272   
-80    -48    
304    -144   
-16    80     
80     -320   
80     112    
-48    32     
-304   -16    
-144   80     
80     -16    
-96    -16    
-128   -64    
80     -16    
352    -288   
0      80     
144    -576   
48     -128   
192    -48    
240    112    
0      0      
-80    -16    
240    32     
-48    -96    
-416   -96    
96     -16    
-928   -192   
224    -272   
144    -416   
-16    -272   
-16    -112   
48     -288   
96     -208   
192    -496   
-608   -16    
608    80     
-16    112    
-64    -176   
304    -16    
432    384    
-272   -208   
-144   752    
0      -736   
112    160    
64     -64    
-224   208    
64     -624   
-480   528    
112    -48    
64     -32    
-256   48     
-64    -64    
-112   288    
16     -96    
736    96     
-176   288    
-32    -256   
-240   -320   
-1360  -432   
32     176    
-496   -64    
240    -64    
-304   -208   
128    -256   
-16    208    
-304   -608   
-368   80     
256    -160   
208    80     
48     352    
432    16     
-16    80     
-192   -352   
64     -208   
-160   -96    
0      -48    
464    -48    
-208   32     
288    -336   
-144   128    
144    -288   
64     48     
-176   16     
-96    224    
288    -16    
112    -32    
-496   -80    
240    -176   
-448   16     
-16    -16    
16     -16    
128    -144   
-48    16     
176    96     
16     96     
64     -480   
240    -128   
-448   0      
160    -112   
-192   16     
0      -64    
-16    16     
192    -112   
-32    -96    
224    -208   
-160   128    
112    -96    
128    48     
-32    -16    
96     -16    
-544   -16    
0      -64    
-384   48     
80     96     
-176   -16    
-16    -64    
-16    0      
32     48     
-464   -64    
256    -144   
128    64     
-64    -96    
176    128    
96     -48    
-288   -64    
-112   48     
-528   208    
0      64     
352    0      
192    16     
-32    80     
-208   0      
128    32     
256    256    
-1312  32     
0      -16    
128    -48    
-64    304    
-560   -128   
-112   -48    
128    -48    
-80    80     
-16    96     
-720   -144   
-96    -48    
-1824  -96    
0      16     
208    112    
-224   240    
-272   -80    
64     -80    
-64    -320   
16     -80    
-128   -80    
-96    -96    
240    208    
-112   352    
-128   96     
-96    -224   
32     48     
-512   -16    
-176   -80    
320    -160   
128    256    
-400   336    
-112   336    
-32    -48    
-80    -272   
64     -80    
-64    128    
-48    -192   
-16    32     
-128   224    
48     336    
48     96     
-32    -32    
-112   -80    
-1152  -176   
112    32     
96     -112   
80     64     
-144   -160   
0      192    
96     48     
-80    48     
-48    16     
-224   -272   
80     16     
-160   -384   
176    -288   
-176   80     
208    400    
-1408  -192   
64     -160   
-160   -144   
256    320    
-624   48     
-272   128    
96     464    
-80    -256   
128    -32    
64     128    
0      -128   
-144   80     
32     224    
64     -144   
-240   -256   
-752   176    
224    48     
112    32     
240    64     
256    192    
-176   656    
32     -288   
112    -128   
240    192    
176    304    
-256   48     
480    240    
-768   -512   
-16    -208   
192    256    
-144   -192   
416    64     
-1120  -112   
384    -1248  
-240   32     
512    288    
-400   -224   
144    -176   
16     128    
80     -112   
336    128    
-144   -304   
64     16     
-304   80     
-176   -240   
-256   48     
64     336    
-496   16     
272    -32    
256    96     
48     112    
48     112    
-320   -16    
32     32     
0      144    
-160   0      
192    -48    
224    80     
-432   -64    
192    176    
-352   -16    
208    32     
176    48     
272    96     
-160   -32    
496    208    
-112   128    
-304   48     
96     32     
768    480    
-704   320    
32     80     
-48    544    
-656   352    
112    -400   
752    16     
-224   224    
80     80     
48     80     
-128   48     
-16    64     
80     16     
-96    -32    
192    144    
-176   -16    
112    96     
0      -16    
64     48     
-32    16     
64     -16    
-16    16     
-224   -64    
-48    48     
-80    32     
160    32     
-80    -16    
208    16     
-80    64     
-176   64     
128    48     
0      -16    
-128   -208   
480    -144   
-336   144    
320    32     
-80    32     
96     64     
-96    32     
-128   -80    
208    -32    
208    -224   
-64    -144   
32     0      
-64    80     
0      -80    
160    0      
128    144    
-112   -32    
-288   16     
48     64     
64     -32    
192    -128   
32     112    
208    64     
256    96     
-160   -32    
64     0      
96     80     
0      64     
-32    96     
240    96     
160    -32    
-272   -96    
0      80     
-16    -368   
64     0      
32     80     
-16    80     
-96    0      
16     -16    
0      -16    
-16    208    
64     272    
96     32     
64     64     
160    80     
-112   32     
256    192    
-240   -48    
144    -384   
-32    192    
160    208    
128    0      
-32    -16    
96     -48    
128    -32    
80     48     
144    96     
32     -32    
-64    0      
48     96     
64     48     
192    80     
-80    48     
32     -208   
-240   -528   
-240   -400   
-80    272    
-128   240    
112    32     
320    208    
-144   96     
0      -64    
144    96     
304    -256   
272    48     
-80    16     
0      96     
-32    32     
16     -464   
-16    64     
32     -16    
16     96     
160    96     
192    208    
-288   112    
208    288    
0      64     
384    16     
336    48     
368    208    
-208   -96    
-112   -656   
112    -352   
-112   -16    
-176   368    
128    -208   
-16    0      
32     0      
160    64     
64     192    
-320   272    
-16    160    
16     -32    
736    544    
-160   352    
0      -128   
384    -416   
112    -320   
512    -16    
64     112    
-256   -320   
64     -80    
-208   416    
0      304    
224    80     
256    352    
1072   704    
-400   -384   
176    -128   
80     224    
80     -48    
112    0      
368    -96    
-16    112    
16     16     
-80    -256   
128    224    
96     -48    
-96    -32    
176    144    
128    16     
144    0      
80     208    
48     -64    
-192   -320   
144    272    
-16    0      
256    16     
288    96     
-112   -224   
-336   192    
-64    112    
128    -160   
112    80     
-208   -448   
112    320    
176    320    
336    176    
128    -240   
112    -272   
32     272    
-32    208    
160    432    
-160   32     
-16    -144   
272    16     
64     16     
256    -560   
-368   0      
96     -208   
48     48     
272    192    
0      240    
384    192    
144    -112   
-48    32     
496    -144   
-128   0      
432    -336   
144    -48    
240    -208   
240    48     
272    -48    
-448   64     
32     -48    
-160   -736   
-128   48     
64     -1040  
80     -96    
336    -272   
-32    -272   
208    96     
336    400    
144    -112   
192    -112   
-48    -112   
80     144    
-64    48     
64     -256   
272    -32    
-192   -224   
256    272    
-160   -48    
224    -144   
16     -32    
192    -160   
-96    16     
96     -160   
80     -32    
-48    16     
240    16     
80     -240   
-48    -192   
32     112    
96     128    
144    -160   
64     -16    
-192   -16    
368    288    
-192   192    
-64    -256   
32     -192   
-176   -288   
224    0      
112    -816   
64     -64    
0      -48    
-112   32     
304    -160   
-96    64     
64     -128   
32     128    
-112   64     
80     64     
16     -112   
160    -96    
96     96     
0      208    
160    112    
16     -208   
240    16     
-112   -144   
112    -64    
80     32     
32     64     
64     32     
-144   -272   
-64    -128   
160    16     
-1104  -64    
-176   16     
96     112    
-48    -96    
-80    -64    
176    -256   
-320   64     
32     -1360  
224    224    
-192   112    
48     144    
0      32     
192    -48    
-240   48     
-16    0      
-320   -80    
0      -16    
-304   -144   
112    -176   
-384   0      
192    -272   
96     16     
144    -128   
80     16     
304    320    
-288   -112   
-192   48     
48     16     
-144   0      
176    32     
-80    -96    
304    144    
-528   -112   
16     -288   
-864   -336   
48     176    
128    640    
224    192    
-96    0      
80     -256   
320    -64    
112    64     
160    -64    
-224   -64    
80     -176   
-192   128    
112    -48    
-336   -240   
144    224    
256    48     
336    272    
112    -112   
-224   -208   
-368   -80    
192    528    
-496   -560   
352    -64    
208    272    
-128   0      
-112   -96    
-432   0      
0      -416   
-160   -288   
-240   0      
48     192    
-144   -64    
-16    48     
272    -80    
-192   240    
160    272    
160    -80    
-384   -208   
368    144    
-384   0      
16     -32    
-80    112    
192    160    
-672   144    
80     144    
-64    -16    
-176   -176   
-96    -16    
-64    -32    
-592   -48    
48     48     
-576   -32    
-112   32     
48     -80    
160    48     
96     80     
0      16     
112    -48    
-288   80     
-448   128    
-304   -32    
32     0      
64     0      
64     48     
-224   48     
480    768    
-2080  -64    
480    0      
-1248  -208   
64     240    
464    288    
-480   -96    
112    -48    
-32    112    
-80    64     
256    -16    
176    0      
-480   -240   
336    -64    
-96    80     
-64    64     
-112   48     
-144   96     
-16    0      
48     192    
-400   128    
-304   -48    
32     -240   
48     -144   
208    -128   
304    96     
-672   -160   
528    -48    
720    320    
-624   144    
-368   -144   
416    -16    
-336   -48    
-48    -96    
288    -16    
-816   -64    
96     -16    
-48    -32    
-64    -96    
320    96     
-480   288    
128    -160   
0      -64    
-64    80     
48     -32    
64     112    
-368   64     
0      -96    
16     -48    
160    64     
-352   16     
48     -32    
-1552  -32    
32     16     
-16    -112   
16     112    
-48    -48    
48     -16    
-48    -32    
-304   -32    
304    208    
-496   112    
144    -64    
144    -16    
208    48     
-400   0      
0      0      
-96    112    
-176   80     
48     0      
48     48     
208    128    
-160   -32    
-192   -96    
0      -80    
0      48     
112    144    
-112   -48    
-144   16     
160    48     
-384   112    
224    64     
-656   -48    
0      -48    
-288   0      
-64    96     
96     64     
-80    -48    
-112   32     
48     96     
96     400    
288    176    
-192   64     
-208   192    
32     -64    
-304   -176   
-16    16     
-368   16     
112    80     
-800   -208   
144    -64    
32     -80    
0      176    
-16    -48    
-96    -16    
-16    -176   
64     240    
-96    -16    
-160   -144   
64     -80    
-48    112    
16     144    
-320   -352   
-16    -48    
176    -80    
96     352    
224    -48    
-48    -288   
48     256    
-144   -144   
32     128    
-144   48     
-144   16     
0      32     
272    928    
-80    -192   
-48    -320   
-384   64     
-128   -64    
272    176    
-256   16     
16     -208   
288    96     
-48    -208   
304    288    
208    -96    
48     32     
-16    96     
-176   -48    
-112   -32    
-432   -48    
-48    96     
-208   16     
128    32     
240    16     
64     176    
-144   -560   
176    320    
112    528    
32     -448   
368    -16    
176    288    
256    -288   
272    240    
-48    0      
-272   -128   
-176   112    
64     160    
-208   -80    
-96    96     
-48    16     
0      240    
-176   64     
-208   -384   
448    384    
-96    -272   
144    -208   
192    -48    
128    -96    
-64    80     
-208   -32    
32     -32    
-64    160    
-64    -16    
-304   -320   
224    -576   
160    -144   
176    176    
-256   112    
-96    -80    
0      -48    
-224   64     
336    64     
-288   -32    
144    -192   
-80    -16    
96     16     
-32    32     
0      96     
96     16     
112    -160   
144    -512   
-64    -336   
176    -384   
-144   -400   
48     -272   
-32    -48    
-16    96     
-176   -176   
432    -256   
112    176    
176    -720   
-352   144    
192    208    
-80    -32    
320    -192   
48     -16    
560    32     
240    48     
-80    80     
-208   -48    
-48    240    
560    192    
112    -64    
16     0      
-240   -128   
-112   -304   
128    16     
-240   -48    
112    -48    
288    16     
736    144    
-128   -48    
-224   -112   
-128   224    
-144   112    
-416   -272   
80     -272   
192    -32    
-496   -96    
608    -80    
128    -480   
64     144    
-96    -80    
-80    80     
80     -48    
-176   80     
128    48     
-64    -48    
-192   -128   
432    80     
80     96     
-128   96     
160    336    
-16    224    
304    112    
-128   -80    
128    -32    
-64    32     
80     96     
96     128    
208    48     
-144   48     
96     -64    
304    -112   
144    128    
-208   96     
400    144    
16     -48    
112    -128   
-208   96     
64     -288   
-240   240    
64     -112   
80     -16    
112    -16    
80     -16    
-208   240    
352    32     
384    64     
-16    0      
-192   -96    
-32    -96    
96     16     
160    -80    
208    48     
96     -96    
-32    -32    
208    -192   
48     48     
-32    80     
16     -32    
16     -32    
64     16     
160    32     
64     64     
0      -16    
32     -80    
80     160    
480    256    
-240   272    
112    -48    
-192   -320   
0      -256   
544    336    
-176   288    
32     64     
16     0      
272    128    
64     -48    
160    288    
160    208    
-192   -80    
-48    -96    
208    64     
112    192    
144    -272   
208    304    
48     -32    
16     560    
0      256    
96     -112   
48     -144   
176    -176   
144    416    
128    416    
0      -304   
80     -64    
224    48     
48     -144   
224    -96    
256    112    
0      -160   
32     -432   
160    1312   
256    288    
-144   -768   
-48    224    
48     -784   
96     80     
-32    -160   
400    -432   
144    176    
-96    -1792  
32     208    
-48    240    
0      -176   
-48    -288   
240    -416   
160    -656   
32     16     
144    -432   
-176   -80    
256    -240   
96     48     
-2528  -128   
-16    -160   
48     -16    
-96    -416   
256    -80    
336    -256   
-320   -192   
-32    -112   
-208   -144   
-208   -160   
160    16     
432    0      
80     -80    
208    -176   
336    16     
-1808  48     
-112   -192   
0      -112   
-304   16     
400    32     
64     -128   
-128   -96    
-16    -704   
240    -64    
256    -80    
-128   128    
304    -48    
-16    0      
-560   -48    
240    32     
-144   -80    
-64    -144   
16     16     
240    48     
0      -144   
-16    -432   
176    -112   
160    -320   
176    16     
144    0      
48     64     
-224   -112   
336    32     
-416   -64    
16     -16    
-176   -48    
128    -16    
-528   -144   
640    224    
-560   32     
112    -336   
64     -112   
208    -112   
16     16     
-512   -400   
752    16     
-592   32     
-192   -160   
128    32     
-16    96     
-592   -32    
-64    -208   
-880   -112   
-64    64     
-224   144    
-176   -64    
320    -112   
-112   -160   
176    -16    
464    304    
-288   176    
-112   -128   
240    64     
-496   -288   
480    -272   
256    144    
-32    -112   
496    224    
-224   -16    
-208   0      
80     -160   
-32    64     
-512   -544   
496    -64    
48     -96    
-336   -48    
64     0      
224    -16    
112    0      
48     32     
-176   -80    
80     -208   
-544   -80    
80     0      
-1552  -80    
-32    -176   
64     0      
96     -128   
96     48     
160    -112   
48     80     
-224   -16    
144    -32    
-160   -288   
304    -160   
-416   80     
-96    -160   
112    48     
112    32     
-16    48     
128    -16    
64     16     
-64    -96    
32     48     
144    -384   
112    64     
-448   -16    
16     -128   
-80    -128   
-32    -48    
-160   48     
0      -96    
-160   -48    
384    48     
-288   -16    
192    -64    
48     80     
-784   -48    
-96    32     
-688   -240   
-1424  32     
-96    -16    
-560   -64    
-192   -112   
320    -112   
-464   -224   
304    48     
-112   -16    
80     224    
-224   0      
-480   -224   
112    272    
-48    -240   
-160   -208   
240    -16    
-64    -80    
80     192    
-64    -80    
-320   -32    
160    -48    
-112   -80    
208    176    
-32    -48    
-48    -176   
160    272    
-368   -144   
80     96     
160    224    
-448   -16    
128    32     
-16    -176   
0      272    
-416   96     
-192   -752   
-288   240    
64     336    
-1328  -256   
16     192    
-144   -208   
176    -96    
304    560    
-160   -432   
64     240    
-16    144    
-176   -224   
-208   -160   
-144   -240   
-80    240    
-160   -592   
32     256    
48     160    
-368   -128   
-64    80     
64     32     
-192   -64    
-32    48     
144    272    
-192   -144   
0      -592   
112    640    
112    432    
-144   -320   
0      -112   
32     -16    
128    176    
-64    0      
-96    -16    
80     -32    
-80    -96    
304    -304   
-80    -160   
256    176    
144    80     
-192   448    
32     96     
-112   112    
208    368    
-288   80     
-192   32     
-96    -64    
0      0      
-112   -48    
208    -16    
-656   -80    
144    16     
176    32     
-256   160    
-288   176    
-160   -16    
-64    64     
176    96     
32     192    
16     112    
-32    96     
-224   -48    
-16    -80    
-176   0      
304    96     
-720   -64    
64     16     
-160   16     
-224   240    
-32    160    
-16    -32    
0      32     
-16    -80    
-144   -48    
128    -48    
16     48     
-64    -32    
64     16     
16     -16    
128    64     
-272   256    
48     -96    
96     -16    
-192   -288   
0      -208   
-144   32     
-80    -80    
160    160    
128    16     
96     176    
80     64     
-320   96     
208    -128   
-208   112    
80     240    
-272   -320   
320    368    
48     128    
128    336    
-128   112    
-336   -176   
224    96     
-32    240    
-80    -112   
-176   0      
-176   -48    
288    96     
96     128    
0      128    
-128   128    
-80    -144   
-352   144    
-464   -64    
272    -176   
96     0      
224    96     
32     16     
160    288    
640    496    
-304   192    
-336   176    
-96    96     
-176   -256   
-96    -32    
144    64     
272    144    
80     -32    
48     32     
80     176    
-128   128    
256    -64    
-48    48     
192    -48    
224    112    
-288   160    
256    -16    
-240   128    
160    16     
-224   -160   
208    -64    
64     -80    
112    48     
-96    64     
160    -48    
-16    208    
0      48     
-16    16     
-96    -112   
-112   -144   
-48    -80    
-208   400    
256    64     
240    -224   
-352   -128   
0      80     
32     -32    
176    272    
352    128    
-80    240    
-112   -80    
-64    96     
96     64     
80     -160   
-32    -48    
48     -64    
112    64     
-96    -80    
48     80     
-32    16     
144    144    
80     96     
48     48     
96     -16    
64     224    
32     -160   
-64    -112   
80     -16    
48     112    
-160   48     
-32    144    
-32    512    
224    384    
48     368    
160    -208   
-80    -224   
288    256    
0      240    
-80    -192   
192    256    
16     128    
16     -112   
48     64     
96     32     
336    384    
-256   -64    
48     64     
208    96     
-48    -320   
112    256    
-192   -1280  
240    224    
128    -16    
-144   16     
112    -64    
32     32     
16     192    
32     16     
-48    -64    
-112   48     
96     -80    
112    -16    
64     64     
-128   -64    
96     64     
-224   -304   
144    -32    
-32    -32    
-64    -64    
16     -48    
32     -128   
-112   16     
-32    -80    
-48    -304   
112    -64    
128    -144   
240    96     
192    96     
-16    -144   
224    16     
48     -224   
256    160    
-240   16     
-224   0      
256    112    
-96    32     
0      32     
272    48     
-32    16     
0      -32    
80     -128   
-144   -112   
-176   64     
224    -64    
496    48     
-272   0      
-48    48     
208    -880   
-400   -96    
176    -48    
32     -16    
176    -144   
352    96     
112    32     
304    96     
-176   -64    
144    48     
-112   96     
272    -112   
256    -96    
-128   -96    
-32    160    
-304   -288   
-32    -48    
208    -272   
112    80     
0      -48    
224    48     
128    32     
-96    -64    
336    112    
-64    -48    
96     0      
192    -224   
0      -16    
-144   -256   
288    0      
208    -144   
64     -16    
-32    -736   
96     16     
-16    -32    
32     96     
0      64     
-96    176    
304    176    
16     -304   
160    112    
-112   -240   
112    64     
928    352    
-688   224    
224    -224   
-64    0      
128    -112   
704    320    
-416   144    
352    -112   
0      16     
128    -80    
432    32     
96     -80    
144    208    
256    64     
-208   -144   
-80    -176   
112    16     
0      48     
32     -16    
384    -208   
-224   128    
240    128    
-128   -544   
-464   -208   
224    32     
80     -880   
-432   -32    
288    -864   
-64    -144   
96     -48    
208    -128   
704    -112   
416    16     
-96    304    
-64    -32    
-176   -80    
-192   -48    
176    -320   
-384   -112   
-112   48     
320    112    
-160   -16    
96     -400   
64     -48    
48     128    
64     -64    
112    -352   
32     -112   
128    -304   
-48    -32    
16     256    
0      -48    
80     -96    
112    -16    
-368   288    
240    48     
0      -144   
16     -32    
32     -192   
64     -768   
592    512    
-352   -112   
112    -224   
384    384    
-224   -80    
160    -128   
-80    48     
16     0      
128    0      
-1088  -32    
352    -176   
128    -32    
192    -112   
-64    -16    
-112   -1440  
160    1040   
64     -672   
-64    -160   
144    656    
-112   -208   
208    -64    
-144   -368   
-288   -128   
-176   544    
-336   -304   
-32    -320   
192    -192   
528    288    
-256   -368   
48     -400   
144    -208   
96     -1072  
-64    272    
-80    -48    
112    -128   
128    -416   
192    -256   
-64    -16    
208    -112   
-160   -80    
240    -16    
-448   -32    
-192   -96    
64     -32    
64     -64    
-192   -240   
256    -448   
0      128    
96     -384   
32     -64    
-64    -192   
96     -128   
16     48     
208    32     
0      48     
384    176    
-832   176    
64     16     
-304   -80    
-48    0      
64     -16    
176    -224   
-304   -528   
352    -800   
0      0      
-16    -96    
16     16     
-144   96     
208    64     
-192   0      
144    -64    
-384   -48    
160    -112   
-48    -144   
176    256    
64     272    
96     64     
48     16     
64     -208   
96     -208   
-32    -48    
240    32     
16     -16    
288    192    
-400   32     
336    32     
-128   32     
160    0      
112    112    
-64    -48    
96     112    
192    -128   
-48    144    
416    -192   
112    16     
-224   16     
48     -80    
-32    -48    
-32    -64    
176    272    
-320   64     
-64    -64    
96     -352   
-1024  -48    
480    0      
-160   64     
-656   -160   
160    -176   
0      64     
160    16     
208    -32    
-160   -128   
-240   -320   
32     0      
0      48     
16     -48    
-32    64     
128    -16    
176    240    
-560   64     
-128   -352   
-640   -480   
-880   -176   
-304   -224   
-544   -400   
160    -112   
96     256    
-32    176    
-368   320    
-128   -112   
160    112    
-16    128    
16     144    
16     -400   
-336   -224   
32     -80    
-320   -80    
64     64     
-128   -336   
-272   -144   
208    -304   
-256   240    
0      -112   
-1104  -144   
-112   112    
64     144    
-368   256    
-560   -256   
368    -176   
48     -384   
240    -224   
320    -80    
-288   64     
-288   -704   
368    -400   
272    -272   
288    304    
192    -16    
32     96     
224    336    
-608   48     
32     -112   
32     -64    
-432   192    
-176   96     
-48    144    
-432   64     
-224   32     
112    272    
-336   336    
576    448    
-320   -48    
48     -16    
128    64     
96     192    
496    656    
-816   448    
32     80     
-208   -192   
-48    64     
432    320    
-48    240    
80     288    
16     272    
-528   304    
64     -160   
-256   272    
16     32     
-96    -48    
272    416    
-752   -48    
-400   -112   
-768   -432   
160    48     
480    368    
-112   752    
192    528    
-336   144    
-192   -624   
224    -384   
496    704    
-368   400    
-272   -144   
-240   -416   
208    800    
-432   496    
368    -704   
-176   -16    
32     -16    
-64    320    
-160   32     
-112   -400   
48     192    
-16    -144   
160    240    
32     -112   
-128   -64    
0      32     
-48    -80    
496    256    
-144   -272   
-32    -16    
-1392  -144   
-272   144    
-32    -32    
-96    -48    
-48    -64    
-32    272    
96     -320   
-32    -96    
16     -16    
-208   192    
48     0      
-32    -144   
32     176    
-176   80     
48     -48    
-176   -160   
208    16     
-144   80     
0      -48    
96     16     
-160   -32    
-64    -32    
-32    416    
96     160    
32     -32    
64     -16    
-16    64     
-16    -48    
-112   -320   
80     -144   
160    -32    
32     -96    
160    -128   
-16    48     
-112   112    
-64    128    
-48    144    
64     -112   
112    -80    
-48    48     
32     288    
-256   -64    
96     -80    
-304   0      
-112   32     
176    64     
144    32     
-32    16     
80     -80    
144    112    
16     144    
-48    48     
0      -128   
-32    -64    
-240   32     
-160   16     
-176   -48    
32     48     
-16    0      
64     48     
80     -16    
96     16     
-176   -32    
144    32     
-32    80     
-176   32     
32     16     
400    224    
-400   240    
160    576    
-288   272    
-16    -64    
384    -32    
208    -160   
16     96     
-496   112    
-96    -80    
224    128    
-128   64     
512    64     
-112   -16    
32     -16    
160    -16    
32     80     
-16    48     
96     80     
80     -48    
-96    0      
96     32     
144    48     
32     -16    
336    48     
-48    -48    
144    64     
16     96     
-288   -144   
112    -16    
208    48     
432    128    
-32    160    
-32    144    
-368   -144   
272    -992   
32     64     
96     32     
192    32     
48     48     
16     -32    
32     0      
112    0      
80     48     
-112   48     
-16    -16    
96     96     
-192   64     
144    64     
-368   -16    
-160   -192   
608    -112   
192    -48    
144    16     
224    -192   
144    80     
-224   144    
96     48     
-384   -160   
496    96     
0      80     
-208   -208   
-96    -336   
16     16     
448    192    
-96    -80    
-112   -16    
384    -1120  
-48    16     
288    128    
-272   -240   
416    -272   
208    -304   
-144   -160   
176    240    
-48    -208   
192    -288   
-160   -336   
96     -96    
-192   272    
-16    144    
-272   -112   
-80    -80    
48     -32    
80     16     
-176   -80    
240    96     
80     32     
336    272    
-80    -32    
144    128    
-96    -16    
0      -32    
144    48     
-32    128    
-32    128    
80     -112   
160    -16    
112    128    
-32    -64    
400    416    
-336   -928   
-112   96     
64     320    
80     -240   
176    320    
288    288    
32     -352   
256    880    
-64    -80    
32     -384   
-96    -288   
-176   -96    
288    576    
256    -16    
-64    416    
-128   -736   
64     -32    
0      -336   
96     -176   
-96    -48    
176    80     
80     144    
80     -16    
-80    -48    
272    -32    
-80    176    
96     64     
64     112    
208    112    
96     80     
32     96     
160    96     
224    48     
208    16     
32     128    
-96    -64    
176    0      
80     -208   
-48    -112   
0      -336   
32     32     
224    -240   
-16    -112   
288    -128   
-144   64     
0      48     
64     0      
-48    0      
112    112    
32     32     
80     -176   
192    -144   
16     -32    
32     48     
16     -320   
144    64     
240    80     
-208   128    
64     -160   
64     96     
80     16     
96     -80    
0      -48    
256    -592   
-128   -432   
64     -112   
-16    -608   
144    -112   
64     -64    
160    64     
320    144    
80     128    
-112   32     
-48    -160   
16     -1552  
160    -32    
208    -112   
160    64     
128    -144   
208    -48    
-144   -80    
48     -352   
80     -64    
256    -336   
208    -16    
96     -784   
0      -48    
-160   80     
112    -96    
-48    -48    
192    128    
-64    -16    
-160   -64    
-160   -208   
224    -224   
-736   64     
-96    -48    
112    96     
144    -160   
224    64     
-16    -816   
320    128    
-32    208    
0      -112   
80     -160   
-304   -32    
-64    -160   
160    -112   
-272   -48    
-80    -144   
-1136  -48    
224    0      
144    -144   
224    -16    
-464   -64    
-352   -208   
224    -32    
32     -528   
-48    -208   
336    -32    
96     -16    
48     16     
144    -64    
-240   -64    
400    -16    
-720   32     
112    -64    
320    64     
-128   -48    
112    32     
-160   80     
-96    -304   
192    -976   
0      -96    
-48    -464   
-32    -96    
96     -16    
80     0      
-128   -256   
80     16     
-560   0      
-128   16     
-1920  64     
448    208    
256    288    
192    0      
144    176    
80     0      
-80    -576   
-112   -944   
416    512    
-144   624    
176    48     
-96    -240   
-96    384    
-208   1184   
432    32     
-192   -1408  
-128   -448   
48     464    
-208   32     
144    192    
304    -256   
320    32     
96     -160   
480    112    
-192   -656   
-16    -112   
-208   96     
-32    -192   
-496   -256   
352    -144   
-368   -240   
-480   -720   
-496   928    
-48    240    
-160   -432   
208    96     
592    368    
192    -1424  
448    32     
-176   304    
64     -320   
-672   -256   
176    320    
-816   928    
304    -432   
-112   -320   
224    -144   
256    448    
0      -304   
208    0      
-48    -464   
208    384    
-512   -256   
144    -48    
160    192    
32     0      
-112   -160   
144    112    
-128   -48    
192    -176   
-160   80     
-48    240    
0      208    
192    -288   
224    144    
-1936  96     
32     80     
16     80     
-1200  -48    
-160   -16    
560    64     
-448   -32    
176    -32    
128    96     
96     16     
64     -16    
-1280  -112   
112    176    
-80    -112   
-16    16     
-176   -96    
-272   -176   
-160   -144   
-128   48     
-272   -32    
-1088  32     
-192   16     
96     160    
48     -144   
112    -64    
-96    96     
-224   112    
-16    48     
96     -128   
64     112    
304    64     
-288   -16    
-112   -48    
-160   -16    
144    -496   
48     48     
48     0      
-128   0      
-128   16     
-64    -192   
-64    -16    
-304   -80    
32     224    
-32    -32    
16     -16    
64     -16    
-144   -272   
-112   -208   
-112   16     
128    0      
-80    64     
-48    128    
-16    160    
-208   64     
-1104  -32    
112    64     
-64    -160   
112    80     
-288   -96    
-80    -16    
16     -32    
64     80     
-208   64     
-128   -32    
128    32     
-320   -80    
-32    -64    
-448   -112   
-192   -32    
-336   80     
0      -32    
16     -64    
-96    -240   
-224   -96    
-64    80     
-32    64     
-32    -112   
208    160    
80     112    
80     48     
96     64     
-288   0      
80     32     
-32    -16    
176    16     
176    64     
-96    -64    
96     -16    
368    96     
224    32     
64     0      
-48    0      
0      -32    
64     400    
-816   32     
16     -64    
192    -160   
416    -176   
240    96     
-448   -64    
80     80     
-1328  -144   
336    256    
-512   128    
-256   16     
32     0      
32     -80    
112    -16    
-80    32     
-192   32     
0      0      
-64    48     
-80    -96    
0      16     
64     16     
64     32     
-1456  -208   
448    -16    
-80    48     
-48    64     
-96    80     
-96    48     
240    16     
-112   80     
208    32     
-288   -80    
112    16     
-192   -96    
64     64     
-32    16     
16     48     
-64    0      
80     128    
128    128    
-80    16     
-48    128    
624    496    
-368   144    
-16    -32    
-32    112    
-336   -16    
112    48     
-16    -80    
128    80     
-320   -16    
352    128    
-512   -144   
192    208    
-496   96     
112    64     
-80    192    
64     96     
336    112    
96     256    
176    352    
-496   128    
-64    -272   
-48    -384   
0      144    
-288   288    
-112   -160   
-272   -192   
0      48     
64     448    
-80    -240   
256    -96    
32     -16    
-176   -16    
32     -224   
1808   1728   
-1200  -464   
-96    -416   
-480   96     
-336   224    
464    128    
-96    -48    
784    -320   
-112   64     
16     432    
-96    -304   
-112   144    
432    320    
-80    144    
-176   -176   
80     -32    
-240   384    
112    -32    
-16    144    
384    704    
-144   144    
224    0      
-64    16     
32     -288   
16     -464   
160    -64    
96     -112   
-240   -160   
-272   80     
176    -144   
160    272    
-112   -192   
112    48     
-224   -64    
96     32     
80     112    
80     -128   
208    -32    
-128   48     
48     64     
-64    0      
96     -48    
0      -48    
128    -48    
-32    -32    
128    64     
32     -128   
16     -64    
144    32     
-96    -48    
176    32     
192    128    
-16    0      
128    0      
32     -32    
240    -112   
256    160    
-128   64     
176    -32    
-176   48     
208    96     
80     160    
-160   176    
-160   -16    
-48    -192   
-192   0      
112    64     
96     96     
16     96     
32     -48    
64     32     
-16    48     
32     48     
64     112    
32     -32    
64     48     
-112   -176   
144    96     
-176   -48    
-128   -304   
112    128    
160    -48    
240    144    
32     64     
-64    32     
160    -48    
80     96     
64     176    
160    32     
-32    64     
192    -16    
0      -32    
-32    -144   
-224   -224   
176    -144   
64     -32    
0      32     
432    96     
-64    288    
128    128    
0      32     
80     -64    
-80    -176   
48     96     
112    -64    
240    192    
-32    64     
-208   -128   
112    0      
400    0      
112    144    
480    -48    
-240   176    
64     32     
48     96     
176    -256   
16     176    
-112   -64    
-128   0      
16     -16    
96     32     
160    176    
176    80     
-80    -160   
-32    -656   
176    -432   
160    -400   
144    240    
240    -576   
-128   80     
-32    -112   
-64    -112   
96     80     
608    688    
-480   512    
48     -64    
368    -128   
256    -160   
384    -48    
-144   -64    
64     64     
144    -160   
96     128    
224    -272   
0      -32    
112    80     
-176   0      
-96    80     
496    480    
-576   48     
112    -240   
48     -80    
336    384    
0      -16    
160    -208   
96     -32    
-240   -352   
48     320    
96     -464   
176    -112   
128    288    
384    128    
-160   -144   
128    32     
-48    -112   
160    -64    
48     368    
-112   -848   
-32    208    
288    -192   
288    176    
64     -272   
304    432    
128    -240   
288    -32    
-320   80     
400    -528   
-464   -80    
912    752    
-80    -832   
160    -880   
304    -752   
528    192    
48     -48    
-256   -528   
496    336    
-192   320    
-144   -80    
96     -240   
-48    -224   
208    208    
240    -80    
320    272    
-512   -64    
-96    -608   
240    -112   
0      560    
224    592    
208    -480   
-256   -352   
-144   -272   
848    592    
-656   240    
144    -96    
16     -320   
112    32     
480    -64    
16     32     
128    -16    
-128   -16    
112    64     
224    -48    
-32    -48    
96     112    
64     48     
48     -448   
64     -96    
160    80     
-176   16     
272    -112   
176    16     
48     16     
48     -48    
-208   192    
80     64     
-944   -48    
-128   0      
-48    32     
192    64     
256    -128   
0      -448   
-96    -96    
144    -64    
-112   16     
160    -128   
32     -48    
64     0      
32     -112   
-448   -128   
112    -96    
-464   32     
-48    -48    
144    -96    
80     -80    
144    -80    
112    -528   
-176   16     
224    128    
-336   -80    
96     -144   
192    112    
-160   -80    
208    -80    
192    144    
-224   128    
-736   -208   
80     112    
192    -208   
96     -208   
64     -80    
144    0      
-48    144    
80     -192   
48     384    
272    -32    
80     -48    
-128   32     
32     -80    
0      16     
-64    -160   
-384   96     
240    -80    
64     -16    
48     -48    
16     16     
64     -160   
-80    48     
208    -448   
144    80     
16     16     
16     16     
32     0      
0      -240   
-288   -224   
112    -96    
-640   -64    
112    16     
48     -16    
80     -160   
128    0      
256    -128   
112    0      
64     -96    
240    112    
-48    -48    
208    48     
-336   -16    
64     -288   
-512   -576   
112    32     
160    224    
48     -16    
-128   -144   
0      -176   
112    -16    
32     -160   
-112   -64    
-16    32     
64     -32    
-400   -16    
128    -16    
-48    -16    
16     0      
16     64     
-48    0      
96     -64    
80     -16    
-176   -112   
192    -192   
-304   -48    
176    -16    
112    0      
-304   -48    
-1648  80     
-96    240    
-592   -48    
-80    -48    
-16    -80    
0      16     
288    -32    
0      -112   
192    -96    
48     0      
-176   80     
-96    176    
-352   -64    
224    -16    
-304   48     
-256   240    
-112   64     
-544   80     
-448   64     
-1296  -16    
-144   -48    
336    112    
16     -16    
-480   -96    
-16    -80    
-432   -112   
-32    80     
-208   -64    
128    240    
48     192    
-112   64     
-80    96     
-112   64     
-80    0      
-720   -224   
-144   96     
-2288  128    
208    96     
64     32     
80     -16    
-160   -160   
-32    16     
-96    96     
-128   256    
-80    144    
-128   -208   
-96    144    
192    -224   
-384   -352   
64     384    
112    -80    
-1024  -96    
192    144    
-464   -272   
-16    272    
192    16     
-288   -288   
-208   -48    
-16    -176   
-240   -240   
112    48     
-16    -208   
144    304    
320    80     
0      304    
32     544    
-400   -336   
-64    -544   
-1136  352    
-80    -240   
-688   -592   
336    -128   
-176   -128   
-528   -256   
-224   -96    
-288   -208   
-80    192    
224    80     
576    304    
-512   480    
-352   112    
224    -384   
288    -160   
-240   400    
48     160    
64     -176   
-160   -64    
-16    16     
112    -48    
-208   -144   
320    -80    
-128   48     
0      -96    
-176   32     
-384   48     
-176   288    
-16    16     
144    -80    
-160   -80    
304    368    
-688   48     
176    -64    
-128   -64    
144    96     
-192   64     
144    0      
-176   16     
-112   0      
16     -64    
176    -32    
416    384    
-432   240    
176    192    
-576   16     
160    64     
-480   -16    
0      -48    
48     16     
-48    176    
96     48     
-16    -16    
144    48     
-272   -96    
96     -16    
-128   -48    
-32    112    
-256   -32    
32     -32    
-176   -128   
64     -16    
144    -48    
144    80     
144    160    
-16    48     
-16    48     
-144   -64    
64     144    
64     80     
32     64     
-160   16     
-96    240    
-32    -176   
240    -80    
-96    -176   
32     32     
128    96     
-16    32     
160    48     
16     32     
-16    112    
-64    -144   
0      0      
96     64     
-80    -80    
-48    -64    
128    80     
-144   0      
112    320    
80     48     
48     -144   
-32    -144   
128    -80    
16     80     
32     144    
128    0      
128    32     
80     80     
32     0      
0      -16    
80     -16    
-16    80     
-64    -96    
144    -64    
64     16     
128    -192   
32     32     
-16    128    
16     96     
256    224    
-144   208    
16     176    
240    176    
80     16     
-32    -32    
0      -128   
32     -16    
-384   -32    
64     32     
64     -224   
-16    -272   
160    -80    
-112   -144   
160    -48    
64     -160   
16     96     
-80    -240   
-368   -512   
-80    -304   
-16    112    
176    -96    
48     -160   
272    320    
-64    736    
16     64     
96     -576   
224    496    
-112   -80    
16     0      
384    160    
-336   -352   
64     -336   
-176   160    
16     -336   
-176   -208   
-112   240    
-32    0      
80     96     
-112   -320   
448    544    
-144   -112   
176    -64    
16     336    
64     -208   
528    272    
16     -64    
-16    816    
192    0      
-128   -384   
-16    32     
48     -288   
16     -176   
208    64     
176    -144   
-32    48     
-112   176    
320    144    
-160   32     
-80    96     
0      -16    
192    16     
16     64     
352    64     
-32    16     
-384   -464   
16     -400   
-448   -16    
16     -224   
96     -240   
128    32     
160    192    
64     128    
-384   -16    
-64    32     
-400   -288   
544    -96    
-400   -128   
368    -48    
144    16     
-592   -208   
128    16     
-32    -112   
-80    -96    
192    -224   
-16    112    
32     -384   
-112   0      
352    112    
16     0      
128    64     
48     112    
-384   -432   
192    -256   
304    208    
368    352    
-512   -64    
208    -288   
208    -32    
-144   -80    
-576   -256   
640    -688   
352    176    
-160   256    
-112   80     
-320   -80    
464    0      
-208   112    
-128   -16    
704    192    
-352   272    
144    16     
176    -16    
32     48     
128    -16    
32     32     
96     -480   
48     -32    
32     432    
-112   0      
112    32     
160    32     
192    48     
-48    192    
96     32     
80     -160   
128    -64    
48     32     
112    48     
0      -208   
-32    32     
-32    -240   
64     368    
304    32     
0      -80    
-48    -48    
0      80     
16     64     
96     64     
-80    -64    
0      32     
160    64     
208    -112   
128    96     
32     -144   
176    -64    
80     -112   
-32    96     
96     -144   
208    96     
-48    -16    
80     -32    
-48    144    
256    96     
192    16     
-32    -400   
96     80     
32     0      
16     48     
96     -144   
32     -32    
224    -16    
64     128    
-80    -416   
80     -80    
-96    64     
64     -48    
48     112    
-80    208    
128    -1392  
160    0      
-48    -128   
0      128    
240    112    
64     -112   
48     -16    
-48    -160   
160    48     
48     -16    
96     -144   
64     48     
16     16     
48     112    
-1600  -16    
-112   -256   
48     -128   
288    96     
-48    -16    
16     192    
32     -48    
112    0      
144    32     
-64    -464   
48     0      
128    -112   
320    144    
-128   -544   
-400   -848   
-1024  -400   
-112   -160   
32     -16    
96     -224   
240    -336   
96     -544   
400    -80    
176    304    
384    448    
0      -592   
32     -304   
96     48     
64     272    
80     16     
32     -240   
-352   -32    
80     80     
48     -96    
128    432    
96     192    
-48    -336   
-32    -304   
224    -480   
-80    32     
288    -208   
-144   -192   
240    -224   
-144   16     
96     112    
-112   -96    
-368   96     
-80    160    
-1408  -80    
48     -336   
336    64     
-80    368    
160    192    
128    -368   
352    -288   
608    272    
-144   480    
32     576    
-128   -48    
112    -288   
-320   -128   
-592   -192   
-80    176    
-704   208    
288    -224   
32     64     
32     -64    
-592   -16    
304    -480   
-16    240    
96     -320   
0      128    
144    16     
48     -48    
-432   -16    
416    -432   
-256   32     
-112   128    
0      -80    
64     -144   
48     -112   
272    -112   
-96    -48    
32     496    
256    -400   
208    -16    
-288   16     
48     -416   
48     352    
-112   -384   
240    96     
-208   528    
-352   -16    
176    -544   
192    -112   
-880   64     
80     -368   
-128   48     
-96    48     
-64    160    
176    -256   
160    16     
256    0      
-128   -80    
64     0      
192    -80    
-240   48     
336    -80    
-16    -16    
368    -32    
-384   48     
-480   -240   
64     80     
272    0      
112    64     
448    -352   
-112   -112   
-496   80     
592    160    
-304   -16    
96     256    
-624   96     
-96    -48    
-176   -64    
352    -144   
-784   112    
112    -112   
64     80     
-48    -240   
128    -192   
-32    -64    
-704   16     
192    64     
-864   -48    
-32    224    
112    -48    
96     -112   
-64    64     
112    144    
416    144    
-608   -80    
-1648  -32    
64     192    
-368   144    
80     144    
0      -112   
-784   -160   
112    -128   
-1056  -112   
64     -80    
-1600  -592   
0      -368   
336    0      
-80    192    
-240   224    
-32    -64    
128    0      
-160   112    
-96    192    
64     -144   
160    -192   
-512   80     
48     0      
-288   -48    
-96    32     
-560   64     
-160   -32    
-2368  -96    
-80    -112   
-304   -32    
160    64     
80     0      
16     32     
-224   -192   
0      0      
-80    -16    
-32    64     
-48    -32    
32     256    
32     144    
-160   -16    
224    272    
-1424  272    
-160   -96    
128    -224   
128    96     
-128   -16    
80     16     
336    128    
-272   160    
272    288    
-224   256    
-96    96     
-240   -32    
16     -16    
-112   -32    
-16    32     
-16    80     
32     -16    
16     -64    
192    -64    
-16    -240   
192    48     
-64    128    
64     160    
384    480    
-352   80     
-160   32     
-48    224    
-64    16     
-96    -192   
-160   -432   
-112   -400   
144    -16    
-2144  -448   
240    592    
-256   576    
0      416    
160    224    
-128   -160   
64     160    
48     -368   
176    208    
80     224    
-384   -704   
-80    288    
-96    48     
-64    0      
256    48     
-448   16     
80     32     
64     16     
192    -96    
240    112    
-144   128    
-176   -912   
-208   368    
-96    48     
32     -304   
224    240    
80     -192   
48     96     
-640   32     
176    368    
-304   80     
-368   -336   
-112   -176   
-32    64     
208    -48    
160    144    
560    560    
-336   304    
-336   80     
240    272    
-240   0      
-112   -96    
96     -144   
-48    -144   
112    -80    
-128   -272   
336    -48    
48     80     
-64    48     
80     16     
-64    16     
-128   144    
80     0      
32     0      
96     96     
48     160    
-80    -64    
256    48     
-96    32     
224    112    
-336   -128   
-112   -112   
272    48     
128    112    
64     16     
176    16     
-96    16     
192    80     
-144   0      
-64    -16    
80     -336   
-80    -80    
-80    144    
16     16     
-48    64     
-32    32     
192    -80    
0      32     
-336   16     
64     -112   
-64    64     
48     192    
-256   -96    
-112   -176   
48     -64    
352    128    
144    48     
64     -32    
176    16     
-144   0      
512    272    
-464   80     
-336   -160   
320    -64    
-128   16     
480    144    
224    224    
-272   -48    
-144   -32    
-512   -96    
288    0      
-112   32     
-144   64     
80     96     
-80    80     
-800   -464   
528    -256   
368    192    
-496   32     
48     -80    
-336   -144   
224    144    
368    144    
-208   48     
-176   -32    
240    176    
-112   -48    
-80    16     
16     80     
-80    -16    
64     16     
-16    16     
0      16     
112    48     
96     0      
-224   80     
80     256    
-224   32     
336    64     
96     -16    
-192   0      
-112   -80    
320    144    
48     -48    
176    48     
32     64     
-16    -64    
176    -128   
32     -32    
32     32     
0      48     
-192   48     
176    16     
64     96     
0      48     
144    0      
-208   -128   
256    48     
32     48     
-16    48     
144    64     
-64    0      
112    64     
-16    64     
288    32     
-112   128    
336    128    
-208   32     
64     -16    
-176   64     
128    -176   
0      -80    
16     -32    
208    64     
-272   -368   
80     -64    
-32    -32    
144    -80    
96     224    
192    112    
-16    -32    
-144   112    
0      208    
128    -32    
-64    -80    
48     80     
-16    32     
32     240    
-64    16     
160    -368   
-112   -400   
48     416    
32     0      
48     32     
96     128    
-176   -64    
176    -128   
192    496    
192    -80    
-32    32     
-48    -240   
-112   112    
80     -80    
144    48     
16     -80    
128    80     
208    -240   
96     -176   
128    224    
-320   32     
-240   256    
96     -1120  
-16    -528   
368    944    
-32    -160   
-32    -32    
48     96     
-192   -80    
-96    -528   
64     288    
128    -64    
96     -336   
160    -32    
-112   -416   
208    272    
-16    448    
192    -432   
-32    -96    
288    -16    
-32    192    
0      -288   
-128   80     
144    -208   
48     112    
32     0      
16     64     
32     -736   
64     176    
96     384    
272    -48    
-128   -80    
176    -256   
-48    160    
80     256    
-16    -208   
128    -480   
-80    112    
80     -16    
336    -128   
-32    -128   
160    -16    
64     -48    
-80    304    
160    160    
-144   -192   
-96    -480   
-96    128    
-144   224    
80     -320   
400    304    
-256   -192   
96     -16    
96     -144   
64     32     
240    -16    
-96    272    
128    32     
272    336    
-304   64     
160    144    
64     288    
112    -400   
16     48     
224    32     
-16    -352   
96     0      
176    -880   
80     16     
-80    32     
-16    -80    
16     112    
48     -64    
96     192    
192    0      
80     -336   
48     112    
176    -48    
48     0      
-176   464    
480    -320   
-224   -128   
48     -528   
128    -160   
240    -96    
416    -112   
-208   32     
-16    -352   
32     -336   
144    128    
-48    -96    
544    48     
-144   112    
-192   -32    
-816   -48    
-32    16     
-32    -112   
128    -576   
320    -240   
-224   -288   
-352   112    
16     -64    
224    -224   
240    -176   
480    176    
192    224    
112    96     
-128   0      
128    -16    
-1104  -32    
144    -16    
-240   -144   
144    -96    
-16    -80    
-64    32     
240    -48    
160    -464   
320    160    
-144   -176   
-16    16     
16     80     
32     80     
-48    64     
32     -144   
-16    128    
112    48     
48     -32    
80     176    
-48    -16    
304    -704   
0      -96    
48     -16    
-48    -32    
96     -32    
64     48     
-80    16     
272    -64    
-112   -32    
592    560    
-1040  160    
-336   -272   
-2576  -448   
64     -304   
176    16     
-16    -80    
128    -32    
-16    -128   
464    448    
64     -1040  
-160   -80    
96     -176   
128    -96    
176    -160   
160    64     
-208   48     
64     0      
-208   96     
528    272    
-1056  432    
-128   48     
-128   160    
96     -240   
-32    -32    
368    -224   
208    320    
224    192    
32     368    
-144   -64    
-32    -288   
-160   80     
336    -112   
128    -32    
32     -112   
-608   -64    
96     -80    
-112   16     
-32    16     
48     48     
176    -576   
240    16     
32     64     
-32    96     
-224   16     
128    0      
-112   128    
64     -208   
-336   -400   
-16    -160   
-480   272    
176    -160   
48     -80    
-16    -48    
288    80     
64     -160   
176    -16    
-144   -32    
64     80     
-64    -208   
96     80     
-96    -144   
-48    0      
-512   -176   
240    -784   
112    416    
176    -176   
0      96     
-832   128    
-192   -160   
-128   0      
-352   144    
-32    -144   
160    368    
-32    224    
336    64     
-128   240    
32     16     
128    -32    
128    -144   
128    16     
-416   -64    
32     48     
48     -80    
-64    32     
0      -32    
192    32     
64     32     
-800   0      
-272   -96    
-240   16     
-512   48     
112    32     
-144   -48    
320    -80    
192    96     
-464   -112   
144    48     
-416   -32    
-496   -64    
640    336    
-688   48     
-240   -64    
496    -288   
144    -32    
-224   64     
-400   -80    
16     32     
-64    96     
-544   -96    
112    -80    
112    -160   
128    16     
-48    96     
-272   0      
176    48     
-144   0      
-432   -64    
112    -48    
96     48     
-208   48     
-176   -16    
-1200  -48    
-80    48     
-128   0      
96     64     
224    -96    
80     16     
-256   32     
-208   -128   
16     0      
-176   -32    
240    128    
-368   -208   
352    -16    
-208   48     
48     0      
-160   -32    
16     48     
-576   -896   
608    -256   
-496   160    
-192   -144   
-176   -32    
-144   32     
272    288    
272    48     
576    32     
-448   64     
-144   -224   
48     -48    
-336   96     
-320   -96    
-112   -144   
-448   48     
112    256    
-576   -80    
112    -32    
-288   16     
32     48     
160    160    
-368   48     
400    208    
-800   0      
288    -64    
-160   48     
-288   32     
0      0      
224    -16    
-528   -112   
96     32     
-144   32     
48     -16    
-128   16     
-16    32     
-192   32     
-48    80     
-288   -192   
288    -48    
-144   208    
-144   208    
192    -48    
-464   -160   
80     16     
-1360  -176   
112    -48    
16     112    
48     32     
32     0      
112    160    
48     -32    
80     -48    
-32    0      
-128   80     
-80    -32    
-64    -48    
160    144    
-144   32     
64     48     
-224   16     
-16    128    
176    160    
-176   -144   
-160   -48    
128    64     
0      16     
-64    16     
64     -16    
-96    64     
112    -64    
-320   -160   
272    64     
16     96     
-64    -448   
-256   608    
48     160    
-64    -176   
64     -64    
-32    16     
224    224    
-176   -96    
-128   112    
192    -128   
-64    -208   
176    224    
-144   -176   
-16    0      
-112   176    
-32    112    
240    -32    
-256   272    
96     -448   
256    272    
288    -64    
32     624    
-80    -272   
336    -240   
-64    496    
-96    -256   
-128   112    
0      -624   
80     48     
-64    240    
-32    -48    
0      144    
16     240    
656    432    
-288   144    
-48    -144   
176    32     
32     64     
96     272    
-48    48     
-96    -448   
0      128    
-80    64     
128    -64    
-96    128    
-112   -32    
-48    -144   
112    16     
-48    16     
-80    48     
-80    96     
-96    208    
0      192    
96     48     
-80    -96    
48     -48    
176    64     
-272   256    
176    144    
224    16     
48     304    
80     144    
16     208    
192    112    
80     336    
-80    368    
-80    256    
32     160    
256    96     
416    352    
-272   96     
32     -80    
-16    -48    
112    -16    
32     64     
144    80     
112    96     
-32    144    
-224   -32    
208    -192   
320    48     
16     0      
160    -48    
80     -16    
-160   -48    
-80    -224   
96     -272   
64     64     
-128   -368   
16     -144   
-176   224    
-80    64     
-32    0      
304    96     
-128   96     
-64    -16    
16     -80    
-32    -80    
-160   -224   
160    -48    
-48    64     
-16    128    
-32    0      
64     -176   
160    96     
64     -1232  
112    240    
128    0      
240    48     
-112   0      
0      176    
-128   -240   
112    -64    
192    -128   
-16    96     
64     144    
32     0      
80     208    
-96    -32    
64     80     
96     -336   
240    160    
-32    -48    
224    -160   
-80    -192   
96     -32    
-16    -64    
16     192    
-80    -144   
192    -496   
272    -560   
-224   -880   
0      -208   
160    -64    
128    320    
-224   -240   
-16    16     
32     -224   
336    16     
704    -32    
224    224    
-624   208    
-528   -48    
-624   -288   
176    -160   
144    -352   
384    -336   
32     288    
-192   48     
-288   272    
-272   -352   
-64    -32    
192    -160   
416    80     
-16    64     
0      304    
32     160    
-128   -208   
176    256    
272    240    
736    416    
-528   240    
-112   -16    
-112   -64    
-80    -32    
128    -432   
16     -16    
272    -432   
-48    144    
16     -32    
448    32     
-16    80     
240    112    
32     128    
112    80     
176    48     
-400   -208   
224    -48    
0      -656   
112    -48    
160    -352   
224    -112   
-32    -512   
-160   -112   
48     -112   
-192   96     
32     32     
384    320    
-224   176    
16     80     
128    208    
64     192    
64     64     
0      -96    
0      -16    
176    -128   
80     176    
-16    64     
-112   96     
-48    112    
336    496    
48     352    
224    -1056  
32     -1392  
16     -48    
208    320    
-64    -32    
-32    368    
32     80     
224    176    
-176   32     
0      -272   
-32    576    
160    -160   
-64    -288   
160    304    
48     -224   
48     208    
-16    -64    
336    -544   
-80    -16    
304    -336   
112    -608   
-64    -112   
32     64     
96     -240   
-80    32     
64     224    
16     -752   
-32    416    
-80    -192   
0      -16    
48     288    
-96    -80    
-160   -48    
144    -192   
224    464    
192    -64    
0      -176   
-32    -1232  
80     -96    
112    -16    
96     64     
64     -112   
112    -32    
192    -32    
0      16     
0      64     
48     -80    
-1296  16     
144    -112   
560    672    
-304   288    
-80    -176   
304    -352   
96     -16    
128    -160   
64     -112   
-16    80     
-112   160    
-176   -176   
208    -192   
-288   -48    
384    -16    
-768   32     
-16    -320   
128    -112   
0      64     
-128   -64    
-48    -448   
144    -96    
112    -656   
80     16     
64     -16    
-48    48     
192    -16    
-48    -16    
-240   -112   
384    224    
-688   -48    
-128   -64    
-1632  32     
-16    0      
-112   -96    
192    -160   
304    64     
128    -320   
240    -128   
304    -256   
-48    16     
96     112    
256    -32    
0      -32    
96     -64    
80     32     
80     -32    
-800   64     
-400   -128   
-496   -32    
176    -160   
208    -48    
176    -256   
672    240    
-432   240    
-352   -64    
144    48     
80     -16    
0      -48    
256    -32    
-160   -64    
0      -64    
-416   -32    
48     -112   
144    16     
64     -16    
-64    -16    
144    -192   
112    112    
16     -496   
176    -128   
96     160    
-224   -192   
592    -80    
-16    16     
80     64     
-16    32     
48     0      
-432   -448   
384    128    
-320   16     
208    32     
-304   -224   
-336   -48    
16     144    
224    16     
-480   64     
112    -32    
-160   -176   
32     -32    
32     -80    
224    16     
128    160    
112    -208   
192    0      
96     -32    
64     -64    
160    -48    
64     288    
-16    240    
-1472  -192   
-752   -304   
-16    -32    
80     80     
-208   -32    
464    16     
-80    -80    
-272   -176   
160    -352   
384    -240   
-1936  -224   
-176   -16    
0      -160   
-304   160    
-160   112    
-352   80     
-304   -32    
192    192    
80     -96    
-80    -64    
-160   48     
-112   -144   
48     -384   
-384   240    
32     304    
-240   -256   
112    48     
-224   0      
-48    -544   
-368   432    
80     160    
-16    -272   
-416   96     
48     48     
-896   -64    
-16    32     
-224   -80    
192    112    
32     208    
-80    -176   
96     -16    
96     384    
-240   -256   
64     96     
-96    16     
-192   -80    
16     -240   
-64    96     
-144   224    
-352   0      
-48    128    
-464   -496   
-192   448    
-32    -32    
16     144    
720    720    
-400   528    
-208   128    
-176   -176   
80     -320   
-80    -208   
-16    -32    
-112   16     
-64    304    
-144   144    
272    224    
-240   224    
-32    272    
-48    32     
288    -176   
-32    -160   
-48    -32    
16     -64    
-240   -192   
-32    -80    
16     64     
64     80     
-48    0      
-80    0      
0      -48    
64     -16    
-656   -96    
160    96     
-64    -32    
240    128    
64     32     
-16    -128   
-64    -112   
-192   -48    
32     112    
32     16     
-32    16     
0      -32    
-16    48     
-112   16     
16     32     
-288   -16    
32     96     
-48    96     
208    176    
-16    112    
-176   80     
48     272    
-432   112    
176    -144   
160    0      
-64    -16    
128    80     
-16    -96    
-240   -144   
48     176    
-224   -16    
80     -112   
-480   -80    
-192   32     
-16    48     
-192   16     
208    64     
-16    160    
-96    112    
-112   96     
-80    -48    
-144   -48    
-16    32     
-96    -96    
176    80     
-144   80     
32     -48    
-128   -48    
-96    64     
-32    64     
80     48     
-48    -32    
-48    240    
16     -32    
128    -32    
-160   -64    
0      -32    
-16    48     
-128   -144   
272    -48    
-480   -416   
-16    -160   
32     -160   
-240   -144   
224    -16    
-48    80     
96     96     
128    -80    
-80    272    
80     80     
240    160    
304    464    
-384   240    
-32    -112   
80     -144   
144    -176   
240    -112   
112    128    
48     -48    
-32    -192   
-128   -64    
32     -32    
-64    32     
128    16     
128    32     
-16    144    
-48    224    
80     224    
-192   -80    
-80    -64    
160    -160   
-64    -80    
112    -32    
144    -64    
-48    0      
48     -208   
-256   -288   
16     -336   
-80    -288   
32     -256   
-208   128    
-48    320    
-224   240    
32     -400   
144    -144   
160    96     
112    -224   
160    208    
-16    272    
-96    288    
560    272    
-400   -272   
-208   -16    
-128   160    
-64    48     
144    -16    
400    -208   
320    -32    
-224   176    
-560   240    
48     -160   
-336   80     
112    48     
304    -80    
16     -192   
-16    -176   
-512   -464   
-96    -176   
16     112    
16     -544   
64     -272   
160    -480   
64     -352   
128    -208   
-240   -1376  
-16    64     
144    32     
80     144    
-192   32     
-48    16     
-64    80     
256    -208   
224    128    
32     208    
-192   -64    
96     -64    
80     48     
128    -16    
-48    176    
336    112    
-48    -96    
160    192    
-224   224    
112    -160   
352    336    
-112   -240   
-80    176    
0      48     
-144   -240   
48     64     
112    176    
48     32     
-96    96     
-64    -96    
160    -80    
-48    112    
32     -96    
144    304    
-32    -160   
32     112    
32     144    
-112   0      
320    96     
160    208    
-96    -288   
-16    208    
-64    96     
240    256    
-48    -144   
80     -272   
336    160    
-128   -336   
192    240    
0      -64    
-48    16     
64     208    
96     -64    
0      32     
112    96     
96     -80    
144    0      
-128   -112   
96     -352   
128    -32    
-80    -64    
64     0      
96     -448   
64     0      
208    368    
-176   128    
48     144    
240    544    
-176   80     
-16    80     
-96    80     
48     0      
0      -80    
112    -240   
176    -16    
48     -96    
144    -48    
128    -80    
144    16     
32     -384   
48     48     
96     -224   
160    64     
16     224    
48     64     
112    -16    
-144   16     
96     96     
432    464    
-560   288    
64     -192   
272    32     
80     -288   
-64    16     
400    -80    
80     192    
-32    160    
64     -112   
0      -96    
96     176    
64     64     
112    -16    
80     64     
128    160    
112    80     
32     -352   
0      80     
0      -192   
160    80     
-96    -64    
96     176    
-432   64     
-80    -32    
96     16     
176    48     
336    64     
256    -144   
496    160    
-176   -48    
64     96     
-176   -64    
0      32     
112    -48    
0      16     
48     -128   
416    112    
-448   16     
-112   -176   
288    48     
128    -144   
32     -640   
-80    -80    
272    -1472  
-208   -64    
-48    -32    
-32    -16    
16     96     
-160   -272   
464    -16    
48     -48    
48     -1248  
320    144    
-288   -336   
-16    -16    
-400   16     
-32    -480   
32     -144   
96     -192   
16     -96    
368    48     
48     -32    
176    96     
-64    -144   
128    -944   
208    48     
48     -208   
16     0      
-128   -96    
352    112    
-704   -80    
-112   -256   
16     -16    
112    16     
-128   -288   
928    -128   
-192   -48    
384    -1376  
-480   -592   
272    -304   
-96    -224   
320    32     
32     176    
368    0      
144    -160   
-448   224    
-192   80     
64     -112   
512    528    
-432   496    
0      64     
288    -160   
144    -976   
-80    -224   
16     -160   
80     80     
96     -16    
176    -96    
208    320    
144    320    
-16    -368   
608    32     
-864   128    
-240   -400   
16     256    
144    -16    
-400   -400   
240    128    
240    0      
-160   -432   
160    -64    
-80    112    
-240   -208   
192    -48    
48     80     
48     176    
48     32     
-448   -288   
-32    -96    
240    -80    
240    288    
-304   -352   
-128   624    
304    -208   
208    -608   
-736   -608   
352    144    
64     800    
512    112    
-560   128    
-368   -816   
-192   -400   
-176   80     
400    64     
-752   -96    
176    16     
-384   -240   
-160   -272   
-96    128    
240    -416   
16     192    
-32    -96    
112    -112   
-160   -112   
-144   -192   
48     48     
80     112    
-208   -32    
96     192    
-160   80     
464    96     
-336   208    
-16    -144   
96     80     
400    176    
-128   176    
16     -400   
-16    -128   
-128   -32    
160    -80    
64     16     
64     32     
-144   64     
208    -64    
-128   32     
32     -32    
-144   0      
48     16     
80     -64    
384    -48    
144    -32    
-400   -16    
128    16     
-256   16     
112    -16    
-32    16     
256    144    
-384   -112   
160    -32    
-256   -64    
16     -128   
64     0      
272    32     
-16    160    
-1008  -112   
-48    112    
-432   96     
240    -112   
-144   48     
208    -112   
16     0      
64     96     
-48    -64    
64     112    
144    160    
-32    64     
48     -32    
-1040  -32    
-240   160    
-816   -448
[truncated: 260,011 more chars]
