# Supplementary material for: A Fault Diagnosis Method for One‐Dimensional Vibration Signal Based on Multiresolution tlsDMD and Approximate Entropy
Source: Hindawi journal article supplement (doi:10.1155/2019/3262818), 2019-01-01
Supplement: f1 [file 3262818.f1.zip › 3262818.f1/gear signals/normal gear signal/Data20.txt]

32     32     
144    128    
432    208    
-224   256    
-272   -112   
224    -32    
32     -80    
16     384    
-240   80     
-32    -240   
64     16     
144    -176   
96     192    
80     80     
16     256    
32     176    
96     -128   
32     -160   
80     48     
-224   48     
-32    80     
112    32     
16     32     
208    96     
80     96     
-144   96     
80     -352   
160    -16    
240    -144   
112    32     
0      -48    
-48    -16    
-96    -208   
144    144    
192    208    
-32    128    
16     128    
48     -80    
144    320    
176    320    
32     96     
-96    -144   
-96    -96    
208    -320   
-144   48     
-64    0      
160    256    
128    0      
0      -32    
96     -400   
416    224    
-240   -64    
-64    -256   
64     64     
32     -144   
-224   -32    
48     -96    
-80    -144   
160    -272   
336    240    
-48    -208   
-32    96     
16     16     
16     48     
-176   -64    
304    288    
208    144    
304    288    
48     240    
96     -64    
-256   -32    
32     -272   
48     64     
0      -272   
144    48     
256    128    
96     64     
-16    128    
0      16     
-16    16     
176    80     
-32    64     
48     -64    
32     48     
32     -16    
16     64     
32     -112   
-16    16     
192    64     
128    112    
64     -48    
288    112    
-272   -32    
224    96     
176    368    
-64    -160   
224    128    
320    -32    
-240   64     
240    -160   
96     32     
48     -64    
96     80     
32     -144   
64     64     
-64    -144   
32     0      
-16    48     
144    -560   
96     80     
288    -64    
-96    -192   
224    -144   
-96    -48    
128    -48    
96     112    
192    -16    
-48    192    
64     -32    
32     -432   
176    0      
-32    -240   
176    64     
-32    -192   
192    -96    
224    48     
112    -464   
128    80     
64     -112   
176    -96    
0      -80    
128    16     
-496   -176   
1008   64     
-80    64     
320    48     
512    48     
-224   48     
224    -240   
128    -368   
-208   208    
512    352    
-752   0      
-32    -544   
448    -176   
-64    -128   
-64    -256   
656    48     
160    80     
48     -80    
80     112    
192    80     
-336   -160   
32     -160   
208    64     
-112   16     
208    -32    
16     -48    
96     -64    
32     16     
-32    16     
144    -48    
160    144    
48     -32    
464    112    
-176   128    
64     -64    
96     16     
160    64     
48     0      
-688   -96    
144    -64    
-688   -16    
304    -96    
-160   176    
192    160    
256    16     
-48    -160   
-192   32     
-48    16     
16     64     
192    -80    
32     -64    
-96    -64    
128    -48    
-240   -16    
48     -128   
-704   112    
48     32     
-64    -64    
160    -80    
-112   0      
-64    -448   
80     -240   
192    -224   
192    160    
128    -48    
-96    -64    
64     112    
48     -16    
-240   -16    
144    -208   
-144   64     
208    -160   
-2112  -96    
176    -224   
-80    256    
160    -64    
160    -96    
240    -112   
-64    48     
-176   48     
16     -112   
-16    -32    
80     -192   
176    80     
-16    -80    
-432   -224   
192    64     
-128   96     
80     -80    
16     16     
224    -80    
-224   32     
112    -256   
128    -192   
-80    160    
240    400    
-160   -704   
128    208    
-896   -96    
32     0      
-64    -96    
144    64     
-48    304    
-16    368    
160    192    
256    -480   
80     -48    
32     80     
256    -368   
-96    224    
0      32     
-96    -144   
144    464    
-128   -672   
320    352    
-224   -32    
96     -112   
-128   448    
80     -528   
96     192    
-1328  160    
-128   0      
-144   16     
-1040  32     
48     96     
-2048  1008   
-304   -800   
-80    -400   
80     272    
128    -144   
-32    352    
-96    -416   
224    0      
80     -16    
-48    -128   
-384   -352   
0      208    
32     400    
-912   -224   
-176   -112   
-512   208    
-32    32     
-224   -320   
16     -176   
224    -304   
-80    32     
-272   -32    
-32    -128   
-160   -80    
0      -96    
-160   -160   
0      -160   
0      32     
-224   64     
48     0      
-48    352    
64     112    
144    -48    
-64    -80    
16     64     
-64    96     
-176   80     
80     256    
48     -176   
96     304    
-48    48     
0      0      
-48    48     
-16    48     
0      208    
-80    32     
112    64     
-288   240    
-32    64     
-592   -32    
0      -32    
112    32     
32     128    
32     144    
-48    16     
240    -144   
-128   176    
144    48     
432    272    
-240   -128   
-400   -400   
-32    -160   
-656   16     
16     352    
-624   -96    
32     -48    
-112   -272   
96     32     
-256   -624   
-112   -352   
48     208    
128    320    
-256   352    
-176   -16    
-96    144    
288    96     
-304   688    
-160   208    
96     -16    
-256   336    
320    48     
-80    -48    
-16    -416   
-16    -176   
-176   96     
80     128    
80     112    
-48    112    
-160   16     
-16    96     
16     48     
64     32     
-208   -16    
208    -16    
-544   -112   
-48    -48    
-128   176    
-16    96     
192    -192   
-48    64     
160    192    
-272   128    
64     -64    
-240   -240   
160    -16    
-112   624    
128    352    
-80    -336   
-112   80     
-272   528    
416    464    
-368   0      
64     -64    
256    128    
-496   192    
304    176    
-272   -16    
0      -80    
128    128    
32     128    
176    64     
32     96     
-176   -80    
32     112    
0      128    
-128   256    
144    32     
192    64     
80     -128   
-96    16     
160    224    
-144   224    
80     -32    
-96    -144   
176    -16    
-48    -16    
-16    16     
-32    -16    
-64    112    
-128   128    
128    160    
160    48     
48     64     
256    320    
-80    304    
384    160    
-256   96     
96     96     
-144   -32    
-80    -48    
-80    64     
80     80     
-128   -48    
272    224    
-320   160    
176    240    
-192   128    
-48    -32    
64     32     
80     -112   
16     -96    
-48    -48    
0      96     
32     -112   
192    -16    
-144   32     
96     -128   
96     160    
32     16     
32     -544   
48     192    
32     176    
0      16     
0      32     
16     112    
80     0      
96     0      
240    -48    
16     64     
-48    -336   
-256   16     
-16    304    
-144   -160   
240    80     
64     96     
272    144    
160    80     
80     128    
-48    48     
16     64     
-16    176    
-16    96     
32     64     
48     48     
-64    32     
-16    -16    
48     48     
32     0      
128    80     
320    192    
-320   48     
-96    -32    
160    -16    
80     80     
48     80     
208    64     
-208   32     
-16    64     
-64    80     
48     224    
80     80     
96     -16    
96     48     
256    176    
0      96     
48     192    
-176   -80    
208    -64    
368    288    
112    0      
112    80     
-80    0      
160    48     
160    176    
-64    48     
-16    0      
64     32     
-112   -48    
0      -384   
208    -16    
-192   -32    
112    112    
-48    -48    
224    48     
16     96     
96     0      
0      32     
32     64     
16     80     
16     80     
-48    -144   
-80    32     
48     16     
48     -176   
240    -32    
-64    -624   
224    48     
-48    96     
192    80     
64     -32    
-32    16     
64     144    
-144   64     
16     16     
208    48     
-16    -176   
288    80     
0      80     
80     -272   
224    0      
0      -432   
-32    32     
-32    32     
-80    -48    
160    128    
112    80     
32     176    
112    -16    
-80    112    
368    160    
-112   128    
32     -96    
240    160    
-384   -192   
0      -160   
224    -480   
352    256    
272    -944   
112    32     
368    96     
-496   208    
64     32     
-624   -224   
832    96     
176    160    
80     32     
384    -16    
176    128    
-16    0      
-240   0      
144    -144   
128    48     
352    48     
-176   224    
32     -192   
128    -16    
48     80     
-64    64     
16     -16    
192    96     
-96    112    
144    -16    
80     48     
80     -32    
64     208    
96     64     
0      32     
48     -176   
-32    208    
80     32     
80     -16    
32     112    
128    144    
64     80     
144    144    
16     -16    
128    -64    
48     384    
160    32     
-176   -400   
112    -480   
112    512    
96     -496   
208    0      
224    384    
-112   -80    
-64    -32    
-64    112    
80     -240   
256    352    
96     -176   
96     -112   
64     128    
-64    -192   
80     -288   
-16    384    
48     80     
-112   -224   
192    288    
32     -160   
0      96     
80     -160   
32     -416   
80     -336   
-16    -144   
16     -1088  
192    -592   
528    400    
-128   128    
-112   32     
112    -352   
176    -144   
-48    -400   
-32    -944   
-176   96     
448    -384   
-176   144    
128    -176   
144    -96    
80     -16    
128    -512   
224    -128   
160    -912   
-96    -112   
208    -352   
96     -112   
160    128    
-32    64     
240    -96    
48     560    
352    -32    
128    32     
-48    64     
144    -208   
-32    -16    
112    -144   
32     -288   
176    -128   
-64    256    
80     -384   
-16    -256   
96     32     
160    16     
16     -32    
224    -288   
0      -144   
16     208    
-64    48     
144    80     
-80    0      
-80    -96    
32     -80    
272    16     
-128   64     
0      -144   
256    -112   
192    -576   
-160   64     
-96    -176   
48     -208   
0      -32    
96     -32    
-256   -16    
112    -64    
-320   -96    
352    64     
0      32     
224    -16    
32     -112   
64     -304   
16     -48    
-64    -1008  
112    48     
16     -80    
320    224    
-624   96     
192    208    
256    240    
192    144    
-272   -16    
-32    -224   
-2192  -144   
96     -144   
16     -80    
96     -112   
256    144    
96     -96    
-112   96     
304    64     
-80    -32    
-128   96     
-32    -96    
0      -144   
192    -96    
-16    0      
16     -48    
-496   144    
96     -16    
96     64     
112    -112   
-80    -64    
96     -304   
-16    -96    
-176   -192   
208    -272   
208    64     
-32    80     
-64    384    
-144   -32    
-704   32     
32     -160   
-1008  -288   
64     160    
-224   16     
16     -160   
64     -16    
-96    -448   
320    -560   
112    -592   
128    96     
-64    -144   
96     224    
-768   -368   
176    -48    
48     144    
64     -96    
192    -64    
-80    48     
304    -16    
96     -288   
0      128    
256    -48    
-208   496    
-208   32     
-224   240    
208    880    
304    336    
384    16     
-112   208    
-416   -16    
-336   16     
-80    -96    
-352   -384   
416    -208   
-48    -416   
96     -256   
-1136  128    
-144   -128   
-272   96     
384    80     
144    0      
288    96     
32     -144   
288    -80    
-624   -176   
-64    -16    
-176   0      
-32    80     
-48    -192   
144    -496   
16     96     
208    16     
-480   176    
-64    -688   
-432   -384   
48     -80    
-672   32     
0      -256   
-976   -320   
-16    48     
-64    0      
64     288    
-288   48     
-80    -96    
80     -816   
-144   -80    
192    -208   
-128   -160   
256    -288   
-224   -192   
16     -48    
-864   -432   
16     -480   
-944   -160   
256    112    
64     48     
96     128    
-464   -288   
240    112    
-224   240    
-32    -64    
256    -128   
-256   -48    
-48    -128   
-112   -144   
48     112    
-560   -16    
-160   -512   
-304   224    
160    144    
-992   -176   
160    160    
-48    -592   
48     -544   
240    400    
-240   -80    
384    320    
-304   -224   
-32    224    
224    -352   
240    48     
240    32     
-64    32     
-128   96     
-304   -16    
-736   -128   
80     112    
96     -128   
224    80     
128    16     
-80    -80    
-64    64     
-160   240    
-160   112    
-192   64     
-32    -32    
48     -32    
208    192    
-240   0      
-16    -16    
-592   16     
160    112    
-192   -16    
176    -96    
32     -80    
-240   -128   
-16    96     
96     672    
-352   448    
-96    -64    
256    -144   
16     16     
-96    64     
144    144    
32     16     
112    96     
32     16     
-2272  16     
0      16     
-128   -16    
64     48     
-160   -112   
112    -16    
-96    80     
-96    96     
-64    16     
96     48     
240    400    
-464   112    
224    48     
-224   -64    
272    80     
-1264  -16    
-160   -112   
-32    -80    
-112   112    
-176   16     
-160   -16    
112    112    
-64    64     
-16    0      
112    32     
208    176    
-368   -48    
288    128    
-240   -96    
144    -32    
80     32     
208    224    
-80    128    
-288   -16    
32     -48    
48     -16    
96     48     
224    48     
32     48     
-112   -80    
96     48     
-48    80     
32     32     
-256   -80    
192    16     
80     112    
80     64     
-32    0      
0      16     
96     64     
176    112    
80     80     
-16    64     
48     16     
-224   0      
128    32     
-192   48     
208    160    
-176   -32    
144    16     
16     -32    
32     48     
256    96     
-64    32     
160    64     
-128   -32    
192    -64    
-112   16     
32     16     
-112   80     
48     64     
48     208    
144    80     
96     80     
-448   160    
160    -32    
-32    112    
80     80     
32     -32    
48     64     
112    176    
-256   0      
96     -80    
48     96     
-208   -16    
1008   576    
-336   576    
-416   -16    
-16    -32    
-256   64     
48     16     
272    -32    
-32    -176   
160    -96    
0      80     
-16    112    
352    336    
-224   336    
32     0      
64     16     
-192   32     
-48    -176   
80     16     
0      -112   
160    208    
-48    112    
-144   -112   
80     64     
-64    80     
128    96     
-80    -176   
256    272    
-16    16     
80     96     
-144   -16    
96     544    
-48    -80    
48     -320   
-80    128    
192    -288   
-192   16     
48     -64    
48     48     
80     96     
176    -16    
64     80     
-176   256    
-128   -256   
464    352    
-96    384    
0      -576   
112    16     
560    -128   
-560   -400   
-192   -368   
176    -16    
-96    112    
128    416    
-144   -96    
384    -272   
-112   -144   
288    144    
-32    32     
224    112    
-16    0      
288    112    
-144   144    
-112   -240   
-64    64     
128    96     
-160   -64    
64     -16    
80     32     
96     0      
96     32     
-256   -80    
272    16     
0      112    
528    240    
-176   48     
240    0      
-128   80     
-48    -176   
256    -208   
32     -272   
128    16     
-80    0      
160    112    
-176   112    
144    0      
176    80     
0      48     
-16    112    
224    80     
64     32     
-160   -208   
144    -96    
32     -32    
208    48     
16     -96    
48     -32    
-48    -160   
96     32     
96     32     
304    256    
-112   256    
128    176    
0      112    
-32    96     
-32    64     
112    -144   
224    32     
-144   -32    
0      16     
16     64     
-240   -192   
256    -944   
32     -128   
0      -144   
96     304    
-96    0      
240    0      
-32    0      
80     192    
-32    32     
160    -80    
64     32     
0      -80    
0      0      
48     -272   
-16    -16    
64     -320   
240    32     
-80    16     
64     80     
192    48     
64     128    
0      -32    
64     -176   
208    32     
80     -128   
48     176    
16     -16    
80     112    
96     -48    
144    112    
96     160    
16     128    
-64    -352   
208    -144   
176    64     
32     48     
144    -160   
48     -176   
160    96     
80     48     
144    112    
48     -16    
-48    -112   
96     96     
208    64     
-64    -144   
-64    64     
112    -112   
112    64     
-32    80     
112    0      
-32    -784   
160    -256   
144    224    
48     0      
0      112    
64     -64    
160    96     
0      -368   
96     -160   
16     -48    
256    -864   
48     208    
304    -96    
176    128    
-976   80     
128    96     
64     0      
-32    -112   
64     -288   
64     -656   
64     384    
-64    512    
464    208    
-32    -1072  
80     96     
192    -160   
32     -272   
80     -64    
224    -576   
-288   -64    
-64    -592   
-80    -272   
304    320    
96     784    
-400   -1008  
-80    -752   
-192   -1200  
240    -448   
320    352    
288    304    
112    176    
-176   -352   
288    -80    
368    320    
-160   -128   
48     -64    
240    -384   
-336   -816   
176    320    
-560   128    
-144   -256   
48     -128   
400    -256   
32     -256   
-144   -176   
144    -16    
352    496    
-208   144    
176    240    
-464   -432   
384    208    
-576   560    
-32    -304   
-128   -464   
384    560    
80     -224   
32     224    
-144   160    
112    -912   
96     64     
-96    -96    
96     112    
16     -16    
32     -144   
0      -48    
128    -16    
-64    64     
208    112    
-672   368    
368    -128   
-352   -64    
128    -624   
32     -64    
96     -224   
16     -32    
96     80     
64     32     
-320   -208   
208    -48    
-240   64     
208    -16    
-48    32     
64     -80    
-208   -96    
48     -192   
96     0      
-16    -96    
192    -80    
-144   -240   
-64    112    
48     112    
176    80     
16     -240   
96     -240   
-48    -16    
16     -176   
-592   -240   
96     -144   
352    -496   
-304   -896   
-64    32     
480    240    
-160   0      
64     -128   
128    160    
-80    128    
128    32     
-192   -144   
304    -128   
-288   -640   
16     -368   
-384   -192   
48     -96    
64     96     
288    176    
-112   160    
112    -128   
32     64     
208    -192   
112    80     
-208   -48    
-80    16     
96     -32    
32     32     
-224   32     
160    -32    
-176   -32    
-64    -160   
0      32     
96     -32    
-80    32     
-64    -32    
272    400    
192    -64    
-144   -64    
-64    -16    
-1536  -16    
32     352    
176    192    
-80    -192   
0      80     
16     224    
-160   -80    
-48    -32    
-1600  80     
80     80     
-640   -48    
144    112    
-112   0      
-688   48     
-48    16     
-512   144    
-256   -16    
-288   -32    
112    96     
32     32     
-80    -16    
224    0      
-208   32     
-208   -32    
128    208    
128    -32    
-48    -64    
96     64     
-288   16     
-96    16     
32     -32    
-144   -48    
-272   64     
48     32     
-448   -64    
-160   -32    
-272   -128   
16     64     
-176   -80    
128    96     
-192   -128   
0      32     
-32    48     
-128   48     
64     0      
0      0      
-48    64     
-64    0      
-16    -16    
-256   -48    
-176   16     
-48    48     
80     64     
-48    0      
32     48     
-176   -144   
-192   16     
32     128    
48     16     
-16    32     
-224   16     
-80    96     
-80    0      
16     16     
-544   -176   
272    -80    
-1424  16     
240    96     
-32    -80    
16     0      
-80    0      
160    96     
-256   48     
0      32     
-240   32     
96     176    
-112   160    
-128   32     
208    32     
64     0      
176    16     
-336   80     
-16    128    
96     32     
-32    16     
96     -32    
0      64     
0      128    
32     32     
-112   96     
-240   -144   
400    -32    
192    0      
288    128    
-432   -80    
-112   -48    
-544   32     
480    480    
-448   -96    
720    544    
-736   144    
-400   -752   
256    32     
96     80     
576    -192   
32     336    
96     -96    
-448   -144   
-176   704    
-80    -512   
336    288    
-352   592    
272    -32    
-176   -112   
-128   640    
160    -448   
-32    -176   
-64    352    
-16    -64    
-80    112    
144    128    
-224   -32    
-288   192    
208    192    
-288   -64    
288    32     
-112   -96    
-128   160    
320    48     
-64    48     
112    16     
144    0      
-16    80     
-32    -48    
-208   16     
128    144    
-208   400    
112    0      
352    80     
-352   -128   
112    -80    
-288   32     
112    48     
96     -48    
208    -48    
160    32     
64     112    
80     0      
-32    16     
-144   128    
96     80     
208    240    
80     16     
240    16     
-64    48     
32     112    
-304   0      
0      0      
-144   80     
0      -32    
48     48     
-160   64     
16     64     
64     48     
-48    48     
64     -48    
144    48     
-288   -32    
160    -16    
-160   0      
80     112    
-16    320    
304    528    
224    144    
0      -144   
64     -16    
32     16     
160    64     
0      64     
-80    48     
176    240    
-16    80     
16     -144   
176    64     
-304   -32    
480    144    
0      176    
112    -64    
32     -96    
-240   -16    
176    48     
-48    128    
-144   -144   
256    -240   
160    -16    
176    32     
-112   -48    
144    16     
-16    144    
-160   32     
400    368    
-384   288    
-224   16     
176    32     
-80    32     
208    -112   
96     -48    
-16    -96    
112    64     
16     272    
-128   -48    
240    -16    
-64    -48    
-48    32     
-144   176    
-224   -1040  
-32    16     
96     112    
160    208    
112    160    
0      96     
48     -64    
32     -80    
-160   -80    
-80    80     
-80    96     
144    80     
176    64     
-112   -80    
128    48     
80     -400   
224    -240   
-208   32     
80     128    
-80    400    
320    496    
-32    112    
96     48     
32     -16    
144    464    
32     -96    
-32    -176   
-80    32     
48     -48    
0      -64    
192    -240   
80     96     
112    32     
112    224    
-96    224    
-64    272    
128    -128   
96     -112   
-16    0      
64     16     
192    480    
-224   128    
16     -256   
304    -240   
-48    96     
176    -320   
-16    48     
80     176    
-208   -48    
176    352    
256    -128   
-80    336    
112    -112   
16     80     
-48    32     
80     -16    
192    48     
-96    64     
96     80     
-16    -160   
160    336    
176    -96    
64     -176   
160    -112   
-224   -144   
80     48     
-80    -240   
16     256    
-224   -64    
128    192    
0      -640   
-304   -224   
160    384    
80     304    
0      96     
736    128    
-80    192    
-32    -352   
16     48     
16     -1136  
176    16     
-112   128    
-48    336    
1248   1104   
-816   48     
-432   -656   
96     -256   
48     0      
-32    -256   
432    64     
176    -96    
-144   -96    
64     -176   
-224   304    
64     48     
96     80     
64     64     
240    48     
48     0      
16     32     
-112   32     
64     -272   
160    128    
-176   96     
128    128    
96     -48    
128    96     
-96    -128   
0      32     
112    -96    
80     112    
16     128    
176    96     
-32    32     
112    48     
-48    128    
80     352    
48     384    
496    16     
-176   96     
64     -288   
112    16     
112    80     
-144   32     
272    -32    
-48    80     
-32    48     
0      160    
48     144    
288    -32    
0      -448   
176    -64    
-32    -384   
128    -48    
48     -16    
144    -192   
144    128    
96     16     
48     112    
112    -208   
48     -128   
208    80     
-160   -304   
144    -16    
-672   32     
32     -672   
192    -80    
208    -80    
176    128    
-112   -480   
112    -32    
144    16     
48     -32    
16     80     
-144   -96    
240    -32    
240    -64    
32     -64    
32     -272   
-1520  -160   
64     -96    
0      -64    
208    16     
64     -16    
-64    64     
192    -48    
160    -2112  
-48    -112   
16     16     
-128   96     
96     -32    
80     0      
48     -144   
0      -64    
-544   -96    
144    0      
128    -16    
-16    16     
112    0      
-368   -784   
160    -256   
-176   -640   
-16    224    
240    16     
288    144    
-208   -80    
192    -144   
-16    -32    
16     -80    
-96    16     
32     32     
96     16     
-32    -176   
112    -96    
176    -16    
144    80     
112    -256   
96     16     
128    -32    
-16    80     
128    16     
144    32     
-64    48     
32     32     
-208   -112   
-32    -240   
-736   -144   
-48    -32    
80     -32    
-48    0      
-32    32     
-16    -272   
-96    64     
112    -256   
16     96     
-32    -80    
144    16     
-128   32     
112    -96    
-192   -32    
48     -48    
-224   -32    
144    32     
-672   48     
-64    16     
128    32     
80     -128   
48     160    
272    -192   
-112   96     
0      96     
112    -32    
0      48     
160    0      
-176   -16    
144    -16    
-160   32     
96     -16    
-320   -16    
-48    -160   
16     16     
208    -80    
-32    48     
96     48     
0      128    
0      32     
112    -80    
-288   16     
32     -80    
-432   0      
96     96     
-16    -112   
64     -160   
-400   -160   
496    -32    
-368   144    
288    -96    
-48    -16    
96     -272   
-16    64     
-208   -512   
240    336    
-496   -528   
288    64     
32     96     
64     -432   
-272   224    
448    576    
-832   -512   
272    64     
32     240    
208    -48    
48     -416   
-1680  368    
-64    -320   
272    160    
-96    192    
192    96     
16     160    
-32    64     
560    368    
-528   -112   
544    656    
-464   128    
-1104  -16    
128    384    
240    48     
16     144    
160    -192   
80     96     
-480   -240   
-560   0      
-64    0      
-624   208    
208    224    
32     32     
-112   -144   
384    32     
-112   -32    
-32    -160   
-112   112    
-368   -64    
16     16     
16     -288   
-96    32     
-144   128    
-128   -32    
-16    224    
32     112    
144    32     
48     -64    
-80    80     
-272   0      
16     -48    
-160   -160   
80     16     
-176   64     
-64    48     
-256   32     
-48    32     
-144   80     
160    -48    
32     64     
-496   -16    
80     -112   
-480   0      
-32    0      
-80    -64    
144    16     
48     32     
128    96     
-128   0      
-192   -32    
176    -48    
-240   16     
-80    -16    
-384   64     
32     0      
48     -80    
-272   48     
-1120  0      
-160   0      
-144   -16    
176    32     
112    16     
32     32     
-80    -128   
16     -128   
-16    128    
-112   32     
0      -16    
-80    96     
-64    16     
-112   -32    
128    -48    
-160   96     
112    48     
176    -208   
32     0      
-128   48     
-144   -32    
-80    -16    
-112   -64    
160    64     
-32    96     
32     48     
-128   16     
64     -64    
112    -96    
64     112    
-96    16     
0      16     
-416   -16    
160    160    
96     -16    
-144   64     
0      -144   
-48    80     
-272   48     
-128   0      
-48    0      
0      144    
-192   112    
16     -96    
256    144    
-96    16     
-176   224    
-64    240    
16     576    
144    368    
48     32     
128    -16    
128    -240   
48     -64    
-64    -48    
-288   -176   
0      -80    
-32    -144   
0      112    
-80    16     
-304   -80    
144    64     
-224   192    
320    -176   
-80    208    
-160   112    
304    208    
-16    272    
128    144    
32     720    
288    400    
-288   48     
-16    -352   
-144   -176   
432    544    
-400   -112   
448    -32    
304    288    
-256   -368   
80     -112   
-176   256    
-208   -192   
-16    208    
192    -16    
96     368    
-192   -272   
112    128    
-48    352    
-144   96     
64     -144   
-176   16     
0      160    
-176   -80    
144    -304   
80     64     
0      192    
96     128    
32     -240   
-48    -256   
112    -416   
-16    96     
-160   48     
0      -112   
-80    112    
96     224    
-144   32     
192    32     
-176   -112   
64     -272   
64     -128   
112    80     
-32    64     
-16    16     
16     -16    
-96    64     
64     96     
-16    48     
144    432    
-32    208    
-32    -32    
-272   -48    
-80    192    
-144   -16    
64     0      
80     112    
80     96     
-112   -16    
112    0      
-16    64     
16     0      
64     32     
-16    -160   
208    16     
-320   -32    
96     -16    
-352   0      
112    112    
-80    -144   
240    -192   
288    144    
-32    192    
-96    -224   
1008   -80    
80     80     
272    -352   
336    -384   
-528   416    
-720   -160   
496    -80    
-208   176    
-48    64     
224    32     
-224   0      
64     96     
-16    -32    
112    -16    
288    0      
80     64     
16     32     
16     32     
16     96     
-96    0      
96     80     
-32    48     
240    48     
48     0      
32     -464   
400    96     
-384   16     
80     16     
224    144    
144    144    
64     -16    
-112   48     
-272   208    
432    128    
-128   -16    
96     32     
-400   -16    
176    -144   
80     96     
112    -912   
112    -64    
64     -80    
-48    16     
240    16     
112    64     
-64    16     
-80    -64    
160    -48    
144    96     
160    32     
48     32     
-16    -16    
128    80     
80     128    
-160   -112   
112    -16    
192    96     
-48    80     
144    16     
256    128    
-240   80     
-48    -16    
288    -128   
32     96     
-32    0      
128    80     
128    48     
-16    -32    
192    96     
144    -80    
-48    80     
160    -1152  
176    224    
64     176    
48     96     
-32    208    
176    144    
-80    48     
48     208    
-48    48     
352    240    
-64    368    
-48    144    
144    80     
112    -144   
32     -48    
96     -112   
16     128    
48     -784   
48     -32    
160    128    
0      208    
-160   0      
272    32     
0      48     
96     -400   
128    -736   
192    -96    
336    48     
32     -128   
64     64     
144    -64    
144    -80    
16     -256   
-240   -368   
-336   -208   
-64    96     
80     96     
208    64     
160    64     
80     0      
128    48     
48     -272   
144    32     
16     -48    
240    208    
160    208    
-112   80     
-96    -560   
-80    48     
-96    0      
208    64     
-48    -96    
208    -160   
48     -256   
224    -112   
80     160    
64     -16    
64     -16    
64     -112   
112    16     
176    -80    
288    320    
-16    64     
16     0      
160    384    
32     224    
32     256    
-96    -224   
80     -304   
192    48     
112    128    
144    -80    
-32    -208   
96     -64    
-112   160    
-144   -208   
64     352    
-64    800    
80     -560   
0      64     
176    16     
-16    -400   
-192   16     
48     -448   
208    160    
160    -256   
0      -64    
80     256    
16     -256   
176    16     
16     128    
-32    -176   
160    -48    
-16    -80    
176    -224   
-48    -224   
176    80     
-432   -144   
16     112    
-64    -16    
400    -160   
304    160    
112    -96    
96     -384   
320    288    
240    -576   
-16    304    
-288   64     
-176   -592   
128    320    
-16    112    
112    288    
-400   336    
-32    80     
256    48     
32     -192   
160    96     
16     -208   
208    96     
48     -640   
144    -16    
-32    -48    
0      320    
160    256    
112    368    
-576   64     
256    -144   
-1104  -112   
-176   -496   
208    -224   
-80    -32    
-32    16     
-176   -112   
176    144    
48     -512   
288    16     
176    -32    
272    272    
0      -32    
32     -192   
-240   -208   
112    128    
-320   96     
-160   224    
-608   -160   
144    -48    
48     16     
160    -32    
-224   -176   
288    -240   
-48    208    
320    -368   
-96    176    
224    -208   
64     -112   
-128   32     
256    64     
32     160    
160    -80    
-240   -64    
176    -176   
-960   0      
240    208    
-64    304    
256    -224   
112    -176   
144    -1360  
-144   0      
-128   -160   
16     144    
80     -96    
256    -16    
-208   -96    
160    0      
-640   -32    
64     -80    
-336   80     
48     -96    
192    0      
48     -192   
112    80     
144    -720   
64     32     
16     80     
128    112    
16     -32    
64     -16    
-272   176    
16     288    
-80    0      
96     -48    
0      192    
176    16     
-80    48     
112    -80    
80     64     
32     -240   
272    -96    
-64    96     
32     -16    
80     144    
272    48     
-96    16     
176    0      
64     48     
112    -32    
-128   0      
80     -128   
-80    -112   
256    -224   
16     32     
-272   -32    
-1856  -80    
32     80     
160    -64    
-80    48     
64     0      
-64    16     
0      -208   
-144   -16    
-64    0      
-144   96     
-1712  112    
144    64     
128    240    
288    304    
-192   0      
-560   -32    
-112   32     
-464   -128   
-256   -224   
-576   0      
-96    32     
144    448    
-224   -176   
-1264  -384   
-16    -240   
-352   -160   
80     368    
-272   48     
-496   -192   
192    112    
-272   -16    
288    512    
-208   -192   
-16    48     
-1008  -64    
-32    -96    
-16    -352   
-160   -16    
272    16     
336    208    
-32    48     
-96    16     
-160   16     
-80    208    
-96    -96    
-32    -48    
192    -160   
-112   -64    
-224   -64    
-240   304    
-64    112    
-176   -240   
112    -16    
-48    0      
-64    48     
-144   -192   
64     -32    
64     144    
160    96     
48     112    
-96    48     
-208   0      
-224   -96    
-112   16     
-48    0      
80     80     
160    64     
144    0      
-176   16     
32     32     
-48    64     
-16    32     
64     64     
0      48     
-32    16     
16     -16    
-96    0      
-32    16     
80     80     
16     64     
64     32     
-432   -32    
256    48     
-1408  -16    
176    16     
-48    32     
32     64     
-256   448    
272    80     
-256   -48    
0      96     
-64    -32    
112    64     
128    64     
-80    208    
-384   -16    
-512   -80    
48     -16    
-1376  0      
288    -64    
16     64     
192    80     
0      0      
-16    80     
48     0      
32     96     
-80    192    
128    240    
-400   -32    
-304   -272   
-32    -240   
320    176    
-160   96     
-496   -320   
208    -192   
464    240    
-368   80     
144    -48    
-64    80     
-16    64     
-240   -80    
48     112    
-336   -64    
-80    0      
128    144    
-336   176    
112    240    
-112   128    
48     -144   
-192   16     
-144   0      
-80    80     
64     64     
-48    48     
96     96     
-128   96     
-160   80     
192    64     
-128   64     
-32    32     
-48    96     
-96    -48    
128    96     
-352   -32    
96     32     
96     48     
-112   128    
160    96     
64     0      
112    -80    
-80    -128   
-32    80     
224    48     
-16    144    
-16    -80    
32     32     
-144   -176   
-96    -80    
-48    48     
112    112    
0      64     
32     0      
48     80     
-16    -48    
176    112    
-32    16     
208    16     
-112   -64    
-16    96     
-192   -48    
176    80     
64     0      
-80    16     
80     32     
16     -32    
-48    -32    
80     -160   
-288   -256   
-16    80     
64     16     
-128   -400   
128    -16    
-176   192    
96     -64    
0      32     
208    -32    
-368   16     
80     176    
112    160    
-96    -256   
256    160    
144    128    
16     80     
128    -192   
96     0      
16     144    
96     80     
-48    -96    
208    -64    
32     192    
160    240    
48     80     
-176   -208   
-32    144    
48     16     
160    160    
0      96     
80     0      
128    48     
96     0      
128    304    
-192   -512   
-48    400    
32     -160   
-48    0      
96     64     
144    -208   
144    144    
96     -96    
80     -176   
80     528    
-112   -80    
-208   -48    
-32    96     
48     96     
0      -32    
256    80     
128    48     
112    -16    
-48    -112   
-96    0      
112    48     
-112   -16    
336    1056   
48     -400   
-48    -16    
-160   176    
128    -144   
96     80     
-16    256    
-128   -32    
208    64     
-32    128    
32     80     
80     -32    
208    304    
128    -16    
-48    -672   
240    64     
96     0      
112    624    
176    -128   
-112   -224   
0      464    
64     128    
-48    -288   
224    112    
128    -96    
-96    96     
80     -96    
144    160    
160    496    
-32    -720   
-112   176    
64     -544   
224    576    
144    160    
192    -176   
-64    -96    
208    0      
96     256    
0      96     
-32    112    
80     -48    
32     128    
-16    -304   
96     64     
176    64     
64     304    
128    416    
288    448    
160    608    
144    256    
-48    80     
64     -96    
-112   -192   
32     80     
-16    160    
336    -48    
-176   80     
-16    -192   
-96    -48    
96     -128   
-112   -272   
48     -1168  
112    -16    
16     -608   
144    272    
-320   80     
-64    0      
-192   160    
96     -16    
32     128    
208    -112   
144    96     
128    112    
64     0      
-48    -288   
112    112    
16     -144   
-112   -16    
-64    -80    
320    304    
-592   144    
-96    16     
352    -16    
-128   224    
48     32     
176    -64    
0      112    
64     48     
176    48     
48     -320   
96     16     
64     0      
384    64     
-336   -32    
64     160    
0      -128   
-112   -240   
160    -16    
48     -64    
208    -48    
0      80     
144    144    
-80    176    
304    16     
80     -96    
0      -64    
-32    -64    
240    128    
0      -112   
-16    -112   
128    -16    
16     240    
224    128    
-144   -48    
352    192    
-304   128    
96     16     
144    -144   
32     80     
112    -16    
-96    -224   
128    -416   
160    -1312  
-144   96     
48     -512   
-112   16     
112    -240   
32     16     
176    -32    
96     -240   
-32    -48    
-32    -64    
336    32     
160    -64    
128    32     
128    96     
80     -80    
96     -320   
48     -32    
144    -80    
-112   -64    
-112   -224   
288    -64    
-16    -64    
192    -112   
128    -64    
48     16     
32     -144   
176    -864   
304    -96    
16     -96    
64     16     
112    64     
-48    -112   
96     -128   
-48    -16    
-352   -384   
64     -208   
-1968  -128   
0      -48    
256    -192   
-192   -224   
112    -592   
160    -288   
272    32     
224    16     
0      -112   
80     -480   
-48    -144   
80     -32    
64     -16    
48     -192   
80     80     
-64    208    
288    16     
-48    192    
-32    -192   
-208   -736   
336    752    
-96    -352   
-80    -208   
-128   160    
96     -112   
-96    48     
256    112    
96     -64    
48     -384   
-256   112    
-208   224    
192    -176   
-1024  -32    
352    -272   
240    -32    
160    32     
-80    32     
32     -144   
64     128    
48     32     
-16    -128   
-176   -96    
64     -112   
-272   -64    
224    -48    
128    288    
-160   -64    
-352   48     
80     -16    
112    -64    
160    -160   
64     32     
112    -480   
80     80     
32     48     
-16    16     
-96    -16    
128    -32    
-176   -176   
0      -32    
-224   0      
64     16     
-288   48     
96     16     
128    -16    
160    -256   
-112   -64    
96     48     
-48    -112   
64     -1024  
96     -144   
-16    16     
48     -32    
192    -16    
32     0      
-240   48     
112    0      
-96    -16    
64     -96    
0      16     
64     -32    
144    0      
16     -144   
48     64     
-720   0      
144    -48    
-288   -16    
128    -96    
-64    96     
48     16     
-224   -32    
144    -48    
-192   32     
192    -16    
-400   -352   
16     -144   
48     32     
240    -112   
80     80     
-16    80     
0      48     
48     -128   
128    -128   
80     96     
-112   160    
48     -112   
0      -32    
-48    0      
224    -64    
128    192    
-528   -48    
80     0      
-880   -64    
-960   -304   
304    -128   
128    160    
-112   32     
-736   128    
-304   48     
48     -64    
-176   -32    
176    112    
-800   -336   
-48    -144   
224    224    
-896   -96    
112    64     
-144   -48    
288    240    
-128   112    
-416   -80    
368    64     
-592   112    
-48    -80    
-848   -80    
-32    64     
96     -32    
-16    -16    
-336   -144   
112    16     
-64    48     
-112   80     
64     16     
-144   -64    
224    -16    
-224   -160   
-368   -128   
96     48     
-48    32     
-112   160    
-112   128    
-1104  -48    
-80    16     
-128   -32    
96     160    
160    144    
-320   -48    
-48    64     
-128   -96    
-80    -16    
-112   48     
-112   -16    
-48    0      
256    32     
-1088  -144   
32     -32    
-384   48     
320    96     
-176   -32    
16     -96    
32     -80    
-96    16     
-16    16     
-64    -32    
112    144    
-288   -32    
272    0      
-112   96     
-208   160    
-288   -144   
64     -16    
-192   224    
-16    80     
-304   -640   
224    192    
-192   176    
256    208    
16     -144   
-144   -80    
80     64     
-96    0      
80     224    
-48    -96    
64     -96    
64     224    
-128   128    
0      -16    
432    432    
-1088  -192   
128    0      
224    304    
96     384    
32     -16    
-208   -640   
0      384    
-64    288    
32     -240   
96     304    
-96    -48    
48     -224   
368    864    
-448   -656   
0      192    
-448   320    
-64    -320   
128    0      
-48    -240   
-48    128    
-256   -448   
48     176    
80     208    
16     -48    
-64    80     
48     112    
-624   -96    
48     144    
-192   -48    
-64    64     
-80    -592   
80     320    
48     320    
-96    0      
112    16     
64     -32    
224    224    
16     -16    
80     160    
-80    -160   
-16    -32    
144    -400   
80     -64    
96     -96    
144    0      
-96    512    
16     80     
-144   16     
0      -16    
-80    64     
-192   48     
208    16     
-64    16     
112    0      
-176   32     
144    -16    
0      16     
96     48     
-144   0      
-80    288    
80     32     
-80    160    
144    208    
96     240    
128    112    
0      160    
-64    0      
-80    16     
80     128    
32     80     
0      64     
-64    -32    
112    64     
-112   176    
32     176    
0      48     
112    112    
80     -64    
0      -48    
192    -96    
96     80     
16     64     
32     48     
160    48     
48     -16    
16     336    
-224   -80    
160    16     
-112   128    
112    192    
-112   480    
-160   -112   
176    80     
112    -32    
32     48     
112    -32    
-64    -96    
288    192    
112    320    
-144   192    
-32    -176   
80     -96    
112    48     
80     -48    
-128   -80    
-112   192    
240    224    
80     208    
112    -16    
80     96     
80     32     
288    -96    
-272   -112   
128    -16    
-400   -48    
224    -208   
-320   192    
-240   64     
304    -80    
64     80     
224    80     
-16    64     
224    256    
496    368    
-272   144    
-112   288    
48     144    
-176   -240   
-16    -16    
96     80     
160    176    
-48    0      
32     -224   
80     256    
-96    144    
352    0      
-16    80     
288    96     
192    144    
-176   256    
144    16     
-112   144    
128    16     
-48    -96    
48     48     
176    -128   
112    160    
-128   -288   
208    176    
-64    -80    
112    64     
32     32     
-16    -48    
-96    -48    
48     0      
-304   416    
576    96     
160    -208   
48     -64    
-96    32     
64     112    
80     320    
384    144    
-32    192    
-64    -784   
-80    48     
96     96     
32     -128   
0      -160   
80     -48    
128    112    
32     -32    
-64    32     
128    0      
16     144    
144    -144   
16     128    
240    32     
112    224    
0      -368   
0      -96    
128    64     
160    16     
-176   112    
112    128    
96     624    
528    400    
-16    16     
-32    64     
304    272    
64     688    
96     208    
-80    -256   
192    336    
16     -256   
0      64     
48     -448   
128    -112   
384    432    
-160   -144   
-32    16     
192    -96    
-16    112    
-48    -304   
-144   512    
176    -176   
80     48     
-48    -288   
192    160    
96     -256   
208    64     
48     -176   
-16    -16    
-128   0      
-32    0      
80     80     
272    64     
-96    64     
96     48     
176    832    
160    320    
0      112    
-64    64     
-16    64     
0      -160   
0      -48    
-160   -480   
-80    -256   
176    160    
16     0      
176    64     
224    160    
-48    -48    
256    -304   
160    128    
-16    -288   
-48    -144   
-64    80     
16     32     
-128   -176   
64     48     
144    -192   
160    128    
-144   16     
176    -48    
-32    -64    
224    -640   
160    -80    
176    -224   
-32    128    
96     -16    
48     16     
-128   -16    
176    128    
0      -32    
96     -64    
192    -16    
224    256    
352    304    
-256   -208   
128    32     
272    -288   
64     -160   
80     -64    
32     -272   
16     0      
-64    -464   
96     16     
176    128    
-64    -32    
112    32     
96     48     
288    -64    
-16    80     
16     -112   
48     0      
-400   0      
160    32     
128    -16    
192    -48    
-160   0      
64     -128   
144    16     
0      208    
128    -32    
-16    112    
48     -16    
-48    -320   
64     -80    
0      0      
224    128    
-512   -32    
32     -96    
-208   -112   
-144   -304   
240    -64    
-112   96     
352    16     
16     48     
-48    -288   
176    64     
-64    64     
208    -144   
224    128    
224    144    
32     -112   
0      -240   
-16    -64    
-944   -80    
48     32     
176    64     
-80    -64    
80     48     
-80    -416   
-208   0      
304    -48    
-96    -64    
688    0      
-160   64     
-272   -128   
304    -64    
-384   -32    
-368   -400   
80     -80    
-128   -208   
80     -96    
-304   -48    
32     -208   
176    32     
-256   64     
288    -848   
480    240    
-304   112    
304    -176   
-176   -288   
48     48     
-160   64     
128    -112   
-528   -16    
32     -48    
-272   -32    
96     32     
-208   -16    
256    -192   
-96    -224   
96     -192   
-48    32     
208    -80    
-96    -208   
32     -112   
80     -48    
208    -48    
144    160    
-320   48     
320    -592   
-96    272    
64     -64    
-64    -64    
-288   -112   
144    48     
-48    -224   
352    -112   
80     64     
160    -272   
-160   48     
-64    -80    
-384   -80    
432    800    
-1104  -960   
32     48     
-208   688    
-48    -224   
96     -144   
224    -448   
-80    416    
-48    -224   
128    48     
-32    -128   
64     -176   
-368   240    
208    -128   
272    128    
96     32     
-112   256    
384    432    
-208   560    
80     48     
-224   48     
272    16     
144    -16    
160    -112   
192    -80    
-384   48     
16     -32    
-32    176    
-32    48     
32     96     
224    -96    
-80    -176   
64     -112   
160    -64    
224    -48    
0      128    
-528   192    
128    128    
-368   -176   
-352   -80    
-176   -128   
-848   -128   
48     -224   
-336   -48    
-128   112    
272    80     
-192   64     
80     -32    
0      208    
-208   112    
272    288    
-672   64     
48     -16    
128    -96    
64     16     
64     0      
-208   80     
-144   -64    
-176   80     
-16    224    
-1952  -128   
-96    -160   
208    -96    
16     96     
-144   -80    
208    80     
-80    -64    
-32    32     
32     -48    
-96    48     
304    0      
128    112    
-208   32     
-304   -16    
-32    128    
-736   48     
240    -16    
-64    -160   
144    -128   
160    -96    
16     160    
-48    -96    
-32    16     
80     32     
-128   144    
112    128    
-416   96     
32     -96    
-192   -192   
80     64     
-80    240    
-304   112    
-2432  -144   
368    32     
-80    48     
192    240    
48     32     
-32    16     
-128   -272   
-16    0      
-16    64     
-240   0      
80     112    
48     160    
64     240    
-256   96     
-64    -352   
-1248  -448   
128    -112   
-176   -224   
320    -240   
96     -96    
32     288    
-144   224    
-32    304    
0      -208   
32     80     
144    320    
-64    96     
-96    -48    
-576   -160   
64     16     
-128   -96    
224    16     
48     -336   
-80    -96    
80     -432   
-176   -336   
112    -112   
192    -144   
-32    128    
128    -64    
-272   32     
-448   -176   
80     -384   
-208   -288   
240    -32    
-32    -224   
-240   -224   
-1552  -432   
112    496    
304    256    
32     128    
144    176    
32     -160   
-16    -96    
-128   -272   
144    64     
-160   -256   
224    -416   
176    0      
224    240    
-416   32     
144    0      
464    384    
-544   96     
0      -336   
-272   -32    
-112   -96    
0      -80    
112    -32    
-112   -768   
-32    -368   
16     -128   
-192   336    
32     16     
-112   -384   
112    -192   
208    -256   
-144   -176   
352    -240   
-32    128    
-272   -112   
-32    -48    
-240   16     
112    -464   
-128   32     
304    16     
-336   192    
80     160    
-272   -320   
80     -320   
-384   -480   
16     -144   
48     496    
112    336    
128    -704   
-224   208    
160    64     
-400   -112   
112    -48    
464    -192   
-80    704    
176    256    
-352   -240   
-32    -208   
256    240    
128    288    
48     -32    
48     -240   
-256   0      
160    32     
48     112    
32     0      
48     320    
-368   -304   
32     336    
160    128    
144    -352   
80     320    
-208   -64    
304    272    
-192   -176   
32     384    
128    112    
16     -96    
-80    -352   
208    400    
192    192    
-96    -240   
144    -32    
64     192    
-128   16     
-112   -112   
-96    64     
64     -32    
304    32     
32     80     
208    32     
-96    -224   
-16    96     
64     144    
192    240    
-80    48     
80     32     
256    64     
-128   -176   
-176   -464   
-32    -112   
176    416    
-272   32     
112    -160   
128    208    
32     112    
64     -48    
224    -48    
48     64     
-16    0      
192    -112   
224    96     
160    320    
32     -16    
160    16     
-224   16     
-32    112    
192    48     
-80    -320   
16     -32    
80     -112   
32     -192   
160    -32    
128    96     
176    224    
48     48     
0      -80    
-16    48     
-144   64     
0      16     
-16    32     
80     -16    
176    -16    
304    80     
80     80     
64     32     
64     16     
-48    128    
144    80     
-304   -32    
-128   16     
-48    -32    
-16    96     
352    96     
256    96     
0      80     
-48    -64    
-128   -80    
112    -128   
80     96     
64     -496   
160    48     
-96    16     
160    64     
-80    -16    
112    128    
64     -144   
32     48     
64     48     
-32    64     
32     32     
-80    -160   
96     -80    
96     -208   
48     48     
32     -336   
0      48     
16     80     
0      80     
64     -64    
48     128    
64     -48    
-48    -16    
96     32     
272    96     
-32    0      
112    -48    
112    64     
128    -48    
96     48     
144    -144   
48     16     
176    112    
0      48     
144    32     
160    112    
64     32     
-80    -384   
-96    -64    
-32    128    
48     -32    
80     32     
80     224    
-80    112    
336    -32    
-112   -240   
224    0      
-64    192    
240    -64    
-16    0      
-64    -144   
112    -112   
48     112    
32     -48    
80     -128   
-32    -32    
208    -48    
-224   0      
208    -176   
96     432    
-240   112    
-288   -80    
16     -240   
176    352    
-304   336    
512    480    
-400   -32    
240    48     
-144   -176   
128    -64    
112    48     
256    -96    
192    144    
144    -144   
-160   48     
192    -496   
48     192    
160    112    
144    -64    
64     144    
80     -160   
80     304    
112    -64    
48     -128   
-80    -192   
176    -32    
-80    -208   
480    304    
-32    256    
-192   -272   
320    112    
224    16     
-80    -432   
-144   -416   
160    -768   
64     336    
96     0      
464    80     
-352   -176   
-144   -704   
0      -720   
224    -288   
208    -592   
-208   -144   
400    176    
-112   -112   
-48    -224   
64     -48    
96     -176   
48     48     
16     -80    
0      -80    
-528   -80    
-96    -112   
272    -96    
48     48     
160    -112   
64     -32    
160    -48    
176    208    
48     32     
80     -32    
0      -224   
80     -208   
32     96     
-16    -112   
-32    32     
-16    0      
400    32     
-144   64     
128    32     
-112   -64    
32     -464   
0      0      
48     -368   
32     112    
96     -32    
-144   -96    
224    -208   
-176   96     
-64    -80    
224    -48    
-128   96     
112    -64    
-560   -64    
112    -48    
-48    80     
112    -208   
64     -32    
96     -176   
256    32     
-208   -240   
32     0      
16     -64    
176    0      
-48    96     
176    -16    
-208   -48    
80     144    
-1104  0      
-80    -96    
272    -96    
128    96     
192    0      
160    -256   
128    -16    
160    -112   
0      48     
112    -80    
112    -48    
192    -64    
-16    64     
-208   -32    
-80    -32    
-176   -96    
80     16     
-1504  64     
128    0      
-96    128    
112    -224   
240    -16    
112    -304   
304    208    
-176   32     
176    -96    
-80    -64    
224    -16    
-208   64     
320    48     
-944   -80    
208    0      
-1024  -112   
-32    -144   
-48    -144   
144    -240   
64     48     
-48    -208   
320    96     
-64    48     
144    -48    
-144   80     
-208   144    
-16    -16    
384    80     
-400   -96    
48     -208   
-272   0      
32     -64    
32     64     
176    -144   
-64    0      
304    -304   
16     128    
-160   64     
144    -32    
-224   -32    
144    -112   
-480   -48    
112    -304   
-64    0      
112    -128   
-32    -272   
96     48     
80     16     
80     -96    
96     96     
96     144    
208    0      
-320   -48    
384    320    
16     160    
48     112    
-176   -80    
144    -80    
0      -192   
80     240    
-240   944    
-192   1584   
-272   128    
-752   -512   
80     880    
-416   -192   
-16    -1120  
256    -336   
-672   640    
-224   368    
-784   -608   
-240   288    
448    176    
32     -176   
112    128    
-80    -112   
-1040  -288   
-64    -176   
-432   160    
-160   32     
80     -272   
-48    240    
128    32     
-736   -352   
-48    672    
-384   -416   
-80    -608   
192    192    
-608   -400   
656    -864   
368    1056   
-48    128    
448    -368   
-112   208    
-304   352    
112    400    
-1040  -816   
-144   288    
-256   272    
400    320    
-288   -528   
-192   288    
-400   -48    
-144   240    
-160   -432   
16     112    
-80    176    
112    -96    
48     0      
32     48     
-224   -240   
288    288    
-32    16     
352    -464   
-368   16     
-128   112    
-48    -64    
-800   -48    
256    32     
-240   0      
80     -32    
-240   -16    
160    0      
-48    -16    
-16    -32    
-64    16     
48     48     
112    112    
-160   144    
144    160    
-320   192    
-16    96     
-208   0      
0      32     
144    -208   
128    0      
-208   48     
-96    0      
-32    48     
32     64     
144    464    
16     352    
-272   144    
-304   -208   
112    -32    
192    112    
-96    48     
-416   -16    
0      208    
-464   64     
400    64     
400    672    
-576   32     
-112   176    
-352   144    
-112   80     
16     -48    
272    32     
-80    48     
192    16     
-16    160    
-368   -32    
-256   -16    
-240   32     
-288   176    
112    64     
256    176    
-224   80     
-16    16     
128    144    
-176   64     
-80    -32    
48     0      
-128   32     
240    -80    
-160   48     
144    144    
-320   -48    
48     112    
-144   256    
48     80     
224    64     
-320   -16    
16     32     
224    480    
-272   160    
64     80     
80     16     
-48    -16    
-176   -176   
112    -80    
144    208    
-32    16     
-176   -112   
-144   -48    
-176   208    
-272   32     
32     0      
0      32     
160    64     
96     16     
-96    32     
-32    80     
-112   0      
0      0      
-112   96     
-176   96     
-112   -16    
144    32     
-160   -144   
112    0      
416    400    
192    192    
-144   -320   
-224   -272   
0      48     
-32    128    
-112   96     
64     0      
-48    64     
144    112    
256    144    
-256   0      
32     48     
16     64     
80     32     
96     48     
48     32     
0      96     
48     80     
-16    80     
0      64     
96     32     
32     128    
-176   16     
-176   -16    
64     48     
-112   -64    
-16    -64    
-16    64     
80     80     
112    64     
-32    48     
0      32     
-32    64     
16     64     
128    32     
48     80     
-16    16     
112    16     
-112   -32    
96     16     
-32    16     
16     0      
-32    0      
32     144    
0      -32    
96     -16    
192    96     
32     144    
-192   160    
-48    16     
-16    -16    
-96    80     
48     160    
-80    96     
208    0      
176    -48    
96     48     
144    112    
-112   -80    
144    32     
-80    208    
208    128    
48     80     
-112   -32    
-208   -32    
160    160    
-176   -144   
96     -176   
0      320    
32     -48    
128    -16    
0      -880   
-128   -112   
80     80     
544    432    
-768   -1552  
-160   208    
-352   272    
32     32     
352    0      
720    -96    
-448   608    
240    -192   
32     -400   
-176   352    
96     32     
48     -480   
-304   -240   
208    -48    
144    176    
-16    -320   
80     112    
80     64     
96     -352   
64     0      
80     128    
432    208    
-208   400    
-176   320    
-32    32     
-64    128    
288    -112   
416    48     
-224   144    
-16    -240   
-128   32     
224    48     
144    80     
64     64     
-96    -336   
-64    176    
-208   80     
256    112    
96     -48    
208    64     
48     160    
-96    32     
-48    -64    
48     -1472  
80     80     
112    160    
368    96     
-144   0      
208    0      
-128   48     
0      32     
176    -96    
-112   112    
48     0      
-160   -64    
-176   48     
96     -48    
32     160    
16     -80    
16     80     
48     -64    
288    0      
-96    16     
64     80     
64     -16    
48     144    
-80    48     
144    -80    
0      48     
-80    -144   
128    -32    
32     -16    
16     32     
48     -496   
96     16     
-128   -1600  
400    208    
-16    96     
480    112    
-272   64     
0      48     
-80    64     
160    -80    
272    80     
80     16     
112    208    
-256   -48    
352    32     
-96    -128   
32     32     
96     -320   
352    112    
-160   48     
288    0      
-96    -96    
-80    -192   
32     96     
-304   -240   
144    64     
176    80     
176    80     
272    16     
-96    112    
-64    -16    
48     -80    
384    -144   
304    160    
-16    0      
96     48     
-336   -96    
256    -208   
16     64     
192    16     
96     128    
48     -32    
-16    -48    
208    -128   
0      112    
112    0      
64     -112   
-48    -176   
240    -1328  
-240   176    
288    304    
240    384    
-128   208    
-288   -32    
96     -112   
48     -656   
176    -64    
224    448    
-160   -304   
352    32     
64     112    
112    -240   
64     320    
-48    112    
160    64     
144    -64    
144    -112   
-112   128    
144    -112   
-16    -160   
-64    -256   
96     -80    
16     -384   
48     -208   
336    -352   
272    112    
224    240    
-160   -336   
208    -48    
-192   192    
32     48     
96     32     
-1360  -304   
64     208    
160    0      
208    -160   
32     -16    
-48    -240   
96     -80    
-64    -432   
64     64     
96     -288   
240    816    
96     32     
192    -144   
-112   -96    
32     0      
-1088  -112   
288    96     
-320   32     
272    -32    
-32    16     
208    -320   
272    -80    
272    208    
16     432    
304    16     
-16    304    
-16    -176   
-48    0      
-32    -80    
-80    -224   
-16    -48    
128    0      
-752   32     
176    -96    
-16    16     
80     -16    
-32    272    
48     -336   
96     -144   
-256   512    
64     368    
32     -80    
-96    -112   
-320   -224   
736    640    
-640   480    
48     -32    
-1360  -160   
224    -160   
-160   80     
96     -32    
224    16     
32     -256   
32     -32    
416    -1424  
-64    -208   
-32    112    
112    112    
-176   0      
112    -80    
-176   128    
-144   48     
-416   -48    
224    -32    
-304   64     
-16    -160   
224    -368   
128    -384   
144    128    
-32    -304   
160    -80    
-176   96     
192    48     
0      -48    
-144   -16    
-672   -48    
144    48     
-224   16     
96     96     
32     32     
-16    -192   
-16    -32    
128    -32    
16     0      
144    -192   
96     64     
-1008  0      
96     16     
0      16     
128    16     
-352   80     
144    32     
112    96     
-368   -128   
160    32     
176    -96    
-176   -112   
352    -96    
336    144    
-400   -80    
112    112    
-144   160    
208    48     
-64    -96    
48     -64    
-352   -96    
48     -16    
0      -32    
304    -16    
144    64     
80     32     
48     336    
-528   -16    
192    -48    
64     -16    
-1904  -16    
-16    48     
-544   64     
64     16     
272    128    
-240   0      
160    -16    
-48    0      
80     16     
64     48     
0      -320   
64     -208   
-320   0      
-304   64     
-32    0      
-112   -96    
-160   96     
-624   64     
-224   -16    
-1120  -144   
80     48     
-64    -48    
192    128    
-272   -32    
176    96     
32     272    
-304   384    
-144   -16    
-16    16     
192    -64    
64     128    
-160   48     
64     -80    
-32    16     
-48    16     
16     32     
-272   -96    
48     80     
-384   -32    
-16    208    
-112   96     
48     96     
48     64     
-16    48     
-80    -16    
112    208    
-176   112    
-208   -64    
-48    48     
80     16     
160    160    
-624   -128   
160    -96    
96     -112   
48     80     
-128   -64    
144    64     
-160   64     
-176   -16    
-128   -16    
-32    -16    
-32    48     
-144   64     
-176   32     
-32    128    
-384   112    
-208   48     
160    16     
-80    0      
48     16     
-176   -160   
-80    -48    
-48    128    
48     48     
0      -80    
96     -48    
224    32     
96     80     
128    128    
-416   -16    
-32    48     
-352   80     
64     48     
-512   -32    
80     64     
0      192    
32     96     
80     0      
-64    32     
144    48     
-80    48     
96     48     
48     256    
-64    80     
-64    16     
64     192    
48     16     
112    -176   
-1040  224    
32     128    
-96    -208   
-240   128    
16     48     
192    320    
-32    -480   
-192   288    
160    144    
-48    32     
272    224    
-176   32     
48     96     
-336   48     
160    -176   
-752   80     
-144   -528   
-208   -144   
160    160    
-80    272    
256    -208   
96     304    
48     32     
-112   -112   
-384   288    
0      -80    
-288   -288   
240    -80    
-512   -64    
384    128    
-352   -16    
368    -432   
-208   -128   
560    208    
-176   416    
-80    256    
-144   -112   
64     80     
-80    16     
64     80     
352    224    
-560   48     
400    256    
-368   80     
272    64     
-96    80     
-64    32     
-96    112    
304    -32    
16     32     
128    96     
192    320    
-208   32     
144    -112   
-224   -80    
96     176    
-112   0      
80     0      
-16    -48    
-80    32     
176    -64    
16     32     
256    304    
-160   96     
176    64     
-80    -48    
112    80     
80     0      
48     64     
-16    0      
-64    240    
128    32     
160    16     
0      32     
-128   -16    
160    0      
0      176    
-48    144    
-16    -32    
80     -16    
-16    -16    
-32    80     
0      -48    
144    128    
64     48     
144    128    
64     16     
32     32     
-160   80     
80     96     
128    16     
-48    0      
-64    -32    
80     -32    
144    160    
-16    -16    
192    48     
112    48     
16     48     
80     0      
80     144    
-240   48     
64     -48    
32     -48    
48     48     
32     16     
128    32     
16     80     
32     16     
0      128    
192    96     
16     -16    
0      -160   
160    64     
-64    32     
128    80     
96     80     
96     -64    
128    80     
48     0      
96     -128   
48     16     
-48    80     
-64    -112   
208    -128   
160    128    
304    416    
-64    256    
96     -32    
-80    -160   
224    128    
-256   48     
192    -224   
224    112    
128    -272   
-48    -64    
112    -64    
-64    80     
-128   48     
80     112    
-48    -224   
-16    -192   
16     -16    
-48    -64    
48     -80    
176    -64    
160    96     
-112   -416   
-240   -416   
-32    -704   
-112   16     
224    -80    
0      -64    
752    944    
-240   560    
-144   -176   
272    -368   
112    336    
-64    64     
0      -112   
320    -112   
-176   -32    
144    -224   
-192   304    
-64    -400   
80     208    
0      -224   
80     192    
16     -240   
64     160    
224    224    
-176   -208   
240    144    
-32    112    
176    48     
64     -272   
80     112    
256    -128   
48     -64    
-96    -368   
-16    -256   
32     -576   
16     96     
64     96     
96     48     
-96    80     
96     48     
-48    0      
64     16     
-64    48     
96     -112   
48     32     
112    0      
256    80     
0      -96    
112    368    
32     -336   
80     0      
-80    16     
80     0      
-16    32     
160    -16    
144    80     
0      48     
-16    80     
112    176    
-144   64     
272    0      
32     96     
192    -224   
-192   96     
0      48     
48     -16    
0      96     
224    160    
-64    -96    
240    -64    
-64    112    
208    -224   
160    112    
-80    -192   
96     -16    
272    -480   
32     -112   
-192   48     
-352   -480   
480    -240   
0      320    
-432   -32    
128    -176   
112    -64    
192    256    
160    240    
144    208    
-128   32     
496    -112   
-160   112    
256    -32    
176    48     
64     176    
96     192    
-64    -128   
112    80     
0      48     
48     -880   
112    48     
32     -480   
96     -176   
176    -32    
64     -832   
144    48     
-96    -304   
272    192    
-16    16     
64     -96    
32     48     
176    16     
64     -464   
-48    48     
112    32     
-128   0      
192    -352   
-16    -416   
-64    16     
-48    144    
240    0      
32     -144   
-80    -16    
192    -1456  
64     -16    
48     32     
-16    -48    
176    0      
-48    32     
0      -96    
-32    80     
-320   32     
-48    -80    
-1424  -16    
112    0      
-80    -32    
64     -208   
160    -96    
144    -112   
-32    16     
16     -80    
192    -64    
144    16     
80     112    
128    0      
160    80     
-16    -80    
464    -16    
-960   -160   
-320   -192   
336    448    
-80    192    
-80    -48    
144    48     
176    32     
-16    -1216  
-608   -192   
240    -80    
48     -64    
-32    64     
96     -176   
32     144    
80     96     
-336   0      
112    112    
-1008  -64    
32     96     
-48    96     
-32    -176   
-192   -176   
288    -624   
-192   0      
48     -32    
48     48     
112    -16    
144    64     
-368   -32    
0      -144   
-144   -80    
416    64     
-896   -640   
-176   -544   
-96    64     
-160   0      
-80    64     
96     -336   
144    96     
368    240    
224    656    
-224   -112   
304    -880   
0      -32    
304    336    
-32    112    
112    -272   
-144   -144   
112    0      
-1248  32     
64     -80    
-128   64     
336    -592   
112    -224   
-48    -336   
96     16     
-80    -16    
160    0      
-240   160    
80     240    
-624   64     
80     -16    
-336   -32    
80     -96    
-240   32     
-16    -176   
80     112    
112    -48    
112    48     
-64    -1360  
-272   -320   
32     384    
144    304    
-128   -240   
-64    -480   
-240   -272   
336    640    
224    -16    
16     -144   
96     -112   
-16    -96    
160    288    
-80    -128   
208    -96    
-64    128    
144    160    
-144   -224   
64     80     
-128   0      
144    -32    
-16    64     
176    -16    
16     320    
16     -272   
112    -64    
-960   160    
-64    64     
-496   -128   
-336   -16    
-96    64     
-1072  176    
-432   16     
-1584  -208   
-80    16     
144    -32    
-64    -16    
80     -272   
-160   336    
-1488  544    
384    544    
-352   -704   
-224   208    
-400   64     
64     -336   
32     48     
0      -208   
-176   0      
-112   -128   
-288   128    
-608   -96    
-32    -32    
0      96     
80     -16    
64     -96    
-16    32     
96     64     
32     -48    
112    32     
-128   96     
-64    96     
128    48     
80     -112   
48     0      
-32    48     
-544   -144   
368    80     
-368   128    
32     -224   
144    -112   
80     32     
256    -96    
48     240    
32     0      
-112   -80    
0      -16    
-128   -80    
368    224    
-800   320    
112    -160   
-832   -336   
-288   112    
-1520  -64    
432    -208   
-80    32     
-16    144    
-48    -144   
336    256    
-480   224    
48     112    
96     48     
80     176    
-96    48     
-80    -96    
-336   -176   
80     -112   
0      96     
-224   -80    
-80    -416   
-160   -464   
320    112    
-96    336    
-432   336    
112    -96    
32     32     
-320   48     
-144   112    
-16    -176   
128    -208   
48     144    
80     16     
208    48     
-576   -144   
-64    96     
-64    32     
160    -16    
-160   -64    
128    32     
-80    144    
-96    -48    
80     128    
-160   128    
-48    -16    
32     48     
-16    48     
-304   -112   
208    -160   
-144   0      
-112   16     
-192   -272   
112    -32    
272    320    
-208   144    
0      -64    
-80    16     
32     96     
-160   -48    
176    -32    
-160   -96    
-48    -64    
-288   -32    
80     144    
-160   96     
128    16     
-368   0      
-96    0      
144    160    
-16    64     
-112   64     
16     48     
32     32     
32     48     
-64    -32    
-176   336    
160    272    
-48    16     
0      16     
-32    48     
-16    -16    
112    48     
-384   -208   
-112   -320   
32     -592   
0      -544   
176    -192   
-112   -272   
-176   128    
272    400    
-304   288    
48     -128   
-160   48     
192    544    
-208   -608   
128    96     
-48    176    
-176   -80    
112    96     
64     48     
0      0      
-96    64     
-80    0      
-32    176    
-96    -112   
160    -480   
288    304    
-16    80     
-176   -112   
-240   -96    
-128   -112   
32     -176   
208    272    
64     112    
224    32     
48     -16    
16     -32    
-144   64     
32     64     
-128   48     
-48    208    
272    448    
-416   -96    
112    -16    
-32    32     
64     -32    
-48    16     
144    32     
-80    -112   
-144   -80    
128    80     
32     96     
32     96     
112    48     
16     96     
-192   -80    
112    64     
0      -192   
0      -64    
16     48     
16     48     
48     48     
-16    32     
-16    48     
144    160    
32     48     
192    32     
-32    32     
-144   0      
160    64     
-16    -32    
96     -32    
80     144    
352    -624   
-208   64     
288    64     
0      32     
144    32     
64     48     
160    48     
-224   128    
48     -16    
0      -16    
48     32     
64     144    
64     -64    
-48    32     
96     -96    
96     -352   
64     96     
-48    -64    
144    64     
-96    80     
240    96     
-320   48     
160    -32    
144    -144   
-16    144    
304    32     
80     160    
-496   -64    
224    64     
-128   96     
96     -448   
240    32     
-192   0      
288    96     
64     160    
-288   128    
352    64     
512    -16    
-32    80     
208    80     
-32    -16    
128    -112   
80     -176   
64     128    
368    80     
16     0      
208    -32    
-96    -48    
64     80     
-144   -16    
80     64     
0      48     
224    48     
-16    16     
112    80     
144    -96    
-32    -32    
160    -32    
16     -16    
-16    32     
272    -160   
-112   16     
-112   -368   
208    96     
-80    16     
0      16     
288    288    
-96    48     
32     80     
128    144    
-16    0      
176    128    
-32    48     
112    -112   
-16    80     
64     -64    
112    112    
48     -96    
80     0      
80     -240   
80     64     
64     -64    
112    80     
-48    16     
-16    -48    
112    112    
112    256    
320    224    
80     -64    
48     176    
-144   -368   
64     -208   
96     192    
128    80     
320    -704   
-48    -96    
80     -128   
-80    -64    
-32    192    
-48    -48    
224    0      
448    352    
-80    64     
96     -272   
32     80     
80     128    
128    112    
64     -256   
144    0      
-160   -368   
288    -336   
208    432    
128    16     
-48    96     
112    -32    
-112   -304   
-144   -560   
32     448    
64     -96    
48     176    
240    -368   
96     192    
16     -80    
64     48     
32     -688   
16     112    
-48    -16    
192    -48    
112    -80    
384    64     
-272   -192   
-64    -448   
-176   368    
-16    -16    
128    48     
208    -192   
240    256    
-48    -144   
416    -288   
-112   272    
96     80     
-32    -80    
16     -768   
-32    -304   
288    720    
-48    -496   
0      -464   
-144   -1344  
-16    224    
-80    -448   
288    -224   
192    224    
-16    -96    
128    160    
144    -128   
128    -80    
32     160    
320    192    
-304   64     
-64    -128   
112    -208   
128    224    
144    0      
-64    -256   
48     -240   
224    160    
128    -48    
-224   -16    
32     -288   
-48    160    
96     -208   
320    304    
-160   -544   
80     -224   
-32    320    
224    288    
-48    112    
96     -192   
-208   0      
224    -512   
176    0      
-16    -688   
-16    -80    
16     -80    
240    -128   
64     48     
32     -144   
176    -176   
-32    -240   
-192   -320   
160    -128   
-336   16     
144    -80    
32     -112   
16     -224   
-32    16     
16     -32    
176    32     
96     -208   
112    -32    
64     -96    
-48    -16    
-304   -144   
0      -144   
-432   -160   
-64    -400   
0      -16    
224    -480   
-64    -576   
384    -368   
80     192    
96     80     
-48    32     
96     -112   
16     -64    
48     288    
176    -16    
-112   32     
480    -96    
-288   64     
176    -128   
-384   -160   
96     -96    
-16    -96    
112    16     
304    192    
-336   224    
0      -320   
16     -560   
144    208    
80     176    
144    -112   
-176   16     
224    48     
-240   -48    
320    -16    
-576   -48    
144    -80    
-144   -32    
144    48     
-256   16     
32     -176   
-144   -144   
128    -320   
128    32     
304    224    
48     240    
-160   -32    
64     -144   
-208   128    
176    48     
-160   32     
80     16     
16     0      
128    48     
-128   192    
160    -192   
304    -32    
-160   -144   
32     -16    
-128   48     
64     -96    
-128   112    
0      -224   
-160   -64    
80     48     
448    624    
-224   608    
-560   192    
112    -240   
-224   208    
144    -64    
0      32     
96     -256   
-80    -256   
208    -48    
80     32     
-240   -80    
-32    -176   
96     -160   
160    -32    
-272   160    
112    -96    
-112   0      
144    -144   
448    288    
-896   80     
-192   112    
-1184  -592   
-1088  -96    
-112   64     
96     512    
80     352    
-272   -176   
-112   -48    
32     -64    
-48    112    
-208   208    
224    240    
-256   48     
-32    208    
-352   -160   
-16    64     
-128   -80    
-480   80     
96     16     
-144   -272   
128    -48    
-672   64     
-240   224    
256    160    
0      160    
80     64     
16     128    
-384   -304   
-96    -304   
0      96     
240    224    
0      -48    
-48    48     
176    48     
-208   0      
-96    64     
-176   112    
-128   -80    
-176   -16    
-32    160    
-80    -128   
-16    144    
-256   -448   
288    848    
-32    -208   
208    -16    
64     128    
-64    -80    
-176   16     
64     96     
112    368    
192    544    
-128   -160   
-272   -240   
192    64     
-688   -160   
96     0      
16     16     
96     144    
16     -80    
-96    16     
80     64     
-112   16     
-96    -16    
-64    -16    
112    48     
32     64     
176    80     
0      80     
16     112    
-1232  -64    
-112   -16    
64     -48    
80     0      
144    96     
160    64     
16     0      
-336   -16    
-32    48     
-192   96     
-400   -96    
-432   48     
-160   176    
16     64     
-96    0      
-144   16     
128    48     
-48    -128   
128    80     
112    112    
-176   176    
0      0      
16     -32    
-80    16     
32     64     
-96    -16    
96     -16    
-16    96     
-64    16     
176    -16    
-448   -48    
144    80     
-576   0      
-80    -32    
48     48     
96     48     
16     48     
-32    0      
32     32     
-160   -16    
32     48     
-32    -16    
144    64     
-400   -64    
112    64     
-272   -32    
144    64     
-176   -160   
208    -208   
48     112    
48     -32    
-208   -176   
-112   -48    
32     320    
-272   144    
64     -128   
-64    128    
64     16     
-48    -160   
-112   128    
-16    -80    
16     48     
80     -32    
80     128    
80     192    
96     16     
-32    48     
-80    16     
64     -16    
160    48     
-80    96     
192    112    
-192   -80    
64     -96    
288    192    
-304   96     
-64    -16    
-32    112    
80     -32    
-144   176    
-128   112    
48     96     
-128   64     
160    -64    
144    32     
672    224    
-544   112    
-48    -400   
128    -144   
-112   208    
-304   48     
96     32     
-176   80     
64     176    
48     128    
48     -48    
128    48     
-96    96     
144    160    
112    96     
-320   -16    
0      -96    
16     0      
-144   -16    
160    112    
80     96     
-32    16     
144    16     
16     272    
16     288    
16     -32    
-192   -112   
128    16     
-16    64     
-160   -32    
176    -48    
-128   -16    
240    112    
-368   -160   
240    16     
144    176    
-48    -720   
64     800    
64     64     
-48    -144   
192    80     
-96    -96    
208    192    
-144   16     
-112   64     
320    -48    
-128   -192   
240    352    
0      -272   
16     256    
160    336    
-80    96     
240    96     
-320   192    
64     -528   
128    208    
512    448    
-112   -128   
-96    -32    
176    -176   
96     464    
-96    32     
-96    -192   
-208   64     
112    -112   
288    240    
48     -48    
-48    64     
144    -96    
-112   -544   
-80    -576   
-48    16     
-48    192    
400    176    
48     96     
96     16     
0      -144   
64     64     
160    240    
-80    -48    
64     80     
-64    64     
80     96     
80     48     
256    16     
32     96     
-80    -48    
80     -432   
176    -80    
48     64     
128    0      
32     -32    
-64    -320   
-16    32     
-16    -32    
-80    -16    
64     -848   
-16    -272   
192    -144   
176    -16    
80     -112   
64     -160   
0      96     
-64    -208   
-32    0      
-80    192    
-176   -32    
112    -160   
0      48     
112    -128   
128    160    
-80    -1056  
128    32     
64     96     
128    -128   
-160   -336   
-64    -16    
16     -96    
128    64     
80     80     
80     64     
-48    -144   
-48    -256   
128    32     
-16    -96    
336    192    
16     64     
112    16     
-32    -1088  
144    96     
112    176    
-16    112    
64     -160   
96     80     
-64    64     
-32    -16    
192    48     
80     -80    
48     64     
0      -96    
144    176    
144    -272   
-16    -96    
-32    -192   
32     0      
-112   -96    
432    192    
-128   0      
112    224    
-64    32     
48     -48    
144    160    
-32    -128   
176    48     
176    -96    
352    208    
144    32     
32     -96    
176    -256   
-32    -144   
0      -240   
-256   -336   
96     -304   
160    -192   
64     -112   
256    -928   
-304   -352   
-80    -848   
32     192    
112    -16    
-176   80     
112    -176   
176    -144   
192    -64    
416    -80    
-144   288    
-368   16     
-176   96     
-32    -176   
176    -48    
80     -464   
144    -240   
-32    128    
-16    16     
-96    208    
-48    112    
-96    -192   
112    48     
240    -16    
-112   112    
112    80     
160    -368   
-272   -32    
512    -176   
224    -832   
400    48     
-240   -112   
112    32     
-48    112    
-96    -176   
288    -320   
-32    -320   
176    -336   
-192   -240   
400    -64    
64     128    
80     -304   
192    -48    
-528   0      
128    -144   
-96    -48    
288    -32    
-32    64     
48     -464   
336    -16    
-208   272    
112    64     
32     384    
384    208    
160    -16    
-48    -128   
112    -32    
-224   -192   
-272   48     
96     -144   
112    -416   
0      -256   
16     -144   
112    -352   
144    -112   
-64    144    
112    -176   
112    -16    
160    0      
192    -144   
-288   128    
176    -272   
64     -128   
144    -256   
96     -128   
48     128    
416    336    
64     288    
-96    144    
176    208    
80     -128   
544    400    
-160   -48    
64     -48    
64     -160   
16     304    
144    -64    
-96    128    
-192   16     
48     128    
-496   32     
0      16     
192    -16    
0      -96    
0      -112   
240    -288   
192    352    
-32    -240   
144    720    
224    -432   
48     -64    
-272   48     
48     -560   
-160   32     
240    128    
-176   -80    
-112   -656   
-64    16     
112    16     
-48    16     
64     -96    
144    80     
144    -528   
96     80     
64     32     
112    -32    
-240   -16    
80     0      
-128   0      
192    48     
-464   -416   
272    -736   
-64    -48    
304    272    
64     64     
160    0      
144    192    
-192   -368   
-160   -80    
-128   32     
144    144    
176    64     
352    16     
-160   -16    
208    16     
-528   0      
0      -48    
-192   16     
16     -112   
144    48     
240    -64    
96     64     
48     -176   
-48    16     
-512   -16    
-64    80     
-320   48     
240    48     
-272   -48    
160    -16    
128    160    
-128   -32    
-48    -64    
176    -160   
96     96     
144    -112   
48     -80    
112    -320   
16     -32    
16     80     
160    64     
-176   48     
32     -32    
-128   -16    
96     16     
176    -32    
-160   64     
-144   0      
80     -144   
176    48     
400    -112   
272    64     
-1424  -112   
-272   -32    
112    16     
-80    16     
-64    0      
160    16     
32     -32    
64     -80    
128    48     
112    48     
-176   0      
-1072  -80    
16     0      
64     -16    
64     48     
-64    0      
-432   -16    
-80    0      
-208   -48    
-16    -48    
-144   112    
96     -32    
80     -32    
-64    -48    
192    160    
96     80     
-352   -112   
-80    0      
-288   -192   
-128   176    
-192   96     
-128   -160   
-32    48     
-96    128    
80     0      
-160   -48    
-32    -16    
64     32     
-128   -32    
32     80     
-16    96     
-112   -96    
-64    64     
-64    -128   
-192   -240   
160    -80    
-208   112    
432    32     
-272   -144   
-80    -16    
-176   192    
-368   96     
-624   -400   
128    -96    
272    416    
-240   176    
-32    -112   
528    304    
-368   144    
32     -48    
32     64     
-32    -80    
-96    32     
128    192    
-96    32     
-48    -32    
176    144    
-576   -64    
128    -240   
-352   48     
128    128    
0      -16    
32     288    
48     -336   
32     128    
112    176    
-192   -224   
64     112    
-336   -128   
208    176    
48     64     
128    -80    
-224   96     
16     0      
32     32     
-64    112    
-96    -400   
96     -192   
-224   48     
16     16     
112    0      
-80    192    
192    320    
144    -160   
-16    -208   
-80    0      
160    416    
-416   -272   
-32    96     
-416   -480   
-272   -304   
272    -784   
-432   -288   
96     -176   
-80    0      
304    304    
224    -64    
320    80     
-192   -96    
-224   -80    
-304   -64    
80     48     
-272   -176   
48     32     
-80    80     
48     224    
160    128    
-80    32     
352    80     
-32    176    
-96    96     
-16    64     
16     16     
-80    -64    
-64    128    
0      64     
160    96     
-112   0      
128    64     
-464   -32    
80     16     
-96    96     
-272   -96    
128    -272   
32     -176   
160    144    
-176   0      
96     -96    
-80    48     
-16    96     
-96    16     
32     80     
-256   -16    
48     -16    
-112   0      
-112   96     
0      -224   
-128   -80    
-80    -336   
240    16     
-64    176    
-80    48     
272    48     
224    176    
-128   128    
-224   16     
112    -80    
-16    -112   
112    160    
-112   -32    
32     32     
-144   -32    
176    160    
16     128    
-64    80     
16     16     
-16    112    
160    -16    
-32    64     
112    -32    
-80    16     
112    160    
-128   -96    
160    80     
-32    80     
-16    80     
128    80     
-48    -32    
64     368    
80     16     
224    -80    
-112   -48    
0      -80    
-112   32     
128    16     
48     0      
80     -80    
-160   -64    
48     -144   
-32    -112   
0      0      
48     48     
-48    32     
208    -96    
-96    48     
16     96     
64     80     
64     -32    
-240   -48    
16     128    
-16    112    
304    176    
-96    32     
112    112    
48     -16    
176    112    
-32    176    
144    416    
-64    224    
-48    -64    
48     -64    
32     -96    
128    112    
-16    -64    
16     -96    
-16    112    
128    144    
-176   112    
144    -512   
224    96     
128    96     
48     128    
272    368    
-96    400    
-128   304    
512    288    
0      -96    
-240   -368   
-112   -176   
80     304    
-96    96     
144    -96    
160    240    
48     -912   
176    -64    
240    0      
48     -48    
224    416    
112    48     
80     -128   
16     192    
144    112    
-112   448    
32     -160   
-48    -80    
480    176    
-224   208    
64     352    
-32    -448   
-32    512    
224    224    
-208   64     
304    -432   
144    -80    
416    288    
-224   -80    
-64    224    
-160   -112   
0      -160   
96     -128   
288    160    
144    -48    
-192   80     
432    -32    
112    96     
160    -464   
-16    112    
-336   -304   
0      64     
224    288    
112    -112   
-128   -16    
160    -128   
-128   80     
224    432    
-176   48     
64     -288   
320    544    
160    -64    
-208   -352   
-80    -240   
432    304    
0      -64    
160    -128   
16     -208   
48     304    
-96    -144   
32     304    
304    32     
-32    -96    
48     -64    
96     -176   
304    336    
-80    -368   
128    224    
48     -192   
240    -112   
-272   -1264  
112    48     
-128   -128   
224    208    
144    112    
80     256    
64     -368   
48     48     
-80    224    
48     -160   
80     256    
-32    -32    
128    32     
112    128    
-80    -128   
0      128    
192    -32    
-96    -432   
-64    48     
16     64     
-128   176    
48     240    
144    32     
80     -64    
176    -64    
32     64     
-32    -112   
0      -112   
80     -288   
144    16     
-32    -736   
192    112    
-64    0      
176    160    
64     128    
176    144    
48     208    
-48    16     
-16    144    
48     -80    
96     80     
80     -48    
128    96     
64     112    
80     80     
48     -560   
48     -272   
-112   32     
288    -1280  
0      80     
224    -368   
192    -992   
384    -32    
144    -320   
-128   48     
256    48     
-288   -64    
192    -16    
-112   -240   
-128   -32    
336    160    
96     -256   
96     0      
176    32     
0      -128   
-608   -192   
224    -80    
16     32     
-64    -240   
144    -64    
0      -576   
32     0      
-144   112    
-144   -176   
208    -320   
160    -48    
272    -80    
224    80     
96     -192   
224    80     
-848   -64    
96     32     
128    0      
64     16     
128    -96    
96     -176   
320    64     
-160   -496   
-128   -16    
208    16     
208    32     
-32    -16    
0      96     
-224   -16    
144    -32    
-144   16     
160    96     
96     80     
32     -224   
48     -96    
240    -96    
0      48     
32     -928   
160    0      
64     0      
-48    64     
208    0      
16     48     
-176   -48    
112    32     
-240   -16    
144    -64    
-1056  -48    
64     -160   
16     -64    
96     -48    
176    -64    
112    -304   
-64    64     
80     -144   
64     -80    
-48    -64    
128    32     
-64    32     
144    80     
0      -64    
80     -112   
-752   128    
64     32     
288    400    
-48    208    
32     48     
160    -288   
-16    -160   
0      -592   
64     48     
-48    -160   
96     -64    
16     128    
-112   -464   
-112   -304   
0      32     
-752   32     
288    -128   
-240   -16    
160    80     
-144   -96    
208    -240   
48     -304   
32     -416   
288    512    
-208   240    
256    -288   
-304   -304   
304    -64    
624    624    
112    -144   
-208   -304   
48     144    
-288   144    
0      -208   
144    32     
192    -400   
160    208    
128    -288   
-32    32     
-16    -96    
160    64     
-112   -80    
-96    -32    
-272   64     
256    -320   
-304   160    
-272   -496   
-16    -432   
544    352    
-336   -256   
96     352    
-336   -656   
224    -1120  
32     -288   
320    384    
-80    256    
-144   160    
64     48     
80     0      
112    192    
-112   -96    
-16    -48    
176    48     
16     -64    
112    48     
-1344  -32    
-32    192    
-288   16     
-704   32     
272    48     
-352   32     
-128   -80    
80     -48    
-16    0      
0      32     
-80    -32    
64     0      
224    240    
-912   -96    
-112   80     
-528   -208   
48     -64    
16     -16    
80     112    
0      16     
80     32     
32     16     
-1472  112    
-96    48     
-32    -32    
-48    48     
-432   -176   
336    80     
-368   -112   
-16    80     
-96    0      
-16    48     
64     16     
-80    0      
112    96     
-464   -16    
16     48     
-224   -16    
0      32     
-640   0      
128    -80    
-112   32     
512    160    
-128   224    
-176   64     
80     -80    
-144   -32    
-32    64     
-96    -16    
112    48     
-208   16     
80     16     
-640   -96    
-96    0      
-800   0      
16     -128   
-96    -32    
16     432    
-16    -128   
272    128    
-400   128    
-128   0      
48     0      
-64    -32    
192    0      
224    224    
-208   96     
32     -48    
-256   -96    
-416   -112   
128    144    
144    80     
-112   -32    
256    -240   
48     48     
32     96     
-32    128    
-192   160    
16     -32    
-80    32     
32     -64    
-32    176    
-224   -48    
-48    0      
0      -64    
272    48     
-2528  32     
-16    -32    
80     -96    
240    128    
-32    352    
-176   48     
48     80     
16     -64    
-32    -48    
-16    80     
48     -32    
-16    16     
-96    48     
-176   0      
64     144    
-800   96     
64     176    
128    80     
-192   -224   
-48    -304   
288    304    
-208   352    
80     64     
16     48     
-64    80     
144    224    
80     288    
192    160    
-160   -80    
128    -160   
16     -304   
80     -16    
128    176    
64     96     
32     80     
-128   480    
-16    -432   
-256   -16    
112    576    
-176   -288   
-128   0      
-144   -64    
416    -240   
48     288    
144    208    
-64    -208   
-288   -144   
-16    96     
-48    16     
144    -224   
0      -80    
-144   256    
176    -288   
64     432    
-96    32     
64     608    
-736   -160   
80     -464   
-128   288    
-64    224    
192    -144   
96     -80    
-64    -160   
80     112    
80     80     
240    -608   
-96    304    
64     336    
-128   -32    
240    144    
-16    -96    
-48    -80    
240    272    
-16    -128   
-176   -368   
368    64     
96     368    
192    0      
112    -224   
144    176    
-192   -416   
0      80     
-96    208    
96     -176   
192    16     
-48    208    
0      160    
16     16     
-160   -48    
48     -240   
-112   -112   
64     80     
96     48     
80     80     
16     128    
240    160    
-304   -32    
128    -48    
-80    16     
48     48     
208    64     
-64    48     
144    64     
-80    0      
-32    32     
64     16     
144    160    
-96    -48    
128    -96    
112    -16    
336    128    
-256   -48    
-16    16     
80     32     
-96    16     
48     112    
48     0      
96     96     
48     144    
-64    64     
160    64     
0      96     
96     -32    
176    64     
-64    96     
32     -112   
128    96     
-96    -16    
192    16     
-32    0      
176    80     
-16    -32    
48     -112   
-144   80     
16     192    
96     160    
-80    -64    
-192   -48    
96     32     
96     48     
-624   -192   
144    64     
0      0      
-32    -96    
144    0      
144    128    
416    48     
208    -208   
-320   112    
-160   240    
-16    -32    
192    16     
64     0      
208    -96    
96     -80    
80     80     
-144   160    
96     48     
80     -48    
16     32     
240    80     
0      352    
144    80     
-80    -128   
48     -272   
176    208    
-80    240    
112    48     
-64    -32    
144    96     
224    272    
-240   256    
-160   -80    
96     -16    
-16    16     
64     -48    
288    48     
128    0      
256    -16    
0      -432   
-128   -208   
-144   -48    
-160   144    
-16    32     
160    32     
128    112    
64     80     
-64    32     
16     96     
-160   -32    
64     32     
-16    144    
16     -16    
-80    -32    
160    -176   
144    128    
32     -464   
128    144    
32     32     
64     80     
-112   0      
128    32     
112    96     
48     64     
112    32     
96     48     
144    256    
48     176    
-144   -48    
112    -64    
256    16     
0      -224   
256    64     
0      -208   
48     0      
-80    -32    
96     16     
96     16     
144    32     
288    80     
-64    -32    
256    32     
16     -48    
0      -48    
0      -144   
128    80     
128    -80    
0      48     
64     -688   
48     48     
192    80     
112    64     
64     0      
-32    -16    
0      0      
64     -272   
-32    0      
160    16     
-80    -48    
192    -48    
112    80     
112    -208   
0      16     
80     16     
64     96     
272    224    
-48    240    
128    -32    
48     -64    
48     0      
0      -192   
336    224    
128    176    
0      96     
-32    32     
144    -32    
-32    -752   
-32    128    
32     480    
-240   -240   
32     32     
80     112    
368    -864   
96     944    
16     -1568  
288    -752   
16     -240   
-288   -128   
-16    -80    
208    128    
64     -128   
96     -48    
128    -16    
144    -400   
-64    -400   
224    -64    
-128   -896   
304    -272   
80     -32    
304    352    
-400   -528   
-80    -384   
128    -512   
-64    -368   
160    -64    
16     80     
176    384    
208    -48    
-112   0      
-80    -240   
-128   -288   
144    -240   
96     -288   
80     -144   
528    112    
-336   464    
-64    -528   
192    -64    
-64    -368   
64     -160   
112    -208   
-160   -64    
352    16     
-32    128    
0      112    
16     -128   
-128   -176   
144    -160   
-848   32     
-208   -48    
368    -64    
48     -32    
128    32     
128    -352   
224    -176   
112    -1424  
96     80     
128    -48    
-64    16     
192    32     
288    16     
-320   -16    
64     -208   
-64    32     
-80    128    
144    128    
-272   -112   
-80    -32    
-112   32     
-224   64     
144    -352   
128    0      
176    16     
160    128    
224    16     
16     -16    
80     -32    
0      -80    
-112   112    
256    16     
-160   0      
112    -176   
-160   0      
80     -192   
64     80     
128    -144   
0      96     
112    16     
16     144    
-144   -16    
96     -48    
48     0      
0      32     
-208   0      
64     -64    
-1056  -208   
160    -80    
-1216  64     
-16    -192   
-48    176    
144    -224   
-16    32     
160    -512   
64     80     
16     128    
64     112    
-48    32     
96     -64    
144    0      
96     160    
80     112    
48     -48    
-192   64     
192    176    
-160   336    
-48    -32    
160    -48    
96     -672   
64     -208   
-32    96     
-16    80     
-208   80     
112    80     
-256   -160   
176    -176   
16     -48    
-80    -176   
32     -80    
176    -144   
16     224    
192    0      
-16    112    
-112   -16    
48     -208   
-528   -208   
336    96     
-320   -96    
160    -192   
-80    -160   
32     -80    
-64    0      
48     -112   
-352   128    
48     -240   
144    48     
320    352    
-240   480    
-144   96     
-368   32     
-176   736    
304    48     
-80    -96    
368    208    
80     160    
-208   -16    
-496   -288   
-1216  128    
-64    -16    
-384   -160   
272    -16    
-400   96     
-544   -80    
80     64     
-48    -32    
-240   -288   
-208   16     
-16    0      
-1552  -80    
144    224    
80     -112   
96     304    
64     -48    
176    -32    
-160   -192   
112    -80    
-80    32     
-304   80     
-128   -128   
-240   -64    
0      208    
-208   -224   
-352   -256   
-48    -32    
-176   -112   
352    128    
112    0      
-32    -96    
192    112    
-176   -32    
32     -32    
-48    112    
-176   96     
80     16     
48     96     
-112   32     
144    -128   
-96    -304   
-96    -464   
80     144    
-736   32     
-112   80     
-544   -16    
160    -32    
-256   64     
0      208    
16     -16    
160    -48    
-32    -176   
272    0      
16     128    
-224   -16    
128    32     
-320   -224   
-48    -128   
-384   16     
-32    -128   
-144   -288   
64     112    
-32    80     
-224   192    
-16    -16    
160    -32    
-432   -96    
128    -64    
-144   48     
304    48     
-48    96     
-368   80     
0      96     
-896   -48    
288    128    
-480   -80    
48     32     
32     -16    
64     48     
80     112    
32     224    
-416   80     
352    0      
-48    -48    
-64    80     
-96    -48    
-64    -96    
16     96     
-48    48     
80     80     
80     48     
-32    96     
32     64     
-128   64     
144    64     
16     80     
-240   16     
96     -48    
-16    -96    
-144   -96    
48     64     
-48    0      
176    64     
-320   0      
16     48     
-592   -16    
112    64     
16     -64    
448    400    
-272   288    
-272   32     
192    192    
-16    48     
64     -64    
-384   0      
240    240    
-288   48     
16     0      
-128   48     
-32    80     
-1104  -80    
144    80     
544    256    
-352   64     
-224   -144   
112    16     
-64    112    
-144   0      
112    -48    
432    128    
-208   144    
144    160    
320    112    
-304   48     
80     176    
192    64     
-144   16     
48     96     
48     144    
-16    240    
16     112    
96     16     
16     -144   
80     -80    
160    64     
208    -96    
-240   -32    
-16    224    
-112   96     
0      0      
160    96     
-144   64     
16     16     
-112   -320   
48     48     
-48    128    
-208   -144   
16     48     
-16    48     
-352   144    
-80    64     
-272   -208   
256    -192   
128    -144   
192    -32    
-16    160    
-96    80     
16     48     
48     112    
48     80     
-16    64     
-64    16     
368    320    
-176   176    
64     -16    
224    80     
0      -16    
112    80     
32     -32    
-32    32     
-80    -48    
240    160    
400    272    
-32    176    
112    16     
64     -48    
112    80     
-112   32     
-16    144    
-16    16     
160    80     
-48    16     
-80    32     
-80    144    
16     48     
-16    -32    
112    64     
16     48     
0      64     
-32    16     
-160   -32    
32     48     
-32    0      
32     -112   
-32    -16    
208    48     
192    -96    
-32    -272   
0      -64    
32     112    
64     160    
-64    80     
48     0      
160    16     
16     160    
384    544    
-160   -576   
112    -288   
96     256    
48     -80    
-32    112    
192    -48    
-96    32     
224    -64    
-32    256    
0      -16    
112    48     
176    352    
144    48     
112    -96    
272    32     
192    528    
-16    -400   
-48    624    
-192   -304   
-128   176    
64     -208   
224    -832   
-144   464    
256    -1104  
-48    144    
208    -208   
-48    -208   
368    608    
-112   560    
-240   272    
176    -768   
-16    -160   
-16    -176   
-112   -144   
48     -64    
-112   224    
160    -96    
48     0      
-16    -112   
80     16     
240    -112   
-224   -240   
-16    288    
-160   144    
-176   -128   
256    32     
304    112    
-80    112    
224    0      
-128   -64    
96     192    
-80    176    
400    192    
256    -224   
160    128    
-16    -448   
64     -16    
-32    -128   
64     176    
160    -16    
64     80     
-16    -464   
144    -256   
-64    448    
192    176    
64     208    
-64    -112   
208    -32    
-32    -256   
16     -48    
112    -832   
144    240    
-208   96     
96     -32    
48     144    
32     16     
288    -160   
16     112    
128    32     
0      -16    
368    96     
-32    -240   
16     -64    
-16    -432   
-112   32     
208    -272   
208    112    
320    112    
0      80     
0      -32    
-32    -32    
704    384    
-480   -16    
-16    -144   
-112   -368   
-32    208    
272    48     
128    -48    
128    0      
0      64     
192    320    
224    80     
32     -96    
0      -32    
-96    -64    
32     48     
96     128    
48     -128   
144    64     
48     -160   
-32    160    
144    -64    
-64    160    
-32    -80    
96     -224   
224    -48    
0      64     
48     32     
64     -96    
112    48     
16     -400   
64     432    
256    -32    
-32    -880   
48     -16    
-96    -256   
144    -128   
48     96     
0      48     
-16    -32    
256    -224   
32     -448   
64     48     
64     -176   
-208   256    
-176   256    
304    -112   
64     -64    
64     -64    
0      -32    
96     -128   
-16    16     
320    -160   
80     -192   
-144   -576   
96     32     
192    160    
-208   256    
208    96     
80     -272   
-176   -208   
96     -176   
-32    -176   
-32    -336   
32     112    
208    112    
80     -352   
96     -304   
128    -224   
256    -80    
-192   0      
64     -80    
144    80     
192    -48    
-32    0      
-272   -96    
272    80     
-224   16     
288    32     
-80    -256   
288    -128   
304    288    
-112   -112   
176    48     
-48    -128   
-80    208    
240    384    
-256   -208   
336    -144   
112    96     
48     -128   
64     0      
-128   96     
96     96     
-64    -112   
96     -208   
32     -128   
96     48     
-176   32     
416    -832   
-160   0      
144    -80    
80     48     
0      -16    
144    -32    
-320   -112   
0      -240   
-368   -32    
128    0      
-352   48     
32     -48    
160    16     
112    -400   
-160   0      
96     -464   
64     80     
48     -16    
32     80     
-144   -80    
80     0      
-96    96     
128    96     
-144   80     
80     -16    
-608   0      
192    112    
-144   -16    
128    -64    
-32    -16    
224    -80    
-48    176    
128    -80    
208    -144   
-32    128    
0      -176   
-96    -64    
-96    -16    
0      -112   
64     96     
-176   144    
176    -128   
-112   -48    
32     96     
48     0      
96     -112   
-256   0      
-80    32     
0      -80    
-800   -320   
576    -80    
160    208    
352    176    
-592   -128   
224    64     
-464   -160   
304    -112   
96     48     
272    0      
-64    -80    
256    -208   
-144   272    
-480   80     
400    -16    
-48    80     
16     48     
32     -48    
128    48     
16     32     
-48    -32    
-64    0      
144    -224   
-96    -176   
272    -64    
80     96     
-2400  -112   
-1168  16     
16     -48    
-144   0      
80     64     
-880   -16    
16     16     
192    -48    
-240   -16    
208    112    
-80    112    
-416   -64    
-64    -48    
-656   -112   
32     160    
-400   -96    
32     -48    
32     -32    
-496   -16    
-336   -48    
-512   16     
-96    32     
304    64     
80     16     
128    -48    
-160   -48    
-464   64     
-112   -32    
-224   -176   
112    144    
128    80     
-80    272    
-32    32     
48     -160   
-16    64     
-544   208    
-336   48     
112    -336   
-16    -208   
128    0      
192    -32    
-128   -176   
-32    64     
-128   16     
0      64     
-64    112    
144    240    
-336   192    
-128   80     
-16    208    
-128   176    
144    32     
-784   -224   
-96    176    
32     48     
16     80     
96     48     
96     -64    
32     -80    
-176   32     
-112   96     
-48    80     
-80    16     
64     0      
80     48     
-208   176    
-16    0      
-400   -32    
48     -32    
-640   16     
544    816    
-768   -352   
-16    -528   
288    240    
240    16     
112    -160   
64     -64    
16     96     
-176   96     
-416   -752   
0      816    
-208   -304   
0      16     
240    272    
-80    0      
16     80     
80     -144   
240    80     
112    128    
0      48     
-80    -752   
-352   144    
-80    128    
112    -48    
144    176    
-80    16     
16     240    
-32    144    
-320   -96    
-608   -272   
96     144    
128    224    
-80    -32    
-48    -368   
-48    704    
-240   -368   
0      -112   
272    336    
-48    -80    
496    464    
-320   -32    
48     -128   
-112   128    
-16    32     
-256   -96    
48     304    
-1296  -48    
-160   112    
-16    16     
-16    128    
-144   160    
-16    -864   
64     640    
-32    96     
176    -800   
-64    544    
48     80     
-48    -208   
32     256    
-128   160    
176    -32    
240    384    
-352   -80    
80     -432   
80     0      
176    352    
48     -160   
-48    -16    
-320   -192   
80     -688   
80     368    
-32    288    
-144   32     
-32    -16    
-48    0      
192    464    
144    0      
-80    112    
16     240    
32     480    
272    240    
-112   224    
32     256    
48     32     
0      336    
16     -64    
-160   48     
-64    -144   
-48    -80    
-320   320    
-64    128    
128    80     
-96    64     
96     64     
-48    16     
288    0      
-32    496    
256    336    
-128   -16    
288    -128   
-64    16     
-16    48     
-224   -64    
208    -96    
80     128    
-192   144    
-64    48     
-144   16     
192    -64    
16     -16    
96     -176   
-16    -32    
112    176    
-112   -64    
192    -32    
-160   -240   
-32    32     
-128   16     
192    80     
112    80     
0      160    
288    32     
-432   64     
80     16     
-80    -80    
128    16     
80     -48    
-16    32     
-128   -192   
128    -304   
-272   -48    
-64    240    
-112   -272   
32     -80    
-80    -80    
32     96     
224    128    
32     160    
160    0      
112    48     
-16    16     
-48    32     
32     64     
-128   112    
64     224    
64     48     
-32    96     
-48    48     
-304   -112   
208    -128   
64     64     
96     80     
64     48     
224    80     
-144   128    
-48    0      
144    32     
-192   256    
-16    96     
320    16     
32     32     
-96    96     
-64    64     
80     -208   
-208   -160   
128    -112   
208    176    
-64    128    
-64    -32    
176    -240   
208    64     
-64    144    
16     48     
-32    -96    
-32    -64    
-64    -112   
192    -208   
192    32     
240    -48    
-48    224    
-16    -16    
112    80     
112    128    
0      32     
-32    32     
448    96     
-96    64     
-192   96     
-16    176    
0      16     
64     -96    
80     -48    
224    64     
16     -96    
16     80     
192    -800   
144    -16    
32     64     
-96    -96    
-32    96     
304    -16    
-48    -240   
208    0      
-80    64     
-48    240    
48     -192   
-128   -48    
64     256    
-224   -288   
112    48     
-144   -432   
320    464    
80     48     
144    16     
80     208    
32     -16    
-32    0      
-112   224    
-96    0      
-80    -48    
208    208    
304    16     
160    -32    
32     -80    
-32    -64    
144    -288   
-208   -64    
192    -960   
112    -96    
432    -240   
304    -48    
64     32     
-32    48     
0      144    
-32    -80    
-80    0      
32     -80    
304    128    
112    32     
96     48     
0      -64    
80     64     
0      -128   
32     16     
16     160    
112    80     
32     16     
32     80     
0      0      
-96    -80    
256    -32    
80     -96    
224    48     
192    -80    
-112   -48    
112    -256   
288    384    
-192   48     
256    48     
208    -112   
-128   -48    
96     16     
144    0      
128    96     
48     -48    
112    64     
64     -64    
-16    160    
64     -176   
-80    64     
112    -288   
96     112    
256    -320   
-16    32     
80     -48    
48     -1456  
0      16     
-32    -112   
128    -832   
-16    64     
0      -672   
48     16     
96     -32    
-32    -80    
192    96     
-48    -32    
128    48     
240    -96    
64     -672   
160    32     
80     -416   
16     -48    
-832   -48    
80     80     
-208   -288   
416    -320   
-176   16     
256    -1456  
304    -144   
192    128    
176    0      
-176   -128   
352    -64    
448    -16    
-368   96     
-80    -256   
128    -80    
-304   160    
0      -128   
352    -96    
368    64     
80     -64    
112    -336   
400    -64    
-48    80     
16     16     
224    -80    
-32    16     
128    -80    
48     48     
128    -64    
128    -32    
-224   -112   
128    -128   
208    -32    
-48    -176   
272    0      
0      -160   
-48    -32    
128    -1104  
160    32     
160    -64    
-16    48     
-32    -32    
32     48     
288    160    
-400   80     
-160   -128   
144    80     
-720   16     
80     -80    
-48    32     
96     -160   
144    -32    
-48    -64    
-64    0      
-16    -496   
240    48     
128    -176   
64     -64    
-352   -64    
112    112    
-80    112    
64     -32    
-592   -224   
128    160    
176    400    
288    32     
-80    -48    
-96    -32    
80     64     
-16    -496   
48     0      
32     208    
176    -64    
-64    208    
240    -16    
-64    80     
224    80     
-592   -288   
32     176    
-656   -224   
64     80     
16     16     
-48    -16    
80     -80    
128    -352   
128    16     
-48    -272   
32     320    
80     -16    
160    -96    
-160   32     
0      -48    
-336   32     
-112   32     
-240   16     
16     16     
-368   -128   
320    -1776  
176    624    
272    -368   
0      112    
-128   176    
80     -48    
-96    48     
176    112    
-512   -320   
96     -272   
0      272    
192    -32    
48     -80    
128    144    
96     -96    
240    -112   
-288   96     
288    -800   
448    368    
-288   160    
-32    -416   
-304   192    
-128   -224   
0      400    
64     176    
-16    -400   
48     -112   
-1088  80     
112    -96    
-240   -208   
416    -1232  
192    784    
-800   416    
-624   -48    
-176   336    
-656   -320   
-256   144    
128    -96    
224    -240   
320    32     
-240   128    
272    -176   
-80    48     
-448   208    
-176   -144   
-256   0      
-64    -16    
-80    384    
256    416    
-304   0      
176    -16    
64     48     
-752   224    
-64    48     
64     224    
0      176    
144    48     
-32    64     
112    -32    
-224   -288   
-320   -672   
144    64     
-32    192    
32     0      
-80    -80    
-160   -208   
-128   80     
-464   64     
-64    -16    
-1264  -32    
144    16     
-32    80     
192    32     
-144   -32    
64     -32    
-80    -208   
-256   -128   
256    -224   
48     -64    
-208   32     
-256   -64    
-160   128    
-240   -96    
-32    128    
-48    304    
-480   304    
32     -208   
64     -48    
-304   464    
128    160    
208    224    
192    0      
32     -80    
0      192    
176    48     
-208   96     
128    -192   
-176   96     
352    -32    
-336   272    
160    144    
-480   16     
368    16     
64     -192   
-64    -16    
80     -464   
-304   80     
160    -160   
-128   -16    
80     192    
0      -32    
-128   48     
0      -80    
16     288    
-464   80     
224    128    
-1632  -112   
304    160    
32     16     
64     48     
-112   16     
-96    16     
0      -64    
0      -96    
64     -16    
16     112    
-96    0      
-128   -192   
-80    -96    
-112   0      
-16    320    
-464   0      
64     -112   
96     -224   
544    464    
-608   432    
-32    -80    
-16    80     
528    448    
-224   624    
-176   48     
32     -32    
64     -16    
48     272    
192    160    
-64    224    
256    -16    
128    -128   
-16    -96    
-160   160    
0      144    
-48    32     
160    80     
-80    160    
400    304    
-240   112    
-128   96     
-144   -128   
112    -160   
-16    48     
-80    448    
-224   96     
240    -16    
-80    -48    
-16    -16    
-112   0      
-32    16     
288    -16    
80     128    
-48    240    
-144   -16    
48     -16    
-64    64     
-80    176    
-448   -32    
256    -48    
-224   -80    
0      16     
288    -128   
160    160    
80     80     
80     64     
-96    0      
16     32     
64     -32    
128    -128   
48     -128   
32     -16    
224    128    
-128   96     
144    144    
160    80     
-112   -96    
-112   176    
64     -128   
-32    176    
-32    128    
64     -16    
64     64     
32     96     
-128   -16    
176    0      
-144   0      
96     160    
-96    -48    
64     48     
-224   -272   
112    160    
16     464    
-80    112    
208    -48    
208    -32    
128    112    
-80    48     
-48    -288   
-224   -32    
-192   -144   
-272   -144   
-32    64     
-160   -128   
0      0      
128    48     
176    80     
112    32     
128    48     
144    0      
80     80     
0      64     
-32    48     
-16    -112   
224    96     
208    160    
-48    16     
192    48     
-96    16     
0      16     
-144   32     
48     16     
-96    -208   
48     -80    
16     48     
48     64     
160    16     
-48    -16    
32     48     
16     -48    
240    192    
112    -32    
112    -16    
-16    112    
80     -320   
-64    64     
32     -16    
32     48     
0      80     
256    112    
-208   -16    
128    32     
256    272    
-160   -16    
-32    -32    
160    48     
-144   64     
160    64     
-32    -16    
112    -1360  
-64    32     
112    48     
32     0      
-32    16     
48     64     
112    64     
144    32     
208    128    
-32    48     
96     -112   
48     48     
64     64     
144    32     
-64    32     
-208   -880   
48     16     
64     64     
304    16     
112    80     
224    160    
-16    0      
64     80     
-160   0      
256    96     
-192   64     
-16    0      
96     0      
128    -48    
176    32     
-96    -176   
160    96     
-16    224    
272    128    
-96    48     
144    0      
-144   192    
32     0      
0      112    
160    224    
32     272    
144    128    
48     -16    
-144   0      
-32    -16    
128    -80    
64     0      
384    -32    
208    96     
128    -240   
208    64     
-80    112    
144    112    
-272   96     
272    48     
0      48     
32     -176   
144    -80    
352    64     
-144   64     
32     16     
48     32     
80     -112   
96     48     
-16    -592   
208    48     
16     64     
0      64     
16     -192   
80     -16    
32     240    
-48    -128   
80     -48    
48     -48    
0      80     
0      -480   
160    16     
32     -128   
160    64     
-16    -144   
-16    -16    
-80    -176   
-48    -16    
128    384    
-16    144    
272    -304   
176    400    
0      144    
112    -608   
-112   240    
-32    -144   
96     48     
48     336    
160    -256   
144    256    
-112   64     
96     80     
16     80     
176    288    
-224   -448   
-16    192    
240    96     
0      -16    
128    160    
16     -128   
240    176    
-32    48     
96     16     
128    224    
-96    320    
256    592    
-32    -48    
96     -176   
-112   96     
160    240    
368    -144   
96     352    
16     -560   
96     -96    
160    448    
272    -48    
16     224    
96     -64    
80     176    
80     256    
32     -208   
160    192    
-48    -400   
-32    -64    
-992   64     
-16    -32    
128    -80    
-16    -128   
192    -496   
112    -544   
208    -16    
0      -48    
-16    -16    
112    -288   
128    224    
144    240    
-304   64     
80     -352   
304    352    
-288   240    
208    0      
160    16     
80     -288   
96     304    
80     -144   
-80    -128   
32     -128   
0      48     
-80    0      
224    64     
-16    64     
-64    48     
-176   -192   
320    -48    
-416   80     
96     0      
32     -32    
48     -112   
-64    240    
112    32     
160    -32    
176    -1136  
-16    0      
256    16     
-16    -16    
176    -160   
-32    96     
-32    64     
160    224    
-720   0      
160    -160   
-240   -128   
240    48     
-288   -80    
384    -208   
128    -160   
32     -304   
-208   -208   
-64    16     
32     112    
80     224    
256    192    
128    128    
16     224    
-128   -128   
112    -176   
-592   32     
-16    -112   
-16    -272   
144    -112   
-400   64     
256    208    
176    320    
96     112    
208    80     
0      -48    
128    -96    
-240   -16    
0      -80    
-176   208    
112    192    
-192   -16    
192    48     
-832   -112   
-16    -16    
112    240    
80     -112   
128    -256   
112    -784   
208    192    
-64    -64    
128    336    
-336   -384   
96     112    
48     128    
0      80     
-480   64     
-48    -48    
-224   32     
-48    -320   
-16    -64    
432    -528   
64     320    
16     -48    
32     0      
-112   304    
192    608    
-80    256    
112    -256   
-48    160    
240    -208   
-160   416    
288    48     
384    208    
112    208    
-464   -96    
-224   -192   
160    -48    
48     16     
368    144    
-80    80     
384    320    
-400   400    
208    -16    
-224   -432   
-64    -80    
64     -240   
-64    256    
288    -16    
-160   -48    
-16    0      
-624   -208   
-128   -112   
64     -32    
-224   112    
160    -208   
-192   160    
-16    -48    
-192   -768   
-224   -576   
-16    -208   
-96    160    
48     48     
384    48     
-544   -96    
192    48     
-336   -160   
48     -80    
-96    96     
-656   176    
160    400    
-1264  320    
-48    256    
-1440  -384   
208    64     
240    -208   
-544   -144   
80     -192   
192    -32    
-176   -144   
96     -160   
-32    -256   
-128   -64    
-160   304    
-192   64     
-224   144    
-112   -240   
80     -112   
-48    320    
-48    -96    
-64    -304   
-48    -96    
-256   16     
-48    0      
-176   -32    
400    -16    
-96    -208   
192    368    
-96    80     
16     -48    
-32    80     
-176   -416   
-112   -688   
-304   704    
256    -192   
-1184  176    
0      -48    
64     32     
112    -336   
-416   176    
-144   32     
-112   -16    
0      -16    
208    -144   
16     -16    
240    176    
-208   32     
-208   -16    
-128   -32    
-144   48     
-640   80     
144    208    
48     144    
288    48     
144    0      
0      -16    
-32    -32    
176    96     
-48    32     
16     48     
-80    -16    
-320   32     
64     -64    
-224   -64    
16     -112   
-192   -48    
160    80     
-2144  464    
80     368    
-144   -128   
-160   -128   
-64    112    
80     240    
-288   144    
160    352    
-288   48     
96     48     
-32    48     
128    -16    
256    80     
-448   -160   
416    -16    
-848   -64    
272    224    
-16    48     
32     64     
-48    64     
32     368    
-64    48     
-192   -48    
-80    32     
-160   64     
-112   -160   
-16    -192   
368    48     
0      208    
192    64     
-96    -64    
80     64     
0      48     
-160   0      
-112   0      
-176   -32    
48     48     
-112   192    
-112   80     
-64    -48    
-176   16     
-16    64     
144    96     
-80    96     
32     32     
-432   -80    
16     16     
-32    96     
96     32     
112    -16    
-112   48     
96     16     
64     32     
160    48     
-368   -48    
16     16     
-112   0      
176    96     
-48    32     
48     64     
-288   -144   
80     80     
96     48     
-16    16     
128    64     
16     -16    
96     16     
-16    160    
48     48     
-112   -80    
32     32     
-112   32     
48     -32    
-144   16     
48     48     
320    80     
-208   96     
208    -16    
32     -16    
0      -160   
112    272    
-144   128    
128    -16    
-144   16     
272    32     
48     208    
-384   32     
400    -32    
-448   -32    
144    96     
112    176    
192    16     
-80    32     
16     -16    
128    64     
-160   352    
208    192    
160    -48    
-112   -192   
-96    -160   
304    80     
-208   48     
272    64     
-48    -144   
128    -48    
224    -16    
0      -64    
64     176    
112    48     
48     64     
144    224    
64     32     
-224   -32    
320    -208   
-96    -48    
240    192    
-48    -64    
96     80     
48     96     
-32    208    
144    -208   
-96    128    
128    128    
32     112    
80     -128   
144    80     
96     320    
128    -224   
-80    80     
-32    32     
144    176    
16     -256   
-112   80     
16     112    
96     80     
576    320    
-320   608    
272    -160   
-112   160    
144    496    
64     -672   
-208   80     
-96    992    
256    -208   
-32    -432   
0      -96    
320    -96    
-16    400    
112    -224   
-224   -672   
32     -112   
-304   128    
80     0      
-48    -96    
16     -128   
-32    96     
240    64     
256    -16    
96     -16    
-96    -32    
224    16     
-128   -32    
96     -80    
-80    -176   
176    -320   
320    48     
-176   48     
48     32     
-320   192    
32     16     
-112   16     
96     -32    
32     -48    
48     -112   
-128   -16    
64     96     
288    64     
-96    -16    
-16    -80    
64     -752   
0      112    
112    64     
-128   64     
64     48     
-48    -48    
208    -80    
96     80     
-112   -16    
32     -48    
80     0      
32     48     
160    128    
-48    -96    
176    48     
-16    176    
128    224    
48     336    
176    32     
272    64     
-192   -16    
176    -224   
112    48     
-16    0      
144    80     
64     -32    
48     -288   
32     -160   
176    -224   
288    128    
-272   64     
80     -128   
288    -384   
16     144    
-48    192    
48     -32    
0      -80    
128    32     
80     96     
32     80     
64     96     
144    -64    
192    -32    
0      -112   
64     32     
112    -32    
32     96     
-112   -144   
32     160    
144    -592   
160    128    
64     64     
-16    208    
160    80     
32     0      
240    112    
-32    64     
80     288    
144    -176   
0      96     
128    -160   
80     32     
-128   -96    
336    128    
16     80     
112    144    
0      16     
0      0      
16     32     
288    -128   
-64    112    
32     -208   
128    64     
112    -256   
-32    80     
144    -176   
112    208    
112    -16    
0      80     
0      16     
128    32     
0      32     
224    -1440  
-80    -256   
32     -304   
80     -272   
16     -16    
48     496    
64     0      
-192   160    
128    32     
160    32     
80     -16    
16     -928   
48     -80    
320    304    
-272   528    
-176   -208   
144    -576   
-448   -688   
336    -192   
-240   64     
64     -464   
160    64     
224    416    
272    544    
-128   512    
64     64     
-144   544    
128    336    
112    -1232  
0      448    
-272   -96    
48     416    
384    208    
144    -112   
-144   16     
416    -624   
96     192    
192    -304   
48     -16    
-32    0      
176    -80    
208    288    
-192   800    
16     -208   
144    -112   
-144   176    
160    -304   
-1040  352    
160    80     
-32    224    
-48    -144   
-96    -256   
256    -496   
112    -112   
144    272    
-352   -400   
672    -256   
32     640    
0      608    
144    -544   
-160   240    
-96    -400   
-80    -256   
-48    -96    
-192   80     
160    32     
-192   -160   
352    128    
128    176    
192    48     
112    -16    
112    -256   
-240   224    
-64    -64    
192    224    
-368   -176   
-144   400    
80     80     
64     -448   
-1216  96     
144    -224   
-80    -16    
-48    112    
0      -128   
112    -288   
112    112    
272    -48    
-96    -32    
-48    32     
32     128    
128    64     
32     -144   
-400   0      
-144   -112   
-1296  -64    
128    -80    
80     -64    
144    224    
32     144    
160    -64    
-176   96     
240    -400   
48     0      
528    544    
-144   96     
-144   -176   
144    112    
-480   384    
-96    144    
-32    -48    
48     -192   
-256   -80    
0      -96    
96     160    
368    80     
-256   64     
80     -704   
32     176    
32     -48    
224    176    
-800   16     
144    -16    
-160   -192   
224    -32    
-160   16     
0      16     
-144   0      
288    224    
-64    128    
112    -224   
64     -80    
-80    -720   
-112   -256   
-128   -64    
160    144    
-368   48     
16     80     
16     384    
192    144    
208    -16    
-48    -144   
-352   0      
-64    272    
192    288    
-160   -464   
-336   -112   
160    320    
-1680  -80    
0      -48    
352    144    
64     64     
192    32     
-32    32     
-48    -64    
-176   48     
48     0      
160    176    
-80    -64    
192    16     
-144   -16    
-144   32     
-64    -32    
-400   16     
-176   32     
-704   -16    
-160   128    
240    -32    
-176   -96    
240    48     
-64    48     
-128   -16    
32     16     
-624   -240   
-32    80     
-304   -176   
192    32     
0      0      
-160   -32    
-96    16     
-288   0      
-64    32     
-464   16     
-32    32     
160    48     
-80    48     
-112   -80    
16     16     
-32    -48    
-48    32     
48     32     
160    -48    
-80    32     
-240   0      
-96    32     
-176   -16    
-16    0      
-320   -48    
32     112    
-1712  48     
48     0      
-80    -112   
0      64     
-16    80     
160    48     
-48    -80    
-240   -240   
64     -240   
-96    32     
112    80     
-128   0      
-16    32     
-192   -32    
32     -16    
-1088  -112   
160    80     
-176   64     
240    192    
-144   -16    
-160   -80    
192    64     
16     -32    
224    16     
288    208    
-32    112    
48     80     
-96    0      
-48    -96    
-96    48     
-352   96     
80     48     
-96    32     
0      -48    
80     -80    
-96    0      
96     -32    
-16    -16    
128    32     
80     160    
368    368    
-400   -192   
368    432    
-816   -32    
-80    -544   
16     0      
224    160    
-1072  -240   
-64    368    
-64    -208   
-208   0      
-32    688    
128    -496   
304    160    
-320   640    
160    -48    
-336   -192   
-48    720    
80     -480   
112    -80    
-400   256    
32     -144   
-976   0      
112    208    
-112   -64    
-80    272    
192    208    
-112   16     
144    112    
112    -80    
-304   64     
336    96     
-48    96     
64     -16    
192    0      
-224   32     
16     32     
-336   32     
176    160    
-112   288    
128    -16    
240    96     
-384   -64    
0      32     
-32    112    
144    48     
-80    -80    
288    -96    
-128   -16    
128    128    
-32    -64    
48     80     
-128   160    
128    0      
112    160    
112    -16    
96     32     
144    80     
-48    96     
-160   16     
0      32     
-224   32     
48     -80    
-96    16     
-48    80     
-64    48     
144    48     
-64    48     
48     -32    
192    80     
-112   0      
160    0      
112    48     
128    80     
-144   144    
112    464    
16     96     
80     -160   
32     0      
32     64     
-48    16     
-32    16     
-64    64     
160    256    
16     80     
144    -128   
128    112    
-256   -32    
384    240    
-96    144    
192    -48    
-32    -64    
-208   48     
0      80     
16     96     
-160   -176   
224    -400   
128    64     
256    160    
-64    -64    
64     80     
-160   96     
-128   64     
512    416    
-464   288    
16     -64    
64     -272   
-80    -272   
-32    -128   
-176   -16    
128    -144   
208    176    
-48    224    
112    -32    
64     -48    
-32    0      
-16    112    
128    240    
-256   128    
32     -64    
176    64     
80     -96    
144    64     
-80    -176   
96     -144   
256    368    
-96    448    
-240   176    
224    32     
96     32     
144    32     
-96    -112   
48     -64    
192    96     
32     64     
-272   -320   
-224   -320   
-16    -112   
16     -240   
16     16     
112    -48    
64     80     
-16    304    
304    368    
-80    224    
-48    64     
128    192    
32     -32    
176    80     
-64    48     
144    80     
-80    -240   
80     112    
176    208    
176    -144   
288    208    
-32    -32    
32     208    
-32    -416   
272    528    
176    384    
144    -64    
-96    176    
112    -160   
-160   32     
96     -160   
80     224    
64     -48    
112    400    
-16    -496   
-32    176    
240    -208   
80     208    
400    48     
-240   -80    
96     32     
-96    -80    
208    80     
304    -304   
96     272    
-80    -224   
-160   16     
-48    272    
96     -32    
128    160    
112    -96    
-32    -144   
-96    64     
304    256    
-112   384    
256    176    
208    -352   
96     0      
-128   112    
-48    -416   
16     192    
-80    128    
96     -224   
0      144    
80     32     
80     -96    
-224   -944   
304    -288   
112    -112   
192    336    
240    112    
752    672    
-672   64     
-96    16     
-128   128    
-32    0      
512    -160   
80     -128   
256    64     
112    16     
-16    64     
48     -64    
-96    64     
256    -144   
-48    112    
-16    -32    
224    -32    
256    80     
-128   -48    
-64    -64    
16     192    
80     48     
48     -96    
240    96     
112    -272   
-192   -80    
160    -80    
-48    32     
-80    32     
80     -336   
80     -352   
0      80     
208    -160   
-32    272    
16     0      
80     -192   
272    0      
-144   -144   
240    32     
32     -16    
208    32     
-96    -208   
160    16     
192    16     
-64    96     
0      32     
32     64     
272    96     
80     -816   
0      128    
112    32     
0      -592   
96     -144   
64     -32    
64     -48    
80     32     
-176   -48    
288    64     
480    272    
-176   -32    
0      32     
-16    -288   
208    -96    
224    -128   
-16    -80    
64     -16    
128    -544   
368    192    
-144   -192   
-224   -48    
144    240    
64     -48    
32     -112   
-32    -192   
368    -128   
-176   48     
-32    -336   
48     192    
-416   192    
-176   48     
144    -128   
112    -240   
320    -224   
208    48     
-16    0      
144    -336   
48     -32    
-64    -96    
96     64     
0      -64    
-80    32     
-48    -48    
288    -144   
-256   -288   
512    32     
-304   0      
16     -32    
224    96     
96     128    
112    -80    
112    -240   
16     144    
-16    320    
-240   80     
64     -112   
32     48     
-64    -144   
160    -80    
-144   0      
-32    -32    
-864   -32    
16     -144   
64     -96    
192    48     
-16    48     
-16    16     
-160   -48    
48     -640   
128    -128   
160    -80    
32     -48    
-16    16     
368    160    
-288   16     
176    -16    
-256   32     
128    -48    
-464   0      
176    -64    
176    16     
80     -336   
256    112    
-64    -64    
16     0      
192    0      
48     64     
-144   -32    
160    -32    
-80    0      
112    96     
32     112    
0      -32    
-80    160    
160    32     
32     -16    
176    -32    
-96    48     
128    -208   
16     64     
144    -112   
80     -64    
-176   -16    
144    16     
-16    -16    
96     32     
-288   0      
80     -64    
-496   32     
-96    -176   
80     32     
144    96     
16     112    
176    32     
64     240    
-336   -16    
-32    -48    
0      -32    
-112   -64    
144    144    
-32    16     
-304   -176   
-176   16     
-16    96     
96     -416   
-144   192    
464    -512   
16     336    
208    112    
-336   -192   
128    496    
-240   -160   
64     -688   
176    256    
-176   64     
-272   -240   
16     -144   
-112   304    
544    -144   
-176   -80    
-128   16     
144    80     
272    288    
-304   -672   
-224   96     
176    -176   
-1376  16     
64     -288   
80     16     
16     272    
-128   -512   
160    336    
-160   -16    
-448   64     
-1664  -272   
-16    -80    
-64    -128   
368    144    
-512   -96    
112    -80    
-80    128    
-464   272    
-48    -64    
-736   -96    
160    -96    
144    32     
16     96     
272    96     
-32    -112   
-448   -192   
16     112    
176    -112   
96     -16    
-64    256    
-144   80     
32     -96    
-496   0      
0      0      
-112   224    
112    0      
-288   -96    
-112   -64    
160    16     
32     -32    
208    16     
16     32     
32     -80    
48     48     
-416   -128   
144    32     
64     16     
-64    -32    
32     144    
-272   -32    
-128   -16    
-320   -32    
0      48     
-192   -32    
160    96     
-48    16     
224    0      
-304   -160   
32     16     
32     -80    
32     64     
48     64     
96     64     
-112   96     
-160   -16    
-80    32     
-16    64     
-80    192    
-160   -32    
0      32     
-224   0      
144    64     
0      -240   
-80    16     
-128   192    
160    -32    
80     -16    
-64    128    
-112   64     
-80    0      
-16    0      
0      48     
96     176    
-512   -96    
240    0      
-16    -64    
96     0      
-16    48     
160    176    
-64    96     
-128   -32    
0      -32    
-144   -112   
96     -32    
-64    80     
-80    0      
-128   336    
-160   240    
-448   -256   
144    32     
-288   48     
0      -48    
208    -128   
32     16     
-16    304    
240    624    
-208   16     
112    -288   
80     -432   
256    -176   
112    48     
-128   0      
240    288    
-304   240    
16     112    
-912   -32    
0      -176   
-80    32     
-80    32     
-112   48     
-80    -32    
144    80     
-16    128    
144    272    
-80    368    
-144   32     
224    -192   
32     -32    
64     0      
-32    96     
128    432    
-240   288    
80     -128   
0      -112   
208    16     
-208   256    
400    -96    
176    176    
-272   96     
-112   -320   
0      128    
-272   32     
80     16     
-128   -32    
160    368    
-160   -272   
272    96     
32     432    
0      112    
-48    -144   
-80    80     
-32    128    
80     176    
128    -304   
-16    -80    
32     176    
-80    64     
32     -128   
-256   -352   
128    -448   
96     112    
16     96     
16     -96    
-128   64     
64     160    
-176   32     
176    32     
-176   -144   
128    -272   
-80    -96    
160    80     
-240   -32    
48     32     
-96    -32    
-80    80     
128    112    
-48    64     
96     352    
-32    176    
-64    16     
0      32     
-64    240    
-160   -48    
16     32     
-48    32     
144    112    
-144   16     
224    96     
32     64     
-16    0      
16     16     
96     -64    
144    16     
-64    96     
160    16     
-64    64     
16     112    
-144   -80    
-16    -160   
160    48     
144    224    
-208   -240   
320    -256   
0      144    
-496   -672   
368    -400   
288    464    
-608   304    
128    96     
384    -32    
-176   -16    
-208   -48    
128    16     
0      96     
-96    0      
112    144    
-32    -160   
64     -416   
80     0      
64     16     
48     48     
48     32     
112    144    
-176   0      
80     0      
-80    32     
128    80     
-16    -64    
64     0      
-192   -96    
144    0      
224    160    
0      -432   
-48    -144   
368    -32    
-224   144    
336    112    
-32    -16    
0      0      
-16    64     
-144   16     
288    -64    
352    160    
-192   96     
-32    -16    
96     112    
64     16     
80     -144   
304    240    
-32    160    
-224   32     
16     0      
96     -80    
176    -64    
128    80     
80     48     
240    192    
-176   -144   
16     -16    
144    16     
96     16     
-208   -32    
288    -192   
752    288    
-640   160    
-160   0      
-48    16     
48     48     
0      144    
-64    48     
-96    -144   
64     -80    
32     -48    
-176   -176   
-16    48     
16     96     
128    -80    
240    -64    
48     192    
176    -224   
-80    32     
208    -32    
-256   -128   
128    -16    
160    32     
-240   -80    
80     -80    
176    -256   
208    32     
176    192    
0      -112   
96     32     
16     -32    
112    80     
240    0      
-192   16     
80     -288   
224    400    
-400   -224   
32     112    
-16    304    
192    0      
336    224    
-64    192    
80     160    
208    -96    
256    528    
96     80     
-112   -64    
-112   160    
32     112    
-32    -448   
16     16     
-16    0      
96     48     
-16    64     
144    -32    
48     -80    
128    -144   
304    80     
16     -16    
32     112    
-48    -192   
80     96     
512    336    
-160   256    
-32    208    
112    -240   
48     -112   
144    160    
80     144    
112    48     
160    96     
32     -128   
64     -96    
80     -48    
-128   -192   
128    -384   
144    48     
96     192    
32     272    
32     -208   
-112   -16    
144    64     
64     64     
128    -176   
208    -112   
96     48     
160    -304   
-48    -336   
368    224    
-16    432    
48     -256   
-48    0      
144    32     
224    192    
-48    -176   
-32    -368   
80     -80    
32     -256   
96     128    
-864   48     
96     -208   
64     -48    
208    176    
32     -112   
0      176    
-224   -160   
288    0      
-16    160    
112    -384   
128    144    
64     96     
-288   -144   
144    -32    
144    336    
-384   -272   
-384   -320   
288    -544   
272    32     
464    320    
128    -464   
-16    96     
0      -704   
-112   -160   
112    128    
-48    112    
80     32     
176    48     
-96    80     
256    48     
-592   -32    
256    -240   
80     144    
160    -48    
-16    144    
272    -272   
32     128    
208    -1168  
96     -48    
-48    -48    
320    -208   
80     -32    
208    48     
-512   -16    
272    144    
-640   64     
240    -48    
-2272  16     
-64    -48    
-112   96     
48     -176   
320    -32    
96     -64    
96     128    
320    -128   
224    -96    
208    -96    
-176   16     
-64    48     
-16    -96    
160    -112   
-80    0      
-1472  -16    
128    -224   
16     -112   
192    -48    
-128   64     
224    -16    
-208   48     
144    -704   
48     -32    
16     -80    
96     -64    
304    272    
-224   224    
-208   -48    
32     -208   
-768   -32    
-96    16     
-1872  -80    
-48    -192   
80     -160   
48     -208   
64     176    
176    -288   
48     -64    
144    112    
16     112    
-160   48     
144    -96    
-368   32     
112    -48    
-272   128    
64     -48    
-128   -64    
48     -80    
0      32     
48     -160   
32     0      
80     -432   
96     -16    
144    112    
128    -96    
80     -64    
0      32     
112    64     
96     0      
-80    32     
336    48     
-224   112    
96     -128   
64     0      
144    -208   
-128   32     
224    -240   
48     -64    
-624   32     
80     -96    
-368   16     
96     -32    
-192   208    
160    192    
-208   -16    
160    -128   
-272   32     
-32    -192   
-16    128    
176    -160   
0      -16    
336    -192   
128    224    
-64    48     
-64    -80    
-80    0      
-112   -112   
-272   -64    
240    -112   
-48    80     
112    -48    
16     16     
-736   16     
0      144    
-208   96     
0      112    
-624   -96    
-368   -416   
144    112    
-64    240    
16     288    
-2032  416    
48     -160   
32     -240   
-256   128    
-704   -80    
128    -16    
-112   -480   
-16    160    
-304   -64    
-80    16     
-48    32     
-16    256    
-144   128    
-336   -112   
208    -48    
144    -80    
16     96     
80     -208   
-32    -64    
-480   64     
-112   -32    
-112   160    
208    112    
-304   -240   
80     -160   
-64    -112   
0      192    
96     160    
16     32     
-176   64     
144    192    
-192   80     
144    -32    
32     -32    
-112   -176   
128    48     
-48    16     
208    176    
-208   -48    
96     144    
-224   32     
-16    -16    
32     0      
80     32     
-32    80     
-64    -96    
32     32     
-160   -16    
-16    64     
96     -16    
32     80     
64     -32    
48     32     
-48    32     
0      32     
-240   0      
160    208    
-16    0      
96     16     
-48    0      
-240   -48    
-144   0      
-80    112    
-176   16     
-1248  -32    
-112   192    
-400   -16    
304    160    
-80    32     
272    -176   
-192   48     
0      96     
16     -48    
-96    128    
-160   32     
16     16     
128    80     
-32    -48    
240    32     
-256   -32    
112    64     
-128   64     
16     112    
-240   48     
32     -176   
-32    -144   
0      -96    
80     64     
-480   -176   
144    -240   
176    -32    
-96    192    
-144   -144   
192    32     
-832   64     
-192   -32    
192    96     
-192   -32    
-32    64     
208    160    
-496   128    
240    48     
-192   128    
48     0      
112    -80    
-64    0      
-48    48     
-208   -96    
48     96     
-176   64     
0      128    
64     32     
112    96     
-32    64     
-48    64     
-96    48     
80     48     
112    96     
-96    48     
112    0      
-32    16     
-64    80     
96     -48    
16     48     
96     -64    
-128   -144   
-32    32     
80     32     
-64    128    
208    -32    
-32    16     
128    -96    
-128   -96    
-128   32     
64     80     
-176   48     
64     -16    
0      48     
80     16     
0      48     
-128   16     
208    0      
-64    -48    
-48    80     
-32    32     
112    80     
256    112    
-176   16     
-160   -32    
128    -48    
-48    -48    
496    144    
-416   -256   
144    -32    
16     64     
-80    -336   
240    -144   
160    176    
96     -16    
80     64     
128    -48    
-288   -144   
-16    32     
80     320    
-32    -48    
224    -48    
128    64     
-64    112    
128    -128   
128    -64    
16     112    
208    144    
-32    -32    
80     -96    
48     48     
0      -272   
64     496    
-144   -80    
-208   -144   
176    240    
-128   -32    
112    224    
-112   -112   
208    -16    
144    96     
352    640    
-400   -576   
16     48     
96     80     
0      -112   
96     112    
160    -80    
176    -32    
0      -96    
-96    160    
-144   64     
-112   64     
-144   96     
48     0      
112    112    
64     0      
256    0      
160    128    
128    48     
160    112    
-96    -32    
192    240    
-128   -80    
48     720    
192    592    
-224   -576   
-32    112    
32     352    
-16    -1040  
-80    352    
16     -96    
256    64     
80     96     
80     80     
160    0      
288    304    
32     176    
64     80     
144    -64    
144    160    
-80    240    
112    -144   
-192   -96    
-144   -1136  
128    112    
80     128    
128    32     
80     -16    
-64    64     
-16    -240   
80     -48    
16     -192   
32     320    
0      288    
112    -432   
32     160    
128    80     
240    80     
-80    -832   
160    -224   
224    -128   
-32    320    
0      64     
48     -16    
48     192    
-16    -112   
32     -64    
112    64     
32     176    
16     64     
272    -48    
144    400    
192    384    
48     416    
128    48     
-176   -528   
-32    -96    
-32    48     
448    224    
-96    304    
-64    64     
-48    -112   
48     -32    
-208   -416   
96     -400   
64     -16    
128    -256   
96     288    
-320   -128   
-80    64     
-96    -272   
112    -32    
-16    -912   
160    -32    
64     80     
208    176    
-16    -16    
-16    -96    
48     64     
32     240    
-32    16     
-160   -176   
240    192    
-320   -80    
48     -16    
352    -368   
-176   208    
128    -224   
208    80     
-64    48     
32     112    
96     32     
96     80     
64     0      
96     16     
384    48     
-304   -48    
64     128    
16     -192   
-144   -272   
192    -256   
48     64     
160    -336   
0      128    
128    112    
-48    288    
256    -32    
96     -16    
16     -48    
-32    -576   
192    112    
0      -80    
0      -112   
80     -128   
32     288    
160    -80    
-80    64     
256    -128   
-256   128    
48     -96    
144    0      
-32    64     
160    -128   
-80    -448   
80     -352   
80     48     
0      96     
64     80     
-80    -176   
80     0      
-16    -96    
176    48     
80     32     
16     16     
-64    128    
352    -400   
64     -32    
112    96     
176    48     
96     -32    
64     -96    
112    -96    
128    -272   
-16    -192   
48     -96    
160    -64    
144    -128   
112    64     
256    48     
-32    80     
-32    -208   
272    -480   
-224   -48    
32     48     
32     -64    
112    -64    
-64    -336   
64     -640   
176    -48    
128    0      
0      -96    
16     -96    
-64    48     
224    -272   
-320   -48    
0      -528   
192    -240   
-80    48     
224    64     
-32    -16    
48     -352   
48     -240   
96     -32    
64     48     
176    -736   
64     -128   
192    160    
208    96     
-16    160    
-160   -80    
-288   -736   
288    976    
-96    -448   
-64    64     
208    80     
112    -16    
-48    -48    
224    96     
128    -48    
48     -864   
-352   240    
32     320    
160    -80    
128    -64    
288    -480   
16     -80    
208    64     
-368   48     
-32    -192   
32     32     
64     -32    
64     -208   
-96    -256   
112    -128   
80     -512   
192    112    
368    240    
-240   64     
80     -96    
48     -48    
-160   -112   
160    16     
-48    48     
112    16     
-384   0      
80     0      
-448   -16    
48     -112   
80     48     
32     -160   
64     32     
-112   -768   
16     16     
-32    0      
112    48     
80     48     
96     32     
-112   -16    
80     32     
-80    16     
192    -80    
-400   32     
64     -32    
80     160    
208    -32    
-64    -16    
32     -400   
48     32     
-144   64     
128    0      
-64    0      
48     0      
-304   -16    
160    -48    
-608   -48    
112    0      
-128   16     
128    -48    
0      48     
384    -32    
-272   32     
320    -304   
-80    -48    
128    80     
160    -16    
-384   160    
384    96     
-528   32     
160    0      
-240   0      
0      -48    
-192   112    
128    0      
192    80     
-32    -304   
224    64     
-368   160    
48     -48    
-48    96     
-80    -48    
80     -32    
-96    16     
-32    64     
96     -48    
96     240    
192    80     
-64    16     
-1056  -160   
-64    -80    
-272   -48    
-48    48     
-80    16     
-1056  -32    
-32    208    
-560   16     
208    -80    
-32    80     
48     80     
-96    -256   
-96    -192   
192    -128   
0      144    
-256   -96    
-32    -64    
0      -64    
-320   144    
160    -48    
-288   16     
-32    64     
32     48     
-48    96     
-336   -16    
-240   -48    
-80    48     
-16    -32    
-320   0      
272    320    
-48    64     
-144   0      
-192   -144   
-224   -176   
0      32     
48     48     
-64    80     
-272   -64    
-48    -160   
-32    48     
-16    112    
-1392  -96    
0      64     
128    32     
-64    16     
-48    -96    
112    80     
-288   160    
160    128    
-64    32     
-48    16     
-144   64     
0      96     
80     32     
-368   16     
128    16     
-208   80     
176    16     
-528   -256   
128    -176   
-48    -64    
192    -208   
-16    208    
-80    -16    
32     112    
16     -256   
-96    400    
-32    16     
-272   -672   
160    -80    
48     112    
-320   304    
112    -112   
-592   32     
96     -96    
-96    48     
32     32     
160    -208   
-288   -32    
224    0      
-144   112    
-64    -400   
-128   496    
-240   -160   
-48    -368   
48     320    
-400   112    
-32    -272   
-192   -368   
320    160    
64     32     
-32    -64    
176    272    
-272   -96    
80     304    
16     224    
-192   -144   
32     -96    
160    304    
-240   240    
-64    0      
-64    272    
32     -32    
-304   -48    
80     16     
80     -16    
-32    64     
-32    -96    
80     224    
-80    80     
112    32     
304    288    
-320   176    
-80    -368   
32     -208   
144    96     
-224   -128   
112    96     
-288   -48    
32     112    
64     176    
-176   -48    
432    464    
-208   32     
224    320    
64     -160   
-32    -304   
-112   -288   
-272   -336   
-48    -256   
304    -256   
-176   16     
96     112    
-704   -16    
0      32     
96     128    
96     192    
-16    0      
-112   144    
80     -160   
-112   -176   
240    64     
-64    80     
176    64     
-288   -80    
112    -80    
-224   -208   
0      112    
224    -64    
16     48     
128    160    
-80    144    
208    48     
16     64     
16     -48    
48     -80    
80     -48    
-80    -112   
80     64     
-16    -32    
96     320    
-256   144    
96     16     
96     0      
-16    16     
96     144    
-48    96     
32     32     
128    -80    
-208   -80    
304    -512   
-96    -240   
0      -48    
48     48     
-208   144    
16     16     
64     336    
0      128    
-64    144    
-80    -368   
-128   -64    
176    112    
448    224    
-240   592    
160    192    
-80    224    
-144   112    
-16    -336   
64     16     
32     176    
16     -192   
-368   16     
-64    0      
-128   432    
288    304    
0      240    
432    640    
-32    64     
64     -32    
224    -48    
-64    0      
96     32     
-144   16     
288    112    
-176   176    
-160   448    
336    -96    
64     -224   
144    -80    
240    80     
48     368    
-64    -64    
-48    32     
0      0      
192    288    
-64    144    
240    112    
-352   -240   
144    192    
-320   480    
-144   -48    
400    240    
-160   80     
192    -32    
-16    32     
368    288    
-128   272    
16     -32    
-48    160    
288    224    
-80    272    
224    -80    
-32    -224   
128    96     
176    224    
-16    240    
-240   -192   
416    -688   
-64    16     
160    64     
144    80     
384    288    
-144   208    
32     64     
-64    -368   
-32    -288   
144    -176   
-144   -64    
144    -96    
176    160    
-16    32     
-16    208    
48     -112   
112    112    
256    144    
-176   128    
272    128    
-80    144    
0      96     
96     -112   
-64    -48    
272    64     
32     160    
192    48     
-144   128    
160    -400   
-112   -112   
304    -464   
0      -304   
192    -480   
-96    -112   
64     -208   
-144   -544   
-64    -432   
112    272    
-32    -256   
256    224    
-96    16     
-48    -144   
64     240    
-16    -528   
80     176    
112    -64    
-32    224    
144    -816   
-144   304    
-64    -448   
176    128    
160    16     
368    224    
-48    -48    
144    96     
160    -112   
128    16     
144    192    
112    112    
-128   144    
-16    0      
0      -32    
208    -240   
-208   -80    
416    -528   
176    -512   
272    32     
96     48     
-80    64     
112    176    
128    208    
192    464    
-256   384    
320    0      
-400   96     
-144   -240   
272    32     
128    0      
-80    48     
240    -16    
-96    224    
-64    144    
224    144    
-416   -80    
-16    -208   
-16    96     
32     -32    
208    96     
-32    -112   
48     160    
176    -176   
96     -176   
256    80     
160    80     
80     0      
96     96     
-96    -48    
112    64     
-64    16     
96     32     
48     32     
-112   -112   
256    96     
240    -224   
-144   -64    
64     -64    
64     16     
176    112    
176    96     
160    -80    
64     -96    
-96    -16    
112    -96    
48     -224   
96     -32    
64     -64    
-16    -144   
176    -1504  
192    0      
-96    48     
80     -96    
80     112    
96     -128   
112    -128   
48     -48    
-160   -224   
96     16     
64     -128   
144    -48    
176    -80    
96     -160   
128    -48    
256    0      
-32    -64    
144    -432   
128    -96    
64     -80    
112    -16    
-48    16     
96     384    
144    112    
-48    -32    
-144   -128   
80     -208   
-592   288    
96     0      
160    32     
-288   -144   
224    -112   
16     -384   
240    160    
64     112    
272    96     
112    -80    
-80    -32    
240    16     
-80    -64    
-192   -80    
32     64     
-352   80     
208    -32    
0      -48    
240    -192   
48     0      
192    80     
80     0      
64     -672   
-272   -64    
272    -48    
-144   -256   
48     -48    
48     128    
-240   -32    
256    192    
-320   -16    
80     16     
-128   144    
-160   48     
144    -176   
80     -176   
112    48     
-16    -320   
80     -48    
32     -80    
-16    32     
48     16     
144    32     
-160   0      
128    -384   
-464   -176   
64     64     
-288   -64    
176    -112   
-64    -144   
96     -160   
-16    -80    
288    -256   
64     224    
0      64     
240    -320   
-32    176    
32     -256   
128    0      
-288   -128   
-48    -16    
-48    -16    
48     -112   
192    80     
-384   -192   
-64    -240   
-240   64     
-32    -272   
768    1040   
-672   -1376  
48     32     
96     304    
-32    -16    
-304   -192   
80     -288   
-80    176    
48     48     
-528   208    
208    -320   
-16    -240   
32     16     
0      0      
416    -336   
16     0      
112    -112   
48     48     
-480   688    
112    112    
-368   -352   
160    -240   
-64    -96    
176    -96    
-208   80     
-16    -80    
-208   48     
128    48     
80     96     
176    -96    
48     -96    
-128   -416   
32     -432   
160    64     
128    128    
-160   176    
-160   112    
0      -64    
112    -160   
-96    -16    
64     -64    
16     96     
-464   -112   
48     144    
-624   -208   
-48    144    
-112   224    
-256   -16    
208    160    
-1008  592    
16     160    
-80    -80    
192    -48    
192    0      
-16    128    
0      32     
256    240    
-752   -16    
-112   144    
160    -208   
-160   -112   
-80    -240   
-240   -16    
-96    48     
-384   32     
64     16     
-272   64     
-64    32     
128    -176   
-224   -176   
96     -160   
64     176    
-112   -96    
144    48     
-48    -16    
-112   -32    
176    48     
-544   -224   
192    -208   
-64    272    
-144   64     
-96    -64    
16     -16    
-1472  64     
0      112    
-256   -192   
144    -96    
16     -64    
48     80     
-16    144    
208    112    
-304   -32    
16     -16    
240    176    
128    176    
80     224    
0      112    
-160   80     
-1744  -16    
32     -144   
-16    96     
0      96     
-32    16     
48     32     
0      32     
-176   128    
240    32     
-176   -176   
112    48     
-272   112    
112    112    
-176   160    
-32    16     
-208   32     
256    128    
96     192    
80     32     
-48    -304   
-48    144    
-48    -448   
-352   48     
64     -160   
-160   208    
192    16     
-160   -224   
-96    -320   
80     -272   
-64    320    
-32    -208   
48     -144   
-656   -32    
224    176    
-256   240    
-272   -64    
240    -240   
176    -144   
32     -224   
80     -144   
-272   0      
-112   -576   
432    48     
176    -80    
144    320    
-96    -48    
16     0      
-864   32     
-112   -384   
80     48     
-80    -176   
32     -240   
160    128    
96     240    
-336   48     
176    16     
368    400    
-368   304    
-192   -256   
-224   -96    
-336   -128   
96     -32    
-384   -32    
-64    -464   
-176   -336   
48     -32    
-320   512    
112    176    
-128   -224   
160    -128   
144    -16    
-304   -192   
192    -384   
-208   80     
-160   -128   
-224   -64    
-80    -64    
192    -480   
-160   -32    
208    32     
-208   448    
48     256    
160    -112   
-96    -496   
-208   -592   
-32    -192   
-96    320    
224    528    
64     -656   
-240   -208   
208    176    
-496   192    
80     -304   
336    -528   
0      688    
320    240    
-288   32     
-112   -336   
64     0      
80     320    
96     -144   
-32    64     
-144   -32    
32     48     
80     128    
-272   -96    
112    288    
-288   -384   
224    448    
64     176    
176    -208   
96     128    
-144   32     
240    240    
-272   -240   
32     384    
32     304    
32     64     
-208   -432   
80     176    
-48    288    
48     -304   
208    -112   
224    240    
-160   64     
-96    16     
-112   0      
240    -48    
352    32     
-16    112    
240    32     
-208   -224   
48     48     
-64    80     
192    160    
0      48     
112    64     
240    -16    
-64    -336   
-160   -544   
64     -32    
96     512    
-128   176    
176    208    
80     128    
80     48     
-192   -144   
400    -16    
-48    32     
112    160    
48     -80    
240    32     
192    208    
-64    0      
192    48     
-144   -16    
-16    96     
48     -96    
-32    48     
-272   48     
160    144    
-80    -160   
208    -96    
64     64     
448    -64    
80     32     
272    -32    
160    48     
144    64     
-240   0      
128    48     
96     160    
-256   0      
288    48     
112    80     
240    80     
48     -48    
272    112    
176    208    
0      144    
112    256    
-240   -448   
-144   -176   
224    -32    
272    160    
208    96     
80     64     
-64    176    
64     48     
-32    -128   
144    112    
-112   48     
64     96     
64     32     
-112   -208   
112    64     
48     -624   
96     64     
16     0      
-64    16     
48     48     
0      48     
-48    64     
288    128    
80     -32    
80     144    
0      32     
-48    -192   
32     16     
144    -64    
128    0      
32     -528   
-16    96     
-16    32     
-32    -16    
128    16     
80     80     
80     32     
112    48     
-80    16     
160    32     
-80    16     
-16    -64    
112    96     
96     -48    
128    0      
80     -160   
224    368    
64     -192   
128    -48    
-32    128    
48     -32    
16     -128   
-32    160    
-64    -32    
0      96     
48     16     
224    -96    
-208   144    
368    -128   
80     352    
-16    96     
128    -64    
32     160    
96     80     
0      -544   
80     0      
-16    112    
192    -64    
-32    -272   
-16    -128   
64     112    
32     -128   
96     -48    
-112   -480   
-32    -352   
96     -64    
128    160    
-96    -160   
32     32     
0      -32    
48     48     
256    -32    
144    80     
288    192    
-128   336    
112    -128   
-112   -272   
112    144    
160    48     
-32    48     
0      208    
16     -64    
176    32     
112    192    
-96    32     
304    240    
-336   -928   
48     688    
64     -16    
-48    -16    
192    176    
272    -240   
608    576    
-144   128    
-64    -96    
192    -768   
-176   -176   
144    432    
64     176    
144    -352   
-176   -496   
-144   -288   
144    -768   
16     -96    
224    -48    
176    160    
64     -32    
80     -896   
160    -96    
32     128    
112    -80    
-304   -64    
352    -192   
-112   160    
224    32     
48     -160   
-16    32     
0      16     
272    -176   
144    -96    
128    -208   
144    128    
144    -112   
0      112    
0      160    
176    0      
32     32     
-224   16     
448    16     
-144   0      
160    -32    
64     64     
-96    0      
32     16     
48     -80    
96     -64    
128    112    
-48    -16    
272    -32    
112    -480   
-160   48     
176    -112   
192    -16    
0      -96    
-176   -16    
192    -96    
160    48     
-416   64     
64     16     
-2464  0      
192    0      
-64    -16    
160    -32    
-96    0      
16     -208   
112    -16    
48     -752   
0      -16    
64     0      
160    128    
-368   64     
32     -112   
112    0      
176    96     
-256   96     
112    -48    
80     -16    
0      -64    
160    80     
-32    -96    
192    32     
320    -320   
128    48     
96     48     
-64    64     
-144   -48    
96     -144   
-160   -96    
112    128    
-720   32     
160    -80    
-2176  -208   
192    -80    
-64    0      
0      -240   
32     -208   
96     -192   
-48    -48    
96     -160   
-32    208    
-96    0      
128    -16    
64     16     
112    208    
-160   16     
176    16     
-528   96     
32     -80    
-128   208    
288    176    
112    80     
-48    -208   
16     304    
272    368    
-16    224    
48     256    
128    48     
-192   -128   
80     -240   
64     -32    
-32    160    
-48    32     
112    -32    
96     272    
144    176    
112    208    
144    144    
-16    -128   
-496   16     
16     -128   
-224   -208   
64     -16    
-224   -80    
32     -112   
-80    -208   
128    -32    
-16    176    
304    192    
-208   272    
-160   -16    
80     224    
64     0      
16     224    
-176   -368   
-208   -528   
-16    -704   
192    1312   
-144   272    
144    -880   
192    848    
720    1104   
-624   -288   
-208   -1168  
288    -64    
-1296  912    
-176   -176   
-1008  -320   
-1296  240    
-288   -64    
-416   64     
-96    -32    
-1248  64     
192    -272   
288    64     
-32    96     
-112   -336   
-336   32     
-496   -272   
384    -512   
240    544    
48     576    
-80    -480   
-560   0      
304    304    
-912   -1024  
32     288    
48     384    
-544   -368   
-32    -416   
-96    496    
32     784    
144    -432   
-240   160    
48     -288   
-192   816    
160    -320   
-128   64     
80     112    
-144   -240   
-48    112    
16     -48    
-160   128    
-32    48     
-336   16     
128    320    
-64    32     
-192   -112   
-304   144    
160    256    
-160   -80    
64     -48    
-192   272    
80     0      
-32    -96    
-224   -64    
64     -48    
-96    96     
-160   112    
160    144    
16     128    
-448   -48    
64     96     
-160   -224   
272    -48    
-80    -224   
-160   -192   
96     96     
-176   0      
48     112    
-176   112    
-144   48     
96     -48    
-96    16     
-80    -16    
-112   -96    
-736   -592   
-64    -176   
0      32     
208    160    
-112   208    
-64    -176   
-80    0      
16     -144   
64     -16    
128    -16    
80     0      
-448   -336   
240    144    
-480   -144   
-224   -176   
-352   80     
-176   0      
-32    16     
336    80     
96     16     
0      -144   
144    96     
-128   64     
144    -112   
-80    -32    
32     32     
-256   -224   
112    -64    
-176   32     
-144   -240   
-144   -32    
112    144    
-2448  -16    
48     160    
-208   48     
112    -16    
160    48     
0      32     
-80    -192   
128    -208   
96     80     
-256   -32    
240    96     
-128   16     
-368   -496   
-464   -256   
320    192    
-1696  48     
64     48     
464    416    
-560   128    
112    -144   
-32    -32    
656    128    
48     -80    
384    -160   
64     32     
-464   -32    
96     16     
-32    112    
16     -64    
304    80     
160    32     
-160   -32    
0      -48    
0      48     
48     0      
-192   32     
16     48     
176    176    
-288   -176   
336    -112   
400    80     
16     320    
-16    192    
-192   -80    
-176   -64    
16     48     
0      144    
-240   -128   
112    -48    
96     -16    
64     96     
-64    0      
0      112    
0      48     
-160   -16    
80     16     
-64    -32    
80     96     
-64    -32    
112    64     
-48    32     
16     48     
-144   112    
32     48     
80     16     
32     -32    
48     32     
-80    96     
48     32     
64     48     
-32    64     
0      0      
48     32     
32     64     
96     48     
32     64     
-16    0      
96     16     
32     16     
48     16     
-80    16     
224    176    
-272   144    
160    80     
-144   -32    
144    0      
96     112    
96     -16    
-96    96     
-96    32     
80     64     
-48    32     
96     96     
-224   96     
208    48     
64     96     
128    80     
80     112    
64     192    
80     144    
-112   240    
0      96     
112    96     
-80    48     
-64    -32    
80     16     
16     -112   
32     176    
96     128    
48     16     
160    48     
-16    32     
-32    48     
-32    224    
-384   -1536  
192    -496   
-352   752    
-288   112    
512    -432   
-48    640    
576    608    
-480   -704   
272    528    
-16    160    
-32    -208   
96     -48    
-48    -624   
-208   400    
288    144    
80     -128   
0      80     
160    -624   
96     -352   
-80    -64    
144    -48    
48     48     
400    96     
-144   336    
-128   256    
-128   192    
-48    192    
272    112    
384    -176   
-208   288    
-16    -112   
-16    16     
208    160    
160    -80    
16     80     
0      -656   
-48    192    
-80    112    
208    144    
128    -32    
208    112    
0      -32    
-112   144    
-32    -32    
96     48     
48     80     
48     64     
384    112    
-112   0      
192    48     
-112   -80    
-48    0      
176    -112   
-128   112    
-48    -64    
-144   64     
-224   -32    
160    32     
-112   128    
80     80     
-32    64     
-16    -32    
256    0      
-48    -128   
32     80     
80     -48    
16     96     
-48    224    
144    16     
-16    -16    
-32    48     
96     -48    
64     112    
0      16     
48     16     
128    16     
-80    -64    
384    240    
16     80     
368    112    
-208   -320   
16     16     
-64    -400   
160    -32    
272    64     
80     176    
48     224    
-208   48     
224    0      
-64    48     
48     0      
96     32     
256    64     
-16    -544   
224    80     
-80    -160   
-64    -80    
-48    48     
-224   0      
112    48     
160    64     
64     0      
240    144    
-64    48     
16     -144   
-16    -48    
368    -288   
224    208    
-96    -176   
-80    144    
-192   -240   
400    32     
-16    112    
160    128    
-16    16     
64     80     
16     -64    
256    112    
64     96     
96     -80    
128    -48    
-32    -192   
48     32     
-96    -32    
144    528    
288    32     
272    160    
-368   -640   
112    -736   
80     80     
208    -144   
256    400    
-656   96     
368    256    
128    256    
112    -304   
128    416    
-64    112    
176    -48    
128    -64    
64     -304   
80     288    
112    48     
0      -304   
-48    80     
96     -144   
-176   48     
-1008  -288   
256    -608   
272    16     
160    192    
-80    -304   
208    -352   
-128   16     
96     -640   
48     -48    
256    -400   
48     256    
160    64     
208    -112   
48     -64    
-16    -48    
-160   -48    
-32    128    
128    96     
96     -192   
240    720    
48     -128   
256    -384   
240    -1040  
112    80     
144    64     
320    160    
-272   -64    
208    16     
16     0      
208    -96    
320    96     
256    640    
-624   304    
272    -288   
112    96     
-80    -208   
-16    -112   
160    -544   
-128   -32    
160    -176   
64     16     
64     64     
160    16     
-64    -32    
64     64     
-240   176    
176    -128   
-1328  -192   
-112   656    
48     384    
112    -48    
-16    -128   
-64    -272   
480    464    
-384   -1440  
64     64     
0      -32    
176    0      
144    16     
0      -64    
-80    16     
0      -144   
-736   -160   
192    -224   
-1232  -96    
32     128    
96     -48    
16     -240   
80     16     
224    -240   
-112   0      
-80    16     
304    -32    
-80    16     
0      -144   
80     -416   
240    -176   
48     144    
96     -144   
-304   -112   
-176   0      
64     48     
176    -112   
-48    80     
80     -224   
144    96     
-352   -16    
112    -64    
64     16     
96     48     
-256   -16    
80     48     
-464   -112   
224    -32    
-528   16     
-80    -160   
32     64     
240    0      
16     64     
112    80     
112    96     
64     -160   
-176   -144   
-16    80     
16     96     
-272   272    
400    80     
64     -224   
-144   -240   
-80    32     
224    48     
-32    128    
64     -64    
80     128    
-32    -176   
0      288    
-128   272    
240    -48    
224    64     
48     -128   
128    -16    
144    160    
-160   128    
256    -96    
-80    -96    
-16    -96    
128    160    
-1216  -16    
208    112    
-512   -112   
-384   0      
96     144    
-1568  32     
-96    -16    
112    -272   
-208   -224   
464    -48    
-336   16     
-112   48     
-304   -112   
-448   -128   
0      160    
-912   -240   
-48    80     
224    176    
-368   64     
128    -16    
-208   16     
-224   -64    
-1280  -1056  
-16    -752   
-96    384    
-656   304    
-352   -48    
112    -192   
-272   -112   
-64    112    
-176   -144   
256    16     
-16    -16    
-64    0      
240    48     
-160   -160   
288    -80    
128    48     
64     96     
-1056  -80    
64     32     
-176   -208   
96     -320   
240    -112   
-64    224    
-112   16     
-160   -48    
-16    0      
-112   224    
-160   112    
96     112    
-32    16     
-160   16     
-16    -32    
-1136  -80    
-32    64     
-112   -16    
16     32     
160    16     
192    48     
32     32     
-144   -16    
-192   -64    
-48    -64    
0      80     
192    80     
64     112    
80     128    
-128   16     
-112   -16    
80     64     
-528   192    
-80    112    
-208   -96    
128    48     
-32    -48    
16     -32    
-32    -32    
-32    -48    
112    96     
-112   48     
-112   -64    
-112   -112   
64     64     
32     48     
64     48     
-848   -48    
48     32     
0      -64    
-144   -128   
-32    -32    
-96    64     
96     -112   
-160   96     
224    80     
-432   -272   
448    16     
80     144    
-128   -96    
-144   32     
-96    -336   
-928   32     
272    288    
-240   -512   
208    224    
64     -192   
-48    48     
176    48     
48     -128   
192    400    
128    -128   
-32    992    
112    -1184  
-128   512    
-224   176    
48     -464   
-272   176    
112    112    
352    80     
-64    80     
-80    208    
-16    320    
-176   96     
288    -160   
-48    176    
400    240    
-512   32     
-32    -16    
-208   -48    
-112   -176   
256    -352   
80     160    
32     144    
48     -16    
-16    64     
-272   -160   
288    48     
-16    48     
144    -16    
-256   96     
48     -208   
-176   -208   
96     -112   
-80    240    
16     64     
32     -32    
-192   -512   
16     -64    
-176   208    
16     0      
112    0      
-48    0      
48     112    
-208   -32    
48     48     
0      224    
144    160    
-32    -432   
192    -240   
-448   -240   
16     0      
-32    224    
0      64     
208    48     
-48    -16    
128    -16    
-96    96     
32     96     
-16    -48    
256    144    
-112   16     
112    144    
16     0      
272    80     
-336   -80    
32     128    
160    112    
48     80     
64     48     
112    -96    
-32    32     
-64    32     
32     -16    
80     0      
-64    80     
-48    16     
16     48     
16     -32    
192    192    
-144   16     
16     -64    
-16    112    
48     48     
48     32     
-96    32     
-32    -48    
-48    -48    
128    192    
64     80     
112    -16    
32     96     
32     0      
-48    0      
16     32     
-32    -144   
128    32     
272    240    
-112   192    
-48    48     
16     -16    
176    16     
-64    128    
32     48     
-112   -48    
208    112    
-144   160    
96     16     
-48    -64    
288    208    
-272   112    
64     -160   
-96    16     
192    -16    
176    0      
112    128    
-16    -112   
80     -16    
-336   -32    
-256   -96    
-64    -144   
288    80     
192    208    
48     -16    
0      -64    
-128   16     
96     -352   
160    320    
32     256    
-144   32     
192    0      
64     32     
112    64     
112    656    
256    384    
16     160    
-80    256    
-48    48     
112    -64    
-128   -656   
240    192    
240    304    
-160   32     
112    160    
144    -112   
-80    208    
-80    240    
208    -208   
48     -336   
128    112    
64     -112   
-32    -160   
80     112    
48     32     
-32    -80    
80     -80    
16     400    
80     -48    
-16    -1408  
112    224    
-192   -112   
0      -16    
240    -16    
144    336    
48     160    
464    208    
-304   32     
144    -64    
144    64     
-128   -160   
176    112    
64     -256   
32     48     
80     -32    
192    32     
-16    32     
208    32     
-144   16     
64     48     
-64    80     
32     -208   
288    -208   
96     0      
368    112    
-32    -144   
64     32     
48     16     
16     80     
144    48     
336    96     
-16    -32    
96     -144   
-96    16     
48     0      
80     48     
160    -80    
176    48     
16     -32    
-96    -48    
64     -144   
0      0      
320    -48    
-160   144    
320    -144   
-144   64     
96     -368   
144    32     
-48    128    
96     560    
-192   96     
192    48     
0      320    
-16    64     
128    -80    
96     -64    
448    352    
-432   32     
160    -144   
128    -112   
-32    -32    
368    256    
-384   32     
128    16     
-64    64     
-80    -192   
288    -64    
80     48     
160    -64    
-64    96     
176    -32    
32     0      
144    32     
-32    0      
96     48     
-32    32     
176    -224   
112    -544   
304    -160   
-64    -560   
80     80     
48     0      
128    -192   
80     0      
144    -848   
16     -128   
-32    128    
-80    0      
0      288    
480    160    
-32    -16    
-96    -48    
-16    -432   
0      0      
-16    -224   
48     -128   
-1360  64     
64     -96    
224    -48    
144    16     
48     -64    
112    -16    
128    -160   
32     160    
16     64     
240    -336   
-80    -16    
80     -240   
-32    112    
288    16     
160    -80    
-1408  -96    
80     -288   
112    -32    
64     -48    
96     -16    
48     -416   
224    -48    
-48    -1440  
-64    -656   
240    -320   
-464   240    
176    80     
-16    128    
-336   -16    
400    0      
-336   0      
-64    -48    
0      64     
272    96     
-32    -112   
32     -48    
-48    -144   
256    -32    
128    128    
272    -32    
80     80     
-128   0      
-16    128    
-272   64     
-224   -112   
-208   -160   
432    48     
-720   80     
-48    -32    
-48    -48    
240    32     
256    128    
-48    0      
-144   0      
-208   -80    
576    128    
-192   -752   
-416   -896   
-368   128    
-112   384    
-208   64     
-48    -288   
-352   -128   
192    -16    
224    768    
0      176    
224    -928   
96     -672   
448    416    
128    -544   
96     -64    
-112   -240   
-48    -192   
224    144    
48     96     
-128   -48    
224    208    
-272   -320   
-16    -320   
-1120  64     
144    80     
-80    -128   
112    -96    
-48    80     
208    -560   
0      256    
-112   -144   
80     -16    
-80    96     
-96    -96    
-448   -128   
64     96     
-48    304    
-32    144    
-304   -384   
256    -448   
176    304    
192    -160   
-384   -448   
224    -1008  
304    336    
288    112    
-144   16     
-480   160    
-32    -16    
-160   -400   
32     160    
-48    0      
64     48     
-224   96     
32     -224   
-32    112    
112    -112   
112    16     
96     -16    
-96    -224   
368    912    
-96    -624   
-224   -64    
48     224    
-32    -64    
80     48     
-160   224    
0      -32    
-320   -208   
64     640    
32     -640   
-592   496    
112    -144   
-112   80     
-800   -160   
48     -960   
-704   176    
224    672    
-16    0      
-496   -240   
32     -272   
-16    464    
224    -64    
368    208    
-176   0      
96     -96    
-336   -80    
-144   -176   
96     32     
-416   -48    
32     -80    
-192   -96    
-32    48     
-1040  16     
-176   -112   
304    -96    
144    160    
48     112    
112    -160   
64     -128   
-160   64     
96     -128   
-64    16     
-352   -48    
320    -160   
-320   -16    
144    -144   
-144   -16    
-400   96     
-160   -96    
144    32     
-16    -16    
-112   96     
320    224    
-448   -144   
176    -304   
32     -64    
-192   288    
64     -32    
-176   -96    
-16    336    
-176   176    
224    -160   
32     0      
-80    0      
32     -304   
-128   -32    
64     -48    
32     -192   
-160   -48    
-96    160    
416    192    
-256   128    
-32    -32    
-352   32     
528    368    
-288   624    
-208   144    
-48    -240   
320    -192   
-688   32     
128    112    
-48    -128   
-128   -128   
0      -48    
160    304    
144    32     
80     -64    
-176   48     
64     64     
224    32     
176    48     
-96    48     
32     112    
-304   -32    
-384   -160   
112    32     
-608   -32    
192    -16    
48     -16    
96     16     
16     16     
80     64     
-224   176    
144    112    
208    -32    
-160   240    
80     -32    
-176   -80    
208    128    
-64    112    
112    -48    
-224   -48    
368    144    
-176   192    
128    112    
-112   144    
-48    32     
48     0      
112    48     
96     48     
-112   16     
80     64     
-48    16     
32     48     
-64    -112   
48     16     
-128   -48    
-272   96     
80     80     
208    176    
-144   16     
-224   0      
-48    80     
-112   0      
16     -16    
-112   -352   
288    -32    
16     16     
128    -96    
64     736    
-288   528    
-432   48     
224    544    
-16    112    
48     -304   
176    112    
256    208    
-224   -384   
-96    -384   
-128   480    
-144   176    
96     -96    
160    176    
-64    16     
-320   80     
-80    64     
-48    64     
224    -96    
256    16     
128    1104   
-128   -112   
-80    -48    
-208   128    
96     -64    
240    336    
-64    -96    
224    -48    
-32    -80    
32     96     
-96    176    
-32    112    
-48    -16    
-32    48     
96     -48    
144    -144   
-16    -192   
-208   -144   
-64    80     
-32    80     
-80    48     
-64    64     
16     32     
64     160    
0      144    
-16    64     
80     32     
32     0      
160    32     
-32    -32    
128    96     
128    112    
64     224    
-96    112    
48     112    
112    0      
-32    64     
80     64     
0      16     
16     0      
96     -32    
-144   32     
-16    48     
112    64     
32     64     
96     48     
80     -16    
0      64     
16     -96    
144    -96    
0      80     
16     -16    
-32    112    
-64    -16    
-48    48     
144    0      
0      48     
256    80     
-112   32     
64     0      
0      64     
112    64     
48     160    
-176   16     
64     -16    
-64    48     
-112   96     
144    16     
-80    16     
64     -608   
192    144    
48     240    
336    32     
-128   0      
-80    0      
144    96     
-112   80     
208    -32    
0      128    
-144   16     
192    64     
-48    64     
176    -16    
144    -224   
-128   -128   
112    224    
-48    -496   
128    16     
-144   -128   
128    160    
80     160    
-16    16     
48     16     
112    96     
-144   64     
64     112    
16     -80    
32     32     
96     80     
80     -160   
48     64     
128    -272   
48     0      
-112   16     
128    -64    
-32    32     
96     224    
304    0      
-64    80     
-240   16     
208    96     
64     96     
112    128    
-16    48     
256    -208   
32     64     
160    48     
112    144    
-64    -32    
160    -32    
-32    48     
64     0      
-32    -96    
-48    48     
176    80     
160    96     
0      -16    
-16    -16    
48     64     
96     -96    
96     96     
32     -16    
0      -112   
96     -800   
16     304    
288    176    
96     32     
32     176    
-80    -160   
48     -256   
160    144    
0      64     
320    -224   
0      -144   
32     -160   
-144   -96    
-176   -32    
-208   -160   
288    -480   
512    336    
96     -208   
128    -176   
-64    -96    
48     208    
-64    160    
192    32     
112    128    
-128   -144   
304    -32    
272    336    
208    -16    
-96    -272   
0      16     
-16    -608   
16     416    
48     336    
64     -96    
-80    48     
400    -96    
80     224    
48     32     
0      32     
80     64     
-16    64     
-128   -208   
48     32     
112    16     
400    48     
-32    -1040  
224    656    
-240   208    
-96    48     
-80    -16    
208    -64    
160    32     
64     -496   
288    496    
0      -160   
48     32     
48     -144   
0      80     
96     608    
160    -80    
-80    -656   
-16    192    
-32    336    
16     -48    
-144   -160   
176    -176   
144    -368   
80     -80    
128    -128   
208    48     
128    -32    
48     48     
176    -144   
-16    -400   
-32    80     
240    544    
-96    -896   
-64    -144   
176    48     
160    432    
-48    -208   
80     -576   
-192   16     
-176   -256   
96     -96    
160    -16    
-32    -368   
48     -160   
160    400    
32     144    
-96    -272   
128    -336   
176    96     
128    -144   
-64    208    
48     -32    
0      -112   
-144   32     
96     0      
0      96     
96     -432   
176    96     
-96    -928   
144    80     
224    16     
16     176    
48     -96    
-256   160    
-16    16     
-32    32     
16     -112   
80     64     
-672   0      
32     -64    
16     208    
-16    -48    
144    80     
336    -16    
-16    240    
208    192    
224    576    
-32    208    
144    544    
512    720    
-208   112    
-144   -128   
240    -304   
-112   80     
304    -336   
-1120  144    
224    -48    
64     -96    
192    0      
-112   0      
400    -176   
-80    48     
64     144    
176    -48    
144    176    
64     0      
-224   -80    
464    224    
-576   272    
-32    64     
-704   32     
96     -80    
-96    -144   
208    -320   
-16    -144   
96     -32    
0      48     
80     -32    
64     32     
-208   -16    
160    96     
-80    48     
16     -48    
80     -144   
80     80     
-272   16     
64     -128   
-1280  32     
160    -112   
-32    -144   
144    16     
16     48     
160    -272   
64     -80    
-16    -80    
112    96     
48     -16    
208    -32    
-144   176    
256    -96    
16     -64    
80     32     
48     32     
-128   -112   
208    -96    
96     -16    
144    48     
-160   192    
688    352    
-112   320    
240    160    
-112   112    
224    -48    
-112   -96    
96     -224   
-176   -480   
-128   -64    
-16    -112   
240    -64    
-112   -240   
96     -176   
-112   192    
-224   80     
160    -32    
-32    48     
0      48     
-640   0      
368    16     
-208   -144   
224    -224   
32     32     
400    336    
-288   368    
-1216  -64    
0      -256   
-80    -64    
160    16     
112    304    
-768   336    
-368   144    
-1840  64     
32     112    
240    -128   
0      0      
304    -144   
-32    80     
-336   -48    
-96    -224   
-288   -112   
48     160    
-112   224    
-288   192    
-160   16     
-80    112    
-80    -32    
32     -112   
16     -240   
-1136  176    
-176   64     
192    -48    
-224   80     
-128   128    
-32    96     
-224   -64    
-32    80     
96     -192   
-144   -96    
-80    -16    
-48    -96    
144    176    
-144   -736   
176    384    
-464   -144   
-240   176    
192    -192   
96     32     
48     -32    
336    368    
-192   352    
-128   832    
352    176    
-144   -224   
-160   160    
176    0      
-112   -208   
-80    -96    
-256   64     
-736   16     
-240   0      
-432   -16    
112    144    
128    112    
96     80     
-64    -160   
-256   48     
-272   0      
-32    48     
176    160    
128    48     
80     32     
-208   -144   
-240   -64    
-496   16     
-64    0      
-144   -64    
224    144    
-256   -208   
272    -16    
-80    -176   
-112   -176   
80     -208   
0      192    
80     80     
-80    64     
128    -16    
-112   -48    
-48    48     
-96    -128   
144    -16    
-144   96     
208    96     
-432   -32    
48     80     
144    176    
-80    48     
160    64     
-192   -32    
0      80     
-64    0      
0      -16    
128    -64    
-48    48     
-96    48     
-16    64     
-400   0      
80     48     
-1424  0      
192    64     
-64    64     
-128   16     
-16    96     
80     32     
-176   0      
-64    16     
-16    32     
432    480    
-544   320    
32     -208   
0      80     
-16    0      
208    0      
-720   -272   
-112   32     
-224   128    
0      -64    
144    160    
-192   64     
368    64     
-16    0      
64     -16    
-224   32     
-32    -32    
-48    -128   
176    96     
-96    16     
240    96     
-48    96     
-64    48     
144    0      
-128   -32    
496    208    
-208   128    
0      -48    
96     -16    
-80    -48    
32     48     
144    80     
-80    0      
64     32     
-288   -128   
96     128    
-48    64     
16     64     
32     -112   
176    16     
80     320    
-128   112    
80     -64    
-112   -64    
-48    16     
-32    -144   
144    -48    
-176   64     
128    32     
-432   -32    
208    -240   
32     -64    
48     80     
240    32     
-224   112    
-112   16     
64     48     
80     -16    
0      80     
112    64     
-80    96     
160    -96    
48     -176   
-112   32     
-144   -80    
192    80     
64     48     
0      64     
32     96     
0      80     
-48    -176   
-16    64     
288    192    
16     16     
-32    672    
64     16     
80     -208   
-240   112    
192    -256   
48     448    
208    -288   
-240   176    
-48    -48    
96     288    
16     224    
240    -32    
176    0      
224    208    
16     80     
-176   -48    
32     160    
-304   -416   
64     272    
64     208    
272    208    
-16    -272   
-16    -48    
112    656    
96     -320   
176    -32    
64     160    
-224   544    
-96    240    
112    -160   
80     80     
-96    0      
224    -160   
-256   -832   
48     -48    
128    208    
-16    48     
288    272    
16     -320   
96     -64    
96     128    
96     176    
64     176    
-48    -32    
0      -16    
32     112    
32     -96    
96     48     
-304   -48    
-16    -16    
-80    -32    
128    -432   
160    -64    
64     64     
64     -48    
32     -64    
-16    -128   
-80    -64    
16     176    
-208   -224   
112    -80    
-256   -400   
384    -336   
192    -96    
64     -448   
48     -304   
32     -1056  
-144   -96    
-32    128    
-128   160    
16     16     
112    144    
32     112    
128    64     
16     64     
-32    96     
32     -32    
32     -32    
288    -16    
-176   -64    
-240   -144   
96     -528   
80     128    
128    192    
192    240    
32     -16    
-32    -112   
-80    -32    
96     -48    
112    16     
128    192    
80     -80    
0      -128   
64     192    
48     -112   
64     -64    
64     -608   
16     -48    
32     -784   
32     160    
128    -16    
96     32     
0      32     
48     80     
112    400    
272    240    
-16    64     
-96    -128   
96     -112   
-32    -240   
432    288    
-48    112    
32     128    
64     -528   
32     -112   
112    -192   
-48    -80    
96     -64    
160    -112   
240    48     
96     80     
80     -16    
32     112    
80     208    
48     -272   
-304   -160   
160    -512   
368    -32    
80     -160   
432    448    
-128   432    
-48    -32    
0      208    
16     32     
-16    400    
64     -464   
192    -16    
160    -208   
272    192    
-32    288    
-336   48     
16     -128   
192    -112   
-16    -192   
96     -16    
-160   144    
-96    0      
-96    48     
80     96     
-144   -64    
80     -128   
112    16     
256    48     
32     80     
-128   96     
272    144    
-16    -240   
0      336    
464    128    
528    352    
-224   304    
80     -448   
-96    -64    
16     -304   
96     -848   
-48    96     
208    -304   
0      80     
48     -1120  
464    -64    
96     96     
224    48     
96     176    
80     32     
192    -208   
-368   -64    
304    128    
-112   -16    
224    32     
0      -288   
240    -128   
-128   -672   
112    -160   
208    -848   
-256   -16    
128    16     
160    -48    
-208   -112   
32     -176   
160    64     
-32    16     
0      -48    
-64    -64    
-96    144    
-48    -112   
128    16     
-96    -192   
-176   0      
-16    -48    
144    -288   
192    -160   
160    80     
176    176    
128    144    
-48    -160   
64     -144   
32     -304   
32     -304   
-560   -176   
176    -112   
-304   -128   
336    -64    
144    272    
144    176    
16     -352   
-32    192    
96     -192   
416    -32    
-176   -128   
176    -240   
-128   -16    
0      64     
272    -32    
-224   -80    
128    192    
-272   -608   
-112   496    
48     -720   
336    144    
48     -48    
16     -320   
-384   272    
224    -208   
32     -128   
-32    -192   
-112   736    
-160   48     
192    -176   
-32    -32    
-32    48     
-656   -32    
128    -16    
-2144  -64    
-16    -128   
80     144    
-16    -32    
112    0      
352    -544   
-128   0      
80     32     
384    560    
-96    288    
304    -224   
160    -176   
-64    -96    
-368   -32    
368    224    
-384   176    
272    16     
-464   -480   
432    -208   
-448   128    
96     -304   
16     240    
-304   0      
288    -16    
96     32     
368    80     
-144   -160   
288    -96    
-352   48     
0      -48    
-272   -16    
-128   -32    
-16    -48    
128    -144   
-80    -64    
224    -112   
320    160    
48     32     
-16    -64    
144    32     
288    96     
-208   16     
96     -48    
-192   32     
192    256    
-48    96     
16     -160   
-64    -96    
48     -48    
0      16     
16     -80    
96     96     
-64    208    
-192   0      
-64    -64    
192    32     
32     96     
144    -32    
-16    112    
-176   -16    
-112   0      
192    32     
144    48     
32     -80    
144    48     
-96    -112   
-432   0      
-160   16     
-1600  -32    
-128   32     
240    64     
-160   -16    
64     -64    
-160   16     
80     -64    
16     48     
-544   32     
-80    -64    
160    -160   
-32    64     
-288   -144   
-304   48     
112    -16    
-336   -160   
48     112    
-304   96     
-96    -80    
-688   -16    
-208   80     
-208   112    
-80    -96    
-224   64     
192    48     
-112   -144   
-16    0      
128    0      
16     160    
-96    0      
-144   -64    
-144   32     
-288   -32    
-144   -80    
-1216  16     
16     176    
-16    -48    
-64    48     
128    128    
-144   32     
96     -224   
64     176    
-192   80     
272    -48    
-272   48     
-80    288    
-144   128    
0      0      
144    112    
-512   48     
112    -16    
-1376  -48    
64     -80    
-80    -144   
192    48     
-96    32     
-16    64     
160    96     
-224   16     
-16    -240   
48     80     
64     32     
96     -16    
-64    208    
-320   -464   
16     96     
-272   240    
-48    -64    
48     96     
-224   -240   
128    96     
-16    240    
128    -144   
-112   -32    
16     80     
128    160    
-192   80     
-64    -352   
-112   192    
-416   -128   
48     96     
-240   64     
96     320    
144    0      
144    -256   
16     -32    
-144   -64    
64     304    
-352   -560   
0      32     
-96    -32    
-16    -144   
0      240    
-208   144    
-128   256    
224    416    
-48    384    
192    -144   
256    -560   
-80    -304   
-160   -192   
48     0      
32     -32    
-112   32     
16     144    
288    112    
-16    48     
16     80     
0      16     
-32    -176   
-16    -112   
-96    -16    
16     144    
-400   64     
-128   -32    
160    48     
96     -16    
48     -16    
-32    80     
-48    48     
96     176    
32     64     
32     16     
144    -80    
-288   16     
112    128    
-256   -80    
96     80     
32     48     
144    32     
48     64     
0      64     
-16    16     
-96    16     
-80    144    
64     80     
160    96     
-256   304    
160    256    
-624   208    
0      -64    
48     -32    
96     96     
16     80     
-64    -144   
192    -48    
96     176    
-320   48     
-48    160    
160    -80    
176    96     
0      48     
16     64     
0      -32    
-16    -64    
128    -128   
-64    160    
80     128    
-144   -48    
-16    48     
112    64     
32     32     
112    32     
128    80     
16     96     
48     16     
-16    -80    
-32    0      
16     -64    
-16    -192   
176    48     
-176   192    
112    160    
-32    192    
64     32     
48     16     
-192   32     
48     -176   
16     176    
0      112    
80     0      
-64    16     
-32    48     
192    192    
-176   160    
-16    176    
96     32     
32     144    
80     304    
80     0      
144    -80    
-48    -128   
32     -112   
-80    -64    
0      48     
48     -112   
64     -112   
-32    -208   
160    16     
-16    -16    
-32    -576   
96     96     
208    208    
-48    304    
16     144    
112    -80    
-32    -208   
32     -48    
112    64     
-128   16     
-80    -16    
0      -64    
32     -320   
128    -80    
288    128    
-112   -688   
48     336    
160    16     
208    -176   
32     -416   
-32    -144   
80     0      
16     -192   
-16    256    
16     -192   
-288   -208   
0      -256   
-16    -320   
32     256    
208    -32    
80     -448   
128    64     
96     256    
-32    256    
464    144    
-224   -112   
128    480    
224    48     
80     208    
464    288    
-304   336    
208    256    
112    -192   
-1008  -464   
160    -112   
-192   352    
192    160    
80     256    
-80    -288   
144    -208   
-96    112    
-48    32     
160    32     
-32    208    
-144   -16    
-48    -80    
112    304    
96     -80    
208    -16    
160    256    
-224   -64    
96     -224   
48     -704   
224    160    
48     16     
208    304    
-160   -64    
208    -16    
-160   208    
80     -112   
304    240    
-80    -400   
-128   368    
-80    -336   
-96    -224   
128    16     
160    176    
272    304    
-128   -80    
-64    16     
192    48     
0      160    
112    -48    
16     64     
128    -112   
0      160    
0      96     
-80    -352   
352    304    
224    176    
48     -208   
-80    160    
-32    0      
192    192    
-96    -544   
96     32     
304    272    
-16    112    
176    64     
48     -112   
-128   -32    
32     96     
176    96     
16     -160   
224    -208   
240    -208   
80     48     
160    -240   
64     352    
-16    -96    
80     -32    
80     0      
-16    32     
-64    32     
672    -32    
-272   -176   
-96    -80    
288    -176   
0      -592   
-32    -80    
192    144    
-288   240    
-96    112    
-112   64     
192    -144   
320    272    
112    112    
288    128    
-144   64     
0      0      
224    240    
-304   0      
112    -48    
304    -288   
192    64     
80     -16    
192    112    
-128   -96    
-528   -800   
-32    -496   
304    384    
-448   224    
272    -160   
-48    -32    
-64    -864   
352    -560   
368    -32    
512    -672   
-352   -80    
144    -96    
160    -32    
-64    80     
-32    -256   
320    -80    
80     16     
0      48     
176    0      
128    -432   
160    -32    
-1408  48     
48     -32    
336    32     
-128   -64    
-160   0      
-144   -656   
112    32     
96     128    
112    -32    
144    -304   
96     16     
0      -32    
48     96     
0      -128   
32     -16    
-32    112    
192    -64    
96     16     
-48    -64    
48     -48    
272    -368   
-16    -16    
96     -560   
48     -16    
48     -112   
-16    32     
96     -16    
0      48     
144    -16    
-16    -16    
-48    0      
128    -48    
-240   -112   
96     -112   
16     0      
48     -32    
160    0      
80     -224   
0      -64    
272    0      
-192   32     
208    -112   
96     48     
-32    16     
176    32     
-96    -80    
80     0      
-432   32     
-32    -112   
224    64     
96     -16    
176    0      
0      -64    
-144   -16    
-80    -928   
96     -64    
0      32     
192    112    
-128   112    
240    -16    
-320   0      
160    -16    
-96    -256   
208    -80    
-32    16     
160    -208   
0      -48    
-96    -112   
160    -176   
0      -416   
144    96     
32     48     
112    32     
-256   160    
320    160    
-144   -16    
-144   -32    
64     -256   
0      -336   
-1312  -80    
16     0      
-240   144    
192    -160   
-112   -160   
304    160    
-48    224    
208    -192   
0      0      
-48    0      
80     144    
-32    96     
-96    -128   
0      80     
-16    -160   
-512   16     
96     160    
112    -16    
-16    -16    
224    -16    
240    176    
-240   -288   
-224   896    
368    -720   
80     -384   
-448   -144   
0      -96    
-80    864    
176    -240   
-432   -768   
0      -560   
32     448    
384    416    
240    0      
48     -144   
48     -352   
-64    -192   
-144   -64    
96     80     
-368   -16    
96     192    
-336   16     
96     -160   
16     -64    
-16    -64    
-176   -80    
-32    -192   
80     16     
-1184  -240   
96     208    
-928   -144   
-576   48     
-80    -16    
-880   -16    
-32    -80    
-144   -64    
96     32     
208    208    
-112   128    
128    16     
-160   16     
-1280  -112   
-32    80     
-272   -192   
208    -48    
160    48     
-480   48     
-32    32     
-480   192    
160    32     
-400   80     
32     -16    
64     -16    
-64    48     
64     -48    
16     -32    
-208   -144   
96     144    
16     48     
-144   48     
-48    48     
-512   0      
-112   -80    
-112   16     
192    48     
-288   -112   
-96    48     
-1152  -32    
-16    -16    
-160   16     
16     80     
192    -32    
-48    48     
-48    -224   
-256   -48    
64     0      
-96    96     
-96    -64    
96     -48    
256    464    
-368   160    
112    -128   
-1024  32     
-128   48     
160    176    
-256   80     
0      -176   
304    16     
32     144    
-144   16     
160    48     
-144   0      
144    64     
-48    80     
-144   32     
-80    -80    
128    -80    
-496   -48    
64     -64    
-1376  64     
-32    32     
-160   -16    
304    128    
-16    128    
144    208    
-176   48     
192    -16    
176    -80    
-96    224    
-160   16     
16     -48    
256    48     
-352   32     
-64    48     
-912   -64    
48     -32    
48     -96    
112    48     
128    32     
96     -32    
-48    -16    
-32    80     
-144   112    
-48    -32    
0      64     
96     80     
-160   -208   
-224   -224   
304    240    
-688   -48    
160    16     
-16    48     
-96    112    
64     112    
16     144    
128    128    
-128   -144   
192    -96    
144    -48    
64     160    
-48    48     
16     80     
-240   96     
0      -192   
-80    -464   
-96    448    
96     400    
-320   -192   
-112   192    
-160   -96    
384    48     
240    192    
48     144    
-144   -320   
-224   -160   
-160   144    
0      -80    
80     -48    
208    48     
-608   336    
256    -304   
-64    400    
272    160    
64     480    
-336   -400   
80     -80    
-16    80     
-112   192    
144    -176   
128    16     
-160   -112   
192    240    
-32    -32    
240    -560   
-272   496    
16     240    
0      -80    
224    128    
-48    -128   
96     16     
32     160    
32     -176   
-48    -96    
160    144    
16     320    
32     -96    
-32    -176   
-160   128    
16     -304   
80     128    
96     96     
48     -112   
192    96     
-208   112    
96     112    
-48    -16    
32     -16    
128    -160   
-112   -80    
48     32     
-64    -128   
64     96     
-160   64     
304    160    
-160   16     
80     -32    
-64    -32    
64     80     
144    0      
112    96     
160    64     
80     -16    
-32    -16    
-16    16     
144    176    
-224   -32    
128    -64    
32     16     
336    96     
-304   -80    
-16    32     
64     32     
32     48     
16     64     
176    64     
112    80     
-16    96     
-96    32     
32     -32    
48     112    
0      0      
272    112    
-224   64     
32     -112   
128    32     
-80    -64    
192    16     
0      64     
160    80     
16     48     
-16    48     
-336   -16    
96     160    
32     112    
-64    -80    
-208   -96    
160    16     
16     80     
-624   16     
176    48     
128    64     
-64    -64    
224    112    
80     96     
464    112    
176    48     
-432   80     
-128   16     
-16    -48    
352    80     
-64    0      
256    -64    
112    -32    
160    -352   
-240   176    
160    32     
16     -64    
-48    16     
336    112    
32     400    
208    256    
-128   -128   
128    16     
48     384    
-208   288    
48     16     
0      -176   
80     64     
352    -48    
-16    160    
-544   112    
-96    -64    
48     48     
-240   -96    
336    -64    
256    192    
192    -112   
192    0      
-224   -224   
224    80     
-448   176    
-416   -112   
0      -80    
240    -144   
0      16     
160    -496   
144    128    
-256   48     
48     368    
-80    320    
176    16     
-352   -64    
64     48     
192    176    
-176   96     
256    192    
112    48     
96     -32    
-144   -256   
112    16     
176    48     
64     128    
96     176    
128    96     
176    144    
160    176    
-256   -48    
80     -16    
16     -48    
32     -48    
96     48     
0      -96    
144    128    
-112   -112   
96     48     
48     -448   
112    80     
224    -848   
-112   48     
112    -48    
80     80     
96     64     
-32    160    
-32    -32    
128    -64    
-32    96     
64     -96    
-16    32     
240    -288   
128    16     
160    -208   
-16    0      
16     64     
64     16     
-48    16     
176    48     
-80    48     
192    -48    
96     80     
160    112    
96     48     
80     -208   
48     80     
128    -144   
-16    -64    
96     -80    
160    160    
-64    240    
32     352    
224    48     
240    48     
-144   64     
144    -176   
-64    -144   
48     224    
96     560    
80     -560   
-80    32     
-160   192    
32     -288   
416    512    
-272   -1104  
176    -224   
208    848    
-240   -400   
64     -1360  
-16    192    
-16    -144   
112    -16    
-16    -128   
192    -1056  
0      224    
224    -160   
-48    -96    
160    368    
144    112    
304    -880   
-96    -736   
80     176    
512    384    
-128   464    
64     576    
-624   -208   
-16    -160   
144    -304   
96     -544   
-48    -32    
240    -560   
576    672    
-336   352    
112    368    
-32    48     
192    -96    
-48    -480   
176    -96    
-96    176    
-128   128    
-1008  0      
144    -192   
128    32     
-16    -64    
0      -128   
96     -496   
80     208    
-64    656    
-32    32     
128    -304   
432    192    
-32    96     
144    0      
-272   -160   
0      16     
-592   48     
160    -48    
160    -112   
80     -80    
48     64     
64     16     
96     -112   
96     -640   
-16    176    
96     -96    
304    -16    
-160   -288   
144    80     
-112   -32    
64     -160   
-128   48     
48     -16    
-256   64     
80     -128   
128    -96    
-96    -304   
160    64     
-16    -96    
32     -32    
176    -176   
96     -16    
32     0      
-64    -48    
-112   -16    
224    48     
-64    0      
96     16     
-1072  -64    
32     -144   
0      -160   
160    16     
64     32     
-80    -96    
16     0      
128    -384   
-128   -32    
176    -160   
112    80     
208    64     
-32    -80    
-64    -32    
144    -32    
-48    128    
-96    16     
-832   48     
32     -16    
48     -16    
64     -224   
192    0      
176    -16    
-144   160    
96     -48    
336    96     
-144   32     
192    80     
-256   144    
-112   -32    
-112   -48    
256    0      
-352   80     
48     -32    
176    112    
80     -64    
0      -96    
80     -368   
256    -64    
-240   80     
176    -80    
-560   -32    
80     32     
-96    128    
160    80     
-144   -48    
80     -144   
-864   -304   
32     -336   
-144   80     
96     -144   
48     -112   
32     -496   
160    80     
-32    128    
80     32     
-48    48     
112    -48    
-288   -160   
32     656    
64     144    
-80    -240   
96     592    
240    240    
-96    256    
-736   -48    
-96    64     
-224   208    
-2192  -96    
16     -64    
-832   176    
256    -96    
32     -416   
-16    496    
80     -96    
-224   80     
-32    -80    
112    -288   
-160   176    
48     -192   
-16    -144   
16     176    
-224   -128   
-384   512    
-16    -64    
-176   -128   
-256   80     
-544   -352   
-304   112    
160    176    
-32    -112   
96     32     
-96    144    
-128   -224   
96     -256   
32     48     
16     112    
-192   32     
-112   48     
-144   48     
-96    64     
-32    -16    
-272   0      
128    80     
224    128    
128    32     
-416   -144   
32     -96    
-240   -128   
-80    -16    
-192   -272   
-32    416    
-208   208    
160    -16    
256    192    
-160   128    
432    176    
-272   128    
-32    192    
-1296  -128   
-240   -32    
-192   48     
112    48     
16     16     
-64    96     
64     0      
-96    -32    
-368   32     
-240   -32    
-32    -160   
32     -48    
144    64     
16     144    
-208   144    
-816   -144   
80     0      
-208   -48    
304    -32    
-240   -48    
112    -128   
-80    176    
-64    0      
160    64     
-208   48     
160    -48    
-32    48     
48     16     
-160   48     
-384   48     
-256   -64    
208    144    
256    32     
256    -16    
-208   0      
-64    -16    
96     -48    
-48    -16    
-16    96     
-80    80     
-48    48     
-32    16     
80     64     
-32    128    
-32    16     
-144   -48    
304    64     
-1152  16     
64     -32    
-80    -144   
48     0      
-144   48     
0      16     
0      80     
96     64     
-16    0      
-80    -32    
80     32     
-288   128    
144    224    
64     48     
0      96     
-352   -32    
-64    48     
352    288    
-208   160    
-192   0      
256    -48    
32     16     
-80    16     
112    80     
-32    144    
-160   -48    
0      -16    
144    80     
-144   -48    
272    32     
-272   32     
-192   48     
96     -192   
352    0      
-336   192    
-160   144    
160    416    
80     336    
64     0      
64     -80    
64     48     
-112   64     
64     352    
-144   160    
128    16     
-64    -32    
128    144    
-64    288    
-304   -144   
32     -224   
272    48     
-64    240    
64     96     
176    -16    
-224   -32    
272    80     
-96    16     
64     384    
-208   256    
320    -336   
240    -48    
128    -112   
400    0      
224    160    
224    96     
96     -208   
-16    -96    
-432   -144   
-48    16     
-192   80     
224    176    
112    320    
-384   32     
-64    -112   
112    48     
144    96     
288    160    
-16    160    
192    48     
-112   -32    
-144   16     
80     -32    
-48    -64    
-32    -32    
208    176    
-80    48     
-80    176    
176    128    
-256   -48    
-48    48     
-16    16     
208    144    
80     112    
80     64     
-64    16     
64     -16    
192    80     
32     112    
192    80     
-64    0      
32     -16    
-80    -32    
0      112    
240    96     
80     -16    
48     0      
80     -112   
-64    -64    
48     64     
-112   32     
64     176    
80     16     
192    -16    
32     48     
16     96     
144    112    
-32    64     
-64    -96    
0      128    
48     464    
32     -368   
-32    -112   
-80    208    
80     16     
144    48     
144    320    
32     -80    
0      -144   
80     144    
16     -64    
144    96     
-32    -80    
-32    448    
-144   -16    
-16    -176   
-16    368    
368    -240   
336    528    
160    -128   
160    512    
-192   384    
-96    -560   
48     32     
-128   96     
208    336    
-32    160    
-176   -80    
80     -1088  
-96    240    
368    -192   
-336   320    
48     176    
-112   0      
192    192    
-208   -368   
48     -96    
128    -16    
0      48     
352    112    
-224   80     
-192   400    
336    80     
112    -128   
-112   -96    
304    -80    
-32    32     
-272   16     
64     0      
-80    16     
0      0      
-80    -160   
352    -80    
-16    -48    
-16    16     
48     -192   
-80    -160   
-64    80     
272    -144   
-16    32     
32     32     
0      48     
-112   -1072  
176    64     
496    -528   
112    -32    
80     -208   
96     176    
-144   48     
48     288    
192    160    
64     -32    
160    -208   
128    -80    
-48    112    
144    -112   
368    272    
-96    176    
32     -32    
-64    -224   
208    112    
64     16     
96     96     
160    80     
48     112    
304    96     
-64    128    
128    32     
256    -128   
-48    96     
16     -128   
-64    96     
320    -448   
-16    -80    
-128   -96    
-176   288    
128    16     
128    128    
192    16     
240    -16    
112    256    
176    -96    
240    192    
-160   -400   
-16    -48    
-128   -176   
112    64     
192    -80    
112    96     
16     -288   
128    112    
16     32     
80     96     
-144   32     
-64    0      
32     192    
192    -160   
128    144    
128    -96    
48     -32    
160    -160   
-128   64     
272    -112   
64     64     
80     144    
64     160    
-224   -32    
240    -624   
0      -240   
-16    -144   
64     -1504  
224    -176   
16     32     
80     -16    
96     144    
-48    112    
80     288    
144    32     
128    -352   
32     -16    
112    64     
-80    144    
-16    -240   
352    -528   
176    -112   
-64    -320   
128    -16    
416    -160   
-304   320    
80     176    
80     -400   
144    -32    
160    -144   
-96    -336   
16     -144   
-16    64     
32     288    
96     -336   
128    -80    
-1328  -176   
240    -128   
-144   48     
16     -64    
176    -176   
240    176    
-64    -144   
-80    0      
256    256    
144    -176   
288    128    
-48    -336   
352    80     
192    272    
-96    -48    
48     -48    
-16    16     
80     32     
144    224    
-304   -176   
336    -96    
128    176    
128    -1008  
96     0      
48     128    
96     112    
-16    -48    
128    -192   
-192   -176   
80     64     
-496   -16    
400    -32    
-32    -64    
144    -16    
112    -16    
32     -224   
160    -80    
-80    -656   
-208   64     
64     -48    
80     80     
128    16     
80     -32    
-240   -48    
112    -112   
-400   -48    
64     0      
-768   32     
0      -16    
48     -48    
48     -176   
16     32     
160    -192   
64     80     
112    16     
48     32     
-16    -32    
112    48     
-208   -32    
128    32     
-80    -32    
192    0      
-368   80     
160    -240   
-1104  -128   
64     -32    
96     -48    
-192   -288   
-64    48     
224    -1680  
-48    144    
0      48     
160    -144   
-96    -32    
64     160    
-160   -128   
144    16     
-496   -80    
224    -16    
32     0      
0      -208   
192    -16    
32     -96    
64     16     
96     -1456  
96     64     
-64    16     
192    48     
-192   0      
112    -16    
-256   16     
32     -16    
112    112    
-144   80     
336    0      
80     -16    
-48    64     
208    -208   
-32    32     
-16    64     
-48    0      
0      -16    
240    -96    
-560   -160   
16     -48    
96     48     
160    112    
-192   32     
144    -96    
-912   -80    
144    -48    
-32    48     
80     -96    
192    64     
-80    64     
-1664  32     
-144   -16    
-48    32     
-80    -32    
-208   -32    
-32    64     
256    0      
-176   -64    
16     -144   
0      112    
-592   -80    
32     -16    
-64    -96    
80     80     
-144   0      
-192   -48    
-208   -16    
-576   368    
-176   64     
-288   -16    
-96    112    
208    64     
-288   32     
-608   -80    
240    112    
-512   -128   
-32    160    
-336   0      
-144   -144   
144    -240   
-160   -48    
64     -16    
-96    -112   
-96    -16    
-496   0      
-144   80     
-96    16     
384    288    
-352   80     
0      96     
-112   48     
96     208    
336    224    
-112   -176   
-160   160    
-64    160    
-128   48     
-48    80     
-208   -144   
64     -48    
-144   112    
-304   112    
32     112    
-96    -112   
112    -16    
0      16     
112    256    
208    -32    
144    16     
64     -64    
-160   80     
432    1040   
-1088  -256   
-256   -624   
176    384    
400    -80    
-64    -224   
96     0      
-80    -48    
16     176    
-752   -896   
64     816    
-352   -288   
-48    32     
176    288    
-96    96     
-256   0      
16     -144   
288    64     
384    112    
128    -16    
-384   -1024  
-272   368    
-144   192    
192    -32    
160    128    
48     -16    
-16    272    
-224   208    
-496   -144   
-16    -224   
64     128    
192    128    
0      64     
-240   -720   
-32    576    
-736   -256   
96     -272   
-1216  384    
32     -96    
448    432    
-384   160    
32     -144   
192    176    
-80    48     
112    0      
-32    224    
80     -32    
-128   48     
-240   32     
48     160    
-160   160    
-32    -912   
-304   544    
-272   160    
128    -768   
-16    320    
96     160    
64     -144   
0      208    
-80    224    
48     -144   
64     368    
-240   -48    
-32    -480   
160    16     
-16    256    
80     -80    
-1008  -144   
-240   -240   
208    -608   
224    592    
-112   240    
-80    -48    
-176   -32    
64     -16    
96     432    
112    -16    
32     128    
-176   352    
128    368    
-80    208    
32     -16    
32     224    
192    176    
32     304    
112    160    
-176   32     
-32    -112   
0      -112   
-160   368    
48     144    
32     48     
-64    80     
-192   48     
16     144    
-32    -96    
144    224    
96     144    
32     144    
64     80     
-48    -16    
0      -32    
144    96     
-16    64     
0      -128   
-48    -256   
-304   64     
-64    160    
-224   32     
224    32     
-240   -176   
304    -48    
96     144    
112    208    
-48    432    
-96    -80    
32     -128   
32     176    
16     48     
-16    32     
48     -32    
-336   -400   
176    -48    
-256   256    
32     32     
704    480    
-400   496    
-64    160    
80     -32    
-48    160    
320    -176   
0      -16    
-128   -64    
176    -64    
16     144    
144    -32    
144    -48    
64     48     
-96    208    
80     80     
224    64     
16     -16    
16     0      
-64    -80    
-32    -176   
-48    -384   
160    -144   
64     -64    
-64    48     
16     64     
176    48     
32     32     
144    80     
-256   -240   
48     -864   
-16    48     
-64    -192   
0      -112   
160    80     
-96    -64    
176    -112   
112    64     
-48    64     
-80    32     
-144   272    
144    64     
128    -160   
112    96     
48     64     
32     128    
256    -48    
224    0      
64     64     
-64    48     
-32    144    
192    80     
-16    0      
192    64     
48     -144   
96     -16    
-32    16     
128    -112   
304    80     
0      112    
16     0      
-240   -176   
-32    64     
240    -80    
-112   -224   
224    256    
-128   192    
96     192    
192    80     
240    160    
-80    -32    
0      64     
48     0      
208    80     
16     272    
32     -176   
-16    -48    
176    -720   
208    208    
96     0      
240    -272   
48     304    
256    128    
-224   -128   
96     176    
-128   96     
368    560    
-432   -368   
176    -160   
208    32     
-192   -272   
112    -96    
160    -496   
416    32     
288    32     
512    0      
-384   -384   
-240   160    
0      176    
80     96     
320    -80    
224    96     
800    688    
-512   64     
272    416    
-64    256    
32     240    
336    0      
144    32     
80     320    
0      160    
-160   0      
96     64     
-160   32     
272    80     
144    64     
112    64     
32     48     
128    0      
0      0      
208    -112   
64     48     
96     -240   
16     16     
48     -208   
336    336    
-336   -16    
224    64     
64     96     
-16    176    
112    112    
-16    -128   
-96    144    
96     0      
64     144    
-16    -64    
208    208    
-16    -112   
208    48     
144    -96    
16     48     
128    48     
32     0      
64     32     
96     80     
160    16     
-112   -16    
80     96     
-64    -16    
160    64     
32     -48    
144    -32    
32     0      
32     96     
16     -32    
256    96     
-96    -192   
48     64     
-80    -16    
112    -416   
96     -976   
160    64     
-80    -1424  
96     -128   
64     -16    
0      -96    
128    48     
64     64     
112    96     
48     -208   
352    -48    
-432   256    
368    -592   
-16    -16    
-384   -96    
256    -128   
144    16     
32     -64    
-80    -16    
112    -272   
208    -32    
96     320    
-144   -32    
256    -32    
32     -128   
-16    -208   
240    16     
112    -208   
128    64     
-448   -96    
240    -16    
-96    16     
48     -128   
240    16     
80     -304   
96     -80    
112    -624   
64     -16    
192    32     
-144   112    
240    0      
-144   32     
80     48     
112    96     
-528   -80    
-16    -80    
-1184  0      
336    128    
-112   0      
96     -112   
128    -80    
-16    -784   
64     -224   
-112   16     
-112   0      
368    -16    
-96    112    
128    -80    
240    112    
-304   -16    
288    32     
-736   128    
32     -64    
112    0      
192    0      
32     -80    
-16    16     
192    16     
-32    -448   
64     32     
432    192    
-256   96     
-16    -224   
144    -96    
-32    -16    
96     -64    
-240   -128   
64     -32    
-400   176    
0      -288   
-144   64     
160    -128   
192    0      
112    -688   
96     -240   
-96    384    
-96    -224   
-96    80     
368    -96    
0      112    
-32    -176   
-160   80     
80     -48    
-560   64     
240    448    
48     -352   
-64    -160   
-64    48     
48     -384   
32     64     
-48    -160   
208    32     
-288   48     
-240   -128   
-496   -64    
160    1248   
-256   -80    
368    -112   
96     -16    
192    -208   
-96    16     
-16    -256   
-80    -512   
-160   -96    
-16    512    
16     -32    
144    160    
336    288    
-16    -48    
-176   208    
288    96     
-384   -464   
304    496    
112    416    
112    -640   
192    464    
-32    -80    
16     -240   
16     288    
-64    -320   
-64    -128   
64     176    
-112   48     
80     0      
-368   -352   
528    112    
-112   736    
144    48     
-288   -208   
32     -80    
96     -160   
80     -16    
-144   224    
240    -304   
-640   336    
80     128    
-144   -64    
80     224    
16     208    
-384   -208   
16     112    
-192   32     
80     352    
80     464    
64     -144   
240    32     
-192   -48    
224    192    
-208   -32    
-240   208    
64     208    
-112   0      
-112   64     
-736   -16    
-352   -336   
96     -400   
80     64     
128    176    
48     -32    
-208   -176   
32     -160   
-384   -64    
112    128    
-64    -16    
16     -16    
80     -16    
-304   80     
16     -16    
-432   0      
16     -48    
-1008  -48    
-208   -80    
224    -496   
64     80     
-496   -80    
-48    48     
-64    -48    
128    -112   
80     80     
240    112    
-464   272    
144    -144   
-16    -128   
-64    112    
-64    80     
-96    688    
64     -96    
144    -80    
-32    -176   
128    160    
-96    304    
160    -80    
-128   112    
80     480    
-48    288    
128    -224   
-272   -240   
224    -272   
-80    128    
-96    -192   
-400   -304   
-160   -448   
-1584  -224   
-144   16     
272    -192   
16     112    
-48    -64    
-64    288    
48     240    
-48    -80    
224    -48    
-128   0      
64     0      
-160   -96    
-16    128    
-144   0      
-64    0      
-208   -128   
48     96     
-208   -80    
352    -208   
-128   80     
144    128    
-112   -32    
112    208    
-48    -176   
112    -16    
-192   -80    
48     112    
176    336    
-48    288    
288    416    
-496   -32    
208    -32    
-752   -368   
-96    -208   
112    -128   
112    64     
-128   -160   
112    -80    
-304   -432   
80     -176   
64     224    
-304   288    
-96    48     
-176   -96    
80     64     
-288   -144   
256    -192   
-368   -192   
-32    -16    
-272   -96    
0      32     
-64    240    
-80    192    
32     -304   
-128   -112   
-64    -16    
-128   32     
64     80     
-48    0      
-16    80     
-224   16     
-48    16     
144    -128   
128    -16    
-128   96     
-32    -16    
-80    -208   
144    -32    
-192   112    
112    80     
32     -16    
-272   144    
128    64     
-144   -80    
-48    16     
-16    -80    
96     -48    
0      -80    
-80    160    
192    208    
-64    176    
-32    96     
0      -144   
96     272    
-96    -48    
96     160    
-176   112    
-96    -48    
96     304    
32     0      
-256   48     
-112   64     
-48    -432   
96     64     
48     64     
48     -32    
272    256    
-144   48     
-80    144    
160    368    
-336   80     
32     -48    
336    -528   
-64    -416   
144    400    
-320   64     
-256   -48    
-144   64     
-176   272    
112    320    
256    256    
368    480    
-16    112    
176    112    
48     144    
16     -48    
-16    80     
48     96     
-112   -64    
32     16     
32     80     
-32    64     
0      272    
48     160    
416    0      
-80    32     
-112   32     
112    0      
32     16     
192    -144   
288    160    
48     208    
0      -32    
-112   -112   
96     -96    
-144   112    
-16    160    
48     48     
48     80     
160    128    
-320   -64    
-32    16     
32     16     
64     32     
48     144    
-64    32     
-32    32     
176    64     
-176   -48    
128    -800   
80     96     
16     48     
16     192    
160    80     
48     48     
48     48     
-96    32     
96     64     
48     48     
80     48     
96     32     
-64    -64    
192    32     
96     96     
128    -368   
-48    32     
-16    48     
-32    112    
128    96     
16     0      
96     64     
-80    0      
-16    0      
240    64     
128    -16    
80     80     
-128   -16    
48     64     
-112   80     
-32    0      
80     16     
176    -96    
-128   80     
352    48     
112    96     
32     -96    
-16    64     
-64    32     
64     32     
96     48     
-80    48     
80     48     
-96    -64    
160    -32    
64     0      
16     16     
240    -176   
80     192    
0      80     
224    192    
208    48     
64     48     
-16    -64    
96     -32    
-112   -48    
192    208    
-320   208    
288    -128   
224    -16    
-48    -16    
192    16     
-32    -192   
288    208    
-256   -128   
160    48     
80     -96    
48     -80    
96     0      
32     96     
80     -32    
112    96     
32     80     
32     -80    
160    64     
32     -80    
32     64     
-16    -448   
208    -176   
-64    -304   
208    112    
-112   -112   
272    -32    
-128   16     
160    48     
-48    -64    
-96    -96    
80     96     
64     -128   
144    64     
64     -176   
288    -96    
96     -160   
160    240    
-32    192    
-16    -128   
32     240    
64     176    
128    -192   
272    176    
80     0      
80     -208   
32     208    
-32    -32    
160    176    
256    -160   
96     96     
-96    -96    
304    -448   
144    368    
96     112    
-80    32     
128    224    
80     32     
96     240    
64     -144   
160    -32    
64     208    
256    16     
96     112    
-272   -480   
-48    32     
224    112    
352    304    
-160   -816   
-32    288    
96     -96    
128    -368   
240    192    
-112   -544   
48     -560   
240    128    
-112   112    
144    192    
96     96     
-96    64     
80     64     
96     -16    
0      -144   
96     -80    
0      -448   
48     80     
128    -128   
-144   432    
-480   224    
32     -336   
144    -16    
0      -400   
48     -64    
64     -800   
192    -80    
48     -160   
144    48     
224    176    
32     160    
80     64     
-128   160    
224    80     
-64    -320   
0      96     
176    224    
-64    32     
240    -512   
96     -192   
272    -112   
96     48     
0      368    
0      -48    
256    -208   
-144   -32    
48     -160   
-48    64     
336    0      
48     48     
-336   0      
32     -64    
-240   -32    
32     -48    
-32    32     
-64    16     
128    -80    
-16    -448   
-32    -144   
176    -192   
-144   64     
208    -32    
-80    -48    
320    0      
-128   128    
-96    -48    
-112   -96    
-1120  -96    
160    -16    
192    64     
192    -288   
80     -16    
-32    -352   
-256   -112   
96     16     
-80    80     
176    -64    
80     16     
-96    208    
144    48     
-224   -144   
16     -368   
-240   -368   
32     -80    
32     0      
112    -16    
-96    64     
48     -304   
48     64     
48     -496   
96     -128   
96     -64    
64     -48    
160    48     
-224   -224   
-80    -80    
208    -96    
-32    384    
352    80     
-384   -112   
48     -224   
192    -160   
160    224    
-160   -64    
128    -160   
-48    -96    
96     -272   
-192   -352   
0      -160   
-16    192    
160    48     
0      416    
-608   -96    
-64    -16    
-624   64     
64     -432   
-720   -432   
176    -288   
-16    208    
96     -768   
160    176    
-96    -128   
208    176    
160    64     
336    224    
-496   528    
160    -112   
-240   16     
208    80     
-48    -64    
112    -128   
-256   -384   
320    -768   
-96    -208   
352    -32    
192    16     
-144   272    
112    -208   
-48    48     
-48    16     
-352   -112   
-16    -64    
-144   16     
80     304    
-432   -48    
240    160    
-16    64     
224    144    
576    624    
-448   288    
-112   192    
-416   96     
128    -32    
64     -336   
256    -176   
240    -16    
-224   80     
-128   -48    
-32    -256   
-144   -256   
-720   -384   
48     -48    
-96    -176   
256    16     
-464   -528   
-240   0      
-384   -48    
-560   -224   
-288   -256   
-208   -128   
-320   0      
304    -240   
-496   -368   
128    -384   
-192   -32    
0      -128   
32     224    
64     64     
-48    0      
80     416    
32     0      
-240   -160   
-64    -16    
144    -112   
-144   -160   
80     112    
-80    -16    
0      -512   
128    288    
-80    0      
-176   -128   
464    528    
-288   256    
-400   -1184  
-112   368    
80     48     
-96    400    
80     32     
0      368    
-560   -400   
-112   96     
-416   48     
272    -16    
96     208    
112    32     
-80    -96    
-160   64     
-304   -80    
-128   112    
-96    -32    
208    -160   
160    -144   
32     -192   
80     16     
-208   192    
-16    112    
-448   16     
-176   400    
-2320  96     
288    -96    
-48    -96    
-192   -16    
416    144    
-224   16     
0      224    
-16    48     
192    -48    
-656   -368   
-32    -368   
144    192    
-464   144    
-704   64     
96     240    
-1072  48     
208    224    
80     -16    
304    16     
256    32     
48     16     
352    112    
-304   -64    
192    48     
64     64     
48     0      
-96    -64    
-48    96     
-480   -64    
-560   -192   
240    -32    
-128   144    
-464   -16    
-336   0      
-176   16     
-16    112    
384    128    
160    -32    
160    -48    
-16    0      
-16    -16    
-288   0      
-176   64     
-144   -32    
272    32     
-384   16     
16     0      
-16    32     
32     64     
64     -48    
128    0      
80     32     
-240   32     
-48    0      
-64    48     
16     80     
144    96     
160    48     
80     64     
0      16     
48     -48    
-48    48     
112    80     
-48    32     
80     32     
144    48     
-64    32     
16     32     
-80    -16    
160    64     
-112   0      
112    32     
80     64     
-160   -16    
48     48     
-304   -32    
-32    -48    
48     80     
160    96     
-224   -16    
32     16     
64     128    
-160   -64    
96     -16    
-16    16     
144    -32    
-160   64     
-32    64     
-16    112    
-256   -32    
160    -96    
-48    96     
320    -16    
-240   96     
-176   -16    
80     -176   
96     144    
-112   48     
208    64     
-80    -128   
16     48     
-160   16     
224    48     
-128   16     
288    -208   
-64    -128   
-144   96     
160    208    
-64    128    
144    48     
112    32     
64     32     
16     64     
64     80     
-32    80     
176    224    
-240   0      
176    16     
-192   -96    
128    -48    
0      64     
-80    -48    
160    224    
32     176    
32     -128   
0      176    
48     64     
-32    -80    
-16    -112   
-32    0      
144    144    
-64    -48    
160    96     
-304   48     
176    96     
32     -240   
192    32     
-16    256    
48     -592   
64     144    
-32    368    
-96    -176   
80     96     
112    32     
-176   32     
272    -512   
-384   384    
592    32     
-32    -368   
112    496    
-48    -144   
-176   -768   
96     -64    
208    544    
-80    224    
-48    -208   
160    -224   
128    48     
80     320    
-96    176    
256    80     
-112   160    
208    112    
0      224    
224    -576   
-96    96     
16     96     
-96    144    
0      -32    
-176   -48    
176    64     
16     112    
192    64     
-32    176    
-288   -192   
224    0      
-112   64     
480    32     
-112   144    
336    -688   
-176   160    
-64    -96    
240    -64    
96     -16    
112    16     
0      0      
192    32     
-128   240    
80     32     
144    -48    
16     64     
80     144    
176    -16    
256    32     
-160   -80    
112    -128   
0      -608   
176    48     
0      32     
112    -48    
-128   64     
96     64     
48     -160   
320    224    
-192   192    
96     208    
32     80     
0      -144   
16     112    
48     -336   
272    0      
-112   -160   
48     32     
16     80     
-368   -160   
304    -96    
-48    -96    
-112   -256   
80     304    
-208   -16    
240    -128   
96     80     
-64    96     
-96    0      
160    -128   
112    16     
32     -16    
-16    16     
144    -528   
-48    112    
-16    -48    
240    16     
16     32     
48     96     
144    0      
48     64     
160    48     
-96    32     
224    -16    
128    80     
80     240    
-48    -208   
80     80     
80     -144   
160    208    
128    240    
-16    64     
112    -144   
96     -16    
112    -16    
64     -112   
-32    -48    
48     48     
160    80     
64     -160   
144    64     
16     -144   
-48    -32    
112    16     
160    96     
-32    -64    
-32    16     
80     -160   
128    112    
0      144    
16     -32    
0      -16    
160    -160   
128    64     
80     -80    
-48    96     
-32    -16    
208    -48    
32     -816   
144    -80    
192    160    
112    384    
176    112    
272    0      
160    -832   
32     64     
64     208    
-16    -128   
16     -272   
80     64     
256    384    
-16    256    
-64    176    
448    64     
-32    -432   
48     112    
208    32     
32     -208   
-304   -176   
288    -656   
48     0      
32     -592   
16     96     
272    96     
-144   -208   
-384   -672   
0      -1056  
-208   112    
368    -288   
176    80     
208    336    
16     -96    
144    -208   
-400   -80    
32     208    
192    -272   
-96    16     
160    -448   
-224   -688   
368    272    
-400   -144   
96     -112   
-32    256    
240    -272   
32     -160   
-16    96     
-192   -16    
400    240    
-512   112    
128    176    
-160   -384   
416    176    
80     336    
32     -416   
-96    -160   
288    -48    
96     144    
0      -80    
-64    352    
96     -48    
144    80     
-272   64     
0      -256   
-112   336    
48     -80    
96     -304   
112    -48    
176    -16    
16     -48    
-336   544    
368    -320   
-800   -400   
64     336    
48     -176   
64     -608   
-64    208    
-96    16     
208    128    
-528   16     
128    -256   
-768   -32    
192    80     
176    16     
16     -80    
-128   16     
64     -288   
176    32     
-16    -256   
176    -112   
-176   -48    
96     112    
16     -32    
144    0      
0      16     
80     -112   
-256   48     
-112   -32    
-608   -192   
96     -224   
512    0      
-256   -912   
-48    -208   
336    -208   
-240   512    
-224   144    
208    -128   
-176   -192   
128    -80    
-128   -176   
416    -96    
-224   -608   
192    -304   
-1008  -176   
-48    -32    
0      80     
432    288    
-256   160    
80     -496   
0      16     
144    -32    
240    -32    
32     0      
-192   -48    
240    -160   
0      -64    
-528   16     
416    -32    
-752   32     
-336   -240   
112    32     
16     64     
-304   48     
-64    0      
176    368    
256    144    
592    -128   
160    -96    
-32    -32    
-240   336    
96     224    
-304   -288   
-64    48     
80     368    
-368   -144   
16     -64    
352    -32    
224    80     
-528   -128   
320    48     
-352   0      
-48    16     
-80    32     
80     128    
-400   -16    
432    32     
-128   96     
128    -64    
-160   -16    
-1968  -96    
-144   -16    
-752   -304   
112    112    
16     160    
-80    -112   
80     0      
-880   64     
-320   32     
-624   -32    
-272   -112   
112    32     
96     240    
-912   48     
144    -32    
-400   -208   
128    80     
-288   -64    
-240   16     
-32    16     
-448   -48    
0      48     
-256   0      
48     32     
-464   32     
80     160    
304    -16    
-96    -32    
128    -16    
-160   48     
-96    -32    
160    64     
48     -32    
-112   0      
-48    -48    
-192   -16    
-64    64     
0      -16    
-80    0      
-576   0      
-96    48     
-1216  0      
-80    48     
-272   -96    
352    160    
-112   -80    
176    112    
-64    32     
-96    -48    
-80    -32    
144    192    
-160   128    
64     16     
-160   -16    
144    208    
-48    432    
-96    128    
208    -112   
192    64     
304    96     
208    -32    
-80    64     
48     16     
-144   -80    
96     80     
32     64     
-32    48     
-112   -32    
-176   16     
-144   -112   
48     96     
-256   -16    
176    80     
-224   -32    
128    -240   
80     48     
48     320    
-144   -128   
256    240    
-192   464    
-96    -416   
32     -192   
48     96     
112    -336   
-288   368    
48     -64    
-416   -192   
208    544    
-1552  -208   
240    -368   
-32    624    
128    -48    
-16    -240   
-96    896    
80     -656   
-16    256    
-176   -16    
0      -128   
-32    96     
176    240    
16     0      
-368   112    
208    272    
-512   0      
272    144    
160    -160   
-160   240    
304    208    
-160   224    
32     80     
144    32     
16     176    
-64    -32    
-64    0      
-16    112    
-80    384    
-32    0      
272    96     
-672   -160   
16     -96    
-32    48     
-32    0      
16     -112   
176    -64    
80     48     
64     80     
112    -16    
-48    -32    
-128   128    
-144   80     
224    208    
-64    16     
272    32     
-64    0      
-32    112    
-192   96     
32     0      
-192   80     
-16    -16    
160    80     
-64    80     
32     48     
0      32     
-80    112    
-32    -16    
240    16     
-256   -32    
160    -16    
16     96     
-16    64     
0      400    
320    448    
208    128    
48     -112   
16     -16    
16     -16    
160    32     
-16    80     
-160   48     
192    240    
-80    112    
16     -176   
208    96     
-208   -48    
352    16     
32     176    
112    -32    
-64    -96    
-272   -48    
80     16     
-96    96     
-112   -144   
192    -288   
240    32     
32     48     
-48    -80    
32     0      
-112   144    
-96    80     
560    432    
-512   272    
-288   -48    
176    -128   
-144   -64    
368    -48    
-16    -16    
-160   -112   
32     80     
0      288    
48     -80    
304    -48    
16     -32    
-48    48     
48     192    
-352   96     
-144   -16    
64     112    
224    96     
96     96     
64     16     
48     -48    
144    32     
-304   16     
-160   128    
-144   32     
160    48     
256    32     
-208   -112   
144    -16    
32     -48    
96     -256   
-176   -144   
96     -32    
-64    336    
256    400    
-48    64     
144    -16    
-32    -96    
192    288    
-48    -224   
0      -400   
80     144    
32     -336   
16     -80    
112    -16    
112    80     
96     64     
128    288    
-144   64     
-48    208    
80     -48    
64     -32    
32     -16    
48     -48    
240    464    
-336   -208   
112    -160   
256    -720   
-16    272    
64     16     
-32    -48    
80     352    
-176   -144   
160    176    
192    -368   
-112   240    
176    -272   
-96    160    
-32    -80    
112    240    
112    -16    
-176   32     
48     -112   
0      -288   
112    384    
256    -192   
96     304    
96     -208   
-272   -144   
96     96     
-160   -192   
48     176    
-304   -32    
128    160    
64     -592   
-304   -320   
192    320    
0      -144   
112    192    
480    -800   
-32    224    
160    16     
64     64     
16     96     
-16    0      
-160   48     
48     224    
512    608    
-288   224    
176    -112   
96     -208   
64     -32    
64     -352   
16     -48    
32     80     
-64    -48    
144    -96    
-16    208    
64     64     
112    112    
16     32     
160    16     
112    32     
-48    -96    
16     16     
64     -192   
96     160    
-176   -224   
192    208    
80     -16    
144    64     
-128   -528   
16     16     
112    -48    
80     112    
16     112    
176    64     
-16    80     
112    -96    
80     288    
16     240    
144    288    
544    176    
-240   64     
112    -224   
112    64     
64     96     
-160   48     
272    144    
-16    96     
-80    64     
-176   -128   
144    144    
144    48     
16     48     
144    16     
80     80     
64     -112   
0      -32    
96     -208   
224    144    
64     -192   
64     112    
96     112    
64     -272   
224    64     
-208   -272   
240    64     
64     64     
-224   -320   
432    -144   
224    224    
144    176    
-384   128    
-32    -96    
320    32     
112    -160   
-16    -528   
-384   -160   
272    -848   
240    -320   
-32    -160   
208    -160   
0      -64    
96     -240   
-80    -208   
272    112    
112    48     
-400   48     
128    -48    
368    -352   
-128   64     
112    -32    
-464   64     
-16    -80    
432    -64    
-800   -64    
-32    -208   
128    -96    
144    -336   
272    16     
-80    -192   
80     48     
-432   -1040  
224    -560   
-512   336    
-288   336    
256    112    
160    112    
-304   -192   
320    -224   
-2288  -64    
16     -80    
208    -192   
32     -64    
-112   16     
-208   -304   
304    -160   
160    -912   
112    80     
272    -80    
352    80     
96     80     
-16    48     
-176   0      
192    -80    
-304   -48    
240    16     
160    128    
-160   0      
160    -112   
-144   -160   
-176   -48    
-224   -224   
320    112    
-32    -16    
48     80     
144    -48    
64     48     
-288   -64    
176    -16    
-48    -16    
64     -16    
-400   16     
80     -16    
0      -32    
144    -32    
160    96     
-112   -288   
64     0      
144    48     
-16    128    
-64    -16    
-16    -128   
-16    96     
112    32     
-128   -32    
80     -96    
-1552  -32    
80     -224   
-16    64     
32     16     
32     0      
0      -176   
-32    64     
208    -1760  
0      32     
-96    0      
80     -32    
-128   0      
96     0      
-288   -160   
-112   -160   
-544   -336   
176    -144   
320    64     
80     -144   
96     96     
240    -144   
-208   80     
240    -800   
0      96     
64     -16    
-32    -128   
-256   -32    
720    336    
-576   -384   
240    -32    
112    -48    
304    128    
-176   -432   
432    416    
-176   192    
240    -240   
80     208    
160    -256   
-48    0      
-256   96     
-64    -368   
-464   256    
192    16     
96     -32    
96     16     
-256   256    
336    0      
0      32     
352    496    
-32    224    
-16    0      
176    -112   
-16    448    
-336   -192   
-96    -224   
448    224    
-448   -272   
48     160    
-48    -160   
-112   -144   
-48    240    
16     -48    
-192   -128   
-880   -192   
-32    112    
16     48     
-112   96     
64     64     
-1008  -96    
192    -64    
-1040  64     
0      80     
64     16     
-96    112    
368    -16    
192    -16    
224    -48    
-64    144    
144    -96    
-48    64     
-144   -240   
-672   64     
-160   64     
-208   96     
-384   48     
-480   32     
-16    32     
-752   32     
-16    112    
-64    0      
-160   416    
-16    64     
144    16     
-112   -112   
144    96     
64     32     
-16    64     
48     -16    
-80    -80    
-128   0      
-160   -32    
-208   96     
-320   48     
16     32     
144    176    
-96    96     
32     -112   
48     32     
-80    -128   
32     16     
-32    -32    
32     32     
144    80     
-224   144    
-176   32     
-320   -32    
-64    80     
16     32     
64     16     
-1456  -64    
-64    208    
80     -96    
144    16     
192    96     
-96    80     
-48    -16    
-96    -64    
32     32     
128    144    
-128   -16    
256    -32    
-80    32     
-32    -48    
-208   -32    
-352   48     
112    128    
0      -64    
96     -16    
-144   -160   
80     -16    
32     96     
-384   -32    
16     304    
-208   144    
48     -96    
0      32     
-144   112    
-288   -144   
304    -112   
0      32     
-32    192    
-496   384    
-64    32     
-32    -336   
48     -512   
272    -208   
176    128    
112    96     
192    320    
-256   224    
-208   32     
-16    16     
48     -112   
-16    192    
-288   80     
32     64     
-512   -80    
128    16     
48     -64    
-32    96     
96     144    
-64    -64    
160    -224   
-64    -256   
96     32     
-336   -576   
-144   -224   
-224   -304   
144    112    
-256   128    
-176   -176   
-320   -128   
400    288    
64     64     
-64    304    
-16    160    
-64    -32    
-176   0      
112    0      
32     16     
48     -192   
32     224    
16     -128   
192    -32    
-224   16     
-32    80     
-32    -64    
48     112    
80     320    
112    288    
-48    -144   
-176   -112   
160    48     
32     304    
128    48     
-128   160    
-16    -80    
-272   -192   
16     64     
-128   -160   
112    -48    
-16    96     
80     112    
-96    96     
16     368    
128    208    
-112   -48    
-16    80     
-32    -16    
-144   32     
-112   48     
160    112    
-144   -48    
-80    -160   
-192   -192   
0      80     
-240   -80    
208    -16    
-64    112    
288    64     
64     16     
128    48     
-16    32     
-128   -48    
-16    32     
-144   16     
96     112    
112    128    
-128   64     
16     -16    
-224   -16    
0      96     
48     -64    
80     48     
144    320    
-48    96     
192    -96    
-64    -32    
-176   384    
176    128    
288    240    
-304   384    
160    -16    
336    -96    
-352   112    
160    64     
48     0      
144    128    
-112   96     
96     -96    
128    80     
-128   64     
48     16     
-112   16     
96     64     
-80    32     
80     80     
-256   -64    
0      -736   
160    -16    
80     16     
80     144    
240    32     
0      -16    
48     16     
48     112    
64     112    
224    96     
-64    0      
-128   0      
-64    -96    
192    32     
-80    96     
-64    -128   
128    96     
64     48     
224    48     
16     -32    
-144   -16    
96     0      
160    64     
-32    64     
96     48     
-32    -16    
-96    48     
16     32     
304    112    
224    144    
-32    -288   
48     -64    
-176   -240   
48     48     
-16    64     
32     96     
128    96     
80     -16    
-144   -16    
96     48     
-208   -144   
160    128    
32     144    
272    176    
336    16     
48     -176   
112    96     
144    -528   
160    -48    
208    0      
96     -32    
-176   -224   
272    -112   
-48    128    
64     112    
-208   -272   
64     64     
-16    144    
-256   -320   
256    -16    
-32    -288   
-176   -240   
224    -176   
320    48     
224    -192   
48     0      
-320   -240   
48     32     
-64    208    
176    48     
-160   32     
48     16     
0      0      
64     -160   
304    64     
80     64     
720    880    
288    80     
80     -64    
144    -528   
-80    -32    
-304   144    
128    384    
320    160    
64     496    
-352   432    
32     64     
336    -112   
496    112    
160    112    
-16    -144   
272    48     
160    -128   
-16    64     
64     -112   
-48    -160   
-160   -144   
-64    48     
-320   -16    
-32    160    
112    144    
224    -64    
128    128    
-128   368    
464    480    
48     32     
-256   -320   
-32    -160   
64     144    
0      48     
128    32     
0      32     
-64    -32    
0      -160   
112    80     
32     -224   
-192   -336   
0      -128   
48     -208   
80     288    
160    32     
96     0      
-32    -32    
176    416    
-80    -144   
-32    -208   
208    240    
-96    -176   
-64    -672   
32     96     
240    304    
128    -208   
176    -720   
-32    -80    
96     80     
160    -144   
160    96     
-32    -64    
192    -16    
16     -112   
-80    192    
112    -80    
112    -384   
16     160    
352    -368   
256    192    
32     -16    
-80    -864   
96     96     
80     -256   
240    -208   
128    256    
-16    -368   
-96    -48    
224    240    
240    -192   
272    416    
-400   -704   
-96    -48    
-848   176    
336    -320   
128    48     
368    -256   
464    -208   
128    -736   
208    -208   
-96    -1712  
-128   -96    
208    160    
-144   -48    
320    -48    
-16    192    
192    -64    
48     -224   
-464   -160   
-16    -96    
-640   -144   
144    -32    
32     80     
384    208    
-256   192    
-112   -80    
-16    64     
208    -16    
80     -80    
336    -144   
-16    64     
208    0      
80     -144   
224    -48    
288    64     
-1536  192    
-32    -288   
0      -128   
96     -336   
-32    192    
32     64     
160    32     
128    -1392  
-144   32     
96     240    
240    64     
-16    -32    
128    -176   
-224   144    
64     -96    
-432   -32    
64     -192   
-672   -192   
128    32     
-16    32     
224    -160   
-144   80     
-80    -736   
288    -176   
208    32     
80     128    
-208   160    
304    -32    
-480   80     
256    -192   
-512   0      
16     80     
-912   0      
32     -96    
32     112    
192    -160   
0      -48    
192    -128   
16     160    
288    96     
16     -80    
-64    -16    
80     -128   
48     -16    
144    -16    
-16    80     
112    -80    
-592   -160   
128    -368   
-800   -48    
-64    48     
-32    -96    
224    -208   
16     80     
16     -1248  
144    -80    
-208   16     
-80    80     
240    32     
192    -64    
-576   -160   
160    -208   
-736   32     
-112   -48    
-320   48     
160    -112   
32     32     
112    -160   
224    272    
-272   192    
32     48     
-96    48     
112    16     
-96    32     
176    112    
-304   -16    
48     -80    
-64    -16    
16     128    
-80    80     
144    -176   
160    -64    
64     -208   
144    128    
-16    -16    
-304   -240   
-208   32     
-32    32     
-64    -16    
160    64     
-208   80     
352    256    
48     48     
-96    -304   
-112   -256   
-1200  48     
96     352    
176    384    
-320   240    
-112   -272   
16     -272   
-32    -16    
-336   -96    
-320   -304   
128    32     
-160   192    
64     0      
-288   48     
-480   352    
256    16     
-176   0      
64     -16    
-448   -128   
-272   32     
16     -176   
-240   -240   
144    240    
-144   80     
144    160    
-592   -128   
-240   -192   
16     -48    
-144   96     
-64    464    
80     160    
-128   -176   
32     16     
64     -48    
-48    -48    
144    -16    
-80    -32    
-80    64     
-48    192    
-192   -80    
-848   -32    
32     0      
-144   -64    
240    -16    
64     -160   
128    32     
-160   -96    
-224   -48    
-16    48     
-240   -16    
48     48     
-48    48     
16     32     
-224   -48    
-48    16     
-464   -32    
96     32     
-1248  -96    
192    16     
32     -112   
-176   -16    
-16    -80    
-160   16     
96     16     
0      64     
16     -512   
-272   -176   
-240   112    
-112   -176   
208    0      
112    32     
16     32     
-336   -80    
-16    -144   
-144   -16    
192    112    
48     -48    
240    144    
64     96     
32     -32    
-80    0      
-208   -32    
-16    -16    
-240   0      
96     -64    
-240   -144   
176    96     
-352   112    
64     208    
0      0      
96     0      
224    192    
-240   160    
80     96     
112    -112   
-32    32     
-240   32     
240    96     
-48    0      
-112   48     
-80    -48    
-80    48     
-144   -48    
32     -48    
-1136  -96    
336    -32    
-128   48     
-160   96     
32     96     
32     -16    
0      96     
176    32     
48     0      
-256   0      
-112   -16    
48     16     
-96    32     
-48    0      
64     64     
-400   0      
-96    -64    
64     -32    
96     112    
96     80     
80     80     
-192   208    
432    128    
-224   32     
-288   -80    
-64    96     
208    128    
48     16     
-224   80     
304    112    
128    192    
-192   32     
-112   0      
160    96     
176    -32    
-192   -16    
80     0      
-128   96     
224    96     
-160   16     
16     112    
-112   176    
-16    48     
-336   -16    
112    -16    
192    128    
-96    144    
48     32     
224    112    
32     192    
352    512    
-336   304    
-112   192    
176    288    
240    304    
112    0      
-64    -176   
144    128    
-128   -48    
-64    96     
208    -64    
-128   -160   
-96    -160   
-64    256    
144    -112   
-48    -64    
144    64     
32     176    
112    96     
-160   -176   
128    -48    
-176   128    
64     80     
80     -224   
-32    -272   
0      96     
-128   560    
-320   -272   
272    -32    
-48    0      
272    -80    
240    128    
48     -112   
336    96     
-160   160    
-160   928    
-144   -576   
368    240    
112    112    
240    -16    
128    208    
176    -96    
336    192    
-512   272    
-384   -336   
-272   80     
-192   208    
-144   0      
96     0      
192    96     
384    -16    
32     -96    
272    -528   
48     112    
-240   0      
-64    -80    
112    256    
-320   -1072  
128    144    
0      496    
-16    -224   
-176   -112   
-128   384    
-32    -384   
144    112    
336    160    
16     -48    
64     -752   
208    80     
16     -256   
-16    -112   
256    32     
-80    160    
16     48     
-192   -144   
-160   -112   
304    192    
-144   448    
176    -48    
-80    -80    
112    80     
96     16     
16     -80    
320    208    
16     272    
352    400    
-176   -64    
32     -112   
192    -32    
176    240    
-96    -128   
80     -48    
0      224    
48     336    
-80    224    
0      -176   
32     64     
96     16     
144    16     
160    -128   
32     144    
-96    320    
96     96     
208    272    
-128   400    
80     160    
112    -224   
-80    -368   
176    -48    
288    496    
-336   272    
96     96     
-128   -624   
240    -192   
-112   -592   
368    192    
-224   208    
128    288    
-112   336    
144    288    
224    144    
96     16     
-32    -272   
64     -80    
416    128    
208    0      
208    64     
-160   96     
0      0      
160    -16    
-32    -64    
48     -832   
-144   128    
240    -144   
336    32     
-32    96     
32     -48    
288    -48    
208    336    
-192   224    
176    -48    
-128   64     
-96    -32    
176    96     
160    -272   
144    48     
96     -176   
96     128    
144    -32    
-16    16     
160    -224   
-32    96     
-96    208    
384    256    
-112   224    
192    -80    
-64    96     
240    -208   
16     -80    
288    -176   
-160   208    
-64    -112   
160    16     
192    -16    
-48    -16    
-144   -80    
144    160    
224    112    
-80    32     
32     48     
192    160    
128    144    
336    -112   
64     304    
144    -176   
80     -32    
-16    -416   
128    32     
112    0      
0      -208   
-144   80     
208    -128   
240    64     
32     -32    
144    16     
0      -48    
-64    16     
96     -80    
320    128    
-144   96     
0      -48    
64     16     
48     -592   
16     -48    
80     -144   
-32    96     
-1008  -48    
48     -208   
96     -240   
64     -128   
-160   32     
176    -480   
-64    -96    
224    -144   
48     80     
-288   -256   
32     -64    
256    -224   
-64    -48    
64     128    
-64    -16    
-288   -16    
176    -224   
80     -208   
144    -400   
48     -160   
128    -64    
-80    -128   
128    -16    
-80    -384   
128    -240   
-16    160    
64     -208   
-32    -16    
-96    -368   
144    -288   
-160   -48    
16     -64    
176    -64    
-128   -256   
176    272    
-112   -160   
64     80     
240    -336   
176    -720   
464    992    
0      -368   
160    16     
112    208    
192    16     
-16    -80    
112    272    
-400   -256   
-880   -80    
304    -336   
544    256    
400    80     
96     -272   
544    -208   
-704   -288   
-208   -368   
128    224    
0      -32    
448    368    
-480   -144   
-160   -240   
208    -96    
240    -48    
-352   -80    
336    -48    
-224   32     
-80    32     
144    144    
240    -32    
-192   -112   
64     -160   
80     144    
-32    0      
128    -48    
0      64     
64     -16    
112    96     
32     -144   
-608   -224   
352    -224   
16     48     
272    48     
48     16     
160    -48    
-112   48     
-32    -560   
128    -32    
160    80     
48     -192   
128    -128   
144    16     
-224   -48    
0      16     
-688   -48    
64     80     
-48    48     
160    32     
48     -144   
144    -96    
64     32     
160    -448   
16     -16    
96     0      
0      80     
32     0      
-32    -32    
-112   16     
-48    -112   
0      16     
-16    96     
64     80     
-64    -96    
32     -48    
16     -80    
-80    -80    
352    -208   
32     96     
-224   64     
-96    -80    
-144   0      
128    32     
96     0      
32     -144   
-144   -32    
224    64     
-480   32     
384    -208   
-224   80     
224    -144   
32     96     
-32    -32    
80     -160   
-48    48     
-80    -64    
64     -144   
-64    -128   
-128   80     
160    16     
-272   16     
128    -80    
-32    0      
-96    -64    
48     -32    
-320   -256   
-48    176    
-512   -240   
-896   0      
-80    64     
32     80     
-96    80     
-736   -64    
-48    -32    
80     48     
-64    32     
224    -64    
-112   80     
-160   0      
64     32     
-752   -96    
32     32     
-160   32     
16     -16    
144    80     
-16    -96    
-176   -176   
-16    32     
-80    -112   
192    0      
-96    48     
-32    48     
-112   144    
16     -112   
224    0      
16     -96    
208    96     
-160   112    
-32    64     
16     -112   
-96    -96    
-96    -64    
0      16     
-16    16     
-416   32     
-192   -48    
-64    -128   
144    -16    
-96    -16    
-16    80     
-32    0      
192    80     
-16    32     
-80    -64    
48     -32    
-96    -48    
-32    -208   
-112   96     
144    368    
-448   48     
16     64     
-960   -64    
64     64     
-32    0      
-32    288    
48     -256   
-64    -192   
-80    384    
48     176    
-256   112    
144    -256   
64     240    
-64    0      
-80    48     
-48    0      
-32    16     
16     32     
320    224    
128    16     
0      -16    
48     832    
-112   -528   
-96    144    
-208   464    
-48    -48    
-208   -208   
128    -352   
-208   304    
192    512    
-432   -432   
16     240    
-1072  0      
-128   -176   
-16    608    
64     -336   
32     -160   
0      336    
192    -48    
-64    64     
-128   -320   
224    -16    
128    -208   
-128   64     
-16    192    
-128   -64    
32     32     
-32    128    
448    160    
-672   -48    
64     -160   
144    32     
-96    -528   
-144   0      
80     64     
80     -96    
-208   16     
112    16     
-112   320    
48     32     
-272   112    
-16    -48    
-336   -128   
-48    -256   
48     -112   
0      -160   
64     -368   
80     128    
-288   -272   
48     -544   
176    -352   
384    0      
-16    112    
-192   64     
-16    48     
-64    112    
-16    80     
-208   -112   
16     64     
-48    -96    
176    -48    
224    304    
-96    64     
272    208    
-192   96     
48     0      
160    -16    
-32    144    
64     -96    
80     0      
32     240    
-96    144    
112    16     
16     32     
160    112    
-112   64     
80     0      
-32    -96    
0      64     
112    16     
64     96     
-192   48     
0      32     
-48    -32    
-16    32     
-16    112    
112    160    
16     144    
32     -96    
-128   -176   
272    -368   
112    -160   
144    272    
160    -32    
-240   48     
-48    -16    
64     224    
-32    192    
-112   -240   
-96    32     
-192   -80    
128    64     
432    176    
-256   304    
80     320    
64     128    
32     -48    
96     32     
32     144    
16     96     
-64    -80    
-16    -64    
-80    48     
0      192    
160    400    
-112   160    
208    272    
-64    32     
128    32     
208    0      
-48    -48    
32     16     
-144   0      
336    240    
-304   320    
-16    400    
112    272    
96     -32    
-80    -64    
432    -16    
-160   16     
-64    -128   
80     0      
0      32     
208    256    
-240   144    
160    -144   
-288   -48    
272    -16    
-256   256    
-64    160    
160    160    
-112   96     
16     64     
48     32     
336    32     
-352   -352   
96     -96    
-16    64     
176    192    
-80    160    
16     128    
192    64     
48     32     
176    0      
-32    -96    
320    240    
-144   256    
-48    -240   
16     -112   
128    128    
384    -112   
-304   0      
0      96     
-256   304    
256    80     
544    48     
-16    48     
48     80     
176    -208   
-32    -32    
80     -64    
-112   32     
80     0      
192    -128   
-80    48     
48     -16    
-128   -16    
80     128    
16     272    
-128   -48    
192    -128   
64     -64    
64     128    
32     -48    
112    192    
416    320    
-240   512    
32     528    
-16    -256   
96     96     
0      -240   
48     592    
192    -1232  
-16    -224   
128    416    
176    -32    
-32    16     
112    208    
-112   -144   
-32    208    
192    -16    
0      -16    
16     -144   
64     144    
336    -208   
48     608    
-112   -128   
80     -816   
288    -80    
-128   -352   
80     160    
-80    176    
32     -48    
400    -128   
192    -224   
112    -64    
-16    -32    
-64    64     
32     -64    
704    944    
-528   976    
-80    576    
128    -368   
112    32     
0      -192   
96     32     
48     -160   
400    -320   
304    -112   
-80    16     
192    -16    
208    96     
-352   64     
32     -304   
176    64     
-464   -272   
288    -272   
560    0      
-112   -32    
736    -320   
112    160    
64     -16    
112    16     
-64    64     
48     -48    
272    48     
416    288    
-288   128    
-320   -176   
160    32     
80     -16    
48     -32    
400    -96    
96     96     
144    -48    
16     48     
112    -32    
-96    48     
-160   112    
128    64     
128    -608   
128    -176   
-208   48     
144    -80    
-16    32     
144    -32    
272    48     
144    0      
0      80     
48     -80    
192    0      
0      64     
32     -560   
-160   80     
-272   -48    
96     -544   
80     0      
32     -64    
80     32     
96     -112   
64     -64    
256    160    
-112   -224   
128    -432   
16     0      
64     -48    
128    80     
32     -240   
160    -256   
-1024  -80    
272    -208   
-112   16     
256    0      
64     -16    
64     -400   
96     -304   
80     144    
144    32     
16     112    
16     -48    
160    -208   
-288   128    
96     -64    
0      80     
-176   64     
-16    0      
208    -272   
-112   -208   
112    -64    
32     -224   
64     64     
160    -560   
256    0      
-48    -96    
32     -64    
144    -112   
-96    64     
96     32     
-32    16     
-208   -80    
128    -208   
128    16     
80     -32    
112    -112   
128    96     
208    64     
-16    -256   
128    32     
-64    -256   
96     128    
32     -16    
96     0      
-80    -32    
160    -80    
32     80     
-64    -32    
-368   64     
112    16     
112    -16    
48     -96    
-48    -32    
80     -608   
0      64     
0      -80    
80     32     
128    -144   
80     -80    
-96    -32    
32     32     
16     -16    
96     -32    
-144   0      
-80    -336   
16     -176   
336    96     
-384   -240   
208    -144   
176    224    
-64    -528   
192    16     
-352   64     
256    112    
-352   -144   
-64    160    
80     -144   
208    64     
-640   0      
-64    -208   
-512   960    
256    -544   
48     288    
-32    192    
32     -176   
-96    -96    
16     -288   
-64    -144   
272    32     
-336   240    
-16    -160   
-80    -384   
128    -112   
-32    -80    
-160   -432   
48     -224   
240    64     
16     -112   
32     192    
-144   -112   
160    -784   
160    -144   
-128   -96    
80     48     
64     -16    
144    0      
32     -48    
-48    -48    
-368   -96    
64     48     
-1904  -224   
64     -432   
224    -64    
-64    16     
-32    80     
112    -320   
32     -32    
-48    -32    
-16    -48    
-16    160    
112    16     
112    224    
-96    64     
-48    -16    
192    -80    
-400   144    
464    -32    
160    -32    
-1360  32     
208    464    
-144   0      
-320   -176   
-176   144    
-1488  0      
-48    128    
-16    -32    
96     272    
32     32     
-96    0      
-80    -432   
208    -96    
-112   48     
-48    160    
0      -80    
-16    -16    
-304   96     
-384   -64    
-16    64     
-480   -144   
192    -16    
-240   112    
32     32     
192    -128   
-320   -48    
-672   -240   
0      48     
-128   96     
272    304    
-640   -208   
-176   16     
192    -80    
48     32     
-96    48     
-32    -48    
96     -16    
-16    -160   
-160   0      
-592   80     
48     176    
-224   -96    
32     -80    
0      -176   
64     208    
-448   -96    
-144   -96    
128    32     
-64    -32    
192    96     
48     208    
-48    -96    
-336   0      
112    128    
-352   -96    
48     -64    
48     -224   
80     96     
16     320    
176    304    
-112   96     
256    352    
-144   304    
0      96     
-96    -336   
-144   -160   
0      -112   
-192   208    
160    80     
-144   -416   
144    -32    
-240   -96    
112    464    
-160   -96    
-32    144    
-128   128    
64     16     
80     496    
-256   288    
-32    448    
112    192    
-96    48     
160    48     
-32    192    
-160   0      
416    256    
-848   96     
-48    176    
64     16     
160    304    
-240   288    
-272   -448   
-336   -224   
112    -368   
-128   224    
96     32     
208    304    
-272   384    
176    64     
-288   128    
240    464    
-592   256    
32     80     
48     -16    
80     48     
-160   80     
-368   64     
272    256    
-128   256    
208    16     
-16    0      
-128   -16    
-400   48     
-64    688    
0      288    
48     64     
-320   160    
16     16     
16     544    
-32    304    
-64    384    
144    224    
16     -240   
16     144    
176    64     
-208   192    
-64    -112   
-368   224    
592    -464   
0      -256   
32     224    
-16    64     
-112   944    
240    304    
32     432    
-16    -400   
0      -544   
16     176    
-96    848    
384    -240   
-288   -256   
240    464    
224    272    
-544   -112   
-176   -432   
16     -48    
112    384    
272    -96    
-96    -160   
144    64     
0      16     
-96    448    
128    -80    
-64    64     
96     16     
0      112    
-192   0      
-224   -128   
64     32     
176    64     
304    528    
-144   -320   
160    176    
16     -160   
160    80     
-96    -288   
-16    0      
64     32     
304    272    
-16    -176   
-96    -16    
176    432    
-128   -112   
208    -96    
64     80     
-224   80     
96     208    
32     96     
-48    32     
160    32     
144    16     
544    240    
-128   -160   
-128   -48    
-192   48     
16     -48    
80     48     
-272   240    
160    896    
112    416    
-112   -176   
-128   -544   
112    -208   
-64    96     
32     -48    
240    64     
64     336    
-448   160    
-32    -48    
240    48     
-224   -32    
-224   32     
80     -160   
336    80     
96     128    
112    32     
112    48     
-48    96     
-32    16     
368    64     
32     176    
272    352    
-464   112    
-96    -160   
336    -64    
192    144    
176    128    
176    -160   
352    32     
32     112    
-16    80     
352    272    
-480   48     
-48    -112   
112    16     
112    128    
-160   -128   
560    -32    
48     -48    
656    -32    
416    48     
-128   64     
-528   -208   
-32    -320   
112    128    
288    -544   
288    80     
64     128    
-112   16     
32     -32    
32     112    
-48    64     
80     80     
32     0      
0      32     
-16    16     
16     80     
112    48     
80     -112   
32     48     
112    -416   
-48    48     
-16    96     
240    112    
192    32     
32     144    
96     64     
-64    -80    
32     -80    
128    64     
64     -16    
32     112    
48     112    
64     -16    
-16    -16    
96     32     
48     64     
80     -464   
112    32     
32     16     
176    32     
-32    -80    
80     -48    
32     32     
144    48     
160    -16    
80     -32    
80     256    
96     64     
-16    -16    
-64    -16    
96     -80    
80     -224   
-224   112    
192    -256   
-208   -128   
48     -16    
112    272    
16     112    
336    160    
-112   32     
160    -256   
64     80     
-16    -48    
192    16     
-32    -144   
160    112    
-16    -128   
352    368    
16     192    
-48    64     
96     304    
176    352    
176    288    
-64    352    
304    0      
-160   -144   
160    16     
-80    -304   
176    -16    
144    -64    
128    48     
112    -96    
48     64     
-80    -112   
128    -112   
32     144    
112    384    
0      0      
128    -96    
96     192    
80     -400   
112    96     
48     32     
-128   -176   
96     -48    
224    48     
176    800    
-192   -592   
80     32     
48     -288   
224    208    
256    32     
-224   -560   
624    480    
-192   80     
-16    32     
96     -368   
-320   64     
336    592    
224    704    
64     400    
-112   -336   
64     -32    
48     -352   
80     -1264  
-48    -48    
208    16     
144    -336   
96     48     
-80    -624   
256    16     
-112   -192   
128    208    
32     112    
224    64     
160    96     
80     -16    
144    -448   
240    -64    
256    -160   
-80    64     
-112   0      
176    -176   
-64    -272   
0      -544   
32     -96    
16     -96    
112    -160   
128    -432   
224    -48    
-128   80     
16     -48    
16     -240   
-16    16     
128    0      
48     32     
-400   -144   
224    -80    
-1856  0      
32     48     
-32    -240   
224    -16    
240    96     
-288   -560   
32     -208   
160    -704   
64     96     
128    -32    
16     64     
160    -96    
-80    0      
-208   -80    
80     -80    
80     0      
80     -32    
144    128    
256    -160   
32     48     
-112   -208   
48     64     
-160   -976   
112    -48    
208    80     
128    64     
128    -48    
224    16     
-320   -48    
48     -64    
-272   -64    
352    -128   
272    -112   
272    -16    
80     -16    
-176   -32    
-32    -80    
-80    -288   
160    64     
-128   -112   
-64    48     
48     -112   
304    16     
144    80     
16     16     
-416   64     
112    128    
-1552  96     
-16    64     
128    128    
-16    96     
-128   -192   
160    -160   
80     64     
-48    -48    
240    80     
-112   -80    
128    -48    
-16    -80    
192    -32    
-208   -64    
64     -144   
-336   -112   
-32    16     
-736   -192   
144    -256   
80     -96    
224    -416   
112    16     
240    -304   
-112   96     
-48    64     
-48    -176   
-64    -32    
112    -32    
-384   -96    
208    -176   
-112   -128   
64     -352   
-496   192    
128    -160   
48     192    
208    208    
16     128    
112    -272   
80     -112   
-480   288    
160    0      
-224   -160   
-112   -224   
208    -48    
-256   -240   
-176   -368   
112    -192   
-16    -112   
176    80     
144    528    
576    880    
-912   -1312  
-192   -768   
112    704    
16     -336   
-112   -800   
288    -96    
304    896    
-336   720    
400    -896   
-144   -272   
-128   400    
112    -144   
-560   112    
-128   -96    
-496   -176   
32     320    
96     272    
-336   -144   
-192   16     
-496   464    
-144   -176   
96     -16    
-352   384    
288    -720   
96     224    
-112   496    
-32    -144   
-624   256    
-320   912    
-624   -800   
192    -80    
32     288    
-208   -256   
176    -32    
-64    -208   
-160   288    
-1104  -128   
-96    -192   
48     80     
256    288    
-384   -144   
224    -32    
-144   -112   
-48    224    
64     48     
-32    -48    
-16    112    
-112   -80    
-16    80     
-16    160    
-288   -32    
-368   -96    
128    336    
-656   144    
0      80     
-320   80     
192    192    
-80    96     
16     -48    
48     -32    
64     16     
-208   64     
112    80     
0      16     
-256   32     
48     96     
-336   -160   
0      -144   
-736   -160   
-224   -208   
-64    -96    
64     96     
0      -80    
240    48     
-160   64     
80     16     
-96    0      
96     32     
16     -16    
16     -432   
-256   -416   
-64    32     
48     304    
-720   144    
128    -16    
-128   -32    
-16    -48    
-32    -96    
-48    -48    
80     160    
-304   -608   
112    32     
-128   32     
-224   -64    
-80    48     
-208   -112   
-48    -96    
272    80     
-224   64     
304    -80    
-448   16     
-32    96     
96     -160   
-96    -128   
0      64     
-192   -192   
304    -112   
32     128    
-496   -320   
-96    -96    
-48    144    
-160   96     
144    272    
-640   -16    
208    -64    
-1344  -80    
112    0      
-80    -208   
304    -144   
144    144    
-96    -48    
368    64     
-80    96     
-976   -896   
144    -256   
-16    352    
-400   112    
48     64     
32     176    
-240   64     
48     -16    
-48    0      
576    272    
80     -32    
704    -96    
-240   128    
-592   -64    
144    64     
-112   64     
288    -16    
224    64     
-48    0      
-160   16     
-352   -32    
80     80     
-464   -64    
-320   16     
-160   16     
-48    0      
-160   -112   
832    96     
208    64     
336    16     
-240   -208   
-288   -16    
-128   0      
-464   32     
48     96     
-400   -64    
336    96     
256    80     
48     64     
-80    32     
-80    112    
48     16     
112    48     
48     16     
-80    64     
48     80     
-128   80     
112    80     
-32    -16    
112    128    
-304   -16    
64     16     
64     32     
64     32     
-32    16     
-48    64     
80     64     
80     48     
-16    48     
-128   16     
-16    48     
-96    16     
144    32     
-16    32     
128    32     
-192   -64    
-32    -16    
16     16     
-16    0      
80     48     
-96    80     
80     144    
-48    -48    
112    -48    
112    96     
48     80     
-224   112    
32     48     
-112   -16    
64     80     
64     176    
-96    112    
256    32     
160    -16    
144    64     
112    160    
0      48     
128    80     
-112   224    
128    96     
144    240    
-192   64     
-64    -16    
-16    32     
-16    -96    
80     -16    
112    304    
64     -64    
144    -16    
-96    112    
0      -48    
-64    320    
-256   -1232  
-64    -976   
-272   640    
-208   320    
272    -496   
16     768    
400    480    
-432   -832   
352    544    
-64    224    
-80    -352   
32     32     
-48    -544   
-208   304    
224    112    
96     48     
-32    -16    
16     -672   
96     -48    
-96    0      
160    96     
-32    224    
480    -304   
-224   384    
-32    384    
-112   144    
48     160    
288    144    
448    160    
-176   320    
-32    16     
-16    144    
256    112    
176    96     
-32    32     
48     -64    
-48    224    
-112   16     
240    80     
112    -256   
160    128    
96     176    
-80    160    
-112   32     
16     48     
16     64     
112    128    
400    80     
-32    160    
48     -32    
-96    -112   
32     -16    
208    -176   
-128   96     
-32    -256   
-112   144    
-112   -32    
112    0      
-112   96     
96     32     
-80    80     
48     32     
176    -32    
-32    64     
-160   16     
32     -96    
-16    16     
32     -32    
192    48     
16     -112   
-64    32     
96     -464   
16     80     
96     0      
48     32     
144    -32    
-48    32     
240    240    
32     128    
368    112    
-176   48     
16     -32    
-64    -160   
144    -32    
288    144    
80     224    
64     16     
-160   0      
240    32     
0      80     
0      -32    
128    32     
176    16     
80     16     
272    144    
-80    -64    
-48    16     
-144   -96    
-224   32     
96     -144   
176    32     
176    -176   
160    176    
-240   -48    
32     -64    
-96    -144   
544    32     
224    160    
-16    -128   
-192   96     
-320   -320   
336    128    
-128   80     
240    64     
128    -64    
48     64     
80     -144   
160    96     
112    160    
160    16     
224    -16    
-32    32     
-96    0      
-64    -416   
0      96     
272    -160   
320    208    
-336   -128   
112    32     
80     0      
160    80     
288    -144   
-16    288    
272    672    
80     -384   
0      -176   
96     0      
-16    -688   
176    -160   
192    -352   
-16    -288   
80     288    
96     -96    
0      -144   
-64    -176   
64     -128   
0      -208   
32     -416   
192    -512   
128    -320   
-16    64     
-720   -224   
160    112    
-96    32     
0      -32    
272    272    
144    -496   
16     80     
192    288    
144    -32    
-48    -128   
0      48     
96     -64    
-96    160    
32     -224   
-16    -384   
160    672    
240    160    
256    -160   
224    -144   
0      0      
112    -176   
224    64     
-256   -32    
304    48     
-64    96     
224    -96    
176    -208   
-16    -16    
32     304    
288    128    
-208   224    
48     -144   
-656   144    
64     -208   
-80    -240   
176    -256   
144    0      
144    -240   
112    -176   
0      -1760  
-144   -48    
160    -16    
240    32     
-80    -96    
-16    -656   
-288   -336   
-112   -48    
-672   -16    
144    144    
176    -192   
-32    112    
160    96     
160    -272   
-80    -48    
240    -224   
0      64     
160    16     
32     0      
-32    48     
112    96     
-288   48     
144    -96    
-48    48     
160    -16    
-224   -16    
64     16     
-368   -48    
288    -144   
32     96     
112    -16    
32     64     
64     160    
16     0      
48     16     
-48    48     
-256   -64    
160    64     
-80    -48    
16     -128   
-1632  0      
128    -144   
64     0      
0      -144   
16     64     
288    -336   
-48    32     
-16    -1248  
176    144    
32     80     
0      -32    
-16    -16    
0      96     
-384   16     
240    -32    
-64    16     
-96    -160   
0      -16    
288    112    
-336   96     
80     -80    
304    96     
-448   -352   
176    -160   
112    256    
-80    48     
-192   144    
224    0      
64     -16    
16     -128   
16     -80    
0      -128   
-96    -416   
304    -272   
176    160    
144    -208   
32     144    
-272   224    
112    -32    
128    -128   
32     0      
-352   16     
64     16     
16     32     
128    -16    
-64    64     
-176   -144   
-48    16     
384    -176   
224    16     
-768   -32    
64     128    
16     32     
-1648  64     
-576   48     
-512   -64    
176    128    
-160   128    
-368   0      
0      -32    
-192   -80    
-576   -96    
80     -32    
-464   128    
-128   32     
-64    96     
688    1232   
-992   1264   
-256   -64    
16     -416   
320    -64    
144    320    
-1936  80     
48     80     
-192   -128   
160    64     
272    -32    
0      32     
-32    0      
0      48     
-704   -128   
-96    -80    
-16    -16    
96     96     
-208   64     
-512   -48    
-272   112    
-1312  16     
80     0      
32     -80    
176    32     
-32    -144   
160    -64    
464    -32    
-160   -16    
208    48     
-224   0      
-32    112    
-64    112    
-160   16     
0      -64    
160    80     
-272   -16    
-112   -80    
-928   -32    
-176   -208   
32     -304   
288    -32    
272    16     
-64    -160   
32     -16    
-272   64     
-64    -176   
16     -64    
16     48     
-80    48     
224    0      
160    16     
32     64     
-336   -80    
-16    48     
-96    -112   
112    16     
96     80     
-64    64     
-32    32     
-256   -192   
-48    -32    
-48    96     
-80    32     
-144   32     
48     -48    
-208   -80    
16     -128   
-976   -144   
96     16     
96     -16    
-80    -64    
-80    144    
-128   -240   
-32    64     
-112   320    
-144   -32    
256    32     
-224   0      
224    224    
-112   -288   
-240   288    
64     -256   
-336   -128   
112    -128   
0      80     
-192   -32    
-48    64     
-272   48     
208    192    
-144   864    
32     -736   
224    -96    
-32    656    
-32    -576   
144    128    
-448   224    
128    -112   
-48    256    
288    400    
-816   96     
-16    -96    
-240   -144   
80     -112   
-48    400    
192    32     
-304   -224   
144    -128   
32     -176   
-480   -272   
32     48     
-160   80     
80     128    
-240   -16    
192    80     
-96    32     
208    176    
80     80     
112    -16    
-32    -128   
32     -320   
16     48     
-64    128    
48     144    
-80    -240   
304    -240   
-224   48     
128    160    
-256   -64    
304    -80    
-80    48     
224    48     
64     16     
192    32     
-144   112    
-144   -160   
192    -288   
-48    -144   
240    32     
-64    -48    
128    80     
-192   -16    
144    80     
-288   -32    
288    16     
64     80     
-48    32     
48     48     
-160   64     
160    192    
-48    -48    
48     0      
32     32     
144    144    
-272   0      
0      80     
-192   -16    
-16    0      
144    -96    
144    96     
48     80     
-176   0      
272    48     
128    48     
-64    32     
96     -192   
-96    32     
-256   160    
128    -16    
240    -96    
64     96     
16     0      
128    64     
160    48     
0      -32    
240    112    
-80    64     
-32    -16    
48     48     
64     112    
-16    32     
112    32     
-128   -144   
224    16     
-112   112    
80     144    
-224   64     
112    48     
0      -32    
128    96     
112    64     
112    32     
0      -48    
160    -16    
-64    48     
-16    64     
16     -80    
224    -16    
176    144    
128    352    
144    160    
80     -160   
-96    -656   
-16    112    
-192   -144   
304    -256   
368    -96    
400    -16    
288    -64    
-16    112    
-368   0      
-112   -32    
32     64     
416    -48    
-16    96     
32     224    
-48    208    
80     -160   
64     -80    
256    96     
352    304    
-464   -48    
-96    128    
48     384    
256    304    
48     -80    
416    96     
-64    528    
48     352    
208    16     
240    304    
-128   -144   
64     -400   
400    128    
-336   -144   
80     -544   
-160   272    
96     -320   
-48    -192   
96     304    
-64    -240   
160    160    
-112   -352   
384    624    
-240   -224   
208    16     
-32    224    
96     -656   
272    96     
16     -192   
160    512    
-16    -128   
-80    -176   
32     -96    
160    -32    
-64    48     
160    80     
80     176    
-16    80     
48     96     
96     -16    
0      0      
32     48     
32     -48    
128    -192   
144    96     
224    128    
-16    64     
-176   -256   
48     16     
-112   48     
32     -96    
0      -64    
160    80     
160    48     
64     -96    
-112   48     
-32    -80    
48     320    
64     16     
96     192    
128    -416   
96     -16    
-368   48     
96     48     
-48    -80    
96     96     
112    64     
-32    -192   
192    16     
-112   -16    
352    -32    
-32    -32    
64     32     
96     -48    
240    416    
-240   -32    
352    16     
112    -272   
-32    48     
48     176    
144    -64    
-48    -144   
208    -336   
-128   176    
240    128    
-16    32     
-112   -112   
160    32     
0      32     
304    32     
112    0      
16     208    
160    48     
-16    -80    
48     32     
64     128    
32     -32    
176    16     
-16    48     
80     -160   
208    64     
48     -48    
128    48     
-256   32     
384    160    
-32    -96    
-16    0      
-48    -64    
144    -1120  
16     16     
16     -48    
192    -128   
112    -112   
368    -864   
-368   -144   
64     32     
96     96     
224    96     
32     16     
48     -864   
192    -32    
128    -560   
112    32     
-144   -192   
96     96     
-480   16     
-64    -320   
16     -64    
224    -288   
96     -32    
0      -160   
144    16     
-16    -144   
208    -80    
16     -80    
96     32     
32     -112   
144    80     
160    32     
128    0      
-256   -32    
48     -112   
32     64     
256    -160   
560    560    
-576   208    
-272   -320   
48     -640   
48     64     
304    -32    
-48    -112   
208    -16    
80     -16    
16     -368   
128    -288   
-48    16     
-96    0      
-272   48     
208    -64    
320    96     
-48    0      
-32    -32    
-32    0      
-96    -48    
-128   32     
-48    -48    
160    -160   
208    272    
-128   112    
-16    -80    
64     -160   
240    -144   
-480   208    
-48    48     
16     -96    
32     -224   
288    112    
352    -80    
-736   -912   
-576   -1216  
-288   96     
-160   -32    
16     -80    
336    -384   
64     -544   
416    -64    
256    464    
-816   208    
176    -816   
-608   -320   
128    48     
-96    288    
112    -144   
48     -256   
224    -784   
-160   224    
80     0      
32     784    
-16    160    
80     -624   
-464   -256   
224    128    
-480   -16    
272    16     
-752   -192   
240    -128   
-64    144    
48     -272   
-80    -112   
128    208    
-144   48     
16     -96    
32     -208   
288    256    
-16    208    
-176   -96    
240    -480   
80     16     
320    288    
-416   -208   
288    -240   
64     -480   
160    208    
-96    32     
32     80     
-32    80     
-192   -160   
128    -16    
-160   112    
64     -48    
0      32     
144    240    
-512   -240   
64     -80    
-576   -48    
48     -64    
-224   96     
544    -512   
-192   384    
48     -96    
-32    -240   
0      64     
32     -32    
-144   112    
80     176    
-432   -32    
336    -144   
-176   384    
64     -160   
-32    192    
-112   128    
-144   96     
-2240  -464   
48     -592   
-2288  -656   
-160   720    
-368   -176   
-448   -192   
64     304    
400    160    
128    336    
-96    -16    
64     160    
288    -64    
-208   64     
-832   -32    
32     -32    
-368   -112   
-176   -32    
32     16     
-16    48     
-16    0      
-336   64     
-16    32     
-624   -128   
-240   -128   
192    208    
-192   48     
336    48     
80     112    
-656   -112   
336    16     
-448   80     
288    128    
48     192    
32     -48    
-144   -144   
-80    32     
-144   -16    
-16    192    
224    160    
-576   16     
192    -528   
-320   48     
-48    320    
64     -96    
-48    48     
-112   336    
0      48     
192    -96    
-224   16     
-176   -32    
192    -416   
-192   -80    
128    96     
-112   -176   
-896   -16    
-208   112    
416    128    
-144   160    
48     -80    
-64    16     
496    352    
-256   624    
-304   128    
0      -224   
304    -144   
48     112    
0      80     
112    -112   
-272   -208   
-1024  -80    
128    288    
-512   -32    
208    -32    
-160   -32    
224    112    
192    16     
160    32     
80     96     
176    192    
-176   0      
-48    -96    
80     0      
-208   0      
144    -80    
-80    32     
160    64     
-352   -48    
112    64     
-304   160    
80     112    
208    -32    
-160   192    
192    0      
-80    -64    
64     96     
-80    96     
112    -48    
48     -16    
368    128    
-256   144    
240    160    
-448   96     
32     48     
48     -64    
112    80     
80     48     
-144   16     
32     48     
-96    32     
-64    0      
0      -80    
80     -16    
112    16     
-16    80     
-416   16     
464    464    
-912   80     
-64    80     
144    64     
112    32     
112    -80    
-192   -400   
256    -192   
96     -96    
-144   -480   
464    288    
-432   512    
-464   -16    
192    432    
-240   208    
320    -64    
32     -208   
432    288    
48     -64    
-416   -752   
-336   -224   
-240   336    
128    16     
336    16     
48     160    
-128   0      
-96    -16    
-256   -80    
464    224    
48     -160   
-32    224    
-144   224    
-288   -144   
-336   64     
0      -48    
144    272    
336    128    
80     560    
176    -80    
-256   -208   
-384   144    
-304   128    
-224   -48    
112    -16    
304    -80    
624    48     
-64    144    
-304   -176   
-48    -192   
48     -96    
-16    96     
48     240    
-112   112    
32     144    
48     176    
48     176    
128    32     
0      -32    
160    32     
-144   -80    
128    16     
80     64     
-32    -112   
176    0      
176    64     
96     64     
0      48     
144    32     
64     32     
240    0      
-160   -48    
64     80     
-144   0      
160    32     
-176   0      
48     0      
48     192    
-32    112    
-16    32     
0      112    
16     64     
-112   0      
-16    16     
64     48     
16     -16    
80     96     
64     48     
-32    0      
-32    -64    
-64    16     
48     16     
96     144    
-48    -64    
-160   -48    
48     144    
32     64     
192    -16    
0      64     
-16    -32    
336    128    
-208   64     
224    -240   
-208   96     
-112   96     
112    48     
64     112    
160    32     
16     176    
0      -32    
80     -48    
64     64     
128    64     
-16    112    
128    192    
-176   80     
160    -64    
48     64     
16     112    
128    48     
-112   64     
32     -432   
144    48     
-16    112    
-48    16     
224    16     
-128   -16    
144    112    
48     -16    
64     64     
-16    32     
32     16     
80     64     
-160   32     
-48    -16    
48     48     
208    -112   
272    48     
-256   -32    
64     0      
80     -32    
176    48     
16     80     
112    -16    
48     80     
16     112    
32     16     
80     144    
-32    0      
64     -32    
-160   96     
240    80     
64     64     
32     -464   
112    16     
-112   32     
272    112    
0      -144   
32     64     
48     -16    
32     48     
-32    48     
80     80     
368    112    
-128   80     
208    -112   
-128   -320   
96     48     
-128   -432   
128    -48    
144    160    
96     208    
192    -128   
-192   0      
-32    48     
-64    144    
32     -32    
192    336    
320    32     
128    64     
-48    208    
-96    -256   
-144   -144   
96     -352   
144    144    
336    -464   
-96    -64    
-64    256    
128    -32    
96     176    
16     336    
-80    -288   
96     64     
96     16     
0      -224   
352    800    
48     64     
224    -144   
192    112    
0      -112   
-112   192    
-96    -112   
-32    64     
-80    16     
-80    -32    
240    -32    
368    160    
608    -96    
-592   64     
-480   -800   
64     -144   
128    752    
368    -368   
464    -192   
384    64     
0      -464   
-128   -128   
-448   528    
-16    0      
-80    -48    
80     -80    
176    144    
864    448    
-272   96     
-160   -656   
144    336    
144    416    
-80    192    
256    -256   
112    320    
16     -112   
0      48     
144    80     
176    -1408  
-256   64     
-96    0      
-80    -368   
32     -320   
192    -320   
320    144    
-112   192    
128    -432   
144    -192   
64     352    
96     64     
16     -176   
336    -144   
-32    32     
448    -16    
-176   -144   
-416   -160   
224    -368   
80     64     
176    96     
96     128    
0      -1376  
-48    -192   
96     224    
112    -48    
0      -256   
64     144    
144    -80    
-288   32     
48     -368   
128    -112   
-384   -208   
-48    -208   
208    -208   
64     -224   
128    240    
80     160    
0      96     
112    -496   
176    176    
176    96     
-192   96     
192    64     
176    224    
-48    -16    
144    -176   
-592   -128   
48     -112   
-16    -256   
224    -80    
0      -64    
-32    -464   
208    -240   
-192   -608   
-176   -48    
304    -176   
112    176    
-64    -64    
-16    96     
-112   -384   
144    64     
-432   -96    
48     -192   
-1632  64     
-32    -160   
224    288    
176    -96    
176    64     
16     -736   
-96    192    
96     -272   
96     -208   
48     128    
304    384    
-48    32     
192    -144   
-64    16     
176    48     
-608   32     
48     -48    
-48    -32    
144    -80    
-16    160    
-16    -80    
384    144    
0      -720   
176    16     
224    -16    
-128   0      
-32    112    
-48    -160   
144    -160   
0      16     
-48    0      
128    -336   
-32    48     
128    16     
16     -32    
112    -64    
48     16     
-96    -816   
144    -96    
-48    272    
-48    96     
-32    48     
192    16     
-480   32     
32     -128   
-368   48     
-160   -64    
-192   64     
-192   -368   
544    -448   
-112   -192   
224    352    
-16    -192   
-32    -160   
-224   -48    
16     144    
-112   96     
-208   -128   
-16    -128   
96     128    
-288   144    
224    112    
-144   160    
64     -160   
128    16     
48     -208   
-64    80     
16     -240   
224    -320   
-192   -176   
272    48     
-80    80     
48     80     
-320   -240   
240    -144   
16     16     
-32    -240   
-272   144    
208    -16    
96     48     
-256   -208   
240    32     
-368   32     
-1792  -16    
-288   -112   
-752   0      
-160   -160   
112    0      
32     336    
208    0      
-160   -48    
-48    -80    
-112   144    
-608   -32    
96     -80    
-304   -32    
160    256    
-144   80     
-176   -272   
-144   32     
64     64     
-128   -80    
-480   -224   
208    144    
-16    48     
-64    -224   
-304   -64    
-64    -16    
-240   -128   
-16    -96    
-432   -240   
-592   -48    
256    -464   
112    -32    
320    -160   
208    336    
112    112    
-448   -224   
-144   -112   
-1472  192    
-64    -64    
288    944    
-64    368    
240    -80    
80     384    
-272   -144   
160    -224   
64     -112   
400    0      
-48    32     
-224   16     
128    176    
-528   96     
-144   32     
-880   -64    
208    -16    
0      -64    
96     -48    
-16    -48    
-352   128    
-80    80     
-224   -64    
528    -16    
128    16     
112    -16    
16     32     
-240   80     
-336   -48    
688    160    
-928   -128   
96     80     
-864   -336   
368    -32    
-240   32     
-288   -48    
80     16     
-64    -16    
-64    32     
-32    -16    
96     -32    
-32    -16    
-16    112    
-176   0      
64     48     
-272   -32    
-48    160    
-1040  16     
48     32     
80     0      
-176   -16    
16     32     
-80    -32    
16     0      
80     64     
0      80     
-16    32     
-96    16     
-208   -16    
-80    32     
-288   0      
144    112    
-832   80     
-16    0      
64     0      
-32    64     
48     32     
16     80     
96     576    
128    176    
16     -96    
-272   80     
48     -64    
-160   -112   
144    -64    
128    48     
64     0      
80     0      
-96    176    
-48    0      
16     0      
-176   -48    
208    32     
32     128    
0      -48    
48     -16    
-384   -16    
80     0      
-48    64     
64     128    
-144   0      
48     112    
-160   -48    
0      32     
-48    144    
48     -32    
144    -80    
-176   32     
64     176    
-288   0      
192    -32    
16     -96    
160    0      
-80    48     
-64    64     
-384   -64    
48     -16    
-112   80     
-256   192    
128    32     
160    -32    
0      48     
0      -16    
-48    -48    
272    48     
-112   64     
-128   32     
304    -80    
-288   -192   
160    160    
-352   0      
304    112    
144    112    
64     112    
128    -32    
-112   -32    
48     -16    
-48    16     
96     -192   
-160   -64    
96     160    
-64    -32    
80     48     
-112   -48    
0      64     
128    0      
-64    -32    
160    80     
-16    160    
-32    16     
112    -16    
208    288    
-384   -480   
-16    -192   
64     320    
112    176    
-240   -256   
272    -80    
-112   288    
-32    -48    
80     0      
336    0      
16     -80    
16     64     
-144   0      
112    16     
64     160    
256    -16    
-80    320    
32     -480   
256    240    
160    -48    
96     464    
-96    -192   
336    -384   
64     688    
-64    -176   
-176   0      
0      -432   
112    96     
176    352    
64     -48    
0      96     
128    208    
496    528    
-240   -656   
-176   -256   
224    16     
-16    -256   
320    560    
-16    112    
-32    -192   
-16    -64    
64     0      
0      144    
64     80     
-80    -64    
-112   128    
16     16     
32     80     
128    48     
-208   -64    
112    384    
0      -96    
288    -288   
-80    48     
0      -208   
208    16     
-160   -96    
-144   -80    
48     64     
96     48     
-96    32     
480    -64    
224    16     
336    48     
80     16     
-208   80     
-288   160    
-80    160    
128    16     
80     -48    
48     64     
96     64     
80     32     
32     -16    
64     -48    
-16    32     
-16    32     
208    80     
-80    240    
-256   0      
192    112    
112    128    
80     -144   
160    128    
144    -128   
-48    144    
0      80     
208    96     
0      32     
256    -128   
80     -176   
-48    96     
-96    64     
112    -48    
128    -128   
32     176    
0      -48    
0      -192   
64     16     
96     -48    
128    128    
112    -368   
32     48     
32     112    
112    192    
48     256    
0      -80    
176    -16    
32     128    
64     80     
16     32     
96     -80    
144    -128   
64     80     
96     -64    
-16    0      
64     -96    
176    -160   
64     -848   
96     64     
-32    80     
-80    448    
96     256    
128    224    
-96    144    
176    288    
608    256    
48     224    
368    720    
128    512    
48     576    
-80    -304   
-64    0      
240    -448   
-16    256    
192    160    
32     -64    
32     128    
0      16     
-64    176    
160    -304   
368    192    
-96    -272   
32     400    
-144   48     
-80    16     
48     -16    
80     -144   
-16    80     
144    -32    
32     -32    
176    64     
32     32     
-144   16     
304    112    
48     -160   
-144   160    
464    144    
384    176    
-128   112    
48     -64    
-32    -112   
0      96     
64     240    
0      96     
144    368    
112    -160   
-48    -32    
496    -32    
80     -848   
224    0      
80     128    
80     0      
192    64     
-368   -144   
304    112    
-144   -128   
320    -400   
-32    48     
272    -272   
-128   -464   
96     -352   
208    -160   
-288   -32    
160    -256   
96     -96    
-192   -144   
128    -96    
160    -512   
-48    -128   
-48    -48    
64     -192   
224    160    
-80    -48    
176    -208   
-224   -96    
-448   0      
-16    -192   
-880   -400   
208    -96    
192    112    
144    -80    
128    -64    
-80    -624   
128    -160   
64     -112   
0      -176   
-64    -16    
-32    128    
32     -144   
224    128    
-48    256    
112    80     
-192   -240   
0      144    
64     -208   
368    -144   
-128   -288   
208    -640   
-160   -96    
-16    -656   
288    64     
16     -96    
-48    224    
192    -704   
-160   400    
-32    -608   
368    448    
-368   -32    
80     -32    
80     256    
224    192    
64     -240   
32     0      
-16    832    
0      -304   
112    -224   
128    -64    
-32    96     
-64    32     
128    -16    
-64    -16    
0      -160   
-256   80     
0      -80    
-352   -16    
320    -32    
-96    16     
0      0      
512    416    
-96    -384   
256    -176   
432    0      
-64    32     
-192   -32    
480    368    
-496   128    
224    -80    
-432   -544   
576    -80    
-560   64     
96     -112   
208    160    
-432   -192   
240    32     
176    -176   
352    192    
144    -464   
336    16     
-128   96     
0      32     
16     48     
-192   0      
-304   0      
208    0      
-368   -80    
288    -96    
-752   96     
224    -80    
48     0      
240    -112   
144    144    
48     -496   
384    -128   
-432   -48    
16     240    
96     144    
80     -128   
-144   -160   
96     64     
-176   0      
32     -80    
80     80     
176    160    
-240   48     
368    -144   
80     64     
-256   80     
192    -48    
-32    96     
-240   32     
-96    -32    
80     0      
-80    0      
80     -128   
-16    16     
112    -16    
-320   48     
-32    -80    
0      48     
-2400  -128   
96     64     
-64    32     
-288   16     
48     48     
-976   0      
-128   16     
256    96     
-256   -48    
288    112    
-128   16     
-1088  16     
-96    48     
-240   -32    
-144   -304   
-256   -48    
-480   96     
224    80     
-464   0      
-256   -80    
-592   48     
-32    0      
-48    16     
320    -16    
-128   32     
16     16     
-128   -112   
-48    112    
-48    -32    
48     -80    
-32    -64    
-96    48     
-16    -128   
-224   32     
-64    352    
-224   208    
-64    -96    
-336   160    
-96    80     
-208   -48    
-240   32     
80     -112   
304    176    
-256   128    
176    -80    
64     -112   
-32    -48    
96     32     
-144   32     
144    -32    
16     48     
-144   64     
0      -144   
-160   -96    
-896   48     
64     96     
80     -80    
-64    208    
32     -16    
64     -128   
-64    64     
-96    -32    
64     -80    
192    224    
-368   -96    
64     -176   
-208   128    
0      -32    
-16    208    
-432   -96    
112    -32    
48     128    
16     -16    
-96    -96    
-160   -112   
32     -16    
-208   176    
144    -48    
-208   208    
112    -96    
-176   64     
-144   -368   
-144   112    
208    144    
-432   -32    
96     48     
-2240  -240   
192    416    
32     -192   
224    144    
-368   112    
-112   -368   
-112   -480   
128    -512   
-352   -304   
128    -96    
224    208    
96     320    
208    544    
-176   112    
-192   112    
-1152  176    
288    64     
-48    -112   
-288   -208   
-96    -128   
16     -32    
80     -32    
64     0      
112    176    
-144   80     
16     16     
-272   -32    
80     16     
-336   -64    
80     16     
-368   32     
-112   48     
0      0      
48     -80    
-64    -32    
-96    48     
-112   64     
128    432    
32     272    
-272   0      
-48    0      
-256   112    
0      64     
-224   -32    
32     80     
-224   -32    
16     16     
256    0      
-48    32     
-32    -80    
192    288    
-176   -64    
688    144    
-64    192    
192    -16    
96     -48    
-192   32     
192    128    
-272   80     
208    -112   
352    80     
256    288    
-96    48     
160    0      
-144   32     
-64    32     
-192   16     
32     -16    
128    -96    
-160   96     
-32    -64    
16     80     
128    80     
-64    0      
32     48     
128    16     
16     96     
-16    80     
-32    64     
-32    -16    
112    -32    
-64    32     
-144   -288   
160    48     
-80    160    
-128   64     
-240   112    
192    48     
-256   -32    
240    96     
128    160    
96     -80    
-96    208    
-176   16     
128    48     
64     176    
48     -64    
80     288    
-48    128    
128    -16    
80     -64    
80     96     
-48    144    
96     -48    
16     -48    
32     -80    
32     16     
32     64     
-48    32     
-80    -160   
-32    -48    
32     -80    
-16    -32    
128    48     
-16    32     
0      208    
0      208    
64     224    
-32    48     
-160   -32    
304    -96    
-32    -16    
128    0      
176    -16    
0      -16    
-48    -336   
-208   -384   
-144   -352   
-96    0      
352    -96    
-192   160    
16     128    
-384   -896   
144    -448   
128    -96    
32     -96    
288    32     
32     144    
64     -208   
64     -64    
208    -320   
-96    -432   
32     -32    
-48    -16    
0      -64    
80     -80    
-128   -64    
256    16     
-320   96     
384    -176   
-224   352    
16     -16    
-32    16     
-16    192    
288    160    
-144   256    
96     144    
288    144    
432    288    
-320   544    
176    384    
-144   592    
192    -16    
-64    -224   
224    -352   
192    16     
-176   -224   
224    144    
64     16     
176    32     
256    672    
-336   -160   
-96    -144   
192    272    
-96    16     
-592   -336   
128    -96    
-368   -272   
416    -32    
0      -176   
224    -240   
-128   -320   
144    288    
-16    -112   
-16    48     
384    -272   
160    240    
-32    -144   
192    -64    
64     -32    
16     -192   
32     240    
80     -48    
112    144    
-64    -384   
192    -32    
-48    -112   
208    336    
112    -176   
112    16     
240    288    
-32    -112   
-176   -32    
256    256    
-16    -144   
256    -112   
-80    80     
80     -80    
48     16     
-16    -208   
-144   32     
176    -416   
112    208    
16     16     
160    16     
48     16     
-48    64     
192    64     
-16    -16    
-128   -64    
160    -112   
-176   -416   
96     -272   
208    144    
128    -64    
32     64     
32     -400   
16     80     
-112   -160   
224    0      
160    128    
128    -96    
32     128    
96     32     
112    176    
128    -96    
192    64     
0      48     
-48    144    
-224   -80    
112    48     
112    -16    
112    64     
160    -16    
0      160    
32     48     
208    -144   
-64    -96    
-384   -192   
224    96     
48     48     
-48    -544   
432    -832   
832    368    
-144   192    
48     32     
448    -144   
-736   -272   
624    -192   
448    528    
-592   -112   
32     -1248  
64     -288   
464    -128   
96     32     
-208   -48    
-128   -400   
352    -112   
0      240    
-256   -80    
208    0      
-192   -192   
528    -256   
-432   144    
-208   -416   
208    32     
96     -208   
432    -64    
304    48     
176    -416   
112    -16    
-80    -400   
32     -48    
272    96     
176    48     
176    -192   
208    32     
592    144    
-576   48     
-48    -176   
176    128    
-208   64     
-80    -64    
176    -80    
144    128    
32     -64    
16     -128   
208    32     
32     -480   
48     -80    
80     -48    
128    128    
-32    -16    
-112   32     
32     -128   
144    0      
-208   16     
128    16     
-544   -32    
16     -16    
128    16     
80     0      
144    96     
64     -96    
32     -16    
48     -128   
-80    32     
128    0      
64     96     
128    -64    
32     -80    
32     -32    
-144   -96    
96     -16    
64     32     
160    32     
0      -304   
144    -288   
80     48     
-240   -16    
224    304    
-64    64     
96     32     
112    112    
-208   -144   
16     -288   
-176   -80    
112    -112   
-144   -48    
176    -32    
-1664  -416   
-64    -352   
240    -48    
48     -128   
288    32     
0      80     
128    304    
-16    -32    
96     48     
-32    -160   
-48    -368   
-80    -176   
112    240    
-96    128    
80     48     
-1200  -224   
176    48     
64     320    
32     -208   
80     64     
112    -160   
0      208    
192    -176   
128    -64    
64     64     
0      16     
-96    -96    
48     -16    
128    -16    
128    -208   
-272   32     
16     128    
144    -352   
288    448    
-464   -1216  
32     -256   
528    544    
-256   -1472  
336    592    
-400   -752   
336    -272   
-96    416    
208    352    
-432   -352   
-48    -208   
-176   -48    
224    -176   
64     336    
-32    -320   
-48    64     
288    -64    
-240   -96    
-208   -64    
16     32     
-288   176    
-48    -32    
-80    128    
384    128    
0      64     
112    -48    
-208   -80    
320    -48    
-48    48     
64     -96    
48     48     
-1376  176    
-384   -48    
-176   16     
-432   -128   
0      -64    
64     -32    
96     112    
96     0      
16     64     
208    0      
-240   96     
-288   0      
-48    -16    
-48    16     
80     -64    
192    -96    
-416   -48    
-112   32     
-336   0      
16     32     
-128   16     
-48    0      
160    32     
-256   -48    
192    0      
-160   -16    
-208   -112   
16     0      
-176   -176   
-48    128    
336    96     
-128   272    
-368   96     
192    -64    
-128   -16    
-144   -16    
112    -32    
-256   96     
-192   0      
-272   64     
0      -48    
-208   -48    
48     48     
112    -176   
32     112    
-208   176    
224    -96    
144    192    
-496   0      
-96    0      
-400   -96    
16     -80    
224    16     
288    320    
-144   64     
128    0      
-368   -192   
320    -96    
-32    80     
256    32     
-112   -96    
320    -208   
96     128    
48     112    
80     336    
-448   96     
-80    -80    
-128   -80    
112    -64    
-1440  64     
80     0      
0      -80    
272    0      
208    16     
-240   -32    
-64    -112   
208    16     
256    192    
-32    320    
-64    64     
96     64     
96     -16    
-160   -64    
32     96     
-16    -16    
176    64     
-80    -16    
48     48     
0      64     
-64    160    
16     96     
64     96     
96     -128   
-80    -128   
224    256    
-288   448    
64     208    
-112   -160   
-32    -64    
-64    -48    
144    192    
-752   32     
-96    96     
16     -80    
-112   -192   
0      -80    
96     -64    
16     0      
-96    -64    
0      688    
-160   -256   
-288   -256   
-80    448    
-32    -176   
-480   -128   
128    -80    
-1600  -512   
336    352    
192    320    
16     -144   
-320   16     
0      -80    
16     48     
160    -336   
192    48     
-224   16     
176    -352   
-32    384    
96     224    
48     480    
-400   96     
64     -496   
-16    288    
-80    288    
160    -224   
96     0      
-112   -160   
0      192    
0      -32    
256    -496   
-176   272    
112    256    
-288   -80    
288    176    
-192   -160   
144    48     
48     176    
96     -64    
-80    -160   
176    -48    
-48    272    
48     -16    
-16    -208   
64     160    
-48    -288   
-144   64     
96     48     
-144   -112   
224    96     
-368   48     
208    96     
0      48     
48     16     
64     -128   
-32    -64    
48     16     
64     -32    
32     80     
-80    112    
272    160    
-400   -48    
112    16     
-128   -32    
224    128    
80     16     
112    96     
144    112    
-32    -96    
48     -48    
-32    0      
128    80     
-112   -32    
80     -112   
-16    16     
288    -48    
-256   -128   
64     96     
-32    48     
48     80     
48     48     
48     32     
256    -16    
-32    64     
-32    112    
80     0      
-32    80     
-16    32     
192    64     
-192   80     
176    -16    
0      64     
0      -16    
-112   -64    
64     -160   
128    80     
80     80     
-16    48     
-112   48     
144    112    
192    96     
-80    0      
48     32     
128    64     
16     0      
-208   176    
-64    112    
208    16     
-208   -208   
176    -256   
128    96     
240    -112   
224    -160   
-224   160    
-128   240    
-240   32     
208    0      
48     0      
144    -64    
64     -32    
512    432    
-496   400    
-16    112    
0      0      
-16    0      
368    64     
320    256    
384    352    
-176   80     
64     -80    
128    128    
-304   224    
-224   -48    
112    -16    
-144   144    
-112   -496   
224    -288   
-416   352    
-416   128    
32     -272   
-256   0      
160    -208   
336    224    
96     48     
272    80     
-16    -112   
272    32     
-320   128    
-512   -16    
-80    -96    
192    48     
-80    -48    
240    -48    
144    176    
-288   -208   
-32    352    
-144   112    
144    64     
-272   -16    
32     48     
96     176    
-144   64     
80     192    
176    304    
208    -16    
-240   -64    
-64    -64    
112    -16    
0      112    
128    -48    
16     112    
16     80     
192    336    
-320   -112   
32     -48    
464    32     
-144   32     
336    80     
-64    144    
-208   -96    
208    -32    
-32    -48    
288    -96    
64     0      
352    16     
96     64     
304    -256   
16     96     
-144   -400   
160    0      
144    0      
32     112    
48     -16    
176    96     
-16    32     
128    192    
128    112    
48     -16    
112    80     
-16    -96    
96     48     
-48    0      
208    112    
-16    -48    
144    128    
96     48     
112    80     
-112   -48    
128    96     
16     16     
288    192    
-32    208    
160    -352   
-32    -16    
96     -176   
0      -352   
208    -48    
96     224    
-48    -128   
-48    336    
144    176    
32     -224   
-192   -320   
128    640    
-272   16     
64     -560   
176    416    
320    -160   
192    976    
48     -256   
224    -784   
-16    240    
-240   288    
32     -320   
272    176    
112    -48    
48     0      
80     192    
224    -928   
-112   -336   
304    -80    
-80    -1088  
256    -144   
48     48     
336    384    
-400   -528   
-144   -256   
208    -416   
-80    -352   
192    304    
32     112    
208    464    
48     112    
-688   -112   
-144   -608   
-128   -528   
352    -512   
64     -336   
144    -304   
352    -224   
-208   768    
-64    -96    
176    -448   
48     -48    
-96    -208   
80     192    
-128   -160   
224    96     
-96    80     
0      96     
48     -224   
0      -208   
144    -272   
96     128    
-208   -144   
352    -144   
16     64     
128    32     
144    48     
272    -144   
0      80     
32     -48    
96     0      
-208   -16    
160    48     
352    80     
16     -144   
80     -176   
272    -112   
-112   144    
432    48     
-304   144    
-64    0      
-496   48     
96     48     
144    32     
16     -32    
160    16     
-128   80     
208    -16    
-2448  16     
304    32     
-16    -64    
-64    112    
192    16     
80     -240   
-32    -80    
80     -608   
32     32     
128    -16    
48     16     
-48    48     
112    64     
-288   80     
64     -112   
-944   -16    
272    -16    
112    64     
80     0      
64     -16    
128    -176   
160    80     
-32    -352   
-64    0      
48     128    
144    48     
-80    -32    
176    -48    
-128   32     
160    64     
-64    80     
96     80     
-1888  0      
64     -224   
64     48     
128    32     
64     0      
160    -224   
64     304    
-160   240    
-128   48     
16     -16    
128    -416   
80     -208   
64     32     
-304   16     
144    0      
-400   48     
-160   -32    
144    -96    
192    -144   
-240   -144   
-160   -240   
-48    32     
-96    144    
336    0      
-368   16     
96     48     
-128   -96    
112    -16    
-224   48     
16     -112   
-352   -144   
80     -160   
80     48     
96     -80    
-16    48     
16     -96    
48     -48    
16     32     
624    448    
-352   208    
32     48     
144    544    
80     480    
208    368    
-16    64     
-80    256    
240    16     
-112   64     
240    -208   
16     144    
-288   -288   
-176   -288   
-80    16     
-752   400    
-128   96     
96     -160   
-80    -192   
-128   -48    
16     32     
-32    -80    
-336   80     
-416   -208   
96     304    
-1024  -304   
-16    -16    
128    128    
-16    -176   
80     432    
80     176    
-32    -208   
-688   -64    
192    112    
32     80     
-112   -224   
-16    96     
32     176    
-544   32     
352    192    
-128   -224   
16     64     
80     32     
-288   48     
-64    80     
-288   64     
-224   16     
-224   -16    
-64    -208   
-672   -32    
32     128    
-176   -96    
288    544    
272    544    
160    128    
-32    -112   
-304   192    
-208   176    
-80    0      
-112   80     
-160   32     
224    48     
-144   80     
-128   32     
-1760  -96    
-32    128    
48     32     
-80    32     
64     0      
240    64     
-176   -192   
-96    -16    
0      64     
-80    -48    
80     96     
-112   112    
32     -16    
16     0      
-144   64     
64     0      
0      16     
-288   -80    
64     16     
-208   -48    
64     0      
-16    16     
-80    -16    
0      96     
-64    -16    
144    -32    
-48    -112   
128    -48    
-640   -96    
-48    80     
0      -48    
96     96     
-416   16     
64     64     
64     -16    
0      48     
128    48     
16     32     
-64    0      
-128   32     
-160   0      
48     -16    
-32    16     
-48    48     
112    112    
-256   16     
16     112    
-448   -16    
32     16     
144    32     
-96    0      
112    16     
-112   48     
-32    32     
80     80     
-16    -288   
-32    -240   
144    64     
-304   -16    
0      48     
-256   16     
144    0      
96     -64    
0      16     
144    48     
-176   -32    
-96    0      
-64    48     
128    32     
-48    -112   
48     128    
-80    16     
-16    -16    
32     -32    
80     96     
32     208    
-288   -32    
144    -112   
112    -32    
64     -224   
80     -176   
-64    64     
-160   32     
192    16     
16     16     
-64    -400   
-112   -176   
-32    0      
-16    -48    
192    240    
-352   -112   
-32    32     
-496   64     
192    48     
560    -112   
0      -16    
-160   32     
32     16     
-192   0      
-288   -32    
80     -544   
288    -304   
320    336    
144    112    
-48    144    
-416   -32    
112    16     
224    -112   
144    448    
-192   208    
16     96     
48     112    
192    -48    
240    -16    
-32    -144   
480    16     
-32    48     
192    16     
80     16     
-512   -224   
-128   -208   
-304   128    
-112   48     
80     80     
-112   64     
80     176    
272    112    
-336   -32    
-464   -80    
-272   -272   
-64    -80    
0      176    
-96    32     
-16    -80    
256    -32    
224    -48    
-16    -16    
160    0      
112    48     
272    48     
32     -64    
-224   -16    
-32    32     
48     64     
160    -16    
272    -16    
-16    -16    
448    160    
-320   48     
240    224    
-384   144    
-32    96     
32     16     
-64    -112   
208    176    
0      144    
112    -32    
-32    -64    
-32    32     
-80    80     
144    176    
-192   -96    
128    -464   
16     672    
16     112    
-256   -256   
16     256    
32     0      
-96    -160   
224    64     
128    304    
-32    -160   
0      208    
64     -32    
48     160    
-320   -464   
176    32     
-64    224    
112    -400   
240    176    
96     -432   
-80    -1088  
-80    -400   
144    -16    
144    768    
-48    -128   
224    240    
16     -176   
256    112    
-16    320    
384    272    
-496   -496   
64     -352   
-208   128    
0      -128   
64     176    
192    240    
176    432    
-64    -32    
112    -32    
-32    64     
304    96     
-208   176    
-224   -288   
288    -176   
16     -16    
-224   -256   
240    160    
-64    160    
-128   -32    
16     -16    
64     -128   
-48    -48    
-48    -400   
256    -48    
0      96     
0      48     
112    -160   
160    0      
-208   64     
336    -32    
-128   -16    
64     64     
16     16     
-112   528    
192    -16    
448    -576   
80     -80    
112    -592   
48     176    
-112   48     
48     288    
240    224    
80     64     
64     -176   
176    -32    
-64    80     
48     -48    
400    272    
-192   112    
-16    -48    
-96    -96    
240    64     
64     32     
112    144    
224    -416   
32     80     
224    48     
-48    128    
48     48     
176    -80    
-32    32     
32     -16    
-16    128    
64     -560   
112    -144   
-64    -48    
-224   288    
176    -16    
32     80     
128    -384   
176    -32    
80     192    
208    -144   
192    144    
-64    128    
-16    -48    
-144   -32    
160    80     
272    -160   
144    64     
48     -128   
112    16     
96     -112   
-16    32     
-64    -96    
32     96     
32     288    
192    -32    
64     0      
128    48     
96     16     
128    -160   
-144   -16    
288    -208   
16     48     
176    192    
32     32     
-176   48     
128    -16    
64     -64    
80     48     
144    96     
32     -496   
-64    16     
-16    -112   
48     -800   
0      -208   
176    -640   
-32    -48    
208    48     
80     -112   
128    192    
-208   32     
16     0      
80     80     
384    -240   
160    192    
80     -560   
400    80     
-464   -64    
-192   64     
-256   336    
176    96     
144    0      
192    -144   
96     336    
-208   -96    
48     -384   
80     -112   
144    -48    
272    -80    
256    128    
80     -160   
272    -32    
-1168  160    
192    -304   
-64    128    
272    80     
-384   -560   
48     -16    
48     -64    
368    448    
-112   -192   
320    -96    
160    32     
-240   64     
192    -208   
160    144    
32     -160   
-592   -48    
-96    -224   
144    128    
208    112    
160    -160   
48     -80    
16     -80    
96     -784   
-32    160    
224    112    
-272   -16    
-16    -64    
-16    0      
-240   -80    
176    80     
-272   -16    
112    64     
208    160    
96     144    
144    -32    
-64    -48    
-32    -80    
208    -208   
-32    0      
208    0      
32     80     
0      -112   
256    -80    
-64    -32    
176    64     
-64    96     
-32    -48    
-816   -32    
64     -80    
-16    -64    
128    -96    
-144   -48    
256    -192   
160    32     
-96    -1632  
-96    64     
160    80     
-96    -48    
80     32     
32     16     
-160   16     
336    16     
-80    96     
112    -64    
-768   128    
-176   -80    
208    -48    
-32    -224   
48     128    
64     -848   
48     -32    
-128   32     
96     64     
-112   -48    
80     -64    
16     80     
48     160    
-480   64     
288    -80    
-208   32     
-128   -48    
160    0      
48     -48    
-48    32     
208    32     
128    64     
32     48     
160    -80    
-288   -176   
0      -48    
-160   80     
64     -16    
96     64     
-96    -64    
-224   -32    
112    -64    
112    48     
-48    -16    
0      160    
272    48     
64     -16    
-864   -80    
192    -80    
-96    32     
-112   48     
-16    48     
208    -16    
-224   -48    
128    -32    
-416   -96    
176    -80    
0      80     
-80    -144   
128    112    
-2240  -192   
-240   -16    
-192   -16    
-144   16     
80     64     
256    64     
-272   -48    
32     -48    
-144   -48    
-64    -64    
32     64     
-112   48     
128    32     
-896   -48    
-64    -352   
-96    -48    
-352   32     
-64    -80    
-112   96     
96     32     
-2240  64     
-224   -80    
352    -48    
-96    16     
-224   -48    
80     160    
-128   160    
112    64     
-48    -160   
-80    192    
-96    128    
-16    -48    
16     -128   
-496   -16    
-48    -208   
-256   -112   
-272   0      
-240   -160   
-80    -256   
-80    -176   
176    176    
16     -240   
144    -96    
-224   -288   
144    -64    
64     256    
32     16     
-16    -112   
80     -112   
16     16     
-48    112    
32     0      
-160   -32    
128    -64    
-96    0      
96     32     
-288   -160   
704    112    
-640   -1328  
-80    304    
-720   880    
-592   -272   
-208   -32    
48     352    
288    256    
240    -96    
352    -128   
-128   784    
48     -560   
-16    32     
-48    64     
96     -176   
16     80     
-416   -96    
-256   16     
-144   -112   
240    -96    
80     -16    
320    1008   
-176   176    
-720   -384   
-400   96     
-512   -128   
64     112    
-1008  -160   
112    -256   
-336   -128   
-320   160    
-176   0      
240    288    
-224   -96    
48     656    
288    480    
-240   -384   
-96    272    
160    -80    
16     16     
448    528    
-288   -592   
-144   224    
128    80     
-144   -48    
96     -112   
80     320    
144    -160   
16     144    
-64    16     
-96    16     
-304   -112   
64     -384   
-80    512    
-32    80     
80     -624   
96     560    
-624   -16    
256    -288   
-96    256    
-224   128    
80     -112   
16     240    
-288   -432   
-16    -352   
80     256    
16     -32    
96     -80    
-128   -16    
-80    -208   
64     -144   
256    720    
-352   80     
-128   -288   
-64    0      
80     0      
80     320    
80     32     
0      32     
-128   512    
256    416    
128    320    
96     -144   
-272   160    
224    224    
-240   144    
128    256    
-320   -32    
-64    -80    
96     -80    
-96    272    
-48    160    
-32    32     
-128   64     
-32    80     
-16    144    
96     -64    
64     144    
-80    64     
96     176    
-64    48     
64     -16    
0      -32    
80     80     
-80    48     
-80    -160   
-96    -288   
-192   96     
-80    144    
-48    16     
144    48     
-192   -240   
272    -48    
0      96     
96     144    
-80    352    
0      -48    
-32    -96    
32     160    
48     16     
96     48     
64     -32    
-96    -336   
0      -96    
-160   240    
-96    0      
640    464    
-224   640    
-80    208    
128    -48    
-144   48     
224    -224   
-16    16     
-192   -192   
160    -80    
96     160    
128    0      
192    -32    
-48    48     
-112   192    
80     64     
160    16     
64     -16    
-192   -32    
-32    -32    
-48    -128   
-80    -416   
112    -128   
144    -80    
-96    80     
96     64     
96     16     
96     32     
96     80     
0      -48    
64     -16    
-128   0      
0      -192   
-224   -144   
208    96     
-64    -64    
192    -80    
144    80     
-32    64     
-48    64     
-160   272    
112    -32    
256    -112   
80     112    
128    160    
96     336    
112    -96    
192    -32    
16     64     
-32    -64    
0      112    
144    -64    
16     -80    
192    64     
80     -96    
112    -32    
-48    48     
224    -64    
256    80     
-144   112    
-16    48     
-208   -368   
0      -176   
112    -80    
-64    -224   
176    240    
-112   -256   
32     224    
224    112    
224    240    
-48    80     
16     -48    
32     -64    
208    -48    
-32    208    
-96    32     
-64    -320   
128    -160   
224    160    
208    16     
224    -48    
16     -160   
352    320    
-96    -288   
-144   -16    
-80    256    
64     416    
-240   -128   
208    -144   
512    544    
-96    -80    
192    -64    
48     0      
400    -16    
128    -16    
432    384    
-192   -144   
-240   -208   
112    -176   
80     32     
0      48     
288    208    
112    -192   
-32    320    
-224   -80    
512    -128   
432    -16    
368    -256   
336    -112   
48     -112   
-288   96     
-304   -192   
-16    -16    
192    -416   
128    32     
208    -432   
48     48     
-48    -32    
-160   0      
-16    -64    
224    128    
-16    80     
128    -32    
-32    32     
0      -32    
-128   -64    
256    -224   
112    64     
272    16     
160    16     
96     -304   
0      80     
224    -128   
-160   -128   
48     64     
144    -96    
32     -80    
112    96     
112    48     
224    -192   
-64    32     
240    16     
0      32     
48     64     
48     16     
-48    -16    
16     48     
64     48     
112    -16    
16     -32    
0      -80    
176    96     
0      -128   
112    48     
64     -160   
64     -64    
-32    -144   
32     112    
-16    -128   
0      80     
112    112    
-32    16     
16     -96    
240    -576   
-48    48     
240    -160   
64     -176   
80     -112   
96     0      
64     0      
-160   -160   
288    -368   
-80    192    
208    -48    
208    -16    
128    96     
176    -240   
-160   0      
208    -816   
176    -288   
-96    0      
192    -256   
96     -80    
176    0      
128    -32    
80     -336   
176    -32    
48     96     
16     -16    
160    -112   
-16    96     
0      -48    
176    32     
80     -80    
80     -112   
-1920  -64    
64     -16    
112    48     
48     -304   
16     -112   
208    -784   
-112   -16    
192    0      
96     -64    
16     -64    
96     -48    
112    -96    
240    96     
-160   64     
32     -48    
-208   -32    
336    -112   
-272   -176   
48     -64    
-16    -48    
336    64     
80     32     
80     -336   
176    96     
-80    -112   
144    112    
32     176    
-32    160    
112    -16    
192    -32    
-384   -224   
-80    -176   
80     48     
0      -64    
80     0      
384    208    
-112   336    
96     -608   
64     -64    
64     176    
16     80     
64     -144   
0      -144   
-160   -64    
32     16     
-720   -160   
144    -64    
-672   160    
48     -80    
80     -320   
-32    144    
-624   -192   
48     -208   
208    -32    
256    96     
-112   16     
-16    112    
96     112    
-16    -48    
224    480    
-400   -224   
-48    -16    
-368   16     
48     -16    
-80    -48    
-128   -400   
160    64     
-16    -48    
-256   32     
-160   -96    
64     1488   
48     -304   
336    -176   
128    -32    
208    -48    
-128   -48    
-48    -192   
-560   -608   
-144   -64    
-320   560    
-48    -144   
32     48     
720    288    
-192   -112   
208    -768   
384    128    
-80    -192   
-48    832    
-160   -160   
-32    32     
-176   288    
0      -384   
-224   240    
-48    -240   
-144   -416   
256    256    
112    144    
160    -128   
16     48     
0      -64    
48     1152   
-16    -16    
240    -512   
-384   -144   
32     -368   
-256   -32    
112    32     
-416   192    
576    320    
-368   464    
528    240    
16     192    
320    64     
368    -112   
-112   64     
-16    32     
-416   112    
224    48     
-560   0      
64     -160   
-112   0      
96     16     
192    16     
16     -32    
32     -160   
-208   -96    
-16    0      
-224   -48    
144    64     
-80    16     
-208   -64    
0      0      
-608   -16    
-64    96     
192    32     
-80    192    
80     64     
-96    -32    
-144   -32    
-64    112    
-112   -96    
-16    32     
-64    -80    
-48    32     
-176   96     
-224   -80    
112    32     
16     448    
-80    -64    
-304   -128   
-128   48     
-176   48     
-96    272    
-272   16     
64     -32    
-288   -80    
-16    112    
-144   -32    
-160   -112   
-144   48     
128    -464   
-48    160    
-176   64     
192    16     
-240   48     
48     -160   
-672   112    
32     -128   
48     -112   
160    -80    
-192   -64    
336    112    
-144   288    
80     176    
-112   -16    
-16    656    
96     176    
-144   256    
64     -96    
-608   -112   
-48    32     
-560   -16    
48     80     
-112   -192   
-144   -96    
-240   -192   
-80    112    
80     -32    
224    48     
-176   64     
-48    -32    
48     48     
-256   48     
144    112    
32     128    
-256   -208   
-144   -48    
80     368    
-336   -32    
-48    -16    
96     -256   
-16    80     
352    192    
-304   192    
-192   -352   
256    -64    
-112   432    
64     -16    
-64    -608   
0      -448   
80     -128   
-320   -48    
-112   80     
-640   -240   
-176   -144   
448    -192   
-224   176    
80     176    
144    144    
256    -32    
-32    -96    
32     48     
-176   -128   
-208   -176   
-352   -352   
48     -96    
-160   -32    
128    240    
-448   160    
-256   -128   
272    -304   
160    96     
208    112    
-128   112    
-96    0      
-80    128    
192    224    
0      0      
-16    -160   
-80    -224   
0      64     
48     48     
-80    -128   
-240   -304   
112    -16    
16     -16    
-64    0      
336    80     
-224   224    
256    -32    
32     -16    
160    16     
-400   -80    
64     -80    
80     -16    
-16    112    
-96    128    
256    256    
128    240    
112    -96    
-96    -48    
96     48     
16     288    
160    32     
-16    0      
-96    48     
144    -16    
32     112    
512    336    
-432   -144   
48     32     
-128   -16    
-32    80     
112    0      
128    48     
192    80     
-64    288    
128    16     
240    -320   
-528   -432   
64     32     
96     256    
48     16     
368    -112   
-32    240    
320    224    
-224   224    
-112   384    
-176   192    
-160   112    
0      128    
-112   32     
336    208    
-224   48     
128    0      
-16    -64    
256    32     
-64    32     
752    544    
-736   144    
-96    -96    
208    -32    
-128   64     
32     48     
272    96     
-576   -80    
144    -80    
-48    128    
-640   96     
208    48     
128    -16    
-32    64     
80     128    
16     192    
-64    128    
-272   -80    
416    48     
176    96     
336    -16    
48     48     
-32    64     
-48    128    
144    160    
-48    -48    
-64    0      
144    48     
-80    16     
16     48     
624    448    
-608   16     
128    -912   
144    -32    
224    80     
96     96     
112    16     
160    32     
-112   0      
112    80     
-48    -16    
32     64     
-144   32     
144    48     
80     32     
336    176    
-304   16     
176    -368   
-32    80     
112    80     
112    16     
-112   -64    
-128   -16    
-32    16     
80     80     
256    16     
112    -16    
176    80     
48     64     
-64    -112   
0      112    
224    144    
-160   0      
-80    -48    
48     48     
128    96     
176    48     
-64    48     
112    80     
16     16     
288    160    
-64    64     
96     80     
-32    80     
-48    0      
96     80     
128    192    
112    320    
48     160    
-64    -272   
-48    16     
80     -80    
240    64     
64     32     
64     304    
176    -144   
-16    -128   
-144   -16    
64     112    
80     -16    
-64    80     
192    96     
16     -144   
96     -64    
64     -608   
256    48     
-160   -656   
64     96     
16     -192   
96     48     
-112   -112   
112    0      
128    32     
16     112    
-112   48     
160    -320   
-112   -256   
112    -128   
-32    48     
128    -544   
-48    16     
0      -208   
80     16     
128    48     
96     32     
112    64     
16     -64    
-96    -16    
16     -80    
-192   -224   
176    -208   
-16    48     
304    192    
48     96     
144    96     
-96    96     
-208   -992   
128    80     
128    48     
144    -144   
-32    176    
176    80     
-288   -48    
-16    32     
16     112    
192    64     
-144   -32    
32     -64    
304    128    
32     -128   
96     -16    
-16    -64    
176    0      
-16    64     
112    304    
-16    0      
-16    288    
144    352    
64     -464   
64     192    
-48    192    
192    352    
352    64     
48     144    
0      16     
144    -96    
176    336    
288    176    
0      192    
176    368    
64     96     
128    112    
128    -48    
208    160    
-48    -128   
32     48     
272    32     
-80    0      
128    16     
-16    -144   
144    -352   
128    144    
176    0      
0      -128   
48     -928   
112    -96    
176    -64    
128    320    
-336   -48    
32     -336   
288    208    
-80    -1120  
192    16     
224    48     
128    -16    
16     384    
-96    32     
-80    -464   
-64    -224   
16     -224   
-240   48     
-112   48     
-160   64     
-96    -128   
288    -192   
416    16     
-32    96     
192    -16    
48     112    
-112   0      
-320   16     
0      48     
256    -32    
160    32     
48     -48    
144    112    
-112   -80    
208    -208   
-272   32     
144    48     
224    208    
-48    -64    
192    -64    
-112   -272   
160    96     
-224   -48    
416    -192   
160    -48    
-48    0      
-96    -224   
-64    -16    
-192   16     
64     208    
-96    96     
240    96     
-32    160    
48     -224   
80     -224   
32     -48    
128    0      
32     -192   
128    16     
144    0      
112    464    
160    208    
48     0      
96     -16    
0      0      
-96    -112   
64     32     
-752   16     
80     176    
64     160    
128    -112   
192    128    
-16    -416   
-80    64     
176    80     
48     64     
64     -272   
32     64     
128    144    
96     -64    
-16    288    
-128   -288   
0      176    
192    64     
-32    48     
-16    -176   
-112   -96    
48     -352   
-48    -176   
16     -112   
384    -496   
-32    192    
48     -64    
-176   -16    
-64    160    
-96    512    
240    16     
-400   -304   
0      64     
-1136  -176   
16     256    
272    144    
512    48     
256    768    
-464   -48    
-144   48     
-48    32     
16     160    
208    96     
48     0      
-144   -112   
64     16     
-640   -384   
96     -432   
16     -32    
144    -304   
-64    320    
336    -176   
-208   192    
256    -112   
-128   -16    
-304   -240   
64     48     
160    48     
272    32     
-64    160    
240    -16    
-48    -128   
-336   -864   
0      -64    
-144   208    
-96    -32    
320    -800   
48     -144   
-64    80     
-112   -240   
-160   -160   
-16    -240   
-144   48     
320    80     
-272   384    
176    96     
-560   -624   
16     -448   
240    -208   
-576   -128   
-48    -480   
-1072  -384   
-160   -144   
-128   -208   
32     -320   
-16    -320   
-208   208    
-256   144    
96     224    
48     -80    
352    -240   
-16    576    
-16    64     
-80    -384   
-96    -208   
-48    112    
-64    -304   
-304   -96    
352    288    
-432   -240   
240    -208   
-528   304    
-80    -32    
-624   -112   
160    256    
-208   -1008  
-384   -48    
96     -192   
64     336    
16     304    
240    144    
16     -144   
-416   -16    
-176   32     
-288   -16    
112    -96    
48     64     
-80    -64    
-112   80     
-192   96     
-160   -144   
-128   80     
-384   -160   
256    -96    
224    -112   
112    -80    
96     16     
-16    208    
-80    96     
-224   0      
-48    384    
64     224    
240    -96    
-304   0      
-368   -64    
-784   0      
-176   32     
16     192    
128    112    
160    -112   
-656   -448   
112    -416   
-64    112    
-400   144    
-528   128    
48     208    
-336   48     
32     144    
-336   -96    
256    32     
-320   -32    
224    48     
368    80     
-64    32     
0      64     
48     64     
-48    -48    
96     -48    
-64    112    
-192   0      
-544   -448   
224    -64    
-288   272    
-784   96     
-192   -16    
-208   -80    
80     144    
-1040  16     
528    -48    
96     -96    
-144   64     
-32    80     
0      64     
-256   0      
-96    0      
544    192    
-400   96     
0      -64    
-144   -112   
272    160    
-48    -32    
224    -32    
-352   0      
-480   64     
-272   -32    
-80    16     
-112   80     
176    96     
256    32     
224    128    
16     48     
448    80     
-160   32     
-208   -80    
80     64     
-272   -16    
160    32     
0      48     
128    16     
0      0      
240    144    
-128   32     
0      16     
-16    32     
-32    16     
80     64     
-112   64     
16     -80    
-416   -128   
288    176    
-400   -64    
192    32     
224    160    
-96    0      
128    0      
-176   -32    
192    -160   
16     128    
-16    32     
208    208    
-272   0      
96     0      
48     80     
304    32     
-304   176    
-160   -32    
16     -144   
96     96     
-128   0      
192    32     
-64    -64    
-32    32     
-32    16     
128    48     
-192   0      
336    -48    
-240   -32    
-32    128    
0      128    
48     160    
-112   -16    
32     -16    
16     0      
80     48     
80     80     
80     80     
160    224    
-208   80     
160    0      
-128   -80    
48     -64    
-16    48     
16     -16    
-16    112    
112    208    
0      -32    
32     128    
96     96     
16     -48    
32     -112   
32     16     
96     96     
-16    -16    
128    80     
-128   144    
208    96     
-80    -160   
176    -32    
-144   128    
64     -288   
48     96     
64     464    
-80    -256   
240    144    
112    48     
-224   0      
208    -704   
-208   336    
448    256    
0      -336   
64     592    
-240   -400   
-48    -848   
80     928    
80     -304   
-64    -448   
16     160    
96     -304   
240    336    
-112   672    
-64    368    
112    32     
48     96     
176    144    
-160   192    
160    -16    
-160   -96    
96     144    
-80    176    
-48    -656   
-128   48     
176    112    
32     144    
368    192    
-112   224    
32     -32    
128    -16    
-32    48     
352    16     
-160   64     
288    160    
-224   128    
160    128    
80     256    
112    -176   
160    64     
48     -112   
112    -64    
64     272    
32     112    
-32    -64    
-32    0      
80     32     
48     112    
240    176    
-112   96     
-128   32     
32     -96    
96     96     
128    -304   
16     16     
80     -1152  
64     80     
-16    32     
16     -160   
-16    -224   
16     -32    
-48    -160   
-48    -32    
256    32     
-32    192    
48     -32    
240    -112   
96     96     
-80    -32    
192    304    
96     -544   
112    160    
-256   16     
208    -80    
16     112    
-176   144    
160    -64    
256    -96    
-48    144    
-80    160    
16     16     
176    -32    
0      -16    
176    -48    
48     0      
-48    -16    
-144   48     
128    -800   
112    80     
-32    0      
336    16     
208    -16    
-64    16     
-224   16     
48     32     
96     -96    
112    0      
96     -16    
-64    -128   
96     -112   
0      -688   
128    176    
128    -112   
-112   96     
-128   -1216  
336    32     
-160   32     
160    128    
-112   0      
224    32     
64     96     
288    -80    
-32    0      
0      -272   
160    80     
128    -32    
16     64     
96     -320   
48     80     
-16    -96    
0      64     
160    32     
0      96     
80     0      
128    -192   
64     16     
144    16     
-16    288    
160    224    
48     32     
96     -336   
-80    -224   
160    -160   
-208   -144   
16     -224   
-16    32     
32     0      
368    -704   
-272   32     
416    -512   
272    -416   
208    32     
464    496    
-128   128    
304    -144   
112    48     
48     -16    
-144   -48    
-64    -400   
-112   -480   
256    -160   
112    -400   
-672   -656   
288    -672   
-192   992    
656    112    
32     -192   
-128   -192   
-64    -848   
-80    144    
80     144    
-64    480    
-128   -16    
-48    -400   
112    144    
48     -208   
224    288    
-320   -80    
368    -288   
32     192    
192    -160   
240    -48    
-176   -400   
64     -16    
64     -64    
144    -144   
160    16     
-128   288    
320    -64    
-144   368    
336    -208   
-160   144    
-496   288    
432    384    
-384   -544   
336    32     
128    48     
80     -464   
288    16     
-16    -256   
208    -48    
208    0      
32     -208   
96     80     
-64    192    
-96    -208   
128    -160   
-48    96     
80     112    
-2224  160    
-272   -64    
576    -240   
-96    384    
48     -64    
192    -528   
64     64     
160    128    
16     208    
208    -112   
48     16     
-112   16     
48     -128   
-128   -32    
128    0      
0      176    
-64    -48    
112    0      
64     -96    
128    -112   
48     -336   
80     64     
-64    -976   
272    240    
-16    -16    
-16    16     
-16    48     
160    -192   
-192   -160   
-64    -240   
192    -304   
144    -480   
-160   -48    
64     240    
-32    496    
-240   -32    
128    -96    
48     -560   
144    -32    
96     -304   
-32    -640   
240    -400   
80     -128   
80     192    
304    0      
-176   0      
192    32     
-400   144    
144    48     
160    32     
32     -16    
-96    16     
96     -224   
0      -592   
176    -288   
-16    432    
-608   320    
128    -32    
-592   48     
-16    -32    
-64    0      
128    0      
112    48     
512    -288   
-256   0      
-512   32     
-240   0      
-112   -304   
480    240    
-544   240    
64     224    
-496   464    
-96    -80    
160    -176   
240    -128   
32     32     
-176   80     
-352   0      
-176   -128   
-96    176    
-176   -176   
-48    -32    
192    -112   
112    144    
64     -80    
704    -32    
-352   32     
-32    16     
-224   -64    
192    16     
-160   144    
240    96     
208    -112   
-592   -192   
-112   160    
-752   32     
32     80     
-480   -128   
-48    -48    
32     96     
-240   -16    
-416   -96    
-448   -192   
272    16     
96     112    
224    112    
-16    -112   
224    64     
-96    16     
96     64     
144    -32    
80     64     
-128   -80    
-64    -80    
-64    32     
32     80     
-80    0      
-192   -48    
16     48     
-640   0      
-240   -64    
-272   -80    
80     0      
160    0      
32     48     
16     -64    
64     48     
32     16     
96     64     
-112   64     
32     96     
-64    -48    
-160   -48    
-432   0      
-784   -96    
-112   48     
-48    0      
144    80     
-16    -48    
16     144    
16     -80    
-16    -48    
-96    0      
144    368    
64     288    
-160   -32    
-64    80     
-544   160    
-80    -16    
-224   -32    
176    96     
-1312  0      
176    128    
-160   -128   
80     -48    
64     -16    
96     -16    
-80    32     
176    144    
-304   -32    
-112   -48    
-128   64     
-176   -112   
0      -160   
-256   96     
80     352    
-784   -272   
0      192    
64     320    
16     -32    
-144   -64    
80     192    
-112   -224   
128    176    
80     -96    
-80    -272   
320    528    
-112   -368   
-320   -832   
-224   512    
32     160    
-128   -208   
-112   400    
32     -256   
0      80     
112    96     
-16    -96    
32     -64    
-128   384    
96     160    
48     96     
-64    96     
208    272    
-528   96     
-368   -448   
192    -112   
-512   -48    
160    0      
-496   -176   
-160   -80    
64     128    
368    352    
-128   128    
32     0      
48     -80    
16     -96    
-16    208    
272    320    
-128   128    
-208   -32    
48     96     
-304   -80    
-144   -32    
-32    16     
-144   16     
112    48     
160    160    
48     48     
80     -48    
-144   16     
-32    16     
-16    -16    
-96    128    
64     64     
16     -48    
64     32     
-176   -64    
0      -16    
32     32     
256    32     
16     64     
-80    -64    
144    0      
0      96     
-64    96     
256    -16    
16     80     
-192   16     
-144   -32    
-16    -336   
-32    112    
0      0      
176    -80    
16     176    
-48    64     
-16    32     
80     -64    
96     64     
-288   -96    
112    16     
208    96     
16     64     
96     64     
-272   96     
-176   -160   
288    112    
48     128    
384    176    
-208   16     
96     -80    
448    368    
-368   176    
-16    144    
-96    -32    
288    32     
208    64     
352    -48    
-80    -48    
-400   -352   
160    -192   
-32    208    
-336   80     
272    240    
-96    224    
592    112    
-176   112    
-256   -112   
128    -112   
-16    144    
208    112    
16     -32    
144    64     
-64    -96    
208    48     
-336   -16    
-176   -32    
96     160    
-128   160    
144    112    
32     80     
-160   -224   
-16    -272   
-16    0      
-352   48     
-16    64     
32     -32    
128    288    
112    80     
-48    48     
-96    64     
224    160    
32     256    
48     240    
224    288    
48     128    
-128   48     
0      -112   
160    -256   
-112   -176   
224    -144   
80     -32    
-16    -48    
-176   -128   
96     -16    
64     48     
80     -240   
144    208    
-112   -96    
-16    -48    
32     64     
32     -64    
64     -32    
112    -64    
320    336    
-256   -320   
-48    -272   
224    -48    
-48    96     
32     64     
96     -80    
112    304    
-224   -80    
112    -160   
160    -96    
-160   400    
176    -240   
-16    192    
-48    -16    
0      272    
128    128    
-304   -256   
64     272    
-96    -416   
128    384    
288    -192   
144    -80    
160    -192   
-192   208    
64     112    
-32    -160   
32     208    
-208   -32    
112    176    
-32    -624   
-304   -352   
192    304    
32     480    
128    -48    
464    -16    
-80    304    
48     -400   
48     144    
32     64     
16     -32    
-144   16     
32     160    
480    592    
-240   592    
128    80     
176    -64    
-32    -16    
96     -336   
-16    -96    
16     -128   
-80    -80    
96     -112   
32     240    
128    -128   
80     80     
64     -256   
80     16     
48     0      
-32    32     
0      0      
80     0      
-32    64     
-112   -16    
192    112    
96     -80    
112    80     
-96    -144   
32     0      
144    -144   
64     128    
48     -560   
112    48     
-16    48     
96     32     
-80    16     
176    288    
32     336    
496    256    
-112   96     
128    -384   
80     32     
128    -64    
-176   64     
272    0      
-16    96     
-32    32     
32     48     
-48    128    
304    64     
-80    32     
128    16     
-32    16     
144    -320   
48     64     
48     -368   
160    112    
96     -32    
48     48     
80     -48    
80     64     
240    112    
-192   128    
-16    144    
208    96     
192    -176   
-80    -384   
160    32     
160    112    
-64    96     
112    -224   
112    80     
0      32     
-16    64     
160    -336   
160    -32    
0      96     
64     -96    
336    192    
-192   -80    
-96    144    
-240   32     
96     -256   
-96    16     
-288   -1152  
224    -240   
16     160    
-256   208    
144    368    
-224   -48    
352    -544   
192    96     
-48    -128   
-144   -32    
160    0      
16     -192   
-2128  32     
-144   -192   
32     -32    
832    400    
-640   352    
-752   -512   
224    -336   
176    -48    
16     -416   
752    -528   
-32    304    
-128   32     
272    -240   
112    -256   
-256   -32    
-720   -16    
32     -48    
64     48     
-16    80     
240    -80    
464    16     
32     32     
-80    -432   
112    -112   
80     -80    
256    112    
192    -176   
80     0      
96     336    
-464   144    
240    272    
-368   96     
-144   -112   
112    -144   
144    -48    
-112   -160   
0      16     
-16    -112   
32     96     
-96    0      
304    144    
288    112    
-80    -176   
0      -32    
160    112    
-400   -16    
80     -160   
160    0      
-192   -160   
96     -64    
240    -144   
144    -96    
48     -272   
128    -80    
224    -464   
0      48     
240    -128   
-32    0      
-32    48     
-32    -16    
-176   -16    
48     0      
-272   -16    
64     80     
-1648  -16    
96     -16    
144    -16    
96     -160   
224    16     
-80    -32    
96     16     
112    112    
-48    80     
80     144    
160    0      
16     0      
-16    112    
176    48     
-80    -64    
-1168  -144   
16     -16    
128    48     
-16    -144   
16     176    
112    208    
336    -16    
-64    480    
128    -192   
32     48     
320    224    
-256   16     
-96    -672   
-32    416    
48     48     
-416   -320   
-160   80     
48     176    
-144   -416   
288    304    
-224   -384   
288    -144   
-128   -144   
128    -272   
-144   96     
64     -64    
32     144    
-16    -448   
128    48     
48     -64    
-256   -112   
32     -192   
256    -64    
-256   -80    
320    112    
-480   208    
96     16     
-144   -32    
224    -208   
-288   -352   
192    80     
-240   -192   
-176   -80    
64     128    
96     160    
-240   96     
-304   -48    
176    64     
-464   192    
-480   144    
0      -80    
-640   144    
-96    -176   
-192   -160   
-96    0      
-480   96     
-256   -80    
144    -96    
-80    80     
80     64     
48     144    
-608   -272   
160    64     
-768   -128   
80     80     
144    0      
112    96     
0      -16    
-320   0      
-384   224    
-288   288    
48     -32    
192    -16    
80     96     
-656   -80    
96     64     
-272   -160   
48     -16    
-96    -48    
16     16     
-80    96     
-304   -16    
-16    0      
-32    192    
-128   80     
-176   -48    
-16    -16    
-2496  -112   
-16    16     
-144   -144   
128    32     
144    16     
-16    176    
-128   64     
-224   -32    
-176   32     
-64    32     
-16    16     
-32    32     
-48    160    
-16    80     
-64    -48    
-48    32     
-80    64     
-112   -64    
32     16     
48     -32    
80     96     
-48    -16    
160    -16    
0      16     
16     -32    
-16    -80    
320    128    
-112   80     
-64    -48    
-64    -112   
-208   -128   
176    48     
-512   80     
-48    80     
-48    208    
-192   224    
-336   -192   
176    -16    
-32    80     
-80    128    
-144   -96    
80     -80    
288    336    
224    528    
-272   80     
16     -32    
-96    128    
-1616  80     
192    -48    
208    -80    
192    -48    
96     192    
-128   128    
-448   -96    
-192   -128   
-64    -224   
64     48     
-80    80     
-208   -32    
80     128    
-576   128    
240    288    
-832   288    
-112   48     
352    -48    
-128   32     
192    -80    
-192   288    
208    320    
-208   160    
-16    -160   
32     0      
256    176    
-336   48     
432    -64    
288    128    
-96    64     
-32    -96    
0      -48    
-32    96     
-96    -80    
144    -16    
80     336    
-192   -192   
176    48     
16     416    
16     48     
16     0      
-320   -16    
-32    32     
-128   -80    
192    -192   
-160   112    
-32    144    
48     128    
-48    -304   
32     -128   
208    -16    
32     304    
-32    16     
-112   32     
-128   96     
-16    240    
-192   -80    
176    -48    
-304   -176   
160    -208   
-16    -48    
144    -16    
-112   32     
48     -32    
112    32     
-80    96     
128    112    
0      64     
160    320    
-32    80     
-16    144    
16     64     
-64    176    
-288   -96    
64     32     
112    48     
80     64     
0      96     
240    80     
80     32     
-32    -32    
16     32     
-16    -48    
192    0      
-128   144    
160    32     
-144   32     
64     64     
-64    32     
-64    -48    
208    48     
96     160    
-48    -128   
272    -256   
-112   32     
-176   -272   
224    -176   
-32    224    
-176   208    
192    -32    
80     64     
-256   -32    
32     16     
-96    -80    
-16    80     
48     48     
112    96     
160    64     
128    80     
-16    -16    
80     16     
112    64     
80     32     
128    160    
-240   48     
160    0      
-48    16     
144    112    
224    -48    
-160   0      
-80    -80    
128    -16    
160    144    
48     48     
-16    -32    
208    64     
-48    64     
112    80     
0      -48    
-240   -48    
96     96     
-176   -144   
304    64     
432    384    
-288   304    
-16    16     
128    32     
80     80     
64     16     
256    176    
-32    176    
-288   16     
-80    -80    
176    32     
96     112    
224    112    
-16    -64    
64     -80    
0      64     
48     -416   
144    64     
160    112    
-16    -96    
112    0      
352    304    
-272   128    
0      16     
80     0      
112    -16    
-64    32     
-96    64     
64     -48    
64     -192   
64     32     
-16    -320   
0      -96    
112    128    
48     -160   
208    -48    
64     112    
144    64     
80     -64    
272    -16    
-288   -208   
144    -176   
304    48     
-256   -80    
-48    -192   
224    -240   
304    -144   
224    192    
0      -80    
240    48     
-112   -32    
64     16     
400    64     
-400   48     
-112   0      
816    704    
-688   176    
-432   -64    
-304   240    
80     -128   
496    384    
-208   144    
-16    160    
304    -288   
192    432    
368    304    
0      -64    
-416   208    
-128   128    
-224   64     
32     32     
-80    0      
0      16     
0      64     
144    -112   
272    -160   
48     -432   
544    112    
192    48     
144    96     
-192   -80    
-48    112    
400    624    
-432   432    
-32    288    
240    -208   
208    -272   
272    32     
112    224    
-48    -480   
176    80     
192    48     
128    -160   
128    -192   
-240   -96    
496    -416   
-16    -336   
16     -128   
48     160    
-192   208    
-80    32     
128    -16    
16     -160   
352    368    
240    80     
208    -112   
-16    144    
-160   -48    
144    -832   
-48    304    
16     -176   
208    -48    
-32    64     
0      160    
32     144    
-32    -224   
288    144    
16     -64    
32     0      
160    -32    
208    192    
-80    -144   
0      -80    
32     224    
-224   -384   
304    128    
-16    128    
176    -80    
-16    -208   
-176   -944   
-112   -288   
448    128    
288    112    
16     -288   
128    -192   
176    32     
64     576    
352    160    
-272   -48    
96     -512   
-144   176    
0      96     
-192   256    
-240   480    
80     -144   
320    -32    
112    -144   
192    -208   
-48    -336   
304    -208   
-112   -80    
80     -112   
-48    -144   
64     96     
-144   -16    
48     -96    
-160   -32    
112    16     
-112   -16    
-48    -288   
-400   -80    
64     -128   
48     -96    
-64    -240   
224    16     
-96    -80    
304    -32    
208    -784   
208    224    
-64    -112   
-160   -224   
192    -80    
96     112    
-256   224    
-80    144    
-656   -16    
240    -208   
144    32     
240    32     
-32    -32    
160    -304   
32     -16    
192    -720   
-272   240    
112    -16    
80     -192   
0      -32    
240    16     
-208   144    
96     32     
-272   32     
48     -208   
-976   -80    
320    -256   
-16    96     
64     0      
-336   -176   
288    -272   
-96    16     
240    96     
-48    368    
32     0      
320    -240   
224    -48    
112    64     
-80    48     
96     -80    
48     64     
64     -48    
-16    -32    
32     -80    
80     16     
176    -176   
16     80     
128    -416   
32     48     
-32    -48    
96     -16    
208    304    
-16    112    
-304   -16    
96     -96    
-128   112    
112    -80    
-336   0      
128    -32    
-16    16     
32     -480   
192    -80    
96     -832   
-64    48     
128    144    
240    80     
-80    16     
144    -80    
16     -16    
80     -48    
-272   0      
112    0      
-32    -160   
160    -208   
0      0      
-128   -128   
-32    -32    
208    -208   
320    48     
-224   96     
32     -32    
-528   112    
-80    -192   
-208   0      
-16    48     
96     16     
272    64     
208    -16    
64     -240   
272    96     
64     -96    
-160   -16    
-32    144    
160    32     
-336   -48    
-32    -256   
-96    -16    
80     176    
96     256    
224    80     
-368   -160   
-32    -288   
-624   -400   
144    -16    
-192   256    
-80    0      
336    48     
448    208    
-176   400    
-272   -16    
-496   -128   
464    624    
-240   80     
-288   -160   
224    -128   
128    64     
-1104  -32    
-80    48     
-384   -656   
-144   336    
-416   -16    
-720   -176   
112    128    
176    -16    
-16    0      
-544   272    
112    256    
-1360  0      
-128   -80    
32     -304   
-32    -16    
-16    -16    
416    -128   
176    -112   
48     64     
-80    16     
-192   32     
-256   -112   
-320   -16    
96     16     
-240   -112   
176    -112   
-480   -224   
64     16     
160    32     
-96    0      
-16    -64    
48     48     
-80    -128   
-16    48     
64     80     
-16    16     
48     16     
-64    -16    
16     32     
-48    -32    
32     0      
80     144    
-352   0      
-560   -16    
-96    64     
0      -80    
16     64     
192    -352   
-400   -144   
144    80     
-144   -32    
160    96     
112    64     
-160   0      
-112   -192   
-64    -144   
-144   48     
160    128    
-576   -144   
144    176    
64     16     
144    48     
-64    -48    
-80    -16    
-144   -32    
-128   32     
0      -80    
-176   -96    
160    112    
96     208    
0      160    
-160   16     
-32    -80    
-208   128    
-256   160    
-736   -96    
224    -64    
-32    128    
-128   0      
192    96     
0      64     
-96    32     
240    16     
-96    48     
16     32     
-16    -48    
-384   -240   
352    -32    
-336   80     
48     32     
-96    48     
48     32     
-16    16     
64     0      
0      0      
-176   32     
16     -80    
64     0      
-48    64     
-144   16     
80     -16    
-224   -32    
64     -16    
-64    -64    
144    128    
-1104  -16    
-144   0      
-288   0      
448    112    
-336   48     
-96    0      
0      48     
96     112    
-48    -48    
-272   -16    
320    80     
-192   64     
16     32     
-224   48     
192    32     
48     112    
-80    -16    
16     32     
80     96     
80     16     
-16    32     
-224   -208   
16     32     
96     96     
80     0      
192    16     
-208   -112   
128    0      
-112   32     
80     16     
64     16     
-48    -176   
32     -144   
48     -80    
144    -176   
16     -224   
-48    128    
80     192    
224    -32    
-272   0      
-32    -16    
48     160    
-64    176    
-112   32     
-32    -192   
-16    288    
-32    176    
-80    -64    
-128   -80    
16     128    
16     208    
-224   48     
80     -48    
-32    192    
-224   368    
304    416    
-544   -416   
-144   -368   
80     528    
112    -160   
288    64     
304    16     
48     -128   
256    128    
48     48     
-560   -400   
256    -672   
176    688    
336    -64    
256    32     
80     112    
-176   -192   
208    384    
-64    224    
-576   -448   
-96    352    
-448   16     
-64    -80    
144    80     
80     16     
288    -16    
304    96     
-48    -96    
128    16     
-240   96     
-112   48     
-304   -144   
288    -32    
592    288    
-336   -992   
-80    176    
64     368    
-32    -240   
-176   32     
-48    112    
16     -64    
288    112    
96     32     
80     -32    
-128   -80    
-128   208    
-432   -448   
272    16     
-80    16     
0      -32    
208    512    
-256   -176   
160    144    
80     304    
272    192    
80     192    
48     -128   
0      -80    
0      192    
192    -224   
48     144    
240    400    
-64    480    
256    448    
80     -256   
144    176    
-176   -208   
-112   -80    
64     32     
-32    208    
16     192    
96     112    
32     80     
144    16     
16     32     
192    -128   
32     192    
0      288    
64     384    
256    -928   
-144   624    
144    400    
48     -16    
-16    -240   
144    0      
272    512    
-288   352    
96     64     
-112   -192   
272    -192   
-64    -64    
384    224    
-208   32     
144    304    
-128   288    
112    272    
304    224    
48     -48    
0      -288   
32     -96    
352    96     
208    112    
192    0      
-144   128    
-144   -16    
160    -48    
-64    -48    
16     0      
-128   128    
288    -144   
400    64     
-48    -656   
16     -64    
256    -112   
144    240    
-176   192    
192    -16    
-176   0      
-32    0      
176    96     
128    -48    
96     64     
176    80     
96     160    
160    -336   
-32    16     
128    -688   
-16    48     
-64    -64    
384    368    
-160   208    
192    112    
-160   80     
240    32     
48     -64    
352    -32    
-176   160    
-16    -288   
144    32     
224    -224   
-48    -48    
-48    -160   
144    192    
176    160    
-32    112    
-32    32     
208    240    
48     80     
416    0      
80     336    
112    -192   
64     -64    
0      -192   
160    80     
48     16     
-32    -160   
-32    32     
208    -16    
192    16     
32     32     
64     -32    
16     32     
-80    -16    
112    -112   
256    -96    
-160   -32    
-16    -48    
80     -64    
80     -16    
64     -160   
96     48     
-32    0      
112    32     
80     -16    
0      -768   
0      64     
96     -64    
112    -32    
48     -192   
192    -240   
160    -64    
-112   112    
48     176    
288    -64    
-32    -112   
0      80     
176    96     
-112   -640   
112    208    
208    -16    
64     80     
-176   -48    
32     -144   
32     80     
112    -80    
80     400    
336    336    
160    16     
0      -576   
-32    -128   
-64    192    
128    176    
192    32     
80     80     
-64    -64    
96     320    
-944   -272   
80     -208   
-992   -64    
-240   -96    
896    1248   
-592   -1088  
64     -32    
144    -512   
-112   -160   
96     -16    
32     16     
-160   -240   
64     160    
48     96     
-80    208    
-528   -400   
240    -176   
-224   288    
-256   144    
432    112    
112    144    
-160   -304   
224    64     
-288   -176   
112    112    
160    368    
-288   32     
-80    112    
-16    16     
-64    -96    
192    -240   
512    -144   
-496   -32    
368    -16    
288    160    
128    -80    
0      -64    
-32    -192   
-528   64     
-128   -928   
-48    -80    
192    64     
192    128    
608    416    
-608   0      
96     -128   
32     -112   
-432   -32    
96     -112   
-384   -96    
320    240    
-416   -64    
80     -96    
752    368    
-576   -192   
144    16     
224    32     
480    32     
-512   -144   
-16    -208   
-96    -16    
-48    64     
-112   0      
96     0      
-608   16     
144    -48    
-576   112    
-64    -240   
224    64     
128    -128   
144    48     
64     -384   
224    144    
-304   -144   
272    -112   
-64    16     
240    80     
-160   64     
16     -96    
160    224    
-368   80     
432    -16    
-16    -48    
224    16     
176    -80    
80     48     
224    -496   
0      48     
-384   112    
16     -144   
-64    48     
0      16     
-32    -48    
48     32     
-160   -112   
256    -112   
96     64     
192    -144   
160    48     
-32    -144   
-96    128    
-112   -48    
80     -16    
-192   -64    
224    80     
-224   -32    
64     0      
176    112    
-272   176    
144    -32    
128    -112   
112    128    
-1168  -144   
0      -112   
-288   -192   
-1808  32     
-80    64     
-80    -128   
-112   0      
-1696  64     
-128   32     
192    -80    
-64    64     
176    0      
-16    112    
-384   -48    
0      -16    
48     -112   
240    32     
-144   -176   
-144   240    
-96    112    
48     0      
-16    16     
-704   -32    
-48    0      
-1072  0      
-208   0      
224    0      
-80    -96    
-560   -80    
0      64     
-96    -192   
160    0      
-160   64     
-32    16     
32     16     
-112   -48    
208    192    
-256   192    
64     32     
-336   16     
176    160    
-1664  32     
-96    -16    
48     16     
64     48     
-16    0      
-16    -48    
144    -160   
-176   -336   
48     80     
-176   16     
112    48     
-64    96     
48     32     
-272   48     
0      160    
-784   -192   
192    -304   
48     -160   
144    208    
112    128    
-256   -144   
16     80     
-160   -64    
144    112    
-176   -16    
-208   -96    
-96    -16    
-288   80     
-240   64     
64     -112   
-752   496    
208    -352   
0      -352   
176    480    
16     64     
32     -384   
-160   -480   
16     208    
-272   352    
0      -160   
-48    64     
-16    -48    
208    128    
-272   400    
0      -208   
-208   -176   
224    288    
-128   256    
-16    112    
128    -16    
-336   192    
-48    -208   
112    -32    
-144   144    
-176   -32    
64     0      
-64    224    
-32    64     
112    -80    
-32    16     
-288   272    
-192   -496   
-1536  -400   
-96    32     
48     32     
144    48     
-80    -80    
-48    144    
-112   -48    
16     48     
-64    -64    
48     176    
-32    128    
-288   0      
-288   -160   
-336   -624   
-48    48     
144    -80    
-64    -176   
-480   -80    
-416   80     
80     64     
240    48     
304    96     
-128   96     
0      48     
128    96     
-224   -80    
16     -64    
0      32     
-160   128    
224    -80    
-32    -32    
96     -80    
-16    -80    
-64    -240   
0      128    
-80    64     
32     48     
-48    48     
128    0      
-128   32     
96     32     
-96    -128   
96     0      
-160   -48    
96     -80    
-32    64     
0      64     
32     272    
96     48     
48     0      
-32    32     
112    48     
-176   48     
64     -160   
32     48     
48     80     
80     208    
-224   -32    
-128   -224   
176    80     
128    48     
192    160    
48     -80    
-96    96     
240    128    
-144   128    
240    -400   
128    -32    
-48    288    
-208   -32    
288    208    
-160   -80    
112    160    
272    112    
-240   -336   
96     -192   
-240   64     
320    -32    
64     160    
288    96     
-144   80     
112    0      
96     -32    
-144   416    
80     -128   
208    -96    
-272   80     
16     16     
64     48     
112    80     
-160   -192   
288    -144   
-112   80     
-16    -336   
0      -80    
80     192    
-32    160    
-80    80     
288    -64    
-128   96     
112    0      
-240   -64    
272    -272   
-48    272    
384    -32    
0      144    
304    112    
272    -144   
-112   96     
304    0      
-80    0      
32     48     
-336   160    
384    384    
-64    96     
240    -64    
-144   112    
16     -112   
112    -48    
16     -48    
32     48     
48     192    
240    288    
208    -352   
-384   -272   
-80    112    
-192   16     
0      96     
-16    96     
208    -32    
16     -64    
96     -192   
64     -208   
96     16     
-16    16     
96     128    
-160   224    
192    176    
64     48     
32     64     
96     96     
0      -16    
96     0      
16     -96    
-48    0      
160    48     
-80    -144   
176    96     
0      224    
-32    80     
-16    -128   
400    224    
-112   80     
80     -48    
-272   -368   
-96    -528   
32     368    
224    192    
-16    464    
16     -240   
192    -176   
-64    480    
-16    -416   
128    0      
112    -752   
64     -16    
-176   208    
128    -336   
96     144    
-80    -64    
80     16     
16     -144   
464    176    
192    -16    
-192   80     
-16    -64    
-32    160    
48     -208   
176    352    
-368   -352   
-288   -128   
48     -1008  
-32    128    
416    336    
32     112    
48     32     
-240   80     
864    480    
-480   112    
-336   -240   
-176   -96    
112    112    
96     224    
-256   112    
112    144    
48     144    
240    -544   
112    208    
176    48     
496    48     
-208   48     
-192   -64    
272    -48    
-256   -96    
48     -208   
432    96     
-48    -16    
736    -144   
320    224    
32     48     
192    -32    
32     -160   
0      32     
112    32     
432    368    
-432   160    
-208   -128   
80     -48    
0      192    
-48    -80    
464    -176   
128    112    
144    -32    
-64    32     
208    -80    
-144   80     
-304   -16    
-208   176    
112    128    
848    256    
-672   96     
-144   16     
144    -32    
176    -48    
384    64     
272    64     
-64    96     
-48    -112   
256    80     
0      -48    
-80    16     
-112   -96    
224    -48    
32     0      
-48    -320   
0      16     
128    0      
128    -112   
48     -64    
64     -176   
0      -64    
80     -1552  
96     -64    
16     80     
176    48     
48     0      
352    192    
-224   -80    
272    16     
-32    -160   
-32    16     
-416   -16    
-64    -208   
128    208    
-32    -160   
128    -160   
-192   -1200  
64     -144   
112    160    
0      -16    
256    -176   
-352   48     
128    -128   
-336   -128   
336    224    
-240   -16    
208    48     
64     0      
144    -80    
240    -96    
16     -16    
96     32     
160    0      
-128   -176   
128    -112   
96     -32    
-64    -16    
128    -64    
224    192    
32     0      
160    -96    
-416   64     
160    0      
-848   -48    
112    32     
128    0      
-80    64     
48     48     
112    -448   
176    48     
336    -16    
-128   48     
48     -48    
48     80     
-144   -96    
48     -192   
-320   -16    
80     -16    
-176   48     
144    48     
160    -80    
-48    -64    
-80    -224   
240    -192   
-80    160    
0      -1200  
32     -192   
32     -240   
-32    32     
-144   -176   
304    128    
-160   144    
96     -80    
-256   -16    
96     16     
384    -208   
224    32     
-96    64     
192    -112   
-96    32     
272    -384   
112    96     
16     -208   
208    112    
-128   16     
64     16     
48     784    
-336   -1136  
-48    464    
0      -48    
-800   -288   
272    144    
256    64     
-16    288    
-240   32     
304    -816   
48     336    
16     240    
64     256    
176    -48    
336    272    
48     80     
48     112    
80     368    
-144   -208   
-96    -32    
-64    224    
176    464    
240    -16    
112    112    
176    -240   
-48    32     
-144   32     
192    48     
-336   32     
80     48     
80     32     
48     208    
-64    304    
208    -96    
48     0      
32     -144   
144    48     
128    16     
64     80     
160    -128   
112    -64    
0      -128   
48     -112   
-112   -48    
128    64     
48     -64    
32     -96    
16     64     
-112   -112   
-112   -496   
240    -16    
-112   272    
-432   -128   
80     -48    
-1184  -224   
-688   0      
-64    -192   
-1584  -112   
-176   0      
16     320    
-240   96     
-16    -80    
-32    -80    
-96    -32    
-336   0      
-304   -112   
160    96     
-480   -192   
80     64     
-208   16     
224    -32    
352    80     
-16    64     
48     16     
-400   144    
-336   48     
-32    -48    
-160   -160   
-208   -144   
384    32     
16     128    
160    48     
-192   -112   
32     48     
-16    224    
160    144    
-288   80     
-112   -112   
-176   -144   
-80    96     
208    208    
-1296  128    
-48    -80    
272    -32    
64     224    
16     112    
128    96     
-16    -80    
-144   -176   
48     16     
16     64     
-160   -16    
-48    48     
-128   80     
32     192    
-112   96     
-560   -288   
-144   -320   
-1056  -208   
-176   -160   
144    -432   
128    0      
160    240    
-160   192    
64     320    
-80    -192   
80     160    
32     256    
176    208    
-208   -64    
-256   -272   
-384   -16    
-176   -32    
-928   32     
112    -160   
-144   -64    
144    -336   
-16    -256   
80     -128   
160    -64    
-176   96     
48     -96    
-192   -32    
-112   -48    
-240   0      
-48    -48    
-192   64     
288    -112   
-912   -400   
208    480    
96     272    
176    352    
16     -176   
-320   112    
32     -240   
-272   -304   
112    -128   
0      48     
-256   -160   
128    -272   
176    -16    
-208   -16    
64     80     
-400   -64    
64     -272   
-480   -544   
-288   16     
-64    128    
16     64     
-48    160    
80     80     
-288   -272   
288    48     
-112   -96    
176    -384   
0      -128   
-128   -160   
160    80     
-112   -224   
80     224    
320    608    
-64    -208   
16     128    
16     0      
-160   208    
-96    448    
448    480    
-128   272    
-16    -528   
-144   -224   
208    -96    
16     320    
208    640    
-304   160    
96     -32    
-112   -288   
192    496    
320    544    
-464   -240   
32     -432   
240    624    
-304   448    
-48    -464   
128    -176   
-208   -80    
208    368    
-160   176    
176    -160   
-48    -48    
-16    64     
48     48     
64     48     
0      -32    
112    128    
-192   -192   
-48    336    
32     -256   
304    -224   
400    496    
-432   -224   
176    160    
-16    -336   
208    368    
-160   -320   
128    -336   
32     -48    
256    256    
32     -16    
16     -176   
48     288    
80     352    
80     -80    
-64    -128   
-112   -16    
-80    48     
160    160    
-112   16     
128    0      
128    16     
416    384    
-192   96     
-224   -16    
-32    -48    
192    -16    
-32    48     
-416   32     
-208   400    
96     448    
16     0      
-32    -496   
-144   -96    
-240   32     
160    96     
176    240    
-64    288    
-256   80     
208    -32    
288    224    
-288   128    
-352   -160   
368    -192   
112    112    
176    112    
96     48     
16     32     
-16    160    
-112   -48    
288    144    
16     240    
256    416    
-368   48     
48     -160   
288    -48    
176    160    
208    128    
240    -48    
304    16     
-80    112    
16     48     
176    208    
-480   48     
-48    -144   
240    -400   
112    128    
-96    -112   
544    -64    
0      -208   
752    -224   
624    0      
-80    96     
-304   -16    
-160   -48    
48     32     
208    64     
240    64     
400    96     
-336   -16    
96     -912   
16     112    
-192   32     
32     48     
240    0      
48     32     
-96    80     
-48    48     
32     48     
192    0      
64     -16    
32     48     
80     112    
-272   32     
96     80     
288    -112   
32     112    
96     0      
-16    -80    
48     0      
112    16     
112    -48    
16     96     
-16    -256   
0      80     
-64    -32    
160    96     
-32    -32    
32     -160   
48     48     
0      -208   
112    16     
-16    -528   
16     -16    
96     80     
96     32     
112    0      
80     64     
64     336    
160    208    
-16    -80    
-64    128    
16     -96    
48     -240   
-128   128    
160    -160   
-128   -16    
96     -720   
160    144    
-96    224    
384    112    
0      176    
128    32     
144    0      
0      208    
80     16     
-48    -48    
160    48     
16     400    
304    256    
16     -128   
-64    -80    
48     128    
112    240    
176    -64    
-128   176    
192    -384   
0      -96    
48     -80    
-80    32     
0      -32    
128    -96    
128    144    
160    -112   
80     16     
64     -736   
16     368    
96     144    
-32    32     
96     -208   
80     0      
-16    176    
64     176    
-48    -48    
176    -64    
-48    128    
96     144    
464    384    
-208   -368   
-16    -144   
112    256    
112    -80    
32     32     
272    -272   
464    336    
-288   576    
-80    -400   
256    -320   
-128   208    
0      48     
16     -128   
240    -528   
-336   -208   
112    -160   
192    160    
32     208    
288    80     
48     192    
128    -16    
48     -192   
144    96     
-80    -48    
224    -16    
-336   -80    
416    48     
-64    -240   
256    48     
16     -688   
96     0      
96     224    
304    -112   
192    -48    
32     -160   
-64    272    
160    96     
64     -192   
-32    32     
112    -384   
0      -192   
-2736  -192   
272    -272   
192    -112   
-64    32     
96     16     
80     -624   
0      -128   
128    32     
80     48     
64     -224   
96     96     
224    -64    
-32    80     
-80    -288   
240    -272   
-208   192    
-208   0      
0      -80    
192    -256   
32     16     
160    48     
48     16     
96     -304   
48     -32    
48     -48    
-16    48     
64     -32    
16     -16    
-112   48     
192    -16    
-320   16     
-16    -144   
64     64     
-400   -80    
96     -160   
176    32     
288    96     
224    -160   
224    48     
-176   -16    
-176   32     
-64    -96    
128    -64    
480    -48    
496    16     
-16    -16    
-80    0      
-320   -64    
-48    -48    
224    -64    
-16    -96    
-32    112    
-96    -256   
64     16     
240    -144   
64     96     
48     80     
48     80     
0      -16    
-48    -144   
0      0      
0      0      
-576   -80    
144    0      
0      0      
-32    32     
80     128    
-64    -368   
192    64     
48     -256   
128    64     
32     0      
96     -48    
-144   -160   
-80    -160   
-224   -80    
192    -80    
-96    80     
272    -160   
-448   -32    
240    -240   
-128   96     
128    -32    
-128   -16    
144    -192   
80     0      
-240   -16    
240    -208   
-208   -128   
128    -160   
-320   176    
128    64     
-480   160    
192    368    
-496   0      
80     -32    
80     16     
192    16     
208    16     
0      -176   
-32    -272   
336    -144   
-288   -208   
-16    -208   
32     -128   
-208   -176   
128    48     
112    224    
352    32     
-960   -1616  
64     -528   
16     672    
272    -768   
32     -384   
256    -112   
224    816    
-320   384    
416    -608   
-288   -496   
-176   288    
-208   -80    
64     160    
-272   -128   
128    -48    
-176   464    
288    -64    
32     -96    
-2000  -80    
16     400    
48     -96    
-80    -16    
-112   336    
-1088  -736   
64     224    
0      624    
-112   -208   
432    400    
-288   1040   
-80    -736   
112    -64    
-736   192    
-128   -96    
32     -240   
192    -336   
-144   528    
-192   -240   
-96    0      
-624   -416   
224    320    
-448   -176   
208    48     
64     -48    
-224   112    
176    16     
-64    -80    
16     16     
96     -48    
16     -192   
-96    112    
-304   -48    
-192   -224   
144    64     
-64    32     
0      160    
-960   -224   
-240   -48    
-2704  176    
-32    96     
-272   -64    
128    -16    
-16    -96    
112    -16    
-176   -272   
-192   48     
-64    32     
192    128    
-96    16     
160    176    
-256   112    
-16    -16    
-48    0      
-624   -160   
208    -112   
96     16     
-48    192    
-48    -48    
32     96     
80     64     
192    416    
-112   160    
-112   48     
-80    -32    
-80    -48    
0      144    
-240   -96    
-80    80     
-448   112    
112    160    
-2048  -112   
160    176    
-400   -80    
112    64     
-128   32     
80     32     
-32    -16    
-64    -80    
-96    48     
-32    32     
64     160    
-336   80     
160    0      
-208   -96    
144    -224   
-2016  -144   
272    160    
16     0      
-240   80     
352    320    
-416   160    
-64    16     
-32    96     
-208   -96    
160    -96    
272    32     
224    112    
16     48     
-208   -48    
192    128    
-528   -16    
592    16     
-80    32     
-48    80     
-32    -208   
-272   -560   
-464   -80    
-208   176    
240    32     
-192   -288   
464    -16    
-224   224    
144    -16    
-560   -16    
512    144    
-240   272    
-688   112    
-112   -112   
-336   -32    
112    -16    
160    16     
-48    48     
-32    144    
-176   -16    
-496   48     
-96    96     
-752   -64    
-320   -64    
-224   -80    
0      -80    
-224   -64    
-640   32     
608    144    
368    16     
-432   -80    
-224   -32    
-16    336    
-288   64     
176    -112   
160    16     
-160   96     
464    176    
-96    -16    
-144   -64    
-192   -80    
-48    -64    
160    80     
176    128    
-320   -96    
160    -48    
-144   -80    
32     64     
-32    96     
-176   -64    
416    48     
32     64     
-192   16     
224    96     
-336   16     
336    48     
-80    -16    
16     16     
80     32     
80     64     
-96    16     
64     -48    
0      64     
32     64     
64     48     
-16    0      
32     80     
-48    128    
64     128    
-240   -16    
240    224    
96     32     
80     32     
-48    128    
16     32     
0      0      
-80    -48    
272    48     
80     80     
176    80     
-112   -48    
304    -16    
-64    32     
224    224    
-176   160    
32     -32    
-128   48     
48     176    
176    160    
208    128    
-176   176    
176    0      
128    -48    
32     0      
96     -64    
64     256    
64     96     
-112   -208   
64     192    
16     48     
-32    32     
176    240    
-80    -944   
352    -192   
-16    1008   
496    384    
-80    -496   
-32    528    
-64    -96    
336    -704   
-160   736    
-80    0      
-48    -384   
96     176    
-64    -368   
672    320    
-272   32     
-64    144    
64     96     
-16    -496   
-16    144    
256    336    
16     240    
80     240    
-208   -16    
288    -128   
0      -96    
176    64     
288    -48    
-368   80     
-80    -400   
112    448    
272    272    
272    -80    
-144   32     
-48    -16    
-48    16     
144    64     
128    64     
304    48     
-240   112    
48     0      
-208   -64    
0      -96    
80     96     
176    -416   
80     32     
112    0      
96     -16    
-112   -32    
208    48     
-64    96     
192    16     
128    32     
32     0      
48     -32    
80     -48    
256    -48    
288    48     
-32    96     
176    -736   
-96    96     
176    -64    
176    192    
-144   144    
160    32     
-16    0      
-96    32     
80     112    
112    80     
-16    48     
80     -48    
160    96     
-16    64     
128    96     
48     -96    
176    32     
144    32     
80     48     
-80    -320   
48     -64    
-272   -48    
224    0      
16     176    
336    288    
-16    112    
-96    -32    
96     -64    
16     -352   
272    128    
-128   -48    
240    64     
96     96     
112    -16    
-80    -1152  
48     192    
-80    -16    
208    -112   
-144   -224   
320    -208   
352    96     
224    48     
160    64     
64     64     
-176   32     
112    -16    
176    192    
320    -384   
-96    -64    
-224   -16    
-336   48     
-208   48     
96     128    
-192   -208   
464    -16    
-48    144    
-320   -160   
-48    48     
144    -112   
288    64     
144    -128   
-80    48     
-160   -192   
128    -144   
176    -48    
272    304    
816    928    
-560   432    
-304   -160   
384    -208   
144    160    
368    -32    
0      -32    
160    48     
-144   16     
-128   -512   
16     -64    
-128   144    
-96    496    
208    192    
128    -832   
-32    16     
32     -608   
160    80     
16     -144   
112    16     
112    192    
272    -208   
176    96     
192    160    
0      288    
48     368    
-32    32     
160    -1024  
64     416    
80     48     
96     -48    
112    -288   
144    -240   
-112   192    
112    -160   
-176   -480   
64     -272   
48     240    
96     -320   
208    80     
0      -208   
176    112    
-128   -160   
144    -464   
32     80     
-176   32     
-80    16     
144    -16    
-736   -96    
224    -48    
-48    16     
208    48     
-16    112    
0      -304   
-80    400    
-32    -432   
-48    -416   
-192   -112   
-16    -32    
256    -240   
-112   -32    
-144   144    
128    144    
-352   -48    
48     112    
-48    112    
224    16     
-64    -96    
240    48     
64     48     
-64    -288   
400    672    
-192   272    
192    208    
176    -32    
224    -128   
-144   144    
192    -64    
-272   -160   
336    -96    
-48    0      
160    -64    
-32    -80    
48     -368   
-96    32     
0      -416   
32     -96    
160    -80    
16     64     
64     -64    
224    16     
-240   32     
112    -128   
-144   -160   
64     -32    
-1840  16     
192    -96    
-176   -80    
-176   32     
384    64     
-64    -176   
-160   16     
-112   -80    
480    96     
16     48     
-128   -16    
192    48     
-64    -80    
-112   -16    
160    0      
-80    16     
-80    -64    
-224   0      
-112   -80    
48     48     
256    -64    
-32    32     
144    -432   
48     -48    
176    80     
80     -64    
-32    -16    
128    -144   
-528   -112   
176    32     
-112   96     
16     -48    
-304   -48    
416    -176   
-176   -64    
32     -128   
-80    160    
16     -160   
224    -160   
-144   -16    
80     -48    
-1040  -16    
112    0      
-160   160    
256    16     
-192   -64    
16     -160   
-240   -16    
0      -208   
64     -16    
144    -64    
0      64     
-128   16     
48     -32    
-208   0      
48     48     
-192   -80    
112    -64    
0      16     
144    0      
-64    -48    
80     -32    
96     384    
112    416    
-576   32     
-608   -144   
208    -48    
112    176    
-2496  48     
-176   -16    
208    -64    
0      64     
128    -64    
80     -16    
-112   80     
-96    0      
304    80     
800    1040   
-1184  880    
32     16     
-128   -512   
-224   0      
-16    320    
112    96     
96     128    
-80    -48    
-176   32     
128    -48    
-256   -64    
80     96     
-16    16     
-912   -192   
128    -48    
-160   -160   
208    144    
-304   -64    
-160   -16    
-64    208    
-272   112    
96     -16    
-336   -64    
32     16     
-144   -64    
-32    -192   
800    16     
-32    32     
0      -64    
16     0      
-176   48     
-64    160    
-208   32     
0      -48    
160    80     
-96    -80    
-80    -128   
-496   48     
-464   -176   
-320   -128   
208    96     
-640   -16    
48     -144   
192    -192   
-288   32     
-240   -288   
64     64     
48     96     
-112   -48    
336    -80    
96     0      
-16    80     
48     48     
-288   48     
-176   -80    
-144   0      
-208   -32    
80     80     
-160   -48    
96     -160   
-16    -80    
64     112    
-192   32     
-16    96     
-16    -48    
0      0      
48     -96    
64     32     
-16    32     
-128   0      
-128   96     
-320   192    
0      -352   
-928   224    
0      288    
-192   -272   
128    48     
-160   -160   
288    432    
-80    -432   
-32    256    
48     -112   
-352   -176   
80     -16    
-144   96     
-32    -16    
-336   112    
-48    -32    
-432   464    
-240   32     
-64    -320   
352    -48    
-80    512    
160    -176   
208    192    
-496   368    
0      -96    
0      416    
96     368    
16     64     
32     -240   
-512   -32    
-32    -80    
-1088  -320   
-112   -112   
64     80     
96     224    
112    -288   
-320   -224   
96     112    
-64    128    
48     144    
240    160    
-32    176    
-32    208    
144    192    
0      64     
32     16     
-480   -48    
-16    -256   
256    -64    
-80    48     
112    160    
-48    32     
64     -112   
96     -80    
-16    48     
-16    96     
128    -16    
-192   -64    
192    16     
-128   -16    
272    -64    
-48    64     
64     96     
-80    -32    
48     -128   
-16    -32    
48     32     
144    32     
-48    64     
32     0      
-464   96     
256    16     
-192   -64    
160    80     
-192   32     
96     -96    
48     288    
-80    80     
-48    -48    
80     -16    
80     64     
16     112    
0      32     
96     96     
-16    -16    
16     64     
176    32     
-64    32     
-64    192    
32     32     
64     -48    
-96    0      
-16    -192   
80     64     
32     224    
0      -64    
224    0      
112    64     
-96    0      
176    0      
80     128    
64     64     
-80    -48    
32     -48    
-208   -16    
16     0      
128    32     
64     96     
48     32     
-64    32     
160    80     
-80    0      
48     -144   
96     48     
64     64     
-32    -16    
192    64     
16     64     
128    64     
64     -48    
128    -128   
112    96     
-96    112    
-48    -128   
240    -176   
160    112    
432    464    
96     272    
96     -80    
48     -16    
0      128    
-304   -16    
160    -96    
256    -48    
384    64     
160    -80    
272    32     
-256   96     
-256   32     
-16    80     
64     -240   
208    -80    
128    224    
-304   -32    
32     -32    
112    16     
384    112    
208    32     
-496   -608   
-144   0      
-176   352    
224    176    
16     -48    
592    320    
-128   720    
32     288    
192    48     
304    336    
-192   -208   
-16    -32    
352    192    
-240   224    
112    -608   
-112   -192   
240    16     
-256   -1632  
256    528    
-240   -272   
256    112    
-112   -224   
368    608    
-272   -160   
256    96     
-64    176    
128    -192   
448    208    
112    112    
-16    560    
64     -288   
16     -192   
16     -80    
96     -64    
0      -64    
128    144    
112    208    
0      48     
-16    0      
224    112    
-96    -16    
48     112    
-80    -48    
112    -128   
80     64     
192    -16    
48     96     
-64    -576   
-80    -240   
-128   96     
48     -80    
16     -32    
176    64     
112    96     
32     64     
-176   16     
32     48     
0      0      
288    -144   
-80    112    
272    -64    
-64    48     
-256   -256   
176    32     
64     -368   
192    16     
144    -48    
0      16     
16     224    
0      0      
160    32     
-128   48     
192    64     
-64    128    
208    192    
80     80     
320    80     
240    304    
-208   272    
336    -256   
80     -16    
-144   -128   
144    304    
0      -32    
176    -96    
-32    16     
-16    -192   
128    176    
208    -80    
160    112    
32     -208   
0      -160   
64     -112   
16     144    
-64    0      
224    64     
0      0      
96     48     
96     -16    
80     80     
64     16     
64     64     
-128   48     
160    -192   
-224   -112   
192    -64    
0      144    
144    0      
-128   32     
64     -528   
128    32     
176    112    
176    16     
112    32     
-32    -96    
112    -384   
256    48     
64     -1472  
160    -160   
128    224    
192    64     
-16    32     
96     -48    
80     48
[truncated: 74,011 more chars]
