# Supplementary material for: A Fault Diagnosis Method for One‐Dimensional Vibration Signal Based on Multiresolution tlsDMD and Approximate Entropy
Source: Hindawi journal article supplement (doi:10.1155/2019/3262818), 2019-01-01
Supplement: f1 [file 3262818.f1.zip › 3262818.f1/gear signals/pitch errors signal/Data1.txt]

48     -192   
112    144    
848    -528   
-2928  928    
-1408  480    
1696   -672   
-1536  -304   
-224   64     
448    -432   
160    -816   
-96    -288   
0      -320   
256    -80    
16     128    
256    -80    
-128   -336   
-256   48     
384    -80    
48     32     
-128   -32    
80     -16    
-704   -176   
48     -48    
-416   -560   
-992   0      
2160   80     
912    -80    
-608   336    
-160   -1232  
-256   -80    
-208   -144   
0      48     
416    -64    
208    144    
-144   -48    
-96    -64    
-16    -48    
-96    -32    
160    -176   
368    160    
32     16     
-624   -400   
176    -16    
480    -736   
352    96     
-960   64     
192    -256   
-176   -64    
-64    -672   
608    16     
208    -224   
192    -64    
-368   112    
-176   224    
416    224    
16     -160   
-272   -496   
16     160    
16     176    
400    -272   
240    -128   
192    48     
-128   -176   
-64    80     
176    -64    
32     0      
-304   -48    
192    -128   
-368   -128   
64     -32    
-1344  -128   
416    -128   
-1840  2768   
848    -304   
64     -544   
-688   -1584  
624    16     
-672   64     
-448   -176   
960    -64    
320    48     
-288   80     
-160   -64    
32     0      
80     -176   
-192   160    
336    -128   
-400   112    
-128   -160   
176    112    
112    -368   
-992   16     
720    -272   
-16    64     
-64    -160   
752    -32    
-416   -16    
-304   128    
224    80     
256    32     
-464   -144   
-368   -304   
480    80     
144    -64    
-416   48     
160    -336   
384    -48    
-80    0      
-304   32     
-240   -32    
272    48     
-128   64     
-288   208    
192    80     
-224   32     
-112   304    
128    -64    
-112   112    
48     -208   
48     -48    
-112   -160   
-1168  80     
-224   304    
464    496    
688    -224   
-608   -400   
-240   -240   
256    592    
208    528    
-48    0      
-96    96     
48     -176   
-288   224    
-80    112    
736    320    
-736   -208   
-192   -64    
-16    560    
208    464    
-224   64     
-1376  -288   
80     -32    
368    -112   
-144   -16    
-336   -48    
-112   16     
160    -288   
96     -496   
-144   -176   
16     592    
16     128    
-160   -16    
320    -560   
-1216  1536   
800    -144   
-64    -768   
-336   352    
-960   192    
64     128    
272    64     
-240   -48    
-128   144    
112    336    
-112   -288   
-144   -112   
-16    320    
-96    160    
16     16     
-160   -112   
-64    224    
-352   0      
-32    32     
192    -480   
-528   -32    
496    112    
64     -192   
208    64     
-32    272    
-352   1072   
176    336    
-176   -48    
-112   -272   
64     -128   
160    -192   
-176   192    
-96    64     
128    64     
-192   96     
-128   32     
-528   -272   
64     64     
176    -144   
16     48     
-32    80     
-64    16     
32     320    
128    240    
-144   208    
-208   0      
224    -80    
-128   112    
-272   176    
1488   -496   
-1456  336    
64     1056   
512    608    
-288   128    
-16    -208   
80     288    
-256   352    
-112   -368   
240    96     
240    128    
-48    0      
-128   16     
-80    16     
32     448    
0      96     
64     -32    
-368   0      
112    80     
-400   -816   
1472   848    
384    -368   
-1456  224    
48     -1248  
208    -848   
448    -640   
-416   704    
240    640    
-112   336    
176    560    
-256   320    
-128   80     
96     -688   
-400   -560   
368    96     
176    -304   
-656   -928   
96     -416   
224    -64    
-144   64     
-96    -32    
32     -624   
512    992    
-864   1232   
-368   -352   
752    -1216  
272    -512   
-672   -416   
352    -224   
32     -128   
-336   48     
288    -160   
192    288    
-240   -752   
-464   -528   
0      336    
-192   336    
-128   192    
-160   208    
256    0      
-224   16     
16     464    
-560   304    
16     32     
816    -64    
192    -16    
-144   16     
-416   208    
-80    144    
-592   -80    
-640   224    
608    32     
32     -48    
-496   800    
-192   32     
-224   48     
352    -880   
224    400    
-160   32     
-176   -208   
96     -112   
208    368    
112    -80    
-112   -144   
-144   240    
160    64     
-304   32     
80     512    
-64    368    
-64    128    
336    160    
112    112    
-944   -976   
-512   96     
464    -192   
-96    192    
-336   -208   
-80    64     
336    400    
-144   368    
-112   0      
16     224    
-176   64     
-192   32     
400    -112   
128    -144   
-448   0      
128    16     
112    80     
304    -96    
-272   112    
-128   768    
176    400    
112    416    
-304   -192   
112    -160   
192    -160   
-32    -16    
-240   80     
208    160    
-256   -256   
-224   -1200  
176    704    
192    304    
304    304    
208    -320   
-48    -432   
-64    80     
48     352    
144    96     
-112   208    
-176   224    
256    112    
-48    80     
208    432    
96     0      
-96    -560   
-192   240    
304    320    
256    -80    
-16    112    
192    144    
-416   -48    
112    176    
528    -80    
-288   -96    
-304   -16    
272    192    
48     256    
-368   1648   
2320   128    
-368   -160   
-1152  80     
592    -288   
448    -272   
-464   32     
-256   -336   
528    -384   
144    464    
-16    -192   
-144   96     
160    144    
-64    480    
-64    -80    
208    384    
352    16     
-224   -304   
-144   176    
240    -2240  
-304   880    
1376   -128   
-304   -96    
-784   96     
864    112    
64     464    
160    -368   
-304   64     
272    -176   
80     160    
-176   -48    
288    -48    
-352   48     
336    96     
-80    176    
-112   -32    
-16    384    
352    -80    
-336   192    
32     48     
112    -224   
80     80     
-240   80     
-144   80     
384    144    
160    -176   
-80    0      
-112   -48    
64     352    
-288   1488   
832    480    
-16    -768   
-640   128    
-432   208    
240    64     
544    -80    
48     112    
80     -112   
208    160    
-32    144    
-160   -32    
80     16     
-80    -16    
464    176    
-224   -80    
-80    32     
240    16     
-32    -16    
160    96     
-160   -480   
960    368    
1344   352    
-784   -208   
144    32     
0      -32    
464    -16    
304    560    
-192   -16    
-384   240    
400    -320   
80     112    
-160   96     
-32    -16    
240    176    
384    48     
-480   32     
64     -16    
144    176    
0      -368   
32     128    
272    -256   
-1168  304    
-64    -32    
-384   176    
-48    -336   
64     48     
432    -240   
944    160    
-624   -672   
-240   192    
352    -32    
-144   272    
-208   -32    
-32    -224   
-160   -768   
-272   -32    
-128   -576   
-768   336    
400    176    
16     -64    
-112   112    
16     -336   
48     128    
112    304    
-176   -1360  
336    64     
368    -800   
-656   -976   
1600   1968   
-512   992    
-80    -496   
1120   -352   
-464   112    
-320   -1264  
592    -160   
192    64     
-176   -80    
-288   -176   
464    112    
80     -256   
-192   96     
144    32     
-192   -304   
-480   112    
464    -144   
-96    -80    
-448   -496   
608    -496   
224    -1904  
-464   -784   
-64    416    
-368   -256   
-496   -448   
960    -192   
288    -96    
-576   352    
-224   448    
624    -224   
-192   -240   
-416   80     
528    16     
256    -528   
-352   96     
32     -256   
160    -160   
160    -640   
192    32     
-176   -48    
-112   112    
384    96     
240    384    
-96    448    
-336   304    
-192   480    
512    -80    
-96    224    
-128   416    
192    432    
224    192    
480    480    
-1456  -192   
144    624    
816    880    
0      240    
-208   32     
144    -304   
-48    432    
160    112    
-272   -432   
-80    -368   
-528   -160   
112    -80    
-128   16     
48     -160   
-48    -304   
64     192    
0      64     
-80    -32    
80     16     
80     -16    
48     16     
-192   -112   
176    -560   
160    -96    
-352   -320   
64     -736   
416    -64    
-784   -144   
-416   -400   
240    -864   
-192   -752   
-80    112    
-80    -528   
-48    224    
-16    16     
64     96     
64     160    
48     128    
16     0      
192    -32    
-112   32     
-256   -64    
32     -16    
240    -192   
80     -128   
-160   -32    
16     384    
80     -1424  
-128   -208   
320    -272   
320    368    
-208   -16    
-240   272    
224    -96    
32     16     
-400   32     
192    -368   
-96    -160   
0      -112   
384    144    
32     -256   
-224   112    
112    -384   
144    128    
-272   -96    
64     0      
32     16     
-64    -48    
-176   80     
208    128    
-64    -128   
-208   64     
-16    -176   
-96    -96    
48     48     
0      -192   
144    80     
-176   80     
272    -688   
-2224  320    
80     -144   
96     272    
160    -64    
-304   288    
-112   -432   
256    -1664  
448    -560   
-272   432    
-400   -16    
32     144    
320    -32    
-32    144    
-400   32     
-112   336    
288    96     
160    400    
-288   -96    
96     0      
432    1280   
64     -624   
-1712  288    
704    -32    
480    944    
-1312  -192   
-512   -448   
912    352    
-496   1088   
-480   432    
256    48     
-32    -48    
-16    0      
224    -176   
-192   128    
144    64     
-800   -320   
144    -112   
-80    -32    
-48    64     
-160   0      
0      160    
-224   -304   
-304   -176   
880    464    
464    256    
-304   224    
48     -96    
-144   -256   
-448   144    
112    16     
16     160    
48     -160   
0      -448   
400    208    
-96    1088   
-1360  912    
144    -64    
-48    -128   
-352   0      
-304   96     
-80    0      
32     272    
176    -208   
-256   -144   
-416   -64    
64     128    
240    64     
-1536  736    
-208   -448   
800    688    
816    -224   
-1744  -112   
-464   240    
1104   -880   
-384   288    
-320   144    
48     112    
-16    -208   
256    -176   
-160   0      
-304   176    
96     176    
-352   -96    
480    288    
-416   -96    
-192   96     
48     -720   
400    -1264  
0      80     
-304   352    
-96    80     
-64    -128   
112    -128   
464    224    
-96    336    
192    -144   
-352   -144   
-128   240    
144    256    
-112   208    
-128   256    
16     288    
-128   224    
240    16     
-208   112    
192    0      
96     176    
-128   96     
192    0      
-144   -48    
-432   112    
352    0      
-432   144    
-192   -48    
-672   -16    
128    112    
-240   48     
192    -64    
-400   -80    
208    -16    
64     -720   
-704   -144   
560    192    
368    -352   
-480   48     
128    176    
128    -176   
240    -416   
-160   -16    
-400   48     
96     -112   
80     160    
80     112    
-48    128    
144    -64    
-624   320    
128    224    
448    -224   
-256   80     
-240   176    
256    192    
224    176    
-400   -48    
96     96     
208    80     
-320   -32    
128    176    
192    80     
-80    64     
-1056  912    
2432   -480   
144    -48    
-656   1040   
1200   -336   
-464   368    
-512   -528   
64     352    
-16    80     
96     -144   
-112   192    
-16    64     
0      -48    
-16    336    
336    -384   
-432   -64    
96     16     
240    32     
-16    96     
-176   -96    
-64    -1328  
-912   352    
896    64     
-416   304    
-80    176    
272    48     
-304   64     
-448   -256   
384    64     
144    -144   
-240   112    
0      0      
224    -16    
32     192    
-48    -32    
-528   192    
496    176    
16     64     
112    16     
-208   -48    
112    144    
-32    80     
96     64     
-160   -128   
-128   80     
432    16     
-288   80     
-32    48     
224    208    
-464   -224   
-1008  -80    
416    160    
64     -512   
-320   208    
-368   32     
272    128    
-128   224    
288    208    
240    176    
128    96     
-448   48     
176    16     
160    16     
-448   32     
208    80     
-16    96     
-48    -320   
64     -192   
-48    16     
64     144    
16     -608   
-1440  464    
1312   240    
-144   -368   
-288   -160   
624    192    
-288   -256   
352    192    
48     304    
-144   -16    
-80    160    
-112   0      
64     -496   
176    112    
-208   -16    
-48    64     
176    128    
144    -192   
176    16     
0      224    
-16    144    
432    64     
-464   144    
432    80     
48     96     
-336   -144   
-368   320    
544    -304   
48     80     
-224   -1232  
256    144    
112    -112   
-272   112    
736    224    
0      304    
-624   48     
-32    -64    
416    128    
-16    16     
-496   64     
496    48     
176    32     
-96    -64    
-272   208    
208    320    
-64    176    
-320   -768   
-192   -384   
864    -480   
-560   -2656  
-1648  -1008  
1376   352    
736    384    
-336   64     
-432   192    
112    16     
384    0      
0      -432   
-144   96     
32     -384   
32     112    
432    -816   
-192   64     
-480   -16    
16     48     
416    0      
-112   96     
-64    -544   
-432   -560   
464    -48    
-16    -208   
-208   256    
1136   -64    
-384   80     
-144   -272   
144    224    
192    -16    
-512   -80    
64     -96    
592    368    
-112   16     
-592   -192   
-16    -80    
432    224    
0      64     
320    -80    
-432   -944   
-144   -496   
240    48     
112    0      
-112   0      
-192   -288   
528    688    
-240   608    
-144   -240   
384    -1072  
-496   -272   
352    1008   
96     -400   
96     -112   
-464   544    
1216   416    
-128   1440   
-144   784    
336    -96    
-272   -288   
320    -160   
-32    160    
-144   -96    
32     96     
-32    64     
160    128    
96     32     
-32    112    
-64    -512   
-256   -752   
112    -752   
240    -256   
-256   224    
128    -80    
16     176    
128    -144   
80     -80    
-208   80     
32     -80    
144    16     
208    -336   
288    192    
-512   64     
-80    -416   
112    208    
1120   -560   
-672   32     
-96    -32    
528    -208   
304    208    
-576   -16    
-48    96     
400    80     
-32    -96    
-256   32     
128    -160   
64     -64    
-896   -192   
192    -336   
96     176    
-304   240    
0      -32    
80     -1024  
528    -288   
-1168  208    
304    -64    
368    16     
-128   -48    
-80    32     
128    320    
-208   144    
192    -256   
-128   -160   
-16    -16    
-240   16     
288    80     
64     -224   
-256   -80    
208    112    
224    -160   
-192   224    
160    -64    
64     -16    
-32    -272   
-80    32     
-16    144    
-192   128    
304    0      
-352   80     
-96    -32    
128    16     
672    -352   
-384   704    
1072   -432   
-640   160    
256    160    
-272   -16    
-368   144    
-64    -48    
192    -32    
-336   1552   
160    272    
32     -608   
240    -688   
-688   -336   
-432   -80    
112    48     
192    48     
-16    -48    
-32    -656   
-224   -320   
-64    -3456  
64     64     
-48    784    
2272   192    
-720   128    
-624   64     
416    -784   
768    -992   
-896   -1136  
0      -80    
-224   192    
-336   -16    
-48    -192   
432    -96    
-64    112    
-368   -432   
528    80     
-112   32     
-176   -48    
-352   240    
176    -96    
0      -48    
256    0      
224    272    
64     -192   
-448   64     
-672   288    
80     -128   
272    -64    
-112   96     
112    -880   
-928   272    
240    -208   
384    -240   
-336   -96    
-160   -80    
384    288    
672    -32    
-1408  224    
-320   -96    
96     -80    
-64    -224   
64     144    
304    -352   
-16    368    
272    -464   
128    64     
480    96     
80     96     
-576   -336   
944    -640   
-960   688    
-656   160    
-32    -208   
32     -192   
576    208    
32     96     
-880   240    
-1008  -320   
416    160    
-1184  -464   
-1088  160    
-48    -96    
-192   256    
-112   32     
-176   -16    
-32    16     
144    -112   
-96    80     
64     -432   
-592   128    
80     -336   
-176   320    
-224   -144   
-688   48     
-208   288    
16     224    
96     32     
-352   -32    
-320   176    
-96    -64    
-176   368    
176    -32    
64     240    
32     176    
-176   80     
-144   48     
64     0      
176    0      
-208   208    
-16    48     
-304   0      
352    192    
16     -144   
-144   0      
-32    48     
-80    336    
-192   448    
32     512    
112    272    
-128   224    
-208   160    
-32    656    
1104   224    
32     -368   
-1632  32     
736    -208   
400    -448   
-864   -192   
-32    96     
192    0      
64     112    
-560   -80    
-32    112    
128    16     
48     112    
0      96     
-64    48     
0      64     
288    96     
96     144    
-592   160    
208    96     
288    -16    
-176   272    
-128   -144   
48     0      
-240   -224   
-32    48     
-288   -240   
160    208    
-1296  544    
1472   -688   
704    -352   
-624   16     
-144   -80    
-112   480    
432    -208   
-176   -64    
96     448    
-192   -16    
0      -64    
-256   -80    
96     160    
112    -208   
-32    -32    
64     32     
0      208    
80     64     
-48    -16    
-16    0      
-160   -1280  
-640   368    
672    96     
-272   128    
-160   144    
192    -64    
-256   16     
48     -160   
-144   128    
288    176    
-192   32     
-384   64     
96     160    
448    336    
-288   96     
-320   144    
368    -64    
-384   64     
480    48     
-368   80     
-128   128    
16     -128   
-48    80     
-128   -112   
-64    112    
-656   112    
272    144    
-128   -16    
-288   224    
1536   1200   
-1472  -96    
-2048  80     
1424   16     
-48    -64    
-832   16     
544    224    
256    64     
-384   0      
96     80     
320    64     
-192   32     
-96    48     
432    144    
-512   -32    
64     192    
112    32     
-32    -96    
-32    -352   
-16    -16    
-48    -32    
32     -720   
-1696  688    
832    272    
288    224    
96     176    
-96    32     
-352   112    
-256   160    
-32    0      
160    32     
32     80     
-112   -16    
-32    112    
16     192    
-16    -64    
-256   16     
288    112    
608    0      
-416   96     
-208   96     
464    224    
160    -176   
-352   -48    
-64    368    
288    -80    
-624   272    
-32    -48    
576    160    
320    128    
-464   0      
-48    96     
224    -96    
96     272    
-480   -144   
416    288    
-16    -464   
-912   224    
96     -240   
-336   256    
432    -112   
48     80     
32     160    
16     -48    
-128   128    
-96    -432   
-416   0      
96     80     
-16    -432   
-112   256    
896    144    
-2080  -128   
1120   432    
944    192    
-1664  160    
-144   112    
560    -640   
16     112    
-768   208    
384    96     
736    -80    
-400   288    
-336   352    
144    -1296  
64     -64    
192    272    
144    -624   
-336   -80    
240    -528   
64     -768   
0      -240   
-80    144    
-16    208    
528    -272   
-32    528    
-176   640    
64     448    
-80    272    
48     -432   
64     -608   
-320   320    
176    96     
-96    -192   
-64    -256   
80     -192   
144    192    
-352   -128   
352    -384   
-32    -224   
-160   -16    
32     -176   
-272   -128   
32     -144   
96     -1680  
-512   -192   
80     416    
-64    320    
512    544    
-208   672    
112    96     
-16    528    
-320   976    
1072   448    
-384   880    
-16    544    
480    -192   
320    816    
-528   880    
128    -752   
224    -384   
-128   -576   
80     96     
-208   160    
64     96     
336    -96    
-112   0      
0      112    
528    800    
-80    240    
144    -16    
-32    32     
-48    -32    
112    128    
160    -96    
16     256    
208    -192   
-224   16     
304    -208   
448    16     
-208   -320   
-256   -112   
320    -96    
448    368    
16     -208   
-528   416    
176    -48    
416    -128   
64     208    
-112   -240   
16     96     
16     -240   
272    16     
-144   -304   
80     128    
-64    -432   
256    -64    
-192   -256   
0      16     
112    144    
-16    384    
-32    -400   
96     -432   
-64    272    
272    16     
-64    320    
-16    -480   
368    -272   
-368   -176   
48     272    
320    192    
-144   80     
-112   -32    
176    144    
-80    96     
-48    112    
80     240    
64     -800   
-192   224    
0      -16    
144    16     
304    -352   
-192   304    
-224   -32    
64     48     
480    -352   
-320   -352   
-384   368    
224    176    
400    -48    
320    512    
1024   -320   
-1616  -32    
352    -112   
1056   -384   
-480   0      
-320   -336   
416    -32    
128    -336   
-48    64     
-16    -64    
96     112    
96     80     
16     -848   
-336   -896   
112    -224   
192    -272   
-16    256    
-32    32     
32     -128   
48     176    
-656   240    
2016   -288   
-752   -544   
-1472  -304   
1136   320    
112    -688   
-528   -16    
112    80     
384    -288   
128    128    
144    -208   
-48    -112   
-112   -1696  
-368   -96    
624    112    
64     -48    
-480   32     
128    16     
304    -16    
-128   160    
288    192    
-272   64     
-176   -128   
96     -32    
-960   208    
-144   -384   
-240   -160   
80     -736   
64     -32    
-144   -704   
272    512    
112    432    
448    -192   
-144   -80    
-80    128    
-64    -144   
-176   64     
176    336    
-512   336    
-1184  -176   
400    -176   
-64    -64    
-112   -48    
-48    -64    
-80    448    
848    -96    
-192   -1424  
-720   128    
-128   1120   
-656   -592   
-624   368    
-192   -176   
64     -160   
256    64     
-912   -128   
-528   128    
544    -64    
64     48     
-256   -528   
-112   -784   
-144   -368   
-96    -272   
-128   16     
-112   16     
-16    -96    
192    32     
96     -80    
320    176    
-1200  -352   
464    192    
528    -368   
-1696  -144   
592    -320   
960    -16    
-32    -240   
-672   -96    
864    -240   
96     -176   
-352   32     
176    32     
64     -96    
-16    -16    
416    48     
-800   -128   
32     128    
720    112    
-672   16     
-336   -64    
336    160    
-16    -208   
192    240    
-144   -560   
144    144    
352    -1136  
-32    -32    
-400   176    
144    -64    
224    -16    
256    96     
-528   0      
-496   -400   
192    -16    
912    -128   
-384   272    
-192   -112   
112    -432   
384    -768   
-160   -32    
-48    -592   
128    -48    
176    96     
-144   -128   
-480   -272   
128    -256   
-304   896    
-240   304    
64     -224   
400    176    
16     400    
-368   -512   
48     -48    
272    -32    
144    32     
-224   160    
-304   -80    
-304   -16    
416    432    
224    80     
-400   -256   
-672   -2864  
-1328  384    
1776   -16    
96     48     
64     656    
-112   -144   
128    672    
-912   208    
224    0      
-32    32     
-752   32     
-224   -48    
192    128    
256    -576   
-384   528    
128    144    
48     -112   
208    -144   
-128   96     
-144   176    
384    -640   
-1504  400    
144    -304   
816    -112   
-576   -96    
-592   -320   
48     80     
-208   -80    
80     80     
-80    208    
-272   -16    
-336   96     
320    0      
64     64     
-320   192    
-112   -160   
224    -96    
-368   -96    
48     -80    
-32    96     
64     128    
-112   64     
-32    112    
128    64     
-128   144    
-112   96     
352    96     
80     48     
-128   192    
736    1184   
-464   -320   
-1824  176    
976    0      
-400   32     
-416   192    
768    80     
112    208    
-560   80     
-144   32     
256    80     
256    -32    
-320   48     
-272   48     
-240   -352   
464    144    
-256   -80    
-336   144    
320    64     
368    32     
-288   0      
-96    -848   
-1744  1056   
1248   1040   
-16    560    
-736   -112   
-48    592    
-1008  208    
0      -16    
-48    -256   
-80    -48    
80     -48    
-176   80     
16     80     
352    32     
-32    -80    
-448   96     
48     -336   
-176   -80    
96     224    
128    272    
288    144    
-128   576    
144    -304   
-96    336    
384    96     
-784   -1104  
-496   144    
624    208    
-144   -48    
-176   32     
64     16     
32     448    
80     96     
544    -16    
96     240    
-672   -128   
208    -784   
560    48     
48     400    
-16    0      
-16    128    
256    64     
-96    -16    
-80    -336   
320    192    
656    -32    
-528   352    
96     240    
64     128    
-592   -1024  
1344   -496   
1296   -240   
-1088  864    
-944   -160   
752    192    
896    672    
-640   816    
-352   416    
192    288    
224    -272   
-48    240    
-288   32     
64     128    
-80    0      
240    -208   
160    -32    
-176   384    
128    208    
-208   -48    
32     -48    
-32    80     
64     32     
144    192    
-48    192    
-96    736    
48     -512   
240    -608   
0      608    
-80    304    
208    -832   
240    224    
-656   96     
-16    192    
320    -432   
16     272    
-352   688    
336    -64    
304    -400   
-96    704    
-160   448    
-176   -432   
256    -240   
160    -48    
-128   -32    
-48    -160   
-112   320    
16     -256   
48     -144   
-64    96     
-176   -16    
-48    -864   
-192   -656   
160    -1232  
160    -832   
32     16     
-160   -160   
-96    -32    
144    416    
16     208    
16     256    
-32    16     
0      160    
288    64     
32     208    
-208   240    
176    496    
240    32     
80     -912   
-192   272    
-80    288    
16     16     
160    -144   
-288   224    
-32    160    
-176   -384   
272    -304   
176    -864   
320    -656   
-560   336    
-32    240    
112    1344   
240    560    
-336   -304   
-64    -224   
-48    -352   
-128   -240   
112    -416   
144    -16    
32     64     
-176   320    
144    32     
-48    -128   
96     -368   
16     16     
64     224    
-160   -16    
96     -64    
256    16     
-208   112    
-384   -48    
768    -320   
-240   512    
-80    -880   
96     -1248  
336    -80    
208    624    
-240   560    
112    -336   
96     192    
-96    160    
0      112    
304    176    
-64    208    
-224   -32    
256    32     
96     -32    
32     16     
-48    -64    
-176   -208   
-144   -16    
112    128    
48     64     
-48    -736   
48     128    
-192   240    
48     16     
-80    96     
160    160    
-256   304    
-480   -416   
-1088  -176   
1744   32     
-384   -336   
-464   272    
240    -320   
48     -432   
384    -272   
-208   -416   
240    128    
-288   -1936  
-400   176    
352    48     
528    208    
-400   -48    
-160   64     
160    160    
32     192    
-48    64     
48     80     
-80    -32    
1328   144    
-832   112    
400    352    
160    112    
-688   80     
272    96     
368    -32    
336    160    
-368   -144   
-160   48     
128    48     
128    64     
48     96     
-352   -128   
16     112    
656    32     
64     480    
192    -16    
-112   -128   
48     -656   
-336   -560   
-576   -1232  
912    64     
-208   -272   
-448   176    
368    32     
576    -16    
-256   -16    
-112   96     
128    128    
-48    16     
64     256    
144    -160   
-256   96     
-208   -848   
608    16     
80     -144   
-32    32     
64     -16    
-96    80     
16     -80    
416    208    
16     32     
144    64     
-800   304    
-112   -464   
736    96     
-208   -192   
1568   2240   
-1088  1568   
720    192    
176    -928   
-1216  192    
448    -192   
768    560    
-384   -16    
-368   -64    
384    80     
32     -112   
80     400    
-448   -80    
112    32     
0      -208   
64     160    
-176   -80    
-160   112    
-224   -560   
784    448    
240    -176   
-816   336    
496    272    
-48    -1056  
-480   272    
288    -352   
576    432    
-352   -48    
80     144    
176    80     
288    -112   
-480   -112   
64     -96    
-144   48     
48     -1552  
-80    64     
160    -128   
160    -48    
-208   -208   
64     -448   
96     -64    
64     -336   
32     -16    
-128   -336   
144    -96    
0      16     
-288   -176   
96     0      
304    -64    
64     -208   
-336   64     
-64    -560   
688    256    
-112   -16    
-544   80     
-928   32     
192    -224   
224    -304   
-176   -416   
48     -144   
-240   -368   
352    -128   
64     -112   
-160   240    
-112   -96    
128    0      
160    -352   
-608   176    
-48    -800   
32     -272   
-272   208    
-176   128    
160    -128   
144    -400   
-64    144    
-176   0      
64     -128   
240    -656   
-176   288    
-48    -144   
-400   -1536  
2176   -448   
240    512    
-1312  -592   
-288   -16    
512    128    
288    -96    
128    48     
112    208    
-256   176    
48     48     
176    -80    
-176   -464   
-160   -48    
160    560    
336    -96    
-432   -16    
112    -176   
-48    -224   
-64    0      
96     0      
-400   -144   
944    -368   
-736   160    
320    -688   
64     192    
-192   336    
192    -832   
-128   288    
-160   -160   
240    112    
400    32     
-576   96     
-80    -64    
224    -304   
128    -224   
-64    400    
-688   352    
144    -96    
-912   -400   
-128   -256   
-32    272    
256    -96    
0      -80    
48     48     
-32    -192   
-80    48     
112    -80    
96     0      
224    -48    
752    48     
-2288  624    
16     128    
384    -416   
608    -32    
-288   336    
320    288    
-48    -96    
-400   128    
400    -528   
240    -112   
-352   -16    
208    -64    
96     -400   
-368   -160   
112    -128   
80     0      
-64    256    
208    128    
-48    128    
-128   32     
-416   144    
2672   -640   
-592   432    
-1152  -192   
896    272    
1088   1104   
-848   1088   
-608   688    
672    192    
64     256    
-176   0      
-128   48     
224    288    
-48    464    
160    48     
224    -144   
-1424  464    
720    400    
-80    272    
-512   240    
224    -144   
112    224    
-336   1072   
368    1024   
640    128    
-1040  -16    
-176   -688   
160    -192   
-112   208    
-384   16     
256    -224   
64     -336   
-304   -368   
-1168  720    
-448   0      
336    -368   
256    448    
496    752    
-496   656    
-240   80     
448    -272   
-48    -128   
-752   -384   
288    384    
96     560    
-464   416    
-576   -368   
160    64     
160    -160   
896    2592   
-1072  1248   
304    -112   
1472   -304   
-672   400    
-960   320    
592    -1040  
432    128    
-32    560    
-464   -304   
128    -128   
608    112    
-112   112    
-512   96     
208    112    
-112   -128   
208    256    
32     48     
-368   288    
-16    80     
32     -144   
-448   -16    
192    368    
816    16     
-672   96     
-240   -624   
496    32     
160    432    
-368   -128   
-112   224    
144    272    
288    128    
-368   48     
-384   -224   
272    -32    
288    800    
-576   848    
48     448    
-544   960    
144    816    
-176   -560   
-288   -432   
144    -80    
-80    544    
480    160    
-224   64     
-384   208    
288    672    
448    -1376  
-224   -304   
-720   64     
-176   768    
1776   -352   
-768   288    
-864   -400   
352    -176   
448    -624   
16     416    
-224   672    
-128   -816   
-400   -192   
224    688    
352    304    
-368   -176   
-48    -432   
304    320    
0      528    
-208   192    
-272   -160   
192    -400   
-224   16     
144    -160   
-288   96     
64     -48    
208    -592   
-320   -416   
160    32     
-96    -448   
-560   448    
-80    288    
560    848    
-448   -1216  
-720   624    
272    416    
528    -1104  
-496   -1104  
160    -416   
288    192    
-224   224    
-176   432    
192    592    
48     112    
-16    -48    
64     -256   
-352   160    
176    -32    
-96    -176   
48     -32    
-144   -256   
240    -32    
-80    96     
-240   1632   
672    -320   
-704   -240   
64     624    
512    -576   
-256   -256   
-384   32     
384    96     
176    -64    
-240   -64    
-32    -80    
-128   -96    
-160   -128   
160    -16    
-48    -256   
-272   -48    
0      160    
288    0      
-160   192    
-32    -16    
96     96     
-288   112    
256    64     
-400   -224   
128    112    
160    -48    
-48    80     
-272   -144   
368    48     
-800   192    
96     -208   
1696   0      
-624   -160   
112    256    
592    80     
-192   144    
-224   32     
-16    144    
208    -64    
-144   208    
16     16     
-32    192    
320    144    
-368   144    
112    48     
48     32     
-576   144    
240    32     
144    96     
-288   -368   
704    752    
1216   16     
-592   288    
-16    80     
352    320    
-864   64     
-224   -16    
784    128    
-48    208    
-336   80     
-160   48     
256    32     
64     64     
-80    112    
48     0      
176    208    
-320   -32    
-48    -416   
-576   256    
112    144    
0      -80    
-592   -1776  
-240   176    
-672   -112   
-80    32     
-208   -352   
-672   16     
0      288    
592    400    
-528   80     
-272   48     
352    -96    
160    -64    
-336   96     
272    144    
-368   48     
-112   -176   
-80    288    
528    224    
-384   64     
0      96     
352    144    
-64    64     
-96    176    
160    -80    
128    16     
144    -16    
320    192    
-1600  -2112  
2384   -1488  
576    -224   
-1072  96     
640    64     
-144   -240   
144    496    
64     0      
-80    32     
32     -144   
240    240    
-112   -64    
80     208    
464    -144   
-400   80     
-32    80     
208    48     
64     32     
-80    -112   
-464   -512   
208    320    
64     240    
-112   0      
576    16     
400    32     
-208   192    
-96    -32    
336    224    
-480   -128   
192    160    
320    112    
48     32     
-144   176    
-352   -128   
464    256    
-16    -288   
-112   304    
-384   -704   
240    32     
0      176    
-256   -16    
-128   -16    
432    0      
-288   32     
112    16     
-64    192    
0      -224   
-144   64     
128    -192   
176    -224   
-528   -400   
-96    -512   
800    -256   
32     -192   
-144   -272   
224    80     
-336   208    
64     352    
448    48     
64     144    
-336   240    
256    -48    
144    48     
-272   -80    
32     -160   
64     -400   
208    400    
-192   -912   
-112   288    
160    576    
128    448    
-224   256    
208    208    
-112   272    
-80    -112   
64     -96    
272    -160   
496    464    
-528   512    
-48    240    
240    -256   
224    -1664  
-1360  1200   
960    0      
464    224    
-32    -400   
-768   240    
176    -80    
384    144    
-128   -208   
128    64     
-48    -96    
-32    48     
304    -336   
80     128    
-368   128    
192    192    
32     -320   
-320   240    
-80    -320   
208    -240   
384    -416   
-752   -1216  
288    -1120  
128    304    
192    -656   
-224   -240   
-16    224    
368    -224   
96     304    
-208   -64    
-96    352    
64     -80    
352    -752   
-32    -224   
-224   -48    
240    272    
192    -432   
-304   -160   
112    -96    
176    48     
-144   -96    
-96    -128   
0      128    
240    64     
16     -368   
-240   288    
128    16     
128    -96    
16     0      
-592   -336   
1008   -176   
736    480    
-1072  -528   
-624   -480   
432    -144   
48     176    
-16    -400   
-224   96     
16     -896   
-48    160    
176    -352   
48     0      
32     -32    
-160   -224   
160    160    
-16    112    
-208   -656   
32     32     
256    96     
-48    0      
-96    -592   
-1728  832    
1152   -832   
992    -848   
-496   80     
-528   -368   
384    64     
-336   -960   
-144   -1136  
528    -496   
-176   320    
-176   240    
240    -320   
-32    -48    
96     -112   
64     -240   
-224   -320   
-48    -240   
368    -112   
-144   272    
-64    -416   
-288   64     
288    16     
352    1136   
-1168  -48    
-528   -672   
1536   -1488  
-144   -480   
-144   -368   
-128   -240   
-128   336    
32     -816   
-720   32     
160    -48    
-320   160    
304    -688   
-176   -1552  
-512   -592   
288    352    
-128   -112   
176    -224   
-352   32     
16     640    
368    -208   
368    512    
-64    592    
80     32     
-32    -16    
-208   64     
-336   96     
256    640    
1424   656    
-720   -832   
-800   208    
608    640    
464    592    
-480   -576   
-368   80     
128    -224   
368    480    
-224   -272   
-432   -224   
80     -448   
560    144    
-240   96     
-480   -96    
48     64     
208    -960   
96     -48    
96     272    
-96    -16    
-112   -112   
-288   160    
400    160    
-864   -736   
304    -496   
240    -432   
-896   -512   
-80    -1296  
656    304    
240    752    
-288   624    
16     -768   
368    -224   
-400   -336   
112    -384   
80     -432   
-240   -256   
32     -336   
240    -144   
-144   32     
-80    -128   
-112   64     
608    400    
-720   -272   
-544   -512   
544    304    
-352   -416   
-304   -592   
32     -208   
208    -112   
-1504  368    
224    704    
752    544    
224    416    
-304   288    
-464   -64    
144    -160   
0      576    
-224   480    
16     48     
80     -144   
-352   336    
-320   32     
160    -192   
32     112    
-624   304    
-192   608    
-144   400    
128    -32    
208    32     
-304   -320   
-256   64     
304    -320   
256    432    
-16    432    
-288   80     
-208   -304   
0      -304   
-256   -736   
896    -2128  
-656   544    
0      -144   
144    144    
-640   208    
-160   -848   
-80    48     
160    -96    
-336   16     
16     112    
64     240    
64     -160   
-48    256    
-512   176    
256    80     
-128   352    
-176   -16    
-48    -112   
80     112    
-496   -48    
-496   -368   
176    -48    
608    48     
-336   -80    
400    288    
112    -80    
-224   144    
-432   128    
368    -80    
208    -128   
-192   -64    
-32    -208   
0      -160   
-80    128    
-208   16     
208    288    
-736   -96    
-16    176    
-48    -144   
-48    64     
-32    112    
208    48     
16     208    
-144   16     
-240   64     
80     192    
144    -80    
-432   48     
272    80     
-1408  -32    
1552   624    
992    -208   
-896   192    
224    112    
-320   80     
-224   -240   
-176   112    
0      -144   
16     144    
-64    32     
-16    64     
-64    0      
-96    -112   
-368   48     
352    -96    
-160   192    
-384   -208   
160    208    
-16    64     
-192   112    
-752   -80    
1520   320    
688    -480   
-2128  96     
976    160    
896    16     
-400   480    
-640   512    
96     -192   
80     -16    
-32    144    
-208   -48    
-112   32     
-16    176    
224    0      
-48    320    
-336   -80    
-112   128    
304    -48    
-176   80     
-16    128    
-928   144    
48     -80    
192    96     
-368   -592   
-288   -368   
208    592    
112    64     
-560   -128   
224    32     
416    192    
-192   112    
-176   272    
144    -48    
16     48     
-64    -112   
-416   -144   
-48    16     
368    480    
-224   -16    
-16    112    
16     -96    
-368   112    
144    176    
-32    32     
112    128    
112    -32    
-160   176    
-1232  -1488  
1984   -1152  
912    464    
-1616  320    
-880   320    
1280   112    
-144   -304   
-560   48     
256    240    
432    -80    
-304   192    
160    48     
-64    64     
-48    64     
128    64     
320    -16    
-448   128    
-48    0      
-16    80     
-272   -112   
496    48     
-448   352    
32     64     
304    288    
-144   0      
-416   128    
272    96     
-288   208    
432    176    
-144   256    
-160   32     
352    176    
16     288    
-416   -96    
192    384    
112    368    
-320   352    
192    160    
-128   240    
208    240    
48     176    
-192   96     
16     -112   
-80    -96    
176    -96    
336    336    
-16    368    
-432   352    
128    208    
208    304    
-160   64     
-112   -464   
512    -800   
-16    528    
-384   544    
240    432    
64     432    
-320   352    
0      224    
608    -48    
-240   -192   
-288   -64    
176    -128   
112    64     
32     560    
320    -16    
-256   288    
16     -656   
144    -192   
48     -208   
-96    224    
-144   336    
96     208    
-112   96     
-64    -80    
-80    -208   
304    -400   
112    -384   
-32    -240   
48     432    
-80    -32    
736    544    
-1136  832    
160    -320   
624    -1760  
-32    -160   
-464   240    
352    448    
512    -448   
-368   -80    
-64    336    
32     32     
-80    160    
96     112    
80     -144   
-304   -368   
128    176    
336    128    
80     -256   
-112   -1408  
144    -80    
160    -608   
-720   -128   
256    128    
496    -352   
-32    96     
-192   128    
-48    -80    
64     0      
80     16     
16     0      
-112   96     
-160   80     
128    176    
-112   -464   
176    -64    
16     -688   
-192   64     
96     -272   
304    144    
-240   64     
-160   144    
48     80     
32     176    
224    112    
16     -240   
-224   112    
-32    -144   
112    160    
224    -752   
-512   -912   
1488   -2208  
-352   448    
160    -176   
-96    256    
-224   -80    
-64    112    
-16    560    
496    -656   
-144   192    
-176   -96    
160    656    
224    -256   
-144   48     
-64    -512   
256    576    
64     -432   
-288   -128   
-144   -1008  
576    1088   
-48    320    
-304   -464   
-1328  1376   
1600   -752   
-288   320    
416    -176   
-144   -320   
-496   -1792  
-896   -1472  
720    -384   
352    192    
-352   448    
112    496    
-16    336    
-160   -80    
48     176    
336    -16    
-512   -464   
-224   -1104  
416    128    
-48    -192   
0      160    
160    320    
-288   400    
304    -272   
768    0      
480    336    
176    688    
-224   1840   
576    0      
112    -192   
-176   -2528  
256    -384   
64     -576   
-336   256    
608    240    
-368   -608   
-800   -2528  
-592   -144   
384    448    
-144   272    
160    -192   
32     -1120  
112    608    
432    -368   
176    576    
0      -224   
-160   -16    
208    896    
224    -528   
-32    -672   
384    -1472  
384    336    
-208   -288   
-432   32     
496    432    
32     80     
112    112    
-80    304    
-384   -96    
400    128    
272    -80    
-192   96     
-752   0      
352    -80    
480    -288   
-368   16     
-272   -320   
-288   -1200  
320    -160   
288    592    
-272   176    
-16    -80    
-528   -112   
176    80     
576    32     
-96    160    
-208   -80    
-848   -144   
304    320    
400    432    
-48    736    
-48    208    
-96    -128   
-256   48     
304    -1936  
-32    -112   
-176   -32    
208    -64    
64     -48    
-16    -224   
16     112    
256    -48    
-32    -48    
-128   -80    
464    80     
32     240    
-80    -320   
272    -1008  
-64    80     
-48    -336   
480    864    
-1040  96     
-64    96     
480    0      
-128   -160   
-112   -144   
-48    -224   
-112   0      
32     -32    
-640   -80    
80     -288   
-112   64     
432    16     
-192   96     
-176   -560   
176    96     
192    -2000  
-448   -64    
192    -496   
96     32     
-160   16     
128    192    
16     -64    
-48    -32    
-336   -992   
-512   -256   
16     400    
128    -272   
16     128    
-320   -1280  
1920   640    
1024   -640   
-1440  0      
-144   192    
448    80     
-656   -32    
320    -512   
-48    -16    
-112   -112   
-224   64     
480    -32    
-208   368    
-16    -128   
-48    -192   
128    -304   
144    80     
-80    -64    
32     -304   
-144   -80    
112    -16    
-544   352    
976    -64    
416    -16    
-688   -304   
-208   272    
592    -416   
-176   -256   
-416   -32    
192    32     
240    16     
112    0      
-336   16     
-80    96     
352    240    
272    176    
-320   -48    
-224   64     
16     80     
144    -64    
-144   96     
128    -112   
112    288    
112    -208   
-288   96     
416    0      
112    80     
-272   48     
-656   16     
-80    -160   
-688   -320   
-112   448    
896    192    
-640   -160   
-544   -32    
176    16     
256    48     
-464   208    
-304   16     
464    64     
-176   -144   
-272   -112   
-16    96     
-16    -160   
-96    64     
272    48     
-368   -128   
-1088  -48    
480    -64    
-80    -32    
-192   64     
-432   -880   
-720   240    
1760   -320   
-528   48     
-1328  -64    
704    -16    
272    48     
-1008  48     
-32    -80    
640    48     
-16    -16    
-320   112    
48     16     
96     16     
128    96     
-96    -128   
-128   48     
-288   -112   
112    160    
240    -32    
-144   -304   
672    272    
592    32     
-624   80     
-400   -208   
384    208    
144    96     
368    -400   
-720   240    
16     80     
304    -304   
224    -16    
-48    -48    
288    128    
16     -144   
144    -96    
16     192    
-464   352    
-224   96     
-16    48     
128    16     
-272   -96    
-144   112    
0      -112   
-240   -32    
240    -208   
32     96     
-368   -64    
64     -944   
-592   -2592  
-864   -160   
320    432    
592    416    
224    64     
-1040  -192   
96     208    
624    -208   
-624   0      
16     -32    
320    160    
-304   -176   
-64    320    
48     -240   
-48    0      
336    128    
-64    16     
-128   144    
112    -416   
-512   -304   
160    224    
128    176    
192    112    
304    -144   
-496   224    
64     -64    
-928   48     
256    80     
-32    480    
224    592    
-480   96     
64     -128   
496    16     
0      672    
-832   96     
-32    192    
912    880    
-496   992    
-288   288    
-16    128    
320    224    
-192   112    
64     64     
48     -32    
-32    592    
144    912    
-16    -16    
80     -288   
-192   496    
64     48     
112    80     
-192   -96    
592    -80    
-192   480    
-208   576    
144    224    
-288   -1216  
-192   1104   
288    592    
112    -16    
160    0      
-240   0      
-48    64     
-80    -64    
336    96     
-16    464    
-80    112    
-480   -32    
176    0      
112    48     
-48    32     
-96    -48    
32     64     
208    400    
-96    304    
-144   48     
-112   0      
384    -144   
-224   -64    
-80    128    
0      48     
-448   -112   
160    -256   
-224   240    
208    -192   
256    272    
-192   -64    
-64    -48    
-32    112    
-16    112    
96     32     
16     96     
32     96     
-80    0      
144    0      
-16    64     
208    -96    
-64    224    
96     224    
-48    48     
448    640    
-192   496    
-112   -64    
688    -80    
-400   64     
-144   -16    
368    208    
-64    160    
-208   112    
240    32     
48     80     
-64    -32    
-48    144    
-48    112    
96     16     
-64    -544   
-112   32     
176    -176   
-64    -176   
-96    192    
224    304    
-272   240    
-112   128    
464    112    
64     112    
-416   -16    
128    112    
32     -48    
-224   112    
144    -288   
-1504  -1568  
1488   -304   
48     -144   
-400   -272   
64     -16    
336    -16    
-352   160    
-624   -96    
144    128    
144    208    
-208   -32    
-48    48     
-32    144    
208    272    
128    64     
-272   -112   
-96    208    
48     -64    
400    -144   
-192   -240   
224    -480   
-1984  928    
704    320    
448    304    
-336   464    
112    16     
384    1440   
-784   1344   
-352   1120   
544    464    
-48    -432   
-160   16     
96     -112   
-128   400    
-272   160    
176    -144   
272    784    
-768   736    
-144   -128   
224    496    
352    96     
-176   160    
-624   224    
912    -416   
-240   240    
-432   -1136  
-512   -192   
288    -832   
160    16     
176    64     
-464   0      
144    32     
368    144    
288    -144   
-160   0      
-160   272    
384    48     
80     144    
-432   -224   
224    -48    
256    80     
-224   176    
-80    -1104  
-192   176    
272    208    
-592   352    
96     -48    
96     -32    
576    720    
-64    448    
496    -1504  
240    560    
-608   192    
-496   16     
720    288    
-160   -320   
304    336    
80     -864   
16     144    
192    -816   
192    240    
-64    -1024  
-352   64     
208    192    
-16    96     
-288   176    
224    -16    
-288   -64    
544    -528   
160    1056   
32     400    
-64    256    
-768   -448   
384    128    
528    -176   
-80    320    
-432   -32    
256    224    
432    -16    
-112   176    
-160   304    
192    352    
304    -96    
-256   -224   
0      48     
368    -64    
368    0      
-224   -128   
-448   256    
576    0      
96     32     
-96    112    
-80    80     
32     352    
304    -176   
-512   -144   
352    -560   
128    304    
-160   -304   
80     352    
176    -16    
336    -96    
-528   64     
-176   -160   
-240   -416   
-96    -240   
-48    16     
240    -304   
16     0      
64     -1008  
-32    -400   
-112   -16    
288    -832   
-96    -112   
32     -144   
272    320    
-288   352    
-192   -432   
576    -240   
-80    -32    
-128   -16    
432    -32    
-96    -48    
-32    80     
-16    -144   
-192   -384   
-64    224    
80     208    
-112   -176   
-496   -1824  
2464   912    
1200   -1360  
-1680  -96    
-160   608    
704    -80    
-624   -224   
448    -144   
416    -288   
-544   288    
-16    -208   
416    -528   
-384   144    
-208   16     
160    176    
576    -32    
-448   -496   
64     -208   
80     112    
-128   -192   
32     48     
-336   720    
1296   -480   
-192   -368   
-864   144    
960    96     
400    -16    
-1728  -496   
-112   -48    
480    -464   
-48    64     
64     -112   
64     -80    
80     -64    
272    -1456  
-224   64     
-464   176    
640    32     
-208   48     
256    -208   
-144   -80    
96     -208   
-240   64     
288    -192   
64     48     
288    -64    
0      144    
-80    -656   
-352   -48    
208    -336   
-672   -480   
-96    112    
944    80     
-384   -48    
-544   32     
-144   -48    
528    -128   
-64    -16    
128    -176   
16     -176   
-32    48     
-112   -112   
-80    -448   
0      176    
-32    -352   
-160   240    
176    -880   
-304   -160   
176    -368   
208    -224   
-208   48     
32     -608   
-1472  352    
1104   192    
336    32     
-720   96     
-816   -80    
192    -48    
-336   -176   
-464   16     
560    48     
64     -592   
-144   -32    
-112   64     
48     -64    
-272   96     
176    16     
-320   16     
-128   -80    
-112   -32    
112    32     
-208   -128   
512    384    
1008   -384   
-1488  -16    
160    176    
288    -768   
-192   -160   
48     192    
0      16     
-368   -32    
336    -32    
288    -64    
-256   48     
-368   80     
-16    -208   
752    160    
-656   -240   
-384   -192   
240    -496   
240    -16    
144    144    
176    -304   
-592   224    
176    -64    
272    432    
-272   112    
-496   -112   
-192   -128   
1232   400    
272    -912   
-2464  -880   
-192   -368   
1728   160    
-1136  -176   
-704   448    
1216   928    
-896   560    
-720   -208   
416    160    
320    -80    
-480   16     
32     160    
192    64     
-80    -32    
-224   -160   
16     256    
-384   -128   
112    -176   
368    96     
-192   848    
-288   16     
-192   -96    
736    -624   
-224   272    
-496   224    
-64    -752   
-304   -576   
-96    -192   
-144   416    
-352   -16    
64     304    
240    192    
16     224    
-480   -272   
128    0      
144    96     
128    16     
224    -208   
-80    -32    
48     48     
-208   0      
-32    -128   
-624   -832   
-272   688    
112    608    
-80    432    
112    416    
-112   -400   
-144   160    
48     128    
-160   -896   
-176   -304   
288    -1136  
-192   -752   
208    384    
-384   896    
-112   -80    
-432   320    
224    32     
-208   80     
-176   32     
-48    -112   
80     -256   
-544   -32    
-112   304    
272    64     
-192   -144   
208    -80    
16     80     
96     -32    
-96    16     
128    48     
-224   96     
0      64     
-544   -96    
192    256    
-400   208    
48     176    
224    16     
-256   112    
96     928    
736    352    
-336   -176   
-208   224    
-128   96     
224    176    
-368   176    
-32    -64    
272    -112   
16     96     
-80    224    
112    16     
0      -80    
144    48     
32     64     
-48    208    
-48    144    
-144   48     
-64    -128   
-240   -256   
672    -816   
-96    496    
-48    -64    
-288   208    
224    -16    
64     368    
-64    288    
-176   -176   
64     -128   
-16    80     
80     128    
-64    32     
64     64     
112    -32    
0      0      
-192   352    
80     400    
32     944    
-112   112    
-64    -192   
-128   160    
-80    128    
-16    240    
160    -16    
-48    -176   
-16    -32    
96     96     
48     192    
64     96     
-1248  -1168  
0      -192   
992    16     
-880   -48    
-240   1408   
576    -304   
-400   480    
64     160    
320    -48    
-16    -864   
-512   96     
48     -80    
128    256    
-160   -96    
-192   176    
224    16     
64     -208   
-352   -32    
-64    32     
272    288    
-64    1216   
576    -736   
-1840  96     
928    -704   
-1808  2128   
256    96     
-64    0      
-592   -144   
560    -400   
48     48     
-224   128    
-80    -32    
224    -64    
288    -128   
-384   64     
-112   144    
416    160    
-96    320    
-176   -16    
32     -432   
-288   -80    
288    880    
-928   -416   
-208   80     
672    128    
-352   -240   
96     272    
848    480    
96     -176   
-464   160    
32     240    
640    32     
208    272    
-560   80     
-256   0      
-416   128    
32     -128   
-448   400    
304    -240   
528    16     
-368   128    
-224   16     
224    16     
-320   16     
112    144    
-400   144    
-160   80     
208    112    
-16    0      
-624   -1648  
1312   -1744  
736    160    
-480   496    
-432   128    
192    208    
400    32     
-112   128    
-16    -144   
-160   -64    
272    -480   
-16    304    
-176   16     
224    208    
-176   -16    
80     96     
-208   0      
-144   64     
-112   -288   
720    448    
-80    -176   
-416   288    
208    448    
480    224    
-320   -112   
-464   -32    
512    -32    
-592   64     
240    -224   
-144   80     
208    48     
-32    -32    
-208   96     
288    288    
-256   -48    
-160   -128   
176    -80    
-16    192    
272    64     
-688   144    
304    -64    
448    64     
-576   -768   
32     -160   
-160   64     
336    0      
-448   176    
144    112    
-240   -288   
48     64     
-96    -240   
-144   -544   
768    -80    
288    -288   
-224   -400   
80     -464   
176    32     
-512   -752   
-176   96     
272    0      
-144   -96    
-80    208    
16     160    
96     -80    
-48    96     
0      -32    
224    -400   
-112   -416   
384    -80    
-864   496    
304    -352   
-64    80     
48     -400   
-32    -16    
128    -352   
-48    112    
-240   368    
448    368    
-384   -352   
-32    -48    
304    208    
-1056  1424   
2368   -608   
-128   -240   
-800   -80    
496    80     
176    -880   
-832   160    
528    1104   
-288   -832   
128    -144   
208    64     
-352   -240   
-80    160    
400    464    
224    -128   
-336   -272   
48     -32    
48     128    
112    96     
32     -80    
-176   -1408  
-912   48     
1008   336    
-432   -96    
-128   0      
96     144    
-272   -128   
128    -224   
240    336    
-192   -16    
0      -256   
80     0      
-192   -64    
368    80     
-224   -128   
-32    256    
192    -304   
-368   176    
320    -208   
-48    48     
-112   -176   
96     176    
112    -16    
-32    208    
-144   -112   
-16    64     
320    64     
-128   -400   
-224   -432   
1904   2320   
464    -16    
-2656  -32    
160    128    
944    -16    
-464   192    
-624   -192   
896    -2288  
176    -416   
-464   -384   
160    -496   
224    -64    
0      -816   
-128   -304   
272    -176   
160    -144   
-192   160    
32     -176   
80     -1184  
528    -224   
-224   -1968  
384    1056   
-1120  -928   
-1072  304    
960    -352   
768    -816   
-608   32     
-560   -400   
496    -16    
48     -64    
-176   -176   
-176   -2464  
-16    336    
688    -224   
16     224    
-272   -144   
-528   80     
480    -16    
-336   -80    
-432   -336   
272    -224   
-1088  -144   
-208   -320   
-176   560    
-160   -480   
176    -96    
96     -80    
192    -928   
-624   480    
288    -32    
-560   144    
-160   32     
160    -272   
352    -144   
-288   320    
-720   -32    
-624   80     
560    -64    
784    -448   
-320   -96    
80     480    
640    -96    
-144   144    
-96    -1072  
-144   32     
432    240    
-384   256    
-192   -80    
-32    -160   
128    -32    
-256   -304   
432    400    
1040   -336   
-1376  16     
-288   176    
896    -272   
-320   96     
-464   1904   
576    -64    
-112   -32    
-96    -384   
48     -112   
-160   144    
0      64     
-160   16     
320    48     
-544   -48    
-64    -16    
-80    -80    
-176   384    
-48    512    
176    -32    
128    48     
-960   -432   
688    -608   
0      -640   
192    -336   
-240   -144   
176    -48    
-64    -208   
160    112    
0      -16    
160    -368   
-336   -688   
256    -784   
-656   -288   
-48    -144   
272    240    
-416   304    
128    -352   
400    -832   
144    -96    
-144   32     
160    -512   
-272   -304   
32     352    
0      -176   
-112   -48    
64     -560   
-128   -352   
-144   64     
128    -928   
-1280  736    
464    -272   
672    384    
80     1088   
-656   -64    
320    -1088  
144    32     
-336   656    
-16    -48    
64     -96    
208    -80    
-560   -592   
-16    -400   
-176   32     
272    48     
96     16     
-384   -464   
160    64     
-96    -32    
-96    96     
0      208    
-96    -32    
-80    -240   
48     -32    
16     352    
-160   720    
16     368    
240    -48    
-64    0      
-640   496    
-560   672    
80     -384   
112    224    
-176   64     
-144   192    
80     176    
-928   240    
-176   368    
-464   -96    
-128   -192   
0      -32    
240    48     
-112   288    
-176   176    
32     -224   
-32    -192   
-320   -256   
-144   -128   
-16    112    
-48    592    
544    -80    
-1120  192    
432    -352   
-288   -112   
-128   288    
0      512    
-96    -48    
-208   -352   
-96    464    
96     -112   
224    -272   
-192   -368   
-64    -16    
128    112    
32     96     
-352   0      
-368   112    
208    0      
96     224    
-128   0      
-576   -32    
0      272    
0      16     
-192   16     
-80    80     
-96    96     
48     144    
80     -112   
848    -336   
-2352  736    
16     304    
688    -48    
-272   432    
176    -288   
-640   -112   
-176   -352   
0      16     
-32    -336   
-400   32     
272    -336   
192    160    
-304   -128   
-80    80     
176    96     
112    -16    
32     176    
-192   -32    
-208   48     
32     -32    
32     -416   
-1792  1040   
912    128    
-480   -144   
-192   -480   
-128   -144   
352    -48    
-992   96     
400    32     
208    -64    
-464   144    
192    48     
0      -48    
-128   176    
256    32     
-288   0      
16     0      
-96    112    
-176   -176   
240    0      
128    336    
-368   256    
-48    64     
-240   0      
384    -48    
192    960    
-416   416    
-288   -528   
-16    304    
-48    -48    
-144   176    
176    96     
144    -80    
-864   -224   
560    -448   
-80    192    
32     -208   
448    144    
336    368    
-704   160    
80     16     
592    208    
-592   96     
-384   -16    
784    512    
288    -64    
-1040  32     
160    112    
-112   -448   
-1440  -1472  
-704   48     
448    -160   
-336   -64    
-80    192    
-144   176    
144    -160   
-144   144    
112    352    
-240   -176   
-112   64     
96     32     
-272   32     
96     64     
224    80     
-16    -48    
-176   32     
-80    0      
560    80     
-1184  32     
832    0      
0      0      
-528   -128   
-256   0      
-112   -16    
160    64     
288    256    
112    -224   
-352   96     
96     256    
0      96     
272    448    
-368   -112   
-144   160    
32     160    
496    304    
-384   -16    
-192   528    
416    -112   
-224   304    
0      -64    
-464   16     
192    -112   
368    64     
-208   64     
-144   272    
416    640    
400    304    
-528   32     
224    48     
-256   -64    
-256   -1136  
-832   16     
400    -208   
144    -160   
-80    -112   
544    -128   
272    32     
-304   -512   
-288   112    
160    112    
64     -80    
-80    -160   
128    48     
-32    144    
-48    -80    
-48    160    
496    368    
-416   128    
16     -16    
448    -256   
-176   272    
-224   112    
192    176    
32     176    
-288   64     
384    320    
-96    384    
64     -32    
-32    -16    
592    2512   
-528   -1424  
-1472  848    
640    -352   
96     240    
-304   112    
32     96     
240    -512   
176    -3344  
-336   576    
-16    496    
176    64     
48     128    
-208   16     
336    192    
240    736    
-336   -112   
0      224    
256    208    
-176   304    
-464   -784   
1168   -512   
-304   448    
-368   416    
592    16     
-144   48     
144    208    
-208   768    
80     -16    
-128   -16    
0      176    
224    -80    
-32    144    
-336   80     
176    288    
176    -96    
32     -304   
-208   288    
160    -48    
-80    128    
32     -1104  
-16    112    
-32    48     
-80    80     
-80    208    
352    96     
-224   -192   
-112   0      
48     32     
128    272    
-1232  -64    
400    -560   
1632   -96    
-720   48     
208    400    
256    -832   
-176   160    
-32    224    
-208   -160   
336    -16    
-112   0      
-96    64     
112    64     
192    208    
-448   -16    
160    192    
288    16     
-16    144    
-224   -128   
96     -48    
128    -464   
752    -432   
-1168  -928   
288    768    
272    1040   
-480   -16    
-336   -208   
320    -80    
320    -112   
-112   560    
-480   336    
208    -224   
288    160    
-240   -336   
-432   -64    
288    272    
432    -32    
144    -800   
-272   128    
-192   -48    
160    48     
64     96     
192    320    
112    112    
-144   -368   
224    -320   
80     304    
-1040  1488   
-240   384    
368    112    
-32    -272   
-272   -224   
48     -528   
-32    896    
560    -48    
-224   -768   
-784   -80    
-192   112    
80     -96    
32     112    
16     112    
16     -352   
-240   -80    
32     -32    
112    -320   
688    -400   
416    16     
-240   -688   
-144   -480   
64     16     
912    2320   
-1024  832    
112    224    
944    -592   
-928   -656   
-144   -240   
544    -240   
272    432    
-544   -1152  
-176   1008   
208    -672   
384    208    
208    112    
-112   144    
64     -96    
-32    -1296  
80     -208   
-224   -704   
-192   -512   
368    -48    
48     -672   
32     16     
-288   -1040  
-112   48     
432    -64    
64     -304   
-256   688    
80     1280   
208    -272   
-144   -224   
16     -896   
-176   -256   
-32    416    
352    320    
384    624    
-304   -96    
-176   -176   
448    -112   
400    448    
-288   -16    
-224   -144   
-160   208    
400    -192   
-32    576    
-48    1120   
-64    320    
336    -400   
208    976    
-208   -352   
-256   16     
-80    -624   
672    80     
880    -240   
-768   -144   
-144   -176   
-48    -16    
432    368    
-240   592    
-128   352    
-64    16     
48     -96    
176    -96    
-80    128    
-352   80     
-160   -368   
304    112    
-32    224    
-16    -144   
-448   144    
-64    -160   
-80    -80    
160    -1120  
-48    16     
96     -208   
288    -400   
-160   -560   
128    -752   
-144   -912   
144    224    
96     240    
-240   160    
208    -976   
-544   752    
416    528    
192    160    
320    576    
-208   224    
128    -176   
368    -496   
-288   656    
-320   -160   
176    240    
160    -80    
-64    -32    
-256   112    
96     -304   
-592   -400   
272    -80    
-96    176    
-304   -160   
272    784    
-224   -1120  
160    -992   
240    -2256  
-256   576    
-80    480    
128    0      
-16    0      
-112   -128   
-208   272    
-32    -16    
-48    0      
-80    32     
176    160    
80     -48    
-112   -96    
16     -320   
48     160    
160    -336   
-16    -16    
80     80     
-16    16     
-608   48     
48     -160   
-48    -16    
0      160    
304    16     
16     32     
-304   -80    
-288   -352   
112    1264   
2752   48     
-880   256    
-768   -384   
720    -96    
-224   208    
-416   -32    
-352   16     
560    -32    
-48    48     
-256   16     
-112   -64    
128    32     
224    16     
-336   -112   
112    64     
0      80     
-224   48     
32     128    
128    -112   
-208   144    
-624   -16    
1744   272    
368    -32    
-1312  192    
768    -80    
112    48     
-96    288    
-400   -32    
-528   160    
80     48     
-368   -128   
48     64     
-288   16     
384    48     
-48    16     
-384   -176   
-352   272    
-736   -128   
-304   32     
-272   -16    
-224   -448   
-192   64     
336    64     
-624   -208   
400    432    
608    208    
304    -96    
-272   256    
352    208    
-128   -160   
-672   80     
48     -64    
-448   -176   
208    128    
-192   -96    
-64    128    
-192   224    
16     144    
-288   -48    
-96    128    
-176   -160   
16     96     
32     -80    
400    432    
-384   112    
-368   304    
0      96     
-448   -336   
32     352    
1952   576    
16     -528   
-1264  -288   
880    48     
240    -224   
-96    288    
-464   128    
80     80     
352    48     
-160   192    
-368   -80    
-64    80     
208    -16    
-288   128    
-32    32     
48     64     
80     -16    
-160   0      
96     -528   
-928   128    
864    -96    
-272   224    
352    64     
32     -128   
-672   32     
576    368    
-528   64     
-192   0      
528    0      
-32    -160   
-800   32     
192    -48    
-864   -80    
624    128    
-304   -96    
-32    256    
-144   0      
-208   304    
-32    192    
-32    160    
80     144    
-96    304    
-208   -64    
160    96     
-112   16     
-336   144    
304    160    
-48    128    
-32    112    
-256   16     
144    160    
-288   576    
816    -96    
224    48     
-704   160    
240    -48    
48     -160   
-128   256    
-512   288    
288    128    
192    -32    
-208   80     
-288   -112   
272    176    
64     96     
-208   80     
-192   160    
112    -64    
-64    -208   
16     -16    
-176   176    
64     -96    
-256   160    
16     112    
256    256    
-16    128    
32     368    
-208   0      
-32    -208   
192    -240   
384    -1792  
-2304  1920   
1376   -416   
416    336    
112    -464   
-528   208    
32     160    
160    240    
0      336    
-32    80     
-416   0      
96     32     
304    144    
-160   -16    
-352   64     
304    32     
160    368    
0      224    
-32    64     
-16    112    
432    1088   
-704   1632   
-32    176    
144    -768   
-144   -1008  
-192   160    
288    960    
-16    -272   
-144   -96    
0      0      
-192   96     
0      352    
192    -144   
-224   96     
-256   240    
96     144    
64     -272   
-176   -48    
-224   -96    
288    368    
-112   192    
-288   -48    
128    80     
208    160    
-48    64     
-336   256    
64     240    
144    -352   
128    240    
-304   144    
-1536  560    
2704   -496   
256    288    
-1536  672    
496    -32    
352    -128   
-272   -1440  
288    -144   
224    432    
-192   432    
-192   96     
352    80     
-144   -16    
-32    96     
464    -16    
-416   32     
-304   -32    
432    -240   
-240   288    
-16    528    
624    1392   
-1024  -640   
-1504  288    
1584   352    
480    400    
-832   480    
-16    256    
320    -384   
-224   -224   
-48    224    
240    48     
-288   144    
-144   16     
272    48     
-160   320    
-368   112    
336    -736   
208    752    
224    704    
-208   256    
-112   160    
176    256    
-48    -144   
960    -768   
256    -1120  
-256   -800   
-288   -528   
736    -448   
-16    -848   
-384   176    
80     224    
-304   -544   
-64    -432   
896    448    
-704   496    
-688   32     
-240   -928   
48     -704   
368    -272   
-256   352    
336    -64    
64     -224   
-176   -464   
-400   272    
112    -576   
-464   -304   
592    -464   
-256   336    
-128   -704   
-80    0      
576    528    
-1872  0      
160    256    
976    288    
32     208    
-688   720    
-96    -768   
848    -1552  
96     528    
-336   -96    
-128   -160   
192    -800   
560    -208   
-144   -96    
-288   32     
192    480    
320    384    
-352   -336   
96     -64    
80     80     
0      160    
-128   32     
352    352    
128    -48    
-224   64     
0      96     
-448   -112   
160    48     
576    864    
-80    768    
-304   64     
-96    -288   
-112   -48    
400    -32    
-272   -320   
-144   48     
320    64     
112    400    
96     784    
96     144    
-128   0      
-256   -128   
336    -96    
-128   -1584  
-96    928    
96     224    
304    640    
-192   -528   
32     -304   
96     192    
-384   -336   
656    -672   
336    432    
-960   48     
112    -448   
544    -256   
-832   -1120  
-336   -1120  
464    -544   
96     256    
-208   208    
96     496    
-128   432    
144    480    
304    448    
-288   368    
112    272    
-112   -304   
-384   160    
208    -464   
-112   112    
48     -128   
192    144    
-112   -16    
224    32     
-288   -128   
16     -304   
96     -64    
128    400    
-32    144    
-112   -2400  
-1088  400    
1152   -1296  
192    -272   
80     544    
-288   544    
288    352    
0      -256   
-80    -1152  
-96    -224   
-32    -752   
-64    32     
128    240    
96     -160   
-64    288    
-16    -176   
96     -288   
-160   96     
-48    -192   
128    -144   
560    352    
-1104  448    
480    -448   
128    -64    
-48    -1376  
-304   -144   
112    -528   
192    96     
-16    -784   
0      -176   
-352   48     
-192   16     
288    96     
32     -272   
-288   -64    
400    -576   
0      64     
32     -2288  
-96    256    
288    -16    
-208   48     
-48    48     
224    16     
256    16     
-64    96     
-624   -96    
80     160    
672    -48    
0      -304   
-48    240    
320    -336   
-1472  352    
224    -256   
224    -112   
-528   32     
16     -288   
304    16     
-416   -80    
-208   -96    
368    32     
112    32     
-80    32     
-800   -48    
-320   -224   
352    -32    
80     -48    
-240   16     
176    -80    
448    -64    
-304   -1040  
336    1040   
-112   -512   
-2240  160    
416    -384   
416    96     
160    -144   
-240   192    
848    80     
-176   -192   
-992   -80    
224    -32    
224    48     
-160   -512   
160    416    
656    -1104  
-592   -64    
256    80     
224    144    
-256   -208   
288    -96    
-224   -224   
-48    272    
992    -320   
-864   -64    
-1104  208    
288    -240   
-448   32     
-336   -48    
-192   96     
-144   16     
96     -144   
352    192    
-96    80     
-528   -336   
224    432    
-48    144    
-480   0      
-720   368    
384    -64    
-112   -288   
-192   -32    
48     96     
64     -16    
16     80     
-384   -320   
352    96     
336    -1440  
-560   -304   
832    1712   
-336   -1856  
-2144  -240   
1584   704    
640    -96    
-432   224    
-448   -32    
176    0      
-48    -96    
464    -272   
352    -32    
-160   -336   
-160   -16    
-96    144    
416    -32    
-144   128    
-96    -96    
-288   144    
192    -160   
-320   -32    
688    -432   
-464   96     
208    -48    
-656   -32    
-720   -272   
576    144    
224    -192   
-272   160    
80     -48    
-368   352    
432    0      
-272   208    
64     -48    
192    96     
112    96     
-272   160    
48     192    
-288   -96    
352    96     
-544   -112   
-96    80     
144    48     
-176   16     
272    176    
-352   224    
-144   -48    
-80    32     
320    16     
-96    0      
-352   64     
320    -48    
128    64     
-192   -96    
-992   464    
272    992    
544    1376   
-208   272    
-400   -512   
256    -816   
-400   -672   
64     0      
192    -64    
-64    -16    
-112   -16    
-64    -16    
-192   -224   
-16    -208   
80     -384   
256    -80    
-256   -128   
0      272    
80     384    
48     -720   
-176   -464   
48     448    
-48    176    
224    624    
-208   -464   
-448   -832   
144    560    
352    640    
-192   0      
736    1424   
720    176    
-1536  -304   
-128   -16    
640    96     
208    912    
-480   480    
208    -448   
64     304    
-128   -32    
48     48     
-240   144    
-128   -176   
32     112    
64     240    
-400   -96    
128    -112   
160    320    
-224   96     
-240   -784   
992    -848   
-176   432    
-352   480    
-48    144    
-240   -112   
224    -1312  
-224   -416   
-272   -144   
-64    336    
144    -160   
-208   96     
-96    288    
112    192    
64     160    
32     16     
96     0      
-448   -96    
-96    544    
112    80     
64     -32    
-80    -80    
16     0      
-16    32     
160    -16    
-48    0      
0      -336   
-32    304    
-64    128    
304    -80    
832    -432   
-3056  352    
-128   16     
1888   -864   
-416   -112   
-560   0      
32     320    
-32    624    
64     -416   
112    304    
-112   -80    
-304   64     
304    -16    
-32    64     
-336   -224   
0      80     
272    176    
-32    176    
192    288    
192    -208   
48     640    
576    -704   
-1440  480    
32     288    
240    48     
48     -304   
-32    144    
-960   -544   
128    -880   
240    80     
-272   992    
32     352    
240    464    
16     -80    
16     -224   
128    16     
-160   352    
-32    32     
-512   288    
256    192    
176    160    
-288   -16    
272    -656   
-304   -320   
-576   -736   
192    -496   
-160   -784   
1040   -1760  
384    -960   
-320   288    
-128   224    
128    -32    
-144   144    
-688   416    
1216   -272   
480    32     
-432   -640   
112    -544   
-272   -112   
288    -240   
16     -96    
-128   320    
-192   176    
-64    80     
192    -160   
-256   224    
-240   240    
256    160    
560    448    
-352   96     
128    -928   
-1552  -624   
736    -32    
352    1376   
-320   240    
-544   112    
240    -112   
688    1520   
-176   -272   
-576   -672   
-96    -48    
512    96     
-32    416    
-272   96     
-272   32     
-64    144    
528    0      
-336   -96    
-320   -480   
-192   32     
448    528    
32     160    
-96    128    
656    320    
-192   176    
-48    -64    
320    176    
16     448    
176    64     
-144   128    
-144   368    
176    176    
-496   352    
320    560    
-64    400    
0      -80    
-144   -16    
-32    336    
176    224    
-32    80     
0      -32    
32     16     
-128   -16    
144    -64    
160    688    
-160   -1984  
-64    400    
304    272    
64     544    
-112   512    
-48    384    
-224   608    
1168   96     
-176   -48    
-240   336    
-112   -64    
48     -592   
-288   -352   
112    -144   
-176   0      
208    -128   
-32    32     
-112   -112   
-64    -192   
192    112    
160    608    
-448   416    
544    1088   
-400   928    
-80    192    
64     -320   
352    384    
-336   240    
0      -64    
432    48     
-80    -736   
-768   32     
544    320    
448    304    
-336   16     
784    2160   
-1728  944    
144    -144   
864    -368   
-432   -224   
-496   208    
304    48     
288    -64    
-320   -144   
224    -240   
-16    -192   
-80    112    
272    -800   
-80    224    
-304   -128   
-64    -528   
208    128    
16     160    
-128   560    
352    256    
-416   -720   
832    -384   
-64    464    
-592   -16    
112    128    
288    64     
-224   -304   
-48    -112   
352    -80    
-160   -1248  
-208   80     
128    -144   
144    96     
64     176    
-64    128    
176    208    
-144   32     
-288   160    
144    -128   
-208   32     
144    -64    
176    192    
-176   -80    
-96    16     
400    -736   
-256   -80    
-208   240    
432    0      
-304   16     
96     208    
-512   1136   
2272   576    
-336   240    
-1424  -320   
800    352    
816    -224   
-624   320    
64     -320   
176    128    
-32    -208   
-352   -64    
160    192    
304    48     
-320   160    
368    208    
64     144    
-288   -432   
256    224    
480    -32    
-144   80     
-112   -128   
-608   -288   
1568   272    
1152   0      
-2016  -640   
512    0      
1248   -224   
-416   496    
496    -16    
144    96     
-96    256    
32     -48    
96     -1888  
-192   -112   
64     -16    
160    -112   
320    112    
-224   -64    
-32    -112   
592    -384   
-16    -960   
64     928    
16     -400   
-1040  240    
768    -320   
-144   16     
-768   -240   
112    -448   
416    -224   
-112   -480   
-144   32     
320    224    
176    112    
-448   -848   
-112   -352   
-656   128    
416    272    
-80    320    
192    -96    
96     -288   
-272   -192   
176    -176   
112    -224   
0      64     
80     288    
-64    -192   
-704   0      
80     -176   
144    -192   
48     -688   
-752   1296   
1072   -48    
-704   -384   
-832   -304   
432    -288   
384    -112   
-912   160    
80     -64    
304    352    
-304   -656   
-224   -96    
560    -1504  
-272   -64    
-16    -96    
272    256    
16     -240   
-320   32     
128    -304   
576    208    
-880   16     
352    -224   
-48    -240   
-64    -160   
944    16     
-240   -304   
-368   480    
560    -464   
64     160    
-576   48     
176    -336   
144    64     
96     -48    
-256   64     
160    128    
-192   240    
176    832    
-416   592    
96     -32    
400    -144   
-224   -128   
-32    96     
-64    -608   
16     192    
208    -512   
-384   -288   
320    -80    
-80    -480   
-368   -240   
272    512    
32     240    
-32    -352   
-480   -432   
624    -656   
-608   -1232  
-336   -496   
144    -32    
-160   -272   
-928   -1232  
128    -1920  
288    144    
-96    208    
-16    -32    
64     16     
112    16     
-144   48     
96     -240   
-112   288    
-16    16     
-48    -96    
32     -240   
-64    -112   
208    416    
-240   224    
208    -560   
-208   -368   
288    -464   
-208   -288   
-400   208    
256    -272   
288    160    
-32    48     
-496   480    
32     144    
-32    -80    
-144   -272   
48     96     
0      -464   
96     -432   
176    -128   
112    144    
-176   -304   
32     -80    
128    -32    
-16    -16    
48     -304   
96     -16    
48     368    
-80    -144   
-192   96     
144    112    
-256   -480   
912    -1008  
-160   544    
-1216  -240   
16     64     
32     48     
-352   32     
0      -32    
-176   -16    
-256   -16    
64     0      
112    32     
96     16     
112    208    
-864   128    
240    -80    
-128   -160   
-48    192    
-48    208    
-256   48     
96     -48    
-16    -160   
-32    160    
-304   -64    
176    160    
-112   160    
-240   144    
304    -128   
-144   144    
-80    -288   
960    80     
-2864  272    
-192   80     
1568   -688   
-912   -736   
-1072  80     
592    -624   
-16    352    
-160   1744   
240    240    
304    -304   
-512   -96    
80     -64    
96     160    
-80    64     
-64    208    
64     -48    
-384   -736   
32     48     
160    -48    
-288   -720   
1328   768    
192    -368   
-1072  320    
416    0      
-336   -416   
-144   -960   
256    -800   
32     64     
-272   320    
128    64     
48     -128   
-16    -176   
-176   -96    
32     -128   
-112   112    
-48    -16    
-128   672    
-448   592    
176    48     
64     -112   
-32    176    
-560   -400   
624    -448   
240    64     
-160   1072   
192    -32    
528    1056   
992    1136   
-816   -224   
-144   144    
384    -320   
80     208    
-96    -112   
176    448    
-1232  64     
-288   -208   
144    624    
448    240    
-1456  -720   
-832   416    
368    -96    
368    -112   
-688   128    
-208   -128   
224    480    
1120   80     
-528   -160   
-704   640    
480    352    
176    -2368  
-1840  -928   
896    592    
352    -544   
-304   -1312  
-176   528    
176    16     
336    992    
-288   432    
-352   144    
224    -96    
96     -48    
352    352    
-400   208    
-224   176    
224    32     
160    -16    
-480   -80    
112    -1136  
-608   -208   
368    528    
-96    272    
-352   -384   
720    304    
240    16     
-704   192    
144    -384   
-16    -64    
-176   -80    
-32    64     
32     -144   
-32    -64    
-160   128    
96     16     
240    64     
384    352    
-640   -208   
0      -288   
400    144    
-256   256    
-64    0      
-240   -96    
368    -176   
352    16     
-448   160    
-64    368    
256    208    
-144   384    
64     240    
-112   160    
-112   80     
-144   -704   
-304   16     
224    272    
368    -256   
-256   256    
192    96     
-128   192    
48     464    
0      96     
0      160    
64     176    
-288   -144   
208    48     
128    80     
-304   256    
96     -48    
176    32     
-176   240    
80     -240   
144    240    
-80    160    
-144   -320   
48     -208   
64     48     
-272   -32    
-176   -320   
32     -16    
64     0      
-160   96     
464    1856   
-240   -1824  
-1552  752    
608    -160   
144    -160   
-464   224    
96     464    
992    64     
-608   -432   
-368   -16    
352    160    
176    176    
32     192    
-224   80     
-32    -192   
208    208    
-192   128    
-80    -80    
160    144    
64     32     
-336   -688   
1040   -240   
144    368    
-1008  320    
784    -144   
-288   160    
112    -240   
-112   432    
464    -192   
-384   176    
-256   -112   
224    400    
400    -160   
-320   144    
-16    128    
160    160    
128    192    
112    -128   
-64    -144   
-64    160    
96     -192   
112    144    
-48    144    
-96    -512   
336    176    
-256   16     
-240   208    
224    96     
64     64     
-192   -1728  
144    2640   
3328   592    
-848   304    
-2096  -128   
400    240    
1152   -112   
-304   224    
-384   -64    
528    0      
64     144    
32     80     
32     48     
192    64     
-144   240    
480    160    
-112   208    
-192   32     
176    208    
64     -64    
64     128    
-96    144    
-528   160    
1616   32     
128    48     
-576   -512   
-224   336    
528    -80    
-304   176    
-160   48     
272    48     
112    64     
80     -208   
-64    96     
-256   -128   
272    224    
448    96     
-208   -144   
-256   -144   
-64    -464   
256    320    
0      -1040  
160    960    
-512   -80    
-864   368    
688    -128   
-176   96     
-256   -64    
128    96     
208    -16    
416    16     
-224   144    
-80    32     
-48    288    
-176   -48    
160    224    
448    -160   
-80    560    
80     -352   
-32    128    
160    48     
144    64     
-32    0      
-144   112    
96     128    
48     224    
-96    -64    
-608   -64    
288    144    
224    -112   
-112   1168   
688    2112   
800    208    
-1664  -576   
-304   128    
1712   -96    
-1136  416    
-512   -464   
304    416    
496    32     
-480   -208   
-304   0      
432    -480   
-416   320    
192    -96    
144    384    
-288   -80    
-80    128    
192    -560   
-32    -496   
-240   -880   
256    80     
-64    32     
224    128    
720    -208   
-368   144    
-208   64     
64     -592   
80     -320   
64     -384   
-16    912    
176    -96    
-256   -432   
0      -480   
128    128    
48     304    
48     176    
-112   -272   
192    -880   
224    -160   
-192   64     
176    384    
-16    240    
-16    0      
-160   -288   
336    672    
48     368    
144    448    
400    512    
-320   -2208  
-128   -144   
-48    -1280  
-224   992    
1088   272    
-528   784    
-448   208    
432    48     
672    1104   
-624   944    
-224   -1632  
496    176    
-80    -144   
-304   32     
80     -144   
-16    48     
-16    -272   
96     -32    
32     224    
-160   208    
96     48     
-16    -64    
-64    -592   
112    -112   
176    0      
64     80     
128    -896   
64     144    
-304   0      
208    144    
160    64     
-288   64     
-32    128    
-288   496    
464    -448   
-640   0      
-960   -192   
272    64     
32     -32    
-464   144    
144    -288   
-112   -1632  
64     -192   
48     96     
112    16     
-48    -16    
-80    160    
16     -176   
176    -32    
-288   -16    
-128   -224   
-32    -80    
784    560    
-448   528    
-144   -304   
736    -240   
-448   0      
-192   16     
-96    -1248  
304    -176   
-48    192    
192    128    
-96    -64    
-80    -48    
-80    -16    
144    -16    
48     -32    
-48    0      
-896   -96    
176    -384   
256    -16    
-128   96     
-240   96     
176    -672   
96     -144   
128    -160   
-16    96     
-224   -32    
-192   128    
192    192    
208    -208   
-272   -48    
-1584  80     
1056   -272   
736    112    
-1056  928    
256    -224   
-96    -912   
-752   192    
128    -128   
64     -992   
-80    144    
96     128    
-144   -64    
-176   96     
352    432    
-96    0      
-192   -208   
-80    -432   
288    -1056  
-288   -656   
-192   -256   
352    -416   
-2144  912    
528    -464   
496    -1568  
480    -720   
-512   176    
272    704    
-656   528    
-144   128    
16     -112   
160    -64    
-48    96     
-144   144    
256    -128   
-224   -416   
-96    160    
96     -288   
96     208    
688    80     
-192   -48    
-512   16     
-16    48     
-64    16     
-736   1664   
576    -464   
784    0      
-464   -128   
48     336    
384    -112   
-240   -384   
-48    128    
-192   -288   
160    304    
-224   32     
-1072  -1040  
-304   48     
448    576    
-496   -128   
-160   -144   
576    144    
384    -48    
-560   -16    
-112   -48    
432    -80    
240    560    
-944   224    
-576   -96    
496    0      
-256   -880   
-1072  -400   
160    2224   
768    -64    
-1200  -208   
-352   -304   
880    -128   
-368   -256   
-1088  -160   
-32    -304   
368    80     
96     -128   
-608   80     
-160   -48    
304    -160   
-112   80     
-32    16     
-96    64     
-16    -16    
64     -112   
-496   592    
384    -80    
-400   144    
224    224    
-192   -112   
-160   144    
-208   -272   
352    224    
-32    64     
-112   176    
320    32     
-608   0      
0      32     
96     -64    
-352   64     
240    -32    
96     112    
-656   192    
-16    224    
-32    -112   
64     0      
-32    -64    
272    128    
-96    16     
-336   16     
-336   -112   
400    -48    
384    432    
-432   64     
-64    192    
176    -32    
-96    16     
-560   -448   
704    288    
1024   48     
-752   208    
-144   112    
384    224    
-336   64     
-144   128    
80     -176   
-144   -64    
64     80     
-256   0      
64     16     
-144   0      
16     -112   
-192   -416   
-80    -288   
-528   -112   
352    -32    
-32    -80    
-432   16     
176    -48    
64     -112   
-80    160    
-160   416    
-112   -512   
-224   48     
-48    224    
80     -144   
96     160    
-1312  -896   
512    -544   
1232   -64    
-752   -352   
-112   432    
224    -160   
-192   416    
-192   -912   
0      -32    
448    400    
-288   0      
-112   0      
128    192    
-96    96     
80     -208   
-208   224    
256    -224   
-176   -288   
-64    112    
48     48     
-400   -1088  
-256   80     
496    64     
-512   80     
144    144    
32     -592   
-336   208    
288    224    
-320   256    
48     32     
-272   -128   
-64    -208   
-128   -16    
160    112    
96     80     
-128   48     
-400   80     
176    336    
288    0      
-272   -32    
-64    16     
144    208    
-80    -48    
-240   -32    
64     16     
416    80     
-224   192    
-96    -32    
32     32     
800    1328   
-80    1200   
-1232  416    
1008   176    
368    -32    
-1248  -80    
288    208    
464    -176   
144    -144   
-528   -48    
128    64     
-192   64     
-64    96     
16     144    
-80    -16    
416    128    
-160   80     
-80    -144   
-144   -144   
416    -256   
-240   48     
0      976    
384    -400   
-1328  -144   
752    -784   
80     256    
-384   -32    
144    176    
464    272    
80     -96    
-480   64     
-96    112    
224    112    
176    112    
-176   48     
208    -64    
-240   144    
-48    -80    
208    -176   
-320   304    
240    352    
-32    16     
144    176    
-944   0      
-496   96     
480    592    
736    -448   
-80    32     
-224   160    
96     16     
208    16     
-464   240    
-304   592    
1424   -576   
-336   -304   
-464   96     
816    -112   
224    256    
32     336    
-256   112    
-144   16     
304    80     
48     16     
-176   96     
-160   -16    
64     -32    
544    -128   
-176   64     
-160   16     
448    944    
-432   1040   
-928   1824   
448    -1216  
336    192    
-960   -144   
784    592    
304    320    
-256   624    
-96    192    
-176   112    
144    -384   
-112   192    
112    576    
-64    192    
224    176    
-32    80     
96     160    
16     -592   
48     176    
160    160    
-80    -96    
-16    96     
-64    -16    
400    464    
400    32     
-16    560    
256    176    
-352   544    
544    1008   
352    624    
-288   -624   
-96    -336   
176    -592   
0      240    
-112   -912   
-160   320    
0      80     
144    80     
-80    464    
-64    656    
80     64     
-144   48     
0      368    
16     256    
-48    272    
-32    -352   
-16    1184   
64     1392   
-112   -192   
-48    -1104  
240    48     
16     144    
-448   -784   
256    -560   
528    144    
-704   -128   
160    176    
336    320    
-32    640    
-352   1088   
304    -208   
288    0      
-64    -160   
-80    112    
144    -288   
208    160    
-176   -48    
-16    368    
64     816    
144    96     
0      -96    
-48    32     
80     -48    
176    -224   
-16    144    
-128   -192   
288    -608   
560    -160   
-368   48     
-176   -32    
368    144    
144    -64    
144    -352   
-864   96     
112    160    
240    0      
176    272    
-288   -32    
0      -384   
-160   -144   
0      -272   
-32    240    
0      -400   
160    48     
0      -160   
32     16     
-32    -464   
192    96     
64     256    
-144   256    
-16    144    
-192   -432   
752    -736   
128    16     
-160   128    
-352   -176   
224    -224   
352    -320   
-16    160    
-64    -48    
160    160    
-112   -48    
32     80     
160    32     
-64    48     
48     -336   
112    -1568  
48     -448   
-160   -96    
128    544    
-144   -64    
-32    -32    
288    -240   
144    128    
-208   -112   
32     432    
128    -96    
-144   -352   
208    80     
320    -304   
-464   112    
48     -1104  
-2192  112    
624    -544   
832    160    
-592   128    
-192   432    
464    96     
-368   464    
32     -112   
304    -304   
-160   -32    
-112   -192   
304    -32    
256    -464   
-272   -144   
-240   -32    
288    -176   
-176   192    
48     16     
-48    -80    
-224   -1760  
1136   832    
864    -384   
-1136  -32    
0      -1120  
240    -432   
224    16     
-32    48     
80     -64    
80     16     
-832   224    
272    -224   
-480   144    
-288   -304   
-448   -144   
240    -224   
480    240    
-320   -576   
-304   -112   
320    48     
-256   64     
0      -144   
-224   272    
864    -128   
-240   -16    
-544   -784   
-496   176    
-224   -896   
-368   -208   
592    112    
80     16     
64     336    
176    64     
-224   -176   
80     -640   
256    -160   
-224   -64    
48     224    
-32    -192   
304    -144   
-192   -32    
0      64     
96     64     
240    48     
-544   -112   
160    -176   
528    0      
32     -224   
-320   80     
64     -2064  
-384   -3424  
-1600  -1008  
704    336    
560    64     
-512   -272   
240    368    
-16    64     
-144   304    
160    -320   
-1968  160    
288    -448   
176    80     
-48    -176   
-528   224    
96     -256   
160    272    
96     -480   
-144   64     
0      -336   
-672   224    
640    -144   
-208   112    
-16    -160   
208    80     
48     32     
-288   48     
192    224    
480    16     
-384   96     
16     -384   
576    96     
-48    -560   
-544   -64    
-240   112    
288    208    
-16    256    
-96    128    
-320   224    
224    -16    
-128   160    
-32    -80    
-400   16     
224    -512   
336    -272   
-288   -272   
-512   0      
208    -16    
560    -176   
-384   -32    
-192   -32    
16     32     
192    112    
-1184  -160   
-144   -704   
-464   -192   
784    -464   
-80    -64    
-912   -336   
64     224    
-192   -48    
-336   144    
-224   80     
-240   0      
32     144    
-352   32     
-80    -96    
176    368    
-112   288    
-320   32     
176    32     
160    -128   
-208   160    
-80    -304   
112    -64    
-32    112    
-736   -416   
400    -688   
-32    240    
-336   80     
-112   -224   
560    2192   
-1120  -1328  
-1568  608    
864    -432   
-32    -128   
-352   416    
400    272    
160    144    
-416   32     
-160   -528   
272    -240   
-128   256    
192    -128   
-128   320    
-416   -96    
208    -80    
-304   96     
-112   -320   
-240   96     
128    224    
-96    112    
464    1168   
928    -352   
-1232  48     
-176   -112   
528    80     
-96    80     
-144   -304   
304    -480   
-112   208    
80     144    
112    48     
-192   80     
-176   -112   
224    336    
-16    80     
-80    80     
-240   -160   
16     -208   
-16    112    
80     64     
-32    -48    
128    32     
-48    -64    
-400   176    
464    48     
-256   32     
64     96     
-112   48     
0      48     
-1360  -80    
1216   224    
400    -224   
-608   64     
512    208    
-560   -80    
-304   -128   
304    -272   
176    -48    
-32    -32    
-240   112    
32     -32    
192    80     
-224   48     
-96    256    
-1008  128    
144    176    
224    16     
-304   96     
-16    0      
-48    208    
-224   592    
2080   -464   
-576   720    
-832   624    
224    -64    
544    -176   
-128   128    
-128   -64    
-96    112    
0      96     
80     64     
-160   64     
-48    -16    
336    48     
-16    64     
-128   112    
-32    128    
48     -144   
80     -48    
176    64     
-64    64     
112    64     
-336   448    
-432   -80    
-448   -672   
64     -224   
-688   32     
16     -144   
704    480    
-816   528    
-32    -208   
-16    192    
-64    -496   
-752   176    
784    -160   
-48    800    
560    48     
-352   -224   
-208   224    
160    -96    
224    16     
-240   -32    
-96    224    
16     144    
32     1168   
576    -80    
-448   96     
16     -16    
208    112    
1296   1056   
-1728  384    
128    0      
752    -560   
-656   272    
-640   224    
176    304    
800    1264   
-384   304    
-144   -256   
176    -32    
112    -64    
-128   80     
-224   -64    
16     448    
80     656    
128    -880   
-144   288    
-400   416    
336    800    
160    -32    
-16    -160   
-16    144    
352    624    
32     368    
-48    400    
64     48     
-112   128    
0      384    
144    560    
-192   32     
0      48     
-16    304    
-256   128    
368    64     
-80    288    
160    560    
-752   -144   
144    -880   
464    -272   
-208   256    
-544   176    
48     -48    
512    64     
-352   -528   
-32    272    
128    -80    
240    80     
-272   240    
-144   -224   
-16    16     
-432   640    
1264   320    
-16    1024   
-320   912    
176    512    
224    -96    
-192   1040   
-96    -960   
-32    272    
48     64     
-128   160    
224    -304   
-192   -48    
-368   -192   
176    -240   
272    -288   
144    272    
-160   192    
176    -64    
160    64     
16     176    
-112   336    
272    0      
-64    0      
-288   240    
-128   304    
48     256    
112    304    
240    -208   
-352   -208   
320    -192   
176    400    
0      -816   
160    -80    
224    304    
-592   16     
272    -336   
672    128    
-336   288    
-272   352    
112    208    
32     -64    
128    240    
32     -48    
-16    96     
32     112    
208    80     
32     64     
-80    112    
400    -480   
-736   -48    
160    64     
400    -48    
-288   -272   
208    400    
-144   -80    
48     -464   
112    208    
64     -304   
-64    48     
-208   -1104  
112    160    
-80    448    
112    -288   
80     112    
-144   16     
128    -192   
96     192    
-272   96     
-160   48     
288    288    
-48    -384   
-128   0      
0      -288   
112    352    
192    -384   
0      48     
-112   48     
-560   -512   
1040   464    
1888   320    
-1216  80     
-336   -80    
288    112    
480    -32    
-64    -160   
-32    0      
16     64     
-48    192    
208    144    
-96    -64    
-112   -64    
320    -32    
352    -80    
-304   112    
-48    96     
480    0      
0      128    
-176   32     
-208   -816   
1488   704    
-272   -224   
-256   -48    
672    256    
-704   48     
-176   -128   
656    112    
192    -272   
-400   208    
-80    128    
272    64     
-16    64     
0      176    
48     -176   
-272   96     
400    240    
80     -16    
320    272    
64     -544   
-320   64     
-96    -304   
1216   96     
64     464    
-384   -320   
320    -304   
-208   192    
112    320    
144    112    
144    96     
-304   -208   
-272   -144   
80     -400   
-80    -48    
-96    -32    
384    384    
224    96     
128    144    
144    -368   
176    208    
-400   64     
128    16     
336    64     
16     -80    
-272   -880   
496    -240   
-192   -2864  
176    -224   
720    64     
-1728  -736   
1600   -160   
1136   64     
-1056  752    
-96    320    
160    -2448  
256    176    
288    -352   
112    -112   
-672   -432   
-208   -32    
704    -96    
32     -208   
-128   -48    
-176   -256   
528    0      
320    -32    
-240   -48    
288    -816   
160    -208   
-1136  -416   
976    -112   
-128   -112   
-192   0      
800    -16    
-688   -432   
-592   64     
848    -64    
-160   -224   
-32    -624   
96     -176   
80     -2032  
-80    -112   
160    32     
-32    -32    
288    208    
-16    96     
-192   -16    
64     64     
80     16     
112    -48    
-1424  0      
416    80     
80     -128   
-80    0      
224    -80    
-224   -272   
-96    288    
912    -128   
-272   32     
-176   16     
128    64     
400    368    
-1024  32     
32     128    
608    112    
-992   -224   
-128   -208   
80     -416   
-64    -176   
96     224    
400    -96    
-80    32     
-224   -752   
176    -96    
-48    64     
-80    80     
304    192    
-80    -304   
-400   96     
272    176    
240    0      
-80    -80    
-400   64     
144    48     
-32    16     
-320   -592   
-112   224    
272    -496   
-112   -544   
-272   -112   
-48    -208   
704    -1632  
-592   320    
-80    -480   
16     -224   
-48    320    
480    128    
-304   0      
-144   -672   
-512   240    
272    -304   
160    128    
160    -496   
-192   208    
112    -752   
352    -16    
-304   -256   
96     128    
-96    16     
-96    112    
64     48     
-480   -544   
688    -352   
272    544    
-832   160    
272    -208   
272    -144   
-80    -144   
-288   272    
256    -1632  
416    48     
-576   0      
-192   80     
-160   80     
48     -64    
-32    -128   
208    0      
-64    32     
-224   -32    
0      96     
16     -112   
144    -80    
176    -256   
-336   112    
208    -176   
-48    -208   
32     16     
80     288    
-304   48     
128    -272   
480    688    
784    -256   
-2064  -144   
128    96     
752    144    
-704   -80    
288    576    
-336   256    
-176   208    
-80    288    
-176   224    
80     80     
-624   112    
-32    -48    
176    -64    
-176   -64    
0      0      
96     -160   
-560   -432   
80     -64    
-16    -272   
-208   -928   
-1600  800    
1728   64     
-848   0      
-272   -192   
432    -240   
-1088  608    
16     224    
192    -64    
112    128    
-96    -64    
-352   -112   
48     96     
320    80     
-32    96     
-64    224    
16     -96    
0      16     
208    80     
-192   0      
-224   32     
-208   80     
160    336    
-960   416    
-96    -32    
192    -384   
-208   400    
416    -224   
32     -16    
-192   -224   
-240   0      
112    -112   
224    96     
-16    112    
96     -672   
64     -16    
240    -32    
96     -368   
-256   -32    
-224   192    
-912   -128   
0      16     
48     464    
240    336    
-128   -240   
144    48     
544    256    
-480   704    
-128   400    
416    32     
-272   -1808  
-2208  -352   
-176   -176   
1232   176    
48     176    
-992   -912   
0      -16    
112    624    
256    -128   
256    -384   
-80    416    
-432   -160   
-128   288    
128    -112   
336    240    
-464   -512   
-224   16     
96     272    
240    80     
-96    576    
-320   528    
96     64     
0      -432   
-208   224    
-336   608    
320    176    
-64    -208   
544    912    
32     1104   
-336   64     
0      -144   
32     288    
352    -128   
-272   448    
-224   176    
-96    -256   
400    128    
-192   48     
128    16     
-64    -32    
-96    -192   
160    80     
-48    32     
112    -224   
-240   -832   
640    928    
-128   512    
-256   160    
-544   -624   
80     32     
32     -512   
592    -96    
-144   -80    
-576   -256   
-16    -48    
320    -80    
-176   -624   
96     -1984  
96     112    
-352   720    
-288   272    
160    -128   
224    304    
-64    -112   
-96    432    
-384   432    
208    560    
-192   -160   
-112   -272   
48     -48    
-160   304    
80     -16    
16     -320   
192    -48    
96     176    
16     464    
-304   -864   
384    -464   
96     544    
-304   240    
688    1632   
-1248  2016   
-16    -176   
608    -256   
-160   528    
-560   416    
752    -192   
208    -64    
-320   704    
112    48     
192    224    
-96    -64    
80     64     
-160   352    
-128   192    
-32    -64    
80     -176   
-176   144    
64     32     
80     -176   
544    480    
-784   1584   
208    -704   
-32    -992   
-64    112    
-128   560    
16     160    
128    -256   
-208   96     
144    496    
-96    80     
-128   -64    
128    128    
48     -16    
-192   384    
416    -128   
-496   -320   
-288   -560   
128    -160   
224    240    
-112   144    
-144   80     
176    -16    
32     192    
-304   -80    
-144   96     
384    0      
112    112    
-224   -16    
320    336    
-1168  208    
1936   704    
784    -96    
-1216  0      
304    160    
672    256    
-272   64     
-464   336    
320    80     
64     160    
-176   64     
-112   112    
32     32     
32     80     
304    144    
-16    208    
288    144    
-288   -48    
-352   32     
96     -32    
32     160    
-880   -240   
1744   160    
944    96     
-1232  224    
-192   -64    
64     -2832  
320    64     
-368   0      
80     -16    
144    64     
-32    48     
64     160    
-144   0      
-240   112    
464    80     
80     -288   
96     192    
16     128    
288    -224   
-208   128    
-16    560    
736    160    
-1088  -96    
-1664  112    
336    -576   
368    208    
-208   352    
64     464    
16     -480   
-592   16     
144    160    
432    64     
16     -112   
32     -208   
-352   -96    
160    -736   
352    96     
-384   240    
-416   -32    
160    48     
880    0      
-608   224    
-560   0      
80     16     
768    608    
672    32     
-832   96     
96     272    
624    -1264  
-2192  2128   
752    -128   
-144   944    
-272   -768   
-96    -272   
608    672    
-64    96     
-464   48     
-384   -112   
448    144    
368    64     
-352   96     
-48    16     
64     96     
288    64     
272    160    
-224   -160   
32     128    
784    160    
-1216  -32    
544    -960   
320    -208   
-416   -160   
512    96     
-64    80     
-112   48     
128    112    
208    -160   
-576   -16    
192    -16    
-176   -144   
272    -48    
-80    32     
-240   -208   
304    176    
448    -384   
-624   -64    
192    224    
336    192    
-128   -64    
-96    64     
-96    -128   
112    -624   
48     80     
240    -64    
-176   96     
128    -160   
-208   -48    
384    -224   
336    0      
-336   -1728  
80     -544   
-896   192    
496    96     
-192   80     
128    64     
256    176    
-320   80     
-96    -32    
352    -320   
144    64     
-272   -208   
-16    96     
400    48     
48     320    
-304   -144   
48     32     
144    -304   
-176   -960   
96     160    
96     -592   
80     -800   
208    -368   
160    -480   
-64    -400   
-288   352    
224    64     
192    112    
128    -208   
-48    -80    
-416   -1376  
1168   -2432  
-672   352    
-464   -560   
480    384    
-560   368    
256    832    
384    -160   
-304   -416   
-208   -288   
304    -32    
384    96     
-320   0      
-48    -144   
208    -16    
416    608    
-288   48     
16     416    
224    64     
-32    160    
-224   208    
160    1344   
64     -48    
-496   -16    
176    -512   
0      -720   
224    -544   
-80    -128   
0      112    
-80    -48    
-16    112    
96     -16    
48     208    
80     160    
32     -288   
-256   -160   
-128   48     
-592   -128   
96     -96    
112    16     
16     -256   
96     -48    
-16    -176   
16     -144   
80     -208   
176    112    
112    128    
-192   -96    
-272   -208   
112    0      
832    1328   
-1344  64     
-1232  48     
1392   -336   
-512   160    
-912   272    
976    432    
352    1088   
-640   -336   
192    -1216  
160    176    
-96    80     
32     128    
64     -48    
-336   -48    
48     224    
272    80     
-448   -80    
0      -592   
336    -112   
-240   -112   
528    640    
2800   -96    
-1232  944    
-896   496    
1072   32     
-304   -336   
-496   -80    
192    -96    
80     -240   
-160   -32    
288    0      
96     304    
-352   144    
-528   -240   
272    0      
-720   240    
272    -416   
-144   -544   
-608   -1248  
160    -96    
464    -432   
-128   -416   
416    208    
-160   448    
-304   80     
848    656    
-496   128    
-496   320    
368    -416   
-160   128    
-384   -288   
208    32     
736    144    
-656   -400   
240    160    
576    -1232  
-688   32     
32     432    
48     112    
224    80     
-32    16     
-256   288    
80     -16    
48     -48    
112    -64    
-704   48     
288    96     
352    304    
-144   -96    
176    1008   
288    -48    
-16    176    
272    -1440  
128    -400   
-384   -128   
432    0      
368    144    
-144   -832   
-384   -512   
224    224    
384    -48    
-592   192    
-400   384    
-560   -688   
-624   -288   
-128   -304   
-304   -224   
-176   288    
-96    -384   
16     -384   
-64    -80    
-352   -304   
736    160    
80     -400   
-736   160    
448    112    
-432   1296   
192    976    
-480   -464   
-80    -1056  
208    208    
-192   96     
192    192    
-80    144    
-112   -320   
-1264  -464   
592    480    
144    656    
-208   784    
16     608    
240    912    
96     32     
-400   -224   
224    400    
-160   192    
208    -480   
384    -176   
-528   112    
-80    -128   
-16    -128   
-320   -448   
240    -192   
-96    1520   
-912   320    
-816   -416   
336    -176   
48     -416   
-384   48     
160    -112   
320    0      
-208   32     
-192   -16    
128    224    
0      224    
-160   -272   
-32    -16    
-288   -112   
-288   -240   
368    -272   
-816   -336   
-32    -208   
496    -240   
32     32     
-496   96     
64     -160   
144    -464   
-80    -512   
0      352    
-64    240    
-208   -304   
1104   1456   
656    480    
-1248  -240   
352    -96    
384    800    
-320   1328   
64     768    
-608   336    
32     -368   
-32    -160   
-16    -208   
-96    48     
192    240    
-368   160    
96     -64    
-288   48     
112    320    
-96    64     
-96    96     
-1280  -352   
720    96     
144    176    
-608   48     
320    32     
32     176    
-144   -128   
-80    240    
272    288    
-336   64     
-160   -16    
352    -128   
176    80     
-464   208    
64     32     
112    -64    
-32    224    
16     112    
-80    336    
176    80     
32     16     
144    144    
-144   -48    
112    256    
-160   32     
-144   224    
-32    64     
208    128    
-224   -160   
96     32     
-16    -864   
-2928  1056   
224    -16    
1392   -448   
-224   80     
0      -48    
-240   304    
352    80     
-48    464    
0      -64    
80     96     
-128   -96    
304    176    
-208   -224   
-368   160    
352    -112   
80     144    
-112   176    
128    80     
-32    -16    
0      112    
48     -576   
-1664  336    
1104   208    
1056   416    
-96    112    
-112   -80    
-256   176    
-432   144    
96     128    
208    128    
176    96     
-144   16     
-64    112    
144    80     
-208   64     
-112   128    
64     -16    
528    -112   
-176   -16    
-880   224    
208    -496   
1296   192    
384    0      
-816   512    
-32    -176   
-544   64     
-224   352    
384    -240   
-80    688    
224    32     
-128   -160   
192    -576   
320    96     
-208   80     
-80    80     
512    -256   
-16    128    
-784   -432   
-80    -48    
272    272    
-80    -32    
-144   176    
160    64     
0      64     
-64    48     
-96    64     
-256   144    
64     112    
192    -432   
1392   -2272  
-2592  -288   
624    368    
1136   64     
-608   320    
0      -64    
240    32     
-256   144    
-176   112    
-96    96     
256    -16    
288    128    
-256   64     
64     96     
-288   -64    
400    144    
160    0      
-48    96     
0      -192   
784    -240   
-192   16     
-192   144    
-80    160    
-608   -112   
-32    -32    
464    128    
-16    128    
-432   -32    
144    16     
496    -32    
-32    -16    
-352   192    
160    240    
368    288    
-416   -224   
-208   80     
256    144    
240    64     
-16    176    
-32    144    
224    64     
144    80     
-208   16     
256    -176   
-432   -336   
-96    144    
240    32     
-192   -64    
-16    48     
144    -352   
-240   -32    
16     432    
144    -112   
-208   224    
-192   144    
256    -448   
384    -688   
-464   -848   
144    112    
272    0      
-256   -112   
-304   -480   
560    -864   
-80    -240   
-224   -512   
176    -48    
-160   -752   
320    -176   
32     -464   
-256   368    
-48    -16    
240    144    
-16    -32    
-128   64     
-336   -80    
80     32     
224    -368   
80     400    
-16    320    
-48    -272   
-64    48     
432    -752   
-1200  1712   
720    160    
304    -448   
-336   592    
-160   112    
-16    256    
144    80     
-224   0      
64     -48    
128    192    
64     -16    
48     -96    
16     -176   
-128   64     
128    -224   
192    112    
-128   -384   
48     -96    
80     32     
576    704    
-928   464    
144    -352   
544    208    
-96    -80    
-304   224    
208    -848   
-112   -704   
48     -1312  
256    352    
-64    -96    
-224   176    
160    -256   
32     240    
-16    -64    
0      144    
-64    80     
-32    80     
128    176    
-112   0      
-176   96     
0      -368   
192    64     
224    -112   
-96    0      
-352   192    
208    160    
128    -624   
48     48     
0      160    
-864   -1088  
-400   496    
1072   -528   
-1008  16     
48     464    
208    208    
-352   -496   
544    48     
336    736    
-144   -48    
-288   -224   
48     96     
0      16     
192    0      
32     64     
16     -640   
-160   160    
336    -1456  
208    -1184  
-240   -192   
368    128    
-1120  -752   
-912   272    
880    -416   
112    -320   
192    -960   
-80    -1008  
480    -1360  
-656   -1504  
-240   -544   
112    -1168  
112    192    
176    368    
-320   432    
32     672    
832    -384   
-528   384    
64     1120   
432    496    
-80    432    
-128   16     
128    288    
-48    416    
112    -912   
-832   -320   
224    -96    
592    64     
-416   -208   
-16    -96    
256    -416   
-368   -48    
-144   -176   
512    -352   
240    336    
-496   -1312  
-336   -976   
192    -16    
-80    720    
-208   256    
-288   336    
336    -96    
-80    80     
-80    256    
-448   336    
-1424  -160   
800    -96    
272    -176   
-112   -112   
-400   32     
48     -128   
-336   -2160  
-1072  -2176  
1024   48     
64     80     
-576   -592   
-448   -176   
208    48     
80     -688   
96     -160   
-480   672    
-144   448    
96     -384   
288    -80    
80     -32    
-64    -240   
-240   64     
624    -1008  
0      -208   
-368   -416   
-208   -112   
304    48     
160    -112   
368    80     
880    464    
-1712  192    
400    -144   
-192   -208   
176    160    
-912   -16    
192    -176   
528    -288   
-256   -272   
-288   -112   
336    -16    
544    -128   
-336   -48    
-448   -224   
256    48     
224    -16    
-208   -544   
-752   -544   
48     -288   
400    128    
-320   48     
176    -144   
48     96     
128    -1296  
-528   -256   
176    -64    
224    96     
-64    160    
-128   208    
256    -96    
80     80     
-592   96     
160    656    
-496   400    
192    -592   
-240   -448   
0      -160   
-48    192    
-32    -304   
352    160    
128    96     
-224   320    
-224   352    
16     -208   
-256   -80    
-160   96     
288    208    
-128   -112   
-160   384    
128    -32    
-128   -96    
320    -224   
-16    -112   
-560   -32    
352    320    
320    128    
-368   -144   
-544   -1104  
1760   -1488  
-624   528    
-752   -288   
-128   -80    
752    480    
-80    256    
-144   -224   
320    816    
-752   -160   
-208   -96    
240    80     
16     -32    
-128   -160   
-400   -144   
48     112    
-320   -208   
-32    432    
0      -96    
-272   -48    
-176   -144   
656    864    
624    -224   
-1200  -16    
-256   -32    
656    -64    
-224   224    
80     160    
-144   128    
-432   -80    
-32    -64    
128    224    
192    -160   
-1280  144    
272    64     
-64    336    
-112   -32    
0      128    
160    -32    
-320   -144   
128    96     
0      64     
-48    -16    
-208   64     
-208   -32    
336    112    
96     -128   
-128   -112   
-560   -144   
-64    192    
-336   1056   
656    608    
224    -112   
-704   80     
-672   -160   
240    144    
480    -32    
-304   256    
112    16     
256    112    
0      112    
-192   32     
48     32     
-144   -64    
0      176    
-272   -32    
-128   128    
-96    -112   
304    32     
-368   -32    
-32    192    
-480   96     
1712   -320   
272    176    
-1136  352    
848    -176   
-384   256    
-48    -176   
224    208    
128    48     
-320   -240   
96     112    
48     -80    
-16    160    
-96    -176   
176    112    
160    -16    
-256   192    
-80    -96    
16     128    
-80    48     
128    112    
704    16     
-464   160    
736    -80    
-144   128    
-368   -32    
-1104  -176   
-224   256    
800    160    
-224   32     
-160   80     
192    0      
-80    96     
112    128    
384    -80    
64     48     
-192   160    
368    -352   
-192   160    
16     -64    
176    80     
-384   80     
48     -752   
96     64     
192    288    
-224   0      
-400   -32    
272    64     
-160   -1680  
-320   1344   
912    112    
-1376  64     
-352   -32    
1120   0      
-352   96     
-496   416    
-384   -144   
464    144    
48     -16    
-512   -16    
160    -32    
-64    128    
64     96     
176    160    
-304   192    
-368   64     
464    32     
592    448    
-944   496    
-48    -576   
480    -464   
-320   -144   
480    16     
304    400    
-848   416    
272    -96    
464    448    
-464   -64    
-352   0      
608    -192   
544    48     
-1152  -96    
48     32     
864    -368   
-176   128    
-784   -96    
240    -256   
-16    -32    
128    64     
-128   -96    
-272   -144   
144    -288   
336    -112   
-848   -288   
80     -464   
336    -96    
256    -80    
-352   -592   
-336   -256   
-192   -192   
240    -1264  
-112   -48    
256    -272   
-48    -368   
320    448    
384    112    
-288   672    
-128   0      
192    -368   
256    64     
-176   208    
16     224    
128    208    
64     176    
-16    -144   
80     272    
176    528    
80     -96    
-192   240    
96     16     
144    80     
48     -48    
-160   -48    
112    -320   
288    176    
-336   -64    
112    48     
224    304    
0      176    
-192   -176   
-32    -688   
0      -320   
-112   176    
-144   -160   
-80    160    
48     80     
64     -16    
80     192    
16     160    
0      144    
160    32     
-96    128    
-320   64     
64     64     
192    -16    
128    -48    
-192   240    
-32    400    
96     -32    
-96    -32    
192    480    
528    192    
-464   128    
-256   288    
368    -16    
-32    128    
-272   -368   
0      -432   
112    -448   
-16    240    
256    -784   
96     80     
-208   160    
0      16     
176    128    
-112   -32    
-32    16     
192    144    
-80    80     
-224   256    
240    -80    
176    -16    
-224   144    
256    -160   
-192   -176   
-240   -624   
32     384    
80     224    
-288   64     
1120   1104   
-1440  720    
-544   160    
944    112    
-240   -544   
-384   272    
80     128    
192    1952   
512    -592   
96     -272   
-272   48     
80     -240   
288    96     
-80    -1872  
-208   -128   
-96    -80    
48     -112   
192    -64    
-128   144    
-192   192    
-32    -656   
1440   576    
-208   -160   
-1168  -96    
448    -432   
448    720    
-576   832    
-112   512    
736    -1552  
-528   -208   
64     -48    
320    208    
-128   64     
64     400    
320    -48    
-48    -16    
-96    -48    
-160   176    
336    96     
96     64     
-288   192    
80     -32    
448    224    
-80    -256   
-1136  -528   
384    -1312  
592    304    
112    400    
528    752    
112    -16    
-880   432    
-48    -176   
480    144    
336    320    
-496   -112   
32     -800   
1232   -1008  
-48    -96    
176    112    
-128   96     
80     -224   
368    176    
96     32     
-544   320    
48     80     
448    320    
320    64     
0      -128   
0      336    
-368   800    
160    -2496  
-1072  -1168  
864    736    
320    -96    
48     608    
-80    -1488  
-112   160    
416    96     
272    16     
-320   -272   
-128   80     
352    48     
128    48     
208    -16    
-208   -368   
-96    144    
592    -128   
-64    160    
-272   -160   
-288   912    
416    640    
16     144    
192    160    
-192   -544   
-432   128    
-512   80     
-480   -2096  
160    -144   
224    -48    
-16    512    
64     512    
-32    448    
96     304    
176    32     
-112   112    
80     144    
-128   -368   
16     176    
128    -16    
-176   48     
-944   -48    
464    336    
-112   -192   
128    -368   
192    16     
224    -208   
-272   -112   
80     304    
96     -192   
32     -656   
160    -32    
-384   -480   
592    -256   
96     48     
-768   -160   
160    -96    
224    16     
-288   32     
-64    -640   
-304   -256   
304    -384   
256    -176   
32     -144   
-112   64     
48     240    
-256   16     
272    176    
480    352    
-432   -416   
-32    -80    
144    240    
64     80     
-784   0      
80     -96    
288    -48    
-272   -208   
128    -336   
272    -288   
-208   32     
-32    208    
288    1008   
512    -1808  
-1584  736    
144    592    
-320   -544   
-640   400    
448    -256   
-448   -16    
-80    16     
-256   -400   
272    416    
336    -48    
-128   -240   
-160   -32    
192    -2048  
160    192    
-48    192    
-80    208    
128    96     
80     -32    
-304   0      
512    816    
1152   48     
-1088  -176   
-48    16     
624    -224   
-464   -144   
-32    -320   
400    160    
16     160    
-64    208    
336    -16    
16     32     
-368   144    
224    -384   
-368   -32    
224    -112   
240    -48    
144    128    
-416   -224   
-128   -96    
208    -112   
96     -32    
160    96     
-256   -464   
400    112    
-16    -1248  
0      -224   
80     16     
-176   -240   
-640   928    
1056   128    
-304   112    
-624   -272   
-80    112    
544    -80    
-256   -32    
112    96     
272    -160   
-48    0      
0      96     
-64    48     
176    -48    
-16    -112   
-16    176    
96     -16    
-112   16     
-64    -96    
224    -192   
-96    80     
80     32     
-432   -400   
-240   -48    
1728   -208   
-1232  -128   
288    96     
736    192    
-544   -112   
368    -80    
-96    176    
-96    -112   
48     -16    
-64    80     
-16    -112   
224    96     
-112   -160   
-32    32     
-112   -352   
144    -112   
-432   -368   
-176   176    
-32    112    
368    112    
-400   -64    
-528   16     
64     64     
-192   96     
-512   208    
416    -48    
96     -16    
-432   -80    
128    32     
304    -240   
-240   64     
464    80     
208    48     
-512   -48    
-400   -32    
128    48     
176    -48    
-480   96     
176    48     
240    0      
-32    32     
-240   80     
-112   -160   
48     32     
-160   80     
-192   32     
592    720    
1120   2752   
-2272  1680   
752    -496   
1712   -160   
-1008  144    
-560   160    
416    -160   
304    -64    
-912   96     
-80    112    
96     -16    
256    64     
-128   -32    
-64    176    
-128   0      
240    144    
48     112    
-320   32     
16     144    
480    656    
-32    544    
-320   64     
-128   -416   
-352   192    
304    -304   
-48    544    
416    -144   
-384   -480   
0      -352   
208    -192   
-160   176    
128    -448   
96     256    
-112   288    
-272   80     
112    -16    
-304   -464   
96     -432   
544    288    
-112   464    
-112   112    
-48    -32    
304    -176   
-128   304    
-32    384    
272    -736   
-560   -720   
144    16     
160    1072   
-224   224    
-128   -224   
496    1136   
-544   784    
-656   1360   
432    656    
-992   -288   
-96    0      
112    -608   
-176   144    
112    -48    
32     96     
-64    -80    
-16    224    
-96    64     
-32    224    
0      368    
-144   656    
-240   -48    
-112   -160   
144    176    
-112   -16    
-208   144    
128    16     
-224   32     
0      224    
144    80     
-96    48     
128    112    
-224   32     
-176   96     
64     64     
-352   16     
640    -192   
-384   192    
400    -32    
-512   112    
-144   240    
0      -272   
80     -240   
-272   16     
64     96     
-176   112    
16     0      
128    0      
208    -32    
-560   128    
112    -192   
400    -144   
-256   80     
-128   256    
-112   -64    
368    -352   
-864   128    
240    192    
144    288    
16     16     
-48    -32    
240    432    
-336   752    
112    -208   
336    -192   
-176   96     
-272   80     
128    32     
160    -32    
-288   128    
96     256    
224    608    
-16    288    
128    64     
32     -48    
-160   48     
128    -80    
-16    -64    
-176   48     
176    288    
-64    -128   
-112   0      
-16    -320   
208    0      
-432   -544   
880    -784   
496    -464   
-288   -288   
-544   -16    
256    112    
192    208    
160    448    
-944   -1600  
-240   256    
624    416    
-64    288    
-288   80     
96     -112   
-160   -48    
224    96     
-32    112    
-160   -208   
-32    224    
352    368    
16     288    
-16    -960   
-1584  976    
1056   32     
272    240    
-528   208    
-544   0      
736    272    
144    -80    
-592   -272   
432    64     
112    80     
-384   48     
-80    240    
512    128    
-320   48     
-192   128    
208    -240   
320    48     
-16    144    
-16    96     
-160   80     
-208   -80    
-368   48     
368    -256   
544    592    
272    192    
-96    -48    
-128   144    
0      -160   
576    304    
400    128    
-352   -16    
-80    336    
320    96     
352    432    
-784   48     
64     688    
1008   112    
80     -752   
-176   272    
208    240    
-192   176    
192    512    
-144   64     
-208   288    
-80    64     
-272   96     
208    112    
128    -192   
-1520  -656   
1712   -1584  
816    -48    
-848   176    
-784   48     
592    208    
336    -416   
-400   256    
-256   80     
176    256    
112    176    
-288   112    
-80    -480   
16     80     
-256   -96    
352    192    
192    80     
-32    -48    
64     80     
-208   -272   
512    144    
-480   -160   
96     -144   
128    -128   
-352   192    
-256   -176   
-192   0      
240    -336   
0      -32    
-96    48     
64     48     
176    336    
128    112    
-32    224    
-112   -448   
-112   0      
208    -48    
-112   352    
144    -336   
-16    384    
16     0      
-400   48     
384    208    
160    -48    
64     48     
80     48     
-128   400    
96     336    
144    624    
32     224    
16     224    
-96    -368   
-288   64     
432    -1136  
656    784    
-1136  112    
112    320    
784    -192   
-976   32     
-64    -272   
64     -192   
352    144    
-128   0      
-144   48     
128    -208   
-96    80     
112    -464   
0      144    
128    -800   
-288   -112   
64     96     
224    16     
112    64     
-144   112    
-176   -128   
80     -368   
640    208    
-400   96     
80     128    
-48    -112   
160    32     
1056   1216   
-3104  1264   
-208   -144   
1536   -16    
-304   -32    
-128   -224   
-624   112    
416    -464   
112    -208   
80     224    
-48    320    
32     -192   
144    -16    
-128   48     
-176   -112   
176    -32    
256    -80    
-176   16     
-48    288    
288    32     
-240   -592   
816    -544   
-800   432    
-32    -208   
416    -48    
-288   -352   
0      -176   
320    -16    
-96    -32    
-16    208    
-240   80     
256    64     
384    -144   
-304   -144   
-448   -32    
512    -224   
176    0      
-816   64     
384    -192   
-368   -112   
416    -48    
96     -80    
-176   -192   
160    16     
112    16     
-144   -256   
96     -112   
-64    112    
112    48     
96     272    
-1216  -944   
-976   -208   
1776   -544   
-400   -464   
-416   240    
224    -352   
-32    -144   
-48    -480   
192    64     
160    -640   
-112   80     
-16    -48    
304    192    
-64    -192   
-192   144    
336    -144   
-96    -64    
-64    16     
192    -32    
-160   48     
-16    48     
-736   -416   
624    -640   
976    -800   
-768   -784   
-32    400    
192    -16    
-160   -80    
-416   -80    
48     128    
304    -80    
64     64     
-80    -32    
-32    112    
-208   208    
-64    -64    
-192   -240   
400    144    
352    -32    
-288   -32    
-192   208    
560    -448   
-80    0      
-352   -416   
160    448    
96     -160   
-592   208    
80     -48    
608    64     
176    80     
-336   -128   
-16    0      
304    -64    
64     272    
-384   -432   
448    320    
144    -848   
-1040  256    
112    -240   
-368   112    
320    -160   
128    -112   
-144   -16    
80     -112   
-96    64     
112    -240   
-896   176    
-80    32     
336    -224   
-176   80     
880    2624   
-1504  1280   
560    -544   
1696   -3728  
-1312  0      
-720   -16    
992    -992   
-720   -768   
-624   80     
320    16     
704    128    
-624   -368   
-160   -256   
368    -64    
96     128    
-176   432    
-80    672    
-128   -96    
-80    384    
416    656    
-400   -48    
-176   -384   
-32    -368   
176    288    
-400   -208   
-144   -688   
96     -320   
448    32     
-192   -16    
-64    576    
48     16     
80     -208   
304    80     
-112   368    
-160   16     
-272   -96    
368    -48    
96     192    
-32    192    
-32    256    
-16    -64    
192    192    
240    -48    
0      688    
0      1136   
0      880    
160    -224   
-224   544    
32     128    
144    80     
48     336    
304    -96    
-1072  1088   
288    496    
128    144    
-288   -528   
-192   192    
112    1008   
144    -608   
-480   -704   
256    208    
16     -192   
80     64     
128    -16    
-224   96     
-288   -80    
-80    -176   
-144   -32    
-816   800    
208    96     
-256   32     
208    -16    
-96    48     
-80    32     
-160   16     
0      48     
-32    96     
144    -304   
-608   -352   
-208   176    
352    64     
272    528    
-768   544    
96     -256   
80     448    
-496   -240   
-64    112    
-224   64     
-96    112    
80     -48    
-16    64     
-144   64     
-224   272    
160    96     
-176   112    
-112   112    
48     432    
-16    288    
-304   304    
80     -144   
-272   -144   
-208   1040   
400    144    
-432   -240   
-272   -336   
176    80     
80     512    
-240   -112   
-160   -160   
192    -96    
112    112    
0      -208   
80     -80    
-272   0      
176    176    
-176   256    
96     32     
16     16     
16     448    
-192   -464   
112    -448   
400    560    
-128   -16    
-176   -128   
96     112    
272    -176   
-224   -80    
-160   432    
128    192    
112    80     
848    1344   
-64    64     
-2112  -112   
1088   64     
896    352    
-672   384    
-288   -16    
432    -144   
0      -64    
48     48     
0      -112   
-32    0      
112    48     
-16    -144   
-256   48     
-64    -192   
192    144    
-352   208    
-48    208    
0      160    
32     112    
-752   144    
1792   -400   
-752   -368   
-1184  -48    
1008   160    
-48    -320   
-560   16     
48     112    
336    -32    
-80    32     
160    96     
-304   0      
-144   -32    
-416   64     
400    0      
160    16     
-544   -112   
-64    112    
256    64     
-64    144    
224    304    
0      -80    
-352   -96    
112    144    
-128   -112   
-224   -80    
-304   -96    
336    -16    
160    96     
-400   96     
176    480    
272    352    
576    64     
-80    128    
0      96     
-32    -80    
-16    64     
-32    480    
-272   304    
-80    -96    
400    16     
-96    112    
-48    144    
32     64     
-384   -240   
144    64     
416    64     
-720   240    
-464   -1264  
-432   -3952  
-1872  -912   
416    -560   
416    368    
-288   -32    
-688   272    
-224   -192   
208    320    
128    -144   
-96    64     
-160   -176   
96     208    
-272   160    
-96    144    
32     80     
-112   112    
-224   64     
80     112    
384    320    
0      -128   
-688   352    
752    -32    
-464   32     
-624   96     
544    80     
880    160    
-448   0      
-592   112    
1088   80     
-336   176    
-112   176    
256    128    
0      112    
-80    256    
384    208    
-240   48     
-368   -16    
240    80     
176    144    
112    96     
-112   -64    
-336   64     
336    64     
-128   80     
432    80     
304    224    
-464   -176   
0      112    
320    -48    
-64    192    
-112   64     
368    -704   
-992   -80    
-448   144    
816    -512   
-400   -240   
-112   336    
208    192    
288    80     
-384   48     
64     128    
288    -32    
-64    -16    
208    -16    
-96    112    
-48    64     
304    144    
432    128    
-304   -832   
-464   480    
512    240    
304    0      
-160   -32    
-240   144    
0      208    
304    288    
256    -64    
128    480    
-560   352    
192    -352   
-176   -1424  
1776   -32    
-192   432    
-1200  -96    
208    592    
64     64     
208    48     
-96    192    
400    -384   
-256   -80    
96     48     
384    -96    
-80    208    
-176   16     
80     816    
368    80     
-352   -544   
64     192    
-160   -1808  
144    224    
32     -96    
-720   592    
1440   -224   
-16    -96    
-880   -128   
512    192    
288    256    
-32    128    
-320   256    
64     -176   
192    -16    
48     -432   
64     64     
-176   -304   
0      80     
160    -112   
160    48     
-496   -64    
160    80     
176    160    
80     0      
16     -48    
-160   -96    
192    112    
144    -112   
-224   16     
-32    -160   
352    192    
48     -672   
128    176    
576    1008   
-1632  448    
-688   240    
1376   -272   
-112   192    
-384   240    
448    208    
480    400    
-400   112    
-256   -32    
384    64     
368    -176   
0      112    
-352   0      
-128   -160   
464    -304   
-160   64     
-304   -32    
416    80     
304    16     
-176   112    
16     -704   
-1504  672    
1632   752    
-512   528    
-656   192    
384    256    
-864   416    
-144   -176   
112    -128   
-16    -704   
64     160    
-192   128    
96     160    
464    64     
80     48     
-480   400    
128    -432   
-176   -48    
176    240    
176    528    
352    0      
-160   352    
320    -544   
-368   576    
448    -48    
-432   -752   
-960   576    
480    -48    
192    -64    
-208   -400   
0      -1360  
0      -32    
176    -800   
512    -96    
512    384    
-592   -640   
288    -656   
624    368    
48     352    
-176   -320   
32     -224   
272    80     
96     -304   
-288   32     
-448   560    
928    272    
-144   -64    
-512   160    
128    80     
144    0      
-80    1536   
752    144    
-1104  -688   
-96    -1152  
416    -576   
432    -1760  
-544   -704   
-144   -32    
400    64     
0      528    
-80    -416   
-416   -112   
112    -304   
96     16     
16     -128   
16     64     
272    -704   
64     -112   
-224   112    
192    272    
208    16     
48     48     
-320   -32    
368    -32    
-240   -880   
-368   -432   
-256   560    
208    48     
-320   -608   
96     288    
48     224    
320    -512   
-224   -288   
-112   176    
240    1136   
80     208    
-128   96     
-64    208    
48     832    
-144   -336   
160    -400   
176    -32    
-416   128    
-672   -128   
-16    -32    
400    144    
16     -320   
-288   -304   
160    -16    
240    64     
-16    400    
176    -496   
-704   -208   
224    -16    
16     512    
48     272    
48     -240   
0      448    
-256   0      
-32    48     
-304   16     
160    -48    
-128   144    
-48    -176   
128    208    
112    864    
-320   496    
-208   -624   
80     -720   
272    304    
96     32     
-96    -96    
32     -128   
0      16     
384    -256   
-208   -288   
-112   -304   
-416   -528   
368    -480   
144    336    
48     -64    
-336   288    
288    -208   
-160   -928   
-48    -1328  
496    -208   
-64    560    
-352   32     
16     -80    
160    -224   
-64    288    
16     -272   
-32    32     
144    -224   
-64    -64    
-96    -304   
-32    -192   
-128   -160   
112    -144   
160    80     
304    -480   
-864   912    
480    80     
384    -160   
-528   -560   
-496   -320   
352    -16    
-96    288    
-128   -48    
0      112    
-176   -80    
-1216  -32    
64     -48    
-16    64     
112    48     
-48    272    
-80    144    
176    -48    
-64    80     
-144   -48    
208    -16    
-480   -64    
-224   64     
-176   -416   
-352   -80    
112    -176   
-320   80     
32     0      
-16    -64    
48     208    
-1168  320    
2512   272    
-400   -240   
-1200  160    
1104   96     
320    448    
-64    576    
-192   560    
-48    144    
0      -96    
-512   0      
32     64     
192    288    
16     16     
-272   176    
-672   -128   
-96    80     
-16    -160   
288    80     
64     -64    
288    1376   
48     -720   
-1248  192    
1200   -144   
-736   192    
-416   32     
112    112    
304    32     
176    -96    
-544   -48    
-32    0      
16     64     
176    64     
176    80     
-528   -288   
352    64     
368    112    
0      544    
160    224    
-64    -160   
32     112    
-400   -448   
-448   64     
816    -32    
-272   -256   
-464   240    
368    -64    
400    -112   
-160   48     
-144   32     
80     80     
0      -16    
64     240    
80     208    
-304   -32    
-400   64     
432    -512   
160    64     
-240   384    
-128   96     
-176   48     
224    112    
64     -32    
-128   0      
80     432    
-32    -16    
-416   80     
448    96     
-176   -688   
-352   -448   
1984   -2144  
112    1184   
176    640    
-816   -320   
16     304    
-80    -32    
112    -16    
0      16     
-192   -80    
-352   -32    
-176   224    
144    -256   
208    192    
-128   64     
-32    192    
-192   48     
80     112    
304    64     
-592   -160   
176    240    
80     96     
-32    48     
688    -32    
176    16     
-832   -96    
-48    304    
544    -32    
-128   0      
320    -32    
-368   240    
336    128    
-48    288    
-160   -32    
80     128    
160    -32    
-144   -80    
208    288    
-96    16     
-352   96     
-16    80     
16     -32    
0      160    
16     48     
-128   256    
64     128    
160    128    
32     96     
-208   -96    
-48    96     
240    64     
-64    16     
-176   -256   
-96    -96    
432    -224   
608    -16    
160    160    
-224   544    
-240   288    
80     32     
208    -48    
-96    224    
-208   32     
96     16     
208    160    
-80    48     
-224   -48    
352    0      
0      128    
-32    -288   
0      112    
-80    240    
128    320    
-240   64     
144    176    
176    224    
0      144    
16     -112   
-48    80     
128    208    
80     208    
-512   -2704  
-1568  1136   
1440   0      
416    112    
-80    224    
-800   144    
336    96     
-400   736    
336    256    
64     144    
-240   48     
-272   -16    
256    0      
-96    16     
-496   48     
144    -320   
160    48     
-144   -224   
144    96     
-32    176    
-288   -640   
432    -928   
-368   608    
544    -368   
-192   240    
176    368    
-80    336    
-80    16     
176    -144   
144    240    
-288   336    
-208   1296   
496    -208   
-400   -48    
-128   -16    
96     -464   
160    -304   
64     352    
-208   752    
-80    288    
240    -64    
-80    176    
-208   208    
-16    160    
160    128    
-144   -80    
64     96     
16     272    
48     -1248  
-208   80     
-1344  -512   
1408   -192   
336    -224   
-432   384    
240    -112   
496    -16    
-368   -48    
-608   -16    
240    -96    
416    368    
-416   -48    
-48    96     
304    192    
-176   -112   
352    272    
64     192    
-144   -144   
256    -256   
224    -144   
-48    -160   
-352   -640   
1408   1184   
304    0      
-1056  -160   
416    -144   
288    -176   
-240   -576   
-720   -16    
512    -368   
-64    96     
-272   -1024  
144    112    
160    32     
64     -240   
-32    -288   
320    144    
-144   -240   
400    -240   
512    64     
-432   208    
32     -16    
192    -176   
192    -336   
-64    -192   
624    -48    
-496   -1504  
-544   -464   
320    176    
80     32     
-144   80     
272    320    
-112   -32    
0      -416   
-592   -1216  
-256   -208   
256    464    
304    -416   
480    -96    
192    -304   
-464   48     
32     -96    
176    128    
-96    -3984  
-32    176    
304    -80    
-208   512    
-512   -112   
-240   -176   
96     -80    
160    48     
640    112    
-1888  -288   
896    80     
1344   -48    
-768   176    
-816   240    
624    256    
592    1104   
128    -736   
-608   -336   
144    -16    
416    272    
-16    80     
-400   160    
112    -144   
-96    400    
288    256    
-256   416    
-160   -208   
256    -160   
-80    -320   
-32    272    
400    80     
256    -368   
-656   -272   
-160   -128   
560    -288   
144    128    
-176   -832   
-112   208    
96     288    
304    -112   
-128   -128   
-304   -192   
272    240    
128    640    
-240   224    
144    -96    
-160   368    
160    -208   
80     -896   
-320   -560   
32     -272   
0      688    
608    -128   
-352   64     
-304   128    
400    -496   
448    -1376  
-368   -32    
-592   -16    
320    1296   
1808   128    
-672   688    
-832   416    
848    -64    
368    -112   
-144   368    
-16    640    
-16    -1168  
-224   -304   
240    800    
384    -624   
-240   -512   
0      -336   
352    48     
32     608    
-192   -32    
208    -240   
96     -480   
-224   -256   
160    -128   
-528   -64    
112    -304   
288    -720   
-176   -576   
208    -208   
-96    -464   
-432   352    
48     0      
880    1600   
-912   -368   
-528   256    
784    432    
192    -832   
-560   -960   
272    -80    
368    64     
-288   -32    
-208   544    
256    144    
-16    -32    
64     -640   
80     -400   
-288   -304   
96     -256   
176    -448   
-80    -32    
-128   16     
112    -32    
-64    32     
288    1440   
272    64     
-752   -448   
-368   192    
480    -224   
-160   -224   
-208   512    
496    208    
176    -80    
-240   -144   
0      -1072  
-224   192    
128    -16    
64     64     
-48    -128   
-16    -80    
96     192    
208    32     
-384   16     
160    64     
-224   -128   
-192   80     
192    -288   
-224   -256   
304    -16    
160    -48    
-224   0      
-144   64     
576    720    
-1200  -144   
2176   656    
992    -256   
-1104  16     
896    144    
576    208    
-656   16     
-96    176    
368    -80    
48     160    
32     64     
32     -80    
-16    208    
-96    32     
-32    160    
192    -48    
-224   -96    
-336   128    
400    -32    
-272   -16    
-144   -640   
1056   512    
-192   -368   
-752   96     
512    -192   
-176   -64    
-928   -176   
496    32     
880    -1200  
-384   128    
-544   -48    
-32    80     
368    32     
112    48     
-240   -48    
0      -32    
-160   -272   
-80    64     
96     -80    
-96    -176   
80     144    
-160   -432   
-320   -192   
-432   -96    
-944   96     
288    -48    
128    -480   
-848   -224   
-48    -96    
448    144    
-112   208    
-400   128    
-16    64     
-352   -256   
-144   -384   
-64    0      
-544   -224   
-80    -224   
-32    -128   
544    32     
-688   80     
-656   -48    
176    48     
192    32     
-32    304    
-432   160    
-208   32     
560    -144   
16     16     
32     4688   
1088   -144   
-1280  -432   
1152   -1200  
240    -64    
-1200  432    
304    128    
16     320    
-80    -96    
-816   112    
400    128    
48     0      
64     -32    
32     -112   
-16    48     
-96    32     
128    80     
160    -32    
-144   96     
-240   1056   
688    80     
-528   416    
-112   -160   
256    96     
-256   176    
-304   -128   
-672   32     
48     -128   
-448   16     
416    -80    
0      48     
-64    48     
-96    -288   
-272   0      
368    -80    
-368   -160   
176    -48    
-352   48     
-32    -160   
112    160    
-256   -16    
-384   -48    
208    0      
-224   80     
-64    160    
48     -112   
-144   -32    
-160   16     
336    -16    
-16    96     
-240   160    
16     272    
144    -240   
-400   304    
464    432    
-208   416    
-480   176    
400    880    
496    512    
-192   240    
-272   -80    
240    144    
64     80     
-80    176    
-80    160    
-96    0      
160    0      
-352   -208   
-64    -336   
160    -352   
32     -464   
-576   -320   
192    80     
-816   -128   
-160   128    
0      -256   
448    112    
-176   304    
-560   -256   
112    -256   
176    48     
-800   -1408  
576    -944   
-256   672    
-112   -16    
304    208    
-304   -608   
-192   464    
-432   -544   
400    224    
176    0      
-400   96     
-80    32     
144    -48    
240    -144   
-320   -176   
80     176    
112    656    
-128   16     
-240   -352   
80     0      
-64    -832   
272    -544   
-352   672    
80     320    
320    -272   
-224   -208   
-48    80     
320    160    
144    64     
-112   256    
-96    -224   
80     -240   
288    -16    
16     368    
0      176    
256    -48    
-240   -144   
-464   32     
96     416    
80     -176   
-192   48     
0      80     
-144   48     
32     -64    
160    128    
-208   96     
-16    -128   
48     272    
-224   80     
-16    -1120  
1408   -928   
-1024  544    
-208   384    
624    432    
-304   96     
48     -704   
208    208    
-64    64     
-80    288    
-32    -32    
320    192    
16     176    
-144   -160   
-240   -32    
192    192    
-16    32     
-176   176    
160    560    
208    -96    
-96    112    
-640   -384   
-352   240    
1888   -16    
-304   -272   
-720   -176   
16     -544   
160    -928   
-720   -928   
240    48     
480    608    
-192   352    
0      -48    
32     48     
16     576    
432    560    
-96    32     
-416   -128   
32     320    
256    336    
64     432    
-224   288    
-128   112    
416    0      
-176   336    
-1280  208    
448    240    
528    -784   
-352   -1120  
304    -416   
-160   16     
32     208    
-240   -544   
64     -320   
400    624    
-416   640    
528    -64    
-352   -32    
32     528    
0      304    
-160   -224   
192    -48    
-16    -128   
272    64     
112    -352   
464    -416   
-80    544    
-112   544    
160    528    
32     368    
-560   -944   
1104   -320   
1504   32     
-1040  -336   
-992   -160   
1024   -784   
608    -352   
-496   -1760  
-304   544    
192    336    
192    288    
-32    -336   
-176   -224   
160    -64    
352    240    
-240   32     
-352   -128   
-48    208    
160    32     
96     32     
48     320    
-80    160    
-80    -608   
-240   336    
448    -400   
-832   -608   
304    -352   
144    16     
-528   -464   
-80    -976   
528    464    
208    1008   
-144   592    
-32    -64    
256    -48    
-336   -288   
224    -224   
144    -464   
-256   -144   
80     -704   
208    16     
-48    32     
80     32     
-128   320    
720    1232   
-384   720    
0      448    
432    784    
-160   480    
-176   -176   
-32    -512   
736    848    
-1008  16     
-224   128    
432    -784   
352    -496   
-80    -480   
-224   -64    
144    -272   
16     32     
64     192    
224    448    
-64    208    
-176   304    
-240   -16    
304    -288   
64     320    
-128   16     
-48    288    
240    -64    
16     624    
176    -336   
16     96     
-128   -32    
32     -16    
-224   -288   
752    -944   
-96    -208   
-192   -416   
384    384    
-256   -96    
928    2208   
1184   528    
-1088  0      
-64    -736   
368    -128   
624    416    
-368   464    
-64    16     
272    48     
-48    176    
240    -160   
-32    96     
-112   208    
160    -176   
192    -32    
-128   -192   
16     -240   
240    336    
-224   -448   
272    96     
912    496    
-1728  96     
-368   16     
880    -32    
-336   -288   
-224   64     
128    -80    
304    -96    
-384   256    
64     144    
368    112    
-112   96     
-160   256    
80     -144   
-96    16     
-48    -400   
288    64     
-16    32     
-112   32     
192    128    
320    96     
-336   16     
16     -144   
288    -1184  
160    0      
16     144    
-224   80     
336    64     
-48    -128   
1536   384    
-2208  400    
-1424  -864   
1856   -192   
-304   -576   
224    384    
368    -304   
-48    -432   
-224   -160   
224    -640   
160    -256   
-176   -240   
-16    -48    
320    176    
288    -64    
-560   64     
224    -336   
-32    -592   
32     96     
32     -64    
32     112    
384    1024   
-608   -288   
-2560  80     
1936   0      
-432   -96    
-1008  -32    
464    -96    
384    768    
160    -32    
96     -512   
-160   48     
0      -96    
64     112    
208    -80    
-192   16     
-128   0      
64     -128   
64     -128   
-112   208    
-112   -48    
112    -416   
432    48     
624    -752   
-336   32     
-96    -192   
240    -864   
144    -16    
-416   -16    
256    -272   
304    -128   
-400   48     
-240   96     
256    176    
-16    -416   
-208   -224   
112    -368   
112    -304   
704    -288   
-112   192    
-224   -384   
32     80     
48     -64    
80     128    
272    0      
-112   -16    
-368   128    
112    -16    
-144   -32    
-96    -848   
1680   608    
-1968  688    
176    -256   
1488   80     
-160   0      
-944   -576   
384    -32    
480    32     
-416   -448   
-864   128    
784    -112   
-112   32     
-32    -48    
-48    0      
-64    -160   
-176   176    
320    -80    
-128   64     
-112   -416   
768    -144   
16     -368   
-256   16     
-112   -1440  
-576   -96    
-64    -176   
688    -96    
-512   -304   
64     -224   
192    -192   
-64    -128   
-208   32     
-48    -144   
-416   -96    
-64    16     
112    -208   
-272   -352   
352    -192   
-32    -1280  
32     -80    
-96    -80    
112    0      
176    64     
-320   208    
96     320    
112    208    
64     -96    
-496   -512   
128    -288   
240    -368   
32     -176   
32     48     
160    816    
-160   -432   
-112   -464   
-16    -368   
128    -256   
-352   -640   
-160   -480   
224    -400   
288    -160   
-384   48     
-16    160    
32     256    
-80    -208   
336    -496   
64     -272   
-288   -240   
-432   -208   
-688   304    
432    448    
-944   -16    
-224   -176   
48     -80    
-112   16     
48     32     
-96    224    
224    256    
-144   112    
-336   -32    
32     -208   
-144   -240   
-304   -2000  
-384   -960   
160    1168   
-96    592    
-592   -32    
-160   -640   
336    -1072  
144    704    
-32    48     
32     16     
-288   -16    
-32    -96    
112    128    
32     0      
-240   -48    
-64    -80    
208    -160   
-32    -368   
-128   -64    
-64    -192   
-336   -416   
-192   -224   
0      -112   
-800   -448   
192    0      
-112   -48    
-128   80     
-48    32     
144    -16    
48     -176   
-144   -16    
-80    64     
-80    176    
-128   -32    
144    -64    
-32    176    
-240   -128   
48     -416   
-288   -96    
-96    144    
-224   16     
80     176    
-144   -64    
144    112    
-80    -144   
-112   0      
-208   192    
128    160    
272    0      
-448   -928   
1408   -1440  
-848   128    
576    -128   
-560   112    
-416   112    
-496   304    
336    -256   
416    -400   
-240   448    
-272   128    
208    448    
224    -240   
-304   16     
-32    -32    
240    608    
-32    -192   
-688   -304   
320    64     
352    1184   
-144   -192   
-896   -112   
112    96     
1360   -800   
-480   -192   
368    -640   
-176   -512   
-624   -1008  
-336   496    
912    1152   
48     496    
-96    784    
208    336    
-272   624    
-192   176    
336    384    
-288   -304   
-576   160    
288    -288   
240    96     
-128   32     
48     -32    
160    352    
-336   256    
304    -192   
192    -1216  
368    -1120  
-176   -480   
224    -336   
480    -64    
-80    192    
0      368    
320    336    
-368   -368   
160    -192   
-48    0      
-528   128    
-464   560    
432    -512   
48     48     
-176   -336   
496    256    
-112   -400   
288    -144   
-64    16     
592    192    
-464   336    
-288   128    
304    160    
192    272    
928    2784   
-1168  1696   
368    -352   
864    -208   
-96    896    
-1072  -16    
208    592    
1120   -432   
-512   -128   
-1072  -32    
608    192    
480    -80    
-352   -80    
-528   112    
256    144    
-16    64     
128    -16    
-224   0      
-96    1040   
192    1104   
48     80     
-80    -128   
-320   -496   
272    528    
352    160    
-720   208    
240    -224   
208    112    
-480   128    
128    288    
-208   -416   
64     -480   
192    -128   
-304   -192   
112    80     
112    64     
-80    480    
224    176    
-112   288    
-144   48     
-32    96     
304    80     
-48    128    
-240   112    
496    336    
-368   -528   
16     -384   
464    464    
-624   336    
-112   240    
384    64     
-304   -1056  
-944   -144   
912    -32    
80     -112   
-64    336    
-288   176    
-16    288    
352    112    
16     80     
-80    128    
-32    192    
224    -64    
-16    32     
-32    80     
-96    112    
-64    32     
160    -160   
208    352    
-592   432    
256    -272   
304    80     
-176   -48    
-208   144    
16     48     
240    880    
704    320    
-288   -224   
-192   448    
208    48     
1088   3248   
-1872  -240   
-1344  192    
1456   -80    
160    -224   
-832   -1632  
320    -112   
704    528    
-352   64     
-224   80     
176    176    
-128   176    
240    -128   
-48    -208   
-272   208    
336    304    
-256   128    
-16    -160   
128    208    
64     144    
-368   -960   
1072   -160   
64     -1344  
-784   -192   
-496   208    
432    144    
224    352    
-240   352    
128    -240   
-176   304    
-64    -48    
64     176    
288    32     
208    96     
-528   -16    
96     -64    
240    64     
-80    -544   
-16    96     
64     192    
48     32     
32     160    
-48    64     
-80    -304   
352    144    
-448   -80    
96     208    
240    16     
-240   -80    
-272   -992   
992    -656   
-128   -32    
-496   -448   
48     -160   
624    -976   
144    80     
-400   224    
240    16     
-32    -288   
-320   208    
352    48     
96     112    
-272   -64    
192    0      
176    0      
-384   -352   
192    176    
192    -416   
-96    112    
192    -624   
-112   -528   
1056   768    
-304   -224   
-1216  -80    
976    400    
576    96     
-560   192    
304    272    
752    -160   
-368   16     
-608   32     
400    112    
128    -112   
-112   80     
16     -480   
-112   112    
144    -96    
128    -16    
160    208    
-176   144    
-208   32     
80     -352   
-1040  80     
304    -912   
464    128    
48     -416   
-432   176    
-256   -336   
544    -192   
192    -176   
-144   96     
-96    -128   
-128   48     
-144   -48    
16     480    
-240   -320   
-272   -336   
528    64     
288    -208   
48     64     
-192   16     
144    176    
80     -160   
-80    160    
368    224    
-512   176    
-320   32     
480    192    
128    0      
256    464    
-848   1264   
720    48     
1056   -880   
-576   -32    
96     256    
496    -32    
0      32     
-160   -144   
-256   -80    
480    112    
32     -416   
-320   128    
192    -528   
-64    144    
-192   -336   
144    -208   
160    -144   
32     144    
480    336    
-96    -192   
-48    -160   
-128   -80    
608    48     
32     -128   
-208   -96    
368    -864   
-96    80     
144    -720   
-608   -608   
144    -672   
288    32     
-1584  0      
-192   -448   
352    -384   
128    -400   
-224   -240   
464    -1056  
16     -528   
-192   -448   
64     -176   
-96    -480   
-80    -64    
272    144    
-96    -128   
-416   -592   
-128   -896   
208    224    
240    -352   
-304   -240   
16     -272   
400    272    
-1056  -80    
448    -112   
304    -3168  
80     -16    
368    1664   
-608   1296   
0      -1088  
336    -144   
-368   -16    
32     -16    
0      0      
80     -96    
-752   192    
192    -400   
-320   -336   
240    -768   
304    16     
-400   -656   
64     32     
112    80     
96     240    
-112   -128   
16     -544   
240    -16    
32     288    
-432   288    
256    -32    
-544   -160   
-16    -32    
496    528    
-736   336    
160    -272   
272    -48    
-128   16     
-208   -960   
112    272    
144    -192   
80     48     
-48    48     
48     -96    
0      0      
64     -16    
-288   0      
-176   -32    
-336   160    
272    -128   
0      -64    
0      -448   
-272   96     
288    -384   
832    288    
-720   -48    
-64    -64    
48     -32    
48     -352   
16     -496   
80     144    
-432   144    
-112   48     
64     -32    
96     -304   
-48    48     
-48    -496   
160    128    
-48    -368   
-48    -272   
-48    -336   
144    -16    
16     -80    
176    0      
80     -48    
-256   -48    
-256   -160   
368    -160   
48     -80    
-224   -208   
144    48     
-80    32     
1264   752    
-2064  688    
-96    -160   
736    176    
48     -416   
-400   224    
192    144    
912    -112   
-48    144    
-320   -32    
16     -240   
-64    64     
272    208    
-144   -16    
-496   -160   
304    -16    
160    48     
-384   -432   
-832   -144   
96     16     
208    -384   
1216   464    
-1424  -240   
-464   -256   
752    0      
-240   688    
-64    176    
832    288    
592    -16    
-752   -368   
-224   0      
96     -96    
-32    -144   
144    -128   
-32    208    
-128   128    
-192   -576   
544    -32    
208    240    
-64    480    
-752   448    
144    304    
368    -144   
-688   -96    
-48    -688   
128    304    
400    -528   
-432   368    
-176   -32    
-288   16     
256    16     
-288   -128   
-240   -80    
-640   192    
16     32     
496    -160   
-128   -32    
-224   -464   
544    352    
-192   64     
-512   -48    
304    96     
112    -80    
64     -416   
-480   144    
448    80     
112    48     
-144   64     
-400   -384   
-464   736    
-768   1120   
144    208    
0      176    
-496   -352   
224    240    
336    -176   
-512   160    
-688   48     
384    -144   
-160   224    
-224   0      
-320   0      
416    112    
-80    -192   
-240   336    
384    -144   
-160   128    
112    0      
-96    -352   
-400   704    
112    784    
0      160    
288    -16    
640    0      
-880   80     
112    -32    
-64    80     
256    192    
-624   0      
112    48     
80     144    
128    448    
-240   16     
80     112    
256    48     
0      304    
-512   -16    
-96    64     
688    112    
-176   64     
-608   48     
176    96     
48     0      
144    16     
-176   32     
-512   -80    
240    -48    
-880   -304   
-16    96     
0      208    
-80    256    
-160   -992   
-736   -192   
448    -144   
416    0      
176    -80    
80     48     
80     80     
-192   16     
48     96     
-32    48     
32     208    
16     128    
112    160    
80     128    
-256   80     
-48    208    
288    240    
176    96     
-528   480    
288    176    
176    -96    
-304   144    
-128   -48    
0      48     
64     -80    
144    576    
-208   224    
96     -224   
48     144    
1040   2848   
-2288  -448   
-1200  -112   
1648   -64    
-48    -752   
-992   16     
512    -48    
800    432    
-944   0      
-32    -176   
288    112    
-32    416    
128    -64    
-256   80     
-32    -208   
240    144    
-224   432    
-48    -176   
32     -48    
208    240    
-304   -768   
1024   -96    
160    480    
-752   32     
400    144    
288    64     
-480   208    
32     384    
496    -64    
-352   304    
176    48     
352    288    
0      192    
-352   208    
-64    -48    
80     -80    
384    64     
-256   -64    
64     192    
192    144    
-48    128    
-128   80     
208    112    
80     112    
176    192    
-352   96     
-272   112    
64     128    
320    48     
-384   -256   
-160   1664   
1424   -32    
-624   208    
-816   -288   
384    160    
432    176    
-416   64     
496    48     
-112   240    
-608   112    
224    16     
256    48     
-48    112    
48     16     
-432   32     
368    80     
-112   -64    
128    304    
336    208    
-32    144    
64     176    
-752   -80    
1312   0      
1008   -128   
-1312  -80    
64     48     
672    80     
-224   80     
-608   32     
544    -48    
272    112    
-224   48     
64     128    
-112   16     
0      -320   
256    80     
-16    32     
-176   -32    
0      96     
80     144    
-16    16     
0      0      
720    192    
-1072  -224   
-208   -80    
976    160    
-784   144    
80     176    
624    -64    
-176   -64    
-240   48     
272    -2320  
240    -48    
-80    0      
-64    -208   
-48    160    
112    -496   
-144   272    
272    192    
-192   80     
-32    112    
432    448    
-528   256    
-208   32     
160    -224   
48     -496   
0      -256   
-80    32     
-96    -176   
608    -1232  
-1040  -2176  
-640   -272   
768    192    
416    112    
-64    384    
-288   -32    
-224   -160   
-400   -352   
32     -48    
496    -336   
80     176    
-288   -256   
48     112    
176    -1168  
96     224    
-48    -160   
-16    144    
-176   224    
496    736    
-240   592    
-16    352    
-80    -240   
368    -80    
576    592    
16     16     
-208   432    
-320   128    
448    1088   
304    656    
-112   -96    
-304   -16    
208    240    
80     -256   
48     -400   
-224   -144   
0      224    
192    -32    
304    -384   
16     112    
-32    144    
160    96     
-400   -144   
32     96     
80     688    
208    832    
16     -512   
-192   176    
192    -656   
48     80     
-16    304    
-144   -96    
-432   -192   
976    -1328  
-144   -560   
-368   -64    
480    576    
96     -384   
-176   96     
-160   -176   
240    112    
176    48     
-224   -80    
-32    160    
16     464    
-432   288    
80     -384   
64     32     
64     -416   
464    32     
-112   -32    
32     16     
176    -96    
224    32     
-80    -96    
48     160    
144    -16    
-48    32     
-352   -48    
176    -1104  
176    80     
-496   -304   
816    -1488  
416    432    
-128   -400   
-528   96     
128    96     
256    -256   
-240   432    
-240   352    
288    -256   
128    -96    
0      64     
80     208    
128    -64    
16     -352   
-48    -128   
240    -272   
-64    336    
-128   -704   
-16    -144   
192    -864   
96     -32    
16     -16    
544    -304   
-368   -368   
-32    80     
464    -80    
48     304    
-256   -256   
144    -48    
-304   48     
32     -32    
-32    64     
32     32     
208    -64    
144    240    
-160   272    
240    64     
-192   -512   
64     -688   
256    240    
-128   96     
-256   -16    
48     112    
432    -160   
-176   160    
-96    128    
224    -112   
-112   -80    
208    288    
-768   1824   
2384   -304   
-608   -464   
-1008  -16    
1184   -112   
352    -240   
-320   -736   
-64    -208   
128    160    
-176   800    
-32    320    
16     208    
-464   -144   
-176   -16    
448    -176   
0      -608   
-320   -192   
64     -192   
576    160    
-240   -256   
416    320    
-1744  -384   
-496   336    
816    -1184  
-816   -1024  
464    -640   
-784   -448   
912    576    
528    240    
-304   -208   
-192   -48    
160    112    
416    144    
-432   208    
-560   -320   
384    144    
304    -224   
-496   -224   
-32    192    
128    272    
352    64     
-144   -752   
-1152  768    
1456   -608   
-752   160    
-336   -128   
528    128    
64     -336   
-624   240    
128    -720   
416    -112   
96     128    
-64    -16    
-560   80     
160    -208   
0      16     
448    -336   
400    -160   
592    96     
-288   -32    
-176   -48    
176    144    
-32    -176   
96     48     
240    -560   
-416   -16    
32     112    
272    -32    
208    864    
560    4384   
-1088  1840   
224    -112   
1552   -736   
-320   144    
-896   64     
304    -192   
784    112    
-272   -432   
-240   80     
672    -48    
80     -48    
-192   64     
-16    -32    
80     96     
128    96     
-320   32     
16     64     
352    304    
240    -368   
-496   464    
384    -400   
0      416    
-1072  -480   
-272   128    
1072   -80    
-736   -48    
-400   160    
-976   -48    
304    32     
-144   16     
-320   48     
464    -16    
0      -144   
-160   64     
96     16     
-144   -32    
592    16     
-784   -176   
-16    112    
240    48     
-208   -32    
80     256    
-96    128    
96     144    
-176   32     
80     48     
-336   -48    
-400   -128   
160    -48    
352    128    
160    1104   
-688   32     
-272   576    
880    464    
-944   224    
-528   128    
560    -16    
192    64     
-208   16     
128    64     
288    -32    
-1088  -32    
0      224    
192    128    
-128   224    
48     720    
80     640    
-240   208    
384    -176   
-192   128    
-48    96     
256    224    
-48    128    
-304   -144   
16     80     
272    -144   
-400   -480   
-304   -240   
-480   304    
144    176    
1040   -1216  
-1584  624    
-272   -624   
320    176    
-128   128    
384    912    
640    352    
-640   -560   
256    -320   
32     336    
32     -64    
208    -64    
-96    464    
-672   -192   
304    80     
112    -144   
32     400    
-80    48     
-96    -16    
-208   -656   
1120   -80    
304    336    
-944   224    
560    -288   
-64    224    
48     80     
-144   -256   
-80    208    
-384   32     
112    48     
-48    -96    
160    112    
-144   48     
-320   0      
352    64     
-288   176    
208    224    
-96    80     
-144   80     
80     -128   
32     -48    
-384   16     
144    96     
-48    64     
288    64     
-1664  -80    
0      32     
208    32     
-592   672    
-1040  112    
4512   368    
288    336    
-1536  -112   
640    -32    
784    144    
-864   0      
-336   -128   
736    160    
-288   -128   
-208   80     
-112   -160   
80     176    
-176   -112   
224    224    
304    16     
-256   160    
-128   -32    
-16    304    
464    128    
-304   -560   
1136   992    
-528   112    
-512   -208   
448    464    
496    320    
-160   176    
-16    208    
464    -48    
-128   96     
-704   128    
-160   -272   
448    48     
256    80     
80     128    
-240   96     
64     224    
96     -208   
-384   176    
-16    128    
112    208    
144    416    
-768   528    
64     -368   
-32    512    
400    -400   
944    32     
-256   192    
64     240    
-144   160    
-320   -48    
-32    176    
144    144    
32     432    
-336   368    
-640   80     
80     0      
800    -96    
-96    128    
-352   752    
704    48     
-32    112    
-192   160    
96     -96    
304    544    
-160   -80    
-160   144    
112    -96    
-64    240    
-272   192    
-96    2192   
992    128    
-576   -144   
-192   144    
992    -80    
-528   320    
-896   960    
752    1376   
-128   608    
-288   16     
32     -256   
-64    352    
0      -160   
-192   -48    
304    160    
0      256    
-288   208    
320    -240   
-96    160    
-48    576    
96     208    
96     256    
-944   -160   
400    -672   
96     -432   
112    -288   
-96    -224   
48     16     
80     -784   
64     208    
112    224    
208    -288   
-208   -576   
240    -720   
0      -496   
-16    -96    
272    336    
-368   464    
160    -336   
336    -544   
80     -16    
-48    160    
96     -576   
-192   -512   
96     416    
16     -176   
-160   -160   
336    -416   
-176   -48    
-128   240    
-16    -976   
-1056  464    
528    32     
672    432    
-144   928    
-592   -960   
480    -128   
-64    912    
-80    496    
-32    -208   
112    -896   
112    -176   
-256   -448   
64     64     
176    288    
208    336    
48     80     
-64    -16    
80     -144   
48     64     
0      48     
96     208    
-32    80     
-192   -256   
176    -112   
48     240    
-112   432    
160    256    
96     224    
-112   48     
480    112    
-784   -224   
240    32     
128    128    
48     352    
48     256    
80     176    
-96    720    
144    0      
-48    160    
-80    -128   
0      48     
336    -624   
-128   224    
-240   -80    
0      208    
-48    240    
-144   16     
-208   -192   
-112   -576   
752    -368   
160    48     
-560   0      
128    -448   
32     -256   
64     -96    
176    176    
144    -1536  
-16    144    
-192   -816   
320    176    
256    0      
-144   -48    
32     240    
16     432    
192    -192   
-144   208    
-224   -64    
144    112    
160    112    
32     416    
-176   208    
272    96     
80     64     
-240   -64    
96     112    
128    112    
48     -32    
48     -144   
112    -624   
-1712  160    
1232   -656   
96     16     
224    224    
-288   32     
-304   -224   
304    224    
-96    -32    
-128   -96    
48     -16    
128    96     
-80    -64    
-64    256    
432    96     
0      208    
-112   240    
64     -192   
-96    128    
-16    -176   
96     144    
-400   -944   
-608   512    
1152   -336   
-96    176    
16     -112   
624    -144   
-336   -208   
-544   -544   
912    96     
-144   -192   
-176   -176   
224    -96    
-192   -624   
272    160    
48     64     
-192   -80    
240    -48    
-32    -128   
224    -544   
288    80     
32     16     
-576   352    
-64    -128   
144    -672   
-80    -192   
32     784    
-1120  448    
-528   -544   
464    -144   
-48    -2352  
-304   -32    
304    272    
96     -128   
80     432    
160    -448   
-272   -336   
416    -176   
720    -720   
-192   16     
-1648  80     
240    48     
560    -64    
-688   48     
-224   -224   
864    -240   
-448   256    
-416   80     
304    -32    
16     944    
-480   3024   
448    480    
-896   224    
-432   -544   
464    80     
-96    32     
-624   -112   
64     -112   
464    80     
-736   -48    
16     -496   
464    112    
-16    -400   
-176   48     
192    -48    
-48    0      
16     -16    
112    80     
-288   -416   
-576   112    
656    -288   
-384   0      
-800   -160   
480    -400   
368    96     
-80    -80    
272    -16    
160    -608   
-176   96     
144    -112   
-528   -32    
464    -112   
-384   -112   
0      -112   
336    192    
112    -160   
-752   -240   
272    96     
-256   -16    
-848   176    
64     -160   
-288   64     
160    -432   
80     128    
16     -608   
96     144    
320    -208   
-48    -208   
-304   144    
256    -96    
-272   64     
-304   208    
560    -128   
240    64     
-224   192    
560    -48    
192    -240   
-352   240    
-224   192    
192    -320   
16     144    
-192   112    
384    -144   
32     48     
-160   64     
-208   -48    
336    -96    
144    128    
-592   -32    
-16    240    
48     -128   
-208   32     
160    -352   
128    304    
-16    -192   
-352   240    
544    -144   
-96    208    
-64    96     
32     -32    
1104   2608   
-2336  144    
-688   0      
1472   -160   
-464   -80    
-400   96     
352    144    
432    -224   
-528   -768   
-112   -240   
256    272    
-128   176    
96     64     
-208   -32    
208    -560   
112    608    
-144   -64    
-144   176    
272    80     
-112   160    
-208   -352   
560    -704   
-1152  192    
528    544    
176    128    
-656   -96    
-48    -224   
-464   240    
-64    -32    
-720   -176   
0      240    
208    -112   
-128   -48    
-192   144    
80     144    
0      -192   
128    32     
-352   144    
112    160    
-112   32     
64     208    
-96    128    
-128   0      
-64    64     
-176   208    
240    32     
-176   80     
-192   -64    
-208   -176   
48     368    
-1504  -384   
1328   -160   
1344   -176   
-1072  224    
368    176    
400    368    
-272   160    
-256   96     
-112   -224   
208    112    
-272   -32    
-624   32     
96     0      
128    -16    
-432   -80    
256    -80    
96     160    
-112   -288   
-176   -32    
80     -64    
176    1200   
-128   -688   
-1328  224    
896    576    
16     880    
-896   224    
-176   112    
704    144    
-384   -96    
-336   112    
-800   64     
400    0      
336    -176   
-288   -192   
-352   -32    
448    224    
240    416    
-192   -208   
-400   -112   
32     64     
0      80     
48     208    
48     224    
-416   16     
128    432    
-192   -144   
-784   -1824  
-560   -1488  
496    -272   
-224   544    
-128   32     
0      336    
-32    -48    
624    448    
608    576    
-592   128    
-160   -752   
272    0      
160    -176   
80     -256   
-160   -16    
-112   0      
32     320    
288    192    
0      224    
256    -528   
-16    128    
-64    192    
-16    192    
80     208    
160    -1056  
-2336  -720   
608    -480   
464    112    
-320   -304   
-336   192    
32     16     
624    -480   
-32    1216   
-304   80     
-32    -48    
320    144    
320    48     
-208   96     
-80    -208   
-192   336    
464    96     
-224   224    
-176   -272   
192    -528   
80     208    
-80    304    
-720   -32    
-16    -16    
704    -400   
96     64     
-336   1120   
32     -80    
-32    -832   
-64    176    
64     -240   
-176   192    
-144   640    
336    656    
176    352    
-368   -16    
-112   16     
400    288    
368    464    
-192   -64    
-224   -48    
-272   80     
336    -208   
160    768    
-336   512    
-176   -176   
416    240    
192    864    
-304   -512   
-32    64     
-176   -912   
656    -128   
80     -544   
-448   -80    
-288   -96    
-64    240    
16     640    
176    192    
-80    -240   
-256   -192   
64     256    
208    -32    
64     -16    
-304   -176   
-160   352    
400    464    
192    128    
-416   96     
-464   -160   
192    -112   
-96    48     
-48    16     
192    -128   
-160   144    
-32    448    
-144   336    
-272   320    
448    976    
16     400    
48     32     
528    512    
-1712  1008   
448    -704   
864    -240   
-80    -176   
0      -480   
-128   128    
240    496    
-112   288    
16     -608   
16     240    
-80    -160   
32     128    
144    224    
112    32     
-64    320    
176    0      
-64    -336   
112    64     
192    128    
-128   -592   
-128   384    
256    944    
-128   224    
0      -528   
-64    -208   
-16    -240   
96     32     
0      -80    
64     -48    
32     80     
-64    192    
304    -48    
0      288    
-96    352    
64     -208   
144    -320   
80     -96    
-96    304    
-48    0      
0      96     
-16    -112   
160    -704   
16     -16    
128    -688   
48     64     
-240   208    
0      16     
16     32     
1264   1552   
-624   -320   
-2048  -32    
1184   0      
-304   -128   
-608   -416   
752    -80    
320    240    
-192   -192   
-192   144    
240    -912   
160    112    
-32    64     
-96    -16    
-208   80     
336    80     
-96    48     
16     320    
176    272    
112    128    
-144   32     
448    928    
256    -336   
-1984  176    
832    144    
288    -480   
-656   144    
160    -944   
128    144    
672    -64    
-224   272    
32     -144   
80     208    
224    112    
-128   -16    
-464   32     
400    -16    
608    208    
-352   176    
-240   192    
336    -704   
192    224    
208    -912   
-496   336    
496    -96    
224    -192   
-688   208    
-400   144    
240    128    
-240   80     
-48    16     
592    -208   
-160   176    
16     -80    
32     -256   
64     224    
192    16     
112    -320   
304    144    
-64    -608   
-432   256    
288    48     
352    32     
-192   64     
-464   -336   
288    144    
608    -224   
-192   32     
464    320    
-432   -1296  
-1760  -2688  
-576   -224   
944    -704   
-448   176    
0      80     
512    128    
-80    128    
-80    128    
176    96     
672    -16    
112    112    
-160   -272   
176    304    
96     -80    
-32    112    
-144   -288   
0      144    
-48    -192   
624    800    
-544   -1120  
-112   624    
608    -288   
-400   48     
816    0      
-224   -304   
-352   512    
688    -128   
-176   320    
48     -416   
288    240    
-80    -256   
160    288    
-272   -208   
112    272    
448    -48    
-336   448    
256    144    
0      -400   
-256   32     
32     80     
320    -1040  
64     -48    
-176   -2336  
288    -64    
-16    -192   
-720   -32    
608    48     
96     80     
-176   -1104  
-80    16     
176    -336   
-304   480    
640    -208   
320    64     
-1552  32     
272    -256   
176    -144   
-144   -480   
-496   128    
224    -256   
272    -112   
-160   80     
-160   -224   
208    -176   
144    48     
-128   -288   
-144   112    
128    -32    
80     256    
80     240    
-224   144    
48     -272   
-32    -16    
64     160    
272    -96    
-16    128    
128    -1360  
-144   464    
-160   -208   
256    -64    
-112   -2784  
-960   512    
1248   -384   
192    864    
496    112    
-576   -96    
-688   448    
240    208    
480    544    
-32    -256   
-448   288    
64     -560   
304    64     
32     112    
-368   336    
96     -240   
240    -464   
-112   -112   
80     16     
-112   0      
96     -864   
-736   -448   
160    32     
80     432    
-304   656    
32     -208   
128    -1056  
-128   256    
112    -2864  
-96    144    
0      -304   
144    -192   
-160   192    
-64    112    
192    -320   
16     64     
-352   448    
96     -48    
-384   160    
-144   -192   
128    128    
224    -208   
-240   -16    
48     -864   
80     -112   
112    -32    
160    272    
-112   -224   
-96    -416   
-16    -592   
1920   -528   
-1616  432    
-528   144    
480    -128   
160    112    
416    1152   
-384   -672   
-48    -1168  
96     -912   
-80    144    
144    48     
-80    96     
128    256    
-144   -128   
-144   176    
464    -64    
-64    -512   
-160   -496   
80     -144   
-32    0      
-832   112    
2000   -256   
320    496    
-1616  480    
480    400    
640    352    
-448   -192   
0      -240   
256    48     
-208   80     
32     144    
144    304    
-32    -64    
-208   320    
432    16     
16     -32    
-112   304    
-272   528    
224    -48    
176    -64    
16     -304   
96     16     
-640   -1616  
-352   -1264  
336    -400   
160    -48    
-512   32     
-128   768    
352    1264   
-160   96     
560    112    
160    112    
-832   128    
544    -352   
128    448    
240    1200   
-784   816    
-544   448    
-672   -320   
-336   176    
96     240    
224    400    
-16    -368   
-144   624    
-112   304    
-384   640    
144    -576   
-96    384    
-528   160    
304    208    
1040   -544   
112    -80    
16     -352   
-336   336    
16     -592   
240    144    
48     2016   
-192   -256   
-192   -192   
-96    32     
208    464    
96     32     
-96    -432   
-96    336    
-160   -416   
16     -384   
-272   -64    
-208   176    
304    32     
-112   160    
-432   -80    
-112   -16    
1152   -288   
-224   0      
-624   64     
-16    80     
176    -144   
320    -1168  
-64    -80    
-336   256    
96     464    
-336   16     
-144   464    
480    176    
-400   16     
-400   -320   
160    -464   
-128   -272   
-208   400    
0      416    
-16    384    
112    96     
-144   288    
-48    -960   
-416   448    
256    304    
96     944    
-80    384    
-80    -176   
-32    64     
48     544    
1056   560    
-496   80     
-208   608    
912    976    
-272   1280   
-560   480    
192    -480   
192    -464   
-112   -208   
16     -80    
-64    -208   
-80    -112   
304    32     
-320   80     
48     432    
192    320    
-400   -128   
-32    16     
-400   -192   
96     80     
32     32     
-32    -16    
224    368    
-304   192    
96     80     
-112   -384   
-32    -176   
80     96     
752    352    
-2064  1168   
1056   -800   
-32    528    
-112   512    
-720   448    
336    624    
48     96     
32     -112   
0      -48    
-240   64     
-48    80     
192    192    
-48    176    
-144   176    
-16    -320   
-16    -736   
-64    -336   
-160   16     
112    0      
560    912    
-1024  528    
384    -384   
80     -48    
-176   -336   
-144   -320   
0      -352   
192    272    
64     64     
-64    0      
-112   176    
-336   16     
272    144    
16     -128   
-384   64     
400    -32    
-32    112    
48     32     
-192   336    
256    -16    
-192   80     
-96    96     
80     16     
208    208    
-80    192    
-416   80     
-176   176    
512    80     
-112   16     
-240   -160   
928    -480   
-832   656    
-320   -16    
336    48     
-240   -64    
-16    48     
-32    48     
-192   48     
-144   -64    
160    176    
176    80     
-64    144    
16     96     
-368   -48    
160    112    
160    144    
-192   -32    
-80    80     
576    80     
-64    -80    
-112   320    
1024   304    
-1696  -128   
-672   -368   
-48    48     
336    160    
-288   112    
624    -112   
240    32     
-384   -32    
16     128    
176    48     
-32    112    
-368   112    
816    64     
-160   0      
-304   560    
480    -16    
-112   96     
-240   16     
144    176    
-528   -448   
352    384    
32     -48    
-960   304    
496    64     
-32    256    
-144   336    
-48    176    
-160   -256   
-304   16     
304    464    
320    112    
48     160    
-768   112    
544    -96    
80     832    
-576   368    
224    -416   
160    32     
-80    192    
-112   32     
256    96     
128    112    
-80    -416   
-944   128    
336    112    
352    -48    
-432   -784   
2560   752    
-1616  1376   
-512   -240   
1840   -656   
480    16     
-1232  -2464  
-304   256    
1248   32     
-160   192    
-240   -96    
-272   208    
160    96     
240    16     
-176   32     
-32    -32    
144    288    
256    0      
-112   128    
-240   -560   
80     720    
752    -448   
-704   416    
320    80     
-160   32     
-528   96     
288    192    
208    64     
-112   176    
-144   -512   
-224   64     
224    -336   
-80    80     
32     48     
-224   -16    
320    -16    
-144   -352   
0      -80    
-352   112    
32     -16    
48     208    
144    112    
224    -144   
-48    -16    
336    -464   
-272   176    
-272   32     
320    224    
240    208    
-208   -32    
-80    128    
160    -240   
0      96     
160    -640   
-384   -528   
256    -1296  
96     -272   
-352   -80    
224    880    
-112   800    
16     256    
-16    0      
80     112    
16     128    
80     -32    
16     208    
80     0      
-256   304    
64     -400   
-64    224    
160    -496   
32     -432   
48     304    
-352   928    
192    -128   
304    -128   
-192   -432   
-336   208    
96     1024   
336    -400   
0      -720   
-400   -464   
-672   -336   
1280   -608   
32     400    
-736   160    
544    192    
0      -560   
-208   -576   
-96    800    
272    -384   
-16    112    
-112   -976   
16     80     
32     80     
176    144    
-144   -320   
-80    96     
112    -288   
-144   -176   
16     -576   
80     288    
-256   1728   
576    96     
-480   -208   
-160   -160   
368    224    
496    960    
-432   1264   
-176   256    
416    -320   
-112   32     
-208   -256   
160    -64    
192    -64    
64     16     
64     -64    
-144   224    
208    -544   
48     80     
-240   -304   
-176   -704   
-240   192    
224    -240   
96     160    
-288   0      
144    -304   
-80    416    
144    -112   
80     -96    
-320   176    
-176   -1120  
1952   -624   
-1104  544    
-720   592    
208    816    
-128   320    
256    480    
272    -1232  
-352   -416   
-272   -1072  
400    -160   
336    192    
-144   -80    
-96    -336   
-64    -32    
96     -336   
-80    128    
-128   -160   
-288   -192   
-64    96     
160    -16    
-240   592    
1888   -400   
-352   16     
-640   512    
64     288    
160    -1680  
544    -976   
-256   800    
144    960    
240    -496   
-208   -464   
48     -512   
336    -16    
-112   -112   
144    -240   
-48    -304   
64     288    
256    32     
-192   -288   
128    -288   
160    -448   
-32    800    
592    464    
128    656    
-256   1104   
192    176    
-624   1600   
576    624    
176    160    
-144   -256   
240    304    
288    -224   
-320   -784   
-816   240    
1488   -208   
736    240    
-48    1104   
272    -608   
48     432    
288    112    
-80    -112   
48     -112   
-112   0      
32     400    
192    -32    
-544   -256   
-480   16     
-64    80     
48     112    
416    2080   
-128   992    
400    288    
32     -1728  
-864   -32    
0      480    
544    448    
-96    160    
-416   976    
160    512    
256    -560   
80     -160   
-256   -176   
-592   256    
256    288    
-192   304    
80     -64    
-288   16     
16     -528   
-416   -656   
336    -800   
96     -272   
-416   -112   
560    176    
80     416    
-16    -544   
160    -624   
48     -448   
-144   -448   
96     -576   
-144   -112   
336    -144   
-464   128    
208    176    
304    656    
-112   256    
-192   -240   
-224   272    
256    368    
-112   288    
-32    -16    
0      -64    
32     -48    
32     -160   
64     512    
-432   608    
32     448    
208    208    
80     464    
-16    640    
-160   400    
-368   192    
976    0      
0      -240   
-320   160    
-96    -192   
96     -576   
-144   -432   
-96    -192   
-176   -272   
240    112    
-368   -208   
-48    48     
-336   -352   
0      48     
-16    128    
-672   144    
448    384    
-848   544    
-96    -96    
96     -16    
160    -16    
-400   32     
-128   32     
448    -192   
-272   -368   
-704   -176   
736    192    
0      48     
-336   112    
592    -736   
-2080  1664   
800    48     
544    368    
-624   -96    
-752   208    
176    112    
32     96     
144    560    
128    32     
-352   32     
-192   -176   
320    64     
80     32     
-576   512    
192    448    
720    -272   
-576   -64    
80     -384   
336    256    
144    1680   
-976   0      
-1376  128    
864    -48    
-144   -272   
-256   208    
-96    192    
272    32     
-32    176    
-80    -80    
-128   0      
-240   -16    
256    -48    
-80    -96    
-208   0      
0      -128   
-160   -64    
-368   -160   
-176   224    
144    16     
128    96     
-272   -144   
-64    112    
304    128    
-288   -112   
-208   256    
448    -64    
-368   96     
192    64     
-384   784    
864    -960   
-1952  224    
-384   -256   
1248   208    
-64    -96    
-992   384    
336    -208   
112    16     
-224   -96    
-208   64     
560    224    
-304   -80    
-272   256    
368    16     
-208   112    
-288   -112   
272    176    
-384   64     
-192   176    
-176   -32    
224    464    
624    -192   
-2192  96     
-64    -48    
2128   -432   
-1728  176    
-192   256    
-32    80     
-240   -144   
-176   48     
64     32     
48     80     
-48    48     
64     144    
-304   -144   
-336   128    
64     64     
272    -80    
-272   -224   
-288   144    
336    112    
-272   464    
1264   -144   
-176   -128   
-480   208    
816    272    
272    448    
-832   -64    
288    -64    
96     -48    
-32    128    
-80    208    
336    240    
96     -80    
288    -32    
-368   96     
144    -192   
-96    240    
-16    64     
352    -64    
-48    16     
-112   144    
-128   -48    
0      48     
272    352    
480    -192   
-384   112    
-80    -64    
-48    -144   
-336   -3520  
-1472  272    
1280   544    
736    -160   
-144   224    
-560   0      
96     128    
512    208    
-576   -208   
352    -48    
336    128    
-192   80     
64     32     
64     128    
160    -16    
176    128    
-16    112    
-320   0      
288    672    
-48    592    
144    912    
32     80     
-304   -144   
336    64     
720    -32    
-656   64     
240    -176   
320    352    
-432   0      
208    32     
16     -48    
112    -176   
-192   128    
160    112    
-144   80     
-32    736    
64     672    
80     544    
112    -48    
-224   0      
-32    160    
-64    -480   
-64    192    
256    -64    
-400   -336   
320    -96    
-80    -576   
-336   -96    
160    592    
144    240    
16     -64    
-432   400    
1056   -640   
-400   -960   
-240   -192   
-96    -528   
-400   -1872  
-624   -1728  
304    -880   
144    224    
-48    0      
-144   96     
-16    96     
112    64     
32     -32    
32     480    
-208   -32    
-48    48     
192    192    
160    240    
-144   192    
-48    -528   
64     48     
-176   528    
112    528    
-320   64     
208    176    
576    48     
-528   192    
-112   0      
240    32     
224    -544   
-112   160    
-144   32     
160    208    
96     16     
288    -16    
-336   48     
176    112    
224    352    
-64    208    
-64    112    
-96    0      
320    112    
-352   128    
64     208    
144    0      
16     16     
-64    144    
-144   -304   
672    -240   
-1312  368    
400    0      
352    -16    
-112   -272   
-64    208    
128    -112   
48     48     
32     192    
80     96     
-144   64     
-112   192    
80     -96    
-32    432    
160    -32    
-112   32     
144    32     
-112   160    
-64    288    
0      16     
-144   96     
-96    64     
64     176    
96     0      
-224   224    
144    288    
-48    16     
144    -368   
-176   224    
-384   -896   
1376   -16    
1280   -880   
-1712  -736   
192    -720   
1200   768    
-320   432    
112    1232   
-64    688    
-96    -1264  
-272   48     
496    16     
160    304    
-176   32     
-16    320    
352    -400   
-64    -144   
112    -208   
-64    688    
-64    -592   
64     32     
-1024  -64    
1696   128    
416    -336   
-560   -96    
720    432    
0      1072   
-384   1504   
128    304    
64     -128   
224    -208   
-32    32     
0      160    
-96    256    
64     -32    
16     112    
-80    288    
112    752    
-304   128    
64     -32    
352    0      
64     -208   
-80    -160   
16     480    
544    272    
-432   -96    
288    -320   
-320   1824   
1152   160    
-96    -320   
-528   -96    
464    192    
304    64     
48     -96    
304    1024   
-784   16     
-304   -208   
80     992    
384    -144   
-112   -112   
-752   320    
432    48     
432    -272   
-736   80     
-160   -336   
384    416    
1056   160    
-464   -912   
-656   832    
256    128    
176    -3200  
-1792  -1088  
1104   0      
640    -432   
128    -928   
-336   336    
288    0      
480    704    
-432   416    
-320   144    
368    16     
144    -32    
336    96     
-496   112    
-816   0      
512    -112   
128    -112   
-192   -32    
-160   -160   
80     736    
336    832    
-256   -16    
64     -240   
1296   176    
-368   96     
-640   -96    
176    240    
496    -80    
-144   224    
-176   -160   
64     272    
-304   -176   
-16    -352   
224    -352   
400    -16    
-128   -512   
-496   -192   
464    32     
192    -336   
-272   64     
-80    -336   
32     240    
208    160    
-208   -80    
64     0      
160    -192   
-1120  -176   
288    -176   
496    -64    
-160   -112   
-320   128    
176    560    
1264   -112   
-368   -1552  
-800   320    
768    -32    
288    -16    
-624   -48    
96     -352   
-512   0      
368    -224   
-96    -80    
-96    32     
-656   112    
-192   -416   
624    -336   
336    -96    
-560   -192   
352    -768   
368    400    
-272   -208   
-112   128    
-128   176    
192    176    
80     48     
-208   -320   
-672   128    
480    48     
-640   -160   
-256   -80    
16     -3040  
-2000  752    
1328   208    
560    -352   
-320   96     
32     -176   
-96    -448   
-256   -48    
240    288    
144    112    
-176   96     
-528   112    
320    -192   
32     -352   
-528   64     
-16    -32    
416    -224   
-272   240    
0      -464   
112    80     
640    -3088  
-1712  480    
16     128    
1280   -80    
-1072  368    
176    -672   
-512   224    
352    -160   
-272   304    
240    -368   
-64    48     
-304   -192   
96     240    
464    -176   
-480   -64    
-128   80     
16     -96    
0      -48    
-176   32     
-48    -16    
-80    96     
48     48     
-48    32     
80     -112   
-448   -208   
496    176    
272    -80    
-256   48     
0      -96    
1232   -304   
-1008  -800   
-2816  656    
1552   -80    
1232   64     
-592   96     
-720   272    
560    256    
416    -64    
-528   96     
-112   -240   
64     192    
-128   -96    
32     352    
-192   -96    
-416   112    
320    32     
-48    -16    
-240   144    
-736   16     
32     16     
448    576    
352    -128   
-1552  -176   
96     -896   
64     -384   
-192   32     
-96    -32    
448    192    
-176   -432   
-496   32     
-32    16     
32     64     
128    48     
128    144    
-688   -64    
-480   16     
224    -272   
336    -320   
-160   144    
-192   0      
160    64     
-288   48     
784    64     
192    0      
-416   128    
464    96     
48     64     
-224   160    
-224   -208   
-144   144    
-128   -48    
-64    240    
0      32     
416    240    
-496   48     
-64    352    
0      96     
48     64     
0      0      
-288   32     
-16    32     
80     80     
64     32     
-224   -48    
-208   -112   
432    112    
352    192    
-592   48     
208    816    
944    2992   
-1776  1984   
512    -560   
1584   48     
-944   48     
-368   576    
832    -176   
368    -80    
-768   128    
16     -16    
736    0      
-320   -144   
304    48     
-176   16     
-48    32     
-160   208    
480    48     
-208   80     
-48    -496   
32     -864   
32     -112   
-208   192    
48     -112   
-672   -16    
224    -160   
112    272    
16     -224   
-80    -96    
-128   464    
144    1040   
-416   -160   
176    -448   
256    -128   
-224   480    
-144   224    
-112   144    
144    -432   
-64    -80    
-448   32     
80     -128   
96     464    
112    704    
32     592    
0      976    
-16    1104   
-176   896    
384    432    
-448   928    
304    16     
128    -240   
32     128    
592    304    
-1344  672    
144    336    
480    -32    
-16    320    
-288   160    
176    -256   
384    -1920  
-256   688    
-128   48     
112    -96    
112    112    
48     128    
-224   -224   
128    112    
32     -16    
144    -48    
-48    208    
96     48     
160    0      
-64    64     
80     144    
-240   0      
32     64     
-32    32     
544    -96    
144    32     
-640   16     
256    224    
368    16     
336    208    
-1200  384    
528    -16    
272    304    
-144   -32    
-128   -64    
384    80     
-544   304    
32     448    
288    80     
16     -112   
-160   240    
48     0      
96     208    
176    112    
-32    144    
-176   160    
-48    352    
224    64     
-336   -384   
480    -384   
544    464    
-592   32     
128    -32    
-64    80     
176    400    
-208   528    
224    -224   
48     32     
-176   16     
160    48     
224    80     
0      128    
-128   64     
112    128    
-144   -64    
-48    288    
0      112    
-224   112    
-16    -48    
176    192    
128    240    
-368   208    
192    112    
144    176    
-192   48     
-32    -96    
112    160    
-48    32     
656    -544   
-2752  480    
672    64     
1472   -1168  
-144   -256   
-560   928    
-112   -208   
288    80     
-80    1088   
-352   -48    
32     -16    
-96    64     
32     -96    
224    -112   
48     0      
-128   320    
-160   272    
304    1296   
320    848    
-224   48     
304    1344   
256    -1056  
-1776  688    
448    160    
352    1376   
320    128    
-160   -160   
496    -224   
-208   -96    
-352   -480   
-496   -32    
64     48     
160    16     
192    128    
-160   -112   
-608   112    
448    -128   
-160   128    
208    144    
208    80     
-192   112    
96     64     
-192   176    
-832   -1808  
-672   -928   
768    608    
176    160    
-496   496    
480    -416   
-144   -384   
-240   192    
32     32     
160    208    
-80    48     
-432   -784   
-880   608    
448    240    
-144   -128   
-352   80     
288    576    
672    16     
-368   64     
-160   -160   
352    16     
432    272    
-848   32     
-400   -432   
848    80     
112    -368   
-1008  416    
-80    2384   
1360   -16    
-1264  -368   
-352   -272   
1136   -80    
-384   -176   
-1120  48     
112    -592   
400    160    
192    -112   
-624   160    
-16    -256   
384    -16    
-96    -1888  
32     112    
-16    -64    
208    192    
112    -128   
-96    880    
384    -80    
-576   -16    
288    240    
-80    -144   
-160   160    
16     -192   
368    256    
-96    -672   
-96    176    
384    -224   
-528   80     
128    96     
144    32     
-192   176    
256    64     
16     144    
-32    256    
-16    32     
128    -160   
64     32     
32     -496   
320    128    
-176   -208   
-240   96     
-240   -304   
496    16     
336    288    
-480   64     
0      32     
256    192    
-48    176    
-208   -592   
880    0      
336    48     
-656   48     
64     -192   
304    240    
-352   -80    
112    176    
64     0      
160    0      
-32    112    
-112   96     
80     -48    
-64    64     
176    80     
-48    -144   
-80    -320   
96     112    
144    112    
-32    -176   
-192   208    
256    96     
-32    112    
64     -1392  
-192   544    
-288   208    
336    -1328  
-208   336    
160    -64    
128    -48    
-320   1568   
2576   -1040  
-448   192    
-1312  -768   
720    -32    
432    32     
-512   -176   
-208   928    
752    -656   
-32    -304   
-144   192    
240    -384   
-64    112    
-432   0      
256    -528   
-96    -272   
80     112    
16     -32    
-128   -240   
16     176    
288    -2112  
928    -352   
-928   -128   
64     80     
528    -128   
16     848    
496    -416   
-560   -64    
-80    -368   
208    0      
-816   -16    
-80    448    
-112   96     
32     -144   
-176   -128   
80     -1040  
544    112    
-208   -208   
-368   80     
432    -144   
272    160    
-256   -160   
64     -16    
320    96     
64     -64    
-448   176    
192    -288   
0      16     
-64    -672   
-1248  608    
896    288    
640    -16    
-1392  -2512  
672    384    
992    -32    
-768   224    
-560   -528   
416    32     
208    0      
-144   -144   
-112   -160   
208    -48    
-1120  128    
-448   -48    
224    176    
160    -208   
32     -192   
-256   -832   
352    48     
32     96     
-304   -64    
2224   -96    
-368   784    
-1008  -96    
112    -80    
544    -48    
128    -176   
-400   144    
112    48     
208    -48    
96     -256   
-224   96     
-80    -240   
128    336    
784    -208   
-288   80     
-208   352    
64     -304   
128    -272   
96     -80    
128    496    
-80    160    
-912   144    
-208   -560   
704    -304   
0      224    
-32    -32    
240    -48    
384    208    
-544   -1344  
-752   64     
1104   -352   
112    -160   
-880   -224   
864    -192   
400    -16    
-64    80     
-384   48     
-32    -144   
368    48     
64     -144   
-96    112    
-176   -272   
256    128    
352    -816   
-320   0      
-64    0      
576    96     
-880   1296   
176    3104   
864    -16    
-1248  -1024  
-736   224    
1680   272    
-576   992    
-432   -400   
64     -64    
32     -208   
0      912    
224    32     
-320   -496   
-240   -80    
192    -176   
304    -96    
176    -128   
0      -80    
144    96     
288    272    
-288   160    
32     80     
48     16     
-416   -736   
-16    -272   
-112   -320   
-464   144    
-112   -224   
-560   480    
-384   992    
80     192    
64     -112   
-240   -144   
-144   -432   
496    -688   
-352   -304   
-192   -464   
-432   -432   
320    320    
32     640    
-192   -48    
256    0      
-48    336    
-80    192    
-48    128    
288    640    
-128   1712   
208    -160   
-32    -176   
-208   -160   
-240   -80    
416    960    
-160   -304   
-912   464    
752    304    
240    736    
-544   608    
112    960    
192    144    
-32    -736   
32     -144   
-192   128    
16     32     
-928   -272   
16     96     
320    144    
-304   256    
64     -112   
464    -48    
-144   0      
-224   32     
16     144    
16     272    
-176   144    
-32    0      
-240   576    
112    80     
-320   0      
-96    -112   
432    112    
-192   -112   
256    512    
-816   288    
320    -112   
-32    304    
-112   -208   
-128   -16    
528    0      
-528   400    
-160   336    
176    -144   
-16    -32    
48     192    
-96    -32    
-128   160    
-624   16     
112    96     
-64    272    
-208   128    
112    -32    
-240   -448   
592    -432   
112    352    
-400   48     
-128   0      
144    -96    
240    -144   
-80    192    
-144   -240   
160    96     
-272   96     
144    176    
96     144    
-112   240    
-48    -240   
96     -272   
-128   -64    
-160   448    
352    144    
-320   -224   
-192   48     
240    48     
64     192    
-368   80     
160    -432   
-304   -176   
32     400    
288    144    
-144   128    
-32    64     
-1600  -32    
1088   -320   
1008   128    
-1184  -528   
-224   464    
880    -592   
-1408  -352   
-240   64     
528    48     
80     176    
-544   64     
-80    160    
224    272    
-192   272    
-16    192    
112    80     
-272   192    
192    208    
128    48     
-96    -64    
464    864    
-1728  -528   
-656   512    
1744   -464   
112    -528   
-944   -128   
-96    96     
320    16     
-16    32     
-80    336    
768    0      
-368   80     
-384   96     
608    112    
256    160    
-448   80     
-144   160    
592    160    
-96    -128   
-240   80     
0      96     
448    768    
-752   -64    
-224   304    
608    -560   
256    -688   
-272   -64    
528    -848   
-480   -208   
-176   144    
112    64     
64     144    
176    272    
-80    -224   
-112   -32    
432    -496   
352    304    
16     240    
-336   80     
16     16     
208    -32    
80     96     
-144   80     
48     96     
80     -48    
-336   0      
16     32     
96     16     
224    1344   
592    2464   
-192   816    
240    288    
800    -352   
-1072  -32    
-688   112    
848    160    
256    -16    
-336   288    
-128   -304   
192    224    
416    32     
-224   160    
-48    0      
80     272    
128    -192   
-64    192    
112    -80    
432    592    
-608   -128   
176    480    
592    -80    
-384   160    
-848   -64    
320    64     
496    0      
-304   -96    
-528   32     
368    16     
160    32     
32     -768   
16     80     
32     160    
128    80     
-320   -272   
-288   -32    
416    32     
272    -16    
-160   48     
192    64     
-64    112    
-160   64     
144    96     
192    384    
-256   80     
-176   16     
176    448    
224    192    
-400   64     
48     0      
464    64     
-16    672    
-112   0      
-416   864    
-608   304    
112    80     
640    464    
-496   48     
-336   -240   
448    80     
32     -64    
-240   48     
160    192    
144    96     
-112   32     
48     32     
48     864    
-16    272    
-256   -272   
192    32     
176    0      
-112   176    
128    -192   
192    16     
-144   208    
-304   -672   
560    -336   
112    -752   
-432   -32    
144    -240   
544    1920   
-160   -1744  
-1392  544    
720    -256   
80     -48    
-208   560    
336    208    
240    336    
-384   -96    
-48    -176   
224    -560   
-16    304    
224    -400   
16     368    
-384   -2240  
336    -160   
-16    -80    
-112   -224   
-128   -48    
240    320    
-384   -608   
1024   112    
320    112    
-1152  -48    
112    48     
288    -64    
-32    208    
256    208    
-96    -272   
-256   -480   
304    64     
64     -144   
48     112    
-96    128    
128    80     
112    272    
-112   -64    
-224   48     
16     -16    
272    -16    
16     32     
-192   160    
192    -400   
-240   80     
384    -64    
-144   32     
-240   224    
272    96     
-16    48     
-704   160    
576    288    
1968   -368   
-1184  224    
-416   -80    
240    -176   
112    144    
64     336    
-96    32     
112    96     
80     -80    
-16    80     
-48    128    
-128   80     
352    0      
-352   -208   
-64    48     
240    64     
-224   112    
208    -208   
48     144    
-272   -912   
1392   672    
-544   160    
-320   -688   
368    -144   
48     -384   
-64    144    
384    -2016  
-400   80     
-224   -672   
112    -48    
112    16     
128    -208   
-16    0      
-80    -2624  
64     -32    
224    128    
-80    32     
-112   16     
128    16     
80     -48    
16     128    
-704   -48    
-240   -352   
352    320    
-96    416    
-352   -544   
544    -496   
640    0      
-784   -464   
32     -272   
192    0      
288    -384   
-64    464    
896    -336   
-816   416    
96     -224   
176    16     
112    -128   
-272   16     
-144   16     
144    0      
336    -32    
-160   64     
-112   96     
192    -672   
96     112    
352    -464   
-336   -1152  
-304   144    
-176   1888   
224    592    
-224   -1040  
336    -112   
928    -224   
-464   -400   
-480   144    
320    -208   
400    416    
-272   -320   
-384   -208   
160    -688   
464    80     
64     96     
-160   544    
-80    912    
112    -272   
320    -64    
16     -320   
-320   656    
64     432    
32     64     
-288   -336   
-256   -80    
144    112    
-48    112    
112    -128   
160    48     
32     -624   
-144   592    
128    -176   
-96    192    
96     352    
144    32     
-480   208    
144    -224   
48     800    
368    48     
-816   -576   
-128   -544   
784    128    
240    160    
-240   -80    
-304   -464   
432    -192   
320    -128   
-544   -16    
-128   -80    
384    64     
96     -144   
-64    560    
80     -640   
-624   -96    
64     192    
192    752    
-384   720    
464    544    
-112   832    
176    -1184  
-64    224    
-96    -720   
112    80     
32     -320   
448    144    
-192   -368   
-112   -288   
-368   -320   
112    208    
-80    -48    
-272   -144   
-176   -16    
80     32     
-96    240    
-48    -160   
128    32     
336    -1072  
64     80     
-176   64     
-64    112    
-48    -144   
592    -256   
-912   240    
144    -400   
160    -736   
-384   80     
16     656    
656    -160   
-784   -304   
48     144    
352    464    
-144   112    
-1168  -32    
-16    -16    
-128   176    
16     208    
160    48     
-224   -240   
-64    -128   
16     80     
-112   -496   
464    -528   
-112   176    
-336   160    
-192   -192   
176    96     
-80    -144   
64     -544   
-128   16     
-288   368    
-80    16     
-832   112    
-96    480    
-80    400    
64     -512   
-240   80     
96     352    
-304   -512   
-208   176    
160    -432   
208    64     
-48    128    
-192   112    
32     48     
112    160    
-144   144    
-400   32     
80     112    
240    -48    
224    112    
-800   -1200  
-1616  160    
1632   -464   
-48    32     
592    240    
-672   96     
-368   256    
256    80     
176    224    
-128   -208   
-240   80     
-80    -32    
144    80     
-816   -240   
-48    144    
160    -160   
-128   32     
-16    208    
272    112    
-144   0      
-192   160    
-624   -96    
1968   -336   
-432   48     
-864   16     
1104   208    
128    -80    
-528   -160   
-496   48     
288    -16    
-112   0      
176    112    
-64    -48    
-256   32     
160    208    
240    -64    
-224   32     
192    16     
384    192    
352    80     
-256   80     
-400   -256   
768    336    
1184   -144   
-352   -144   
-656   656    
368    432    
352    -48    
352    -368   
-512   144    
32     -16    
240    208    
64     16     
-400   0      
-400   96     
240    416    
480    272    
128    96     
-144   208    
336    240    
-608   -112   
48     -48    
384    -16    
-32    32     
-368   -48    
624    -96    
-32    -224   
32     -192   
560    -16    
-1952  -960   
1472   -96    
1280   -48    
-944   736    
0      432    
-16    -128   
-144   64     
432    0      
256    96     
-448   -208   
-48    32     
704    144    
-96    -48    
-160   96     
-112   -16    
624    112    
-48    128    
-48    128    
128    0      
-800   -608   
-256   176    
528    80     
-272   16     
560    96     
352    -256   
-880   304    
192    32     
480    16     
112    208    
-176   80     
-176   224    
208    16     
-272   128    
-288   -32    
448    224    
-32    -16    
-416   112    
-64    -80    
16     0      
-64    -16    
-160   192    
192    48     
-240   64     
-432   96     
352    32     
-48    -80    
-160   576    
48     176    
-128   400    
192    -192   
-128   160    
-336   -32    
-96    400    
1232   16     
-336   176    
-464   144    
496    128    
80     -272   
80     -160   
-80    0      
-288   -64    
-48    96     
160    96     
32     -48    
-144   -160   
192    240    
-160   128    
-144   80     
384    96     
64     432    
-416   256    
0      -32    
288    -48    
-208   64     
-48    80     
144    -64    
432    -176   
-336   112    
16     80     
-16    -512   
160    96     
-688   1728   
1360   -336   
-832   320    
-688   160    
1088   -96    
-384   -96    
-464   16     
304    320    
448    -448   
-160   -144   
-192   128    
-96    -96    
160    0      
32     -192   
32     -832   
-16    256    
208    -80    
-176   16     
-16    -48    
160    32     
416    -640   
-1520  624    
816    -448   
656    -240   
-576   48     
16     224    
96     432    
-240   224    
-48    320    
432    -720   
-48    16     
-352   32     
96     32     
-32    0      
0      112    
192    272    
240    144    
-304   192    
0      80     
16     -32    
144    -80    
64     -128   
-320   128    
240    -96    
-16    -176   
48     128    
16     384    
-144   272    
224    96     
1248   1936   
-560   -400   
-2192  -16    
672    464    
720    192    
-864   192    
64     -352   
-80    -336   
48     -512   
-432   -80    
64     -320   
336    16     
80     -896   
0      304    
-352   128    
-16    256    
192    128    
-272   400    
-128   112    
160    176    
-64    16     
208    480    
2848   64     
-1792  576    
-528   -256   
848    0      
240    1184   
512    96     
-224   -128   
-224   96     
128    64     
144    -304   
192    160    
-384   32     
64     64     
16     176    
192    0      
-32    -32    
-256   144    
-112   208    
32     -80    
272    64     
-112   -1008  
896    -240   
464    -176   
-688   96     
16     160    
-400   -32    
-16    -240   
464    400    
48     16     
-128   -80    
-128   -48    
-16    -64    
96     528    
368    -512   
48     -272   
128    560    
144    224    
176    -288   
176    176    
-224   192    
-208   -256   
160    -112   
272    32     
-176   32     
384    208    
272    -512   
-160   -768   
288    32     
736    -64    
-1824  176    
-448   -352   
1344   336    
608    48     
-816   272    
-320   -1888  
224    -816   
176    304    
48     -32    
112    368    
-192   -112   
-32    80     
144    -160   
208    384    
-320   -352   
-112   -128   
112    -80    
304    0      
-128   128    
-256   720    
128    -96    
416    -224   
-240   288    
-192   -1216  
208    -1104  
176    320    
400    1584   
-80    480    
-112   -400   
-32    -368   
240    48     
272    -464   
-304   -576   
-160   -560   
0      288    
-144   -96    
-80    -1584  
336    16     
-160   -1360  
96     32     
208    -320   
96     -272   
-32    256    
128    16     
-400   -688   
-144   -144   
416    -192   
-144   992    
80     192    
592    896    
-224   -176   
-816   -640   
192    -80    
16     64     
-208   -160   
-384   576    
-784   -432   
-48    -1248  
544    -1376  
32     224    
-288   -896   
144    -48    
128    -128   
-48    -512   
-80    -256   
224    448    
112    -32    
96     -128   
-128   -96    
48     176    
-624   -48    
-144   -256   
-16    -48    
96     48     
224    512    
-32    -1120  
-320   -208   
208    -448   
80     272    
464    1664   
816    576    
-688   -352   
-176   672    
704    928    
-96    -544   
-752   -272   
304    272    
-480   -400   
16     48     
144    48     
-32    -192   
48     -352   
128    -1088  
256    96     
-176   688    
16     192    
176    -128   
48     -144   
-464   -448   
432    -1232  
96     928    
0      512    
-1168  -272   
272    -192   
96     416    
128    304    
-80    -192   
-48    -688   
192    32     
128    80     
-48    -96    
-32    -144   
-48    224    
688    928    
-352   640    
-352   -784   
16     -448   
-288   -144   
-64    32     
-512   32     
208    -128   
128    240    
-272   -272   
-176   112    
464    -448   
96     64     
-320   16     
320    448    
-1168  320    
2704   688    
560    -240   
-1088  -48    
992    272    
128    80     
-816   96     
-144   224    
240    -32    
-64    -256   
-48    96     
-32    -832   
-80    -224   
48     176    
368    -112   
-144   160    
-288   -208   
-464   -16    
208    48     
-224   -96    
-192   -656   
1296   1168   
1216   -288   
-1696  16     
-224   -528   
544    176    
544    -784   
-144   48     
240    64     
176    -16    
-544   -80    
48     32     
144    -16    
32     160    
240    16     
-288   -48    
-112   128    
-304   144    
288    -48    
-256   -176   
80     128    
-432   -624   
-1632  -144   
1632   176    
1264   -336   
-416   -288   
-240   400    
240    560    
-96    -16    
256    -336   
288    -160   
-384   288    
-288   32     
32     -160   
0      -240   
336    -400   
-432   -288   
-224   64     
496    0      
16     -336   
-624   -272   
-288   -256   
704    176    
288    0      
-448   -608   
-1168  32     
816    224    
-176   -224   
-528   0      
2272   -1552  
-2864  -64    
480    208    
368    128    
-272   128    
-192   -144   
-64    368    
544    16     
-112   -80    
-112   48     
368    80     
-336   -64    
0      112    
240    16     
144    -48    
-288   -48    
288    64     
-368   -80    
112    320    
720    -304   
-912   256    
384    -64    
-352   64     
-384   112    
448    48     
0      160    
-128   -48    
48     96     
-128   -48    
64     400    
144    160    
-240   304    
208    -128   
-448   -208   
-112   -80    
496    176    
-336   96     
-144   224    
512    48     
-16    48     
-160   32     
-1696  -256   
224    96     
128    -48    
-32    80     
-272   48     
224    -32    
-208   16     
256    336    
464    176    
-256   96     
64     -288   
-928   160    
272    32     
-272   -16    
112    0      
64     160    
-256   224    
-64    -64    
192    -304   
64     0      
-368   32     
64     96     
288    80     
-16    272    
-352   64     
112    208    
48     32     
-144   512    
160    320    
64     256    
-192   -48    
112    16     
-48    -112   
-64    -272   
-112   32     
176    256    
128    752    
208    256    
-192   -192   
80     896    
-368   -1568  
-960   176    
928    -688   
160    576    
-896   624    
304    -448   
592    -48    
-384   160    
-320   48     
256    -144   
112    -336   
-96    80     
0      336    
-48    192    
-48    -816   
208    -832   
80     -240   
160    144    
-112   32     
-192   -560   
288    -800   
80     864    
464    288    
-128   336    
144    256    
-80    368    
256    -304   
-192   64     
-112   -64    
160    288    
32     80     
-176   112    
0      80     
-16    144    
0      -48    
64     -128   
-128   272    
-80    -160   
192    352    
32     32     
-192   32     
96     16     
32     144    
-32    -160   
-256   128    
32     176    
-144   -336   
288    -80    
-112   112    
-1264  -432   
1152   -336   
576    -816   
-864   16     
736    544    
352    544    
-1040  880    
368    1360   
352    48     
-288   -384   
-16    112    
-64    96     
-144   -80    
320    16     
160    -16    
-160   272    
96     432    
80     -240   
-80    -272   
0      304    
480    -288   
-2464  -64    
-640   336    
1904   976    
-464   -64    
-544   -272   
800    -400   
-16    -112   
-272   -176   
0      -304   
16     224    
-128   160    
144    304    
272    -176   
-96    -96    
80     304    
-256   -240   
-144   -928   
688    -1216  
-64    -368   
-400   -48    
112    464    
-160   -64    
192    528    
96     -1216  
-672   -1568  
432    896    
720    144    
-368   0      
-16    352    
160    976    
-480   -112   
-560   32     
784    112    
-432   -256   
-160   816    
528    304    
-112   784    
624    -160   
-256   -160   
-48    0      
160    16     
368    512    
256    208    
-128   -96    
-176   112    
-96    -256   
288    -592   
-144   112    
-464   -352   
1056   288    
1504   368    
-1344  832    
-672   1088   
1104   16     
192    -448   
-784   -80    
-144   448    
480    528    
224    -384   
-32    208    
32     -288   
-80    -144   
224    496    
144    512    
-336   192    
-16    448    
208    -16    
48     528    
-32    400    
96     -704   
64     16     
-560   -240   
720    32     
-160   112    
-288   176    
192    -1200  
-432   512    
240    1184   
32     976    
304    0      
-16    -336   
-176   336    
160    304    
-16    464    
64     -240   
416    -704   
144    -400   
-368   -384   
320    -624   
272    176    
-144   224    
-304   336    
256    208    
256    288    
-160   192    
368    -528   
-368   128    
96     -96    
192    0      
-160   -1312  
-384   0      
544    1040   
-64    -1248  
-1248  -1008  
592    736    
64     -576   
-320   -160   
80     -544   
416    144    
-160   -96    
-192   -128   
224    336    
128    304    
-160   -32    
-16    0      
-144   16     
192    -384   
336    -448   
-736   -464   
0      -192   
544    -192   
16     16     
-432   112    
144    16     
192    -272   
96     -432   
-48    288    
-96    208    
-128   -784   
1424   -144   
-48    352    
-720   -384   
304    -144   
528    560    
-480   1184   
352    1024   
-496   944    
128    32     
48     176    
-32    128    
-96    -128   
304    -80    
-256   -112   
128    -48    
32     -288   
48     128    
-48    96     
112    128    
-352   -704   
304    -944   
-272   192    
448    432    
-352   -64    
-128   -640   
112    -64    
64     -144   
176    -112   
-320   -112   
64     208    
0      160    
208    -80    
-32    -304   
64     176    
-112   -416   
96     240    
144    -112   
128    -832   
-272   112    
144    -1104  
80     -496   
-96    0      
-96    -432   
96     -48    
0      -96    
32     -80    
-64    -1728  
0      -112   
-480   208    
-704   -976   
3072   784    
912    448    
-944   176    
912    176    
-320   -320   
-464   -288   
-800   -96    
224    -208   
-176   64     
-32    -464   
-32    -256   
-240   -2096  
464    -32    
128    0      
-272   32     
128    80     
-128   16     
0      -224   
-112   -48    
-224   -592   
1200   1008   
912    240    
-1488  256    
-1056  96     
656    -256   
192    -96    
304    -336   
144    32     
128    -480   
-512   208    
16     -288   
160    16     
32     -96    
96     208    
192    32     
-48    176    
-640   -240   
-16    -96    
192    -128   
-160   32     
-768   -624   
-496   128    
1088   -144   
-96    -656   
432    -32    
256    208    
-912   384    
256    -224   
-128   352    
224    32     
-432   272    
-560   -256   
176    -304   
176    -96    
-208   144    
-448   32     
208    224    
-304   144    
-64    -1136  
240    192    
-48    96     
-176   112    
128    -48    
272    80     
-320   128    
112    -160   
0      -96    
-64    96     
144    3088   
1168   -704   
-2080  64     
416    -592   
-160   -336   
-128   256    
752    272    
160    -1392  
-1136  64     
272    -208   
176    -16    
-80    144    
-160   -32    
192    192    
-32    -208   
-160   80     
432    -208   
-144   -32    
-272   -288   
752    608    
224    -416   
-752   240    
368    -656   
-288   -80    
-832   -80    
432    64     
96     64     
-304   48     
16     -64    
464    -32    
-16    -144   
-352   80     
32     112    
400    176    
-352   224    
-208   -160   
256    176    
272    -176   
-48    32     
-144   96     
320    128    
-32    -48    
-64    16     
176    -128   
-320   48     
-32    96     
192    -48    
-208   -32    
-16    -352   
96     -96    
96     -208   
304    960    
-768   128    
-384   -848   
64     -784   
0      -944   
16     32     
-304   432    
176    144    
192    176    
-240   144    
688    800    
-624   736    
-672   320    
624    64     
-48    144    
-320   672    
-16    544    
80     192    
-32    -192   
-352   -144   
-176   -48    
112    -48    
112    -16    
-224   -288   
-16    -224   
-192   -944   
0      240    
-48    432    
112    368    
-16    -16    
608    2112   
560    368    
-1040  -608   
0      -688   
416    528    
112    336    
-208   288    
48     96     
-784   -240   
-80    48     
-80    -48    
32     -96    
-32    -112   
80     336    
-32    -112   
-128   -160   
0      -160   
48     -32    
64     160    
-416   -272   
528    -192   
48     96     
-480   368    
-432   256    
-32    368    
96     224    
-64    400    
-64    112    
32     96     
-112   -448   
176    16     
-272   80     
112    -80    
-128   16     
-144   48     
64     96     
80     16     
-96    -64    
-176   -128   
32     80     
-688   -208   
48     64     
32     -80    
-64    416    
-160   176    
224    -48    
96     -144   
-144   80     
80     224    
-128   -1168  
-1904  736    
1568   -32    
-112   752    
-560   32     
-144   -48    
-176   -368   
512    464    
176    512    
-32    -288   
-192   144    
-144   80     
96     80     
160    -96    
-96    64     
-48    304    
-16    176    
160    112    
0      48     
-272   -128   
160    -544   
-2416  256    
352    128    
96     -688   
16     -1504  
-544   -1040  
-16    -944   
0      -608   
-256   -176   
32     96     
-32    608    
160    304    
-256   -496   
-272   -656   
496    -368   
-768   224    
-16    -928   
448    -976   
-192   -352   
-112   48     
64     96     
-80    -240   
32     -432   
160    1760   
832    512    
-496   -1136  
-832   -1104  
336    -224   
48     -432   
-352   -304   
352    176    
-96    -256   
-320   176    
-224   -128   
544    -960   
272    -160   
16     480    
96     736    
432    224    
-112   -96    
-208   16     
288    80     
432    432    
176    176    
-704   -384   
-192   -160   
192    48     
224    256    
160    128    
784    1824   
-208   1072   
192    -32    
-80    -304   
64     1024   
-192   928    
272    576    
80     -112   
-528   576    
48     -512   
-144   -448   
208    -224   
48     160    
-160   -64    
-128   96     
224    -80    
256    128    
208    208    
-64    416    
-368   208    
448    -144   
16     -80    
-192   192    
1024   1200   
-32    416    
-448   976    
544    48     
176    496    
-208   672    
-64    576    
544    304    
-160   128    
-240   16     
256    16     
560    16     
-272   48     
-432   64     
384    80     
112    16     
-144   -416   
-848   -416   
336    -160   
384    208    
-400   -112   
192    -64    
32     16     
0      -240   
-320   -32    
224    192    
144    192    
-96    160    
176    1104   
-320   816    
-96    256    
192    336    
80     -784   
-928   -1552  
192    224    
608    176    
112    112    
-368   144    
176    192    
128    96     
-224   96     
128    -80    
-112   -208   
-336   240    
464    272    
-16    -304   
-160   -64    
-240   144    
176    -480   
-144   48     
272    384    
32     48     
-176   192    
352    176    
-240   -32    
32     80     
160    80     
352    -1632  
-2304  1104   
864    16     
1136   -272   
-288   384    
-928   592    
448    -480   
560    640    
-832   -704   
272    -256   
32     208    
-128   0      
64     -32    
128    -160   
0      160    
-192   -288   
0      -592   
-16    256    
-16    -160   
336    176    
176    -1232  
-1760  448    
688    112    
736    -1504  
-656   32     
-48    -608   
-48    448    
128    240    
112    448    
432    48     
-176   -160   
-480   160    
416    -80    
-80    176    
224    -160   
-48    192    
0      -64    
192    304    
96     -368   
-192   48     
288    -704   
160    240    
-80    -144   
-80    -96    
-272   -128   
224    32     
-80    224    
192    160    
16     -16    
-80    -1344  
-1232  -320   
928    -240   
368    -32    
-368   -80    
-720   -16    
144    -944   
256    176    
-256   -1968  
160    112    
208    48     
-96    64     
48     32     
48     -16    
-320   128    
352    -272   
16     112    
-96    -192   
272    -16    
-256   -368   
48     144    
-592   -1024  
1424   -400   
464    128    
-864   480    
880    -160   
-336   304    
0      -256   
448    320    
64     96     
16     -32    
80     128    
112    -528   
-48    128    
-160   -272   
464    144    
96     -144   
-352   224    
48     32     
176    128    
-96    128    
496    720    
-32    -336   
-464   144    
688    -176   
-256   -144   
-352   -272   
-560   -560   
288    352    
400    -304   
-464   128    
192    -96    
32     80     
-192   -496   
320    304    
144    192    
-272   -944   
144    624    
-592   96     
16     -1360  
384    48     
-224   208    
-112   -208   
144    112    
160    -48    
0      -176   
-32    -144   
320    -1600  
-128   160    
-32    432    
1680   -1360  
256    480    
-688   -128   
-224   -336   
800    -672   
288    -128   
-576   -1136  
-240   80     
400    -176   
-160   128    
64     48     
-16    -32    
272    -288   
-64    48     
-80    -64    
64     48     
0      -160   
-336   -48    
-192   1184   
624    752    
-416   96     
-64    -464   
208    48     
-480   -1040  
128    320    
464    -256   
-416   -96    
32     -80    
656    16     
-32    -272   
-800   -368   
48     -80    
1136   -160   
-1168  -128   
-192   -288   
576    -368   
256    -464   
-112   -176   
-96    -208   
-64    -160   
400    -544   
160    -160   
-384   -224   
160    -240   
288    -352   
-80    96     
-320   -272   
-160   -304   
336    192    
336    32     
-432   1024   
-608   -304   
-656   -592   
640    -704   
-32    -720   
-672   -576   
192    -224   
64     -672   
48     80     
-96    160    
-128   -304   
128    -112   
64     -288   
-384   -208   
16     -144   
-368   -320   
-208   -576   
176    352    
32     -208   
16     -32    
96     -288   
-96    208    
-48    -448   
160    336    
304    64     
-320   -160   
112    -976   
512    -416   
-240   -192   
-544   224    
560    -432   
-416   64     
-496   80     
96     -256   
16     80     
-32    -320   
0      320    
32     -16    
32     144    
32     0      
224    -256   
-192   48     
-128   32     
-176   -16    
96     -16    
-32    -192   
-80    160    
-208   192    
144    -208   
-112   0      
32     640    
800    176    
-464   -144   
-304   208    
288    -96    
144    -64    
-560   -352   
144    -320   
32     -96    
0      64     
176    -48    
80     -128   
-400   16     
80     -144   
144    176    
-112   -320   
0      -32    
176    -224   
-64    -80    
-112   208    
320    48     
48     -64    
-192   112    
-16    -288   
-64    -128   
-256   -240   
48     128    
320    32     
-336   160    
624    -544   
-2752  32     
960    32     
-64    256    
-512   96     
-224   736    
-752   -544   
320    -1920  
528    -640   
-160   512    
-208   192    
-16    48     
400    128    
-32    32     
-592   -48    
-16    448    
160    0      
112    384    
-192   -320   
0      -32    
480    1200   
-896   -672   
-1568  272    
736    -272   
-176   -608   
-1312  -1216  
16     -976   
864    -528   
-832   176    
-320   -144   
128    -64    
-112   -144   
176    400    
-64    96     
-336   0      
208    32     
48     -128   
64     -352   
-208   -32    
0      64     
-16    32     
-272   -96    
-416   -336   
192    -656   
1232   -1008  
-368   448    
16     1168   
-496   368    
-224   80     
160    592    
560    224    
-144   192    
-464   192    
0      -144   
368    -512   
-1168  -1264  
-848   -112   
192    -16    
-208   416    
128    -272   
-272   32     
-224   -176   
256    144    
272    160    
-176   192    
-560   288    
32     48     
-16    0      
448    1040   
-464   -1056  
640    -2416  
560    512    
-1552  640    
-288   160    
224    32     
256    -192   
-208   512    
-592   -256   
160    288    
400    -400   
-272   304    
-16    -32    
-304   64     
-80    -16    
512    64     
-624   112    
-64    -16    
32     640    
448    976    
-160   944    
96     368    
-96    -192   
-96    80     
752    272    
-48    -320   
-240   16     
240    -384   
-64    544    
240    400    
-32    480    
304    -48    
-112   544    
-336   -288   
64     160    
-1008  -224   
16     128    
464    256    
-256   208    
-64    224    
368    96     
-304   -160   
-32    -96    
368    -80    
-320   32     
-448   16     
496    -128   
176    144    
-720   -80    
192    -64    
0      -64    
192    64     
-256   192    
240    96     
608    160    
-64    304    
96     144    
208    192    
-80    448    
112    64     
0      144    
-224   80     
32     272    
-48    176    
208    208    
32     48     
-128   -528   
-416   -304   
288    416    
48     96     
32     -160   
-64    64     
80     144    
0      64     
-224   -32    
256    0      
64     416    
-176   208    
-64    -64    
176    96     
-416   -416   
1408   1584   
2192   304    
-1760  32     
208    272    
608    112    
-400   -16    
-384   160    
352    -336   
-192   192    
160    -80    
256    -96    
-80    256    
-512   32     
528    464    
352    352    
-704   16     
64     64     
496    64     
-176   0      
-144   0      
-384   784    
1184   -224   
-288   -304   
-640   0      
720    256    
-96    -48    
-416   192    
16     368    
416    48     
-96    160    
176    -96    
-32    400    
-176   96     
224    64     
-288   48     
-80    336    
432    -64    
96     192    
-112   -224   
-288   224    
352    32     
16     320    
176    96     
-304   160    
448    128    
-48    16     
-32    96     
128    80     
-208   -96    
-496   1120   
976    272    
-480   96     
-448   -160   
-128   32     
512    112    
-112   -48    
64     -288   
160    -112   
-32    240    
-64    16     
-32    112    
176    96     
-64    -80    
128    272    
0      16     
-80    160    
0      32     
240    96     
0      64     
64     112    
-752   -160   
912    -400   
1264   -304   
-1328  288    
736    400    
592    112    
-640   416    
192    -272   
-384   208    
224    0      
128    16     
-112   128    
-80    160    
256    -32    
-80    176    
112    -256   
16     -416   
336    416    
384    -704   
-240   48     
32     384    
-192   0      
-128   352    
624    -48    
-336   32     
-352   -272   
176    -288   
384    208    
-256   -64    
160    112    
320    224    
-464   -64    
224    192    
272    -288   
-336   0      
-192   160    
160    112    
400    112    
-368   128    
-16    -208   
304    48     
-64    80     
0      -80    
-96    -64    
272    -112   
-144   64     
-32    -32    
336    768    
-192   -352   
-1136  880    
608    448    
-304   -304   
-416   -368   
976    272    
-416   -608   
-624   272    
400    -16    
224    80     
64     64     
-272   -48    
32     96     
288    -160   
-96    80     
-128   -288   
-80    176    
176    -112   
304    128    
-304   640    
-224   672    
256    400    
96     32     
256    112    
-352   -32    
336    384    
-352   128    
-112   -128   
304    -272   
-96    400    
96     32     
-368   -64    
48     144    
384    208    
176    64     
-208   -16    
64     448    
80     608    
-208   1056   
96     320    
-64    96     
160    -832   
-48    240    
48     -96    
-288   -592   
64     176    
320    1008   
-272   656    
576    -1088  
-336   -320   
-64    544    
48     -64    
576    -304   
-832   -1360  
48     -1088  
128    240    
-224   464    
160    368    
-144   -288   
192    432    
192    -272   
-176   16     
-64    -176   
224    -64    
-144   -448   
0      368    
-96    688    
-256   -2656  
-16    -192   
112    -112   
80     -48    
-128   -16    
256    32     
-240   -192   
32     320    
288    -208   
-48    112    
80     -32    
-224   -1056  
-96    112    
224    -800   
16     544    
96     -688   
-256   -352   
416    0      
-176   -320   
-272   80     
-16    176    
240    -112   
-144   -1888  
-160   0      
32     160    
96     -128   
80     -240   
208    0      
-464   96     
-256   400    
160    -64    
224    -464   
-400   -240   
-64    -144   
-624   432    
800    -496   
-560   -112   
-16    -112   
208    128    
112    -1696  
-144   -864   
-64    -320   
-208   464    
192    160    
144    128    
0      -128   
-96    -48    
-128   128    
160    -64    
-928   -144   
-224   272    
-16    112    
80     -368   
128    -144   
-64    -624   
32     -288   
112    -16    
96     -16    
-128   0      
320    -176   
-192   -288   
320    -528   
-448   368    
304    -1456  
-1376  -704   
448    -720   
352    -80    
272    -240   
128    -128   
-272   -976   
688    -800   
656    864    
-384   800    
-208   -16    
112    -272   
-64    48     
336    96     
-272   64     
-96    -112   
-400   80     
112    32     
-640   0      
-32    -144   
416    1696   
-336   -1328  
-1568  608    
768    -816   
336    0      
-704   -1056  
-672   -576   
720    -368   
-288   192    
-256   144    
528    -144   
-320   0      
-336   -16    
256    128    
112    -32    
-384   144    
288    -592   
336    320    
160    -832   
-112   112    
-144   64     
-208   -64    
-480   -128   
496    -416   
640    400    
208    160    
-352   -208   
0      128    
-48    -384   
704    -160   
144    96     
-240   -320   
32     192    
-32    -288   
-16    -128   
-736   -224   
976    -544   
-48    208    
-368   -128   
96     -64    
144    -128   
-512   -32    
-80    -416   
-496   96     
448    -256   
-720   48     
-48    -80    
336    -16    
-304   -592   
1312   960    
-1648  1472   
160    -384   
1664   -192   
-400   -112   
-944   -96    
624    208    
864    128    
-384   -144   
-688   -16    
512    -48    
496    240    
-656   -144   
288    128    
-512   -144   
-1008  48     
-80    128    
-176   -16    
320    544    
-944   -64    
-16    384    
544    -224   
-352   96     
208    48     
-16    -96    
576    -288   
-144   96     
-448   -240   
176    -144   
-224   80     
-112   -368   
-48    192    
-32    -80    
160    -48    
-32    -112   
-288   -112   
64     -160   
592    96     
144    -208   
-352   272    
112    -160   
-208   -80    
-48    -336   
224    80     
-160   128    
-112   -48    
240    -144   
160    -560   
-608   -432   
0      -192   
256    32     
-448   -864   
-928   -192   
672    416    
304    96     
-896   384    
560    400    
-448   192    
-128   -16    
-128   112    
208    -32    
32     96     
-320   -128   
48     -16    
-208   -16    
144    32     
-128   -48    
96     -192   
-1680  -336   
144    128    
176    -112   
0      64     
-80    0      
-80    -176   
144    80     
352    96     
-512   176    
176    80     
-80    144    
64     32     
-320   -3104  
-2384  912    
1632   336    
576    112    
-512   224    
-672   -176   
432    16     
176    768    
128    112    
-176   -272   
-64    144    
-64    16     
-48    224    
144    -240   
-384   176    
304    240    
32     240    
-160   0      
144    -128   
96     48     
256    -1136  
-1488  608    
640    128    
496    112    
-416   16     
-176   -48    
-16    16     
208    -48    
16     224    
-48    96     
112    80     
-448   16     
160    240    
304    256    
-240   128    
-1184  48     
528    -80    
-368   48     
336    96     
-240   64     
-128   128    
256    48     
-112   0      
48     64     
-128   48     
-144   240    
208    48     
-64    16     
-512   -32    
1632   1328   
-1504  -208   
-2448  144    
1488   160    
320    -128   
-1600  -32    
544    -16    
736    -144   
-528   -80    
112    160    
368    16     
-192   16     
-160   64     
496    80     
-592   -64    
192    160    
96     80     
-32    -96    
32     -256   
-32    -48    
80     80     
-240   -688   
-1104  736    
1360   -224   
-144   144    
-208   256    
32     32     
-352   -80    
-352   144    
-112   32     
384    64     
0      96     
-96    -16    
0      80     
128    192    
-176   48     
-80    -96    
528    272    
192    -16    
-400   64     
-80    64     
624    560    
-576   320    
-320   -160   
304    192    
-240   -176   
-320   -16    
240    208    
320    -16    
-96    144    
-128   32     
32     -16    
-16    48     
112    16     
-32    400    
-112   -240   
-960   400    
608    -144   
-80    48     
32     -16    
416    128    
16     64     
0      160    
-208   144    
32     -16    
80     272    
528    176    
16     48     
-576   576    
432    -112   
-528   144    
-352   864    
-64    -800   
-464   -80    
912    256    
-256   -416   
112    512    
976    -288   
-304   -48    
-512   128    
48     0      
352    -512   
-80    -80    
-320   -176   
112    560    
192    336    
192    368    
96     -32    
-304   752    
48     496    
272    -208   
96     -224   
-160   -352   
64     -560   
208    -288   
32     208    
-176   672    
48     272    
80     512    
128    -400   
48     16     
-176   656    
160    176    
112    128    
32     208    
-112   -192   
112    96     
-368   -16    
176    -48    
112    -112   
-64    -64    
96     -144   
-192   -240   
96     -1264  
416    -1024  
-224   -96    
-96    -336   
-288   48     
144    -208   
-272   -96    
272    496    
-48    -656   
-592   -320   
432    -64    
-80    320    
-400   336    
240    832    
416    944    
-352   -304   
128    -240   
32     80     
-32    16     
144    112    
-192   -384   
-160   80     
64     -496   
-144   -528   
-496   192    
160    160    
-192   96     
272    0      
-16    256    
-112   48     
-16    144    
48     80     
-144   0      
304    -208   
-512   -400   
-176   96     
416    96     
448    384    
-832   672    
464    -704   
128    560    
16     -576   
0      48     
-256   208    
0      96     
80     80     
-64    64     
-128   16     
-80    192    
176    272    
-80    16     
-96    128    
64     32     
176    528    
-272   608    
48     192    
-96    -800   
224    96     
192    208    
-416   -64    
-256   -112   
288    48     
48     32     
-256   512    
-16    544    
-64    -544   
16     -160   
448    -224   
32     128    
-192   -368   
336    -64    
-80    -832   
96     112    
-32    448    
176    -128   
-128   -48    
32     656    
192    -128   
288    -32    
16     -16    
-128   -320   
-80    400    
352    96     
176    -352   
32     -432   
-304   384    
608    -1024  
-2304  352    
608    208    
1120   480    
-832   480    
-16    -16    
368    240    
-416   -32    
-16    448    
528    -80    
-64    272    
-208   -192   
16     144    
112    -64    
352    112    
-160   -96    
-160   -144   
224    -128   
144    -304   
-144   0      
-384   -800   
1664   -496   
-880   -480   
-208   -432   
1376   48     
-608   -240   
336    256    
720    128    
64     -240   
-448   240    
48     80     
192    -384   
16     32     
48     -80    
512    80     
-464   0      
-224   -128   
640    48     
160    -512   
-208   -128   
-80    -1376  
-288   -352   
80     -48    
176    176    
-112   -288   
144    -432   
272    -176   
-16    -176   
-400   0      
400    96     
80     144    
-288   144    
-400   -272   
-240   -128   
192    -176   
-16    -640   
80     -64    
208    -2192  
80     512    
288    -112   
-320   -96    
16     -160   
160    0      
-80    -16    
176    528    
-192   -448   
-592   144    
-112   -176   
192    176    
-240   -2624  
1648   -2848  
352    192    
-144   -576   
-384   48     
688    192    
544    112    
48     16     
-304   -48    
32     -224   
288    -400   
80     0      
32     -176   
128    160    
192    -208   
176    192    
48     -144   
-64    0      
-128   -592   
-96    448    
912    -928   
-784   240    
112    128    
480    112    
-448   112    
-1072  -304   
416    208    
640    -144   
-1312  -80    
496    -176   
-1072  -160   
-160   -240   
-16    0      
-160   -224   
16     256    
672    -400   
-128   192    
-224   -112   
288    -112   
32     80     
-80    112    
208    208    
-128   48     
128    -176   
-368   -128   
-960   -224   
464    16     
320    304    
-128   224    
-304   192    
208    -320   
80     -480   
592    80     
192    80     
-800   416    
256    448    
304    160    
-400   176    
-624   256    
672    0      
-160   96     
-144   112    
16     32     
-16    -128   
-48    64     
144    -208   
112    -896   
-512   -256   
288    1040   
-176   -96    
0      -384   
-64    -96    
-240   80     
0      0      
208    -160   
-112   -176   
32     -192   
304    96     
-64    -800   
-64    224    
96     112    
-224   2352   
2784   -288   
-784   400    
-1152  32     
720    -544   
224    192    
-512   -656   
-320   48     
592    80     
-80    -176   
96     -192   
-176   0      
-416   -16    
16     576    
160    -592   
-672   -64    
32     272    
-736   48     
-16    -32    
-176   -176   
-736   64     
1136   -144   
512    32     
-1056  -48    
256    224    
288    176    
-80    64     
-384   176    
144    -16    
32     -400   
-16    -208   
-16    -48    
-272   208    
-64    32     
64     16     
-32    -96    
-896   176    
224    -160   
112    128    
32     -80    
-96    -80    
32     112    
112    -192   
0      0      
-176   0      
-16    160    
128    144    
64     64     
32     -112   
-256   -272   
-1552  144    
880    32     
144    -16    
80     -16    
80     64     
-720   -16    
560    -208   
-16    -160   
-400   16     
160    192    
240    80     
-416   64     
-176   -32    
288    304    
-16    -48    
80     32     
192    160    
-96    112    
-448   -16    
144    240    
-352   -272   
2528   -304   
-1216  -368   
-1296  -576   
944    208    
288    16     
288    -320   
-320   64     
208    48     
480    192    
-128   80     
-256   80     
32     16     
-320   -224   
-80    160    
144    -224   
128    112    
272    176    
64     544    
-368   208    
-96    32     
-192   -880   
176    304    
0      64     
-320   -256   
1184   544    
416    304    
-608   -176   
-96    -96    
224    160    
192    128    
-160   304    
-208   -288   
-672   160    
224    416    
112    -1184  
-352   -128   
-256   880    
-192   240    
112    -128   
-192   16     
-288   112    
160    -48    
64     -112   
-592   16     
-608   192    
448    -368   
-384   160    
64     64     
96     -1792  
-2320  -752   
464    208    
1040   752    
192    -272   
-1216  816    
64     640    
784    480    
80     544    
-608   -368   
-16    384    
0      -96    
16     192    
-48    16     
-80    -160   
-208   224    
288    480    
-32    -16    
-176   -80    
128    -48    
96     176    
-16    144    
-320   -80    
176    480    
160    -128   
-496   -448   
-32    -400   
256    896    
-160   16     
-272   -832   
-64    448    
384    416    
48     -144   
-400   -48    
240    992    
192    480    
-128   416    
-64    352    
48     1168   
-160   -320   
208    -240   
320    336    
-416   304    
-192   -160   
0      384    
480    80     
-64    -496   
-352   416    
304    176    
320    240    
288    1056   
-800   -336   
-720   320    
832    1392   
256    1024   
-160   528    
-32    1056   
336    -224   
128    -48    
-368   -256   
64     32     
208    -160   
32     112    
0      96     
-48    -208   
-224   -512   
80     -64    
16     1072   
-80    624    
16     -272   
208    48     
-128   336    
0      -96    
-64    -224   
-144   320    
224    368    
-176   960    
-416   1088   
-144   -96    
448    -96    
-96    -608   
-256   -672   
-176   64     
896    -224   
-480   128    
-288   480    
112    576    
0      112    
-16    -288   
-16    -352   
192    256    
0      144    
-160   80     
-48    -144   
192    160    
208    -48    
80     0      
32     -128   
-80    128    
-192   -272   
672    -224   
16     176    
-688   368    
400    720    
320    -16    
-416   -160   
48     304    
304    176    
-16    80     
-96    96     
224    -96    
176    48     
-176   32     
-160   -288   
160    128    
288    -912   
-48    176    
-80    128    
32     -416   
-176   -128   
32     -32    
144    -32    
16     208    
48     192    
-256   256    
128    -64    
-64    48     
112    112    
-272   -64    
80     -160   
-1872  -832   
1440   272    
912    48     
-720   176    
-448   -80    
512    -304   
416    -640   
-352   80     
176    0      
-144   160    
-464   64     
320    160    
512    112    
-448   -240   
-112   32     
256    -320   
-64    80     
32     -2144  
96     32     
176    736    
976    -64    
-1408  -80    
832    112    
-336   160    
-496   128    
160    160    
448    112    
320    48     
-576   -192   
-96    64     
288    0      
96     128    
64     -352   
-336   96     
736    -224   
192    144    
-80    -160   
192    144    
208    128    
32     112    
-528   144    
1328   -208   
512    80     
-816   -64    
496    64     
432    128    
-640   80     
-32    -208   
624    -16    
0      -656   
-448   320    
288    32     
48     48     
-288   -160   
704    64     
-208   -64    
-32    -16    
560    0      
416    32     
-128   304    
-464   -176   
224    160    
240    -304   
-336   -368   
-352   -112   
480    144    
-272   -64    
704    112    
-1712  -2384  
-1360  0      
1040   688    
240    272    
160    -16    
-384   -416   
224    128    
0      -432   
-192   240    
0      -336   
176    112    
208    -256   
-64    -32    
0      80     
80     128    
80     48     
352    128    
-304   96     
528    144    
-816   -32    
384    112    
384    -64    
-768   -320   
336    208    
512    128    
-704   -16    
-48    -624   
304    -80    
-288   240    
16     -1776  
-160   144    
128    -320   
16     -1104  
-48    -240   
112    224    
176    48     
-176   128    
128    16     
96     64     
32     -80    
-160   16     
-32    -128   
416    -128   
-16    192    
-16    -576   
112    96     
-368   -32    
-16    -720   
-304   -144   
384    -112   
32     32     
-48    -1248  
-528   -144   
656    -224   
656    -144   
224    -272   
-224   560    
-128   384    
176    64     
144    -256   
-128   -96    
-400   -112   
64     -80    
256    -64    
-112   -80    
-16    -16    
272    -336   
128    576    
-320   48     
96     -128   
176    -144   
-64    400    
-304   -144   
160    -16    
224    -304   
-176   272    
96     48     
-160   -240   
-912   -16    
208    -128   
-1120  784    
1472   -1056  
-384   160    
-624   -544   
512    -80    
128    -240   
-672   -32    
320    -880   
336    -64    
96     -16    
-144   176    
-128   -192   
128    -96    
-144   -560   
48     -320   
80     176    
32     16     
0      176    
-64    -368   
224    -128   
0      -2608  
-432   640    
592    -432   
-144   768    
-48    384    
-80    -160   
-48    48     
48     -464   
-192   -80    
64     208    
-80    752    
-640   48     
-112   -448   
592    -576   
0      -384   
-64    -1056  
-160   240    
192    800    
416    -144   
-304   -320   
0      -192   
144    64     
64     192    
32     -192   
64     -112   
-80    -48    
144    32     
16     -64    
240    -240   
976    352    
-2368  752    
-224   432    
800    -800   
448    -144   
-272   320    
320    80     
-80    128    
-240   48     
304    -32    
160    112    
-416   48     
352    -144   
16     -240   
-208   -80    
224    160    
64     -352   
96     144    
144    -160   
48     -16    
-240   -320   
592    592    
2528   -128   
-1312  864    
-832   240    
928    -352   
256    -192   
-1104  560    
208    288    
304    192    
-224   80     
-112   -336   
224    48     
112    -224   
-112   -272   
240    160    
-32    -224   
352    -304   
448    80     
-496   144    
64     0      
176    240    
64     -688   
112    -640   
-384   -912   
-912   -592   
-64    -256   
448    624    
-80    128    
-80    -128   
192    0      
-848   400    
-224   176    
-576   48     
672    -832   
624    96     
-128   240    
-112   -416   
-384   -400   
-336   -176   
80     64     
-320   -32    
-32    208    
480    -16    
-624   -192   
-464   -624   
0      112    
96     160    
-352   192    
-32    96     
-512   -448   
-592   512    
-208   -176   
-224   -48    
304    -240   
-368   -64    
-224   -1056  
240    -720   
240    1072   
-224   32     
-368   -144   
-160   -64    
288    112    
-80    64     
-512   -16    
-320   -576   
-272   96     
48     0      
224    400    
-256   -144   
-32    -80    
240    288    
-800   -80    
32     224    
336    -176   
96     -224   
-720   336    
208    160    
112    -400   
112    384    
-656   64     
0      368    
304    -240   
128    -176   
-448   -64    
224    640    
176    80     
-48    1040   
112    592    
-384   -432   
96     -912   
80     -416   
96     224    
-688   176    
112    16     
288    112    
-80    -432   
-976   -1808  
112    -48    
736    -336   
320    160    
-1792  208    
64     784    
1536   1408   
-544   960    
-672   80     
288    1296   
320    480    
-64    -192   
176    720    
0      992    
-96    128    
-256   -256   
80     144    
-80    176    
-112   -176   
288    -304   
-288   -768   
-208   160    
432    480    
64     336    
-256   -128   
16     -64    
144    576    
-112   608    
-320   -64    
432    512    
-416   96     
-208   -240   
-208   -384   
976    592    
368    96     
-1280  -1136  
-144   1216   
672    1376   
-80    720    
-384   0      
160    -144   
-80    -720   
-192   -544   
128    -160   
48     272    
-176   288    
-224   272    
288    80     
-416   432    
-160   208    
192    160    
176    192    
-128   96     
-528   -672   
688    -480   
16     432    
-464   -176   
576    -112   
-384   -176   
-224   -368   
80     -528   
176    32     
-144   96     
48     224    
208    -128   
-192   -48    
96     96     
0      -80    
-288   160    
-112   -64    
288    80     
-48    32     
-128   80     
64     48     
-240   128    
144    272    
-160   -64    
-160   80     
272    0      
16     112    
-272   128    
-80    -192   
-64    -608   
-1568  -528   
1424   -160   
272    -256   
-704   32     
800    -320   
-16    -64    
-176   -208   
-240   192    
224    -112   
-16    224    
32     32     
-112   192    
304    16     
-384   176    
160    32     
144    96     
-720   48     
320    112    
208    0      
-336   -224   
544    576    
1424   160    
-720   320    
-64    96     
400    272    
-800   96     
-64    0      
816    -16    
-96    192    
-432   32     
-176   80     
368    0      
144    96     
-128   96     
80     96     
16     -112   
-80    80     
-48    -240   
-208   -64    
144    96     
-160   -80    
-208   -112   
-336   336    
-1072  112    
224    -80    
96     -416   
-640   -160   
-48    -32    
416    128    
-32    288    
-400   160    
-128   48     
160    -48    
-144   -64    
-112   32     
-256   48     
-16    -128   
48     -112   
272    0      
-384   80     
-16    -16    
192    16     
192    128    
48     192    
-688   368    
48     336    
192    -416   
-544   -560   
2448   2576   
-1808  912    
-352   640    
1696   224    
-464   -32    
-464   32     
-48    -368   
144    288    
16     -96    
-272   80     
304    96     
48     -128   
-208   -16    
80     80     
400    -16    
-208   128    
0      48     
288    64     
-208   -560   
576    -320   
-16    -208   
-176   -224   
48     368    
-480   -256   
-48    80     
-48    112    
144    32     
-256   96     
304    -256   
96     208    
-304   -720   
192    208    
48     48     
160    256    
-208   144    
128    352    
160    -96    
192    -16    
-128   -48    
320    112    
160    192    
-48    -32    
-16    192    
208    -400   
-224   32     
256    -336   
-16    176    
208    -224   
-352   0      
304    -208   
320    -48    
-160   -560   
-1136  448    
592    -256   
-224   -336   
0      -32    
-16    -160   
0      -128   
-80    -192   
0      128    
32     -144   
-208   64     
128    -992   
288    -64    
-160   -304   
-96    144    
0      432    
400    336    
-16    416    
-48    272    
176    544    
112    16     
32     160    
112    64     
64     -64    
48     -832   
-528   224    
288    -400   
432    576    
-192   -48    
-464   -1248  
1072   -1456  
-320   752    
-288   -384   
-288   -144   
432    -32    
272    -576   
-16    384    
-80    -736   
-128   224    
96     80     
240    64     
-112   0      
-160   -80    
160    256    
336    48     
-224   -80    
32     656    
192    -176   
96     -496   
-400   -448   
480    -832   
-64    704    
480    336    
-480   320    
16     -352   
272    -48    
-144   80     
-224   336    
112    48     
96     160    
80     -208   
-64    -432   
-208   144    
0      -80    
-32    -144   
80     -400   
336    80     
128    256    
-96    -96    
80     -16    
16     160    
128    -144   
256    -208   
-144   208    
-32    -256   
160    0      
64     48     
192    -288   
-400   96     
-1376  304    
2192   -464   
240    -688   
-1312  0      
880    -624   
576    -208   
-448   208    
-304   192    
384    -32    
48     80     
-288   80     
112    -224   
32     208    
112    -160   
-816   -240   
0      0      
224    -32    
-80    -992   
272    160    
-48    -736   
320    -432   
-2016  -400   
-624   112    
2112   -96    
0      464    
-768   368    
272    992    
128    496    
-336   -608   
-256   -1056  
-112   0      
-80    192    
288    -304   
96     -400   
-32    -368   
160    -112   
-144   -880   
16     -160   
256    -80    
0      336    
-80    144    
-208   16     
256    128    
400    1056   
-1568  -48    
-512   -784   
1472   -1408  
-112   -640   
96     -336   
-160   -416   
32     496    
-48    -1296  
-416   -80    
368    320    
-400   752    
512    -128   
-400   -656   
-192   0      
96     240    
-368   -336   
272    -96    
-560   -304   
288    -48    
208    -320   
432    -912   
-160   288    
-128   112    
144    576    
96     272    
-416   -1264  
1072   -1232  
1408   256    
-1056  -16    
-1040  -1008  
896    -1328  
800    -1168  
-704   16     
-128   400    
-64    400    
160    -432   
64     64     
144    64     
-96    608    
-32    -1056  
160    112    
-128   96     
-144   48     
64     448    
-64    -224   
32     -176   
32     -96    
-304   144    
704    -48    
-432   544    
160    672    
-240   384    
-96    144    
464    688    
-304   288    
-560   -1120  
-16    -640   
384    -80    
-432   256    
-224   112    
304    688    
-80    -16    
-160   -48    
96     256    
-192   -80    
-128   -64    
128    -112   
-192   112    
192    400    
-64    1328   
80     528    
-112   320    
-32    768    
240    464    
176    80     
-208   32     
-352   784    
1200   -176   
-32    -304   
-720   -1104  
-768   -848   
288    -400   
-240   -688   
-496   -384   
48     544    
32     368    
-32    272    
-688   384    
320    224    
-96    -80    
-336   -224   
144    688    
416    432    
-176   960    
240    688    
-400   -96    
48     16     
224    -112   
-240   -16    
0      -208   
-496   144    
80     -416   
80     -400   
16     -432   
-192   -144   
-640   -2112  
-224   -512   
672    -96    
-736   -32    
272    208    
-176   -448   
96     -464   
-144   128    
64     -16    
192    32     
-32    144    
-224   176    
112    -80    
144    448    
-32    80     
-64    96     
-720   288    
176    -112   
-160   -128   
96     96     
592    1360   
-496   -80    
-832   512    
528    -176   
-176   -176   
-368   -160   
16     288    
528    240    
-352   400    
-400   -160   
272    80     
-336   -32    
-176   144    
0      -80    
-112   16     
-48    -368   
160    -96    
-112   0      
-304   -16    
272    144    
272    32     
-368   208    
-96    -112   
208    48     
-32    -48    
-112   64     
-368   96     
272    80     
-688   -48    
992    -336   
-3104  608    
-112   288    
1760   -288   
-576   -32    
400    272    
288    272    
-736   192    
-176   176    
352    16     
112    80     
-384   48     
112    96     
336    160    
-880   -48    
-80    272    
400    -16    
-80    48     
-96    80     
160    -96    
16     176    
-496   -960   
-832   128    
2096   -320   
-1504  -128   
-912   176    
1520   96     
-112   208    
-720   224    
-368   -160   
400    160    
64     80     
-240   48     
-64    64     
32     80     
176    32     
-144   224    
-160   -160   
-304   96     
384    176    
-176   -64    
-112   176    
-992   -32    
272    48     
-64    -16    
-192   -240   
-288   -528   
272    752    
-48    176    
-512   48     
272    -32    
336    112    
-256   -144   
-64    176    
160    208    
-144   80     
96     160    
80     240    
448    -96    
-128   160    
-368   112    
96     -16    
80     16     
-48    64     
96     160    
-496   128    
112    128    
144    32     
-288   -352   
816    4112   
640    624    
-464   -224   
144    -512   
-192   16     
-208   176    
160    320    
176    176    
-288   -352   
-960   32     
640    160    
160    0      
-240   64     
48     80     
-96    0      
192    160    
160    -48    
-64    64     
-128   -192   
608    -320   
-80    64     
-80    -16    
-256   128    
-272   128    
320    128    
432    48     
-336   224    
144    -64    
160    368    
48     -32    
-144   160    
-112   176    
176    208    
240    128    
-496   320    
384    480    
288    192    
-208   256    
128    208    
-256   208    
272    80     
-48    -112   
32     -160   
32     -144   
-288   80     
-128   416    
384    48     
64     32     
-288   144    
176    -32    
-16    64     
-176   -576   
112    -112   
272    304    
-64    480    
-32    32     
336    -256   
176    -416   
-768   -512   
-32    -544   
432    -128   
-256   0      
-16    160    
-16    -448   
-336   -1872  
16     96     
272    -432   
336    320    
-240   80     
-48    320    
160    -144   
160    -16    
0      64     
64     128    
16     240    
-16    640    
48     448    
16     608    
-112   -192   
32     -272   
176    288    
-16    -784   
64     -112   
432    1056   
-16    688    
-400   16     
32     544    
352    576    
-240   96     
-112   -272   
240    304    
-16    -64    
-80    -112   
64     -16    
-128   16     
176    224    
48     32     
0      480    
-80    224    
208    320    
544    144    
-1088  784    
320    -128   
592    304    
-480   -32    
-224   32     
160    -32    
96     -96    
-80    96     
48     -64    
0      64     
-192   -2352  
112    48     
-48    -16    
160    16     
96     -416   
-160   32     
0      48     
336    256    
-288   64     
-96    128    
112    64     
32     208    
224    80     
48     -304   
-272   80     
0      -64    
128    144    
224    -272   
-432   -928   
1680   -1440  
-592   592    
256    160    
-112   592    
-416   288    
-96    400    
272    -304   
512    -816   
-256   448    
-256   80     
400    16     
208    -576   
-336   -32    
128    -96    
416    416    
-96    -448   
-656   -32    
528    1024   
144    416    
-144   -480   
-912   80     
1568   -144   
736    -864   
-608   -576   
48     -816   
192    -160   
-304   1984   
752    1552   
368    416    
-144   -80    
304    -288   
128    -576   
-176   -448   
352    -16    
400    -16    
-288   -656   
176    304    
560    160    
-112   -48    
-128   96     
80     0      
112    -448   
192    144    
-128   576    
-272   1792   
-176   928    
128    720    
96     544    
-368   112    
160    -96    
240    -576   
-352   64     
560    304    
-176   352    
-400   -224   
272    -880   
1424   -1440  
272    400    
-240   608    
32     96     
0      16     
400    -560   
-560   656    
-16    -752   
-320   96     
384    -320   
128    624    
-288   208    
-80    160    
-384   176    
-352   512    
288    -144   
0      -48    
272    352    
32     160    
-320   1072   
-96    -240   
688    144    
128    -48    
-624   -144   
-96    0      
832    -176   
96     -112   
-464   -336   
208    -96    
224    208    
352    32     
32     768    
-208   928    
288    0      
160    32     
256    16     
-272   -32    
-160   320    
416    -352   
-176   -128   
128    -336   
400    0      
-160   -304   
0      -544   
-48    -1472  
80     80     
128    -48    
-176   16     
128    64     
-112   224    
160    112    
96     64     
-96    -96    
-160   -160   
-96    -16    
352    32     
-304   -64    
-16    176    
592    -336   
-352   160    
80     528    
608    -784   
-80    -96    
-48    320    
528    208    
-672   144    
-208   -192   
112    -80    
48     112    
128    32     
-192   -80    
-528   -176   
80     -224   
96     -80    
-32    -48    
432    160    
-64    -48    
-128   64     
272    64     
128    240    
-480   -368   
336    -336   
96     48     
-144   -240   
32     112    
208    -128   
-544   -32    
48     -1120  
-1248  48     
288    256    
192    -144   
80     -384   
-368   -704   
1824   1040   
1248   0      
-1504  -80    
-240   0      
448    16     
-384   80     
176    -464   
304    80     
-80    -80    
-144   96     
368    -64    
-112   208    
-16    304    
-80    -336   
256    0      
128    -496   
-128   112    
32     -80    
-128   -192   
112    32     
-272   784    
1232   -48    
192    176    
-1168  -112   
112    112    
784    -32    
-256   -592   
-416   352    
160    -304   
256    80     
112    -272   
-80    -192   
-320   64     
448    -48    
0      144    
-112   80     
-384   -80    
112    32     
-96    -192   
96     -160   
-1088  80     
208    -144   
-160   48     
16     -96    
432    96     
-320   96     
-624   0      
16     48     
-64    176    
-112   1488   
1232   48     
-656   128    
-768   -256   
112    96     
832    -48    
80     112    
-832   32     
208    144    
-176   -304   
128    144    
0      32     
-288   -48    
-96    176    
592    192    
-272   144    
-560   -32    
480    -16    
112    16     
32     96     
-272   192    
16     704    
2144   -112   
-992   80     
-912   -272   
1120   16     
48     160    
-608   96     
640    -16    
192    32     
-704   -64    
-912   -48    
384    -48    
-224   32     
-80    64     
-16    -80    
160    112    
-160   -160   
-16    64     
144    16     
-176   160    
192    272    
-1120  -32    
-672   80     
624    64     
336    176    
-752   64     
-448   -880   
-320   32     
416    256    
-368   -48    
176    16     
-384   -16    
-32    96     
-192   224    
48     -224   
-384   112    
272    64     
288    128    
96     48     
-288   144    
-80    80     
288    32     
-464   32     
160    400    
-112   -288   
-288   96     
416    -16    
16     -368   
-112   -528   
176    -816   
560    384    
208    -224   
-608   -240   
320    256    
528    16     
-400   -16    
-64    -192   
-480   -176   
256    160    
-224   64     
-160   144    
32     -48    
-48    16     
-128   -144   
-112   144    
112    -48    
-32    192    
544    272    
-128   368    
-160   80     
-208   -208   
512    208    
-48    -144   
-176   144    
224    -144   
-112   160    
80     -640   
-624   -752   
304    -400   
224    208    
-160   272    
-176   -336   
288    -96    
-64    -192   
-128   -304   
448    -1168  
-80    -304   
-272   -224   
112    -192   
-608   -400   
-32    16     
256    96     
-256   -336   
-400   -736   
-96    -320   
352    352    
16     -352   
-272   -96    
-32    80     
256    -208   
-1136  384    
720    -208   
-32    -224   
48     -144   
64     1136   
-912   -176   
112    -1088  
368    208    
-160   112    
-48    144    
64     32     
-16    208    
128    -112   
160    -208   
-416   160    
64     256    
128    464    
-368   -16    
32     80     
32     16     
112    16     
-208   32     
144    -16    
80     64     
-48    -240   
-64    128    
96     320    
112    112    
64     -112   
304    -336   
-1008  0      
336    32     
176    80     
0      64     
-48    -256   
-96    144    
32     240    
96     16     
48     64     
-96    64     
112    48     
16     48     
-160   176    
48     -64    
-80    80     
96     128    
32     80     
-48    0      
-128   32     
624    -384   
-160   224    
320    48     
-368   96     
-128   208    
336    416    
-64    544    
0      -192   
0      -80    
128    32     
128    176    
-96    96     
-96    80     
112    96     
48     -208   
-144   192    
256    -64    
-112   64     
-176   96     
240    304    
-112   192    
-144   224    
368    48     
128    288    
-272   80     
112    64     
96     48     
-272   80     
224    80     
-1520  448    
1376   -80    
464    -128   
-832   80     
-32    48     
272    64     
-384   -656   
-528   -448   
176    432    
0      144    
-336   -64    
16     32     
-128   240    
272    224    
112    48     
-256   -832   
-128   208    
176    0      
448    -336   
-304   -240   
16     -752   
-1648  1248   
1520   112    
-208   560    
-208   832    
48     496    
288    576    
-1248  864    
128    320    
592    192    
-64    -672   
-208   -16    
-112   -256   
-80    32     
-208   352    
144    -32    
-112   -720   
-672   400    
144    64     
512    320    
288    224    
-432   -80    
80     80     
400    -336   
-32    0      
-448   -144   
480    -272   
320    -1728  
256    96     
-208   16     
208    208    
160    32     
112    144    
80     352    
-464   192    
-96    -64    
128    352    
-496   -192   
224    80     
320    48     
-32    -112   
-112   16     
48     368    
704    -16    
-224   32     
240    -16    
96     16     
-144   352    
336    -720   
192    -1600  
-2240  -432   
816    32     
2112   336    
-192   -176   
-1520  480    
832    80     
576    496    
-208   0      
-528   176    
192    -1696  
224    112    
16     -112   
224    160    
-368   -128   
336    176    
32     -112   
-256   144    
272    -992   
-704   -864   
272    -48    
96     -160   
128    144    
656    -208   
-800   0      
32     -176   
112    256    
288    208    
-464   160    
32     -128   
160    288    
96     272    
-224   192    
160    144    
144    -80    
32     336    
-496   -368   
-48    48     
640    -80    
-160   208    
-400   -128   
192    64     
48     224    
272    304    
-272   96     
336    -176   
-240   -128   
-176   -224   
320    320    
304    -400   
-272   128    
-224   608    
928    160    
-48    112    
32     208    
80     64     
80     64     
-272   128    
0      144    
-48    32     
96     -64    
176    -32    
-160   -400   
-16    112    
96     -224   
144    -160   
-48    -400   
240    48     
-240   -128   
192    -160   
-96    -448   
-256   240    
288    48     
96     -352   
80     32     
-80    -480   
64     -32    
192    -480   
-48    64     
16     0      
-944   -128   
2016   -1072  
352    -112   
-1200  -624   
592    128    
688    -368   
-1136  16     
144    416    
480    -512   
-32    -176   
-304   48     
-80    80     
16     -80    
-32    -48    
96     -384   
144    -160   
-80    432    
160    -1296  
-112   -176   
48     192    
-560   -288   
288    -192   
512    -32    
-656   -256   
208    224    
624    -272   
-448   -32    
-512   80     
480    -560   
-16    32     
48     -864   
-48    -144   
304    -128   
352    208    
-240   160    
-720   240    
784    -208   
-272   144    
224    -336   
-128   -32    
16     -144   
32     64     
-464   -224   
-96    -64    
320    -144   
-32    160    
-80    -80    
32     16     
96     -176   
-1104  -832   
864    416    
448    16     
-800   -48    
-448   -128   
352    48     
320    -544   
64     -352   
-320   -160   
-256   -48    
32     48     
128    -48    
-80    16     
192    -208   
-768   -144   
416    -320   
0      32     
96     304    
400    144    
-160   48     
-16    112    
-672   -304   
2096   -144   
416    -176   
-1488  64     
496    32     
736    -144   
-304   -144   
-192   80     
832    -64    
-112   -528   
-112   80     
160    -512   
48     32     
128    112    
176    -32    
-192   96     
48     96     
-80    32     
0      16     
-144   96     
352    400    
-1344  -304   
-336   304    
1536   16     
-496   -336   
-176   -16    
256    -416   
0      32     
304    32     
-32    128    
-512   48     
16     48     
432    -32    
224    -176   
-464   -432   
144    288    
384    0      
-48    -128   
-64    32     
-80    -224   
-288   368    
720    -464   
-128   32     
-400   -304   
128    -96    
144    16     
96     -80    
-704   -1024  
-448   -1232  
1152   -2288  
272    384    
-1024  144    
-336   -480   
640    144    
16     -560   
528    -208   
48     -112   
-288   -288   
-224   0      
-400   64     
-160   80     
16     -64    
-144   -64    
224    128    
-176   -80    
224    -192   
-64    192    
-240   -160   
128    -320   
-272   -352   
-128   -80    
-16    512    
-736   -176   
-192   -160   
272    496    
-272   -160   
-880   -608   
96     -400   
304    64     
-32    -16    
16     -176   
80     512    
-160   320    
48     16     
0      -240   
-64    400    
272    144    
-80    -96    
-96    48     
32     128    
-16    80     
-336   -1328  
-704   -576   
-112   144    
32     336    
224    752    
-224   -208   
-224   -160   
272    320    
-32    -768   
-608   768    
624    128    
-48    -688   
112    -160   
-336   768    
-160   -16    
-176   352    
176    -16    
-64    144    
-160   16     
16     16     
48     -64    
-576   -192   
-96    304    
192    96     
0      -48    
448    16     
-96    160    
16     -64    
-16    0      
224    -32    
-224   128    
-32    160    
256    112    
-64    -16    
-1504  -224   
144    240    
176    0      
-448   -400   
880    -992   
112    480    
-80    -224   
-720   16     
128    -16    
16     -144   
-192   208    
-400   352    
160    96     
-336   -336   
80     -16    
-848   -64    
192    208    
-192   16     
48     16     
192    -96    
48     -272   
64     192    
-160   224    
576    -16    
-1040  640    
336    -176   
352    -32    
-272   -144   
-448   -32    
336    -320   
-80    -224   
-80    304    
32     128    
-48    48     
-240   64     
32     -112   
0      112    
-64    16     
-16    -224   
32     -32    
-128   -16    
48     784    
-80    320    
-32    -208   
192    48     
-192   16     
-176   336    
-16    -64    
-48    -96    
112    -128   
-64    112    
-128   160    
-48    160    
1664   -736   
-1424  496    
-448   688    
1232   752    
-528   1040   
0      64     
240    240    
-416   -960   
-288   -384   
416    0      
160    304    
-16    32     
-48    112    
240    -32    
-128   -64    
-64    -208   
336    240    
-112   288    
-304   208    
288    160    
-560   160    
2304   -64    
-880   -1424  
416    208    
-448   -560   
368    -192   
144    224    
-1184  544    
192    0      
560    -16    
-96    16     
-336   112    
-112   368    
880    64     
160    112    
-608   -256   
240    96     
336    -80    
112    752    
-576   336    
-240   -320   
1392   96     
-1200  320    
-416   -400   
256    384    
-192   -192   
-112   -272   
976    -96    
-208   192    
-496   -192   
64     -32    
240    176    
272    80     
-176   384    
-432   -384   
-720   176    
-464   -624   
-560   -192   
512    480    
-96    48     
-288   48     
256    80     
-208   112    
-192   240    
-48    48     
-80    48     
176    128    
-320   -400   
-352   -2032  
1104   -912   
800    0      
-1136  400    
-560   160    
752    16     
368    -16    
-416   16     
-144   128    
64     -144   
-112   160    
16     96     
-304   32     
288    416    
-176   0      
112    160    
-112   48     
-160   80     
-80    -208   
368    848    
208    -176   
-528   208    
240    48     
560    128    
-32    -16    
-816   128    
592    112    
-464   -80    
144    -1840  
-144   128    
208    64     
80     0      
-304   48     
304    304    
-224   -160   
-144   16     
192    -176   
48     352    
240    -48    
-672   208    
272    -16    
432    16     
-496   -16    
16     -336   
-16    160    
240    -112   
-400   112    
144    16     
-240   176    
112    128    
192    96     
-96    -144   
608    80     
-400   -48    
416    -272   
-432   -16    
-304   -320   
-176   -16    
112    -272   
208    0      
-96    -560   
208    32     
-192   144    
48     32     
48     -96    
-48    64     
-64    -32    
176    -112   
-240   -800   
-208   32     
128    -16    
-224   -240   
272    368    
144    -640   
-160   16     
-128   -592   
416    -208   
176    -240   
-736   560    
160    176    
0      -1840  
1776   0      
-352   560    
-1104  -96    
128    240    
192    0      
64     1072   
528    -32    
-368   -864   
128    80     
224    16     
176    -128   
-16    288    
-80    256    
-96    -384   
336    144    
16     128    
-16    320    
-80    -96    
-80    0      
-96    -192   
976    320    
688    240    
-1200  16     
560    -288   
112    -480   
-96    -176   
320    -1168  
-80    320    
-64    -976   
144    48     
64     -48    
64     288    
-32    16     
-96    16     
368    128    
-208   -128   
-16    -32    
304    -240   
-160   96     
192    -384   
64     112    
-208   -16    
128    160    
-16    48     
272    64     
-256   80     
0      96     
240    176    
32     272    
-2160  480    
2880   416    
1552   208    
-1328  -272   
656    160    
480    112    
-624   -128   
-288   -112   
544    -160   
-64    -64    
-208   16     
112    32     
64     112    
-48    -176   
-128   -32    
496    336    
-160   -112   
-96    0      
-192   -128   
336    -32    
-144   -640   
816    704    
1088   208    
-960   -752   
-240   -80    
752    -1232  
288    288    
-176   160    
336    -432   
32     -32    
-448   -448   
-112   -528   
-16    320    
336    -112   
176    224    
128    -144   
-128   144    
336    -144   
-240   -64    
-32    144    
144    112    
208    512    
-688   -352   
-16    -704   
-672   288    
432    -656   
1008   672    
224    -192   
-80    80     
80     -976   
-192   -96    
-112   256    
112    208    
64     224    
-32    368    
-544   -32    
-48    -64    
608    -224   
80     80     
-720   432    
672    -16    
64     -64    
-208   -256   
160    -272   
224    48     
-16    -240   
-128   -32    
272    -16    
-128   48     
-192   288    
32     1920   
912    -32    
-656   -240   
-128   96     
832    -112   
-496   -16    
-784   1296   
800    1328   
-80    432    
-208   -160   
80     -272   
-80    0      
-64    -48    
-80    -80    
272    272    
-160   144    
-16    192    
240    -48    
-144   400    
-80    432    
192    -112   
-224   -64    
-944   -192   
880    -656   
32     -144   
288    -256   
-272   -416   
352    80     
64     0      
16     352    
192    -176   
304    -384   
-320   -272   
256    32     
-224   512    
112    208    
-224   400    
-368   -400   
-496   -496   
288    176    
176    -16    
-64    -464   
80     -48    
32     -1344  
176    -320   
-288   -64    
304    -320   
32     240    
-96    176    
-112   32     
-416   -784   
320    -704   
336    96     
-512   -400   
-336   -1680  
368    112    
-48    576    
-240   80     
288    -960   
144    176    
-208   176    
-48    192    
96     640    
-64    384    
-192   -32    
-96    -304   
160    96     
240    -192   
-32    96     
112    -96    
32     16     
288    -96    
-224   192    
-96    -464   
80     -32    
-176   -416   
48     -432   
0      -96    
16     -48    
-208   0      
-208   -480   
128    -304   
-352   96     
-112   -272   
272    -240   
64     -48    
-960   -608   
352    -560   
256    -48    
-336   16     
16     -16    
-640   112    
-112   -64    
160    -32    
-144   -144   
-128   -272   
304    -272   
288    -16    
-208   272    
176    496    
-336   480    
-16    -512   
608    112    
-624   672    
-176   128    
144    -224   
-512   -48    
0      -96    
-192   80     
-208   400    
-64    -48    
64     64     
160    -96    
-128   -16    
-128   240    
80     -352   
544    208    
-64    -128   
-288   16     
-16    -16    
80     192    
-16    16     
-224   128    
96     16     
208    128    
-1648  32     
-176   80     
-240   -224   
-400   -624   
832    96     
1360   272    
-1200  -416   
-208   16     
-128   80     
720    -208   
-144   -320   
-272   96     
192    -144   
304    -16    
-352   32     
-64    16     
144    224    
-224   64     
-80    224    
-16    0      
0      224    
160    176    
160    -32    
-144   64     
16     -256   
1264   -256   
-1376  272    
128    -256   
-192   848    
-672   -16    
-144   240    
848    -80    
-1744  80     
-64    160    
240    -192   
-160   112    
112    112    
-16    -96    
-96    128    
160    48     
-192   160    
-224   -80    
-208   -128   
-224   32     
80     -48    
448    -144   
96     208    
-368   -240   
-192   160    
240    -432   
1184   -496   
704    704    
-720   272    
-256   -48    
400    176    
176    -64    
-80    16     
-496   -384   
352    320    
608    464    
-400   -272   
-192   560    
592    224    
-48    112    
32     16     
320    368    
-352   96     
-240   32     
672    608    
368    -208   
-768   160    
32     112    
48     -640   
-1616  -1808  
-656   48     
288    -48    
-240   -160   
-96    16     
-128   160    
32     -64    
-208   48     
192    368    
-576   -240   
32     64     
384    96     
-304   96     
-128   -48    
304    80     
-96    -48    
-32    64     
-48    -32    
0      -320   
-864   80     
944    -128   
-432   128    
-80    32     
640    -64    
272    128    
-16    48     
256    128    
16     -128   
-144   48     
64     32     
-736   -64    
384    -112   
-352   16     
144    -96    
256    96     
-80    -160   
-576   -64    
368    -48    
-576   64     
256    96     
-16    -16    
64     272    
-192   16     
-144   160    
288    -96    
96     -256   
-208   -288   
-336   -80    
176    96     
-112   96     
0      304    
224    480    
1168   32     
-224   -64    
16     32     
432    704    
-688   256    
-144   80     
144    64     
304    144    
-304   -96    
160    48     
96     32     
-128   0      
32     -64    
160    336    
-80    144    
-80    -32    
240    -144   
-48    -288   
-560   112    
368    256    
16     64     
112    16     
-48    80     
-32    0      
-32    704    
80     48     
32     -160   
32     96     
-1072  192    
1680   -544   
496    -144   
-784   80     
352    304    
224    144    
-336   0      
-400   -736   
384    -304   
384    464    
-368   112    
80     64     
0      304    
160    -784   
-176   64     
-32    384    
224    16     
-32    64     
-48    192    
272    208    
-640   -576   
400    -192   
688    -48    
-1008  912    
320    -144   
144    -144   
240    -336   
-400   -208   
144    -1536  
128    -48    
-144   240    
16     -80    
192    160    
32     96     
0      80     
-192   32     
128    -160   
112    -32    
128    -224   
16     80     
144    192    
144    208    
-112   128    
-144   -384   
-48    112    
320    -1056  
32     304    
-112   96     
240    -160   
624    -1104  
-2304  1232   
-656   432    
1392   -112   
352    16     
-912   -112   
-240   -16    
816    128    
-320   176    
-208   112    
304    64     
-64    -2448  
80     64     
64     192    
-256   224    
-224   336    
512    96     
0      -64    
-384   144    
16     -192   
128    -544   
1104   336    
-816   -64    
-400   -96    
272    352    
-272   64     
-336   -480   
96     -208   
320    -1456  
16     624    
-544   272    
224    -16    
336    80     
-224   -96    
-496   -80    
512    224    
416    192    
16     -384   
-384   64     
64     -96    
128    80     
64     96     
80     336    
-32    -272   
176    416    
-128   -64    
-800   -1664  
-592   -1408  
576    -176   
-304   528    
-80    80     
64     304    
32     -272   
720    -32    
528    320    
-448   480    
224    -432   
576    128    
368    -1376  
-112   -160   
-112   -48    
0      144    
224    192    
176    192    
240    1040   
-288   656    
-176   144    
288    304    
176    656    
-16    -48    
-864   -800   
-608   160    
528    -160   
128    -128   
1008   768    
-608   -256   
-304   496    
496    272    
480    -672   
-64    160    
-400   -944   
-32    208    
240    160    
112    240    
-368   -160   
288    -272   
240    -352   
368    112    
-32    448    
-288   -32    
160    -592   
48     16     
128    192    
144    368    
-432   -272   
0      -304   
624    752    
-192   672    
64     -672   
144    -192   
48     -80    
240    -16    
64     256    
-368   544    
192    400    
272    0      
48     -832   
-400   544    
0      -304   
288    -304   
448    144    
-368   -320   
-32    -192   
128    624    
416    -304   
32     -112   
-208   832    
64     -528   
160    -272   
-192   -928   
-80    -896   
-160   -544   
512    -112   
0      -384   
352    -448   
-464   240    
-144   -176   
-208   -624   
224    -240   
304    96     
-176   -768   
-128   -64    
-64    64     
208    288    
32     -192   
-512   -320   
272    480    
336    0      
-256   32     
80     -176   
16     -32    
-144   64     
160    256    
640    288    
-176   256    
576    -416   
-384   224    
32     -3856  
224    -208   
-320   -752   
960    -1008  
-16    -304   
-672   -256   
-128   64     
336    416    
-128   944    
16     -320   
-560   -864   
-112   176    
-208   -32    
224    -512   
224    -32    
-48    -192   
-112   144    
144    -320   
-64    -224   
192    -48    
64     80     
-240   48     
432    416    
-448   -352   
288    -1104  
-144   -256   
-224   192    
-144   336    
160    192    
48     -112   
-144   -32    
-96    80     
32     -544   
-192   0      
32     192    
352    -368   
-208   -192   
-32    -240   
-64    496    
256    240    
-112   -240   
-112   -48    
-240   64     
-32    -96    
-128   64     
48     -304   
128    240    
464    -1040  
48     -48    
-240   64     
-176   -128   
48     -896   
1808   -32    
-928   400    
-848   -112   
480    -48    
-592   -128   
-64    48     
272    -368   
-32    80     
48     -336   
-16    112    
176    48     
0      160    
48     -96    
-464   -16    
400    -16    
-16    0      
-112   -64    
160    128    
224    48     
-144   -128   
-112   -160   
1200   -496   
-1632  64     
-304   192    
896    -80    
-672   -128   
64     -80    
-176   -192   
448    -128   
-80    224    
-96    16     
-16    112    
416    48     
-160   -112   
-624   -160   
16     -176   
688    128    
-240   272    
-96    -48    
368    32     
80     0      
320    -352   
-544   240    
32     -64    
224    -112   
-576   368    
-544   112    
224    96     
-416   16     
64     48     
688    -16    
-656   -32    
-16    144    
32     -480   
-16    48     
-288   -112   
16     -304   
496    96     
-144   -32    
-736   80     
128    64     
320    -80    
-176   -80    
-560   -176   
528    -48    
368    32     
-272   -288   
336    160    
-976   -752   
-1600  64     
368    432    
96     144    
-496   112    
336    128    
272    160    
-640   -112   
-320   -144   
240    128    
576    -48    
-224   -80    
-160   64     
144    -32    
-96    32     
-128   -160   
0      32     
48     32     
-112   32     
704    352    
-1264  -224   
448    256    
256    -96    
-112   -64    
544    48     
-640   -32    
-64    528    
96     192    
-208   240    
448    96     
128    16     
-448   96     
176    -16    
-432   -208   
464    192    
-144   -16    
-96    416    
-112   80     
-208   336    
-336   0      
16     96     
-64    112    
-112   288    
-224   -96    
256    176    
16     112    
-288   64     
208    144    
48     48     
-16    64     
-224   16     
144    240    
-256   416    
848    -96    
-144   -384   
-592   240    
128    -144   
160    -112   
-160   0      
-544   272    
192    80     
240    0      
-128   64     
-144   32     
160    32     
64     -112   
-208   -208   
-48    48     
64     304    
0      576    
320    560    
-560   16     
32     -112   
-192   -256   
-32    208    
144    -80    
-80    272    
240    784    
-176   720    
-288   80     
96     0      
-416   -1456  
240    -464   
496    -128   
-48    560    
720    624    
-608   -288   
-448   352    
288    -48    
576    112    
-64    144    
-464   192    
-16    144    
160    16     
96     16     
-352   32     
16     32     
80     -160   
-80    -80    
-64    -64    
32     16     
-320   -1424  
-16    -1008  
240    608    
112    1040   
-160   480    
160    -800   
-16    112    
-16    272    
112    -48    
-16    80     
16     -32    
-64    304    
-208   -112   
64     -368   
304    -16    
-48    416    
-256   -80    
320    -48    
32     -256   
-192   160    
240    224    
192    -96    
-224   144    
-128   80     
160    208    
224    256    
-304   -64    
32     32     
96     192    
1520   1648   
-880   -208   
-2112  -400   
1632   464    
-64    448    
-240   32     
-64    -896   
-256   -1264  
-80    464    
-112   496    
288    176    
-32    -48    
-128   112    
208    -288   
-576   -384   
464    -160   
288    0      
-400   432    
192    1024   
192    688    
-320   -336   
1008   816    
1840   0      
-1552  -816   
-704   -464   
896    224    
-32    96     
-224   720    
144    480    
-112   -32    
-272   80     
336    -32    
80     32     
-480   160    
304    -224   
-48    16     
-208   16     
48     -656   
-320   -560   
16     -192   
32     80     
224    64     
-32    -192   
-336   1552   
752    960    
288    112    
-32    80     
0      288    
576    -400   
-624   -736   
16     288    
224    112    
-288   -160   
256    448    
400    -224   
-480   -176   
-176   -864   
-688   -208   
496    48     
-112   -112   
160    -496   
208    -160   
32     -96    
-608   528    
192    -272   
-656   -272   
464    -96    
-64    144    
-272   -448   
-144   16     
800    1104   
-1808  -176   
320    240    
1200   592    
0      16     
-608   656    
0      -752   
784    -2720  
160    544    
-320   368    
-144   -304   
176    -304   
560    64     
-192   384    
-144   16     
176    624    
256    400    
-304   80     
160    48     
48     288    
0      -224   
-32    32     
352    -256   
-320   208    
80     176    
208    160    
-416   160    
192    736    
320    1248   
-112   96     
-160   -320   
-176   -224   
16     -64    
288    -688   
-560   112    
224    -96    
560    576    
-416   16     
144    -64    
336    -1904  
-368   -336   
-48    -256   
144    -128   
16     160    
-64    -48    
272    -752   
-176   -1136  
-208   -32    
288    352    
80     -96    
-128   912    
-32    384    
-384   -816   
64     176    
-128   -320   
-368   -176   
320    464    
352    1264   
-192   496    
48     128    
-112   -320   
96     -192   
96     -112   
-192   -480   
16     -432   
160    -304   
-176   112    
-144   -416   
256    128    
176    -272   
-32    112    
-96    -992   
96     16     
-176   -32    
160    240    
64     208    
-64    432    
96     0      
48     -560   
-240   304    
496    2304   
1360   368    
-1056  1264   
208    400    
288    -400   
80     352    
-256   448    
176    96     
-208   224    
272    176    
208    240    
-208   -480   
-48    192    
48     -176   
160    -64    
-144   -640   
-16    -464   
128    -416   
16     -80    
48     32     
0      1808   
592    -448   
-448   208    
224    -80    
48     -1184  
64     -480   
48     -256   
-64    384    
-16    -304   
0      112    
352    80     
-16    160    
-256   -160   
368    96     
-96    -64    
-64    96     
-48    48     
304    -320   
-320   16     
128    -32    
288    -240   
-384   48     
-64    48     
80     -64    
304    -544   
368    -112   
-432   -832   
16     -80    
-48    80     
-320   1152   
1696   336    
-208   -128   
-848   -544   
1024   160    
240    240    
-624   -320   
16     208    
528    -384   
-256   64     
-112   -224   
16     32     
256    -528   
384    80     
-288   64     
-64    -32    
320    -16    
-256   -48    
-128   0      
368    64     
-176   -80    
288    272    
2160   80     
-624   400    
-1264  -272   
-208   -80    
752    -304   
-704   -320   
224    -48    
464    -1248  
-112   -96    
-144   -32    
64     128    
-112   -416   
-272   224    
640    48     
-400   -336   
-96    -192   
320    -48    
-656   64     
112    112    
-48    -496   
-768   32     
640    -32    
-448   -432   
-64    240    
96     -32    
96     -80    
112    -112   
0      -288   
-608   16     
112    0      
384    -64    
256    288    
-768   -240   
416    -336   
400    240    
-336   -464   
32     -192   
224    144    
48     80     
-48    -432   
224    64     
96     16     
0      -480   
-1024  176    
288    80     
464    -16    
-448   -1104  
2320   1376   
-1360  784    
-928   -496   
1696   -352   
608    -144   
-1184  -368   
-384   288    
1312   -576   
-160   192    
-400   -224   
-224   240    
272    80     
192    48     
-288   -96    
-64    -128   
-64    96     
160    16     
-112   112    
-368   -368   
528    512    
368    -256   
-592   320    
320    -224   
-672   -64    
-176   80     
544    32     
-256   96     
64     -80    
-336   64     
496    288    
-80    288    
-16    -16    
32     16     
96     -160   
0      96     
-32    -240   
-48    -16    
240    -80    
256    -32    
-144   -80    
176    96     
-176   -112   
320    176    
-16    240    
-80    128    
-192   -16    
384    -144   
-288   -112   
-288   -112   
352    80     
224    -32    
-64    -128   
-1216  160    
272    1200   
128    1488   
-720   352    
-208   -736   
176    -640   
-144   -448   
176    -224   
192    -256   
-64    -208   
-96    -96    
-256   -304   
-128   -128   
96     -272   
224    -272   
144    160    
-208   240    
-112   176    
16     -240   
-80    160    
-336   -272   
-96    16     
-224   -80    
208    -912   
240    176    
-80    1088   
-384   -176   
544    -448   
240    -48    
-192   -1296  
-992   528    
672    576    
192    128    
-608   -160   
48     -992   
336    656    
-192   -16    
-912   -112   
208    -48    
80     -224   
96     48     
-224   -272   
-32    -32    
240    -112   
-48    496    
-144   -128   
176    -144   
0      128    
256    -176   
-1136  672    
576    -480   
320    -576   
-64    160    
-224   432    
-640   -256   
720    -176   
-272   -448   
-176   640    
0      -304   
64     352    
-144   -80    
-208   32     
-32    -80    
-224   -128   
160    -128   
368    -176   
-96    1024   
-480   96     
112    0      
-592   -128   
-48    -96    
128    -96    
-96    288    
96     -208   
-48    96     
-96    320    
-96    16     
-560   -576   
1216   192    
1808   464    
-1808  -736   
-704   -1168  
736    -544   
128    -624   
-208   624    
-160   -16    
-160   -176   
112    80     
464    160    
-80    80     
-208   112    
64     -64    
224    192    
-208   112    
-192   176    
-208   -224   
-64    -16    
16     240    
-448   464    
2048   -240   
-304   464    
-816   576    
-64    464    
192    80     
416    -32    
-288   1200   
240    768    
192    -560   
-256   -496   
48     -416   
368    32     
-192   560    
240    192    
80     -192   
-48    16     
-160   -160   
-688   -240   
144    -112   
-16    -144   
432    304    
400    864    
-320   528    
-256   288    
112    -192   
400    1648   
864    1216   
-144   -96    
-272   -176   
480    -496   
-16    496    
-816   -32    
432    736    
1472   -304   
-32    -672   
160    -592   
-208   112    
400    -48    
128    112    
-208   240    
-128   -128   
-80    -48    
240    16     
-224   256    
-272   96     
256    160    
576    480    
-240   144    
-192   -2016  
-1488  -944   
720    32     
576    1408   
-144   32     
-672   -256   
0      -96    
1104   -144   
-240   -672   
-656   -64    
-80    448    
432    -32    
208    96     
-176   -448   
-432   -272   
288    -16    
544    48     
-288   64     
-272   1024   
192    816    
64     176    
80     -272   
288    144    
-240   -240   
-48    192    
96     272    
-512   -80    
160    -48    
16     48     
-128   -320   
0      -224   
-304   -64    
464    -80    
-336   -272   
-80    192    
256    224    
-96    -128   
96     256    
80     352    
192    384    
-160   -48    
-64    96     
32     32     
-272   48     
288    608    
80     496    
96     304    
-192   240    
320    432    
-48    400    
352    1328   
-96    -32    
-832   112    
272    -272   
272    -128   
-240   -304   
160    -160   
80     16     
112    -176   
-208   48     
-16    0      
160    48     
96     64     
0      160    
-176   -32    
224    -112   
176    48     
128    -64    
160    240    
48     -256   
-560   -384   
352    -224   
352    176    
-384   48     
-144   208    
496    -96    
-368   -32    
-144   -96    
240    192    
-352   -1136  
1168   -1200  
-224   480    
-432   -128   
208    288    
176    144    
-224   96     
384    112    
-128   -208   
-528   -240   
480    160    
208    144    
-96    176    
-192   32     
304    -224   
192    208    
-736   432    
176    144    
112    48     
-112   -304   
-256   -192   
816    720    
1088   -272   
-1104  64     
-176   -224   
672    -176   
-160   -128   
-192   128    
256    96     
-80    112    
-224   -608   
304    64     
0      80     
0      144    
-32    16     
176    224    
-80    32     
-256   -96    
144    0      
-288   -128   
144    48     
208    -880   
-192   96     
-96    -144   
496    112    
-416   -48    
-48    304    
368    -32    
-320   80     
-32    -480   
448    1216   
2336   336    
-1104  128    
-1072  -224   
1520   176    
176    -48    
-848   16     
96     128    
304    -320   
-176   0      
-256   112    
496    208    
-256   -96    
128    160    
464    32     
-368   32     
-256   160    
624    -112   
-48    -48    
-304   -304   
32     -80    
736    608    
1536   112    
-1600  -304   
32     992    
1984   -80    
-848   384    
304    -208   
0      336    
-160   0      
-208   -80    
160    112    
64     -96    
144    64     
112    -160   
128    80     
-112   -160   
16     224    
80     496    
-528   224    
-32    -144   
-160   -960   
-976   288    
944    -32    
-368   80     
-16    -576   
656    -144   
496    -352   
-400   320    
112    0      
16     112    
-192   -336   
-96    112    
352    -192   
608    288    
480    -64    
-224   -352   
-16    96     
-160   -528   
176    -304   
384    -128   
-272   272    
16     -112   
128    96     
-32    -160   
592    192    
304    -176   
-208   -576   
-320   -688   
1888   -1664  
-2320  -464   
352    -688   
1264   -240   
-352   -192   
-512   -256   
208    64     
656    80     
-464   -272   
224    -688   
784    -192   
-512   96     
128    -16    
224    0      
0      -48    
80     -64    
240    48     
-288   -416   
-176   -688   
224    -800   
96     240    
-208   128    
-272   -416   
-288   -48    
848    -432   
-48    -288   
-224   128    
320    96     
64     0      
80     448    
0      -336   
0      0      
80     64     
144    16     
-32    -144   
-384   -608   
272    -448   
96     144    
32     0      
-80    -96    
64     48     
160    -960   
-720   -448   
368    -240   
48     112    
64     480    
160    288    
-336   -64    
256    288    
96     560    
-128   16     
-1152  -656   
512    -320   
224    -752   
-400   -224   
272    464    
0      240    
-784   -416   
96     -1264  
224    -208   
-16    48     
0      -96    
32     -16    
96     0      
-80    -48    
48     -240   
-160   304    
0      -208   
-144   32     
80     -208   
-160   208    
112    -304   
-176   16     
48     -1728  
0      16     
80     -16    
-224   256    
192    -224   
-48    -576   
-64    -16    
144    128    
-224   1232   
0      368    
-288   -160   
-48    -96    
192    -112   
336    288    
-288   1056   
96     -48    
240    -128   
-96    48     
-48    -480   
-32    176    
224    64     
-320   416    
128    -272   
256    -448   
-144   -64    
-160   -16    
16     -16    
784    512    
-784   592    
-128   -208   
816    -512   
-400   176    
-80    -64    
144    -32    
128    240    
-80    144    
-112   48     
-32    -48    
-112   -32    
16     48     
-176   320    
304    -176   
-160   160    
32     -304   
16     288    
64     -624   
-80    -176   
-144   48     
-80    144    
-80    128    
160    -96    
-320   192    
64     32     
0      -96    
-32    16     
32     112    
-112   -32    
-336   1328   
2960   -1104  
-1136  48     
-1680  -448   
1664   -192   
224    -112   
-960   -464   
96     1584   
-128   640    
-624   -832   
320    0      
368    208    
-160   -192   
-288   16     
-288   -128   
32     -208   
16     -704   
176    336    
-176   64     
-112   -32    
-896   -320   
0      -32    
1776   -256   
-704   960    
416    752    
368    -320   
-608   992    
96     1024   
240    832    
160    256    
0      144    
-64    192    
64     560    
-48    272    
-80    -16    
-176   208    
32     -304   
-144   -544   
-224   -336   
240    -16    
-400   -128   
-32    32     
-256   912    
480    336    
-448   -688   
96     -240   
-592   768    
816    -512   
240    -272   
-624   -176   
480    352    
240    32     
48     32     
240    976    
-656   -16    
-320   -80    
-80    1120   
-192   -240   
16     128    
-880   368    
368    64     
480    -144   
-816   64     
-224   -96    
256    432    
1168   128    
-608   -176   
-928   640    
576    -80    
288    -2768  
-2048  -1136  
800    496    
800    -48    
160    -736   
-576   400    
336    -48    
576    752    
-464   288    
-336   160    
272    0      
48     -64    
208    48     
-480   128    
-176   176    
448    144    
16     -32    
-160   16     
-528   -80    
176    1008   
400    976    
-256   16     
176    32     
1136   32     
-512   128    
-496   32     
160    384    
512    240    
-160   416    
-32    -112   
0      288    
-112   -176   
-32    -160   
208    -96    
320    160    
-720   -320   
-192   64     
496    160    
-64    -16    
-96    -48    
-176   144    
256    512    
-32    272    
-448   48     
304    -112   
-16    -336   
-848   -320   
544    -192   
128    -176   
-192   -32    
-704   -320   
656    -80    
832    336    
-672   -176   
-528   112    
736    32     
-160   -64    
-288   80     
64     -144   
-160   -80    
0      192    
80     -32    
96     80     
-320   80     
16     176    
464    -224   
-96    96     
-320   16     
288    -288   
16     144    
-384   240    
240    -192   
16     -352   
-96    -112   
96     -80    
0      -80    
160    -192   
-112   256    
-32    64     
224    96     
-1040  640    
2032   -672   
352    48     
-928   -96    
416    240    
672    224    
-1056  368    
-16    320    
688    -272   
-208   112    
-80    -192   
-144   16     
96     208    
-48    288    
256    -336   
-144   320    
-48    128    
176    -128   
-192   -80    
-16    16     
-464   -368   
432    -80    
704    -112   
-1152  -32    
352    -128   
192    320    
240    -176   
-624   -16    
-48    -80    
464    368    
320    -32    
-432   160    
-48    16     
48     80     
400    192    
-144   16     
-320   208    
64     160    
480    112    
-192   -64    
-128   32     
0      112    
304    160    
-144   160    
352    128    
-128   32     
-208   112    
192    144    
96     96     
-1104  -1408  
-2160  -832   
2288   64     
848    288    
-672   80     
-688   -32    
144    -48    
64     160    
-624   -48    
272    -32    
272    128    
-240   -48    
-144   64     
112    -112   
-48    96     
352    32     
-256   64     
-32    96     
224    -32    
176    160    
-112   48     
-480   -768   
-320   -64    
1088   -944   
176    128    
-448   -816   
432    -32    
-272   256    
-240   32     
272    160    
384    32     
-112   48     
-112   192    
-16    0      
176    304    
528    -96    
-240   144    
-336   -464   
-64    -80    
320    272    
96     -240   
64     848    
-272   -32    
-832   304    
528    32     
-144   48     
-272   64     
176    80     
304    -496   
448    -48    
-384   96     
-80    48     
0      304    
-128   -80    
384    160    
64     -480   
112    240    
48     -1056  
-48    176    
144    112    
48     112    
-48    -192   
80     48     
32     -48    
48     288    
-448   96     
48     32     
384    64     
-256   -528   
160    -1760  
1376   -2736  
544    208    
-1248  -224   
-512   144    
704    -32    
256    112    
-688   336    
-32    -192   
448    144    
-80    176    
16     112    
-240   208    
432    -192   
-256   -80    
64     -128   
-128   16     
240    32     
64     0      
288    992    
-160   -1104  
-16    -16    
384    192    
-576   -32    
-544   272    
816    -16    
-48    -96    
-208   -544   
0      -768   
192    -208   
192    864    
-64    -416   
128    -368   
-80    -1024  
144    48     
-32    -16    
48     80     
64     176    
-320   64     
160    256    
112    160    
-16    416    
256    144    
64     -16    
-16    -160   
-240   624    
320    -80    
-368   832    
288    464    
256    -240   
32     -32    
544    720    
-1280  400    
96     672    
704    288    
-32    480    
-192   416    
272    224    
448    -1744  
-304   -64    
-32    144    
176    -224   
64     128    
80     -16    
-240   -192   
128    -64    
128    16     
160    -112   
0      -320   
144    32     
176    16     
48     -1424  
80     -128   
-144   -2000  
16     -176   
128    16     
704    -352   
-64    80     
-432   -192   
208    192    
304    -128   
336    -928   
-1040  224    
496    -96    
64     144    
-1104  -80    
80     16     
64     -272   
-208   -96    
-32    176    
160    -80    
160    -336   
-128   160    
-48    -144   
288    -736   
64     192    
128    -512   
-240   -144   
-16    48     
208    -48    
-512   -48    
592    -896   
-224   400    
272    -32    
-288   -128   
-32    -800   
-112   -336   
256    -3184  
112    304    
160    16     
0      16     
0      32     
-16    48     
112    -32    
208    -128   
-176   -32    
-208   -128   
-944   -448   
304    -112   
-160   -80    
-192   -240   
112    -48    
80     -912   
192    -352   
0      16     
-176   64     
-96    -96    
208    192    
80     -16    
-16    368    
-1072  1584   
3136   -864   
-848   624    
-1264  832    
240    320    
192    144    
-528   -608   
-80    -432   
192    784    
272    -1968  
-112   224    
32     48     
128    -96    
-176   -352   
160    -48    
-32    208    
80     528    
-32    1296   
16     608    
-96    0      
-928   -496   
1280   -448   
896    -256   
-352   768    
-656   -496   
352    -160   
-272   -64    
96     -112   
128    -512   
496    -768   
-144   -160   
-48    176    
-256   -112   
-48    240    
192    48     
-96    -400   
-64    32     
-288   -240   
-256   112    
336    -160   
112    160    
144    -48    
528    1856   
-64    256    
-864   -32    
-320   -160   
592    -240   
-624   464    
96     0      
-224   -304   
128    -144   
0      -288   
32     256    
464    640    
48     -400   
-544   112    
560    400    
176    -144   
-736   -688   
-288   112    
608    144    
-64    0      
-368   192    
112    -400   
672    -16    
-32    -208   
-448   32     
400    288    
192    -560   
-672   -2928  
-1504  -160   
1152   288    
288    112    
-208   224    
-320   496    
-384   288    
880    272    
-656   0      
-64    96     
144    48     
-32    -160   
336    208    
-496   -304   
-208   128    
448    -336   
160    64     
16     64     
-752   -176   
336    192    
-560   144    
-160   -160   
448    0      
48     32     
-480   64     
224    80     
-160   -96    
-240   64     
-128   -80    
-272   32     
-176   96     
208    32     
-528   -96    
-16    -128   
128    -48    
-336   -96    
-96    416    
-608   208    
96     0      
80     -48    
112    48     
-48    -240   
-320   80     
-272   -144   
464    32     
288    432    
-432   32     
-80    208    
176    -48    
-112   16     
-320   -288   
640    160    
752    128    
-720   96     
-976   80     
336    240    
-416   -48    
-16    208    
96     -128   
48     -16    
-32    64     
-192   -16    
48     -80    
-80    48     
48     -64    
32     -128   
-112   -176   
-176   208    
64     -64    
-304   -16    
-208   192    
176    96     
-16    112    
16     -336   
-272   288    
-320   240    
320    -464   
-208   256    
32     48     
0      144    
-96    1776   
2736   -32    
-832   288    
-1424  208    
736    -144   
448    48     
-480   -288   
-160   1200   
736    -448   
-192   -160   
-80    192    
288    -112   
-128   0      
128    0      
208    336    
-208   -256   
16     544    
-16    192    
-160   -48    
-368   -48    
816    736    
448    -16    
-1024  48     
352    128    
128    -16    
176    528    
240    112    
-448   96     
176    -144   
64     -48    
96     -144   
144    80     
-256   192    
32     32     
-192   80     
304    144    
240    256    
-384   64     
0      32     
272    16     
80     128    
-336   96     
384    0      
96     64     
-464   -32    
16     240    
288    48     
-128   0      
-224   288    
-624   2496   
2256   -128   
-624   160    
-1232  -320   
1408   304    
272    -112   
-896   48     
-160   208    
832    288    
-128   272    
-224   -16    
192    16     
80     -16    
-240   -176   
-480   32     
288    0      
80     288    
-368   96     
64     400    
352    96     
-288   -608   
976    656    
592    352    
-480   240    
-400   -16    
192    -80    
400    192    
384    112    
-96    48     
-288   112    
16     0      
224    128    
32     128    
-240   -96    
352    128    
128    112    
-224   -32    
80     -192   
-208   400    
176    96     
80     112    
96     96     
-880   48     
-592   112    
512    656    
656    -544   
-48    -80    
-384   224    
128    32     
224    -96    
-464   80     
320    432    
1056   -560   
-320   -112   
240    592    
16     112    
-144   112    
400    80     
-576   64     
-112   176    
208    -16    
256    80     
-80    -16    
-256   224    
512    464    
-352   288    
-384   96     
416    80     
-112   -1008  
-832   -1792  
1488   -1696  
688    -304   
-1488  192    
16     176    
688    -512   
-640   -560   
-32    0      
448    80     
-224   64     
-144   -480   
544    0      
-192   352    
-288   448    
80     192    
240    80     
-96    240    
-160   64     
128    0      
-96    -16    
48     112    
96     208    
-32    48     
-720   656    
528    112    
-688   320    
544    16     
32     896    
-336   672    
112    -272   
-64    -640   
32     -176   
160    64     
-64    784    
32     480    
96     32     
128    416    
80     -1776  
-96    432    
80     -352   
272    64     
-48    160    
-112   -64    
64     -64    
480    352    
-576   -528   
112    -1472  
352    -112   
-336   32     
-160   144    
304    -288   
384    -304   
-1392  496    
272    384    
464    160    
-96    -528   
-416   -528   
48     -1296  
-416   -416   
432    1088   
176    464    
-96    -32    
-224   128    
80     320    
288    112    
-64    -256   
-320   -208   
272    -240   
464    176    
-256   96     
-32    -80    
64     32     
224    -224   
-96    -96    
-112   -128   
224    -640   
624    -64    
-368   0      
-176   176    
384    144    
176    -96    
-112   -448   
-528   -336   
16     112    
400    -336   
80     352    
-208   -48    
-384   -64    
80     -592   
144    64     
-240   160    
-16    128    
176    -32    
0      128    
32     16     
-112   -96    
304    -16    
64     -272   
-80    128    
0      16     
320    624    
-80    -368   
16     -96    
640    -256   
-432   144    
-32    192    
288    240    
240    -48    
-192   64     
-32    32     
144    -224   
96     112    
-16    -368   
16     96     
64     256    
80     304    
-336   -416   
112    -304   
320    -16    
-112   368    
-208   64     
16     160    
64     -80    
64     -784   
112    464    
-160   16     
256    -32    
128    -64    
-224   208    
128    -16    
-512   1328   
2544   -1392  
-640   16     
-1232  176    
1184   -112   
-176   32     
-416   0      
480    208    
-80    -256   
-160   160    
176    -80    
64     144    
-240   -272   
-160   -32    
368    -144   
-96    0      
32     -80    
112    64     
176    176    
96     -448   
176    -720   
-1968  864    
1280   160    
512    624    
-496   -448   
-272   -304   
112    240    
-128   -128   
-48    -240   
704    -16    
288    112    
-576   -256   
80     -48    
672    192    
-160   -608   
-480   0      
-16    0      
320    0      
-224   -16    
0      -272   
96     -96    
144    -832   
-1072  128    
784    224    
304    576    
-576   -912   
0      896    
48     -144   
-512   0      
128    -272   
96     -304   
304    -240   
176    -112   
-384   -32    
528    224    
112    416    
384    -272   
-240   -144   
128    -1232  
0      -96    
80     -112   
48     32     
160    48     
16     -32    
16     -32    
416    -32    
-48    -16    
-352   -176   
224    -528   
-176   -912   
-2208  -480   
816    -368   
1056   -64    
-896   -688   
48     464    
288    -480   
80     400    
128    -176   
-672   384    
112    -128   
320    128    
-176   -144   
-496   144    
0      -176   
208    256    
112    -176   
-160   48     
-64    -464   
-528   -32    
592    -96    
-240   -288   
192    -32    
368    -144   
-128   48     
-320   128    
368    80     
432    16     
-448   -80    
-16    64     
496    -208   
-272   16     
-576   -144   
160    48     
544    -32    
320    192    
-496   -656   
-176   400    
144    32     
-16    80     
-112   -32    
-96    0      
0      -48    
352    -64    
0      -48    
-496   -304   
224    -208   
320    96     
-528   32     
-224   -224   
-160   160    
64     -672   
-560   144    
560    -384   
496    192    
16     208    
-432   -224   
-64    -96    
416    -288   
-288   96     
-32    -48    
112    96     
0      -96    
0      -64    
80     -304   
-128   352    
144    16     
80     16     
-128   -112   
80     -112   
-336   48     
160    32     
-320   128    
176    176    
-32    -240   
128    -208   
-768   608    
464    -224   
-176   -368   
-320   -160   
-928   -1840  
-64    -176   
1456   0      
-624   -240   
160    304    
-304   -112   
32     80     
-128   -80    
96     -224   
0      -320   
-128   224    
-160   -128   
80     -48    
64     32     
-688   -416   
-16    320    
80     -384   
-352   -160   
16     160    
-432   48     
496    -208   
-1616  480    
352    -256   
912    -32    
-560   -256   
-16    80     
-128   64     
-192   -512   
240    -80    
48     16     
-208   80     
-32    -80    
-160   0      
80     -16    
-112   272    
-80    112    
-32    -48    
64     -80    
-1184  -176   
-160   64     
160    112    
0      -48    
-80    32     
224    -144   
-496   -368   
464    128    
-48    128    
-240   48     
160    304    
1536   496    
-2096  144    
-688   416    
1248   -32    
-272   144    
48     64     
-656   336    
112    48     
32     32     
-192   0      
0      -128   
0      64     
208    112    
-16    -128   
-128   -32    
144    -96    
64     -64    
80     176    
-112   -64    
-80    48     
80     80     
-592   -816   
-192   544    
944    -320   
-624   -528   
-224   96     
208    32     
-96    -32    
-32    144    
368    160    
64     48     
-16    64     
-272   -32    
16     48     
144    -64    
32     16     
-544   -64    
0      -176   
48     -112   
96     176    
80     -32    
0      -32    
368    256    
-192   560    
-464   -384   
-48    -416   
128    640    
-720   -192   
-288   -160   
752    688    
-704   576    
-224   -336   
-16    224    
-128   -624   
-768   256    
752    -208   
64     832    
560    64     
-304   -112   
-320   256    
272    80     
240    0      
-224   0      
-96    80     
-208   -48    
576    720    
464    80     
-144   208    
-288   816    
64     256    
576    -2064  
-1712  -1184  
-64    752    
656    464    
176    208    
-1024  352    
-48    -64    
736    0      
-128   -192   
-368   224    
-32    64     
-32    -48    
176    144    
-272   0      
-240   -480   
-80    -432   
400    736    
-112   -288   
-368   -336   
-48    -560   
160    272    
48     208    
-144   -448   
-64    -528   
-112   -336   
96     -96    
-80    48     
16     -128   
128    -448   
-208   272    
32     320    
-96    0      
128    272    
160    112    
-480   224    
160    -80    
192    816    
240    208    
-464   -240   
-160   -528   
576    80     
240    144    
-192   32     
-400   -112   
512    -368   
144    288    
-528   -80    
-48    128    
320    80     
144    -80    
176    1088   
-320   -112   
-656   432    
512    944    
176    1136   
-336   400    
288    256    
-208   -976   
272    0      
-80    368    
-16    0      
0      -288   
-16    -176   
128    -240   
-224   -256   
-96    -496   
-144   336    
112    384    
-48    -144   
-112   16     
112    48     
-48    -112   
-288   96     
80     144    
432    464    
-528   704    
-128   352    
336    480    
48     176    
-320   48     
-432   -480   
656    -384   
-464   960    
-16    256    
-240   -464   
128    -544   
-160   -96    
-176   96     
-96    -304   
96     -160   
176    64     
48     -32    
-80    16     
-96    -16    
64     0      
224    112    
48     176    
-160   16     
32     48     
240    720    
-368   272    
128    -112   
240    -288   
-224   224    
-144   256    
96     240    
16     704    
32     -64    
48     -304   
-96    368    
-48    -208   
112    -224   
-208   80     
0      192    
128    -240   
-32    48     
96     0      
112    208    
-272   -16    
0      64     
256    64     
-128   64     
-32    128    
96     -80    
0      176    
192    64     
48     64     
-224   -80    
-480   -560   
1136   752    
1872   -128   
-1184  304    
32     -128   
-256   96     
592    0      
80     16     
-144   224    
-144   64     
48     112    
208    144    
-112   -384   
-112   0      
560    -32    
-160   0      
-176   -32    
208    32     
-48    304    
64     -64    
160    32     
384    448    
-32    -640   
-1648  64     
1504   -304   
-176   -96    
-1184  208    
416    -208   
704    224    
-96    -64    
-256   -48    
-16    64     
-32    -112   
208    176    
192    -96    
-400   96     
144    -1728  
32     288    
-192   48     
-528   224    
80     64     
496    96     
-128   -464   
-1504  528    
-48    0      
512    -352   
-144   224    
80     -112   
-496   336    
224    -272   
144    -16    
224    -720   
48     -160   
96     -432   
176    272    
-32    -256   
-384   208    
16     112    
-144   -48    
-144   96     
256    32     
96     64     
-48    -272   
-192   96     
32     -800   
-48    48     
496    -48    
-128   -64    
-800   -608   
1360   736    
-2096  -160   
-800   272    
1168   -720   
-1120  -464   
768    48     
624    -48    
-544   80     
-144   -416   
688    400    
-160   -64    
-128   96     
32     -192   
0      192    
0      -304   
-48    224    
416    -80    
-240   128    
112    -32    
816    592    
-1136  112    
464    208    
304    -64    
-496   -160   
752    368    
-384   -160   
-496   176    
656    -400   
-208   -48    
-64    -144   
224    96     
32     96     
-48    -368   
0      0      
16     -896   
512    -480   
-96    112    
-416   -1440  
208    96     
352    -320   
-160   -112   
-160   80     
400    -32    
-416   -80    
96     96     
544    -368   
-736   -368   
320    -976   
224    -208   
-400   64     
32     -160   
-208   32     
-16    -768   
-128   -144   
704    -656   
-496   -96    
0      224    
416    16     
192    -368   
32     144    
-224   -320   
-368   112    
240    -64    
144    0      
-224   -48    
128    -256   
-512   -64    
192    -736   
-16    -144   
176    -352   
-16    -32    
-128   -288   
160    0      
-144   -32    
-64    -160   
160    -224   
400    32     
-256   256    
-80    -432   
112    -592   
208    -16    
-2160  16     
944    -784   
64     -80    
-560   -304   
784    128    
-384   -480   
-352   -128   
160    -1408  
480    -448   
32     -112   
-288   192    
16     -112   
160    16     
32     -208   
-96    -80    
-32    144    
288    -96    
-256   -16    
-16    -128   
256    -16    
432    -896   
-1712  608    
768    -960   
800    -96    
-464   -96    
-48    208    
64     304    
-176   -32    
-64    256    
432    -48    
-144   -16    
-320   -16    
-624   -48    
-64    -176   
32     -48    
240    112    
304    144    
-240   -128   
-64    64     
64     -48    
176    -240   
80     -112   
-320   -208   
192    -176   
0      -160   
-32    -16    
32     0      
-320   192    
176    -80    
864    1760   
-32    -528   
-2224  -16    
592    -352   
704    208    
-896   -2880  
144    -176   
96     -208   
32     -176   
-688   -64    
80     -144   
144    -96    
64     0      
-128   208    
-272   96     
-32    208    
208    -144   
-256   352    
-176   -32    
128    176    
80     -128   
-368   -48    
2688   -64    
-1072  -208   
-1312  -192   
912    -32    
-48    720    
528    -96    
-176   -48    
-224   0      
32     -16    
80     -160   
64     176    
-208   -160   
16     272    
-32    352    
80     -208   
-112   640    
-96    480    
-128   128    
64     0      
144    -96    
-16    -96    
528    528    
816    96     
-656   -320   
-880   272    
-240   -160   
-288   -320   
272    64     
112    -16    
-240   -160   
-256   -16    
-432   128    
-208   272    
400    -1024  
-160   -176   
64     784    
-32    96     
-464   160    
192    192    
-176   176    
-176   -464   
-240   -272   
224    32     
-192   -32    
32     64     
400    -496   
-336   -448   
112    0      
256    1408   
-1456  736    
-368   -256   
1056   176    
688    464    
-640   704    
-336   -1552  
176    -1280  
80     144    
-112   -272   
80     240    
-160   224    
-32    -128   
112    -16    
0      640    
-432   64     
-16    -240   
-192   -80    
64     -400   
-224   -320   
-176   576    
64     -80    
352    16     
-304   48     
-496   736    
448    128    
32     16     
432    1072   
32     1280   
-224   -160   
-16    -80    
64     80     
80     -224   
-240   -80    
-288   -544   
48     128    
32     -48    
-272   -96    
272    -80    
-192   -176   
-16    48     
48     -64    
0      -512   
48     -48    
-32    1024   
-64    400    
-432   -112   
48     -720   
-320   576    
192    448    
400    752    
272    -400   
-944   -192   
-128   176    
384    -64    
-240   144    
384    960    
-432   1824   
-208   -176   
384    -656   
-16    -64    
-256   112    
32     -288   
80     80     
-624   -688   
-176   -64    
128    64     
64     384    
32     -144   
-112   -144   
32     256    
208    416    
-80    128    
-32    96     
-32    528    
64     1744   
-16    176    
-336   -448   
240    48     
-32    16     
-160   2784   
1088   192    
-736   -448   
-224   -416   
400    1088   
-64    192    
-464   -128   
288    352    
-48    16     
-96    64     
-16    160    
-16    112    
64     -208   
64     -16    
48     112    
-304   560    
112    224    
128    -224   
0      -112   
-336   -688   
464    -880   
-224   544    
-128   -656   
-16    -144   
192    208    
-112   0      
0      128    
-48    0      
-80    -96    
-176   -80    
224    64     
-32    80     
-80    96     
48     -48    
144    416    
32     560    
48     208    
-192   176    
-16    -16    
80     208    
-64    48     
112    80     
-112   48     
176    80     
-464   80     
80     16     
336    112    
-240   16     
144    144    
-688   -1056  
-896   -272   
1952   -16    
-224   -16    
0      368    
432    128    
-560   -32    
-80    112    
240    64     
112    112    
-272   80     
-160   64     
144    32     
32     64     
96     80     
112    208    
464    64     
-384   64     
-464   -80    
192    64     
-16    144    
-688   -240   
2272   208    
320    80     
-1344  16     
-208   -80    
384    64     
256    96     
-336   96     
304    80     
-80    112    
-96    96     
288    48     
-208   -16    
-64    176    
368    112    
-80    272    
-208   -144   
144    224    
304    208    
-560   0      
304    496    
-1184  -48    
-960   -208   
1056   96     
592    464    
-752   -96    
-368   -240   
752    -352   
80     304    
-256   64     
-256   -80    
208    144    
672    208    
-464   -336   
-400   688    
144    640    
752    80     
176    -96    
-320   464    
-288   336    
16     400    
656    -112   
-320   80     
16     704    
-160   160    
-176   16     
672    160    
-608   -368   
112    1968   
2128   -928   
-624   1200   
272    -512   
288    96     
-128   304    
-752   -16    
672    144    
560    -32    
-224   -176   
-576   -16    
352    80     
48     144    
16     -16    
-144   80     
-112   -320   
-16    256    
320    -192   
-608   -336   
640    432    
480    -64    
-816   384    
464    96     
-560   -160   
-32    64     
384    32     
0      128    
-336   96     
304    -304   
192    -144   
-16    -736   
-192   -16    
160    -736   
96     224    
-288   80     
-96    48     
432    176    
-144   -32    
64     -128   
320    144    
64     80     
-96    144    
64     128    
256    -208   
-288   112    
-256   -32    
352    272    
16     -192   
-240   192    
368    -416   
96     304    
336    992    
-352   160    
-464   224    
400    32     
32     112    
-48    192    
-32    -16    
-64    -160   
384    -96    
192    48     
-288   -64    
-16    -208   
400    240    
32     16     
-224   64     
0      -128   
192    -368   
-192   -288   
-32    -32    
48     32     
80     -176   
224    -208   
144    -64    
-16    48     
-304   288    
208    288    
176    -672   
144    -112   
-96    -240   
-368   -1056  
912    -1232  
-688   416    
-368   -320   
464    672    
-400   576    
320    640    
384    96     
-320   -624   
-224   -16    
304    -224   
272    -144   
-240   -624   
-32    240    
160    -48    
240    0      
-64    -480   
96     128    
288    192    
-16    144    
-224   -224   
608    -752   
-432   240    
-96    -272   
128    -48    
0      64     
48     400    
144    -64    
32     -304   
-224   -656   
80     128    
16     176    
32     -880   
-64    -96    
96     -80    
-48    -16    
48     -288   
-176   -944   
32     -176   
256    208    
80     96     
-160   -16    
144    -368   
192    464    
-64    -272   
-208   -736   
16     192    
64     -400   
96     48     
-384   -64    
-1136  -1104  
32     96     
1232   -896   
-704   256    
464    -128   
320    224    
-832   -720   
192    1200   
336    448    
-144   -464   
0      -176   
-128   32     
16     -304   
368    -32    
-32    -32    
-176   144    
-240   416    
96     -272   
-64    -368   
32     -272   
432    -736   
-2512  -816   
-464   304    
1952   960    
-560   -192   
-432   -640   
768    -608   
-48    -320   
-288   -368   
48     -240   
64     16     
-608   -48    
192    16     
272    -256   
-112   -256   
96     96     
-304   -848   
-64    -976   
736    -4288  
-432   -336   
-352   -240   
160    496    
-144   64     
352    128    
-96    -1168  
-656   -800   
608    432    
528    -352   
-1520  48     
-32    192    
96     496    
-752   -160   
-176   -96    
880    -832   
-704   0      
544    1168   
48     560    
80     -224   
656    -560   
-224   -224   
32     -176   
-112   -80    
576    -256   
208    144    
-144   -272   
-704   -96    
112    48     
512    -16    
-240   -560   
-544   -992   
1504   -1376  
1152   -352   
-1008  448    
-304   720    
608    208    
368    128    
-272   592    
-96    -416   
-544   -672   
208    -352   
-96    -352   
48     -336   
-256   544    
256    -144   
-96    -16    
-192   -1872  
-160   -336   
-48    304    
16     -288   
-96    -336   
48     -144   
-352   -320   
816    240    
-80    -512   
-656   176    
416    0      
-96    1456   
144    48     
-224   -1376  
96     -832   
112    -48    
-208   288    
80     -160   
112    -384   
0      -368   
256    816    
-80    656    
64     0      
208    -80    
-640   -320   
-384   -496   
352    -416   
-32    80     
-96    -624   
-432   80     
528    640    
0      64     
-64    16     
-128   16     
-128   96     
688    160    
512    16     
-608   -688   
-624   1168   
2096   -864   
-368   -448   
-736   -400   
224    80     
-464   -416   
-224   192    
0      -64    
16     -368   
-480   -192   
-416   176    
176    304    
144    192    
-128   112    
-64    224    
0      528    
384    208    
-208   32     
-368   32     
336    224    
176    -240   
-592   -544   
64     -624   
16     -80    
-112   608    
-16    160    
480    -160   
-1952  1680   
928    -320   
-224   -80    
-208   -160   
-80    1280   
320    496    
96     864    
160    0      
-64    -176   
-48    -80    
-48    -112   
-80    -80    
64     432    
48     224    
-112   -320   
-128   48     
0      0      
-272   80     
64     0      
-144   -976   
272    -160   
32     112    
-400   192    
592    96     
-80    96     
-112   0      
-96    -96    
256    128    
32     64     
-16    208    
-304   -48    
16     -112   
-64    -32    
32     272    
-48    -192   
-176   128    
-192   -336   
288    16     
48     80     
-96    -16    
64     192    
64     -16    
64     -48    
-160   -64    
-64    144    
128    -48    
80     144    
64     192    
976    -592   
-3184  64     
-2080  1104   
1584   -208   
-576   -432   
-512   96     
656    -208   
256    208    
-320   -128   
-32    160    
240    -64    
-16    176    
112    -32    
-176   -64    
-496   -112   
336    144    
-352   -192   
0      80     
-16    -96    
-32    32     
16     64     
-704   -400   
-48    -64    
2144   -144   
-80    -144   
-752   496    
64     -112   
-272   -256   
-144   96     
-128   64     
512    32     
32     128    
-128   80     
-128   -16    
-96    16     
144    80     
320    48     
96     64     
-576   96     
-96    144    
624    -144   
-48    752    
-1488  -176   
-384   176    
816    -208   
32     208    
384    400    
368    -336   
64     528    
-128   -224   
-512   192    
256    -240   
-208   -224   
-80    96     
256    -32    
-368   -208   
-432   -80    
368    448    
400    -272   
-272   -144   
-32    128    
48     -144   
-16    96     
-144   112    
128    256    
-16    240    
240    64     
160    16     
-320   128    
-912   -752   
2688   -2192  
64     336    
-1408  352    
-32    0      
320    96     
304    112    
288    336    
-992   80     
288    16     
176    64     
-240   128    
-112   -32    
240    272    
64     -96    
-176   112    
288    80     
-64    -32    
-352   -96    
544    704    
224    -96    
-672   288    
416    128    
-128   192    
-336   16     
96     80     
240    80     
-288   80     
32     112    
304    64     
240    80     
-464   80     
16     -16    
112    256    
-96    288    
-352   320    
224    144    
208    96     
0      96     
-16    112    
176    48     
144    32     
-128   80     
176    -112   
-352   -160   
-112   112    
176    -112   
-160   48     
-128   -80    
192    -128   
-192   0      
256    912    
-512   128    
-144   -592   
-48    -496   
288    -1216  
160    -432   
-416   128    
192    112    
112    80     
-208   256    
512    944    
-432   704    
-48    560    
608    240    
16     192    
-416   -1984  
16     464    
368    400    
32     80     
-256   -80    
-64    -32    
400    -64    
64     0      
-208   -160   
128    -128   
16     -816   
-16    32     
-112   480    
128    384    
96     224    
464    1600   
576    304    
-912   -256   
96     -480   
464    400    
80     432    
-160   288    
160    144    
32     -144   
48     96     
-128   144    
16     -32    
-48    -96    
16     208    
80     112    
-32    -304   
16     -96    
112    208    
64     176    
-368   -304   
656    -160   
96     224    
-352   400    
-112   224    
-48    400    
160    224    
-96    592    
-64    208    
48     -80    
-64    -144   
192    -336   
-240   112    
128    -1888  
-32    80     
-16    112    
48     144    
144    64     
16     -16    
-160   -224   
48     96     
32     -48    
96     64     
176    208    
-80    160    
-208   240    
240    -384   
128    -176   
-112   -624   
16     272    
-288   -3008  
-1568  816    
1680   -176   
-384   992    
-464   256    
112    80     
-48    -144   
464    224    
240    736    
-64    -496   
-224   176    
-80    32     
96     160    
176    -320   
-16    128    
-16    -816   
-48    176    
272    224    
48     96     
-224   -112   
272    -240   
-2336  112    
-96    -336   
832    -416   
176    -1264  
-448   -768   
192    -1264  
128    -736   
-384   -368   
48     208    
-32    448    
224    496    
16     -336   
-272   -768   
704    -80    
-560   224    
-160   -640   
544    -992   
-32    -128   
-128   -32    
48     256    
80     -464   
96     48     
-336   928    
768    112    
160    -608   
-912   -848   
-112   192    
464    -272   
-512   -272   
0      96     
272    96     
-256   -80    
-272   -352   
336    -336   
304    352    
112    80     
64     -624   
0      -240   
80     80     
-112   32     
240    288    
48     528    
320    -32    
-160   -144   
-672   64     
64     -112   
208    208    
288    -320   
-160   -1392  
816    -3600  
464    448    
-624   272    
-288   -304   
928    -448   
96     -592   
-144   -816   
-352   -736   
416    384    
48     128    
-176   -112   
0      80     
-208   96     
48     -480   
336    -240   
-128   -32    
-32    16     
368    -80    
-64    288    
224    528    
-96    16     
-496   -288   
64     -656   
1616   -1136  
-704   -80    
0      -400   
-64    -352   
576    -352   
-32    -128   
-96    400    
144    -48    
112    0      
128    -624   
160    -64    
-112   -16    
-304   0      
176    144    
224    96     
16     416    
-240   48     
64     128    
400    208    
-240   384    
-16    272    
-96    0      
368    -96    
-432   -272   
0      -624   
352    -96    
80     -192   
-256   -192   
512    -672   
96     32     
-240   -16    
112    704    
-368   656    
192    -608   
-336   -416   
-16    -144   
-912   64     
80     -96    
384    160    
-32    64     
-128   176    
160    -112   
-272   80     
176    -384   
-48    96     
224    512    
-384   48     
80     -48    
-112   -96    
-128   -144   
464    -192   
-544   48     
-160   -240   
400    0      
32     80     
-320   -32    
912    2080   
-1200  -496   
-1120  -1072  
1344   32     
80     -256   
-672   -480   
112    -32    
448    -192   
-160   -800   
-400   304    
-48    32     
128    64     
-640   16     
-176   -352   
-80    80     
400    -208   
-576   208    
48     -1120  
304    112    
-128   -128   
208    1088   
-272   -432   
-704   384    
736    32     
64     -96    
-608   480    
-256   -192   
304    -176   
160    -368   
-400   -16    
96     176    
0      -48    
32     -336   
272    -160   
-496   48     
272    -240   
208    192    
-272   -112   
-160   144    
400    -112   
-272   16     
-128   -128   
32     128    
288    16     
64     144    
-544   -64    
160    32     
-144   32     
80     -32    
-32    608    
368    -112   
-880   544    
736    -432   
80     -96    
496    192    
-208   64     
-80    576    
0      64     
-560   -32    
0      48     
-16    -48    
32     32     
-80    192    
192    16     
-256   144    
-32    0      
-80    192    
-592   16     
320    80     
-32    48     
384    944    
-1840  -592   
-1072  224    
816    240    
-592   -80    
80     -112   
-224   128    
-96    -224   
-320   64     
144    -32    
-256   64     
-112   112    
112    -16    
16     192    
-64    -64    
-320   80     
400    0      
0      176    
-112   -112   
192    160    
-112   16     
-576   96     
848    -448   
-512   -192   
-272   -80    
304    32     
480    112    
-64    64     
-592   -144   
-256   -272   
272    112    
-384   -112   
288    48     
64     -112   
-352   208    
96     16     
320    -64    
128    432    
560    0      
-432   32     
32     176    
320    -16    
-80    48     
-288   -16    
-176   -160   
128    96     
-80    160    
-144   96     
800    1120   
-1888  896    
-1168  752    
672    -128   
96     -208   
-208   64     
-688   32     
-16    160    
704    -96    
-400   -32    
96     0      
-128   64     
192    64     
-432   128    
16     48     
192    0      
-144   -16    
-224   112    
400    16     
560    528    
-864   704    
128    -272   
288    -592   
-320   -144   
544    -16    
288    128    
-1136  96     
288    -144   
432    432    
-400   48     
-368   -336   
608    -80    
368    0      
-1120  -176   
480    80     
80     -240   
-208   -672   
-96    96     
-80    -16    
-128   192    
384    96     
-304   -48    
-256   208    
-112   -32    
176    0      
304    464    
-320   496    
-128   272    
336    224    
0      656    
-208   528    
-144   416    
208    1152   
1568   80     
-752   576    
-464   448    
256    -144   
32     -160   
-32    -16    
-48    672    
0      32     
-64    -320   
112    48     
-192   -16    
16     160    
128    112    
-96    0      
64     -80    
0      656    
-48    -112   
96     112    
-176   -96    
96     176    
-80    -16    
160    -224   
-304   -336   
0      48     
224    -672   
-256   -256   
-256   -96    
496    32     
-192   -432   
224    -1104  
-16    64     
128    -288   
112    -32    
0      208    
48     160    
-48    80     
-112   112    
80     176    
-112   80     
-32    0      
208    144    
240    32     
-336   64     
-112   32     
320    -32    
32     304    
-80    160    
-48    16     
208    -352   
-848   144    
320    64     
336    336    
96     128    
-224   160    
208    448    
-304   368    
96     -192   
320    -208   
-240   32     
-272   192    
192    144    
80     -48    
-96    208    
-160   -16    
64     208    
-16    32     
-48    96     
144    -64    
-144   160    
-96    128    
96     96     
160    112    
64     320    
-144   224    
144    -32    
32     -32    
64     64     
-240   -288   
1856   -880   
-1360  144    
400    64     
-160   912    
-352   80     
64     -528   
-96    -352   
-80    1296   
-48    -128   
128    -48    
288    16     
32     0      
-96    96     
64     368    
64     -256   
-128   -288   
128    -1952  
-32    -16    
-192   224    
-48    -752   
1408   832    
496    -256   
-1456  384    
368    304    
464    784    
-656   1312   
-176   752    
608    -448   
-560   -352   
192    128    
224    112    
-128   -176   
272    32     
96     80     
144    64     
96     112    
64     416    
448    400    
-16    0      
-384   160    
128    240    
144    112    
-304   48     
80     1264   
1152   160    
-144   -320   
128    -352   
-224   -96    
-224   -704   
128    -128   
-32    224    
144    -176   
64     -224   
416    272    
-32    1120   
-1296  1008   
256    -32    
96     -16    
-304   -64    
-352   -192   
-32    48     
288    240    
272    -32    
-192   -1440  
-448   160    
160    192    
224    112    
-272   1152   
-224   -1248  
1104   -912   
880    -32    
-1520  320    
-384   352    
656    -160   
-16    -112   
-144   512    
-320   -416   
160    256    
304    -1072  
-208   288    
0      -272   
-192   176    
-48    -96    
592    176    
-608   16     
-48    48     
256    688    
352    752    
-160   992    
192    336    
-80    -224   
-64    48     
880    320    
-112   -704   
-80    -16    
304    -1120  
80     608    
144    -928   
-32    224    
448    -80    
48     352    
0      -128   
112    112    
-160   -112   
304    -208   
336    208    
-400   -176   
48     224    
336    -128   
-336   -160   
288    -368   
272    144    
-224   -64    
-224   144    
672    80     
48     0      
-576   -32    
192    -64    
480    320    
-48    80     
-80    736    
848    0      
128    48     
-304   -192   
464    96     
-64    -336   
0      464    
-352   128    
224    144    
336    -32    
-176   -704   
-64    -32    
128    -208   
96     112    
-80    512    
384    176    
-48    -384   
-240   368    
368    -32    
112    32     
-224   -208   
-80    -64    
176    160    
-16    -192   
64     -240   
128    -672   
-144   -176   
32     32     
240    800    
432    -1552  
-1520  -736   
320    304    
-352   -368   
-432   240    
304    -208   
480    -32    
32     -352   
-240   -288   
128    80     
176    -16    
-96    -80    
112    224    
-1024  -48    
240    -496   
320    -240   
-192   -80    
-96    32     
224    -32    
-192   -560   
928    -480   
-224   64     
-224   -304   
672    32     
-208   -32    
-320   176    
768    160    
-64    -400   
-928   96     
256    -256   
32     160    
-64    -80    
48     -80    
-128   -368   
768    192    
-240   -544   
-224   224    
16     -96    
288    96     
64     80     
-112   48     
-256   -64    
176    -144   
-96    -128   
-528   64     
352    48     
16     -80    
-112   -16    
704    384    
32     224    
-240   64     
736    -32    
128    -96    
336    176    
-480   -208   
192    96     
-112   -208   
-96    -80    
-288   144    
336    48     
-1136  -64    
-128   0      
144    -80    
-96    -64    
224    -64    
0      -112   
-160   176    
96     160    
-32    0      
512    1344   
-304   -656   
-1984  -96    
1376   96     
-176   288    
-672   -112   
224    16     
16     -32    
352    -224   
-160   112    
-176   -32    
128    -384   
128    112    
-64    -1680  
32     -16    
-368   96     
176    -176   
-160   -48    
-416   144    
208    -64    
208    -224   
224    48     
352    -464   
-720   48     
368    -112   
208    624    
-448   -560   
-96    48     
368    -176   
-272   32     
-128   -32    
512    48     
-192   16     
128    64     
208    -144   
-192   64     
-224   64     
16     64     
192    -64    
-352   -80    
160    80     
320    -144   
-80    336    
-176   -224   
32     48     
-240   32     
-176   32     
-240   -192   
848    336    
608    384    
-2608  -96    
1216   -192   
1872   112    
-1280  -80    
-576   336    
640    176    
496    -32    
-272   128    
-320   64     
-944   -128   
64     128    
256    -64    
-176   144    
-368   144    
32     128    
400    -176   
-400   -16    
112    -336   
-368   -304   
0      -432   
-64    -160   
-416   -16    
1168   368    
-448   176    
-320   -240   
128    240    
-32    336    
-496   160    
-64    -288   
480    208    
-64    -32    
-608   -256   
-16    -96    
416    240    
-144   -112   
384    144    
-576   -1168  
-320   -656   
272    -48    
16     160    
-176   -16    
-416   -32    
464    672    
-384   400    
-128   -624   
496    -1024  
-352   480    
240    896    
48     -224   
112    -192   
-176   656    
1168   576    
-320   1600   
64     432    
96     -288   
-304   -240   
64     288    
-208   -112   
96     16     
-144   128    
-192   192    
320    256    
-160   -80    
-160   -128   
-80    -848   
-208   -144   
-32    224    
256    128    
-272   80     
32     80     
32     80     
-64    48     
-16    -32    
32     144    
-144   32     
176    -32    
-96    112    
-304   -144   
-320   176    
-320   -400   
848    -336   
96     448    
-128   -208   
-192   272    
192    -64    
80     -448   
-16    -96    
-224   256    
112    48     
-256   64     
16     0      
176    64     
48     -16    
-432   192    
208    -240   
256    -256   
-144   160    
-224   272    
-16    64     
144    -320   
-416   128    
128    128    
-112   176    
64     -112   
48     0      
192    256    
-560   832    
32     -144   
464    -112   
-224   -192   
-96    -48    
64     176    
-16    16     
-48    64     
192    160    
-176   -272   
-176   -176   
192    192    
0      160    
-96    112    
-256   432    
160    144    
-112   176    
192    -96    
-464   400    
-80    288    
400    560    
368    -128   
352    992    
-144   1184   
-608   720    
224    128    
-160   160    
-656   48     
-16    64     
-48    1280   
96     -368   
-160   -1232  
-160   -96    
336    192    
272    160    
-384   80     
128    -16    
-32    112    
128    80     
64     -432   
-272   -336   
-96    -160   
-176   -624   
1104   976    
1152   -64    
-928   64     
-96    160    
848    560    
48     0      
-784   400    
640    -464   
-16    -144   
-496   80     
368    48     
368    192    
-464   144    
-32    144    
384    -128   
-272   48     
-176   -272   
32     -48    
64     80     
-64    96     
192    240    
144    48     
-896   192    
-368   -656   
272    -144   
336    336    
-320   -96    
16     96     
-144   -176   
96     -176   
80     256    
-160   -208   
384    80     
400    80     
-160   -176   
-832   -32    
464    -368   
640    256    
-352   176    
-96    272    
112    64     
144    256    
224    -224   
-448   384    
160    -48    
144    112    
-192   -128   
272    880    
-1312  -496   
1120   -416   
1312   -240   
-1264  336    
-864   192    
976    32     
288    -288   
-704   96     
-144   192    
288    160    
32     272    
-368   -48    
-16    16     
-112   96     
-160   -784   
384    144    
96     80     
-64    112    
-32    -208   
176    1008   
400    -48    
-544   432    
128    -128   
64     -32    
288    -16    
-320   176    
-144   192    
304    336    
-48    -304   
160    -208   
-128   32     
112    -128   
0      48     
-240   -112   
-16    -96    
96     160    
144    -64    
-560   -416   
-544   -352   
544    -112   
-48    160    
48     -144   
-48    192    
-208   304    
112    -224   
32     64     
144    -64    
-432   -320   
224    0      
224    -192   
-384   -48    
112    -288   
656    -256   
-432   208    
-384   832    
1104   288    
-400   304    
-128   224    
704    16     
64     -560   
-224   64     
-144   -160   
240    96     
144    176    
48     16     
-64    80     
16     -224   
-144   -112   
192    48     
16     64     
-48    144    
-48    -160   
32     -32    
0      160    
208    -352   
-464   192    
208    0      
96     176    
80     16     
-128   208    
-448   -1936  
1984   16     
128    496    
-1392  16     
-16    80     
704    448    
-48    -368   
-96    608    
-112   368    
-144   -400   
272    -128   
96     -256   
0      192    
-16    -912   
192    64     
176    16     
-416   272    
256    32     
-32    48     
-144   -80    
-272   -80    
864    672    
976    32     
-1136  80     
-48    -160   
656    -32    
16     -240   
32     16     
-368   -176   
192    208    
-80    -256   
128    -16    
240    -48    
-208   144    
-336   -128   
496    128    
160    -16    
-464   224    
512    16     
-336   -1184  
336    16     
0      -224   
-192   144    
272    -64    
80     16     
-80    -16    
16     96     
-160   64     
304    176    
336    208    
-2224  128    
1360   528    
1920   -576   
-1488  -64    
224    96     
1120   368    
-592   128    
-80    144    
304    -448   
-176   160    
-128   -80    
224    224    
-32    -80    
-144   288    
448    -32    
-112   -144   
32     -1056  
64     -160   
48     -48    
48     32     
-208   -352   
896    592    
1232   304    
-944   192    
-272   32     
128    32     
320    -96    
224    208    
208    -544   
16     -400   
-112   -160   
96     -704   
96     0      
0      -256   
-112   -112   
320    -96    
112    16     
-720   32     
64     -16    
448    -80    
-112   16     
-544   -192   
592    -480   
336    -96    
-368   48     
-384   -96    
448    176    
-288   -224   
-576   -208   
304    -208   
352    -1264  
-80    -80    
-112   96     
48     176    
272    -640   
-128   144    
848    -240   
-240   96     
432    224    
-320   208    
-480   -80    
48     -112   
192    -32    
128    -352   
-16    208    
128    -1232  
-208   48     
176    -1616  
416    -480   
-816   -1392  
1136   -2336  
432    352    
-960   976    
352    320    
768    -32    
-144   1040   
-816   1152   
-416   -272   
480    -400   
-304   0      
0      0      
64     -208   
272    -848   
32     -256   
-192   -352   
-336   112    
48     320    
96     416    
224    544    
-160   848    
-160   160    
0      -208   
-336   448    
-352   112    
-48    -464   
288    -304   
384    -80    
-208   -272   
16     880    
32     -80    
128    144    
256    256    
-96    352    
0      224    
-80    208    
272    368    
240    816    
16     144    
-48    -64    
-672   112    
160    -176   
0      96     
336    528    
-624   -240   
-128   -2064  
224    -528   
96     -656   
16     -656   
48     -48    
352    -80    
-576   -480   
304    -464   
-192   -640   
-96    -992   
96     -240   
128    -400   
-80    96     
16     832    
208    -16    
-160   -880   
48     320    
16     -80    
-32    112    
128    -336   
48     -96    
48     -400   
352    -688   
416    -208   
-192   304    
112    -32    
-288   -32    
336    -16    
64     -112   
-176   128    
208    -400   
-80    -192   
144    -352   
384    -16    
-352   32     
-112   -48    
-272   1040   
720    -224   
-672   240    
-64    208    
160    -208   
32     96     
128    176    
-32    -288   
0      64     
-368   -448   
192    32     
-384   208    
-912   -80    
48     0      
240    16     
-208   352    
128    512    
-48    544    
-128   -32    
224    -720   
-912   -576   
128    176    
112    96     
-64    144    
-64    -320   
240    176    
-256   1024   
-96    48     
240    -128   
-208   32     
-336   208    
240    0      
-128   -144   
-224   -288   
144    48     
0      -128   
-272   -336   
-112   176    
48     480    
-32    -368   
-288   -64    
-320   112    
96     240    
480    224    
-592   0      
-448   -160   
-256   -128   
544    -96    
-272   -784   
1936   -608   
-1088  704    
-688   -320   
960    -464   
-464   -352   
-224   64     
432    320    
144    -48    
-320   48     
-128   96     
112    48     
80     16     
-256   -192   
-528   -48    
-16    -288   
240    208    
-112   -144   
-224   160    
0      0      
96     48     
-896   -352   
880    -448   
496    -1040  
-1760  416    
768    608    
272    -640   
-784   144    
-64    80     
400    0      
-512   -64    
48     96     
-112   -160   
-48    64     
-416   32     
432    64     
160    -16    
-608   -80    
-32    80     
272    16     
-96    144    
208    496    
-224   80     
-320   -224   
144    112    
-80    176    
-112   96     
-192   -32    
-96    -96    
-16    -32    
48     -48    
176    256    
-16    416    
256    -48    
-96    192    
160    80     
-416   -32    
-128   176    
128    -432   
-368   144    
112    160    
224    96     
-608   -16    
-192   16     
-192   -192   
624    464    
768    -64    
-704   128    
-288   -240   
784    1360   
608    3840   
256    96     
-1008  112    
160    -560   
736    0      
-320   -64    
-304   192    
432    112    
-80    144    
-224   384    
160    32     
-224   80     
304    -192   
-16    160    
-176   48     
176    192    
272    32     
-176   64     
-672   -352   
160    432    
304    -160   
-480   336    
704    16     
288    144    
-944   -160   
-368   368    
1152   320    
-816   -224   
-144   368    
400    -16    
-192   224    
-64    176    
0      176    
-160   48     
224    448    
64     32     
-80    -272   
48     48     
-16    80     
-16    16     
272    192    
-160   16     
144    -32    
-400   -64    
-480   -48    
432    176    
272    176    
-208   400    
-400   48     
272    160    
0      -496   
624    176    
288    176    
-896   352    
208    448    
512    192    
-464   208    
-576   304    
704    48     
-208   96     
-144   96     
-64    -96    
-16    144    
-80    0      
96     160    
128    -752   
-288   -288   
176    1200   
-144   144    
160    -208   
176    16     
-272   304    
-16    64     
176    -64    
0      -208   
64     80     
192    352    
-272   -256   
0      64     
0      288    
832    1968   
2144   160    
-1328  464    
-704   384    
592    -384   
272    208    
-416   -368   
0      -272   
256    208    
-16    -64    
272    80     
-144   16     
-32    112    
64     960    
384    -384   
-400   -256   
32     224    
-112   608    
176    240    
-32    -80    
-560   848    
1680   -240   
-384   -240   
-816   -48    
640    -32    
304    400    
-192   0      
-96    464    
-80    288    
-16    -336   
192    128    
208    -16    
-336   176    
16     80     
416    96     
-48    0      
-336   320    
304    32     
0      144    
-16    0      
-48    96     
-16    288    
80     112    
-32    64     
80     80     
-16    224    
-96    464    
160    128    
-192   -384   
-832   -1168  
512    80     
784    -304   
-672   48     
992    320    
-368   16     
-768   64     
608    -144   
368    128    
-240   160    
-256   0      
128    -144   
-80    -1424  
64     80     
16     128    
-96    240    
416    144    
176    240    
-528   80     
0      112    
32     -496   
1040   832    
1104   176    
-1776  448    
800    -336   
832    -64    
96     896    
704    -896   
-48    96     
192    -1536  
-160   32     
16     256    
240    144    
-336   -192   
-240   32     
544    48     
80     160    
16     -144   
48     -192   
0      -48    
-432   48     
112    480    
-224   752    
480    -464   
-464   -1024  
768    112    
80     -592   
-848   224    
320    352    
384    48     
-400   128    
-128   160    
96     128    
-144   16     
192    -256   
416    -160   
-240   1232   
272    -272   
-112   -608   
-416   -320   
0      160    
256    176    
208    80     
-704   320    
-400   -48    
608    112    
512    -48    
-928   64     
-288   -192   
608    192    
-576   1264   
96     512    
-448   -1552  
224    -352   
112    -336   
-32    -816   
-384   -544   
48     48     
288    -160   
-16    784    
-240   -304   
-320   64     
208    32     
32     -16    
-80    192    
144    -400   
224    -320   
0      -32    
-224   272    
240    96     
96     32     
-16    -1088  
-176   32     
368    -160   
-224   576    
-96    704    
224    -16    
80     -2944  
-128   368    
144    208    
320    -608   
-80    336    
-320   304    
400    -192   
176    -880   
-544   -80    
240    -80    
432    -1200  
-112   -624   
-288   560    
240    -592   
352    -432   
0      -1392  
-160   0      
224    -480   
64     64     
144    -560   
-144   -416   
48     144    
-48    -400   
64     -1344  
-448   304    
352    -1136  
192    -1456  
48     -864   
-272   -752   
-96    -944   
240    432    
-48    176    
112    368    
-48    -64    
128    -592   
192    -112   
32     224    
-80    288    
128    416    
192    -144   
144    -1152  
-208   336    
-176   144    
48     -176   
160    -224   
-160   400    
64     256    
-16    -576   
-48    -560   
368    -1328  
528    -448   
-416   -112   
-400   224    
448    752    
432    640    
-352   32     
-544   608    
96     -64    
-64    -800   
-112   -544   
192    16     
-320   304    
-112   -48    
144    -112   
32     -192   
144    192    
16     128    
16     32     
-288   -192   
96     128    
256    96     
-176   -32    
-144   512    
224    -352   
-512   -224   
336    -1152  
-880   -992   
144    112    
416    240    
-176   -144   
-96    48     
16     -304   
-80    176    
-32    560    
352    -32    
-144   -144   
-64    224    
144    -32    
-80    -32    
144    -96    
32     -80    
-368   416    
192    272    
336    368    
-208   -224   
-64    16     
16     -480   
112    64     
-128   -688   
-64    144    
32     -144   
-48    496    
-1280  -384   
1632   224    
1072   -432   
-1504  -80    
-160   -16    
1104   64     
-336   496    
-448   336    
48     320    
384    -208   
-528   0      
0      -512   
320    208    
-208   -48    
-192   208    
48     -80    
-32    16     
-240   -48    
416    -16    
-16    -48    
448    752    
-1296  -608   
-784   256    
1200   -496   
-768   -192   
-96    48     
32     -272   
352    256    
-128   -144   
-336   -64    
128    64     
96     48     
-48    64     
32     -256   
112    288    
496    -80    
-336   -96    
-80    -320   
176    -64    
-16    -144   
-208   -176   
-176   160    
528    64     
-528   16     
-1152  128    
400    -64    
-224   208    
-912   96     
448    64     
448    32     
-192   -208   
-544   -80    
-448   -256   
32     -32    
-384   -256   
256    -736   
-448   -304   
272    352    
64     272    
32     -48    
-112   -16    
-1136  112    
-16    192    
144    0      
-192   48     
544    64     
-48    96     
-720   -64    
464    -1008  
-1824  768    
192    -32    
-208   480    
224    -416   
400    96     
-896   -144   
-272   160    
384    -176   
0      144    
-944   32     
16     80     
224    32     
176    128    
-80    -128   
64     32     
0      -48    
272    -16    
-96    48     
272    -128   
-1264  -64    
832    -80    
-48    -16    
-464   -48    
576    -96    
-160   -16    
-816   64     
208    48     
80     96     
0      224    
-192   0      
128    96     
160    -16    
-32    -48    
64     -48    
48     -272   
16     16     
-80    112    
80     96     
-176   48     
80     144    
0      -16    
-304   64     
224    144    
-144   112    
80     176    
128    144    
16     96     
-160   -144   
-96    48     
208    16     
-96    48     
-240   -272   
16     -96    
448    -208   
640    -128   
-48    160    
-256   272    
-416   512    
160    -48    
144    48     
-112   256    
-64    48     
-48    -48    
96     -176   
-224   32     
-16    160    
112    -80    
144    896    
-384   560    
0      -208   
160    -96    
-112   112    
-256   192    
-384   -80    
144    -144   
-224   272    
320    224    
-240   -112   
-64    16     
224    16     
-848   1648   
1696   -736   
-832   560    
-736   -64    
448    -192   
208    64     
-736   240    
320    -608   
64     -224   
112    -96    
-112   160    
-80    -144   
112    160    
32     -368   
112    -288   
-112   160    
48     0      
-96    144    
-128   -80    
96     -96    
-48    -944   
-384   464    
528    -256   
-176   736    
-16    368    
-96    64     
80     160    
-64    -224   
0      -48    
64     368    
480    720    
-672   400    
-128   -272   
560    -32    
16     -384   
-112   -336   
-304   16     
208    768    
400    48     
-224   -112   
-32    96     
256    160    
48     272    
-48    -48    
16     -48    
-80    48     
128    160    
-16    64     
240    96     
944    832    
-2112  992    
-560   272    
864    -288   
192    224    
-112   336    
288    128    
64     112    
-304   16     
272    -112   
272    80     
-336   0      
256    16     
80     -448   
-352   -64    
112    -96    
128    192    
-80    336    
224    240    
48     272    
-144   160    
-288   -192   
2736   -144   
-720   736    
-1152  160    
992    16     
928    752    
-1024  1248   
-480   656    
640    384    
-32    224    
-192   128    
32     48     
288    160    
64     192    
112    352    
112    -240   
96     560    
800    448    
-304   448    
-160   240    
192    -80    
384    -128   
-128   512    
624    272    
-352   -1072  
-640   -432   
336    192    
160    16     
-128   112    
224    288    
-96    112    
-16    -384   
-608   -1008  
-64    -464   
336    464    
160    -144   
480    -400   
-176   -848   
-464   -272   
16     -176   
-112   80     
-48    -144   
288    336    
80     -384   
-464   -368   
-224   -192   
-96    112    
-80    192    
128    160    
-224   -2144  
-1536  -400   
832    464    
480    160    
-368   -128   
-704   -144   
176    784    
368    -864   
192    192    
-416   304    
-64    336    
16     -192   
208    272    
-48    -32    
-368   288    
240    -80    
-256   -304   
-192   -64    
256    240    
-64    352    
-96    144    
224    -64    
-352   -144   
-272   624    
272    0      
240    176    
-656   256    
432    496    
352    304    
0      128    
-288   288    
-96    80     
400    256    
144    -224   
-528   -144   
288    944    
288    544    
-64    976    
160    992    
-32    864    
128    -480   
128    -480   
96     400    
-208   544    
-64    -336   
512    224    
192    800    
-944   -864   
-128   -880   
880    -256   
592    1184   
-1488  -240   
-368   208    
1328   656    
48     384    
-880   -464   
208    992    
432    272    
0      -160   
32     80     
224    1088   
-96    304    
-48    -112   
-48    -176   
-16    -160   
-160   208    
320    -240   
-144   -752   
-304   -352   
432    352    
64     48     
-96    -128   
-48    -1440  
128    288    
0      256    
-144   -32    
288    160    
112    480    
-160   -288   
-176   -144   
784    1440   
672    -176   
-1136  -848   
-432   736    
656    816    
32     320    
-368   16     
160    -384   
240    -480   
-128   -480   
176    -48    
0      160    
-32    336    
-48    192    
368    80     
-368   480    
-160   32     
224    208    
160    -96    
-144   176    
-432   -1008  
592    -224   
224    0      
-464   -176   
544    -128   
-336   352    
-224   -496   
112    -592   
224    -80    
-96    16     
96     -672   
192    -320   
-176   32     
128    -16    
96     -16    
-288   96     
-112   -16    
320    -48    
48     -832   
-176   64     
208    -160   
-256   32     
-112   160    
-144   -752   
-160   -192   
256    -1584  
64     -80    
-224   -1328  
0      -304   
-128   -624   
-1392  -624   
1632   -128   
0      -320   
-800   -512   
976    -592   
160    -224   
-320   -368   
-800   48     
272    -272   
32     112    
16     -432   
-64    128    
256    48     
-336   64     
192    -1248  
64     -272   
-608   -144   
416    80     
192    -64    
-352   -480   
1120   592    
528    -192   
-1008  128    
400    -64    
-64    -16    
-896   112    
448    -64    
816    -496   
-400   64     
-320   -1024  
-80    64     
416    16     
64     80     
-32    0      
-16    64     
-128   -352   
-16    64     
-112   64     
176    -160   
-1120  -16    
-256   -224   
208    -496   
-400   -368   
-912   128    
640    80     
240    304    
-288   -272   
-176   -160   
304    -352   
384    80     
-480   -32    
-224   368    
144    352    
-64    -48    
-320   -112   
80     -32    
160    272    
-48    48     
-16    -16    
80     -160   
-128   96     
16     -336   
176    112    
64     -304   
-592   0      
160    112    
-128   -16    
-144   -240   
864    -3952  
-3024  -368   
1168   1248   
448    96     
-400   496    
32     -192   
-336   -64    
320    -32    
16     -720   
-368   -64    
160    144    
-48    -224   
-448   112    
256    -160   
-128   0      
-144   64     
-320   128    
-16    -80    
240    736    
-192   80     
-96    608    
432    -464   
-512   -64    
-64    -176   
16     64     
64     96     
64     -272   
32     -208   
64     -208   
-304   -48    
-32    96     
240    -64    
112    -32    
-288   -176   
-240   -272   
240    -16    
128    96     
128    368    
-288   -80    
80     128    
96     -112   
-224   64     
48     -80    
224    208    
16     32     
-16    0      
128    16     
-64    -144   
-32    400    
96     192    
-64    256    
-528   544    
992    -80    
-896   -48    
-160   -16    
336    -128   
-176   -736   
-832   -544   
320    -176   
32     0      
160    32     
-160   -48    
-112   64     
-48    160    
-368   64     
64     16     
-544   -352   
-80    416    
-112   96     
-224   576    
-16    464    
-64    176    
-112   96     
32     -16    
16     48     
0      144    
528    -272   
-272   272    
16     544    
-16    -96    
656    -544   
-1872  1648   
992    -256   
592    96     
-160   -64    
-704   0      
112    -192   
496    -32    
-544   -464   
0      0      
48     128    
80     80     
128    -64    
16     32     
-368   112    
256    256    
32     128    
-336   128    
-128   -416   
96     -64    
128    -592   
-304   0      
32     64     
-32    32     
320    496    
-432   -448   
-112   -128   
-1024  -96    
128    64     
-160   160    
-112   -224   
144    -336   
256    48     
-16    432    
-64    80     
288    0      
-336   -144   
-208   272    
48     304    
64     -256   
-112   64     
-16    -48    
-336   -16    
-80    16     
208    112    
-16    64     
-16    0      
-96    64     
-224   176    
544    528    
480    -144   
-1776  -112   
1232   976    
-192   656    
-816   240    
32     336    
496    -336   
-224   32     
-416   -176   
96     -80    
368    48     
-240   -16    
-384   208    
80     -64    
112    -16    
-48    -80    
-272   96     
48     -544   
-176   160    
0      -160   
16     304    
2576   80     
-1056  -32    
-1424  320    
192    400    
624    688    
-352   1184   
272    592    
-96    -992   
-176   -496   
288    160    
16     208    
-336   -80    
96     -128   
80     -208   
-80    -48    
80     -80    
-240   -448   
0      144    
-144   256    
208    272    
112    -16    
-336   64     
432    928    
1088   -96    
-1184  -1344  
-544   -1056  
176    -720   
-16    -144   
176    336    
-352   -176   
544    -368   
-256   160    
192    1232   
-432   -64    
-352   304    
368    -320   
-208   352    
384    -208   
-192   192    
-160   112    
0      -400   
-336   -64    
-208   -800   
-112   -352   
240    336    
80     624    
-128   384    
112    256    
-16    -1936  
-1776  -208   
96     192    
1104   112    
-128   -1568  
-1184  -1104  
-16    -480   
480    576    
-240   336    
16     64     
16     -32    
-240   16     
48     496    
80     80     
48     -96    
-64    144    
192    192    
112    208    
-96    320    
16     -208   
-48    32     
176    144    
-176   -32    
-224   384    
608    512    
96     816    
144    256    
-144   544    
0      736    
96     -272   
128    -848   
-416   -512   
80     320    
432    176    
80     192    
-256   448    
192    144    
-16    240    
80     288    
80     96     
80     -64    
208    144    
-80    336    
144    912    
288    1232   
80     800    
112    192    
-96    960    
32     528    
-80    112    
608    1216   
-368   128    
-704   -768   
64     -672   
496    -1328  
48     -384   
-272   -400   
224    -336   
128    64     
32     448    
112    416    
16     208    
-144   400    
-192   48     
320    -80    
192    448    
-320   624    
112    800    
112    960    
48     496    
272    48     
-96    -96    
-192   -176   
208    -240   
-16    -288   
272    -512   
-384   -592   
-112   -896   
112    -352   
-416   -1136  
1040   -1392  
-304   704    
-384   -96    
256    352    
-32    -96    
112    -672   
-160   192    
144    -480   
-144   160    
-32    -544   
128    176    
112    -96    
48     320    
-336   224    
384    96     
-144   384    
-112   -32    
48     -320   
96     160    
-64    64     
-576   -512   
192    -32    
704    -144   
-464   16     
464    -288   
256    48     
-128   240    
-368   288    
384    0      
256    -128   
-256   -192   
32     -160   
112    -112   
64     176    
-32    -16    
240    192    
-80    80     
144    -16    
48     160    
-176   -576   
-16    240    
336    -2512  
32     192    
-192   112    
-272   48     
320    224    
96     48     
-304   64     
96     288    
-752   1040   
3152   784    
-240   144    
-992   -32    
720    112    
-720   -64    
-288   96     
592    -176   
16     64     
-256   -528   
96     96     
256    80     
-240   64     
-192   -128   
512    272    
128    -32    
-208   176    
80     32     
224    -32    
-160   0      
-160   -608   
496    1040   
1744   0      
-1536  160    
448    -224   
1120   128    
-832   96     
-64    -464   
256    -144   
128    256    
-176   64     
128    -320   
192    96     
-96    -640   
80     112    
32     -16    
144    -48    
-320   80     
320    -112   
-96    -64    
160    176    
-352   -128   
-48    112    
112    176    
-128   0      
288    960    
-96    96     
-96    -256   
-544   80     
176    304    
224    -80    
-256   32     
-128   -176   
272    -48    
-16    -192   
-48    32     
112    -224   
864    -1280  
112    -96    
-288   -208   
0      -1440  
64     48     
96     -592   
304    -48    
-96    144    
-432   -64    
112    80     
128    16     
-112   -816   
2224   336    
-2032  448    
64     -352   
1568   0      
-304   -32    
-1328  -64    
416    -368   
496    -16    
-688   -720   
-576   -96    
800    -400   
-176   -80    
48     176    
80     -48    
-368   -176   
288    128    
256    -240   
-144   48     
208    176    
-112   -224   
-32    320    
304    -240   
-448   -192   
0      -16    
464    16     
192    -272   
-16    304    
-48    80     
0      320    
352    -448   
-240   48     
-16    -16    
224    32     
288    -80    
-512   16     
336    208    
80     96     
-432   256    
144    -16    
-256   160    
256    -64    
-80    -272   
208    -1408  
-96    -144   
-160   208    
0      96     
608    -80    
-192   -128   
-336   -176   
192    -544   
-64    16     
-128   -272   
224    -352   
112    -112   
-160   144    
16     -544   
304    -592   
112    -992   
-816   -560   
192    -160   
288    16     
-128   48     
32     128    
-192   -576   
-336   -256   
-48    0      
336    -576   
288    336    
-288   -80    
48     96     
240    -448   
128    -64    
16     -64    
16     128    
96     -304   
0      656    
112    384    
-16    416    
-128   -224   
96     -96    
16     -32    
176    -1328  
-48    -144   
320    1120   
-112   672    
-432   -160   
-208   256    
512    480    
-224   -16    
-128   -1152  
176    256    
144    -80    
-48    48     
-80    -96    
-32    176    
176    16     
16     -80    
-224   208    
-16    240    
48     272    
624    416    
-832   784    
80     -656   
560    256    
-400   -160   
-240   32     
304    144    
176    128    
-240   0      
16     128    
-224   -32    
-128   48     
64     0      
32     96     
16     144    
208    -272   
-256   -64    
-48    224    
288    224    
-256   -112   
-128   0      
16     0      
208    32     
208    16     
128    -32    
-544   80     
304    96     
96     -64    
0      -16    
-528   -288   
752    -320   
800    592    
-720   -96    
-112   0      
-128   -304   
-544   -272   
-432   992    
-608   -544   
-64    -352   
-96    176    
64     560    
240    48     
-336   -128   
-32    -416   
304    512    
-672   80     
-464   -400   
32     -1056  
608    1232   
-192   -176   
-832   -336   
-752   736    
1968   -704   
-368   352    
224    -144   
-176   -416   
-320   -608   
-288   752    
960    1424   
128    496    
-112   736    
288    288    
-352   640    
128    304    
320    400    
-32    -176   
-432   544    
528    -48    
64     -48    
-448   -160   
16     -64    
-816   -368   
-96    272    
192    320    
-288   272    
80     -384   
-288   -1040  
256    -1584  
32     -368   
-112   208    
304    0      
-144   16     
0      944    
96     0      
-752   -112   
112    -112   
928    480    
704    672    
-704   -160   
16     352    
176    -416   
384    864    
-464   48     
-160   320    
-32    -224   
48     -80    
-112   -80    
-208   -432   
0      32     
-272   -2192  
-1152  -512   
752    576    
304    -64    
0      -304   
-688   368    
112    0      
304    400    
144    240    
-80    -160   
-384   160    
-48    -48    
592    240    
32     -32    
-528   16     
160    48     
288    128    
112    -352   
64     -432   
-480   752    
336    496    
-160   272    
224    -80    
144    16     
-560   320    
368    192    
-160   64     
80     32     
224    144    
-304   704    
-32    -32    
16     112    
-128   0      
288    64     
-256   -32    
0      48     
-688   -240   
-16    -576   
-48    160    
32     112    
-32    112    
-80    240    
160    304    
-112   32     
-160   192    
224    -960   
-512   -304   
-48    320    
704    384    
-48    -16    
-400   -448   
400    -352   
-208   128    
-624   -32    
144    64     
128    336    
320    304    
-96    160    
-208   16     
48     16     
112    80     
-80    32     
80     -80    
0      80     
-208   -80    
208    208    
-64    32     
-240   -224   
288    192    
224    48     
-304   -176   
32     160    
208    0      
-16    80     
128    -608   
-880   432    
336    368    
240    -176   
-48    448    
-432   -528   
1648   1536   
1568   96     
-1488  -48    
-416   224    
624    64     
-368   144    
240    -336   
240    176    
-64    16     
-160   96     
416    -128   
-160   352    
-128   208    
-80    144    
288    -16    
64     -64    
-160   320    
128    -64    
-176   48     
64     160    
16     1088   
1600   64     
-128   288    
-1360  0      
288    112    
784    128    
-400   -240   
-416   176    
144    16     
64     -48    
-32    48     
16     -80    
0      96     
176    -48    
32     176    
-16    176    
-304   48     
64     -48    
48     64     
128    16     
-64    224    
128    16     
-304   0      
368    128    
48     32     
-288   176    
336    80     
-128   64     
-32    -560   
432    848    
704    -320   
-896   192    
-320   -48    
736    224    
384    32     
-240   48     
-160   96     
48     -32    
-272   112    
368    144    
48     96     
-288   -32    
64     224    
528    80     
-448   112    
-112   160    
416    32     
-32    160    
80     128    
-144   -224   
816    976    
1072   -96    
-1472  -128   
336    48     
1088   128    
-480   -784   
-16    288    
864    -64    
-256   64     
-656   128    
288    96     
176    0      
-112   80     
-48    0      
-80    112    
144    -224   
96     48     
192    176    
-240   0      
-176   32     
-16    -2128  
-800   48     
528    -16    
256    96     
-80    -112   
-224   224    
-32    352    
640    -240   
-128   112    
-80    144    
-160   -64    
0      -48    
-176   0      
240    288    
-560   288    
-32    -336   
352    -64    
144    -672   
-48    64     
-80    80     
96     128    
-224   112    
112    160    
368    -80    
-784   320    
-160   96     
416    96     
528    928    
-224   -48    
-2352  -128   
1392   -144   
1664   256    
-576   -944   
-864   80     
304    144    
1072   368    
-1008  -288   
-48    272    
784    -144   
-176   128    
-368   -80    
160    -160   
-16    -48    
288    208    
192    -64    
-176   16     
224    -352   
-416   -464   
176    -80    
112    -288   
272    128    
272    -176   
-368   240    
112    -48    
-384   208    
208    112    
64     528    
304    272    
-512   -448   
160    -240   
480    -432   
-64    368    
-736   -400   
256    320    
592    640    
-720   256    
-144   -304   
352    208    
80     -64    
48     -48    
80     -144   
-32    -352   
208    112    
192    -1024  
32     -128   
-288   80     
112    144    
208    -672   
0      -16    
-48    352    
1216   224    
-736   256    
16     176    
-80    272    
304    2160   
672    928    
-320   -1168  
32     16     
160    -48    
-32    128    
-80    -32    
208    272    
-272   -144   
208    -192   
208    -1584  
-336   112    
256    304    
256    240    
-48    80     
-144   -400   
-32    -672   
240    -528   
-256   -1152  
80     -208   
304    16     
-144   320    
-16    208    
-32    -80    
-320   -192   
624    -416   
176    0      
-32    -176   
-352   -80    
160    -96    
-496   -304   
32     -224   
-32    -48    
-48    48     
48     32     
32     -848   
-48    -240   
144    192    
-80    -80    
320    64     
-176   144    
-48    -384   
-32    -32    
32     -192   
-352   -352   
-224   0      
-16    48     
-16    32     
528    0      
-16    -96    
-208   448    
32     -144   
80     -672   
-32    -80    
0      -64    
32     48     
48     -112   
96     -32    
-144   -16    
224    -48    
32     32     
48     0      
-448   -16    
-48    -48    
-208   192    
304    16     
-144   64     
-272   368    
160    208    
144    -608   
-336   64     
192    48     
-32    96     
144    736    
880    -384   
-1648  -160   
832    -416   
-848   -432   
-400   -416   
-128   -96    
704    -720   
288    480    
-208   -320   
-48    -16    
208    -384   
32     192    
-48    416    
-288   -160   
160    -160   
352    96     
-64    -144   
-576   -352   
-128   -320   
208    -816   
1232   832    
-368   -496   
-1040  128    
880    -112   
-144   960    
16     -208   
896    608    
704    208    
-544   -48    
-304   -16    
176    -192   
144    -112   
208    -272   
112    208    
-96    128    
48     -576   
688    -576   
-656   160    
-128   -256   
-576   144    
240    16     
176    -352   
-480   -1264  
224    -528   
192    1072   
-288   256    
-464   160    
-208   64     
-576   64     
32     -208   
-544   128    
80     -176   
-16    0      
112    -48    
368    0      
160    -288   
128    224    
160    -288   
-352   208    
-32    192    
64     -32    
272    464    
-640   320    
-48    112    
-160   -48    
-288   96     
224    32     
-272   176    
-256   -2320  
1632   -1360  
560    224    
-1632  240    
-1168  304    
1744   272    
-16    -320   
-768   448    
224    -352   
192    192    
288    -160   
-192   144    
-80    -48    
-112   -176   
48     144    
-320   -304   
-352   176    
320    -112   
-544   -624   
336    -1152  
0      240    
-240   384    
-144   320    
-736   -160   
304    48     
512    -32    
-128   144    
-464   0      
192    -80    
464    112    
-384   0      
-160   352    
0      -64    
352    -192   
-304   -48    
-16    -48    
256    144    
224    -64    
-256   -48    
-320   224    
416    112    
16     -80    
-48    48     
-256   80     
256    512    
-112   -336   
-272   -96    
400    16     
-48    176    
-448   96     
288    80     
448    1088   
-528   288    
-544   160    
-400   -144   
32     -16    
-384   96     
320    64     
128    0      
16     160    
-16    -144   
-48    0      
-144   -96    
160    64     
-48    96     
-96    -16    
-16    -288   
-352   -320   
96     320    
-128   -96    
-64    -112   
32     32     
48     160    
-320   -256   
64     16     
-16    -112   
-176   160    
-16    -448   
16     128    
48     208    
480    2112   
-304   -1568  
-1696  288    
592    -160   
688    -560   
-1104  320    
464    384    
1200   448    
-832   -128   
-288   -160   
368    320    
96     400    
16     -80    
-352   -16    
48     -208   
96     -48    
-192   464    
-160   -240   
64     -128   
208    224    
-256   -672   
704    -368   
-176   416    
-1392  -112   
448    128    
-64    0      
-416   128    
512    336    
160    -48    
-368   144    
48     128    
256    112    
-128   16     
-384   -48    
-192   64     
448    48     
80     -208   
-528   48     
272    -272   
-112   384    
176    32     
-112   272    
-32    0      
112    240    
32     -144   
-384   64     
0      16     
272    128    
-48    48     
-448   -464   
1152   -896   
-416   96     
-336   -160   
-48    -304   
768    128    
-432   128    
-176   32     
-192   -176   
-64    -336   
0      192    
64     128    
16     112    
16     16     
-176   112    
544    128    
-160   192    
-128   64     
192    -48    
-416   -256   
-32    48     
-64    -512   
1280   944    
-304   64     
-1232  0      
896    16     
32     96     
-368   96     
256    -32    
752    16     
-544   112    
-192   112    
192    -80    
80     128    
16     96     
144    48     
-176   80     
96     32     
112    -96    
-16    144    
-32    16     
48     96     
-128   -416   
-800   144    
1440   -64    
-592   80     
-176   256    
592    96     
-448   0      
-208   240    
432    80     
80     16     
-480   -16    
-16    32     
80     -160   
224    32     
-384   -64    
352    -176   
-448   336    
224    80     
128    112    
64     -112   
32     416    
384    48     
-160   80     
128    -80    
-32    -160   
-192   272    
96     48     
-304   400    
1248   1840   
-992   2112   
48     -160   
816    -176   
-320   16     
-544   -112   
864    64     
448    -592   
-560   192    
144    48     
352    80     
-144   144    
-48    208    
80     80     
-32    -48    
144    -16    
-112   48     
16     16     
-112   -368   
384    -448   
-64    -208   
-240   112    
-144   80     
672    -720   
-496   32     
-288   -48    
400    -480   
-240   -624   
-32    -528   
48     448    
0      160    
48     224    
288    368    
-48    368    
-304   -32    
32     -304   
176    272    
224    176    
176    -1024  
-96    -128   
96     -32    
-192   32     
16     -128   
-16    -656   
-208   672    
224    928    
-96    608    
288    416    
-192   -752   
-64    336    
32     -32    
-144   -976   
224    -256   
192    -1072  
-272   -464   
384    480    
-80    352    
-192   64     
-160   192    
240    16     
176    64     
-256   -32    
80     192    
32     384    
-304   416    
16     32     
32     -48    
80     48     
480    -336   
-176   48     
-32    -128   
160    48     
256    16     
-80    176    
16     144    
144    64     
-144   -480   
-256   -96    
128    176    
160    176    
-432   -400   
880    -1248  
48     432    
48     -672   
-576   160    
208    -256   
144    -64    
-176   -16    
-288   336    
144    144    
32     -160   
112    -144   
48     160    
144    176    
-160   160    
48     32     
240    -336   
-16    -176   
16     112    
-96    272    
688    -128   
-912   672    
272    -624   
528    -32    
-192   -112   
-208   96     
368    -384   
128    -128   
-176   352    
112    112    
32     96     
-192   -144   
128    32     
32     -256   
0      48     
32     -560   
64     -144   
0      -768   
64     368    
-16    416    
144    -16    
176    -128   
-96    96     
-144   16     
192    352    
32     0      
160    -528   
-32    64     
-112   -192   
-192   -1024  
2144   -912   
-704   880    
-1136  -624   
496    -160   
672    160    
-96    464    
128    688    
-80    288    
-144   -208   
240    -880   
320    -176   
-144   -560   
-304   240    
560    -192   
208    192    
-336   -192   
-80    -144   
544    -336   
-144   160    
0      176    
-800   -1232  
832    -384   
800    -1376  
176    736    
1296   48     
-400   -2176  
576    0      
-432   192    
-224   -272   
416    144    
48     -32    
-240   112    
-320   -320   
432    -240   
416    112    
-368   0      
-16    -96    
192    64     
144    -208   
-208   -160   
-144   -976   
1056   1216   
208    -880   
-960   224    
176    224    
96     -784   
-688   -320   
208    96     
448    -48    
-320   -336   
-336   -48    
0      -80    
256    128    
304    208    
-224   -32    
-832   400    
-192   -592   
-816   144    
32     48     
144    -832   
-160   -128   
272    64     
-80    48     
-208   208    
112    -32    
64     -224   
96     -304   
-352   -160   
128    -656   
400    736    
880    32     
-1216  -160   
-752   -256   
992    -176   
432    -208   
-560   -112   
-112   -144   
256    -256   
-208   112    
-96    0      
-176   0      
352    0      
-128   -16    
48     0      
-128   -112   
-176   -336   
-176   -336   
320    624    
352    -176   
-576   176    
208    -32    
736    -1024  
0      -80    
-864   -48    
576    48     
-352   -64    
160    -208   
-272   64     
208    -224   
-112   -112   
-256   -32    
-160   192    
-240   -224   
-112   -64    
176    -560   
144    336    
160    -848   
-720   208    
416    32     
384    -96    
-544   -96    
0      -384   
-80    128    
240    -256   
-432   48     
176    0      
-432   112    
128    -48    
-144   -32    
16     -144   
368    112    
-432   -160   
592    -128   
-496   -1488  
-368   -288   
-112   -224   
224    -64    
-112   -96    
-80    96     
192    -16    
-128   32     
-160   -112   
96     -176   
-64    -32    
48     544    
128    288    
-304   -448   
208    -80    
-48    -1088  
-96    -112   
256    320    
112    32     
-320   -48    
-16    -48    
336    -256   
-48    -592   
-640   -80    
192    272    
96     -224   
1248   -848   
-1280  432    
-336   -560   
240    192    
-176   48     
464    800    
544    416    
-464   -208   
240    -416   
-64    240    
-48    -96    
432    -208   
-80    528    
-432   64     
336    16     
-144   -352   
0      256    
-736   -192   
-112   80     
-128   -880   
1024   -288   
-336   336    
-592   32     
496    -192   
-96    96     
128    480    
-192   32     
-48    16     
-128   -128   
64     80     
-544   -304   
352    80     
-448   -80    
-80    112    
320    80     
-400   160    
336    352    
-704   176    
-96    64     
192    96     
-16    -128   
-176   128    
64     -64    
-16    16     
96     48     
-384   48     
144    112    
64     80     
-1088  -1856  
1440   544    
4160   160    
-1216  -112   
-1120  -48    
1440   -48    
-560   160    
-656   368    
-784   16     
192    224    
-400   -160   
80     160    
288    -48    
-16    144    
-240   112    
688    96     
-208   128    
-320   -80    
64     32     
448    48     
-32    32     
160    1424   
-336   -608   
-2208  -400   
1200   -160   
1072   -176   
-672   304    
-624   -192   
512    64     
16     -16    
-272   -128   
-144   64     
144    496    
544    -32    
-80    256    
-400   -32    
-416   -16    
448    80     
-464   144    
128    16     
160    -176   
-16    -16    
-416   -528   
352    -352   
-112   528    
0      -192   
-112   1392   
-960   80     
-144   -48    
-176   -112   
-352   -144   
144    160    
272    160    
-16    -32    
-272   -496   
-1104  32     
400    -16    
368    384    
-544   288    
80     64     
304    -496   
-384   192    
0      -128   
-160   -32    
-112   208    
-144   -336   
-368   -144   
-32    80     
-240   -144   
400    -32    
432    2224   
-608   1296   
-32    -80    
352    -80    
-656   176    
-320   240    
864    224    
192    -112   
-432   1408   
368    416    
224    64     
-96    -96    
-16    176    
-64    -144   
80     64     
-320   144    
336    64     
-112   -48    
-144   -304   
128    400    
-32    400    
32     16     
256    480    
608    -784   
-864   -464   
144    -736   
-448   -160   
240    -80    
-448   240    
240    176    
-144   352    
-224   -432   
-176   -448   
0      -800   
-112   -80    
176    240    
-112   272    
128    368    
48     -928   
-432   368    
-160   96     
-176   32     
80     -240   
64     672    
-240   320    
80     -176   
64     -528   
-256   384    
160    352    
144    352    
-32    656    
416    -544   
-688   32     
-160   -16    
240    -1168  
-128   -320   
-208   1328   
352    -144   
-320   -656   
-32    -288   
0      272    
224    128    
-64    640    
-64    288    
96     -48    
144    -112   
96     -112   
-368   48     
160    272    
32     64     
-64    144    
-112   48     
112    112    
288    32     
-256   160    
64     288    
48     224    
48     240    
32     -208   
-80    0      
192    448    
-16    160    
16     -64    
128    128    
-416   -304   
-80    96     
-48    64     
-80    -32    
-256   272    
-80    -64    
0      -128   
-16    -32    
112    16     
-64    224    
-96    64     
240    -16    
0      -304   
-320   -160   
-16    32     
96     288    
-96    1056   
672    80     
-928   352    
624    -224   
-272   -496   
-16    96     
-16    -224   
80     -160   
-16    -16    
-48    688    
64     0      
192    -288   
-192   -192   
64     112    
96     256    
80     -16    
-304   80     
-256   -16    
240    112    
144    -448   
-64    160    
-160   144    
288    256    
48     208    
-304   32     
64     144    
96     96     
32     80     
144    -64    
160    -912   
-1936  304    
1040   -16    
384    -128   
128    576    
-480   -576   
-256   96     
368    64     
-144   128    
-176   -64    
176    176    
0      48     
-80    96     
32     256    
464    176    
-160   128    
-128   256    
-48    176    
-96    -48    
80     128    
-32    0      
-816   -608   
544    -1488  
560    -272   
-48    112    
304    688    
768    64     
-736   0      
336    32     
608    128    
-352   64     
192    96     
0      96     
-176   64     
352    32     
-272   -112   
224    80     
96     -208   
176    144    
256    -1424  
-112   128    
-304   -416   
-112   -144   
32     80     
416    176    
-272   96     
-608   -864   
-736   -16    
192    288    
560    32     
-176   -288   
-256   112    
-112   -672   
256    32     
448    -1808  
-848   496    
256    208    
544    160    
-704   352    
-80    160    
240    64     
-256   -96    
144    416    
432    -16    
-96    32     
-976   208    
704    112    
592    -192   
-576   608    
704    448    
720    -112   
-48    992    
592    -144   
-288   -80    
176    192    
80     64     
272    -544   
-96    -160   
160    176    
688    -32    
-256   80     
-384   288    
464    -192   
-48    64     
-48    -160   
0      128    
-144   32     
96     208    
656    -496   
-656   224    
416    96     
64     224    
-688   -112   
-384   64     
-96    80     
288    -320   
-144   256    
96     -160   
-208   112    
672    -80    
80     -16    
0      112    
-144   -2144  
-208   -272   
112    -976   
448    -320   
-368   -16    
528    -672   
112    -96    
-224   -992   
-192   -176   
192    208    
448    48     
-224   128    
-112   -48    
128    -496   
432    192    
-368   -560   
112    112    
-240   -176   
-80    -752   
-992   -64    
256    -736   
112    -432   
-48    -848   
384    48     
592    128    
-160   -464   
-416   208    
176    -224   
128    -848   
-224   -80    
144    -128   
48     112    
-368   -272   
-96    128    
640    96     
-272   112    
-48    -176   
480    -272   
-96    144    
-96    -864   
128    -64    
32     -64    
-160   64     
448    160    
-128   512    
112    -80    
48     -336   
672    2864   
-816   -1680  
-1632  592    
1056   -368   
0      192    
-384   -48    
112    48     
432    -1408  
-32    -1056  
-240   704    
96     512    
96     0      
80     128    
-224   -48    
304    -432   
192    688    
-208   -96    
-368   32     
320    16     
-304   -16    
-272   -640   
736    -896   
-608   336    
320    544    
256    -224   
-352   -32    
-16    -416   
160    272    
-16    64     
-208   -80    
32     240    
192    -320   
-224   -176   
-144   96     
-400   112    
128    -16    
192    0      
-144   80     
32     -16    
-32    -848   
96     256    
-112   -16    
-48    32     
96     64     
240    112    
-80    -80    
-208   16     
-16    48     
80     -32    
-144   848    
-864   16     
2992   224    
-224   -144   
-1552  -16    
720    -496   
864    80     
-400   -528   
-480   -16    
304    96     
176    -64    
-400   0      
128    -192   
-304   32     
-64    -240   
80     208    
176    -224   
-656   16     
48     -384   
400    128    
-32    -208   
192    160    
-1984  480    
112    -16    
992    -928   
-144   -976   
-624   -48    
400    -48    
640    64     
-96    48     
-624   -272   
96     -160   
-544   128    
16     -112   
176    208    
368    0      
-304   32     
-320   -112   
-208   224    
144    16     
112    -64    
-128   128    
-112   -96    
-240   -48    
-96    -128   
-96    -432   
-224   144    
496    1744   
576    1360   
-272   176    
-560   -560   
112    96     
144    -336   
-288   848    
-496   208    
-656   -608   
960    -336   
304    272    
-112   -192   
-32    144    
-48    160    
-240   -128   
176    32     
-80    -224   
-144   96     
-544   -1344  
-512   -272   
-48    -80    
128    -640   
160    -336   
-416   -32    
336    1232   
1392   336    
-1456  -64    
-208   -304   
1120   -896   
-240   32     
-592   -80    
-368   -128   
736    1152   
-64    -240   
-224   64     
-400   128    
80     48     
128    -144   
64     416    
-304   272    
-224   368    
336    -176   
-240   -784   
-496   -96    
64     320    
464    384    
432    -128   
-480   -432   
-432   -272   
384    1024   
-336   -1072  
-32    -1120  
320    128    
-512   -96    
48     -112   
288    272    
-48    -96    
-192   -400   
224    -624   
-96    -96    
-48    192    
-128   -208   
-144   -128   
-32    160    
288    16     
-240   -32    
-192   -128   
80     -800   
192    -544   
-112   272    
-96    -1088  
96     -144   
-240   32     
-144   288    
-304   16     
992    -176   
-128   112    
-304   144    
304    288    
512    -384   
-352   -416   
-304   -64    
256    432    
128    32     
-112   -32    
-256   -160   
-256   320    
0      16     
160    -320   
-848   -288   
224    96     
0      96     
-208   400    
0      80     
80     96     
-224   320    
160    32     
464    -192   
-96    -416   
256    -416   
-368   -736   
128    -192   
176    112    
-208   -96    
544    -1248  
-528   160    
16     -128   
48     336    
384    624    
-256   816    
144    -784   
304    -320   
-256   688    
-240   -32    
160    224    
160    64     
0      112    
-208   16     
80     -48    
-112   -112   
160    448    
0      208    
-240   16     
464    160    
-720   64     
288    -1184  
272    -640   
-144   448    
-128   464    
112    448    
80     -64    
-224   160    
-160   -192   
64     192    
-224   -48    
0      256    
240    -304   
-208   -208   
16     176    
48     512    
224    304    
-48    -96    
-112   112    
-16    -32    
-96    32     
-192   0      
0      288    
64     96     
432    192    
-176   -96    
-224   64     
-192   32     
208    -464   
1632   -160   
-1328  704    
-560   -208   
256    -160   
-512   32     
480    96     
176    16     
-160   32     
-16    32     
16     48     
224    112    
0      128    
-48    -128   
-432   96     
448    0      
-112   96     
-112   112    
176    224    
192    64     
-144   80     
160    224    
1072   -128   
-1840  64     
80     240    
576    -128   
-720   0      
112    176    
64     -32    
592    -16    
-144   240    
16     16     
0      112    
288    144    
-192   -80    
-480   64     
352    -64    
592    240    
-400   352    
-240   240    
160    -32    
256    352    
16     -176   
-544   352    
608    -16    
16     -304   
-544   -128   
-48    96     
272    -64    
-432   160    
384    224    
352    -80    
-240   96     
-80    96     
16     0      
176    -48    
-256   -736   
64     -176   
432    160    
-304   -208   
-752   16     
256    240    
368    96     
-160   -32    
-464   320    
592    -128   
-32    432    
-96    80     
-16    -224   
-576   896    
-352   3264   
784    112    
-880   336    
80     -208   
480    112    
112    320    
-544   -64    
-48    48     
768    160    
64     48     
-256   112    
-32    176    
240    -48    
-336   64     
0      16     
224    192    
64     -656   
-16    128    
176    -1648  
-976   208    
896    -96    
-256   304    
368    96     
80     -96    
-496   80     
608    160    
-736   -144   
32     -112   
544    128    
-272   -240   
-320   176    
48     -176   
64     368    
400    -432   
-656   128    
480    -128   
-480   -96    
-160   -96    
192    112    
144    224    
-288   48     
32     0      
-144   64     
-192   -48    
416    -16    
432    0      
-592   -192   
320    128    
256    -576   
-176   -64    
-64    -2992  
592    -272   
48     576    
-272   240    
112    -112   
32     288    
-96    80     
256    -48    
-112   -64    
80     32     
16     160    
192    -304   
-48    160    
-32    -208   
112    272    
112    -176   
288    32     
-272   -304   
208    -416   
80     -224   
-240   -16    
208    336    
208    64     
-32    64     
-304   192    
32     -224   
0      -1456  
256    -352   
-208   -192   
-304   -256   
1872   1056   
1152   464    
-1824  528    
-224   -224   
624    -304   
176    352    
-160   304    
-48    576    
-112   336    
240    -768   
192    80     
-240   -128   
-64    192    
384    96     
128    176    
-144   -416   
16     176    
64     128    
-32    48     
0      352    
400    1504   
0      784    
-432   -992   
224    64     
368    608    
-256   240
[truncated: 26,011 more chars]
