# Supplementary material for: A Fault Diagnosis Method for One‐Dimensional Vibration Signal Based on Multiresolution tlsDMD and Approximate Entropy
Source: Hindawi journal article supplement (doi:10.1155/2019/3262818), 2019-01-01
Supplement: f1 [file 3262818.f1.zip › 3262818.f1/gear signals/pitch errors signal/Data2.txt]

-176   0      
-80    -160   
16     240    
336    32     
-448   -272   
-160   -960   
320    -176   
128    0      
-256   256    
0      368    
0      -224   
16     -496   
336    48     
-80    -32    
-192   -32    
208    -96    
-112   -272   
144    -32    
32     448    
160    -528   
-224   -656   
64     544    
272    -544   
304    96     
-64    -336   
-224   48     
-80    304    
384    256    
112    -352   
48     -192   
-448   256    
976    -528   
-2528  288    
16     64     
1360   656    
-608   704    
-160   -16    
176    -864   
-384   288    
16     336    
560    80     
-160   48     
-240   -128   
-80    -32    
96     80     
192    32     
-144   -32    
-416   -192   
128    -304   
192    -48    
-64    -592   
-368   -880   
1632   0      
-272   -128   
-768   416    
1424   48     
-544   -192   
240    496    
592    -112   
48     -160   
-496   160    
80     80     
-64    -16    
-16    -80    
-272   32     
576    -160   
0      112    
-320   -240   
528    128    
272    -144   
-240   -128   
-160   -32    
-256   -528   
-176   -96    
240    192    
-336   -240   
304    -672   
288    -80    
16     -272   
-768   272    
336    64     
432    240    
-304   176    
-464   -128   
-256   -656   
192    -128   
-240   -64    
128    64     
-16    -224   
208    640    
80     128    
-480   -208   
-160   -128   
272    -112   
32     64     
352    752    
-272   -160   
-624   -32    
992    -16    
272    1408   
-480   32     
1088   -1504  
960    688    
208    0      
-912   -208   
464    288    
896    144    
-272   256    
-304   -80    
-16    -112   
-208   -400   
160    160    
-1040  -352   
-240   224    
208    -64    
-304   32     
-272   48     
-560   -16    
-80    -304   
784    480    
272    -192   
-912   320    
640    160    
-464   -336   
-544   -192   
-208   -16    
896    112    
-848   -336   
-224   272    
528    -176   
-592   -96    
-32    -112   
-96    -144   
-480   -256   
-384   -16    
272    -224   
-544   -112   
32     176    
304    -384   
224    176    
-272   -64    
-256   -80    
112    128    
144    16     
-64    160    
-176   112    
128    -80    
-160   -144   
96     -208   
-448   -32    
-32    32     
-272   784    
-304   -128   
-1024  64     
368    -400   
-288   -336   
192    176    
-128   -256   
-16    -112   
-48    -96    
-48    -32    
240    80     
-208   -112   
224    64     
-288   -48    
-80    32     
-352   960    
320    144    
-400   -1104  
-320   384    
320    -16    
240    32     
-80    -80    
-320   80     
-32    192    
320    288    
48     -112   
-144   -144   
-544   304    
160    -32    
208    -80    
288    -1296  
-1504  704    
32     -672   
528    -64    
-544   144    
128    96     
656    624    
288    96     
-608   -160   
112    240    
208    -80    
32     80     
-272   -64    
80     -800   
128    464    
-192   256    
-208   -256   
-752   -560   
304    208    
-208   -528   
896    32     
-96    112    
-1072  32     
720    80     
-48    -32    
-224   0      
128    160    
160    -368   
-288   64     
-144   160    
144    16     
0      160    
-576   -304   
112    224    
176    16     
-176   -16    
288    -208   
-288   80     
-16    -16    
-16    160    
96     80     
-144   32     
-160   32     
48     -64    
288    80     
-336   -80    
-256   160    
192    64     
-752   80     
688    192    
1456   176    
-1072  -96    
-32    64     
576    -128   
-592   176    
-240   224    
192    368    
304    -48    
-144   48     
-352   48     
-192   208    
528    112    
96     80     
-464   -160   
-16    144    
272    128    
-224   0      
-272   112    
96     96     
-32    -256   
1152   864    
-1728  -272   
432    80     
1568   496    
-432   -352   
192    64     
208    208    
208    -32    
-320   112    
-480   112    
304    96     
288    32     
-432   -16    
-48    224    
416    -64    
112    576    
-96    192    
-128   0      
-112   -672   
-64    -48    
-288   -384   
224    752    
-64    -240   
-112   96     
928    1264   
-1120  128    
-688   -208   
736    160    
-16    80     
-448   -16    
-80    -272   
208    -160   
96     272    
368    64     
-32    -320   
-32    352    
560    704    
-112   -240   
-384   -208   
-32    208    
304    80     
128    -144   
-592   240    
-272   608    
960    368    
128    0      
-896   256    
-32    208    
32     -16    
416    1184   
1424   688    
-1424  -224   
-400   -1088  
512    208    
592    464    
-704   352    
-272   336    
448    656    
208    368    
-272   -224   
-416   64     
144    64     
96     0      
64     -176   
64     -192   
64     352    
128    336    
-128   128    
32     32     
-16    176    
112    16     
112    64     
16     160    
-128   816    
96     -304   
240    -656   
32     592    
-48    368    
208    -816   
272    0      
-464   352    
-96    -960   
400    -176   
48     416    
-320   592    
304    128    
448    -176   
-208   752    
-176   480    
-160   -448   
304    -160   
208    -16    
-64    -96    
64     -160   
-192   0      
128    -368   
80     -544   
-128   80     
-144   80     
-112   -672   
304    -944   
64     -880   
-96    -384   
128    96     
0      -624   
16     512    
-128   352    
128    272    
112    112    
-96    -144   
96     112    
112    0      
48     160    
16     -1440  
128    384    
96     -464   
96     -736   
-176   544    
-16    288    
-96    -256   
192    -96    
-192   448    
112    336    
-32    -240   
-160   -528   
368    -1168  
544    -608   
-480   32     
-336   -208   
384    800    
432    688    
-272   128    
-464   304    
160    -96    
-80    -832   
240    -720   
112    368    
16     464    
-80    192    
112    -272   
32     -80    
96     -176   
-64    256    
96     -128   
-192   176    
128    -512   
240    32     
-320   -112   
-368   48     
688    -160   
-384   512    
-32    -1008  
448    -1264  
240    -144   
-112   432    
-224   544    
176    -480   
48     144    
0      -288   
-16    128    
224    -400   
-96    240    
-192   0      
304    64     
112    0      
80     32     
-80    -64    
-256   -512   
-16    320    
160    -64    
32     80     
-16    -16    
112    208    
-192   176    
112    16     
-112   -32    
256    160    
-288   176    
-96    -304   
-1776  -160   
1792   272    
432    16     
-816   -176   
-48    240    
464    -480   
272    -448   
-224   -320   
304    112    
-272   0      
-432   176    
304    -64    
560    128    
-464   -80    
-112   -1888  
176    112    
16     -1552  
-32    -816   
32     -16    
-32    -1152  
1216   0      
-1184  -176   
784    64     
80     240    
-704   112    
256    176    
448    -112   
320    -704   
-384   112    
-176   -464   
64     48     
0      -48    
112    -272   
-320   -256   
-32    -192   
624    192    
-64    -224   
464    -16    
-16    -64    
-112   64     
-240   -528   
-608   128    
768    -416   
-224   -240   
-304   80     
400    -96    
128    -176   
-160   -304   
-112   -128   
96     -80    
-32    0      
32     -80    
0      -16    
-208   -1696  
-288   400    
352    -144   
-16    48     
208    -160   
64     -48    
-160   -208   
96     -240   
176    -48    
16     -16    
-768   192    
-832   256    
-240   32     
928    -80    
-288   -208   
1696   1664   
-1216  1584   
432    272    
656    -816   
-928   16     
272    -16    
800    224    
-368   -176   
-448   -80    
384    -64    
-16    128    
160    240    
-592   32     
-128   -288   
128    -128   
176    -112   
-208   96     
-192   -1248  
-208   -272   
1184   -96    
-272   -192   
-608   160    
480    160    
-656   -160   
-128   0      
512    -48    
-48    -144   
-880   272    
32     -176   
160    432    
112    -240   
-368   352    
192    -1584  
0      112    
-128   -224   
-208   -48    
128    272    
48     -240   
-128   -48    
320    32     
-224   -16    
64     -80    
-128   16     
144    96     
-352   208    
64     -48    
-288   112    
192    -128   
288    -32    
-240   176    
0      -64    
-16    80     
480    -208   
-528   336    
-240   -512   
-752   48     
336    -144   
16     496    
432    64     
-160   -256   
-64    -240   
176    144    
64     -96    
-32    -64    
-192   0      
272    64     
32     -96    
-80    -160   
-32    400    
224    -240   
-16    -96    
-208   192    
192    288    
112    -176   
-208   -112   
0      176    
-64    176    
128    -480   
-80    -32    
-48    96     
-224   48     
1168   -1824  
-688   528    
-112   -1008  
-32    -208   
80     160    
160    -240   
480    -960   
-176   96     
-288   432    
-128   144    
432    0      
-1072  -112   
-784   0      
240    432    
-48    480    
-320   -128   
-352   384    
96     0      
-224   112    
96     176    
-288   1104   
992    -224   
-1200  320    
560    -592   
-176   128    
-64    288    
240    -48    
-128   400    
-272   -64    
112    -128   
240    -480   
-704   48     
-176   144    
-544   -48    
352    80     
-16    352    
-448   48     
-96    -416   
288    -48    
-96    -176   
-80    96     
0      -176   
0      -128   
80     -32    
-192   48     
-96    96     
-48    -16    
112    32     
16     16     
224    -592   
-1968  -176   
848    -48    
-496   -224   
672    0      
16     176    
48     368    
-560   224    
-192   192    
544    272    
-144   400    
-368   144    
320    32     
-32    -80    
-192   160    
208    176    
-384   -144   
112    112    
272    -224   
48     80     
-304   -160   
176    448    
2688   -208   
-1216  656    
-720   224    
800    -112   
592    496    
-1184  1248   
-160   800    
304    432    
-176   208    
-256   -128   
80     48     
-16    -112   
96     176    
80     96     
112    -224   
0      528    
752    464    
-336   448    
-192   352    
176    -80    
368    0      
-176   752    
512    448    
-80    -848   
-992   -400   
208    32     
-528   -128   
-160   224    
208    304    
-16    -128   
64     -448   
-448   -944   
-448   112    
16     336    
272    -304   
416    0      
320    -112   
-656   -96    
-48    304    
16     0      
-80    -240   
-464   -96    
336    -256   
-400   160    
-464   -128   
-240   -80    
16     16     
96     48     
352    -1984  
-2080  -704   
752    288    
1248   272    
-736   -208   
-928   16     
256    1424   
512    480    
-64    -1472  
-544   -48    
32     352    
176    192    
48     16     
-288   -80    
-224   16     
64     656    
80     48     
-592   -48    
144    -416   
32     -64    
-144   304    
16     -32    
240    48     
-416   48     
-64    208    
80     656    
-128   -304   
192    -64    
288    400    
-288   -208   
-144   -80    
-16    48     
160    112    
96     320    
-496   -64    
-80    -608   
320    -320   
-240   -656   
-560   -416   
352    224    
224    928    
-144   528    
-320   -48    
560    -176   
-112   80     
-192   -96    
128    -176   
192    1312   
-144   880    
-272   176    
128    -528   
336    -288   
-576   16     
-480   -416   
736    -448   
304    176    
-368   -736   
-464   -784   
256    -416   
32     512    
-32    -704   
-112   -448   
16     352    
224    512    
-48    272    
-16    0      
0      272    
112    592    
32     720    
-32    64     
0      -192   
-64    336    
320    192    
-176   144    
-80    672    
336    368    
-288   288    
176    -384   
416    16     
-144   64     
-544   -1824  
-176   -16    
704    32     
176    -368   
-336   768    
160    32     
-48    176    
-48    144    
-48    -80    
144    -176   
-160   112    
-80    0      
112    -32    
96     496    
-160   112    
96     288    
208    112    
-16    -224   
-160   -176   
-48    48     
432    1040   
-480   -368   
-16    -64    
800    352    
-688   400    
-80    -640   
576    0      
48     -560   
-512   -128   
128    -80    
240    -96    
-144   -48    
176    -1616  
-16    192    
-96    -128   
320    0      
208    304    
-176   80     
-144   128    
272    64     
-96    0      
0      272    
256    16     
-112   336    
336    -48    
-224   -32    
-96    96     
160    -528   
256    -208   
-816   -400   
1408   528    
-304   -512   
-1200  -96    
528    80     
-128   -240   
-704   -160   
160    -48    
368    -32    
-144   -32    
-64    32     
32     -368   
64     192    
-112   -496   
-32    144    
352    -2352  
-240   -48    
208    112    
448    64     
-288   160    
-16    112    
672    448    
-1488  208    
-496   176    
608    208    
-256   -96    
-240   272    
800    96     
16     144    
-688   208    
272    -1408  
304    48     
-16    192    
-112   64     
0      32     
-32    64     
-80    16     
96     288    
-176   -256   
400    -240   
256    112    
-160   -144   
432    96     
352    -192   
416    48     
640    -608   
-272   -336   
480    -1248  
608    112    
-336   256    
-128   368    
576    96     
-64    32     
-128   -128   
160    -144   
64     48     
304    -144   
224    -64    
208    -784   
-336   -16    
128    -64    
384    176    
-48    -400   
-240   128    
-16    -16    
224    224    
544    128    
-256   240    
-128   -16    
848    160    
-1792  3056   
1472   -416   
-272   -448   
-1504  0      
1136   48     
320    -352   
-64    -96    
-288   -208   
416    112    
32     144    
-192   160    
0      -144   
384    96     
-384   64     
-32    -608   
320    112    
-320   -128   
-128   16     
432    -816   
-912   -176   
512    -672   
-32    160    
128    -176   
528    -80    
-144   80     
48     -1408  
160    368    
-144   -2096  
48     304    
192    -224   
64     -400   
-32    80     
-272   96     
336    -80    
96     224    
-192   96     
-336   -176   
208    48     
-112   -64    
-176   -48    
-96    -48    
288    112    
-464   -64    
144    0      
-48    80     
0      -64    
-112   -64    
176    -944   
128    -384   
-496   -64    
-64    -576   
880    -208   
-64    -80    
-32    -592   
112    96     
-256   96     
96     480    
336    80     
-96    -128   
-272   -64    
208    -160   
160    -256   
-240   -368   
0      -288   
80     -656   
256    240    
-224   -48    
-96    -16    
192    16     
96     -16    
-208   -16    
240    160    
-256   112    
-80    -48    
-144   -384   
368    -128   
176    608    
-432   400    
96     96     
256    -240   
-448   -2096  
64     -1104  
96     96     
32     -432   
176    -352   
-256   -480   
-48    336    
16     -720   
80     -656   
112    -160   
-128   160    
112    16     
176    -144   
176    -320   
-320   -592   
128    160    
144    -512   
-128   32     
-160   -144   
32     64     
-16    -848   
208    -672   
-320   352    
-32    432    
240    -368   
-48    -432   
-256   -32    
192    -192   
-112   -96    
-32    -32    
-96    -416   
160    -544   
224    -16    
96     528    
-16    112    
192    -144   
-288   -128   
-224   320    
128    192    
-256   -432   
-64    112    
-160   -208   
-176   -16    
-64    -112   
256    144    
-112   96     
160    -240   
-16    288    
-320   -1040  
144    -1168  
1600   -544   
-1264  464    
16     720    
528    432    
-896   -16    
112    -576   
192    112    
-16    -144   
-256   272    
144    -560   
480    272    
-48    -208   
-272   -80    
-192   304    
352    -144   
-64    16     
-288   448    
160    160    
160    -128   
-144   16     
-912   -256   
1184   -48    
1360   448    
-1568  288    
-336   -752   
624    -448   
-224   -368   
-464   1024   
544    1680   
144    192    
64     -480   
96     -64    
-368   336    
176    144    
464    48     
-224   -16    
-304   272    
16     288    
80     64     
-80    -528   
-160   -304   
112    32     
112    -16    
-688   -992   
-368   128    
1248   1008   
-1504  1504   
16     1136   
272    384    
-80    -96    
-96    -208   
-16    656    
688    48     
-64    -768   
256    -336   
-144   -96    
384    -224   
512    -256   
-384   48     
-352   64     
352    16     
576    608    
-320   272    
-208   576    
-112   704    
-112   -336   
-320   -480   
-128   -464   
368    0      
704    2176   
-736   1072   
-544   -832   
496    -96    
528    1536   
-400   1808   
-16    896    
496    -464   
64     -272   
-320   -208   
-96    304    
128    160    
240    -160   
-480   -560   
-224   432    
368    -176   
240    -80    
-288   -144   
80     -416   
32     352    
-48    64     
48     48     
96     -96    
64     80     
-80    352    
176    -832   
-432   -272   
256    48     
272    -832   
-224   -1040  
-464   448    
320    784    
32     288    
-208   -352   
-208   -208   
240    -496   
-464   -368   
160    -176   
-176   -432   
-160   -128   
-176   -192   
-144   -112   
224    160    
-432   -32    
-16    880    
576    176    
-176   48     
-240   480    
304    -176   
112    -384   
-336   -16    
-32    896    
1344   512    
-368   464    
-592   -480   
-208   -32    
48     -400   
-304   -272   
-80    -144   
112    912    
176    576    
-80    224    
-128   512    
272    192    
16     64     
-272   -272   
80     768    
336    304    
-48    1104   
96     544    
-336   176    
-80    -16    
176    64     
-640   -112   
48     -176   
-464   -480   
64     -752   
176    -944   
-80    -672   
-48    -176   
96     -2288  
-1152  1040   
992    176    
-288   256    
-112   96     
-144   -528   
-144   -320   
368    160    
-416   0      
304    -160   
-144   112    
-176   -160   
192    -48    
-32    32     
-64    -400   
-16    160    
48     -272   
32     -32    
-16    -16    
-80    128    
-256   -576   
944    16     
240    48     
-624   176    
272    192    
-160   336    
-160   64     
176    64     
176    -480   
-320   -80    
-272   48     
208    48     
48     112    
32     160    
-32    0      
160    416    
-480   128    
-16    80     
128    112    
32     -64    
-112   64     
64     -32    
-176   128    
0      32     
160    -48    
112    112    
-224   -64    
-48    96     
304    16     
-672   384    
1680   -912   
-1728  208    
-720   96     
336    -144   
-352   -32    
304    176    
544    -80    
128    112    
-240   -128   
-96    160    
176    80     
32     96     
-208   -112   
416    256    
144    -96    
-304   272    
48     -112   
-48    80     
-96    128    
32     32     
288    400    
848    -272   
-2048  -416   
864    288    
1168   80     
-1392  -32    
-112   144    
512    576    
304    176    
-96    -96    
-208   144    
0      -32    
80     80     
128    96     
-128   80     
-80    112    
96     -80    
624    -320   
-304   400    
-224   -80    
208    -160   
352    96     
400    -112   
-272   128    
-176   -336   
464    -736   
272    48     
-480   -144   
192    -96    
432    64     
-336   96     
-320   144    
416    256    
-64    64     
-64    80     
176    240    
-96    160    
288    -272   
-32    304    
-96    -32    
224    32     
-112   64     
208    -304   
256    64     
-128   -80    
-112   64     
-128   32     
96     80     
432    560    
688    -3168  
-2720  -800   
1440   768    
1264   -112   
-672   320    
-640   160    
352    -224   
224    256    
-592   -176   
256    224    
208    48     
-400   144    
400    144    
-16    32     
-416   96     
240    112    
112    208    
128    80     
256    336    
-608   224    
336    480    
368    -256   
-384   -160   
176    -128   
304    64     
-80    -336   
272    368    
-320   160    
-48    384    
400    208    
-272   32     
-32    0      
256    48     
240    -144   
-480   32     
416    192    
48     64     
16     304    
80     -48    
-256   176    
240    -16    
-48    -208   
176    -288   
-160   16     
-112   368    
0      176    
496    -64    
-144   -128   
-240   -128   
160    -208   
0      208    
-48    -480   
192    -240   
144    -32    
-128   368    
48     -352   
224    -480   
224    -1840  
-800   -624   
64     -432   
368    -112   
-192   -64    
0      80     
-16    -96    
-480   -288   
176    -112   
304    -640   
64     -336   
-320   -144   
96     464    
224    -288   
64     -32    
0      -192   
96     48     
-16    80     
-32    16     
-96    -80    
64     -224   
-32    384    
128    -496   
-304   -544   
624    -1936  
128    368    
-528   -16    
-80    -112   
160    -256   
-48    -1248  
-368   -416   
48     480    
-32    240    
112    -48    
336    16     
-16    112    
-288   144    
192    -464   
256    48     
-96    -256   
-240   -288   
112    -368   
80     -112   
-304   -704   
816    -512   
-176   -256   
-80    -240   
-48    -240   
176    -1008  
160    64     
0      32     
-32    -128   
32     -208   
16     -752   
336    0      
-80    -16    
-32    64     
112    -48    
-32    -320   
-16    272    
272    -336   
-64    -1056  
-112   -48    
128    -48    
192    -80    
-224   160    
0      -192   
-80    -176   
288    -464   
144    48     
48     -640   
-304   16     
48     32     
-416   -1504  
-96    -64    
-48    -224   
-208   -48    
480    336    
448    16     
-224   -96    
-864   -896   
32     32     
336    560    
0      320    
-368   -272   
96     -1008  
272    -272   
-128   -928   
-160   -224   
208    -80    
368    -800   
-320   1088   
-48    48     
288    256    
1104   -32    
-2064  224    
352    -720   
-1552  -656   
-128   -688   
144    -720   
720    224    
-528   1616   
-304   960    
272    544    
-176   -560   
224    624    
192    352    
-176   368    
-304   48     
400    304    
64     -96    
-368   -64    
-288   -48    
128    -112   
16     128    
160    240    
-80    -80    
-432   -1104  
-528   -1680  
-128   -1728  
144    -1136  
-592   -656   
-96    128    
48     208    
-304   288    
16     128    
0      -688   
-176   -336   
624    80     
-96    1936   
-704   768    
-192   -320   
480    -880   
-224   80     
-352   -800   
-128   -560   
112    -320   
0      -416   
-320   -112   
512    -128   
0      -800   
-176   -144   
-368   272    
576    1232   
512    -240   
-1184  -32    
-784   48     
1104   -112   
704    -608   
-1376  -864   
-336   64     
1072   -1232  
384    192    
-752   -80    
-272   48     
176    16     
224    -96    
0      144    
-144   -176   
-352   128    
432    496    
-112   256    
-16    -912   
-80    -160   
256    -256   
-128   208    
-592   -1376  
864    -192   
16     -16    
-448   -176   
32     112    
352    -464   
-32    -704   
-128   -432   
-256   -144   
32     96     
-224   80     
-48    -352   
128    128    
-256   -528   
112    80     
128    0      
32     96     
-304   -208   
192    -112   
208    -176   
-384   -80    
32     64     
544    608    
-256   592    
208    384    
448    32     
-960   -160   
96     800    
-112   64     
-880   144    
16     0      
-352   -96    
-176   -144   
-880   -192   
-256   -128   
0      -112   
48     -16    
144    32     
-112   144    
64     -16    
-80    128    
-304   -96    
176    208    
48     80     
-528   -256   
240    -144   
-128   0      
-272   -176   
64     160    
112    -16    
-368   64     
80     -576   
-720   320    
144    304    
128    -320   
-48    432    
-176   -32    
1136   2192   
1680   368    
-1264  48     
-416   208    
512    -48    
-224   -464   
-128   -352   
224    240    
-64    -32    
-128   32     
144    32     
-176   352    
-112   -96    
144    -304   
64     -32    
96     368    
-80    96     
-48    -128   
-96    0      
48     48     
-352   -336   
240    -128   
688    -80    
-416   -256   
-160   336    
-144   -160   
64     176    
-384   176    
240    48     
96     16     
144    -64    
-288   -16    
-336   64     
240    304    
176    48     
-320   -64    
-368   48     
80     16     
0      32     
-144   32     
-128   -112   
48     208    
112    -256   
-272   -16    
192    -48    
288    0      
-320   112    
176    80     
0      -272   
-128   -1392  
-1168  -112   
864    80     
-240   -80    
-416   112    
336    0      
-256   -128   
-96    112    
-496   -16    
352    64     
-112   96     
-240   16     
144    96     
80     -112   
-448   16     
368    48     
32     64     
-432   48     
368    96     
-192   -16    
-128   96     
-128   -704   
-1376  432    
1280   48     
144    192    
-1312  240    
320    0      
368    224    
-928   -48    
-112   -64    
624    96     
112    32     
-384   32     
80     48     
-96    -80    
192    128    
-96    16     
-112   160    
-224   -32    
32     96     
288    -16    
-160   -288   
592    272    
672    160    
-528   160    
-304   -32    
336    208    
208    160    
96     -416   
-560   320    
176    -16    
16     -144   
336    -96    
-80    -32    
208    48     
-48    80     
464    -160   
-96    48     
-352   224    
-208   160    
96     0      
160    16     
-112   32     
80     128    
-176   0      
-96    224    
672    -32    
-64    128    
-640   64     
-96    -880   
-112   1936   
544    320    
-1632  16     
-304   -256   
944    64     
-544   80     
-304   144    
-48    -112   
400    272    
-112   -160   
-416   112    
192    -80    
96     32     
-64    160    
224    128    
16     16     
-336   160    
240    48     
-400   368    
-32    720    
192    368    
64     80     
-416   -48    
-224   192    
384    -144   
-224   256    
16     -32    
-160   -144   
240    -512   
176    -352   
-272   304    
32     384    
-48    112    
80     -528   
-112   80     
144    -32    
-672   -976   
-128   -432   
400    32     
-256   -304   
-32    -48    
-16    -64    
0      160    
-144   -64    
288    -416   
96     -432   
48     320    
-496   -192   
208    -368   
144    320    
-272   64     
560    -96    
32     -256   
-464   -752   
-16    -512   
-160   -128   
528    -192   
496    -1856  
-416   -496   
0      304    
0      304    
16     0      
48     240    
-16    -32    
-416   -336   
320    176    
240    272    
-192   432    
112    192    
48     224    
32     32     
-32    -128   
-32    -304   
32     128    
-160   320    
128    -288   
160    -352   
-112   224    
32     144    
-64    112    
-256   -240   
576    -496   
32     224    
64     -208   
-416   144    
176    -224   
240    -48    
96     -64    
-144   112    
-144   64     
96     128    
96     112    
-64    64     
64     112    
64     112    
256    -288   
-64    240    
-176   -208   
48     0      
16     -16    
336    -400   
-720   288    
128    -688   
192    256    
320    -2480  
-112   96     
-208   -96    
112    0      
128    160    
176    128    
-192   96     
-128   240    
96     -16    
96     48     
-112   208    
128    -80    
160    80     
-256   -144   
160    384    
0      -512   
-48    -144   
-80    -240   
160    0      
128    -112   
48     -64    
-240   128    
96     144    
-64    -96    
256    64     
-320   224    
368    608    
1664   -32    
-1200  48     
-304   160    
288    208    
272    320    
-672   -2608  
-240   272    
304    -144   
128    -96    
48     208    
-32    144    
-192   -64    
368    -192   
64     32     
-304   64     
-208   -448   
672    208    
336    496    
-320   -80    
-816   -544   
576    -224   
1504   -848   
-1280  -208   
352    48     
0      176    
-400   -1376  
-912   -1008  
560    -1968  
272    -656   
80     -336   
-96    144    
-320   -64    
32     -208   
112    16     
-64    160    
-352   -896   
-64    -448   
224    -80    
400    -528   
0      32     
-64    -144   
352    192    
-144   176    
192    -64    
-80    880    
672    352    
176    -64    
192    144    
-144   -128   
400    320    
64     48     
48     144    
96     144    
-368   -2544  
-128   -96    
-16    -224   
-368   -448   
336    32     
224    -608   
-32    -128   
-48    16     
16     560    
672    0      
-208   -16    
320    -48    
0      32     
0      -32    
32     -352   
256    -2384  
-2080  -592   
752    0      
1936   -304   
-288   -256   
-1424  384    
784    192    
512    -112   
-128   128    
-416   -288   
64     -176   
288    -128   
-32    -144   
272    -128   
-256   -176   
80     144    
144    -240   
-592   -144   
400    -992   
-1200  -1616  
192    -800   
256    -128   
-144   -112   
592    -64    
-512   -2288  
-208   -192   
112    -160   
176    416    
-144   32     
-48    80     
-144   -272   
160    -48    
112    320    
32     288    
-32    160    
32     240    
-368   48     
-64    -208   
592    -176   
48     -576   
-592   32     
272    48     
128    -32    
176    -208   
-144   -112   
-288   -80    
304    -256   
-80    -144   
48     32     
0      224    
-32    -32    
-144   -1104  
-560   -368   
496    -128   
368    -320   
192    -192   
240    -1536  
-16    112    
-64    0      
-48    96     
0      64     
48     176    
-96    32     
160    -64    
16     -80    
-160   -128   
-544   288    
384    224    
0      -224   
-496   64     
352    176    
80     -880   
-256   96     
112    -96    
-64    64     
64     -176   
176    272    
-432   288    
192    -288   
-32    -96    
976    784    
-3216  640    
-336   -80    
832    -128   
-448   -768   
-768   -112   
624    -704   
288    320    
-400   -608   
96     -192   
0      -256   
-112   176    
368    144    
96     64     
-464   -64    
96     -128   
304    304    
-192   -96    
-416   -448   
256    -16    
-80    80     
496    -496   
-560   368    
-112   -112   
416    -80    
-816   -64    
-112   64     
656    224    
80     16     
-480   32     
160    144    
48     32     
-48    -144   
-560   -32    
-160   -96    
368    -48    
368    -416   
-672   -48    
320    -176   
0      256    
96     64     
-96    304    
32     16     
96     192    
80     -96    
-416   48     
-176   -32    
272    80     
160    64     
-1376  -848   
736    336    
144    -640   
-912   64     
-304   -288   
336    240    
-208   0      
-400   784    
16     448    
-304   64     
-288   48     
240    32     
48     112    
-112   -32    
-192   -176   
48     -32    
304    64     
-240   -80    
528    224    
-112   -16    
-352   48     
-96    -16    
-208   -80    
2080   -16    
-2016  16     
-688   112    
848    80     
80     80     
-432   -304   
208    240    
464    -304   
-368   112    
0      64     
176    32     
-80    -16    
160    112    
80     32     
-160   96     
-16    272    
16     -16    
-64    112    
-288   0      
336    688    
-768   -464   
-896   512    
1520   -144   
-272   -64    
-464   16     
304    32     
-48    -80    
16     0      
48     192    
-320   112    
-128   128    
144    -32    
128    320    
-752   16     
-336   576    
816    -336   
-48    128    
-160   -208   
-416   96     
-112   -432   
16     48     
304    64     
-480   272    
-160   544    
576    -80    
160    64     
-128   544    
-1600  624    
1232   400    
1232   -368   
-2464  -224   
-816   272    
1536   -144   
-432   16     
-976   624    
656    48     
144    368    
-656   96     
224    0      
176    -80    
-80    240    
-192   32     
112    80     
-128   -48    
16     224    
-96    -304   
-192   -592   
-192   112    
432    528    
112    528    
-528   -176   
-64    -304   
512    -96    
-160   -352   
-160   -416   
160    -448   
-16    176    
-32    400    
0      32     
-128   224    
-352   368    
368    352    
144    64     
-192   64     
32     432    
-240   112    
-80    -144   
-32    -160   
0      -112   
-32    160    
-176   -304   
160    -1104  
256    -32    
-432   -64    
-32    336    
-352   704    
192    -80    
64     160    
-432   -160   
720    464    
240    736    
-560   -464   
0      -976   
240    32     
192    384    
160    64     
-128   64     
-16    128    
64     368    
-32    112    
-128   -64    
128    -672   
288    -208   
-336   272    
-64    240    
80     272    
-256   80     
-160   96     
-32    96     
48     32     
-128   80     
0      -16    
128    80     
-240   32     
-144   272    
32     96     
32     -144   
-64    48     
288    848    
-496   480    
128    -192   
208    64     
-304   112    
128    96     
-208   64     
0      -128   
-96    -32    
-48    224    
-240   208    
112    16     
64     -80    
128    -96    
-224   128    
128    112    
144    32     
64     -336   
112    -16    
-128   112    
512    -80    
-1008  256    
384    96     
224    208    
-16    80     
-336   -64    
224    -144   
96     -32    
-16    128    
32     160    
-16    64     
-144   -80    
16     0      
32     144    
-16    64     
48     -368   
-32    -176   
64     -384   
-112   -48    
80     384    
32     192    
144    -112   
-160   48     
-48    -96    
240    288    
-96    80     
80     112    
48     16     
-144   -16    
-96    0      
544    720    
1376   48     
-1248  -480   
-288   -880   
1424   -688   
0      208    
-32    -432   
-224   480    
64     352    
-96    1088   
400    48     
-128   16     
-240   -144   
-64    176    
512    0      
-176   208    
-368   288    
176    -160   
592    64     
-272   -192   
384    -96    
-2176  -176   
16     240    
-112   -1264  
-288   -1472  
144    -16    
-448   96     
1056   304    
272    544    
-448   80     
0      128    
80     -112   
288    608    
-496   176    
-496   -400   
304    80     
208    -384   
-464   -112   
0      224    
176    448    
432    176    
-176   -528   
-976   640    
1280   -256   
96     240    
-240   96     
384    -352   
-16    -32    
-432   176    
112    -512   
336    -144   
208    -112   
-48    -16    
-544   -1520  
144    -128   
672    192    
432    -128   
784    -176   
448    208    
-192   -16    
16     32     
160    80     
-192   112    
208    112    
272    -32    
-368   48     
-16    -128   
176    32     
320    -784   
688    3232   
-1264  1664   
192    -352   
1792   -544   
-368   0      
-1024  -16    
320    144    
912    240    
-480   -48    
-160   112    
656    0      
-16    128    
-144   -224   
-64    80     
80     -96    
144    272    
-240   -1232  
16     128    
288    272    
368    -240   
-432   464    
272    -112   
16     352    
-752   -336   
-224   144    
1040   -64    
-704   288    
-176   -128   
352    208    
352    -192   
-176   128    
-224   -624   
368    112    
144    -144   
-240   256    
256    48     
16     208    
640    -48    
-368   -48    
-176   144    
336    -272   
64     80     
-32    288    
-48    128    
112    -16    
0      -16    
0      -80    
80     96     
-336   80     
240    160    
288    48     
96     656    
16     192    
-448   464    
800    448    
-656   96     
-432   144    
304    -384   
144    48     
16     -240   
-48    160    
288    -112   
-176   160    
0      48     
64     -1152  
-48    -16    
-16    352    
208    -368   
-224   -656   
-224   -448   
304    -48    
-208   -256   
240    32     
176    16     
-96    -16    
-192   -128   
304    -128   
400    -960   
-768   672    
176    -1152  
144    -832   
1216   880    
1168   352    
-1264  288    
-208   -32    
480    -192   
-224   -1136  
192    -560   
160    -176   
-560   400    
368    -80    
544    -96    
-464   240    
-400   -208   
464    -80    
352    96     
-448   16     
112    -384   
-128   -192   
64     -176   
208    -96    
-624   112    
704    -496   
96     -1008  
-688   144    
448    -336   
-192   192    
-32    496    
288    -96    
-112   -160   
-48    0      
48     -48    
-128   -96    
-384   80     
320    144    
-304   -32    
160    240    
-128   16     
-16    0      
464    -32    
-208   -848   
-96    0      
272    64     
-32    96     
176    -64    
-400   -48    
192    96     
224    32     
-352   -16    
-80    -48    
1952   -48    
-3120  -352   
-2400  416    
2048   -416   
176    96     
-1280  -1264  
320    272    
976    -128   
-640   128    
-256   -16    
416    -224   
-208   -16    
-16    0      
-352   -32    
384    -32    
-1872  -64    
224    -192   
48     64     
320    208    
-176   -16    
-224   -720   
112    -864   
-1280  1136   
896    208    
-112   560    
-560   16     
-160   -16    
128    -16    
-400   -16    
-128   -128   
128    112    
432    -320   
224    -48    
-448   112    
112    -32    
-272   -320   
224    64     
-112   16     
-96    208    
464    128    
-144   -64    
-112   -32    
-32    -144   
608    -576   
0      432    
-176   96     
-336   112    
-1088  784    
352    -832   
-288   112    
112    -496   
192    240    
16     160    
16     32     
-624   -464   
48     176    
320    32     
80     160    
-560   416    
288    80     
144    -304   
-480   -160   
-16    -16    
-64    -432   
-144   272    
-144   -576   
-288   -32    
-96    -32    
-96    -64    
256    -272   
992    2544   
-880   1392   
304    -32    
592    -112   
-768   144    
-528   112    
832    -400   
336    -1280  
-1216  576    
304    512    
-96    224    
-256   64     
-144   64     
-336   -16    
128    -288   
-560   -592   
208    176    
320    -256   
-368   -192   
128    -240   
-48    -80    
-176   -160   
-256   -16    
832    192    
-208   96     
48     -320   
-720   -416   
448    -64    
-128   64     
-96    -400   
-384   -64    
208    448    
-208   208    
96     224    
-432   -128   
16     -480   
-112   -352   
48     -48    
144    656    
-304   96     
-64    -64    
48     32     
80     336    
-240   -192   
448    -496   
-64    416    
-64    144    
-80    400    
-272   -192   
208    -64    
80     144    
112    1040   
1520   32     
-656   -80    
-240   64     
384    1040   
528    336    
-864   -1104  
112    -608   
128    352    
-32    -128   
-160   64     
0      336    
0      -224   
-240   -160   
-144   160    
-336   -64    
352    -16    
-16    -32    
-16    0      
16     96     
-48    48     
96     32     
-384   32     
32     144    
-80    208    
-144   256    
-224   208    
-176   112    
-368   -416   
-80    80     
-384   -256   
320    -256   
-480   32     
336    -256   
112    -320   
112    -208   
-192   -320   
320    -720   
320    -176   
32     -16    
16     -128   
-32    32     
-16    -16    
16     -128   
-32    -80    
-704   -48    
224    80     
192    160    
-256   208    
-176   480    
368    -320   
-176   256    
416    96     
-688   304    
-128   384    
0      -192   
144    -96    
0      656    
-192   -288   
-128   -384   
192    0      
16     -80    
16     16     
16     -240   
-336   -240   
48     544    
224    -224   
-80    128    
-320   -144   
32     144    
64     -160   
-112   0      
96     -176   
-288   -160   
0      48     
160    -144   
192    0      
-48    64     
-16    240    
-1392  176    
1328   -112   
448    -416   
-864   112    
576    -176   
-416   544    
352    432    
-272   32     
80     224    
-16    160    
448    144    
-416   64     
-112   -48    
496    16     
0      -16    
-336   -32    
-192   -128   
-32    -96    
80     80     
32     96     
-192   160    
16     880    
1760   -64    
-352   480    
-400   -480   
624    160    
160    80     
-272   240    
704    -32    
-256   -16    
112    176    
160    32     
-272   16     
80     256    
0      -16    
-192   -16    
336    128    
-96    96     
128    80     
48     -144   
-176   48     
-176   288    
320    -112   
256    368    
144    0      
-608   160    
-272   -128   
256    -560   
432    128    
-240   192    
96     -32    
0      64     
-352   112    
288    304    
-272   -688   
-160   -96    
144    176    
-352   -400   
-512   208    
576    80     
288    32     
-512   -144   
160    256    
480    112    
-160   -320   
-816   384    
880    192    
112    -16    
-176   1312   
1088   3312   
-384   1712   
256    912    
1120   32     
-432   128    
-144   32     
240    304    
400    -80    
-352   -96    
208    64     
784    160    
-288   144    
-448   336    
256    -96    
0      112    
32     64     
32     144    
-208   48     
0      64     
880    -400   
-736   176    
256    96     
112    368    
-528   -32    
-272   256    
-272   48     
208    -144   
-352   208    
176    32     
-80    -160   
304    32     
160    -1392  
48     128    
32     80     
-96    32     
-320   -48    
528    32     
-80    -256   
80     64     
432    -48    
-304   192    
208    -16    
16     224    
144    -32    
-64    -176   
-128   -160   
-512   -1152  
256    -128   
384    16     
-80    304    
64     176    
320    1216   
-176   192    
-576   416    
32     336    
-320   192    
-240   -304   
192    -32    
320    592    
-32    -464   
48     160    
160    -544   
-272   224    
-16    -1152  
176    112    
96     176    
16     -64    
-528   -96    
304    240    
112    112    
-208   256    
320    -112   
32     96     
-192   256    
80     32     
224    208    
112    16     
-400   64     
48     -560   
144    16     
-64    192    
0      2144   
2288   -544   
-1312  448    
-352   -80    
800    80     
-144   96     
-480   -144   
-32    -336   
608    -784   
-96    432    
-48    0      
160    64     
-32    -1184  
144    -400   
-32    -272   
-128   384    
192    32     
48     80     
-192   224    
272    160    
-368   -992   
0      -128   
864    320    
-1040  448    
272    -240   
176    160    
224    448    
-144   288    
128    48     
144    0      
-160   160    
-160   -80    
320    304    
224    160    
-384   112    
16     -16    
80     -224   
96     160    
0      -160   
48     16     
-96    -96    
48     16     
112    -96    
224    192    
-128   -64    
-192   288    
240    -64    
112    192    
-368   0      
48     -1296  
1936   544    
-864   304    
-992   48     
1088   176    
-544   64     
-32    -48    
432    192    
-32    -224   
-112   -112   
-80    16     
272    192    
32     64     
-192   -480   
-80    160    
544    32     
-144   -544   
-224   -224   
64     -384   
416    -48    
-96    32     
128    -880   
-1664  1152   
656    -528   
320    -2432  
16     -864   
-192   -528   
272    -128   
496    -320   
-64    224    
-1072  -400   
-16    -400   
32     112    
96     -64    
176    80     
288    -464   
-208   -128   
-32    304    
-240   288    
160    -112   
160    32     
-96    64     
-96    -16    
-96    -144   
-160   -224   
-176   32     
-416   208    
-432   368    
816    -784   
288    -624   
-448   -272   
32     -48    
352    -400   
-64    -272   
512    -816   
-160   -320   
176    416    
528    352    
576    0      
304    192    
-144   80     
-32    0      
-688   64     
336    48     
112    -16    
336    1008   
-448   864    
-144   80     
256    640    
336    48     
-96    128    
-1072  -1024  
-384   352    
560    -112   
-16    432    
816    1200   
-496   16     
-592   144    
720    304    
368    -368   
-48    -672   
-336   400    
64     16     
144    -96    
112    -64    
-192   272    
160    -16    
416    -96    
-16    -192   
0      32     
-48    656    
144    144    
-272   -432   
-608   -48    
240    -160   
368    -240   
-16    272    
32     -1840  
32     -592   
-256   528    
176    -32    
176    -16    
-96    48     
-432   32     
160    -432   
-432   -544   
160    64     
128    -80    
-144   -192   
48     -256   
240    -272   
-80    -112   
-64    -192   
48     0      
256    -864   
-592   -704   
-64    -608   
144    -320   
-528   -1152  
240    112    
256    -96    
16     816    
-64    -304   
-672   16     
368    -16    
-160   16     
-304   64     
-288   -336   
512    -624   
-48    -576   
-288   288    
-80    48     
192    -32    
64     -144   
128    208    
-384   32     
272    -368   
192    -192   
-528   -80    
-176   -32    
144    128    
32     80     
48     -144   
240    192    
-448   -80    
80     1056   
-224   416    
-112   880    
224    656    
32     -512   
80     -240   
368    176    
-1760  992    
688    -784   
720    -240   
192    -528   
64     -304   
-1376  -112   
352    448    
-496   368    
112    -608   
-112   288    
-256   -224   
16     48     
-224   128    
96     -144   
-64    448    
160    336    
-32    -176   
48     -144   
-224   -160   
112    -272   
-640   1216   
464    128    
128    -288   
-288   -432   
-240   -32    
-32    -160   
80     128    
-144   -32    
-64    -160   
-544   32     
-144   48     
144    64     
160    -112   
-304   -432   
96     352    
32     320    
192    96     
-160   -192   
-208   128    
64     112    
-80    64     
-128   160    
-48    240    
48     160    
336    192    
-112   -128   
-288   -16    
-160   96     
0      -1328  
1840   -64    
-480   192    
-976   -224   
256    -80    
-144   -64    
240    416    
224    368    
-288   128    
-16    -112   
16     32     
-112   16     
-32    64     
-112   144    
-352   64     
-48    64     
176    48     
-192   -480   
-208   -128   
304    -64    
32     -16    
-256   -256   
800    1040   
1072   -304   
-1312  -224   
384    16     
112    112    
-336   0      
-32    -208   
-608   288    
192    -288   
-336   48     
224    -112   
80     32     
176    208    
32     16     
-432   80     
-32    -224   
272    -32    
384    32     
96     -48    
-48    -80    
0      464    
608    -128   
-352   128    
-496   64     
432    -32    
-304   48     
-832   -32    
480    -48    
-336   -160   
-528   272    
288    16     
224    176    
-32    240    
-144   0      
-112   -80    
176    144    
-512   -192   
16     -80    
624    -320   
288    96     
-432   128    
-160   80     
336    304    
-16    -368   
-448   96     
128    48     
0      -144   
0      528    
1072   1504   
80     496    
-16    1008   
656    -96    
-496   0      
-608   112    
224    -80    
192    -32    
-80    0      
-864   -64    
-48    160    
192    48     
64     96     
-192   64     
32     -16    
176    96     
-32    0      
16     192    
-208   -80    
-192   752    
880    -32    
-688   320    
272    16     
-512   -208   
-144   128    
416    96     
-288   128    
-80    240    
176    320    
-304   -80    
-80    256    
144    -96    
-176   144    
336    0      
-544   32     
208    320    
128    -128   
-256   128    
144    -128   
80     48     
128    -96    
-544   -128   
192    -96    
0      64     
-464   -352   
640    -32    
128    -128   
-480   96     
96     128    
272    176    
-48    64     
-112   -32    
512    -208   
-272   368    
-176   288    
336    80     
-96    240    
-80    288    
288    -128   
-96    -144   
-16    160    
-64    128    
224    80     
-112   112    
-32    240    
160    288    
32     224    
240    -16    
-208   -160   
224    -288   
96     -224   
-288   0      
48     320    
320    16     
-192   80     
-128   112    
-80    -256   
128    -960   
0      -96    
-208   272    
32     336    
336    1616   
1952   -624   
-1600  96     
96     -640   
672    528    
-112   -112   
-688   -352   
208    -320   
368    -400   
48     32     
-208   -144   
-80    144    
48     128    
272    -128   
-112   -64    
-96    192    
-32    80     
16     -64    
64     -32    
16     -32    
-288   -1424  
-112   -1168  
336    480    
32     928    
-176   768    
192    -656   
-16    -592   
-32    288    
144    48     
16     128    
-80    -96    
32     48     
-112   64     
64     112    
336    -256   
-48    352    
-432   496    
272    112    
160    -368   
-256   -64    
0      176    
208    -256   
-176   -64    
48     -416   
32     -96    
64     16     
-16    384    
-64    -256   
16     -112   
256    -192   
1456   -192   
-1760  -320   
-496   16     
960    -544   
-16    368    
544    976    
-272   32     
-16    -896   
48     -736   
-80    144    
240    -1312  
-112   208    
96     400    
64     336    
-320   320    
352    160    
240    -160   
-224   -672   
192    -592   
32     -208   
-864   -544   
144    -288   
1728   976    
-944   656    
-192   32     
608    -544   
-176   -128   
-144   -880   
288    0      
160    -32    
-256   112    
112    -16    
384    -80    
-320   48     
224    -208   
272    160    
-256   208    
16     144    
160    80     
160    64     
-112   288    
-96    400    
480    1120   
-816   1520   
-272   192    
32     64     
304    -112   
-960   -352   
224    -1520  
480    -800   
-240   224    
256    -384   
208    -384   
-832   -64    
448    -512   
176    -1312  
608    -768   
-16    -384   
-128   224    
0      -400   
-416   -240   
48     -176   
576    528    
144    128    
224    -432   
288    -608   
-304   192    
144    -96    
160    -752   
-16    -192   
672    608    
1024   144    
-912   -48    
-432   -352   
496    304    
304    336    
-640   -1856  
-512   -656   
480    576    
80     -16    
64     -480   
-400   -688   
-160   368    
368    -272   
0      288    
-192   496    
208    224    
272    -1168  
-128   -1520  
-80    0      
208    -480   
96     -64    
-1040  432    
480    176    
-208   -208   
368    -304   
272    -176   
-336   1104   
-48    576    
368    32     
112    -304   
224    -1296  
-224   -400   
-96    -128   
432    112    
-320   -96    
-112   192    
-336   496    
-240   -448   
-96    -368   
496    -320   
-192   -224   
48     -240   
272    1056   
-16    544    
-128   48     
96     -1056  
64     -432   
-80    176    
128    192    
-32    -912   
-160   -480   
-80    -304   
240    -384   
-64    -464   
256    -1104  
96     -672   
-128   -544   
-32    240    
192    -1936  
0      64     
144    112    
144    160    
32     0      
-48    32     
-48    -272   
64     -512   
416    -48    
-240   32     
-672   96     
240    64     
16     -176   
112    176    
32     -112   
-128   -432   
160    -208   
-16    80     
-112   464    
-32    -96    
16     -752   
400    -1904  
-736   416    
32     -992   
-192   224    
-304   368    
64     -816   
-128   -480   
0      -528   
160    -304   
-64    -224   
16     -32    
224    -2464  
-16    64     
-144   112    
192    512    
-240   336    
64     512    
128    96     
-96    -208   
-752   -272   
672    304    
-608   192    
-288   -256   
-64    320    
432    -112   
-288   320    
0      -704   
144    -128   
-48    -240   
-48    -32    
368    176    
0      16     
-336   -16    
320    -32    
-112   64     
64     -64    
-352   32     
272    -32    
-224   48     
96     -480   
272    64     
-80    -192   
-16    128    
-80    192    
160    96     
544    64     
-336   16     
-224   64     
-48    -16    
-512   -1936  
-752   224    
1424   -480   
-368   -208   
-208   256    
432    -48    
-48    -400   
-320   224    
432    -96    
64     80     
-272   -176   
-96    -16    
16     -96    
96     272    
256    0      
-192   112    
-80    -208   
240    80     
-48    0      
-464   160    
256    -144   
-128   -448   
-1008  -64    
1664   -256   
272    64     
240    -32    
-224   208    
384    -32    
-688   -32    
-336   192    
208    -32    
144    32     
-256   16     
-48    96     
576    -176   
-1376  -16    
256    304    
-256   -384   
-880   16     
336    96     
256    -96    
-320   -160   
-208   -16    
-16    -128   
-304   -144   
736    -512   
-160   -32    
160    0      
-160   -368   
-96    -208   
336    -368   
256    272    
-240   -192   
-368   -96    
16     96     
240    -544   
-512   -208   
-288   -112   
16     -384   
-80    192    
-144   112    
64     -96    
-48    32     
-208   -16    
-80    -64    
272    336    
944    64     
-464   80     
-672   96     
1184   0      
-2352  1520   
-288   -192   
992    224    
-1632  -320   
176    32     
1184   176    
-736   -48    
-768   288    
624    -80    
544    192    
0      -16    
-720   -64    
272    128    
240    16     
32     160    
-480   -80    
-112   144    
48     -96    
384    512    
-448   -336   
-192   656    
352    -208   
-608   32     
224    32     
448    -32    
-432   96     
80     -112   
-160   -144   
352    -48    
0      -272   
-272   -48    
160    48     
128    -16    
112    -16    
-464   0      
192    32     
16     -32    
400    -128   
32     -208   
-112   224    
16     -16    
-96    224    
224    -16    
-128   -16    
64     -224   
32     16     
80     -48    
-288   -112   
-64    128    
240    128    
64     224    
-176   -688   
-784   224    
208    1120   
-128   1520   
-32    336    
16     -544   
160    -304   
-256   -368   
224    -176   
192    -304   
-176   -112   
-96    -48    
32     -208   
-240   -256   
64     -176   
-32    -528   
176    -48    
-480   48     
48     336    
80     432    
96     -800   
-128   -256   
32     608    
-128   208    
368    32     
-208   -672   
-336   -368   
80     768    
288    336    
-288   -320   
480    224    
128    464    
-1072  -528   
16     -208   
336    -32    
224    1344   
-432   944    
224    -432   
48     320    
-48    -80    
112    32     
-96    176    
-112   -112   
16     208    
-16    256    
-256   208    
192    -160   
144    416    
-192   144    
-288   -400   
832    -656   
-160   336    
-608   -464   
128    -80    
-112   96     
320    -1088  
-352   -1024  
-256   256    
80     784    
112    -128   
-48    96     
-48    48     
48     288    
128    64     
64     80     
192    128    
-368   -160   
-192   -48    
304    240    
-96    96     
-224   -64    
64     80     
112    48     
-272   272    
144    288    
-272   304    
48     112    
96     -16    
32     112    
448    1616   
416    -96    
-1808  -160   
896    912    
192    0      
-624   16     
384    -32    
272    -480   
-416   496    
-208   -304   
480    256    
-32    -16    
-112   96     
0      -96    
-208   144    
0      48     
176    0      
-176   -80    
-432   -208   
208    320    
128    -64    
96     1056   
1568   -144   
-464   -160   
-464   -80    
32     336    
176    -112   
480    -272   
-304   1136   
256    896    
240    -576   
-240   -480   
16     -352   
320    256    
-32    0      
96     48     
240    -160   
-64    304    
256    304    
-272   -208   
128    -32    
160    0      
-16    960    
560    448    
240    688    
-336   1136   
176    336    
-496   1136   
368    304    
352    448    
-240   -160   
528    544    
288    -80    
-176   -512   
-944   208    
1136   -240   
640    672    
-96    160    
304    224    
-16    496    
272    304    
-64    -64    
160    48     
-128   0      
80     368    
176    -80    
-368   -80    
-624   -336   
144    -64    
-16    -64    
416    1584   
112    928    
272    -464   
224    -1248  
-1088  -128   
-96    304    
672    528    
-160   -800   
-640   544    
304    672    
384    -80    
208    -16    
-400   -400   
-496   64     
384    240    
16     -192   
-256   0      
-256   -256   
272    688    
-240   -96    
112    -480   
0      -224   
-384   -64    
-96    16     
304    32     
-96    208    
192    -64    
96     -816   
-240   32     
208    -176   
-32    -304   
208    -64    
160    -288   
-80    -176   
208    -1104  
-48    64     
64     208    
112    -128   
-304   -192   
-144   16     
64     112    
128    176    
-16    48     
192    112    
80     -112   
80     -928   
176    -208   
-208   -640   
-80    -528   
-96    -784   
288    -256   
144    -2624  
-1552  112    
704    256    
848    304    
-272   144    
64     880    
-256   608    
144    352    
32     464    
112    -64    
80     160    
-128   -64    
128    400    
352    160    
-240   -240   
48     -400   
80     -352   
144    -1136  
48     -144   
-272   -208   
-416   -272   
432    -64    
320    -128   
-368   256    
-64    176    
320    -96    
-256   -224   
-48    -176   
128    32     
-464   -1120  
1344   -2048  
16     576    
-608   -112   
224    496    
272    16     
-176   -176   
336    384    
64     48     
-624   544    
304    -32    
432    -32    
-192   -272   
-176   64     
256    224    
416    880    
-736   -224   
-48    224    
448    -352   
-336   -1152  
-144   144    
-256   208    
1008   -784   
-96    -16    
-272   -992   
400    -32    
-80    448    
64     -64    
-80    112    
0      -48    
128    -528   
144    80     
-16    -336   
-208   16     
176    -16    
48     -576   
48     432    
304    48     
32     -112   
272    -864   
-192   -80    
-16    -736   
256    112    
176    96     
-304   -176   
144    64     
384    -48    
-384   -16    
240    64     
16     -176   
1008   -304   
-3168  256    
-32    256    
2208   -64    
-1136  -432   
-1088  -112   
1120   -352   
368    272    
-272   -944   
0      -160   
480    -288   
-320   -48    
-320   48     
528    144    
-528   -32    
-48    80     
240    32     
-48    -160   
-688   0      
192    0      
192    16     
400    928    
-896   -608   
-1680  -160   
1984   800    
-384   -544   
-1712  448    
928    -384   
-528   96     
-256   -192   
160    -208   
160    64     
-48    48     
-304   32     
48     48     
-160   -160   
-224   -128   
-176   176    
48     -304   
-208   -128   
432    -784   
16     48     
-48    496    
1792   -256   
-752   -224   
-160   64     
752    384    
-304   464    
-1296  0      
704    -480   
-48    -128   
-64    0      
16     176    
416    -96    
64     16     
272    -592   
-496   144    
320    -352   
-64    144    
-16    112    
288    -224   
-112   16     
64     32     
-512   -80    
-32    -32    
176    320    
608    -224   
-400   96     
-16    -352   
-144   -304   
-64    -4176  
-1776  -448   
1824   960    
672    -160   
-624   464    
-240   -192   
128    96     
240    -16    
-432   -160   
528    -144   
304    64     
-384   -208   
224    112    
144    -144   
112    -48    
128    -48    
128    128    
-336   16     
112    128    
320    -416   
16     576    
-160   64     
-336   -240   
-320   48     
912    48     
-400   -208   
-48    -352   
240    272    
-64    -64    
112    432    
96     -368   
-48    -160   
-80    80     
80     16     
-80    -176   
-448   -480   
448    -272   
112    464    
-128   96     
-128   -64    
-80    -64    
224    -320   
-848   -224   
112    0      
352    288    
-288   176    
160    736    
-112   288    
-176   -304   
96     224    
-256   304    
-16    -832   
-336   352    
608    672    
-336   240    
208    576    
256    1872   
-480   2160   
-256   1216   
224    112    
-16    -32    
-80    -16    
192    -32    
-112   32     
-304   -16    
0      -112   
-128   -176   
-784   160    
-16    -32    
-16    48     
112    -288   
-64    32     
-16    416    
192    -32    
-112   368    
64     -176   
160    -160   
-560   128    
144    -64    
240    -48    
-96    0      
-448   -784   
-144   -336   
192    -272   
-288   -256   
0      -16    
-128   -272   
112    -800   
160    -160   
-176   96     
-32    208    
-16    -64    
32     -64    
-80    -48    
96     -64    
64     208    
-160   176    
-96    352    
-16    256    
-608   -80    
-144   -160   
144    288    
640    304    
-848   -224   
304    -144   
-32    16     
-128   32     
16     0      
0      -48    
-48    192    
-48    128    
96     -144   
-16    -112   
16     336    
-720   160    
160    -48    
128    -192   
-144   96     
-144   -288   
240    -320   
336    -80    
-32    176    
-80    208    
0      176    
-16    128    
32     0      
-112   -16    
176    48     
-80    208    
-96    -64    
976    1760   
-448   144    
-1632  -80    
1648   368    
-112   -368   
-1600  -1200  
272    -512   
80     -1392  
-320   -64    
64     1280   
272    -384   
-336   16     
-32    -16    
96     64     
-224   -240   
-64    416    
-432   400    
-448   432    
-288   -320   
256    224    
-128   -272   
384    656    
2032   -64    
-1376  48     
160    -704   
128    -352   
-368   -288   
96     -1328  
112    -816   
-448   -208   
160    224    
-192   -176   
-32    -240   
-256   -176   
96     0      
-96    144    
-96    160    
-32    1280   
-352   1008   
192    480    
192    -48    
48     176    
-272   -480   
368    192    
336    -32    
-368   1184   
384    -48    
160    1840   
1184   976    
-672   -208   
-320   -16    
416    -192   
208    192    
128    -16    
192    768    
-1136  48     
-144   -176   
48     672    
432    352    
-176   -576   
-832   416    
400    16     
416    -112   
-656   32     
-240   -64    
112    544    
1136   160    
-416   -112   
-832   656    
448    272    
304    -2688  
-1904  -1056  
720    416    
512    -816   
64     -1552  
-384   224    
96     -16    
528    1040   
-240   480    
-368   256    
336    -64    
192    -16    
256    368    
-400   224    
-192   128    
320    112    
160    -16    
-400   48     
80     -1280  
-368   -384   
304    464    
-64    320    
-288   -272   
608    304    
288    128    
-656   256    
208    -400   
-48    -16    
-144   -32    
0      240    
144    -16    
16     -32    
-80    224    
64     32     
240    128    
432    448    
-624   -144   
-48    -240   
416    160    
-304   240    
-32    32     
-304   -272   
400    -144   
400    32     
-384   256    
0      320    
208    256    
-240   256    
32     32     
32     272    
-112   32     
-176   -1120  
-528   -96    
320    256    
288    -304   
-96    224    
192    240    
-144   320    
0      432    
112    112    
0      240    
-16    208    
-160   -80    
208    -96    
80     80     
-272   -832   
-16    -176   
160    -16    
-80    -48    
64     -160   
144    416    
-16    48     
-80    -320   
48     -224   
32     16     
-240   -160   
-128   -400   
128    32     
32     -272   
-144   128    
16     192    
192    -1776  
-1168  624    
592    -176   
96     -48    
-464   160    
32     336    
864    0      
-384   -352   
-480   160    
368    208    
208    176    
112    240    
-336   -384   
16     -256   
320    -32    
-128   64     
-48    -640   
176    192    
0      0      
-304   -256   
896    -48    
480    384    
-1168  176    
784    208    
-48    -80    
16     -320   
32     288    
272    16     
-272   64     
-80    -176   
272    288    
400    -800   
-448   144    
-32    32     
336    112    
80     -64    
128    -128   
0      32     
80     112    
0      48     
128    32     
-80    160    
16     -80    
128    208    
368    -368   
-496   176    
16     -816   
176    112    
0      320    
-1584  -2224  
1024   -656   
2512   -32    
-992   -272   
-768   320    
512    96     
48     112    
-320   64     
-256   -256   
352    -96    
112    -528   
-112   -64    
-128   -64    
160    -144   
-96    160    
464    0      
-320   128    
0      -112   
160    -32    
80     -16    
16     112    
16     -1008  
-1200  544    
800    -144   
176    864    
144    32     
0      224    
0      -32    
-256   64     
16     -368   
400    0      
-16    64     
-240   128    
96     48     
80     -400   
-32    -1232  
256    -320   
-64    480    
80     144    
256    16     
16     -128   
-96    -192   
480    0      
1232   16     
-576   144    
-48    384    
-80    16     
224    -992   
64     272    
-768   -96    
64     -336   
336    -240   
352    -256   
112    208    
-224   -208   
-336   48     
416    -16    
-304   -80    
192    -1008  
0      48     
-80    -816   
64     96     
32     -304   
16     -592   
-32    0      
112    144    
464    -96    
-272   112    
-128   -32    
384    -1088  
-496   -2160  
-1856  -832   
1472   320    
768    160    
-672   -160   
-16    32     
112    496    
688    0      
-592   -112   
16     64     
352    -336   
-192   0      
416    -592   
-160   304    
112    -800   
80     272    
352    -1264  
-320   64     
80     -1008  
-336   -320   
176    512    
-192   240    
-64    -192   
-304   16     
32     -256   
-16    192    
-720   -256   
32     -32    
16     880    
96     960    
-320   -352   
192    -1008  
96     16     
-48    368    
-144   240    
0      16     
176    -416   
-64    -48    
-368   -208   
32     -208   
64     128    
128    560    
96     128    
112    368    
0      432    
-304   704    
352    -208   
-512   864    
400    -336   
160    -256   
32     -80    
560    752    
-1264  336    
48     528    
288    480    
-16    240    
-256   224    
64     1184   
-1200  -1696  
-224   -656   
16     480    
192    -480   
0      208    
112    -352   
-32    -96    
96     -256   
-80    144    
16     48     
-16    240    
-112   32     
160    -32    
32     -32    
-64    64     
-416   48     
16     -160   
-16    96     
80     528    
336    80     
-544   -144   
176    160    
272    -112   
32     480    
-272   336    
80     -160   
608    -64    
-80    0      
-368   -16    
192    160    
16     32     
224    -304   
176    -288   
-256   -16    
80     0      
160    -256   
-32    16     
-112   0      
-208   -128   
-80    -192   
384    -288   
-128   -128   
-192   -144   
-592   -176   
448    -144   
-192   -64    
-32    -48    
288    128    
240    -720   
224    -176   
-32    -112   
-48    320    
-16    80     
-432   64     
-288   176    
-48    -144   
48     16     
-128   224    
48     112    
304    288    
-496   480    
-368   -48    
272    -80    
-304   -48    
-304   32     
-272   160    
-48    352    
-288   272    
-176   64     
144    -128   
-816   -208   
-64    160    
-256   -464   
864    272    
1280   272    
-1440  -704   
-208   -592   
464    1504   
96     912    
-112   -1072  
-96    32     
-112   576    
208    -112   
-96    16     
-144   128    
-48    0      
-176   -272   
-928   -48    
-80    112    
80     -208   
64     1040   
-144   384    
128    -16    
-560   -1168  
-560   384    
1440   -848   
-400   -336   
256    -32    
-176   32     
-144   -736   
-752   -480   
224    16     
416    752    
240    384    
-400   -368   
-16    64     
-48    -192   
80     48     
320    -176   
-480   112    
336    -160   
192    0      
-272   -32    
-160   64     
-64    128    
-96    -192   
928    560    
1440   1136   
-384   -464   
-1232  -352   
736    -432   
-144   416    
32     0      
160    16     
-160   144    
0      0      
-112   96     
-208   560    
768    -432   
-96    -80    
-624   416    
368    -208   
624    -368   
-432   128    
-496   -192   
192    352    
48     0      
-128   -496   
-624   352    
416    64     
16     96     
-592   -176   
-448   -1936  
1680   -960   
320    128    
-1056  320    
-256   192    
416    -16    
256    96     
-736   208    
-608   384    
608    16     
208    32     
-560   112    
-256   128    
256    96     
176    -16    
224    160    
-368   64     
160    160    
-256   -608   
416    160    
-160   -320   
-352   192    
176    272    
-272   0      
-496   -144   
368    96     
112    48     
-368   96     
192    32     
256    80     
-560   -64    
176    16     
-112   -80    
-48    272    
112    48     
-16    192    
-32    240    
-128   -320   
112    -176   
-272   -128   
-48    48     
256    80     
-128   48     
-208   64     
-304   0      
384    -32    
288    432    
-368   32     
-64    112    
192    96     
-80    64     
-96    -112   
528    176    
912    240    
-640   192    
-48    256    
400    272    
-336   64     
-112   176    
64     -272   
-176   -112   
144    64     
-192   0      
80     48     
16     176    
-32    -96    
-80    -272   
-176   -304   
-192   -128   
352    -96    
48     192    
-288   -64    
96     16     
80     -16    
-128   272    
-48    112    
144    -304   
-272   416    
-128   -192   
192    64     
-144   -16    
-176   -2672  
-1520  912    
1392   160    
320    208    
-240   192    
-160   -112   
-80    176    
224    -224   
-624   832    
400    0      
64     -208   
-384   192    
128    16     
144    -304   
-304   64     
32     96     
256    -176   
-32    272    
16     128    
16     -96    
272    -416   
-1216  592    
624    272    
272    192    
-464   128    
368    -48    
-672   448    
224    112    
160    32     
-112   0      
-128   0      
32     128    
32     336    
128    48     
-16    272    
304    256    
-432   128    
-256   32     
544    -16    
-48    80     
-400   0      
-32    96     
336    80     
-80    192    
-368   -368   
208    240    
80     0      
48     112    
48     96     
-144   -1296  
1424   -672   
-672   576    
-240   64     
944    160    
-448   -48    
-656   336    
512    144    
544    -224   
-96    -240   
-304   -64    
16     -32    
144    80     
0      -800   
-240   -208   
240    192    
160    32     
-64    160    
-128   -128   
384    -64    
112    112    
-336   -240   
1344   544    
-992   -96    
176    -736   
-32    272    
-48    -160   
192    240    
432    -1344  
112    0      
-496   48     
-32    80     
224    112    
144    160    
-208   -112   
256    112    
16     -544   
-160   -32    
160    -224   
-240   416    
208    144    
96     -144   
240    416    
-672   -512   
-832   176    
80     -1536  
928    -400   
-16    192    
-240   112    
128    16     
336    112    
-608   144    
-480   608    
1376   -512   
-112   -240   
-640   144    
768    -272   
272    144    
0      48     
-288   160    
-64    -320   
352    144    
64     -224   
-112   80     
-272   -16    
256    208    
352    -240   
-336   144    
-48    -16    
720    352    
-864   1376   
48     2656   
1088   176    
-1472  -688   
-768   240    
1744   -112   
-208   1152   
-464   -960   
-32    -96    
0      -48    
-80    864    
176    240    
-64    -160   
-352   -352   
272    -144   
384    176    
176    -288   
32     80     
80     -592   
336    -400   
-272   -192   
32     224    
176    48     
208    -112   
-208   112    
688    -304   
-688   320    
128    -784   
-320   -640   
112    -352   
256    576    
0      320    
-288   272    
96     -208   
256    368    
256    -304   
-112   304    
-112   -304   
224    -400   
208    -240   
-336   64     
96     48     
80     -432   
48     -336   
-224   -224   
144    -416   
176    -1456  
-304   0      
240    272    
272    448    
-144   0      
-400   -144   
880    208    
544    -1168  
-704   -176   
144    -1072  
160    -464   
48     -560   
208    -1312  
176    400    
-432   -288   
80     -96    
192    208    
144    192    
-144   128    
-144   -288   
224    -1968  
144    -432   
-416   -144   
80     192    
192    -416   
32     -368   
-32    -96    
0      -384   
96     0      
416    -512   
-512   352    
-208   -96    
624    160    
-272   -128   
-304   -64    
96     -64    
224    448    
416    192    
-256   -64    
-96    208    
176    -144   
-96    -240   
80     48     
144    400    
-240   -32    
144    -224   
16     -224   
-80    64     
240    -544   
0      112    
16     -80    
0      80     
64     96     
-64    -144   
-176   -224   
800    160    
-1040  864    
304    -208   
352    -96    
-112   -256   
-176   336    
144    96     
336    336    
-160   336    
0      256    
80     -432   
112    -32    
0      -80    
32     112    
32     528    
48     384    
-384   -320   
128    -896   
-16    -112   
-128   192    
-128   144    
0      48     
-48    -32    
48     -304   
160    112    
-224   -528   
112    64     
336    208    
-288   96     
144    -32    
-1728  864    
1856   -160   
400    368    
-1104  -192   
224    80     
512    -416   
-1216  -272   
-256   -352   
688    -592   
-128   96     
-352   -448   
0      160    
192    96     
128    240    
-80    64     
32     16     
-432   -192   
352    -64    
-64    -176   
-144   -32    
112    832    
528    -1136  
-1424  80     
608    80     
608    832    
96     560    
-112   16     
224    48     
112    -128   
-480   -400   
-192   -96    
304    208    
16     -224   
-400   0      
112    -272   
176    -64    
-96    -368   
-304   160    
528    -128   
32     96     
-160   -256   
-128   -192   
784    128    
0      -64    
-704   96     
80     512    
704    -128   
-32    848    
80     368    
96     -144   
-144   0      
-96    -368   
-224   -48    
32     144    
240    48     
-1184  432    
-320   -80    
0      -16    
304    192    
48     16     
-16    48     
-336   -80    
80     64     
-192   32     
208    208    
-176   -32    
-640   -16    
256    64     
-928   -288   
240    816    
-112   2528   
864    256    
-1408  -464   
-496   0      
1392   16     
-1392  240    
-432   -272   
336    304    
112    112    
528    128    
-576   -112   
-160   -128   
384    112    
112    -80    
-192   128    
-16    96     
-192   64     
-160   -448   
0      496    
272    -80    
-704   224    
240    192    
128    -16    
16     -64    
-336   -112   
272    32     
32     -80    
-112   192    
112    0      
-160   64     
-224   176    
160    -80    
16     128    
-16    -64    
160    -64    
64     0      
-656   -192   
-16    -176   
-400   -16    
16     -128   
48     128    
128    80     
-128   304    
64     192    
304    -32    
-176   208    
-112   224    
160    320    
160    0      
-336   -32    
-208   -64    
0      -352   
-592   16     
576    336    
-208   176    
-192   320    
-288   -224   
272    0      
192    -448   
-304   16     
-16    -48    
48     64     
-128   0      
0      32     
-16    128    
-288   -16    
144    -416   
-144   -112   
16     112    
112    96     
-48    80     
-80    -32    
-48    176    
64     224    
112    48     
-288   864    
-80    32     
272    -80    
128    288    
-272   288    
992    928    
-2336  912    
240    0      
1344   112    
-912   -192   
-144   32     
-144   64     
288    208    
-624   352    
224    208    
-112   -160   
-160   144    
240    144    
144    0      
-720   400    
240    -208   
272    112    
-336   -192   
-96    -176   
16     112    
-384   -704   
800    -400   
-384   208    
-784   96     
208    48     
-32    160    
-32    80     
240    32     
-96    -384   
-304   0      
240    32     
112    -80    
-192   0      
-80    96     
80     64     
144    304    
-432   -64    
-288   -16    
16     -128   
48     32     
80     112    
-160   16     
256    112    
-144   -48    
-112   160    
320    -48    
-400   128    
128    48     
160    144    
144    0      
-1632  976    
1056   192    
752    -240   
-752   32     
672    288    
-512   -32    
-400   -176   
288    -160   
192    -160   
-16    16     
-272   80     
160    64     
208    64     
-32    176    
-16    80     
-224   80     
0      -32    
352    -112   
-336   96     
-48    64     
128    112    
-736   -176   
1232   -944   
128    448    
-880   352    
16     -144   
544    -48    
-320   -112   
128    224    
80     -16    
112    192    
96     32     
-224   64     
-32    -16    
320    96     
112    64     
-208   64     
-80    -176   
256    -16    
112    224    
-32    128    
48     48     
320    240    
416    240    
-208   -144   
-96    400    
272    640    
-112   -144   
-832   208    
400    400    
288    -128   
-176   208    
-112   16     
128    528    
-688   -32    
-16    160    
416    -64    
-224   -224   
-48    208    
32     0      
288    64     
112    -32    
-240   128    
-192   144    
336    16     
-160   -992   
-320   -160   
-176   48     
-128   608    
576    928    
-64    336    
128    -688   
976    480    
112    1072   
-1040  144    
368    160    
864    112    
-176   -144   
-448   -720   
160    -64    
288    192    
80     384    
-192   224    
-96    -112   
128    160    
272    -688   
-160   -48    
-256   512    
272    -240   
240    -496   
-256   -400   
-112   336    
112    112    
-64    368    
-160   -144   
16     -160   
-128   32     
240    224    
-64    48     
-96    -48    
144    -560   
48     128    
-16    -128   
160    -384   
-224   -80    
256    -176   
-160   -80    
240    -1120  
208    -832   
-352   -112   
-64    608    
368    144    
80     -80    
-224   -272   
64     256    
176    32     
-320   48     
112    -16    
128    176    
128    -288   
112    -96    
528    704    
-1152  -1024  
-320   720    
704    704    
160    -96    
-352   -640   
176    -160   
-400   -1552  
368    304    
48     -16    
-96    128    
-128   -192   
0      -176   
432    -256   
-224   -448   
-112   -240   
-144   48     
208    496    
48     -208   
-224   64     
-96    -128   
144    240    
-128   208    
-32    112    
144    288    
112    448    
80     464    
32     176    
-240   288    
-128   -208   
608    -288   
-720   224    
112    -256   
240    -1392  
-144   192    
160    416    
608    48     
-688   288    
-112   624    
432    464    
32     112    
-224   128    
16     -480   
-16    368    
96     -32    
96     224    
-208   -608   
-96    128    
128    64     
112    240    
-256   1296   
112    752    
-352   -336   
32     112    
176    -64    
-112   -240   
-128   1008   
144    -544   
128    -304   
-48    160    
-48    48     
16     -432   
64     -112   
224    416    
-80    304    
-128   -240   
96     352    
16     64     
-16    -176   
-48    -80    
-128   -32    
112    -112   
304    -80    
-176   272    
-192   -256   
368    16     
64     -32    
-176   80     
-128   16     
48     -912   
1552   -688   
-1584  -1056  
96     -32    
-352   -304   
-336   224    
752    240    
-16    160    
-144   -48    
-432   0      
368    -96    
80     144    
-144   32     
16     -960   
368    -16    
-384   -480   
128    16     
256    240    
-160   96     
80     144    
192    -384   
224    1072   
112    -1232  
-1264  448    
1232   -176   
-32    -32    
-1216  208    
352    -368   
576    16     
80     0      
-320   -80    
-48    128    
64     48     
160    -112   
32     0      
-240   -368   
-224   0      
432    -272   
-160   -32    
0      -576   
-144   -112   
32     -1312  
240    512    
400    -320   
-576   224    
240    320    
608    -368   
-1040  -144   
-64    -48    
-432   176    
528    128    
-1824  48     
-288   16     
112    0      
160    -336   
304    -224   
160    -848   
-544   -176   
336    -32    
352    -224   
-256   -240   
-128   288    
48     32     
144    -80    
96     16     
224    576    
-704   32     
-432   224    
1024   144    
-608   -896   
304    1824   
1824   -928   
-848   32     
864    -1488  
336    -240   
-1344  368    
176    192    
1056   112    
-240   -192   
-592   176    
432    -288   
48     80     
0      16     
-1264  -176   
272    224    
-160   0      
-128   -16    
384    -144   
-320   -1392  
-368   512    
752    224    
-448   448    
96     -16    
576    64     
-528   -32    
16     144    
400    128    
-432   64     
288    192    
-240   -128   
-32    112    
64     -176   
-64    96     
-304   -368   
624    224    
-528   -112   
48     -64    
128    64     
-144   -96    
-512   -64    
224    224    
48     16     
-336   0      
-192   160    
304    -144   
-160   80     
336    528    
-304   368    
-144   128    
368    -80    
-496   16     
-208   16     
-80    384    
1216   -112   
-496   112    
-176   192    
304    -80    
16     -576   
16     -304   
-96    -224   
-288   -48    
-32    -112   
224    160    
-1248  -480   
128    -176   
192    16     
-128   0      
-96    -160   
192    -16    
16     224    
-192   112    
-192   0      
224    -32    
-272   128    
-32    -176   
128    -112   
144    16     
-240   288    
-576   -592   
0      -336   
240    208    
-1120  -1552  
80     -320   
0      -112   
-384   -320   
496    240    
-352   16     
-208   288    
32     -256   
160    96     
224    512    
-592   -160   
80     32     
16     240    
80     -128   
-480   304    
64     -128   
-48    16     
-128   64     
16     64     
-624   32     
-128   224    
128    -640   
-656   624    
400    -16    
336    -144   
-416   -224   
48     80     
400    368    
208    288    
-512   32     
-208   192    
256    128    
176    96     
-64    96     
-96    -240   
0      32     
-656   0      
128    144    
-48    -32    
-16    16     
-96    -64    
-416   -144   
256    -48    
96     -112   
-128   48     
-112   112    
-80    112    
96     160    
-64    -240   
-224   -320   
-1504  -384   
736    -272   
1184   -352   
-1168  -32    
384    288    
592    -208   
-688   672    
112    144    
96     64     
288    304    
48     144    
-144   128    
-160   0      
0      -144   
-352   -176   
160    16     
-336   -240   
192    -112   
208    -384   
-160   80     
-256   -784   
1680   688    
-544   -144   
-816   272    
1072   -352   
-416   -128   
416    352    
384    464    
-336   -144   
-288   32     
-112   208    
288    -32    
208    144    
-464   -32    
96     -96    
-16    128    
144    64     
160    -304   
-400   96     
-224   0      
96     48     
192    48     
-208   -336   
880    -496   
320    -304   
-720   -128   
-80    128    
-416   -80    
-832   -272   
528    384    
64     112    
-208   -112   
-192   -112   
0      96     
-112   320    
336    -736   
-16    -240   
32     1056   
-32    256    
0      80     
272    176    
-352   112    
-208   -432   
-80    -208   
320    80     
-224   48     
96     96     
432    -608   
-208   -416   
112    128    
944    1408   
-1264  1376   
-272   224    
848    128    
560    -16    
-560   544    
-304   -784   
192    -1328  
96     320    
-32    -128   
192    16     
-240   240    
32     -48    
224    32     
-128   576    
-272   672    
48     -112   
160    -432   
-64    -544   
-160   -752   
-240   48     
208    192    
368    464    
-96    -256   
-832   -16    
432    384    
208    -256   
-48    -1536  
64     512    
-64    736    
-64    272    
-128   -16    
112    240    
-64    480    
-160   560    
272    -32    
352    112    
-208   256    
-176   208    
48     160    
96     208    
80     64     
-160   528    
144    336    
-16    -112   
288    -880   
368    416    
-448   736    
-144   160    
-64    -384   
288    224    
-96    960    
1104   224    
-224   0      
-192   224    
352    32     
-96    240    
160    -176   
256    -1680  
-240   -912   
-336   368    
208    240    
96     64     
-64    64     
-176   0      
96     224    
144    208    
-112   384    
-176   -144   
176    -96    
0      288    
64     192    
-160   96     
96     -128   
240    464    
96     1296   
-160   1424   
48     -576   
208    -336   
-256   -144   
320    1392   
-704   608    
-32    -240   
416    -1328  
32     -1776  
160    176    
304    416    
-64    192    
-176   400    
272    432    
224    48     
-32    80     
32     -288   
-160   432    
16     96     
80     -224   
16     -480   
-192   -800   
144    288    
128    16     
464    880    
-640   1408   
256    -432   
-64    -592   
-160   48     
-144   464    
96     496    
128    -112   
-144   128    
16     288    
32     -272   
-144   -32    
96     -560   
96     -64    
-256   384    
624    400    
-496   128    
-304   -704   
-16    -368   
176    96     
-112   96     
-80    112    
208    -176   
64     288    
-256   -16    
-144   -128   
368    16     
112    -352   
-224   0      
400    560    
-1408  448    
1600   624    
928    -320   
-1344  -208   
544    320    
752    192    
-560   80     
-400   96     
528    -96    
-32    144    
-176   0      
-32    112    
48     -112   
16     32     
272    -1072  
0      160    
352    -368   
-160   48     
-336   16     
192    96     
-48    64     
-912   -336   
1424   -80    
960    -240   
-1072  240    
-128   -288   
16     80     
240    -368   
-304   176    
0      -96    
144    48     
64     -656   
64     176    
-144   -48    
-240   144    
416    16     
112    48     
80     64     
-64    80     
416    80     
-192   -288   
-112   560    
864    -112   
-928   -80    
-1504  -48    
544    -368   
224    64     
-240   288    
160    496    
64     -240   
-672   16     
176    288    
432    32     
112    -80    
16     112    
-656   -272   
112    -720   
544    -160   
-224   128    
-560   -224   
32     16     
864    -656   
-496   192    
-608   16     
-32    -96    
1104   176    
288    -592   
-624   -160   
736    224    
-752   -1440  
-800   1632   
1872   96     
-896   512    
-560   80     
416    -320   
928    224    
-880   16     
-304   -1824  
48     80     
320    -352   
-240   96     
-784   -144   
-64    -592   
-336   -16    
320    -32    
192    -32    
-304   -816   
480    -384   
-96    -320   
-1168  48     
1184   -944   
-272   80     
336    -144   
352    -128   
-368   -176   
16     -272   
112    144    
96     -192   
-336   0      
80     -624   
-80    64     
320    -992   
-224   64     
336    160    
192    64     
-96    -96    
-176   96     
192    -144   
-448   176    
-96    -16    
48     -16    
-128   112    
-144   -224   
48     -128   
368    -192   
48     -80    
-160   -80    
80     -256   
384    -592   
-256   -160   
-240   -160   
-304   -272   
192    -144   
128    0      
-416   144    
352    112    
-128   -144   
-208   -112   
-176   288    
-64    272    
192    160    
48     32     
-16    -96    
160    -448   
-192   80     
-144   16     
272    320    
-48    480    
112    608    
320    304    
-96    48     
16     16     
48     -32    
-16    0      
32     -240   
48     -96    
96     -144   
-256   480    
272    -224   
-176   -32    
-128   160    
-32    -1632  
-656   80     
816    -736   
16     736    
-784   528    
368    736    
640    -240   
-784   -112   
-256   -224   
192    96     
432    32     
-288   -160   
-112   -384   
112    -128   
400    336    
-144   608    
-48    336    
96     160    
16     128    
16     144    
-256   1712   
144    -384   
-944   -32    
256    48     
-64    -528   
160    -608   
-192   -80    
208    720    
-48    16     
-96    -128   
144    -112   
-64    192    
16     -192   
-144   176    
64     -160   
-688   16     
16     -64    
-32    -64    
144    240    
-160   32     
48     -192   
-48    144    
16     -192   
112    -64    
48     -592   
128    432    
-160   48     
160    -384   
-560   96     
64     -416   
1456   -640   
-1520  -16    
352    64     
-32    -32    
-672   128    
96     -528   
848    -1120  
-272   288    
-80    720    
-240   -400   
-352   -128   
32     128    
-560   160    
-272   0      
-32    -32    
128    -128   
-96    -32    
-304   336    
192    -64    
80     -192   
-496   -608   
-144   144    
1184   -704   
-672   -784   
-304   -352   
336    -352   
-464   -64    
-416   32     
256    160    
-128   192    
-32    32     
-176   -256   
144    -320   
112    -96    
16     96     
112    -144   
-480   -432   
48     -848   
496    -384   
-368   -112   
-368   48     
288    560    
-288   288    
256    416    
32     -1200  
-768   -832   
-160   720    
640    0      
-384   -128   
48     384    
32     912    
-256   -192   
-736   -304   
640    112    
-256   -384   
-544   320    
752    -112   
-160   1216   
480    128    
-288   -128   
-256   400    
112    64     
144    688    
-144   192    
-112   32     
-160   16     
112    -176   
-16    -592   
-192   16     
-208   240    
32     1344   
1344   448    
-1536  64     
-1024  -624   
752    -560   
240    -192   
-832   -480   
-416   144    
-48    320    
240    448    
-80    -192   
-192   624    
80     -256   
144    -320   
256    -224   
-208   80     
-176   256    
336    -112   
-16    -304   
-160   96     
16     240    
160    240    
-656   -400   
-704   144    
880    -48    
-672   -16    
416    736    
-608   -720   
-32    -1776  
-96    -800   
96     144    
80     336    
-240   -32    
112    -160   
-288   -288   
32     0      
-368   800    
80     496    
-16    144    
-32    240    
-80    0      
-208   -2656  
-112   -272   
144    80     
16     48     
160    -528   
-608   528    
128    240    
48     -16    
64     -128   
192    1168   
-464   240    
-368   576    
672    2032   
1312   272    
-816   448    
-208   208    
352    144    
96     272    
-192   112    
96     272    
80     112    
-32    368    
48     -144   
0      -384   
-128   -80    
112    48     
160    0      
-448   -208   
160    -816   
96     -448   
-272   -80    
-304   -96    
240    208    
240    112    
-320   -48    
-80    -448   
80     -160   
16     192    
32     -16    
448    192    
-1712  1616   
912    -160   
-64    16     
-176   -16    
-32    992    
208    208    
0      304    
112    -608   
-16    -144   
64     -352   
-32    176    
16     -96    
-128   272    
48     -320   
80     160    
80     144    
-208   208    
-48    -16    
128    32     
640    352    
-1200  848    
464    -208   
-16    -256   
-384   16     
208    -144   
0      160    
16     160    
-208   32     
272    -176   
-144   48     
-272   -32    
96     448    
144    -16    
-64    64     
-208   96     
64     32     
208    448    
-32    64     
-96    160    
-128   32     
-96    64     
112    -16    
-160   112    
48     -224   
144    208    
-112   -128   
-48    160    
48     160    
-720   -1056  
944    656    
3376   784    
-880   80     
-1424  -80    
448    112    
704    304    
-336   592    
-400   192    
448    240    
-224   64     
96     224    
-224   -96    
-112   96     
432    48     
128    32     
-240   128    
32     208    
48     80     
-16    112    
0      64     
-240   -288   
720    592    
1728   320    
-832   672    
-1200  16     
512    -80    
-192   208    
192    -608   
16     -144   
96     368    
-112   128    
-96    96     
128    16     
-96    80     
-128   48     
400    112    
128    336    
-256   32     
-720   -64    
576    320    
576    -48    
-368   160    
-1504  -48    
224    112    
592    -80    
-16    176    
784    528    
192    -128   
-48    560    
-80    -224   
-544   192    
240    -256   
-176   -192   
-80    240    
208    -96    
-320   -16    
-400   96     
464    -176   
416    -464   
16     -1120  
-112   176    
96     96     
80     160    
-144   144    
48     96     
160    -48    
192    128    
192    80     
-432   112    
-832   -2080  
1504   384    
1104   272    
-1520  272    
-128   400    
560    -320   
-304   32     
240    128    
16     -80    
80     320    
176    -64    
-368   -16    
96     16     
160    64     
128    112    
48     -32    
-336   16     
64     112    
-128   -64    
-176   -224   
-304   -96    
336    -48    
-96    -176   
464    -16    
448    -288   
-352   176    
-272   144    
400    208    
144    0      
-352   -16    
-368   -80    
464    -144   
48     400    
-336   0      
272    208    
320    -304   
-96    48     
-304   -1568  
-16    160    
224    -704   
-96    64     
-272   160    
304    256    
-192   -64    
128    96     
336    0      
-240   -16    
96     -112   
64     -224   
-48    -32    
64     -496   
48     0      
-160   -64    
512    -112   
-144   -160   
128    -352   
-624   -1184  
256    -768   
144    -16    
-336   0      
144    160    
240    -400   
-256   -432   
-128   -528   
96     80     
-176   -144   
112    -400   
0      -608   
-240   -432   
64     -304   
224    192    
-160   -16    
-128   144    
64     -32    
352    -128   
48     -288   
-240   -352   
-144   1024   
304    -16    
-64    -352   
-96    -304   
-80    -816   
640    -1808  
-496   608    
64     -176   
-112   -912   
112    0      
320    -128   
64     -48    
-96    -16    
32     64     
48     208    
-16    -528   
64     -112   
-48    432    
32     144    
96     112    
48     -448   
0      -176   
0      48     
160    240    
-224   -80    
384    -720   
-48    336    
-608   -256   
48     -496   
-16    336    
32     -48    
64     544    
-16    -256   
-16    64     
-144   -80    
224    160    
-160   -48    
192    -112   
-144   -16    
-16    -96    
144    -208   
240    -352   
-240   96     
-48    -96    
144    48     
208    -208   
-64    64     
-80    -816   
80     -256   
400    -1696  
16     -16    
-208   16     
-224   192    
0      -160   
1328   928    
-1872  464    
-1104  -80    
1968   -224   
-624   128    
-1952  -432   
368    -320   
96     1072   
-176   -752   
272    -192   
224    0      
48     272    
128    -1136  
-112   64     
-64    -48    
32     560    
192    -48    
32     -48    
-16    0      
192    -256   
-384   -752   
1408   752    
592    -144   
-976   96     
-128   -624   
144    -208   
496    -112   
-400   -1376  
432    784    
-16    608    
192    816    
-32    240    
-160   -304   
224    -912   
-240   -720   
-480   192    
720    -32    
-1616  -1184  
-288   -688   
160    -400   
80     -288   
-64    -128   
192    -832   
-16    832    
32     192    
-688   -176   
336    -32    
992    -80    
-416   384    
0      256    
464    272    
16     16     
-304   80     
208    -368   
528    304    
64     1280   
-304   224    
-352   -688   
288    -608   
560    -304   
-80    -64    
-288   48     
48     16     
144    -400   
-352   -224   
-128   224    
640    -80    
96     416    
-96    352    
-208   320    
1120   -192   
-1664  -304   
480    -320   
704    160    
-352   -80    
-944   -288   
304    -144   
384    992    
-448   -112   
-240   -544   
-32    288    
224    192    
16     -240   
-48    -128   
-192   0      
64     -336   
368    -16    
160    -240   
-688   -64    
-496   -384   
384    -192   
-64    -128   
-160   192    
960    1264   
-272   976    
-144   992    
480    80     
112    240    
-400   496    
-128   688    
-240   224    
-128   240    
-208   0      
80     80     
432    32     
-464   -160   
-512   -112   
16     80     
160    -32    
-96    352    
-512   -96    
32     -224   
480    352    
-80    336    
96     416    
-256   -16    
320    144    
-496   -208   
-96    -336   
144    -96    
-16    96     
-336   -544   
496    -736   
224    -128   
-1200  -240   
-256   784    
80     768    
80     -240   
-576   -448   
-80    -80    
48     -64    
-192   -64    
304    -32    
96     -48    
-304   288    
-32    240    
144    -224   
-16    144    
-320   304    
144    0      
-16    -144   
-352   144    
224    64     
-112   -48    
64     144    
32     -256   
-496   144    
320    320    
256    80     
-352   16     
-624   -1248  
1792   -144   
-128   160    
-1136  -288   
-256   96     
800    528    
-64    272    
-192   32     
112    608    
144    -144   
-176   160    
336    48     
-64    -64    
-96    -144   
-96    32     
-32    0      
176    -112   
16     272    
-112   -96    
-208   16     
80     224    
-176   1120   
1312   -160   
-960   -400   
-272   64     
880    64     
-48    784    
96     -176   
-208   -112   
48     -256   
0      80     
112    112    
208    0      
-384   224    
192    64     
48     160    
-128   -128   
-64    272    
560    -64    
-368   160    
32     16     
160    80     
32     128    
-208   32     
-144   -176   
32     32     
224    -32    
-96    112    
96     80     
-160   -192   
-192   -1168  
-1152  -272   
688    208    
-192   96     
-608   48     
16     -16    
288    -16    
-336   16     
-256   0      
240    -16    
160    64     
16     16     
-144   16     
128    -32    
-672   -32    
432    96     
-80    -48    
-48    -16    
-160   -16    
-32    -16    
-96    64     
-160   -624   
-1040  720    
704    -32    
-352   -560   
0      448    
368    -80    
-848   48     
-64    96     
640    -144   
-80    144    
-320   -48    
96     112    
144    96     
32     96     
-384   48     
80     96     
336    96     
-128   160    
32     64     
16     -80    
-160   32     
-32    320    
1104   -464   
-560   112    
304    0      
128    160    
320    576    
-928   48     
-672   0      
784    32     
144    0      
-400   160    
288    -16    
224    48     
-368   48     
-32    16     
144    -48    
144    528    
544    -128   
-416   112    
-224   16     
288    48     
128    112    
-112   112    
-112   -256   
16     32     
208    128    
-176   -16    
176    784    
64     -2448  
-2096  -448   
1424   544    
896    64     
-784   224    
-880   80     
256    -48    
1136   96     
-240   -48    
-576   64     
608    48     
112    176    
-80    64     
-144   0      
-96    16     
224    48     
288    80     
-32    32     
-208   -608   
400    -1296  
256    192    
-176   736    
-176   272    
-416   -80    
-240   -352   
944    -416   
144    304    
-464   80     
-144   176    
368    32     
-64    48     
-80    368    
368    144    
-80    -48    
-32    272    
96     144    
-32    144    
96     464    
224    144    
-80    288    
-112   96     
240    176    
192    288    
-80    368    
-192   224    
-64    416    
464    256    
-64    32     
-176   144    
224    736    
272    432    
480    1680   
-1072  -176   
-400   -176   
656    0      
64     -512   
-672   -224   
128    -592   
0      -208   
240    496    
-144   176    
-96    -368   
32     -320   
-48    -128   
-192   -144   
64     48     
96     80     
-272   -1072  
-16    288    
64     -80    
80     96     
-48    16     
-96    192    
-64    144    
112    480    
144    -176   
-224   -80    
-160   992    
352    -192   
-112   16     
-256   112    
496    752    
-256   512    
48     -464   
256    -2752  
176    -176   
-144   48     
-64    -96    
48     -160   
32     -144   
64     -48    
16     112    
-48    64     
160    48     
272    96     
-240   -48    
-288   64     
352    -336   
64     192    
32     0      
-96    80     
304    -1152  
-784   112    
304    96     
432    432    
-80    192    
-272   32     
80     336    
0      16     
0      -256   
272    -368   
-240   64     
-240   128    
240    160    
224    -1152  
-208   208    
-96    -656   
272    80     
-64    -32    
-80    128    
336    160    
-144   288    
-176   48     
192    16     
16     -32    
16     -208   
416    64     
128    -144   
-128   272    
-144   -80    
560    -32    
-1296  1776   
2352   -528   
-784   512    
-144   144    
272    16     
384    256    
112    672    
-256   1072   
-240   -880   
144    96     
176    112    
-256   -240   
0      112    
208    288    
144    -224   
16     64     
-64    -352   
-192   16     
240    160    
96     96     
-96    -928   
-2016  688    
1104   -192   
496    -256   
-736   -1568  
-112   208    
720    160    
-240   -976   
-480   -1136  
416    -512   
-368   -256   
-64    -704   
416    384    
-304   -112   
-336   112    
512    -64    
112    -560   
80     -432   
-176   -944   
80     -96    
256    224    
-224   -144   
-336   -80    
16     -992   
1472   -2160  
-112   240    
-64    1616   
-320   512    
-192   -176   
128    512    
-224   176    
-128   -464   
-240   -176   
32     -896   
624    -208   
-256   208    
-1440  720    
272    528    
-160   -32    
-128   -384   
-288   32     
-144   -32    
128    368    
432    -112   
-144   -240   
-752   -240   
64     64     
304    -32    
-352   640    
-272   -496   
688    720    
928    -368   
-1728  -1376  
-288   272    
1168   -1040  
-528   192    
-192   -128   
144    176    
-144   -304   
256    48     
-128   -176   
-288   144    
-176   176    
64     -96    
272    112    
-96    -640   
-160   112    
160    -544   
32     -784   
144    -1248  
-208   -144   
-48    128    
208    -48    
-544   -64    
336    80     
112    160    
272    384    
-288   -368   
-544   -672   
336    -560   
-432   -160   
-80    -464   
-144   -320   
-160   -128   
368    -1888  
-112   -176   
-400   -64    
176    -368   
224    -80    
32     -96    
-160   -32    
-32    -256   
-432   224    
48     -16    
160    48     
-336   -16    
-288   -160   
464    -448   
128    368    
-160   -288   
-112   400    
432    832    
-384   272    
-528   -144   
48     288    
-192   48     
-304   16     
96     -32    
96     560    
32     176    
-32    -48    
-80    304    
208    -192   
32     64     
80     -80    
-256   -208   
304    -576   
208    -16    
-544   272    
192    -192   
-144   0      
32     16     
-128   112    
192    -80    
-96    -80    
-160   80     
96     256    
288    -80    
-176   128    
-96    -160   
1376   2736   
-2240  -320   
-864   48     
1712   256    
-1232  32     
-336   96     
432    -112   
336    -352   
-240   368    
-128   -336   
96     160    
64     144    
80     -208   
16     144    
-656   -800   
-464   -48    
304    0      
-560   192    
0      48     
-48    208    
-304   -144   
672    768    
656    192    
-1088  -32    
496    -48    
-256   -112   
-528   16     
144    -160   
448    208    
-128   -64    
-320   96     
464    32     
-144   160    
-352   208    
-80    -80    
-288   48     
32     96     
240    -32    
64     128    
-48    -128   
-192   32     
352    112    
-80    64     
240    96     
-352   80     
320    80     
0      -32    
-288   48     
128    48     
-384   304    
-944   592    
-16    384    
-416   224    
-320   -288   
240    176    
32     -224   
-368   80     
-176   320    
608    32     
-64    144    
-32    16     
-272   48     
96     -32    
112    0      
-464   0      
160    16     
-272   80     
112    -192   
-720   -256   
-160   0      
-32    48     
304    -528   
-1776  512    
400    368    
160    -416   
-592   -256   
608    160    
-224   -160   
16     528    
672    0      
-240   -16    
-576   -16    
16     32     
-560   -80    
64     208    
0      -208   
-320   160    
112    -96    
-48    -256   
-256   208    
64     112    
16     -144   
304    96     
176    -272   
-640   -64    
320    32     
80     528    
-352   -48    
-400   0      
320    144    
-480   -176   
-128   64     
384    208    
176    80     
-240   -32    
288    -96    
112    144    
-64    224    
-352   144    
288    96     
-64    -32    
-208   -16    
224    80     
-336   16     
-16    -16    
-304   -208   
48     32     
80     144    
-32    -16    
-448   544    
1056   1952   
-560   944    
112    -48    
1296   -352   
-1120  -112   
-384   -208   
848    16     
336    -32    
-800   0      
-96    -64    
-336   240    
144    -80    
-160   224    
-224   -80    
64     0      
288    0      
-80    64     
-288   -16    
-208   -400   
704    -736   
-112   320    
-400   144    
176    208    
-640   -320   
80     -320   
192    160    
256    -16    
-320   80     
208    -416   
288    -672   
-416   208    
80     160    
320    -352   
160    0      
-272   48     
-96    208    
-112   -384   
-112   -480   
512    -816   
-192   -32    
-224   -16    
0      0      
288    -32    
-96    0      
-240   864    
576    528    
-336   -656   
-96    -1088  
352    128    
-304   848    
-144   0      
192    848    
96     -160   
-752   368    
464    848    
-144   592    
-176   688    
192    -112   
-176   176    
144    64     
32     -32    
-64    -160   
-128   160    
-48    -48    
0      48     
80     752    
-272   928    
-288   192    
-32    -320   
128    64     
16     48     
-208   144    
192    48     
-112   64     
16     304    
192    64     
-48    64     
128    96     
-112   112    
0      176    
-64    160    
-384   -224   
768    -432   
-336   288    
304    -176   
-288   336    
16     144    
144    -544   
32     -352   
-96    128    
96     208    
-128   128    
64     -16    
224    16     
32     16     
-160   144    
160    -288   
352    -64    
-224   64     
-112   240    
0      64     
656    -224   
-1152  224    
320    48     
288    208    
-32    -80    
-80    32     
-144   16     
80     -144   
144    -176   
160    16     
-240   -32    
-256   -16    
320    128    
160    64     
-368   128    
-64    48     
352    272    
176    272    
0      192    
16     -32    
-64    128    
272    -144   
-160   -112   
-96    -96    
16     -32    
208    160    
-32    -16    
64     -112   
-480   464    
256    272    
-224   1488   
1584   272    
-144   -80    
-512   240    
320    32     
496    112    
128    992    
-496   224    
-336   -1360  
432    80     
0      352    
-400   -48    
240    -16    
-128   -704   
112    64     
48     176    
-128   -352   
-192   -528   
384    -288   
0      -48    
192    -240   
-2096  1056   
480    -240   
496    240    
-544   96     
-608   -736   
304    -544   
528    -64    
-688   -464   
304    96     
272    -1264  
-352   128    
-240   208    
432    128    
-32    -96    
-400   192    
272    -160   
352    224    
96     208    
-32    16     
-144   64     
-176   -112   
-560   32     
272    -512   
624    784    
400    48     
-48    -128   
-128   -48    
0      -192   
592    144    
416    176    
-336   -48    
-80    416    
272    80     
288    224    
-672   112    
272    416    
912    304    
-96    -864   
-80    160    
224    -16    
-336   224    
272    -816   
-304   256    
-64    32     
-240   192    
-336   64     
320    144    
-80    -784   
-1200  -1056  
1552   -2160  
368    -32    
-512   208    
-512   -112   
208    336    
240    -496   
144    160    
-304   -32    
-128   32     
48     176    
112    144    
16     -144   
-192   224    
-16    -80    
272    -256   
144    64     
-64    -64    
-48    -128   
240    816    
416    -64    
-560   128    
80     16     
64     -432   
320    128    
-288   144    
-32    32     
240    160    
48     -384   
128    -320   
-96    -64    
144    -128   
-16    -16    
-288   -224   
-16    -560   
32     64     
192    -192   
-512   80     
-496   -272   
576    -96    
-96    16     
-160   -480   
48     -80    
-480   64     
208    -144   
80     0      
16     -352   
-576   -544   
240    -1536  
384    -224   
-512   -16    
-64    -144   
688    128    
752    160    
-624   -976   
-352   -80    
736    -288   
-256   -160   
128    128    
80     176    
16     80     
-112   -96    
96     -48    
112    -704   
80     144    
48     208    
48     224    
-32    -32    
96     240    
384    0      
-96    112    
-416   144    
272    0      
-208   -128   
-96    -160   
-16    -352   
144    -256   
48     -176   
48     -336   
0      -144   
96     -464   
-800   -1296  
160    -848   
912    -176   
-368   -112   
0      144    
-96    16     
32     -144   
-272   576    
512    112    
-688   -448   
-128   112    
16     0      
-16    32     
304    -400   
-320   -480   
240    224    
0      96     
-144   112    
304    -16    
-16    96     
560    992    
-1424  -48    
-144   -80    
1152   -144   
-528   -128   
-480   -112   
272    80     
160    128    
96     -320   
-192   -352   
-112   96     
160    -256   
80     64     
-48    -128   
112    48     
-16    0      
-176   48     
384    -32    
-384   48     
-272   32     
160    16     
-416   -208   
64     0      
-112   -48    
-16    -96    
432    96     
-176   -416   
-176   64     
288    0      
-144   144    
-288   848    
3280   -80    
-1136  224    
-832   -128   
736    -96    
-48    176    
-672   176    
304    -96    
32     32     
-224   -208   
32     112    
288    -464   
-272   64     
16     160    
480    32     
-496   160    
32     -96    
-80    -272   
48     -96    
-48    0      
-144   -384   
928    688    
800    112    
-608   256    
-32    -96    
-16    0      
256    -80    
240    224    
64     -64    
0      -112   
-368   112    
160    -64    
-48    96     
-48    128    
-224   -112   
208    16     
128    288    
-304   -368   
-272   96     
320    -272   
32     0      
-1168  -672   
-160   32     
128    272    
0      -496   
-336   192    
560    -16    
-16    176    
-496   64     
-160   -128   
352    -16    
-64    128    
-960   -96    
112    -144   
192    336    
-720   -32    
-592   112    
928    -80    
-272   16     
240    -192   
112    176    
-208   64     
-48    48     
32     48     
-64    -96    
144    240    
752    192    
0      -64    
-800   112    
368    -560   
-480   1296   
-320   656    
-464   -848   
-944   -320   
880    208    
32     -400   
-560   1184   
880    -288   
-336   -240   
-352   80     
144    -16    
304    -32    
-208   -320   
-320   192    
-112   -368   
512    -448   
128    496    
48     416    
-144   -16    
-32    736    
448    752    
-144   176    
-96    48     
336    688    
208    480    
-448   96     
-240   -336   
-224   -32    
192    -256   
48     -32    
-304   288    
96     -176   
-256   -400   
48     -96    
48     -176   
96     -80    
-480   -400   
368    -320   
0      32     
-208   32     
-144   -240   
-288   -64    
-16    -288   
144    -1136  
-592   -624   
16     240    
-80    240    
368    -32    
-96    880    
32     -336   
112    688    
-624   144    
864    -288   
-272   304    
-48    848    
-160   -272   
112    -464   
-144   736    
208    1008   
160    -384   
-304   208    
96     0      
48     96     
-64    32     
192    -48    
144    -176   
96     -336   
48     -672   
368    -368   
-48    224    
-32    32     
-160   32     
208    -160   
-16    32     
-144   80     
-160   96     
224    48     
-80    592    
192    368    
-192   0      
-224   80     
16     -320   
96     -224   
-800   64     
400    -304   
128    80     
-240   144    
-512   -32    
16     32     
16     -80    
48     32     
0      -16    
-32    -176   
-96    -48    
160    -128   
-144   -48    
-16    -352   
160    -368   
32     -304   
16     96     
-320   -288   
480    -608   
-320   256    
112    400    
-240   496    
-80    48     
16     -64    
112    816    
224    192    
-320   192    
-80    144    
448    96     
-64    208    
-288   -80    
304    -48    
-240   16     
48     320    
112    -160   
256    80     
-64    656    
-128   352    
64     -144   
352    64     
0      320    
-304   -48    
-288   240    
464    48     
208    -320   
-128   -208   
-352   384    
640    -448   
-2640  448    
128    304    
1312   752    
-608   848    
-112   96     
112    128    
-272   64     
-112   208    
528    48     
-112   -48    
-384   -96    
48     48     
-48    32     
240    304    
-112   176    
-64    96     
-64    128    
128    128    
-64    0      
-208   160    
272    1184   
2208   192    
-1504  144    
16     304    
672    80     
-448   -32    
112    -112   
144    272    
-16    -64    
96     192    
288    48     
-64    112    
-192   -128   
-352   64     
544    112    
112    48     
-496   32     
32     48     
224    96     
-16    192    
240    464    
-16    -176   
-448   -48    
96     176    
96     -80    
-288   -368   
-224   -96    
320    -32    
176    240    
-432   128    
176    432    
160    192    
592    80     
-48    64     
80     96     
-64    -80    
-48    64     
-16    496    
-304   160    
-64    -112   
416    -112   
-80    128    
0      176    
96     64     
-368   -448   
-64    96     
544    96     
-832   208    
-256   -1792  
-80    -3456  
-2208  -1056  
400    -544   
720    256    
-400   -224   
-640   432    
-176   -896   
336    304    
32     -160   
-96    400    
80     -176   
128    352    
-304   96     
-128   160    
128    0      
32     176    
-304   16     
-48    96     
240    48     
768    -528   
-688   160    
224    -480   
-96    -16    
-768   48     
224    0      
656    208    
-160   -32    
-848   96     
992    288    
-176   16     
-208   176    
176    96     
64     -16    
-352   -112   
496    -464   
16     -224   
-480   0      
192    256    
352    -1200  
112    96     
-112   176    
-240   -176   
128    208    
192    64     
-48    176    
-96    96     
128    -32    
-96    -128   
144    -160   
-240   -96    
64     176    
304    320    
304    64     
-864   -928   
144    240    
-112   -16    
208    -16    
-272   -720   
-256   -208   
272    -272   
-352   -80    
176    -48    
16     -64    
-144   32     
-80    -272   
224    160    
48     -704   
-176   -304   
144    784    
-192   288    
320    -480   
192    16     
-416   272    
64     80     
272    -160   
16     -80    
-112   160    
224    32     
-32    -416   
80     64     
80     288    
-896   1360   
2048   -800   
-288   80     
-832   -288   
672    -64    
144    336    
-272   -144   
-576   736    
624    -32    
0      112    
-48    96     
-96    -720   
32     192    
128    -992   
192    48     
0      384    
-160   160    
384    -80    
-112   192    
-208   -656   
576    -128   
-1328  592    
576    -160   
576    32     
-480   -400   
-48    -2352  
32     -32    
96     144    
16     288    
256    272    
-160   -208   
-384   112    
240    -288   
320    240    
-128   -80    
-288   -1392  
432    432    
-16    -96    
-32    128    
160    -144   
-48    -240   
64     -96    
-48    -160   
-64    -176   
112    -544   
112    -240   
0      112    
-144   -128   
0      -976   
-496   288    
1312   -128   
528    144    
-1104  -560   
336    -272   
-48    -288   
-544   -32    
176    272    
64     -96    
112    -112   
160    -192   
-304   -112   
-288   -96    
448    128    
304    16     
-400   -80    
-16    128    
368    112    
-128   -64    
-336   -16    
-96    -32    
-112   -784   
1328   608    
-288   -144   
-656   32     
1440   -208   
32     32     
-32    -624   
896    -32    
-128   -224   
0      80     
-16    -48    
-32    144    
176    160    
-144   -16    
-592   -192   
272    64     
-48    -272   
160    -288   
240    0      
-16    592    
-336   352    
64     -832   
-432   -544   
320    -304   
-80    160    
-144   -432   
1248   416    
208    464    
-512   -208   
96     -96    
128    16     
-288   32     
-32    32     
-128   -208   
-624   192    
0      272    
592    -1216  
-368   384    
-368   432    
-16    -16    
352    -32    
-112   -128   
-400   -160   
304    -480   
400    688    
-288   112    
-1056  384    
672    192    
32     128    
-112   -320   
928    1344   
-1600  416    
112    -176   
1248   -1216  
-272   112    
-704   -768   
-176   -864   
720    -272   
-320   -96    
-96    448    
64     -192   
112    80     
208    -192   
-528   -64    
64     160    
144    352    
-256   -416   
-112   -256   
304    -400   
128    240    
-416   0      
-48    -112   
240    160    
144    -48    
-544   -400   
496    -576   
160    640    
-176   608    
48     -464   
240    -112   
80     720    
-240   -560   
-48    -32    
256    -400   
32     848    
-240   352    
256    -208   
-16    32     
208    1024   
-64    -32    
112    -624   
-656   -48    
304    288    
432    -32    
96     -160   
-224   432    
-176   -160   
192    -496   
-112   160    
-592   96     
-240   144    
-880   -432   
592    -816   
-48    -320   
-176   96     
80     240    
48     -416   
32     480    
-112   240    
-48    128    
176    80     
-160   -112   
96     112    
-272   -80    
-144   80     
-112   272    
-160   336    
192    80     
-240   -864   
-288   -144   
-96    384    
-80    -128   
128    -384   
-208   112    
-80    -64    
-240   -192   
288    -256   
112    528    
32     -400   
-624   336    
112    112    
-96    240    
48     -336   
-432   -656   
432    -976   
-848   -736   
-16    640    
-16    848    
48     -16    
-16    -528   
48     80     
160    -192   
-112   48     
-240   -32    
-96    -64    
48     96     
304    96     
160    16     
-176   112    
-256   48     
-80    368    
224    1184   
-112   16     
-464   240    
208    848    
208    912    
-416   -768   
-64    -560   
272    128    
64     64     
48     64     
80     -96    
-144   -32    
-224   48     
432    192    
-256   224    
-112   144    
-416   -112   
0      -16    
112    0      
144    368    
-208   240    
-48    288    
240    16     
-96    320    
48     -80    
-80    0      
224    64     
-224   96     
48     528    
0      672    
1392   -144   
-1616  0      
-832   16     
1312   48     
-288   400    
-640   464    
288    -624   
-240   -224   
-176   -176   
-64    160    
688    80     
16     96     
-384   -144   
-352   80     
416    -160   
-16    144    
-224   96     
144    128    
-320   80     
64     -1424  
-256   -768   
-1008  704    
1040   -48    
-992   -16    
624    208    
336    64     
-560   208    
-208   -32    
-192   208    
304    -112   
-48    160    
-192   -32    
160    240    
-640   -208   
576    272    
-96    16     
-368   32     
128    -144   
48     16     
240    16     
-240   -224   
288    368    
1024   -64    
-304   64     
-128   -48    
704    -80    
-112   336    
-816   128    
352    64     
560    0      
-208   0      
-368   256    
320    64     
-64    -16    
-112   -176   
704    -192   
-432   -160   
-144   112    
592    -16    
320    160    
-160   256    
-528   112    
208    112    
304    80     
-240   -480   
-672   0      
384    112    
-112   -16    
736    1296   
-288   -1808  
-2736  -256   
1152   -416   
160    416    
-112   -32    
-448   48     
496    -160   
-192   336    
-208   160    
128    0      
48     48     
416    -96    
-800   176    
0      16     
32     -16    
160    64     
64     160    
-464   -64    
-112   64     
928    -240   
-592   176    
224    48     
-288   144    
-752   -112   
432    96     
480    176    
-480   128    
32     144    
-336   -160   
384    272    
-192   0      
-32    192    
112    112    
0      48     
-144   176    
-256   -64    
144    224    
-96    48     
144    0      
304    128    
-304   32     
64     64     
-64    48     
176    96     
-16    144    
128    144    
-304   32     
272    384    
80     64     
-160   304    
0      16     
112    720    
16     -160   
-560   432    
-96    -432   
-608   -32    
256    64     
272    352    
464    176    
-320   -192   
0      128    
112    144    
32     96     
16     -144   
-160   48     
32     -144   
-96    -656   
16     -80    
-48    448    
224    -64    
64     -64    
-208   352    
240    368    
64     112    
-128   -96    
0      464    
-80    112    
144    -192   
0      -144   
-32    208    
-416   -816   
1360   -1552  
-576   672    
-160   -1040  
-128   32     
160    224    
208    80     
592    96     
-96    752    
-432   240    
176    32     
416    -192   
-160   208    
-128   -176   
64     688    
224    -48    
-368   -192   
144    -48    
48     -1168  
-128   256    
208    0      
-384   -672   
640    -352   
-432   -144   
128    -112   
208    864    
-208   144    
96     240    
-64    -208   
-48    -64    
128    368    
592    496    
-560   576    
-144   -352   
608    80     
64     -816   
32     -160   
-208   48     
48     368    
304    96     
-112   208    
-176   -16    
208    224    
160    144    
-80    0      
32     240    
-32    -64    
16     144    
0      -16    
-16    -32    
352    80     
752    -272   
-1280  0      
912    176    
-656   -48    
0      -384   
-32    160    
656    16     
32     -112   
-320   -64    
48     320    
320    -32    
-192   80     
-16    208    
144    320    
-224   -32    
128    32     
112    -720   
-384   -176   
-64    -160   
112    -48    
544    -64    
-2336  32     
-192   112    
1120   -240   
-464   -288   
-608   -464   
464    1104   
864    752    
-384   256    
0      -144   
112    160    
-64    176    
144    192    
-112   464    
-16    528    
-160   -160   
432    864    
-368   688    
-368   32     
528    464    
-48    0      
-144   48     
-144   736    
576    1232   
-800   448    
176    816    
944    0      
0      -608   
-160   160    
160    -48    
-368   16     
80     80     
-64    -912   
560    544    
864    -1248  
64     -480   
-160   672    
-240   432    
-288   992    
384    256    
-144   -32    
-416   -160   
352    -928   
448    -96    
-400   80     
-32    32     
576    240    
176    -80    
-320   32     
-16    -368   
-448   1824   
192    576    
-832   -464   
-400   -208   
992    80     
-192   -288   
-512   -1360  
160    -640   
432    1344   
0      80     
-304   -800   
-496   -192   
320    -304   
176    208    
-352   -256   
80     -336   
-384   -416   
32     -160   
352    -1360  
-208   240    
-48    -128   
304    176    
-320   -144   
-400   640    
384    16     
272    288    
-800   -160   
512    416    
416    304    
-128   -560   
-240   -96    
-160   -1072  
304    48     
256    -2432  
-512   -400   
-128   -496   
384    48     
-144   -848   
-592   -176   
288    384    
336    992    
-224   432    
-352   -320   
-592   -496   
48     -320   
-288   -176   
32     -928   
368    352    
128    1280   
-336   384    
-144   -1920  
592    -480   
32     64     
-560   -112   
176    1136   
944    448    
-16    1360   
-272   -32    
-144   -864   
48     464    
-480   992    
112    32     
176    -432   
16     -272   
0      224    
272    -1680  
-192   -400   
-96    -464   
368    -352   
-128   400    
-192   80     
-80    -304   
80     -432   
-352   -224   
-48    -288   
96     -96    
96     -464   
-192   128    
-160   -256   
128    48     
832    928    
-1360  384    
0      -368   
896    432    
-48    -640   
-544   -336   
320    80     
400    64     
-528   0      
32     368    
-80    384    
-80    -256   
-32    -16    
96     -496   
-272   80     
192    -352   
64     -272   
112    -112   
-160   -208   
128    -96    
64     16     
-432   1392   
544    -320   
-576   -320   
64     432    
400    -672   
-176   -608   
-336   -272   
304    -144   
272    -96    
-192   -368   
96     64     
-304   -272   
-112   -96    
64     -64    
176    -80    
-400   160    
-80    -144   
80     -64    
96     -176   
-608   0      
160    -48    
-112   32     
-80    -32    
96     32     
-1632  -384   
-464   -96    
160    112    
-432   64     
-576   16     
1424   -512   
-3104  320    
-352   32     
2032   64     
-688   -144   
-1008  336    
-48    -32    
528    400    
-912   -128   
48     288    
64     -272   
-304   96     
112    -48    
-288   112    
256    16     
-592   64     
0      48     
464    48     
-128   128    
-112   -128   
64     112    
-304   -944   
-1184  640    
896    -320   
-288   0      
-128   -192   
608    304    
256    96     
-688   -192   
-464   16     
352    -64    
352    80     
-624   32     
-288   16     
0      -96    
-80    96     
-48    -128   
96     288    
32     -368   
384    -272   
80     0      
-224   -64    
352    112    
304    128    
112    -128   
416    -48    
32     -304   
240    -336   
576    224    
-1056  0      
-128   304    
656    -48    
-256   -64    
-192   -208   
48     -16    
-160   -48    
208    112    
480    32     
112    624    
-448   224    
-256   96     
352    -16    
-544   -16    
-96    96     
-144   48     
96     -240   
-672   48     
-80    -224   
-256   -784   
-64    -528   
1728   -3120  
-3200  -368   
464    800    
768    -96    
-256   192    
-208   -48    
-400   -96    
-48    -32    
144    240    
-512   -192   
208    96     
272    -128   
-320   32     
-112   128    
544    -16    
-80    48     
-128   128    
192    -16    
-96    -272   
320    208    
16     -144   
-352   112    
112    192    
-80    80     
-128   48     
-80    112    
272    32     
-192   -112   
-80    320    
288    -48    
-96    16     
-144   32     
-80    -160   
-80    128    
224    -112   
-368   -64    
304    -160   
-336   80     
-32    -48    
80     32     
-112   64     
-320   -64    
80     -16    
-256   144    
-80    96     
176    208    
-224   -80    
-112   0      
320    -80    
-80    -16    
-304   -16    
-64    -96    
288    -400   
-304   240    
416    288    
-80    576    
-384   304    
256    960    
720    624    
-128   240    
-336   64     
192    96     
160    32     
-240   128    
-32    -112   
48     32     
240    464    
-240   224    
-64    320    
48     592    
128    416    
-176   320    
160    192    
-112   256    
-48    96     
80     -128   
48     -160   
320    -192   
-432   320    
128    400    
96     48     
400    -768   
-1392  1808   
928    -176   
192    112    
0      16     
-576   272    
304    0      
544    544    
-352   624    
-160   112    
16     32     
64     64     
112    144    
-80    32     
-304   -16    
240    192    
-16    -64    
-144   -80    
-96    352    
112    96     
192    816    
-672   240    
192    -448   
336    -624   
-240   288    
-112   -16    
-48    368    
32     192    
32     -16    
0      192    
-80    32     
-80    -32    
64     -48    
-192   928    
-32    0      
-112   -64    
80     -240   
384    320    
-16    128    
-128   -160   
48     128    
96     128    
64     112    
80     -112   
-112   -224   
160    240    
80     112    
-240   64     
-64    32     
512    -272   
400    -752   
-1904  592    
1232   544    
64     240    
-656   208    
192    496    
-96    -208   
32     32     
112    -80    
144    304    
-16    224    
-128   32     
64     -224   
-48    272    
48     -176   
32     192    
-48    -96    
16     -224   
32     -112   
-208   48     
-16    -64    
272    800    
2144   -288   
-864   -128   
-1136  592    
576    576    
368    736    
-304   736    
288    768    
112    -768   
-336   -544   
480    -192   
144    560    
-448   352    
128    -224   
432    -272   
-272   16     
-160   128    
-144   0      
-64    -464   
160    -288   
-112   -144   
128    -64    
80     16     
-528   -1232  
-80    352    
1344   1712   
-1152  800    
-80    448    
352    -112   
-192   -256   
64     -192   
-384   128    
672    -80    
288    112    
32     304    
432    144    
-320   1456   
512    400    
-288   -976   
-272   -16    
288    -2752  
272    -448   
304    -512   
-176   -160   
368    -912   
-64    208    
-160   400    
96     368    
112    112    
-512   -1376  
1248   -1040  
1344   -528   
-1040  -560   
-912   -1056  
816    -1312  
688    -1184  
-272   256    
-160   112    
64     608    
-32    -208   
144    -160   
96     -192   
-16    336    
80     -16    
-16    -128   
-192   -144   
-112   32     
112    496    
80     16     
96     192    
-64    -464   
-224   -272   
-32    -96    
320    -1248  
-608   0      
96     32     
-112   -288   
-112   -48    
0      192    
416    1120   
128    656    
96     -688   
-96    -208   
80     -160   
-320   -224   
400    -480   
64     64     
-192   -80    
80     352    
192    0      
16     336    
-272   -208   
-16    -16    
672    48     
-864   -848   
-48    -336   
592    352    
-288   -464   
-304   -928   
96     -144   
480    -528   
-1200  384    
256    704    
752    736    
64     960    
-144   64     
128    160    
112    -176   
16     1328   
-176   848    
368    368    
240    -128   
-336   416    
-112   -208   
192    -144   
352    320    
-368   544    
144    1056   
80     -208   
48     448    
272    -368   
-96    -80    
-608   -160   
192    -416   
-96    -720   
400    -1376  
-320   -1104  
-208   -1904  
192    -544   
-384   -592   
1200   272    
432    128    
-832   -176   
128    -320   
48     -192   
464    -304   
-80    128    
-112   256    
80     -176   
-48    32     
272    -560   
32     -48    
-112   -144   
128    -320   
192    -528   
-112   -320   
96     0      
112    304    
-176   32     
224    128    
912    800    
-1552  48     
-480   0      
736    -368   
-512   -352   
-112   -32    
128    -160   
224    -320   
-304   -80    
96     -1632  
256    -112   
-160   192    
-112   160    
112    -16    
-128   -32    
-96    -416   
128    -32    
-32    -80    
-160   0      
-432   80     
352    32     
-304   -16    
-32    -160   
176    96     
240    0      
32     96     
-272   96     
272    64     
32     -240   
1328   1888   
-368   -688   
-2464  624    
944    -160   
480    -208   
-688   64     
288    -256   
688    112    
-176   -352   
-80    -48    
96     -256   
16     208    
-48    -1488  
80     64     
416    -48    
-176   -160   
-160   144    
144    -352   
-144   -48    
0      -144   
-400   -192   
176    -208   
352    -208   
-1936  -672   
496    416    
1456   -368   
-1264  96     
-64    -368   
304    0      
464    -336   
144    32     
-400   80     
144    48     
64     16     
96     32     
-96    -96    
-144   80     
0      -400   
144    -128   
0      96     
-64    -400   
256    48     
-160   -352   
416    -128   
-272   144    
-144   -160   
512    64     
-48    -48    
-608   -400   
-496   -64    
416    144    
144    48     
-448   48     
48     -112   
272    -144   
-112   -240   
16     32     
208    -464   
720    256    
160    -80    
-144   -272   
-208   16     
64     48     
-32    80     
320    32     
-144   16     
-544   96     
-48    -64    
96     -48    
-192   -768   
1840   3216   
-544   1184   
-960   -592   
1184   -304   
-64    -144   
-1264  -48    
368    208    
464    80     
-304   -320   
-1120  -112   
528    16     
208    -176   
-272   80     
-320   -16    
-64    48     
-64    32     
320    64     
-80    -16    
-560   -288   
784    32     
-48    -48    
-352   112    
-432   176    
-576   -256   
-96    -208   
576    160    
-352   -208   
0      64     
336    -240   
-160   -32    
-96    -192   
-48    32     
-48    -96    
-240   144    
256    -256   
-496   -304   
160    -336   
-176   -304   
-112   -32    
-96    -144   
-16    0      
224    -96    
-304   176    
-32    128    
160    480    
128    160    
-480   -464   
-96    -288   
192    -96    
-16    -288   
-80    80     
-80    368    
0      -80    
-160   -304   
-64    -32    
80     -128   
-144   -576   
-352   -576   
176    -752   
352    -432   
-400   -304   
-112   16     
176    96     
-208   -48    
208    -272   
208    -224   
-288   -192   
-336   -464   
192    224    
64     -80    
-208   320    
-992   -96    
64     112    
-48    0      
16     -80    
-192   -368   
64     -208   
-64    -304   
0      -272   
16     288    
-208   -48    
448    -784   
-784   336    
144    0      
384    -912   
-176   -160   
-368   -48    
480    -272   
432    -144   
-192   64     
-80    432    
-144   -48    
-80    96     
208    240    
128    -96    
-320   16     
80     112    
240    400    
144    -48    
-224   -176   
96     -112   
304    -240   
-720   416    
160    -96    
384    -304   
-80    64     
-272   448    
16     176    
64     -16    
32     -176   
-32    80     
-80    32     
-208   128    
112    48     
-64    32     
48     192    
144    -208   
-400   -112   
-464   432    
448    256    
-368   16     
-208   96     
0      0      
272    32     
112    0      
80     112    
-576   160    
224    32     
176    -96    
-464   -80    
48     224    
-1280  1808   
1904   -80    
-528   512    
-16    128    
496    544    
288    464    
-448   -544   
-368   368    
64     192    
336    224    
-48    0      
-304   -240   
112    256    
128    112    
-176   384    
-64    -368   
368    128    
112    592    
-432   752    
128    -688   
496    1712   
-32    -1072  
-1568  528    
864    -288   
-592   -48    
96     -16    
96     608    
576    1168   
-752   1968   
16     1152   
96     112    
-400   80     
288    416    
176    400    
-224   288    
-368   144    
432    448    
64     240    
-384   384    
-32    224    
64     32     
-112   112    
176    368    
-144   -128   
-464   -800   
-416   -1728  
-160   -832   
352    -304   
-688   -32    
-192   272    
160    304    
-288   480    
-144   -16    
416    -704   
-288   -112   
336    288    
256    176    
144    -256   
-320   -272   
304    0      
-80    48     
-416   304    
240    -416   
-352   352    
112    16     
-544   576    
544    0      
64     0      
-224   432    
-112   176    
-560   2352   
80     704    
-304   -64    
-272   -256   
496    912    
592    704    
-768   1152   
-400   -320   
912    0      
352    64     
-912   0      
-224   16     
816    48     
224    128    
-624   -64    
32     128    
192    -48    
400    -96    
64     -464   
-448   656    
240    352    
112    -16    
336    -128   
368    16     
-752   192    
272    288    
48     272    
96     -48    
112    240    
-256   592    
96     944    
176    272    
64     160    
400    224    
160    -32    
-368   -64    
256    -176   
64     48     
-304   48     
48     128    
64     48     
-48    -16    
-208   -96    
144    64     
128    -128   
-416   944    
272    912    
240    96     
-720   -288   
176    -512   
80     160    
-304   16     
928    128    
-48    80     
-112   176    
192    -128   
-288   -416   
16     -224   
160    64     
80     16     
-32    176    
-80    240    
64     176    
-32    144    
160    -112   
0      160    
-224   -16    
256    0      
288    -160   
-656   448    
256    -16    
304    48     
-208   -160   
-176   176    
112    32     
160    1040   
528    272    
-272   -304   
-192   400    
304    -80    
640    2272   
-896   -1152  
-912   512    
1152   -128   
192    -160   
-688   -512   
112    576    
832    400    
-192   -32    
-256   -80    
96     224    
96     -176   
80     -96    
48     384    
-336   288    
176    32     
112    -784   
-64    256    
112    -256   
-112   80     
144    -448   
-272   944    
1232   -208   
-160   64     
-752   -240   
128    192    
560    -80    
-80    -416   
-304   400    
112    -624   
64     208    
352    -272   
-192   -16    
-240   16     
272    400    
384    240    
-160   64     
-224   32     
16     32     
112    96     
-16    80     
144    16     
-48    -272   
240    0      
-192   -192   
16     128    
416    -80    
-320   144    
64     -160   
144    128    
624    -1360  
-2064  -256   
736    224    
704    -288   
-864   64     
240    -160   
96     -560   
-112   -112   
272    32     
128    -64    
80     48     
-304   -128   
96     64     
352    -32    
-336   0      
-240   240    
608    -496   
-48    -32    
-416   -1408  
144    -64    
-400   -176   
416    880    
64     -480   
-1984  176    
1072   -336   
816    -1616  
-976   -32    
-16    -112   
768    32     
-208   -160   
-352   32     
112    -160   
0      112    
-224   -416   
320    -80    
-128   -48    
-240   -160   
176    -160   
192    -624   
128    16     
-224   -1056  
-160   -112   
16     -608   
-864   96     
384    -48    
288    48     
128    -144   
-384   224    
-320   -592   
240    -224   
176    432    
-224   -96    
-64    -272   
-160   -272   
0      32     
-336   -192   
208    -208   
-224   -304   
352    96     
176    -176   
-64    32     
-144   -80    
-16    128    
304    0      
-80    32     
-304   32     
288    -144   
-304   -48    
128    -96    
-32    64     
-144   -1168  
1552   -1984  
656    -16    
-1280  64     
-576   128    
496    112    
768    -64    
-544   208    
-320   -128   
768    -48    
-576   -48    
-16    48     
240    -32    
64     96     
-128   -112   
288    -16    
-704   -224   
16     -96    
128    -64    
-192   -16    
176    -32    
-48    144    
160    -128   
-640   16     
-96    -48    
320    16     
-208   208    
0      48     
-160   -400   
-16    -800   
256    -224   
-224   640    
48     352    
-144   128    
160    -816   
-64    128    
160    64     
-656   -1120  
-160   -496   
416    -176   
-224   -208   
-64    -160   
-176   -256   
144    48     
-272   -96    
256    -400   
160    -672   
112    80     
-320   432    
80     -816   
208    -336   
-272   64     
-80    1040   
928    528    
-480   1200   
176    864    
-48    560    
-80    1360   
544    2016   
-48    -192   
-16    -272   
192    64     
-32    -192   
-80    64     
144    -240   
192    576    
-48    192    
64     -48    
-544   -320   
128    -64    
64     -144   
144    -80    
-128   208    
-208   128    
224    432    
64     112    
-208   160    
-80    -160   
176    96     
-768   32     
-16    112    
144    -48    
-432   -656   
-320   -144   
-192   144    
336    -160   
128    96     
-144   -192   
-80    -112   
-304   176    
-176   -112   
112    64     
-224   -144   
48     32     
0      0      
-400   112    
32     -64    
-512   176    
96     48     
-304   -64    
160    0      
-16    -128   
320    96     
576    320    
-512   0      
-32    32     
96     160    
-80    -208   
240    -176   
32     112    
-288   112    
-144   64     
240    -80    
96     -80    
-96    96     
-64    -192   
-256   -16    
-16    96     
-80    -288   
0      -640   
80     -240   
176    128    
-224   256    
224    160    
-192   128    
-304   288    
48     320    
224    80     
-240   96     
-80    192    
224    -192   
-800   -992   
2048   -816   
-1568  528    
-144   80     
-128   48     
-144   400    
-192   -304   
-112   160    
256    -144   
16     -160   
176    96     
0      -32    
-160   48     
-128   -128   
272    176    
16     208    
-112   80     
-400   -416   
528    656    
176    400    
-176   160    
-912   -672   
832    -400   
848    -448   
-1328  0      
576    288    
-192   48     
-352   -704   
-1136  -272   
608    -656   
160    -816   
-32    -176   
-128   -112   
-192   -96    
-224   -112   
-32    448    
176    -32    
-96    -304   
-752   400    
48     160    
432    464    
368    288    
-352   176    
-320   416    
688    -784   
-416   -16    
-512   -944   
-224   -544   
320    -176   
16     -80    
32     -96    
-368   -16    
176    -96    
320    112    
272    0      
-144   -96    
-256   320    
400    -80    
-64    -16    
-480   -16    
192    -224   
336    80     
-448   128    
-48    -752   
-288   -48    
304    16     
-768   336    
-16    0      
96     32     
592    800    
-256   -528   
736    -2240  
512    128    
-384   368    
-528   48     
288    240    
32     -320   
336    352    
32     -400   
-464   96     
352    -48    
176    224    
-32    80     
-368   -32    
160    192    
144    -16    
-256   192    
272    -16    
-400   -512   
448    -1408  
160    80     
-96    448    
-16    560    
-512   -80    
48     96     
704    -48    
-144   160    
-208   32     
112    320    
336    16     
-16    160    
-160   48     
0      288    
144    432    
-144   128    
-288   16     
272    160    
304    16     
-80    80     
-640   -32    
496    32     
352    48     
-368   112    
32     -160   
-464   -240   
608    272    
-224   160    
-176   144    
-16    -288   
208    -80    
-144   -48    
-224   -176   
496    -128   
656    208    
-448   288    
-176   432    
32     256    
-320   176    
16     32     
64     80     
-80    48     
96     80     
192    -48    
-160   -32    
-48    96     
112    80     
144    -128   
-112   -288   
160    16     
-160   352    
80     -192   
-96    -48    
-224   224    
272    96     
64     32     
-96    64     
-48    208    
256    -336   
-96    -112   
16     416    
-96    -112   
-448   -1936  
-656   576    
1344   176    
-176   128    
-304   736    
688    160    
-624   192    
-432   -256   
528    0      
208    192    
-400   -80    
-32    -192   
208    288    
320    112    
-672   112    
80     -336   
400    -96    
-176   -400   
96     -304   
32     0      
272    1136   
-384   -192   
-720   272    
944    112    
48     16     
-912   32     
192    32     
736    144    
-176   64     
-256   16     
64     208    
176    112    
-32    -1280  
-176   32     
-256   48     
336    48     
336    -160   
-544   16     
400    -192   
-80    272    
112    64     
-96    320    
32     -112   
80     240    
112    -48    
-384   32     
-128   0      
240    -704   
176    32     
-496   -720   
608    1216   
704    -448   
-464   224    
-224   -288   
544    336    
-240   -144   
-128   864    
432    576    
-272   528    
-400   112    
304    -272   
64     80     
32     -416   
16     -160   
-432   -896   
512    32     
-144   0      
304    368    
272    144    
-112   208    
96     208    
-720   -32    
1728   -160   
528    -368   
-1296  -160   
464    -80    
560    112    
-288   -96    
-528   32     
640    -192   
176    144    
-208   -96    
144    96     
-112   -32    
0      48     
288    48     
48     96     
-224   -96    
48     -176   
96     176    
-32    -128   
-16    -80    
880    224    
-960   -192   
-272   -1040  
960    192    
-736   176    
48     176    
704    -64    
-304   224    
-256   -32    
336    64     
224    -48    
-96    -32    
-16    -224   
-48    16     
128    -544   
-48    -256   
272    176    
-208   64     
-96    128    
448    432    
-512   288    
-112   32     
112    16     
0      -624   
112    80     
-48    64     
-96    -352   
544    -1168  
-1088  288    
-112   848    
112    -208   
48     -192   
496    304    
-240   -240   
-688   -880   
-160   -176   
320    0      
224    -32    
-112   112    
-16    -16    
64     -736   
96     -96    
48     -2432  
0      -32    
-32    -64    
-80    160    
496    576    
-448   0      
80     -80    
32     -464   
272    -2080  
272    544    
224    96     
-96    288    
-1824  432    
560    592    
192    -128   
-160   -672   
-288   -80    
208    -144   
16     -448   
112    -320   
-112   -208   
-96    -240   
224    32     
304    -272   
-144   176    
48     -16    
144    -32    
-640   32     
16     -352   
128    832    
240    1200   
16     368    
-240   -288   
352    -960   
32     288    
-128   160    
-144   -192   
-272   -384   
944    -880   
-288   -416   
-320   912    
496    624    
-112   0      
-208   -32    
32     -128   
192    -144   
208    -240   
-144   -256   
32     -16    
-32    -432   
-400   400    
160    -96    
-160   -144   
16     -368   
480    -112   
-144   192    
96     -112   
-16    0      
144    -32    
-416   0      
80     16     
192    48     
-32    0      
-240   208    
192    192    
96     32     
-272   -608   
288    608    
704    432    
-272   -192   
-224   320    
-80    -32    
208    64     
-112   48     
0      0      
240    -384   
-16    -32    
-16    192    
64     160    
-96    -256   
112    -32    
192    -1456  
-160   240    
-96    32     
-80    -112   
16     -192   
-192   -528   
512    -624   
-16    288    
-224   -96    
-144   160    
48     16     
-144   -400   
-112   -352   
80     -576   
16     96     
0      -112   
48     32     
272    -176   
16     -80    
-96    -32    
48     16     
-208   -272   
-48    -240   
-80    -624   
160    144    
-336   160    
-144   -224   
144    64     
400    -336   
-160   -32    
-96    -32    
144    240    
-320   48     
176    -64    
-496   0      
1184   1104   
-1376  1168   
-640   96     
1056   128    
32     224    
-1552  32     
336    -256   
208    -32    
-48    -736   
-176   -224   
304    192    
-32    496    
144    160    
-48    80     
64     16     
-128   -64    
-160   -288   
128    -32    
-48    128    
-288   160    
176    80     
-784   -576   
1088   -544   
-48    -848   
528    1424   
880    -48    
-720   -544   
368    144    
-400   -48    
-208   -96    
-144   32     
0      32     
-176   80     
-48    -352   
-192   -112   
176    112    
-192   -288   
-208   320    
-112   -128   
32     -224   
112    -496   
80     144    
-544   -336   
800    -176   
-96    256    
-608   -112   
448    672    
-400   160    
-656   -208   
224    -32    
448    384    
-192   -112   
-176   96     
-288   -224   
256    0      
240    -64    
512    -448   
224    -272   
688    -432   
-320   -16    
-336   192    
320    32     
-112   -32    
-320   112    
320    -176   
160    80     
-272   -160   
48     96     
-48    -112   
112    -560   
976    1328   
-1584  1440   
192    -304   
1856   -208   
-320   -160   
-1120  96     
80     -128   
672    320    
-576   -240   
-192   144    
688    -48    
-288   112    
-16    80     
-48    0      
-128   -80    
48     272    
-320   16     
16     144    
144    -80    
624    -656   
-528   112    
48     -64    
16     256    
-400   0      
-848   -32    
928    192    
-464   -336   
-480   368    
304    0      
208    -80    
0      16     
-272   32     
-16    160    
416    128    
-496   160    
-32    64     
16     48     
304    240    
96     -48    
-960   -112   
304    96     
-848   -144   
-432   -48    
48     -224   
-256   -32    
288    16     
-336   80     
96     112    
-192   0      
16     -32    
-96    -32    
-64    -160   
432    -144   
672    -176   
-544   -192   
256    32     
-16    80     
-496   96     
16     128    
64     32     
-320   48     
-144   208    
352    16     
-16    112    
-112   144    
48     112    
432    272    
-496   656    
368    672    
-64    -144   
-96    208    
-240   -112   
16     272    
-208   96     
144    0      
128    -32    
-96    -256   
-320   16     
416    480    
272    464    
-496   -240   
352    -1904  
-2144  1392   
896    304    
672    240    
-256   -48    
-624   -224   
96     -656   
-80    192    
288    624    
304    112    
-512   -80    
-128   448    
528    -112   
-64    -96    
-656   336    
240    112    
16     -80    
160    -32    
-16    96     
-128   144    
-320   -752   
1056   -528   
-272   448    
-368   208    
544    -192   
-272   256    
112    0      
112    -368   
-112   208    
-128   80     
208    32     
-64    -112   
48     256    
-144   -112   
-176   0      
288    -64    
-112   32     
-208   -272   
464    -160   
-96    16     
64     16     
0      208    
0      0      
0      144    
-32    -128   
96     160    
-80    -96    
-80    160    
-16    48     
288    256    
-832   -1632  
-2656  752    
1456   -96    
896    128    
-624   96     
-1056  32     
816    448    
208    288    
-528   480    
240    -16    
96     128    
-224   -16    
80     96     
80     208    
144    112    
-464   192    
208    -48    
64     256    
256    128    
-96    224    
-272   80     
240    -720   
-1392  1104   
848    288    
-352   224    
-160   -112   
-144   -336   
-80    304    
-112   48     
-96    80     
176    16     
192    -96    
144    336    
16     208    
128    256    
-384   32     
-208   16     
208    -64    
-448   176    
160    -48    
192    -32    
-176   -304   
-192   -1296  
0      560    
-128   -1440  
112    -32    
64     352    
96     -672   
-592   464    
224    80     
-672   352    
-64    64     
128    -112   
320    16     
-144   432    
-560   96     
-672   144    
272    -224   
832    -288   
-240   -80    
-240   912    
672    16     
-112   96     
-144   144    
144    -64    
144    464    
128    -16    
-176   -80    
160    -48    
-224   -128   
-176   288    
-256   2544   
832    224    
-960   -128   
-112   -160   
1248   272    
-560   496    
-1216  -1024  
384    304    
480    496    
-480   736    
32     16     
-112   32     
320    96     
-176   -176   
64     -192   
176    -288   
-464   -144   
272    16     
192    -576   
-256   -176   
64     -1088  
112    128    
336    -304   
-448   864    
192    112    
-64    880    
448    48     
-384   288    
96     -128   
208    128    
-144   -112   
-288   48     
208    384    
32     464    
352    784    
80     528    
-16    16     
16     -896   
96     -400   
-144   800    
-64    560    
-96    -32    
144    80     
224    848    
-352   -96    
80     -144   
80     -976   
-240   336    
192    208    
112    320    
-272   -912   
784    -512   
-560   -144   
-336   144    
144    384    
16     -992   
-80    -352   
304    1424   
272    912    
-240   -384   
32     240    
16     -256   
160    -320   
-16    64     
-48    304    
-192   -64    
-144   144    
144    128    
-32    96     
0      80     
160    48     
-32    32     
-32    64     
-112   -96    
224    -512   
48     176    
112    704    
-64    752    
-160   64     
128    224    
144    48     
-448   1136   
352    -336   
-256   64     
64     16     
256    -1056  
16     272    
-288   -304   
256    -464   
192    -64    
48     -1056  
80     -448   
-32    32     
-16    -192   
160    32     
-48    -224   
-128   -64    
160    -32    
256    -1200  
-176   224    
-240   -96    
544    -272   
-848   448    
416    -336   
-400   -160   
-144   128    
0      -560   
384    -1632  
48     272    
16     192    
-240   -224   
336    -496   
208    272    
-64    -288   
32     336    
-144   32     
224    -224   
-144   288    
-208   -544   
16     96     
160    -576   
80     240    
-144   32     
176    192    
16     -32    
-272   -64    
176    -272   
32     192    
-48    16     
192    32     
960    -208   
-2336  416    
128    0      
704    -160   
-1072  256    
368    -192   
-608   -96    
112    -624   
32     -256   
112    -592   
-560   -96    
256    -176   
224    112    
-112   -352   
-416   -16    
80     -176   
288    -208   
-112   -112   
96     -80    
-384   112    
80     -16    
608    992    
-1248  144    
-544   -160   
544    -336   
96     -16    
-864   -208   
480    544    
96     -320   
-672   80     
240    96     
-80    -128   
-96    32     
304    80     
-480   -160   
-16    -192   
-368   -80    
-64    -32    
-144   48     
-16    -64    
-160   176    
-32    -944   
656    -144   
32     224    
-64    -176   
-608   80     
48     -464   
1120   -224   
1136   896    
-736   -240   
-544   -64    
752    -144   
192    -112   
-144   128    
-96    -144   
-496   896    
864    -1584  
-288   64     
-864   -160   
288    -400   
784    -272   
208    -16    
-400   48     
240    -240   
80     48     
-112   -416   
160    96     
496    -48    
-416   48     
736    560    
640    2624   
-2256  1056   
944    336    
1184   240    
-704   48     
-720   -160   
464    160    
224    16     
-480   -96    
384    -48    
560    144    
-464   -64    
-512   96     
224    160    
80     -112   
160    176    
16     -144   
-320   64     
80     128    
560    -336   
-688   336    
512    -64    
-192   224    
-544   -224   
-496   32     
-208   -240   
176    -176   
-256   -32    
80     112    
-752   -288   
384    -16    
-400   -576   
-624   32     
-80    64     
-224   -32    
-432   -48    
16     0      
-144   -336   
64     48     
432    -144   
-256   112    
208    112    
-464   64     
128    0      
-448   -160   
-96    -48    
-544   -480   
-64    -144   
464    64     
-176   256    
-32    128    
128    704    
96     16     
-368   416    
0      400    
-288   160    
-224   -400   
-208   -304   
384    336    
16     -256   
-48    128    
96     144    
-96    80     
-112   -32    
-16    32     
64     16     
-112   -64    
-608   112    
-32    400    
240    48     
-320   -288   
16     -64    
48     80     
-192   208    
64     16     
64     224    
80     16     
-336   528    
32     256    
64     -208   
-16    0      
-1152  656    
1520   -800   
96     -160   
-688   -112   
320    -16    
32     128    
-368   -112   
-112   -688   
32     224    
224    400    
-256   0      
-48    -32    
0      64     
368    -48    
-496   672    
80     -80    
-96    -96    
-256   48     
-128   16     
-96    -160   
304    -544   
-1408  688    
960    160    
0      -1472  
-512   -16    
96     160    
-288   288    
224    -144   
-128   -80    
48     112    
-64    -208   
-224   176    
32     -16    
192    -80    
-512   -64    
-32    256    
-1200  -224   
0      -64    
-144   -144   
16     64     
16     32     
-96    48     
-32    48     
80     -112   
208    16     
-416   -112   
-64    128    
64     64     
-16    48     
-528   640    
144    688    
2544   -80    
-1392  160    
-816   0      
1248   -400   
-64    64     
-304   -112   
-128   -32    
-112   64     
48     112    
32     112    
224    144    
-352   -16    
-32    -176   
-128   -176   
320    16     
-448   0      
-160   -64    
224    80     
112    160    
176    1568   
-1152  -336   
-928   192    
1024   96     
-16    240    
-784   608    
64     368    
736    384    
304    -144   
-496   -288   
-688   240    
256    0      
448    -64    
-256   -128   
-304   0      
384    176    
192    448    
-16    -80    
-224   -16    
96     96     
-64    128    
112    336    
32     256    
-128   144    
80     336    
-80    0      
-640   -1696  
-768   -944   
512    -64    
-288   464    
-128   112    
-32    192    
48     32     
352    560    
768    720    
-672   -256   
-192   -832   
16     -112   
256    32     
48     -96    
-48    0      
-112   -128   
-176   96     
160    128    
-16    -256   
608    -800   
128    -16    
-80    -560   
-256   -624   
48     0      
656    64     
-1968  192    
464    96     
1008   -496   
-1216  -1200  
-352   -240   
432    -176   
416    -208   
-224   -16    
-288   1072   
96     -416   
336    176    
256    240    
-144   192    
16     -240   
-176   240    
336    96     
-272   176    
-192   -48    
240    -624   
144    -416   
32     432    
-512   96     
-96    64     
656    -64    
-48    -80    
-368   816    
64     1488   
272    128    
-112   -288   
-16    240    
-112   -240   
-16    -80    
256    64     
480    544    
-288   384    
-176   112    
224    80     
320    128    
-224   320    
-176   -32    
-272   208    
368    320    
-272   112    
288    816    
-80    784    
112    -320   
352    352    
-160   512    
-176   384    
0      64     
128    752    
1360   560    
-592   336    
-192   208    
96     256    
544    -176   
-288   304    
-176   592    
48     288    
112    -112   
176    128    
-32    16     
-464   96     
-48    -336   
336    -912   
-96    224    
64     288    
-240   256    
48     352    
192    160    
-16    112    
-272   304    
240    16     
720    240    
-112   -176   
368    176    
-304   192    
144    -928   
160    -160   
-272   -896   
816    -592   
256    80     
-752   -512   
-160   -160   
-144   320    
96     -224   
160    448    
-32    -144   
-96    -368   
-16    336    
240    -128   
48     304    
-16    -288   
-224   0      
208    -32    
-16    336    
-48    -1392  
48     -64    
-80    208    
-80    -256   
608    -368   
-272   976    
-496   368    
112    -352   
320    -480   
0      64     
-48    -112   
0      112    
192    -48    
96     -448   
208    192    
144    -256   
-288   -16    
16     48     
288    -160   
48     576    
-144   672    
-192   -144   
208    -176   
96     16     
-64    96     
160    240    
16     -176   
80     176    
0      -320   
-336   192    
48     -288   
64     64     
224    16     
704    16     
-2576  320    
-256   352    
1408   48     
-336   96     
-496   0      
208    -512   
304    256    
-128   -256   
-176   128    
128    -96    
96     32     
96     -64    
-128   -128   
-240   32     
336    16     
-80    112    
64     304    
240    144    
48     144    
-128   128    
320    352    
848    -480   
-1664  192    
560    400    
656    -160   
-800   256    
144    -32    
96     -256   
192    -400   
-48    16     
-144   16     
384    -608   
48     128    
-192   -80    
-528   -2528  
-144   -144   
320    -256   
544    -256   
240    0      
208    -304   
32     -144   
336    256    
512    -32    
-304   96     
176    -272   
-32    -416   
-352   -1184  
-368   -64    
112    0      
-528   -304   
-208   128    
448    0      
80     -176   
48     -1040  
-160   -240   
-96    256    
368    32     
-400   -544   
-64    -144   
768    -352   
272    80     
-480   16     
-96    -144   
416    224    
176    -624   
-544   -80    
400    -592   
-480   -128   
48     0      
1328   -80    
768    -1520  
-448   656    
880    -352   
-160   128    
-400   192    
272    48     
352    160    
16     32     
-720   -64    
-176   64     
336    -128   
192    -64    
-144   0      
-80    -64    
128    -16    
272    -672   
-16    0      
48     -160   
-688   112    
736    192    
-192   240    
-96    -16    
64     -80    
-480   -64    
304    -80    
-80    -176   
-640   80     
304    -64    
304    96     
-304   64     
-160   -304   
-128   64     
192    -640   
112    -64    
-512   -16    
528    -192   
-704   -160   
-64    -144   
112    32     
128    224    
-272   16     
48     192    
-224   -64    
80     -32    
96     224    
320    48     
-352   112    
240    -64    
208    -32    
-192   -48    
128    0      
16     400    
832    -144   
-208   -336   
-416   -48    
128    -96    
96     -448   
-1072  176    
-416   144    
16     64     
160    -272   
-112   32     
-80    -1232  
176    112    
112    -272   
-48    160    
-288   160    
160    -176   
-96    -608   
-48    -400   
-256   -128   
192    208    
-416   176    
176    -48    
112    304    
192    -240   
-176   -832   
-48    -1040  
128    0      
-48    480    
800    2624   
-2880  32     
176    32     
1232   -896   
-768   48     
-368   176    
464    -128   
448    -288   
-512   -640   
-64    0      
160    -80    
192    272    
176    -48    
-160   96     
-112   80     
256    112    
-112   -224   
96     -192   
-176   -16    
0      64     
-176   -96    
512    -704   
64     16     
-432   -224   
160    400    
304    496    
-240   352    
-64    -64    
-64    128    
-144   16     
-160   16     
160    -112   
32     -128   
80     80     
224    624    
-272   0      
176    -512   
224    80     
-832   -176   
-80    272    
160    128    
208    -64    
-80    -80    
-400   0      
-128   -96    
176    80     
80     208    
-432   -272   
-32    176    
-64    176    
1280   672    
-2688  272    
-976   352    
1840   448    
-272   496    
-528   -112   
96     -944   
-352   -528   
-320   480    
64     592    
304    128    
-336   -48    
-432   -16    
352    96     
-1616  -512   
-64    80     
736    -112   
-128   -448   
-320   -448   
304    -16    
-144   128    
-1008  -16    
1584   -384   
752    1040   
-1456  1104   
128    288    
688    240    
-448   -256   
-48    -240   
144    -208   
16     16     
-224   -16    
240    -48    
240    -400   
-304   0      
208    -176   
272    96     
-352   160    
16     -320   
128    96     
-112   -128   
-144   384    
-160   32     
496    1728   
-400   1616   
-368   1408   
-336   352    
448    1104   
-256   400    
0      320    
640    -704   
-496   144    
-192   592    
720    736    
-496   -608   
-864   0      
64     160    
176    1280   
928    976    
-480   144    
80     320    
-48    464    
-192   288    
-928   -48    
464    -288   
-144   304    
160    576    
0      -48    
-272   256    
672    672    
96     144    
-944   -1552  
-1072  528    
256    512    
160    80     
304    1376   
-736   -304   
-48    192    
736    1008   
80     352    
16     -80    
-160   -80    
-32    128    
352    576    
-16    -320   
-112   144    
144    736    
32     192    
-160   144    
112    -96    
-80    336    
-80    224    
32     16     
176    0      
-416   144    
16     320    
224    -64    
-528   64     
-32    176    
624    1248   
-96    512    
-288   16     
-160   -288   
-176   144    
336    -128   
-192   -256   
-352   -160   
288    -80    
96     176    
176    864    
32     528    
16     320    
-320   256    
304    80     
-80    112    
-128   -16    
-192   1136   
384    864    
-80    720    
-64    48     
64     0      
-176   240    
256    400    
992    576    
-400   192    
-240   784    
1008   1040   
-288   1328   
-512   432    
256    -576   
128    -656   
-144   -256   
-64    -80    
32     -128   
-192   -224   
336    -64    
-304   -192   
64     240    
160    528    
-112   224    
-176   240    
-16    32     
80     64     
16     -16    
96     -32    
16     -48    
-240   -64    
208    512    
48     544    
-192   -64    
32     -288   
336    976    
-608   -672   
-16    1072   
288    -384   
-304   -384   
176    -80    
224    -976   
-80    -304   
-128   128    
224    32     
-96    80     
-16    -16    
240    -48    
-128   -96    
-144   64     
240    432    
-208   448    
-16    800    
288    336    
-80    176    
-288   80     
624    1088   
32     224    
-224   -192   
-64    304    
336    336    
-224   128    
-32    -368   
16     -176   
-48    -160   
-80    64     
416    80     
48     192    
-288   -16    
288    176    
96     -32    
-192   80     
-32    -80    
80     288    
32     80     
-64    16     
144    64     
0      96     
-96    -336   
-80    48     
-48    0      
272    -1008  
96     -32    
-240   128    
288    144    
672    736    
-2576  -240   
0      464    
1616   144    
-720   -64    
-448   80     
432    128    
320    -128   
-528   336    
48     -112   
368    112    
-80    -1328  
-144   128    
-80    -144   
-176   144    
288    0      
0      96     
-208   96     
288    0      
192    -336   
-320   112    
576    1040   
-624   -608   
-1872  240    
1024   -544   
192    176    
96     -464   
-288   304    
1040   352    
-64    -32    
-288   -16    
192    64     
16     304    
-80    48     
-48    192    
960    -64    
-592   32     
64     720    
512    96     
-192   -48    
16     128    
144    -128   
-432   -256   
608    -224   
-352   -80    
-1008  480    
800    -64    
-416   240    
-128   448    
16     208    
-192   -160   
-416   -80    
304    192    
304    256    
-176   32     
-624   160    
496    -416   
128    896    
-464   368    
320    -336   
80     -272   
-176   288    
0      0      
208    96     
32     64     
64     -368   
-976   144    
352    -64    
304    64     
-496   -944   
2592   1984   
-1200  1248   
-816   -64    
1840   -736   
688    0      
-1296  -336   
-528   192    
1328   16     
0      192    
-544   -160   
-304   288    
352    176    
352    -336   
-288   96     
-96    -448   
144    272    
400    -256   
-128   208    
-32    -320   
-336   496    
800    272    
-608   400    
208    -32    
288    176    
-480   80     
112    176    
256    48     
-176   64     
64     -176   
-576   -352   
352    -320   
-32    96     
-48    96     
-352   -96    
336    96     
-64    -368   
144    288    
-528   -128   
-160   80     
64     160    
144    -144   
80     -544   
-128   -288   
80     -80    
-144   -256   
16     -16    
16     -32    
-128   -80    
240    -208   
-64    -736   
-160   192    
48     -768   
464    -208   
432    256    
-320   1616   
352    624    
192    -192   
-480   -560   
64     -560   
112    -304   
-512   -544   
0      -304   
128    0      
48     -176   
144    -640   
32     -48    
-32    -400   
-320   -80    
64     -528   
144    -272   
-192   336    
-240   256    
448    -480   
-80    64     
16     272    
-32    112    
-112   432    
384    -2432  
16     -416   
-192   800    
-96    432    
816    -16    
-1472  1136   
624    -848   
784    -592   
-672   -256   
-272   -240   
-592   1328   
240    336    
-256   -352   
112    -240   
48     -144   
-112   -224   
96     -64    
80     -368   
-240   160    
336    96     
64     432    
-272   -400   
160    144    
-48    112    
592    352    
-1248  768    
432    -864   
608    -1088  
-96    -224   
-80    416    
-96    624    
432    -752   
-48    -208   
-192   544    
80     -192   
144    48     
-64    -272   
80     -144   
-144   96     
0      -192   
0      112    
160    192    
-288   -320   
-32    -288   
112    0      
80     -352   
-272   128    
-32    -272   
352    -112   
-144   -176   
112    96     
-32    -112   
112    96     
48     -48    
240    -1024  
-2240  608    
1360   -80    
800    -528   
-448   272    
0      144    
-160   0      
-192   320    
432    -864   
208    288    
-320   -192   
-64    -48    
288    -96    
16     32     
-352   -160   
48     48     
112    96     
64     -16    
272    80     
192    -256   
80     640    
768    -1104  
-1136  560    
64     192    
128    208    
-480   -272   
576    640    
-912   -272   
0      -1104  
272    -320   
-240   736    
-80    416    
208    240    
144    -144   
112    16     
272    32     
-240   160    
16     -32    
-608   -128   
304    256    
208    96     
-288   -208   
336    -656   
-48    -112   
-848   -816   
32     -832   
32     -400   
880    -624   
848    -112   
-272   -368   
-240   48     
-864   -912   
16     560    
-1136  -80    
720    400    
992    -256   
-320   -912   
224    -720   
-448   -96    
240    16     
320    -16    
-272   176    
-96    -288   
-176   -48    
-448   -128   
-64    448    
-656   -144   
-128   784    
512    768    
-128   288    
480    608    
-1696  -80    
592    0      
128    576    
-704   352    
-1104  624    
256    48     
656    1744   
-208   320    
-528   -672   
48     -336   
512    128    
-80    464    
-400   464    
-144   80     
-176   192    
432    176    
-352   -144   
-304   -800   
-464   -800   
-32    -144   
-16    64     
-480   -48    
560    368    
-64    416    
-80    -320   
288    -560   
112    176    
-64    -224   
-32    -96    
-128   240    
352    480    
-400   160    
144    528    
144    624    
-96    208    
-160   -208   
-448   240    
160    512    
-64    320    
-32    176    
32     -160   
-48    -128   
192    32     
16     144    
80     816    
16     592    
80     144    
48     464    
-112   592    
144    432    
-240   -480   
-352   80     
608    32     
-112   240    
-48    288    
64     -656   
-592   -512   
48     -224   
-368   -16    
272    -144   
-64    -96    
-224   -112   
-176   -320   
288    16     
-144   352    
-144   272    
-208   160    
-32    352    
0      64     
-272   176    
16     0      
144    32     
128    16     
-144   192    
80     448    
-320   112    
0      112    
304    -128   
-64    32     
-592   -832   
944    -1920  
-464   352    
128    -80    
-304   32     
-144   240    
-32    -64    
560    288    
-256   -176   
-656   320    
432    224    
320    176    
-64    80     
-320   -64    
256    112    
224    896    
-832   224    
-48    -144   
336    -192   
-368   -336   
-112   176    
-192   928    
1168   -224   
-496   32     
-128   -32    
496    128    
-160   608    
-48    176    
-64    112    
-48    48     
-48    -32    
208    96     
-96    64     
-192   0      
32     -16    
64     96     
-16    480    
256    208    
0      0      
208    32     
-144   96     
-16    128    
176    128    
128    48     
-208   -96    
64     240    
448    32     
-480   128    
288    96     
48     -144   
1312   352    
-2768  752    
-672   384    
2448   320    
-784   -240   
-1456  48     
928    -192   
480    288    
-352   80     
-16    80     
320    -80    
160    80     
-672   16     
352    272    
-32    112    
-272   224    
256    80     
176    32     
-560   256    
-96    80     
288    112    
160    512    
720    -176   
-2336  -16    
304    -112   
1904   -384   
-1664  224    
-240   352    
272    80     
-384   -16    
-208   48     
144    80     
64     80     
-48    96     
240    80     
160    96     
-272   112    
-32    -144   
208    96     
-304   160    
-576   336    
304    144    
-448   -864   
-656   208    
992    48     
-688   64     
192    0      
752    -320   
256    -128   
-528   272    
208    96     
-240   48     
-144   -48    
-240   -32    
288    208    
240    304    
768    -80    
-256   64     
-16    -112   
0      160    
-256   336    
384    48     
-112   80     
-48    112    
64     -16    
-48    -304   
-448   304    
656    128    
-16    96     
-80    304    
-176   3056   
1968   -1024  
-736   320    
-272   -1040  
528    144    
-192   320    
-192   128    
480    112    
-48    64     
-336   -208   
80     352    
176    112    
-176   144    
176    112    
-304   112    
0      -48    
-224   32     
400    48     
80     -96    
-480   288    
208    800    
16     832    
128    0      
496    224    
-352   -144   
-512   384    
560    -432   
-288   192    
-160   80     
400    384    
-320   384    
96     -224   
112    288    
-96    -272   
-96    -144   
112    -2336  
176    -736   
-544   -160   
112    256    
192    272    
-16    128    
-208   -64    
32     672    
704    64     
-352   208    
-192   288    
400    -560   
-304   160    
96     -464   
-160   -272   
112    -592   
0      0      
-80    1024   
1088   -208   
-560   176    
256    432    
-256   -464   
-512   -1824  
-336   -1088  
512    96     
-48    224    
-16    -128   
-48    96     
-32    96     
64     48     
80     -304   
0      208    
-64    -384   
-32    -240   
160    144    
64     16     
-80    368    
160    144    
-224   -32    
256    -400   
-112   -96    
96     -272   
-128   48     
80     -576   
-16    -80    
0      -704   
176    96     
-96    832    
-16    736    
-128   208    
-144   288    
64     208    
-48    -320   
-32    -464   
64     400    
112    336    
16     -384   
32     240    
48     -144   
0      80     
96     -576   
144    112    
-16    -112   
16     352    
-16    416    
192    272    
-208   -400   
432    -256   
160    512    
-480   -16    
176    128    
80     -144   
0      -16    
112    -144   
112    160    
-48    112    
0      176    
144    -336   
176    64     
48     304    
-80    -880   
128    -96    
-288   -144   
-64    -320   
-160   -320   
256    -2752  
336    -352   
-64    320    
-96    -16    
32     208    
16     -32    
112    -96    
16     -112   
160    -416   
48     64     
-176   -144   
-48    96     
1008   -640   
-1584  -32    
528    560    
880    736    
-880   352    
-144   624    
880    240    
-496   -1136  
-240   -624   
208    -1088  
320    352    
16     -304   
16     256    
-160   208    
128    -336   
-16    -240   
144    -240   
-256   432    
-128   -272   
176    -48    
-912   -864   
800    -208   
944    -2960  
-720   560    
864    624    
16     -48    
-672   1008   
16     928    
320    496    
0      -368   
-224   -64    
-80    48     
-672   240    
64     176    
208    -16    
0      -272   
160    -704   
128    -1568  
-96    -752   
96     -368   
32     64     
144    208    
-432   -560   
-160   -320   
512    -32    
-704   368    
-80    -1088  
-1616  320    
496    240    
272    416    
-320   -432   
208    -176   
-192   -96    
-64    -272   
848    -1104  
400    192    
16     -944   
-672   512    
-160   -272   
720    -688   
224    -48    
-336   -176   
32     -128   
80     144    
144    0      
-896   304    
0      112    
576    -160   
-272   544    
-336   -2656  
1200   -2512  
320    528    
-688   1152   
-656   -240   
496    384    
224    16     
-320   160    
-208   272    
528    144    
-304   -192   
-224   -80    
-1136  -176   
128    64     
416    96     
-32    -112   
-336   112    
256    -192   
-112   -592   
368    -832   
-16    816    
-240   432    
272    320    
-208   -64    
-800   192    
560    32     
192    -352   
-144   -240   
0      0      
400    208    
-240   -128   
-16    0      
240    112    
96     336    
-304   144    
-304   -32    
16     352    
512    -192   
-352   -32    
192    64     
80     -32    
64     -160   
32     -64    
-384   -288   
0      272    
432    -128   
-176   -16    
-304   -96    
320    -48    
-16    48     
-32    0      
-304   -544   
640    -480   
320    400    
-464   -288   
-304   -240   
272    32     
-32    176    
-864   32     
48     -256   
-1264  -544   
-48    128    
128    -32    
-32    48     
-176   176    
-800   -240   
544    -512   
160    48     
-576   -176   
400    -256   
96     304    
-448   -208   
176    128    
-240   128    
48     240    
-64    -16    
-304   -96    
-496   272    
224    112    
320    -32    
-896   -112   
368    -1440  
-2336  1680   
928    0      
768    272    
-400   16     
-256   -224   
160    -112   
160    144    
-288   480    
336    -144   
-208   16     
-320   -112   
176    80     
288    224    
-896   256    
160    -160   
0      240    
-144   64     
-480   -128   
112    48     
-224   -192   
160    -448   
-672   -16    
624    240    
368    -352   
-592   656    
-96    -96    
0      256    
592    -160   
-400   192    
-272   128    
112    144    
240    -112   
-512   -160   
-16    160    
0      80     
208    384    
96     -144   
-112   -96    
-240   0      
96     80     
96     80     
-16    160    
-192   -32    
240    96     
-192   0      
-528   64     
192    96     
-112   -48    
-192   -432   
-864   272    
3408   1184   
-272   -192   
-2064  -208   
96     304    
976    16     
-336   144    
-432   -304   
176    0      
16     -80    
0      64     
-48    -64    
128    160    
-272   -96    
304    224    
-656   -32    
-368   96     
176    160    
192    128    
96     64     
0      112    
-416   -816   
-320   192    
784    -352   
64     304    
-112   144    
208    -80    
-144   224    
-384   -128   
160    224    
80     -112   
-48    96     
-208   128    
32     160    
-32    -16    
288    48     
112    128    
-160   448    
32     384    
240    0      
80     96     
-304   -368   
656    304    
624    -192   
-448   240    
48     64     
-464   128    
224    64     
0      288    
-624   160    
0      -112   
208    -128   
336    -176   
32     320    
-352   -208   
-240   128    
208    -288   
-272   64     
64     64     
0      96     
-208   -128   
96     96     
-16    48     
0      112    
112    80     
128    480    
480    -32    
-304   96     
-112   128    
304    192    
-320   -1968  
-1936  -928   
1440   432    
656    128    
-608   -80    
-80    256    
192    288    
736    224    
-624   80     
64     224    
288    -224   
-112   144    
432    -464   
-240   496    
48     -272   
160    416    
256    -80    
-288   224    
-112   -784   
48     -160   
160    832    
-192   304    
-96    -144   
-240   112    
208    -144   
-80    320    
112    16     
16     240    
80     1104   
16     704    
-400   -416   
128    -576   
272    224    
-128   528    
-160   192    
-32    128    
208    -320   
-48    32     
-368   96     
144    -96    
48     416    
288    656    
80     416    
128    656    
-96    688    
-80    880    
320    336    
-368   1136   
384    400    
144    -304   
48     80     
560    704    
-1248  608    
176    832    
304    592    
-48    352    
32     288    
32     688    
416    -1712  
-224   128    
80     560    
112    -240   
-32    224    
80     240    
-64    -192   
128    -64    
-80    112    
96     144    
-96    320    
16     144    
128    32     
-48    128    
-112   112    
-48    112    
0      -32    
0      96     
-32    656    
288    112    
-464   224    
224    -2400  
240    -16    
-96    448    
-144   160    
80     -240   
544    -112   
-32    80     
-224   96     
0      160    
272    -80    
176    -544   
144    -128   
-304   144    
64     -112   
192    80     
80     -320   
-80    112    
-192   -16    
160    -176   
464    -32    
16     144    
-272   96     
-112   -448   
0      -32    
144    64     
-192   96     
368    -144   
80     -208   
160    -48    
-160   176    
-144   -64    
112    80     
96     -848   
-192   160    
-80    -48    
176    224    
-160   368    
128    160    
176    80     
-96    784    
-32    240    
352    -96    
128    80     
-288   -64    
-32    304    
224    288    
-192   304    
-160   -592   
240    -112   
96     -304   
80     192    
-240   32     
512    816    
2032   0      
-1376  -768   
-432   -816   
608    928    
144    1680   
-208   -816   
96     -336   
112    800    
224    32     
128    -16    
-16    192    
16     -48    
-64    -160   
112    -16    
16     192    
144    -192   
80     752    
-48    1104   
176    240    
-368   -848   
-704   240    
1744   -864   
-432   16     
256    48     
-96    -192   
-80    -608   
-704   -1488  
256    96     
288    800    
384    448    
-224   -256   
-16    48     
32     -128   
32     -160   
528    32     
-368   -224   
352    -176   
272    -128   
-256   0      
-96    -96    
-32    240    
48     -2112  
848    832    
1696   1168   
-288   -480   
-592   -384   
800    -432   
0      672    
16     -240   
224    192    
-112   -64    
48     64     
-32    32     
-144   672    
880    -624   
-32    -48    
-448   336    
432    0      
624    -416   
-480   -464   
32     0      
240    -992   
32     -592   
-224   -736   
-432   -112   
496    -96    
-96    -64    
-416   -176   
-128   -1792  
1696   -1840  
208    112    
-960   256    
-112   -416   
464    160    
336    -352   
-464   464    
-816   288    
704    -16    
96     -96    
-272   -160   
-144   -96    
112    -272   
352    -112   
224    240    
-464   0      
176    -288   
-176   -464   
672    -1536  
-256   -144   
-240   -224   
240    320    
-688   -16    
32     -176   
496    32     
-112   -32    
-352   -32    
384    -288   
64     -16    
-272   -448   
208    -112   
-160   -80    
384    336    
-144   192    
-112   208    
272    16     
112    -432   
-160   -80    
80     -176   
-256   -32    
192    -144   
-96    224    
-48    -112   
-192   -16    
320    -368   
256    -176   
-496   -528   
48     -80    
192    96     
16     192    
-32    -656   
784    -304   
-192   160    
-448   32     
-64    48     
96     128    
-336   0      
256    -16    
64     -96    
96     -224   
64     144    
-112   -400   
48     -16    
-32    -32    
160    -16    
-176   -272   
-48    -368   
-64    112    
256    -96    
-32    144    
-192   -80    
368    -112   
-16    -304   
-96    -80    
-128   272    
-48    -304   
64     -576   
-128   352    
144    -112   
112    80     
-1088  -144   
1088   -848   
544    112    
-880   -432   
0      208    
432    -224   
-528   192    
-272   -784   
-432   -272   
400    160    
-288   48     
16     -352   
144    176    
32     -1088  
96     -176   
-96    304    
176    -288   
-128   -304   
96     48     
-48    64     
-336   -912   
-80    -128   
416    112    
-688   32     
256    -208   
0      -528   
-112   -128   
272    288    
-304   304    
176    64     
0      64     
-112   -352   
-80    -16    
192    48     
48     80     
-144   16     
-272   80     
272    96     
144    32     
-192   -272   
64     32     
176    64     
-224   -32    
-288   -16    
272    -16    
320    -16    
-336   112    
-32    -48    
96     80     
656    1584   
176    576    
-1552  336    
1168   48     
336    16     
-1280  -336   
320    48     
224    -432   
224    -320   
-528   -32    
-512   -16    
-192   112    
-160   64     
32     112    
-208   112    
496    112    
-160   32     
-176   -272   
-400   -304   
448    -304   
-288   16     
144    1024   
80     -592   
-1312  -176   
960    -800   
-96    208    
-304   80     
64     64     
320    192    
-64    -176   
-400   64     
0      16     
144    128    
128    32     
-144   112    
192    -304   
-352   192    
-32    -224   
192    -272   
-288   368    
256    368    
-64    96     
144    144    
-832   -32    
-832   176    
208    496    
288    -512   
0      32     
-304   -48    
112    16     
128    -192   
-496   256    
-288   688    
1408   -528   
-352   -272   
-512   208    
704    -144   
160    160    
48     272    
-416   144    
-128   16     
112    16     
176    80     
-192   -80    
-240   32     
144    48     
400    -224   
-272   112    
-112   -16    
672    576    
-928   1184   
-320   3168   
1056   288    
-1104  -80    
-976   80     
1536   560    
-96    1184   
-432   112    
-320   -96    
-16    -96    
-80    464    
64     304    
48     144    
-416   -432   
256    96     
256    224    
160    -48    
-112   32     
0      -96    
16     -800   
-320   -256   
-176   -80    
64     272    
-208   192    
-176   448    
656    -48    
-496   304    
16     176    
-112   -672   
32     -768   
128    -48    
-96    320    
-192   240    
32     -16    
-16    832    
336    400    
-192   464    
16     432    
-224   96     
112    -416   
-144   -64    
-160   272    
240    -32    
16     128    
-128   -48    
-208   496    
432    -160   
-704   -1360  
-64    -544   
304    -32    
128    208    
-528   48     
-16    976    
1488   768    
-528   352    
-464   560    
320    336    
432    16     
-352   -288   
48     -1232  
-352   320    
80     288    
64     64     
128    -64    
-80    -16    
-128   160    
-32    176    
352    -32    
-512   -608   
0      176    
384    160    
-144   208    
288    144    
-96    272    
32     96     
192    400    
-64    544    
32     -144   
432    -224   
-480   -160   
-112   192    
384    32     
-336   416    
160    -240   
-448   80     
400    -48    
112    48     
-32    96     
-608   512    
64     128    
96     -384   
-16    -32    
-128   128    
0      112    
16     32     
208    64     
-224   -32    
224    32     
-32    -192   
-112   64     
112    208    
-160   80     
352    -528   
-128   208    
448    32     
-448   0      
0      -176   
176    -96    
192    -192   
-176   -544   
64     -48    
-48    80     
112    224    
64     192    
-128   256    
0      -176   
112    -144   
-16    128    
-176   672    
288    176    
-336   -432   
-208   -144   
336    80     
208    208    
-320   48     
96     256    
32     48     
-208   -32    
288    64     
400    -144   
-688   224    
832    -768   
-2288  352    
576    -528   
688    224    
-720   -80    
-112   448    
416    -48    
-560   384    
-128   -48    
416    224    
-160   -48    
-128   144    
288    48     
192    112    
-144   -48    
-80    112    
288    176    
-160   352    
64     320    
-32    80     
-48    240    
128    1104   
2160   256    
-816   -448   
-576   -928   
32     -96    
368    -560   
-80    128    
-32    16     
128    608    
-224   144    
-208   -32    
352    272    
192    0      
-336   32     
-240   224    
320    32     
192    0      
-576   288    
256    -80    
288    112    
80     -112   
-336   -512   
-272   128    
688    144    
64     1040   
-768   816    
48     288    
-656   720    
-48    224    
320    80     
-48    -192   
368    -64    
0      -96    
-368   144    
592    368    
-48    416    
352    -208   
-288   -1088  
160    112    
-128   32     
128    64     
224    -32    
144    96     
-16    -32    
-64    48     
288    16     
240    160    
-304   -16    
496    16     
848    3232   
-1536  1872   
384    -368   
1584   -768   
-1264  -176   
-368   304    
656    -48    
192    144    
-48    512    
-608   -160   
304    80     
480    128    
-208   272    
-336   128    
144    96     
160    176    
96     -16    
-48    112    
592    -320   
-864   256    
464    48     
368    64     
-464   -112   
-672   272    
528    -64    
176    112    
-304   -160   
-80    144    
128    64     
48     -176   
224    128    
-16    -128   
-48    176    
144    -352   
-176   -272   
-352   -272   
384    32     
256    -176   
16     160    
128    -96    
-80    224    
0      48     
176    384    
64     512    
-112   64     
-32    240    
272    64     
0      192    
-384   -48    
240    80     
400    -96    
-192   -112   
480    336    
-112   944    
-288   96     
-256   480    
448    144    
48     -48    
-288   -112   
-176   -368   
384    -32    
-208   -64    
176    64     
80     -160   
-144   96     
128    -176   
48     -240   
16     -240   
96     -272   
-208   224    
-96    -768   
256    -848   
16     -64    
32     -1728  
-16    -16    
224    144    
208    208    
-96    -480   
-112   80     
0      432    
160    160    
128    2080   
1856   96     
-1104  -128   
-368   160    
608    -288   
-320   -16    
-192   -64    
272    384    
256    -176   
-240   -800   
288    -304   
-80    368    
-48    -160   
144    112    
352    -80    
-256   -176   
-16    16     
256    -496   
112    256    
-256   128    
448    -576   
-1616  512    
736    -352   
480    -112   
-288   -896   
16     16     
-64    -672   
-80    -560   
80     -64    
160    192    
-272   80     
64     240    
144    -80    
64     -80    
-256   144    
16     -96    
-864   -160   
176    -192   
32     32     
16     16     
-112   -16    
240    -96    
-352   -80    
352    -448   
-48    96     
-272   176    
432    -16    
-160   16     
-128   176    
-336   -1056  
2128   -128   
-1120  288    
-608   80     
-464   -176   
-496   -96    
544    -336   
272    -272   
-528   -64    
-112   -848   
192    128    
256    48     
-320   48     
-128   48     
192    -400   
-112   16     
16     -112   
-160   -320   
-112   48     
48     -64    
-48    -80    
-240   -272   
1040   -272   
-1184  160    
160    -912   
496    -272   
-32    96     
-256   336    
320    -96    
-336   0      
-224   32     
0      0      
48     32     
224    -32    
-848   -16    
-128   -288   
-432   16     
240    -112   
-48    96     
-128   48     
144    192    
48     -2240  
112    64     
-704   -208   
-288   -400   
0      544    
-64    560    
-688   -640   
368    48     
432    -16    
-688   -720   
-224   -176   
208    112    
288    0      
-304   16     
848    240    
-672   -528   
224    -608   
400    160    
-16    64     
-448   32     
0      16     
112    48     
272    64     
-112   -96    
-480   -512   
624    -864   
208    -176   
464    304    
-240   976    
-288   592    
-400   176    
-432   384    
-400   384    
96     192    
832    16     
-736   -112   
-384   -96    
448    -800   
80     -256   
-208   128    
-272   144    
-1040  -128   
176    -64    
-400   128    
-240   -384   
-128   -256   
16     816    
-32    -464   
-608   -496   
-176   -304   
240    400    
80     160    
0      -224   
16     -480   
-352   -576   
96     -48    
80     -96    
-96    -80    
304    -432   
-464   -208   
-16    304    
-352   -160   
-16    -112   
0      112    
-272   32     
-656   -96    
16     -512   
-32    496    
-64    848    
16     224    
96     -160   
64     -64    
112    256    
-240   -192   
-272   560    
800    16     
-256   320    
-224   48     
-272   -128   
160    304    
-416   -432   
736    624    
672    336    
-464   -256   
-528   -1008  
272    -608   
-224   -992   
208    -1440  
-208   1008   
-256   64     
-112   176    
112    -16    
112    160    
-224   -48    
-48    304    
64     336    
320    288    
-384   160    
48     0      
208    0      
-32    64     
-32    -304   
32     -128   
96     128    
-48    160    
16     640    
304    320    
-96    256    
-320   320    
272    160    
80     -368   
224    -1104  
-176   368    
80     544    
-592   -416   
208    -144   
-560   -688   
544    -976   
544    -352   
-48    -96    
-288   48     
16     176    
16     0      
176    -16    
-16    -64    
-144   -64    
-112   -240   
112    -128   
128    80     
-912   -96    
80     -736   
-256   -880   
160    496    
144    0      
-176   160    
176    -48    
-208   -752   
144    336    
128    544    
0      32     
-112   -128   
-176   480    
-48    368    
-48    -48    
-32    -48    
0      416    
-176   -176   
224    160    
-48    -160   
-288   144    
-80    144    
192    256    
0      -80    
-160   -112   
-160   272    
288    288    
224    48     
-272   -16    
-176   48     
-560   -1184  
2016   144    
416    272    
-1152  -160   
-144   -208   
304    160    
576    96     
-192   -48    
64     304    
-256   32     
16     192    
128    48     
-80    112    
-224   -240   
480    64     
-224   -272   
-176   80     
96     320    
320    256    
-32    208    
16     0      
-80    -80    
1088   32     
-1184  0      
688    -240   
544    320    
-1344  176    
128    -64    
560    112    
224    32     
-464   -32    
-64    144    
128    80     
224    48     
0      192    
-160   -48    
-224   128    
432    48     
-48    32     
176    32     
-144   -48    
-160   16     
160    288    
672    -176   
-400   288    
-48    224    
752    -256   
-784   160    
-192   224    
0      320    
400    32     
-560   96     
-208   -32    
96     80     
96     -128   
224    -16    
192    -304   
-336   -144   
208    112    
400    -176   
-208   16     
-160   288    
128    144    
112    80     
128    80     
272    720    
-560   96     
-400   624    
832    176    
-912   -704   
736    2144   
1744   -272   
-816   240    
992    -400   
224    -304   
-1344  496    
256    336    
912    224    
-384   -128   
-320   224    
464    -48    
48     176    
0      176    
112    -32    
224    272    
-336   64     
-64    288    
384    -96    
-448   32     
-16    48     
656    0      
-640   336    
352    176    
192    64     
-544   224    
576    80     
224    176    
-608   160    
672    64     
-304   -176   
32     48     
-64    -48    
16     16     
-128   128    
416    -256   
-656   80     
224    -112   
320    256    
-192   80     
-400   64     
480    192    
-48    -32    
-288   128    
256    336    
-112   -32    
-112   304    
608    160    
-848   96     
112    144    
336    -336   
-96    80     
-96    48     
400    192    
592    48     
-560   48     
336    -80    
240    -48    
-224   208    
80     256    
0      160    
-48    208    
64     112    
48     -176   
-64    176    
128    -160   
192    128    
-32    -592   
-256   464    
592    272    
-272   96     
-336   128    
192    -16    
160    -112   
-16    96     
-48    192    
96     144    
160    -160   
-128   -288   
32     304    
64     -576   
80     304    
192    2112   
1200   0      
-1280  -448   
-352   224    
1056   -240   
-336   64     
-352   -48    
208    496    
288    -336   
16     -176   
-64    128    
-16    -48    
32     -16    
160    -16    
160    -64    
-144   32     
208    -32    
-64    -128   
32     0      
128    32     
464    -352   
-1536  656    
784    -368   
672    -144   
-448   96     
96     240    
-48    128    
-176   -64    
32     -128   
352    16     
-48    -800   
-416   16     
256    -144   
0      48     
-160   272    
96     64     
192    -64    
-128   128    
16     80     
208    -512   
-160   32     
224    -48    
48     288    
208    16     
-128   176    
-144   -32    
224    80     
176    -928   
64     192    
-480   -1168  
2112   -64    
0      432    
-1040  -32    
352    240    
32     -112   
112    176    
384    0      
-208   224    
-64    -48    
-80    144    
144    96     
16     192    
-16    -160   
272    144    
160    -128   
-96    -688   
160    256    
-16    -64    
0      -672   
112    -112   
368    -1744  
-2416  512    
832    1120   
592    160    
-816   160    
528    960    
-848   848    
-112   -576   
528    -1264  
32     112    
64     -96    
-416   -32    
96     -48    
416    -64    
0      352    
-80    -128   
96     32     
64     640    
224    272    
48     -480   
-96    -96    
-64    112    
400    928    
-960   320    
-256   144    
864    -544   
-192   272    
512    -336   
160    -144   
-768   -288   
-256   -144   
224    -192   
304    -240   
112    288    
32     -1248  
112    -144   
400    -16    
80     -64    
-64    112    
-208   448    
-64    -16    
208    -176   
48     192    
128    144    
-128   -48    
384    -80    
272    -192   
-560   256    
208    304    
368    -496   
-960   -160   
-768   -1984  
-208   288    
464    0      
-160   -80    
-96    -32    
48     1776   
-208   464    
384    32     
-64    224    
-128   -160   
-1040  -224   
-192   -128   
160    48     
528    -416   
-288   -48    
-416   -272   
48     576    
592    592    
-16    832    
-272   -80    
-48    -240   
80     -240   
80     112    
48     -288   
-224   -288   
32     816    
112    592    
-112   -1056  
-208   -448   
-224   -96    
304    -432   
240    -272   
-240   -912   
-96    -96    
-144   592    
-240   -272   
-160   -400   
464    -96    
-336   -176   
32     240    
-64    -256   
192    -288   
-1536  32     
-32    944    
-48    -144   
-352   -240   
368    -528   
-352   -160   
80     416    
112    64     
544    -528   
-848   160    
-160   256    
240    80     
-112   128    
0      640    
128    1584   
-256   1360   
112    -112   
112    -240   
16     -112   
96     -128   
224    -176   
-128   -112   
-640   -64    
208    -368   
176    -256   
112    368    
-240   112    
-96    -240   
96     -48    
64     128    
-224   176    
-64    -496   
-80    -1232  
128    -640   
112    832    
64     176    
96     16     
-112   -1888  
-672   -112   
320    528    
464    1872   
-800   1744   
-448   -80    
336    -624   
80     -96    
-208   -272   
-912   -272   
-96    208    
-480   -128   
160    48     
-112   -368   
-304   320    
144    352    
-496   480    
-320   -160   
-96    -176   
16     -80    
192    -864   
-240   -336   
-384   -112   
64     16     
-128   -96    
-96    -144   
32     -656   
-64    -48    
32     288    
80     16     
-224   96     
-416   0      
208    448    
-240   160    
-96    -16    
-48    -864   
-160   -368   
-208   352    
240    224    
48     0      
-128   -48    
128    32     
0      64     
-16    -80    
-432   -128   
272    80     
240    176    
-176   -32    
32     96     
-144   -144   
-1008  1440   
2928   -64    
-1008  64     
-896   -32    
1280   16     
96     -144   
-704   16     
48     224    
192    16     
-272   160    
96     80     
-32    80     
-176   48     
-64    144    
480    80     
-48    160    
64     -16    
-400   -48    
-32    96     
80     0      
-96    208    
-192   192    
2320   32     
-480   208    
-704   0      
-240   -48    
80     0      
288    -48    
-352   32     
112    128    
-192   32     
96     112    
-448   0      
-224   64     
-176   16     
480    -16    
-128   48     
64     -48    
32     320    
384    224    
-384   -16    
48     832    
336    -144   
-1312  -320   
-1088  240    
736    -304   
-48    160    
-1312  48     
384    448    
32     -320   
-768   16     
144    240    
416    32     
32     -64    
16     48     
-672   -176   
80     -656   
528    -64    
-288   96     
-528   -112   
-80    -48    
992    -80    
-656   112    
-624   0      
0      -96    
992    304    
432    -304   
-608   48     
720    384    
-384   -1456  
-1632  1984   
1472   -272   
-512   352    
-656   16     
272    -112   
816    272    
-784   80     
-384   -176   
-96    -48    
480    64     
-160   96     
96     112    
-96    32     
-240   128    
272    176    
288    128    
-448   -32    
288    -16    
304    -240   
-1376  32     
944    -48    
-80    -64    
-128   -48    
512    -16    
-416   192    
-80    80     
368    176    
80     -32    
-496   0      
208    -192   
-176   -16    
288    -176   
-256   224    
176    224    
336    256    
64     -16    
-432   0      
208    -32    
-128   160    
-96    16     
0      64     
32     192    
-64    0      
48     64     
336    -64    
-48    80     
-96    48     
-32    -176   
384    -544   
-144   -144   
-352   -112   
-112   -672   
-272   160    
352    16     
-544   160    
352    80     
176    32     
-400   128    
16     240    
80     64     
160    192    
-160   128    
0      32     
160    -144   
-80    192    
-352   16     
240    304    
0      304    
48     656    
368    448    
-80    304    
-16    -48    
80     -192   
128    0      
32     -176   
-128   80     
32     112    
176    480    
112    80     
-176   0      
-304   -656   
448    -1504  
-640   352    
384    -80    
112    704    
-656   512    
496    944    
512    96     
-448   0      
-272   -128   
384    288    
400    400    
-272   240    
-192   -176   
144    -144   
320    528    
-192   -2000  
-80    592    
112    208    
112    208    
-16    208    
-144   1792   
160    -336   
-400   -192   
288    336    
-16    -160   
128    -656   
-176   0      
160    544    
-32    96     
-128   320    
112    -896   
96     256    
32     -32    
32     112    
32     -16    
-192   112    
16     96     
80     -80    
96     352    
-64    80     
48     -96    
0      176    
-32    -48    
176    80     
48     96     
80     352    
-128   16     
176    -560   
-240   224    
144    848    
1024   -464   
-1632  -48    
864    112    
-128   48     
-736   288    
224    -208   
912    96     
-528   1120   
64     288    
160    -224   
64     -192   
144    240    
48     -672   
-304   -80    
-16    -96    
240    -64    
-176   240    
-144   448    
160    -336   
80     -224   
-1040  -224   
1040   -48    
1344   -704   
-1184  -608   
272    528    
816    352    
-720   528    
-304   -640   
496    352    
208    -1584  
96     -112   
-32    -304   
144    -96    
-64    384    
240    272    
144    -288   
-400   80     
496    720    
160    1088   
-336   432    
160    144    
464    288    
-320   336    
720    -512   
-416   -832   
-336   -288   
1008   -400   
48     -240   
-176   528    
-16    -64    
48     48     
-864   144    
176    0      
656    -96    
-736   176    
864    416    
-160   560    
64     -736   
752    -320   
-48    -848   
0      -16    
-192   -160   
640    -128   
336    48     
-112   0      
-512   -144   
0      -32    
528    -224   
-208   -272   
-624   -1040  
1472   -1136  
1280   -480   
-1072  416    
-464   976    
736    96     
320    576    
-320   688    
-128   112    
160    -240   
304    -352   
80     -16    
112    -576   
-240   304    
288    528    
176    608    
-336   -112   
-64    96     
144    -160   
48     560    
16     144    
64     -16    
-128   -256   
-208   -80    
832    -112   
-560   256    
16     -1568  
48     -16    
96     1168   
144    1616   
-112   -2256  
336    -464   
-16    -304   
0      256    
48     496    
32     80     
80     -1488  
496    -528   
96     -288   
-400   16     
272    304    
240    512    
48     288    
-352   112    
224    96     
112    -128   
48     -336   
400    -1424  
-368   128    
112    32     
128    -224   
-96    -1488  
-128   -144   
576    1632   
-576   -1008  
-1248  400    
816    352    
-128   -1040  
-432   -592   
144    -336   
432    -48    
-128   -32    
-160   -448   
192    400    
32     -624   
-128   -272   
16     -64    
-288   -96    
144    -144   
336    -512   
-832   -496   
-16    -368   
288    -272   
112    -224   
-352   96     
48     -176   
192    -528   
96     -1600  
-80    176    
-96    -736   
-80    -288   
1152   1504   
384    464    
-912   -240   
400    -240   
288    656    
-368   1264   
64     928    
-400   480    
-992   -432   
80     -176   
-32    -224   
16     -208   
304    224    
-192   48     
144    -80    
-112   -112   
128    288    
-48    32     
64     80     
-416   -240   
544    16     
-16    288    
-288   -16    
80     -144   
-144   48     
-272   -208   
64     224    
272    272    
-304   -448   
-64    32     
288    -1296  
240    -16    
-304   192    
0      -32    
144    -96    
16     -16    
-32    -64    
-16    80     
-512   0      
176    0      
-96    208    
-128   -368   
64     144    
-80    -336   
-112   176    
96     -752   
128    128    
-96    -48    
32     -176   
-864   -976   
-2256  -128   
1520   -704   
688    -320   
-256   160    
112    -128   
0      32     
336    -544   
-256   256    
208    -208   
16     192    
96     -32    
0      0      
64     -16    
256    112    
-16    80     
-16    -80    
192    96     
-16    -144   
-208   80     
16     -48    
-736   -224   
1216   -400   
1168   -304   
-848   -448   
-272   656    
384    -832   
-368   -256   
-224   144    
96     96     
368    32     
32     112    
-240   -64    
-32    -16    
-288   -128   
176    -16    
288    -16    
224    160    
-416   112    
-848   -176   
672    -16    
80     960    
-1360  -176   
-528   160    
832    -272   
-384   224    
-112   208    
544    -480   
-48    384    
208    -208   
-896   144    
272    -112   
-80    -80    
-176   192    
96     -224   
-240   -16    
-432   96     
416    208    
432    -448   
-256   -240   
-128   128    
-240   -32    
64     128    
-192   80     
48     144    
160    -48    
240    112    
160    -192   
-464   96     
-1184  -2112  
2496   -1232  
656    160    
-1600  480    
-80    256    
240    -80    
-16    -32    
336    528    
-688   -16    
-224   176    
160    -112   
-416   -112   
-16    0      
96     -32    
160    32     
-240   48     
64     112    
-16    -64    
-304   -16    
-144   -32    
448    288    
-496   368    
176    -64    
384    80     
-48    16     
-320   112    
16     16     
80     112    
-48    -32    
-96    16     
144    192    
-64    -32    
-96    -32    
-320   -80    
352    48     
-112   256    
-48    -48    
-208   -240   
-128   -64    
16     16     
-16    96     
-384   -96    
-80    -48    
-144   112    
96     192    
-352   128    
176    224    
-96    144    
32     192    
240    432    
-448   240    
-144   -400   
512    -384   
-16    752    
-384   480    
272    1424   
128    864    
-80    256    
-96    -96    
160    96     
-32    -272   
-368   -208   
336    -512   
272    -288   
-480   -240   
0      -48    
-16    576    
368    160    
-32    -160   
-320   -288   
16     176    
192    144    
128    240    
-144   64     
-256   0      
112    -16    
208    -496   
-16    432    
-80    368    
160    208    
-16    64     
-64    -1312  
-816   1120   
912    -16    
64     -736   
-64    448    
-240   48     
-16    320    
176    144    
-192   -48    
-16    128    
48     272    
48     -288   
-96    -160   
-16    224    
-96    288    
112    32     
-128   -512   
32     432    
-176   -32    
0      288    
592    128    
-864   608    
288    -272   
320    352    
16     -96    
-96    432    
-160   -576   
-16    224    
64     816    
16     288    
-48    -320   
-256   128    
48     -208   
-16    -288   
288    128    
-128   -160   
-240   -64    
-48    64     
320    240    
-112   176    
-240   96     
32     208    
64     256    
48     -128   
-144   -240   
-224   96     
256    208    
112    224    
-128   48     
208    96     
-1424  1344   
2784   -720   
-512   -80    
-1232  -80    
1152   32     
320    -208   
-464   192    
208    1152   
32     -912   
-224   192    
-112   64     
-32    144    
-16    32     
64     64     
160    208    
-128   512    
-64    32     
224    400    
-64    -80    
-96    64     
160    -800   
-2176  1056   
800    -144   
400    -80    
288    -64    
-528   112    
208    544    
128    688    
-176   800    
96     608    
-16    816    
192    -48    
16     -592   
-320   -864   
768    -112   
-608   112    
-80    -736   
480    -1088  
-64    -496   
-160   -16    
0      128    
-32    -240   
80     16     
-304   1120   
800    -304   
176    -448   
-1008  -1024  
-144   224    
464    -336   
-528   48     
-112   80     
352    224    
-272   -80    
-288   -336   
32     448    
336    672    
160    -240   
160    -1136  
-336   -288   
32     -768   
-32    160    
128    32     
-192   176    
208    48     
432    240    
-768   560    
-240   48     
32     496    
400    384    
-432   -1120  
752    -1312  
880    336    
-1008  -16    
-512   -352   
1376   -1552  
112    -384   
-272   336    
-240   -192   
400    144    
384    672    
-160   480    
-128   -240   
-48    144    
208    80     
160    304    
-224   -96    
-512   -32    
320    -720   
464    -208   
-96    -240   
-256   176    
112    -96    
-752   192    
448    1584   
768    -128   
-560   -32    
-256   -48    
400    528    
576    128    
-736   -416   
96     -64    
400    -48    
64     0      
-592   32     
-32    16     
576    320    
128    -224   
-320   -64    
16     -512   
336    -448   
192    -336   
-304   -16    
48     288    
16     80     
96     -64    
-160   -80    
288    -288   
0      -32    
-128   144    
64     144    
192    144    
-208   208    
128    80     
192    112    
-160   416    
320    -672   
480    -288   
-160   -336   
-208   144    
32     368    
320    176    
-64    160    
-272   64     
320    128    
64     -272   
112    320    
96     -368   
-64    -64    
-80    96     
176    272    
256    -144   
-128   384    
112    80     
-16    -160   
-288   48     
576    -416   
-16    80     
-464   64     
304    160    
336    -208   
-720   -2208  
-336   -384   
1152   304    
-352   -432   
64     48     
-240   32     
-80    448    
192    304    
-336   768    
432    -400   
-224   0      
-128   64     
64     -48    
256    -272   
48     48     
-96    -272   
-112   32     
32     288    
64     -112   
192    144    
496    0      
-1536  -528   
384    -96    
912    -560   
-768   -1232  
192    -288   
-288   112    
64     -16    
0      -544   
336    -400   
-48    128    
-528   -288   
352    160    
160    -16    
-208   -400   
192    160    
240    -496   
-368   16     
320    -480   
96     64     
-224   -16    
32     -32    
112    48     
160    -48    
16     -64    
-288   -656   
160    -16    
-80    96     
128    16     
-224   48     
816    -336   
-1136  416    
768    48     
432    -64    
-368   -32    
-176   48     
464    176    
48     -160   
-256   -192   
112    -64    
0      -64    
48     -16    
-128   -304   
464    48     
-192   -240   
-16    128    
16     96     
-64    -80    
0      80     
208    -192   
-96    608    
480    0      
-1232  -112   
624    32     
208    -240   
-752   384    
848    -112   
192    -1584  
-960   48     
32     -48    
224    144    
-48    -48    
-80    32     
-64    -112   
320    48     
-144   -32    
-224   -32    
-432   -80    
0      0      
32     -48    
48     -144   
0      -144   
-1104  128    
288    160    
-656   112    
-80    -32    
144    -384   
672    -128   
928    16     
-720   192    
-304   128    
448    -208   
-544   96     
-144   -208   
80     -144   
16     144    
-240   96     
-32    -960   
-864   416    
336    -1312  
96     80     
-144   0      
0      -80    
-112   -16    
112    112    
-160   -96    
160    -96    
80     16     
-432   16     
240    2256   
1728   112    
64     576    
-160   -752   
-176   -160   
368    -288   
608    112    
-496   -256   
-464   128    
112    -80    
96     224    
-96    -112   
-112   96     
160    -32    
0      16     
-96    -16    
96     -80    
-16    16     
-320   -208   
-80    832    
496    1392   
-224   816    
-80    -336   
480    32     
-256   0      
-352   336    
304    64     
-320   128    
48     -432   
448    80     
-64    368    
-576   -320   
-32    48     
1008   176    
-528   64     
-464   0      
288    512    
176    -240   
-384   -32    
-144   -128   
80     80     
-32    32     
240    192    
-416   -64    
128    0      
608    -48    
-624   -256   
-224   256    
64     48     
256    160    
128    -32    
-560   -352   
448    64     
432    864    
-448   912    
-608   1232   
-160   704    
160    688    
176    784    
-432   560    
-240   -592   
-240   -96    
240    288    
-224   128    
-48    352    
-16    96     
-112   -112   
96     288    
-160   464    
144    96     
-16    64     
-144   -32    
-176   32     
32     32     
80     -368   
-256   -32    
0      64     
208    -832   
-304   -608   
-288   64     
384    0      
-224   -400   
160    -944   
-80    256    
-64    240    
-368   128    
-64    144    
-336   192    
32     320    
-64    192    
-32    208    
-176   -96    
-16    80     
128    -48    
0      16     
-144   32     
256    32     
32     96     
0      0      
-64    48     
-128   16     
688    832    
-640   672    
48     -304   
-688   -32    
112    -272   
-464   64     
-32    -64    
608    -544   
160    16     
-352   320    
-208   224    
224    16     
32     80     
-16    112    
-192   -80    
64     32     
48     -112   
-112   80     
-768   -64    
112    112    
208    -160   
-128   64     
16     32     
-48    16     
-320   464    
224    192    
16     128    
-16    -16    
128    -32    
-48    112    
-1200  -1200  
64     144    
816    -400   
-912   -48    
368    384    
352    -768   
-480   -448   
464    96     
224    1344   
-16    -176   
-304   -32    
-176   -80    
240    -160   
64     -128   
-192   320    
-48    -64    
208    432    
80     -192   
16     192    
64     -80    
256    656    
-1584  -416   
-832   256    
1424   -288   
-576   -976   
-1104  -1456  
384    -720   
528    -912   
-880   -384   
-64    -624   
0      -352   
-192   -96    
288    480    
-256   128    
-304   224    
320    48     
-16    -144   
144    -240   
-176   -128   
-16    112    
160    48     
-256   0      
-368   -192   
32     -832   
1472   -1104  
-192   368    
-128   1600   
-352   560    
-336   -16    
256    752    
608    336    
-112   224    
-352   32     
-80    -400   
592    -352   
-768   -800   
-1088  144    
336    144    
-320   368    
32     -272   
-256   32     
-288   -96    
368    384    
368    160    
-160   208    
-512   320    
0      112    
-16    16     
528    1056   
-480   -880   
800    -2144  
448    384    
-896   464    
-240   96     
-176   656    
560    -240   
-144   400    
-736   -288   
192    352    
400    -240   
-240   288    
-16    -80    
-304   128    
-48    32     
512    48     
-512   128    
-112   -96    
208    976    
320    1360   
-224   832    
256    256    
-128   -240   
-96    208    
896    448    
-272   -368   
-80    -16    
256    -48    
208    640    
48     -80    
-112   128    
464    -128   
112    384    
0      -208   
80     64     
-208   -144   
368    48     
288    144    
-352   112    
32     144    
320    80     
-336   -160   
288    -48    
320    128    
-208   -48    
-224   160    
624    64     
48     -32    
-528   -32    
192    368    
384    272    
-64    320    
-208   480    
880    -368   
48     48     
-240   320    
640    64     
-64    32     
-112   464    
-272   352    
256    176    
256    16     
-240   112    
-112   -112   
112    48     
64     -224   
-96    448    
128    -32    
-16    -352   
-192   384    
336    48     
0      -48    
-128   -16    
-16    16     
112    160    
64     32     
64     32     
16     64     
-192   -48    
64     160    
-368   -1296  
1296   -512   
-592   416    
-816   -64    
368    -528   
-240   -1440  
64     -224   
112    704    
256    -240   
-288   -128   
192    304    
352    -80    
-128   64     
-272   -112   
368    -384   
96     384    
-160   112    
-32    112    
144    -128   
-32    0      
-80    -240   
224    1280   
1168   80     
-1008  -256   
16     32     
800    64     
-528   -16    
-80    32     
288    368    
112    48     
-192   160    
400    -224   
-32    304    
-224   -32    
288    96     
-256   -320   
96     112    
288    -2896  
144    176    
-96    -192   
-160   176    
288    16     
32     304    
160    64     
-192   208    
304    32     
-144   -32    
128    160    
128    32     
-192   -208   
-560   1152   
880    336    
-512   -160   
-256   -256   
400    -144   
272    64     
-336   -32    
320    128    
112    -192   
-96    208    
-32    80     
32     -32    
128    96     
-96    -160   
208    224    
0      -528   
-48    192    
96     -144   
256    96     
-32    32     
64     128    
-736   -64    
992    -96    
1008   -432   
-1280  608    
816    416    
512    -432   
-624   528    
336    -880   
-512   272    
288    -128   
128    64     
-48    96     
-96    128    
288    -64    
-64    192    
160    -176   
48     128    
320    352    
400    -144   
-240   224    
64     208    
-272   48     
64     208    
656    -16    
-416   0      
-368   -352   
272    -48    
400    224    
-224   -32    
240    -368   
288    224    
-544   -96    
192    160    
272    -128   
-272   -848   
-240   -32    
256    -1424  
464    -32    
-432   128    
112    -64    
224    64     
-144   -96    
64     -1472  
-16    -32    
224    -208   
-160   -48    
32     -480   
272    256    
-1392  -576   
-1168  1776   
816    1056   
-768   -896   
-336   -544   
1200   -1248  
-368   -464   
-720   272    
448    48     
272    -96    
192    160    
-304   -288   
-48    64     
240    -112   
-16    -96    
-288   -128   
-112   80     
144    64     
384    -176   
-384   320    
-224   272    
320    560    
96     48     
272    -176   
-208   -624   
-32    320    
-304   240    
-32    -160   
144    -192   
-192   144    
96     144    
-320   -352   
0      64     
224    176    
208    32     
-144   -304   
32     336    
144    -1072  
-448   1024   
144    336    
-80    256    
176    -80    
-96    160    
-80    192    
-208   -688   
-368   -640   
448    128    
-688   1072   
480    240    
-240   -1040  
0      288    
192    -352   
640    -256   
-256   288    
32     -1296  
208    -224   
-176   -176   
32     528    
-176   -240   
32     -144   
208    32     
-176   224    
-176   -32    
224    -144   
-512   16     
-64    -256   
-240   128    
-256   288    
288    -96    
-16    -256   
-32    0      
-144   32     
272    32     
-224   -96    
-16    128    
16     48     
-16    32     
96     64     
16     96     
-592   -96    
-208   -80    
-320   -336   
672    -592   
208    528    
-80    -640   
-208   256    
224    -240   
240    -480   
-224   -192   
-128   320    
0      192    
-32    -32    
-32    -80    
192    -32    
-192   160    
128    -144   
256    -208   
256    128    
-192   240    
-32    -112   
48     -112   
560    -64    
-1104  432    
352    -64    
336    -16    
-208   -208   
-16    -112   
-176   48     
144    -480   
80     -64    
96     -96    
-192   80     
-160   -112   
320    112    
192    -320   
-368   32     
-80    48     
304    208    
-80    288    
-16    16     
-16    -176   
0      64     
176    -160   
-112   -208   
-224   -144   
112    -80    
112    16     
-592   -96    
144    -224   
-192   288    
-208   -80    
480    -32    
720    -400   
-192   -256   
-672   112    
272    48     
336    128    
112    208    
-1008  -1568  
-192   352    
368    400    
16     400    
-368   -96    
112    -96    
-192   -16    
320    96     
-112   96     
-368   -128   
16     416    
336    720    
-16    352    
-576   -1008  
-1088  544    
1456   -512   
-288   -624   
-464   -32    
-16    1200   
992    1408   
-544   160    
-224   -176   
448    -176   
-272   256    
-304   -96    
208    208    
32     -32    
-480   96     
-496   -144   
48     -64    
96     -336   
-32    96     
-16    -128   
-32    176    
-304   -368   
192    48     
704    -336   
464    -288   
-336   288    
-16    32     
96     -80    
-288   -96    
432    -512   
-352   224    
64     -48    
80     -80    
-304   224    
-96    -432   
-224   -224   
992    -384   
-256   288    
-304   160    
304    -128   
112    176    
-528   80     
-64    -512   
-240   64     
384    -16    
-928   0      
-80    128    
-416   -176   
-208   80     
1296   2032   
-1072  1600   
80     -320   
1712   -272   
-736   32     
-912   -64    
672    256    
832    -48    
-416   112    
-736   -112   
480    64     
112    48     
-240   64     
-16    -48    
144    128    
-128   48     
-48    176    
64     48     
-128   48     
384    -720   
-384   320    
240    -112   
-208   112    
432    64     
384    -192   
160    -80    
-288   -336   
-32    -48    
272    336    
-224   304    
64     128    
-144   208    
-112   64     
176    384    
144    144    
48     80     
-48    144    
128    368    
128    416    
-320   128    
272    48     
64     -16    
-352   64     
64     16     
-240   80     
64     112    
176    224    
112    656    
-48    416    
48     384    
224    144    
208    864    
-384   128    
-560   240    
624    352    
592    -48    
-992   -256   
400    -336   
176    -272   
0      -160   
-128   32     
-80    48     
144    176    
96     256    
80     32     
-48    48     
-16    -112   
-160   144    
144    80     
0      64     
32     112    
-80    -128   
0      192    
-16    32     
256    16     
-416   160    
128    240    
112    128    
0      256    
-48    96     
-448   -688   
1728   944    
1088   704    
-1408  336    
-176   -16    
304    -96    
400    -240   
-160   496    
-224   -272   
-48    -112   
160    256    
176    112    
-176   96     
16     48     
144    336    
208    -32    
-448   -32    
160    16     
240    128    
-352   96     
32     -32    
-432   352    
944    -432   
-64    64     
-736   32     
672    240    
256    80     
-304   208    
-208   -64    
48     96     
496    80     
16     80     
-464   144    
128    48     
528    352    
-288   176    
-48    160    
160    -16    
-208   224    
576    -16    
-400   192    
32     80     
176    128    
0      80     
208    80     
-240   48     
-160   224    
352    80     
-32    32     
-304   272    
1520   2000   
-1168  -768   
-2256  -944   
1456   -48    
112    -144   
-1008  -16    
704    224    
432    272    
-704   -96    
176    160    
384    -32    
-224   128    
-240   32     
448    320    
-224   -144   
-176   400    
96     -240   
-48    -320   
16     112    
-16    -32    
-32    48     
592    1056   
-1296  -288   
-656   464    
832    240    
160    -224   
-32    128    
-320   336    
304    -16    
-16    -96    
-112   112    
48     16     
-144   0      
80     96     
112    -1248  
176    80     
-160   112    
-224   -208   
64     240    
272    64     
-144   -32    
-96    -48    
592    96     
288    464    
-240   -320   
96     384    
336    80     
-256   -288   
-64    64     
256    -496   
0      112    
-80    288    
208    128    
80     -16    
-160   176    
-112   -48    
1152   448    
-176   192    
-512   432    
304    -192   
-432   64     
0      80     
-16    -160   
304    208    
80     -384   
112    528    
-416   -576   
-400   192    
592    -176   
176    -224   
-448   160    
352    -800   
208    -272   
784    16     
-112   -96    
-608   32     
896    768    
-640   640    
-496   -368   
368    -224   
320    160    
-304   -336   
-96    -192   
448    -1024  
160    0      
-384   -128   
-208   528    
-64    208    
0      576    
448    896    
-208   640    
-144   224    
80     -528   
0      736    
-368   -1152  
-64    -304   
224    -1056  
384    -32    
-192   -368   
-32    672    
96     48     
48     -96    
320    -16    
-32    448    
-64    176    
-160   -208   
320    176    
144    176    
-32    288    
48     -80    
32     208    
352    176    
128    96     
-48    688    
256    1456   
80     1728   
224    256    
-32    432    
64     -560   
272    464    
224    -432   
240    -544   
-864   672    
656    432    
-48    -112   
-352   -256   
-48    272    
320    -160   
80     -992   
-144   -1488  
48     64     
32     -272   
256    176    
192    -144   
48     -64    
-192   -144   
96     -16    
-80    240    
-96    544    
0      -128   
-48    32     
128    -176   
-32    -528   
-64    96     
-32    -592   
-144   64     
256    -160   
16     -96    
-656   -288   
-64    -480   
176    -16    
464    -368   
-784   288    
144    16     
208    144    
128    208    
-32    -560   
-416   -272   
128    112    
208    80     
-48    160    
-144   -272   
-16    -96    
16     176    
112    0      
-192   32     
0      32     
288    288    
-80    192    
-16    352    
-176   -720   
352    -320   
80     352    
-368   176    
-80    304    
112    80     
-96    -288   
-272   336    
-144   528    
-32    -224   
-16    -304   
352    -192   
16     -80    
-160   -608   
400    -144   
-192   -800   
112    208    
112    656    
112    -464   
-208   -224   
80     480    
96     -304   
288    80     
-144   -256   
-176   -96    
-352   224    
336    272    
224    -288   
80     64     
-208   304    
1344   128    
-2464  352    
-816   -48    
1536   720    
-48    224    
-288   560    
-192   64     
-112   -160   
0      128    
496    -128   
-240   -128   
-192   -176   
128    16     
0      48     
112    192    
-64    -32    
-16    64     
16     -544   
96     64     
-32    -32    
-272   -272   
736    1056   
2000   112    
-1824  512    
704    48     
192    -112   
-288   304    
592    -144   
144    -144   
-128   -48    
96     -208   
336    64     
-96    -480   
-224   -80    
176    48     
624    112    
-512   0      
-96    144    
592    -96    
-64    128    
-320   16     
240    192    
-768   384    
-64    -240   
112    -48    
240    336    
-48    352    
-16    208    
-320   -144   
-112   -288   
416    -144   
32     -448   
-192   48     
-208   96     
224    -32    
32     0      
-480   -96    
128    96     
64     -496   
-240   -128   
272    16     
-16    160    
-448   -272   
-256   -176   
-304   -336   
992    0      
224    -112   
-416   96     
-240   -1056  
560    -1008  
1088   1104   
624    -288   
-992   -208   
-560   -176   
816    -176   
-416   -288   
-224   -176   
64     176    
-96    0      
-160   400    
-192   -16    
-160   112    
32     -256   
-80    112    
-80    80     
160    208    
272    48     
-160   32     
-800   -560   
-80    448    
384    -176   
-448   272    
752    16     
304    224    
-944   -128   
-560   192    
1184   368    
-976   -144   
-192   464    
-352   -96    
-32    272    
-64    16     
0      224    
-48    -160   
-144   240    
288    -144   
80     -32    
-144   0      
-160   -48    
-16    -96    
64     32     
0      -64    
-160   112    
-256   176    
-640   0      
176    80     
144    -208   
-176   352    
-304   -64    
256    128    
-16    -272   
304    240    
896    128    
-784   128    
224    -256   
208    208    
-288   656    
-256   608    
336    448    
-320   32     
-240   208    
-144   -112   
-144   192    
-16    112    
272    64     
16     -896   
-800   192    
304    -48    
304    -416   
-288   48     
-96    80     
-96    80     
96     -80    
128    176    
-16    -96    
-208   288    
-128   -240   
80     -208   
48     128    
-16    176    
-1056  1376   
1984   -864   
-64    48     
-960   -304   
560    -16    
128    208    
-352   -320   
-672   656    
544    -80    
0      48     
-16    48     
-384   -256   
16     176    
-192   -464   
352    -480   
-144   496    
-48    240    
0      -464   
-80    -304   
-112   144    
-208   -992   
-352   528    
1040   256    
-528   224    
-272   128    
336    -96    
-160   32     
-288   -128   
64     -80    
192    80     
-64    176    
-320   96     
144    192    
80     -16    
-176   160    
64     16     
-160   -208   
-48    144    
240    -48    
-160   -48    
16     112    
-128   -32    
224    128    
192    80     
-320   80     
-32    96     
288    128    
64     32     
-256   112    
1520   896    
-1856  368    
-192   304    
1040   -16    
-816   80     
-288   96     
976    64     
-96    208    
-448   272    
32     48     
336    112    
80     -80    
128    48     
-288   -16    
-192   -96    
496    128    
-272   80     
-288   160    
304    48     
384    112    
-272   48     
48     -656   
-1632  1344   
1760   896    
-640   720    
-976   -80    
480    368    
-896   496    
-48    -16    
-64    -192   
16     -64    
176    64     
-256   112    
80     112    
432    144    
-64    -96    
-480   160    
-16    -304   
-144   -144   
160    224    
192    304    
368    256    
112    880    
-64    -272   
-144   416    
320    0      
-1008  -1328  
-96    80     
624    304    
-288   0      
-144   -96    
352    144    
-96    400    
112    192    
496    -96    
64     80     
-544   608    
112    -320   
256    -400   
512    208    
208    224    
-112   0      
16     192    
96     144    
288    -384   
304    -256   
-64    -208   
-400   -128   
816    -160   
-48    32     
-784   -832   
1584   -1456  
896    -256   
-624   944    
-1120  800    
784    272    
656    64     
-384   -16    
-480   -288   
240    -448   
352    160    
64     -672   
16     144    
-16    0      
32     208    
448    512    
-304   416    
-272   -256   
384    -64    
16     -64    
-288   176    
-112   160    
320    144    
192    32     
-608   -304   
384    -704   
288    -32    
-176   656    
112    -848   
240    208    
160    768    
-288   -288   
0      0      
192    16     
32     592    
-128   -112   
224    -368   
0      288    
-96    304    
160    -432   
144    -192   
-480   448    
208    240    
304    -144   
288    464    
-432   48     
-144   -176   
352    624    
32     -48    
-160   256    
-144   320    
256    816    
1584   736    
-512   1408   
-624   1152   
160    624    
624    1184   
-432   -416   
-288   -560   
336    -176   
112    -192   
-176   176    
0      -64    
-80    48     
96     32     
224    -448   
-32    -336   
128    784    
-32    912    
-48    -448   
-160   32     
112    16     
16     112    
96     -912   
320    176    
144    0      
-288   656    
352    1120   
288    544    
64     -144   
-576   -256   
256    -1040  
496    -208   
-224   352    
-240   688    
304    800    
-96    208    
-64    720    
176    -368   
128    80     
-272   -208   
16     64     
160    -192   
256    -160   
-112   -192   
-48    400    
-224   336    
256    240    
176    288    
-240   -160   
208    480    
-320   -1040  
64     -512   
176    -80    
-272   160    
176    -352   
352    -80    
-288   -544   
-144   384    
96     224    
80     96     
-192   224    
272    -48    
-96    -80    
-48    128    
192    64     
-80    -112   
192    80     
32     -112   
-288   464    
112    112    
224    320    
-144   -16    
48     272    
32     -96    
32     272    
-80    -304   
-80    -64    
288    112    
-336   272    
-592   -336   
-704   -464   
2192   64     
-640   -240   
-704   320    
720    224    
176    -272   
32     -256   
-16    -448   
320    144    
-432   -1408  
-416   176    
-608   -112   
480    -80    
-432   -112   
0      -704   
144    -64    
0      512    
16     -64    
32     112    
-112   -256   
1232   -448   
-1120  -64    
608    -240   
288    224    
-704   -384   
240    -112   
144    -112   
240    128    
-288   -144   
-128   -112   
256    -112   
-32    -672   
80     96     
-112   -160   
-320   -16    
688    -224   
-144   16     
336    -288   
-288   48     
-80    0      
32     -672   
-1200  208    
512    -544   
32     -64    
-512   -16    
0      32     
832    -480   
48     -48    
-416   -1504  
32     -16    
208    -48    
16     192    
-80    144    
-160   96     
-576   64     
560    -288   
-128   -128   
-128   208    
-1152  -64    
-96    -32    
240    -96    
400    -192   
-96    -128   
320    -704   
-560   96     
-432   96     
816    128    
-304   -752   
1184   1760   
112    496    
192    704    
432    -352   
-928   -80    
272    -80    
688    464    
-256   -208   
-256   -176   
256    -96    
176    -208   
32     480    
-208   -816   
-208   176    
112    -128   
224    -16    
-304   32     
-112   32     
-160   -256   
560    512    
112    -336   
-832   80     
-832   32     
32     16     
-352   0      
432    0      
416    96     
-352   -208   
176    112    
80     304    
368    -176   
-544   256    
272    -224   
-256   0      
0      -272   
-224   -16    
80     32     
48     -32    
-192   -48    
-64    48     
256    -432   
-16    96     
0      -816   
-112   48     
16     -48    
-16    0      
-192   -64    
48     -96    
112    -144   
96     -64    
-208   64     
-64    -288   
528    224    
608    -128   
-384   496    
-352   160    
80     224    
-64    -400   
-288   -80    
48     112    
-224   -80    
-16    -96    
128    -144   
-208   272    
-80    112    
192    80     
272    -144   
-608   208    
160    -928   
-384   128    
256    48     
48     -80    
224    -416   
-1088  -144   
-32    224    
-128   -240   
-128   -208   
384    288    
-336   224    
-64    -112   
-192   -144   
1168   1504   
1152   80     
-1568  448    
-320   560    
528    -240   
176    80     
-848   720    
64     -128   
-128   -304   
64     -160   
48     128    
-240   0      
-16    -16    
96     -240   
272    -512   
-192   80     
64     -160   
-144   160    
-32    -96    
-224   -208   
128    -768   
-560   704    
752    -304   
-656   512    
-48    -768   
32     -304   
-16    -64    
-144   -288   
-576   112    
48     112    
96     -256   
-48    -192   
-224   -32    
528    64     
-48    112    
-80    208    
-64    208    
96     -112   
144    160    
-272   32     
-224   -32    
32     64     
160    0      
-160   96     
-112   160    
-176   -160   
64     192    
-96    -224   
-64    48     
32     -1024  
1344   -656   
-1216  96     
416    288    
-112   -320   
-448   -64    
-208   192    
656    144    
288    112    
-480   128    
-208   384    
-304   32     
-96    144    
-272   368    
304    336    
-208   208    
-48    -32    
112    -96    
-368   -160   
-48    -64    
16     -128   
560    -144   
-2448  -80    
-48    448    
992    176    
-544   -160   
-560   -176   
672    1072   
784    1056   
-336   640    
80     304    
96     32     
-176   48     
16     -16    
-64    160    
-80    304    
-240   64     
368    448    
-608   512    
-336   400    
480    432    
-272   80     
-144   -128   
-224   736    
240    960    
-896   240    
800    -128   
576    -176   
-288   -352   
-48    368    
96     128    
-384   176    
128    -400   
-144   -304   
912    192    
640    816    
-400   -240   
-112   160    
-688   336    
-16    544    
576    208    
-272   64     
-208   96     
352    -16    
48     96     
-272   160    
432    400    
560    -64    
160    128    
-336   -64    
-304   48     
400    1056   
1168   32     
-2240  -496   
-336   192    
1664   144    
-112   96     
-656   1008   
-512   656    
352    -720   
368    -64    
-320   64     
-368   192    
352    48     
64     -416   
128    112    
-336   96     
128    288    
416    112    
-208   -128   
-48    -32    
112    240    
-48    -16    
-608   -32    
640    -464   
208    112    
-224   -160   
-16    -80    
-384   -416   
176    496    
336    48     
-176   -240   
16     -80    
48     16     
64     256    
240    448    
-48    -800   
-96    -592   
240    -784   
32     -1344  
-592   -1184  
96     -112   
176    400    
272    -128   
-864   -256   
240    0      
192    -96    
-192   -1520  
-448   112    
192    864    
352    304    
48     -768   
-1200  416    
464    480    
1056   1216   
-1024  928    
-208   416    
240    800    
192    80     
-144   -32    
208    1184   
-32    272    
16     -224   
16     -112   
0      368    
-96    160    
-16    -384   
192    -304   
-256   -352   
-16    640    
320    464    
96     192    
-112   -176   
-64    -160   
112    512    
96     672    
-144   208    
336    496    
-176   128    
-96    -288   
-48    128    
704    1248   
448    96     
-976   -752   
-352   1280   
576    896    
-128   832    
-416   -80    
224    -128   
160    -352   
-96    -256   
208    -64    
-48    176    
-80    112    
32     -208   
192    -16    
-288   -32    
-208   160    
208    432    
96     160    
-272   -16    
144    -832   
-464   768    
464    272    
-128   -384   
32     -192   
-432   752    
256    -992   
-48    448    
-112   352    
-32    96     
64     272    
288    160    
32     320    
-112   64     
48     208    
32     128    
-48    0      
-144   160    
144    -16    
-96    -112   
48     112    
224    -288   
-160   32     
304    48     
-208   96     
-320   112    
128    144    
240    96     
-96    112    
800    1504   
-592   -784   
-2208  800    
912    144    
224    -128   
-1216  32     
384    352    
528    -48    
-336   160    
-112   -736   
304    96     
-272   48     
144    16     
-96    -192   
432    128    
-176   112    
-112   32     
464    128    
-144   64     
16     144    
96     -32    
-144   -464   
-1200  352    
960    32     
-352   -1184  
-128   -112   
704    -1184  
320    256    
-720   -272   
-384   224    
560    -112   
304    192    
-176   48     
-176   0      
48     64     
-32    80     
32     -16    
192    -64    
288    272    
48     -240   
-128   -48    
160    -16    
240    -240   
160    64     
864    256    
528    80     
-544   48     
368    -192   
560    -256   
-160   112    
-240   -496   
272    320    
320    -176   
32     112    
0      -400   
240    240    
352    -624   
-32    64     
96     -496   
-128   -32    
144    -112   
336    128    
96     -64    
-256   -224   
-80    -16    
384    48     
672    -32    
-112   16     
176    176    
192    -912   
-976   2128   
2048   -2128  
-928   816    
-704   -32    
784    32     
208    -16    
16     -512   
-240   -336   
432    -208   
-32    192    
-160   -32    
-80    32     
592    -32    
-464   80     
-80    -96    
336    128    
-224   96     
-176   -64    
256    -768   
-736   -448   
528    -160   
-1232  -224   
192    -928   
512    -240   
-128   -352   
16     32     
256    -1184  
-256   -192   
144    352    
144    -128   
96     192    
-48    80     
-304   -144   
368    272    
64     -336   
-128   304    
-448   -304   
160    0      
-32    192    
-176   -192   
-112   -208   
400    -704   
-272   -48    
176    16     
-16    128    
-48    -240   
-144   96     
224    -464   
32     -416   
-416   -288   
-16    -704   
704    -272   
-128   -48    
112    -240   
224    -112   
-304   176    
144    592    
544    256    
-32    -128   
-288   -16    
176    -80    
16     -80    
-176   48     
-16    -112   
96     96     
288    256    
-400   128    
-32    -288   
-272   32     
128    -192   
-176   -32    
240    -16    
-176   112    
-32    -848   
16     -272   
304    -352   
160    608    
-352   544    
80     208    
112    -128   
-400   -2192  
-192   -400   
16     32     
-208   -400   
240    -400   
-192   -384   
-80    224    
112    -768   
96     -992   
64     -80    
-112   448    
0      96     
192    0      
160    -224   
-352   -96    
144    160    
64     480    
-64    -128   
-240   -64    
64     -112   
-80    -976   
192    -896   
-400   704    
16     320    
320    -400   
-128   -144   
-16    16     
240    64     
112    -128   
-144   208    
-80    -688   
64     -400   
272    -96    
-96    736    
16     -160   
224    -96    
-304   -32    
-48    224    
208    -80    
0      -160   
-80    -624   
64     -64    
-176   -16    
-48    -160   
32     240    
-64    32     
32     -32    
-48    176    
-576   176    
320    -832   
1440   -272   
-1504  464    
256    1120   
416    432    
-448   -64    
192    -16    
272    144    
16     -144   
-240   176    
240    -176   
416    96     
-176   96     
-192   -160   
-64    368    
256    -48    
80     128    
-224   384    
288    288    
176    -160   
-16    128    
-912   -304   
1488   0      
1328   304    
-2144  192    
-336   -512   
640    -672   
-352   -480   
-448   800    
576    1792   
32     368    
0      -512   
256    -432   
-256   320    
-112   80     
592    240    
-304   -96    
-352   224    
-112   400    
-80    -16    
32     -320   
-96    -288   
80     64     
176    -64    
-752   -1232  
0      288    
1376   1680   
-1488  1200   
-160   960    
320    160    
-80    -112   
-128   -512   
-336   464    
944    128    
-128   -608   
160    -32    
-48    0      
48     1072   
336    -64    
-480   -96    
-128   128    
352    192    
464    -48    
-32    -208   
-256   592    
176    160    
-176   -400   
-336   -320   
64     -288   
320    -96    
320    1888   
16     192    
176    -336   
-576   96     
32     1168   
-336   1248   
80     912    
192    -160   
256    -288   
-256   -416   
-112   128    
272    416    
432    112    
-432   -304   
-304   256    
384    160    
128    160    
-208   -272   
112    -544   
-80    -80    
-416   -144   
128    16     
-32    -48    
464    -80    
-384   960    
288    -576   
-400   -64    
80     0      
304    -352   
-288   -1408  
-496   -80    
384    576    
144    608    
-256   -224   
-208   -112   
160    -304   
-384   -224   
112    -208   
-48    -320   
-160   -176   
-192   -160   
16     -80    
-48    224    
-256   192    
-96    1008   
560    352    
-208   48     
-192   784    
224    -16    
192    -320   
-512   -128   
-48    976    
576    320    
-288   448    
-528   -608   
-256   -224   
48     -672   
-352   -592   
48     -304   
96     880    
160    512    
-128   160    
-128   528    
304    144    
64     144    
-336   -320   
112    752    
192    240    
-176   976    
208    464    
-432   80     
48     32     
176    16     
-48    16     
-16    -272   
-352   32     
48     -432   
176    -448   
0      -448   
-64    -96    
-208   -2448  
-576   512    
768    16     
-512   208    
144    144    
-112   -496   
-80    -560   
96     48     
-144   80     
224    128    
-128   144    
-208   -64    
176    -112   
-80    96     
96     -272   
-128   80     
0      -128   
112    -96    
64     32     
0      160    
-304   -480   
848    -48    
112    0      
-496   288    
320    96     
-240   352    
-128   128    
272    144    
96     -512   
-320   -128   
-240   80     
272    112    
16     144    
16     144    
80     128    
112    384    
-304   208    
-64    96     
176    112    
32     -48    
-144   64     
32     -64    
-144   144    
-32    -80    
176    32     
0      48     
-128   -16    
-48    176    
288    -32    
-1040  -1216  
2320   384    
608    -608   
-1584  64     
48     -112   
-320   -16    
128    224    
320    -64    
304    336    
-240   -80    
-176   128    
48     -16    
192    112    
-320   -48    
48     272    
784    64     
-384   224    
48     -16    
0      224    
48     -128   
-64    112    
-160   -240   
1152   800    
432    -80    
-1424  240    
1872   96     
-176   176    
-912   160    
448    -416   
32     -48    
224    160    
-192   16     
96     176    
160    32     
-96    48     
32     64     
-48    112    
176    48     
-208   416    
160    -272   
-160   112    
240    128    
-272   -736   
-160   272    
176    112    
-144   48     
272    1024   
-256   400    
-64    -144   
-576   416    
-32    208    
368    144    
-272   -96    
-208   48     
224    -176   
0      -48    
0      96     
288    -624   
544    496    
320    -16    
-112   -32    
-192   224    
16     160    
48     112    
240    48     
-32    96     
-544   224    
128    -16    
160    96     
-192   -336   
992    3840   
528    432    
-704   -1040  
768    -432   
144    -32    
-912   64     
352    256    
512    192    
-176   -192   
-1232  -80    
656    -96    
352    48     
-240   96     
32     128    
0      64     
112    -96    
240    48     
-128   -592   
-160   -240   
816    -1312  
80     -48    
-320   16     
-112   256    
-608   48     
16     -32    
672    112    
-432   -80    
128    -96    
448    -64    
-144   -64    
0      -240   
-48    128    
0      -192   
80     400    
48     -432   
-160   112    
432    -528   
-208   -256   
80     -32    
-16    64     
128    160    
224    240    
-272   432    
176    160    
-176   -16    
-32    -640   
-288   256    
400    192    
-16    32     
112    464    
112    80     
80     144    
-608   512    
304    48     
96     -256   
96     -64    
-160   144    
112    608    
208    576    
-16    864    
112    192    
144    272    
-112   -208   
32     272    
160    -400   
176    352    
-80    240    
-144   752    
-80    -80    
288    -128   
-112   -208   
-80    128    
-96    192    
112    176    
176    176    
48     64     
-64    336    
128    496    
160    96     
16     -144   
32     80     
-496   1392   
688    -128   
-96    -112   
-240   1104   
480    192    
480    448    
-768   880    
-96    -816   
384    32     
96     48     
-128   16     
-80    64     
176    16     
192    176    
32     144    
-240   32     
96     256    
64     352    
0      -192   
0      0      
-512   944    
640    -592   
-352   -96    
-80    -160   
224    -112   
64     -800   
-208   32     
-32    192    
112    -176   
48     -672   
-96    -16    
96     -512   
32     64     
96     0      
-176   96     
-96    336    
160    -240   
-128   64     
48     48     
432    -160   
-96    -144   
-64    -288   
-144   -1040  
80     -176   
0      -224   
160    -96    
-304   48     
208    112    
368    -96    
-48    0      
640    -528   
-800   192    
944    144    
-288   -96    
-608   272    
-64    64     
592    -976   
432    -928   
-176   352    
-256   192    
352    32     
272    -400   
-272   64     
64     256    
304    208    
-80    -176   
-624   -352   
-592   320    
256    736    
-112   -480   
-832   -144   
864    -368   
752    -816   
-736   -656   
416    -3248  
-32    -400   
-608   -288   
112    1488   
864    1504   
-16    608    
-16    448    
320    112    
-912   352    
160    272    
448    336    
176    -32    
-624   224    
480    -272   
288    96     
-80    -416   
48     32     
192    240    
-224   240    
368    -208   
-16    -1408  
224    -1264  
-256   -1168  
352    -1296  
544    -480   
-272   224    
240    432    
96     160    
-416   -416   
288    -208   
-176   -624   
-368   208    
-160   1648   
720    -640   
-256   -384   
-112   -480   
368    176    
32     -288   
352    -560   
-144   -192   
272    -400   
-336   128    
-336   -256   
208    -656   
160    304    
1264   2192   
-1600  1248   
624    -2032  
1104   -192   
-64    592    
-1344  -208   
288    -480   
1456   -576   
-672   -336   
-992   192    
112    -16    
688    -96    
-112   -48    
-480   -80    
64     96     
-112   -32    
208    -32    
-288   112    
112    640    
-240   -112   
144    -288   
-144   -288   
-384   -80    
624    32     
80     -272   
-960   -48    
512    -144   
288    -32    
-432   -160   
-112   -944   
-400   -528   
176    -176   
96     -240   
-64    -192   
96     48     
-160   144    
96     384    
160    32     
-384   -16    
32     48     
-16    0      
16     -288   
-176   -112   
-1024  -320   
384    112    
-576   544    
256    1136   
336    640    
-720   -160   
64     -32    
-64    112    
-384   336    
816    -64    
32     -80    
-128   16     
176    -256   
-576   -624   
32     -272   
-64    -208   
80     48     
-112   0      
-80    304    
-112   224    
-160   48     
224    32     
-32    32     
-288   160    
160    144    
224    -512   
-496   -16    
80     80     
144    -16    
-112   96     
32     -64    
-128   -272   
384    -224   
144    416    
-352   -32    
64     144    
-208   304    
720    -416   
-2432  1072   
-192   -400   
816    -16    
-1120  -96    
-384   -96    
192    -800   
96     304    
-320   -96    
176    144    
-48    48     
-320   416    
224    16     
-32    -368   
-128   -160   
144    208    
-256   208    
32     -112   
80     128    
-96    48     
-336   -336   
544    -624   
-592   320    
-240   -496   
16     80     
0      144    
-32    272    
96     384    
48     -368   
-304   192    
-160   32     
0      96     
288    80     
176    64     
-688   -32    
128    0      
-368   -192   
48     160    
-144   112    
48     160    
16     32     
-96    80     
-144   -16    
-144   -48    
288    64     
-480   64     
80     160    
192    64     
-256   16     
-352   -1408  
1120   -16    
-912   -400   
-1040  160    
656    96     
368    176    
-496   48     
48     -176   
-32    -16    
-48    -112   
-304   64     
400    112    
16     80     
-416   -160   
272    208    
176    -80    
-464   128    
208    112    
304    -128   
-144   144    
112    64     
-112   -288   
800    960    
944    -16    
-1360  160    
448    272    
896    -32    
-544   208    
-160   176    
896    -16    
-208   48     
-656   128    
-112   0      
208    -48    
-288   48     
48     0      
-128   80     
208    208    
16     96     
-16    80     
-16    -16    
-272   48     
240    64     
-1136  48     
-288   80     
480    64     
320    224    
-672   -48    
-400   -928   
96     176    
416    240    
-208   112    
96     0      
-336   176    
16     64     
-256   192    
0      -240   
-336   144    
480    144    
224    224    
128    -48    
-208   192    
48     192    
288    16     
-128   128    
144    352    
-48    -16    
-352   64     
432    64     
-48    -480   
80     -656   
240    -1264  
1024   48     
304    0      
-912   -112   
208    208    
736    -80    
-304   144    
16     -144   
-272   -64    
288    112    
64     176    
-176   96     
96     144    
-48    32     
-160   -64    
48     80     
112    -32    
-96    208    
512    416    
-112   208    
-112   112    
-192   -80    
576    240    
-48    -144   
-208   160    
512    -80    
-160   160    
192    -448   
-656   -736   
336    -208   
144    240    
-112   288    
-112   -288   
256    -48    
-64    -96    
32     -368   
480    -1088  
-208   -240   
-224   -192   
192    -224   
-128   -176   
-80    96     
272    80     
-240   -432   
-336   -640   
-112   0      
368    272    
-32    -448   
-192   0      
64     368    
240    -2048  
-896   224    
704    -496   
16     -432   
48     -528   
240    320    
-992   64     
96     -1456  
272    -672   
-80    192    
80     192    
0      112    
-176   -112   
336    -944   
80     -96    
-352   -624   
176    480    
48     400    
-80    144    
16     192    
-96    48     
176    -208   
-32    304    
144    512    
-112   128    
112    -464   
-48    -48    
-48    176    
128    -112   
176    -16    
64     -464   
-416   -48    
64     192    
256    80     
16     144    
-96    -192   
-96    192    
64     432    
192    176    
64     16     
-160   -64    
80     80     
64     144    
0      80     
16     48     
-224   -144   
144    192    
32     -1008  
96     32     
-304   -448   
800    -576   
80     176    
-80    64     
-192   32     
-80    384    
80     -16    
64     112    
64     -176   
-96    -32    
48     112    
272    -144   
0      80     
-32    -448   
32     240    
224    -624   
-288   64     
96     256    
0      800    
-128   224    
96     -80    
208    -208   
0      48     
-80    32     
112    -304   
240    112    
96     128    
96     -64    
96     -352   
-192   320    
720    -768   
-2560  304    
864    192    
928    192    
-256   -96    
-176   -48    
496    160    
400    1040   
-384   -448   
48     -96    
-48    64     
-80    -384   
352    -32    
-192   -592   
-192   112    
224    -288   
128    -48    
-32    -64    
-416   752    
176    576    
368    1008   
688    -528   
-2288  -448   
960    -784   
480    -624   
-416   144    
32     -944   
1024   -1136  
-320   -1472  
-464   -752   
-96    -1056  
0      224    
208    192    
208    128    
64     -272   
-144   288    
112    -624   
464    -704   
-192   -16    
-240   -688   
-256   -112   
160    -160   
-64    -304   
-240   544    
256    -16    
192    1040   
-464   -128   
-320   240    
-160   -160   
80     144    
-464   -112   
-352   -48    
224    -304   
96     -1536  
32     0      
400    -976   
192    64     
192    320    
160    -272   
-352   208    
128    16     
0      -544   
352    576    
-576   336    
96     208    
-416   -96    
-208   -64    
208    -112   
-144   48     
-304   -1888  
1520   -1232  
816    320    
-1520  -656   
-944   144    
1712   -128   
32     -192   
-624   432    
336    -192   
64     304    
416    -416   
-336   128    
-80    -160   
-592   0      
80     48     
288    -64    
-304   -272   
304    -80    
-336   -1616  
432    -1440  
208    16     
-64    528    
64     496    
-672   -64    
176    -96    
736    -256   
-256   48     
-288   -32    
80     144    
464    -64    
-48    -32    
-176   -128   
112    192    
336    240    
-96    32     
-48    -2304  
288    208    
416    -192   
-160   -112   
-656   -16    
608    96     
160    16     
-112   96     
-512   -128   
-128   64     
336    -528   
-560   -608   
256    -352   
160    240    
-128   448    
240    -80    
-32    -96    
288    -400   
-400   224    
-80    -128   
-224   -192   
-272   -160   
112    -160   
192    16     
32     -160   
-64    16     
0      16     
-64    224    
160    0      
-144   112    
144    -992   
160    304    
-304   96     
-112   -176   
400    -384   
-80    -64    
-176   128    
336    -160   
-272   48     
48     64     
-160   64     
-160   -384   
-256   32     
0      96     
-32    -80    
-464   -1760  
1952   336    
224    32     
-1184  -80    
-48    496    
272    -112   
-544   -32    
592    -128   
-16    -304   
-464   320    
128    -112   
400    -336   
-64    128    
-272   80     
288    400    
512    16     
-368   -208   
32     176    
48     128    
-224   -224   
96     48     
-224   1024   
1232   -384   
-416   -192   
-752   0      
1056   80     
128    -16    
-720   -336   
144    -32    
320    -144   
-304   -112   
144    -16    
-112   -112   
32     -80    
224    112    
-64    64     
-432   320    
576    -96    
-368   128    
368    -256   
-240   0      
16     -176   
32     160    
-272   -224   
-64    80     
112    -464   
-448   144    
-64    16     
-112   80     
112    256    
-688   -544   
-160   -304   
64     64     
-656   32     
-144   112    
160    112    
-32    -352   
96     -256   
-32    -560   
-128   -32    
-112   96     
-48    0      
-80    80     
32     224    
-208   0      
-320   160    
272    -32    
-1024  -176   
208    -240   
384    -96    
-80    64     
-16    -832   
-1456  640    
1280   144    
160    96     
-752   160    
256    16     
48     112    
-480   -256   
-544   144    
624    -48    
-96    48     
-400   0      
-80    80     
-736   -192   
-144   112    
144    -96    
-48    128    
-144   32     
176    32     
64     96     
-96    -96    
448    400    
976    -320   
-1488  352    
272    112    
160    -96    
-384   -80    
368    192    
-80    -48    
-320   80     
320    16     
416    96     
-320   -64    
-304   -48    
-80    -192   
512    -96    
-608   384    
-32    -192   
48     160    
112    -96    
208    528    
-208   -336   
-480   160    
256    -64    
304    -16    
-624   64     
-272   -80    
-256   -656   
1328   -112   
-448   -2288  
-1504  -912   
656    48     
912    96     
-176   16     
-720   16     
416    560    
-640   208    
16     -144   
528    -144   
48     160    
-672   -160   
128    192    
208    0      
80     256    
-80    160    
48     192    
-176   160    
400    736    
-208   800    
-80    544    
48     -144   
240    -64    
400    208    
-64    224    
-128   352    
-416   432    
464    1136   
240    768    
-192   -320   
-320   -64    
176    112    
16     -256   
-48    -432   
-112   -96    
-32    208    
256    -16    
128    -320   
-96    176    
-80    128    
176    320    
-512   16     
-80    64     
16     1216   
336    672    
-112   -80    
-368   -208   
272    -784   
48     368    
-32    0      
-384   -32    
-400   560    
1408   -480   
-480   512    
-384   1216   
592    160    
144    -800   
-288   96     
-80    -240   
112    176    
192    -112   
-128   80     
48     32     
-64    960    
-224   368    
-16    -240   
-176   64     
64     192    
288    272    
-288   -192   
112    128    
112    80     
64     -16    
-16    80     
192    208    
-16    64     
-304   -224   
-112   -224   
160    64     
16     208    
-320   -368   
720    -928   
16     224    
128    -80    
-640   32     
176    224    
96     -208   
-176   -80    
-160   288    
128    336    
48     -160   
32     -144   
80     112    
80     192    
-144   224    
112    -16    
272    -16    
-256   256    
-96    320    
-160   96     
336    592    
-160   320    
48     -224   
512    -160   
-224   -96    
-128   144    
416    80     
0      160    
-256   208    
144    80     
16     96     
80     128    
-176   176    
64     80     
160    16     
160    528    
-112   256    
224    384    
-128   128    
-16    -384   
320    -32    
-224   320    
-176   16     
16     304    
400    -160   
-144   16     
-112   144    
208    96     
-64    288    
192    48     
-1536  -624   
1216   0      
528    80     
-1024  176    
160    1264   
896    -192   
-432   480    
0      -192   
240    -288   
-16    -656   
-320   224    
144    144    
0      224    
-112   0      
0      112    
192    -2000  
32     -176   
-256   256    
176    64     
208    304    
0      1056   
656    -640   
-1904  240    
1056   -976   
-1856  2384   
432    192    
-224   0      
-608   -48    
688    -544   
-16    -16    
-352   32     
144    176    
256    -240   
320    -80    
-464   0      
-96    160    
448    160    
-64    320    
-240   -48    
-16    -64    
0      -192   
336    816    
-1072  -240   
176    -32    
656    160    
-512   -464   
416    368    
768    160    
-112   -144   
-352   160    
-80    304    
496    -272   
320    288    
-624   96     
-240   -128   
-272   160    
368    -128   
-224   656    
624    -80    
576    -160   
-432   -112   
-80    64     
80     -512   
-144   64     
288    -640   
-496   176    
-112   128    
272    80     
400    848    
-896   1152   
848    -976   
736    368    
240    -112   
-704   -32    
-320   288    
528    -32    
384    128    
-256   -224   
-448   208    
864    -464   
-128   208    
-208   -704   
176    32     
-64    96     
192    48     
-352   80     
-144   -160   
96     -192   
912    -1072  
-464   176    
-64    0      
304    496    
-192   -176   
-624   64     
784    -400   
-288   -32    
-464   336    
352    64     
272    -32    
16     16     
-320   16     
176    -144   
400    112    
-448   32     
256    80     
-16    48     
672    224    
-128   -176   
-432   144    
384    -32    
208    16     
-224   112    
0      -16    
32     272    
96     208    
-144   -368   
176    -208   
-288   128    
208    80     
320    112    
-16    160    
288    160    
-416   272    
720    288    
-544   160    
-432   -192   
176    -208   
128    -736   
48     0      
16     -560   
256    -640   
-176   64     
80     -800   
16     -320   
-16    -2672  
16     0      
208    -144   
-192   -736   
-304   32     
288    -16    
-192   -816   
240    96     
144    -368   
-240   96     
-144   -224   
288    -160   
384    400    
-672   480    
224    -288   
48     -1248  
1440   992    
1056   96     
-1280  304    
-160   -176   
432    -80    
-144   -320   
224    -464   
0      -464   
-432   368    
272    -80    
544    -240   
-912   208    
-160   -448   
368    -144   
352    160    
-272   96     
16     -352   
-80    -128   
64     112    
208    112    
-432   880    
960    -432   
-352   -352   
-416   192    
368    -176   
-192   -32    
-560   288    
224    48     
-160   -304   
32     0      
224    -16    
-192   -608   
272    -192   
80     -736   
-144   48     
144    -48    
-288   160    
304    128    
240    176    
-192   48     
-48    128    
64     -32    
-16    128    
-32    -208   
-224   64     
144    -80    
16     32     
32     96     
224    -48    
272    -1280  
-3376  1168   
-48    336    
1600   -272   
-896   64     
-336   -144   
928    368    
-224   -16    
-432   256    
32     -64    
272    32     
-224   16     
-96    -16    
208    192    
-240   -592   
-288   240    
432    -400   
16     16     
-32    224    
-288   176    
64     208    
-608   -304   
256    -240   
1008   -544   
-1440  256    
-512   704    
368    96     
224    -400   
-608   96     
96     -464   
432    160    
400    -1056  
-144   -64    
-592   160    
112    -272   
96     -16    
272    16     
-480   -64    
416    -96    
128    144    
-160   160    
16     64     
560    416    
192    64     
368    -400   
-464   384    
-512   -1376  
-208   240    
368    -32    
-240   -48    
480    -16    
160    0      
-96    192    
-80    -16    
176    224    
896    -80    
416    496    
-688   -576   
-336   304    
928    656    
-640   544    
-352   -208   
32     -16    
-128   -16    
64     -160   
-384   208    
400    -112   
-80    32     
32     112    
-64    160    
976    -400   
-1552  -128   
-288   -208   
832    256    
-944   -208   
-384   96     
896    1264   
-80    1744   
-288   240    
176    -176   
-48    -448   
-752   112    
96     -16    
112    -16    
-208   368    
-32    880    
288    80     
-528   112    
336    160    
-144   176    
-128   128    
-96    -80    
688    224    
-96    -208   
-736   464    
160    144    
32     320    
-96    128    
-272   32     
400    672    
-192   -16    
-368   -176   
-16    -240   
64     464    
224    784    
32     592    
-48    288    
-16    -432   
32     -384   
-144   800    
-240   192    
-256   -80    
176    80     
-512   864    
-496   -64    
32     -352   
-16    -336   
-160   368    
256    368    
-32    256    
128    1040   
64     -496   
-784   -128   
-48    -144   
160    -1312  
-304   -144   
-32    1280   
464    -368   
-352   -704   
-80    16     
-160   0      
224    128    
-16    448    
-48    112    
16     -208   
64     -240   
64     -96    
-432   96     
112    256    
-16    48     
-32    192    
-224   32     
-32    96     
128    -48    
-272   384    
-880   48     
192    -80    
-16    32     
-16    -240   
-80    -32    
96     144    
192    -400   
32     48     
112    48     
-416   -256   
-128   -48    
-96    -32    
-16    -224   
-400   -240   
16     -32    
16     -128   
0      -32    
80     96     
-144   -32    
-64    -48    
288    -112   
96     -288   
-256   -128   
80     128    
192    176    
-528   656    
480    -32    
-480   -240   
496    32     
96     1104   
-224   -128   
-32    16     
80     656    
-160   -160   
128    -320   
112    64     
96     176    
-176   64     
-48    -32    
304    -176   
128    672    
-288   -320   
-224   432    
112    -128   
224    160    
-128   -96    
-64    0      
-80    -80    
304    0      
48     160    
-240   144    
-160   -64    
16     64     
80     160    
1152   1472   
-496   -160   
-1648  -224   
1168   -16    
-256   -608   
80     160    
-320   224    
80     128    
128    144    
-80    112    
-448   80     
208    80     
256    128    
-96    -176   
-464   64     
240    -112   
400    0      
-32    -144   
16     64     
-112   96     
176    160    
560    1056   
-1376  -400   
-560   -16    
320    32     
96     -480   
-784   416    
544    592    
-384   -128   
-384   48     
288    0      
-304   32     
32     32     
288    128    
-304   64     
320    32     
-176   32     
-80    192    
-128   80     
48     128    
-112   144    
208    384    
160    -80    
-176   192    
-416   -64    
64     -48    
576    192    
432    -336   
112    -240   
-512   432    
-16    16     
-16    208    
352    80     
160    -48    
-672   -480   
704    -368   
-32    176    
-352   -144   
496    288    
560    608    
-592   160    
128    32     
512    128    
-560   288    
-144   -192   
912    160    
16     128    
-736   112    
416    112    
-208   352    
-1408  1472   
384    608    
-368   816    
-272   -160   
336    128    
48     48     
-576   112    
144    -64    
512    224    
-944   16     
-16    -400   
592    96     
48     128    
-272   48     
80     96     
32     32     
112    144    
224    96     
-576   -288   
-96    336    
352    -16    
-336   32     
208    -224   
672    -48    
352    -48    
-112   -1072  
96     160    
96     208    
64     0      
-144   -48    
-480   128    
432    -160   
-192   176    
96     -144   
272    80     
-192   32     
-96    192    
224    -192   
-752   -64    
400    32     
-32    -288   
336    256    
-368   -48    
-80    256    
384    0      
160    -64    
-400   -144   
-176   64     
144    -384   
0      160    
96     32     
464    144    
640    48     
-192   -400   
64     -48    
224    368    
-640   272    
48     -560   
144    -80    
160    64     
-160   32     
144    -624   
64     128    
-176   -32    
176    -16    
160    208    
-176   176    
-16    96     
304    -256   
-112   -256   
-496   96     
448    288    
-32    -480   
144    -32    
-112   -96    
0      48     
-16    656    
112    96     
-16    -160   
64     32     
-960   -304   
976    -144   
800    -336   
-720   64     
320    288    
144    -80    
-240   64     
-224   -2032  
112    272    
304    304    
-208   144    
64     -800   
48     176    
240    -368   
-320   496    
96     192    
32     -208   
-32    160    
-112   -160   
272    16     
-112   -2016  
-672   640    
1136   -16    
-736   208    
96     -592   
192    320    
96     320    
0      528    
0      -192   
144    192    
-96    96     
-96    -144   
240    288    
192    -128   
-320   128    
48     -192   
80     288    
64     -48    
-16    384    
32     -912   
-80    64     
48     -64    
144    144    
160    160    
-128   208    
-144   480    
272    -336   
96     496    
-320   -96    
112    -816   
1936   160    
-1232  608    
-896   -208   
1136   448    
-432   -240   
-80    -96    
368    112    
96     -256   
-160   -288   
-16    -64    
288    -608   
-32    -48    
-144   -352   
80     96     
592    -384   
-352   -144   
-128   16     
240    -240   
208    32     
-240   -192   
-192   -1088  
-544   368    
1152   -576   
-448   224    
32     96     
464    -464   
-80    -80    
-144   -240   
0      64     
32     160    
464    -80    
-272   -608   
-112   48     
528    -320   
320    96     
-560   -176   
-96    -448   
-48    -304   
368    144    
-64    -112   
-16    -48    
-368   -32    
-128   -96    
-32    -96    
-96    -480   
-64    -160   
1040   704    
1072   1520   
-240   -448   
16     -144   
96     -64    
0      -288   
288    1056   
-528   576    
-560   -368   
992    -736   
560    64     
96     -544   
-48    96     
-48    -112   
96     -128   
176    -128   
112    -96    
-112   -1088  
-272   -1168  
-480   -368   
-80    -144   
144    -704   
288    -432   
-320   -288   
560    784    
1440   688    
-1552  -288   
-592   -336   
1168   -1008  
-144   -96    
-400   -64    
-288   -64    
672    688    
48     -160   
-128   64     
-384   144    
96     48     
160    -320   
32     384    
-176   176    
-128   400    
432    -304   
-96    -784   
-448   -544   
-432   464    
432    224    
592    0      
-464   -832   
-496   -656   
512    -672   
-96    -720   
-192   -1104  
368    -48    
-352   -32    
48     -320   
240    464    
32     -48    
-496   -240   
240    -752   
-32    16     
0      -48    
-160   144    
-112   -416   
80     112    
464    -1536  
-240   -432   
-208   -208   
96     -704   
160    -576   
48     192    
-304   -672   
64     -752   
-288   -96    
-160   0      
-176   -400   
560    -496   
48     -144   
-176   -256   
496    96     
544    -384   
-304   -256   
-272   -320   
384    256    
160    176    
-144   -64    
-144   -64    
-144   160    
160    512    
80     -128   
-480   -240   
304    48     
192    80     
-96    80     
112    160    
-32    112    
-720   96     
64     320    
-16    320    
-272   464    
576    448    
-464   832    
-64    -528   
192    -336   
-208   -528   
736    -336   
-368   -80    
-864   -432   
-368   -352   
-144   240    
128    48     
-48    688    
-112   -384   
-496   -464   
-64    432    
192    -176   
0      112    
0      -256   
-432   -144   
128    80     
-48    128    
0      -144   
112    -16    
-192   144    
-160   -528   
656    -592   
-688   992    
-208   448    
-48    -448   
384    32     
-192   -272   
-144   32     
-1344  -272   
32     -144   
-16    -64    
176    32     
-96    -16    
-208   -176   
128    -80    
-16    176    
-96    -112   
-192   0      
16     -176   
80     48     
-16    0      
-128   64     
64     -64    
-608   224    
32     240    
-320   -48    
-64    64     
128    -240   
64     160    
80     -112   
-1216  -1040  
-336   96     
1664   -432   
-592   -32    
-48    224    
240    256    
-448   256    
16     192    
-16    -112   
96     80     
-528   -16    
0      112    
-144   -144   
208    288    
352    48     
-272   176    
80     -80    
0      -112   
-112   -160   
-208   48     
112    128    
-96    -320   
-1600  464    
1232   64     
80     -240   
-1472  80     
704    112    
-224   -240   
272    192    
-64    96     
144    48     
0      80     
-224   96     
-160   -16    
-144   80     
512    96     
-48    208    
-208   -144   
-656   144    
-208   112    
-80    -64    
272    432    
-800   32     
32     16     
288    80     
-368   -240   
64     -864   
512    -208   
-16    -416   
64     48     
688    240    
-480   128    
-144   144    
0      112    
64     416    
128    -256   
-192   352    
80     160    
288    272    
-368   -96    
-784   16     
176    208    
368    144    
-64    -48    
-368   528    
336    -176   
-128   400    
-560   176    
-240   32     
-144   1440   
96     3280   
624    -112   
-992   -272   
368    0      
544    -144   
-80    224    
-544   -128   
48     80     
592    -32    
160    144    
-288   -32    
-176   48     
288    48     
-304   32     
16     32     
64     96     
32     -32    
-16    112    
272    -400   
-1136  32     
880    -144   
-208   352    
464    -48    
96     -16    
-512   64     
640    160    
-816   -176   
224    -144   
464    192    
-208   -48    
-320   192    
128    -112   
-112   304    
496    -16    
-624   32     
400    -48    
-464   -96    
-128   32     
176    208    
32     208    
-96    144    
-32    208    
-208   128    
0      144    
160    384    
400    192    
-416   32     
240    64     
144    -112   
-224   -144   
64     -144   
400    -48    
432    384    
-112   -208   
-288   -96    
144    160    
-80    -208   
144    48     
-496   48     
176    -48    
176    16     
0      112    
-112   16     
128    16     
16     -192   
-160   -208   
144    48     
16     336    
176    704    
208    384    
-320   64     
0      -16    
240    -80    
-128   144    
16     -672   
-80    256    
288    656    
-128   784    
-208   144    
208    16     
-592   -960   
816    -576   
288    -144   
-176   896    
752    384    
-304   -192   
-528   400    
160    288    
464    96     
32     -848   
-448   304    
-32    304    
240    176    
176    96     
-304   160    
32     48     
112    -160   
48     48     
112    96     
-80    -16    
96     -576   
-112   -64    
240    320    
-112   608    
-272   240    
320    128    
144    0      
-160   112    
80     0      
32     208    
-16    -32    
48     -32    
-96    -32    
-64    320    
304    -208   
-48    288    
-448   560    
208    48     
224    288    
-272   -176   
16     160    
224    -1072  
-96    -48    
32     112    
16     -128   
32     16     
32     384    
-32    -800   
16     -112   
192    -320   
1568   96     
-1664  352    
-784   -432   
1088   -464   
-192   544    
608    144    
-416   -480   
96     -224   
96     -64    
-208   128    
192    -336   
-80    160    
80     384    
-32    336    
-288   336    
432    144    
192    -64    
-240   -912   
224    -656   
80     -576   
-816   -416   
688    -432   
1440   992    
-1216  -2112  
16     48     
624    -416   
-336   -256   
-80    -320   
336    0      
128    96     
-240   176    
176    160    
368    -240   
-368   272    
336    -48    
256    160    
-160   800    
-32    512    
112    -448   
192    160    
0      144    
0      624    
128    -64    
-928   272    
-80    -784   
144    -352   
-32    -848   
-1088  -1232  
480    -704   
160    -128   
128    -336   
256    -720   
-416   -720   
-336   448    
1072   0      
112    -288   
192    -784   
-640   -736   
416    320    
-176   160    
-352   -160   
160    -96    
608    -368   
-208   320    
192    -496   
-224   -288   
256    64     
96     928    
-224   272    
-48    -1440  
1696   -1120  
320    48     
-784   -128   
-32    448    
448    736    
416    -368   
-384   400    
-272   1104   
240    -48    
-32    -400   
208    512    
-64    576    
-112   272    
160    -176   
-16    288    
-208   -32    
48     -560   
0      304    
240    -80    
-160   -320   
-48    -160   
-176   -432   
976    32     
-112   -1840  
-624   432    
224    432    
224    -128   
160    -1024  
-32    -272   
-112   -208   
224    448    
-320   -448   
-128   176    
288    128    
-336   -160   
-336   -352   
256    -576   
192    -256   
-144   448    
96     448    
-48    -512   
96     -32    
-32    128    
16     -704   
-304   624    
272    432    
80     832    
-48    480    
-48    -176   
-16    -48    
-192   512    
1008   480    
-480   -192   
-176   -272   
880    592    
-528   160    
-480   -416   
336    -528   
208    -320   
-144   -48    
-48    176    
-32    192    
144    128    
240    384    
-256   256    
-16    208    
-96    -288   
-512   -192   
304    -464   
-112   -160   
-48    -464   
224    128    
16     -560   
240    64     
-288   -192   
-64    -592   
224    -96    
176    416    
-176   160    
-112   -2304  
-784   448    
1248   -528   
208    912    
336    432    
-544   320    
352    -128   
-16    -512   
-144   -1568  
-160   -272   
192    -496   
-32    -16    
32     144    
208    144    
-16    240    
-16    320    
320    800    
-208   720    
-96    192    
256    -48    
-48    -800   
-736   352    
464    -240   
80     -256   
96     240    
-240   784    
240    96     
-128   -480   
0      -224   
112    -336   
-96    -144   
-320   96     
224    128    
-240   -64    
192    -128   
-320   -80    
32     -224   
-80    -64    
208    -272   
16     64     
-112   -544   
96     32     
32     16     
160    -96    
-256   -80    
-320   32     
304    144    
48     80     
-288   -272   
1056   272    
-1936  368    
-832   -96    
1664   208    
-448   -320   
-864   144    
544    -96    
608    96     
-928   -160   
16     128    
304    -96    
-32    32     
-224   -32    
-96    -80    
-320   -80    
384    -16    
-128   32     
-208   0      
336    96     
-384   -464   
-288   80     
496    800    
-1392  -640   
-1664  128    
832    16     
272    -16    
-64    -160   
-224   160    
992    288    
-560   -208   
-304   -32    
368    16     
-544   -96    
-208   -112   
224    288    
416    -96    
-704   -32    
528    -48    
-80    48     
-176   -128   
272    64     
-464   -96    
-16    480    
1120   -208   
-1248  64     
0      80     
240    480    
-16    -64    
-192   160    
-384   -48    
-208   288    
240    -48    
128    -32    
-464   16     
-736   -208   
432    208    
-16    352    
-144   -608   
-880   -144   
48     544    
-384   -160   
-160   -160   
-48    192    
-48    272    
0      -96    
-320   208    
656    112    
-304   -96    
-816   -48    
1360   1440   
-1936  128    
-1296  144    
1632   -288   
-1568  -416   
32     352    
800    -48    
-416   208    
-512   0      
720    -32    
336    16     
16     80     
-512   -112   
288    256    
224    0      
16     240    
-464   -192   
-64    176    
16     -144   
304    608    
-544   -64    
-448   592    
624    -32    
-640   -176   
624    160    
160    -112   
-416   320    
192    16     
-192   -96    
560    -304   
-416   -128   
-176   -64    
48     32     
256    64     
-128   -96    
-272   -96    
-320   -224   
400    96     
-64    32     
-64    176    
0      224    
-112   16     
208    160    
-464   -80    
176    192    
272    304    
-192   32     
-288   128    
320    320    
80     -64    
-352   80     
-144   -96    
144    752    
624    -48    
-528   -1168  
-160   -544   
336    656    
32     736    
192    160    
128    384    
-432   528    
32     480    
160    208    
-32    112    
-16    160    
80     112    
0      16     
-192   64     
16     -256   
32     -160   
-32    240    
-224   400    
464    112    
-128   544    
-80    352    
-32    208    
-32    624    
288    -448   
-160   -544   
-256   496    
-48    528    
656    0      
-1360  1008   
688    -688   
608    -560   
-560   48     
-144   -96    
256    1696   
192    64     
-320   -64    
0      80     
0      -96    
-176   32     
32     96     
16     -176   
-80    208    
208    96     
32     -64    
-208   -64    
112    304    
128    144    
272    -240   
-864   752    
480    -304   
192    -336   
-112   80     
-64    -128   
64     -960   
608    704    
-16    176    
-128   384    
-80    -256   
0      -48    
64     304    
-80    128    
-144   -16    
-64    0      
32     176    
432    -400   
-288   304    
-112   208    
304    192    
16     -32    
-176   96     
144    48     
-176   192    
160    256    
-208   160    
-96    64     
144    -176   
-96    208    
-1440  896    
2544   -560   
304    448    
-1088  1168   
432    112    
288    192    
-384   -1072  
208    624    
80     48     
-96    336    
-80    64     
128    128    
-16    0      
176    32     
208    80     
16     32     
-128   0      
272    160    
80     144    
-368   32     
272    -608   
-1680  1200   
816    -384   
432    -768   
112    -1184  
-224   128    
-416   768    
640    528    
-240   -288   
-480   -848   
336    -96    
0      320    
-320   -32    
0      640    
-208   896    
-112   384    
240    -336   
48     -96    
352    -96    
-208   -2128  
-160   176    
176    -448   
-512   96     
192    608    
608    -208   
-240   -160   
432    1408   
-1136  1328   
-416   432    
320    -160   
-272   -544   
-240   -592   
160    576    
976    320    
-1456  160    
-496   -672   
96     -1328  
32     112    
160    -48    
-528   48     
160    -32    
80     32     
96     -320   
-96    -32    
80     336    
224    512    
336    416    
-320   688    
-224   448    
128    -672   
816    -272   
800    -464   
-864   1376   
-64    1152   
880    -96    
176    -256   
-400   64     
-816   -912   
672    -240   
464    144    
-368   320    
-176   32     
-96    -64    
400    -96    
432    -32    
-544   112    
-160   -400   
448    0      
400    752    
-64    880    
-176   0      
16     0      
-496   160    
272    -528   
-32    320    
64     560    
304    112    
-304   304    
240    592    
16     -560   
80     -192   
352    -400   
-144   -224   
304    -1264  
-32    0      
16     0      
208    -224   
-288   -208   
-144   0      
64     176    
176    192    
64     128    
192    128    
64     -208   
64     -464   
160    32     
-192   -736   
-32    -272   
-64    -848   
272    -16    
-144   -1360  
-960   208    
1008   624    
416    736    
-208   784    
96     304    
-448   16     
192    -400   
-224   240    
288    -416   
64     80     
-176   -320   
64     -176   
304    -176   
-128   384    
-208   224    
272    512    
-48    592    
-96    288    
-368   96     
160    -304   
272    128    
-16    -16    
-16    176    
256    128    
-512   208    
112    -16    
432    32     
-128   -112   
0      1328   
-64    -1648  
-432   512    
768    -176   
-192   -240   
-464   240    
208    -224   
512    -112   
-464   -432   
-112   -240   
336    80     
32     272    
144    -32    
-128   160    
-80    -496   
64     -1008  
-304   464    
224    -528   
-160   576    
160    -48    
-304   -912   
704    112    
368    -272   
-864   -160   
320    -1280  
288    -352   
-336   -320   
0      128    
304    80     
-128   -48    
-160   -992   
256    0      
96     -352   
-128   160    
-16    -32    
112    -64    
-688   -256   
-224   -240   
224    32     
-288   16     
80     -96    
288    -208   
-48    32     
-96    64     
320    80     
0      -400   
-240   256    
496    -32    
-176   80     
32     80     
-1376  -32    
1744   544    
992    -336   
-1584  -112   
256    224    
1376   128    
-592   -80    
-208   -32    
368    -1232  
0      160    
-400   -96    
-144   160    
592    -64    
-256   -144   
-16    -16    
224    -48    
-208   -48    
64     16     
496    112    
-16    -240   
-176   0      
-416   -1664  
240    128    
2064   -1056  
-1600  -800   
-864   144    
1968   -128   
-544   -80    
272    -112   
256    -16    
32     -16    
-176   64     
112    0      
-1424  -80    
48     -112   
144    0      
352    -96    
-144   -144   
16     80     
640    144    
-64    -1024  
48     528    
592    -224   
-1136  224    
688    64     
80     128    
-1040  -64    
224    -272   
-16    -208   
-176   432    
-208   80     
304    32     
112    112    
-272   -304   
-192   -384   
-704   -1056  
704    192    
-224   528    
160    80     
-192   -160   
160    -160   
-288   -128   
-80    48     
112    0      
176    416    
-784   -288   
-528   -256   
400    0      
-64    -240   
-688   -3392  
1600   -1312  
832    848    
-2304  304    
-128   112    
1248   0      
-224   -256   
-624   256    
336    -64    
48     -160   
-608   16     
-176   -32    
144    -272   
0      240    
-320   -128   
336    128    
-240   0      
224    -32    
176    16     
-528   -64    
16     608    
208    832    
32     64     
432    208    
-384   -288   
-496   176    
576    -336   
-304   0      
0      208    
480    -112   
-272   176    
-64    -368   
-1024  -32    
-224   96     
-320   -224   
288    16     
80     48     
48     480    
-208   240    
-64    0      
192    16     
-128   -336   
192    -608   
-32    -128   
-736   -144   
464    176    
-368   384    
-144   48     
160    -144   
-128   768    
96     432    
-624   -240   
240    -208   
-576   160    
160    -416   
112    -16    
-96    768    
704    624    
592    64     
-320   -864   
-208   -464   
48     -144   
-128   48     
-80    240    
-64    32     
0      -192   
-336   -256   
48     368    
-352   -64    
-96    224    
0      -128   
0      448    
32     240    
32     0      
-128   -608   
32     -96    
16     64     
-48    64     
-48    -32    
-32    -144   
-96    48     
208    896    
-352   1280   
-480   240    
-16    160    
-144   -48    
-128   32     
-160   192    
160    448    
-256   -208   
-32    -368   
160    240    
-64    0      
-112   256    
-144   96     
0      144    
0      -176   
-96    -144   
16     -400   
96     32     
-448   128    
-368   32     
288    -192   
48     -16    
-112   368    
112    256    
-96    -32    
96     144    
-144   368    
32     80     
0      -16    
-112   -64    
16     96     
-224   -160   
272    -336   
-304   128    
48     400    
-16    -176   
-272   64     
96     96     
176    192    
-336   96     
-64    16     
144    0      
-96    -32    
32     -208   
16     -64    
-64    160    
48     -96    
-240   192    
-192   -224   
1760   -496   
-1552  672    
-672   -64    
1312   -192   
-384   464    
-144   736    
304    176    
-416   -1120  
-48    -64    
160    272    
256    272    
32     0      
-112   48     
-16    -48    
-16    -32    
16     416    
32     944    
-320   80     
176    48     
-64    48     
-448   448    
2448   144    
-1040  -192   
-256   -992   
608    0      
-368   608    
32     -272   
48     -1104  
-192   -912   
48     -368   
0      -32    
16     -208   
-288   -208   
64     -48    
-96    144    
-32    224    
-16    1296   
-336   1024   
208    432    
176    16     
-48    96     
-240   -384   
336    -304   
352    48     
-304   1168   
336    32     
512    1248   
1200   1264   
-784   128    
-96    112    
288    -368   
192    224    
128    16     
-80    -320   
-1120  432    
0      -576   
640    -96    
256    400    
-432   -864   
-528   -96    
384    128    
-96    -288   
-160   96     
64     -96    
416    368    
496    48     
-608   -240   
416    208    
-16    288    
-992   -224   
-672   160    
480    400    
464    1952   
96     1584   
-224   32     
0      -16    
448    -656   
-368   -144   
-224   -16    
144    352    
0      -32    
-32    -352   
-240   -96    
-16    48     
160    -16    
192    112    
224    80     
-240   448    
64     -400   
-16    -224   
-64    -16    
512    336    
448    -176   
-688   208    
144    80     
128    160    
336    -144   
16     -64    
-80    288    
64     224    
-48    32     
96     176    
160    416    
-80    64     
-272   800    
528    320    
16     -16    
-144   240    
176    32     
-48    272    
224    208    
-384   0      
-192   192    
400    48     
-96    -16    
-304   -48    
400    64     
-48    96     
-64    -352   
-160   -592   
624    -560   
16     368    
-336   16     
64     -48    
-112   336    
-32    144    
336    160    
-16    320    
80     32     
-160   320    
144    80     
176    -80    
-224   64     
288    576    
-144   368    
-32    -1840  
208    592    
-256   448    
-32    -32    
-64    160    
336    256    
-80    16     
-64    0      
160    -32    
400    800    
304    160    
-544   16     
144    160    
192    -32    
544    2144   
2272   -224   
-1312  336    
-432   192    
752    0      
96     -256   
-672   16     
352    432    
16     160    
-48    -128   
208    0      
-64    -176   
-224   -96    
272    480    
368    48     
-272   -192   
-32    -16    
384    0      
-240   192    
48     64     
-224   960    
1072   -192   
-320   -432   
-736   432    
784    -272   
32     752    
272    -208   
-496   -64    
176    -48    
144    -32    
288    64     
160    -704   
-400   128    
-80    -1504  
464    32     
48     -128   
-48    -16    
32     352    
336    112    
-48    64     
32     48     
-96    208    
192    32     
128    256    
400    -80    
-496   192    
0      16     
256    160    
16     -64    
-1424  -2384  
704    -416   
2592   192    
-448   80     
-624   240    
16     32     
176    224    
-64    -16    
-400   -144   
320    -48    
176    -192   
-64    -48    
-32    -112   
32     -16    
160    -80    
336    48     
-304   48     
96     16     
160    16     
80     48     
0      16     
-464   -1184  
-160   320    
1328   -912   
-16    272    
-432   -112   
592    16     
-368   48     
-224   64     
256    0      
448    64     
-128   32     
-64    160    
-32    112    
112    128    
576    -16    
-160   -128   
-208   0      
-64    80     
224    144    
192    -64    
-80    224    
528    -64    
-592   160    
160    -112   
-48    -32    
-464   176    
272    -528   
128    -352   
0      -320   
0      -224   
0      352    
96     128    
-176   -240   
-208   -576   
688    -352   
-112   -80    
64     -128   
80     96     
192    -80    
160    -176   
-16    -32    
-144   -544   
128    80     
32     -336   
144    -192   
-1520  112    
176    112    
336    -160   
-416   352    
368    2256   
816    -400   
-1760  -80    
64     -48    
1824   96     
-1200  64     
-368   -400   
352    208    
384    16     
-448   -32    
-144   -144   
-64    -400   
-224   0      
80     48     
192    112    
-432   80     
160    -208   
112    -208   
0      -3872  
-192   320    
224    240    
32     272    
400    -80    
-224   -224   
112    96     
-80    96     
-400   352    
448    1104   
-1152  432    
320    -944   
48     -256   
-272   0      
144    144    
176    -896   
48     -144   
-32    16     
128    144    
320    160    
-112   -128   
-16    -112   
-464   -336   
-64    -256   
640    80     
176    -80    
-80    -528   
-368   -112   
128    -560   
-480   -800   
192    -128   
64     240    
-288   -768   
432    -352   
-688   -240   
240    -576   
32     -416   
-608   -272   
-48    288    
720    1792   
-48    -464   
-400   -1072  
-224   416    
80     -80    
-64    208    
240    48     
64     -48    
-128   -1312  
16     336    
0      112    
-192   48     
-48    -16    
80     -64    
-304   -64    
-48    -192   
-224   -128   
-16    -336   
-224   368    
288    0      
-368   288    
112    -320   
176    -16    
-48    -112   
-96    64     
-176   -208   
576    -48    
-240   -64    
-160   80     
0      160    
112    16     
80     -368   
224    -304   
-336   160    
16     -240   
176    32     
48     -272   
48     32     
-240   -288   
128    -32    
256    -112   
80     -144   
-288   32     
-624   496    
752    -192   
-336   -240   
-160   240    
240    208    
16     -480   
352    -800   
-96    256    
-160   96     
-64    144    
-160   -112   
-416   144    
-208   -80    
-608   -272   
0      -64    
96     128    
144    -144   
-368   -448   
-176   -272   
240    128    
-208   -48    
-512   -160   
256    -64    
-336   -288   
96     -160   
336    80     
-192   272    
-208   112    
-256   64     
48     400    
1424   -368   
-1888  560    
-416   384    
384    208    
-352   0      
624    -752   
448    640    
-256   -160   
160    -496   
16     -48    
-16    128    
144    32     
-176   160    
-240   432    
240    240    
64     -16    
-192   176    
-672   -1152  
272    -384   
48     128    
0      1216   
2384   48     
-848   928    
-192   -544   
-608   -288   
224    -16    
-96    720    
512    480    
-112   -240   
80     -176   
-320   -144   
128    464    
-704   80     
0      208    
576    -112   
-272   112    
128    -368   
-560   176    
-224   -48    
432    96     
176    208    
16     -80    
608    2896   
-288   1328   
-1152  -80    
192    -176   
528    -64    
-848   496    
160    -16    
-384   -320   
32     32     
-48    -352   
64     432    
336    336    
192    -496   
-512   96     
288    464    
208    0      
-528   -960   
-576   336    
560    128    
0      240    
-464   -16    
-16    -256   
16     128    
352    16     
-432   -144   
208    576    
256    -400   
-288   -2592  
-1872  -656   
928    -32    
448    160    
-48    224    
-496   672    
-240   128    
1152   800    
-608   -144   
-384   240    
240    -176   
128    112    
16     -48    
-240   112    
-368   -16    
336    192    
304    -16    
-96    144    
-336   -496   
-304   -16    
480    80     
-208   -112   
384    144    
368    -128   
-656   208    
144    -112   
432    256    
-288   -224   
-32    288    
96     -80    
-112   304    
240    160    
-416   -64    
160    32     
144    16     
80     -208   
-336   272    
144    352    
16     160    
64     32     
-320   -64    
288    192    
-208   160    
-16    96     
160    176    
48     -16    
-16    32     
-96    224    
160    32     
-48    -32    
-144   32     
-240   272    
768    -48    
-144   -160   
-208   64     
208    -96    
80     -224   
-272   144    
32     -16    
-352   192    
320    96     
-144   64     
48     224    
144    160    
-128   128    
16     304    
32     448    
-64    48     
112    240    
336    80     
-240   -112   
-80    288    
176    176    
-32    320    
0      -272   
176    240    
-272   528    
176    -224   
112    160    
-144   48     
288    -2384  
-2320  1168   
1120   160    
832    240    
-240   96     
-432   -128   
0      64     
464    48     
-848   848    
320    -80    
64     -272   
-320   256    
176    -16    
64     -336   
-272   -32    
-16    192    
320    -224   
0      192    
32     176    
96     -32    
16     -928   
-864   432    
640    368    
32     192    
-288   192    
320    -448   
-496   352    
384    272    
-144   288    
-16    0      
0      0      
-32    -208   
64     208    
80     32     
64     224    
0      128    
-304   176    
144    352    
208    64     
-192   -16    
-32    16     
192    208    
-224   0      
-96    32     
192    96     
352    80     
-368   176    
48     0      
32     64     
1200   976    
-896   560    
-992   304    
1392   48     
-80    -112   
-1120  -144   
480    96     
592    320    
-224   224    
-304   336    
176    -48    
-144   80     
-240   -288   
128    80     
144    304    
448    -464   
-320   192    
-80    -1840  
208    224    
176    64     
-288   96     
528    912    
-1232  -592   
-720   208    
992    240    
272    -176   
-368   528    
-160   -64    
224    208    
32     48     
-96    -48    
-128   64     
32     -688   
240    48     
192    384    
-400   0      
-416   112    
608    400    
-192   -192   
96     -144   
-144   -48    
112    192    
-272   -240   
-160   -416   
352    -400   
656    -336   
-64    608    
64     -448   
-336   96     
-96    160    
-64    64     
256    -320   
880    -32    
-544   672    
160    256    
688    -224   
-896   416    
-192   0      
368    -144   
-32    96     
-192   0      
-80    112    
320    -224   
64     48     
-64    -1392  
144    -160   
-576   112    
208    224    
160    32     
-528   336    
848    704    
160    240    
-32    112    
352    352    
176    -128   
-800   240    
128    528    
496    320    
240    -96    
-192   -352   
0      112    
192    -64    
224    176    
-64    -272   
-80    352    
-256   224    
32     224    
0      48     
-192   -640   
-16    -32    
224    32     
-16    -32    
-368   -368   
272    -48    
-512   -352   
176    64     
272    -512   
96     -816   
80     -144   
-32    384    
-112   512    
400    432    
64     -112   
80     -192   
-592   -352   
192    -800   
128    -208   
-16    -736   
-368   -352   
288    560    
160    -48    
-192   -1616  
-64    0      
32     256    
224    -512   
-592   96     
288    816    
80     -832   
-208   176    
176    64     
128    0      
-240   -640   
80     -912   
448    -896   
-720   -496   
256    160    
384    304    
-128   656    
32     1824   
112    -528   
240    -912   
64     -80    
-112   -496   
192    -240   
64     -736   
-112   160    
400    -1264  
-224   528    
-96    -80    
400    -192   
-48    -112   
112    80     
-16    -176   
176    32     
96     -96    
-32    -32    
-448   -352   
480    -304   
-304   -16    
-80    80     
320    -80    
-384   80     
432    -528   
-528   240    
400    -144   
160    -176   
-48    192    
-336   672    
160    448    
-176   -416   
16     -272   
32     144    
-16    32     
192    -96    
-32    0      
-32    -112   
64     -240   
16     96     
-16    -464   
96     -32    
656    144    
-832   736    
208    -448   
688    -96    
-480   144    
-16    272    
-208   80     
320    80     
-832   160    
48     -32    
32     -32    
32     -176   
-16    -16    
80     -784   
128    -80    
32     -320   
-208   -416   
96     -144   
272    720    
64     400    
-80    -160   
-480   -208   
128    -304   
-64    -16    
-64    288    
-400   -32    
240    -128   
-48    -208   
-112   -112   
64     -32    
-16    544    
2000   272    
-848   -384   
-928   368    
1200   -272   
-512   96     
-288   48     
624    64     
-384   -144   
-160   48     
-48    -48    
64     -176   
-288   -112   
-144   -256   
384    32     
-48    -192   
0      224    
32     144    
256    160    
-16    -16    
176    -768   
-2064  1088   
1168   304    
224    368    
-432   -432   
-400   -192   
96     -192   
-128   64     
0      -544   
672    112    
256    -96    
-464   -48    
-80    208    
704    240    
-16    -48    
-544   48     
144    96     
400    -48    
-416   -32    
-16    -48    
64     48     
304    176    
-1056  256    
496    -208   
368    304    
-272   -896   
-144   576    
80     -32    
-432   -128   
-32    -112   
16     -224   
288    -80    
288    192    
-400   -16    
352    304    
208    288    
528    -256   
-400   48     
-272   -96    
0      48     
-336   -224   
-640   -160   
80     64     
-1168  -176   
-256   -16    
192    -96    
80     80     
-384   -144   
288    -320   
864    1360   
-2208  1024   
-128   -816   
1888   -176   
-1520  -448   
-96    720    
448    -64    
128    256    
-112   0      
-912   16     
336    -192   
480    192    
-240   -32    
-480   208    
48     -144   
80     192    
48     -80    
-384   48     
48     -384   
-624   144    
672    -128   
-368   176    
128    -144   
448    48     
-320   16     
-320   144    
432    160    
320    -64    
-880   -32    
64     112    
384    -176   
16     48     
-576   -128   
192    32     
432    -32    
240    80     
-624   -32    
-112   352    
-32    16     
-64    192    
-112   0      
-112   80     
0      96     
-80    112    
-64    -32    
-384   -160   
96     -112   
112    -16    
192    80     
-336   -240   
-144   96     
32     -432   
-480   80     
512    160    
336    160    
-208   208    
-400   -144   
352    -16    
240    -256   
-368   112    
32     -160   
176    128    
-208   -96    
48     96     
64     80     
-160   288    
112    240    
64     -16    
80     -128   
-16    -128   
-224   128    
80     144    
-192   240    
128    256    
-16    -224   
-48    -128   
-624   736    
528    -256   
128    -288   
-384   16     
-576   -2144  
-352   480    
1312   16     
-336   -96    
-176   272    
-32    -288   
0      240    
-160   -336   
-128   -208   
304    96     
-464   384    
16     -192   
-688   48     
32     -160   
-208   -96    
32     416    
144    -48    
-80    144    
80     192    
-80    -48    
624    1136   
-1296  240    
-128   -64    
1024   -224   
-480   -32    
-112   64     
80     112    
80     -304   
-288   192    
80     192    
-272   176    
112    304    
96     -64    
-64    64     
-288   64     
16     -16    
16     -64    
176    48     
-80    128    
32     192    
-176   16     
176    -32    
-336   80     
400    48     
-256   32     
-64    256    
288    -32    
-256   96     
-48    0      
-16    288    
1984   -128   
-2000  592    
-464   0      
96     -304   
432    112    
240    -496   
-192   80     
-96    -160   
-128   16     
32     160    
224    80     
-288   48     
-48    160    
-96    112    
544    240    
-144   144    
-352   80     
448    96     
48     64     
-128   0      
496    1200   
-1504  -816   
-608   208    
1120   640    
176    224    
-528   -80    
-144   160    
144    -16    
128    -96    
0      16     
-192   160    
192    96     
64     64     
-240   -16    
-160   128    
64     112    
80     128    
0      256    
-48    -224   
-240   80     
-32    96     
-32    -96    
464    -64    
336    240    
-32    -272   
112    -320   
416    256    
-48    96     
-576   -272   
688    128    
272    224    
-32    -16    
-160   176    
688    -96    
-672   272    
416    -800   
-656   384    
-96    240    
384    144    
64     -112   
-224   160    
-64    160    
112    48     
272    16     
224    -496   
-864   384    
80     -48    
64     832    
240    752    
-608   -1504  
608    -2048  
1312   976    
-32    672    
-1024  144    
624    480    
784    224    
-384   0      
-480   -592   
192    -272   
336    -816   
48     528    
-272   128    
-32    16     
160    -96    
288    -432   
-128   432    
-320   304    
208    -208   
192    -704   
-144   -16    
-16    528    
-192   -560   
192    -448   
-128   -576   
-32    -304   
-128   -48    
64     -480   
-208   0      
272    -128   
112    320    
64     64     
48     144    
-80    64     
160    304    
240    -64    
-96    448    
-208   784    
224    736    
352    -80    
-144   -384   
-352   224    
-32    -496   
432    128    
176    -272   
-800   -320   
208    112    
544    0      
160    592    
-320   144    
-32    -16    
-256   -576   
544    -1040  
240    -464   
-144   112    
64     896    
320    288    
-144   944    
-272   -176   
256    -304   
272    320    
-144   144    
80     -208   
-112   -192   
-80    224    
240    -304   
0      -240   
160    -224   
64     0      
128    32     
144    -176   
96     224    
-112   144    
256    96     
32     48     
-288   -32    
-304   80     
-32    16     
192    112    
320    192    
-288   -96    
224    384    
160    256    
48     -1120  
112    144    
96     512    
-480   544    
176    -144   
576    304    
-288   48     
-336   528    
224    -320   
176    112    
48     208    
0      128    
-80    128    
128    240    
288    0      
-16    -64    
-128   160    
400    -448   
-400   864    
352    -224   
144    112    
-224   -560   
320    592    
-64    96     
32     -544   
64     -16    
32     464    
-16    -320   
-160   256    
48     288    
-48    128    
192    -304   
48     -160   
-144   176    
240    -192   
-48    176    
-208   -48    
-48    144    
208    144    
-80    -48    
-80    -128   
-80    -112   
176    288    
336    -80    
-48    -960   
-208   -144   
-560   -2272  
1344   304    
1424   0      
-1168  96     
-16    -48    
128    112    
640    -32    
-96    -176   
64     -1232  
-32    64     
-16    -240   
160    -112   
-880   -32    
-64    -816   
496    -160   
-16    -1056  
-144   0      
96     336    
336    0      
-32    160    
-16    -256   
-48    -304   
1152   288    
-1216  -480   
592    -320   
608    80     
-1328  -128   
-304   -256   
720    -48    
192    -272   
-432   -112   
-48    0      
176    0      
240    -224   
-16    -1088  
-128   -176   
-144   -112   
496    32     
-80    -144   
144    0      
-176   -288   
16     -112   
208    416    
544    -272   
-480   176    
192    368    
672    -480   
-880   -352   
-176   -176   
112    -112   
480    64     
-624   128    
-272   112    
144    112    
160    -80    
224    -144   
32     -336   
-640   -288   
368    80     
-928   -256   
-336   -368   
64     160    
48     -16    
16     64     
192    -368   
528    400    
-1120  208    
80     240    
256    -160   
-976   -624   
2848   1744   
-720   1248   
-768   688    
1776   32     
-624   -272   
-1056  -416   
-592   128    
368    -288   
-448   -32    
320    -368   
80     128    
-304   -352   
192    192    
336    -96    
32     -32    
-720   80     
384    0      
-160   -80    
-352   -544   
832    48     
-48    -384   
-528   176    
432    288    
-672   -496   
-96    -368   
1184   80     
-608   -304   
-320   272    
480    -160   
-112   -128   
-80    -80    
112    -80    
-128   -80    
352    176    
-576   -112   
208    112    
-32    -112   
144    -368   
-160   -112   
0      -176   
192    -64    
-240   -592   
288    0      
384    -96    
-720   -64    
320    -64    
400    -352   
-608   -160   
240    160    
-352   -208   
496    96     
112    192    
64     -224   
-752   320    
480    64     
336    256    
-240   -64    
-272   -272   
-464   16     
304    -256   
288    -64    
16     64     
-256   128    
128    -80    
-64    -112   
64     -176   
64     -80    
-96    -320   
-176   96     
-208   -112   
240    -48    
-560   -112   
-784   96     
176    0      
-64    0      
-288   64     
-128   384    
144    -80    
48     -496   
-528   128    
-144   -464   
624    -1616  
-624   272    
32     -272   
-432   -224   
64     288    
176    -64    
144    96     
-208   -576   
-416   336    
320    272    
128    64     
-32    16     
-224   96     
112    -80    
272    320    
-256   -128   
-416   -176   
192    176    
-272   -64    
96     192    
-256   832    
1312   -96    
-672   -112   
-672   192    
592    -16    
-208   144    
-80    -352   
-304   -48    
128    -112   
176    16     
112    176    
-48    -112   
-80    256    
320    80     
-64    112    
-128   -32    
-176   -16    
176    -160   
-272   96     
-64    176    
560    256    
-496   224    
-272   48     
-192   16     
192    -192   
32     160    
-208   -112   
32     400    
352    416    
336    -176   
-2400  368    
640    400    
688    96     
-464   32     
-48    32     
-448   -304   
32     176    
-96    -224   
-80    0      
-176   -64    
-96    112    
-16    48     
160    48     
-528   -32    
112    -80    
96     128    
-256   176    
128    240    
-80    16     
-224   -160   
736    928    
2176   176    
-2176  768    
512    -304   
288    -144   
32     1232   
528    64     
-192   -176   
-320   0      
-112   0      
256    0      
224    176    
-464   0      
-16    32     
-96    256    
192    -32    
112    384    
-320   320    
-80    240    
-80    -64    
240    32     
-416   -288   
752    416    
800    448    
-608   -96    
-128   512    
-256   -208   
-288   -304   
432    160    
160    16     
-96    -192   
-192   -48    
-112   48     
-192   336    
272    -1104  
-32    -64    
48     1008   
-16    208    
224    352    
176    112    
-176   304    
-208   -496   
32     -64    
256    96     
-224   80     
32     48     
400    -592   
-272   -544   
112    128    
912    1584   
-1360  1264   
-240   32     
800    144    
656    272    
-592   576    
-272   -992   
96     -1344  
128    272    
-112   -368   
240    112    
-208   256    
-32    -48    
208    80     
-64    736    
-288   128    
48     -144   
160    -336   
48     -576   
-96    -480   
-272   272    
160    208    
480    208    
-224   -96    
-672   608    
480    288    
48     -240   
480    1040   
48     1648   
-144   -96    
-16    -64    
-48    64     
320    -224   
-240   -32    
-176   -320   
64     112    
144    16     
-272   -80    
256    -128   
-224   -128   
48     32     
176    48     
48     -496   
0      -176   
-64    1072   
-48    384    
-432   48     
336    -528   
-384   592    
144    608    
320    640    
352    -272   
-976   -32    
-64    320    
368    96     
-208   320    
272    1120   
-288   2128   
-272   528    
448    -544   
64     -160   
-176   144    
160    -192   
48     112    
-32    -640   
-352   -160   
80     -112   
224    384    
192    80     
-112   -32    
-96    208    
192    384    
64     384    
-128   160    
-64    688    
304    1824   
144    1168   
-368   -208   
112    -288   
256    -16    
-352   1712   
880    -240   
-576   -480   
-208   -1552  
128    -928   
-160   96     
-208   208    
368    160    
-32    752    
-240   -304   
0      176    
0      -400   
240    48     
16     208    
-16    240    
-208   -240   
240    -144   
96     160    
-144   -64    
-48    96     
192    1952   
96     128    
-96    -672   
208    80     
-96    -256   
160    -224   
-144   -1232  
176    -16    
-96    480    
-64    192    
208    64     
80     32     
-256   208    
464    80     
-224   -432   
256    -672   
192    -64    
-48    192    
-176   176    
96     -112   
160    -144   
-240   96     
96     160    
304    192    
128    -48    
-432   96     
0      176    
240    -96    
-48    -64    
1312   -96    
-2672  208    
-1264  -96    
2096   224    
-816   -208   
-752   -96    
1072   -96    
288    -240   
-432   64     
304    -2624  
240    32     
-192   128    
128    112    
240    112    
-576   16     
48     -80    
64     80     
608    80     
-96    32     
-32    48     
272    -96    
-128   -512   
-1920  544    
1168   208    
528    -512   
-224   304    
-208   -800   
-224   96     
0      80     
-80    48     
224    16     
256    112    
-240   48     
32     16     
-80    -48    
-32    64     
304    -48    
64     -320   
64     -240   
-48    -80    
368    80     
-272   -720   
1216   320    
272    400    
-1952  -160   
-240   -112   
688    432    
0      512    
-144   208    
80     -128   
-624   -1120  
80     144    
512    -288   
-192   16     
96     -128   
-208   -48    
144    -720   
256    112    
-384   128    
-400   32     
48     32     
1040   -16    
-608   224    
-688   -192   
96     -64    
1104   -32    
224    -240   
-272   -416   
624    304    
-1008  -2000  
-112   1152   
1504   -976   
-720   -304   
-112   240    
544    -1104  
496    16     
-1136  -96    
112    -240   
416    240    
-96    352    
-336   0      
496    16     
-112   16     
-448   128    
352    32     
-48    112    
-96    128    
544    -208   
-864   -288   
80     368    
592    64     
-1040  144    
672    -128   
-208   -176   
-112   -208   
112    -112   
-112   -1472  
64     -160   
368    272    
-336   128    
352    -48    
-96    64     
176    -800   
272    48     
-416   -208   
-48    -16    
400    16     
-496   -16    
-48    -64    
64     -240   
176    -96    
80     -160   
-96    112    
-96    -336   
192    -48    
-32    -240   
80     0      
48     -352   
-816   -176   
432    -320   
160    -704   
224    -320   
-96    -128   
16     -128   
384    -160   
-480   -112   
176    0      
304    96     
-80    -1168  
160    -128   
0      32     
0      176    
-64    -32    
0      -96    
16     -48    
176    -48    
-192   416    
384    576    
-576   304    
64     -176   
80     32     
112    -96    
48     16     
16     -192   
-96    -176   
112    -384   
128    192    
-240   208    
-16    176    
-48    -16    
-80    1504   
1488   -992   
-1440  -480   
-224   -272   
1056   368    
256    -480   
-688   -768   
-16    128    
528    -112   
-80    144    
-160   -976   
0      -384   
96     224    
112    368    
112    -304   
-288   -768   
-304   -672   
272    -368   
-80    -256   
-64    -112   
-160   -800   
544    -256   
-240   640    
-176   48     
16     -96    
176    -112   
-160   512    
-32    -368   
192    -176   
-96    -192   
144    -32    
32     -64    
0      -144   
-224   192    
64     96     
-192   80     
64     -32    
112    32     
16     -432   
-96    160    
16     -560   
16     208    
-160   176    
160    -144   
48     0      
64     240    
-192   128    
240    -272   
-448   144    
64     -304   
1632   -368   
-1632  192    
208    208    
176    112    
-176   -224   
48     -784   
848    -784   
-368   -256   
-80    240    
64     32     
224    -48    
80     96     
-48    -16    
-304   -144   
96     -192   
144    -32    
-160   192    
-32    256    
128    -592   
80     -96    
-672   -304   
1824   16     
0      -192   
-2352  -128   
960    720    
64     832    
-864   576    
160    416    
176    160    
64     -128   
96     -128   
-480   112    
-32    448    
-80    112    
288    176    
-464   -448   
-48    656    
512    1088   
-528   656    
-64    64     
384    -80    
0      -528   
-432   112    
240    160    
-384   1200   
608    720    
-96    -656   
-672   528    
208    -592   
-208   -48    
-320   -608   
-336   352    
928    208    
-496   -176   
-48    144    
768    -1152  
-1040  -208   
-96    -96    
96     304    
464    80     
-48    96     
-368   240    
176    16     
208    -176   
80     208    
-496   -16    
256    384    
336    368    
-144   -16    
352    2032   
-192   400    
-496   160    
752    -1440  
288    -624   
-1264  -640   
288    -608   
784    -544   
-16    320    
-400   336    
144    192    
512    560    
-96    432    
-352   -304   
-80    -368   
-128   -176   
128    96     
-240   96     
-320   -144   
96     -272   
-352   -16    
-80    160    
-32    160    
1216   -96    
-976   192    
144    -96    
208    -128   
-96    -1600  
-48    -1552  
176    224    
16     1056   
-272   -32    
144    48     
-32    -384   
16     208    
80     480    
208    512    
-1280  -640   
160    -384   
208    -992   
-832   -368   
-64    -256   
192    112    
272    224    
-384   -352   
-80    816    
-64    96     
-112   -288   
256    48     
-240   224    
-400   -464   
832    -384   
-560   48     
-544   -3152  
400    -464   
960    192    
-384   1152   
48     192    
272    -176   
-432   -640   
-288   -16    
176    -48    
112    -432   
-352   384    
240    560    
-48    112    
208    304    
-256   -80    
-224   -48    
32     368    
464    240    
-144   32     
-320   112    
224    160    
272    -144   
-384   -608   
32     -688   
112    0      
-112   384    
32     64     
496    1184   
-1680  1616   
688    -224   
96     32     
-256   -32    
-16    976    
192    320    
16     544    
64     -272   
-32    -240   
80     -352   
0      48     
-32    -160   
-176   400    
144    0      
-16    -64    
192    208    
-160   192    
16     160    
128    16     
320    -608   
-752   544    
464    80     
-240   -48    
16     48     
160    -96    
-96    0      
16     320    
-80    384    
368    48     
-208   32     
-112   -80    
128    272    
128    208    
-96    0      
0      160    
-64    96     
64     0      
-48    224    
64     -128   
-304   128    
16     112    
160    64     
0      112    
32     240    
64     32     
-96    128    
-32    -16    
48     -112   
-272   -384   
2400   1584   
416    -64    
-1216  16     
832    144    
128    0      
-1104  320    
-96    64     
608    288    
-272   -144   
-208   48     
272    48     
-112   96     
112    160    
192    128    
-192   144    
80     80     
-96    -128   
-128   0      
176    16     
32     32     
224    688    
704    32     
-1856  -80    
-176   -816   
640    32     
-272   272    
256    -48    
432    112    
-128   208    
-160   -128   
-432   128    
128    112    
80     48     
112    112    
208    80     
-240   112    
-224   -304   
-192   16     
544    112    
192    -224   
-336   160    
-224   -288   
928    -64    
48     -96    
-320   608    
400    304    
-704   -576   
-816   304    
48     -352   
64     -112   
448    64     
-304   32     
-160   416    
240    -64    
112    -192   
400    224    
-240   -1328  
-432   -352   
-144   -256   
-96    208    
32     16     
-80    144    
112    64     
48     48     
-32    -160   
-176   128    
-208   144    
240    96     
96     -544   
1104   -2688  
-2896  -224   
864    -144   
1120   -16    
-432   304    
-256   -32    
32     160    
128    336    
272    -32    
-416   144    
368    -96    
240    96     
-176   64     
-96    80     
32     192    
256    -64    
-128   112    
256    -160   
320    336    
-352   -1296  
144    496    
416    -224   
-544   -64    
-160   0      
336    160    
144    -48    
0      80     
-112   -96    
160    -80    
96     80     
-96    32     
176    -96    
160    -384   
-96    -80    
96     -288   
96     272    
0      -880   
128    80     
16     64     
-48    160    
-16    -80    
32     48     
144    -144   
-16    -192   
352    -80    
-48    -48    
-48    240    
304    -32    
-160   352    
144    48     
240    -48    
-192   -976   
16     160    
272    896    
496    1312   
-528   704    
128    48     
160    -256   
-192   -32    
-32    -96    
256    -1056  
-96    -800   
-368   -1024  
192    -16    
-64    -192   
144    -256   
-160   -1248  
-224   -416   
80     -240   
288    304    
-176   160    
-144   224    
112    48     
400    -112   
16     336    
-240   -48    
-96    1120   
400    -192   
-112   -336   
-224   -560   
112    -128   
416    -2640  
-752   624    
544    0      
-176   -48    
64     -176   
160    -224   
80     -576   
-144   -112   
176    336    
16     160    
96     272    
64     80     
0      -64    
48     -224   
208    176    
176    192    
-160   336    
48     -144   
240    -784   
-352   -304   
128    -384   
-512   320    
240    -576   
112    -400   
-160   -176   
512    -272   
-192   816    
112    -512   
272    -448   
-80    160    
-64    -64    
-16    -16    
-48    368    
-48    -32    
-128   -48    
-544   160    
144    48     
112    -112   
-144   -144   
-112   -160   
64     -736   
144    -256   
272    -160   
-128   192    
-368   192    
224    96     
160    -272   
-112   0      
0      64     
-416   -1296  
-1088  496    
1744   -240   
-752   672    
-368   -160   
320    160    
-288   -608   
288    -432   
336    1008   
0      -464   
-256   96     
-256   48     
64     96     
240    -48    
-16    48     
-16    -64    
-400   48     
304    -48    
-480   -48    
-240   -16    
400    544    
-1616  -528   
-656   16     
992    -960   
-96    -1424  
-176   -2880  
-16    -1728  
272    -1952  
-560   -960   
-128   -448   
-16    -192   
0      320    
192    -16    
-432   -80    
656    368    
112    112    
-368   96     
336    -288   
208    -176   
-160   208    
16     144    
128    144    
16     480    
-448   -272   
352    -576   
704    320    
-752   384    
-384   544    
640    192    
-464   -32    
-528   112    
480    64     
-352   -48    
-272   -464   
-32    656    
304    640    
272    -64    
144    -1184  
-416   -448   
-64    0      
-48    128    
-16    -48    
-176   -16    
-288   -224   
432    16     
-800   512    
-144   -80    
-16    432    
416    -16    
-480   -1168  
912    -1824  
784    80     
-1008  -16    
-480   -464   
1072   -1264  
80     -496   
-352   -432   
-272   -688   
208    688    
224    576    
-80    -64    
-48    -96    
-160   480    
96     -208   
288    96     
-128   -320   
-352   208    
336    -496   
320    -48    
-48    240    
-176   112    
-400   -304   
-560   -528   
1280   -624   
-176   -784   
-368   -320   
-80    -128   
512    -432   
48     -672   
-608   -304   
0      -208   
-16    -32    
112    -32    
-272   16     
-160   -16    
128    16     
32     80     
80     160    
-112   416    
240    416    
-16    496    
-208   -448   
224    64     
-176   112    
-192   192    
352    384    
-272   144    
-256   -64    
16     -128   
112    64     
-384   -432   
432    -848   
144    -176   
-304   -544   
-464   592    
256    960    
-16    -256   
-640   -288   
-240   -304   
192    64     
-96    -96    
256    -64    
128    -96    
-256   256    
0      320    
-64    -16    
64     64     
-688   304    
288    272    
-32    -32    
-144   288    
112    16     
-112   -64    
224    -192   
-112   -32    
-432   16     
496    112    
128    192    
-432   -80    
-432   -112   
1072   -1536  
-1200  528    
-304   -368   
128    -320   
-80    -352   
96     304    
64     -80    
368    240    
-400   176    
-96    -304   
320    352    
64     112    
-320   48     
-16    -272   
304    240    
-224   -80    
-64    144    
272    112    
-144   0      
-832   -688   
928    -416   
-160   176    
-464   144    
432    -80    
-176   -144   
64     -480   
160    528    
224    208    
-752   256    
-16    32     
528    0      
-48    112    
-144   -144   
-128   -80    
-224   -160   
32     256    
-736   -16    
-336   208    
256    -48    
-80    96     
-272   16     
-144   48     
144    -48    
256    64     
0      80     
-32    192    
-16    0      
-128   48     
-144   -976   
816    -336   
576    -208   
-960   16     
336    32     
624    160    
-224   112    
-544   48     
736    128    
64     -48    
-320   112    
-80    48     
64     64     
-160   -80    
128    144    
320    -16    
-384   160    
112    16     
16     -80    
-304   -32    
272    -48    
-96    -288   
1248   560    
-560   192    
-256   -192   
672    -208   
-848   480    
800    -16    
256    400    
-720   0      
-128   176    
176    0      
0      16     
-368   32     
-64    -96    
336    224    
-16    0      
-320   16     
320    -208   
32     160    
-128   -64    
80     64     
48     -192   
-1024  560    
224    0      
-752   272    
-80    -176   
240    -192   
1136   -144   
432    208    
-768   320    
-48    144    
176    -112   
-128   144    
-96    144    
-192   -48    
-128   192    
-192   144    
-256   -576   
-544   240    
384    144    
-288   -16    
160    128    
64     80     
-144   64     
80     272    
-192   272    
464    48     
192    80     
-752   -432   
2160   2128   
-1088  640    
272    -528   
1440   96     
-848   48     
-512   80     
672    48     
400    320    
-272   0      
-512   96     
704    -16    
16     112    
-80    64     
64     128    
-224   -32    
208    208    
368    32     
-224   32     
-336   -656   
496    -1392  
288    -640   
-384   320    
-96    368    
-496   0      
-256   -336   
1120   -320   
32     320    
-416   176    
-80    128    
320    64     
0      192    
96     608    
176    192    
-368   208    
640    240    
112    768    
-656   496    
304    400    
288    96     
-48    176    
-96    240    
-32    192    
272    208    
256    304    
-832   192    
144    -16    
608    -48    
32     192    
-96    224    
-224   -320   
-96    -464   
240    -1280  
-784   160    
688    480    
224    352    
128    736    
448    352    
-80    1040   
0      496    
112    -672   
224    192    
-96    592    
-112   48     
192    320    
96     80     
80     -256   
-64    656    
240    -464   
96     -64    
-144   64     
112    32     
96     64     
128    16     
144    336    
-144   320    
160    96     
192    672    
-144   1232   
112    -48    
48     240    
48     -64    
-400   976    
160    -208   
-176   -208   
-128   -784   
-16    -48    
176    -112   
48     -256   
80     -64    
32     -96    
-16    -176   
128    80     
-16    48     
-128   64     
48     224    
368    -192   
-128   160    
-96    -384   
16     80     
32     16     
-160   -304   
640    -592   
-304   496    
208    -560   
-144   240    
96     208    
32     0      
160    896    
288    560    
-544   208    
160    -336   
480    80     
-64    -192   
-128   16     
80     -96    
112    224    
-16    -592   
-16    128    
96     144    
32     -32    
192    -32    
16     224    
32     112    
-16    -128   
-288   128    
64     208    
80     96     
96     -368   
352    -32    
-416   128    
-80    -912   
-1152  80     
1472   48     
-640   480    
240    576    
240    96     
-320   -928   
448    -1520  
368    784    
-16    256    
-224   -352   
-112   0      
240    -672   
112    0      
-144   208    
32     272    
272    256    
112    112    
-64    -272   
112    64     
352    1360   
-784   -512   
-1392  416    
1536   -432   
-256   -304   
-1312  -1472  
176    -976   
912    -624   
-816   528    
-192   -224   
176    -128   
-96    -992   
176    304    
80     80     
-320   160    
368    48     
32     -272   
224    -1744  
-32    -144   
-48    -2592  
144    -80    
-160   64     
-336   -320   
-96    -592   
1536   -800   
176    480    
-128   1312   
-224   -608   
-208   -176   
96     528    
528    240    
-320   -64    
-240   -464   
-48    -704   
656    -592   
-672   -688   
-1136  -240   
336    -64    
-288   352    
80     -496   
-288   -752   
-240   -48    
336    288    
464    160    
-80    48     
-592   288    
-160   48     
32     -160   
704    624    
-560   -1168  
800    -2368  
416    128    
-816   384    
-208   -1472  
-32    720    
608    -624   
-160   416    
-704   -320   
192    544    
256    -400   
-64    0      
-112   -192   
-384   80     
-416   32     
368    -240   
-400   128    
-96    -208   
576    1120   
-176   336    
-192   -240   
320    -272   
-32    16     
0      0      
896    384    
-544   -128   
240    64     
-16    144    
400    -208   
-880   -896   
-96    -432   
336    -560   
336    -256   
64     -96    
96     -256   
-480   -48    
480    -2224  
176    -144   
-400   -192   
-16    80     
192    -48    
-128   -48    
240    -160   
112    256    
-400   -272   
64     160    
-944   -80    
-48    16     
-160   -32    
208    -64    
352    80     
-256   -656   
256    160    
816    160    
-400   -192   
-48    -64    
544    -176   
-336   -96    
-64    -352   
-400   32     
352    0      
112    -32    
-176   -416   
-624   -112   
32     -352   
32     48     
112    -160   
320    384    
-272   32     
0      -80    
160    192    
0      -64    
-272   96     
96     80     
112    96     
-192   -80    
-64    -528   
208    -192   
-208   32     
0      -48    
160    1264   
288    -1664  
-1488  400    
656    -1920  
-240   -432   
-544   336    
432    -160   
352    144    
-48    336    
-256   -368   
256    448    
64     -128   
-144   -176   
-32    0      
0      -624   
96     128    
240    -32    
-176   192    
-16    80     
160    96     
-240   -192   
816    400    
368    240    
-928   -64    
640    -176   
160    -112   
-592   0      
480    -64    
176    0      
-976   -64    
128    176    
560    -128   
-112   -96    
-192   208    
-240   -96    
-224   32     
-832   -432   
-240   80     
352    -16    
-368   48     
176    -16    
-16    -16    
-464   -288   
0      32     
0      -288   
80     16     
-464   -48    
304    80     
-80    48     
-480   -960   
592    720    
336    -752   
-544   0      
-160   -96    
320    224    
-48    -192   
-128   -80    
288    -416   
-256   32     
-400   -64    
96     32     
160    80     
-240   48     
-128   16     
288    64     
-256   128    
-160   0      
160    384    
-16    64     
48     16     
0      96     
-640   -96    
2144   -208   
-96    -176   
-1008  256    
864    400    
-48    -144   
-224   800    
-352   -128   
-432   0      
336    80     
80     -16    
-176   48     
-192   64     
48     -128   
96     16     
144    -64    
-64    -96    
368    400    
176    -112   
-336   -32    
48     80     
-528   48     
336    208    
272    -64    
-448   0      
-208   -48    
544    -80    
-128   160    
-176   48     
336    80     
128    128    
-576   80     
432    224    
-224   -336   
-272   -144   
16     96     
256    256    
96     0      
-416   112    
256    96     
-176   0      
-96    128    
64     0      
64     -144   
-48    -336   
32     32     
-176   -96    
352    864    
-672   368    
-256   2864   
1360   192    
-2224  -256   
-384   -336   
1600   -48    
-544   32     
-912   -80    
416    400    
144    112    
208    256    
-480   -256   
-160   128    
-432   -224   
224    304    
48     -16    
-320   96     
112    176    
272    48     
-96    784    
-256   176    
-16    64     
224    32     
128    144    
-672   368    
400    0      
-272   128    
-96    176    
160    608    
176    816    
-176   0      
-352   368    
240    320    
368    0      
48     -80    
-432   80     
240    352    
-304   528    
192    -96    
-80    -288   
-256   -192   
80     -64    
128    48     
-208   -576   
-416   176    
496    1232   
80     752    
-224   -416   
464    -1104  
-304   1088   
-128   272    
208    640    
160    -400   
-960   -736   
368    -208   
-80    240    
-272   416    
80     -304   
-176   160    
224    144    
112    16     
-32    -208   
-48    192    
-112   112    
128    160    
0      496    
-160   672    
-80    -32    
-64    32     
128    112    
48     32     
-176   32     
80     128    
-176   32     
128    -160   
368    112    
-144   16     
-64    -80    
-272   -208   
-80    144    
288    64     
192    576    
-416   320    
0      16     
432    80     
-128   -32    
-400   224    
16     704    
208    240    
-160   -256   
-96    -80    
-80    176    
32     64     
80     80     
272    -32    
-512   176    
-32    384    
16     -112   
96     -224   
-64    -32    
-64    96     
-576   32     
560    -96    
-320   16     
-48    0      
176    224    
112    112    
96     -304   
-416   -288   
48     496    
272    176    
-48    -64    
-80    -96    
-16    224    
-32    464    
96     -32    
-80    -272   
-224   -496   
-16    0      
304    192    
-80    16     
-112   128    
-112   432    
144    32     
32     96     
160    -160   
-400   352    
-80    208    
512    560    
160    48     
800    816    
-448   1488   
-672   -1952  
368    176    
192    32     
-704   -160   
-32    32     
192    1424   
240    -544   
32     -1056  
-336   -288   
352    240    
304    240    
-336   112    
64     -112   
-32    -336   
160    112    
128    -832   
-224   -496   
-160   -368   
80     -144   
656    1120   
1744   48     
-976   384    
80     640    
688    -48    
224    -800   
-848   -256   
544    -448   
128    -32    
-544   -64    
304    64     
432    160    
-272   176    
-256   -128   
672    16     
-176   64     
-192   -176   
-224   96     
128    128    
48     -288   
224    160    
496    304    
-448   96     
-384   -416   
-400   384    
256    32     
16     -368   
-48    160    
-48    -1696  
-528   80     
272    48     
144    -112   
32     -352   
80     -112   
160    -16    
-96    -688   
-752   144    
272    336    
16     0      
-224   -240   
224    176    
288    -560   
240    16     
-160   -320   
304    160    
656    -1776  
-80    112    
-160   896    
-64    -256   
-656   2384   
896    448    
-864   -576   
-784   -256   
1104   144    
352    -80    
-1184  240    
32     -256   
528    240    
208    -80    
-336   64     
-80    -288   
224    -16    
-320   160    
208    0      
128    144    
16     -64    
16     128    
-320   -400   
224    336    
-64    -32    
-48    -80    
160    -192   
-576   128    
-288   -864   
-48    -192   
208    -432   
-112   -160   
48     -32    
48     -112   
112    16     
96     384    
-144   96     
-32    -80    
16     0      
176    32     
-288   624    
-320   128    
432    368    
-80    -160   
-256   64     
400    -144   
-192   16     
160    0      
192    -656   
-112   -128   
-448   -1760  
240    -496   
368    32     
-496   -400   
-48    -144   
672    144    
576    48     
-560   -448   
-64    -96    
624    112    
-320   336    
528    -480   
64     336    
48     -176   
-320   80     
16     -16    
144    -416   
48     -192   
-32    -544   
112    32     
-112   -1328  
144    -144   
352    112    
-240   -144   
-336   96     
240    -32    
208    -864   
48     224    
-224   -80    
48     176    
-112   -128   
-32    32     
-96    -208   
-48    0      
272    1952   
2480   -416   
-1200  144    
-464   -576   
272    -496   
880    -32    
-304   -32    
-336   -528   
320    16     
128    320    
32     -320   
-384   -112   
144    -192   
-128   288    
288    -240   
-368   0      
80     -144   
272    16     
-192   -688   
-16    -112   
-272   208    
848    -432   
80     -16    
-768   32     
672    128    
336    -128   
-480   128    
-208   -160   
16     -96    
528    32     
-80    -80    
-352   -128   
160    -144   
368    -304   
-352   0      
272    -112   
-208   -64    
80     32     
416    -96    
-464   48     
240    0      
-48    48     
112    16     
16     -160   
-368   -96    
-416   32     
336    16     
-160   16     
-96    -432   
800    -512   
-2736  -256   
160    736    
1584   -192   
-1104  -32    
-368   96     
1184   -288   
-208   48     
-336   32     
368    16     
208    -96    
-288   -80    
192    80     
-96    -224   
-416   -320   
352    -32    
-32    -304   
-16    -16    
160    -864   
96     -160   
0      96     
-416   -608   
-544   416    
1536   -608   
-1088  -16    
-96    336    
48     -80    
-368   -192   
-704   128    
96     -304   
336    64     
32     -176   
-96    32     
48     -880   
144    48     
-496   -96    
-64    -256   
352    96     
336    -32    
-336   80     
-16    160    
448    448    
-304   -192   
-224   -224   
272    400    
-16    -144   
-576   0      
256    144    
400    16     
48     16     
-384   48     
32     -80    
160    -48    
144    320    
-384   -160   
384    -96    
-704   -352   
-432   -80    
192    -144   
-416   176    
608    16     
-160   -288   
-32    224    
-176   -144   
-80    48     
-160   -320   
-720   -176   
160    80     
-672   -448   
16     -144   
208    -3040  
-1584  -800   
400    800    
112    272    
-1440  -96    
128    -16    
32     1264   
656    448    
-560   -32    
96     -64    
304    -48    
-48    64     
-144   -176   
-1040  96     
-144   -240   
528    -528   
176    544    
32     208    
-176   368    
-64    704    
400    784    
-64    32     
64     -64    
320    496    
112    -304   
-16    -112   
-416   -208   
-112   -240   
-96    256    
32     320    
-48    -176   
-208   144    
0      400    
144    368    
48     64     
32     336    
-16    720    
-272   384    
64     144    
112    0      
-144   160    
-192   64     
0      272    
-112   656    
480    -432   
-1280  -1040  
-96    -16    
-416   -1168  
288    432    
-384   -448   
-144   -144   
672    -640   
-672   -368   
16     -1040  
-16    -272   
-224   144    
-64    -576   
160    416    
-32    640    
-128   0      
0      112    
-80    80     
-272   48     
-16    -64    
-160   -16    
-48    240    
-208   32     
-368   -640   
-128   -80    
48     144    
208    80     
16     32     
-240   -80    
-16    48     
224    80     
-304   48     
400    96     
-784   160    
-64    304    
528    -144   
-96    464    
-144   -112   
48     -32    
352    0      
-192   -352   
-208   272    
160    240    
-64    96     
64     -32    
-112   -48    
-192   16     
-32    256    
-96    -48    
-240   16     
-48    160    
80     304    
-32    176    
-304   -320   
96     -352   
128    -112   
-464   1072   
672    96     
-544   -16    
0      -336   
304    -208   
32     80     
-80    -432   
-176   -720   
256    -32    
176    256    
-48    -240   
160    -112   
-128   48     
144    288    
0      352    
176    -208   
32     128    
0      432    
-320   -576   
208    -256   
416    512    
-96    112    
-192   -208   
-80    224    
256    -272   
-224   -176   
-112   304    
32     336    
224    16     
928    1360   
416    -224   
-2176  -128   
560    -624   
1392   -304   
-784   -48    
64     -128   
96     -304   
-192   -384   
224    -96    
-64    48     
-64    16     
208    64     
16     -80    
-304   16     
64     -64    
128    48     
-16    384    
-128   160    
-64    160    
80     96     
-688   192    
2112   -240   
-928   -272   
-944   -160   
1056   160    
-208   -336   
-384   48     
128    112    
192    -48    
32     96     
192    48     
-32    48     
-160   -64    
-480   16     
544    112    
48     -32    
-512   -160   
32     96     
256    96     
-96    176    
256    512    
-160   -80    
-320   -96    
160    240    
32     64     
-144   -272   
-192   -352   
144    -176   
64     48     
-144   160    
208    496    
64     544    
512    -32    
-96    272    
208    144    
-240   -48    
-128   224    
400    128    
-640   560    
224    128    
304    16     
-112   -16    
-32    144    
-176   -64    
96     736    
1072   -32    
-624   -816   
-304   160    
688    2464   
-448   3088   
-64    624    
-720   256    
32     -432   
608    288    
-384   -208   
-480   384    
528    -64    
16     336    
-272   -384   
-208   304    
0      -176   
160    -688   
-176   64     
-272   -48    
160    112    
336    64     
32     96     
-16    -80    
-1264  -16    
1168   -128   
-176   32     
48     -208   
864    224    
-192   -16    
-608   272    
768    272    
256    -496   
-576   496    
368    -16    
112    272    
-48    16     
80     64     
208    -64    
-736   -352   
368    -192   
480    144    
-352   32     
-256   96     
176    32     
64     -176   
272    -16    
-208   112    
48     368    
-48    -96    
-16    128    
64     -224   
-96    -48    
-128   -48    
224    160    
-48    64     
-48    576    
1040   -80    
-320   -16    
80     -576   
96     -16    
-80    416    
48     112    
48     384    
16     -448   
-272   240    
80     240    
-176   48     
0      -48    
224    48     
112    368    
-720   704    
224    -720   
640    -512   
-384   352    
-192   -32    
64     -64    
240    -192   
144    160    
-64    -96    
-368   64     
112    -832   
352    352    
128    288    
-208   -80    
-896   -1696  
336    224    
1616   -272   
-592   -192   
144    560    
128    -192   
48     544    
-816   48     
384    80     
192    -128   
-144   176    
-112   -288   
0      288    
208    -656   
-144   432    
192    256    
-144   112    
448    96     
-144   -80    
-192   192    
464    -624   
-1280  480    
448    -416   
832    16     
-576   -240   
-64    -64    
96     -160   
80     128    
-16    304    
288    336    
-144   32     
-416   224    
304    -336   
240    -128   
-256   128    
-176   -48    
432    192    
-224   -16    
112    16     
-48    -144   
96     144    
-48    -208   
32     128    
160    128    
-160   112    
-32    64     
240    -416   
64     -2608  
-304   -448   
912    -448   
112    64     
-1120  720    
960    32     
-432   -80    
-720   80     
1024   -16    
320    -128   
-624   -224   
-16    80     
448    -144   
-128   -128   
-80    -80    
-64    -672   
-160   -80    
272    -224   
-48    -208   
-384   -2016  
128    -96    
384    -16    
-128   -16    
288    160    
-1840  -160   
336    912    
1312   -272   
-976   -384   
-384   1088   
-480   32     
-32    16     
96     -64    
-320   -48    
160    -48    
0      -240   
0      -48    
288    -320   
224    -64    
-416   -528   
144    -256   
-240   -288   
48     176    
80     288    
320    -96    
-384   -16    
528    -816   
-736   656    
640    -112   
-576   -800   
-1008  752    
560    80     
112    -656   
-224   -32    
160    -2240  
-144   128    
144    -304   
608    -64    
416    448    
-800   -336   
192    -960   
608    -128   
32     336    
32     -208   
-32    96     
144    64     
64     -176   
32     -1168  
-160   320    
688    -688   
-272   32     
48     224    
80     192    
-784   -1216  
1392   -832   
1424   -192   
-1520  432    
-960   -464   
688    464    
848    704    
-544   640    
-528   80     
272    240    
320    -496   
-48    192    
-288   0      
144    -560   
32     -64    
208    -176   
32     192    
-144   480    
288    48     
-128   -48    
-32    -144   
80     80     
192    -144   
128    112    
-240   128    
32     208    
288    -1376  
80     -400   
-64    -1792  
32     -768   
208    -192   
80     592    
-560   -288   
160    -112   
80     224    
-144   800    
-192   432    
160    -32    
112    768    
128    672    
16     -336   
-448   -496   
224    160    
464    -1408  
112    64     
-160   368    
-288   -16    
160    -576   
304    192    
-400   32     
-208   144    
-288   0      
1088   -688   
-176   240    
-336   672    
176    592    
384    -80    
-48    1328   
-400   -144   
320    0      
224    -96    
-208   -112   
48     -16    
96     144    
16     -32    
144    160    
80     -448   
160    -672   
-208   608    
-80    480    
-176   -112   
-112   64     
112    208    
-64    80     
-416   224    
48     160    
-352   64     
464    -224   
256    176    
-144   -368   
-624   -336   
480    -752   
96     192    
-288   720    
-608   1056   
272    448    
-320   -1152  
-160   -336   
144    240    
-32    608    
-240   -32    
-16    144    
0      48     
-384   96     
-128   -112   
-64    208    
-336   432    
144    224    
208    256    
-304   -144   
208    624    
-432   -480   
-240   -576   
304    -16    
-128   112    
96     368    
64     -336   
-272   -432   
-352   256    
80     256    
-656   -48    
-224   224    
192    -176   
-96    -96    
-16    320    
96     160    
-144   80     
160    -48    
0      48     
-320   576    
240    176    
240    304    
-384   64     
-272   96     
16     -80    
-48    -16    
-272   -48    
-112   -64    
128    -32    
-528   640    
-880   -640   
928    -672   
1904   80     
-288   320    
-736   -144   
464    -128   
320    240    
-288   656    
-176   352    
336    96     
-512   -144   
-48    144    
176    64     
240    144    
-272   112    
160    16     
-64    32     
-224   32     
288    -16    
-64    32     
320    1392   
-592   -976   
-1168  336    
1568   -544   
-832   80     
-528   -128   
320    128    
-240   160    
208    -80    
-576   -64    
96     -16    
-32    64     
-16    48     
224    48     
-528   0      
672    -16    
32     112    
-32    240    
416    16     
64     16     
-256   32     
-528   -96    
416    -160   
672    64     
-544   -256   
-64    128    
528    144    
0      32     
-144   0      
368    -80    
-16    144    
-400   256    
128    96     
16     0      
-304   -64    
192    944    
624    880    
-304   -32    
384    -384   
272    0      
-176   112    
-64    -48    
288    128    
208    64     
128    -128   
-1088  320    
160    128    
592    32     
112    1184   
1136   336    
-3008  624    
944    -912   
432    -416   
-608   96     
-240   240    
736    -224   
-208   496    
-368   80     
160    48     
32     32     
400    16     
-768   160    
-96    96     
-64    -144   
160    96     
96     32     
-512   32     
-176   144    
896    -176   
-464   336    
272    -48    
-416   32     
-720   -16    
640    176    
240    32     
-640   128    
256    -288   
-528   -112   
320    -176   
-416   -96    
272    -96    
48     304    
48     32     
-32    240    
-128   144    
-64    -48    
-48    48     
352    96     
96     112    
-368   32     
64     144    
192    80     
64     -48    
-128   -128   
128    16     
-16    0      
224    224    
-528   -16    
272    16     
144    96     
48     192    
-1152  368    
304    -112   
176    400    
352    64     
-240   16     
240    -256   
64     96     
-192   112    
160    96     
-272   -96    
64     160    
272    320    
32     16     
-224   16     
192    176    
144    -192   
96     -688   
-16    192    
-176   272    
112    -96    
-64    -208   
32     96     
32     240    
160    -192   
-192   -160   
0      320    
240    288    
16     32     
144    -1616  
-2112  1776   
1552   128    
640    896    
-96    208    
-752   32     
592    688    
-464   1152   
112    304    
-48    -336   
-160   -80    
-96    224    
288    -208   
96     272    
-672   480    
432    -304   
96     48     
-112   -112   
80     -96    
16     272    
-112   0      
112    -400   
-544   416    
912    -256   
-512   880    
208    272    
-64    288    
-80    -336   
240    -208   
112    64     
-352   384    
-32    1136   
512    128    
-240   -80    
-176   -96    
-336   -256   
368    -32    
400    192    
-448   -16    
-80    -48    
128    0      
48     80     
-48    -112   
-16    -64    
16     -224   
256    176    
48     -16    
-96    48     
-96    -32    
-480   160    
432    320    
1072   -96    
-928   -240   
528    128    
-416   288    
-240   -48    
96     304    
496    -16    
-224   96     
-416   -208   
352    304    
192    96     
-512   -240   
400    -768   
16     -80    
-224   48     
224    352    
-192   240    
0      304    
80     224    
576    1152   
-976   -960   
-1504  608    
1744   464    
16     -976   
-1120  0      
-16    -160   
1280   1152   
-160   416    
-368   400    
176    176    
224    144    
48     80     
-192   448    
-64    464    
-16    -64    
320    736    
-416   448    
-448   288    
464    -1088  
16     176    
-192   -272   
-48    1040   
352    1056   
-976   304    
656    -80    
800    -96    
-272   -480   
-48    -144   
96     192    
-336   -624   
176    -416   
-112   -608   
944    176    
496    464    
-288   -144   
-112   -208   
-576   432    
160    208    
688    80     
-288   64     
-128   160    
288    -32    
-80    16     
80     80     
480    16     
432    -208   
192    96     
-176   176    
-448   -576   
1136   96     
1136   -448   
-1824  -128   
-176   400    
1440   -176   
224    704    
-480   112    
-688   -1056  
432    -800   
480    -272   
-208   304    
-208   32     
208    160    
288    -176   
320    -16    
-272   304    
496    -144   
208    -576   
-256   -64    
128    192    
128    336    
-256   -512   
288    -544   
336    -160   
-80    80     
64     624    
384    -176   
-512   256    
0      -1888  
176    -432   
144    176    
32     -160   
-144   336    
176    208    
432    -640   
-464   -224   
-112   -144   
576    -272   
-864   896    
-240   1104   
0      320    
240    -224   
0      -240   
0      -304   
64     -96    
-320   0      
208    1376   
544    368    
128    -224   
-544   -288   
-176   -576   
896    -576   
-16    -640   
-1072  -1296  
-336   -640   
464    -656   
224    -1120  
-192   -160   
0      -48    
-432   -880   
16     -1968  
192    32     
-80    224    
16     -16    
192    208    
144    400    
-144   400    
48     256    
-160   -640   
-224   -448   
336    -128   
-240   128    
80     64     
144    -928   
-544   -768   
224    -752   
-112   -224   
-464   448    
32     288    
784    1456   
-672   -656   
-720   80     
640    464    
256    -1360  
-512   -992   
304    -48    
432    192    
-272   0      
-128   160    
160    240    
16     -576   
-16    -48    
32     -416   
-208   -64    
16     -288   
272    -352   
80     48     
-224   352    
160    0      
16     16     
16     1264   
16     -160   
-768   -352   
464    -16    
272    48     
0      -256   
-112   816    
368    -1536  
208    144    
-304   32     
-16    0      
-288   192    
224    0      
-224   -16    
-144   -144   
-48    -176   
192    -48    
-128   16     
-128   -64    
208    128    
-32    -336   
-144   144    
128    -624   
-144   -48    
400    -32    
64     160    
-224   -64    
-144   0      
416    336    
-848   208    
2336   976    
656    -32    
-1136  -48    
1344   288    
272    352    
-624   -64    
128    352    
432    -208   
-192   144    
16     96     
192    -32    
-16    176    
-192   -80    
-80    144    
320    -16    
-192   16     
-224   64     
304    0      
-32    -320   
-32    -528   
912    352    
-528   -16    
-192   48     
-64    16     
-432   -160   
-1072  96     
464    -128   
800    -32    
-496   96     
-288   -48    
-96    16     
64     -144   
64     48     
-272   -112   
-32    64     
-96    -208   
-176   112    
-16    0      
80     -208   
-48    16     
-304   -128   
0      -96    
-448   384    
-1072  336    
272    96     
-16    -240   
-720   -368   
-32    -80    
352    -64    
80     272    
-368   16     
-272   144    
160    -64    
-288   -160   
-144   16     
-624   0      
48     -176   
32     -256   
208    -48    
-464   -32    
-80    -64    
160    -64    
240    128    
96     192    
-736   336    
-192   -336   
32     80     
-304   -464   
1920   3936   
-1232  608    
-640   528    
1472   80     
-560   -48    
-480   0      
-208   -400   
128    192    
0      -32    
-304   64     
240    -272   
256    192    
-240   -112   
-128   176    
592    -48    
-192   128    
-144   -16    
208    16     
-240   -464   
544    -256   
-144   -224   
-208   80     
192    416    
-272   -128   
16     64     
-32    0      
176    128    
-272   288    
416    240    
-128   256    
-272   -144   
160    192    
32     32     
176    208    
-368   128    
304    304    
-16    -64    
160    -160   
-608   -176   
160    128    
256    64     
-224   48     
-32    160    
192    -176   
-192   32     
144    80     
64     144    
160    -32    
-560   -240   
320    -464   
96     -256   
-464   -1056  
-752   384    
464    -304   
-480   32     
288    96     
48     384    
-272   336    
-128   64     
144    0      
-32    -32    
-240   0      
144    0      
224    -32    
-112   -256   
-144   176    
-32    400    
384    176    
-16    352    
-112   192    
208    288    
-16    80     
32     64     
160    176    
-16    -64    
-80    -528   
-352   -80    
320    336    
208    560    
-208   80     
-384   -1264  
896    -1552  
-592   688    
-32    -528   
-368   16     
256    -464   
80     -272   
-160   432    
64     -432   
128    -32    
-160   -48    
224    32     
-160   -64    
-144   0      
112    304    
304    96     
-400   -112   
48     368    
-16    -448   
64     -80    
-336   -240   
560    -480   
-176   608    
-16    256    
-368   624    
-48    -320   
304    -192   
-96    32     
-208   96     
-80    -160   
256    160    
112    -256   
-112   -48    
-384   -672   
320    592    
16     208    
-416   128    
384    -416   
128    304    
-176   304    
80     -48    
224    48     
-80    192    
32     -112   
-32    -192   
128    576    
128    16     
-320   48     
-176   -160   
736    -272   
752    -448   
-2320  608    
784    352    
576    -208   
-528   -64    
-80    0      
-112   -256   
208    336    
-48    -160   
160    304    
-96    48     
-272   0      
128    -144   
224    0      
-48    -96    
-128   272    
16     80     
224    -224   
-256   592    
-192   -112   
16     -592   
1408   880    
-288   -352   
-1664  -592   
528    -368   
688    336    
-272   -144   
32     -2464  
352    -1936  
-640   -864   
128    720    
176    592    
-128   -96    
16     96     
-96    496    
-288   144    
320    -176   
192    -352   
-128   0      
-64    96     
48     656    
336    528    
-144   -544   
-176   144    
768    912    
1120   -144   
-1456  -912   
-112   -1216  
80     -912   
-32    -144   
320    352    
-288   0      
400    -416   
-144   208    
192    1168   
-176   96     
-368   80     
448    -384   
-112   528    
400    -304   
-176   80     
-160   160    
128    -368   
-272   -48    
-64    -800   
-208   -208   
368    560    
64     480    
-144   448    
112    160    
192    -2176  
-1904  -64    
-64    224    
1072   64     
-80    -2512  
-1072  -1328  
0      -704   
416    704    
-224   320    
176    352    
-48    -832   
-176   -16    
-64    352    
144    288    
64     -160   
16     -192   
256    192    
224    96     
-80    592    
-64    -320   
48     160    
224    368    
48     96     
-752   -128   
784    368    
-16    720    
416    544    
-176   544    
80     960    
48     -640   
176    -1056  
-432   -464   
-64    592    
416    368    
304    128    
-288   432    
128    -1392  
-16    336    
-16    -1392  
256    96     
96     16     
224    192    
64     384    
64     864    
224    1088   
80     544    
288    528    
-160   704    
-48    160    
-32    -672   
608    1168   
-400   80     
-608   -656   
96     -688   
496    -1248  
-16    -448   
-144   -640   
208    -496   
64     -192   
32     688    
112    304    
80     208    
-128   -64    
-144   96     
240    -160   
256    400    
-240   560    
112    1072   
128    1200   
80     688    
240    -64    
-48    0      
-256   -160   
288    -400   
-32    -384   
336    -672   
-352   -672   
-176   -1120  
96     -288   
-368   -1456  
1232   -960   
-352   480    
-224   -272   
400    240    
-96    224    
0      -944   
96     -1744  
112    -1744  
-144   224    
32     -2448  
192    -80    
48     144    
32     144    
-256   0      
304    -32    
-96    304    
-16    -352   
48     -352   
64     16     
32     -32    
-208   -1008  
-624   0      
928    -304   
-336   48     
224    -160   
240    -96    
-32    -896   
-384   -192   
304    -928   
336    -544   
-112   48     
0      -480   
144    -288   
-64    160    
16     224    
224    320    
-48    16     
-32    -32    
-288   -96    
16     -112   
-32    0      
288    16     
64     64     
-128   -144   
-80    -16    
160    -352   
272    0      
-320   -80    
240    -32    
-1456  -1616  
-48    16     
1904   -320   
-400   224    
176    448    
-128   48     
-608   -384   
80     96     
48     -304   
96     112    
64     -32    
16     -944   
-96    -48    
32     -16    
-560   -64    
544    -16    
-112   -48    
16     -96    
128    96     
-16    0      
-96    -224   
-1488  -528   
1008   -112   
1072   -784   
-2032  -80    
1040   224    
896    -496   
-672   496    
-320   48     
-96    -80    
240    64     
32     0      
0      32     
-48    -32    
-256   16     
320    -112   
-192   208    
-272   -448   
-512   144    
448    -64    
-176   -80    
16     -352   
-736   128    
272    -784   
96     112    
-128   -496   
-432   -448   
160    512    
304    -176   
-720   -144   
192    -96    
432    144    
-96    -128   
-368   240    
192    -80    
-128   16     
64     -272   
-48    -48    
176    -624   
112    464    
-432   -80    
64     -208   
32     -256   
-304   48     
80     80     
-224   -64    
96     96     
224    -240   
-352   80     
-1328  -704   
2960   -2080  
112    384    
-1536  192    
208    -320   
432    64     
-336   112    
304    144    
272    512    
-752   112    
-96    224    
816    -112   
-480   -48    
-112   16     
176    -80    
224    -16    
-64    112    
-80    -192   
-272   -112   
800    224    
224    -192   
-576   160    
64     272    
-368   -176   
-192   -176   
496    144    
-288   -288   
-80    64     
608    -256   
-160   -32    
-16    0      
-64    48     
-560   -320   
-48    336    
112    -144   
-384   16     
352    -176   
-400   -320   
-32    0      
-160   -96    
-16    144    
272    144    
-272   480    
48     224    
-256   -64    
-192   -736   
-192   336    
128    128    
-128   80     
112    368    
-32    -96    
-144   -272   
-592   304    
288    352    
-144   80     
64     288    
-64    688    
368    992    
-144   608    
-112   592    
368    -96    
48     16     
-272   -160   
176    448    
-256   320    
48     -384   
80     96     
-240   -432   
-160   -32    
16     -112   
112    208    
-608   -80    
-144   -32    
128    -240   
16     -160   
-112   -640   
-160   -208   
64     -656   
-96    192    
48     -16    
-368   -480   
816    -560   
-208   640    
-672   -944   
-16    -912   
208    32     
-304   -992   
-672   -96    
0      320    
80     224    
96     -272   
272    80     
-96    48     
-192   128    
224    -80    
96     -16    
-128   32     
-208   -368   
112    -144   
0      144    
-336   -368   
768    -416   
-272   560    
-400   -208   
16     48     
-48    -208   
240    -176   
112    224    
-64    160    
-16    48     
-32    -32    
240    16     
-128   16     
-32    96     
0      -32    
16     128    
-208   480    
272    -176   
-448   -16    
-176   64     
-48    -48    
256    16     
32     144    
-64    64     
0      -176   
96     32     
80     128    
112    160    
-480   128    
-96    48     
-352   -1376  
-528   -240   
144    -320   
-928   -288   
416    224    
384    -160   
48     144    
-624   -848   
-16    304    
288    368    
64     448    
-384   -80    
32     -16    
240    -192   
-64    416    
-176   16     
32     0      
400    -880   
-352   928    
-32    448    
192    256    
1184   32     
-1936  160    
272    -448   
-144   -80    
-336   -560   
112    -576   
704    -240   
-480   1296   
-544   1088   
304    784    
-224   576    
160    960    
64     576    
-128   512    
-288   16     
320    240    
160    -160   
-400   16     
-16    -16    
48     64     
-80    112    
112    208    
-176   -96    
-464   -720   
-240   -1440  
-160   -880   
80     -1584  
-656   -960   
0      144    
48     304    
-272   400    
288    464    
-208   -144   
48     -272   
608    112    
384    2288   
-1072  1280   
-112   -224   
480    -640   
-240   160    
-400   0      
-144   -176   
192    -544   
-192   -320   
0      -336   
352    256    
80     -816   
16     -336   
-448   -656   
1024   -1008  
752    160    
-1200  336    
-752   -96    
1200   -464   
336    -560   
-1088  144    
-48    528    
320    128    
432    64     
-48    -32    
-384   224    
-192   240    
336    -48    
592    176    
-480   192    
-352   32     
-160   -688   
352    -176   
32     160    
-240   144    
112    144    
-560   -96    
176    224    
496    96     
-144   272    
-32    288    
-48    32     
240    848    
304    800    
16     496    
48     208    
-192   192    
-192   192    
208    16     
32     -272   
-64    -112   
0      -944   
112    192    
-80    -32    
176    320    
144    320    
-176   160    
272    240    
-48    -128   
-208   -1072  
368    -256   
-192   208    
-176   384    
96     80     
-144   -1072  
-1104  0      
752    -1104  
256    80     
-48    288    
-224   416    
-32    544    
304    224    
48     160    
-80    112    
-96    -32    
272    -144   
32     -32    
-112   80     
-112   80     
-48    0      
224    -80    
176    256    
-464   416    
288    -528   
304    64     
-64    0      
-256   224    
64     64     
112    992    
672    160    
-240   -240   
-192   448    
304    64     
816    2640   
-1824  -1344  
-1168  480    
1424   -64    
144    -144   
-736   -208   
256    -96    
720    528    
-176   80     
-224   32     
112    256    
0      -112   
144    -176   
0      -192   
-288   416    
272    256    
-256   -96    
64     128    
176    -64    
-96    112    
-224   -736   
752    400    
592    -576   
-768   128    
-688   -144   
512    96     
288    304    
-320   160    
64     -160   
-176   144    
64     -48    
16     64     
160    0      
96     -288   
-32    -64    
-16    -224   
32     256    
-160   -368   
0      32     
32     80     
176    32     
-16    224    
176    48     
-256   96     
288    112    
160    80     
-272   96     
320    80     
-112   -256   
16     160    
-176   1088   
1840   80     
-1168  -368   
-400   -192   
1184   144    
-96    48     
-288   96     
0      80     
144    -48    
-272   32     
208    160    
176    -176   
-192   64     
-128   112    
672    208    
-208   -208   
-400   112    
496    -432   
48     0      
-16    80     
16     336    
-400   80     
2256   112    
-464   48     
-1376  -544   
1168   128    
400    64     
-720   16     
368    16     
544    240    
-416   -128   
-160   192    
512    -48    
-288   128    
-32    144    
176    -176   
96     16     
-32    -2048  
-160   -1824  
288    0      
0      16     
224    688    
-496   -1520  
-976   0      
416    64     
432    224    
-320   48     
-48    -512   
-768   592    
544    -112   
112    -320   
96     240    
-160   256    
144    96     
-288   -128   
272    -416   
-48    -32    
128    -256   
128    -240   
96     368    
-16    -96    
-48    128    
368    -352   
-32    -384   
-272   48     
528    -208   
32     112    
-80    -176   
-96    32     
-1120  -1200  
1552   -2016  
432    432    
-1440  240    
-528   16     
752    -160   
608    -336   
-720   -656   
80     -80    
576    -144   
-480   160    
96     64     
128    0      
16     128    
-80    -384   
-288   64     
-416   -112   
256    16     
-128   -368   
384    -560   
80     -400   
-192   96     
-48    -1872  
-304   128    
512    -80    
-256   -16    
448    -128   
-32    32     
112    416    
-352   -128   
-32    -416   
416    -640   
-1568  -240   
-208   -112   
528    -80    
352    -320   
-624   176    
320    96     
448    -48    
-96    -48    
-160   224    
-16    -320   
-64    -272   
-48    16     
112    416    
-208   560    
-64    -272   
-368   -128   
288    432    
-64    -80    
-16    -496   
208    976    
-512   0      
-176   864    
496    -1168  
-96    704    
288    960    
16     1600   
64     2096   
160    -16    
-304   -176   
112    -256   
-480   112    
144    -192   
-272   464    
144    128    
-128   -192   
272    -592   
224    -144   
-416   -672   
-64    -48    
160    32     
192    288    
-128   -208   
-160   -720   
512    -224   
112    432    
-544   384    
128    -80    
32     0      
32     -336   
448    640    
-688   336    
368    -128   
160    128    
-144   16     
-448   272    
192    144    
80     -208   
224    -48    
-144   -48    
-80    128    
0      32     
160    0      
-656   -144   
-240   -176   
-128   96     
304    -208   
48     -16    
32     16     
0      176    
-224   848    
928    -256   
-928   16     
160    -64    
160    48     
-16    -64    
64     -336   
112    128    
-288   160    
-64    -16    
288    -112   
-32    -144   
-48    112    
-16    -128   
-864   -64    
-176   208    
-368   -368   
16     -640   
-48    -112   
32     -16    
96     32     
80     -144   
-224   -112   
-208   96     
112    -192   
288    -16    
-496   -96    
384    128    
-320   240    
1072   1280   
-400   256    
-1920  -576   
1408   -640   
-192   -560   
-768   -144   
-16    -144   
880    -1040  
-32    816    
-240   0      
-48    -48    
96     64     
32     16     
32     384    
-368   -160   
128    -192   
384    208    
-80    -272   
-608   -512   
-272   -352   
224    -688   
848    1008   
-80    -128   
-1088  432    
1008   544    
-368   640    
48     416    
544    1312   
976    1120   
-480   704    
-320   336    
128    -144   
96     -192   
192    -224   
-16    368    
48     -32    
-272   -80    
400    704    
608    224    
80     544    
-704   464    
80     144    
752    384    
-624   -288   
-192   -336   
112    -64    
592    -960   
-416   96     
-160   -144   
-256   128    
240    16     
-80    -192   
-288   48     
-704   96     
32     -32    
432    -16    
-144   -80    
-208   -320   
512    256    
-176   176    
-592   -64    
352    112    
112    -32    
112    -416   
-512   0      
528    80     
80     -16    
-16    80     
-784   -992   
-240   80     
80     2464   
128    224    
-768   -368   
-816   -352   
800    160    
688    -144   
-1296  -224   
-352   32     
320    -48    
192    128    
-432   80     
-448   -16    
656    240    
-448   -176   
64     192    
48     -112   
-64    32     
288    208    
-80    1296   
384    320    
-272   -320   
-176   -128   
400    -128   
-16    64     
-80    96     
160    112    
176    -160   
128    48     
-336   -48    
128    176    
176    -224   
-144   -144   
-224   192    
80     128    
-352   -112   
80     -240   
208    64     
-192   320    
-352   0      
240    96     
368    -16    
-464   -16    
64     -112   
-480   -336   
640    288    
-144   160    
-304   128    
160    -80    
144    64     
-80    160    
-352   -448   
656    -352   
288    272    
-384   128    
-384   208    
-128   -96    
-432   -64    
224    32     
-64    0      
32     48     
32     128    
80     160    
16     48     
-192   80     
144    128    
288    416    
-272   240    
-144   32     
368    112    
32     160    
-176   48     
256    0      
-16    224    
-96    32     
144    -112   
-224   -48    
64     688    
160    160    
-96    -144   
-272   -48    
1440   1408   
1984   544    
-1600  128    
-608   192    
832    -576   
-240   -448   
-240   -224   
400    208    
-288   240    
32     -320   
368    -144   
-144   432    
-80    112    
32     336    
464    -160   
-320   -240   
-112   560    
160    -240   
-64    -192   
-32    32     
-368   528    
768    -432   
144    -48    
-848   80     
704    320    
544    -80    
-752   -144   
-192   192    
528    -176   
-80    176    
64     32     
0      16     
192    32     
288    272    
-272   -32    
-480   288    
608    -128   
-224   -144   
272    -144   
-144   112    
96     -32    
-16    208    
272    48     
-160   96     
256    96     
-64    224    
64     64     
-96    64     
96     256    
-464   -400   
16     -144   
224    96     
-400   -80    
-144   48     
-160   64     
576    -176   
80     -240   
-160   -304   
-48    -32    
128    208    
16     0      
-128   64     
160    240    
-160   64     
-224   176    
320    -16    
-336   -112   
304    -640   
192    0      
-64    -2096  
-96    -528   
-1136  640    
1648   304    
-288   0      
-688   160    
464    32     
32     144    
-560   -272   
-160   192    
640    0      
-176   112    
-96    80     
-32    -208   
-64    -16    
-16    16     
240    80     
-160   -48    
-32    144    
160    48     
32     96     
-176   -304   
896    512    
176    -528   
-1264  368    
752    32     
-304   -224   
-256   64     
752    -16    
-240   176    
-304   -304   
368    80     
352    -1440  
-208   16     
-128   -624   
-80    -16    
224    -640   
-96    464    
160    -16    
-128   304    
-128   0      
448    256    
-496   288    
-96    -112   
64     16     
-16    -768   
96     48     
0      -368   
-80    96     
432    -1088  
-944   1792   
528    544    
-560   224    
-224   -304   
912    288    
-256   -256   
-1104  -608   
272    -144   
384    80     
-192   32     
-64    -176   
208    48     
80     -64    
0      128    
-16    -880   
48     48     
-96    -160   
144    32     
96     -832   
-464   -576   
384    -80    
176    496    
-240   -16    
48     -1024  
464    48     
16     -448   
-416   -608   
224    -1264  
112    48     
-48    656    
80     128    
-144   128    
-48    608    
320    144    
96     -192   
-112   80     
64     -80    
-272   0      
32     -192   
0      -192   
48     -288   
128    -144   
-192   -896   
320    336    
144    880    
80     592    
160    560    
-240   -784   
272    0      
32     -64    
-32    -1920  
352    -336   
-912   -144   
464    -960   
48     336    
-16    320    
-16    288    
448    112    
0      -80    
-128   -32    
0      -176   
144    32     
32     -80    
336    288    
-112   -80    
-32    -256   
64     -160   
-288   -816   
0      -112   
272    -624   
-80    -208   
-160   128    
64     0      
64     -240   
-112   64     
144    -592   
336    -368   
16     -128   
-144   48     
-144   0      
-224   -832   
-160   -400   
-272   32     
464    -96    
208    208    
-144   -192   
320    -352   
368    0      
-16    208    
0      -32    
96     -400   
0      -80    
-64    80     
64     96     
144    80     
-160   -272   
128    -224   
144    -256   
144    176    
0      112    
48     544    
624    -960   
-928   32     
368    -320   
96     192    
-176   -96    
-64    -368   
128    80     
16     -48    
-128   -48    
128    -208   
32     -160   
-16    -176   
-16    -16    
96     -640   
-128   -608   
-96    -1312  
128    -416   
32     560    
64     288    
-64    -160   
96     -48    
32     -96    
32     64     
-16    -112   
176    -112   
-304   -96    
272    -128   
-64    96     
336    -1040  
-1952  -144   
1232   -336   
272    208    
-560   -912   
128    304    
-416   -48    
112    640    
352    192    
240    -112   
-736   -608   
-16    -368   
128    -48    
272    0      
-1376  -32    
0      -64    
432    528    
16     -576   
-464   352    
224    -400   
-112   -592   
1376   576    
-832   -304   
-96    1712   
-368   -560   
-1296  800    
1168   256    
-1376  -656   
-64    -240   
272    -32    
-16    144    
48     -80    
32     -400   
352    -64    
64     -32    
-224   -80    
0      176    
256    0      
-224   144    
-32    -560   
-512   80     
160    448    
0      -832   
-768   512    
528    -80    
-272   -544   
64     592    
848    -480   
96     16     
-384   -32    
-144   208    
400    -112   
176    304    
-336   -96    
-224   -96    
-480   -96    
0      -352   
-608   544    
336    -352   
704    144    
-432   -16    
-320   128    
-160   -224   
-192   144    
-208   -112   
-1344  64     
-224   -16    
160    -32    
176    592    
-1040  -1536  
1152   -2032  
944    512    
-592   80     
-944   0      
176    256    
544    -240   
-48    208    
-384   -496   
-304   240    
752    -16    
-256   128    
-352   -64    
144    96     
-144   -32    
-16    112    
-480   -96    
-800   -32    
-64    -512   
736    -816   
-416   0      
-64    80     
320    480    
-64    -64    
-704   0      
528    176    
-144   -112   
-464   480    
176    -48    
176    -16    
-144   -80    
-288   -16    
-128   144    
368    80     
-432   176    
304    64     
-96    -32    
640    176    
-192   -208   
-432   80     
320    144    
96     -32    
-208   176    
-144   -16    
32     320    
-32    -64    
-144   32     
-32    128    
-336   112    
-576   32     
368    176    
0      480    
48     240    
-432   480    
832    544    
-688   384    
-448   64     
352    -160   
80     0      
-32    48     
48     128    
256    64     
-336   96     
32     64     
-80    -208   
-64    112    
-16    656    
192    352    
-272   -272   
-16    -128   
32     80     
-240   -16    
336    288    
80     0      
-240   32     
-192   -208   
336    -336   
-96    -80    
-656   640    
80     -112   
-144   -1664  
1680   512    
-16    640    
-1216  176    
-64    80     
160    -32    
-128   640    
512    -368   
-256   -688   
-448   384    
448    -16    
368    -160   
-544   288    
-48    -128   
160    -272   
240    368    
-1328  -32    
80     -112   
-208   -48    
-16    128    
256    160    
-272   1104   
992    -416   
-544   -256   
-416   192    
480    -16    
-192   192    
192    432    
240    240    
-352   -304   
0      176    
0      -96    
-240   64     
208    0      
112    96     
-160   48     
96     -16    
-288   176    
256    192    
256    256    
-192   80     
-48    160    
112    -16    
-32    144    
48     -176   
-304   224    
256    64     
16     240    
0      64     
64     224    
864    -912   
-3504  1216   
-592   544    
1904   -208   
-992   16     
-576   -96    
1040   432    
-176   -48    
-512   464    
48     -64    
336    128    
-144   48     
-96    192    
112    160    
-48    128    
-400   176    
400    32     
-16    192    
112    448    
-256   176    
-48    256    
-304   -528   
-272   352    
1120   -256   
-1008  512    
-656   848    
416    144    
208    -80    
-560   96     
16     -32    
448    192    
448    144    
-48    -224   
-656   192    
64     -272   
16     80     
352    96     
-528   32     
368    0      
288    208    
-224   96     
-16    80     
384    368    
416    -112   
176    128    
-336   240    
-640   -912   
-592   640    
544    -352   
-352   128    
384    -160   
192    208    
-16    208    
-80    128    
80     16     
544    256    
448    416    
-384   -208   
-432   448    
672    720    
-336   240    
-400   -80    
320    32     
-128   -80    
32     96     
-368   80     
176    -192   
-32    96     
-96    -368   
240    16     
1312   1824   
-1520  1088   
400    272    
976    96     
-816   320    
-288   480    
912    848    
336    688    
-528   1184   
464    592    
64     -160   
32     64     
-16    -48    
64     -304   
-64    16     
-176   416    
416    -80    
-160   16     
-16    -256   
64     336    
-48    304    
0      -32    
304    544    
672    -624   
-864   -224   
208    -960   
-352   -176   
144    -384   
-304   128    
176    -64    
-160   -448   
-112   -240   
-192   -336   
64     -1008  
-240   -416   
160    272    
-240   128    
288    592    
192    -816   
-560   -144   
-112   -112   
-80    160    
64     -272   
-64    -128   
160    560    
-144   -304   
320    -32    
-464   -480   
64     240    
240    176    
-224   -688   
880    -720   
-448   624    
-320   16     
192    672    
-80    -640   
-16    -256   
368    1184   
192    304    
-304   -224   
48     16     
80     64     
96     -544   
-128   368    
32     224    
0      144    
-48    192    
-80    240    
-64    112    
64     128    
-48    -16    
-96    -224   
-112   160    
304    -32    
-64    160    
32     -512   
272    -528   
-48    -1408  
-112   32     
16     -944   
-32    -304   
400    -528   
-32    400    
208    -160   
-320   400    
0      288    
-32    -96    
272    128    
-304   -128   
-16    96     
176    -208   
32     336    
-128   -144   
80     -16    
192    -16    
224    64     
-16    400    
-176   512    
96     144    
208    176    
-192   -640   
-384   -912   
576    240    
-320   -336   
288    -32    
-64    -352   
-112   -448   
-32    -272   
64     688    
224    -336   
48     -208   
-208   -16    
-16    352    
0      -160   
112    160    
256    -160   
-272   288    
32     -112   
208    -32    
112    -160   
-112   16     
96     0      
-80    -48    
96     144    
176    -128   
-128   176    
0      144    
-80    -656   
-48    -304   
48     -240   
1584   -1456  
-1408  272    
112    -256   
192    -208   
-352   592    
512    128    
-64    640    
144    32     
64     544    
-176   16     
-48    48     
336    16     
112    32     
-576   -752   
128    -240   
416    -240   
0      -64    
96     -176   
80     -144   
16     -1952  
288    496    
496    -864   
-1376  224    
576    -480   
-128   640    
-656   288    
-64    128    
560    -384   
-752   32     
-448   16     
80     -96    
-128   0      
256    96     
-48    -272   
-80    -288   
176    -80    
-80    0      
-80    48     
0      80     
-112   160    
-48    -384   
608    -144   
-96    208    
-64    -336   
-496   192    
192    -560   
1168   -368   
1088   672    
-512   -128   
-336   -608   
720    64     
112    -640   
-128   144    
-224   -160   
-112   864    
848    160    
-448   48     
-720   368    
720    -80    
288    -352   
144    -48    
-880   176    
-48    -432   
80     -32    
240    112    
752    -336   
-384   -608   
-208   48     
400    -1792  
-1312  -3296  
-2096  -688   
1440   -560   
304    -144   
-512   -64    
-608   176    
576    -144   
-320   304    
-64    320    
-272   -64    
64     -64    
-64    -192   
-128   -400   
112    96     
96     -512   
160    80     
-32    -32    
-64    -128   
464    -208   
-1040  -224   
784    -176   
-96    160    
-320   -32    
144    0      
192    192    
208    -304   
-624   -96    
208    -192   
-240   112    
192    -128   
-480   -48    
400    -80    
-464   -160   
-160   -144   
448    160    
0      -208   
-720   -176   
160    -32    
-528   -192   
-48    0      
80     -160   
-160   192    
32     -272   
-32    160    
240    -528   
96     -48    
-128   -400   
-144   96     
-48    192    
112    304    
-48    256    
64     736    
832    -144   
-112   -96    
160    144    
496    480    
-352   224    
-160   80     
16     112    
336    -192   
-160   -144   
32     128    
240    160    
-128   32     
112    -192   
-96    224    
112    -144   
-32    -192   
96     -160   
80     96     
-608   112    
368    64     
-528   -416   
64     -144   
-400   -176   
-368   -48    
96     352    
-752   -240   
-160   -96    
-768   -128   
-656   -1696  
-128   576    
1728   -400   
-656   144    
-176   96     
144    -384   
-48    192    
-400   -656   
-368   720    
528    64     
-320   -48    
-160   -64    
128    96     
288    -112   
-768   704    
224    -176   
144    -96    
-112   64     
-64    -96    
224    -48    
-96    -1184  
-1104  768    
1072   224    
-416   16     
-128   -112   
144    192    
80     496    
32     432    
-48    -192   
144    160    
-48    -64    
-592   0      
208    192    
144    32     
-368   128    
48     -16    
144    288    
-48    -144   
-160   224    
16     -48    
-112   32     
0      0      
96     80     
80     112    
-320   -80    
-32    256    
-416   -192   
-48    64     
-160   -128   
432    -64    
1584   -48    
-1760  752    
-512   -112   
1120   368    
-640   32     
-128   240    
448    80     
0      -256   
-288   -368   
-112   16     
192    64     
-64    144    
-64    0      
-144   32     
304    0      
-416   0      
48     96     
304    96     
-80    48     
-112   0      
-608   -640   
848    -560   
496    272    
-640   896    
352    896    
816    256    
-480   416    
-608   48     
-128   -256   
576    320    
304    -64    
-400   80     
-112   128    
576    48     
-48    -48    
-528   80     
-160   -96    
256    -96    
176    144    
-224   32     
48     -48    
-112   144    
96     192    
-48    -64    
-96    352    
112    -832   
784    -1312  
-144   -976   
32     288    
320    240    
-16    112    
-192   416    
112    -416   
-704   624    
192    1120   
-272   32     
-192   -304   
-448   352    
-128   -208   
192    -64    
80     224    
-96    240    
-256   192    
16     0      
-288   944    
368    0      
0      480    
-48    800    
-192   400    
352    960    
688    -224   
-48    -672   
304    320    
-784   576    
-384   672    
880    208    
0      656    
-768   -272   
-240   -496   
432    384    
176    -96    
-96    16     
-160   -48    
80     320    
128    -400   
-368   -240   
-256   -112   
-128   256    
160    208    
-80    -688   
-64    192    
-16    48     
-64    608    
192    320    
-48    -400   
-64    800    
80     944    
-16    -256   
-160   0      
128    64     
-80    -112   
-128   576    
352    688    
256    400    
-304   16     
-96    48     
320    160    
336    496    
-240   -192   
-224   96     
-192   112    
384    -192   
128    560    
-448   48     
-256   -272   
592    1120   
-224   -496   
-96    -304   
80     -528   
-80    -416   
528    -16    
-672   32     
16     -448   
-208   -448   
-160   -80    
-272   128    
368    -688   
-144   -448   
-384   128    
-32    160    
256    80     
80     -112   
80     192    
-192   320    
336    -144   
240    0      
-544   -64    
160    16     
128    336    
-64    112    
16     240    
304    320    
-496   416    
32     864    
-208   464    
176    992    
208    -208   
-224   -1232  
48     -32    
-48    -1248  
-1072  208    
928    -288   
272    144    
0      176    
-64    544    
-48    880    
-192   -656   
-32    -480   
336    544    
-16    -64    
-208   80     
-32    -80    
160    -704   
80     208    
-16    -2080  
-48    -304   
-48    -32    
144    304    
144    0      
-512   -304   
512    -656   
-192   1216   
-208   512    
112    240    
-144   -816   
-176   448    
64     -80    
256    240    
-96    464    
-64    -912   
224    64     
176    384    
-256   96     
32     288    
192    -80    
16     -64    
-112   336    
-16    224    
64     96     
-96    -48    
192    256    
80     -128   
64     -80    
64     96     
-192   -192   
0      160    
32     -688   
128    128    
784    -16    
-2352  224    
-80    208    
1216   48     
-608   128    
-160   64     
256    -80    
176    320    
-96    240    
-128   -208   
144    64     
0      -736   
64     128    
-144   -640   
128    160    
32     -48    
-64    112    
192    128    
160    192    
-208   16     
80     128    
528    928    
-976   -400   
-1168  176    
1664   -272   
-608   0      
-160   -16    
176    16     
160    512    
688    -160   
-352   -704   
336    64     
112    160    
16     80     
-272   32     
16     96     
336    32     
384    160    
-256   576    
-320   160    
160    48     
304    320    
-208   -160   
-416   16     
560    0      
-80    -768   
-480   -256   
112    -16    
384    -192   
-496   160    
512    272    
288    96     
-384   -192   
80     176    
32     -704   
128    -16    
-304   -272   
32     -272   
560    -352   
-128   16     
-720   -1056  
272    192    
480    -64    
-144   64     
-656   -352   
560    -320   
272    288    
32     -224   
112    96     
-800   -944   
-1776  384    
512    32     
-272   240    
-304   0      
640    224    
64     -144   
-464   48     
64     -112   
528    96     
432    -16    
-32    80     
-80    -912   
112    128    
-32    -2272  
0      -112   
-48    80     
64     -64    
-32    80     
912    496    
-1136  -1712  
304    272    
432    -560   
-144   -128   
752    -64    
-480   -32    
-832   576    
64     80     
-128   64     
448    -464   
240    -96    
-352   80     
288    -112   
-448   -80    
560    -80    
-96    -272   
-16    416    
-16    -80    
-208   320    
-48    -32    
64     -32    
128    0      
-48    16     
-208   -144   
240    80     
-16    32     
-112   16     
160    64     
160    -2528  
16     0      
-128   -64    
304    288    
48     512    
704    16     
-128   -688   
-384   -64    
224    -128   
96     -272   
-272   256    
-464   272    
208    -32    
224    -528   
-80    -80    
-96    -896   
112    -16    
64     -160   
-224   -208   
16     -128   
112    304    
16     512    
288    416    
-352   96     
64     -256   
-480   -128   
80     48     
96     -224   
-96    48     
208    1056   
-48    32     
-288   -96    
208    -1712  
-400   -2192  
-320   192    
1328   -304   
-544   1120   
736    -32    
-448   -176   
-336   416    
-144   320    
656    448    
-816   144    
-480   448    
-48    144    
288    -64    
80     144    
-304   -752   
80     96     
160    -224   
112    48     
80     96     
-48    -160   
208    -96    
-288   864    
128    -64    
-48    -240   
-320   240    
224    384    
240    256    
-160   -176   
0      192    
32     96     
32     -32    
32     -112   
96     -16    
-304   0      
224    48     
-160   32     
-320   336    
-16    128    
256    96     
-272   -80    
-80    -464   
144    240    
16     -272   
64     48     
0      -432   
-32    64     
272    0      
0      16     
-112   -176   
-208   -1408  
1824   416    
-336   688    
-1392  -832   
384    -128   
112    128    
464    128    
-96    864    
32     -448   
176    -192   
-192   -400   
272    128    
-112   32     
-144   176    
240    272    
-368   176    
-48    64     
352    112    
-160   -48    
128    -480   
64     -464   
-320   -896   
-1088  608    
1904   48     
-192   -112   
-1024  -560   
-208   -848   
160    -240   
-352   112    
160    304    
-864   -112   
-336   -80    
-112   -368   
384    128    
-80    -288   
-32    -96    
176    0      
-240   -256   
-304   -832   
224    -304   
80     -176   
-176   80     
-256   -48    
448    1488   
-464   1488   
-560   800    
-112   320    
48     752    
-672   304    
144    -928   
608    -720   
-448   224    
160    32     
352    -32    
-864   -96    
48     -640   
128    -304   
704    -160   
304    128    
-416   96     
80     -528   
-416   -224   
-256   -112   
352    576    
240    -144   
208    48     
496    -384   
-448   256    
144    -480   
320    -480   
-64    176    
0      1328   
1168   -48    
-1520  368    
-576   -16    
592    0      
96     352    
-832   -1872  
-688   -1184  
-16    256    
64     224    
16     -592   
-336   -336   
-320   -48    
336    128    
-32    208    
-272   448    
224    176    
384    -128   
-240   -48    
-160   144    
144    32     
-16    -48    
-512   400    
368    48     
-256   80     
336    -80    
336    32     
-352   880    
-128   -368   
208    -288   
208    0      
176    352    
-480   -272   
224    112    
256    48     
-544   240    
-96    400    
448    144    
-496   -416   
-144   -288   
400    -592   
-240   -80    
-32    -176   
272    464    
-592   -928   
-128   -368   
240    -816   
-96    96     
-160   256    
160    -160   
-304   176    
416    -544   
96     -432   
-528   224    
512    -240   
-320   0      
-224   976    
-32    944    
128    128    
-16    -96    
-16    -128   
-32    -432   
-128   -176   
240    -384   
-208   -176   
0      80     
192    384    
144    192    
-528   288    
32     192    
128    160    
0      -48    
96     -16    
32     32     
-144   96     
272    656    
-64    288    
-96    -240   
64     -192   
816    2160   
-1456  288    
128    672    
432    -240   
-352   -704   
16     -112   
160    240    
128    464    
64     864    
256    528    
-400   304    
-16    224    
352    -32    
-176   -96    
-224   -128   
160    -224   
-80    -288   
48     -624   
80     -48    
-64    32     
-96    304    
-128   -448   
-32    560    
192    16     
-208   64     
272    -224   
-288   192    
48     624    
144    176    
-80    336    
-176   48     
-32    -48    
64     64     
160    112    
-528   -64    
112    96     
192    64     
112    80     
-240   128    
96     128    
48     160    
-160   16     
80     96     
-48    96     
128    176    
64     112    
-352   64     
208    32     
-64    256    
-496   -784   
1504   -464   
688    128    
-1088  -16    
352    -112   
416    64     
-352   176    
-352   128    
448    144    
-128   48     
-96    128    
32     -16    
32     176    
-48    32     
96     208    
-160   176    
128    128    
32     32     
-256   32     
272    112    
352    112    
-416   -384   
1216   848    
640    -16    
-1184  400    
-496   -224   
32     128    
224    -208   
-416   96     
720    80     
96     96     
-320   96     
96     96     
48     128    
-240   -304   
-80    224    
592    128    
-528   -176   
240    -128   
224    64     
-464   160    
80     80     
32     -368   
-864   336    
736    -288   
-736   -64    
64     -2736  
-16    -48    
0      -128   
96     144    
224    0      
-496   32     
-112   -48    
368    -176   
272    224    
-576   -240   
208    -208   
176    96     
-224   -416   
112    -256   
208    224    
-16    -944   
-32    96     
240    80     
96     144    
272    96     
-1088  400    
32     48     
688    144    
-528   -672   
1808   3552   
-288   1056   
-896   -416   
1728   -192   
624    -96    
-1248  192    
-448   128    
1344   -48    
-32    464    
-560   -112   
-336   256    
416    160    
240    -48    
-160   96     
-112   -224   
208    336    
224    -32    
-80    176    
-272   -272   
288    672    
560    -32    
-720   -160   
480    32     
-656   -2128  
-192   192    
464    160    
-96    208    
176    -32    
-432   128    
368    240    
-16    288    
0      -48    
48     48     
96     144    
0      -144   
64     208    
-16    -368   
256    208    
160    -1136  
-48    16     
272    -1024  
-160   0      
288    192    
48     352    
-64    144    
32     96     
272    0      
-160   -80    
-240   96     
368    -64    
80     176    
-48    -464   
-736   560    
592    1424   
0      1424   
-32    -32    
-96    -352   
160    -400   
-16    -304   
256    -240   
208    -208   
-128   -112   
0      -800   
-48    -224   
-144   -544   
160    -112   
240    -576   
144    144    
-96    -304   
-16    320    
128    -1264  
-96    -464   
256    -528   
-144   64     
-336   64     
400    -848   
96     -240   
-160   608    
-192   464    
656    -464   
160    -240   
-96    -1856  
-896   624    
416    576    
256    -160   
-528   208    
80     -1360  
80     -336   
160    -2224  
-224   -96    
192    112    
80     -400   
96     96     
-64    -144   
-48    -128   
128    176    
16     176    
-48    128    
112    -288   
96     80     
352    736    
-624   -352   
128    -608   
656    -960   
-224   80     
-624   112    
48     1056   
560    -944   
-160   -32    
-176   -272   
208    -1904  
96     -176   
-48    -96    
112    0      
-160   -384   
0      48     
96     -304   
160    -144   
-224   -528   
-32    96     
416    128    
16     -48    
-256   -48    
192    -144   
-16    -96    
16     304    
-64    192    
-48    -880   
224    -336   
16     0      
-1584  -160   
1024   -80    
1136   -336   
-768   416    
192    688    
320    800    
-320   -496   
0      -480   
336    352    
-32    0      
-208   -16    
144    -176   
64     -496   
144    -96    
240    176    
-16    0      
-128   -128   
272    -48    
48     -16    
-272   64     
96     -752   
-1776  1168   
640    -448   
432    -496   
64     96     
-128   192    
-368   752    
576    32     
-320   -368   
-400   -1360  
336    -224   
-16    -48    
-288   -80    
-16    448    
-176   816    
-224   208    
256    -400   
-368   -352   
432    -240   
-848   -144   
-96    16     
128    -640   
-384   -112   
304    464    
528    -560   
-240   -224   
256    224    
-1104  624    
-272   304    
288    48     
-320   -496   
16     -416   
272    592    
496    -288   
-1616  160    
-192   -752   
-176   -1312  
288    -272   
-32    -448   
-464   -432   
288    -16    
96     400    
80     -32    
-128   -112   
288    -16    
-144   240    
128    144    
-624   -176   
-160   -160   
-240   -1488  
1200   -1552  
512    -48    
-528   496    
-672   960    
544    -688   
528    -624   
-816   -1376  
-704   -1504  
512    176    
480    352    
-336   192    
-208   -432   
-464   -432   
480    112    
176    -96    
-512   -288   
-112   112    
448    592    
112    864    
-16    208    
16     -80    
-352   -240   
-240   80     
240    -80    
-96    96     
176    -352   
144    -624   
-240   -32    
256    -864   
-304   -528   
288    -176   
-64    -160   
-560   -144   
384    336    
-256   160    
-448   -16    
16     240    
16     384    
-48    352    
-464   208    
112    32     
64     -208   
0      -112   
80     272    
-16    912    
-320   592    
160    336    
224    400    
-80    752    
-336   224    
-320   80     
944    208    
-32    -240   
-432   16     
-176   -384   
48     -560   
-864   -224   
-160   -320   
-160   -272   
208    32     
-96    -80    
-16    192    
-272   -48    
240    192    
64     -160   
-576   0      
208    -352   
-592   -320   
-16    -208   
160    -48    
160    32     
-912   -48    
-32    96     
624    -16    
-416   -320   
-240   -240   
560    -16    
-144   0      
-192   144    
320    -1696  
-1968  1696   
1280   96     
176    80     
-608   176    
80     -32    
-224   208    
-224   224    
384    464    
-528   64     
-448   -48    
-176   -96    
368    80     
96     -288   
-416   496    
192    800    
736    -224   
-592   -112   
144    -368   
176    -96    
608    1328   
-1248  64     
-224   64     
832    -128   
-864   -256   
-16    16     
176    336    
112    80     
-128   32     
48     -64    
-32    80     
-384   48     
224    -16    
-16    -48    
-112   -16    
-16    -144   
-64    -112   
0      -80    
-208   240    
304    48     
0      80     
-912   -80    
48     144    
240    112    
-304   -144   
-16    224    
240    -64    
-368   128    
240    64     
-368   288    
1376   -992   
-1856  240    
-448   -128   
1296   128    
-528   0      
-880   432    
80     -160   
16     176    
-240   -112   
-32    64     
608    240    
-224   -48    
-416   128    
496    32     
-240   0      
-224   -32    
208    192    
-256   32     
-128   160    
48     -112   
64     -160   
848    80     
-1824  -64    
-608   -288   
2528   96     
-1376  0      
-608   496    
336    -48    
-288   16     
-272   64     
80     48     
96     64     
-96    48     
176    112    
-16    -112   
-368   128    
-144   -112   
272    -176   
-304   48     
-48    64     
192    32     
-688   16     
960    -64    
320    -144   
-784   240    
928    496    
80     288    
-656   -304   
384    96     
224    -16    
-128   112    
-176   160    
224    112    
240    -224   
512    32     
-320   96     
160    336    
-80    240    
-112   0      
368    -112   
0      96     
-32    112    
-48    32     
0      80     
144    304    
752    -176   
-240   128    
-144   -48    
-176   -832   
496    -4656  
-2512  -768   
1680   1200   
1024   0      
-896   304    
-272   -32    
448    160    
224    208    
-512   -176   
544    0      
304    -64    
-528   96     
240    64     
176    144    
112    -80    
128    160    
64     128    
-368   16     
144    432    
320    192    
48     816    
32     240    
-368   -176   
-128   64     
928    16     
-592   -176   
112    -176   
288    272    
-256   64     
160    112    
32     -96    
48     -208   
-32    176    
208    16     
-160   16     
-160   384    
240    448    
48     608    
176    32     
-176   96     
-64    160    
32     -768   
-384   -16    
384    -112   
-256   -112   
208    304    
80     -240   
-288   -16    
240    624    
80     656    
16     112    
-304   16     
768    -384   
-192   -800   
-112   -208   
80     112    
-512   -1712  
-752   -1280  
208    -1488  
-48    -944   
-32    -384   
64     80     
16     256    
48     64     
-128   -80    
32     208    
-112   192    
-32    -112   
128    80     
112    -16    
-64    432    
32     -1200  
-112   -32    
80     -144   
96     112    
-96    192    
-32    336    
496    112    
-208   112    
-112   -96    
96     128    
288    -480   
256    -32    
-160   480    
-32    176    
160    96     
400    480    
-272   928    
144    -656   
192    -240   
-80    256    
-16    -80    
32     144    
192    96     
-176   464    
144    160    
192    -176   
-208   192    
-64    -64    
48     -336   
608    256    
-672   288    
64     -240   
752    -1680  
-528   176    
128    64     
64     48     
112    80     
-16    -16    
-32    208    
-16    144    
-48    -80    
144    48     
-256   592    
176    -208   
-32    -112   
-16    -224   
112    160    
96     -464   
-176   0      
-16    -848   
-48    160    
16     208    
144    80     
-288   256    
32     176    
128    80     
-192   112    
224    0      
0      240    
-976   1472   
3392   -1840  
-592   368    
-1552  368    
1680   -768   
720    -352   
-544   -800   
384    816    
0      944    
-400   -384   
240    128    
368    64     
-192   32     
-160   -48    
240    -960   
64     256    
32     64     
384    -448   
-128   0      
32     336    
288    -1104  
-2064  608    
1152   -32    
240    288    
-288   -464   
416    -704   
-480   -1888  
-512   -1504  
352    -592   
80     -64    
-16    224    
-176   -256   
256    -176   
48     -464   
16     160    
112    -896   
224    544    
384    480    
48     48     
-144   -96    
-96    112    
16     -640   
-32    -1024  
-432   -1104  
512    736    
-592   528    
368    -336   
-1312  784    
144    672    
544    -144   
-320   -256   
112    -368   
-288   176    
80     -864   
720    48     
-64    -144   
16     -864   
-640   432    
-128   -480   
816    -832   
160    -992   
-304   -80    
192    -176   
16     224    
224    -560   
-912   464    
288    0      
0      -192   
-352   -128   
112    -720   
768    -1872  
496    256    
0      864    
-864   1792   
464    720    
400    -688   
-400   -560   
-144   -704   
496    -272   
160    -32    
-160   240    
-144   -528   
304    -128   
160    32     
-32    -64    
-144   128    
-320   -192   
-32    656    
-96    -320   
-96    -368   
192    -272   
0      112    
-704   -400   
544    48     
176    -64    
16     192    
-448   -144   
64     -240   
-16    80     
192    48     
-240   -16    
48     -96    
-96    16     
-32    80     
432    816    
-256   304    
-224   -64    
400    -80    
-288   80     
-80    -1632  
-224   -128   
432    -80    
496    16     
-544   80     
32     176    
160    112    
-112   32     
-320   80     
64     192    
-1296  0      
-144   -1216  
-528   -256   
368    16     
192    -16    
64     112    
176    112    
-240   32     
160    416    
-112   176    
176    0      
-32    128    
-192   -80    
192    -32    
64     -176   
-272   512    
288    -128   
-48    32     
-32    592    
352    16     
48     -544   
-192   352    
-48    -1600  
240    -96    
128    128    
-96    608    
-800   480    
464    -16    
144    -144   
-320   -80    
1040   2096   
-2208  -32    
-480   -32    
1616   -304   
-352   -128   
-560   -480   
352    112    
512    304    
-640   160    
80     -256   
80     192    
-288   -96    
208    80     
144    320    
-640   160    
144    -80    
256    160    
-112   96     
-80    -176   
128    208    
96     288    
-144   -336   
-640   80     
864    128    
-112   -432   
-320   528    
-320   32     
176    48     
480    -112   
-224   128    
-400   192    
160    -160   
32     240    
176    -448   
-208   16     
-240   -96    
144    224    
112    352    
-512   0      
-272   48     
-480   -32    
144    32     
-80    16     
-192   160    
96     -208   
-336   80     
-416   -480   
-80    144    
-208   -96    
-272   544    
2240   416    
-368   -1264  
-1984  240    
-96    -416   
640    0      
144    112    
-224   -32    
304    432    
304    -272   
-400   144    
-48    80     
48     80     
48     -32    
176    64     
-128   -64    
-240   96     
160    -96    
-64    -48    
-176   -32    
0      64     
-176   -320   
928    544    
432    -144   
-832   544    
-528   528    
624    16     
-416   96     
368    -32    
176    128    
-336   32     
-176   96     
272    0      
-32    112    
-96    208    
-96    -80    
-368   48     
176    -32    
-80    176    
-160   240    
-592   -160   
16     192    
-208   -800   
-880   240    
544    -272   
-32    -32    
304    80     
144    112    
-272   -128   
288    256    
96     80     
-176   32     
-304   48     
64     -128   
400    400    
-432   -272   
-464   192    
192    -336   
-96    96     
-48    0      
-160   160    
48     80     
96     64     
80     16     
-176   16     
-176   -288   
208    112    
512    160    
-432   96     
-16    432    
1344   2368   
-1616  1872   
1104   -160   
1248   -128   
-1376  48     
-464   608    
1024   -432   
-80    -96    
-544   48     
-16    -48    
720    -32    
-416   -160   
448    -48    
-160   320    
-48    64     
-112   288    
448    32     
-528   32     
-32    -800   
160    -384   
64     608    
-176   288    
-112   -160   
-352   128    
304    -336   
-224   368    
176    80     
-112   944    
16     1104   
-64    -416   
-464   -672   
304    192    
-96    448    
-32    192    
-304   -208   
48     -96    
80     304    
-64    -96    
-64    176    
-16    -192   
32     -96    
384    -160   
-448   320    
-208   512    
-304   64     
352    -432   
-32    -208   
-208   -1088  
320    -528   
-96    464    
176    144    
-48    -800   
96     -320   
256    -592   
-416   -272   
464    -320   
192    -16    
16     1184   
-336   1456   
368    -1024  
64     -32    
-288   256    
192    240    
-32    288    
-144   112    
144    -64    
80     208    
-32    224    
224    304    
96     96     
32     16     
48     0      
160    128    
-32    -16    
128    144    
-16    320    
-160   480    
320    208    
224    160    
-272   32     
-32    112    
-160   848    
608    -272   
-608   112    
-160   64     
192    80     
16     48     
-288   528    
16     -16    
-192   -176   
144    -112   
-32    176    
16     64     
32     -80    
-128   240    
112    -48    
128    144    
-208   128    
-144   -32    
64     -80    
768    336    
-1040  592    
-80    -336   
768    -64    
-480   608    
-224   -32    
-192   -64    
224    64     
-160   48     
320    48     
-32    64     
-112   -32    
-80    224    
176    208    
16     -48    
64     64     
-112   -192   
112    -64    
192    160    
144    176    
64     32     
-176   -848   
-48    96     
320    -144   
-160   96     
-304   48     
224    -160   
144    -144   
160    144    
-80    480    
-512   1408   
3168   -816   
-624   432    
-1472  -128   
544    -304   
272    576    
-512   -576   
-80    -720   
176    720    
240    432    
64     144    
0      240    
16     80     
-64    -80    
112    -224   
48     64     
0      -688   
96     512    
-64    1216   
160    464    
-400   -512   
-464   -672   
1792   -736   
-288   512    
-128   656    
0      128    
-176   -688   
-432   -288   
272    16     
368    256    
400    288    
-288   -320   
80     -16    
-160   -32    
368    160    
448    -80    
-400   464    
208    192    
-160   -1152  
64     -64    
48     -96    
64     112    
-160   -1472  
2032   -1776  
384    -336   
-848   416    
288    576    
240    112    
-144   16     
352    192    
144    -48    
-96    -32    
-32    -32    
192    -800   
1008   256    
336    96     
-336   -256   
384    -288   
560    1040   
-1056  288    
0      -16    
512    32     
-144   -592   
-400   192    
-32    32     
960    32     
-80    -64    
-960   -464   
1056   -592   
1440   2720   
-1488  624    
720    -64    
880    -352   
-736   208
[truncated: 68,011 more chars]
