# Supplementary material for: A Fault Diagnosis Method for One‐Dimensional Vibration Signal Based on Multiresolution tlsDMD and Approximate Entropy
Source: Hindawi journal article supplement (doi:10.1155/2019/3262818), 2019-01-01
Supplement: f1 [file 3262818.f1.zip › 3262818.f1/gear signals/pitch errors signal/Data3.txt]

528    1984   
-1072  1168   
-144   -272   
384    -192   
16     352    
-48    -16    
0      208    
-64    -64    
176    224    
80     80     
-272   240    
-64    336    
112    336    
64     160    
-128   -96    
-192   1248   
592    224    
-384   448    
16     736    
160    336    
-112   304    
-176   272    
-80    80     
32     -64    
0      16     
0      64     
80     -48    
0      96     
48     224    
-80    176    
64     592    
96     -32    
-160   112    
16     224    
336    -32    
-128   96     
-64    80     
-240   144    
128    -16    
-48    128    
144    -800   
-320   176    
64     96     
544    144    
-384   -624   
1264   -1264  
-672   160    
608    304    
-224   400    
-384   512    
-176   656    
400    -560   
480    -656   
-320   384    
-256   -304   
208    -576   
272    -272   
-176   224    
-32    -336   
208    544    
32     48     
-144   208    
-208   -1072  
544    608    
-80    464    
-112   -688   
-1424  1536   
1648   -272   
-656   1040   
432    624    
144    -544   
-240   -528   
-1280  -2352  
432    -1408  
432    -784   
-448   -176   
-128   0      
176    -256   
-288   -48    
-160   -192   
208    80     
112    -32    
-720   192    
160    16     
176    32     
-64    -16    
-96    -144   
-48    -1392  
-48    80     
576    1008   
112    1360   
192    624    
-400   -528   
0      -464   
320    -48    
-320   -384   
-16    -128   
496    560    
-560   480    
208    -32    
592    -208   
368    2320   
-1280  1040   
-256   -32    
480    -1280  
-160   128    
-224   -144   
-320   -640   
96     -400   
48     -320   
-224   16     
352    128    
0      -736   
32     -304   
-208   416    
-16    2000   
896    272    
-928   -480   
-592   480    
720    -240   
992    -176   
-1328  -912   
-496   -80    
1056   -256   
528    432    
-784   -112   
-432   80     
704    32     
336    -48    
-256   64     
48     -144   
-32    160    
512    400    
176    1168   
-336   -1040  
112    192    
48     -368   
544    176    
-272   -256   
-256   608    
560    -64    
-304   288    
16     64     
496    128    
-192   768    
32     48     
64     256    
80     48     
416    96     
-64    -240   
-112   240    
128    -32    
-16    112    
-32    48     
0      128    
64     -144   
-96    -112   
0      304    
64     -112   
-144   80     
80     -432   
-560   -976   
-96    -960   
336    48     
64     -32    
-416   -80    
592    112    
1072   288    
-784   240    
64     512    
240    176    
96     64     
176    -752   
-144   32     
16     240    
48     -128   
48     -32    
-416   48     
16     96     
400    -16    
64     -944   
-304   32     
176    -928   
128    -160   
-16    -464   
-176   -16    
112    80     
-64    -480   
160    -224   
-176   -1184  
416    -1088  
48     112    
-80    240    
160    -176   
-448   -224   
304    -2576  
-1920  1552   
1584   -560   
64     128    
-192   -96    
240    368    
-1136  -64    
-272   -208   
-32    -64    
240    96     
-80    -128   
-240   -192   
208    64     
-80    -160   
96     -320   
80     -16    
-304   272    
288    -160   
0      96     
-48    -112   
-384   -672   
464    -688   
-784   176    
-64    -288   
128    -16    
48     32     
-16    -256   
64     240    
176    -1600  
-352   288    
64     32     
-96    176    
272    -16    
224    32     
-560   -192   
16     -64    
144    16     
0      80     
32     -96    
16     -80    
160    -288   
0      -208   
48     -128   
-224   -592   
400    160    
-32    -176   
-224   224    
416    -128   
-144   -16    
-80    -176   
112    1408   
1296   -448   
-1312  32     
-48    -288   
976    160    
-608   -112   
48     64     
16     -64    
-48    -160   
-240   32     
288    -1072  
160    64     
-176   -48    
-192   48     
544    176    
-32    48     
-560   -48    
400    -48    
160    -192   
-80    -48    
80     176    
-768   -512   
1248   48     
848    -624   
-1344  -336   
128    -864   
784    64     
-432   -256   
-432   0      
448    -112   
144    -128   
-352   16     
208    -16    
-64    16     
-240   64     
-64    -32    
96     -400   
-176   64     
-144   -320   
112    240    
288    -464   
-144   -304   
592    144    
496    80     
-576   48     
-80    16     
112    176    
160    -208   
224    -480   
-432   128    
208    -112   
-80    -224   
208    112    
208    16     
112    144    
32     -640   
48     -144   
48     256    
-384   400    
-64    0      
-64    96     
192    16     
-96    -112   
-320   32     
224    -128   
-80    -240   
-304   -80    
64     144    
-256   -128   
496    576    
-208   -592   
-2768  -976   
1408   240    
704    304    
-416   80     
-304   112    
-384   -144   
1008   400    
-656   -64    
-176   256    
688    -192   
-720   80     
-320   0      
144    -96    
-176   -48    
-48    160    
464    -32    
-176   128    
304    176    
192    272    
-240   -192   
-192   -128   
-128   -176   
752    256    
-384   -160   
-64    192    
208    -240   
-192   144    
80     -448   
-624   -832   
272    -352   
192    256    
-192   288    
-240   -112   
224    -112   
-64    -224   
-224   64     
96     -752   
-64    -576   
-320   -384   
64     -176   
-160   -544   
-160   -96    
112    80     
-32    160    
-224   336    
-144   -464   
32     16     
144    560    
-224   -176   
-16    -288   
48     1104   
-560   0      
-400   496    
448    416    
-208   576    
80     -432   
224    -80    
0      1632   
-48    528    
-240   -80    
16     -224   
0      96     
224    0      
-336   -208   
-304   240    
240    256    
-96    64     
192    -144   
16     352    
-64    160    
-48    112    
16     -112   
192    -32    
-384   656    
32     336    
-32    -160   
112    -112   
-192   352    
80     208    
-272   -80    
-336   -432   
528    -944   
-64    448    
-80    -304   
-368   -80    
160    -112   
64     -112   
128    272    
-128   96     
-112   48     
48     80     
-16    64     
-64    48     
48     128    
-144   64     
304    16     
-224   224    
48     192    
-416   -144   
-32    16     
64     -592   
-960   112    
480    208    
96     272    
112    -176   
-96    -32    
-96    -368   
48     -128   
160    128    
224    352    
-240   144    
-208   -208   
208    128    
-208   -64    
0      64     
80     240    
128    -192   
-96    -576   
48     0      
0      96     
64     0      
-176   -176   
112    80     
432    16     
-16    -288   
-400   -240   
-128   32     
208    80     
-432   272    
240    16     
-1552  -240   
1232   128    
896    -672   
-1248  -192   
48     32     
592    -192   
-144   -96    
-736   -192   
96     256    
-48    32     
-160   208    
-48    80     
32     -176   
-240   304    
256    -112   
0      160    
-128   32     
96     272    
-144   624    
64     48     
224    1264   
32     -944   
-1568  368    
1376   128    
-208   -32    
-192   -224   
128    -816   
816    -1248  
-640   -1376  
-400   -1136  
48     -496   
-336   64     
176    0      
368    -112   
32     208    
-240   240    
16     -288   
464    192    
336    304    
-32    544    
-592   592    
-80    128    
656    528    
-512   -160   
-112   -304   
80     -352   
608    -944   
-256   -176   
-32    -128   
-368   32     
176    128    
352    112    
-336   240    
-400   -96    
-48    -320   
96     176    
-32    -48    
-224   112    
16     272    
448    -48    
-384   160    
80     0      
112    -112   
176    528    
304    112    
-112   48     
496    16     
-96    112    
128    800    
-352   528    
624    -720   
-1776  -256   
976    -144   
1504   176    
-480   16     
-944   528    
496    176    
304    464    
-16    272    
32     64     
-240   -64    
304    48     
-112   -112   
208    416    
112    -144   
-336   288    
192    -48    
-208   -688   
400    976    
-256   1424   
-160   96     
368    -224   
-144   -80    
-624   304    
464    80     
-16    256    
-32    368    
-544   -192   
384    96     
160    0      
-208   208    
-64    288    
176    -640   
240    -400   
-240   -2048  
128    0      
224    144    
352    -16    
-16    -64    
-416   240    
320    160    
192    80     
96     -144   
-128   80     
-144   240    
336    -352   
-496   -400   
256    -432   
96     368    
-128   192    
192    480    
-80    -480   
416    -512   
-304   112    
-96    0      
-288   -48    
-176   -144   
-96    -256   
288    96     
-96    -80    
16     -160   
0      160    
32     -48    
80     96     
-96    -304   
48     112    
240    592    
-176   176    
-112   -144   
256    464    
224    32     
-320   -64    
80     64     
304    144    
-112   96     
144    -112   
-64    320    
-64    192    
240    -272   
-48    -832   
-80    112    
-1312  -176   
2016   -1504  
496    -288   
-1008  -272   
608    352    
976    352    
-1424  432    
-144   320    
848    -240   
-64    240    
-240   432    
-192   -192   
224    -32    
208    -784   
-368   288    
288    -160   
-32    -304   
80     -704   
128    416    
-224   -48    
592    544    
-1568  -32    
192    32     
1152   32     
-896   -240   
-432   416    
704    -1280  
96     -64    
-352   -128   
288    -16    
-160   -112   
-96    -64    
0      -16    
80     96     
-224   48     
512    496    
-256   80     
-80    -160   
128    -96    
-112   48     
144    0      
0      -144   
-192   64     
144    -112   
-96    -64    
-128   -192   
0      80     
224    112    
-32    144    
-400   -880   
1040   -3488  
-208   -16    
0      -144   
144    -416   
512    112    
-544   128    
208    448    
-208   112    
-208   -400   
80     96     
64     -16    
64     0      
32     80     
-80    -752   
-96    96     
336    -176   
-256   -176   
640    224    
80     -256   
-144   32     
64     -1248  
-384   -240   
2080   -208   
-528   -256   
-864   48     
640    -16    
224    -176   
-224   0      
-256   -256   
640    -32    
-96    -16    
-112   -48    
-336   32     
-96    -272   
-16    -80    
304    -368   
48     0      
-144   -544   
80     32     
64     -256   
-32    -32    
-16    -368   
768    320    
-576   -496   
-384   48     
880    224    
-656   -16    
-256   -96    
768    -144   
-352   64     
-320   -112   
448    0      
320    -80    
-176   16     
-176   -1744  
-144   -160   
512    -304   
-448   400    
112    -192   
-144   96     
48     -160   
272    240    
-304   -416   
-528   -96    
-384   -64    
272    320    
-272   112    
-272   -784   
-144   -112   
1232   -1424  
592    208    
-2752  -736   
1568   240    
1472   16     
-912   -96    
-624   224    
1040   560    
-144   400    
-416   -48    
192    208    
176    -176   
-304   -32    
64     0      
128    16     
-80    -352   
192    16     
80     16     
-32    -96    
-240   -512   
512    -720   
-80    -368   
-240   16     
-224   -48    
480    464    
-736   -160   
-304   -192   
832    480    
-192   -160   
-192   -256   
32     -640   
224    -16    
48     -848   
-32    -288   
48     -112   
-160   128    
48     256    
96     -16    
-272   -208   
32     80     
-96    -240   
-176   96     
256    144    
256    -96    
240    1280   
-208   624    
16     -16    
384    -800   
-160   -528   
-272   -48    
176    224    
128    -176   
592    1168   
-656   -416   
-624   128    
1040   1280   
-240   1024   
-288   -160   
-32    -608   
320    128    
80     -208   
-272   -80    
64     -288   
304    128    
-128   352    
384    848    
96     128    
32     -352   
64     -32    
-320   -144   
-64    272    
368    -144   
-304   32     
-176   -160   
48     96     
64     16     
-80    64     
-128   -224   
-480   -352   
-16    -32    
-256   80     
0      48     
400    -848   
-1104  144    
96     -32    
288    -96    
384    -336   
-256   -32    
-112   0      
112    640    
-144   -320   
-80    -96    
16     112    
-192   288    
-80    256    
-144   192    
16     -16    
-384   16     
-272   96     
96     320    
112    96     
-48    -128   
-496   -288   
144    -16    
-352   128    
16     -256   
240    112    
0      128    
-496   416    
192    224    
80     -96    
-144   -96    
-240   48     
-128   288    
-976   176    
-80    16     
-96    -96    
-32    512    
16     16     
-144   608    
224    272    
-192   32     
-112   -160   
224    256    
32     128    
-512   288    
-176   -192   
-128   16     
176    80     
-352   0      
192    32     
-336   -1184  
1840   -1024  
-928   -32    
-272   448    
432    48     
0      0      
-128   464    
496    480    
-448   608    
-320   176    
224    -400   
480    -304   
-144   -160   
-368   -80    
160    240    
80     80     
-144   224    
-304   96     
320    -16    
224    0      
-208   16     
304    -672   
-1744  1120   
1360   -48    
-1072  -496   
928    -528   
-208   544    
-304   512    
1024   -336   
16     160    
-544   -32    
80     208    
-16    -80    
160    432    
-400   288    
-400   64     
336    -16    
0      0      
-368   16     
16     48     
112    576    
272    128    
-64    16     
-1104  384    
1008   -128   
-96    128    
-272   -64    
208    -464   
-112   368    
-96    64     
-80    -48    
96     272    
384    128    
176    64     
-688   224    
-176   -176   
176    448    
464    -32    
-96    496    
704    320    
48     -304   
-352   224    
-640   -112   
48     -48    
-96    48     
288    64     
-496   176    
-256   64     
240    48     
400    736    
-1104  -624   
896    -1792  
1056   432    
-464   48     
-1008  112    
0      208    
608    80     
-16    208    
-144   -208   
-416   16     
480    112    
128    112    
-320   32     
320    144    
-288   -32    
240    176    
-144   -32    
-272   80     
-144   -64    
288    1040   
96     -80    
-528   80     
160    208    
768    -64    
0      48     
-736   192    
720    0      
-512   -144   
112    -144   
-192   96     
32     176    
160    16     
-192   16     
-256   48     
208    -144   
-432   -32    
352    -112   
-656   -112   
384    112    
-112   128    
-144   144    
224    176    
-176   48     
48     368    
-208   -80    
320    272    
-176   112    
-80    256    
48     -48    
48     -32    
-304   32     
-16    48     
256    544    
944    -32    
-768   576    
224    320    
736    448    
-544   176    
-208   144    
96     96     
-112   256    
-208   176    
288    80     
-48    112    
-48    80     
32     80     
400    336    
-416   800    
400    656    
128    -112   
-224   288    
208    48     
0      352    
-368   160    
192    48     
320    112    
-224   -208   
-304   -112   
496    32     
192    -352   
-272   112    
-176   -2400  
-1760  2144   
1536   368    
192    448    
16     -80    
208    992    
-608   480    
-192   -464   
720    -432   
-272   592    
-480   -128   
160    208    
-16    176    
32     -720   
-224   208    
112    240    
-288   304    
400    -128   
64     48     
-176   32     
480    1584   
-912   -32    
-128   192    
976    -176   
-448   256    
-16    -192   
208    320    
-608   368    
208    -560   
192    48     
-64    336    
-160   176    
320    -64    
-192   256    
160    112    
80     240    
-32    160    
416    320    
-624   416    
96     160    
64     256    
96     32     
-48    160    
-32    -272   
208    224    
48     -400   
-176   208    
128    96     
48     96     
-848   -736   
960    -160   
3664   32     
-1632  240    
-896   -64    
1344   48     
352    -16    
-1040  -96    
272    128    
592    -112   
-384   16     
-16    -16    
144    64     
48     112    
-48    -208   
-80    160    
384    48     
-304   48     
96     80     
-240   -288   
208    64     
-144   -32    
592    208    
1120   272    
-816   16     
-176   -752   
288    -1200  
288    144    
-64    -480   
240    0      
0      160    
-64    144    
288    336    
-528   224    
112    -48    
-48    192    
528    80     
-96    48     
0      208    
416    -160   
-240   80     
32     -512   
208    112    
544    400    
-208   400    
464    -416   
-416   304    
-560   -1200  
224    -32    
368    80     
-16    208    
608    144    
48     32     
-48    192    
-80    -880   
224    208    
656    32     
336    384    
-368   -384   
-416   416    
656    544    
-192   288    
-320   -96    
272    -32    
-128   -80    
0      -16    
-208   -128   
-144   -304   
16     112    
-48    -144   
432    -160   
768    1824   
-480   672    
32     -160   
816    -240   
-688   16     
-368   -160   
560    -272   
720    -1312  
-576   -1056  
-48    -560   
480    -1232  
-64    32     
-96    112    
-128   256    
304    432    
32     144    
-128   48     
544    -336   
-224   352    
-48    464    
112    -112   
96     32     
-112   -480   
-512   432    
640    272    
-336   304    
512    48     
-160   320    
368    -48    
-112   -480   
48     -64    
304    -128   
272    -512   
-240   -768   
208    -256   
-112   -256   
32     192    
256    -16    
-352   -128   
-912   -992   
352    64     
288    64     
-96    -48    
80     -576   
-128   0      
240    288    
-48    48     
-48    -656   
352    -144   
-176   32     
48     96     
-32    -1120  
-864   384    
656    128    
512    512    
-128   832    
-384   -816   
192    -1264  
-144   544    
16     112    
96     -160   
64     -672   
96     -272   
-256   -624   
-64    80     
224    272    
224    448    
32     -16    
-112   -64    
0      -160   
-32    -144   
64     -32    
96     64     
112    -80    
0      -160   
64     -16    
128    -1088  
-352   832    
160    368    
96     112    
64     -64    
512    864    
-672   752    
336    -240   
16     208    
-32    -192   
-336   80     
48     96     
-112   -144   
-176   96     
-176   -160   
-96    -400   
16     0      
208    -368   
-48    288    
-144   0      
256    -192   
0      -368   
-256   -240   
0      16     
176    -16    
-592   800    
832    64     
-1536  288    
256    240    
208    672    
96     -256   
-112   -96    
48     -32    
-192   -176   
160    -528   
240    -224   
-160   432    
-208   -112   
64     192    
352    -448   
-48    256    
-400   -288   
-608   80     
240    -128   
144    -112   
-16    -96    
48     -48    
-176   -912   
128    128    
128    192    
-160   48     
-176   96     
-48    48     
-112   -432   
-128   -1104  
1552   -608   
-1120  304    
112    192    
-160   -208   
-96    448    
528    -96    
-288   432    
144    0      
48     256    
-16    0      
-224   208    
160    -48    
112    160    
-336   48     
-16    160    
96     -16    
16     112    
-48    160    
224    -240   
-128   80     
-144   -976   
1216   544    
-880   16     
-384   0      
-352   224    
288    -384   
-464   -320   
608    320    
128    -176   
-480   -16    
240    192    
80     48     
-128   -48    
-256   -32    
-224   96     
-160   -64    
272    208    
-32    160    
0      -64    
80     -192   
-48    32     
-304   176    
208    -160   
32     352    
576    96     
-496   -16    
-1232  -1072  
-448   -176   
240    400    
352    176    
-208   48     
-112   0      
-272   -48    
-128   -160   
864    -80    
-1072  416    
112    160    
800    576    
-480   48     
-256   -224   
-384   48     
-240   16     
96     16     
16     -112   
16     384    
-416   -672   
-432   -48    
512    112    
-464   -384   
48     576    
1872   1744   
464    32     
-1696  64     
-112   -80    
-16    -112   
176    144    
-592   -96    
336    128    
-32    -320   
-704   224    
144    -272   
304    160    
208    64     
-144   96     
0      64     
-128   96     
64     48     
224    0      
-480   -368   
-480   240    
592    -32    
-1072  -96    
176    16     
352    -160   
288    208    
-48    -48    
240    80     
64     96     
-336   0      
48     32     
-496   -112   
464    48     
-544   -144   
48     -64    
144    256    
320    -32    
-1120  -256   
464    288    
-336   -32    
-16    288    
208    -64    
-496   80     
128    -48    
32     32     
0      48     
0      256    
368    224    
-32    112    
-400   176    
144    -96    
-256   -16    
-464   -640   
0      -80    
-96    80     
96     96     
384    0      
144    -352   
-256   144    
-96    -208   
0      16     
32     192    
-144   32     
176    -64    
144    32     
-288   112    
-80    -80    
80     128    
608    416    
-592   160    
-80    -160   
592    -256   
-176   256    
-176   224    
176    112    
0      272    
-240   32     
448    272    
-208   368    
-48    176    
-48    -112   
240    848    
544    -1856  
-1744  736    
448    -368   
96     176    
-320   112    
-32    -32    
352    -64    
512    16     
-432   624    
-240   -144   
320    -144   
0      176    
-112   48     
64     576    
144    -80    
-288   -432   
304    224    
-48    16     
-48    16     
-112   256    
592    1568   
672    -96    
-1344  -336   
640    -320   
128    320    
80     144    
-288   -256   
112    -32    
32     32     
-16    -16    
112    32     
16     256    
-96    48     
-48    -32    
352    16     
-240   160    
-16    -208   
32     -16    
208    -112   
32     96     
192    128    
-80    0      
-64    112    
-128   -96    
-80    96     
176    -192   
-80    288    
-80    0      
272    192    
1184   448    
-2496  240    
-736   160    
2096   48     
-704   -240   
-800   -112   
208    -16    
256    -128   
112    320    
-208   160    
160    128    
-144   16     
128    160    
112    0      
112    48     
-320   -80    
128    96     
176    160    
0      112    
-272   96     
128    208    
-384   304    
1696   -400   
-192   768    
-384   656    
544    112    
560    688    
-496   640    
-528   192    
96     -240   
592    160    
272    128    
-336   128    
-176   16     
464    64     
48     32     
-384   160    
-208   -80    
112    -80    
224    80     
-192   -416   
80     64     
-176   160    
16     112    
32     64     
-224   -352   
-32    -256   
1184   880    
752    1328   
-304   608    
160    -160   
-64    64     
16     -464   
256    816    
-336   144    
-560   -768   
992    -176   
432    800    
448    -64    
64     304    
-112   384    
-16    -48    
160    144    
288    -64    
-96    128    
192    16     
-784   688    
-80    -112   
208    480    
464    240    
-16    -80    
-1008  1904   
896    -848   
-560   -112   
-288   400    
1488   1088   
-512   192    
-672   112    
480    192    
480    -848   
0      240    
-352   64     
-112   144    
128    128    
160    224    
-80    -80    
64     -112   
208    -1232  
192    208    
208    816    
-208   768    
64     -112   
64     -352   
-512   160    
304    80     
176    -48    
32     144    
96     -1264  
112    -16    
-352   1120   
208    -624   
240    464    
-160   -400   
-304   80     
16     -1440  
-432   -400   
208    -16    
288    112    
-320   -48    
0      -176   
384    64     
-16    0      
-112   -64    
-32    -48    
224    -800   
-432   -480   
-32    416    
-48    -272   
-416   -864   
304    0      
288    208    
96     944    
-208   -80    
-672   304    
800    160    
-224   320    
-384   112    
-256   -256   
576    -640   
-48    128    
-144   512    
16     16     
48     -448   
256    -16    
304    112    
-240   -48    
32     -496   
352    -96    
-272   -208   
480    224    
128    224    
-192   -112   
48     432    
256    112    
-272   400    
-32    208    
-16    336    
-80    736    
128    80     
-112   -720   
96     -128   
208    -1424  
-1632  608    
1072   -320   
368    352    
-352   16     
80     -80    
64     624    
112    240    
-192   -144   
400    -528   
0      176    
-240   0      
-32    -192   
192    224    
160    176    
-32    64     
160    -608   
-192   -416   
176    64     
224    64     
-288   -912   
128    -480   
144    912    
-208   -544   
96     -368   
-160   -80    
-48    -272   
224    96     
32     -416   
80     -1248  
-144   96     
16     176    
304    -192   
16     144    
-208   32     
-176   -144   
352    -368   
32     -288   
-144   48     
64     -112   
64     -64    
-16    -256   
144    208    
-64    48     
176    -256   
288    16     
-208   0      
-64    16     
-144   -288   
896    704    
336    -144   
-1824  208    
1040   112    
272    -160   
-1120  -112   
560    -928   
560    -240   
-336   -320   
-128   -48    
176    -16    
144    64     
-16    16     
256    80     
-672   -64    
320    80     
-64    0      
-80    -256   
-1088  -224   
224    -192   
-48    -128   
-64    -848   
1184   880    
80     -464   
-1312  -32    
928    -144   
-336   160    
-224   -176   
432    -240   
-624   176    
240    -32    
-560   -32    
256    -192   
-736   -128   
240    160    
80     -32    
-400   64     
48     -208   
128    -256   
368    96     
128    -928   
16     160    
-144   208    
704    -64    
-240   96     
-256   -224   
320    -352   
160    -32    
-336   -48    
352    288    
-112   96     
-544   -48    
176    16     
176    -176   
-176   -32    
272    -336   
-272   352    
320    -288   
-288   -432   
-208   -224   
320    -16    
80     64     
-320   -64    
-304   -16    
288    -128   
-144   -400   
-768   -96    
96     128    
-112   -192   
-624   -560   
656    -2448  
2464   -2608  
-928   -368   
-576   144    
560    0      
-224   -16    
-224   32     
336    208    
48     208    
-416   144    
-64    32     
256    -48    
144    48     
-64    -80    
-224   144    
160    -432   
272    96     
-128   -32    
-32    32     
-544   -576   
-96    224    
448    -16    
-336   240    
368    32     
-256   -96    
-32    112    
448    -224   
-896   32     
432    -432   
384    224    
-832   -416   
48     -16    
0      -32    
-224   288    
288    -80    
-544   -112   
384    -208   
-576   -240   
-128   80     
160    128    
-64    240    
-496   -144   
32     336    
-416   -304   
64     288    
112    384    
288    208    
-464   64     
192    48     
144    -96    
-656   -80    
64     0      
256    400    
688    240    
-400   -352   
-368   48     
-32    -128   
32     -192   
-80    -48    
-528   256    
128    64     
160    -96    
-112   48     
-400   -96    
64     -16    
48     -208   
-192   -256   
-640   32     
96     256    
-48    400    
288    560    
-400   64     
48     -144   
-32    -128   
-96    160    
128    -32    
-80    192    
32     816    
-96    528    
-224   -48    
96     -240   
-256   -2768  
-1568  1328   
1632   -384   
-720   640    
688    -304   
-320   16     
-352   512    
-96    320    
576    720    
0      272    
-560   512    
-16    208    
368    176    
-96    48     
-432   288    
64     -80    
-96    -96    
128    160    
-128   96     
-96    144    
464    736    
-576   1584   
16     64     
64     -656   
-208   -672   
16     368    
288    560    
-192   -96    
-128   0      
-16    -144   
-32    192    
64     224    
304    128    
-592   -112   
-128   448    
64     -112   
-64    -336   
-144   240    
128    -224   
112    272    
-192   192    
-208   -48    
32     128    
32     -64    
-64    144    
-304   144    
64     -16    
160    192    
-320   -128   
-352   592    
-416   1056   
3136   160    
-816   608    
-1376  336    
768    -112   
48     -128   
-64    -592   
176    912    
64     464    
-224   224    
-16    128    
336    0      
-272   32     
16     -144   
512    -32    
-1056  16     
-128   16     
544    -64    
-304   352    
-112   496    
640    1648   
-864   -704   
-1408  400    
1616   640    
272    448    
-784   416    
16     384    
336    -352   
-288   -464   
-112   96     
224    80     
-128   192    
-256   -192   
224    112    
-80    176    
-400   96     
304    208    
64     704    
0      336    
-208   128    
16     352    
48     336    
32     336    
400    1056   
832    832    
-80    -32    
-160   -128   
448    -176   
384    -1360  
-656   -992   
160    592    
-48    -48    
-256   -512   
368    336    
416    -224   
-528   -64    
160    -368   
-592   112    
-16    176    
-48    -80    
176    -288   
352    16     
96     368    
-560   448    
208    288    
-544   432    
128    368    
240    -288   
-384   -480   
-240   64     
944    2704   
-704   784    
-32    32     
1216   -368   
-288   208    
-192   -640   
432    208    
352    1472   
-160   -384   
-224   -96    
-64    240    
144    432    
160    144    
-48    -464   
-304   320    
-64    0      
-16    -400   
-80    128    
-160   320    
384    288    
-80    64     
-144   -48    
-288   -272   
880    192    
128    128    
-816   432    
304    400    
320    320    
80     -816   
-80    -656   
-144   -64    
256    496    
64     128    
-368   160    
528    336    
-160   208    
-384   272    
144    -80    
272    -656   
-336   -464   
-128   -96    
352    -208   
-256   -80    
64     -32    
288    688    
-592   -848   
-192   -832   
320    -1664  
64     -32    
-192   416    
144    -128   
-144   160    
480    -288   
48     -352   
-272   32     
304    -368   
304    -576   
-192   512    
0      1168   
48     656    
112    368    
16     -112   
112    -752   
-48    -16    
176    -560   
-32    80     
48     -96    
192    0      
512    256    
-432   208    
0      272    
288    240    
-64    -80    
64     176    
0      -160   
16     -192   
224    64     
80     304    
-64    288    
-80    -400   
144    -688   
416    -1808  
-864   1104   
448    -816   
-288   0      
192    -176   
32     -1136  
-144   -368   
112    336    
176    240    
-96    224    
16     208    
240    112    
-64    -64    
-208   -1056  
240    384    
-208   352    
160    944    
288    288    
-192   176    
-304   -608   
896    640    
-320   80     
-144   -192   
0      384    
352    464    
-352   448    
-32    -528   
176    -112   
-96    -464   
-80    48     
432    96     
0      176    
-208   0      
288    48     
-176   32     
128    0      
-128   80     
272    112    
-304   144    
112    -128   
256    144    
-112   32     
48     144    
-144   16     
64     224    
560    -208   
-384   112    
-48    -640   
-16    192    
-672   -1040  
320    608    
544    -224   
-880   -64    
400    304    
768    -48    
-384   -128   
-304   -336   
688    48     
-32    -96    
-288   96     
112    -624   
-32    0      
144    176    
288    160    
-96    160    
-112   32     
304    144    
-16    224    
-384   192    
256    -240   
16     -432   
-1296  368    
1296   -32    
320    -288   
288    80     
-224   -16    
480    96     
-448   0      
-352   224    
464    0      
128    -416   
-128   0      
-48    -80    
720    -112   
-640   16     
64     80     
464    -576   
-464   144    
176    -96    
304    0      
-240   -224   
448    448    
528    -288   
-784   -1120  
720    -192   
-208   -496   
-32    160    
-368   -128   
-208   -160   
-112   112    
224    -432   
240    -16    
-304   0      
-224   -288   
320    624    
16     256    
-528   -240   
-272   384    
496    -208   
-288   -80    
-224   -224   
128    96     
-480   -80    
144    -96    
-384   -800   
-128   -272   
384    -64    
-336   -208   
128    -256   
1920   -3216  
-2832  -256   
160    96     
1712   -368   
272    -16    
-1216  64     
-256   16     
864    -208   
208    80     
64     -256   
-576   0      
160    -80    
272    0      
160    0      
-144   -288   
64     -1440  
224    0      
112    96     
-192   -112   
-96    704    
736    48     
-864   240    
544    -96    
-416   -48    
-432   80     
48     32     
0      192    
64     -64    
-256   -624   
-160   -176   
240    -960   
-32    80     
96     128    
-304   48     
272    -240   
-160   -112   
32     -176   
-448   -224   
-144   -48    
0      144    
-80    16     
288    -80    
-224   -16    
384    -368   
-352   -32    
-176   -208   
288    208    
144    -832   
-96    32     
-80    -48    
96     -48    
-128   -352   
448    -560   
-176   -48    
352    192    
-48    192    
-160   -544   
-304   416    
-32    592    
112    32     
-240   -432   
-16    -16    
80     -288   
32     -48    
112    -128   
16     256    
-304   -80    
-64    48     
-32    144    
176    160    
-112   -144   
-320   -560   
-80    -640   
16     -416   
448    -80    
-160   -544   
-320   -576   
320    -416   
320    1184   
-64    -48    
-368   -336   
-528   -2256  
352    64     
736    704    
-544   -128   
-16    224    
320    352    
-224   -432   
96     -432   
-80    480    
128    32     
-160   304    
0      -192   
48     128    
0      0      
-128   -144   
-48    -96    
0      -272   
-192   576    
64     16     
-32    -96    
-256   -992   
-160   -592   
336    720    
-480   848    
224    80     
208    -528   
-768   -32    
-48    -416   
272    16     
0      -304   
-240   304    
16     368    
16     224    
-32    -16    
-96    -48    
-224   -32    
64     -112   
-80    320    
-48    208    
-560   -224   
-144   32     
-176   -96    
-80    -112   
32     -32    
-272   272    
112    -304   
0      -80    
-32    192    
-80    128    
-432   -160   
672    704    
2160   -32    
-1904  -672   
-160   -880   
528    112    
208    -16    
240    528    
-48    352    
-272   -192   
-64    112    
320    64     
-272   96     
-240   112    
-208   208    
256    96     
-176   48     
-112   272    
32     -64    
-64    384    
-128   -224   
-368   -560   
-368   -48    
928    -272   
-432   -560   
256    -288   
-496   -624   
-512   752    
496    -240   
-432   -912   
-304   -528   
-1168  80     
-48    592    
-352   -112   
304    688    
-352   576    
-144   400    
288    -400   
-64    -224   
336    -176   
-224   96     
-192   160    
272    -32    
-624   208    
-80    464    
560    256    
-592   80     
640    2480   
-720   2432   
-528   1184   
352    -144   
-176   -416   
-480   -240   
-96    -320   
1072   656    
-784   352    
-832   272    
160    672    
-384   560    
-80    448    
-208   576    
-272   -48    
128    -160   
112    -208   
128    240    
-288   -48    
64     -64    
464    -128   
96     -192   
-224   -224   
176    144    
-752   1568   
0      576    
-544   -720   
400    -1200  
944    144    
-768   -16    
-576   -464   
576    -896   
400    576    
-240   608    
-368   -80    
-128   48     
624    -432   
272    0      
-512   -208   
48     -16    
512    -32    
128    304    
-160   1104   
48     576    
-176   -192   
192    -176   
176    96     
-112   -496   
-16    160    
160    432    
-544   -48    
224    -80    
240    112    
-240   -32    
-64    -112   
-288   -304   
48     -32    
-336   -688   
-336   -160   
192    32     
-96    -16    
-48    -384   
160    -240   
-32    -96    
16     144    
-80    304    
32     128    
-304   176    
160    -848   
-560   -496   
32     -256   
0      -608   
-96    -656   
48     -544   
-704   -464   
768    208    
1008   -32    
-1280  224    
48     256    
256    384    
144    672    
288    320    
-64    480    
224    304    
-192   224    
32     32     
240    320    
-432   80     
64     80     
96     -176   
-112   -112   
-288   -816   
-80    -544   
256    64     
304    -272   
64     -48    
-576   -176   
128    192    
320    96     
-272   288    
432    -112   
48     -176   
-272   -128   
208    176    
-736   -1920  
-368   -768   
720    -64    
-672   -352   
304    336    
384    -208   
-592   48     
32     32     
624    -160   
-128   192    
-384   336    
-64    32     
96     240    
-32    -560   
-64    -128   
528    544    
48     160    
-224   256    
176    304    
-96    -112   
752    192    
-1664  432    
576    -144   
496    32     
-624   -112   
208    -240   
208    0      
16     240    
-128   48     
240    320    
32     0      
-176   288    
112    64     
48     96     
-16    -16    
-64    -208   
48     -224   
176    80     
-48    272    
256    -16    
-112   64     
-208   -64    
80     96     
144    0      
-352   -96    
224    320    
112    -32    
-368   112    
304    64     
-144   848    
928    -1072  
-2064  544    
400    -48    
1424   224    
-1136  -144   
-688   352    
656    -272   
-80    96     
-368   -112   
48     -176   
560    320    
-176   -3072  
-416   112    
528    16     
-96    48     
-160   48     
224    224    
-176   48     
-144   96     
208    32     
16     -448   
992    752    
-784   -208   
-1072  -240   
2208   400    
-224   -64    
-1024  304    
704    -16    
-192   256    
-320   112    
32     48     
80     96     
16     128    
224    -32    
112    64     
-32    96     
-192   -32    
176    288    
-112   288    
-384   -32    
128    80     
-176   -1216  
-1056  384    
960    -736   
-592   -16    
-96    -80    
848    -176   
512    -80    
-608   176    
176    16     
-240   128    
-128   -32    
-240   -208   
80     96     
208    144    
736    -96    
-192   -480   
16     -32    
112    -592   
-368   112    
64     -448   
96     144    
-32    112    
96     32     
-112   -304   
-464   256    
592    32     
112    48     
-144   160    
-496   576    
2304   -1744  
-448   384    
-768   16     
352    -80    
96     288    
-160   -112   
304    112    
0      32     
-224   -240   
-16    304    
192    112    
-240   96     
272    -48    
-352   80     
144    -448   
-304   176    
352    -272   
144    144    
-560   -272   
96     512    
112    64     
32     160    
560    128    
-80    -208   
-672   384    
592    -304   
-272   240    
-96    -240   
432    416    
-288   256    
112    -80    
192    -16    
-160   112    
-112   -592   
256    -160   
0      -1376  
-368   160    
64     480    
192    208    
16     64     
-160   -256   
224    -1440  
576    -64    
-608   272    
288    496    
176    160    
-288   320    
256    -32    
-352   -848   
272    -336   
-272   -192   
592    -560   
240    528    
-320   352    
432    448    
-1248  -48    
368    1376   
704    1584   
96     880    
48     448    
112    -96    
-192   -192   
-80    0      
208    32     
128    -592   
-96    -112   
48     -304   
32     224    
16     -608   
48     -160   
-176   -256   
0      544    
144    80     
-208   432    
192    -160   
-320   -864   
448    -48    
368    384    
-464   -240   
16     -320   
272    -240   
176    -656   
-96    -112   
-32    -832   
208    -448   
-80    0      
208    -1104  
-256   -960   
64     -464   
128    336    
96     -336   
-16    0      
-16    -960   
240    -144   
-160   -416   
-16    272    
176    400    
48     432    
-96    336    
-176   -64    
208    -464   
-928   160    
480    48     
-144   -176   
-176   -368   
176    -176   
-48    -192   
0      -352   
64     16     
80     -288   
-128   128    
-96    -16    
128    80     
-304   416    
80     -48    
-288   -288   
32     112    
-64    160    
64     128    
48     -144   
-96    -48    
-288   -160   
96     -64    
176    64     
-240   -160   
64     256    
128    -48    
-224   -32    
80     -64    
192    176    
-1104  1344   
3232   -704   
-768   240    
-1456  0      
1952   -1664  
944    -720   
-768   -1088  
400    240    
-112   1024   
-368   -592   
208    304    
480    -128   
-304   32     
-160   48     
256    -144   
64     288    
-96    592    
192    -16    
-48    -192   
-224   80     
816    352    
-1856  -160   
-384   -304   
1088   -912   
-576   -1728  
272    576    
80     112    
-384   -496   
48     -944   
96     -272   
-464   0      
64     48     
96     160    
128    64     
-160   -64    
208    64     
-48    -112   
64     32     
464    16     
-128   48     
-240   144    
64     -32    
432    560    
-112   656    
-368   -544   
496    -720   
-48    -208   
96     -688   
-848   -640   
432    -144   
288    -192   
-528   464    
128    -128   
-16    192    
-512   -384   
112    -208   
48     304    
-1120  -592   
64     144    
-16    80     
112    0      
-208   48     
-272   208    
624    -208   
-96    -240   
-704   -544   
-224   112    
-240   -272   
736    -272   
-464   -400   
-944   1504   
416    640    
-368   -352   
96     1936   
368    1696   
-224   -80    
-48    -48    
304    -672   
-240   -288   
-240   32     
-144   80     
48     112    
-32    -560   
-256   16     
-48    80     
16     128    
96     -16    
208    96     
-256   1328   
-176   576    
80     80     
-944   -464   
176    224    
1136   -96    
-672   176    
-416   -96    
192    528    
480    128    
-192   320    
-48    -144   
-32    224    
-16    0      
-128   -160   
128    -160   
208    -16    
-304   -656   
-640   -432   
336    64     
-800   -192   
-80    64     
-192   -240   
-96    208    
176    0      
-112   16     
64     144    
64     80     
-672   80     
288    288    
448    160    
-240   96     
-368   144    
-112   848    
1008   0      
-720   32     
-592   432    
800    -80    
48     -128   
-656   -160   
192    80     
-448   208    
336    -64    
-16    0      
-256   128    
192    48     
-176   -64    
352    432    
464    288    
-384   0      
-80    576    
480    256    
-176   -208   
-144   464    
-64    304    
128    128    
176    256    
-96    672    
-816   688    
288    128    
432    -96    
-416   -112   
1216   1664   
-3104  288    
-672   144    
1584   -144   
-464   -176   
-1200  48     
416    64     
528    336    
-672   160    
240    -272   
-48    144    
-80    -16    
160    208    
192    368    
-688   -16    
96     -96    
64     288    
-64    32     
-160   16     
128    192    
-368   -224   
208    -704   
-672   208    
448    240    
352    -368   
-480   656    
-96    -64    
0      320    
624    -160   
-480   160    
-208   112    
-16    144    
240    16     
-112   -240   
16     64     
-496   -48    
176    416    
192    48     
-112   0      
-288   96     
240    112    
80     64     
-32    128    
-208   0      
320    128    
-368   96     
16     -16    
176    192    
-208   -64    
-240   -1136  
1664   3808   
1168   -432   
-2128  448    
-304   -192   
1232   32     
-272   -96    
-288   -176   
224    256    
432    64     
-352   224    
48     32     
96     80     
192    0      
-176   240    
432    64     
-272   240    
16     16     
192    144    
-80    -48    
144    144    
32     256    
-368   448    
1632   -64    
-320   416    
-512   -608   
-80    368    
272    -80    
-320   160    
-16    96     
144    -32    
-80    96     
192    0      
-16    96     
-240   -16    
224    224    
416    80     
-192   80     
-208   -304   
-192   -96    
80     208    
160    80     
80     576    
-64    32     
-880   160    
592    32     
-192   -32    
-384   80     
176    32     
112    -336   
256    112    
-96    128    
0      416    
48     160    
-96    -144   
-128   272    
592    -64    
-208   192    
112    128    
176    96     
32     48     
144    128    
48     32     
-144   192    
80     96     
-16    0      
192    -80    
-480   160    
-128   64     
432    64     
-576   -688   
-896   1344   
240    960    
-528   -592   
0      -336   
1392   176    
-640   -624   
-400   576    
720    -160   
0      80     
16     96     
-528   240    
608    384    
-496   272    
192    -128   
-16    -80    
352    -48    
-384   128    
192    0      
-32    1184   
-208   464    
224    -96    
-112   -192   
-416   -16    
912    336    
-368   256    
-272   144    
480    448    
-288   352    
32     -176   
-304   -1072  
-128   144    
304    592    
-96    96     
144    -304   
-400   -576   
160    192    
0      496    
-32    80     
64     112    
-80    32     
128    -224   
464    -240   
-640   80     
-160   240    
-384   -112   
480    -336   
-16    -208   
32     -1296  
304    -608   
-192   96     
272    192    
80     -1456  
-288   96     
384    -384   
-464   -176   
336    -560   
176    -512   
112    -624   
-32    2144   
16     400    
128    -1024  
-160   320    
80     -64    
64     144    
-256   112    
160    80     
144    -720   
80     32     
80     304    
240    144    
16     16     
208    128    
112    48     
-16    96     
16     96     
0      -240   
752    -192   
-144   -64    
-128   32     
112    0      
48     112    
272    -1264  
-592   160    
288    64     
-320   224    
128    16     
240    112    
-32    -192   
-352   144    
32     320    
176    96     
208    -144   
-128   16     
-112   128    
224    -656   
208    240    
48     -240   
-288   -32    
-64    64     
288    304    
-320   -608   
752    -656   
-256   704    
80     144    
48     112    
-176   -96    
304    272    
-96    368    
304    -160   
-16    16     
-128   80     
48     96     
272    32     
64     -512   
96     224    
16     128    
-144   192    
-32    448    
176    608    
-256   -1104  
-144   -224   
320    64     
304    112    
-272   512    
208    144    
96     288    
-304   64     
80     80     
96     -208   
64     -400   
176    -688   
-2096  416    
1008   576    
608    -608   
-64    304    
-112   1536   
-432   -832   
-32    -832   
448    160    
-256   352    
-128   160    
16     -144   
-16    -640   
96     -64    
224    -416   
-224   0      
-208   -368   
16     -272   
192    944    
-80    608    
-240   -416   
1264   -80    
-1488  -416   
208    -1328  
-112   -256   
112    144    
48     -368   
560    -704   
240    -80    
-144   912    
-496   720    
64     -176   
464    -544   
-368   128    
208    64     
-192   -48    
-160   -128   
352    -528   
-560   -528   
160    0      
208    -208   
240    304    
-64    -144   
1008   2640   
-1520  1952   
-928   0      
720    -464   
16     -672   
-816   352    
256    96     
-1456  -304   
0      -48    
144    -176   
16     -16    
208    336    
192    -400   
-800   160    
528    -1600  
144    112    
-432   -912   
-640   368    
592    80     
80     176    
-320   -272   
-64    -128   
16     480    
704    64     
-432   -112   
-496   -432   
640    -1472  
1008   496    
-1952  1056   
736    -608   
736    -32    
-464   96     
-176   -48    
400    -656   
768    -80    
-64    -320   
-656   80     
464    -96    
400    192    
-384   -48    
-208   -208   
-192   -160   
-64    -208   
288    16     
-352   -368   
688    304    
-704   528    
448    16     
256    -16    
-448   -448   
144    256    
240    -16    
-192   160    
32     -176   
-80    128    
-288   -304   
208    144    
336    -304   
-208   48     
240    -592   
-96    96     
48     -3168  
-160   192    
-256   -32    
144    -128   
-112   -128   
-16    80     
-208   -128   
-240   -128   
288    -208   
240    -16    
48     -32    
-384   -80    
48     400    
672    -304   
-336   144    
-224   112    
112    96     
48     -384   
-1360  224    
544    -16    
384    48     
-416   0      
112    176    
384    128    
-80    128    
16     16     
-320   -160   
80     -48    
-80    -144   
48     16     
-128   64     
-752   -192   
-32    -448   
112    -128   
-288   -224   
-80    0      
96     176    
64     -64    
-160   -128   
-608   -448   
-16    288    
-272   -128   
160    -416   
16     112    
144    128    
-160   -64    
512    2512   
-272   -1840  
-2000  304    
896    -336   
432    -272   
-752   192    
32     -96    
496    160    
-160   -1040  
-544   224    
160    480    
192    -160   
-112   80     
0      256    
-512   176    
240    -144   
-224   288    
-320   -112   
32     -160   
-208   128    
176    832    
-528   -128   
-128   112    
640    -176   
-288   -48    
-48    352    
-208   48     
-112   48     
544    -144   
-192   112    
-176   112    
-192   192    
192    -128   
-48    -64    
-656   -208   
160    -48    
-80    -240   
-160   -144   
80     48     
272    80     
-432   -80    
-48    128    
304    48     
208    -48    
-256   80     
-432   144    
368    -80    
-16    160    
48     0      
-592   -144   
320    96     
1456   -240   
-960   -80    
-32    -320   
960    128    
-832   16     
-64    96     
544    752    
256    -80    
-416   240    
64     -48    
240    96     
-208   0      
16     -208   
-464   -16    
400    -16    
-272   176    
64     320    
-32    304    
304    160    
-288   -352   
864    576    
432    288    
-608   368    
-224   64     
80     -80    
176    224    
432    16     
16     80     
-432   0      
80     112    
96     -16    
-16    160    
-384   -176   
112    288    
496    80     
-240   96     
16     208    
-112   176    
96     -272   
112    0      
112    272    
48     320    
-720   -16    
-512   -752   
496    -32    
-16    400    
-64    -48    
80     128    
384    240    
-400   64     
-720   -608   
352    288    
464    464    
-1008  -240   
688    -112   
496    0      
-304   160    
-144   0      
96     144    
256    64     
-128   64     
-128   80     
-208   -64    
-128   -160   
512    192    
144    -16    
-240   48     
144    416    
48     -704   
-1296  -816   
-32    512    
752    304    
-544   -160   
128    16     
720    -1072  
-416   368    
-240   256    
-32    240    
480    -640   
-368   -336   
16     336    
128    368    
208    64     
-80    64     
16     144    
-144   112    
96     176    
320    512    
-272   -80    
-112   -32    
-80    -272   
336    432    
320    32     
112    592    
-16    112    
-128   672    
576    896    
144    128    
-160   -640   
-16    -176   
96     -48    
-176   320    
32     -544   
-128   208    
-80    64     
-32    208    
48     608    
-112   624    
80     32     
-320   96     
160    448    
64     352    
-16    304    
-160   16     
352    1360   
-256   736    
-192   -336   
208    -288   
160    -16    
-272   48     
-528   416    
1264   32     
-48    352    
-784   672    
448    848    
448    656    
-192   1456   
-64    -352   
-96    -512   
208    208    
128    192    
-96    -128   
192    -48    
-64    176    
-32    368    
544    640    
-496   176    
-224   0      
656    0      
-112   224    
144    64     
-32    80     
144    96     
32     288    
-96    48     
48     -144   
544    -96    
-320   176    
-192   224    
304    80     
-480   576    
576    -1856  
-608   144    
352    -80    
224    96     
0      144    
-608   720    
160    80     
128    -320   
-80    96     
-64    240    
32     16     
96     96     
-80    -144   
-16    -592   
112    -48    
16     -960   
48     -32    
32     64     
432    880    
-496   576    
96     -240   
656    -144   
-336   144    
-80    512    
240    432    
352    400    
-160   624    
-32    16     
96     -64    
96     128    
-144   0      
16     112    
160    336    
32     192    
-336   -592   
112    -480   
368    416    
-64    608    
-256   -336   
-48    32     
96     -112   
96     128    
0      288    
-192   -80    
176    16     
208    -144   
-416   288    
416    -1456  
-1312  1728   
2816   160    
-240   368    
-1456  -384   
720    240    
512    -736   
-1136  -336   
272    96     
240    -64    
-128   208    
-16    -192   
16     240    
-80    64     
16     416    
304    32     
64     192    
-416   -464   
320    112    
32     0      
-32    48     
320    1568   
-384   -816   
-1424  64     
1408   -432   
496    64     
-400   192    
-16    144    
288    48     
144    160    
-368   -1200  
384    32     
48     -272   
-256   -48    
16     -176   
272    144    
160    0      
-224   -96    
-48    176    
624    64     
-176   80     
-144   -80    
-80    -192   
864    -464   
-96    16     
-416   -80    
192    656    
768    -176   
-128   1040   
176    336    
96     16     
32     48     
16     -112   
-224   256    
-64    192    
320    -64    
-400   352    
-320   -48    
16     -272   
448    80     
128    -352   
-64    128    
-272   -720   
128    208    
0      112    
0      208    
48     160    
0      128    
160    -80    
16     208    
112    1888   
-528   2432   
288    1472   
-448   -480   
-336   -304   
1360   208    
80     -304   
-848   96     
464    -624   
-80    32     
224    -416   
-192   208    
-272   -112   
-64    -176   
144    -176   
-112   -864   
112    -48    
-256   -624   
208    48     
-368   -32    
512    16     
-464   -624   
-160   -240   
752    -224   
592    32     
-864   -192   
96     96     
304    -272   
32     -176   
-224   16     
80     -240   
48     -32    
192    -64    
-304   -16    
16     -720   
448    -256   
384    -320   
-672   -48    
96     176    
-176   64     
80     16     
16     -208   
-192   -32    
-16    96     
-208   208    
208    -32    
-336   -48    
48     -176   
240    48     
208    -1376  
-352   -48    
-160   48     
16     -512   
-480   128    
512    192    
432    160    
-208   80     
-480   -240   
368    -112   
64     -288   
-304   -32    
64     -176   
176    -176   
-128   -128   
192    -224   
160    128    
-208   -1184  
160    -368   
-32    -208   
0      80     
112    -32    
-80    0      
16     176    
-112   272    
-352   128    
144    -256   
32     752    
-400   576    
416    -208   
224    -80    
-304   304    
496    -2320  
-2672  1712   
1360   240    
752    240    
-864   16     
160    -448   
112    112    
32     -448   
-464   32     
528    400    
-528   128    
112    -96    
160    240    
112    -704   
-688   384    
320    -672   
320    96     
-176   352    
48     -160   
-112   -144   
-112   -144   
128    -704   
-608   464    
224    -80    
-96    80     
-464   32     
240    -32    
-208   512    
-544   16     
-96    16     
64     -288   
16     -32    
320    -1056  
-256   -112   
-272   -288   
208    -80    
-192   32     
-16    48     
-80    144    
192    -32    
-352   -16    
0      -48    
-16    32     
-144   48     
544    80     
-384   -112   
160    192    
96     64     
-64    0      
-912   -192   
944    32     
1424   112    
-1408  48     
320    64     
-144   -432   
-288   400    
416    112    
-160   336    
16     -32    
112    128    
96     -224   
-64    80     
-256   32     
144    -48    
-352   -112   
-32    -96    
96     176    
-256   -32    
160    -48    
32     -80    
-416   -288   
1168   624    
544    480    
-1648  -880   
-112   16     
-160   48     
112    32     
0      144    
16     64     
-336   0      
16     48     
-80    32     
48     64     
-16    32     
96     80     
16     96     
-192   -16    
0      400    
-272   -128   
240    -16    
-32    -112   
-32    176    
-16    48     
-432   272    
-416   0      
-96    -432   
-64    -32    
-816   32     
240    -48    
496    320    
-928   512    
144    -288   
-64    320    
-176   -464   
-672   240    
704    -224   
32     592    
464    64     
-368   -176   
-256   192    
352    80     
208    16     
-256   -16    
-176   64     
-656   -112   
112    1216   
544    -112   
-448   32     
-256   -1040  
240    -384   
1360   896    
-2096  240    
32     -528   
832    -336   
-832   352    
-464   -400   
112    -160   
576    -16    
-192   -208   
-16    96     
272    240    
32     -112   
-160   176    
-240   32     
-176   224    
256    848    
160    -336   
-208   128    
-256   112    
336    784    
128    80     
-96    -288   
-272   -16    
496    272    
-32    400    
-64    288    
-400   -80    
-64    176    
-192   -16    
336    528    
-128   288    
144    -32    
32     128    
-304   48     
256    304    
16     16     
144    1008   
-432   1088   
64     160    
304    -512   
-32    -304   
-960   144    
-144   112    
416    96     
400    -16    
-720   -272   
48     112    
400    -144   
144    448    
-320   112    
0      32     
-256   -1008  
208    -944   
416    -144   
-240   -16    
-16    864    
-48    240    
-240   1680   
-288   672    
-80    -384   
192    80     
16     -32    
32     -16    
-160   384    
-288   528    
192    -16    
0      128    
16     -688   
80     112    
-48    192    
272    48     
-48    -32    
-112   -16    
64     128    
144    16     
-304   -560   
-736   -528   
-32    -304   
400    -400   
224    -80    
-336   160    
-144   1408   
656    -64    
-80    -512   
-80    544    
80     336    
-528   304    
-64    944    
400    480    
-304   16     
-240   64     
208    -96    
32     192    
-32    80     
32     208    
-48    64     
96     352    
192    272    
64     160    
-112   64     
464    688    
-448   1488   
272    -128   
384    32     
-272   64     
64     448    
112    880    
-16    -448   
-16    -320   
112    144    
-64    144    
-80    -224   
-16    -208   
-112   256    
-112   -96    
128    -272   
0      240    
80     16     
0      352    
-208   -128   
48     128    
-16    -48    
-128   64     
-16    240    
176    -192   
-208   -96    
208    80     
-32    16     
-96    144    
-80    176    
-624   1984   
2528   160    
-960   96     
96     112    
160    -288   
-144   48     
320    -144   
-160   -80    
240    -16    
-160   288    
96     64     
-16    112    
-144   16     
48     336    
672    80     
-320   160    
-240   -192   
480    -208   
48     -16    
-224   112    
-128   -176   
720    880    
1216   144    
-912   112    
544    304    
80     -128   
-496   368    
368    0      
128    -16    
-240   224    
-96    400    
304    96     
112    80     
-224   16     
144    144    
64     96     
16     96     
176    144    
336    160    
256    304    
-304   48     
-144   -160   
592    352    
1136   -416   
-256   -368   
-160   -1216  
464    352    
144    160    
512    -240   
-368   224    
64     96     
192    352    
224    208    
-224   96     
-320   96     
-48    320    
688    208    
192    0      
-256   96     
352    176    
-192   -96    
16     80     
400    -160   
-96    48     
-336   -128   
720    352    
528    -304   
-464   96     
624    160    
-848   -1312  
-544   1792   
1856   272    
-1232  0      
-1088  64     
1168   -48    
544    -128   
-768   -224   
160    48     
112    -48    
-368   432    
480    -64    
-48    48     
-208   -64    
-240   -80    
544    80     
256    -16    
-384   160    
384    144    
560    272    
-1248  48     
768    -240   
112    48     
-384   -496   
976    288    
-688   -1088  
-480   208    
976    0      
-448   16     
-64    -64    
240    176    
32     -16    
-80    176    
192    96     
-224   -32    
624    192    
-240   96     
-320   128    
160    224    
400    176    
-192   -736   
-144   96     
400    80     
-304   32     
64     144    
608    128    
-864   -320   
368    -416   
528    -240   
-240   48     
80     208    
-288   -272   
64     -736   
-480   -32    
784    -80    
-496   -1168  
-192   64     
368    112    
128    384    
192    224    
-192   224    
-176   288    
144    -560   
240    96     
-32    -64    
-80    48     
-192   -64    
464    -64    
-288   16     
128    -176   
400    -224   
-240   176    
16     192    
-96    48     
-32    -128   
144    400    
160    416    
48     -48    
-48    112    
48     640    
448    352    
32     -2224  
-1504  976    
1712   -48    
272    512    
-192   -16    
-304   -720   
64     240    
160    -1200  
-96    464    
-144   176    
-304   -64    
112    16     
0      64     
304    -288   
-640   -2304  
192    -256   
96     272    
16     32     
32     64     
16     48     
-160   -1232  
304    -688   
-624   128    
256    64     
352    -224   
-320   -96    
160    -80    
400    16     
240    192    
-464   -464   
-144   128    
288    -128   
144    -16    
-16    -832   
-192   -192   
112    -288   
-176   240    
176    -16    
48     64     
32     112    
-112   -128   
-480   80     
512    -288   
0      -32    
80     -320   
-224   48     
64     -544   
256    96     
-16    -96    
-416   176    
-896   1280   
3056   -32    
-352   208    
-1456  -224   
976    -80    
368    -80    
-768   -448   
-96    -320   
128    -208   
224    -16    
-112   -96    
-112   -224   
-48    -16    
-32    -640   
448    224    
-96    96     
-128   112    
400    80     
64     96     
-160   32     
384    1328   
-112   -800   
-2000  -528   
2080   -656   
0      -304   
-928   -160   
464    -816   
-192   64     
112    -192   
-48    0      
-64    -48    
32     224    
0      0      
160    -80    
-160   -48    
128    -192   
96     144    
16     -128   
-400   -64    
-32    -96    
-80    160    
144    128    
32     32     
240    -1280  
-624   -368   
96     208    
304    -656   
-448   544    
656    336    
192    16     
-176   -112   
-432   32     
16     -64    
-400   -336   
560    400    
240    400    
240    -688   
352    -16    
-16    -240   
80     -80    
160    -1520  
-144   144    
-288   -128   
160    -240   
-80    -208   
0      176    
544    304    
0      -496   
-448   -272   
320    64     
416    -656   
-1776  240    
-32    -288   
800    16     
768    -16    
-736   0      
-336   -1568  
0      -768   
160    256    
128    -192   
176    80     
-352   336    
0      0      
144    -144   
80     336    
-304   736    
-128   -352   
240    -384   
48     -688   
-80    -688   
-432   176    
-480   192    
288    384    
160    -336   
-912   192    
416    288    
48     -608   
240    -784   
128    1440   
-176   256    
-48    240    
-480   208    
304    336    
-656   432    
-192   496    
128    -304   
544    320    
-272   96     
-144   0      
-96    0      
-832   -208   
176    -80    
-96    304    
112    -32    
-384   -1104  
608    800    
-256   80     
-176   224    
-640   -848   
-112   -48    
320    -448   
416    -144   
-176   224    
-656   -16    
160    -80    
-208   80     
-240   -720   
144    -1200  
-64    496    
-128   1296   
-80    208    
32     -144   
208    160    
256    128    
-160   544    
-592   480    
176    112    
112    -560   
48     160    
-80    496    
-560   -208   
112    -336   
-400   -112   
96     112    
-96    -800   
-128   -1472  
-384   -1040  
352    640    
336    336    
32     -80    
-32    -1664  
-1088  -256   
240    448    
704    1840   
-1200  1392   
-736   -432   
624    -816   
0      -224   
-112   -272   
-208   240    
-112   128    
0      64     
160    -48    
-192   -368   
-512   112    
320    320    
144    272    
-128   32     
-256   208    
160    256    
-208   -1136  
112    -928   
-416   1120   
176    720    
-608   -496   
128    208    
-128   288    
-192   352    
192    -272   
80     -32    
-80    32     
-64    144    
-16    -304   
48     48     
-80    48     
-528   1040   
400    256    
192    -240   
-48    64     
-288   -128   
64     352    
16     0      
-96    64     
-48    -48    
288    320    
80     96     
-208   16     
16     128    
288    -16    
-448   800    
1248   -480   
-1872  944    
192    -208   
480    -48    
-1232  -176   
368    96     
608    16     
-208   -32    
-384   32     
256    32     
128    112    
32     48     
-48    128    
32     32     
-112   288    
-208   -112   
-256   160    
432    -160   
64     128    
-544   -80    
416    1120   
192    -608   
-1968  176    
992    -224   
352    -16    
96     128    
-128   64     
80     64     
272    96     
-208   -16    
-176   -48    
48     160    
-192   -32    
288    160    
0      -128   
-464   112    
240    64     
-176   544    
16     -144   
-256   -144   
224    128    
-400   -448   
-704   -224   
1408   304    
800    -192   
-784   160    
-32    416    
96     528    
-176   80     
496    -16    
352    0      
-528   -96    
-176   32     
480    -128   
-320   -256   
-16    304    
-80    224    
304    272    
368    -48    
48     320    
-512   224    
-208   448    
832    -48    
16     48     
-32    720    
-688   288    
64     352    
848    112    
-640   -304   
224    3008   
1776   -528   
-1248  -240   
800    -960   
544    96     
-672   432    
-672   96     
1040   80     
240    0      
-368   -80    
-448   208    
432    176    
64     144    
-32    -80    
-256   112    
64     64     
-368   192    
576    80     
-352   112    
-464   464    
1040   128    
-832   192    
256    80     
-64    -32    
-320   240    
592    48     
-208   240    
-288   48     
224    80     
464    0      
-384   224    
160    -80    
-80    192    
304    128    
96     288    
-496   80     
64     -32    
528    -32    
-480   80     
80     -896   
144    112    
64     64     
0      64     
-16    176    
-144   144    
32     128    
0      48     
64     -64    
32     -112   
-848   -192   
496    -160   
80     -512   
288    -240   
16     96     
64     -1504  
368    16     
-464   0      
112    240    
352    224    
-144   -96    
-32    -96    
16     192    
16     176    
-32    32     
-208   16     
240    160    
256    0      
-272   160    
416    752    
-176   480    
-80    560    
96     224    
0      -80    
-64    128    
-16    0      
112    -80    
192    304    
-160   432    
-208   640    
-48    208    
176    112    
-896   -1520  
736    -816   
368    -1056  
-848   -480   
768    1248   
704    -752   
-976   -112   
-64    -256   
704    48     
-112   -544   
-400   48     
240    -400   
144    352    
-96    96     
16     224    
224    -448   
-144   160    
16     144    
64     16     
-48    112    
272    -512   
-208   1280   
320    -80    
-272   144    
64     160    
-32    -256   
-16    288    
-32    -256   
288    -48    
64     192    
48     256    
32     160    
32     400    
0      -336   
144    288    
96     -1056  
16     144    
208    16     
-112   -240   
-80    -16    
0      400    
192    -128   
-192   32     
-128   80     
128    -16    
32     -144   
176    32     
0      176    
-96    -848   
-368   -272   
1088   368    
1344   496    
-1616  -448   
144    -512   
880    96     
-272   128    
-96    96     
704    -576   
-144   -496   
-320   -304   
112    384    
416    -336   
-96    112    
0      128    
112    432    
32     -32    
192    -128   
-256   -2320  
48     240    
0      304    
336    -832   
-2048  944    
1600   -112   
304    912    
-752   -512   
576    -720   
192    -560   
-528   -320   
112    -272   
352    -256   
-272   -128   
-128   176    
208    144    
304    -336   
-112   -48    
144    -208   
-208   -160   
-832   -784   
800    -2384  
16     -656   
-480   -368   
-16    96     
80     -608   
-272   368    
592    -464   
-592   -720   
-80    992    
928    160    
-304   -256   
16     368    
48     352    
192    32     
-848   80     
432    0      
144    -368   
-912   -576   
896    -912   
-80    304    
192    272    
-192   272    
-240   304    
448    128    
-16    464    
16     -592   
32     128    
64     32     
240    80     
-192   32     
-32    -16    
128    48     
-384   1808   
720    192    
-512   -976   
-736   -736   
368    -64    
224    -560   
-592   -608   
-464   64     
224    -448   
304    704    
-224   -176   
-368   608    
224    496    
208    -544   
-768   -592   
-96    -336   
-16    -272   
480    144    
96     -80    
-208   -752   
32     -160   
288    -2384  
-128   -112   
-1024  64     
1120   64     
-272   -32    
160    1072   
-240   592    
16     -512   
-128   -1328  
48     -224   
-496   144    
0      160    
96     -160   
-224   -352   
-16    -288   
-304   224    
-48    992    
224    656    
-112   672    
416    432    
-144   0      
-128   -80    
288    -144   
-16    64     
304    -736   
-1120  336    
208    -16    
0      -96    
128    -336   
192    1232   
-448   -336   
-320   576    
928    1168   
1264   -288   
-1392  -688   
48     -1136  
320    368    
128    832    
32     448    
160    160    
-352   -80    
64     128    
320    -400   
-64    -576   
-208   -16    
160    -368   
160    64     
-128   -736   
128    80     
48     208    
48     160    
-80    224    
-48    -32    
-64    160    
320    400    
-576   688    
0      64     
320    192    
208    208    
-880   -1424  
288    -1264  
448    336    
-192   96     
-80    -192   
16     -1360  
-208   -944   
16     -1536  
96     192    
16     240    
-272   240    
240    224    
96     -144   
-16    -464   
48     -208   
-192   304    
160    -128   
208    0      
-96    -48    
-1136  128    
-272   1296   
768    -336   
-864   -192   
528    -32    
176    -112   
-208   80     
0      48     
16     -48    
-48    -176   
-1328  -176   
528    32     
-80    -32    
-176   32     
-96    0      
-96    112    
64     96     
-192   32     
-272   304    
-96    -64    
48     112    
160    -32    
-192   -32    
-80    128    
-16    -16    
16     96     
0      176    
128    -128   
-80    -32    
112    96     
752    -656   
-3152  1136   
-960   704    
1440   16     
-1616  -352   
176    32     
448    112    
64     352    
-96    176    
80     160    
112    -128   
-80    144    
160    -240   
-160   -128   
-368   32     
256    -16    
0      48     
-112   -32    
64     32     
-160   -112   
-16    80     
-400   -608   
-1216  496    
1520   -96    
576    288    
-656   -304   
352    -96    
-320   128    
-432   224    
160    0      
224    80     
400    128    
-240   16     
-192   96     
112    0      
-256   112    
32     -32    
256    288    
560    -160   
-384   0      
-624   48     
368    -288   
1056   64     
-400   32     
-256   320    
-192   -368   
-688   -368   
496    496    
368    -192   
32     352    
256    48     
-32    16     
320    -208   
272    32     
-448   160    
-64    0      
400    -208   
192    -32    
-336   352    
48     -16    
224    96     
-80    64     
-16    64     
160    64     
-272   -144   
0      144    
-336   -144   
-32    144    
-384   -64    
640    1216   
-1904  -800   
-656   512    
1712   224    
-752   -272   
400    256    
-208   0      
-672   32     
800    160    
208    -144   
-432   16     
320    112    
48     -48    
-48    160    
-480   16     
384    240    
-32    80     
-384   112    
368    0      
432    336    
-880   128    
448    320    
368    0      
-608   -160   
272    224    
144    32     
-160   80     
0      -32    
192    176    
-256   96     
-176   -128   
128    208    
208    -64    
0      -16    
-192   112    
320    144    
64     384    
-192   224    
16     128    
144    208    
-144   96     
-112   0      
-48    -80    
80     -128   
-80    -224   
416    -112   
-208   16     
-16    112    
288    240    
-224   240    
144    -16    
208    -128   
-240   -464   
256    112    
160    608    
240    672    
-592   -144   
144    -512   
256    -192   
-320   -64    
80     128    
224    192    
-320   -480   
-160   -160   
112    112    
-256   -64    
144    -416   
-48    -592   
-352   -512   
64     -80    
208    160    
-128   128    
-256   48     
32     -32    
384    208    
0      320    
-240   272    
-208   864    
304    -352   
-144   -304   
-80    -32    
144    160    
272    -1584  
-784   272    
880    464    
-336   400    
80     -272   
272    0      
-16    -128   
-176   -48    
80     240    
16     112    
160    336    
176    384    
-48    -48    
16     -160   
192    80     
192    272    
-240   304    
80     -16    
176    -240   
-80    -64    
448    -128   
-640   272    
400    48     
16     240    
-272   -80    
512    432    
-240   432    
144    -656   
256    -288   
-160   208    
-176   -288   
48     288    
112    464    
-80    128    
-112   288    
-96    224    
48     -2304  
224    16     
-176   160    
-192   96     
0      128    
160    80     
224    128    
-80    -192   
-384   416    
304    176    
64     32     
-192   48     
80     -80    
-1392  -224   
1008   112    
496    -656   
-1232  176    
752    672    
480    -32    
-528   -160   
320    912    
288    -48    
-96    -80    
-368   96     
32     240    
48     96     
208    80     
32     80     
-32    352    
-96    48     
176    160    
128    -128   
-112   320    
224    -128   
-1984  96     
64     -96    
608    -448   
272    -1328  
-208   -1568  
-176   -1712  
112    -1936  
-384   -912   
32     -320   
-208   -352   
128    256    
256    -80    
-464   -112   
512    -96    
160    224    
-400   592    
448    480    
192    240    
-160   272    
-48    160    
144    448    
-112   832    
-304   -1600  
-80    -720   
816    752    
-128   1824   
-592   624    
688    720    
-96    448    
-576   192    
320    144    
304    208    
64     304    
-608   384    
-96    -80    
352    -432   
384    656    
-704   320    
-272   272    
400    -64    
-176   64     
-128   -544   
-480   -32    
448    80     
192    -48    
-208   -64    
-112   -496   
-256   -336   
64     160    
-544   2688   
592    496    
-624   0      
-16    -288   
480    1824   
304    528    
-480   384    
208    -848   
224    256    
224    -1056  
-112   -368   
-96    64     
32     224    
272    32     
144    -144   
-352   368    
-64    -48    
-160   176    
416    272    
-16    240    
-272   -704   
400    208    
-80    -80    
-848   -864   
176    384    
96     464    
-112   -144   
-128   320    
160    160    
144    544    
-144   400    
176    112    
-80    224    
-256   -112   
-48    80     
464    -576   
176    -48    
-384   -32    
96     144    
144    -64    
432    -48    
-320   0      
-192   944    
160    448    
224    128    
-208   -112   
80     -736   
320    -416   
-32    -272   
-160   -512   
208    48     
-80    -1184  
-688   -608   
96     128    
512    -48    
64     1264   
176    -400   
80     -912   
16     -128   
-16    112    
160    -16    
-128   -64    
-400   -352   
352    80     
224    48     
-64    112    
128    -352   
64     16     
-112   0      
64     -80    
320    -416   
-128   400    
144    -48    
-144   -240   
-288   -352   
688    0      
-48    -16    
-512   80     
96     80     
336    32     
-1024  -1664  
-368   -1168  
1440   -96    
-528   -976   
48     -448   
-240   -496   
-80    512    
224    -48    
-512   656    
512    -368   
-288   0      
-144   -16    
80     160    
-240   -384   
0      -448   
-256   -400   
240    -352   
-16    224    
-16    -48    
224    48     
144    -1328  
-1088  512    
912    -64    
-32    160    
-448   -80    
304    -592   
-160   208    
-48    304    
-80    320    
496    48     
-368   -160   
-496   -16    
384    -64    
-96    -32    
304    -16    
96     -128   
0      -80    
-96    32     
384    -32    
-272   80     
224    48     
16     0      
80     -160   
-16    0      
-384   -128   
48     112    
0      48     
-48    16     
48     -128   
832    416    
-1696  -128   
288    192    
1200   -800   
-1120  16     
-464   -64    
640    -272   
80     -192   
-848   16     
32     -112   
320    -16    
-656   0      
-32    -240   
-576   160    
-208   -208   
-96    256    
384    -288   
-112   160    
-256   -672   
352    -32    
-96    16     
320    208    
-1552  48     
-160   304    
368    -64    
-688   -176   
464    -336   
-512   16     
-112   -224   
64     -80    
64     64     
-112   -96    
-96    176    
224    -400   
32     48     
-144   -16    
-304   96     
256    112    
112    -32    
0      0      
80     16     
-112   128    
-560   -192   
624    80     
-304   -304   
-608   80     
576    -432   
688    656    
256    32     
-1296  -160   
144    -144   
144    96     
-496   0      
272    -16    
112    192    
-480   80     
-192   -160   
176    -48    
-224   96     
-48    -400   
-112   112    
-560   -160   
352    80     
32     32     
-208   32     
-48    96     
-368   240    
384    -48    
16     -32    
-608   -576   
1904   432    
-1984  512    
528    -224   
1312   256    
-1120  32     
-448   160    
592    0      
448    288    
-240   -144   
-624   48     
688    -48    
-160   64     
-96    64     
112    208    
-288   -16    
-288   144    
416    -48    
-256   -192   
-480   80     
656    304    
256    -1072  
-528   -1040  
-112   96     
-240   16     
-672   -240   
864    224    
192    -128   
-496   96     
-112   336    
512    -240   
-1504  -416   
-736   -96    
352    -32    
848    -176   
-944   -208   
-208   -224   
384    -208   
128    -400   
-144   -112   
-48    192    
-48    -64    
176    -80    
176    -352   
-512   -224   
128    -224   
-48    -208   
-64    0      
-352   -288   
-208   -192   
224    -608   
448    -400   
-288   80     
-208   -304   
-592   -304   
192    -976   
32     -720   
-1008  -336   
192    -80    
16     -768   
0      -528   
-272   592    
-96    160    
-16    -336   
-32    112    
-256   -256   
-64    0      
192    176    
-336   -368   
-112   -32    
16     -144   
-16    32     
-128   80     
-112   16     
-128   128    
48     464    
16     -32    
-160   16     
-208   656    
352    -400   
-320   -48    
-320   320    
928    768    
-768   1120   
192    -64    
400    192    
160    -16    
-240   32     
-80    48     
-16    128    
-16    -80    
32     -176   
112    64     
-208   96     
112    128    
288    240    
-272   0      
-192   304    
64     224    
-16    -64    
128    128    
16     112    
-832   480    
640    -144   
-640   -160   
208    -288   
96     32     
240    224    
-128   -272   
-480   -496   
384    96     
96     304    
-128   0      
-128   -176   
-96    208    
112    96     
48     -128   
-240   -80    
-96    128    
112    96     
-48    0      
-368   -112   
224    48     
-80    -80    
-112   96     
288    288    
-64    368    
-288   192    
96     0      
-80    64     
256    -320   
32     464    
1136   -368   
-2000  160    
1056   -304   
-48    128    
-784   -544   
48     160    
-48    656    
160    1328   
-128   -608   
-208   0      
240    16     
304    144    
-224   0      
-96    576    
32     -80    
16     16     
32     -224   
-64    -352   
-208   176    
-128   -224   
736    832    
1728   128    
-1536  288    
96     -784   
704    -896   
-400   -80    
-592   -480   
720    -896   
-208   -800   
-112   -384   
336    -208   
-112   128    
-288   352    
560    208    
-128   -32    
-208   80     
-192   -256   
144    -320   
240    128    
-240   112    
16     64     
480    0      
80     224    
-976   -1920  
-512   -448   
672    560    
-112   1136   
480    224    
368    704    
-736   624    
-112   -304   
288    96     
192    -240   
-336   -288   
-192   -416   
1520   -304   
256    -128   
-16    480    
48     -32    
64     32     
416    32     
176    384    
-640   336    
-32    -64    
560    -48    
320    -528   
-112   176    
96     832    
-256   1232   
560    -1776  
-1712  -1168  
928    576    
1008   256    
-672   -400   
16     -656   
-48    -48    
400    560    
64     -384   
-160   -192   
-208   -288   
304    16     
176    64     
224    96     
-96    -64    
-416   208    
704    -80    
-144   112    
-176   -736   
-320   672    
480    656    
-48    16     
112    64     
96     0      
-384   48     
144    272    
-400   -128   
128    240    
288    -720   
-80    592    
224    352    
-208   352    
256    240    
256    336    
-160   32     
96     272    
-240   0      
64     320    
208    336    
-240   -48    
-224   128    
512    -16    
-128   -48    
192    -880   
240    192    
96     80     
-464   64     
240    384    
240    -128   
-80    -272   
-128   0      
-176   -224   
560    -208   
-320   336    
-528   128    
384    144    
-176   -224   
-80    160    
-16    -320   
0      -208   
128    -496   
64     176    
176    112    
-80    224    
0      160    
-176   -112   
432    -416   
192    176    
-448   304    
272    -144   
32     96     
-32    32     
-96    64     
240    112    
32     0      
-112   -80    
128    304    
208    -1504  
-112   0      
-96    16     
1376   176    
-3440  768    
-704   96     
2032   -656   
-1648  272    
32     -160   
512    48     
208    -192   
-176   -176   
16     192    
0      -928   
-272   352    
256    240    
320    272    
-992   400    
496    48     
272    -192   
-432   -352   
128    160    
176    -48    
-16    592    
-112   -720   
-624   224    
896    -288   
-48    96     
-576   -32    
368    240    
448    288    
-304   128    
-192   96     
256    32     
-144   128    
48     48     
176    0      
-320   144    
688    272    
-272   240    
-224   256    
-64    -32    
384    160    
-80    -32    
-112   64     
-112   -32    
128    -272   
240    -32    
-384   -128   
304    16     
-144   -64    
48     -1328  
432    448    
144    -1872  
96     656    
928    320    
-384   -176   
-256   176    
64     -496   
560    64     
-544   112    
16     -368   
-32    176    
320    16     
-64    -144   
-128   -128   
256    -272   
-80    0      
192    176    
-112   48     
-48    -1072  
32     0      
32     48     
-64    -176   
896    48     
-1344  32     
352    0      
528    176    
-1152  -128   
224    -144   
-112   -736   
-304   16     
384    96     
-112   -112   
48     32     
144    -464   
-48    -160   
-112   64     
208    48     
32     224    
-96    304    
-272   -240   
-80    -112   
112    48     
-176   48     
-64    176    
-144   0      
-448   96     
432    -464   
544    0      
-192   -736   
-272   -112   
272    -1488  
-80    80     
-256   -192   
240    32     
-64    -208   
-560   208    
320    96     
512    -96    
-320   -208   
-432   -96    
-448   -16    
80     0      
-416   80     
64     -144   
256    240    
208    -208   
-64    224    
304    -224   
160    160    
-272   -608   
-784   -816   
2128   -672   
464    -768   
-2240  592    
-32    64     
816    112    
-336   80     
-336   144    
-64    -208   
64     192    
384    -560   
-32    224    
-320   256    
-80    96     
464    -64    
368    144    
-480   -176   
-48    -32    
0      -128   
464    -240   
-240   -576   
-320   -304   
80     224    
-48    16     
-464   576    
304    -448   
32     240    
-208   -1136  
352    192    
288    176    
-400   -96    
-176   480    
400    48     
160    -144   
32     0      
-432   224    
256    -240   
-640   -32    
400    -992   
-96    -288   
-240   -400   
144    16     
176    -304   
-64    -240   
-608   704    
640    1040   
-256   -32    
-96    -1168  
352    -368   
-256   1024   
-224   -96    
384    912    
-208   -320   
-544   160    
528    400    
-336   64     
0      80     
-48    -624   
-176   240    
80     -32    
128    -96    
96     -208   
0      96     
-336   160    
176    -80    
-16    112    
-48    -272   
-64    -176   
-1184  -32    
192    192    
-48    -320   
-64    80     
-64    64     
-304   -16    
128    -224   
176    80     
-208   -96    
-352   -48    
-256   -224   
-48    80     
272    48     
240    336    
-1264  336    
304    -288   
288    368    
-32    -368   
-416   48     
64     912    
112    400    
-64    -176   
-384   -96    
0      96     
-304   112    
32     112    
-80    -16    
-160   64     
-272   256    
16     544    
128    -240   
80     0      
-32    32     
-416   1088   
880    -128   
-1040  64     
-16    -176   
208    -112   
48     144    
-208   -400   
-128   -96    
-304   -80    
-128   128    
240    -48    
16     16     
-288   -160   
288    64     
144    304    
-272   -16    
-336   768    
-32    256    
32     -48    
-16    32     
-144   -112   
112    -240   
32     64     
-16    -112   
-208   256    
368    -176   
-208   16     
320    -288   
-384   528    
608    -704   
-1872  -640   
288    -576   
160    480    
160    -176   
-224   144    
-176   144    
-48    -1392  
816    672    
-432   928    
-384   688    
-480   128    
0      -128   
352    0      
-160   -96    
-384   160    
112    -32    
384    528    
-144   464    
-144   480    
-208   -688   
1328   336    
-1232  -400   
-336   -624   
592    -576   
208    1328   
-800   1376   
-208   1280   
608    -160   
-512   -352   
-80    224    
400    96     
48     112    
-544   48     
144    240    
256    -80    
-288   32     
-128   -304   
32     -112   
-80    -64    
32     272    
0      144    
368    256    
-832   112    
-480   -832   
80     -144   
224    224    
-288   -144   
-80    80     
-128   -672   
-176   -144   
176    160    
-160   -176   
192    112    
48     -288   
160    112    
-544   -832   
-336   64     
496    256    
-240   -32    
-224   -48    
320    64     
240    -224   
128    48     
-160   -80    
304    192    
560    16     
-224   0      
-176   688    
-48    -768   
-528   2160   
512    640    
-672   -448   
-640   -96    
1120   192    
304    208    
-1248  288    
80     -80    
464    160    
416    -80    
-480   64     
-176   48     
208    48     
-144   192    
80     -48    
-48    240    
-80    -240   
-96    176    
176    -464   
-544   48     
448    -192   
-96    208    
256    208    
-656   -112   
-256   160    
64     64     
240    -112   
-192   96     
-112   496    
208    -96    
-176   384    
80     96     
128    304    
16     368    
-32    176    
-32    288    
144    0      
176    384    
-160   224    
80     64     
-336   -16    
272    336    
192    -64    
80     160    
32     -80    
-224   352    
96     432    
160    656    
32     384    
0      192    
-224   176    
-112   32     
400    -16    
272    400    
-1200  128    
592    -64    
416    -416   
-976   -240   
160    -144   
-64    -128   
288    -592   
-96    128    
-144   112    
48     96     
-48    0      
32     -80    
-16    48     
32     64     
0      0      
176    160    
-192   48     
144    32     
16     144    
-144   -32    
64     -32    
448    -688   
-368   192    
272    128    
-208   112    
176    208    
320    -2464  
-2832  2160   
1216   352    
592    320    
-128   144    
-608   0      
-48    16     
160    480    
368    -144   
-80    -160   
-48    -416   
0      112    
-128   224    
304    0      
-528   336    
432    96     
96     64     
-272   48     
400    160    
64     144    
512    1552   
-1376  16     
-64    80     
1104   -128   
-560   -128   
-432   -16    
240    224    
192    -640   
288    -144   
-304   -96    
-80    128    
144    224    
64     64     
-48    -96    
176    32     
-144   112    
64     160    
304    -48    
-512   -16    
352    80     
-96    0      
32     32     
80     -624   
-240   -32    
112    32     
384    80     
-256   112    
-64    80     
112    16     
-448   -1504  
1344   1056   
2288   -112   
-1744  -160   
32     -64    
1056   16     
-624   -288   
-128   288    
464    -736   
-240   144    
-112   -1968  
192    176    
112    96     
-240   64     
288    32     
0      0      
-48    176    
48     64     
-64    16     
0      -96    
-48    128    
-112   -560   
1168   336    
-1072  -368   
240    -432   
336    -176   
-320   448    
112    -192   
416    272    
224    -16    
-80    80     
-240   208    
112    128    
144    64     
16     0      
-160   128    
320    -832   
32     320    
-576   -128   
80     48     
240    -272   
-112   48     
-576   -96    
592    -448   
112    240    
-288   0      
416    -32    
480    144    
-320   -32    
-416   -304   
256    128    
176    -48    
0      160    
-160   0      
48     -80    
304    -400   
-720   192    
784    32     
512    -48    
16     224    
256    -80    
-240   128    
0      -16    
96     48     
-48    0      
-16    -32    
496    48     
480    64     
-352   -368   
240    416    
-48    320    
544    2672   
848    -192   
-2064  -1632  
-544   -64    
2336   -864   
-704   -1792  
-336   -1424  
912    -480   
176    192    
-672   -2080  
-48    -240   
400    -272   
-64    -80    
-176   -16    
240    368    
-176   608    
48     -192   
656    -896   
-432   496    
-256   -64    
304    -304   
320    -320   
16     -384   
48     -560   
224    -784   
48     -32    
-128   -352   
-48    64     
96     512    
48     -240   
80     -304   
-160   384    
112    432    
48     128    
64     208    
112    256    
176    576    
-240   0      
160    16     
224    -400   
-80    128    
-48    -352   
32     272    
0      -1120  
624    592    
-176   -736   
-112   -176   
-208   -944   
144    576    
-416   -608   
-144   -640   
592    -560   
-656   -416   
32     -1312  
240    -320   
-32    368    
-96    -1472  
-112   -800   
160    -832   
-240   80     
256    160    
-192   32     
-240   -96    
320    16     
-16    384    
-240   224    
-288   208    
-32    -576   
-432   -176   
144    -64    
96     48     
304    -112   
-336   -64    
160    -528   
368    96     
-96    176    
160    384    
-224   576    
64     -32    
288    -32    
-272   -272   
416    -784   
32     176    
272    -288   
-384   -224   
-560   224    
560    -176   
-16    128    
48     -224   
-16    32     
-112   48     
64     -16    
128    -144   
-96    -48    
-208   48     
160    -272   
-208   -464   
-48    -720   
-736   -448   
112    -320   
-512   -448   
272    -352   
-32    -224   
-16    -848   
144    192    
96     -736   
224    -64    
-368   -304   
176    -80    
272    -96    
-208   -96    
-96    -32    
144    -96    
-320   64     
80     432    
96     96     
128    -960   
-176   624    
-64    -352   
96     160    
608    112    
-288   32     
-304   192    
64     128    
304    -336   
-176   -288   
-432   48     
16     -16    
576    -112   
160    96     
1248   -288   
-2000  432    
32     -672   
1520   112    
-816   -256   
-320   -160   
32     -160   
-224   -336   
-112   -256   
-96    96     
96     16     
224    112    
32     -256   
-624   -144   
112    -368   
112    112    
112    128    
-272   176    
-96    -32    
128    80     
-864   -448   
1232   -416   
96     -896   
-1664  -224   
928    304    
-448   -544   
-848   80     
176    -128   
0      -80    
96     -96    
112    112    
-128   -48    
-16    176    
-720   -160   
-64    16     
288    32     
-480   -160   
-416   176    
192    64     
0      96     
-192   0      
384    -256   
-256   144    
-32    80     
128    -480   
-400   -272   
-304   -288   
480    240    
272    -32    
-656   80     
-80    48     
240    -96    
528    48     
-176   -112   
-176   32     
64     -32    
-144   -144   
-64    528    
-144   -48    
-400   -304   
432    80     
-112   -128   
0      144    
64     48     
-304   -640   
-272   0      
544    96     
-816   64     
-288   -2128  
-176   -3232  
-2240  -1296  
448    -16    
704    352    
-400   0      
-1248  192    
-400   -208   
336    288    
160    -96    
-112   336    
160    -208   
32     288    
-384   32     
-96    128    
112    128    
48     176    
-320   -16    
-96    32     
80     0      
704    -176   
-928   160    
400    128    
-384   -128   
-528   32     
592    192    
640    64     
-768   32     
-176   112    
1008   -80    
-560   112    
48     96     
128    112    
-80    80     
-192   208    
480    304    
-608   224    
-240   -64    
160    -160   
64     80     
32     80     
80     48     
-368   16     
272    -16    
-96    16     
496    96     
288    224    
-512   -32    
144    272    
304    64     
-32    192    
-240   -32    
192    96     
-1536  -32    
544    96     
240    16     
-528   -48    
256    368    
368    576    
224    272    
-352   176    
416    240    
-16    16     
16     112    
304    192    
-80    304    
-736   -528   
688    -592   
48     160    
-416   112    
320    -352   
-208   160    
64     160    
256    16     
-224   -48    
-192   16     
448    352    
-432   96     
-64    -464   
-208   -352   
16     416    
1056   3456   
-1616  -1232  
-1632  320    
1328   -480   
128    -352   
-448   16     
-96    -32    
944    176    
-192   176    
-368   -128   
64     160    
-48    160    
256    -80    
-64    432    
-512   -368   
128    -192   
240    192    
-176   32     
32     -608   
96     64     
-32    -416   
512    -512   
-752   480    
160    256    
608    96     
-592   336    
-144   0      
384    224    
-16    -352   
-224   -208   
-144   144    
240    -16    
0      320    
48     -160   
0      160    
-64    96     
112    160    
288    -128   
-320   144    
-80    -80    
16     128    
64     0      
-64    48     
-176   -32    
176    64     
240    32     
-160   64     
-224   96     
96     288    
-512   16     
1568   160    
32     432    
-1056  -240   
592    64     
0      -368   
-416   272    
288    240    
-128   64     
112    -96    
112    -432   
-224   112    
-192   192    
512    288    
80     144    
-400   16     
176    32     
32     144    
-288   -160   
64     128    
48     16     
144    704    
480    -16    
-2000  -624   
1824   -208   
944    400    
-992   -224   
528    -144   
-64    208    
224    -16    
-304   48     
-480   160    
304    112    
208    64     
-320   16     
-48    144    
352    80     
16     416    
160    208    
-224   64     
-32    -688   
-208   48     
64     160    
-32    1008   
128    -368   
-272   112    
944    800    
-560   -272   
-848   -48    
656    208    
48     80     
-368   80     
-64    80     
64     112    
-160   208    
112    -608   
448    -80    
-320   1088   
336    -400   
-240   -576   
-512   352    
32     144    
240    16     
176    160    
-656   208    
-400   -304   
416    -16    
448    -80    
-752   -624   
-272   -64    
624    -400   
-880   1232   
-288   48     
96     0      
336    1424   
448    288    
-608   -608   
-160   -448   
240    -304   
176    -464   
-208   -160   
-224   336    
-192   64     
160    -208   
48     128    
-224   64     
-32    304    
480    -592   
64     -208   
-384   -784   
208    144    
112    -48    
96     32     
-448   64     
400    144    
-64    -704   
-416   -144   
160    704    
192    32     
-320   -304   
16     352    
80     624    
352    -736   
-256   -112   
64     -176   
352    544    
-288   -816   
-96    -144   
288    688    
96     -64    
-336   -528   
368    288    
416    416    
-400   -32    
-160   16     
0      464    
512    32     
64     -672   
-288   608    
160    -64    
320    320    
416    -80    
-1056  272    
-272   800    
752    1744   
416    784    
-96    416    
-80    1888   
320    -848   
176    -352   
-368   -768   
80     144    
224    -256   
64     176    
96     -64    
-80    -192   
-288   -496   
304    64     
32     1344   
-480   304    
-112   -208   
240    16     
-96    -128   
112    -64    
-32    208    
-160   400    
192    576    
-160   720    
-464   1104   
-160   -304   
432    -48    
-16    -928   
-352   -1808  
-144   416    
1152   432    
-608   704    
-224   -352   
128    -432   
144    208    
80     -208   
-208   -48    
224    -32    
160    -224   
-160   416    
-32    -48    
96     -800   
400    256    
192    -112   
-64    96     
-112   -880   
112    384    
-624   1056   
752    128    
-736   192    
-32    672    
336    992    
-336   -848   
144    -720   
320    448    
48     144    
-208   -336   
192    -32    
176    -336   
-48    -96    
96     64     
-192   -32    
256    -16    
16     -48    
-112   -144   
320    448    
-144   0      
-64    -224   
80     160    
192    -656   
256    -64    
-288   -96    
-48    32     
320    80     
-144   -176   
656    320    
624    1392   
-1392  -1136  
-2208  176    
112    -112   
1008   32     
-352   -592   
-544   -64    
400    720    
608    -1632  
-640   48     
64     -208   
128    48     
96     -64    
-176   64     
224    48     
-256   64     
-80    -144   
256    144    
-720   -144   
-112   80     
128    48     
-288   -16    
1888   -352   
-1072  -336   
64     -16    
432    32     
-16    -16    
-64    16     
-208   -224   
208    -80    
176    -80    
-16    16     
80     -32    
-368   0      
208    336    
-176   -144   
-304   -176   
256    208    
-416   -144   
-272   192    
64     -1440  
336    432    
128    -288   
-912   144    
96     -80    
464    -96    
-512   -160   
-192   -272   
-128   80     
-80    -176   
-1216  -224   
416    -128   
144    -128   
-96    -208   
80     80     
608    0      
-512   848    
-176   560    
208    -96    
-640   -80    
304    -96    
-32    -272   
-224   0      
-368   80     
32     -112   
224    416    
736    -48    
-464   128    
-432   -176   
144    -960   
-1200  1552   
912    160    
-1072  240    
336    -512   
448    112    
-480   -32    
-288   -16    
592    -112   
-32    -80    
-336   208    
96     48     
176    -64    
288    -80    
96     -160   
-48    48     
112    -208   
304    32     
-96    80     
352    128    
-1280  -272   
768    96     
256    -144   
-656   -144   
240    144    
480    128    
-784   -144   
-1232  -112   
240    -128   
-624   160    
48     -176   
-144   160    
192    -176   
-208   -16    
-336   -112   
-48    -80    
-192   176    
-240   -80    
144    112    
112    16     
-560   -112   
-144   32     
-144   0      
256    96     
48     -112   
16     16     
32     -32    
-192   -48    
64     -16    
-544   -48    
432    0      
-176   32     
32     -112   
-1120  224    
544    -224   
112    368    
512    144    
-336   -64    
272    -176   
48     -160   
-144   32     
32     -32    
-240   -80    
16     112    
240    288    
-16    -64    
-272   -96    
64     64     
-432   -192   
96     -608   
48     128    
-240   240    
32     -384   
-48    -208   
-80    -208   
80     192    
144    -320   
-224   48     
48     352    
304    208    
-48    0      
240    -576   
-2608  2208   
1568   96     
720    1376   
-448   16     
-832   32     
496    784    
-320   1216   
112    208    
-48    -192   
-224   -144   
-80    80     
240    48     
-96    144    
-624   48     
160    -352   
160    -48    
0      -208   
80     16     
-624   32     
-256   -576   
416    -880   
-656   144    
800    -384   
-496   624    
64     80     
-48    224    
-64    96     
160    -208   
96     192    
-336   272    
-272   1024   
352    -112   
-288   -64    
-352   -112   
-144   -352   
208    -272   
336    416    
-464   272    
-176   240    
112    16     
-32    176    
-144   112    
16     16     
32     0      
48     -64    
32     -112   
-192   64     
-16    -16    
16     272    
-768   1952   
1424   384    
-848   -112   
368    16     
-80    0      
-112   80     
-80    -48    
48     -160   
-64    -288   
-272   -320   
-160   -208   
288    32     
-336   -128   
112    16     
208    -272   
-240   32     
0      240    
160    112    
32     80     
96     16     
-80    16     
1168   400    
-1952  -336   
208    -912   
1088   0      
-880   288    
-736   -896   
272    -1376  
560    -800   
-896   -528   
-144   -16    
336    64     
128    160    
-144   -112   
-128   -224   
272    16     
-272   -176   
528    -400   
0      -96    
-336   80     
208    -32    
128    320    
-192   -560   
176    -448   
384    -656   
-1040  -928   
-48    -448   
560    704    
-16    112    
-16    32     
224    208    
-352   96     
16     -384   
-608   -848   
64     -448   
240    368    
64     -144   
496    -304   
48     -704   
-624   -384   
96     352    
-48    240    
-80    -224   
192    160    
112    -432   
-416   -32    
-256   64     
-96    288    
48     48     
240    64     
352    -1120  
-2112  -464   
672    208    
1184   240    
-544   464    
-928   416    
112    80     
752    1712   
384    -832   
-480   -656   
-160   -128   
400    576    
112    96     
-352   64     
-64    -32    
-208   384    
432    512    
-352   400    
-112   -80    
272    -304   
-192   48     
16     208    
416    224    
288    -208   
-624   -112   
-160   -176   
416    -208   
0      -320   
112    -496   
-160   784    
-192   48     
352    192    
-112   -128   
-304   -576   
176    464    
16     384    
-96    -288   
96     144    
-608   -688   
256    -1168  
240    -992   
-288   -144   
-128   96     
144    -128   
496    -272   
-480   -176   
-208   80     
352    -1696  
336    -288   
-448   544    
-272   448    
624    480    
864    864    
-672   304    
-432   1616   
1296   144    
80     1504   
-272   864    
112    16     
-80    208    
32     880    
224    576    
128    -192   
-96    -256   
96     64     
304    -1184  
-336   -320   
-160   -528   
576    -32    
-144   752    
-192   336    
0      16     
256    -240   
-80    -80    
-160   880    
256    608    
-128   80     
-96    352    
320    -736   
-16    32     
528    208    
-2064  1216   
800    -992   
1424   288    
-368   1408   
-400   1424   
256    -320   
224    -256   
-400   48     
176    -368   
-96    -160   
-128   -256   
208    160    
32     -272   
-256   -64    
144    -112   
512    176    
80     -1456  
-240   304    
48     224    
-48    -416   
896    -592   
-656   896    
-208   -32    
320    -544   
112    1088   
160    160    
64     224    
192    80     
48     176    
48     352    
-32    176    
-272   -16    
192    64     
32     -400   
-32    352    
192    32     
208    128    
-240   48     
64     16     
176    128    
-176   -176   
128    112    
-96    -224   
32     224    
432    -416   
-96    144    
-144   -640   
80     368    
176    -32    
-176   656    
3296   960    
-848   -240   
-992   -16    
1952   592    
-320   368    
-528   -160   
464    320    
384    -480   
-288   160    
224    -144   
32     48     
96     -32    
-384   32     
304    80     
176    144    
-304   -224   
288    64     
32     80     
-272   -64    
400    528    
752    -528   
-1376  192    
672    -448   
192    224    
-720   -336   
-192   128    
864    112    
128    -64    
-512   -96    
-80    -928   
112    32     
160    -16    
-48    64     
96     16     
-128   -768   
-16    -288   
48     -1984  
160    336    
400    -16    
-112   -64    
-128   160    
368    -432   
-320   -2240  
-688   304    
640    240    
0      448    
-192   -96    
-32    -640   
176    -400   
336    -160   
-256   -48    
-208   64     
0      160    
-32    -1248  
0      -80    
-144   144    
48     96     
-112   -64    
96     32     
-144   -64    
-128   -48    
0      -48    
240    -112   
-128   48     
-720   160    
112    240    
96     -144   
-480   -768   
2720   1344   
-2416  352    
-480   624    
2512   384    
-432   -240   
-928   48     
-48    -592   
352    256    
80     48     
-480   -16    
384    -16    
224    32     
-336   -176   
80     -16    
496    -176   
-192   -160   
0      -64    
336    -928   
-400   -320   
432    -96    
-64    -208   
-208   -192   
128    192    
-368   -16    
-32    16     
-32    80     
144    -112   
-704   48     
384    320    
-16    192    
-208   -128   
320    160    
64     -224   
144    272    
-144   -432   
80     352    
240    -112   
208    -128   
-160   -128   
304    -144   
48     64     
16     -32    
-368   144    
256    -160   
-496   32     
272    -128   
-96    32     
256    32     
-432   80     
352    -560   
352    -48    
-96    -384   
-1168  192    
752    -320   
-400   -240   
-80    -160   
64     -208   
-240   -688   
-128   -432   
-1120  -176   
32     -288   
-288   -112   
176    -272   
304    48     
-176   -656   
-112   128    
-32    304    
384    96     
-32    528    
32     592    
64     672    
96     176    
-112   80     
160    128    
-112   -112   
96     -272   
-544   -240   
224    0      
352    512    
-128   -368   
-496   -1184  
1264   -816   
-400   608    
-304   -416   
-224   32     
240    -320   
128    -208   
-224   224    
144    -400   
-64    -96    
-16    -32    
240    0      
-176   -192   
-96    -16    
224    -192   
256    32     
-336   -32    
128    384    
32     -400   
80     -208   
-560   -592   
544    -960   
-192   608    
256    592    
-528   544    
-768   -528   
288    -80    
-1088  16     
-240   16     
32     48     
144    416    
48     -336   
-368   -272   
-400   16     
64     416    
-160   32     
-80    -240   
384    272    
80     -80    
-96    112    
-256   -208   
16     192    
-16    -192   
144    160    
-80    -32    
-176   -48    
48     -64    
-176   144    
-224   176    
400    -448   
-608   -848   
-992   240    
1200   -208   
-1360  528    
720    -64    
368    -544   
-496   544    
-128   -112   
96     96     
304    -304   
-544   -80    
-304   112    
48     80     
368    -208   
-256   368    
-192   112    
-432   -32    
272    608    
-368   -64    
16     112    
192    768    
832    -400   
-2208  -112   
64     336    
1328   -144   
-368   -320   
-368   -704   
624    -528   
16     208    
-512   1408   
192    336    
-512   -304   
80     -32    
304    256    
-400   400    
-352   96     
432    -272   
176    -304   
-80    128    
-64    144    
64     400    
320    384    
-384   -96    
-48    -192   
1056   16     
-64    -48    
-1088  784    
784    -1056  
-608   -240   
-32    -48    
192    -368   
176    176    
-144   -320   
-576   448    
448    416    
-464   192    
240    1296   
-336   1168   
-256   304    
544    -288   
-80    416    
-576   16     
-256   -896   
-112   -448   
-112   -480   
-272   -768   
400    256    
240    496    
-208   304    
32     160    
-528   -1632  
-1040  -224   
-240   -320   
448    -176   
80     -1360  
-704   -1024  
-96    -160   
0      576    
-256   256    
352    -16    
-496   -32    
-352   48     
-64    624    
352    -112   
128    -48    
-208   80     
128    208    
224    240    
-16    368    
-32    -160   
-128   48     
32     0      
80     176    
-592   352    
576    608    
64     656    
208    432    
-208   624    
0      800    
128    -96    
176    -736   
-496   -736   
-128   448    
384    368    
208    208    
-304   384    
-16    320    
96     352    
0      464    
128    48     
64     64     
112    96     
272    16     
-400   -320   
416    -16    
96     128    
-112   -592   
-96    96     
192    704    
-160   416    
80     208    
416    -192   
-608   -704   
-688   -608   
688    -272   
656    128    
-224   368    
48     768    
192    -176   
304    -752   
-32    -304   
-304   128    
48     -352   
-288   192    
288    -48    
-112   32     
-80    -336   
-176   -640   
192    -480   
-80    80     
-32    256    
48     240    
96     208    
32     272    
-432   48     
576    -784   
96     -96    
-80    -400   
480    176    
-224   16     
208    2720   
1664   608    
-1248  112    
-160   160    
624    -128   
576    608    
-192   432    
-144   448    
272    -32    
-80    128    
160    -192   
112    160    
-80    80     
192    -64    
176    240    
-80    -176   
64     128    
160    336    
-64    48     
224    144    
768    336    
-1856  336    
432    -112   
384    -16    
-416   -48    
208    240    
64     -144   
-256   -288   
48     -192   
320    256    
160    176    
-224   96     
48     -656   
-48    128    
-144   16     
0      240    
432    0      
-240   128    
-64    -32    
224    112    
48     -80    
-128   128    
-32    -80    
112    64     
0      64     
-64    64     
160    32     
-128   -272   
16     160    
80     -720   
-2336  -720   
1792   64     
704    -64    
80     288    
64     -144   
-400   32     
-176   -112   
96     144    
112    48     
96     64     
-96    80     
96     112    
224    -16    
-720   -16    
304    -272   
208    48     
-64    144    
-32    -48    
192    80     
-48    112    
-368   -592   
-720   128    
1824   -432   
-1632  -112   
-352   288    
1392   32     
-432   176    
-144   -624   
-240   304    
208    -1328  
160    80     
-96    -32    
-48    112    
-80    16     
192    144    
32     -48    
128    -96    
-400   16     
464    80     
-144   0      
-48    400    
80     64     
-80    80     
272    -64    
80     -64    
-240   880    
128    -1136  
720    -64    
256    -240   
-272   16     
64     64     
272    336    
-80    -32    
-64    160    
176    32     
-192   224    
64     96     
-688   272    
224    -224   
112    -112   
224    64     
0      80     
-144   16     
-144   -528   
432    48     
208    32     
-64    144    
-208   0      
736    368    
-2096  3120   
704    -112   
480    96     
-976   -720   
608    112    
576    -400   
-736   464    
16     -416   
752    272    
512    -304   
-752   80     
96     -16    
192    208    
-192   -96    
208    256    
-96    160    
-272   -80    
384    128    
240    -288   
-880   64     
416    -912   
128    16     
240    -192   
688    64     
-560   80     
-160   352    
720    -32    
-688   48     
16     -336   
112    -320   
0      64     
48     -224   
144    144    
32     -176   
64     -80    
-48    -352   
-240   16     
224    -336   
32     -64    
-128   16     
-144   -928   
208    272    
304    -240   
-128   496    
96     -160   
224    -752   
304    -352   
-320   -528   
32     -256   
32     176    
-16    -96    
304    944    
336    0      
-272   -256   
-96    -480   
-32    -1024  
224    160    
32     16     
-240   0      
-384   240    
-96    208    
64     176    
192    160    
-160   -80    
-48    -224   
-144   272    
432    688    
416    288    
-208   -560   
-112   -256   
192    -64    
304    224    
-32    -80    
-48    -64    
-32    -128   
192    -48    
272    176    
-192   -48    
48     -208   
48     -96    
864    1584   
-1056  928    
-208   -304   
1104   -144   
-16    416    
-864   368    
208    1280   
656    0      
-336   -128   
-304   -144   
240    176    
-80    0      
-16    -112   
32     -144   
-224   -544   
224    160    
192    -576   
-16    416    
-128   -32    
112    -32    
592    64     
-944   1008   
336    -272   
464    112    
-400   -16    
-160   480    
-816   320    
80     -80    
0      -352   
48     32     
-48    16     
-128   -256   
80     80     
0      -1072  
48     160    
256    -272   
-352   -320   
-112   384    
528    112    
-368   0      
-208   -96    
-400   -128   
288    -208   
16     16     
144    96     
-544   160    
240    -320   
48     -32    
-80    -1104  
-288   288    
-224   1456   
1856   432    
-448   160    
-208   -240   
128    -592   
64     -608   
-688   368    
96     592    
-96    -400   
-64    -304   
-128   -480   
128    -96    
-64    -128   
32     -144   
-16    -432   
112    400    
304    128    
-512   848    
64     -1344  
0      0      
288    -208   
-2096  -448   
-32    400    
592    -512   
-288   -656   
288    352    
272    752    
-1040  -160   
-224   -1424  
512    -960   
-432   -688   
-416   -480   
304    -816   
-240   -336   
-368   -336   
-16    112    
352    304    
-688   320    
-128   48     
224    -112   
0      144    
-112   -320   
-32    -400   
-96    -336   
528    880    
-32    1232   
240    288    
-560   -640   
128    -512   
336    -176   
-320   -256   
-240   -352   
576    368    
-848   592    
304    -144   
400    -16    
-432   1152   
-1392  1088   
-176   -48    
-144   -144   
-176   -48    
-176   48     
-416   64     
544    -304   
-272   -256   
32     -368   
16     96     
96     -528   
176    -240   
-576   -864   
896    -1392  
720    -176   
-1248  704    
-800   112    
784    -80    
480    -1248  
-944   -272   
-304   240    
192    160    
432    16     
-64    -48    
-368   256    
-160   96     
288    -96    
640    80     
-272   144    
-464   -96    
160    80     
-16    -896   
64     -768   
-304   -256   
224    528    
-416   -240   
-576   160    
992    -464   
-272   320    
-416   -176   
-64    80     
224    -448   
320    -80    
-112   464    
-160   -80    
-112   128    
-336   176    
256    -16    
96     -128   
-352   -32    
288    16     
128    32     
0      -16    
-192   -224   
128    -192   
-736   -288   
-272   96     
256    48     
192    1024   
32     112    
176    -288   
-96    96     
-48    112    
560    1248   
-1104  384    
-64    272    
464    64     
-256   -32    
-80    -144   
-32    -96    
-592   -48    
128    144    
-32    -48    
32     -32    
224    80     
368    96     
-288   96     
-240   -16    
208    32     
144    224    
-352   208    
16     -480   
16     208    
64     112    
64     176    
-176   0      
-16    112    
-400   -640   
0      -624   
128    192    
-160   16     
336    -304   
-304   -1264  
1408   -1056  
-1456  176    
-528   -272   
560    128    
-336   192    
-288   880    
928    368    
0      -320   
-368   96     
-592   0      
288    -272   
-32    176    
32     544    
-352   256    
240    -80    
-96    -208   
-160   160    
160    0      
-160   160    
160    192    
-176   1088   
1280   32     
-544   64     
-912   64     
416    96     
608    128    
-496   -304   
-208   192    
0      -48    
144    16     
48     96     
-64    32     
-80    128    
288    -112   
-128   160    
-176   80     
-192   32     
-64    -48    
48     32     
160    112    
-16    176    
128    64     
-240   48     
96     128    
432    80     
-416   176    
288    32     
-80    48     
-64    192    
-192   1312   
1536   224    
-1328  112    
-352   -336   
1376   96     
-224   48     
-304   128    
80     -48    
64     -64    
-288   64     
192    144    
192    112    
-304   -32    
-128   208    
592    112    
-272   192    
-320   80     
496    32     
-144   -80    
64     64     
-48    304    
-192   416    
2192   112    
-800   48     
-880   16     
1264   80     
-48    192    
-560   48     
656    48     
176    192    
-528   48     
-144   16     
512    48     
-528   -48    
48     144    
32     112    
160    48     
-48    240    
-160   -32    
176    48     
-80    192    
352    736    
-704   -16    
-752   160    
464    32     
384    352    
-432   -128   
-144   -448   
-496   464    
512    -64    
16     80     
160    256    
-240   272    
16     128    
-224   -16    
320    0      
-96    192    
96     112    
176    0      
64     -32    
-16    176    
-160   64     
384    -128   
-32    16     
-256   64     
368    16     
64     112    
128    -16    
-144   240    
32     -352   
1776   -1648  
432    -80    
-1376  416    
-448   336    
480    16     
656    16     
-688   176    
0      -240   
576    48     
-576   176    
192    128    
224    64     
32     256    
-16    -48    
240    224    
-592   32     
208    112    
-112   -128   
240    -368   
64     -304   
-208   224    
64     160    
-608   -336   
592    -32    
-272   -448   
304    192    
192    32     
16     496    
-160   448    
176    512    
448    -160   
-464   -96    
-416   48     
512    400    
544    0      
-544   272    
0      1088   
624    96     
0      368    
-160   96     
48     352    
-96    208    
-16    64     
80     304    
-16    672    
64     528    
48     -32    
64     432    
64     624    
-64    -288   
-240   384    
-176   16     
-336   208    
288    416    
-128   304    
272    336    
32     -688   
32     1952   
240    832    
-240   32     
16     -224   
128    192    
80     -176   
-144   560    
96     176    
-112   -160   
304    -288   
336    -224   
-512   -144   
-80    -256   
160    160    
32     -160   
0      0      
-112   -240   
352    0      
32     384    
-304   368    
128    -32    
208    16     
16     96     
720    544    
-1008  624    
464    -528   
208    400    
-112   -192   
-144   272    
32     -144   
112    0      
240    -880   
-48    48     
-128   32     
128    96     
112    144    
-96    112    
-96    32     
-256   144    
272    -16    
-96    -192   
80     0      
-144   -192   
576    240    
512    32     
-768   32     
144    96     
48     224    
0      -80    
144    -368   
96     -128   
-128   128    
16     224    
352    32     
-64    80     
-32    -32    
128    224    
144    112    
-368   0      
128    224    
80     656    
-112   192    
64     -80    
208    -64    
0      -1152  
-32    80     
-64    -352   
224    -1536  
48     160    
96     -1472  
96     -400   
-240   528    
560    -800   
-2448  96     
560    464    
1248   -608   
-112   -368   
-288   -752   
304    16     
240    832    
-432   -544   
-1040  -32    
-80    0      
-16    -16    
352    -1040  
-160   -480   
-176   -864   
144    208    
144    -48    
16     -256   
-480   416    
192    704    
480    1264   
368    -848   
-2480  -320   
1472   -816   
224    -704   
-464   -352   
16     -880   
928    -1632  
-496   -1264  
-256   -880   
-112   -336   
-128   -1376  
256    64     
256    -64    
144    -144   
-192   208    
112    -400   
464    -720   
-176   16     
-176   -752   
-304   -208   
64     -32    
-48    -384   
-288   336    
320    -544   
96     1040   
-448   128    
-224   368    
-64    96     
-48    80     
-16    -48    
-352   32     
0      -192   
48     112    
-64    192    
512    -144   
-384   -48    
112    144    
400    -128   
-464   144    
-160   80     
112    -240   
352    880    
-384   -240   
-208   240    
272    -272   
-160   80     
80     -96    
-416   -400   
-192   -640   
848    1440   
736    -112   
-1472  -800   
-1152  -112   
1584   -160   
448    80     
-1088  -80    
288    272    
-16    -528   
448    128    
-288   -64    
-112   -16    
144    -48    
-320   32     
384    -80    
-144   0      
-64    -32    
80     -144   
-160   464    
320    -1152  
-256   -544   
-48    -160   
64     64     
-160   -928   
448    -16    
-16    16     
48     -176   
-16    288    
176    32     
-352   64     
0      -320   
-112   -16    
32     480    
-96    160    
-224   0      
176    -64    
416    -96    
-112   256    
-640   -528   
528    112    
432    16     
-368   48     
-320   -256   
-400   -400   
448    -16    
-320   -144   
-112   -16    
160    16     
32     176    
16     48     
-192   -512   
624    -832   
16     192    
-224   -240   
-384   0      
-192   -288   
-160   -112   
176    0      
-16    -48    
-32    -16    
32     96     
-128   160    
112    -64    
-288   -32    
96     -144   
304    464    
-864   112    
-256   -16    
288    -400   
-112   160    
-288   128    
16     0      
-144   96     
-400   144    
176    -48    
-208   -112   
16     544    
112    192    
-80    -160   
-704   -528   
1872   1376   
2304   592    
-1696  352    
-432   416    
368    -400   
-464   -240   
272    -176   
240    48     
-784   272    
112    -320   
352    -336   
-96    304    
-176   112    
96     384    
656    -240   
-384   -160   
-112   288    
112    -64    
-112   -256   
32     0      
-400   848    
1200   -336   
-368   -240   
-1136  -112   
1008   288    
48     -64    
-816   -304   
64     64     
400    -256   
-224   -128   
144    -32    
-32    -176   
80     64     
240    240    
-208   16     
-432   320    
560    -64    
-320   192    
320    -96    
-256   16     
-32    -32    
32     144    
160    -112   
-64    112    
176    -96    
-64    224    
48     -32    
-32    64     
16     176    
-496   -480   
160    -16    
192    144    
-480   0      
-352   -64    
0      128    
432    -464   
48     -368   
-528   -496   
-64    -16    
160    48     
64     80     
-96    112    
272    304    
-464   -80    
-208   240    
272    -96    
-368   -144   
352    -176   
0      -16    
-128   64     
-448   -672   
-656   576    
1632   -64    
-800   16     
-608   64     
720    0      
-176   112    
-800   -256   
-112   160    
656    -16    
-224   64     
-48    80     
-96    16     
-128   -128   
-32    32     
80     0      
-128   0      
-160   112    
192    64     
-336   -48    
-128   -160   
672    528    
352    -608   
-1136  304    
688    192    
-256   -32    
-272   -80    
624    224    
-304   128    
-320   16     
368    48     
400    96     
-432   -64    
-208   -128   
-736   -272   
432    -272   
-352   432    
80     -144   
-112   144    
96     -64    
272    576    
-192   -144   
-480   208    
368    -32    
208    -112   
-288   -16    
-224   -32    
-384   -528   
1232   -208   
-624   -3056  
-1680  -1440  
1456   384    
800    368    
-512   16     
-144   368    
384    896    
-640   544    
96     -144   
608    32     
16     112    
-480   -48    
160    240    
112    -16    
32     240    
16     176    
64     272    
-240   160    
352    432    
112    896    
-160   960    
-16    32     
32     64     
624    -128   
-240   352    
-384   320    
-64    -368   
80     496    
272    1008   
-48    368    
-336   -96    
208    256    
192    80     
-160   -320   
-160   -192   
16     64     
144    64     
320    -272   
48     224    
-160   -96    
288    32     
-400   80     
16     -96    
-80    -256   
-48    1024   
208    1280   
-256   416    
352    -112   
48     -288   
-128   352    
-144   -144   
-272   -544   
768    -800   
-176   -1088  
-528   464    
624    1104   
-48    304    
-240   80     
-208   -32    
208    48     
336    -160   
-384   -80    
-16    64     
64     560    
-448   496    
-16    -160   
-112   -112   
112    32     
544    16     
-272   0      
-16    64     
208    96     
256    48     
-96    144    
96     160    
128    80     
-208   -96    
-208   -208   
176    176    
0      176    
-400   -528   
1040   -960   
32     432    
176    -256   
-816   16     
128    144    
96     -224   
-176   -320   
-448   352    
160    -16    
128    -192   
112    -80    
16     224    
144    304    
-160   192    
64     48     
240    -144   
-96    -80    
80     272    
-144   160    
640    480    
-752   752    
320    -336   
464    -64    
-288   -1136  
-288   176    
512    -64    
64     -176   
-192   240    
80     208    
0      64     
-48    -112   
-16    -256   
16     208    
-16    80     
144    -32    
-80    -432   
128    -992   
-192   -688   
96     -688   
224    304    
80     -192   
-208   32     
-16    -176   
304    304    
-176   0      
80     64     
16     -112   
-80    32     
-192   -64    
800    368    
1104   224    
-1344  -432   
96     -640   
1216   -800   
-96    208    
352    -256   
-320   976    
-80    336    
160    752    
528    -128   
-224   32     
-352   0      
176    256    
512    128    
-304   0      
-336   368    
368    -352   
480    112    
-320   -272   
224    -560   
-1808  672    
1360   176    
-912   -1136  
864    -736   
-160   -32    
-608   432    
1216   -224   
64     384    
-384   -80    
48     96     
16     -16    
208    272    
-528   224    
-160   -336   
320    -32    
-64    -256   
-384   0      
128    -736   
336    144    
336    176    
-352   -624   
-336   400    
992    -96    
-160   144    
208    80     
80     -192   
-448   -256   
112    240    
176    -368   
192    -128   
176    160    
-48    -64    
-416   48     
48     -112   
944    64     
288    -480   
592    -112   
144    -112   
-176   224    
208    -336   
176    176    
-288   -32    
288    144    
240    -16    
-320   80     
-48    -112   
96     112    
192    -464   
928    2944   
-1376  2160   
0      -1008  
1776   -464   
-400   -192   
-1120  -1584  
240    -64    
1168   -144   
-464   -240   
-176   112    
528    -176   
-112   208    
112    -288   
-144   -960   
-16    32     
160    -16    
-272   0      
112    -288   
240    400    
-32    -288   
-336   64     
400    -192   
-32    160    
-944   -368   
80     16     
1072   -64    
-848   448    
80     -192   
304    -16    
336    96     
-192   -32    
-128   32     
448    -352   
-16    -272   
-64    48     
192    -144   
80     160    
480    -320   
-368   64     
192    -160   
80     -32    
-32    -1024  
368    240    
-128   192    
16     16     
-144   -128   
352    192    
-112   16     
-112   -192   
256    -112   
240    -64    
128    864    
-960   -256   
128    336    
592    256    
-704   64     
64     -144   
400    -80    
64     -176   
-176   80     
208    16     
192    80     
-160   0      
48     192    
0      64     
-144   16     
-448   464    
0      432    
-224   528    
608    -128   
-208   32     
-96    -464   
320    208    
176    -528   
-240   -16    
32     64     
320    -240   
-128   -560   
-112   -416   
32     400    
80     -256   
1216   -672   
-1680  80     
-288   -416   
16     -272   
-544   -16    
624    448    
720    416    
-560   -880   
384    -272   
-96    320    
32     -160   
432    -112   
-176   352    
-496   -144   
304    -16    
128    -80    
-32    176    
-592   -112   
-16    -192   
-112   -512   
1040   -272   
-112   224    
-816   -80    
720    -224   
-96    112    
0      -128   
64     -192   
-128   112    
176    112    
96     -16    
-192   -96    
208    128    
-160   48     
-96    48     
416    128    
-224   -32    
176    192    
0      -320   
-80    128    
208    -32    
112    16     
-352   112    
128    48     
-112   48     
368    -112   
-368   144    
48     -32    
192    80     
-176   704    
-1744  224    
3792   448    
1152   864    
-2048  -400   
1184   176    
960    -80    
-1488  112    
80     -64    
800    -80    
-512   -32    
-192   -48    
256    0      
112    128    
-272   -272   
-64    -224   
576    -48    
-1120  -32    
-32    -48    
-272   -240   
192    -96    
-288   -368   
624    560    
384    256    
-1296  0      
144    0      
384    -272   
192    224    
0      32     
240    0      
-624   0      
-320   144    
-144   -256   
-288   240    
176    -144   
-256   160    
224    16     
-480   -160   
448    320    
-176   96     
-176   80     
-1152  -160   
48     128    
-96    -816   
-240   448    
-64    -288   
272    -64    
496    960    
800    -128   
-400   64     
624    -16    
-96    96     
-240   0      
-256   48     
-64    -144   
400    0      
-272   -64    
-464   -304   
-448   304    
368    16     
-432   -928   
-144   128    
256    -96    
-144   -80    
304    64     
-96    -176   
336    0      
352    192    
96     32     
-176   0      
-304   64     
-640   -1024  
-512   -176   
0      -320   
-288   16     
496    96     
-128   -496   
-400   -512   
-320   -1168  
336    -1008  
-160   -128   
-64    528    
-224   -96    
400    336    
-128   16     
-176   144    
352    -320   
-432   -16    
-448   16     
384    416    
-128   -64    
-32    80     
-16    80     
480    -240   
-448   832    
0      144    
-144   672    
320    96     
-416   144    
16     -192   
208    96     
-272   -224   
-304   208    
64     192    
48     768    
448    592    
48     416    
16     -144   
-112   -288   
112    368    
64     784    
-112   240    
-144   -64    
144    608    
288    448    
-688   -560   
144    160    
0      416    
48     352    
256    176    
-336   -128   
576    1696   
-1072  144    
-576   -144   
368    -336   
64     -416   
-400   656    
-16    160    
432    -1200  
-368   -512   
32     336    
-16    -64    
352    448    
-144   64     
64     -496   
-256   -432   
224    -112   
112    -224   
-512   16     
32     208    
64     80     
-48    80     
-96    192    
144    -64    
80     -16    
-64    192    
112    288    
-160   688    
-32    320    
240    -80    
-80    0      
528    768    
-624   672    
336    -176   
32     256    
-80    -64    
-112   192    
80     176    
-224   400    
-64    592    
-144   32     
-224   -192   
0      -32    
240    -64    
-144   416    
-176   304    
48     128    
-48    144    
-192   32     
-80    -32    
-160   -96    
544    272    
496    -176   
-800   288    
432    -448   
-192   -608   
32     -240   
336    -272   
-16    -432   
-48    496    
-176   576    
336    32     
96     -16    
-208   320    
160    128    
-80    352    
144    -192   
-80    368    
-224   -288   
-80    144    
208    16     
32     272    
-208   112    
176    0      
-16    -32    
-192   64     
176    16     
80     192    
-64    -32    
352    -144   
-704   -1424  
-928   64     
960    -448   
-544   128    
800    48     
-592   368    
-48    304    
48     512    
16     240    
16     240    
320    272    
-272   128    
-128   64     
224    304    
448    160    
-224   112    
-256   304    
0      48     
48     128    
64     48     
-112   176    
-784   -688   
864    -480   
176    -400   
-64    144    
272    736    
672    -32    
-640   -96    
288    208    
432    112    
-256   112    
304    64     
-32    64     
-320   144    
432    48     
-144   96     
-16    -256   
96     -384   
112    80     
192    128    
224    160    
-288   -384   
-352   112    
80     -48    
528    240    
224    224    
-384   -96    
-1136  336    
-176   576    
960    -80    
-272   64     
-384   16     
64     -32    
32     48     
912    -176   
-816   416    
-64    0      
1056   672    
-320   -64    
-400   -80    
-400   96     
-16    176    
64     -512   
16     0      
0      352    
-512   -304   
-192   64     
736    16     
-608   -544   
32     -1360  
2640   -1040  
16     -2496  
-1168  416    
48     192    
464    0      
256    -384   
-352   96     
224    -48    
-304   -80    
-96    160    
240    192    
48     32     
112    -112   
-112   -32    
0      -320   
-80    128    
304    -720   
-128   -32    
-144   736    
704    48     
-832   336    
272    0      
592    32     
416    128    
-192   144    
-80    336    
-192   0      
-16    -112   
384    112    
-256   32     
-32    288    
-32    -256   
432    64     
192    32     
-224   32     
-272   224    
800    144    
-512   96     
48     240    
80     -64    
112    -144   
384    -80    
-400   -208   
-32    112    
224    -176   
32     512    
-240   -448   
224    -64    
0      -336   
-16    -112   
112    -384   
560    -128   
-384   400    
80     240    
-192   208    
-256   -496   
-288   -16    
400    -160   
144    -96    
-32    -112   
96     208    
-16    -192   
-128   16     
32     -576   
160    160    
160    -80    
-544   240    
224    48     
224    192    
-304   48     
320    -144   
112    192    
-304   224    
176    272    
320    16     
-16    144    
-304   -256   
176    400    
48     -64    
-176   512    
960    1792   
2512   -976   
-1888  608    
-176   -208   
976    -448   
-320   -112   
-480   -2624  
240    208    
752    -624   
-416   -192   
208    240    
192    -128   
-112   176    
-80    -416   
400    -1040  
-96    320    
416    128    
-32    -48    
-768   -208   
176    -96    
-304   368    
1040   -832   
-592   -464   
-304   336    
608    64     
48     -192   
-64    -912   
-96    -1200  
208    240    
80     -368   
-16    192    
64     -64    
64     -352   
-144   -16    
240    -160   
-176   16     
16     -256   
96     -32    
256    -880   
0      -48    
176    -2448  
64     80     
-96    -32    
0      -64    
-16    32     
240    -144   
16     96     
-64    -240   
80     80     
1024   -160   
-2768  416    
-320   224    
2000   -64    
-816   -384   
-656   -512   
224    -208   
416    -32    
-64    144    
-96    176    
192    -64    
-208   -16    
96     16     
144    112    
-96    144    
-368   272    
-352   -96    
144    16     
-256   -192   
-112   32     
128    -208   
1008   880    
928    368    
-960   -1792  
-288   -1008  
368    -416   
-96    -112   
-416   -224   
-256   32     
112    -32    
496    -304   
-224   48     
-16    -64    
-48    224    
-176   16     
-96    16     
448    -272   
112    288    
160    -192   
-144   80     
128    64     
96     -80    
96     -288   
208    -128   
-16    -176   
416    80     
336    1488   
-656   352    
-1040  80     
608    -704   
-272   -64    
48     -128   
-112   256    
-256   -1856  
-160   -448   
480    352    
-800   720    
-336   -48    
-464   -16    
-256   -32    
144    0      
32     160    
-112   -32    
-592   -80    
128    -272   
96     1040   
528    176    
64     384    
-96    704    
-224   416    
672    528    
864    -400   
-784   48     
624    -272   
-336   864    
-496   736    
624    192    
128    -192   
-736   128    
-272   -1184  
432    352    
176    -176   
-112   -96    
-192   -592   
-16    464    
16     -272   
-368   -224   
-64    -224   
-192   400    
176    960    
112    -48    
-208   -416   
240    -272   
-32    176    
-112   -64    
32     176    
-512   -1536  
-464   464    
32     1024   
-160   -80    
-176   112    
-176   64     
256    -480   
-320   -256   
384    -192   
-32    304    
-256   96     
160    160    
336    16     
-480   160    
-208   96     
-448   -144   
384    592    
-256   -192   
144    480    
-48    736    
-304   -448   
352    528    
-336   288    
-256   592    
-112   256    
368    656    
1136   320    
-864   704    
-160   272    
64     368    
384    -96    
-80    672    
-128   512    
-240   -192   
-48    -160   
160    -16    
16     208    
-464   -64    
-176   -384   
144    192    
-112   192    
-304   -224   
-544   272    
16     -384   
-192   48     
64     -224   
80     -80    
-112   -304   
48     -640   
-192   -240   
0      -720   
80     -240   
32     848    
80     448    
176    1280   
-544   -288   
-752   688    
1408   176    
208    16     
256    32     
-560   -768   
192    -16    
208    400    
-352   608    
-16    -176   
32     192    
112    336    
-96    -224   
48     32     
-80    160    
64     416    
-16    528    
64     -96    
-64    -176   
512    16     
-1056  752    
416    -1024  
320    -560   
-160   112    
-256   464    
64     176    
192    64     
-304   -128   
-16    -416   
48     160    
-128   -16    
-112   192    
256    -112   
-704   -416   
144    400    
160    384    
128    240    
-80    -80    
-32    128    
80     48     
-96    -32    
48     144    
-144   144    
128    112    
304    96     
-128   32     
-320   -144   
-128   -64    
192    688    
688    -1040  
-1920  464    
672    96     
432    32     
-1072  -64    
352    -96    
544    -160   
-288   -160   
-192   0      
128    16     
112    0      
-32    112    
16     -80    
-544   16     
192    0      
-64    16     
-80    32     
64     48     
80     80     
-144   48     
96     -320   
1248   128    
-1504  32     
-528   224    
1088   -32    
-864   32     
0      128    
48     -352   
160    128    
-208   -240   
-208   80     
512    32     
-16    224    
256    128    
-496   16     
-176   0      
304    32     
512    -272   
176    -32    
240    112    
-16    -192   
544    272    
-16    -16    
-80    48     
272    528    
-224   544    
-496   128    
-240   336    
224    -48    
-688   -32    
352    96     
208    -80    
48     96     
176    288    
-480   -32    
208    -80    
352    624    
-368   224    
-16    176    
512    -112   
336    -16    
-208   144    
-144   176    
224    336    
-336   256    
384    64     
48     -16    
-448   -64    
960    1424   
880    2752   
-2448  1168   
960    144    
1376   -64    
-752   -48    
-256   208    
416    -16    
192    80     
-208   -96    
-352   -48    
80     176    
32     160    
0      32     
208    48     
64     0      
-32    192    
-208   96     
224    64     
-304   -352   
800    48     
-112   -80    
-336   304    
176    -48    
-672   128    
608    64     
-176   -16    
32     256    
432    -208   
-288   64     
-464   -48    
480    16     
32     0      
160    96     
-112   16     
-208   128    
384    -160   
-288   144    
640    16     
-32    160    
48     208    
-48    64     
176    304    
-32    -64    
304    160    
-48    576    
-80    192    
-16    -144   
256    -928   
-400   80     
224    -2576  
-144   0      
320    288    
-816   432    
176    -256   
256    -112   
-224   32     
48     -112   
-48    -96    
336    160    
160    80     
-192   -32    
-48    -64    
80     -112   
64     16     
-176   -464   
144    -48    
48     -64    
64     400    
96     672    
-304   848    
224    208    
336    96     
-112   -528   
-160   272    
-16    -224   
160    -64    
144    320    
-336   560    
464    640    
80     -16    
-112   1280   
-320   -2208  
-1312  576    
1440   -720   
-928   928    
-320   368    
528    240    
576    -544   
-560   -336   
-336   -176   
288    96     
240    -112   
80     -160   
-96    80     
64     -256   
240    272    
-128   -384   
32     -32    
-64    -32    
112    128    
-128   -768   
192    -1424  
96     -256   
-16    880    
256    800    
-144   -208   
-192   -560   
288    -224   
-16    256    
-32    80     
-80    176    
32     144    
48     256    
-16    -496   
-288   -336   
48     48     
400    416    
-80    -176   
-176   128    
160    16     
64     96     
-256   -48    
96     -96    
256    208    
16     -96    
-320   240    
144    96     
144    -192   
-64    -1104  
-224   224    
-1360  1008   
2784   -192   
176    416    
-1472  208    
816    192    
112    -224   
112    -592   
112    464    
16     368    
-128   32     
-48    128    
400    -176   
-304   0      
160    -1296  
400    -192   
-560   -96    
-112   96     
480    112    
-176   656    
32     624    
624    768    
-1776  -160   
-688   -192   
2048   -400   
-80    -160   
-736   1040   
320    560    
224    464    
-64    -320   
96     224    
176    -32    
-224   -912   
-16    208    
400    -192   
-384   -336   
0      -16    
336    -496   
112    -160   
272    304    
-16    -32    
-160   64     
-96    -128   
-160   -640   
752    -1680  
-320   -848   
-336   0      
16     -560   
560    80     
-336   1456   
304    288    
-256   -432   
-288   192    
624    544    
352    -1168  
-1168  480    
-256   304    
80     864    
768    -688   
-144   48     
80     -96    
272    576    
-176   96     
-272   -48    
272    -400   
-96    240    
512    464    
-224   -192   
-224   -144   
576    304    
64     -32    
-1424  -720   
224    352    
304    -976   
-560   -96    
480    368    
-208   -352   
128    1648   
-128   992    
-400   -544   
400    -304   
-208   704    
-96    448    
-192   -128   
336    -528   
192    32     
-96    -880   
48     -256   
368    -48    
-112   496    
-208   -224   
176    -32    
208    256    
-352   -272   
-656   -192   
512    -256   
32     80     
224    0      
-384   -1312  
-368   -208   
304    304    
176    144    
-16    16     
496    -352   
-496   256    
272    0      
304    -80    
-224   -576   
-304   -96    
32     448    
128    256    
64     384    
208    -16    
-96    352    
32     -752   
464    496    
128    336    
16     1328   
224    -304   
-48    -160   
-112   64     
592    -256   
-1312  64     
80     704    
1088   -480   
-800   -304   
-432   64     
928    -448   
-512   -1264  
-448   -272   
-64    32     
64     -112   
96     672    
144    -128   
-192   480    
80     400    
256    160    
-256   -384   
592    -224   
-240   -192   
-112   -32    
144    -112   
-32    32     
-80    224    
64     128    
-32    -48    
288    -464   
-80    -64    
-16    224    
-64    240    
-464   -1264  
1040   -1856  
-1120  208    
96     -1488  
-288   656    
336    224    
-48    -784   
-208   -528   
16     -144   
256    -176   
-80    64     
48     -48    
192    192    
-64    -336   
-160   -208   
128    320    
-160   576    
128    496    
256    -32    
-176   144    
-320   -544   
624    -1152  
-352   320    
-112   -416   
-208   352    
368    432    
-800   576    
-16    96     
-432   -464   
-784   80     
-160   -112   
128    16     
-128   -80    
16     112    
-208   -96    
-80    224    
128    -80    
32     128    
-144   -128   
-464   64     
128    192    
-208   -224   
32     144    
-208   -256   
80     -64    
224    128    
-400   -64    
160    144    
-192   -192   
-544   -464   
144    -368   
624    -304   
-1136  -80    
496    -48    
480    32     
-496   -112   
-224   48     
544    -16    
-304   160    
-16    16     
208    96     
-128   48     
-96    160    
-16    64     
-112   128    
-112   48     
-96    0      
-272   -32    
432    112    
96     -192   
-352   -272   
1200   624    
-480   -176   
-976   -128   
-336   -224   
304    208    
-272   -208   
96     96     
752    96     
-272   96     
-288   48     
144    64     
-96    -16    
-368   64     
496    0      
80     192    
-432   112    
560    -80    
-32    64     
-416   80     
176    128    
-416   -528   
64     560    
64     -48    
-1168  416    
800    -384   
-352   48     
-176   112    
16     304    
-144   -320   
-384   0      
320    224    
240    160    
-176   176    
-608   -80    
384    -496   
144    976    
-640   528    
48     -528   
256    -112   
-368   64     
-144   16     
32     -16    
128    128    
-896   -688   
-768   128    
448    80     
64     -16    
-432   -800   
2544   528    
-2320  592    
-416   -32    
1856   -112   
288    -128   
-1392  -48    
-368   208    
1248   48     
80     144    
-176   -96    
-832   -32    
304    128    
240    64     
48     80     
-144   -48    
80     272    
128    16     
48     96     
-352   -240   
256    688    
496    48     
-736   320    
528    32     
-768   -144   
-160   176    
208    16     
-112   176    
208    16     
-496   96     
416    304    
-96    208    
0      -64    
16     64     
-16    160    
32     -16    
-16    144    
-112   -224   
96     240    
96     32     
-80    32     
0      96     
-64    -176   
256    144    
192    256    
-256   256    
-80    160    
432    48     
-80    192    
-320   176    
240    -16    
112    96     
32     528    
-816   672    
304    800    
336    480    
-272   352    
-96    304    
128    -272   
-112   -304   
352    112    
320    16     
-96    -48    
0      -48    
-32    -80    
-288   -208   
112    -208   
144    -416   
160    -32    
-176   112    
64     368    
112    368    
-96    -896   
256    -432   
0      432    
-384   160    
336    -608   
-176   -656   
-304   304    
0      960    
384    -48    
-208   -1056  
960    -1056  
-864   752    
-704   -176   
592    -528   
-176   512    
-16    -288   
-192   -768   
432    336    
-208   -208   
112    176    
160    32     
0      304    
-112   64     
0      80     
128    -112   
-144   -224   
112    368    
64     -48    
16     -80    
48     576    
-16    -176   
0      240    
592    528    
-80    48     
-416   192    
32     1328   
368    48     
-128   -192   
-240   -704   
224    656    
128    -80    
-48    -16    
48     -16    
-112   128    
80     144    
96     112    
16     160    
-240   -448   
-16    80     
480    272    
-32    64     
-304   128    
96     80     
96     16     
64     384    
-96    272    
-16    32     
192    112    
80     -640   
-1440  -384   
528    64     
1104   -496   
-720   432    
368    1104   
480    832    
-464   -352   
112    -576   
336    640    
-16    32     
-224   352    
64     0      
-32    16     
208    -48    
304    -112   
-32    32     
-224   -80    
368    -80    
176    -80    
-128   176    
240    -528   
-1760  1152   
880    -512   
320    -96    
96     368    
-80    672    
-400   688    
512    272    
-144   320    
-400   -896   
352    -464   
-112   -1344  
-192   -288   
-80    656    
-48    768    
-288   -176   
368    -320   
-256   -400   
320    -256   
-144   -288   
-192   48     
304    -64    
-608   64     
-16    640    
704    352    
-64    304    
592    1664   
-640   2464   
-576   1312   
336    -160   
-176   -400   
-304   -208   
-64    -80    
1168   720    
-1136  512    
-688   -112   
144    96     
-272   256    
240    496    
-400   320    
0      48     
64     -544   
80     -448   
112    160    
-96    320    
112    144    
592    224    
16     720    
-224   576    
272    208    
-192   2096   
800    560    
-880   -656   
208    -464   
1104   -48    
-96    960    
-416   400    
48     1776   
336    80     
288    -608   
-320   -384   
-336   368    
416    64     
336    336    
144    272    
-128   -240   
16     208    
288    -432   
320    -832   
-80    -848   
-368   0      
320    176    
208    0      
-400   304    
176    144    
32     -416   
-256   32     
96     -160   
-208   -256   
352    256    
16     128    
-128   288    
432    96     
-256   752    
208    240    
16     -32    
160    48     
16     448    
-80    288    
320    64     
-112   -64    
-64    -624   
112    -32    
-96    -880   
96     -1424  
432    112    
32     -640   
-160   688    
272    336    
80     16     
672    1376   
-592   -272   
-784   -304   
912    -912   
48     -912   
-272   -320   
96     -720   
192    192    
-512   -336   
-208   16     
-16    -32    
80     -416   
160    96     
224    -608   
-224   -304   
176    -240   
240    -112   
176    -688   
208    144    
-64    -528   
-592   -112   
448    -352   
512    48     
-592   48     
-160   -16    
640    -336   
-352   -336   
-256   -256   
208    -32    
-384   -1216  
1744   -736   
0      208    
-736   -208   
400    592    
192    -64    
-208   128    
480    384    
-176   -208   
-768   320    
496    -64    
-416   -192   
-144   -272   
-144   -176   
352    -160   
304    688    
-1008  128    
304    -320   
96     128    
-32    -160   
-32    48     
368    1520   
912    -256   
-992   -48    
208    -64    
320    -384   
-416   -224   
-32    48     
240    176    
-96    48     
-144   48     
256    -800   
0      80     
0      -576   
48     96     
80     -32    
64     -144   
-288   32     
160    96     
-320   -64    
64     -64    
176    80     
-64    32     
-496   -48    
304    -144   
32     -160   
-384   16     
512    32     
-176   -640   
48     288    
-848   576    
2368   880    
-288   -176   
-1584  -288   
1072   192    
1152   128    
-1136  64     
-80    -96    
-192   32     
-16    -128   
-752   -128   
144    -80    
384    16     
-272   -256   
320    128    
96     128    
-352   -144   
224    0      
592    128    
-224   16     
-112   80     
-880   -512   
1344   128    
896    -192   
-2048  -656   
704    96     
1280   -240   
-560   256    
608    -256   
208    16     
-192   -864   
16     48     
160    32     
-224   -16    
-128   -64    
288    -32    
208    64     
-208   -256   
80     64     
624    -128   
-304   112    
320    704    
-320   -160   
-1040  112    
1200   -80    
-416   128    
-704   -320   
-32    192    
304    -192   
-368   240    
112    48     
128    208    
64     48     
-432   -16    
-224   -704   
-224   224    
448    32     
-336   416    
-64    -16    
-384   -192   
-512   112    
80     -80    
16     48     
-320   64     
-16    416    
-432   -272   
-448   48     
432    -80    
-208   -96    
-1488  -3168  
1168   -480   
944    -208   
-1680  64     
-576   80     
704    -112   
64     -144   
-960   304    
128    -32    
272    48     
-608   16     
-304   -64    
144    16     
-32    208    
-272   -16    
160    144    
-224   176    
16     -64    
288    96     
-352   -848   
-544   -576   
352    176    
-32    192    
400    224    
272    -272   
-1008  192    
544    -208   
-240   192    
-80    -176   
368    528    
-320   256    
144    80     
32     -48    
-192   32     
-80    -112   
208    -96    
-32    -800   
-496   -128   
32     272    
144    192    
-96    16     
-208   -32    
240    0      
336    -128   
-592   208    
240    368    
112    304    
-240   512    
160    -144   
-320   -512   
224    -240   
-384   -432   
336    -384   
-80    592    
-240   544    
416    496    
-336   608    
576    2256   
320    1328   
16     1360   
80     800    
96     96     
-176   -256   
-112   -32    
144    112    
-16    -144   
-64    -400   
48     320    
-16    32     
-144   80     
0      -160   
-160   288    
16     656    
-208   -176   
-80    -240   
-368   -176   
-48    0      
224    -32    
96     48     
-208   -128   
-160   144    
560    1056   
-288   1488   
32     208    
96     16     
64     64     
-256   -80    
-224   32     
-16    96     
-400   208    
-240   -288   
176    32     
-48    -160   
-48    48     
-128   16     
32     144    
-64    -272   
-160   -208   
304    -240   
80     -144   
-96    80     
-736   672    
672    0      
-464   -176   
48     256    
-192   240    
-176   -64    
48     64     
-80    240    
32     64     
-32    80     
-16    -96    
48     -64    
-160   96     
64     -64    
64     -16    
48     112    
-32    -32    
-384   -160   
208    -224   
96     -64    
-112   176    
-128   160    
80     128    
-32    48     
16     160    
-96    128    
304    304    
-96    160    
-112   -96    
1296   1568   
-864   48     
-1568  -416   
1856   304    
-144   80     
-1744  -672   
432    -848   
32     -576   
-64    1200   
272    256    
288    160    
-480   -112   
32     112    
224    112    
0      128    
-208   272    
112    416    
-272   -416   
0      -144   
144    160    
-320   -656   
1344   864    
-64    -416   
-1232  912    
560    752    
-432   -656   
32     -1488  
624    -1328  
-256   -224   
-256   496    
64     496    
144    112    
16     -80    
-176   -128   
64     -96    
-128   0      
128    -112   
-240   -496   
16     320    
208    144    
-160   208    
80     176    
-208   32     
528    -608   
-368   -192   
496    -272   
0      -640   
1184   -1232  
-192   -560   
-480   576    
384    224    
-256   80     
128    112    
16     240    
-432   -928   
-304   400    
176    -160   
336    -432   
208    160    
-240   144    
80     -128   
-160   128    
-224   128    
544    144    
96     -976   
128    -48    
-272   0      
32     -160   
816    -416   
-416   176    
-784   2480   
816    928    
-304   -480   
416    864    
-32    1120   
-80    -288   
-320   192    
256    -608   
-192   -256   
48     -1504  
-48    240    
-128   224    
-48    -192   
128    64     
96     -48    
-64    0      
272    144    
304    160    
-144   -320   
-32    -1008  
-48    -368   
-16    272    
576    144    
-128   -32    
-416   -352   
352    0      
-16    -224   
64     -272   
256    -64    
-112   304    
16     96     
0      128    
32     352    
160    416    
-336   -48    
-96    640    
624    144    
-320   -144   
32     384    
256    -944   
64     32     
48     -2224  
-400   -80    
48     240    
304    112    
-160   192    
272    400    
48     64     
-32    304    
128    96     
0      64     
288    -208   
-304   -16    
144    544    
368    -64    
-608   272    
144    -128   
480    64     
-32    368    
240    48     
-192   -128   
128    208    
80     -16    
-80    16     
320    336    
-832   480    
160    224    
592    64     
-720   464    
64     -160   
288    -80    
192    -112   
-80    512    
-112   -1072  
32     64     
688    16     
336    192    
-560   16     
112    80     
-512   -1264  
2416   1200   
784    304    
-1408  64     
112    240    
288    -528   
-240   -32    
448    -480   
192    -256   
-624   176    
400    -16    
320    240    
48     96     
-448   -288   
448    -32    
272    368    
-304   -224   
112    176    
208    -80    
-96    -128   
-208   -320   
928    528    
288    16     
-1120  256    
944    -176   
-112   32     
0      -368   
-48    320    
528    64     
-304   144    
-192   32     
176    240    
528    -80    
-352   -112   
96     144    
80     80     
256    304    
160    -256   
-96    -64    
-224   -128   
272    144    
176    112    
-80    -32    
-224   48     
480    -640   
-352   144    
48     -192   
160    -1552  
-64    -144   
-224   -352   
2032   3280   
784    -752   
-1936  -176   
-528   -224   
688    -288   
464    -368   
-448   32     
16     400    
672    -96    
-624   96     
-32    -352   
224    112    
32     -240   
256    64     
0      -400   
-240   32     
176    -288   
48     -96    
-32    -256   
0      112    
-96    -496   
992    576    
48     -544   
-464   336    
-784   416    
512    -32    
-256   80     
496    -176   
144    144    
-528   -144   
0      -16    
288    16     
0      80     
16     288    
-160   16     
-256   -48    
288    80     
96     -32    
-48    80     
-160   -144   
32     64     
-848   -640   
-352   -256   
528    -304   
-256   -400   
544    -64    
128    32     
-288   -240   
240    144    
-304   160    
80     -240   
-272   160    
128    -240   
496    432    
-416   -80    
-368   160    
48     -32    
-176   -32    
-112   -80    
-112   -32    
48     32     
112    0      
80     -64    
-16    -1680  
-176   -224   
368    16     
416    128    
-384   96     
240    672    
1136   3904   
-1440  1680   
576    -592   
1568   -320   
-1488  160    
-528   208    
1184   -416   
256    -560   
-656   32     
-48    -352   
832    112    
-272   -192   
400    128    
-192   144    
16     -160   
-128   224    
448    -96    
-464   80     
64     -464   
-416   -688   
128    96     
-336   80     
-64    -320   
-464   32     
384    -432   
-48    288    
112    -2320  
64     336    
-32    848    
16     144    
-544   -576   
304    -400   
32     176    
0      400    
-736   -80    
48     -256   
144    -128   
-64    -224   
-208   160    
128    -400   
-48    160    
512    -288   
-240   576    
-32    1200   
-336   544    
272    176    
160    96     
-176   -192   
368    -1136  
-192   48     
272    192    
-32    -1040  
-192   -144   
416    -368   
-512   -464   
496    160    
176    -464   
48     -128   
-224   2208   
288    -48    
144    -896   
-272   16     
0      144    
0      192    
-288   160    
160    -128   
-128   -16    
-464   -192   
160    160    
-592   -48    
0      16     
64     16     
-176   80     
-64    -32    
208    -64    
-16    -80    
208    256    
32     192    
160    112    
-144   -32    
-400   -32    
-288   432    
416    -528   
-528   16     
-592   -48    
288    32     
96     16     
-464   144    
16     -368   
-368   -272   
96     80     
-752   176    
32     -80    
0      -160   
-160   48     
96     -288   
160    48     
-192   32     
-192   -112   
0      -208   
928    512    
-880   656    
-224   -352   
848    -112   
-512   512    
-224   112    
-496   -240   
160    -96    
-1264  0      
272    -16    
-48    -64    
-144   -16    
-128   96     
192    208    
-32    -64    
-32    -16    
-48    -208   
96     32     
128    176    
96     96     
16     -32    
-320   160    
-64    80     
144    -32    
-192   256    
-336   80     
192    -80    
16     -304   
224    96     
-256   256    
320    1008   
2032   -160   
-1344  -496   
-368   -816   
432    1040   
272    1632   
-32    -672   
-176   -416   
-112   1120   
368    512    
-64    -96    
64     112    
80     -192   
-336   -400   
160    -48    
176    128    
32     -80    
-176   544    
0      1152   
272    624    
-640   -496   
80     32     
1824   -832   
-832   320    
-208   752    
-656   -128   
-256   -528   
-384   -464   
288    -64    
368    160    
288    192    
-288   -224   
48     -16    
-256   -80    
384    256    
528    -96    
-512   496    
144    176    
-288   -32    
144    -48    
-112   -144   
16     144    
-160   -1024  
1888   -1520  
704    96     
-864   0      
80     304    
448    -192   
-224   208    
304    336    
160    -16    
-368   128    
-48    -128   
144    -96    
624    688    
672    -48    
-400   -448   
160    192    
576    976    
-336   -64    
-400   96     
464    -64    
16     144    
-320   128    
-256   -544   
208    -112   
240    176    
-624   80     
288    1456   
560    640    
352    -1360  
-208   800    
336    128    
-768   -48    
-16    320    
1088   240    
32     160    
-208   144    
0      -16    
80     32     
272    16     
-176   0      
-144   192    
288    80     
32     64     
-352   176    
-96    -48    
64     688    
400    -288   
-208   528    
192    80     
-288   32     
-448   144    
576    176    
32     64     
-352   128    
0      -16    
96     80     
-80    -48    
416    176    
-208   16     
80     80     
288    -224   
-272   -64    
-400   -208   
400    320    
272    512    
-176   96     
-48    192    
64     0      
-352   -32    
240    -224   
224    144    
-16    -16    
-384   208    
96     288    
512    352    
-320   112    
-16    80     
192    32     
272    544    
-1168  240    
240    0      
400    64     
-320   -96    
-48    192    
448    144    
-32    96     
96     -128   
-176   64     
96     -48    
80     32     
0      208    
0      64     
48     -208   
-16    -304   
192    -96    
-128   -304   
-384   48     
272    224    
208    -48    
-192   -144   
208    -64    
-96    16     
192    -128   
288    -432   
0      384    
128    112    
-64    0      
176    1456   
656    -1472  
-1808  480    
240    -336   
480    -176   
-544   240    
48     64     
320    0      
240    -864   
-528   320    
32     -464   
336    -192   
-80    224    
48     352    
-416   144    
416    -80    
-320   320    
-80    -160   
64     -144   
48     192    
144    608    
-352   -48    
-160   144    
592    -176   
-240   -64    
0      112    
-240   -16    
-32    16     
560    -80    
-144   176    
-64    224    
-96    288    
256    80     
48     48     
-112   80     
320    32     
-80    -16    
-304   -208   
336    48     
256    192    
-480   -16    
-112   64     
448    -1232  
128    48     
-304   32     
-160   304    
320    -112   
32     208    
48     -288   
-464   -736   
768    -1056  
1152   48     
-1008  -192   
544    -96    
320    -112   
-608   112    
224    208    
672    -928   
32     -336   
-336   224    
112    128    
128    80     
-48    144    
-176   -224   
240    224    
96     -16    
-96    288    
-80    -192   
400    -208   
32     48     
-192   -272   
1008   480    
-1248  -224   
576    -784   
32     176    
-160   -128   
192    176    
432    144    
48     -32    
-368   128    
-64    96     
144    -160   
240    160    
-176   -128   
272    0      
-336   160    
80     -16    
192    -832   
-144   320    
144    -256   
32     224    
112    16     
-816   -80    
-448   128    
736    704    
592    -128   
-96    -240   
-240   288    
64     -80    
96     -80    
-368   -128   
640    448    
816    -512   
-544   -96    
544    592    
0      320    
-176   32     
336    -16    
-336   48     
16     160    
144    96     
224    -32    
-16    16     
-176   0      
464    480    
-416   96     
-352   112    
480    -48    
-128   -928   
-1024  -1312  
1664   -1600  
752    -592   
-1776  -592   
-128   432    
864    -1168  
-624   -1264  
64     -192   
160    -2304  
-272   -48    
48     48     
496    -144   
-320   -80    
-320   448    
64     -32    
368    -848   
-16    -352   
64     0      
-32    -192   
16     640    
-80    448    
144    0      
128    -128   
-496   -656   
336    -304   
-112   -192   
80     -144   
-80    1024   
-272   880    
320    112    
-48    -528   
-80    -528   
16     -160   
-160   -464   
448    -464   
-208   -176   
-64    -848   
-128   96     
304    480    
176    480    
-48    -96    
240    -32    
-16    -688   
48     192    
128    16     
272    384    
16     1360   
288    -96    
-80    -400   
-128   -320   
-64    -32    
656    1104   
-928   144    
-656   800    
1216   672    
192    720    
-512   336    
336    -640   
-240   -752   
208    -2160  
176    400    
-272   176    
-80    -32    
64     -96    
208    16     
112    64     
-528   -144   
32     -944   
736    -368   
-464   96     
-96    -64    
0      112    
240    -80    
-224   144    
-16    -176   
-64    528    
640    112    
-496   192    
-96    -48    
432    0      
-32    -48    
384    -32    
-1168  432    
336    -48    
-144   272    
144    -16    
-256   -48    
272    -384   
-320   -80    
-48    192    
64     48     
48     -256   
80     208    
-112   16     
64     -256   
-80    -48    
208    -224   
-176   192    
-128   64     
144    64     
-208   -704   
384    -784   
-80    192    
-32    64     
-32    -432   
-96    -288   
304    -768   
176    -128   
-96    -528   
16     80     
48     -16    
208    96     
-160   160    
-112   352    
-224   192    
112    -16    
-176   224    
-80    -192   
512    -336   
-272   -576   
-192   288    
224    -624   
128    96     
-112   16     
192    -288   
-288   0      
0      224    
256    128    
-208   -176   
-80    16     
-1696  656    
1920   -96    
544    240    
-1440  -640   
32     320    
1344   -880   
-1520  -640   
-128   -144   
352    -144   
0      96     
-320   16     
0      144    
-96    144    
-48    224    
128    128    
112    16     
-672   144    
320    -32    
128    32     
-544   -320   
400    1360   
-1120  -800   
-1424  224    
1760   -528   
-144   -480   
-736   -32    
160    128    
160    0      
48     32     
-144   368    
368    -32    
-304   128    
-432   -112   
480    -16    
400    80     
-624   48     
-288   0      
592    160    
96     192    
-416   16     
-16    96     
16     448    
-48    -256   
-576   288    
384    -496   
224    -512   
-176   -160   
432    -992   
-352   -192   
-176   96     
-16    80     
-144   384    
-64    -64    
128    -128   
-304   -192   
368    -656   
-112   192    
0      240    
-1952  0      
-48    16     
64     -240   
16     112    
-208   -112   
48     144    
160    32     
-432   64     
-64    32     
32     0      
32     416    
-160   -1184  
560    -1632  
320    688    
272    192    
-1008  -64    
-768   208    
672    -128   
320    304    
-432   0      
32     -96    
176    144    
96     -32    
-160   144    
16     16     
128    192    
144    -208   
-176   160    
64     -256   
304    560    
-544   -352   
-48    544    
496    -208   
-384   288    
-832   -336   
416    96     
384    -48    
-512   -64    
-224   48     
112    80     
48     -64    
224    176    
-160   16     
-224   144    
144    64     
-288   -288   
-224   0      
-336   -128   
64     -32    
80     -160   
64     16     
-64    112    
-192   -16    
160    144    
304    176    
-336   176    
-384   224    
240    384    
416    0      
-368   0      
-96    16     
256    128    
-112   480    
-784   -176   
-320   -528   
-496   -208   
784    -48    
-32    0      
-864   16     
256    224    
576    64     
-400   128    
112    160    
32     -16    
80     96     
-192   32     
-80    -96    
96     -544   
-240   112    
-112   208    
448    208    
-32    48     
-272   96     
80     112    
32     80     
128    -160   
-464   1056   
-208   304    
224    -112   
256    304    
-592   304    
496    -1792  
-2992  1552   
1040   272    
848    128    
-912   32     
-48    -272   
320    208    
-64    -416   
-352   -80    
384    416    
-496   336    
96     -192   
32     160    
-64    -304   
-256   48     
208    480    
96     -128   
-144   176    
128    224    
-112   -64    
608    1280   
-1376  256    
80     112    
976    -272   
-576   -96    
16     112    
-64    128    
-64    -560   
144    32     
-112   32     
-288   192    
224    272    
64     0      
-16    96     
-192   256    
-64    144    
304    -16    
64     -96    
-112   -112   
-64    160    
112    160    
-32    32     
-32    96     
208    -64    
-496   -176   
592    144    
-144   176    
-64    80     
240    224    
1552   688    
-2640  32     
-1024  480    
1808   160    
-624   160    
256    96     
16     256    
96     48     
-48    352    
-176   32     
64     -16    
16     16     
288    160    
-80    -112   
-16    -32    
-32    -128   
128    -80    
224    112    
-240   -16    
32     48     
208    176    
-512   -672   
-96    608    
1040   -160   
-592   -464   
-320   -16    
256    -352   
-64    -80    
0      128    
352    144    
80     112    
48     96     
-192   16     
48     96     
128    -48    
96     64     
-208   16     
32     -160   
176    -192   
48     240    
80     160    
80     -1376  
384    288    
272    304    
-176   -192   
0      48     
192    768    
-528   -192   
-512   -64    
864    800    
-368   480    
-176   0      
-64    16     
32     -32    
-1008  96     
672    -144   
48     800    
352    -96    
-224   -160   
-160   240    
384    48     
240    32     
-304   -32    
-48    272    
-32    128    
144    1280   
544    -368   
-416   80     
-272   -1040  
256    -832   
1184   352    
-2128  -592   
144    -528   
480    -1472  
-400   240    
-608   64     
112    560    
880    1168   
-160   320    
-80    160    
176    -128   
-48    224    
0      144    
-176   -304   
-176   16     
-32    -176   
304    -448   
-176   336    
-272   -240   
224    -112   
96     -384   
96     112    
160    224    
336    432    
-96    -240   
112    160    
64     -16    
-208   0      
384    192    
-256   -416   
-80    128    
16     -64    
-16    96     
160    -256   
-144   -16    
-16    -32    
144    -704   
-112   80     
-32    800    
160    640    
128    -224   
32     0      
112    192    
-160   128    
-96    560    
880    208    
-224   320    
-272   -176   
128    -64    
208    432    
-288   -1264  
800    208    
-400   -368   
-272   -1216  
-304   -1616  
192    -464   
-224   -80    
448    1328   
272    192    
-192   -560   
-240   64     
192    304    
80     -144   
272    288    
144    384    
16     48     
-80    -112   
-96    -352   
80     320    
-176   176    
-64    32     
16     0      
160    -256   
-192   112    
16     -528   
688    -768   
336    -384   
-208   -352   
-176   -496   
32     128    
880    208    
-1248  1024   
304    -608   
288    -288   
-448   480    
128    -1200  
672    -304   
-704   -160   
-176   -864   
384    80     
16     240    
-16    -176   
16     64     
-144   224    
64     160    
176    -32    
-160   -848   
-80    -32    
112    -624   
0      -80    
256    -704   
144    -208   
-256   160    
96     -176   
112    128    
16     -304   
160    -624   
-160   304    
-48    288    
16     -96    
288    272    
0      608    
-16    368    
112    -768   
-48    352    
224    480    
-96    16     
-48    -160   
368    -592   
176    192    
-96    -208   
-80    0      
48     -592   
336    240    
-80    16     
-368   -128   
144    32     
192    0      
400    48     
-1136  -1552  
-528   96     
1216   -592   
-960   -112   
1184   32     
-352   32     
-480   160    
272    96     
352    -1008  
16     -384   
-224   -2384  
80     16     
48     -48    
-192   -16    
320    64     
80     -32    
-368   -112   
64     192    
32     32     
-96    96     
-48    128    
-480   -192   
2032   -432   
-736   144    
-480   80     
1168   -256   
-208   112    
-112   -304   
-272   240    
144    -192   
0      -144   
160    32     
64     64     
-288   -16    
48     144    
288    -96    
-192   -320   
128    -224   
256    -16    
400    160    
-176   -272   
-208   32     
224    -80    
1216   -64    
-176   -384   
-368   736    
592    272    
256    -80    
416    -512   
-512   96     
-464   -112   
384    224    
-528   112    
-272   -80    
-304   48     
144    240    
624    352    
176    -144   
-144   256    
352    176    
-272   0      
-80    -48    
464    -48    
-208   -48    
-304   -160   
656    80     
288    -288   
-320   16     
720    -112   
-1648  -1232  
976    464    
1856   144    
-1424  -112   
-624   576    
736    -128   
176    -48    
-400   -16    
224    240    
-512   -304   
32     144    
624    32     
-160   -224   
-288   16     
-48    -224   
816    48     
-112   -48    
-16    176    
32     64     
-224   -768   
-1264  -144   
864    -384   
-432   64     
448    -16    
672    -208   
-1232  -32    
96     16     
608    -112   
-512   96     
96     -144   
-16    288    
-592   -128   
-224   144    
-224   0      
448    224    
192    16     
-736   256    
-192   -176   
144    32     
64     16     
-224   -32    
32     -80    
-704   -128   
-608   -32    
304    -16    
240    -48    
-672   -64    
80     -32    
-224   256    
160    -128   
-128   96     
-352   0      
-192   -96    
400    -80    
-48    48     
-464   48     
432    304    
80     -304   
192    -80    
-144   -304   
-320   -96    
-272   -288   
240    224    
64     -128   
-112   -48    
48     16     
-192   -16    
-112   -224   
-64    -80    
80     320    
-672   112    
48     64     
176    -208   
-288   176    
-144   -272   
192    -96    
400    -240   
-352   320    
-112   -304   
192    -656   
160    -48    
-1088  816    
1152   -736   
-672   64     
-272   -320   
672    336    
-608   -208   
-432   -128   
384    400    
304    -544   
-96    -64    
-112   160    
-128   -64    
208    -48    
-128   -160   
144    -96    
-80    256    
192    0      
-208   48     
16     -112   
-384   -80    
112    -896   
-1664  448    
1088   -256   
16     -112   
-416   -16    
224    16     
-64    400    
-352   240    
16     368    
480    32     
-160   0      
-384   0      
-96    -96    
-16    -80    
-80    -192   
160    224    
-96    16     
-192   224    
-64    -224   
-64    -80    
192    48     
80     32     
-336   112    
240    -96    
0      64     
96     -32    
-112   208    
-144   192    
64     272    
1520   1632   
-1104  -112   
-2096  -32    
1488   336    
272    160    
-1200  288    
144    -400   
80     -256   
96     -272   
-528   -176   
160    -160   
128    -32    
32     128    
16     256    
-336   112    
-144   208    
256    128    
-368   160    
-128   272    
128    96     
16     144    
-592   -144   
2448   -144   
-1104  -736   
-1312  -208   
1280   352    
-384   432    
608    -304   
-64    -64    
-336   208    
112    -176   
32     112    
96     112    
-176   48     
-80    384    
-16    256    
176    -16    
32     864    
144    784    
16     288    
32     80     
160    -64    
32     112    
-160   1408   
1040   864    
-64    48     
-704   352    
368    -240   
-608   112    
16     -304   
272    -48    
256    336    
-128   368    
-192   256    
-256   -432   
-16    -336   
-320   352    
-464   -448   
32     -176   
320    176    
-80    0      
48     -32    
112    304    
-160   384    
-64    16     
-32    -192   
-528   -128   
416    416    
368    448    
-464   32     
208    656    
464    -608   
784    240    
-208   -80    
-592   48     
368    144    
224    1168   
160    1472   
-112   -320   
-176   384    
272    -48    
-64    -80    
304    272    
160    0      
-464   -448   
-224   -320   
432    464    
512    384    
-304   752    
-80    816    
-64    -288   
208    -352   
80     -32    
256    528    
-544   -368   
-64    64     
560    32     
-224   -896   
-144   -1760  
96     272    
160    400    
-64    -80    
-144   256    
-32    112    
32     560    
160    320    
528    -1168  
-32    240    
-208   400    
48     192    
128    336    
32     -176   
-224   640    
144    432    
64     -256   
352    -752   
144    224    
-448   624    
-272   -336   
16     -384   
320    32     
256    -96    
576    80     
-512   -224   
-16    -96    
352    -304   
-336   -672   
112    -2160  
-64    -944   
-416   160    
-64    608    
176    128    
192    512    
256    64     
-128   784    
-448   544    
224    32     
240    -336   
128    256    
-48    336    
-224   -128   
240    -160   
144    128    
176    176    
-48    -496   
-96    -896   
-240   176    
224    672    
320    64     
128    -368   
-480   -2192  
-560   -1152  
224    416    
192    176    
-992   -128   
-448   -480   
384    112    
128    -80    
-96    -128   
-304   112    
-80    32     
64     192    
192    256    
-288   80     
-160   -416   
192    -224   
160    -432   
16     400    
-176   -128   
128    48     
-240   1600   
224    224    
-80    0      
416    192    
-48    256    
224    64     
-256   -48    
160    -48    
16     256    
-96    64     
176    144    
144    -48    
-240   256    
432    -208   
-208   -192   
352    -1888  
256    192    
-112   256    
-128   224    
96     -112   
128    -112   
-352   176    
144    96     
416    208    
-48    -192   
-368   128    
128    -96    
176    112    
-256   -368   
960    -288   
-2784  -352   
464    288    
1376   192    
-1248  144    
96     272    
480    416    
-112   48     
48     208    
320    0      
-80    -144   
-192   32     
192    -256   
192    -128   
-448   -128   
80     -80    
544    -32    
272    240    
-496   96     
224    64     
128    192    
-832   -272   
480    -32    
1520   -448   
-1168  224    
-112   -256   
-32    96     
144    -112   
-288   192    
-32    96     
224    32     
96     -176   
96     160    
-160   -16    
-256   144    
512    96     
64     320    
128    -1568  
16     16     
496    144    
-240   -96    
176    1104   
112    -176   
-1248  -256   
-368   16     
960    -192   
-432   -288   
-384   -1184  
624    96     
48     -672   
-784   80     
64     -528   
464    -672   
480    96     
-96    288    
-912   -112   
112    -528   
864    -512   
-16    -16    
-688   -128   
-48    -240   
512    -368   
16     -512   
-528   96     
-208   -64    
864    -416   
-336   -192   
224    -240   
0      64     
-1872  -1392  
2720   -1648  
432    -1344  
-1088  448    
320    -576   
224    224    
-208   -336   
-208   128    
480    160    
-64    208    
-624   32     
256    256    
224    -112   
-176   48     
-1376  -176   
224    -144   
-288   0      
400    48     
-176   -112   
-560   96     
1072   -48    
-640   -320   
-80    80     
64     -256   
-432   128    
576    -16    
-64    128    
-384   16     
304    0      
160    -208   
-208   16     
96     -192   
-80    192    
272    80     
16     -144   
-480   -160   
384    -752   
144    -64    
-224   -128   
272    -48    
128    32     
16     -64    
-48    80     
208    -304   
-400   80     
-192   -96    
256    320    
80     -48    
-336   -144   
240    -176   
128    144    
272    480    
-64    144    
-448   384    
528    112    
-16    96     
-96    32     
-96    -176   
-48    -224   
368    -64    
208    16     
-1184  -240   
-48    -464   
-32    192    
80     0      
-192   16     
-16    -448   
144    -432   
-160   -1440  
-96    -176   
-32    -112   
64     -224   
176    -368   
224    -64    
-352   48     
-432   208    
64     112    
160    -144   
32     -192   
-48    -304   
-480   -960   
1248   -1568  
-1152  320    
96     -1168  
528    800    
-656   960    
256    784    
304    -224   
-480   -304   
-432   -208   
432    -32    
96     -240   
-224   -304   
32     320    
64     -32    
64     -272   
224    -624   
112    160    
144    -160   
32     -48    
-192   -400   
576    -720   
-752   96     
112    -816   
-64    352    
176    -96    
-48    704    
160    -384   
-896   -64    
-16    -192   
144    288    
-672   -96    
-32    208    
16     0      
-96    160    
-128   -224   
-128   32     
-176   112    
-64    -240   
96     272    
48     112    
-144   112    
-1168  -32    
-96    -256   
-352   -48    
-96    368    
-64    -16    
-48    -48    
208    64     
-80    224    
-1632  256    
1824   -320   
352    -448   
-1520  704    
608    128    
352    64     
-1120  1344   
640    1120   
448    784    
-368   -16    
-80    144    
288    -224   
-304   -160   
-16    128    
-48    64     
-96    368    
144    304    
-176   -256   
-416   -560   
-144   -272   
304    -1104  
-2512  448    
352    272    
1616   1360   
-928   -656   
16     -656   
304    -1360  
-464   -672   
-160   -560   
176    -528   
-48    -48    
-256   32     
144    -64    
128    -144   
-144   -48    
224    192    
-400   -256   
-176   -848   
656    -656   
-320   -256   
-240   32     
256    272    
-288   -16    
272    -16    
80     -1376  
-640   -896   
688    720    
496    64     
-432   208    
96     400    
-256   752    
-624   -144   
-1232  -176   
672    112    
-656   -176   
464    960    
272    688    
-256   608    
704    -224   
-192   -208   
-96    112    
-32    -32    
448    128    
256    112    
-240   -176   
-496   -32    
0      -96    
80     -512   
-176   192    
-576   -992   
1328   -592   
1440   688    
-1040  1296   
-736   496    
880    16     
272    560    
-416   608    
-96    208    
224    0      
160    -560   
32     32     
192    -496   
-352   0      
272    736    
128    528    
-368   176    
-16    208    
64     -64    
0      432    
112    352    
16     144    
-208   -224   
-176   624    
848    -128   
-784   224    
80     96     
-32    464    
48     1728   
160    1776   
-160   -416   
240    -304   
-64    -304   
48     368    
160    384    
-112   -160   
48     -688   
512    -304   
112    272    
-352   368    
112    448    
128    544    
240    160    
-768   -96    
224    160    
-176   112    
224    -592   
464    0      
-448   80     
-48    -64    
32     -48    
-112   112    
608    32     
416    1456   
-1792  -192   
-96    640    
1088   640    
-400   176    
-336   240    
304    832    
192    432    
-176   304    
144    464    
-176   192    
-288   -144   
96     -288   
176    -112   
-400   -176   
112    48     
-128   -448   
-176   80     
-48    128    
64     96     
32     -16    
112    112    
-160   288    
160    624    
480    464    
-176   144    
-320   512    
-64    -288   
752    -1744  
-640   544    
48     -160   
-384   320    
160    -688   
-112   -1024  
0      -1280  
224    -720   
48     448    
176    336    
-16    144    
-96    80     
-112   -80    
144    -384   
160    400    
128    96     
-352   96     
80     -80    
48     80     
752    960    
-1168  800    
528    -208   
160    -304   
-576   0      
352    -96    
0      272    
-16    240    
-192   224    
432    48     
-192   -32    
-96    48     
32     368    
208    192    
-128   -160   
-80    176    
-80    -112   
112    -128   
-96    176    
96     -32    
-240   96     
0      128    
112    48     
0      224    
-16    48     
112    112    
-64    144    
-80    -64    
-16    -48    
-272   -320   
2432   1344   
-352   -688   
-1296  -368   
864    -112   
-432   80     
-240   224    
-16    -176   
192    176    
-48    -112   
-64    80     
176    16     
-64    192    
144    80     
112    192    
-272   160    
160    160    
-16    -80    
-96    -192   
160    64     
48     64     
368    1056   
64     -400   
-2016  -112   
656    -576   
896    0      
-576   400    
368    112    
288    -288   
-112   112    
-192   -128   
-256   -112   
160    208    
64     -624   
192    160    
96     -2560  
-400   144    
-80    -352   
256    112    
656    256    
-432   96     
-240   -528   
544    400    
1072   -112   
-592   112    
16     320    
-160   336    
-560   -368   
-80    -384   
-272   160    
336    -432   
368    32     
16     48     
-160   272    
320    32     
48     16     
480    -48    
-288   176    
-592   -272   
112    -128   
-96    112    
-112   -192   
-32    176    
208    -80    
48     112    
-64    -48    
-128   80     
-160   -1104  
176    80     
80     -432   
768    -3120  
-2736  -1248  
1040   608    
960    0      
-688   464    
160    32     
32     -96    
-128   496    
304    -128   
-336   192    
464    -96    
112    96     
-208   -176   
32     48     
-144   64     
384    96     
-128   32     
224    80     
112    48     
48     -400   
-224   448    
416    -624   
-384   48     
-368   -384   
240    32     
336    -272   
0      96     
-160   -224   
144    96     
288    96     
-160   112    
64     -80    
192    64     
48     -336   
-160   -256   
80     -32    
112    -240   
160    32     
-32    -144   
-16    176    
192    -64    
-176   32     
224    -48    
128    0      
160    96     
96     112    
-96    304    
368    -432   
-240   -448   
128    160    
336    -304   
-224   -1216  
-416   208    
576    784    
464    1232   
-496   992    
112    608    
160    -400   
-96    -2128  
-112   -208   
336    -160   
-64    -832   
-576   -704   
416    -688   
16     -192   
208    -32    
-240   -240   
-192   -480   
208    -528   
352    464    
-288   64     
-160   208    
176    -64    
416    80     
-48    208    
-192   -208   
-176   960    
208    -112   
-80    -624   
-688   -160   
64     -672   
544    -1840  
-688   128    
624    64     
-160   -1184  
112    -416   
336    32     
-16    -112   
-96    -112   
-16    240    
0      -64    
144    208    
48     192    
-48    0      
-16    -192   
240    -128   
224    192    
-192   112    
80     -64    
240    -1104  
-160   -16    
464    -1360  
-592   368    
400    -752   
-80    -240   
-224   -512   
464    48     
-288   -352   
144    -496   
144    -160   
-48    192    
-304   -464   
128    128    
80     272    
16     96     
48     128    
-48    -704   
-32    80     
240    -208   
-160   208    
-176   -96    
48     160    
112    144    
128    -96    
-160   -432   
-320   64     
-80    80     
96     32     
-160   112    
224    -96    
-1600  1248   
2576   -1408  
-464   0      
-1024  80     
1168   240    
400    -256   
-288   464    
-240   496    
144    -1008  
-160   256    
-192   -96    
-224   0      
48     16     
-784   112    
192    16     
-128   64     
-32    -128   
-16    48     
160    16     
32     112    
-288   -720   
-1312  704    
1776   -208   
-336   496    
336    -256   
-608   -352   
-32    432    
-80    1536   
32     1216   
64     288    
-16    640    
256    -224   
-240   -320   
112    -544   
352    -480   
-1088  -128   
480    -736   
128    -352   
-176   -224   
-16    -128   
160    -160   
-272   -368   
48     -448   
352    1504   
832    464    
-576   -1456  
-656   -1408  
352    -480   
-192   -1136  
-128   -464   
528    176    
-128   -208   
-512   240    
-96    -336   
464    -880   
144    -400   
-144   352    
240    464    
96     224    
0      -320   
-240   96     
-1008  -288   
256    576    
240    224    
-416   -352   
-592   128    
-400   -112   
208    32     
384    32     
-96    -720   
720    -944   
192    704    
16     160    
-320   64     
144    -432   
160    192    
-256   -576   
-304   -272   
176    896    
-48    144    
112    -256   
80     160    
-352   272    
-912   -16    
336    -96    
16     0      
-176   -112   
192    -128   
-112   480    
160    304    
-32    48     
-528   -272   
256    -928   
1312   -1248  
-784   -64    
256    -320   
-208   128    
240    -128   
-96    176    
-80    368    
-528   0      
-96    -32    
160    -64    
208    144    
-176   -64    
-336   -16    
64     -112   
256    0      
0      512    
-576   -80    
176    16     
560    400    
16     576    
0      400    
-224   64     
-32    -160   
-592   -352   
64     -208   
336    208    
-48    240    
-240   -96    
416    -288   
-48    -80    
-272   544    
352    512    
-672   224    
-16    -512   
128    -208   
80     240    
-368   288    
128    208    
400    240    
-304   144    
-64    144    
16     -80    
-400   192    
320    -272   
16     -256   
32     448    
-544   144    
208    -192   
-432   -64    
48     176    
352    -80    
-560   144    
16     -176   
208    -144   
-352   -48    
-48    96     
1264   2624   
-2480  -608   
-1120  352    
2144   64     
-64    256    
-1184  352    
256    -96    
688    144    
-512   -480   
-256   112    
-48    208    
-64    -96    
240    -80    
-256   48     
-32    368    
0      -96    
-432   288    
112    -32    
16     -48    
80     32     
608    1072   
-1296  240    
48     -16    
1136   -48    
-928   -176   
-48    144    
-384   256    
160    16     
-208   64     
304    -176   
-64    32     
-560   0      
320    80     
0      176    
-16    304    
80     240    
112    -224   
-400   96     
416    -144   
-272   96     
112    80     
-16    32     
128    160    
-32    0      
-400   -96    
0      128    
-16    128    
96     128    
80     208    
704    304    
-1648  32     
672    32     
944    80     
-1232  0      
-400   32     
720    32     
16     -144   
-576   240    
64     -112   
208    -32    
144    32     
-48    96     
176    80     
-608   -16    
352    32     
96     48     
-192   -32    
80     -16    
-144   48     
-32    32     
-464   64     
368    -288   
432    -128   
-944   48     
1040   240    
-544   320    
-176   -160   
400    320    
352    -80    
-256   0      
96     32     
144    112    
-80    144    
-96    -48    
-32    16     
288    96     
-480   -192   
-32    144    
192    112    
-64    112    
192    128    
640    -16    
-560   304    
1024   -96    
-16    176    
-464   -48    
-688   -128   
-192   304    
656    -96    
-304   96     
160    144    
48     -16    
-160   128    
384    288    
272    -16    
-16    -16    
112    848    
-240   16     
-176   160    
512    48     
-224   80     
-176   48     
48     96     
160    -16    
160    -240   
-224   64     
-32    64     
64     -2240  
-880   -1872  
2176   -2128  
480    -32    
-1856  704    
208    192    
1456   48     
-192   -96    
-864   0      
-256   192    
688    16     
-480   96     
-32    96     
16     32     
224    80     
32     -928   
-32    0      
-112   160    
-16    144    
-224   96     
-224   368    
368    1328   
-48    1488   
-128   80     
576    192    
-112   -96    
-448   560    
384    -272   
-432   96     
192    -304   
496    -208   
-96    288    
-736   -400   
208    16     
1136   192    
-896   -16    
-320   0      
656    160    
288    -272   
-176   48     
-208   -576   
16     -16    
256    -144   
224    -208   
-528   -208   
320    -432   
336    -160   
-240   -576   
-304   -272   
-256   -256   
400    -448   
384    -176   
-176   592    
-352   80     
-592   -272   
336    -816   
64     -752   
-848   -304   
208    -640   
-16    -816   
144    -640   
-160   688    
-16    -624   
128    -416   
32     -112   
-304   -288   
16     112    
112    -208   
-240   -608   
-32    432    
16     48     
16     192    
80     16     
-64    64     
-96    112    
224    -96    
240    32     
-320   -336   
304    -944   
464    -720   
-144   -128   
-576   256    
432    -880   
-464   -160   
176    400    
-80    32     
112    192    
32     112    
-16    -16    
32     352    
48     -16    
48     64     
192    -368   
-160   112    
-192   -304   
144    -64    
160    -48    
-16    -160   
-144   160    
96     304    
48     -16    
-240   -272   
640    -288   
224    320    
-320   64     
-336   272    
512    -80    
112    -272   
-160   624    
128    176    
-384   -80    
192    -192   
544    128    
-80    160    
-176   64     
112    96     
160    -144   
-96    144    
-32    192    
160    144    
80     -208   
192    -112   
-48    64     
32     128    
48     -128   
-176   240    
112    -96    
-48    208    
16     -304   
160    -1168  
-160   256    
-1376  -880   
848    -512   
864    -272   
-848   1200   
544    800    
720    -128   
-352   48     
-144   1152   
16     -928   
240    592    
-176   -336   
-272   -400   
0      -256   
192    64     
128    -304   
64     0      
-96    -1120  
-176   -624   
416    -1264  
112    240    
-208   -1136  
-1552  720    
1712   16     
-80    -256   
-656   -528   
672    1216   
656    976    
-848   -160   
320    -1088  
496    -864   
-1088  -160   
0      -320   
336    -288   
-480   -432   
112    16     
-80    -640   
256    336    
-304   592    
-256   -80    
352    -64    
208    64     
-176   48     
-96    240    
800    1680   
-752   688    
-1184  -480   
128    -1456  
-208   -96    
128    -368   
400    -752   
48     -224   
48     -208   
-496   -848   
336    512    
-160   224    
-176   832    
768    -224   
-512   -160   
112    -192   
416    112    
144    0      
-128   128    
-80    -144   
0      -144   
288    -256   
-80    -448   
-288   16     
-16    -320   
624    -752   
1040   2672   
-1424  1936   
0      -1200  
1888   -336   
-752   -320   
-416   16     
544    144    
144    -384   
-368   160    
16     -368   
-192   -32    
464    0      
80     -16    
-64    -16    
-32    112    
-352   -944   
608    -16    
-208   48     
64     -1136  
-704   -1200  
256    -880   
96     -32    
-64    -112   
96     64     
-96    -432   
-384   704    
-176   -80    
-112   80     
496    -1120  
-240   400    
352    -1040  
-240   112    
256    -96    
224    240    
-224   -16    
0      320    
-208   16     
32     112    
48     208    
-176   -32    
-272   -80    
400    96     
32     -32    
160    -144   
240    128    
176    -400   
-416   -80    
-48    144    
240    -304   
-400   -256   
-112   -128   
-304   -384   
720    -336   
-240   432    
-608   64     
256    64     
-128   0      
-112   160    
-32    -96    
32     -208   
176    -224   
64     -32    
80     96     
-80    128    
-64    144    
-160   -208   
352    -464   
208    80     
-720   112    
256    -336   
-688   0      
32     -48    
-128   64     
-32    -112   
64     -16    
-544   -96    
-640   256    
160    144    
-480   -64    
-96    0      
1152   -528   
-3504  1424   
-16    0      
1728   -864   
-1456  176    
160    -128   
320    352    
-48    -96    
-448   -352   
-16    368    
-144   -304   
-384   256    
480    176    
-96    -224   
-736   480    
-304   144    
128    176    
-304   -80    
48     80     
144    -64    
592    1328   
-1392  192    
-96    176    
1008   -464   
-976   80     
0      160    
336    0      
-192   144    
-384   80     
208    -16    
-528   -32    
-128   32     
-272   240    
32     -16    
-192   -80    
208    -208   
-336   -464   
32     -192   
-240   112    
400    16     
-224   160    
80     -160   
-288   32     
192    16     
-368   -128   
288    240    
-48    32     
-976   -32    
256    -64    
480    -1104  
-1408  -96    
32     -400   
624    160    
-256   -48    
-768   -224   
304    48     
32     -224   
48     208    
96     -48    
64     0      
-208   -176   
80     144    
128    0      
-528   48     
-752   80     
128    80     
32     -64    
-144   144    
-96    -144   
-48    80     
304    -208   
-1600  0      
96     400    
560    -336   
-576   -240   
336    128    
-160   -160   
48     544    
688    -16    
-816   -64    
-112   144    
0      -80    
80     64     
64     176    
-32    -48    
-320   112    
96     112    
-32    -416   
-48    144    
96     224    
-32    64     
448    32     
-192   -240   
16     112    
240    16     
-96    624    
-768   112    
144    -64    
240    128    
-400   -32    
80     32     
448    -64    
-224   176    
256    144    
336    48     
-288   0      
-288   -112   
112    -16    
304    32     
-800   -64    
336    112    
176    -96    
-64    240    
-240   96     
0      16     
-32    96     
-240   128    
-144   32     
640    784    
1280   2192   
-2672  1312   
1040   -560   
1808   -144   
-1216  112    
-656   80     
704    -96    
464    48     
-272   368    
-320   32     
-16    96     
272    48     
160    16     
-48    288    
-432   160    
192    112    
224    -16    
-288   144    
160    640    
160    1136   
160    192    
-80    -160   
-480   -416   
304    432    
192    304    
-32    240    
256    96     
-144   336    
128    960    
-80    496    
400    -64    
128    464    
-240   368    
-272   0      
96     -16    
112    -16    
-112   784    
384    432    
-80    32     
112    -192   
64     -112   
-48    144    
0      -64    
256    -64    
224    352    
-192   1280   
224    720    
-544   -1088  
-64    -752   
624    928    
-112   80     
-496   -592   
544    -560   
48     -1456  
-192   -336   
304    384    
-144   160    
256    -288   
96     192    
-288   160    
-64    -16    
48     -192   
144    64     
80     176    
96     448    
304    960    
-64    192    
160    32     
208    -144   
-352   224    
224    16     
-80    176    
128    -32    
192    160    
-240   -64    
-80    96     
80     -48    
272    -96    
224    80     
-112   -208   
-32    176    
-192   672    
1264   -208   
-848   224    
96     -32    
352    16     
352    656    
-544   624    
48     64     
256    -160   
128    144    
-192   -16    
160    144    
-224   -128   
528    -448   
160    288    
32     592    
-176   256    
-16    80     
16     16     
816    320    
-960   608    
288    -144   
528    112    
-240   -160   
-80    64     
-112   -96    
320    -496   
192    48     
80     -304   
-208   64     
-352   -160   
400    64     
224    16     
-384   96     
-96    176    
448    640    
16     640    
16     176    
32     -448   
-16    80     
0      -80    
64     144    
-144   80     
176    16     
-176   -96    
-80    -672   
-16    -128   
448    -336   
-448   -592   
1392   -1296  
-352   64     
288    -448   
-448   48     
-336   272    
-160   416    
448    -864   
-432   1088   
48     1360   
208    112    
368    -144   
352    -784   
-464   96     
-48    -112   
384    160    
64     -208   
-80    576    
-128   112    
-48    96     
144    -16    
-592   176    
2336   -80    
-608   448    
-736   528    
864    -736   
752    -864   
-656   -1616  
-16    112    
512    240    
-320   96     
-32    -192   
448    352    
-16    0      
-384   96     
528    96     
112    112    
-176   224    
-336   272    
112    16     
96     -336   
176    -64    
432    80     
240    48     
-160   -96    
-704   768    
48     -352   
208    160    
-96    16     
192    -384   
-992   288    
384    0      
304    80     
-144   32     
-144   48     
224    192    
656    80     
-1008  176    
-256   80     
256    -928   
-96    64     
64     128    
240    -64    
-80    400    
416    -128   
80     128    
496    -480   
-32    160    
-448   -544   
1040   -496   
-976   -272   
-736   128    
480    -112   
-192   -48    
608    32     
224    320    
-928   352    
144    -144   
416    144    
416    -880   
-288   0      
-176   -656   
384    -208   
-48    -144   
-112   112    
-48    -192   
128    32     
-96    -288   
320    -304   
-768   -128   
656    -80    
-112   272    
224    -1296  
-624   -32    
-144   -768   
64     -256   
352    -144   
-112   192    
-112   304    
288    -624   
-224   144    
208    -96    
128    208    
-32    416    
-64    48     
48     224    
144    176    
96     368    
16     352    
80     -240   
-368   -96    
112    160    
96     -336   
96     -16    
256    -272   
-144   192    
-160   -528   
144    384    
352    544    
-256   64     
-176   160    
272    704    
992    176    
-528   -768   
-960   -192   
1104   -368   
-992   -112   
48     -144   
0      272    
112    -48    
-16    32     
32     -496   
96     -160   
32     -656   
64     -32    
96     256    
-80    64     
112    160    
368    112    
-208   -160   
-480   48     
-224   -16    
320    -80    
-128   224    
-192   -64    
16     16     
240    -384   
-48    32     
32     -752   
-48    176    
-256   1584   
2880   -416   
-928   112    
-544   -432   
144    -128   
976    176    
-128   -80    
-464   -464   
-336   -80    
240    128    
-16    -32    
-192   -288   
96     -96    
112    -176   
352    -32    
-400   -1472  
160    128    
192    -32    
-240   240    
-80    0      
-192   704    
1232   -448   
-608   -240   
-816   -160   
976    -144   
-832   96     
-160   96     
-400   128    
256    -384   
272    0      
-64    -560   
16     192    
-64    64     
-64    -480   
0      0      
368    -160   
-784   112    
544    -16    
-288   -112   
128    -112   
-32    48     
-208   32     
240    112    
112    -320   
-256   64     
128    -192   
-32    128    
224    96     
352    160    
-2304  -1040  
-448   -672   
2656   -416   
-1088  -32    
-896   464    
1280   192    
-272   32     
-304   -256   
288    0      
-48    -144   
0      80     
64     -64    
-16    -64    
-304   160    
512    48     
-272   112    
48     -96    
0      96     
32     -96    
64     80     
-192   -352   
384    304    
1568   -224   
-944   576    
-176   -224   
160    -16    
-656   -240   
-512   128    
32     -176   
-656   32     
-112   112    
160    96     
32     64     
-16    176    
-240   -80    
272    16     
208    464    
-640   -208   
-128   112    
176    -16    
-16    -16    
-704   -544   
-80    -384   
224    384    
-352   -416   
112    224    
32     48     
-256   -48    
-464   -16    
144    48     
48     0      
-48    224    
-288   -64    
80     -80    
336    -208   
-768   192    
688    -64    
432    -112   
64     336    
64     -32    
-336   64     
-64    16     
-32    -80    
-288   16     
-112   -64    
480    -128   
144    48     
-384   -336   
528    224    
-672   -128   
1456   64     
720    -640   
-2336  176    
64     256    
2256   -16    
-864   96     
-656   -240   
576    448    
176    48     
-784   96     
-176   0      
272    592    
32     -48    
48     128    
32     -464   
-672   -336   
224    160    
-64    -176   
80     -624   
-160   144    
-32    480    
144    432    
-240   752    
-256   784    
16     80     
-48    -416   
320    -336   
-176   -672   
0      208    
240    480    
-112   -320   
256    -272   
-208   176    
-112   176    
-336   -224   
320    64     
16     400    
-64    320    
-144   272    
-48    272    
48     176    
112    176    
48     960    
128    1536   
80     1488   
112    -160   
32     -176   
-16    -1152  
80     288    
192    -544   
-256   -768   
-224   -96    
352    -448   
-336   -1360  
32     192    
-192   -240   
0      -544   
-608   688    
16     240    
-352   64     
208    384    
160    -32    
-80    -96    
-192   32     
160    -144   
208    -384   
96     -720   
416    -192   
-352   240    
288    -80    
-528   -16    
320    -16    
-160   32     
-208   -16    
96     64     
-96    -64    
176    -288   
384    96     
-208   32     
-176   96     
-352   1168   
944    -80    
-656   304    
-336   160    
336    -112   
-16    320    
240    224    
-96    32     
32     96     
160    80     
272    80     
-272   288    
96     48     
112    80     
256    112    
-128   368    
80     576    
-16    704    
-160   320    
496    -464   
-864   0      
496    400    
208    816    
-240   368    
-64    -144   
400    256    
-192   1264   
-80    240    
384    128    
-160   144    
-304   128    
176    96     
-96    -96    
-112   -64    
176    160    
-64    -512   
-288   -16    
80     336    
64     16     
112    -240   
-288   160    
-144   368    
0      0      
464    -80    
-304   -240   
-400   -32    
-144   -144   
720    -208   
0      528    
1024   -368   
-1872  224    
336    -704   
1472   256    
-1376  -288   
-144   176    
880    -48    
-192   -416   
-32    -32    
-96    32     
112    48     
304    112    
-160   -144   
-224   96     
0      -48    
144    160    
80     368    
-80    176    
-32    160    
16     176    
-224   288    
2480   0      
-1696  48     
-416   -240   
848    32     
-448   96     
496    -144   
-32    288    
64     32     
96     48     
192    -752   
-32    64     
-256   -112   
80     112    
640    112    
-240   32     
-288   176    
672    -16    
-32    128    
-192   144    
192    384    
-512   480    
-192   -160   
208    64     
144    240    
0      -64    
48     544    
-448   -48    
-48    -160   
496    -32    
-48    -368   
-192   192    
-80    112    
128    176    
384    64     
-544   -32    
272    288    
-32    -352   
-144   -16    
240    224    
-64    16     
112    96     
-112   -224   
-256   -304   
976    144    
48     -128   
-400   144    
64     -736   
416    -704   
1520   656    
624    -448   
-1024  256    
-160   32     
752    -128   
144    48     
-32    -496   
-112   240    
64     -1312  
-80    400    
240    16     
-208   240    
304    -176   
32     112    
-80    80     
128    224    
160    -96    
-96    64     
-560   -288   
192    96     
352    32     
-400   -48    
832    96     
32     -64    
-992   -160   
144    -96    
1024   192    
-1248  -144   
368    112    
128    128    
-48    160    
-64    256    
48     208    
-144   176    
416    384    
64     208    
-160   -128   
160    64     
0      -16    
-64    64     
256    -1248  
-176   64     
240    -48    
-400   -32    
-528   -160   
496    224    
208    208    
-176   352    
-208   160    
208    -32    
80     -448   
704    -32    
-224   144    
-496   176    
496    480    
208    -320   
-496   -224   
-432   -944   
656    -112   
-368   -64    
48     112    
32     16     
-112   48     
-80    -16    
208    32     
144    -320   
-64    -432   
112    1264   
-464   368    
496    -128   
320    -80    
-432   304    
-112   112    
224    -80    
96     -96    
320    -16    
256    656    
-512   -144   
176    0      
-176   -880   
1888   1552   
1056   224    
-1376  608    
-160   256    
240    48     
176    -208   
-160   240    
464    -1376  
-96    320    
0      0      
384    0      
-32    192    
-96    -368   
320    -608   
224    192    
-224   -192   
48     -144   
-80    752    
208    192    
0      224    
112    960    
1152   -112   
-1088  -352   
-160   -528   
768    -224   
0      128    
-112   -48    
48     112    
-144   -80    
-32    -16    
304    256    
176    -320   
-336   -720   
96     -192   
432    96     
-176   -128   
96     16     
48     112    
0      -16    
48     160    
96     -16    
16     -368   
-576   112    
48     -176   
256    48     
-144   -144   
-240   -32    
288    -224   
-464   -288   
-480   496    
2320   416    
-784   288    
-672   -64    
1552   -16    
-720   -48    
-608   32     
544    144    
272    32     
-80    -48    
-384   -112   
-96    -304   
368    -48    
272    -192   
-368   -224   
96     176    
336    16     
-96    48     
-304   32     
96     32     
-48    -592   
1296   1040   
-1232  144    
-528   80     
1936   256    
-1056  -208   
224    384    
480    48     
112    -176   
-80    48     
-384   -416   
240    144    
304    -112   
-384   64     
-80    80     
528    -48    
-16    304    
160    -96    
-112   -32    
-64    -560   
-368   48     
112    304    
-224   1216   
320    -768   
-384   80     
896    -208   
-384   -544   
-880   -96    
640    288    
112    -32    
-384   -32    
-96    112    
32     -48    
-272   32     
96     -400   
336    -16    
-288   800    
208    -544   
-224   -864   
-544   320    
64     -192   
192    32     
208    -608   
-608   160    
-512   -624   
304    -80    
400    -160   
-736   -352   
-336   -128   
672    64     
-1184  448    
-592   320    
304    48     
272    1440   
592    528    
-544   -176   
-224   -400   
288    -864   
272    -464   
-272   -208   
-256   256    
0      96     
176    48     
16     0      
-192   32     
-64    256    
432    -112   
-32    -304   
-304   -208   
176    128    
128    -240   
80     -16    
-368   -240   
336    64     
-64    -720   
-400   -272   
-32    368    
208    112    
-416   -400   
-32    16     
-64    592    
384    -160   
-336   -272   
32     -128   
208    512    
-224   -704   
-112   -32    
-384   560    
-192   48     
-336   -448   
-256   160    
272    384    
-432   0      
-304   -288   
64     672    
496    64     
32     -512   
-400   336    
-944   -16    
320    304    
352    592    
-1248  416    
-80    992    
576    1744   
336    864    
-496   608    
-128   1664   
-64    -720   
48     -400   
-528   -144   
-16    96     
256    -48    
112    176    
0      -96    
-192   -256   
-160   -528   
400    560    
-144   1184   
-656   -592   
-112   -160   
16     32     
48     144    
-224   -176   
-128   -256   
-1472  0      
288    240    
48     864    
-80    688    
-416   96     
336    0      
-384   -112   
64     -528   
-368   -480   
544    -752   
-416   -336   
-304   608    
192    608    
96     112    
-16    -480   
-352   -352   
176    112    
32     32     
-16    -128   
-32    -336   
96     192    
-64    -368   
112    -176   
192    -112   
-288   128    
-336   -544   
704    -448   
-208   288    
-960   208    
720    -608   
336    -464   
-624   544    
-976   400    
336    -192   
-96    -64    
-128   128    
112    48     
208    144    
-176   256    
-368   -192   
256    96     
144    -16    
-48    48     
-144   -48    
-240   -400   
64     304    
96     0      
-368   128    
32     256    
16     32     
-96    288    
144    -32    
-176   80     
272    112    
-480   -16    
-272   -176   
-1424  -688   
1760   48     
560    48     
-704   224    
-64    0      
352    -48    
-80    -176   
-240   544    
320    -16    
-352   64     
-416   0      
240    208    
432    64     
-496   144    
96     0      
64     96     
-176   64     
160    -48    
64     80     
128    1168   
176    -464   
-1600  -80    
1648   -240   
-1296  48     
-480   -128   
112    112    
384    112    
240    -128   
-672   112    
144    16     
-16    32     
0      16     
160    48     
-432   64     
576    -16    
80     240    
-64    176    
416    64     
96     16     
-80    144    
-560   -64    
672    -32    
496    96     
-544   -320   
16     128    
384    96     
-48    80     
-112   16     
384    0      
-160   48     
-384   208    
96     -32    
96     80     
-352   -48    
480    976    
384    784    
-368   -48    
496    -432   
272    32     
-208   128    
-192   0      
400    224    
144    16     
-16    16     
-1120  144    
288    112    
464    -32    
16     992    
1008   736    
-2816  624    
1136   -144   
624    -64    
-656   320    
-64    176    
592    -80    
-288   528    
-384   96     
240    32     
112    96     
288    -16    
-560   336    
-32    -80    
-16    16     
176    96     
32     160    
-384   -48    
-272   -96    
1280   -304   
-528   176    
-16    192    
80     160    
-784   -128   
336    64     
560    48     
-576   112    
272    48     
-464   -96    
368    64     
-304   -32    
160    112    
32     256    
80     64     
-128   240    
-208   -16    
64     112    
-96    0      
368    96     
208    16     
-400   80     
-48    64     
208    128    
144    16     
-112   16     
112    16     
-80    64     
256    464    
-368   80     
192    192    
80     48     
80     784    
-960   -32    
64     64     
48     96     
240    0      
-304   -496   
352    -864   
160    80     
-144   160    
160    144    
-128   112    
80     144    
192    192    
48     -48    
-224   16     
64     176    
256    -144   
192    -544   
32     192    
-240   240    
112    -176   
16     -416   
-48    64     
80     -32    
208    -224   
-192   0      
64     272    
256    272    
64     96     
64     -1936  
-2352  2112   
1616   144    
480    1264   
80     112    
-816   48     
336    160    
-384   512    
256    448    
0      -1008  
-288   -80    
-80    80     
208    160    
240    288    
-720   880    
320    112    
48     160    
-192   -240   
160    48     
-96    288    
336    896    
-688   96     
176    624    
512    80     
-320   528    
400    512    
-208   -1712  
16     384    
240    272    
-64    -224   
-352   -352   
432    -464   
-32    208    
64     224    
-112   -16    
-192   464    
272    288    
16     -640   
-112   -16    
-16    -48    
-64    160    
144    -224   
128    -16    
-160   -48    
0      112    
80     64     
-32    224    
-48    48     
80     80     
0      16     
608    -672   
-944   336    
1040   192    
-480   -512   
-592   -400   
352    80     
560    -1184  
-112   128    
-256   -1552  
160    160    
272    -48    
-144   224    
288    432    
-288   176    
-64    192    
336    16     
-48    -16    
-272   -464   
-80    -48    
112    -368   
-64    -496   
-1088  624    
2000   -912   
-1120  -240   
-320   480    
768    -352   
368    -1120  
-784   -1296  
80     -480   
656    -208   
-48    -16    
-336   128    
32     -208   
240    -32    
-112   -384   
0      160    
-192   -480   
-144   -368   
512    -800   
-240   -208   
80     -32    
176    400    
-32    -832   
-528   -208   
1152   -160   
-224   304    
-672   128    
-112   -336   
256    -160   
-192   -192   
400    -96    
32     368    
608    1216   
-944   352    
-576   -496   
272    64     
80     128    
320    464    
16     576    
-176   -304   
544    -400   
96     -784   
-448   -16    
208    528    
192    624    
-448   416    
-432   -464   
288    -1872  
192    -16    
960    2560   
-1328  1296   
272    -800   
1904   -288   
-1488  288    
-976   -288   
352    -1184  
864    -112   
128    1056   
-448   -1232  
16     -528   
624    208    
16     64     
-384   336    
0      -304   
16     496    
368    432    
-400   336    
-128   -224   
-192   -400   
-112   -144   
-16    64     
400    48     
96     -512   
-480   -720   
-16    -48    
384    -2368  
-64    -416   
192    -640   
-176   400    
-112   -304   
128    64     
-128   -352   
16     272    
-16    288    
-192   -624   
-176   -1056  
-112   -1168  
-720   -1680  
384    -1200  
208    192    
-96    640    
-288   -96    
560    -608   
32     16     
-304   -176   
112    -528   
256    1104   
80     1344   
-208   336    
128    -736   
144    -704   
-608   -272   
-352   -400   
912    -544   
272    304    
-464   -1808  
-384   -384   
368    -2192  
160    -208   
144    -816   
-128   -400   
-192   400    
304    320    
-240   -16    
-208   208    
-48    352    
368    688    
-1408  -128   
80     -736   
-80    -464   
96     -288   
240    464    
-288   -1568  
32     -816   
160    -304   
-176   -640   
640    176    
224    400    
-240   16     
-720   1088   
1904   16     
-480   1424   
-1088  -464   
320    -1216  
320    -304   
-496   -224   
80     96     
544    64     
16     32     
32     -96    
16     16     
-368   -48    
192    -384   
160    48     
-272   -64    
-448   160    
288    160    
64     80     
-160   32     
-176   -1168  
-16    592    
576    448    
-416   -448   
288    288    
-624   672    
-48    -448   
-96    -384   
128    16     
-192   128    
32     288    
240    0      
-144   -80    
-16    96     
160    0      
-256   336    
-96    -592   
160    64     
-560   -592   
-752   128    
160    128    
-480   96     
80     240    
-144   -48    
-368   64     
272    -48    
80     144    
-176   144    
-192   -128   
96     -784   
-1712  -608   
1056   -368   
64     16     
-1216  0      
1168   -640   
32     -144   
-496   -496   
-64    112    
-272   -128   
-112   192    
176    0      
-96    272    
288    -64    
-400   192    
32     -208   
160    144    
-624   -32    
368    96     
80     -16    
-368   -544   
992    784    
656    -16    
-848   272    
176    -32    
0      80     
-1040  96     
256    -160   
816    -224   
-416   128    
-336   -176   
-96    128    
320    -112   
32     16     
-32    96     
-32    16     
-32    16     
-192   176    
-16    -48    
144    -128   
32     64     
-544   -80    
48     -192   
-176   304    
-1104  304    
400    128    
144    -192   
-800   -352   
-80    -176   
448    64     
-48    128    
-368   96     
-176   320    
96     16     
-256   -160   
-64    32     
-560   48     
64     64     
-352   -112   
80     32     
-320   -192   
-80    -16    
176    160    
80     32     
48     144    
-720   352    
48     304    
80     -64    
-512   -688   
2320   1472   
-2688  368    
-608   -176   
2688   16     
-480   -352   
-1088  160    
-16    -624   
608    272    
64     192    
-720   48     
400    80     
304    48     
-528   -32    
32     208    
416    -16    
-224   176    
48     96     
96     -48    
-288   -480   
592    -832   
-256   -48    
-192   0      
32     352    
-496   -80    
-64    -64    
128    192    
-80    48     
-208   224    
464    96     
-288   176    
-240   -48    
288    112    
0      -16    
176    208    
-528   80     
368    128    
-288   -32    
176    -176   
-176   -16    
80     96     
288    48     
-320   16     
-16    80     
272    0      
-64    96     
-112   64     
224    80     
-48    -128   
-528   -96    
400    -144   
112    32     
-336   -864   
-48    96     
112    -144   
-480   32     
672    256    
288    912    
-816   1328   
176    496    
352    -48    
-176   32     
-208   128    
32     -16    
160    192    
112    16     
-48    48     
-64    -32    
160    -208   
-16    -560   
-352   -528   
256    -496   
-144   -80    
48     -144   
160    -48    
32     240    
-304   160    
160    448    
272    -176   
48     -256   
-80    -48    
576    2048   
-1280  -432   
176    -160   
880    96     
-624   240    
-416   448    
592    352    
384    -176   
-400   656    
-320   112    
256    0      
112    48     
-32    -32    
-192   96     
-176   -192   
240    112    
64     -80    
-256   -48    
112    512    
144    96     
368    672    
-960   352    
448    -384   
176    -496   
-160   -240   
-128   576    
-48    208    
64     -112   
96     192    
-160   -160   
-208   144    
-16    352    
224    288    
-128   -672   
-288   32     
240    144    
304    368    
-272   -224   
48     16     
144    528    
-176   -96    
-16    160    
-80    160    
224    32     
144    -144   
-176   256    
64     224    
96     -16    
256    -224   
-960   -48    
688    144    
1456   352    
-1488  -400   
480    -736   
400    208    
96     -432   
-96    -160   
-384   -64    
96     -1168  
-16    192    
256    -32    
64     144    
-112   80     
-240   -320   
320    288    
32     352    
-192   -256   
208    528    
320    -16    
-96    112    
-416   -624   
-736   256    
2320   -96    
-480   -272   
-720   -32    
80     -1184  
112    -944   
-976   -1168  
464    -288   
320    656    
-48    496    
112    16     
-96    128    
32     496    
608    512    
-224   -224   
-368   -368   
0      -352   
336    -240   
80     192    
-208   128    
-48    256    
352    -48    
-128   -304   
-1408  288    
1136   992    
-176   -160   
-528   -272   
352    -592   
-144   -112   
-16    -432   
-384   96     
656    -112   
320    128    
-96    144    
400    -176   
-224   1920   
608    -2448  
-400   64     
-144   144    
400    400    
336    -608   
160    -592   
-240   160    
352    -592   
-80    -80    
-240   368    
48     368    
240    16     
-208   -512   
928    -1296  
512    288    
-128   -544   
-640   -784   
432    -1152  
320    -624   
160    640    
272    96     
-224   224    
-80    -288   
224    400    
496    384    
-352   624    
-336   -544   
352    160    
128    -64    
-128   176    
144    -544   
-272   -240   
80     -2576  
144    -176   
-144   208    
544    16     
-656   1072   
352    672    
-240   368    
-48    224    
496    608    
-16    -144   
-608   -976   
240    -672   
448    336    
-288   176    
-288   176    
368    -48    
-48    128    
-48    16     
32     320    
-144   -160   
-48    128    
160    -16    
-256   400    
224    400    
-48    1280   
352    464    
-144   -176   
-80    1152   
448    528    
192    224    
-192   -720   
-368   1072   
1280   -208   
-48    -240   
-800   -1168  
-432   -848   
336    -544   
-192   -656   
-64    -496   
32     208    
128    368    
-16    -64    
-160   256    
544    96     
16     96     
-304   -416   
128    -96    
400    352    
-64    608    
240    896    
-304   160    
16     -176   
320    -48    
-96    -992   
0      -336   
-416   368    
112    -400   
128    -304   
96     -464   
-16    -2160  
-240   -2544  
-640   -144   
1040   -32    
-896   -80    
304    -96    
-96    -400   
-32    -1216  
-96    -352   
64     -480   
320    128    
-176   -288   
-160   48     
192    -336   
16     96     
224    -432   
32     192    
0      80     
192    -160   
-64    -16    
160    -240   
-192   -288   
336    -976   
-688   384    
352    -224   
0      -16    
-368   -256   
48     -48    
448    -1472  
-224   304    
-192   -304   
176    48     
96     -128   
-192   96     
-32    -64    
-16    16     
-80    -416   
0      16     
-80    -96    
-160   16     
224    -16    
320    -288   
-368   -112   
-16    32     
128    160    
144    -64    
48     32     
-176   -48    
240    80     
-96    -96    
1568   368    
-2672  752    
-1440  272    
1648   -144   
-288   -288   
272    224    
48     16     
-416   416    
272    32     
-16    48     
128    -1568  
-160   64     
112    80     
320    112    
-368   16     
-368   176    
496    -64    
-144   -48    
-80    -112   
96     -224   
-320   48     
160    -240   
-1648  160    
1008   240    
176    -112   
-1520  -576   
1152   288    
144    -432   
-192   -256   
-336   0      
304    -32    
16     -144   
-112   16     
-240   -64    
112    64     
-32    16     
16     -160   
304    400    
-128   0      
224    160    
208    16     
-80    352    
256    32     
-32    176    
64     -176   
96     688    
-176   1072   
80     -352   
672    -48    
368    160    
-512   -112   
80     -288   
240    160    
0      -192   
-64    64     
160    -176   
-112   224    
-352   -48    
-688   240    
160    -336   
80     -32    
128    16     
64     176    
-368   -96    
-96    32     
288    -80    
192    -176   
-48    128    
-224   -144   
416    -720   
-2352  2800   
464    16     
-320   -64    
-960   -384   
912    64     
288    -144   
-800   224    
160    -256   
800    -208   
144    -16    
-496   16     
-144   -80    
64     176    
-176   -144   
384    64     
-400   -64    
-352   48     
144    80     
-384   -464   
-112   -80    
-928   -96    
-64    112    
544    -112   
304    48     
-768   112    
256    240    
-144   -272   
64     240    
64     -192   
-288   32     
368    176    
-32    272    
-304   128    
16     320    
208    288    
-560   336    
80     128    
-1248  -16    
256    224    
112    0      
-352   112    
32     -368   
-80    -192   
128    -640   
336    336    
-80    464    
-384   400    
160    -80    
80     160    
-304   -32    
-64    -352   
400    -544   
-160   304    
-192   576    
-416   640    
0      304    
-432   -288   
192    -176   
608    -336   
-368   -320   
-320   -160   
192    -224   
-160   -208   
256    -304   
160    -64    
-304   -368   
-320   -400   
-160   288    
240    560    
-736   224    
-48    48     
32     -32    
-16    144    
16     -80    
-64    400    
48     464    
-32    144    
80     512    
-128   -496   
-32    224    
-896   -1360  
192    -976   
32     768    
-640   1056   
224    16     
336    -576   
-384   384    
-80    192    
336    16     
-64    -112   
-208   112    
16     112    
240    -80    
32     272    
-64    0      
-256   240    
80     256    
80     544    
-64    -32    
-192   -32    
112    880    
160    -16    
-768   112    
0      240    
352    128    
-16    352    
-240   -176   
0      0      
64     -64    
-32    160    
160    128    
-32    176    
-32    64     
208    -80    
-368   -192   
176    -144   
-240   -112   
-448   -368   
16     64     
112    176    
128    -16    
-192   144    
-16    -48    
-256   32     
272    -96    
80     208    
-16    112    
-352   -224   
48     192    
-96    -1376  
-880   -16    
288    -384   
-352   -16    
544    144    
416    16     
-272   48     
-752   -1008  
176    368    
464    464    
-32    496    
-480   -320   
96     48     
176    -368   
-96    896    
-160   -304   
256    96     
304    -512   
-384   1520   
112    -224   
496    1472   
176    -816   
-2288  368    
1472   -1120  
-336   288    
-144   -16    
240    1616   
240    1952   
-784   1808   
240    736    
-64    320    
-464   -208   
400    -96    
-128   -112   
-368   -160   
-224   128    
640    528    
-560   576    
-368   64     
240    160    
80     160    
-192   -160   
-16    -496   
-112   128    
528    1072   
16     1328   
288    352    
-496   -128   
144    -352   
432    -64    
-352   -160   
48     -208   
512    432    
-704   720    
496    320    
112    -80    
-528   -1424  
-1200  32     
48     272    
32     480    
-48    -208   
16     -16    
-32    672    
496    176    
-64    544    
64     128    
-176   128    
176    592    
272    -48    
64     -64    
208    -368   
352    624    
-16    576    
-240   256    
-128   288    
256    1328   
816    656    
-320   208    
-1056  -192   
576    208    
720    -16    
-272   96     
-752   48     
368    320    
288    -160   
-224   112    
-352   -208   
-352   -64    
464    1040   
208    896    
-160   256    
-272   -512   
-64    384    
656    128    
-672   400    
224    -160   
384    272    
-512   -144   
224    400    
-288   -624   
128    -256   
192    80     
-208   32     
128    96     
64     -128   
-80    400    
368    -576   
-240   208    
-48    80     
0      112    
272    128    
-64    160    
-240   48     
560    272    
-592   -320   
224    528    
400    400    
-800   128    
80     -32    
320    -224   
-448   0      
448    -128   
208    -96    
-176   16     
336    32     
-304   -80    
128    -16    
96     96     
32     96     
48     -16    
0      432    
-288   208    
-80    208    
320    48     
16     -224   
-336   192    
192    16     
240    -528   
-272   -128   
-80    320    
128    112    
-176   144    
176    0      
-112   -112   
400    -848   
32     224    
-64    288    
-112   -512   
-368   -64    
-528   -1696  
-400   -160   
1648   -480   
-672   96     
48     -720   
912    320    
-688   608    
-384   -144   
144    48     
528    48     
-384   128    
-64    -320   
128    96     
304    272    
-160   272    
48     -64    
368    -32    
-224   32     
160    80     
0      -384   
224    -800   
-1200  -432   
448    -32    
1024   240    
-144   32     
-384   128    
256    512    
64     -64    
128    -64    
16     192    
240    -272   
-144   96     
-224   -160   
112    352    
496    -336   
-256   128    
-112   -528   
112    -32    
80     160    
-80    80     
176    48     
64     176    
160    80     
-336   -736   
288    272    
256    -128   
-352   256    
320    -32    
-16    -128   
-480   -1008  
-544   240    
896    -16    
-864   32     
-32    80     
768    96     
-352   400    
-96    16     
224    480    
192    -416   
-128   112    
0      -176   
128    160    
-160   -304   
96     176    
304    -352   
-464   96     
160    112    
368    -336   
-112   -32    
-64    -224   
-768   -336   
1520   80     
736    -208   
-1568  -336   
432    -160   
800    -80    
-576   -864   
-64    48     
544    160    
-128   -48    
-176   -304   
448    192    
-240   -992   
-128   176    
224    -640   
144    -176   
-144   0      
-224   -144   
320    -80    
0      0      
288    624    
-400   -336   
-912   144    
496    64     
448    224    
-384   -224   
-224   -112   
-640   208    
576    -64    
-48    16     
176    176    
-544   96     
48     -192   
-128   -288   
368    -448   
-192   -32    
112    64     
288    -160   
128    -1168  
-96    -80    
-128   -128   
448    48     
16     -96    
-288   48     
304    -48    
144    16     
-64    -160   
-176   80     
-1168  -624   
1760   -1952  
576    -400   
-1456  480    
-544   160    
672    -320   
416    -112   
-608   192    
48     48     
560    -16    
-560   160    
128    48     
160    -144   
-48    224    
0      -256   
48     176    
-528   -80    
224    -32    
-112   -416   
304    -608   
0      -576   
-224   240    
16     -880   
-320   192    
608    -192   
-416   112    
368    -176   
32     -160   
0      384    
-368   -80    
48     -224   
400    -544   
-2304  -224   
-240   80     
528    80     
448    -272   
-512   352    
416    -352   
352    -256   
-176   -176   
-48    112    
-96    -272   
-64    -352   
48     -64    
-48    -48    
-416   96     
-32    -688   
-128   240    
176    288    
-224   -304   
48     -816   
384    672    
-1040  0      
352    912    
176    752    
128    608    
672    2048   
-528   2096   
-352   496    
336    -1168  
-320   -144   
112    16     
0      144    
32     96     
240    -224   
96     -656   
-528   -32    
400    208    
32     336    
-560   -80    
64     -16    
-48    32     
176    -16    
-240   -48    
144    -176   
-48    -80    
64     -224   
-32    176    
32     160    
-144   80     
304    -320   
128    -512   
-768   -160   
-192   112    
208    -112   
-496   64     
-144   -416   
-96    144    
-112   256    
208    80     
48     -16    
-64    -32    
-208   -64    
96     -48    
16     192    
-48    -16    
-112   48     
-80    16     
-272   32     
-48    -16    
-208   -112   
544    -352   
-176   192    
400    48     
-512   -64    
-224   48     
448    160    
-64    672    
-48    -160   
128    -144   
16     -144   
48     160    
-80    80     
-160   -16    
96     128    
-48    -144   
-128   112    
64     -240   
-176   -208   
-256   -112   
160    256    
-112   160    
-144   112    
368    -128   
80     208    
-384   -224   
112    96     
224    208    
-496   224    
256    -48    
-1488  240    
1600   -16    
640    -384   
-1328  400    
112    352    
768    528    
-544   -640   
-736   -816   
384    496    
144    -144   
-352   -16    
-64    0      
-128   352    
208    -16    
176    -16    
-384   -144   
-208   112    
96     -432   
544    -448   
-400   -144   
-112   -672   
-1600  752    
2080   288    
-656   944    
-352   1120   
256    416    
96     208    
-1376  768    
192    208    
592    224    
-16    -32    
-192   0      
-240   -432   
-64    64     
-288   192    
144    -80    
-528   -368   
-768   768    
144    -144   
512    448    
352    208    
-464   64     
-192   240    
544    -560   
-240   -48    
-544   -176   
272    -432   
208    176    
224    -96    
-224   -160   
-48    -64    
224    -208   
256    192    
176    384    
-352   16     
-288   224    
176    -64    
-352   -128   
-176   336    
608    -96    
-16    32     
-208   64     
-352   64     
416    -192   
-144   -64    
-272   0      
64     112    
-64    -240   
256    -896   
864    2832   
-1520  1696   
256    -1040  
1760   -64    
-48    192    
-1408  -160   
432    384    
1040   -304   
-400   528    
-224   -240   
-112   224    
624    48     
-384   -96    
64     208    
64     -80    
-272   208    
208    -16    
-368   96     
640    720    
-528   320    
-96    -720   
336    -432   
-288   -256   
112    432    
16     -32    
-416   112    
80     -160   
-272   192    
112    80     
96     256    
-288   -240   
128    -176   
272    240    
0      368    
272    208    
-32    176    
-192   96     
-32    160    
432    176    
160    -16    
-640   0      
96     128    
160    -128   
144    -32    
16     -240   
-464   192    
448    64     
32     -16    
-128   -48    
-48    96     
-16    192    
-128   -896   
-784   48     
384    -80    
272    144    
144    -192   
144    16     
-48    0      
-48    128    
16     80     
-16    176    
16     144    
-16    0      
144    128    
112    96     
-224   112    
-80    144    
272    256    
144    -48    
-592   480    
336    208    
128    32     
-432   64     
160    16     
-80    0      
48     -112   
304    496    
-320   400    
144    -176   
96     0      
1328   1248   
-3424  -352   
-1312  176    
2000   -112   
-464   -496   
-864   -256   
672    -496   
192    256    
-256   352    
32     -128   
-96    -288   
-64    192    
128    320    
208    192    
-624   -16    
-80    -96    
672    48     
-288   352    
-64    -464   
128    80     
400    1312   
-640   80     
-624   224    
1088   80     
-192   0      
-1008  320    
576    -112   
576    -128   
-400   64     
16     -160   
-16    320    
-32    -144   
-16    48     
-80    -48    
-80    176    
672    432    
-528   64     
160    432    
-240   -944   
64     128    
112    80     
0      16     
-320   112    
96     -64    
-144   48     
320    32     
0      96     
-64    0      
-96    112    
736    912    
-416   640    
-416   656    
944    -128   
288    -592   
256    80     
-816   128    
16     400    
592    240    
80     208    
-64    -96    
-32    160    
16     -528   
-64    -16    
336    16     
48     -96    
-256   160    
208    -288   
-432   160    
96     -80    
96     32     
448    -496   
-736   -544   
-1440  128    
1536   -80    
-16    32     
-720   208    
128    112    
544    432    
-528   -32    
-256   64     
336    80     
-96    32     
-48    160    
96     64     
-272   32     
32     -704   
176    176    
-96    400    
80     64     
96     96     
48     128    
-384   -96    
1344   496    
-592   32     
-880   -112   
864    80     
-64    -192   
-352   176    
160    -496   
-176   144    
256    -768   
224    144    
-128   -496   
-288   400    
112    176    
448    656    
-384   -80    
-288   0      
192    -16    
320    -80    
96     96     
224    -368   
-416   320    
384    -320   
352    576    
-304   0      
-272   64     
0      112    
1200   912    
528    16     
-2736  -560   
1104   -208   
1760   272    
-816   -96    
-512   288    
1024   832    
-416   560    
-256   -112   
656    192    
128    -16    
-368   80     
128    160    
240    -160   
-16    112    
-64    224    
160    256    
-224   96     
336    352    
176    656    
-144   624    
0      128    
112    -208   
560    -400   
-160   176    
-208   192    
-192   -352   
224    704    
304    -256   
-64    400    
-400   -128   
288    -128   
112    -112   
-720   -720   
-112   -656   
-16    96     
272    -256   
256    -272   
-64    -240   
112    -208   
208    336    
-464   -144   
0      -304   
176    1216   
352    912    
-64    240    
-336   -896   
320    -896   
-32    192    
-32    -704   
-352   176    
-144   288    
1648   -624   
-720   96     
-192   1120   
672    -16    
128    -752   
-144   -208   
-80    -64    
192    80     
160    208    
-256   16     
16     -112   
-80    176    
240    -160   
-64    -48    
-96    -64    
48     64     
-128   -544   
-160   -112   
-144   -1136  
208    -32    
-48    -80    
-16    -32    
112    -64    
-272   112    
-64    192    
192    160    
-80    -96    
-112   -16    
560    736    
-1168  864    
320    -288   
272    160    
80     -208   
96     64     
-144   160    
-48    -16    
0      -128   
-240   -192   
-48    368    
32     256    
48     -160   
-240   -64    
16     -144   
16     -96    
-16    32     
-128   448    
176    -48    
192    -144   
-752   -112   
528    -112   
-416   -96    
80     16     
176    256    
96     32     
-448   32     
208    -144   
0      0      
-64    32     
-144   -128   
320    -64    
-416   80     
-48    -112   
-112   0      
80     -384   
-16    -336   
112    -864   
192    -560   
-32    -32    
-96    32     
128    -32    
304    32     
-272   -144   
64     80     
64     -144   
-224   -272   
-128   -272   
-208   80     
336    -944   
-2016  96     
1248   144    
608    -48    
-1008  -592   
160    -880   
-368   48     
-208   1264   
512    320    
96     -224   
-800   -624   
-128   -320   
416    32     
192    192    
-448   80     
64     112    
416    160    
-256   -208   
-176   -288   
256    96     
-208   432    
1024   -304   
-2000  -128   
608    -800   
-1584  1600   
272    384    
-112   288    
-576   -224   
800    -96    
-160   -176   
-288   176    
304    -304   
304    144    
208    -320   
-784   48     
32     96     
384    80     
-256   64     
-288   -32    
-32    384    
368    16     
176    624    
-1168  160    
624    48     
-96    -16    
-544   -224   
416    -256   
368    592    
-160   -256   
-368   -176   
240    -48    
96     112    
64     -80    
-1040  208    
-144   -96    
528    400    
464    -368   
304    -64    
560    128    
-320   -368   
-176   128    
16     16     
-80    48     
192    -64    
128    -80    
-560   0      
-112   64     
112    16     
304    144    
416    4368   
-1280  2128   
0      -272   
1632   -720   
-448   80     
-1168  -160   
352    288    
992    -96    
-544   -96    
-272   16     
528    192    
0      96     
32     64     
-288   48     
32     80     
64     128    
-288   -16    
96     48     
-192   656    
-176   208    
-112   496    
384    -128   
-288   -48    
-928   -128   
432    96     
576    0      
-640   224    
176    -256   
128    192    
160    80     
-384   -16    
-48    32     
448    -32    
-384   -32    
320    -32    
-176   -256   
336    160    
-176   -288   
32     96     
400    96     
-320   32     
-144   -32    
272    -160   
80     -112   
-208   -240   
-80    96     
320    -96    
-64    -48    
-96    -112   
80     112    
-784   -96    
-16    -832   
-816   176    
608    -448   
-480   -416   
224    -208   
384    -320   
-128   128    
-16    144    
48     64     
128    64     
-112   80     
-80    32     
-48    -160   
16     -96    
-368   160    
-160   -64    
-144   -384   
528    -640   
-240   288    
48     -80    
64     240    
-336   144    
112    96     
256    80     
-160   -272   
-592   -128   
688    208    
192    368    
-384   0      
-656   -2032  
-1584  1712   
1760   320    
-80    320    
64     32     
528    672    
-1056  992    
-32    -448   
224    -656   
-304   336    
-32    112    
-288   -304   
-96    496    
192    -192   
48     -224   
-240   -240   
-48    256    
80     112    
144    16     
0      64     
-224   -1312  
-784   480    
1072   352    
-480   128    
-288   -32    
224    144    
-368   -160   
320    -176   
0      144    
-176   48     
-16    -112   
48     -32    
-176   400    
368    128    
-352   176    
80     288    
0      112    
-176   576    
544    80     
-256   96     
-112   -16    
208    32     
16     96     
32     0      
-448   144    
320    128    
96     272    
-96    16     
224    256    
912    -1328  
-3696  912    
-912   800    
2272   -288   
-1360  -608   
-1408  16     
1840   208    
-416   64     
-704   272    
176    -64    
480    176    
-144   80     
-320   144    
416    240    
-480   -16    
-112   272    
368    32     
-32    176    
-224   -80    
-224   48     
128    112    
-576   224    
1904   -624   
-720   80     
-1232  -736   
352    -176   
544    144    
-32    -80    
-176   128    
112    16     
224    112    
192    416    
-672   224    
16     -96    
32     240    
608    -48    
-240   32     
48     256    
320    16     
-256   0      
32     -32    
48     -16    
336    -32    
-288   576    
336    -448   
-144   48     
-128   368    
992    -400   
-192   192    
608    64     
48     240    
-96    48     
-400   -16    
128    -64    
576    -64    
528    -240   
-416   0      
-512   496    
416    -176   
-128   -624   
-528   64     
336    128    
48     16     
224    112    
-80    -208   
272    32     
480    160    
112    144    
-176   -160   
-240   128    
-480   -2096  
-608   -352   
912    -16    
-240   16     
464    336    
-64    -384   
-336   -576   
-240   -1440  
288    -944   
-192   64     
0      32     
-64    -96    
320    336    
-80    -192   
-112   64     
400    -1056  
-480   -112   
-32    112    
336    352    
-96    80     
-16    64     
32     128    
384    -176   
-352   256    
64     128    
-64    656    
608    -32    
-576   48     
240    -320   
240    -80    
-128   -384   
-176   544    
256    -80    
208    528    
368    -48    
-96    -96    
112    -336   
-208   240    
208    944    
224    -464   
-64    -192   
-96    112    
176    384    
-64    -960   
-272   448    
96     -16    
-96    448    
336    -704   
-32    0      
-304   -192   
224    -688   
-1392  592    
720    -16    
416    544    
-32    1248   
-288   -160   
256    -480   
-288   672    
48     736    
160    -160   
0      32     
16     -352   
-48    -624   
112    448    
112    -688   
96     368    
80     128    
112    112    
80     48     
-16    48     
48     -80    
208    -96    
-96    144    
-176   -176   
304    -96    
-128   -480   
-128   -320   
208    -544   
48     192    
-64    64     
288    -576   
-416   0      
-96    256    
224    -48    
368    304    
112    -80    
-112   -144   
192    112    
464    -352   
-48    144    
-80    -32    
16     176    
128    -48    
16     -112   
-32    -64    
-80    368    
112    352    
192    240    
-240   192    
-320   176    
736    -336   
-496   352    
528    -64    
-720   256    
96     96     
96     -368   
240    384    
-64    96     
0      -304   
-160   -1088  
320    -256   
-64    32     
128    -752   
-32    -224   
-320   -192   
160    160    
528    -112   
-32    -336   
-336   -160   
96     48     
128    -288   
112    176    
-96    -112   
-32    272    
192    64     
112    -176   
128    -48    
32     176    
-320   576    
-912   1696   
2592   -608   
-944   -32    
-48    112    
-112   -208   
448    -560   
224    -528   
-496   -1360  
128    -496   
464    80     
-80    -112   
-144   128    
16     48     
304    0      
-160   -80    
-272   -144   
0      -240   
64     -48    
256    96     
-96    -96    
-128   -1024  
1088   880    
592    -800   
-688   576    
128    -288   
64     -448   
-400   -128   
720    256    
160    -336   
-512   -144   
256    96     
0      64     
-688   -48    
304    48     
-336   -64    
144    -96    
256    96     
-48    -192   
64     -16    
112    -976   
-16    16     
112    208    
384    -64    
160    272    
-176   -112   
-512   80     
288    112    
528    -272   
176    -384   
-832   80     
416    -112   
80     0      
-320   -64    
288    400    
-400   -1008  
384    -96    
160    0      
-752   -464   
-112   -64    
688    64     
-64    -192   
-352   -480   
192    -48    
480    -64    
-512   -496   
-304   288    
736    96     
-64    -352   
256    1440   
1152   3088   
-1520  2272   
592    400    
1600   -304   
-592   80     
-336   -112   
288    240    
432    -128   
-480   -160   
352    16     
384    64     
-128   -160   
-352   48     
272    -272   
-32    48     
208    -80    
48     112    
-320   -976   
176    160    
528    -336   
-592   352    
496    0      
-192   160    
-688   -240   
-224   -288   
-192   80     
288    -80    
-16    208    
64     -144   
-192   48     
608    -208   
-32    112    
-352   32     
-224   0      
-304   -320   
208    256    
272    144    
-512   16     
528    -128   
32     -112   
-144   96     
-176   -96    
128    192    
544    -112   
-224   96     
-96    -416   
-96    0      
416    176    
-272   -144   
128    96     
-176   -48    
-144   -496   
-1040  160    
208    -352   
-16    -272   
-256   -96    
384    160    
528    0      
-1008  -560   
-384   160    
64     -144   
-368   -160   
-80    48     
-208   0      
-32    64     
-368   -160   
-112   160    
528    176    
-368   0      
-48    -128   
592    -192   
-160   -32    
-240   224    
256    -240   
16     208    
-288   -80    
448    304    
-160   496    
16     112    
-160   -176   
688    2720   
-624   -1776  
-1920  1072   
1184   -432   
-192   112    
-512   128    
160    -128   
432    -192   
-336   -1184  
-256   288    
240    656    
-176   -48    
-32    0      
-144   0      
208    -544   
176    672    
-272   112    
-400   144    
240    32     
-688   176    
-112   64     
48     -768   
-544   480    
1088   336    
-240   304    
-384   -112   
-256   -544   
512    -336   
-32    176    
-208   -32    
48     192    
0      32     
-224   -208   
16     -16    
-352   -32    
0      176    
160    -64    
-32    -64    
-240   -192   
-80    -96    
16     -32    
-144   0      
-16    0      
32     -112   
256    16     
-448   -144   
16     80     
-32    128    
-208   16     
-576   -880   
1120   800    
1056   -160   
-1488  -64    
-464   -448   
800    -176   
224    -112   
-336   -32    
0      64     
160    80     
-208   32     
96     96     
128    112    
-176   48     
-48    288    
560    192    
-256   240    
-752   -96    
320    176    
224    -32    
-336   0      
-144   -896   
-800   560    
1056   -384   
-336   -176   
128    -32    
304    -272   
48     -128   
-256   -240   
-32    192    
-112   384    
560    80     
-528   48     
-96    160    
496    64     
224    48     
-688   64     
-160   -464   
-16    -128   
352    160    
-160   -48    
-48    32     
-192   32     
-208   -96    
48     -16    
-400   -384   
32     -496   
1360   144    
608    352    
-176   704    
304    32     
-48    64     
-48    -112   
368    928    
-816   912    
-224   496    
368    -576   
240    80     
-176   256    
-240   -64    
48     -144   
256    208    
-96    144    
-176   224    
0      64     
-432   176    
112    -176   
48     304    
-96    112    
-16    128    
16     -1328  
1248   -1472  
240    -432   
-736   1264   
0      288    
-80    192    
464    176    
-208   -256   
-496   432    
-160   -240   
384    -112   
144    112    
-272   -304   
-16    32     
-16    208    
288    64     
-544   224    
-128   -192   
-208   272    
304    912    
-192   304    
-64    -448   
320    -16    
112    48     
-224   336    
-32    416    
-96    -1152  
-400   720    
624    1600   
-32    -112   
-96    256    
-208   -160   
240    -400   
16     -368   
496    240    
-176   496    
-208   64     
256    176    
400    176    
-224   416    
-320   -96    
-288   352    
448    400    
-80    656    
80     1104   
-80    736    
288    -464   
368    1344   
-256   48     
-128   352    
-96    -752   
688    208    
288    416    
-752   736    
-32    -96    
-80    96     
32     240    
176    496    
-160   -272   
-304   -432   
96     160    
224    80     
0      -144   
-160   -240   
-32    384    
432    288    
208    256    
-576   208    
-32    -336   
304    144    
-160   208    
-96    128    
336    64     
-272   384    
-128   1024   
-80    512    
-64    1184   
336    880    
-224   -16    
-128   -384   
400    -1120  
-1520  0      
912    -16    
352    528    
-288   352    
-192   512    
208    1152   
-160   -544   
-160   -832   
368    224    
0      320    
-352   -48    
0      -160   
128    128    
-48    -352   
-48    -384   
-48    -400   
-80    336    
128    224    
192    112    
-576   752    
576    -192   
-336   752    
16     544    
176    -144   
176    -48    
-368   224    
112    288    
384    496    
-128   -512   
32     192    
352    -304   
-240   272    
-48    -2992  
240    -416   
96     784    
-240   448    
-48    -32    
256    -144   
16     -96    
-16    208    
208    16     
64     352    
32     128    
-144   -32    
-128   32     
208    -176   
64     176    
144    -256   
-1344  -800   
752    496    
1184   -496   
-1168  -464   
592    256    
496    -80    
-720   -304   
-176   -160   
304    -48    
192    176    
-304   -160   
-16    112    
-16    -320   
528    160    
-208   -560   
32     160    
96     -928   
-64    208    
32     224    
176    96     
-80    160    
-704   -384   
1440   320    
688    -464   
-1296  336    
832    -256   
208    192    
-48    352    
-528   128    
-48    -176   
160    112    
-240   -544   
-32    32     
32     64     
576    208    
-352   32     
-112   -16    
-368   224    
384    -512   
224    -96    
-32    -64    
-80    288    
720    -160   
-304   144    
-240   -384   
432    -336   
48     -272   
-448   16     
288    64     
-32    0      
-384   160    
320    16     
64     208    
96     160    
-32    -80    
-192   176    
224    64     
-256   -240   
0      -48    
688    -416   
336    112    
-448   -80    
-48    -80    
384    240    
-112   -1920  
-256   -80    
-528   -272   
-480   -480   
608    1152   
1792   2112   
-1536  1760   
96     208    
1920   -480   
-560   128    
-560   160    
464    -736   
320    -128   
-192   -752   
-528   -112   
176    -48    
32     160    
-96    -32    
208    -432   
128    -176   
-48    -192   
-96    16     
176    -992   
-320   -432   
848    -416   
-224   -256   
-208   352    
224    -144   
-592   16     
624    80     
-224   -176   
128    80     
384    -416   
-272   -160   
-416   -32    
464    -176   
32     -48    
144    -112   
-256   -64    
304    -1488  
0      -480   
-112   -224   
528    -48    
-192   -112   
0      192    
16     -16    
352    -144   
-64    -32    
240    48     
-368   48     
-864   -64    
672    -32    
32     -224   
-368   64     
208    -560   
-64    -48    
-144   -1280  
-352   0      
432    464    
-80    16     
144    16     
112    64     
-208   176    
-208   -128   
16     144    
128    16     
-48    0      
-128   -176   
224    128    
80     16     
-16    208    
-320   -224   
160    -304   
-32    -560   
48     -256   
-160   128    
160    -16    
-368   224    
128    -112   
-16    -16    
16     -48    
-528   384    
16     -96    
-240   -256   
128    -464   
32     -2656  
-1504  768    
1936   -192   
-448   992    
608    -352   
-304   -32    
-384   400    
-16    400    
672    624    
-80    208    
-464   416    
-64    48     
336    16     
16     -64    
-352   -32    
32     32     
256    -592   
64     48     
112    112    
-48    -48    
-64    -832   
112    -480   
-32    352    
-32    672    
-384   816    
304    -528   
80     -416   
-48    -64    
128    48     
80     -80    
48     48     
32     -96    
-112   144    
0      -368   
288    -208   
-176   192    
-176   -192   
192    -32    
-16    -544   
-192   128    
288    32     
-48    16     
-144   48     
-608   -64    
272    48     
160    288    
-320   -368   
144    272    
192    160    
976    48     
-2608  544    
-432   208    
1744   192    
-320   144    
-352   -32    
-288   592    
160    832    
0      -176   
-80    -192   
0      -80    
-352   48     
16     -128   
32     48     
0      288    
160    176    
-208   16     
-400   368    
112    -288   
-288   -432   
-128   -576   
1472   48     
-1408  -144   
-768   464    
1152   -48    
-544   -784   
-400   -560   
336    -704   
-128   -96    
-352   96     
-32    112    
160    0      
-432   -224   
-144   128    
-112   48     
-432   -16    
224    176    
32     336    
-192   -96    
-112   0      
-112   16     
192    400    
-32    320    
544    1088   
736    560    
-80    -304   
-240   -416   
512    -560   
160    -1520  
-560   -464   
160    336    
-464   -592   
-112   -688   
832    416    
-320   256    
-784   -144   
-192   -1232  
-144   -656   
336    -416   
-288   320    
240    -240   
48     -128   
-224   -480   
-320   272    
-64    -592   
-480   -384   
272    -352   
-208   592    
0      -64    
-64    -48    
-272   -1584  
-2016  -640   
1072   624    
640    800    
-224   304    
-416   544    
-64    -944   
576    -240   
48     720    
-224   -64    
-176   -464   
-176   -16    
448    528    
-256   -112   
48     96     
96     544    
128    224    
-128   224    
80     0      
-96    416    
48     160    
80     32     
272    -48    
-688   480    
304    368    
416    448    
-368   304    
-32    576    
-512   -1072  
32     -448   
16     -96    
-288   272    
496    128    
-48    176    
-400   288    
496    96     
208    -240   
-752   -496   
112    -496   
336    48     
-160   16     
48     112    
-128   208    
-48    -320   
320    -896   
176    -32    
-304   288    
192    736    
176    544    
-144   0      
480    576    
-1216  432    
-144   -192   
1040   -192   
-848   -192   
-304   512    
768    16     
0      -1184  
-928   -720   
64     -304   
32     0      
32     256    
112    256    
-384   272    
96     96     
336    176    
-352   -176   
528    -48    
80     -160   
-240   -96    
272    -64    
-128   -32    
-64    256    
-16    144    
-64    80     
192    -208   
-128   -304   
16     416    
-48    208    
-256   -1120  
1248   -1248  
-720   -272   
-208   -1456  
-240   928    
96     256    
80     -512   
-336   -576   
112    -192   
224    -192   
-144   64     
32     112    
112    240    
-64    -112   
-144   -96    
320    400    
-288   608    
144    720    
176    128    
-176   160    
-368   -560   
736    -944   
-448   512    
32     -400   
-224   528    
480    384    
-400   736    
-32    144    
208    -32    
-112   208    
-64    -64    
80     -16    
-80    -32    
48     128    
-112   0      
-96    256    
192    48     
-16    80     
-96    -64    
-16    176    
80     192    
-80    -16    
80     96     
-80    -16    
224    96     
176    208    
-448   96     
272    112    
-144   128    
-224   -496   
1136   -80    
688    -368   
-1376  -64    
560    -32    
592    112    
-496   -96    
-160   192    
448    144    
-288   48     
-32    96     
192    80     
-48    192    
-48    176    
-64    80     
48     192    
96     128    
-80    0      
-208   64     
496    416    
160    112    
-368   -304   
1232   800    
-560   -176   
-768   -128   
-288   -96    
320    224    
-240   -160   
208    128    
624    48     
-208   160    
-176   64     
144    144    
48     144    
-368   -592   
640    128    
32     176    
-336   384    
672    0      
-32    160    
-336   128    
240    160    
-400   -560   
48     608    
160    80     
-1152  432    
800    -176   
-352   -208   
-64    256    
96     -320   
-192   -272   
-448   16     
416    416    
384    144    
-144   192    
-704   -48    
576    -144   
160    656    
-800   496    
192    -480   
384    -64    
-304   160    
-48    -128   
272    80     
80     -80    
-208   -640   
-704   -480   
512    128    
48     0      
-352   -704   
2560   -624   
-2624  352    
-368   -80    
1936   -112   
352    -128   
-1424  0      
-256   288    
1184   -112   
224    128    
-192   -176   
-368   112    
272    -112   
160    64     
224    -1248  
-112   32     
64     144    
16     80     
176    32     
-416   -304   
624    240    
-16    -32    
-320   304    
384    -192   
-912   64     
240    -48    
272    64     
-144   -448   
256    -32    
-320   96     
608    352    
-320   192    
176    -16    
80     96     
128    208    
-176   112    
128    240    
64     96     
304    -112   
192    64     
-80    -928   
240    176    
-176   -240   
464    240    
32     176    
-128   128    
80     64     
320    16     
-272   0      
-112   176    
400    64     
32     336    
16     -80    
-784   -192   
768    1456   
-128   1232   
64     288    
16     -560   
64     -96    
0      -464   
272    -144   
240    -240   
-80    -80    
-16    -48    
-48    -160   
-144   -384   
112    -320   
272    -240   
64     -48    
-80    384    
16     80     
160    -128   
-208   -800   
336    -448   
-240   -240   
-368   96     
432    -768   
160    -448   
-192   752    
-288   -1488  
624    -672   
288    -80    
-128   -1648  
-976   464    
704    64     
288    -272   
-768   448    
144    -1888  
272    80     
32     -80    
-144   -432   
240    80     
96     -240   
176    160    
-336   -16    
-48    -128   
224    32     
64     464    
16     -256   
128    -336   
0      -160   
592    592    
-1056  896    
480    -656   
496    -928   
-208   -160   
-240   336    
176    544    
608    -528   
-384   -464   
-176   192    
-48    -128   
80     0      
-16    -256   
-96    -80    
-96    -320   
-16    -192   
160    -144   
432    -416   
-256   736    
-160   0      
64     -32    
160    -96    
-32    -128   
-48    48     
-176   128    
-848   -448   
64     -96    
-32    128    
-32    96     
-304   -320   
672    272    
2352   -256   
-1328  -1344  
-416   -608   
784    -864   
176    -1040  
64     400    
-192   112    
-368   -320   
32     -304   
368    -16    
32     -48    
-304   176    
112    -160   
256    -64    
-96    -656   
-128   336    
-128   -288   
-64    192    
96     -32    
-800   48     
1632   -368   
-256   208    
-352   432    
256    -176   
-288   -496   
528    -640   
-512   336    
32     688    
240    224    
-160   -512   
-32    -560   
144    -16    
-64    -336   
144    -416   
368    -128   
-160   704    
528    352    
-128   208    
-32    -160   
-16    0      
-32    832    
512    224    
304    432    
-592   1168   
144    144    
-368   1712   
624    -16    
256    304    
-208   -1472  
592    -96    
336    -96    
-336   -528   
-640   736    
1456   -224   
352    240    
192    560    
0      208    
112    432    
384    352    
-128   -320   
16     -336   
-112   -560   
144    464    
112    -624   
-384   -96    
-592   384    
368    640    
-592   272    
864    1952   
-1168  1216   
128    -208   
416    -160   
-688   336    
-496   784    
320    -16    
320    1584   
0      560    
-480   0      
0      -816   
224    80     
-240   160    
-272   544    
-224   160    
-144   240    
448    -16    
-304   -32    
-384   -1312  
-368   -784   
528    336    
-528   192    
-304   208    
496    96     
-48    256    
-144   320    
48     336    
16     608    
-560   128    
-144   752    
-96    368    
128    224    
-416   224    
128    320    
-432   -48    
176    -192   
-192   -112   
-80    -176   
112    -544   
-80    -416   
-96    -48    
-208   0      
16     144    
-304   48     
128    -352   
-912   -800   
-64    -272   
176    -368   
-32    -384   
-96    -752   
-720   -352   
704    -64    
976    -112   
-1440  -112   
16     224    
368    432    
160    272    
128    96     
-80    304    
192    112    
-304   48     
96     64     
-608   -160   
-384   -160   
-80    -48    
192    688    
160    -96    
-304   912    
416    368    
368    384    
-176   352    
-176   272    
144    208    
-80    -96    
-320   -48    
480    304    
432    432    
-736   336    
-96    96     
144    -32    
208    2144   
1728   464    
-1360  368    
64     176    
880    -176   
-416   288    
-272   96     
160    448    
-592   416    
224    0      
224    -224   
-288   32     
-272   -176   
256    672    
416    688    
-832   -176   
-96    -80    
368    -432   
-336   -336   
-16    144    
-144   992    
1280   -160   
-704   -64    
-112   -48    
480    -224   
-144   80     
-192   208    
-64    160    
32     160    
-224   48     
192    16     
-96    -48    
-48    -128   
64     112    
48     -96    
112    -176   
-256   64     
160    240    
-320   -48    
-32    -32    
208    32     
-96    160    
-160   -64    
320    160    
-192   -192   
-368   304    
512    -16    
-288   32     
-80    224    
-256   992    
2800   944    
-1040  96     
-1264  -272   
1712   224    
304    80     
-1184  208    
-64    160    
432    -48    
-144   32     
-608   -112   
448    224    
-208   -80    
48     96     
624    80     
-464   96     
-256   176    
608    32     
-32    -48    
-272   -32    
48     -96    
624    944    
1312   80     
-1856  -240   
768    944    
1632   -112   
-1152  528    
480    -80    
-128   304    
-272   32     
-112   48     
48     80     
48     64     
224    32     
192    160    
-208   64     
-144   -112   
224    208    
-240   176    
-736   272    
288    80     
-496   -720   
-64    64     
640    -80    
-864   272    
624    -160   
592    -128   
0      -416   
-240   288    
272    -192   
-304   112    
-304   -48    
-48    176    
304    -192   
768    112    
-176   48     
-16    512    
32     192    
-272   -96    
272    128    
352    112    
-288   80     
16     48     
96     64     
48     128    
656    -96    
-160   128    
-16    96     
-272   -1024  
512    -3744  
-2528  -1296  
1120   240    
1152   32     
-256   144    
-640   -16    
288    272    
688    224    
-656   -240   
288    48     
448    -16    
-272   176    
176    32     
32     224    
32     -144   
192    208    
96     64     
-352   48     
192    320    
256    288    
48     960    
80     272    
-400   -240   
80     160    
848    16     
-720   96     
368    -128   
160    208    
-416   16     
112    -176   
64     -592   
64     -208   
32     192    
96     16     
-240   128    
128    912    
-64    720    
96     288    
288    -16    
-144   -16    
-160   112    
-128   -256   
64     288    
336    16     
-592   -208   
496    -304   
-272   -432   
-112   32     
128    480    
32     512    
128    112    
-144   896    
1008   -336   
-512   -272   
32     -256   
-272   -752   
-496   -1808  
-48    -1008  
96     -880   
-96    -464   
112    -1008  
-80    400    
-48    256    
32     -48    
80     208    
-64    496    
-32    -80    
16     144    
32     16     
144    176    
-240   -432   
-96    -144   
96     48     
-176   432    
320    224    
-480   -512   
384    0      
464    -864   
-496   112    
-80    96     
160    -544   
400    -1104  
96     -160   
-112   -288   
368    -208   
-32    272    
176    -640   
-288   -704   
-80    -416   
64     224    
96     -112   
32     240    
0      -80    
64     64     
-32    -512   
112    256    
-48    32     
224    -16    
80     272    
-144   192    
-336   -240   
32     -128   
336    112    
-176   192    
176    256    
-16    -144   
80     240    
-160   -688   
144    96     
48     -768   
-16    160    
32     0      
-80    64     
176    -384   
-32    192    
96     176    
0      -128   
-208   16     
208    -192   
352    128    
-144   -112   
-160   144    
64     -240   
48     128    
16     -64    
-112   240    
336    224    
-128   176    
-96    -64    
1408   1168   
-1536  304    
-1440  -1072  
2000   368    
-240   240    
-1680  -32    
352    -1008  
144    192    
96     1616   
224    144    
304    -304   
-480   -48    
16     112    
320    128    
32     336    
-272   -48    
80     -240   
-320   -1104  
192    384    
16     -48    
-128   -16    
1264   -272   
-1712  96     
-144   912    
304    1200   
-640   -1248  
304    -1264  
480    -672   
-256   -480   
-176   640    
-64    48     
384    -1088  
0      128    
-32    -496   
-16    -96    
64     -864   
80     -368   
-176   -1136  
240    -864   
-32    -176   
-272   -48    
128    -976   
192    752    
80     256    
-640   -496   
576    -992   
-80    -560   
288    -1072  
-976   -1472  
432    128    
336    -544   
-512   448    
48     -944   
-32    64     
-432   -160   
512    -112   
224    624    
-144   32     
144    -144   
160    688    
128    -80    
-400   -144   
-880   400    
848    -272   
176    160    
-304   -640   
-688   -48    
720    -256   
720    -752   
-896   -160   
368    1808   
1520   -464   
-1312  -688   
-400   -1504  
224    -736   
304    -288   
-496   80     
-928   448    
320    0      
288    192    
-192   -192   
-272   192    
-16    304    
528    -80    
96     -1152  
-400   48     
304    -64    
0      -784   
208    -1552  
0      -240   
-112   272    
256    256    
32     -96    
-816   -160   
400    96     
240    -160   
-128   -112   
-64    144    
352    -32    
-256   -400   
64     -48    
112    160    
-16    256    
-208   0      
-400   -240   
368    -512   
288    -736   
-736   -112   
320    -32    
-32    -176   
368    -208   
-640   -272   
-272   -224   
384    -32    
-160   -832   
192    112    
640    -96    
-544   240    
-32    48     
416    -112   
256    1264   
-736   160    
-208   -160   
688    288    
-192   -256   
-656   -240   
-672   -64    
272    -352   
96     -80    
48     -48    
-64    -80    
32     -912   
16     96     
128    0      
64     -704   
-1024  16     
384    176    
240    -608   
-640   -208   
-224   64     
336    -304   
16     144    
-48    128    
-48    144    
-16    -624   
416    -480   
144    -176   
-288   -16    
-128   48     
-432   -1200  
1856   -384   
-1136  160    
-960   -368   
320    32     
-304   48     
32     384    
784    64     
-336   -784   
-400   192    
368    -32    
288    160    
-48    208    
-208   -112   
64     -352   
256    176    
-288   80     
160    -192   
-96    144    
32     -240   
-320   -624   
960    -528   
-624   272    
-1760  16     
928    -288   
-576   336    
-80    -176   
-48    464    
240    -272   
-464   336    
-1072  -48    
144    224    
208    -48    
48     -64    
-16    -80    
-256   112    
352    208    
160    288    
-576   -112   
-240   144    
176    -48    
-128   0      
-240   0      
-416   0      
0      -96    
-432   128    
368    -48    
-288   80     
-176   80     
-80    576    
1328   -1552  
-1952  -688   
-800   -96    
688    -288   
320    256    
-304   -112   
-208   144    
416    112    
0      -208   
-320   112    
128    160    
64     64     
-272   32     
208    -80    
-784   -48    
32     128    
80     48     
-144   128    
-48    80     
32     32     
48     -192   
752    -240   
-1264  -32    
80     -832   
48     272    
48     -272   
-352   208    
544    -144   
-16    -48    
-816   32     
128    112    
80     -48    
160    144    
128    -32    
-592   32     
-144   16     
256    -128   
224    -336   
-96    176    
-272   -16    
80     0      
-272   -80    
512    48     
112    128    
-752   64     
672    96     
-48    -48    
-208   144    
-224   -352   
-176   208    
448    64     
-96    448    
80     -96    
272    128    
-672   128    
96     256    
-32    288    
-128   112    
48     0      
-336   0      
112    48     
-272   -16    
64     96     
32     16     
-80    96     
432    112    
32     128    
-304   128    
336    704    
704    2400   
-2112  464    
1248   -512   
1328   64     
-1392  16     
-224   400    
656    -16    
304    16     
-592   208    
16     128    
512    -144   
-288   48     
416    -336   
-144   416    
-16    -112   
80     416    
304    -160   
-400   144    
-224   -912   
144    -208   
32     560    
-144   352    
-352   -432   
-256   208    
336    -336   
-208   352    
208    144    
0      592    
0      1040   
-96    -208   
-480   -656   
288    -112   
160    384    
-48    240    
-320   -48    
0      -16    
160    288    
-144   -96    
-160   144    
48     -144   
32     -32    
512    64     
-496   400    
-48    752    
-352   192    
368    -176   
-32    -112   
48     -832   
208    -736   
-112   480    
112    48     
-80    -816   
80     -256   
144    -512   
-480   -224   
592    -272   
128    -48    
0      1008   
-224   1856   
320    -1120  
160    -240   
-352   256    
144    304    
-144   160    
-224   -64    
32     -128   
48     336    
-80    384    
160    416    
96     96     
-16    16     
0      32     
96     112    
144    96     
32     48     
64     144    
-320   176    
400    256    
128    128    
-208   80     
-160   160    
-112   944    
880    -96    
-816   96     
-160   64     
176    32     
-32    96     
-64    448    
144    432    
-320   -112   
96     32     
-16    96     
48     160    
144    -80    
-368   256    
32     48     
112    384    
208    128    
-240   176    
-144   16     
608    -352   
-1312  272    
384    224    
256    -48    
-64    -272   
96     368    
-96    480    
-208   304    
-176   -144   
288    64     
-144   0      
-288   -2528  
32     64     
144    208    
-208   304    
160    160    
256    304    
-192   416    
48     272    
272    -16    
48     48     
-304   -80    
192    256    
0      176    
-64    208    
176    304    
64     -112   
-112   208    
-48    96     
-96    -896   
2016   -736   
-1456  1104   
-672   16     
496    48     
-128   480    
528    -592   
560    224    
-336   112    
144    -544   
16     -304   
64     16     
256    -560   
-48    240    
-240   320    
320    336    
176    80     
-176   160    
-336   -928   
208    -976   
-80    -496   
320    1072   
2480   160    
-1392  880    
-352   -624   
96     -176   
192    192    
144    240    
592    544    
-80    -928   
-64    224    
-112   -32    
384    336    
-368   208    
112    224    
288    -80    
-368   160    
272    -496   
-592   -128   
32     144    
288    64     
256    384    
-64    -176   
880    2576   
-1744  1936   
-928   96     
880    -640   
-256   -672   
-608   208    
240    368    
-176   -144   
64     160    
112    -80    
32     192    
368    1232   
-672   -240   
-480   -48    
752    -144   
-256   224    
-624   -752   
176    96     
384    -1824  
-256   96     
-192   320    
256    -240   
448    -48    
-176   -32    
-176   -64    
512    720    
-272   816    
-880   -2496  
-768   -640   
896    192    
-16    352    
624    -736   
-272   448    
-768   -624   
784    176    
-272   96     
80     64     
-128   80     
-48    -160   
400    288    
-160   112    
-304   208    
368    -192   
256    160    
112    -192   
-528   -32    
128    0      
192    496    
-64    -96    
432    144    
16     -48    
-464   160    
448    144    
128    96     
-304   32     
384    16     
-448   96     
112    -144   
256    48     
-528   -368   
416    -128   
96     -192   
16     272    
-16    32     
48     48     
112    -80    
64     -1984  
288    112    
-80    -496   
-224   -176   
-272   -48    
528    -144   
288    48     
-448   -16    
96     -80    
192    160    
-16    32     
-96    -448   
864    -288   
144    -656   
-592   64     
192    -48    
144    96     
-400   -192   
272    -640   
112    240    
288    -240   
-160   64     
80     32     
32     -80    
-96    -960   
176    -48    
32     256    
-64    144    
272    256    
-192   176    
0      -80    
80     128    
-48    96     
-192   -48    
-800   -304   
-64    -384   
-96    608    
368    -176   
-192   -272   
96     -320   
-304   -528   
1504   1456   
2480   496    
-1552  336    
-1072  400    
1008   -400   
304    16     
-720   -256   
368    976    
448    128    
-400   -368   
368    176    
128    80     
-224   -224   
304    -496   
272    320    
-288   -16    
-64    80     
144    64     
-160   80     
-208   -688   
960    -800   
-240   384    
-368   48     
224    16     
-240   -432   
432    -560   
-32    176    
128    128    
64     160    
-144   0      
-80    -560   
320    -352   
-128   -16    
-48    -64    
128    -16    
320    0      
-240   -224   
-48    224    
160    -112   
-304   16     
-464   -64    
400    -48    
112    -80    
-336   -48    
-272   32     
448    -1200  
48     160    
48     -608   
-528   -1232  
912    -1200  
768    -224   
-1024  -208   
736    64     
-16    -160   
-544   368    
272    -128   
784    -288   
-672   -368   
-208   -128   
192    160    
64     -192   
-112   192    
-192   -912   
880    336    
-352   96     
-176   -256   
112    -288   
272    -112   
-288   16     
512    1056   
-1040  -880   
-880   -32    
1216   -128   
528    -16    
-480   512    
-192   -112   
64     224    
224    -880   
-112   -176   
-448   -16    
112    16     
160    16     
304    176    
-736   -48    
-176   -192   
368    144    
-80    48     
-96    -240   
-272   -336   
160    48     
-128   -224   
304    0      
528    -48    
-240   -400   
-400   496    
304    48     
-192   -128   
-336   32     
-16    128    
1008   768    
-240   -96    
-928   160    
896    48     
-64    -368   
-656   64     
-864   -96    
80     96     
288    80     
-752   -48    
-224   128    
-176   -48    
64     96     
192    -128   
-416   -208   
128    -272   
320    224    
-544   -96    
640    960    
1664   2672   
-2224  1392   
208    -944   
1952   -208   
-704   144    
-800   1104   
384    240    
272    -400   
-304   -192   
-416   528    
-224   672    
-144   -144   
384    -384   
-160   48     
-272   -256   
-304   -32    
160    -16    
-112   112    
-64    -336   
48     320    
96     496    
-48    160    
-288   -224   
464    -592   
-528   208    
304    -32    
-224   -208   
480    496    
144    720    
-272   352    
0      -400   
224    48     
-128   -128   
-64    -896   
-320   -16    
-80    -272   
32     -208   
-48    176    
-176   576    
96     208    
-352   128    
-128   304    
48     352    
-32    192    
-128   288    
464    1040   
-480   96     
-224   -624   
288    -384   
96     16     
-464   128    
-112   800    
1696   192    
-576   912    
-528   944    
432    880    
272    336    
-64    368    
-912   -2096  
-496   -464   
208    432    
144    288    
0      144    
-112   112    
-208   128    
192    -48    
96     -736   
-624   -672   
-176   240    
480    192    
0      80     
-208   96     
16     160    
-64    -16    
320    80     
-688   112    
-80    208    
560    96     
-224   -64    
-336   96     
-224   -304   
864    -416   
-16    432    
256    -272   
-560   352    
112    192    
32     -416   
544    -480   
-304   -256   
-112   432    
144    80     
0      16     
-96    112    
-48    160    
32     -32    
-32    -80    
-112   -48    
144    96     
112    192    
-80    80     
-736   32     
560    -32    
-464   -80    
-272   -16    
448    256    
-64    240    
-384   96     
-64    272    
144    448    
-96    -16    
64     -176   
128    0      
64     80     
112    176    
-208   192    
0      320    
80     -416   
-160   80     
-144   240    
112    336    
192    176    
32     -128   
-32    48     
-128   192    
160    144    
-96    -32    
128    144    
416    32     
-656   384    
992    -1008  
-2032  752    
544    -336   
928    352    
-512   -240   
32     1024   
464    800    
-896   432    
352    144    
496    176    
-416   80     
-432   -48    
352    -16    
416    -192   
-240   -96    
-256   -32    
128    -32    
-176   -16    
48     192    
-176   112    
-192   -736   
1296   832    
-656   -48    
-704   192    
800    736    
224    304    
-224   80     
224    80     
240    64     
-336   -432   
-624   96     
720    208    
96     -144   
-496   128    
-32    16     
576    48     
32     80     
-480   80     
448    -80    
80     16     
-160   112    
-128   -144   
768    400    
160    -96    
-544   208    
160    624    
800    -64    
-96    976    
400    544    
-48    96     
16     64     
-96    -256   
-320   144    
48     288    
112    -96    
-272   720    
-208   96     
192    -128   
192    96     
-48    16     
16     80     
-192   64     
-32    0      
-112   -272   
240    208    
-320   64     
-272   160    
288    80     
-80    -208   
112    -384   
1024   624    
848    -304   
-1200  -96    
-48    208    
880    80     
-528   240    
144    -80    
-80    64     
320    -784   
448    160    
-528   0      
-16    64     
512    112    
128    -64    
32     176    
-176   128    
96     112    
-128   -160   
816    -176   
-560   -96    
96     144    
240    208    
-624   16     
-64    -672   
672    192    
32     -352   
-832   96     
352    -96    
480    192    
-608   -192   
-64    16     
272    80     
384    208    
-176   48     
-528   160    
16     -32    
736    -160   
-144   80     
192    -160   
-64    144    
304    -1408  
96     144    
-224   48     
0      208    
80     -16    
256    -176   
-208   -16    
-288   80     
192    16     
432    192    
-208   -240   
544    192    
-16    880    
-320   -48    
-304   480    
576    -352   
144    96     
-480   -720   
-48    0      
384    -256   
-336   16     
96     32     
128    48     
-144   48     
96     176    
48     304    
128    -144   
-128   0      
-144   -464   
128    0      
80     -656   
80     416    
256    -640   
-208   336    
80     -352   
448    576    
224    304    
-400   -384   
240    -432   
-80    -1456  
1712   -1328  
-1424  80     
-400   0      
528    -304   
-224   544    
144    -240   
256    240    
-96    -560   
-160   -16    
352    -96    
-48    336    
128    -224   
-48    400    
-112   -144   
240    96     
-112   288    
-16    -656   
-96    192    
144    64     
-192   144    
784    352    
368    -112   
-1216  -48    
336    -80    
160    48     
16     112    
224    112    
-192   -320   
-224   112    
336    -272   
32     -32    
80     -80    
-160   160    
96     -144   
208    304    
-96    -240   
-224   64     
64     -192   
240    48     
-32    32     
-128   -1008  
16     -32    
-176   -2144  
608    -192   
-432   -96    
16     32     
192    -48    
-112   -336   
-736   -768   
1424   160    
1008   144    
-1360  176    
352    -160   
-336   -1712  
144    96     
336    -528   
-336   192    
0      -288   
176    -112   
208    96     
-288   -480   
-192   -32    
240    -608   
112    -32    
-64    208    
-160   -208   
48     48     
272    -112   
-112   -448   
208    720    
384    -464   
-1568  -16    
688    -64    
736    -112   
-320   -192   
-224   64     
352    -352   
-224   -64    
-48    -64    
-144   -320   
288    -160   
80     96     
-208   -64    
-128   -128   
0      112    
80     -96    
-80    -176   
-96    -176   
-144   16     
-880   0      
0      -176   
-64    144    
208    48     
176    -768   
96     -224   
352    448    
480    -1264  
-528   -64    
208    912    
560    32     
-16    64     
64     -160   
672    96     
-160   -384   
48     464    
-576   320    
-64    -32    
512    -112   
-80    -208   
-288   -432   
-96    -64    
256    -432   
144    48     
416    640    
-960   688    
160    -96    
96     -112   
64     -432   
-752   -1056  
912    -848   
1312   -304   
-1424  -208   
-192   0      
1120   176    
240    16     
-448   752    
-384   48     
96     352    
112    -2752  
48     16     
-144   -64    
112    -16    
240    -112   
368    -400   
-496   -736   
0      272    
224    32     
192    160    
-928   -512   
-16    -96    
176    256    
-256   224    
-128   208    
64     -656   
-96    112    
320    160    
-96    -144   
-112   96     
240    -624   
-544   -128   
0      -240   
96     112    
-192   -240   
64     80     
-288   -624   
176    -896   
224    -16    
-32    640    
-64    272    
32     -208   
-448   96     
-48    -80    
96     208    
-96    320    
-496   64     
448    480    
16     -432   
-144   240    
-160   -64    
224    -1024  
-864   336    
304    -800   
256    -1088  
-16    -1376  
-256   0      
-272   -768   
-96    1328   
208    -48    
400    -112   
0      160    
-64    336    
-272   208    
0      464    
-80    304    
-112   400    
80     -400   
-288   -256   
-96    320    
160    -48    
-400   -80    
-16    -144   
-272   144    
160    16     
-496   -528   
-752   -624   
32     -464   
336    -416   
240    -128   
-368   192    
48     1024   
624    16     
-176   -912   
-16    832    
96     304    
-624   48     
80     160    
400    128    
-400   96     
-1168  64     
96     -112   
64     128    
48     176    
64     -80    
-32    128    
-80    -64    
208    96     
-64    -208   
-128   48     
416    -528   
-608   144    
32     64     
288    -144   
-272   -240   
240    272    
-320   -496   
128    112    
160    240    
-96    96     
-32    -176   
-320   384    
16     720    
-80    -336   
160    48     
-144   512    
-192   -16    
288    96     
-192   -496   
-224   224    
-160   128    
240    144    
-288   -64    
-192   48     
-192   160    
432    208    
96     -32    
-240   48     
-176   16     
64     624    
832    -400   
-1616  288    
800    208    
-688   -448   
-400   192    
704    224    
-320   208    
-304   -176   
-240   32     
64     -112   
0      128    
64     -64    
224    400    
-320   96     
-224   304    
368    0      
16     -192   
-528   -144   
144    16     
192    16     
224    -352   
-1984  384    
384    224    
208    336    
-720   -240   
704    224    
-128   208    
-432   -32    
96     128    
320    32     
-160   0      
-272   64     
80     128    
80     -96    
-16    112    
-16    0      
-192   304    
-288   -208   
-208   32     
-16    32     
96     96     
-672   -944   
-816   -32    
448    448    
-640   -464   
112    -400   
656    -208   
-320   496    
0      -112   
32     64     
432    -192   
64     -80    
-224   64     
-112   208    
-544   -528   
-112   -320   
272    16     
-464   -96    
64     128    
256    -32    
-112   112    
0      32     
-224   128    
-144   16     
240    464    
912    64     
-608   288    
-256   64     
912    -512   
-2320  1696   
768    80     
128    -368   
-1584  -592   
1280   -32    
720    -48    
-960   -48    
-112   -240   
704    384    
-368   112    
-16    -16    
-48    -64    
-96    112    
-192   -160   
336    176    
288    -160   
-432   128    
352    128    
592    256    
-1392  -208   
736    96     
112    32     
-400   -80    
1088   192    
-1040  -480   
-432   208    
912    -160   
-400   160    
-64    -224   
144    384    
-64    -80    
-224   224    
-32    64     
64     272    
496    160    
-432   272    
-336   -192   
240    144    
208    128    
-320   64     
160    64     
64     -48    
-672   -48    
464    0      
352    0      
-656   160    
464    176    
-96    288    
272    16     
-144   48     
-304   96     
-96    144    
832    0      
-176   48     
-384   192    
432    240    
16     -240   
192    -128   
-192   -32    
-288   -112   
-80    64     
208    224    
-16    -64    
-64    -16    
176    176    
-192   64     
-144   64     
448    128    
64     464    
-560   192    
160    16     
176    -176   
-224   128    
-128   -160   
208    -2000  
432    -208   
-288   192    
16     64     
96     -368   
80     48     
-416   1712   
1568   -48    
-1168  352    
-176   -176   
944    48     
-528   48     
-336   -96    
432    672    
208    -160   
-128   -480   
-32    -32    
-16    144    
128    -64    
-32    80     
368    -144   
-80    256    
128    192    
-144   32     
32     16     
64     96     
-240   -1024  
-96    304    
1024   352    
-752   384    
32     -240   
240    -208   
-48    -608   
-352   256    
208    176    
528    112    
-96    48     
-208   32     
-144   96     
224    144    
0      0      
144    160    
-80    16     
112    -320   
-16    144    
-96    -80    
704    320    
-304   -288   
-32    240    
-48    96     
336    112    
64     80     
-240   0      
0      -176   
608    -48    
0      -816   
-2176  624    
912    112    
688    -272   
-288   -80    
-240   -272   
-432   752    
640    144    
16     288    
32     272    
304    288    
-160   -48    
-64    192    
32     -208   
-128   96     
80     -48    
-16    -176   
224    -128   
32     -320   
-112   128    
0      -224   
1376   656    
-1840  -752   
-128   368    
2064   -608   
-1152  448    
688    -288   
96     16     
-80    -64    
-48    16     
-272   192    
192    192    
128    32     
16     -160   
-112   16     
224    -416   
48     256    
0      -240   
-240   -32    
-48    0      
96     176    
64     192    
128    656    
-48    64     
-816   -96    
480    336    
224    -576   
-192   432    
720    144    
16     -32    
-304   -208   
-112   304    
192    288    
0      -304   
656    -256   
160    464    
336    -256   
304    -624   
-144   128    
-32    240    
-144   -48    
96     -480   
32     512    
144    -464   
64     -80    
384    -128   
432    64     
-672   240    
64     320    
416    -144   
-1040  464    
-432   -528   
-304   448    
496    -112   
32     96     
-144   -176   
48     1680   
-80    -256   
320    432    
-16    96     
16     -240   
-32    96     
-224   -320   
64     64     
400    -528   
80     -496   
-416   336    
-16    128    
448    544    
-32    -912   
-64    -832   
-384   32     
-208   32     
384    -128   
544    -1104  
-576   192    
160    -2656  
-496   -1760  
352    224    
-64    304    
-32    -32    
176    240    
80     160    
208    688    
-48    352    
-272   -416   
-832   288    
272    -80    
96     -64    
64     -144   
-80    -352   
128    -128   
176    384    
-112   208    
-112   -1744  
-624   448    
384    0      
224    -144   
384    -672   
-560   -112   
96     -512   
-1904  320    
608    -272   
416    -160   
-480   -512   
64     -80    
96     -2080  
-336   -1392  
240    -1168  
160    1008   
-112   16     
96     432    
-384   32     
192    208    
320    480    
272    112    
-304   -304   
-192   -160   
240    400    
64     -16    
32     -240   
-32    -608   
-384   192    
32     -704   
-128   -1120  
256    -976   
48     704    
-96    320    
-160   -80    
-304   -960   
976    -2048  
-160   304    
240    368    
176    640    
960    -768   
16     -624   
-320   -176   
0      -336   
288    48     
256    -64    
144    -880   
-96    192    
-160   112    
304    16     
0      -160   
-80    -448   
-176   240    
224    208    
-192   -48    
384    752    
-1392  864    
384    -752   
0      -208   
-96    80     
-208   336    
176    -816   
224    -288   
-144   272    
176    336    
-48    80     
-144   -48    
-208   272    
-48    -48    
-304   16     
0      -1056  
-208   -352   
-112   592    
352    192    
-16    -304   
-144   -48    
256    -400   
16     -32    
16     -160   
-288   -32    
192    0      
48     128    
-384   -112   
176    48     
-448   -1600  
1360   960    
1280   -704   
-1696  -576   
448    304    
1344   -224   
-1168  560    
-272   16     
720    240    
-400   -32    
-176   -64    
176    -16    
176    32     
-288   -80    
352    144    
-112   80     
-176   -16    
-624   -64    
592    -48    
144    -16    
-1136  16     
416    1120   
560    -560   
-2960  -64    
848    -144   
-32    -112   
16     160    
-176   -16    
128    80     
320    -176   
-288   -32    
-544   -112   
-32    112    
-272   -16    
448    224    
-256   -128   
-272   128    
176    -208   
-128   320    
-464   192    
-224   32     
496    -32    
-1120  176    
976    -16    
944    48     
-1232  352    
-80    -512   
816    -320   
-272   -304   
-560   256    
512    32     
400    -64    
-256   288    
-512   64     
-208   352    
672    192    
496    384    
-720   16     
-608   80     
-192   64     
480    -16    
-144   176    
-368   -32    
-16    0      
608    112    
-528   -528   
-144   16     
48     -80    
-688   -16    
1232   1712   
-1376  -1648  
-1760  768    
1984   -480   
-608   -304   
-240   160    
240    240    
-256   -336   
-352   528    
-336   -176   
576    272    
368    -48    
-464   128    
32     32     
160    -48    
160    -64    
32     -16    
-48    48     
-416   64     
1008   528    
-944   -224   
-128   592    
448    -384   
-608   32     
672    -16    
-128   96     
-400   192    
464    80     
96     32     
-608   -16    
208    64     
-192   -144   
304    16     
-160   48     
-176   144    
128    96     
256    -48    
-912   -112   
400    160    
-32    96     
-208   -48    
48     64     
-144   64     
-32    0      
-64    32     
384    0      
-32    32     
-240   128    
32     -192   
352    -464   
-448   -112   
-112   32     
-288   -416   
256    64     
64     -336   
-480   32     
240    176    
144    -112   
-96    -32    
80     352    
-496   496    
96     96     
288    48     
-128   0      
-144   64     
32     -160   
16     160    
-48    -256   
-368   -192   
288    -560   
160    -272   
-48    -144   
0      160    
-368   64     
-64    64     
320    288    
368    16     
-416   -208   
-16    -512   
256    -96    
-80    0      
672    -896   
-2560  1648   
1744   432    
-80    944    
-480   -832   
16     496    
-144   1056   
-80    96     
336    -48    
-32    -160   
-368   304    
240    464    
192    -176   
-80    -240   
-400   160    
368    1008   
80     816    
-192   448    
-64    256    
16     112    
560    416    
-960   608    
592    -848   
-112   -656   
32     208    
-176   -64    
144    -64    
-64    128    
256    -80    
-48    240    
48     128    
-112   96     
16     208    
0      -96    
48     48     
48     160    
128    48     
144    80     
-144   -64    
-64    -48    
-16    320    
208    32     
-160   -160   
-64    288    
48     -16    
48     -128   
208    144    
16     64     
-208   32     
-336   -1008  
2048   96     
-208   880    
-1136  -48    
208    32     
448    -336   
-384   -640   
560    -1136  
-96    -880   
-32    416    
-256   -112   
144    176    
272    -16    
48     256    
-272   -80    
-16    -80    
224    0      
-112   80     
-96    624    
-32    240    
32     -48    
-736   -128   
1808   16     
432    -688   
-1440  -752   
816    624    
416    -960   
-864   1008   
-48    720    
464    496    
112    336    
160    0      
16     192    
-80    240    
-64    256    
336    176    
-48    -128   
-16    640    
624    1104   
-464   688    
-112   64     
368    -192   
160    -240   
32     256    
512    288    
-384   1568   
592    720    
112    -736   
-736   448    
416    -384   
-160   -128   
-320   -688   
-144   384    
688    144    
-448   -80    
208    160    
608    -1264  
-1120  -528   
368    -2368  
96     288    
304    128    
-32    80     
-288   272    
224    64     
32     0      
64     192    
-416   -416   
256    560    
256    320    
-96    96     
240    1888   
32     -432   
-352   -528   
624    -2160  
432    288    
-480   32     
272    -400   
704    -352   
80     -240   
-368   -224   
48     544    
480    96     
128    720    
-304   192    
-128   -768   
-32    -240   
176    -192   
-176   80     
-192   176    
64     -368   
80     -784   
0      32     
-224   -48    
1264   -64    
-720   -176   
-112   128    
496    160    
-128   -144   
160    -1776  
-160   -1824  
-16    320    
48     128    
48     464    
112    -640   
-16    -80    
96     -944   
368    1168   
-320   -640   
112    -80    
304    -688   
-784   -144   
-64    -448   
304    48     
192    96     
-256   -656   
-256   640    
272    304    
-32    -112   
304    -144   
-256   240    
-224   -528   
816    -192   
192    -176   
-528   -976   
224    80     
1936   -784   
-752   -80    
-160   -176   
560    -144   
-416   -576   
-256   176    
272    -208   
176    -336   
-448   128    
256    544    
208    240    
208    288    
0      16     
-224   0      
160    -384   
592    -128   
-304   -192   
-400   -320   
240    112    
432    -688   
-336   240    
-64    -336   
112    -160   
-16    -496   
400    -272   
512    -16    
-2240  1792   
976    -896   
192    112    
-144   -256   
128    -400   
384    736    
128    1328   
144    -384   
-64    -352   
-160   224    
32     -192   
144    160    
160    272    
-16    448    
0      -992   
80     -960   
144    0      
-16    -160   
80     16     
-128   -1168  
480    -944   
-96    16     
-240   64     
688    64     
-208   112    
48     -112   
-16    -2256  
192    -320   
-64    128    
304    112    
-80    -352   
-96    -96    
-16    -96    
80     304    
0      -208   
-176   -336   
-544   0      
400    -128   
128    112    
80     -400   
-32    -80    
160    -48    
0      -224   
16     144    
-16    64     
160    -80    
-192   96     
208    -272   
528    -688   
-2992  1120   
-560   592    
1072   64     
-1232  -400   
256    -64    
992    64     
-80    80     
-272   112    
208    16     
144    -368   
-80    160    
-48    -240   
-112   -16    
160    32     
0      96     
-64    16     
192    -160   
-64    48     
0      -112   
-592   48     
-656   -368   
1536   0      
784    -144   
-1072  -208   
-192   -896   
432    96     
-384   -352   
32     80     
64     176    
336    -32    
-80    16     
-32    -144   
-208   -96    
-160   -96    
-128   16     
304    144    
-176   64     
-720   -416   
48     48     
672    -608   
-176   560    
-1360  -304   
208    208    
640    -400   
80     160    
352    512    
-128   -336   
112    368    
0      -16    
-752   192    
112    -336   
-1584  -288   
-16    64     
320    -176   
-432   -624   
-176   -368   
640    96     
32     -176   
-160   -64    
128    -16    
48     48     
-32    -64    
-112   112    
240    112    
-240   160    
240    -256   
-224   -80    
-192   -112   
-608   -800   
2752   -2512  
-576   832    
-992   -736   
128    -208   
-352   96     
384    -16    
0      96     
-944   32     
288    -272   
16     16     
-208   32     
-80    -128   
-496   240    
0      -288   
-96    176    
400    -320   
-112   0      
-192   -480   
592    768    
48     -96    
-576   224    
336    112    
-288   32     
-416   -80    
416    96     
160    48     
-368   144    
-16    32     
528    -144   
16     48     
-1568  0      
112    128    
400    352    
-736   64     
-320   0      
96     -32    
224    64     
-96    -48    
-112   16     
336    160    
-16    80     
32     208    
224    112    
-528   -32    
192    176    
-16    -144   
-16    -16    
-304   -240   
80     -176   
160    144    
0      496    
-1104  192    
-112   -960   
128    -624   
-272   -128   
-208   128    
-144   160    
64     32     
-80    32     
80     -16    
704    352    
-992   496    
224    80     
496    48     
-32    208    
-256   832    
-64    464    
336    368    
224    -160   
-832   -16    
-192   128    
320    96     
288    -32    
-208   -272   
-96    -112   
-192   -528   
160    704    
-80    80     
-256   32     
-224   -576   
1424   -32    
-560   480    
-864   -1024  
176    -544   
272    800    
240    -160   
-160   144    
80     176    
0      32     
-48    432    
32     -384   
0      -160   
-48    272    
48     224    
160    144    
0      16     
-176   640    
-64    -32    
128    0      
-224   -256   
672    -192   
-1424  288    
224    -608   
96     -624   
-176   192    
464    256    
-272   944    
96     -304   
176    -144   
-192   128    
-224   -16    
48     272    
32     320    
32     160    
-64    48     
-96    144    
-240   -128   
224    224    
-224   32     
-288   32     
64     240    
64     192    
0      -32    
-48    -224   
-160   -16    
192    160    
16     208    
-160   112    
-16    128    
-688   1344   
3152   -704   
-1696  -192   
-544   -880   
464    -416   
224    -192   
-336   -16    
-608   -432   
96     256    
16     416    
80     -128   
16     80     
0      208    
-128   -80    
272    80     
-224   -496   
-80    96     
-288   -64    
64     272    
176    -144   
-912   -176   
1056   -112   
640    -208   
-320   896    
-256   1344   
-80    1552   
-208   672    
-208   -448   
336    -672   
-96    -544   
-16    -608   
16     -112   
-96    688    
400    976    
-784   160    
192    80     
576    1392   
-336   992    
32     480    
144    16     
64     192    
-48    784    
-208   -416   
624    -1488  
-208   -64    
-368   1568   
688    1472   
48     320    
-464   400    
656    464    
208    -144   
-432   352    
-16    -96    
544    608    
240    1040   
-400   256    
-304   -240   
368    -432   
608    -256   
-144   96     
-128   -32    
80     -128   
304    -384   
-256   -32    
-80    384    
528    16     
128    240    
-64    -32    
-160   144    
1072   16     
-1824  -256   
528    128    
704    160    
-480   -320   
-656   -112   
96     -320   
384    656    
-64    -208   
-256   80     
-160   624    
80     240    
208    -320   
144    224    
-160   128    
-176   224    
576    32     
256    96     
-480   -272   
-464   -400   
432    48     
64     64     
352    208    
864    592    
-1696  432    
656    240    
352    48     
-32    -32    
-752   48     
304    -240   
400    -176   
-352   128    
-240   -16    
256    64     
320    0      
-128   176    
-368   192    
160    -640   
96     256    
-64    -48    
-288   384    
128    256    
-112   -528   
-176   -208   
128    -192   
128    96     
-240   464    
192    368    
272    304    
-272   -96    
-48    -64    
336    416    
-944   432    
-160   -64    
704    -272   
96     -464   
-544   16     
96     592    
720    304    
144    -240   
-240   0      
80     64     
-240   -80    
-80    64     
256    -416   
-240   -144   
-16    0      
416    384    
-80    96     
-208   -2352  
176    0      
32     224    
-80    80     
208    -64    
-432   64     
624    80     
288    224    
-720   -208   
224    80     
288    0      
-688   -1920  
-1376  224    
1696   -48    
-256   -64    
-176   -2016  
-400   -240   
32     480    
192    -304   
-448   528    
496    -144   
-240   80     
-32    128    
64     288    
128    -128   
-80    -96    
-160   128    
544    -96    
-176   32     
-96    144    
272    -592   
-336   -768   
96     -848   
352    272    
-512   -32    
400    208    
48     -192   
112    -176   
-128   -192   
384    -16    
64     160    
-80    -32    
240    96     
-176   -48    
96     128    
64     -160   
48     80     
-80    -544   
496    16     
-528   -208   
96     16     
208    80     
64     160    
-192   48     
-160   80     
384    160    
48     -288   
32     96     
48     -96    
-64    96     
-288   224    
672    832    
-512   -704   
-816   -176   
944    -272   
304    192    
-640   -32    
240    224    
576    64     
-240   160    
-32    192    
-16    48     
144    80     
-128   -192   
320    224    
-128   -336   
-48    128    
208    -48    
144    48     
-48    80     
-80    -80    
480    304    
1312   320    
-528   0      
416    -176   
-304   -272   
208    -384   
528    368    
-64    -624   
-416   272    
480    -400   
96     160    
-192   -80    
0      64     
96     -320   
528    128    
-336   48     
-64    -336   
288    16     
-16    16     
48     -736   
432    496    
-1024  -480   
128    80     
16     128    
-320   -176   
0      64     
32     -272   
912    -1312  
-448   128    
-224   -1408  
480    48     
-208   96     
-240   -512   
224    -80    
64     176    
-160   -32    
-144   -1456  
-752   368    
384    -1072  
-32    -64    
-64    80     
64     -48    
-48    -224   
80     160    
16     -240   
160    96     
304    80     
-496   -320   
752    3408   
1248   48     
-384   464    
128    -784   
-112   -112   
160    -304   
544    -32    
-272   352    
-144   -64    
-80    -240   
272    288    
224    -208   
-112   160    
128    -32    
-208   -32    
-112   -48    
320    -48    
-144   -96    
-352   160    
512    928    
400    -272   
-528   -944   
-32    -1904  
160    144    
-560   -16    
528    496    
320    -416   
-496   -32    
48     256    
528    -96    
-160   -272   
-624   -304   
-272   16     
928    -336   
-928   -160   
-128   -576   
416    -336   
64     -560   
-48    -32    
-48    -112   
-128   -80    
336    -96    
192    -272   
-400   -96    
112    -80    
-80    0      
208    -48    
-784   -176   
-240   -208   
432    -48    
416    272    
224    1392   
-800   -32    
-432   -320   
576    -736   
0      -608   
-656   -288   
144    -736   
-48    -480   
320    560    
-256   48     
16     -576   
-272   -352   
16     -192   
-608   -80    
144    144    
-16    -352   
-96    -256   
32     304    
0      112    
-32    144    
160    0      
-16    64     
-96    -96    
224    -272   
64     -64    
-304   -512   
176    -1040  
400    32     
-224   -256   
-480   -160   
80     -1088  
-32    -624   
-64    352    
-64    -560   
16     224    
-80    -32    
64     -32    
-64    128    
48     112    
-80    48     
240    -48    
-304   -64    
-240   -32    
64     -80    
288    -304   
-48    -128   
-144   -128   
144    320    
96     -688   
-288   -480   
560    -720   
144    544    
-192   -96    
-416   544    
384    -160   
48     -64    
-208   576    
160    384    
-560   -128   
160    -336   
544    144    
-720   -64    
-224   32     
64     -96    
-912   192    
-128   80     
-800   192    
96     144    
48     -192   
96     -208   
-32    16     
16     112    
32     -48    
-256   160    
0      112    
-64    224    
-96    -656   
208    -272   
-288   96     
-1136  -1168  
256    480    
880    -400   
-800   80     
-208   320    
432    -928   
-352   32     
-64    1312   
-64    752    
80     -384   
-288   -496   
-368   176    
0      -512   
208    144    
48     48     
-80    -128   
-80    -272   
-240   -480   
320    272    
48     160    
-144   -816   
-1920  688    
1360   64     
160    -272   
-800   -512   
336    704    
752    992    
-784   -592   
16     -976   
448    -608   
-496   -192   
-48    16     
256    -112   
-528   80     
64     80     
-96    32     
176    464    
-304   448    
-272   -96    
336    48     
240    48     
-224   112    
-160   32     
992    1600   
-544   432    
-880   -272   
176    -1216  
-320   144    
0      -192   
304    -688   
48     -32    
-544   -128   
-640   480    
-80    592    
-64    160    
-528   -160   
640    -208   
-416   -144   
-32    0      
480    208    
128    0      
-288   32     
16     -160   
32     96     
160    -96    
-288   -32    
-304   -32    
-96    -256   
848    -1168  
512    2528   
-928   1328   
-16    -368   
1392   -240   
-544   48     
-656   784    
880    144    
-32    -544   
-624   336    
224    96     
-208   464    
272    -112   
80     -48    
-320   112    
-128   224    
-176   -64    
-400   160    
-176   -80    
336    112    
-592   -800   
0      -864   
288    -288   
-176   64     
112    64     
352    -64    
-544   688    
16     240    
-224   160    
576    -656   
-432   112    
208    32     
-352   -176   
272    -208   
176    384    
-144   32     
-96    416    
128    144    
-16    80     
16     192    
-160   32     
-160   -64    
272    256    
-48    -208   
160    96     
128    64     
160    64     
-352   112    
128    192    
224    -128   
-32    -144   
-144   0      
-240   -272   
656    -240   
-304   352    
-640   336    
352    80     
-128   192    
-160   96     
-80    272    
64     -240   
160    208    
-80    160    
176    80     
-80    144    
16     144    
-208   -112   
368    -496   
112    80     
-432   272    
240    -80    
-80    -96    
0      112    
-128   -80    
240    80     
-176   -144   
-48    352    
80     288    
176    160    
-112   -32    
-96    48     
880    -1440  
-3424  1840   
256    16     
1296   -896   
-1312  64     
224    -144   
496    576    
-224   -16    
-48    -176   
-32    320    
-144   -240   
-368   256    
480    176    
0      -272   
-624   464    
384    240    
64     208    
-224   -16    
96     64     
80     0      
544    1168   
-1360  400    
-96    80     
992    -288   
-896   160    
64     176    
416    64     
-192   208    
-272   192    
288    80     
-352   96     
-16    16     
320    256    
-16    -16    
-32    112    
16     -288   
-144   -160   
16     -272   
-160   -464   
320    48     
-144   192    
144    -112   
-176   80     
144    16     
-336   -80    
448    208    
-112   48     
-192   96     
288    0      
224    -960   
-1552  -560   
128    -240   
448    48     
-288   -288   
-464   -16    
352    160    
32     64     
304    368    
112    0      
32     80     
-208   0      
224    48     
240    48     
-688   -48    
256    64     
64     48     
48     -128   
-160   -96    
-112   -576   
64     96     
16     -896   
-1056  720    
1408   160    
-608   -48    
64     -32    
752    144    
-672   -224   
496    0      
-192   144    
80     16     
-80    48     
-32    128    
-48    32     
304    -464   
-160   64     
48     -272   
80     240    
224    64     
448    -80    
-128   48     
48     432    
-48    -48    
48     288    
688    32     
-304   160    
-384   -496   
-128   352    
608    48     
-208   -32    
64     96     
384    -112   
-272   0      
-112   -528   
704    32     
-192   192    
-432   144    
80     32     
672    176    
-544   32     
-128   96     
400    48     
-48    -32    
48     -96    
-160   -160   
176    48     
-80    -416   
-16    48     
112    368    
32     -400   
-1424  -1376  
80     496    
752    192    
-320   -96    
496    288    
96     -352   
-704   416    
320    -192   
304    -32    
160    -96    
-304   128    
-112   -64    
464    224    
-96    -608   
-192   32     
-112   -640   
288    128    
368    192    
-448   416    
-192   688    
352    816    
64     96     
208    -64    
-112   -528   
48     256    
-272   352    
80     -336   
112    -16    
-160   32     
208    160    
-400   -304   
64     336    
272    352    
160    224    
-192   -128   
144    -160   
-16    640    
-208   640    
160    320    
-128   -144   
160    0      
-32    -128   
0      -80    
-464   -736   
64     160    
432    544    
-208   1136   
544    -1120  
-400   -3152  
-96    720    
112    -544   
640    -896   
-944   -832   
352    -1312  
0      -416   
-240   336    
80     -48    
-304   -64    
320    112    
304    240    
-128   -160   
-32    -2128  
0      48     
112    -912   
-160   112    
-576   928    
-208   16     
-16    -352   
112    -96    
192    -144   
-240   -1424  
224    32     
-160   64     
144    80     
240    -48    
-32    0      
-64    -144   
-192   -16    
-96    -32    
336    -80    
-352   496    
-864   -144   
176    -288   
480    -560   
-112   -400   
-384   -64    
144    848    
224    -816   
-32    -448   
-336   -320   
64     112    
48     0      
16     112    
-192   -160   
16     -96    
-496   256    
32     448    
160    0      
112    -144   
-112   64     
-48    736    
848    -160   
-784   -880   
32     -128   
208    -144   
48     208    
-304   320    
112    176    
-96    -272   
-176   -112   
512    112    
-32    0      
-688   -144   
288    -224   
160    176    
-96    96     
-80    192    
-16    -656   
-192   160    
48     96     
32     256    
-16    256    
128    -16    
-160   128    
64     -80    
320    240    
-80    96     
-688   -80    
304    -448   
-1200  496    
1360   224    
-304   -32    
-64    -832   
384    672    
992    -1872  
-480   672    
-208   1568   
-112   32     
368    -944   
-96    -928   
-672   -352   
224    48     
-48    -240   
48     32     
-48    -32    
-112   -304   
-96    -736   
368    -736   
16     -192   
176    -1088  
-2208  944    
896    -144   
544    592    
-1008  352    
-336   -128   
752    -208   
144    -640   
-608   -432   
512    -32    
0      96     
-384   -128   
128    208    
464    -224   
-464   48     
64     -496   
192    64     
96     -272   
-32    112    
-320   -112   
-16    96     
-352   -368   
400    112    
736    -272   
128    -592   
-752   80     
240    -160   
224    -96    
-112   352    
32     -336   
-288   80     
416    -64    
-240   -64    
-480   16     
-192   -400   
432    48     
432    -272   
-800   80     
-112   208    
496    -112   
-208   -192   
-288   -64    
-320   -224   
256    -16    
304    0      
-1680  -320   
48     64     
112    0      
-544   864    
1360   -288   
-2368  208    
416    0      
1520   80     
-288   -80    
-864   -144   
352    -352   
704    320    
-144   -64    
-560   192    
352    64     
224    96     
-272   -48    
416    64     
-288   16     
-304   80     
-160   64     
-32    -32    
464    416    
-592   192    
160    320    
432    -16    
-304   -48    
80     160    
-224   -320   
336    -48    
-48    304    
-192   0      
-80    -320   
0      96     
-256   -288   
80     16     
64     -96    
160    -256   
32     64     
-192   -160   
224    -32    
448    -512   
-160   -256   
-48    32     
80     80     
-336   -96    
320    0      
32     64     
-240   80     
-176   -112   
32     -176   
192    -272   
-464   -272   
160    -112   
-1344  -192   
-288   -928   
-544   -400   
736    1072   
-544   80     
-336   544    
848    -32    
-1008  96     
-64    -320   
-32    -48    
304    0      
-80    128    
-224   -16    
-112   -160   
-160   -96    
-1008  -384   
-64    -16    
16     -192   
-96    -48    
160    144    
16     80     
-16    -96    
0      224    
-112   -112   
128    112    
352    64     
-336   192    
208    64     
-240   80     
144    160    
-416   -2528  
-2160  1616   
1520   288    
352    400    
-240   48     
-576   48     
240    -32    
128    624    
272    208    
-288   -224   
144    160    
-176   -32    
-144   192    
144    -304   
-304   288    
288    16     
-64    288    
-304   -176   
80     -208   
32     16     
320    -864   
-1264  656    
800    96     
176    0      
-512   -128   
32     -80    
-224   0      
256    80     
32     112    
48     224    
-112   -208   
-352   32     
-672   -16    
480    288    
-192   112    
-400   192    
576    80     
-384   -32    
304    64     
-224   48     
-96    144    
320    160    
-80    32     
-32    80     
-16    64     
-208   176    
352    112    
-32    48     
-288   304    
1696   1328   
-800   -160   
-2576  464    
1584   176    
224    -80    
-1440  -112   
752    -32    
432    -80    
-640   0      
112    -16    
256    32     
-240   16     
80     160    
480    144    
-704   -144   
192    144    
16     -16    
0      -32    
64     -288   
-80    0      
64     32     
-128   -656   
-992   832    
1216   -96    
-576   -16    
0      384    
208    -64    
-368   48     
-384   176    
32     80     
288    32     
64     144    
-64    16     
0      144    
112    240    
-208   0      
-80    -144   
400    240    
336    -32    
-304   128    
48     208    
480    624    
-688   -112   
-208   -288   
368    624    
-176   -176   
-528   64     
304    192    
336    0      
0      160    
-192   48     
-48    -16    
80     -32    
144    304    
-272   -32    
272    -80    
-944   -80    
16     -16    
128    -96    
-240   288    
592    48     
-48    -64    
0      224    
-112   -48    
-64    96     
-64    -112   
176    -64    
80     80     
-720   -96    
240    -304   
-144   -3168  
-1392  -608   
1760   1552   
16     192    
-1120  336    
384    160    
64     1568   
448    784    
-336   -48    
192    -80    
224    -16    
-80    224    
-80    -112   
-208   192    
-160   -240   
560    -544   
192    448    
-32    304    
-64    -240   
-16    464    
464    816    
48     384    
32     96     
384    928    
112    224    
-32    -128   
-304   -336   
-224   -656   
96     -176   
160    592    
-144   -144   
-112   -448   
-208   -1296  
176    384    
128    112    
128    -208   
-288   336    
176    592    
32     432    
80     192    
-64    -352   
-272   272    
96     192    
112    1040   
480    1328   
0      544    
-112   144    
-16    -960   
-48    -32    
-176   -128   
-256   -656   
816    256    
-464   416    
-144   -624   
240    -656   
144    64     
-48    -800   
-256   -816   
240    448    
-32    352    
112    -32    
-144   176    
-192   -208   
288    288    
256    -560   
-352   336    
-288   160    
32     -592   
-176   -80    
112    112    
0      112    
288    96     
-352   32     
160    -48    
352    48     
-192   80     
336    192    
-304   336    
-64    176    
368    -736   
-96    96     
304    -1520  
-192   256    
608    -288   
-272   -112   
-272   224    
384    48     
-64    80     
112    -96    
-48    48     
-160   -128   
-48    144    
272    -480   
-208   -16    
-144   0      
16     240    
-16    -288   
-256   -400   
112    -320   
112    -32    
-688   992    
816    208    
-544   -32    
-96    -416   
384    -112   
128    400    
-176   -480   
-112   -800   
224    -80    
192    128    
64     -176   
160    -160   
-176   96     
224    144    
160    224    
64     -96    
-16    672    
112    -160   
-256   -688   
128    0      
384    -80    
144    128    
-112   -480   
-48    128    
80     -192   
224    384    
96     -1792  
96     384    
-96    384    
1376   -512   
-2560  336    
-656   80     
1664   -352   
-160   -1024  
-768   864    
736    -608   
-832   96     
288    368    
688    160    
-448   -96    
-240   32     
176    0      
96     32     
320    224    
-208   -176   
-32    -144   
-256   -224   
224    -688   
-96    16     
-320   -1328  
1488   592    
-752   -816   
-272   192    
1040   192    
-752   -80    
400    112    
704    -16    
64     -320   
-352   224    
-16    -16    
144    -480   
-128   -48    
80     0      
464    80     
-112   -352   
-272   -416   
640    -1136  
192    -16    
-272   32     
0      0      
-192   -576   
-208   48     
192    48     
-192   -352   
224    -704   
464    0      
-64    128    
-720   272    
352    16     
528    -32    
-320   -48    
-272   -432   
-320   208    
384    -752   
-240   0      
-64    -304   
400    -80    
-240   192    
576    -80    
-176   -16    
-160   80     
192    -48    
-48    -192   
32     64     
464    -528   
-656   192    
576    -144   
-48    -992   
-272   -4272  
1888   -2736  
512    -192   
-352   128    
-320   176    
544    144    
464    32     
-16    -112   
-512   -176   
48     -208   
32     80     
288    -64    
-96    0      
288    -32    
128    -240   
128    -64    
16     96     
-32    -128   
-64    80     
-192   -48    
800    176    
-704   176    
160    -112   
384    32     
-416   256    
-1088  -208   
784    256    
-208   -528   
-1088  -96    
656    -336   
-176   0      
0      -16    
80     -256   
-192   -16    
-48    160    
688    112    
-208   128    
-192   -32    
336    -48    
208    32     
-144   112    
144    0      
-240   64     
400    -192   
-448   -128   
-432   -240   
560    128    
64     -688   
-48    48     
-352   48     
96     32     
352    -192   
640    -128   
-1008  64     
80     272    
80     384    
16     -112   
-352   -640   
-304   -272   
256    -304   
-272   -480   
224    80     
-48    -512   
-32    -32    
-48    -192   
224    144    
0      432    
304    -240   
-224   320    
-672   688    
592    -128   
368    16     
-384   80     
-240   -16    
112    16     
256    -144   
400    -80    
-480   528    
-1184  144    
208    -112   
-1328  -1488  
2000   608    
-320   224    
-1136  112    
160    320    
-32    192    
144    -240   
-144   352    
96     -576   
-320   256    
-16    -112   
336    -16    
-64    -48    
-208   -80    
288    80     
-240   624    
-192   -144   
-160   -192   
-64    416    
208    160    
-272   224    
528    816    
544    -208   
-1360  -320   
368    -80    
336    -320   
-144   80     
-32    0      
112    -176   
-272   336    
-176   144    
368    320    
-48    -96    
-288   -144   
-208   96     
224    0      
-176   0      
336    -128   
-208   0      
0      16     
-80    48     
64     48     
-48    64     
-192   112    
64     64     
256    48     
-240   -48    
-272   0      
128    128    
-800   192    
832    1088   
720    608    
-1296  64     
48     -176   
784    -416   
-608   -32    
0      112    
48     208    
192    -112   
-16    176    
-528   -16    
-176   192    
480    128    
48     176    
-608   -160   
192    80     
-928   -80    
-272   16     
-96    -64    
64     112    
128    512    
704    448    
-2160  -672   
1648   80     
1152   592    
-1088  -240   
544    -144   
-112   240    
272    80     
-528   0      
-384   160    
176    -48    
160    48     
-336   -96    
160    272    
208    32     
48     448    
-80    176    
-320   -64    
-64    -464   
-32    -144   
-128   -368   
256    432    
-464   -96    
-32    -192   
928    1536   
-1552  288    
-448   -224   
128    -96    
-208   -1232  
-288   -112   
-192   -240   
176    -160   
192    288    
512    352    
-320   -368   
32     160    
512    256    
-352   -192   
-368   -320   
48     256    
144    48     
112    -64    
-560   32     
-128   656    
784    288    
48     192    
-544   448    
-96    208    
-32    96     
576    1152   
1024   480    
-1472  -544   
-224   -1008  
352    -448   
528    -224   
-768   304    
-240   528    
464    480    
208    336    
-240   -208   
-384   112    
304    208    
-16    -128   
32     -112   
-32    -112   
128    384    
208    336    
-144   192    
-64    16     
0      176    
128    32     
96     80     
80     208    
-192   976    
160    144    
176    -720   
32     320    
-192   368    
224    -656   
320    -144   
-352   400    
-224   352    
368    -272   
48     16     
-368   544    
224    -16    
368    -432   
-32    752    
-144   400    
-272   -464   
240    144    
400    -16    
-112   -352   
80     -80    
-160   368    
128    -480   
64     256    
-208   -96    
-240   208    
-48    -576   
704    -800   
-128   -1280  
-304   -704   
80     -240   
32     -1072  
16     528    
-128   816    
16     64     
240    192    
-288   -96    
80     80     
32     160    
-32    144    
144    304    
160    -288   
128    -736   
272    672    
144    624    
-128   -224   
-32    48     
112    160    
-80    304    
16     608    
160    336    
-240   384    
480    560    
176    320    
224    -224   
-864   -496   
656    -1088  
640    112    
-336   768    
-336   1168   
448    720    
160    -64    
-304   560    
48     288    
80     432    
96     -176   
16     64     
32     336    
208    -128   
0      -144   
-336   -48    
-112   -192   
-16    0      
144    -160   
192    96     
192    -352   
-1040  1040   
912    752    
576    528    
-976   -320   
224    -352   
480    368    
-240   320    
-272   -608   
320    112    
-128   -64    
-128   -16    
-64    176    
160    -304   
224    -320   
-432   0      
48     112    
144    320    
48     -304   
192    -240   
-176   144    
-16    -192   
144    160    
-320   -96    
288    240    
48     224    
64     -192   
32     32     
-496   -1712  
480    -1456  
1584   1456   
272    -448   
-1664  80     
112    0      
816    240    
-480   144    
-144   -896   
208    0      
0      -80    
-240   176    
688    80     
176    -16    
-416   -80    
-128   -32    
480    -32    
-96    96     
-32    128    
144    144    
-80    48     
16     -112   
-656   -112   
704    -48    
384    -320   
-1040  288    
928    -208   
336    16     
-464   -160   
-320   -176   
256    -144   
448    64     
-192   -576   
64     176    
-112   16     
112    576    
32     -240   
-496   320    
192    144    
-304   304    
-240   16     
-48    -64    
384    560    
112    -288   
-1008  448    
272    -80    
384    -80    
-480   -384   
16     -64    
224    -400   
-176   112    
-240   -32    
512    208    
80     -96    
-160   96     
208    128    
320    144    
-608   928    
304    -240   
-160   -176   
-624   -16    
80     32     
208    -144   
144    0      
-304   -32    
-176   -16    
832    64     
272    -64    
-496   -128   
32     256    
-784   -32    
2528   144    
352    -480   
-1056  -192   
368    384    
336    176    
-304   -192   
-48    128    
592    400    
-80    -496   
-64    272    
-320   -160   
368    224    
224    -48    
-64    -64    
144    -240   
-176   -80    
176    -80    
384    -144   
-544   -224   
-96    176    
384    128    
-256   -112   
736    0      
64     -48    
-560   -976   
336    160    
272    -288   
-192   -80    
-288   -368   
-96    -256   
176    -208   
-128   -288   
-80    -16    
272    -624   
160    112    
-96    16     
304    -80    
-80    -272   
-480   32     
448    16     
128    144    
-32    -96    
-192   -112   
-208   -208   
16     -368   
48     -144   
-32    96     
48     48     
384    -240   
-272   -304   
16     -1216  
480    256    
1056   -96    
-560   688    
-144   96     
64     272    
80     -768   
-480   -176   
-48    160    
-160   -16    
336    0      
16     -128   
-144   112    
16     -96    
96     -32    
384    -720   
-544   192    
80     -864   
-192   -128   
192    0      
-16    -48    
48     -288   
64     -208   
-144   256    
-160   -32    
-704   -272   
256    0      
-256   256    
-32    -112   
-416   -992   
2080   160    
48     656    
-1072  -1344  
-368   624    
688    -176   
240    80     
256    784    
80     704    
-464   48     
160    -384   
-192   -272   
-176   -112   
16     -32    
96     704    
320    -128   
-320   -608   
128    -112   
64     -2384  
-16    352    
208    48     
-320   -256   
832    -528   
-848   -96    
544    -240   
-16    1072   
-448   144    
240    240    
-656   192    
-128   -256   
240    -176   
480    -208   
-512   320    
112    -176   
16     -112   
288    -32    
-16    176    
-400   240    
288    -304   
144    -144   
16     -32    
32     96     
64     -128   
-176   -96    
160    -240   
-96    112    
0      -16    
0      32     
224    -160   
32     16     
48     -1168  
-864   -752   
496    -464   
-960   -192   
800    64     
432    -16    
-464   128    
-448   176    
64     256    
512    384    
-224   464    
-144   96     
384    176    
-256   -144   
304    384    
32     240    
-240   -208   
224    -224   
224    -192   
-32    -192   
-336   -688   
1072   1280   
1152   -208   
-1376  336    
736    272    
288    48     
-192   -864   
-624   -224   
560    -464   
-464   32     
-320   -16    
-480   -16    
112    0      
-704   -384   
-128   -352   
352    16     
-288   -224   
464    -352   
256    48     
-192   -160   
160    16     
16     16     
-144   -480   
32     -736   
432    -592   
-1072  -800   
-208   -496   
608    704    
-64    16     
-160   -128   
256    0      
-288   256    
-48    -304   
-688   -432   
272    -960   
448    304    
-192   -128   
352    -320   
-400   -848   
-288   -192   
-32    48     
-432   96     
144    96     
368    160    
-224   -208   
-496   -576   
80     -208   
-144   -48    
-144   128    
128    32     
-544   -1424  
-880   -16    
416    368    
-240   -48    
272    -96    
-448   -32    
-272   912    
240    -1200  
432    160    
-320   224    
-624   512    
-192   -368   
-240   80     
112    112    
-416   96     
176    -224   
-320   -656   
-336   -384   
288    208    
-112   416    
-96    160    
160    64     
-256   -160   
-480   528    
192    64     
304    416    
-704   144    
224    560    
304    256    
-80    -384   
-192   272    
-304   -288   
368    448    
240    -64    
-640   -464   
112    576    
448    736    
-288   640    
80     1504   
144    1440   
96     528    
112    -128   
-256   272    
160    576    
-368   224    
384    80     
384    1264   
-688   464    
-320   -976   
480    -640   
448    1024   
-912   176    
-528   -368   
560    -464   
592    -688   
-896   -160   
-224   -144   
176    288    
192    272    
-320   -1040  
32     -48    
-224   352    
-112   320    
80     -272   
-160   -368   
-288   464    
352    352    
96     -288   
-624   -848   
304    -304   
-160   48     
32     16     
-48    96     
-176   -384   
-80    -768   
-32    -192   
-48    -176   
496    576    
112    144    
0      160    
-448   1888   
1952   192    
-672   928    
-944   128    
496    -128   
32     544    
-512   128    
128    -48    
496    192    
-224   -224   
80     -144   
-16    160    
-128   -64    
192    -304   
224    48     
-304   0      
-400   224    
272    416    
64     48     
-192   128    
-112   -1152  
-272   720    
560    208    
-288   -320   
192    272    
-416   928    
128    -128   
-80    -224   
16     208    
-96    192    
-48    336    
352    96     
-80    112    
-80    128    
160    288    
-304   288    
-48    -144   
0      -16    
112    16     
-208   128    
224    160    
-128   128    
16     272    
80     16     
-352   128    
192    -32    
160    192    
-96    176    
-416   -144   
560    -656   
-2272  -528   
1312   -96    
368    16     
-1280  -16    
848    -480   
192    -176   
-352   -272   
-144   80     
208    -48    
-96    192    
48     64     
-96    208    
384    64     
-480   112    
112    64     
208    144    
-656   96     
224    0      
208    32     
-336   -320   
752    720    
976    128    
-832   352    
400    16     
128    272    
-736   128    
160    -112   
768    -64    
-416   112    
-160   64     
-192   48     
336    80     
96     64     
-32    144    
80     48     
64     176    
-208   128    
-160   -144   
208    -112   
96     48     
-288   -16    
-96    -112   
48     608    
-1088  112    
256    48     
176    -688   
-768   -96    
-80    160    
544    464    
-224   176    
-336   128    
-32    112    
240    -224   
-176   -32    
0      96     
-464   48     
16     -208   
128    -160   
272    128    
-464   144    
-96    -160   
224    -512   
176    112    
64     -640   
-512   272    
0      416    
336    64     
-416   -192   
1920   4928   
-816   1568   
-1200  -528   
2416   -720   
32     -144   
-1264  192    
128    -400   
368    192    
176    -96    
-608   112    
496    -96    
240    112    
-304   -16    
48     128    
352    16     
-160   128    
80     96     
352    112    
-320   -448   
352    640    
48     -320   
-352   112    
272    208    
-304   0      
-96    112    
96     32     
128    112    
-304   -400   
416    416    
-48    240    
-224   -16    
144    96     
64     32     
144    192    
-192   160    
112    352    
176    -16    
240    -80    
-128   -352   
160    -32    
240    -208   
16     144    
-144   80     
224    -80    
-240   -208   
224    -16    
-16    80     
224    224    
-512   -16    
416    -96    
304    -80    
-288   -736   
-1088  352    
800    -624   
-448   -16    
80     -176   
96     64     
-176   -816   
-16    -96    
176    -1040  
-48    0      
-208   -32    
192    48     
272    16     
-144   -208   
-160   96     
16     400    
384    256    
80     304    
-112   256    
240    32     
16     96     
-32    -80    
208    144    
32     -272   
-80    -560   
-464   192    
448    432    
240    320    
-144   -96    
-336   -1072  
928    -2192  
-528   816    
496    -208   
-480   16     
144    -544   
160    -240   
128    48     
48     -768   
-368   -1280  
240    240    
224    176    
-80    160    
-240   0      
240    -112   
336    192    
-16    0      
-128   -224   
208    32     
128    288    
-192   144    
-112   -176   
320    144    
448    784    
-480   -752   
32     -2288  
16     464    
-16    -464   
32     -32    
-448   -32    
-128   -464   
-16    112    
144    -1104  
-160   -96    
-144   -1184  
64     -96    
432    528    
-176   -96    
80     128    
112    -16    
-32    -256   
-64    -64    
64     176    
272    -448   
-544   -208   
-176   -160   
96     160    
176    -640   
336    -272   
-848   336    
-160   880    
2896   -912   
-1408  -576   
-224   -1312  
864    384    
304    16     
-272   -592   
-336   176    
240    -448   
-48    208    
80     -208   
-32    -48    
-48    288    
-160   -400   
304    -48    
16     160    
-112   -1936  
96     160    
400    -96    
-144   96     
-96    -864   
-1536  576    
1872   -352   
384    -496   
-832   16     
-128   32     
176    -496   
-880   -1408  
144    -1472  
480    -368   
-128   560    
80     -160   
0      -32    
32     320    
496    432    
-48    -192   
-448   -128   
-112   -480   
368    -96    
32     320    
-192   448    
-432   48     
416    -224   
-64    112    
-1520  176    
656    480    
144    -784   
-560   -880   
448    -1408  
-224   -160   
96     -240   
-384   -192   
512    -224   
368    416    
-336   144    
464    -32    
-352   1536   
576    496    
-656   96     
-144   -64    
336    384    
352    -848   
128    -736   
-208   0      
288    -560   
-48    -176   
-256   160    
0      192    
288    32     
-160   -32    
784    -880   
432    608    
-112   288    
-512   -416   
400    -560   
256    -224   
288    304    
288    -160   
-208   -496   
-128   -192   
144    544    
560    320    
-624   80     
-320   -416   
240    128    
144    192    
-336   -176   
96     -384   
-448   -528   
64     -368   
96     -144   
48     -16    
448    -144   
-576   992    
576    16     
-560   96     
80     144    
352    32     
-112   -1024  
-704   -784   
304    -224   
160    80     
-272   -208   
-400   -144   
448    -96    
-320   -112   
144    -192   
-16    -128   
-176   -592   
-1392  -256   
64     -16    
80     448    
-176   256    
-96    1136   
576    336    
-224   -80    
-208   928    
384    -144   
192    -240   
-624   -144   
-48    992    
976    80     
-368   368    
-496   -896   
-128   -192   
48     -352   
-464   -912   
64     -672   
48     752    
160    288    
-224   -80    
-48    624    
368    128    
-16    208    
-528   -384   
224    304    
208    48     
-16    448    
256    -160   
-464   -192   
0      32     
384    -96    
-288   112    
-384   -96    
-192   1296   
384    768    
-80    1280   
368    544    
-96    128    
-1152  -544   
1040   -1328  
-272   0      
-864   -128   
720    160    
288    560    
-112   256    
-464   -144   
464    -16    
-16    -80    
32     112    
0      368    
-16    160    
256    96     
208    336    
-80    -272   
32     512    
240    -32    
-288   112    
272    32     
720    1232   
-1456  0      
-304   224    
848    -176   
-624   -80    
-80    -96    
-64    -176   
32     -256   
-624   -160   
240    368    
192    32     
-144   352    
-96    -160   
-112   32     
-176   -160   
-80    176    
464    -48    
-256   144    
-96    -80    
256    96     
48     -96    
-176   112    
48     -64    
-16    0      
48     128    
-144   -80    
240    144    
-128   32     
-16    32     
-176   -1232  
-1872  -960   
1856   48     
32     -208   
320    464    
160    -320   
-848   -64    
0      -144   
64     64     
-240   -48    
144    112    
-720   -48    
128    48     
-32    -16    
-736   -80    
576    64     
-160   16     
96     112    
-32    -48    
96     160    
-224   32     
-720   -256   
1040   -16    
880    -576   
-2176  -144   
1376   224    
-256   -272   
-528   608    
-128   400    
112    -48    
-32    96     
0      112    
112    16     
-176   48     
0      144    
224    48     
16     304    
-384   -336   
-112   224    
288    -32    
-240   80     
-208   -192   
-704   176    
320    -64    
-32    128    
-80    -848   
-336   -608   
320    736    
128    320    
-576   -80    
208    32     
400    48     
-320   -80    
-112   304    
144    -48    
-112   144    
208    -128   
-480   32     
288    -16    
128    480    
-208   0      
32     128    
144    -32    
-416   80     
160    112    
-288   -48    
160    160    
112    -80    
-240   192    
-1296  -1648  
2592   -1920  
384    512    
-1712  128    
-288   352    
1104   160    
-320   48     
-144   80     
368    480    
-160   96     
-176   160    
592    -16    
-272   144    
-64    80     
256    32     
160    -32    
-304   96     
-16    0      
-128   80     
144    576    
448    320    
-560   480    
16     -64    
96     176    
-224   -144   
80     192    
64     -16    
-336   336    
688    0      
-192   144    
-192   112    
208    0      
0      -16    
-416   -48    
448    -176   
-400   -320   
80     -96    
176    80     
-208   0      
192    32     
0      64     
144    -80    
-272   32     
-16    240    
240    448    
160    160    
-544   -416   
96     -192   
160    32     
-48    -80    
192    160    
80     704    
-352   352    
80     -272   
48     -464   
-48    -560   
-288   -688   
-16    -192   
272    -208   
96     -64    
-176   48     
80     160    
-48    272    
-16    256    
304    160    
208    368    
-160   400    
-176   800    
-48    224    
304    -304   
-112   -224   
-208   176    
16     304    
112    176    
112    -400   
16     176    
-208   -336   
112    512    
32     -224   
16     464    
0      -32    
-528   2416   
1136   352    
-208   -448   
-560   576    
704    320    
704    1200   
-944   1376   
-192   -64    
544    -400   
0      288    
-112   -1088  
0      448    
32     -64    
240    16     
128    112    
-224   272    
-112   496    
192    96     
16     -160   
-272   -128   
384    128    
304    144    
-608   -128   
16     -64    
320    304    
64     288    
-144   16     
-16    -832   
112    96     
16     32     
256    160    
-48    -32    
32     208    
160    -240   
-208   -80    
80     -304   
400    64     
-272   -224   
-16    -96    
176    224    
224    -576   
-112   256    
-32    -256   
-128   144    
384    -128   
80     240    
16     -80    
-144   0      
-16    128    
240    -1136  
-1120  -352   
192    -416   
-192   -32    
496    -224   
352    16     
0      -16    
-656   -784   
0      -80    
416    384    
112    -224   
-432   -48    
48     -96    
336    -304   
-96    656    
-96    -32    
224    0      
352    -880   
-352   1392   
80     -336   
448    992    
624    -496   
-2240  320    
1136   -960   
-160   64     
-304   -1280  
160    512    
608    1440   
-560   1920   
-48    880    
208    640    
-432   320    
400    -112   
64     400    
-304   32     
-256   32     
592    384    
-144   128    
-448   -560   
144    -48    
64     -144   
-48    224    
112    144    
-96    128    
-176   -352   
-32    -560   
32     -544   
-256   -2272  
-432   -1264  
304    -256   
-144   192    
-288   0      
448    512    
-256   -224   
-16    -192   
704    112    
496    1120   
-1104  1520   
-288   -1424  
512    -544   
-736   32     
-256   -48    
-240   -464   
240    -432   
-48    -560   
-144   -2752  
320    -128   
48     -832   
48     -320   
-384   -240   
816    -144   
1232   -656   
-1440  -240   
-896   48     
1120   -48    
592    -1440  
-1248  -1104  
-288   128    
688    -368   
480    -80    
-288   -912   
-384   64     
64     320    
336    -240   
544    -208   
-336   112    
-352   -96    
192    -144   
0      -992   
112    -768   
-352   -192   
336    528    
-448   -352   
-256   112    
864    -400   
-128   96     
-224   -208   
96     -448   
144    -384   
464    288    
-16    640    
-64    -32    
-160   96     
-384   144    
432    -128   
-160   -192   
-224   -320   
304    -64    
32     32     
-16    -96    
-16    -80    
224    -80    
0      -176   
-272   80     
304    64     
-96    16     
400    -112   
112    -192   
-384   208    
160    64     
336    0      
-1312  -48    
272    32     
512    -48    
-240   -160   
32     -400   
-208   -128   
112    -592   
144    128    
-16    -864   
-96    -128   
352    -272   
272    -32    
-304   -32    
-144   32     
64     -112   
224    32     
-288   528    
-160   -112   
-304   -32    
336    48     
48     -16    
-160   48     
48     128    
-240   -128   
528    -320   
-16    -336   
-272   208    
352    -224   
176    1008   
32     -2096  
-1808  528    
688    -160   
448    -240   
-864   -32    
192    272    
912    464    
-144   -368   
-384   -32    
112    -176   
32     -128   
128    -592   
48     -128   
-464   464    
304    80     
-464   -80    
160    -96    
-80    16     
-32    -16    
-368   -256   
912    272    
368    -48    
-880   -320   
-496   176    
496    -144   
208    416    
-320   224    
80     -336   
-304   240    
96     -32    
-80    80     
256    16     
240    96     
-528   32     
-48    -80    
272    -272   
0      160    
-64    -48    
80     208    
-32    -48    
-16    176    
-272   16     
-112   -32    
448    48     
-608   0      
240    176    
144    16     
-224   64     
-256   -832   
1104   -528   
-688   -176   
-112   224    
928    -80    
-416   128    
-704   -128   
0      80     
-64    144    
-816   16     
-128   16     
32     64     
-112   -32    
-240   -96    
240    -80    
-352   -288   
32     96     
256    -32    
-432   80     
-96    -272   
160    16     
96     64     
688    80     
-2048  96     
144    -176   
1504   144    
-1184  -16    
-400   -192   
272    0      
-272   32     
-288   -16    
80     160    
96     -64    
-256   144    
288    -144   
-144   80     
-128   96     
0      -112   
224    16     
-32    -48    
-400   16     
-80    0      
-320   -160   
-128   -144   
608    64     
-1376  -16    
-48    -16    
240    -304   
384    896    
320    -288   
-288   128    
160    16     
-288   80     
64     -144   
-128   0      
144    -80    
-560   352    
272    176    
-208   -32    
-16    -32    
-368   -64    
128    48     
-80    -32    
-288   192    
224    0      
192    -224   
-624   112    
-16    48     
64     16     
480    688    
-464   -768   
-2160  -1184  
1504   -64    
1024   288    
-304   208    
-688   -80    
-144   128    
864    400    
-784   64     
128    160    
512    -128   
-368   64     
-112   -32    
176    176    
-176   -112   
352    352    
96     -144   
-224   160    
48     -384   
-400   -240   
176    -64    
128    208    
-112   112    
224    -112   
-432   304    
272    64     
-528   208    
176    32     
208    528    
208    432    
-560   0      
-16    -304   
672    -96    
-32    416    
-720   192    
-96    224    
928    928    
-1040  624    
-128   224    
256    368    
128    400    
112    416    
144    144    
-32    -96    
-32    352    
224    640    
-80    64     
192    128    
-64    672    
112    80     
-128   -272   
-160   320    
592    -384   
-320   320    
240    576    
0      368    
-240   -384   
176    832    
192    1568   
-128   176    
288    -64    
-144   -64    
-64    160    
112    96     
80     544    
-224   0      
112    -480   
-592   -368   
320    144    
352    -176   
-64    -16    
-80    112    
-128   128    
352    0      
-256   -288   
-64    176    
-16    352    
80     128    
-256   -224   
96     48     
-352   176    
16     704    
672    96     
-272   48     
-288   400    
544    -48    
-80    368    
32     80     
-112   48     
-144   80     
128    176    
32     0      
-96    128    
32     32     
96     144    
304    -16    
-160   -16    
-16    0      
48     0      
80     32     
128    -240   
-608   336    
176    208    
96     272    
384    0      
-96    176    
-304   336    
16     160    
80     -192   
96     -32    
-192   80     
-128   144    
176    64     
112    -32    
-256   272    
208    -96    
128    224    
-192   208    
160    128    
16     48     
-224   432    
96     176    
-64    272    
-352   176    
48     304    
64     112    
-272   128    
96     272    
304    -112   
-208   240    
1248   -400   
-1760  80     
624    832    
464    1008   
-432   640    
-32    720    
656    -1152  
320    160    
-576   336    
160    160    
336    80     
16     -592   
64     544    
-256   16     
160    0      
288    192    
112    560    
-416   -368   
-128   -640   
160    -880   
1008   1424   
592    -96    
-1456  1184   
912    512    
-80    560    
0      272    
592    -896   
1056   1008   
-512   688    
-272   448    
128    -64    
256    -144   
288    -272   
-32    352    
-32    48     
64     -192   
528    384    
352    448    
16     304    
-656   208    
144    240    
624    -608   
-672   -128   
128    -592   
224    608    
192    -288   
-448   496    
-160   -32    
-144   112    
192    -64    
-288   -16    
-160   -160   
0      320    
80     208    
528    -176   
-80    -144   
48     -224   
576    32     
-432   -848   
-208   64     
240    96     
272    720    
-288   224    
-272   256    
336    -32    
-144   160    
64     -32    
-416   -448   
-160   -576   
896    1456   
784    -192   
-1296  -304   
-1200  -48    
1088   -1104  
784    48     
-1312  -944   
240    368    
64     48     
480    272    
-368   -128   
-112   208    
272    -64    
-384   0      
432    32     
-112   0      
128    48     
80     -272   
48     576    
320    -1584  
-240   -560   
-32    -816   
96     112    
-192   48     
512    48     
-16    0      
80     32     
32     336    
224    80     
-32    160    
16     -544   
-48    64     
16     -160   
-48    208    
-208   32     
144    -48    
400    48     
-80    272    
-704   -176   
544    64     
384    16     
-320   128    
64     -128   
-400   -736   
672    -32    
-432   -272   
0      -112   
224    -32    
96     320    
16     48     
-144   -544   
544    -736   
-160   256    
-224   -176   
-336   0      
-128   -176   
16     -64    
256    176    
-16    -192   
96     -48    
-16    48     
-32    304    
176    160    
-112   192    
96     -80    
240    352    
-304   96     
-208   -304   
560    -272   
-80    -320   
-48    208    
-272   -80    
-192   -944   
32     0      
128    -464   
-240   -336   
176    -1040  
-48    224    
32     0      
-512   -1776  
2496   896    
-176   384    
-1248  -48    
736    576    
-400   176    
-192   576    
832    -96    
-320   -560   
-464   160    
368    96     
352    -160   
48     -320   
-416   -96    
480    176    
448    240    
-624   160    
304    -224   
0      160    
-224   16     
-192   -384   
880    448    
624    -32    
-1088  16     
-16    -48    
992    -208   
-544   112    
-80    96     
528    -208   
-208   16     
128    -144   
288    128    
-64    144    
-352   16     
32     -96    
176    -304   
416    -96    
-624   -80    
400    -240   
-352   0      
0      -80    
-144   96     
160    -64    
144    160    
336    -32    
-608   32     
-80    -1872  
272    160    
160    32     
-352   -496   
416    432    
368    -576   
-512   -32    
-336   -384   
64     240    
336    -16    
-336   208    
-352   -288   
352    -304   
-224   -288   
16     0      
160    -752   
48     128    
-384   -96    
512    304    
16     48     
-224   80     
400    0      
-352   -256   
-112   48     
-48    -560   
672    608    
192    -48    
-944   192    
784    -144   
64     176    
-224   -464   
288    32     
736    -128   
-352   -32    
-304   -16    
352    -16    
0      48     
64     64     
192    48     
-192   -32    
128    -80    
160    -64    
-64    112    
48     -128   
64     64     
96     -384   
-1232  0      
1152   -2240  
-32    48     
-512   32     
688    48     
-464   -48    
-304   112    
208    -32    
32     -224   
-512   -16    
-48    48     
272    -176   
304    -368   
-448   -384   
256    -368   
-64    192    
48     0      
96     64     
-16    0      
-144   368    
592    -192   
-128   32     
-176   -448   
0      -112   
80     176    
208    -128   
-720   -896   
-320   -2016  
1152   -2416  
160    448    
-704   160    
-464   -128   
-464   192    
-288   -48    
1024   -176   
-112   -240   
-464   -336   
-32    48     
352    96     
-160   64     
96     -160   
-48    -32    
-320   16     
-32    32     
176    -272   
-176   272    
-48    304    
-256   -128   
-256   -336   
-528   -224   
-352   704    
0      112    
-208   192    
608    560    
-368   496    
-192   592    
64     -352   
112    -160   
-32    32     
-112   -480   
96     -192   
-144   48     
64     224    
32     0      
-320   -96    
128    256    
-144   -160   
-256   272    
432    80     
192    96     
256    1120   
-496   192    
-128   -608   
432    -544   
-128   -336   
-176   512    
-80    16     
336    128    
544    352    
-1600  368    
320    992    
592    1040   
-672   -512   
-560   -624   
-112   0      
-64    16     
176    192    
-256   -16    
96     240    
0      128    
64     -144   
-512   -272   
-256   80     
352    0      
-48    -48    
16     208    
144    -96    
192    128    
-176   -16    
-64    96     
32     -192   
-64    80     
48     -112   
288    224    
-176   368    
48     64     
144    -112   
-256   80     
-256   1184   
960    144    
-464   32     
-64    240    
-208   96     
48     96     
-192   400    
-688   -32    
368    -160   
256    160    
-144   272    
64     112    
0      -96    
176    32     
-48    -32    
0      208    
-48    336    
-176   224    
-208   -192   
-128   160    
288    -496   
-208   272    
608    -144   
-352   112    
-96    96     
432    160    
80     448    
-416   64     
96     32     
48     112    
16     80     
-160   288    
-48    96     
48     16     
144    224    
-176   -32    
272    -160   
-720   -944   
48     -592   
320    80     
-32    64     
-304   -64    
0      16     
432    160    
-176   288    
-64    208    
80     -128   
-272   48     
0      240    
352    1120   
1536   112    
-1408  -336   
-416   -688   
1344   -608   
-144   112    
224    -400   
-208   1136   
-144   544    
144    688    
496    -240   
-288   -16    
-464   0      
224    368    
528    144    
-320   208    
-496   128    
560    -64    
176    -32    
-352   -16    
128    -704   
-1536  880    
1824   224    
-1072  -208   
1312   -48    
-528   -48    
-432   512    
1088   -400   
-160   224    
-336   -160   
144    176    
-272   -256   
128    16     
-464   96     
144    144    
208    -80    
-224   -48    
-240   80     
160    -272   
304    -208   
224    208    
-496   -576   
352    176    
320    32     
-304   -160   
544    848    
-464   48     
-560   -112   
144    160    
528    464    
-224   64     
-288   80     
-80    -112   
96     -16    
240    -144   
688    -256   
0      0      
576    -304   
-416   48     
-176   240    
464    48     
0      0      
-144   176    
272    0      
144    48     
96     48     
-16    96     
-128   64     
-144   -1168  
672    -2800  
-2224  -1264  
176    208    
1328   -64    
96     -112   
-880   160    
-144   -112   
672    400    
-112   -32    
16     48     
-160   -32    
288    96     
-32    64     
-32    240    
112    -80    
-32    128    
32     32     
208    96     
464    512    
-976   272    
640    272    
96     64     
-432   -272   
-464   -480   
720    96     
-144   -144   
-48    16     
208    -240   
0      112    
96     96     
-256   -32    
240    144    
176    128    
-256   96     
464    -32    
-352   -48    
352    -48    
-416   32     
336    -272   
352    80     
-368   16     
-48    0      
240    -160   
192    -64    
-112   -112   
16     96     
176    -112   
64     80     
112    -384   
-16    144    
-160   96     
-32    -912   
-688   208    
560    -1040  
-480   -464   
352    -128   
384    -288   
-128   208    
48     160    
64     16     
160    16     
-96    48     
0      32     
80     -64    
32     -32    
-128   48     
-16    -560   
-304   -432   
528    -560   
0      192    
-112   -416   
208    144    
-176   -16    
32     96     
192    -32    
128    -128   
-528   240    
448    656    
576    416    
-432   -288   
496    -1696  
-3104  1600   
368    384    
896    16     
-176   -112   
160    272    
-288   224    
-208   -272   
640    -192   
-304   496    
-432   -160   
208    272    
160    352    
-96    -624   
-192   160    
96     256    
-192   128    
272    -48    
176    0      
-112   0      
512    304    
-1328  368    
368    -1952  
848    -176   
-544   112    
64     80     
-96    -480   
-160   368    
240    112    
-48    0      
-48    144    
96     96     
-128   32     
176    -656   
-16    -64    
-176   -160   
352    32     
-240   -480   
32     -64    
-16    -48    
16     48     
48     176    
192    48     
-128   160    
-48    -512   
80     272    
320    -464   
-144   96     
-192   -576   
1760   3088   
1120   -656   
-2656  -96    
-528   128    
1936   704    
-1168  -304   
-752   80     
1264   -96    
-288   0      
-112   144    
240    -208   
0      48     
-16    -176   
-64    0      
592    -240   
-416   -80    
-176   0      
160    160    
304    -64    
16     -880   
-304   16     
320    -1008  
-1408  1040   
944    416    
48     112    
-576   -176   
-32    -1152  
-16    112    
-240   -160   
-48    -16    
336    112    
304    -368   
288    -880   
-560   128    
240    -320   
-352   96     
304    -128   
-336   -160   
-432   32     
496    -288   
-240   -80    
-48    -192   
80     -16    
656    -928   
64     416    
-160   -1696  
-512   -464   
-752   496    
512    -464   
-368   176    
304    -240   
160    -192   
176    0      
-352   32     
-16    -144   
544    320    
464    64     
-272   -336   
-368   176    
640    480    
-320   -304   
-336   -48    
336    -144   
-192   0      
48     -96    
-416   32     
224    -448   
80     0      
-128   80     
288    48     
880    2608   
-1584  912    
144    -80    
1392   -448   
-864   288    
-208   -80    
1040   880    
272    800    
-400   1424   
320    256    
160    -256   
32     -112   
32     -16    
144    -112   
-192   -144   
-544   416    
464    -144   
-1408  0      
176    -560   
112    16     
-96    -112   
-288   -160   
176    -1648  
736    -608   
-592   -560   
160    -608   
-656   -288   
528    -224   
-416   224    
176    -144   
-128   304    
-32    -48    
-80    -272   
48     -848   
-384   -704   
160    -496   
-144   192    
192    48     
176    -160   
-640   -752   
-48    -288   
-144   224    
64     -560   
-176   -176   
336    624    
-176   -80    
272    -368   
-704   -384   
80     32     
576    80     
-272   -1008  
784    -128   
-720   464    
-128   144    
240    -2224  
-320   -1152  
-48    112    
608    1536   
-160   720    
-224   -512   
64     176    
48     -208   
-16    16     
64     416    
80     64     
112    -48    
112    176    
-320   64     
-96    128    
-48    16     
-64    16     
-256   -144   
-16    112    
368    288    
-176   112    
80     -320   
224    -512   
-112   -320   
112    -32    
-176   80     
16     -160   
272    -464   
-64    -160   
256    -16    
-432   -208   
-144   48     
16     -16    
-32    -320   
-384   -368   
-32    -160   
-160   48     
64     64     
128    160    
-96    64     
-304   64     
-272   -288   
32     -400   
-480   -464   
-400   -96    
160    224    
-880   992    
960    80     
-1696  64     
592    -208   
-400   720    
240    160    
96     96     
112    -512   
-320   -560   
-48    608    
-192   -192   
224    -336   
-320   -384   
-48    400    
176    208    
-16    -272   
-320   336    
-400   -336   
176    256    
160    32     
-64    240    
-224   16     
224    96     
-80    -48    
-256   16     
128    -80    
128    256    
32     16     
256    -112   
-576   -1376  
-1392  -192   
1184   -336   
-624   16     
832    240    
-624   0      
-160   320    
-1040  416    
32     304    
0      176    
304    288    
-288   16     
-96    16     
192    240    
320    48     
-288   96     
-288   240    
16     64     
-80    48     
16     64     
-224   96     
-864   -448   
1056   -592   
-256   -80    
48     -160   
400    704    
336    -144   
-528   64     
704    160    
-64    -16    
-80    224    
336    16     
-208   32     
-192   128    
272    16     
-256   64     
272    16     
-16    64     
112    64     
-544   -128   
-64    96     
-464   -160   
256    -160   
32     336    
480    0      
-416   16     
-624   -896   
-432   -240   
336    384    
80     80     
-256   128    
0      16     
-464   -160   
176    -48    
144    -1280  
-560   416    
320    272    
-64    0      
-544   384    
32     64     
-112   144    
-464   -64    
112    320    
592    64     
-112   192    
-1120  80     
448    48     
576    -32    
-752   -176   
480    -1376  
1136   -1872  
-400   576    
608    -224   
-224   -112   
16     352    
128    64     
272    144    
16     -80    
-240   128    
640    -80    
-144   240    
-368   144    
160    48     
-16    64     
-176   48     
32     64     
-48    64     
-336   -240   
992    32     
-304   -256   
-352   208    
448    336    
-176   160    
-224   176    
-432   -80    
144    -144   
-288   16     
0      32     
80     -32    
-16    -96    
176    -256   
-48    160    
112    -16    
16     160    
-464   -128   
496    0      
-64    -320   
16     64     
480    -48    
-336   208    
192    112    
-16    224    
64     -112   
0      144    
-192   -224   
-400   -336   
480    -48    
160    64     
0      384    
0      208    
240    1056   
-832   144    
-96    16     
96     -64    
-384   -80    
96     416    
752    80     
-128   0      
-400   208    
192    32     
240    -64    
-304   176    
80     96     
112    16     
0      -16    
-112   256    
352    96     
-160   -112   
-240   -48    
672    -32    
-48    144    
-304   192    
144    -48    
0      128    
-224   64     
448    400    
-224   432    
-80    112    
-16    -112   
512    1888   
144    -1552  
-1936  880    
880    -480   
-64    304    
-592   80     
48     -16    
464    -336   
32     -1120  
-352   400    
128    576    
64     -112   
-16    176    
-144   32     
352    -112   
192    768    
-256   -32    
-64    160    
256    176    
-208   288    
-208   -528   
576    -736   
-576   496    
560    672    
128    -816   
-352   0      
-144   -384   
304    208    
80     112    
-240   0      
0      256    
128    -64    
-80    -176   
-64    240    
96     112    
64     144    
176    -240   
-112   144    
-16    0      
-80    -544   
112    144    
-112   128    
-16    16     
128    0      
256    80     
-240   -112   
-80    192    
48     112    
-16    96     
-432   432    
176    640    
2752   112    
-1392  -112   
-960   -176   
1296   -672   
304    -144   
-400   -80    
-64    48     
256    160    
-80    208    
0      176    
192    96     
-208   192    
-128   160    
544    272    
-48    208    
-384   0      
192    48     
448    0      
-288   -288   
-32    -656   
-1344  112    
1056   -288   
128    -736   
-32    -768   
128    -368   
256    -256   
64     -128   
-64    208    
-208   240    
416    64     
-144   176    
-48    80     
400    112    
352    -384   
-608   64     
-112   -1328  
-128   176    
368    -160   
-80    -48    
-48    -160   
-160   -192   
-160   -256   
-32    16     
-176   -560   
-192   96     
912    1920   
1088   1568   
-384   544    
128    -368   
48     80     
160    -800   
240    848    
-352   -1088  
-576   -496   
960    -384   
400    512    
256    -48    
-16    256    
-128   240    
128    -176   
208    80     
112    -64    
-112   128    
-128   -1408  
-560   -160   
0      -288   
112    -448   
304    -752   
-32    32     
272    1216   
1360   304    
-1648  -208   
96     -48    
1264   -768   
-496   -576   
-208   432    
-240   -336   
576    768    
16     -320   
-80    -16    
-336   -272   
80     160    
160    -304   
128    336    
-96    176    
-176   528    
432    -256   
64     -736   
-480   -400   
80     400    
336    448    
576    16     
-496   -464   
-480   32     
576    1248   
144    272    
-80    -1056  
128    -1200  
-144   544    
112    32     
352    -128   
-16    -64    
-192   -1040  
352    -768   
-32    -48    
-64    -1008  
-48    0      
-128   -1696  
-16    64     
416    112    
-192   -288   
-64    -128   
-16    -992   
304    -1408  
-64    112    
112    -1264  
96     0      
-240   -240   
-96    336    
-176   -48    
1120   -1040  
-288   -448   
-352   -624   
400    96     
640    -784   
-448   -624   
-192   192    
320    416    
176    -288   
0      -32    
32     -112   
-272   320    
-240   -96    
192    -624   
-256   -352   
224    64     
-320   224    
-384   368    
0      -16    
224    -352   
-112   128    
32     -80    
400    -208   
-208   -560   
368    -224   
-224   -944   
160    -960   
128    -192   
-320   -320   
688    -1072  
-656   464    
400    448    
160    192    
400    560    
-288   -144   
128    -784   
384    -2416  
-336   144    
-192   448    
224    240    
272    -192   
-16    272    
-112   -32    
96     -272   
-112   -160   
208    336    
64     208    
-240   -160   
464    432    
-608   -496   
304    -1200  
352    -1024  
-288   336    
-208   144    
144    352    
208    -80    
-144   336    
-144   -288   
32     0      
-272   -192   
128    384    
-16    -352   
-208   -432   
32     112    
160    448    
224    448    
-80    -608   
-128   176    
112    -288   
0      128    
-32    112    
-80    160    
32     48     
400    64     
-96    -128   
-80    -64    
-368   -160   
288    80     
832    -464   
-1984  192    
240    -32    
672    -240   
-832   -16    
224    -256   
624    -176   
-304   -224   
-176   -192   
144    -48    
240    -32    
-128   16     
176    -80    
-608   -48    
384    -288   
-752   -144   
0      -448   
160    144    
128    -112   
-96    64     
-16    -160   
1184   -112   
-1920  16     
-48    224    
752    -48    
-752   80     
-16    80     
48     -288   
320    -112   
-144   -128   
-304   48     
432    -96    
160    256    
32     -112   
-512   0      
-16    -160   
496    240    
336    -176   
0      48     
208    64     
48     -48    
432    -176   
-368   112    
144    -128   
208    80     
-384   1056   
-688   304    
32     432    
-304   -144   
-400   48     
592    -96    
-96    -16    
-80    -16    
-208   -272   
-288   48     
400    -256   
-48    -160   
144    0      
-48    272    
-176   96     
304    32     
64     -272   
-176   176    
-512   -432   
128    288    
800    -64    
-320   112    
224    128    
208    -880   
-1792  -3056  
-1328  -720   
1456   288    
-368   -32    
-224   64     
128    -160   
-208   224    
-208   -48    
176    96     
432    -112   
128    48     
-272   16     
-80    144    
192    32     
0      112    
-224   -32    
-384   208    
48     -48    
176    400    
144    -48    
-720   368    
736    -192   
-464   16     
464    96     
96     16     
-576   32     
704    -128   
-352   -32    
-64    -80    
128    112    
48     144    
-96    144    
-160   -16    
-304   -80    
640    144    
-544   -80    
304    96     
176    -48    
-336   -48    
16     96     
16     -96    
224    -80    
-80    64     
224    64     
0      -320   
-912   -80    
672    -144   
-160   16     
-416   -64    
112    208    
-112   160    
-208   -304   
0      -304   
176    448    
-224   64     
256    208    
64     224    
-208   256    
-288   -32    
96     96     
128    144    
-208   -48    
-96    16     
32     80     
128    208    
-928   -16    
-304   256    
80     -288   
-80    -464   
32     -272   
-96    192    
96     112    
-432   272    
80     16     
240    160    
32     192    
-80    352    
0      0      
-272   -352   
128    -240   
-128   -2608  
-2192  2272   
1824   -80    
-272   1120   
400    -384   
-208   32     
-352   432    
-32    576    
624    656    
-16    400    
-528   544    
-80    192    
416    80     
-128   -48    
-400   368    
-48    -32    
272    -384   
112    112    
64     64     
-96    80     
48     -496   
-112   64     
256    160    
-64    400    
-368   800    
240    -112   
80     -432   
-80    80     
-16    32     
16     272    
-80    -112   
32     -16    
-160   80     
-32    48     
320    -256   
-48    352    
-272   400    
208    128    
112    -80    
-256   -192   
144    304    
144    -176   
-192   64     
-144   0      
144    192    
-48    -48    
-208   96     
48     -16    
144    80     
1040   1312   
-384   -240   
-1600  64     
1200   496    
112    80     
-528   176    
240    -528   
-272   -272   
176    608    
-96    320    
432    224    
-176   -32    
-112   160    
368    -240   
-560   -368   
320    -192   
304    16     
-336   128    
224    880    
176    704    
-352   48     
800    960    
1872   144    
-1536  -1024  
-784   -544   
992    432    
-128   592    
-176   848    
48     544    
32     96     
-336   -48    
304    16     
128    96     
-528   144    
336    -112   
-64    96     
-192   -32    
-16    -944   
-288   -448   
-144   -64    
32     -112   
320    -176   
144    -384   
-720   656    
624    192    
368    816    
80     240    
-272   1216   
800    496    
-528   -448   
-64    176    
416    640    
-416   224    
-128   224    
1104   -336   
-224   -800   
144    400    
-832   416    
96     464    
80     -224   
144    -224   
336    -32    
96     224    
-576   496    
224    -192   
-752   -48    
336    80     
-32    -96    
-192   -656   
-160   176    
912    352    
-1696  560    
-16    -48    
1728   -128   
-192   -624   
-480   192    
48     -112   
688    -1824  
48     -608   
-208   544    
-208   48     
80     -528   
464    -320   
-672   -64    
-208   -160   
64     -480   
304    320    
-320   -128   
96     -96    
48     64     
-48    272    
-32    -80    
320    352    
-48    -240   
-80    192    
320    -144   
-480   -48    
-48    512    
432    848    
-96    -32    
-64    -336   
-224   -224   
16     160    
592    -112   
-640   16     
256    48     
528    608    
-400   352    
96     0      
400    -320   
-368   -448   
-144   -144   
224    -192   
0      -144   
-80    -16    
368    -880   
-224   -1360  
-336   -576   
272    272    
128    -1792  
-336   784    
160    320    
-448   -704   
16     352    
-64    256    
-464   0      
400    592    
432    1408   
-256   176    
112    -48    
-64    -704   
0      -384   
48     -336   
-160   -288   
32     -432   
224    48     
-208   192    
-160   464    
320    160    
176    192    
-48    96     
-64    48     
112    32     
-208   32     
32     304    
112    -496   
-112   0      
144    -336   
32     192    
-144   240    
544    2704   
1184   224    
-992   1296   
496    288    
112    192    
384    896    
-432   544    
32     -608   
-96    -1632  
352    -208   
96     -272   
-80    0      
16     32     
-96    672    
144    -32    
-160   -368   
-32    -48    
304    208    
-64    -48    
-64    160    
240    1920   
336    -368   
-432   384    
256    -208   
64     176    
0      -272   
-16    -336   
16     -240   
16     -208   
-96    -432   
384    320    
16     160    
-192   -272   
240    -64    
-176   -1424  
160    -544   
-96    144    
224    -1024  
-288   80     
256    -1520  
112    -112   
-48    144    
-32    -32    
112    -16    
352    -48    
32     -320   
-288   160    
240    -592   
-288   -128   
96     1488   
1424   -416   
-1136  -64    
-240   -192   
1344   0      
-112   -320   
-928   -128   
656    -48    
208    16     
-272   48     
80     0      
-64    -160   
112    144    
288    -32    
-240   144    
-32    -16    
160    80     
-704   -240   
224    32     
368    -192   
-448   -400   
1040   848    
1088   -208   
-1312  304    
-608   -496   
240    128    
144    -480   
-416   48     
736    48     
80     -128   
-448   32     
128    -96    
-64    16     
-384   -304   
352    112    
352    128    
-496   -176   
512    -1072  
144    -48    
-400   -688   
224    160    
-256   -544   
-192   528    
400    -32    
-1184  112    
592    -464   
-224   -240   
-512   192    
128    224    
-944   -288   
-448   -240   
240    160    
400    -416   
-176   128    
-672   -528   
544    -160   
256    704    
-688   528    
160    -640   
240    -144   
-352   96     
-112   144    
208    16     
112    48     
-1296  -784   
-736   -16    
496    16     
112    -128   
-384   -688   
2528   -368   
-2528  384    
-288   -256   
1936   -208   
272    -96    
-1440  -112   
-192   240    
1152   -96    
80     16     
-128   -320   
-1200  -64    
272    -16    
-304   16     
272    -96    
-160   32     
64     -272   
32     48     
224    -1584  
-416   -464   
576    288    
-16    -240   
-352   160    
272    -240   
-960   -32    
336    -16    
64     -32    
-96    64     
208    -144   
-208   32     
560    240    
-288   32     
144    0      
144    -608   
144    208    
-272   128    
192    192    
-128   48     
400    64     
112    -16    
-144   32     
192    112    
-208   -48    
-416   160    
-64    128    
-96    48     
256    -80    
192    48     
-304   -112   
-112   0      
336    0      
-16    32     
-160   -736   
-560   208    
768    1248   
-544   1408   
256    -64    
96     -880   
-176   0      
64     -160   
160    -224   
48     -256   
-96    0      
-112   -64    
-368   -176   
-128   -48    
-704   0      
192    -16    
32     224    
-96    336    
-80    -192   
64     -544   
-160   16     
336    -288   
-656   -320   
-256   64     
176    -880   
144    304    
-192   592    
-480   -304   
560    -528   
320    624    
-560   -1392  
-1200  288    
944    1040   
32     48     
-784   32     
176    -1568  
352    608    
-80    -304   
-80    64     
112    -160   
16     -96    
128    32     
-160   80     
-96    -64    
160    80     
32     352    
-512   -160   
80     -80    
-752   32     
592    384    
-1120  800    
528    -672   
448    -1104  
-208   0      
-176   448    
112    1088   
592    -368   
-144   -448   
-272   160    
-96    -96    
-16    208    
-112   -144   
-112   320    
-400   -272   
-96    144    
-16    -208   
448    -256   
-256   736    
-176   384    
160    32     
112    -48    
-96    -144   
176    128    
-192   288    
96     -272   
-32    32     
-64    224    
-48    0      
-640   -192   
528    416    
1888   -80    
-1600  -272   
-320   -1136  
720    -560   
176    -592   
96     1216   
-144   16     
-288   -80    
-16    -144   
400    80     
-16    80     
-320   144    
48     0      
240    96     
-80    272    
-592   304    
-160   352    
-32    0      
32     -112   
-816   0      
1680   -352   
-352   304    
-192   480    
208    -288   
-304   -560   
464    -672   
-96    416    
32     944    
224    528    
-192   -80    
-144   -624   
128    144    
-16    -464   
-64    -336   
384    -112   
-48    656    
560    128    
-160   32     
-112   -240   
128    16     
-160   864    
640    176    
368    496    
-544   1136   
112    336    
-496   1008   
464    64     
368    272    
-208   -144   
544    368    
304    -176   
-208   -576   
-976   496    
1456   -160   
480    480    
64     912    
240    240    
48     528    
192    192    
-144   -64    
-80    -288   
-128   -32    
128    416    
112    224    
-448   -32    
-368   176    
240    576    
-144   336    
816    2784   
-832   1520   
-48    -112   
512    -816   
-832   304    
-416   768    
464    528    
224    1648   
-112   1056   
-368   -112   
64     -624   
512    144    
-176   144    
-336   656    
-48    288    
-160   320    
368    48     
-288   0      
-256   -1072  
-448   -816   
432    -96    
144    208    
-400   160    
640    288    
0      400    
-160   16     
304    272    
128    560    
176    16     
-160   416    
-64    432    
192    272    
-480   368    
224    544    
-48    416    
32     -96    
-112   -16    
-144   32     
256    -32    
48     -48    
-64    -48    
48     -48    
-48    128    
16     16     
224    848    
-400   -16    
-96    208    
336    304    
16     272    
48     176    
-672   0      
48     464    
1680   -160   
-1040  -368   
-464   -336   
208    -640   
112    128    
112    320    
-160   80     
112    256    
96     240    
-80    144    
144    528    
-304   304    
144    208    
32     -576   
-432   -928   
32     -928   
-480   -592   
64     -176   
512    -192   
208    -176   
-736   -128   
48     192    
656    80     
-464   -96    
16     -352   
512    -160   
-208   32     
-16    224    
-64    -2064  
-1312  272    
1248   -80    
-560   -80    
-128   288    
432    -144   
-432   160    
-96    96     
720    48     
-16    304    
-480   240    
-48    -176   
144    224    
64     -544   
-208   16     
576    704    
224    -384   
-256   288    
112    -784   
-32    -128   
640    -256   
-1440  416    
592    -224   
416    64     
-528   -112   
80     -208   
288    -32    
16     144    
-96    32     
208    64     
96     -48    
-144   -16    
48     192    
48     -96    
0      48     
-128   32     
352    96     
48     0      
208    48     
48     32     
-160   96     
160    96     
240    96     
-192   -160   
-224   -48    
656    16     
-448   32     
192    128    
208    -320   
1056   176    
-2448  -32    
-96    320    
2160   -272   
-1232  -336   
-1152  96     
1264   -144   
464    288    
-352   64     
-128   112    
496    -96    
-128   -16    
-96    -16    
432    96     
-720   -544   
128    176    
688    0      
-368   0      
-272   64     
304    -32    
-32    48     
176    16     
-1600  48     
640    208    
1120   352    
-2288  192    
320    128    
496    -496   
-448   48     
224    -48    
368    48     
96     64     
-16    192    
-160   -16    
-32    32     
-240   32     
304    64     
64     144    
-240   -496   
592    320    
544    -288   
-464   -336   
1152   -640   
-288   32     
-96    144    
528    64     
-624   32     
-416   -288   
144    32     
176    208    
-224   -48    
352    -112   
320    48     
-64    48     
-208   256    
-896   0      
336    80     
-32    128    
112    -48    
400    48     
-208   48     
16     -320   
240    80     
-96    176    
0      -1376  
224    96     
-624   -368   
96     -896   
64     -32    
288    -48    
-1008  3200   
1472   480    
-784   -368   
-464   -256   
736    -320   
128    144    
-624   96     
128    192    
400    336    
-512   32     
-256   0      
480    -432   
-272   -720   
-48    -80    
272    -48    
-80    0      
-112   -192   
272    -176   
208    -2304  
-816   -768   
320    -672   
96     -144   
96     -144   
912    176    
-896   -256   
192    448    
48     80     
-176   -224   
-944   240    
-48    -112   
240    96     
128    0      
-160   -272   
0      -128   
48     -80    
160    -528   
-704   -544   
240    -400   
256    240    
-80    -48    
-112   96     
48     624    
736    128    
-800   32     
-48    144    
368    -336   
-336   16     
224    -16    
-352   -880   
192    -608   
-160   -2768  
160    16     
400    48     
-432   560    
400    256    
-336   -192   
224    1584   
736    1344   
-80    1232   
144    1024   
-1120  336    
-176   -80    
-96    -112   
224    -272   
-32    -160   
-16    -1504  
0      256    
32     48     
-32    96     
-16    -272   
-16    48     
0      688    
80     -320   
-96    -208   
112    -160   
-240   -48    
336    96     
240    96     
-224   -288   
-240   176    
592    416    
-240   1280   
112    80     
144    -208   
128    -176   
-112   -96    
-272   48     
80     -48    
-416   -64    
-64    -352   
0      -64    
64     -352   
-304   16     
-128   -16    
96     112    
-64    -368   
-80    -192   
288    -1888  
160    -128   
-112   32     
-800   752    
848    -64    
-544   -208   
-256   16     
80     160    
-16    -224   
16     -112   
-80    304    
16     -80    
-32    96     
112    -592   
160    64     
-32    -496   
0      32     
32     -80    
176    96     
-176   -16    
-96    -144   
32     -480   
240    -80    
144    64     
-96    176    
-704   80     
160    -16    
96     384    
-192   -64    
368    32     
-112   0      
64     -48    
1104   -80    
-2608  128    
-672   -16    
2016   -96    
-1072  -608   
-1200  176    
592    -352   
128    1264   
-48    1680   
-256   -672   
128    -272   
-848   -176   
128    208    
256    32     
-544   80     
-384   -272   
-128   -544   
-256   -576   
224    304    
-128   -64    
48     464    
976    -656   
-2784  160    
368    512    
-48    752    
-848   304    
400    656    
368    1328   
-176   1424   
-48    880    
-192   496    
256    176    
-48    512    
-304   384    
-128   -32    
-112   -32    
-80    -368   
-272   -800   
320    -656   
-176   -112   
-240   96     
16     -240   
160    784    
-224   912    
-480   -304   
528    -544   
64     832    
-240   192    
-1248  -528   
832    -304   
48     -16    
-496   560    
-96    -48    
0      112    
-224   304    
960    -384   
144    1040   
-624   400    
96     -112   
640    400    
304    192    
-800   -304   
32     352    
528    -208   
128    608    
-1040  -144   
-608   160    
864    80     
240    -224   
-1136  -1072  
1088   -352   
1280   -416   
-1456  160    
-752   -1440  
496    -608   
304    -112   
-640   240    
-240   736    
528    304    
160    32     
-368   -112   
-240   16     
-512   320    
480    32     
-16    96     
-448   96     
192    64     
-48    -352   
400    256    
-160   928    
16     464    
240    96     
-336   48     
-848   -48    
912    16     
-96    32     
-208   256    
-336   464    
208    32     
-144   -112   
64     0      
48     -16    
-240   -144   
-368   -176   
-224   -288   
704    -176   
-32    128    
-592   64     
160    -80    
-32    0      
240    80     
-192   240    
-192   128    
208    0      
-368   -96    
416    -112   
224    -224   
-784   -176   
176    -64    
352    96     
208    192    
-1312  304    
320    -176   
592    -352   
-560   -160   
-96    -80    
336    112    
-80    96     
192    -176   
-112   224    
96     32     
-192   0      
64     208    
288    176    
-384   -240   
-192   -288   
224    48     
-160   -144   
96     -240   
144    384    
-80    16     
-64    -384   
-128   -368   
0      -16    
-16    416    
-416   80     
144    80     
208    64     
-224   96     
768    3008   
-944   -1904  
-1648  672    
1328   -224   
-176   -224   
-736   240    
224    256    
1040   368    
-752   -128   
-32    -368   
112    304    
32     -112   
80     160    
208    464    
-624   48     
144    -112   
208    368    
-144   0      
-128   144    
64     160    
272    1088   
-528   -128   
-560   64     
1216   112    
-352   -176   
-112   304    
-336   240    
336    -16    
96     80     
-32    -144   
-368   272    
0      -144   
-80    384    
544    -48    
-480   -80    
-112   48     
80     -64    
160    256    
-256   96     
-16    -16    
-80    80     
112    112    
16     0      
64     16     
-480   -128   
448    144    
112    80     
-256   -32    
16     96     
880    704    
-2128  1456   
-1040  800    
2352   112    
32     -80    
-528   128    
-176   -128   
576    544    
-160   128    
-416   256    
336    -48    
96     128    
-304   -16    
160    96     
-400   -32    
240    48     
256    128    
-256   -32    
32     -752   
128    -64    
16     112    
80     -112   
-1312  544    
720    160    
432    848    
368    80     
-320   464    
160    -16    
-272   112    
224    176    
368    -176   
-192   144    
-16    96     
112    -144   
-80    64     
448    64     
-32    128    
-80    320    
-64    272    
160    16     
160    48     
-176   -48    
672    48     
-320   32     
48     32     
-112   -176   
-544   240    
288    -32    
96     -768   
-80    192    
48     -160   
32     352    
224    128    
-176   -32    
-288   352    
784    -112   
-80    240    
64     128    
112    -16    
112    48     
112    48     
48     0      
-128   192    
80     -48    
16     176    
144    -1600  
-560   192    
176    128    
256    80     
-240   960    
464    3200   
528    80     
-1424  -480   
-384   -192   
1968   384    
-1072  144    
-576   -624   
448    352    
432    -304   
-432   32     
-224   -720   
224    -160   
-240   416    
112    160    
192    -80    
-496   192    
112    -96    
144    -64    
-80    -1152  
-96    416    
288    464    
16     144    
304    -96    
-48    -400   
16     256    
32     80     
-208   176    
496    -832   
96     640    
192    -2016  
96     -432   
-336   160    
160    560    
176    80     
64     -64    
-96    -80    
176    -16    
304    240    
-176   32     
144    96     
-400   -208   
96     112    
544    -80    
304    592    
192    -176   
-464   208    
96     -256   
-464   -1008  
192    -16    
48     160    
-368   -400   
544    -816   
-784   240    
336    -1136  
160    -112   
-704   -448   
0      -592   
592    1472   
32     848    
-464   -1248  
256    384    
48     16     
-96    208    
288    208    
128    -80    
-176   -64    
0      160    
96     80     
-176   112    
80     80     
16     -224   
-48    80     
-80    -16    
32     64     
48     -128   
-304   0      
160    128    
-256   -416   
224    -800   
128    16     
64     -288   
-112   32     
0      -192   
800    -16    
-48    32     
-272   -48    
336    304    
80     -64    
288    -992   
240    -208   
-240   0      
-16    0      
208    -352   
-96    -496   
240    -160   
-160   -496   
-16    176    
176    -384   
288    -192   
-176   -464   
-352   832    
1216   -96    
-928   -80    
288    -80    
-64    304    
128    128    
0      32     
48     0      
-80    -240   
-464   -144   
320    -336   
384    -32    
-128   0      
-144   64     
192    -1024  
-48    -144   
16     352    
16     464    
-192   208    
-16    -160   
288    -16    
192    144    
-496   208    
144    112    
32     320    
-176   -64    
32     -80    
144    -176   
-16    -32    
-128   -1328  
-1440  240    
1520   -160   
48     144    
96     848    
-224   96     
-784   -1344  
352    832    
64     352    
-384   -448   
-208   -304   
-128   -176   
-96    -192   
320    -16    
80     224    
-208   96     
-64    304    
448    448    
128    -480   
-288   -784   
496    608    
-1648  -752   
-1024  656    
1072   -224   
224    -880   
-464   -288   
128    720    
-960   592    
-128   208    
0      -432   
64     -208   
-64    96     
-192   128    
576    48     
-368   -1200  
-208   176    
240    -256   
144    -80    
592    96     
-256   -32    
-272   64     
-80    0      
80     -80    
-432   2448   
1488   160    
448    -496   
-704   -208   
672    -160   
304    240    
-144   -1264  
112    144    
-144   -160   
192    48     
-208   32     
-496   -224   
560    -464   
240    240    
-800   208    
368    -528   
560    -528   
-384   -128   
-48    48     
256    160    
128    80     
-96    -1808  
-688   160    
192    0      
160    112    
-672   -512   
-272   -2064  
1568   -992   
448    -320   
-1152  304    
-128   32     
32     80     
432    224    
-224   400    
-448   160    
608    112    
0      -320   
-80    -32    
-256   16     
16     192    
336    48     
272    32     
-576   32     
128    -80    
-192   -480   
832    -608   
-352   -144   
-640   -96    
112    192    
-1472  -160   
272    -48    
272    144    
-432   -32    
-176   64     
-384   -112   
-272   -128   
80     -32    
-32    -16    
-176   32     
512    160    
-304   112    
-320   -48    
64     -416   
128    96     
-272   0      
0      176    
144    80     
-144   -16    
-16    208    
-48    16     
-80    256    
-464   48     
176    -176   
-32    144    
-96    -112   
-288   -80    
192    64     
112    832    
0      -32    
-624   96     
208    -32    
16     -96    
-432   -304   
128    -48    
160    -144   
112    32     
0      -16    
-64    16     
-640   -32    
-192   112    
48     -48    
192    240    
-48    160    
128    256    
256    -32    
-736   80     
112    -32    
288    -144   
-112   32     
-64    160    
-80    144    
-128   -336   
256    -112   
-640   144    
-112   -144   
-32    16     
-400   -1152  
2064   -528   
-976   160    
-832   -320   
208    96     
-32    176    
64     176    
0      -112   
576    -1024  
-496   544    
-128   176    
448    -176   
-96    304    
0      272    
-384   -48    
432    16     
-448   144    
-80    -336   
144    -32    
-80    176    
112    512    
-256   -224   
-144   160    
528    -112   
-272   -96    
-48    576    
-256   80     
0      -48    
512    -128   
-464   -16    
-64    224    
32     208    
96     128    
48     16     
-80    128    
336    16     
-400   -144   
-304   -176   
416    16     
112    192    
-576   64     
-96    16     
240    -80    
-16    144    
-608   -272   
144    368    
-32    -208   
32     112    
48     0      
-336   -1984  
1584   -1248  
-688   512    
-288   96     
992    144    
-800   -192   
-352   64     
592    -160   
352    -736   
-544   -32    
-48    -96    
160    224    
-80    0      
-96    176    
-112   160    
720    272    
-352   208    
-112   -144   
160    -64    
112    -112   
-320   32     
416    960    
-1072  -704   
-720   128    
1184   48     
272    -16    
-400   528    
-240   -32    
64     160    
96     0      
-128   0      
-144   48     
32     112    
176    32     
208    224    
-640   -32    
-320   16     
544    288    
-176   256    
64     -192   
-416   -224   
144    64     
-176   -96    
144    -96    
512    -176   
112    -336   
-400   608    
256    16     
-192   -80    
-272   112    
-64    192    
656    208    
400    -112   
-1024  432    
720    208    
208    -528   
-864   144    
160    272    
128    96     
208    80     
-176   0      
-144   176    
160    48     
160    144    
32     16     
-224   -320   
-336   -144   
432    288    
-352   -64    
-96    848    
1712   2528   
-1040  2192   
-160   -128   
1312   -144   
-80    16     
-1120  480    
272    448    
752    192    
112    -160   
-224   -112   
-32    224    
64     80     
288    48     
-48    -224   
-176   176    
-304   256    
112    64     
-64    48     
-224   -416   
-96    -320   
208    32     
32     80     
-288   32     
112    272    
-624   -288   
256    112    
256    -80    
-128   -880   
64     -480   
-64    -176   
-112   688    
304    336    
128    -80    
128    672    
-560   160    
240    160    
128    192    
-80    -464   
-400   -560   
144    144    
320    32     
-256   -224   
-64    -64    
-48    -80    
320    -480   
-800   -592   
320    112    
96     720    
-304   640    
176    80     
160    64     
-176   -928   
-304   -752   
464    -960   
-848   -736   
224    -352   
224    -32    
-80    336    
-48    2032   
224    16     
352    -656   
-80    -128   
-208   32     
288    -16    
96     80     
-192   336    
384    720    
-208   944    
-80    0      
352    -80    
32     176    
32     32     
16     -64    
160    112    
32     160    
-80    -16    
-32    -240   
608    16     
-352   144    
-128   112    
240    144    
-368   784    
752    -432   
-560   192    
208    -16    
224    -16    
-48    128    
-176   448    
192    480    
-32    -400   
48     16     
-112   -32    
-32    128    
240    -720   
-96    272    
48     -384   
-48    144    
32     112    
64     -32    
-96    -96    
576    -176   
-1168  288    
432    -64    
336    176    
16     -448   
-192   0      
-80    -560   
320    48     
-32    -1232  
16     112    
-16    160    
-144   176    
128    32     
-64    -32    
64     -272   
176    -176   
368    592    
-224   400    
-16    192    
544    -608   
-112   32     
-288   -208   
128    288    
144    160    
-32    0      
192    64     
-240   48     
-432   -112   
736    -192   
-240   640    
1216   -896   
-1760  288    
32     -48    
1376   80     
-1152  -240   
-208   -240   
1568   -704   
-304   32     
-560   -352   
336    144    
400    16     
-96    128    
-192   272    
208    304    
-112   208    
160    -16    
192    0      
-96    -160   
0      0      
112    -16    
-576   -128   
2128   -320   
-544   -208   
-1312  -752   
272    48     
608    -96    
-224   128    
-192   -48    
336    -1920  
-400   -512   
-160   -160   
512    -160   
-48    -112   
-416   -208   
-112   -32    
592    128    
-128   -240   
-560   304    
416    48     
144    -448   
-48    -32    
-320   -528   
704    0      
-48    -400   
-336   -1280  
-240   -16    
16     -2000  
-240   -864   
576    -1632  
-32    0      
160    240    
64     192    
-224   -80    
240    -64    
-176   -1104  
-304   -480   
-16    192    
224    -16    
176    80     
-80    -96    
-1376  -80    
144    96     
176    0      
-128   -16    
240    48     
224    -288   
0      -160   
-112   -192   
-368   320    
-640   -512   
0      752    
-256   -64    
-128   -32    
1152   144    
-16    -672   
-1056  464    
512    -256   
-112   128    
352    -144   
-304   96     
-144   -352   
208    96     
176    -1456  
-448   192    
160    16     
-160   160    
16     -144   
-112   224    
576    -48    
-816   176    
96     16     
592    -112   
-240   -64    
-448   -144   
416    208    
64     -48    
-96    208    
224    -304   
-288   144    
-192   48     
304    96     
192    -144   
48     128    
-112   32     
-16    32     
-48    -48    
64     -208   
-1184  -32    
160    -144   
160    -32    
224    -48    
-384   -224   
-48    -336   
432    64     
432    -1856  
-592   16     
0      16     
320    128    
-16    96     
-16    -208   
416    16     
544    -544   
-192   -480   
-464   -176   
-32    -224   
592    -128   
-64    -112   
-576   -448   
480    48     
-144   -1024  
-32    16     
32     -80    
-32    -64    
48     64     
16     -576   
-512   -336   
144    96     
-288   96     
-32    -176   
144    -176   
-32    48     
144    192    
-128   -176   
352    -80    
224    416    
240    -32    
-704   -480   
192    112    
-416   -1216  
1952   272    
-352   224    
-1152  0      
256    16     
320    0      
-528   -256   
48     -48    
256    -464   
-64    192    
208    336    
128    -96    
96     -304   
-272   160    
208    -384   
208    256    
-256   176    
64     -112   
-64    144    
-64    32     
48     112    
48     1472   
1168   -256   
-1216  -32    
-320   -320   
400    80     
-208   144    
-480   -384   
-32    -528   
-224   144    
336    208    
48     -80    
-224   96     
-16    -48    
112    128    
240    256    
-240   -16    
-576   -160   
128    -160   
-160   -336   
-32    160    
-240   80     
176    64     
-240   96     
432    -16    
-384   -48    
-368   160    
224    48     
-96    64     
-848   16     
896    224    
2240   176    
-1632  80     
-224   96     
48     -416   
240    16     
32     16     
-272   224    
48     -32    
-48    48     
32     80     
-448   32     
-192   64     
-64    -128   
240    32     
-160   -32    
-288   -224   
144    -16    
272    32     
-192   -48    
336    1088   
-144   -432   
-1696  -128   
1184   48     
560    -80    
-736   80     
-352   144    
288    -208   
-544   -160   
-144   -32    
-176   -208   
320    112    
0      -96    
-192   32     
-192   80     
64     64     
32     96     
-80    32     
-80    -160   
-240   32     
-48    144    
-96    -176   
240    48     
192    16     
64     -336   
160    -416   
640    528    
-80    16     
-624   -176   
736    112    
240    48     
48     256    
-112   208    
624    -128   
-640   144    
368    -800   
-864   64     
-112   272    
272    48     
112    -48    
-368   16     
-64    160    
0      -96    
288    -80    
-32    -864   
-768   128    
-16    -48    
176    928    
288    1024   
-736   -1616  
592    -1712  
816    1168   
-512   704    
-720   -128   
736    672    
112    80     
-336   64     
-256   -368   
64     128    
224    -272   
96     560    
-288   112    
-80    -16    
192    -80    
304    -480   
-112   528    
-240   32     
256    -176   
-16    -736   
-112   144    
-144   304    
-112   -96    
16     -400   
-16    -368   
-144   16     
-176   48     
224    16     
-352   0      
176    -320   
112    272    
112    192    
-16    208    
-128   -176   
-48    208    
336    -32    
-272   144    
-16    944    
160    720    
336    128    
-128   -464   
-432   288    
-80    96     
336    144    
384    96     
-864   -176   
32     144    
448    -32    
224    352    
-368   144    
0      0      
-304   -912   
368    -1056  
368    -656   
-176   -80    
-112   1152   
176    320    
-16    2048   
-320   144    
-128   -400   
240    480    
48     -16    
48     -208   
-80    176    
-400   208    
272    96     
160    -256   
112    -256   
-80    128    
160    176    
272    80     
-112   144    
-80    208    
272    32     
0      16     
-528   16     
-48    368    
-96    96     
-96    272    
256    0      
-160   -544   
560    -832   
-96    448    
224    -960   
304    -416   
192    624    
-592   304    
432    -448   
640    -224   
-32    112    
-224   128    
64     304    
-32    -80    
336    64     
48     -176   
-96    96     
-64    -160   
176    112    
128    64     
-128   0      
0      -704   
-80    -672   
-16    368    
176    -80    
16     400    
96     -624   
-128   -64    
80     496    
192    192    
48     -256   
-32    144    
0      32     
64     -160   
144    160    
-32    464    
-64    16     
80     16     
0      64     
128    544    
-32    0      
-192   0      
128    32     
320    288    
-224   112    
-32    -16    
176    -832   
-96    112    
-16    96     
-208   -48    
1424   1120   
-1296  1008   
-464   240    
1120   80     
-1184  -32    
464    32     
0      -208   
-224   -16    
-16    -64    
176    288    
-32    64     
-112   -448   
240    64     
288    128    
-768   -48    
272    64     
288    144    
-224   -80    
-176   16     
96     64     
16     96     
-160   -720   
-880   928    
1184   -400   
-960   -160   
272    272    
1232   -304   
-704   336    
-640   -96    
400    112    
272    32     
-64    80     
-112   0      
-64    176    
16     -224   
432    112    
-192   16     
-112   16     
-112   -160   
272    -352   
144    96     
-144   -80    
-448   -160   
384    -976   
352    336    
-912   -848   
624    -192   
624    -560   
208    128    
-320   160    
128    208    
432    32     
128    320    
-240   320    
-288   -32    
-368   -96    
432    -544   
320    -80    
-512   -496   
352    160    
112    -416   
-112   176    
320    -432   
-128   144    
-256   -80    
464    672    
1008   -64    
-656   208    
128    272    
272    -1280  
-1824  2384   
1440   96     
-560   -128   
-1472  -256   
1280   -80    
864    -400   
-784   -96    
-80    -368   
464    80     
-288   176    
320    0      
32     96     
-240   32     
-160   16     
528    -432   
384    48     
-432   -448   
352    192    
544    160    
-1200  -48    
720    -608   
48     -32    
-448   -256   
1120   288    
-880   -304   
-400   272    
928    80     
-352   -384   
32     -128   
112    96     
64     112    
-80    32     
64     128    
-32    -96    
576    208    
-256   -32    
-320   -16    
224    192    
336    160    
-272   0      
0      -208   
416    -32    
-544   -256   
256    -2032  
560    -32    
-864   -432   
512    -240   
192    -32    
0      0      
80     80     
-368   48     
-16    -1616  
-16    112    
576    -416   
-608   16     
144    48     
336    -592   
-32    -96    
64     -160   
-288   -208   
-224   -176   
240    -96    
192    -1024  
-128   -48    
32     -64    
-224   -64    
192    -448   
-32    -96    
160    80     
-176   16     
-32    128    
240    0      
-528   128    
-64    -224   
192    -192   
496    112    
-288   240    
-112   -544   
256    -512   
288    192    
-1104  -544   
800    -1168  
-64    -192   
-288   -528   
832    464    
-640   -288   
-336   96     
-16    -64    
544    -720   
-80    -16    
-272   80     
0      -192   
240    -384   
64     -240   
-48    -320   
-320   80     
256    -192   
-176   80     
80     -48    
176    -112   
320    -304   
-1600  208    
448    -688   
672    -400   
-608   16     
208    176    
-32    240    
-224   -272   
0      96     
416    -176   
-80    48     
-368   -16    
192    48     
0      -208   
64     48     
16     64     
304    32     
-400   144    
0      -48    
-448   -224   
80     -256   
464    -352   
-352   -240   
272    -144   
-64    -400   
128    -16    
16     -304   
-144   192    
-32    -160   
1072   880    
64     -288   
-2080  -96    
864    160    
352    64     
-1104  16     
464    -64    
-160   -272   
80     -400   
-352   -64    
32     -224   
256    0      
112    -1296  
0      288    
-304   32     
-48    112    
160    32     
-160   224    
-544   32     
176    48     
-48    16     
-704   -320   
2192   -48    
-528   -928   
-1568  -224   
1280   -352   
-288   0      
432    -544   
32     96     
-336   192    
336    -64    
-224   0      
80     112    
-256   -16    
-64    320    
-48    256    
176    -64    
-144   816    
160    464    
32     288    
80     -176   
144    -48    
48     -32    
80     1568   
960    928    
-112   -128   
-784   320    
304    -400   
-592   -48    
176    -256   
272    -48    
176    48     
-544   224    
-112   16     
-320   -176   
96     -896   
-192   304    
-432   -48    
-416   -208   
256    192    
-976   0      
-128   0      
64     -32    
-128   176    
128    -48    
-176   -160   
-336   -416   
640    320    
-240   368    
-288   224    
720    1856   
-384   592    
528    -256   
48     -16    
-80    224    
48     384    
128    1440   
-96    416    
-80    -192   
-368   112    
192    -256   
-512   48     
208    160    
-32    -96    
-304   -144   
-224   384    
16     400    
320    -304   
-256   128    
-64    -224   
-336   -624   
128    -48    
208    272    
192    224    
-1520  -480   
256    304    
352    -336   
-96    -1584  
48     32     
-48    672    
16     256    
-128   208    
176    304    
-96    576    
-176   672    
96     -240   
496    320    
-256   48     
-128   96     
-240   -32    
-48    -112   
-720   -320   
-144   480    
80     -160   
-96    -944   
560    304    
-208   240    
-272   480    
-416   -672   
16     -256   
336    -592   
528    48     
-160   560    
-528   240    
80     -48    
144    176    
-736   -752   
144    -768   
-176   448    
0      1488   
0      272    
32     0      
160    96     
176    64     
-176   480    
-544   384    
176    -96    
224    -368   
192    256    
-128   144    
-272   -192   
32     -80    
272    336    
96     96     
-128   -432   
-128   -640   
-192   560    
64     560    
272    16     
192    0      
-576   -2320  
-480   -1088  
-80    320    
-16    240    
-1072  -352   
-448   -528   
192    96     
272    -48    
-320   -288   
-352   272    
-176   0      
112    208    
192    240    
-208   160    
-192   -208   
80     -336   
144    -128   
48     368    
-224   -48    
0      -32    
-64    1936   
128    128    
-144   -352   
368    144    
-48    288    
192    -160   
-272   -288   
192    -112   
-144   352    
-160   112    
192    80     
144    96     
-336   304    
384    16     
-304   -656   
464    -736   
-16    432    
-288   624    
-112   240    
160    64     
32     -112   
-256   224    
48     -80    
448    0      
-304   -16    
-272   32     
256    224    
-16    80     
-336   128    
80     -912   
-1952  -240   
1584   112    
-160   128    
-944   320    
960    352    
-96    240    
-416   32     
400    240    
128    -32    
-176   128    
-128   48     
48     80     
-48    -80    
144    192    
48     160    
352    80     
-432   64     
-224   -32    
240    160    
-208   128    
-224   -256   
2448   192    
-784   96     
-1104  -48    
304    -32    
368    16     
32     128    
-160   -48    
208    96     
-320   64     
32     176    
320    -16    
-304   -48    
192    144    
0      64     
0      272    
-288   -48    
304    0      
-144   112    
-368   0      
208    -448   
-1424  160    
304    32     
1824   -80    
-480   272    
-752   256    
224    208    
304    -160   
160    80     
272    64     
-352   -80    
-128   144    
496    -208   
-368   -320   
-240   144    
-176   144    
448    272    
496    -96    
112    128    
-640   32     
-176   -496   
992    48     
16     16     
-112   336    
-1072  384    
592    400    
224    96     
-1088  -800   
2912   1904   
-1376  1168   
-688   704    
1696   288    
64     -80    
-912   -128   
-336   368    
1200   -544   
-32    -80    
-528   -160   
352    112    
16     -32    
-144   160    
352    64     
80     32     
-304   80     
384    144    
-224   -112   
-368   -144   
1280   -384   
-640   -32    
-80    208    
96     -384   
-512   192    
592    -1648  
-144   80     
48     112    
160    160    
-160   48     
48     384    
272    96     
-224   352    
224    -176   
-416   -80    
-32    -80    
608    288    
-320   144    
-128   176    
544    96     
32     -352   
-64    48     
-176   16     
208    80     
112    48     
80     16     
-240   -560   
240    32     
-192   -96    
432    -64    
144    -64    
-304   -240   
0      -800   
-608   96     
528    -96    
-608   16     
288    -64    
256    -1840  
-336   224    
80     560    
0      224    
144    144    
-32    176    
16     -16    
192    -16    
-80    -32    
-176   -176   
224    240    
-144   336    
112    352    
416    -128   
-112   144    
64     -640   
-192   544    
48     -1200  
224    -16    
192    -160   
-112   -16    
144    96     
384    272    
-144   144    
1088   1712   
-2480  848    
656    528    
1104   352    
-688   -1280  
-704   -704   
240    -432   
304    640    
-48    128    
-144   96     
-208   160    
208    592    
192    32     
48     -240   
-368   -48    
208    944    
304    512    
-224   96     
-80    192    
64     -368   
512    720    
-848   -176   
736    -432   
32     -144   
-112   -416   
-128   224    
192    -288   
240    768    
144    -256   
32     448    
32     -352   
32     208    
32     48     
16     0      
80     -240   
128    336    
128    -288   
128    112    
-160   -192   
-16    -32    
0      384    
208    -1184  
-144   -144   
-16    -160   
128    -320   
-32    -368   
208    208    
96     -16    
-288   160    
-112   -1200  
2256   16     
-816   768    
-880   -16    
304    208    
240    -448   
-64    -720   
720    -1072  
-336   -1248  
64     -160   
-48    -208   
160    224    
176    0      
112    -96    
-336   -1824  
16     -240   
240    192    
-112   160    
48     16     
-16    -272   
-64    -368   
-224   224    
2992   128    
-1040  160    
-1616  -272   
1312   240    
-288   336    
-624   -336   
224    160    
240    -944   
16     -128   
192    -32    
192    240    
-352   208    
-112   96     
304    -144   
-160   128    
368    -112   
-368   -1200  
-640   -928   
400    -240   
336    80     
-320   -400   
656    272    
-432   -608   
208    -768   
864    -624   
-928   880    
-224   -32    
416    0      
64     640    
-224   416    
752    -160   
32     0      
-768   -128   
752    -272   
-2064  -400   
288    1088   
-128   1056   
-304   -128   
560    64     
-144   -448   
32     480    
-480   464    
48     -80    
352    -160   
48     160    
-272   -944   
-32    -368   
288    160    
720    80     
-2176  272    
-96    848    
1440   352    
-80    -688   
-816   64     
224    -768   
640    544    
96     -400   
-400   256    
16     -208   
0      -112   
-16    -496   
176    -192   
-416   320    
176    384    
288    192    
-208   -272   
-336   -176   
112    320    
16     304    
16     -208   
368    432    
-16    -688   
-480   384    
720    -160   
-528   -832   
592    -432   
208    832    
32     1712   
-160   608    
-224   -32    
352    -272   
-528   352    
96     192    
96     384    
-144   -1184  
-640   -464   
304    -704   
96     -176   
-416   96     
-32    80     
-320   144    
400    96     
-464   272    
416    160    
-880   -752   
96     160    
240    -64    
-128   -208   
-192   -448   
496    -528   
-432   384    
-448   0      
2320   -160   
-624   1360   
-464   336    
480    384    
128    -208   
-400   304    
-16    48     
192    80     
80     480    
-32    336    
272    -480   
-208   -176   
-256   -256   
160    -144   
-288   -704   
-128   -1040  
208    -464   
-560   -224   
-384   -336   
48     32     
240    368    
144    1072
[truncated: 20,011 more chars]
