# Supplementary material for: A Fault Diagnosis Method for One‐Dimensional Vibration Signal Based on Multiresolution tlsDMD and Approximate Entropy
Source: Hindawi journal article supplement (doi:10.1155/2019/3262818), 2019-01-01
Supplement: f1 [file 3262818.f1.zip › 3262818.f1/gear signals/pitch errors signal/Data4.txt]

304    1264   
272    496    
-224   -688   
-160   -272   
-144   240    
64     -208   
-80    -288   
-16    -48    
-48    -160   
64     96     
144    -48    
32     288    
-272   -240   
0      368    
32     320    
144    16     
-64    -896   
-16    96     
-432   384    
272    -224   
544    -320   
-336   -48    
-416   464    
128    320    
384    -512   
-160   -720   
-352   192    
-416   1104   
1760   -448   
-800   -2352  
-672   832    
1088   32     
-240   -672   
-320   416    
-48    368    
320    -368   
-144   128    
48     -16    
-48    96     
0      96     
176    0      
-128   96     
-176   -96    
48     128    
16     -592   
-96    176    
-272   -64    
784    -96    
-112   112    
-688   -992   
224    -240   
80     144    
384    -240   
-592   -1024  
-160   -32    
160    -832   
112    176    
48     -96    
0      112    
96     224    
128    -128   
128    160    
96     -208   
-560   -128   
128    640    
160    336    
96     -384   
-48    16     
0      -400   
48     176    
352    -272   
-176   -160   
176    -224   
96     208    
0      -32    
160    48     
304    -1200  
-2544  320    
1568   32     
848    -304   
-496   -368   
-48    -672   
-16    224    
-96    16     
288    -368   
128    -208   
-304   288    
-208   -176   
208    160    
112    -224   
80     192    
48     96     
32     -80    
288    -64    
208    -752   
-96    -160   
512    144    
-1792  -704   
-32    -112   
656    -544   
-288   416    
272    848    
-432   -208   
272    1344   
160    1216   
-432   -304   
288    -688   
-64    -560   
-64    -512   
-656   400    
48     240    
-528   0      
400    -416   
-272   -368   
288    -64    
-32    -336   
-208   -640   
368    -16    
-640   304    
-32    624    
704    544    
-112   192    
592    2032   
-880   2336   
-576   1024   
336    -384   
-432   -672   
-224   -608   
48     144    
1008   -144   
-1408  352    
-496   -1088  
-64    -976   
-64    -240   
160    -192   
-512   48     
144    16     
80     -96    
80     -400   
-160   -80    
128    256    
-592   288    
272    192    
-176   608    
-96    208    
160    -608   
848    0      
992    -112   
-880   -304   
48     1072   
928    -32    
208    -32    
-256   480    
-800   -208   
384    -528   
512    -32    
-560   128    
-144   160    
-336   384    
432    -288   
480    272    
-496   16     
-320   -336   
368    -752   
512    336    
-48    768    
-192   400    
80     48     
-352   -64    
-48    -352   
224    -96    
-144   608    
304    784    
-368   272    
192    624    
304    112    
-48    -368   
400    -32    
80     -304   
160    -304   
48     -544   
-48    112    
208    -240   
-272   -640   
-288   -272   
192    -208   
-112   0      
128    -144   
-416   32     
112    -272   
-96    -768   
336    -416   
0      64     
-16    -624   
-208   -560   
304    -672   
496    -368   
-1680  -192   
544    -80    
512    96     
-368   -96    
32     480    
-336   336    
48     352    
-64    384    
128    112    
144    0      
-176   176    
96     -224   
368    96     
-176   -96    
-80    32     
-64    -144   
144    -528   
-192   -32    
-336   -48    
-192   -224   
384    -112   
144    -16    
-256   208    
448    384    
-624   -128   
-128   144    
448    -272   
-80    -64    
80     1680   
-368   -1568  
-368   576    
448    -240   
-464   -368   
-640   160    
240    -160   
448    -128   
-496   -288   
176    -576   
-192   144    
-368   -112   
288    96     
-272   32     
-288   -272   
-128   -640   
240    128    
32     112    
-480   384    
288    288    
-896   -848   
672    -640   
-544   368    
-176   0      
-240   0      
-16    624    
-192   -208   
80     160    
128    -240   
-160   -32    
-240   0      
-16    -16    
288    16     
-176   128    
-128   80     
128    176    
-352   288    
-944   -32    
-160   -32    
64     16     
208    208    
-272   -48    
-128   160    
96     -64    
160    -32    
-592   192    
480    80     
-288   80     
-144   0      
-576   -912   
1360   -512   
-1120  -544   
-1360  -208   
1216   144    
112    -176   
-1072  96     
64     -336   
288    64     
-304   -144   
-176   64     
608    288    
-176   -32    
-528   32     
592    16     
-160   -144   
-352   48     
288    144    
-320   80     
-272   80     
-176   -32    
176    0      
688    16     
-2016  -64    
96     -160   
2272   -256   
-1968  176    
-192   176    
48     64     
-384   -208   
-112   32     
64     96     
16     48     
-96    48     
144    192    
-288   -224   
-416   176    
160    -96    
176    -176   
-448   -208   
64     -32    
240    64     
-288   480    
1600   -112   
-752   -144   
-240   160    
800    464    
-176   448    
-912   32     
608    -144   
-224   -144   
96     176    
-64    64     
400    80     
256    272    
-112   -112   
-544   240    
512    -256   
-224   96     
64     176    
432    -64    
-128   48     
0      96     
-96    16     
16     16     
400    320    
240    -96    
-464   128    
128    -48    
32     432    
-1232  -2368  
-912   192    
1488   432    
336    32     
64     224    
-528   160    
80     80     
352    160    
-400   -48    
224    -32    
-144   0      
208    96     
-112   48     
-80    0      
256    16     
192    0      
-144   96     
-192   -48    
320    592    
-192   880    
144    1040   
112    112    
-352   -272   
208    -16    
608    -16    
-832   0      
432    -128   
160    304    
-432   -64    
272    -144   
-32    -64    
96     -256   
-16    112    
96     16     
-240   16     
64     784    
32     640    
32     432    
160    -112   
-160   96     
-144   96     
-80    -688   
-352   64     
464    -32    
-368   -32    
304    304    
-16    16     
-240   128    
320    448    
-64    832    
144    400    
-288   144    
720    -96    
-256   -608   
-96    -96    
96     192    
-688   -1200  
-704   -1504  
128    -1632  
-112   -688   
-16    -208   
0      112    
64     240    
48     0      
-80    0      
-16    352    
-96    160    
16     -144   
128    144    
112    320    
-112   336    
0      -512   
-32    -112   
-80    160    
160    272    
-192   64     
80     288    
336    -32    
-336   48     
0      -32    
64     16     
288    -704   
112    96     
-208   336    
32     -384   
144    96     
528    384    
-400   528    
144    448    
272    352    
-64    336    
-80    144    
-64    96     
320    96     
-320   -48    
32     336    
192    240    
-16    496    
-160   -16    
-256   -912   
464    -560   
-1264  160    
688    224    
64     -192   
-144   -400   
-32    400    
32     -112   
-32    -80    
144    16     
-32    144    
-96    96     
-224   208    
128    96     
80     320    
-64    -80    
16     -80    
192    112    
-288   -32    
-96    480    
176    80     
-240   0      
-160   -48    
128    112    
112    0      
-160   -32    
176    128    
-112   -48    
144    -48    
-224   272    
-192   -1200  
2336   -608   
-1024  528    
-688   160    
1280   512    
-560   1216   
-176   928    
704    1488   
-272   -160   
-64    -416   
16     -736   
176    400    
48     176    
16     -80    
-80    -160   
112    -224   
48     400    
96     688    
-352   -192   
176    224    
-32    -64    
112    672    
2288   32     
-1360  -176   
0      -800   
272    -192   
-256   -224   
304    -1184  
0      -1744  
-208   -576   
192    -368   
48     80     
32     -528   
-224   -144   
112    -560   
-64    192    
16     -176   
-176   896    
-304   848    
320    368    
-16    16     
32     288    
-224   -224   
576    -832   
64     -32    
128    576    
304    48     
1088   -176   
656    704    
-736   -1248  
320    368    
-96    -1328  
144    240    
32     64     
-256   -832   
-624   400    
208    -400   
416    -576   
192    64     
-352   -400   
-112   -144   
192    240    
-272   -672   
320    160    
112    -448   
256    208    
96     -144   
-224   -192   
624    -128   
-224   256    
-1152  576    
320    496    
208    -128   
672    1520   
192    1712   
-224   -336   
-144   144    
336    -992   
-256   -240   
-96    -96    
80     336    
-128   80     
16     -288   
-64    -80    
96     32     
48     -16    
208    16     
352    96     
-144   544    
64     -384   
-16    -640   
-96    -16    
464    368    
416    -96    
-672   -48    
240    128    
80     112    
272    -1168  
64     -64    
-32    -64    
-16    -560   
16     -128   
112    -976   
240    176    
-192   -1632  
-288   416    
576    496    
-64    -96    
-112   352    
240    -464   
32     -1168  
176    176    
-384   -384   
-288   144    
512    -368   
-144   -208   
-272   32     
336    0      
-32    80     
48     80     
-80    -656   
496    -1456  
-96    240    
-160   160    
384    80     
-416   -144   
-144   96     
544    -112   
-112   384    
224    -144   
-240   32     
-304   144    
192    -224   
-240   -48    
432    816    
-544   368    
16     -496   
416    576    
-416   512    
32     -240   
32     32     
192    480    
-32    32     
-128   -16    
0      32     
480    480    
272    224    
-528   -208   
48     -96    
-16    -272   
1088   1728   
2464   272    
-1440  320    
-336   -672   
496    -64    
16     -688   
-272   -176   
352    336    
-432   336    
256    -208   
256    96     
96     -208   
-336   -144   
-880   288    
432    208    
-256   -336   
0      400    
304    -48    
-208   -656   
-48    256    
464    1344   
992    0      
-1232  -240   
400    288    
320    -144   
64     -240   
-80    -16    
256    80     
-368   -80    
-32    -160   
48     272    
544    -336   
-496   96     
64     -144   
256    64     
128    -960   
176    -192   
-80    -112   
-80    -16    
0      -32    
208    0      
-208   -16    
-160   -80    
352    80     
-304   -112   
-496   -16    
224    -128   
-48    16     
-208   -928   
1408   3104   
480    -1728  
-1728  240    
-192   -176   
848    96     
0      -16    
-256   -144   
112    464    
608    -80    
-432   96     
0      -160   
-144   80     
0      -352   
256    128    
-64    -272   
-160   224    
208    -512   
-16    -80    
-144   -48    
-16    48     
-48    -464   
1024   224    
-944   -128   
-160   -352   
-320   352    
464    -224   
-448   80     
608    -96    
64     64     
-592   -128   
128    64     
-32    -304   
-128   48     
64     208    
-560   -32    
-208   -32    
320    -160   
144    -288   
0      128    
-288   -48    
64     16     
-400   -176   
-656   -208   
160    96     
-736   -176   
688    32     
64     144    
-256   80     
-256   -160   
-336   112    
320    -32    
-368   336    
0      -112   
368    112    
-704   208    
-16    80     
-112   368    
-144   -16    
128    -16    
-272   -16    
96     64     
48     112    
-176   32     
16     32     
-176   32     
496    96     
-16    128    
-272   160    
208    688    
448    1200   
-2416  -544   
1344   -480   
1344   64     
-1328  0      
80     448    
448    96     
464    192    
-704   144    
64     176    
336    -192   
-224   288    
64     -464   
-80    352    
-400   -384   
128    336    
48     -224   
-256   272    
-64    -192   
192    1008   
-80    528    
-160   96     
-320   -592   
336    528    
-32    -128   
-416   432    
512    208    
-448   608    
-16    544    
-192   -912   
-128   240    
336    624    
-64    288    
-32    -496   
-272   -224   
208    80     
-160   480    
-80    144    
208    160    
-208   -48    
112    -368   
112    -512   
-720   -352   
-288   -464   
-288   -352   
544    -256   
-336   -656   
400    -992   
-80    384    
-208   512    
144    -80    
-224   -64    
944    -496   
-400   -496   
-352   -240   
496    -464   
208    736    
-256   1824   
-304   -400   
240    -1088  
0      576    
-688   -176   
192    176    
-160   -64    
-128   -144   
208    144    
-144   320    
-192   320    
80     368    
16     32     
-16    0      
-112   64     
144    112    
80     80     
-48    32     
0      112    
-496   32     
528    176    
-176   160    
-272   0      
-192   144    
64     688    
704    128    
-736   64     
0      144    
144    -32    
-176   96     
-48    240    
144    544    
-464   -176   
80     0      
-48    48     
48     208    
192    -64    
-432   160    
32     48     
128    336    
272    96     
-224   192    
-192   32     
464    -336   
-1184  176    
320    160    
16     64     
256    -656   
112    432    
-144   608    
-192   304    
-128   -16    
208    -16    
64     128    
-224   112    
-16    0      
80     112    
-208   304    
128    112    
320    304    
-256   80     
64     336    
288    -32    
48     16     
-416   -208   
144    144    
0      224    
-16    32     
256    272    
64     240    
-160   64     
-64    48     
0      416    
1424   -800   
-1824  304    
160    784    
432    1072   
-496   -944   
784    -672   
592    1152   
-416   -896   
144    -320   
-80    -112   
96     144    
176    112    
-112   416    
-112   288    
208    64     
128    -176   
-288   -528   
-400   -1296  
352    -112   
-256   -480   
944    1680   
1136   -48    
-1200  624    
144    -112   
-64    -112   
144    -48    
416    -16    
432    368    
-160   960    
-336   688    
-32    -112   
464    -96    
-512   160    
272    288    
-160   -80    
-224   0      
272    -448   
-544   -240   
208    96     
96     192    
256    400    
-176   96     
464    256    
-2192  1168   
-496   176    
912    -240   
-672   -656   
-288   0      
160    416    
-336   48     
64     -848   
112    48     
-48    -48    
272    1264   
-1040  272    
-256   -208   
624    -176   
-496   208    
-480   96     
592    -96    
112    128    
-288   16     
0      240    
368    -80    
128    -368   
-512   -208   
224    48     
784    1024   
-656   1392   
-1104  -960   
-192   -160   
560    0      
-192   112    
752    336    
-368   112    
-896   320    
624    -304   
-192   32     
192    -32    
-384   240    
-32    -320   
496    288    
-192   -1152  
-240   224    
352    -32    
176    144    
224    64     
-608   160    
320    352    
48     608    
-96    80     
336    96     
-64    32     
-352   -112   
416    256    
80     -240   
-192   208    
368    -1040  
-496   144    
112    96     
272    96     
-528   -208   
384    -48    
32     -336   
0      128    
16     384    
80     272    
-48    -80    
32     -96    
288    144    
0      -496   
-384   64     
-160   -752   
464    48     
256    -656   
-288   144    
-32    48     
224    96     
-80    -16    
-96    -144   
656    144    
800    224    
-672   128    
48     160    
368    288    
-352   80     
80     128    
16     32     
112    0      
-16    -320   
-64    32     
80     -752   
-144   128    
144    -128   
-16    -256   
-160   -208   
-16    256    
272    -80    
16     -80    
-160   160    
160    -560   
-144   32     
144    -544   
-160   400    
-336   -192   
240    -288   
-176   336    
112    16     
80     48     
-912   944    
2560   -944   
-288   368    
-1376  -32    
800    -48    
544    -16    
-512   -320   
-336   704    
800    -752   
0      160    
-160   64     
288    -192   
-64    -144   
208    480    
224    0      
-48    32     
112    416    
-48    -64    
-48    16     
144    96     
304    1472   
608    -304   
-848   -144   
224    -208   
304    32     
128    880    
432    -64    
-608   -192   
272    0      
96     80     
208    96     
32     -864   
-96    128    
0      -560   
-176   0      
240    -2064  
480    80     
-368   -32    
-192   -64    
432    48     
224    32     
-240   -1120  
208    48     
160    -384   
-256   -96    
-16    112    
240    -272   
48     -64    
-64    -432   
-1104  512    
1200   288    
704    -16    
-1488  -512   
1296   304    
368    -384   
-736   -144   
-256   -560   
768    432    
-64    112    
-160   48     
192    32     
64     -224   
-112   -160   
-656   -448   
448    -48    
16     96     
80     208    
48     352    
352    96     
-272   -1168  
832    560    
336    160    
-576   400    
-176   0      
192    -16    
96     112    
528    -128   
-160   -64    
-320   -128   
112    16     
208    -64    
112    -48    
-192   -816   
304    -32    
32     -1552  
-80    -16    
160    -208   
-160   384    
240    176    
80     -16    
144    96     
-720   96     
-720   160    
528    560    
448    -416   
-96    -96    
-272   192    
96     -160   
240    -224   
-416   112    
464    688    
944    -656   
-576   -240   
448    416    
48     160    
-224   32     
432    -128   
-544   48     
-32    32     
-48    -32    
256    -48    
-544   -16    
-224   80     
416    368    
-416   16     
-320   112    
512    32     
-272   -928   
-928   -1200  
1760   -1904  
416    -336   
-1712  -160   
-192   304    
704    -496   
-944   -688   
96     -80    
-144   -16    
-336   -80    
-16    -320   
496    -560   
-288   272    
-256   80     
-16    208    
288    48     
-64    192    
-80    -48    
32     64     
-144   240    
144    32     
16     48     
32     48     
-992   320    
432    -192   
-272   416    
448    -176   
-320   816    
-112   160    
240    -752   
16     -544   
-64    -224   
240    48     
-144   80     
176    288    
0      336    
32     96     
80     656    
16     512    
32     -192   
320    64     
-32    -48    
-96    -16    
-112   -480   
336    144    
-352   336    
112    -480   
272    -816   
-368   -400   
-240   32     
336    96     
336    208    
-1392  704    
176    1168   
624    656    
-160   272    
-1024  -512   
64     -608   
-672   -1888  
448    192    
240    1088   
-240   48     
-208   32     
-480   176    
224    -16    
16     -192   
-496   -464   
352    -592   
528    288    
-640   16     
-64    -32    
32     -176   
288    64     
-208   176    
-128   -112   
160    -160   
448    96     
-448   112    
-416   32     
288    144    
80     -16    
0      -528   
-624   64     
-112   192    
304    -224   
176    336    
-240   -144   
-464   -224   
32     -320   
16     272    
-240   192    
-80    -224   
128    48     
-176   176    
48     -80    
-416   -48    
176    -16    
-96    -208   
-64    240    
-48    16     
64     480    
96     -320   
-80    48     
576    -144   
-512   112    
-112   128    
208    256    
240    -64    
-144   288    
-208   16     
112    -80    
48     -16    
-224   -16    
32     112    
48     544    
112    432    
-384   -96    
96     -464   
288    -64    
-128   352    
-192   96     
-64    256    
48     -128   
64     -160   
-16    352    
-352   112    
208    -64    
-144   16     
-240   400    
0      -352   
-48    736    
1840   304    
-880   -192   
-1152  384    
1344   -192   
-832   560    
-16    480    
816    128    
-656   -112   
-224   96     
480    0      
96     80     
-544   -208   
-208   -144   
368    -256   
-96    -48    
160    32     
-128   80     
192    240    
80     96     
-80    -912   
-1120  688    
1792   304    
-560   1056   
-672   560    
384    -32    
64     -16    
-640   0      
64     -96    
640    -192   
-432   160    
-240   -80    
352    128    
208    240    
-464   -128   
-176   -32    
464    288    
-336   16     
-240   0      
304    -48    
-80    0      
-144   -416   
-832   192    
944    32     
-48    1088   
-960   512    
304    512    
-384   864    
-64    240    
128    -80    
-64    -160   
384    -160   
0      16     
-304   352    
544    112    
-336   480    
128    -192   
-256   -112   
336    80     
-112   112    
-16    80     
160    128    
240    80     
-192   -64    
128    80     
544    144    
-32    128    
-384   0      
-64    -1840  
-496   -3792  
-1696  -1360  
528    -16    
560    -112   
256    16     
208    176    
-576   224    
304    320    
80     -320   
-208   528    
-192   112    
-96    0      
0      -144   
-144   96     
-240   -32    
-16    272    
112    16     
-48    128    
-416   -304   
112    224    
32     96     
-304   -144   
720    128    
432    -64    
-736   96     
-128   -64    
656    48     
-16    -144   
-288   288    
48     64     
16     128    
96     -112   
-208   144    
-32    -80    
464    80     
224    0      
-608   -96    
80     128    
-256   96     
112    96     
-16    80     
128    176    
-64    224    
64     304    
336    -32    
32     352    
-208   176    
112    -256   
288    48     
-320   -96    
-64    -48    
32     96     
480    96     
672    784    
400    224    
-640   176    
176    288    
784    384    
-432   240    
-176   224    
448    96     
-128   160    
-160   -112   
96     176    
160    -48    
0      288    
-192   400    
464    192    
16     16     
-320   176    
48     128    
192    -208   
-416   -288   
112    -128   
96     416    
224    -608   
-304   -576   
80     -80    
-16    400    
224    144    
-432   2144   
2416   -240   
-1056  256    
-448   80     
1088   -192   
-560   288    
-208   32     
384    560    
240    96     
-336   -64    
432    -288   
-112   416    
-112   -304   
352    384    
288    128    
-352   -160   
80     384    
112    80     
-32    -80    
176    0      
-512   -784   
592    80     
416    -48    
-416   320    
400    160    
-16    -48    
-208   208    
128    384    
384    256    
32     -272   
112    96     
-240   96     
112    144    
256    160    
112    -144   
-16    64     
-32    192    
64     128    
-80    176    
-16    -48    
80     -128   
128    256    
144    -64    
-336   272    
512    -528   
-256   64     
112    -368   
160    160    
80     -240   
-1232  704    
1296   112    
480    -208   
-896   -192   
1280   352    
-576   320    
-528   240    
432    0      
208    -48    
16     -16    
-224   -80    
128    80     
96     -304   
320    192    
-432   -480   
-48    96     
256    304    
-176   112    
160    16     
48     48     
-416   -480   
1536   688    
-48    384    
-1008  -944   
480    -224   
352    -96    
-160   128    
304    -384   
-288   112    
-224   -880   
32     80     
-16    48     
192    128    
-16    112    
-176   -416   
144    112    
144    -544   
-96    -64    
-32    112    
48     320    
-96    -96    
64     48     
-576   -240   
-128   -160   
272    -560   
-80    400    
-160   256    
944    -128   
64     80     
-656   400    
560    -80    
-64    -128   
272    -256   
528    432    
432    -368   
-352   976    
-240   640    
-80    -144   
512    -48    
-176   144    
-368   -480   
32     -32    
432    -544   
-64    128    
416    896    
-816   672    
208    -112   
208    -1648  
-208   -672   
-624   -144   
752    416    
1360   -16    
-832   -480   
-112   -800   
1056   272    
176    -1312  
-512   496    
-320   752    
256    -48    
-688   224    
80     -32    
-128   -208   
160    -176   
288    -128   
336    -1040  
-304   -624   
16     336    
400    -32    
160    -48    
-336   -560   
-16    -256   
16     208    
-160   240    
-16    -96    
-128   -144   
-80    -80    
352    -48    
-192   -752   
64     -240   
192    -528   
16     96     
80     -720   
48     -64    
-192   -256   
288    0      
-384   -464   
240    -720   
128    432    
96     560    
-480   224    
-112   -416   
-432   16     
32     -64    
240    352    
-176   160    
-304   -48    
496    -1376  
-64    -416   
-128   416    
48     16     
144    -656   
-768   288    
288    -672   
208    -1248  
-288   -1200  
-80    16     
-352   -1024  
-192   1024   
224    256    
384    -384   
-16    32     
-96    -48    
-192   112    
-16    432    
112    320    
-80    320    
80     -272   
112    -64    
-64    -96    
240    -32    
16     -64    
-128   -256   
-32    -64    
144    -48    
-64    -544   
-768   -624   
0      -1008  
464    -384   
224    -1264  
-256   224    
-368   1392   
848    -64    
-208   -400   
-112   688    
32     -48    
-368   -208   
-576   432    
464    176    
-352   112    
-256   64     
208    -144   
48     -128   
32     176    
48     -304   
16     32     
-16    256    
272    192    
0      112    
-80    96     
512    -272   
-736   832    
64     -160   
480    256    
-208   32     
336    352    
-208   672    
-16    -1136  
272    -416   
160    128    
-176   112    
-384   448    
64     400    
-208   208    
208    -480   
-192   320    
-128   64     
336    144    
-32    -384   
-256   16     
-144   -32    
224    208    
48     -128   
-144   80     
-192   128    
464    160    
-16    -32    
-144   -192   
-256   -48    
-80    -224   
1216   -784   
-1264  320    
544    256    
-368   -624   
-1232  320    
1440   192    
-112   368    
-384   -96    
-272   -128   
304    -64    
-224   32     
-32    48     
304    288    
-144   64     
-704   320    
240    -64    
176    -176   
-656   -192   
-272   -96    
224    64     
320    96     
-1936  432    
224    144    
288    288    
-672   -304   
112    192    
32     336    
-448   -16    
80     176    
96     -80    
-176   -96    
-256   -48    
64     144    
-32    -160   
-32    160    
0      -64    
-256   288    
-160   -464   
-304   0      
288    192    
80     32     
-432   -848   
-928   112    
304    352    
-624   -576   
64     -560   
96     -336   
-288   576    
-32    -144   
0      176    
464    -352   
32     -16    
-112   -96    
-160   128    
-288   -352   
16     -464   
288    -80    
-624   -256   
16     32     
352    -16    
-112   160    
-16    16     
-240   112    
-1136  -144   
128    416    
864    112    
-544   240    
-368   64     
1200   144    
-2496  1296   
48     272    
384    -320   
-1472  -448   
1056   -80    
848    -160   
-624   160    
-304   -336   
512    352    
-1056  -128   
160    96     
48     -48    
-208   144    
-96    -160   
160    96     
432    -80    
-496   48     
176    112    
736    832    
-928   304    
272    528    
272    -240   
-816   -240   
928    512    
-528   -272   
-656   240    
800    -256   
-384   -96    
-80    -144   
112    112    
0      16     
32     176    
80     32     
-160   -48    
384    112    
-48    48     
-368   160    
112    224    
336    112    
-208   -16    
-256   96     
80     192    
-336   -16    
-64    208    
528    128    
-704   -192   
224    -160   
512    -256   
-320   128    
96     192    
-320   112    
64     -688   
-656   192    
800    -96    
-624   -144   
-176   64     
368    176    
96     288    
176    272    
-240   144    
-256   240    
176    -16    
208    32     
-128   128    
-48    -48    
-240   96     
352    -128   
-368   -16    
144    -112   
80     -176   
-160   192    
160    192    
-160   112    
-80    -64    
96     128    
336    400    
-128   224    
-112   -144   
224    192    
352    320    
-704   -1936  
-160   64     
848    -192   
-192   144    
464    256    
-592   -32    
-288   368    
112    -304   
528    -208   
-32    384    
-416   224    
16     -160   
160    240    
80     -256   
-400   320    
32     -112   
224    -32    
-208   -16    
96     160    
128    32     
528    1056   
-1632  240    
176    -112   
1376   0      
-624   256    
-16    320    
-144   0      
-16    -80    
-96    -256   
192    208    
-144   -112   
-320   96     
240    16     
-16    96     
-112   320    
80     48     
320    16     
-240   176    
-32    144    
144    -144   
-96    -256   
352    -368   
-240   0      
208    64     
-160   -256   
48     16     
176    304    
-224   48     
-144   -288   
400    -304   
1232   208    
-1856  0      
-32    0      
288    96     
-640   -96    
608    544    
-288   64     
-48    -48    
-224   0      
-96    224    
192    -48    
176    176    
-112   80     
-96    -384   
-96    320    
112    128    
-96    192    
-400   16     
208    112    
64     80     
-832   -192   
1600   -128   
304    -960   
-1840  -272   
1072   144    
-288   -640   
144    -320   
96     160    
-336   -48    
416    80     
32     128    
-80    192    
-16    32     
-112   352    
80     176    
144    48     
-80    640    
208    560    
64     256    
112    96     
80     -48    
64     160    
-192   1488   
960    656    
112    224    
-832   -1408  
512    -160   
-624   80     
64     -192   
336    -16    
224    400    
-144   368    
-160   336    
-304   -400   
128    -320   
-384   400    
-464   -432   
208    -128   
304    -48    
-32    64     
48     -816   
80     272    
-192   352    
-32    96     
-64    -240   
-528   -224   
624    176    
272    576    
-416   64     
464    896    
432    -416   
768    16     
-288   -80    
-416   -64    
480    176    
224    864    
112    1360   
-64    -2480  
-176   448    
224    -288   
-64    16     
288    192    
192    -16    
-432   -544   
-96    -64    
368    720    
368    48     
-256   608    
0      528    
-48    -256   
208    -384   
128    128    
240    272    
-624   -320   
80     16     
576    32     
-240   -784   
-80    -1680  
112    336    
128    432    
-80    -192   
-48    80     
32     144    
16     160    
304    288    
416    -224   
-160   176    
-144   -224   
96     144    
112    0      
48     -176   
-176   576    
224    528    
16     -192   
320    -912   
208    240    
-416   624    
-192   -176   
-48    -1072  
304    80     
272    320    
656    288    
-512   -176   
64     64     
352    -208   
-288   -448   
144    -2160  
-48    -1088  
-352   -160   
-32    496    
192    160    
96     352    
288    96     
-64    688    
-416   624    
192    384    
208    -368   
96     -112   
-32    448    
-240   -176   
192    -384   
128    -160   
192    192    
16     -624   
-80    -1728  
-160   -2096  
272    144    
224    640    
64     -128   
240    -1360  
-1056  400    
464    176    
560    1408   
-912   848    
-608   16     
608    -752   
128    -240   
-96    -1232  
-112   96     
-1488  -32    
64     -16    
208    32     
-176   -256   
-320   -128   
288    -848   
192    -176   
-16    96     
-256   192    
192    -240   
-224   -176   
320    -848   
-320   1152   
448    448    
-32    -288   
64     464    
-160   320    
16     -64    
160    -736   
-144   96     
64     -528   
144    -96    
-112   16     
336    208    
-192   192    
32     240    
384    -656   
144    -624   
-288   -48    
112    64     
-64    -80    
-272   -128   
64     -128   
112    144    
400    -176   
-320   -576   
-128   -48    
208    -1616  
-160   -160   
1344   32     
-2016  208    
-960   224    
1936   208    
-896   -80    
-640   -112   
352    -304   
432    -112   
-976   -48    
288    160    
-16    16     
-128   -48    
224    -32    
288    -384   
-720   -16    
64     -240   
352    304    
576    208    
-336   80     
-16    -112   
272    -144   
-592   -560   
-944   112    
2112   -48    
-672   144    
-400   0      
-32    -112   
32     -48    
-336   -256   
-16    96     
304    -16    
-48    128    
128    32     
-48    -96    
-480   -64    
384    -48    
80     32     
128    -16    
-336   144    
496    -352   
-1568  -160   
-16    624    
496    -144   
-1216  -512   
-656   256    
1056   -704   
-496   -48    
-496   0      
688    112    
128    -128   
-880   48     
-224   160    
560    48     
320    208    
-272   336    
-928   80     
256    -240   
880    -112   
16     0      
-768   64     
-96    -560   
384    -288   
144    0      
-528   32     
-272   208    
816    -576   
-352   -80    
384    -256   
144    48     
-1712  -992   
2784   -1872  
64     -128   
-784   -656   
400    -96    
144    448    
-496   -624   
80     192    
640    160    
48     48     
-848   -32    
320    96     
96     -144   
-80    16     
-400   -48    
160    0      
-384   80     
464    -112   
-320   16     
-832   288    
1104   144    
-1136  -64    
80     48     
-208   -160   
-560   112    
576    -32    
-128   176    
-304   16     
304    64     
208    -192   
-128   -128   
16     -144   
-928   32     
240    224    
-96    208    
-512   -48    
352    -32    
-64    -144   
-240   -48    
176    -80    
64     96     
32     160    
-16    128    
-1088  -112   
-368   80     
-144   -96    
288    304    
48     -32    
-288   -160   
48     -304   
96     -32    
64     400    
16     -16    
-560   224    
400    0      
-48    176    
-288   32     
-16    -160   
-992   -112   
272    160    
192    128    
-128   32     
-128   -192   
192    208    
-64    -224   
-112   0      
-80    48     
96     -208   
-48    -592   
-320   -384   
-16    -336   
0      -32    
128    -144   
288    -32    
-128   240    
-768   224    
208    160    
112    -592   
-16    -336   
-80    -176   
-656   -592   
1584   192    
-336   208    
-928   768    
448    192    
-208   -32    
96     912    
464    304    
-480   -272   
-176   -80    
-528   -16    
320    96     
-352   -160   
-48    0      
128    -32    
352    336    
-144   400    
-48    352    
112    96     
-48    64     
-160   320    
480    560    
-432   -192   
-416   -1168  
400    208    
-256   352    
-64    -64    
32     448    
48     -816   
-224   320    
80     -224   
-64    144    
-16    -112   
-64    -48    
48     0      
-112   240    
0      -80    
-160   96     
-160   -176   
176    192    
-32    224    
-80    -80    
-224   -192   
64     400    
-96    -16    
-224   -256   
32     224    
48     -32    
80     288    
80     160    
-1136  -752   
-352   160    
1472   -400   
-1088  448    
272    0      
288    16     
-976   -112   
48     208    
416    784    
-272   96     
0      272    
-16    -80    
-112   32     
48     -176   
192    0      
-128   160    
-16    320    
80     224    
-176   -336   
80     -240   
336    304    
-2080  -848   
-992   464    
1920   736    
-512   -144   
-304   16     
704    -608   
-64    -176   
-272   -128   
112    -224   
-128   112    
-144   176    
224    464    
240    -16    
-128   -80    
0      224    
-224   -208   
-224   -768   
832    -1232  
-112   -352   
-416   -64    
112    336    
-96    -288   
-16    656    
256    -1168  
-624   -816   
368    960    
752    256    
-464   -16    
96     592    
-96    1008   
-496   -176   
-400   128    
768    96     
-576   -192   
224    752    
464    576    
-304   1168   
784    -128   
-208   -240   
-64    208    
-80    -144   
528    112    
256    16     
-160   -144   
-432   48     
-16    -48    
432    -336   
-288   176    
-624   -864   
1472   -208   
1616   608    
-1376  1184   
-544   832    
880    128    
320    880    
-336   576    
-16    224    
192    -400   
144    -224   
160    -16    
128    -512   
-352   384    
240    608    
112    464    
-256   64     
-96    80     
80     16     
64     480    
16     224    
64     16     
-192   -240   
64     608    
688    -176   
-800   240    
336    144    
-144   368    
192    1696   
176    1904   
-128   -208   
240    -224   
-96    -336   
48     368    
96     416    
-32    -64    
160    -544   
448    -480   
32     192    
-336   80     
96     -96    
176    608    
176    -224   
-416   96     
304    656    
-192   128    
224    -464   
480    96     
-384   0      
0      -48    
16     -64    
-112   192    
640    -64    
416    1584   
-1808  -368   
-224   640    
1264   944    
-400   528    
-192   528    
288    848    
160    496    
-160   272    
160    448    
-128   304    
-208   -80    
128    -112   
176    -48    
-400   -112   
128    0      
16     -672   
-208   -432   
64     -16    
32     -1600  
256    -80    
-32    224    
-112   432    
272    976    
432    496    
-288   -528   
-256   224    
-64    -400   
816    -1776  
-704   544    
112    -224   
-160   400    
32     -1296  
-32    -1120  
128    -1440  
80     -336   
48     -336   
192    528    
32     176    
-176   272    
-96    -336   
160    -256   
96     368    
112    80     
-320   -16    
32     -240   
112    144    
704    1264   
-1200  704    
416    -256   
256    -256   
-624   -592   
352    -64    
0      -544   
-16    192    
-176   80     
464    0      
-224   -48    
-112   96     
48     320    
192    -32    
-144   -208   
-160   16     
96     -48    
144    496    
-128   176    
64     -256   
-192   112    
16     -464   
128    48     
16     192    
128    128    
64     80     
-96    96     
32     32     
-16    -400   
-384   -224   
2512   1168   
-368   -752   
-1312  -576   
1056   16     
-576   -160   
-368   272    
144    -256   
192    128    
-48    -192   
-16    128    
160    -48    
32     -64    
192    176    
-80    112    
-80    192    
176    -48    
-96    16     
-16    48     
128    64     
80     32     
512    912    
-1152  -960   
-1408  -144   
1584   416    
752    -1232  
-720   464    
272    176    
-128   -656   
-16    -384   
-96    -1520  
288    -208   
64     128    
-144   0      
304    208    
-112   -288   
-272   -1520  
144    32     
736    -976   
32     256    
-944   -176   
320    -496   
1152   32     
112    -544   
-656   144    
48     -544   
-640   -304   
320    224    
384    -416   
64     464    
464    -224   
16     -16    
368    -400   
192    96     
-416   160    
16     -48    
448    -480   
112    -176   
-112   336    
208    384    
560    -320   
16     16     
-16    -1200  
80     -96    
32     -1408  
96     48     
-32    32     
-48    144    
-48    -128   
592    928    
-2256  2656   
528    64     
768    80     
-768   -272   
640    80     
-384   -320   
-464   -336   
960    -528   
96     -96    
0      -816   
-96    32     
48     -80    
-32    0      
-176   -112   
400    64     
-448   64     
-176   112    
128    48     
320    -32    
-2272  -96    
688    -288   
64     16     
16     -96    
624    16     
-160   -144   
-432   176    
352    -1280  
256    240    
-288   16     
-400   -112   
416    96     
224    16     
-240   48     
32     176    
224    32     
48     144    
-352   208    
-16    128    
192    80     
-96    -704   
-256   96     
240    -1936  
-64    64     
96     48     
400    -96    
-368   -112   
96     -528   
-16    -176   
-48    -272   
16     -288   
32     64     
-352   656    
608    -352   
-320   -640   
-128   -1552  
-560   -1040  
352    -784   
144    160    
-336   -128   
288    320    
-224   256    
-288   624    
720    304    
-368   432    
-400   336    
176    -432   
160    -224   
-272   -112   
-16    576    
192    -128   
16     -160   
-160   -400   
-128   32     
-128   64     
80     112    
-128   272    
-48    -384   
224    -64    
-80    48     
0      48     
912    1648   
-1712  544    
304    -352   
1040   384    
-528   -544   
-16    144    
128    -176   
144    160    
-288   -128   
16     -208   
0      -160   
160    112    
64     32     
-16    -304   
-144   -48    
144    -112   
160    80     
-96    -480   
48     -80    
-304   -352   
624    416    
-1584  -128   
80     -336   
416    560    
-528   -64    
-288   -320   
-480   -880   
-144   -816   
160    224    
64     224    
80     -80    
-224   128    
-96    -304   
96     -16    
-192   -64    
-32    -48    
-96    -16    
-48    208    
160    0      
-448   -32    
-224   32     
-448   32     
-16    192    
96     -128   
-96    64     
-16    -320   
160    96     
16     -80    
80     176    
-416   -384   
688    304    
1328   448    
-1136  -368   
256    -1216  
384    -336   
144    32     
-16    16     
-800   -896   
-368   640    
112    -48    
192    -208   
0      160    
-16    -32    
-144   -32    
96     -288   
16     -224   
-80    144    
-416   -96    
64     96     
304    16     
-944   80     
1664   -192   
-16    -32    
-656   80     
-448   -528   
-352   -288   
-576   -1120  
-80    -1664  
272    -1168  
-208   -784   
32     -256   
-64    400    
128    896    
208    464    
-1008  400    
640    192    
208    1072   
-432   336    
-80    272    
176    80     
-288   160    
112    784    
-272   -336   
512    -1344  
-432   -192   
-112   1440   
880    1056   
-96    544    
-352   352    
640    464    
32     -160   
-480   304    
64     -208   
512    544    
96     1248   
-576   144    
-208   -224   
272    -672   
624    -256   
-128   -16    
16     128    
-80    -128   
352    -400   
-336   -240   
-80    352    
528    80     
208    624    
-80    544    
-400   224    
1456   1264   
-1872  96     
368    -160   
896    -16    
-272   80     
-912   -32    
288    -64    
400    608    
-304   -16    
-288   -64    
16     800    
128    112    
48     -432   
16     128    
-288   -32    
-80    208    
416    -64    
304    80     
-544   -208   
-496   -464   
352    -176   
64     -32    
208    272    
992    1200   
-1472  464    
448    688    
432    -112   
-80    160    
-688   128    
96     -224   
496    -128   
-400   48     
-176   48     
272    32     
416    48     
-192   144    
-368   160    
240    112    
112    192    
-112   -400   
-448   160    
176    112    
-16    -368   
-240   -288   
112    -336   
112    160    
-288   80     
80     288    
320    240    
-192   -16    
-80    -64    
448    976    
-816   800    
-304   64     
608    -368   
80     -864   
-640   -224   
128    816    
768    448    
112    -288   
-304   80     
-16    16     
-128   -48    
-112   -16    
304    0      
-176   -128   
-208   128    
416    432    
-16    -160   
-208   -304   
-64    128    
160    32     
-272   -128   
304    224    
-352   -112   
256    176    
208    208    
-528   208    
176    48     
256    -16    
240    -2368  
-2256  1408   
1520   -16    
624    336    
-176   256    
-912   480    
320    192    
464    608    
-784   640    
304    -272   
-160   256    
-64    32     
96     -80    
176    -336   
-96    176    
-192   -304   
64     160    
48     240    
-64    -16    
272    128    
272    -816   
-1600  624    
752    -32    
352    96     
-688   -64    
224    -464   
-176   304    
16     272    
144    432    
448    144    
-240   -240   
-336   160    
352    -128   
-176   48     
320    -112   
-96    176    
0      0      
112    320    
176    0      
-352   0      
320    -112   
112    192    
-48    128    
-96    -160   
-240   -32    
192    -48    
-144   272    
272    96     
-16    144    
160    -1520  
-1312  -672   
592    -80    
0      32     
-624   -32    
-128   -16    
464    -160   
-240   320    
48     -64    
208    176    
80     48     
-64    48     
144    112    
96     0      
-432   96     
288    16     
0      -48    
-16    32     
240    -224   
-272   128    
48     192    
-272   0      
1680   -320   
-400   -496   
-208   496    
688    -400   
-560   208    
272    -224   
368    224    
-256   -48    
240    0      
96     16     
-80    112    
-144   48     
-128   -128   
544    80     
-128   -144   
-320   96     
208    -400   
112    128    
-80    -976   
512    896    
-400   -336   
-320   512    
608    -176   
-368   96     
-304   -176   
-272   -256   
880    256    
-48    48     
-480   64     
432    -80    
-112   80     
-256   -96    
224    16     
144    176    
-112   64     
-64    -208   
-848   368    
272    16     
160    144    
-192   16     
48     64     
-112   64     
96     -112   
80     -80    
80     -128   
320    176    
-416   -144   
800    3424   
1744   -560   
-448   720    
48     -928   
-48    -32    
208    192    
496    144    
-304   64     
64     -32    
-128   0      
224    -32    
128    -16    
-32    96     
272    144    
-256   -160   
32     96     
384    -304   
-176   0      
-336   176    
656    1024   
272    -240   
-496   -880   
16     -48    
-112   -32    
-656   -64    
1056   144    
160    -64    
-432   48     
80     560    
480    -384   
-144   -320   
-528   -208   
576    160    
352    -400   
-416   192    
-48    -368   
192    -656   
64     96     
176    -64    
-112   -1136  
-128   -48    
336    -2208  
176    -96    
-112   288    
-112   -80    
-48    368    
480    128    
-80    288    
-224   0      
384    112    
352    784    
496    1120   
-1216  272    
-736   -256   
608    16     
32     -480   
-464   -528   
96     -576   
80     -32    
368    1040   
32     -432   
-64    -752   
-48    -480   
64     48     
-80    -128   
96     128    
-144   -224   
16     144    
-336   48     
-48    16     
-32    -80    
208    -304   
-32    80     
-64    -16    
176    -336   
256    -1872  
-352   -464   
256    -1088  
400    112    
16     -240   
-544   0      
-176   -1040  
144    -592   
-128   176    
-288   -304   
-128   64     
160    -32    
80     -48    
112    -144   
64     80     
16     -1328  
208    -16    
-80    -64    
-256   96     
96     16     
272    -80    
-160   -208   
-112   -48    
-96    224    
64     32     
-400   -608   
976    -880   
-96    576    
0      -464   
-336   416    
352    -480   
32     48     
96     816    
320    288    
-512   -272   
112    -272   
528    32     
16     32     
-192   16     
64     -32    
128    64     
32     48     
16     160    
64     80     
-16    -64    
272    -224   
-32    64     
16     -720   
-48    -48    
-96    464    
288    64     
-112   16     
-64    -160   
-192   -64    
256    -400   
-1712  400    
2000   -96    
-464   -320   
-784   128    
528    768    
640    -704   
-224   512    
-256   -272   
-64    -1152  
368    672    
48     -80    
-384   288    
-64    -128   
256    304    
352    -320   
-128   112    
-288   -304   
-80    384    
320    -176   
64     160    
-608   -880   
-576   352    
2320   -464   
-800   688    
-272   1456   
1504   1008   
-192   512    
-976   1312   
848    752    
336    560    
-288   416    
96     -112   
-64    -560   
-208   -384   
192    176    
-256   -96    
304    208    
-416   208    
-16    96     
176    -176   
48     -144   
16     -160   
160    -48    
432    608    
-1424  1088   
-192   -160   
-128   -320   
192    -672   
336    272    
-208   32     
-720   -32    
208    -352   
-912   -512   
-128   -432   
-432   288    
992    1392   
752    432    
-400   240    
208    -112   
240    -16    
416    64     
96     368    
-624   192    
-48    -208   
480    -48    
-96    -336   
-192   144    
96     848    
-224   992    
832    -1008  
-2096  -848   
864    96     
1360   -32    
-816   -416   
-192   -736   
112    80     
592    496    
-32    -256   
-384   -272   
-32    -192   
224    16     
128    -16    
304    128    
-304   -224   
-336   272    
576    -256   
-240   80     
-672   -784   
-304   480    
192    640    
-112   224    
112    -144   
0      48     
-688   -208   
416    48     
-624   -368   
304    288    
-64    784    
32     576    
48     240    
-240   496    
48     320    
192    160    
-160   96     
208    48     
-608   0      
-432   256    
400    336    
-256   16     
-224   144    
368    160    
-400   -144   
240    0      
208    160    
-240   48     
-464   -16    
368    128    
144    0      
-144   160    
-416   80     
128    400    
-80    48     
-528   80     
-256   448    
192    224    
-320   160    
96     -48    
-48    544    
192    96     
-32    128    
-112   384    
208    -48    
-112   16     
-48    -32    
-208   128    
224    -272   
0      -144   
-128   304    
64     -128   
-112   -128   
48     0      
160    -80    
112    16     
-176   48     
96     128    
-176   112    
144    64     
-32    -64    
-128   48     
-16    -2144  
-1920  1408   
1504   -80    
48     -736   
-592   -128   
160    -32    
128    480    
-384   208    
112    -320   
64     368    
-304   0      
-256   32     
480    112    
-224   -448   
-128   160    
112    160    
112    416    
-304   -128   
16     16     
-112   -48    
544    224    
-1552  544    
464    240    
512    -256   
-1040  112    
464    48     
160    -32    
-384   112    
-128   64     
352    80     
-560   -16    
0      16     
272    64     
0      48     
0      80     
16     -240   
-176   -256   
16     -224   
-176   336    
272    -16    
-144   192    
144    -176   
-208   64     
160    -16    
-368   -80    
272    160    
0      80     
-288   32     
336    48     
736    -704   
-1360  -32    
-64    -240   
560    96     
-112   -32    
-704   -80    
192    144    
80     -208   
48     160    
128    -144   
48     32     
-208   -112   
160    176    
160    144    
-544   -16    
64     224    
128    64     
112    64     
-176   176    
-144   -64    
16     112    
368    -64    
-1584  256    
128    272    
320    -208   
-240   -112   
448    144    
-304   -96    
128    528    
688    0      
-272   -16    
-192   128    
96     112    
112    64     
64     208    
-16    -64    
-272   144    
96     144    
64     -336   
128    16     
48     256    
-64    176    
384    64     
-224   -128   
336    80     
176    176    
-240   352    
-560   304    
480    -144   
64     64     
-320   48     
304    80     
240    -80    
-320   64     
624    128    
176    288    
-544   -48    
-256   -144   
704    192    
-80    -16    
-624   112    
608    96     
176    32     
-128   96     
-288   208    
144    304    
-96    160    
-256   64     
-224   -272   
704    -512   
80     -1648  
-2768  -1312  
1472   -144   
1504   416    
-944   -16    
-256   448    
144    224    
336    144    
192    -16    
-320   192    
-16    -80    
80     160    
352    64     
-144   16     
-480   144    
48     96     
320    32     
-80    -208   
-80    -192   
-448   -1088  
464    -192   
48     -96    
-384   384    
992    320    
-400   304    
0      -208   
256    416    
-80    224    
-368   496    
64     -240   
528    160    
-80    496    
-400   -416   
-64    -208   
320    -224   
16     80     
352    544    
-224   -304   
-256   -480   
272    -256   
48     96     
-112   96     
-128   -208   
608    624    
-176   720    
-208   768    
400    -704   
-704   -1328  
496    928    
256    -16    
64     -240   
-576   -512   
864    -656   
-240   64     
144    352    
432    608    
-320   192    
224    144    
48     128    
-144   80     
-112   -160   
48     144    
224    208    
112    208    
48     -112   
144    448    
-160   -560   
240    208    
304    48     
-384   256    
176    -80    
-32    192    
128    -48    
96     16     
-208   16     
-64    -32    
80     0      
176    -480   
272    192    
-224   -336   
-80    144    
-64    592    
1216   -160   
-832   -1040  
80     16     
336    -144   
288    672    
-480   576    
112    112    
256    -112   
80     64     
0      96     
144    -128   
-240   -96    
592    -480   
256    320    
-16    288    
-176   352    
-16    -64    
32     0      
816    368    
-944   576    
192    -176   
576    32     
-176   -112   
-144   -80    
-176   -96    
480    -768   
320    176    
-96    192    
-80    0      
-272   64     
288    80     
208    -144   
-352   96     
-32    -48    
416    384    
0      496    
112    -448   
112    -1472  
-48    -176   
96     -784   
48     -288   
-128   16     
128    48     
-48    -128   
32     -192   
48     -192   
256    -480   
-432   -672   
1488   -1632  
-128   -992   
-48    -128   
-704   -336   
-336   -240   
112    48     
368    -768   
-672   1152   
80     -432   
304    -576   
336    -336   
352    -48    
-512   176    
-32    224    
432    -240   
0      -80    
-96    144    
-144   -240   
-16    -384   
176    -112   
-400   304    
2624   -512   
-960   320    
-416   240    
976    -768   
496    -864   
-848   -1584  
224    -528   
368    112    
-464   48     
144    -96    
448    384    
-224   16     
-624   16     
672    -176   
-272   -112   
-192   -240   
-272   112    
176    -112   
64     -112   
208    -512   
480    160    
-272   -208   
-624   -464   
-368   416    
272    -16    
-112   -160   
-48    0      
-448   -1120  
-512   -128   
-528   48     
32     -32    
192    80     
144    -288   
208    -64    
-384   -1232  
-496   16     
624    112    
-176   16     
-320   -160   
480    -48    
192    -272   
304    -128   
-272   -112   
336    -32    
640    16     
-48    -144   
-224   576    
0      -864   
-240   2512   
912    720    
-864   -240   
-656   -816   
960    112    
544    16     
-1152  -64    
-224   64     
528    80     
320    176    
-496   -160   
-304   160    
272    -304   
-768   32     
240    -176   
96     128    
32     -336   
0      192    
-320   -1376  
288    416    
16     -48    
-112   -64    
112    0      
-400   -32    
-352   -448   
-32    -192   
-112   -224   
-80    -176   
16     64     
-16    -256   
128    176    
112    48     
-144   256    
-32    32     
-192   -16    
208    272    
-144   800    
-752   480    
384    304    
-80    -208   
-304   -48    
368    -48    
-240   -80    
144    80     
160    -16    
-128   -48    
-400   -272   
176    -160   
384    -64    
-528   -80    
-192   48     
576    256    
480    96     
-560   -672   
-112   -32    
592    32     
-512   320    
656    128    
-176   160    
16     -192   
-224   64     
32     -128   
80     -96    
-384   16     
-656   -16    
-128   288    
144    -32    
96     -48    
352    80     
-208   -96    
-416   48     
112    128    
256    -144   
-64    160    
-1248  -64    
64     256    
96     -80    
-64    256    
-48    -160   
-512   0      
432    1872   
2688   336    
-1280  400    
-528   -368   
64     -64    
-144   -48    
-208   64     
-448   -400   
96     -80    
256    208    
-16    64     
-192   -112   
208    64     
0      288    
288    -128   
-480   96     
96     112    
32     -64    
-592   192    
-128   0      
-512   960    
1440   -416   
-960   -128   
-352   -64    
896    -208   
-16    224    
-192   0      
-496   320    
240    -128   
192    0      
-64    32     
64     160    
-144   64     
-272   -304   
224    0      
48     -96    
-576   176    
48     -128   
-256   16     
128    -256   
48     128    
-304   0      
240    96     
16     -48    
-160   0      
64     96     
-176   48     
144    112    
288    176    
-2176  -960   
688    384    
2224   -352   
-2032  -64    
-64    400    
1248   -16    
-752   -208   
-16    -128   
224    -160   
-240   112    
-112   -80    
32     160    
-160   -32    
-64    336    
432    64     
-240   192    
-128   -192   
32     -32    
-48    -224   
-16    112    
-272   -496   
1056   784    
208    192    
-576   16     
208    32     
-240   176    
176    -48    
496    272    
112    32     
-144   -32    
-272   144    
-16    48     
208    96     
-48    160    
-128   192    
-480   -64    
-32    272    
-720   32     
128    -16    
256    288    
-192   48     
-464   80     
832    -752   
32     336    
-512   32     
656    -128   
240    224    
-384   -80    
-464   16     
320    192    
-32    -112   
-144   -80    
-96    128    
-64    112    
64     -416   
0      64     
880    -112   
-416   64     
528    352    
-432   224    
-256   -48    
-48    -16    
160    144    
-64    -144   
-16    384    
-64    -288   
-336   128    
352    160    
352    -336   
-1136  -1472  
1632   -2192  
256    480    
-1072  544    
528    288    
512    16     
16     1344   
-592   1552   
16     -16    
240    -368   
-160   80     
48     160    
-112   -96    
432    16     
48     -272   
-288   -128   
-240   288    
-48    352    
-16    432    
480    704    
-272   800    
-64    448    
-64    -304   
48     688    
-336   272    
-96    -240   
224    -272   
208    -160   
-176   -320   
128    864    
-48    -16    
32     -208   
384    96     
-144   544    
0      112    
-336   -16    
416    480    
112    960    
128    400    
-192   144    
0      320    
192    224    
64     128    
288    1168   
-80    1520   
-16    1008   
96     -624   
32     -640   
-16    -656   
64     -64    
224    -416   
-352   -576   
96     -528   
240    -752   
-256   -1232  
64     384    
-16    -160   
0      -368   
32     1072   
144    128    
-256   144    
144    272    
144    -64    
-16    -48    
128    -48    
96     -176   
176    -224   
80     -640   
496    -240   
-208   336    
176    -96    
-352   160    
400    -16    
-48    176    
-160   16     
48     64     
0      -32    
128    -64    
352    176    
-128   64     
-272   16     
-304   976    
816    -384   
-848   48     
128    -80    
240    -32    
-128   416    
160    -16    
-16    96     
16     64     
208    80     
240    176    
-224   256    
64     -48    
240    224    
112    160    
-128   512    
112    480    
32     304    
-144   -160   
736    -1904  
-832   496    
48     -112   
576    -288   
176    -480   
-80    144    
-16    688    
16     880    
-112   192    
272    -48    
-176   -160   
-384   288    
224    112    
48     -336   
-48    -112   
48     -928   
192    256    
-400   -336   
80     128    
192    768    
-128   32     
-288   -368   
-288   176    
96     -32    
400    528    
-272   192    
-400   -368   
48     -144   
544    -304   
-208   -1088  
1728   -816   
-768   768    
-624   -2832  
1104   912    
-256   336    
-800   288    
1440   784    
-48    208    
-448   240    
176    160    
240    224    
224    144    
0      -144   
-480   -272   
176    -176   
208    48     
48     256    
-224   -544   
-16    128    
112    112    
-624   16     
2176   -32    
-1024  -480   
-1072  -144   
1120   272    
-352   -304   
-32    -288   
128    304    
48     -160   
288    160    
192    -208   
-64    64     
-224   -1408  
-144   48     
656    -416   
-80    32     
-528   96     
576    48     
96     96     
-192   192    
288    576    
-368   272    
-192   -96    
208    -176   
160    560    
-48    112    
0      336    
-480   -176   
-32    -112   
496    -336   
80     -48    
-208   304    
144    64     
64     192    
224    144    
-432   32     
128    -256   
128    -416   
-112   -496   
192    224    
0      80     
128    128    
-128   16     
-304   -160   
800    -496   
656    -144   
-752   32     
96     -32    
400    1632   
992    3200   
368    -2176  
-880   -640   
96     -336   
944    -176   
-176   -64    
-368   -16    
432    160    
-64    16     
-112   384    
96     -96    
-272   -1648  
272    -144   
48     -368   
-160   -112   
-1216  16     
416    -560   
-16    -16    
-96    -320   
-1024  -32    
1104   -528   
-304   -64    
384    48     
544    -32    
-336   -1040  
-416   176    
944    496    
-368   -32    
-320   512    
480    -624   
-320   176    
-96    -144   
112    0      
256    -608   
-656   -224   
448    -288   
304    64     
-272   -176   
-208   16     
160    64     
16     16     
272    -112   
-320   272    
48     224    
-112   240    
-192   0      
176    -304   
-32    -208   
-144   -112   
256    -112   
-16    -176   
-96    384    
1280   -144   
-688   -144   
144    -608   
416    160    
-272   256    
-144   464    
256    448    
0      112    
-304   144    
128    -112   
-592   32     
-16    224    
256    -128   
224    -288   
-912   512    
224    -1264  
512    -848   
-352   288    
0      176    
-160   -64    
160    0      
272    208    
-32    -80    
-544   80     
272    -464   
112    -192   
32     256    
-16    128    
-1472  0      
2064   -1232  
16     -848   
-928   -480   
656    -384   
176    80     
-272   -288   
-656   544    
480    -336   
160    -288   
-144   48     
-112   -176   
-96    144    
-32    -528   
-128   -496   
-144   208    
-144   112    
32     -816   
80     -384   
-32    -400   
-320   -1104  
-144   320    
1088   128    
-864   224    
-80    176    
368    0      
-32    48     
-672   -256   
352    -352   
272    -144   
-48    -16    
-96    144    
16     80     
0      0      
32     -112   
192    16     
-592   -288   
112    16     
176    96     
80     -80    
-112   -16    
-48    -208   
16     48     
192    -192   
-336   -80    
32     -32    
288    176    
0      -288   
224    96     
256    96     
-2048  944    
256    400    
1184   -96    
-944   32     
272    -128   
-304   -64    
432    96     
-208   -208   
-320   -16    
288    0      
368    64     
-480   128    
-224   -272   
288    64     
-224   -288   
-416   -32    
240    32     
-672   -112   
-160   -48    
176    96     
-720   -128   
1776   -416   
-448   -1152  
-1936  -336   
896    192    
-1024  -768   
-256   -160   
-336   -16    
48     224    
560    80     
-192   -16    
-320   64     
-416   0      
-80    -16    
-432   64     
256    16     
-432   256    
336    240    
128    64     
-144   -64    
-240   -208   
208    -880   
-240   400    
480    -96    
-720   -80    
720    1248   
1008   112    
-640   -384   
-64    160    
224    -16    
80     -64    
-1120  -336   
-128   176    
-512   256    
-288   48     
768    -672   
-576   512    
-320   288    
32     -144   
304    -80    
-96    48     
-400   16     
384    32     
464    688    
-480   336    
-672   320    
608    96     
64     176    
-320   32     
1232   1856   
-2000  560    
-16    416    
1392   -1248  
-368   -528   
-992   -880   
-224   -464   
1040   832    
-368   448    
-336   496    
-96    -640   
496    272    
-32    0      
-112   112    
-176   -240   
-112   -496   
-16    -288   
-80    480    
80     112    
96     160    
-16    16     
-112   80     
-128   160    
-192   -144   
192    496    
160    864    
-80    192    
-432   -560   
256    208    
-80    640    
-480   -592   
-272   -48    
704    320    
-240   192    
-272   -656   
320    336    
144    336    
-432   -208   
-496   -768   
480    288    
16     352    
-32    -96    
-320   112    
48     624    
-144   -528   
-16    -224   
-64    368    
-176   -368   
48     176    
176    -240   
-192   -432   
272    -384   
-656   -768   
48     -1312  
-112   -704   
-176   -304   
0      -768   
-160   832    
272    368    
-160   160    
48     112    
-96    -64    
-304   80     
-16    48     
112    240    
64     656    
-480   272    
-128   -992   
-80    -192   
112    416    
128    -112   
-160   80     
0      0      
144    160    
208    -416   
-176   -320   
-240   -880   
-688   -1040  
224    -96    
160    256    
688    576    
-944   1280   
-80    208    
400    -256   
128    -768   
144    -336   
128    -224   
-144   -560   
32     -80    
80     -144   
-48    224    
16     -32    
-160   -240   
-48    224    
-32    160    
224    48     
160    -128   
-336   48     
-16    112    
352    -16    
-352   -80    
320    -352   
32     -656   
-400   -544   
128    -512   
64     0      
64     432    
80     -160   
80     192    
144    -96    
0      80     
-64    -112   
-48    304    
384    112    
-208   304    
-144   -16    
96     -48    
-176   -192   
256    432    
32     496    
-352   416    
16     448    
368    96     
48     384    
-48    -96    
-96    32     
384    128    
-176   64     
496    400    
256    2272   
464    -800   
-2480  224    
48     -144   
1392   96     
-1008  -416   
-544   128    
544    768    
576    416    
-352   176    
16     96     
336    64     
-16    0      
-224   144    
368    80     
-272   192    
32     -64    
288    240    
-304   -96    
-80    176    
64     80     
32     256    
1952   -64    
-1312  -64    
384    -112   
-16    160    
192    -32    
-32    112    
-160   160    
400    -48    
-112   192    
-32    48     
192    80     
-352   16     
288    48     
-768   160    
368    -112   
-32    -240   
-32    -80    
-80    240    
-208   96     
576    528    
-1072  -48    
-368   96     
480    304    
-496   64     
-304   -48    
736    224    
288    -16    
-736   -48    
-96    96     
624    -80    
-80    96     
-208   112    
96     176    
-512   -576   
144    -816   
432    -192   
-416   464    
-304   176    
-96    240    
240    -32    
368    64     
-320   -112   
-32    128    
336    -160   
-352   -352   
368    80     
-48    -832   
-496   -176   
2432   -2336  
-80    976    
-16    336    
-560   -224   
416    -128   
256    240    
-304   -192   
48     -96    
128    96     
64     -272   
-128   512    
-32    -496   
-16    336    
32     -704   
160    288    
-304   80     
64     176    
80     -32    
-160   640    
688    -16    
-752   352    
304    80     
416    32     
-416   -48    
160    -80    
576    160    
-336   80     
320    96     
-48    0      
352    -32    
-368   -624   
96     -16    
-224   48     
128    128    
16     208    
32     160    
128    -96    
-144   -160   
32     192    
128    -80    
128    160    
-96    -128   
-16    32     
-32    -1024  
-32    128    
-224   -1168  
32     -16    
304    -240   
-112   0      
-160   -16    
-112   -368   
688    80     
80     96     
-352   48     
-800   -240   
368    16     
48     -16    
192    96     
-64    -544   
-240   48     
352    0      
80     0      
-80    144    
-256   224    
272    16     
64     -112   
-240   144    
-16    -496   
160    -176   
48     -128   
-224   336    
288    240    
176    96     
-192   -96    
-16    496    
-16    128    
80     -272   
48     -80    
-32    240    
-272   -368   
1232   -1952  
-800   688    
256    -1504  
-288   304    
256    -128   
96     -288   
480    -1376  
-272   -96    
-96    240    
16     432    
336    -160   
-32    -1488  
-128   176    
368    -80    
144    688    
-432   -16    
112    160    
144    -16    
-112   -176   
80     224    
464    1584   
480    -128   
-928   848    
720    -1088  
-240   -1280  
0      0      
208    -368   
-64    176    
-64    -240   
-16    -144   
-608   -784   
464    -672   
-64    96     
-64    96     
240    80     
-80    -528   
0      -512   
0      -1872  
-80    384    
176    -16    
-16    16     
-192   0      
80     240    
112    -80    
-48    -416   
-160   -112   
0      32     
-128   -80    
0      -80    
-752   1392   
1936   -80    
-624   -16    
-208   -992   
1024   -224   
-384   144    
-304   -80    
96     -192   
0      -320   
-144   -560   
-176   -336   
208    -128   
-384   -256   
0      -288   
240    -432   
-224   -176   
32     288    
80     432    
96     144    
144    192    
352    928    
-304   -736   
-1936  256    
1872   -480   
-32    -240   
-1184  272    
-144   960    
1248   528    
-160   256    
-496   64     
-320   208    
288    -16    
128    128    
-192   160    
-80    448    
-128   -752   
432    736    
-464   736    
-368   512    
352    240    
-64    -32    
-224   -416   
-48    640    
176    720    
-912   -32    
688    -400   
432    -128   
-304   -192   
16     288    
80     112    
-176   -464   
144    -320   
-80    -640   
1024   -448   
64     272    
-496   48     
-128   -672   
-592   -64    
704    -720   
400    -112   
-512   304    
176    16     
-64    -80    
-336   -112   
432    -320   
256    -160   
48     -64    
96     160    
-16    -144   
-768   -1536  
1472   -2080  
736    272    
-1184  496    
-48    48     
592    -496   
608    672    
-272   448    
-720   -1664  
160    192    
496    432    
192    -96    
-48    -240   
-512   -64    
352    304    
144    -96    
-192   -160   
496    -368   
-128   -208   
-96    272    
144    80     
-144   -64    
-112   -160   
560    336    
-48    304    
-192   208    
176    -32    
240    160    
-416   752    
-368   -480   
32     128    
384    112    
-128   224    
-288   48     
208    -192   
304    224    
-336   800    
-640   464    
384    1328   
-480   1408   
112    688    
-288   -304   
112    -416   
-224   528    
336    352    
-128   64     
-704   -16    
320    1360   
576    -656   
-96    -640   
-672   -160   
-224   480    
1440   -688   
-432   -80    
-832   -1088  
320    -176   
416    -880   
-32    640    
-176   704    
-80    -848   
-224   -256   
32     560    
224    368    
-672   -224   
-16    -400   
352    80     
-144   256    
-272   -224   
288    -816   
-16    -512   
-304   384    
224    48     
-80    -64    
-48    -96    
-32    -432   
-32    -176   
64     -528   
-304   320    
-176   336    
-48    16     
400    2016   
-1744  736    
0      -672   
1168   480    
-288   320    
-624   624    
336    496    
256    -96    
-368   224    
16     -352   
-16    -144   
-176   -144   
128    160    
-48    -80    
-272   -64    
-176   240    
528    224    
80     112    
-192   272    
16     144    
-32    -656   
720    -1168  
-656   944    
0      16     
48     -512   
32     688    
64     -16    
32     -656   
-144   -32    
32     32     
32     144    
-192   128    
-1520  -96    
160    144    
-48    -16    
192    304    
192    176    
-80    -80    
-208   80     
224    32     
-64    -16    
-112   192    
288    32     
-256   208    
480    112    
-224   -16    
-96    64     
-400   64     
384    -112   
-816   -1216  
1424   544    
-448   -704   
-1168  240    
1024   32     
-432   -432   
-560   96     
416    -96    
128    -32    
-336   -32    
144    144    
-208   -80    
96     160    
-320   -80    
240    256    
208    96     
-384   -112   
384    128    
176    0      
-240   32     
48     48     
64     -464   
-1456  752    
848    0      
-352   -112   
-192   -208   
576    224    
192    112    
-1056  -320   
-64    0      
368    48     
320    80     
-208   112    
-240   32     
128    48     
-32    96     
16     -112   
112    0      
176    640    
-480   64     
-144   -32    
384    288    
-192   -240   
-48    112    
832    320    
208    528    
-608   608    
304    368    
240    -256   
-64    -48    
-384   -272   
144    176    
496    48     
112    416    
-64    -32    
288    336    
-176   0      
-144   352    
208    16     
272    64     
-64    -208   
160    128    
240    -64    
-256   32     
-192   -32    
384    160    
528    -112   
-16    112    
256    176    
-912   -2304  
480    -240   
1392   -288   
-688   944    
0      192    
-64    -48    
256    224    
224    -112   
-192   80     
192    -64    
48     160    
-32    48     
64     96     
432    16     
-544   96     
64     32     
224    192    
-128   48     
-128   32     
48     -640   
-624   -320   
464    -304   
-160   96     
368    192    
416    -96    
-224   96     
32     112    
336    352    
-544   -80    
240    352    
144    -32    
80     192    
-112   240    
-272   32     
368    304    
80     208    
-128   352    
-368   -176   
192    64     
-64    112    
-208   -96    
-176   32     
448    176    
-288   -32    
112    0      
-64    0      
0      64     
-208   112    
240    0      
128    -336   
-528   -96    
-96    -464   
800    -368   
-48    -80    
16     -144   
224    160    
-400   144    
240    288    
528    160    
-160   -64    
-416   48     
272    -144   
144    -16    
-224   48     
64     -240   
-48    0      
320    400    
-192   352    
-96    96     
128    432    
112    160    
-176   144    
272    256    
-240   -64    
-48    144    
0      -240   
352    -368   
240    512    
-448   144    
64     176    
208    -48    
-448   -2176  
0      -176   
80     176    
-128   -320   
288    -304   
-272   -368   
-128   352    
-96    -688   
176    -688   
160    48     
-224   32     
48     96     
240    -848   
176    -224   
-352   -3264  
176    240    
96     560    
-176   -64    
-176   -416   
160    96     
-160   -896   
304    -560   
-384   368    
128    576    
336    -320   
-160   -448   
48     240    
160    -192   
176    -48    
0      144    
-80    -304   
80     -144   
320    96     
96     384    
112    144    
64     -112   
-272   128    
-32    352    
0      -192   
64     -176   
48     112    
-16    -80    
-208   -240   
-32    96     
176    -560   
32     32     
-32    -720   
32     112    
-224   448    
1120   1856   
-528   -528   
-1376  -160   
1904   -368   
-720   -64    
-800   -64    
272    192    
544    208    
96     160    
-400   -224   
240    -64    
160    -16    
-64    -624   
-96    320    
-48    -272   
0      112    
48     16     
0      -240   
-48    -144   
-208   -32    
16     -400   
816    960    
1856   -64    
-1744  -624   
-608   -16    
960    384    
144    736    
-144   240    
400    -1152  
-576   -1840  
-32    112    
304    544    
-80    192    
-64    32     
-48    0      
-64    80     
320    -32    
160    272    
-256   -848   
-80    -64    
-32    288    
336    336    
128    -160   
-352   -2624  
448    1216   
1280   -960   
-1392  -1728  
-1024  -688   
128    -784   
-96    -208   
400    -496   
-336   -336   
544    -1312  
-112   -160   
128    1088   
-32    -32    
-416   -1008  
512    -832   
-208   -992   
416    128    
-144   -464   
-128   176    
32     48     
-288   -304   
-80    -848   
-240   -736   
256    368    
128    -112   
-64    192    
176    -400   
544    -1168  
-2064  -64    
-336   -512   
1040   -320   
352    -688   
-992   -944   
-224   -864   
64     144    
-80    -48    
16     176    
-96    -320   
-128   -320   
48     112    
112    240    
0      -576   
64     -432   
224    -128   
-32    384    
112    720    
-16    464    
-32    16     
112    -112   
288    -48    
-464   -608   
176    -848   
32     448    
176    -288   
96     -32    
48     256    
48     1120   
16     448    
-224   -976   
-176   -304   
352    0      
256    64     
-240   272    
-32    288    
176    0      
80     464    
-80    160    
80     48     
32     -80    
432    -368   
-688   -640   
528    -752   
256    -288   
-112   -1440  
-176   -672   
304    176    
-144   240    
-176   -64    
592    -368   
-656   -272   
-656   -352   
592    512    
688    240    
-448   528    
96     928    
304    96     
240    -848   
48     -272   
-272   -704   
32     -368   
-224   80     
368    -32    
-176   64     
16     -416   
-320   -752   
256    -608   
-368   -32    
0      160    
-192   144    
96     160    
80     32     
-336   -272   
576    -752   
80     -576   
-96    -416   
416    -176   
-144   -80    
336    2608   
1552   416    
-1504  0      
80     -128   
416    -128   
576    432    
-208   368    
-96    112    
240    -160   
-80    -192   
224    -144   
96     -80    
-32    128    
-32    -240   
176    208    
-240   -336   
144    32     
32     272    
-128   80     
144    80     
864    160    
-1936  304    
432    -352   
160    32     
-400   -208   
272    176    
48     -448   
-192   -336   
-64    -272   
240    304    
64     80     
-144   144    
-16    112    
0      48     
-224   -48    
32     144    
416    16     
-112   0      
48     16     
-80    -80    
48     -32    
-112   -80    
-352   -32    
16     16     
-64    160    
-48    64     
-128   64     
-272   -48    
96     16     
-784   -1552  
-848   -624   
1888   -272   
-480   64     
528    464    
-288   -304   
-752   -256   
224    -112   
-176   -128   
0      80     
-16    16     
-80    80     
-80    -96    
-144   -144   
-1312  -160   
576    16     
-160   16     
96     16     
-128   -272   
80     144    
-240   -160   
-704   -64    
1520   112    
272    -608   
-1776  64     
1552   48     
-80    -80    
-352   528    
-240   416    
-224   -144   
96     112    
-272   -80    
112    64     
-144   -144   
-96    192    
176    -32    
112    352    
-224   -128   
-176   144    
128    -16    
-368   -16    
-16    -256   
-624   160    
272    -16    
-128   64     
48     -32    
-864   -240   
224    656    
-112   352    
-560   112    
416    -96    
208    -80    
-384   -160   
64     128    
160    16     
-224   128    
176    0      
-160   400    
320    -144   
-208   288    
-176   64     
-208   -96    
48     0      
-160   -16    
176    128    
-464   -400   
128    144    
96     -16    
-80    256    
-304   1344   
2192   -1280  
-464   816    
-688   -80    
48     48     
-80    144    
128    336    
128    288    
32     128    
-1200  -128   
432    224    
416    32     
-304   0      
64     176    
48     -16    
96     144    
160    48     
-112   32     
-240   -160   
656    16     
-32    -304   
-240   32     
-160   128    
-448   -64    
-128   -144   
640    224    
-480   -64    
256    -144   
256    -128   
-192   -144   
48     16     
-128   32     
-80    16     
32     336    
112    -32    
-336   -48    
416    -80    
-384   -336   
176    176    
-192   -16    
0      208    
208    192    
-240   480    
240    368    
-288   -64    
-160   -608   
-208   368    
512    608    
-128   160    
96     352    
16     -224   
-160   -160   
-464   256    
384    416    
-80    -80    
160    144    
-16    560    
208    976    
48     672    
-128   624    
368    368    
64     224    
-160   208    
80     512    
-32    480    
256    -128   
32     448    
-336   64     
-64    -256   
272    -496   
64     240    
-128   160    
-80    48     
112    -16    
-16    -192   
-80    -592   
-224   -192   
64     -544   
-48    -96    
160    272    
-288   -144   
544    800    
192    560    
-784   -1120  
-48    -864   
336    192    
416    -32    
-992   -832   
176    240    
112    -80    
32     16     
176    96     
-48    32     
-208   336    
304    -224   
112    32     
-96    -32    
-368   -208   
192    -272   
32     -80    
-352   -400   
832    -608   
-176   624    
0      -176   
-208   -256   
48     160    
272    96     
144    384    
-144   96     
0      16     
-16    -112   
224    32     
-80    0      
-48    144    
-16    224    
208    128    
-240   352    
-64    -16    
160    256    
-144   -32    
32     32     
80     176    
144    -112   
96     96     
176    48     
-480   208    
320    48     
240    32     
-432   16     
32     64     
-1088  1904   
1728   128    
-144   352    
-192   160    
480    384    
304    192    
-512   -224   
-112   672    
128    -176   
48     -272   
-320   -304   
96     384    
16     112    
-48    -416   
-32    -640   
128    624    
192    288    
-336   288    
240    -1024  
32     640    
64     -944   
-2240  800    
1184   96     
0      1136   
224    720    
32     544    
-336   -2064  
-1088  -1456  
544    -1440  
432    48     
-352   208    
96     768    
-96    544    
-80    624    
80     240    
272    -16    
-528   -368   
-48    -304   
416    176    
0      0      
-64    -112   
144    352    
-208   496    
336    -432   
96     -1248  
288    -2080  
16     -448   
384    -672   
592    160    
-112   -16    
240    608    
224    224    
-512   96     
288    -256   
-144   0      
-384   160    
-32    1920   
928    -112   
-288   -432   
-144   -224   
480    -112   
144    48     
64     -816   
-288   -64    
416    -640   
-128   64     
-272   -272   
-32    -688   
112    160    
864    -592   
-2128  -720   
608    -48    
1552   -192   
-96    -416   
-1472  -464   
432    -1184  
1104   400    
-400   -448   
-592   224    
32     -64    
320    80     
128    208    
-32    48     
-432   -16    
-144   192    
656    96     
96     -384   
112    -1024  
-544   -928   
304    256    
160    16     
-128   320    
720    -704   
-704   -208   
0      368    
224    80     
-32    176    
64     176    
-240   480    
32     944    
208    512    
-16    -192   
416    400    
80     -128   
-272   80     
352    -304   
-48    128    
-240   -192   
160    192    
144    48     
-176   80     
-32    176    
160    -144   
-128   32     
96     -608   
-528   -704   
-48    -480   
480    288    
48     -32    
-432   -288   
704    -624   
624    208    
-752   -32    
128    160    
16     144    
304    -1104  
112    112    
-256   -960   
0      -272   
208    48     
-112   -496   
-192   -272   
80     -592   
112    -112   
128    96     
48     -176   
-96    0      
112    608    
544    -128   
-464   -80    
-48    -704   
128    0      
80     96     
496    352    
-1040  896    
128    -400   
416    -144   
-80    160    
16     160    
-128   1680   
3008   384    
-864   160    
-928   64     
688    -80    
-16    -576   
-288   -240   
96     240    
96     -176   
96     -176   
256    -16    
-160   -288   
-64    -336   
192    -560   
64     32     
240    -256   
-80    -32    
-16    -304   
-208   -64    
128    -112   
-320   -800   
256    0      
944    32     
-640   -272   
-96    336    
-16    -240   
0      -80    
-464   304    
240    -176   
272    128    
208    -656   
-192   -320   
-304   -672   
576    192    
224    272    
-272   -80    
-272   0      
128    -64    
48     -144   
32     80     
-32    48     
96     304    
32     -32    
-224   -128   
656    80     
-256   -496   
-128   160    
224    -592   
-96    336    
-464   1072   
992    848    
-416   48     
-1136  -352   
672    128    
592    -80    
-416   352    
-432   -64    
-960   -80    
0      -176   
80     80     
32     -48    
-144   96     
-160   -352   
640    224    
-240   -16    
-368   64     
400    -80    
80     -48    
48     16     
-128   160    
48     464    
2128   -16    
-1312  64     
-288   96     
1104   112    
-368   48     
-224   272    
928    -480   
-96    128    
-624   -608   
192    80     
352    -96    
-224   144    
-240   -48    
-144   0      
128    32     
48     160    
128    224    
-192   160    
-304   -32    
272    -592   
-1168  192    
112    -272   
416    96     
16     32     
-416   64     
-896   -384   
656    -336   
-48    208    
-128   16     
16     -144   
-256   -32    
-144   64     
112    320    
-1040  -96    
-304   -256   
528    -64    
320    -96    
176    0      
-256   64     
-336   80     
-160   -48    
-32    80     
368    272    
-544   144    
-464   96     
544    16     
-16    -432   
656    1616   
-944   1792   
640    336    
1200   -688   
-912   -128   
-64    96     
240    64     
-112   -16    
-80    -64    
-1072  -160   
624    144    
80     -64    
-304   160    
272    -192   
-272   128    
-272   -176   
288    160    
-32    -176   
48     320    
160    -400   
-384   -352   
-144   -160   
-192   96     
768    160    
-656   -176   
32     256    
-256   16     
-304   96     
240    -576   
-512   -160   
144    224    
112    640    
0      -64    
-48    64     
-112   144    
-160   96     
464    -304   
336    -688   
-416   32     
-176   -240   
192    -160   
-272   -48    
16     144    
-272   96     
-304   -176   
-288   -448   
-64    416    
336    -336   
-160   -400   
-48    352    
80     464    
32     -832   
-560   -160   
432    -928   
-336   -656   
224    -704   
-112   -1056  
-960   -1520  
-32    -1456  
160    336    
128    96     
0      192    
-96    -80    
-192   -48    
368    -320   
-80    224    
-240   560    
-240   336    
80     16     
176    160    
0      32     
-192   -96    
48     -112   
-96    160    
80     576    
-144   -80    
48     -224   
256    -224   
-208   64     
-80    176    
208    -32    
-480   -112   
384    -176   
-512   240    
272    -208   
192    160    
-112   -224   
-48    -96    
-176   160    
32     192    
-16    -16    
16     48     
-96    32     
-208   0      
288    -16    
-64    112    
128    -176   
-48    208    
96     144    
-128   -32    
512    608    
-496   336    
112    -144   
544    -240   
-384   144    
-512   -144   
288    176    
-32    64     
-112   304    
240    16     
-80    32     
-112   -48    
32     112    
-128   80     
32     0      
0      112    
-64    -160   
128    -272   
-80    -368   
-48    256    
-144   112    
-256   48     
64     -48    
384    32     
-32    -240   
-320   -80    
176    160    
-16    -16    
-128   160    
144    496    
-784   1776   
2992   -944   
-992   -80    
-896   -1088  
640    -64    
240    -128   
-848   -1136  
-240   1168   
496    -224   
80     -96    
-96    192    
-48    48     
-192   16     
432    -128   
112    0      
-336   240    
-336   -640   
688    256    
224    480    
-368   416    
-832   -480   
832    -64    
1456   -1168  
-1728  -272   
416    0      
96     240    
-512   -1568  
-752   -1040  
544    -1120  
96     -656   
176    -144   
-144   96     
-400   208    
64     -288   
240    160    
-112   176    
-352   -784   
-80    -400   
208    -16    
336    -624   
-32    -48    
-32    -336   
336    112    
-368   512    
80     -144   
304    1152   
784    448    
-32    384    
96     192    
-96    -48    
512    304    
-16    208    
-176   208    
112    352    
-224   224    
-80    -144   
-144   496    
-448   0      
560    144    
-16    32     
-64    96     
48     -80    
48     800    
480    -96    
-240   -96    
432    16     
32     144    
48     752    
-192   176    
288    -2304  
-1712  -864   
1056   432    
1488   144    
-384   -32    
-944   480    
640    192    
-224   528    
160    144    
-368   272    
64     -800   
64     80     
48     -80    
368    80     
-432   -112   
176    128    
16     -16    
-176   96     
400    -816   
-880   -1376  
96     -368   
240    128    
-64    176    
736    96     
-752   -80    
-80    -368   
336    144    
224    288    
-592   80     
176    -32    
80     128    
128    304    
-80    496    
48     352    
160    160    
0      368    
-448   128    
-128   96     
672    -80    
-160   64     
-448   -384   
224    192    
0      -208   
336    176    
-224   -32    
64     -288   
-32    -240   
-144   -80    
160    592    
304    400    
-288   128    
-240   -656   
-16    -288   
192    -400   
256    -144   
112    -960   
192    -32    
-192   -1872  
0      128    
-64    128    
64     80     
160    208    
-16    176    
48     224    
128    128    
-80    48     
16     272    
416    288    
-192   -608   
-288   96     
304    224    
-272   64     
-32    -288   
256    48     
-208   -336   
80     -96    
288    -240   
-224   432    
128    176    
64     -112   
-128   -2288  
-2128  1648   
1568   336    
416    128    
-512   704    
640    16     
-512   48     
-400   -352   
608    48     
64     -336   
-384   0      
-176   -112   
336    336    
352    -96    
-720   272    
112    64     
512    -320   
-160   512    
32     112    
0      -112   
688    896    
-1632  176    
-64    -224   
1312   32     
-880   -544   
-592   496    
800    -16    
48     -160   
-288   192    
160    -48    
-144   48     
-208   -432   
240    -32    
48     -368   
-48    48     
288    -160   
-432   272    
400    -16    
-448   288    
128    -304   
144    272    
-16    -80    
-160   160    
-48    -144   
-64    208    
496    144    
64     -32    
-224   -32    
32     -64    
1008   416    
-800   592    
80     544    
656    -256   
336    176    
-320   -448   
-224   208    
416    800    
336    -704   
96     368    
112    -768   
-64    -544   
16     -144   
-80    -112   
560    -96    
-400   -480   
48     -16    
0      96     
-384   -16    
320    224    
48     -16    
272    -448   
-1600  -272   
-112   32     
1056   352    
-1008  -96    
-112   -48    
112    112    
48     -64    
-688   16     
416    -288   
128    -96    
-208   16     
0      16     
32     -192   
-256   80     
256    -176   
-128   240    
-144   16     
224    -64    
-192   -64    
-48    -80    
432    368    
1088   -672   
-1360  160    
384    -928   
16     -320   
-256   -688   
512    144    
-272   128    
-288   -16    
432    -16    
400    16     
-224   -48    
-288   -208   
-128   -64    
432    -512   
-656   352    
160    -144   
-128   112    
64     -128   
400    560    
-448   -320   
-320   -48    
320    -1488  
80     -416   
-48    -32    
-80    32     
-256   -400   
704    -1216  
-1168  -2048  
-704   -336   
896    288    
304    80     
-96    352    
128    -128   
-704   -496   
-288   -576   
384    -128   
176    -1888  
0      224    
-48    -80    
32     192    
32     -176   
0      -112   
-160   -112   
-80    -352   
-80    16     
336    -64    
-832   -96    
208    -480   
-272   -320   
288    -432   
128    384    
208    -224   
16     384    
-320   464    
368    -64    
-32    -912   
-112   -336   
-224   272    
96     -144   
-288   -144   
320    320    
-304   176    
-96    -96    
96     160    
-80    32     
-176   -192   
208    176    
-48    144    
-128   112    
-32    192    
160    -192   
368    -1184  
-480   -864   
-96    -288   
-16    544    
160    96     
16     48     
-352   48     
704    432    
608    672    
-672   1152   
272    -1056  
272    -432   
160    -1120  
416    144    
-224   192    
160    96     
64     192    
64     -160   
-224   -128   
352    -864   
544    -240   
-288   480    
176    48     
-128   -224   
-352   224    
64     -176   
-96    80     
-32    16     
-240   96     
192    32     
96     -32    
-256   16     
304    208    
48     224    
-160   80     
16     32     
704    -176   
-1488  448    
-960   -384   
272    144    
304    -352   
-160   16     
144    176    
-240   608    
-48    -208   
-336   -240   
96     144    
-96    320    
-32    256    
-144   96     
80     -112   
48     -192   
-32    160    
-128   128    
96     304    
112    -64    
-864   688    
864    -304   
-1024  -128   
16     -64    
80     176    
48     -64    
-480   -16    
48     208    
16     -96    
-112   48     
32     -240   
320    -32    
-144   -144   
-48    192    
0      -80    
-16    -352   
-112   -496   
160    -720   
112    -128   
16     160    
-192   -112   
48     -96    
176    -80    
-384   -16    
32     32     
64     -112   
-128   -128   
224    -256   
-128   320    
96     -1312  
-2016  -176   
1424   112    
-112   192    
-736   352    
224    64     
-592   288    
-32    720    
400    -192   
-176   -848   
-720   -576   
64     -416   
304    256    
0      -192   
-304   96     
64     32     
176    16     
-400   -112   
80     96     
128    128    
-48    1360   
320    -960   
-2064  112    
1216   -1392  
-1616  1776   
864    -80    
-880   -800   
80     496    
944    64     
-368   32     
-416   96     
288    192    
288    352    
-160   128    
-720   -32    
288    224    
384    64     
-528   128    
-256   -32    
176    672    
496    176    
-240   -32    
-1072  400    
1232   -176   
64     128    
-304   192    
304    -368   
-192   320    
-80    48     
48     -80    
288    -208   
80     208    
-160   -208   
-496   176    
112    -112   
992    32     
160    -416   
816    -416   
-80    -48    
-288   176    
320    -80    
80     96     
-224   144    
320    112    
144    16     
-288   -128   
-48    32     
-112   0      
48     -800   
944    -704   
-1808  480    
-192   -320   
1488   -48    
-176   -224   
-816   64     
-144   -80    
720    496    
-272   -112   
96     -80    
16     -208   
240    128    
-64    -16    
-112   256    
144    -64    
-48    160    
96     32     
64     16     
448    528    
-864   288    
496    432    
256    -48    
-512   -304   
-464   304    
624    16     
-16    -96    
-176   80     
288    -208   
-80    112    
160    128    
-368   -160   
272    192    
160    64     
-288   160    
512    -128   
-304   48     
288    176    
-528   -96    
512    176    
304    64     
-480   64     
0      0      
208    -64    
192    -112   
-240   16     
-16    16     
176    -64    
160    96     
256    352    
-272   192    
-96    192    
-96    -656   
-272   192    
336    -272   
-512   -384   
688    32     
256    -288   
-272   224    
-144   128    
64     208    
48     96     
48     32     
-32    112    
80     -112   
0      -128   
128    352    
-240   464    
176    96     
320    -496   
-304   240    
240    0      
0      208    
-336   224    
160    16     
304    96     
-256   -112   
-368   -256   
432    -240   
112    304    
-192   112    
-672   -1744  
-368   800    
1744   -176   
-432   304    
112    128    
400    320    
-1104  992    
176    -96    
80     -608   
-16    432    
48     304    
-208   -2480  
-64    448    
272    32     
64     -208   
-80    -48    
-64    256    
96     224    
176    -16    
16     32     
-288   -1328  
-864   704    
1168   320    
-560   144    
-160   -16    
192    176    
-368   -464   
336    -192   
176    320    
-208   96     
96     80     
64     -48    
-192   400    
416    128    
-352   192    
96     320    
-32    16     
-128   624    
464    0      
-256   -80    
-96    -48    
304    -368   
0      112    
144    144    
-448   128    
288    128    
160    240    
-96    16     
176    336    
1344   -848   
-3648  800    
-1584  800    
2512   -144   
-1184  -720   
-1248  48     
1536   256    
-272   -656   
-544   272    
192    -720   
400    112    
-144   128    
-192   112    
336    336    
-320   16     
-384   176    
496    112    
-16    176    
-176   112    
-272   96     
240    80     
-576   304    
1920   -736   
-784   0      
-1216  -1024  
224    -48    
576    -80    
-32    -112   
-224   208    
112    32     
208    64     
208    416    
-752   240    
128    -32    
16     304    
640    -208   
-240   64     
96     192    
304    64     
-256   -544   
80     0      
64     -1200  
304    -80    
-256   480    
240    -384   
-64    -64    
224    784    
912    -448   
-320   -64    
672    0      
0      128    
-96    64     
-304   -160   
64     -80    
512    -1088  
192    0      
-432   -768   
-96    720    
464    16     
-528   -864   
-112   -80    
416    128    
-112   -160   
336    -192   
-64    -16    
368    -496   
240    128    
224    -672   
-304   -16    
-240   -32    
-832   640    
-176   512    
736    -560   
-400   32     
816    544    
-304   -416   
-816   -1168  
320    -656   
272    416    
-320   656    
144    176    
-112   -176   
352    -16    
-176   -128   
64     -496   
272    -304   
-480   -384   
320    -144   
0      -32    
-96    -1440  
96     64     
80     -224   
-128   -1088  
-192   384    
128    -688   
96     336    
336    -400   
-400   -64    
272    -128   
176    -256   
-64    304    
-48    288    
128    -1328  
224    368    
304    -224   
-48    -176   
144    -112   
-160   -608   
240    768    
240    -1392  
16     -416   
-112   -144   
192    432    
-96    -1840  
-336   160    
208    432    
-144   256    
336    -800   
16     -16    
-192   208    
320    -352   
-2064  352    
736    -320   
-592   320    
64     928    
-224   352    
320    -1136  
-144   -48    
-32    -416   
112    -240   
64     -688   
64     -192   
-208   -720   
-112   -160   
192    32     
192    224    
-96    -48    
-16    -16    
-80    -48    
16     -96    
96     -64    
128    -112   
0      -96    
-128   -432   
224    -192   
64     -64    
-144   368    
288    0      
112    176    
-48    -144   
560    -32    
-880   528    
400    -176   
-80    144    
128    16     
48     -32    
32     16     
-16    704    
304    208    
-160   224    
-64    -448   
-32    -16    
352    -80    
-112   80     
-224   160    
0      304    
-144   416    
0      -128   
-448   -208   
-384   -768   
816    -784   
-128   352    
-288   -208   
-224   -496   
0      -256   
0      -560   
336    160    
112    -32    
-64    -32    
-272   -304   
400    -176   
0      160    
32     176    
96     240    
-256   -240   
-32    160    
80     -96    
-64    -64    
-144   -320   
96     0      
112    -176   
-32    128    
304    -1136  
-160   -336   
-192   32     
160    -304   
96     80     
32     -64    
-80    16     
-1296  864    
1584   144    
-160   -304   
-432   96     
592    -688   
-48    224    
352    -32    
-512   -128   
144    -880   
432    48     
80     -16    
-336   48     
-176   -112   
560    -64    
-320   -80    
-256   -240   
-208   -176   
-32    -240   
64     96     
-48    -256   
-144   32     
512    672    
1376   -96    
-816   752    
-16    -512   
272    -208   
-160   64     
208    288    
528    -160   
-656   -192   
384    176    
64     48     
-160   -64    
224    208    
-352   -208   
48     96     
-160   -112   
-64    144    
48     288    
-128   -32    
-240   16     
-800   288    
368    -160   
96     272    
-64    -32    
-544   -32    
80     320    
640    -576   
272    -160   
-704   -64    
512    64     
-64    -240   
-592   144    
48     336    
-512   -400   
208    -672   
-256   64     
-864   -480   
-544   -48    
912    -96    
256    -48    
-720   -176   
-112   -80    
544    96     
-176   -544   
-560   336    
656    -32    
-32    -16    
128    1392   
1216   3552   
-1328  2432   
528    480    
1088   336    
-608   320    
-512   16     
96     336    
272    -192   
-640   -112   
512    16     
480    160    
-304   -16    
-272   192    
160    -48    
-96    112    
176    64     
-32    112    
-368   -16    
160    192    
400    -480   
-720   320    
352    32     
-224   192    
-576   -256   
-240   -48    
-176   0      
288    -16    
0      192    
-32    0      
-144   48     
480    16     
-32    -48    
80     16     
-256   224    
-448   -368   
48     208    
208    16     
-496   32     
-368   -160   
128    32     
-240   -160   
-96    48     
-16    240    
464    112    
-144   128    
-176   -144   
-256   -256   
400    80     
-128   -112   
144    224    
-176   16     
80     368    
-1008  256    
-304   -304   
32     -192   
-320   -160   
304    352    
608    48     
-96    -304   
-432   144    
112    -48    
160    -64    
-272   48     
48     128    
-32    32     
32     -16    
-160   80     
304    128    
-448   -176   
-64    -16    
496    -80    
-96    208    
-272   160    
192    -16    
-48    96     
-192   -112   
384    304    
-240   400    
16     64     
-176   -208   
656    1872   
-608   -1840  
-1456  976    
1216   -464   
-224   256    
-432   176    
192    112    
368    -304   
-160   -1008  
-272   320    
208    672    
-96    -80    
16     96     
-144   -16    
176    -512   
208    752    
-240   16     
-112   224    
176    -48    
-176   208    
-208   -176   
336    -768   
-688   592    
1008   464    
-128   368    
-400   -112   
-256   -592   
512    -224   
-16    208    
-320   -96    
128    288    
-16    -16    
16     -112   
-160   -48    
32     32     
32     192    
160    64     
-64    32     
-144   -128   
-80    -112   
0      0      
-128   64     
0      -32    
112    -32    
208    0      
-304   0      
-176   32     
112    224    
-160   64     
-400   144    
336    768    
2496   336    
-1632  96     
-512   -128   
1040   -272   
64     -112   
-192   -96    
-48    32     
112    112    
-208   112    
144    160    
176    16     
-192   96     
-144   224    
640    384    
-144   192    
-320   16     
224    128    
304    -32    
-272   -48    
-48    -784   
-1216  1072   
1088   -352   
-64    -368   
-48    -464   
256    -288   
80     -272   
-32    -240   
-80    192    
-80    480    
480    16     
-272   112    
-128   176    
576    64     
240    48     
-720   64     
-128   -480   
-80    -176   
416    240    
-192   -64    
16     96     
-160   -224   
-80    -736   
-16    -48    
-272   -256   
96     -576   
1456   176    
528    224    
-96    656    
336    96     
-80    80     
-80    -96    
336    624    
-752   832    
-96    512    
192    -560   
256    48     
-240   -448   
-336   -32    
144    -128   
240    192    
64     272    
-128   304    
-32    64     
-464   192    
128    -320   
112    432    
-112   -80    
-16    224    
-112   -1712  
1776   -1648  
144    -496   
-960   688    
192    -304   
176    320    
304    160    
-192   -304   
-288   592    
-144   -128   
304    -304   
128    192    
-240   -240   
64     -48    
16     304    
240    -16    
-480   -16    
-96    -128   
-80    -352   
304    672    
-80    -2416  
16     -400   
288    -64    
64     -48    
-128   352    
-64    752    
-64    -720   
-512   -608   
656    576    
48     992    
-176   -64    
-112   -208   
288    -496   
64     -288   
480    -96    
-112   160    
-160   160    
176    -64    
288    48     
-208   -448   
-192   0      
-256   -16    
400    512    
-256   176    
240    560    
16     640    
192    -544   
400    1120   
-256   -80    
-128   464    
16     -560   
560    448    
672    -768   
-736   576    
-16    -240   
-112   224    
128    128    
112    720    
-96    -16    
-272   -336   
64     48     
336    -144   
0      48     
-304   -384   
-48    96     
400    400    
96     160    
-432   -304   
-384   -176   
160    -224   
-64    176    
-48    -96    
208    -176   
-224   -112   
32     784    
-160   688    
-96    608    
240    1184   
-144   640    
128    256    
736    -224   
-1744  800    
528    -736   
944    -112   
-240   -304   
-64    -688   
-80    -112   
272    688    
-192   784    
192    -560   
80     -96    
-144   -464   
16     192    
176    -240   
80     80     
-32    96     
256    -144   
-144   -720   
64     -48    
224    32     
-224   -1392  
-48    0      
96     -1776  
-96    -288   
128    -32    
-64    -192   
-112   -160   
-16    -1008  
128    -176   
80     496    
64     -544   
-80    224    
208    -112   
-64    -1104  
0      416    
16     -1232  
-64    48     
-128   224    
16     -224   
128    -272   
-144   -864   
80     80     
208    -832   
48     -176   
64     416    
-240   96     
0      160    
32     -144   
240    -176   
800    96     
-2272  -48    
544    352    
656    -32    
-752   -64    
-352   80     
128    208    
80     256    
-32    -128   
0      -80    
96     -784   
-64    -272   
16     -288   
16     80     
400    48     
-288   160    
176    -112   
160    -96    
-128   -272   
-96    -112   
-432   64     
-80    -544   
-1568  64     
1552   240    
16     -208   
-480   -240   
608    -64    
-176   -432   
368    -16    
-400   304    
272    -64    
-64    -80    
32     -208   
-528   -96    
400    96     
576    16     
-240   192    
-608   16     
192    -400   
-32    128    
-208   -48    
-288   -448   
64     -352   
192    128    
-432   -208   
480    368    
528    464    
192    -144   
96     432    
448    32     
-640   -208   
-112   -208   
-96    -48    
-224   -416   
352    -192   
-144   160    
336    -416   
-352   -1344  
-112   -224   
608    -464   
272    160    
-576   -16    
-16    -16    
320    -64    
352    -560   
-816   0      
176    -272   
-384   -32    
-80    -48    
832    848    
192    32     
-384   896    
1200   -752   
-336   176    
-416   -160   
368    -112   
256    -32    
-32    -240   
-864   -48    
224    -80    
-288   96     
-48    -16    
32     48     
240    -160   
-288   32     
-48    -240   
80     112    
-240   -400   
320    752    
496    -832   
-656   -48    
-64    -304   
-672   -112   
368    -64    
64     -48    
-176   272    
496    -224   
-352   -32    
-384   -256   
352    -112   
128    -176   
112    112    
-96    -272   
-144   128    
288    -160   
-288   80     
544    -32    
16     48     
0      176    
-32    96     
112    176    
96     -96    
80     96     
128    544    
-576   112    
144    64     
112    -48    
-928   -208   
240    -48    
-256   -112   
-160   -592   
-896   224    
240    0      
80     -128   
-256   48     
64     64     
-80    -128   
64     -80    
96     48     
-128   80     
-208   -64    
-112   80     
-48    -96    
-272   -16    
96     336    
-320   32     
48     -80    
-272   -592   
-480   -240   
-144   -288   
240    352    
-400   -16    
-64    -224   
16     0      
176    -32    
-240   -912   
-144   -752   
112    -224   
128    176    
720    2016   
-3200  400    
368    -64    
1184   -976   
-672   -688   
-160   288    
144    -80    
288    -48    
-112   -160   
-112   -256   
-288   16     
48     176    
496    288    
-208   192    
-464   -96    
240    -48    
192    208    
-64    144    
-208   -64    
-32    96     
496    736    
-672   1184   
-208   -144   
0      -672   
-272   -976   
192    800    
304    512    
-80    -176   
-112   208    
-48    -96    
-112   64     
-48    16     
64     0      
-288   192    
16     320    
-16    -288   
-256   -48    
-288   80     
208    400    
-848   -176   
32     -32    
64     32     
-160   80     
64     -16    
48     -128   
-16    64     
192    176    
-96    -32    
-160   -240   
208    -576   
1488   -304   
-1680  240    
-208   -112   
688    -352   
-416   272    
720    560    
-656   -1200  
16     -672   
144    0      
0      304    
64     32     
-224   16     
400    80     
-608   -496   
112    -16    
480    64     
-256   -192   
16     560    
240    784    
-368   336    
128    736    
2560   336    
-1184  -480   
-1328  -48    
1056   496    
80     960    
-336   768    
0      480    
32     -32    
-320   48     
224    96     
160    208    
-688   -64    
272    -96    
-224   0      
-224   -64    
96     -688   
-352   -496   
-48    -176   
-32    -192   
224    -240   
128    -368   
-768   208    
464    -32    
352    928    
80     192    
-272   1344   
624    576    
-448   -256   
-64    48     
352    656    
-352   256    
-256   176    
1152   -432   
-192   -16    
144    512    
-816   496    
112    528    
-16    -400   
128    -208   
320    -160   
80     208    
-672   560    
368    -32    
-896   -48    
336    -32    
-48    -128   
-256   -576   
-160   96     
896    2032   
-1744  256    
304    224    
1376   336    
-304   -640   
-416   288    
-48    -320   
752    -1728  
48     -96    
-160   432    
-176   -96    
80     -400   
448    -80    
0      464    
-128   -176   
112    464    
192    336    
-368   -16    
128    -112   
112    208    
-32    240    
-144   -80    
336    400    
-128   -256   
-144   272    
272    -32    
-480   -32    
80     384    
496    1200   
-128   224    
-144   -272   
-240   -336   
-48    144    
608    -192   
-512   -32    
176    16     
304    544    
-208   400    
128    272    
208    -112   
-336   -176   
-160   -48    
208    -208   
-112   -80    
-48    928    
256    -64    
16     -128   
-448   -592   
208    -320   
160    16     
-592   -64    
560    -384   
-112   64     
-672   464    
288    -1392  
-208   -512   
-448   -496   
288    608    
176    944    
16     720    
0      240    
96     336    
-128   32     
48     -80    
-16    -64    
32     160    
-48    -224   
-320   96     
80     128    
368    -1184  
-256   144    
-32    112    
208    112    
-208   112    
160    -176   
-176   -96    
32     592    
160    368    
48     -80    
-224   -80    
-688   -256   
1168   -464   
-784   464    
112    -736   
240    -944   
-176   -656   
-64    -176   
224    960    
-256   848    
32     496    
304    272    
-176   144    
-112   -80    
208    -336   
48     -240   
0      224    
-32    -544   
-160   -800   
144    -48    
144    -160   
-320   -864   
704    -1456  
-304   304    
272    -304   
-48    -16    
320    -224   
208    416    
-192   320    
80     288    
0      208    
48     -64    
112    -112   
-32    -96    
-16    336    
384    -192   
-272   208    
112    -368   
-64    416    
160    -112   
-64    96     
240    -176   
-64    96     
-16    96     
-96    96     
-192   128    
512    368    
-80    0      
-208   -16    
320    176    
-320   -960   
-608   -352   
704    -256   
-304   112    
-336   -1120  
608    -96    
64     -48    
-416   96     
560    272    
32     -32    
-320   80     
96     48     
128    128    
144    -160   
144    160    
-112   -256   
48     128    
320    -240   
-224   -16    
-416   128    
352    64     
-496   -480   
-192   96     
1488   -592   
-304   192    
-256   144    
336    192    
0      -32    
-816   0      
448    336    
272    -304   
-176   112    
32     -80    
304    560    
-480   -288   
-272   112    
704    368    
-624   432    
48     208    
240    96     
-144   112    
224    -240   
-48    -288   
-480   112    
1600   144    
-416   -256   
-96    -48    
656    -80    
-176   288    
256    16     
544    48     
-96    48     
-464   336    
304    16     
640    -96    
-224   -1344  
-96    -80    
784    -144   
16     160    
-304   16     
352    -16    
160    96     
-48    -144   
-48    64     
-32    0      
512    -1856  
-240   160    
112    -224   
128    176    
-1504  -2128  
1888   -1472  
1248   176    
-1456  -64    
-224   288    
656    -1648  
96     -240   
0      128    
-48    -160   
-768   144    
368    -32    
320    -240   
48     48     
-352   -80    
-272   128    
288    -80    
128    32     
-1008  -176   
-144   -176   
240    -576   
-736   -560   
736    -352   
-512   -464   
800    80     
288    176    
-624   -112   
432    -224   
-464   64     
384    144    
-480   288    
144    144    
176    80     
-1360  -48    
-288   -48    
288    144    
144    304    
-16    272    
-272   16     
-240   32     
0      -1584  
96     0      
-64    -128   
-16    -32    
-64    288    
80     -16    
-112   0      
-144   -208   
-160   -240   
320    -80    
16     32     
-96    48     
80     -160   
384    -928   
288    544    
64     992    
576    720    
-176   -320   
-368   -368   
0      -176   
96     -368   
-464   -464   
48     -352   
-96    -176   
80     -208   
-640   -400   
-64    -176   
-400   -384   
-160   0      
64     160    
272    -16    
0      -272   
-320   -736   
-144   -288   
48     -256   
576    0      
-352   -352   
-352   -432   
256    320    
416    656    
-304   -640   
-416   -208   
-816   -880   
1344   -336   
64     752    
-784   0      
656    352    
-128   -1184  
-144   -1056  
-64    1136   
256    -528   
-128   240    
-32    16     
-448   -64    
64     32     
80     48     
-112   -128   
-320   240    
48     -32    
-112   -160   
16     -528   
-32    208    
64     528    
496    48     
-672   -304   
176    -480   
-160   -48    
672    960    
-784   1248   
-112   32     
288    -320   
-48    336    
-288   -480   
32     -352   
112    -288   
176    -368   
112    -48    
-112   160    
-192   0      
-192   -432   
400    464    
-256   96     
-160   -16    
208    80     
48     -48    
-176   240    
96     128    
-464   192    
128    -64    
16     144    
32     -160   
1264   1552   
-1504  -48    
-1888  -240   
1840   -144   
-624   -400   
-864   -80    
192    -704   
160    272    
-144   608    
112    -128   
240    -32    
-192   208    
96     -160   
80     160    
-560   -368   
-48    144    
256    16     
-112   256    
112    48     
0      96     
80     544    
368    -816   
-1376  432    
432    -240   
-400   -256   
48     -720   
384    -512   
-1040  -1024  
208    -752   
0      0      
-272   928    
96     224    
160    304    
-368   -160   
288    -720   
-240   -336   
-368   128    
-256   272    
-640   32     
320    144    
-112   -144   
176    672    
-272   -80    
-624   -464   
-32    336    
416    560    
-80    144    
192    -288   
-480   32     
80     96     
144    256    
-768   432    
-144   -528   
672    576    
-128   16     
-1040  400    
304    1232   
-512   464    
224    800    
-272   352    
-272   160    
112    -400   
16     -304   
32     -16    
-336   112    
144    80     
560    64     
64     64     
-560   -32    
384    144    
-720   2064   
480    640    
-320   -928   
80     -1008  
944    400    
-224   768    
-400   896    
32     1680   
208    224    
304    -368   
-304   -304   
-384   432    
368    112    
176    352    
160    240    
-576   64     
0      192    
208    -176   
352    -848   
-144   -640   
-352   -64    
288    560    
0      -112   
-352   640    
0      -64    
-112   -192   
-160   304    
16     112    
-320   -16    
400    528    
-400   48     
96     224    
256    304    
-128   688    
208    -16    
-64    -176   
240    240    
-208   64     
-272   -96    
224    -288   
-128   -64    
-16    -112   
48     64     
-32    16     
32     -224   
176    -352   
-48    96     
-96    96     
-32    -320   
224    -352   
608    304    
-1552  -240   
64     -560   
992    -288   
-336   -592   
16     432    
-272   464    
208    576    
-144   288    
48     288    
32     64     
-80    -112   
96     208    
320    176    
-208   96     
-80    64     
80     -208   
96     -496   
-192   32     
-288   96     
-112   -160   
208    -64    
176    0      
-320   144    
288    368    
-672   176    
64     176    
464    0      
-160   -96    
144    2080   
-496   -992   
-224   464    
992    -64    
-368   -192   
-560   144    
304    -128   
192    -160   
-416   -144   
48     -448   
80     224    
-128   96     
288    64     
-144   192    
-304   -336   
-112   -624   
256    208    
96     160    
-176   480    
384    304    
-416   -800   
672    -688   
-704   496    
0      64     
208    160    
-48    640    
-208   -64    
96     128    
224    -128   
-128   16     
-176   64     
0      112    
288    32     
16     96     
-112   96     
160    160    
-224   416    
-80    32     
-128   32     
32     48     
176    176    
-288   80     
-96    128    
240    160    
64     16     
-480   224    
528    32     
-368   80     
64     48     
-576   -144   
1360   -1296  
-1568  32     
-176   -160   
1280   208    
-480   -208   
-1008  -288   
528    48     
288    112    
-448   -64    
16     48     
720    256    
-432   -32    
-240   208    
528    128    
-256   48     
-80    16     
320    112    
-672   32     
-96    192    
384    80     
336    928    
-144   -560   
-2160  256    
1936   768    
192    -480   
-2048  416    
880    -240   
-400   144    
-48    -96    
224    16     
80     96     
-16    144    
-64    -160   
16     208    
-336   32     
-16    -1280  
224    240    
-144   -176   
128    32     
640    48     
-368   -352   
912    512    
720    -128   
-848   224    
672    -48    
-240   384    
-352   -64    
-240   272    
-176   -320   
-144   -48    
336    -592   
272    48     
128    -1408  
-48    528    
-928   128    
192    -16    
128    0      
-32    -80    
416    176    
-384   112    
96     64     
224    64     
-112   144    
32     48     
208    144    
-672   176    
96     64     
112    -304   
320    528    
-960   3056   
1152   352    
-752   -736   
-544   -240   
624    -144   
288    208    
-672   128    
96     192    
480    176    
-608   -96    
-80    0      
320    -96    
-112   272    
-128   -816   
208    208    
-208   -1328  
48     64     
320    -272   
-272   -880   
-512   -432   
416    208    
32     240    
352    256    
160    -272   
-864   160    
640    -304   
-256   16     
-80    32     
448    112    
-368   320    
128    -192   
96     240    
-96    144    
16     -112   
272    -80    
-32    -224   
128    352    
-176   272    
64     144    
160    -48    
-128   -288   
464    -944   
-224   -192   
-320   -128   
560    -32    
-464   272    
272    192    
160    144    
128    720    
256    688    
16     864    
-48    112    
-544   -768   
336    -224   
48     -352   
-48    0      
672    -1616  
-96    -896   
-208   -1168  
-48    -640   
16     -512   
48     128    
-16    368    
-32    0      
128    112    
32     96     
112    -480   
-48    -240   
-128   -368   
208    112    
-80    -288   
128    -656   
112    160    
32     -96    
0      416    
512    -320   
-688   256    
288    128    
336    -144   
-272   -16    
-32    -1360  
-96    -1440  
384    304    
-64    -192   
-64    160    
32     -16    
96     256    
400    384    
-208   16     
0      512    
128    128    
64     144    
-80    64     
160    -240   
16     208    
-368   144    
0      208    
-1104  224    
192    80     
-224   -736   
784    -880   
256    256    
-752   -112   
544    -288   
-16    144    
-176   96     
192    -272   
240    -208   
-112   -128   
-16    96     
224    144    
48     -48    
-160   64     
-240   64     
128    0      
0      -352   
144    80     
320    320    
-160   320    
0      -512   
384    -16    
96     -224   
-64    32     
288    -144   
48     -128   
-160   0      
-16    -96    
256    48     
16     0      
-880   -1312  
-864   448    
1456   -288   
-864   -208   
-32    1248   
944    -384   
-656   1616   
288    224    
32     -16    
128    -688   
-192   64     
-128   96     
-80    -160   
64     128    
48     -336   
-16    400    
-128   400    
448    480    
160    -720   
-496   -112   
672    -784   
-2016  -32    
-224   -240   
944    -848   
-640   -832   
384    256    
-272   -624   
-576   -1520  
160    -960   
-80    -32    
-144   96     
-64    -192   
-1056  -336   
48     -384   
-32    144    
176    -128   
240    752    
496    48     
80     544    
-256   -192   
80     80     
0      192    
0      -592   
-720   -400   
656    752    
-944   576    
144    -304   
-1536  592    
400    704    
336    272    
-336   -416   
128    -288   
-224   -16    
96     -496   
544    -144   
64     128    
-256   -1152  
-336   144    
-320   -208   
448    -768   
-160   -96    
144    96     
128    -80    
-384   128    
144    -704   
-432   32     
496    176    
-416   -816   
-256   -64    
816    1248   
112    -192   
-528   272    
672    80     
-800   1728   
256    560    
304    64     
-288   -576   
-672   -592   
352    -560   
32     304    
144    -80    
0      80     
80     -160   
-512   112    
-96    -160   
-176   48     
-480   -64    
464    448    
-320   -688   
-128   -784   
208    -320   
-80    32     
-640   -48    
480    32     
-96    128    
48     -128   
-336   -176   
-16    -416   
-432   80     
64     0      
-656   0      
-64    16     
-336   144    
-64    160    
672    688    
-400   272    
-336   -144   
416    272    
-208   64     
-96    288    
-224   -240   
240    48     
528    16     
-432   64     
-128   112    
464    144    
-256   -128   
-528   -64    
-80    0      
0      0      
-80    -1072  
-848   -96    
432    416    
160    -240   
-240   160    
304    -32    
-272   112    
-48    464    
48     112    
80     224    
-64    96     
-256   -80    
16     0      
128    112    
-576   208    
112    -96    
128    0      
-160   144    
192    -400   
96     336    
-128   48     
-96    -384   
96     -272   
-16    16     
-128   304    
-448   -16    
128    48     
176    48     
-224   128    
688    3056   
-1408  -1216  
-1504  272    
1504   0      
-304   -320   
-656   224    
336    416    
912    320    
-688   0      
32     -352   
16     240    
-48    -80    
208    176    
224    432    
-560   32     
64     -176   
176    368    
-496   -160   
-80    96     
160    128    
144    624    
-320   -384   
-736   128    
1104   96     
-176   -336   
-208   512    
-320   224    
240    16     
192    -112   
-96    48     
-560   112    
32     -96    
-144   272    
496    -96    
-368   -64    
-368   0      
320    80     
80     352    
-320   112    
-160   16     
160    64     
64     16     
-48    0      
-64    96     
-272   -144   
-272   112    
528    -16    
-208   48     
-160   96     
32     368    
1520   -2912  
-2448  128    
-256   -80    
656    -128   
176    272    
-80    64     
-208   -16    
560    -112   
-288   -336   
-224   128    
96     208    
96     112    
-176   80     
288    16     
-416   80     
112    64     
128    96     
-192   128    
0      176    
-80    -48    
64     -128   
768    -288   
-1264  -32    
64     -928   
32     256    
-96    -384   
-208   192    
480    -128   
32     -96    
-560   128    
64     64     
16     64     
112    96     
176    128    
-656   0      
-80    16     
240    -112   
256    -304   
-128   64     
-224   64     
-16    -112   
-128   80     
576    0      
0      176    
-384   176    
608    32     
64     160    
-224   208    
-320   -144   
-96    224    
480    64     
-48    416    
112    0      
240    -64    
-656   256    
240    160    
-144   320    
-64    160    
112    -32    
-192   64     
80     48     
48     112    
0      144    
48     80     
-16    240    
544    80     
-128   128    
-192   160    
352    576    
240    272    
-2336  -992   
1392   -176   
1424   272    
-1296  -128   
80     576    
464    224    
544    304    
-624   192    
96     192    
256    -256   
-192   288    
272    -496   
-32    416    
0      -304   
224    480    
32     -160   
-288   -2576  
-96    -272   
240    768    
32     912    
-128   304    
-256   -592   
192    528    
64     -160   
-336   512    
544    192    
-320   704    
48     912    
-256   -784   
-240   -272   
-64    272    
-32    -48    
16     -80    
-288   -176   
144    -32    
16     480    
-96    32     
112    192    
-64    -48    
80     -80    
416    -128   
-560   208    
-32    448    
-448   -320   
528    -272   
-48    -224   
144    -1472  
240    -496   
-192   560    
240    80     
-96    -912   
192    -192   
80     -480   
-480   -208   
672    -144   
128    -80    
32     736    
-192   1920   
304    -1008  
224    -256   
-240   336    
144    -64    
-80    256    
-176   112    
240    -16    
48     192    
-80    272    
240    288    
176    192    
-16    -48    
-32    32     
128    112    
144    112    
48     48     
64     0      
-96    400    
208    64     
256    64     
-224   -512   
-32    112    
-272   736    
720    -384   
-592   80     
-272   32     
288    144    
48     96     
-448   368    
176    -192   
-208   -224   
144    -288   
32     208    
48     -256   
64     -32    
-128   -112   
32     0      
160    -464   
-96    112    
-208   -256   
0      32     
928    560    
-752   624    
48     -320   
768    -96    
-496   496    
-144   -160   
-176   -224   
288    -416   
-32    240    
304    -928   
-32    64     
-160   -624   
-64    176    
144    64     
176    -80    
0      80     
-176   -112   
96     -256   
256    80     
144    192    
-96    -128   
-160   352    
96     -176   
416    -144   
-192   -240   
-208   96     
128    -160   
96     96     
112    96     
-16    336    
-304   1472   
2800   -496   
-1200  -144   
-896   -912   
560    -288   
240    816    
-256   -320   
-96    -864   
128    992    
352    -16    
64     80     
32     32     
16     -240   
-288   -800   
256    96     
112    384    
96     528    
-48    1360   
32     64     
240    -1008  
-976   -928   
1264   -288   
560    -608   
-560   224    
-80    448    
32     208    
-320   -96    
112    -1712  
192    -496   
384    -1456  
176    112    
-64    -192   
16     -800   
-272   -96    
752    -480   
32     -192   
-32    -32    
-336   352    
-288   224    
384    -384   
96     32     
176    -256   
224    976    
352    16     
-1200  -240   
-96    160    
800    -32    
-912   288    
-672   -272   
160    -352   
80     -192   
48     -576   
-32    256    
272    -1056  
512    -688   
-544   240    
528    448    
240    -144   
-352   -800   
-560   -16    
672    96     
-288   0      
-336   64     
-368   -304   
672    464    
336    -96    
-384   -208   
64     80     
368    -1136  
-256   -2416  
-1904  -1616  
1312   96     
336    48     
0      208    
-192   464    
-336   256    
896    816    
-416   -128   
-272   240    
368    -400   
-48    -32    
320    -224   
-160   32     
-400   -144   
336    160    
320    -160   
-256   96     
-272   -640   
-384   -96    
528    -32    
-64    -32    
368    32     
240    -208   
-832   -16    
368    -224   
-80    112    
-336   -288   
208    224    
-160   -208   
-80    80     
416    -496   
-512   -96    
208    -256   
272    -32    
16     -288   
-176   272    
32     336    
144    16     
-112   -176   
32     -16    
-64    16     
-304   96     
-608   -48    
336    -176   
208    400    
-64    -192   
-144   352    
304    -800   
16     0      
-176   -48    
320    432    
1120   16     
-592   -16    
-96    160    
480    176    
-272   112    
-112   16     
-368   -192   
16     -224   
80     80     
-160   -240   
160    96     
-80    -688   
80     -336   
-272   -400   
-128   -384   
-176   64     
432    -256   
-240   160    
-256   -176   
176    -32    
-96    -368   
-16    -96    
-160   208    
-288   -96    
256    -576   
-176   368    
128    -736   
112    -48    
-800   1088   
2512   -592   
-352   176    
-1328  -208   
672    176    
544    -64    
-608   -208   
-320   688    
512    -528   
64     0      
-112   192    
-640   -496   
-96    128    
-464   112    
-704   112    
-32    -144   
-800   480    
-160   144    
48     -176   
-80    208    
592    1136   
384    128    
-832   -208   
368    48     
32     -272   
288    672    
-48    -96    
-400   176    
320    -240   
-272   16     
-16    -224   
-176   -32    
-272   176    
-528   -128   
-144   144    
464    64     
224    240    
-400   -16    
64     -32    
-32    -128   
32     176    
-160   96     
368    -64    
-112   32     
-544   -80    
320    160    
96     48     
-32    48     
-96    560    
-496   1936   
1424   -32    
-960   -16    
-704   -560   
1344   224    
-480   160    
-448   368    
592    768    
432    -16    
-480   240    
-80    -32    
336    160    
-192   -16    
-240   -304   
0      16     
256    -48    
-496   48     
-112   32     
336    -336   
16     48     
-96    16     
912    528    
-1520  -16    
624    -1024  
160    144    
-272   -192   
96     176    
256    96     
96     -128   
-432   48     
-192   80     
96     0      
304    96     
-1072  160    
32     -48    
-592   -48    
368    128    
32     -208   
-96    0      
-112   224    
208    176    
-112   -224   
-720   -256   
0      -336   
800    240    
48     432    
16     -80    
-336   176    
-304   -16    
-48    0      
16     -640   
928    -208   
-496   400    
112    208    
784    -160   
-1024  272    
-112   32     
304    -32    
-80    32     
-112   128    
-160   80     
64     -64    
96     0      
-400   -96    
112    -160   
-544   144    
144    176    
176    48     
-576   288    
880    416    
304    144    
-144   672    
208    80     
240    -272   
-1040  384    
48     336    
704    240    
144    -176   
-416   -128   
32     336    
128    128    
288    -32    
-128   -256   
-128   160    
-256   112    
0      96     
-80    0      
-208   -432   
16     96     
64     128    
0      112    
-368   -112   
352    -96    
-784   -320   
512    32     
-16    -320   
288    -272   
128    544    
-176   992    
32     64     
336    512    
-112   -288   
-80    -624   
-464   -304   
144    -160   
-16    -224   
-48    -448   
-304   160    
192    432    
-240   16     
64     320    
-16    288    
0      400    
-32    -64    
48     928    
-80    1232   
-144   400    
48     -384   
240    -80    
-288   -32    
-416   176    
896    -704   
-128   -208   
-928   272    
496    768    
400    624    
-16    1744   
16     192    
-304   -1440  
368    -304   
-80    352    
-48    80     
192    -16    
-112   160    
16     240    
320    -128   
-688   -784   
-80    224    
624    128    
-112   208    
96     112    
-48    208    
224    112    
208    448    
-496   688    
-112   336    
704    64     
-432   16     
-256   144    
48     0      
288    528    
304    224    
-176   -16    
0      352    
160    -16    
-128   -208   
272    -160   
64     400    
-224   256    
272    -80    
-96    80     
-192   256    
256    80     
-64    64     
-16    -32    
-96    352    
48     352    
128    112    
0      -48    
208    -288   
-800   80     
352    288    
80     176    
272    -80    
-112   -96    
-160   16     
96     -64    
64     -384   
112    64     
-48    256    
-160   176    
0      64     
-96    -896   
64     -176   
64     -304   
416    272    
-368   192    
-64    32     
592    -176   
-128   -48    
-320   176    
144    144    
80     176    
48     32     
224    -48    
-256   64     
-384   0      
544    -960   
0      1216   
1120   -560   
-1760  320    
272    112    
1376   -80    
-1264  -144   
176    -128   
1376   -80    
-416   0      
-464   48     
448    112    
192    -112   
-160   96     
-80    224    
144    -64    
-32    160    
128    -2336  
192    -64    
-176   -32    
48     -80    
80     80     
-704   48     
1984   -240   
-112   -336   
-1104  -496   
-80    320    
528    192    
-144   96     
-192   16     
256    656    
-240   64     
-304   -576   
400    208    
96     -80    
-368   0      
-240   176    
544    -16    
-16    -160   
-688   288    
304    80     
224    128    
-48    0      
-448   -384   
464    48     
240    -400   
-368   -688   
-512   -368   
16     -832   
-384   -1024  
704    80     
-80    240    
48     416    
160    128    
-256   -192   
80     176    
-80    -320   
-272   -400   
-16    224    
208    48     
208    -96    
-32    112    
-128   -192   
112    240    
176    -1504  
-160   64     
240    112    
144    0      
16     16     
-64    128    
-528   128    
-704   608    
320    896    
-576   16     
-16    -176   
1392   144    
-144   -368   
-736   32     
416    -32    
-16    -144   
448    -480   
-480   16     
-272   0      
256    224    
320    32     
-320   48     
32     -1120  
-208   144    
48     -320   
64     624    
656    -144   
-912   272    
288    -224   
560    -48    
-64    -64    
-384   32     
384    80     
0      0      
-80    192    
256    -336   
-368   80     
-160   -32    
384    144    
144    -192   
48     96     
-16    -320   
-32    80     
-64    -336   
80     -128   
-208   32     
160    96     
144    16     
224    -1648  
-336   -96    
-32    -608   
544    -64    
368    224    
-496   -368   
80     -48    
240    -2320  
-128   -176   
144    128    
208    112    
720    -368   
144    -480   
-256   -336   
-208   -304   
400    -160   
272    336    
-688   208    
352    112    
-48    -80    
-96    -176   
-48    -160   
-16    -112   
224    -80    
32     -752   
-224   -384   
400    240    
-128   96     
-208   -192   
176    0      
16     -304   
-160   -112   
16     -304   
320    176    
-896   80     
16     -560   
-48    208    
-32    608    
224    320    
656    2112   
2032   448    
-1536  -1120  
-192   160    
960    -464   
-448   224    
-128   -96    
336    368    
80     -16    
-208   -64    
288    -432   
-128   368    
-96    -16    
400    -16    
368    32     
-432   -464   
128    336    
128    -592   
0      -96    
192    -64    
-544   -672   
608    -256   
352    -16    
-512   96     
512    224    
-128   -144   
-192   48     
-192   576    
464    -160   
-96    -256   
96     -208   
-144   -96    
64     -32    
224    -128   
112    -256   
-48    128    
-64    16     
80     256    
-240   32     
-16    -112   
0      0      
-128   208    
352    -112   
-384   -64    
-528   160    
272    -96    
-224   128    
224    -160   
240    -32    
-432   -1888  
-1712  96     
1216   -96    
-64    -224   
112    272    
512    -432   
-784   -288   
192    48     
320    -80    
-16    192    
-432   -16    
128    -208   
448    16     
-208   -496   
112    -16    
-144   -128   
16     -160   
336    -160   
-304   -192   
-528   -32    
176    -16    
-880   -272   
1488   -768   
-64    384    
-1040  80     
-32    -320   
560    -448   
-320   48     
208    -96    
-16    80     
224    -96    
0      -96    
-368   16     
64     -80    
240    80     
64     0      
-192   48     
-48    -160   
80     -160   
224    -176   
48     112    
64     48     
192    272    
-224   352    
-496   -272   
-1264  -912   
-464   80     
-832   48     
192    -288   
656    480    
-976   544    
144    -176   
-128   192    
-320   -480   
-416   304    
384    -336   
240    48     
656    256    
-560   -208   
-256   208    
256    48     
176    -80    
-64    112    
-576   -112   
-416   -176   
-256   64     
448    112    
-32    0      
-400   592    
-96    -64    
720    -2288  
-2048  -1664  
224    1040   
368    -448   
-336   32     
-704   416    
32     32     
848    1088   
-128   416    
-240   80     
-192   -272   
-32    96     
-160   128    
-112   0      
-400   -688   
-64    -480   
240    208    
-96    -112   
-368   64     
-32    -624   
112    -112   
48     224    
64     96     
0      -32    
-112   -384   
64     -16    
0      0      
-272   -96    
160    -112   
-336   -640   
32     160    
-128   -80    
-32    208    
176    -16    
-256   -80    
-48    112    
-64    -1072  
-208   96     
48     800    
112    752    
-48    -336   
-80    -160   
-176   48     
-128   80     
-400   464    
896    400    
-176   208    
-224   144    
-48    -80    
160    400    
-352   -608   
768    352    
-48    -176   
-480   -864   
-368   -1264  
256    -368   
-192   -544   
272    -560   
96     1264   
-464   -256   
-176   304    
16     176    
192    48     
112    240    
0      416    
0      576    
160    368    
-240   -320   
-64    176    
-16    192    
-208   -112   
-16    -64    
96     -192   
-144   128    
-256   -416   
640    -688   
432    -640   
-304   -464   
-304   -336   
112    112    
896    1024   
-1120  1008   
384    -400   
-64    528    
-208   512    
176    -48    
608    240    
-608   608    
-128   320    
256    -256   
64     -16    
-128   -80    
-112   160    
-96    352    
64     112    
48     112    
-320   272    
-144   192    
128    176    
32     368    
-96    992    
352    656    
-608   -112   
-16    496    
96     224    
-48    1184   
160    944    
-80    -544   
-208   -672   
32     352    
176    16     
-144   -144   
32     16     
128    256    
-208   -448   
128    16     
-16    -288   
-448   80     
352    -240   
208    16     
-128   -112   
-176   208    
64     -112   
48     -80    
144    160    
-400   256    
-112   0      
240    0      
272    96     
64     -1008  
-2112  -528   
1392   -160   
-576   -464   
384    608    
384    -256   
-976   112    
272    16     
272    400    
208    -128   
-384   128    
96     0      
192    144    
-160   -288   
-288   96     
320    -96    
-144   80     
-176   400    
320    192    
-48    96     
-192   160    
-704   -288   
1664   -464   
-368   32     
-736   -64    
1168   288    
32     -48    
-384   -240   
-240   272    
128    0      
48     64     
208    112    
64     128    
-320   -96    
64     288    
384    16     
-176   -128   
224    -144   
320    304    
432    160    
-288   -32    
-256   -16    
400    384    
1264   0      
-368   -368   
-208   496    
-32    224    
224    336    
496    -544   
-432   -1088  
64     -48    
48     256    
144    -32    
-208   48     
-304   0      
304    560    
544    432    
48     144    
144    192    
208    176    
-448   32     
112    -80    
400    32     
-32    -16    
-336   -320   
528    -240   
-256   48     
496    -112   
288    -16    
-1872  -720   
2272   -1824  
384    -240   
-640   -240   
480    400    
-688   512    
16     192    
624    512    
112    176    
-368   192    
160    -880   
368    256    
0      -96    
32     176    
64     192    
160    112    
-176   144    
464    0      
-272   -32    
-656   -112   
432    192    
-16    448    
-144   16     
672    176    
-528   -128   
48     64     
592    112    
-480   -624   
544    48     
-272   48     
0      0      
-16    80     
-32    80     
-336   -176   
592    144    
-704   -80    
128    -32    
288    176    
-272   -128   
-336   0      
480    176    
-64    -16    
-336   160    
336    272    
-128   32     
-160   208    
672    -80    
-1088  -112   
288    -32    
144    96     
48     80     
-32    -352   
352    -16    
32     -96    
-224   -32    
496    -48    
-64    80     
-224   -416   
-144   304    
224    -736   
192    112    
128    -32    
-176   -16    
-96    32     
208    16     
32     -208   
64     16     
-176   64     
176    -96    
-224   -208   
64     -384   
96     208    
0      -272   
256    32     
32     -1120  
-192   304    
-176   416    
320    -32    
48     -144   
-400   544    
-288   -1104  
1216   -1584  
-992   448    
32     -336   
-192   160    
64     400    
496    112    
64     112    
-128   -608   
-352   352    
352    288    
96     -16    
64     32     
-272   224    
224    -64    
240    320    
-288   -736   
-16    -32    
288    -560   
-208   48     
16     -112   
176    1360   
1440   -480   
-1232  -144   
-352   -32    
672    128    
-160   -336   
-32    -208   
16     -192   
32     16     
-160   -80    
336    -176   
48     32     
-48    32     
384    256    
-64    208    
-256   -32    
-64    -96    
384    128    
-176   -304   
80     64     
0      -464   
-160   -720   
336    -64    
-112   -448   
96     -1024  
-80    -48    
48     -304   
48     -192   
80     -688   
-1056  -1072  
-448   -256   
1520   -864   
-416   -128   
128    96     
384    -272   
-400   576    
400    -448   
-80    96     
432    -32    
0      -112   
-960   -32    
-16    -64    
64     -80    
224    -32    
32     -32    
-192   -1808  
512    80     
144    -48    
-176   0      
272    560    
512    -368   
-2352  -624   
1536   -416   
176    -208   
-880   144    
-400   -832   
-256   -192   
224    -160   
-144   -32    
-80    0      
80     64     
0      0      
256    -864   
-112   368    
80     -304   
96     272    
-48    800    
-32    304    
-16    160    
16     -128   
-144   48     
448    1360   
-832   1200   
-544   352    
864    -32    
-96    -800   
400    -288   
272    -1472  
-400   -224   
-192   64     
240    16     
320    272    
144    448    
-224   -800   
160    -320   
368    320    
-192   208    
-1056  0      
-112   0      
32     0      
240    -288   
240    -400   
-160   -592   
96     448    
80     -64    
-464   -176   
-96    192    
368    144    
-240   48     
112    1760   
672    -512   
-144   352    
-960   160    
16     304    
-576   80     
0      -1424  
-32    -176   
-48    -496   
-144   176    
272    -544   
16     16     
0      16     
-96    224    
144    608    
432    -320   
-224   -512   
32     -736   
-352   -704   
160    -304   
16     528    
-224   16     
-384   -32    
880    -160   
-128   352    
-160   -336   
-160   80     
-80    1984   
304    368    
-64    -272   
224    96     
-544   -96    
80     16     
352    -160   
-64    -640   
-256   160    
160    -368   
-96    -32    
-32    -608   
240    -432   
-272   -160   
16     -208   
-208   -512   
128    -192   
-16    832    
256    0      
-64    -176   
64     -224   
576    352    
-448   32     
-1360  -1056  
112    -384   
608    320    
0      -160   
-96    352    
0      -80    
-832   208    
384    1376   
272    1456   
-272   384    
16     16     
160    -336   
-416   16     
80     -64    
352    -272   
112    -128   
-256   -496   
-304   480    
-16    32     
-16    -288   
80     64     
-544   288    
-176   336    
0      32     
-160   192    
-624   1168   
0      1008   
80     -192   
-528   -176   
-144   48     
192    -1024  
-176   -288   
432    -480   
144    -1264  
144    -704   
80     -240   
-176   208    
-240   48     
192    512    
240    -128   
-64    -16    
-80    -144   
-352   304    
96     -16    
128    -32    
0      -432   
-352   -32    
96     32     
-16    -336   
592    272    
-784   1408   
224    -688   
-48    -624   
16     96     
-368   176    
-32    -384   
96     -96    
-432   432    
224    272    
-144   -16    
-224   -32    
208    224    
-64    176    
-96    -64    
-128   -928   
-160   -320   
-240   384    
256    96     
-144   -32    
-208   -64    
48     128    
32     96     
-432   -224   
-496   -96    
-352   -112   
192    240    
-256   -176   
32     176    
-144   -992   
720    1184   
2016   -480   
-1472  80     
-192   -128   
768    128    
-16    128    
-304   128    
64     96     
-528   -112   
0      112    
-528   -80    
0      144    
-240   -128   
272    192    
208    0      
-144   144    
-672   -48    
48     192    
336    0      
-352   -32    
-32    -400   
1408   352    
-1344  -288   
-704   -32    
912    -96    
-48    128    
208    64     
96     0      
272    -80    
-240   -48    
-192   96     
64     32     
-96    64     
224    144    
224    -32    
-512   80     
80     -128   
-112   400    
-144   -128   
-272   -64    
368    -32    
-608   -256   
-192   -192   
1664   464    
-144   -224   
-512   -448   
432    208    
64     464    
-544   64     
576    -208   
560    80     
-448   176    
-320   208    
-16    -48    
368    208    
400    -384   
-560   -144   
-352   48     
512    -64    
608    -304   
-544   -304   
-304   -368   
528    176    
528    112    
-416   -688   
-960   160    
432    -480   
-368   64     
112    96     
1472   -2560  
-3104  -688   
592    -672   
480    -496   
-544   -32    
-656   -32    
752    16     
288    448    
-560   -32    
-160   176    
784    -96    
-400   96     
-272   -64    
368    224    
144    -256   
-112   160    
256    0      
-576   -16    
192    -16    
992    -304   
-832   160    
304    48     
-336   64     
16     160    
400    0      
-464   64     
272    96     
48     32     
-256   80     
32     352    
224    144    
-240   272    
192    -128   
-448   -144   
-64    -144   
576    256    
-208   208    
-208   208    
512    48     
64     208    
-176   0      
-144   -16    
96     80     
144    48     
-128   16     
-176   80     
192    0      
-224   0      
288    464    
528    336    
-224   144    
144    288    
-784   272    
352    176    
-368   224    
0      -96    
224    160    
-336   96     
-16    -48    
208    -416   
16     -624   
-240   64     
80     96     
304    208    
16     368    
-272   64     
32     16     
144    -192   
-128   112    
240    176    
-96    208    
-16    -80    
128    -336   
128    -64    
-80    -272   
-192   -144   
176    240    
96     432    
288    160    
-192   -64    
-272   -400   
272    -1856  
-1056  288    
848    -816   
128    1024   
-848   1056   
416    704    
512    -400   
-464   -176   
-272   -192   
304    -64    
272    -160   
-224   -448   
-96    224    
64     128    
144    -64    
160    -352   
48     176    
96     288    
16     192    
-192   -64    
656    192    
-560   -48    
-256   -448   
208    -48    
0      -768   
-80    -192   
48     -1904  
112    -656   
-256   304    
96     -176   
16     208    
32     -64    
-112   32     
64     -112   
-16    288    
16     144    
-176   0      
-16    160    
112    -192   
80     -208   
0      -16    
0      -224   
160    240    
-64    160    
16     16     
0      0      
-16    288    
-208   -64    
288    -32    
480    -512   
-2672  832    
1152   480    
288    -32    
-672   -112   
-48    -544   
192    -96    
-800   -1664  
48     -112   
160    96     
128    -16    
-368   -128   
32     192    
272    80     
64     0      
-128   -208   
-48    -144   
288    272    
64     272    
16     48     
80     672    
1136   64     
-2336  272    
432    -976   
736    -992   
-960   560    
272    432    
832    560    
-64    144    
-288   432    
-176   96     
-32    16     
32     -16    
208    -16    
-32    160    
-336   -32    
432    208    
-240   368    
16     1472   
592    560    
-160   208    
-400   -128   
288    96     
-544   -544   
448    1120   
32     1376   
-880   -1216  
544    -240   
336    -752   
-416   -304   
160    -1408  
752    128    
-416   0      
-336   16     
672    32     
-912   -192   
464    -416   
368    -1312  
-384   -240   
-128   336    
-256   -64    
432    -304   
-176   64     
-224   -288   
96     272    
144    -48    
384    192    
-272   528    
-80    256    
272    -624   
-800   272    
-320   -272   
416    -1488  
-592   -448   
208    176    
192    -1264  
-496   -304   
-448   -1312  
192    -480   
352    -96    
-272   -192   
-400   416    
352    320    
224    -336   
64     -368   
48     -672   
16     -176   
368    -16    
176    208    
-256   -688   
0      -1040  
16     80     
-112   -848   
-864   -16    
928    -160   
-288   -96    
272    736    
-176   336    
-32    -432   
-80    -1280  
112    -288   
16     272    
-32    -112   
48     64     
-224   -128   
32     -336   
-672   384    
32     800    
160    448    
-64    96     
496    176    
-144   -96    
-32    -80    
208    -96    
16     -32    
256    -656   
-576   448    
208    -240   
0      16     
144    0      
240    1248   
-864   288    
-208   208    
1056   1712   
1184   -32    
-1296  -304   
192    -976   
336    208    
32     -336   
-80    544    
256    128    
-32    64     
32     192    
336    -304   
-112   -464   
-240   -256   
32     -176   
160    -368   
-528   -368   
176    -320   
32     -208   
-16    -496   
-160   -208   
16     -720   
224    432    
208    832    
-432   832    
0      -160   
176    -528   
32     -16    
-592   -2464  
-976   -464   
912    80     
-96    -112   
-16    -240   
112    -832   
176    -304   
224    160    
144    576    
-16    256    
-224   -128   
160    0      
48     -16    
128    -272   
-112   416    
-16    -256   
-16    -64    
272    -112   
-288   0      
16     -240   
-1056  -528   
832    -560   
-432   192    
-80    -32    
736    80     
-304   -384   
48     -16    
-96    -224   
240    -336   
-304   96     
384    96     
-192   16     
-96    -256   
-224   -80    
176    80     
240    -80    
-192   -128   
-208   80     
352    -512   
80     128    
80     -640   
16     80     
-16    128    
128    -144   
-240   0      
-48    48     
32     -32    
64     48     
16     320    
1264   -240   
-3104  176    
-1792  752    
1872   -48    
-768   -528   
-112   192    
496    208    
256    496    
-176   -32    
-80    80     
64     -176   
64     80     
144    -80    
-48    -144   
-400   -32    
288    -16    
-80    0      
-208   -240   
48     80     
-400   -192   
-16    144    
-416   -528   
-752   192    
1872   -240   
-384   -256   
-880   256    
512    -256   
-496   -224   
-320   128    
-64    -112   
512    -144   
288    80     
-624   -272   
-128   16     
-64    -144   
-96    128    
304    -160   
32     176    
-160   32     
-672   -192   
400    80     
288    816    
-448   -160   
-1184  112    
800    -272   
-672   64     
80     -160   
1216   -544   
96     304    
80     -528   
-976   32     
576    240    
128    416    
-16    -112   
-384   208    
-16    304    
-336   352    
416    -176   
-816   -768   
64     -64    
112    32     
-16    208    
160    16     
-208   64     
-96    -224   
176    -272   
96     112    
128    96     
-464   16     
-288   -1216  
-128   1152   
1280   416    
-1232  -272   
-1008  176    
784    -112   
-1216  -32    
64     400    
0      -240   
64     368    
224    -16    
-480   32     
112    48     
64     0      
64     64     
80     -32    
-224   128    
-80    32     
-176   64     
-144   -352   
-112   32     
-128   -256   
-16    144    
416    -48    
192    -48    
-432   128    
-224   112    
240    80     
-80    -112   
-240   -64    
-96    64     
160    32     
-48    208    
-432   -80    
272    -256   
32     -80    
-480   -368   
-112   0      
-80    -176   
96     16     
-96    48     
-192   -64    
0      -48    
-256   144    
160    288    
-272   192    
144    240    
-128   112    
64     160    
144    240    
-416   352    
-368   -288   
624    -368   
-96    384    
-304   400    
240    1200   
368    1168   
32     672    
-32    288    
160    240    
-48    -384   
-528   -240   
416    -576   
128    -320   
-560   -320   
32     -112   
-144   528    
400    192    
0      -112   
-448   -320   
64     208    
256    288    
128    272    
-288   96     
-208   -32    
0      -96    
304    -272   
-48    624    
-80    384    
80     16     
48     48     
-464   -2096  
-320   384    
736    48     
-272   -592   
128    448    
-208   -48    
-192   224    
224    0      
-64    176    
-32    304    
32     -16    
-160   -32    
-32    368    
0      160    
-64    208    
-144   96     
-32    176    
48     352    
-80    192    
-80    -32    
160    -432   
-560   -128   
464    272    
-16    -240   
336    320    
-16    448    
-400   1120   
208    688    
-256   -144   
0      -96    
160    112    
208    -64    
-112   240    
16     80     
128    80     
32     208    
-80    160    
-64    -80    
80     96     
256    -80    
-16    16     
-80    -112   
-64    16     
32     352    
176    256    
-128   192    
-176   -96    
240    -80    
240    80     
-400   -448   
1920   -576   
-1440  672    
384    208    
528    272    
-528   432    
160    384    
208    -528   
-416   784    
-192   0      
272    -176   
160    -48    
80     48     
-48    64     
-160   96     
112    96     
208    448    
-48    -160   
-288   416    
208    -240   
-16    -128   
576    800    
2032   -192   
-1152  480    
-160   -976   
-112   -1136  
416    -672   
-656   32     
352    464    
176    944    
176    880    
-80    512    
-240   -192   
304    -912   
-272   -880   
-224   288    
736    -32    
-720   -1840  
-144   -816   
176    -496   
-32    -288   
-80    -240   
128    -400   
368    1184   
-464   1392   
-784   -240   
768    -1312  
656    -1104  
-592   -560   
384    -336   
-32    -192   
-304   32     
240    -528   
256    256    
-192   -640   
-368   -864   
176    288    
-160   352    
-288   384    
-160   304    
448    96     
-96    128    
-64    688    
-464   592    
64     32     
752    -240   
16     32     
-128   -544   
-400   -288   
80     128    
-928   -848   
-720   160    
656    -624   
-112   32     
-224   816    
192    80     
-240   464    
112    -256   
320    336    
128    -512   
-192   -224   
-32    176    
128    448    
208    -336   
-16    -160   
-288   16     
80     96     
-192   -128   
272    528    
-32    -496   
-208   96     
272    -368   
32     -64    
-912   -1184  
0      240    
176    0      
-240   240    
-64    32     
176    -16    
96     512    
-160   304    
192    32     
-96    -32    
-192   96     
-112   -720   
400    -128   
224    -32    
-320   96     
64     80     
160    320    
416    -32    
-256   112    
-304   656    
176    336    
240    432    
-240   -224   
64     -224   
320    -1184  
-16    -80    
-224   144    
144    192    
-48    -976   
-704   -576   
64     176    
496    224    
16     1136   
256    -752   
48     -544   
-48    -320   
-64    304    
320    -384   
-80    128    
-416   -416   
304    240    
144    -16    
-32    240    
160    -144   
64     -16    
-224   352    
176    256    
304    -112   
-128   192    
176    256    
-176   -400   
-32    128    
528    -240   
-208   -112   
-224   16     
240    208    
160    -32    
-928   -80    
1408   -656   
-16    -128   
-896   -336   
528    -1328  
192    -880   
-384   176    
-192   -1824  
256    -96    
384    48     
-208   -112   
-48    176    
128    160    
64     208    
32     -224   
-112   -528   
544    -224   
-272   -272   
-144   112    
304    -192   
-496   -1360  
336    -272   
304    -656   
-800   -48    
672    -16    
16     -288   
64     -1632  
-176   -176   
352    64     
272    48     
-128   -272   
64     64     
0      -80    
-176   0      
208    -304   
-16    -80    
-1296  -32    
480    160    
-176   -112   
-192   -192   
368    -176   
112    -80    
-80    -272   
-160   -272   
-144   -64    
272    -192   
-144   224    
176    -112   
-64    128    
176    -1616  
-1296  -944   
480    0      
48     -112   
-608   -160   
-48    -256   
400    -32    
-288   -1072  
-208   16     
272    -1280  
80     32     
48     -144   
64     96     
224    -80    
-688   -128   
304    -64    
48     0      
-160   -160   
80     -112   
-352   -144   
0      -272   
-384   -368   
192    -96    
96     -272   
-736   -1120  
1136   400    
-480   128    
-432   -48    
320    240    
624    -112   
-368   64     
48     -256   
128    -32    
-32    16     
-144   -112   
-160   32     
240    48     
-64    -144   
-176   32     
64     -208   
48     32     
-64    -448   
1008   240    
-176   32     
560    16     
416    64     
-368   128    
-720   -48    
-784   160    
576    -48    
208    48     
-416   -176   
144    -304   
-32    176    
208    -192   
400    -80    
176    -896   
-64    -32    
480    -320   
-208   -48    
0      -128   
96     16     
-368   80     
176    -48    
-32    32     
144    176    
-432   -96    
-320   -224   
256    112    
128    -992   
-1168  2352   
752    -256   
-800   -624   
-432   -320   
1024   -80    
-384   48     
-448   336    
-208   128    
400    96     
-32    -128   
-416   -160   
-160   16     
-96    0      
160    256    
288    -112   
-336   320    
-160   -272   
432    -32    
544    320    
-1008  288    
128    -640   
368    -608   
-304   -176   
672    -144   
0      0      
-1072  32     
544    -176   
32     336    
-448   16     
-576   -656   
592    -112   
192    -208   
-1264  -80    
512    16     
144    -256   
-208   -752   
-176   -208   
-112   -272   
-176   32     
320    48     
-352   -224   
-496   -160   
-352   -464   
48     -320   
-144   -128   
64     208    
-96    160    
288    -64    
-208   -304   
-624   -96    
-64    400    
48     416    
912    -272   
-336   -736   
-512   -752   
384    -624   
160    -432   
-368   -928   
-208   -704   
192    672    
48     624    
-96    -304   
-192   -464   
128    -16    
-16    -192   
-64    128    
144    -288   
144    -384   
-576   -16    
-80    16     
80     -48    
48     96     
112    16     
144    304    
-368   240    
64     -64    
432    192    
-464   0      
208    -48    
272    32     
16     304    
-544   928    
208    352    
-304   -240   
-352   272    
80     -224   
112    32     
32     -224   
112    32     
-48    -80    
-96    -32    
16     80     
112    48     
-192   48     
-224   128    
448    112    
-112   96     
-16    96     
-144   -112   
-32    288    
48     -144   
672    -480   
-304   16     
128    -416   
-208   -96    
0      192    
0      -144   
272    816    
304    432    
-736   208    
64     -176   
416    32     
48     112    
-320   -160   
32     192    
-16    -80    
-16    176    
48     0      
32     176    
-16    -48    
96     0      
-32    160    
0      64     
-128   -48    
-288   -48    
0      336    
-48    112    
-112   -352   
288    -320   
-416   368    
-64    -992   
-2160  0      
1600   128    
-464   528    
240    64     
64     608    
-512   -416   
320    -2128  
560    -128   
-64    848    
-336   48     
-240   -16    
304    224    
32     -128   
-176   288    
-176   256    
288    288    
240    224    
-48    16     
16     208    
384    1584   
-448   -704   
-1680  336    
1632   -32    
-304   96     
-1488  -1216  
32     -1408  
992    -224   
-992   160    
-208   -368   
16     -544   
-240   -288   
160    192    
96     80     
-400   240    
336    64     
-16    -128   
208    -176   
0      -16    
-208   -32    
80     32     
-192   -16    
-256   -240   
-240   -384   
1312   -144   
240    352    
-256   944    
-112   144    
-272   -304   
-48    480    
512    112    
-176   32     
-80    -224   
-96    -544   
624    0      
-128   800    
-1360  976    
400    400    
-272   112    
-128   -112   
-272   64     
-208   16     
240    432    
432    -96    
-224   -32    
-480   -80    
96     224    
272    64     
-288   1008   
-224   -144   
528    912    
832    -320   
-1568  -192   
-496   240    
976    -1008  
-240   80     
-240   128    
-208   288    
0      -288   
464    -272   
-208   -48    
-224   240    
-64    144    
-112   32     
480    160    
-288   -16    
-336   32     
80     -912   
336    -1104  
48     96     
-208   448    
-16    224    
-112   -224   
-144   -128   
640    256    
-256   352    
448    -32    
-400   -128   
48     688    
128    144    
-48    384    
-128   -112   
0      352    
-272   224    
384    -912   
-192   128    
240    80     
48     256    
-64    160    
240    32     
112    48     
-336   224    
128    64     
-320   144    
-144   -144   
256    128    
48     -16    
-128   176    
112    -144   
-384   -432   
224    -16    
80     -560   
-864   -256   
608    192    
448    -336   
-672   -160   
256    96     
128    -320   
288    -288   
-144   32     
-304   32     
16     -208   
32     80     
128    -48    
0      -224   
160    512    
-464   736    
128    0      
432    -240   
-240   336    
-192   48     
240    80     
160    32     
-48    176    
-128   128    
224    -96    
-336   -176   
176    48     
176    96     
-80    32     
-672   -1712  
16     -1552  
1312   -144   
-848   -240   
592    -208   
96     80     
-176   368    
-384   240    
288    -256   
64     112    
-224   160    
-160   -80    
320    -16    
-16    -432   
-160   -384   
96     288    
96     -384   
-16    64     
-96    -2272  
16     96     
816    768    
-1568  608    
128    80     
944    -256   
-1024  144    
336    96     
256    48     
-208   128    
-208   176    
400    -32    
-400   96     
-144   -16    
320    240    
96     -816   
-128   192    
416    -48    
-432   -144   
64     -48    
-224   304    
400    -16    
-224   224    
192    -32    
-288   0      
256    128    
-128   -192   
-144   224    
352    -128   
-320   96     
144    -32    
1184   176    
-912   608    
-64    304    
752    80     
-48    -32    
-736   -48    
0      -560   
448    16     
-384   -416   
160    -96    
112    -112   
80     64     
-64    -48    
112    144    
-16    -528   
-208   256    
256    -16    
-80    192    
-176   192    
48     192    
-80    -224   
432    832    
-16    -224   
-1600  -160   
1264   96     
-224   -16    
-624   208    
512    -176   
-240   96     
736    -464   
-32    224    
-384   16     
128    -1392  
224    32     
-80    -496   
48     -1952  
-208   96     
112    -688   
-16    288    
-560   -2512  
80     -256   
224    -80    
64     16     
336    96     
-752   -16    
144    -608   
368    0      
224    -496   
-576   304    
240    -160   
-48    -128   
-256   -64    
112    -160   
384    -432   
-480   -1520  
-32    -224   
384    -816   
256    240    
-496   208    
224    32     
240    -320   
-208   16     
160    -64    
0      80     
-16    -48    
16     48     
-1152  0      
112    -80    
48     -128   
-448   96     
560    -640   
816    -1600  
-592   864    
384    -1600  
-496   -128   
-352   -240   
656    -64    
304    128    
-512   -144   
-352   -128   
288    32     
256    -112   
-208   80     
-112   -48    
176    -64    
368    -32    
-64    -640   
-288   -224   
-64    -960   
480    -272   
-48    432    
-96    336    
80     48     
-608   -464   
192    -976   
160    176    
96     -80    
-352   -192   
336    -704   
176    -960   
-336   48     
144    -480   
48     -416   
160    -128   
-160   176    
64     -96    
-304   -432   
160    -608   
496    -384   
-352   80     
-32    272    
-80    -48    
320    -32    
-752   32     
128    -16    
192    -688   
-640   -992   
448    16     
48     1200   
0      -96    
-224   -720   
400    800    
-928   224    
496    1168   
-48    1232   
-256   416    
112    80     
208    -80    
-288   32     
144    -224   
-272   -112   
192    144    
-80    -96    
-192   -400   
80     -208   
16     -1744  
352    -768   
224    -144   
-480   208    
192    32     
112    -48    
-160   -48    
-80    128    
-144   -176   
160    -224   
-80    -112   
-64    -240   
-64    128    
-128   -320   
-48    32     
336    -640   
496    -64    
-1424  256    
656    -224   
-32    272    
80     -288   
-384   -32    
144    512    
0      384    
32     -208   
-288   -80    
112    -128   
-160   224    
64     32     
-144   144    
32     -496   
-272   208    
-16    480    
256    0      
48     -16    
-144   96     
-320   1008   
928    -272   
-864   -64    
0      -304   
128    -80    
32     144    
-224   -96    
-384   -160   
16     80     
-96    128    
176    0      
-16    -48    
-624   0      
80     64     
16     32     
-208   -160   
-272   496    
-96    112    
48     -336   
0      -64    
-64    -320   
112    -320   
-16    -512   
64     -176   
-128   64     
128    -224   
-144   -352   
288    -160   
-448   416    
480    -560   
-2224  -640   
208    -832   
272    464    
80     -400   
-208   -208   
-464   -160   
336    -1488  
928    -16    
-448   1072   
-464   400    
176    -176   
-80    -208   
208    48     
-176   128    
-560   80     
128    32     
160    528    
-80    768    
-128   352    
-48    -64    
1232   -544   
-1616  -48    
352    -816   
448    -448   
-192   880    
-768   1344   
48     800    
240    400    
-544   -128   
176    144    
144    64     
-816   -240   
-448   -48    
320    -48    
-160   0      
-160   -80    
96     144    
192    -96    
-96    112    
-160   224    
128    272    
-160   -32    
-912   128    
-208   -272   
736    -528   
128    192    
-528   0      
144    112    
-320   592    
640    -16    
-368   64     
-160   -32    
464    16     
400    192    
-384   -144   
-992   368    
1056   -288   
464    32     
-576   224    
32     64     
240    -64    
208    448    
48     -160   
-768   352    
384    80     
-80    -16    
80     -64    
176    496    
-1680  -256   
1456   -624   
1216   -576   
-1312  240    
-944   16     
688    -16    
128    -448   
-576   176    
-272   -16    
160    240    
-352   32     
-288   128    
112    -224   
-16    32     
-176   -32    
352    144    
144    0      
-96    96     
-16    -32    
-160   672    
608    176    
-656   464    
64     -144   
-80    -240   
80     192    
-400   -80    
80     240    
144    240    
-32    -288   
208    -240   
-224   -16    
192    0      
-96    192    
-272   -160   
-32    -48    
-48    32     
160    -64    
-416   368    
-640   -176   
624    336    
-288   -128   
-144   32     
336    -16    
-368   80     
208    64     
-96    80     
32     -176   
-528   -432   
144    -320   
256    -288   
-656   -160   
48     -272   
576    96     
320    -16    
-528   -192   
272    64     
192    240    
-352   464    
816    304    
-80    224    
0      208    
-192   96     
144    64     
96     -160   
16     48     
32     96     
-96    240    
-64    64     
128    16     
336    176    
-144   -48    
-400   112    
160    256    
208    -48    
80     240    
-160   -32    
16     160    
160    -128   
-80    112    
0      -112   
32     64     
-528   1472   
2016   -928   
-912   64     
-496   -128   
224    -80    
496    384    
-48    -144   
-224   -176   
240    352    
-112   64     
32     -64    
-208   0      
48     48     
128    -144   
32     32     
-80    64     
-64    96     
96     0      
-16    -288   
-80    0      
272    -1072  
-976   672    
864    48     
-288   112    
-32    144    
112    80     
-320   -32    
176    48     
224    240    
48     176    
0      -48    
-320   -48    
16     16     
432    48     
-48    0      
-464   128    
480    240    
-272   -112   
208    160    
-32    -128   
-272   160    
240    144    
48     0      
-224   64     
176    176    
-208   32     
224    112    
80     48     
-272   -880   
16     976    
1616   -864   
-2160  560    
-208   240    
944    0      
-784   -144   
176    400    
352    0      
-432   48     
-64    -160   
304    192    
-112   16     
-64    128    
144    160    
64     -896   
-256   272    
208    -16    
-112   128    
-48    288    
-64    192    
16     64     
656    1040   
-1504  -416   
-512   416    
944    288    
16     -96    
-32    -16    
-304   256    
32     32     
160    -304   
-80    96     
16     -208   
-112   128    
64     128    
112    0      
224    -48    
-288   160    
-144   -128   
432    80     
0      128    
-224   -144   
-16    -272   
944    16     
-400   800    
-224   -544   
464    272    
-240   -576   
-352   -128   
352    -640   
400    16     
-256   -592   
-128   176    
320    160    
80     -64    
-240   0      
176    448    
1088   384    
-976   96     
-112   304    
-96    -544   
-272   16     
240    -672   
-112   48     
304    -224   
0      48     
176    240    
-720   304    
-176   144    
656    272    
-288   288    
624    2192   
-640   1344   
-32    -512   
1728   -480   
-896   -272   
-816   192    
1200   -784   
-784   -464   
-416   -336   
320    80     
464    48     
-400   -224   
-176   -400   
544    16     
-32    256    
-208   240    
96     784    
-288   -576   
64     608    
528    672    
-256   448    
-144   -416   
-16    -368   
0      -528   
-400   -448   
-144   -640   
144    -416   
304    -160   
-64    32     
32     624    
-16    -496   
0      -144   
448    -176   
-32    448    
-80    -64    
-272   -64    
416    0      
128    736    
16     144    
32     448    
-48    80     
368    176    
160    -16    
-64    -2544  
320    480    
144    1552   
224    -656   
-16    352    
32     -368   
256    432    
112    -64    
336    -704   
-864   832    
784    496    
-192   -144   
-368   -864   
-32    -224   
240    400    
16     -1248  
-192   96     
160    -96    
80     -48    
208    80     
288    -1120  
-352   -352   
-240   -16    
192    288    
-96    256    
-320   432    
112    -240   
16     -80    
80     -496   
-288   192    
-80    -16    
-32    96     
112    -160   
80     48     
80     -320   
-496   -304   
16     -144   
96     -384   
624    -96    
-992   496    
256    -32    
48     48     
64     160    
192    -288   
-544   48     
-80    32     
208    80     
-368   -16    
-128   -160   
-192   176    
112    16     
16     144    
16     -432   
-96    304    
80     -1984  
-176   608    
128    16     
-128   64     
-64    720    
496    80     
-544   -528   
-224   -608   
-64    -160   
176    400    
-192   160    
-128   160    
48     -304   
-16    -320   
112    -208   
256    -896   
-320   112    
352    16     
-64    64     
112    -240   
16     464    
16     208    
-320   -848   
64     -256   
432    656    
-176   -144   
-96    -464   
-288   48     
288    -416   
96     80     
16     32     
-16    160    
192    160    
1344   1744   
-1120  128    
-1680  -224   
1264   368    
800    -944   
-768   864    
-16    -256   
-176   -144   
-64    -160   
304    -80    
-144   -160   
-288   -96    
192    -304   
-64    -112   
-48    -1456  
16     144    
-32    48     
0      224    
-16    128    
0      -32    
-272   32     
-80    624    
2416   48     
-1568  -144   
-400   160    
832    -160   
-544   -144   
96     -592   
208    224    
-32    -496   
160    128    
16     0      
0      64     
-448   -256   
-336   -64    
384    -48    
144    32     
-528   -32    
96     0      
352    112    
-64    -64    
240    464    
96     -336   
-448   48     
96     64     
128    -32    
-400   -256   
-224   -304   
224    -272   
96     32     
-240   96     
192    432    
32     208    
592    -176   
0      64     
192    -128   
-128   16     
-544   -96    
224    432    
-480   528    
-432   -96    
288    -128   
-880   -16    
-16    128    
112    -16    
-624   -400   
352    -16    
224    32     
-1792  -64    
-80    -1600  
-816   -4288  
-1664  -1216  
96     -256   
496    112    
-288   -176   
-672   192    
-544   -48    
336    192    
176    -144   
-432   -32    
-256   -144   
144    80     
-304   192    
-144   0      
-16    160    
-96    -96    
-176   112    
16     -160   
64     144    
336    -304   
-656   384    
624    0      
-672   -16    
-416   -64    
496    112    
560    112    
-1008  -160   
-80    112    
864    -288   
-464   192    
144    -48    
160    192    
-96    -96    
-32    272    
448    208    
-464   128    
-240   -96    
176    64     
32     112    
-224   -32    
16     16     
-960   -208   
304    112    
-192   -240   
384    192    
112    -80    
-272   -96    
-80    48     
304    -16    
-144   64     
-96    -16    
304    912    
-752   -176   
-448   256    
624    -400   
-752   -224   
-48    96     
336    144    
-512   -112   
-224   32     
-32    -48    
304    128    
-144   -32    
160    0      
-128   0      
-144   0      
304    1152   
368    112    
-320   -736   
-640   448    
592    112    
-16    -160   
-80    -16    
-560   96     
16     176    
208    64     
256    -176   
32     496    
-656   320    
176    -176   
-240   -1248  
1584   192    
-640   416    
-976   -112   
160    176    
-208   48     
64     -48    
112    256    
160    -512   
-352   272    
32     16     
320    -32    
-32    160    
-176   80     
144    944    
288    272    
-320   -304   
64     64     
-224   784    
192    288    
48     0      
-368   976    
1344   -368   
-1008  -288   
-384   -112   
560    48     
192    240    
-48    80     
-144   416    
-112   128    
16     -48    
144    -128   
176    0      
-336   192    
-96    144    
352    64     
-32    -128   
-496   256    
112    -208   
-48    176    
176    -16    
-80    -32    
-32    32     
48     -16    
64     -112   
-288   -64    
0      96     
80     112    
48     48     
96     -144   
-256   416    
-1616  112    
1024   32     
96     -240   
-592   -16    
816    -80    
-448   16     
16     128    
128    -80    
-224   32     
112    0      
400    320    
-272   144    
-192   208    
112    -16    
208    -112   
-384   -80    
224    -16    
432    -32    
-144   -80    
-48    112    
-496   -720   
432    144    
896    -720   
-2080  32     
208    160    
480    -544   
-1072  80     
256    -48    
-224   -48    
512    -16    
96     32     
-384   48     
160    224    
336    176    
-288   32     
-128   64     
-160   176    
32     -16    
160    -160   
224    -320   
16     96     
464    880    
-464   496    
464    -384   
-416   96     
-784   -256   
1136   -560   
160    208    
-656   272    
464    48     
304    256    
112    304    
128    512    
-64    -32    
-368   -368   
368    1040   
-368   608    
-192   -576   
688    -336   
256    96     
-208   0      
-336   -816   
464    240    
480    256    
80     -144   
-880   32     
352    -32    
912    -352   
-400   32     
208    1424   
880    320    
-320   0      
576    224    
-672   1632   
224    384    
288    -240   
224    -1728  
-400   -512   
-96    -320   
352    752    
336    -240   
-48    -16    
-112   80     
128    272    
400    528    
-336   16     
-336   -432   
336    -96    
32     -160   
-192   176    
-144   96     
288    -192   
256    48     
-480   -192   
320    -768   
96     -96    
96     848    
208    208    
16     -624   
224    656    
-80    448    
-272   -176   
288    -256   
-16    656    
-192   272    
192    32     
128    -464   
240    1200   
-32    32     
128    -576   
-544   64     
336    208    
288    -192   
112    -288   
-176   -64    
-272   272    
192    -256   
256    128    
-304   144    
-176   -32    
-224   720    
1344   -320   
-240   1056   
-240   688    
160    768    
320    288    
-208   560    
-288   -720   
352    -160   
224    -192   
-256   32     
32     32     
48     240    
-32    96     
224    -32    
128    -128   
32     -896   
288    416    
208    400    
-224   -160   
-16    -432   
288    64     
-128   352    
-16    336    
16     -80    
-144   -224   
624    -800   
464    -64    
-192   -176   
-576   128    
544    288    
624    672    
-304   208    
-752   368    
208    208    
-48    -912   
112    -672   
64     272    
-16    512    
-144   384    
160    -16    
-16    -48    
176    32     
-16    272    
16     -176   
-304   176    
112    -784   
256    208    
-208   -144   
-400   192    
608    -576   
-448   432    
208    -1344  
176    -1248  
32     -112   
304    320    
-160   576    
48     -112   
-48    256    
32     -64    
64     0      
336    -80    
-208   112    
-224   -96    
384    48     
48     -496   
96     96     
0      -96    
-288   -464   
-112   112    
208    -144   
96     -1760  
-144   -144   
112    -2304  
-256   64     
240    176    
-112   16     
128    288    
-208   -432   
592    -528   
-2576  112    
1088   -416   
1232   80     
-1136  80     
-208   336    
544    -528   
64     -528   
48     -400   
224    -1152  
-48    -16    
-576   -384   
336    -256   
576    192    
-224   -480   
-272   176    
192    -48    
144    -176   
-192   64     
16     -32    
-320   -688   
1360   496    
-512   -224   
-912   384    
464    32     
-688   144    
224    -16    
432    -128   
176    -880   
-32    48     
-288   -336   
176    96     
160    -192   
-112   128    
0      -576   
-560   128    
576    -128   
-112   -96    
-80    -80    
-144   -176   
-112   32     
160    -368   
-1040  160    
480    -672   
16     -16    
-384   128    
-96    96     
672    -80    
-16    32     
-480   -16    
80     32     
192    16     
-48    16     
-96    -144   
-112   -192   
-640   -160   
448    -336   
160    -48    
-32    80     
16     -16    
-240   -800   
224    80     
464    -16    
-160   -48    
192    432    
-80    -112   
-560   112    
736    64     
-400   -816   
80     512    
864    -1408  
80     1184   
352    320    
-640   -528   
416    16     
208    288    
-96    -224   
0      -112   
48     -64    
64     16     
-96    320    
-96    -320   
32     128    
0      16     
96     80     
-560   64     
96     -80    
-208   -32    
-320   96     
640    176    
-688   80     
240    32     
576    -1296  
-400   -64    
-208   -64    
656    -240   
-352   -128   
208    -112   
-176   -80    
288    -112   
-368   -112   
64     16     
-272   16     
192    80     
160    272    
-64    -208   
304    -80    
-192   -1040  
-240   -80    
240    -48    
160    112    
-144   16     
-176   -16    
-144   -288   
-80    0      
-144   -176   
-16    0      
144    96     
320    -48    
-304   128    
32     -288   
576    432    
976    -128   
-496   544    
-96    256    
96     240    
-144   -528   
-512   -272   
160    128    
-96    80     
304    32     
32     -32    
-224   208    
64     -256   
48     112    
-256   -96    
-480   224    
96     -464   
-720   144    
160    80     
-800   -320   
-112   -352   
-128   -160   
16     144    
-32    -256   
-48    -96    
-560   208    
-368   208    
-320   -368   
96     144    
544    2272   
1472   48     
-1536  704    
-400   -128   
464    -256   
80     32     
-656   464    
272    -416   
-128   -368   
272    -144   
-96    144    
-368   -192   
32     96     
-112   -624   
272    -384   
-240   96     
-96    32     
-128   352    
-160   -272   
144    -48    
320    -432   
-976   896    
960    -544   
-768   496    
-384   -896   
128    -304   
-144   -96    
-16    -160   
192    48     
-32    -96    
-64    -688   
80     -496   
-176   208    
416    144    
-160   288    
-128   304    
-32    -48    
-80    -672   
32     176    
-112   224    
-160   144    
64     -32    
192    -160   
-192   -80    
0      160    
-16    48     
32     128    
-16    80     
16     112    
-240   -912   
1168   -1200  
-688   64     
576    480    
-368   -336   
-992   240    
304    48     
448    0      
320    336    
-352   16     
-160   528    
304    272    
-96    128    
-192   336    
192    368    
-240   352    
-48    0      
96     -112   
-432   -272   
-32    -144   
-64    -272   
544    64     
-3280  80     
368    688    
784    352    
-784   -144   
-336   -112   
624    1200   
656    1312   
-384   416    
192    240    
64     96     
-176   96     
0      -48    
-64    112    
-224   -16    
-288   160    
176    528    
-512   592    
-192   544    
464    272    
-272   160    
-96    -176   
-64    832    
400    1088   
-1008  352    
800    224    
528    -176   
-352   -544   
-32    640    
16     192    
-400   240    
32     -16    
-224   64     
928    400    
656    752    
-384   -208   
16     416    
-416   592    
-128   848    
576    112    
-448   -160   
-192   0      
288    -48    
16     48     
-144   224    
512    480    
400    128    
128    32     
-272   144    
-112   176    
-160   2704   
896    256    
-1536  -496   
-544   -224   
1648   704    
-400   -288   
-672   -1168  
-32    1408   
160    224    
32     -192   
-224   -416   
-464   112    
272    144    
192    -48    
16     -16    
-96    -112   
-288   368    
416    688    
16     448    
-144   -32    
96     -112   
160    192    
-656   -96    
176    400    
176    -192   
160    -128   
-448   464    
224    144    
80     -432   
304    464    
-304   128    
-176   192    
352    112    
192    -240   
-352   80     
208    1104   
96     912    
-144   880    
352    1776   
-64    1024   
48     -96    
128    -592   
-32    192    
112    528    
-272   256    
368    -64    
336    896    
-448   1376   
-432   -608   
464    -432   
176    -48    
-144   -272   
-864   -784   
64     -608   
752    -1088  
-208   80     
-416   -1536  
-336   -640   
352    64     
112    784    
96     -432   
-192   -560   
32     432    
256    496    
-64    304    
-48    -352   
-16    256    
80     384    
160    976    
-272   80     
64     -384   
-64    224    
240    -80    
-80    128    
-80    1216   
304    752    
-256   64     
-48    160    
512    -624   
16     48     
144    0      
-1456  1072   
1024   -896   
704    0      
-352   1152   
-128   -592   
112    432    
112    -208   
-208   144    
128    -96    
-48    -224   
-32    -112   
144    192    
-80    -208   
-272   -208   
80     -112   
400    64     
16     176    
-160   528    
32     256    
0      -192   
640    912    
-64    656    
-624   -48    
448    -64    
272    416    
64     144    
0      960    
368    368    
-16    336    
-144   96     
112    176    
-320   112    
80     80     
176    144    
-80    -304   
48     -16    
64     -96    
176    48     
-112   96     
208    144    
0      64     
-224   176    
304    -576   
-368   -80    
288    16     
192    176    
-96    -16    
-192   -160   
176    80     
-640   -976   
-80    -16    
1840   -400   
-960   -48    
208    16     
688    -176   
-352   0      
-208   -48    
80     -16    
224    16     
-256   112    
208    144    
-144   112    
448    -192   
-352   96     
64     -368   
192    176    
-528   -144   
160    64     
288    -2448  
-240   112    
-224   384    
1872   0      
-608   368    
16     112    
384    512    
-144   48     
-400   -32    
512    16     
96     208    
-240   64     
-96    96     
176    128    
48     48     
-32    -608   
144    96     
64     192    
112    64     
0      -480   
-480   288    
64     192    
192    0      
-432   448    
96     -656   
16     -336   
-256   -272   
128    400    
-464   32     
-208   352    
464    -256   
-448   -128   
-96    -64    
448    32     
160    208    
-64    128    
224    0      
-512   -192   
-144   368    
352    128    
464    144    
-256   -304   
0      144    
400    -272   
-112   96     
-256   -64    
432    128    
384    -192   
160    80     
192    96     
-960   -2320  
768    -352   
1520   -16    
-800   432    
112    -64    
-144   -32    
144    -32    
432    -176   
-208   -64    
96     -32    
48     -32    
32     -176   
-96    -16    
544    -832   
-560   16     
32     -128   
256    -288   
-112   -128   
-224   -208   
576    -96    
-928   -1904  
624    -272   
-80    48     
0      -288   
352    80     
-128   -304   
-16    -336   
192    112    
176    -416   
-240   288    
16     -272   
48     32     
192    -192   
-16    -48    
176    -96    
0      -128   
-80    -96    
176    -256   
144    128    
-224   -432   
-16    288    
128    -144   
-208   48     
192    -160   
128    208    
-32    -48    
-16    -160   
-32    -16    
-64    -208   
-48    176    
160    -192   
-48    144    
-96    -256   
448    -160   
-432   128    
-96    176    
784    160    
144    752    
-752   1120   
208    432    
128    -112   
96     0      
-400   -16    
-48    -32    
96     -112   
208    -304   
16     -192   
-64    -96    
160    -304   
80     -1360  
-240   -496   
240    -592   
-144   0      
48     -208   
240    64     
-64    -16    
-176   -528   
-400   368    
528    320    
32     80     
-112   -192   
-320   -864   
480    -2400  
-288   656    
672    -640   
-672   112    
208    -432   
176    -272   
96     448    
32     -1056  
-272   48     
112    112    
96     80     
-32    -48    
-464   -144   
176    96     
368    32     
-32    -304   
-48    432    
160    -880   
80     0      
-368   -1792  
656    -512   
-256   624    
400    64     
-544   560    
48     -528   
160    -336   
-128   208    
-400   32     
32     -80    
-544   224    
128    -608   
-176   -16    
-256   -528   
192    320    
-80    -272   
-208   48     
400    -560   
176    304    
-336   256    
80     -240   
128    32     
96     128    
-368   -272   
16     -544   
128    304    
192    64     
-256   64     
-352   -320   
576    -608   
528    -1136  
-2128  384    
960    -336   
-288   -176   
-192   -144   
224    368    
-576   -240   
336    -64    
64     -192   
128    256    
-304   -96    
-208   64     
64     144    
-224   -304   
16     144    
-240   240    
-384   -144   
320    -272   
-864   384    
-176   -32    
-112   -736   
1456   688    
-96    -272   
-1488  -1088  
384    -656   
544    528    
-928   -368   
0      -528   
96     -2144  
-720   -880   
32     800    
240    752    
-176   48     
-176   -192   
-128   96     
-768   -48    
256    16     
256    16     
-336   -192   
-64    -128   
-16    320    
192    -32    
112    32     
-352   -112   
112    1008   
1152   -224   
-960   -1792  
-720   208    
-112   -352   
-176   80     
272    320    
-256   48     
192    48     
160    -112   
-96    160    
144    -32    
-576   -752   
864    -1440  
32     -320   
32     224    
-208   -128   
48     -112   
496    1008   
-384   800    
-32    176    
-512   640    
-16    80     
-368   -160   
-16    80     
192    -80    
1200   2304   
-1472  960    
-704   -192   
1184   128    
720    1728   
-768   1680   
-240   560    
448    -544   
272    -208   
-208   -48    
-192   256    
32     -32    
128    -448   
-192   -384   
-256   464    
304    128    
160    -256   
-192   -304   
48     -640   
-144   128    
0      112    
80     144    
208    96     
32     -96    
-144   560    
144    -688   
-352   -240   
48     32     
320    -608   
-448   -1408  
-512   160    
384    480    
80     464    
-176   -256   
-160   -96    
320    -208   
-400   -288   
160    -144   
-160   -480   
-192   -160   
-240   -32    
96     -16    
-160   272    
-160   256    
-640   1056   
544    464    
-224   -16    
-208   848    
416    224    
144    -224   
-272   -128   
-368   928    
1248   -64    
-64    -96    
-624   -1056  
-560   -640   
224    -672   
-432   -592   
-64    -448   
0      -96    
32     288    
48     352    
-208   -32    
448    64     
-128   -16    
-320   -192   
16     496    
320    80     
-96    624    
96     736    
-160   384    
16     128    
-16    128    
0      16     
96     -32    
-320   -1136  
-272   -896   
416    -1232  
-320   -736   
-80    -80    
1024   576    
-1904  1552   
864    -48    
208    -80    
-288   144    
-320   -336   
-368   656    
608    144    
-480   304    
32     -80    
-80    48     
-160   -16    
144    288    
128    -192   
-352   160    
160    80     
48     -160   
-160   384    
112    160    
-80    144    
-288   160    
-336   896    
1728   -128   
-784   -80    
16     -176   
368    48     
-48    176    
-32    -80    
224    432    
96     352    
-272   160    
16     112    
224    176    
-48    0      
48     16     
96     -112   
144    -80    
-416   32     
288    80     
64     192    
-256   32     
-32    256    
352    16     
16     64     
-224   -64    
-160   16     
208    288    
0      48     
-112   112    
-48    416    
-688   1680   
3360   880    
-1072  192    
-832   -48    
528    96     
-512   176    
-16    224    
432    128    
-144   176    
-144   -16    
112    80     
256    80     
-208   128    
-384   -240   
512    320    
64     -80    
-320   272    
176    -64    
144    64     
-64    64     
-144   160    
-48    624    
2112   288    
-1216  -48    
-128   176    
1312   32     
-912   192    
208    -144   
-64    -96    
-64    224    
16     -16    
112    160    
-80    0      
-128   -576   
80     144    
48     48     
96     272    
-464   384    
272    80     
-48    208    
-96    96     
-48    -160   
-608   192    
240    -48    
-32    192    
48     80     
-320   -192   
288    576    
-336   48     
-480   144    
496    96     
160    -32    
-304   -128   
48     320    
160    -16    
-240   112    
208    -48    
-128   352    
384    -288   
0      336    
-416   32     
-32    -96    
64     -48    
-176   -32    
192    160    
-368   -864   
208    160    
192    -64    
-160   256    
-1392  -1456  
2512   -2416  
288    80     
-1536  400    
-16    64     
656    128    
-288   128    
176    -32    
224    480    
-400   -128   
-16    240    
640    -2096  
-368   80     
-48    96     
224    32     
240    -272   
-192   96     
-80    -32    
-96    80     
144    576    
464    464    
-480   480    
64     -176   
128    128    
-208   -400   
48     144    
48     -528   
-288   272    
784    -240   
-160   192    
-128   112    
320    112    
-32    48     
-400   -160   
416    32     
-240   -112   
-16    128    
240    144    
-240   80     
352    -16    
-16    128    
-16    -448   
-160   -320   
-80    -464   
416    208    
336    0      
-432   -96    
-336   -336   
320    -176   
-16    -272   
-80    -32    
48     368    
80     -240   
-80    -144   
48     48     
32     192    
-16    -240   
-448   -512   
320    -880   
496    -288   
-304   -192   
-240   -48    
160    -64    
16     -48    
224    -224   
176    -368   
-320   -128   
-208   -496   
352    -288   
80     -160   
-176   496    
-32    -208   
192    64     
-64    -624   
32     -48    
-192   -144   
224    -128   
-32    -400   
96     -304   
48     400    
-208   -256   
640    -560   
-912   576    
176    96     
448    -1168  
-48    -176   
-80    -64    
464    240    
400    -496   
-176   -512   
112    416    
-128   -656   
-176   240    
240    -128   
144    -336   
-288   -208   
96     -224   
320    48     
208    0      
-64    -304   
32     -96    
224    -576   
-816   -80    
464    -16    
416    -1632  
-32    0      
-272   -400   
-112   64     
-176   -96    
128    -176   
48     -96    
-80    -128   
-128   80     
160    -288   
0      -64    
96     -256   
128    -160   
-272   -48    
64     272    
480    -64    
-336   16     
-208   -16    
80     -16    
80     128    
192    -224   
-480   -96    
-512   32     
192    32     
96     -144   
16     -80    
-336   -192   
-224   1328   
1520   368    
-80    -544   
-336   -160   
192    0      
144    0      
-320   -208   
-304   320    
32     -480   
-432   -256   
-224   -480   
128    288    
64     16     
-96    16     
-144   -1200  
176    128    
336    -1376  
-384   1232   
0      -1024  
176    -16    
544    592    
-1696  -720   
-416   -16    
512    -336   
-624   -160   
512    256    
-432   1600   
-432   2064   
-592   368    
432    -800   
-320   -944   
-496   -720   
496    -208   
-224   -64    
-352   -256   
-144   96     
640    672    
-576   512    
-240   -240   
64     -368   
-64    -256   
-528   -64    
160    -496   
-400   -64    
64     -128   
-80    -336   
64     -544   
-288   -1920  
-384   -864   
224    -160   
-208   -64    
-192   -272   
352    512    
-240   -48    
-128   -320   
784    -96    
528    2464   
-1072  1632   
-800   16     
592    -768   
-160   48     
-336   -480   
-272   -528   
256    -848   
32     -704   
-208   -208   
288    48     
112    -768   
144    -304   
-320   224    
144    1904   
1104   128    
-800   320    
-912   304    
864    64     
928    -864   
-1408  -1584  
-384   32     
1024   -320   
480    336    
-688   -112   
-368   -32    
400    -80    
272    -80    
48     80     
32     -64    
-304   96     
448    352    
-512   608    
-64    -560   
-80    0      
16     -416   
400    352    
-624   -240   
-896   320    
240    -208   
-416   -80    
96     144    
480    -48    
-176   64     
16     -640   
-176   -96    
96     96     
352    64     
-192   -48    
16     272    
-80    -400   
-32    96     
112    64     
-144   48     
-16    96     
-48    208    
-48    224    
-176   32     
-352   -64    
160    -592   
-688   -848   
-256   -576   
448    192    
0      16     
-432   -16    
560    -80    
704    192    
-736   304    
32     272    
80     -48    
-192   -144   
256    16     
-592   0      
-112   112    
144    48     
16     16     
-416   16     
-16    112    
336    -240   
48     -80    
-352   96     
160    192    
64     -416   
-288   -160   
-128   208    
-112   96     
-160   16     
-16    -48    
-256   -304   
384    -704   
-80    352    
-240   -64    
192    -112   
-464   0      
480    -2096  
-2240  1584   
1120   -224   
320    32     
-336   -48    
48     192    
-32    -352   
-272   128    
-112   96     
224    96     
-320   -64    
-304   416    
336    -32    
-48    -336   
-48    -224   
128    80     
-272   352    
160    -32    
16     80     
16     -32    
-400   -608   
720    -672   
-880   448    
-128   -528   
112    112    
-320   -16    
-80    240    
-64    320    
192    -304   
-400   112    
-144   32     
-48    64     
272    48     
272    112    
-624   64     
-16    16     
160    16     
-64    144    
-240   -144   
-32    128    
32     -144   
-16    176    
-560   -144   
-256   -16    
208    -96    
32     -80    
-352   192    
352    32     
-176   48     
32     256    
-224   1104   
1392   -352   
-1056  -16    
-192   -208   
944    320    
-432   -32    
80     256    
-368   0      
-96    0      
-176   48     
256    80     
112    96     
-192   32     
-272   32     
528    144    
-96    112    
-480   16     
416    144    
64     -160   
-64    16     
-80    48     
-784   -256   
1440   -112   
384    -80    
-1248  -320   
448    112    
496    48     
-512   -352   
-160   160    
480    144    
-80    80     
-160   96     
320    160    
-256   -160   
-208   240    
288    -80    
0      80     
-160   -96    
-256   16     
256    128    
208    80     
-48    0      
512    80     
-480   176    
-128   -80    
192    -16    
64     -16    
112    992    
-544   -64    
-48    16     
224    -48    
-176   0      
320    -192   
32     96     
176    16     
16     352    
464    -176   
-240   -112   
-80    -48    
-272   192    
128    48     
0      -64    
96     64     
64     96     
-240   64     
-64    112    
832    96     
-80    112    
-576   16     
-288   -1104  
-288   1296   
-48    1552   
-800   -320   
-144   -240   
912    48     
-608   -96    
-272   176    
112    -256   
80     224    
288    -176   
-384   112    
80     -368   
32     192    
0      32     
144    48     
416    176    
-336   48     
176    176    
-48    464    
-288   560    
240    208    
96     160    
32     -96    
-240   -64    
128    96     
-112   -64    
-528   80     
304    160    
144    352    
384    272    
-688   -576   
80     -400   
592    -240   
64     336    
-752   -32    
112    144    
656    800    
-528   928    
-80    176    
224    384    
80     368    
160    -816   
192    80     
32     0      
-112   464    
208    624    
-80    384    
288    -208   
-96    624    
48     336    
-80    96     
-112   -800   
144    -304   
16     -1152  
-96    -592   
128    -512   
-400   -2464  
-832   -1840  
384    -496   
48     864    
224    240    
-80    64     
0      -64    
-208   -16    
320    -416   
80     288    
-256   448    
-96    464    
32     48     
176    304    
32     32     
-80    -272   
96     -160   
-48    -480   
288    560    
-176   160    
112    -352   
-64    80     
32     272    
-16    -512   
272    -48    
176    -528   
-624   -16    
80     96     
240    -304   
-80    192    
-16    -320   
-64    208    
-96    -336   
192    0      
64     16     
-48    32     
32     -128   
0      160    
-112   0      
128    -16    
-352   192    
208    0      
16     -32    
96     -192   
-352   64     
368    160    
544    464    
-528   -592   
-80    112    
32     -2160  
0      -16    
272    -304   
144    304    
-336   224    
-128   112    
272    -80    
208    -16    
-48    160    
16     -128   
112    32     
-16    0      
-32    -144   
32     -864   
144    32     
128    -224   
0      496    
192    48     
-192   32     
-192   288    
192    128    
192    -16    
-304   112    
160    256    
96     -112   
112    1136   
912    -1328  
-1888  -64    
1088   -752   
48     -144   
-576   -224   
-96    208    
640    -576   
320    416    
-144   192    
144    160    
32     96     
64     -320   
112    560    
-352   -928   
96     -48    
368    -64    
144    800    
-128   -560   
-160   -480   
144    -256   
464    1440   
1472   16     
-1248  160    
576    0      
-80    -112   
-144   336    
-160   976    
1248   688    
-144   960    
-208   1056   
352    240    
144    32     
0      -192   
48     240    
208    -288   
-48    224    
-64    688    
736    -64    
96     192    
-432   -96    
-112   -880   
720    144    
-48    -736   
-544   464    
384    -2032  
896    -336   
192    -48    
-16    -48    
-144   288    
96     80     
624    272    
-320   336    
-416   -400   
176    -256   
-544   64     
80     -144   
-336   112    
-96    96     
624    -304   
-336   -288   
64     -240   
144    -1024  
192    400    
320    -144   
-32    -16    
544    -96    
-48    112    
128    560    
-336   672    
288    -2304  
-1600  -928   
640    496    
1248   -224   
-432   -144   
-640   -320   
512    224    
-176   128    
224    208    
-272   -192   
-96    -48    
112    -176   
-80    -112   
384    64     
-160   -272   
-192   -16    
96     -176   
-432   -96    
752    -32    
-880   -1232  
-16    -976   
416    -384   
-272   -480   
400    16     
-256   -1328  
-256   144    
224    -256   
-144   320    
-48    -32    
144    160    
-240   -304   
64     -352   
192    80     
112    256    
-544   128    
-96    64     
-48    -32    
16     -16    
384    112    
144    -48    
-432   64     
64     0      
256    -16    
-32    -144   
192    -384   
-528   336    
560    96     
192    160    
-144   -448   
-496   -208   
192    -160   
192    -144   
-1024  80     
352    16     
352    0      
160    -32    
128    -2048  
240    32     
-112   16     
48     -176   
-32    48     
-16    -144   
-160   -160   
160    -272   
-128   -16    
-112   -80    
-704   -192   
48     -208   
304    448    
-368   -112   
192    -48    
272    -1296  
-272   -48    
16     32     
96     -32    
-208   112    
32     336    
-240   -368   
96     -160   
-144   128    
576    2704   
-928   -1776  
-1360  272    
1472   -144   
128    -848   
-1136  208    
608    176    
992    256    
-704   -48    
-128   -288   
-48    496    
80     144    
128    -176   
-240   -128   
80     -112   
240    240    
-480   192    
160    -560   
-112   256    
128    -16    
-336   -448   
1088   240    
48     144    
-1072  -128   
352    -64    
400    -48    
-512   208    
64     272    
512    -224   
-496   176    
112    -240   
288    224    
-48    0      
-288   192    
-48    -336   
32     -32    
288    112    
-368   0      
32     240    
-192   -16    
-96    48     
16     64     
112    112    
112    -128   
192    64     
-1200  -144   
-224   208    
32     16     
304    96     
-560   -352   
-544   1216   
896    -32    
-272   96     
-688   -240   
256    352    
304    80     
-720   176    
400    224    
-192   336    
-336   208    
224    -64    
48     64     
0      -80    
224    112    
-800   -416   
304    0      
-80    16     
0      80     
480    240    
-224   -32    
-16    128    
-976   -160   
976    -32    
64     -368   
-1248  -288   
272    -128   
576    128    
-384   -320   
-624   -80    
496    0      
240    112    
-208   32     
112    80     
-208   -64    
-112   -16    
192    -16    
32     64     
-256   -144   
-48    48     
96     160    
-64    -144   
-64    -192   
784    352    
-704   -336   
-144   80     
864    192    
-848   112    
-80    96     
720    -96    
-416   160    
-192   16     
208    16     
240    -48    
-432   -112   
-80    -240   
-944   -80    
208    -480   
112    256    
176    64     
-288   176    
-32    0      
416    480    
-608   240    
-208   0      
96     -80    
128    -528   
-80    16     
-160   -32    
-432   -448   
688    -1328  
-1472  -2640  
-1072  -256   
960    -16    
496    -112   
-144   320    
16     80     
-256   -16    
-672   -144   
304    -160   
400    -144   
-80    128    
-400   -208   
48     240    
128    -48    
80     224    
-224   128    
-48    176    
-112   144    
400    576    
-176   848    
-32    704    
32     -96    
32     0      
592    16     
-160   368    
-272   320    
-288   -192   
288    800    
304    1120   
-80    384    
-464   -176   
128    208    
128    64     
-96    -208   
-144   -224   
-80    -128   
160    96     
272    -128   
32     224    
-128   144    
224    -208   
-384   32     
-16    48     
-256   -1392  
-368   -80    
64     624    
-192   480    
336    736    
-32    -176   
-160   320    
32     64     
-112   -864   
-256   80     
432    -896   
-464   -1136  
96     320    
-240   1136   
-352   336    
-160   112    
224    176    
-80    160    
0      16     
32     224    
-96    -384   
-576   -704   
0      400    
256    256    
-96    16     
256    -32    
240    -80    
96     144    
-96    16     
0      112    
48     64     
-48    64     
112    96     
224    288    
-208   496    
48     128    
176    -128   
-128   16     
-416   1312   
944    -176   
-640   48     
176    48     
-128   256    
16     64     
16     64     
144    -304   
192    -16    
96     256    
-16    96     
96     32     
-96    -192   
160    32     
112    160    
-256   128    
32     -176   
16     -96    
-48    96     
-48    144    
272    400    
352    256    
-576   -64    
-96    144    
272    128    
-176   -224   
-16    -272   
176    176    
-48    288    
-80    64     
80     -48    
288    -96    
-16    32     
-80    64     
176    48     
-64    -576   
-80    -240   
176    -624   
112    -464   
-16    176    
-96    16     
144    0      
336    -112   
-256   -64    
-80    112    
176    336    
-192   128    
352    224    
-240   96     
1312   928    
-2192  720    
-272   240    
1104   432    
-288   -624   
-1296  -672   
64     112    
288    -608   
256    224    
-32    576    
-16    1216   
-80    544    
400    96     
176    80     
-240   -288   
-304   16     
160    -336   
448    624    
-288   32     
-336   -64    
336    80     
-592   368    
2464   16     
-896   -1216  
976    176    
-384   -640   
256    -832   
368    208    
-960   832    
48     368    
496    96     
0      -80    
-208   -112   
-304   0      
304    -944   
512    144    
-416   -560   
-64    320    
368    16     
112    448    
-256   32     
-160   0      
304    464    
624    -128   
-912   464    
192    16     
336    -240   
-768   224    
144    32     
208    -272   
272    448    
-384   160    
-240   -112   
32     64     
544    -96    
304    368    
-320   128    
208    1072   
-32    432    
-816   16     
272    96     
352    80     
64     -64    
80     192    
-64    -208   
224    48     
448    160    
96     160    
-368   -304   
-96    112    
240    -2592  
-1616  -1264  
320    608    
160    208    
304    208    
-208   -128   
-320   272    
80     -144   
160    400    
160    -768   
-224   128    
304    -768   
-144   224    
0      -48    
144    112    
-48    -144   
48     208    
176    -96    
496    816    
-784   192    
432    160    
288    -80    
-384   -352   
-848   0      
624    -560   
384    48     
-512   96     
288    -176   
32     -1248  
304    272    
-128   64     
-32    96     
304    -80    
-112   -16    
176    160    
160    0      
16     96     
480    -400   
-288   32     
160    16     
48     16     
48     80     
352    240    
-192   -368   
128    224    
-112   0      
240    -992   
0      16     
-272   -64    
208    -256   
336    -208   
176    -736   
-160   48     
-400   752    
976    176    
-720   288    
-400   -48    
416    -48    
160    -224   
64     -1248  
-48    128    
160    -96    
-320   128    
-256   -128   
-16    -544   
-32    -176   
0      -208   
368    -192   
-224   -768   
-432   -176   
432    -1968  
-224   -128   
224    -208   
128    -32    
-48    144    
-240   16     
192    -144   
352    704    
-800   560    
176    -224   
-32    -144   
832    1824   
1632   592    
-1232  -432   
-32    -112   
384    -816   
-160   -672   
80     -352   
224    672    
-656   224    
496    -320   
464    -144   
-560   -80    
-96    -112   
368    368    
-112   16     
-336   -272   
112    -224   
-176   -160   
128    -48    
240    -368   
-416   -1280  
-272   -1104  
880    304    
-720   -64    
208    64     
80     0      
-368   -128   
208    -352   
192    368    
-320   -160   
48     -80    
-384   -144   
-240   224    
384    0      
-192   48     
-48    48     
224    -720   
-336   -112   
240    -272   
0      96     
-64    -80    
32     16     
80     -128   
-48    0      
-64    -208   
-144   -48    
352    -48    
16     -32    
-496   80     
576    576    
2160   -208   
-2304  80     
112    48     
1184   224    
-528   0      
-608   -64    
1008   -16    
-128   -352   
-496   -176   
224    0      
144    80     
-160   0      
128    -112   
-1664  64     
608    -192   
-288   160    
80     -176   
-96    80     
512    -1632  
80     -192   
144    880    
-16    -736   
-1488  -144   
1488   -320   
576    512    
-240   624    
-448   -64    
400    -48    
208    16     
-96    -256   
-480   160    
-208   -160   
784    -32    
80     -480   
112    -272   
-512   128    
320    176    
208    -256   
-400   80     
192    160    
32     176    
80     448    
-672   -16    
-224   -416   
-64    416    
592    -272   
1008   208    
-112   144    
-16    192    
16     -32    
-336   -16    
0      96     
-80    208    
112    64     
-64    304    
-448   -16    
-208   -384   
512    160    
128    240    
-1568  -784   
336    32     
32     -208   
-192   -160   
304    48     
-304   -16    
320    -144   
-304   112    
192    -112   
-368   16     
-320   48     
-912   144    
-528   624    
464    -880   
-448   176    
544    176    
-144   -512   
-752   -1120  
-368   -1728  
432    -688   
-560   272    
-112   400    
-208   -224   
368    336    
-112   112    
-240   144    
384    -464   
-432   96     
-144   112    
480    464    
-288   48     
0      32     
-64    -208   
480    112    
-176   192    
-224   336    
-16    32     
-144   304    
-64    144    
-272   192    
304    432    
-560   -256   
-336   -144   
-48    -560   
32     -512   
-176   -192   
80     336    
-192   128    
128    96     
48     -672   
-528   -528   
-96    192    
-112   320    
0      -352   
-208   -288   
384    544    
-304   112    
304    160    
-480   -752   
48     224    
224    -16    
-400   -720   
992    -400   
-160   704    
-560   -80    
80     1232   
-160   720    
-32    -1328  
-96    -416   
560    768    
-160   400    
-144   -64    
-80    96     
48     -576   
96     -352   
-112   48     
-240   416    
-240   160    
272    -80    
-80    32     
-128   -64    
96     16     
-96    112    
0      48     
-128   0      
80     -32    
-336   96     
-48    656    
-144   608    
-160   240    
48     -192   
-48    64     
-560   496    
528    -256   
-624   96     
336    -144   
144    -352   
144    -32    
-160   -320   
288    -816   
304    -128   
-80    -144   
112    -128   
-32    64     
-32    -80    
144    -32    
-80    -224   
-128   80     
96     160    
208    272    
-240   224    
-224   176    
672    -592   
-336   208    
304    -96    
-512   -48    
-272   80     
64     -336   
224    -576   
80     64     
-48    -48    
-336   -272   
320    80     
192    288    
-16    240    
160    224    
-320   -192   
96     -16    
16     96     
-160   -192   
-112   208    
-32    -176   
112    384    
-160   -32    
352    32     
-160   -96    
-320   176    
320    -32    
160    240    
-128   -160   
240    -80    
-352   -1520  
-1392  -192   
1024   -336   
-416   256    
784    272    
-832   144    
80     96     
128    192    
-192   176    
-64    -80    
96     176    
16     112    
-128   -16    
16     272    
448    192    
-64    288    
-224   320    
144    208    
-160   32     
32     0      
-64    96     
-528   -976   
-336   -32    
992    -160   
-32    96     
-160   160    
560    -160   
-256   -432   
-656   224    
880    96     
-160   -16    
-208   144    
224    160    
-400   -192   
240    256    
16     -32    
-160   48     
128    48     
-16    48     
256    224    
336    80     
-80    224    
-640   416    
128    -256   
-16    160    
640    80     
-48    992    
-1248  656    
-576   -496   
784    -208   
-128   0      
-448   192    
336    192    
272    48     
80     560    
-16    -512   
-416   -240   
544    -128   
800    -192   
-384   96     
-816   112    
304    144    
560    0      
-608   80     
-176   -16    
672    400    
-32    256    
-464   0      
336    96     
-496   416    
-1088  1952   
432    880    
-608   816    
-288   -48    
496    224    
160    64     
-784   48     
320    96     
368    64     
-848   -16    
16     112    
512    -656   
-192   32     
-80    48     
240    144    
-48    16     
0      64     
160    112    
96     -240   
-1136  -32    
1040   -208   
-208   48     
-192   -48    
176    0      
352    0      
208    16     
160    -208   
48     -144   
-112   96     
160    272    
-336   48     
432    320    
-448   -144   
64     48     
96     208    
496    144    
-736   -112   
336    512    
-96    16     
-192   160    
272    -64    
-576   -272   
240    32     
192    -512   
-112   16     
16     272    
400    608    
176    224    
-432   48     
192    -304   
-272   -64    
-272   -1136  
-608   -16    
464    -80    
80     -288   
160    -48    
368    -464   
32     64     
-64    -624   
-64    112    
16     304    
-80    48     
144    -176   
144    80     
-176   112    
-32    -48    
80     112    
496    336    
-384   176    
-16    -224   
528    -208   
-80    128    
-176   288    
160    -48    
0      144    
-96    -1488  
336    256    
-128   192    
80     0      
-64    -48    
224    256    
320    -1888  
-1552  320    
752    -320   
64     -48    
-336   128    
112    -96    
256    -128   
336    -1152  
-288   592    
-80    -736   
208    -96    
96     208    
-208   -32    
112    720    
176    -16    
-144   -400   
272    160    
96     96     
-112   32     
-192   160    
832    976    
560    0      
-1360  -496   
704    -448   
128    352    
128    384    
-352   224    
64     0      
-32    160    
0      -16    
352    48     
-64    256    
-208   -32    
32     -208   
464    48     
-208   112    
-16    -128   
80     -128   
192    -16    
-16    -192   
224    96     
16     80     
-128   400    
-80    -160   
48     224    
320    -384   
-48    176    
-16    -768   
320    -224   
912    -896   
-2640  560    
-32    672    
1792   -48    
-1296  -144   
48     -720   
-96    -576   
-112   -144   
304    -144   
176    80     
96     -48    
-320   -288   
192    -112   
176    -400   
128    -256   
-384   -592   
96     -64    
176    -480   
48     -224   
-256   -320   
128    240    
208    448    
1952   -96    
-544   416    
-160   -16    
336    192    
480    432    
-1072  608    
-608   144    
160    -480   
704    -128   
144    48     
-304   -1552  
-112   -112   
384    -80    
-64    -16    
-144   96     
-176   272    
224    -224   
176    -144   
-368   -64    
144    32     
-384   176    
128    176    
80     32     
-96    320    
208    -1136  
864    -2128  
-176   -1632  
160    -1136  
352    128    
-48    160    
-128   464    
272    -64    
-752   656    
48     672    
-112   -416   
0      -176   
-80    160    
-272   -288   
32     -336   
160    64     
128    208    
-64    240    
-48    -16    
-512   -480   
-64    -704   
64     256    
-96    -256   
16     -48    
-112   -1088  
1584   -704   
528    -448   
-1328  240    
288    -672   
576    -608   
-368   128    
-80    -144   
-288   -192   
272    1104   
80     -592   
192    208    
-416   192    
48     96     
96     -464   
96     336    
-112   48     
-256   208    
464    -320   
-160   -432   
-448   -736   
-96    464    
208    -416   
432    96     
-144   -208   
-448   -208   
96     -2144  
640    944    
-192   1072   
16     -736   
32     352    
32     -304   
64     -48    
16     16     
-608   288    
-96    560    
384    128    
176    0      
-464   -160   
96     128    
304    112    
240    -400   
64     144    
-160   368    
176    -896   
-272   400    
240    736    
-528   -992   
-96    544    
416    160    
160    304    
96     1232   
-848   368    
-128   512    
608    -32    
-304   144    
-336   -48    
-160   -240   
352    144    
0      432    
-80    48     
-16    -176   
-304   -48    
352    -64    
256    80     
-320   -528   
64     -208   
-272   -128   
-80    -112   
304    -48    
48     320    
-96    48     
-192   320    
128    288    
-400   336    
-80    736    
-160   160    
-128   752    
32     -160   
-96    -400   
0      -320   
320    -576   
-2000  304    
944    -640   
96     -448   
-464   -128   
192    -224   
-224   480    
144    432    
-160   240    
240    -608   
-320   64     
-240   -16    
16     -320   
128    384    
16     -272   
-48    416    
128    0      
-64    -224   
128    -48    
112    48     
0      -576   
-896   752    
480    -256   
80     -1088  
-112   -176   
-384   336    
-80    -128   
-1936  -48    
-48    -288   
-16    -224   
-192   224    
-192   -96    
256    224    
352    -96    
-288   -400   
-80    256    
32     560    
256    144    
-64    -224   
-208   128    
32     208    
-80    192    
-448   96     
32     128    
0      208    
320    368    
112    -128   
16     80     
16     144    
-544   -512   
1200   608    
1152   -96    
-1504  0      
496    144    
560    -112   
-848   256    
496    544    
-224   336    
-64    112    
-160   32     
32     128    
-112   -192   
-16    96     
240    16     
-368   128    
208    64     
-64    256    
-272   80     
32     160    
160    -16    
-208   128    
-848   -400   
1488   96     
416    0      
-1808  160    
832    0      
-16    -16    
32     480    
-320   -112   
-384   192    
176    64     
0      32     
-16    -32    
-448   -64    
544    176    
240    48     
-208   80     
-512   144    
400    -32    
-416   80     
-128   96     
-208   -432   
-176   160    
304    16     
-432   -48    
320    464    
528    320    
528    -32    
-96    464    
496    256    
-224   -128   
-352   96     
112    -240   
-224   16     
-32    256    
128    160    
352    272    
-112   368    
-80    128    
-160   176    
-288   32     
-192   112    
64     160    
144    -48    
96     592    
-128   -160   
-352   480    
-304   80     
64     80     
-416   1472   
944    2992   
448    144    
-1184  -48    
464    -96    
384    -144   
-128   240    
-320   -96    
16     48     
400    80     
256    208    
-176   -64    
-80    128    
128    64     
-176   128    
-16    -48    
-80    160    
80     16     
-208   32     
752    672    
-880   64     
336    592    
224    -288   
-144   -16    
592    80     
-416   16     
128    480    
224    240    
-368   256    
384    64     
192    128    
-208   128    
144    208    
-224   -64    
128    160    
448    80     
-512   192    
400    0      
48     128    
-288   -144   
32     128    
-32    -96    
256    -96    
-112   0      
192    160    
80     -128   
-880   -32    
656    -64    
-16    -48    
-240   64     
112    -32    
-144   16     
-48    -912   
-672   64     
432    352    
16     0      
-128   176    
112    240    
-144   80     
96     -240   
112    128    
-96    144    
-32    80     
-48    16     
160    0      
-160   -16    
80     64     
-64    -48    
0      304    
96     544    
-352   720    
80     96     
272    16     
-272   -368   
-96    -1088  
32     -96    
48     -128   
240    448    
-272   928    
400    624    
0      160    
-336   -288   
448    -1776  
-1168  336    
864    48     
-608   784    
-288   -32    
384    272    
704    528    
-352   -2080  
-528   528    
352    400    
384    320    
-16    240    
-256   -32    
96     192    
160    176    
-80    -448   
-112   64     
-80    272    
80     192    
64     192    
336    1840   
16     1072   
-512   -992   
96     -1120  
416    -336   
-288   1200   
-144   288    
176    -320   
-48    96     
112    128    
144    160    
-32    144    
-16    96     
256    -32    
-32    192    
16     -304   
-16    -192   
160    -368   
-96    -304   
-16    -2224  
272    16     
64     48     
-144   208    
-48    -16    
192    224    
160    192    
-192   -144   
-48    -48    
272    304    
880    1296   
-352   -384   
-1312  176    
1440   656    
-128   528    
-384   -896   
656    144    
-672   -3712  
-208   -432   
208    80     
336    512    
-160   -32    
-192   240    
416    208    
-464   -224   
-80    192    
608    -16    
-64    -352   
-384   -752   
464    64     
-64    320    
-1040  -112   
1008   -688   
1152   1216   
-1488  768    
144    -176   
656    -656   
-352   -16    
16     -80    
192    -176   
80     -64    
-144   -208   
256    -96    
288    -624   
-416   -32    
352    -736   
336    208    
-416   -672   
96     -160   
176    48     
144    160    
-128   320    
-144   48     
400    1120   
-64    1456   
-192   1696   
-144   416    
496    1552   
-112   640    
-96    336    
736    -1184  
-416   240    
16     -240   
720    720    
-544   -688   
-672   -16    
80     112    
144    1376   
848    816    
-224   -48    
192    224    
-112   336    
-208   320    
0      288    
496    -48    
-224   544    
672    592    
-432   -224   
-32    160    
640    544    
80     -896   
-1280  -1168  
-416   288    
496    -496   
-256   -224   
464    256    
-432   -720   
32     -336   
320    1136   
96     -32    
352    -368   
-160   352    
-64    32     
128    176    
0      -368   
192    -304   
64     48     
16     -576   
64     32     
112    208    
-160   208    
144    -112   
80     -656   
256    -240   
-608   336    
256    240    
320    32     
-352   192    
144    480    
32     -112   
-80    -1040  
-32    -208   
-272   128    
208    96     
416    -272   
-544   -96    
304    -16    
400    288    
-304   224    
208    -192   
240    -384   
-272   -272   
-208   -32    
256    -208   
-96    -16    
-80    1088   
224    96     
-80    288    
-336   -752   
-400   -528   
256    144    
-512   -384   
656    -928   
304    688    
-752   -752   
240    -304   
464    -128   
-1040  -448   
-176   -1184  
368    -672   
0      16     
-80    368    
64     432    
-144   352    
-80    256    
368    192    
-256   0      
176    336    
96     -64    
-400   -320   
128    -112   
-176   -976   
-48    80     
144    -64    
48     -16    
64     352    
-144   32     
160    144    
-64    -432   
-48    -240   
128    -128   
976    1968   
-1584  880    
928    112    
96     656    
-496   -32    
-144   -576   
240    480    
96     224    
144    976    
240    576    
-352   304    
-16    176    
256    -80    
-208   -368   
-160   -368   
0      -160   
-112   96     
-464   -288   
208    -400   
-32    64     
-272   -1120  
352    -1200  
-272   848    
240    -368   
-320   208    
432    160    
-528   384    
112    368    
-96    -16    
-128   -16    
-80    -32    
208    32     
-224   -48    
-64    -112   
80     0      
-192   48     
272    48     
-112   48     
272    -320   
-736   112    
192    -80    
-144   -64    
-16    96     
-112   -64    
48     -48    
384    128    
192    -112   
-352   112    
176    16     
-304   -80    
-96    1120   
1616   976    
-816   -96    
-800   -336   
1328   128    
304    272    
-976   -96    
224    272    
672    -208   
-304   80     
-384   -80    
112    -240   
-64    -32    
256    -32    
128    0      
-256   -48    
96     160    
176    48     
-1008  0      
-464   -32    
-128   64     
-576   -448   
-16    80     
1296   -736   
-416   160    
-176   -32    
-448   384    
48     -176   
-864   80     
384    192    
-32    -112   
-160   -64    
16     32     
64     288    
80     -128   
-720   144    
576    304    
-704   -96    
-304   80     
288    -48    
0      16     
-80    -272   
640    16     
-560   -192   
560    128    
512    -672   
-816   -240   
576    -160   
-304   -128   
-192   -256   
352    -160   
224    144    
-1024  -288   
-272   -48    
224    80     
368    -448   
-672   -368   
112    128    
0      -496   
-160   64     
-16    176    
80     -32    
-80    80     
-144   208    
-112   -128   
112    592    
880    16     
-480   128    
-448   96     
864    1008   
-2256  2112   
-496   -128   
1184   -240   
-1904  -608   
432    272    
1248   112    
-656   80     
-800   176    
432    -32    
560    96     
112    128    
-560   -64    
32     128    
240    0      
0      160    
-304   -176   
-784   160    
224    -96    
176    160    
224    -464   
-624   432    
592    -176   
-608   64     
-16    32     
448    0      
-400   96     
160    -48    
-208   -240   
192    144    
-80    -320   
-208   64     
-96    80     
160    112    
160    -64    
-304   208    
192    256    
-64    112    
464    0      
224    -16    
-176   64     
80     112    
-256   16     
480    176    
-96    336    
-64    0      
208    112    
-96    -112   
-192   -16    
-144   144    
288    0      
48     192    
144    576    
-864   592    
432    928    
208    704    
-336   144    
-128   64     
16     -768   
-144   -576   
240    -48    
272    80     
-432   -160   
16     128    
32     176    
-240   -64    
48     -160   
16     0      
144    -80    
-240   -160   
128    48     
48     352    
320    560    
-464   672    
400    416    
48     48     
160    576    
-464   800    
-224   -80    
352    -896   
128    320    
-320   304    
-48    2192   
1376   -208   
-1104  -176   
-224   528    
752    -32    
-272   -704   
-352   -144   
-32    656    
80     -672   
-96    112    
80     -96    
-32    48     
-64    272    
192    -64    
-80    64     
-240   112    
16     272    
-96    -368   
0      -80    
-64    112    
-304   1488   
432    -48    
-368   224    
-160   144    
416    176    
336    1072   
-528   1520   
-160   160    
384    -224   
-96    -64    
-128   -128   
16     384    
96     -176   
64     64     
-32    16     
-304   112    
208    -16    
256    496    
48     -272   
-288   -160   
-256   80     
128    64     
144    176    
-112   -80    
-96    -16    
16     0      
128    -32    
80     112    
-288   240    
-576   -912   
2016   -160   
480    960    
-1488  -112   
480    256    
-16    336    
272    -160   
704    832    
-176   -208   
-448   160    
144    -32    
432    64     
-112   160    
-176   208    
96     112    
224    128    
-96    224    
-160   256    
-160   176    
-192   192    
96     -1568  
-880   -384   
672    -672   
464    480    
-384   688    
320    128    
-288   -320   
176    256    
304    -1152  
-400   -912   
192    800    
240    816    
-160   80     
-208   64     
400    -528   
-560   -928   
368    208    
-96    240    
624    48     
128    96     
-320   64     
112    176    
-192   -736   
-80    -544   
624    -400   
64     -1104  
-336   -368   
-160   -1744  
-1168  -1344  
144    -832   
112    -48    
-224   -192   
304    -16    
224    784    
-16    -448   
-976   112    
192    -384   
-336   -1088  
208    -240   
96     -560   
-528   -368   
352    96     
0      64     
112    -240   
-96    -112   
240    -272   
128    464    
272    272    
-208   784    
-64    592    
192    -48    
80     1248   
1184   176    
-1168  -144   
112    48     
1056   320    
80     688    
-240   1008   
-240   1600   
176    -160   
560    -560   
-208   32     
-416   0      
432    464    
304    32     
224    144    
0      144    
-16    368    
224    16     
336    -288   
-80    -800   
-320   -208   
192    272    
464    -144   
-320   400    
160    336    
-16    -336   
-672   -1216  
336    -64    
-144   -2048  
16     -96    
-32    -80    
-336   32     
240    -160   
-336   -512   
-144   144    
208    256    
-160   -80    
176    -224   
208    80     
-16    16     
80     256    
-96    -128   
64     96     
-352   -96    
192    -880   
-560   -512   
144    -224   
-128   -592   
144    -384   
32     -320   
-608   -464   
768    192    
864    -336   
-1232  240    
160    -64    
64     160    
160    576    
384    416    
-32    144    
208    416    
-176   192    
64     96     
224    576    
-288   304    
48     80     
160    -784   
-320   -80    
0      -1264  
-352   -656   
112    -176   
480    -80    
176    -112   
-480   -32    
0      -160   
544    64     
-320   -208   
-48    -128   
384    -16    
-112   -256   
32     -2208  
496    -1824  
-1424  -560   
976    -112   
-144   160    
-160   -32    
32     208    
-128   -160   
-96    48     
192    240    
400    -1456  
-480   -48    
-48    -400   
320    0      
64     -368   
-448   -64    
-80    -448   
560    -400   
-144   112    
16     -816   
416    144    
-400   -1504  
544    -992   
-624   -528   
272    80     
16     -48    
-112   528    
0      -352   
32     16     
32     -160   
-32    -160   
-128   32     
64     -208   
208    32     
96     -160   
-192   -32    
112    -2144  
64     64     
-304   -32    
112    64     
-240   -96    
0      -64    
160    -16    
-144   -48    
-128   -112   
288    112    
-1008  -368   
-368   -16    
512    -208   
-208   -160   
176    160    
-1024  1216   
2336   1088   
-320   -2240  
-1904  -176   
1104   240    
1008   160    
-880   -32    
80     16     
224    -32    
-64    64     
-512   -176   
0      112    
464    -80    
-240   -128   
-48    16     
368    -688   
-288   -48    
-80    -320   
608    96     
-16    -16    
-208   192    
-416   -800   
-256   128    
1984   -224   
-1520  -1056  
-1008  240    
1856   -176   
-624   64     
272    -80    
224    48     
-176   -560   
64     48     
160    -400   
-256   32     
0      32     
-128   96     
320    -64    
-64    -80    
-176   400    
592    176    
-48    0      
-256   -448   
832    -64    
-624   -272   
-352   176    
608    -320   
-720   48     
-432   -576   
96     240    
256    -2848  
-144   0      
288    -224   
128    -176   
0      128    
80     560    
-1104  -64    
-96    -224   
192    -480   
-96    -128   
432    368    
-80    -176   
-80    128    
240    -192   
0      160    
-16    -1280  
432    240    
112    0      
-400   112    
112    -32    
64     656    
-1424  -1488  
-816   528    
1456   640    
-352   -128   
-16    272    
112    -144   
-256   64     
192    -112   
-112   -64    
432    -320   
-64    96     
-128   -48    
128    -16    
-224   64     
288    -160   
64     48     
-48    -16    
-224   64     
-32    -368   
544    -992   
-16    240    
-112   448    
-784   -192   
-400   96     
720    32     
-464   -160   
-48    -48    
-544   112    
32     80     
96     704    
96     80     
0      240    
-96    32     
-832   -64    
224    112    
-944   -576   
512    -576   
-80    -480   
-320   144    
-48    128    
-288   -32    
384    752    
-832   432    
16     176    
320    -48    
-432   -112   
96     -416   
320    -48    
-320   192    
144    -160   
-176   -496   
512    720    
-992   32     
112    -112   
0      320    
-112   80     
-16    -1040  
208    -1552  
-416   -1072  
-544   -464   
-208   -464   
-928   -80    
16     192    
0      48     
-16    -16    
-64    -368   
16     320    
16     16     
0      -80    
-176   160    
112    208    
-144   288    
112    -240   
-96    -16    
-96    -432   
-160   32     
-192   16     
112    128    
-48    64     
-64    48     
-176   -128   
496    864    
-288   1312   
-16    112    
160    -80    
0      -112   
-240   -96    
-64    -672   
-16    -336   
-224   16     
-80    -16    
-160   -128   
0      -96    
-1072  -80    
144    -64    
-112   -144   
-32    128    
32     400    
192    192    
-48    272    
-352   16     
176    -400   
-960   64     
544    192    
-128   288    
-128   -192   
-128   -208   
96     -80    
-624   -64    
80     208    
-64    48     
-80    80     
-112   -16    
32     80     
-208   576    
96     -144   
-48    -160   
-64    -16    
80     128    
-64    -112   
-128   -48    
-224   -48    
-128   176    
0      144    
160    80     
-320   192    
-64    80     
80     32     
-320   80     
288    32     
80     192    
-1440  1632   
2656   -672   
-544   176    
-1056  -512   
1072   -896   
928    -256   
-832   -560   
0      -1040  
112    256    
-208   1200   
-64    16     
240    -416   
-176   304    
16     64     
112    112    
16     368    
-192   576    
432    176    
-16    48     
-192   -48    
560    496    
-1840  -272   
-592   -304   
976    -704   
-640   -304   
224    1024   
352    848    
-400   -768   
-64    -1328  
-48    64     
-208   288    
32     112    
160    16     
96     -48    
-160   -32    
80     160    
-16    144    
96     976    
352    720    
-208   752    
-240   128    
64     64     
400    560    
-320   720    
-432   -400   
608    -624   
-112   -304   
96     -704   
-976   -848   
608    -192   
160    -80    
-544   512    
96     32     
-64    160    
-448   -16    
496    -208   
16     496    
-64    -416   
128    96     
-96    288    
256    80     
-256   48     
-288   288    
608    -64    
96     -48    
80     -400   
-352   176    
48     16     
784    -304   
-528   -48    
-1248  1232   
288    688    
64     -240   
128    2064   
512    1680   
-208   0      
-256   -48    
464    -528   
-304   -160   
-256   -48    
64     176    
-32    0      
176    -304   
-288   -48    
64     144    
80     224    
128    -32    
288    144    
-272   992    
-144   1152   
272    352    
-224   -384   
48     -80    
1072   224    
-400   96     
-608   -256   
160    112    
288    320    
-128   400    
32     -96    
16     112    
-32    -64    
-32    112    
160    -160   
304    96     
224    112    
-784   -480   
272    -176   
224    -64    
-176   192    
-16    16     
-384   -912   
496    -224   
496    112    
-416   224    
96     448    
32     288    
-80    320    
208    176    
-96    208    
-176   64     
-128   -1168  
-464   -80    
320    272    
96     -80    
-96    208    
336    16     
-176   240    
-80    368    
96     32     
16     224    
80     144    
-192   -32    
96     144    
112    96     
-224   -192   
-208   -688   
176    160    
-144   -512   
-64    -288   
176    416    
64     -752   
-80    -224   
16     -2272  
64     144    
-80    -160   
32     -400   
48     112    
-48    128    
-32    -112   
-480   -1056  
1360   -1024  
-880   448    
-272   -384   
176    -64    
-272   176    
-64    -224   
720    0      
-16    -912   
-688   496    
384    48     
288    240    
112    192    
-368   -80    
176    80     
336    432    
-112   -272   
-32    160    
304    224    
-144   -112   
-32    272    
432    1360   
1008   64     
-1216  -512   
336    464    
352    -2416  
-32    256    
160    -48    
48     224    
-176   -64    
16     192    
336    -16    
320    160    
-416   80     
-208   -128   
544    64     
32     -208   
-80    -16    
-32    160    
256    64     
32     -864   
48     96     
-96    48     
96     176    
-96    96     
608    192    
-288   0      
-208   -96    
96     128    
224    -368   
-704   -1504  
-1184  -1600  
2160   -320   
-640   -416   
-896   -16    
704    272    
112    -64    
-304   784    
-272   320    
384    -48    
48     64     
-144   -128   
-192   -384   
320    64     
-528   -400   
464    80     
-64    -176   
-160   16     
112    -288   
-16    16     
-16    -400   
464    704    
-1376  240    
16     320    
272    560    
640    -128   
-352   48     
224    -256   
-48    -96    
-64    -416   
256    -48    
-96    -80    
-192   112    
192    16     
224    -176   
-448   -288   
192    -272   
-32    -32    
320    -512   
176    -16    
-112   -496   
80     -320   
-16    240    
1280   -400   
-432   96     
-128   -176   
192    -144   
176    304    
48     80     
-560   -848   
-128   -32    
480    -128   
272    192    
112    -16    
48     -352   
-784   208    
528    128    
-144   304    
32     -208   
112    -48    
-208   -368   
48     -64    
128    -704   
48     0      
64     16     
-96    160    
560    80     
-32    176    
-240   16     
384    384    
720    2896   
-2112  704    
608    -720   
1456   -32    
-1392  -32    
-160   336    
720    -416   
384    -752   
-528   96     
-16    -224   
720    -64    
-240   -240   
464    96     
-80    16     
-96    -144   
-112   352    
528    -64    
-416   64     
-48    -736   
128    -1216  
16     -640   
-160   48     
368    480    
-720   -320   
192    -1312  
176    128    
112    -304   
-80    -400   
-176   -896   
272    352    
96     1056   
112    0      
-128   -528   
-112   -96    
-160   32     
-48    80     
128    176    
48     -192   
-352   48     
208    -192   
64     -320   
-464   -384   
320    -288   
160    -640   
176    -1104  
-432   -816   
-80    -352   
-640   -944   
-224   -160   
240    368    
-128   -144   
-224   -128   
96     -912   
-704   -432   
496    -880   
-144   -208   
-512   -304   
-112   -656   
464    1472   
32     400    
-528   -1152  
240    544    
64     -192   
-128   112    
160    32     
208    -16    
-1008  -272   
32     -256   
112    -96    
-208   -16    
32     144    
16     -160   
-128   -16    
-112   48     
32     16     
32     176    
-400   -320   
-384   -48    
432    -224   
-64    64     
-112   -48    
-416   -272   
608    -688   
32     448    
-80    -112   
256    48     
-352   -32    
-224   -160   
448    96     
48     496    
-448   192    
80     -160   
48     0      
0      16     
112    16     
-336   48     
-320   80     
144    208    
176    304    
-1456  -544   
-208   0      
880    -96    
-1392  496    
464    -144   
256    -32    
-272   -64    
-48    240    
-384   32     
240    48     
-80    -64    
384    -128   
48     48     
-672   -112   
-112   224    
64     -112   
112    -176   
-32    16     
-512   -80    
-48    -528   
-320   -224   
32     96     
-1344  160    
-16    64     
304    -224   
32     -112   
-32    -208   
-192   -80    
-464   -48    
112    192    
320    -192   
-16    0      
-1488  -1280  
96     32     
928    -208   
-1120  -32    
432    -352   
-80    -1168  
-1088  256    
-800   864    
288    -496   
-384   0      
0      0      
-144   16     
-176   -48    
256    -64    
160    400    
-272   128    
-320   224    
496    416    
272    -272   
-272   176    
368    1984   
-576   -1184  
-1840  864    
1280   -128   
-240   768    
432    288    
-144   144    
224    96     
-224   -112   
-48    -944   
-528   -240   
0      160    
64     64     
128    48     
-32    0      
-1040  128    
496    112    
-176   224    
368    192    
176    -112   
-320   112    
112    -192   
-240   240    
-848   -3136  
-1472  -960   
880    400    
240    160    
-896   -128   
464    -416   
-208   400    
-480   256    
176    192    
-16    -16    
-48    16     
-736   592    
-1184  528    
-144   -400   
496    -160   
-464   80     
-432   256    
528    -240   
48     128    
-304   -48    
16     448    
288    -176   
208    -192   
-352   -16    
-144   -80    
608    1008   
-672   1376   
-624   -1936  
-976   -720   
704    0      
160    224    
592    256    
-480   704    
-640   464    
1072   656    
-256   0      
-432   96     
64     -128   
112    -64    
224    128    
-160   48     
-528   64     
192    112    
288    48     
-224   -64    
384    -304   
-960   -432   
496    -336   
80     -256   
-80    128    
528    112    
-416   -32    
-224   48     
400    208    
-48    -160   
-352   144    
320    -48    
48     16     
0      32     
176    96     
-288   80     
144    48     
-32    416    
-32    144    
64     32     
-128   -160   
-16    112    
-96    -16    
-256   16     
288    -176   
224    80     
-32    -128   
-352   128    
-64    272    
592    144    
-288   64     
-64    128    
128    96     
208    496    
-1264  288    
256    0      
384    128    
-384   -48    
-64    112    
272    -32    
-16    -32    
112    -128   
-144   48     
64     -48    
112    80     
-96    192    
80     32     
32     64     
-16    160    
128    176    
144    48     
-528   192    
192    -176   
192    -16    
-224   16     
-96    256    
112    32     
0      -224   
-48    560    
240    112    
-176   -176   
32     224    
-288   -224   
1328   1824   
1344   576    
-1392  112    
-384   544    
640    -192   
96     48     
-176   -80    
48     1056   
400    -208   
-240   -144   
128    256    
208    -128   
-160   144    
112    336    
288    192    
-64    -64    
32     464    
-96    -128   
-48    32     
112    32     
-144   944    
640    -560   
-592   32     
0      -80    
448    64     
-272   304    
512    -304   
-336   0      
-128   96     
176    144    
208    144    
-256   80     
-32    -176   
48     192    
64     -144   
-288   64     
32     -96    
336    -336   
-240   144    
0      32     
288    64     
48     112    
-464   -32    
96     -112   
336    272    
160    -16    
-288   272    
-96    -32    
96     160    
1328   1392   
-1520  816    
-784   480    
1392   -32    
-672   -416   
-464   112    
640    -80    
144    416    
-64    384    
-240   416    
272    112    
-224   48     
-112   128    
64     -64    
-16    352    
528    0      
-368   96     
0      -160   
80     -144   
256    48     
-352   272    
576    1216   
-896   -736   
-896   176    
1008   -16    
224    48     
-288   368    
0      48     
80     112    
80     48     
-176   -48    
-96    -80    
-48    112    
304    -400   
80     272    
16     -1168  
-496   176    
272    64     
160    -160   
32     -256   
-48    384    
-32    128    
112    208    
-800   -160   
-320   96     
656    848    
576    -192   
-80    -80    
-208   48     
-32    80     
128    -384   
-320   256    
256    -160   
992    -368   
-656   -624   
96     496    
368    32     
-112   128    
416    112    
-368   240    
-160   48     
240    -96    
208    64     
-32    -144   
-256   16     
96     -640   
416    -240   
-336   -1504  
144    64     
480    576    
-816   1264   
-64    3408   
1024   880    
-992   -208   
-976   -320   
1616   560    
112    640    
-608   352    
-112   16     
32     -176   
32     -80    
-64    192    
80     176    
-224   -336   
352    112    
272    256    
96     16     
-48    128    
176    16     
272    -672   
-304   -256   
-16    16     
80     64     
368    288    
144    576    
320    -16    
-256   384    
144    544    
224    368    
-48    -784   
80     -480   
16     0      
0      288    
-112   48     
80     -480   
112    464    
-96    144    
0      368    
112    160    
-112   448    
112    -144   
-304   144    
192    224    
64     -2480  
0      320    
-144   -1168  
16     848    
144    1232   
-160   48     
48     -320   
288    -544   
-160   -224   
-400   -1168  
448    -912   
320    -32    
-912   -64    
272    160    
240    208    
0      -288   
-384   1120   
320    -320   
320    32     
-192   0      
-96    -416   
160    -176   
160    -48    
-32    0      
64     112    
144    752    
-16    -2176  
176    -224   
-32    -32    
96     -48    
96     -304   
-160   144    
-32    -128   
208    -528   
272    -112   
-352   -128   
-1488  64     
432    48     
176    -112   
144    -464   
-816   -96    
0      -192   
192    -96    
192    -48    
-320   96     
144    -352   
-336   -176   
160    384    
-80    240    
-144   -224   
144    16     
-112   -32    
-16    64     
96     16     
32     -96    
32     112    
-64    -160   
-16    -96    
-128   -304   
240    560    
544    48     
-640   -32    
0      -80    
176    112    
224    -32    
-112   144    
-128   656    
96     144    
-144   32     
112    -320   
208    -256   
64     -80    
128    80     
-48    -448   
80     320    
144    -592   
-320   -320   
-112   160    
176    208    
176    288    
128    -256   
-208   -256   
-304   -560   
-464   80     
432    160    
-528   0      
-240   -32    
192    32     
752    1152   
336    800    
-1264  944    
432    -112   
640    -400   
-1104  -288   
128    96     
912    -496   
-720   -288   
-272   -176   
368    112    
128    0      
-32    -128   
-112   -176   
-128   272    
64     -16    
224    128    
272    -1488  
-320   -432   
144    -80    
80     -96    
-944   -1024  
400    -784   
864    464    
-608   1424   
-272   928    
272    -336   
-16    -144   
-224   -224   
-32    -32    
736    -368   
-320   192    
-304   -112   
320    32     
0      224    
-208   -160   
-304   -48    
368    336    
-144   -176   
-336   -112   
160    -128   
128    -80    
96     352    
-1024  32     
480    64     
-16    0      
-256   -480   
-336   608    
-352   -176   
-688   -208   
48     -176   
-112   -96    
192    128    
176    224    
-80    -384   
112    48     
240    -336   
416    96     
-752   0      
-128   144    
-256   -176   
144    0      
208    -16    
-432   96     
48     32     
-240   -16    
-144   0      
-208   0      
-128   16     
384    1344   
160    3568   
-240   752    
80     816    
992    -320   
-784   32     
-976   -128   
512    192    
480    -112   
-224   288    
-416   -592   
-16    -128   
544    16     
-80    48     
-144   -96    
-96    224    
288    -160   
-224   -96    
160    -144   
-128   416    
80     -368   
-208   560    
688    -176   
-368   224    
-1072  -288   
320    48     
752    96     
-560   -128   
-656   -32    
416    -112   
-304   32     
-192   48     
-96    -128   
16     112    
304    112    
-64    160    
-576   96     
48     -32    
560    80     
-176   -16    
256    208    
-160   48     
256    96     
-80    -80    
-192   -112   
-80    -176   
96     -16    
304    -416   
-400   -80    
-144   -96    
176    64     
176    128    
-64    -144   
416    32     
368    -448   
-240   -528   
-544   -176   
272    -240   
224    -192   
-80    224    
-624   96     
448    160    
-352   -48    
-32    128    
-48    -96    
-64    128    
160    64     
-48    -192   
-256   -16    
336    208    
-16    176    
-288   80     
96     96     
0      -240   
-240   -208   
16     -304   
80     288    
112    -960   
-352   -352   
176    576    
-80    -32    
112    -128   
-1040  16     
1360   -1168  
-320   16     
-720   -256   
848    320    
-320   272    
-288   32     
16     144    
224    -288   
48     -128   
-496   224    
32     -48    
0      32     
144    -64    
-16    -144   
-208   336    
64     -64    
128    144    
112    176    
-256   0      
624    1312   
-1344  80     
-16    128    
752    -368   
-464   -144   
-192   96     
-32    0      
304    112    
-416   336    
48     80     
-224   128    
0      240    
368    32     
-336   128    
-240   -160   
48     -112   
16     0      
48     112    
-80    192    
176    112    
-128   16     
16     192    
-128   -16    
-160   128    
512    48     
-544   80     
176    176    
80     80     
-128   80     
-816   -144   
928    -64    
1200   -32    
-1232  32     
528    176    
-400   -256   
-288   320    
272    16     
-96    48     
-32    48     
112    112    
128    80     
-144   96     
-144   64     
448    96     
-528   -112   
-16    48     
192    336    
-304   256    
160    -32    
80     32     
-448   -304   
1360   784    
480    464    
-784   -720   
-144   -160   
256    480    
160    128    
96     160    
-32    -32    
-368   64     
208    128    
-144   32     
96     112    
-32    80     
96     112    
48     112    
80     160    
-16    416    
-64    144    
272    -16    
96     32     
64     176    
-192   -48    
-352   192    
-192   368    
0      -80    
-336   -608   
-336   144    
544    -272   
48     -192   
-880   352    
320    -96    
-160   352    
-288   -416   
-112   400    
224    -256   
176    80     
656    176    
-352   112    
-304   32     
304    144    
144    -32    
-16    128    
-64    48     
-272   -2352  
528    784    
592    320    
-208   64     
-80    672    
32     416    
1312   160    
-2032  -752   
448    672    
912    -496   
-928   -112   
-544   0      
96     -400   
896    1424   
-176   144    
-16    -976   
224    -64    
-48    80     
-80    112    
-160   -32    
-144   320    
160    816    
208    -624   
-176   368    
-144   192    
224    688    
96     16     
0      -368   
-192   -320   
416    400    
128    368    
-80    336    
64     -16    
-64    240    
-224   144    
480    624    
-176   176    
160    128    
-16    -176   
-80    64     
256    304    
32     0      
-32    304    
-48    1072   
80     544    
320    -400   
0      -560   
-304   -96    
-96    112    
304    192    
448    160    
-816   64     
-64    48     
624    192    
224    -96    
-208   400    
16     48     
-80    -848   
-528   -992   
528    -800   
144    -448   
-192   -128   
-48    224    
64     -832   
-272   -288   
160    496    
240    -176   
160    -64    
-80    240    
-240   320    
144    224    
64     528    
-16    224    
-160   416    
176    -64    
0      -192   
48     96     
48     -112   
64     -80    
-208   -352   
256    160    
208    368    
-544   704    
-80    224    
336    416    
32     272    
-336   -96    
0      -1200  
-16    -560   
-224   672    
32     -224   
-352   0      
112    -192   
464    -368   
-592   -864   
-112   80     
240    224    
96     144    
128    96     
-16    -48    
-320   112    
128    304    
256    192    
-224   -288   
-96    160    
48     96     
-64    96     
96     128    
400    352    
-368   -32    
-176   400    
256    64     
64     928    
0      16     
0      -416   
-48    64     
-16    208    
128    48     
48     -752   
96     -416   
208    384    
-144   -176   
64     -352   
128    -320   
-256   -208   
224    320    
272    144    
-96    -1120  
-160   160    
384    -224   
-112   -240   
96     -112   
160    -176   
-112   -112   
-80    -976   
112    -416   
1056   1776   
-912   1104   
-752   432    
1024   -304   
-1232  -336   
416    0      
352    -496   
-320   96     
-32    -464   
-176   -208   
176    -144   
-128   -288   
240    -80    
144    -16    
-320   -80    
-192   -272   
368    -64    
96     -240   
-496   -112   
160    -208   
-16    80     
592    928    
-1760  -224   
-384   176    
800    -32    
-1392  -672   
-128   -16    
304    -144   
32     -432   
48     16     
176    -256   
-80    -112   
-336   -192   
160    64     
336    -112   
-384   32     
0      0      
112    -144   
-272   256    
-160   -32    
-528   -208   
368    -80    
288    944    
-544   -112   
-640   -256   
832    208    
208    384    
-320   176    
-464   -480   
-128   96     
592    80     
-544   -48    
-192   80     
-96    304    
368    -96    
288    -16    
-272   -240   
-1200  -224   
512    -16    
208    -192   
-336   -496   
144    352    
-32    -112   
-32    192    
272    32     
496    608    
-912   48     
-112   336    
144    48     
-784   -640   
1056   2528   
1152   48     
-1424  480    
1168   -336   
368    -352   
-1120  496    
128    256    
560    32     
-128   -112   
-96    -16    
192    -144   
-176   144    
144    48     
224    -96    
112    272    
-240   -48    
-144   128    
352    -96    
-176   -32    
-1024  -608   
-32    352    
224    96     
-96    -224   
736    16     
-64    -880   
-704   432    
752    96     
-160   48     
288    192    
-80    0      
-176   160    
48     32     
-256   96     
-96    -32    
272    288    
288    -336   
-384   368    
-160   -400   
32     96     
272    -464   
-192   -80    
-384   -48    
144    -16    
-720   -208   
416    -32    
336    -32    
-800   -352   
384    -288   
224    -448   
-112   176    
128    -176   
-384   128    
144    -784   
-672   256    
768    -64    
-528   -224   
-384   -144   
288    0      
16     368    
176    224    
-160   256    
16     176    
-304   -112   
48     -304   
32     144    
-464   208    
-144   144    
288    256    
-192   112    
-160   80     
336    144    
16     144    
-368   -16    
64     -48    
192    64     
-80    -80    
-208   -256   
112    -48    
-112   48     
-192   -576   
0      -464   
704    2176   
-1088  -880   
-112   224    
1184   -544   
-800   64     
-256   176    
416    -32    
64     176    
-944   -608   
-144   -64    
320    256    
16     144    
208    -128   
-304   160    
-96    -384   
208    368    
-96    -208   
-48    -64    
160    144    
-176   112    
32     128    
-448   560    
1488   -384   
-720   640    
-784   448    
272    -96    
0      48     
-80    -560   
-144   80     
80     -400   
304    240    
160    128    
-160   32     
-240   112    
16     -48    
112    -128   
96     96     
-48    80     
-80    -32    
16     96     
-464   48     
464    336    
-240   304    
-288   336    
176    -240   
64     96     
224    64     
-208   144    
-176   176    
-48    96     
832    1584   
112    -512   
-2304  -96    
848    240    
288    16     
-1456  -48    
560    368    
-448   224    
80     80     
-176   64     
-336   160    
64     32     
160    192    
0      16     
16     -48    
-208   48     
80     0      
80     -176   
-608   -448   
80     -192   
128    -112   
-192   -1040  
-1648  624    
2000   528    
-1216  32     
-304   -112   
736    -240   
-1088  624    
208    272    
272    80     
160    80     
-160   -48    
-352   -96    
80     272    
272    0      
-64    112    
0      208    
-112   -160   
64     320    
352    32     
16     -48    
-144   16     
-48    144    
224    624    
-1056  496    
0      -64    
688    -240   
-432   352    
592    -224   
16     0      
-464   -176   
-176   16     
240    -208   
208    64     
0      432    
144    -432   
80     -64    
288    0      
64     -304   
-208   144    
-112   336    
-160   -64    
176    48     
80     256    
64     240    
-288   -80    
528    48     
208    -64    
-800   288    
112    112    
352    112    
-1152  -768   
-1200  -464   
112    176    
688    112    
96     240    
-480   -480   
-48    816    
-400   656    
368    -272   
176    160    
-32    288    
-384   -416   
-208   128    
144    80     
416    32     
-320   -816   
-320   144    
-112   176    
384    -64    
128    384    
-272   864    
-80    -144   
224    -320   
-16    -80    
-464   544    
368    336    
-160   -512   
640    592    
240    1312   
-304   0      
-80    0      
80     432    
208    0      
-144   624    
-160   352    
96     -384   
512    528    
-224   128    
0      -144   
-96    144    
-96    0      
240    -128   
-128   624    
64     480    
-32    -144   
304    -848   
464    512    
-480   752    
-64    96     
-80    -48    
304    224    
-176   1184   
944    160    
-144   224    
-224   48     
400    32     
-16    224    
-16    1728   
432    -624   
-128   -1392  
-368   80     
128    320    
128    -336   
-272   144    
160    -80    
96     -400   
160    -160   
-208   48     
-192   320    
176    -192   
-16    -432   
176    304    
-192   352    
-80    288    
32     -32    
-112   -208   
368    752    
144    1104   
-128   -128   
-288   32     
-144   -816   
672    -1680  
80     -176   
96     608    
736    1552   
784    16     
-112   -432   
-144   -336   
-96    -176   
192    -96    
304    -64    
80     48     
-64    464    
-160   0      
288    256    
336    -64    
-144   432    
-96    112    
208    -128   
160    272    
-416   -928   
400    -960   
160    768    
32     800    
-448   272    
336    32     
-128   -384   
16     288    
128    -176   
-192   -336   
48     -64    
272    160    
-16    176    
-96    64     
112    -144   
-176   -1520  
512    -512   
48     -752   
-208   784    
-192   368    
272    32     
96     -32    
-224   192    
80     0      
256    256    
160    0      
-384   144    
48     160    
128    -64    
-112   -16    
1584   336    
-1904  80     
-640   -112   
1712   112    
-1040  -928   
-720   128    
832    -144   
224    208    
-272   32     
368    160    
16     -48    
-224   96     
176    128    
288    80     
-192   112    
-272   32     
-192   -160   
80     -176   
560    0      
-128   -384   
-32    176    
560    1392   
-480   -624   
-1760  224    
1440   -96    
128    32     
160    144    
-240   32     
144    0      
0      64     
-112   -144   
288    64     
-192   -144   
-80    112    
432    80     
48     -48    
-432   112    
240    -128   
32     496    
-96    -80    
-96    -144   
624    -352   
-688   -224   
-80    -528   
1504   544    
-208   -448   
-336   -352   
368    -16    
48     496    
-384   -336   
640    -240   
544    48     
-448   80     
-240   112    
128    -272   
144    -160   
480    -608   
-448   -208   
-176   -208   
544    -16    
528    -160   
-608   -32    
-320   -160   
976    128    
288    -320   
32     400    
-1216  464    
592    -336   
64     96     
-912   -1360  
2480   3232   
-240   1248   
-592   304    
960    384    
208    -176   
-480   -320   
-512   496    
928    -496   
144    224    
-64    -368   
-304   -320   
224    -16    
-128   -64    
192    -176   
-432   32     
-160   -256   
-352   176    
592    -272   
-416   -80    
-48    176    
832    -112   
-944   336    
448    -128   
-192   -208   
-208   128    
464    -80    
-368   112    
-128   -144   
224    32     
0      -160   
-272   64     
-64    -112   
-208   64     
336    -208   
192    -208   
-544   -240   
96     -896   
544    -48    
-512   -80    
48     80     
224    -64    
-48    16     
144    -128   
-64    128    
-64    96     
96     144    
-608   -112   
64     -32    
224    256    
-736   208    
352    -48    
128    -240   
128    160    
624    -1488  
-240   128    
528    -64    
-384   64     
48     80     
352    32     
-240   -496   
-352   -336   
16     -32    
272    48     
-288   176    
-160   112    
192    48     
224    -288   
-128   -368   
-176   -1840  
192    -480   
-48    -176   
0      -16    
-48    32     
-352   -224   
-32    -48    
256    208    
144    160    
-368   -208   
-240   -512   
240    -384   
-368   -144   
848    384    
-2288  1504   
1328   112    
400    320    
-480   -1456  
-464   -752   
-112   -512   
224    432    
-48    192    
-16    128    
-240   -16    
-96    -128   
64     224    
144    -144   
-384   176    
-80    -656   
368    -512   
112    -208   
96     -288   
-48    -1344  
-160   -656   
640    -736   
-224   1104   
288    80     
-16    -208   
-80    576    
0      256    
64     -32    
32     -496   
-192   128    
176    -176   
0      64     
128    -368   
-80    -32    
96     -1232  
-64    208    
-96    160    
-96    -48    
-96    176    
96     -320   
16     -128   
16     -64    
-16    -16    
208    112    
48     224    
48     -144   
0      -64    
32     -208   
-176   112    
80     -80    
928    48     
-2992  560    
224    400    
848    144    
-816   144    
-400   -64    
832    752    
-368   736    
-240   -1344  
288    0      
-1248  192    
-192   160    
-128   -64    
240    80     
-304   224    
-160   80     
-32    -48    
-192   -208   
176    -96    
-48    176    
-416   -592   
1264   736    
1280   -512   
-1328  208    
272    112    
224    -352   
-768   -528   
176    -736   
-32    -400   
-368   -368   
-64    -80    
384    160    
64     384    
-448   208    
-272   -80    
176    -32    
-80    48     
352    -192   
-352   -960   
-736   -752   
288    -272   
320    -48    
-240   -544   
288    48     
64     560    
-304   1232   
672    688    
-96    -448   
-656   480    
416    -528   
-384   -208   
-336   -544   
-128   288    
672    80     
-416   -80    
80     80     
768    -688   
-1264  -848   
384    -848   
160    400    
176    128    
16     -128   
-464   0      
160    -304   
48     32     
96     240    
-768   -112   
208    944    
432    448    
-176   112    
-464   -976   
1472   -1552  
80     -1072  
-352   -208   
448    608    
-272   256    
176    -96    
496    96     
-48    -528   
-352   -544   
64     304    
128    -496   
208    112    
-848   288    
144    224    
-48    176    
-112   -96    
-80    -32    
-48    208    
16     480    
-16    -80    
48     -144   
-80    -32    
-224   592    
672    -224   
-560   32     
-128   32     
80     -448   
-416   1440   
352    1744   
-256   48     
256    -224   
128    -368   
-192   160    
-64    48     
-16    352    
80     96     
272    -688   
80     -480   
-496   -640   
336    -384   
128    -320   
-112   368    
-272   384    
96     -224   
320    -320   
-128   576    
160    -160   
-320   -48    
112    448    
288    192    
176    -240   
-1232  48     
192    -1408  
752    -912   
-928   592    
-464   -480   
384    448    
-480   -720   
-112   -48    
336    -176   
144    -144   
-208   -16    
0      -272   
416    16     
16     336    
-272   176    
80     112    
0      48     
-48    -192   
144    16     
-80    -32    
48     -48    
-224   -64    
-16    80     
192    448    
128    1024   
-384   752    
-32    -96    
160    -352   
144    128    
-224   -1984  
-992   176    
944    96     
-144   -176   
96     -16    
-32    784    
256    848    
160    1296   
288    480    
-160   -160   
-160   32     
-32    -272   
80     96     
128    528    
-48    352    
16     -320   
48     128    
80     16     
-80    128    
80     64     
80     -1184  
-384   256    
400    192    
-592   208    
496    160    
-48    16     
0      32     
-16    192    
48     400    
352    16     
-288   32     
-112   -112   
64     384    
112    96     
-112   -144   
-64    128    
0      -48    
144    272    
-112   208    
128    0      
-208   96     
-48    128    
176    64     
-96    272    
160    -16    
112    224    
-176   -48    
32     32     
48     224    
-720   -1696  
1760   1632   
2512   320    
-1456  80     
-688   -144   
512    208    
304    368    
-368   496    
-208   80     
304    240    
-304   -64    
176    192    
-240   -64    
0      96     
272    48     
96     -16    
-192   128    
16     -1856  
-80    288    
96     64     
16     160    
-192   -128   
608    784    
1456   208    
-736   880    
-720   128    
448    -64    
-160   -32    
448    464    
96     -256   
-80    240    
-176   160    
64     -144   
160    32     
-80    144    
-176   16     
272    144    
208    272    
-112   -80    
-640   -80    
576    480    
624    -16    
-368   528    
-1168  80     
160    80     
560    -400   
-224   288    
736    -48    
384    -352   
112    544    
16     -368   
-688   128    
560    -80    
-64    208    
-80    48     
0      128    
-160   112    
-432   224    
528    48     
464    -688   
48     -288   
-64    144    
0      -688   
176    128    
-176   -560   
32     -16    
208    -176   
32     144    
224    144    
-352   48     
64     -672   
-640   2512   
1344   416    
-912   -192   
-1072  240    
944    -96    
-416   80     
-240   -112   
608    -144   
-32    -80    
240    96     
-288   192    
144    48     
16     96     
-128   208    
432    16     
-352   288    
-208   64     
192    128    
416    160    
-992   -48    
672    -16    
96     -48    
-16    -48    
432    -496   
-48    64     
-320   -912   
256    128    
256    80     
-160   256    
-368   -16    
176    160    
208    -208   
32     -288   
-144   -16    
272    32     
144    400    
0      80     
80     112    
80     -960   
-112   144    
80     -752   
-48    -16    
96     -96    
64     -80    
256    32     
64     96     
-128   304    
368    -80    
-240   224    
176    16     
320    256    
-32    -1152  
-800   128    
544    -176   
144    32     
0      1024   
80     1248   
-64    688    
192    384    
-96    192    
160    96     
640    800    
-848   544    
352    496    
640    304    
-112   80     
-192   96     
64     384    
304    208    
64     80     
-64    -1008  
-48    16     
192    32     
112    -1264  
-128   144    
128    -144   
304    16     
-176   -512   
-32    -496   
-16    -304   
16     176    
-480   608    
1056   -864   
-512   256    
-320   384    
432    -256   
-96    -752   
-208   -320   
256    -80    
0      224    
-16    176    
128    -960   
-128   144    
-48    -64    
208    64     
64     -240   
-48    32     
-144   -400   
64     32     
48     -80    
-80    -160   
256    -624   
-512   80     
528    144    
-144   -416   
-112   0      
32     -160   
-752   448    
96     336    
16     384    
-16    -512   
144    -288   
-64    -1216  
-96    -288   
96     -480   
256    208    
-32    -272   
-368   -80    
0      64     
272    -96    
-80    80     
-160   64     
-224   0      
16     144    
64     -240   
80     -240   
-112   -160   
96     208    
0      128    
48     -176   
192    16     
-1136  1712   
2304   -480   
-304   224    
-320   912    
720    208    
320    16     
-192   -144   
304    944    
-208   -960   
-192   -320   
16     464    
-128   -208   
-16    112    
176    -448   
112    128    
-32    400    
-112   -128   
208    352    
-32    -128   
-224   -144   
304    -576   
-2416  704    
544    -544   
16     -208   
352    -1280  
-288   -976   
0      -1056  
240    -288   
-176   256    
192    1088   
-96    576    
48     64     
192    -288   
-448   -800   
576    448    
80     48     
-464   720    
528    -32    
0      0      
-160   -176   
-704   16     
160    -224   
-208   496    
-160   -2272  
-224   -880   
720    -256   
-96    1504   
-560   752    
768    832    
-128   688    
-672   240    
336    288    
352    208    
-48    416    
-720   32     
-48    -192   
320    -448   
352    976    
-560   320    
-400   432    
464    -1216  
-144   -112   
-176   -400   
-656   -176   
192    64     
528    -288   
-304   48     
-160   -1008  
-528   -576   
192    -288   
-1472  -224   
-656   192    
768    -400   
-288   -144   
-112   432    
64     224    
-272   176    
16     -848   
464    272    
-160   128    
-240   -576   
-224   -176   
272    352    
144    16     
32     96     
-272   96     
336    16     
-80    -224   
-992   -336   
-352   128    
64     240    
-48    128    
480    -16    
-352   -32    
-1888  -176   
784    -544   
192    -144   
192    -32    
-752   -336   
-80    -400   
320    -304   
-448   -208   
-96    -96    
112    -176   
288    48     
-192   112    
-528   16     
144    -80    
-80    80     
-176   -608   
-960   -304   
176    -208   
320    144    
-256   -176   
-16    -272   
80     80     
-80    -672   
-480   -160   
240    -144   
144    288    
-80    176    
-144   32     
304    -96    
-112   32     
-304   208    
304    656    
-688   208    
-976   -784   
-32    -464   
80     32     
-240   240    
-80    -96    
432    112    
96     80     
-400   240    
-16    304    
-128   -128   
208    0      
-208   320    
160    208    
-256   -176   
-128   320    
-256   32     
-96    32     
208    16     
-48    -64    
-480   -80    
544    320    
112    112    
-432   -64    
-528   -1296  
1728   -384   
-496   192    
-768   -304   
-96    128    
272    400    
48     224    
-320   -96    
96     624    
32     -432   
-224   192    
336    -288   
-32    -64    
-80    -48    
-96    288    
48     80     
272    48     
192    192    
-272   -128   
-128   112    
144    160    
-208   896    
1360   -352   
-896   -112   
-816   -128   
1008   128    
-288   688    
256    -336   
-160   -96    
112    -240   
-48    128    
64     0      
240    80     
-352   80     
32     96     
160    -192   
-16    96     
-256   0      
528    176    
-608   -112   
-64    48     
320    160    
-16    128    
-128   -32    
-144   -240   
-160   -48    
176    -80    
-160   192    
144    80     
-96    208    
144    -1456  
-1424  -992   
496    -176   
80     160    
-736   16     
48     0      
272    64     
-240   -128   
-400   0      
256    -80    
64     48     
96     48     
-48    96     
256    160    
-608   -32    
144    128    
176    16     
-96    16     
-144   208    
0      -144   
-160   48     
128    -608   
-1200  864    
480    112    
-480   -544   
160    352    
528    -224   
-976   192    
-32    -112   
576    -32    
-224   32     
-176   112    
-16    64     
176    96     
-80    -32    
-256   -32    
-112   96     
352    272    
-16    176    
16     64     
48     0      
-208   48     
-368   192    
1056   -448   
-592   64     
-96    -48    
368    192    
288    352    
-80    -32    
-704   16     
512    -112   
272    144    
-432   160    
304    32     
272    144    
-480   128    
-176   -112   
160    32     
32     512    
624    -80    
-496   -16    
-160   144    
304    16     
32     96     
-80    64     
-32    -16    
-160   256    
416    48     
-32    -80    
-512   -608   
1584   -1376  
-2320  -368   
768    -16    
1264   256    
-832   192    
-592   -16    
384    32     
800    336    
-128   -128   
-720   128    
640    -96    
64     144    
0      48     
128    240    
-304   -48    
80     288    
432    0      
-112   32     
-464   80     
560    640    
128    -960   
-368   -992   
16     96     
-240   208    
-592   -48    
832    352    
224    -176   
-448   32     
16     448    
528    -176   
-80    -256   
-752   -240   
432    16     
672    -128   
-832   16     
-160   -464   
384    -256   
64     -464   
32     -528   
-64    112    
-128   -16    
192    -96    
224    -336   
-400   -304   
224    -320   
320    -432   
-336   -336   
-272   -160   
-208   -464   
288    -560   
384    -560   
-560   -1168  
144    -624   
-400   -208   
64     -32    
32     512    
-528   528    
192    720    
400    736    
-96    -112   
-336   -848   
-64    704    
400    720    
-80    304    
32     576    
-144   -96    
-80    -240   
192    544    
-144   -304   
128    304    
112    -1360  
-160   16     
48     128    
-16    48     
64     -192   
-160   32     
-64    224    
96     -544   
-256   96     
-112   272    
336    96     
-256   -544   
464    -1088  
-32    272    
0      416    
96     -176   
64     128    
0      416    
128    336    
32     -336   
-80    160    
-144   32     
64     32     
208    112    
80     32     
-96    16     
240    -64    
16     176    
96     -272   
-16    80     
-64    -176   
416    752    
-272   -512   
160    -144   
176    -368   
112    -432   
-320   320    
0      48     
544    -64    
384    368    
-528   320    
-128   32     
352    -16    
96     -176   
-16    64     
-80    -192   
64     96     
80     -240   
80     288    
-16    96     
48     -16    
224    -96    
0      256    
64     64     
-32    16     
-304   64     
64     -16    
0      96     
-80    -576   
480    -112   
-416   176    
320    -576   
-2336  -80    
1584   64     
-336   208    
240    -128   
0      176    
-368   -128   
128    -1664  
576    -1040  
-32    736    
-288   -48    
-64    128    
272    -80    
128    32     
-240   -176   
-112   368    
208    -272   
448    512    
-96    -160   
-32    -2320  
16     352    
1056   -2736  
-1888  352    
432    -16    
624    1312   
-864   1056   
-624   -800   
992    368    
16     1120   
-656   560    
416    -64    
-48    -416   
-80    -1952  
416    -416   
32     -1072  
-48    80     
48     96     
-32    512    
432    448    
80     -672   
-288   16     
96     -416   
256    336    
-96    -96    
-704   1376   
944    -272   
16     -1056  
336    -688   
208    384    
-176   -544   
-768   -32    
16     -48    
400    128    
608    416    
-384   192    
176    -320   
240    -1232  
-288   -192   
784    -1072  
-400   112    
-160   -336   
176    112    
240    -416   
-384   144    
48     192    
144    320    
176    -32    
336    -160   
-992   -816   
-320   -304   
-176   -1520  
-752   -400   
688    16     
-256   -448   
784    944    
-320   -80    
-464   176    
816    -256   
320    224    
-448   -448   
16     224    
80     -176   
224    0      
240    -224   
-256   -112   
-112   -32    
512    -48    
96     48     
-448   32     
-144   1360   
496    -512   
-96    -16    
256    16     
-48    -16    
-656   -16    
400    -32    
-576   -160   
240    32     
-256   496    
-96    352    
32     128    
-240   -64    
192    80     
272    224    
-192   48     
16     -176   
-80    192    
16     80     
96     176    
-272   16     
-128   -32    
192    144    
272    -160   
-16    0      
160    -128   
160    144    
-144   -16    
32     32     
48     -304   
48     128    
320    -288   
-240   16     
352    96     
672    80     
-432   -160   
16     -64    
432    32     
-288   -160   
-208   -64    
-368   192    
272    48     
368    -224   
-208   -128   
-96    -304   
-32    -32    
112    -208   
-16    352    
160    -736   
-16    -272   
-752   256    
416    -224   
32     -240   
-144   -64    
-192   -96    
128    16     
48     -192   
-16    16     
-96    48     
-64    -144   
112    96     
-352   -720   
1664   1648   
784    368    
-1648  -112   
656    -128   
224    192    
-272   -240   
-80    128    
208    -304   
-304   176    
80     -336   
288    -64    
-32    208    
-448   144    
304    816    
-272   -96    
-608   -144   
0      -80    
-144   32     
-64    32     
-128   -80    
-464   -800   
288    -336   
624    -32    
-1216  192    
480    96     
512    -112   
-560   192    
-400   -352   
400    80     
-208   -480   
-464   -80    
32     -64    
96     -32    
-16    144    
192    -96    
-560   -160   
-96    0      
-80    -48    
64     96     
16     -48    
-80    -112   
144    -32    
-208   -208   
192    48     
-528   -272   
352    192    
16     32     
-336   16     
144    -48    
1040   -1104  
-1568  32     
-432   -224   
624    128    
-304   -96    
-560   -32    
32     -192   
208    -16    
-368   -144   
224    -112   
-16    160    
-64    -32    
-16    128    
0      -32    
16     96     
-320   112    
272    96     
-208   96     
-48    0      
-832   -80    
-96    64     
16     -32    
800    -144   
-1328  -144   
768    48     
-48    32     
-816   16     
272    48     
-48    -576   
-224   -48    
320    256    
-288   16     
-32    16     
80     0      
-176   -208   
-224   224    
176    -64    
32     368    
-96    128    
-272   -256   
-128   0      
224    160    
-224   128    
16     208    
96     -32    
-624   176    
384    -48    
208    304    
144    -16    
-416   0      
208    240    
-256   -16    
-256   -128   
-32    176    
176    176    
-656   128    
32     -160   
448    -80    
160    -16    
-528   -64    
96     80     
368    112    
-432   64     
-32    112    
96     96     
160    -144   
-320   -304   
64     48     
48     96     
192    416    
-384   1072   
-240   3424   
1264   960    
-1488  -16    
-432   -368   
1488   0      
-352   -272   
-976   16     
496    320    
32     -288   
192    288    
-544   -160   
-160   -32    
288    16     
16     80     
-112   -128   
-272   304    
64     -80    
352    192    
-336   -544   
-432   -16    
384    496    
-96    64     
128    16     
464    -304   
-512   144    
-32    128    
144    80     
16     -64    
-608   -768   
128    -240   
352    528    
-176   64     
-304   -512   
-32    -288   
144    176    
-64    16     
352    272    
-320   -288   
-368   -608   
240    -208   
128    -64    
-160   144    
-176   -192   
512    288    
112    832    
-208   848    
320    -96    
-688   -1152  
128    -336   
432    512    
-48    144    
-528   -1040  
16     -512   
128    -1632  
-528   -704   
368    -624   
-16    -288   
-80    192    
224    192    
-96    144    
-48    208    
96     -64    
64     16     
-16    0      
-96    -256   
64     -256   
576    -240   
256    320    
-592   32     
208    64     
144    16     
48     0      
-48    272    
-32    16     
96     176    
224    16     
-32    80     
-96    192    
-160   96     
16     0      
352    32     
384    144    
-1280  464    
448    -128   
32     320    
144    -160   
-272   64     
-80    896    
32     352    
0      -160   
64     -128   
-240   240    
-80    224    
112    144    
432    -128   
-688   240    
-272   144    
304    -48    
16     240    
-32    -112   
-112   -64    
16     -368   
-256   272    
-16    240    
128    112    
-80    320    
80     64     
272    416    
-336   928    
16     -144   
432    -224   
-112   64     
-368   240    
240    -48    
144    -640   
-256   208    
64     272    
224    608    
16     464    
208    80     
80     48     
-224   0      
192    -112   
-32    -304   
-96    -160   
64     64     
112    128    
16     -192   
144    -176   
-320   -432   
-192   592    
128    1328   
1664   240    
-256   96     
-560   352    
352    -128   
432    -192   
320    1072   
-784   -800   
-448   -560   
752    576    
16     224    
-496   -224   
256    32     
-160   -656   
176    80     
80     -928   
-128   -288   
-208   -320   
416    -176   
16     176    
368    -48    
-2112  1136   
800    -208   
368    368    
-608   0      
-368   -944   
112    -512   
496    176    
-592   -128   
320    64     
272    -352   
-352   128    
-288   80     
416    64     
48     -128   
-464   176    
224    -16    
368    352    
208    176    
-32    160    
-176   80     
-96    -128   
-448   -176   
-160   -208   
448    848    
576    -160   
0      16     
-272   -208   
112    32     
272    832    
720    80     
-400   -16    
-128   160    
336    0      
480    304    
-288   -64    
-816   192    
1088   -240   
336    -224   
-384   224    
112    -384   
208    0      
192    32     
176    -192   
-560   368    
480    112    
64     80     
96     48     
176    1056   
-1088  544    
592    2160   
1376   640    
-1488  96     
-336   -128   
848    -48    
320    -16    
-944   -16    
-192   -96    
352    144    
368    336    
-416   -32    
-176   240    
160    48     
-240   192    
224    -464   
-16    256    
32     -352   
-32    128    
160    -544   
-608   16     
496    -352   
-16    144    
256    -96    
-592   -112   
-176   512    
128    288    
240    112    
-176   -272   
-240   -1136  
400    -32    
-304   -656   
160    -304   
160    128    
112    -224   
32     320    
-160   -192   
208    -240   
512    -528   
-96    -928   
0      176    
144    -272   
-352   -80    
160    -80    
64     -416   
-64    64     
-48    -320   
192    -352   
240    -2032  
-496   -448   
208    -64    
240    -96    
-16    -48    
-1040  16     
400    -352   
384    -272   
-736   208    
640    544    
-560   416    
-144   304    
48     128    
160    -192   
64     -176   
-192   -480   
160    96     
-240   -1056  
128    96     
144    -240   
96     128    
-272   32     
-304   112    
352    -48    
240    112    
-304   -96    
-144   64     
272    -144   
-144   -144   
112    -272   
-112   128    
112    -304   
-16    -48    
-384   -1200  
1152   -1664  
-896   144    
-16    -304   
64     192    
96     368    
64     -320   
288    656    
-208   16     
-608   -320   
320    -240   
160    128    
96     48     
-64    16     
-16    -320   
416    -64    
-288   -1264  
224    128    
0      96     
-208   176    
16     0      
-272   688    
1232   -576   
-832   -160   
-336   -96    
976    -112   
-1120  0      
-112   32     
-464   -144   
16     -352   
416    144    
112    -272   
-288   224    
80     -160   
368    224    
-320   128    
160    160    
-128   -48    
-288   176    
528    -64    
-384   112    
-144   -48    
80     -32    
-48    0      
336    -32    
-160   128    
-272   -80    
320    80     
32     -1296  
-224   144    
1376   2224   
-496   -208   
-2480  544    
1440   -336   
-192   32     
-544   -64    
64     256    
384    48     
-304   -176   
32     -80    
160    64     
-80    -192   
-32    48     
304    -976   
-160   -144   
-224   304    
320    -224   
-704   32     
-96    -48    
-128   224    
16     -144   
544    1232   
-1056  -496   
-752   304    
944    -176   
160    -96    
-32    -336   
-320   304    
256    -176   
160    48     
-240   16     
-16    -96    
-320   80     
112    16     
144    -144   
80     144    
-144   16     
-160   -560   
-336   336    
272    -192   
16     64     
-592   32     
144    672    
576    -400   
-784   -96    
-304   384    
800    -64    
-96    112    
-240   -96    
-176   32     
224    48     
-64    -80    
-256   -240   
16     112    
-128   16     
48     -432   
-288   -160   
960    -272   
-336   -112   
224    320    
-192   80     
-304   48     
0      48     
-208   -16    
-176   -112   
-96    -96    
416    -160   
32     -48    
-240   -224   
368    -224   
-464   320    
512    1584   
992    -480   
-2144  64     
0      -96    
1808   80     
-1168  -320   
0      -1808  
1056   208    
-96    272    
-992   320    
144    32     
288    -288   
-112   352    
-176   32     
256    416    
-240   832    
144    -272   
512    -32    
-416   576    
-272   48     
224    -336   
112    -288   
-224   -64    
48     -560   
-160   -752   
48     -240   
-288   -96    
-128   0      
-16    144    
144    304    
-48    -128   
-224   -272   
-160   432    
32     240    
112    160    
0      -288   
-288   352    
96     640    
0      576    
-224   -32    
32     224    
-416   -80    
48     144    
0      16     
176    1184   
0      816    
-320   256    
400    832    
-240   -192   
224    688    
-272   48     
16     1152   
752    992    
-272   1344   
160    32     
464    -848   
176    512    
-272   1200   
128    -608   
96     -224   
-192   192    
64     192    
-128   64     
-144   -16    
352    -320   
-32    -368   
144    96     
96     -240   
416    -48    
-144   160    
-96    48     
-96    -96    
256    -32    
-80    32     
-224   128    
16     48     
32     0      
16     16     
368    96     
-240   80     
-160   0      
-288   368    
384    -352   
-768   160    
160    -240   
240    96     
-688   144    
16     240    
48     80     
-96    -80    
176    48     
80     16     
0      -144   
-112   0      
240    0      
-112   -48    
80     -336   
176    -352   
80     -256   
-16    112    
-96    -32    
272    -928   
80     192    
128    608    
-304   448    
-160   -240   
16     -416   
160    592    
256    128    
-304   208    
-192   144    
512    176    
-64    128    
-144   16     
128    -128   
-240   -48    
32     224    
112    224    
192    -288   
-96    432    
-96    768    
-48    -512   
496    64     
48     272    
-256   -16    
-352   304    
448    320    
112    -656   
32     96     
-432   256    
1088   -128   
-2784  368    
48     528    
1488   944    
-896   736    
-144   288    
160    384    
-320   176    
-144   320    
624    48     
-144   48     
-192   16     
16     16     
-64    176    
272    304    
-64    288    
-144   128    
-48    16     
176    80     
-80    0      
-288   -96    
800    1392   
1792   208    
-1712  352    
544    400    
96     96     
-512   144    
560    -192   
80     288    
-256   -32    
176    128    
336    112    
-80    48     
-224   -192   
-96    -16    
592    176    
-144   0      
-448   80     
336    -96    
112    128    
-128   128    
336    672    
-336   -80    
-288   -96    
48     128    
64     288    
-320   -96    
-64    32     
-64    -192   
-160   32     
176    80     
208    512    
-96    368    
528    48     
160    192    
32     32     
-224   16     
-256   -112   
304    320    
-416   592    
320    -880   
368    -32    
-160   16     
16     176    
64     64     
-448   -224   
368    160    
336    176    
-1040  160    
16     -1728  
-672   -4176  
-1712  -1328  
128    -16    
784    208    
-304   0      
-496   -368   
-480   -144   
336    240    
272    -176   
-160   272    
-144   -80    
96     352    
-176   144    
-208   64     
32     80     
64     -128   
-224   160    
-64    -32    
32     -448   
960    -48    
-432   -784   
-64    192    
64     -320   
-784   16     
176    -192   
272    352    
192    -16    
-896   32     
912    80     
-160   80     
-224   32     
208    112    
176    16     
-480   -368   
272    64     
368    -368   
-304   192    
-16    -32    
320    -48    
144    144    
-96    160    
128    -416   
-144   192    
272    -160   
-352   0      
-368   -160   
432    160    
48     256    
0      -32    
-224   112    
64     48     
32     -384   
752    -240   
-96    96     
-480   -1824  
384    448    
128    176    
-272   192    
-384   288    
480    192    
-304   64     
32     0      
208    16     
-336   128    
-96    240    
304    -192   
160    -736   
-800   -48    
176    -64    
464    -896   
-208   256    
48     176    
-192   96     
48     -96    
320    256    
32     64     
-416   272    
96     -160   
272    16     
208    384    
-192   -208   
-736   -2480  
112    -336   
1216   -48    
-688   -64    
448    384    
48     -64    
-96    544    
-624   -16    
384    160    
176    176    
-224   -672   
-144   0      
96     -256   
512    176    
-592   672    
256    -240   
-64    -272   
448    512    
-32    -560   
-240   64     
448    736    
-544   -320   
-544   352    
1088   128    
-48    -208   
-352   -112   
-96    -512   
320    -80    
-16    -192   
0      -480   
-80    160    
80     -240   
48     224    
192    -208   
32     -1312  
-128   112    
64     -160   
576    -96    
-656   -16    
-16    -560   
-48    -64    
160    -112   
128    48     
-112   -608   
-64    -64    
288    208    
-96    -112   
-240   -240   
256    96     
-464   -448   
-640   -1216  
1664   32     
-336   16     
-1360  -160   
1632   320    
-16    160    
-1104  96     
560    -128   
416    -208   
-160   -144   
-112   -2400  
192    -176   
-320   -432   
128    -96    
352    -16    
-320   112    
80     -208   
480    160    
-208   -16    
-192   144    
-640   48     
-544   64     
2064   -624   
-1088  -752   
-1328  -416   
1072   -160   
-176   -656   
-304   -240   
384    -16    
-192   -32    
576    128    
112    -112   
-272   -48    
96     112    
240    80     
-416   -112   
16     -96    
-208   16     
32     -144   
192    -224   
272    -416   
128    -32    
432    -736   
-416   288    
336    -320   
-208   96     
-864   -976   
592    -736   
352    240    
-560   -176   
176    -64    
272    -112   
-224   288    
128    -112   
480    -96    
240    -160   
-880   48     
400    -2032  
192    272    
448    512    
208    32     
-240   80     
16     -112   
-48    -112   
96     -352   
96     240    
496    96     
-512   32     
240    320    
16     64     
-608   -480   
832    608    
1472   -592   
-1520  -720   
-272   -1440  
512    -1344  
576    -1312  
-512   -80    
-304   736    
272    144    
96     352    
48     -208   
-880   -256   
144    -96    
-32    48     
96     -128   
32     -176   
128    -576   
16     -48    
-240   -1248  
240    -144   
-320   -16    
112    -32    
-320   -144   
304    0      
-416   -912   
-336   -528   
112    544    
32     640    
-304   -384   
96     -96    
-48    624    
288    -640   
-32    -144   
-272   288    
448    992    
64     416    
-160   16     
-80    -160   
48     1104   
-64    -128   
48     -512   
288    -128   
-464   -144   
-192   -32    
-32    -464   
240    352    
-576   64     
-272   -528   
-16    112    
-208   -80    
-240   -496   
-16    -848   
-720   -912   
64     -784   
-128   -384   
80     144    
16     -128   
-800   -64    
208    336    
-368   128    
16     112    
-48    32     
-224   16     
-96    -144   
-368   -144   
144    -208   
-1248  352    
-64    800    
-256   -208   
352    -480   
48     32     
-80    208    
-160   -192   
160    -208   
192    176    
64     512    
-384   368    
400    976    
192    448    
128    -64    
-832   -416   
544    -944   
640    368    
-352   624    
-656   1168   
80     880    
-112   -400   
-64    -288   
208    368    
-192   288    
-240   336    
112    48     
-32    -96    
112    272    
32     224    
-16    -16    
-416   16     
32     80     
96     16     
-240   96     
-1424  -176   
560    -576   
-160   48     
144    -864   
-224   -1488  
224    304    
224    400    
-128   576    
0      16     
-32    128    
16     32     
80     -96    
80     -224   
-320   256    
-336   -144   
-144   96     
368    0      
-240   -48    
48     304    
240    -16    
-320   -176   
64     -80    
160    48     
64     -32    
208    -176   
-368   0      
64     48     
224    32     
-208   -96    
752    -208   
80     1744   
-672   -864   
-2992  -208   
1984   224    
-480   -208   
-1104  -288   
288    -32    
0      -64    
0      416    
48     144    
32     144    
176    16     
-16    112    
-304   -160   
16     176    
-96    -112   
0      64     
-320   112    
128    112    
-80    96     
-96    16     
-576   -608   
144    0      
432    -256   
-960   80     
1040   208    
32     -48    
-448   96     
-272   -176   
-320   256    
432    -96    
96     112    
-400   0      
16     144    
-160   -160   
736    224    
-272   32     
-240   0      
160    -80    
-128   16     
208    -64    
-160   -240   
288    400    
816    -96    
-352   192    
224    384    
368    352    
-368   512    
-704   64     
496    144    
560    -64    
-208   -64    
-480   240    
320    192    
-48    -80    
-160   -272   
656    -560   
-464   -384   
-208   -128   
640    -96    
192    32     
-96    272    
-576   16     
144    32     
352    96     
112    -272   
-976   128    
208    64     
144    -48    
320    1056   
1408   128    
-2848  560    
656    -784   
560    -352   
-656   48     
-528   -80    
624    -128   
16     400    
-16    -80    
256    144    
0      -16    
432    384    
-768   288    
-48    80     
64     -32    
112    208    
-160   64     
-176   96     
-384   -384   
816    624    
144    -320   
-768   160    
448    128    
-160   144    
-272   -32    
464    176    
288    144    
-416   416    
368    128    
-32    336    
336    -160   
-544   240    
224    -64    
-288   64     
80     96     
16     192    
-16    128    
160    -96    
-224   0      
-160   144    
192    16     
208    208    
-48    96     
-208   -32    
-112   -224   
-96    16     
-32    -64    
0      160    
16     176    
336    160    
-416   48     
64     176    
208    448    
1056   -128   
-448   352    
352    0      
-48    272    
48     16     
-752   224    
224    128    
112    144    
32     288    
64     128    
-240   0      
160    -64    
-16    160    
160    352    
48     -64    
16     496    
-80    240    
80     0      
-16    80     
16     384    
-208   272    
192    112    
224    224    
-128   320    
144    -112   
-160   -192   
64     256    
64     176    
-240   -2832  
-784   624    
944    112    
32     400    
272    272    
-544   -16    
160    336    
-352   1168   
368    432    
0      16     
-240   -224   
-112   80     
96     -48    
-32    -96    
-336   -144   
272    -624   
48     -32    
64     64     
176    160    
-80    144    
-432   -480   
912    -640   
-752   112    
544    -736   
-176   -64    
-224   -224   
-16    32     
64     64     
96     -208   
-32    16     
-64    -176   
-336   -480   
496    -656   
-96    288    
-96    352    
256    480    
-48    -560   
-128   -480   
32     -400   
-80    288    
208    368    
64     48     
-112   -112   
-48    -304   
144    80     
-64    -96    
-16    80     
-16    -416   
160    144    
144    -256   
208    -880   
-1488  -704   
784    -336   
-864   -192   
736    304    
512    224    
-352   -64    
-320   128    
-64    64     
432    112    
16     80     
-240   112    
400    -848   
-32    -384   
-384   -1488  
400    96     
-112   144    
64     464    
224    64     
32     256    
-48    96     
-736   -224   
2256   -192   
-384   -144   
-1376  64     
1088   480    
864    832    
-336   -192   
-688   720    
624    368    
240    320    
16     -64    
-96    64     
-16    208    
128    528    
-16    144    
208    -320   
-480   0      
160    -144   
496    288    
-352   -16    
224    192    
80     160    
16     -576   
-576   -864   
896    544    
0      544    
-592   672    
-208   -48    
240    -464   
-224   -144   
400    -272   
-64    288    
416    464    
-272   -64    
-544   -544   
16     368    
-96    -288   
-208   -432   
576    -640   
-112   -2896  
368    224    
288    -768   
-528   352    
-288   128    
576    -624   
-16    -448   
-144   -1120  
192    -224   
64     -1408  
-656   -1440  
1568   -2144  
640    192    
-896   528    
-64    -208   
224    -1152  
592    656    
0      1184   
-736   -1824  
-304   80     
496    -192   
80     240    
16     -304   
-80    -80    
160    -240   
512    16     
-144   -2640  
400    -144   
96     -704   
-304   -416   
224    -160   
64     368    
-48    -368   
-320   0      
432    -816   
16     -96    
-1296  -416   
48     208    
-368   -592   
144    656    
384    -208   
-208   -592   
-16    -64    
160    -176   
48     160    
112    480    
160    64     
-96    -688   
96     512    
256    -144   
-288   -912   
48     -464   
192    -144   
240    288    
-368   -48    
-112   -48    
544    -112   
240    1216   
-704   -2032  
-336   -592   
816    -192   
432    1232   
-880   -80    
-496   -416   
368    -720   
560    -1040  
-832   -336   
-272   -1056  
-1376  32     
432    800    
48     -880   
96     -864   
-336   -96    
48     -240   
240    192    
-128   -96    
-48    64     
64     608    
208    672    
-128   496    
-48    -240   
-144   -176   
-16    256    
-208   48     
-96    128    
-16    1056   
400    352    
-304   80     
144    -400   
640    -368   
16     -320   
-128   -1104  
-1216  896    
1168   -800   
400    -432   
-240   960    
-48    496    
-80    160    
128    -112   
-32    64     
-176   -224   
-112   -640   
0      -96    
192    128    
16     -32    
-304   -48    
112    0      
304    32     
96     144    
-336   400    
16     128    
-80    32     
624    384    
-240   512    
-560   -336   
416    -80    
288    32     
32     48     
-32    608    
368    336    
0      160    
-144   -160   
32     -32    
-144   64     
-48    64     
160    32     
-176   -336   
-16    -80    
-80    96     
272    -144   
-80    144    
128    32     
80     144    
-624   -192   
288    224    
-336   -112   
-176   32     
240    64     
-112   48     
-272   112    
-176   -256   
176    -736   
-1792  -544   
1792   256    
64     -176   
-480   288    
48     -80    
112    240    
-208   -352   
-512   128    
400    -96    
-320   48     
-48    -16    
-112   -160   
352    16     
-800   -48    
-208   48     
272    160    
-272   -32    
-512   -128   
384    112    
-272   -96    
-960   -336   
896    -496   
176    -176   
-560   -64    
432    304    
576    -112   
-688   32     
-336   224    
16     -48    
48     128    
-224   64     
-48    64     
-336   -192   
-32    16     
32     0      
112    -32    
96     -192   
176    176    
-592   336    
-160   144    
368    240    
-304   -192   
-96    16     
608    144    
288    464    
-1040  576    
224    400    
64     -112   
-64    -48    
-256   -288   
160    144    
432    32     
-96    112    
80     64     
208    176    
-32    144    
-208   -16    
352    -400   
-176   -240   
-80    -80    
-448   -128   
224    80     
-224   32     
-160   32     
32     -128   
480    64     
-336   256    
48     48     
832    1552   
-2112  2992   
304    416    
96     -16    
-1280  0      
528    176    
304    -48    
96     240    
-96    48     
-912   -64    
-160   112    
288    80     
-64    -144   
-464   224    
-16    32     
112    160    
80     64     
-288   80     
-48    -48    
48     -80    
400    -560   
-144   432    
-48    -144   
-304   224    
-1312  -192   
144    32     
144    160    
-64    0      
-16    192    
320    -112   
-256   192    
-208   0      
208    160    
16     32     
160    208    
-384   176    
240    336    
-48    -32    
288    -96    
-176   -128   
144    -16    
144    128    
128    144    
-208   160    
128    -32    
-304   32     
272    -80    
-96    48     
224    304    
-256   240    
80     256    
464    144    
32     992    
-928   448    
336    384    
144    -48    
-448   -96    
-112   -176   
304    -512   
96     -80    
-48    64     
176    144    
-176   80     
-32    -16    
256    208    
-240   256    
-128   176    
96     -320   
-96    -288   
-208   -560   
32     -608   
32     -592   
-160   -176   
64     -16    
-128   96     
-144   112    
-16    -128   
368    0      
-80    656    
-368   352    
16     32     
160    16     
-480   -2352  
-16    -352   
-160   288    
64     32     
272    -224   
-304   80     
-64    48     
192    112    
-16    -368   
96     -96    
-128   192    
-112   112    
304    112    
64     96     
-224   432    
128    48     
-32    -80    
-240   320    
80     48     
80     -176   
528    368    
-1040  1232   
368    -464   
144    -272   
-48    272    
0      64     
-176   112    
80     16     
-16    32     
-48    112    
-336   -336   
-64    384    
160    208    
-96    384    
-208   -48    
-144   -176   
416    96     
144    656    
-64    -272   
0      -112   
0      368    
-160   -96    
224    16     
192    32     
-176   416    
-32    -368   
144    -112   
160    160    
64     512    
32     112    
-880   -752   
416    -208   
416    112    
-1056  352    
592    656    
480    48     
-432   -208   
272    128    
-144   -16    
192    -16    
-192   -32    
-208   -592   
16     64     
320    -256   
32     384    
-112   64     
-96    112    
400    176    
-368   352    
48     144    
-64    -416   
1568   432    
-1408  272    
-864   -848   
864    -624   
128    32     
-384   -1760  
272    -1136  
336    -1456  
-720   -96    
160    1040   
144    672    
-144   -192   
-32    -192   
-112   224    
-256   48     
256    -64    
240    48     
-384   -160   
-16    -48    
-112   192    
208    16     
208    16     
-192   -208   
-176   496    
1008   -192   
-128   -704   
-864   944    
304    352    
-144   352    
336    176    
-96    112    
96     592    
656    240    
64     -672   
336    -96    
-176   -144   
560    -368   
432    -432   
-304   80     
-64    400    
240    128    
384    416    
64     80     
-240   704    
80     160    
-176   -384   
-112   -32    
112    -224   
320    -128   
-320   -656   
1312   -1872  
288    -592   
-560   -928   
-256   -768   
160    -176   
320    208    
112    304    
320    128    
-176   352    
-192   -256   
160    112    
352    352    
0      480    
-96    -448   
-176   -96    
-32    -336   
-32    320    
80     400    
32     640    
112    -448   
32     192    
-144   -320   
-304   416    
464    -1008  
-720   -528   
64     -304   
160    -368   
-352   -272   
-64    -848   
512    784    
144    672    
-16    528    
0      -576   
192    32     
-256   -352   
144    -16    
224    -496   
-320   -240   
96     -256   
288    224    
-32    -128   
112    -496   
-80    240    
336    384    
112    1072   
-32    448    
320    208    
-112   208    
-16    592    
-96    -640   
320    336    
192    48     
-608   -704   
-448   -768   
416    -1072  
640    -608   
-320   -576   
64     176    
160    -304   
256    -1088  
128    -784   
-352   -160   
112    -432   
-176   96     
320    112    
-160   -880   
128    -400   
0      -1248  
144    -592   
-176   -688   
-416   -624   
32     16     
336    -160   
-112   32     
-144   -560   
-144   1216   
368    672    
-128   640    
256    272    
0      -48    
-544   -2752  
-224   -624   
448    304    
-768   -128   
272    -32    
-16    -464   
-160   -560   
32     -352   
64     -144   
304    -528   
-256   16     
-128   -1312  
160    -176   
48     -720   
48     -208   
0      -224   
-112   -256   
64     -80    
160    16     
-432   48     
-208   -48    
320    976    
1184   -192   
-1072  128    
624    -160   
-32    32     
-208   -320   
160    -304   
400    -400   
32     496    
-352   32     
96     192    
304    80     
-16    -112   
-128   -96    
128    -208   
48     -160   
-224   -48    
240    16     
48     -144   
-208   -48    
-32    -80    
384    16     
80     192    
-176   16     
-160   64     
128    272    
64     -96    
-176   -48    
160    -80    
-1552  -160   
1760   928    
656    -352   
-1328  -16    
672    32     
64     48     
-640   -992   
-32    80     
128    -1168  
-64    208    
128    -224   
64     96     
-112   -144   
64     64     
-768   -144   
624    64     
-448   -96    
48     -128   
-544   -96    
48     -32    
80     48     
-288   -816   
-880   272    
1968   -368   
-1616  -32    
-224   112    
1232   -112   
-544   -48    
192    -224   
-208   -176   
32     -144   
-160   -16    
144    -32    
-176   32     
80     16     
-48    96     
64     -352   
240    496    
-64    -304   
192    96     
-96    -1312  
-128   0      
672    -64    
-192   80     
-352   -96    
-96    320    
96     496    
400    -160   
16     448    
416    32     
-320   -32    
-80    -464   
64     -48    
320    -208   
-448   192    
336    208    
32     192    
-512   464    
-16    -272   
-112   224    
192    80     
192    16     
-112   -96    
144    80     
224    -160   
0      48     
-48    -96    
-272   80     
-160   -16    
80     -336   
1184   -3200  
-3408  -1184  
880    368    
1136   -176   
-512   128    
-336   224    
48     -176   
192    160    
-384   -448   
-128   96     
304    -64    
-544   80     
352    144    
-144   -96    
-352   -160   
96     80     
-192   -32    
-48    48     
-272   -288   
384    -656   
-1136  -320   
-144   -128   
-80    64     
-688   -48    
128    -128   
560    192    
-592   -384   
208    -160   
-48    -528   
-192   -160   
112    -16    
-64    48     
-128   -112   
-272   176    
224    -368   
-880   -352   
240    -224   
-128   -208   
16     -32    
64     -176   
-112   0      
144    -352   
-288   80     
32     400    
224    512    
176    496    
-688   -896   
-144   -464   
176    -64    
-80    -192   
16     160    
64     528    
-944   32     
-32    -208   
32     32     
64     176    
-80    -64    
-464   -480   
288    -320   
400    -432   
-416   -320   
-288   -176   
80     -160   
-32    -64    
208    -16    
144    -256   
-448   16     
-384   -240   
352    -192   
-32    -480   
-128   160    
-160   224    
240    192    
-48    0      
16     -224   
-160   -320   
128    -160   
144    0      
-32    -256   
128    416    
-320   -32    
960    1232   
-1344  1792   
-80    -304   
416    -1216  
0      -512   
-544   304    
240    1488   
544    -448   
-112   96     
-80    0      
-32    240    
-96    176    
16     -144   
80     48     
-352   0      
48     368    
112    -16    
64     304    
-720   160    
96     368    
416    624    
-512   688    
240    -256   
176    736    
-416   304    
-192   -416   
288    16     
144    48     
-80    416    
-80    48     
0      160    
-16    -64    
80     48     
-400   -80    
-96    80     
48     128    
-32    400    
304    -304   
-128   -16    
-160   -64    
-64    112    
272    32     
32     112    
-64    128    
-160   -128   
368    80     
-112   48     
160    272    
-224   -160   
-144   80     
528    -912   
-1616  -464   
-32    -448   
-80    -240   
272    -608   
16     -592   
448    240    
-128   896    
-384   -112   
-16    -480   
368    -208   
-288   352    
-112   144    
176    -16    
48     -400   
-64    544    
-144   -48    
304    336    
-240   -1056  
-80    576    
-176   -288   
1024   1056   
528    176    
-752   -512   
320    -1136  
-512   -48    
80     -32    
640    800    
656    -1296  
-688   -1648  
-144   -496   
512    -64    
-192   96     
128    -208   
256    -192   
176    -320   
-416   96     
352    112    
416    -304   
-288   -272   
16     176    
64     64     
-16    -432   
176    176    
-16    880    
-192   2048   
32     1344   
-176   176    
352    64     
-336   112    
48     -80    
336    -304   
-256   0      
32     992    
432    304    
-544   -160   
-32    16     
736    1760   
848    560    
-400   -256   
-16    256    
272    -112   
96     256    
96     -496   
-352   0      
352    -720   
-160   112    
-96    -32    
-288   -336   
-96    -64    
1504   2000   
-1840  528    
256    64     
1136   400    
288    624    
-1568  -352   
224    -1024  
1488   -432   
-416   -320   
-992   320    
256    48     
640    160    
32     -128   
-496   128    
-112   48     
-192   64     
336    -16    
-32    -160   
-256   992    
112    672    
96     32     
80     -144   
-368   -464   
-192   448    
608    368    
-624   208    
320    128    
128    80     
-368   288    
64     704    
160    560    
32     64     
128    -1424  
-288   208    
-304   192    
432    224    
-64    112    
-16    -48    
80     -16    
-112   112    
80     -144   
80     176    
112    -96    
-96    48     
-16    64     
368    -16    
-48    304    
208    -784   
240    -528   
-160   0      
64     144    
608    1424   
-864   432    
-256   336    
464    240    
-208   160    
-16    -128   
80     -208   
-208   48     
48     -32    
48     -112   
80     32     
-16    160    
352    320    
-112   -1008  
-144   80     
256    208    
160    176    
-384   -752   
400    208    
224    48     
-304   -96    
48     48     
144    96     
64     128    
384    176    
-832   912    
224    -256   
288    -48    
-64    -32    
-64    32     
-560   672    
2304   -448   
-496   240    
-880   64     
592    16     
560    -176   
-784   400    
-16    96     
112    32     
272    -48    
-64    32     
16     -400   
32     80     
192    -560   
128    160    
-208   -432   
240    -176   
-160   192    
64     144    
64     48     
816    1008   
-1536  464    
-64    -32    
1008   208    
256    -416   
-448   64     
-288   -144   
592    0      
96     352    
208    -256   
-368   0      
-32    128    
288    128    
64     -64    
-336   208    
128    96     
160    128    
240    -1168  
-32    144    
32     -624   
-144   192    
48     -64    
-80    112    
272    16     
128    -16    
-656   560    
496    80     
-96    64     
-48    128    
-352   -784   
1024   -704   
-656   256    
640    128    
528    80     
-688   -80    
0      288    
448    -112   
-144   144    
-80    -432   
0      160    
208    -480   
80     -80    
-144   0      
224    -464   
32     -80    
-1104  -256   
400    -976   
-32    -64    
-16    -224   
288    16     
-256   -2000  
848    848    
672    -80    
-1184  32     
736    288    
640    16     
-512   224    
96     224    
832    -496   
-320   112    
-624   -160   
240    -32    
352    -16    
-336   -112   
208    -96    
-128   -464   
128    -80    
80     -272   
-112   0      
128    -64    
-96    160    
416    608    
-624   -112   
-752   -240   
480    128    
384    144    
-240   -64    
-128   -304   
-576   464    
512    -400   
-16    -192   
288    112    
-112   80     
-80    32     
-64    -176   
368    256    
112    -80    
-160   -32    
112    -384   
16     16     
48     96     
-48    -160   
96     -16    
64     -80    
-336   -112   
336    80     
624    80     
-80    -656   
-384   -16    
-48    -1424  
1024   3040   
704    144    
-1744  -368   
-176   -272   
800    0      
-208   176    
-352   -384   
-272   224    
656    -112   
-128   32     
-288   -208   
320    0      
48     -384   
-48    256    
336    -1264  
48     240    
-352   16     
272    80     
-144   256    
-304   -192   
144    -368   
144    144    
-288   -240   
-240   16     
496    -112   
-416   -304   
-208   -96    
96     -192   
176    -128   
256    -1072  
-656   -720   
128    -640   
496    0      
-48    -160   
-480   -192   
128    48     
288    736    
-752   0      
176    -608   
-112   -128   
-64    -224   
160    -48    
288    -48    
0      160    
-32    192    
176    608    
-16    -480   
208    -208   
-224   688    
160    -16    
-224   32     
0      -592   
32     -432   
-80    -1264  
-144   -544   
112    -656   
-352   -1536  
-832   -2240  
368    -176   
64     272    
208    160    
0      -48    
0      -16    
-272   96     
336    -512   
80     -32    
-320   240    
-32    384    
0      48     
-64    112    
96     -16    
112    16     
64     -208   
-144   0      
320    -336   
64     144    
16     -192   
-416   -128   
0      -48    
176    -160   
48     -32    
656    208    
-1120  384    
432    -96    
176    160    
-368   32     
-176   192    
-304   48     
112    16     
64     -176   
-48    32     
-144   64     
-464   16     
-32    32     
-112   -16    
-256   16     
-48    64     
-32    -64    
80     -128   
-176   -96    
-288   -80    
-624   432    
656    -624   
-624   16     
-96    -304   
112    112    
-32    128    
-208   496    
-176   80     
-80    -240   
48     -64    
32     112    
-128   320    
48     -80    
176    48     
-336   64     
288    80     
160    96     
-304   768    
16     336    
-32    -32    
-128   -192   
-96    48     
80     48     
-192   16     
0      -32    
-96    112    
0      80     
-416   -160   
336    80     
-96    304    
-176   1456   
2320   -752   
-1408  320    
-144   64     
304    -80    
256    240    
-640   64     
-400   368    
-32    -176   
0      -112   
48     96     
-48    48     
-512   160    
288    -240   
144    -352   
-352   128    
-176   -96    
64     -352   
448    -288   
-176   240    
176    -496   
-1568  1280   
1200   -464   
-208   -384   
-384   -128   
528    288    
0      1632   
-848   1408   
-352   1664   
592    1264   
-224   464    
-80    16     
160    288    
-208   304    
-208   -176   
96     -128   
112    880    
-336   192    
-320   -160   
32     -48    
128    -80    
-112   -16    
-832   -528   
704    656    
-240   480    
-176   256    
-912   480    
96     -96    
-176   256    
176    272    
-384   0      
-320   160    
352    16     
176    -80    
-112   400    
224    -144   
128    176    
304    336    
32     -144   
-496   16     
256    288    
-80    32     
336    800    
-448   384    
-48    224    
0      -144   
-256   192    
208    -64    
-432   240    
32     -336   
336    1728   
640    320    
-1440  -368   
-848   80     
1168   -144   
432    176    
-1120  -192   
112    272    
-128   -96    
288    224    
-112   -16    
-256   80     
352    224    
-432   112    
256    192    
112    80     
-96    48     
160    -48    
-320   992    
352    1472   
-16    480    
-320   -368   
560    16     
224    -32    
-624   208    
256    0      
128    352    
304    -176   
-624   80     
176    -112   
160    304    
128    608    
-464   -96    
240    64     
32     16     
64     400    
-496   80     
-96    112    
608    112    
-208   96     
-368   96     
176    224    
-32    -64    
240    -32    
-160   -112   
-176   -112   
192    -80    
-144   -112   
96     48     
0      80     
-112   192    
0      -640   
-864   48     
432    0      
320    208    
224    -48    
96     144    
208    16     
-192   64     
112    80     
-48    112    
-80    0      
-144   -128   
160    16     
-32    64     
-128   32     
-16    -288   
-96    -160   
160    384    
-64    48     
-16    -48    
224    -16    
-32    80     
-208   48     
160    80     
-16    320    
-112   -144   
-32    -464   
-16    384    
16     80     
-512   -1376  
1696   -96    
-528   448    
-736   -176   
512    464    
-256   240    
-288   -32    
816    -32    
112    -208   
-672   336    
192    -304   
368    -112   
-32    336    
-160   224    
-64    176    
400    -240   
-96    -64    
-112   464    
112    -256   
-144   -208   
192    160    
-512   -704   
416    -32    
368    112    
-720   -32    
256    48     
576    -112   
-336   560    
-464   -160   
496    80     
-112   128    
-96    80     
-192   288    
256    0      
176    -128   
80     64     
-144   -192   
-288   272    
448    -32    
-496   288    
80     -64    
64     96     
48     64     
-144   -464   
0      -48    
-192   32     
384    64     
192    144    
-112   32     
-128   96     
736    1216   
-48    1040   
-448   1008   
720    0      
128    -96    
-256   -48    
80     128    
64     -592   
-496   -816   
512    -144   
128    48     
-160   160    
32     80     
96     176    
-336   80     
832    336    
-336   80     
-48    208    
192    -160   
-240   0      
-16    0      
-240   -656   
1088   752    
48     -112   
-688   192    
752    -48    
-208   128    
-80    32     
256    32     
688    224    
-192   80     
-384   96     
352    144    
80     64     
32     48     
272    240    
-16    -64    
-32    192    
160    128    
-48    96     
-64    -528   
48     208    
336    -864   
-704   -352   
-336   528    
1408   48     
-592   -192   
-112   96     
320    112    
-112   -128   
304    32     
64     192    
-304   160    
-64    -16    
416    144    
144    80     
-64    352    
-288   192    
800    -144   
-32    128    
-16    96     
-448   112    
176    -384   
-288   352    
480    32     
-464   176    
-112   -1312  
432    -16    
112    -688   
112    736    
-352   -16    
-768   2112   
672    1072   
-16    -256   
-400   -240   
800    448    
128    -400   
-1040  -864   
-224   -432   
432    -192   
192    -192   
0      -112   
-64    160    
-80    -240   
160    144    
224    -128   
-16    240    
-160   -1120  
-16    288    
432    432    
-288   -576   
96     464    
-16    -608   
96     -528   
608    32     
-64    -2224  
-256   272    
-208   -144   
208    672    
464    1312   
-80    64     
-336   64     
192    112    
272    -16    
-16    48     
-128   -464   
64     -144   
-704   -256   
320    -896   
144    -128   
-144   128    
208    -272   
-112   -320   
48     -16    
16     -2864  
-672   -1184  
208    -256   
32     288    
256    464    
-64    304    
-112   -304   
112    352    
144    -416   
-912   832    
400    416    
-48    -752   
-496   -1088  
-80    -528   
-176   160    
-48    -352   
240    128    
-176   64     
128    240    
-16    -368   
96     528    
-160   128    
-48    -208   
448    16     
-32    288    
-624   240    
352    -304   
192    32     
-48    -208   
-224   64     
144    -96    
-16    144    
-64    -864   
272    -224   
384    -416   
-16    -80    
-64    160    
64     32     
-144   -1040  
-352   -544   
-336   224    
416    -400   
160    -96    
-96    -112   
320    -80    
64     16     
-288   96     
64     -1120  
128    96     
-80    -16    
-80    288    
-112   240    
160    48     
-144   -112   
-208   80     
-288   192    
224    32     
-656   -160   
-272   -464   
-16    -64    
-160   0      
128    32     
80     -48    
80     112    
-240   16     
112    80     
176    -192   
-80    -64    
-48    64     
-144   32     
48     -112   
80     -48    
-464   -80    
-64    -352   
0      112    
64     -192   
32     880    
-96    -16    
16     32     
256    -1872  
-32    -80    
-288   32     
96     64     
-48    -16    
192    -48    
-192   -192   
-48    -96    
-672   -192   
1040   -128   
848    112    
-656   -496   
-288   -832   
928    -1392  
224    176    
112    -1264  
-432   672    
-112   448    
128    960    
336    -144   
-208   -160   
-368   -304   
0      176    
496    112    
-128   144    
-336   368    
160    -240   
528    48     
-272   -528   
512    224    
-2080  576    
400    384    
-48    -1312  
-528   -1664  
304    -384   
-624   -256   
1056   192    
320    368    
-400   176    
16     80     
16     32     
432    464    
-288   224    
-432   -144   
352    80     
208    256    
-928   -192   
0      32     
-976   368    
320    128    
112    176    
-1136  352    
944    -192   
256    224    
-1232  -672   
576    48     
-416   80     
-144   80     
-80    -304   
128    240    
480    48     
-16    144    
-768   144    
-272   -160   
96     464    
448    0      
-208   592    
640    304    
208    -224   
-544   0      
-48    128    
-64    -128   
-160   80     
304    -144   
-592   16     
-320   80     
144    16     
464    784    
-1072  80     
976    -1072  
304    576    
192    -48    
-688   80     
-256   304    
368    16     
336    160    
-16    -288   
-496   96     
384    48     
-48    96     
-208   80     
192    80     
-208   64     
192    32     
-224   -16    
-464   -112   
32     -80    
-240   816    
176    -128   
-608   16     
272    224    
480    -224   
-240   32     
-480   128    
592    32     
-704   -64    
224    -176   
-128   112    
0      64     
48     48     
-128   -48    
-48    240    
-48    -224   
-400   112    
-112   -272   
-480   -16    
384    -48    
-496   32     
-32    112    
336    48     
-416   64     
80     192    
-240   -32    
352    240    
-224   112    
-144   224    
128    0      
-192   -224   
-272   48     
-64    0      
192    688    
1088   -320   
-768   624    
224    480    
688    432    
-384   144    
-288   64     
-16    112    
-192   240    
-48    288    
32     -96    
-32    112    
-288   -224   
48     32     
256    256    
-288   656    
192    240    
224    -432   
-272   240    
80     48     
112    272    
-208   64     
112    80     
128    96     
16     -208   
-480   -64    
432    656    
208    496    
-336   -160   
240    -1424  
-2064  2160   
1360   192    
304    272    
-288   -64    
-32    208    
-192   -416   
-176   -16    
592    576    
0      128    
-576   -144   
-16    352    
464    64     
-32    -176   
-528   416    
-32    0      
-96    -32    
208    -144   
160    144    
-208   144    
-144   -16    
368    -880   
-528   496    
624    176    
-32    -48    
-240   32     
256    544    
-160   96     
-128   -48    
192    208    
48     80     
-176   -16    
384    224    
-224   224    
-96    128    
368    64     
-240   144    
256    304    
-176   112    
-112   144    
224    16     
48     -16    
-224   160    
16     0      
-64    160    
448    80     
-352   144    
-32    80     
240    96     
144    112    
-1840  1632   
3056   160    
480    32     
-1744  -64    
416    128    
1120   160    
-1072  -336   
-336   -112   
768    -208   
-224   48     
-144   32     
96     16     
-32    128    
288    16     
-640   -48    
368    48     
-16    192    
64     0      
-256   -112   
-352   -352   
224    192    
-336   512    
1952   -224   
-1008  224    
-672   -832   
-48    -416   
544    208    
-16    -64    
-32    144    
-64    32     
128    176    
416    528    
-528   160    
-192   -64    
-64    -48    
464    48     
0      176    
-288   128    
288    -192   
-96    -800   
-96    112    
160    16     
528    816    
-16    288    
432    -256   
-560   320    
-544   -1232  
16     80     
384    112    
-32    288    
640    96     
-48    64     
-16    192    
-64    176    
240    -704   
800    320    
272    400    
-560   -336   
-288   288    
800    720    
-496   272    
-256   0      
288    -48    
-112   48     
-32    128    
-272   0      
16     -480   
-48    -144   
64     -112   
240    -144   
1040   2112   
-368   1184   
-496   96     
1104   -352   
-656   304    
-416   288    
528    -288   
688    -1504  
-544   432    
80     656    
448    448    
32     128    
-128   48     
-16    288    
144    -560   
-304   -480   
224    -1008  
384    -16    
-384   224    
176    128    
16     -112   
128    96     
-352   -560   
160    384    
192    304    
-192   608    
416    384    
-32    368    
368    176    
-240   -64    
80     64     
352    -848   
240    -336   
-304   96     
272    96     
-128   -144   
144    192    
96     64     
-352   -224   
208    -752   
272    272    
240    416    
-160   -272   
192    -304   
-256   224    
240    528    
-112   -624   
32     -336   
336    -1648  
-256   192    
-16    160    
16     -1360  
-944   64     
720    192    
432    304    
160    1040   
-288   16     
176    -1264  
-128   528    
-64    784    
80     -80    
144    -768   
16     32     
-352   -800   
80     -192   
240    208    
240    336    
112    -160   
-256   -48    
112    0      
-48    -912   
0      160    
32     48     
96     48     
240    -160   
-160   128    
256    -192   
-48    752    
48     320    
128    48     
16     -48    
64     624    
-16    96     
208    -32    
64     112    
-224   -496   
-144   -176   
64     -240   
160    -336   
-336   -656   
-16    -32    
80     -16    
-16    -16    
32     -416   
16     -112   
32     -192   
384    -672   
64     224    
-256   -1632  
176    -560   
208    112    
-112   -912   
-240   -480   
64     240    
-96    -464   
624    -608   
304    -192   
-192   -176   
-320   -608   
240    -784   
384    352    
-32    -448   
-432   -128   
-208   -48    
160    -464   
-32    112    
96     -656   
-176   -368   
336    -192   
112    -304   
32     480    
-48    -336   
-16    160    
128    128    
-96    -176   
176    96     
272    96     
-160   128    
-240   32     
160    -32    
-432   384    
96     992    
1792   -160   
-752   -96    
48     -96    
-224   -1344  
720    -432   
16     -240   
-304   -32    
176    -320   
304    176    
112    -240   
-176   -96    
0      -192   
448    -112   
-64    0      
-224   -96    
0      -192   
-96    -400   
160    80     
96     -400   
-176   96     
112    688    
1712   224    
-560   288    
-240   -160   
512    128    
304    64     
-544   112    
864    -32    
-416   0      
-32    80     
448    -224   
-192   -336   
-160   160    
336    -48    
-256   80     
256    -1632  
16     48     
112    -160   
320    96     
32     96     
-368   -368   
-192   -80    
48     -112   
496    96     
-80    96     
-992   -608   
-1040  208    
-176   736    
992    80     
96     48     
-496   -624   
-128   112    
272    -80    
928    1296   
-480   944    
-896   144    
464    192    
496    -368   
-512   -240   
-352   -96    
-80    144    
176    -240   
-544   -96    
-48    -256   
80     -272   
-576   -16    
320    64     
128    -256   
-368   1440   
944    3392   
608    -48    
-1216  -496   
48     -80    
608    -32    
32     80     
-1200  -64    
624    -64    
-272   -112   
-704   -64    
144    -80    
464    -96    
-64    -32    
16     -1344  
176    -144   
-320   0      
112    0      
144    64     
-160   -368   
-992   0      
960    -368   
-400   80     
32     -208   
384    96     
224    144    
112    32     
272    -48    
80     -112   
-224   64     
160    144    
-352   80     
448    272    
-400   -80    
80     -96    
-48    224    
528    -48    
-704   -48    
304    384    
144    96     
-304   160    
224    -48    
-848   -320   
256    32     
224    0      
-576   -16    
-80    224    
96     560    
208    224    
-400   -96    
208    -32    
-272   -160   
-192   -928   
-1120  -80    
496    -96    
-640   -480   
-16    -16    
368    -208   
304    -32    
-112   -432   
-176   144    
32     48     
-112   -64    
-80    48     
-448   96     
-96    80     
32     32     
-32    176    
96     -160   
-96    -128   
-304   -16    
448    208    
144    128    
-368   -64    
-16    -96    
-32    -112   
64     -176   
-48    96     
-240   -256   
80     -16    
16     240    
-960   -1216  
1632   -224   
-688   96     
-944   80     
608    64     
0      128    
-96    -32    
32     240    
400    1024   
-16    -48    
-288   -464   
272    96     
128    16     
-464   -16    
-64    -144   
-896   -656   
-176   400    
304    -64    
16     16     
-112   -272   
176    208    
-400   -240   
960    -432   
-352   192    
-784   544    
560    -32    
16     -208   
160    -400   
-240   256    
144    64     
-48    -32    
-112   288    
-608   -176   
256    240    
144    48     
-352   0      
-80    -128   
48     176    
144    224    
32     336    
16     48     
-288   16     
32     64     
144    112    
192    288    
-304   -16    
-80    304    
-176   -208   
64     192    
-208   -192   
-32    -1152  
1856   256    
-1472  144    
-640   -32    
1504   176    
-896   176    
0      0      
416    192    
80     176    
-80    112    
-384   64     
304    112    
-272   -96    
-64    96     
-192   176    
496    400    
-128   176    
-192   96     
64     64     
304    48     
-144   0      
288    -144   
-1824  1184   
528    -448   
192    -1040  
-144   -1296  
-224   -336   
160    -240   
608    192    
16     336    
-368   -464   
-208   -32    
64     0      
96     80     
112    160    
224    272    
-160   32     
0      576    
-272   208    
64     16     
32     -16    
-112   192    
16     112    
-192   176    
-192   160    
256    512    
-560   416    
-720   -1184  
240    -1632  
320    -656   
-608   48     
0      112    
176    608    
-240   16     
720    -112   
192    192    
-256   816    
176    -880   
112    112    
288    48     
16     -304   
-48    16     
-16    128    
112    304    
160    192    
16     592    
112    -96    
-96    160    
112    272    
192    432    
-112   288    
-112   -2320  
-2240  -832   
1488   -416   
-208   -432   
-464   -288   
288    512    
-192   -16    
384    -448   
128    1152   
-144   -336   
-128   96     
208    48     
224    -48    
-112   0      
-112   -224   
-144   496    
464    256    
-224   96     
-96    -224   
96     -464   
128    464    
80     128    
-816   -64    
192    176    
624    -80    
-128   -640   
-160   976    
16     192    
-128   -720   
96     112    
48     -208   
-160   384    
-32    464    
400    448    
288    464    
-272   176    
-16    -16    
256    64     
240    432    
-80    144    
-176   -96    
-304   448    
336    176    
-48    576    
112    1072   
-128   400    
320    -448   
288    1296   
-144   -32    
-48    432    
-48    -224   
496    384    
480    64     
-592   -144   
48     96     
-336   480    
288    368    
48     528    
96     448    
-224   -80    
-32    -1024  
320    64     
128    192    
-464   80     
-48    -336   
192    176    
-64    368    
64     80     
-784   320    
-64    304    
32     128    
176    128    
-160   112    
64     112    
432    -192   
-192   -816   
320    -320   
-96    -544   
-16    -144   
144    80     
-112   -832   
912    -1040  
-224   144    
-144   -144   
144    400    
64     448    
-64    688    
208    64     
224    -624   
-176   -208   
-176   112    
176    80     
208    -96    
16     272    
-256   -256   
288    192    
-32    48     
64     -240   
176    -96    
-288   96     
-320   -400   
960    -352   
-352   1072   
-64    272    
-96    -32    
224    -352   
208    -80    
176    -352   
-80    -48    
-112   -160   
16     240    
352    80     
48     -112   
-464   -192   
64     96     
144    304    
208    -192   
-272   -272   
-48    -160   
176    336    
192    -16    
64     176    
160    -144   
0      384    
112    -368   
-208   80     
-224   0      
256    32     
32     64     
256    48     
-832   -1360  
-1328  16     
2032   -96    
-736   -288   
-368   208    
928    400    
-464   336    
-176   32     
288    16     
64     -192   
-64    112    
32     32     
32     64     
0      272    
496    224    
-304   160    
80     -160   
192    32     
32     -384   
-224   80     
144    -320   
448    528    
-1760  -608   
-48    112    
1168   -672   
-848   48     
432    80     
-48    -96    
192    480    
384    -64    
-64    80     
32     -224   
-64    240    
80     -80    
-288   48     
320    -160   
192    160    
80     -432   
-304   480    
-144   -80    
32     160    
352    640    
-528   -80    
-176   192    
400    -656   
-240   -2496  
160    -560   
672    -1168  
-64    -592   
-304   432    
992    192    
-48    224    
-368   224    
176    224    
-16    -160   
144    -1328  
-128   32     
80     -400   
384    224    
-208   -416   
-704   -496   
224    48     
416    -1104  
-32    -352   
-544   -1344  
288    -256   
224    384    
-32    -160   
64     192    
-480   -1232  
-1792  448    
256    544    
-160   400    
80     0      
304    176    
64     -64    
-432   -144   
160    -304   
464    48     
464    -592   
16     48     
-80    -176   
144    48     
32     -464   
0      96     
-80    -272   
16     128    
-16    -64    
464    496    
-192   -144   
-288   576    
400    -400   
-400   0      
640    96     
-112   -160   
-256   192    
736    -400   
-240   128    
80     -1568  
144    224    
16     160    
64     224    
0      -64    
-96    -144   
496    -80    
-384   -208   
-16    -80    
384    -32    
-192   -112   
16     -128   
16     -256   
368    -1120  
144    -16    
240    -880   
176    352    
-752   -160   
432    16     
48     -240   
-352   0      
48     -128   
-192   -112   
160    -416   
-1024  112    
-736   -272   
176    -272   
-480   32     
144    -64    
-48    -16    
224    -320   
128    96     
-112   -208   
0      48     
-16    64     
144    -48    
-160   -96    
48     -192   
-16    -192   
64     192    
96     672    
-224   576    
192    224    
240    -208   
64     -240   
-48    -256   
-32    -112   
32     -1216  
304    544    
-304   1056   
416    464    
-144   -80    
-304   -736   
752    -1632  
-1232  208    
624    240    
-528   672    
-368   -240   
400    -96    
672    528    
-320   48     
-512   512    
368    -1040  
384    256    
-144   208    
-208   -112   
-128   144    
176    80     
-288   -528   
-48    -64    
-64    192    
48     -16    
64     224    
464    1056   
32     1056   
-496   -432   
176    -768   
352    -16    
-304   784    
-112   112    
192    -208   
-112   0      
112    64     
112    0      
-64    -192   
128    160    
272    224    
-208   160    
128    -464   
176    -16    
64     -240   
-64    240    
-80    160    
-512   -272   
-80    160    
64     176    
-80    -80    
240    -16    
-32    272    
-224   -416   
-80    48     
160    48     
1376   1056   
-2176  16     
-832   352    
1616   16     
-784   368    
-288   16     
144    -1008  
-576   -848   
-128   864    
80     560    
-304   208    
-432   -80    
64     80     
288    -144   
-672   -544   
368    64     
480    -96    
-384   -208   
48     512    
336    768    
-192   528    
-480   576    
2336   16     
-400   352    
-1648  816    
848    368    
368    752    
-928   320    
192    -64    
0      -224   
-192   176    
176    -32    
240    288    
-96    -32    
-224   304    
528    256    
-64    -64    
-112   880    
-96    688    
-32    496    
-16    -112   
80     16     
-608   128    
-176   -560   
-1008  -816   
144    -1328  
16     -544   
-80    -1040  
-1120  -752   
512    -496   
-96    352    
192    -272   
304    -448   
-464   -544   
-608   656    
912    -144   
-32    -592   
208    -1072  
-320   -576   
208    288    
-80    -128   
-480   -224   
176    -272   
528    -64    
-368   -224   
448    -512   
-144   -480   
-48    336    
112    -80    
-224   -160   
-96    -368   
1088   848    
1120   -224   
-1328  272    
-800   -256   
656    688    
208    256    
-608   -1744  
-528   -448   
256    496    
-32    0      
160    -288   
-288   -400   
-336   144    
256    -16    
-128   112    
-112   512    
112    80     
288    -160   
-368   -464   
-48    48     
208    176    
304    160    
-784   48     
304    -144   
240    112    
160    -64    
192    -144   
-416   -560   
-160   1056   
416    688    
96     0      
48     -320   
208    96     
-608   80     
336    48     
144    -80    
-80    -336   
-288   304    
96     688    
96     304    
80     176    
192    16     
-208   256    
-112   -272   
400    -720   
224    320    
-256   432    
112    624    
0      144    
-112   -400   
480    1232   
-800   656    
-384   -304   
720    416    
-512   416    
-512   432    
736    1104   
336    816    
-400   -240   
-16    -560   
-96    -464   
-128   -448   
48     48     
-176   -176   
0      48     
128    0      
-80    -80    
-368   192    
160    112    
368    224    
-208   192    
-48    112    
80     32     
-240   128    
160    -304   
-80    -48    
-80    272    
160    480    
80     96     
-80    -160   
-576   -2016  
208    -304   
48     -304   
16     -672   
320    112    
-288   -128   
64     -128   
80     -352   
-80    -736   
-192   -416   
128    -224   
-144   -176   
64     176    
208    416    
-16    336    
-144   32     
48     64     
-160   368    
-80    288    
144    80     
496    1040   
-1072  624    
688    -432   
-144   496    
-192   -400   
-192   -336   
16     -448   
144    80     
48     144    
144    304    
-32    208    
-256   -48    
64     0      
256    80     
-336   -32    
160    96     
48     48     
128    144    
-16    32     
-32    64     
48     240    
-240   -96    
240    -944   
-112   -32    
128    -240   
336    48     
-304   -32    
32     192    
64     -32    
-624   -400   
880    960    
880    -240   
-1152  -112   
224    112    
784    144    
-368   272    
-576   336    
576    -1008  
144    32     
-240   -16    
32     144    
-64    0      
96     64     
464    48     
-176   -16    
-176   16     
240    224    
-80    -32    
-256   -32    
0      -112   
144    224    
-736   -224   
1728   -1296  
336    -16    
-640   96     
-432   272    
800    384    
-656   128    
-272   160    
608    -64    
-304   96     
-48    128    
144    -16    
288    416    
-768   96     
32     -64    
608    208    
-608   224    
208    256    
-80    -672   
64     112    
320    368    
-112   -336   
-512   368    
1520   -16    
-368   192    
-80    112    
224    176    
112    304    
224    -32    
448    -224   
-32    192    
-464   32     
240    96     
512    -224   
-64    -512   
-336   -128   
704    1072   
-288   -544   
-240   -352   
240    32     
192    112    
-128   -112   
-144   224    
-128   -176   
624    256    
624    -32    
-448   -144   
-144   144    
768    -256   
-2064  2960   
736    -896   
336    -368   
-1888  -496   
688    48     
1088   192    
-544   80     
-688   320    
384    80     
576    224    
272    16     
-560   0      
80     -80    
240    80     
288    16     
-240   -96    
-352   64     
240    -64    
16     32     
608    -480   
-656   256    
496    -80    
-512   32     
-192   -32    
528    32     
-272   32     
176    16     
-64    -496   
144    320    
304    -192   
-192   144    
160    -688   
96     112    
192    96     
-112   208    
112    272    
-16    112    
336    -64    
320    -496   
-112   32     
176    -224   
-112   -80    
464    80     
80     368    
-144   16     
32     176    
320    -128   
-48    208    
-288   144    
304    64     
160    64     
208    -912   
-656   336    
80     -640   
480    -1440  
-480   -144   
-160   544    
160    -400   
-208   -288   
304    -192   
304    384    
-16    96     
64     -176   
144    512    
-80    -112   
32     -16    
-112   -224   
208    64     
-128   -80    
192    -576   
16     -384   
224    0      
-480   592    
336    -48    
352    -432   
-160   -192   
-368   320    
-16    224    
384    -384   
-16    -1184  
-432   112    
-880   -224   
1376   -624   
-288   608    
-448   288    
608    368    
-144   -128   
-64    -1216  
192    560    
112    -48    
-32    -128   
-32    240    
64     -128   
16     176    
272    0      
-96    -160   
80     -32    
112    -320   
-256   432    
96     -288   
32     -240   
-336   -1248  
-48    -496   
160    592    
-432   352    
160    -1664  
-16    -912   
0      -1120  
256    736    
272    512    
-96    -352   
-272   176    
0      -112   
-112   208    
-80    96     
48     -192   
-176   64     
128    -144   
608    -320   
32     368    
-240   -1072  
32     112    
240    -48    
0      -80    
192    96     
-256   192    
112    -16    
-96    128    
-160   48     
224    -176   
-608   192    
-1072  1472   
3088   -1136  
-880   -144   
-960   -592   
1152   -208   
0      480    
-304   -752   
496    656    
-80    -176   
-240   224    
64     16     
112    -48    
-304   -112   
224    -80    
224    -16    
-80    -160   
-608   -64    
416    64     
0      144    
-160   -256   
288    -608   
-1472  720    
944    -384   
96     -688   
256    -208   
-240   224    
-496   256    
368    896    
-144   176    
-976   -1040  
400    -384   
-112   208    
-208   -112   
-16    720    
-48    512    
-304   304    
400    -1344  
-144   -64    
352    64     
-96    96     
-304   48     
432    272    
-896   320    
-112   544    
544    768    
32     448    
528    2416   
-352   2448   
-672   1552   
448    -384   
-96    -288   
-384   -256   
-80    -464   
960    544    
-672   352    
-912   -16    
224    512    
-496   480    
272    672    
-272   560    
-112   64     
-304   -304   
96     -816   
16     48     
-512   80     
224    288    
528    16     
-656   128    
-464   -16    
-304   32     
-1008  1728   
208    720    
-288   -864   
208    -1376  
880    224    
-272   240    
-496   512    
64     704    
304    816    
-48    -480   
-240   -160   
-400   192    
384    -432   
240    304    
-352   -128   
32     -48    
128    176    
176    208    
192    576    
-144   -272   
-416   -464   
208    -144   
512    112    
-336   -80    
-32    176    
64     144    
-640   -784   
272    -336   
-48    -320   
-112   -224   
-48    -112   
-848   -208   
160    -240   
-624   -704   
-208   80     
320    352    
-176   -96    
96     -112   
144    48     
-64    112    
48     192    
-64    320    
-16    32     
-384   80     
96     -928   
-576   -496   
0      -256   
-144   -608   
-208   -416   
16     -448   
-656   -576   
784    256    
704    -400   
-1248  192    
144    272    
80     208    
112    720    
304    336    
-96    448    
176    400    
-160   272    
48     96     
160    480    
-544   128    
128    112    
-384   -608   
-288   -112   
-80    -1216  
-352   -784   
112    -128   
400    -192   
80     -80    
-480   -160   
0      160    
432    32     
-320   -16    
-48    -128   
224    -144   
-400   -144   
80     192    
-64    -1920  
-1072  736    
880    96     
-384   -64    
-96    208    
112    16     
-304   208    
-144   96     
512    528    
224    256    
-592   -32    
-112   -32    
208    16     
64     -32    
-448   608    
-80    304    
688    -160   
-512   -240   
0      -336   
288    192    
272    1472   
-752   -224   
-560   640    
992    32     
-528   -80    
0      336    
-32    288    
112    -160   
16     144    
144    -144   
-352   80     
-64    96     
352    16     
16     -48    
-208   128    
272    192    
-176   272    
-112   96     
-192   -48    
128    208    
208    160    
-352   96     
-112   144    
80     16     
304    48     
-736   80     
384    32     
-224   112    
-48    64     
-176   -1600  
1424   304    
-304   -592   
-1264  -80    
704    -96    
928    256    
-1088  -32    
-464   272    
400    144    
-224   -192   
-288   32     
-64    64     
400    128    
-432   32     
144    176    
544    32     
-512   112    
-176   112    
560    128    
-80    -112   
-96    16     
48     96     
240    784    
1680   160    
-1568  -16    
528    848    
1728   0      
-1136  208    
560    0      
48     272    
-272   32     
-192   96     
96     144    
48     16     
144    64     
112    176    
240    48     
-240   96     
32     336    
16     -64    
-464   192    
-48    32     
176    -416   
-1504  384    
832    32     
-288   -80    
-320   -176   
800    -80    
352    48     
-496   256    
112    32     
-256   144    
-96    -16    
-160   64     
16     -32    
240    368    
672    -112   
-304   -224   
160    -128   
-32    32     
-160   352    
432    48     
-224   80     
16     32     
-48    48     
-128   -320   
-224   320    
608    96     
-96    160    
-144   64     
880    3776   
1152   1328   
-928   576    
592    -512   
160    32     
-352   320    
64     144    
608    32     
-128   64     
-352   32     
592    160    
-192   128    
-192   128    
432    -112   
-336   176    
-80    -960   
80     176    
224    64     
-112   144    
48     1232   
288    576    
-368   32     
128    -112   
-16    48     
-720   0      
640    192    
-112   304    
-384   -320   
288    272    
112    -608   
-112   -144   
-80    -32    
-48    -48    
-16    160    
128    80     
208    352    
96     976    
368    272    
-416   16     
160    16     
144    192    
-64    -256   
464    -352   
-320   -96    
-144   144    
336    -432   
-448   272    
272    -464   
80     -128   
160    672    
272    624    
-224   48     
288    -128   
-608   16     
304    -544   
-48    -80    
-16    752    
720    544    
416    -624   
-288   -672   
144    -416   
64     -48    
-160   -544   
16     272    
96     112    
0      -48    
-32    -336   
144    464    
-48    -32    
-80    144    
48     -208   
0      304    
-16    688    
16     -128   
-112   208    
64     -176   
-192   -64    
320    -384   
112    352    
-208   -1136  
-16    192    
304    144    
-80    320    
48     -144   
112    -480   
176    -448   
-96    160    
160    -544   
-16    -544   
32     32     
48     288    
176    -80    
-16    -352   
-48    80     
224    -160   
-64    -80    
-16    160    
112    432    
176    240    
16     384    
-288   48     
304    -448   
-976   16     
736    16     
-176   96     
48     -224   
80     256    
-32    -464   
-64    -64    
112    0      
80     144    
-80    32     
-144   80     
16     32     
-32    608    
80     -48    
-48    -256   
96     128    
-48    -352   
0      176    
16     -224   
-128   64     
-80    -48    
64     192    
192    -288   
-304   304    
64     240    
32     0      
16     -32    
64     80     
-144   336    
128    832    
2400   -1328  
-1408  -464   
-192   -784   
1456   -576   
160    -128   
32     -1504  
160    -576   
32     64     
-176   960    
368    -96    
304    -416   
-96    48     
-160   -352   
208    -352   
64     -416   
48     -1792  
352    -384   
-160   -160   
-16    -32    
-192   -496   
-912   480    
1776   -112   
-528   48     
336    -384   
352    -1072  
-832   -1360  
-208   800    
240    1168   
16     64     
-560   -128   
-208   -144   
192    48     
80     -368   
128    -32    
16     -944   
240    -240   
272    -640   
-176   -720   
0      -656   
96     96     
96     -192   
-336   -720   
-352   -480   
624    336    
-912   448    
16     -560   
-1232  320    
496    128    
240    352    
-288   -896   
256    -144   
-224   -32    
96     -336   
944    -240   
144    144    
-64    -960   
-448   320    
-208   -336   
688    -800   
128    -192   
-224   -464   
192    -272   
-64    112    
448    64     
-832   400    
32     64     
544    -1056  
-400   720    
-400   -1600  
1232   -2064  
496    512    
-992   704    
-720   -1120  
384    160    
288    -16    
-352   352    
-1232  448    
560    320    
112    -128   
-160   -48    
-272   -208   
64     96     
448    80     
48     80     
-320   160    
208    48     
-128   -656   
288    -528   
16     432    
-160   416    
208    176    
112    0      
-736   -112   
336    144    
176    -528   
-96    -240   
64     -320   
368    224    
-192   -1296  
0      48     
-48    -48    
128    448    
-48    160    
-304   -32    
64     384    
560    80     
-784   -32    
144    208    
-224   -64    
16     -80    
96     160    
-416   -192   
-144   208    
464    -896   
-128   -176   
-368   -160   
336    -176   
-64    -32    
32     -48    
-432   -448   
608    -400   
464    352    
-432   -320   
-48    -64    
128    64     
-176   80     
240    -144   
16     -176   
-144   -384   
64     160    
144    32     
176    64     
-128   128    
-128   -288   
544    -496   
32     80     
-416   -240   
448    -416   
-160   368    
-160   -288   
224    -16    
-576   -64    
80     176    
16     32     
-608   -544   
-224   -48    
-1024  48     
0      0      
0      -112   
-112   -2272  
-1712  1312   
1440   32     
-16    48     
-176   16     
-528   -416   
-176   -288   
-592   -224   
288    496    
352    16     
-608   80     
-384   80     
208    -16    
272    -112   
-896   448    
32     -256   
224    224    
-288   112    
-240   0      
80     160    
384    1344   
-1168  384    
-288   -112   
1360   -48    
-800   16     
-48    -16    
-352   448    
0      -224   
96     144    
128    -16    
-528   160    
-976   -288   
-16    256    
464    -192   
-224   -16    
-240   -80    
320    128    
48     208    
-224   -48    
-192   96     
80     32     
16     80     
0      48     
-96    128    
-96    -144   
-480   224    
-592   -192   
80     176    
-160   -64    
-224   -528   
2352   1744   
64     -1168  
-1840  240    
-64    -320   
576    176    
176    80     
-240   -32    
160    672    
400    -128   
-448   256    
128    48     
96     112    
96     -48    
0      80     
368    -32    
-416   96     
144    80     
0      -16    
16     -64    
64     64     
-48    240    
0      640    
1584   64     
-464   832    
-496   -32    
64     336    
96     96     
-64    0      
-352   128    
-32    -64    
-112   16     
288    32     
-48    64     
-464   -112   
224    128    
112    32     
-112   32     
-192   -240   
-240   -96    
96     192    
16     0      
96     560    
-672   -48    
-944   128    
768    96     
-336   -80    
-144   -16    
-64    112    
192    -64    
624    -96    
-336   160    
-48    384    
-176   368    
-144   -288   
304    240    
288    48     
-208   320    
240    192    
-128   16     
128    112    
176    48     
-16    -32    
-176   96     
16     128    
-16    240    
96     -112   
-560   176    
208    48     
112    0      
-384   1072   
512    3312   
688    32     
-1840  176    
48     -304   
2016   336    
-1136  384    
-560   -496   
480    368    
416    16     
-432   64     
-352   -176   
288    -176   
-496   176    
208    64     
96     288    
-288   96     
-160   64     
176    -32    
-224   -960   
-320   -1168  
240    -160   
-48    288    
0      320    
752    -240   
-576   144    
0      16     
-32    -384   
-144   -560   
144    -512   
-112   1104   
160    400    
-224   -432   
80     -80    
48     128    
16     192    
80     160    
-176   -272   
144    112    
240    224    
-208   96     
304    80     
-48    -112   
-416   -384   
-352   -944   
112    -288   
208    176    
-16    -112   
624    368    
-272   672    
-192   16     
-16    0      
-256   272    
1104   -544   
-512   -304   
-240   80     
416    -304   
224    352    
16     1696   
-384   320    
304    -1104  
64     704    
-304   -256   
208    208    
-112   192    
-240   -16    
288    -80    
80     192    
-144   192    
240    192    
96     48     
-16    0      
112    0      
32     48     
80     80     
-16    16     
112    -96    
144    368    
-32    -1008  
128    32     
-144   -16    
16     80     
-80    -208   
256    -224   
-176   176    
-496   112    
208    160    
208    48     
-176   -144   
-128   -160   
-80    80     
160    240    
144    -16    
-128   -1296  
-192   144    
208    0      
160    224    
224    64     
-240   -64    
-208   208    
160    304    
-256   -528   
1040   -864   
-112   736    
-64    80     
-96    16     
-80    160    
288    368    
-160   240    
192    -192   
48     -32    
-128   -32    
16     32     
368    48     
-16    208    
-160   368    
176    64     
-48    16     
-80    -144   
96     592    
-224   160    
-48    -128   
240    304    
128    0      
-208   48     
96     -320   
160    224    
64     -48    
80     16     
-48    128    
-176   144    
1232   208    
-2656  784    
-224   80     
1392   -608   
-384   -272   
-192   1344   
352    1168   
-160   -1200  
208    32     
32     -320   
-272   208    
32     -112   
208    128    
-32    -64    
16     -208   
-48    -144   
0      -16    
-192   -800   
192    672    
64     176    
-352   -1040  
1360   976    
-400   -784   
-720   224    
336    -352   
-448   80     
224    -2256  
416    -48    
512    96     
-160   896    
-384   832    
80     160    
464    -96    
-352   176    
128    256    
-16    -176   
-224   176    
384    -480   
-624   -208   
128    128    
208    144    
288    96     
-112   -64    
896    2672   
-1568  2208   
-1040  128    
1008   -480   
-192   -672   
-704   384    
304    368    
-128   -144   
-16    96     
128    -688   
112    288    
288    464    
-352   -352   
-560   -336   
784    272    
-144   208    
-624   -864   
-80    96     
608    192    
-240   192    
-208   -272   
160    -224   
576    0      
64     64     
-272   -288   
192    464    
128    -720   
-240   -2416  
-1744  -960   
1168   208    
288    128    
160    272    
-256   704    
-304   192    
1024   896    
-320   -160   
-400   224    
384    -544   
96     144    
256    -80    
-160   192    
-432   -80    
256    256    
352    -128   
-160   -144   
192    -560   
-736   -464   
544    -336   
80     -464   
160    -80    
544    -64    
-496   -272   
48     -160   
448    -1248  
-96    -368   
-160   352    
352    -256   
-144   160    
192    -272   
16     -912   
-256   224    
288    -272   
224    400    
-528   -368   
64     -592   
144    -80    
32     64     
-144   -32    
112    192    
128    -96    
176    112    
64     -128   
-160   -96    
-64    -176   
368    -416   
-64    0      
64     128    
-96    144    
-320   -1008  
-816   -176   
464    112    
64     -192   
-128   112    
288    -208   
160    48     
-48    -112   
-80    96     
112    224    
-16    80     
0      -48    
176    48     
-48    48     
-48    -64    
0      -416   
160    -144   
-560   -16    
192    -80    
48     48     
16     -304   
16     -176   
176    -336   
-16    64     
256    -784   
64     -320   
64     128    
112    256    
-176   -224   
736    2400   
-864   -1296  
-1056  448    
1280   -128   
128    -240   
-880   128    
128    -96    
496    224    
-128   -880   
-304   112    
192    -304   
16     -160   
80     -32    
160    304    
-336   64     
336    -48    
-192   224    
-96    -272   
-48    -224   
80     80     
-32    320    
-160   -384   
-80    240    
688    -112   
-400   -64    
-48    224    
-80    -144   
-16    -1216  
560    48     
-256   160    
-16    -16    
-208   48     
288    -560   
-144   -128   
-112   -32    
-208   -80    
144    -64    
-848   -256   
96     -208   
224    32     
-336   -112   
-48    128    
416    16     
256    -176   
-336   -112   
-432   48     
224    -80    
80     160    
80     -48    
-592   32     
256    -448   
1312   -416   
-800   -528   
336    -320   
208    48     
-656   368    
384    400    
432    672    
272    -208   
-480   160    
176    0      
176    112    
-80    32     
-96    -352   
-224   -112   
304    -176   
-64    272    
-224   160    
304    112    
176    80     
-384   -832   
1120   656    
-784   160    
0      -528   
-96    64     
0      -192   
176    208    
480    64     
-32    -112   
-352   0      
-64    112    
224    16     
160    128    
-480   -272   
272    48     
-752   -176   
16     16     
128    -304   
-176   336    
112    384    
-288   144    
160    112    
-1296  -16    
-608   176    
544    752    
720    -224   
-208   -128   
-304   272    
-80    -176   
224    -112   
-480   0      
432    736    
848    -464   
-672   -352   
336    624    
-256   160    
-208   32     
256    -80    
-416   160    
-160   64     
128    64     
144    -112   
-32    48     
-304   -48    
416    528    
-176   16     
-480   112    
480    64     
96     -816   
-1424  -192   
1152   -80    
992    -688   
-1648  -464   
-768   656    
1200   0      
-576   96     
-368   -624   
144    -32    
-224   48     
-16    608    
352    -16    
-368   -528   
-336   448    
-16    -112   
416    -64    
112    112    
-48    0      
-16    16     
192    272    
-320   320    
192    416    
-336   -48    
-304   -576   
176    -400   
64     -80    
-288   96     
16     -160   
-448   512    
384    1184   
96     240    
-176   16     
-160   -96    
-144   -48    
320    -464   
-144   -448   
-64    -384   
-384   -736   
144    -272   
160    208    
-288   0      
240    -16    
-48    208    
32     80     
-256   112    
320    -432   
-16    -176   
48     944    
320    560    
-64    160    
-208   -144   
-176   -336   
16     -720   
-688   -944   
160    -784   
320    -720   
-352   16     
-160   80     
608    864    
-112   1120   
-240   -496   
-96    240    
160    144    
64     -48    
-224   160    
0      96     
96     144    
-224   800    
64     592    
48     -176   
-160   96     
16     80     
-208   64     
48     -16    
-96    32     
0      -448   
-272   -304   
-144   -320   
128    48     
112    80     
-320   -112   
-224   80     
704    -560   
48     160    
224    0      
-448   -112   
80     208    
80     80     
496    -256   
80     -240   
32     96     
-64    128    
64     -16    
-128   -192   
-112   160    
-32    0      
128    32     
-240   96     
128    -48    
160    240    
-64    64     
-192   -528   
-96    64     
-48    288    
0      176    
240    80     
-176   -288   
-208   -16    
48     -336   
128    -416   
32     -48    
0      288    
-288   144    
32     32     
-128   -32    
48     -368   
144    -288   
272    448    
-256   704    
-32    160    
560    -192   
-144   -96    
-336   64     
32     208    
176    512    
-192   -128   
144    48     
-80    96     
-448   -224   
480    32     
-288   -944   
1808   -1472  
-480   -480   
-240   32     
448    864    
256    320    
-464   480    
848    768    
128    0      
-592   224    
96     -96    
480    160    
-64    32     
-272   -32    
-80    -128   
304    32     
-64    -48    
240    -32    
-176   64     
240    192    
160    192    
-96    -1008  
-1264  624    
1520   320    
-224   784    
-400   128    
64     -48    
64     -80    
-240   144    
-32    -320   
736    16     
-16    160    
-400   -32    
112    208    
464    416    
32     -48    
-416   48     
256    304    
208    -80    
-336   -32    
144    32     
64     -1472  
240    640    
-1008  32     
208    112    
320    -160   
-128   -656   
-384   272    
336    -544   
-592   -320   
96     0      
-96    -16    
112    368    
224    416    
-112   -288   
-80    -64    
416    -1104  
288    96     
-224   -64    
-128   192    
16     32     
176    48     
112    16     
-160   160    
32     48     
112    96     
-288   128    
48     112    
0      -16    
144    448    
-32    -224   
368    -1216  
176    1008   
608    96     
-576   -16    
-960   128    
528    128    
704    160    
-384   16     
-192   -464   
224    -64    
576    -224   
16     32     
-96    -96    
-64    -96    
416    -64    
-48    -16    
160    -80    
-80    -336   
272    -448   
-272   464    
656    -128   
-288   256    
-944   -192   
288    96     
864    96     
-512   -128   
-688   -80    
448    -48    
256    -32    
-208   112    
0      -304   
32     144    
336    -176   
-32    240    
-544   -624   
128    96     
592    -16    
-80    112    
256    192    
-64    160    
224    112    
64     64     
-144   0      
48     0      
16     16     
240    -352   
-320   -16    
-128   48     
240    160    
288    32     
-96    -160   
496    -624   
304    0      
-352   -496   
-432   192    
480    -144   
208    -16    
-208   32     
-416   -112   
448    64     
-112   -80    
80     80     
32     -560   
-144   144    
192    -560   
80     -432   
-208   -336   
288    320    
-112   304    
-160   96     
128    -16    
32     -720   
-128   -160   
80     -496   
208    384    
176    -256   
-96    -528   
-32    -112   
-64    512    
256    -144   
-256   2144   
1776   -384   
-1184  288    
-320   -16    
1072   48     
-432   336    
-208   -256   
176    608    
336    -240   
-144   -288   
96     -208   
-64    256    
-32    -384   
144    384    
288    -320   
-256   208    
-16    -32    
288    -752   
128    208    
-112   96     
592    -480   
-1440  640    
848    -896   
384    -144   
-240   -896   
96     -48    
-192   128    
-144   -800   
336    -80    
128    16     
-384   -1424  
112    240    
144    -864   
-64    0      
-176   0      
-32    -144   
208    -16    
192    0      
96     -32    
-80    32     
-80    -48    
256    -512   
-304   64     
432    -96    
-224   80     
-208   -128   
480    16     
-208   -208   
-192   96     
64     -560   
1616   -640   
-1904  112    
320    160    
-144   -336   
-672   -32    
928    -464   
256    48     
-384   -96    
-128   -400   
224    64     
160    80     
-304   64     
0      128    
-32    -176   
112    0      
0      -128   
-384   -464   
128    -144   
304    -64    
-128   -128   
240    688    
240    -1328  
-1408  -144   
672    -1408  
464    -176   
-192   -96    
-240   208    
416    -80    
-368   -96    
-144   -16    
-160   32     
0      48     
240    32     
-1392  -112   
-208   -32    
160    -80    
176    -320   
-96    -288   
-64    -208   
-160   224    
-32    32     
96     96     
-480   -144   
-80    -304   
288    -320   
-64    208    
-80    400    
880    -224   
-320   -80    
-672   240    
16     -176   
-48    -48    
176    -320   
416    144    
576    -336   
-560   -1232  
32     304    
-16    -32    
464    -256   
-240   112    
-288   -128   
-96    -96    
464    -176   
-352   64     
176    656    
-592   128    
112    32     
448    -592   
-368   -1360  
-352   80     
-336   1584   
880    224    
-224   -816   
-176   64     
800    272    
112    256    
-688   -320   
-32    -432   
208    80     
-128   0      
-256   -288   
64     -288   
336    192    
256    -336   
-96    400    
-160   576    
48     -320   
224    176    
32     -272   
-128   672    
48     240    
176    -48    
-64    -496   
-144   -240   
64     192    
-480   160    
48     -176   
176    112    
32     -192   
-32    576    
0      -128   
-192   -16    
-144   -208   
320    -48    
-464   -80    
144    -320   
-32    128    
240    1120   
-240   656    
-48    -160   
144    -400   
-32    160    
96     80     
-832   -256   
32     272    
736    -64    
-608   368    
-288   -288   
-368   160    
96     144    
-400   -464   
592    -272   
-336   -1040  
-544   -832   
-432   -640   
416    208    
-320   -512   
288    -288   
-96    928    
-160   -96    
-176   128    
-48    -80    
144    96     
-64    160    
-48    224    
-304   304    
384    544    
-32    96     
-48    32     
80     0      
-80    0      
-64    -384   
160    -112   
-48    -32    
-208   32     
272    352    
464    80     
-128   0      
-416   176    
192    48     
192    -32    
48     -784   
-240   224    
-48    896    
112    -256   
304    -112   
-400   -496   
400    -496   
320    -480   
96     -224   
-80    -16    
-112   64     
-80    -48    
320    -112   
96     -48    
-48    -32    
-112   -192   
-320   -160   
128    -96    
-464   -256   
32     -720   
-384   -976   
64     480    
304    -288   
-128   -368   
272    -352   
-368   -880   
32     192    
96     544    
32     112    
-128   -128   
-256   224    
-64    624    
64     112    
-528   -208   
-96    416    
-160   -384   
304    256    
0      -128   
-272   208    
-240   112    
160    256    
48     -144   
-144   -144   
-208   336    
192    224    
160    96     
-256   -112   
-96    160    
-704   -800   
1872   -992   
-176   -128   
-576   160    
512    32     
-1136  464    
880    -64    
192    112    
-208   480    
-288   160    
112    96     
160    64     
-272   48     
-96    -176   
560    96     
-288   -240   
-32    144    
-464   176    
80     288    
16     176    
80     48     
-112   -32    
944    -192   
-1360  16     
880    -160   
320    176    
-1440  80     
448    -112   
416    64     
144    0      
-432   -96    
-80    240    
-32    80     
224    96     
160    160    
-240   -32    
-256   64     
432    96     
-288   208    
-64    -64    
-240   -192   
80     48     
256    864    
-144   -448   
-656   192    
464    496    
656    480    
-192   384    
-560   -320   
-192   288    
640    144    
-528   160    
-224   208    
-16    304    
368    0      
448    96     
-352   -144   
-592   -112   
480    272    
160    -32    
-368   -96    
288    240    
-192   160    
-80    64     
432    128    
624    224    
-1232  304    
64     -256   
-112   48     
-784   -784   
2944   1648   
-1152  1712   
-432   320    
848    80     
-480   80     
-240   -336   
-464   96     
-224   -336   
-128   48     
336    -96    
-208   256    
-368   112    
16     96     
288    -32    
16     -64    
-704   112    
144    144    
-80    48     
-336   -224   
592    848    
208    -240   
-688   160    
576    192    
-560   -208   
-208   192    
1184   96     
-560   48     
-368   176    
416    -64    
-128   32     
-32    16     
-16    -16    
256    32     
-112   304    
-144   -576   
-256   240    
400    -48    
176    160    
-160   48     
-272   112    
448    32     
-320   -64    
32     144    
528    256    
-640   -32    
208    192    
480    -560   
-1040  -224   
336    144    
-144   -448   
336    144    
-16    -432   
384    -96    
-368   48     
16     0      
512    112    
-192   208    
-176   352    
-144   320    
192    0      
224    160    
96     32     
-80    64     
-144   208    
192    -144   
96     -64    
64     80     
-208   256    
240    96     
-288   -208   
16     -48    
128    176    
-64    32     
192    32     
-16    240    
-32    368    
-64    240    
144    -128   
224    656    
-320   256    
-384   -464   
1472   -496   
16     592    
-1200  112    
96     144    
384    -192   
48     144    
32     64     
272    368    
-368   448    
208    -160   
224    -128   
-96    320    
-112   48     
64     176    
352    -32    
-192   -304   
128    240    
-96    48     
-64    80     
176    112    
-272   -1216  
32     96     
720    480    
-800   -208   
176    80     
272    -256   
-144   144    
-336   368    
208    240    
576    16     
-144   -832   
-240   64     
-112   -2112  
64     0      
240    -144   
192    256    
80     64     
-176   192    
48     64     
-48    64     
256    32     
64     112    
-336   192    
272    -160   
32     -32    
176    -16    
-32    304    
-128   -176   
32     48     
928    928    
0      -176   
-2256  -160   
896    320    
352    272    
-768   192    
384    0      
-304   -368   
208    -192   
-384   -384   
-128   -16    
256    -272   
144    144    
80     -32    
-224   112    
-144   272    
192    80     
-192   80     
-304   96     
208    144    
64     224    
-800   -368   
1360   -336   
528    -848   
-1712  -720   
1008   128    
-208   -1072  
-32    -528   
304    -112   
-352   240    
368    32     
32     160    
0      160    
64     32     
-160   112    
112    -160   
96     112    
-160   160    
320    304    
160    192    
80     128    
64     -96    
64     224    
-400   560    
784    608    
416    528    
-800   -208   
624    112    
-592   -1232  
-128   -1104  
272    -240   
336    -1840  
-80    304    
-160   -1040  
-16    -880   
-240   512    
-496   384    
-336   -672   
144    -416   
240    -944   
-128   -32    
160    -752   
128    432    
-128   -432   
-80    -192   
-64    -336   
-672   -64    
384    272    
576    -288   
-448   -192   
-160   -256   
1424   -1568  
896    64     
-512   -64    
-736   -336   
624    64     
160    128    
240    1312   
-80    -464   
-224   144    
-80    0      
48     -400   
432    48     
160    -736   
-432   -320   
-160   -880   
576    192    
368    672    
-240   624    
-64    640    
32     496    
288    -416   
-80    -224   
16     336    
-80    48     
-304   -336   
512    -208   
-224   832    
-240   -1392  
240    -384   
144    -128   
80     -256   
-432   -3344  
-160   -400   
240    -496   
160    400    
224    -192   
144    -96    
-416   256    
128    96     
0      400    
-64    48     
-336   -480   
-80    288    
352    448    
-16    -128   
592    -416   
-400   -448   
256    656    
176    240    
0      176    
-400   384    
1120   -384   
-16    -48    
-144   64     
192    -96    
48     176    
-64    1904   
640    480    
-272   -976   
-368   -608   
128    160    
176    -352   
-224   144    
176    -272   
144    -368   
-16    -304   
-16    96     
-336   304    
128    -368   
32     -48    
192    176    
-304   224    
-32    -160   
-640   240    
64     640    
176    1600   
208    272    
48     -224   
-368   -848   
16     352    
-112   -688   
-144   -320   
368    -528   
384    -1072  
-48    -432   
48     96     
-112   80     
-224   -112   
128    544    
320    -176   
48     96     
-48    -464   
-208   304    
176    -80    
192    -32    
0      -464   
-224   32     
-192   256    
224    0      
32     848    
-544   -240   
496    -288   
16     496    
-320   80     
0      -208   
16     656    
272    16     
-192   -80    
96     -240   
0      48     
-176   32     
0      -272   
-80    -304   
-240   208    
672    752    
-336   480    
-288   -704   
16     -464   
-256   -96    
-176   0      
-64    80     
48     -144   
-32    272    
-208   -32    
-304   32     
336    -80    
-400   48     
-320   64     
128    256    
-1056  -960   
1216   720    
1168   -672   
-2560  -128   
432    272    
576    208    
-496   96     
-432   96     
480    32     
-48    128    
-176   -32    
-96    64     
-176   0      
32     -16    
96     64     
32     144    
400    80     
-368   -48    
-224   -48    
240    80     
-144   48     
-736   -384   
1776   -112   
176    -240   
-1296  112    
80     -112   
32     192    
144    -176   
-304   -64    
192    -80    
-96    64     
-336   32     
224    160    
-176   -96    
-208   208    
352    -192   
-16    288    
-208   -240   
32     400    
544    32     
-640   64     
128    896    
0      -208   
-1216  -384   
-128   256    
816    320    
-208   48     
-288   -96    
-272   -272   
80     16     
-576   -112   
-48    240    
272    144    
592    336    
-208   432    
-928   96     
128    -176   
832    -80    
32     96     
-752   -48    
-192   0      
208    -544   
64     -32    
-1168  -96    
-400   -64    
1008   -480   
304    368    
16     -80    
-544   144    
-1312  -1856  
1808   -1264  
832    512    
-1056  -400   
256    96     
1024   176    
-304   -416   
-880   144    
432    192    
224    336    
-400   48     
-288   64     
464    -112   
-112   224    
-288   -16    
224    240    
-320   0      
48     224    
528    -112   
-880   -368   
-288   272    
528    -48    
-400   256    
672    48     
-592   -128   
176    160    
-496   16     
-208   112    
176    -48    
304    224    
-288   32     
128    448    
64     48     
-64    -80    
480    -32    
-288   -16    
-304   224    
544    240    
-288   48     
-512   64     
176    224    
0      -48    
128    96     
-208   48     
96     80     
240    160    
-16    32     
-128   96     
304    528    
-288   464    
-16    496    
112    272    
-432   448    
816    -32    
-640   -192   
304    160    
-128   208    
-16    80     
240    -128   
-16    -144   
-624   176    
128    64     
256    16     
-16    128    
-128   48     
48     -80    
96     144    
32     -144   
-240   32     
224    -272   
48     -48    
-80    -16    
64     320    
-272   384    
96     192    
192    368    
192    48     
-288   -64    
0      -272   
304    32     
-96    -16    
784    1696   
-2288  1056   
1104   160    
576    -96    
-464   -704   
-480   -352   
-16    -640   
304    240    
-64    112    
-96    224    
-112   16     
-32    -48    
128    320    
144    80     
-400   176    
-64    -368   
304    -560   
32     -160   
64     -288   
-32    32     
-160   -544   
672    -608   
-144   1120   
560    352    
-160   144    
144    336    
16     448    
128    -400   
-80    128    
-112   -64    
208    320    
-64    -48    
48     112    
-16    -192   
80     112    
-96    80     
160    208    
-112   48     
-64    -48    
64     128    
128    176    
-32    0      
144    -160   
176    432    
-96    64     
-112   -176   
-64    16     
80     -864   
-96    64     
160    -16    
208    -496   
-2368  576    
1488   656    
-160   432    
-672   -128   
144    -400   
288    -272   
-944   -1008  
112    176    
112    672    
64     48     
-384   -256   
48     32     
256    128    
-16    80     
32     -32    
-176   -160   
224    0      
176    208    
16     160    
-352   -560   
1744   720    
-1488  -208   
-448   -576   
688    -496   
-656   -784   
-496   -656   
784    -640   
112    -256   
-480   -816   
48     272    
128    128    
16     -304   
-272   -176   
48     128    
-128   16     
144    144    
224    -720   
-752   -576   
16     96     
432    208    
0      432    
-160   288    
544    272    
-880   -1936  
496    -1376  
336    -16    
-1136  656    
320    -336   
144    480    
160    208    
64     528    
736    -160   
-400   32     
-160   240    
608    -96    
-816   768    
656    992    
-400   992    
-336   -448   
448    80     
-64    -1168  
80     160    
-544   560    
80     16     
320    -96    
48     64     
-272   -752   
-16    -272   
448    256    
784    384    
-2352  208    
448    896    
1568   720    
-304   -384   
-608   544    
144    -496   
528    384    
192    480    
-304   112    
-48    64     
64     32     
-16    -448   
160    144    
-416   256    
112    352    
384    272    
-240   -64    
-96    -368   
112    384    
16     464    
-16    -128   
176    400    
720    -528   
-864   368    
544    -144   
-32    -336   
16     -1648  
32     -1264  
240    736    
-112   288    
-240   -96    
128    -384   
112    -96    
48     -416   
0      272    
256    640    
-224   208    
112    -208   
320    -240   
-800   -432   
16     -432   
256    -16    
128    160    
-96    -400   
-544   -112   
496    624    
32     -128   
192    -16    
-160   272    
-144   400    
528    768    
720    0      
-464   -1232  
-768   528    
1376   480    
-96    -160   
-160   624    
128    -144   
-160   -1296  
-224   -176   
48     128    
416    -128   
-496   -320   
-128   -384   
224    400    
256    -144   
-192   -1872  
64     240    
-96    -160   
64     112    
96     -576   
-96    -256   
272    -96    
32     -80    
-80    320    
288    880    
336    368    
-208   -1088  
-224   -48    
-192   -528   
816    -1872  
-464   512    
80     16     
-144   -240   
80     -656   
-80    -624   
304    -336   
-368   240    
16     240    
128    400    
32     -240   
-128   16     
96     -1664  
-32    48     
96     208    
64     -96    
-80    -176   
-288   64     
144    -64    
-80    128    
-336   -672   
-160   352    
768    144    
-688   -128   
16     128    
208    -160   
-64    -208   
32     -960   
-48    32     
128    -608   
-240   192    
256    -400   
16     -64    
80     80     
-272   32     
32     96     
160    -144   
-144   -240   
-320   -16    
-864   -16    
48     -32    
32     144    
-48    -192   
128    -96    
-32    -416   
64     128    
16     -48    
48     112    
-32    592    
-1744  -352   
1984   160    
1680   -208   
-1152  240    
624    -64    
-336   -32    
-96    -560   
-208   368    
48     -752   
-48    160    
-32    -864   
-80    160    
-224   -1728  
256    288    
368    -80    
-240   64     
-96    80     
192    -16    
-128   32     
-32    -64    
-160   0      
304    304    
1280   224    
-944   256    
-1056  272    
592    -384   
176    144    
304    16     
48     160    
-16    32     
-160   112    
-112   0      
192    48     
-112   16     
-112   80     
256    -16    
128    304    
-384   -32    
-496   -272   
976    240    
336    -208   
-544   -304   
-1168  -464   
864    176    
-320   -224   
464    352    
448    752    
-704   -80    
336    304    
-32    672    
0      288    
-288   64     
-368   -320   
288    -16    
384    -128   
-448   -432   
-464   -128   
400    128    
368    608    
-16    0      
-320   16     
208    -176   
-32    -112   
-240   16     
160    128    
-32    240    
288    -80    
-48    -96    
-432   -256   
-944   -1376  
1232   -2848  
-128   720    
-1456  272    
496    -320   
-368   160    
-384   -32    
720    304    
-1056  -16    
48     -128   
96     96     
-16    112    
-464   -80    
144    208    
-48    -320   
-144   176    
112    -48    
-128   32     
-256   64     
32     256    
480    192    
-752   304    
192    0      
-112   176    
-240   96     
-240   -64    
128    80     
-288   -96    
32     128    
192    -64    
240    224    
-304   -48    
-112   -224   
-32    64     
64     48     
-384   384    
112    192    
64     32     
-224   16     
-48    64     
-496   -80    
112    -144   
-208   -256   
16     -96    
-272   -288   
-256   112    
256    -176   
-336   -16    
80     96     
192    16     
-384   -192   
48     -128   
80     -128   
-224   656    
-224   560    
-48    496    
368    -32    
-592   -832   
96     -272   
112    -496   
-192   -96    
-112   -304   
256    -544   
-208   -176   
96     -16    
96     16     
-384   -384   
144    -304   
0      -672   
-208   240    
-128   96     
176    144    
-480   -144   
-176   64     
-272   48     
128    336    
464    576    
-96    832    
-112   -336   
-16    -80    
32     48     
-672   -1696  
336    -496   
-80    96     
-320   -288   
224    560    
-240   -448   
-560   16     
320    96     
-16    48     
16     432    
16     -128   
-80    96     
-96    336    
112    208    
-48    80     
-16    192    
-128   288    
64     320    
-96    176    
-176   -160   
192    -432   
-592   -256   
416    272    
-592   -432   
288    96     
32     176    
-352   1040   
144    656    
-96    -16    
32     -48    
96     336    
112    96     
-288   48     
80     -48    
128    64     
80     64     
-352   -64    
-32    80     
144    0      
224    -128   
-96    32     
32     16     
-112   -48    
-32    432    
-16    -32    
-48    -80    
-64    -208   
16     -160   
272    160    
-624   -864   
2096   -624   
-688   704    
-240   -768   
928    -992   
144    384    
-48    368    
224    -160   
-464   -192   
-224   608    
176    -336   
224    -144   
48     144    
-16    16     
-160   0      
32     -128   
160    192    
-128   -80    
-432   32     
192    112    
240    16     
-448   624    
2160   -48    
-784   448    
-48    -608   
-240   -864   
208    -736   
-736   -1056  
160    -1056  
320    -64    
-160   560    
192    832    
-192   192    
272    -16    
-48    -528   
-816   496    
928    288    
-208   160    
-368   -272   
96     -112   
112    192    
0      112    
160    528    
-336   -160   
400    -736   
-640   -208   
176    1120   
896    480    
-208   560    
-32    144    
608    560    
-112   96     
-144   320    
192    -240   
528    288    
-64    1536   
-304   480    
-208   -336   
128    -704   
400    -320   
-64    -96    
96     96     
-80    160    
192    -208   
-320   -176   
208    336    
544    144    
240    672    
-144   720    
-304   336    
1232   336    
-1920  -288   
384    176    
768    16     
-384   -896   
-896   -672   
384    -1584  
352    32     
-144   -128   
-192   816    
0      496    
16     -144   
96     -288   
96     368    
-48    160    
-208   144    
480    48     
80     -80    
-368   -400   
-208   -304   
160    16     
144    -464   
432    208    
656    288    
-1808  176    
880    240    
240    -80    
48     96     
-656   -144   
272    -224   
336    -208   
-256   128    
-160   0      
176    -128   
384    80     
-128   192    
-176   -48    
160    128    
48     352    
-48    -272   
-336   224    
208    144    
-128   -400   
-208   -288   
144    -224   
176    144    
-256   -48    
144    368    
256    336    
-128   96     
-48    0      
480    960    
-720   976    
-272   -1504  
528    -80    
208    -1040  
-864   -496   
112    672    
720    448    
272    -272   
-384   208    
80     176    
96     272    
-176   48     
288    -80    
-96    -64    
-416   -80    
464    -48    
176    -688   
-80    224    
-304   -1872  
272    -112   
-240   -80    
208    288    
208    0      
-256   272    
128    0      
16     -64    
64     112    
16     -96    
1024   2432   
-2000  544    
-112   -96    
1472   32     
-256   -80    
-704   -816   
320    96     
288    -48    
-48    -672   
-240   384    
0      112    
0      96     
288    272    
-96    256    
-144   -112   
352    192    
-464   32     
64     -48    
320    -192   
-128   -32    
-48    96     
-48    -768   
-656   560    
1136   224    
-336   32     
-448   640    
0      -80    
144    -64    
128    -176   
-320   -80    
80     272    
-80    -368   
-32    224    
384    -400   
-512   -80    
224    -336   
128    384    
-160   0      
-192   352    
512    -32    
-208   96     
-160   96     
-16    -112   
208    -16    
336    -208   
-368   128    
256    -144   
-128   112    
32     -48    
-256   -528   
784    -1008  
-48    512    
288    -272   
160    48     
384    224    
-368   -720   
-80    480    
480    128    
-336   -1104  
-16    -32    
16     -2752  
80     -240   
-208   0      
448    0      
16     -96    
-112   0      
32     -1936  
0      -96    
-16    -320   
192    -96    
64     160    
544    -240   
-1264  -16    
992    -208   
-192   -320   
-688   -112   
960    32     
128    -592   
-704   112    
32     0      
144    -32    
-48    -528   
-48    176    
64     -304   
240    160    
-96    -80    
-144   -320   
0      -304   
-16    -208   
16     112    
32     -96    
-176   -576   
-816   32     
480    -240   
-960   208    
224    -128   
576    -240   
1184   16     
-288   -160   
-704   96     
64     -32    
-64    -112   
-224   -16    
192    208    
-256   -160   
-272   -96    
-80    -32    
-272   -976   
-128   -144   
176    -512   
-432   0      
272    32     
96     16     
-112   -112   
32     304    
-288   272    
448    0      
48     64     
-704   -240   
1712   2480   
-976   1776   
16     -352   
1264   -144   
-688   240    
-304   -384   
528    16     
496    -96    
-128   -32    
-576   -96    
656    -32    
80     64     
0      64     
128    80     
-336   -224   
-144   144    
480    -32    
-352   -48    
-464   -64    
576    368    
176    -1504  
-416   -960   
-16    -256   
-352   16     
-480   -224   
1152   0      
-48    -144   
-352   112    
-80    304    
464    -400   
-448   -528   
-464   -96    
128    0      
144    -288   
-400   -64    
0      -1200  
128    -400   
32     -400   
272    -16    
-192   240    
-144   -48    
224    -144   
224    -96    
-352   112    
48     -64    
-48    160    
336    160    
-480   -64    
-224   -208   
384    400    
448    448    
272    1424   
-816   0      
-448   -496   
272    -816   
-16    -992   
-864   -432   
80     -816   
-176   -848   
272    -160   
-112   976    
-80    -448   
-96    -560   
-48    -400   
-160   -288   
96     -160   
80     48     
-288   -912   
-16    160    
-64    -208   
48     16     
-160   32     
-32    32     
-224   64     
240    240    
-96    -160   
-208   -176   
-48    608    
384    -448   
-272   112    
-368   32     
960    640    
-1056  576    
-112   -128   
384    112    
-160   -64    
-144   32     
16     -80    
-144   48     
-48    -176   
112    -160   
96     -80    
-288   128    
-800   -128   
368    288    
-512   -256   
-272   384    
176    96     
48     -16    
128    160    
-304   48     
-464   -288   
-528   16     
-144   -144   
416    -320   
-272   112    
128    -176   
288    208    
-592   624    
64     544    
272    -288   
-32    -80    
-384   176    
-64    -64    
160    -144   
-160   64     
-112   0      
-224   16     
-48    128    
-336   16     
128    -48    
-304   -96    
-32    144    
-48    -96    
48     64     
336    -304   
-176   192    
192    80     
-160   -288   
-160   208    
-288   -16    
944    288    
1184   160    
-1456  224    
-384   -336   
160    272    
-272   352    
320    -208   
-1328  -1632  
-176   -544   
336    416    
160    -80    
-176   0      
-352   -32    
64     -96    
336    208    
-128   176    
-400   272    
-32    96     
112    192    
64     176    
-1264  -512   
944    -176   
928    -384   
-1008  544    
720    1232   
1168   -608   
-608   -880   
-384   816    
912    576    
-96    -432   
-128   -448   
-80    -304   
-224   -336   
-80    -48    
224    272    
-736   32     
176    32     
-384   0      
64     192    
144    -64    
-64    -32    
176    -96    
128    -16    
256    192    
-1472  944    
128    208    
-128   112    
208    -656   
256    336    
-208   80     
-320   0      
160    -352   
-176   -288   
-48    -416   
-320   288    
1168   1152   
672    464    
-512   352    
304    -112   
128    -32    
448    144    
64     480    
-544   272    
-224   -288   
416    -80    
256    -160   
-208   160    
-464   848    
-240   1024   
1120   -336   
-1776  -432   
896    112    
1328   -48    
-816   -288   
-64    -832   
48     32     
368    368    
-32    -192   
-400   -224   
-112   -304   
256    144    
128    -32    
192    208    
-160   -192   
-384   240    
688    -80    
-144   160    
-192   -1184  
-528   -192   
448    368    
48     368    
-80    -96    
208    160    
-384   -80    
32     512    
-400   -32    
80     240    
352    256    
-256   512    
288    336    
-240   176    
304    64     
176    400    
-160   96     
-48    224    
-32    208    
-112   80     
112    304    
-256   -16    
-112   96     
192    192    
64     -16    
144    80     
192    48     
192    144    
-320   32     
128    224    
128    -96    
16     -96    
48     -80    
-304   -368   
560    -400   
176    480    
-848   -208   
352    96     
16     -48    
-304   96     
0      -576   
-320   -112   
256    80     
288    -64    
-16    -48    
-128   -16    
-32    192    
0      0      
256    512    
320    256    
-368   -192   
-112   64     
288    320    
80     32     
-160   128    
48     160    
112    192    
-64    16     
64     -208   
192    80     
-192   96     
-16    176    
240    928    
96     -1680  
-1392  384    
1040   592    
-512   -368   
-416   368    
400    -64    
368    288    
0      32     
-240   -272   
112    416    
192    -112   
16     96     
-208   -64    
16     -576   
64     128    
144    352    
-256   112    
128    128    
112    -32    
-256   -384   
528    1136   
928    48     
-1296  -208   
688    -32    
416    0      
-672   64     
384    -16    
336    256    
-192   96     
-48    224    
528    32     
-128   176    
-240   288    
256    -64    
-368   -336   
224    0      
192    -208   
176    128    
-128   -80    
-48    112    
224    64     
16     240    
176    112    
-224   176    
432    48     
-208   32     
96     112    
192    144    
-336   96     
-288   1872   
1072   -32    
-992   -304   
-224   -464   
528    176    
496    64     
-448   -112   
304    96     
160    -112   
-224   240    
-96    -128   
208    144    
0      0      
-160   -176   
304    272    
16     -32    
-80    176    
112    -176   
256    112    
96     -560   
32     128    
-816   -176   
1216   -336   
272    -432   
-832   448    
768    352    
96     48     
-128   592    
-80    -224   
-624   144    
448    -80    
320    0      
-224   -192   
-144   176    
336    32     
-48    192    
192    -608   
-32    -16    
400    352    
272    144    
-272   -64    
112    64     
-416   48     
416    160    
336    -32    
-480   -256   
-208   -256   
464    -416   
128    304    
-144   -432   
352    144    
96     -192   
-528   176    
336    176    
112    -32    
-192   -64    
-64    192    
272    384    
144    -112   
-320   192    
368    -112   
-48    64     
-128   -144   
176    -16    
48     -560   
112    -128   
-112   0      
112    80     
352    720    
-416   704    
-1008  1728   
1056   1392   
-384   -384   
-528   -448   
1264   240    
-192   -624   
-784   160    
464    -16    
160    96     
240    -32    
-256   80     
-144   0      
304    64     
0      112    
-48    -320   
-160   192    
128    -320   
368    -1120  
-240   240    
-304   128    
176    96     
80     16     
352    -400   
-256   -288   
128    320    
-320   400    
0      -336   
160    -1376  
-80    336    
64     -784   
-336   -256   
192    160    
272    288    
112    176    
-176   -880   
176    176    
32     272    
-352   944    
224    624    
-48    288    
128    -64    
-80    208    
32     -528   
-304   -592   
-160   -416   
496    400    
-288   1104   
528    -96    
-416   -1056  
16     288    
-32    -352   
640    -320   
-624   -128   
176    -704   
0      -432   
-256   -704   
48     192    
-48    -288   
0      320    
208    32     
-80    -16    
-208   -160   
96     -336   
-48    -32    
0      0      
-272   256    
-384   304    
240    -304   
16     -1360  
64     -144   
-192   -96    
208    64     
-112   -80    
16     496    
-16    -48    
80     -64    
32     -48    
-112   240    
-896   96     
-176   32     
-288   -368   
944    -752   
-336   144    
416    -896   
-272   304    
80     160    
176    -528   
160    -368   
-128   16     
-64    176    
-176   -80    
160    -32    
256    -80    
192    0      
-416   -96    
272    -208   
416    -512   
-352   -32    
-64    64     
-16    112    
432    -2064  
-736   240    
400    176    
-80    80     
16     -48    
144    96     
176    384    
-512   976    
-32    -336   
528    -400   
-672   64     
-288   -64    
208    64     
112    -496   
-160   144    
208    -160   
16     544    
-112   -48    
288    128    
-48    160    
-176   -112   
-144   32     
192    144    
-256   288    
208    48     
-464   208    
-176   -192   
64     32     
736    -656   
-288   -48    
1120   -1040  
-864   480    
624    -256   
-128   -384   
-928   -48    
-64    128    
208    128    
-224   1888   
0      -544   
-160   -640   
272    -160   
496    64     
-480   160    
48     -32    
144    48     
224    -16    
96     -192   
-384   -480   
-112   -640   
-16    -80    
16     704    
2528   224    
-1280  464    
-176   880    
944    -880   
144    -1344  
-848   -1632  
336    -256   
176    -96    
-560   112    
-112   -480   
-336   272    
-304   64     
-800   80     
608    32     
-128   32     
-288   -80    
-288   96     
80     80     
64     -160   
192    112    
368    192    
-144   64     
-544   -320   
-528   704    
208    -64    
-320   -144   
-112   80     
-32    -896   
-624   64     
-368   16     
-48    -128   
240    64     
16     -144   
272    144    
-80    -592   
-672   16     
400    304    
-128   -272   
-336   -48    
320    -32    
192    -224   
288    112    
-208   -208   
16     48     
608    -64    
-32    64     
-880   480    
160    -704   
-720   2352   
944    800    
-1024  -352   
-720   -144   
848    0      
544    96     
-1152  128    
-128   0      
464    128    
352    160    
-576   48     
-240   272    
208    -80    
-288   160    
64     -48    
-528   32     
32     -96    
-80    0      
-256   -464   
0      208    
96     -64    
-144   80     
176    0      
-528   -32    
-256   -224   
-128   -64    
224    -224   
-96    16     
-32    208    
48     -128   
-592   176    
144    272    
0      272    
-48    304    
-288   -48    
112    240    
-48    496    
-112   480    
-48    384    
160    -64    
-448   -16    
320    32     
-32    -96    
-48    0      
144    128    
-352   208    
-160   432    
48     208    
368    512    
-352   128    
-112   224    
224    624    
832    272    
-432   -816   
-896   -208   
1072   -240   
-448   -240   
-32    -96    
64     272    
32     144    
-48    96     
0      112    
-16    0      
-48    256    
160    160    
0      192    
-64    32     
96     336    
240    160    
0      64     
-384   256    
176    80     
176    16     
-160   208    
112    -80    
-96    -64    
0      -112   
-208   16     
-160   -208   
128    144    
-880   -640   
832    -1360  
112    -208   
-704   -48    
176    32     
224    320    
80     -64    
-192   352    
304    256    
-112   -144   
-160   -80    
-32    0      
0      176    
192    -176   
-128   128    
128    80     
-96    160    
112    80     
0      -160   
-48    48     
336    -880   
-1136  688    
800    16     
-208   -16    
-176   96     
128    -32    
-272   64     
192    80     
208    160    
32     192    
48     -64    
-336   -16    
96     176    
432    224    
-192   -32    
-368   128    
464    128    
-320   -48    
192    128    
-64    -16    
-272   96     
240    96     
-32    0      
-160   96     
144    208    
-128   144    
208    64     
0      0      
-288   32     
112    544    
1232   -688   
-2304  432    
160    272    
800    -64    
-864   -144   
96     176    
416    80     
-528   16     
48     -48    
288    144    
-128   112    
-128   80     
160    128    
80     64     
-352   208    
272    64     
-112   96     
-32    320    
-112   176    
0      80     
640    1152   
-1328  -432   
-496   448    
864    304    
16     -112   
16     32     
-320   368    
32     -64    
208    -16    
-96    48     
32     0      
-288   64     
80     128    
48     -160   
272    32     
-288   176    
-192   -144   
304    96     
112    144    
-256   -192   
-48    -272   
1024   304    
-304   816    
-272   -400   
352    160    
-144   304    
-432   -208   
384    176    
336    -208   
-224   -96    
-112   176    
336    272    
32     -32    
-192   80     
288    448    
992    288    
-1088  288    
-32    224    
-160   -288   
-208   -80    
256    240    
-144   16     
320    240    
-48    16     
176    16     
-768   304    
-48    -752   
512    16     
-304   384    
1200   2944   
-1536  1952   
784    64     
1744   -64    
-1520  -304   
-560   176    
944    -1216  
-816   -1200  
-352   128    
448    192    
688    -80    
-528   -80    
-176   -160   
368    48     
-32    240    
160    608    
80     16     
-528   -144   
288    176    
320    256    
-352   -592   
-96    -400   
-304   -448   
112    -512   
-144   -528   
-176   64     
80     304    
288    -112   
96     560    
48     368    
-336   -352   
160    160    
288    416    
-96    256    
144    32     
-112   432    
208    624    
240    512    
128    -176   
-128   64     
96     240    
0      48     
128    -48    
432    848    
-464   -448   
-144   -432   
112    -848   
64     -560   
96     -544   
96     48     
192    -336   
-384   -448   
160    -592   
224    -912   
-192   -1264  
48     192    
-64    16     
16     -1040  
16     864    
96     -400   
-176   96     
192    -512   
224    0      
-48    -48    
32     48     
48     0      
224    -144   
16     -320   
336    -432   
-80    192    
160    -384   
-336   176    
304    -208   
0      176    
-80    -160   
-128   224    
272    -1056  
-112   672    
96     352    
16     32     
-256   144    
112    -368   
96     -208   
-624   96     
304    -240   
160    96     
-128   0      
-192   -48    
160    80     
-64    -192   
96     64     
48     -896   
48     -112   
-80    0      
272    -64    
-128   -16    
16     -608   
208    -1728  
112    -160   
48     432    
-256   -208   
544    -816   
16     144    
0      368    
-320   128    
-16    -112   
80     -384   
112    -32    
272    272    
-288   -16    
-112   32     
304    -48    
64     -448   
-144   -160   
352    -448   
-256   -384   
64     -480   
144    -128   
240    -320   
-80    256    
-128   592    
48     -432   
592    -208   
48     368    
-272   -560   
-320   208    
208    240    
304    -544   
-16    -96    
-320   112    
1008   -416   
-2736  -992   
224    304    
1504   944    
-912   -736   
-320   768    
864    -336   
-1248  96     
80     544    
864    96     
-320   -16    
-608   -128   
160    -240   
48     32     
304    64     
-64    176    
-96    -272   
80     -256   
192    -896   
-48    -128   
-368   -688   
1312   1136   
608    -224   
-1296  544    
1088   256    
-320   32     
-400   320    
992    -256   
-784   64     
-176   16     
160    48     
256    32     
-64    -80    
-192   -336   
224    96     
448    32     
-368   48     
64     144    
656    0      
-224   16     
-144   -96    
192    224    
-528   384    
-48    -80    
144    -112   
176    336    
112    96     
-240   416    
-768   -608   
64     -32    
624    -96    
-64    -272   
-208   -16    
16     -32    
-288   96     
32     -80    
-288   -144   
304    -32    
48     -208   
-240   -400   
-416   -64    
128    -128   
144    0      
-128   -272   
-336   -128   
640    -224   
896    -192   
-800   -144   
48     -80    
112    1776   
720    4112   
272    544    
-896   -560   
-128   -496   
1104   -48    
-304   -224   
-576   128    
544    128    
-48    96     
16     352    
128    -368   
-304   0      
64     -112   
176    160    
-240   -112   
-176   -16    
-64    -80    
64     -64    
112    -96    
-1216  -128   
960    -32    
-128   -224   
16     80     
800    -192   
-16    144    
-304   -384   
352    400    
368    -32    
-608   336    
384    -256   
-64    32     
-128   -144   
48     -48    
416    -144   
-944   -384   
272    -80    
496    -64    
-384   80     
-208   -192   
176    240    
-464   -288   
64     192    
-304   64     
-464   64     
160    96     
-16    -96    
-240   48     
160    -48    
-80    -80    
288    16     
-160   32     
-944   -720   
80     16     
336    -208   
-288   368    
176    112    
-464   -400   
32     -384   
-288   -160   
32     -112   
-192   96     
-96    208    
112    0      
144    -64    
32     -144   
-304   576    
0      -208   
128    304    
240    800    
352    32     
-576   -144   
0      96     
160    176    
-32    -144   
-128   16     
-336   -176   
-480   192    
-416   -128   
240    -416   
-336   0      
832    1184   
-2688  880    
576    64     
816    -160   
-384   -192   
-176   -80    
-64    -16    
352    -384   
-176   288    
-48    -16    
-48    32     
-208   208    
192    0      
96     384    
-656   -144   
304    -208   
176    48     
-32    160    
-32    -432   
-112   -80    
96     -208   
304    -736   
-928   528    
448    48     
464    112    
-656   336    
-112   112    
320    128    
32     -336   
-672   -528   
-64    224    
240    -176   
48     320    
48     -304   
-64    144    
-96    32     
48     16     
352    -240   
-416   80     
-16    32     
-48    128    
112    112    
-48    -64    
-192   80     
-256   -64    
384    64     
-160   -32    
-240   128    
176    112    
-624   128    
800    608    
1120   336    
-1104  -144   
128    0      
560    -320   
-720   192    
-16    112    
0      224    
256    0      
-48    128    
-336   48     
-784   160    
480    112    
256    192    
-464   -176   
64     144    
240    192    
-256   -32    
-240   48     
112    64     
-160   -416   
1168   576    
-1728  -144   
864    16     
1360   304    
-784   -32    
336    32     
256    48     
64     48     
-192   0      
-432   96     
240    96     
224    144    
-448   -32    
-160   112    
416    0      
0      336    
160    -112   
-160   144    
-256   -592   
-224   48     
176    320    
-272   1216   
192    -496   
-176   160    
752    576    
-480   -592   
-848   -64    
688    256    
-16    96     
-416   96     
-16    192    
-48    16     
-96    192    
32     -320   
400    -16    
-288   1072   
432    -144   
-240   -752   
-576   80     
32     128    
224    16     
224    48     
-656   256    
-432   -16    
496    176    
480    -48    
-1120  -352   
-128   -16    
368    48     
-976   1792   
80     112    
272    -480   
-304   640    
272    400    
144    -720   
-448   -896   
-128   -192   
256    208    
112    576    
-304   -576   
-352   80     
144    -32    
32     160    
-192   96     
112    -336   
160    -352   
48     -32    
-240   112    
176    240    
64     112    
128    64     
-304   -64    
368    -176   
-384   -288   
-64    416    
208    880    
-48    -560   
-144   16     
144    992    
80     -128   
112    -304   
-368   48     
368    272    
224    -752   
-592   -608   
96     -208   
304    304    
-64    -1008  
-288   112    
352    544    
160    160    
-112   96     
-48    496    
112    -32    
192    -160   
192    608    
-176   -64    
32     224    
-112   -112   
384    -384   
-1072  752    
448    336    
368    112    
208    -144   
-224   0      
-96    -672   
304    -192   
-160   -576   
-64    176    
16     224    
64     128    
240    224    
32     0      
-208   -144   
-64    -208   
384    592    
-144   608    
-528   -512   
96     32     
80     48     
-16    176    
-96    -112   
-48    -320   
-176   288    
304    -496   
16     960    
32     720    
-416   288    
352    -16    
-160   176    
48     -544   
-224   -240   
624    -496   
-512   -144   
-64    528    
224    784    
48     144    
48     -656   
32     -256   
160    -368   
112    16     
-160   16     
-64    -144   
176    80     
208    48     
80     -80    
48     -64    
-208   48     
-112   -160   
592    48     
416    48     
-1072  320    
384    624    
640    128    
-560   -608   
16     48     
320    -1392  
-32    112    
-32    112    
368    0      
80     -96    
-64    32     
-160   32     
16     112    
384    32     
-336   -128   
-48    320    
288    -32    
-224   -208   
112    -224   
144    -80    
0      -144   
304    -64    
-432   32     
240    208    
64     -16    
-64    0      
624    -528   
192    -192   
-1984  -784   
-2048  224    
880    272    
928    -64    
-768   -16    
-208   -64    
640    736    
288    -848   
-144   112    
224    -400   
-272   192    
112    -160   
176    288    
176    -96    
-400   272    
192    -16    
240    16     
-288   16     
-32    32     
-64    -160   
624    352    
1424   -32    
-1248  -32    
784    -128   
-304   256    
16     112    
320    48     
-48    336    
256    -32    
-176   208    
32     128    
224    -368   
-144   112    
208    -304   
-768   176    
512    -352   
32     -192   
-112   -192   
-256   176    
-48    -784   
512    320    
-1232  48     
-48    -48    
320    160    
-288   -16    
80     -16    
576    -240   
176    32     
-608   -128   
16     128    
448    -48    
-80    64     
-208   -176   
-16    256    
-544   -240   
256    -784   
160    96     
-48    -48    
-32    32     
-336   -80    
256    -400   
464    -32    
-176   -944   
272    432    
-112   -128   
-480   48     
800    176    
-192   -1008  
576    1056   
800    208    
240    272    
64     -208   
-656   -416   
368    -288   
176    448    
-368   -368   
-112   -208   
240    -512   
128    64     
208    -736   
-400   352    
-16    96     
96     -16    
176    112    
-256   112    
-32    32     
-208   -208   
560    320    
352    -448   
-1168  160    
592    96     
-224   -16    
-272   -176   
656    48     
240    -560   
-336   352    
240    -1232  
-16    240    
416    -288   
-576   304    
256    -416   
-256   112    
-32    -112   
32     80     
-192   144    
96     -80    
64     -192   
176    32     
-16    -64    
112    16     
-64    -16    
0      -192   
-64    144    
48     96     
-320   128    
112    -112   
336    -160   
-208   -48    
-64    -80    
-240   -448   
752    -128   
-192   160    
-288   -256   
-864   288    
432    -112   
-16    208    
272    -672   
-144   -176   
-176   -2336  
320    16     
96     -48    
-48    64     
-352   48     
304    -16    
-208   -320   
-192   48     
-240   -224   
128    -288   
-1472  0      
-160   96     
304    80     
112    -400   
-112   80     
16     -416   
-64    64     
128    -368   
64     64     
-112   64     
-304   -960   
1024   -1824  
-608   544    
96     -752   
-336   304    
-32    16     
64     -336   
544    -592   
-144   368    
-240   432    
48     -160   
400    -80    
-144   208    
0      -32    
96     800    
112    464    
-256   -80    
208    240    
-32    -272   
-64    96     
160    128    
-208   1136   
976    -336   
-1200  352    
832    -624   
-80    288    
-224   16     
224    112    
-64    320    
-304   -16    
224    -208   
96     -368   
-192   160    
0      144    
-208   -128   
336    128    
48     368    
-352   304    
208    -848   
160    -240   
-64    -320   
96     192    
48     80     
-512   -144   
0      -48    
-112   0      
-112   80     
32     -32    
64     80     
160    48     
384    -608   
-2192  -608   
800    -272   
-672   -400   
416    256    
976    96     
-448   160    
-544   -112   
-752   96     
464    192    
-1040  288    
-320   208    
400    80     
-160   -48    
-144   144    
304    288    
-176   -304   
160    48     
176    -448   
32     0      
-224   -112   
304    480    
2608   -16    
-1632  1232   
-224   256    
832    -208   
240    416    
-1376  1168   
-176   336    
32     -288   
-192   96     
-16    -16    
80     112    
96     -80
[truncated: 296,011 more chars]
