# Supplementary material for: A Fault Diagnosis Method for One‐Dimensional Vibration Signal Based on Multiresolution tlsDMD and Approximate Entropy
Source: Hindawi journal article supplement (doi:10.1155/2019/3262818), 2019-01-01
Supplement: f1 [file 3262818.f1.zip › 3262818.f1/gear signals/pitch errors signal/Data5.txt]

176    704    
-336   224    
-16    -240   
-112   -928   
-160   -960   
400    -144   
224    -256   
-80    -224   
0      -240   
16     48     
-208   -272   
128    -192   
128    -112   
192    16     
-112   -64    
144    16     
16     448    
320    112    
-624   464    
336    240    
-784   176    
320    416    
-320   544    
-256   -608   
224    -816   
240    -48    
-256   256    
288    2208   
832    48     
-1136  -80    
192    368    
416    -304   
-304   -1040  
-448   -160   
0      544    
80     -672   
-144   144    
96     -64    
16     -304   
0      208    
272    -336   
-64    64     
-144   -64    
48     320    
-48    -288   
16     -240   
-80    -32    
-192   464    
288    -160   
-32    720    
-352   624    
400    -256   
224    272    
-400   336    
-96    -400   
432    -528   
-80    192    
-112   -944   
16     496    
64     48     
-16    48     
32     -16    
-320   32     
48     -224   
576    16     
-368   448    
-240   32     
-80    -96    
160    -176   
64     -96    
176    -128   
-320   368    
224    -688   
-64    144    
-112   48     
256    -112   
-176   208    
-1088  1168   
2608   -496   
-352   16     
-1472  -144   
960    -432   
-48    144    
-528   -352   
480    -368   
112    432    
-272   64     
-80    288    
144    -32    
-176   80     
160    -176   
192    160    
16     -64    
-208   96     
400    16     
288    112    
-144   0      
640    1024   
-1968  -432   
-352   64     
512    288    
-640   640    
256    64     
-304   -528   
-832   -1104  
64     -352   
48     816    
-320   880    
32     -160   
208    -80    
-304   -208   
-496   -1008  
-64    -336   
-528   -240   
48     112    
-656   -192   
272    32     
96     32     
-176   -288   
336    -752   
-480   -64    
-688   -752   
176    -944   
96     -448   
512    -304   
592    -816   
-320   -992   
-48    96     
160    -576   
-112   528    
-464   -224   
416    512    
656    -64    
-208   -768   
544    -464   
-256   -128   
256    160    
-144   0      
-208   192    
-416   -592   
-128   -80    
224    -48    
-80    608    
-352   -16    
-80    864    
320    672    
-256   240    
848    2800   
-704   1152   
80     0      
368    -1024  
-1008  -304   
-352   512    
272    560    
112    1184   
-48    1536   
-320   -304   
-48    -32    
448    160    
-96    272    
-480   800    
32     -144   
-288   144    
96     464    
-272   16     
-16    656    
-128   256    
16     -224   
208    -288   
-560   -160   
-432   368    
-368   256    
-112   -128   
176    -976   
32     -752   
-336   0      
224    -400   
-64    48     
224    304    
96     -96    
-320   -464   
432    -96    
-128   400    
112    176    
64     -320   
-432   -32    
-464   16     
112    352    
-32    96     
16     -144   
224    64     
-32    -208   
-48    -896   
32     -608   
-112   -432   
-32    -512   
-144   -336   
176    -336   
320    -256   
-1680  -272   
656    128    
480    -96    
-288   -64    
144    576    
-176   640    
32     768    
112    352    
-64    384    
128    112    
-160   80     
64     384    
208    336    
-192   -64    
112    16     
160    96     
192    336    
224    368    
48     112    
-464   352    
192    320    
304    288    
-272   -144   
-240   -144   
576    -128   
64     80     
-480   240    
96     176    
32     160    
448    2576   
592    256    
-864   32     
-240   -64    
352    -176   
240    16     
-320   -160   
144    208    
-32    -400   
-64    128    
240    32     
-192   80     
-176   128    
112    -144   
192    -480   
320    320    
-320   64     
-96    160    
80     -240   
-144   -32    
592    -144   
-1408  544    
560    -144   
336    -48    
-656   -112   
368    -224   
0      256    
-16    208    
0      192    
256    80     
-112   16     
-304   80     
224    0      
112    32     
-48    96     
96     -32    
-160   -48    
128    48     
-176   80     
208    240    
64     128    
-256   128    
-112   80     
144    144    
128    -48    
-464   240    
448    0      
-256   160    
0      128    
-80    -1424  
976    -720   
-176   -288   
-688   16     
352    -48    
944    336    
-640   -128   
-464   416    
368    -16    
-112   112    
-144   32     
-288   -16    
288    176    
16     16     
-208   128    
480    208    
-144   160    
-240   -32    
256    192    
464    128    
-144   176    
-48    176    
-544   -816   
208    240    
1696   -160   
-1712  -816   
-224   336    
1648   -48    
-848   -1072  
528    64     
320    32     
-288   128    
160    112    
192    128    
-240   32     
-64    0      
-224   32     
464    80     
-96    80     
-96    496    
0      528    
208    240    
-224   -512   
1120   -336   
-160   -160   
-432   272    
880    48     
-768   -240   
-48    -64    
144    352    
-48    176    
160    16     
608    16     
-176   -96    
-96    272    
304    256    
-32    -368   
-608   320    
320    -176   
-272   128    
416    480    
-96    48     
-176   112    
208    144    
16     64     
32     80     
32     256    
720    -160   
-176   16     
112    80     
-512   -928   
624    -3904  
-2240  -1776  
1424   304    
352    128    
-496   -1472  
192    64     
-160   240    
352    256    
-192   -160   
368    304    
448    -96    
-560   96     
240    128    
64     64     
-48    32     
-32    128    
112    128    
-48    -272   
-80    -48    
384    224    
64     -480   
-448   -1456  
208    240    
-304   -384   
-544   288    
784    -80    
-400   496    
-144   -272   
352    112    
-48    -352   
48     -304   
-80    256    
-96    -336   
32     176    
160    -16    
272    352    
0      368    
448    240    
-448   -32    
128    64     
288    80     
-192   -288   
480    -544   
-128   -224   
-320   32     
304    -256   
-400   320    
224    -208   
128    -288   
-96    80     
384    656    
-336   -400   
384    -528   
-496   272    
320    -256   
112    -128   
-176   560    
560    2000   
688    -64    
-160   -352   
176    240    
64     448    
-80    -112   
-16    0      
176    -256   
64     240    
-32    -400   
48     -32    
-64    224    
0      64     
144    -160   
-128   -208   
32     544    
48     -48    
-240   640    
192    96     
-288   -32    
304    -144   
368    112    
-336   -32    
64     112    
80     -320   
176    -1216  
96     -160   
0      -2496  
-32    192    
32     -1088  
480    -400   
-96    800    
176    -1168  
208    -32    
16     -1200  
48     0      
0      128    
160    160    
-112   528    
96     16     
288    -1232  
-208   -48    
-128   -240   
-48    -48    
80     416    
-32    -32    
-160   -272   
688    -960   
-528   224    
288    -1152  
-32    -16    
80     -176   
-16    -32    
0      -608   
96     -32    
224    -144   
-128   80     
240    -160   
-240   -16    
-208   80     
96     144    
352    96     
96     128    
-80    96     
112    -160   
464    -192   
0      -208   
-112   -336   
320    -208   
48     336    
-176   128    
416    0      
-192   112    
-96    -208   
1408   736    
-1984  544    
-800   432    
1248   128    
-384   -368   
-816   -608   
704    -32    
-688   -1632  
-256   -768   
592    -112   
80     272    
-432   -96    
240    64     
80     -304   
-208   -128   
-64    -192   
64     400    
32     672    
-144   -16    
144    -32    
80     -144   
-928   240    
1920   -480   
-144   416    
-400   592    
640    1008   
-64    400    
-352   1856   
288    1440   
0      -576   
16     -432   
240    -64    
-224   352    
112    320    
-800   208    
208    -128   
-208   -32    
64     -944   
80     -1456  
-192   -1536  
96     -256   
160    -304   
96     320    
-336   -656   
-240   -416   
624    576    
-672   432    
96     272    
-1232  736    
288    464    
304    304    
-912   -112   
288    -352   
-320   80     
32     -528   
720    304    
352    -160   
32     -96    
-528   672    
-160   -432   
608    0      
352    -64    
-624   -128   
128    192    
336    128    
336    528    
-688   80     
-448   -384   
704    112    
240    -160   
-544   16     
448    1072   
752    -320   
-1536  -720   
496    -1392  
-256   -1136  
256    -256   
-352   -16    
-112   80     
-192   -96    
256    288    
-512   112    
-240   128    
-160   128    
256    -96    
144    -128   
-384   -128   
416    80     
320    256    
-64    448    
-128   -464   
-32    -400   
-64    -96    
528    192    
176    -288   
-560   16     
160    96     
-512   304    
416    96     
-160   -192   
-96    352    
0      240    
-128   32     
-32    16     
-16    176    
64     32     
-560   192    
256    448    
224    -96    
-176   -16    
-256   -128   
-96    256    
-400   192    
-48    384    
-496   -240   
416    64     
-112   -208   
-832   -160   
432    64     
288    16     
-240   16     
-624   96     
64     976    
1120   48     
-528   -176   
-736   192    
912    112    
-176   -160   
-304   32     
64     -320   
-608   96     
416    48     
-48    -48    
-160   128    
16     16     
-256   -144   
400    256    
352    224    
-560   -64    
112    672    
352    -80    
-112   -144   
-176   448    
-48    256    
192    48     
16     -48    
-80    496    
-512   272    
272    48     
272    -32    
-240   64     
912    2768   
-2352  176    
-256   -96    
1344   64     
-624   -304   
-336   144    
240    336    
688    320    
-624   -64    
160    -272   
-16    240    
-208   -32    
320    192    
48     256    
-480   -208   
192    160    
-48    192    
-112   -112   
80     64     
-384   96     
-240   -480   
560    -560   
-336   208    
-384   192    
784    -176   
-528   80     
112    -416   
96     416    
480    -48    
-560   16     
-144   -128   
240    432    
416    -32    
-464   144    
-384   -32    
320    96     
144    -128   
64     -96    
32     240    
-48    48     
-16    48     
176    80     
-144   48     
-112   -16    
32     224    
528    48     
-464   160    
-160   -32    
128    144    
0      48     
-1296  -1440  
-1424  -1824  
3184   640    
-688   80     
-1008  448    
1264   80     
-192   -48    
-384   768    
-368   -32    
336    -32    
16     0      
-80    -32    
-224   -64    
96     48     
-560   -160   
640    96     
-160   96     
-224   -16    
240    -272   
-112   64     
32     32     
400    880    
-1184  224    
16     224    
416    400    
288    -240   
-256   528    
208    -80    
-96    256    
-128   -144   
80     -64    
-48    128    
-192   48     
128    48     
208    -48    
-512   48     
144    112    
16     -208   
224    -256   
64     -16    
-288   64     
48     96     
-304   160    
928    48     
-160   48     
-368   96     
560    80     
48     144    
-128   32     
-64    -96    
-240   304    
352    48     
-272   192    
16     -192   
496    464    
-576   144    
-144   144    
224    224    
-288   48     
128    112    
-112   112    
-32    80     
48     80     
128    80     
-48    -48    
-80    -336   
-224   112    
592    112    
-272   0      
-208   -192   
1152   -240   
-80    -592   
144    448    
608    48     
-1216  32     
-416   -32    
1024   -400   
-256   96     
-416   -240   
-80    -16    
576    416    
-64    32     
-96    544    
336    -336   
-400   176    
-32    -320   
128    176    
32     -96    
144    560    
224    1072   
-80    -240   
-48    -192   
288    0      
-272   160    
-256   640    
768    -176   
-144   288    
-16    320    
-16    -640   
-48    -1104  
400    144    
-32    688    
-16    240    
-144   -704   
304    80     
0      80     
96     656    
80     192    
80     96     
64     176    
176    -64    
-688   -608   
304    -512   
304    -848   
0      -1232  
-352   -1056  
-32    32     
-224   -352   
-496   -576   
272    336    
80     16     
-272   -128   
304    -400   
-848   -368   
512    -752   
-16    -176   
-528   -224   
-144   -1472  
144    -256   
224    1312   
-512   -544   
208    464    
-48    -96    
-112   -768   
416    192    
64     288    
-128   -48    
16     0      
96     -176   
-208   96     
64     128    
-32    48     
-80    96     
112    128    
32     96     
48     240    
-400   -336   
-320   32     
448    -352   
16     208    
-144   224    
-336   -128   
528    -320   
48     480    
-160   32     
224    80     
-192   -32    
-224   48     
432    16     
48     640    
-432   272    
48     -160   
160    128    
32     -32    
208    128    
-352   -48    
16     144    
144    704    
240    320    
-176   -112   
-112   32     
768    -96    
-1168  608    
576    -112   
256    -64    
-224   304    
80     208    
-336   -128   
320    -144   
-160   -80    
272    -336   
176    96     
-48    -16    
-240   224    
48     48     
304    -80    
16     0      
-176   64     
0      -288   
320    -128   
128    176    
-176   160    
48     64     
224    -272   
160    48     
128    -176   
-112   -16    
-352   -144   
144    192    
128    -48    
96     96     
-720   -1088  
-800   240    
1376   -32    
-912   -336   
256    208    
80     -944   
-736   -960   
-16    544    
336    960    
-448   -528   
0      160    
80     -256   
-224   16     
160    -96    
304    0      
-128   384    
-368   288    
208    880    
192    64     
-48    -112   
-160   -864   
1488   400    
-1664  -464   
304    -384   
32     -400   
-320   400    
208    -208   
432    -112   
368    -224   
-160   944    
-240   752    
-64    -192   
512    -1712  
-320   48     
144    -928   
64     -160   
-240   -384   
496    -336   
-640   16     
0      48     
320    160    
128    272    
128    -336   
352    2928   
-320   1312   
-1360  64     
384    -192   
592    96     
-1008  448    
304    -704   
176    -528   
0      -384   
48     -400   
-48    320    
224    -496   
912    -352   
-368   112    
144    48     
464    -144   
48     224    
-992   432    
304    -32    
320    0      
-256   -352   
-208   0      
144    272    
832    -352   
-160   -16    
-720   -752   
960    -528   
992    2368   
-880   1408   
896    -128   
384    -272   
-912   48     
96     -240   
1008   -208   
256    -640   
-320   -176   
-400   -128   
288    144    
320    -48    
0      80     
-64    -160   
144    64     
-160   -1456  
80     160    
-272   -96    
400    848    
-192   352    
64     208    
256    -112   
-496   -464   
-560   96     
704    -112   
-128   112    
-208   -320   
0      -16    
32     -1072  
112    80     
576    -688   
-336   144    
48     -64    
496    -48    
-416   -112   
-240   -416   
464    -64    
-32    -16    
-112   112    
64     208    
-960   -160   
-176   -192   
-112   16     
160    -32    
-32    256    
-160   -16    
208    -176   
-48    -48    
-64    16     
-64    32     
192    48     
144    448    
288    -256   
-704   192    
224    -64    
192    -32    
-272   -432   
-288   -80    
384    -160   
48     320    
240    -736   
-160   80     
176    -2080  
-48    -112   
-128   -48    
240    80     
-64    240    
48     240    
-32    304    
-224   96     
-128   -128   
48     80     
128    64     
-160   -160   
208    -272   
-144   -448   
-160   512    
336    -1072  
-192   208    
176    112    
128    -16    
-480   1904   
1888   -272   
-1136  304    
-720   80     
960    64     
144    -64    
-368   -32    
-112   -112   
480    -512   
16     336    
0      128    
96     -112   
-32    112    
0      368    
240    -224   
-160   256    
144    -32    
0      -256   
128    144    
64     64     
-272   -720   
144    -400   
-160   112    
-336   80     
512    -48    
-256   -448   
0      -144   
-192   64     
-288   256    
160    -80    
0      160    
-32    -288   
-144   16     
176    -48    
160    64     
128    -144   
-336   160    
160    256    
272    48     
-416   -528   
16     0      
-96    64     
-176   64     
48     176    
-176   0      
320    96     
-1056  48     
48     16     
0      32     
1008   480    
-304   656    
-608   720    
880    -96    
112    32     
-1264  -368   
384    176    
320    -112   
96     -80    
-160   -256   
-80    -64    
-192   128    
-256   -16    
-32    80     
-784   -224   
64     160    
96     -192   
-144   352    
-112   -96    
352    192    
128    96     
-448   -432   
992    464    
-288   144    
-192   0      
-224   208    
-64    -144   
96     160    
368    64     
-160   -80    
-400   112    
-144   -160   
288    112    
0      -16    
-128   -16    
-32    272    
496    80     
-128   96     
-112   288    
-128   288    
256    -288   
48     -64    
16     160    
224    192    
-576   -144   
-352   -736   
-16    -16    
240    544    
-80    -144   
208    96     
208    208    
-256   -32    
-528   -1152  
-288   496    
752    512    
-816   -80    
192    256    
544    -16    
-352   -144   
-80    -160   
288    208    
-112   16     
16     160    
-144   -80    
64     192    
-80    0      
32     416    
512    0      
-128   128    
-608   -320   
912    -64    
480    -1120  
-2704  -816   
1232   -224   
1392   -160   
-800   112    
-432   768    
256    -320   
208    -272   
-96    -112   
496    768    
-208   656    
-304   -96    
400    -432   
48     16     
-160   -32    
-368   -32    
-80    288    
-48    -16    
-288   -464   
112    96     
-64    144    
-32    0      
-192   -224   
-160   -656   
-48    -512   
-208   112    
96     -16    
64     -896   
112    -512   
-48    192    
-272   560    
240    96     
368    -288   
-128   624    
-272   640    
-128   -128   
192    160    
32     -48    
-160   -784   
-16    64     
240    256    
-128   -48    
-80    -256   
-32    0      
416    192    
-448   0      
-64    -1424  
352    -32    
-384   -128   
-48    464    
192    -96    
480    544    
-1232  784    
96     1008   
560    624    
-192   224    
-208   -32    
160    -80    
-496   -1072  
496    32     
336    464    
-272   48     
-96    -16    
-64    32     
320    128    
176    96     
-528   -80    
240    -544   
592    -144   
-384   208    
48     32     
-208   192    
112    224    
-80    144    
16     96     
-160   592    
320    208    
-384   16     
-32    -16    
512    112    
-176   16     
240    400    
-496   608    
416    -128   
64     208    
-240   -32    
0      48     
432    336    
-192   752    
32     -32    
384    -464   
-208   256    
64     80     
64     -80    
-320   96     
96     128    
112    32     
-208   -160   
64     32     
144    112    
-32    128    
-320   -304   
144    -96    
-320   208    
272    64     
160    208    
-256   32     
-224   160    
112    -464   
80     -112   
32     112    
48     32     
-192   80     
-16    -16    
-128   64     
80     -272   
288    -32    
-128   432    
-48    704    
80     464    
448    48     
-176   -80    
-288   -112   
192    96     
208    -320   
-128   48     
-176   128    
208    48     
-144   -112   
-256   384    
528    240    
-912   1904   
2080   672    
-272   32     
-304   -1040  
720    48     
192    -240   
-1008  -672   
416    -160   
320    -1328  
-336   368    
-32    32     
16     96     
48     144    
192    416    
128    192    
-64    144    
-352   -160   
352    -160   
-64    -208   
-80    16     
-112   -416   
992    -624   
-1200  480    
192    256    
304    1056   
192    -1072  
-32    -112   
96     -48    
112    160    
0      -320   
-816   160    
448    -64    
336    128    
-400   144    
-192   0      
160    -16    
272    176    
-256   80     
-80    -192   
352    112    
-128   -608   
48     144    
-176   80     
656    -64    
-208   -304   
-128   -384   
-448   336    
112    -688   
-432   -336   
592    272    
-48    96     
96     -48    
320    -16    
-112   -400   
-16    384    
400    -480   
-240   240    
160    -1296  
48     -112   
240    32     
-144   128    
48     160    
240    80     
336    48     
-160   -80    
32     128    
512    64     
160    208    
-496   -160   
368    -320   
560    -784   
-2400  -304   
1184   -224   
1200   -48    
-1056  -240   
-192   784    
464    -112   
-240   320    
272    64     
-320   496    
-48    144    
-96    32     
288    176    
-224   -432   
-48    64     
-144   -64    
256    0      
80     -176   
672    -80    
-1248  160    
784    32     
160    32     
-384   -240   
-256   400    
560    -80    
-432   16     
0      -272   
432    272    
-368   -32    
-64    -32    
704    -48    
-128   192    
-320   -112   
192    96     
-176   -240   
0      16     
240    32     
-16    -960   
208    -160   
128    -336   
-32    -1216  
-256   -48    
144    304    
320    400    
-176   448    
-288   32     
176    400    
448    -48    
-352   192    
32     32     
320    -352   
32     464    
0      -288   
-240   976    
-384   624    
288    -128   
208    272    
-480   -304   
-64    -416   
416    32     
-64    -320   
-240   48     
320    -16    
64     -384   
-160   32     
80     -480   
80     208    
-176   -112   
-208   -144   
48     -192   
224    -176   
80     -80    
0      128    
176    160    
-80    0      
160    -256   
304    960    
192    208    
-320   -656   
48     240    
-80    -480   
1424   1472   
464    352    
-1232  -16    
16     144    
352    -416   
-16    -144   
-48    -80    
288    64     
0      80     
-80    -16    
464    -1072  
-224   336    
-176   -48    
336    448    
416    80     
-336   -272   
-112   64     
96     -384   
-416   -144   
128    32     
-96    -1280  
-448   368    
944    -32    
-240   -80    
224    -192   
32     -992   
-240   192    
-224   -256   
560    -224   
0      -16    
-208   -48    
32     48     
16     112    
96     -32    
-80    272    
-320   0      
208    16     
128    -176   
112    -224   
-176   96     
-16    -384   
96     -16    
-224   64     
480    80     
-352   32     
-16    96     
256    -96    
-208   0      
-80    272    
-368   -592   
2128   224    
-1888  512    
-1328  -16    
848    -160   
-352   -112   
16     -224   
464    32     
-112   -416   
-320   -112   
16     112    
320    32     
-368   0      
-144   48     
-112   -240   
32     -160   
-352   -144   
-48    -320   
-256   -16    
336    -256   
-32    112    
-240   -832   
1184   304    
-1040  -208   
-64    -736   
176    -496   
16     240    
-240   256    
416    112    
-448   -48    
-272   -48    
-48    -16    
48     16     
224    112    
16     -32    
-96    144    
112    -288   
192    160    
-48    176    
-48    336    
144    64     
80     -48    
-48    80     
-288   -256   
-400   -144   
-16    592    
16     272    
-352   -784   
-368   32     
720    -240   
-240   -496   
-800   -128   
320    -48    
-96    224    
-480   -432   
48     288    
-816   -288   
144    -304   
704    128    
-320   144    
-288   -48    
96     96     
224    -208   
64     128    
-208   -176   
-368   32     
544    320    
512    304    
-160   96     
-240   1072   
-128   432    
832    -1424  
-1872  -704   
400    720    
512    -480   
-640   -416   
-736   -512   
-16    -256   
960    2000   
-240   0      
-128   64     
-80    -320   
-96    16     
-160   224    
-176   -368   
-96    320    
-176   384    
272    -896   
-560   464    
-384   288    
-448   480    
128    32     
128    -352   
-32    384    
224    816    
128    400    
-96    -160   
0      -128   
-32    64     
0      320    
128    256    
-288   -192   
80     128    
-256   -112   
-32    0      
-240   80     
-160   224    
192    320    
-704   -880   
-112   -1040  
336    160    
-112   224    
-384   -192   
-256   32     
448    208    
-112   -368   
-224   -96    
64     -32    
64     112    
-176   400    
-64    -240   
-64    0      
-752   560    
1280   -368   
-32    400    
-192   1216   
240    1856   
112    352    
-32    1216   
-240   -976   
-192   -352   
-112   608    
-16    16     
288    -32    
-128   -32    
-608   -256   
160    -64    
224    -464   
128    96     
-176   16     
144    64     
96     144    
-96    144    
-32    400    
304    0      
-208   32     
-304   352    
16     464    
-160   176    
-128   176    
16     -48    
-240   -336   
96     -496   
-96    480    
144    -1024  
176    -96    
176    416    
-656   160    
304    -160   
608    304    
-256   592    
-304   416    
112    240    
64     -16    
192    128    
48     -16    
-96    192    
-48    160    
336    160    
112    64     
-192   128    
416    -128   
-576   912    
336    -80    
256    112    
-240   32     
16     464    
64     656    
-32    -512   
96     -288   
-64    384    
-64    32     
-208   -176   
64     -400   
-80    80     
48     208    
80     -192   
0      384    
80     -240   
-160   16     
-144   48     
16     48     
80     32     
-192   0      
-96    288    
128    -240   
-160   -64    
-48    -192   
160    128    
-208   64     
336    -144   
-1360  1232   
1760   336    
-208   -48    
112    352    
848    -64    
-720   384    
80     256    
176    -48    
288    -128   
-224   32     
16     112    
128    112    
-48    16     
-208   48     
416    224    
-64    80     
-176   -32    
240    240    
64     224    
-80    64     
-64    160    
-656   -208   
1472   -416   
-496   144    
-512   16     
1088   336    
-16    0      
-352   -208   
-224   272    
128    -80    
80     48     
256    144    
48     128    
-288   -16    
-16    224    
432    -112   
-240   -48    
192    -192   
112    96     
160    -112   
144    80     
-208   144    
-400   144    
944    -288   
80     320    
-672   800    
-160   368    
224    0      
832    -64    
-288   320    
-64    144    
480    208    
192    288    
-112   432    
-560   -128   
-208   -448   
560    -304   
288    -64    
-656   32     
272    160    
144    64     
-80    240    
368    128    
-240   80     
-656   48     
208    592    
1008   -176   
-192   -336   
-32    160    
176    -512   
-2000  752    
352    192    
-16    64     
464    -128   
176    -176   
-336   288    
80     -208   
176    -352   
320    128    
-352   192    
208    -16    
96     96     
-32    -432   
-128   -48    
-112   160    
624    -128   
-224   64     
176    128    
544    848    
-800   592    
544    640    
304    -192   
-560   -80    
784    544    
-384   16     
-592   32     
976    -112   
-544   -96    
32     -144   
192    224    
112    -192   
-80    96     
176    -512   
-80    -144   
240    256    
128    96     
-192   224    
80     224    
320    -96    
-64    80     
-288   128    
528    368    
0      64     
-112   32     
464    192    
-528   -544   
96     64     
784    -400   
-288   128    
128    288    
-224   160    
208    -96    
-880   240    
672    -208   
-224   48     
-400   -160   
368    96     
112    352    
208    32     
-144   320    
-16    64     
64     0      
48     -432   
64     112    
-112   -1296  
-160   112    
480    304    
-208   128    
-16    32     
560    176    
-80    160    
-112   96     
64     -48    
32     96     
64     32     
-128   -80    
160    -128   
32     0      
-96    64     
240    -464   
800    1760   
-1968  -48    
512    160    
1424   -336   
-672   80     
-304   224    
432    -80    
304    288    
-560   -144   
176    -224   
80     176    
16     208    
272    -320   
-208   48     
-112   -464   
192    336    
-16    144    
16     -32    
112    64     
-192   96     
-80    240    
624    1312   
816    -48    
-1120  -592   
80     288    
384    -416   
-160   336    
176    -512   
0      -160   
-80    -464   
16     48     
384    144    
48     64     
-224   304    
256    320    
-80    128    
64     0      
32     -336   
128    -240   
-144   176    
-16    128    
688    400    
-432   208    
-64    272    
-96    -528   
352    -576   
96     160    
-112   -80    
0      320    
160    368    
1136   304    
-2480  368    
32     -944   
928    -240   
-672   -688   
128    64     
-32    -400   
-480   -464   
320    -240   
-144   -272   
-32    -496   
-16    16     
208    -112   
112    272    
-496   -64    
0      80     
0      -32    
-208   -64    
-192   64     
128    -64    
32     -112   
-736   -1376  
1408   -496   
192    -640   
-1424  176    
1120   304    
-336   -816   
-144   -1008  
400    32     
-416   64     
288    -112   
-80    64     
48     112    
112    -16    
-128   -256   
224    -496   
-16    -240   
-272   -416   
320    -928   
304    -224   
48     -128   
-80    128    
-32    -48    
-576   -1792  
-384   -960   
688    -336   
-576   -256   
224    -112   
416    -112   
-400   224    
-224   400    
112    -192   
304    -80    
112    -1456  
336    752    
-608   -16    
-416   -368   
416    400    
-96    560    
-160   160    
-192   -128   
-64    208    
176    -208   
-752   -448   
-128   -144   
80     304    
112    -96    
-400   -336   
-192   -848   
208    96     
0      -48    
-560   1968   
-80    -736   
-32    304    
-352   -464   
-64    -496   
288    928    
32     1008   
-384   -432   
480    464    
-288   48     
176    -528   
-240   304    
-208   -336   
112    -48    
576    -2416  
-160   848    
-464   80     
64     -64    
272    416    
-48    112    
-208   -608   
-32    -32    
-880   -192   
352    -112   
-384   -560   
-416   160    
304    464    
-544   -2112  
176    -944   
-144   -992   
-32    112    
320    -240   
96     -64    
-112   112    
128    960    
-176   224    
-448   -144   
-32    64     
272    16     
-176   464    
-16    -64    
96     192    
288    528    
-64    320    
-80    -1232  
-704   -448   
240    368    
304    384    
96     -240   
-160   -448   
272    880    
-816   560    
80     112    
320    224    
-208   32     
-128   80     
480    256    
-1424  -1424  
64     -1616  
272    176    
-704   240    
-128   48     
-656   208    
-64    -144   
64     -304   
-240   112    
192    224    
16     256    
160    -224   
-144   -80    
-448   192    
176    160    
-176   -80    
112    80     
0      528    
-304   1808   
-240   640    
-400   -640   
256    -288   
-96    -96    
-704   768    
464    -432   
-128   -560   
-736   -832   
32     -880   
0      432    
-352   432    
176    -112   
144    176    
-320   0      
-336   -80    
32     128    
240    -128   
-80    384    
-272   -240   
-80    -192   
-1024  -112   
96     128    
-160   48     
-48    240    
-288   -432   
384    -784   
-128   1024   
256    592    
-208   -256   
32     240    
-64    320    
-176   288    
144    144    
-112   -80    
-64    0      
-320   16     
0      -320   
-96    176    
112    160    
-608   240    
400    336    
256    416    
-16    0      
-48    -64    
128    208    
48     64     
-144   144    
-16    -112   
-48    192    
176    48     
-272   112    
-32    96     
-32    16     
256    -1120  
1328   -656   
-880   448    
-576   -48    
1088   224    
-304   -64    
-592   240    
256    -160   
-64    64     
-528   -160   
128    160    
144    64     
-48    64     
-64    -96    
-64    32     
-16    -80    
128    256    
-432   -96    
-96    256    
144    -16    
-240   48     
-128   -432   
1024   1088   
800    -208   
-1616  160    
496    -144   
160    64     
-128   -192   
336    368    
-336   16     
-32    224    
-224   -64    
80     112    
112    32     
-192   -32    
192    176    
-16    48     
-48    288    
-304   32     
320    272    
112    240    
-208   48     
208    416    
-1232  112    
-512   -288   
1344   144    
400    560    
-432   48     
-352   -192   
352    -160   
192    208    
-256   240    
-224   256    
128    192    
784    352    
-352   336    
-720   512    
32     272    
912    64     
96     -16    
-560   128    
-272   16     
48     -224   
320    -48    
-336   160    
-592   -96    
768    -528   
432    512    
-304   -16    
-720   160    
-1024  -1968  
1824   -1104  
816    576    
-1408  352    
80     320    
1152   32     
-80    -320   
-992   288    
176    -48    
608    416    
-128   64     
-544   80     
496    -48    
-80    272    
-208   16     
176    256    
-144   80     
-320   144    
816    -80    
-656   -464   
-976   96     
976    -48    
-320   304    
672    16     
-352   -80    
-80    176    
208    16     
-192   240    
128    -112   
160    256    
-304   -160   
-32    432    
160    -112   
-32    80     
416    0      
0      -16    
-288   96     
240    192    
-64    -48    
-448   80     
16     160    
32     0      
224    224    
-272   -96    
48     32     
304    -16    
48     128    
-256   96     
368    512    
16     256    
-144   496    
64     256    
-288   320    
576    -112   
-256   -16    
96     96     
-16    304    
-48    16     
144    -176   
64     32     
-656   272    
256    128    
272    16     
-80    160    
-96    -16    
0      -144   
64     160    
160    32     
-272   80     
288    -64    
96     32     
-144   -64    
80     368    
-352   352    
176    240    
224    336    
208    64     
-400   -416   
16     -2736  
224    48     
-16    48     
688    1056   
-2192  1360   
1392   384    
368    -16    
-496   -976   
-352   -624   
-144   -544   
192    240    
128    144    
-64    -160   
-224   176    
-48    224    
288    160    
224    160    
-432   224    
-64    32     
448    -352   
32     -320   
-64    -304   
-16    144    
-80    -320   
240    -512   
320    592    
352    624    
-320   80     
368    240    
16     592    
96     -576   
-272   128    
176    -432   
96     208    
-48    208    
48     144    
16     0      
48     272    
-16    -48    
208    112    
-176   -128   
16     -384   
48     480    
128    144    
-48    48     
208    -112   
96     -16    
-64    -1616  
-112   -144   
16     240    
240    320    
-112   16     
48     48     
-32    -656   
-1824  464    
1648   624    
-512   432    
-448   -80    
448    -608   
32     -864   
-848   -1360  
272    272    
160    -144   
32     0      
-160   -1408  
32     160    
160    -32    
0      96     
48     -48    
-96    -48    
176    -32    
160    192    
-64    112    
-432   -864   
1600   976    
-112   -752   
-1104  336    
832    48     
-160   -400   
-832   -2624  
448    -480   
192    -464   
-384   -144   
32     304    
320    256    
96     80     
-384   -144   
0      -128   
80     -240   
-48    288    
432    -1136  
-656   -1520  
-512   -1552  
480    -144   
224    -304   
-192   -16    
560    432    
-272   1008   
-16    304    
880    688    
-608   64     
-400   176    
480    -432   
-128   96     
-240   48     
192    80     
560    160    
-512   -336   
464    160    
176    -1008  
-800   -96    
496    224    
-112   592    
416    128    
48     160    
-144   464    
16     112    
128    96     
208    -48    
-368   176    
176    -224   
288    80     
32     16     
352    1584   
224    -128   
-336   608    
960    -960   
192    -1712  
-896   -528   
320    -1792  
848    -224   
48     96     
-288   -32    
128    -208   
528    -1616  
0      224    
-352   -160   
0      -464   
-192   -208   
128    -304   
-176   -1232  
-272   240    
176    -752   
-32    -16    
-16    -96    
-176   -192   
1216   -496   
-816   -48    
112    -32    
336    -368   
0      -1344  
0      -1088  
240    -256   
128    480    
-208   0      
-96    288    
288    -192   
48     -336   
-80    64     
240    640    
-320   -592   
272    -432   
352    -672   
-752   -576   
-64    -848   
272    208    
112    160    
-128   -768   
-464   -272   
320    272    
-48    -304   
272    384    
-192   272    
-272   -96    
576    -400   
-80    0      
-496   -1424  
-32    -624   
832    -176   
-48    304    
-160   -832   
192    -1728  
-288   -912   
-272   -720   
160    -112   
224    -768   
-416   112    
160    400    
224    464    
144    256    
0      0      
-304   32     
32     1008   
-480   576    
-32    192    
-176   208    
208    176    
272    -192   
-336   -736   
192    -528   
160    -64    
-48    512    
-160   192    
704    2160   
-1440  800    
400    -240   
384    -144   
-352   272    
-288   -544   
96     -784   
96     -576   
192    -464   
-64    80     
224    -480   
-32    272    
32     -736   
-144   160    
80     -432   
32     224    
176    48     
-288   -272   
-112   -192   
112    -160   
368    992    
-1120  448    
80     -144   
336    -704   
-896   16     
496    -336   
-64    192    
-16    -896   
-208   -32    
320    -48    
-48    -32    
-432   112    
160    144    
144    -80    
16     128    
-336   0      
112    -48    
64     -32    
224    -464   
-272   272    
48     -112   
-112   208    
224    -256   
-160   -96    
320    -160   
-112   -64    
-64    -128   
0      224    
80     64     
-112   368    
-1104  736    
3536   928    
-528   16     
-1200  -16    
960    96     
144    -272   
-144   16     
-464   -784   
272    -112   
-208   64     
0      128    
-112   -48    
-144   64     
128    16     
400    16     
-368   32     
-16    64     
144    -16    
-272   64     
-80    -16    
-560   -48    
-112   304    
1904   160    
-624   560    
-928   160    
192    96     
288    32     
-672   336    
32     112    
144    64     
-256   128    
-144   -32    
208    144    
-128   -144   
-224   80     
192    -48    
176    240    
-128   224    
-736   -112   
688    464    
320    -176   
-448   544    
-1456  80     
432    176    
352    -384   
-80    352    
816    -240   
160    -304   
288    352    
-80    608    
-240   272    
224    -32    
-304   -96    
80     128    
208    -160   
-560   -112   
-432   -48    
464    272    
192    -384   
-368   -480   
-208   64     
-48    -48    
112    256    
-144   -16    
80     16     
64     -240   
80     64     
192    -16    
-528   16     
-624   -1680  
800    320    
1072   -736   
-1888  368    
176    608    
512    -320   
-688   112    
448    432    
-32    0      
-240   192    
288    0      
-384   32     
144    -32    
-32    32     
48     48     
96     0      
-304   208    
-48    64     
-240   -96    
-112   -400   
-688   -192   
240    32     
-176   -64    
608    0      
352    -208   
-496   192    
-192   112    
224    192    
112    -96    
-368   -112   
-320   0      
224    64     
80     304    
-544   -64    
336    -80    
144    -336   
-128   -304   
-800   -192   
32     64     
112    -64    
-64    112    
-208   192    
160    272    
-176   320    
256    384    
-112   208    
32     208    
48     176    
-32    112    
320    400    
-368   272    
-128   256    
480    -48    
160    -128   
-304   -208   
64     160    
272    960    
208    1088   
-64    560    
112    480    
80     -112   
-448   80     
432    336    
576    320    
-688   -16    
-80    -48    
32     640    
368    528    
32     576    
-304   -144   
0      48     
208    128    
32     288    
-208   176    
-64    -48    
16     -144   
16     -432   
-96    -816   
-80    416    
48     288    
-80    144    
736    816    
-1792  1456   
944    -240   
528    -16    
-320   -320   
16     592    
-96    16     
128    464    
-128   -128   
80     -160   
-16    0      
64     -112   
32     -64    
16     48     
-128   32     
96     -48    
80     32     
-176   -512   
32     0      
64     16     
304    416    
-304   -208   
-48    -96    
336    512    
-224   144    
-256   -96    
304    0      
-432   -800   
176    -528   
112    16     
-80    128    
-208   -352   
80     48     
80     416    
128    -48    
-128   272    
-160   80     
0      112    
176    48     
-208   64     
-208   16     
-16    96     
112    -16    
304    128    
-288   -176   
-448   400    
176    160    
224    -64    
-32    -16    
-64    208    
-912   -1024  
-288   448    
880    -512   
-1152  -272   
320    656    
160    144    
-448   112    
560    -912   
320    1408   
-304   32     
-16    -624   
64     240    
-176   0      
160    48     
80     128    
-16    -176   
-112   128    
368    -176   
208    416    
-240   32     
384    1280   
0      -768   
-1184  608    
1024   -208   
-544   192    
256    -1072  
48     144    
368    -672   
-560   -1408  
-192   -832   
176    -304   
-176   112    
240    640    
-144   1040   
-288   624    
864    -128   
-432   112    
-176   1184   
288    1056   
32     736    
-32    -208   
64     272    
48     -224   
448    1104   
-816   736    
-240   -256   
736    -1088  
-96    -704   
-256   -352   
352    -320   
-304   -192   
-160   -96    
400    -16    
192    304    
-224   -464   
-336   -912   
64     336    
-192   -608   
-112   112    
-128   0      
368    224    
0      32     
48     848    
-336   544    
-176   128    
832    -32    
304    80     
16     -240   
-496   -272   
-16    224    
144    -2592  
-1856  -1088  
880    -656   
688    -288   
-576   -1168  
-352   -144   
192    -224   
288    -208   
96     -624   
-96    576    
-160   -544   
32     64     
192    208    
96     240    
-32    240    
-128   -64    
528    272    
-48    -1488  
-96    -448   
-224   -800   
160    336    
160    224    
576    96     
368    -480   
-1904  -80    
912    -464   
64     -16    
256    -144   
-768   -720   
256    -336   
368    -416   
-176   288    
-272   -416   
192    80     
432    -288   
32     0      
-320   -752   
96     -80    
128    144    
0      -496   
-512   -48    
272    112    
-48    -464   
-272   -736   
144    -256   
224    -240   
-208   416    
80     208    
288    592    
-48    -64    
-32    160    
448    112    
-512   1168   
-272   528    
464    352    
288    -944   
-1024  -720   
144    416    
640    -144   
368    240    
-448   96     
160    400    
176    16     
-176   144    
208    -768   
-48    -16    
-480   336    
512    -144   
144    -208   
-48    384    
-368   208    
288    -336   
-176   16     
176    96     
352    48     
-368   144    
64     -32    
144    -240   
32     192    
-48    -128   
960    2656   
-1760  560    
-208   -832   
1344   -176   
-320   -368   
-400   -720   
176    128    
368    -704   
160    -720   
-272   -352   
-16    -304   
-16    256    
288    -96    
-160   256    
-128   -128   
336    0      
-384   0      
0      -928   
416    64     
-208   -144   
-192   -464   
544    -768   
-544   336    
432    112    
272    -192   
-592   -160   
304    -1008  
176    480    
336    32     
-704   144    
112    -368   
256    48     
80     -176   
128    -16    
-144   -144   
-144   -64    
-512   48     
160    -128   
-352   16     
336    -496   
-48    48     
-240   -96    
96     0      
112    -1504  
128    160    
192    -64    
-48    240    
192    16     
-208   64     
-128   -592   
16     -32    
-192   -272   
224    -240   
-512   96     
-176   96     
832    32     
96     -800   
-224   -368   
512    -1696  
-144   80     
64     64     
0      96     
160    -112   
-176   -80    
288    144    
-48    32     
-304   -32    
176    160    
448    -64    
-208   -32    
16     96     
-240   64     
1648   -416   
-304   -416   
-80    448    
560    -336   
-496   32     
128    -288   
384    -64    
-96    16     
-16    -128   
336    80     
0      -48    
-912   64     
32     -240   
64     112    
240    -80    
-304   -64    
32     -320   
48     208    
16     -2320  
32     -240   
848    -48    
-544   192    
768    -112   
256    128    
-672   -144   
-880   -640   
-640   -96    
864    -16    
-960   16     
80     -144   
208    16     
-128   -224   
16     176    
480    -448   
320    160    
-128   160    
368    -224   
-320   96     
464    0      
-144   -48    
-304   112    
112    32     
208    128    
-128   464    
-48    -288   
-336   112    
224    -96    
496    -48    
-1232  3072   
736    432    
-624   -240   
-224   -512   
432    -32    
-336   64     
-336   320    
-112   176    
176    144    
256    -160   
-576   -80    
256    -192   
-192   112    
16     32     
336    144    
-272   -240   
-240   -176   
224    -32    
848    320    
-1136  976    
96     16     
256    -416   
-208   -352   
608    -32    
144    -240   
-1328  224    
688    -352   
496    400    
-720   -272   
-352   -304   
512    -384   
-112   -576   
-1072  -144   
688    112    
-16    -96    
-144   -880   
-144   -288   
-48    -240   
-480   -48    
464    -32    
0      -64    
-448   -160   
64     96     
-48    -384   
-128   160    
-32    240    
-224   224    
464    96     
-240   208    
-368   368    
-240   352    
-48    848    
1152   -464   
-528   -848   
-448   -832   
448    -496   
96     -528   
-96    -736   
-208   -736   
96     784    
-32    624    
32     -384   
-96    -256   
128    -32    
48     -176   
-208   112    
64     -336   
-112   -272   
-32    96     
-96    -208   
48     128    
-48    -96    
224    128    
64     144    
-352   336    
112    0      
352    -96    
-464   -416   
144    -48    
288    32     
16     256    
-32    528    
208    528    
-336   0      
-464   144    
128    16     
-16    32     
176    224    
80     160    
-176   -32    
-80    -128   
0      64     
192    16     
-112   48     
-128   32     
304    208    
-48    112    
32     -96    
-112   0      
-416   112    
448    672    
-144   272    
-32    -80    
192    -336   
0      -416   
-240   320    
-160   -144   
576    -224   
288    240    
-592   176    
-304   160    
304    -48    
-144   -144   
0      112    
-32    -32    
64     -96    
96     -144   
-96    32     
-48    96     
-16    0      
256    -128   
-96    112    
-64    64     
32     80     
-336   448    
304    144    
-32    128    
32     -176   
384    -320   
-480   -160   
-496   -1152  
-1200  512    
1776   128    
-1024  688    
192    704    
432    672    
-512   -592   
608    -1632  
208    1360   
-32    176    
-208   -128   
-160   128    
64     -192   
112    0      
-400   80     
32     224    
176    304    
80     96     
64     176    
0      48     
288    1456   
-352   -752   
-1440  336    
1520   -64    
-352   368    
-1344  -944   
112    -1328  
784    -336   
-832   416    
-400   -448   
176    -512   
-256   -288   
160    -64    
272    -128   
-352   160    
288    160    
80     64     
176    320    
176    256    
-160   16     
-96    0      
16     144    
-192   -192   
-192   64     
640    1296   
864    768    
-352   -304   
160    -400   
-144   -320   
-336   -352   
112    -160   
32     192    
176    -80    
80     -48    
304    256    
176    1344   
-960   1152   
16     416    
336    -160   
-448   -32    
-176   176    
-176   32     
80     80     
272    -256   
-48    128    
-368   -224   
48     128    
480    -64    
-768   48     
32     -272   
-224   3120   
448    784    
-1056  -400   
-240   -48    
1312   64     
-752   96     
-272   48     
384    128    
16     0      
256    464    
-80    -32    
-352   144    
208    144    
48     192    
176    192    
16     -32    
-176   176    
64     -368   
80     -944   
96     -944   
-256   -240   
80     496    
80     -48    
-624   -112   
432    160    
32     240    
208    336    
-160   -320   
-544   -432   
544    -272   
-384   64     
-80    -272   
-128   224    
-320   -1264  
464    208    
-176   48     
-80    16     
80     -48    
-16    64     
144    0      
240    80     
-480   224    
128    208    
-352   160    
-64    -112   
16     192    
80     128    
-112   48     
208    -704   
-432   -144   
288    96     
144    -640   
-912   -288   
640    272    
448    -304   
-528   0      
224    112    
64     -272   
288    -448   
-208   48     
-368   -32    
192    -112   
-16    32     
144    -304   
64     128    
48     -608   
-544   256    
336    304    
288    -128   
-128   144    
-128   224    
208    224    
112    176    
-96    -160   
64     144    
112    112    
-240   -272   
112    176    
144    -416   
16     128    
-656   496    
2160   -400   
-784   48     
-480   1040   
1392   16     
-448   256    
-288   -608   
16     528    
48     144    
128    -48    
-112   112    
0      -272   
-48    -32    
48     160    
480    -336   
-528   -688   
176    144    
208    -80    
-96    96     
-16    -80    
-80    -1104  
-416   496    
944    528    
-912   -64    
-192   96     
832    -16    
-512   48     
-352   -176   
320    16     
304    -64    
-480   64     
128    -96    
192    -112   
-32    48     
192    80     
-192   -224   
0      -80    
80     -64    
-96    192    
112    16     
-48    192    
176    -176   
-192   112    
224    -192   
-400   16     
416    -240   
-32    64     
-256   -144   
272    96     
1056   -432   
-3296  1008   
1008   352    
1296   432    
-608   144    
-736   -208   
288    176    
-32    -688   
-432   0      
544    -640   
192    112    
-304   -160   
-64    176    
192    48     
-32    288    
-192   224    
224    48     
-176   96     
16     208    
64     96     
-176   -272   
384    816    
176    -368   
-1696  64     
1200   -192   
-192   384    
-576   144    
528    32     
-288   -176   
704    -192   
-64    240    
-336   176    
160    80     
176    -688   
-64    -816   
32     -144   
-48    -2112  
48     -80    
-16    400    
-512   0      
112    -112   
240    -64    
-128   96     
368    0      
-464   -816   
-272   96     
512    -752   
352    -96    
-464   -720   
16     -656   
208    -16    
-208   -128   
-128   -128   
432    -288   
-224   -224   
-416   -128   
352    192    
480    -192   
-368   -64    
-176   -336   
624    48     
-176   -112   
-160   112    
-64    -80    
192    32     
80     288    
-80    96     
240    -128   
192    -272   
-448   -1088  
-640   -2048  
1936   -2656  
-192   -176   
-1088  400    
-224   208    
656    272    
176    -144   
16     352    
-384   -480   
-64    16     
-32    -256   
144    16     
-320   -160   
-192   48     
464    -288   
448    80     
-192   -48    
-192   -960   
-176   -16    
560    -560   
-272   -48    
-96    32     
336    400    
-864   -224   
336    -656   
-112   144    
160    32     
-880   -80    
240    -768   
288    -992   
-320   160    
-64    64     
288    -960   
64     -272   
-80    256    
16     304    
-112   -416   
-128   -880   
512    -816   
-144   64     
-208   304    
64     -112   
272    -64    
-128   96     
80     560    
368    -864   
-576   -896   
512    -272   
80     1376   
-32    -1216  
-96    -336   
288    496    
-784   336    
256    1216   
96     1216   
-400   544    
240    -16    
-512   -96    
-208   -176   
-672   -480   
32     -128   
160    64     
0      -320   
-304   96     
176    -944   
0      -64    
240    -16    
-32    -64    
-288   -64    
208    192    
-16    -16    
-48    32     
-208   32     
-160   -176   
-32    -304   
288    16     
-48    48     
-112   -304   
-80    -96    
-16    -624   
288    -176   
400    352    
-1040  416    
592    -64    
256    144    
-176   -208   
-240   64     
-80    912    
96     272    
-240   -208   
-16    -352   
-96    224    
-48    -160   
64     144    
320    -256   
-432   96     
-208   368    
80     128    
48     -224   
96     -160   
-208   -80    
-640   416    
688    -224   
-592   -128   
-32    -208   
128    -160   
80     288    
-656   -512   
-448   -544   
64     336    
192    240    
-32    -224   
-608   -144   
-96    256    
-48    448    
32     -160   
80     -144   
-352   -768   
-16    -288   
208    240    
-672   -64    
-96    224    
-224   256    
192    192    
32     80     
0      -128   
-496   304    
-144   384    
176    448    
160    -32    
176    752    
592    -144   
-1152  400    
832    -704   
176    -144   
-704   -352   
-128   96     
176    -448   
-160   1264   
112    1072   
-336   -672   
80     -608   
432    -16    
-400   368    
-352   288    
96     32     
-1600  -208   
64     368    
-128   0      
-112   -160   
32     -384   
-704   -432   
1040   -816   
16     240    
-640   -16    
512    256    
496    800    
224    -368   
-512   80     
336    208    
32     256    
-448   -48    
48     -144   
352    -64    
32     16     
-416   -48    
480    96     
-64    368    
-16    -144   
-64    0      
64     -64    
0      176    
-160   112    
256    224    
528    -496   
320    -544   
-544   176    
144    96     
-976   -288   
-144   224    
272    -656   
-320   400    
320    32     
-80    -96    
-496   48     
-48    -352   
-128   -352   
928    -304   
-544   288    
-176   96     
352    -96    
-48    16     
-432   144    
-320   -576   
-128   272    
416    -80    
-816   16     
-48    96     
224    -48    
-416   -112   
1600   2224   
-1344  1488   
320    -144   
1392   -160   
-768   64     
-672   -128   
400    240    
880    32     
-336   -32    
-560   0      
128    112    
464    272    
-176   -64    
192    96     
96     112    
-160   208    
-16    144    
112    -16    
-256   64     
448    -560   
-352   496    
480    -64    
-432   112    
144    -96    
560    -32    
336    -176   
-496   -128   
32     16     
384    352    
-384   160    
432    32     
-160   192    
-176   -48    
64     368    
80     192    
128    32     
-240   80     
96     336    
-80    208    
-256   112    
320    80     
208    96     
-560   64     
160    80     
-320   16     
160    80     
240    272    
208    640    
-176   288    
-48    432    
640    256    
-48    704    
-336   368    
-400   32     
800    -208   
-96    -240   
-528   -384   
416    -304   
-128   160    
96     -16    
-96    64     
-16    32     
32     192    
80     368    
-64    80     
80     64     
-48    -144   
32     288    
-240   336    
-112   48     
208    96     
128    -32    
-80    16     
-96    192    
208    -48    
-304   0      
112    -64    
-128   112    
96     -160   
-112   80     
-464   -816   
1024   -2032  
-832   256    
240    -112   
16     128    
-48    480    
112    -80    
368    752    
-304   432    
-368   -96    
352    -160   
80     208    
96     128    
-112   128    
32     144    
112    64     
-240   -32    
224    96     
-176   16     
16     -48    
-80    320    
544    1248   
768    -48    
-976   -160   
144    32     
560    -144   
-96    304    
208    208    
-432   352    
-48    -128   
272    80     
48     32     
32     64     
-112   160    
-80    -192   
112    16     
368    -16    
-544   0      
240    48     
64     -48    
-96    48     
224    16     
-208   0      
96     128    
272    -80    
-400   64     
-112   -112   
208    -128   
16     48     
-112   80     
64     416    
-1520  -128   
896    176    
144    176    
-480   208    
384    192    
128    0      
-304   -176   
224    96     
256    -32    
-32    64     
-160   32     
96     16     
416    208    
-544   32     
352    224    
-112   0      
-48    -32    
208    -144   
-128   -32    
32     112    
208    0      
-1504  1056   
720    320    
48     320    
-128   112    
304    48     
-352   -336   
-256   336    
32     -2640  
128    80     
96     64     
-144   96     
-32    160    
192    96     
128    -144   
-304   208    
-64    -96    
544    32     
-64    128    
-224   -288   
160    -224   
800    -288   
-528   672    
-80    -768   
448    176    
-416   432    
-208   -48    
352    -128   
320    32     
-208   16     
0      224    
224    160    
96     0      
-176   32     
240    304    
1024   304    
-992   32     
32     336    
-160   -448   
-288   16     
240    -992   
-128   16     
240    -512   
64     32     
208    256    
-736   384    
-288   144    
720    320    
-288   320    
720    2416   
-816   1808   
576    80     
1680   -432   
-1136  -528   
-672   320    
1040   -1664  
-880   -992   
-336   -864   
240    96     
560    272    
-320   -208   
-208   -128   
400    -112   
0      480    
0      400    
-48    768    
-336   -256   
192    528    
480    112    
-384   32     
-96    -672   
-64    -496   
-48    -400   
-128   -1104  
-256   -480   
112    -16    
320    432    
16     384    
0      352    
-256   -752   
112    336    
400    96     
-144   464    
16     -64    
-112   432    
272    656    
192    1328   
192    176    
-64    0      
80     144    
192    -32    
80     272    
320    -16    
-736   -1152  
16     -944   
144    -48    
128    -512   
160    -784   
64     224    
208    -336   
-416   -960   
320    -800   
128    -416   
-176   -1296  
192    -288   
32     -320   
-16    -336   
96     928    
32     -208   
-256   -192   
304    -48    
80     -80    
-32    -784   
224    -496   
144    0      
240    -112   
0      -848   
496    -288   
-160   96     
304    -96    
-528   -48    
384    -320   
-656   0      
-32    -32    
-64    48     
96     -304   
80     -16    
368    -976   
-160   -144   
-208   112    
-240   464    
560    -384   
-960   144    
384    -464   
128    48     
-384   128    
32     0      
-288   -32    
-32    -240   
160    -112   
128    -96    
-48    -208   
16     -1168  
240    0      
0      -2176  
-64    -240   
80     -672   
112    -560   
64     -416   
-80    448    
80     -336   
16     0      
336    80     
-112   288    
-48    -16    
-16    48     
304    224    
368    -96    
-272   64     
-112   -320   
400    32     
-16    80     
-48    128    
192    -144   
-176   368    
-128   -96    
96     -800   
128    96     
304    752    
-784   -256   
-128   -192   
576    224    
48     224    
-528   16     
-240   -352   
560    -144   
192    -336   
32     -32    
-368   144    
304    -832   
-2224  80     
1264   112    
864    704    
-1376  1120   
224    96     
240    112    
-1456  288    
16     272    
512    -32    
-144   -96    
-176   32     
64     -976   
-16    208    
320    256    
-16    -32    
-208   -80    
48     -352   
-112   -48    
-16    0      
-608   -480   
1168   992    
368    -96    
-1248  320    
1088   288    
-288   32     
-256   448    
960    -768   
-16    192    
-160   48     
128    32     
48     96     
-48    -16    
-240   -144   
352    16     
208    96     
-368   -64    
0      208    
608    -192   
-144   128    
-112   -176   
256    464    
-592   -272   
-16    -272   
16     16     
208    560    
-48    208    
48     272    
-832   -80    
-48    -352   
496    -144   
160    -64    
-624   272    
272    -160   
-32    160    
-416   -432   
-336   16     
-80    144    
-64    -352   
-160   -144   
-80    176    
-96    16     
16     0      
-96    -16    
-160   -112   
304    656    
1024   -96    
-880   32     
-1104  -64    
160    1792   
160    3680   
224    960    
-992   -512   
96     -512   
1136   192    
-320   -304   
-736   240    
-368   -64    
-32    176    
192    -64    
32     -48    
-528   -272   
240    32     
112    16     
-128   -16    
-224   -32    
480    64     
-32    0      
0      -304   
-1424  -96    
1024   -176   
-352   128    
320    -16    
512    112    
-1136  -32    
-560   128    
848    224    
-272   112    
-384   384    
464    0      
-144   -32    
-128   -32    
64     -64    
240    -288   
-784   -288   
368    -48    
416    240    
-368   64     
-336   0      
-400   -32    
32     32     
192    -16    
-112   400    
48     272    
-208   288    
-96    -128   
160    -176   
-176   -16    
-224   -64    
272    64     
-32    -32    
-64    544    
1024   16     
-704   -96    
256    -496   
320    48     
-352   480    
-176   672    
256    288    
0      64     
-272   208    
80     16     
-272   192    
-80    208    
256    -48    
48     -192   
-864   624    
208    -592   
464    -768   
-512   240    
-48    80     
-160   -240   
64     80     
208    80     
96     112    
-384   112    
0      -144   
256    304    
144    304    
-288   -160   
-1072  -1856  
800    -240   
720    80     
-928   -224   
592    320    
96     16     
-384   432    
-768   512    
432    -96    
192    64     
-208   96     
-224   -96    
0      192    
256    -512   
-128   576    
64     32     
-224   -80    
432    0      
-160   432    
-384   -32    
480    208    
-1344  368    
560    -256   
560    -64    
-624   -144   
-64    -64    
16     112    
80     144    
64     432    
240    224    
-192   -96    
-400   80     
144    -208   
288    240    
-352   -80    
-192   176    
320    240    
-272   128    
176    32     
-144   48     
0      48     
0      96     
-32    96     
32     32     
32     64     
-80    0      
96     64     
-32    32     
-144   304    
-112   -416   
1696   -336   
-2016  160    
576    -48    
832    288    
-1376  -144   
544    -112   
608    112    
-528   -176   
0      0      
208    32     
-112   48     
64     160    
96     -16    
128    160    
-272   112    
192    96     
-288   -48    
-320   -48    
272    -16    
16     80     
64     960    
112    -528   
-1824  -624   
2336   -560   
336    -80    
-1104  80     
704    -256   
-288   160    
320    304    
-528   -48    
-288   144    
272    96     
160    96     
-240   48     
-16    192    
240    32     
48     400    
208    176    
-192   112    
-112   -544   
-176   -64    
112    272    
-208   1040   
128    -384   
-192   64     
720    608    
-464   -544   
-752   -32    
688    224    
-80    48     
-336   176    
32     288    
-64    128    
-272   16     
-32    -400   
480    32     
-352   928    
272    -320   
-96    -352   
-752   224    
16     -2064  
192    80     
192    240    
-576   112    
-432   -656   
80     -256   
704    -160   
-736   -144   
-416   -192   
480    0      
-880   -1344  
-1584  -96    
992    -336   
96     1504   
288    1360   
-304   528    
-352   -336   
64     -960   
384    -224   
-128   -688   
-368   544    
-176   160    
176    384    
192    64     
-240   48     
-208   592    
352    448    
-32    0      
-160   -80    
64     -192   
128    -448   
80     512    
-256   64     
336    336    
128    -368   
-544   -720   
112    -64    
256    1152   
-288   96     
48     144    
-64    592    
320    -160   
64     -176   
64     320    
192    656    
48     -336   
96     240    
80     384    
-128   144    
-64    -208   
320    -48    
320    544    
-352   -16    
-32    80     
-160   336    
448    -256   
48     -496   
-272   544    
192    352    
144    352    
528    688    
-608   96     
-528   464    
592    1456   
208    1328   
16     416    
0      736    
256    -192   
112    -144   
-384   -160   
16     128    
192    -112   
80     32     
64     256    
-16    -48    
-272   -272   
32     -448   
32     256    
-368   928    
-80    -464   
320    144    
-192   -352   
176    128    
-176   384    
96     160    
-16    240    
-128   -48    
-752   -112   
320    -544   
128    48     
640    -608   
-816   96     
-192   560    
592    752    
-96    -288   
-64    -208   
160    -816   
-64    -128   
-32    256    
48     496    
80     -112   
-16    256    
-208   16     
-16    32     
48     112    
128    -192   
48     112    
-224   -112   
80     224    
304    -144   
-256   -448   
64     -656   
64     -688   
0      -128   
96     -688   
-192   -176   
96     640    
240    -16    
-16    -176   
80     -16    
-80    -288   
-16    544    
-64    -176   
256    112    
112    -288   
-432   48     
112    -160   
80     256    
-16    32     
224    -224   
128    -96    
64     -272   
-48    320    
-272   -448   
208    160    
176    -336   
-80    144    
144    -128   
96     272    
-768   640    
752    -304   
3024   48     
-1360  -2576  
-1184  48     
1664   -784   
160    -176   
-432   320    
-208   -400   
160    -96    
-16    -1232  
-96    -112   
352    -32    
0      96     
-352   -48    
272    -16    
208    -192   
-224   -96    
-16    -320   
240    32     
112    -96    
416    896    
-1296  -880   
-624   48     
1312   -304   
-864   -192   
128    96     
64     -512   
112    256    
272    -80    
-480   -128   
48     32     
160    144    
-48    -32    
160    96     
-560   -96    
768    -272   
-848   -64    
96     144    
432    -112   
112    -64    
48     -48    
-464   -160   
768    -304   
304    -1184  
-256   0      
96     176    
16     208    
96     -208   
48     16     
336    -144   
-32    112    
-704   48     
160    64     
336    -144   
-288   -256   
256    944    
288    400    
-240   -176   
576    -608   
352    -96    
-192   -32    
-144   -48    
336    -16    
272    48     
368    32     
-944   304    
-32    128    
608    -256   
-896   48     
2000   896    
-2336  1760   
528    -224   
960    -336   
-1168  -192   
-416   -368   
928    -1664  
176    80     
-208   -16    
112    48     
144    96     
576    80     
-768   256    
-32    -192   
-128   -96    
80     -16    
-448   48     
-288   -16    
-560   -464   
1024   -272   
128    -256   
-576   -1616  
256    208    
-384   112    
-48    48     
608    144    
-96    16     
-192   352    
-16    32     
-80    384    
192    -112   
-496   256    
176    -368   
-112   160    
-96    -144   
-80    64     
240    -368   
16     16     
-96    -48    
288    0      
-176   16     
80     -64    
-128   48     
96     0      
-112   208    
176    16     
-496   32     
128    -176   
352    -176   
-240   -64    
32     96     
-176   -624   
624    -272   
-416   352    
-160   -368   
-880   -16    
320    -160   
80     304    
432    48     
-400   -400   
-96    -224   
144    48     
112    -176   
-16    48     
-192   -64    
336    112    
-112   -560   
-16    -16    
-80    288    
128    -96    
16     32     
-176   272    
192    336    
128    96     
-160   -16    
16     432    
-336   64     
-656   -368   
128    -32    
-640   -96    
-256   -608   
1008   -2160  
-864   624    
464    -752   
-464   368    
96     160    
-304   -336   
624    -768   
-240   256    
-240   432    
80     64     
368    -80    
-288   96     
-32    144    
64     656    
80     432    
-208   -160   
-16    96     
-64    -320   
-448   208    
80     32     
-576   416    
848    -384   
-1536  -144   
656    352    
-384   816    
-192   64     
320    32     
-176   208    
-208   -320   
240    144    
704    560    
-640   560    
-128   16     
32     -48    
320    -240   
32     -16    
-432   80     
-240   336    
240    -144   
-32    -288   
16     128    
32     -32    
16     208    
112    -144   
-112   -128   
-256   96     
64     48     
-16    80     
-32    -160   
1328   448    
-1824  848    
112    -80    
256    -384   
-1056  160    
368    160    
192    64     
-80    -192   
-352   -208   
240    -240   
192    -368   
-320   -160   
-48    16     
352    -160   
-640   -336   
80     -208   
80     112    
-240   192    
-32    240    
32     304    
-416   176    
-288   -480   
-112   224    
1552   -1088  
-1600  -560   
272    288    
832    -224   
16     -1280  
-896   -1168  
224    -192   
448    -240   
-128   80     
-224   16     
-128   -64    
208    -208   
-320   -384   
-16    96     
-336   -1008  
-480   -640   
576    -352   
-256   -256   
16     16     
-144   -48    
112    -800   
-560   -1184  
112    -528   
576    -464   
-464   720    
-368   448    
176    -416   
-272   -368   
208    0      
-16    -368   
128    -48    
160    -432   
-480   -384   
-256   384    
-144   -608   
-416   -432   
720    -704   
48     -160   
48     240    
224    192    
-352   128    
-432   16     
384    -256   
288    -224   
48     -224   
272    16     
-64    112    
-800   -1232  
1456   -1376  
1040   -48    
-1360  272    
-144   240    
624    -480   
256    688    
-160   1904   
-768   -992   
384    368    
352    -208   
48     464    
-64    -192   
-80    48     
192    96     
464    16     
-128   240    
416    -16    
-16    -304   
-224   -128   
208    96     
-64    288    
-192   -112   
192    16     
176    -48    
-224   80     
272    848    
192    432    
-592   288    
80     -496   
-32    -160   
48     80     
144    -48    
-224   160    
80     304    
464    -336   
-304   -128   
-96    320    
480    -272   
272    1056   
-608   272    
0      208    
272    480    
144    416    
-160   256    
80     -160   
-256   -80    
128    1296   
496    448    
32     -320   
-592   304    
-32    -512   
912    -480   
-96    -1040  
-720   -1120  
112    -528   
336    -64    
112    -576   
-128   128    
80     384    
-544   -912   
64     -768   
288    0      
-208   144    
16     -112   
128    320    
128    400    
0      640    
-48    672    
176    -384   
-176   -208   
352    272    
-304   176    
0      144    
384    -160   
-256   -256   
96     -16    
144    -144   
-672   144    
-208   288    
416    -496   
448    -1552  
-720   800    
16     -240   
352    -1808  
-144   -624   
208    -544   
240    160    
-160   32     
-240   128    
192    208    
128    288    
-32    240    
160    128    
-144   480    
208    224    
-192   0      
48     80     
-240   -320   
224    -384   
-32    160    
-592   16     
880    -608   
-272   192    
-96    80     
512    -272   
-304   -80    
-416   -512   
272    -192   
176    16     
-48    384    
64     256    
208    80     
-144   32     
176    -336   
96     96     
-272   -1040  
-112   -80    
320    144    
-16    16     
-176   48     
224    192    
-352   64     
224    352    
-96    -112   
-240   160    
192    -48    
16     192    
-16    48     
-64    320    
-464   288    
16     -1040  
720    16     
-384   64     
-464   128    
416    144    
160    176    
-176   0      
-16    192    
176    -144   
-288   96     
144    112    
-80    -160   
448    192    
-144   -96    
-64    176    
192    -160   
-304   64     
-144   -512   
384    176    
-144   64     
-800   -224   
1264   -288   
160    -176   
-608   -16    
592    432    
224    -176   
-576   80     
176    144    
128    -128   
96     208    
-128   -192   
32     48     
16     -128   
80     96     
96     -64    
48     64     
16     -256   
256    -336   
-560   384    
64     400    
288    288    
-352   0      
128    -16    
304    -688   
-112   -176   
-32    400    
-160   512    
-112   -96    
336    -80    
-480   -192   
48     -32    
512    64     
144    272    
-48    144    
336    -192   
-400   128    
-192   -80    
320    352    
528    160    
-208   -16    
-64    -16    
448    -32    
-64    -112   
-352   16     
384    -208   
848    400    
-384   64     
-480   144    
-400   -2576  
1200   -1744  
800    -560   
-1296  -352   
352    256    
1168   -240   
-208   352    
-800   96     
416    96     
752    -160   
-48    -48    
-432   -128   
208    -1232  
704    64     
-352   -1264  
-80    -528   
-32    80     
32     -96    
64     -64    
-144   -1728  
-656   -640   
240    -48    
32     -64    
480    192    
400    -176   
-320   -608   
240    128    
336    -592   
-720   -112   
448    -496   
32     -128   
64     -32    
-112   -320   
-272   -112   
416    -432   
-16    32     
48     -304   
-480   -240   
240    64     
208    192    
-288   -160   
-144   16     
512    16     
-304   32     
112    -80    
48     112    
-528   -160   
-192   -320   
320    -352   
16     -480   
-224   -48    
-96    -992   
528    -560   
-320   -1872  
560    -64    
-64    0      
-544   288    
544    1136   
640    1024   
-256   0      
-208   -64    
-192   -96    
80     0      
-16    32     
80     -96    
-96    -16    
288    208    
-224   -176   
-32    -848   
32     -128   
64     -464   
-192   -144   
240    -48    
-208   -64    
-128   -16    
48     -336   
336    -176   
48     624    
-272   256    
96     -304   
144    -128   
-592   -2016  
512    -960   
-576   -448   
48     -480   
304    -944   
-96    -304   
-144   400    
-32    -704   
80     -672   
176    -208   
-224   288    
-16    -16    
-128   -96    
192    -480   
-896   -192   
144    80     
32     416    
-16    -320   
-96    -16    
64     -2496  
-112   -784   
192    -496   
-208   336    
-16    464    
208    -144   
-96    -480   
160    -32    
224    32     
64     16     
-16    272    
-80    -480   
64     -240   
272    -432   
160    752    
64     -528   
384    32     
-416   -320   
-48    400    
128    48     
48     -432   
-288   112    
32     -128   
-208   0      
80     -112   
176    240    
-336   -144   
176    -16    
16     -80    
-160   -224   
-464   -1248  
1616   -304   
-448   768    
-1088  -48    
1120   -592   
-208   -112   
-176   -304   
368    576    
-176   -144   
-96    -240   
-304   -16    
368    -320   
112    32     
-32    -448   
-192   -256   
144    -112   
-288   80     
-224   -416   
48     -48    
160    16     
-64    224    
96     -848   
-1680  1088   
1280   -768   
512    -384   
-576   672    
-64    896    
496    1616   
-1328  -240   
-160   -1968  
448    -976   
-864   672    
-32    432    
64     -48    
-32    -400   
-736   0      
128    -112   
-288   0      
112    16     
208    -96    
-16    48     
-240   -80    
-80    192    
-96    -32    
496    864    
-816   16     
-848   -240   
1456   -176   
-32    1200   
-32    32     
-464   176    
-256   368    
608    208    
-768   304    
-384   -496   
-256   -176   
80     -288   
32     -1248  
-1120  -1280  
448    0      
-128   160    
96     -224   
-288   112    
-224   1024   
304    432    
64     1008   
128    320    
80     -112   
144    -208   
-352   -96    
-96    224    
-528   1696   
992    80     
-336   208    
-656   336    
560    1968   
208    800    
-352   -464   
-288   -256   
-96    144    
176    144    
80     48     
-528   -192   
112    -336   
-928   560    
48     96     
-240   -48    
-176   -160   
192    -592   
0      -512   
-16    0      
-176   16     
80     288    
-816   -32    
1296   -16    
-864   -352   
-176   -512   
80     -912   
-240   -256   
-704   -208   
432    800    
176    432    
-32    288    
-128   -464   
208    -80    
-384   -304   
80     -144   
352    -384   
-480   -208   
16     -288   
336    128    
-224   -64    
-32    -80    
-112   -16    
416    240    
-512   -112   
-240   -144   
272    -592   
-256   -336   
-64    -336   
-96    176    
416    80     
-1008  224    
208    912    
416    224    
-16    224    
-144   -32    
144    240    
80     208    
-336   1072   
-208   944    
-1024  400    
384    -80    
-432   192    
-80    64     
224    -128   
336    416    
-448   352    
224    944    
-192   368    
96     48     
272    0      
-224   -256   
-240   -16    
96     -368   
192    128    
-16    352    
-224   -288   
-16    -672   
-64    -336   
-256   -944   
960    -1984  
-608   784    
576    16     
32     112    
-336   112    
288    -560   
-128   192    
240    -160   
-416   176    
128    128    
128    272    
64     -256   
32     400    
-368   80     
224    192    
-112   320    
-16    -96    
-32    -48    
128    208    
-80    32     
-272   -1120  
-560   208    
1120   80     
-928   -16    
272    448    
464    -32    
-288   64     
-368   -352   
288    0      
352    0      
-48    208    
0      80     
-16    176    
-64    96     
-64    96     
80     240    
288    -80    
-192   144    
-96    -176   
32     128    
112    -96    
16     224    
96     -64    
0      112    
0      80     
-32    16     
256    176    
-208   16     
0      32     
-352   -1664  
-1264  -656   
1760   32     
-592   112    
-448   160    
1136   128    
-48    368    
-864   384    
192    192    
160    -16    
96     80     
-240   -32    
32     144    
320    352    
-480   96     
-64    224    
368    -64    
-496   96     
208    -16    
144    64     
32     128    
160    320    
-1616  96     
1056   992    
256    -112   
-1648  48     
1296   288    
0      -144   
-384   -464   
160    -144   
-64    -32    
-48    64     
48     -176   
-32    -784   
192    112    
-128   112    
-64    -48    
352    496    
-96    384    
160    -16    
-48    192    
-128   160    
592    -48    
-272   144    
400    32     
-64    560    
96     928    
272    -144   
464    208    
32     208    
-480   80     
192    -16    
288    0      
144    -16    
-368   256    
416    240    
-192   192    
-176   896    
-576   368    
96     -32    
112    -16    
448    80     
-16    32     
48     -496   
-144   -16    
304    -720   
192    48     
-240   144    
16     32     
736    1440   
-1280  -2016  
-976   912    
1504   352    
-512   -96    
192    272    
448    -80    
-608   352    
0      96     
272    144    
752    32     
-704   -160   
64     -16    
352    176    
-112   -48    
-192   224    
272    64     
-160   16     
384    32     
448    464    
-912   640    
288    304    
368    -112   
-160   -48    
368    16     
16     -64    
-304   0      
720    208    
-736   -896   
-96    48     
368    96     
-288   0      
96     -128   
272    -96    
-32    -304   
-208   -288   
192    -336   
-160   -96    
128    -16    
48     -176   
-224   32     
32     -784   
32     -48    
224    -352   
-192   496    
-32    -32    
192    -624   
368    -512   
-400   32     
-32    -96    
144    384    
16     320    
288    896    
208    -48    
-224   -464   
16     -336   
-112   -576   
176    -160   
64     -480   
-288   208    
224    -1856  
-32    432    
64     464    
224    176    
-240   -336   
-32    160    
-96    416    
352    160    
400    368    
-208   64     
-80    -112   
160    64     
320    208    
64     32     
-16    160    
16     -112   
112    416    
272    256    
-208   608    
-16    -432   
48     -96    
448    1056   
-496   -336   
176    -160   
624    848    
-224   592    
-512   -240   
176    384    
400    176    
-208   144    
-176   -400   
160    352    
80     -128   
48     -2000  
-144   -128   
-112   16     
192    144    
128    -192   
-64    -528   
-64    32     
112    320    
368    336    
-288   416    
96     -416   
272    128    
-416   128    
-144   -768   
304    -160   
256    -64    
32     -208   
-496   16     
0      112    
144    0      
64     -288   
16     -80    
-64    -2032  
208    160    
-256   528    
112    -288   
192    -96    
-192   -32    
-96    -208   
144    144    
192    -112   
32     112    
-384   -160   
-32    -48    
192    -128   
256    112    
-384   -32    
-32    -368   
-704   -1248  
-112   -144   
-80    -192   
-304   -352   
-16    64     
432    -368   
272    240    
-656   -400   
-224   192    
192    112    
304    336    
-336   -176   
48     -176   
144    -176   
0      -112   
32     288    
80     -432   
112    -800   
-320   -128   
112    848    
-16    -800   
1520   816    
-1600  176    
320    -288   
-176   -416   
-464   -576   
-336   -1328  
816    -2160  
-432   -1440  
-528   32     
528    960    
32     512    
-32    752    
480    208    
0      528    
-272   64     
0      -544   
448    -688   
-224   0      
-224   336    
80     224    
-352   0      
80     160    
176    -128   
-512   -240   
-320   0      
-400   -48    
544    1776   
-400   720    
-448   384    
48     0      
-96    160    
-416   -368   
704    -320   
-112   -96    
-160   272    
-192   -1392  
1072   -1936  
-352   -352   
32     544    
48     240    
-256   80     
352    240    
-448   400    
160    384    
-400   784    
384    -176   
-16    -16    
-176   400    
-48    144    
-896   -672   
-624   256    
288    -256   
-64    -416   
176    112    
368    992    
-416   1328   
-400   -368   
928    -240   
400    0      
-1008  96     
-288   -32    
704    64     
352    -112   
-656   -128   
128    -192   
80     48     
576    448    
-192   736    
-368   -32    
112    0      
64     -560   
560    -16    
-240   -288   
-32    592    
432    80     
-496   96     
32     16     
400    80     
-224   64     
160    -512   
-144   -256   
32     96     
144    -208   
112    16     
112    272    
-1152  0      
224    192    
16     0      
-448   -32    
-256   -32    
-304   128    
288    240    
-320   0      
-48    144    
464    -176   
-336   240    
128    624    
544    96     
-288   -144   
-128   -80    
544    -240   
-608   80     
-64    -80    
32     -96    
-160   240    
16     288    
-192   160    
-640   -64    
-48    -128   
192    -160   
-144   32     
272    -32    
-48    16     
-176   -48    
128    192    
-48    -288   
-224   -208   
224    432    
272    -16    
-320   -160   
64     176    
64     -16    
-96    64     
352    -32    
-1040  752    
272    -48    
176    -160   
-48    400    
-80    -64    
208    2176   
2464   -32    
-1136  192    
-576   224    
640    16     
-32    -528   
-464   16     
160    336    
-128   -128   
0      112    
192    144    
-64    176    
-368   -320   
192    -192   
64     80     
176    528    
-16    -16    
-144   -64    
80     16     
-96    32     
-272   -1248  
-448   240    
704    160    
-240   48     
192    304    
96     -32    
-208   416    
-544   -160   
224    16     
80     48     
224    80     
-160   96     
-272   16     
16     304    
544    -80    
-272   144    
-32    16     
16     80     
144    160    
-176   -96    
-32    -80    
-32    32     
-64    0      
32     -64    
-240   128    
560    80     
-336   144    
48     -32    
112    128    
112    -752   
-816   -160   
-32    -80    
208    112    
-368   -160   
32     0      
64     -32    
-240   -48    
128    -48    
240    -16    
-144   -48    
-272   -16    
16     112    
176    96     
-336   16     
144    208    
224    32     
-480   -48    
192    80     
-80    -48    
-160   128    
416    656    
-1264  -448   
-752   -48    
1488   416    
-1408  -208   
-400   256    
752    400    
-336   -16    
-576   80     
416    32     
384    -16    
-448   48     
-16    144    
256    -48    
-112   128    
64     16     
-64    256    
-128   48     
80     16     
144    -16    
16     160    
16     288    
1200   96     
-48    144    
-464   112    
80     208    
128    -320   
1616   -176   
-512   288    
-400   48     
304    -160   
128    192    
-80    -32    
-32    144    
208    -432   
-80    112    
208    320    
-416   496    
-144   32     
16     144    
272    16     
-192   32     
-208   64     
144    16     
-48    -224   
-304   -80    
96     128    
-320   -16    
464    320    
-912   -2144  
-1248  -400   
896    160    
496    336    
448    32     
-736   -32    
-96    112    
560    48     
-496   -16    
336    64     
96     112    
-256   -48    
64     192    
48     80     
-32    -80    
384    256    
-16    16     
-48    96     
96     432    
-144   816    
128    560    
80     80     
16     -256   
-144   32     
80     80     
-48    -240   
-512   80     
208    112    
96     176    
368    -608   
-672   -752   
64     -240   
592    -32    
-128   -208   
-496   -272   
160    16     
416    848    
-624   336    
112    -192   
144    -112   
-80    -240   
-48    -176   
256    -912   
0      144    
112    320    
96     224    
64     -304   
-64    496    
-32    240    
160    -272   
-32    -208   
-16    1136   
1136   496    
-640   1376   
224    608    
-32    384    
96     624    
400    1376   
-32    544    
96     -256   
128    16     
-80    80     
-96    96     
176    128    
-16    608    
80     -80    
176    -464   
-608   -368   
256    240    
208    -288   
64     112    
80     160    
-224   -128   
320    -64    
-176   -144   
16     160    
0      464    
144    144    
-128   -16    
48     16     
-272   224    
0      912    
624    -48    
-352   144    
-112   288    
496    112    
-144   272    
80     -240   
-96    48     
-192   -544   
160    176    
160    80     
-64    112    
-48    64     
256    64     
128    -48    
144    128    
-112   -32    
112    96     
-16    144    
624    -112   
-1184  224    
464    -224   
304    80     
-64    -16    
-16    128    
-16    96     
48     -32    
64     496    
176    160    
-208   -16    
-16    -48    
112    80     
-80    160    
128    -64    
96     176    
48     -192   
64     -576   
16     -416   
64     -32    
176    256    
-288   -2080  
16     96     
400    -624   
-16    -64    
-432   -160   
48     176    
64     32     
-480   336    
304    -64    
-1312  -848   
592    736    
1328   -384   
-976   464    
176    208    
464    560    
-16    -192   
-608   -1168  
112    400    
-16    256    
-176   48     
160    128    
-48    64     
-16    608    
272    96     
-48    -16    
-64    224    
-80    544    
32     -32    
-16    -800   
464    1264   
-1264  -432   
-448   496    
1136   -144   
-832   -224   
320    -560   
96     -432   
240    -1520  
-848   -1024  
208    -624   
16     -208   
-208   288    
272    -48    
48     416    
-32    -400   
-48    -16    
96     80     
176    -336   
-352   -624   
-160   -656   
96     -224   
32     -464   
-416   -608   
192    688    
416    -448   
-96    672    
-816   512    
128    144    
-144   368    
160    96     
-192   -48    
-336   -160   
336    -816   
192    -48    
-48    -384   
416    -80    
48     -480   
544    144    
-240   -384   
-336   -416   
224    160    
-80    -160   
400    592    
-528   -752   
96     0      
-304   0      
-192   80     
192    -384   
-208   640    
-96    -1312  
864    -384   
336    -144   
-1040  -496   
-1664  160    
960    48     
352    -192   
-528   272    
256    -128   
-160   96     
560    -256   
-192   192    
-16    -48    
32     -256   
-400   64     
480    -336   
-336   96     
240    -32    
-256   -384   
256    -912   
368    -1376  
-144   -256   
32     416    
-208   -240   
-80    -144   
752    -176   
-208   -1008  
48     -16    
128    144    
320    0      
48     -96    
-80    -80    
-32    288    
128    544    
-416   160    
-16    -112   
-96    -48    
496    0      
-176   128    
-624   -160   
640    64     
304    -944   
-464   96     
80     -224   
-384   -112   
672    -128   
-592   -208   
112    -192   
112    -32    
-224   32     
-32    80     
-208   -576   
576    -592   
-144   48     
-160   -336   
-384   -176   
-32    -720   
-128   -16    
224    -720   
80     64     
176    -16    
-80    64     
-112   112    
144    96     
-176   80     
80     48     
160    384    
-176   288    
-368   -96    
496    -336   
-32    80     
-160   -128   
432    144    
-48    -192   
-64    112    
144    -128   
-96    -304   
64     608    
128    208    
-48    -240   
-336   -256   
1280   1952   
1536   256    
-1632  16     
-96    192    
640    -416   
-416   -480   
192    -176   
336    -128   
-432   240    
160    -320   
336    -128   
-304   272    
-144   16     
-96    16     
400    -352   
-208   -64    
-48    256    
48     -416   
-48    -240   
112    160    
-416   -1136  
560    16     
208    -800   
-688   -112   
416    272    
560    -256   
-592   368    
-368   144    
336    -112   
-48    48     
-128   -16    
-176   272    
176    0      
240    -176   
16     32     
-1280  -448   
256    128    
-512   -384   
-432   48     
80     16     
-496   -16    
-32    -16    
128    -96    
-288   16     
208    112    
352    176    
112    -16    
-336   16     
-192   -176   
1104   -16    
-2848  912    
1392   160    
832    64     
-496   32     
-576   -320   
272    192    
96     896    
-16    752    
544    352    
-32    -128   
-208   -80    
-496   -192   
-32    -112   
176    -64    
-256   -128   
-144   64     
208    96     
-560   272    
112    128    
48     96     
224    912    
-384   -528   
-1824  -96    
1600   -96    
-320   48     
-832   128    
256    -32    
448    448    
-480   -144   
-304   80     
144    -144   
-176   48     
-64    128    
80     160    
-288   -32    
-112   128    
240    16     
-208   -128   
-16    80     
-240   0      
16     48     
-480   -384   
592    592    
384    -256   
-1168  240    
768    -32    
208    48     
-656   64     
64     -96    
-64    128    
80     -96    
-64    -112   
-272   -16    
-304   0      
144    64     
-16    464    
-992   -384   
-496   320    
192    -192   
160    208    
64     -224   
336    288    
32     176    
48     64     
128    -240   
-48    -256   
-272   304    
176    0      
-400   176    
1120   1568   
-896   1264   
16     -112   
880    -128   
-672   -224   
-576   16     
640    -192   
656    -1072  
-336   128    
-272   -32    
144    144    
48     96     
-32    208    
32     -96    
-144   -32    
32     -96    
32     -16    
-32    -224   
-80    -64    
480    -208   
-112   -560   
-144   -352   
-208   -128   
80     -208   
-416   -240   
-416   -208   
736    -224   
-560   -1168  
-80    -800   
32     800    
0      32     
80     96     
192    128    
0      544    
-848   320    
48     16     
16     48     
96     -16    
272    -320   
-224   352    
112    -32    
-32    32     
32     240    
0      -1168  
-512   -560   
160    496    
-80    336    
160    800    
-96    -128   
-32    32     
112    352    
-128   -752   
-48    560    
528    608    
-624   -192   
128    -208   
-208   544    
-368   -288   
-48    176    
64     -48    
144    -32    
-96    32     
-144   96     
16     16     
-448   0      
-96    224    
80     144    
32     -48    
496    0      
-48    224    
64     -48    
0      48     
288    32     
-96    144    
-16    96     
80     16     
0      176    
-512   160    
192    288    
192    80     
-368   -96    
640    32     
288    688    
-160   -320   
-256   336    
-96    32     
352    128    
-320   480    
-272   448    
256    -112   
208    -240   
-32    288    
16     240    
64     336    
16     96     
64     -80    
192    144    
-176   416    
-208   144    
16     -32    
-32    208    
464    -384   
-160   384    
336    -240   
-336   112    
-16    160    
288    416    
32     528    
-384   32     
224    -160   
80     112    
64     224    
-112   304    
-16    0      
272    0      
-48    176    
-112   464    
368    496    
-80    912    
-176   -16    
256    -80    
-96    320    
-128   48     
0      400    
336    -192   
64     112    
-128   16     
240    80     
-240   224    
48     -112   
-1232  -864   
368    32     
608    -176   
-992   -208   
224    1072   
512    -80    
-368   320    
-96    464    
240    -560   
176    -816   
-480   -144   
48     16     
64     320    
-96    -128   
0      80     
176    0      
-16    -176   
-352   -176   
96     -144   
320    368    
-240   432    
1088   -320   
-2000  16     
976    -880   
-1600  992    
-560   720    
816    800    
-1120  -368   
480    -448   
176    -160   
-320   272    
-32    -32    
176    -160   
320    -288   
-192   208    
-208   32     
304    -176   
128    256    
-144   -2576  
64     -496   
-416   64     
160    368    
240    -624   
-800   400    
592    -176   
-304   -64    
-64    448    
864    -32    
-96    48     
-176   288    
-160   -192   
-128   -288   
112    224    
176    -304   
-80    240    
-672   -1120  
-464   -176   
-464   112    
176    -320   
560    208    
-224   32     
-272   32     
336    176    
-288   112    
0      -16    
-160   144    
-144   -208   
272    128    
-160   -544   
-464   -2832  
1008   -2192  
1024   256    
-704   -592   
-800   48     
400    224    
496    -112   
-272   224    
144    -96    
-432   32     
64     -160   
288    240    
-192   -160   
112    304    
-48    -160   
240    272    
-96    -496   
-288   144    
32     -1424  
464    976    
176    -272   
-704   272    
336    144    
560    32     
-208   0      
-272   224    
528    -176   
-672   -368   
336    -160   
48     -16    
80     32     
-96    -336   
0      192    
432    224    
-480   -80    
-32    -144   
128    32     
320    304    
80     48     
-816   144    
496    -224   
176    -16    
-192   -352   
-32    -144   
-240   -192   
368    -64    
-400   -16    
256    80     
-400   -416   
144    304    
352    -96    
-208   -240   
432    -304   
-384   16     
624    -1216  
-368   -384   
-624   -288   
-16    -416   
400    112    
48     -192   
-112   80     
144    -160   
-64    80     
96     0      
-48    -416   
-48    0      
80     16     
224    -128   
-336   -848   
-320   -192   
256    -48    
-224   -576   
368    48     
112    -160   
-144   32     
-160   -16    
288    -304   
320    96     
-672   672    
192    -496   
-192   -1120  
1504   1088   
160    320    
-2208  -16    
304    -224   
-112   -176   
144    240    
608    -336   
-320   -1072  
-256   192    
352    -672   
368    -432   
-160   352    
-96    -48    
160    -416   
288    304    
-80    80     
32     -128   
-400   -96    
16     64     
256    160    
368    1216   
752    -336   
-880   -624   
80     32     
432    -2352  
-256   16     
480    64     
-16    320    
-176   -416   
112    128    
160    -48    
-240   16     
272    -80    
-48    -16    
-176   -64    
96     -304   
-304   -112   
544    -256   
16     128    
80     -432   
-176   192    
112    -224   
-144   112    
272    -272   
-176   -32    
160    -112   
-96    192    
128    -48    
-48    -112   
-64    -912   
-2848  1040   
512    496    
1216   -496   
-1728  -416   
-160   -560   
1680   224    
-864   -2512  
-416   304    
384    -128   
240    176    
-176   -48    
-160   -48    
16     32     
96     96     
-768   64     
432    -32    
-624   176    
192    272    
-304   336    
16     0      
-128   -880   
-224   -144   
896    -128   
-1072  464    
-368   816    
368    80     
176    -208   
-640   32     
128    -80    
352    80     
384    80     
-528   -400   
-608   -16    
208    -272   
-176   -96    
384    32     
-416   -368   
96     16     
224    192    
-128   0      
-416   64     
128    144    
368    -544   
304    320    
-592   112    
-608   -880   
-768   560    
592    -576   
-400   224    
544    -432   
48     128    
112    -160   
0      32     
-32    160    
576    336    
432    304    
-496   -352   
-432   368    
768    576    
-528   128    
-352   -112   
80     64     
-144   -208   
64     80     
-512   -224   
80     -288   
32     -96    
-352   -176   
-48    144    
1232   2336   
-1456  1152   
-96    416    
1264   -128   
-704   336    
-368   352    
992    1456   
368    2176   
-560   640    
112    -592   
-240   -464   
176    288    
0      -176   
32     16     
-176   176    
-208   800    
272    -208   
-1328  -144   
-32    -352   
240    448    
-32    624    
-48    -208   
272    96     
112    -560   
-528   192    
144    -1024  
-528   -624   
48     -544   
-64    560    
336    224    
-336   368    
-224   -320   
-240   -560   
-16    -1120  
-368   -176   
160    768    
-320   128    
400    224    
64     -912   
-432   496    
-208   -80    
-144   128    
64     -416   
-64    160    
-128   512    
-160   -368   
80     -368   
-432   -528   
208    576    
-176   -48    
-448   -272   
640    -400   
-560   656    
-176   16     
-32    -224   
-272   -928   
16     576    
112    1376   
16     320    
-112   -624   
16     240    
16     32     
64     -352   
48     224    
-144   80     
-96    144    
-80    48     
-336   256    
-144   -32    
64     96     
-96    176    
-32    -96    
-128   144    
320    240    
-160   48     
64     -176   
320    -496   
-240   -336   
-48    32     
0      112    
-144   -272   
608    -816   
-160   384    
352    -336   
-384   160    
-144   128    
0      -64    
240    -128   
-560   -576   
-16    32     
32     336    
16     240    
-80    128    
32     -144   
64     -64    
336    -112   
-176   96     
-224   352    
-704   176    
176    160    
-320   -336   
-224   -432   
176    0      
-384   128    
448    -128   
-112   -96    
-224   -480   
-144   -448   
128    544    
48     176    
64     -160   
-528   -208   
0      432    
-64    -176   
32     496    
160    -448   
-320   432    
32     -272   
176    240    
16     -144   
-128   128    
128    112    
-112   112    
-80    112    
224    -128   
-64    48     
-144   144    
0      144    
112    -240   
-752   -1104  
1664   -816   
-304   224    
-400   64     
480    240    
-560   624    
704    -96    
-240   112    
32     128    
48     64     
240    -96    
-256   32     
-32    -32    
160    320    
-64    176    
-128   208    
-64    -32    
-32    192    
32     128    
272    96     
-128   -64    
-208   -736   
1408   976    
-464   256    
-208   0      
-464   368    
336    -288   
-416   -272   
608    384    
144    -64    
-480   -16    
416    208    
-64    96     
-96    64     
224    96     
-416   64     
256    96     
144    192    
-96    48     
96     336    
-528   0      
-96    112    
256    352    
368    -32    
0      304    
-208   160    
-112   48     
304    528    
688    -304   
256    -352   
-464   96     
448    176    
32     0      
-352   96     
-176   416    
-400   -464   
48     -640   
304    144    
-656   -208   
-560   336    
896    240    
112    48     
-560   -240   
256    48     
336    80     
48     -176   
-816   352    
640    176    
-64    48     
-64    752    
976    1952   
-224   832    
592    0      
304    96     
-848   -192   
-192   240    
992    336    
-160   -128   
-496   0      
384    96     
400    160    
-384   -32    
-224   208    
160    -80    
0      128    
128    48     
-32    -160   
-384   32     
-112   -80    
1136   -432   
-464   16     
32     176    
96     384    
-176   224    
-256   80     
-480   -16    
288    -368   
-256   144    
144    -16    
-16    0      
160    -208   
32     -1248  
160    96     
48     -2224  
64     128    
-560   -32    
624    -80    
-176   -336   
160    128    
528    0      
-368   192    
256    64     
-64    176    
208    -192   
-64    96     
-128   -256   
-480   -736   
384    -96    
320    -192   
48     496    
0      304    
352    1392   
-416   400    
-240   192    
112    -48    
-496   -16    
144    240    
656    144    
-48    304    
-320   224    
176    144    
272    -112   
-320   144    
48     -64    
144    48     
32     336    
-32    112    
-112   -128   
128    -304   
-176   48     
336    496    
368    32     
-336   -144   
-80    -32    
64     -64    
208    -48    
64     -80    
-288   -336   
80     -368   
64     240    
-512   -1248  
1568   576    
-384   -80    
-1184  240    
688    -80    
-128   64     
-112   -96    
160    368    
512    1040   
-48    -48    
-240   -496   
400    -112   
64     64     
-160   -16    
96     384    
240    -1136  
-80    176    
384    -2496  
-48    -16    
-48    -192   
64     304    
304    1472   
1024   -96    
-1088  -336   
272    144    
368    240    
16     -64    
-304   -192   
112    -320   
80     176    
32     -624   
96     144    
-96    176    
80     -48    
-16    64     
352    32     
-240   208    
48     -96    
128    112    
160    -656   
-16    96     
224    -192   
32     128    
-32    -448   
-48    -48    
-64    -208   
336    -112   
-96    -112   
16     80     
144    144    
1040   256    
-2752  224    
416    416    
1392   192    
-1360  -464   
320    -384   
48     -416   
-160   0      
80     -80    
160    304    
160    -32    
-304   80     
128    64     
160    -2432  
96     128    
-288   -1280  
208    16     
64     112    
48     -288   
-160   80     
96     -528   
448    928    
1728   144    
-880   256    
-80    -320   
352    -256   
48     -800   
-400   112    
-400   224    
224    -272   
624    -672   
-64    48     
-480   -80    
-16    -544   
48     -80    
-128   -1056  
208    -32    
-64    208    
208    -176   
48     -80    
16     -128   
176    -240   
16     128    
224    176    
80     128    
144    656    
336    -608   
144    -2000  
-576   -1568  
448    -304   
288    -32    
0      192    
-96    720    
16     -704   
-608   -1328  
416    880    
-656   64     
96     -176   
-272   208    
-272   -304   
-80    -352   
144    0      
-16    224    
-144   272    
-416   16     
-384   208    
208    -384   
96     240    
-112   544    
-80    208    
-512   -1264  
1808   -1680  
144    -688   
-384   464    
208    112    
-240   816    
160    -224   
-96    -240   
-288   240    
-560   -464   
224    320    
192    -400   
-336   -400   
0      64     
32     -32    
272    272    
-432   -448   
16     -96    
16     0      
208    -80    
-208   816    
16     -80    
448    80     
80     -144   
-800   -128   
16     992    
-272   48     
-400   64     
624    752    
16     -112   
-128   528    
-192   -1216  
128    320    
144    -48    
320    256    
16     384    
-288   144    
112    -880   
560    -400   
-368   352    
-240   -80    
-176   -160   
336    624    
-656   -112   
48     80     
-48    656    
224    -1536  
400    912    
-224   576    
-80    48     
-208   -64    
480    272    
480    448    
-672   352    
-48    32     
-240   0      
-32    144    
144    336    
-64    80     
-224   -384   
0      80     
384    -336   
64     -16    
-448   -80    
48     -64    
176    416    
0      128    
-304   -32    
-496   208    
32     -320   
-176   -64    
-16    -80    
64     -192   
-128   -208   
96     -464   
-176   112    
-96    -704   
-832   -368   
-208   528    
336    -80    
240    1264   
-688   208    
80     -224   
896    80     
-128   -208   
224    -368   
-512   -592   
-176   192    
288    544    
-240   288    
-64    -208   
-80    -160   
64     336    
-16    -256   
16     48     
-64    320    
-16    320    
0      288    
64     -272   
-192   -64    
480    0      
-1008  544    
416    -1056  
224    368    
-208   272    
-224   -416   
240    560    
160    -16    
-128   208    
-160   -80    
-16    -32    
-96    -192   
16     368    
-688   -352   
-128   0      
-16    -112   
0      512    
192    144    
-32    240    
-96    -32    
112    80     
-80    192    
-128   192    
-48    112    
-80    176    
320    272    
-32    -128   
-144   112    
48     -16    
-656   -944   
1568   -512   
-880   304    
-112   -96    
768    288    
-640   -48    
-224   64     
144    96     
-224   -208   
64     -32    
-48    -64    
-32    144    
-128   -16    
208    256    
-576   -208   
-336   192    
-240   -240   
-144   16     
-240   -96    
240    64     
32     -128   
-144   160    
-384   128    
2064   224    
-688   -32    
-640   208    
656    144    
-224   -16    
128    384    
-880   -48    
80     64     
-192   32     
-160   144    
-80    -144   
144    160    
320    80     
-416   -16    
16     -32    
-128   -128   
96     -16    
240    48     
-112   128    
-432   176    
752    -32    
-400   48     
-176   -48    
224    -96    
-400   448    
-1584  -96    
704    208    
-288   144    
-784   304    
304    144    
208    176    
-208   -144   
64     -208   
-144   -64    
80     -160   
-400   -320   
-224   -272   
688    -160   
288    80     
-416   160    
-1040  -64    
160    80     
288    -528   
-528   -80    
160    368    
832    -96    
-544   0      
1328   1488   
-240   1536   
176    -128   
352    -224   
-816   -272   
-416   576    
352    -32    
560    -224   
-512   -176   
-864   32     
752    224    
224    64     
-144   -16    
-208   0      
256    32     
208    80     
-112   96     
-80    32     
-320   -224   
256    848    
576    -192   
-784   144    
224    -64    
-560   112    
624    0      
-432   -32    
-112   208    
576    -272   
-208   -80    
-464   -32    
336    -16    
112    32     
48     -32    
-80    -48    
-432   64     
496    -96    
-384   160    
672    -112   
0      112    
0      208    
-16    128    
272    288    
0      -32    
256    80     
0      656    
-352   160    
176    144    
80     -128   
-416   48     
272    -64    
-224   -80    
176    -272   
-928   304    
352    -144   
112    -176   
-288   80     
160    96     
-128   -32    
192    -112   
96     64     
-128   32     
64     48     
-96    80     
112    16     
-192   -96    
192    160    
-336   -112   
80     224    
96     320    
-352   560    
208    48     
176    96     
-96    -304   
-32    -16    
-32    0      
144    -128   
0      -304   
-272   -352   
256    304    
-16    416    
624    2720   
-1840  -1296  
-496   592    
1680   -1072  
-864   784    
-144   160    
224    -320   
416    -464   
-320   -480   
-96    -144   
32     0      
208    -80    
144    -144   
-160   16     
-144   -496   
240    96     
112    560    
16     224    
-80    32     
0      80     
16     -304   
-80    -944   
192    -176   
80     608    
128    96     
-192   -464   
-64    -400   
112    -272   
-64    -144   
32     64     
-64    -64    
16     208    
-64    96     
16     128    
-272   -256   
64     160    
320    384    
-128   -224   
-176   16     
208    -96    
0      192    
-144   160    
96     -80    
176    256    
-16    -64    
-208   -512   
96     320    
224    -1344  
96     224    
-384   320    
-1216  176    
1856   -768   
592    -336   
-1616  304    
688    272    
112    304    
-304   -672   
96     -1344  
80     0      
32     320    
-128   128    
256    80     
-208   -256   
112    208    
464    -16    
-464   32     
-256   -80    
368    -464   
-288   -96    
-16    688    
624    1856   
-128   -800   
-2000  480    
1360   768    
592    496    
-880   -288   
208    272    
272    -480   
-192   -336   
-64    -992   
208    224    
-192   96     
-96    -80    
304    64     
-160   320    
-400   112    
368    208    
64     832    
288    864    
-48    528    
-48    16     
64     160    
-80    -368   
864    -448   
96     -1936  
-192   -1120  
-256   -960   
848    -944   
-128   -720   
-96    960    
-32    144    
-496   -512   
240    -224   
976    496    
-800   720    
-592   -32    
-192   -784   
304    -608   
240    -496   
-304   272    
528    128    
-96    -480   
-320   -448   
80     -288   
-96    -208   
-32    -32    
320    128    
-400   288    
400    320    
112    -80    
-528   -1936  
-2016  480    
1056   -128   
352    528    
96     640    
-448   -240   
0      208    
544    1104   
-16    352    
448    112    
-192   -144   
48     304    
384    608    
-160   -784   
32     -48    
320    112    
112    -112   
-16    80     
16     288    
-32    256    
208    208    
96     80     
-112   -368   
-432   336    
512    -1088  
-48    256    
-208   112    
-256   -1408  
-176   -768   
336    -192   
-32    128    
-64    -224   
336    -224   
-48    208    
-304   -80    
304    -992   
144    -512   
-576   -784   
240    160    
352    576    
-176   -96    
-960   -320   
-176   -448   
-144   -448   
400    -1088  
48     368    
144    -448   
224    560    
-32    0      
-64    -256   
464    400    
-1040  352    
48     -96    
736    240    
-672   -128   
-192   864    
464    592    
128    -752   
-448   -832   
176    -592   
16     -32    
0      -144   
224    48     
-272   -1072  
64     -80    
208    -288   
-80    160    
352    64     
272    128    
-160   -112   
160    -160   
-96    -48    
16     -32    
-112   -48    
32     320    
176    240    
-128   -624   
96     -304   
96     -400   
-320   288    
912    1776   
320    32     
-464   336    
176    592    
-176   -288   
176    288    
-320   432    
160    -128   
-640   112    
320    144    
176    16     
-64    -160   
-64    80     
-48    -480   
96     -64    
16     -864   
-96    -592   
16     -560   
96     -32    
-32    32     
-224   256    
576    -496   
-560   -48    
288    -112   
32     -288   
208    -80    
224    144    
-192   0      
64     160    
16     176    
112    -512   
224    -80    
-32    -16    
16     176    
464    48     
-368   128    
144    -112   
-272   32     
288    -80    
-240   -64    
80     64     
-48    -48    
0      112    
48     -240   
-192   16     
224    -544   
192    -16    
-384   80     
608    -496   
1104   -1152  
-4416  1040   
-1632  144    
2672   -16    
-1328  -720   
-1024  -16    
1184   112    
256    -160   
-624   48     
336    -176   
208    -32    
-112   -800   
-272   16     
64     32     
-32    64     
-112   -16    
-64    -80    
-80    96     
368    160    
-144   -144   
-144   112    
592    944    
-1120  -512   
-1056  64     
1264   16     
448    -32    
-176   -32    
-80    -272   
320    160    
-16    32     
-272   112    
96     -144   
192    144    
-176   -272   
368    368    
64     -208   
-368   -16    
416    -640   
-224   -112   
144    -304   
240    96     
-288   -240   
-64    416    
816    -416   
-1520  80     
400    208    
-256   560    
224    480    
0      128    
-528   0      
-192   32     
192    -64    
-208   128    
-352   368    
-368   -400   
128    592    
96     608    
-304   -288   
-448   -80    
256    464    
-224   -128   
-144   48     
-208   160    
-272   48     
80     0      
-864   -416   
192    -16    
32     112    
-752   0      
352    304    
1056   -4320  
-2752  -1056  
1456   64     
-288   -192   
64     288    
208    -112   
-752   64     
-80    -96    
176    -192   
416    0      
-192   -64    
-256   96     
-64    -48    
448    96     
16     -112   
-16    -32    
-416   224    
304    -64    
-352   -144   
672    -352   
-400   -144   
96     96     
-144   -48    
-656   0      
496    -16    
-624   -208   
160    64     
0      -368   
-80    496    
400    -96    
-240   176    
48     96     
192    96     
176    160    
-320   192    
176    304    
-16    192    
448    128    
160    -80    
-96    -80    
80     32     
-160   160    
400    128    
-64    384    
48     128    
192    -16    
64     -64    
-304   -208   
-32    80     
304    48     
-80    208    
-48    -208   
-672   400    
640    1472   
-416   1904   
144    240    
128    -704   
-16    -448   
0      -224   
176    -336   
-32    -384   
-112   -176   
-48    -112   
-96    -304   
-176   -256   
64     48     
128    -272   
32     64     
-320   0      
48     320    
-48    32     
-80    -976   
-608   -688   
-176   240    
-224   192    
352    -656   
-64    -720   
-144   640    
-64    1024   
432    -224   
-224   -960   
624    -1360  
-896   464    
-368   -240   
400    -320   
-320   432    
288    96     
-704   -800   
304    368    
-240   -32    
224    176    
192    128    
-192   192    
-192   96     
48     144    
64     48     
-176   -304   
144    112    
32     304    
16     -16    
-288   -576   
784    -288   
-192   784    
240    480    
-16    -48    
-400   64     
80     -480   
192    1200   
-240   -208   
-160   -64    
240    -32    
144    96     
-96    544    
-48    0      
-32    64     
-16    16     
320    80     
-512   -32    
-64    640    
80     256    
256    -32    
-16    -32    
-144   -96    
-16    144    
464    -80    
-224   -16    
-32    -272   
-64    224    
-176   96     
304    48     
832    -80    
-3216  -272   
-176   -80    
1808   -544   
-848   -928   
-448   -144   
224    -576   
-192   576    
-80    320    
320    -272   
-16    96     
-304   144    
192    176    
48     -48    
-240   16     
-64    96     
176    -48    
-128   240    
144    -208   
256    192    
-352   -352   
1344   272    
-976   240    
32     -640   
-48    -720   
-272   48     
592    352    
-16    1024   
-256   -80    
320    -832   
-128   -544   
-64    592    
224    496    
368    -16    
-96    1136   
576    640    
-224   272    
64     32     
-256   320    
16     224    
352    288    
-160   -80    
384    480    
416    720    
-160   672    
-272   496    
320    144    
160    2544   
992    1776   
-96    432    
-192   -432   
608    -208   
0      0      
-320   -704   
-336   1008   
1248   -16    
192    -80    
448    416    
48     240    
128    272    
496    496    
-160   48     
16     -336   
-160   -272   
304    336    
16     544    
-512   64     
-304   560    
416    688    
-144   192    
832    2752   
-576   1072   
192    272    
384    -1200  
-816   -512   
-160   768    
240    80     
528    1952   
-64    944    
-496   -432   
-32    16     
560    304    
-80    272    
-336   384    
-112   -272   
-304   464    
416    464    
-304   -80    
-16    -352   
-448   -896   
192    -384   
320    -576   
-512   -48    
592    256    
-32    240    
-144   -304   
480    224    
-80    256    
160    -128   
64     512    
-80    624    
192    304    
-512   272    
576    816    
-272   384    
64     -64    
64     -256   
-240   224    
272    144    
48     -16    
-16    -384   
32     -16    
64     112    
64     64     
176    912    
-128   464    
-160   384    
320    160    
16     416    
64     -96    
-336   112    
-80    416    
1648   -64    
-976   -736   
-368   -432   
208    -1952  
16     128    
48     352    
0      96     
-16    96     
128    224    
-80    96     
48     304    
-112   336    
112    224    
192    -192   
-512   80     
320    -176   
-560   -32    
96     -80    
400    -336   
240    -32    
-480   16     
32     160    
512    -80    
-320   -208   
-128   -160   
416    -400   
-64    224    
0      -48    
80     -2016  
-704   -32    
752    240    
-288   -80    
192    96     
16     160    
-256   144    
-192   64     
608    480    
208    112    
-448   16     
-16    144    
224    -144   
192    16     
-400   304    
256    448    
544    -208   
-480   -32    
352    -336   
272    240    
304    752    
-1024  -16    
-352   448    
1104   128    
-544   -112   
-80    96     
80     -64    
96     -304   
32     -1232  
128    -176   
-96    176    
-144   0      
288    48     
64     -320   
-96    112    
160    -64    
-160   32     
48     64     
-176   -48    
240    -432   
-160   -144   
-272   -80    
-32    16     
192    -32    
128    -80    
-384   -2448  
512    -304   
-368   176    
128    -80    
-96    -1040  
912    -800   
-496   80     
80     96     
32     -464   
816    256    
-848   -320   
-512   176    
336    -144   
-112   -192   
-112   -32    
32     -112   
320    -48    
-384   32     
256    96     
432    -128   
-352   112    
-48    -160   
400    48     
-16    -240   
-160   -112   
16     128    
64     496    
1824   -80    
-1456  -272   
48     576    
2192   -384   
-1168  96     
544    -240   
256    304    
-448   -32    
16     128    
112    16     
32     32     
64     -16    
192    112    
-32    -176   
-112   -128   
-640   -32    
256    32     
96     16     
-256   -128   
288    -32    
-1472  -16    
704    64     
48     -864   
-704   -160   
960    -208   
464    352    
-640   128    
96     -16    
-288   16     
-16    80     
-272   32     
0      -160   
-576   176    
736    -416   
-176   -432   
160    -640   
32     256    
-432   64     
496    32     
-144   16     
-32    -48    
0      -16    
-32    -384   
-544   112    
496    0      
-96    80     
-80    -48    
-64    1872   
1312   -448   
-1120  1024   
560    -624   
192    0      
-272   -112   
-48    64     
368    -144   
96     -384   
-448   -112   
496    96     
-240   64     
-176   96     
0      -240   
-400   -48    
-256   -208   
16     -80    
256    32     
-32    -96    
64     1376   
336    144    
-384   32     
-32    -192   
-80    -96    
-832   256    
960    192    
-512   352    
-272   -384   
224    -64    
-48    -304   
32     -16    
-112   144    
-64    0      
112    -144   
304    288    
-16    64     
256    480    
400    -320   
-448   -96    
0      0      
208    0      
64     368    
0      480    
-272   112    
448    -256   
-256   -240   
-208   -880   
384    -224   
-720   -288   
144    -272   
-224   -672   
-16    496    
-912   288    
-208   -144   
-304   96     
-192   -368   
32     -1360  
128    -864   
-416   -48    
96     544    
-176   112    
112    -32    
176    128    
-160   -240   
-144   64     
208    96     
-128   128    
80     -176   
-128   144    
-112   -32    
-80    96     
-112   -496   
-480   -160   
144    192    
0      272    
32     256    
336    64     
-640   80     
192    48     
288    128    
-192   0      
-272   -1056  
-96    -848   
32     464    
-48    240    
-192   176    
-48    192    
-224   112    
208    208    
-336   64     
-32    544    
48     144    
32     288    
-96    -128   
96     48     
48     208    
-208   160    
-48    176    
-32    256    
64     -48    
-192   -256   
144    416    
96     -32    
-944   80     
-192   -400   
-208   16     
-112   -192   
176    -32    
-176   -336   
-48    208    
32     208    
160    -128   
80     -96    
160    336    
-240   352    
0      -96    
256    -80    
-112   48     
-160   -288   
128    -400   
320    -48    
144    80     
0      256    
-48    208    
80     224    
208    144    
-256   -32    
272    128    
-176   112    
-64    -64    
1296   1392   
-1104  528    
-1360  -304   
1808   48     
-672   -720   
-1344  -928   
720    -64    
-672   -800   
-208   -1280  
32     -720   
208    48     
-528   -64    
112    -80    
32     192    
-192   -192   
-64    464    
128    368    
-400   288    
-128   -336   
160    272    
-192   -352   
496    880    
1568   -192   
-1232  -64    
320    -544   
-16    -240   
-336   272    
224    -1136  
-16    -1264  
-128   -288   
192    432    
-32    -48    
-48    -224   
-192   -192   
16     -64    
32     208    
-144   176    
48     1680   
-368   1312   
192    736    
240    128    
32     240    
-64    -144   
160    688    
432    64     
-480   672    
304    -144   
-112   1936   
1200   464    
-576   -80    
-304   -224   
128    -48    
48     112    
192    0      
320    1200   
-992   208    
-16    -16    
224    752    
112    32     
208    352    
-912   736    
240    -16    
464    16     
-656   128    
-416   -160   
-192   384    
976    -48    
-48    -64    
-832   400    
288    256    
1376   960    
-1984  32     
416    16     
800    -1712  
-176   -1648  
-592   -288   
208    -80    
368    832    
96     576    
-464   272    
208    -48    
208    -48    
352    352    
-256   304    
-416   64     
288    240    
176    -96    
-352   144    
208    -624   
-288   32     
224    240    
80     192    
-464   -576   
320    496    
432    112    
-672   272    
240    -432   
-208   -288   
-96    0      
160    80     
-32    -16    
-16    -112   
32     160    
96     -96    
352    160    
128    -416   
-816   -432   
320    0      
272    192    
-144   240    
-48    -176   
-368   -176   
496    -144   
256    128    
-240   176    
224    464    
-384   144    
48     528    
496    224    
-240   176    
-352   -16    
-128   512    
752    0      
-208   288    
-624   192    
624    224    
368    32     
-576   64     
192    176    
-432   192    
416    0      
-16    96     
-128   112    
160    0      
-176   -48    
384    400    
464    224    
-448   -304   
16     576    
544    32     
-128   -64    
-240   496    
-32    224    
240    -32    
48     -64    
-112   464    
-464   384    
400    80     
240    -64    
-224   96     
1056   1776   
-2592  816    
32     -112   
1360   -128   
-592   -96    
-288   -1792  
336    192    
448    368    
-480   192    
368    -192   
-144   224    
-224   16     
352    112    
224    448    
-624   128    
160    -128   
128    368    
-32    48     
-80    -96    
176    64     
16     -560   
-96    -656   
-592   368    
816    256    
224    -400   
-496   592    
0      -128   
32     288    
560    -240   
-368   304    
-224   80     
0      192    
320    -48    
48     -240   
-48    64     
-112   -592   
288    352    
160    -1568  
-80    0      
-272   48     
208    144    
160    -48    
-32    176    
-176   -16    
320    208    
-400   0      
144    -96    
80     144    
-16    -144   
-352   -1552  
1040   2304   
4848   2192   
-1264  -928   
-1568  144    
1504   144    
256    -32    
-816   224    
352    -272   
656    288    
-480   192    
48     96     
352    16     
112    32     
-112   224    
592    224    
-272   80     
32     32     
272    -16    
-160   64     
160    -48    
80     224    
-624   -112   
1664   -256   
-128   160    
-784   -640   
48     400    
448    -560   
-464   352    
96     -176   
176    64     
-112   -352   
352    80     
-112   -160   
-160   96     
208    176    
448    144    
-176   -64    
-144   -160   
-256   -208   
160    400    
192    112    
160    688    
-192   -64    
-736   80     
672    0      
-240   -384   
-224   64     
112    -32    
128    -192   
480    96     
-176   160    
-64    384    
48     352    
-96    -240   
160    320    
528    -1920  
-240   272    
240    240    
96     -224   
48     48     
176    0      
80     64     
-176   80     
112    240    
-64    48     
304    -1104  
-528   192    
96     -128   
208    16     
-1872  -496   
48     2512   
736    320    
-1520  -1504  
320    -576   
1744   -544   
-1136  -368   
-128   -416   
560    16     
96     -384   
-176   96     
-240   -352   
384    -112   
-464   176    
448    32     
-496   144    
-224   -256   
-16    96     
128    -112   
-32    -1056  
-320   -1264  
256    -320   
0      -192   
-16    112    
624    -800   
-448   192    
16     -160   
-64    -592   
16     -752   
96     -368   
-304   1152   
176    -288   
-288   -416   
112    0      
80     160    
96     -128   
-32    -272   
-64    -368   
240    48     
176    144    
-208   96     
336    336    
-48    560    
-16    192    
-48    688    
416    1280   
-208   576    
-144   368    
432    432    
-336   -416   
80     -272   
-224   176    
128    592    
1296   112    
-688   -592   
64     416    
128    336    
544    1184   
-704   960    
48     -1136  
144    48     
-272   -448   
-128   -32    
128    -240   
-432   -32    
80     -176   
64     80     
-64    -352   
-16    336    
16     -640   
-80    128    
48     -32    
0      0      
80     96     
112    -128   
-16    16     
-48    32     
-544   48     
496    208    
-384   80     
-224   -128   
-160   64     
-16    576    
880    -32    
-688   48     
-160   112    
192    0      
-64    -224   
-160   368    
176    -48    
-400   -288   
192    -96    
-112   48     
64     64     
-128   -240   
-288   64     
112    -64    
176    -32    
16     144    
-192   -768   
0      -32    
784    384    
-992   560    
304    -432   
624    -144   
-624   496    
16     -80    
-320   -480   
352    -304   
-320   -16    
288    -96    
96     112    
-48    0      
-208   176    
64     -128   
208    -144   
112    16     
-144   -80    
-64    -464   
304    -240   
96     128    
-48    160    
-128   272    
80     -304   
256    -304   
64     -80    
-208   0      
-192   -224   
160    224    
-32    -368   
-576   0      
-1680  -112   
992    64     
528    -32    
-1440  256    
304    -480   
-16    -1664  
-848   -160   
432    1680   
-288   -624   
-1360  -1008  
320    -32    
-320   -208   
-192   32     
416    -48    
96     192    
-208   112    
-624   96     
224    48     
-496   -656   
-128   320    
592    1824   
-880   -1040  
-1488  800    
1520   -496   
-560   -512   
304    -256   
-16    304    
176    368    
-224   96     
-16    -912   
-528   -240   
-208   80     
0      32     
-32    0      
32     32     
-1056  128    
432    16     
-128   -64    
272    48     
160    -160   
-272   160    
128    -176   
-224   336    
-752   -3248  
-1424  -1264  
880    336    
240    192    
-896   -16    
544    -352   
-208   224    
-416   288    
96     96     
-608   -112   
112    -32    
-16    528    
-1264  640    
-16    -368   
256    -224   
-544   80     
-256   544    
640    -256   
-160   176    
-240   -208   
48     320    
304    272    
-272   -528   
-528   96     
256    64     
608    624    
-896   1152   
-1056  496    
80     -176   
-368   -16    
176    -64    
752    240    
-592   144    
-912   416    
560    -480   
-288   48     
192    -64    
-320   224    
-112   -144   
32     144    
-128   -80    
-560   96     
304    0      
-16    208    
352    48     
-688   464    
400    416    
-272   528    
-48    32     
528    -80    
-240   48     
-464   -32    
336    256    
80     -80    
-400   -16    
384    0      
-1744  -32    
144    -1424  
384    112    
-832   -240   
432    -112   
144    -288   
-192   -32    
48     416    
-16    464    
0      -32    
48     -80    
160    -32    
64     32     
-448   32     
-80    -32    
96     0      
160    528    
-160   240    
-176   208    
256    80     
-128   -48    
-112   48     
368    640    
1152   32     
-880   -144   
-64    192    
352    80     
-304   288    
-80    96     
48     -16    
-80    -240   
96     80     
-96    -64    
80     96     
-144   144    
128    -64    
-48    -304   
-208   -336   
-176   -80    
256    -272   
-48    256    
-272   -16    
224    48     
-208   -208   
96     176    
-112   560    
-160   -432   
80     -224   
-128   384    
80     -80    
144    80     
-1008  -832   
1136   -480   
256    144    
-1232  -240   
784    416    
304    -96    
-480   304    
-448   -688   
608    -368   
304    496    
-352   48     
144    0      
80     240    
-32    304    
160    -192   
-64    336    
80     -16    
32     -224   
96     64     
48     144    
-464   -352   
528    -336   
-320   64     
-368   48     
560    128    
-256   -208   
240    -224   
-240   -32    
-80    112    
144    64     
160    192    
-192   -48    
-16    -48    
-48    0      
160    16     
-400   -32    
96     -80    
192    144    
-240   128    
112    96     
304    32     
-48    32     
-464   0      
176    -48    
496    208    
-64    -32    
-288   176    
-16    64     
0      16     
560    -896   
-1520  -576   
-128   480    
496    48     
-384   -320   
128    128    
592    -144   
-384   480    
-416   176    
336    112    
0      16     
-160   32     
-96    128    
80     -160   
368    128    
-80    -176   
-176   -96    
48     -800   
224    656    
-240   208    
-48    128    
320    -224   
-1504  592    
752    464    
160    544    
192    -208   
-80    208    
-592   192    
64     48     
96     32     
224    0      
-128   64     
-192   -32    
64     112    
432    -832   
-592   96     
80     64     
160    112    
112    368    
-96    240    
-208   -80    
96     -80    
-64    80     
736    128    
496    336    
-576   -192   
-448   96     
368    32     
16     -16    
-272   -16    
112    192    
928    1120   
-608   -16    
-608   128    
1024   80     
-400   -176   
-416   0      
144    288    
64     144    
320    32     
-128   -16    
-256   160    
176    -16    
144    96     
112    -656   
-368   -320   
-128   -608   
368    256    
-320   112    
192    1136   
2144   2512   
-1600  2112   
336    -208   
1120   304    
-112   -112   
-864   1136   
320    912    
656    -640   
32     -304   
80     -112   
-64    816    
16     -240   
336    -416   
32     -288   
-160   48     
-304   0      
-64    128    
-32    16     
-128   -320   
48     -32    
64     -64    
-16    0      
-176   -368   
-48    -720   
-32    -480   
-80    144    
32     -336   
336    -752   
208    -1072  
0      672    
-192   416    
368    288    
128    -32    
16     -32    
-496   -560   
32     -592   
-16    -240   
80     -1296  
-112   64     
128    592    
-48    -272   
-112   -224   
64     96     
48     32     
112    -144   
-464   32     
448    1216   
-176   688    
-112   448    
272    -48    
-32    64     
-320   -912   
224    -976   
288    -1184  
-912   -1120  
352    -272   
320    -576   
-64    624    
-32    1632   
-48    -240   
288    -400   
112    -336   
-128   -192   
64     -208   
-64    96     
-16    208    
448    592    
-304   688    
-64    0      
352    -208   
128    192    
80     -32    
-32    16     
128    -160   
32     -1136  
-112   -240   
144    -1616  
272    -80    
-1024  128    
-48    -128   
336    -128   
-416   -48    
496    -512   
-656   -208   
448    -304   
160    80     
-48    64     
-512   720    
128    48     
64     -1328  
-48    -96    
-32    16     
-48    -128   
-560   -128   
16     192    
-64    -176   
176    -176   
48     -304   
16     -304   
48     -16    
416    128    
-496   272    
224    -768   
528    -176   
-336   -16    
16     368    
160    384    
208    -16    
-400   400    
-16    -128   
-32    -16    
160    -96    
0      48     
16     -224   
208    528    
-16    -608   
-400   -272   
96     -592   
448    -432   
-192   128    
-240   192    
-96    144    
112    -160   
0      -208   
160    80     
-896   -32    
144    -96    
448    96     
-544   32     
304    -176   
-1680  32     
1616   32     
160    48     
-656   48     
352    0      
720    -400   
-1296  -288   
128    -240   
448    144    
-288   -80    
-352   144    
80     16     
32     176    
112    112    
112    144    
96     -224   
-288   0      
352    -848   
-112   -176   
-48    -272   
80     576    
512    -768   
-1600  208    
768    384    
576    880    
-224   528    
-96    -192   
-240   48     
112    64     
-288   -272   
-160   -208   
336    288    
-80    -1024  
-224   96     
192    -32    
304    -48    
-224   -96    
-160   -288   
368    -128   
0      -128   
-512   -16    
-32    -272   
672    448    
144    -176   
-560   16     
48     -624   
560    -304   
-96    560    
208    80     
64     -96    
112    -144   
-64    -16    
-272   272    
-112   160    
272    -160   
-528   416    
-288   -128   
-336   -32    
304    -96    
96     0      
16     -32    
-320   16     
112    16     
-32    96     
-320   192    
64     -112   
-368   64     
288    -144   
0      208    
-544   1392   
-368   3424   
800    1024   
-832   240    
-704   -512   
1232   272    
560    -656   
-976   192    
-192   -304   
-832   288    
240    -400   
-256   16     
-496   0      
16     80     
432    96     
-80    -32    
-240   -16    
-352   -80    
48     32     
-96    448    
768    144    
-1488  -96    
112    32     
400    -416   
240    -32    
-944   32     
416    176    
272    -160   
-256   128    
80     -32    
-208   48     
-288   144    
448    48     
-80    0      
-240   -176   
336    -96    
-32    -240   
-528   -160   
144    -112   
-528   112    
176    -16    
-64    80     
272    112    
-272   256    
-64    352    
128    208    
272    448    
-304   320    
-16    144    
240    -208   
-272   -96    
-80    -272   
32     240    
544    176    
400    880    
272    160    
-496   64     
176    272    
560    320    
-432   96     
-192   192    
240    0      
-1264  -32    
-96    160    
96     -16    
160    32     
-112   304    
0      592    
416    112    
16     -176   
-320   32     
-48    144    
208    0      
-448   64     
96     64     
48     16     
128    -1040  
-1328  -176   
320    464    
48     -384   
48     -256   
-1264  -1728  
784    -880   
288    128    
-880   -192   
848    416    
-256   112    
-320   112    
-160   -144   
416    -128   
-64    -288   
-432   448    
-192   -224   
64     96     
-80    -176   
48     -80    
-144   368    
32     -96    
192    -16    
32     208    
-224   -32    
592    768    
-1408  272    
272    -16    
736    -240   
-592   16     
160    112    
-224   -32    
32     -352   
-432   -160   
128    224    
-384   208    
96     320    
224    -48    
-176   128    
-224   48     
0      -16    
176    48     
96     32     
80     224    
-64    96     
-80    80     
32     32     
-304   64     
160    32     
0      112    
-320   208    
368    -64    
-192   96     
-80    192    
-560   -1264  
2256   368    
-960   320    
-1232  -48    
464    -208   
-208   -128   
144    -48    
-16    64     
16     352    
-624   -96    
16     192    
240    96     
-272   48     
-160   32     
48     -224   
16     -48    
-64    -32    
-96    -144   
-256   -32    
320    -64    
-256   -48    
-144   -208   
896    -32    
-1184  352    
64     -608   
432    -448   
-80    176    
-272   272    
368    112    
-272   144    
-208   64     
-48    80     
16     48     
224    48     
-32    192    
-208   64     
144    64     
208    96     
-64    208    
-80    400    
64     96     
-16    144    
144    112    
-480   -160   
-320   -288   
240    752    
-176   512    
-416   -640   
336    96     
624    192    
-752   -848   
-160   -16    
64     -80    
-16    -128   
-208   64     
736    240    
-736   -80    
304    -576   
352    0      
-80    112    
-256   16     
-32    160    
128    144    
208    144    
-48    -64    
-608   -512   
768    -896   
64     -16    
464    320    
-128   592    
-432   192    
-192   -2096  
-1056  -560   
752    -16    
-32    576    
80     -304   
-288   368    
-160   224    
208    -1136  
288    -80    
-240   224    
-240   672    
-16    128    
272    -240   
160    512    
-368   -448   
-112   -544   
256    1120   
192    -464   
-320   -256   
-64    -352   
64     144    
288    416    
-112   -496   
80     -608   
-96    -464   
0      0      
176    16     
-16    -128   
64     -224   
-96    96     
32     304    
-208   96     
16     48     
272    176    
-400   -144   
16     -16    
224    -272   
96     1088   
-48    672    
-112   -128   
320    -576   
144    400    
-80    -2400  
-240   -64    
-48    432    
736    416    
-352   192    
-336   -384   
112    -144   
224    512    
-512   -704   
912    32     
-160   144    
-304   -32    
-304   -1024  
192    -1504  
-192   -624   
496    368    
256    880    
-160   -480   
-192   32     
-32    416    
288    -16    
224    400    
32     256    
0      480    
112    592    
-176   -176   
112    144    
-96    64     
-176   -192   
16     16     
176    -544   
-128   128    
-160   112    
656    -736   
448    -448   
-176   -272   
-272   -400   
112    176    
864    768    
-992   1024   
416    -416   
-32    464    
-80    496    
224    -160   
512    224    
-352   496    
-80    224    
432    -736   
48     -32    
-144   -320   
48     288    
-32    400    
144    240    
144    64     
-304   448    
-176   224    
208    144    
96     272    
-240   1024   
80     576    
-400   -400   
80     256    
96     -48    
-64    464    
-192   448    
224    -80    
-16    -464   
32     288    
-16    -128   
48     -208   
16     -352   
192    288    
-96    16     
-48    -288   
80     160    
-48    -256   
192    352    
-16    -240   
-48    48     
80     -336   
368    64     
-208   96     
48     112    
144    64     
16     128    
0      96     
-16    -432   
528    1360   
-80    656    
-944   416    
1040   -144   
-1360  -432   
80     -416   
928    256    
-560   -528   
16     -48    
-128   -64    
304    32     
-192   32     
80     64     
192    384    
-48    -240   
-368   320    
352    -112   
48     176    
-352   -208   
288    224    
112    -208   
304    1520   
-688   -960   
-960   688    
1280   -16    
-608   -768   
-688   176    
192    -304   
144    -16    
-16    -64    
16     -480   
16     -176   
-224   -1536  
192    -144   
304    176    
-304   -112   
32     -384   
0      -208   
-224   -992   
-208   112    
-80    -816   
464    -32    
-288   944    
-1184  32     
-448   -208   
880    -208   
208    48     
-48    144    
-848   -480   
-176   144    
432    0      
-192   -224   
-208   256    
64     -80    
368    48     
416    16     
-560   352    
-368   288    
400    96     
-240   128    
0      -368   
368    -112   
-304   112    
-48    16     
304    -272   
304    -528   
-1024  80     
496    -416   
-672   -96    
-176   -128   
2512   -2128  
-2720  -656   
272    -688   
176    -544   
-480   128    
624    -80    
-528   304    
-96    80     
-32    -128   
432    -480   
-448   -160   
-256   -48    
0      64     
192    256    
-32    -160   
-544   80     
272    -64    
-592   16     
48     -576   
784    -304   
-304   -384   
-112   -80    
112    -16    
-816   -496   
496    -480   
672    112    
-640   160    
16     160    
16     112    
192    -160   
-144   -48    
144    -144   
48     64     
416    240    
-880   0      
528    -16    
-368   -48    
32     -368   
0      32     
144    -16    
-64    -64    
-128   -464   
544    -16    
192    -176   
-688   -48    
432    -16    
16     16     
48     144    
-80    -96    
-576   -224   
560    -128   
-48    608    
-208   -176   
-816   224    
816    -96    
-224   160    
-192   -240   
32     -384   
-48    -272   
208    -352   
224    -80    
32     32     
-176   -16    
176    0      
-160   112    
-16    48     
256    144    
-16    -224   
-320   64     
336    32     
320    112    
-176   -352   
80     144    
64     96     
32     -144   
-416   -352   
96     0      
64     112    
-96    -608   
48     -416   
912    2544   
-1520  -816   
-736   256    
1568   -480   
-544   -144   
-448   400    
624    -112   
384    320    
-800   -288   
-96    -480   
32     160    
32     128    
144    -192   
-112   32     
-192   -304   
128    80     
-176   112    
48     -400   
208    144    
-768   -80    
-96    240    
544    624    
240    -144   
-1312  -208   
96     -112   
176    144    
-176   128    
160    128    
176    -160   
-416   144    
-160   -192   
416    0      
-48    -96    
-48    32     
176    64     
-80    352    
-224   -16    
32     224    
128    96     
-352   -144   
128    80     
-288   -352   
-48    96     
-976   -208   
-256   336    
208    -64    
16     128    
-144   -176   
-48    -64    
416    -80    
-1472  -1600  
-48    64     
624    -544   
-976   48     
528    192    
192    -240   
-592   672    
240    128    
-288   112    
272    176    
112    128    
-144   80     
-176   -48    
48     -64    
-224   -208   
208    -48    
-240   -160   
240    -96    
160    -320   
-112   32     
-304   -672   
1552   752    
-1072  -496   
-656   288    
1328   -192   
-1152  -304   
544    16     
128    208    
-144   80     
-112   -32    
-304   224    
368    64     
16     32     
-288   64     
48     -304   
-32    -112   
96     112    
48     -592   
-384   -256   
-224   -160   
-560   -48    
176    144    
-160   -720   
864    -1360  
-336   -1264  
-448   -288   
384    -128   
-736   32     
224    16     
528    672    
-96    96     
-336   -80    
-176   -208   
-160   -160   
144    400    
352    -112   
176    -352   
-880   800    
80     208    
240    64     
144    64     
-224   192    
-240   -256   
112    -240   
240    -32    
-240   96     
224    112    
352    -608   
-304   -288   
336    128    
928    1872   
-1696  1232   
-416   80     
688    256    
848    128    
-656   944    
-464   -944   
224    -1488  
160    560    
-128   -528   
240    304    
-304   288    
32     160    
144    32     
80     544    
-496   288    
-80    -304   
32     -528   
32     -512   
-64    -528   
-320   0      
128    544    
512    160    
-144   -112   
-640   496    
384    448    
64     -112   
480    736    
-112   1968   
-144   -80    
-48    -176   
-48    128    
400    224    
-192   0      
-272   -496   
16     -272   
64     144    
-320   -192   
304    -208   
-208   -272   
16     176    
0      -32    
128    -480   
80     16     
-48    1072   
-160   80     
-128   -16    
464    128    
-352   992    
80     272    
192    464    
224    -272   
-592   16     
96     480    
80     240    
-48    288    
480    1008   
-480   1968   
-240   -304   
496    -1120  
-48    -32    
-208   144    
128    -224   
-64    -96    
64     -624   
-256   -80    
128    -192   
176    352    
144    -128   
-80    -288   
-144   320    
112    288    
48     224    
-16    144    
-48    560    
-80    1648   
0      1120   
-256   -224   
288    -208   
288    -80    
-640   992    
592    -432   
-176   -560   
-416   -944   
128    -880   
-32    448    
-400   480    
288    64     
96     448    
-208   -48    
-192   -96    
48     32     
288    64     
32     416    
-32    48     
-272   -368   
112    -208   
208    160    
-48    32     
-32    192    
-64    2080   
128    160    
176    -80    
224    336    
-208   160    
288    16     
-112   352    
80     96     
-80    -64    
-48    112    
240    80     
32     32     
-336   32     
496    -32    
-176   192    
96     416    
288    -288   
144    -256   
-352   192    
208    -32    
176    128    
-320   -2000  
112    96     
144    208    
352    16     
-400   160    
64     48     
96     144    
352    -16    
992    544    
-1872  544    
-432   0      
1552   -80    
-880   -224   
-960   -32    
912    -176   
192    -208   
-304   0      
400    208    
128    16     
-128   176    
96     16     
112    288    
-176   48     
-128   -128   
-112   -240   
-32    32     
576    -80    
-80    96     
48     -288   
432    1328   
-368   -848   
-1840  128    
1424   -176   
224    48     
-96    208    
-80    96     
-32    16     
32     -160   
-32    -80    
144    144    
-64    144    
-16    80     
320    256    
-112   -224   
-208   160    
240    -400   
96     576    
-288   -1328  
-32    48     
688    -80    
-704   32     
416    -224   
1216   512    
-496   192    
-208   -112   
336    -96    
32     96     
-448   -128   
496    -272   
544    96     
-288   -48    
-304   144    
-80    -384   
304    224    
560    -560   
-384   -96    
-416   0      
480    -64    
624    -320   
-496   -224   
-400   -288   
672    96     
496    160    
-80    -560   
-1200  336    
496    -1008  
-400   160    
-240   -1184  
2560   -144   
-2496  48     
0      -1200  
624    -656   
-688   96     
-720   -176   
672    336    
688    -32    
-384   -144   
-400   16     
640    -816   
-112   64     
-272   -112   
288    176    
224    -128   
-272   112    
288    -144   
-288   -32    
-464   -224   
1424   -48    
-304   -144   
-320   240    
48     -32    
-416   -64    
688    -64    
-336   -128   
112    64     
128    128    
-64    0      
-80    176    
496    -16    
-352   -640   
208    48     
-320   -32    
-160   -336   
272    144    
-208   -80    
-336   -672   
496    -272   
256    176    
-64    -48    
-96    112    
96     -64    
304    -32    
-384   -160   
-144   128    
352    -16    
-112   128    
48     624    
640    -320   
-272   336    
-416   752    
-272   160    
0      288    
-16    -48    
-32    -48    
240    -608   
-96    -288   
-176   -80    
432    -320   
144    -528   
-224   -16    
64     -64    
80     288    
96     -112   
-32    -80    
-160   -32    
112    -400   
-64    -512   
-192   -800   
112    -400   
64     -640   
256    64     
208    -1264  
-80    256    
-352   224    
160    128    
192    -704   
-96    -384   
-64    -64    
-368   -192   
1520   1200   
384    384    
-1760  656    
592    -816   
-48    -1408  
272    -352   
384    544    
-240   -16    
-96    48     
240    32     
400    336    
-288   640    
-160   -64    
192    192    
480    224    
-528   464    
-224   -16    
-640   -32    
160    64     
0      -96    
-320   -256   
480    -768   
-368   768    
192    -240   
-48    -752   
192    464    
-208   -80    
192    448    
-80    32     
-176   -224   
160    -112   
16     -208   
112    -96    
48     272    
-432   -64    
-160   -32    
-64    -128   
-16    -336   
112    688    
-16    -704   
80     0      
-112   16     
0      -192   
112    -48    
80     -288   
64     336    
-144   80     
32     -304   
-160   -128   
-720   -384   
1728   -736   
-2192  800    
672    240    
256    720    
-656   -256   
144    -208   
1008   -368   
-368   1072   
-96    496    
48     -448   
96     0      
192    112    
-128   -16    
-288   -192   
-96    -48    
288    -32    
-112   192    
-144   112    
144    160    
48     -352   
-752   -272   
800    -256   
1104   -912   
-1520  -880   
544    144    
576    448    
-784   256    
-288   -32    
400    48     
112    144    
192    -176   
-32    -224   
80     -416   
-112   352    
240    -16    
144    -176   
-592   32     
560    688    
48     1232   
-288   416    
112    112    
336    368    
-400   400    
592    -448   
-480   -1216  
-272   -736   
1040   528    
-416   -416   
-128   528    
-64    144    
-64    512    
-688   -208   
-64    -48    
608    80     
-560   -128   
544    864    
304    768    
-304   1040   
896    -496   
-336   -352   
-128   -48    
-32    -64    
128    -160   
352    96     
-176   -224   
-656   -48    
-64    -336   
0      -464   
-272   96     
-944   -384   
1136   672    
1360   -48    
-1408  848    
-384   752    
736    160    
192    1024   
-176   608    
-144   160    
32     -112   
64     -352   
0      80     
0      -496   
-352   16     
160    608    
256    464    
-336   272    
-208   80     
208    -320   
128    0      
16     416    
16     -32    
128    80     
-736   480    
928    224    
-304   -400   
-480   0      
128    -768   
-48    1648   
112    864    
-480   480    
240    -352   
176    -320   
-160   -64    
-208   160    
-64    336    
-64    -224   
480    -720   
96     -176   
-416   -496   
304    48     
272    384    
-32    832    
-432   32     
112    -304   
256    304    
-160   96     
400    -400   
-336   480    
-320   -288   
64     -368   
-224   -1376  
208    -144   
112    1424   
-336   -1216  
-1232  -576   
384    -208   
-128   -1632  
-272   -256   
-32    -448   
352    352    
-48    32     
-224   -144   
32     592    
-256   432    
-16    -48    
-480   -176   
-144   -112   
80     -96    
288    -304   
-720   -320   
-16    -128   
352    -64    
96     -32    
-320   96     
0      48     
96     -352   
16     -624   
0      240    
-240   48     
-64    -480   
1232   1040   
176    416    
-864   -304   
304    -144   
272    1072   
-256   1296   
272    1312   
-624   784    
-48    -144   
-16    -224   
-16    -112   
-160   -128   
304    144    
-336   416    
192    -64    
-208   -176   
96     144    
-144   288    
128    80     
-416   -464   
560    -944   
-480   544    
320    160    
176    0      
-624   144    
256    -64    
-96    256    
384    160    
-768   -48    
128    80     
-304   -208   
208    -48    
-160   160    
32     -64    
-16    32     
32     128    
224    32     
-32    224    
-176   16     
80     160    
336    112    
-208   48     
160    16     
-240   160    
64     96     
-16    352    
224    64     
-80    64     
240    32     
-1200  -1472  
-1296  -544   
2736   80     
-752   -48    
-288   384    
384    -80    
-128   560    
256    144    
-112   320    
48     -48    
64     144    
64     112    
-144   32     
-80    48     
320    256    
-32    32     
-128   -16    
240    176    
-48    -112   
-96    112    
-96    0      
-592   -496   
208    -144   
1424   -352   
-960   -464   
-448   416    
640    160    
160    -48    
-464   -112   
-64    144    
400    80     
272    144    
-48    0      
-192   16     
-112   64     
-80    96     
480    -96    
80     48     
-96    80     
-544   -336   
528    64     
256    704    
-288   -32    
-560   144    
944    -96    
-608   -32    
160    -176   
1328   -32    
144    192    
128    -672   
-880   0      
736    368    
320    560    
96     -128   
-208   288    
-16    528    
-144   672    
512    -256   
448    -352   
-96    192    
256    -32    
-144   144    
224    144    
-144   0      
-64    64     
160    -80    
48     160    
64     80     
-384   80     
512    384    
-1200  2560   
1168   368    
-768   -1056  
-1360  -208   
1344   112    
-528   112    
-480   64     
800    -288   
-96    352    
192    32     
-368   0      
272    48     
-96    -48    
-128   48     
400    32     
-336   -1008  
-160   112    
80     96     
352    -128   
-944   -64    
592    -176   
0      144    
272    16     
544    -176   
-320   80     
-384   112    
416    176    
192    80     
-352   -288   
-320   0      
400    -512   
176    336    
-384   128    
176    256    
368    -192   
-96    -160   
-240   64     
16     96     
192    32     
-112   96     
-192   192    
288    352    
-144   384    
208    176    
16     192    
-16    32     
96     128    
16     -496   
256    368    
-240   368    
-144   304    
608    -208   
176    -160   
-432   -336   
128    224    
320    944    
32     800    
-48    464    
144    256    
16     -240   
-464   -48    
576    -64    
480    -160   
-592   48     
-32    -944   
0      592    
480    464    
48     352    
-416   -288   
128    64     
240    224    
64     128    
-240   208    
-128   -160   
64     -112   
176    -912   
32     144    
-16    512    
144    272    
48     -480   
48     -1248  
-960   1120   
1248   96     
-64    -448   
80     -48    
-160   528    
-128   64     
208    160    
-16    -288   
-16    160    
16     -16    
0      -112   
-16    -128   
96     320    
-64    0      
48     272    
-64    -272   
64     592    
0      64     
-16    272    
464    16     
-784   560    
784    224    
16     464    
64     528    
-48    368    
-336   96     
160    368    
64     528    
-16    -704   
176    -64    
-48    352    
-80    -128   
48     -240   
288    112    
80     -496   
-208   -256   
-80    -288   
256    -144   
224    -80    
-128   -16    
64     96     
-48    -208   
-16    160    
-32    -112   
64     -848   
64     -112   
112    -64    
48     144    
-992   -448   
704    -80    
1392   -224   
-1344  144    
768    -592   
496    -544   
-240   -144   
544    608    
-544   -848   
-144   -784   
80     816    
208    -96    
-64    -32    
80     -192   
-48    -160   
48     -48    
-96    -400   
48     96     
-304   -512   
32     176    
256    -944   
-656   -752   
224    -848   
800    -336   
-224   736    
336    1248   
-256   944    
80     1120   
-96    896    
416    -208   
-240   -576   
32     -688   
-704   -576   
-176   -48    
352    800    
-32    -816   
-560   -272   
608    -496   
16     192    
-112   144    
80     -80    
80     -352   
-176   -240   
-48    -256   
336    1392   
672    432    
-640   -1120  
-1536  -1040  
352    -496   
-192   -384   
-80    -528   
480    64     
-176   -624   
-416   304    
-80    -688   
560    -864   
128    -576   
48     304    
160    336    
304    224    
-144   16     
-224   -224   
-80    128    
304    432    
0      288    
-352   -368   
-512   64     
112    -512   
272    -208   
336    -816   
-208   -1152  
1232   -1888  
64     128    
-704   -256   
80     288    
336    208    
-144   0      
96     -400   
-272   -496   
-176   304    
-48    -928   
-16    -144   
64     -304   
-352   368    
16     -320   
352    -128   
-112   0      
112    -64    
48     176    
-80    464    
256    512    
48     224    
-656   -288   
48     -544   
1376   -976   
-864   80     
640    -368   
-272   144    
272    112    
64     416    
32     752    
16     128    
64     -160   
256    -112   
192    64     
-320   -144   
-144   304    
176    384    
160    96     
16     672    
-336   240    
128    272    
496    288    
112    1040   
112    160    
-128   96     
288    -480   
-592   -480   
48     -368   
256    -96    
-128   32     
-256   -528   
416    -688   
16     -320   
-352   64     
256    704    
-592   640    
-624   -912   
-368   -464   
-1216  -448   
-272   0      
-176   -96    
448    64     
-16    32     
-832   160    
-32    224    
-208   -192   
96     -192   
-16    288    
112    304    
-608   -256   
32     336    
-208   48     
0      64     
112    -144   
-496   -16    
-240   -96    
96     -80    
-64    144    
-944   -96    
224    1552   
-288   -1536  
-1472  912    
1312   -448   
-384   -256   
-80    -528   
48     336    
336    -224   
416    64     
-464   320    
-96    -336   
32     288    
80     -32    
-336   48     
-240   -208   
256    512    
-512   -96    
-128   160    
16     0      
-272   -48    
-304   -752   
784    -560   
-560   304    
32     208    
464    0      
-544   -128   
176    -320   
144    560    
336    0      
-832   192    
48     -64    
208    -32    
-64    -16    
-608   -192   
-160   -96    
-48    -112   
32     304    
-16    -160   
-448   128    
400    -48    
-160   80     
-256   48     
-32    48     
144    -80    
192    -16    
-80    -32    
-48    208    
80     32     
-640   64     
16     -800   
208    -1024  
544    496    
160    -96    
-768   -96    
-64    272    
1040   256    
-176   -160   
-224   -384   
288    -64    
-256   48     
-192   144    
0      64     
-16    0      
-224   48     
512    144    
-320   -80    
112    16     
128    288    
-16    32     
160    160    
-336   -288   
688    416    
608    144    
-304   -144   
448    -64    
-784   16     
464    -256   
688    480    
-528   -208   
-352   192    
128    32     
208    128    
-320   112    
-16    0      
112    144    
352    0      
-272   48     
-112   304    
160    96     
-32    64     
-48    48     
240    768    
-704   -192   
-272   336    
368    96     
-768   -176   
-160   -176   
608    256    
1152   208    
-672   192    
-336   160    
336    48     
-32    48     
-224   -16    
64     48     
112    224    
-208   -80    
32     208    
-992   336    
240    64     
192    -48    
-288   0      
-80    16     
-32    96     
16     -80    
224    -464   
-224   112    
192    80     
-128   16     
-944   -400   
2368   -2400  
240    880    
-912   272    
-144   -224   
944    448    
336    -80    
-720   -32    
-80    16     
304    48     
-272   160    
144    64     
-64    64     
112    32     
-16    -48    
-32    0      
96     112    
-176   48     
-288   144    
-416   32     
480    992    
0      1392   
-144   256    
480    128    
-48    -48    
-352   416    
496    64     
-544   144    
144    -288   
496    192    
-80    512    
-624   -32    
-16    112    
1136   160    
-1008  -64    
-208   112    
592    400    
160    -224   
-176   128    
80     -64    
-160   128    
128    -48    
240    -112   
-368   -368   
240    -160   
432    -544   
-512   -432   
-224   -160   
-128   -272   
272    -560   
432    -288   
-528   -656   
160    -608   
-448   480    
112    -80    
96     336    
-576   432    
288    608    
208    560    
-32    -224   
-288   -464   
64     848    
128    192    
-16    528    
32     320    
-32    -176   
48     192    
-208   560    
-224   -448   
208    176    
80     -112   
-192   112    
0      16     
-144   112    
96     176    
0      80     
-64    256    
-48    928    
96     848    
-352   336    
64     -976   
352    816    
-272   608    
80     -272   
544    112    
176    80     
-128   -144   
0      -16    
-16    -112   
-16    0      
208    -176   
16     208    
-192   112    
176    -256   
368    176    
-288   -560   
-288   336    
240    -16    
80     48     
128    96     
-32    128    
-304   -368   
96     80     
0      0      
304    -160   
-256   80     
80     32     
272    208    
-592   672    
144    496    
272    -288   
-112   -64    
-336   304    
176    -48    
112    -64    
32     208    
32     48     
-16    160    
-16    -208   
-48    160    
96     -96    
-144   208    
16     144    
80     -128   
96     208    
256    -176   
-288   224    
208    -1184  
-224   -256   
96     176    
-240   -256   
1328   -512   
736    240    
-1504  160    
672    -256   
336    160    
-64    736    
112    -384   
-864   -1680  
96     720    
96     -80    
240    80     
64     -32    
-224   32     
80     -1456  
352    240    
-144   96     
-160   544    
-80    -48    
224    336    
48     32     
-832   -528   
896    -160   
992    -592   
-1040  464    
704    1488   
1200   32     
-448   -560   
-480   992    
960    -144   
-80    32     
-112   -160   
160    -240   
-176   -576   
-160   -160   
240    128    
-272   -16    
288    480    
-320   432    
-80    256    
288    -192   
16     -16    
64     -224   
32     160    
960    1616   
-992   1520   
-464   -160   
112    -1376  
-240   -336   
80     -224   
448    -528   
0      96     
96     32     
-464   288    
208    400    
-176   -112   
-224   560    
736    -272   
-560   -320   
176    -144   
416    224    
64     32     
-112   64     
48     -192   
-32    16     
288    -736   
-64    -160   
-240   -400   
-160   -352   
832    -1104  
384    1504   
-480   624    
96     -288   
1200   16     
-800   -304   
-432   -1248  
944    80     
-240   -992   
-624   160    
240    160    
0      112    
32     -304   
288    -384   
-416   -272   
0      -512   
80     -240   
-64    320    
-80    -144   
464    608    
-224   256    
-96    -1056  
320    -448   
-192   -80    
112    192    
624    176    
-576   -144   
304    -256   
0      -576   
384    -208   
-48    -496   
-16    -320   
272    -2688  
240    -272   
96     -544   
48     -80    
-256   -16    
464    -64    
192    -192   
-384   -320   
-336   -64    
192    -176   
-1104  -208   
512    -144   
0      80     
32     -128   
64     -64    
336    -1904  
-64    -224   
-208   -96    
144    368    
480    176    
-288   32     
240    256    
800    -32    
-544   -160   
-96    384    
240    256    
-144   16     
-48    -384   
-512   -48    
464    -48    
432    -384   
-256   -48    
-80    -400   
32     96     
128    -112   
96     592    
384    192    
-320   -448   
-112   224    
336    192    
16     -96    
-224   -80    
80     -32    
192    80     
-240   48     
80     -224   
240    64     
-160   -368   
-64    96     
752    2000   
-432   -1440  
-1536  496    
1680   576    
-1072  -80    
-336   48     
320    -80    
416    -128   
-48    192    
-80    -400   
-112   512    
128    -672   
-32    -128   
112    -1216  
-480   -176   
256    -96    
464    176    
-368   144    
16     -96    
96     64     
-288   -608   
656    208    
32     144    
-832   112    
1088   -272   
-160   -192   
-544   -160   
672    32     
208    -224   
-368   160    
160    -496   
336    -112   
-224   -160   
-128   16     
0      -144   
-208   -48    
304    -320   
-128   16     
160    80     
-256   -176   
192    48     
0      -176   
176    144    
32     -208   
96     224    
128    -48    
-384   32     
336    -48    
16     48     
-480   -672   
640    3024   
1984   -288   
-1856  0      
-672   -448   
704    -32    
640    176    
-352   -16    
224    -48    
-384   -512   
-928   48     
-48    -32    
224    80     
-64    64     
-48    -16    
368    240    
-80    0      
-192   32     
160    -32    
144    -16    
16     16     
80     128    
-1520  -576   
688    16     
736    -688   
-1280  352    
752    448    
208    16     
-432   352    
80     -368   
-656   208    
368    -16    
144    0      
-160   96     
-80    32     
208    -128   
-176   128    
160    -256   
-16    208    
224    160    
400    -144   
-240   0      
-32    256    
-192   -64    
-192   160    
704    0      
-576   16     
-352   -464   
-48    128    
528    80     
-352   -304   
128    160    
256    -48    
-224   0      
-128   64     
592    0      
0      224    
-512   112    
-160   32     
688    176    
-480   80     
-160   112    
304    -48    
-608   -144   
128    -80    
-224   112    
160    480    
-144   -16    
-96    112    
-96    -144   
432    -1088  
-1280  -2816  
-848   -528   
1376   -224   
16     208    
96     288    
-128   -320   
-432   288    
-160   -256   
288    -160   
-16    -96    
-144   144    
-160   -256   
432    176    
-208   -240   
-432   48     
-64    64     
176    48     
240    16     
-384   -80    
-352   96     
192    368    
16     128    
-32    -96    
208    -544   
-1056  -176   
-224   368    
128    -224   
-48    -560   
-432   -592   
288    304    
-240   48     
-160   -320   
32     192    
128    480    
-16    16     
-80    176    
304    -288   
-656   912    
176    880    
-304   96     
48     -80    
-96    256    
48     336    
-272   -400   
-416   -656   
448    304    
-320   1056   
528    368    
-384   -1088  
-96    160    
-48    -288   
592    -144   
-592   -112   
80     -816   
-304   -608   
-304   0      
-16    368    
16     -256   
-16    64     
160    288    
-208   144    
-112   -16    
256    -208   
-272   160    
-96    -80    
-256   -384   
-192   128    
-192   176    
160    128    
-192   -64    
-64    144    
48     64     
-144   64     
-16    112    
112    64     
-112   96     
224    160    
-224   368    
160    32     
-256   144    
-400   -256   
976    -496   
-400   352    
416    -224   
-368   192    
-16    128    
160    -576   
144    -224   
-256   240    
48     256    
-192   80     
144    0      
208    16     
128    16     
-496   176    
240    -160   
320    -272   
-176   -48    
0      304    
-64    80     
160    -336   
-592   96     
432    256    
-144   192    
64     32     
64     -32    
272    384    
-400   1248   
32     32     
528    -256   
-256   128    
-256   208    
160    -16    
16     -224   
-112   208    
208    400    
48     672    
-176   112    
192    112    
-32    256    
-128   0      
-160   112    
64     208    
-112   352    
304    96     
-544   128    
-48    0      
16     48     
720    -432   
-240   -800   
1712   -1232  
-816   -32    
384    -80    
-96    -272   
-464   -16    
-240   -32    
320    -912   
-288   656    
160    1824   
-48    -144   
112    -528   
400    -272   
-368   368    
-80    400    
304    160    
80     -112   
-16    336    
-64    224    
-32    0      
80     -80    
-784   -432   
1168   -496   
112    -176   
-896   -688   
688    0      
576    624    
208    32     
-400   544    
592    336    
0      224    
-288   -16    
144    -128   
480    -16    
-176   16     
-80    112    
448    128    
-128   656    
-192   256    
-48    -64    
224    128    
0      -128   
96     -320   
592    160    
480    -992   
-400   -320   
-448   96     
400    272    
112    16     
176    1088   
-608   272    
-80    32     
496    176    
-304   0      
-464   80     
48     256    
880    592    
-352   -96    
-816   -32    
320    -464   
160    96     
-128   -48    
-96    64     
-320   224    
560    -80    
112    -16    
-32    -32    
96     16     
-240   32     
688    992    
416    -2176  
-2000  -1136  
832    288    
464    128    
384    -144   
-352   240    
-192   -976   
240    320    
304    -32    
128    192    
-80    208    
-80    -80    
64     256    
352    80     
-192   112    
-272   -64    
176    240    
0      -144   
752    304    
-1184  -224   
768    96     
128    -160   
-16    144    
-320   -16    
32     464    
256    208    
48     384    
-208   16     
-160   0      
272    112    
-304   -32    
192    -96    
160    -224   
176    -96    
-80    -80    
-176   80     
304    -464   
448    -432   
-208   -512   
32     224    
32     -32    
-208   160    
464    0      
32     208    
96     80     
-128   -16    
96     48     
144    -16    
-192   0      
192    -160   
-224   48     
-144   -944   
-128   -208   
640    -224   
-1024  448    
416    304    
464    -416   
-976   -80    
240    -288   
-64    -48    
320    128    
-80    160    
-80    -208   
0      0      
-16    -208   
48     -112   
-128   -128   
112    16     
64     -192   
144    144    
-96    144    
32     -32    
64     80     
-64    144    
112    80     
336    -208   
-272   224    
288    -96    
-112   112    
128    -64    
-384   -2672  
-1200  560    
1424   80     
-432   -64    
160    288    
-272   -128   
96     -1440  
-80    720    
192    -80    
-32    -384   
-48    176    
-16    -240   
-64    -16    
304    -1104  
-336   128    
336    -16    
-16    128    
-48    32     
240    -224   
-32    -528   
464    96     
-1312  -160   
512    -80    
528    -128   
-464   -640   
-96    64     
16     -592   
176    272    
272    -816   
-144   -48    
64     32     
-144   64     
16     176    
272    -112   
80     -480   
-400   128    
512    144    
-80    -192   
-304   176    
256    -272   
-336   48     
272    -576   
64     -16    
-240   -464   
208    -64    
128    -528   
16     -32    
0      -304   
16     32     
464    -1072  
592    -464   
-1488  64     
496    -32    
256    -160   
-672   -176   
-336   -160   
496    240    
-128   -96    
-192   32     
208    -96    
-96    -240   
-48    0      
-16    -400   
336    48     
-432   -128   
256    192    
-48    -48    
-144   96     
0      -16    
-64    -32    
-64    144    
560    -176   
-1600  -416   
976    -912   
384    -128   
-416   -16    
48     -32    
432    -656   
272    176    
-192   -32    
-224   112    
-144   -32    
208    0      
16     -16    
0      64     
16     -144   
-112   -144   
-864   112    
352    -176   
-48    80     
-240   -16    
0      544    
832    -1984  
-224   96     
-112   160    
688    -256   
-112   144    
-224   -144   
-128   64     
224    80     
-176   -64    
64     -96    
-48    80     
-64    32     
-32    -464   
304    -32    
736    -32    
-432   -336   
608    336    
-464   288    
-144   -16    
128    80     
160    -80    
-400   -64    
-32    144    
128    -224   
-240   32     
256    80     
432    -416   
-1200  -1472  
1664   -2432  
304    -160   
-912   304    
368    352    
576    0      
0      1120   
-464   1664   
112    224    
208    -304   
-400   -128   
160    224    
48     160    
48     -80    
176    -720   
-496   -272   
-480   -832   
144    400    
-128   -416   
112    -576   
-224   -16    
-384   528    
192    528    
-496   608    
-64    1280   
208    704    
-112   -96    
288    -720   
-128   -368   
-112   -400   
208    432    
-336   -128   
304    -256   
0      -672   
-512   0      
-320   -160   
-288   -608   
16     -1232  
-608   -368   
144    304    
-48    -80    
176    -96    
288    -208   
-240   304    
336    944    
-32    848    
240    -112   
48     336    
-144   752    
-32    -560   
64     624    
416    -64    
-1264  976    
448    0      
64     880    
-1360  576    
-256   528    
288    816    
32     -816   
-288   -448   
64     320    
-112   -128   
256    -112   
-32    32     
16     256    
-208   112    
224    0      
-112   336    
-192   496    
192    16     
-512   -16    
112    32     
-512   256    
-16    64     
-144   -96    
-240   96     
64     -96    
-112   288    
-304   -48    
-16    -64    
-80    96     
336    -432   
-896   256    
144    96     
32     176    
96     304    
80     -288   
-784   -80    
64     192    
128    -16    
16     144    
-80    -64    
-48    -32    
-80    176    
80     -128   
-208   -80    
-48    -48    
160    224    
-112   672    
64     448    
-432   -368   
320    -384   
-288   256    
-240   0      
-336   -32    
144    0      
64     -352   
-176   416    
-48    720    
-48    96     
-112   -112   
416    224    
64     -32    
-272   112    
368    -32    
-448   -544   
48     240    
48     672    
256    -368   
-432   -144   
48     752    
112    -224   
256    0      
-16    -128   
-256   0      
-160   368    
192    288    
304    -80    
-112   64     
-160   192    
1360   976    
-1664  272    
-1344  -336   
1296   400    
1024   -1344  
-1056  608    
720    -224   
-512   -496   
-160   -192   
544    208    
-112   -176   
-272   -96    
112    -16    
32     -32    
-96    144    
-16    80     
64     80     
-80    384    
0      192    
-192   -32    
-112   112    
-432   528    
2544   -48    
-1328  -64    
-560   80     
880    32     
-416   -336   
-128   0      
240    240    
-32    -112   
16     80     
288    64     
-112   -16    
-144   -96    
-560   32     
672    128    
64     96     
-528   -128   
32     48     
256    112    
-80    128    
336    480    
32     -128   
-464   -48    
48     176    
64     -80    
-192   -144   
-240   80     
112    -16    
-112   80     
-32    0      
176    288    
-64    64     
512    80     
112    80     
112    128    
-288   -32    
-176   128    
192    384    
-384   656    
240    -128   
288    -16    
-240   0      
96     176    
112    32     
-528   -272   
240    160    
384    160    
-960   144    
32     -1680  
-848   -4064  
-1712  -976   
368    512    
832    336    
-432   64     
-256   144    
-576   128    
400    240    
208    -48    
-304   80     
-32    -16    
-96    208    
-160   192    
-96    208    
-96    80     
-16    0      
-208   80     
160    32     
224    400    
128    -176   
-544   528    
800    -128   
-880   -144   
-48    0      
496    368    
608    -16    
-752   -112   
304    80     
480    -304   
-304   80     
192    176    
80     128    
-80    208    
288    368    
64     400    
-368   352    
32     -176   
128    48     
-48    80     
96     112    
96     -64    
-320   112    
224    -128   
-144   48     
624    32     
272    176    
-496   144    
272    416    
240    128    
64     224    
-96    16     
-32    -576   
-992   272    
960    -256   
-48    384    
-368   112    
144    112    
400    208    
224    96     
-176   144    
304    224    
-112   -16    
208    144    
304    240    
-128   272    
-512   -352   
496    -1072  
-32    240    
-128   -448   
432    -224   
-496   192    
96     224    
336    80     
-80    -64    
-288   0      
272    240    
-416   96     
160    -416   
-32    -192   
-64    432    
1056   2784   
-1792  -1088  
-896   464    
1632   -640   
-208   -160   
-496   -1824  
96     0      
800    160    
-208   240    
-304   -320   
64     240    
-32    192    
272    32     
-96    144    
-304   -688   
160    272    
256    240    
-208   -176   
64     -768   
160    160    
-144   -1616  
544    -544   
-624   32     
-192   176    
800    48     
-384   288    
-144   -32    
336    192    
48     -544   
-192   112    
-144   176    
352    80     
32     112    
-112   -528   
96     224    
64     -752   
0      128    
448    -704   
-304   192    
32     16     
64     256    
96     112    
32     112    
-160   128    
0      64     
368    96     
-160   -144   
-256   112    
256    144    
0      448    
-720   1344   
3040   144    
-1152  240    
-896   -80    
1584   240    
-896   176    
-448   304    
560    400    
176    160    
-96    -304   
-256   96     
-64    -96    
320    128    
144    64     
-144   -96    
32     128    
288    144    
48     -16    
-336   144    
80     80     
-112   -432   
1072   944    
240    240    
-1248  640    
1680   -624   
224    0      
-112   576    
848    80     
-96    -272   
224    64     
-336   -432   
112    144    
320    -96    
-208   112    
-320   -128   
368    -1392  
96     -192   
-1152  -416   
160    -784   
80     368    
-368   -208   
208    272    
-416   -352   
544    -384   
-288   352    
0      -864   
1232   -144   
-288   400    
-224   0      
368    -80    
-176   -16    
-32    144    
-496   160    
-144   -624   
-592   64     
368    -256   
144    -1184  
-224   -480   
-16    864    
-432   192    
224    0      
48     -160   
-160   192    
32     -352   
144    -16    
-304   -240   
-32    224    
80     160    
-368   288    
416    96     
368    -1744  
-2512  -976   
768    208    
672    -912   
0      -864   
-992   304    
-128   1120   
800    1056   
176    -272   
-352   416    
-176   -112   
272    -128   
-96    160    
112    -160   
-80    -368   
-240   -224   
256    176    
32     208    
0      256    
144    112    
16     -144   
-96    -1760  
-112   -112   
96     272    
400    512    
-336   -112   
-208   -1408  
128    96     
-32    272    
-384   -432   
-208   -80    
96     -208   
272    -144   
-176   -192   
272    176    
416    672    
-48    -1136  
32     272    
-144   848    
32     -80    
144    -400   
368    80     
-608   96     
-16    -16    
-144   176    
448    48     
-304   -816   
-304   -208   
-16    416    
288    32     
336    880    
-288   -320   
-544   400    
528    864    
144    704    
-128   -48    
64     800    
272    224    
144    -576   
-672   -144   
64     48     
128    -192   
48     -112   
0      160    
80     -208   
-256   -80    
112    -496   
-64    624    
-368   -48    
-32    -400   
224    112    
-176   -32    
80     80     
-16    224    
-352   320    
64     288    
-352   528    
-576   496    
128    -336   
96     -208   
400    -832   
-528   -896   
-320   672    
880    592    
-448   832    
-352   0      
128    -144   
-160   384    
176    240    
-128   496    
176    -144   
64     240    
-144   240    
-16    -112   
128    -304   
432    128    
96     80     
-80    192    
-144   32     
-48    304    
-16    752    
592    240    
-640   -656   
-336   800    
384    288    
-304   -400   
112    -384   
160    272    
48     -144   
-32    80     
160    -96    
0      -96    
48     -128   
64     128    
-720   32     
144    0      
-240   64     
-64    -160   
272    544    
-144   448    
-256   -32    
-16    320    
-592   -256   
192    96     
-208   -96    
16     160    
208    -64    
-288   80     
-176   32     
1600   1248   
-1200  48     
-1776  -176   
1600   224    
-672   -336   
-832   -32    
256    -224   
128    576    
112    160    
-48    256    
176    -16    
96     -32    
-160   64     
-96    -80    
288    192    
-192   64     
-16    32     
240    -16    
-144   48     
-224   -32    
16     128    
-592   -192   
1344   -192   
-464   -464   
-560   336    
816    -240   
-112   64     
-112   16     
-400   -208   
144    -112   
416    64     
-160   0      
-144   96     
-96    -32    
-32    496    
16     -160   
-832   192    
288    256    
-368   240    
-160   112    
-64    -80    
224    416    
80     -192   
-896   256    
224    32     
176    -208   
-448   -192   
0      -240   
128    304    
-304   144    
-400   -96    
288    0      
304    -16    
-528   -64    
64     144    
320    -16    
-384   544    
288    80     
-336   -192   
-624   96     
16     48     
240    16     
192    -112   
-320   -16    
-432   -64    
688    80     
80     -224   
-320   16     
0      176    
-1184  -208   
2528   -1312  
1008   272    
-1632  512    
-64    368    
1152   416    
-160   -112   
-656   -112   
240    272    
160    32     
-144   48     
-400   -80    
96     -608   
176    160    
-320   -16    
240    272    
-416   16     
0      80     
496    -80    
-656   -96    
240    288    
-256   256    
-32    32     
704    -112   
-288   -128   
-432   -144   
704    64     
-272   -96    
160    -32    
-16    -256   
176    32     
-160   -16    
16     272    
-240   80     
224    224    
224    240    
-192   -32    
208    -64    
-128   16     
-384   64     
256    64     
256    208    
-192   16     
-208   16     
32     -240   
-112   48     
-64    0      
-64    96     
224    48     
176    0      
-240   64     
-144   -224   
640    432    
768    48     
-480   480    
-640   688    
272    288    
-224   -368   
-96    -144   
96     32     
-240   -16    
384    -48    
0      -16    
-144   272    
-176   160    
224    -32    
160    -224   
-464   240    
16     -576   
-16    -288   
0      240    
-112   224    
176    -80    
64     -16    
-64    272    
-80    352    
0      -96    
128    -144   
-96    224    
-16    64     
-368   -1328  
1024   -1392  
-832   512    
-64    -464   
-272   544    
224    -144   
32     -144   
512    -288   
-128   592    
-288   288    
0      -80    
432    -80    
-176   336    
16     80     
176    1024   
96     336    
-272   -128   
208    160    
-32    -240   
0      400    
128    112    
-160   912    
928    -352   
-1136  -32    
896    -32    
-224   1312   
-176   160    
336    336    
-144   304    
-224   -128   
208    -48    
512    112    
-432   416    
-48    176    
-80    160    
336    -48    
48     368    
-384   144    
176    -80    
192    -128   
208    -16    
32     144    
-16    16     
-80    -16    
192    -32    
-32    0      
-144   128    
112    96     
96     128    
160    -48    
496    -496   
-1648  -480   
736    -352   
-592   -416   
224    176    
688    192    
-144   240    
-464   48     
-80    256    
528    256    
-48    432    
-272   192    
368    0      
-224   -560   
-128   208    
272    128    
-176   -112   
160    304    
256    -64    
32     144    
-112   80     
-224   192    
2560   -16    
-1328  368    
-752   -528   
1392   -32    
384    736    
-832   1776   
-128   1360   
624    672    
-224   416    
64     -112   
64     32     
80     208    
64     432    
144    32     
272    48     
-160   1024   
816    736    
-16    576    
-80    304    
160    -16    
432    384    
-160   992    
368    1328   
768    640    
-1008  48     
-80    -800   
176    -192   
0      576    
160    288    
192    80     
112    352    
80     176    
-1040  720    
-80    400    
448    -368   
192    528    
608    784    
-352   752    
-128   224    
336    -352   
-96    32     
-144   -368   
304    448    
-144   16     
-544   608    
-128   -176   
176    32     
112    -64    
1104   2784   
-1264  1328   
336    112    
1472   -192   
-608   64     
-832   400    
320    -1200  
496    -608   
208    784    
-480   -496   
80     -496   
560    432    
64     -688   
-272   304    
80     144    
-192   32     
240    400    
48     176    
-144   160    
208    144    
-128   48     
-16    -368   
384    192    
208    -384   
-608   -176   
-96    -704   
368    -608   
96     -144   
48     16     
-160   336    
112    -176   
224    176    
-192   -48    
-144   -48    
256    304    
-128   160    
-256   -992   
176    128    
-352   -848   
160    -1008  
336    -272   
-240   240    
-208   -1728  
112    -368   
304    -176   
-208   128    
-208   -176   
384    -1296  
176    -48    
-304   128    
-272   -704   
560    48     
560    1184   
-800   560    
256    1488   
576    192    
112    1088   
-192   -544   
128    -880   
-64    704    
0      1264   
176    80     
-192   -80    
176    112    
-16    112    
128    -896   
-176   -464   
96     -608   
368    640    
-208   704    
16     -288   
-16    192    
272    -128   
-32    -64    
-64    1008   
288    608    
-112   240    
-496   -256   
432    -720   
-224   -96    
64     -928   
-1344  864    
1200   -1280  
576    -160   
-176   -560   
-80    1072   
16     272    
80     -64    
-112   -128   
160    -512   
-64    -432   
-48    -112   
-16    352    
16     272    
-1120  0      
112    240    
448    -64    
64     -80    
-64    112    
16     96     
-16    -640   
432    -1392  
-512   736    
192    32     
-48    -352   
240    1040   
256    112    
64     240    
112    176    
-240   -32    
0      -96    
-208   -112   
-16    80     
128    -64    
-96    -48    
-32    128    
256    -992   
80     -16    
-192   -32    
176    16     
112    112    
-176   -32    
128    -48    
-272   -64    
-240   48     
384    -64    
-928   32     
-64    -112   
-64    -384   
-192   -1088  
1456   272    
-176   -896   
-800   -16    
368    -288   
960    416    
-272   -48    
-224   224    
416    -160   
0      64     
-320   -32    
496    176    
-448   -96    
80     -16    
-432   -144   
304    -112   
96     80     
-224   -272   
96     192    
240    -624   
-192   -144   
128    -608   
1184   304    
-896   -96    
-48    32     
592    64     
-480   -176   
-496   -112   
688    -240   
-16    -224   
-112   -64    
-144   32     
-32    -112   
224    144    
112    -928   
0      -80    
-160   64     
96     -160   
-320   272    
128    352    
416    -288   
-112   -192   
-480   -16    
336    -144   
-128   320    
-944   384    
96     448    
16     -688   
-640   -64    
-32    -128   
256    32     
-16    272    
-352   192    
-464   176    
192    -144   
-256   -144   
-32    -32    
-288   144    
48     -192   
-208   -64    
-448   -288   
-288   128    
-544   -336   
80     144    
304    80     
-48    288    
-544   112    
-1216  -128   
-160   48     
-32    -80    
1056   5904   
96     2432   
-304   1232   
144    -512   
-48    144    
192    -16    
-208   -112   
-272   -112   
16     32     
-208   -32    
304    192    
-48    32     
-528   -128   
-112   16     
-224   -48    
-96    96     
-96    -96    
144    32     
-176   -240   
96     1200   
384    -144   
-480   144    
160    -96    
-208   112    
-176   112    
80     48     
32     96     
-368   112    
400    400    
-224   240    
-64    -80    
144    128    
64     -80    
-80    112    
-32    -16    
-32    176    
160    80     
160    16     
-224   -240   
144    -80    
128    112    
128    128    
-224   128    
96     -32    
-256   -16    
256    -64    
-416   32     
224    304    
-464   48     
368    -96    
320    -320   
-160   -32    
-1344  320    
784    -272   
-368   -160   
-64    -144   
16     -208   
-368   -960   
-208   -432   
48     -112   
16     32     
-384   -80    
176    16     
96     -272   
-176   -176   
-160   -192   
0      400    
320    384    
64     640    
48     752    
80     864    
48     272    
0      272    
112    160    
0      160    
80     224    
-576   -208   
256    112    
432    256    
-160   208    
-496   -624   
1200   -112   
-304   672    
-400   -480   
-112   192    
176    -128   
-16    80     
-192   -128   
192    656    
-48    -368   
-144   -64    
80     -176   
-128   48     
-240   96     
192    336    
160    -32    
-320   64     
96     16     
80     -208   
16     -240   
-368   176    
704    320    
-432   32     
-208   -1056  
-144   -112   
-16    576    
128    -272   
-32    0      
-336   16     
0      -16    
160    48     
240    16     
-112   208    
-240   -624   
208    432    
16     224    
-336   256    
288    -464   
48     288    
-256   64     
160    -16    
208    -64    
-16    240    
-288   -96    
48     -240   
144    480    
208    144    
-304   128    
-288   -256   
688    -304   
1040   -304   
-2800  480    
368    416    
1072   -816   
-1088  -352   
64     -16    
-144   -592   
0      768    
-48    -192   
304    352    
16     64     
-272   160    
96     144    
64     160    
-16    -96    
-80    224    
-48    -32    
112    -336   
-112   128    
-176   -96    
-48    -272   
752    608    
1296   -272   
-1344  -224   
-176   480    
672    880    
160    976    
32     1776   
448    -720   
-640   -2096  
-96    -336   
448    800    
-80    288    
-224   -160   
-80    -160   
-64    0      
128    16     
112    64     
-320   0      
16     16     
-16    0      
144    32     
208    112    
-304   -16    
-80    496    
1152   -224   
-512   -816   
-848   832    
432    864    
-192   208    
384    256    
-368   192    
480    256    
288    64     
-80    -96    
208    -32    
-480   -464   
928    -1408  
16     -352   
128    336    
-240   32     
128    -160   
496    944    
-336   880    
-32    192    
-256   672    
-48    192    
0      -16    
-64    144    
208    112    
1232   1936   
-1568  640    
-672   336    
1280   304    
592    1072   
-704   528    
-256   -496   
288    -416   
160    432    
-32    -144   
48     160    
0      -112   
80     -1328  
16     288    
-112   -48    
208    -224   
224    -208   
-16    32     
48     -80    
-112   448    
112    432    
144    256    
560    112    
-688   -608   
-96    -896   
288    -208   
32     -544   
176    48     
80     864    
48     992    
-128   544    
48     32     
-208   -560   
128    -192   
208    -16    
-32    0      
-336   80     
304    -304   
-80    16     
-64    128    
48     -176   
-80    272    
624    -720   
-688   -560   
288    -1200  
368    -352   
-176   -192   
0      80     
16     672    
208    576    
-176   -352   
560    -528   
-304   512    
-624   336    
432    1440   
640    768    
-32    1248   
-96    624    
336    432    
352    -1344  
192    -128   
-320   -96    
176    -288   
-128   -688   
272    256    
-240   256    
144    -528   
-160   -528   
176    -1040  
16     -432   
-128   -272   
96     256    
96     -160   
-32    160    
-192   208    
544    192    
128    -1024  
-96    1008   
448    528    
-256   208    
480    2640   
1168   384    
-1136  -96    
16     -80    
368    0      
400    368    
-144   176    
0      -32    
224    144    
-112   -336   
336    -48    
48     -720   
-96    288    
96     -352   
192    336    
-64    -160   
0      -16    
144    240    
-192   96     
320    64     
432    -1056  
-1696  256    
784    0      
256    -80    
-752   -16    
592    48     
-128   -176   
-176   -288   
32     -112   
464    416    
-16    80     
-96    336    
48     48     
-48    -144   
-16    144    
16     112    
432    16     
-256   -160   
96     16     
48     -48    
128    -48    
32     48     
128    -32    
-96    16     
80     432    
-32    -80    
336    16     
-240   144    
16     -48    
-336   -2560  
-960   -896   
1728   96     
-592   -128   
-160   224    
800    0      
-144   176    
-640   -144   
208    -432   
64     0      
112    -784   
-112   16     
-64    48     
192    64     
-752   -192   
528    -48    
64     -256   
-256   -1248  
160    -64    
192    48     
-32    80     
-304   -720   
-944   320    
2192   -32    
-1648  -256   
-688   160    
1616   0      
-800   -64    
-208   -192   
192    -304   
160    -400   
48     -64    
-16    -96    
48     -48    
80     -624   
112    -144   
-16    -256   
-160   -368   
-304   -16    
576    208    
-144   -128   
0      416    
-704   -128   
304    144    
176    -240   
-224   -320   
-416   -464   
48     16     
800    -464   
-544   -656   
-192   -144   
512    80     
80     240    
-176   80     
272    -80    
-176   -192   
-128   -208   
-240   -640   
-192   -64    
64     256    
-160   -160   
144    80     
272    -112   
-464   64     
48     -240   
80     208    
256    -144   
112    48     
-336   -112   
-880   -1872  
880    -256   
1360   -864   
-1552  -320   
-576   416    
784    -112   
-272   -208   
-576   -304   
160    144    
80     -192   
-240   80     
320    -80    
-128   -592   
-224   48     
224    -64    
432    -32    
-448   128    
-16    -32    
-240   -64    
-112   80     
288    288    
-320   576    
-176   -80    
320    96     
-128   -144   
-272   -80    
288    48     
-368   112    
784    224    
-80    128    
-208   144    
352    96     
0      -64    
-480   -304   
496    -64    
-368   -144   
-64    -80    
80     144    
-208   -176   
272    0      
-32    -464   
96     -176   
-224   -688   
-32    32     
416    16     
240    464    
-832   -816   
32     -816   
64     -384   
-112   -336   
160    240    
80     752    
-496   448    
176    -592   
0      -592   
0      -672   
-96    -320   
0      -368   
224    128    
-48    112    
0      112    
-32    320    
-80    416    
-112   80     
352    -176   
80     320    
-176   64     
-352   496    
0      208    
128    32     
-128   -464   
-160   144    
-1280  48     
64     256    
48     144    
-560   128    
-208   80     
240    528    
0      -256   
80     288    
-16    -16    
-368   2272   
944    64     
-608   -208   
-336   1104   
288    16     
512    1008   
-848   816    
0      -144   
288    80     
-48    288    
-16    -128   
-176   288    
-80    -144   
96     -48    
64     80     
-176   240    
-128   480    
-112   128    
-16    192    
-448   -352   
272    368    
272    -176   
-688   192    
64     80     
256    144    
-80    32     
-256   -128   
-64    -96    
-16    16     
-48    128    
80     16     
-32    144    
-64    -96    
336    80     
-464   -240   
240    -224   
624    416    
-528   32     
-288   304    
96     -144   
176    96     
-160   0      
-144   64     
-224   80     
448    80     
-208   96     
-112   -48    
176    -144   
-80    96     
1600   368    
-1936  1040   
-144   64     
48     -80    
-80    48     
-208   256    
128    0      
128    592    
-272   -80    
160    -240   
96     -240   
-256   -96    
-48    320    
-80    -32    
144    272    
-48    -464   
-208   208    
160    624    
144    352    
-272   -880   
96     432    
-48    160    
2272   -32    
-1248  784    
560    368    
-160   768    
-48    464    
224    2240   
512    640    
-240   -720   
-416   -1072  
544    -816   
-160   -480   
-16    -352   
272    -144   
288    -272   
-400   160    
224    560    
432    176    
-144   -192   
-112   -16    
64     -64    
96     -432   
-352   80     
64     784    
-224   1584   
-80    784    
-208   -368   
304    -1024  
-304   -384   
-48    -128   
304    -368   
-256   -160   
0      1056   
336    304    
-528   -208   
-16    -48    
736    1920   
608    416    
-400   -224   
48     176    
320    -112   
176    560    
-176   -208   
-320   80     
256    -608   
-32    -112   
-16    352    
-480   144    
-112   -48    
848    -1168  
-2128  -1056  
672    192    
784    -128   
240    -496   
-1328  -480   
256    -992   
704    672    
-224   80     
-432   112    
-64    144    
144    -16    
288    96     
-64    32     
-544   -64    
-192   416    
464    96     
208    -176   
80     -864   
-688   -64    
240    496    
160    176    
-288   224    
704    48     
-688   -288   
-160   160    
304    -96    
-112   -16    
-128   64     
-128   -96    
-64    736    
96     240    
16     -128   
384    176    
64     -32    
-320   16     
416    -32    
-48    64     
-320   0      
112    160    
144    -32    
-160   -48    
-144   -64    
144    96     
16     -48    
-96    848    
-272   16     
80     -688   
-208   -288   
176    48     
-176   208    
160    800    
1264   384    
-688   176    
-16    320    
176    -256   
-64    -96    
400    -96    
-224   160    
-176   32     
208    176    
-48    -96    
-496   112    
0      80     
400    80     
80     -32    
-256   112    
128    240    
-32    -240   
144    -16    
-192   320    
0      0      
-176   16     
256    96     
-208   64     
224    -736   
-336   384    
192    128    
176    -240   
-464   112    
-240   -2720  
-912   448    
1600   96     
-576   32     
-48    208    
528    560    
-352   224    
-416   -224   
48     192    
400    128    
-176   32     
-112   -16    
128    32     
32     256    
0      -112   
-96    -320   
192    128    
-16    224    
-48    80     
144    16     
448    1376   
-896   -48    
-640   176    
1088   -96    
240    -144   
-624   48     
-112   -224   
592    -704   
0      240    
32     -176   
-304   160    
32     48     
352    192    
48     -96    
-400   240    
112    -32    
224    160    
176    -96    
-96    160    
112    16     
-192   -144   
-32    128    
-96    0      
336    208    
-64    64     
-448   256    
496    0      
-256   192    
112    64     
336    416    
-80    384    
544    512    
368    64     
112    160    
-288   -48    
-112   160    
224    272    
-64    48     
192    128    
80     -1184  
-160   64     
112    16     
96     80     
272    -16    
-464   -16    
176    96     
384    176    
-448   0      
176    192    
80     0      
-48    -464   
992    560    
-1392  -352   
-496   -48    
1712   -192   
-768   0      
-384   -256   
848    192    
32     -144   
-384   -80    
-160   64     
304    112    
-272   -16    
128    0      
48     32     
-320   -208   
224    80     
160    -304   
128    240    
-288   -464   
-96    48     
-16    -896   
-704   112    
480    0      
32     64     
16     32     
-112   -32    
-992   256    
672    -400   
80     400    
-320   -128   
-16    -64    
-208   -624   
32     128    
-48    240    
-224   0      
-288   -304   
512    0      
240    128    
144    48     
-272   144    
144    192    
-48    -16    
-32    -96    
336    384    
-336   -224   
-288   144    
464    -112   
-64    -384   
544    -512   
-288   48     
96     912    
720    -448   
-720   -80    
48     352    
368    -272   
96     -880   
160    -400   
-560   -192   
304    176    
208    48     
-64    80     
128    0      
-128   48     
-96    -160   
-48    256    
240    -400   
0      288    
320    816    
-32    -1488  
-144   -96    
-112   -800   
528    -240   
-96    -352   
-208   -416   
752    -272   
-336   -288   
240    -400   
-688   -864   
192    -640   
384    80     
-240   32     
-144   -160   
224    -384   
-160   -464   
0      -80    
416    -816   
-192   -1024  
-320   -560   
160    -1024  
-48    -608   
-160   -880   
176    -16    
-160   -1280  
-336   -480   
-128   -784   
256    448    
128    -672   
-352   -304   
208    -240   
304    384    
-1104  400    
752    480    
-1040  320    
240    48     
496    1408   
-512   1952   
-64    -192   
176    -1504  
-128   -352   
144    -224   
-80    144    
48     32     
176    176    
160    -480   
-464   -368   
304    32     
96     112    
-336   -352   
144    64     
-32    112    
96     -32    
-96    -176   
128    -928   
96     -112   
-16    0      
-96    384    
128    192    
64     -48    
96     -176   
576    -208   
-1376  0      
416    -176   
48     144    
-128   32     
-64    -224   
-160   160    
128    80     
320    -224   
80     -16    
-128   -352   
32     96     
112    -80    
-64    208    
-16    -80    
-272   192    
144    0      
16     -192   
96     -80    
-416   -304   
208    -800   
80     672    
-208   -32    
-176   64     
-64    176    
176    -528   
176    -96    
64     -416   
-128   112    
0      144    
352    112    
-96    16     
16     -112   
-96    112    
144    16     
-320   -32    
208    288    
-96    656    
-112   0      
16     -160   
240    -752   
-32    112    
48     -160   
176    -160   
176    96     
-16    32     
64     -176   
240    -368   
-528   192    
880    -272   
-2944  -480   
-80    -240   
1328   -1088  
-336   -1120  
-464   -96    
352    -976   
688    -80    
-432   1104   
48     -608   
-144   -16    
-96    -208   
256    160    
-128   -368   
-336   240    
288    128    
80     -64    
-80    -672   
-464   560    
176    432    
112    -160   
1232   -432   
-1856  -208   
400    -144   
720    -32    
-544   512    
224    64     
880    816    
384    640    
-496   432    
-32    -224   
-192   -224   
112    -432   
416    -368   
0      -96    
-224   336    
16     -784   
400    -112   
16     240    
-416   256    
-656   304    
-16    208    
336    384    
-1840  -272   
224    -704   
192    400    
80     -336   
-592   304    
16     -96    
-608   -272   
256    80     
-368   -448   
-144   -112   
16     416    
-384   304    
592    -96    
-48    -160   
-160   32     
496    32     
-560   336    
-240   64     
240    80     
64     304    
-112   -80    
-416   128    
336    16     
-176   80     
128    48     
-560   -864   
-256   -624   
656    2400   
304    80     
-1328  -384   
-816   -160   
1072   48     
480    112    
-1216  -160   
144    160    
-16    272    
496    96     
-304   0      
-144   112    
160    16     
-368   80     
336    -192   
-224   112    
192    0      
-80    16     
-32    96     
352    -1168  
-432   -736   
-64    256    
-16    -160   
-160   112    
528    -192   
-160   -48    
96     -16    
0      256    
208    16     
0      48     
-128   -192   
0      48     
-64    576    
-224   160    
-96    112    
-176   -144   
464    240    
-384   128    
-608   0      
576    16     
208    -32    
-304   112    
-80    -208   
-432   -96    
624    -64    
-624   32     
224    -128   
32     192    
-64    -16    
-16    320    
-112   -512   
528    -448   
-672   128    
0      -176   
-288   -96    
-32    -288   
-128   -32    
176    96     
160    0      
48     32     
-176   64     
-176   240    
224    320    
-96    192    
0      32     
64     64     
-288   160    
-384   -192   
480    -288   
-160   160    
96     144    
272    0      
-272   128    
80     48     
80     368    
-208   -240   
16     -288   
16     416    
64     64     
-320   -1088  
1008   -1280  
-1072  432    
-160   -224   
576    192    
-720   496    
144    672    
1056   256    
-528   -304   
-352   48     
192    416    
208    160    
64     -80    
-288   48     
160    -128   
288    368    
-560   80     
256    -272   
-128   512    
80     160    
-304   -320   
880    272    
160    32     
-1056  -48    
464    96     
608    -96    
-608   272    
112    112    
416    -48    
-496   176    
208    -16    
176    160    
160    208    
-384   240    
96     -64    
48     -64    
320    -16    
-432   0      
352    160    
80     112    
32     80     
-160   96     
80     16     
176    96     
272    144    
-416   144    
-176   96     
192    176    
272    48     
-496   -704   
624    3184   
2288   -48    
-1744  416    
-240   -272   
592    208    
48     160    
16     720    
-144   800    
-224   528    
-224   144    
256    -48    
-144   0      
-32    64     
-48    -240   
-256   32     
528    0      
-448   48     
544    320    
144    192    
-208   160    
80     240    
-336   0      
2112   -176   
-768   -128   
-864   16     
1040   160    
-80    16     
-336   64     
304    320    
592    0      
-384   144    
160    96     
128    64     
-128   48     
288    240    
224    80     
-176   128    
-16    256    
96     0      
-128   96     
-16    160    
304    704    
-608   -1424  
-544   576    
1472   -128   
-576   -16    
-128   -144   
384    80     
-208   208    
448    48     
-16    224    
-384   112    
-80    64     
464    112    
96     240    
-112   -176   
0      400    
336    -1728  
-64    48     
64     -144   
-352   160    
-176   -16    
544    -48    
192    96     
-368   320    
-160   576    
528    0      
144    -64    
-16    352    
-1488  176    
1968   -864   
560    -576   
-1904  -592   
-400   272    
1328   -48    
-480   176    
160    1312   
352    80     
-368   0      
-320   176    
464    -144   
-48    -48    
96     304    
-112   32     
48     176    
-48    16     
224    384    
-64    32     
-192   224    
128    256    
256    592    
160    224    
-656   224    
-128   208    
416    352    
224    224    
304    960    
-304   1488   
-32    -512   
384    -64    
192    -96    
-208   192    
-80    -576   
64     -208   
208    -400   
112    176    
-480   -2560  
64     624    
192    0      
-304   64     
352    64     
224    16     
192    816    
-160   880    
-192   16     
336    -352   
64     -528   
-48    -288   
-32    400    
224    -576   
656    1104   
-1168  -1216  
-304   -272   
1024   352    
-752   752    
-32    -288   
-48    320    
96     224    
208    -80    
-320   176    
128    -112   
128    288    
112    -736   
-448   288    
-160   -368   
464    -80    
48     176    
-208   64     
320    -256   
224    176    
-16    48     
-96    192    
64     16     
-192   96     
48     112    
416    -656   
-96    224    
0      -320   
208    32     
16     -112   
-496   848    
912    -848   
-688   160    
400    -32    
-112   304    
160    112    
16     16     
400    -320   
224    -144   
176    288    
-112   -144   
16     -32    
0      -464   
336    48     
80     -176   
-176   240    
-16    -592   
-80    16     
112    -80    
-160   -624   
864    -480   
-128   -1040  
-160   -1072  
-64    0      
240    -688   
-80    16     
112    -1232  
-80    -288   
128    32     
-32    -176   
80     160    
112    -112   
32     112    
112    0      
-16    48     
256    144    
-256   48     
192    720    
-224   752    
320    320    
-32    -320   
-96    -224   
48     -160   
224    -336   
224    -320   
-112   -16    
80     -48    
176    -80    
-112   224    
-496   -1664  
-1136  16     
1136   -112   
-784   144    
-400   576    
512    64     
-384   -64    
0      800    
224    -336   
256    -736   
-592   -752   
0      -480   
160    176    
144    -224   
-224   64     
112    -128   
192    208    
-304   -688   
-192   -176   
80     -96    
-224   -656   
1360   304    
-1456  -240   
464    1456   
-336   -816   
-1360  784    
1360   16     
-1056  -432   
0      -496   
336    48     
-144   256    
48     -208   
-48    -352   
368    -208   
0      192    
-224   -304   
-32    -80    
272    -160   
-48    32     
160    -320   
-720   320    
-16    -832   
880    -352   
-1072  224    
240    -240   
-96    -16    
-272   144    
608    -368   
144    240    
-320   112    
16     -160   
-928   -48    
32     -208   
368    -128   
128    32     
-528   -368   
-768   -64    
-352   -640   
-240   -1328  
480    240    
-192   -96    
-272   -112   
288    144    
-96    32     
-240   224    
80     -96    
-192   -16    
192    -160   
-256   -16    
320    -192   
368    1680   
1136   -416   
-1040  48     
-736   -2944  
512    -304   
544    112    
-336   -256   
-240   304    
144    -368   
-528   160    
160    -144   
-464   -16    
224    16     
64     16     
-64    -112   
176    240    
16     -224   
-112   96     
-464   -80    
688    416    
-528   416    
32     -416   
416    -32    
560    -128   
-1056  0      
448    592    
112    96     
-16    112    
-400   48     
-16    -144   
208    176    
0      -176   
-416   144    
320    -48    
-336   288    
256    -160   
-640   -208   
400    -16    
-432   0      
-32    96     
400    32     
-528   64     
144    -32    
-464   -112   
-128   0      
-336   192    
-96    16     
0      16     
-80    -256   
-224   -128   
-128   16     
-816   272    
848    -208   
-800   560    
320    448    
400    400    
-528   208    
-528   -176   
96     -32    
-224   -192   
-160   224    
-80    -256   
128    32     
-176   192    
-48    128    
352    -176   
-336   48     
528    800    
-976   464    
64     -48    
160    -80    
-112   48     
-416   -32    
208    176    
128    -96    
-160   432    
-16    -336   
-256   -752   
32     -48    
96     304    
-1216  -208   
1584   -1328  
-368   -208   
-1072  -272   
832    352    
-848   -624   
-1040  448    
384    720    
-192   -48    
176    -272   
224    336    
-560   -272   
-80    192    
368    352    
128    -240   
-320   -144   
-96    48     
-16    176    
-96    -64    
-32    32     
-432   -1296  
-352   512    
752    96     
-576   112    
-64    -112   
288    144    
-464   -240   
256    -160   
112    240    
-288   48     
48     80     
96     0      
-304   288    
320    -16    
-208   176    
-144   -16    
192    80     
-592   -96    
432    -64    
-256   0      
-48    -64    
64     240    
192    -32    
-64    224    
-304   -128   
64     224    
336    -48    
-144   96     
-256   48     
1312   1856   
192    -1168  
-2928  0      
368    528    
1312   640    
-1536  -496   
-368   48     
1328   160    
-704   -64    
-64    160    
368    -16    
-112   64     
-208   0      
-112   -80    
352    -80    
-16    -48    
-608   48     
240    0      
48     -224   
432    -80    
-368   -240   
368    1040   
-1344  -448   
-464   432    
1200   -240   
-80    -704   
-400   -224   
-368   288    
272    -16    
-112   80     
32     -32    
-112   16     
192    528    
320    -96    
-64    288    
-128   -112   
-464   128    
480    192    
-320   112    
-32    -224   
128    80     
-176   -112   
-32    32     
-336   816    
-272   -384   
240    256    
80     320    
-16    -768   
-720   400    
400    -96    
-720   400    
0      16     
80     -32    
224    -128   
-144   272    
-832   -192   
-400   176    
672    224    
320    -256   
-512   -112   
496    640    
288    -16    
-240   208    
-64    368    
-112   32     
352    496    
-384   192    
-176   112    
-80    128    
256    80     
-432   -656   
816    -336   
992    352    
-1232  160    
-432   -96    
976    -336   
-208   -304   
0      1040   
16     -928   
-352   -1040  
224    48     
144    112    
-304   -192   
-128   288    
128    400    
384    544    
-320   -240   
272    96     
80     272    
-96    688    
-48    112    
112    -320   
-48    -80    
-480   448    
624    336    
-528   352    
560    -32    
64     560    
128    752    
-224   176    
144    352    
320    -304   
240    -304   
-192   320    
192    848    
-96    1152   
80     -32    
-32    -96    
-416   -576   
448    688    
48     464    
304    -16    
-112   -256   
48     464    
96     624    
160    -480   
-256   128    
464    -80    
-144   816    
-64    -96    
112    16     
-608   -64    
944    -1152  
96     176    
16     0      
80     -192   
704    928    
-16    1088   
-128   -224   
80     -656   
96     -304   
-64    320    
-272   176    
144    608    
-224   656    
64     208    
-64    -16    
256    -272   
304    48     
48     80     
160    80     
-64    64     
256    32     
-208   208    
-32    512    
80     48     
-288   128    
112    224    
16     64     
32     -32    
-16    -16    
-544   400    
704    -800   
-672   128    
464    -208   
192    32     
48     192    
-80    80     
384    -240   
80     -32    
160    -208   
208    -144   
-96    80     
-128   224    
160    192    
-64    -128   
-128   -352   
288    -528   
288    -16    
-32    -192   
416    544    
-656   480    
240    -288   
688    -48    
-560   624    
0      208    
128    96     
-96    480    
224    224    
-16    -208   
-320   112    
16     176    
192    -208   
144    256    
-176   -448   
-176   288    
32     -16    
512    352    
64     -256   
-176   96     
-112   256    
32     48     
208    -32    
-96    96     
-96    288    
160    -112   
64     128    
208    -240   
112    368    
-352   -240   
-720   2080   
2480   -1136  
-784   112    
144    0      
144    -592   
-192   0      
416    -144   
-352   -368   
96     -400   
144    224    
336    -16    
-208   224    
-48    -384   
512    -16    
-224   -384   
-144   48     
-48    -160   
-32    -96    
32     96     
160    96     
-112   64     
32     800    
1904   -32    
-896   224    
336    -480   
272    -256   
-32    112    
112    -160   
672    48     
-448   -240   
256    256    
240    -192   
-240   64     
112    160    
-144   64     
32     80     
352    176    
-16    144    
128    64     
-496   160    
-96    -160   
96     288    
448    -240   
-48    336    
-64    -288   
-160   64     
-128   -288   
208    -432   
400    0      
-160   -48    
400    80     
-64    -800   
-384   -16    
-112   -32    
-80    -1296  
-64    -704   
32     256    
-496   -208   
-368   336    
608    0      
48     32     
-416   -240   
208    -176   
352    80     
-80    -384   
-640   320    
256    -16    
-16    -320   
0      848    
1248   2832   
-848   2064   
912    -48    
528    32     
-608   432    
-208   -176   
816    512    
64     -288   
-592   -544   
480    32     
544    176    
-304   -240   
-608   -80    
80     -96    
-32    32     
240    48     
-112   -16    
-384   -240   
272    64     
752    -1408  
-608   320    
624    -288   
-240   336    
-416   -400   
-496   -176   
64     -176   
288    -16    
-48    256    
0      48     
112    -80    
464    -208   
-32    -16    
96     -144   
-192   224    
-224   -576   
288    352    
256    -1344  
-560   288    
800    -240   
-128   176    
96     32     
-448   -16    
80     112    
528    32     
-432   -128   
-32    -32    
48     128    
336    160    
-432   -240   
320    -256   
-320   -336   
-176   -1376  
-656   -80    
464    -112   
-112   0      
224    -128   
400    -464   
-256   -16    
0      -528   
-16    -16    
0      48     
-416   64     
288    -64    
160    -16    
-96    96     
-128   -224   
272    -320   
416    256    
-448   32     
432    288    
-160   -96    
-176   16     
224    -64    
112    96     
-240   128    
-240   224    
176    -384   
16     -432   
-512   144    
0      -64    
688    -944   
-2912  736    
1264   48     
832    -16    
-720   -352   
32     -96    
256    -16    
208    816    
-976   656    
368    -256   
112    -336   
-544   192    
352    -416   
-64    400    
-448   -256   
352    -256   
-208   32     
-208   -32    
112    -816   
128    -448   
448    944    
-1488  192    
368    -96    
944    -528   
-1008  272    
224    -144   
-288   496    
416    -368   
16     160    
80     -176   
32     32     
-32    80     
32     112    
112    -48    
-336   -48    
48     192    
112    -96    
0      -144   
-160   0      
48     48     
-32    -192   
-80    64     
80     -64    
96     16     
-64    -288   
-352   -16    
-128   -304   
0      256    
-144   -32    
-608   -944   
2176   -208   
-1152  432    
-1424  -176   
1408   208    
-320   -384   
-352   0      
448    96     
176    -304   
-240   -272   
-464   -176   
320    112    
-96    -48    
-112   0      
-80    208    
544    144    
-368   112    
-48    -16    
144    112    
64     0      
-224   -112   
-16    -960   
-736   224    
816    -560   
-400   -64    
160    224    
544    0      
-256   -96    
-368   -304   
16     176    
96     464    
416    112    
-400   48     
-176   208    
336    -64    
192    48     
-720   -32    
-144   -608   
-112   -144   
352    256    
-96    -176   
-16    0      
-208   -96    
-160   -192   
16     -32    
-304   -288   
96     -464   
1264   560    
448    752    
-304   544    
272    -48    
-512   -32    
-16    -368   
400    864    
-656   976    
-400   -208   
448    -656   
144    -32    
16     -112   
-192   96     
0      -48    
80     -80    
80     144    
-80    128    
-160   32     
-432   -864   
-224   -656   
64     288    
-672   -208   
0      160    
-352   -976   
1328   -160   
928    304    
-1120  128    
336    -352   
320    -224   
-352   416    
-144   -576   
-80    -112   
-32    736    
0      -112   
-112   -272   
-384   160    
-640   -96    
-16    -96    
256    480    
-416   272    
-64    -16    
48     -112   
16     -480   
-224   560    
-48    416    
384    16     
352    -128   
-672   -272   
-256   416    
0      144    
-560   -896   
320    304    
64     416    
-144   288    
-80    368    
128    -640   
32     -336   
176    80     
96     352    
-224   128    
16     -304   
352    -496   
-240   368    
-224   112    
-224   -304   
224    576    
-176   -176   
64     208    
-32    592    
128    -496   
400    672    
-160   768    
-112   192    
-176   16     
384    464    
896    528    
-624   96     
-128   -160   
-272   112    
112    272    
208    528    
-256   -144   
-448   -192   
0      96     
336    80     
96     -80    
-384   -32    
-16    48     
320    480    
-80    64     
-368   64     
-336   144    
96     -432   
-176   96     
-112   -128   
112    -32    
-336   -384   
0      160    
-160   368    
0      -96    
-32    272    
-144   688    
208    -16    
528    976    
-1312  560    
464    -592   
704    -400   
-192   -480   
160    -592   
-480   -784   
288    704    
80     1024   
0      96     
32     -272   
-48    -176   
80     320    
64     -160   
48     48     
-32    448    
144    352    
0      16     
96     -128   
-80    -16    
256    -240   
-832   1216   
720    -480   
160    -288   
16     -16    
-240   160    
48     144    
128    192    
-96    -272   
80     -496   
-80    160    
-64    -96    
240    -288   
112    48     
-256   -272   
128    192    
160    336    
128    208    
-96    112    
64     112    
16     -16    
-80    32     
144    160    
-80    224    
192    192    
304    176    
-208   -32    
-112   -32    
192    240    
-32    1440   
1072   -176   
-1696  528    
1088   144    
368    224    
-1248  -144   
336    160    
496    -112   
-240   128    
-32    -64    
160    96     
-32    32     
-64    144    
240    48     
-528   80     
320    -144   
0      64     
-160   -80    
48     -1520  
288    48     
-32    80     
-128   -288   
1024   1008   
704    -288   
-1600  368    
896    -32    
-320   144    
-192   80     
320    -336   
-512   224    
448    32     
-192   -304   
16     112    
240    -368   
352    192    
-336   64     
-304   48     
320    208    
96     -320   
96     -160   
384    0      
64     -112   
240    528    
224    -112   
-288   160    
352    336    
-192   -224   
-640   112    
-448   112    
464    -80    
-656   -896   
-80    144    
336    64     
-32    176    
256    368    
-240   144    
-32    -688   
160    544    
-224   304    
16     192    
464    -160   
400    -192   
-96    224    
-176   -416   
160    368    
-80    -240   
112    64     
208    416    
176    -80    
256    704    
1360   3824   
-1584  2688   
1088   -896   
128    -480   
-720   -32    
80     336    
352    -208   
304    -112   
-368   -416   
-528   80     
592    -144   
128    96     
-64    -96    
-64    0      
224    -48    
144    96     
-224   112    
144    112    
-368   -336   
576    592    
240    -144   
-432   16     
64     -96    
-400   160    
688    64     
-560   -160   
144    80     
528    -960   
-192   -64    
-416   80     
368    16     
96     96     
192    64     
-160   -48    
-208   -208   
400    -112   
-256   352    
672    64     
32     -128   
16     192    
-16    -80    
272    304    
-16    -160   
320    80     
0      656    
-176   208    
0      160    
256    -16    
-416   -112   
224    -144   
-192   -48    
352    80     
-864   432    
240    -688   
112    -208   
-256   -240   
208    16     
-128   -192   
272    32     
128    80     
-64    -16    
-16    -32    
32     272    
112    -432   
-128   -80    
144    -1408  
-48    -256   
48     400    
128    544    
-304   800    
256    96     
272    -32    
16     -496   
-128   -96    
0      -96    
128    -272   
112    240    
-432   544    
432    176    
64     64     
-16    320    
-64    -2192  
-1328  160    
1520   -528   
-960   1120   
-288   -256   
432    -16    
544    -448   
-384   -560   
-352   16     
240    160    
352    16     
-128   -80    
-176   -144   
-80    32     
256    16     
-160   -384   
32     -304   
-32    -80    
96     -224   
-128   -528   
432    -1584  
0      112    
-32    544    
288    912    
16     160    
-256   -336   
224    -96    
16     -80    
-160   48     
-48    32     
0      -64    
-96    -192   
256    -160   
-176   -704   
-112   32     
432    336    
16     224    
-192   -48    
96     -240   
192    -144   
-128   32     
32     48     
160    -80    
-48    -64    
-64    -160   
80     -112   
240    -368   
-64    128    
-240   144    
-1152  -400   
432    -1296  
1248   -576   
-1168  -368   
512    608    
-80    -96    
-320   384    
128    -1280  
-192   -640   
64     -128   
-16    48     
-1104  -64    
-96    32     
-80    256    
464    -96    
-336   112    
-192   -592   
240    -592   
-224   -416   
-96    352    
576    1680   
272    -624   
-2208  368    
1136   720    
784    336    
-912   -512   
-16    0      
368    -592   
-624   -432   
-128   -368   
144    144    
-112   -112   
-144   -112   
288    -1328  
-96    176    
-480   48     
336    -32    
-16    656    
208    752    
-368   592    
-32    272    
48     224    
-16    -176   
32     -96    
224    -1104  
-160   -1056  
-224   -832   
864    -832   
-16    -1808  
-192   400    
-48    160    
-528   -816   
-32    -480   
992    576    
-704   528    
-592   -80    
-288   -1376  
144    -1008  
256    -528   
-336   384    
512    -160   
16     -16    
-208   -480   
-384   -96    
16     -528   
-384   -192   
464    -112   
-480   288    
320    128    
-32    -112   
-304   -1520  
-1984  288    
992    16     
480    240    
208    896    
-688   544    
-16    -400   
752    192    
-224   896    
-800   -288   
-64    -224   
-1008  336    
192    464    
48     -464   
-16    144    
256    272    
96     -32    
-96    64     
16     144    
-208   208    
128    80     
-384   -432   
160    -320   
-528   464    
400    416    
48     240    
-640   272    
-112   -176   
-192   -928   
96     -192   
0      352    
-208   336    
288    -48    
80     160    
-656   -128   
288    -128   
208    -496   
-720   -944   
192    0      
352    544    
-384   32     
-80    -192   
-64    -240   
-144   -144   
224    -704   
224    224    
0      256    
192    736    
0      208    
-128   -496   
384    784    
-912   480    
-128   -144   
896    336    
-848   64     
-368   944    
800    912    
144    -144   
-768   -864   
80     -528   
-480   16     
-80    304    
128    -32    
-240   32     
32     160    
176    160    
-240   112    
384    144    
224    32     
-112   -144   
112    -112   
-96    64     
0      192    
-112   0      
-48    352    
96     -16    
-160   -640   
-80    -48    
80     528    
-496   -512   
976    -112   
-448   -144   
-176   -688   
-256   880    
0      192    
288    544    
-256   128    
-64    -480   
-96    -608   
192    -144   
0      0      
112    96     
-624   144    
-176   496    
128    304    
-208   160    
-64    352    
256    176    
-96    -64    
-272   -48    
736    1312   
-96    -96    
-592   128    
656    -160   
-400   96     
-256   -368   
112    96     
-384   -240   
-80    -96    
-144   80     
416    320    
64     128    
-272   96     
288    -16    
-304   16     
112    32     
-208   80     
416    128    
-544   -32    
224    80     
112    -32    
-128   160    
-112   16     
0      96     
400    160    
176    -16    
-464   144    
192    32     
-160   528    
-2000  -64    
784    -544   
2224   -512   
-1056  -176   
-1120  -64    
720    448    
928    -368   
-656   544    
32     -176   
272    288    
-96    96     
-192   16     
32     -176   
400    224    
-128   -144   
-32    176    
176    80     
-112   48     
-352   -368   
0      96     
144    48     
-864   -336   
1600   192    
496    -192   
-864   288    
-448   304    
656    80     
-320   416    
-112   352    
320    -160   
32     48     
-160   48     
-32    64     
352    48     
-864   144    
464    48     
112    -368   
-400   48     
400    256    
-416   32     
32     144    
432    608    
-848   -80    
272    288    
688    -160   
-336   544    
-112   656    
0      320    
336    80     
368    368    
-112   288    
-288   -224   
160    144    
416    48     
176    0      
-192   1040   
32     -192   
640    -816   
-192   512    
-144   320    
192    48     
160    128    
80     64     
-80    112    
176    624    
-288   96     
-496   96     
704    64     
176    144    
-1104  192    
2544   -2224  
-688   576    
48     -256   
576    112    
-816   592    
96     -240   
528    288    
80     -320   
-480   224    
-240   96     
176    160    
400    -176   
-288   -272   
-144   0      
16     160    
576    48     
-208   144    
144    128    
-560   32     
752    304    
-480   256    
192    96     
112    -16    
-576   224    
336    80     
0      256    
96     192    
-256   -2880  
-128   -144   
240    -80    
16     64     
0      96     
-288   -16    
288    -64    
-144   -176   
64     -176   
-256   -32    
96     128    
32     208    
64     16     
176    -96    
0      80     
400    -880   
-384   96     
-256   112    
528    160    
48     384    
-384   208    
240    96     
160    48     
144    880    
-592   480    
80     -288   
352    -896   
-448   0      
-16    496    
176    -144   
-160   -416   
448    224    
272    -320   
-32    64     
48     64     
0      64     
-256   -160   
144    -128   
176    -208   
208    80     
-160   -64    
16     304    
112    416    
32     -1136  
224    -272   
128    432    
-288   256    
368    -2128  
-256   -848   
-256   160    
128    1072   
400    368    
-352   -848   
768    -1184  
-752   288    
-784   -544   
752    -432   
-48    256    
48     208    
-240   -720   
416    -160   
-240   -32    
192    -560   
224    224    
-112   -2064  
-128   224    
80     32     
64     -32    
-160   -320   
144    320    
128    32     
80     -16    
32     496    
64     -240   
-64    432    
704    416    
-192   48     
-416   0      
48     704    
416    528    
-176   176    
-192   -864   
320    448    
144    -240   
-80    256    
-48    -128   
-128   -80    
128    0      
128    80     
16     416    
-320   -992   
16     -192   
560    -272   
64     224    
-400   -336   
112    80     
160    32     
16     192    
-64    160    
-48    -80    
256    48     
80     -448   
-1216  -528   
496    640    
1328   -416   
-720   -720   
272    672    
512    -32    
-384   992    
272    -608   
256    320    
-128   208    
-96    384    
80     -96    
-32    48     
208    -80    
208    64     
32     -96    
-176   -96    
304    64     
144    48     
-176   -48    
336    -640   
-1744  1520   
1088   -288   
-112   -880   
192    528    
48     -144   
-256   992    
560    528    
-224   224    
-400   -976   
368    -1024  
-96    -128   
-208   -2032  
160    272    
-240   1024   
-176   208    
352    -304   
-128   -464   
352    -624   
-176   16     
-144   -96    
128    16     
-656   240    
208    736    
640    160    
-224   -288   
720    1776   
-864   2048   
-448   752    
368    -464   
-352   -832   
-80    -784   
-16    96     
912    -128   
-1296  592    
-304   -608   
-144   -784   
-176   -224   
208    -384   
-288   -32    
224    -128   
16     -48    
144    -512   
-48    -16    
112    -160   
208    464    
320    240    
-320   848    
-32    576    
16     -480   
656    608    
1152   -32    
-1232  784    
112    384    
704    -240   
272    -192   
-208   112    
-832   -592   
464    -864   
432    16     
-128   80     
-192   -144   
-176   -16    
352    -240   
560    304    
-480   -96    
-256   -224   
96     -288   
576    112    
-96    672    
-224   320    
-320   -48    
-496   -48    
192    -688   
64     -16    
32     784    
272    400    
-288   464    
224    384    
64     -352   
-32    -400   
448    -128   
-272   -48    
368    -864   
-224   -224   
64     224    
80     -176   
-352   -240   
-240   -80    
64     256    
48     112    
32     -480   
272    64     
64     -2240  
32     -528   
0      -400   
-32    -464   
0      -384   
-144   -336   
-96    -224   
-208   -1104  
-1232  64     
1312   832    
32     688    
-128   432    
176    160    
-528   -592   
160    -144   
-272   -800   
320    -64    
48     -32    
-160   -160   
-272   -416   
272    -208   
-192   368    
-64    304    
112    544    
-64    128    
-128   -64    
-208   32     
176    368    
32     48     
80     32     
112    -144   
224    -160   
-1056  112    
320    256    
336    128    
-176   -80    
848    2016   
-1616  1056   
576    -48    
768    -80    
-720   -80    
-304   -80    
144    64     
80     -256   
-320   32     
336    -368   
-144   48     
-208   0      
288    48     
-16    272    
-464   -16    
-240   -448   
640    -112   
-240   32     
-144   464    
416    192    
-656   -544   
384    -544   
-1072  64     
240    144    
352    48     
-352   352    
-192   -96    
112    208    
208    -208   
-704   48     
-256   -16    
0      48     
272    80     
-64    32     
-128   64     
176    -16    
-208   384    
-384   -112   
-160   -112   
0      160    
240    112    
-304   160    
-304   48     
64     16     
-112   -32    
-640   80     
496    96     
-224   112    
-80    -64    
-80    -1296  
880    -1344  
-240   224    
-112   144    
-208   -224   
624    416    
-16    -320   
-1040  192    
144    -304   
96     -48    
-448   16     
0      192    
-208   -32    
-400   -16    
160    -144   
336    80     
-464   -112   
-16    128    
416    112    
-176   -176   
-160   -48    
-16    16     
304    864    
1456   64     
-1712  -64    
704    720    
1648   -16    
-1440  144    
800    64     
-224   144    
-384   160    
48     16     
48     128    
16     32     
64     -16    
192    192    
0      -32    
-144   112    
0      272    
240    368    
-192   32     
-240   -32    
-240   -784   
-1312  432    
560    -48    
-432   -32    
-288   -112   
640    -240   
64     32     
-400   304    
64     48     
-368   144    
-144   0      
-32    16     
80     -112   
48     224    
544    -128   
-352   -288   
304    -80    
-336   -128   
-192   320    
368    -272   
-224   48     
32     64     
-16    48     
-80    -304   
-320   192    
528    80     
-112   80     
-128   112    
528    2544   
1168   320    
-1136  912    
544    -544   
96     -96    
-256   448    
-64    96     
464    -32    
80     64     
-416   -16    
448    160    
-240   80     
-160   192    
416    -160   
-416   160    
-112   -80    
48     96     
176    -32    
-96    224    
32     1184   
304    384    
-352   -160   
144    -112   
-192   -48    
-688   240    
976    208    
-400   400    
-224   -272   
320    112    
-64    -304   
-64    -80    
-112   288    
-288   -256   
64     128    
144    160    
-32    320    
208    672    
352    -384   
-432   -80    
112    48     
176    96     
160    416    
16     512    
-304   160    
368    -224   
-240   -272   
-208   -544   
384    -288   
-192   320    
128    -32    
-192   -496   
448    624    
-928   256    
256    -176   
-32    -16    
-128   -496   
16     -1472  
96     -1008  
-432   -48    
96     592    
-192   208    
144    240    
128    32     
-32    32     
-192   32     
224    320    
-64    192    
160    -96    
-16    224    
-96    -16    
160    16     
-112   -480   
0      16     
240    320    
-80    544    
80     112    
336    96     
-768   -64    
416    256    
224    80     
-208   96     
-208   -1008  
-48    -816   
192    368    
-144   96     
16     160    
-64    128    
64     -496   
320    -16    
32     0      
-96    304    
96     320    
0      160    
-128   272    
144    -176   
192    208    
-80    512    
-80    368    
-32    272    
128    288    
-224   -512   
848    -544   
-96    416    
-592   -48    
448    -144   
-96    96     
64     224    
192    -16    
16     -912   
-112   48     
64     -16    
272    160    
-32    -16    
224    176    
-352   16     
48     144    
48     -64    
112    160    
64     224    
-112   336    
64     32     
544    -32    
-16    48     
-144   -528   
368    96     
0      112    
-176   224    
160    -80    
-16    144    
0      160    
480    -720   
-2736  -64    
1056   224    
368    -656   
-848   208    
-64    896    
208    -784   
-272   224    
560    160    
384    608    
-48    352    
-432   256    
80     144    
224    -48    
160    256    
-160   -320   
-144   -352   
-192   -528   
272    448    
48     -128   
-48    80     
1200   -608   
-1648  480    
384    -16    
16     688    
-656   -688   
592    -576   
480    1024   
-160   1376   
-32    240    
-96    -208   
112    112    
48     192    
-64    224    
96     16     
-16    -32    
32     -400   
-272   -1440  
-32    -816   
144    -512   
-240   -1376  
96     -16    
-96    -528   
544    -480   
-416   -176   
480    -240   
-64    -624   
1168   -1168  
-208   -400   
-240   576    
352    336    
-320   64     
208    32     
-16    160    
-416   -1088  
-80    288    
224    -96    
208    -640   
240    112    
-288   -80    
0      -192   
-32    192    
-256   80     
544    128    
96     -224   
176    -176   
-256   -112   
96     -80    
640    -384   
-416   32     
-960   1664   
544    576    
-272   -624   
128    2064   
544    1728   
-192   288    
-240   64     
384    -752   
-352   -160   
-64    -352   
80     496    
-112   -544   
-48    -224   
-64    -352   
192    -64    
-80    -320   
272    192    
320    -624   
-144   256    
-64    -432   
0      -160   
0      0      
400    400    
368    -624   
-640   32     
256    144    
0      240    
304    48     
144    -112   
-240   368    
192    48     
0      208    
-16    -80    
304    320    
-144   16     
-240   336    
560    336    
-96    -320   
-64    -576   
304    -208   
-48    -400   
288    192    
-368   -1104  
-240   -112   
528    80     
-224   -320   
-240   -16    
432    -208   
-144   -288   
96     64     
-112   -1264  
416    -640   
-192   272    
-176   -64    
304    32     
-48    -80    
-304   -192   
368    -112   
16     160    
192    -864   
-224   176    
272    176    
160    -176   
-272   -208   
288    704    
-240   0      
32     112    
192    672    
-224   144    
-496   -112   
-144   -64    
352    -176   
-16    -592   
-144   -240   
160    -32    
336    608    
480    -816   
-528   -64    
48     -16    
176    176    
432    2256   
2704   -80    
-1584  160    
-336   32     
464    -144   
-48    -576   
-560   -96    
480    496    
-336   48     
160    -688   
256    -128   
64     -2960  
-384   80     
256    448    
464    16     
-208   -224   
-64    304    
320    -192   
-176   64     
-288   -32    
112    1200   
112    -256   
-864   -528   
-400   320    
832    -320   
-144   560    
288    -576   
-272   176    
160    -160   
-112   96     
336    -80    
352    -112   
-496   0      
-208   -224   
512    48     
48     -96    
-768   -112   
16     144    
32     -16    
16     -144   
64     64     
-160   -192   
96     96     
208    -944   
384    64     
-656   96     
128    -48    
128    112    
48     480    
-2112  -1616  
240    -1904  
2640   432    
-1088  -320   
-1088  -240   
48     -176   
1040   -192   
-208   -432   
-480   -176   
576    -1664  
0      80     
-80    -48    
96     32     
-336   0      
400    128    
144    0      
-336   16     
48     -64    
240    -32    
48     96     
80     -160   
-592   -768   
48     -192   
1120   -656   
-352   -400   
-480   -32    
800    -96    
-592   80     
-192   -32    
336    -32    
128    32     
64     -16    
-80    144    
-128   -64    
-144   208    
528    -160   
-176   112    
-256   -560   
-48    128    
96     112    
288    -48    
-128   480    
0      -160   
-816   192    
656    -48    
-304   -112   
-304   32     
64     -48    
176    -336   
336    -48    
-496   -160   
64     592    
-32    80     
-144   -256   
208    416    
240    -224   
-256   256    
448    128    
-112   32     
80     96     
64     -16    
32     -64    
-320   -64    
-896   -32    
48     320    
-288   -112   
-448   128    
160    -80    
-192   -96    
-544   496    
1408   304    
112    -32    
-1584  -160   
192    128    
1168   -16    
-928   656    
-352   -240   
320    384    
208    -16    
-384   -16    
64     -240   
-352   -32    
160    -128   
-256   144    
224    -112   
-496   256    
352    -208   
-144   144    
48     592    
-112   1152   
208    480    
-144   -256   
192    48     
-576   368    
848    16     
-400   64     
112    576    
240    64     
-112   -576   
368    -416   
0      960    
-64    352    
-144   -304   
208    -176   
-64    16     
128    672    
16     320    
-144   192    
-80    96     
128    -336   
-576   -608   
352    -464   
64     -976   
-48    -416   
-288   512    
288    384    
-448   560    
-112   624    
304    0      
0      -96    
544    784    
-1408  -224   
-16    288    
160    352    
-224   288    
0      416    
320    1168   
192    -768   
-416   -160   
112    288    
-48    -272   
-80    64     
208    -48    
-304   -112   
-16    0      
112    -96    
64     -144   
96     176    
-272   32     
128    48     
96     -32    
112    80     
-240   96     
-112   48     
64     112    
624    -176   
-112   -16    
-288   -32    
64     144    
240    32     
208    -448   
-928   144    
496    176    
-352   48     
96     112    
240    64     
-32    -192   
-304   160    
0      320    
128    304    
128    -224   
-128   112    
-160   80     
192    -48    
64     176    
192    64     
-384   -176   
-64    224    
48     112    
-160   -160   
704    -640   
-256   768    
128    16     
-16    -160   
-240   176    
144    96     
-112   176    
192    16     
112    160    
-16    16     
-48    288    
-160   -80    
240    -64    
144    -128   
-192   208    
-224   144    
96     464    
320    80     
-208   -16    
-224   144    
288    -208   
256    -64    
-48    144    
160    144    
-192   -128   
-384   208    
32     80     
144    80     
32     16     
-1312  -992   
224    400    
1168   -80    
-1120  672    
208    -16    
-32    -1600  
-752   -592   
400    1728   
-400   -240   
-304   -1104  
160    -224   
-240   112    
-176   160    
400    464    
0      16     
-208   -32    
-32    -32    
224    -496   
0      -976   
-80    32     
528    544    
-2048  -176   
-32    704    
400    -480   
-272   -1088  
272    -352   
96     864    
-544   736    
-80    576    
80     -336   
64     -128   
-32    112    
-256   464    
528    16     
-304   -192   
-160   160    
176    -112   
-16    144    
640    160    
-176   128    
-288   112    
-192   16     
288    -96    
-640   2528   
1280   144    
576    -96    
-768   -160   
656    368    
256    160    
-288   -288   
144    48     
-64    -48    
160    352    
-304   128    
-512   -544   
464    -352   
192    320    
-864   112    
384    -1488  
848    -304   
-368   176    
-144   0      
240    336    
160    16     
-160   -368   
-624   336    
480    160    
-48    80     
-592   -336   
-256   -2064  
1632   -1648  
-144   240    
-592   192    
-160   16     
176    272    
352    256    
-176   240    
-400   400    
544    48     
-64    112    
32     144    
-208   -16    
-16    240    
384    -64    
112    160    
-528   144    
160    64     
-192   48     
784    -944   
-416   240    
192    -160   
-192   128    
-592   112    
672    64     
160    64     
-384   128    
0      -48    
208    64     
-176   -256   
528    208    
-304   0      
-32    0      
544    -128   
-352   -224   
-432   -272   
560    -896   
-64    256    
80     256    
0      192    
-16    -112   
-400   -80    
336    -64    
304    176    
-16    112    
-400   240    
128    176    
464    32     
-336   96     
0      -272   
208    48     
336    624    
-1136  288    
112    96     
336    16     
-208   -240   
-176   112    
528    160    
16     80     
96     -128   
-96    128    
112    -16    
-16    -48    
32     272    
144    48     
16     -240   
-48    -592   
208    -160   
-160   -1552  
-256   48     
224    272    
192    -16    
-80    -160   
144    -96    
-112   304    
208    80     
208    -576   
64     272    
80     256    
-96    -80    
704    1776   
-608   -2256  
-1392  688    
1504   -416   
112    -48    
-832   208    
256    0      
608    384    
-304   -560   
-416   0      
304    640    
-32    -144   
32     16     
208    240    
-432   -304   
288    -144   
-64    176    
-32    176    
32     -272   
48     96     
496    1136   
-896   256    
176    80     
688    -16    
-480   -80    
272    384    
-512   432    
240    -64    
304    -144   
-176   -112   
32     160    
-16    224    
96     320    
144    -352   
-96    240    
368    32     
-368   -752   
-224   -48    
624    -832   
64     -736   
-464   -160   
-80    -768   
368    -80    
-16    -32    
-304   -224   
144    336    
-16    -400   
64     160    
144    -224   
192    -1568  
544    592    
32     736    
352    -240   
400    -432   
-480   -512   
-832   400    
896    64     
432    -112   
-576   -336   
128    -128   
-16    112    
16     -256   
-48    -112   
-160   0      
624    64     
-208   48     
-64    -272   
-32    -336   
336    -368   
-240   -192   
-16    400    
496    -208   
-1408  -240   
944    -1472  
176    32     
-208   -192   
16     48     
144    144    
256    -48    
-304   -80    
-304   96     
160    -32    
272    80     
-160   192    
32     -96    
-768   48     
320    -144   
80     -320   
32     -384   
-208   80     
96     -16    
48     -256   
-592   -128   
-80    -96    
848    160    
160    352    
-48    -144   
-256   160    
-80    16     
-16    -192   
-352   -416   
1088   -128   
-1184  -80    
-240   -32    
848    288    
-608   208    
-176   -128   
448    -416   
-288   16     
16     112    
0      32     
192    48     
48     -176   
-208   176    
448    288    
-768   336    
-112   -64    
336    32     
-416   -1232  
-1088  -1904  
1776   -2976  
-96    448    
-1088  -688   
-112   352    
416    -1808  
-592   -1168  
240    224    
432    -80    
-528   -16    
48     -688   
384    64     
-144   224    
-160   320    
-32    -176   
176    -32    
48     -240   
112    32     
96     -208   
-32    432    
32     -944   
144    112    
80     16     
-560   816    
-256   544    
256    96     
48     -192   
-96    400    
-320   -256   
80     -720   
-160   -464   
48     -160   
352    32     
-192   -80    
-48    752    
128    -144   
176    112    
48     768    
-32    -16    
-64    -816   
288    304    
-48    0      
-80    -144   
-16    -48    
448    176    
-656   -208   
96     -1424  
368    -368   
-384   -464   
-64    432    
400    -352   
336    -64    
-1312  656    
576    1040   
-64    800    
-48    48     
-144   48     
-176   -1152  
-512   -624   
592    976    
-416   432    
-624   -176   
-224   256    
-400   -32    
288    112    
-48    -48    
-416   -160   
176    -176   
256    48     
-336   112    
176    -112   
0      16     
160    -64    
-128   128    
-64    -320   
-16    -448   
400    0      
-224   80     
-112   -32    
80     64     
144    16     
-576   -416   
-112   -240   
-464   112    
304    -128   
80     272    
-192   48     
-608   0      
112    -336   
160    -128   
-208   224    
16     -80    
176    -64    
-16    -16    
-32    -80    
-160   -80    
128    -96    
-64    -144   
-160   160    
0      208    
-256   496    
-16    -208   
-528   -112   
528    -144   
-512   16     
0      16     
160    64     
128    -80    
-176   -48    
-32    -48    
-16    32     
176    16     
0      144    
-112   336    
16     496    
-144   128    
-384   160    
-112   -32    
480    -576   
-384   -304   
-224   208    
80     224    
64     192    
48     96     
272    -96    
-448   32     
-128   32     
512    256    
-464   32     
-64    16     
-1712  -368   
768    -80    
496    96     
-800   608    
-752   240    
1104   0      
-1184  -160   
-272   -176   
656    224    
-272   -16    
-320   176    
-32    -16    
80     192    
64     144    
-96    160    
16     64     
-352   -96    
80     -304   
-64    -96    
-400   -144   
-32    256    
944    -624   
-1616  288    
496    352    
416    1024   
-16    464    
-128   -112   
192    48     
96     80     
-272   -368   
-432   16     
416    256    
-128   -288   
-304   112    
0      -32    
368    32     
-160   -48    
-320   0      
416    -16    
-32    64     
-192   80     
-96    -208   
848    320    
-48    16     
-496   96     
32     240    
720    -144   
-112   1216   
80     560    
-128   -48    
192    160    
-224   -160   
-352   48     
144    336    
64     -48    
-272   688    
-336   -16    
48     -208   
0      144    
48     -48    
-32    80     
-272   16     
-80    80     
0      112    
16     32     
-304   -16    
-320   144    
320    16     
80     224    
-192   1968   
1216   2880   
816    144    
-1392  -656   
-752   32     
1504   176    
-336   32     
-496   -80    
176    -48    
-80    528    
368    464    
-16    -112   
-208   160    
32     32     
400    16     
112    112    
-32    16     
-432   80     
-112   -352   
704    320    
176    -144   
-704   224    
256    352    
-112   64     
-160   -16    
272    144    
320    304    
-752   208    
224    128    
592    32     
-672   -80    
-128   128    
272    48     
352    144    
48     240    
-512   144    
-48    0      
480    192    
-112   -96    
64     240    
-16    -16    
256    64     
192    -16    
-352   -208   
-16    -96    
176    16     
352    -128   
-448   -80    
-144   16     
224    96     
176    224    
-96    -176   
432    208    
288    -272   
-304   -880   
-512   48     
528    -144   
192    16     
-400   -80    
-304   32     
512    16     
-240   16     
32     -64    
0      -112   
-96    64     
208    192    
-64    -368   
-16    -240   
0      -256   
-240   -1344  
32     -80    
112    -64    
0      352    
176    176    
-80    160    
208    -160   
224    1264   
288    48     
-368   -400   
48     176    
-256   -656   
1712   544    
160    144    
-1120  0      
288    -272   
176    0      
80     -128   
-16    144    
224    -384   
-128   304    
160    416    
288    -48    
-80    -16    
-176   176    
320    -320   
240    432    
-352   16     
96     160    
-32    304    
64     -64    
176    112    
-160   992    
1312   -176   
-800   -48    
-112   256    
624    48     
-208   256    
-48    -208   
240    32     
-64    -16    
256    176    
96     32     
-304   112    
192    -32    
208    -352   
80     80     
-48    -2576  
-192   80     
144    0      
-64    128    
64     64     
-48    64     
240    80     
80     32     
-336   176    
512    112    
-400   0      
192    -96    
176    160    
208    -480   
-1712  -512   
-864   -1392  
2640   -640   
-768   -160   
-112   720    
816    16     
-608   -96    
96     -80    
160    -176   
48     160    
-224   176    
160    128    
224    -160   
112    368    
-336   48     
96     400    
256    176    
-96    256    
-48    -480   
128    128    
-176   -64    
352    688    
1888   -288   
-928   480    
-544   448    
608    304    
368    -48    
-176   -16    
0      96     
-208   -112   
192    80     
-48    -160   
32     96     
48     -240   
224    128    
-16    48     
112    176    
-80    256    
-16    112    
288    -64    
96     -32    
48     240    
-240   -416   
-336   96     
-48    192    
-32    176    
-368   -1152  
-32    208    
704    -48    
-400   -768   
-512   -16    
240    -32    
-48    32     
-256   -144   
576    336    
-544   -288   
320    -528   
432    -32    
-112   240    
-192   -128   
0      192    
160    0      
240    192    
-128   -144   
-448   -368   
656    -1104  
160    320    
400    128    
-192   -96    
-288   -96    
-384   -624   
-304   -560   
96     -32    
272    -1280  
464    -464   
-176   240    
-400   -160   
48     -1152  
304    -288   
-192   -144   
-304   496    
32     -224   
336    -112   
224    -160   
-256   -208   
-80    384    
96     -32    
272    -288   
-48    -816   
-96    208    
0      512    
320    -128   
-160   -128   
128    16     
32     464    
160    384    
176    176    
-80    192    
80     144    
80     48     
-128   -224   
-128   -160   
160    224    
32     -432   
-160   352    
208    -768   
208    352    
336    -976   
-480   -704   
-64    128    
528    480    
224    -304   
-176   16     
-368   32     
544    -384   
-256   -256   
-256   -368   
112    400    
128    -528   
80     -464   
608    304    
-1024  -640   
-624   -1520  
624    96     
160    1280   
-272   768    
224    -608   
-272   -1120  
336    416    
368    544    
-80    80     
-16    -64    
-272   -304   
320    -208   
48     -112   
-160   -320   
-368   0      
384    -464   
48     -32    
-80    -48    
144    16     
80     -160   
-208   64     
208    96     
384    192    
-848   208    
-48    -112   
-192   272    
48     -16    
-336   80     
-624   672    
880    -304   
-416   -384   
-208   384    
-48    -416   
-16    -368   
-272   448    
64     192    
-176   -272   
-224   -288   
64     -128   
144    96     
-256   48     
-32    128    
-1184  -176   
128    48     
240    -48    
-32    -192   
-112   144    
528    -272   
-624   736    
368    -64    
144    -128   
-272   384    
0      272    
80     704    
32     560    
32     -448   
96     -432   
-512   448    
-48    -528   
64     -80    
-144   240    
96     -80    
48     -528   
-32    -192   
-16    64     
-128   464    
-352   -256   
64     -80    
96     -16    
-160   -80    
-80    -16    
32     -240   
-16    64     
304    -80    
-48    48     
-320   -320   
-128   -640   
704    -256   
960    -688   
-976   -336   
1104   208    
-16    -416   
-1024  80     
576    -352   
16     -144   
-368   -32    
-80    176    
256    112    
-16    -144   
-160   -128   
-48    -320   
192    -64    
-368   112    
128    16     
272    -144   
-304   32     
-80    -32    
-128   -736   
1152   880    
-400   -240   
-64    80     
496    304    
-896   32     
-432   -64    
800    112    
-16    -320   
-416   176    
-192   192    
64     48     
128    32     
-64    16     
-80    -80    
-1216  64     
528    480    
-240   64     
160    16     
-144   -224   
-256   176    
-32    -96    
784    -208   
-512   176    
240    80     
400    -64    
-64    80     
-32    336    
-496   480    
288    96     
-608   112    
-288   -208   
-592   -96    
272    -144   
272    -16    
-32    -256   
-640   -352   
448    128    
192    -352   
-304   -112   
96     288    
-112   128    
-16    96     
256    112    
544    560    
-944   272    
-144   432    
304    48     
-992   -704   
2176   3440   
80     1920   
-480   448    
576    -80    
-720   -80    
320    128    
-208   272    
-288   -528   
-48    -96    
336    -80    
-144   320    
-496   48     
112    176    
208    -80    
144    -32    
-1440  16     
192    192    
-192   -192   
-112   -192   
560    560    
-64    -368   
-496   32     
480    192    
-784   -352   
-80    0      
960    32     
-736   16     
-160   176    
48     0      
64     64     
-320   -112   
192    64     
0      -96    
272    352    
-496   -112   
192    224    
192    0      
-64    -128   
0      -64    
-32    176    
48     -96    
-272   -64    
416    -112   
80     -192   
-704   96     
336    -16    
32     144    
80     160    
-112   96     
-336   -32    
512    48     
240    768    
-256   -176   
-832   368    
752    112    
-192   176    
-288   48     
-32    -432   
-288   -256   
208    -16    
208    -128   
16     128    
-192   80     
144    16     
-80    224    
-96    96     
320    256    
-96    -96    
-304   160    
368    304    
192    112    
-336   -128   
64     48     
-32    80     
48     -64    
-384   -368   
176    -80    
16     288    
-112   64     
256    -256   
880    1536   
-2288  416    
288    64     
1568   -336   
-752   -32    
-272   176    
256    160    
272    192    
-480   384    
224    -320   
-192   -80    
32     256    
96     64     
96     128    
-464   112    
272    0      
-32    368    
16     0      
48     -144   
-176   128    
-272   -624   
704    -624   
-752   32     
-288   80     
528    -144   
-496   -16    
48     -16    
368    480    
256    272    
-480   16     
-256   240    
256    32     
112    128    
64     -48    
-192   -304   
32     -96    
-256   160    
176    32     
-112   96     
144    112    
-144   96     
-544   128    
576    16     
16     16     
16     -224   
-176   96     
0      64     
176    272    
-64    -64    
-448   -400   
-640   1984   
2704   192    
-864   176    
-432   -96    
736    0      
-80    272    
304    -352   
0      -176   
-240   -256   
160    144    
48     0      
0      80     
-96    48     
0      192    
384    144    
-80    192    
-96    48     
432    240    
-32    -48    
-32    -1664  
368    1264   
-176   -784   
-2080  0      
2352   -432   
-336   64     
-688   400    
320    -432   
-432   -144   
368    16     
-224   -80    
112    144    
-112   224    
-64    80     
240    -96    
-112   -1120  
64     -16    
96     192    
-64    256    
-144   128    
32     128    
48     160    
0      240    
224    976    
-80    976    
-720   800    
688    592    
-80    -496   
64     384    
512    32     
-64    -992   
-224   128    
-16    96     
272    288    
-112   -288   
656    16     
400    432    
192    80     
256    -800   
-176   96     
-16    224    
-96    48     
80     -80    
16     288    
160    304    
0      -400   
448    144    
336    -128   
-528   656    
112    384    
320    192    
-944   -1136  
-992   -304   
-16    256    
576    -160   
-48    144    
-288   -320   
64     1104   
-192   784    
336    16     
160    -128   
32     128    
-256   -720   
-256   48     
80     -224   
512    -368   
-160   -400   
-336   592    
-16    640    
576    752    
-48    624    
-288   96     
-48    -192   
48     -240   
112    192    
224    -592   
-288   -16    
352    640    
-480   -848   
96     -2016  
-128   96     
-80    0      
368    -48    
64     -384   
-96    -112   
112    704    
-48    512    
-512   96     
160    -64    
336    320    
-16    80     
-128   16     
112    -448   
208    720    
-80    -144   
-144   -928   
-672   -96    
432    432    
160    96     
304    -752   
-352   -368   
176    256    
-928   656    
608    -48    
368    272    
-384   -272   
-112   128    
144    -1344  
-608   -2016  
240    -672   
224    1040   
-48    208    
112    272    
-256   288    
144    208    
272    688    
240    112    
-64    320    
-304   -144   
160    544    
96     48     
112    -208   
-80    -352   
-304   16     
112    -224   
-144   -640   
160    -1808  
208    -144   
-288   528    
-128   -352   
-240   -272   
928    -400   
656    784    
-544   -32    
-448   816    
1024   864    
-144   -176   
-336   -448   
80     192    
208    -640   
224    384    
32     16     
-112   -512   
-32    -48    
368    -272   
384    -352   
-256   464    
48     32     
208    -240   
128    -1200  
-336   -848   
272    -1104  
16     784    
160    176    
-240   -176   
288    -192   
-96    48     
128    -272   
160    96     
-272   64     
144    -224   
-448   -64    
96     -512   
32     -64    
-32    -32    
16     -128   
368    -592   
-64    320    
-272   272    
160    0      
16     -64    
-80    -16    
160    144    
0      32     
48     -80    
-400   -128   
-688   -176   
144    128    
-16    -32    
-112   208    
-784   -448   
272    0      
736    -192   
-864   -1632  
-160   336    
1216   -16    
-176   208    
-304   -176   
592    144    
-320   -208   
-32    80     
-208   -32    
-16    64     
96     -176   
-112   48     
160    -192   
224    -224   
240    192    
-304   -128   
240    144    
80     -48    
-592   -576   
-384   -112   
1968   -208   
-960   0      
-272   144    
32     -48    
64     -160   
-864   -176   
32     48     
208    -96    
64     0      
80     16     
-16    -16    
-288   0      
336    64     
144    80     
-160   -208   
-240   -96    
496    -64    
-160   16     
-464   32     
976    -224   
-992   -144   
-1184  -160   
304    -576   
240    64     
-144   160    
176    -480   
96     -304   
-720   -2416  
16     96     
384    -80    
96     -64    
-48    -48    
-608   -224   
-32    -816   
624    -192   
-240   32     
-608   -80    
-128   16     
1072   -496   
-400   144    
-640   -336   
-192   -112   
1040   32     
512    -384   
-528   -16    
512    96     
-416   -1520  
-1056  1536   
960    -688   
-576   -1760  
16     -400   
816    -64    
144    64     
-1024  -96    
112    -320   
304    128    
224    48     
-544   -224   
560    -112   
-192   -16    
-224   48     
64     128    
176    144    
-448   64     
720    -16    
-480   -528   
-1104  -96    
960    -352   
-368   112    
592    -80    
-768   -272   
-224   160    
256    48     
-992   64     
64     -112   
208    176    
-240   -32    
112    384    
96     -48    
-64    -32    
304    -112   
-80    -48    
-288   240    
224    144    
-240   0      
-464   -80    
176    144    
-96    -48    
-32    -16    
-240   112    
-80    16     
192    112    
-464   -80    
-16    32     
352    368    
-704   512    
304    128    
96     -64    
48     32     
448    80     
-336   -240   
336    -96    
-352   -160   
-96    192    
288    176    
-480   -272   
-112   -320   
-144   0      
-16    144    
-32    128    
-96    208    
32     -96    
272    16     
-304   -160   
320    368    
-208   160    
-80    256    
80     128    
-32    -160   
-160   -32    
-48    -32    
16     -240   
128    112    
0      432    
-384   656    
-48    144    
-16    -112   
-512   96     
1520   -1184  
-976   -784   
-560   176    
1248   1296   
208    32     
-944   -592   
0      -176   
416    -48    
-64    0      
-288   -352   
16     -384   
-224   208    
128    320    
-48    -352   
-192   -832   
-400   -672   
192    -272   
96     -272   
-112   0      
-368   -800   
512    176    
-240   -80    
-128   160    
16     512    
48     592    
-240   448    
-128   -256   
208    -112   
-464   -144   
160    64     
0      -144   
0      0      
16     320    
-48    224    
-160   96     
48     96     
48     -32    
16     272    
-48    176    
-64    -112   
-80    128    
-112   -16    
224    80     
-144   -96    
144    432    
-304   48     
128    -240   
-144   144    
256    656    
1024   -144   
-2016  544    
1056   576    
32     560    
-880   240    
464    480    
720    272    
-688   992    
112    400    
-128   -112   
96     32     
144    224    
16     -112   
-416   -32    
16     32     
224    224    
-192   240    
-64    -112   
48     -64    
-16    192    
-528   208    
2720   480    
-928   -416   
-1376  -752   
1088   224    
-208   576    
-752   -144   
192    192    
224    -128   
-128   48     
272    -16    
208    448    
-176   480    
-80    208    
224    80     
-64    48     
272    512    
96     304    
-640   -256   
128    -208   
256    -256   
-16    -640   
96     -224   
192    320    
-288   1712   
720    912    
-80    -656   
-592   560    
368    -496   
-320   -144   
-352   -576   
-144   368    
624    112    
-400   -48    
80     32     
368    -944   
-1024  -528   
464    -416   
-32    496    
400    208    
-48    80     
-192   544    
32     368    
16     -16    
224    144    
-368   64     
176    96     
144    0      
80     144    
656    2096   
-528   720    
-544   336    
1392   -1616  
176    -368   
-864   -384   
144    -848   
896    16     
144    640    
-400   320    
64     32     
448    512    
-48    208    
-272   -288   
-192   -160   
-112   160    
352    336    
-272   208    
-272   -176   
144    -192   
80     272    
-64    80     
128    592    
816    0      
-1024  224    
704    -352   
-160   -832   
288    -944   
-96    848    
496    480    
-32    624    
-400   -288   
32     32     
176    64     
96     192    
32     352    
-80    -576   
-688   -688   
272    -320   
64     -672   
-560   -160   
-16    176    
112    496    
240    -96    
-256   -624   
240    384    
-528   -368   
48     512    
288    -80    
-160   -224   
-160   -400   
464    -464   
-592   432    
-272   -576   
1936   -800   
-320   880    
-320   144    
320    208    
64     224    
-32    -272   
-96    416    
128    368    
112    560    
128    384    
224    -208   
-208   -320   
112    -16    
80     -112   
-176   -352   
224    -1040  
128    -480   
-144   -240   
-208   -256   
64     16     
240    -48    
16     1088   
-352   -1280  
-16    -112   
176    -464   
208    -64    
-896   -1920  
-176   -832   
656    304    
-208   32     
32     -368   
192    -848   
-48    -160   
272    -576   
16     592    
144    -16    
-224   624    
208    -496   
48     -64    
16     -416   
0      336    
-80    176    
16     -32    
304    -128   
-64    0      
-64    144    
32     1456   
704    -304   
-880   -320   
480    160    
592    -208   
-496   368    
176    -416   
192    304    
0      -800   
-464   176    
768    96     
-32    352    
-256   -96    
0      240    
240    48     
144    160    
64     96     
-272   160    
272    -16    
0      -192   
368    0      
-192   -512   
240    224    
-192   -832   
64     240    
-80    -1232  
288    64     
-80    16     
112    288    
288    -352   
-3088  -96    
1856   80     
864    -256   
-1632  32     
400    -736   
912    736    
48     -144   
-208   592    
144    -816   
208    160    
-64    0      
-16    160    
-112   -128   
112    336    
160    -48    
-96    288    
144    80     
64     -880   
-48    112    
32     64     
-576   -448   
144    -80    
1744   -224   
-880   -752   
-576   480    
800    192    
176    0      
-400   -192   
0      224    
320    32     
272    -496   
-96    16     
-160   -192   
-144   16     
160    -32    
464    -16    
0      -384   
-496   -80    
32     -208   
784    32     
-80    960    
-976   -288   
-112   128    
880    -1280  
-304   -48    
528    -320   
704    -704   
400    432    
80     -1728  
-944   -96    
528    32     
160    160    
-32    128    
32     -192   
-288   -368   
-432   32     
560    -128   
336    -448   
-192   -416   
-144   -128   
288    -32    
160    -240   
-272   16     
80     -272   
160    -272   
256    -1264  
192    64     
-448   96     
-1056  -2224  
2240   -2432  
672    96     
-1760  352    
400    384    
192    -96    
-336   -128   
384    480    
-768   -192   
80     -96    
112    -176   
-176   -64    
176    -176   
-64    64     
240    -592   
-160   0      
224    -96    
-64    16     
-224   -128   
-16    160    
512    80     
-560   336    
-640   -256   
304    112    
-112   -32    
-96    80     
192    -16    
-160   64     
16     -160   
240    -1440  
288    160    
-256   0      
-16    -128   
16     48     
208    64     
-432   432    
176    144    
32     0      
-80    -64    
-176   96     
112    -144   
240    -224   
-160   -640   
-320   -304   
-288   -656   
-176   112    
336    -176   
-320   -32    
48     -96    
208    -272   
-272   -192   
176    704    
-368   96     
-48    16     
-336   -144   
336    -1408  
432    -1168  
-480   -768   
160    -192   
192    -400   
-240   288    
544    96     
-256   304    
-240   368    
592    -80    
16     112    
-352   -432   
-16    32     
336    64     
-208   256    
-48    -336   
-288   -160   
256    -112   
-48    32     
-96    -160   
128    160    
160    -496   
-176   -752   
112    272    
-16    32     
32     160    
352    2320   
768    80     
-1168  384    
64     320    
288    -320   
48     496    
-160   -80    
112    304    
-16    -640   
128    -224   
16     32     
-80    32     
-144   -304   
96     -144   
-96    -112   
-160   64     
-16    -608   
176    112    
-128   -192   
-192   16     
-288   736    
880    -240   
-704   464    
-96    -288   
112    -304   
-176   -608   
176    -848   
-16    -288   
-128   400    
-224   160    
304    -48    
-16    64     
224    -144   
-320   -64    
-64    -112   
128    -48    
-320   -176   
-240   96     
-608   -16    
80     64     
192    80     
-400   112    
-208   16     
-128   -160   
416    -272   
-672   -48    
-272   128    
-32    16     
-272   16     
1168   288    
-2352  528    
-464   -96    
1568   112    
-1184  -224   
-240   -192   
256    -176   
-480   1360   
128    -1328  
368    64     
-128   368    
-448   0      
64     48     
-768   64     
-96    -16    
-16    160    
64     -208   
0      -48    
192    -192   
-80    80     
-352   -256   
1488   368    
-1424  64     
48     -64    
64     1312   
112    1280   
416    1264   
368    1568   
48     1312   
-240   80     
144    -512   
-208   -736   
-208   -304   
128    256    
-480   64     
832    -288   
-288   -288   
-496   -128   
176    368    
96     272    
-160   -32    
-48    32     
80     -464   
480    1104   
-944   1184   
-976   -368   
784    -1280  
-16    -752   
-288   -384   
352    -192   
-384   -416   
-256   -96    
224    -224   
144    416    
-496   -640   
-208   -896   
96     288    
-192   480    
-400   368    
-160   256    
-528   -48    
-112   96     
32     480    
-496   528    
0      80     
640    -112   
-32    64     
-96    -592   
-464   -304   
80     112    
-640   -2128  
-1232  -576   
912    -432   
-144   -48    
-288   320    
-192   304    
-112   -160   
96     -704   
256    -48    
-48    -144   
-144   -480   
32     240    
240    688    
128    -80    
-96    -176   
-144   112    
192    192    
-272   48     
144    256    
-144   528    
-320   160    
192    240    
448    -128   
-752   -1440  
-736   160    
480    -416   
-224   448    
32     -400   
-256   160    
224    240    
-112   528    
48     -16    
-256   160    
-80    -32    
16     80     
32     -480   
128    32     
-160   192    
80     192    
-48    608    
352    592    
0      288    
-416   32     
176    192    
96     384    
-64    0      
-96    336    
416    96     
-64    -80    
-304   -64    
32     -64    
112    -1216  
-944   -752   
32     -160   
688    -16    
-32    1136   
128    208    
64     -336   
208    -32    
-64    -96    
272    -80    
-256   -192   
-448   -80    
128    64     
240    96     
-192   112    
224    -224   
128    208    
-352   176    
160    48     
352    -128   
-224   576    
128    304    
-112   -192   
-144   48     
608    -32    
-336   -112   
-320   176    
224    48     
224    48     
-1136  -336   
1488   -672   
368    80     
-848   -144   
512    -128   
-16    -224   
-224   336    
-176   -512   
-96    480    
448    -304   
-176   112    
-64    96     
32     272    
48     0      
160    16     
-112   448    
432    -240   
-304   192    
48     80     
272    16     
-544   -992   
224    224    
432    336    
-800   64     
320    176    
256    -464   
-96    128    
-176   112    
224    0      
288    -352   
-176   -16    
16     160    
-16    32     
-128   112    
368    -176   
-64    112    
-80    144    
512    272    
-272   0      
-208   0      
400    176    
64     80     
-80    80     
-336   -272   
96     -944   
176    -112   
-160   224    
208    80     
-112   160    
144    832    
-640   208    
-96    496    
528    -160   
80     32     
-1072  -256   
400    224    
352    -16    
-272   384    
112    112    
272    -48    
-32    -16    
0      128    
32     -64    
-304   80     
336    16     
-160   112    
96     0      
208    -16    
-272   48     
48     48     
-432   -176   
512    -144   
336    -144   
-672   272    
1104   -464   
-544   432    
-528   -1424  
416    304    
464    48     
-176   0      
-80    80     
256    96     
-96    64     
0      32     
-176   -16    
320    96     
-144   -208   
-128   -208   
96     128    
0      -480   
-64    -384   
928    208    
-96    48     
256    176    
496    112    
-272   224    
-864   -480   
-608   320    
864    48     
-16    144    
128    0      
16     -16    
-80    32     
80     0      
320    -160   
224    288    
-128   -448   
640    -240   
-176   -944   
160    0      
144    -144   
-176   176    
128    80     
192    160    
-32    368    
16     80     
-288   192    
160    -80    
704    432    
-1600  3760   
672    912    
-352   -784   
-352   -512   
672    -704   
-288   160    
-240   -736   
-192   192    
272    160    
192    64     
-448   -32    
240    32     
-128   128    
128    160    
256    128    
-272   -80    
-192   80     
368    -160   
656    304    
-1056  -368   
64     -976   
240    -480   
-128   -16    
848    112    
-288   -400   
-960   160    
480    -480   
480    512    
-288   -544   
-240   -240   
400    80     
96     0      
-400   208    
480    192    
-416   352    
288    -16    
336    304    
-304   208    
-128   208    
320    192    
-48    240    
-16    -128   
-80    352    
128    48     
800    576    
-576   224    
-144   448    
384    256    
32     176    
64     -368   
-336   -176   
480    -32    
736    448    
-560   512    
-48    -144   
-16    -464   
-80    48     
400    320    
32     560    
-272   -1424  
-16    -208   
288    656    
-128   16     
96     368    
-16    -256   
-80    -320   
112    688    
-208   -208   
224    176    
112    -208   
-160   -688   
32     48     
16     -64    
80     -272   
-112   -496   
-48    0      
32     -1680  
-64    784    
-384   96     
336    -144   
128    224    
112    -112   
-80    -352   
448    0      
-80    -272   
16     -144   
-432   -80    
16     -64    
-48    -80    
160    -128   
-48    -16    
-16    -480   
240    -48    
272    80     
-304   -32    
-208   -32    
256    -64    
48     -288   
80     96     
-64    112    
-224   -320   
-336   -112   
128    -32    
160    -304   
-96    80     
128    -48    
320    160    
-624   688    
160    80     
448    -64    
-144   -352   
-320   224    
224    -48    
208    -80    
-32    64     
-32    -176   
-144   176    
176    -192   
-336   16     
-64    -208   
16     64     
160    -16    
-256   -16    
368    -1104  
-208   384    
-288   240    
192    -32    
-304   -176   
384    -608   
-160   -448   
1968   -592   
-1824  1216   
32     480    
320    432    
-256   -128   
-80    384    
128    -688   
32     464    
16     1072   
-64    -416   
416    -1280  
160    128    
-304   144    
64     208    
-16    -48    
-48    -144   
-96    -176   
32     -96    
-464   -16    
32     -176   
-16    480    
2240   160    
-1424  400    
-160   -672   
1008   -1344  
-128   -2096  
-848   -672   
672    -672   
16     -1104  
-176   -400   
320    -32    
-448   192    
-96    304    
192    96     
-96    -320   
-304   96     
-64    -544   
-32    -384   
304    -160   
-240   96     
16     -816   
464    -384   
-16    48     
-816   -2000  
-704   -464   
768    496    
-192   1072   
384    32     
224    592    
-720   560    
-816   -112   
272    -224   
128    -224   
-288   -464   
-208   -512   
1344   -736   
-16    -304   
128    528    
80     -16    
-80    -48    
496    0      
-16    80     
-576   336    
96     176    
432    208    
192    32     
160    -128   
-224   -272   
-1264  192    
176    -2176  
-768   -688   
208    368    
-176   -96    
-224   640    
-368   176    
-464   -80    
880    64     
272    16     
-400   144    
-192   112    
-112   -80    
112    0      
288    -32    
-336   16     
288    -96    
0      304    
96     0      
-160   1632   
0      320    
-240   -96    
-592   -368   
336    368    
-432   -272   
-192   32     
336    -480   
-320   288    
176    -240   
-688   -368   
400    -784   
-432   -112   
-32    -224   
-288   -64    
-112   -32    
304    112    
-240   48     
-160   16     
80     -112   
-480   -96    
96     48     
112    32     
-336   240    
-112   128    
-176   224    
-112   -320   
-96    16     
32     112    
-48    112    
144    -48    
-624   -208   
288    176    
-16    -864   
-880   -352   
752    288    
528    -208   
-384   -240   
256    128    
96     -336   
256    -208   
-336   16     
-240   112    
192    -80    
-144   -48    
48     -64    
-96    -16    
-112   -592   
-480   -192   
256    528    
-128   -32    
112    -80    
-720   -32    
96     160    
-80    -80    
-32    16     
192    32     
0      288    
-80    80     
0      48     
112    64     
-384   -352   
1392   1824   
1632   304    
-1888  -96    
416    -416   
304    272    
-208   -288   
-240   288    
336    -416   
-176   240    
96     -96    
224    -48    
-48    192    
-368   80     
512    -128   
64     416    
-368   96     
0      -64    
176    96     
-160   -80    
0      208    
-32    1184   
1392   -112   
-1776  -656   
-208   160    
864    144    
-640   -16    
0      48     
240    432    
32     -16    
-272   128    
448    -96    
-176   256    
-240   112    
160    -16    
-240   48     
-80    64     
256    -32    
176    176    
-240   -128   
-96    112    
320    32     
-16    192    
160    96     
-240   96     
368    80     
-368   -48    
240    80     
64     128    
-464   -224   
48     3264   
2496   0      
-1632  224    
-688   -320   
640    176    
736    288    
-368   48     
96     128    
48     -176   
-224   128    
-80    -64    
256    128    
-80    48     
-112   80     
464    144    
-176   112    
-208   -112   
144    208    
224    144    
160    160    
-80    144    
-672   32     
1680   -192   
80     -400   
-912   336    
688    400    
-32    -80    
-80    576    
-480   64     
-384   -144   
496    128    
0      -64    
-144   144    
-64    176    
144    -64    
32     144    
176    -128   
-48    -160   
352    336    
96     176    
-208   -48    
96     0      
-624   48     
528    112    
80     32     
-288   48     
-32    96     
640    -144   
-176   304    
-128   64     
400    160    
16     112    
-416   160    
368    272    
-176   16     
-96    -240   
112    96     
240    256    
-240   -112   
-48    128    
384    0      
-352   80     
-80    80     
176    128    
96     -176   
112    -208   
-96    48     
144    80     
320    704    
-608   800    
176    3232   
1520   752    
-1856  0      
-112   -208   
1264   0      
-448   -1392  
-592   16     
416    544    
0      144    
336    256    
-192   -48    
-224   144    
128    -48    
112    256    
144    0      
-240   160    
80     240    
240    -16    
-32    496    
-432   128    
-16    -224   
96     16     
384    16     
-416   496    
320    64     
-304   224    
-48    32     
304    656    
176    1056   
-176   96     
-368   -64    
384    656    
272    112    
64     -32    
-368   -64    
352    -32    
-240   736    
64     768    
16     -400   
-304   -368   
128    80     
80     80     
-48    -272   
-480   -80    
544    992    
0      400    
-240   -496   
480    -1136  
-368   864    
-32    464    
240    336    
144    -448   
-720   -2416  
544    -272   
-304   352    
-64    576    
208    -112   
-176   256    
144    288    
80     -192   
-48    -96    
80     160    
-128   288    
80     -80    
-32    384    
176    608    
-128   -16    
-16    -336   
-80    208    
272    -384   
-144   144    
144    -560   
-160   16     
96     -48    
224    160    
64     0      
-80    128    
-288   -112   
-128   -64    
400    16     
400    320    
-1008  336    
176    -368   
480    240    
-96    -1728  
-368   208    
32     560    
128    192    
16     -224   
-176   48     
-32    80     
-32    96     
128    64     
32     -144   
-176   144    
-160   208    
32     384    
208    -304   
80     -16    
-48    -144   
-400   864    
864    -192   
-816   32     
192    -128   
256    16     
16     352    
-96    -704   
-160   -288   
112    0      
48     272    
224    -976   
80     -32    
-128   -96    
160    384    
112    0      
-160   -320   
-304   48     
96     224    
160    -176   
16     -96    
-128   48     
48     -336   
176    -48    
176    -816   
-80    192    
192    -768   
-112   -176   
416    -160   
-288   512    
1040   128    
-2352  576    
0      -512   
320    800    
64     96     
-448   -880   
-32    -208   
288    224    
688    -2432  
-272   -448   
-256   736    
256    352    
0      -320   
288    -320   
-16    -96    
-352   -144   
192    -2768  
352    240    
-208   -384   
-32    560    
-160   -1040  
1504   608    
-656   -400   
-416   -784   
768    -416   
48     640    
-192   1072   
-352   -368   
752    -208   
-432   -272   
-128   -80    
384    -16    
144    256    
-464   0      
176    240    
304    -224   
-272   -528   
-64    -624   
-48    -288   
112    32     
-48    -144   
256    192    
192    -128   
-576   -256   
-464   -704   
-48    32     
320    128    
-112   -240   
-16    -48    
-144   -880   
-256   -176   
176    80     
-160   -256   
240    32     
160    -256   
176    -224   
-544   -928   
-224   -272   
544    176    
-320   -368   
-96    -48    
432    -96    
192    -176   
288    -176   
-288   -112   
304    80     
576    -32    
-128   0      
-224   128    
-256   -992   
-48    2208   
1184   480    
-1168  -192   
-496   -112   
1024   -528   
496    224    
-1120  -96    
-176   160    
432    80     
352    96     
-480   -48    
-128   144    
32     -224   
-208   -48    
-160   -128   
112    144    
-144   -144   
48     -32    
-320   -432   
128    -544   
-16    64     
-112   -1200  
384    64     
-592   -16    
-160   -304   
-224   -208   
368    -288   
-240   -80    
64     192    
-80    -128   
64     272    
-16    208    
0      112    
-32    176    
-224   -352   
288    256    
-96    496    
-96    608    
176    416    
32     -336   
-464   -32    
608    -16    
-272   -64    
160    -16    
-128   80     
-16    -128   
-496   16     
160    -320   
512    176    
-608   -112   
64     176    
496    48     
736    -80    
-752   -944   
-192   -288   
640    -112   
-432   416    
624    160    
-80    176    
-64    160    
-80    -112   
64     0      
128    -272   
64     304    
144    -224   
32     368    
-48    -992   
144    48     
272    128    
32     32     
-496   112    
176    176    
128    -192   
32     176    
-144   -112   
-16    96     
-288   -208   
-48    16     
64     -80    
-224   -176   
-320   1616   
2544   -640   
-1504  96     
-512   -96    
-560   -240   
432    304    
-208   -304   
-304   -400   
208    208    
0      240    
128    -208   
-256   48     
32     -240   
112    80     
144    -192   
-272   336    
0      -16    
320    96     
-288   144    
-64    -64    
-432   -896   
368    0      
64     112    
-736   80     
496    160    
-144   -272   
-480   208    
-96    -512   
128    240    
448    -48    
-112   96     
-448   16     
80     16     
480    240    
-496   208    
48     112    
-32    -80    
-240   192    
384    -144   
-624   96     
64     -80    
128    160    
-16    -48    
272    144    
-416   -160   
-224   176    
400    48     
-176   -80    
-256   288    
704    752    
-1776  400    
160    480    
752    48     
-736   -80    
0      144    
432    -48    
-288   -48    
-32    -32    
448    80     
-48    16     
-368   -80    
64     112    
384    96     
-608   0      
240    128    
-112   -96    
-288   -224   
160    -352   
-320   -96    
80     96     
-80    -512   
-1344  992    
1040   64     
-176   224    
-256   160    
352    32     
-384   160    
-400   288    
-48    -64    
240    16     
64     64     
-160   16     
-64    192    
96     192    
32     0      
-704   -32    
240    192    
480    -288   
-288   144    
-128   128    
320    144    
224    -608   
-720   256    
144    272    
224    -240   
-720   288    
32     -16    
528    112    
80     16     
-272   48     
-192   0      
288    208    
-80    -32    
-272   -128   
416    464    
-64    -176   
-912   208    
304    -160   
-480   144    
304    -176   
64     160    
-128   -16    
144    80     
-192   -32    
0      -304   
-656   32     
192    208    
0      -176   
-176   432    
1328   1184   
-2384  336    
1440   560    
1104   240    
-1824  -96    
64     272    
208    -720   
-416   -32    
-288   448    
192    48     
736    144    
-336   400    
-128   800    
32     320    
-192   -496   
464    272    
144    -688   
-544   -48    
224    -512   
32     -720   
-96    -400   
0      224    
-256   240    
752    224    
-32    832    
48     1008   
-208   176    
-176   -256   
64     -192   
112    -176   
-208   512    
80     48     
-272   -256   
0      -336   
256    64     
0      -16    
-608   -432   
320    -1072  
64     -416   
-272   16     
64     64     
-576   -80    
112    -80    
128    -176   
-48    1088   
64     768    
-288   240    
576    848    
-304   400    
128    288    
-272   112    
416    832    
480    640    
-336   720    
240    912    
608    576    
336    560    
-592   -48    
192    -944   
160    -112   
0      352    
-80    -208   
-304   240    
208    48     
96     368    
-192   224    
-80    240    
272    512    
-256   320    
352    -176   
-176   256    
304    32     
-144   160    
160    -64    
80     160    
160    80     
-32    240    
32     304    
240    32     
48     32     
-304   -448   
624    -656   
-128   432    
624    -320   
-560   240    
-96    -368   
592    -352   
112    80     
-32    96     
-16    112    
-80    128    
192    -16    
128    -80    
-160   96     
-160   160    
112    -80    
0      -304   
-16    -320   
128    -16    
16     80     
-304   -48    
480    128    
-256   80     
160    208    
64     384    
80     208    
144    -320   
-416   -656   
176    160    
352    336    
-144   -112   
16     192    
-48    -32    
16     336    
0      272    
80     16     
160    -288   
-96    192    
-192   96     
144    -656   
640    144    
-240   464    
-96    -208   
16     176    
384    -352   
-256   -480   
-144   384    
-96    128    
480    80     
288    1120   
1072   -464   
-2160  64     
448    -3088  
1984   912    
-848   -48    
-576   160    
1504   400    
-336   -64    
-192   -320   
368    320    
64     112    
32     176    
32     -224   
-304   -80    
160    -144   
144    -64    
0      496    
-32    -576   
-32    160    
16     -48    
-768   -240   
1808   -320   
-368   -608   
-1360  -256   
1056   352    
-192   -496   
-432   112    
208    112    
96     -192   
160    112    
176    -160   
16     48     
-112   -448   
-480   64     
656    -160   
112    64     
-528   -400   
32     64     
240    32     
-80    192    
352    560    
-144   32     
-352   -16    
144    64     
224    144    
-176   -224   
-144   208    
-160   -192   
0      48     
256    -352   
176    416    
-80    368    
560    144    
0      32     
112    80     
-288   32     
-48    384    
240    -208   
-336   -48    
336    240    
192    32     
-48    96     
-48    -48    
-128   -16    
240    192    
1120   80     
-672   64     
-224   256    
128    1648   
-112   3248   
-64    416    
-848   -528   
432    -416   
800    96     
-48    -48    
-800   32     
656    -32    
-64    -304   
-16    96     
192    -128   
-368   -64    
272    -144   
80     128    
-176   -32    
-48    80     
368    48     
48     -32    
0      -1120  
-1168  -272   
1168   -448   
-432   -48    
384    48     
592    -96    
-272   112    
-384   112    
784    368    
-224   0      
-368   -1744  
496    -80    
-112   32     
32     -112   
96     48     
160    -176   
-560   -368   
416    -800   
304    64     
-208   64     
-224   -48    
112    64     
64     -48    
192    -240   
-64    352    
16     -32    
-352   256    
176    80     
272    -288   
-64    -144   
-144   -320   
240    -144   
16     -432   
208    464    
1072   -208   
-896   -176   
384    -240   
352    -128   
-272   464    
-400   640    
512    416    
-112   128    
-240   64     
192    -112   
-928   128    
-16    224    
352    -32    
144    -864   
-768   48     
288    -848   
256    -784   
-208   -1088  
160    80     
-240   48     
96     0      
272    -64    
16     -64    
-288   112    
272    -304   
-64    -448   
16     192    
64     240    
-560   816    
2848   -768   
-1040  80     
-672   -160   
688    -560   
320    176    
-432   -800   
-432   384    
496    -176   
144    -288   
48     -16    
-96    -48    
-144   80     
-48    -208   
176    -720   
-304   144    
16     144    
-160   -528   
160    -432   
64     -272   
-560   -784   
704    -1952  
448    320    
-976   32     
272    320    
448    -32    
-176   32     
-528   -176   
288    -288   
-176   -272   
112    16     
-720   112    
-80    272    
-96    80     
208    -208   
144    0      
-544   -800   
352    112    
112    192    
128    -176   
-80    -32    
-48    -176   
-48    0      
256    -80    
-496   -64    
16     64     
224    64     
96     -304   
64     160    
640    -1216  
-2368  528    
1408   224    
480    48     
-912   -336   
976    -320   
-496   -128   
-80    -48    
-64    -48    
-48    16     
96     96     
224    80     
-640   -64    
16     -208   
128    144    
128    -352   
-176   16     
304    -672   
224    -208   
-144   16     
112    32     
-640   -464   
1088   -288   
192    -1120  
-2112  -192   
640    448    
368    -976   
-448   -96    
128    -32    
-96    272    
928    -48    
-128   96     
-1424  -112   
-320   96     
80     128    
-208   32     
144    16     
-176   304    
160    80     
128    -160   
16     -336   
-80    -80    
384    -224   
-864   464    
672    -464   
-912   -64    
304    1216   
1056   -304   
-496   -176   
-240   256    
416    -64    
0      -16    
-384   -160   
32     480    
-368   64     
-384   -176   
800    432    
-576   864    
-544   -688   
496    -352   
160    -432   
-80    64     
-368   -32    
432    256    
400    416    
0      96     
-912   128    
224    -128   
608    -368   
-272   -32    
752    2224   
-256   560    
-304   320    
1280   -224   
-336   832    
-592   -128   
-128   -1168  
736    -1120  
-464   -144   
-304   -336   
32     624    
544    192    
112    16     
-80    48     
-192   32     
192    480    
-224   -320   
-160   -288   
208    -352   
112    64     
-160   48     
-112   400    
128    240    
-32    -176   
-464   -224   
448    16     
256    1072   
-480   720    
256    -496   
-64    592    
-224   208    
-432   -144   
304    224    
-128   -32    
-16    -192   
32     -576   
-32    0      
-176   208    
-416   -864   
288    -16    
-16    336    
-208   288    
-80    128    
32     224    
112    -144   
-256   -224   
-128   320    
-32    592    
-48    -528   
368    -112   
-272   -416   
480    160    
-112   160    
-368   -1072  
-272   -1088  
-64    -304   
16     -704   
-352   -288   
240    912    
16     256    
16     160    
-368   -32    
-32    80     
-176   -96    
80     -64    
208    640    
-512   528    
-192   -592   
-192   -848   
160    384    
64     -64    
-128   48     
-112   -16    
160    -80    
240    -528   
-144   -320   
-416   -784   
-624   -704   
-640   112    
240    352    
448    528    
-912   1056   
176    -128   
272    -464   
304    -752   
80     -192   
112    -208   
-112   -544   
32     -128   
112    -448   
-48    288    
-176   -320   
-32    -96    
-16    112    
-80    -16    
96     112    
80     -336   
-304   -80    
80     160    
368    32     
-384   -560   
-96    -544   
592    96     
-336   -800   
-336   -928   
400    96     
112    800    
-80    -304   
-16    256    
176    -96    
0      48     
-48    208    
-96    160    
240    176    
16     80     
-368   32     
-32    16     
-48    320    
96     -192   
208    -368   
-64    240    
-304   -240   
272    144    
-288   128    
288    80     
-32    192    
224    32     
-32    64     
-288   -416   
112    -1376  
1936   528    
-640   448    
-1216  -64    
1328   208    
-432   176    
-480   496    
368    -272   
-128   -16    
-112   -208   
-112   144    
768    224    
-96    0      
-320   -64    
-224   96     
544    16     
-160   128    
80     224    
128    64     
0      144    
-48    -64    
0      -512   
-1040  816    
1408   176    
-1168  16     
720    192    
160    16     
-544   96     
16     -112   
-160   384    
480    32     
-16    64     
-240   64     
0      48     
-32    -32    
672    144    
-416   -1376  
-128   352    
32     144    
32     160    
192    -96    
-144   -272   
704    240    
144    192    
-224   -80    
304    208    
0      0      
-112   144    
-704   192    
432    96     
288    64     
-64    -592   
-176   192    
128    192    
16     64     
384    112    
192    -656   
-544   -144   
384    528    
-64    176    
480    80     
16     0      
-512   288    
-32    176    
224    16     
-256   -112   
416    -144   
-32    80     
-672   -96    
896    -288   
-2032  -128   
-544   -112   
256    992    
560    128    
0      80     
-672   208    
-112   -80    
544    -224   
-160   32     
-176   -128   
64     128    
160    -176   
192    80     
-16    -800   
-80    192    
192    32     
336    64     
-240   112    
576    576    
-816   80     
512    464    
464    -192   
-656   -32    
208    192    
384    64     
-832   128    
304    176    
144    80     
-16    304    
-208   -32    
-16    192    
336    -64    
-16    -144   
96     48     
-16    32     
176    224    
-208   -128   
112    208    
96     48     
-48    128    
16     48     
-16    -64    
208    -16    
0      -608   
96     -48    
96     -1136  
176    160    
-96    -528   
-400   -80    
368    -112   
0      96     
-32    -736   
-832   224    
544    -256   
416    -16    
368    80     
-80    48     
-160   352    
16     -64    
144    -160   
-80    -480   
-128   16     
16     32     
208    320    
64     0      
-176   -16    
304    -32    
0      336    
-64    -128   
96     0      
-16    288    
64     544    
-192   288    
192    0      
240    288    
-96    32     
176    -160   
-96    -256   
64     208    
112    224    
-1024  -1984  
-48    -464   
656    -928   
-192   -240   
304    288    
-288   32     
-400   -1152  
16     -272   
480    112    
-96    368    
-240   -592   
32     32     
64     -688   
320    32     
-416   864    
288    256    
-224   160    
-48    -144   
192    96     
-16    48     
480    1072   
-1072  -48    
496    688    
432    -64    
-336   928    
400    496    
-272   -112   
80     432    
192    -2176  
-16    -256   
-304   -1872  
480    -880   
48     208    
32     -80    
-112   -96    
-272   -960   
304    80     
160    -256   
-160   -576   
-32    -160   
-112   128    
112    -240   
192    48     
-96    -352   
-112   -16    
224    -48    
48     16     
-16    -48    
-112   -192   
-640   -1168  
1280   -1472  
-336   -656   
-208   -1008  
1152   16     
-1328  624    
-128   -240   
704    -208   
320    -64    
-400   64     
-160   352    
432    480    
-48    32     
-864   -208   
496    48     
-112   32     
-96    -16    
192    48     
-256   -16    
-16    -160   
128    -432   
560    896    
-1552  -1232  
-896   912    
1840   448    
-688   -288   
-784   -256   
400    944    
704    1408   
-256   272    
-144   288    
208    32     
-128   32     
160    -368   
-48    400    
-16    32     
-272   192    
464    880    
-336   864    
-272   672    
464    336    
-320   96     
0      -240   
-240   832    
544    1216   
-1648  528    
624    224    
512    -240   
-176   -672   
-32    528    
160    -272   
-352   320    
320    -352   
-256   48     
1008   192    
544    800    
-400   -208   
32     -32    
-432   352    
160    576    
224    -96    
-272   16     
-992   16     
256    -176   
-48    64     
80     -112   
576    512    
384    -800   
80     80     
-176   144    
-304   -48    
656    1536   
1232   176    
-1680  -400   
-384   -128   
1552   -528   
-160   -384   
-320   80     
-560   1168   
448    -512   
320    -432   
-176   400    
-208   -1696  
160    384    
128    -384   
368    -128   
-416   368    
224    0      
-64    -336   
-224   -304   
96     -176   
112    32     
-384   -112   
-256   -432   
464    -464   
-112   -656   
64     160    
176    -32    
-352   544    
-32    160    
32     -432   
-208   -48    
176    -352   
-272   0      
80     288    
336    -368   
-176   -1008  
-1584  -528   
304    -1120  
208    -464   
-368   720    
112    544    
0      -80    
-512   -80    
-400   320    
-64    112    
-288   -112   
96     256    
432    1632   
272    64     
-624   64     
48     -1168  
288    80     
32     -816   
-512   -864   
-320   -688   
464    192    
96     -768   
-320   -32    
32     608    
-624   -592   
-64    -944   
128    -64    
-336   64     
-16    -128   
48     80     
208    288    
-96    592    
-144   736    
224    -304   
-224   -672   
368    256    
-384   112    
-16    96     
320    -432   
-288   -512   
128    -272   
0      -176   
-768   288    
-288   272    
368    320    
192    -1552  
-864   688    
384    -112   
272    -1248  
-400   -1328  
288    -496   
368    272    
-320   -128   
-192   640    
112    592    
16     192    
-48    -272   
-64    -464   
-272   -176   
128    -224   
-96    -400   
48     16     
-160   -160   
224    16     
-64    80     
256    1936   
224    -48    
-672   -368   
384    512    
48     -576   
-32    -240   
-464   352    
432    96     
16     -128   
-112   -176   
-1440  -256   
-192   48     
192    -64    
-96    80     
-80    -48    
112    -32    
16     144    
80     -80    
-208   176    
176    80     
-96    -80    
-208   32     
96     -176   
-464   -32    
592    80     
-320   64     
-96    16     
-224   -32    
-288   -624   
1040   640    
752    -144   
-1408  32     
-160   -336   
1152   208    
384    -48    
-624   144    
400    -112   
192    48     
-656   -16    
512    240    
-128   -80    
-32    304    
-288   -240   
128    240    
160    16     
-352   0      
0      48     
256    112    
-208   -48    
48     -592   
1088   656    
-976   -160   
-432   96     
800    32     
-656   -160   
-400   48     
768    80     
-416   -160   
-160   -64    
-160   80     
16     32     
176    176    
112    96     
-16    64     
-112   64     
32     -192   
-160   -48    
304    448    
528    -16    
-208   32     
-336   32     
416    -176   
-496   -160   
-576   -32    
320    192    
0      400    
-16    224    
-80    -64    
48     -176   
464    -80    
-544   -80    
-304   352    
96     496    
-240   -96    
0      64     
288    16     
16     448    
-464   320    
-144   -48    
192    -16    
-320   0      
-112   -16    
192    64     
256    -64    
-704   224    
0      -16    
-496   0      
-192   -720   
1824   -2528  
-2928  -1312  
832    -480   
32     -64    
-176   48     
240    0      
-544   64     
336    128    
-144   224    
-336   -16    
416    128    
80     16     
-640   80     
64     32     
464    80     
-112   144    
-128   144    
32     -96    
-160   -368   
624    -1056  
-256   48     
192    64     
-160   320    
-528   -144   
48     -32    
144    160    
-240   -32    
144    192    
288    -208   
-160   112    
-288   -64    
272    112    
112    112    
160    64     
-368   224    
288    0      
96     64     
240    -112   
-144   112    
16     208    
224    48     
-320   -16    
96     144    
176    0      
-80    64     
-32    64     
272    128    
32     -96    
-368   -32    
320    160    
64     240    
-144   -720   
144    80     
-144   80     
-416   16     
816    208    
144    704    
-848   1296   
256    480    
272    0      
-32    -16    
-96    176    
-112   96     
96     272    
304    208    
-48    32     
-64    -176   
32     -208   
0      -672   
-256   -672   
192    -688   
-272   -192   
144    -224   
80     -400   
80     160    
-304   128    
240    -240   
192    -208   
-16    -192   
16     64     
704    2112   
-1360  48     
384    208    
960    -16    
-608   -96    
-368   352    
560    448    
400    -32    
-384   512    
-256   288    
320    64     
64     -816   
80     128    
-160   -2800  
-80    -64    
224    160    
112    32     
-240   -176   
176    448    
80     160    
336    752    
-928   16     
496    -224   
160    368    
-304   -720   
96     448    
-128   64     
96     -112   
112    48     
-32    -192   
-208   0      
-32    368    
192    336    
-80    -400   
-224   -368   
96     80     
352    432    
-224   -192   
80     160    
112    48     
-176   80     
-48    -144   
64     256    
272    -224   
-16    -128   
-224   -2000  
16     320    
240    -272   
432    -272   
-1072  272    
-144   880    
2976   -400   
-1472  -176   
-160   -752   
736    544    
112    992    
-16    -768   
-96    192    
48     -304   
-192   448    
224    -672   
208    48     
-80    -256   
-160   -160   
240    256    
112    256    
-192   -416   
80     -144   
336    288    
-160   32     
128    -592   
-1952  768    
1184   -400   
672    -784   
-640   592    
-48    816    
544    1008   
-864   -1568  
-48    -2288  
480    -960   
-192   784    
64     336    
80     -112   
0      128    
304    80     
96     32     
-336   -80    
0      0      
288    -384   
64     176    
-160   -48    
-176   112    
208    16     
624    1216   
-1408  224    
-288   -544   
1584   -1360  
-464   -96    
416    -688   
-272   -352   
-16    704    
160    -672   
-512   288    
352    -272   
-464   448    
368    -448   
-336   -1504  
-400   -288   
320    448    
-272   16     
288    -1008  
-96    0      
64     528    
224    -640   
448    208    
64     -528   
-112   128    
96     432    
-32    -64    
-352   -16    
320    1328   
1840   208    
-752   448    
-800   544    
768    368    
304    -192   
-176   -1184  
-1296  384    
-48    -112   
96     272    
208    -1472  
-128   -544   
64     -608   
224    640    
0      0      
-208   -368   
-64    -96    
32     -80    
176    -64    
144    336    
-64    112    
-112   -128   
-576   192    
1088   -816   
-960   -560   
240    -784   
-80    -528   
-160   48     
112    272    
352    1024   
80     416    
128    -800   
-144   -416   
80     -304   
-384   -256   
448    144    
64     64     
-352   -176   
240    224    
160    0      
-32    432    
-288   -192   
128    -432   
240    -1216  
-720   -1056  
-176   -128   
80     -416   
224    352    
48     736    
-112   352    
-128   -1008  
-288   -368   
352    112    
416    960    
-1072  1056   
272    1296   
256    848    
-144   288    
-256   -928   
-656   -1648  
256    -224   
240    -208   
0      -336   
144    -80    
-160   416    
48     -544   
-48    -576   
-208   -1280  
-288   -656   
208    -192   
80     128    
-192   32     
-32    -192   
304    320    
112    -192   
-560   112    
816    144    
-368   848    
-96    368    
1200   1424   
-2016  1344   
688    -256   
592    80     
-288   -48    
-176   0      
-464   384    
240    -64    
-448   80     
208    -16    
-80    -112   
-160   -144   
176    -192   
32     -272   
-272   -128   
48     -16    
112    -336   
-144   192    
-368   64     
-32    -96    
-464   -80    
752    1008   
1008   -192   
-1264  -224   
800    224    
80     -352   
-304   192    
192    -1008  
368    -528   
-240   336    
-240   288    
144    224    
112    96     
-160   0      
128    -112   
0      208    
-96    -16    
-192   224    
288    -272   
-48    160    
-160   -336   
144    112    
-160   -96    
128    -64    
96     64     
-48    -16    
-128   -64    
-112   80     
304    -16    
-496   -1344  
1568   -784   
-848   -160   
-544   -48    
112    -272   
-128   48     
-624   -128   
640    368    
400    -208   
-480   -144   
-144   32     
-624   48     
112    -16    
-352   -48    
64     288    
736    48     
-656   32     
320    -96    
-80    80     
-208   -240   
-64    80     
-16    -384   
944    1040   
288    -144   
-1536  336    
2176   16     
-640   32     
-992   128    
816    -176   
-176   -384   
-80    -80    
-176   48     
-144   -48    
128    144    
-144   16     
64     80     
0      -48    
32     -304   
-112   448    
32     -112   
-240   -16    
400    128    
-288   -32    
-224   96     
-208   112    
-752   -144   
432    752    
-224   320    
-256   -288   
-544   -64    
560    224    
64     -96    
-560   64     
-112   -48    
384    -16    
-144   96     
32     -16    
144    -128   
576    320    
304    -32    
-128   -96    
-256   224    
-800   -32    
64     96     
240    -192   
-64    32     
-496   80     
160    128    
80     32     
-48    -96    
1216   4000   
-240   2144   
-752   80     
1088   -448   
-80    -256   
-1104  208    
448    32     
256    16     
-112   -448   
-1040  -80    
672    128    
0      80     
32     48     
16     96     
-256   -48    
32     160    
352    32     
-96    96     
-288   -224   
544    -912   
-160   -304   
-48    32     
-576   160    
-512   32     
240    16     
432    64     
-368   144    
192    -224   
-96    208    
48     -80    
80     32     
-192   208    
-32    144    
112    240    
-176   240    
-48    304    
368    208    
-432   -64    
192    224    
-1776  -80    
288    224    
64     224    
-144   256    
128    -112   
-320   -304   
-96    240    
256    944    
272    512    
-256   384    
224    176    
-64    -272   
-208   -832   
-96    -160   
240    624    
-112   544    
176    400    
224    192    
288    0      
-624   -16    
-224   -128   
560    -112   
-224   -288   
-80    -144   
80     160    
-560   128    
256    -432   
272    -112   
-240   -624   
-240   -16    
160    480    
272    48     
-48    -160   
-80    -128   
64     0      
0      -32    
-128   -32    
-128   176    
32     -192   
-80    544    
192    -384   
-640   -672   
928    -1584  
-32    384    
-304   -48    
112    -736   
-176   80     
240    -848   
-336   -64    
64     -32    
-160   64     
144    -176   
320    64     
-64    32     
-304   16     
160    144    
80     -176   
0      -32    
-272   -544   
48     80     
80     16     
-64    448    
464    -384   
-352   496    
336    -64    
-272   -144   
-128   128    
304    80     
192    272    
-144   176    
0      80     
-32    32     
160    64     
-16    -32    
-64    64     
-48    192    
208    176    
-368   448    
-16    -96    
304    208    
-272   -112   
-224   48     
208    144    
256    -80    
-16    128    
144    -32    
-368   96     
304    112    
304    128    
-480   160    
-64    48     
-1248  -384   
1088   -128   
-304   128    
-336   -160   
368    560    
480    352    
-176   -48    
-496   -32    
-32    224    
416    432    
-64    288    
-320   -1408  
128    144    
144    80     
-176   688    
80     -512   
320    176    
-64    -64    
-288   1264   
144    -688   
560    1312   
0      -592   
-1984  416    
1664   -976   
-576   320    
-48    -208   
448    416    
304    1792   
-656   2112   
304    880    
0      112    
-592   -480   
416    -400   
-112   -208   
-320   -192   
-208   32     
608    704    
-272   832    
-352   240    
240    112    
-16    64     
-144   32     
144    -96    
-96    -176   
-32    -80    
-128   -288   
32     -288   
-352   -1744  
-368   -1168  
288    -128   
-224   -48    
-240   -272   
512    592    
-336   416    
80     -32    
608    16     
448    2480   
-1072  1744   
-272   -272   
496    -480   
-192   80     
-160   -16    
-288   32     
400    -384   
-128   -672   
0      -512   
48     176    
176    -176   
176    -192   
-448   -752   
880    32     
752    -448   
-832   464    
-768   -192   
976    -96    
336    -1552  
-976   -384   
16     624    
400    32     
304    80     
32     64     
-368   192    
-128   240    
224    -176   
608    -80    
-320   304    
-272   -128   
-176   -576   
224    -1088  
224    -112   
-224   -1440  
304    704    
-368   -336   
-32    208    
720    -400   
-256   240    
-144   -64    
160    224    
96     -160   
512    112    
-48    592    
-64    32     
-176   32     
-352   48     
400    128    
-64    -1104  
-176   112    
336    -64    
-32    112    
0      -96    
80     112    
176    -112   
-16    16     
-128   64     
432    -784   
48     352    
192    -400   
192    -224   
-320   -240   
112    208    
496    0      
-1296  192    
432    240    
416    192    
-208   -64    
16     -192   
-368   -80    
160    -48    
304    192    
-64    -352   
-96    -128   
272    -352   
240    0      
-240   -64    
-80    80     
112    -144   
80     160    
48     784    
-240   -16    
128    112    
256    -1392  
-32    -112   
-176   96     
80     -400   
-32    560    
752    -400   
-352   -144   
-144   320    
352    -272   
784    3184   
-1328  -1408  
-1504  784    
1696   -128   
32     -320   
-704   -288   
304    -48    
640    -128   
-272   -240   
-112   -608   
96     96     
-192   -16    
288    -240   
16     -2112  
-192   -112   
256    320    
-464   -160   
304    -592   
16     96     
0      0      
-432   -544   
848    -368   
-224   -112   
-1152  -272   
0      -16    
0      32     
144    192    
0      96     
32     -640   
-256   64     
64     176    
-112   128    
320    -64    
336    112    
-576   -208   
32     -48    
128    -112   
48     48     
-192   32     
32     48     
128    -80    
-64    -176   
16     -96    
-80    -480   
464    96     
-448   -1488  
32     272    
272    -48    
-336   64     
208    -624   
144    -656   
96     432    
256    -144   
-400   -272   
608    -48    
-1568  -160   
-144   -544   
208    -336   
-208   -240   
0      128    
176    -624   
80     112    
-112   -496   
176    160    
80     -128   
-256   112    
368    48     
-80    32     
-80    -32    
256    96     
-400   -336   
880    944    
208    -160   
-1296  -176   
1328   48     
208    -656   
-768   80     
576    -1040  
576    -48    
-384   -64    
-384   48     
368    0      
-48    -160   
-64    80     
96     -32    
-256   32     
272    16     
-144   16     
160    -32    
-352   32     
-80    -144   
-16    -480   
-752   -464   
464    -32    
-32    -80    
-32    -288   
-192   -288   
-912   160    
624    -272   
16     272    
-208   144    
-96    -416   
-384   -32    
16     -192   
0      496    
-288   -160   
-272   80     
464    -560   
176    112    
-192   -80    
-208   64     
32     64     
-48    64     
-160   -16    
432    256    
-704   -64    
-320   -80    
-176   64     
64     -432   
848    1072   
-944   1376   
240    544    
1120   -800   
-496   -64    
-192   208    
192    64     
400    64     
-48    -240   
-704   -96    
592    64     
-32    48     
-160   112    
16     -32    
-160   -16    
-192   -64    
-464   -128   
-16    -16    
-16    144    
-144   -224   
-112   -416   
-624   -208   
-96    240    
-32    112    
-624   -112   
304    368    
80     208    
-160   -32    
112    -400   
-848   -128   
256    672    
-192   432    
320    272    
64     208    
-272   304    
-288   160    
432    -256   
160    -480   
-672   304    
-96    64     
64     144    
-192   144    
-128   48     
112    160    
-368   -160   
0      336    
-112   624    
368    -384   
-320   16     
16     432    
48     352    
-304   -1008  
-16    -352   
-16    -992   
-144   -272   
-784   -336   
-640   -2016  
-656   -1632  
480    816    
-80    544    
304    128    
-208   -320   
-80    32     
-96    -32    
272    48     
-64    496    
48     272    
-384   16     
32     -16    
80     48     
-528   -96    
-80    -32    
-16    -112   
256    352    
-144   256    
-144   80     
48     -544   
288    -224   
-336   -32    
-32    208    
128    80     
-624   464    
688    -272   
-608   176    
112    -128   
272    208    
-176   64     
-80    -160   
-176   96     
-144   48     
224    32     
64     0      
-96    96     
-128   80     
320    0      
0      48     
96     -192   
-144   144    
64     160    
0      112    
640    144    
-1056  400    
176    -272   
608    16     
-320   -32    
-48    32     
80     32     
0      -192   
0      352    
240    96     
-256   48     
-128   -96    
144    80     
-128   128    
32     0      
-112   192    
96     -256   
-368   -560   
80     -272   
-240   48     
80     32     
-224   -32    
112    -80    
256    0      
-96    -288   
-352   -48    
176    272    
-80    -80    
-256   160    
192    448    
-1088  1552   
3168   -544   
-848   -144   
-976   -672   
592    -64    
208    160    
-960   -1056  
-288   -192   
416    752    
-128   -352   
16     256    
0      -48    
-240   224    
272    -496   
128    96     
-384   16     
-96    -32    
320    -448   
400    288    
-272   352    
-144   -528   
-976   1024   
2224   -176   
-1216  416    
-80    768    
256    640    
16     784    
-1152  1376   
176    688    
464    384    
-192   16     
32     -32    
-192   -480   
-240   -256   
-96    384    
240    64     
96     144    
-784   720    
64     96     
432    656    
368    320    
-320   400    
-304   480    
752    -752   
-352   -32    
-704   -880   
64     -464   
128    -384   
96     -112   
144    64     
-320   32     
240    0      
224    48     
96     80     
224    -192   
-464   416    
448    80     
-144   -16    
-448   160    
688    16     
-32    -80    
-256   224    
-208   -672   
176    64     
96     -48    
-528   96     
144    80     
-144   -384   
832    -256   
448    2656   
-688   928    
576    -240   
1088   64     
-592   -32    
-512   80     
208    96     
1040   -496   
-336   272    
32     -288   
-96    416    
544    0      
-160   192    
-176   96     
368    176    
-320   160    
224    192    
-336   -80    
288    1008   
112    1536   
-112   528    
352    -272   
-256   -368   
-480   352    
432    48     
-144   320    
128    144    
-480   -32    
416    48     
96     272    
-320   -96    
96     32     
176    -400   
64     -384   
128    80     
-32    96     
32     0      
-32    -1440  
192    64     
176    160    
-304   32     
-32    32     
320    32     
-96    112    
336    -32    
-592   192    
560    384    
96     176    
-96    -224   
-464   -496   
320    -32    
352    560    
-992   -64    
208    -96    
320    -1664  
256    16     
-128   288    
336    64     
32     176    
-16    160    
48     96     
32     0      
-160   -208   
208    -32    
-64    -48    
-96    112    
-64    -96    
96     -176   
272    512    
-464   -592   
320    16     
240    0      
-304   144    
16     80     
48     0      
-16    160    
64     544    
-192   -352   
64     -80    
80     240    
960    3296   
-1632  -1216  
-1488  -64    
1904   -80    
-160   -960   
-1136  -16    
800    -2144  
672    224    
-624   128    
64     -176   
16     224    
32     352    
144    -64    
-32    48     
-160   -256   
-16    -80    
112    384    
-32    -496   
-48    -160   
176    -32    
-192   -464   
720    -720   
-512   336    
-64    -128   
544    192    
-480   -80    
-48    176    
608    608    
96     -64    
-352   304    
224    48     
272    272    
-64    -48    
-288   112    
-48    -272   
384    -16    
240    -1152  
-608   64     
480    -512   
-128   304    
256    64     
-80    240    
-48    48     
160    208    
128    -32    
-384   -160   
-32    32     
192    -32    
160    64     
-400   -864   
1152   -1008  
-1024  -704   
-208   96     
368    -176   
256    224    
-240   -80    
-272   208    
-80    -352   
-160   -848   
16     128    
112    112    
144    160    
16     -384   
-400   -48    
576    -144   
32     112    
-192   32     
512    80     
-368   -208   
16     144    
-64    -208   
688    208    
864    80     
-1344  128    
848    -784   
112    16     
-368   496    
272    -304   
608    208    
-208   64     
-224   128    
336    64     
32     -832   
-64    -32    
400    -496   
-128   80     
0      64     
176    -368   
-64    -96    
-16    -480   
16     -32    
224    -1088  
-1136  -400   
480    -80    
576    -144   
-576   -32    
480    -528   
-16    -1328  
-320   368    
624    -80    
-176   128    
-400   -96    
-48    64     
96     -176   
208    -80    
-160   -512   
80     208    
80     -16    
112    -288   
112    -192   
-224   112    
-256   176    
752    -576   
-48    80     
-272   -96    
-96    448    
288    -160   
208    -192   
-240   -576   
-1280  -832   
1952   -2080  
48     160    
-1296  -240   
-448   -256   
928    208    
-368   -624   
640    784    
192    -272   
-496   -160   
-192   -96    
432    192    
-176   -192   
80     112    
-160   -128   
64     112    
-720   -16    
240    -48    
-112   -48    
-192   -112   
288    672    
192    352    
96     128    
-672   -448   
16     80     
288    192    
208    -96    
64     560    
-32    1584   
-224   96     
304    -512   
-256   -144   
-208   176    
96     -384   
48     -384   
96     -176   
160    -208   
-448   -240   
0      128    
224    224    
-304   -272   
320    -48    
256    -32    
128    272    
-96    1152   
-192   192    
240    -64    
80     -496   
-256   -400   
128    224    
160    -176   
656    672    
-704   -672   
-752   -1088  
1152   -368   
-720   416    
-96    -432   
-176   -240   
176    416    
208    -576   
-352   -48    
-128   -80    
256    240    
-16    400    
-368   416    
16     -160   
368    -336   
16     256    
-320   -592   
400    -192   
32     80     
32     0      
-256   80     
96     16     
-256   64     
64     96     
288    16     
-96    16     
-64    -96    
240    -144   
0      96     
-384   912    
944    -112   
-560   -400   
352    -64    
-288   192    
224    160    
-144   208    
224    -176   
256    -208   
256    144    
-208   128    
64     -112   
16     -224   
304    16     
48     128    
-176   -16    
-80    112    
64     -400   
-1024  -272   
-240   -288   
128    -592   
-352   560    
240    -48    
-352   240    
144    -176   
64     448    
112    560    
-272   -144   
-16    -416   
-32    32     
-240   -112   
-16    128    
0      48     
96     32     
-32    240    
-176   512    
224    368    
-640   1120   
-304   -16    
352    -16    
-128   240    
-384   32     
32     304    
160    -272   
64     80     
-272   -128   
336    112    
-224   208    
0      -128   
-1392  -688   
448    -48    
400    -336   
-816   -256   
352    1136   
176    0      
-336   448    
-128   -48    
224    -496   
48     -1008  
-400   16     
80     -128   
16     224    
-192   -208   
16     32     
112    -80    
-32    -256   
-384   -224   
160    144    
160    272    
-208   672    
752    -608   
-2144  -160   
1360   -160   
-1968  1680   
-128   608    
384    368    
-1040  -192   
704    -400   
64     -176   
-416   192    
32     80     
192    -144   
400    -160   
-448   80     
-320   -160   
384    96     
-64    240    
-144   128    
0      -624   
-288   -48    
240    608    
-304   -640   
-544   416    
704    -112   
-512   -288   
144    432    
704    64     
-336   -112   
-160   240    
-256   0      
352    -32    
-208   224    
-160   80     
-240   -128   
-464   -48    
-16    -304   
-240   688    
560    -112   
320    176    
-256   32     
-256   0      
32     16     
-256   32     
272    128    
-512   80     
-192   96     
-176   -176   
-32    -240   
-1136  -2752  
1008   -2448  
448    384    
-48    320    
-432   64     
-320   304    
288    -48    
272    240    
0      -320   
-592   224    
368    -48    
-16    112    
-208   32     
64     16     
-128   32     
-32    48     
-192   32     
-192   48     
-80    -480   
720    64     
-272   -352   
-304   160    
256    384    
144    176    
-560   -112   
336    176    
64     -400   
-752   224    
336    -208   
176    128    
64     -32    
-272   -16    
64     208    
496    112    
-672   0      
144    -96    
0      80     
640    272    
-272   -16    
-688   128    
512    96     
-16    -48    
48     80     
-208   -64    
0      368    
128    0      
-160   48     
192    64     
-464   80     
272    224    
448    96     
-64    320    
80     -32    
-576   320    
1040   -368   
-592   96     
-672   -336   
144    -32    
352    16     
-16    -32    
-64    144    
192    96     
-32    144    
80     112    
32     -32    
-96    128    
80     960    
224    624    
-368   -112   
288    -176   
-160   128    
-336   -80    
592    384    
32     -16    
-304   -64    
-112   -48    
416    -240   
0      -528   
-480   80     
112    336    
-272   -832   
1456   -1040  
-1552  512    
96     -128   
64     64     
-576   176    
512    1040   
912    272    
-576   -608   
160    -208   
-16    416    
128    -48    
400    64     
-192   400    
-352   -128   
320    80     
256    112    
-96    208    
-96    0      
-112   -32    
-80    -272   
896    -16    
-144   256    
-592   32     
608    -176   
-192   208    
48     16     
240    -208   
-192   160    
112    288    
64     32     
-80    16     
96     144    
0      96     
-208   64     
480    176    
-256   96     
112    -480   
-48    64     
-112   112    
288    -16    
112    64     
-368   160    
160    144    
0      208    
400    48     
-432   208    
48     -48    
176    160    
80     528    
-1536  784    
3584   464    
768    80     
-1888  112    
624    -1728  
1536   96     
-1168  432    
192    288    
640    112    
-528   0      
-128   -16    
304    32     
144    112    
-304   -256   
-64    176    
608    -64    
-256   320    
-80    -224   
0      464    
384    -48    
-240   -400   
1024   704    
-272   384    
-592   -224   
1152   720    
272    672    
-240   128    
224    64     
368    32     
-240   16     
-528   176    
-80    -240   
512    -176   
176    16     
144    -416   
-96    176    
-16    64     
384    48     
-352   208    
144    304    
16     -240   
128    416    
-496   -576   
-48    32     
-272   256    
560    -464   
1088   784    
-32    -176   
0      224    
144    -688   
-240   16     
-16    -768   
16     352    
96     208    
192    544    
-528   112    
-48    -160   
624    -16    
-48    336    
-560   -32    
640    0      
48     128    
-304   -288   
368    -32    
16     -320   
320    -224   
-64    48     
224    -192   
-240   -48    
-64    272    
-480   2416   
448    368    
-320   -432   
-160   208    
1120   800    
-368   240    
-816   448    
656    896    
128    1424   
-288   -384   
192    -144   
-240   -224   
192    -80    
-176   -304   
240    -96    
-64    384    
-240   176    
352    -336   
-128   -80    
-80    288    
160    -272   
192    144    
-848   -240   
544    -192   
-144   -384   
240    -464   
-80    -752   
0      -320   
-96    -144   
272    192    
80     0      
176    -448   
-320   -848   
224    -736   
48     128    
144    512    
240    384    
-640   -32    
416    -720   
400    384    
192    -48    
-112   -16    
96     -496   
-48    368    
256    -1344  
-208   -208   
176    -992   
224    -560   
-288   192    
32     -96    
-272   -1216  
16     -576   
672    64     
-64    -544   
64     -992   
240    80     
176    1168   
-144   1424   
256    256    
-32    -688   
-160   160    
-192   -400   
0      -96    
-1200  160    
32     -16    
48     -64    
208    96     
320    -320   
96     -832   
16     0      
0      0      
304    -224   
-256   96     
-192   192    
272    -160   
-304   -128   
96     -416   
160    -208   
-304   -128   
-64    -208   
-176   -608   
96     -384   
-352   192    
320    -800   
320    48     
192    -1328  
-256   -288   
384    -736   
384    -256   
128    64     
80     240    
-176   112    
-80    -112   
96     -208   
-48    -304   
-544   -192   
224    -32    
288    80     
-144   -288   
80     736    
96     -1408  
-48    16     
688    -48    
-720   736    
-128   128    
80     -224   
48     -112   
160    464    
-160   -256   
-352   -160   
96     112    
224    176    
64     -160   
-80    -400   
-320   -144   
80     96     
512    176    
128    -1184  
-288   -96    
0      144    
64     -304   
224    48     
-48    -128   
-192   272    
160    64     
96     64     
224    -176   
-640   304    
-240   432    
-832   1776   
2560   -432   
-720   96     
-96    -848   
528    -592   
-528   96     
560    64     
-336   -288   
32     -336   
64     64     
400    -144   
-640   32     
-96    -240   
576    -32    
-128   -128   
-240   -32    
-48    -528   
-64    -112   
-48    -272   
160    144    
-96    160    
-384   224    
2048   -272   
-736   656    
112    -528   
240    400    
208    80     
-240   80     
416    -32    
-224   -192   
48     208    
448    -256   
-272   96     
-32    0      
128    -64    
-528   64     
368    -160   
-192   48     
224    320    
-320   112    
-272   16     
-128   -192   
112    -336   
-464   112    
160    -624   
-144   -32    
-400   -1120  
-720   -144   
-80    432    
336    160    
-32    -112   
-608   -96    
-480   80     
48     -240   
640    -784   
-704   608    
-368   224    
256    256    
-576   192    
144    -64    
-32    80     
-592   -224   
112    448    
288    -240   
-160   272    
-992   0      
-80    0      
720    144    
-1232  -608   
240    -2432  
2000   -3088  
224    816    
-336   448    
-208   176    
432    -16    
32     16     
-240   16     
-272   48     
64     320    
480    -160   
-336   320    
-336   192    
576    80     
-336   -96    
-80    144    
-1008  -32    
0      144    
-176   -288   
704    416    
-64    -608   
-528   304    
400    32     
-16    320    
144    128    
-656   -32    
256    -208   
-368   -272   
16     -160   
32     32     
80     16     
-16    -192   
-96    160    
32     -240   
176    384    
-688   -336   
304    32     
304    -400   
-256   192    
624    64     
-480   48     
256    32     
32     -16    
-80    -112   
0      48     
-176   16     
-576   -160   
144    -64    
80     -128   
-80    416    
32     192    
288    1120   
-48    144    
-576   432    
272    144    
-512   32     
-112   32     
528    -32    
144    608    
-304   112    
96     112    
80     -48    
-400   112    
64     32     
176    64     
48     64     
-64    32     
-240   -160   
176    -288   
-272   176    
160    448    
528    64     
-416   -160   
-176   -32    
32     -32    
160    -80    
-64    96     
-256   -304   
-320   -80    
64     240    
-768   -1440  
1808   -144   
-1040  96     
-1024  -32    
816    32     
-256   64     
-176   -112   
192    176    
752    576    
-304   448    
-256   -432   
400    16     
-16    240    
-272   -80    
304    880    
-128   -256   
-96    -320   
272    128    
48     64     
-144   -48    
-304   -64    
992    800    
48     0      
-1136  -192   
896    -720   
-224   400    
192    240    
-368   960    
-48    -96    
-112   32     
16     176    
240    -16    
-16    368    
-336   -16    
128    128    
288    -64    
0      128    
-256   96     
224    192    
-144   256    
16     -48    
-112   -80    
16     144    
-240   -64    
-160   80     
480    144    
-288   160    
32     16     
0      160    
240    -336   
-1520  -1120  
336    80     
1536   -608   
-1648  -192   
272    432    
1008   608    
-640   320    
-192   208    
-144   -192   
416    16     
-208   -16    
-48    80     
48     48     
96     112    
-432   -112   
320    80     
80     96     
-160   32     
-64    48     
144    -32    
16     480    
384    -592   
-1376  336    
720    -112   
-80    560    
-672   432    
32     368    
512    240    
384    -112   
-304   144    
-736   352    
368    -48    
304    -80    
-288   -160   
-368   -80    
432    224    
0      32     
272    -320   
-256   128    
32     192    
-16    160    
112    320    
112    240    
-64    80     
176    512    
-176   80     
-736   -1664  
-640   -912   
480    -432   
-512   368    
48     80     
-96    0      
48     -48    
512    512    
496    480    
-368   208    
144    -960   
16     -48    
208    48     
112    -288   
-80    -48    
-48    160    
48     320    
176    192    
16     304    
176    -336   
-96    -160   
192    -336   
-16    112    
-80    256    
-240   -1920  
-1808  -96    
1264   64     
-352   -432   
-288   -448   
256    624    
-336   48     
400    -576   
160    848    
16     -992   
-144   672    
-16    48     
240    -496   
32     -144   
-32    -352   
32     304    
496    64     
-160   -64    
16     -288   
144    192    
160    1152   
112    -448   
-976   -128   
448    -336   
496    -448   
32     768    
144    -128   
-96    -432   
-208   624    
208    -1328  
240    480    
-112   -528   
-288   -96    
48     -192   
-304   -128   
144    48     
368    464    
-512   -608   
16     -112   
368    176    
-16    -48    
0      -240   
16     32     
112    -640   
-96    -592   
64     400    
-496   -928   
-32    352    
448    624    
176    304    
352    1024   
-832   512    
-192   672    
688    368    
-128   320    
-304   -224   
-64    288    
480    416    
96     400    
144    -160   
-176   0      
-224   -416   
400    112    
208    -448   
-160   -160   
-112   544    
208    -224   
432    -16    
400    336    
144    -96    
48     0      
96     224    
80     80     
-80    -368   
160    -928   
32     -448   
-16    -1536  
160    -368   
16     -608   
16     0      
-560   1200   
1312   -304   
-800   544    
-160   640    
208    320    
112    384    
48     -768   
-320   -736   
48     544    
112    272    
128    80     
-112   -144   
16     544    
-80    -848   
112    272    
-32    320    
-96    528    
0      -16    
64     -48    
-48    160    
432    96     
16     -384   
-352   -1216  
240    192    
128    -336   
32     528    
-144   -720   
80     416    
128    -256   
-48    -464   
176    32     
128    16     
-256   -496   
96     -112   
176    -544   
128    176    
-256   384    
64     96     
144    96     
0      -32    
160    96     
128    -288   
-32    384    
112    64     
-272   -304   
-80    16     
304    -496   
-80    -160   
256    16     
-1088  -1728  
304    160    
1424   -896   
-1296  -384   
320    592    
816    -48    
-432   336    
-224   -160   
368    -400   
32     -32    
-80    -448   
48     16     
-128   -1008  
384    96     
-288   -112   
-272   64     
208    -128   
64     -176   
-80    -256   
-128   -48    
176    -16    
-64    -400   
-1616  -32    
1792   -128   
-160   -80    
-416   -16    
688    112    
-368   -320   
400    -160   
-416   304    
32     -32    
304    -48    
-224   -336   
-416   -208   
320    64     
528    48     
-176   -288   
-256   144    
320    -432   
-288   256    
-176   -32    
-64    -272   
-384   240    
560    -208   
-752   16     
288    320    
-96    -240   
544    -352   
224    16     
496    -112   
160    -128   
-480   -1120  
256    -160   
-96    -192   
80     480    
80     -48    
368    432    
-128   384    
-32    160    
-224   96     
-176   -32    
-528   0      
144    80     
256    -112   
240    496    
-128   -176   
-256   -192   
-384   208    
64     -688   
-96    1408   
1840   1104   
-16    -688   
-1168  -944   
336    80     
672    -80    
64     0      
-704   320    
64     -80    
272    -224   
-64    32     
-464   -112   
-160   -240   
272    16     
-80    -96    
0      96     
16     112    
96     -128   
-16    -48    
32     -720   
-1024  -80    
720    -432   
-832   112    
496    -176   
-1456  -160   
64     48     
432    -320   
-848   -256   
256    -64    
208    -16    
-176   16     
-32    112    
-48    -64    
16     352    
224    -176   
-640   48     
608    -224   
-768   -176   
64     -256   
-80    144    
176    176    
-384   0      
176    -304   
-128   80     
-224   -608   
416    32     
256    -160   
-560   -80    
160    80     
128    0      
-144   -48    
-176   -272   
480    -560   
-224   384    
80     592    
336    -160   
-336   272    
96     -208   
288    160    
224    -256   
64     48     
-272   96     
176    -160   
-48    80     
-64    -16    
-32    192    
208    160    
144    -64    
-272   -832   
48     -672   
32     -416   
-96    128    
-272   224    
224    176    
-432   -208   
-400   336    
128    128    
-608   -128   
176    -288   
-416   -192   
-656   -864   
2272   1296   
144    384    
-1472  688    
-48    -432   
16     -304   
368    496    
144    512    
-176   512    
-416   448    
64     128    
320    448    
-416   192    
-208   176    
128    352    
160    48     
-1328  -528   
-32    -192   
-96    32     
-16    32     
-32    192    
544    672    
-208   544    
-336   -144   
256    208    
96     640    
-336   256    
144    224    
-16    192    
0      -32    
-192   -48    
-368   -272   
-96    -16    
240    -112   
-32    272    
-368   -288   
368    400    
80     144    
-224   48     
96     -176   
208    -240   
-128   208    
-16    64     
64     -112   
16     32     
-32    128    
-16    -16    
224    160    
-992   16     
-144   176    
-1104  -368   
176    -192   
1376   -656   
-992   -272   
304    576    
-96    -240   
-384   -96    
240    -272   
-208   0      
32     80     
0      144    
144    32     
-176   80     
0      32     
432    64     
-512   -80    
-112   -32    
256    -560   
-336   -48    
-96    464    
544    1760   
-448   -880   
-2112  400    
1760   464    
448    256    
-1024  48     
112    128    
208    -208   
-400   -528   
-16    192    
176    -96    
-256   256    
-112   -80    
240    80     
-304   288    
-304   192    
336    192    
144    848    
288    816    
-128   304    
-160   -32    
-80    32     
-96    -288   
832    -1008  
-48    -1248  
-736   -1136  
-448   -672   
880    -912   
-160   -112   
16     1136   
-112   0      
-576   -416   
192    -192   
944    544    
-1040  592    
-544   176    
-240   -736   
448    -528   
-112   -528   
-256   608    
240    48     
-176   160    
-192   -432   
-16    -224   
-208   -272   
-32    -16    
240    48     
-368   240    
352    560    
-16    -128   
-736   -1776  
-1328  720    
848    112    
-64    -96    
352    1280   
-608   16     
160    576    
592    1200   
-128   672    
368    -288   
-80    112    
-48    512    
144    672    
-48    -432   
112    80     
240    -48    
64     -336   
112    320    
-80    432    
-64    448    
224    -192   
96     16     
-128   -544   
-496   304    
544    -240   
-80    96     
-64    -64    
-288   -848   
-128   -192   
288    720    
-32    16     
-32    -96    
320    -64    
-288   128    
-304   -112   
400    -48    
-32    -608   
-560   272    
304    1072   
224    528    
-48    -32    
160    -192   
-352   -208   
-16    -352   
304    368    
-32    896    
176    720    
208    352    
-64    -224   
-144   0      
448    160    
-1216  80     
224    464    
912    64     
-800   -48    
-64    704    
816    192    
-80    -1280  
-416   -528   
176    -96    
0      496    
16     416    
176    144    
-256   256    
80     320    
256    192    
-240   -48    
592    80     
144    -144   
-176   -144   
144    -64    
-112   192    
16     288    
64     176    
-80    256    
208    -112   
-176   -800   
64     -16    
-32    464    
-432   -544   
1184   -528   
-464   -208   
-16    -976   
-224   880    
128    608    
336    640    
-224   80     
-80    -704   
48     -592   
160    -256   
64     48     
32     16     
48     64     
-128   496    
176    592    
-176   112    
0      240    
240    208    
-64    0      
-192   80     
752    1616   
-16    -32    
-544   112    
592    -96    
-368   48     
48     -256   
32     32     
48     -96    
-32    -112   
-80    -1248  
384    320    
16     144    
-208   176    
336    48     
-240   48     
112    32     
-176   128    
400    80     
-496   32     
224    48     
192    96     
-112   160    
-16    -320   
0      32     
336    -720   
176    48     
-400   48     
304    112    
-336   656    
-1952  -368   
1248   -384   
2368   -192   
-1488  176    
-1008  352    
1360   576    
608    -544   
-768   832    
304    -448   
128    368    
-64    -384   
-176   160    
64     -2176  
432    272    
-128   -240   
16     224    
208    16     
-32    208    
-272   -208   
128    192    
80     -48    
-752   -448   
1312   240    
720    -288   
-736   288    
-400   192    
528    48     
-176   -304   
-96    448    
144    -80    
144    80     
-144   0      
-32    144    
288    32     
-768   208    
352    -16    
240    -400   
-432   0      
384    112    
-352   16     
80     -1104  
448    624    
-768   -704   
48     288    
992    -80    
-176   848    
-144   656    
-16    416    
336    96     
464    368    
96     208    
-144   64     
-80    272    
448    -800   
352    176    
-272   432    
80     -32    
848    -80    
-96    512    
-224   112    
352    128    
144    112    
32     80     
-112   -48    
64     208    
240    -240   
-400   -32    
448    16     
160    -96    
-1696  -1568  
2256   -2320  
464    0      
-944   832    
560    432    
-480   -352   
288    -144   
352    160    
-16    -400   
-784   96     
208    -240   
320    -800   
320    -128   
-384   -2288  
-272   -80    
256    16     
272    0      
112    -16    
-272   -160   
208    -2000  
-720   32     
784    -416   
-560   224    
800    -304   
64     -432   
-1120  -80    
464    -320   
-336   0      
368    -80    
-528   160    
320    -1392  
128    -32    
-64    176    
-304   0      
224    16     
176    336    
-32    272    
-272   224    
-240   0      
16     -272   
-32    -80    
-128   -224   
80     -80    
-128   -48    
128    192    
80     -384   
-240   -16    
0      32     
336    80     
-48    0      
-208   112    
48     -176   
384    -208   
144    496    
48     1936   
576    624    
-336   -656   
-144   -480   
-64    -64    
16     -304   
-208   -784   
64     -192   
-16    -1168  
80     -112   
224    -368   
-16    192    
-272   -288   
-208   32     
32     48     
224    208    
-80    -336   
-304   -512   
-448   -688   
-48    -384   
784    -16    
-288   -272   
-400   -208   
304    400    
352    512    
-128   -752   
-352   -48    
-624   -480   
1632   -432   
-224   640    
-912   -64    
800    16     
-96    -832   
-480   -1072  
-16    1120   
208    -608   
-144   96     
-64    128    
48     -368   
80     160    
192    -80    
-144   -80    
-32    224    
48     160    
-144   -320   
16     -368   
-112   32     
48     1392   
576    352    
-704   -80    
-1008  -256   
432    -352   
576    816    
-608   1184   
-160   -32    
432    -896   
-144   368    
-272   -512   
96     16     
64     -400   
208    -16    
-16    -96    
-96    144    
-128   144    
-32    -224   
320    -176   
-144   -288   
-304   336    
256    80     
160    272    
-240   -272   
192    -64    
-176   384    
192    -112   
272    -240   
-304   112    
-144   368    
1456   -288   
-2064  960    
160    496    
672    944    
-544   128    
240    992    
320    -800   
-272   -208   
-128   -64    
416    -304   
-96    48     
32     -64    
-16    -32    
-320   16     
-144   -176   
192    -176   
-320   -288   
-240   96     
112    64     
-144   -448   
608    960    
608    -176   
-736   48     
-256   -96    
-304   848    
352    592    
176    496    
-192   1328   
480    368    
0      -896   
-144   -448   
96     0      
400    112    
-192   608    
-368   288    
-80    64     
-320   -288   
-128   -32    
-96    -16    
144    64     
-112   0      
160    608    
528    784    
-272   768    
-352   624    
-320   80     
192    2400   
976    1728   
-160   400    
-240   -400   
608    -368   
-16    64     
-432   -560   
-160   896    
1152   -272   
16     -400   
352    -80    
-96    224    
160    480    
192    272    
-704   -128   
-96    -512   
-208   -352   
256    336    
-48    464    
-432   64     
-64    496    
352    784    
-272   256    
1040   2288   
-1184  1104   
288    144    
384    -688   
-816   -32    
-176   544    
16     304    
640    1840   
-208   400    
-528   -576   
-80    -240   
512    384    
-16    112    
-416   208    
-240   -64    
-240   464    
512    256    
-400   -224   
-192   -768   
-608   -944   
384    -48    
208    32     
-528   80     
224    256    
-144   160    
-96    -224   
368    560    
-48    592    
256    0      
-16    832    
-208   464    
112    96     
-592   240    
464    768    
-416   240    
160    -304   
-112   -80    
-240   -80    
112    -208   
0      -176   
0      -176   
-16    160    
48     240    
-16    80     
224    704    
-528   -96    
32     336    
272    368    
-128   256    
128    -208   
-560   -80    
272    640    
1552   -144   
-1552  -320   
-112   -368   
-496   -592   
112    208    
224    336    
-176   384    
320    352    
-144   176    
-16    128    
192    592    
-336   400    
-32    144    
224    -464   
-448   -320   
-128   -976   
-288   -688   
176    -80    
368    -432   
-128   -240   
-320   -224   
48     288    
304    112    
-272   400    
544    144    
-96    -128   
-256   -112   
144    48     
-848   -160   
960    -1168  
-496   160    
-432   -336   
480    384    
224    -128   
-496   48     
-32    16     
640    -208   
-192   144    
-64    128    
-112   48     
-64    224    
128    -304   
80     -320   
448    224    
-400   160    
64     160    
64     -144   
-112   -80    
256    -1008  
-1152  336    
1072   -48    
-16    160    
-592   -32    
128    -304   
224    32     
-144   144    
-48    16     
304    240    
96     16     
-288   96     
-80    240    
32     48     
16     80     
-128   160    
368    240    
48     -64    
240    32     
-64    -64    
-144   160    
256    112    
112    96     
-240   -176   
-192   96     
544    32     
-592   144    
384    96     
-112   0      
416    -1056  
-1568  -592   
1296   -112   
80     96     
80     368    
-912   -368   
416    32     
752    192    
-496   -64    
192    96     
384    32     
-320   -16    
48     144    
336    96     
-624   -64    
240    160    
400    128    
-432   -48    
48     32     
176    -48    
-80    48     
176    192    
-1424  112    
688    272    
960    32     
-2336  160    
816    208    
240    -224   
-560   48     
592    240    
96     80     
-32    96     
64     160    
-144   32     
-96    16     
-208   64     
256    -32    
0      112    
-256   352    
32     464    
224    64     
-208   -432   
1008   -336   
-464   -208   
-96    368    
720    32     
-912   -48    
192    -656   
256    112    
-64    400    
-32    64     
432    -192   
64     -144   
-96    192    
16     464    
-864   240    
400    -48    
-208   -96    
48     -176   
480    16     
-480   0      
144    48     
64     16     
16     192    
64     80     
240    240    
-544   288    
16     128    
144    -256   
624    1504   
-1344  4912   
1264   832    
-144   -464   
-784   -656   
464    96     
336    -1088  
-416   0      
-80    208    
272    320    
-352   192    
-96    80     
448    0      
-432   32     
80     -80    
256    256    
-80    32     
-144   144    
240    80     
384    -272   
-848   -672   
288    -1168  
64     -128   
32     -80    
960    240    
-992   -96    
432    288    
32     -128   
-176   -48    
256    464    
-272   288    
224    192    
128    128    
-112   -48    
-16    -32    
128    -80    
32     -976   
-512   -400   
112    -176   
144    240    
32     -96    
-160   48     
208    -16    
560    -48    
-592   368    
432    624    
-80    320    
-64    416    
272    -144   
-400   -576   
272    80     
-272   -544   
528    -256   
-464   352    
192    464    
320    144    
-192   960    
736    2096   
752    1040   
-208   256    
144    80     
16     -64    
-32    -304   
-16    128    
128    80     
0      -112   
48     -768   
80     352    
0      -912   
-80    224    
48     -96    
80     544    
112    432    
-32    -16    
-16    -432   
0      16     
80     32     
-32    16     
-16    192    
96     -352   
-192   112    
656    784    
-400   1440   
240    -48    
240    -80    
112    -304   
-128   -48    
-256   256    
112    112    
-384   64     
-96    -416   
192    -400   
48     -432   
0      -320   
-96    -256   
112    96     
-128   -400   
-48    -208   
256    -336   
160    -128   
-32    -272   
-656   -656   
896    -32    
-496   -304   
-16    336    
-592   304    
32     -416   
32     0      
-176   -400   
80     -48    
96     -800   
64     -160   
144    16     
0      -48    
96     96     
112    -80    
272    48     
-96    -32    
-208   -480   
336    -560   
64     -96    
80     -32    
-64    192    
-16    -64    
112    128    
192    -224   
-160   -112   
368    -1760  
-112   64     
-80    -64    
1584   1040   
-1824  352    
-1152  -256   
1952   288    
-720   -624   
-1632  -928   
656    -656   
-784   -1840  
240    -624   
240    -576   
176    288    
-624   -320   
192    -2752  
96     272    
0      128    
-144   320    
208    96     
-416   -368   
-112   -320   
240    32     
-560   -752   
1264   944    
-1184  -432   
-1056  -192   
512    -16    
-448   -624   
-16    -992   
560    -1680  
-48    192    
0      -304   
32     288    
16     -320   
32     -464   
-160   -128   
128    -128   
-160   0      
0      -448   
-368   224    
-272   240    
320    192    
-96    -96    
16     208    
-160   -944   
576    -704   
48     -1104  
0      1008   
272    176    
1024   320    
528    800    
-720   288    
240    352    
-48    -400   
-16    128    
64     -80    
-400   -800   
-736   272    
224    -736   
384    -1136  
176    256    
-304   -1200  
-336   -128   
272    176    
-208   -432   
112    48     
112    -272   
160    240    
224    80     
-304   -176   
528    -64    
-432   16     
-960   -832   
-96    240    
224    64     
-160   1952   
672    1040   
-256   688    
-48    -64    
544    -544   
-832   -272   
-144   -272   
160    400    
-48    -32    
-32    -304   
-176   -240   
64     -96    
32     -304   
256    192    
320    -32    
-176   496    
0      -864   
-16    -128   
-208   -160   
304    416    
608    -240   
-672   48     
96     48     
64     304    
208    0      
128    -272   
-336   176    
176    32     
-16    160    
-224   -384   
240    208    
-1104  -544   
-112   112    
320    464    
-144   64     
-288   -16    
112    -48    
-160   224    
336    448    
-288   224    
-352   48     
496    0      
-432   -336   
-608   -176   
176    -464   
16     -48    
-64    -32    
-320   -432   
608    -464   
256    176    
-496   -160   
-704   -32    
432    0      
-288   -160   
144    160    
48     -48    
-112   -16    
-144   16     
256    80     
128    -160   
-336   192    
80     288    
240    -240   
-192   224    
-208   48     
48     -464   
-352   288    
-288   272    
16     -464   
-112   -432   
-96    -192   
16     48     
128    -32    
384    -176   
-352   16     
-16    160    
304    96     
-1152  544    
2272   -976   
-368   -32    
-864   -96    
880    320    
384    256    
-1360  272    
64     400    
-384   -480   
0      160    
-16    -160   
64     -48    
-176   48     
-16    368    
400    -304   
-224   256    
-144   144    
320    -128   
-80    32     
-112   -80    
-336   -16    
928    -224   
-112   -144   
-1088  -48    
864    -48    
0      560    
256    -208   
-608   -560   
224    -144   
48     288    
352    -112   
0      80     
-256   32     
-304   -96    
464    64     
-32    -96    
-368   32     
-16    368    
224    -16    
16     16     
-288   -160   
-96    160    
128    112    
48     192    
528    128    
-480   80     
-112   -16    
144    160    
64     144    
-1584  -1712  
-800   -1472  
3120   320    
-928   224    
-1040  -96    
704    224    
576    -48    
-448   128    
-368   -128   
496    -48    
-96    80     
-112   -96    
112    80     
-192   -48    
96     160    
400    32     
-352   96     
-32    -112   
256    -32    
-176   -32    
32     64     
-464   -624   
-528   544    
1520   -384   
-208   96     
-544   48     
704    -32    
-480   144    
-240   -64    
320    176    
208    -64    
-80    32     
-208   16     
-80    112    
64     112    
560    64     
-112   144    
-224   -176   
-112   128    
144    80     
224    48     
-128   112    
416    48     
-656   224    
368    32     
-112   -176   
-512   208    
208    -144   
160    -240   
112    -16    
-80    160    
-32    416    
192    160    
-48    -16    
-192   432    
752    -224   
-256   240    
160    160    
64     0      
48     48     
80     32     
64     80     
-192   112    
144    176    
-176   -64    
208    -128   
-496   160    
16     112    
272    16     
-592   -864   
-144   2384   
816    400    
-1392  -144   
176    -288   
1536   448    
-1072  -352   
-288   -368   
512    0      
80     48     
-352   -32    
-224   64     
368    0      
-656   256    
432    -96    
144    288    
-80    -48    
-240   224    
272    -16    
-16    -352   
-416   -1248  
128    -288   
0      112    
-144   432    
928    -256   
-816   48     
144    -64    
16     -304   
-144   -704   
64     -448   
-80    1136   
176    192    
-208   -272   
16     -224   
96     208    
64     240    
-64    80     
-80    -320   
144    16     
160    176    
-176   224    
320    432    
-32    528    
-80    32     
-64    544    
512    1120   
-224   672    
368    928    
336    784    
-368   -272   
64     -32    
-320   256    
320    1072   
1152   176    
-720   528    
336    496    
-128   672    
352    464    
-720   -1008  
320    -592   
32     576    
-96    -352   
112    240    
-96    -144   
80     -144   
288    112    
-80    -96    
-80    -96    
-16    -16    
-176   -208   
32     176    
-64    -864   
-128   160    
48     112    
96     96     
96     320    
-384   0      
-288   -64    
416    -48    
-32    176    
-96    96     
-480   -304   
832    -480   
-112   400    
112    -384   
32     208    
-144   -368   
-176   -96    
672    -208   
48     272    
-240   384    
-64    -16    
144    48     
-32    160    
16     16     
-48    32     
-208   -32    
80     -240   
416    176    
48     -64    
-160   192    
-336   -880   
208    0      
-32    -2016  
-176   256    
448    -48    
160    -208   
240    -192   
-208   -32    
-96    352    
-112   128    
224    192    
-16    208    
-64    16     
-112   -288   
-16    176    
224    -176   
288    80     
-416   -816   
-48    32     
160    192    
-80    16     
-128   -80    
176    -160   
-192   -112   
208    -176   
416    144    
-16    96     
-224   160    
-144   -272   
448    1280   
768    -496   
-1680  32     
1072   -48    
-48    160    
-576   -4160  
912    -576   
448    1472   
-384   -48    
288    -1232  
-64    -208   
48     256    
240    64     
-80    256    
-176   144    
272    96     
256    -416   
-304   -224   
-352   -1680  
288    272    
-32    224    
224    1120   
2304   160    
-1376  1008   
448    -1056  
-352   -528   
64     -96    
0      352    
592    656    
-144   -32    
176    -144   
32     -272   
224    432    
-240   128    
-48    160    
576    -640   
-256   208    
336    0      
-512   272    
-288   0      
416    -320   
160    336    
240    -288   
80     1680   
208    -16    
-1152  -192   
240    16     
736    384    
-976   416    
304    -288   
208    -128   
-16    -2416  
32     -128   
-80    -160   
224    -480   
1168   -480   
-320   208    
224    448    
448    -1488  
-64    -160   
-928   -512   
512    -112   
272    224    
-272   -320   
-224   -528   
464    576    
752    -144   
-320   32     
-448   -704   
880    -1072  
576    1488   
-1808  704    
1120   -336   
576    -512   
-720   80     
16     -816   
672    -528   
496    -128   
0      -272   
-544   -208   
576    48     
160    48     
-16    144    
-80    48     
-144   -80    
-224   -80    
336    -256   
-416   -144   
880    -64    
-880   32     
640    -672   
144    -160   
-160   -1808  
448    32     
-80    -256   
-304   240    
272    -64    
16     112    
-464   -96    
512    16     
-384   -224   
16     112    
-336   16     
-288   208    
368    32     
304    208    
-592   -224   
320    -480   
-96    80     
112    -160   
-144   80     
160    32     
32     112    
144    64     
16     16     
-16    -288   
-48    -96    
-64    -96    
192    -160   
-16    -48    
-112   -112   
-544   -48    
592    -336   
16     224    
-160   -832   
320    112    
240    -208   
-304   -128   
-128   -192   
-384   -48    
416    -80    
-208   -48    
-32    80     
144    -48    
-160   -64    
16     208    
32     432    
-192   -304   
288    144    
352    -1648  
-304   -128   
0      208    
160    128    
-64    432    
16     -96    
-48    -272   
-256   448    
-160   -128   
176    -80    
-32    160    
-640   -2800  
-816   320    
1600   -224   
-704   -96    
224    16     
208    -144   
-352   528    
-160   -1056  
-208   64     
480    128    
-800   -208   
-64    32     
96     192    
-32    -224   
-64    -160   
-64    64     
176    -224   
32     -608   
112    208    
48     -368   
-400   -912   
288    -208   
96     176    
-592   48     
560    0      
-304   -496   
224    -160   
-256   -48    
-112   32     
80     -16    
144    -128   
-336   -64    
0      -160   
80     144    
-208   -208   
-1040  -16    
176    -160   
320    -48    
-496   48     
224    128    
384    48     
-80    -112   
-528   -96    
176    -112   
448    144    
-64    -144   
16     176    
-800   -48    
128    224    
32     -864   
-1600  -320   
-64    656    
112    -16    
-352   -176   
400    192    
400    128    
-784   -272   
-288   -96    
544    -288   
-96    176    
-80    -96    
112    192    
16     -160   
176    160    
-512   96     
304    -48    
16     288    
-240   -400   
-224   -64    
-160   -80    
-560   -528   
-880   176    
752    -544   
-608   -208   
-256   80     
208    -608   
-256   240    
-304   -272   
112    80     
336    48     
80     64     
-320   32     
-192   160    
32     -208   
160    16     
176    48     
-464   -144   
144    -304   
-432   80     
128    336    
-304   -176   
432    160    
640    112    
80     384    
-1104  496    
-48    -416   
224    48     
144    32     
-80    -16    
128    -16    
144    0      
-1488  96     
544    -224   
-448   -64    
-384   416    
544    -96    
-224   -112   
48     16     
224    -96    
-48    64     
-224   -80    
-112   96     
96     176    
-64    48     
-48    320    
496    16     
-256   -80    
-640   -352   
576    -432   
-448   -2768  
-1552  -1264  
1376   432    
672    16     
-640   -144   
384    -544   
144    -128   
-224   288    
-224   352    
544    -336   
-352   -576   
-112   96     
160    544    
240    112    
-208   -32    
-32    160    
-400   32     
0      64     
176    336    
-80    0      
-96    256    
-16    -48    
416    560    
496    800    
16     224    
-320   176    
368    480    
-208   -336   
-16    -640   
176    -432   
96     400    
-384   -128   
-160   -48    
240    608    
176    96     
-112   80     
-80    112    
-32    -352   
-64    -1072  
-48    336    
-144   32     
96     -16    
32     -288   
-320   -128   
-96    -160   
192    -1456  
-624   -512   
336    288    
224    448    
-144   144    
-464   -336   
720    -16    
-192   -32    
-320   -80    
528    -544   
-240   -464   
-256   -912   
512    -528   
176    1632   
-368   688    
-160   32     
208    144    
176    48     
-208   160    
-96    -64    
128    -64    
-112   432    
16     304    
-96    48     
-96    64     
-272   -64    
48     112    
-48    -48    
-80    80     
32     -304   
-16    -96    
-96    48     
-32    208    
304    16     
-192   32     
96     416    
160    0      
64     32     
304    16     
-384   -128   
-144   192    
640    464    
-272   416    
48     -64    
192    -448   
-96    304    
64     -64    
176    -80    
-240   112    
112    144    
-32    128    
-16    -112   
-16    -32    
112    -16    
-48    208    
-160   960    
720    32     
-848   -112   
240    -16    
0      256    
144    272    
-160   176    
-48    656    
96     16     
-96    160    
64     32     
64     -128   
48     -144   
112    -48    
-128   -32    
-48    -32    
128    144    
-112   272    
-224   560    
-128   -32    
336    160    
128    -192   
-256   192    
-16    592    
240    80     
-128   -16    
208    -16    
624    -48    
-1008  256    
1136   -784   
-2416  16     
368    -304   
224    -320   
-240   0      
-96    592    
384    336    
-624   400    
160    48     
272    -16    
-192   64     
-64    64     
256    -64    
240    -48    
-224   -224   
-80    160    
160    -48    
-112   416    
96     96     
-80    112    
-256   -400   
1008   320    
720    96     
-1056  -240   
160    -592   
240    -368   
64     112    
-80    144    
144    48     
80     -48    
-992   336    
384    -16    
528    256    
-496   128    
-352   -224   
320    80     
384    -144   
-352   16     
-128   144    
320    -16    
-48    128    
-48    16     
96     432    
832    -144   
-624   -48    
-144   -816   
128    -144   
-160   -480   
16     -736   
464    -144   
-48    272    
128    400    
-208   288    
-64    336    
256    -80    
-448   176    
-160   -256   
32     336    
272    64     
64     64     
-32    80     
-240   16     
32     -96    
80     128    
-48    128    
96     96     
-48    -64    
256    0      
16     -16    
-592   1216   
-336   3344   
928    1312   
-864   160    
-800   -480   
1360   272    
656    -464   
-1296  160    
416    -32    
112    480    
432    -144   
-192   16     
-448   -224   
112    144    
496    -176   
-96    80     
-48    -352   
-368   96     
64     -224   
112    624    
624    -144   
-992   288    
272    64     
672    -224   
80     -16    
-528   -176   
432    288    
64     -272   
-96    288    
336    -176   
-336   160    
-272   192    
480    64     
48     16     
0      112    
32     32     
48     64     
-176   -80    
112    32     
-320   112    
144    -256   
112    144    
368    16     
-224   224    
-96    -16    
560    160    
352    -480   
-400   256    
-32    48     
304    80     
-192   -144   
48     -448   
96     336    
800    -528   
208    320    
128    -416   
-400   -112   
464    -48    
592    464    
-640   0      
144    240    
256    16     
-96    112    
-64    144    
32     -1184  
272    -96    
-336   -80    
-256   -160   
496    112    
32     -240   
-304   -32    
160    64     
144    -432   
-304   -192   
160    -352   
176    -144   
160    -368   
-112   -736   
32     512    
-32    176    
288    -160   
-192   1824   
2384   -400   
-1424  112    
-304   -272   
1040   -256   
-368   -1136  
-192   -16    
240    672    
352    -96    
-192   -352   
336    -224   
-208   320    
-240   -16    
352    512    
368    -144   
-608   -176   
64     -64    
176    -256   
64     -320   
64     -16    
-240   -1296  
-192   272    
960    -1488  
-416   -80    
304    -80    
96     -32    
-208   64     
-128   496    
560    -160   
-96    -128   
-80    -272   
-64    -224   
144    48     
336    -224   
32     -64    
-80    80     
208    48     
64     -336   
-144   16     
0      -32    
224    176    
-128   80     
416    144    
-256   -208   
-160   -112   
400    -64    
-208   48     
-80    32     
48     128    
1632   592    
-2848  -16    
-1696  704    
2176   -704   
-1168  -464   
-96    -1264  
1104   160    
-224   368    
-80    224    
-48    128    
192    -208   
-176   -16    
304    32     
-416   -240   
160    -144   
-240   -192   
128    -272   
192    -96    
-304   -224   
112    0      
240    -144   
-416   -944   
-224   208    
992    -384   
-576   -576   
-160   -96    
160    224    
-32    -112   
-128   128    
352    0      
-80    64     
160    0      
-176   32     
-48    -144   
240    96     
144    -192   
-224   64     
32     0      
208    -80    
64     192    
160    64     
-464   -48    
352    96     
304    80     
-16    -80    
-16    384    
256    640    
-304   -64    
-608   -128   
688    480    
-32    -368   
-224   320    
64     -176   
32     320    
-1072  -64    
448    -80    
-112   368    
-80    -272   
-32    16     
-112   16     
192    32     
240    -416   
-224   48     
-128   -288   
224    16     
-176   -496   
240    -432   
-448   80     
-880   -848   
624    -816   
832    2080   
-848   640    
144    -720   
640    32     
-944   672    
-448   448    
112    -16    
144    -1200  
-400   -240   
0      304    
176    432    
-272   -304   
-288   -192   
-976   560    
-240   -16    
-208   128    
176    944    
-304   -624   
-96    -128   
256    -176   
96     496    
-80    -16    
-256   -128   
208    -512   
16     480    
16     336    
-224   176    
48     -16    
-560   176    
272    448    
-400   32     
96     64     
-528   -64    
-176   80     
304    -48    
-32    32     
80     288    
-320   848    
-128   -736   
336    -656   
-96    -160   
-400   448    
-176   -48    
400    48     
80     -208   
-448   -256   
16     -16    
272    -400   
16     288    
-128   -128   
-48    32     
-592   -256   
1072   -816   
-80    -208   
-320   640    
224    1744   
112    400    
-64    1360   
-304   -1040  
-304   -672   
48     480    
0      224    
224    -240   
0      -80    
-384   -48    
16     80     
448    -320   
48     64     
-304   0      
256    96     
64     128    
-144   -16    
-32    192    
128    -80    
-128   -96    
-384   416    
336    560    
-208   288    
-400   368    
208    -208   
-112   -432   
480    -1200  
16     544    
-112   176    
448    -592   
384    208    
-480   112    
464    -224   
448    -144   
32     0      
0      128    
-128   224    
-128   -16    
240    -80    
80     -80    
-80    32     
-544   -32    
64     48     
224    -64    
-128   -208   
-368   -16    
144    -432   
-80    224    
144    -384   
48     -208   
-16    -864   
-320   -752   
192    576    
128    640    
-176   48     
128    -16    
-848   -368   
-16    16     
64     112    
16     400    
-112   -64    
48     -32    
-128   32     
112    352    
0      80     
-240   -16    
48     0      
272    48     
-192   160    
-96    -32    
144    96     
-352   -32    
16     96     
-32    -112   
736    1392   
-176   1152   
-720   464    
1120   -144   
-1360  -608   
-688   384    
1568   128    
-560   80     
-320   -176   
144    -48    
112    -64    
-176   80     
112    160    
304    384    
-368   112    
-192   336    
320    32     
-112   -160   
-320   -160   
192    32     
160    96     
400    544    
-1696  -144   
-176   464    
576    128    
-752   -320   
160    320    
272    192    
-176   96     
-32    80     
272    -48    
16     -32    
-336   144    
112    160    
240    -32    
-208   64     
0      -32    
-272   112    
-64    208    
-256   320    
-96    -32    
464    32     
48     48     
-1488  528    
48     -112   
432    -256   
-32    -304   
96     32     
-816   -96    
96     -304   
144    -112   
160    -112   
-128   144    
64     32     
192    176    
96     -16    
-448   432    
32     384    
-48    176    
-240   288    
304    96     
144    -112   
-288   0      
-144   32     
16     32     
32     -608   
-288   128    
208    -320   
-944   -32    
1008   1520   
-240   -2864  
-2048  -544   
1632   -256   
-608   -240   
288    544    
656    160    
-688   160    
-80    416    
448    160    
0      224    
-208   16     
-16    -16    
-16    128    
48     80     
-240   128    
288    96     
-112   16     
-272   96     
608    288    
288    -352   
-448   576    
640    -32    
-672   80     
-16    480    
544    224    
-512   96     
320    48     
-224   -192   
-128   128    
224    -400   
192    144    
-128   16     
128    128    
32     -256   
-32    288    
336    -32    
-240   288    
96     160    
320    64     
32     48     
-336   192    
480    256    
144    160    
-272   224    
480    64     
-480   -64    
112    -784   
704    -176   
-304   32     
112    304    
-224   112    
144    -336   
-832   176    
896    16     
-464   144    
-272   0      
352    96     
160    464    
224    240    
-224   -80    
-192   288    
160    -160   
224    48     
-96    -32    
-16    32     
-224   64     
432    16     
-272   144    
192    -144   
336    -144   
-240   224    
16     208    
-64    32     
-48    64     
80     48     
224    448    
-16    -96    
-48    64     
160    144    
320    400    
-480   -2288  
-1120  1200   
2208   32     
-416   432    
160    176    
-176   -176   
-464   320    
64     -480   
432    368    
192    304    
-496   64     
80     -288   
96     320    
304    -576   
-560   448    
192    -1696  
160    112    
-80    176    
96     96     
32     -16    
352    1120   
-960   -80    
-272   480    
1344   160    
-368   96     
-176   96     
-96    -432   
256    -240   
64     -448   
-48    -16    
-96    -208   
-128   256    
384    112    
16     304    
-384   256    
144    64     
192    0      
-176   -288   
96     48     
304    -64    
-256   112    
144    0      
80     208    
16     96     
-64    288    
-112   -80    
128    64     
160    -48    
128    192    
-800   -544   
2112   -624   
-400   384    
-672   -848   
720    176    
-496   -352   
368    272    
304    640    
-128   400    
48     128    
-352   144    
160    -832   
112    256    
16     -96    
256    -1552  
-80    -112   
-176   -160   
192    -896   
-256   -224   
0      -1024  
176    -80    
96     -656   
-1824  832    
2064   432    
-912   96     
-464   -848   
784    -80    
-976   -96    
256    272    
240    -80    
160    144    
224    -96    
-352   -816   
224    160    
144    -144   
144    -256   
-160   -912   
-96    -400   
224    -560   
352    -208   
16     -464   
-176   160    
32     -80    
-544   -1488  
-432   -1216  
720    -512   
-1120  -416   
368    240    
128    144    
-384   240    
-48    128    
256    224    
160    -32    
-32    -1568  
224    -96    
-608   1216   
-480   352    
0      -384   
-176   -208   
64     -224   
-112   -256   
144    -96    
256    288    
-336   160    
-208   -224   
256    -192   
-592   48     
-80    464    
608    -48    
-352   32     
-528   -1296  
1520   -1376  
880    416    
-400   144    
-1040  240    
720    -240   
96     -160   
128    608    
-288   96     
-176   -32    
96     64     
48     -240   
384    208    
192    -800   
-416   -592   
-160   -1776  
560    320    
320    496    
-240   752    
-144   656    
160    432    
160    -464   
-144   -640   
-272   240    
-176   -144   
-944   -368   
416    -256   
-240   848    
-160   -1824  
208    -768   
64     -320   
32     48     
-368   -208   
64     -432   
32     -272   
176    240    
240    16     
160    0      
-368   80     
112    256    
-272   304    
16     -400   
-192   -64    
48     544    
192    416    
160    -896   
512    80     
-400   704    
16     208    
-96    -528   
320    -144   
-256   1088   
1072   272    
-592   160    
-48    0      
144    -48    
-160   -16    
272    -352   
16     -2048  
-256   -816   
-64    96     
32     112    
-368   272    
176    -32    
-48    272    
-144   736    
-16    336    
208    0      
-16    -256   
48     304    
-272   352    
128    -368   
160    -400   
288    -464   
80     -112   
-48    -976   
-384   -1488  
320    -112   
240    480    
-80    48     
672    272    
-1520  1264   
288    16     
752    1216   
-704   1360   
-784   -80    
864    -1008  
160    -160   
-1344  -80    
-160   144    
-784   128    
-176   -16    
96     0      
-1072  -672   
-432   336    
-416   64     
32     416    
-32    -64    
-192   224    
32     48     
-128   -1072  
-48    -1136  
-560   976    
144    -352   
80     -480   
112    496    
-320   560    
-208   480    
144    -32    
-128   48     
32     -128   
-48    16     
-240   -416   
112    208    
48     48     
-560   896    
368    -176   
384    -144   
-368   -96    
192    64     
192    176    
-336   -48    
-80    32     
32     128    
432    112    
-432   80     
-128   -64    
-32    80     
304    32     
992    736    
-1472  960    
-368   368    
1616   64     
-528   -304   
-1408  -192   
608    -160   
640    -96    
-512   32     
272    64     
112    64     
-304   32     
48     0      
-128   112    
-256   0      
-896   208    
-144   -208   
128    -96    
400    -128   
-144   -128   
112    16     
368    976    
-1216  -304   
-1120  64     
1520   -112   
-240   16     
-208   80     
-352   144    
80     208    
80     -96    
-272   -96    
144    96     
-144   0      
32     96     
208    128    
-368   96     
192    64     
64     80     
208    -96    
-496   288    
288    160    
112    -128   
240    432    
1344   400    
-848   -80    
-1168  528    
272    224    
288    -256   
-32    -304   
-208   512    
-304   320    
224    0      
320    -32    
-512   32     
-272   176    
560    48     
384    656    
-368   448    
-752   80     
64     368    
272    64     
704    688    
-1072  176    
-560   16     
576    32     
-160   128    
208    112    
-640   160    
-96    0      
1488   1600   
-2272  128    
-720   1280   
1088   1648   
-368   176    
-256   208    
-32    304    
288    -80    
-544   176    
-448   -80    
240    240    
368    32     
-320   48     
128    64     
-64    48     
144    32     
240    0      
16     -32    
-480   80     
912    544    
-656   48     
0      608    
576    -272   
-688   48     
720    32     
-352   64     
-96    208    
432    160    
16     48     
-528   16     
288    32     
-304   -80    
320    16     
-112   32     
-208   112    
272    272    
224    -176   
-656   -16    
432    176    
-48    48     
-240   16     
144    48     
-112   80     
32     -16    
-32    96     
384    80     
0      48     
-192   96     
80     -112   
224    -608   
-288   -96    
-224   -80    
-144   -624   
16     32     
160    -160   
-464   64     
192    128    
128    -112   
-64    16     
128    416    
-464   528    
272    176    
144    0      
-64    -96    
-112   -144   
48     -192   
-112   96     
192    128    
-320   256    
288    128    
304    128    
-176   -32    
96     448    
-304   400    
96     224    
224    272    
272    0      
-384   -224   
80     -304   
240    16     
-16    96     
736    352    
-2624  1776   
1520   576    
320    80     
-768   -1504  
-224   -944   
-192   -160   
64     464    
336    208    
0      240    
-416   352    
-80    496    
368    112    
96     -16    
-432   128    
-48    592    
384    128    
-32    112    
-80    160    
-96    176    
128    336    
-128   -304   
560    464    
288    864    
-368   -192   
240    224    
16     -80    
256    -128   
-288   400    
176    -512   
-16    208    
0      -416   
0      160    
112    272    
0      -112   
64     -16    
240    32     
0      176    
-16    352    
64     80     
-48    -128   
64     448    
96     224    
-256   -80    
80     -144   
-128   464    
48     -1440  
0      -208   
240    96     
-16    128    
-1472  608    
2272   -160   
-128   -624   
-1344  -304   
1360   352    
352    480    
-1216  880    
576    832    
208    -880   
-160   -208   
-16    288    
32     32     
-96    -96    
208    -16    
256    144    
-112   336    
16     288    
80     -160   
16     128    
0      -48    
592    -208   
-2336  -432   
-240   480    
1936   720    
-960   -288   
-96    -256   
672    -1104  
-128   32     
-208   -640   
352    -16    
-112   128    
-160   240    
112    400    
320    -64    
-64    -208   
64     288    
-128   -16    
-304   -608   
752    -1328  
-80    -880   
-416   -144   
-112   -208   
48     -496   
-112   752    
544    352    
-736   -1040  
-48    672    
864    160    
-368   32     
96     256    
48     832    
320    -32    
-688   -16    
352    64     
144    -448   
-832   -224   
960    -992   
-256   464    
336    352    
-224   144    
-224   304    
432    224    
64     688    
128    272    
-160   48     
16     240    
224    64     
-64    -608   
-96    64     
16     384    
-176   1968   
912    0      
-1136  -208   
-896   -1040  
880    -16    
112    -912   
-576   -560   
-384   464    
352    544    
192    288    
-64    80     
-192   544    
112    -496   
144    -48    
384    -624   
-128   352    
-80    -128   
496    80     
-16    -464   
-96    -144   
80     -1424  
240    400    
-736   -480   
224    -208   
480    240    
-832   -96    
352    -1664  
-688   -1680  
192    -1760  
-240   656    
224    432    
320    -224   
-256   -112   
48     -240   
-16    -112   
80     128    
-16    -752   
160    -736   
-304   -640   
272    -688   
-160   -832   
-176   -96    
-144   448    
144    -512   
320    -560   
-208   80     
272    -400   
-112   464    
112    128    
144    -496   
-144   -1312  
-496   -144   
352    544    
336    -1136  
-1712  256    
720    -288   
96     -368   
-400   -304   
32     -1008  
400    0      
32     80     
-192   -96    
160    -2832  
128    416    
-80    -224   
-144   160    
-80    -112   
64     -64    
512    -32    
-672   -176   
-256   -192   
448    -128   
288    -96    
-352   16     
32     -224   
128    -544   
64     -784   
64     -640   
-128   -32    
-128   -624   
1520   1168   
176    208    
-896   -288   
240    -144   
368    976    
-272   1536   
336    1232   
-1088  960    
96     -288   
0      -96    
64     -304   
-64    -80    
272    -352   
-208   352    
160    -928   
-80    -192   
64     -96    
-128   272    
96     -32    
-304   -240   
-128   -1200  
-272   144    
352    208    
-384   -160   
-1200  272    
256    -128   
-192   80     
112    -608   
-400   80     
352    -1616  
-400   256    
256    -208   
112    -32    
0      48     
-224   -368   
0      128    
272    -288   
-48    -112   
-368   96     
240    96     
-48    16     
144    64     
-240   -368   
240    48     
-16    -464   
32     -48    
-112   64     
96     -48    
-256   128    
-400   1232   
3680   736    
-1312  -64    
-1456  -432   
2016   368    
-352   -320   
-1056  -80    
0      -368   
416    -112   
-336   48     
-80    -48    
48     -32    
-64    0      
336    -144   
144    -96    
-128   32     
-192   96     
-16    -128   
-144   16     
64     -240   
-304   -416   
896    944    
752    80     
-1344  240    
-448   192    
832    -832   
-240   -192   
-144   -64    
560    32     
32     80     
-608   112    
-256   64     
464    -48    
-48    -96    
-64    80     
0      0      
-16    192    
-320   48     
32     -416   
816    -48    
-416   -144   
-1536  -816   
-464   240    
-32    128    
-464   128    
976    80     
-176   960    
-992   208    
448    -80    
-224   320    
32     128    
-512   16     
-368   -288   
208    -256   
480    -64    
-496   -176   
-672   112    
80     336    
112    736    
-592   64     
-800   -96    
176    -96    
-80    -64    
-96    32     
176    224    
-224   160    
-320   -256   
80     -64    
-208   -64    
416    2160   
976    -352   
-848   752    
640    32     
96     -432   
-752   352    
704    144    
368    -352   
-1344  0      
128    -208   
-128   80     
336    160    
-336   -80    
240    224    
-192   -192   
32     224    
400    -16    
-224   -32    
-304   -160   
528    624    
80     -96    
-400   80     
160    176    
-608   -192   
-256   -96    
224    32     
64     128    
-448   32     
208    32     
480    -208   
-144   -80    
-288   160    
48     192    
512    256    
-560   -16    
-240   -256   
176    -208   
112    32     
-368   -192   
-80    48     
-32    64     
-16    208    
64     304    
288    336    
-368   -96    
208    64     
-16    64     
32     64     
-240   -48    
32     256    
352    272    
16     112    
-1024  192    
560    -768   
48     -224   
-160   688    
-64    704    
-464   176    
80     128    
-80    64     
176    -272   
384    -128   
-1200  352    
592    112    
304    288    
224    96     
-288   800    
-128   352    
240    -48    
320    -144   
-384   160    
-96    400    
-592   128    
384    32     
-64    -48    
-224   -80    
-192   144    
256    896    
16     -112   
-192   -144   
-400   -912   
1152   -1200  
-928   416    
-128   -912   
32     -240   
80     544    
368    -304   
-224   -144   
-96    16     
64     240    
-32    480    
112    -160   
80     96     
-48    272    
64     160    
208    224    
144    0      
-176   704    
-112   -96    
272    144    
-304   -208   
688    -96    
-576   448    
400    -384   
96     224    
-208   624    
544    688    
-480   1184   
144    240    
208    -144   
-224   -48    
-208   -16    
-48    96     
32     416    
112    -16    
-208   128    
-144   160    
48     160    
256    144    
-272   80     
-240   48     
0      80     
176    -16    
256    80     
-208   -240   
-448   352    
176    192    
192    -16    
-192   -128   
32     144    
-1440  -320   
1296   576    
368    -448   
-1408  192    
1024   560    
320    272    
-752   192    
528    736    
96     -224   
-256   -496   
-144   256    
-80    224    
-64    64     
160    80     
192    208    
-240   368    
-176   96     
336    416    
-112   -112   
-160   -16    
192    -528   
-2032  656    
1024   -32    
-144   -144   
80     -736   
-368   -496   
80     -976   
-176   -224   
-144   512    
160    768    
-112   960    
288    512    
-64    -400   
-240   -928   
624    -288   
-880   80     
144    -816   
352    -1376  
-144   -736   
-128   -160   
16     48     
-32    -432   
0      -208   
-208   1360   
800    640    
-32    -512   
-976   -1456  
96     -256   
160    -720   
-416   -304   
272    -64    
48     -80    
-352   -160   
-272   -304   
480    -304   
144    -32    
-48    288    
144    -432   
48     160    
64     -400   
-256   176    
288    112    
160    784    
288    192    
-240   -160   
-608   192    
0      -96    
336    -448   
240    -144   
-416   -1312  
1328   -1936  
112    144    
-784   -112   
-48    240    
656    -432   
-224   16     
96     -1632  
-240   -416   
176    624    
-64    -432   
144    -64    
32     128    
-336   480    
0      -176   
272    -160   
-96    208    
-16    0      
112    192    
-96    352    
288    192    
80     240    
-448   -560   
-80    -640   
1600   -736   
-944   -112   
672    -272   
-320   368    
304    -96    
48     576    
48     528    
48     256    
0      -48    
304    -32    
96     128    
-176   -160   
-80    272    
128    48     
144    272    
32     976    
-160   480    
16     480    
384    160    
192    304    
96     496    
-288   96     
464    48     
-528   -208   
32     -192   
240    -64    
32     -176   
-304   -400   
528    -880   
64     -176   
-256   -16    
176    976    
-256   464    
160    -560   
-384   -480   
112    -64    
-96    -16    
-48    -32    
352    80     
48     -16    
-144   208    
112    192    
-336   -80    
208    -400   
32     224    
144    176    
-352   0      
192    -1504  
-80    272    
16     80     
416    -16    
-496   128    
16     -96    
384    -64    
-64    48     
-96    64     
1056   3280   
-2048  -592   
-1312  368    
1920   -304   
-352   -624   
-384   -320   
80     -528   
496    -128   
64     -784   
-432   432    
64     -96    
-80    256    
368    160    
-144   64     
-128   144    
288    144    
-528   208    
192    -496   
144    192    
-80    -608   
288    1088   
-416   -448   
-432   480    
1120   160    
-256   32     
-544   352    
-96    -400   
176    -48    
160    -352   
-256   128    
112    80     
-160   64     
-16    80     
480    16     
-576   32     
272    -160   
112    80     
-272   -320   
-48    240    
480    -1136  
-224   32     
-272   0      
-32    -16    
224    -16    
192    -400   
-368   48     
320    -976   
-208   32     
176    48     
272    512    
192    48     
480    736    
144    -128   
-480   -256   
944    -32    
80     64     
-1136  560    
352    112    
112    -32    
-176   -880   
-96    -144   
224    -144   
-80    -32    
336    -1312  
-304   -368   
256    -112   
-112   208    
-112   -224   
208    128    
0      -96    
448    1024   
-656   -352   
-832   -16    
768    272    
-800   -176   
400    32     
32     96     
-48    -352   
-272   -608   
208    -208   
-48    -144   
-144   144    
272    -16    
-48    208    
0      -112   
-272   32     
256    16     
32     -80    
-144   16     
240    96     
-80    16     
-608   -464   
640    -96    
-256   -480   
-544   -112   
544    -992   
672    832    
-608   -80    
-880   -160   
560    -384   
-32    -128   
-336   112    
304    -160   
-400   48     
-464   -96    
-176   -224   
208    -352   
0      448    
592    -384   
-384   48     
-160   -1200  
400    32     
80     -80    
-160   -32    
-16    -80    
-144   208    
320    16     
-48    -144   
-832   -896   
1056   -3264  
-2816  -1552  
976    -48    
832    432    
-704   -112   
-576   64     
288    -592   
1104   304    
-368   -192   
-384   160    
656    -80    
-112   112    
-48    -160   
96     64     
-448   -192   
208    80     
320    64     
64     -16    
-416   -672   
448    -1776  
128    -1056  
0      -400   
-96    352    
-608   80     
-16    -224   
880    -512   
-48    288    
-384   -96    
-144   -16    
80     48     
128    256    
0      576    
16     -16    
-512   256    
848    0      
-16    672    
-432   224    
160    496    
-80    128    
64     32     
-288   160    
0      192    
96     320    
416    464    
-912   224    
240    -32    
448    -112   
32     32     
-64    224    
-176   -432   
-128   -592   
-416   -1408  
-832   192    
736    640    
272    432    
96     784    
496    288    
-48    928    
-16    288    
-16    -864   
352    -192   
-144   736    
-320   64     
112    240    
-144   128    
144    -80    
-160   336    
208    -80    
0      -144   
-128   16     
96     32     
-208   -16    
-32    -16    
-192   -64    
0      -64    
224    80     
80     672    
-224   1072   
304    288    
-48    -320   
-64    -80    
-608   896    
592    -176   
-416   240    
-400   176    
-16    -112   
96     -176   
16     -288   
-144   32     
-64    -32    
-48    128    
64     48     
-32    -96    
-144   48     
-112   112    
400    112    
-64    128    
-48    -144   
-96    -16    
-224   112    
-96    -48    
560    -512   
-384   368    
208    -224   
-112   0      
-1216  16     
-16    -80    
512    480    
336    608    
-720   304    
-32    -16    
496    16     
-176   -96    
-96    16     
-160   -32    
0      -32    
128    160    
-112   48     
-128   64     
-16    -48    
64     -336   
-96    64     
-64    -16    
32     48     
-192   544    
448    160    
-144   176    
80     80     
176    -336   
16     -272   
-1280  -1120  
352    752    
1008   -240   
-1104  400    
624    1120   
336    240    
-368   336    
80     1296   
32     0      
160    -656   
-192   112    
-288   64     
64     32     
80     96     
16     -32    
16     -144   
-64    -128   
-112   -192   
96     208    
80     -112   
-112   -384   
-2016  272    
144    32     
704    -336   
-1056  -1600  
-208   -576   
896    208    
-464   -1008  
-448   -976   
368    -688   
-448   -144   
-112   144    
400    496    
-592   368    
-16    112    
16     -208   
32     48     
-512   -384   
-320   -176   
144    112    
352    144    
-288   80     
-368   64     
144    -656   
1040   -1568  
-608   -144   
192    1008   
-592   720    
-208   176    
528    512    
320    96     
-80    224    
-512   176    
64     112    
416    -112   
-848   -1248  
-448   -400   
192    -48    
-400   368    
384    -96    
-272   -48    
-288   -112   
416    112    
144    176    
16     176    
-544   256    
-64    48     
-128   -256   
832    16     
-608   -992   
560    -2176  
16     752    
-16    320    
-528   -128   
-384   624    
736    -400   
-256   464    
-704   -352   
192    464    
208    -80    
-176   320    
208    -96    
-448   144    
0      80     
448    16     
-448   208    
16     16     
240    1168   
256    1552   
-224   544    
240    -64    
-224   -240   
-48    240    
816    432    
-288   -320   
0      -160   
96     -144   
224    560    
96     -208   
-112   32     
384    -160   
128    208    
0      -288   
64     -64    
-224   -96    
480    0      
192    32     
-336   16     
0      48     
272    32     
-416   -192   
368    -80    
112    160    
-144   32     
16     192    
448    64     
-16    -32    
-416   -16    
208    304    
432    224    
-80    128    
-160   640    
960    64     
-224   -80    
-320   464    
528    176    
-80    128    
-48    464    
-480   304    
352    32     
272    16     
-224   208    
-16    224    
96     160    
96     80     
-32    544    
368    64     
-144   -176   
-320   192    
528    48     
16     -16    
-208   64     
-64    96     
144    176    
64     -80    
48     -32    
192    64     
-176   32     
16     96     
-144   -832   
1232   -1520  
-1584  464    
192    816    
-224   -672   
-464   304    
560    -80    
192    -2512  
64     0      
-144   -192   
112    464    
320    -128   
-144   0      
-16    144    
-192   -400   
80     0      
384    336    
-288   128    
48     144    
112    16     
-320   -592   
928    368    
-16    -224   
-848   96     
1152   -128   
-192   -80    
-496   112    
720    0      
128    -48    
-416   128    
256    176    
224    96     
-96    -256   
-160   208    
96     -112   
-16    -16    
368    -224   
-416   48     
448    80     
-176   -784   
256    0      
-272   128    
240    80     
-80    48     
448    128    
-320   -128   
-160   288    
384    -32    
-192   128    
-432   -1184  
2032   -1264  
-1056  -160   
-624   -384   
432    -64    
-16    -800   
464    -32    
-144   -320   
240    -176   
-432   96     
-112   16     
240    0      
224    64     
-304   0      
128    0      
416    16     
-128   16     
0      -48    
16     -240   
80     0      
304    -48    
-336   -16    
560    -32    
1248   272    
-896   80     
480    -256   
-352   -32    
-272   208    
720    -80    
-1072  288    
320    -16    
160    0      
48     96     
48     -832   
-64    208    
-176   32     
496    96     
-16    256    
-48    0      
32     -160   
-80    352    
80     96     
-176   -96    
-256   176    
448    -1136  
-480   208    
176    -352   
528    464    
192    -240   
-384   112    
224    -288   
96     80     
-288   -1712  
112    160    
80     128    
-512   192    
80     96     
544    -256   
-112   64     
-512   48     
720    96     
80     32     
-480   176    
112    -208   
240    272    
224    -80    
-96    16     
112    32     
320    176    
-144   -272   
-992   -1344  
2048   -1152  
-176   -640   
-1744  -1488  
32     144    
864    -528   
-128   112    
-96    -1008  
-176   -528   
32     176    
288    -176   
112    208    
-272   -64    
-144   -16    
464    -192   
448    -128   
-368   -16    
-208   -48    
0      -320   
512    -624   
-240   -1200  
-96    -160   
304    -848   
-560   -112   
128    112    
128    -304   
160    32     
-256   32     
416    -560   
-48    -784   
-432   -144   
80     192    
208    -512   
96     -288   
-64    80     
-32    80     
-64    -480   
-112   -736   
528    -816   
-176   -368   
-128   -32    
112    -336   
208    0      
-192   0      
64     336    
320    -832   
-576   -848   
352    288    
-32    1184   
-96    -336   
-96    -416   
320    192    
-944   544    
720    1392   
-256   560    
-208   144    
352    -688   
48     176    
-96    0      
128    -272   
-192   64     
272    144    
-288   -144   
-224   -240   
208    -192   
32     -624   
384    -704   
112    64     
-144   -128   
-16    -336   
256    96     
-16    0      
-32    208    
112    -160   
-32    -16    
32     0      
96     0      
-176   32     
80     -32    
-128   -64    
208    64     
32     -720   
-960   16     
256    -32    
32     0      
48     208    
-176   -768   
176    -640   
208    16     
64     176    
128    0      
128    -32    
-192   16     
48     112    
-64    224    
144    -144   
-480   -480   
240    -400   
-208   128    
16     176    
-144   -368   
848    -1920  
-272   560    
208    -1168  
-64    64     
-176   160    
48     -112   
352    656    
64     48     
-608   -224   
-64    -16    
304    16     
64     80     
-128   32     
112    -256   
80     -48    
112    -416   
288    -608   
-160   128    
-144   480    
-160   64     
400    208    
-320   320    
48     -32    
-240   -336   
272    336    
144    176    
0      -16    
-832   464    
272    -288   
-848   1776   
2176   48     
-480   176    
-352   -400   
944    -16    
688    -112   
-96    944    
-368   960    
-304   -1664  
464    -656   
32     272    
-544   416    
96     -320   
-112   -304   
-160   -256   
-32    224    
-272   -480   
-160   -128   
320    48     
-208   224    
64     -608   
-2112  1072   
1360   -304   
-144   432    
-864   80     
-48    -32    
512    304    
-272   -64    
-384   -336   
272    -112   
-160   192    
-352   -368   
32     224    
384    16     
-480   80     
128    16     
32     -80    
128    -352   
-352   96     
16     -48    
48     64     
-240   128    
-16    64     
672    -368   
368    -464   
-464   272    
128    -48    
160    -128   
-208   208    
288    -560   
-336   352    
208    -112   
-160   -80    
-832   32     
-64    -320   
176    -192   
672    -320   
-736   -48    
64     176    
304    -192   
-208   -208   
-384   48     
-208   -352   
32     96     
352    -112   
-704   -176   
-160   64     
96     -32    
-368   80     
1536   -272   
-3216  -96    
576    0      
1152   -96    
-464   32     
-944   -272   
432    0      
752    224    
-192   -176   
-432   144    
208    -128   
256    304    
-144   -80    
368    80     
-48    16     
-272   192    
-64    0      
128    80     
32     400    
48     -16    
-160   384    
608    -176   
-528   144    
208    -224   
224    32     
512    -400   
-400   16     
-192   -80    
224    32     
-464   -144   
320    -176   
-384   240    
64     16     
-576   48     
192    96     
-144   -80    
80     128    
528    608    
208    192    
-432   272    
352    16     
-224   -208   
-256   -176   
176    -96    
-352   48     
112    48     
128    -80    
224    -272   
-848   -384   
192    -16    
416    32     
-176   112    
-896   224    
480    176    
256    -240   
-768   320    
768    464    
-576   352    
32     224    
-128   144    
224    112    
-32    -96    
-208   16     
-256   -336   
-400   48     
304    240    
-48    224    
160    -112   
-336   -336   
-48    128    
368    -160   
-16    112    
-192   96     
48     -96    
-80    96     
480    208    
-512   160    
304    176    
-112   256    
128    112    
736    -1024  
-3424  2112   
720    96     
800    16     
-288   48     
-464   -192   
-272   144    
272    176    
208    -304   
-112   -32    
-160   304    
-48    16     
-32    176    
192    112    
-432   208    
320    112    
96     32     
-272   32     
384    128    
32     144    
624    1216   
-1504  272    
128    -64    
1056   -32    
-592   -160   
-416   160    
160    176    
208    416    
272    -64    
-320   -192   
-16    144    
16     128    
0      128    
112    -224   
176    -192   
-384   80     
336    192    
32     -112   
-336   256    
352    -128   
-272   256    
64     -96    
48     64     
-304   -32    
224    96     
112    32     
-48    144    
0      48     
-144   32     
224    -640   
960    -736   
-1904  288    
464    32     
768    -32    
-896   -160   
64     352    
560    448    
-336   -32    
16     112    
176    80     
-96    128    
-32    80     
128    96     
144    16     
-432   160    
320    96     
-64    128    
-128   352    
-16    176    
-96    16     
576    1136   
-832   -576   
-1104  144    
1328   192    
224    -144   
-272   224    
-208   288    
176    80     
160    -80    
-192   96     
-16    0      
-80    144    
-32    0      
176    -48    
96     -16    
-256   144    
-160   -224   
224    -960   
176    80     
-304   -192   
-32    -192   
928    448    
-224   448    
-128   -352   
336    544    
-128   128    
-240   -48    
176    -224   
304    32     
-176   64     
-96    -112   
240    32     
112    -1664  
-144   128    
0      80     
1104   288    
-448   240    
-240   448    
208    -272   
-496   240    
160    -64    
-32    112    
208    128    
96     32     
160    544    
-496   112    
-304   112    
736    192    
-16    64     
-528   -1184  
816    -1296  
48     112    
912    -112   
-528   -352   
-432   416    
1056   336    
-832   864    
-352   -576   
336    -96    
144    128    
-176   -272   
-96    -304   
464    0      
128    128    
-240   -608   
-144   688    
-112   176    
48     608    
528    784    
-240   880    
-48    336    
112    -112   
-352   336    
-176   -416   
-128   -544   
64     -608   
400    48     
-48    -16    
0      752    
-48    -448   
48     -80    
480    32     
-80    592    
-64    64     
-160   144    
336    224    
160    1120   
128    752    
0      80     
64     240    
272    288    
176    256    
304    -208   
-704   -656   
-16    -832   
192    -32    
64     -496   
160    -720   
48     272    
240    -208   
-416   -560   
368    -416   
64     -32    
-208   -752   
336    -320   
-32    -1296  
-96    -544   
144    720    
128    448    
-400   -352   
288    144    
64     -144   
-80    128    
288    -304   
16     -48    
160    16     
144    -560   
576    -224   
-224   128    
320    -64    
-400   -80    
400    -16    
-64    -16    
-16    64     
-32    -48    
-48    -16    
192    -496   
416    240    
-176   32     
-160   -1328  
-320   848    
560    -496   
-896   -448   
304    -336   
240    -1904  
-256   272    
208    -80    
32     -32    
-64    80     
176    -144   
256    128    
-192   80     
128    -80    
224    192    
160    -16    
-208   368    
-416   16     
80     -288   
-48    -448   
752    96     
-768   816    
288    -1488  
544    -544   
144    -272   
-144   320    
-272   288    
224    -448   
192    0      
-160   0      
-112   -512   
-192   -16    
-16    -64    
176    48     
-64    368    
96     -176   
-128   64     
-80    256    
144    -64    
352    -1344  
-464   544    
-16    112    
-224   -272   
416    -336   
48     -144   
-96    -16    
-32    288    
-16    -48    
-144   -32    
80     176    
-1056  1232   
3056   -656   
-336   176    
-1648  -1456  
176    -544   
480    -240   
-688   -480   
496    -384   
-48    -560   
-480   192    
240    -160   
192    0      
-288   -224   
272    -32    
-592   -160   
-16    -272   
48     288    
-48    192    
256    128    
64     -336   
304    1264   
-1488  -3760  
-864   528    
2080   -352   
-832   0      
-288   -48    
736    -176   
-608   208    
48     96     
32     -80    
-176   128    
-1360  16     
176    -224   
384    -32    
-240   -448   
-368   64     
432    -128   
288    48     
-288   64     
224    -112   
-64    32     
-432   -96    
528    -288   
208    176    
-208   288    
-48    -112   
-384   -288   
96     -576   
160    -64    
0      -32    
-96    192    
16     -64    
-176   -80    
-336   336    
144    -176   
-32    -80    
368    320    
-128   -80    
416    320    
-160   176    
-400   -16    
-192   -80    
144    -64    
16     32     
448    816    
-512   -32    
-544   -96    
992    64     
64     848    
-224   -800   
672    -1280  
1104   1232   
-320   672    
-768   -16    
0      32     
656    336    
80     208    
-416   -160   
176    224    
96     -144   
208    96     
320    -464   
-96    256    
144    -112   
208    128    
80     0      
-320   0      
-32    -144   
208    640    
720    -176   
-928   336    
576    112    
-368   -96    
-320   32     
-752   -240   
720    288    
-768   -320   
-176   368    
288    -224   
-992   -16    
144    -96    
-1248  -64    
-528   -272   
208    128    
464    -112   
-288   16     
-192   32     
-32    -400   
224    192    
-368   -32    
112    144    
-64    0      
-16    -176   
-320   -96    
-320   -112   
224    -16    
-304   0      
112    -48    
-128   48     
-80    48     
240    64     
368    -288   
-1056  80     
528    256    
-256   144    
-16    -32    
0      -704   
-352   -256   
-64    -256   
-368   -160   
384    48     
-368   -48    
32     -96    
-160   -368   
32     176    
208    656    
432    -112   
-192   160    
-816   688    
704    -368   
336    -16    
-272   80     
-288   176    
0      -80    
128    -16    
464    -144   
144    624    
-608   128    
-96    -192   
-288   -1008  
1760   1280   
352    240    
-1120  0      
32     272    
-304   -272   
384    32     
80     240    
368    -416   
-384   400    
160    -32    
352    -64    
-32    112    
-192   64     
192    896    
192    304    
-320   -416   
64     112    
-240   688    
288    416    
-128   0      
256    1488   
976    -192   
-1104  -304   
-48    -64    
528    -192   
-48    192    
-96    -48    
128    448    
-336   304    
-96    48     
80     -32    
288    -32    
-1264  -16    
96     80     
464    96     
-128   -32    
-144   224    
160    -80    
-96    80     
112    32     
-16    64     
-64    160    
-16    80     
-224   -224   
112    144    
-192   0      
-144   144    
48     0      
320    -80    
-1952  144    
1504   -16    
928    -320   
-1536  -96    
1296   640    
48     64     
-1008  80     
480    160    
336    32     
-208   -32    
-336   32     
-16    -176   
128    64     
-32    -64    
-80    64     
-112   224    
224    48     
288    144    
-336   144    
-80    16     
-80    -80    
752    912    
1280   32     
-1856  528    
720    -320   
896    48     
-304   832    
880    -16    
-400   -80    
272    -64    
-144   48     
-48    96     
288    208    
-224   32     
-320   -144   
320    64     
48     -192   
96     -144   
144    64     
48     432    
-400   400    
96     368    
-496   -32    
688    -96    
-496   400    
192    -624   
1072   -528   
-544   400    
-80    224    
400    -80    
-320   208    
80     288    
-64    384    
-224   -304   
-544   -256   
592    320    
-320   -608   
-48    -272   
16     592    
-592   528    
112    64     
64     0      
64     288    
-288   64     
-112   -512   
-208   -320   
400    16     
-288   96     
-464   144    
448    80     
-208   -2208  
-2112  -272   
1104   608    
336    608    
176    352    
-752   1280   
-160   640    
416    -160   
240    -224   
-352   -624   
-256   912    
32     -224   
16     336    
176    16     
-240   -160   
-208   400    
240    528    
0      192    
-112   128    
64     0      
96     -160   
48     240    
-208   112    
128    416    
272    80     
-496   -704   
-48    -976   
224    880    
-240   384    
-160   -96    
-16    384    
256    -176   
128    96     
-80    352    
80     912    
368    496    
-32    0      
32     608    
-128   624    
48     -208   
272    -112   
320    384    
-448   32     
32     192    
-224   384    
512    32     
-32    -656   
-304   0      
304    496    
192    464    
528    752    
-768   528    
-240   832    
656    1392   
144    992    
-32    112    
32     832    
416    -576   
112    -432   
-528   -32    
32     -32    
224    96     
80     -256   
48     192    
-96    -336   
-128   -384   
416    128    
-288   1072   
-368   -80    
0      -128   
48     32     
-48    224    
48     -48    
16     128    
-272   416    
320    432    
-16    960    
-48    512    
-240   -48    
96     96     
-64    288    
160    -480   
-416   112    
528    -32    
-464   -368   
16     480    
128    784    
16     192    
160    -112   
-144   -288   
128    0      
64     224    
-32    -304   
64     80     
112    -352   
32     64     
128    -112   
176    -112   
-240   -176   
-224   -416   
848    -288   
-112   64     
-864   96     
512    -672   
272    -144   
-528   -128   
112    656    
336    -448   
-128   144    
-176   -432   
272    160    
288    80     
-176   288    
-400   -224   
304    144    
256    -32    
48     64     
-128   352    
0      -496   
-144   -384   
96     -176   
240    -48    
-112   0      
288    160    
-384   -624   
240    96     
-144   -400   
-32    176    
800    288    
-752   -592   
-2080  -80    
1792   704    
16     -272   
-944   160    
528    240    
160    -672   
80     -224   
-144   -480   
272    160    
-128   -144   
-544   208    
416    -224   
544    208    
-464   -160   
-48    192    
176    -128   
-64    256    
-48    80     
80     -48    
-208   -560   
1376   560    
-688   32     
64     288    
512    -64    
-928   208    
608    80     
224    -864   
256    240    
-240   224    
-160   -432   
272    80     
96     -48    
0      -384   
-240   -320   
-16    -1008  
640    288    
-128   448    
288    208    
-16    -64    
-16    48     
-272   -464   
-304   224    
608    -1584  
-224   -160   
-32    -448   
16     -96    
-16    -272   
96     -672   
-144   -256   
-16    -224   
-96    -16    
128    -1760  
144    -80    
-256   112    
-176   384    
560    640    
-16    64     
304    -352   
160    -32    
-208   -192   
0      -272   
-160   -32    
144    0      
336    192    
-864   384    
-80    16     
816    -160   
-256   -384   
1856   608    
-1632  2016   
656    -1264  
576    -704   
-992   -208   
-48    -288   
864    64     
-64    -96    
-864   -80    
208    32     
-192   128    
400    112    
-624   400    
-16    -544   
32     -128   
192    -352   
-48    32     
-288   0      
-464   -256   
1264   -144   
-224   -144   
-368   -48    
128    80     
-736   -80    
256    -32    
336    -16    
-528   -192   
256    -144   
-416   -400   
336    224    
-144   -720   
64     160    
160    -512   
-32    192    
-128   -144   
-208   -48    
112    208    
-48    -32    
144    -80    
320    -240   
-448   -32    
-48    -128   
16     96     
192    32     
-224   160    
176    -368   
-176   0      
320    -416   
-192   192    
80     160    
160    80     
64     944    
-672   -96    
-256   160    
64     32     
272    -80    
-304   -112   
112    -336   
288    -64    
-272   128    
256    -192   
-224   128    
128    -96    
208    96     
128    -16    
-176   0      
-144   128    
416    -544   
96     -400   
128    160    
-480   -64    
96     -288   
-208   -272   
-32    -192   
-512   80     
224    -736   
-160   128    
96     48     
208    208    
-48    -144   
592    -640   
-1952  1744   
1568   -192   
240    1136   
224    -496   
-848   -336   
480    656    
-656   1168   
112    -48    
96     -272   
-64    -256   
-160   320    
304    -272   
-16    288    
-672   240    
448    -384   
-48    0      
48     -208   
144    0      
-112   224    
-176   -240   
112    -688   
-528   304    
1136   -416   
-704   960    
112    -224   
-128   352    
-736   192    
160    -208   
-64    16     
-752   272    
80     1008   
-96    64     
-336   -96    
-144   -192   
-448   -80    
400    80     
320    112    
-880   -400   
-48    -224   
-288   -208   
80     32     
-144   48     
-96    -160   
-112   -80    
48     208    
-48    32     
-320   -32    
-176   0      
-672   -656   
912    -736   
-96    -528   
-384   -32    
704    112    
-1280  368    
-336   -112   
688    240    
352    64     
-528   256    
-256   400    
464    384    
-128   80     
-256   224    
336    320    
-160   304    
-32    80     
0      -272   
-432   -192   
-48    -336   
80     -112   
528    -96    
-2160  -368   
32     1136   
960    -16    
-1136  -784   
-336   112    
1088   1376   
528    1472   
-336   480    
176    -112   
64     176    
-1440  48     
96     32     
-16    -192   
-32    16     
-400   -288   
480    464    
-768   496    
32     528    
256    128    
-224   32     
-48    -176   
-48    576    
96     352    
-976   -192   
1024   -736   
-64    -176   
-224   80     
112    480    
112    144    
-288   160    
160    -368   
-208   -528   
1040   -304   
128    480    
-576   -32    
0      -544   
-592   -160   
416    -208   
320    -16    
-144   192    
-96    112    
80     -128   
-1408  -64    
320    32     
512    288    
176    -192   
112    128    
-192   160
[truncated: 272,011 more chars]
