# Supplementary material for: A Fault Diagnosis Method for One‐Dimensional Vibration Signal Based on Multiresolution tlsDMD and Approximate Entropy
Source: Hindawi journal article supplement (doi:10.1155/2019/3262818), 2019-01-01
Supplement: f1 [file 3262818.f1.zip › 3262818.f1/gear signals/pitch errors signal/Data6.txt]

-32    -224   
528    176    
-96    -176   
-464   176    
-32    -112   
352    112    
32     0      
-112   -448   
-528   -848   
416    -176   
48     -112   
-64    576    
784    -1408  
-480   -96    
-64    -144   
208    -32    
0      -224   
-608   -688   
304    -96    
272    64     
-256   -448   
-192   -144   
128    80     
240    160    
-176   -480   
448    -480   
-816   -976   
-48    -1072  
288    -16    
48     -832   
-240   -160   
-64    128    
480    416    
-592   -16    
112    -1200  
192    -1488  
-208   992    
240    736    
-160   -416   
208    -704   
32     736    
-432   240    
-432   1600   
656    640    
176    208    
-304   -176   
320    -336   
-176   -496   
144    144    
-32    0      
-48    48     
288    368    
32     -16    
32     64     
-240   -256   
-336   -288   
16     128    
400    -48    
-288   160    
96     -336   
-64    32     
224    -736   
128    -128   
-128   -1120  
-160   64     
112    -160   
0      -160   
288    64     
-320   128    
-272   -80    
368    208    
512    112    
-576   -112   
-192   0      
368    -368   
288    192    
-336   144    
-80    240    
256    -1216  
-208   112    
32     -128   
176    48     
-112   -64    
224    -80    
192    -160   
288    320    
-368   480    
-112   -32    
-176   -96    
832    -144   
-1296  304    
432    -144   
352    -96    
-144   -368   
48     192    
-128   -256   
96     -384   
352    -96    
128    -48    
-96    -128   
-352   144    
320    64     
128    -96    
-272   16     
80     128    
16     640    
-64    240    
64     -96    
160    -384   
-128   64     
112    -1232  
112    -48    
-288   -48    
208    80     
-272   -224   
-80    -320   
64     -176   
352    -208   
-976   -704   
1680   -1696  
-48    -144   
352    -16    
-464   32     
-368   -336   
128    -96    
272    -1744  
-944   -1136  
32     1616   
320    592    
0      -208   
272    -400   
-400   352    
-176   192    
368    32     
128    -320   
-192   336    
-48    128    
48     112    
192    -368   
-848   -432   
1232   -800   
32     -400   
-784   -608   
752    -16    
528    640    
160    -368   
-480   288    
624    336    
-160   112    
-224   -112   
192    -48    
448    -176   
-304   16     
-112   -128   
320    128    
-256   336    
-224   368    
-64    -96    
144    32     
-96    -304   
224    -240   
416    32     
336    752    
-848   16     
-160   -144   
432    272    
-752   -96    
272    784    
-1072  288    
144    -176   
432    272    
-256   80     
-432   -16    
48     400    
1040   720    
-1200  336    
-576   -64    
352    128    
-64    64     
16     -32    
160    -32    
-608   384    
528    -112   
-16    0      
432    208    
0      144    
-640   -496   
1216   192    
-848   -176   
-1072  -304   
-144   32     
-32    -80    
432    64     
32     272    
-864   48     
0      112    
528    32     
288    -80    
-272   0      
-272   -208   
160    272    
-144   -80    
-128   160    
-144   -80    
32     64     
-320   -80    
336    -144   
-1696  -240   
736    -176   
-208   96     
256    128    
-688   -48    
64     384    
-112   128    
224    48     
-176   128    
-176   208    
320    176    
-288   256    
128    -192   
64     224    
0      224    
-496   160    
96     272    
320    -272   
240    80     
-240   -48    
160    128    
-336   16     
256    272    
336    0      
-64    128    
192    16     
-256   240    
-64    416    
48     528    
240    512    
-192   176    
-256   160    
-720   -96    
560    96     
-176   -560   
-1248  64     
1152   -160   
-224   -416   
-400   -240   
64     48     
-80    -64    
160    80     
-96    64     
-32    160    
-16    384    
16     -48    
-48    16     
-304   -192   
96     368    
208    144    
80     144    
-368   208    
192    32     
144    32     
-128   128    
96     -48    
176    64     
-176   -48    
128    64     
-112   -96    
32     128    
-784   -1824  
304    -400   
576    -64    
-1392  80     
464    16     
-176   224    
96     -32    
-192   672    
496    208    
-96    -224   
-64    128    
-80    -64    
-192   144    
272    -256   
-256   192    
144    16     
-112   160    
112    96     
64     -208   
-112   -32    
448    -448   
-1312  736    
768    -16    
144    -16    
-368   -32    
-64    16     
-224   32     
112    256    
320    96     
-144   32     
64     -48    
-384   -128   
0      176    
336    32     
32     -112   
-448   128    
496    208    
-208   -112   
32     208    
80     -112   
-336   160    
256    96     
0      0      
-192   80     
176    96     
-112   112    
80     0      
32     64     
-192   64     
288    -352   
352    -432   
-1824  160    
1008   128    
496    -32    
-928   -128   
208    272    
608    368    
-560   -160   
128    112    
48     16     
-176   128    
-96    32     
160    96     
192    32     
-544   128    
352    32     
-80    96     
-128   400    
-64    112    
0      96     
544    1136   
-736   -624   
-1216  48     
1248   208    
144    -272   
-192   272    
-240   320    
144    48     
208    -48    
-224   80     
16     -16    
-112   160    
80     80     
144    -96    
160    48     
-288   80     
-128   -224   
96     144    
160    128    
-288   -240   
32     -192   
960    432    
-432   464    
-112   -432   
448    480    
-256   240    
-304   -128   
320    96     
304    -32    
-208   112    
-144   96     
288    96     
32     -32    
-160   144    
96     96     
1040   -800   
-832   224    
-64    352    
-32    -304   
-304   80     
240    144    
-160   16     
240    176    
32     0      
208    416    
-720   368    
-208   208    
720    176    
-160   80     
288    2240   
-480   1504   
608    80     
1728   -176   
-800   -256   
-1072  368    
1200   -992   
-688   -1136  
-384   -352   
208    128    
608    320    
-368   -336   
-128   -176   
336    -128   
-32    560    
-48    416    
32     416    
-336   -112   
208    560    
416    880    
-336   96     
-128   -320   
-192   -528   
0      -352   
-176   -976   
-160   -16    
96     32     
272    368    
-16    544    
96     208    
-304   -352   
176    128    
272    432    
-112   -1216  
112    0      
-48    256    
176    768    
272    896    
176    -48    
-160   -128   
80     208    
-16    32     
112    320    
256    -32    
-848   -1104  
48     -640   
128    -240   
128    -560   
144    -944   
80     96     
192    -944   
-416   -448   
240    -992   
112    -288   
-96    -880   
288    -288   
-80    -656   
-16    -544   
80     1056   
96     272    
-288   -224   
224    48     
48     160    
-16    -32    
336    -112   
-16    -400   
96     240    
48     -2336  
528    -192   
-240   192    
288    0      
-416   112    
352    0      
-16    160    
0      -144   
-224   144    
192    -224   
0      416    
240    -496   
-80    0      
-320   -320   
-48    -240   
256    -560   
-672   192    
304    -352   
144    304    
-192   -128   
-160   -48    
112    80     
-64    -144   
160    112    
64     -160   
16     -160   
-96    -400   
272    32     
-80    -144   
0      -320   
176    -320   
144    -256   
64     272    
-112   464    
224    -400   
208    16     
192    464    
-304   432    
-192   -240   
-32    -592   
336    320    
480    -80    
-400   320    
-224   288    
432    0      
-16    16     
0      -1200  
128    16     
-96    -192   
-160   -736   
176    -512   
432    -416   
400    608    
-720   -448   
-160   -480   
656    368    
176    480    
-288   -32    
-304   -16    
640    -1632  
112    128    
-64    -400   
-304   96     
-176   -1328  
-1248  400    
1360   -224   
496    96     
-2016  1264   
1200   448    
544    -192   
-1504  32     
368    288    
576    64     
-320   96     
-160   -528   
176    80     
240    -128   
48     -64    
-176   -144   
-112   -176   
-16    -128   
128    -128   
-48    -16    
-192   -48    
1200   -720   
-1792  -1472  
1088   -192   
304    -1008  
-928   -192   
896    272    
304    48     
-32    -256   
-176   256    
-112   -48    
0      -96    
-224   -48    
256    256    
416    32     
-416   -144   
-48    -272   
640    -480   
64     64     
-112   -912   
-80    32     
-464   -704   
16     -32    
336    48     
-336   -384   
112    -624   
448    48     
-64    -160   
-544   208    
-1184  80     
224    112    
-176   0      
-176   -64    
-592   64     
416    -592   
48     32     
48     -1024  
128    -80    
112    368    
0      256    
-544   16     
32     -64    
240    -64    
-96    -192   
-416   240    
416    -576   
-736   176    
752    0      
-160   -624   
-272   -3712  
1968   -2784  
928    -576   
-1136  384    
-704   512    
960    16     
448    160    
-112   -112   
-528   -64    
-80    -96    
336    -112   
352    -16    
-496   -80    
-64    0      
288    -224   
320    -368   
32     48     
-224   -528   
48     80     
-96    384    
896    144    
-1008  240    
352    16     
80     64     
-96    208    
-944   -240   
592    144    
-16    -304   
-800   -32    
608    -320   
-384   0      
160    16     
80     176    
-304   -256   
16     272    
768    144    
-240   64     
-160   -112   
288    -80    
208    144    
-240   48     
208    48     
-240   32     
288    -336   
-416   -80    
-416   -224   
416    192    
64     -32    
96     64     
-240   64     
0      64     
80     -432   
656    -176   
-560   32     
-16    240    
32     512    
128    -48    
-528   -464   
-352   -224   
272    -160   
-784   -384   
288    48     
-48    -128   
-560   48     
-32    -80    
-128   144    
96     -640   
-416   -432   
-32    1152   
-416   320    
352    -208   
352    -32    
-432   288    
-672   -128   
192    -80    
16     -352   
160    96     
128    288    
-336   -448   
32     80     
80     192    
624    2432   
1440   16     
-1552  624    
-112   176    
304    -144   
240    16     
-224   -608   
-160   -96    
160    160    
48     -192   
240    64     
-160   0      
-192   48     
-128   400    
352    -576   
-352   176    
0      336    
-320   -80    
-176   -176   
-32    -224   
-592   -368   
1104   -224   
-80    112    
-864   96     
528    64     
288    96     
-208   160    
-336   64     
160    -176   
160    -144   
64     -16    
64     64     
-240   272    
-128   96     
224    16     
-208   -80    
-576   -16    
368    0      
64     208    
96     0      
-64    16     
-64    0      
80     64     
192    -32    
-352   -32    
-16    96     
48     48     
32     48     
-32    128    
1056   -560   
-3472  800    
848    576    
1200   -320   
-1088  64     
688    -288   
-160   112    
96     -144   
-32    48     
-208   0      
176    96     
176    224    
-384   80     
0      16     
-224   0      
208    -96    
-448   -128   
160    160    
288    -128   
-80    80     
16     144    
-336   -768   
352    -80    
736    -560   
-2192  0      
240    400    
448    -800   
-640   32     
144    32     
-320   160    
752    64     
-128   -32    
-368   64     
176    176    
240    224    
-240   96     
-32    0      
-240   256    
64     0      
176    -128   
144    -432   
-112   16     
592    336    
-640   624    
624    -784   
-720   256    
-96    848    
1360   -384   
-416   -80    
-368   304    
416    -32    
64     48     
96     -32    
48     592    
-400   224    
-416   -192   
800    272    
-576   976    
-368   80     
288    -400   
368    32     
-224   16     
-384   -32    
400    128    
496    688    
-80    400    
-816   480    
592    64     
384    96     
-128   128    
1136   2352   
-1312  944    
-640   736    
1712   -1328  
-304   -1056  
-1424  -1216  
16     -64    
1184   1264   
-272   576    
-464   448    
-96    -576   
544    400    
128    -256   
-48    128    
-80    -64    
-224   -416   
0      -288   
16     256    
144    288    
-16    304    
16     224    
-192   -352   
0      128    
-48    96     
256    576    
160    864    
-48    96     
-416   -752   
224    32     
32     304    
-400   -368   
48     240    
368    16     
-304   -160   
-112   -752   
288    384    
-32    256    
-272   -400   
-272   -368   
352    384    
-64    128    
-16    -96    
-192   32     
16     -32    
32     -256   
64     224    
80     512    
-368   -352   
48     -192   
320    -224   
-256   -432   
480    0      
-544   -400   
-176   -1392  
-288   -1136  
-64    -320   
-16    -848   
-96    256    
256    720    
-64    208    
-80    80     
112    80     
-208   96     
-80    -32    
48     16     
224    96     
-368   704    
-144   -432   
-48    -720   
208    352    
176    -16    
-112   176    
-32    0      
96     -80    
336    -288   
-192   -352   
32     -432   
-656   -432   
128    384    
400    224    
192    48     
-768   896    
368    -400   
16     -496   
432    -816   
144    -80    
112    192    
-208   -160   
16     -48    
240    -512   
16     80     
-80    -304   
-80    -192   
128    64     
0      96     
16     -336   
16     -240   
-176   -1040  
192    32     
288    64     
-240   -576   
-288   -544   
672    272    
-320   -464   
-80    -464   
160    -16    
0      656    
-96    -64    
96     208    
224    96     
-64    16     
-160   0      
-48    -80    
368    160    
48     80     
-352   0      
16     0      
-48    336    
144    -272   
320    -400   
-224   -64    
-176   -144   
272    96     
-256   64     
288    112    
-96    -16    
224    48     
64     -624   
-288   -480   
16     -3680  
2064   768    
-32    512    
-1696  32     
1152   96     
224    272    
-896   512    
336    -512   
-48    32     
-80    -192   
-160   224    
720    0      
-48    112    
-304   -416   
-176   240    
560    -144   
-192   176    
64     192    
224    176    
-32    48     
32     48     
-288   -480   
-528   576    
1104   -128   
-1136  -224   
992    112    
48     -352   
-384   144    
-128   -464   
-320   240    
496    -320   
144    112    
-304   48     
80     96     
16     320    
480    -80    
-656   368    
304    720    
-192   624    
-160   240    
144    -80    
96     -128   
512    32     
-592   112    
-32    -64    
256    -896   
-64    -48    
-80    -208   
-160   304    
-112   -32    
-160   16     
368    240    
320    -160   
-336   128    
-112   -176   
640    208    
-192   432    
112    16     
-192   -416   
-576   0      
80     -64    
224    -64    
112    -112   
-160   128    
-416   -16    
592    448    
592    -144   
-448   -80    
352    -528   
-1056  -336   
1600   -1712  
1328   -160   
-1856  112    
192    -16    
1136   -352   
-128   -80    
-224   -1008  
-112   432    
176    -96    
80     368    
-368   -432   
144    -304   
80     -144   
80     -144   
144    -144   
-272   -352   
32     -144   
512    -592   
-432   -640   
-608   144    
464    -352   
-176   16     
720    160    
192    -368   
-480   -48    
128    192    
288    -368   
-176   -96    
384    -400   
-192   48     
240    -352   
-144   304    
64     -80    
160    144    
240    416    
-112   -224   
320    -48    
16     80     
-512   48     
320    80     
112    -32    
16     -80    
-352   -48    
80     32     
80     80     
160    -48    
-32    -16    
-32    -496   
464    32     
-272   -1024  
80     144    
128    288    
1072   -80    
-336   416    
304    -48    
-240   176    
224    -368   
-896   -32    
304    128    
-176   160    
192    144    
-32    -96    
-112   -192   
80     -128   
-112   -80    
368    352    
-336   -224   
176    16     
-432   288    
224    -128   
96     -368   
32     -144   
-272   16     
144    64     
-176   -288   
16     -208   
144    304    
-272   -32    
16     -96    
64     -48    
784    2480   
816    -1472  
-1344  672    
-64    -400   
288    80     
304    160    
-224   592    
128    -400   
-192   -496   
-224   32     
64     48     
-464   -256   
-32    -128   
32     -400   
320    -1072  
-192   368    
128    -1664  
-144   304    
-64    -256   
224    -64    
-64    -1104  
-448   448    
816    -320   
-1008  64     
288    -1328  
208    -192   
-96    0      
-160   -448   
32     176    
176    -16    
304    208    
-320   -224   
-112   -64    
480    16     
128    -112   
-304   -336   
-224   -48    
-80    304    
528    240    
-160   192    
-112   -64    
-16    176    
176    -192   
0      160    
32     -16    
-240   64     
144    -80    
64     -112   
-192   -128   
1072   976    
-688   1216   
-512   480    
1120   -304   
-1248  -64    
240    -304   
480    -48    
-544   64     
-272   -304   
272    -320   
288    -480   
-272   -128   
-544   -112   
288    -16    
-640   -240   
-400   -80    
176    80     
-272   176    
0      112    
16     224    
-80    144    
-464   -656   
576    16     
992    -1200  
-1696  -528   
320    240    
896    336    
-256   -656   
-1024  -384   
528    -96    
160    -64    
-128   32     
-176   -80    
-32    144    
176    256    
-48    48     
144    48     
-464   -128   
192    -496   
400    -272   
-448   -256   
288    96     
80     256    
-208   -608   
-352   0      
1088   848    
-688   944    
-848   -208   
-64    -144   
-16    -256   
-128   -64    
384    -240   
-80    752    
496    912    
-976   672    
-544   -320   
480    0      
-112   704    
368    544    
96     608    
-288   -64    
448    -112   
96     48     
-496   80     
-192   352    
176    304    
-896   16     
-32    368    
80     -144   
96     112    
464    1792   
-16    544    
-32    416    
1104   -160   
-224   -96    
-1184  -192   
400    -1568  
288    -1536  
48     896    
-720   -256   
80     48     
64     48     
-16    208    
-288   112    
112    160    
-160   -144   
256    336    
-32    336    
-208   240    
176    16     
-160   -288   
16     48     
288    384    
96     -128   
-672   -80    
48     -256   
176    -416   
-80    -224   
48     -400   
-176   576    
0      -16    
160    240    
-192   -192   
-96    -16    
176    400    
-208   -64    
-192   -576   
64     -96    
-496   -672   
144    -1296  
304    -16    
-400   176    
-192   -336   
-608   -432   
96     -112   
-160   192    
-240   -336   
336    -1136  
48     816    
-272   256    
-352   -144   
448    384    
640    1072   
-784   720    
192    1136   
384    176    
-48    704    
-144   112    
-656   -224   
64     496    
-48    1280   
112    80     
128    -64    
16     160    
-48    304    
112    -352   
-224   -512   
-80    -528   
288    -224   
-288   592    
-32    112    
-32    -176   
80     -64    
-16    64     
-96    288    
16     384    
96     96     
-96    144    
176    -176   
-48    16     
592    1472   
-1536  784    
368    -784   
752    496    
-240   320    
-304   800    
240    416    
272    -240   
-272   288    
48     304    
112    -160   
-112   -48    
112    32     
-64    -128   
-208   -80    
0      -112   
400    -48    
-48    128    
-112   304    
32     48     
-128   -288   
608    -240   
-272   800    
-368   32     
240    144    
256    672    
112    160    
0      960    
240    160    
0      144    
-32    -48    
-96    0      
-208   208    
176    112    
-128   80     
16     80     
240    -96    
80     48     
-128   16     
48     112    
272    160    
-192   0      
80     112    
-144   -240   
32     208    
496    16     
-96    176    
-112   0      
-48    -160   
-224   -256   
1232   672    
448    -32    
-1152  48     
-48    -336   
1280   672    
80     144    
-528   528    
608    48     
32     112    
-320   16     
448    160    
-80    32     
96     144    
-528   -80    
304    144    
48     -176   
-240   -16    
288    160    
48     16     
-256   -16    
256    -400   
1264   400    
-1376  64     
336    -64    
336    64     
-640   -192   
-208   160    
432    -80    
-96    -128   
-128   -96    
-192   -176   
16     64     
176    208    
32     80     
-16    32     
-80    112    
64     -192   
-208   16     
224    416    
576    144    
-224   0      
-160   16     
320    -240   
-368   -80    
-880   240    
800    -208   
64     448    
-384   -464   
48     240    
176    -160   
416    -176   
-752   -208   
-176   368    
128    400    
-320   0      
16     48     
624    208    
-144   256    
-528   320    
-144   32     
256    -224   
-272   -96    
-144   -512   
304    96     
320    -32    
-816   224    
-288   144    
736    -16    
-352   -928   
1456   -2240  
-2848  -1472  
832    0      
832    240    
-944   96     
-480   0      
512    -48    
544    112    
-496   -144   
-736   32     
752    192    
352    96     
-720   -48    
32     176    
320    112    
112    208    
-48    16     
16     16     
-272   -368   
768    -1152  
-96    0      
144    -48    
-240   304    
-528   -224   
256    16     
32     32     
-80    64     
128    176    
256    -160   
-192   -16    
-144   80     
240    48     
96     144    
224    160    
-336   160    
320    96     
32     -256   
240    -176   
-112   -272   
64     208    
336    -416   
-240   96     
-64    -384   
288    -48    
-208   -64    
128    112    
208    64     
96     -32    
-560   -240   
480    -336   
96     -48    
-144   -1184  
-720   160    
560    -320   
-672   208    
512    -16    
208    448    
-512   592    
80     240    
272    -16    
-32    48     
-208   -16    
112    -160   
160    -64    
-32    -624   
0      144    
-64    432    
304    176    
128    528    
16     672    
208    640    
-96    224    
16     -16    
368    416    
-96    192    
-16    -176   
-368   -64    
384    16     
192    -256   
-144   -16    
-496   -1056  
816    -2080  
-528   544    
544    -800   
-208   112    
-32    -224   
-96    -288   
96     32     
176    -1008  
-80    -80    
-48    -800   
224    -80    
-384   0      
-176   -368   
192    208    
256    -336   
-80    -208   
48     -384   
80     -288   
48     224    
-368   -528   
640    -1248  
-256   640    
240    -128   
-416   576    
80     -848   
128    -304   
-384   416    
-32    -432   
64     128    
0      -256   
64     -256   
-64    -1504  
-288   288    
176    384    
-224   128    
-16    -496   
544    32     
16     -192   
-208   48     
32     -96    
16     176    
-112   -112   
96     -256   
-16    -288   
176    -176   
144    -32    
-96    32     
-176   16     
576    -2256  
-112   -1136  
-1088  352    
1536   -128   
-1328  384    
464    -160   
544    -512   
-496   368    
-448   -48    
144    -144   
-32    -400   
-400   160    
-208   0      
96     -224   
448    -336   
-80    -432   
-160   16     
32     240    
256    544    
-192   -192   
96     48     
80     432    
912    -448   
-2128  512    
384    -160   
992    -592   
-352   -560   
-512   -1152  
688    -1824  
-192   704    
-80    1680   
128    416    
-400   -2656  
256    48     
400    416    
-432   -32    
-240   144    
368    -16    
112    112    
176    16     
-368   -208   
0      -320   
-784   0      
-192   -144   
80     -240   
704    -896   
-688   288    
320    848    
720    272    
-592   912    
208    0      
-144   -256   
576    672    
-624   176    
-608   32     
0      -704   
-336   144    
848    1104   
-1136  656    
272    -368   
400    -352   
-80    256    
-512   -192   
-224   224    
448    336    
-144   768    
-320   -336   
240    -320   
0      -384   
-352   -176   
-16    160    
-896   960    
112    -896   
256    -672   
-560   -112   
208    1664   
352    1584   
-224   128    
-368   -944   
-144   144    
448    -96    
48     240    
-368   -256   
0      -352   
368    96     
-80    304    
-224   80     
-336   -368   
176    -1008  
16     -384   
64     -304   
-144   48     
-560   208    
-864   -304   
768    592    
-928   -192   
96     -320   
192    -464   
-528   -832   
-16    -912   
352    528    
256    880    
-80    560    
-1136  -512   
192    -64    
-400   -496   
192    0      
112    -448   
-688   -448   
16     -336   
-32    0      
-112   -112   
0      -16    
-176   64     
592    96     
-704   -464   
-384   -288   
352    -288   
-368   -656   
-112   -400   
-144   -224   
448    64     
-1120  192    
304    800    
544    128    
-32    64     
-256   -256   
-112   -112   
-176   -176   
-64    1104   
-416   592    
240    368    
352    -144   
-496   0      
-64    64     
48     -176   
336    144    
-464   192    
320    384    
-368   16     
160    -176   
176    -48    
-272   -80    
-160   -32    
128    -80    
256    608    
-240   944    
16     336    
-144   -432   
-128   -224   
160    672    
-80    -1568  
-384   496    
1216   16     
-304   48     
-432   448    
-48    -368   
256    272    
-112   -96    
-384   160    
112    48     
-160   224    
144    112    
128    -224   
-512   400    
304    64     
-64    224    
-224   112    
-144   -224   
160    -16    
-288   112    
-608   -96    
1184   -112   
32     -80    
-1200  -32    
1184   -96    
-176   48     
-112   208    
-224   480    
480    64     
-80    -176   
-224   -16    
192    -176   
-32    -48    
0      96     
112    64     
112    144    
-240   0      
160    32     
-96    16     
-144   80     
-240   192    
432    64     
-432   112    
-240   -80    
-320   112    
288    256    
80     -32    
-192   96     
112    256    
-624   2400   
2160   656    
-1360  -144   
-480   -128   
384    272    
-32    112    
-576   96     
544    224    
-288   -16    
-496   0      
160    48     
304    112    
-192   32     
-480   -64    
544    224    
48     -64    
-384   176    
208    80     
80     80     
-112   0      
-64    192    
-272   352    
2144   224    
-1408  -48    
32     288    
1328   48     
-1184  128    
16     -336   
224    -352   
-96    64     
96     96     
128    32     
-16    96     
-80    0      
0      32     
80     128    
96     -128   
-352   640    
240    -144   
-160   -240   
320    160    
-272   -64    
-32    240    
48     112    
-64    64     
112    608    
-64    592    
-384   -416   
-416   96     
464    -16    
64     224    
-480   192    
-96    240    
128    32     
-256   48     
528    400    
-192   -160   
304    -96    
240    96     
64     32     
-272   96     
-176   64     
-64    96     
432    64     
-240   16     
-448   144    
-80    -16    
192    128    
176    -640   
1824   3216   
-1840  2192   
288    -80    
2032   -224   
-864   -224   
-1184  416    
896    -48    
384    32     
-656   -560   
-624   176    
672    16     
-208   112    
320    192    
-16    16     
-416   32     
224    96     
448    64     
-128   96     
-128   32     
368    -896   
-48    160    
160    -80    
-288   128    
-304   80     
384    240    
80     -48    
32     432    
48     160    
-288   528    
368    80     
-64    96     
-32    240    
32     112    
224    224    
-336   352    
432    512    
128    128    
-64    352    
96     32     
-304   176    
288    32     
-144   -400   
32     -144   
80     -400   
-304   0      
-64    944    
624    640    
-96    -64    
-192   176    
240    -160   
-48    -32    
-160   -752   
160    -144   
-16    240    
-48    688    
160    144    
192    -736   
160    -624   
-784   -656   
-48    -368   
384    -224   
-112   -160   
48     -112   
-48    -240   
-576   -240   
288    -128   
288    -320   
-112   -512   
-320   48     
160    816    
224    -208   
-48    -400   
-32    -96    
32     -1040  
96     208    
0      336    
16     256    
-64    16     
-80    528    
176    -416   
-432   -672   
688    -1984  
-176   544    
-96    -96    
-80    -496   
-176   0      
144    -1232  
32     368    
0      -80    
-192   288    
208    -464   
368    0      
-32    80     
-256   -16    
112    80     
240    -80    
-16    -32    
-208   -400   
-16    -64    
64     -144   
-128   272    
672    -560   
-256   416    
144    -240   
-224   -192   
-64    192    
272    160    
176    128    
-96    272    
-80    0      
48     0      
208    0      
32     -16    
-64    96     
-16    -80    
160    256    
-272   320    
80     -240   
368    -320   
-192   -96    
-272   -1296  
224    144    
272    -1104  
96     144    
64     -32    
-288   208    
288    16     
368    176    
-448   144    
-144   16     
-1248  -240   
1264   -528   
-400   -64    
-272   -432   
480    464    
496    32     
-208   -256   
-496   -112   
64     496    
352    544    
-176   -16    
-320   -224   
128    32     
160    240    
-256   224    
176    -320   
400    32     
-256   528    
-192   480    
128    -656   
544    1312   
-800   -1152  
-1008  416    
1152   -496   
-816   64     
432    160    
544    1568   
-240   1856   
-592   1184   
528    -624   
-288   -688   
-496   -1008  
416    -688   
-336   -400   
-304   -176   
-16    -128   
576    752    
-608   560    
-160   64     
272    -224   
-32    -560   
-192   -32    
144    -592   
-96    -1008  
272    400    
-64    352    
208    240    
-336   -1040  
-160   -688   
336    16     
-336   -864   
-16    -704   
624    832    
-528   640    
208    192    
480    -560   
320    1392   
-1216  1232   
-32    -144   
368    -160   
-240   -192   
-48    -272   
-208   -352   
400    -400   
-240   0      
48     -576   
112    112    
224    224    
208    -144   
-688   -896   
864    -432   
1040   -256   
-1184  -48    
-960   -128   
1200   -560   
272    -656   
-784   288    
0      464    
96     -128   
464    -464   
208    -176   
-384   0      
-352   208    
416    -176   
736    160    
-512   240    
-352   -32    
-464   -720   
384    -752   
64     -64    
-240   -48    
240    512    
-448   -432   
176    128    
640    -624   
-304   224    
0      -64    
32     128    
112    -64    
528    192    
-96    608    
-16    -96    
-416   32     
-304   -32    
256    112    
-64    -128   
-192   112    
352    -208   
-144   -32    
48     -1104  
-64    48     
144    -480   
-16    -16    
-112   0      
352    -16    
0      320    
208    -368   
304    -576   
-304   -48    
-368   32     
736    832    
-2208  352    
48     0      
320    96     
-128   -416   
96     -112   
-224   -1008  
-144   -16    
160    -48    
112    -64    
-208   -80    
48     160    
448    96     
-160   144    
-512   -64    
208    64     
-688   112    
-288   -304   
320    -448   
-160   192    
192    32     
176    -96    
-32    128    
-80    0      
-128   -688   
-208   -416   
256    352    
-352   -64    
176    80     
-512   -1504  
1664   224    
-464   112    
-656   -320   
288    144    
0      -16    
-432   400    
784    -960   
240    0      
-352   16     
-32    -48    
304    -112   
0      192    
-48    272    
-256   16     
128    -176   
48     -368   
-96    272    
240    -112   
-240   -32    
64     -320   
-240   864    
1456   -512   
-400   0      
-1040  -208   
384    160    
464    32     
-224   -320   
-368   368    
48     32     
112    64     
336    -16    
-208   -128   
-1168  -112   
480    16     
-704   128    
-80    0      
-288   48     
-48    64     
-64    -96    
-304   80     
176    16     
-448   176    
-48    16     
-304   48     
656    160    
-208   -160   
-128   144    
80     -32    
-208   -48    
-224   720    
-240   736    
-192   256    
-288   -288   
-352   -16    
288    144    
192    80     
-240   304    
-80    128    
-240   -112   
-160   -80    
0      -288   
-48    112    
-144   -320   
16     112    
368    -208   
-640   -32    
32     80     
336    32     
-208   32     
16     144    
-464   -640   
-272   384    
1632   -112   
-1520  -464   
-528   176    
1008   -48    
-256   -128   
-784   64     
496    16     
192    -96    
-272   0      
96     112    
48     0      
-304   160    
400    16     
-96    48     
-272   -144   
-240   80     
144    96     
336    64     
-688   -288   
656    160    
-352   -96    
-208   32     
224    -16    
-80    -224   
640    848    
-512   128    
-320   -112   
176    -16    
-176   -32    
272    -64    
96     48     
16     -32    
0      464    
432    -288   
-208   -128   
-112   -400   
-208   240    
128    80     
0      -64    
272    64     
80     96     
-400   -48    
144    304    
800    96     
-112   144    
-464   80     
-624   -224   
1200   2016   
608    320    
-1808  -320   
-512   -304   
864    32     
368    272    
-640   -64    
-304   336    
800    112    
-416   240    
-144   -32    
288    208    
-144   -160   
112    160    
208    96     
-416   112    
-192   128    
304    16     
-400   448    
16     176    
-48    64     
-16    -48    
-592   16     
368    -32    
-80    96     
-96    496    
432    0      
-416   32     
160    352    
-16    704    
288    688    
-256   224    
-368   80     
208    304    
560    288    
-224   0      
-816   -480   
496    368    
320    448    
-352   176    
128    272    
-112   192    
-176   112    
144    112    
272    -16    
176    592    
-256   -16    
-176   -448   
352    384    
-16    704    
-304   -288   
544    -656   
-544   -592   
-64    -1168  
-352   -704   
-224   -672   
432    -1536  
-64    -2048  
-96    160    
-112   352    
-32    320    
-144   -288   
96     320    
-96    -272   
-288   -176   
208    336    
192    480    
128    288    
-16    272    
-176   384    
96     64     
48     -48    
-16    -64    
-96    432    
-160   272    
288    -160   
-64    -288   
-96    336    
176    256    
-128   80     
-400   -288   
832    -688   
-240   432    
288    -192   
-416   -32    
-32    48     
208    -224   
128    272    
16     128    
-144   32     
16     144    
112    144    
16     48     
160    64     
-272   48     
400    96     
-176   64     
-48    80     
0      48     
96     -16    
-224   -368   
32     208    
-224   48     
-16    160    
448    128    
80     0      
-288   352    
-224   32     
96     -112   
128    -32    
0      208    
-128   176    
-16    48     
208    -48    
-320   160    
272    -128   
208    320    
-272   704    
112    400    
-48    -96    
-288   -1616  
160    -32    
16     -32    
-208   80     
64     208    
128    96     
-160   -80    
-208   -32    
592    -176   
-496   -1072  
2000   -512   
-128   1136   
-1264  16     
400    -112   
224    -208   
-160   -464   
-240   336    
384    -160   
-16    -176   
96     208    
352    144    
-64    32     
-16    -160   
176    656    
0      48     
-96    -32    
-48    400    
352    560    
-32    -192   
0      -224   
-608   464    
2224   -96    
-912   -2016  
-320   -32    
464    -720   
-336   -496   
-448   -1376  
288    -1424  
272    -1120  
-256   -272   
256    -16    
64     176    
-272   432    
48     272    
288    -160   
-96    -16    
-320   304    
480    -976   
176    96     
-176   -160   
-144   64     
560    -256   
224    -144   
-672   1056   
288    -144   
928    288    
256    176    
-80    240    
-96    304    
128    144    
560    16     
-224   320    
-432   -304   
256    -432   
-400   -880   
240    -32    
-528   -304   
48     336    
448    -272   
-480   112    
208    32     
48     -192   
272    -32    
-64    -96    
256    80     
416    -32    
-32    48     
32     368    
-544   992    
-240   -2112  
-848   -368   
192    -480   
464    -64    
240    80     
-176   256    
-112   96     
-544   224    
528    -240   
-336   -96    
80     32     
-336   -48    
416    160    
144    -576   
-256   384    
432    -560   
-304   224    
336    -48    
-160   32     
-240   1184   
240    1072   
-144   96     
496    112    
496    -32    
-784   96     
272    32     
160    176    
304    -112   
-624   -272   
160    32     
400    304    
80     416    
-416   -48    
304    0      
-192   -144   
192    128    
-432   -144   
-48    -432   
224    176    
-64    -160   
32     32     
-48    -464   
-16    288    
112    0      
-48    352    
496    -304   
-624   160    
48     -400   
352    224    
160    -16    
-240   -1088  
16     912    
1104   64     
-368   -240   
-32    80     
96     -128   
80     0      
-144   144    
-64    -32    
0      48     
80     -256   
176    -1696  
-112   -32    
-32    -1232  
96     80     
176    -544   
-64    -496   
-48    -112   
-160   384    
416    -272   
-304   -624   
-48    112    
288    -320   
-32    -48    
192    64     
-160   208    
144    -112   
192    -336   
-96    224    
-16    96     
-864   528    
2272   -1536  
-1040  -176   
-1088  -448   
976    256    
528    -96    
-992   272    
144    -32    
288    -336   
144    -48    
-96    144    
-144   0      
48     -48    
192    -416   
-80    16     
48     288    
-96    -16    
-112   -224   
-32    304    
0      80     
-80    -1408  
-752   368    
896    -240   
-112   -256   
-560   -400   
416    -48    
64     496    
-560   160    
352    -112   
32     128    
-192   -64    
-256   160    
384    48     
240    -304   
64     -16    
-224   -560   
96     192    
384    -480   
-560   160    
144    -608   
-16    192    
96     -224   
-32    64     
-240   -32    
192    128    
384    48     
96     16     
-368   -160   
32     -128   
608    -960   
-1696  -224   
1216   -448   
112    0      
-304   -16    
-480   -512   
608    240    
80     -64    
-32    32     
384    -112   
-32    -64    
-128   -64    
-48    -64    
-32    -96    
528    80     
-1056  0      
368    96     
-544   -48    
-208   -144   
368    -32    
-48    -192   
208    -16    
-1568  -272   
512    432    
656    -256   
-944   -224   
320    144    
192    16     
-528   -128   
-400   64     
480    32     
-128   -176   
-464   -16    
112    -32    
-128   -64    
-112   -112   
320    96     
-96    -288   
-112   208    
208    -96    
16     -144   
-160   -208   
672    368    
432    -528   
-1184  224    
784    -80    
-512   -80    
-368   -32    
816    -240   
-336   256    
-192   -288   
208    112    
448    -480   
-96    -80    
-192   -272   
-240   16     
144    -544   
256    336    
32     -16    
-224   192    
-160   -80    
368    320    
-544   240    
-48    -96    
64     -96    
-80    -816   
48     144    
-288   -176   
-1008  -560   
944    -832   
-1120  1376   
-16    800    
-368   128    
-256   -272   
1152   176    
-96    -240   
-1328  -512   
176    -336   
288    -32    
-48    -288   
-112   -16    
16     16     
-96    48     
128    -32    
-32    16     
-224   -32    
-176   -208   
-144   160    
64     -480   
-608   -736   
288    -512   
112    -176   
-176   128    
16     0      
400    -208   
-48    0      
-240   -256   
64     -784   
32     -544   
-64    416    
-160   128    
-176   -112   
-176   464    
384    400    
48     128    
-176   -48    
48     256    
-320   -192   
16     -144   
0      64     
16     -240   
0      80     
-272   -176   
272    -800   
144    528    
-64    368    
96     576    
-272   112    
160    -320   
-192   176    
-256   -592   
640    112    
-720   896    
288    272    
16     -288   
48     464    
320    416    
336    -240   
-112   176    
-224   -80    
-192   144    
208    -16    
-320   -240   
384    -560   
144    0      
-176   160    
-400   -240   
-176   48     
-432   96     
80     192    
-16    16     
-16    48     
-240   48     
192    112    
48     -16    
-272   96     
256    224    
64     272    
-144   48     
48     -16    
688    240    
-1616  480    
368    32     
16     48     
272    -160   
-48    48     
-48    336    
-64    384    
-128   -288   
-192   -112   
-32    240    
-64    320    
-32    48     
-112   112    
-96    -192   
96     0      
-336   32     
176    432    
128    -80    
-32    -112   
-400   -320   
48     48     
-144   96     
32     80     
32     208    
96     16     
-400   480    
128    112    
80     -192   
-160   -192   
48     208    
-80    144    
0      384    
-160   -96    
-48    176    
-16    496    
-32    288    
-288   864    
464    240    
-240   -64    
-288   160    
128    368    
320    -96    
-432   160    
-368   -16    
96     176    
64     0      
-64    48     
256    48     
272    944    
480    -224   
-1280  16     
1200   -128   
160    144    
-1136  96     
48     160    
560    128    
-192   -944   
-320   -96    
336    528    
112    816    
96     192    
-112   112    
32     -32    
-272   -112   
64     -176   
320    128    
-48    544    
-400   384    
304    160    
-880   -272   
1824   -320   
-368   -1296  
160    1680   
1248   256    
-560   112    
768    240    
-640   528    
-144   80     
544    96     
16     32     
-224   144    
-304   -240   
304    -144   
448    96     
-336   128    
-144   256    
336    48     
96     320    
-80    -208   
-96    16     
224    496    
864    -160   
-992   624    
304    -128   
240    -208   
-784   368    
224    -64    
144    32     
288    432    
-384   192    
-224   -96    
48     48     
544    -64    
208    640    
-528   224    
368    592    
-416   560    
-464   80     
80     144    
80     64     
224    48     
144    96     
-320   -96    
272    32     
416    0      
112    112    
-416   16     
224    1600   
-336   1600   
-544   352    
-176   96     
-576   16     
672    240    
448    -16    
-608   96     
-224   -80    
624    432    
-416   144    
-48    272    
-16    -176   
16     112    
192    -64    
-192   176    
224    0      
176    -48    
-64    64     
-400   -864   
-448   96     
592    -224   
-240   128    
80     48     
720    144    
-416   -64    
-464   192    
1024   0      
-240   320    
-272   -240   
-144   112    
272    80     
128    -336   
-624   -16    
528    -848   
-80    16     
0      352    
-272   -64    
-272   384    
768    128    
-336   128    
64     80     
-160   112    
0      160    
320    64     
-192   320    
192    -16    
-192   -112   
304    48     
304    -736   
-352   96     
-64    160    
-160   -752   
0      304    
112    -368   
-864   -288   
992    -48    
288    -400   
-320   208    
-32    160    
48     48     
208    32     
-144   32     
-80    64     
144    -464   
-48    -144   
-96    48     
0      -416   
-176   -544   
528    -320   
-176   48     
-16    80     
144    16     
-208   -16    
16     80     
160    48     
224    -64    
-400   32     
304    784    
416    16     
-304   -288   
608    80     
-2416  1424   
704    64     
736    0      
-464   -160   
-144   144    
-48    -560   
48     80     
448    464    
48     112    
-576   -240   
32     240    
464    144    
80     -320   
-512   352    
144    32     
-48    32     
224    -1616  
208    128    
-240   64     
336    1136   
-496   -192   
-352   304    
1072   112    
-208   -288   
-304   16     
368    464    
-384   368    
112    -240   
160    -80    
-112   -96    
-112   128    
336    -144   
-256   208    
160    112    
112    176    
16     16     
464    352    
-672   336    
128    -80    
64     240    
128    -144   
-48    160    
-16    -368   
128    224    
64     -272   
-80    256    
32     -320   
-16    160    
-720   -592   
656    -1664  
3872   560    
-1264  144    
-672   -288   
1696   16     
-784   32     
-448   528    
864    128    
80     16     
-352   -80    
48     -48    
240    -32    
96     192    
-304   -2384  
448    288    
176    -208   
-256   -32    
-48    0      
128    240    
480    32     
-336   -976   
1136   256    
-1104  -240   
400    -176   
1008   800    
-48    848    
-192   -272   
224    208    
352    -288   
-64    160    
-576   64     
-64    -400   
560    -288   
48     -336   
192    -192   
-240   -320   
128    0      
384    -464   
-304   96     
128    -736   
16     -16    
176    352    
-656   -32    
-80    -304   
-208   496    
512    -656   
1136   256    
-752   -16    
240    208    
-192   0      
-256   -32    
64     32     
128    256    
96     256    
-96    -1216  
-768   176    
160    -336   
864    -336   
-272   64     
-320   784    
688    -64    
-144   48     
-224   16     
240    -80    
-400   304    
176    -432   
-128   80     
160    -512   
-128   64     
-80    -640   
80     1648   
1024   96     
-640   -560   
-464   32     
1168   -144   
-336   336    
-528   1744   
464    1456   
-272   176    
-352   -416   
224    -432   
-464   336    
32     -336   
-112   -144   
432    -160   
-256   416    
-96    -2608  
320    -320   
-176   -112   
-32    176    
112    128    
112    128    
-1104  48     
800    -336   
-640   -320   
352    -688   
-112   -224   
128    32     
-176   0      
272    -48    
112    0      
192    -768   
-304   -848   
320    -624   
0      240    
80     512    
208    144    
-720   -32    
464    -848   
272    304    
192    -80    
-336   128    
80     -736   
-32    256    
160    -272   
-208   -144   
112    -1152  
240    -208   
-192   224    
48     -32    
-480   -1168  
-384   272    
768    32     
144    -80    
16     -608   
-32    -960   
320    16     
-96    1232   
48     736    
-48    -416   
80     64     
-128   -384   
-192   -384   
-160   -224   
160    -64    
0      80     
96     144    
64     -128   
160    32     
-176   0      
0      -160   
144    32     
-128   -16    
-160   -80    
128    -192   
-160   0      
-1312  -496   
64     48     
-16    112    
-176   -32    
368    -240   
-720   176    
176    80     
-16    48     
176    160    
144    -128   
-64    0      
-96    432    
384    256    
-464   48     
-128   288    
-96    -64    
128    -64    
-144   -80    
-208   128    
-64    288    
-400   448    
-96    48     
-208   -320   
-336   -720   
1024   -512   
112    224    
-720   -400   
288    -304   
-304   -576   
-240   192    
304    -416   
48     -288   
-80    80     
-256   272    
288    144    
96     -208   
-352   304    
128    288    
-96    384    
208    -320   
80     176    
-208   -320   
-32    304    
32     -224   
160    304    
-160   176    
208    144    
-176   -48    
-384   -16    
272    0      
16     160    
-272   -176   
288    -240   
128    -960   
-1680  -192   
1152   -272   
-704   -192   
544    496    
-448   192    
-32    -144   
176    320    
-304   192    
-32    -16    
112    128    
-64    16     
-192   -64    
0      352    
352    48     
-192   160    
-816   144    
48     320    
-96    -80    
16     48     
32     160    
-656   -864   
160    -208   
544    -640   
-144   48     
48     496    
608    -176   
-528   -384   
-144   256    
544    80     
-256   64     
272    80     
16     112    
-400   -64    
464    48     
-256   64     
80     -80    
96     32     
0      16     
416    48     
-64    64     
-400   -416   
-320   48     
224    16     
96     -160   
-80    160    
-784   -560   
-1184  160    
-352   608    
896    192    
112    -80    
-544   -32    
-240   160    
80     -304   
800    -144   
-992   368    
-592   240    
208    496    
-176   416    
560    96     
-320   96     
-720   -272   
256    416    
128    -80    
-176   368    
-1040  64     
144    64     
736    144    
-864   -544   
336    -2368  
2096   -3024  
400    1312   
-960   608    
-512   144    
544    -32    
384    192    
-336   0      
-288   64     
208    480    
432    32     
-288   176    
-320   176    
304    16     
-32    32     
80     112    
-128   64     
-224   32     
-160   -208   
1024   -80    
-448   -352   
-192   224    
240    352    
-96    304    
32     112    
-688   -144   
416    -400   
-304   -16    
80     -64    
16     -48    
256    -32    
-80    -336   
96     96     
16     96     
-32    112    
-544   -112   
592    -48    
-288   -400   
256    128    
448    -32    
-400   192    
272    176    
-112   144    
256    -48    
-96    48     
-160   -256   
-512   -512   
464    -32    
176    80     
80     528    
-112   224    
288    1216   
-816   384    
16     -32    
-80    -128   
-416   -96    
208    496    
592    96     
-32    48     
-352   128    
176    48     
176    -32    
-208   176    
48     176    
80     64     
-96    0      
-80    256    
256    -80    
-128   -272   
-224   112    
464    176    
144    160    
-304   -16    
64     -32    
-16    -64    
48     -144   
160    176    
-176   96     
-16    -128   
16     96     
-304   -576   
688    -1664  
-1504  560    
592    -192   
256    32     
-640   144    
176    -16    
288    -160   
464    -160   
-384   608    
-48    -112   
208    -48    
48     304    
-240   -176   
288    816    
64     144    
-112   -720   
128    160    
176    144    
-144   64     
-464   -416   
1168   80     
-224   208    
-752   -32    
880    -352   
-384   304    
192    48     
-160   912    
32     -16    
-240   80     
16     80     
304    -1056  
32     192    
-368   -2240  
160    192    
240    32     
144    16     
-272   304    
144    112    
-112   224    
128    80     
-112   16     
0      160    
-80    0      
32     272    
384    64     
-448   -288   
112    -80    
80     -272   
416    -112   
-1600  592    
2416   336    
-368   80     
-1280  16     
1424   240    
-64    672    
-288   112    
-16    112    
-112   32     
192    192    
-96    112    
272    48     
-160   32     
-80    -320   
-144   -32    
432    112    
-288   144    
-16    -96    
224    80     
112    192    
240    1264   
-1248  -480   
-624   336    
1040   192    
-272   -384   
-352   32     
288    -32    
640    560    
144    -592   
-416   -672   
-432   -960   
256    176    
224    -384   
-32    80     
48     -16    
80     112    
-64    672    
-48    288    
-16    -128   
128    80     
-112   288    
32     32     
-80    240    
-240   -160   
336    368    
-608   192    
-512   -240   
688    -1136  
128    -528   
-432   -80    
128    224    
272    592    
-96    32     
368    -768   
-144   -384   
576    576    
384    432    
400    208    
288    128    
0      208    
-32    192    
224    112    
240    -416   
-32    96     
384    672    
-656   944    
-48    64     
272    48     
192    64     
-16    -400   
-1056  1104   
544    -320   
-112   -384   
-592   -384   
1328   16     
-464   -800   
-256   800    
-16    -896   
512    -80    
16     -16    
-128   272    
-352   -320   
64     176    
144    160    
-96    -144   
176    -16    
0      192    
496    32     
64     240    
-448   -256   
112    -608   
160    352    
400    96     
0      -1376  
-784   -224   
432    -1952  
480    624    
-128   -288   
288    -768   
-272   16     
176    -816   
448    640    
16     -1440  
-288   240    
80     -176   
272    -160   
160    144    
-384   784    
32     -496   
48     -272   
544    160    
-304   -224   
-480   -160   
224    480    
320    -192   
64     -1248  
48     656    
-112   -1904  
64     -224   
-176   -288   
112    -688   
-400   -896   
256    -464   
-144   -512   
432    -400   
128    128    
-128   -160   
-336   -464   
320    -256   
224    0      
-80    -16    
-112   16     
48     -224   
48     352    
160    224    
-432   -320   
208    128    
384    112    
-256   -272   
336    0      
-176   32     
112    -496   
-192   -176   
288    -64    
-240   848    
160    240    
208    224    
80     416    
-96    80     
144    -384   
32     1408   
1088   -288   
-944   -304   
32     -352   
32     -432   
-32    -1248  
240    -176   
-320   704    
-48    560    
-128   -352   
224    -176   
16     -112   
64     -416   
-176   -32    
144    16     
-64    400    
32     -160   
64     -128   
-64    -160   
-208   -416   
592    -256   
-176   -512   
-272   -944   
144    -16    
16     -592   
64     352    
-64    -400   
-16    -144   
48     -736   
96     -64    
224    -16    
-48    -432   
-240   -528   
192    -240   
160    16     
48     176    
-256   224    
32     -32    
96     -192   
-192   -32    
176    -32    
16     -64    
0      288    
112    32     
-320   -256   
0      -48    
272    -1056  
-128   -48    
480    144    
-1344  336    
672    448    
496    -144   
-1824  -352   
896    256    
976    32     
-1024  64     
-32    -336   
416    -208   
-240   -80    
16     -256   
160    112    
-112   -320   
192    224    
288    16     
-288   80     
80     -192   
128    -32    
-208   -240   
-192   160    
96     32     
144    -96    
-2704  144    
1152   64     
336    -176   
-656   48     
768    112    
-192   -272   
512    64     
-128   32     
-144   -16    
272    96     
-128   112    
-288   -16    
0      48     
528    0      
-32    -48    
-288   -112   
-224   -240   
-176   160    
-224   -80    
192    432    
-736   160    
144    -368   
-144   288    
-800   -32    
240    -576   
496    -16    
16     -432   
-208   -480   
336    -144   
-160   -128   
32     32     
-432   160    
-144   704    
-144   -16    
400    528    
160    400    
-16    496    
-384   32     
-560   64     
32     96     
144    112    
32     -112   
-1280  336    
224    -96    
-480   -192   
-192   192    
-16    48     
-1024  1008   
528    3072   
1184   272    
-2384  -144   
-304   -272   
1664   192    
144    112    
-1568  -64    
16     32     
1072   -160   
-176   416    
-624   -80    
-512   112    
304    32     
-80    -64    
-16    -48    
-304   96     
96     -64    
64     128    
544    48     
-1440  0      
720    -112   
-64    32     
176    -192   
-16    0      
-464   48     
656    352    
-1344  -224   
-176   48     
512    -160   
16     32     
-352   16     
96     -32    
-368   -16    
448    112    
-432   -16    
64     384    
-128   80     
-240   368    
-48    192    
-208   -32    
224    176    
-384   176    
-192   -80    
240    48     
-80    128    
16     224    
-96    80     
96     64     
112    64     
-192   96     
192    160    
-144   704    
704    -96    
-288   -480   
-496   -16    
480    16     
-192   -160   
48     208    
-384   240    
160    16     
208    -32    
-160   0      
-112   32     
128    128    
48     16     
-144   -144   
-128   48     
-16    96     
16     112    
208    -96    
-352   96     
0      80     
-176   272    
-640   -32    
-32    -64    
-32    288    
96     928    
-32    752    
-192   -112   
192    -192   
-336   -2336  
-560   736    
1152   -32    
-736   832    
832    -496   
-224   464    
-512   480    
-48    336    
608    288    
32     192    
-416   400    
-192   192    
272    208    
176    320    
-352   736    
64     144    
-32    -240   
16     -48    
192    144    
-176   -32    
304    16     
-528   720    
272    -16    
-160   -144   
-272   256    
304    640    
48     304    
-192   240    
32     192    
-64    160    
-16    -128   
48     -80    
112    -112   
-240   0      
16     128    
128    112    
-400   80     
48     272    
272    400    
-224   160    
-208   -144   
80     240    
16     256    
96     -64    
-32    -96    
-176   96     
128    -128   
-128   208    
-16    -176   
-400   -1216  
1728   256    
80     784    
-1408  -688   
464    -624   
16     304    
576    64     
-16    1360   
-16    -48    
192    -496   
-384   -96    
256    80     
16     112    
-112   80     
320    368    
-400   224    
96     320    
256    336    
-192   192    
144    -336   
96     -768   
-256   -832   
-1344  592    
2048   -32    
-368   -528   
-592   -96    
608    -832   
-128   -560   
-304   -416   
208    32     
144    -400   
-160   96     
80     -48    
192    256    
-160   -128   
160    -160   
288    128    
-304   -208   
64     -320   
192    32     
112    400    
-32    528    
-64    128    
384    1264   
-464   2000   
-160   848    
-176   96     
544    832    
-992   -224   
240    -1536  
464    -864   
-272   288    
304    -304   
176    80     
-848   160    
400    -400   
48     -352   
576    -496   
-96    -192   
-80    112    
64     -368   
-576   -720   
96     -64    
512    464    
48     176    
272    -144   
288    -384   
-304   112    
256    -416   
112    -272   
160    352    
-256   1344   
976    -832   
-896   -464   
-704   176    
864    720    
176    -144   
-576   -1536  
-672   -1824  
448    624    
-48    320    
224    -256   
-352   -384   
-304   144    
368    -16    
0      304    
-176   336    
176    192    
288    -224   
-128   -272   
-48    0      
112    304    
240    224    
-512   -16    
672    -128   
-176   0      
368    48     
176    240    
-160   1136   
-80    64     
96     -400   
176    -64    
304    288    
-352   -96    
16     -240   
240    208    
-272   32     
144    736    
176    -16    
-304   -592   
-48    -2896  
400    48     
-128   208    
48     128    
496    672    
-464   -528   
-160   -496   
208    -832   
-32    -128   
32     320    
32     208    
-128   -720   
160    -48    
144    -368   
-80    16     
160    -896   
336    -672   
-96    -688   
32     1136   
48     624    
64     496    
-32    -128   
160    -176   
-32    32     
144    -80    
0      96     
64     -144   
192    64     
288    -112   
-352   336    
160    80     
128    208    
-16    -208   
160    32     
-80    -64    
32     -144   
224    416    
48     800    
-112   96     
-16    -544   
400    624    
-432   -1488  
-256   976    
688    -608   
-592   288    
368    80     
48     -528   
-64    -976   
80     400    
224    272    
-288   128    
32     80     
352    -64    
-112   -112   
-256   -480   
336    176    
-48    288    
96     912    
320    48     
-112   256    
-480   -784   
672    -1200  
-416   608    
432    16     
-336   384    
176    -304   
-224   432    
-80    -448   
256    -704   
-144   -176   
64     -1728  
256    96     
-64    -112   
-64    -96    
16     32     
-288   -48    
384    -992   
-144   256    
288    -544   
-448   224    
416    48     
-160   -224   
-1056  -80    
-160   -128   
240    -288   
416    -416   
-384   -288   
16     -1024  
208    -144   
-1168  -512   
64     928    
4880   496    
-1088  64     
-2096  -528   
1696   320    
864    -288   
-1520  48     
192    -240   
368    -16    
-480   -64    
112    -16    
160    -80    
160    160    
192    32     
-128   -160   
160    -64    
80     -112   
-192   -144   
96     -128   
320    -64    
-256   64     
288    432    
1872   0      
-944   704    
-672   -128   
-48    -80    
496    -352   
-528   -304   
32     -16    
224    -768   
16     -16    
-176   -128   
-32    128    
-16    -384   
-16    192    
336    96     
-448   -368   
304    -352   
80     -528   
-1088  -16    
48     32     
-48    -256   
-656   288    
784    176    
-992   -1168  
0      -912   
160    -416   
96     -432   
-128   -48    
48     -80    
-432   -176   
112    -208   
128    -288   
-48    176    
-576   -208   
416    -656   
-352   -32    
-128   128    
736    -480   
-64    -192   
-320   368    
-160   -944   
320    -192   
272    16     
-112   -496   
-1136  240    
688    0      
-288   112    
-656   -896   
2464   2512   
-1584  800    
0      -672   
416    -480   
-272   32     
112    -224   
-496   416    
704    -912   
16     272    
80     -304   
-192   0      
-160   -16    
16     16     
32     -32    
-16    -64    
96     16     
-224   -32    
64     32     
-240   -432   
576    416    
32     -480   
-336   240    
336    -912   
-960   0      
400    32     
-16    0      
-96    48     
160    -176   
-176   320    
528    64     
-400   176    
208    16     
80     80     
256    144    
-240   208    
256    -16    
-16    144    
464    -112   
320    0      
-192   32     
160    32     
-352   96     
496    112    
-240   160    
80     0      
400    48     
-64    -16    
-384   -256   
48     -160   
224    64     
-208   -64    
-112   -800   
-416   96     
608    1200   
-848   1248   
96     -368   
-96    -816   
-256   160    
208    176    
128    -224   
-32    -16    
-16    -80    
-96    -64    
-432   -304   
-32    48     
32     -80    
224    -96    
0      -32    
-128   80     
-144   96     
80     -240   
-224   -272   
384    -592   
-496   -432   
-288   -16    
400    -176   
48     304    
-128   560    
-496   -448   
416    -448   
320    720    
-576   -1088  
-720   496    
784    848    
-80    -528   
-688   192    
128    -1520  
32     -208   
-16    112    
-1056  -288   
272    288    
0      -48    
80     160    
-144   -80    
-48    -48    
176    -176   
-64    336    
-128   -48    
112    -64    
64     0      
464    576    
-1024  640    
224    -752   
544    -752   
-416   16     
-208   112    
-736   1472   
608    -544   
-224   -480   
-144   -272   
0      160    
48     96     
-32    -176   
-32    96     
-224   -80    
-96    224    
32     96     
464    -400   
-304   -160   
-304   320    
384    192    
0      -160   
-192   176    
128    0      
-208   256    
160    240    
-192   176    
-208   -16    
208    -208   
-64    272    
-1120  1312   
3312   -624   
-352   624    
-1184  1200   
752    416    
272    768    
-624   -672   
320    144    
32     240    
-272   -160   
112    192    
-16    96     
-208   80     
160    272    
272    16     
-96    144    
-208   176    
0      64     
-256   32     
-304   -224   
-112   -512   
-976   736    
1328   -784   
-992   -544   
480    -560   
-208   -528   
64     992    
304    -224   
-576   -1312  
144    -144   
304    1056   
-144   16     
-336   -224   
272    -448   
-592   -496   
352    -32    
-224   96     
576    -160   
-384   -160   
-368   80     
176    192    
-256   -720   
-128   -544   
608    -432   
-96    -1104  
-464   -368   
-352   -2208  
-976   -1712  
368    -848   
-128   64     
48     448    
320    -64    
192    736    
-576   -624   
-272   -128   
432    288    
-368   96     
400    -112   
-336   -336   
-64    -304   
240    64     
160    496    
-96    688    
-48    128    
288    -336   
-272   -80    
-656   -576   
-128   -688   
160    -272   
-464   -896   
1488   -1856  
560    -224   
-528   368    
-896   384    
160    -64    
544    -272   
-352   -624   
-208   464    
176    640    
-48    -96    
448    16     
-224   272    
-432   720    
128    144    
-112   -192   
112    432    
-304   80     
64     640    
-160   288    
176    -208   
144    -192   
-576   -112   
-80    288    
304    544    
-112   -336   
288    -752   
-144   -640   
-48    -288   
80     -528   
-144   48     
272    416    
-256   -48    
160    144    
224    688    
-176   432    
-160   -224   
16     352    
128    448    
96     496    
-176   -32    
64     -64    
96     -48    
256    160    
0      304    
80     832    
-48    592    
304    512    
96     848    
-32    848    
-80    448    
-368   192    
1088   464    
-176   -80    
-400   368    
160    32     
16     -256   
-224   -240   
0      -336   
-288   -304   
288    -16    
-64    32     
-80    -160   
-32    -256   
96     16     
128    576    
-416   336    
448    1040   
-400   768    
80     176    
-112   208    
304    -80    
-320   336    
144    64     
384    -144   
-144   -368   
-496   -32    
480    304    
112    352    
-128   64     
592    -608   
-1472  1360   
1184   176    
16     240    
-32    0      
-272   96     
-80    -144   
0      48     
96     -96    
400    -128   
-400   144    
-128   144    
384    80     
192    272    
-496   288    
-48    48     
592    -176   
-208   224    
0      368    
416    288    
-144   512    
-208   -800   
-512   400    
912    -16    
-272   -48    
-192   512    
32     80     
64     -16    
128    -16    
16     -368   
-144   112    
-144   -48    
448    128    
16     0      
-128   112    
224    128    
-240   0      
-32    96     
-144   -288   
64     208    
304    -464   
-320   144    
-96    -96    
128    48     
336    -160   
-608   160    
560    80     
-272   160    
-64    48     
-80    -1840  
1120   -1104  
-464   -448   
-320   192    
64     -400   
816    416    
-64    -976   
-912   432    
368    -224   
128    16     
-368   16     
0      224    
368    112    
-272   96     
192    96     
352    -16    
-416   144    
-32    80     
496    144    
-128   -16    
-48    48     
64     -752   
288    992    
1584   -176   
-1664  48     
800    656    
1648   32     
-1344  224    
816    32     
-64    208    
-416   -416   
176    128    
-16    -128   
48     64     
208    -224   
192    256    
48     -80    
-80    96     
64     192    
208    512    
-160   208    
-96    80     
-176   -1136  
-976   320    
1184   48     
-864   -96    
368    528    
32     -192   
-304   -512   
416    48     
224    320    
-560   80     
-96    -96    
80     -112   
272    48     
512    432    
336    -32    
-432   96     
368    -128   
-208   -416   
-112   -160   
-48    -1296  
64     0      
208    48     
-128   -16    
-208   -128   
320    176    
640    176    
-240   16     
-32    -272   
2112   4496   
-1552  2160   
-240   -1088  
496    -368   
-512   -736   
-576   -80    
240    -448   
752    16     
-368   -1648  
-32    224    
672    -16    
-464   -304   
192    -192   
192    -96    
-224   32     
96     272    
272    -144   
-80    -112   
-560   -416   
544    320    
32     -752   
-304   -576   
96     16     
-496   -480   
-32    176    
752    -80    
-464   288    
128    -112   
304    176    
-16    256    
208    0      
-112   144    
-32    -224   
32     96     
320    144    
-496   -64    
512    -736   
176    -832   
-288   -976   
64     128    
64     -80    
528    832    
-720   256    
144    304    
592    128    
-400   144    
240    160    
64     176    
-224   -368   
80     -912   
-1568  -496   
304    -800   
-800   96     
832    272    
-432   352    
240    16     
208    976    
-272   1280   
32     1856   
272    928    
64     528    
0      160    
176    -144   
-176   -272   
-144   96     
48     80     
-128   -208   
-576   128    
16     32     
-48    48     
224    -1056  
0      320    
-48    -416   
400    208    
-128   304    
160    -192   
0      -256   
-480   -208   
192    128    
224    -16    
-96    48     
-320   -528   
0      -368   
-32    -384   
-64    -256   
128    -272   
-96    -96    
112    -1840  
240    -208   
0      -80    
0      -144   
0      80     
96     -48    
-128   80     
112    -336   
32     112    
0      272    
-304   240    
-48    64     
160    272    
-240   -640   
800    -544   
32     160    
-672   -64    
368    -192   
-64    -16    
-128   80     
160    -96    
32     -224   
-48    112    
-48    -80    
240    -64    
-48    -112   
256    144    
-400   128    
112    -96    
144    -48    
48     -112   
96     16     
-112   144    
160    -128   
592    -48    
16     64     
-256   -16    
384    80     
-48    272    
-192   144    
192    -48    
-32    16     
-16    80     
320    -960   
-3120  -224   
128    48     
512    -512   
-880   -592   
-704   320    
0      -912   
-672   -336   
336    800    
432    544    
-80    240    
-480   64     
32     -16    
-512   -304   
80     432    
-464   -624   
-128   -352   
-224   -528   
224    448    
-32    -128   
-64    256    
1088   -160   
-1968  592    
608    208    
-320   624    
-640   64     
832    64     
368    1648   
-288   912    
-128   -496   
-208   -176   
240    256    
-16    544    
-64    240    
-64    -48    
-16    -96    
-64    -208   
-320   -1136  
160    -544   
-720   -16    
-336   192    
-304   -240   
272    448    
-16    304    
-528   -368   
624    -1056  
-272   -448   
400    -1104  
-960   -1008  
512    -16    
112    -64    
-544   592    
-16    -128   
-112   208    
-704   -112   
608    -160   
-192   720    
-192   112    
176    -192   
96     896    
176    -208   
-496   -96    
-96    464    
816    32     
32     352    
-272   -432   
-576   -64    
704    192    
288    -128   
-672   208    
-128   2432   
1040   240    
-1168  -800   
-432   -1360  
304    -912   
576    -352   
-640   240    
-368   400    
288    368    
320    496    
-368   -240   
-400   176    
-176   176    
496    240    
-64    -16    
-304   192    
-208   -128   
-96    -368   
256    -576   
-64    384    
-64    272    
96     240    
224    -144   
-704   48     
336    272    
112    -256   
-32    -304   
-16    -16    
0      32     
-304   -96    
112    -48    
-112   -64    
-80    448    
-800   -48    
-336   96     
416    -80    
256    -240   
-640   -16    
320    208    
96     -176   
192    -192   
-320   -336   
-304   -80    
288    128    
-160   -32    
96     304    
528    480    
-352   384    
-304   272    
304    0      
208    832    
-384   32     
-288   0      
576    368    
304    32     
-768   160    
240    176    
192    -128   
160    160    
176    -48    
-176   32     
-32    128    
48     128    
176    16     
144    128    
-944   336    
384    -32    
496    256    
-768   464    
224    -384   
-64    -128   
144    624    
-96    144    
-96    -48    
80     -112   
304    352    
0      176    
-384   -96    
32     32     
-320   -688   
1696   1344   
576    384    
-1248  80     
224    240    
160    -48    
-144   -416   
224    -80    
272    128    
-736   448    
224    -208   
368    304    
-32    -128   
-416   -80    
224    112    
432    448    
-208   -240   
-96    192    
352    176    
-256   32     
-48    160    
560    1376   
848    0      
-1280  -384   
336    400    
192    -224   
-48    96     
80     96     
240    224    
-304   -48    
-80    -32    
224    208    
624    -64    
-624   112    
-96    176    
352    48     
144    64     
112    -192   
-128   16     
-16    96     
64     80     
256    176    
-176   128    
-144   16     
416    160    
16     -32    
-384   224    
144    80     
48     80     
-112   -272   
-1536  528    
4480   1840   
-400   -384   
-1840  -112   
272    -176   
368    144    
784    368    
-592   160    
688    272    
-128   176    
-160   32     
336    112    
144    80     
-96    288    
544    144    
-240   144    
0      0      
192    192    
-112   144    
144    80     
32     96     
-496   -1344  
1936   -48    
-336   672    
-784   -336   
96     416    
384    -96    
-416   128    
160    224    
-32    -96    
-144   144    
336    -16    
-80    64     
-288   112    
352    144    
-32    64     
-16    -496   
-112   288    
-192   -2256  
112    224    
32     64     
288    496    
-1264  32     
16     32     
448    32     
-48    176    
176    -64    
-144   240    
400    288    
496    48     
-400   96     
-128   -384   
-256   128    
80     -624   
672    -176   
-704   240    
352    -96    
0      -80    
-128   272    
96     80     
0      144    
-32    -336   
160    64     
-112   -16    
0      -16    
-320   192    
400    -192   
32     -16    
-320   -256   
1008   208    
256    -3632  
48     464    
576    96     
-960   0      
-416   -208   
880    -416   
-32    176    
-320   -272   
-112   16     
560    224    
-144   -80    
240    48     
144    -176   
-272   -256   
-32    208    
416    -480   
-96    128    
128    -112   
176    -160   
-96    -1120  
-80    -272   
288    480    
-672   -144   
144    256    
368    -176   
-176   80     
80     -496   
0      272    
240    1040   
-336   288    
80     -1280  
288    -208   
-48    192    
-112   384    
-64    176    
208    -576   
-128   -176   
-320   -16    
192    32     
-16    304    
448    816    
48     320    
144    1280   
-208   656    
224    560    
272    -144   
-240   640    
432    -832   
-16    -160   
240    256    
304    -304   
-1344  528    
1072   624    
-144   560    
144    384    
64     -32    
112    -1792  
-96    -592   
-64    368    
208    -448   
-96    192    
160    80     
80     -576   
-304   256    
144    208    
96     -224   
80     -144   
160    -608   
160    -80    
0      48     
160    64     
176    -80    
-96    80     
48     -32    
48     144    
592    -96    
-32    -48    
-96    -304   
-64    -288   
160    16     
224    -848   
-496   112    
400    64     
-320   -592   
128    -32    
304    -1344  
-128   -416   
-208   16     
-48    16     
96     352    
240    -224   
-64    -304   
-128   160    
208    -480   
96     128    
288    -240   
-240   -192   
-576   16     
160    -32    
-64    -112   
672    -608   
-304   368    
336    -80    
-208   -224   
-64    -48    
16     -288   
64     -336   
160    272    
160    -96    
80     80     
-48    -32    
-64    -112   
64     -224   
384    -112   
-144   112    
-192   112    
96     48     
448    -384   
-144   -48    
-256   -48    
176    -208   
272    -288   
96     -16    
80     96     
-224   0      
-528   64     
128    -64    
208    -64    
96     48     
-1808  -576   
1184   96     
848    -336   
-1200  -96    
720    208    
80     -192   
-976   336    
192    288    
-80    -976   
-64    112    
176    -32    
-304   16     
-64    176    
192    352    
96     -80    
-688   -368   
-64    -448   
288    -1280  
64     592    
-208   -192   
368    -896   
-2400  320    
1024   528    
-112   -592   
-160   -1264  
288    -160   
176    720    
-688   592    
-64    544    
160    304    
144    0      
-16    -240   
-576   208    
384    48     
-240   -192   
240    -272   
-144   -64    
176    -464   
544    80     
-272   64     
-144   32     
-352   64     
496    -336   
48     2432   
1616   1040   
-320   -544   
-752   -304   
848    -304   
-16    208    
-112   -96    
240    -272   
-96    -64    
160    -320   
-272   208    
-192   384    
992    -512   
-368   -336   
-304   192    
464    96     
496    -544   
-640   256    
320    -192   
-96    224    
-144   -80    
-288   -608   
0      -128   
432    192    
-528   -112   
192    1440   
320    -80    
896    -2000  
448    64     
352    272    
-960   -32    
0      256    
1184   304    
-48    64     
-352   -144   
-16    -80    
80     -16    
224    128    
-80    -48    
-416   -128   
-416   -128   
-144   16     
48     80     
-272   -96    
384    736    
-240   336    
64     512    
176    -80    
-416   -176   
-48    160    
176    80     
-112   80     
-352   -160   
112    64     
-352   -368   
32     112    
512    64     
-512   96     
144    16     
-448   -288   
-320   -96    
-256   -48    
288    224    
32     544    
-48    -32    
-16    0      
16     -32    
-672   -192   
416    -64    
208    80     
0      -16    
-384   208    
-176   192    
560    256    
-560   32     
16     80     
-592   48     
192    576    
-1344  224    
480    -160   
144    -208   
-336   -16    
16     64     
544    192    
-80    112    
0      -96    
-192   64     
32     -112   
-64    0      
-32    128    
-16    48     
-272   -320   
-80    -416   
16     -400   
-144   -192   
-240   -128   
240    304    
80     -176   
-80    -80    
48     -80    
-112   400    
112    48     
96     -656   
0      416    
32     128    
-192   -80    
-32    736    
-160   -2208  
-1888  352    
1296   -352   
-16    -176   
-640   288    
224    80     
368    112    
-48    -960   
-528   288    
192    512    
0      -208   
32     224    
32     160    
-400   144    
320    -112   
-192   288    
-256   -288   
48     -144   
-16    112    
112    480    
-240   -512   
-64    192    
736    -16    
-432   -48    
-112   384    
-176   -176   
-64    32     
448    -48    
-240   176    
-128   48     
-144   240    
0      -352   
-16    -64    
-176   -192   
288    -880   
96     0      
-256   -160   
64     224    
256    112    
-464   160    
-144   32     
336    160    
160    32     
-272   -48    
-464   112    
496    -32    
-160   112    
208    48     
-944   -592   
832    -864   
704    160    
-176   -160   
32     64     
144    128    
-1008  304    
432    96     
592    272    
-288   -256   
-176   96     
-16    0      
224    160    
-304   -32    
-32    -272   
-416   0      
432    -96    
-192   304    
-16    192    
256    208    
176    96     
-400   -480   
1184   576    
-624   144    
-64    -336   
-176   272    
-16    -208   
176    224    
144    64     
192    -32    
-336   144    
-128   96     
208    128    
224    128    
-160   -16    
208    32     
-176   128    
64     0      
128    -256   
-64    240    
16     400    
-32    144    
288    96     
-832   128    
-496   48     
464    688    
896    -240   
-176   16     
-384   240    
96     48     
160    -144   
-384   128    
560    640    
512    -352   
-624   -336   
560    768    
-192   128    
-224   64     
368    -96    
-448   96     
-48    112    
112    64     
160    96     
-32    16     
-256   128    
288    352    
-128   48     
-448   96     
480    128    
304    -160   
-1616  -144   
1088   -1136  
1056   80     
-1408  -496   
-1040  672    
1440   80     
-304   -208   
-272   -240   
80     80     
-192   256    
64     304    
448    48     
-368   -288   
-240   720    
-64    -128   
432    -96    
80     144    
48     48     
32     80     
208    544    
-80    496    
144    224    
112    32     
-544   -160   
240    96     
32     496    
80     0      
-240   736    
-112   1232   
32     608    
16     -480   
-80    -272   
80     -288   
-208   -96    
288    -144   
32     448    
16     -64    
64     560    
208    1072   
48     304    
144    -160   
176    240    
-176   112    
64     272    
176    272    
240    624    
-16    1488   
464    -640   
-128   -368   
-176   -1520  
192    240    
480    992    
-624   144    
-624   320    
1056   96     
-64    560    
-368   384    
368    1168   
-112   192    
240    -1216  
320    -368   
-352   304    
-96    -144   
-16    -48    
208    32     
240    224    
-400   240    
176    224    
384    80     
16     -16    
-288   160    
-16    144    
80     272    
0      144    
-64    64     
-80    368    
432    48     
-384   -240   
-112   208    
544    48     
-80    0      
288    384    
-752   560    
496    -112   
144    256    
-208   -368   
-64    32     
528    208    
-464   688    
48     112    
320    -496   
-160   368    
32     -128   
176    -16    
-256   -688   
144    144    
0      -1008  
-64    -192   
32     -192   
176    -16    
-32    128    
-272   1024   
704    48     
-800   32     
160    -48    
176    272    
80     512    
-256   0      
-80    480    
64     128    
-128   144    
96     -416   
144    -32    
160    -128   
80     288    
-320   288    
64     464    
320    -352   
-336   -272   
-128   80     
128    -32    
320    352    
128    -224   
-192   -16    
-336   -304   
464    80     
224    0      
-96    144    
304    48     
-448   320    
1824   688    
-1728  1408   
-736   240    
976    -176   
48     -224   
-672   -608   
672    -672   
-160   -576   
-272   144    
304    -160   
96     160    
-128   -192   
176    144    
192    112    
-64    0      
-144   64     
352    208    
-96    304    
112    48     
-48    288    
-128   -96    
544    1280   
1632   -80    
-1024  -272   
32     -1280  
32     -368   
160    -32    
0      304    
48     -64    
256    112    
-848   240    
176    -1456  
624    272    
-256   -80    
-432   -528   
128    160    
528    -1504  
-208   -208   
-352   208    
272    -240   
128    176    
0      -48    
-320   144    
816    -160   
-144   -464   
-224   -704   
-336   -304   
-80    -1056  
-624   -672   
656    48     
-112   64     
160    112    
0      -80    
-128   32     
224    48     
-224   -192   
-224   -320   
32     64     
208    64     
160    -96    
-16    80     
-112   48     
160    96     
-64    32     
-208   -192   
352    -64    
128    -576   
48     32     
416    -224   
-864   -432   
-1152  -3648  
400    240    
-160   -128   
-640   -128   
656    112    
624    -416   
-1136  336    
320    -176   
-160   -16    
288    -736   
-1616  0      
-400   -256   
240    176    
320    -368   
-288   -32    
32     -560   
-288   80     
112    -144   
-128   560    
736    -64    
-960   304    
112    -192   
832    -160   
48     -80    
-688   0      
336    176    
256    -160   
-112   48     
240    -144   
-288   -32    
-240   -112   
464    64     
48     -672   
0      64     
48     -272   
48     -176   
-208   -208   
64     -208   
-352   48     
160    -80    
-48    -32    
336    0      
-1184  0      
-64    0      
592    144    
432    208    
-432   240    
32     -1152  
208    80     
-144   -208   
128    -80    
32     240    
816    -176   
176    160    
224    -272   
-320   -272   
336    -16    
480    432    
-448   160    
80     192    
224    -272   
-80    144    
-16    -512   
48     192    
144    -48    
16     32     
-240   240    
560    96     
-160   -48    
-272   80     
32     48     
208    -224   
-480   -160   
160    -304   
112    304    
208    -1056  
-256   -480   
96     544    
-48    208    
272    -48    
-608   736    
1536   -752   
-1040  -112   
-480   32     
1152   -16    
-384   336    
-272   -128   
0      464    
432    -384   
-144   -272   
128    -208   
-112   272    
16     -240   
64     432    
176    -304   
-416   -96    
-80    0      
240    -352   
32     80     
0      192    
-192   -1280  
-736   304    
880    -128   
-224   16     
128    80     
-320   -144   
-272   176    
-752   -304   
480    -256   
-96    0      
-224   -48    
0      -32    
-512   224    
224    -144   
-32    128    
-208   48     
288    0      
16     0      
-64    -144   
-128   64     
208    -96    
-112   80     
208    64     
-128   -208   
-400   0      
528    32     
-240   224    
-304   -64    
-144   -112   
448    1264   
-1584  -976   
-2608  496    
1552   592    
-560   -800   
-784   304    
1248   -192   
-256   560    
-288   160    
144    240    
160    -128   
-272   -32    
48     64     
-64    -144   
80     0      
-448   -96    
-16    -16    
224    64     
-192   32     
-64    -224   
208    160    
-304   -992   
-832   1008   
1024   -336   
-160   -544   
-352   -64    
-112   240    
-32    -176   
0      240    
304    0      
48     128    
32     48     
-864   -48    
-16    80     
144    16     
112    80     
-272   -16    
32     32     
160    -32    
-80    128    
80     80     
-80    -16    
320    240    
352    176    
-208   -64    
-112   192    
208    784    
-848   -224   
-464   0      
832    688    
-432   288    
-48    128    
-32    -16    
-80    128    
-1040  80     
672    -256   
-16    816    
208    -32    
-256   -208   
-224   160    
128    -32    
240    16     
-224   -96    
-64    368    
-816   -80    
-80    1232   
576    -64    
-704   32     
-112   -944   
256    -480   
1440   1168   
-1840  208    
-576   -384   
784    240    
-240   176    
-1024  48     
112    304    
992    896    
-240   112    
-800   -192   
-176   -336   
192    432    
16     144    
-64    -144   
-336   -48    
-176   -384   
256    -304   
0      224    
-336   304    
16     -80    
48     -352   
176    336    
-80    -64    
48     -32    
-352   -608   
-16    -64    
128    -80    
-80    -128   
96     -256   
-256   -384   
-32    384    
-144   -16    
-48    96     
192    -96    
-304   16     
-32    96     
96     -640   
-288   256    
144    1104   
32     320    
144    -144   
-32    48     
-16    320    
-176   -64    
256    464    
592    672    
-544   368    
-144   -224   
112    -176   
192    400    
-560   -496   
896    384    
-96    752    
-256   768    
-240   48     
192    -896   
-192   -768   
480    32     
176    1024   
-192   -400   
-192   -48    
-48    272    
272    -112   
80     272    
48     48     
-96    208    
160    448    
-192   -112   
48     112    
-32    64     
-224   16     
16     -32    
176    -128   
-160   96     
-192   -208   
544    -768   
464    -464   
-240   -304   
-368   -240   
48     176    
912    704    
-928   1008   
352    -464   
-80    560    
-80    512    
160    -304   
576    -176   
-384   544    
-96    320    
464    -64    
80     16     
-144   -96    
32     192    
-128   368    
224    176    
112    48     
-352   400    
-160   304    
176    160    
64     304    
-96    848    
448    448    
-720   -48    
-32    320    
192    272    
-128   704    
16     880    
48     368    
-240   -448   
112    80     
128    -304   
-48    -256   
80     -336   
240    448    
-128   -400   
128    256    
64     -288   
-176   32     
240    -128   
256    96     
-112   -176   
-224   256    
256    -64    
-64    -112   
256    0      
-368   112    
-96    -288   
240    112    
112    -560   
1040   128    
-2576  32     
656    -176   
256    -240   
-912   192    
1216   96     
-608   -240   
-288   0      
224    128    
272    256    
-240   96     
-48    64     
272    -240   
80     -48    
-848   -1568  
528    -48    
16     144    
-272   144    
128    80     
16     80     
-144   32     
-32    -560   
-784   736    
1280   -320   
-1184  -112   
544    240    
1072   -144   
-736   -64    
-640   16     
400    -352   
256    48     
144    192    
-48    16     
-240   112    
32     96     
544    -432   
-256   16     
32     -48    
96     -112   
112    -176   
176    -80    
-144   160    
-448   -144   
928    -320   
32     -192   
-768   640    
-48    -208   
352    48     
800    -320   
-464   272    
144    -32    
304    304    
240    192    
-240   176    
-528   48     
48     208    
480    48     
176    80     
-240   416    
304    192    
-256   -48    
128    -944   
496    160    
-416   -576   
-336   -128   
640    176    
432    384    
-256   -48    
-96    192    
-736   -1792  
832    224    
704    -720   
-1024  -528   
976    720    
-304   -80    
32     352    
-160   96     
48     288    
-128   -1072  
288    -112   
336    -32    
-336   160    
224    32     
176    272    
400    64     
-240   -336   
272    112    
160    -288   
-512   -784   
-704   -400   
560    -288   
-224   64     
688    32     
208    -352   
-848   400    
560    64     
16     224    
352    144    
-160   240    
48     176    
-128   16     
112    160    
-336   -160   
496    320    
-144   -128   
-224   240    
96     -416   
-128   16     
-112   -144   
64     272    
256    64     
-336   -1152  
-432   -48    
576    -80    
-208   -352   
240    576    
-144   544    
-192   192    
400    -192   
-256   -160   
-16    112    
-16    288    
1264   16     
-576   144    
144    -512   
336    80     
-96    -736   
16     -16    
-160   -96    
-16    -144   
32     0      
80     -128   
-32    -112   
128    -608   
208    144    
-96    144    
-208   224    
576    -80    
-176   224    
-432   -208   
272    -96    
224    -384   
-112   -80    
32     80     
112    -176   
208    -288   
-160   -64    
80     96     
-64    -432   
96     80     
288    1168   
1968   -512   
-1760  240    
-304   64     
1072   -240   
-464   256    
-208   -192   
112    432    
-144   -416   
80     -352   
96     -16    
-144   -240   
-16    -160   
144    -368   
352    -208   
-224   -320   
96     -320   
-128   -336   
-16    64     
272    -64    
272    -576   
-1504  656    
1008   -560   
96     -176   
-320   112    
-240   -48    
-208   272    
-256   32     
96     80     
480    -64    
-96    -432   
-432   32     
240    -144   
-32    48     
128    304    
80     0      
80     48     
-240   -32    
128    -16    
96     -304   
-160   -160   
464    -288   
-416   64     
448    -192   
-144   -16    
-48    -496   
48     128    
112    -1680  
160    0      
-160   544    
1184   -448   
-1200  672    
832    32     
-320   0      
-448   -80    
208    496    
-272   208    
-848   80     
-16    -16    
-176   160    
32     -128   
144    256    
112    -576   
160    96     
-224   -32    
144    64     
-48    -160   
-352   -96    
48     -32    
48     -16    
-672   -848   
-96    -16    
1568   -704   
-1984  32     
496    272    
288    -1296  
-432   -384   
256    -528   
-144   272    
96     64     
-80    128    
-240   80     
240    64     
-64    32     
96     -272   
-128   64     
-176   -352   
224    -528   
272    -272   
-48    -128   
-16    -272   
64     160    
-592   -736   
416    -432   
384    224    
-752   -240   
464    -64    
-384   160    
-400   -16    
112    48     
288    496    
0      336    
-240   160    
256    -688   
-608   1232   
-560   320    
-128   -464   
-128   -576   
-272   -288   
-192   -256   
256    -256   
96     368    
-80    336    
-256   112    
336    48     
-736   192    
-192   416    
576    304    
-576   -16    
-672   -1168  
1296   -1088  
1728   848    
-528   -32    
-1120  432    
448    -1040  
160    -1184  
240    352    
-144   640    
-384   -304   
-96    432    
224    -144   
400    96     
0      96     
-416   -400   
-96    -384   
560    -208   
176    480    
-336   336    
-176   384    
304    848    
224    80     
-240   -368   
-176   224    
48     224    
-864   -352   
304    -160   
-16    1216   
-160   -144   
160    -816   
96     -80    
16     -144   
-560   -144   
0      -464   
240    -704   
112    64     
128    160    
80     -160   
-416   96     
96     112    
224    400    
-112   0      
-720   -384   
-48    544    
240    208    
16     80     
448    -368   
-384   656    
272    816    
-96    32     
112    -144   
-336   816    
1104   128    
-256   432    
-128   352    
272    112    
-112   176    
208    1248   
304    -672   
-400   -1504  
-112   208    
128    272    
0      -96    
-48    16     
-128   -416   
32     -80    
64     32     
-32    256    
-208   16     
32     -304   
-16    176    
144    464    
-512   32     
80     96     
80     288    
160    1120   
160    1600   
144    -80    
16     -432   
-400   48     
128    992    
-304   288    
-96    -192   
304    -832   
-16    -1216  
-64    -208   
464    480    
-96    480    
-272   144    
-288   416    
224    -80    
80     48     
-64    -192   
-288   560    
0      -48    
208    144    
96     -432   
-272   128    
-64    -48    
128    112    
384    704    
-752   880    
368    -608   
-192   448    
-416   16     
-160   128    
128    144    
96     -112   
-128   0      
160    256    
-96    128    
-256   0      
208    208    
-64    -96    
-208   240    
464    -80    
-592   -96    
-448   -640   
336    -32    
80     96     
-288   64     
176    144    
208    48     
0      80     
-608   -96    
368    192    
240    128    
-48    16     
-240   32     
-208   208    
656    1744   
1728   48     
-1456  16     
-160   -272   
1488   368    
-432   -192   
-672   240    
416    128    
-352   32     
-224   128    
288    128    
16     64     
-96    0      
-16    128    
336    32     
0      208    
-192   -48    
-336   48     
176    80     
-176   0      
-160   -240   
816    800    
1216   -32    
-1104  272    
80     -128   
0      96     
176    -80    
240    272    
-160   112    
-128   224    
-160   -16    
160    112    
0      -64    
-192   16     
336    176    
-128   48     
0      112    
-368   80     
448    32     
16     304    
-48    0      
96     -240   
-1488  208    
480    16     
1600   -208   
-192   -176   
-400   112    
-192   80     
240    -16    
400    224    
272    128    
-416   32     
-80    128    
496    -208   
-352   -432   
16     160    
-144   288    
320    112    
512    0      
144    416    
-688   176    
-208   368    
1200   96     
64     0      
-64    928    
-768   336    
352    -304   
0      112    
-592   -304   
896    4512   
848    1472   
-288   -704   
-192   -880   
-768   -192   
288    240    
16     160    
576    -416   
-48    -80    
-336   -288   
32     240    
320    64     
-288   192    
144    -112   
48     208    
-64    0      
-176   320    
336    -16    
-720   -128   
656    656    
544    -112   
-1008  304    
464    -192   
-736   32     
512    -1680  
160    48     
-272   128    
64     48     
112    80     
-16    -96    
336    -48    
-240   16     
16     320    
16     288    
-272   -16    
-64    16     
416    32     
-288   -192   
160    -96    
304    -176   
-80    96     
-32    144    
48     144    
272    -48    
-464   64     
-160   96     
352    288    
-160   -16    
-128   144    
384    96     
-48    304    
192    784    
64     -160   
-416   304    
416    -224   
-64    240    
16     -1168  
0      -96    
-160   -160   
368    -32    
96     128    
-128   0      
-32    -32    
240    224    
16     48     
-80    -64    
-80    80     
80     -288   
-16    -176   
-208   -128   
192    -32    
0      -608   
224    144    
80     -1200  
-80    304    
-288   272    
224    160    
96     -384   
48     -288   
-128   -16    
-592   -1136  
1504   -320   
-624   256    
-448   624    
608    -592   
-656   -656   
480    -528   
656    416    
-496   -64    
-288   128    
320    272    
560    384    
-272   304    
-144   0      
112    -320   
544    320    
-288   864    
-96    512    
128    432    
80     -256   
-64    96     
80     1504   
96     64     
-256   416    
512    -128   
-64    -192   
-128   -688   
-192   320    
464    416    
-176   0      
0      0      
32     48     
160    80     
48     192    
48     -432   
-144   240    
32     192    
-64    -16    
-32    -640   
144    -592   
48     -64    
16     -128   
0      128    
272    304    
-80    -2352  
64     -208   
80     -80    
-48    -16    
-48    208    
112    -224   
1056   16     
-2992  -304   
-64    -160   
1696   -816   
-976   -1936  
-672   -32    
752    -416   
-608   -512   
-432   -1312  
192    -448   
64     64     
-208   -608   
80     -32    
208    -560   
-224   -112   
32     80     
64     -592   
192    -1248  
96     304    
-80    48     
-400   -800   
1744   896    
-816   -976   
-1648  272    
1120   -144   
-336   -288   
-480   -112   
672    128    
128    -1648  
-448   -112   
-32    32     
112    -64    
32     -592   
-224   -112   
64     176    
-144   64     
192    -32    
96     -336   
-416   624    
432    880    
208    320    
-144   336    
96     560    
-16    -560   
-560   -1040  
544    -640   
-416   -720   
-656   -144   
560    -112   
-128   80     
240    -672   
288    160    
432    -192   
-848   0      
400    416    
-864   -80    
-272   512    
416    -816   
-736   -784   
0      -240   
-64    -800   
80     -192   
-64    -1104  
-416   -416   
48     -32    
192    128    
400    368    
-304   816    
-256   192    
432    -112   
-464   -1808  
-1504  48     
1136   -560   
-496   224    
-80    352    
80     -832   
-624   -512   
-512   -320   
272    -144   
352    304    
-256   -208   
-464   240    
416    400    
16     -656   
96     -288   
-96    -304   
16     -80    
-112   192    
128    -96    
-368   -560   
16     -560   
272    240    
-240   -960   
-720   192    
960    -288   
-576   128    
336    560    
-688   -1056  
16     -1648  
-192   -464   
-16    416    
176    80     
-592   -144   
48     -416   
-80    -16    
176    160    
-128   960    
176    -656   
-192   -256   
128    -560   
432    -736   
-288   -400   
-32    240    
32     -16    
240    -800   
-208   224    
32     -320   
-96    64     
160    304    
208    208    
-80    -1120  
-832   16     
464    -1008  
752    576    
-2096  80     
16     -944   
192    -672   
-400   -992   
-112   -576   
304    -464   
-96    -240   
-240   -192   
48     96     
240    352    
-224   320    
-496   0      
-32    16     
112    -64    
384    256    
-640   32     
-336   80     
304    32     
112    112    
-368   16     
32     -64    
48     -576   
64     -576   
-80    256    
-960   -112   
-128   -464   
336    800    
240    560    
-896   -304   
160    -16    
304    848    
-592   1488   
304    1024   
-960   912    
32     -128   
64     -64    
0      96     
-64    -272   
208    -80    
-336   96     
96     80     
-16    -304   
16     128    
-144   224    
64     -80    
-480   -384   
-192   -1296  
-464   512    
720    272    
-208   16     
-1392  192    
112    -160   
-96    0      
304    -96    
-528   80     
160    160    
-352   -16    
304    -128   
-16    -32    
-48    0      
-240   64     
48     176    
224    -192   
208    -16    
-480   0      
48     128    
-32    32     
-224   160    
-112   -112   
96     16     
-32    -80    
-80    -64    
-176   96     
32     144    
112    224    
-1760  32     
2784   848    
704    32     
-2096  -64    
1136   320    
720    -112   
-848   -224   
-352   -32    
352    -192   
-240   48     
-96    112    
0      -80    
-160   -80    
176    224    
208    -48    
-256   112    
16     176    
0      32     
-80    112    
-48    -32    
-160   -96    
496    784    
1264   32     
-1120  672    
-944   256    
800    -336   
64     -208   
-96    -32    
304    256    
96     16     
-512   128    
-256   48     
448    32     
16     -16    
-144   224    
112    -80    
0      256    
-592   -32    
32     48     
384    -192   
-368   112    
-448   -672   
-272   176    
496    112    
-480   256    
880    64     
-496   864    
-1136  592    
192    -816   
240    -144   
224    -160   
-784   576    
-480   -80    
288    -48    
368    16     
16     400    
-432   208    
-320   -224   
256    192    
-400   112    
16     0      
-48    96     
-16    -48    
-96    -48    
96     96     
-288   16     
32     16     
224    -64    
48     -208   
1584   4400   
-1136  2672   
-336   -320   
2128   -304   
-928   -224   
-288   416    
688    32     
-400   -208   
-272   16     
-192   32     
208    128    
272    48     
-208   144    
80     -16    
-304   80     
320    64     
176    0      
48     112    
-144   -128   
640    -368   
-304   -64    
80     16     
-192   80     
-576   -144   
80     -96    
560    256    
-256   -48    
-192   64     
16     -112   
336    96     
-208   32     
32     128    
144    144    
160    -176   
-416   -96    
48     -288   
128    -112   
96     -80    
-16    -48    
-48    64     
208    160    
-352   -80    
128    160    
96     -64    
128    208    
192    128    
-128   272    
304    208    
-272   160    
176    176    
288    -16    
-256   -832   
-464   96     
592    688    
304    944    
-608   736    
128    208    
160    32     
-192   32     
-48    -96    
224    -48    
-192   -1216  
-448   -320   
432    -304   
-176   -160   
336    -240   
-240   -112   
-240   -48    
80     -496   
288    -16    
-96    256    
-176   256    
48     64     
352    112    
-64    160    
-176   144    
-128   992    
288    704    
-80    -416   
-192   -272   
-144   -656   
672    -1344  
-912   640    
528    -480   
-336   64     
96     384    
272    -176   
32     -528   
-64    0      
48     304    
32     544    
64     -96    
64     176    
-16    144    
64     272    
112    192    
176    -48    
-160   752    
48     -32    
224    224    
-304   -224   
480    -464   
-272   224    
0      -208   
112    -960   
-128   464    
224    544    
-32    1312   
-16    464    
192    -32    
-272   112    
64     400    
-288   128    
208    0      
-96    80     
-144   -32    
-32    144    
352    -208   
80     112    
-128   -1312  
-80    64     
112    -16    
80     80     
240    128    
-224   432    
-208   144    
336    -160   
208    -160   
-128   80     
-384   240    
608    -752   
-2384  -96    
1392   80     
-368   144    
-528   -528   
224    16     
-192   -2432  
-32    -576   
592    128    
48     1008   
-208   -272   
112    -288   
-16    208    
128    48     
-64    32     
16     -288   
-80    -96    
288    -304   
192    384    
-288   -144   
464    1520   
-416   -944   
-832   672    
944    -272   
-640   16     
144    -480   
16     -528   
208    -1648  
-480   -1280  
-32    64     
80     288    
32     736    
288    16     
-448   352    
416    336    
480    192    
-432   448    
368    1216   
208    -288   
-96    64     
-80    16     
176    208    
-144   544    
-240   -1744  
-240   -976   
784    592    
-128   2016   
-400   592    
800    960    
-288   -48    
-512   368    
464    -416   
192    448    
32     80     
-432   672    
112    752    
240    -320   
288    -208   
-672   -304   
-160   0      
160    -544   
-96    48     
-96    -880   
-224   -224   
496    192    
-432   208    
32     160    
32     992    
192    208    
-160   272    
-32    2224   
992    384    
-912   112    
-384   -608   
1248   -576   
-112   -736   
-304   368    
32     144    
304    -32    
272    640    
-288   144    
16     -384   
-16    -176   
144    80     
112    -1136  
-224   16     
-352   -176   
272    -48    
-432   -256   
-128   -416   
-128   -320   
160    48     
-736   -112   
480    1744   
1280   224    
-944   512    
0      -704   
304    -448   
480    -464   
-704   -672   
176    -224   
320    -48    
80     0      
-1184  -112   
-16    -432   
416    304    
96     -464   
-96    -128   
-48    -656   
352    -432   
160    -272   
-256   -304   
112    -160   
-224   -224   
240    -128   
-176   32     
416    -64    
-208   96     
-224   96     
240    0      
96     32     
0      976    
848    384    
176    -336   
-816   -176   
576    -3888  
192    -384   
0      -432   
-496   192    
160    304    
192    192    
-96    0      
80     144    
-112   64     
-144   -32    
512    272    
80     -160   
-288   -560   
16     144    
336    208    
32     -304   
16     -96    
96     48     
-336   208    
240    0      
160    32     
-176   -176   
80     -160   
-16    160    
48     0      
-624   1920   
2704   -368   
-1248  304    
-352   -368   
544    -32    
144    -576   
-304   160    
-176   -2160  
144    -160   
160    144    
176    -192   
-80    128    
48     80     
-272   256    
224    -272   
0      432    
368    -400   
-1520  -80    
64     96     
240    -96    
-496   -864   
640    -272   
96     -384   
-896   48     
864    176    
-64    -192   
0      -272   
-112   16     
256    -16    
192    160    
-96    -48    
160    80     
-224   32     
-48    -64    
448    -176   
-64    -160   
-96    144    
592    -208   
-272   16     
-160   16     
368    -32    
192    80     
-96    -32    
-304   -288   
32     32     
224    -128   
-192   144    
48     48     
-32    -144   
0      -288   
-672   -240   
144    320    
192    -144   
512    288    
-1456  -416   
32     144    
448    -192   
-592   192    
80     0      
336    -16    
-128   -160   
-80    -192   
-32    -128   
-416   -192   
384    32     
-112   -96    
0      -48    
288    -400   
-112   -80    
-80    48     
-320   -544   
48     208    
-80    -192   
-704   -112   
1376   416    
-736   144    
-480   -32    
336    240    
608    16     
-224   144    
-1216  -208   
352    64     
-320   0      
-720   -64    
-176   96     
128    16     
-192   -144   
-352   0      
80     16     
128    -144   
-112   -352   
864    320    
16     -192   
176    32     
704    144    
-640   64     
-880   -560   
-272   208    
816    32     
-192   0      
-192   -80    
64     -112   
-592   96     
-32    128    
384    -112   
256    208    
-144   -32    
480    -272   
-192   -96    
448    80     
-80    -96    
-336   176    
256    80     
208    112    
-32    480    
-112   32     
-400   48     
240    144    
400    -416   
-1456  2960   
1168   224    
-992   -432   
-512   -224   
976    -240   
-112   144    
-544   128    
-528   288    
592    176    
-32    0      
-480   -48    
64     48     
-64    -32    
96     192    
192    16     
-592   224    
-144   48     
48     32     
432    -128   
-912   -1200  
96     -1360  
80     -368   
-128   0      
640    80     
-384   -608   
-688   144    
304    32     
272    272    
-176   0      
-256   -272   
176    208    
48     160    
-720   16     
576    160    
-320   160    
80     -672   
48     -32    
-48    64     
-256   128    
160    176    
48     -16    
-176   176    
-128   -16    
-16    128    
720    384    
-592   208    
-240   256    
240    128    
48     352    
-832   880    
-48    688    
304    1344   
1248   -80    
-656   240    
-368   512    
304    400    
-64    224    
224    720    
-48    1088   
-128   -208   
-336   -832   
144    -176   
-128   80     
0      96     
-320   208    
-112   16     
192    336    
-128   672    
96     -16    
0      256    
-160   -64    
16     112    
-32    80     
16     -240   
-224   -96    
-80    32     
128    -240   
-384   -64    
-160   -16    
176    -144   
-144   -336   
272    -992   
-96    80     
160    -160   
112    -64    
32     160    
-80    144    
80     176    
-64    112    
32     256    
-208   176    
-16    -64    
160    16     
176    32     
-240   80     
-208   16     
368    -80    
48     192    
0      112    
-80    -32    
368    -208   
-1120  48     
480    176    
256    448    
-48    336    
-128   -64    
128    496    
-400   256    
224    -368   
448    -144   
-320   64     
-352   144    
288    176    
192    112    
-112   96     
-112   192    
64     -48    
-16    128    
-112   32     
240    32     
-384   144    
-48    112    
-64    -64    
32     -16    
320    -96    
-208   16     
256    96     
-320   -256   
-16    288    
-304   -80    
1216   -240   
1024   160    
-1360  32     
480    -672   
416    -368   
-16    80     
208    -624   
-704   -960   
128    1040   
-16    752    
304    -176   
80     -80    
-256   352    
96     16     
288    176    
-112   48     
-160   448    
0      -320   
48     368    
48     0      
-656   320    
2176   208    
-592   -16    
-816   16     
1136   -544   
368    -1440  
-1040  -1104  
432    -464   
240    -864   
-176   -624   
208    -96    
-112   176    
-144   704    
400    352    
-96    0      
-208   -48    
-160   -416   
64     -496   
320    96     
-368   128    
16     144    
544    48     
48     96     
-1104  -1968  
-208   -640   
736    592    
64     816    
464    560    
176    256    
-832   528    
16     -128   
320    16     
368    80     
-384   352    
32     -576   
784    -1024  
-256   -336   
544    -16    
-352   256    
-64    96     
320    80     
16     -368   
-240   80     
80     224    
80     160    
224    16     
384    -416   
-736   -960   
-192   -656   
-480   944    
176    496    
-304   -16    
-448   -320   
1440   992    
-752   400    
-368   224    
720    -320   
64     384    
-32    192    
32     272    
-272   -112   
336    32     
96     16     
0      144    
240    -176   
-144   80     
224    -32    
48     784    
80     -720   
-336   -752   
64     80     
160    -16    
-480   16     
256    -32    
112    176    
112    400    
-96    -160   
-496   -544   
432    -576   
-336   16     
16     -1184  
-160   16     
-48    320    
208    208    
-176   -80    
224    96     
-16    -16    
-16    32     
208    80     
176    -16    
-368   208    
32     -16    
-176   176    
-144   -432   
128    80     
48     -384   
-80    96     
128    -656   
-448   -112   
352    160    
32     -672   
-768   -176   
832    368    
496    -288   
-400   -256   
272    144    
80     -336   
240    -304   
-240   -144   
-176   80     
224    -528   
-80    -64    
96     -560   
64     128    
0      -416   
-464   0      
304    448    
112    -48    
112    96     
-112   -576   
144    128    
0      -80    
-32    16     
176    -32    
48     256    
-128   -288   
32     176    
144    -64    
-128   64     
816    2080   
2160   192    
-1840  -80    
560    -352   
608    224    
-352   -112   
-192   -32    
208    -304   
-224   336    
208    -448   
240    96     
-16    16     
-256   160    
400    80     
400    272    
-624   -160   
128    -2464  
272    0      
-48    -48    
-16    -400   
-304   496    
1152   -272   
-320   -720   
-992   400    
976    -80    
-64    48     
-320   112    
64     -128   
256    16     
-96    -464   
304    -48    
-32    160    
-176   -48    
48     80     
-176   -496   
-256   320    
512    -224   
32     16     
48     -2320  
-288   112    
416    112    
-112   240    
336    -528   
-352   48     
480    -144   
-192   -32    
160    80     
192    32     
-688   -176   
-496   2640   
1952   224    
-1248  80     
-304   -464   
192    -112   
704    192    
-112   -2160  
0      128    
176    -512   
-160   208    
-112   -112   
160    112    
32     -80    
-128   -128   
256    80     
-144   48     
-320   -32    
64     144    
320    16     
208    -160   
-48    48     
-592   -784   
1744   -192   
-208   -400   
-624   368    
656    192    
-128   -16    
128    528    
-624   -64    
-352   -96    
560    64     
32     -96    
-128   -16    
-96    32     
128    -512   
256    128    
144    -592   
-112   -224   
352    -1136  
0      208    
-96    -96    
64     -80    
-672   32     
592    -32    
-32    0      
-272   -208   
-256   128    
720    -304   
-1456  160    
0      -160   
320    80     
-48    -320   
-384   176    
352    -1584  
-208   64     
16     -336   
64     -16    
320    208    
-352   -320   
80     16     
448    16     
-512   -64    
0      16     
192    128    
176    -240   
32     -288   
-48    -240   
224    160    
432    656    
-1120  544    
944    1392   
1168   -544   
-2416  64     
80     -144   
1296   48     
-288   128    
-576   -192   
48     192    
-16    48     
496    96     
-128   -16    
-368   -272   
-16    32     
432    -400   
400    128    
-752   -48    
0      144    
48     -128   
240    800    
-32    16     
-192   -64    
96     -352   
-80    80     
-624   0      
144    -96    
128    112    
-112   -32    
272    320    
320    64     
-352   -224   
-176   624    
320    -208   
192    -176   
-32    96     
-288   224    
272    -144   
-416   96     
496    -784   
-304   -656   
-176   -528   
160    -64    
-464   -176   
-176   128    
-192   368    
-160   32     
-704   -944   
16     -1040  
192    928    
-752   608    
-144   -464   
400    880    
-784   32     
288    848    
208    1232   
-416   528    
208    -32    
96     -336   
-80    288    
32     -496   
-176   -48    
208    80     
-240   32     
-272   112    
-320   -64    
-96    -64    
400    -80    
-192   64     
-128   -96    
64     240    
-16    -256   
-96    112    
-48    -256   
-224   -32    
128    -176   
240    144    
-48    -16    
-192   16     
-176   -128   
-224   48     
288    -16    
432    192    
-1360  352    
464    -80    
112    320    
-32    -432   
-240   96     
48     688    
0      368    
128    -64    
-224   -80    
-16    32     
-272   16     
16     32     
-112   -16    
32     80     
-336   352    
-96    384    
-1008  -112   
144    -64    
-112   -48    
-416   880    
976    -256   
-864   80     
64     -128   
80     -16    
-32    192    
-96    -528   
-80    -272   
-80    256    
-64    192    
224    -112   
-32    -96    
-640   -48    
96     240    
96     16     
-144   -304   
-304   208    
0      16     
80     -240   
32     -128   
-96    64     
48     -160   
48     -32    
160    -192   
-160   48     
112    -192   
-96    -192   
176    -64    
-336   512    
816    -48    
-2368  352    
160    -128   
176    992    
160    272    
-336   416    
-144   320    
192    -896   
608    -1760  
-384   512    
-224   832    
64     96     
-64    -464   
288    176    
-112   112    
-800   32     
64     -144   
272    528    
-112   544    
-16    448    
-176   -320   
1456   0      
-1696  -224   
304    -416   
592    -336   
-192   1184   
-512   1664   
-64    1504   
272    304    
-480   16     
48     -32    
160    32     
-64    32     
-448   48     
352    224    
-64    -64    
-224   0      
-32    -16    
192    -96    
-16    144    
-176   320    
48     288    
-32    464    
-832   -160   
-336   -656   
608    -400   
96     288    
-368   -112   
112    112    
-144   176    
432    -176   
-176   240    
-160   -144   
480    -80    
192    112    
-192   -128   
-1008  -128   
864    -240   
352    96     
-448   176    
16     112    
256    -80    
144    240    
240    -272   
-512   464    
288    32     
16     112    
112    -16    
320    976    
-1632  -448   
1136   -432   
896    -208   
-1232  16     
-528   272    
432    16     
448    -272   
-608   16     
-208   144    
144    128    
96     272    
-224   32     
-48    -32    
-176   -32    
-144   48     
352    96     
144    64     
-112   80     
64     32     
-192   480    
640    128    
-752   432    
176    -240   
96     -16    
-16    160    
-496   -192   
80     64     
208    112    
-80    -240   
208    -32    
-256   -112   
320    64     
-176   160    
-192   -48    
-96    -64    
16     80     
256    80     
-448   416    
-352   96     
448    288    
-96    -96    
-224   16     
400    64     
-320   0      
240    128    
-48    16     
-64    16     
-624   -304   
208    -160   
432    0      
-624   16     
128    64     
512    576    
688    144    
-640   -736   
48     -80    
416    64     
-368   384    
752    240    
-96    352    
-16    208    
-48    144    
0      16     
112    -224   
64     272    
112    256    
16     368    
-80    64     
160    192    
320    224    
-48    128    
-432   176    
160    192    
176    -96    
32     320    
-48    -224   
48     96     
80     -160   
-96    -384   
96     -144   
48     -2352  
-560   976    
2128   -976   
-992   -16    
-560   80     
560    -112   
272    384    
-80    -160   
-176   -480   
320    400    
-80    80     
48     -64    
-80    48     
-32    -96    
208    -16    
176    -416   
-208   288    
-16    32     
256    96     
-64    0      
-80    16     
-32    -1168  
-144   336    
592    144    
-704   144    
320    176    
272    16     
-496   96     
96     -272   
192    304    
320    112    
32     64     
-432   -1216  
144    128    
528    560    
-272   320    
-208   112    
368    96     
-464   0      
672    64     
-464   64     
-32    -48    
224    176    
0      -96    
128    240    
-80    -368   
-336   256    
448    -880   
32     64     
-256   -912   
912    1248   
-1072  272    
-1296  448    
1568   -176   
-96    -32    
-816   -96    
592    160    
160    -64    
-288   -64    
464    48     
0      -448   
-240   80     
32     -304   
464    240    
-352   48     
-128   368    
192    -64    
-80    96     
48     32     
-112   176    
48     112    
448    480    
-1584  -208   
-64    432    
896    464    
-128   -160   
48     144    
-304   208    
-144   224    
64     -208   
0      64     
80     64     
-80    144    
-16    176    
176    64     
160    -16    
-336   -528   
32     -16    
592    -288   
-160   192    
-192   -272   
272    -144   
752    -704   
-720   704    
96     -560   
416    -16    
-688   464    
-80    -416   
544    32     
304    -160   
-336   -352   
-64    0      
288    192    
112    -128   
-208   -32    
432    320    
384    -16    
-976   -32    
304    80     
-496   32     
304    -544   
160    208    
-96    -144   
256    128    
-592   -48    
80     -752   
-608   64     
192    -272   
144    -112   
-304   -144   
1216   -144   
-2272  -208   
1376   496    
1248   320    
-1728  -80    
-112   -192   
208    -192   
16     304    
-400   128    
192    -32    
592    -112   
-272   272    
-80    224    
32     48     
-96    -1008  
544    -16    
112    -624   
-512   -176   
288    -608   
-32    -720   
32     -800   
-144   -32    
-96    192    
496    -32    
-64    512    
-48    320    
-64    -240   
-80    -32    
96     -352   
160    -192   
-192   512    
64     -1072  
-272   -528   
176    -224   
176    80     
80     -352   
-544   -672   
320    -768   
16     -288   
-224   128    
32     -160   
-896   32     
176    -304   
128    0      
80     992    
48     752    
-240   -960   
496    1088   
-160   -16    
48     256    
-256   -192   
480    832    
128    384    
-384   416    
176    656    
512    736    
-64    528    
-624   -496   
256    -992   
160    -16    
160    -128   
-96    -544   
-336   224    
224    -688   
144    384    
-192   -16    
0      160    
192    224    
-288   80     
384    -144   
-208   224    
320    16     
-224   80     
-544   -144   
224    64     
-48    112    
16     48     
-32    352    
288    -256   
96     80     
-224   -432   
640    -864   
-160   464    
720    -352   
-528   160    
-128   -80    
288    -528   
112    -144   
-96    80     
0      32     
-128   96     
160    -208   
144    -112   
-80    -496   
-96    64     
32     -128   
48     -384   
16     -240   
128    0      
-176   272    
-128   -224   
144    -128   
-112   64     
48     352    
16     176    
96     -416   
336    -800   
-448   -32    
128    -64    
304    272    
-208   112    
-192   208    
96     0      
-144   -32    
-32    -192   
208    224    
224    -384   
-368   -128   
-224   304    
144    528    
688    -656   
-176   176    
-336   672    
-528   -80    
-352   -176   
-320   -144   
-1584  -160   
-48    0      
640    -176   
-160   -1024  
2272   -784   
-1280  1072   
-464   -336   
528    1568   
1616   -640   
-2320  32     
160    -848   
1392   -416   
-752   -224   
-368   -16    
464    112    
-192   -128   
-224   -96    
-704   -208   
208    -208   
0      -16    
-112   128    
-64    16     
-64    112    
-240   -128   
-752   -432   
1392   -512   
-32    -624   
-1392  -96    
944    256    
-96    -512   
-640   160    
208    64     
32     -80    
160    64     
-352   32     
-48    -16    
-80    -144   
-480   80     
544    -16    
96     48     
-576   -400   
96     64     
192    144    
-176   144    
352    640    
-448   -64    
-432   -96    
48     240    
48     208    
-464   -112   
-64    192    
-896   -208   
-112   -64    
288    -192   
160    304    
-240   272    
608    208    
-208   128    
-192   -16    
-240   -96    
-64    240    
144    -304   
-464   -176   
144    176    
160    48     
-80    16     
-848   -176   
-192   -48    
256    672    
1152   0      
-816   32     
-192   224    
96     1840   
64     3424   
64     640    
-1072  -688   
288    -512   
896    336    
-96    -160   
-1072  144    
496    16     
-176   32     
0      176    
80     -80    
-432   -16    
304    -32    
160    16     
-240   -48    
-192   96     
384    80     
64     80     
-128   -288   
-1232  -96    
1120   -240   
-608   112    
528    -48    
320    48     
-288   144    
-1088  192    
816    -1088  
-304   16     
-368   432    
384    -80    
-240   192    
80     -16    
-32    16     
0      -128   
-512   -160   
368    -48    
96     16     
-128   160    
-288   -80    
96     64     
-464   -96    
80     -16    
-48    320    
-96    336    
-352   208    
144    144    
288    -48    
-304   128    
-160   -48    
176    32     
0      -32    
128    528    
1008   128    
-960   0      
400    -176   
240    64     
-304   576    
-368   640    
464    384    
-160   128    
-64    112    
144    -48    
-432   144    
16     288    
336    64     
144    -928   
-736   -112   
256    496    
-32    -448   
-80    192    
192    112    
-304   160    
32     -48    
176    80     
64     -128   
-144   224    
144    -80    
-96    -384   
48     224    
16     240    
-240   1392   
2160   -720   
-1136  288    
-624   -64    
704    -48    
208    224    
-320   -624   
-400   496    
256    -64    
112    -32    
192    48     
-128   32     
-128   128    
-80    32     
480    -624   
-272   464    
-32    240    
-144   -336   
112    -368   
48     -32    
-544   -688   
688    -32    
464    368    
-992   144    
416    288    
400    96     
-176   160    
-432   -144   
304    -160   
144    -112   
64     112    
-32    64     
-112   352    
-96    112    
192    48     
176    -16    
-576   -128   
320    112    
80     160    
96     -16    
0      32     
-96    -16    
112    80     
272    48     
-368   -64    
-32    144    
144    48     
128    80     
0      208    
1328   -384   
-3120  1360   
-544   592    
2176   -288   
-1632  -1008  
144    304    
1136   816    
-384   512    
-304   224    
32     96     
416    80     
80     304    
-480   160    
16     -640   
16     160    
208    -64    
-112   48     
144    0      
208    80     
-32    -32    
112    208    
-624   -608   
944    -176   
352    -928   
-2112  -96    
528    320    
416    -672   
-304   -192   
48     0      
-160   224    
832    -272   
-16    80     
-368   48     
256    192    
112    176    
-224   112    
128    32     
-256   432    
128    -16    
144    -32    
64     -416   
-96    -48    
576    0      
-640   432    
816    -656   
-720   -640   
192    1136   
1280   -336   
-464   -176   
-256   304    
400    16     
96     32     
144    -80    
64     592    
-464   272    
-432   -112   
944    288    
-592   896    
-368   -80    
400    -336   
352    -224   
-128   96     
-368   -944   
400    112    
480    608    
-16    400    
-848   80     
496    144    
464    -32    
-96    80     
1200   2304   
-1536  832    
-304   304    
1520   -1136  
-320   -480   
-1120  -1376  
64     -432   
1168   -16    
-400   672    
-352   320    
-96    -576   
608    544    
96     -272   
-144   176    
0      -48    
-112   -480   
16     -384   
-64    352    
160    32     
160    288    
-16    48     
-176   -224   
64     -592   
-16    0      
160    128    
272    944    
-16    176    
-416   -784   
288    96     
32     320    
-416   -464   
144    256    
496    176    
-384   -144   
16     -560   
448    352    
-64    368    
-288   -752   
-160   128    
320    240    
-80    -128   
112    -176   
-256   48     
-80    -80    
-16    -272   
256    432    
80     80     
-352   -640   
32     -928   
320    -160   
-208   -240   
336    -128   
-656   -656   
16     -1392  
-144   -1456  
-64    -176   
-80    -1168  
-16    352    
304    768    
-240   -176   
-80    80     
96     -224   
-32    160    
64     -128   
128    256    
48     576    
-448   464    
-144   -1152  
-176   -352   
64     416    
272    -1504  
-112   112    
16     -528   
80     48     
224    -432   
-96    -976   
0      -768   
-672   -1616  
192    240    
416    256    
336    384    
-784   928    
304    -368   
32     -976   
480    -736   
192    -336   
48     112    
-192   -720   
32     -464   
-160   -688   
128    -416   
-64    -416   
0      -288   
80     -96    
-16    -112   
-16    -240   
-32    -224   
-160   -304   
192    -224   
272    64     
-112   -976   
-624   -160   
944    592    
-112   -160   
-864   -512   
368    -64    
128    496    
-128   -208   
0      224    
224    -464   
-128   0      
-80    80     
-48    0      
256    16     
288    -144   
-416   -192   
32     -144   
0      128    
112    16     
160    -160   
80     -240   
-352   -272   
16     -80    
-240   -288   
208    112    
176    0      
-48    -272   
16     -64    
112    -192   
-800   32     
1136   432    
2976   288    
-1584  -208   
-1280  -304   
1456   272    
288    32     
-736   272    
-384   -432   
192    -144   
-96    -176   
-48    64     
320    -544   
-144   240    
-544   -1568  
512    240    
96     16     
-240   -176   
-32    -144   
256    -208   
-160   -16    
352    112    
-1984  368    
752    272    
-1184  -80    
-336   -208   
304    32     
-304   -176   
176    528    
-32    -624   
-288   64     
240    -16    
16     -64    
-64    32     
64     -240   
208    336    
464    -128   
-496   -320   
192    -640   
-336   -256   
240    -96    
-144   -64    
176    512    
608    48     
-80    -464   
256    368    
-32    96     
-16    432    
-816   -48    
368    192    
560    -112   
-128   -176   
-688   112    
384    208    
48     -96    
-96    -288   
624    -816   
-432   -672   
160    128    
288    -496   
256    176    
-32    320    
-576   320    
-16    48     
480    -80    
-336   -464   
-224   16     
320    32     
-768   -16    
1040   1088   
-1168  -2160  
-2080  -688   
1184   96     
848    272    
-336   304    
-912   160    
-48    224    
832    -48    
-240   -144   
-16    -176   
16     -96    
32     -256   
-96    -272   
240    192    
-256   48     
-112   -128   
384    112    
-720   -128   
304    624    
-288   -208   
-208   560    
688    -192   
-784   -16    
-128   64     
-96    64     
-480   -144   
-176   224    
304    -240   
-480   16     
80     -352   
-384   -96    
544    -112   
-368   -16    
224    48     
-112   160    
-80    96     
-208   -176   
0      64     
272    96     
48     64     
-208   -32    
-272   160    
208    -48    
0      -144   
-32    -96    
32     -128   
80     112    
80     96     
-512   80     
352    0      
-112   -64    
32     384    
-1184  256    
272    -192   
-64    400    
560    -32    
-592   -128   
352    -336   
96     -32    
-48    160    
144    0      
-208   16     
32     -64    
208    192    
112    -64    
-336   -16    
80     224    
176    -128   
0      -464   
-48    160    
-208   16     
-272   -208   
-32    -192   
-704   16     
-16    240    
192    -496   
-160   112    
-32    272    
288    160    
-64    -64    
432    -560   
-1312  1664   
1424   -160   
32     736    
256    -656   
-624   64     
416    960    
-448   864    
16     -432   
176    -160   
-160   64     
-80    144    
240    -192   
-160   96     
-272   -384   
256    -256   
-16    176    
-16    -128   
144    128    
-112   -16    
-384   -672   
624    -800   
-832   112    
320    -320   
-256   -272   
-512   -672   
16     320    
-16    0      
240    -240   
-80    144    
-400   192    
-400   464    
704    -160   
-272   -48    
-208   -64    
-144   -192   
64     -208   
304    224    
-512   384    
-144   320    
-144   48     
48     128    
-240   16     
-16    128    
64     128    
144    16     
144    48     
-208   192    
-128   -112   
432    304    
-1248  1408   
1376   640    
-544   -48    
176    32     
432    -80    
-672   160    
-224   -80    
176    128    
80     -352   
-224   -160   
-144   -192   
304    32     
-288   -48    
96     208    
336    -192   
-208   64     
16     112    
272    16     
-192   -80    
80     80     
-144   0      
1168   304    
-2096  -336   
688    -896   
960    176    
-1264  656    
-592   -448   
720    -992   
304    -416   
-880   -128   
80     80     
112    -64    
128    192    
-224   48     
-80    224    
224    16     
-96    176    
368    -400   
-576   -352   
176    -192   
32     112    
-16    384    
-320   -48    
528    160    
-432   144    
-288   1488   
864    112    
240    -304   
-208   -144   
160    240    
-368   32     
176    432    
-160   528    
400    848    
880    400    
-112   -272   
0      880    
-144   624    
-272   1088   
336    112    
-256   0      
-224   -144   
288    432    
144    -128   
-192   336    
320    288    
352    128    
0      -16    
-144   96     
-32    272    
-240   2464   
752    480    
-1104  -240   
-688   -336   
1440   -240   
-400   -976   
-576   -1568  
-224   576    
512    176    
208    192    
-352   -224   
-272   240    
336    144    
176    -128   
112    -128   
-128   96     
-32    352    
352    240    
-48    96     
-80    -320   
128    64     
96     240    
-704   16     
672    -240   
32     -80    
-96    -288   
-80    -128   
-240   -400   
160    704    
304    224    
-224   -192   
48     -176   
0      -64    
112    208    
208    336    
-48    -432   
-224   -800   
208    -64    
80     -992   
-592   -2704  
112    -480   
272    688    
192    -96    
-816   -480   
224    -192   
160    144    
-160   -1168  
-304   192    
352    736    
-32    -240   
144    -432   
-1120  528    
944    928    
720    976    
-944   -640   
320    -64    
80     304    
48     -320   
64     480    
192    1424   
112    240    
32     -240   
-112   224    
112    528    
-32    -224   
-48    -352   
112    128    
-128   368    
176    880    
64     -160   
96     -16    
-112   -96    
-32    -48    
336    848    
-16    832    
-48    416    
336    272    
-784   -272   
-160   224    
208    -672   
976    128    
-336   224    
-768   -1184  
128    1184   
352    1344   
48     496    
-96    -320   
-32    208    
-176   -480   
112    -496   
144    -64    
-80    288    
80     480    
-80    624    
240    176    
-352   160    
-144   144    
144    -208   
224    176    
-112   -128   
-512   -880   
640    -1632  
0      400    
-272   -2784  
512    80     
-352   208    
-176   -144   
48     -400   
192    384    
-208   224    
96     160    
272    32     
-192   -48    
208    112    
80     240    
-240   272    
-96    -176   
224    176    
48     -208   
-128   48     
240    128    
-336   112    
160    224    
-32    -32    
-224   128    
288    -224   
-16    176    
-80    -464   
-96    368    
-592   -352   
544    192    
432    -672   
-608   48     
-416   -96    
704    64     
144    -80    
-384   16     
128    96     
160    -64    
-224   176    
272    -64    
-224   96     
528    32     
-352   112    
144    -112   
64     80     
-560   16     
304    32     
176    -688   
-208   48     
-160   112    
1968   -2080  
-928   368    
336    32     
272    -272   
-400   -48    
48     -192   
272    16     
-80    240    
-112   -32    
-272   96     
256    -112   
192    32     
-80    32     
128    -384   
160    288    
-64    208    
176    -32    
-96    -448   
-96    -656   
-384   -80    
128    -144   
32     304    
-1200  -528   
-464   -64    
224    -704   
-752   -400   
64     -192   
432    208    
-32    192    
-544   304    
-272   -112   
256    -288   
-224   -128   
-128   -144   
-368   -160   
64     -288   
-208   -320   
352    -304   
-320   -176   
-208   0      
112    -80    
352    32     
144    336    
-592   240    
-336   -32    
624    -16    
-192   -256   
784    6048   
-384   2368   
-272   -992   
256    -800   
-592   -288   
16     -176   
448    -512   
-144   -560   
-352   208    
-384   -64    
720    224    
272    0      
-640   -48    
-272   -32    
656    -48    
-16    0      
-128   -128   
-496   -32    
-208   -608   
608    -48    
48     -480   
-176   -224   
32     -96    
-496   -128   
112    -256   
128    192    
-192   -80    
-48    272    
512    48     
-272   192    
-256   -176   
240    144    
-48    -64    
256    144    
-1088  176    
320    176    
48     32     
288    -496   
-64    -112   
64     -320   
304    144    
-208   64     
0      96     
272    -32    
-144   -272   
16     16     
272    32     
80     -144   
-480   -160   
384    -96    
48     -112   
-400   -992   
-96    -208   
80     -32    
-544   -96    
688    192    
224    736    
-736   1104   
240    432    
240    -256   
-128   48     
-96    48     
-112   16     
160    -48    
-192   -64    
0      -176   
-112   80     
160    -240   
64     -48    
-176   -496   
192    -208   
-592   192    
192    32     
112    240    
-32    32     
-240   -448   
-16    -32    
128    -96    
48     -112   
-96    96     
144    1216   
-672   -1344  
80     96     
1120   -688   
-464   -32    
-304   -224   
32     -256   
256    -272   
-128   -464   
-208   -224   
32     256    
208    -16    
0      80     
-176   -208   
16     -304   
256    64     
80     0      
-256   -192   
128    448    
-176   -256   
-288   96     
-64    -384   
-160   672    
256    656    
-608   -224   
16     -240   
-64    368    
-112   0      
128    32     
-16    -96    
-368   -592   
-80    368    
-112   -48    
-144   704    
-176   -192   
-288   -64    
432    160    
16     480    
-80    -144   
-208   -160   
-96    288    
-368   -32    
128    64     
240    64     
-144   336    
-224   -80    
0      48     
208    -80    
432    624    
-496   800    
-1456  544    
2464   -624   
176    -464   
-1680  1184   
1088   416    
416    704    
-800   384    
-192   -320   
-576   176    
112    16     
-160   80     
144    176    
0      192    
32     272    
16     -224   
-48    48     
96     176    
-208   -176   
160    -64    
-144   -48    
512    992    
-1264  -1024  
-1328  528    
1216   736    
96     224    
-624   -480   
192    736    
480    1872   
-320   1776   
384    -560   
-240   -928   
-336   160    
432    496    
80     -512   
-304   -608   
48     -176   
-112   -64    
352    -128   
80     192    
-160   -80    
0      -336   
0      192    
-224   -832   
320    480    
-496   -192   
-736   0      
1344   608    
192    1520   
-112   656    
-144   304    
-112   256    
512    576    
-880   400    
-496   -528   
-96    -432   
-160   -144   
144    -880   
-1248  -896   
352    -352   
0      112    
32     -304   
-368   32     
-96    960    
320    352    
144    928    
48     336    
-80    -48    
160    -112   
-272   0      
-160   192    
-768   1856   
1408   272    
-464   -80    
-736   416    
656    1264   
384    368    
-304   -592   
-176   208    
-48    96     
160    336    
80     -336   
-384   -384   
128    -208   
80     752    
-128   -16    
-272   -240   
-96    96     
96     -160   
96     240    
64     432    
-16    240    
-160   -64    
-512   80     
816    -608   
-1008  -512   
272    -496   
-224   -320   
-176   -208   
48     -128   
384    1408   
64     848    
176    96     
-96    -144   
-64    0      
-288   -352   
400    48     
32     176    
-224   -128   
48     288    
128    48     
-64    224    
-256   -272   
48     -80    
240    -768   
-944   -704   
64     -352   
320    -224   
-256   -432   
-112   -256   
16     112    
176    -528   
-1088  -16    
720    1152   
720    976    
-288   1088   
16     864    
240    736    
-32    736    
48     976    
-576   496    
256    288    
416    -160   
-336   -96    
-48    64     
48     176    
352    48     
-416   176    
224    112    
-384   64     
208    -160   
256    32     
-240   -160   
-112   16     
144    16     
336    800    
-272   1136   
32     384    
-48    -224   
-128   -240   
128    560    
48     -1632  
-272   544    
1120   96     
-240   -16    
-448   304    
96     -496   
224    240    
-32    -128   
-272   176    
144    112    
0      400    
144    -32    
144    48     
-528   352    
320    128    
-64    368    
-128   80     
-16    -112   
160    112    
-160   176    
-528   -656   
480    -16    
640    16     
-1248  176    
1024   32     
256    160    
-176   176    
-368   352    
464    -96    
160    -176   
-208   -16    
128    -192   
48     16     
0      208    
112    96     
176    272    
-96    -96    
48     -176   
128    48     
-112   -1120  
-160   144    
432    112    
80     256    
-160   0      
-224   224    
144    96     
320    16     
-352   0      
144    80     
-1312  96     
1536   944    
176    -208   
-1056  -512   
432    352    
272    -480   
-272   -176   
-192   -144   
96     16     
-208   64     
272    144    
128    48     
32     96     
-160   -240   
-592   32     
800    -80    
-304   80     
96     48     
-16    16     
160    64     
32     -32    
-576   -864   
-128   304    
1728   -448   
-2208  -96    
800    352    
768    -224   
-816   544    
-32    256    
96     112    
176    -32    
128    176    
-64    96     
-96    -96    
144    96     
208    -240   
-80    304    
-208   -1312  
-160   96     
624    528    
-144   80     
-64    288    
-576   176    
288    -16    
160    0      
-48    -736   
-592   -832   
16     432    
544    -272   
-464   -128   
176    -272   
320    112    
64     -320   
-32    160    
320    -2064  
-400   48     
-96    -48    
16     -576   
-64    -144   
144    464    
-368   96     
80     -32    
272    16     
-416   48     
96     240    
-16    176    
304    96     
192    -96    
-336   112    
-1312  -2544  
1840   -1792  
1168   -240   
-1792  48     
-352   560    
1136   -64    
-288   352    
64     -480   
96     608    
-144   -288   
-112   288    
688    -304   
-352   192    
-160   -592   
288    96     
304    -384   
-320   144    
-32    16     
-96    48     
-16    240    
640    384    
-496   656    
80     -160   
128    208    
-112   -256   
16     256    
112    -336   
-352   384    
816    -112   
-224   112    
-48    -80    
304    144    
-48    48     
-416   -1856  
464    -144   
-368   -272   
16     -736   
208    112    
-208   -1776  
320    -160   
-64    144    
32     -224   
-128   -288   
-96    -144   
368    288    
400    864    
-672   -752   
-144   -640   
272    -448   
-128   -352   
-880   -160   
-96    -80    
-64    -320   
0      -576   
128    -416   
-112   -880   
-160   -688   
-160   -736   
352    -672   
128    -480   
-272   -272   
16     -528   
-64    32     
-144   -400   
448    -560   
-448   -96    
-336   -288   
-336   -672   
288    48     
368    1072   
-304   -208   
16     -304   
112    -1952  
-16    0      
112    -96    
-32    576    
0      560    
112    176    
160    384    
-64    -544   
-144   192    
-576   -1872  
96     -960   
-128   704    
-416   0      
352    -336   
192    -1056  
-176   -1232  
-176   608    
352    -80    
80     -208   
-144   192    
-128   -112   
112    -112   
112    -176   
-160   -160   
-224   -144   
-384   -352   
208    -112   
16     -128   
-48    -224   
-304   16     
224    -384   
64     -176   
-32    -1136  
320    -112   
48     -160   
-208   128    
-112   224    
80     64     
64     -176   
-112   144    
-240   -176   
144    128    
-336   -96    
48     -16    
16     288    
0      -160   
32     -320   
160    -896   
432    160    
-112   48     
-48    112    
-176   -32    
112    -80    
-256   -96    
352    -304   
-352   96     
-32    -48    
80     16     
-288   -416   
1216   -1232  
-720   -176   
848    400    
-160   -608   
-448   32     
-144   -112   
496    -528   
512    -208   
-80    384    
-384   640    
368    -208   
0      -352   
-288   32     
-80    112    
240    -128   
-128   -352   
-464   -304   
608    544    
80     240    
64     -336   
-864   16     
1488   -720   
-368   -224   
-112   -480   
256    0      
-144   -96    
-480   1216   
928    2000   
272    1216   
-320   -640   
496    -464   
112    -880   
-224   -128   
320    -128   
432    80     
-256   96     
-16    688    
624    336    
-16    -400   
-208   -80    
208    16     
64     -304   
-16    -16    
-16    544    
-144   1168   
32     672    
-656   -528   
448    -944   
-1104  -816   
-64    -192   
272    -336   
-1216  -208   
96     928    
112    176    
-656   -240   
272    0      
720    1072   
672    656    
-464   -112   
-144   240    
224    -160   
144    384    
-288   304    
-432   -160   
-112   -256   
64     -176   
-160   240    
-512   640    
-64    96     
208    -3120  
-1872  -1328  
624    64     
784    -352   
80     -784   
-1152  64     
224    784    
240    672    
336    320    
-80    0      
-544   32     
-64    16     
640    0      
32     48     
-1040  -176   
16     240    
-48    80     
304    -208   
64     -688   
-544   480    
256    288    
96     400    
80     -256   
432    0      
-784   0      
368    272    
-112   96     
-80    -16    
224    128    
-272   592    
240    736    
-384   432    
16     -176   
352    -32    
-112   80     
-160   112    
304    256    
-80    80     
-112   112    
128    96     
-32    112    
-80    176    
-16    272    
-16    128    
-160   48     
80     -240   
-608   -512   
16     -80    
224    48     
-16    272    
-368   -320   
608    -352   
240    -64    
-512   128    
80     176    
-304   -144   
272    32     
272    96     
-352   96     
-128   -48    
144    32     
-48    -272   
-208   -80    
-144   16     
96     64     
112    -128   
48     48     
-32    112    
-16    560    
528    -128   
-400   144    
16     64     
-64    -64    
96     144    
240    512    
-816   448    
112    -288   
320    128    
-240   -304   
-176   -64    
-1120  352    
2400   -960   
-432   224    
-960   -160   
624    304    
352    -288   
-624   400    
-64    0      
-16    16     
224    80     
-16    144    
-64    -176   
-32    -48    
64     -160   
80     352    
-288   448    
64     -80    
-144   -64    
32     48     
32     64     
48     -1232  
-880   464    
816    80     
96     480    
256    144    
-64    -64    
-240   320    
0      0      
224    -128   
80     240    
128    16     
-144   128    
-240   -48    
-80    336    
656    -96    
-352   112    
-32    32     
80     48     
160    176    
-256   -112   
144    48     
-32    -16    
176    80     
-272   -224   
-32    320    
576    -32    
-432   208    
224    0      
32     144    
64     -256   
-784   96     
32     48     
272    -48    
-320   -192   
-352   -128   
512    112    
0      -144   
-128   176    
144    -16    
-48    -64    
-64    48     
32     128    
112    -64    
-288   32     
528    144    
-368   0      
-192   128    
432    -64    
-288   112    
-16    48     
0      -400   
-1216  352    
1744   256    
-560   -464   
-1184  240    
1008   32     
64     144    
-928   0      
304    -16    
416    176    
-80    -32    
-144   48     
224    112    
-272   64     
336    16     
16     96     
-192   16     
-208   64     
192    144    
368    32     
-224   -272   
736    160    
32     32     
-352   0      
128    -32    
-16    -240   
752    880    
-112   -16    
-448   80     
320    64     
-48    16     
304    -48    
112    96     
144    112    
0      400    
608    -112   
-224   -160   
-96    -224   
-224   240    
160    64     
-16    -32    
240    96     
32     48     
-288   16     
96     192    
816    128    
-144   80     
-448   96     
-528   -416   
1248   1552   
1248   -192   
-1824  32     
-416   -112   
768    128    
336    320    
-576   48     
-192   288    
784    32     
-496   272    
-96    -32    
352    208    
-112   -160   
80     -192   
336    224    
-576   -336   
48     176    
192    48     
-80    752    
256    256    
-192   64     
-32    -96    
-336   112    
576    16     
-368   160    
352    304    
256    0      
-64    496    
-144   304    
128    608    
464    48     
-384   32     
-336   144    
368    512    
720    112    
-512   192    
0      1056   
704    528    
-176   208    
-96    432    
192    384    
-48    576    
-48    368    
160    352    
-32    736    
48     96     
96     -48    
160    -1520  
-64    592    
-32    -480   
80     400    
-192   0      
-304   448    
128    320    
-80    544    
256    160    
-160   336    
48     1856   
336    800    
-304   0      
112    -784   
48     208    
112    -592   
-80    480    
176    672    
-224   -128   
256    -288   
320    -224   
-448   -144   
32     -32    
16     160    
32     208    
144    80     
-176   -240   
336    16     
-16    160    
-256   192    
112    -832   
272    32     
-80    -960   
464    512    
-688   480    
304    -64    
240    320    
-96    -16    
-208   448    
112    -144   
192    -192   
192    -512   
-32    48     
-48    -288   
16     80     
128    -80    
96     80     
-272   80     
-80    64     
192    0      
48     224    
-16    48     
-32    224    
-240   960    
896    -768   
-800   0      
128    -176   
128    80     
32     32     
176    144    
-16    80     
-224   96     
-80    -576   
288    -32    
80     -80    
16     272    
48     -32    
-128   -544   
80     -192   
0      -336   
-64    -624   
128    -288   
112    192    
64     208    
208    272    
-304   -32    
-176   272    
384    0      
304    -624   
-320   208    
352    -400   
-128   176    
560    1216   
-80    -352   
-1904  -272   
1632   -384   
-112   368    
-752   -1536  
160    240    
832    -224   
176    -96    
-96    272    
112    -32    
64     -464   
96     32     
48     336    
-368   -624   
-16    -16    
400    -48    
-48    -192   
-384   -992   
48     -32    
-16    -1120  
1152   672    
-320   -64    
-608   -64    
1040   -432   
-480   912    
192    512    
608    2240   
1248   1648   
-336   1792   
-176   768    
128    -192   
112    -400   
352    -512   
112    128    
-80    -112   
64     -144   
528    -688   
416    384    
48     400    
-736   576    
240    160    
640    768    
-784   -448   
160    -832   
-96    -32    
432    -768   
-1696  -96    
48     -352   
-304   -144   
368    -16    
-48    -176   
-272   -192   
-320   128    
-288   -80    
512    16     
64     -144   
-336   -80    
656    144    
-400   256    
-496   -32    
352    -16    
-32    128    
96     -400   
-432   112    
480    -112   
64     -96    
208    -128   
-608   -880   
-48    -1024  
336    2752   
336    208    
-1088  -208   
-944   -384   
992    -80    
688    16     
-1296  -320   
-32    160    
128    -32    
-448   144    
-272   -112   
-320   64     
336    32     
-288   96     
368    -1488  
-128   96     
112    -32    
176    0      
-48    1040   
448    -32    
-416   -560   
-80    -288   
384    -144   
-80    -128   
-96    48     
80     16     
0      16     
144    -352   
-96    48     
80     -288   
96     -96    
16     -96    
-352   -208   
64     -48    
-256   0      
80     -352   
112    64     
-160   -64    
-368   32     
288    32     
256    -160   
-288   48     
160    -144   
-416   -192   
480    160    
32     272    
-416   352    
80     -192   
32     -336   
32     -304   
-224   -80    
480    352    
800    208    
-400   176    
-448   224    
224    -64    
-256   160    
16     -304   
0      160    
160    -128   
-384   0      
-16    -160   
-608   -144   
-176   -144   
96     32     
176    64     
-80    -32    
-80    80     
80     384    
208    -96    
-320   -240   
128    240    
-208   -128   
-48    144    
16     -688   
-128   176    
32     384    
192    -272   
-192   48     
-48    288    
-64    1696   
2496   -720   
-1296  176    
-640   -208   
912    -240   
16     -336   
-608   -80    
128    256    
-48    32     
96     -80    
-80    -32    
-176   208    
-304   -48    
80     0      
240    -304   
-96    112    
-352   272    
128    -384   
-96    -48    
96     192    
-464   -1072  
304    256    
448    16     
-848   -64    
192    320    
688    -288   
-464   448    
-592   144    
464    -96    
-288   32     
-80    48     
-240   192    
320    64     
400    -112   
-96    64     
-608   -592   
352    128    
64     -384   
-160   16     
-32    64     
16     64     
16     64     
96     0      
-384   48     
224    144    
240    160    
112    80     
-320   0      
-512   -96    
352    -1360  
-1712  -688   
1264   -384   
-256   0      
-96    96     
-464   -224   
592    272    
16     624    
-112   144    
480    -16    
-160   -32    
-112   48     
-336   -48    
0      -48    
576    32     
-640   -32    
160    64     
0      16     
-432   96     
288    32     
-64    80     
288    544    
-1344  -720   
-688   192    
1424   -112   
-992   -80    
-192   144    
224    -32    
-64    288    
-944   -16    
384    48     
-176   -48    
-192   144    
16     112    
-80    112    
-432   48     
224    96     
112    256    
-208   128    
224    -16    
0      32     
-32    64     
-176   -16    
1456   416    
-1104  -48    
-336   208    
528    -160   
-336   -272   
0      336    
-16    0      
-336   64     
416    128    
224    48     
-224   48     
-272   368    
0      64     
368    192    
-480   160    
-16    -128   
-192   -80    
304    -16    
-144   352    
-64    -256   
-640   224    
528    32     
336    544    
-288   64     
-400   -32    
-64    208    
800    1184   
352    -2240  
-2032  -704   
1232   -176   
896    304    
-288   -32    
-336   448    
368    560    
-512   832    
304    -256   
480    240    
-176   -16    
-336   -64    
208    240    
192    96     
-16    160    
-96    16     
96     272    
-256   -96    
384    384    
32     896    
-144   1216   
176    224    
64     -112   
368    -576   
-80    368    
-144   144    
-320   256    
400    672    
144    848    
-48    160    
-400   -96    
240    336    
64     -112   
-64    -400   
-128   -208   
-80    96     
272    64     
304    -32    
-176   240    
16     0      
96     176    
-384   352    
32     -176   
-32    832    
368    880    
-64    64     
-272   -224   
224    -768   
-96    224    
-64    -176   
-336   32     
-272   368    
1440   -864   
-624   -464   
0      864    
496    224    
-64    -992   
16     176    
-224   -48    
224    160    
256    -32    
-208   80     
48     -112   
48     704    
16     208    
80     -80    
-192   160    
96     288    
208    96     
-192   -176   
-112   144    
144    64     
112    64     
96     48     
176    208    
-112   -16    
-336   -64    
-32    -224   
80     144    
-96    192    
-64    0      
448    -544   
-16    0      
304    0      
-512   176    
192    272    
-64    -208   
-48    -80    
-336   160    
0      352    
16     -128   
160    -208   
48     -16    
144    -64    
-272   304    
112    -1520  
192    -80    
0      -224   
16     224    
-176   256    
688    208    
-992   576    
416    -208   
384    -32    
-160   -80    
-224   48     
528    -128   
-128   -144   
-128   64     
112    256    
0      -800   
-48    -16    
-80    144    
64     384    
96     0      
-32    0      
-240   -368   
288    -224   
-336   -1392  
64     -336   
176    240    
160    80     
-208   16     
-96    -528   
368    256    
-80    -48    
64     432    
192    368    
-480   240    
256    240    
-224   1664   
2272   -80    
-1056  96     
-336   -240   
1136   -912   
560    -16    
-464   -656   
-368   80     
224    512    
0      1248   
448    176    
-48    48     
-336   -1040  
-16    352    
640    224    
-144   304    
-368   384    
256    16     
528    -112   
-288   -256   
352    -176   
-2128  544    
896    544    
-256   -1120  
-560   -1360  
768    -1040  
-1024  -320   
1136   -1424  
176    224    
-352   -224   
128    96     
-32    80     
320    480    
-672   336    
-128   96     
368    0      
-64    80     
-432   0      
176    -176   
288    256    
352    -304   
-304   -672   
-432   176    
1120   -320   
-208   -176   
192    496    
-16    -304   
-560   128    
128    224    
128    -176   
320    -80    
192    -288   
-96    32     
-416   -416   
112    -128   
1072   -400   
176    -64    
656    -608   
-416   64     
-80    -272   
352    -16    
80     176    
-128   176    
272    -16    
176    64     
144    80     
-32    -160   
-160   80     
32     -1136  
992    -1696  
-1872  -384   
432    416    
1040   -192   
144    -64    
-624   -192   
-192   48     
528    432    
-32    -688   
112    -160   
192    -320   
352    -400   
-48    -112   
0      -1152  
48     -272   
112    112    
160    -384   
32     144    
528    -96    
-1120  144    
880    80     
64     -192   
-528   -320   
-208   0      
656    -144   
-928   -176   
-16    -80    
336    -304   
-224   96     
144    -32    
-112   -528   
256    16     
-16    144    
-112   144    
624    -400   
-336   224    
384    -144   
-672   -80    
752    -464   
304    -144   
-624   -16    
96     -80    
176    -160   
320    -368   
-256   -240   
144    -352   
224    -112   
96     144    
352    208    
-176   -704   
-176   224    
-16    -1088  
-592   160    
464    -272   
-944   -32    
256    -144   
432    -576   
-912   -64    
-16    -416   
16     -48    
272    -272   
-128   -16    
-128   -416   
96     -112   
32     -256   
-160   -32    
-32    -816   
-224   -496   
432    -272   
48     176    
-192   -96    
128    -64    
-320   -160   
112    -16    
112    128    
240    -80    
-224   80     
256    416    
416    160    
-272   -464   
608    400    
-2480  1024   
576    -32    
720    -144   
-464   -192   
-192   -32    
16     -656   
-224   64     
496    336    
-240   176    
-528   -544   
-48    272    
448    -304   
80     -352   
-464   80     
112    224    
-80    -16    
224    -304   
128    -32    
-192   -80    
272    1184   
-688   -80    
-352   48     
1104   -128   
-1056  -64    
-256   -128   
336    208    
-384   144    
176    -80    
96     -752   
-160   112    
-64    0      
304    -320   
-288   112    
208    -48    
-16    48     
128    0      
80     -144   
-592   128    
144    -16    
48     192    
16     -16    
112    -96    
-128   -112   
272    -432   
-192   32     
144    112    
-32    112    
-16    64     
-528   -2144  
1776   656    
464    -144   
-1664  -784   
944    16     
992    112    
-1792  288    
400    -48    
736    -368   
-256   -112   
-112   -16    
32     -32    
128    128    
-16    -128   
-192   304    
800    -16    
-656   128    
80     -208   
64     32     
464    -128   
-224   -16    
448    896    
-208   -608   
-2176  -384   
1648   -288   
608    -704   
-1088  -112   
-352   144    
48     -96    
-112   0      
-208   -160   
-208   16     
272    512    
432    48     
-64    192    
-192   -144   
-1168  -64    
512    304    
-544   -32    
112    -16    
-144   -224   
-272   -64    
-112   -240   
-352   480    
-208   -112   
256    0      
96     1104   
-2048  -528   
-320   336    
160    -512   
-576   192    
176    -16    
160    64     
144    -368   
-208   -256   
-848   -336   
96     -128   
752    480    
-432   192    
-240   -448   
656    -560   
-288   80     
-432   -96    
16     256    
-448   144    
288    -96    
-656   400    
-16    16     
-288   -336   
384    -48    
-96    -480   
768    -1552  
944    256    
-256   192    
-656   -320   
-192   224    
176    -944   
464    -1872  
-528   -720   
-416   560    
400    560    
-80    -48    
-16    0      
-176   128    
144    -176   
-160   -560   
128    160    
208    -128   
-384   64     
80     96     
-80    -128   
144    32     
-400   -320   
832    304    
-752   -80    
0      320    
-384   -176   
432    192    
-96    -160   
-160   -16    
-32    -304   
176    480    
-96    384    
128    528    
-416   176    
32     -416   
-32    -336   
-96    -128   
176    1072   
-848   -336   
16     -288   
-16    -48    
112    400    
-224   -240   
400    -592   
-144   416    
80     208    
-80    512    
-304   -416   
320    16     
-64    192    
544    864    
880    -64    
-800   128    
64     432    
-240   656    
-128   -848   
-496   -1488  
512    -272   
64     384    
-48    320    
-144   -192   
224    208    
112    -144   
-128   -80    
-256   0      
-192   32     
176    -64    
-16    192    
-48    16     
176    0      
-368   48     
-128   16     
32     -96    
160    -96    
-208   256    
240    448    
-128   544    
-336   192    
144    80     
-80    160    
-128   720    
416    128    
-448   112    
80     96     
112    16     
-384   32     
224    336    
-32    976    
-96    272    
192    -16    
128    -64    
-128   -64    
-16    256    
224    336    
0      240    
-160   32     
-16    -192   
192    -192   
16     -224   
448    -304   
-1376  688    
784    64     
32     -112   
80     -400   
-128   528    
32     -464   
-368   -592   
464    -208   
208    384    
-368   288    
-432   -64    
96     -368   
288    352    
-176   48     
-80    304    
-224   -304   
368    80     
48     -192   
-128   176    
-96    -176   
-32    272    
176    128    
-272   240    
160    -64    
32     48     
-64    208    
-64    64     
368    176    
-880   256    
368    640    
1760   128    
-1152  -256   
640    240    
-368   -80    
592    -112   
48     -288   
-128   -80    
32     -448   
192    144    
-16    -128   
-48    208    
16     64     
272    256    
-176   96     
-144   -32    
-16    80     
-48    -16    
192    208    
32     -32    
-208   -240   
992    1440   
688    240    
-576   464    
-256   -16    
320    -384   
32     112    
144    288    
544    -32    
-544   -32    
400    224    
80     32     
-128   80     
208    160    
-400   96     
272    64     
192    192    
-48    96     
80     432    
-288   32     
-240   16     
368    496    
368    -320   
-144   -128   
0      320    
96     -880   
112    368    
464    -352   
336    -320   
-432   176    
560    176    
-64    -16    
-288   224    
-96    528    
-400   0      
176    -560   
368    64     
-816   -400   
-288   32     
976    96     
96     -576   
-416   -32    
144    -192   
240    64     
96     -448   
-112   288    
464    64     
-368   80     
784    1216   
864    3360   
-2480  1616   
1328   -1232  
624    -352   
-672   -128   
-528   96     
976    -416   
-48    -80    
-336   -1472  
352    -32    
304    320    
80     -176   
-256   96     
-128   192    
208    -112   
336    112    
-160   64     
-352   64     
560    544    
-128   -320   
-160   608    
704    -864   
-592   144    
-432   -1232  
-432   -240   
368    320    
160    272    
-112   144    
-64    192    
176    144    
288    144    
32     416    
-144   -80    
-112   240    
-144   -336   
464    464    
-64    80     
-336   400    
752    -848   
-240   272    
128    -80    
-512   0      
144    144    
544    208    
-256   64     
32     144    
112    240    
304    48     
-368   -112   
336    -208   
-320   -80    
-144   -1328  
-848   64     
464    -624   
-160   -96    
112    -656   
432    -64    
128    -16    
16     -400   
-128   80     
48     128    
-16    64     
144    -176   
64     112    
-48    16     
-48    -64    
96     -304   
432    352    
-368   -16    
144    -64    
368    -272   
-176   288    
-16    256    
208    128    
-80    32     
-112   32     
400    288    
32     240    
48     64     
-128   -320   
848    2176   
-1104  -1488  
-1136  672    
1728   -400   
-480   224    
-480   -48    
352    192    
272    -400   
-32    -816   
-224   432    
96     432    
0      -2464  
32     112    
-112   -1392  
256    -128   
80     592    
-48    -368   
0      256    
208    -144   
-96    240    
-464   -864   
944    -1184  
-368   288    
-400   0      
864    -320   
-1824  144    
336    -176   
-80    720    
16     -304   
-224   -64    
64     96     
288    -208   
64     144    
-336   -48    
160    -704   
272    0      
96     -208   
-304   160    
192    -272   
-96    -176   
-192   -176   
48     -160   
32     48     
-64    -80    
-160   -64    
544    -880   
-320   -32    
64     -336   
0      176    
608    -96    
-1600  -1216  
288    -48    
1120   -608   
-1632  -96    
720    416    
576    192    
-464   224    
-16    0      
-272   -336   
336    -352   
-112   -192   
64     -64    
144    -1056  
80     128    
-528   -208   
256    176    
144    -64    
-64    112    
-208   -96    
176    -64    
-240   -96    
784    -656   
-1616  144    
656    -480   
-48    320    
-528   416    
-32    240    
528    -160   
400    -224   
-256   -1104  
-784   368    
416    -160   
448    32     
-336   -240   
-320   -112   
320    112    
144    -192   
192    -480   
-176   80     
-544   128    
0      48     
0      176    
128    -208   
-144   0      
256    -768   
-256   128    
-720   -1840  
-320   -1008  
368    -400   
-608   144    
-112   -160   
-16    -304   
64     -176   
544    272    
128    544    
-400   32     
128    -1168  
32     -656   
256    96     
112    -400   
-64    -48    
0      32     
96     288    
80     192    
80     256    
64     -448   
96     -64    
144    480    
48     336    
-624   96     
-16    -2192  
-2064  -688   
1072   -784   
-240   304    
144    384    
128    368    
-672   -384   
528    -544   
-64    640    
96     -544   
-352   432    
176    80     
32     -288   
48     -256   
-64    160    
128    -48    
352    -16    
-144   -288   
48     -256   
176    -208   
16     1088   
64     -304   
-848   -208   
176    -192   
656    -192   
-256   416    
64     -624   
-368   -1312  
-96    480    
160    208    
48     -256   
0      304    
-1392  -288   
-16    -224   
-1488  -1008  
-208   -16    
160    96     
-432   -128   
48     -320   
16     16     
-240   -32    
-48    -288   
-80    -80    
64     -576   
-432   -624   
-496   -32    
-272   -560   
-624   -912   
384    432    
176    112    
16     1424   
-480   -160   
-496   496    
656    240    
-544   432    
-320   32     
-240   -64    
512    176    
112    352    
-80    112    
-416   -272   
-112   80     
368    -64    
320    96     
-288   -288   
-176   -224   
80     -96    
-160   -352   
384    384    
-224   288    
-64    -16    
-224   176    
144    240    
-128   240    
0      -16    
-32    -144   
-32    560    
160    -160   
0      48     
-336   320    
128    -1296  
-896   208    
128    288    
80     112    
-96    256    
-192   320    
-80    656    
-192   -208   
-272   -576   
352    -32    
0      224    
-272   336    
-160   -464   
48     112    
64     112    
0      -368   
-16    -144   
-224   48     
112    208    
208    -176   
-592   -288   
192    -640   
-368   272    
-416   -880   
208    256    
-16    208    
-192   0      
-64    -320   
240    144    
-16    624    
-128   -240   
16     144    
96     384    
-144   16     
-32    336    
48     -336   
128    -464   
-176   -96    
-240   -128   
0      16     
-1024  -64    
128    48     
128    -144   
64     -160   
128    16     
-272   64     
-80    240    
112    64     
-528   -240   
1568   144    
-1952  480    
48     208    
960    -144   
-1248  -384   
-448   80     
976    -464   
-32    -912   
-256   96     
48     144    
64     32     
-16    -16    
48     32     
-224   -32    
16     96     
224    48     
-240   48     
96     208    
160    208    
-32    0      
-80    128    
16     688    
480    -384   
-2112  160    
1328   -32    
-96    0      
-608   112    
256    96     
-112   112    
800    -176   
-400   -144   
-256   -80    
272    48     
192    128    
-288   -96    
-240   32     
96     -224   
304    96     
-192   608    
-144   304    
240    80     
256    208    
-48    -288   
-544   512    
544    -224   
-192   -496   
16     160    
176    -96    
-80    176    
-800   192    
576    320    
512    48     
-480   32     
144    96     
0      -480   
-32    -336   
-304   -304   
0      -416   
480    -224   
-96    -64    
-784   32     
240    208    
336    -144   
-64    32     
-624   -368   
176    192    
736    560    
-496   32     
-368   160    
272    -1584  
-2112  -560   
-288   -352   
192    112    
720    -192   
-256   160    
32     240    
-528   -48    
-48    -96    
992    464    
-48    176    
-480   -32    
16     160    
480    160    
-112   96     
-224   96     
-96    -32    
192    64     
32     96     
624    656    
-816   208    
128    608    
560    -208   
-288   80     
592    96     
-512   -112   
448    704    
0      320    
-512   256    
592    0      
240    80     
-416   144    
144    128    
-304   -128   
480    256    
-64    64     
-192   464    
224    128    
-304   384    
-64    96     
-64    80     
304    48     
-112   176    
-192   -64    
224    48     
-80    -64    
-144   224    
128    112    
48     160    
64     16     
-144   176    
208    208    
-128   704    
704    16     
-176   -944   
-352   176    
512    -464   
-32    -16    
16     240    
-496   352    
160    96     
160    -16    
-64    -16    
-64    64     
112    112    
112    128    
-80    0      
-48    176    
16     64     
0      -32    
416    -48    
-336   96     
32     224    
-192   288    
160    64     
160    -16    
-16    304    
80     912    
48     672    
-192   -160   
192    -144   
-320   -2480  
-560   784    
1184   -80    
-704   672    
832    -400   
-256   16     
-288   656    
-64    256    
544    256    
80     176    
-368   432    
-144   208    
272    160    
192    192    
-336   688    
64     112    
-48    -192   
48     -32    
208    0      
-64    96     
272    -544   
-352   912    
288    -800   
-208   -160   
-160   352    
304    576    
64     16     
-112   352    
48     272    
-32    240    
0      -128   
80     -80    
144    -48    
-208   -160   
304    96     
32     16     
-288   608    
176    80     
192    400    
-304   112    
-32    -16    
176    208    
-128   16     
80     16     
0      -272   
0      80     
48     64     
-80    0      
0      -448   
176    -1040  
1920   336    
-1408  752    
-752   -1520  
992    -432   
-528   -912   
768    224    
-224   -368   
-64    -112   
352    64     
-304   192    
96     80     
-16    -160   
192    432    
-32    -160   
-224   448    
400    -240   
112    -32    
-272   -1376  
288    -688   
16     -144   
-752   -224   
480    -176   
1824   448    
-1616  592    
96     16     
768    -752   
-512   -832   
-16    -528   
192    -528   
80     -96    
-48    0      
144    128    
144    -432   
-240   256    
368    272    
224    160    
-176   560    
96     608    
32     720    
288    240    
144    400    
-96    112    
48     160    
-896   -368   
128    -1312  
0      -816   
-64    -1072  
-1088  -896   
576    -304   
-64    96     
336    -688   
160    -368   
-544   -1424  
-176   784    
768    16     
-48    -112   
32     -672   
-608   -880   
672    32     
-320   496    
-224   336    
192    128    
400    -448   
-160   64     
96     32     
-304   -320   
592    352    
-128   608    
-480   352    
-576   -1472  
2080   -1392  
640    576    
-512   64     
-80    32     
176    -768   
352    -352   
208    1536   
-208   272    
-320   64     
-48    -80    
272    496    
96     464    
48     -560   
-128   192    
-256   -480   
32     -624   
-128   96     
-112   32     
288    -64    
-176   -912   
-32    -80    
-192   -1456  
992    -96    
-224   -160   
-464   224    
112    208    
-16    -128   
288    -912   
64     272    
-384   464    
160    480    
-992   -272   
256    112    
432    64     
-320   -256   
0      -464   
192    -384   
224    480    
16     192    
0      528    
-176   -112   
192    112    
-32    80     
-64    -208   
-96    1120   
288    400    
-368   592    
48     -272   
0      -144   
-128   32     
432    176    
752    288    
-688   112    
112    -1120  
704    720    
-608   336    
-384   -544   
224    -1152  
32     -304   
-112   160    
80     208    
-208   64     
112    96     
-144   304    
-192   -16    
112    224    
-64    -432   
-368   128    
240    -928   
-192   -128   
48     32     
112    176    
-80    0      
320    208    
-320   80     
48     -512   
-32    -512   
96     288    
-192   208    
400    -832   
-1136  496    
1120   -944   
-544   1024   
416    -176   
-336   240    
240    640    
-48    -368   
96     -672   
-32    -496   
-32    -64    
-16    -80    
80     144    
112    240    
-144   288    
-16    96     
0      144    
-80    -80    
-48    96     
272    -176   
480    400    
-1808  496    
784    -480   
-352   -160   
-160   -480   
-96    -352   
176    -400   
-32    304    
16     -112   
64     -32    
-64    32     
-368   80     
192    -16    
96     -64    
-1600  -256   
-64    -96    
-256   176    
240    -80    
-384   352    
528    -144   
-480   64     
64     0      
-96    -80    
256    128    
-32    64     
-1104  -112   
128    352    
208    -176   
-320   192    
0      1040   
2272   -96    
-1936  432    
-1264  -608   
1488   -32    
16     -32    
-1696  128    
400    80     
480    464    
-512   -320   
112    256    
16     -320   
192    288    
-256   -384   
-352   96     
240    -32    
16     192    
-288   -96    
96     -16    
416    -64    
-448   16     
16     -48    
896    80     
-1728  16     
-16    -1024  
176    272    
272    -112   
-576   496    
400    0      
0      16     
-144   -192   
96     160    
16     64     
-64    16     
-192   320    
880    -32    
-560   -112   
240    544    
96     64     
-784   128    
224    64     
-272   -16    
-256   -80    
960    112    
-928   -112   
-512   576    
224    416    
80     448    
-144   432    
-448   176    
-304   0      
80     -96    
272    432    
-224   224    
-848   -192   
-48    576    
176    448    
80     32     
-624   176    
208    208    
-208   -128   
-176   -48    
-176   224    
96     32     
96     48     
-512   -544   
-80    -16    
192    48     
-752   16     
-144   192    
1440   -4288  
-2896  -1232  
1328   -192   
-288   -352   
176    176    
16     -96    
-464   144    
160    -96    
304    -192   
320    0      
-256   0      
-224   48     
-112   112    
480    128    
-128   80     
32     32     
-976   64     
384    -32    
-320   -128   
768    -352   
-400   -80    
96     48     
-192   -32    
-672   -32    
672    32     
-368   0      
144    32     
-96    -208   
192    368    
96     -272   
-304   128    
-544   -32    
112    96     
240    160    
-368   192    
240    224    
-16    112    
432    -16    
176    0      
-160   48     
112    112    
-240   112    
288    0      
-192   224    
-96    -64    
512    160    
-128   -96    
-320   -160   
80     112    
240    64     
-96    128    
-48    -576   
-608   352    
784    1472   
-640   1456   
368    -80    
16     -656   
-160   368    
336    272    
128    -128   
16     0      
-80    48     
16     48     
-96    -96    
-96    -64    
128    48     
320    -144   
80     -16    
-112   0      
-32    96     
80     80     
-128   -752   
240    -496   
-176   -144   
-368   48     
512    -496   
-16    -80    
-144   624    
-144   544    
384    -272   
-48    -448   
16     -1488  
-880   592    
256    -240   
144    -512   
-384   208    
320    -480   
-224   -640   
176    -80    
-416   -320   
192    -208   
176    368    
-48    240    
-128   304    
48     0      
-16    -64    
-144   -272   
112    352    
128    32     
0      -48    
-160   16     
480    -256   
-112   656    
512    1168   
-144   160    
-512   80     
-32    368    
384    912    
-112   -144   
-288   -640   
240    512    
192    0      
-96    416    
96     32     
-160   -80    
16     64     
304    64     
-400   288    
-192   528    
-48    32     
496    -112   
48     176    
-320   -112   
-80    192    
480    -272   
-224   -304   
192    -64    
-48    112    
-96    128    
304    80     
48     -752   
-2704  -16    
1280   -144   
800    -352   
-640   -960   
-192   -320   
-96    -176   
-128   384    
224    -208   
288    0      
-416   -144   
-224   240    
256    -48    
0      192    
-32    -32    
64     96     
96     240    
128    -32    
400    -192   
-48    224    
416    256    
-368   -944   
-688   608    
1008   688    
-592   560    
240    336    
-112   -784   
-464   -448   
464    624    
-64    1264   
-112   48     
64     -512   
96     -16    
-464   160    
192    -528   
-400   -496   
256    -176   
-400   -128   
-16    160    
224    160    
-192   0      
304    640    
-160   464    
-592   -464   
256    976    
304    768    
-128   592    
192    -576   
-512   272    
448    656    
80     -48    
-640   464    
0      -1120  
624    720    
-160   0      
-688   336    
352    1088   
-528   832    
224    752    
-144   496    
-336   272    
192    -256   
192    -176   
48     -96    
-320   224    
208    -16    
608    80     
96     -560   
-352   48     
432    64     
-864   1840   
240    160    
-448   -640   
128    -1472  
1072   304    
-304   512    
-192   1120   
112    1808   
144    80     
400    -480   
-224   -688   
-272   736    
400    -400   
272    192    
240    -928   
-112   320    
-112   160    
384    32     
352    -448   
-160   -800   
-368   -272   
224    320    
352    -112   
-368   352    
80     160    
-112   -784   
-320   -272   
208    -208   
-272   -208   
160    -96    
32     256    
-96    240    
448    128    
-304   752    
240    496    
16     0      
192    -256   
48     512    
16     272    
240    64     
-128   -192   
32     64     
16     -192   
-112   96     
160    768    
400    528    
0      288    
-80    880    
368    928    
0      608    
592    1424   
-368   -144   
-848   144    
864    -320   
112    64     
-176   -240   
256    80     
48     -192   
208    -288   
-272   -512   
0      -80    
96     -32    
144    -800   
-64    -96    
-336   -80    
32     336    
352    176    
96     704    
336    272    
176    -608   
-288   160    
240    400    
176    272    
-272   -848   
-160   -160   
560    -688   
-32    96     
-256   32     
128    208    
-192   -336   
1056   1136   
-48    544    
-560   -880   
-16    -48    
192    -672   
160    32     
80     -80    
224    304    
-640   -64    
224    32     
464    -288   
-224   16     
-96    0      
176    480    
0      224    
-512   -416   
-144   0      
592    -64    
-480   176    
32     -304   
-192   -320   
928    -1296  
-192   -144   
-528   -384   
576    368    
-176   304    
64     48     
-96    -112   
48     -64    
-64    -176   
304    176    
-496   -96    
-160   80     
224    32     
32     -64    
96     160    
192    -272   
-80    16     
288    -192   
-288   112    
224    64     
144    192    
16     -48    
-304   -336   
352    144    
-64    -240   
-176   144    
400    48     
-240   -256   
-240   -1680  
-512   -320   
976    -144   
-416   64     
224    -352   
-976   -192   
1248   -208   
288    -16    
-640   -112   
384    -80    
224    176    
-368   -176   
0      80     
224    -368   
-752   -192   
416    -240   
224    112    
-320   -272   
64     -16    
112    -560   
-128   48     
288    96     
-1520  80     
752    176    
816    -16    
-2368  192    
944    -48    
32     -304   
-560   -48    
208    144    
128    16     
80     80     
48     -144   
-176   64     
0      -592   
-304   128    
352    -112   
64     128    
-176   416    
80     304    
144    -16    
-240   -672   
976    96     
-272   -192   
-240   352    
800    -96    
-848   16     
432    -864   
128    64     
-256   240    
144    144    
384    -304   
32     -288   
-416   192    
32     224    
-896   128    
288    -128   
-240   -144   
-16    -144   
224    -336   
-96    -144   
128    64     
-128   -112   
144    192    
208    -64    
256    192    
-704   224    
-96    48     
256    0      
688    1456   
-1520  4752   
1552   384    
-432   -272   
-960   -736   
448    -160   
416    48     
-528   48     
-304   96     
384    320    
-864   -144   
-368   -80    
448    32     
-864   -32    
64     64     
192    240    
-112   48     
-112   -16    
208    -16    
368    -176   
-960   -448   
64     -720   
144    -160   
-80    -112   
832    224    
-1136  -320   
112    336    
0      80     
-272   -64    
240    416    
-288   -16    
112    208    
-960   64     
-144   -64    
16     112    
-32    48     
112    -256   
-768   -416   
-16    -800   
272    96     
-128   144    
-96    160    
32     528    
592    64     
-544   16     
0      448    
128    -192   
-688   160    
288    -64    
-528   -608   
128    -480   
-240   -400   
464    144    
336    -368   
-560   48     
384    -16    
-384   -272   
352    1584   
672    1392   
32     1232   
0      1120   
128    912    
-128   336    
16     -128   
-864   -224   
-32    272    
48     -160   
112    32     
32     -48    
-128   -16    
-80    -336   
-144   -224   
-16    688    
32     48     
-224   464    
160    16     
-336   -208   
208    -176   
208    192    
-400   -224   
-48    192    
192    -96    
-128   -176   
128    -320   
160    -304   
96     -304   
-240   272    
48     -656   
32     -896   
16     -112   
32     160    
80     0      
-80    -48    
-16    64     
48     0      
-16    -192   
-512   80     
80     368    
192    144    
-80    288    
-224   160    
128    -416   
-688   -96    
576    304    
-304   160    
128    -352   
16     304    
-176   -48    
0      -80    
176    16     
0      16     
-416   -16    
-144   192    
48     0      
64     0      
32     288    
-80    -80    
16     16     
-272   -32    
-48    384    
128    16     
-336   -48    
-240   -128   
128    80     
-64    -208   
-128   160    
-256   192    
-256   48     
256    -64    
-128   128    
-608   -848   
2000   -496   
448    1088   
-1040  -192   
864    -16    
176    1024   
-320   -32    
1040   -464   
-304   1680   
-160   512    
-48    672    
560    -160   
240    -144   
32     400    
-256   240    
160    -336   
16     -224   
208    -224   
-80    656    
-96    -96    
0      48     
-880   -192   
1024   -208   
272    32     
-624   176    
880    608    
-304   480    
-352   1584   
240    624    
-80    -752   
240    -224   
16     288    
-32    400    
-112   320    
-32    208    
-16    -48    
-96    448    
-32    160    
-144   288    
-32    448    
384    320    
32     -48    
-16    32     
-160   960    
544    544    
-448   -720   
32     -400   
-400   592    
816    -416   
80     -192   
-704   -368   
704    320    
128    64     
160    80     
144    1136   
-896   208    
96     -32    
256    976    
112    96     
112    304    
-800   544    
320    64     
432    -96    
-720   144    
-80    -16    
0      704    
992    -32    
-480   -192   
-432   416    
208    240    
592    -1296  
-2032  -960   
640    160    
608    -1280  
16     -1712  
-416   -80    
96     -16    
640    1056   
-80    592    
-432   240    
160    -240   
128    16     
288    176    
-352   352    
-192   256    
320    272    
144    -48    
-64    48     
-16    96     
-208   928    
352    592    
-80    0      
-256   -480   
656    512    
224    144    
-704   96     
224    -208   
32     16     
16     256    
80     -144   
-64    -16    
32     -128   
-16    144    
208    -160   
416    160    
0      -144   
-672   -400   
400    -32    
128    32     
-160   160    
-32    -352   
-288   -80    
368    -96    
112    -272   
-144   144    
240    -1152  
-560   112    
144    400    
592    192    
-224   192    
-288   80     
0      752    
960    -32    
-464   -208   
-640   144    
640    96     
352    144    
-416   64     
128    -336   
-544   256    
448    -352   
0      96     
-48    80     
112    96     
-272   -176   
560    128    
320    192    
-352   -144   
256    560    
320    224    
-144   -320   
-64    560    
-16    448    
224    -32    
112    -144   
-128   -272   
-320   384    
368    -96    
176    -16    
-96    48     
240    -2320  
-2128  1408   
1616   112    
-80    224    
-208   -16    
64     -256   
-160   -480   
-208   128    
336    336    
304    112    
-304   -336   
-336   224    
272    -656   
368    -192   
-560   -464   
16     -48    
272    16     
-144   288    
0      48     
80     112    
576    848    
-1440  464    
224    -96    
1040   -320   
-640   288    
256    -768   
-304   480    
160    -304   
-160   304    
480    -352   
-304   240    
-288   -112   
-64    384    
736    64     
-352   32     
-240   48     
112    -288   
144    352    
-208   -432   
-16    96     
-48    -80    
96     144    
128    -128   
112    144    
-512   -448   
176    256    
384    -32    
-128   96     
-96    48     
192    1136   
1696   -2416  
-2784  576    
-128   -128   
1152   -512   
64     320    
-640   -240   
-176   320    
800    -320   
-416   -192   
-96    -304   
32     256    
80     48     
-32    -352   
320    -16    
-688   -112   
32     -208   
224    -32    
-112   -784   
80     64     
-144   -224   
-96    -768   
1232   496    
-848   -176   
-352   -432   
-48    560    
336    -576   
-416   112    
672    -720   
32     64     
-800   32     
128    -496   
32     32     
176    -336   
112    128    
-368   -2096  
-224   -48    
352    96     
224    80     
-96    112    
-160   -32    
16     -16    
-224   -560   
-160   48     
400    -224   
-464   -128   
736    64     
48     -16    
-304   -528   
176    -160   
-112   96     
224    -112   
-288   -1488  
-16    -240   
512    544    
-464   -144   
-352   -208   
320    112    
-304   -80    
112    32     
-336   32     
-16    -32    
192    -64    
112    -48    
-48    -112   
-128   -416   
64     64     
560    -688   
-320   -48    
-176   -384   
1888   1328   
-1424  1696   
608    240    
1328   -176   
-1120  -128   
-720   448    
944    -736   
-224   -288   
-464   -128   
-32    16     
736    80     
-336   -304   
576    -528   
-208   -16    
-80    -1376  
-64    416    
560    16     
-336   144    
128    -96    
48     -848   
-176   -880   
0      -16    
160    304    
-592   -240   
208    -128   
192    -112   
-144   -32    
112    -608   
-80    336    
208    80     
-368   224    
160    -608   
208    -480   
-80    288    
-112   304    
-128   256    
224    -560   
-320   -288   
-256   -64    
-544   -112   
16     320    
288    576    
64     400    
128    912    
-208   32     
144    624    
368    32     
-256   1056   
464    -240   
-32    -432   
240    272    
416    -304   
-1408  464    
960    496    
-432   464    
208    592    
192    160    
48     -1760  
-32    -816   
80     1200   
224    -272   
-160   -48    
64     -128   
0      80     
-208   0      
-128   0      
64     -432   
-16    -128   
112    -448   
192    0      
-16    -16    
112    48     
128    -272   
-112   96     
96     -336   
-16    96     
544    -304   
32     0      
-368   -80    
80     160    
160    -64    
496    -176   
-992   256    
528    208    
-96    96     
16     -224   
320    64     
192    -256   
-544   320    
-336   320    
-48    128    
48     -256   
-720   144    
-112   64     
-80    16     
144    208    
112    112    
-320   208    
-64    144    
224    16     
-800   -464   
608    -208   
304    336    
-672   0      
352    -384   
-496   -160   
240    416    
-320   656    
224    -288   
-16    -32    
-272   -80    
-304   -128   
224    -144   
144    112    
-176   192    
-128   -48    
-112   -48    
-80    -240   
128    224    
-176   144    
-160   -160   
224    336    
176    320    
-320   64     
112    64     
16     112    
-48    -160   
96     -32    
-192   80     
-256   128    
880    -112   
-2816  272    
176    -112   
1136   -752   
-400   -528   
-128   976    
0      800    
-128   -928   
304    656    
-320   496    
-96    240    
-32    -48    
32     80     
-96    -64    
80     176    
-128   -96    
-144   240    
160    688    
0      480    
-80    -416   
-208   -336   
1424   448    
-2240  -400   
-208   208    
320    720    
112    -496   
-384   -624   
768    -384   
-224   -656   
-208   784    
-656   320    
32     208    
336    -576   
-192   160    
128    224    
-688   48     
128    32     
112    -144   
-304   -144   
304    48     
-96    80     
112    272    
-384   224    
-272   -1584  
-2128  -48    
-352   224    
960    -128   
-992   -704   
160    -192   
32     512    
-448   192    
80     96     
80     -16    
160    -16    
160    1136   
-1248  224    
-352   -304   
608    -272   
-800   224    
-416   64     
0      -224   
48     192    
-288   -144   
-96    352    
272    128    
-48    -416   
-528   80     
480    48     
544    640    
-880   1376   
-992   320    
-224   -224   
-304   64     
240    -96    
864    240    
-896   128    
-928   448    
608    -352   
-144   80     
192    -144   
-240   256    
-112   -224   
304    224    
-96    -144   
-48    224    
160    -32    
48     192    
368    48     
-592   560    
512    544    
-448   512    
144    0      
320    -32    
-272   176    
-208   -32    
336    256    
-16    -64    
-144   224    
400    -16    
-752   64     
352    128    
96     -32    
-496   -16    
336    -16    
0      128    
-80    128    
320    288    
-96    192    
-32    -128   
48     16     
320    80     
-48    32     
-400   32     
-96    0      
304    0      
144    368    
-384   0      
32     208    
48     0      
-32    -32    
-80    -96    
608    208    
752    -80    
-720   -112   
80     208    
400    256    
-400   288    
80     160    
32     80     
-32    -144   
32     176    
-64    -48    
128    64     
-192   128    
112    -112   
-16    -352   
-160   -432   
-64    48     
288    -80    
16     320    
-224   48     
176    -16    
-160   -176   
144    128    
-208   544    
-80    -528   
-32    -288   
-128   480    
48     -192   
96     48     
-960   -176   
1584   -784   
-144   48     
-1232  -272   
976    368    
224    -128   
-512   224    
-336   -528   
512    -384   
192    480    
-176   32     
32     -80    
0      240    
0      336    
240    -112   
-96    288    
80     0      
80     -288   
128    144    
48     144    
-256   -464   
320    -272   
-160   240    
-240   112    
496    96     
-224   -144   
192    -192   
-112   112    
-128   256    
224    -48    
144    224    
-224   -112   
0      -80    
80     128    
176    32     
-368   48     
144    -96    
272    80     
-336   144    
80     112    
416    112    
-32    -112   
-512   -112   
160    -96    
560    -848   
-112   -16    
-176   176    
-32    64     
-16    96     
736    -304   
-1712  -688   
-16    -32    
400    -48    
-352   -272   
48     32     
720    64     
-288   432    
-560   -16    
432    -48    
64     -608   
-144   0      
0      -272   
32     -224   
448    160    
-256   -144   
-48    160    
48     352    
192    528    
-288   256    
48     96     
208    -496   
-1184  992    
1040   48     
-272   400    
320    -304   
-80    32     
-480   112    
48     -16    
64     80     
272    -16    
0      -112   
-240   128    
-64    112    
352    -176   
-416   64     
208    -272   
-112   -16    
112    -160   
-80    368    
32     -32    
-64    -144   
240    -272   
848    192    
448    384    
-1104  160    
-256   -384   
496    240    
144    0      
-288   -48    
192    0      
752    752    
-1344  144    
80     -544   
608    96     
-560   256    
256    -64    
-144   -1584  
80     192    
400    -336   
-32    96     
-192   48     
16     160    
176    128    
32     112    
-304   128    
592    -16    
32     128    
-704   -736   
1056   592    
336    -2496  
-1936  -1376  
864    -304   
1248   -64    
-416   -48    
48     -128   
160    -48    
-208   192    
-208   256    
656    -112   
-352   -272   
-144   -672   
320    416    
256    -304   
-160   -128   
-112   -160   
-32    128    
96     -80    
160    512    
-48    256    
-16    400    
-16    -240   
256    112    
320    -432   
32     816    
0      -608   
-96    400    
592    944    
0      112    
-32    -800   
32     -352   
-64    -48    
-32    48     
160    160    
176    528    
-112   -736   
96     816    
192    912    
-48    240    
96     -384   
-272   -80    
240    -48    
128    -784   
-160   -48    
-96    -704   
496    144    
-720   -960   
-96    -1088  
352    -304   
80     224    
-368   240    
336    768    
1456   480    
-784   1088   
-432   464    
288    128    
80     368    
256    -992   
48     -624   
-432   -208   
48     224    
240    16     
272    48     
-240   -400   
-224   32     
336    -128   
144    -480   
-336   -576   
-80    160    
64     64     
-16    -48    
128    112    
-48    -192   
16     -112   
400    16     
-544   112    
32     176    
544    96     
-224   -224   
-240   80     
-96    -384   
784    -448   
-144   416    
304    -416   
-400   304    
128    80     
-672   -400   
704    -944   
64     -160   
-96    336    
112    -80    
32     48     
-288   96     
112    -160   
0      0      
64     -48    
-112   320    
112    160    
112    -48    
-128   -144   
-16    -624   
-336   -224   
192    80     
-912   64     
288    -112   
-96    -256   
-96    -400   
64     -272   
96     -1008  
96     -80    
128    176    
-224   240    
48     -64    
-240   -128   
0      -272   
400    -336   
224    464    
-448   528    
-464   64     
736    -336   
-80    -208   
-288   -80    
144    256    
16     144    
-48    144    
384    -144   
-272   -48    
-592   -144   
896    -272   
-464   -880   
1888   -1184  
-624   -96    
-64    -64    
496    720    
-192   64     
-160   832    
1088   656    
16     112    
-448   -16    
288    0      
352    64     
-96    -288   
-464   -16    
16     -80    
32     16     
-32    -32    
128    -368   
-240   -400   
-32    -208   
112    -96    
-272   -960   
-480   -96    
1232   128    
-720   432    
-160   672    
128    16     
80     -256   
-416   112    
-80    -288   
816    -160   
-112   160    
-320   -160   
208    80     
208    384    
-128   -208   
-160   96     
400    -208   
-80    0      
-208   -192   
-384   0      
64     48     
144    80     
-1264  240    
800    -16    
112    496    
-480   -320   
0      848    
-144   416    
-368   -112   
-256   -368   
-192   32     
64     -128   
96     352    
-384   -224   
480    288    
-112   320    
256    -544   
-368   -144   
80     32     
-160   32     
80     16     
160    -64    
112    -48    
-32    -128   
-96    -256   
336    112    
32     0      
-368   32     
816    1056   
560    2176   
-2544  1056   
960    -560   
1632   -288   
-960   -176   
-1104  416    
496    -144   
16     32     
80     48     
-608   480    
112    192    
64     160    
128    32     
-320   64     
-192   -16    
-160   128    
368    -16    
-160   112    
192    -384   
-1200  80     
896    -144   
-240   128    
-80    -192   
608    192    
-64    64     
-512   0      
496    240    
464    -80    
-656   -80    
32     128    
624    -96    
-176   176    
-464   0      
-80    80     
176    192    
336    192    
-288   144    
-288   320    
80     0      
-48    208    
48     -224   
-480   48     
0      -336   
336    -304   
-256   -96    
-400   -128   
160    -96    
288    -48    
48     16     
-128   144    
-160   240    
96     64     
-944   32     
16     -1280  
-304   -352   
176    -272   
-464   -352   
-128   16     
480    112    
144    160    
-304   64     
192    144    
-32    -64    
0      112    
-80    128    
-48    -32    
80     -480   
-304   48     
-240   32     
400    208    
-16    32     
-128   16     
144    -144   
-32    -208   
48     -64    
-448   880    
-16    -112   
224    -16    
208    704    
-288   368    
992    2144   
-2080  912    
128    -80    
1104   -208   
-624   -80    
-272   -16    
336    304    
352    224    
-672   384    
160    16     
-16    -208   
-96    304    
208    112    
128    96     
-672   256    
208    -208   
144    48     
-112   -80    
-224   -224   
112    400    
-528   -592   
752    -384   
-176   96     
-656   16     
256    16     
-192   240    
240    144    
272    256    
-320   -272   
-384   -32    
400    96     
64     -80    
48     128    
-336   64     
64     96     
176    288    
-112   64     
-272   -48    
16     -112   
224    -32    
32     112    
-256   48     
176    32     
-320   32     
304    128    
64     16     
-528   144    
320    96     
-128   -64    
384    496    
-1840  656    
2832   752    
1136   32     
-1360  80     
720    128    
-320   624    
-144   288    
-16    256    
304    -80    
-80    80     
-112   48     
48     32     
-16    144    
272    112    
-352   80     
64     112    
192    496    
-416   -16    
352    64     
-64    -64    
-416   -208   
1152   1104   
496    384    
-688   -352   
-112   176    
320    352    
176    32     
64     192    
-288   160    
-224   -64    
64     144    
48     80     
64     80     
48     224    
16     80     
96     96     
192    128    
-208   336    
-96    240    
256    16     
32     32     
16     144    
-432   -176   
-416   -64    
240    784    
-112   528    
-400   -800   
416    224    
608    208    
-736   -800   
-128   -128   
144    16     
-80    -80    
-208   112    
832    176    
-736   176    
192    -464   
368    64     
48     80     
-208   -224   
-96    160    
112    160    
272    176    
-80    -112   
-480   -368   
528    -1072  
0      176    
592    176    
-192   800    
-336   464    
-416   912    
-288   144    
-624   -32    
576    -368   
640    -1552  
-336   128    
-400   -192   
128    -1008  
256    -128   
-224   32     
-240   400    
48     128    
368    -64    
144    336    
-256   0      
-64    656    
32     400    
288    -256   
-64    -400   
-96    240    
48     576    
288    -96    
-176   -416   
64     -80    
64     496    
80     272    
144    128    
96     -192   
48     32     
-16    576    
112    -16    
-176   272    
128    -32    
160    144    
-368   -192   
192    -400   
192    -256   
320    240    
-400   -720   
-128   -480   
512    -272   
208    208    
-64    -192   
-368   32     
128    -144   
240    96     
-416   -128   
112    -416   
240    400    
0      -560   
48     416    
336    -912   
-912   -560   
0      -1440  
-64    -1008  
48     128    
288    976    
0      1040   
144    -768   
80     -96    
-144   32     
-64    112    
48     -112   
528    176    
-32    -48    
-32    176    
-304   -816   
64     -48    
192    -752   
-272   128    
-48    176    
32     272    
0      272    
-112   48     
32     -288   
480    -624   
208    -80    
-48    -304   
-144   -192   
-48    -192   
928    336    
-1040  448    
432    -304   
32     -256   
-320   512    
240    368    
704    160    
-736   160    
-80    448    
496    160    
32     -336   
-80    -96    
64     -80    
-128   464    
112    -432   
272    160    
-288   64     
-144   320    
96     -1056  
48     320    
192    480    
128    544    
-624   -64    
128    464    
176    304    
-48    752    
32     960    
0      -368   
-160   -256   
80     -128   
96     -32    
-64    -288   
112    -128   
160    32     
-80    -3232  
144    304    
96     -2576  
-128   144    
-112   -144   
256    -336   
-80    -208   
-96    -1120  
256    -160   
48     -48    
208    -96    
-256   160    
-32    -16    
192    96     
0      -192   
1152   -240   
-2560  96     
464    -208   
512    -64    
-1792  -224   
1200   -464   
-256   -512   
-576   -320   
272    -112   
304    80     
-176   -80    
-112   -432   
272    -192   
224    -128   
-864   -48    
448    -176   
64     96     
-240   -336   
-16    -320   
-240   -192   
-48    -16    
336    -688   
-1440  1232   
1264   -240   
-752   -320   
16     -224   
1056   -1616  
-544   288    
-464   -64    
208    128    
352    -48    
0      64     
-96    -160   
-144   -48    
64     -128   
368    48     
-224   32     
-320   128    
64     -368   
-176   -272   
352    112    
160    -384   
-672   -832   
-464   176    
400    416    
-544   0      
-272   32     
16     -400   
80     512    
80     -176   
-16    -16    
352    -240   
96     -240   
-80    64     
-432   -112   
-192   -336   
288    -672   
272    -80    
-608   -2016  
0      -16    
368    -32    
-96    224    
160    48     
-48    80     
-832   0      
32     384    
928    -384   
-240   48     
96     80     
704    144    
-2608  2128   
288    240    
-48    512    
336    -752   
672    -192   
-592   160    
96     -288   
400    -272   
352    -48    
-672   224    
384    -32    
32     -64    
16     16     
-192   -224   
80     96     
-96    -128   
-320   -96    
352    80     
576    512    
-1120  448    
800    528    
128    -272   
-464   -128   
912    144    
-864   -240   
-336   112    
784    -112   
-400   -176   
-320   -368   
16     -224   
272    -16    
-224   -176   
160    128    
-192   -240   
592    144    
-384   0      
-256   32     
192    240    
240    64     
-144   0      
-144   32     
336    160    
-256   -80    
-80    64     
544    -96    
-864   -240   
384    -400   
304    -208   
-144   -128   
208    176    
-528   48     
0      -832   
-640   176    
944    -96    
-816   48     
32     -80    
304    16     
144    192    
128    224    
-240   32     
-192   256    
-32    -192   
176    32     
-96    -128   
-304   -160   
-288   48     
304    -176   
-256   64     
-320   -208   
32     -144   
-224   144    
-16    64     
-96    -32    
-144   -48    
32     176    
224    480    
-160   -256   
-16    -48    
-64    256    
272    384    
-432   -2304  
-592   1008   
1456   0      
-640   224    
352    192    
-448   -384   
-336   448    
-32    -288   
288    256    
176    208    
-448   16     
-16    -176   
80     336    
304    -112   
-544   384    
80     -160   
64     -48    
-64    192    
32     32     
64     48     
80     1152   
-1072  -224   
-1136  416    
1328   336    
-384   -192   
-304   128    
-48    -80    
256    -208   
-16    -192   
-144   -192   
-144   96     
-272   160    
368    144    
32     256    
-496   144    
-144   -256   
32     -80    
-256   -288   
80     80     
288    32     
-272   176    
-208   320    
256    144    
-176   48     
48     16     
-240   96     
160    32     
208    16     
48     192    
-1120  -768   
1120   -576   
112    -480   
-384   32     
128    400    
-432   -128   
144    -16    
288    128    
-176   176    
96     112    
-352   32     
128    144    
-112   16     
0      -16    
144    -48    
112    -112   
-192   80     
256    288    
-128   128    
-48    96     
-1072  -160   
400    -16    
-2336  368    
880    1232   
752    -304   
-1344  -448   
688    304    
-928   1008   
48     208    
320    -272   
96     128    
48     -160   
-528   -16    
0      0      
368    48     
-64    64     
-96    208    
16     64     
144    416    
320    224    
16     160    
-224   80     
-48    0      
0      -144   
-1104  -64    
400    -352   
208    -416   
-128   496    
464    -304   
-384   336    
-272   336    
-64    -192   
304    -64    
16     -160   
320    976    
-704   0      
-256   -368   
352    560    
-224   848    
0      160    
-256   -80    
144    64     
224    144    
0      -272   
-240   0      
96     288    
-272   176    
-544   -32    
208    -656   
-32    -192   
-512   -272   
1152   800    
992    880    
-272   -64    
-1184  560    
400    848    
304    -976   
-32    -1648  
-80    192    
-288   -208   
16     176    
256    400    
192    -192   
0      384    
-144   288    
32     -96    
432    -480   
-64    32     
-160   -320   
-240   -320   
336    432    
304    768    
-208   -112   
-480   -96    
720    384    
-144   320    
-16    -32    
-144   512    
96     2032   
224    144    
16     -352   
240    48     
-544   240    
0      -128   
320    -704   
-32    -624   
-112   176    
288    -32    
-352   -128   
0      -80    
240    144    
-144   464    
-224   -800   
-240   -224   
368    432    
0      1152   
480    -400   
-320   -128   
352    672    
192    784    
-144   80     
-544   -176   
1008   -480   
64     -224   
-256   -32    
304    -48    
-16    64     
192    1744   
720    1424   
-320   -352   
-224   -720   
160    208    
-16    -368   
-144   96     
0      -448   
192    -272   
96     -80    
-48    320    
-160   112    
16     -400   
112    240    
224    432    
-112   192    
64     48     
128    480    
176    1120   
144    1504   
160    -224   
64     -352   
-368   48     
304    1104   
-496   -16    
-32    -480   
320    -832   
128    -1584  
-16    160    
400    416    
16     480    
-288   240    
128    464    
224    -48    
16     144    
-48    -160   
-176   608    
-64    -96    
208    128    
16     -416   
-288   -256   
80     64     
112    -176   
544    608    
-736   1056   
432    -528   
-128   80     
32     176    
-144   144    
192    176    
128    -208   
-112   48     
144    96     
-96    192    
-208   64     
208    128    
32     -48    
-256   -32    
560    144    
-592   176    
-240   -400   
336    0      
80     80     
-272   -144   
208    176    
192    -192   
32     128    
-592   -128   
400    224    
224    128    
-16    -112   
-208   160    
-400   -544   
880    1520   
1408   -1072  
-1248  64     
-144   -176   
1472   320    
-368   -240   
-752   96     
432    160    
-272   0      
-272   160    
304    160    
16     96     
-32    -208   
-48    224    
480    -192   
-16    288    
48     -240   
-400   16     
128    -48    
-112   32     
-96    64     
304    576    
1728   -16    
-960   288    
-160   -48    
-32    -80    
272    16     
272    144    
-80    272    
-96    -96    
-16    112    
128    -240   
112    48     
-208   -400   
288    256    
16     16     
-16    208    
-352   96     
400    256    
128    352    
-192   -368   
336    336    
-1552  -624   
-32    -128   
1632   -480   
224    -64    
-544   -192   
-304   -96    
464    -992   
288    336    
80     224    
-288   160    
64     64     
752    176    
-320   -112   
-368   272    
80     672    
624    -16    
464    64     
-176   160    
-464   368    
-320   208    
1072   16     
-112   -432   
-176   960    
-336   64     
416    -368   
-192   16     
-1056  -80    
224    1008   
2080   0      
-16    -1360  
-896   -752   
-512   -448   
672    272    
-160   128    
256    -96    
176    144    
-64    -304   
-288   -608   
320    48     
-176   -144   
-48    -128   
-192   32     
80     -160   
-384   -16    
496    -352   
-608   -320   
336    384    
816    -176   
-1072  416    
544    -224   
-688   -224   
272    0      
368    -528   
-528   160    
32     -160   
192    32     
-112   -288   
192    -256   
-96    -256   
-16    0      
160    160    
-176   96     
-192   -160   
416    -800   
-144   -288   
48     -384   
320    16     
-32    -32    
0      176    
48     16     
256    -192   
-416   -32    
-112   -96    
-240   208    
-64    -64    
-208   -96    
304    -32    
32     176    
176    -640   
176    -16    
-432   144    
528    -96    
-32    160    
-16    192    
-64    -224   
-160   -288   
336    32     
256    144    
-496   -80    
-64    -224   
176    -32    
32     -336   
-16    -64    
-32    64     
32     64     
176    -3008  
-384   112    
224    -352   
32     16     
32     352    
96     192    
-128   96     
-208   -32    
-16    -80    
256    -368   
-1664  -192   
16     112    
-208   176    
1552   1648   
768    400    
-1712  -656   
432    -448   
384    -752   
432    -640   
-144   -416   
-240   -320   
64     64     
80     -112   
240    -160   
-144   112    
-352   176    
192    528    
368    -128   
-368   -768   
-336   -592   
272    -1216  
96     -224   
64     112    
-352   -1136  
576    -592   
-560   400    
-16    192    
96     128    
-16    608    
-176   416    
-48    -384   
208    -64    
-256   -208   
160    -384   
-16    32     
80     -304   
64     512    
-64    144    
-240   -64    
256    64     
48     32     
-80    192    
-32    32     
-48    -144   
-64    192    
-240   48     
192    -32    
-80    -32    
176    96     
16     224    
80     -256   
-224   96     
80     -816   
2128   -576   
-1728  976    
160    496    
448    528    
-448   -304   
-16    -608   
1008   -816   
-480   336    
0      784    
64     -272   
240    -176   
176    208    
-576   -304   
-544   -192   
-64    -144   
-864   -160   
-144   208    
-16    240    
16     -48    
64     -208   
-1024  -256   
1216   -288   
976    -992   
-1904  -1040  
656    560    
496    592    
-832   544    
-528   -416   
400    224    
48     -16    
112    -48    
-64    -128   
-128   64     
-96    496    
-160   272    
80     -224   
-192   432    
688    1600   
-352   1632   
-176   480    
352    -304   
224    -384   
-352   0      
592    -1008  
-560   80     
-48    32     
832    -400   
-496   -256   
96     480    
-528   -336   
32     -224   
-832   80     
400    32     
480    -64    
-544   208    
896    480    
-592   192    
368    -976   
448    -560   
-256   -304   
-16    -304   
-336   -384   
416    -640   
96     0      
16     96     
-480   -96    
-192   448    
480    448    
-320   -32    
-720   -1056  
1648   -1008  
496    -512   
-544   368    
272    1168   
-16    400    
352    368    
288    160    
-48    -448   
-176   -384   
-16    192    
304    -384   
32     -48    
-416   496    
256    240    
32     432    
-224   -224   
-128   -176   
-64    208    
32     464    
64     -16    
16     -160   
-240   -128   
192    384    
368    -480   
-752   -32    
384    240    
-352   1392   
336    1264   
-448   -16    
-80    -880   
208    208    
-80    -160   
112    320    
80     224    
-32    -64    
16     -400   
592    256    
-96    592    
-64    672    
48     624    
176    944    
64     160    
-432   -128   
-48    304    
-176   320    
272    -208   
352    192    
-400   -64    
-48    -288   
-32    -64    
-160   64     
656    -32    
208    1376   
-1712  -752   
-384   576    
784    944    
-608   -96    
112    672    
-144   720    
144    672    
-16    336    
96     384    
-48    288    
-256   -48    
48     -544   
48     -240   
-272   -64    
32     -32    
48     -928   
-656   -704   
128    -224   
32     -224   
128    -176   
-368   48     
32     400    
144    672    
208    -192   
-208   -192   
-160   -160   
-160   -704   
1264   -288   
-240   608    
-416   -272   
96     -96    
192    608    
-192   1248   
304    944    
-560   768    
-64    112    
64     -16    
0      208    
-48    -176   
192    -96    
-192   288    
64     64     
0      -224   
96     32     
-224   208    
192    112    
-400   -352   
256    -1056  
-448   496    
752    352    
-112   48     
-416   320    
256    -64    
-48    224    
304    -16    
-432   240    
176    144    
-304   80     
304    -144   
-48    0      
32     32     
-224   32     
96     224    
176    -208   
128    16     
-352   96     
144    256    
80     128    
-16    192    
-16    -192   
0      144    
-80    -144   
-16    192    
16     160    
-16    64     
304    -32    
-2064  -928   
1424   496    
1664   -80    
-1920  144    
288    480    
1280   80     
-560   -64    
-192   80     
176    -240   
-32    208    
-112   96     
80     144    
-96    16     
0      224    
432    160    
-240   96     
32     112    
208    128    
-48    80     
-80    112    
-64    160    
-496   -48    
1808   32     
-96    368    
-1136  -16    
16     384    
720    256    
-80    288    
-80    96     
128    96     
-80    96     
80     80     
176    144    
-80    -1120  
-272   96     
320    64     
288    304    
-160   112    
-592   96     
656    304    
752    -80    
-480   544    
-1200  256    
368    0      
464    -320   
64     464    
368    -16    
48     -496   
656    -1200  
-208   576    
-288   384    
176    0      
-224   32     
192    304    
208    -272   
-496   -272   
-400   -240   
544    560    
256    144    
320    -96    
-336   -32    
240    -256   
32     176    
-144   -160   
128    128    
96     -160   
288    80     
96     -16    
-320   64     
-1088  -2080  
2416   -2944  
320    688    
-1136  1072   
752    112    
-672   -96    
192    48     
1072   176    
-1168  80     
176    -192   
96     64     
-16    -1312  
0      0      
16     208    
112    -48    
-176   176    
400    112    
-144   -32    
-208   32     
16     272    
624    256    
-656   480    
224    -128   
144    288    
-256   -224   
48     64     
224    -720   
-272   128    
112    -1280  
304    96     
224    176    
-320   112    
-16    -208   
112    240    
128    192    
-416   448    
224    240    
160    -80    
-48    144    
-16    -96    
96     48     
224    -480   
-96    -112   
-32    -672   
-320   -96    
-160   32     
352    48     
-336   0      
80     48     
208    -112   
-224   -128   
144    400    
-16    -960   
-192   752    
-80    288    
416    -544   
80     -368   
-384   80     
240    -704   
144    48     
-144   256    
320    368    
-48    -144   
-224   16     
384    -288   
96     -320   
-304   -544   
-32    -400   
224    -384   
-48    128    
-32    16     
32     -512   
160    -16    
-64    -1232  
-48    272    
144    304    
336    352    
-336   -512   
-48    -896   
192    -352   
112    0      
-240   1856   
1184   -448   
-992   560    
128    624    
304    -128   
-80    -112   
-224   -272   
208    176    
-32    -448   
160    112    
112    -80    
-208   192    
-416   -432   
144    -496   
0      -80    
-160   -64    
32     16     
224    -1344  
-96    -432   
-128   -16    
-272   240    
704    -240   
-192   -496   
-144   -880   
368    -64    
16     -176   
144    320    
-272   256    
-304   -496   
16     -192   
224    -160   
384    -448   
80     -32    
-192   -32    
32     -304   
224    176    
112    176    
-128   192    
-80    64     
336    160    
192    -32    
-96    0      
-336   48     
224    -288   
576    320    
-112   112    
-288   176    
144    -112   
256    -96    
-64    368    
1184   -432   
-1984  368    
1168   336    
384    336    
-736   400    
352    304    
272    -144   
-416   912    
-64    -560   
-272   -544   
96     80     
80     -16    
96     -176   
-144   -160   
0      -640   
192    272    
32     -1712  
-160   560    
256    -272   
-144   -128   
608    688    
1616   -384   
-1184  336    
304    -672   
-480   -432   
352    -848   
-576   80     
400    1280   
192    1312   
224    -144   
112    -80    
-256   -448   
304    -624   
-288   -928   
-64    80     
656    -160   
-672   -1744  
-208   -1168  
160    -816   
-48    128    
-48    -288   
-208   -176   
192    480    
-192   928    
-656   -192   
800    -720   
720    -1408  
-608   -416   
400    -720   
80     -48    
-256   112    
224    -224   
112    16     
144    -448   
-336   624    
-48    432    
-768   -304   
-16    -512   
-320   -96    
320    -240   
-32    32     
32     -144   
-336   512    
-304   -80    
816    -80    
176    48     
-64    -704   
-480   -592   
192    64     
-336   -2672  
-1744  -896   
896    -64    
480    -96    
-448   -192   
-144   64     
-112   -400   
304    -512   
304    -192   
-96    48     
-128   -752   
-192   464    
304    544    
-64    -80    
-16    -320   
-192   48     
320    224    
-320   -48    
112    -64    
-48    528    
0      128    
208    224    
16     -192   
-576   -1184  
-1200  32     
496    -880   
-480   320    
80     -208   
-224   64     
288    272    
-208   352    
96     -64    
-336   16     
-928   -96    
-128   64     
160    -448   
224    -16    
-432   -80    
-80    144    
-48    464    
272    496    
-96    208    
-576   144    
144    240    
32     352    
-128   -32    
-32    256    
368    0      
112    -128   
-304   -80    
32     -64    
-32    -1056  
-896   -704   
0      -80    
480    80     
-112   1120   
304    192    
-48    -96    
96     16     
-176   -160   
256    -128   
-128   -80    
-448   -32    
208    -16    
208    64     
-96    -96    
288    -144   
-48    240    
-352   128    
272    -32    
288    -192   
-304   480    
-96    192    
-80    -176   
-320   0      
432    -48    
-704   -16    
-304   176    
144    -128   
208    48     
-992   -1104  
1152   -576   
352    -48    
-672   -16    
544    0      
-144   -32    
-272   224    
-128   -208   
-272   608    
496    -304   
-208   96     
-528   -96    
-16    160    
96     -384   
176    48     
-240   128    
240    -128   
-208   208    
-112   -144   
320    32     
-128   -1248  
-816   544    
848    272    
-432   96     
-288   -32    
384    -624   
-528   160    
-48    320    
112    352    
640    48     
-256   -160   
-400   48     
272    -128   
-256   32     
480    -80    
-80    160    
-32    -80    
-64    224    
256    -112   
-608   -48    
400    144    
-16    32     
0      96     
-192   -112   
-512   -64    
144    112    
-208   176    
240    112    
16     96     
416    -816   
-1264  -656   
160    -432   
176    -48    
560    384    
-576   -288   
-784   224    
672    -176   
-640   -80    
-64    -240   
336    -64    
-16    64     
-48    48     
160    240    
-320   -16    
112    192    
48     -32    
-112   80     
-128   240    
192    -16    
-240   64     
160    -416   
-1360  736    
464    208    
-1008  -784   
240    192    
384    -128   
-928   160    
128    48     
624    -128   
-320   64     
-384   32     
240    144    
224    80     
-176   96     
-368   -96    
64     96     
304    320    
-256   240    
112    48     
112    -48    
-32    80     
-112   368    
1056   -544   
-688   144    
576    208    
-128   320    
-304   -32    
-1360  256    
176    144    
576    -80    
96     80     
-320   16     
176    160    
96     -272   
-96    16     
16     128    
-64    -272   
720    240    
336    48     
-320   80     
144    96     
-16    96     
112    16     
80     144    
-288   -208   
96     48     
-112   160    
-112   32     
928    1504   
-2080  816    
-640   1152   
1072   -144   
-272   -352   
80     288    
-544   16     
-48    384    
272    -336   
-288   112    
464    -32    
-320   160    
128    0      
-256   240    
48     -48    
160    288    
-144   -48    
-192   160    
528    32     
480    752    
-560   1808   
112    1232   
336    -272   
-288   -304   
432    48     
416    384    
-1152  160    
528    -96    
384    352    
-528   16     
-160   -80    
544    -192   
416    64     
-1168  -160   
368    80     
352    -368   
144    -32    
-544   16     
128    -144   
0      -32    
128    128    
0      -304   
-416   -80    
144    -144   
144    -608   
-208   112    
192    256    
-240   272    
448    -32    
-112   -288   
-528   -512   
16     96     
-48    -208   
784    0      
-160   -384   
-496   -432   
448    -592   
176    -528   
-128   -736   
-224   -2016  
160    672    
48     864    
48     112    
0      -336   
128    -32    
112    -288   
-32    160    
112    -16    
80     -512   
0      64     
32     -80    
48     144    
16     -32    
192    96     
176    -416   
-336   272    
96     32     
480    464    
-240   608    
240    -144   
192    64     
32     288    
-320   1056   
272    336    
-352   -144   
-304   304    
48     -64    
32     -256   
128    -96    
160    -336   
-16    -128   
0      -1056  
96     128    
64     64     
-160   112    
-112   112    
432    144    
-64    96     
48     96     
-112   -32    
-48    288    
-96    -128   
784    -672   
-320   464    
336    -272   
-288   304    
64     -608   
96     -96    
288    48     
272    544    
-656   320    
128    -160   
560    96     
-48    80     
-176   -112   
48     0      
80     176    
0      96     
64     128    
32     48     
-16    0      
272    -976   
48     272    
0      -128   
-48    32     
-304   64     
160    144    
0      -32    
48     -352   
576    -224   
-528   320    
288    -496   
-2576  -624   
1472   352    
-336   -1088  
-80    -800   
96     -528   
-288   -448   
224    -1536  
368    -736   
80     832    
-96    336    
-240   -176   
304    304    
96     -64    
-128   96     
-16    256    
176    -288   
208    432    
0      -528   
0      384    
272    640    
352    -528   
-1584  -1232  
1232   208    
80     912    
-1248  -176   
-208   -1216  
1152   80     
-736   784    
-368   -448   
240    -496   
-192   -464   
112    -112   
304    -224   
-272   208    
352    64     
80     96     
192    304    
288    32     
-160   64     
32     -80    
-32    128    
-1392  -432   
-176   -256   
800    1088   
800    112    
-368   -96    
128    -1168  
-112   -512   
-240   -16    
160    -400   
-80    176    
208    -240   
80     -144   
416    64     
144    512    
-1184  1168   
-176   384    
48     -128   
-176   -96    
-144   48     
-176   -48    
192    -320   
400    -288   
-128   256    
-496   -176   
208    48     
288    64     
112    896    
-352   144    
464    368    
640    -320   
-1552  -464   
-320   256    
800    -1040  
-32    -352   
-176   -32    
-368   -192   
160    -416   
576    -832   
-256   0      
-144   160    
-368   0      
-112   -112   
688    96     
-576   96     
-64    -112   
-64    -160   
752    -944   
-672   480    
32     384    
-64    -144   
-112   -144   
464    -16    
256    -464   
-320   64     
464    -2288  
-352   112    
432    416    
-144   336    
288    208    
-48    288    
-176   208    
-144   -128   
-80    -256   
192    80     
400    32     
-176   176    
128    48     
320    -128   
-160   -64    
-64    -544   
288    -48    
-496   -48    
-80    -16    
496    32     
0      -48    
-416   16     
240    -352   
-144   -192   
336    0      
-1008  -480   
16     -432   
480    192    
240    -720   
-80    -288   
128    -32    
-32    320    
176    16     
-128   -80    
-208   32     
144    -176   
-176   -64    
192    0      
0      32     
-48    -656   
-800   -336   
256    304    
16     -144   
192    -224   
-112   112    
96     -528   
-64    96     
48     -976   
192    -208   
-96    192    
-96    -32    
16     96     
144    48     
-192   80     
448    2080   
2160   -80    
-1584  32     
448    704    
848    64     
-336   144    
-240   -400   
176    32     
-304   288    
176    -240   
224    80     
-96    48     
-272   48     
400    672    
320    0      
-608   -272   
96     -48    
288    0      
-16    112    
0      -256   
-416   -400   
592    -496   
432    48     
-1472  288    
576    -48    
400    -128   
-608   160    
-224   -272   
464    0      
-64    -160   
-96    16     
48     32     
48     -416   
48     192    
-96    -336   
-624   208    
288    -160   
-224   80     
112    -96    
-480   0      
272    0      
16     96     
144    -32    
-128   -112   
-256   80     
576    -16    
-336   112    
-272   -96    
64     80     
-896   -2272  
-304   -400   
608    -176   
-1008  -112   
64     32     
-272   -112   
288    144    
-544   64     
368    208    
-208   32     
-144   16     
-416   -160   
160    128    
80     -48    
-336   48     
272    -16    
-192   80     
112    -48    
-80    -64    
-160   -80    
64     128    
272    -240   
-1648  224    
432    272    
0      -432   
-368   -384   
-48    96     
-480   -176   
352    304    
272    160    
-240   -224   
16     176    
-48    32     
-16    16     
160    256    
48     -96    
-400   96     
-16    144    
32     -352   
288    -16    
-64    256    
-80    128    
528    48     
-352   -352   
240    64     
96     -64    
-304   160    
-640   336    
560    -144   
48     80     
-336   -64    
256    32     
80     -48    
-272   80     
496    0      
160    256    
-496   -192   
-384   -192   
752    64     
-128   80     
-656   -144   
576    80     
112    16     
-64    -48    
-400   144    
-144   160    
16     48     
-272   96     
-176   -48    
800    592    
-448   -2832  
-2144  -1168  
1440   0      
-608   96     
-48    192    
-160   256    
-384   176    
288    -48    
352    -240   
-272   128    
-112   -16    
-80    32     
512    208    
-112   -192   
-592   16     
-80    -16    
224    16     
64     0      
-176   -336   
-640   -672   
336    -400   
-48    -384   
-96    496    
816    224    
-480   352    
-112   -176   
224    144    
-96    -256   
-640   -432   
160    -304   
384    400    
-320   -304   
-224   -112   
-176   176    
240    144    
-288   -16    
512    -48    
-736   -672   
-112   -624   
256    -176   
-96    16     
-240   -48    
-80    256    
416    448    
-672   -128   
96     -992   
80     -1136  
-208   912    
144    816    
-144   -592   
320    208    
48     880    
896    -48    
-528   1440   
592    768    
80     32     
-288   -176   
192    288    
-192   -112   
144    32     
-80    208    
-160   64     
240    256    
-32    256    
0      -272   
-288   -560   
-240   -240   
192    432    
240    112    
-320   224    
144    80     
-64    144    
128    32     
96     -144   
-224   16     
-160   48     
96     -48    
48     -80    
304    128    
-352   160    
-224   -144   
464    -32    
496    384    
-384   -32    
-48    192    
240    -240   
272    112    
-352   176    
-128   368    
144    -16    
16     128    
-64    64     
144    64     
-160   96     
176    -112   
240    -96    
224    400    
-192   576    
-144   96     
32     16     
768    128    
-1184  432    
336    -128   
416    0      
-208   -176   
64     176    
-320   -112   
240    -752   
368    16     
-80    208    
-80    -64    
-320   144    
368    96     
80     144    
-384   80     
-64    -112   
400    -144   
80     192    
176    -16    
112    -336   
-80    272    
272    -16    
-128   -64    
-112   -64    
0      128    
144    0      
-16    208    
176    -48    
-320   336    
-192   480    
112    944    
1888   512    
-432   128    
-496   848    
464    160    
432    544    
320    688    
-1184  -1296  
-288   -1616  
640    752    
48     512    
-112   64     
-32    -240   
-304   128    
496    208    
0      128    
-240   32     
0      416    
448    704    
0      272    
-176   -1008  
-1056  608    
1712   -752   
-960   -512   
-144   16     
256    1152   
912    1840   
-400   592    
80     288    
480    48     
-304   -48    
-128   -144   
336    128    
304    0      
-416   208    
384    -112   
-64    160    
96     -608   
-32    96     
144    -816   
32     192    
-80    224    
336    224    
656    -576   
160    -592   
-576   0      
288    80     
144    -128   
-112   592    
128    -384   
-256   64     
464    64     
-224   -576   
-464   96     
-80    -608   
560    80     
432    -256   
-864   176    
208    80     
320    48     
-128   -80    
-304   128    
-288   -240   
288    -96    
256    96     
-496   -288   
96     160    
-16    -144   
224    1120   
1488   -1840  
-2352  -352   
608    -80    
1024   32     
-48    144    
-656   80     
64     -432   
768    432    
80     -176   
-176   112    
112    48     
176    -80    
-32    96     
464    -688   
-256   16     
-208   -320   
64     176    
16     -768   
640    464    
-960   256    
560    368    
288    16     
-128   128    
-160   64     
16     144    
400    16     
-128   192    
-96    32     
-80    -464   
32     64     
-144   -448   
160    80     
192    -128   
144    -64    
16     80     
-224   16     
272    -400   
512    -352   
-80    -272   
-16    176    
192    176    
-288   -368   
384    16     
112    -48    
-48    176    
-16    -48    
128    -128   
160    -464   
-368   -288   
224    -32    
-48    -320   
-208   -704   
-560   -320   
784    416    
-592   -16    
-176   -2112  
736    -208   
-992   320    
192    -304   
-112   112    
352    -112   
32     144    
-192   -208   
64     -1216  
-288   -64    
208    16     
-48    96     
-224   -288   
-240   -512   
0      -48    
240    -240   
48     -96    
0      -176   
-32    -224   
-48    240    
416    -112   
-272   -256   
192    64     
-64    96     
-48    -112   
896    544    
-2736  1088   
480    -160   
848    -272   
-480   -32    
-112   -496   
-384   272    
256    -1104  
64     -320   
304    -2768  
-176   160    
-64    -48    
96     80     
128    144    
-448   48     
240    80     
256    -384   
-448   -208   
160    32     
-320   64     
80     288    
-368   -832   
-416   176    
1152   -16    
-160   -64    
-672   128    
384    64     
192    -112   
224    -384   
-224   -32    
-368   160    
368    128    
176    -16    
-160   -32    
-1024  272    
256    0      
-160   -64    
480    -32    
-432   -16    
144    176    
224    112    
-80    -400   
32     112    
-48    -176   
-144   144    
608    48     
-240   -16    
-208   0      
224    -80    
32     336    
496    432    
816    16     
-880   -176   
304    -48    
432    -256   
-656   128    
64     -1008  
448    144    
-544   -160   
-48    0      
160    32     
240    -48    
-352   -128   
112    112    
144    -48    
-208   176    
-240   -48    
-128   -480   
-912   -144   
0      -368   
-128   -320   
992    528    
160    160    
-464   64     
400    224    
-288   80     
112    -128   
240    64     
192    128    
-192   -112   
-256   224    
-160   16     
192    -80    
-16    144    
-96    -64    
368    96     
64     384    
-592   -112   
-112   32     
416    224    
-288   0      
-688   -560   
752    -288   
32     400    
-528   -416   
560    -96    
384    160    
-288   -160   
-432   112    
304    -112   
176    176    
-64    -16    
-160   32     
-80    -208   
240    -112   
-704   240    
864    -128   
64     -144   
192    176    
-32    -96    
-256   16     
32     32     
96     -112   
-80    144    
-80    -400   
464    -16    
-48    -320   
-320   -208   
352    496    
-576   -80    
960    416    
160    -224   
-2016  -128   
176    176    
1776   96     
-880   160    
-176   -704   
352    528    
272    256    
-1024  -48    
160    192    
16     320    
32     96     
96     256    
0      -128   
-688   -176   
256    -144   
208    -240   
-128   -656   
-224   -784   
64     -224   
192    160    
-544   -112   
-32    320    
256    528    
48     288    
112    128    
-128   128    
-272   -672   
288    -96    
-64    320    
-112   -112   
80     -544   
-224   48     
-96    64     
-576   64     
48     -768   
-624   -832   
128    -208   
64     -288   
240    -48    
144    -96    
-512   -752   
160    -1312  
32     -336   
16     768    
-48    -96    
-128   992    
16     -224   
0      560    
560    640    
-640   272    
96     -224   
336    672    
-352   352    
-448   208    
224    1056   
176    400    
-256   -640   
32     -224   
-128   288    
0      -240   
-48    48     
-16    -48    
-256   -16    
-96    -128   
-48    -304   
-432   128    
208    96     
-352   -128   
400    -128   
-144   192    
-48    16     
-80    64     
32     -48    
-112   32     
288    -208   
-656   -336   
-272   160    
432    32     
352    336    
-896   624    
336    -304   
-16    480    
112    -80    
128    32     
-256   448    
-128   112    
304    96     
-48    -32    
-208   96     
-176   304    
192    240    
-80    112    
-80    128    
-224   320    
0      368    
-640   96     
112    -128   
-32    -128   
-48    800    
320    208    
-592   -400   
-32    -192   
144    96     
160    624    
-96    32     
-288   -80    
16     -320   
144    16     
64     -192   
272    -240   
-192   192    
208    128    
-288   304    
16     -128   
80     176    
32     400    
-448   -464   
336    -880   
496    816    
-64    192    
-128   -592   
-336   -80    
256    80     
-32    -128   
80     480    
-240   32     
208    80     
832    1536   
208    -16    
-1936  -368   
720    -976   
2208   -240   
-1408  -64    
64     -80    
1024   -240   
-544   -544   
0      -112   
304    112    
-64    -16    
32     144    
64     -144   
-256   0      
64     -96    
176    144    
96     608    
-144   224    
-16    176    
0      -64    
-768   -144   
1888   -384   
-496   -352   
-1088  16     
1024   272    
-384   -640   
-496   192    
288    64     
-16    -48    
144    128    
192    64     
0      48     
-112   -32    
-592   64     
528    96     
176    64     
-496   -240   
-144   144    
208    64     
-32    128    
224    304    
224    -336   
-464   176    
80     224    
128    -304   
-368   -288   
-192   -16    
272    -48    
64     64     
-112   96     
176    352    
-80    32     
624    192    
96     0      
-80    80     
-208   48     
-144   256    
256    112    
-400   416    
384    176    
304    -48    
-128   64     
-32    144    
16     80     
-272   368    
960    112    
-384   -32    
-640   272    
-320   48     
-896   -1328  
-784   -144   
-160   608    
704    112    
96     160    
-32    224    
-896   336    
656    160    
208    144    
-336   16     
-96    -16    
-176   -160   
-16    192    
64     128    
-224   80     
-160   -80    
144    80     
176    -2000  
368    656    
-1008  -64    
464    592    
400    -320   
-544   192    
560    48     
288    208    
64     -64    
-336   256    
848    0      
-448   96     
176    -48    
48     -16    
64     0      
-16    -352   
544    160    
-848   0      
224    240    
432    96     
-352   64     
-240   80     
144    256    
32     -64    
144    320    
-256   -352   
176    0      
256    -32    
32     -224   
-272   160    
192    -384   
48     96     
384    0      
-144   144    
-400   -672   
-192   -16    
752    -16    
-336   496    
208    256    
48     -240   
32     -496   
0      -96    
112    -112   
-48    32     
-96    208    
128    -448   
112    -32    
-16    -1616  
-320   576    
96     -144   
112    256    
368    944    
384    48     
-560   -192   
96     256    
224    176    
160    -16    
-128   64     
-32    -240   
-320   240    
352    80     
272    -304   
-304   -256   
448    -528   
-2192  928    
1136   -144   
240    384    
-32    -176   
-176   -112   
-144   224    
64     -544   
96     192    
112    224    
-240   -208   
-160   240    
304    -368   
336    448    
-688   128    
272    -368   
96     -336   
128    352    
32     32     
-176   -64    
272    448    
-224   -352   
-544   384    
816    -32    
176    64     
-624   80     
112    192    
336    -144   
-96    -160   
-48    -720   
-112   256    
128    -432   
32     400    
208    -80    
-64    160    
-192   -48    
240    144    
352    0      
-336   -144   
112    96     
-96    16     
144    160    
64     -224   
-128   96     
-16    -208   
320    96     
-128   -32    
-128   128    
128    96     
-560   -160   
-96    416    
3632   240    
-1408  -224   
-608   -208   
1184   -1376  
-976   48     
0      400    
256    -256   
384    160    
-176   -160   
-208   192    
-80    112    
512    -1296  
176    176    
-224   -576   
-96    96     
160    48     
-80    -384   
-224   -16    
128    -64    
-304   -720   
1296   -160   
-1088  -96    
-64    352    
1744   256    
-528   -1872  
320    192    
352    -736   
80     -144   
32     -240   
-576   128    
320    80     
352    -192   
-368   -48    
-160   -144   
480    -32    
-16    -288   
272    -160   
-32    -1200  
-128   -496   
-240   -48    
208    416    
-384   1232   
432    -560   
-432   176    
928    -80    
-544   -864   
-784   -272   
752    224    
16     -64    
-368   96     
144    -48    
-80    16     
-272   -1056  
32     -640   
560    16     
-464   864    
320    -384   
-96    -464   
-704   224    
0      -16    
64     -112   
272    160    
-896   96     
-352   -592   
128    -464   
688    -400   
-752   -400   
-432   -384   
528    64     
-896   48     
-944   -160   
528    -416   
-192   1024   
560    848    
-48    -256   
-768   -1312  
-64    -768   
352    80     
112    -224   
-944   -368   
-416   80     
-32    32     
208    -16    
-128   304    
-16    -1104  
144    -240   
80     -304   
-272   -144   
32     -80    
224    208    
64     0      
-352   -192   
208    -240   
-224   -624   
-560   112    
240    1024   
192    -224   
-176   -336   
144    784    
96     -128   
192    -208   
-320   -48    
336    176    
128    -336   
-512   -896   
144    -128   
400    112    
-208   -1024  
-240   -80    
272    480    
240    144    
-496   96     
16     16     
-64    -176   
256    -368   
288    704    
-144   -544   
-16    -80    
-256   -224   
480    -320   
-896   688    
464    80     
176    -192   
80     -672   
-192   -96    
80     -816   
368    -144   
-176   208    
0      336    
32     -112   
64     96     
-80    48     
-64    -192   
-272   -336   
48     -144   
384    656    
-176   176    
-544   -608   
128    32     
-32    -48    
64     64     
-240   -16    
-64    -368   
-256   272    
-992   -144   
320    816    
-112   720    
-816   128    
176    0      
-144   336    
32     -656   
-320   -112   
384    -144   
-592   -400   
48     592    
240    1040   
16     352    
-128   -96    
-176   96     
-32    64     
112    240    
-176   240    
-240   -32    
48     112    
-544   32     
64     16     
176    -128   
-208   0      
-64    -32    
448    144    
336    -240   
-960   0      
144    688    
544    464    
-624   -160   
128    -256   
128    112    
-112   -112   
-128   160    
96     -144   
-32    384    
-256   -224   
-112   144    
-32    -80    
288    -16    
-224   -192   
-96    144    
272    272    
-144   416    
-176   48     
112    160    
-32    112    
304    -96    
-432   64     
32     32     
96     128    
-112   -112   
384    544    
528    816    
-2128  -720   
-1824  -512   
2256   256    
-336   -208   
-1248  -144   
576    -32    
336    496    
64     -48    
-128   80     
272    80     
-320   -16    
32     48     
-48    144    
272    96     
-704   0      
224    80     
192    -64    
-272   128    
-96    -128   
-16    96     
-48    112    
1824   -128   
-1344  32     
496    64     
-64    32     
-96    -32    
160    32     
-528   -32    
336    -176   
-80    96     
-80    80     
-656   0      
-144   64     
208    -16    
-784   0      
144    -224   
112    -480   
-400   -320   
-144   176    
-144   208    
448    784    
-784   80     
32     -16    
-112   352    
-112   256    
144    144    
-384   176    
256    -48    
-656   240    
-304   -48    
624    240    
160    128    
-368   208    
-32    32     
-256   -576   
-160   -592   
496    -320   
-528   144    
-384   192    
-224   128    
368    272    
128    -96    
-432   -192   
-160   192    
544    -192   
-320   -16    
208    -48    
64     -144   
-912   -448   
2800   -2864  
704    1008   
-1264  912    
-528   -32    
1008   784    
416    16     
-480   64     
-144   -224   
208    -16    
160    -64    
-240   320    
-112   -352   
16     320    
160    -16    
160    224    
-448   48     
-16    80     
224    32     
-432   320    
768    320    
-880   304    
352    96     
496    -64    
-400   -48    
32     80     
688    176    
-464   272    
320    80     
-48    176    
496    -96    
-512   144    
192    -80    
-336   48     
112    112    
192    224    
-144   32     
176    -80    
-144   16     
-96    96     
128    96     
112    144    
-64    48     
-96    -80    
-80    -160   
-96    16     
-144   -16    
-64    -16    
320    -144   
-96    -80    
-112   80     
-192   -416   
640    16     
416    48     
-224   208    
-672   528    
304    144    
-64    -112   
-16    -144   
-16    -48    
-304   -16    
416    -48    
48     16     
-80    304    
-240   144    
192    16     
80     -192   
-400   224    
80     -624   
-128   -192   
112    352    
-48    48     
272    -112   
-96    -176   
-64    368    
-112   192    
32     -224   
96     16     
-144   400    
-96    -112   
-384   -928   
944    -304   
-480   416    
-368   272    
-544   144    
336    -352   
224    176    
368    1056   
-16    480    
-368   -352   
192    -272   
384    176    
-240   0      
0      -64    
-64    176    
240    -400   
-224   16     
208    -1840  
-96    32     
-32    80     
208    80     
-208   -1056  
272    48     
256    -128   
-704   608    
384    -480   
32     -224   
240    368    
-192   -160   
-48    0      
176    160    
560    592    
-592   176    
-144   -80    
384    -112   
208    -144   
112    -304   
-336   176    
112    480    
480    192    
-160   96     
-64    112    
96     144    
128    208    
48     48     
-64    -112   
-240   64     
144    -192   
80     64     
-96    0      
1120   896    
-736   1376   
-336   464    
944    -208   
-1296  112    
672    -128   
432    160    
-64    -64    
-304   -160   
192    -288   
336    -592   
-240   -176   
-32    -256   
512    192    
-560   -2336  
64     -16    
240    64     
-192   64     
-32    -16    
32     128    
-32    80     
-224   -512   
-240   496    
1648   -1024  
-1696  -480   
320    416    
912    -64    
-32    -1344  
-848   -1136  
288    -1184  
496    -336   
-128   -608   
-176   96     
-80    96     
176    -48    
-32    -240   
-64    144    
-368   -880   
-160   -656   
528    -448   
-304   -576   
112    64     
-64    -160   
0      -880   
-464   -1072  
768    400    
-16    272    
-576   496    
-160   80     
160    -480   
-256   -256   
464    -112   
-128   368    
576    832    
-528   208    
-448   -624   
192    336    
-128   224    
64     112    
544    -240   
-272   -96    
432    -288   
224    48     
-432   320    
-192   176    
416    64     
-32    -224   
0      400    
160    -160   
32     112    
-240   -528   
1120   -1296  
416    32     
176    240    
256    288    
-672   1104   
400    -720   
0      -1840  
96     -32    
-224   80     
0      288    
704    -432   
32     32     
-352   -128   
240    448    
80     -192   
112    -176   
400    -240   
-288   528    
192    368    
0      80     
-32    -368   
64     64     
784    288    
-464   -176   
-64    0      
112    -144   
-32    -416   
-336   -480   
48     -848   
48     352    
416    -640   
-48    16     
-352   32     
352    -128   
256    864    
-208   1152   
208    -816   
432    1360   
144    544    
-80    -448   
-208   -720   
64     16     
32     800    
528    -48    
-176   -208   
-304   -496   
368    448    
368    -1200  
-336   -176   
-512   16     
64     896    
1664   -752   
-704   0      
-816   -336   
736    48     
-48    -528   
80     256    
-208   416    
-80    -1408  
-208   -640   
176    304    
176    -16    
-176   -1376  
96     -432   
224    272    
-288   288    
-144   -368   
208    -688   
16     -448   
-128   288    
224    -112   
-128   -64    
-528   32     
96     -720   
-128   -592   
144    -416   
-112   -64    
-240   32     
16     -48    
576    1360   
-784   -368   
-48    -16    
416    432    
-96    -1152  
-320   -960   
336    -240   
320    32     
-288   128    
0      592    
-48    480    
-16    -176   
48     -320   
-16    -448   
-176   -208   
128    -608   
192    -192   
80     -128   
-144   32     
192    -176   
-32    0      
112    1856   
272    144    
-560   -400   
288    352    
-224   -688   
-32    -672   
-592   -80    
400    -144   
224    -96    
-48    -448   
48     144    
-128   -144   
112    96     
-32    -80    
0      -288   
-48    32     
-16    64     
-112   -128   
-112   64     
-352   -192   
96     16     
-400   64     
368    -16    
-384   -16    
368    -48    
112    80     
-48    -720   
-96    16     
-112   192    
-224   592    
1520   240    
-544   -64    
-656   0      
64     -208   
800    -96    
-176   -320   
-80    128    
288    -432   
-128   96     
-64    -96    
352    192    
-224   32     
480    144    
-528   -48    
176    32     
-96    16     
-464   32     
112    16     
224    32     
-288   48     
-432   -144   
1872   -224   
-720   32     
176    96     
240    176    
-96    80     
-320   112    
-208   256    
-64    112    
-16    128    
-304   48     
160    32     
112    -16    
0      48     
16     -48    
256    112    
32     64     
-528   -720   
-128   64     
-208   48     
-416   16     
-272   448    
-240   176    
-592   -176   
-1184  -96    
-16    -192   
-608   -160   
-208   160    
560    -32    
-496   240    
-192   32     
128    -16    
144    -224   
-144   160    
160    -176   
-880   -144   
0      192    
0      208    
496    176    
-672   32     
-64    160    
-832   192    
128    48     
-112   96     
-48    -64    
112    144    
-16    16     
-432   -240   
-912   -1600  
2048   -2544  
288    1920   
-224   544    
-480   288    
672    80     
0      224    
-800   448    
192    -176   
352    -16    
-128   16     
-240   64     
64     -96    
224    176    
80     -112   
32     176    
-160   48     
160    80     
160    48     
-624   96     
528    560    
-512   672    
160    -32    
352    -16    
-64    80     
-656   -96    
240    192    
-176   -432   
-272   64     
304    -368   
-32    96     
-80    -16    
-32    -112   
-272   -32    
352    -192   
-352   -208   
208    -112   
-304   144    
-80    48     
304    256    
-384   -128   
128    -32    
-80    -96    
-208   208    
-48    32     
256    112    
-288   -16    
-80    128    
128    80     
-80    448    
320    288    
0      864    
-432   64     
-96    432    
784    -32    
-640   -80    
-320   64     
400    -96    
160    208    
-32    80     
112    -32    
-208   128    
32     112    
240    176    
-176   400    
-96    160    
48     -304   
-32    -208   
-48    -288   
32     -464   
-192   -512   
112    -160   
-384   48     
-160   16     
-160   -80    
112    64     
112    -240   
-208   -208   
-32    -208   
-80    -144   
-16    144    
272    2176   
1136   -528   
-1680  352    
336    80     
112    -208   
240    -240   
-688   -32    
-48    480    
176    192    
80     160    
96     -144   
-64    224    
-80    80     
128    -64    
0      -80    
-128   112    
48     128    
160    208    
-112   32     
-96    -64    
-208   -64    
624    -368   
-240   864    
176    -480   
16     -16    
64     368    
176    208    
-64    32     
-64    32     
176    272    
96     -16    
-96    -192   
144    512    
96     32     
240    -240   
128    -16    
-400   416    
0      -32    
96     0      
16     64     
32     176    
-48    0      
-176   48     
-112   80     
64     -64    
-112   -16    
176    16     
-208   112    
-480   512    
304    96     
992    -144   
-2064  256    
1152   1056   
288    1008   
-800   160    
384    704    
320    176    
64     -192   
-336   32     
128    -176   
160    80     
-16    64     
-96    128    
-32    400    
64     -112   
128    128    
-176   528    
272    192    
-16    48     
64     -48    
-736   -16    
1408   -272   
576    544    
-1536  -176   
224    -624   
416    -880   
-480   -1104  
-176   1312   
720    2656   
-432   544    
400    -624   
96     -16    
-320   592    
128    128    
464    -32    
-224   48     
-128   208    
-272   16     
0      -16    
224    -272   
-304   -224   
112    144    
0      0      
-576   -880   
32     -240   
1200   2064   
-1088  1232   
256    880    
224    320    
-160   -48    
80     -176   
-288   800    
896    192    
112    -288   
384    -64    
-80    48     
416    864    
432    -480   
-448   32     
16     80     
352    -384   
320    176    
-80    -64    
-96    896    
128    304    
-240   -400   
-48    0      
96     -160   
304    -16    
336    1200   
384    -384   
-208   -944   
416    -480   
384    736    
-176   2080   
-16    -32    
272    -288   
432    -480   
-240   192    
-16    96     
128    128    
160    -176   
-192   -544   
-144   480    
288    128    
128    -96    
-96    -240   
0      -688   
-80    -352   
64     64     
32     -464   
224    176    
480    -768   
-416   752    
352    -688   
-368   -240   
272    -736   
32     -592   
-80    -416   
-128   1280   
256    960    
-80    176    
-16    -320   
96     -272   
96     -400   
-384   -224   
368    -48    
-208   -1088  
-64    -32    
-64    48     
48     64     
304    -144   
-656   -176   
256    -736   
560    -400   
-256   112    
-128   -416   
224    -432   
144    -224   
-368   -304   
528    -304   
496    1072   
-784   -80    
160    368    
352    -272   
-256   -48    
-208   -96    
448    368    
80     688    
336    528    
-192   -64    
112    112    
48     -64    
64     -16    
-112   48     
144    -336   
208    288    
96     176    
336    48     
-384   -288   
96     112    
192    -16    
-16    80     
-48    -80    
-144   864    
240    272    
-112   -160   
160    -496   
32     -1056  
-624   -1232  
352    -1040  
-176   368    
-608   -272   
544    240    
0      -736   
-96    -176   
-176   112    
256    -160   
128    96     
96     176    
-176   192    
80     -560   
128    464    
224    -240   
-32    288    
-16    64     
144    -208   
48     -96    
0      96     
-16    -1072  
448    -528   
-880   240    
704    224    
368    -48    
-1728  320    
160    -416   
384    336    
-64    -512   
-448   -480   
176    -128   
144    -224   
-128   128    
160    -80    
-96    -112   
80     112    
-176   -512   
176    0      
-192   -704   
224    -80    
-240   16     
-144   -144   
-176   112    
144    96     
208    -80    
128    -160   
-368   -96    
288    16     
192    -32    
496    1664   
-576   560    
-960   688    
1424   -336   
-272   -240   
-96    -176   
-352   32     
656    -240   
-336   48     
224    -464   
160    -128   
-224   -848   
-16    -32    
160    -1360  
656    16     
-592   -208   
16     112    
208    -256   
-144   96     
48     -32    
16     0      
80     256    
720    -448   
-3312  -336   
1552   -96    
96     -208   
-1200  -80    
848    80     
336    272    
-208   304    
48     -992   
-240   16     
144    0      
144    96     
-16    128    
-128   -64    
-112   -32    
144    -192   
368    -544   
-416   320    
-176   96     
128    -256   
608    48     
144    -688   
-464   224    
-112   -1520  
432    -544   
560    -176   
-352   432    
112    16     
-48    -80    
-288   -240   
-16    -448   
64     0      
-352   -128   
-704   192    
224    144    
-560   288    
48     -784   
-144   256    
256    -432   
336    32     
-160   -128   
160    96     
128    -32    
160    -304   
-48    32     
-240   16     
0      48     
496    656    
-624   -4176  
-1792  -768   
1456   528    
512    -256   
-336   240    
144    -160   
-400   384    
352    -464   
96     208    
512    16     
-608   32     
112    48     
480    -48    
-288   -48    
-224   64     
112    112    
-64    0      
288    0      
400    224    
-928   608    
464    -32    
304    48     
-288   -112   
400    0      
-352   -160   
-304   144    
608    -32    
-864   -288   
32     -144   
256    112    
-320   -96    
192    -224   
240    -48    
32     -512   
-288   -128   
240    -592   
-144   128    
144    -32    
0      64     
-128   -16    
80     -96    
-272   -288   
272    -96    
-208   320    
-48    448    
144    -528   
320    -1008  
-368   -304   
-592   -560   
-64    -144   
-240   -48    
0      752    
256    -208   
-608   -576   
-128   -432   
176    -400   
80     -304   
16     -144   
-384   -384   
144    -96    
-176   -144   
-208   -240   
208    -32    
-288   -480   
-208   80     
-32    272    
224    -144   
48     512    
-128   976    
-112   -16    
-208   -192   
112    96     
-176   160    
-208   80     
144    144    
0      384    
80     0      
-256   624    
48     -608   
48     336    
432    1120   
-640   -176   
64     -192   
752    1024   
-336   784    
-656   16     
128    592    
560    -112   
-272   -128   
-272   -288   
32     416    
48     16     
80     64     
-144   -128   
-224   144    
176    304    
80     16     
32     368    
-144   160    
48     176    
400    352    
-736   896    
0      -384   
496    432    
-736   160    
-224   32     
176    48     
144    -48    
-32    -144   
-80    112    
-16    176    
-144   -48    
64     32     
-112   16     
-64    448    
288    64     
-528   -112   
-272   560    
432    112    
-608   -176   
-128   -128   
-144   -192   
336    -32    
96     -48    
208    144    
-656   144    
304    16     
192    -80    
-368   160    
-176   80     
-1168  1632   
1936   -208   
-432   368    
-224   -160   
288    384    
320    496    
-176   -272   
-304   416    
-16    304    
80     192    
-192   -352   
-208   -64    
112    224    
16     112    
-224   272    
80     -240   
320    128    
-384   448    
-160   480    
0      -752   
544    1504   
-672   -1136  
-1136  544    
1200   -592   
-880   -16    
320    -32    
448    1360   
16     2096   
-736   1360   
368    -416   
-304   -976   
-608   -736   
336    -320   
-224   224    
-400   -64    
-80    112    
480    592    
-656   656    
-224   -224   
224    -256   
-64    0      
-160   128    
144    -336   
-192   -32    
112    352    
-176   624    
160    272    
-368   -1264  
-192   -464   
240    -48    
-288   -192   
-144   -400   
592    784    
-512   832    
240    224    
400    -96    
240    1488   
-1392  1168   
-112   448    
256    -16    
-240   32     
-48    -112   
-288   496    
464    -64    
-336   96     
96     -336   
80     176    
288    464    
176    208    
-688   -1408  
1104   -1312  
832    112    
-1008  80     
-944   -176   
1136   -512   
112    32     
-448   1008   
-128   688    
-208   0      
384    -16    
384    -32    
-352   176    
-496   272    
368    80     
720    144    
-448   256    
-336   -48    
-320   -672   
432    -384   
224    352    
-288   96     
192    496    
-592   -304   
240    128    
496    -160   
-272   208    
48     160    
-64    48     
96     192    
544    272    
-112   704    
0      48     
-304   80     
-336   32     
400    112    
0      -32    
-128   192    
208    64     
-32    96     
-64    -112   
-16    32     
112    -64    
16     -64    
-208   16     
416    96     
64     912    
192    144    
288    -272   
-320   -128   
48     0      
576    896    
-1072  560    
48     192    
368    128    
-208   32     
112    -16    
-208   -16    
-128   0      
320    128    
48     64     
-32    80     
64     144    
448    160    
-224   128    
-128   64     
176    112    
112    256    
-352   96     
304    -336   
-176   304    
224    -240   
96     128    
-48    144    
32     64     
-128   -448   
80     -416   
96     304    
-144   0      
240    208    
-336   -1200  
1344   -336   
-768   416    
-448   -480   
272    -32    
-112   240    
-400   -144   
816    -144   
112    -16    
-336   80     
-32    0      
416    -32    
-48    304    
16     384    
-288   48     
256    -48    
16     -416   
-48    336    
128    80     
-128   -176   
80     112    
-240   -320   
1168   -192   
-160   -2144  
-768   -176   
528    304    
432    48     
-240   -192   
-240   448    
128    0      
16     144    
384    -32    
-144   -32    
-368   128    
400    64     
256    288    
-192   -176   
-272   160    
144    -192   
48     48     
-80    144    
208    32     
16     -336   
64     16     
-320   -64    
528    240    
48     -48    
-208   224    
288    176    
-128   -352   
-32    528    
-480   336    
-80    448    
64     -304   
-192   48     
208    -1616  
112    -64    
112    64     
-16    96     
0      96     
-16    96     
16     -48    
-16    -112   
64     -48    
-240   -112   
576    160    
-336   -112   
-176   128    
464    -528   
-208   128    
0      -240   
64     -272   
-1312  544    
1632   208    
-336   -112   
-1120  224    
896    16     
160    -32    
-880   64     
192    -400   
480    112    
96     -272   
-160   48     
192    -160   
-192   48     
336    16     
96     128    
-128   160    
-128   144    
160    80     
416    64     
-208   -256   
576    -224   
608    80     
-384   -128   
-48    48     
64     -256   
576    400    
992    -720   
-816   400    
224    -1280  
176    0      
272    -80    
144    176    
96     176    
0      -1424  
448    -64    
48     -128   
-320   288    
-304   -48    
96     48     
304    -96    
-64    48     
32     -64    
-16    64     
-192   16     
480    -560   
0      144    
-464   -256   
-144   -992   
-1072  -672   
-64    -352   
-384   -96    
0      -928   
784    64     
-576   -816   
-96    144    
-16    -144   
176    96     
304    -688   
-336   192    
144    -352   
96     208    
0      -144   
128    80     
0      -208   
-432   112    
336    -96    
-256   -400   
-288   -16    
352    -720   
176    -144   
-448   -592   
-160   48     
528    -544   
-464   0      
80     -96    
-208   -64    
112    -624   
288    -560   
-512   -224   
64     112    
-784   -64    
64     -640   
-288   -256   
304    -160   
-592   -672   
-352   -992   
528    -384   
-128   -208   
-96    -80    
16     -688   
64     -272   
-48    -576   
368    -496   
-32    -784   
32     112    
-720   -352   
304    -832   
144    144    
-176   448    
496    192    
272    240    
-400   0      
128    -80    
-400   160    
656    688    
448    -448   
-432   -1424  
224    -112   
-320   288    
112    -464   
-240   -32    
64     -112   
-768   -528   
320    -64    
272    176    
-48    -80    
0      32     
-48    -816   
160    16     
192    -112   
-128   -32    
-32    -176   
-208   -16    
112    -272   
112    -160   
-256   208    
0      64     
-464   -48    
-400   -160   
608    -432   
-32    64     
112    -272   
-352   192    
288    80     
112    -688   
144    176    
-144   -32    
-144   -96    
-16    144    
112    48     
-64    64     
48     -32    
-256   32     
336    -288   
-64    176    
-32    -240   
16     32     
48     -128   
400    -256   
-1024  -96    
400    16     
-352   144    
304    -224   
-144   96     
-176   -304   
-144   -96    
160    -32    
112    16     
-224   -32    
-224   32     
160    -176   
16     48     
0      -240   
160    160    
16     -112   
-160   -352   
128    144    
128    -96    
-32    -112   
-128   -176   
-16    -128   
192    -160   
-64    -208   
-176   32     
64     208    
-80    -304   
64     128    
-1200  336    
-480   1360   
3120   -1040  
-1408  -160   
-624   -768   
-368   -160   
16     16     
-880   -832   
-64    576    
352    320    
-160   -448   
64     176    
48     -48    
-336   -64    
352    -336   
-16    32     
-400   128    
-192   -256   
128    -512   
336    528    
-976   336    
-416   -736   
-512   416    
1760   -624   
-1472  96     
320    496    
-160   336    
-48    400    
-1312  848    
544    768    
288    32     
0      -80    
-48    -112   
-304   -352   
-272   -176   
-112   352    
48     96     
-112   -432   
-832   304    
-16    48     
624    -48    
112    -128   
-224   176    
-32    496    
368    -576   
-320   -240   
-496   96     
480    -304   
32     144    
224    -272   
-112   -80    
-32    -96    
128    -224   
16     80     
-496   912    
-144   -64    
-368   128    
432    160    
-656   -128   
96     160    
528    -16    
-80    -32    
-160   64     
-288   400    
560    -288   
-288   0      
-16    -112   
-112   96     
32     304    
-96    -512   
960    1360   
-1696  832    
608    -240   
1664   -208   
-192   96     
-1232  112    
640    384    
592    96     
-16    496    
-464   32     
-128   144    
368    16     
-64    -112   
256    256    
-272   -320   
80     208    
-656   -240   
-304   176    
752    -304   
-1104  -1408  
48     -912   
336    -224   
-256   -16    
480    128    
-528   -160   
-160   144    
176    -112   
-32    416    
-304   -32    
-96    -16    
-32    -96    
-608   -128   
112    400    
128    528    
112    96     
-80    304    
-400   0      
-48    256    
544    96     
-144   64     
-464   64     
192    144    
-144   -192   
320    64     
-432   -288   
80     208    
144    -144   
-80    -96    
96     128    
32     160    
-128   144    
-208   -816   
-320   -160   
336    16     
256    -144   
-80    -80    
176    -160   
-160   80     
-48    96     
-240   64     
208    128    
32     112    
-96    48     
96     208    
32     80     
-128   144    
32     352    
464    320    
-208   -464   
-304   144    
240    80     
-272   16     
-16    64     
192    80     
-224   96     
64     -80    
144    -240   
-256   480    
128    48     
48     -112   
-32    -2512  
-1824  1424   
1488   160    
-128   240    
-288   224    
432    16     
-432   0      
-448   -96    
528    160    
112    112    
-288   -144   
-208   16     
288    256    
336    16     
-544   272    
64     16     
304    -144   
-64    336    
80     32     
0      -192   
672    1392   
-1296  48     
-272   -80    
1392   112    
-752   -240   
-800   368    
848    -48    
80     -240   
-304   192    
224    -96    
-224   192    
-64    -96    
-32    112    
128    64     
-224   80     
448    352    
-416   160    
144    160    
-288   96     
32     32     
64     128    
32     32     
-320   32     
80     -80    
-288   0      
336    16     
0      96     
0      48     
-160   32     
704    960    
-720   -192   
-864   992    
1600   16     
-160   -144   
80     48     
-704   176    
160    -432   
320    -240   
128    96     
96     80     
-160   208    
240    64     
-64    80     
-176   192    
672    176    
-448   128    
288    192    
-240   -64    
-224   128    
160    0      
-48    -1120  
1040   464    
-1664  96     
352    48     
1024   192    
-944   64     
-64    112    
704    96     
160    -112   
-768   192    
224    64     
144    112    
-192   16     
176    -368   
48     -32    
-336   -736   
304    -48    
48     -160   
-176   160    
128    32     
80     32     
-272   -400   
-208   272    
1104   -144   
-1184  288    
560    64     
480    240    
-784   -32    
80     -288   
80     192    
128    -208   
-16    32     
-112   160    
-192   64     
384    128    
64     656    
-208   -192   
-416   224    
272    -64    
224    176    
96     -288   
416    96     
-272   256    
128    48     
336    400    
-144   -128   
-400   256    
208    -144   
-144   384    
1712   -80    
-2304  816    
1088   -240   
1696   64     
-864   -16    
-672   288    
1008   480    
32     784    
-224   -80    
432    400    
64     -48    
-288   -240   
160    32     
144    -224   
-48    -64    
64     -912   
80     112    
-176   0      
-16    -368   
544    -368   
-192   512    
-64    336    
16     80     
656    -624   
-416   -192   
-176   80     
-112   -416   
96     272    
240    -288   
0      560    
-208   -1232  
96     352    
336    144    
-160   -80    
-192   -192   
96     0      
160    128    
320    -368   
48     192    
-80    -16    
208    -176   
-352   -160   
0      32     
16     -128   
240    1152   
96     544    
-336   304    
288    -432   
-16    -208   
0      208    
-256   -192   
-416   -448   
960    -976   
-336   -912   
-384   -384   
656    688    
-144   -928   
-128   -64    
-144   -304   
192    48     
320    -224   
-256   0      
0      144    
-112   672    
-208   144    
176    -144   
-112   -112   
80     112    
352    16     
-112   -256   
48     176    
64     -288   
160    48     
32     48     
176    192    
48     -288   
-288   -2352  
-80    -192   
176    -1184  
-32    176    
-336   -400   
816    -1184  
-48    192    
288    -1616  
-560   0      
144    -832   
32     -288   
-144   -32    
-272   208    
0      400    
128    -304   
160    -608   
64     176    
128    112    
-224   224    
80     -48    
288    -464   
-112   -32    
-32    -208   
-112   80     
464    480    
-448   384    
96     -1152  
640    -432   
-336   -368   
-144   96     
544    -256   
-96    32     
-240   272    
160    -96    
-288   0      
32     -32    
-80    256    
0      96     
224    -96    
0      -64    
-224   -288   
464    -480   
-384   -800   
-48    -640   
288    48     
-96    208    
-272   -16    
-32    -160   
464    -208   
-208   144    
-96    16     
224    48     
-544   160    
352    -400   
-1296  704    
2080   -400   
-256   -208   
-672   -160   
816    208    
544    -112   
-272   352    
-352   -672   
240    -208   
-64    -176   
-192   672    
128    256    
-512   80     
-192   -416   
336    -272   
160    -160   
-176   -480   
-224   272    
480    160    
96     -112   
96     1264   
64     -1104  
-1824  208    
1840   -960   
-2144  2464   
720    192    
-304   -128   
-704   256    
880    32     
-352   -160   
-272   -16    
-32    112    
208    -352   
352    -160   
-544   -976   
-80    192    
480    96     
-112   144    
-208   -16    
-48    -192   
-16    -208   
288    448    
-1200  -416   
96     224    
528    -16    
-624   -528   
240    368    
432    -48    
-288   -112   
-16    -144   
-144   160    
384    -112   
176    192    
-528   -112   
-272   -304   
-672   48     
192    -352   
-96    672    
624    16     
224    -16    
-96    -112   
-144   -80    
0      -208   
-144   96     
336    -144   
-528   160    
-224   64     
224    16     
96     416    
-816   -736   
752    -1984  
816    -64    
240    160    
-624   112    
-336   128    
352    -160   
304    144    
32     -304   
-496   208    
-384   -192   
-48    160    
-112   -32    
96     -32    
-64    64     
272    -16    
-304   16     
-192   -112   
-48    -448   
912    -160   
-400   -160   
-192   32     
272    464    
-112   -160   
-480   -80    
336    -224   
32     -528   
-832   144    
224    -208   
160    96     
-336   -96    
-368   -80    
0      112    
400    128    
-608   -96    
128    -112   
-128   -96    
576    336    
-400   -304   
-720   176    
320    -176   
32     -16    
-96    -16    
-96    -128   
-192   144    
-16    -128   
-384   32     
64     16     
-528   80     
192    160    
256    -16    
-272   -544   
416    -272   
-464   -64    
800    -208   
-304   96     
-592   -416   
-240   -160   
288    0      
16     -48    
-272   -80    
80     -96    
-208   112    
160    -32    
-336   -272   
-80    0      
32     -160   
160    -272   
-208   -976   
-512   144    
288    80     
-304   -112   
304    48     
-32    -96    
-144   96     
-160   -48    
112    80     
208    656    
-656   448    
-112   -352   
128    -240   
832    1984   
1456   224    
-1552  112    
160    48     
160    -96    
-112   -496   
96     -480   
112    272    
-688   480    
368    -224   
384    -240   
-384   192    
-256   -208   
224    224    
448    336    
-768   -80    
128    -64    
-256   -48    
0      32     
272    48     
-464   -432   
432    -272   
16     256    
-752   112    
448    -32    
80     48     
-352   464    
336    -176   
-176   -48    
0      16     
-384   -48    
-32    32     
-224   304    
432    160    
-320   112    
64     304    
-80    -16    
-176   576    
512    -64    
-272   16     
-96    -144   
80     128    
32     64     
-48    48     
-432   112    
-304   64     
176    64     
-48    -32    
-160   -304   
1616   1696   
-1440  -944   
-2768  144    
1616   448    
176    -160   
-1392  144    
896    16     
368    320    
-688   48     
128    144    
288    -176   
-144   48     
-160   64     
-48    -48    
544    -48    
-512   -96    
-176   96     
144    80     
208    64     
112    -96    
-416   -64    
432    64     
-1568  736    
592    448    
240    400    
-656   -176   
-16    -80    
-112   160    
-128   112    
-128   -80    
192    96     
272    -272   
336    192    
-512   80     
240    192    
-576   -64    
48     64     
64     -16    
-400   448    
320    -80    
-48    -80    
-64    -112   
-224   -448   
336    -96    
-176   384    
224    -208   
-176   1344   
-1040  288    
96     -160   
-192   -160   
-384   -144   
304    224    
48     -80    
208    -32    
-416   -704   
-608   -96    
288    -208   
544    576    
-512   320    
-16    -288   
656    -784   
-368   224    
80     -16    
-32    96     
-192   320    
160    -304   
-560   464    
-144   -96    
-112   0      
368    -208   
16     -16    
576    -912   
896    -32    
-32    128    
-592   -192   
-304   192    
288    -1040  
512    -2064  
-480   -304   
128    816    
256    480    
96     16     
-48    48     
-96    192    
96     -240   
-128   -544   
160    176    
272    -96    
-272   112    
96     112    
16     -64    
112    32     
-352   -336   
736    320    
-272   96     
-48    352    
-288   144    
352    112    
-96    -160   
-144   -16    
-176   -256   
304    496    
32     544    
112    656    
-480   -48    
16     -816   
48     -224   
32     -48    
320    1040   
-336   -128   
-32    -144   
160    176    
48     352    
-192   -144   
384    -544   
-128   -160   
64     272    
80     720    
-384   -368   
256    -16    
80     128    
176    1248   
1456   -352   
-800   112    
112    400    
-192   896    
480    416    
-576   -1408  
336    -1536  
144    -256   
-32    288    
-144   -112   
160    512    
192    272    
-192   160    
-96    16     
-192   -96    
368    -48    
64     -48    
112    96     
128    -32    
-80    192    
32     32     
-80    -64    
112    384    
-96    0      
-176   240    
48     -912   
-48    -32    
112    -32    
-32    112    
-448   160    
576    -320   
-736   32     
512    -160   
176    -128   
96     128    
-160   -144   
448    -752   
272    -160   
176    -640   
80     -128   
-64    -544   
-48    48     
176    -288   
-96    -160   
-144   -400   
256    0      
224    208    
-144   336    
0      720    
80     -304   
-80    96     
752    -128   
-752   544    
-128   -144   
16     -288   
240    -736   
192    576    
48     -528   
-448   -224   
256    80     
256    448    
80     -160   
64     -192   
-448   -304   
32     480    
304    -32    
192    240    
-256   -112   
-48    -64    
128    -160   
160    0      
160    -208   
-256   -496   
-16    48     
176    -48    
320    80     
-128   48     
192    -48    
-1520  -336   
1264   -304   
384    -224   
-1104  -384   
1216   160    
-720   400    
480    576    
-64    368    
16     448    
-16    -384   
512    320    
-176   80     
-176   0      
336    16     
304    128    
-160   48     
-176   -224   
16     0      
-128   -80    
144    128    
0      -224   
-880   -720   
1072   -1136  
96     -48    
16     -256   
-32    752    
752    96     
-448   -208   
-96    80     
480    64     
-192   -1888  
336    64     
-80    -784   
-304   32     
480    -976   
-240   -80    
208    -16    
80     -32    
32     -560   
448    16     
16     -64    
-304   -400   
-336   -192   
112    -64    
32     -256   
-48    128    
-256   -352   
-1376  48     
-208   448    
1024   -1536  
-224   -112   
-304   80     
-144   -16    
272    -352   
976    816    
-816   464    
-1040  384    
560    96     
128    -400   
-592   -288   
-176   -192   
-112   16     
32     16     
224    -160   
0      400    
-656   -400   
-240   -336   
864    0      
-816   -912   
-176   -1856  
2656   -2784  
336    208    
-1088  176    
-128   176    
896    -240   
-176   -432   
-912   -16    
-16    80     
-112   112    
544    -368   
-160   176    
-352   80     
640    32     
-80    -96    
-144   128    
-32    96     
64     112    
-288   -464   
576    560    
80     -512   
-672   160    
256    64     
224    144    
448    128    
-624   -320   
224    -112   
-256   -560   
32     -208   
16     -720   
64     48     
176    -224   
-96    176    
240    -160   
144    304    
-656   -144   
320    -112   
304    -288   
-304   112    
-544   32     
-368   -48    
400    0      
96     -144   
-96    -80    
96     -192   
-128   112    
-288   -96    
176    -112   
352    -48    
-80    144    
16     112    
176    448    
144    -128   
-464   368    
192    272    
-480   48     
-224   -304   
272    -304   
208    592    
-144   -272   
32     144    
240    240    
-256   -48    
0      -48    
96     -48    
-192   16     
16     -304   
-336   -224   
240    -128   
-272   176    
144    288    
464    -240   
-256   -400   
-240   64     
128    -48    
272    128    
-32    112    
-400   -480   
-16    112    
144    208    
-528   -640   
1456   1312   
336    192    
-1312  400    
544    -96    
-32    -192   
-64    -32    
48     16     
480    1072   
48     -208   
-304   -400   
464    176    
32     -112   
-176   64     
32     320    
208    -368   
-112   64     
400    192    
-64    -224   
-128   -192   
64     96     
320    1584   
384    -240   
-1040  -288   
-208   -176   
-528   96     
16     256    
-880   -48    
48     -192   
-816   64     
48     -32    
144    -48    
-208   288    
0      -368   
-112   0      
352    -176   
-256   304    
-240   -432   
144    176    
-128   -368   
-192   -32    
208    32     
-80    32     
-128   80     
-192   -112   
80     144    
-128   -208   
-224   192    
48     48     
80     192    
464    -176   
-2160  368    
1376   352    
-64    -48    
-1008  -128   
880    -736   
-352   -208   
-224   48     
-144   -16    
32     112    
48     0      
-720   -64    
192    64     
32     128    
0      240    
-320   0      
320    0      
-112   -32    
-16    80     
-144   96     
-32    -32    
672    1184   
848    80     
-912   208    
-64    -48    
-48    -96    
-192   -160   
-208   -448   
-1040  -48    
64     208    
144    -368   
-64    112    
16     -64    
-16    256    
-304   160    
-144   48     
464    -32    
16     480    
80     112    
-128   -64    
0      96     
16     -48    
160    -112   
16     -16    
-64    -96    
432    64     
560    1808   
-720   720    
-688   544    
608    -368   
-80    32     
64     112    
-128   160    
-352   -416   
144    -704   
256    -96    
-992   960    
-272   592    
-496   -112   
112    352    
-336   32     
-48    16     
-224   -176   
-80    -160   
32     -128   
448    640    
352    432    
-112   -224   
-176   128    
-144   64     
896    2336   
-416   752    
-592   -16    
1328   -1072  
-800   -144   
-1104  -384   
672    288    
320    592    
-560   -480   
-288   608    
256    -416   
224    224    
128    256    
-96    32     
-64    32     
0      -80    
-80    -64    
-80    272    
-448   80     
464    368    
-384   -1008  
0      352    
-160   -16    
-288   400    
736    512    
-80    -256   
-384   48     
48     912    
-32    -144   
64     -112   
16     -80    
-336   -128   
-48    752    
144    496    
416    416    
-352   -96    
-240   -144   
480    272    
272    608    
-160   -128   
-144   0      
-384   528    
432    -160   
128    496    
-208   688    
-208   -16    
320    352    
-16    592    
-128   -640   
96     -192   
-320   -832   
560    -64    
-240   -416   
-144   -432   
-224   -304   
-416   -80    
-144   128    
336    -208   
-208   -576   
-352   -32    
32     272    
192    -16    
144    -16    
0      64     
-64    464    
240    176    
160    -64    
-464   112    
-64    -320   
112    48     
-224   96     
64     0      
112    -224   
-272   128    
-32    736    
-128   672    
-64    416    
16     720    
-256   368    
176    -176   
448    576    
-1312  576    
496    -144   
688    160    
16     -304   
-16    -464   
-464   -1056  
240    256    
112    544    
-112   256    
0      -144   
-80    -192   
128    384    
-32    -240   
0      64     
-48    304    
64     336    
80     256    
128    -208   
-128   48     
384    128    
-928   1040   
592    -720   
304    -464   
-144   496    
-176   224    
80     416    
128    80     
-80    32     
-64    160    
-16    -80    
-16    -128   
-16    512    
208    -240   
-48    208    
-112   128    
-80    128    
160    64     
112    176    
-80    160    
144    160    
-160   -32    
-192   160    
144    -80    
-128   -1648  
160    80     
288    112    
-112   176    
160    -16    
-400   -544   
144    432    
1168   -208   
-880   -128   
528    256    
528    -208   
-752   0      
-80    128    
176    208    
32     16     
64     -1280  
-16    96     
-48    32     
-48    80     
496    96     
-384   32     
112    96     
64     272    
-176   -64    
32     192    
64     -80    
0      208    
-736   -800   
448    -80    
1120   -144   
-1264  -160   
720    112    
256    176    
-176   368    
-16    -112   
-480   304    
368    144    
-16    64     
-240   -48    
-240   0      
512    144    
160    80     
-224   16     
-144   96     
304    112    
-272   -80    
-128   96     
-304   -1136  
112    288    
240    -128   
-256   48     
256    800    
-192   352    
544    -80    
304    224    
528    32     
-432   -416   
-448   144    
432    -256   
-192   16     
144    64     
128    0      
576    -576   
-64    368    
-208   -816   
-48    304    
-48    16     
-240   112    
0      96     
256    48     
416    608    
-288   48     
-640   -448   
-48    208    
256    -48    
-784   784    
2208   32     
816    -320   
-2032  272    
-304   240    
1856   -224   
208    -16    
-1040  432    
64     192    
304    -176   
0      256    
-368   -64    
-192   144    
80     -704   
-32    112    
128    -128   
-48    176    
-16    -256   
96     80     
112    -976   
-1104  -96    
704    -368   
-272   352    
560    -64    
-304   16     
-16    176    
544    -192   
-912   -128   
160    -464   
432    192    
-144   -128   
-160   192    
32     -256   
-112   256    
496    -1456  
-640   16     
496    144    
-464   96     
-176   208    
80     -2208  
-32    80     
80     112    
-64    240    
-224   -96    
272    320    
-48    224    
336    224    
-288   -192   
224    96     
192    -160   
-176   -96    
160    96     
80     400    
688    -64    
-1168  -672   
-176   -160   
304    -16    
-32    -176   
144    48     
-528   -1120  
160    -112   
160    -16    
-64    -112   
-32    32     
128    128    
48     -192   
-144   -64    
-64    -208   
144    -176   
-144   -304   
224    -128   
-224   16     
96     208    
-224   96     
144    -256   
176    -16    
112    -400   
-64    400    
0      0      
-80    -208   
160    -384   
352    -1472  
-1792  1440   
1616   -320   
-352   -208   
432    -624   
-848   320    
-128   -272   
64     -48    
256    -176   
96     80     
-320   -144   
-48    -304   
400    -176   
-288   -112   
-240   -208   
208    -304   
80     176    
112    144    
-64    -48    
-112   -128   
-192   512    
-480   160    
176    -192   
208    -48    
16     -464   
-176   -1952  
32     -304   
176    -384   
-96    -224   
64     -128   
-32    288    
-16    160    
48     144    
-144   48     
-240   -304   
-128   80     
256    160    
-1088  -400   
-64    -304   
272    -80    
32     128    
-192   112    
128    -256   
144    240    
64     -272   
-272   272    
32     224    
288    -400   
-16    176    
-368   368    
-1232  256    
2224   -832   
-48    -224   
-1648  144    
416    256    
-176   -256   
-144   -688   
288    -128   
-16    400    
0      160    
-16    48     
176    -16    
-208   96     
-64    176    
592    32     
-864   -160   
-176   -384   
-80    -688   
-272   -720   
-96    -224   
528    992    
272    -592   
-2048  -336   
1056   1168   
880    -1376  
-928   -528   
0      64     
304    -336   
-320   -416   
-144   -128   
112    80     
-160   272    
-128   -288   
96     64     
16     192    
-352   -144   
80     80     
128    64     
0      336    
-16    640    
-16    416    
-176   208    
272    -224   
288    1312   
608    592    
-96    -48    
-16    -176   
288    -80    
272    -1712  
-672   -1184  
224    192    
-240   -192   
-352   -704   
432    240    
160    64     
-880   -416   
-224   -832   
-400   -528   
288    -224   
-320   -208   
224    -480   
304    -320   
-96    -224   
-768   224    
160    -80    
-992   -240   
448    -192   
-448   -496   
-304   -688   
-48    64     
848    2208   
-1824  176    
-32    -448   
1104   -160   
-448   272    
-736   784    
32     -400   
768    -1696  
-96    -464   
-48    160    
-176   160    
-80    -192   
496    -656   
-144   464    
-304   32     
-32    224    
176    384    
-496   -224   
-48    -224   
-160   -160   
-80    416    
-48    -16    
192    384    
176    -352   
-416   128    
16     -320   
-400   -208   
80     512    
288    1072   
-128   -80    
-80    -288   
-304   -224   
-304   144    
368    0      
-368   -80    
-48    192    
-640   192    
48     896    
80     384    
80     -464   
-224   -432   
-272   304    
384    288    
-112   160    
-240   768    
208    304    
-32    160    
-384   -496   
48     -432   
208    416    
-528   -320   
448    -848   
272    576    
-864   96     
336    0      
256    48     
-848   -512   
-224   -1120  
288    -336   
-32    256    
48     592    
64     592    
-176   432    
144    272    
192    208    
-240   176    
-256   -96    
-240   -384   
-176   -176   
384    -144   
-160   80     
16     208    
48     192    
-208   80     
288    96     
-320   80     
-16    -528   
48     -64    
112    464    
-32    112    
64     -1344  
-912   240    
1008   -512   
-672   1072   
544    224    
-496   176    
272    704    
0      -160   
-16    -720   
-96    -464   
-32    -32    
-80    -80    
32     96     
96     304    
-96    240    
-48    144    
-80    -208   
16     -320   
-208   -112   
144    -48    
544    736    
-1264  432    
688    -160   
-96    -176   
-352   -240   
208    -400   
-48    -112   
48     464    
32     80     
96     144    
-80    208    
-416   -112   
160    192    
16     -96    
-512   32     
352    96     
-96    48     
272    16     
-416   224    
400    -32    
-288   80     
-112   32     
80     32     
32     240    
64     208    
-352   144    
-448   -48    
576    16     
-272   -384   
-800   -1520  
3280   1264   
1280   -496   
-2128  -336   
256    -416   
1568   368    
-1392  -160   
-592   448    
960    -112   
-416   144    
-304   -48    
224    144    
160    80     
80     240    
-96    160    
-16    160    
96     144    
-176   -96    
-176   80     
352    -48    
144    208    
-272   -320   
944    944    
432    -288   
-1008  416    
-480   -336   
256    224    
-32    -160   
-288   -96    
208    -224   
-64    288    
16     64     
-112   48     
48     48     
-272   -144   
400    48     
128    112    
-368   272    
336    -80    
-16    176    
-208   64     
0      112    
-304   -640   
-304   640    
656    240    
-1136  -32    
208    -1024  
96     -416   
96     -416   
-96    256    
16     -160   
-384   32     
176    48     
304    -48    
-48    336    
-560   -192   
320    -672   
112    512    
-432   352    
480    -352   
144    -48    
-192   320    
-144   16     
256    32     
272    64     
64     -144   
-1088  384    
336    256    
208    32     
-608   -736   
1968   4160   
-496   1840   
-320   80     
1184   -576   
-464   96     
192    208    
-688   304    
528    -128   
288    288    
80     -112   
-480   240    
-80    112    
384    80     
-32    -48    
-48    -48    
-64    160    
256    -96    
-128   176    
112    -1408  
-272   848    
816    256    
-768   400    
544    -96    
-496   -16    
-224   240    
352    160    
-208   192    
288    96     
-416   -80    
352    192    
-32    192    
-16    -112   
80     32     
-144   -528   
160    -112   
-160   -128   
80     -240   
-208   96     
224    112    
-48    144    
128    176    
128    -352   
80     48     
304    -112   
-416   64     
-240   64     
544    -176   
-16    208    
-304   -576   
160    112    
144    -1936  
128    800    
-464   208    
-96    -752   
368    -1344  
-496   32     
48     752    
192    -144   
-288   -384   
336    176    
208    288    
0      -128   
96     96     
16     80     
-208   192    
160    -512   
32     112    
224    -176   
-144   144    
128    112    
48     208    
528    288    
-704   976    
336    528    
448    128    
80     352    
-448   -48    
-112   -352   
368    -288   
128    560    
-416   -208   
864    976    
32     96     
-960   -688   
400    704    
352    256    
96     1088   
-368   1136   
144    -96    
-16    352    
32     288    
160    -544   
-80    160    
-112   -976   
144    208    
-64    32     
-144   256    
96     -272   
128    224    
-128   64     
-240   144    
560    -64    
96     -64    
-768   -624   
288    -96    
-64    208    
384    -800   
-400   -736   
-128   352    
0      576    
0      -448   
160    112    
-16    -1344  
0      384    
176    128    
192    48     
208    112    
-384   -16    
-192   -80    
464    16     
-32    464    
-176   -128   
160    256    
16     -160   
-112   336    
256    96     
-256   512    
80     -384   
256    -944   
-192   80     
464    1056   
544    208    
-3376  288    
592    -16    
432    464    
-560   -480   
272    816    
320    -848   
-304   -352   
-64    480    
352    -544   
-48    -112   
16     -32    
96     -384   
-352   96     
32     -160   
240    -64    
-320   -336   
-304   -160   
112    32     
48     0      
-32    960    
1472   -288   
-688   -304   
48     -752   
-128   192    
0      -496   
480    -1104  
-240   832    
224    1152   
224    -624   
-224   -912   
128    144    
288    400    
-96    -80    
304    256    
144    -128   
-64    -176   
240    208    
-176   -816   
208    -112   
32     -64    
-272   1024   
608    128    
320    640    
-384   1248   
176    320    
-640   480    
528    -240   
-32    672    
-208   32     
672    400    
176    -304   
-16    -464   
-800   16     
1088   -320   
416    -912   
128    1152   
320    272    
-192   592    
416    352    
32     -32    
0      -96    
-192   -176   
-320   192    
192    -80    
-480   -48    
-464   -400   
0      -240   
80     -384   
224    1008   
544    -1024  
256    224    
304    -1104  
-944   -656   
-96    544    
464    80     
-64    512    
-48    1248   
-160   80     
48     -160   
416    112    
-48    208    
-608   752    
16     -688   
-160   -64    
224    224    
-240   96     
-32    448    
-272   64     
128    -416   
256    -448   
-624   -192   
-96    128    
-64    480    
-64    -336   
96     -1008  
0      -1008  
-144   -288   
144    -896   
-64    16     
320    16     
-112   -48    
64     -1632  
320    288    
-176   512    
-48    16     
-144   64     
64     272    
-112   416    
-48    176    
112    -64    
32     -368   
304    32     
-64    -416   
176    32     
-128   -432   
144    -368   
-224   64     
-176   432    
256    272    
-320   -880   
-352   -80    
864    96     
-336   304    
112    304    
48     -240   
-496   -304   
48     -224   
-384   -160   
416    -32    
-32    -288   
-160   -176   
-48    -480   
272    -176   
-112   224    
96     48     
-112   160    
0      -416   
-192   48     
-192   160    
-80    -96    
-256   -272   
160    -96    
-688   -96    
208    416    
-816   80     
-64    112    
288    -192   
-384   -80    
80     1360   
-1040  -960   
128    16     
1040   -128   
-496   -112   
-208   192    
-32    -16    
-64    -32    
-304   -192   
-528   48     
320    208    
48     0      
64     64     
-208   -64    
-272   -416   
80     416    
-560   256    
240    -80    
-352   -304   
-256   -272   
64     176    
272    1392   
896    -256   
-1056  -48    
272    -64    
656    -144   
-480   432    
16     -32    
0      224    
-240   -96    
-144   32     
352    -16    
-144   80     
-112   -128   
-64    16     
-432   -112   
192    48     
-48    -144   
32     240    
16     -176   
-288   112    
336    64     
64     80     
16     96     
-304   -48    
560    144    
-368   -128   
-16    144    
-304   -48    
-272   -192   
-576   -1408  
-464   80     
768    64     
-432   80     
-48    -272   
-832   -64    
1280   0      
96     64     
-400   32     
112    -16    
320    256    
-320   -128   
-16    224    
224    -16    
-592   -32    
32     32     
304    160    
-1088  -272   
-128   32     
96     -80    
16     48     
432    976    
-1152  -512   
-960   32     
1840   640    
-1616  -320   
-896   240    
1120   -192   
-1040  48     
192    112    
256    -240   
-80    144    
-1008  -16    
32     128    
16     224    
-112   -16    
-224   80     
192    48     
-96    -352   
-48    -304   
144    -128   
112    112    
-272   528    
1520   -80    
-944   -112   
-96    144    
752    -112   
-1088  608    
-320   240    
672    -336   
48     -352   
-32    80     
-160   384    
-64    144    
336    -112   
832    -32    
-672   48     
80     464    
-128   160    
48     240    
-144   -64    
-192   144    
0      16     
-16    -32    
-48    48     
-144   144    
752    80     
160    64     
-144   112    
-320   -480   
1840   -608   
-2576  -576   
512    -208   
1216   16     
-672   32     
-416   -64    
96     192    
192    0      
-272   -240   
288    272    
480    -96    
-544   96     
320    112    
48     96     
-32    0      
-80    304    
176    32     
-112   160    
-320   -416   
560    -448   
-96    -976   
-224   -240   
128    384    
-608   -112   
192    304    
496    -112   
-416   224    
128    32     
176    112    
-80    512    
240    96     
-144   352    
-64    48     
32     48     
320    224    
-560   -160   
384    -336   
128    -688   
-304   -96    
64     160    
48     64     
448    864    
-608   400    
112    160    
496    -48    
-448   -16    
0      -304   
272    -80    
-288   160    
192    -96    
-288   -384   
496    720    
-928   160    
176    -464   
-160   -304   
-128   -608   
112    -1168  
48     -576   
-416   -336   
48     -624   
-128   -208   
-64    288    
160    528    
-32    112    
-176   -176   
160    240    
-112   448    
128    -16    
-48    160    
-80    48     
144    320    
-112   -336   
128    -496   
32     -160   
80     -352   
-32    320    
320    224    
-400   272    
64     64     
240    160    
-80    -16    
288    -16    
-304   624    
352    400    
64     576    
48     368    
-64    -32    
-272   704    
16     672    
-400   32     
0      -176   
128    160    
-16    96     
-144   -48    
-32    -272   
-16    112    
-48    -912   
-80    -32    
336    -160   
80     48     
-80    224    
-224   -304   
96     -176   
48     224    
0      464    
112    272    
-272   -496   
144    -160   
-16    -176   
208    -64    
64     64     
-128   96     
-208   368    
80     -32    
160    48     
48     256    
-64    48     
80     96     
-144   224    
-96    -368   
96     64     
-240   -160   
-96    16     
128    144    
160    -16    
-336   304    
16     -512   
-64    -64    
48     -656   
144    80     
-176   176    
-96    1264   
2880   -800   
-1376  -48    
-432   -864   
1312   -864   
112    -80    
-272   -1072  
448    -1280  
-208   -464   
-256   816    
400    48     
256    -240   
-128   -160   
-48    -128   
176    320    
64     176    
-16    416    
368    -416   
-112   384    
-160   -192   
608    96     
-2096  80     
480    -304   
496    -864   
-544   -496   
528    336    
-208   16     
-576   -2048  
208    -1232  
-32    240    
-80    304    
-64    -112   
176    -272   
32     -112   
-64    -16    
224    160    
80     176    
368    1584   
384    832    
-272   432    
-80    -464   
16     144    
432    192    
-496   720    
128    0      
176    112    
304    1616   
-592   736    
-736   352    
960    -624   
-224   -16    
-256   32     
-32    240    
32     -80    
-48    1008   
880    -848   
-16    960    
-400   272    
48     64     
512    464    
400    416    
-576   -144   
176    432    
672    -192   
176    752    
-480   96     
-528   -160   
864    96     
272    -208   
-640   -64    
384    880    
1184   64     
-1632  -816   
-176   -1936  
272    -1232  
384    -368   
-432   160    
-368   912    
288    144    
-320   448    
-240   -512   
-320   144    
-16    -528   
496    -64    
0      160    
-320   16     
304    112    
-112   -592   
224    -656   
-96    -192   
-16    -112   
64     224    
416    -192   
-496   -48    
-16    304    
240    -640   
-96    -528   
64     -784   
176    -96    
-272   -384   
176    -160   
48     -288   
32     336    
96     -80    
-288   64     
32     96     
336    224    
-304   -112   
224    64     
96     -80    
-32    -96    
128    0      
-400   -176   
-96    96     
432    -240   
-192   -288   
-112   -1952  
304    -144   
-144   -64    
96     0      
-144   -576   
544    -576   
-80    352    
-160   -176   
144    -128   
-64    -48    
-912   -160   
368    48     
-48    -64    
96     -528   
-160   160    
192    -624   
240    -160   
-208   16     
128    304    
128    -400   
-96    224    
-112   -112   
224    -496   
-336   224    
-128   144    
0      -368   
-64    -176   
0      80     
112    -32    
112    -352   
176    -240   
-192   240    
64     -1264  
256    80     
-880   -1072  
1008   -784   
208    -112   
-704   -240   
560    288    
432    112    
-1040  64     
-144   -240   
176    -240   
-16    176    
-64    -80    
-144   -32    
0      128    
128    -976   
128    -112   
-128   352    
112    -288   
-80    48     
96     -176   
-160   -64    
112    -1216  
-960   464    
848    288    
-656   -64    
-400   336    
-368   -736   
-192   -416   
-128   128    
-240   -304   
592    -160   
-64    -64    
-432   208    
-96    -16    
528    208    
-384   -64    
-192   16     
-192   -80    
96     -48    
-192   0      
128    -240   
-240   144    
96     -112   
64     64     
224    -96    
-608   -48    
544    32     
192    -64    
-528   -80    
-80    -16    
432    1232   
720    -2272  
-3136  1456   
736    -560   
944    -352   
-192   80     
-768   80     
144    320    
544    -336   
-448   -448   
112    -16    
-128   160    
80     -80    
-192   160    
368    -32    
-608   32     
112    -112   
-96    -96    
-128   -48    
-256   64     
-160   -112   
-112   -576   
752    240    
-848   -16    
-592   -560   
-480   544    
256    -128   
-544   80     
656    -96    
-640   80     
-640   112    
96     32     
0      64     
128    48     
32     288    
-816   -160   
-272   128    
-128   -272   
176    384    
-176   16     
-240   -64    
-96    64     
-96    -672   
-688   240    
112    -128   
-384   -128   
-128   144    
128    48     
-288   -160   
256    144    
-48    0      
48     48     
-352   -400   
-128   -128   
368    832    
-112   -288   
-640   112    
336    -208   
-352   -96    
-112   96     
-96    128    
-80    48     
16     32     
-416   -160   
-144   0      
-160   -416   
-240   176    
512    -48    
-128   0      
-384   -336   
1152   48     
-128   -544   
224    368    
752    80     
-1120  -96    
-640   -176   
656    -528   
-112   64     
-992   -336   
-80    32     
528    304    
-48    0      
80     416    
192    -352   
-448   80     
-32    -160   
176    176    
0      -32    
96     480    
320    992    
-272   -272   
-160   -336   
288    32     
-592   -32    
-352   432    
832    -80    
-224   -16    
-96    -384   
-112   -768   
32     -480   
320    672    
32     880    
0      80     
-176   -432   
96     -176   
-80    64     
112    368    
-32    128    
-720   -64    
288    304    
-32    -400   
-352   -224   
208    -400   
112    -816   
64     -768   
-368   -256   
176    -272   
-576   -480   
-80    800    
368    240    
-112   -320   
272    912    
-560   -176   
-672   -416   
544    -176   
-592   -464   
-48    -880   
48     1536   
368    -144   
-320   -1552  
112    512    
160    272    
-256   32     
176    64     
16     0      
96     -128   
-224   80     
208    144    
-112   288    
48     16     
-288   -16    
-112   32     
32     96     
-128   64     
-80    0      
-16    -144   
96     416    
240    112    
-576   224    
176    -16    
240    0      
64     384    
-464   240    
-112   -288   
816    64     
-192   -80    
-192   32     
128    224    
-32    16     
256    -368   
320    -272   
-384   320    
0      0      
128    -32    
-48    -48    
128    32     
-272   -112   
0      -208   
272    -32    
208    144    
-128   112    
-656   128    
528    -80    
-384   -48    
128    176    
224    336    
-96    -304   
256    -416   
-112   128    
-128   288    
-176   160    
96     80     
48     368    
-128   -192   
-16    16     
-224   208    
192    208    
400    208    
-336   336    
-224   272    
128    -64    
64     -64    
-160   -80    
-16    208    
-256   368    
-16    352    
112    208    
208    80     
-224   -192   
32     48     
-352   -864   
1920   -544   
64     864    
-848   -80    
496    32     
-48    1264   
256    192    
320    -1152  
-128   624    
-16    1040   
416    -96    
-128   -80    
80     80     
96     -144   
-352   -144   
208    112    
128    368    
144    448    
-144   912    
32     -288   
112    288    
-544   -544   
-32    144    
1456   -1008  
-1056  848    
704    1408   
-128   624    
-32    -384   
-576   -448   
288    -192   
208    640    
336    432    
-160   -224   
16     48     
-32    32     
64     80     
560    -80    
-592   32     
288    -160   
96     -32    
-80    16     
-80    64     
-192   -544   
304    -144   
736    2048   
1696   1408   
-688   -416   
-544   -512   
1040   -464   
-176   512    
-80    112    
208    128    
-160   -208   
144    224    
-304   112    
-320   -48    
784    -544   
-48    -240   
-624   368    
368    -640   
912    -448   
-336   320    
-16    0      
128    336    
128    96     
-32    -400   
-656   448    
288    -160   
48     112    
-576   -240   
-160   -1232  
1216   -368   
240    128    
-528   16     
-432   -288   
208    -16    
320    48     
-400   0      
-656   512    
576    -32    
128    192    
-176   -32    
-272   112    
64     80     
304    112    
304    112    
-528   192    
176    -32    
-336   -416   
720    -1056  
-208   -256   
-208   -1536  
208    352    
-576   -80    
240    -96    
384    -16    
-256   32     
-208   80     
384    0      
-96    0      
-128   -32    
192    16     
-304   16     
592    400    
-272   0      
-160   224    
272    144    
48     -464   
32     -672   
96     160    
-64    128    
272    96     
-128   160    
0      32     
-288   144    
144    -160   
256    -128   
-448   -400   
192    -16    
-16    -256   
64     144    
0      -816   
800    -208   
-320   -752   
-112   144    
144    176    
-48    176    
-480   16     
416    176    
48     272    
224    -96    
-80    160    
16     -208   
48     -64    
-128   -208   
224    32     
-80    -528   
-48    -272   
0      -48    
160    96     
-112   272    
-48    128    
176    -64    
-80    -32    
176    80     
-192   224    
-16    -496   
64     -208   
-112   384    
96     -288   
144    64     
-880   -1168  
992    -624   
160    0      
-992   -368   
816    384    
192    -1136  
-528   320    
-192   -1376  
176    -400   
352    160    
-192   -208   
32     -48    
0      208    
0      -352   
144    -96    
-112   96     
128    -272   
64     -64    
176    -1168  
-48    0      
0      -1792  
-528   304    
272    80     
-240   160    
320    16     
48     -400   
-544   64     
384    -816   
-112   -96    
128    96     
0      -64    
48     -320   
-176   272    
288    -176   
80     224    
176    16     
-464   128    
-112   112    
656    -192   
-144   -80    
-256   -592   
-64    32     
256    -336   
-16    64     
-192   -1232  
192    32     
-64    -288   
160    96     
64     0      
192    384    
656    272    
-192   1056   
480    -112   
496    -240   
-1472  -288   
-384   256    
816    -80    
208    -432   
-272   -384   
32     -480   
-112   96     
96     -128   
-16    64     
32     -336   
-192   80     
144    -256   
-128   256    
-224   144    
176    304    
32     80     
-432   -336   
928    496    
208    -112   
-256   96     
-304   -288   
-80    -80    
368    -336   
352    96     
160    -160   
-368   144    
-80    -16    
320    -96    
32     48     
-112   -144   
-272   240    
560    -160   
-128   -32    
-48    -80    
-16    304    
336    -560   
0      -64    
112    -976   
-16    176    
-496   -96    
-336   -720   
352    -160   
192    480    
-240   -144   
304    16     
96     112    
-400   -80    
-1152  -1024  
672    144    
448    576    
-1136  -576   
704    -112   
496    -720   
-256   176    
-16    -160   
64     256    
208    -32    
128    64     
-256   -48    
32     64     
-320   -112   
528    384    
304    16     
-256   -96    
-288   -416   
704    -1248  
-1136  -1216  
-464   -144   
368    464    
112    -128   
176    -208   
192    -1472  
-160   368    
-336   240    
-64    320    
480    -656   
-272   -464   
-96    192    
64     416    
304    48     
-16    -272   
-16    224    
-144   -192   
96     160    
32     624    
-80    208    
-208   -112   
-48    -272   
96     192    
432    -272   
32     512    
-112   -144   
-112   432    
480    608    
128    304    
-368   -656   
-128   -176   
-224   -96    
-832   256    
48     -528   
-208   480    
-160   448    
0      80     
112    608    
-32    992    
-112   -176   
-272   -144   
-16    432    
-528   224    
32     304    
-176   -400   
96     1088   
-96    1408   
-496   288    
96     -240   
-192   -192   
-272   112    
-608   -544   
624    -832   
-256   -752   
-848   32     
496    448    
240    608    
-144   976    
-208   1088   
-48    -800   
240    -256   
80     -48    
-96    -48    
-16    -16    
0      32     
-32    80     
-80    400    
-304   784    
-976   -160   
288    -80    
-16    128    
128    -16    
-112   -224   
-16    128    
-176   -240   
160    -624   
320    -96    
-160   -128   
-240   128    
144    80     
176    -16    
-176   -384   
-224   -144   
-448   176    
160    16     
-592   -16    
-80    48     
-384   -384   
-112   -336   
112    176    
-176   288    
64     -64    
0      -16    
-96    64     
32     -144   
-64    96     
64     48     
-64    352    
-208   192    
-32    80     
-576   -592   
752    -576   
-16    464    
-176   112    
-128   -16    
-64    -208   
288    -336   
-112   32     
-96    80     
48     -112   
0      160    
-32    144    
80     -48    
-96    -416   
176    -192   
-256   -176   
32     -64    
352    -176   
-80    432    
-256   480    
-176   128    
352    96     
112    -192   
-160   -16    
-272   352    
272    -32    
80     144    
-80    48     
240    80     
-400   336    
1696   1136   
-1104  1648   
-1360  592    
752    -320   
64     -368   
-848   -128   
672    -592   
176    -688   
-544   -160   
96     -16    
304    256    
-160   -64    
80     64     
-80    192    
-32    320    
-160   0      
192    176    
-432   -320   
-80    -96    
144    -32    
-32    0      
-704   -528   
1024   -608   
288    304    
-592   1152   
-144   1008   
224    224    
48     -160   
-352   -64    
-80    112    
528    -384   
-336   208    
-32    -96    
304    48     
16     288    
-288   -80    
-32    -32    
240    128    
-160   -48    
-224   80     
240    32     
48     48     
128    176    
-1184  240    
656    32     
48     224    
-208   -496   
-112   720    
-96    -96    
-480   -208   
256    -112   
-192   64     
336    304    
160    416    
-320   -256   
320    96     
112    -208   
448    -96    
-288   80     
16     224    
-176   32     
176    64     
256    -16    
-144   112    
32     48     
-80    96     
-96    32     
128    160    
-208   -48    
128    1264   
656    2624   
-592   560    
-16    -32    
1456   112    
-160   128    
-1424  -192   
576    160    
688    -32    
-384   336    
-304   -400   
256    -80    
544    96     
0      144    
-96    -16    
-176   256    
304    -64    
32     208    
208    -112   
48     656    
-128   -208   
-112   384    
736    -224   
-464   208    
-976   -224   
448    96     
672    48     
-576   -144   
-496   -160   
368    0      
16     48     
32     144    
-16    -64    
-96    160    
288    48     
-176   -32    
-544   -48    
288    16     
528    64     
-80    112    
368    112    
-224   160    
224    144    
96     112    
-32    64     
-96    160    
-96    144    
176    -160   
-112   16     
-368   0      
224    144    
352    240    
-96    -256   
496    144    
-48    432    
-144   -336   
-416   288    
640    32     
-48    80     
-416   -128   
-240   -16    
448    16     
-256   -128   
192    16     
0      -48    
-160   -16    
160    176    
16     -1216  
0      -272   
48     272    
-144   240    
-16    0      
160    -48    
-16    80     
-64    -80    
-16    -80    
256    192    
192    1024   
128    -240   
-288   -48    
-48    336    
224    384    
688    2272   
1376   96     
-1504  256    
96     256    
608    -288   
-208   272    
-192   32     
224    576    
160    -144   
-176   -144   
304    -224   
-112   384    
-112   0      
160    64     
432    -64    
-352   -416   
-32    96     
176    -2800  
176    224    
0      224    
256    -640   
-960   592    
896    -96    
-64    16     
112    -16    
-16    96     
-304   0      
-160   -464   
496    -304   
32     192    
-352   -48    
160    256    
80     -496   
96     80     
-192   288    
-96    48     
272    16     
176    0      
32     16     
-80    176    
-32    64     
160    -208   
-288   112    
432    -80    
-336   96     
-32    -64    
352    -64    
-272   -864   
-32    288    
-512   -960   
2240   160    
-1840  624    
-624   192    
848    -112   
-400   -64    
48     -144   
480    -144   
-64    48     
-368   -608   
64     224    
288    -176   
-240   80     
-64    -112   
-32    -112   
160    32     
0      64     
-240   -160   
192    80     
176    144    
-112   80     
192    688    
160    -1024  
-1248  176    
480    -96    
544    -160   
-208   -112   
-320   384    
416    -288   
-176   128    
-128   -896   
-192   128    
144    32     
272    128    
-144   32     
-272   -144   
192    -832   
160    -288   
-48    -32    
-16    112    
-112   256    
-80    -16    
144    96     
-560   -512   
-112   -112   
352    -176   
-128   -816   
-96    272    
816    -464   
-112   -16    
-1776  176    
528    -864   
-144   80     
128    -464   
208    416    
720    -1040  
-640   464    
144    144    
0      -96    
384    -752   
-128   176    
-176   0      
-16    64     
368    -160   
-48    -80    
-352   0      
192    -944   
-112   112    
736    -336   
-176   -240   
-320   -208   
-384   2336   
-96    -32    
-144   -208   
176    0      
736    448    
96     224    
-576   -192   
32     -1056  
304    176    
-208   -368   
-208   -112   
-128   -16    
384    -48    
192    -64    
-160   -192   
-128   576    
80     -464   
320    -160   
-64    -640   
-128   272    
32     336    
208    -112   
-144   -480   
144    -288   
-32    240    
80     176    
-320   16     
144    16     
80     -128   
-16    560    
128    -128   
-192   -128   
128    -80    
224    0      
-432   16     
128    -432   
160    784    
288    1296   
-288   -80    
-208   -656   
480    -368   
48     400    
16     -128   
-416   -16    
144    -32    
192    128    
-352   -192   
48     -416   
160    -256   
80     48     
-176   -208   
624    -864   
-784   -848   
-144   -1440  
-224   -816   
176    784    
-128   720    
528    1104   
-192   688    
64     -912   
-176   -144   
-16    160    
128    -304   
416    272    
32     288    
-16    224    
-32    224    
-176   -288   
160    96     
-256   144    
-96    -112   
-464   -80    
112    -192   
-224   -64    
-96    -192   
560    -704   
432    -528   
-160   -240   
-368   -544   
144    160    
576    832    
-720   480    
320    -400   
-96    576    
-304   48     
288    -384   
48     128    
-144   256    
16     -176   
464    -688   
64     -16    
-144   -464   
-16    256    
176    -320   
112    48     
-128   -96    
-176   -32    
-160   -64    
320    -192   
-96    -144   
-320   -144   
-32    -464   
-128   80     
208    -336   
80     -384   
80     -496   
-272   -640   
272    592    
176    336    
-64    -368   
-112   32     
-880   368    
-80    688    
64     -448   
80     432    
-80    32     
-176   -32    
192    240    
144    -256   
96     -176   
-160   288    
-448   -224   
208    144    
-144   -176   
-560   224    
320    112    
16     -16    
-128   0      
-64    240    
-816   -608   
1888   -1632  
-560   272    
-64    224    
400    368    
-1344  64     
928    96     
272    160    
-192   480    
-272   48     
-48    -16    
96     80     
-160   -32    
-112   -144   
320    48     
-272   -224   
-352   -32    
-64    48     
32     144    
32     32     
-64    -80    
-272   -544   
1088   -32    
-960   48     
400    -112   
368    336    
-992   48     
0      112    
592    128    
192    -192   
-416   128    
-288   192    
80     -16    
128    -32    
16     128    
-96    -176   
-320   144    
416    304    
-192   -80    
272    176    
96     64     
-416   144    
-240   -464   
1168   176    
96     64     
-272   -176   
272    -576   
-176   -64    
176    272    
96     112    
16     -288   
-224   -16    
-176   -16    
48     -192   
-64    -32    
16     -64    
288    256    
-144   96     
64     16     
432    -80    
-48    176    
-656   -32    
256    -48    
144    -80    
-144   -48    
-112   -144   
448    -224   
-288   496    
512    80     
-176   16     
-1552  -928   
2208   -1408  
336    -192   
-608   -272   
640    512    
-944   192    
192    80     
304    656    
-288   80     
-272   -80    
-32    -256   
256    96     
-144   32     
128    144    
16     160    
240    64     
-224   96     
336    96     
32     48     
-480   -944   
-768   -272   
544    -400   
-320   208    
512    -32    
416    -240   
-1168  96     
416    32     
32     64     
128    208    
-80    112    
-48    224    
-48    48     
-176   144    
-80    16     
32     224    
336    16     
-512   320    
-48    -160   
-96    0      
208    144    
-576   -112   
160    64     
-64    96     
-608   -176   
448    96     
336    -112   
-800   -176   
496    -144   
-160   16     
192    144    
32     96     
-480   16     
-16    -672   
-208   -48    
640    -16    
-688   0      
240    240    
240    32     
128    160    
64     128    
-320   96     
-128   192    
112    32     
240    32     
-144   208    
16     0      
-320   0      
352    -48    
-320   64     
304    -128   
192    -64    
-288   160    
64     160    
-16    -16    
-96    16     
64     304    
80     256    
96     -128   
-32    144    
-80    864    
336    336    
192    -1104  
-1968  1504   
1520   -192   
256    208    
-272   -96    
-48    -112   
-128   368    
144    0      
-224   560    
400    -256   
-352   -32    
-48    176    
192    16     
48     32     
-368   80     
160    16     
-96    448    
32     -128   
160    -80    
-176   144    
-368   -192   
880    272    
-128   -96    
-672   -336   
320    144    
0      192    
-112   80     
288    384    
176    -80    
-384   272    
-208   -48    
464    48     
96     16     
-80    16     
304    272    
-224   400    
-48    48     
112    240    
160    -64    
-288   0      
80     176    
448    80     
-416   288    
96     80     
-256   144    
208    0      
64     240    
-80    -64    
-16    288    
-16    368    
832    112    
-2112  -304   
736    -256   
-32    288    
-144   80     
272    176    
-336   -592   
-240   -128   
224    -240   
-160   -176   
32     -112   
-32    -144   
160    112    
96     -384   
-336   128    
32     272    
96     128    
-288   144    
-80    224    
96     96     
-16    80     
-720   -352   
1824   -400   
-400   -976   
-1424  144    
1120   256    
-368   -816   
144    -624   
240    -544   
-416   208    
336    32     
-48    128    
64     160    
96     48     
-128   96     
208    -272   
-144   -80    
-176   -320   
256    -752   
240    -240   
0      -96    
-64    -16    
-48    32     
-656   -1568  
-64    -896   
704    -976   
-528   -320   
432    112    
112    112    
-448   496    
-112   432    
240    192    
224    288    
-32    144    
400    656    
-688   784    
-448   -288   
352    480    
-160   384    
32     240    
-208   -768   
176    224    
96     -240   
80     -304   
-224   -32    
224    448    
-144   288    
-608   -256   
64     -544   
80     -256   
-288   224    
80     1872   
832    240    
-96    -112   
-944   64     
176    -720   
704    816    
-32    -1136  
-128   -640   
96     544    
-192   -336   
304    48     
-64    80     
-304   32     
48     32     
496    512    
32     576    
-272   -256   
-48    -640   
208    336    
16     -800   
16     -528   
-80    496    
-432   160    
448    -64    
496    -288   
-560   160    
288    96     
-736   -1936  
352    -16    
-96    352    
-112   -784   
288    -192   
64     -256   
32     -48    
64     576    
-304   144    
-416   -192   
352    304    
224    224    
-64    480    
16     192    
0      -240   
336    528    
-16    -64    
-16    416    
-720   -1296  
224    432    
496    272    
-192   384    
-48    -352   
352    1232   
-272   -304   
-208   288    
128    304    
-112   -16    
-128   160    
400    896    
-560   1088   
-192   -1008  
448    -1600  
16     48     
-128   64     
144    -144   
32     80     
-80    -752   
-304   -2384  
176    -80    
112    144    
160    -176   
144    -560   
-256   272    
-768   320    
48     16     
128    48     
16     128    
-48    736    
-176   432    
-112   -320   
448    -304   
176    -144   
-448   -1792  
-256   -992   
-80    432    
64     768    
-720   640    
-80    -464   
-320   -272   
208    -224   
112    -624   
-224   96     
-144   -208   
48     -400   
256    -336   
-144   -1904  
-336   -240   
208    112    
112    432    
16     -192   
-160   64     
-176   0      
192    -1120  
-32    -912   
-240   304    
224    -80    
64     -64    
-96    -224   
144    -640   
-144   32     
176    96     
224    48     
-192   128    
-144   144    
224    256    
-256   224    
64     -160   
-208   -768   
-208   -400   
-16    160    
-208   -128   
-16    -128   
-144   0      
240    -144   
16     48     
64     -448   
-672   48     
464    -2944  
96     208    
-16    -96    
-176   144    
-272   96     
848    1664   
1264   -144   
-1376  -272   
-176   -448   
1360   256    
-1472  -176   
-592   32     
336    32     
-224   -384   
-256   176    
320    -480   
-48    64     
-16    -48    
-80    112    
416    16     
-64    112    
208    -96    
-432   -64    
-288   -16    
144    48     
-704   64     
-720   -528   
1376   -144   
192    -208   
-800   192    
32     -144   
48     16     
96     -528   
-48    -208   
64     -80    
0      48     
-128   64     
176    112    
-144   -32    
-256   -80    
336    -64    
32     -16    
-64    -96    
-144   -32    
496    -192   
-304   -80    
-112   320    
800    -160   
-832   -48    
-1200  80     
624    16     
576    272    
-96    208    
-160   400    
96     -336   
-672   -256   
48     -128   
368    -112   
112    -544   
-32    -192   
-432   -736   
32     -608   
480    0      
-224   16     
-592   48     
-16    96     
1008   -48    
-608   128    
-736   64     
48     -64    
544    752    
768    -400   
-448   128    
208    -144   
624    96     
-2560  3184   
336    -576   
80     -832   
-464   -512   
192    -192   
-1248  432    
-560   128    
96     -96    
-144   -112   
416    16     
-304   -48    
-80    -80    
112    -32    
-96    -128   
48     96     
432    32     
-240   -144   
-128   144    
704    320    
-1152  144    
304    368    
432    -384   
-976   16     
688    80     
-608   -144   
128    224    
176    -176   
32     112    
-528   -240   
368    112    
-368   -176   
384    -64    
-208   32     
-128   144    
224    176    
208    0      
-624   -112   
256    192    
-16    80     
-288   -112   
160    64     
-192   -80    
96     64     
-176   -96    
400    144    
-144   -32    
-128   0      
-96    -208   
384    -400   
-160   -288   
-240   -128   
-96    -736   
-672   128    
448    80     
-880   176    
304    16     
80     -112   
-208   208    
112    240    
-128   128    
112    128    
-64    64     
16     -64    
112    -16    
-208   128    
-336   -16    
192    144    
-128   0      
-64    144    
176    48     
-96    224    
-128   -272   
128    -256   
64     0      
16     -176   
-128   80     
128    160    
32     368    
208    160    
-224   -48    
-256   -48    
144    -1760  
-944   272    
1376   80     
-80    688    
-1088  544    
128    592    
848    416    
-608   304    
-400   -48    
288    288    
400    176    
-160   176    
-256   -80    
0      -368   
368    480    
-208   784    
-176   368    
0      384    
-112   48     
16     -64    
-384   1344   
288    -192   
-368   1120   
432    64     
-176   -288   
0      -672   
-256   -592   
432    624    
-224   352    
-256   32     
144    -64    
-176   -208   
80     -64    
-96    96     
-16    32     
-560   -160   
192    96     
-128   -336   
64     624    
16     0      
64     -48    
-112   112    
-32    -48    
96     112    
-192   -80    
208    352    
-128   80     
112    -160   
-272   112    
80     -496   
1968   -288   
-1872  832    
624    176    
256    224    
-688   -80    
80     -144   
1024   -496   
-384   1104   
-32    688    
16     -576   
144    32     
128    176    
16     176    
-368   -128   
16     16     
224    -48    
-96    32     
-208   384    
128    96     
48     -160   
-528   -464   
-304   176    
2272   -480   
-1232  160    
-256   432    
1120   272    
-608   656    
-416   64     
224    -96    
224    -96    
48     64     
-64    -224   
48     -272   
32     -16    
128    96     
144    -32    
-544   -480   
208    -448   
368    208    
-448   336    
96     496    
208    880    
-272   368    
352    560    
0      -1584  
-688   -1232  
672    944    
480    144    
-416   144    
208    624    
-64    1088   
-32    -256   
-480   -32    
576    32     
-400   -416   
-256   416    
720    -96    
-240   1584   
720    416    
-336   32     
-80    400    
240    208    
192    688    
176    256    
-144   32     
-48    128    
32     -384   
16     -752   
-112   32     
-240   272    
64     2128   
1312   400    
-1504  0      
-784   -688   
1136   192    
304    176    
-528   224    
-256   432    
112    480    
112    -128   
80     480    
-112   32     
-48    -192   
64     96     
448    -208   
-96    432    
-176   160    
416    -80    
16     -384   
-48    -224   
80     384    
240    288    
-800   -432   
224    384    
448    256    
-784   16     
368    -816   
-816   -1584  
176    -736   
-320   240    
240    368    
256    -16    
-288   -272   
0      -192   
-80    -720   
192    240    
-208   512    
160    -224   
-192   -208   
112    -208   
432    -592   
-288   -608   
0      336    
224    528    
32     -752   
64     -32    
-144   560    
0      -720   
-48    288    
320    -32    
464    1344   
-944   784    
128    -112   
1040   1696   
-80    720    
-656   -16    
416    560    
80     1056   
256    1152   
224    480    
224    304    
-80    112    
-96    -224   
304    -400   
32     -448   
-96    224    
80     -656   
96     224    
-16    -160   
192    -768   
-96    -576   
16     -96    
-256   -224   
128    128    
272    384    
-32    752    
-240   576    
80     -336   
80     -352   
192    -368   
-368   -1856  
-688   -32    
784    144    
-160   -160   
256    -16    
-64    1264   
160    752    
160    1200   
336    288    
-128   -176   
-96    -64    
96     -288   
32     16     
224    432    
-32    336    
48     -400   
0      -320   
128    176    
-32    192    
64     80     
96     -1088  
16     192    
224    192    
-704   112    
464    128    
112    -96    
0      144    
-64    64     
64     352    
368    -80    
-208   112    
16     -576   
48     160    
96     336    
48     32     
32     160    
-176   128    
80     32     
-16    192    
256    -32    
-352   -48    
112    80     
32     -272   
128    144    
-16    -80    
144    144    
-112   -16    
48     16     
80     -96    
-784   -480   
2416   -112   
-1168  -1504  
-1248  288    
1008   -32    
-32    -80    
-240   288    
-176   -752   
176    224    
80     -80    
-208   -128   
128    32     
-96    32     
192    -64    
208    128    
-256   -2112  
96     80     
-16    -384   
-144   144    
96     -112   
48     -688   
-176   -672   
1184   -128   
-496   -112   
-608   -1328  
-160   80     
544    -96    
-448   -384   
64     -416   
512    16     
-48    0      
-448   208    
-160   -48    
400    -208   
-464   -288   
-80    -272   
96     -176   
0      -64    
-368   -208   
-112   -208   
944    -480   
-208   -288   
-464   -912   
-640   176    
672    112    
-304   -48    
800    -512   
-160   352    
-496   -192   
256    128    
144    592    
192    272    
-512   176    
-432   -304   
240    -560   
496    -320   
-400   -240   
-432   -128   
304    464    
400    480    
288    -272   
-384   0      
176    -160   
-16    80     
-112   160    
160    64     
-512   64     
240    -160   
176    -112   
-368   -368   
-1072  -2368  
2192   -2432  
832    144    
-1360  -272   
688    448    
-336   -464   
-208   -16    
1088   576    
-720   -48    
-144   176    
256    -192   
-256   0      
128    -304   
-592   32     
272    -112   
-80    0      
-48    -384   
0      112    
-240   -976   
-64    -288   
-64    -208   
-16    0      
-128   -16    
624    112    
128    -224   
-400   64     
-496   0      
272    96     
64     -80    
-208   -160   
-256   -32    
272    -112   
96     416    
-352   -448   
288    64     
288    -240   
-128   -320   
-336   -32    
80     -48    
64     32     
-64    -32    
-256   144    
224    176    
-32    240    
224    -112   
16     48     
-128   -240   
112    -96    
0      -480   
80     80     
-64    160    
-32    336    
192    736    
544    -336   
-400   -768   
-144   -1200  
-352   -512   
480    -16    
-208   160    
-64    -128   
240    368    
-176   176    
-144   736    
672    -224   
-432   176    
-352   240    
48     -336   
240    -288   
-224   -320   
-96    224    
112    128    
-160   -48    
-32    -112   
-96    -16    
208    160    
-32    352    
160    272    
-48    736    
-928   -624   
-1152  -624   
-144   -80    
-128   832    
-464   -928   
-64    128    
928    288    
-624   64     
48     -400   
208    128    
144    -384   
-464   32     
144    192    
-176   176    
-32    128    
96     16     
-32    -16    
-48    208    
32     112    
128    -144   
-288   624    
-112   -144   
240    128    
-208   64     
240    -80    
-32    64     
-608   -112   
160    192    
-192   112    
-96    -128   
272    -128   
48     848    
-208   624    
-256   -128   
128    160    
-160   0      
256    -112   
-336   -192   
-112   64     
160    -240   
320    48     
-240   160    
-144   160    
48     192    
192    96     
-112   64     
-320   -16    
80     -176   
304    240    
-80    384    
-288   240    
32     32     
-80    -208   
-336   -176   
1344   -960   
-1760  288    
912    -304   
368    -112   
-336   16     
240    192    
176    -768   
-608   -16    
-32    864    
176    -48    
-80    -432   
-112   96     
96     160    
-560   -160   
0      -144   
-416   -320   
-48    160    
-496   -528   
224    512    
272    -288   
-976   -272   
768    -576   
160    176    
-16    496    
320    1248   
-160   960    
32     752    
-288   -48    
224    -1360  
-80    -736   
-144   -16    
176    336    
-480   -96    
384    704    
48     -320   
-768   16     
432    -544   
-16    256    
0      672    
64     592    
-16    144    
-240   -112   
144    -144   
64     1824   
800    896    
-496   -608   
-848   -1120  
-192   -608   
16     -816   
-384   -640   
288    16     
-16    -80    
-448   16     
-192   -608   
304    384    
128    464    
-48    176    
160    -864   
-528   -640   
16     -256   
-400   -80    
80     16     
-272   -272   
-16    -80    
384    432    
-704   368    
32     192    
192    1008   
272    544    
-304   192    
16     1872   
848    272    
-1280  128    
-496   -576   
1472   -96    
-64    -256   
-352   496    
16     1184   
112    -384   
272    352    
-400   272    
-16    -176   
16     -640   
176    240    
64     48     
-224   256    
-320   -64    
64     368    
320    304    
-112   -64    
-256   -160   
272    192    
-160   80     
-768   -320   
624    288    
-384   528    
-96    80     
-16    272    
240    448    
-16    528    
-256   336    
240    64     
-192   272    
-128   112    
-144   64     
240    -288   
112    48     
-192   224    
80     128    
-32    576    
432    576    
-32    256    
-368   -96    
64     160    
96     256    
32     -48    
-176   656    
464    320    
64     192    
-272   -160   
0      -64    
288    -256   
-1232  48     
-32    -112   
928    -64    
-48    -464   
-432   32     
16     928    
688    448    
176    -64    
-128   80     
32     192    
-272   16     
-80    -80    
384    -48    
-144   -64    
-384   336    
464    112    
16     -288   
-112   160    
-272   272    
240    -160   
-256   -48    
128    224    
304    0      
-304   208    
-16    -144   
80     -64    
-48    128    
48     96     
976    2672   
-2048  80     
-400   144    
1520   -384   
-624   -240   
-48    -288   
80     272    
320    -96    
272    -176   
-256   448    
-96    -112   
-96    336    
368    112    
-192   16     
-192   -384   
160    432    
16     32     
-64    320    
288    16     
-240   48     
-304   -384   
1008   176    
-112   240    
-704   -96    
624    48     
-128   -112   
16     96     
400    480    
32     96     
-528   -368   
-144   -16    
464    -1568  
352    -32    
-448   208    
304    128    
-336   368    
128    0      
80     224    
256    -112   
-528   256    
272    96     
-16    112    
128    128    
-176   -48    
-256   -352   
416    192    
-16    -528   
48     112    
96     112    
-64    16     
-256   432    
-480   736    
192    464    
240    -80    
-416   -192   
-352   96     
1040   96     
-368   128    
-272   192    
272    -64    
112    64     
176    -128   
-96    144    
144    -896   
-528   -32    
416    80     
-32    64     
-16    48     
-16    144    
80     -16    
-112   128    
0      -688   
-1024  864    
576    176    
-768   -720   
512    272    
368    -368   
-880   160    
64     -240   
544    32     
-144   80     
-304   128    
144    -64    
208    96     
-176   96     
-128   32     
-112   64     
400    144    
-176   192    
96     -288   
128    96     
-16    -176   
-512   32     
912    -432   
-496   0      
-272   16     
544    160    
288    944    
-464   112    
-768   -240   
560    -32    
384    80     
-416   -16    
144    112    
352    224    
-448   208    
-224   -304   
32     96     
-144   256    
512    -144   
-352   32     
-288   80     
448    80     
96     64     
-128   80     
96     352    
-176   448    
496    -272   
160    80     
-688   -624   
2160   1472   
-1744  880    
240    -400   
1312   -240   
-784   128    
-336   -448   
352    96     
640    320    
64     96     
-752   32     
496    -112   
144    -32    
48     16     
208    144    
-240   -176   
0      304    
480    -224   
-128   96     
-320   -80    
400    1648   
560    384    
-448   -2112  
0      -320   
-144   -1728  
-608   -144   
544    352    
224    -272   
-496   112    
80     -288   
480    -320   
-80    -304   
-656   -288   
368    96     
736    -224   
-752   0      
-96    -272   
256    -336   
192    -384   
0      -288   
32     -384   
-208   -128   
112    -608   
320    -464   
-368   -1184  
256    -272   
208    -1280  
-128   -80    
-96    -32    
-288   -272   
272    -1024  
368    -864   
-512   -1168  
240    -704   
-416   496    
80     64     
160    112    
-624   112    
208    224    
128    -32    
-48    -832   
-208   -848   
-16    576    
320    -400   
-128   176    
48     416    
-64    -128   
-64    -48    
64     784    
-272   -128   
192    64     
-32    -144   
-128   0      
-160   16     
-96    0      
112    -240   
-112   -272   
-32    144    
32     -816   
-112   144    
-64    112    
336    16     
-192   -560   
320    -1104  
-144   144    
48     176    
-64    16     
0      80     
-240   176    
176    176    
32     80     
-48    -96    
-160   -16    
-16    -192   
240    112    
64     -272   
-112   32     
240    0      
96     144    
96     -96    
-96    -64    
-176   48     
384    704    
-496   128    
48     -288   
160    -480   
0      -560   
-288   400    
0      -112   
512    -80    
384    112    
-656   176    
-112   128    
480    -112   
-48    -48    
0      32     
-128   0      
16     -112   
-64    48     
80     48     
-128   48     
-16    -96    
304    -80    
-32    -96    
32     128    
-32    -656   
-352   64     
144    96     
80     -48    
-128   -416   
592    -272   
-1024  272    
512    -320   
-2944  -352   
1376   208    
-336   -112   
-192   -1248  
112    -272   
-96    -400   
0      -976   
640    -704   
160    960    
-288   -48    
-80    32     
48     48     
112    112    
-288   -48    
-64    240    
48     -256   
400    192    
-320   -320   
-64    128    
-96    -112   
1328   -16    
-1632  128    
-224   -144   
-288   880    
-624   1664   
-752   528    
656    640    
208    720    
-640   944    
528    64     
-128   -288   
-128   -608   
256    -336   
-80    -512   
-112   80     
0      -96    
-192   528    
352    -96    
-80    -48    
-384   144    
48     64     
224    352    
-272   64     
-1072  -16    
592    -720   
128    -528   
320    -352   
416    704    
-176   -176   
-928   304    
80     -368   
368    400    
400    224    
-464   272    
-64    -624   
784    -1200  
-304   -384   
592    -128   
-336   320    
-640   -16    
304    128    
128    -272   
-464   272    
-80    64     
224    384    
304    -96    
272    80     
-512   -672   
-368   -208   
48     -1888  
-1120  -704   
176    272    
-96    -32    
848    672    
-704   528    
-336   16     
-32    -176   
288    96     
-464   -144   
96     416    
0      -144   
176    96     
368    -192   
-416   0      
32     -64    
208    128    
160    16     
-464   1168   
144    1376   
112    720    
-224   -464   
48     -32    
-352   -48    
-512   80     
656    -176   
-832   -272   
432    240    
-304   656    
176    480    
-144   192    
-96    448    
-128   192    
224    -112   
-80    -16    
112    0      
-672   0      
48     112    
256    176    
-224   64     
-208   144    
432    176    
-448   -240   
352    0      
176    128    
-208   80     
-336   32     
288    80     
0      -112   
-16    -80    
-384   -16    
-16    256    
48     -192   
-528   304    
-1456  128    
240    -608   
-320   -32    
-32    48     
-32    112    
192    -176   
-160   128    
-112   16     
160    -208   
-160   -48    
-96    112    
-304   -224   
368    -352   
16     48     
-336   176    
-496   -128   
-192   224    
64     64     
-32    160    
112    96     
-64    -48    
-128   240    
64     -48    
192    128    
-96    64     
-80    80     
960    3344   
-1696  -576   
-912   48     
1936   368    
-1728  208    
0      16     
208    112    
432    -176   
-224   416    
0      -240   
-16    416    
-48    32     
224    -48    
16     272    
-576   -176   
208    -112   
432    112    
-400   144    
48     32     
128    256    
-256   -272   
720    576    
160    144    
-1120  -128   
880    -192   
160    16     
-768   112    
608    -16    
96     112    
-208   112    
-224   32     
576    64     
-160   128    
-224   256    
288    0      
-288   160    
176    128    
208    16     
64     96     
-64    -144   
-80    144    
240    32     
-128   208    
224    32     
-336   64     
400    128    
-64    -16    
-112   96     
240    80     
-176   432    
-1216  1344   
1840   912    
-704   240    
-880   64     
304    96     
496    240    
-112   -16    
-224   416    
528    -16    
-80    240    
-32    16     
-96    112    
80     16     
32     0      
-256   16     
288    48     
-256   96     
208    -16    
-32    0      
-144   -32    
80     160    
352    64     
-1520  336    
240    208    
272    -272   
-448   -352   
560    272    
-288   -16    
160    592    
736    48     
-336   -32    
-96    176    
32     48     
80     112    
32     144    
224    0      
-496   144    
160    -176   
-112   -320   
-96    368    
96     112    
-80    -208   
384    112    
176    -96    
-656   64     
368    64     
256    480    
-224   -208   
-320   240    
384    144    
-240   -48    
-192   48     
208    208    
160    -32    
-240   96     
-64    -176   
256    -16    
192    368    
-528   -1008  
416    128    
-48    -32    
-176   48     
208    64     
-96    112    
32     -32    
80     368    
-48    224    
192    80     
48     -128   
-672   -944   
0      -576   
1152   -2224  
80     368    
752    -976   
-1072  -128   
-304   48     
896    -64    
272    224    
-576   -272   
-224   16     
336    176    
256    0      
-48    224    
-352   -128   
288    0      
496    16     
-112   -96    
-224   -80    
-208   -80    
704    -1024  
-192   -1360  
-240   -272   
304    608    
-576   -32    
-96    144    
288    -80    
160    144    
-304   96     
272    -144   
256    -784   
-384   -96    
48     560    
272    16     
256    -400   
-96    208    
-128   -1920  
192    -128   
-480   160    
560    -288   
-96    -400   
-240   -336   
80     -240   
208    -48    
-64    -320   
-448   544    
656    1280   
-64    368    
-240   -736   
608    -1456  
-384   784    
-80    -144   
32     128    
512    -704   
-816   -1056  
560    -1200  
-448   -480   
-288   -16    
288    48     
-160   176    
48     240    
208    176    
0      -272   
-32    224    
-48    -608   
-144   -32    
96     544    
-176   624    
-384   192    
144    -304   
-48    0      
192    32     
-256   48     
208    64     
-112   64     
48     -272   
96     48     
-64    -272   
112    128    
-80    192    
304    128    
-208   -32    
-320   -160   
592    -352   
96     496    
16     -208   
-208   304    
208    -304   
160    -368   
-128   80     
-96    32     
144    176    
64     -224   
16     128    
176    -32    
-256   144    
432    -464   
192    272    
96     496    
-48    448    
-208   48     
48     -304   
400    544    
-288   48     
80     -1312  
480    -256   
-144   -768   
16     192    
-112   208    
352    160    
256    352    
-320   16     
-144   -304   
224    16     
-48    -128   
-96    96     
112    -64    
128    -256   
-416   224    
272    -240   
-64    48     
-224   224    
112    -272   
48     -1232  
192    -416   
64     240    
-80    112    
-48    -368   
544    -112   
-144   -416   
160    -352   
-304   -64    
336    -944   
-2048  -224   
608    -240   
-112   464    
144    -544   
-64    -464   
-160   32     
16     -1232  
880    -352   
-192   1072   
-256   -176   
304    32     
-112   -304   
288    -192   
48     96     
-240   192    
64     -32    
352    -144   
-384   208    
-32    480    
-224   -464   
1200   784    
336    -96    
-720   -688   
640    -128   
-32    -304   
192    -464   
-416   720    
576    96     
-160   -208   
-320   -368   
80     -80    
304    32     
-336   -64    
-336   -48    
608    16     
-64    -112   
-96    96     
-368   -400   
-32    32     
240    -80    
96     -288   
256    -368   
528    128    
80     656    
-720   -96    
-304   -176   
368    64     
64     48     
272    912    
-752   160    
-80    -320   
528    96     
-160   -144   
-480   48     
-160   -848   
768    240    
192    -336   
-784   -96    
192    176    
208    -16    
0      96     
-192   -80    
-496   -496   
64     -96    
-64    0      
-560   -288   
64     112    
112    -272   
-272   368    
2160   1104   
-1712  1952   
400    96     
1376   -288   
-736   64     
-640   -80    
-32    256    
896    -144   
-320   -128   
-528   -128   
80     48     
272    32     
64     -48    
224    -160   
-64    80     
-80    -224   
-96    128    
144    32     
-288   -272   
592    -624   
-224   -96    
0      -16    
-256   -16    
112    16     
576    -112   
-144   640    
0      -32    
48     288    
288    -64    
0      32     
64     192    
80     -208   
-80    16     
-288   -144   
-96    -48    
256    80     
-32    -112   
-480   -640   
-528   -336   
480    -64    
-96    112    
112    -208   
-80    48     
-544   0      
240    176    
-160   -80    
-272   -336   
-672   -480   
-496   -400   
224    -224   
-416   -128   
128    -16    
480    368    
528    0      
-592   -880   
-16    -176   
160    -224   
-416   336    
672    64     
-144   368    
-48    128    
-16    32     
0      16     
16     0      
-32    416    
112    192    
-160   0      
192    -112   
32     304    
192    112    
32     128    
-336   0      
176    144    
112    -64    
-80    48     
-32    -80    
144    32     
-176   192    
272    80     
-160   208    
-192   32     
-96    -2768  
-2336  1264   
1392   64     
-352   144    
240    208    
-288   -464   
-304   144    
-64    -288   
256    -400   
160    112    
-272   352    
-96    -16    
-128   32     
144    96     
-464   32     
112    0      
-112   16     
-144   -128   
-304   -16    
112    48     
-240   -464   
160    -672   
-464   304    
736    96     
80     128    
-640   224    
288    80     
272    -304   
-96    32     
-64    208    
-304   176    
192    -32    
432    -96    
-528   -96    
-352   176    
368    -16    
48     80     
-176   192    
320    -48    
-544   64     
480    -80    
-48    96     
-176   48     
80     144    
32     -160   
-160   80     
0      16     
-80    176    
-176   16     
-64    -416   
-544   -1488  
-320   -128   
1168   -176   
-1152  32     
0      224    
608    -16    
-304   -80    
-320   -32    
384    48     
-80    -128   
-144   16     
-208   -96    
144    192    
96     -80    
-432   112    
128    -96    
-320   32     
0      -144   
224    -160   
-160   -64    
32     176    
272    16     
-1424  976    
512    80     
-48    208    
48     128    
224    -16    
-240   384    
-352   256    
48     -192   
-320   -48    
48     -16    
-192   64     
-48    96     
192    -80    
160    0      
-304   96     
-208   -208   
80     112    
96     112    
-192   -208   
-144   -144   
752    736    
-144   48     
-240   -240   
288    528    
192    -80    
-272   64     
48     -32    
128    32     
-64    80     
-128   16     
112    -48    
48     176    
-160   112    
-64    -352   
320    48     
624    16     
-592   32     
704    288    
-528   320    
-160   -16    
64     112    
112    48     
80     16     
-96    128    
272    -256   
-64    32     
-16    -112   
496    -112   
-896   -672   
1072   -1408  
1184   -80    
-1600  496    
160    480    
1056   -48    
-336   608    
-16    288    
64     464    
352    144    
-496   80     
80     224    
0      400    
112    96     
48     64     
240    224    
-736   -176   
272    -16    
288    -304   
-304   -384   
-240   -800   
-16    -288   
256    16     
-144   -192   
-80    -624   
240    432    
48     464    
-64    416    
128    720    
-256   128    
272    -320   
48     -144   
-144   640    
112    256    
-32    96     
112    160    
16     704    
176    736    
-336   160    
0      -368   
240    -96    
-128   16     
16     160    
-80    0      
-112   -592   
512    -896   
-176   0      
48     -32    
-448   -800   
144    512    
-288   -432   
-96    -224   
544    -704   
-672   -256   
-112   -928   
-80    -448   
-32    288    
-16    -864   
-144   -224   
224    864    
16     288    
64     -336   
-96    128    
-208   16     
-128   176    
128    208    
-160   464    
-176   304    
16     -128   
-160   192    
128    80     
-80    224    
256    128    
-192   48     
32     -48    
208    128    
48     96     
-128   -32    
80     240    
240    -544   
96     48     
-240   -160   
288    -336   
64     560    
416    -176   
-384   352    
-64    64     
256    -240   
352    32     
-80    32     
16     208    
-32    176    
336    -208   
16     192    
80     -80    
-80    48     
288    -80    
-16    432    
96     592    
-48    512    
-128   -208   
592    -96    
-816   528    
304    -128   
336    -288   
208    -480   
-80    368    
-320   -96    
160    -448   
208    -208   
32     -64    
-112   -560   
-112   16     
64     -336   
112    112    
-64    352    
96     16     
-320   -192   
96     160    
160    528    
352    -864   
-736   -624   
-112   544    
240    336    
320    -576   
-176   80     
-128   -640   
368    16     
-48    336    
0      160    
-176   -16    
-880   -1136  
-624   576    
1488   -224   
32     128    
-2016  992    
944    -352   
-48    304    
-688   144    
16     -544   
304    -128   
-176   128    
-64    112    
64     112    
0      176    
240    48     
0      128    
-224   -208   
64     -176   
192    -48    
-64    -512   
-448   -688   
1504   -32    
-608   48     
-528   96     
1088   64     
-800   -144   
16     512    
992    -80    
-48    64     
-224   160    
144    96     
144    48     
0      48     
-96    -16    
352    -208   
240    208    
-352   -160   
96     192    
512    -144   
-128   112    
-112   -16    
288    592    
-688   352    
-16    -208   
224    144    
112    528    
-192   192    
80     160    
-352   -576   
-160   -304   
448    -80    
240    0      
-192   352    
384    192    
-80    240    
-16    -160   
-128   -944   
48     320    
240    -1040  
-352   -128   
320    176    
208    -480   
-112   -160   
-48    -112   
-112   -112   
96     96     
1184   -112   
-640   -2224  
-352   0      
-304   928    
-832   -64    
-464   -336   
-368   64     
688    -432   
256    304    
112    -128   
-992   288    
-112   -96    
160    176    
-224   -144   
-48    32     
-160   -320   
-16    -224   
0      -64    
-112   288    
-208   -176   
192    -80    
176    64     
368    432    
-832   -96    
176    416    
528    -400   
-640   64     
448    -64    
304    160    
400    -528   
-576   -16    
784    -320   
-128   -144   
0      -880   
160    64     
192    0      
-112   112    
464    464    
-352   256    
-176   368    
192    -240   
-368   -128   
-80    -96    
-1216  -48    
112    -240   
-256   32     
176    -320   
-96    -96    
592    -496   
256    112    
-448   -1408  
240    352    
256    80     
-48    80     
-48    32     
64     64     
-1168  144    
592    32     
-128   -192   
-416   -272   
208    288    
368    576    
416    160    
-224   -416   
304    256    
-32    -816   
0      112    
592    240    
-192   192    
-352   -160   
560    384    
224    128    
-368   -1088  
-304   112    
240    240    
-128   -16    
192    -288   
-304   16     
-144   -80    
240    352    
304    -688   
48     320    
-448   352    
208    -400   
-368   -1264  
1248   -880   
-1104  480    
80     -320   
-144   176    
-512   -208   
80     32     
240    -336   
256    -512   
-512   -16    
208    64     
432    -400   
-48    128    
-528   16     
-16    960    
160    -160   
-80    -208   
32     144    
-352   208    
16     -80    
144    -256   
-1136  -160   
832    -512   
-128   224    
-608   -48    
512    160    
192    -96    
-48    128    
-480   -160   
240    -176   
112    -32    
176    16     
-272   64     
-64    112    
-16    112    
48     -32    
32     48     
-368   -448   
-96    256    
-304   -320   
32     96     
-560   -176   
-576   64     
-48    48     
0      128    
-176   96     
-576   112    
176    -32    
80     32     
-272   -288   
1200   1456   
-288   560    
-1968  176    
1312   16     
-928   -352   
-592   288    
1152   -96    
-96    32     
-608   0      
-160   64     
224    -48    
-480   -192   
128    80     
-176   -96    
-16    16     
-48    144    
96     64     
-400   -144   
-208   48     
416    -64    
0      96     
80     1152   
-512   -1024  
-1328  -128   
2016   -320   
-256   80     
-720   288    
464    -320   
-1120  112    
448    304    
-496   -32    
-256   96     
192    16     
48     32     
-176   -64    
-16    48     
112    0      
-144   256    
224    144    
-160   32     
-160   -544   
-288   -144   
80     272    
-912   1200   
368    -624   
-480   32     
832    192    
-224   -944   
-816   112    
512    48     
48     -32    
-448   144    
128    352    
-64    256    
-272   -176   
-384   -496   
496    272    
-352   -192   
0      -336   
48     320    
-912   480    
64     80     
112    -160   
160    304    
-224   16     
-32    -48    
-304   -112   
-48    112    
288    144    
-576   144    
320    160    
496    -1232  
-2576  -688   
176    160    
1232   -608   
-768   -480   
-1072  128    
-64    1040   
768    1120   
144    192    
-272   464    
-400   -48    
208    -272   
176    -128   
32     32     
-128   -112   
-352   -464   
-64    -240   
-112   128    
208    96     
-192   -48    
-80    192    
-144   -128   
32     208    
-96    -96    
-112   96     
480    720    
64     1184   
-528   -448   
368    -464   
128    736    
-240   224    
-96    -16    
160    -16    
-32    112    
-64    -64    
80     -480   
-160   -32    
-192   192    
-336   -656   
288    -80    
48     176    
-384   528    
64     32     
80     320    
384    336    
-320   -224   
-288   -64    
208    480    
48     480    
176    32     
-144   80     
-192   1104   
1328   736    
-272   1248   
-48    1136   
48     576    
224    288    
-368   288    
-288   -416   
320    -208   
112    -16    
-128   80     
16     0      
-64    320    
-144   -96    
288    384    
80     -176   
48     -816   
336    160    
192    544    
-176   -272   
0      16     
256    -96    
-144   272    
80     32     
-208   -416   
-48    -432   
544    -1024  
608    -384   
-736   160    
-112   128    
112    1088   
304    256    
-160   -544   
-96    -784   
-192   -576   
160    544    
96     816    
144    112    
144    -240   
-384   -416   
208    64     
48     -224   
-32    -128   
-112   -240   
0      64     
192    304    
256    -112   
32     -32    
-272   -32    
-112   176    
432    608    
272    32     
-624   320    
176    704    
64     880    
-352   -32    
160    -608   
16     352    
16     32     
176    -16    
224    32     
-208   -416   
-144   368    
400    176    
-64    384    
-208   112    
0      112    
-64    128    
48     -208   
176    -480   
-32    320    
-160   -160   
176    0      
-208   144    
352    32     
-64    224    
128    -16    
16     80     
112    -576   
-688   -720   
1088   512    
2544   368    
-1856  -320   
-768   -48    
1600   160    
-272   -16    
-288   416    
-176   -1424  
16     160    
-48    -96    
-128   160    
384    48     
-32    352    
-288   -80    
48     304    
240    -64    
-176   0      
-144   -48    
160    32     
96     -96    
128    768    
416    -704   
-1472  -416   
1472   -112   
-720   -2176  
-336   208    
288    -32    
96     -16    
512    64     
-64    224    
-304   0      
48     144    
176    32     
32     176    
-128   -272   
-560   240    
672    16     
-304   -224   
64     -112   
-96    -944   
-176   64     
416    384    
-784   448    
224    -128   
-224   240    
-16    128    
112    128    
352    -144   
272    144    
-768   144    
-176   48     
656    208    
208    -64    
-400   144    
16     -144   
112    -112   
-272   -1472  
432    -48    
-368   -272   
-624   0      
128    -32    
272    -112   
32     -160   
-176   208    
-496   0      
448    352    
928    32     
-528   -224   
-336   272    
-464   -1120  
-640   2992   
1008   -80    
-1168  -1120  
208    -528   
1248   -192   
-896   64     
-192   320    
464    272    
-192   160    
-32    208    
0      -288   
-48    416    
368    -16    
160    128    
-32    128    
128    208    
160    -1104  
128    128    
416    128    
-944   304    
576    384    
560    -160   
-720   -128   
-16    256    
544    272    
-544   -368   
32     288    
336    -176   
-544   304    
208    -960   
-368   96     
576    -544   
-256   208    
256    -272   
-32    144    
-256   128    
16     0      
-16    -32    
288    48     
176    80     
-176   -240   
-112   64     
144    -48    
160    208    
-32    -144   
192    80     
-272   -96    
256    352    
80     -160   
-96    304    
80     -16    
-96    416    
240    -272   
-384   576    
160    -432   
-736   -208   
128    0      
224    256    
640    176    
-192   -320   
-144   48     
176    48     
80     128    
112    32     
-336   -976   
176    48     
96     -272   
-176   80     
16     -560   
-48    -976   
96     112    
-16    -256   
224    -256   
-16    -144   
-64    32     
-96    128    
0      -752   
192    -368   
-160   320    
16     16     
-208   -192   
1024   1040   
64     112    
-1040  400    
-256   -128   
336    -272   
288    192    
-96    848    
272    -256   
-384   -512   
336    -448   
160    144    
-32    -336   
-64    192    
96     -512   
224    -176   
-144   224    
-16    96     
-208   272    
64     -336   
160    -64    
544    448    
-1216  640    
896    -112   
-352   -128   
96     192    
400    448    
-320   -240   
-64    320    
224    192    
112    -112   
-448   -16    
336    -48    
-64    144    
64     -16    
-464   -160   
-368   -304   
256    -272   
416    -272   
-272   -64    
-64    -832   
16     144    
32     -48    
80     144    
16     -176   
-32    80     
-16    -128   
304    64     
-240   80     
-144   -176   
16     -112   
-832   1488   
1552   496    
-496   -304   
176    -96    
304    -272   
-208   144    
-176   -608   
-16    160    
208    -272   
0      160    
-176   -160   
224    -160   
-32    32     
-208   352    
400    224    
0      96     
-432   -144   
352    -448   
96     -160   
-80    -544   
-192   -16    
576    112    
1776   -32    
-1424  272    
560    -272   
464    -432   
-80    368    
-672   1344   
336    928    
0      320    
-288   272    
-176   -32    
32     -208   
32     304    
112    160    
64     304    
224    -208   
-240   928    
608    416    
-32    400    
-240   400    
400    16     
-32    416    
-64    192    
-240   784    
1232   1168   
-1008  1056   
-464   -400   
48     -192   
96     -272   
-16    96     
592    -144   
-96    832    
496    1280   
-832   560    
-592   -272   
464    16     
-144   576    
208    112    
336    32     
-224   -240   
384    -48    
208    -64    
-368   288    
-272   -32    
480    -144   
-496   -800   
144    -32    
160    64     
128    80     
-752   -1392  
1744   -2320  
672    -96    
-816   256    
-64    416    
112    736    
352    1248   
-992   1216   
-448   -1056  
32     32     
320    160    
144    -128   
80     -208   
-240   160    
80     0      
448    32     
-752   128    
208    -16    
-48    -464   
-176   -304   
288    -32    
16     352    
-112   -256   
-128   80     
240    -480   
-48    96     
128    160    
-96    192    
-464   656    
-48    320    
144    -272   
-192   -128   
32     -112   
-528   -192   
96     208    
96     80     
48     -720   
-288   -976   
-16    -272   
64     -1440  
-336   -144   
16     160    
0      -320   
176    -368   
-544   32     
0      240    
224    320    
-80    -1008  
-880   -1072  
96     560    
112    -304   
448    384    
-1344  80     
400    864    
816    1056   
-432   720    
-144   48     
64     736    
-64    672    
-64    -512   
240    -784   
144    896    
-272   448    
-240   -256   
80     -128   
-480   112    
-144   496    
112    -272   
16     -496   
-320   -576   
240    16     
-176   64     
32     0      
160    384    
-304   -208   
-16    -1024  
80     -576   
-320   -64    
544    128    
272    256    
-368   32     
-784   -1216  
608    -528   
-128   768    
-224   -800   
64     -752   
64     -656   
-336   -128   
48     368    
144    -208   
-64    -112   
-320   272    
16     48     
32     -160   
144    560    
-272   -48    
80     432    
336    32     
48     -80    
-64    32     
-144   160    
48     -128   
-32    -1312  
-144   48     
288    176    
-224   -512   
144    1040   
288    400    
16     48     
48     480    
-16    -64    
-32    400    
-336   -144   
-96    192    
160    -32    
-240   64     
0      144    
176    -240   
128    32     
-240   0      
96     96     
144    112    
-192   16     
-16    -16    
-64    -128   
-192   80     
576    64     
-112   144    
-64    -16    
-176   0      
-288   -224   
912    1248   
1120   208    
-1328  128    
-320   -352   
912    -64    
384    -160   
-544   112    
192    -112   
256    80     
-384   96     
192    176    
192    64     
-176   224    
144    48     
-256   192    
240    32     
-64    192    
-496   -16    
288    160    
80     -32    
-224   128    
-16    496    
1504   -96    
-624   384    
176    -16    
96     304    
-96    128    
-256   80     
304    240    
-16    176    
-112   256    
-192   32     
128    32     
32     -16    
0      144    
48     16     
64     192    
32     -176   
80     -608   
-496   144    
48     384    
112    368    
-400   96     
368    176    
400    176    
-736   256    
-320   592    
64     608    
-80    160    
208    0      
-480   -288   
160    -16    
432    -48    
80     336    
96     128    
384    352    
-320   208    
-304   272    
432    -144   
272    16     
-96    -160   
0      64     
416    -192   
-176   32     
-304   0      
256    192    
768    160    
80     0      
-320   128    
720    320    
-1216  3456   
976    -1056  
-544   -816   
256    -272   
-144   176    
64     16     
-64    -384   
448    32     
208    -48    
-256   352    
-464   -16    
112    32     
576    176    
-480   -96    
-320   48     
224    176    
32     48     
-208   64     
688    608    
-928   592    
544    288    
224    -32    
-240   -224   
160    176    
-64    80     
48     192    
224    96     
0      -96    
-192   -336   
128    -128   
32     -1344  
96     -32    
-48    96     
144    -16    
-80    -160   
-80    16     
176    128    
80     432    
-272   80     
128    304    
64     -96    
-304   -32    
192    -80    
144    -64    
64     144    
-48    -144   
224    96     
-64    -16    
32     384    
16     368    
-80    336    
32     -192   
544    32     
-576   16     
-240   96     
720    96     
192    704    
-800   1152   
240    416    
240    -48    
16     -272   
-112   96     
-48    112    
112    96     
160    32     
48     176    
-48    160    
176    80     
48     272    
-80    464    
208    352    
-128   80     
32     208    
384    176    
-96    96     
-96    -1008  
-208   192    
336    -304   
160    304    
-112   112    
-448   -1088  
816    -1472  
-368   768    
368    96     
-304   224    
144    288    
-80    384    
144    272    
144    304    
-16    288    
-112   -48    
336    80     
16     -64    
-192   272    
48     208    
192    112    
-224   -48    
-32    -160   
96     -192   
128    -64    
-64    288    
16     1440   
160    -16    
-272   -1344  
224    -208   
-16    560    
240    320    
176    -576   
-80    32     
-112   144    
224    0      
224    384    
-96    96     
128    656    
80     -112   
384    -352   
48     -240   
-416   368    
80     -352   
176    224    
96     -80    
-16    144    
0      -448   
-192   -112   
-48    48     
128    272    
-112   96     
288    -48    
-224   -32    
-192   -512   
-384   -1232  
1712   -416   
-1152  496    
-128   -480   
1072   -32    
-464   192    
112    -160   
368    -176   
-144   144    
16     32     
-112   -512   
208    32     
144    -1536  
-112   -48    
-224   -384   
112    48     
32     -48    
80     -2672  
-160   -592   
320    320    
-64    -96    
464    -48    
-2032  192    
352    -1696  
1200   336    
-384   144    
-128   704    
416    1232   
64     1296   
-1392  -96    
544    -1360  
-160   -576   
-320   176    
352    400    
240    -560   
-304   -544   
64     80     
16     -176   
240    -896   
384    -112   
-128   -480   
0      128    
192    48     
-112   64     
-592   -224   
896    -1008  
-400   -96    
-432   1120   
576    -752   
-528   -16    
192    -208   
144    -2896  
48     -160   
400    -544   
-576   416    
272    768    
-384   336    
-80    128    
160    112    
-672   416    
640    32     
-208   -240   
-112   96     
224    -240   
-384   -400   
16     -720   
-224   -800   
-48    496    
-48    144    
-128   320    
208    80     
1200   1200   
-2192  256    
320    1008   
1120   272    
-32    192    
-864   -320   
-144   -528   
336    -48    
112    -224   
112    32     
16     -400   
-32    64     
208    -800   
-128   64     
-208   -112   
192    -192   
224    -96    
-80    -496   
-176   -720   
-64    -240   
-32    -16    
96     0      
-1136  224    
672    -112   
-608   1040   
464    -544   
-32    -256   
-176   -1696  
160    -736   
144    -640   
-512   64     
192    576    
256    432    
-384   -288   
-144   -224   
128    32     
-192   -240   
-256   -32    
224    -112   
-176   -48    
-128   -224   
176    288    
-464   -144   
304    368    
64     432    
-32    448    
-176   224    
-144   -16    
336    496    
112    528    
-160   112    
-288   -720   
96     -384   
448    -864   
64     320    
-688   -560   
96     208    
256    -80    
-144   208    
192    -336   
-688   -544   
0      -272   
384    -272   
-224   -128   
144    128    
-128   416    
304    -208   
-480   -32    
224    -320   
-464   -96    
208    -416   
224    112    
-48    -256   
-256   0      
64     -144   
160    160    
-208   400    
-96    -256   
-32    -1072  
-80    -464   
-512   -1216  
976    -2304  
-592   704    
640    -464   
-112   160    
-672   -160   
432    -208   
-416   -32    
96     -144   
-336   144    
-256   32     
256    0      
-64    -208   
-240   208    
0      -304   
16     64     
128    -336   
16     16     
-48    192    
-144   48     
208    -240   
896    976    
-1728  32     
48     320    
928    -144   
-944   -192   
144    -240   
-320   160    
208    256    
-512   224    
176    48     
128    -128   
-192   48     
-224   -272   
224    144    
-192   -320   
48     64     
-176   64     
64     0      
-240   128    
64     -96    
-16    80     
-480   -144   
-256   144    
-224   32     
192    -48    
16     -96    
-320   -48    
-32    -128   
304    16     
-608   -320   
1248   -880   
-1472  720    
464    -128   
464    -96    
-464   -80    
-544   208    
720    576    
240    -192   
-208   -96    
-32    64     
-368   96     
160    80     
-96    0      
-96    192    
656    144    
-464   -16    
0      144    
112    16     
112    0      
-144   48     
-144   192    
-320   288    
1856   16     
-1200  -288   
-240   224    
304    -112   
-832   160    
352    96     
-64    80     
-256   64     
256    112    
144    64     
-192   32     
-96    32     
-16    128    
208    -32    
-48    224    
-544   -208   
-32    -16    
336    160    
-496   -80    
96     368    
-896   0      
320    48     
144    -128   
-176   -544   
-480   -592   
-80    64     
656    -304   
-336   -224   
-96    -32    
208    160    
224    272    
-80    48     
240    80     
-240   -128   
-528   -80    
-608   -208   
-720   432    
96     -80    
-64    -64    
400    64     
0      144    
-144   -80    
-288   32     
416    -160   
192    32     
-64    192    
-256   -48    
848    1504   
-2288  2352   
368    1152   
-144   -160   
-976   -544   
784    208    
512    -352   
-816   432    
48     -112   
448    560    
624    -64    
-832   96     
128    -80    
144    96     
-272   -240   
-64    288    
-16    -64    
-256   112    
448    48     
336    512    
-688   832    
288    496    
336    96     
-176   -224   
176    112    
96     96     
-272   64     
480    288    
-336   352    
-224   320    
432    336    
-176   128    
64     272    
32     16     
272    48     
-384   352    
400    512    
208    144    
-80    352    
240    192    
-480   16     
384    208    
-80    96     
-16    208    
32     -224   
-304   -272   
-176   -48    
192    1136   
352    752    
-256   448    
288    528    
80     16     
-16    80     
-688   480    
432    352    
-48    -96    
96     192    
-16    688    
256    1024   
-48    576    
-64    576    
304    304    
32     208    
-160   240    
16     288    
272    160    
224    656    
-176   48     
-240   96     
112    976    
224    336    
-128   -416   
-48    -32    
-32    288    
-128   256    
176    288    
64     640    
-64    528    
16     288    
144    560    
0      -400   
-48    208    
-544   -1792  
192    -1104  
48     960    
-272   848    
112    528    
112    -1312  
-96    -912   
-144   1104   
224    -800   
80     112    
-160   208    
-160   -80    
208    272    
144    -80    
-144   -80    
-48    80     
112    144    
320    -96    
-80    -416   
-16    -16    
0      -384   
-640   0      
480    0      
336    -672   
-48    128    
-208   608    
-16    272    
80     112    
64     -336   
32     160    
-32    64     
-176   -16    
80     96     
-48    16     
32     400    
320    96     
-528   -32    
-208   384    
464    -128   
-304   96     
-288   192    
128    48     
336    32     
144    64     
64     32     
-288   16     
96     64     
400    144    
-320   -224   
-176   144    
-720   -1280  
-144   -96    
-144   -32    
-320   -592   
304    -96    
400    -992   
368    336    
-480   112    
-336   32     
176    -96    
320    32     
-288   336    
-48    -48    
256    -16    
32     -240   
-176   544    
-16    -304   
336    160    
-352   -912   
-32    384    
-80    -528   
752    768    
832    -1760  
-928   -720   
512    -1200  
-512   -448   
128    -16    
608    2016   
1024   176    
-576   -1120  
-224   -1072  
528    -368   
-128   128    
80     32     
400    176    
320    -416   
-336   240    
144    400    
448    0      
-96    -448   
-32    0      
192    112    
80     224    
-192   176    
160    -144   
-240   -560   
288    -896   
-320   -912   
416    -1728  
176    -528   
-32    -800   
320    288    
16     -272   
-544   -272   
288    -240   
48     -144   
-560   208    
-336   592    
384    -416   
96     -32    
-224   -288   
480    -240   
-48    -272   
384    -1104  
-32    -80    
576    -32    
-304   656    
-112   -192   
-32    -400   
-96    -80    
752    1792   
-64    784    
448    160    
352    -32    
-208   336    
-496   704    
192    256    
1216   -720   
-336   -304   
-1168  208    
512    128    
784    96     
-48    -192   
-784   80     
80     -16    
336    -112   
48     -80    
-208   -880   
-480   624    
464    528    
208    -464   
48     -160   
-176   -192   
-592   128    
624    80     
-48    32     
80     160    
96     16     
-240   256    
176    672    
528    512    
-80    624    
48     -1024  
-272   -144   
-1264  112    
448    -224   
-16    -16    
-144   48     
272    -144   
-80    -1504  
160    -256   
-32    64     
144    -160   
48     -224   
-240   32     
432    -368   
144    1040   
160    -128   
288    -560   
-272   -240   
16     -272   
608    1056   
-656   -240   
-256   80     
352    -384   
-144   48     
96     192    
80     112    
-272   -160   
176    80     
112    -192   
-32    96     
-160   176    
384    112    
-272   -32    
-144   -144   
96     112    
160    -224   
-224   -240   
368    144    
272    -64    
-320   -1136  
64     32     
80     -336   
-16    144    
416    224    
-880   688    
176    -160   
240    -144   
-464   -224   
-96    -224   
-1760  544    
2320   -1040  
-576   64     
-672   -352   
656    112    
400    -224   
-704   400    
48     -240   
32     128    
224    -32    
16     -208   
-48    -336   
-16    -80    
176    400    
64     80     
-144   -80    
224    -304   
-80    176    
0      -352   
-16    0      
704    1104   
-1264  80     
-224   -1520  
928    -240   
112    -224   
-304   -48    
-320   -192   
480    0      
-128   176    
272    -208   
-512   0      
-96    -224   
-624   -80    
304    -128   
-560   224    
96     -352   
224    32     
224    -688   
-112   128    
48     32     
-112   -32    
-80    112    
-80    16     
-16    -32    
320    48     
-880   0      
400    64     
-224   0      
-112   -32    
-48    -496   
288    -1184  
368    608    
112    -832   
-64    112    
224    80     
-272   304    
-48    -144   
-48    48     
-80    -288   
16     128    
32     64     
64     96     
-128   -64    
32     -16    
432    112    
-480   -160   
128    80     
336    -560   
-144   -80    
64     32     
-32    32     
-784   -160   
2032   -64    
-560   -112   
-752   -16    
960    16     
-16    112    
-944   -352   
288    -176   
288    192    
-240   -192   
-112   128    
-176   0      
-496   -96    
-304   160    
512    -48    
-112   0      
32     -96    
-240   -64    
240    160    
32     -16    
-96    -256   
576    64     
-848   16     
-32    -64    
128    -64    
-32    -192   
656    960    
-480   -224   
-368   -48    
208    0      
-112   16     
336    -96    
48     80     
16     -64    
-160   96     
432    -352   
-32    0      
-352   176    
-384   320    
32     -320   
192    64     
-96    -16    
-48    32     
-128   -16    
-272   -64    
416    -96    
-144   80     
-512   -32    
-576   -864   
-672   -2144  
-688   -112   
0      112    
112    192    
816    48     
-832   -368   
-240   224    
336    -160   
-224   32     
432    -32    
-160   112    
-208   -224   
-16    224    
-16    -144   
-80    16     
288    128    
0      -32    
0      128    
48     -224   
-416   -112   
256    272    
96     112    
112    176    
-192   -176   
-80    304    
208    -96    
-704   176    
272    16     
128    432    
272    608    
-448   352    
-944   -208   
624    -144   
272    544    
-768   368    
-96    288    
864    464    
-240   832    
-320   528    
96     368    
112    208    
-96    288    
112    176    
96     80     
-528   16     
0      320    
-112   560    
304    -480   
-288   -288   
128    720    
-32    384    
-16    -1168  
-480   -464   
352    -1184  
-288   -896   
304    -720   
-144   -528   
-1040  -1456  
144    -1808  
16     160    
192    352    
-160   144    
48     -48    
-592   192    
272    -368   
96     -272   
-384   112    
176    288    
-96    208    
-16    -80    
0      224    
-208   -64    
-16    -128   
-96    -80    
144    -464   
64     96     
-112   -48    
-224   80     
-448   -208   
32     -64    
16     64     
528    352    
-976   656    
432    -128   
96     400    
-112   64     
-192   192    
-32    128    
112    -96    
112    32     
0      64     
-240   -48    
0      96     
80     48     
176    32     
-304   112    
64     112    
-16    0      
80     208    
16     112    
-48    0      
-480   192    
400    -144   
-464   -16    
96     -64    
208    304    
-64    -16    
-160   256    
-32    -16    
0      -208   
224    48     
-176   144    
-160   400    
128    -32    
128    16     
-224   240    
224    96     
48     -16    
-176   368    
-32    320    
80     16     
-96    -304   
-16    -80    
192    -112   
112    112    
-80    -240   
-160   32     
160    192    
-176   -16    
-112   240    
176    304    
-1472  1056   
2384   -496   
-432   -336   
-864   -576   
480    -64    
80     -192   
-448   -304   
-560   -288   
208    256    
-256   368    
-64    -112   
160    64     
-80    80     
0      480    
288    -112   
-160   96     
-96    208    
80     496    
-80    -208   
16     -512   
592    1568   
-1008  -400   
-624   304    
1088   -272   
-688   -224   
256    -704   
-64    -1248  
464    -1904  
-816   -1664  
-128   -1488  
32     -272   
-368   160    
208    176    
128    -64    
144    -1664  
-160   224    
-96    -480   
544    -416   
-32    128    
-192   -240   
-432   -144   
112    -16    
176    288    
-688   112    
496    -640   
112    352    
-16    -208   
-432   288    
32     -320   
-320   -416   
272    112    
-96    16     
-224   16     
-128   16     
-272   -336   
224    112    
176    96     
-320   -192   
528    352    
-240   64     
-480   80     
336    48     
0      -272   
336    -544   
-288   -64    
496    176    
272    128    
0      112    
-288   -528   
-384   320    
-96    -1136  
-1280  -272   
-48    208    
496    -176   
384    0      
-224   240    
-160   112    
-624   320    
656    -16    
-464   -400   
64     0      
-288   -1712  
208    16     
416    -192   
-384   192    
256    -48    
-240   112    
48     -80    
416    -560   
-1072  -1552  
160    -416   
224    64     
-144   96     
640    160    
-560   -432   
-96    256    
208    -752   
-192   272    
32     192    
64     256    
-192   -288   
64     -240   
160    -224   
64     240    
256    176    
-128   208    
-48    -16    
-16    -80    
320    112    
48     0      
-272   48     
0      -96    
288    64     
-64    -608   
400    32     
-544   32     
480    288    
192    240    
-48    112    
-448   -112   
320    16     
480    1152   
-672   64     
-112   0      
160    -64    
112    48     
-192   -272   
288    80     
128    -512   
144    128    
16     32     
-96    80     
-96    192    
272    272    
-160   112    
32     96     
208    224    
-288   -144   
-128   -176   
448    -224   
-64    208    
48     -352   
208    64     
-160   16     
64     144    
128    -32    
-32    -176   
-32    624    
160    288    
-64    -48    
-272   -304   
1168   2112   
1696   16     
-1488  384    
-112   32     
608    -352   
-240   -320   
-208   -80    
400    304    
-288   80     
112    -672   
240    176    
-128   192    
-112   0      
80     -192   
240    -128   
0      -2112  
-96    -224   
192    -64    
-96    352    
96     128    
208    -800   
-1168  656    
704    -208   
400    -64    
-704   -112   
-16    -1712  
320    128    
-160   -720   
0      112    
416    -256   
-368   -208   
-112   -384   
64     -112   
224    -80    
-240   -336   
416    160    
-288   192    
48     80     
48     -720   
-176   176    
160    -384   
16     80     
-176   -64    
144    -320   
-480   -208   
-224   -176   
64     -32    
160    -96    
32     -64    
-384   -2048  
1200   -1296  
-880   -272   
-288   -336   
832    -176   
0      208    
-656   -16    
352    832    
-176   224    
-544   80     
80     -16    
208    -32    
0      -96    
64     -240   
144    -304   
-624   -272   
592    48     
-160   -1360  
176    208    
448    16     
-112   128    
96     -96    
-560   -336   
496    -112   
800    -288   
-1440  -112   
640    96     
368    -80    
-384   16     
-416   -352   
336    -48    
384    48     
-176   -160   
48     112    
-64    -144   
-176   -96    
32     32     
336    -48    
-240   0      
48     112    
32     -96    
0      -176   
-400   -112   
352    320    
1024   -400   
-1232  192    
368    32     
112    -688   
-384   -256   
416    288    
-144   64     
-416   0      
496    -48    
240    -16    
-112   -256   
-480   272    
144    0      
32     528    
-336   -128   
-208   -192   
32     -464   
224    -48    
224    -624   
464    0      
-384   -672   
80     96     
128    -80    
32     -224   
-400   144    
176    16     
-480   -352   
1472   2016   
-1328  2256   
592    352    
1568   -384   
-1088  -320   
-688   -96    
800    -368   
1088   -1152  
-512   -528   
-224   -144   
32     80     
192    128    
0      176    
192    -192   
-544   -96    
144    48     
32     -112   
256    -64    
-240   96     
0      864    
256    544    
-144   -224   
224    -272   
-528   96     
-64    16     
-160   160    
512    336    
224    640    
-176   1392   
-208   -160   
224    -144   
128    -64    
-240   304    
-192   -80    
32     -352   
128    -288   
96     -320   
-352   -96    
-352   0      
368    480    
-208   -288   
208    -272   
144    64     
-256   -720   
224    -128   
128    944    
96     368    
144    576    
-208   96     
-1120  -320   
80     208    
-624   -736   
656    -208   
-768   80     
-224   -1120  
64     -880   
-144   656    
304    1104   
-192   160    
-64    128    
-48    272    
-80    304    
-112   -208   
-16    -144   
224    -736   
336    -32    
-240   128    
0      208    
0      240    
-432   64     
-272   128    
-48    -96    
80     80     
-128   16     
32     64     
-1024  -48    
-256   -16    
-288   -208   
80     -96    
-64    -208   
-32    192    
-160   -128   
192    -640   
-32    -144   
288    -48    
-480   -96    
80     160    
-96    -240   
-128   -176   
-256   208    
-208   192    
32     32     
-16    -256   
96     128    
64     64     
-160   288    
48     -144   
160    -160   
-128   400    
-192   320    
-112   64     
-96    176    
256    -224   
-112   48     
352    -128   
-416   -144   
64     208    
-704   272    
64     384    
-336   -256   
208    -224   
16     48     
80     224    
-32    112    
-144   64     
96     -80    
-144   -48    
96     64     
-32    -48    
288    448    
-272   752    
192    336    
-352   -176   
16     112    
48     -96    
112    32     
208    16     
112    -48    
-320   192    
448    -192   
-448   336    
960    0      
-2768  288    
400    -16    
560    208    
-480   -1248  
-768   -672   
-528   160    
208    -704   
416    816    
16     480    
-80    1200   
-240   0      
288    -64    
176    -240   
-160   64     
-272   144    
32     -272   
432    768    
-240   -80    
-448   160    
256    -48    
-816   -16    
2080   -352   
-928   -896   
528    1536   
992    240    
-576   -384   
752    272    
-464   384    
-160   0      
336    -16    
32     64     
-240   112    
-80    -368   
-320   -192   
384    160    
-112   -32    
-160   128    
-32    112    
-32    -208   
384    -464   
144    160    
-400   -480   
240    320    
320    -128   
-224   -16    
400    640    
-368   -224   
-496   -32    
144    224    
64     -96    
160    32     
416    192    
-176   0      
-624   192    
144    -48    
928    128    
224    -208   
720    -352   
-48    144    
-176   0      
192    112    
32     80     
-224   48     
80     0      
304    96     
-464   -112   
-144   48     
0      96     
528    416    
352    3872   
-528   1504   
0      256    
1328   -160   
-48    128    
-704   48     
-160   288    
752    -32    
-48    48     
-352   48     
464    336    
-96    48     
96     144    
-48    -48    
-48    144    
144    144    
-352   96     
-96    48     
112    -224   
944    -768   
-608   128    
144    96     
0      352    
-272   112    
-432   -48    
880    256    
-368   -240   
-512   384    
384    -32    
208    48     
32     -48    
-256   64     
80     224    
512    64     
-576   64     
192    -16    
-96    128    
704    288    
-224   48     
-672   144    
528    80     
80     -32    
-96    -16    
-64    -160   
-256   128    
288    -64    
-416   112    
320    48     
-528   0      
96     80     
208    -32    
-224   -432   
416    -496   
64     -128   
0      -64    
208    -896   
-288   176    
-352   176    
192    96     
80     -96    
-288   -144   
-96    112    
144    48     
192    16     
-144   288    
48     80     
384    -336   
-272   -272   
480    688    
-688   368    
224    -112   
112    -80    
-16    32     
-192   160    
192    112    
128    0      
-144   208    
-64    -368   
32     -560   
96     224    
-48    224    
-720   -1840  
432    -48    
624    -64    
-816   112    
752    -64    
240    592    
-928   -1760  
-48    -448   
512    -640   
-48    512    
-240   48     
-64    -64    
-32    384    
224    -400   
-32    16     
48     224    
-496   208    
384    -48    
320    16     
-192   -224   
256    1232   
-752   -992   
-96    128    
1104   96     
-368   96     
-224   -48    
336    560    
-352   -176   
96     -48    
160    -64    
-64    160    
-208   64     
416    16     
-272   208    
-16    80     
320    336    
-208   -112   
336    480    
-304   -528   
-16    192    
160    -96    
112    0      
-288   48     
160    96     
-112   112    
448    144    
-448   80     
64     -224   
144    128    
352    -32    
-1856  -464   
928    -784   
2112   -560   
-1200  -688   
160    320    
400    -96    
-160   -304   
-384   192    
320    -336   
-16    128    
-96    96     
192    176    
-96    -320   
256    464    
-304   -160   
-48    320    
384    -496   
-112   224    
192    -928   
-512   384    
80     128    
-208   -896   
0      -80    
688    -208   
-1104  624    
-192   1184   
400    208    
272    -304   
-512   176    
0      -384   
368    48     
352    -96    
224    -144   
-720   160    
416    112    
-432   96     
336    48     
-208   -240   
-240   336    
416    112    
-128   -448   
0      64     
-208   -576   
496    -400   
-144   112    
144    -176   
-224   1056   
-944   464    
192    -304   
-128   -176   
-432   -64    
304    -1744  
32     -112   
240    -592   
-304   -400   
-688   -320   
-16    -368   
752    320    
-176   -1712  
-224   -432   
720    -144   
32     128    
-112   192    
48     64     
-112   -800   
320    400    
-448   -16    
-144   32     
-96    -224   
224    -256   
-480   -1136  
880    -1568  
1264   -80    
-1152  -192   
-448   32     
720    -576   
64     -416   
48     1728   
96     -432   
-592   -912   
288    -272   
272    80     
-256   -48    
-128   48     
-80    -192   
-320   128    
-272   -112   
-112   80     
240    -368   
-144   -48    
32     -304   
96     48     
144    128    
-880   -48    
544    -480   
-208   -240   
240    -736   
-112   -672   
-144   -640   
-48    160    
176    -208   
192    224    
-32    272    
-48    -384   
80     -912   
112    -1344  
0      32     
240    -416   
-384   368    
48     144    
368    -576   
0      -96    
-96    -224   
0      224    
64     -448   
-256   0      
288    192    
0      336    
176    64     
256    -240   
-144   -128   
576    1408   
-1152  208    
0      -128   
192    -400   
176    -128   
0      912    
-192   1104   
-80    -912   
-368   -896   
32     -64    
144    288    
-48    -192   
-32    432    
-48    496    
192    16     
64     -256   
48     -608   
-384   112    
64     -16    
0      64     
-64    96     
32     -16    
-192   48     
272    48     
-224   -32    
160    -304   
336    -464   
-208   -416   
-160   32     
64     -80    
-144   -304   
464    -736   
-80    512    
272    -496   
-304   352    
32     272    
-48    -144   
416    336    
-256   400    
-144   256    
208    240    
64     240    
-80    -128   
-32    144    
208    128    
16     208    
-80    -64    
80     -144   
160    -736   
112    -176   
336    -32    
-1040  624    
432    -336   
304    32     
-544   576    
64     16     
-192   32     
-16    432    
176    400    
128    -480   
-480   -80    
160    -64    
112    320    
96     -960   
48     -176   
-560   -320   
80     368    
160    -240   
224    240    
-304   -128   
-64    -16    
16     -64    
96     80     
336    -144   
-208   -112   
-256   -16    
-64    -176   
224    144    
-240   -128   
160    -160   
448    -496   
-2480  -192   
880    -336   
-1120  -96    
-96    288    
-144   -160   
-96    -160   
-176   -272   
-320   16     
96     -336   
-512   -32    
240    -304   
128    160    
-176   -272   
-368   0      
96     -112   
-64    -208   
0      -160   
-112   -96    
-208   160    
0      32     
512    1168   
-1040  -432   
-624   16     
496    -416   
80     464    
-704   400    
128    320    
544    -224   
-864   192    
240    80     
-112   -80    
-304   80     
336    128    
-64    -144   
-320   80     
112    -16    
-160   -192   
0      128    
-80    224    
-320   240    
-112   -224   
624    288    
48     0      
-64    144    
-304   480    
-48    32     
528    496    
704    -96    
176    -512   
-928   -96    
384    160    
128    -48    
-208   208    
-304   240    
-304   -608   
-160   -576   
432    -48    
-512   32     
-736   496    
928    384    
96     48     
-624   -224   
-112   208    
432    32     
-304   -80    
-928   256    
192    -112   
352    112    
-752   -688   
576    -2592  
1872   -3072  
256    1248   
-224   640    
-304   272    
624    48     
-160   -16    
80     64     
-176   16     
-208   16     
368    -112   
-112   352    
-576   -48    
528    288    
-208   -224   
-112   48     
-128   64     
192    160    
-16    16     
-192   592    
624    80     
-880   336    
272    -224   
448    -128   
752    112    
-224   -112   
-128   624    
-256   -96    
-16    416    
272    -96    
-224   32     
-240   144    
-16    -32    
208    160    
48     -32    
176    -128   
-304   64     
48     144    
0      -224   
-848   16     
336    -160   
-144   64     
224    80     
-240   32     
-192   208    
320    -96    
160    -256   
-64    -432   
-288   0      
0      240    
112    288    
112    272    
-144   672    
592    16     
-304   80     
192    192    
688    208    
-160   -160   
-352   464    
80     416    
320    112    
-80    80     
-176   144    
304    32     
48     32     
-96    144    
-160   -128   
176    16     
368    304    
-352   288    
144    -32    
48     -224   
-240   112    
96     160    
112    176    
-80    224    
-176   64     
352    144    
48     384    
0      32     
-144   -128   
80     400    
-112   -1920  
-1200  576    
1216   -320   
-480   64     
-352   160    
64     -176   
224    -16    
336    416    
-160   560    
-64    -352   
112    -32    
160    144    
-144   -48    
-64    592    
112    -368   
48     32     
336    160    
-128   -48    
-64    -176   
96     240    
-16    912    
928    -384   
-736   16     
-224   416    
480    48     
-128   -304   
128    -672   
-160   144    
192    240    
-16    32     
32     160    
-192   -272   
144    176    
112    176    
-160   128    
-64    -32    
0      176    
96     144    
80     272    
64     64     
-192   0      
80     48     
48     144    
128    80     
-160   -176   
-112   176    
224    -224   
-32    320    
-96    -288   
-448   -1424  
2080   -224   
-1200  272    
-176   -192   
1264   320    
-928   -64    
272    -80    
336    160    
-16    112    
16     192    
-112   160    
160    160    
64     64     
-48    48     
-160   -192   
64     -224   
160    112    
-192   144    
64     0      
96     48     
192    176    
288    1376   
-1088  -192   
-624   224    
656    480    
-208   64     
-320   352    
80     256    
576    608    
384    -128   
-288   -576   
-720   304    
272    -416   
416    80     
-96    -176   
-432   -112   
96     208    
144    -240   
336    -352   
0      128    
-192   -32    
-16    48     
48     -80    
320    -32    
144    0      
-176   -512   
368    -400   
304    864    
-944   2320   
-160   1344   
240    160    
-176   -48    
144    -176   
-64    -288   
-336   -304   
208    -592   
272    64     
-736   992    
-80    544    
-496   208    
-64    16     
128    96     
96     -96    
-144   272    
-176   192    
128    64     
-112   624    
320    112    
-64    256    
0      832    
-224   480    
-288   -1024  
1728   -1824  
432    -1328  
-272   1104   
128    736    
-592   320    
464    -368   
192    -288   
-384   -624   
-304   -304   
384    272    
256    -240   
-448   -48    
0      240    
-80    -288   
400    704    
-176   368    
-96    -224   
224    -304   
-32    -704   
-256   -304   
16     192    
352    64     
576    -208   
-576   -240   
-736   -3328  
496    96     
48     784    
128    -848   
272    16     
-400   -96    
176    256    
320    -368   
80     224    
-272   48     
16     160    
272    -320   
128    16     
-480   560    
48     160    
64     -496   
544    176    
0      368    
-208   -16    
160    320    
240    -112   
0      -144   
-144   48     
16     1280   
352    -32    
0      176    
512    -272   
-1184  832    
192    -16    
432    -224   
112    -16    
-144   192    
-192   400    
320    -1776  
-64    240    
304    -224   
-112   -528   
-336   -160   
336    -64    
352    -352   
-176   -160   
64     -240   
128    208    
224    -352   
688    -720   
-128   352    
0      -464   
-16    256    
240    -752   
-160   192    
-96    688    
-32    160    
112    784    
-160   240    
-16    -48    
192    48     
448    368    
-1264  1008   
576    -560   
240    -1376  
16     -496   
192    -624   
-432   -496   
320    496    
96     896    
-1360  -448   
-80    -192   
-32    -288   
112    -208   
160    -112   
16     -192   
-32    144    
-64    0      
128    160    
160    -384   
-192   80     
352    480    
-624   -64    
432    -992   
176    -112   
-400   144    
-96    240    
320    64     
144    -48    
-112   96     
-32    336    
96     224    
112    -1536  
-240   -96    
32     336    
144    272    
-64    -32    
-64    -272   
-144   -432   
160    -304   
-64    -64    
96     16     
-432   48     
16     -288   
48     16     
48     -368   
-304   -176   
128    -208   
224    0      
-80    -128   
624    128    
-1264  -768   
-48    128    
784    -160   
-1008  -192   
384    224    
784    -80    
-1184  208    
32     -144   
208    48     
-144   -464   
-192   112    
224    -352   
32     112    
-192   -3056  
352    160    
-32    -176   
-160   112    
272    288    
144    160    
-208   -64    
-48    64     
208    400    
464    -656   
-1680  320    
1232   160    
-32    16     
-672   -208   
384    80     
-192   -1168  
400    32     
48     80     
-368   -112   
288    48     
224    -16    
-16    32     
-576   -112   
-208   32     
384    288    
-272   -96    
160    -464   
480    -64    
-32    -528   
400    544    
176    -352   
-208   96     
48     304    
-16    -208   
-528   112    
-656   -64    
384    -256   
-416   -304   
-416   80     
320    -16    
-256   112    
208    -304   
96     128    
-336   -32    
-32    48     
-256   -384   
32     -320   
592    -192   
336    96     
-480   64     
-48    -16    
192    -16    
560    -528   
-704   224    
-96    -112   
480    32     
-608   -848   
208    -2256  
2240   -2944  
464    928    
-1328  160    
-656   288    
896    128    
-496   -160   
48     368    
-192   224    
-608   -96    
224    176    
16     -48    
-48    64     
-240   16     
-208   -32    
208    112    
-48    -160   
-112   -16    
0      96     
-384   -864   
-736   16     
528    -304   
-368   368    
-112   -272   
-480   -48    
224    -112   
288    -16    
-960   -240   
192    -112   
112    -208   
-16    0      
-384   -224   
-16    -32    
-288   112    
608    80     
-528   -48    
336    224    
-416   48     
-256   304    
32     208    
-128   64     
96     80     
-144   208    
-112   -112   
160    -128   
-112   -16    
-192   144    
96     112    
16     160    
48     64     
-176   192    
80     128    
-288   352    
480    -144   
-112   -48    
-464   160    
448    -16    
-48    -224   
-48    416    
-384   224    
208    224    
80     -32    
-96    16     
-128   0      
96     192    
16     240    
0      336    
-320   160    
-16    -304   
-80    -688   
-288   -272   
0      64     
-272   272    
-176   64     
80     -256   
48     224    
112    -48    
-144   -576   
-64    -832   
-16    -16    
48     384    
704    2752   
-2048  -624   
-128   256    
1440   -976   
-1008  576    
16     -32    
-64    -224   
496    -176   
-384   -384   
-80    -80    
-48    272    
192    144    
240    192    
-128   96     
-96    160    
96     352    
-16    -160   
64     -256   
-64    16     
-160   0      
-48    96     
288    -288   
-160   464    
-1104  -256   
192    -16    
144    432    
-288   544    
96     208    
48     112    
-160   96     
16     64     
112    -48    
-80    0      
-16    384    
80     -16    
-128   128    
-48    -320   
240    -336   
-80    -48    
-224   32     
112    272    
160    48     
-16    -128   
-96    208    
-96    -48    
112    288    
176    208    
-272   -176   
144    176    
160    272    
976    1488   
-624   -784   
-1664  -16    
1600   352    
-48    192    
-368   192    
752    64     
-560   -1200  
-48    80     
176    320    
160    320    
-176   16     
-208   144    
384    352    
-320   192    
-224   336    
448    -16    
112    -64    
-368   -624   
272    -768   
-16    -432   
-576   -608   
-512   352    
1888   64     
-784   -464   
-400   -176   
544    -1072  
-368   -864   
-192   -48    
176    32     
224    -176   
-336   -80    
48     -64    
112    320    
32     -224   
-16    -368   
176    160    
-176   -192   
96     -304   
320    -848   
-208   -320   
-192   -96    
-16    240    
-128   -48    
416    -704   
-224   464    
-144   528    
-80    224    
656    384    
-192   1920   
464    992    
-400   -320   
-336   384    
496    480    
528    48     
-976   464    
-272   240    
-176   224    
560    -144   
-16    -176   
-144   560    
544    512    
-176   336    
-112   -288   
-48    -32    
-64    -176   
-416   -240   
480    -176   
-448   192    
336    0      
48     -112   
640    480    
-2560  -416   
144    -112   
1104   256    
-16    -80    
-800   736    
-240   -640   
864    -1792  
128    432    
64     -48    
-176   48     
-112   -64    
688    -432   
16     432    
-432   144    
80     80     
224    272    
-336   -112   
-96    -128   
224    -272   
-48    352    
-80    160    
16     288    
608    -240   
-496   -80    
-112   96     
-320   -480   
-128   -528   
544    288    
-112   912    
-208   -16    
-64    -144   
-256   0      
272    224    
224    -640   
-160   -128   
-64    16     
160    -192   
240    704    
-96    784    
48     240    
-128   -144   
32     -32    
96     0      
-144   -672   
-128   832    
176    416    
-144   864    
64     368    
48     -640   
64     -64    
-64    992    
1008   96     
-320   -64    
-192   480    
704    400    
-32    720    
-304   1248   
224    272    
48     -384   
-160   -496   
32     -368   
112    -432   
-128   -16    
272    -176   
-192   -64    
0      -304   
272    240    
144    352    
-272   352    
128    176    
32     80     
48     -160   
192    96     
-64    -48    
-80    -256   
80     -64    
80     240    
-32    528    
-48    -128   
-176   -960   
608    -2752  
-592   464    
480    -2848  
-624   816    
416    544    
240    736    
-176   176    
-128   -640   
-96    -736   
208    -192   
160    16     
128    -144   
-96    336    
-96    224    
80     160    
-32    -752   
-96    -672   
80     -1728  
80     16     
48     64     
-144   -256   
624    -608   
-576   80     
480    -144   
-16    96     
176    448    
240    352    
-240   16     
-48    272    
160    112    
80     -256   
-16    160    
144    48     
-80    32     
240    128    
80     -16    
-64    176    
-160   16     
176    256    
272    -48    
-304   96     
128    -720   
-48    64     
336    -16    
-32    16     
-592   -256   
288    368    
256    -240   
-288   192    
368    1072   
1968   -320   
-2384  1072   
-640   0      
1040   -160   
-208   -176   
-384   -336   
160    16     
160    192    
-448   -240   
272    336    
128    -336   
-96    224    
176    -352   
-128   176    
-80    144    
176    -448   
-96    -16    
-224   -240   
304    -96    
272    -48    
-288   -224   
256    480    
1712   -192   
-848   976    
-240   -32    
-416   32     
560    -128   
-512   -48    
128    128    
32     160    
64     -448   
-288   0      
32     32     
336    -448   
-1488  96     
544    -144   
0      -368   
-320   -816   
304    -64    
-304   -1712  
48     160    
368    448    
-304   -352   
-416   112    
1328   -96    
48     208    
-224   192    
-224   -16    
320    128    
-544   -272   
368    -320   
-32    -64    
-336   -80    
144    -144   
384    192    
16     -688   
-288   -576   
592    880    
-400   -224   
-224   -336   
544    -16    
64     192    
-96    -32    
-256   -32    
-96    -224   
432    496    
672    -80    
-480   -112   
-368   96     
1312   1200   
-2448  1856   
-368   -896   
512    -480   
-1120  -208   
736    0      
176    -48    
-16    -96    
-704   -112   
384    -240   
192    -112   
144    192    
-400   -112   
-224   64     
384    -224   
208    64     
-32    -256   
-576   -448   
448    -80    
-352   -1040  
992    -528   
-416   -176   
64     -48    
-224   -16    
-640   -288   
384    -32    
-96    32     
-224   -96    
208    -96    
-1200  272    
560    112    
-96    272    
48     -352   
64     48     
160    -656   
-64    -64    
-48    80     
-32    -272   
48     240    
304    192    
-112   32     
112    -16    
-64    -224   
160    -128   
256    -48    
-368   128    
-160   112    
464    -144   
144    272    
-320   -416   
96     128    
48     -16    
0      208    
-112   -176   
-320   -736   
256    -1408  
-432   -384   
16     -32    
208    272    
-496   432    
192    -192   
192    -16    
-16    -320   
-80    96     
96     -384   
128    64     
-112   96     
-256   -208   
-176   -112   
64     -112   
0      -16    
176    -64    
-448   -352   
336    -992   
-944   -304   
272    -288   
-224   64     
-176   -688   
272    -144   
288    784    
-48    368    
-352   -272   
-272   -2224  
-112   416    
832    -624   
-304   -896   
-128   288    
80     64     
144    1680   
96     208    
-608   -320   
192    368    
-80    -288   
0      112    
-32    -80    
-176   -128   
-176   176    
64     48     
32     208    
-640   -272   
-48    224    
112    48     
384    384    
-1488  912    
416    -912   
544    -1104  
-32    48     
-224   176    
-32    640    
480    -848   
-80    96     
-96    144    
48     -176   
80     176    
-48    -240   
96     -16    
-192   80     
-32    112    
208    -32    
-80    496    
-224   16     
-112   -128   
224    -368   
16     96     
-144   -16    
-176   48     
352    -112   
-256   -304   
176    -192   
-384   112    
-192   160    
-240   0      
1232   256    
-3008  -48    
-704   -144   
2080   -864   
-880   -624   
-480   -112   
320    -80    
-144   -304   
-256   944    
144    -608   
-64    208    
-240   -128   
112    -32    
16     -112   
-704   272    
48     -16    
-960   -208   
-112   -32    
-384   -128   
128    160    
48     192    
-208   1072   
1392   -32    
-592   -304   
-144   240    
-112   -432   
-192   -432   
608    -1328  
-176   -528   
-304   736    
432    1152   
-448   -480   
-64    -144   
-48    304    
176    -496   
-352   -672   
384    -160   
-288   176    
464    -144   
96     224    
-288   -32    
96     240    
-224   -816   
-208   -352   
304    -208   
272    -976   
-704   -624   
496    656    
-1104  672    
-304   -528   
112    -496   
-448   -592   
-16    -448   
-144   -144   
848    288    
-1152  624    
-288   -224   
-64    -240   
-432   192    
368    352    
-448   480    
-304   -16    
64     -176   
-112   -672   
48     -64    
-224   112    
176    160    
544    80     
144    80     
-352   -160   
304    96     
-960   464    
-496   544    
-64    -336   
160    -960   
928    16     
-464   -128   
-528   400    
400    128    
16     1200   
256    -64    
-176   -16    
-480   32     
480    -160   
400    592    
-256   -400   
-16    -240   
240    176    
256    368    
0      848    
-160   992    
-160   256    
32     -272   
640    288    
96     -480   
-256   0      
224    832    
-432   448    
224    16     
320    176    
-256   224    
-96    -32    
-128   -416   
-320   320    
0      0      
-400   -208   
352    -464   
-192   128    
-192   -96    
256    -320   
-144   -416   
64     -32    
16     80     
32     240    
16     128    
224    944    
-256   384    
-112   368    
480    720    
-112   528    
16     224    
-192   112    
-240   544    
1264   304    
-496   -32    
-320   368    
224    224    
-48    -224   
-256   -256   
16     -320   
-416   -336   
288    -16    
-112   0      
-32    -208   
-128   -496   
128    -16    
-16    480    
-144   304    
128    592    
-96    256    
-48    176    
-208   192    
48     -48    
-48    -80    
128    -80    
-16    224    
208    496    
-544   272    
112    144    
208    -288   
-112   -1296  
-192   480    
-176   -1744  
48     336    
880    -112   
-448   48     
-96    256    
80     160    
544    320    
-192   64     
-656   384    
368    48     
208    48     
96     32     
-208   -32    
160    192    
272    848    
-528   -160   
32     96     
464    32     
-528   256    
64     128    
-272   -256   
896    -336   
-224   96     
-432   48     
752    320    
-400   80     
224    -64    
-128   -80    
-16    -208   
64     32     
272    128    
-80    16     
-256   224    
176    192    
96     48     
-144   96     
256    48     
128    16     
-48    80     
288    -80    
-272   -176   
64     96     
80     96     
144    -288   
-544   -80    
576    -2464  
-160   32     
-96    64     
304    48     
368    1328   
-176   1184   
-288   656    
736    -336   
48     -64    
224    -64    
-816   368    
368    96     
-320   112    
224    -320   
80     64     
16     48     
0      -64    
-304   80     
528    48     
16     -16    
-368   112    
-48    64     
416    16     
-80    -96    
-48    32     
-32    160    
-144   496    
2000   0      
-1360  -128   
-80    432    
2112   -320   
-1072  64     
384    -2496  
528    272    
-592   -576   
32     176    
128    112    
32     16     
-64    64     
96     48     
416    96     
-48    32     
-112   -64    
128    -480   
144    -80    
-160   -128   
368    1072   
-224   -1248  
-1008  416    
1456   48     
-736   16     
-144   208    
992    48     
-336   -336   
-400   256    
240    160    
224    -80    
96     -112   
-208   160    
-240   32     
-736   -208   
640    -16    
-288   -64    
96     -16    
192    -224   
80     128    
96     -32    
-160   112    
112    144    
128    -160   
320    160    
-592   -208   
-80    96     
272    -736   
560    1856   
-2048  3696   
688    1360   
336    -608   
-880   -368   
736    -16    
48     96     
-464   -96    
16     208    
48     240    
240    -256   
-256   112    
480    -64    
-224   -16    
-80    -160   
416    0      
256    -80    
-288   96     
-80    -240   
64     416    
384    336    
80     1248   
160    352    
-320   -720   
-96    -496   
816    -176   
-624   -768   
400    -272   
144    704    
-368   -96    
320    272    
32     -192   
16     -16    
-16    -64    
176    -848   
64     -96    
-528   -432   
640    -480   
0      176    
64     -576   
-96    -64    
16     -160   
432    144    
-992   -304   
432    -48    
480    -560   
-400   32     
480    400    
-80    96     
16     -432   
-96    -672   
-224   -752   
400    -256   
-1184  144    
832    160    
-704   304    
160    -144   
240    336    
-96    992    
-128   864    
224    -224   
16     768    
112    592    
112    224    
-32    -464   
-176   -96    
256    224    
-192   320    
32     -176   
48     144    
-112   -64    
96     -48    
-64    -592   
144    -656   
128    -336   
96     -640   
-16    192    
480    -784   
-464   256    
128    -16    
256    112    
-80    -32    
176    -96    
-336   0      
400    416    
-80    544    
48     144    
-496   -32    
-176   656    
64     624    
-304   -272   
-32    -352   
160    -640   
-16    128    
-32    -16    
-16    96     
-16    16     
16     -64    
-224   -96    
368    -160   
-32    -16    
-128   160    
-48    -432   
-272   -176   
384    224    
-160   144    
32     -32    
-96    -544   
64     -416   
176    -144   
208    128    
-112   96     
-160   16     
-192   -48    
176    16     
-208   496    
112    -96    
-112   -192   
-32    -256   
-496   -144
[truncated: 236,011 more chars]
