# Supplementary material for: A Fault Diagnosis Method for One‐Dimensional Vibration Signal Based on Multiresolution tlsDMD and Approximate Entropy
Source: Hindawi journal article supplement (doi:10.1155/2019/3262818), 2019-01-01
Supplement: f1 [file 3262818.f1.zip › 3262818.f1/gear signals/pitch errors signal/Data7.txt]

-112   -64    
-64    -272   
-144   -112   
32     16     
96     -112   
96     -96    
-256   -48    
-176   -256   
304    -272   
208    -176   
-832   -208   
320    800    
368    -32    
-544   -272   
224    -48    
80     -48    
-80    128    
-128   128    
336    -96    
48     416    
-48    -128   
-256   -64    
-64    48     
-176   -80    
-48    96     
-32    -32    
336    528    
-176   592    
-208   -48    
48     256    
16     -16    
272    32     
-240   -16    
-32    80     
144    32     
-192   192    
-128   240    
1664   1440   
-1072  -256   
-2384  -304   
1376   224    
800    96     
-1584  -224   
-32    -80    
592    576    
0      80     
-160   288    
64     -48    
240    -16    
-272   -96    
-112   96     
128    80     
-64    112    
-304   -64    
240    128    
-64    16     
-176   64     
112    48     
-528   -384   
592    -64    
64     -336   
-800   112    
960    48     
-96    -48    
-352   -32    
-144   -96    
-288   176    
432    32     
-112   0      
-80    80     
-96    48     
0      240    
560    -64    
-624   368    
240    656    
-80    528    
-128   80     
160    -208   
-80    -64    
640    96     
-432   224    
-32    -224   
208    16     
-192   -256   
-112   -208   
-720   224    
400    -112   
192    64     
16     -112   
-144   16     
-80    96     
32     128    
464    320    
-176   -288   
-512   64     
384    448    
-384   48     
528    32     
80     -48    
-448   128    
-112   160    
160    -16    
-80    96     
480    208    
-288   128    
-576   48     
816    -816   
-2320  368    
-192   160    
-192   1168   
448    144    
288    48     
-976   176    
64     192    
384    -368   
-16    80     
-80    -176   
48     176    
64     -48    
192    -32    
32     144    
-80    176    
48     -16    
320    80     
-176   32     
480    672    
-848   0      
368    528    
576    -160   
-752   -112   
112    192    
416    176    
-544   -16    
16     192    
240    -128   
-272   320    
0      -176   
-256   128    
464    -112   
-240   0      
304    32     
-112   -16    
48     160    
-256   -112   
128    144    
304    144    
-80    128    
-64    64     
-48    224    
192    16     
112    -48    
32     -80    
48     0      
192    144    
-64    -16    
-544   48     
544    0      
-32    -336   
64     -192   
-1216  368    
576    -384   
192    496    
640    176    
-336   112    
160    -80    
16     96     
112    0      
-32    160    
-176   0      
0      32     
240    224    
176    -16    
-320   -240   
208    160    
64     -96    
128    -624   
64     224    
-176   304    
64     -96    
-32    -240   
48     48     
48     224    
-16    -720   
-80    -32    
0      336    
192    128    
48     16     
400    -1200  
-1888  1728   
1856   -352   
96     1088   
208    -368   
-608   -80    
480    1008   
-400   1280   
144    224    
48     -256   
-176   -144   
-48    192    
208    -64    
-80    -64    
-400   -304   
192    -688   
112    48     
64     -624   
192    144    
-128   144    
-352   -656   
624    -1280  
-800   128    
752    -256   
-368   -304   
-160   -608   
80     272    
32     0      
256    -464   
-32    208    
-304   -32    
-336   384    
784    -480   
-224   0      
-240   -1008  
-96    -192   
256    -224   
288    240    
-432   480    
-96    384    
224    112    
96     64     
-176   80     
-64    16     
96     128    
176    -256   
176    80     
-224   -192   
-48    -48    
512    48     
-976   1568   
1456   720    
-656   -272   
416    80     
640    -256   
-784   176    
-32    -176   
304    16     
-80    -928   
-224   -320   
-16    -304   
288    48     
-384   -464   
224    48     
368    -400   
-256   48     
112    256    
128    128    
-32    144    
192    144    
-80    176    
976    96     
-2176  -544   
992    -256   
896    912    
-1328  -880   
-880   -1168  
1008   -1328  
272    -416   
-864   -80    
32     48     
288    -128   
96     16     
-112   64     
-128   288    
272    -352   
-160   -336   
496    -1600  
-512   -816   
0      -384   
176    -352   
-48    384    
-208   -512   
320    -544   
-48    -688   
-688   288    
784    128    
384    -240   
-144   -288   
-80    -128   
-128   -736   
-144   144    
32     -112   
-384   432    
864    -1792  
336    -16    
-208   512    
272    48     
-560   -656   
64     0      
64     -528   
-416   -48    
224    144    
400    32     
-464   -464   
-272   -1072  
128    -368   
-32    -144   
-96    96     
144    96     
-656   -1984  
-992   -1200  
432    -400   
-48    -128   
496    848    
-192   672    
-192   1312   
272    -1184  
192    592    
-144   -400   
-224   352    
-512   -320   
272    320    
176    48     
-352   0      
80     -320   
-336   -832   
-112   -160   
352    -112   
-32    576    
-48    16     
256    80     
-464   -352   
-32    464    
320    304    
32     144    
-704   384    
592    480    
160    -544   
176    -288   
-240   352    
-208   272    
384    112    
256    -400   
-608   -128   
288    976    
272    1088   
-160   720    
272    1824   
-32    1072   
0      -736   
-16    -592   
144    32     
-720   320    
-16    -256   
320    -64    
320    496    
-976   -1136  
-80    -928   
768    -32    
480    736    
-1200  -304   
-384   -288   
1312   496    
-384   208    
-464   272    
96     464    
80     352    
-288   -464   
112    -560   
32     880    
-160   256    
-64    -96    
32     -224   
0      160    
-112   -432   
256    -320   
-208   -1120  
-320   -656   
464    384    
-160   128    
80     -240   
112    -64    
-160   -240   
64     -368   
-848   -224   
160    -192   
128    544    
-32    -512   
48     256    
304    1600   
1296   -288   
-1264  480    
-384   480    
272    -304   
128    240    
-336   160    
208    -48    
224    -48    
-112   -400   
208    -160   
-48    -208   
-16    272    
0      -416   
80     48     
-304   96     
-240   16     
80     304    
112    112    
-160   48     
-112   -800   
-48    480    
432    352    
-352   -160   
224    96     
-528   960    
352    160    
-160   432    
-1248  192    
-144   64     
64     160    
-352   -48    
-176   192    
160    80     
48     288    
-256   0      
-128   -176   
96     32     
208    -64    
-320   -16    
128    160    
-224   -144   
-96    144    
128    -176   
-704   -32    
64     16     
-32    96     
80     32     
-144   -96    
-496   -736   
-1216  -592   
1008   -16    
192    32     
-688   -176   
-656   160    
592    256    
-464   -64    
-336   208    
352    -112   
-224   -48    
-112   80     
-32    -112   
144    32     
80     0      
-304   144    
-32    208    
-48    -64    
-336   48     
400    16     
-256   -64    
-640   -560   
-192   352    
1264   -336   
-1040  -16    
320    -128   
480    -16    
-496   -64    
-192   -128   
112    -64    
80     112    
128    80     
-64    32     
-896   -64    
112    16     
32     32     
80     -64    
128    -224   
64     432    
-768   368    
-48    48     
368    208    
-480   -320   
208    80     
880    128    
-80    400    
-224   592    
80     416    
-720   -288   
48     -16    
-400   -240   
96     160    
512    -48    
-32    368    
48     -80    
48     192    
176    128    
-144   304    
160    -240   
64     96     
-48    -128   
64     32     
288    -96    
-304   0      
-160   0      
-192   -16    
528    -144   
-80    -80    
224    128    
-896   -2240  
656    -176   
1200   -384   
-1136  240    
896    368    
-544   -80    
-208   480    
336    -224   
-48    128    
80     -176   
-32    208    
-544   -224   
208    240    
448    80     
-528   80     
64     96     
-16    48     
-16    -16    
-96    -16    
-256   -816   
-496   -320   
288    -160   
-192   0      
496    208    
144    -320   
-368   160    
144    48     
256    224    
-736   -160   
448    -64    
96     64     
48     0      
-112   192    
-320   16     
352    240    
-112   96     
32     80     
-640   -288   
192    64     
160    368    
-336   16     
-128   16     
432    64     
-368   64     
48     -32    
96     208    
-224   0      
-96    48     
288    -192   
-48    -80    
-192   16     
-80    -64    
192    -336   
-336   288    
800    -48    
-320   96     
-656   48     
656    1168   
512    848    
-208   112    
-32    16     
-48    160    
80     80     
112    192    
-112   256    
-96    160    
240    -96    
-272   -272   
0      -288   
-112   -672   
-48    -736   
-48    -288   
128    16     
-192   -64    
-96    -48    
48     16     
224    -64    
-224   48     
-112   -240   
48     -80    
-16    80     
-48    2208   
1264   -496   
-1584  208    
336    -160   
416    192    
128    240    
-432   368    
-32    624    
368    384    
32     256    
-32    -128   
16     144    
-32    208    
96     144    
-32    80     
-112   64     
-32    -288   
272    144    
-144   -32    
-112   240    
-192   880    
832    -96    
-592   704    
208    224    
-64    -464   
224    736    
160    -208   
-128   224    
-112   32     
144    -208   
304    688    
-224   240    
0      576    
16     -848   
336    -128   
-192   112    
-128   560    
96     -480   
-64    48     
112    272    
224    32     
-96    208    
-112   96     
-16    448    
64     -240   
176    48     
-80    160    
-32    32     
-192   752    
1536   528    
-768   -224   
-1888  -528   
2272   480    
-704   592    
-672   528    
176    752    
272    -608   
32     272    
-208   -176   
176    544    
-16    -144   
-80    -176   
-16    -160   
-64    -96    
-64    -272   
80     80     
-16    336    
192    -400   
-192   240    
144    64     
-464   208    
2480   304    
-944   688    
-1440  640    
720    -192   
464    224    
-352   1440   
512    2336   
-128   432    
-416   -1136  
608    -448   
-16    448    
-336   368    
144    -400   
288    -272   
-128   -16    
-32    96     
-368   -224   
64     -48    
112    -448   
-16    -144   
192    176    
-112   -32    
-464   -432   
832    -448   
592    1184   
-1232  752    
544    1328   
-48    320    
160    48     
-32    -80    
-112   672    
896    0      
-64    -752   
400    -112   
-240   32     
576    832    
608    -416   
-432   0      
-48    -128   
272    128    
368    -48    
32     -96    
-192   -448   
48     128    
-272   -592   
-32    -224   
64     -304   
272    160    
176    1040   
480    -320   
-272   -624   
448    -752   
-144   720    
16     656    
288    1088   
448    -192   
336    -576   
-320   -688   
-48    176    
208    496    
416    384    
-384   -272   
-208   0      
240    304    
80     208    
-80    -160   
112    -144   
-272   -352   
112    -496   
80     -64    
-128   96     
576    64     
-400   976    
448    576    
-400   336    
64     320    
368    208    
-128   -560   
-608   -1136  
272    -560   
352    336    
-320   16     
-112   208    
352    -48    
-256   16     
80     -352   
144    112    
-240   -304   
-80    32     
240    -32    
-272   368    
0      272    
128    1328   
336    608    
-176   80     
-176   336    
416    -176   
80     -544   
-144   -336   
-208   1136   
1216   -272   
-208   -336   
-688   -1312  
-416   -624   
32     -1232  
-352   -1712  
32     -624   
-144   240    
112    -16    
-16    240    
-112   -144   
480    304    
16     -368   
-272   -448   
96     784    
384    384    
16     1168   
336    688    
-400   0      
80     -64    
304    -176   
-96    48     
0      -320   
-448   -1152  
176    -912   
128    -1648  
-208   -992   
96     -1280  
32     -2208  
-704   -1056  
928    128    
-800   -208   
336    192    
16     -784   
-416   224    
336    -304   
-224   128    
240    -48    
-192   80     
-400   -320   
112    -160   
0      80     
112    -544   
0      96     
16     -736   
16     -352   
208    -144   
-272   176    
-288   -512   
1152   400    
-96    -128   
-736   48     
1184   -16    
-688   272    
-352   -128   
272    -16    
400    -576   
-336   -96    
-192   80     
256    -592   
0      144    
-16    -128   
80     80     
64     176    
-208   0      
-208   -16    
208    -80    
-128   -32    
-192   -16    
144    -16    
-240   -80    
288    -224   
80     -96    
64     -112   
-48    -128   
-128   192    
432    -800   
-592   -1136  
1536   -1360  
-848   -272   
-400   144    
416    -64    
-304   128    
144    -208   
-288   592    
896    -224   
-704   -64    
-272   -48    
32     112    
256    -32    
-96    64     
-112   -400   
832    240    
-496   -160   
240    32     
-32    16     
96     0      
-144   -16    
0      -32    
464    880    
1392   -32    
-1808  384    
1664   128    
-112   16     
-1104  -192   
768    -368   
32     -544   
-160   128    
144    -16    
112    -176   
-128   16     
-32    -208   
160    0      
32     -32    
80     -16    
-320   592    
144    -128   
-160   -160   
304    0      
-208   -496   
-288   160    
272    -128   
-160   192    
304    704    
-464   224    
-96    144    
-464   240    
-192   160    
528    16     
-288   -144   
-192   -208   
160    208    
32     -272   
-208   144    
416    -16    
96     384    
432    -240   
-96    416    
-384   128    
-64    -64    
160    -96    
-160   0      
160    64     
-400   -48    
144    80     
208    -272   
-176   224    
-1136  -1680  
2320   -2960  
224    768    
-1120  272    
-320   -16    
272    112    
-192   192    
208    192    
48     464    
-896   176    
16     128    
832    -96    
-448   -16    
-80    -16    
80     -32    
176    -32    
-128   64     
-400   -336   
-272   80     
-160   704    
528    464    
-608   288    
32     0      
-64    128    
-368   -80    
288    128    
-576   -112   
-288   240    
768    -16    
-256   -64    
-96    128    
144    -16    
-144   -224   
-336   -64    
480    -320   
-432   -432   
160    -128   
-32    -48    
-192   -48    
32     32     
-80    64     
320    -176   
-288   -112   
-384   256    
160    544    
32     -80    
-672   -912   
144    -672   
32     -192   
-112   -352   
160    -160   
-112   720    
-464   320    
96     -416   
-16    -624   
-128   -624   
-320   -512   
-64    -208   
-48    -352   
-48    -208   
-160   -192   
112    0      
-144   -16    
-176   -112   
352    -336   
96     320    
-288   -96    
-272   16     
160    928    
272    576    
-320   -544   
-48    0      
-128   256    
-48    288    
208    240    
-384   656    
-96    496    
0      448    
48     320    
-32    -240   
-80    288    
-848   416    
896    -544   
-48    544    
-816   1360   
432    368    
480    -288   
-560   736    
-432   32     
432    288    
-400   -320   
-32    96     
-160   64     
112    -144   
80     288    
48     -32    
-320   160    
-96    -192   
112    544    
-64    144    
-64    304    
-336   992    
704    272    
-656   -176   
-32    176    
48     64     
0      176    
-192   176    
-16    96     
64     112    
0      96     
-32    -16    
80     -208   
32     0      
128    272    
-208   288    
48     400    
384    288    
-480   368    
-96    128    
384    -208   
-48    96     
-64    -48    
-176   160    
-160   -16    
128    288    
368    -16    
-352   32     
160    32     
272    48     
1184   1264   
-800   736    
-752   112    
1040   80     
-176   256    
-544   336    
-16    48     
688    -272   
-48    544    
64     16     
-80    144    
160    -352   
80     96     
-64    16     
48     400    
0      -480   
-176   128    
-304   160    
576    1168   
-224   -496   
112    -176   
-768   352    
2144   -400   
-928   -176   
-208   -624   
336    -128   
-96    128    
-352   1376   
896    2224   
304    1072   
-288   -144   
512    -656   
32     -592   
-384   -288   
352    288    
448    176    
-176   176    
-208   800    
560    480    
160    256    
-192   32     
144    64     
160    144    
-96    368    
128    64     
-272   -128   
128    -528   
-368   -960   
368    -1792  
16     -608   
-64    48     
416    32     
-64    -64    
-288   640    
320    144    
-416   -240   
-112   208    
336    2336   
816    288    
-384   -272   
32     -64    
240    16     
128    272    
-16    -416   
-320   -16    
384    -640   
-176   64     
16     160    
-336   -256   
32     32     
1024   -16    
-2192  -640   
640    208    
864    160    
48     -208   
-1360  -448   
400    -1088  
800    624    
-192   272    
-368   32     
-144   192    
112    16     
432    240    
16     48     
-512   -32    
-208   384    
608    96     
96     -160   
192    -864   
-752   -1008  
240    176    
144    112    
-96    432    
736    -16    
-832   -608   
48     256    
192    80     
16     96     
32     160    
-128   -48    
-112   464    
80     128    
16     -224   
416    16     
32     -48    
-352   96     
160    -192   
32     -80    
-352   48     
208    -592   
96     -32    
-112   0      
-112   -48    
112    80     
48     -32    
-80    816    
-224   288    
64     -320   
-176   -336   
96     0      
-160   224    
176    848    
1248   240    
-640   256    
16     160    
160    -112   
-112   -512   
464    -80    
-288   80     
-96    112    
192    0      
32     16     
-432   -48    
0      48     
336    -16    
80     -32    
-208   128    
176    112    
0      -32    
256    -352   
-272   352    
0      -448   
-48    112    
256    384    
80     512    
-208   -704   
-176   16     
320    176    
80     -160   
-480   48     
-608   -1712  
736    -256   
960    -208   
-1104  -80    
512    160    
560    288    
-800   400    
-192   -192   
192    -384   
400    16     
-176   32     
-48    -256   
-16    144    
400    304    
-128   352    
-48    240    
336    -208   
-208   -80    
224    160    
16     -192   
336    -480   
-1392  320    
832    -144   
592    336    
16     0      
-224   -112   
0      384    
208    -144   
176    144    
96     32     
64     -288   
-16    192    
-112   -880   
-160   192    
624    -288   
-240   256    
80     -224   
16     160    
192    -320   
-144   -16    
32     -16    
16     0      
144    80     
0      -64    
-336   144    
640    -80    
-352   128    
96     -176   
176    80     
32     -816   
-768   -128   
80     -304   
80     16     
-64    -224   
-480   -160   
384    224    
-80    -1136  
-48    -96    
368    -880   
48     -1232  
-176   0      
16     -624   
272    32     
-352   -288   
288    64     
160    80     
-448   -96    
368    160    
-144   -48    
-48    -112   
496    624    
-1600  -544   
-80    32     
1136   48     
-1392  -464   
176    48     
608    320    
-592   -288   
-320   -1328  
480    -240   
352    -32    
-400   -16    
160    -48    
80     -48    
32     64     
208    48     
-80    208    
-32    128    
48     64     
320    -64    
-144   -112   
176    64     
1168   -64    
-288   -160   
-272   80     
144    64     
144    -320   
1280   -1168  
-704   448    
-16    -48    
352    -32    
176    48     
96     0      
-16    96     
32     -480   
-544   -160   
64     32     
-304   544    
-224   96     
48     -96    
288    -320   
-112   -64    
32     -80    
-16    48     
-96    -128   
384    -64    
32     96     
-416   -192   
-48    -912   
-720   -2000  
-912   -96    
272    240    
352    224    
720    -448   
-768   -208   
-80    -384   
256    -304   
-96    -976   
416    -64    
-240   32     
0      -160   
64     128    
-16    -96    
-64    -128   
448    32     
-400   80     
176    48     
-1440  -272   
-384   -64    
352    224    
192    -80    
-144   32     
-336   -336   
480    -96    
-224   -432   
-320   80     
16     16     
112    -336   
400    -656   
-560   -672   
-32    -144   
336    -192   
-288   -320   
-528   -400   
416    112    
-16    16     
-672   -224   
400    -1152  
112    -96    
-176   -640   
112    -176   
112    -272   
-80    -432   
272    -512   
16     -848   
-160   -96    
-320   32     
-80    -656   
128    -416   
-64    448    
320    512    
704    528    
-480   128    
256    304    
-304   -192   
560    1648   
480    368    
-416   -1440  
96     -384   
-144   288    
16     112    
0      80     
48     144    
-496   -496   
256    -176   
304    -64    
-176   368    
160    176    
-64    384    
128    32     
48     -32    
-160   16     
48     -176   
-192   192    
240    -224   
16     -144   
-128   384    
64     128    
-16    -160   
-640   -336   
816    -768   
-144   480    
64     -400   
-432   128    
32     -64    
-96    -336   
96     416    
224    -64    
-176   0      
16     64     
-48    64     
48     -128   
80     -32    
-992   -80    
400    32     
-224   -80    
16     112    
-208   -416   
-112   -48    
-96    -320   
-128   288    
-112   192    
-128   192    
352    32     
-912   -112   
-336   80     
16     -32    
48     -128   
160    -80    
-128   224    
-208   112    
192    64     
32     -240   
-432   160    
288    -80    
160    256    
-240   768    
-144   368    
-48    -48    
-400   -176   
112    80     
-80    0      
-128   96     
-16    48     
32     288    
-96    -368   
-240   -112   
560    -208   
-512   -608   
1152   -272   
1392   -128   
-1792  -736   
176    -1056  
528    -48    
-272   -336   
-400   304    
-448   1040   
128    -832   
-64    160    
272    32     
-128   32     
-176   -176   
336    288    
16     48     
-208   144    
-176   -400   
608    384    
240    832    
-208   352    
-832   -752   
1024   -384   
496    -1168  
-1456  -496   
800    -576   
-320   -128   
-432   -1504  
-704   -1296  
560    -1152  
-208   -1024  
192    -160   
-112   128    
-368   224    
-32    -224   
160    96     
-112   64     
-320   -896   
-560   -368   
256    64     
176    -592   
0      64     
-64    -480   
240    320    
-80    -64    
-96    -192   
-16    912    
736    128    
-112   448    
208    -208   
-144   -96    
112    -96    
240    -64    
-128   128    
240    1072   
-416   -176   
-288   256    
288    144    
-704   0      
240    256    
512    -32    
-80    48     
-112   32     
-336   208    
560    -240   
-160   -16    
-128   -112   
64     240    
-192   -240   
560    -864   
720    2464   
-1472  1632   
912    -384   
1440   0      
-464   208    
-944   -128   
224    368    
992    -528   
-208   624    
-176   -288   
-176   320    
464    -80    
-80    192    
-48    112    
128    -16    
-464   112    
320    0      
-384   80     
656    784    
-400   1248   
-176   -144   
416    -480   
-352   -304   
-224   448    
288    -32    
-320   304    
112    -64    
-384   128    
224    -64    
48     256    
-304   -144   
96     -144   
208    -288   
0      -112   
224    112    
-160   144    
48     16     
-48    16     
352    176    
112    32     
-416   16     
-64    -32    
272    -16    
0      0      
288    -144   
-496   400    
672    384    
-16    304    
-96    -368   
-384   -176   
272    -16    
128    -64    
-1008  320    
464    32     
160    96     
256    -128   
-80    -48    
240    128    
-48    96     
-160   96     
48     112    
32     -32    
-112   -144   
144    -48    
0      16     
-208   96     
0      304    
240    208    
192    288    
-640   384    
480    112    
-16    16     
-288   208    
80     -96    
-80    -48    
96     -112   
112    592    
-176   48     
112    -176   
64     176    
1120   3040   
-2672  -144   
-592   192    
1840   -80    
-624   -480   
-496   -16    
608    -160   
240    304    
-432   176    
272    -640   
-112   192    
-96    336    
208    96     
64     176    
-352   -176   
-16    -48    
336    320    
-176   16     
96     -160   
80     336    
-96    -496   
496    -480   
-720   448    
336    96     
480    -1632  
-608   -32    
48     128    
624    544    
-16    -112   
-272   208    
224    208    
176    256    
-16    64     
-272   32     
-128   112    
304    -32    
272    -208   
-544   0      
512    0      
-208   -960   
240    80     
-128   224    
64     96     
48     240    
224    48     
-416   128    
-32    -32    
48     144    
240    64     
-512   -928   
1104   -112   
-480   -448   
-672   -80    
432    -304   
352    272    
-208   -16    
-192   -368   
112    176    
-288   32     
-96    128    
144    32     
64     112    
64     -160   
-224   -272   
-48    176    
480    48     
-368   128    
592    32     
0      96     
-96    48     
96     224    
-400   -832   
2112   -128   
-896   -144   
-576   208    
864    -144   
-64    64     
-208   16     
160    320    
512    -144   
-336   112    
192    112    
160    -144   
-128   48     
112    16     
400    48     
-224   -16    
32     208    
96     -1328  
-80    176    
-16    80     
176    336    
176    -128   
-1008  400    
1312   -192   
-112   16     
-576   80     
496    208    
144    -144   
32     -160   
64     208    
-256   -816   
128    48     
288    -64    
64     96     
-112   240    
-64    368    
624    -224   
0      240    
-48    48     
-400   208    
128    -416   
-144   64     
400    144    
-480   -112   
-64    -96    
416    -288   
192    192    
-48    480    
-448   -336   
128    3152   
1392   608    
-1664  -32    
-272   -192   
1312   176    
-208   -688   
-1248  0      
720    -64    
32     320    
-224   16     
176    -16    
160    0      
-80    -16    
0      -784   
112    -32    
-32    96     
-80    -48    
256    160    
48     -1792  
-624   -1344  
496    -832   
112    240    
-176   192    
-32    240    
608    -368   
-80    64     
-80    -480   
48     -400   
48     -528   
-64    -848   
32     96     
-48    -480   
-128   480    
-224   272    
144    112    
-176   -112   
80     -224   
-304   -320   
32     -1616  
16     -128   
-32    -176   
112    -80    
-240   -80    
336    -928   
208    -272   
-48    512    
160    160    
-256   288    
96     -416   
80     224    
-256   -688   
752    -96    
-720   608    
240    352    
240    -736   
96     -688   
256    128    
416    -224   
-32    400    
-160   -432   
-112   208    
288    -256   
-192   -208   
480    -416   
528    0      
-528   208    
64     -352   
-176   -80    
-320   224    
64     128    
32     -16    
-48    16     
-176   -48    
160    96     
64     -80    
-144   80     
400    128    
16     224    
-272   -48    
144    -272   
48     -288   
-1344  384    
400    -112   
96     48     
384    -240   
-144   -368   
144    -48    
96     64     
-80    -96    
-64    -208   
96     176    
-112   304    
16     208    
-256   176    
48     -128   
-192   -64    
0      128    
-192   320    
128    96     
0      -224   
-592   -336   
448    -64    
-432   -368   
224    0      
160    160    
64     144    
-400   448    
288    -32    
-16    -64    
-64    -128   
0      80     
112    176    
-48    352    
-112   16     
-208   112    
16     352    
0      96     
-240   560    
464    -128   
-208   -608   
-112   -112   
64     224    
320    -144   
-400   -96    
-128   48     
-16    160    
-48    32     
-272   -16    
464    -384   
-240   592    
608    -544   
-1504  144    
1264   -224   
416    944    
-1232  -1984  
704    -96    
0      -16    
-160   -880   
-224   -528   
304    -192   
-64    160    
160    -48    
-128   -16    
144    -16    
-176   -96    
32     -352   
192    -160   
80     176    
-352   224    
176    176    
-672   -576   
736    -288   
720    -672   
-608   1584   
2240   496    
-912   464    
896    256    
-336   64     
-304   -160   
464    16     
32     -192   
-224   80     
-64    -560   
96     -96    
400    96     
-656   -16    
-416   -48    
208    96     
-16    -128   
144    -352   
-112   -16    
-32    160    
848    -240   
-1616  224    
208    -208   
80     -16    
-864   272    
32     -304   
144    16     
112    256    
-112   -48    
-240   -160   
-144   -32    
320    -112   
176    512    
-208   -32    
352    976    
-352   256    
-848   -128   
272    176    
192    -32    
128    32     
-16    -16    
-240   -208   
272    64     
336    -32    
-16    128    
-384   16     
-192   64     
-400   -2224  
-816   -144   
-144   -176   
96     0      
864    240    
-336   144    
-464   16     
0      -112   
528    480    
-336   -128   
-288   288    
304    -224   
-112   128    
112    -176   
-240   64     
16     -288   
224    256    
-496   -48    
256    -208   
-1104  -304   
944    -192   
-304   -112   
-224   -208   
208    384    
288    80     
-736   -128   
784    -224   
-112   32     
-384   -64    
-96    128    
96     -48    
256    288    
-560   16     
176    304    
304    -336   
-208   384    
64     112    
-624   256    
928    80     
-96    96     
-304   0      
-112   -96    
16     -16    
272    0      
-272   128    
256    16     
-176   48     
-128   -112   
352    384    
-880   -32    
-96    208    
-112   -864   
-48    240    
80     -336   
-976   -272   
848    -128   
288    -432   
-416   112    
-48    192    
16     192    
48     16     
-144   48     
-224   -48    
176    -48    
-736   -256   
96     432    
-112   576    
-48    144    
304    -672   
-416   240    
320    16     
16     304    
-400   112    
176    48     
256    64     
-208   -240   
-320   -144   
352    96     
192    528    
-224   -80    
-800   -2624  
-528   880    
1760   16     
-1056  240    
544    64     
464    640    
-1232  992    
96     -176   
208    -624   
-176   320    
64     288    
-224   -208   
-144   368    
304    -32    
-128   -320   
-160   -128   
-80    288    
80     128    
176    48     
-32    32     
-128   -880   
-944   528    
928    128    
-304   48     
-176   144    
240    64     
-496   -400   
64     -176   
208    320    
-192   0      
0      96     
96     48     
-304   208    
368    -32    
-208   128    
-112   96     
240    48     
-304   -64    
384    -112   
-176   64     
-112   -144   
96     288    
160    -32    
-32    288    
-240   -96    
48     240    
352    -96    
-176   48     
-176   -80    
1392   2384   
688    -560   
-3200  -320   
336    400    
1504   624    
-1696  -128   
-32    -224   
1024   -64    
-752   -288   
176    240    
224    -32    
-144   48     
-128   112    
-32    -96    
560    32     
-288   -112   
-368   176    
256    0      
144    -64    
160    -176   
-352   -80    
464    400    
-1600  192    
176    464    
960    288    
-624   -320   
-192   -144   
0      256    
-80    128    
-64    32     
144    64     
192    -176   
272    256    
-256   112    
192    304    
-368   48     
-80    48     
272    80     
-496   272    
320    -64    
0      -32    
-128   -112   
-128   -272   
224    80     
-144   272    
224    -192   
-128   1408   
-912   96     
32     128    
-48    -256   
-448   80     
192    112    
80     -48    
208    -80    
-272   -1104  
-720   -224   
192    -112   
688    672    
-432   112    
-112   -304   
672    -464   
-192   224    
-32    64     
64     352    
-320   128    
336    176    
-624   256    
-48    48     
-144   96     
400    -608   
-384   -1248  
816    -2240  
624    608    
-256   400    
-576   -288   
208    -176   
112    -656   
464    -816   
-400   -1616  
-96    -320   
368    400    
-64    0      
-16    -112   
-192   400    
256    192    
176    288    
-240   -736   
432    -16    
-112   304    
48     416    
16     192    
176    64     
-256   -64    
-96    496    
464    848    
-144   992    
256    512    
64     176    
192    -48    
-80    80     
0      -32    
288    -560   
240    144    
64     1136   
-112   1056   
-160   192    
160    -320   
-64    -640   
176    608    
-48    768    
0      -80    
272    288    
0      -176   
-128   576    
352    -640   
0      272    
32     16     
288    928    
-416   -288   
240    -16    
96     128    
128    1392   
1840   -480   
-784   96     
64     448    
0      976    
480    -32    
-624   -1744  
256    -992   
48     -432   
176    560    
-128   -1008  
96     368    
208    -352   
-64    -64    
-64    64     
-224   32     
256    -32    
64     144    
0      48     
160    -112   
-144   224    
-48    -16    
144    -80    
192    -160   
-272   336    
272    144    
-64    640    
-208   -288   
224    96     
-128   160    
-64    928    
448    16     
-432   128    
192    96     
64     16     
-32    272    
240    -112   
0      896    
-112   -16    
208    0      
160    -272   
-112   -32    
0      48     
208    304    
0      144    
-96    -32    
128    -64    
160    -160   
112    -80    
464    -304   
-1248  944    
864    -288   
16     288    
-112   160    
176    160    
-16    352    
-272   768    
272    -496   
192    -160   
-384   336    
-288   -384   
208    -224   
272    160    
-96    -1360  
-144   208    
-176   -592   
528    -16    
80     -64    
-128   176    
-80    -176   
16     0      
224    48     
-160   112    
144    -400   
112    208    
-32    -208   
32     48     
176    96     
-640   640    
272    992    
2272   -96    
-1360  -128   
384    -96    
-48    -592   
256    -176   
64     -544   
-176   -240   
128    -448   
192    0      
16     -80    
-16    -64    
48     -336   
272    112    
-176   -80    
-320   -48    
-16    -32    
-16    -96    
192    -144   
-16    -160   
-160   -880   
976    1376   
864    160    
-592   544    
-176   -256   
320    -368   
16     -32    
208    128    
544    -112   
-528   -96    
-320   128    
160    -256   
-144   -144   
208    -304   
-272   -48    
96     -176   
224    0      
48     -3232  
-176   -16    
240    -320   
64     128    
-400   96     
592    -160   
-144   256    
224    -400   
-656   -144   
-368   -864   
-752   -400   
560    384    
-96    96     
-176   -112   
64     -16    
-320   -1648  
80     -192   
352    -1136  
-560   496    
400    272    
32     192    
-496   96     
192    -224   
160    48     
-400   -80    
-128   336    
608    -80    
-64    112    
-992   -304   
384    64     
576    -304   
-800   -480   
544    -2240  
1664   -3088  
-464   480    
384    -608   
-272   0      
256    272    
-80    -128   
400    176    
-64    -176   
-224   -48    
592    -240   
-80    64     
-304   272    
544    -176   
-272   16     
-80    -1072  
176    -112   
-32    16     
-304   -304   
800    288    
0      -176   
-624   224    
480    224    
16     112    
304    128    
-800   -64    
368    -112   
-352   16     
176    -304   
-64    64     
224    -544   
272    -160   
-48    128    
224    -48    
112    256    
-560   -208   
448    -96    
224    -368   
-240   128    
752    48     
-848   128    
416    -48    
-48    32     
48     -416   
96     32     
-240   -48    
-400   -128   
256    16     
432    -144   
-160   256    
80     80     
48     928    
80     64     
-464   496    
400    48     
-688   16     
-1312  -496   
432    -32    
-544   368    
-336   32     
80     144    
272    32     
-448   -16    
-528   -64    
32     -16    
64     144    
-64    -112   
-288   -48    
80     -112   
-192   48     
80     384    
448    -240   
-272   -144   
-400   16     
32     128    
240    144    
-144   80     
-384   -384   
-256   112    
128    208    
-688   -160   
1616   2224   
1152   -64    
-1952  512    
704    -208   
208    -64    
-240   32     
-16    272    
240    896    
144    -432   
-400   -256   
304    192    
112    -64    
-176   144    
-80    -80    
144    -496   
-240   368    
-1248  -32    
-160   -64    
0      -224   
96     176    
-272   656    
1040   -368   
-800   -176   
-176   496    
416    192    
16     -96    
-192   -528   
-80    -208   
64     192    
-96    -144   
-16    144    
-384   48     
128    -80    
-80    32     
320    0      
-288   64     
64     -128   
80     64     
176    -240   
-32    128    
128    144    
-16    96     
-80    32     
-64    -32    
-208   96     
368    -112   
-224   272    
64     16     
-208   64     
1248   272    
-3024  320    
-288   160    
2032   16     
-992   -416   
-544   -192   
192    -208   
-32    -32    
0      496    
48     320    
112    64     
-304   -16    
-176   -112   
128    -32    
-128   -64    
-448   -48    
208    80     
-16    128    
32     48     
-304   80     
80     256    
-208   432    
2000   -128   
-656   816    
-144   336    
256    176    
272    128    
-416   256    
-496   480    
-112   -352   
672    -192   
80     48     
-256   -48    
-160   64     
128    80     
-32    16     
-16    144    
-176   256    
-16    -272   
112    144    
-128   0      
192    224    
-160   96     
80     144    
64     16     
-96    784    
240    -896   
528    -1968  
-496   -1600  
256    -64    
288    112    
-96    128    
-112   512    
-16    -208   
-624   368    
208    832    
-464   64     
-48    -352   
-256   272    
-368   -416   
-16    -272   
112    256    
16     384    
-112   448    
-16    16     
-464   -144   
64     -400   
64     480    
-144   320    
-96    352    
-368   -1360  
1888   -1328  
240    -400   
-880   912    
288    -128   
-112   704    
256    304    
-16    -496   
-272   368    
-288   16     
256    176    
208    -224   
-336   48     
48     128    
16     48     
272    384    
-416   224    
-160   -128   
80     0      
112    -240   
-32    1056   
-160   192    
368    -160   
448    -288   
-544   -432   
-144   256    
160    336    
-656   -1424  
496    -192   
144    672    
-512   -608   
112    480    
144    -592   
48     -352   
48     -624   
112    16     
-160   256    
48     240    
176    -672   
-64    160    
-160   400    
80     -112   
-16    16     
-80    -208   
16     -544   
-64    -160   
48     272    
304    -1200  
64     656    
-304   176    
-80    688    
-64    688    
1312   288    
-512   576    
-128   672    
272    448    
624    -64    
-352   32     
-96    848    
48     336    
32     -80    
256    32     
0      112    
-576   464    
32     -272   
320    -240   
-192   256    
64     -16    
-480   560    
-144   208    
-192   -32    
112    144    
-32    272    
-96    64     
176    -496   
-336   -1200  
256    -544   
-224   -992   
16     -1440  
304    -112   
-208   400    
512    -640   
-352   624    
688    640    
-96    720    
496    704    
-336   928    
96     -528   
336    -928   
-48    48     
-192   416    
112    272    
272    -80    
16     80     
-48    -96    
32     64     
-32    48     
224    544    
80     160    
-208   112    
432    336    
-784   -128   
768    -944   
-144   336    
-176   768    
-240   -416   
368    32     
144    -128   
-160   448    
-16    576    
144    -736   
-80    0      
-32    512    
224    -288   
-48    224    
-80    -16    
-112   192    
320    160    
0      128    
-48    192    
160    144    
-32    -96    
-224   176    
80     -432   
-64    192    
272    -832   
224    80     
-112   160    
192    -96    
-736   -1184  
1152   -192   
272    -224   
-688   -80    
848    304    
192    112    
-736   80     
288    432    
80     208    
16     -32    
112    80     
-16    -176   
-96    -16    
64     144    
320    0      
-432   144    
320    64     
-112   240    
-144   64     
96     160    
144    -240   
-80    224    
-720   -704   
1472   80     
256    -336   
-1072  272    
976    -400   
-96    96     
64     -32    
-368   -16    
-320   64     
352    160    
32     -16    
-176   16     
-208   -64    
624    128    
-144   96     
-80    -128   
-128   432    
368    -304   
-256   64     
-32    -112   
-320   -320   
464    0      
48     144    
-464   -80    
528    208    
320    112    
368    -224   
288    368    
544    64     
-592   32     
-64    96     
320    112    
-272   -400   
288    -192   
-192   16     
448    -304   
-352   -320   
-112   -256   
480    64     
272    -928   
-512   -16    
-48    -864   
320    -640   
720    -224   
-688   -2208  
48     -304   
-320   160    
-368   -752   
560    -2032  
2320   -3312  
-288   608    
-384   0      
-416   -432   
960    32     
32     -496   
-400   592    
368    144    
-544   80     
64     -32    
96     -288   
-80    -144   
-80    256    
112    -96    
192    240    
80     -256   
-112   -576   
208    32     
-608   -688   
592    256    
-192   96     
64     128    
-96    -144   
-240   -320   
400    -128   
-352   -224   
-112   224    
192    -256   
-192   -144   
-48    -928   
224    -160   
-224   64     
448    176    
-400   -64    
48     288    
208    -272   
-352   -112   
32     -256   
48     -16    
-96    -80    
-624   -240   
352    -160   
0      -400   
-480   -640   
576    -608   
64     -112   
-224   208    
112    192    
192    192    
64     224    
-80    192    
320    -288   
-448   336    
272    416    
80     32     
-272   -192   
64     0      
272    112    
416    48     
-128   64     
-160   144    
304    -592   
80     192    
-112   -96    
96     192    
160    80     
112    -48    
-176   -240   
48     -528   
-144   -80    
96     -64    
-240   288    
64     112    
-80    16     
-208   160    
176    304    
-208   -576   
320    -64    
-64    -336   
-624   -1024  
2016   784    
-128   176    
-1264  592    
288    -656   
-336   -224   
448    464    
224    416    
-144   352    
-816   304    
320    -432   
336    256    
-112   -848   
-240   208    
240    672    
224    96     
-192   -64    
16     64     
-16    176    
-32    -48    
32     128    
320    2016   
-272   800    
-320   -832   
208    -912   
256    -192   
-288   704    
0      192    
240    80     
-32    -1472  
112    -80    
80     -96    
0      -96    
-32    272    
304    224    
-336   16     
80     -528   
128    -64    
-48    -128   
-304   512    
256    64     
224    -112   
-48    -48    
0      144    
-80    -80    
288    -128   
-96    16     
-192   48     
-160   0      
464    0      
544    -912   
-2864  544    
368    160    
1504   -496   
-816   -32    
96     -16    
-416   944    
160    16     
-336   -288   
32     -304   
192    64     
-336   80     
-256   16     
-80    -192   
-176   48     
384    240    
-64    176    
-80    864    
-48    576    
-96    368    
-352   -1200  
1376   800    
-208   -432   
-1632  -752   
848    -656   
16     -16    
-576   -576   
176    16     
-32    176    
-1200  0      
-176   -112   
288    -96    
0      144    
-560   -64    
272    -256   
-240   -256   
-96    96     
144    -800   
-448   -608   
-112   -448   
-32    -112   
48     -16    
-112   -272   
-416   1248   
848    1024   
144    1376   
112    288    
-112   1216   
608    16     
-784   -752   
96     -144   
416    720    
-320   272    
-320   144    
944    -528   
-224   -32    
192    512    
-720   560    
80     560    
-240   -384   
-48    -128   
-352   -352   
32     496    
-512   224    
128    80     
-464   176    
144    432    
144    -272   
-480   -352   
-224   240    
1072   2480   
-1040  400    
288    -96    
1024   -144   
-416   -608   
-272   -464   
32     208    
784    -64    
-192   -1072  
-208   112    
-144   16     
32     -176   
352    -448   
48     64     
-288   -112   
-160   -288   
128    -96    
-464   -48    
-80    96     
112    -128   
-144   32     
-304   -32    
112    400    
48     -608   
-512   -240   
-160   -432   
-400   -736   
-48    -176   
656    960    
-80    576    
-160   -176   
-160   -416   
-304   208    
528    48     
-256   -128   
16     176    
96     192    
32     880    
-32    432    
64     -320   
-160   -144   
-256   208    
384    192    
-208   32     
-288   688    
192    -272   
-64    -352   
-272   -816   
144    96     
144    368    
-592   -192   
592    -720   
-224   320    
-784   480    
304    416    
-112   -512   
-528   -544   
160    -16    
144    1088   
-16    672    
80     384    
64     80     
-144   80     
-32    16     
-144   -176   
16     128    
-64    -272   
-400   -80    
-96    -96    
432    256    
-224   288    
0      224    
80     -48    
-160   80     
288    -144   
-288   0      
112    400    
96     448    
48     -48    
-144   -240   
-656   -384   
1072   -560   
-816   -48    
336    -1056  
288    448    
-464   -128   
128    -352   
96     736    
-272   848    
16     544    
304    192    
-256   208    
-64    -32    
256    -288   
32     -144   
64     208    
48     112    
-256   16     
48     240    
144    96     
-288   -768   
368    272    
32     128    
-240   400    
448    368    
-128   544    
144    256    
-144   -224   
-32    208    
160    -64    
-48    -32    
-80    0      
144    160    
-64    128    
432    128    
-256   112    
112    112    
-304   -32    
464    -96    
-192   144    
64     64     
80     96     
-64    32     
80     -64    
-288   -128   
-16    144    
352    -32    
-320   176    
480    -160   
1680   -288   
-3520  -80    
-2432  176    
2256   416    
-80    -128   
-768   80     
192    176    
560    560    
-528   -304   
160    272    
160    -192   
-80    320    
-80    -320   
-128   240    
-64    -144   
48     144    
-128   -80    
48     272    
384    144    
-80    -32    
-208   16     
624    1072   
-672   -400   
-1616  48     
1200   96     
528    0      
-160   -96    
-192   368    
928    -1872  
-544   -64    
0      -48    
224    -32    
96     256    
-144   -208   
320    528    
320    -64    
-512   -112   
512    32     
-96    96     
16     -112   
304    112    
-112   -256   
-144   432    
960    -912   
-1232  176    
160    512    
32     384    
-176   144    
144    208    
-320   32     
-256   176    
-16    -128   
384    464    
-144   16     
-192   -160   
-96    480    
208    80     
-416   400    
-512   272    
464    176    
-208   -304   
-224   208    
112    96     
0      80     
112    80     
-368   -416   
-16    -208   
256    208    
-576   -80    
320    208    
1312   -4320  
-2768  -960   
1536   1264   
80     -32    
-672   416    
512    -2352  
-480   272    
-80    16     
592    -144   
448    -80    
-352   80     
-272   112    
128    160    
464    96     
-64    112    
80     32     
-416   80     
368    -16    
-304   -400   
768    -176   
-384   -544   
80     192    
-16    -704   
-752   64     
608    -240   
-240   80     
48     -16    
144    -64    
-32    400    
480    80     
-304   192    
176    -160   
96     176    
272    32     
-304   208    
240    -128   
0      128    
432    -752   
192    64     
-96    -128   
176    160    
-256   -48    
544    240    
-128   352    
-80    -48    
400    128    
112    -512   
-208   0      
-96    -160   
400    112    
0      -128   
128    176    
-832   -64    
816    1648   
-272   1760   
112    336    
-16    -528   
-16    -96    
128    -160   
288    -768   
80     -160   
-32    -272   
80     96     
-80    -288   
-176   -144   
96     -208   
320    -16    
160    -144   
-112   0      
48     96     
112    208    
-64    -992   
208    -256   
144    352    
-352   128    
464    -544   
-128   -640   
-128   512    
-32    752    
384    -80    
-224   -1184  
560    -1488  
-1152  272    
112    -1344  
512    -480   
-400   -576   
192    -192   
-400   -800   
288    160    
-304   -448   
176    -192   
224    176    
-48    -1472  
-112   48     
32     160    
64     -176   
-48    -176   
128    240    
96     -544   
32     -96    
-112   48     
336    -320   
-176   608    
640    528    
-176   -144   
-416   -624   
0      336    
416    832    
-192   -48    
-176   -544   
272    112    
256    -176   
-112   352    
64     -208   
-144   112    
144    0      
224    -64    
-512   288    
-224   80     
-1136  -208   
512    -320   
32     128    
-288   -304   
-32    128    
480    -2128  
-256   -576   
224    -288   
-16    112    
-128   48     
320    32     
272    -944   
-2896  -192   
752    160    
944    -288   
-992   -1072  
-240   -416   
-16    -624   
-208   432    
192    -512   
368    -368   
-368   -208   
-224   0      
208    -16    
80     64     
-144   -256   
-48    80     
144    0      
-16    16     
432    -336   
-48    208    
-112   352    
496    -1168  
-1040  112    
784    432    
-368   -304   
80     -320   
416    -240   
-880   -512   
240    -1136  
176    304    
-304   1104   
80     224    
80     -176   
64     -352   
-64    -640   
32     -528   
-1088  144    
48     -96    
-528   -64    
400    -96    
112    16     
-304   -576   
416    -688   
-400   -368   
-640   -1024  
320    -784   
-128   -880   
928    -1648  
320    -1280  
-144   -432   
80     288    
-384   176    
32     496    
-624   112    
1104   -960   
-272   288    
64     -592   
96     -400   
-304   -1120  
464    -576   
-144   -160   
16     192    
-272   400    
32     96     
-16    -224   
-112   -240   
0      -32    
384    -272   
80     -112   
-144   -192   
-288   -2272  
-1392  -896   
1120   368    
-80    1376   
128    0      
-736   -640   
-368   -448   
944    -656   
80     -976   
-560   176    
-160   512    
48     -304   
496    -96    
-112   -688   
-480   -240   
-32    96     
688    -464   
-32    -80    
-208   0      
-464   576    
192    512    
192    64     
208    112    
368    -320   
-560   -368   
240    688    
-176   896    
192    560    
368    384    
-688   496    
-48    0      
-288   -400   
-496   0      
-16    -96    
-368   -400   
352    -272   
-560   32     
-208   -416   
-384   -528   
-80    -336   
176    -16    
-96    144    
32     -16    
-208   96     
32     -496   
-640   -608   
48     -256   
-112   -336   
-80    -608   
0      -704   
-736   -400   
640    304    
928    -240   
-1600  -96    
176    -144   
16     -288   
80     192    
192    16     
-48    400    
304    32     
-240   208    
64     112    
272    480    
-400   224    
48     64     
112    -464   
-208   -208   
-192   -864   
-112   -544   
96     -16    
-64    -368   
-16    -160   
-432   -368   
128    304    
176    192    
-144   464    
592    176    
-304   -96    
-208   -96    
224    0      
-816   128    
784    -1024  
-720   256    
-192   -304   
400    336    
-304   -288   
-592   112    
112    -32    
512    -240   
-160   -48    
-80    80     
-176   -16    
-112   176    
96     -304   
48     -480   
400    128    
-384   256    
0      64     
0      -176   
-160   -112   
144    -624   
-1232  560    
128    -128   
-80    64     
-592   -288   
352    -400   
32     112    
16     192    
-48    80     
320    224    
-96    -112   
-144   144    
-96    16     
0      80     
96     48     
-208   -176   
224    -112   
-128   -80    
0      240    
304    -80    
-304   16     
64     32     
48     112    
144    48     
-592   -144   
496    256    
-304   -64    
-112   64     
256    0      
656    1376   
-928   1152   
144    464    
672    -576   
-416   -144   
1120   160    
-1376  192    
-96    128    
544    352    
-208   -160   
96     32     
224    64     
-384   16     
112    144    
128    96     
-368   128    
0      -176   
160    224    
-480   -16    
-48    160    
160    96     
80     -80    
848    -112   
-2080  192    
576    -32    
1616   -96    
-2064  272    
480    320    
-192   96     
-496   -240   
192    -32    
-80    32     
16     32     
0      144    
64     144    
48     16     
-448   112    
160    -64    
64     -240   
-64    -32    
64     64     
112    112    
-448   240    
1312   -32    
-528   -128   
-416   352    
1040   560    
-608   560    
-624   -224   
656    -96    
96     48     
-256   80     
-96    64     
160    32     
336    -112   
368    -176   
-608   112    
336    384    
-48    272    
-256   -128   
448    -32    
-224   48     
16     128    
80     32     
-96    128    
48     208    
752    -32    
-32    80     
-80    80     
-336   -688   
1568   -2144  
-2656  -1136  
528    -304   
1232   272    
-304   -16    
-560   -32    
-80    128    
608    240    
-352   -208   
320    176    
368    -48    
-400   96     
352    48     
-96    208    
128    -16    
-16    352    
224    64     
-336   80     
-240   -560   
560    -1424  
112    -512   
-240   64     
-48    336    
-528   32     
512    96     
32     -224   
-128   0      
176    256    
-96    128    
112    592    
96     -32    
-16    192    
-80    96     
160    176    
64     -16    
-544   -544   
576    -800   
-32    -432   
0      208    
-16    240    
-48    96     
368    -64    
-928   -256   
528    256    
288    384    
-320   288    
512    560    
-272   208    
128    -496   
-80    -320   
-96    64     
0      -960   
-432   -224   
848    544    
-384   624    
368    1120   
224    1856   
-832   928    
224    240    
32     -240   
0      -464   
48     -208   
128    80     
80     336    
-128   0      
48     -720   
-16    96     
-16    -1088  
80     16     
48     -32    
48     320    
64     624    
-128   208    
256    -192   
-128   -16    
80     176    
-144   80     
208    272    
48     -144   
-48    96     
112    -144   
-80    1536   
-64    -48    
-144   -192   
-176   -2416  
144    48     
176    256    
-160   656    
144    176    
320    32     
-32    -160   
80     -80    
-32    80     
160    80     
-192   368    
144    -224   
272    -240   
-208   -400   
-48    -48    
80     -592   
464    896    
-208   -976   
-224   -32    
1008   0      
-720   560    
224    -128   
48     144    
128    160    
0      288    
-48    48     
32     0      
160    80     
-128   -96    
-128   -64    
240    -656   
-160   112    
-128   -48    
272    160    
128    -224   
-288   -48    
-96    112    
-16    272    
32     96     
80     64     
-176   64     
80     -192   
144    48     
-288   48     
352    80     
128    0      
-1376  1168   
2704   -992   
-48    192    
-1552  560    
1344   -480   
672    -448   
-800   -736   
320    -1664  
-400   -1728  
-160   -144   
144    608    
368    48     
-192   0      
-16    0      
144    336    
128    192    
16     352    
352    -368   
-128   240    
-48    -64    
576    -176   
-2256  144    
912    16     
304    -400   
-464   -128   
672    -192   
-608   -976   
-528   -1360  
384    -640   
-80    -48    
16     256    
-96    -224   
192    -192   
64     -208   
16     -2176  
160    16     
-1408  368    
448    864    
320    704    
-304   192    
64     -64    
-80    -320   
336    -96    
-592   160    
448    704    
-160   656    
592    2000   
-1040  976    
-336   896    
880    -800   
-448   32     
-304   -48    
-144   -240   
0      -48    
416    416    
720    -576   
-96    -640   
-384   448    
0      -304   
720    272    
224    64     
-464   -176   
240    48     
432    96     
368    720    
-800   416    
-400   0      
880    112    
0      384    
-688   -1056  
1312   -1168  
256    -160   
-1312  -336   
144    -2880  
176    -896   
240    -416   
-224   240    
-192   736    
384    208    
112    32     
-80    -208   
-320   -64    
144    368    
112    16     
-48    192    
-288   96     
240    -144   
-128   -176   
560    -352   
-96    848    
48     64     
96     -16    
0      -16    
-704   96     
832    80     
48     -192   
-160   -144   
16     176    
16     16     
0      -240   
64     16     
144    -96    
-112   -32    
-288   -304   
-192   -112   
512    -1408  
80     -144   
-560   32     
384    80     
-144   -160   
416    -160   
-416   -48    
-64    -80    
304    0      
-288   -208   
-96    -16    
576    -128   
-688   80     
128    -16    
320    32     
352    1088   
-848   320    
16     -544   
688    176    
-144   -112   
-656   128    
320    96     
160    -224   
64     -160   
48     -32    
-304   -224   
-32    32     
-48    192    
320    -96    
96     -208   
-928   -64    
384    192    
448    -384   
-720   160    
208    -144   
272    -240   
-144   544    
-48    336    
-176   48     
208    -144   
304    -32    
96     160    
-208   -32    
16     -224   
-544   -1040  
2352   784    
224    448    
-1392  -48    
352    160    
-336   -80    
-176   -576   
288    -144   
256    -96    
-992   352    
480    -160   
224    256    
80     -160   
-320   -208   
304    -400   
288    512    
-160   -448   
80     144    
160    192    
-368   48     
-160   48     
816    1072   
336    16     
-1120  -256   
448    304    
160    -192   
-288   -16    
192    -64    
256    224    
-288   -208   
-48    -16    
-128   128    
640    -16    
-736   144    
-832   48     
208    64     
224    0      
96     -160   
0      64     
-32    48     
112    0      
160    64     
-256   -48    
-128   32     
288    16     
96     -32    
-544   -80    
-128   -128   
-64    32     
-64    32     
-1792  -736   
3744   928    
-64    -208   
-2656  -192   
480    272    
752    16     
-144   208    
-432   -592   
336    96     
-144   -192   
32     128    
160    -304   
96     160    
-336   48     
608    320    
-16    0      
-400   16     
176    64     
-208   208    
96     0      
-256   80     
-512   -608   
96     -96    
720    -688   
-320   -432   
-400   112    
688    -192   
-624   240    
-96    -16    
272    0      
80     32     
32     -48    
-64    96     
-272   16     
112    272    
-48    -80    
-160   96     
-224   -208   
-160   128    
176    -16    
160    -32    
-160   32     
352    -80    
-624   256    
496    -48    
-272   -112   
-528   144    
240    -112   
-32    -432   
48     96     
-224   -80    
-64    304    
160    -112   
-96    112    
-224   352    
800    -256   
-320   128    
112    144    
96     32     
32     32     
128    48     
16     48     
-176   112    
64     0      
-48    0      
160    -176   
-480   224    
-192   48     
320    32     
-576   -288   
-480   2736   
1040   1168   
-1360  -176   
64     -416   
1808   656    
-960   -288   
-496   -16    
576    80     
128    112    
-224   16     
-448   64     
432    -192   
-880   176    
416    -80    
0      368    
-112   -128   
-224   208    
384    0      
-144   512    
-224   -560   
48     -464   
-112   -160   
-64    208    
800    -80    
-640   160    
-80    16     
96     -256   
-432   -512   
96     -400   
-16    1008   
304    320    
-304   -384   
-32    -224   
112    112    
80     208    
-64    48     
-96    -416   
272    -16    
32     48     
-80    336    
80     416    
-64    480    
16     -32    
-32    592    
480    976    
-400   528    
464    1136   
144    800    
-432   -368   
96     0      
-320   304    
320    992    
1008   304    
-768   800    
496    576    
-368   704    
320    96     
-704   -1584  
304    -240   
-144   816    
-96    -432   
144    224    
-64    -80    
128    -128   
176    208    
-112   0      
-128   -160   
16     -80    
-288   -256   
-80    208    
32     0      
-176   160    
128    64     
32     48     
96     288    
-368   -80    
-256   -32    
384    -32    
-32    144    
-80    112    
-368   -288   
640    -528   
-144   416    
112    -176   
176    160    
-288   16     
-224   -160   
704    -192   
0      352    
-160   448    
-112   16     
176    64     
-16    160    
128    176    
-208   32     
-32    128    
48     -80    
384    208    
-128   160    
-144   160    
-112   -528   
-368   -16    
432    384    
-368   -48    
512    -608   
128    288    
32     672    
-224   -32    
-208   208    
16     64     
160    176    
-112   64     
-48    -16    
-128   64     
-112   320    
240    96     
208    -64    
-224   528    
-48    544    
304    -80    
144    16     
-320   -96    
-96    288    
64     480    
-112   336    
64     176    
128    -96    
-80    -16    
224    -48    
-240   -224   
1136   336    
1136   400    
-1152  -64    
336    192    
48     800    
-48    592    
224    -976   
-80    -48    
-32    1328   
320    80     
80     -16    
-16    -128   
96     0      
-352   -272   
144    -96    
176    256    
128    -1520  
16     1008   
-32    528    
176    32     
-352   -960   
-544   576    
2128   -880   
-1120  1360   
400    1328   
128    352    
-256   -992   
-608   -352   
304    -240   
208    448    
416    368    
-144   -800   
64     16     
-176   -1456  
160    176    
720    -64    
-544   336    
224    -80    
16     80     
-32    -48    
48     96     
-64    304    
32     -464   
1648   -48    
1152   640    
-1008  -160   
32     -32    
800    -656   
-352   352    
368    240    
176    208    
-240   64     
64     -208   
0      144    
352    832    
928    -224   
-592   -528   
256    208    
512    576    
-64    -416   
-400   256    
416    -208   
80     240    
-208   -352   
-192   -608   
160    32     
368    160    
-592   16     
176    1328   
224    -480   
1008   -2224  
-368   608    
336    0      
-928   128    
96     176    
1008   496    
-64    304    
-368   176    
144    -368   
128    -48    
176    -96    
-144   -64    
-128   304    
400    48     
-16    176    
-272   128    
-32    16     
-144   -112   
672    -576   
-272   368    
192    240    
-240   -80    
-576   112    
672    16     
128    80     
-352   -64    
0      48     
112    -16    
-112   48     
560    240    
-336   96     
0      160    
512    -592   
-368   128    
-288   -784   
464    -16    
16     80     
64     400    
16     -144   
64     32     
-336   -496   
272    320    
208    112    
-96    240    
-176   176    
80     -320   
256    -1104  
-208   -208   
64     -752   
176    -48    
384    1312   
-736   -80    
-352   16     
528    -144   
-80    0      
-320   -80    
336    -1584  
160    -128   
224    -352   
-224   48     
0      -48    
96     -512   
-16    192    
160    -128   
64     -176   
0      -1408  
128    0      
48     -176   
-528   -48    
320    64     
208    -96    
-32    160    
64     192    
-96    176    
192    -304   
-192   -176   
96     288    
16     -208   
-80    -176   
-320   -1264  
1584   -1824  
-1216  272    
128    -2736  
272    0      
-336   80     
128    176    
272    -304   
512    -752   
-544   336    
-32    -208   
128    -16    
48     320    
80     -64    
-160   -320   
336    -32    
-224   80     
-16    -672   
64     -112   
-32    160    
-192   -560   
592    -976   
-224   240    
320    32     
-128   -80    
-336   -80    
464    -656   
-112   192    
-240   48     
-64    0      
-80    -16    
-144   -112   
464    -400   
-96    -416   
-32    -112   
64     -1216  
416    64     
16     -16    
-240   256    
240    -64    
-192   80     
-160   -96    
208    96     
112    -208   
-160   32     
-1360  -128   
496    48     
-128   -16    
128    -528   
-608   288    
80     16     
1488   -512   
-784   -240   
-416   -288   
1184   384    
-544   -464   
-608   0      
784    352    
96     32     
-352   192    
-560   -128   
240    -48    
-560   -112   
64     -368   
-464   -16    
512    -240   
-160   288    
176    -736   
96     320    
304    176    
-288   -448   
800    560    
304    128    
-928   464    
-128   96     
-96    -288   
272    144    
400    32     
0      -144   
-208   128    
-16    -336   
256    128    
112    -1008  
-128   -272   
224    112    
160    64     
-288   -16    
128    -208   
-400   272    
240    -112   
-96    0      
304    192    
-320   336    
-688   -256   
-176   112    
1088   -928   
-96    224    
-304   32     
208    112    
304    80     
-512   96     
-608   608    
1344   -384   
-432   0      
-560   48     
704    -240   
-32    -128   
192    304    
-368   -128   
-128   48     
-336   -64    
96     64     
-64    96     
-320   -208   
-16    -48    
640    -352   
-320   64     
96     -32    
496    960    
-720   224    
-192   3248   
784    336    
-1152  112    
-944   -464   
1296   576    
48     768    
-528   32     
-208   -80    
-128   -288   
-64    624    
16     304    
-144   64     
-416   -480   
128    -96    
336    64     
32     -160   
-384   -64    
96     112    
96     -800   
-176   -288   
-80    -96    
32     352    
112    -112   
-32    160    
480    -400   
-688   368    
224    -944   
-592   -64    
64     336    
224    544    
48     208    
-416   16     
-16    -96    
176    -912   
16     -736   
-160   -560   
-176   -608   
96     -192   
192    912    
-208   0      
192    -144   
-48    208    
-368   128    
-144   -16    
320    -144   
-112   1376   
320    1008   
336    448    
-224   -432   
32     48     
128    544    
96     -384   
-1024  -1040  
784    -864   
-96    -224   
-576   -224   
96     400    
48     368    
64     -224   
-208   -656   
-368   80     
0      -272   
16     -64    
48     -128   
160    192    
-304   288    
144    528    
288    48     
-192   -96    
-320   112    
-16    144    
-16    160    
16     48     
-160   64     
-176   320    
480    192    
-592   -144   
0      48     
384    -96    
-80    -48    
400    416    
-1040  528    
576    -80    
-144   224    
-64    -64    
-176   16     
592    0      
-720   416    
96     208    
96     -336   
-64    160    
-272   160    
48     0      
-160   224    
-16    128    
-32    32     
-112   128    
-96    16     
160    -96    
-176   -48    
320    224    
288    96     
-832   -16    
352    -48    
-112   16     
240    -32    
-288   48     
-16    240    
32     -192   
-32    128    
32     208    
112    -16    
-80    -64    
112    -256   
-80    -176   
-80    -208   
0      448    
176    656    
-304   256    
-368   -256   
368    -112   
0      -48    
-304   144    
80     288    
96     144    
-192   80     
384    -80    
544    -128   
-1120  192    
720    -1056  
-1888  -336   
832    -352   
-176   32     
-368   288    
528    736    
-128   576    
-1024  368    
480    -112   
224    112    
-272   0      
-112   64     
160    -144   
224    -64    
-208   -176   
-48    112    
48     0      
-112   320    
16     0      
-144   240    
-368   -416   
1008   1184   
864    80     
-1104  -192   
272    -640   
96     -432   
0      48     
16     160    
160    112    
176    96     
-992   272    
304    -32    
544    256    
-400   32     
-320   16     
0      112    
448    208    
-160   -32    
-336   192    
272    48     
-16    128    
64     64     
-336   -16    
672    -80    
-208   32     
-160   -416   
-416   368    
-32    -880   
-352   -416   
608    160    
-144   80     
208    192    
32     -16    
-240   -16    
256    352    
-48    -304   
-144   -96    
-128   384    
64     -144   
272    0      
-160   96     
-112   112    
192    192    
176    64     
-256   0      
240    64     
288    32     
80     112    
-176   48     
-384   -1776  
-800   -3888  
-736   -784   
432    80     
16     -128   
480    192    
480    96     
-864   304    
240    272    
48     -496   
112    272    
-304   144    
-336   -768   
192    32     
112    32     
-272   32     
-64    192    
-16    80     
96     80     
-256   -16    
240    144    
-288   224    
-224   -336   
848    240    
432    -80    
-816   112    
-32    96     
752    -560   
32     -128   
-400   208    
240    80     
-192   64     
288    0      
-304   144    
-32    -80    
400    48     
256    48     
-672   -480   
160    352    
-304   48     
112    64     
80     112    
-80    -560   
-32    -32    
128    -336   
288    48     
-176   112    
-16    64     
176    240    
192    144    
-288   16     
-208   192    
32     -448   
-240   288    
432    336    
432    128    
-368   288    
-288   -240   
736    48     
112    -256   
-416   160    
272    32     
80     80     
-176   240    
160    112    
64     64     
-160   240    
144    32     
176    32     
80     32     
-48    -336   
-144   96     
256    208    
-240   304    
64     -128   
96     -128   
128    -352   
-640   864    
336    -288   
208    -368   
-272   80     
-416   -2880  
-896   656    
1584   0      
-640   32     
208    144    
-32    -240   
-208   48     
0      -368   
0      -128   
352    256    
-560   48     
160    -208   
64     144    
112    -272   
-224   112    
96     384    
112    0      
80     304    
144    240    
-208   -80    
608    1376   
-1056  176    
32     240    
928    -544   
-592   16     
128    -192   
-48    144    
128    -400   
-96    208    
80     96     
-384   256    
144    336    
240    -512   
-176   128    
-208   -320   
16     0      
224    -304   
144    96     
16     48     
64     176    
-64    -112   
208    32     
-432   -32    
336    128    
-64    64     
-176   304    
464    -112   
-224   -176   
-80    -304   
-416   -992   
2096   -448   
-1792  16     
240    272    
592    -16    
-1296  -64    
848    -464   
400    -1104  
-384   -144   
-48    -176   
80     192    
208    -272   
-336   -128   
128    0      
-144   -1072  
288    160    
-16    -368   
-224   -160   
320    96     
16     -80    
-96    -1136  
400    1056   
-304   -896   
-1232  144    
768    416    
560    -176   
-736   -272   
-320   -160   
352    -224   
-80    -224   
0      32     
-256   -112   
208    -144   
176    -2448  
-160   -272   
-272   -336   
208    96     
112    -176   
-96    -112   
-48    -416   
-224   96     
-288   80     
96     48     
-1120  64     
144    -128   
240    -896   
-16    -400   
304    544    
576    -320   
-352   -176   
32     816    
592    32     
-256   0      
224    -48    
640    144    
96     -560   
-80    720    
-256   496    
-592   -96    
560    -160   
-96    -80    
-240   -128   
-48    -48    
336    16     
0      48     
352    496    
-576   608    
64     112    
304    -592   
-224   -1200  
-368   144    
400    2256   
848    -560   
-1072  -496   
544    -192   
176    -16    
176    -448   
-448   80     
-208   496    
-144   272    
144    -2032  
-192   -384   
-64    -272   
192    624    
240    -368   
192    592    
-480   800    
-32    -608   
176    288    
160    96     
-384   608    
-80    -144   
320    -144   
-224   -320   
-64    608    
64     464    
48     352    
160    -32    
176    112    
-16    144    
0      208    
64     -224   
-144   0      
112    400    
32     -16    
-464   288    
192    -224   
-640   304    
352    -1104  
-480   -768   
-112   -288   
512    432    
224    -2400  
-80    -192   
-320   -80    
160    -480   
-336   -64    
-112   -528   
-80    240    
208    -352   
-48    -176   
432    880    
-576   -192   
-752   -128   
608    704    
288    1184   
-208   848    
240    592    
-448   -1024  
336    -928   
384    560    
-240   144    
-16    -208   
-240   144    
512    -272   
-192   -160   
-128   -576   
-272   48     
288    96     
-32    -128   
-336   -224   
80     160    
48     192    
-544   144    
96     160    
384    480    
-560   912    
0      416    
320    496    
48     368    
-272   -64    
-336   -1040  
352    -416   
-1136  528    
208    -368   
-496   -496   
-176   -112   
0      -80    
-736   -176   
-80    0      
-240   48     
32     240    
192    -48    
-192   -16    
-80    -192   
-128   0      
0      -368   
128    -64    
-320   -432   
-144   -48    
-80    -480   
272    -848   
160    -32    
48     -160   
-192   -304   
-240   -144   
240    -768   
176    432    
-256   720    
-192   48     
-32    -352   
224    16     
192    656    
-192   144    
32     32     
-32    336    
96     -256   
-96    208    
-288   -96    
144    464    
224    16     
16     176    
-96    -176   
-192   96     
-288   256    
-128   112    
-160   -112   
128    160    
-48    -128   
496    464    
-1184  -1344  
-160   128    
544    96     
-1104  -112   
1504   464    
-224   -208   
-1088  480    
576    0      
128    208    
-144   -352   
-64    240    
80     -96    
32     208    
-272   -448   
128    192    
80     -96    
-160   48     
80     496    
144    224    
-128   80     
-128   32     
-688   -448   
1264   -496   
-320   96     
-720   -256   
1072   464    
-608   -272   
-384   -64    
-368   80     
160    64     
32     48     
240    160    
16     32     
-304   16     
-32    208    
480    0      
-224   0      
112    -96    
32     16     
144    -272   
80     112    
-768   32     
-288   192    
1072   -400   
-160   240    
-656   864    
320    176    
64     -384   
704    144    
-160   416    
32     160    
256    48     
176    -80    
-96    224    
-752   16     
-336   -96    
368    -528   
352    0      
-560   128    
192    96     
-48    0      
16     144    
336    64     
-288   128    
-272   -48    
336    656    
944    -144   
-800   192    
496    288    
128    -1184  
-2112  2512   
1216   240    
-672   448    
-848   -256   
1120   -80    
-32    -192   
-352   -336   
416    -80    
-64    -96    
-352   112    
544    -16    
-144   -16    
-240   -64    
-144   -64    
304    48     
464    96     
-640   -32    
384    128    
464    576    
-1216  288    
912    224    
-144   -128   
-272   -128   
944    256    
-1072  -320   
-160   208    
912    -144   
-608   96     
96     -176   
-64    240    
112    48     
-112   272    
64     64     
-112   288    
688    64     
-464   272    
-224   -96    
160    256    
256    144    
-272   32     
176    0      
80     64     
-640   -176   
432    128    
352    -144   
-768   -48    
592    16     
-192   144    
320    240    
-64    48     
-400   96     
-112   -368   
464    0      
224    -80    
-544   208    
416    272    
48     -160   
112    -240   
-80    32     
-320   -160   
-224   80     
224    288    
112    -144   
-80    16     
112    0      
-208   32     
0      -128   
128    -16    
144    304    
-320   128    
-128   16     
288    32     
-336   128    
32     -64    
64     -112   
368    48     
-240   336    
-64    -384   
80     -608   
192    128    
-992   -688   
1408   -992   
-544   -96    
-528   -176   
1248   560    
-640   -96    
-272   160    
32     -80    
576    -448   
32     320    
-256   -704   
-32    -160   
48     128    
208    -192   
-96    192    
-16    112    
96     -192   
-80    48     
0      64     
208    64     
544    912    
-1440  464    
448    -464   
896    160    
-416   208    
112    -864   
-208   224    
-96    16     
16     -96    
288    144    
-80    -112   
-368   80     
304    80     
-64    144    
-64    544    
80     -48    
192    80     
-368   64     
112    -128   
224    -64    
-128   -272   
352    -64    
-224   160    
288    192    
-144   256    
-64    208    
80     112    
128    -16    
128    32     
-304   -496   
1728   -960   
-1472  320    
784    288    
400    336    
-752   112    
560    128    
-160   544    
80     -1184  
-64    208    
-288   176    
176    96     
160    336    
16     -48    
288    -32    
-288   -16    
64     80     
128    -112   
-336   0      
64     -320   
96     96     
-144   -1120  
-1072  528    
2528   -160   
-2160  560    
-80    -224   
544    -944   
-1120  144    
496    384    
-48    -160   
272    176    
256    32     
-432   -16    
144    208    
112    -208   
240    -192   
-192   -160   
-160   -240   
240    -992   
368    -208   
16     -2720  
-160   144    
-48    -16    
-608   -1648  
-304   -1088  
768    -176   
-496   -304   
304    -80    
240    112    
-416   464    
-96    432    
208    144    
176    272    
0      -160   
400    624    
-720   640    
-448   48     
240    336    
-160   272    
32     64     
-192   -176   
192    64     
192    -848   
48     -96    
-288   -128   
208    368    
-304   160    
-480   -112   
192    -848   
-112   -64    
-448   -576   
1488   384    
752    960    
-256   -384   
-1104  224    
432    512    
368    -1040  
-16    -1536  
32     368    
-304   -416   
32     48     
288    96     
192    -112   
32     272    
-112   208    
48     -48    
416    -400   
-48    -64    
-80    -3216  
-272   -528   
352    -1408  
352    336    
-176   -208   
-368   -672   
656    240    
-208   176    
144    -160   
-112   960    
32     1536   
144    -304   
144    -672   
240    -496   
-592   80     
48     -448   
368    -560   
-400   -560   
16     -144   
256    -352   
-208   -240   
96     -176   
224    -288   
-144   528    
-160   -784   
-208   -464   
320    288    
-48    1088   
544    -848   
-352   -208   
352    448    
320    928    
-560   -192   
-464   -304   
704    -672   
112    -256   
-224   -176   
288    -80    
-112   -160   
80     288    
864    1248   
-304   -528   
-304   -752   
160    192    
80     -320   
-144   -112   
64     -560   
112    -400   
208    -288   
-144   256    
-144   -112   
112    -528   
112    -224   
208    80     
16     -352   
80     -16    
96     192    
192    1184   
160    1424   
144    -176   
-112   -528   
-288   -32    
368    1280   
-704   720    
-208   -224   
320    -1152  
224    -1440  
-176   176    
464    496    
224    368    
-336   384    
96     -1008  
80     208    
96     -80    
64     -176   
-240   512    
-176   144    
160    176    
144    -192   
-544   -48    
0      -320   
-400   -96    
624    -256   
-560   1632   
352    -560   
-80    592    
416    144    
-448   16     
160    -656   
-48    -416   
64     208    
192    32     
-272   96     
-128   -160   
192    400    
-160   -16    
-112   -128   
-256   -736   
-592   -240   
16     352    
304    16     
-32    -368   
-64    48     
304    -1024  
-80    32     
-64    -240   
-96    -64    
192    -80    
-32    112    
-144   0      
-16    -48    
-96    -848   
1424   -1312  
-1040  64     
-432   -688   
976    160    
96     -32    
-896   480    
528    -736   
304    32     
-672   -144   
192    64     
96     48     
144    64     
-224   -112   
224    16     
-224   -176   
224    128    
-608   32     
224    112    
112    32     
-240   -192   
64     -480   
1040   640    
-672   -80    
-400   -64    
480    -112   
-48    192    
240    -160   
-64    240    
208    16     
-208   224    
-48    -96    
32     96     
-272   -160   
80     112    
224    -256   
-432   -32    
112    -64    
-576   112    
352    -144   
-576   -224   
0      48     
-80    -800   
-1296  80     
1296   192    
944    -320   
-672   -112   
64     512    
-208   320    
-144   160    
224    -304   
416    16     
-560   -32    
-304   128    
384    -192   
-272   -416   
48     112    
-592   304    
32     208    
592    16     
224    288    
-960   -64    
-384   496    
896    -192   
160    80     
128    736    
-1200  496    
432    480    
272    16     
-1040  -560   
1504   4624   
272    1456   
-240   960    
368    128    
-1664  64     
544    16     
-960   304    
768    -256   
416    -176   
-192   -352   
-176   288    
32     -224   
-208   208    
192    -224   
-48    144    
-224   -32    
-320   256    
192    -192   
-704   -160   
-448   464    
704    -32    
-1104  224    
656    -48    
-800   -224   
272    96     
304    0      
-368   80     
16     0      
128    112    
64     -208   
48     -96    
-192   -112   
-112   144    
128    288    
-448   96     
-240   -48    
64     -80    
-112   -80    
-112   -256   
272    -16    
0      80     
-32    128    
0      112    
224    -80    
-496   96     
-144   48     
288    240    
-80    -16    
-224   -224   
-64    -208   
96     144    
-560   96     
288    -16    
-528   96     
544    -80    
-64    208    
-128   224    
-32    -128   
-176   -64    
288    112    
160    224    
-176   0      
-80    -32    
144    128    
-80    -176   
0      80     
-528   0      
48     -64    
96     -240   
-336   -128   
144    -144   
-16    48     
208    256    
208    160    
-128   320    
-384   224    
176    80     
112    -592   
-48    -384   
-160   -48    
-512   -336   
1760   880    
16     592    
-1312  480    
816    -672   
-320   -1200  
240    -128   
608    576    
-480   336    
-288   240    
288    320    
624    528    
-464   480    
-176   -48    
96     -128   
576    592    
-608   832    
-192   256    
80     320    
32     176    
0      -80    
-336   816    
544    -352   
-896   896    
496    -848   
-192   256    
208    -368   
-288   -800   
400    1024   
-256   176    
-176   96     
128    -112   
-48    -48    
64     32     
64     16     
-48    -80    
-240   96     
80     -144   
-48    -176   
128    336    
-48    -32    
112    336    
-256   -16    
112    -128   
64     -144   
80     208    
112    256    
-240   0      
224    -32    
-48    176    
624    1328   
80     80     
-2000  -384   
1984   -176   
-416   -176   
-1280  416    
864    976    
528    1200   
-640   944    
144    -752   
112    -240   
0      304    
112    144    
144    0      
-448   -112   
-16    96     
288    224    
-208   272    
-32    -160   
160    -16    
-160   240    
-432   272    
2800   176    
-1248  -256   
-1280  -864   
1312   368    
-336   368    
-704   -400   
208    176    
192    16     
-112   176    
368    96     
128    480    
-80    544    
-96    400    
240    128    
96     32     
80     736    
432    960    
-624   144    
160    -400   
320    -496   
0      -720   
48     -208   
272    48     
-272   1968   
688    880    
64     -800   
-688   464    
432    -288   
-384   -384   
-32    -576   
-448   256    
672    144    
-192   16     
32     256    
720    -160   
-1248  -592   
528    -1200  
128    64     
208    112    
-32    -144   
-416   -64    
368    -496   
160    208    
96     64     
-496   -80    
160    752    
384    240    
-224   80     
-352   -704   
1248   -1152  
-112   -688   
240    -192   
96     816    
-432   672    
512    144    
544    -96    
-80    -560   
-336   -448   
160    256    
464    -224   
176    80     
-464   320    
192    240    
-64    80     
-16    -64    
-64    -720   
-144   288    
80     688    
128    32     
16     -224   
-240   -208   
288    576    
400    -368   
-752   112    
560    112    
-208   1264   
368    1408   
-80    752    
-112   -1232  
272    -48    
-32    -1264  
80     256    
96     160    
48     -96    
64     -352   
640    208    
-32    496    
32     864    
64     720    
176    928    
240    176    
-432   -240   
304    592    
-272   112    
352    -144   
464    336    
-368   -160   
0      -240   
0      48     
-112   816    
960    64     
0      832    
-1952  0      
320    144    
576    544    
-320   304    
144    432    
64     832    
64     464    
32     288    
272    -112   
-256   48     
-272   -928   
224    -320   
96     -192   
-240   32     
64     80     
-112   -416   
-48    -128   
48     -192   
-80    -64    
256    176    
16     144    
-48    304    
272    1152   
352    160    
-144   -224   
-224   -496   
-112   -256   
720    -2096  
-688   528    
288    48     
-208   0      
32     -688   
-128   -864   
320    -480   
-320   -144   
96     480    
176    160    
0      304    
-144   -160   
-32    -352   
128    -896   
64     352    
144    48     
-176   -720   
-96    -16    
208    -1744  
224    896    
-736   -224   
144    400    
864    -16    
-880   16     
240    80     
64     96     
-80    -224   
-80    -208   
240    16     
48     -832   
-416   192    
192    -464   
160    -48    
-32    0      
-272   -192   
80     64     
112    -320   
272    -368   
-288   -256   
0      -112   
-96    128    
224    -32    
-192   -96    
192    -48    
0      -128   
-16    -192   
-64    -432   
144    96     
-592   -176   
192    864    
3840   768    
-1152  -256   
-976   -160   
1024   -208   
192    176    
-304   -624   
-224   -208   
400    -464   
-240   -80    
64     16     
-112   -80    
32     80     
400    -208   
-144   -80    
-32    -128   
-688   0      
-112   -272   
80     48     
112    -320   
-160   -576   
1104   176    
-16    -48    
-976   -64    
-400   128    
608    -224   
-208   -288   
144    -64    
368    -80    
64     -32    
-640   -16    
-624   48     
496    -80    
64     -64    
0      -144   
48     -64    
-80    -80    
-336   -240   
-80    -2128  
752    -64    
-320   -48    
-448   -736   
-304   80     
560    0      
-608   128    
896    -48    
256    368    
-992   400    
112    -384   
-240   64     
304    -80    
-480   -64    
-304   -256   
272    -560   
384    -48    
-288   -128   
-416   16     
-16    304    
144    544    
-96    -48    
-192   32     
48     -112   
-32    -208   
-176   16     
208    144    
-208   224    
176    -64    
48     -64    
-16    -368   
32     2144   
1552   -688   
-592   400    
288    32     
512    -480   
-960   256    
480    32     
496    -464   
-1008  -32    
-272   -336   
32     112    
352    64     
-224   -352   
256    208    
-96    -464   
0      176    
480    -112   
-96    -144   
-432   -96    
416    784    
112    -48    
-560   112    
160    192    
-352   -32    
-416   -32    
576    48     
96     48     
-416   -112   
224    96     
464    -112   
192    16     
-544   112    
32     32     
496    352    
-400   64     
-336   -16    
416    64     
176    128    
-176   0      
-80    80     
304    16     
-256   144    
16     176    
240    304    
-784   -96    
176    96     
48     -144   
-656   -208   
-176   -208   
128    16     
224    272    
240    640    
-1072  112    
352    -1104  
-256   -736   
256    -352   
-96    192    
-448   16     
160    96     
-384   -272   
-160   16     
752    1120   
-1072  720    
144    464    
464    256    
0      288    
-640   528    
-240   240    
320    608    
224    192    
-368   -112   
32     48     
80     -96    
128    96     
-96    -288   
-80    -144   
-96    -832   
-112   -304   
48     624    
16     304    
-160   64     
288    1808   
432    400    
-1072  32     
304    -448   
-96    -16    
208    464    
-32    304    
32     160    
-96    -96    
80     -80    
-64    112    
-112   -144   
-128   -128   
-32    64     
-16    -16    
-144   96     
16     -608   
-752   208    
16     48     
-368   160    
-48    768    
688    80     
-672   784    
-16    320    
-144   -144   
-144   -336   
512    -1024  
64     16     
-144   624    
-224   128    
112    -48    
-96    64     
128    -368   
-144   48     
-176   -64    
128    -32    
352    -96    
-192   -128   
-176   80     
-96    -32    
256    160    
-112   240    
-80    64     
-48    -96    
256    -288   
16     -128   
-80    144    
-304   96     
-272   128    
1184   -288   
-2848  16     
-272   -176   
1472   -704   
-1056  -368   
-416   -64    
256    -16    
-304   32     
256    -992   
272    736    
-112   304    
-128   -240   
112    96     
-208   64     
0      -16    
-288   -16    
32     -144   
96     48     
208    -160   
-64    272    
-304   -80    
1264   -64    
-1680  96     
528    -80    
-96    1248   
-64    464    
240    704    
592    672    
-384   48     
-432   -688   
-16    -880   
-144   -528   
16     320    
96     592    
-416   160    
832    -304   
-320   -240   
-400   -272   
96     80     
16     144    
-48    -48    
-96    -96    
16     -560   
256    544    
-976   864    
-272   -320   
688    -1072  
-240   -464   
-192   -272   
320    -96    
-480   -224   
-128   -16    
480    -16    
96     464    
-448   -464   
-304   -992   
96     208    
16     880    
-464   800    
-224   320    
400    -96    
-192   112    
64     464    
-608   496    
112    48     
720    -192   
-16    80     
-64    -480   
-480   -224   
80     96     
-976   -560   
-544   96     
640    -272   
-320   -96    
128    864    
128    304    
-400   336    
144    -160   
400    544    
128    -368   
-144   -384   
-64    112    
112    432    
240    -160   
-48    -160   
-176   112    
16     128    
-144   16     
240    368    
-64    640    
-192   176    
288    192    
192    -32    
-736   -1216  
-352   -32    
160    -224   
-224   304    
64     0      
-48    240    
144    368    
-160   416    
112    32     
-176   128    
-240   -48    
-192   64     
336    -208   
208    -64    
-352   160    
128    176    
16     512    
480    448    
-96    288    
-320   368    
96     368    
144    384    
-80    0      
-80    224    
432    16     
-32    -144   
-272   -80    
208    64     
-64    -1136  
-944   -624   
96     -48    
528    32     
16     1184   
256    320    
32     -96    
112    0      
-16    -176   
368    -128   
-288   -208   
-448   -64    
240    128    
224    -1712  
-112   112    
224    -176   
48     320    
-272   304    
240    0      
368    -144   
-192   576    
32     304    
-64    -128   
-96    0      
576    -16    
-288   0      
-240   128    
272    160    
160    -1792  
-880   0      
1744   -784   
-528   0      
-304   -128   
528    -80    
-240   -304   
-128   368    
-208   -624   
48     336    
384    -176   
-144   64     
-96    64     
80     144    
32     128    
80     -272   
-48    528    
496    -512   
-336   128    
48     128    
240    16     
-592   -656   
800    -16    
-48    -48    
-736   128    
736    160    
-96    -128   
16     -256   
-192   -208   
416    0      
128    96     
-48    32     
144    -160   
-256   80     
16     128    
288    -96    
-48    160    
-80    192    
592    112    
-400   32     
-144   -48    
336    176    
96     192    
-96    -64    
-176   -176   
128    -288   
112    -128   
-96    0      
208    112    
-80    -2704  
-96    -112   
-496   320    
80     544    
112    16     
512    224    
-1152  -352   
208    240    
480    0      
-544   112    
192    96     
368    -96    
-32    0      
-144   -16    
32     -48    
-176   -288   
368    -16    
-320   64     
128    16     
240    64     
-176   0      
-32    64     
-448   -448   
368    64     
-128   -528   
-576   272    
1440   224    
-832   224    
-208   -320   
400    336    
432    -336   
-144   48     
32     -16    
176    128    
-32    112    
0      16     
-144   112    
320    48     
-112   32     
-96    -96    
128    80     
96     -240   
-144   -304   
768    96     
112    -176   
192    -176   
784    96     
-368   240    
-704   -224   
-784   336    
848    288    
32     -1104  
48     -416   
144    48     
-80    80     
96     -16    
352    -176   
144    320    
-112   -256   
656    -176   
-128   -240   
176    -32    
176    96     
-176   -528   
144    32     
-288   -208   
-16    -320   
48     -112   
-336   -112   
176    -32    
832    -2160  
-1920  3488   
496    1040   
-256   -352   
-416   -640   
736    48     
-384   -576   
-288   352    
-64    -288   
64     160    
80     -192   
-528   -224   
192    -16    
-176   -128   
128    -112   
224    -176   
-304   -96    
-176   -752   
576    32     
704    480    
-832   1728   
48     80     
272    -400   
-224   -560   
528    -96    
224    192    
-1136  64     
512    -240   
464    80     
-400   -144   
-272   -864   
528    -320   
464    -144   
-1152  -304   
448    -192   
160    -320   
64     -400   
-432   -96    
64     -224   
-48    -64    
-64    -96    
64     -176   
-576   -240   
128    -368   
96     -400   
64     112    
-80    224    
-256   -272   
544    -304   
-64    -2528  
-368   384    
48     608    
-64    1024   
1360   -320   
-480   -288   
-736   -272   
624    -112   
-80    -352   
16     -400   
-224   384    
176    752    
-144   -576   
64     -1216  
-16    -192   
48     -496   
208    80     
-176   -80    
208    -368   
-48    496    
48     -144   
112    272    
0      -112   
-144   144    
160    -48    
64     -48    
-272   -352   
80     -96    
144    -992   
-480   -896   
-64    -704   
384    208    
-160   -592   
432    -992   
-176   416    
128    -160   
-80    -48    
48     32     
-128   48     
112    176    
-336   16     
-16    -16    
-240   -112   
64     -96    
208    144    
112    -992   
-192   16     
240    -1632  
48     144    
128    48     
-32    16     
-208   -128   
720    304    
-1104  464    
336    -160   
112    208    
16     -304   
-384   112    
-112   -272   
656    -784   
224    -368   
-160   16     
-368   336    
48     -96    
-32    112    
80     64     
-304   -64    
16     -64    
272    -48    
-64    -64    
-112   64     
208    16     
-16    80     
-96    -288   
128    48     
0      -32    
-16    320    
416    112    
-144   16     
-224   272    
-192   -16    
240    -384   
-1504  320    
2000   272    
64     -352   
-1104  80     
928    448    
464    -176   
-496   160    
-176   1088   
-544   -1328  
80     576    
-64    -160   
-480   192    
-96    -128   
-416   448    
176    -240   
16     96     
-192   -256   
-176   -288   
240    336    
-96    -64    
48     -432   
-2128  320    
1408   192    
-112   -544   
-1136  -1440  
336    336    
608    560    
-704   -512   
-224   -832   
432    -272   
-800   64     
0      272    
384    272    
-608   352    
96     -16    
112    48     
48     -16    
16     32     
-368   -112   
176    -32    
256    112    
-352   0      
-336   208    
208    -272   
496    -1168  
-1168  -240   
304    48     
-1264  432    
-96    256    
528    -208   
336    128    
-144   -16    
-528   352    
128    384    
224    -32    
-912   -1376  
-48    -656   
-32    -288   
-336   192    
416    0      
-288   -64    
-256   -32    
128    -224   
128    256    
-16    -48    
-368   272    
-240   -80    
-224   -352   
960    -320   
-544   -544   
528    -1792  
-176   656    
528    192    
-816   -208   
-512   1040   
864    -512   
-272   352    
-816   -448   
288    560    
-96    0      
48     304    
192    -176   
-480   64     
-32    176    
240    -112   
-368   160    
-16    -112   
288    1024   
16     1616   
-144   720    
208    -96    
-272   -256   
-144   112    
736    432    
-736   -192   
288    -80    
-112   -48    
320    288    
-32    -288   
-144   -16    
352    -176   
48     240    
64     -336   
-80    -32    
-192   -16    
448    -16    
80     48     
-288   -16    
96     160    
112    -80    
-288   -48    
448    -48    
-32    128    
-112   0      
16     160    
368    80     
-48    -80    
-336   0      
80     256    
560    240    
-272   128    
80     720    
800    64     
-320   -64    
-688   448    
448    224    
-144   112    
-64    224    
-480   272    
432    16     
224    -16    
-304   224    
-48    224    
-16    176    
176    32     
-144   336    
256    48     
-272   -224   
-240   304    
288    -160   
-16    32     
-176   48     
-96    48     
160    160    
64     -112   
32     96     
80     80     
-160   32     
80     144    
-432   -1344  
1968   16     
-1104  464    
-1056  -128   
848    -1008  
-752   592    
320    -304   
128    640    
272    -416   
-352   16     
224    80     
400    -80    
-144   144    
-224   32     
320    -544   
-112   384    
0      176    
-48    144    
-16    96     
64     0      
-64    256    
448    1456   
944    -64    
-1392  -560   
416    160    
624    128    
-736   112    
256    -80    
272    448    
-144   -64    
-160   288    
416    -96    
-64    240    
-288   80     
192    -48    
-288   48     
368    -112   
-32    96     
320    160    
-288   64     
112    80     
32     0      
80     80     
96     80     
-48    192    
336    96     
-480   64     
496    80     
-160   80     
-336   -656   
640    976    
656    -592   
-592   64     
-48    -176   
-208   208    
704    64     
-112   192    
208    -32    
-304   16     
-256   16     
48     32     
224    32     
-96    160    
-144   112    
592    336    
-224   144    
80     16     
-16    272    
176    128    
256    144    
-64    240    
-624   112    
1920   -128   
-288   -272   
-576   128    
544    320    
-240   -432   
320    720    
-624   176    
-352   -1104  
512    112    
112    -32    
-96    128    
-144   192    
144    -32    
80     208    
224    -160   
-96    -176   
368    336    
48     32     
-112   0      
144    32     
-432   80     
432    288    
304    -608   
-384   32     
-224   -240   
512    32     
48     256    
-160   96     
352    112    
112    176    
-496   -48    
256    240    
112    -16    
0      32     
-224   128    
272    112    
128    -80    
-304   -240   
336    96     
-144   -1936  
-80    112    
176    -32    
16     -48    
112    -16    
-112   80     
64     -128   
304    544    
-288   -304   
-1248  1376   
1232   944    
-800   -432   
-272   -144   
1248   48     
-352   -416   
-576   -256   
368    208    
48     112    
336    80     
-224   -48    
-144   160    
272    16     
16     112    
-80    -48    
-144   272    
32     48     
448    96     
-464   -400   
-208   112    
352    688    
-32    192    
352    -304   
-64    -496   
-112   -16    
-288   336    
80     -144   
144    -112   
-80    96     
80     272    
-416   -368   
176    240    
224    160    
80     32     
-240   -672   
128    304    
64     -1008  
-480   528    
256    416    
-112   464    
96     160    
-80    352    
-64    192    
-240   -624   
-144   -400   
464    448    
-288   1376   
592    -736   
-336   -784   
-80    208    
-16    -368   
672    -416   
-672   16     
240    -1632  
16     -624   
-352   -112   
224    432    
-160   -176   
112    352    
320    192    
-96    -256   
-48    32     
192    -304   
-240   96     
-48    -80    
-128   368    
-208   32     
-32    112    
16     -112   
192    32     
-176   80     
160    -144   
-192   64     
112    64     
208    -1584  
-112   -160   
192    -1008  
-352   112    
80     112    
48     -80    
-128   208    
400    -384   
-368   288    
608    -336   
-192   -624   
-224   368    
-48    -480   
320    -144   
-752   -176   
-80    -80    
-192   64     
208    -112   
128    16     
304    -272   
-656   -48    
144    208    
128    -384   
176    -240   
112    80     
-96    -144   
-400   -288   
512    -224   
-256   32     
-160   112    
288    272    
32     -64    
192    -400   
-576   -400   
48     16     
304    112    
-16    -528   
64     -160   
-48    272    
-16    480    
80     -224   
48     -192   
-272   -912   
48     -144   
96     192    
-64    -16    
-848   16     
-64    304    
176    -192   
64     -304   
208    -208   
-368   160    
-64    240    
272    256    
336    368    
896    1072   
-672   512    
-1088  96     
1376   -592   
-288   -208   
-1152  16     
-1072  -352   
400    1600   
352    -1424  
-144   -1152  
-352   -96    
400    480    
368    80     
-176   -1616  
16     -128   
-240   32     
304    144    
176    -480   
-304   -416   
-256   -272   
16     -272   
480    992    
1760   96     
-1360  624    
784    736    
608    -224   
32     -1536  
-672   -512   
656    -560   
-48    -160   
-464   80     
416    64     
176    256    
-208   64     
-336   32     
656    -16    
-368   -16    
-48    -288   
-848   -32    
128    -64    
32     -224   
144    -208   
384    80     
16     -480   
-352   224    
-560   -704   
336    -48    
-16    0      
-96    32     
16     -816   
-640   64     
128    -16    
32     -112   
-192   176    
-64    -272   
288    192    
128    -480   
-816   336    
400    -32    
-176   32     
-624   0      
192    -48    
0      -160   
160    288    
-64    -192   
336    -64    
400    -32    
-144   -48    
-496   -352   
832    -880   
-656   2256   
464    528    
-816   -336   
-384   -656   
1392   240    
16     176    
-1152  304    
32     -64    
480    128    
224    -256   
-224   32     
-224   -16    
240    64     
-208   80     
160    -176   
-208   112    
-16    -528   
16     112    
-624   -688   
-720   0      
608    -224   
-832   208    
192    16     
-912   -96    
-112   112    
-48    240    
240    -144   
-80    96     
-272   304    
64     -32    
-208   416    
-48    -128   
112    352    
-96    208    
-336   32     
48     256    
-48    -32    
80     320    
-256   272    
128    16     
-960   -16    
368    224    
240    -176   
32     112    
208    -112   
-320   368    
-32    288    
128    592    
192    224    
-272   80     
-384   64     
128    224    
624    48     
-224   -480   
-1296  -160   
656    -272   
-400   -448   
-240   -256   
80     96     
-32    -160   
160    160    
-160   -112   
48     160    
-32    384    
192    96     
-112   112    
0      -32    
16     336    
208    224    
48     128    
-336   80     
128    144    
176    32     
-112   160    
64     -176   
96     96     
-192   -320   
96     112    
-32    -80    
96     272    
-1296  -784   
1328   -1072  
368    -368   
-1024  160    
544    -16    
-96    320    
320    -48    
-320   352    
368    480    
-224   -336   
128    16     
-144   -112   
-112   80     
176    -240   
-80    16     
16     0      
-240   48     
160    32     
-64    -224   
-96    16     
176    -864   
-832   624    
432    -144   
-384   112    
-1232  -144   
144    64     
-368   -32    
208    144    
208    176    
-48    144    
32     -32    
-320   -64    
48     144    
416    208    
-80    32     
-528   64     
480    224    
-400   -176   
288    176    
-352   -112   
-176   160    
272    112    
-64    -32    
-160   80     
112    144    
-208   112    
304    64     
0      80     
-336   -48    
32     320    
336    -560   
-2176  -224   
1056   0      
352    -48    
-1088  -240   
560    -304   
192    144    
-496   64     
224    48     
144    112    
-224   64     
-96    96     
224    64     
16     32     
-448   192    
224    -32    
-80    144    
-144   256    
-16    256    
-112   -32    
480    1200   
-768   -512   
-864   160    
1008   288    
160    -176   
-112   128    
-256   368    
192    -64    
144    -48    
-192   96     
0      -48    
-128   144    
-32    -16    
160    -80    
96     48     
-240   112    
-128   -288   
16     208    
192    112    
-240   -224   
-32    -80    
832    704    
-96    256    
-256   -320   
384    624    
-112   32     
-288   -32    
96     0      
272    16     
-64    112    
-112   96     
176    0      
16     96     
-144   176    
-80    -176   
1024   256    
-256   176    
-368   336    
384    -208   
-608   304    
0      -96    
0      160    
112    32     
128    32     
48     480    
-352   64     
-336   32     
592    336    
144    -240   
-832   -992   
912    -2624  
224    336    
656    368    
-368   64     
-496   112    
1024   1104   
-544   1696   
-496   -352   
208    -304   
112    32     
-48    128    
-144   0      
320    208    
128    -208   
-208   -224   
-304   -192   
16     336    
-208   80     
432    -304   
-96    624    
-160   640    
224    448    
-192   736    
-192   912    
48     16     
160    -240   
256    -336   
-176   -624   
0      16     
192    592    
-112   -128   
352    -480   
32     160    
-208   224    
-224   -128   
240    -624   
96     -272   
-144   288    
96     -112   
-112   80     
352    208    
224    0      
-112   640    
336    1440   
32     1792   
288    176    
48     480    
80     -48    
144    128    
160    80     
368    -528   
-896   528    
688    560    
-96    592    
-272   64     
-144   -80    
112    -544   
160    -1056  
-112   336    
-16    512    
64     -96    
240    80     
-32    0      
96     208    
-16    128    
240    160    
0      384    
144    432    
-16    -192   
-128   80     
64     -1216  
32     256    
16     80     
-64    160    
-256   112    
272    80     
-240   -496   
-192   80     
16     -96    
-144   160    
448    -560   
-624   -48    
-160   192    
240    -448   
64     352    
0      -816   
-400   -48    
96     144    
0      96     
96     -96    
-64    16     
-16    -176   
-16    128    
272    16     
-64    32     
96     -176   
144    -144   
32     432    
96     464    
-320   -304   
656    -832   
-144   720    
-16    -288   
-160   336    
-48    96     
80     -96    
16     832    
304    304    
-368   176    
-176   -32    
544    128    
-48    48     
-128   -48    
304    -80    
-208   -80    
-80    -336   
80     -432   
384    -128   
240    944    
-480   320    
-96    -400   
656    208    
64     256    
-400   112    
-272   -128   
592    -112   
176    -352   
48     0      
-480   -208   
80     -864   
-1728  240    
1520   480    
464    576    
-1808  448    
608    480    
1088   -112   
-1520  432    
272    384    
544    64     
-144   96     
-208   112    
48     -32    
256    48     
112    -288   
-48    16     
-96    -208   
128    -160   
64     -96    
16     80     
-352   -496   
1440   256    
-1552  -160   
192    352    
1024   448    
-960   -240   
592    -1072  
592    -400   
-48    -16    
-160   16     
-16    112    
80     0      
48     48     
0      -320   
560    -2656  
-160   112    
-208   -544   
416    224    
-304   -128   
-224   -208   
-64    -80    
64     -944   
-576   352    
224    -352   
16     -256   
224    624    
64     112    
208    -720   
-560   176    
-96    -528   
544    16     
16     -528   
-192   192    
-288   -16    
160    -304   
96     -16    
-304   -352   
448    48     
-320   -528   
96     -352   
320    -2528  
-208   16     
176    -80    
-48    16     
-272   -256   
688    400    
464    -256   
-528   -128   
-112   -272   
416    1536   
624    4064   
560    16     
-1104  112    
224    -592   
480    -192   
160    -896   
-224   80     
160    -48    
-224   160    
32     160    
192    32     
-368   -208   
256    -192   
0      112    
-64    -48    
-768   80     
368    -192   
-64    -48    
0      -384   
-1120  -16    
1216   -336   
-512   208    
480    -1472  
464    144    
-128   -112   
-576   272    
880    320    
-224   -64    
-352   448    
448    -240   
-384   160    
80     -288   
-160   -64    
144    -320   
-768   -208   
512    -320   
304    96     
-224   -624   
-304   16     
144    32     
32     128    
224    64     
-160   304    
16     288    
-160   96     
-64    -16    
208    -240   
-336   -176   
-112   -224   
224    -48    
-32    -384   
-224   464    
1040   -624   
-480   -128   
80     -432   
416    16     
-304   64     
-128   144    
0      160    
144    -48    
-512   128    
128    192    
-240   -96    
-48    -144   
304    -176   
112    496    
-752   848    
256    -800   
720    -480   
-320   -544   
-224   0      
-128   -192   
176    16     
256    160    
-16    144    
-608   -80    
32     -272   
288    480    
288    208    
-256   -160   
-1024  -2560  
160    176    
1488   -560   
-1056  48     
480    288    
16     -160   
-128   624    
-880   224    
336    -96    
272    -16    
-336   80     
-160   -208   
-96    176    
304    -720   
-112   320    
64     16     
-288   16     
-80    -688   
-80    80     
-192   192    
-240   -480   
-1040  752    
560    -224   
-64    32     
-304   -96    
-16    -48    
0      -48    
-96    0      
512    -32    
272    464    
-432   -144   
-448   320    
240    -144   
48     -16    
-224   160    
-528   -16    
-16    -128   
-576   32     
256    -96    
-96    64     
48     112    
-48    80     
32     80     
-16    -32    
-144   192    
-160   32     
352    144    
80     -144   
-448   -128   
1664   1312   
-2000  832    
-560   320    
992    -96    
-1120  -304   
-880   304    
1232   176    
-240   128    
-432   240    
-144   -288   
304    96     
64     -192   
160    208    
-320   -16    
-272   -64    
400    208    
-192   112    
-368   112    
224    272    
352    80     
-320   32     
288    -176   
-2240  608    
1360   1232   
-16    544    
-1152  -48    
544    320    
-912   528    
0      -64    
-96    -304   
-192   -16    
352    96     
-304   80     
-128   -16    
336    -48    
-32    -96    
-496   128    
-48    -208   
-304   80     
96     -48    
192    448    
256    -16    
-352   -48    
336    -864   
-384   768    
496    32     
-960   -1120  
-384   304    
592    224    
-544   -128   
16     -32    
208    0      
-224   96     
96     -80    
464    -256   
224    352    
-720   -96    
320    -880   
256    224    
368    432    
128    -32    
-112   64     
16     176    
32     80     
144    -112   
144    304    
320    128    
-496   -192   
464    288    
-256   96     
-912   -1088  
1760   -672   
1584   880    
-1568  784    
-480   -928   
944    528    
944    1248   
-448   1248   
-416   -176   
176    480    
416    -880   
32     624    
-320   -336   
-16    320    
-256   -80    
432    -64    
48     272    
-288   384    
128    272    
-16    128    
0      304    
-176   128    
176    -80    
160    -16    
-96    240    
-240   464    
192    -352   
48     -912   
32     688    
-160   -64    
112    -848   
192    176    
-400   176    
16     208    
240    -336   
64     336    
-288   768    
288    -224   
224    160    
0      1008   
-80    32     
-336   -272   
176    -16    
352    -160   
-144   -128   
-64    352    
-256   320    
224    -736   
176    -128   
-272   64     
-192   272    
-336   -800   
608    -848   
-128   -864   
-224   -384   
64     16     
48     -704   
96     528    
-288   1040   
48     -256   
288    112    
-176   -48    
64     128    
-16    144    
-48    176    
192    304    
64     -272   
128    -592   
464    368    
224    784    
-224   -288   
0      32     
80     -32    
-16    288    
16     400    
112    128    
-144   192    
592    144    
160    160    
160    -384   
-784   -256   
656    -992   
496    416    
-304   544    
-320   1152   
256    592    
64     -336   
-144   176    
96     272    
-96    608    
64     128    
112    272    
-48    240    
192    112    
64     -112   
-192   224    
-256   384    
32     208    
64     0      
64     80     
224    64     
-960   272    
80     -976   
912    -192   
-512   384    
-80    -64    
288    -272   
-176   128    
-80    -128   
256    160    
-64    160    
-240   -176   
32     192    
16     16     
384    144    
-272   80     
0      96     
80     -192   
48     272    
-112   384    
240    48     
336    208    
-320   -32    
-48    -32    
-64    112    
368    -64    
-224   192    
160    80     
16     96     
-1008  752    
0      336    
3248   96     
-1008  -176   
-1344  -576   
1712   96     
96     -256   
-368   656    
-256   112    
112    416    
48     -128   
-272   112    
384    -32    
-16    400    
-368   32     
224    368    
144    -176   
-304   -224   
32     -80    
288    -112   
96     48     
368    1168   
-1232  -752   
-496   272    
1296   -224   
-944   0      
272    144    
-128   -96    
160    272    
288    -288   
-464   48     
80     32     
0      -64    
32     128    
240    -224   
-288   208    
768    -464   
-224   80     
128    448    
512    192    
0      -48    
-16    80     
-336   -48    
608    -32    
144    112    
-144   -352   
304    -32    
96     -96    
-80    64     
64     -256   
480    16     
-112   -64    
-464   32     
256    -32    
192    -16    
-240   -128   
400    720    
-48    608    
-96    -96    
640    -352   
256    -32    
-176   128    
-256   -176   
336    208    
304    -96    
48     0      
-992   64     
288    112    
416    -976   
64     432    
1680   704    
-2848  1424   
1488   -896   
192    -656   
-992   0      
336    -448   
112    160    
112    224    
-432   192    
208    -192   
96     64     
272    -336   
-496   352    
-32    -592   
-144   -16    
256    80     
96     128    
-416   32     
-336   -224   
1200   -352   
-368   -224   
-48    160    
-48    128    
-656   -32    
304    -144   
592    160    
-512   -368   
192    112    
-496   -192   
480    240    
-272   -96    
160    240    
-80    32     
144    240    
-80    112    
-352   -80    
192    240    
-80    -352   
256    16     
304    -208   
-336   64     
-80    -192   
240    192    
128    16     
-64    304    
160    64     
-208   -368   
320    448    
-128   -592   
32     80     
128    -64    
48     848    
-480   -240   
-304   -48    
128    -192   
128    -128   
-240   -112   
416    -64    
416    -704   
-144   -1120  
224    160    
-160   -320   
48     96     
96     -48    
32     -496   
-144   32     
-128   -352   
560    -160   
144    -80    
192    288    
-208   -32    
16     -256   
208    -48    
-48    16     
-48    -32    
208    -320   
-272   192    
16     352    
96     -144   
-48    -480   
864    1584   
-2112  848    
736    -272   
912    -112   
-32    -672   
-512   -992   
304    720    
-16    224    
-208   -288   
192    -256   
-64    256    
0      -112   
256    -160   
-272   -224   
-64    -1024  
-288   -64    
224    96     
64     -80    
128    176    
-144   -400   
-224   -48    
896    176    
-400   -656   
-112   448    
272    -864   
-304   -768   
-16    -96    
96     -448   
160    -80    
-128   -80    
-256   0      
-256   -880   
544    -320   
-144   -144   
-272   176    
256    0      
96     80     
32     -624   
-208   160    
-176   240    
304    224    
0      32     
-240   -64    
-64    96     
144    -192   
-400   0      
160    48     
-544   48     
64     -112   
496    144    
-1360  160    
1152   736    
-192   -32    
-800   -64    
1760   112    
-528   80     
-352   -48    
192    384    
-48    -112   
-64    -32    
-288   -256   
320    16     
-288   144    
-112   448    
-272   -64    
-96    -240   
-80    16     
320    -512   
0      -64    
80     -1088  
-256   -528   
1184   640    
-1600  -528   
-192   -624   
1280   224    
-1072  608    
-576   -800   
432    -1408  
464    -1136  
-944   -608   
32     -416   
288    96     
80     64     
-80    16     
-112   -736   
272    -160   
-704   -288   
512    -928   
-528   -544   
-64    -512   
144    -240   
-48    160    
-288   -640   
208    -1104  
-128   -688   
-816   144    
816    80     
432    192    
-256   -288   
16     -176   
-160   -288   
-224   208    
32     32     
-624   288    
880    -576   
320    -16    
-272   304    
64     -32    
-560   -416   
64     64     
-464   -256   
-432   -32    
-560   -48    
256    48     
-80    -256   
-496   -656   
64     -96    
-768   112    
-240   144    
176    48     
-560   -2208  
-1280  -192   
720    -32    
-32    0      
224    384    
-320   160    
0      1728   
192    -704   
112    304    
-192   16     
-304   576    
-336   -496   
80     272    
96     0      
-1088  112    
32     16     
-240   -352   
-352   -432   
304    -272   
-32    512    
-144   128    
192    80     
-144   -160   
-368   288    
240    112    
16     368    
-688   32     
656    592    
240    528    
-176   -496   
-144   288    
-720   -80    
272    368    
176    0      
-640   -448   
48     -16    
544    688    
-256   -224   
-480   512    
432    1552   
128    1008   
0      -192   
-160   128    
272    592    
-48    416    
160    32     
-544   464    
-304   1392   
-416   -464   
736    64     
272    304    
-288   -176   
-1168  -816   
352    -944   
704    -1152  
-752   80     
-176   -880   
-288   -80    
320    448    
-80    -528   
-128   -1200  
-416   -480   
64     512    
16     -16    
-64    -96    
-272   32     
160    624    
288    800    
-416   -80    
112    -656   
-32    -80    
-48    400    
256    384    
-320   -80    
16     -720   
160    -336   
-528   -144   
848    80     
-464   272    
-128   96     
-944   -1040  
1136   -576   
-160   960    
-656   -720   
160    -1056  
64     -768   
-336   -272   
-144   48     
464    176    
-144   752    
-112   352    
-192   96     
80     -400   
144    -208   
128    176    
16     -176   
-240   144    
112    -96    
-176   -80    
-112   -144   
784    880    
-1232  864    
544    -432   
400    192    
-720   288    
-80    -752   
256    112    
-48    464    
-544   -400   
80     0      
128    -240   
-32    80     
160    -32    
-80    80     
-16    -32    
96     -128   
80     208    
-224   96     
176    144    
-192   -80    
-144   96     
256    160    
-64    64     
192    80     
-192   -16    
-336   176    
208    128    
224    96     
96     -288   
640    192    
-1696  784    
0      416    
1552   80     
-304   144    
-1136  -256   
288    16     
368    400    
-576   -208   
96     336    
272    -80    
-400   176    
240    -112   
-224   272    
448    64     
-160   176    
-144   -112   
448    240    
-176   -96    
0      128    
0      -80    
48     112    
-1632  512    
864    304    
-272   48     
-192   -96    
368    352    
400    80     
-560   0      
-208   -16    
368    16     
352    16     
-32    192    
-240   -16    
16     144    
-80    0      
96     96     
-64    288    
-80    464    
-128   -144   
-64    -80    
272    64     
256    16     
-272   -16    
528    -32    
848    -32    
-496   -400   
496    -464   
656    192    
-352   368    
-272   176    
512    160    
16     -80    
-48    -256   
224    16     
-80    112    
80     128    
352    -144   
256    80     
-464   112    
32     192    
432    80     
-96    176    
-320   112    
16     64     
32     -96    
224    208    
-320   32     
-128   96     
816    1344   
-2000  112    
-368   1040   
976    -896   
-1408  192    
976    96     
144    -112   
-80    528    
336    0      
-416   64     
-176   96     
256    192    
208    -112   
-256   240    
-48    -1184  
-64    192    
352    96     
-256   128    
-80    32     
448    608    
-192   304    
32     800    
400    -16    
-448   -80    
-160   112    
240    80     
-112   64     
-48    -480   
288    -112   
-160   -1088  
48     -16    
-96    176    
160    -80    
0      16     
192    -64    
-320   -112   
160    -48    
96     -64    
160    336    
-160   176    
48     384    
128    -208   
-416   -368   
192    -48    
272    -32    
-16    112    
-80    -32    
240    64     
-48    -16    
16     352    
32     368    
-48    336    
64     96     
752    -16    
-752   80     
-32    -16    
704    64     
48     96     
-720   432    
272    240    
80     64     
144    -1296  
16     144    
-224   80     
64     416    
320    192    
-16    -16    
-48    -352   
-64    -48    
-32    -672   
-176   -496   
160    -544   
-208   -320   
112    -240   
96     -688   
128    144    
-192   -224   
272    144    
16     -1072  
0      -64    
80     -96    
880    1968   
-2064  1584   
912    -112   
400    304    
-368   -96    
-272   400    
400    272    
464    464    
-384   912    
-32    272    
128    -272   
-48    0      
224    -560   
-48    288    
-272   208    
176    144    
128    -176   
-128   -32    
80     -144   
112    304    
624    624    
-1040  320    
608    -528   
48     352    
-64    -736   
16     128    
-96    -48    
160    -144   
96     160    
-48    -208   
-144   592    
-16    160    
288    288    
16     -816   
-176   -320   
192    176    
288    352    
-272   -160   
208    -288   
160    560    
-224   -656   
-80    96     
80     64     
336    128    
-48    -208   
-256   -1648  
-32    208    
320    -2864  
560    -1008  
-1024  576    
-640   352    
3520   -768   
-1120  128    
-736   -928   
832    240    
240    -32    
-48    -592   
-272   448    
64     -784   
-80    384    
144    -1488  
96     -16    
-320   352    
-32    -176   
240    144    
64     -96    
0      -416   
-192   -1248  
416    320    
-32    0      
320    -352   
-2048  -224   
480    48     
1488   112    
-688   720    
-144   672    
576    1632   
-480   384    
-192   -1968  
560    -2000  
-352   -144   
-16    208    
160    -336   
0      -416   
160    -784   
112    -256   
-352   -96    
240    64     
176    -80    
-64    176    
64     48     
-192   176    
-240   0      
624    1104   
-1456  544    
-464   -656   
1504   -1072  
-272   272    
416    -304   
-256   -304   
-112   336    
368    -512   
-768   304    
208    -288   
-400   192    
224    -304   
-256   -1648  
-592   -560   
320    176    
-336   -32    
288    -496   
-16    32     
0      704    
288    -64    
384    -80    
96     528    
-64    -384   
64     32     
-112   -64    
-304   -192   
592    896    
1552   480    
-960   96     
-528   384    
448    720    
528    160    
-1088  -1248  
-176   96     
-256   240    
160    304    
160    -512   
-160   -688   
64     -192   
192    496    
-64    64     
-304   -272   
-16    96     
0      -192   
64     144    
-208   176    
64     192    
-880   -304   
-400   128    
720    -928   
-784   -656   
256    -352   
-160   -800   
-144   -96    
128    144    
352    1392   
112    752    
192    -224   
-176   -336   
16     -160   
-464   -272   
432    -16    
-80    160    
-48    -128   
-160   320    
128    -256   
-64    304    
-272   -496   
128    -128   
128    -2352  
-944   -912   
-128   -320   
208    -704   
-496   -592   
-64    0      
16     256    
-16    -800   
-768   -128   
944    576    
560    1200   
-560   768    
192    816    
144    304    
-144   784    
96     0      
-768   -160   
128    -192   
336    -304   
-160   -304   
176    96     
-240   400    
192    -496   
-304   -416   
-48    -1296  
-416   -736   
208    -384   
128    192    
-928   48     
-48    80     
208    544    
64     272    
-608   528    
800    1104   
-448   1056   
-64    528    
1232   1984   
-2144  1072   
400    -112   
752    160    
-384   -16    
-240   80     
-464   576    
656    -48    
-640   112    
144    -48    
-176   16     
-192   -208   
48     208    
32     -320   
-1104  -128   
-32    -32    
144    -320   
-176   288    
160    48     
-160   32     
-448   -304   
576    1088   
1040   -96    
-1344  -16    
816    112    
16     -16    
-352   96     
96     -240   
288    -272   
-384   288    
-336   304    
240    240    
176    288    
-112   -48    
144    32     
-48    -32    
-144   0      
-96    224    
240    16     
-48    96     
-288   -96    
96     48     
-368   0      
176    -48    
-48    16     
-48    48     
-448   -176   
-128   192    
400    -192   
-656   -1072  
1488   -1344  
-1280  -160   
-128   96     
240    -64    
-656   192    
624    -176   
-320   384    
368    -208   
32     -16    
-400   0      
0      64     
-432   -128   
-64    -32    
96     112    
464    80     
-512   96     
384    -80    
-160   0      
0      -16    
-80    0      
0      -544   
1232   736    
-736   -272   
-688   368    
2080   -128   
-1376  -16    
-80    -96    
368    240    
-368   -16    
176    64     
-336   -96    
16     32     
112    96     
-48    112    
-16    16     
-112   144    
96     -320   
128    0      
-192   32     
-224   -48    
368    16     
-64    256    
368    80     
-1008  0      
-16    -144   
384    -160   
112    -32    
-368   -432   
-512   -128   
480    96     
-96    48     
-416   272    
-16    96     
144    -160   
-336   16     
416    -16    
-304   -336   
944    -64    
-544   -192   
-64    -208   
16     176    
-80    112    
-32    160    
432    64     
-128   80     
-400   144    
-48    80     
48     96     
0      -560   
1936   4528   
-1200  2480   
-512   -768   
1472   -32    
-352   -176   
-1120  112    
464    16     
400    -16    
-352   -640   
-880   64     
640    32     
-272   48     
336    192    
16     32     
-384   48     
-16    16     
496    64     
-144   32     
-256   -224   
512    -816   
-16    -208   
80     0      
-272   208    
-592   -32    
128    96     
560    112    
-336   192    
208    -128   
-240   208    
192    48     
0      -16    
-192   224    
-64    144    
352    448    
-272   352    
256    560    
336    112    
-240   96     
272    256    
-336   144    
336    160    
48     160    
-80    208    
80     -208   
-368   -304   
-128   448    
496    1120   
48     384    
-208   208    
352    384    
-64    16     
-96    -784   
-176   0      
320    832    
-112   912    
304    800    
176    64     
240    -112   
-640   -16    
-208   112    
512    -80    
-64    -16    
-112   -144   
0      -128   
-592   -160   
304    -384   
352    -64    
-176   -896   
-304   -448   
240    880    
240    -64    
-208   -272   
-16    -128   
0      48     
16     80     
-128   -16    
-16    320    
-48    -176   
-32    592    
208    -368   
-496   -656   
880    -1824  
-48    256    
-288   80     
192    -624   
-256   16     
48     -1200  
-48    -496   
32     96     
-240   64     
176    -304   
352    176    
-16    -80    
-240   -784   
128    0      
176    -32    
80     16     
-208   -416   
48     112    
32     160    
-192   176    
656    -576   
-400   608    
208    -160   
-192   -128   
-192   16     
304    -48    
208    352    
-112   -1520  
-64    0      
48     16     
256    96     
32     0      
-16    128    
-32    0      
144    192    
-208   400    
192    -240   
176    112    
-128   -64    
-192   96     
224    -192   
176    48     
80     -736   
0      -96    
-32    336    
192    96     
272    192    
-336   48     
-160   96     
-1040  -1200  
512    208    
-96    -400   
-576   -160   
592    608    
464    192    
-256   -304   
-576   -544   
64     352    
352    640    
48     -352   
-320   -256   
32     -16    
224    80     
-128   352    
-64    -432   
208    128    
240    -496   
-320   1264   
96     -96    
208    576    
832    -80    
-2320  240    
1328   -496   
-464   1152   
-256   -304   
320    224    
688    -1296  
-640   1200   
-64    1280   
320    1024   
-496   448    
368    608    
224    128    
-240   128    
-240   16     
208    -144   
384    -176   
-352   -96    
-48    304    
80     -128   
-16    192    
160    432    
48     -64    
-624   -864   
-320   -1664  
-368   -848   
480    208    
-848   32     
-48    160    
144    336    
-384   400    
0      -160   
464    -1360  
-240   -112   
464    144    
96     -320   
256    -1408  
-160   -160   
432    112    
-176   -16    
-368   256    
176    -432   
-256   256    
224    -848   
-400   560    
480    -368   
16     -224   
-96    -112   
-80    240    
-224   2592   
432    240    
-528   -240   
-80    -32    
480    928    
784    96     
-1248  -272   
-384   -1856  
1152   -1088  
320    48     
-624   80     
-320   -64    
512    16     
272    -96    
32     64     
0      -240   
-208   128    
496    544    
192    1104   
-64    560    
-80    -1360  
-32    -320   
224    -176   
-416   -352   
432    368    
192    -160   
-400   0      
304    -400   
256    -144   
-48    -352   
-48    -512   
-16    -16    
48     432    
112    -128   
-64    0      
304    -304   
-240   -32    
-224   -32    
288    -112   
-16    -16    
-144   -208   
160    -32    
224    -240   
-352   -64    
32     -48    
352    -784   
-528   -288   
144    448    
704    48     
32     112    
-304   -480   
560    -464   
-384   16     
-80    -64    
-16    -176   
-256   16     
400    112    
32     80     
-112   -112   
48     -160   
16     -192   
-64    -496   
-96    -48    
160    -64    
-64    80     
16     48     
160    -160   
-208   -96    
96     544    
-208   -160   
-432   -304   
96     80     
192    -96    
96     112    
480    368    
-1040  608    
64     16     
336    0      
-80    -128   
-112   -32    
-1008  480    
2928   -1168  
-752   -112   
-848   -368   
736    224    
224    -496   
-928   288    
160    -112   
176    -128   
176    -160   
64     144    
-48    -1504  
-80    -80    
384    -128   
-16    320    
64     464    
64     -256   
-176   -64    
208    96     
-144   32     
176    -1104  
-1888  400    
1056   -208   
64     448    
224    -112   
-80    -16    
-16    32     
32     -96    
320    -144   
96     32     
96     0      
-96    112    
-224   -16    
-64    160    
608    -192   
-256   64     
-16    -112   
80     -32    
176    144    
-160   -224   
96     48     
16     -512   
176    96     
-48    -560   
-224   32     
496    32     
-384   80     
112    -112   
128    -48    
-128   -864   
-912   -608   
448    -176   
0      96     
240    304    
-656   -736   
96     272    
352    -320   
-192   0      
368    -32    
160    16     
-448   -48    
64     32     
192    32     
-304   -16    
96     176    
224    64     
-416   -48    
320    -64    
-160   16     
-128   -64    
592    800    
-1408  -528   
-528   0      
1136   352    
-2096  -176   
-112   176    
576    336    
-320   -48    
-480   32     
400    64     
464    -96    
-528   -16    
-192   -112   
320    -16    
-240   -48    
160    80     
-288   48     
-224   -32    
0      -32    
64     -96    
-64    128    
-576   192    
1136   -16    
64     64     
-560   48     
32     -64    
48     -704   
800    -112   
-320   368    
-576   -256   
432    -16    
-128   -128   
0      -16    
-32    48     
128    -432   
-144   160    
112    320    
-464   448    
-320   -48    
-96    80     
304    -32    
-224   48     
-176   -16    
272    144    
-64    -400   
-240   64     
0      64     
-240   32     
560    496    
-720   -1952  
-2288  -1648  
1024   -48    
1024   352    
-400   -64    
-800   112    
-64    144    
976    336    
-672   -224   
304    304    
16     -240   
-144   96     
32     0      
64     80     
-208   -128   
176    304    
256    -160   
-336   112    
400    160    
-768   -128   
208    -112   
-784   -160   
240    160    
-96    -448   
-288   480    
432    48     
-640   224    
192    -16    
160    528    
160    464    
-368   464    
-48    0      
592    32     
192    576    
-688   400    
-176   352    
672    496    
-240   848    
-512   416    
240    464    
144    288    
-96    400    
144    288    
-32    128    
-240   448    
112    848    
-32    512    
224    -304   
-208   576    
48     432    
-48    -80    
-272   -912   
272    -352   
-432   -672   
128    -48    
16     -112   
-432   -1776  
-224   -720   
320    1248   
-176   864    
352    -32    
-192   -208   
-96    112    
-80    16     
192    272    
-64    560    
0      0      
-400   -112   
-224   -32    
160    -80    
-80    16     
48     0      
-48    32     
272    368    
-144   224    
-176   176    
64     64     
208    -224   
-192   -176   
32     160    
-16    208    
-496   672    
880    -256   
-832   80     
16     16     
464    176    
-208   304    
160    -160   
-176   64     
-176   224    
176    16     
80     0      
-144   144    
-48    80     
272    0      
48     128    
80     -112   
-112   144    
0      112    
-64    96     
736    -16    
-1408  160    
400    -64    
400    -16    
-240   -32    
-64    48     
16     -128   
16     -176   
16     320    
112    80     
-144   80     
-224   -192   
160    112    
-80    112    
80     16     
80     336    
96     -256   
0      -400   
96     -272   
48     112    
144    64     
-272   -32    
48     -96    
368    -16    
-144   -320   
-368   -160   
64     224    
32     16     
-304   384    
240    400    
-1360  1216   
2704   -272   
176    224    
-1392  608    
656    128    
448    224    
-880   -752   
-544   -640   
512    816    
-176   -432   
16     240    
0      -96    
-304   256    
288    -128   
224    -80    
-320   -64    
-160   208    
176    -288   
464    -560   
-336   -32    
32     -480   
-1552  1248   
2096   416    
-912   976    
-288   1024   
464    592    
0      1168   
-1056  1648   
176    960    
560    704    
-80    240    
16     -32    
-96    -304   
-224   80     
-32    336    
240    32     
144    448    
-864   864    
112    48     
384    624    
384    240    
-320   400    
-272   -160   
800    -752   
-400   0      
-624   -592   
160    -496   
208    -192   
144    -192   
112    32     
-224   16     
304    32     
208    -64    
96     128    
80     -240   
-384   400    
448    48     
-272   -672   
-240   272    
624    -64    
-32    16     
-192   176    
-192   -512   
208    0      
96     16     
-496   48     
208    96     
-256   -624   
928    208    
464    2880   
-848   592    
528    -384   
1200   -1840  
-688   48     
-576   144    
192    112    
1264   -400   
-400   224    
-64    -384   
-96    384    
576    -240   
-96    224    
-128   64     
304    224    
-384   160    
304    32     
-256   32     
144    384    
240    1424   
-128   656    
448    176    
-208   -256   
-608   288    
512    -128   
-128   320    
112    64     
-464   -32    
384    -32    
112    272    
-224   32     
32     -192   
192    -304   
64     -656   
144    80     
-80    -352   
128    -16    
-16    -304   
208    64     
192    -32    
-256   48     
-112   0      
352    48     
-64    96     
352    0      
-528   208    
576    208    
80     320    
-64    -368   
-400   -192   
320    -480   
304    528    
-1040  -320   
336    0      
224    208    
400    -48    
-176   176    
368    96     
16     160    
-96    96     
64     112    
48     -80    
-112   -176   
128    -704   
48     32     
-144   -400   
-32    240    
240    144    
272    368    
-624   336    
464    96     
48     32     
-304   256    
208    -32    
-144   64     
176    -112   
80     -80    
-224   160    
112    -560   
96     192    
1248   2448   
-3152  -400   
-928   -144   
1952   0      
-688   -624   
-496   -112   
608    -336   
224    288    
-272   240    
208    -352   
-80    32     
-128   0      
176    144    
224    112    
-480   -112   
0      -256   
448    240    
-288   -32    
128    -384   
160    272    
48     -1024  
224    -624   
-960   464    
656    -880   
272    -16    
-848   -2224  
320    -48    
688    304    
-144   -64    
-128   48     
80     96     
208    272    
-144   48     
-160   -640   
-176   176    
560    -304   
144    -80    
-624   -16    
384    -336   
-160   112    
256    -464   
0      48     
-192   -1984  
112    -48    
-80    -240   
-80    -96    
48     -480   
80     160    
-32    -32    
-80    -256   
608    -1456  
-704   400    
544    -32    
-128   -144   
576    112    
-640   -224   
-336   -704   
416    -336   
-32    -224   
32     -784   
0      112    
128    -64    
16     80     
-208   32     
832    192    
-480   -144   
192    32     
-32    -32    
-336   -144   
-592   -64    
-16    -512   
992    496    
-1360  0      
192    -208   
992    0      
-912   0      
32     -1808  
576    64     
224    -224   
-768   144    
304    96     
128    -16    
-176   -16    
176    -176   
0      -208   
-320   -96    
256    -112   
64     -288   
-128   160    
128    -992   
-272   -80    
-144   -3136  
-432   384    
1072   -224   
-1136  224    
384    96     
608    224    
-816   -160   
64     -32    
-64    32     
32     -80    
-624   -80    
-96    96     
-112   -240   
336    -416   
-112   224    
32     -464   
-416   384    
352    16     
160    16     
32     -288   
224    16     
144    48     
-80    -32    
128    -400   
-32    -304   
-512   224    
240    -224   
-432   -864   
768    704    
-640   912    
-128   64     
1088   -208   
-800   -720   
-320   -416   
576    -208   
704    -1024  
-352   128    
-64    -272   
-80    48     
48     -64    
-256   144    
48     -240   
-64    -64    
160    -96    
-48    0      
112    -592   
-240   192    
352    -384   
-128   -880   
-400   -432   
-16    -128   
256    592    
-576   48     
-304   -160   
656    0      
-400   -704   
-112   -848   
-32    -320   
272    -64    
-48    16     
224    -304   
-32    544    
-272   352    
176    32     
112    32     
64     192    
144    -368   
-96    -48    
128    288    
80     -48    
48     224    
208    -864   
-960   -864   
-368   -384   
16     416    
144    736    
-240   -112   
-96    -64    
-512   208    
16     -576   
-1680  880    
864    608    
-368   272    
-160   -112   
-80    816    
-512   -144   
-352   -80    
208    64     
176    -256   
0      176    
-160   -80    
-64    -320   
-448   -384   
-320   288    
80     32     
-96    -96    
368    96     
0      304    
80     -80    
-32    -16    
144    -16    
-160   32     
-96    48     
64     32     
224    320    
-448   208    
-16    96     
160    -64    
-384   0      
368    672    
480    400    
-272   -112   
-368   96     
-128   -48    
448    96     
-352   480    
-128   208    
368    -208   
208    -160   
-128   336    
-32    176    
48     80     
112    -16    
64     -48    
144    144    
-240   400    
-224   112    
-400   -128   
-96    160    
144    -192   
-160   288    
512    -288   
-416   48     
-96    -32    
432    240    
-64    448    
-368   128    
176    -64    
16     64     
48     96     
-160   448    
-48    48     
96     64     
112    272    
-144   336    
448    320    
-656   -16    
-64    -640   
272    -144   
-80    224    
-272   -80    
-112   208    
448    -64    
-192   320    
-144   144    
304    144    
-592   288    
320    -160   
-1056  1680   
2512   -400   
-656   -16    
-976   176    
1280   464    
224    -128   
-208   -608   
-128   -736   
-16    160    
-80    512    
192    720    
16     368    
-320   -48    
-240   -96    
336    -176   
80     112    
-544   -544   
-144   432    
32     -48    
-64    176    
224    1440   
-592   -1120  
-1648  432    
1840   -992   
-2016  1616   
1168   -48    
-768   -560   
-32    480    
832    336    
-384   -48    
-192   80     
48     176    
192    192    
96     -96    
-688   -192   
32     240    
352    176    
-208   192    
-80    48     
-32    48     
48     -160   
192    496    
-864   -400   
128    320    
624    96     
-640   -368   
448    336    
320    176    
-416   -128   
16     128    
-272   -128   
48     0      
272    416    
-272   0      
-272   -96    
-464   -32    
448    -96    
-224   672    
624    -32    
320    96     
-320   176    
-304   -16    
96     80     
-144   80     
304    80     
-576   144    
-176   128    
304    48     
96     80     
-848   -2400  
1056   -2336  
720    352    
-128   112    
-784   -32    
-144   336    
576    -64    
32     256    
-32    -320   
-496   288    
592    -240   
-80    304    
-208   -64    
208    240    
-224   -48    
272    176    
-224   -48    
-224   96     
-64    -320   
720    576    
-288   -304   
-320   128    
240    304    
272    -96    
-352   -80    
-96    112    
416    -208   
-880   -32    
448    -160   
32     128    
96     64     
-256   -80    
-32    112    
368    256    
-448   -64    
-144   -128   
160    32     
80     272    
208    -32    
-944   96     
592    96     
192    -48    
-320   -32    
112    -128   
-352   16     
448    -96    
-592   96     
288    192    
-368   48     
48     80     
144    16     
-224   -336   
608    -400   
48     -144   
-64    176    
368    224    
-208   192    
-400   144    
160    16     
48     -112   
-224   -128   
-96    64     
16     64     
176    -112   
-128   208    
-48    64     
256    -528   
-96    -720   
304    -2128  
-944   560    
512    16     
-176   -80    
64     -80    
0      -48    
32     208    
-96    32     
0      480    
368    608    
-528   -112   
144    -96    
192    -32    
-288   1504   
2864   -608   
-1408  32     
-112   16     
704    128    
-256   -880   
-352   -256   
432    864    
-688   496    
544    -272   
304    -32    
-512   160    
-16    -256   
336    480    
368    224    
-240   -64    
80     -64    
-176   -128   
128    144    
160    -560   
-496   -608   
592    -208   
208    320    
-800   144    
480    80     
80     128    
-144   640    
272    -192   
-112   -32    
64     16     
256    -96    
-128   48     
-64    -32    
416    208    
-304   -368   
144    304    
-176   160    
32     704    
560    -448   
-240   80     
-176   -112   
240    192    
-16    64     
288    192    
-496   208    
320    -128   
96     240    
16     -256   
-112   -48    
1776   -352   
-3296  288    
-1936  -736   
2464   96     
-928   -560   
-848   128    
1040   336    
-80    560    
-368   304    
144    48     
304    -96    
-160   -32    
-16    144    
-48    16     
512    176    
-816   -1232  
384    128    
-16    -128   
288    432    
-208   112    
-80    320    
32     -800   
-912   1136   
1312   208    
-656   400    
-704   704    
480    -336   
96     -48    
-464   -256   
80     -48    
352    -112   
368    -32    
144    -336   
-640   272    
304    -96    
-384   160    
352    -144   
-208   32     
-192   144    
448    160    
-160   0      
48     -192   
-176   -352   
640    -640   
64     528    
64     -160   
-464   432    
-976   -16    
560    -352   
-496   96     
192    -272   
144    192    
128    416    
112    -864   
-224   -624   
-112   -1104  
544    -192   
0      144    
-464   368    
416    48     
96     -432   
-448   240    
336    -224   
-64    -32    
-128   336    
-32    -592   
-416   256    
-80    -96    
-128   -592   
416    -320   
672    1056   
-560   304    
624    -1168  
560    -112   
-768   128    
-192   -128   
480    -432   
336    -1792  
-384   -64    
368    720    
192    240    
-96    0      
-80    0      
-48    64     
144    -400   
-208   -656   
176    64     
224    -336   
-224   -48    
192    -128   
-64    -384   
112    -496   
-336   -128   
832    208    
-400   32     
96     256    
-320   -304   
400    96     
-96    -304   
-576   48     
-128   -544   
272    384    
144    -240   
160    720    
-400   -384   
-32    -640   
80     -400   
-64    -160   
384    1056   
-384   -80    
0      -144   
240    -64    
0      352    
-208   -208   
-384   -656   
-64    304    
96     -96    
144    528    
-352   -448   
256    -160   
32     80     
368    560    
1328   -288   
-816   0      
128    560    
-304   1184   
464    -80    
-560   -1808  
480    -1200  
0      32     
-80    448    
-400   -336   
192    224    
288    -128   
-128   -304   
-176   -48    
-224   -1152  
320    16     
96     64     
16     112    
208    -32    
-96    64     
-208   -16    
144    -272   
80     -48    
-240   240    
48     528    
-48    480    
-368   80     
224    -272   
-80    176    
-96    480    
592    64     
-448   -80    
144    16     
64     -96    
-48    -48    
64     240    
-16    656    
-80    144    
272    -288   
-368   -288   
-16    -272   
-640   208    
192    16     
-32    144    
-48    -448   
112    -144   
176    -2736  
128    -496   
128    -192   
-1248  864    
848    -240   
-32    224    
-176   -16    
224    -16    
-144   192    
-336   432    
240    -368   
240    32     
-352   400    
-304   -112   
144    -224   
192    368    
-96    -112   
-160   432    
-144   -464   
464    240    
160    -304   
-176   288    
-96    -272   
-32    352    
256    -16    
-176   256    
192    -160   
128    240    
-576   -288   
64     80     
96     208    
-656   656    
592    720    
1216   16     
-1424  -208   
704    -48    
-608   -128   
592    -192   
32     -416   
-1280  -352   
48     -336   
-304   -256   
-96    -96    
-240   -96    
80     80     
160    128    
-240   32     
-176   -64    
-272   32     
-144   -16    
208    160    
-80    -32    
-144   -432   
1152   1232   
-160   -16    
-464   416    
-256   -80    
240    -496   
-208   -144   
448    320    
256    -80    
-576   -112   
352    160    
-304   48     
-48    80     
80     48     
-464   112    
224    -128   
112    176    
32     -112   
-48    112    
128    -272   
-32    32     
208    512    
384    -192   
-96    352    
-288   16     
-208   16     
96     112    
512    -304   
320    -320   
-832   208    
-544   -80    
80     -32    
-416   80     
288    320    
-624   -720   
416    -304   
-128   96     
-592   -240   
-208   176    
688    -64    
128    -16    
-512   -80    
160    128    
400    16     
-208   -432   
-608   352    
656    160    
-304   -96    
336    1248   
1248   3184   
-1296  2080   
736    848    
1104   192    
-608   32     
-192   64     
208    352    
160    -208   
-288   -128   
480    -96    
384    256    
-528   -128   
-112   208    
-1200  -112   
-96    96     
160    112    
-48    48     
-320   32     
192    240    
496    -400   
-704   272    
688    -16    
-384   288    
-432   -112   
-432   -176   
-128   208    
240    -288   
-208   304    
-912   -144   
-128   160    
624    64     
-112   176    
32     96     
-336   256    
-176   -320   
256    320    
240    160    
-544   144    
800    -128   
-224   32     
32     160    
-464   -16    
80     224    
560    144    
-208   -32    
-80    64     
32     112    
336    192    
-432   -144   
336    -48    
-368   -128   
-80    -752   
-912   0      
448    -128   
-336   -224   
192    -48    
320    -128   
64     48     
-304   -512   
-176   96     
32     64     
-112   -32    
176    48     
80     80     
-80    176    
-192   -240   
80     160    
464    288    
-480   240    
64     -192   
320    -208   
-384   176    
192    336    
32     0      
-208   192    
-256   160    
528    96     
16     288    
-32    208    
-128   16     
1328   2880   
-2432  -192   
-544   336    
1872   -192   
-976   112    
-176   192    
288    96     
352    320    
-688   -640   
128    -64    
272    544    
-352   48     
128    -16    
-16    96     
-96    -816   
240    544    
-80    224    
-304   112    
240    32     
-96    96     
48     528    
-480   -656   
-368   400    
1280   336    
-336   256    
-368   -112   
-272   -560   
592    -560   
-48    208    
-112   -32    
0      240    
-32    64     
80     -176   
32     96     
-96    -48    
-64    240    
224    0      
-32    -32    
-176   -112   
32     -32    
128    112    
-160   64     
-32    -64    
112    64     
432    80     
-416   -144   
48     208    
-144   64     
160    80     
-640   704    
464    848    
2624   -176   
-1600  208    
-560   -144   
1024   -368   
-64    -272   
-64    -144   
64     272    
48     320    
-144   224    
208    144    
224    96     
-304   -16    
-176   112    
512    400    
0      176    
-336   32     
48     -320   
352    32     
-96    80     
320    80     
-1824  896    
704    96     
320    -96    
-64    -448   
0      -160   
192    -256   
192    0      
-16    160    
-240   -336   
128    -448   
-112   192    
-32    -480   
320    224    
400    256    
-368   32     
-16    528    
-256   384    
192    -32    
112    -48    
-128   96     
-48    16     
-208   -32    
-160   128    
32     -448   
-464   48     
128    1712   
1088   416    
-320   160    
-64    -80    
80     176    
208    208    
32     192    
48     -400   
-384   -336   
880    80     
368    816    
304    64     
160    320    
-48    400    
48     -144   
192    -48    
176    -1056  
-32    96     
256    -2640  
-720   704    
-64    -16    
240    32     
288    -496   
-48    32     
-880   1248   
1056   -336   
-432   -544   
-432   512    
1392   480    
-464   -880   
-256   608    
-80    -416   
528    -240   
96     -352   
-176   160    
-288   -112   
48     384    
160    64     
-80    -112   
144    -96    
-48    288    
528    144    
176    576    
-576   -416   
96     -608   
128    368    
336    352    
160    640    
-592   112    
96     -272   
672    736    
-176   512    
64     -640   
64     624    
144    32     
384    256    
-48    272    
-272   720    
48     576    
288    -320   
128    112    
-480   -16    
80     432    
144    -640   
496    240    
-80    -224   
-112   400    
176    752    
432    800    
32     -96    
-224   944    
96     848    
304    -144   
-160   -192   
208    -1008  
-992   512    
768    -128   
0      144    
416    -816   
96     32     
-128   -1088  
-144   208    
176    -512   
432    -112   
-176   272    
-208   160    
272    128    
80     -96    
208    560    
-272   336    
128    192    
528    32     
0      -336   
288    -160   
-32    144    
112    -400   
0      -1136  
144    -224   
176    -416   
16     32     
-480   -656   
144    288    
-32    112    
16     -1248  
-64    1616   
1632   -288   
-1200  -288   
112    -80    
144    -240   
16     -784   
192    -672   
-208   -784   
0      720    
16     -400   
144    0      
-192   -224   
96     48     
-160   -32    
224    80     
-48    336    
16     144    
80     -160   
-80    128    
-144   -400   
816    -304   
-464   -352   
-80    -1232  
80     112    
240    -464   
80     336    
-336   -512   
32     -240   
-192   -800   
32     -112   
192    -176   
-128   0      
-160   -592   
240    -416   
48     -64    
-16    -32    
-256   144    
144    -112   
64     0      
32     -80    
112    -112   
-48    -224   
32     80     
-128   -176   
-272   -80    
48     -160   
192    -464   
-112   -192   
576    16     
-1440  144    
1296   -336   
416    -32    
-1456  -416   
752    400    
1232   -32    
-1152  -80    
0      -512   
400    48     
-272   -240   
16     96     
192    -80    
-112   -48    
288    80     
352    -160   
-256   176    
160    -912   
112    -16    
-64    -256   
-192   144    
128    112    
128    -48    
-1824  416    
1200   80     
64     -256   
-672   -80    
528    112    
-352   -240   
272    272    
192    -160   
-16    -80    
128    -640   
0      160    
-208   -48    
-80    -16    
544    48     
-32    -128   
-336   -384   
32     -80    
-352   32     
-368   64     
400    496    
-736   0      
160    -112   
160    -240   
-272   -208   
208    -768   
464    192    
-80    -1088  
-480   -240   
880    288    
-48    64     
-416   48     
144    144    
-208   -48    
464    208    
-432   208    
-16    -320   
496    128    
-304   -528   
-704   64     
256    112    
416    96     
-224   -192   
-576   -160   
32     -144   
112    208    
128    -128   
96     112    
-672   -1232  
-1760  320    
528    672    
-704   736    
288    128    
192    16     
-224   384    
-144   -400   
-352   -64    
544    96     
416    -112   
-336   80     
-32    16     
176    224    
16     -128   
-224   48     
-64    -224   
48     80     
48     -96    
400    752    
-1136  -224   
-240   752    
560    -720   
-688   144    
704    64     
-448   0      
-16    384    
416    -144   
-592   160    
416    -192   
32     96     
-96    96     
96     224    
-592   -128   
64     224    
528    -80    
-544   272    
320    -128   
-144   128    
-112   -48    
-80    32     
96     -80    
-128   -208   
-32    80     
-688   80     
128    -336   
-800   -96    
640    -64    
-80    -160   
-176   80     
48     32     
80     224    
-240   -640   
-224   -112   
272    592    
-352   128    
320    128    
-96    64     
-208   400    
-464   -32    
80     176    
-832   96     
-96    48     
-224   -176   
192    224    
32     48     
0      256    
-320   192    
48     -400   
-80    -704   
-96    -400   
-16    96     
80     432    
-400   272    
-96    -288   
112    272    
-192   -48    
-176   -128   
48     -640   
-48    -256   
64     -224   
512    -416   
-2960  1904   
1760   -48    
96     -304   
-48    -688   
-112   464    
-256   96     
64     272    
64     176    
64     128    
-624   -96    
-48    176    
416    160    
-96    272    
-448   48     
64     -192   
288    208    
-128   352    
0      96     
-208   16     
352    848    
-720   1360   
16     -64    
32     -576   
-48    -592   
-144   16     
272    560    
-688   -208   
-48    128    
48     -64    
-48    176    
64     240    
240    96     
-304   96     
-160   320    
112    -64    
-96    -384   
-128   64     
80     -128   
128    464    
-272   112    
-144   -16    
-64    48     
48     32     
48     176    
-336   112    
112    96     
64     112    
16     0      
-560   576    
-352   992    
3440   -112   
-1152  560    
-1072  528    
688    -272   
-144   -288   
256    224    
-112   1024   
96     224    
-368   -112   
160    64     
224    64     
-400   -160   
352    -192   
32     -304   
-512   96     
-32    160    
304    688    
-256   784    
144    688    
352    -224   
-2224  288    
80     -336   
1824   -720   
-768   -48    
-160   1104   
432    576    
-192   992    
176    544    
352    496    
-48    32     
-272   -128   
80     320    
272    -80    
-176   64     
-64    64     
128    -16    
128    -80    
368    -416   
-160   -448   
-288   -192   
80     32     
-112   -128   
400    -880   
-368   416    
-96    496    
48     592    
384    624    
-272   1680   
704    432    
-528   -240   
-128   912    
608    784    
-80    -512   
-816   384    
-48    256    
64     1168   
816    560    
-272   288    
112    240    
80     640    
-208   224    
-96    -48    
160    -304   
-32    272    
240    304    
-208   80     
-80    336    
608    672    
-80    16     
-1264  -928   
-304   480    
32     576    
-160   96     
448    800    
-464   -816   
208    1056   
48     1824   
32     -224   
512    -112   
-192   480    
48     352    
-48    720    
80     -400   
256    64     
0      -192   
32     -256   
128    160    
64     496    
-128   160    
144    -32    
208    160    
-112   -288   
-752   272    
656    -80    
144    560    
16     272    
-208   -656   
-400   -624   
256    384    
112    368    
-80    192    
512    64     
-496   400    
144    208    
320    32     
-96    -464   
-480   -192   
144    208    
256    544    
32     272    
176    -400   
-192   288    
-80    -288   
512    48     
96     656    
64     960    
160    560    
-48    -80    
-128   -176   
576    608    
-1248  448    
144    32     
912    -528   
-832   -464   
-96    336    
848    -384   
-96    -1200  
-384   -608   
144    -112   
-80    272    
176    560    
160    304    
-304   256    
112    -80    
240    128    
-256   -160   
544    -48    
-16    -224   
-80    -304   
224    -32    
-160   -240   
64     384    
0      256    
-112   368    
256    0      
-192   -608   
48     -32    
64     432    
-448   -352   
1088   -48    
-608   -176   
192    -112   
-16    912    
-272   -128   
288    352    
-128   -448   
16     -640   
-64    -2256  
224    -224   
80     64     
96     32     
48     304    
-144   608    
160    464    
-144   176    
16     176    
240    160    
-112   -32    
-80    -32    
640    1888   
64     -128   
-560   240    
688    -608   
-304   48     
32     -624   
112    32     
48     48     
-16    -96    
-160   80     
352    304    
32     144    
-240   32     
288    48     
-176   -272   
96     48     
-128   -672   
448    128    
-528   -144   
272    48     
160    -528   
-128   144    
-16    48     
16     112    
336    64     
224    80     
-416   144    
320    -112   
-320   576    
-1152  448    
3056   736    
-480   -624   
-1952  -96    
1104   160    
1216   448    
-1072  -480   
16     240    
464    -128   
-240   192    
80     80     
-96    128    
48     32     
464    48     
-192   -32    
80     64     
128    160    
-176   -128   
-80    -48    
208    -480   
-48    192    
-432   -96    
2240   144    
-272   672    
-864   -64    
-432   224    
912    -48    
-784   -1904  
128    160    
480    -1520  
-96    -80    
-112   384    
64     -48    
96     -304   
-704   112    
816    32     
-272   -640   
-208   -704   
368    32     
-352   -432   
0      16     
80     384    
-1024  32     
928    64     
0      -592   
0      256    
304    -816   
-224   48     
320    -128   
400    400    
-336   -16    
-96    -144   
320    -496   
288    144    
-32    -224   
-144   704    
368    -368   
560    -1120  
-336   352    
80     -288   
272    -80    
-112   -544   
240    0      
64     -448   
304    528    
-624   224    
-272   112    
768    -32    
-144   112    
-624   1728   
2416   -1904  
-1136  -304   
400    -416   
-288   80     
-976   272    
-96    -176   
992    -48    
-64    -272   
-544   -1680  
-48    -128   
144    -16    
432    -16    
-352   48     
-16    -48    
-48    80     
592    -48    
-352   -16    
112    112    
-896   -96    
848    176    
-448   144    
144    48     
352    -96    
-672   -160   
384    32     
-16    -768   
64     160    
-112   -528   
-272   -176   
224    -240   
48     16     
-16    32     
-368   -80    
288    -64    
-176   -224   
-112   -192   
-432   -496   
0      -144   
48     96     
96     176    
272    -704   
-144   32     
512    -304   
-496   -192   
-400   -32    
608    144    
80     224    
-368   -112   
-64    -48    
224    -288   
-496   464    
-192   -144   
-640   -864   
448    -1824  
-480   -272   
112    -208   
192    32     
-352   -544   
304    112    
224    256    
16     144    
-48    64     
96     240    
-272   176    
160    -64    
-96    64     
176    112    
-80    0      
256    -256   
-80    -64    
480    208    
-672   896    
544    -704   
256    -16    
160    512    
-240   128    
-464   -400   
320    -544   
96     672    
-240   144    
672    2144   
816    -256   
-1568  -800   
432    416    
704    32     
-144   1056   
-464   1200   
272    -576   
0      448    
-192   -208   
128    -192   
-208   64     
-96    48     
80     16     
-16    224    
-240   -192   
160    -352   
208    384    
-96    -32    
-208   -496   
704    -896   
-528   368    
-160   160    
-112   112    
-528   0      
176    -1456  
0      -592   
-192   48     
-256   576    
272    -480   
160    384    
-880   -96    
64     352    
0      -128   
160    96     
-128   -240   
-496   32     
-112   960    
32     -48    
288    -64    
-288   -16    
-240   -64    
-288   64     
432    -224   
-224   -288   
176    -144   
-64    112    
-160   192    
208    -272   
112    -704   
-2736  -96    
992    624    
864    288    
-688   -176   
-304   -32    
-320   -672   
-272   48     
96     -304   
256    -32    
-240   0      
-368   128    
48     -256   
80     272    
-144   -336   
0      144    
48     176    
96     32     
432    -240   
-80    176    
80     1200   
-48    -1104  
-992   624    
1200   384    
-752   112    
-512   -288   
0      -768   
-640   -592   
416    432    
0      1216   
-192   544    
48     -432   
64     -176   
-240   -32    
160    -752   
-304   -240   
48     80     
-272   -80    
-480   0      
336    16     
-496   -256   
96     416    
80     -80    
-624   -608   
-176   -64    
368    192    
-336   -704   
368    -2256  
-336   -1040  
144    320    
48     624    
-592   672    
48     -144   
0      464    
448    -576   
-1056  560    
400    1072   
-1136  448    
16     240    
112    -544   
-288   112    
144    -80    
16     592    
80     96     
-256   -240   
48     -304   
272    -96    
240    -880   
-176   -688   
112    128    
-992   -528   
-432   480    
240    -576   
224    112    
768    112    
-736   -320   
-592   -240   
704    -1488  
288    832    
-128   576    
-432   192    
-208   -384   
672    -304   
192    160    
-272   -16    
-112   -208   
240    192    
176    112    
-64    1072   
-64    176    
-320   -272   
192    -336   
656    128    
-336   -112   
-80    336    
80     256    
-608   -592   
320    -352   
-320   -448   
-144   -400   
-208   -272   
-224   -112   
48     -176   
-384   -528   
-64    96     
288    416    
-96    -80    
144    -128   
48     128    
64     384    
96     256    
-64    256    
16     -32    
-528   -80    
240    -704   
-464   -400   
192    -64    
-432   -672   
224    -624   
112    -464   
-704   -752   
896    -288   
48     144    
-1008  112    
496    336    
-144   160    
128    -80    
192    -160   
-16    208    
224    112    
-336   48     
256    96     
208    80     
-464   -128   
96     0      
96     32     
-16    -64    
-208   -400   
160    -432   
80     176    
128    -96    
-96    64     
-96    -96    
-48    96     
64     304    
64     448    
592    288    
-432   112    
-128   -48    
320    48     
-544   1232   
1088   -848   
-1072  384    
-16    -224   
464    288    
272    -112   
-560   16     
224    80     
160    -400   
-80    48     
48     48     
-192   16     
-16    256    
112    -128   
208    -512   
192    -96    
-384   352    
320    288    
-128   256    
-128   -16    
240    -1280  
-480   352    
800    64     
-608   192    
80     128    
48     -64    
176    -192   
-128   176    
0      -144   
160    240    
144    0      
-96    96     
-240   160    
176    192    
32     64     
-112   176    
304    64     
16     -64    
144    -32    
80     -48    
-192   208    
256    -432   
112    80     
-144   -96    
-240   160    
624    64     
-512   240    
368    80     
-32    112    
912    -208   
-1808  64     
1216   -272   
96     -80    
160    432    
624    -304   
-1328  496    
656    -1296  
96     272    
-96    -16    
432    16     
-80    -64    
-272   112    
384    224    
-288   64     
-96    192    
352    96     
-160   -112   
-272   64     
-16    112    
48     -256   
464    1056   
-320   -1600  
-1792  240    
2080   736    
-688   -304   
-1552  320    
1184   -128   
-960   112    
112    -80    
304    -96    
0      160    
-48    80     
96     128    
0      288    
-192   -224   
-160   160    
224    -240   
-48    -288   
32     -656   
384    48     
-80    96     
48     672    
1568   -224   
-1008  -48    
160    144    
720    688    
-608   736    
-480   304    
752    -304   
-32    -80    
48     144    
-16    64     
208    -16    
288    -112   
208    -112   
-592   -928   
560    176    
-224   160    
112    224    
256    -192   
-160   144    
192    112    
-48    -80    
-48    128    
160    128    
656    -112   
-224   -208   
48     80     
-320   -1072  
1312   -3104  
-2672  -1984  
768    -16    
992    192    
-192   112    
-512   -176   
0      368    
624    192    
-320   -272   
320    192    
384    -448   
-480   80     
400    -192   
0      176    
80     -144   
-32    304    
272    -608   
-176   144    
-272   -448   
496    -672   
48     -1184  
-256   -240   
128    400    
-592   -576   
80     336    
608    -256   
-384   256    
64     -32    
288    112    
-80    240    
304    160    
-160   -400   
-128   16     
176    96     
320    272    
-432   -128   
432    -1408  
208    -1392  
-272   -256   
64     176    
128    -16    
464    896    
-496   272    
64     160    
480    -288   
-320   32     
96     -352   
208    16     
-160   112    
144    -1392  
-208   -496   
-16    128    
-1056  160    
464    -608   
-192   -336   
0      -656   
192    -624   
-160   992    
-96    992    
208    576    
48     1104   
144    784    
128    -256   
-96    -304   
-144   -432   
272    320    
-336   -32    
128    -160   
-16    -48    
32     -656   
240    -576   
64     -1072  
-64    272    
400    -624   
-160   240    
208    -160   
32     -272   
-480   -80    
352    256    
256    16     
-80    -176   
-576   -560   
128    -480   
-416   96     
-144   -336   
16     32     
-112   -560   
176    -1184  
272    -448   
208    -272   
0      -256   
160    224    
64     0      
-64    160    
288    -336   
128    208    
-352   320    
-32    240    
-272   -16    
176    272    
-224   -496   
896    -736   
-288   464    
-208   -208   
32     -160   
0      -592   
96     0      
144    -16    
32     -16    
-144   32     
144    -176   
112    0      
96     -192   
96     96     
-352   -48    
16     80     
128    -272   
-64    0      
176    -352   
-112   256    
128    -768   
592    -80    
64     48     
-192   0      
192    32     
16     112    
-304   128    
240    -224   
-160   112    
-48    -144   
304    -784   
-2944  -352   
720    160    
464    -608   
-704   32     
-32    576    
48     -752   
-192   544    
512    800    
240    928    
-16    -128   
-464   80     
128    128    
32     -176   
192    224    
-464   -240   
-80    -320   
-240   -608   
192    256    
16     -112   
-128   -864   
1488   112    
-1648  -1248  
16     304    
256    832    
-784   144    
608    -496   
544    784    
-304   976    
48     672    
-224   -144   
176    64     
-64    112    
32     16     
-32    -16    
-80    -368   
80     -160   
-368   -848   
48     -144   
-272   -240   
-224   -48    
-48    0      
-176   -112   
384    -768   
-320   -48    
416    80     
-128   -528   
816    -1072  
-48    -544   
-416   608    
224    240    
-368   -32    
112    16     
-96    96     
-528   -1216  
-384   320    
176    -448   
272    -528   
224    48     
-288   -656   
-288   -432   
16     48     
-224   -144   
224    64     
0      -256   
272    64     
-80    -16    
-256   -176   
464    80     
-256   320    
-1248  -32    
208    288    
-128   -16    
-400   1632   
848    1120   
-304   528    
-160   -192   
448    -496   
-560   -256   
-64    -208   
64     80     
-240   -144   
-32    -336   
-192   -192   
96     32     
0      -32    
48     64     
16     48     
-208   1360   
288    464    
-128   -144   
-112   -560   
352    368    
384    -288   
-672   80     
128    32     
32     416    
240    32     
64     128    
-272   80     
64     176    
-112   0      
-208   -112   
288    128    
-528   -48    
-288   352    
368    368    
112    128    
-304   -144   
336    0      
-128   256    
336    416    
-336   160    
-464   0      
528    16     
-304   -240   
-400   -128   
416    -176   
-128   0      
-16    -96    
-240   -480   
512    -768   
48     416    
-272   -176   
192    32     
32     64     
-448   -176   
320    128    
-176   0      
96     -64    
-352   256    
208    48     
128    -48    
-416   80     
32     160    
48     -144   
-144   80     
112    272    
16     -544   
-224   224    
-272   256    
320    -384   
-80    -400   
-96    -96    
0      80     
144    64     
304    -208   
-400   96     
-16    192    
192    48     
-1088  352    
2176   -1296  
-416   -64    
-752   -160   
736    288    
464    384    
-1120  368    
48     256    
496    -320   
-192   176    
48     -288   
-128   0      
-144   128    
32     272    
336    -496   
-112   416    
-304   -96    
256    -96    
-32    -32    
-80    0      
-400   -784   
640    -32    
432    288    
-1184  -96    
496    -16    
32     192    
256    -160   
-672   -16    
320    -16    
-48    192    
464    -144   
-432   -48    
0      -16    
-224   96     
480    176    
32     -16    
-352   160    
-16    96     
496    160    
16     -16    
-176   0      
-80    128    
192    112    
-32    112    
352    112    
-304   0      
-80    144    
208    160    
112    80     
-976   -1808  
-1296  -1200  
2576   -208   
-912   128    
-96    256    
80     -128   
144    256    
0      48     
-864   -112   
608    -80    
112    48     
-208   -48    
-96    160    
0      -208   
-96    96     
448    -16    
-416   96     
32     -32    
256    -112   
0      16     
-32    48     
-304   -624   
-944   608    
1168   -176   
128    624    
-224   144    
304    80     
-160   128    
-368   -80    
352    240    
352    -16    
-64    96     
-32    128    
-80    144    
32     96     
592    48     
-176   80     
-112   224    
-80    192    
240    128    
176    -48    
-288   -144   
576    -16    
-400   192    
400    16     
-160   -48    
-624   240    
320    -160   
144    -336   
-32    96     
-48    96     
-112   288    
384    144    
-176   16     
-192   528    
688    -496   
-272   208    
224    176    
96     96     
64     48     
128    32     
-32    32     
-128   112    
144    112    
-32    80     
144    -128   
-528   160    
224    128    
96     -32    
-496   80     
368    3168   
960    -464   
-1696  -112   
192    -304   
1872   576    
-1136  176    
-352   -304   
512    336    
144    112    
-272   48     
-128   0      
112    -352   
-320   240    
256    0      
128    288    
-368   192    
96     -544   
176    64     
-64    -880   
-240   -976   
112    -32    
64     352    
176    112    
320    -208   
-448   80     
192    240    
-256   -80    
384    704    
32     576    
160    16     
192    -672   
-384   -560   
80     480    
80     320    
272    16     
-128   -304   
80     -224   
256    -32    
-144   32     
48     416    
-176   416    
-64    496    
416    480    
224    1056   
368    368    
-560   512    
576    672    
-304   112    
-192   -2512  
208    288    
-448   48     
720    192    
-160   496    
64     480    
608    560    
-752   672    
96     -1376  
0      -144   
464    2000   
-464   -352   
96     -288   
192    16     
-176   176    
464    -384   
208    288    
-192   -240   
-112   48     
0      -384   
-112   -64    
-32    160    
112    128    
-304   48     
-80    -208   
32     80     
144    32     
-400   240    
48     -224   
-16    0      
96     -736   
48     128    
-176   -832   
480    -352   
-384   192    
800    -80    
-48    -32    
-224   208    
112    0      
352    -208   
288    -352   
80     48     
-272   272    
144    -256   
96     32     
-16    -80    
208    0      
-144   -224   
16     -16    
128    -16    
272    -16    
-96    144    
-592   1024   
1072   -128   
-752   -336   
368    320    
-16    288    
96     -192   
224    -896   
32     416    
0      -112   
-256   32     
304    -176   
304    96     
-128   144    
-240   80     
112    -192   
96     80     
144    -144   
-112   -208   
-48    128    
32     -112   
112    400    
48     -96    
-16    -192   
-64    -112   
256    96     
320    -384   
16     112    
-16    -112   
-384   -976   
1456   880    
-2544  464    
-896   -1504  
1584   -704   
-528   -992   
-368   -16    
528    1120   
16     -96    
144    -1472  
-32    128    
-272   -352   
48     80     
160    -320   
16     192    
32     -416   
-64    16     
-224   -336   
-160   -1696  
128    32     
112    128    
-304   -416   
1424   -320   
-432   -464   
-576   -112   
496    528    
-304   -16    
208    -48    
416    -464   
432    144    
-128   736    
-368   480    
-128   -176   
464    -208   
-464   96     
288    160    
-224   -320   
-176   -240   
352    -416   
-480   -736   
224    -16    
16     -32    
448    448    
-272   -352   
496    928    
-2192  1312   
-368   288    
976    -208   
-800   -720   
-336   -112   
208    304    
-304   -160   
64     -16    
192    -192   
128    -240   
320    1056   
-944   0      
-320   -96    
768    -400   
-560   304    
-560   -480   
352    -96    
128    48     
-224   -240   
-272   240    
224    -240   
320    -288   
-416   0      
240    -32    
464    608    
-576   448    
-944   -3344  
-432   -288   
784    48     
-176   304    
768    368    
-368   432    
-864   400    
1024   288    
-336   32     
-16    -32    
-432   -16    
-64    -288   
400    80     
-176   -768   
-320   96     
352    -336   
112    112    
176    -16    
-208   -544   
-640   -352   
448    -208   
-224   -80    
448    144    
208    -80    
-656   16     
272    -32    
304    64     
-272   -240   
160    208    
64     -96    
-240   48     
576    80     
-512   -1024  
160    -96    
272    128    
176    -336   
-688   -336   
192    -192   
-192   192    
96     -48    
-192   16     
400    96     
-208   208    
224    -32    
96     160    
16     -448   
32     -96    
-128   80     
224    -96    
-192   -16    
-48    32     
-448   144    
752    -192   
-304   32     
-112   -96    
176    32     
272    -240   
-384   80     
0      -368   
-336   128    
464    -176   
-224   144    
-16    240    
176    96     
-128   -16    
0      160    
-64    448    
-48    0      
336    96     
272    0      
-320   -128   
16     208    
-32    240    
-1376  176    
32     0      
48     -144   
-400   608    
-48    -96    
-128   -112   
-16    144    
-544   -2912  
-1120  640    
2032   -64    
-784   -64    
32     224    
224    -224   
-384   288    
-32    -832   
-592   96     
560    208    
-240   -336   
-464   160    
112    32     
-336   -336   
16     -176   
-224   176    
144    -304   
-448   -304   
64     272    
32     -160   
-336   -1312  
-416   -96    
416    240    
-464   96     
416    176    
-160   -656   
-320   16     
288    320    
-272   224    
112    16     
-16    48     
-112   -352   
-720   16     
64     -16    
160    16     
-128   112    
-416   96     
208    400    
144    -96    
-176   -32    
32     -16    
32     112    
-240   32     
-16    48     
128    64     
288    -16    
-448   224    
64     -80    
-80    96     
608    1488   
-784   1824   
-592   464    
1248   144    
112    -160   
-1648  -384   
544    -208   
688    256    
-592   128    
-80    416    
272    -48    
-336   0      
-208   48     
96     96     
0      336    
416    -32    
-416   240    
-32    -480   
192    288    
96     -80    
-304   80     
528    992    
-1312  -512   
-288   128    
656    240    
336    -112   
-256   576    
-288   80     
32     160    
128    32     
-288   -144   
-96    64     
-512   64     
176    48     
304    336    
-528   16     
-304   32     
320    208    
32     400    
-48    -128   
-352   -256   
160    -16    
-160   -144   
-144   -176   
272    -320   
272    -416   
-432   544    
160    48     
-112   -32    
-288   128    
-144   64     
416    -400   
512    -480   
-992   608    
512    224    
432    -480   
-928   256    
80     112    
16     -128   
48     0      
-144   48     
-176   128    
-80    -144   
80     -48    
-48    128    
240    176    
-752   400    
112    80     
240    32     
-576   -1072  
-240   -1744  
1232   -2304  
-304   1024   
-416   -160   
-32    -16    
-464   -672   
-144   -928   
560    400    
240    96     
-512   -160   
80     -592   
400    112    
-96    640    
-144   144    
-224   240    
128    112    
0      320    
240    -64    
-160   208    
64     896    
-80    48     
128    -160   
160    -48    
-640   608    
336    144    
-368   480    
624    -128   
-400   688    
-96    -80    
0      -592   
-80    -352   
16     -160   
320    288    
-320   64     
128    464    
16     656    
256    592    
128    1056   
-32    800    
0      -208   
320    16     
80     208    
-144   112    
80     48     
352    448    
-64    752    
0      96     
368    -720   
-288   -720   
-128   96     
272    96     
608    768    
-1264  640    
-80    1280   
784    1216   
-144   992    
-144   592    
208    272    
-736   -1552  
560    -624   
336    560    
-272   0      
-80    176    
-112   304    
368    144    
112    -96    
-608   -256   
320    -784   
464    96     
-128   112    
-112   16     
-16    128    
32     112    
-16    112    
0      -32    
0      528    
448    336    
-544   224    
16     -48    
368    160    
-32    0      
512    -64    
-1120  432    
320    112    
80     272    
160    48     
-240   80     
224    -208   
-416   112    
80     608    
-32    160    
0      -224   
112    272    
-128   -64    
64     160    
64     192    
16     -16    
-16    432    
-128   160    
48     32     
-288   -384   
752    -496   
48     544    
-320   96     
-112   -16    
96     -160   
288    -416   
32     32     
-48    -400   
64     -288   
0      160    
96     -80    
96     128    
-128   192    
64     -240   
48     -160   
-48    112    
-80    736    
448    320    
-416   -336   
-320   -128   
336    -160   
240    320    
-224   96     
144    -336   
-112   -80    
-144   0      
480    16     
272    -1392  
-608   160    
-1024  -800   
304    -208   
704    -144   
-816   288    
-352   384    
1280   48     
-1152  -32    
-384   -112   
656    240    
0      96     
-272   176    
-64    -288   
160    272    
144    208    
32     240    
128    128    
-400   -16    
256    -320   
-64    -112   
-80    -112   
80     704    
464    -576   
-1744  336    
1072   48     
672    304    
-416   448    
-48    -224   
384    48     
64     -96    
-416   -128   
64     -1488  
288    208    
-240   -192   
-48    48     
192    112    
256    16     
-304   -96    
-80    -96    
496    0      
-112   -112   
-128   112    
-80    -192   
928    336    
-176   -1024  
-320   128    
272    288    
640    -208   
-144   592    
912    0      
-64    80     
16     224    
-160   -112   
-224   192    
160    288    
-32    -160   
-256   832    
-272   -368   
128    -32    
224    32     
16     32     
32     -544   
-240   32     
32     64     
-64    112    
144    224    
-272   0      
-240   176    
368    -160   
32     240    
176    1728   
1168   4048   
912    352    
-1392  -64    
-128   -144   
1200   176    
-368   -256   
-240   -80    
80     96     
112    352    
496    64     
-256   -1376  
-256   -384   
192    -208   
480    -864   
48     -240   
-32    160    
-320   -48    
-48    -208   
624    352    
144    16     
-672   -32    
448    -2032  
48     16     
-176   -80    
256    80     
112    272    
-544   -144   
176    128    
672    -976   
-784   -80    
32     -368   
320    16     
368    144    
16     112    
-464   176    
80     80     
480    -64    
-160   -80    
32     128    
-16    -304   
-128   -160   
272    -688   
-336   -208   
16     -224   
272    -64    
432    -304   
-384   -144   
-144   -2640  
256    -64    
96     -224   
64     -64    
400    32     
240    -592   
-128   -816   
-384   -304   
0      -464   
400    -96    
-624   144    
-512   144    
528    -64    
-96    -64    
-32    -240   
16     -480   
-48    -16    
192    64     
-32    -464   
-80    -576   
144    192    
-160   176    
-80    -144   
192    -128   
-16    -144   
-480   -208   
48     -512   
320    0      
128    960    
272    -176   
-224   -400   
-64    592    
0      -2768  
1664   1728   
1104   256    
-1552  240    
304    160    
304    -496   
-272   -176   
64     96     
48     -48    
-32    144    
-944   160    
496    -320   
-336   48     
-112   -208   
352    -272   
304    -240   
-368   -48    
112    256    
-48    320    
-48    -96    
208    -112   
-464   176    
1072   -320   
-528   48     
-144   192    
480    112    
-160   -80    
-192   -128   
256    80     
144    304    
128    -272   
160    112    
-304   128    
160    -128   
176    144    
128    -256   
48     32     
-144   96     
64     144    
-96    64     
-208   0      
64     -128   
-192   128    
208    -144   
-384   160    
576    32     
-304   0      
-144   -16    
240    0      
112    -336   
-1200  -1184  
-1456  -176   
2352   -464   
-1264  -288   
656    336    
48     -192   
-880   64     
432    368    
304    -432   
112    176    
-256   -480   
224    112    
272    -64    
0      192    
-16    96     
-160   336    
-96    -32    
256    0      
-288   -32    
64     48     
-64    48     
-400   144    
2096   -576   
-384   688    
-816   464    
224    -416   
-304   -176   
-288   112    
-48    48     
-192   48     
-336   -16    
-96    -32    
-128   -64    
-16    0      
368    80     
-64    48     
-480   -48    
-48    -16    
-128   -272   
368    -48    
48     -80    
-160   176    
32     288    
-592   160    
-416   -112   
-912   -528   
-416   -400   
-1008  128    
528    -16    
128    -96    
-992   192    
320    -272   
-160   272    
-400   -544   
48     512    
-112   -448   
48     -336   
576    48     
-336   80     
-272   16     
144    160    
144    48     
-32    80     
-176   0      
-560   -320   
624    144    
336    -32    
48     192    
-240   1088   
-64    352    
240    -2608  
-1248  -576   
-96    0      
-160   608    
688    208    
-848   128    
-288   48     
240    -192   
-32    -240   
-688   160    
-176   80     
0      32     
240    -272   
32     -32    
-368   -240   
-208   -912   
288    416    
80     -208   
-352   112    
-160   -448   
48     -32    
144    272    
32     -256   
-128   -400   
-288   -704   
144    -160   
48     -112   
-48    -32    
64     -432   
-272   -368   
80     368    
-144   96     
-64    -48    
224    -64    
-416   -64    
16     80     
64     -672   
16     688    
-16    1328   
-112   496    
144    -320   
288    16     
48     224    
-256   64     
-16    304    
624    96     
-256   464    
-192   -320   
-32    256    
160    160    
-400   -560   
816    -112   
-592   -400   
-368   -1264  
-304   -1616  
256    64     
-320   336    
528    1280   
256    1008   
-112   -896   
-304   96     
-64    448    
64     -288   
352    496    
32     320    
-32    416    
-272   128    
-80    -240   
176    208    
-432   16     
-16    16     
-304   80     
-64    112    
-128   80     
32     -208   
432    -432   
160    0      
-32    -160   
-80    -112   
-16    -64    
640    -128   
-1072  544    
272    -528   
112    -384   
-528   336    
240    720    
288    0      
-720   -352   
-64    400    
208    400    
64     0      
16     16     
-64    -96    
-224   176    
80     160    
128    -32    
-128   -144   
-160   -16    
16     144    
-96    -528   
640    -608   
-256   32     
-80    64     
-48    48     
-48    -96    
144    -480   
144    -608   
-272   -96    
-112   160    
64     208    
288    288    
96     480    
-144   288    
32     -16    
-208   176    
256    352    
-80    160    
-240   -32    
240    80     
224    336    
-32    144    
-144   -32    
-144   80     
432    352    
-128   144    
-256   -64    
128    160    
0      -16    
560    448    
-1328  -1104  
80     288    
512    160    
-1104  -160   
1760   480    
-272   -272   
-912   560    
672    48     
240    208    
-160   -192   
-48    176    
80     -48    
0      176    
-352   -128   
480    304    
-128   -48    
-176   48     
224    288    
128    96     
-64    144    
-96    192    
-480   -160   
2176   -384   
-1008  432    
-144   -80    
896    336    
-464   -96    
64     -128   
-160   192    
-32    96     
-64    96     
368    144    
96     96     
-272   0      
96     224    
256    48     
-96    0      
224    -16    
224    304    
368    208    
-224   32     
-192   -96    
496    512    
1184   -144   
-368   -288   
-16    656    
-48    -480   
160    48     
912    -544   
-416   416    
-96    128    
80     400    
304    288    
-224   16     
-240   -16    
288    656    
464    352    
112    0      
128    0      
208    -80    
-448   80     
160    -496   
368    64     
-16    80     
-304   -112   
496    -96    
-176   -240   
336    -112   
816    224    
-2096  -1280  
1760   64     
928    -256   
-1184  448    
416    656    
-144   -560   
-160   128    
752    -128   
240    272    
-848   -240   
352    16     
720    272    
-160   32     
-48    144    
-80    176    
544    -160   
-32    112    
160    128    
48     32     
-304   -640   
-720   -368   
896    -240   
-496   -48    
528    112    
480    -1792  
-1104  160    
576    112    
96     112    
-16    224    
128    160    
-112   192    
-32    112    
80     176    
-224   32     
320    336    
128    -304   
-352   272    
-48    -704   
-16    96     
112    -144   
-128   144    
288    -512   
-240   48     
-560   -192   
592    144    
64     -128   
-288   448    
336    240    
-320   224    
416    -112   
-176   -112   
-208   80     
-64    48     
880    -32    
-176   -304   
-256   160    
480    -1760  
-64    -208   
224    -176   
-160   16     
-192   -144   
-96    80     
160    192    
32     -96    
-16    32     
208    -128   
-128   80     
-144   48     
512    80     
32     336    
-496   256    
144    -224   
256    -64    
-224   112    
32     48     
112    -192   
416    -176   
-240   256    
32     -672   
-16    -560   
96     -224   
-544   1856   
2288   -1232  
-1616  208    
-224   -416   
1200   272    
-608   -144   
-176   -96    
96     384    
336    -400   
-32    -224   
48     192    
-112   32     
48     -176   
128    -160   
288    -432   
-128   400    
144    -368   
-160   48     
128    -144   
160    64     
416    -448   
-1280  528    
832    -720   
304    -1552  
-224   256    
-96    48     
-176   144    
-272   192    
80     -240   
432    48     
-80    -432   
-384   -96    
192    128    
-16    0      
144    -336   
96     96     
208    -144   
-272   256    
80     -112   
48     -176   
-240   -304   
432    -368   
-368   -272   
368    -16    
-176   -336   
48     -272   
64     48     
-48    -1536  
-64    -720   
416    -1280  
1040   -224   
-2064  48     
1136   448    
384    32     
-1008  -32    
400    272    
-96    48     
240    -112   
-224   -32    
-208   80     
160    -64    
192    32     
112    -640   
96     -80    
-336   -16    
128    64     
64     -256   
-384   -96    
160    -176   
32     -128   
-592   -800   
480    -160   
1184   -992   
-2112  208    
864    288    
96     -1312  
-160   -512   
288    -128   
-384   272    
448    -1648  
-112   176    
-64    16     
160    144    
-256   32     
144    -256   
-176   0      
-160   -416   
-128   -608   
240    -448   
160    -272   
-32    -208   
-112   16     
-640   -1216  
336    -432   
608    -1088  
-784   -304   
640    -176   
-336   336    
-320   112    
32     80     
304    464    
48     224    
-368   128    
240    -256   
-1088  1312   
-496   336    
-80    -480   
-80    -640   
144    -144   
-144   -576   
144    -224   
224    320    
32     112    
-304   96     
288    -112   
-576   320    
-256   -48    
384    -288   
-272   -128   
-720   -1056  
1840   -864   
736    688    
-304   -432   
-1200  384    
608    -448   
256    -1200  
64     -208   
48     656    
-464   -400   
96     16     
96     272    
304    -208   
-96    64     
-208   -128   
-368   -240   
432    -560   
96     64     
-112   -528   
-192   48     
368    608    
208    400    
-320   -272   
-272   -96    
480    368    
-224   112    
208    -16    
-144   896    
-128   1376   
176    -432   
80     -464   
304    112    
-704   80     
48     -208   
416    -480   
96     -784   
-96    288    
224    -272   
-336   -208   
-16    -64    
288    -16    
-256   544    
-112   -624   
-272   -400   
336    128    
-32    1216   
400    -352   
-208   -240   
-128   192    
432    912    
-656   -224   
-688   -608   
512    -400   
288    -144   
-320   -96    
-144   -32    
-224   -128   
-48    1104   
784    1936   
48     1344   
-336   -304   
32     -208   
128    -304   
-368   -224   
128    -208   
112    -816   
112    -496   
-144   -144   
-256   480    
-32    -352   
32     -368   
144    384    
-208   272    
-48    160    
80     96     
-64    400    
272    1120   
64     816    
-128   -544   
-320   -16    
-32    0      
192    -1184  
-48    -112   
48     -192   
320    -592   
144    -688   
-80    192    
112    240    
-288   -176   
-1104  384    
368    -128   
64     -112   
-32    64     
-224   208    
128    -48    
48     32     
16     -560   
-304   160    
16     0      
64     64     
496    688    
-880   848    
576    -608   
-400   512    
-304   64     
-160   224    
192    -96    
64     -80    
-176   -144   
176    240    
-128   144    
-288   32     
288    320    
-112   0      
-112   112    
128    -640   
-528   -400   
-224   -176   
320    -48    
-144   16     
-176   0      
-16    64     
64     128    
-96    -192   
-464   -128   
448    128    
112    224    
-48    0      
-144   -112   
16     -480   
1088   560    
1008   -64    
-1376  -32    
432    -80    
448    224    
-336   112    
-992   352    
304    64     
-544   80     
-48    32     
192    144    
32     16     
-144   -16    
112    32     
80     -32    
112    240    
-480   -16    
0      64     
96     0      
-480   -144   
-32    -400   
1008   736    
352    -144   
-672   176    
256    -128   
-192   96     
336    0      
16     256    
304    -80    
-112   80     
-240   96     
96     96     
0      -64    
-16    96     
256    48     
-272   112    
-112   224    
-288   -112   
416    16     
-144   48     
-384   48     
384    -32    
-1440  96     
304    -48    
1600   -48    
-384   320    
-432   96     
-224   -160   
384    -112   
224    176    
288    112    
-496   48     
-80    224    
720    112    
-272   -64    
-464   544    
-48    768    
576    304    
448    -48    
-176   400    
-528   288    
-352   448    
880    -160   
-112   64     
-96    784    
-544   224    
48     368    
896    -16    
-672   -96    
-208   3072   
2320   -976   
-336   1088   
256    160    
-176   -64    
672    400    
-928   -32    
464    160    
800    -96    
-160   -176   
-672   128    
320    160    
32     128    
192    0      
-96    64     
-144   48     
-368   208    
640    -32    
-640   -144   
144    768    
816    0      
-1056  416    
608    -80    
-816   -96    
304    128    
256    -32    
-368   160    
48     32     
160    48     
16     -208   
112    -64    
-96    -64    
-64    208    
192    224    
-192   256    
-224   -160   
304    -112   
-64    -64    
-240   -176   
352    32     
-16    112    
48     160    
-16    128    
224    -16    
-416   80     
-112   64     
352    272    
-48    80     
-240   -224   
160    -96    
48     192    
16     288    
288    -80    
-576   160    
608    -64    
-48    256    
-128   112    
80     -64    
-160   -16    
368    192    
272    288    
-160   48     
-96    -16    
176    64     
-48    -144   
0      96     
-64    176    
112    48     
48     -192   
-352   -656   
128    -144   
16     -2016  
256    352    
272    176    
-80    384    
-416   192    
144    32     
176    -544   
-96    -416   
-48    -32    
-448   -160   
1712   1280   
416    608    
-1552  432    
832    -992   
-192   -1360  
240    -288   
592    720    
-416   416    
-272   256    
352    368    
592    480    
-368   448    
-128   -16    
144    -144   
624    624    
-464   1008   
-48    592    
48     400    
64     192    
48     48     
-192   1344   
304    -48    
-560   912    
512    576    
-128   -288   
16     -1312  
-160   -192   
368    176    
-240   160    
-16    80     
-32    -32    
128    208    
32     240    
32     -416   
-16    160    
-48    -304   
-144   -32    
-32    -192   
176    -480   
16     -256   
0      0      
-64    64     
208    304    
-64    0      
112    192    
32     -80    
-48    96     
-48    144    
160    -288   
960    -80    
-3024  -336   
-32    -304   
1632   -944   
-816   -208   
-528   -448   
512    -176   
-608   -704   
-16    -1168  
48     304    
112    256    
-160   64     
-48    16     
192    192    
-32    48     
-16    96     
-48    -352   
192    16     
128    112    
-112   96     
-288   -880   
1520   832    
-1632  -336   
-624   432    
1200   432    
-752   32     
-160   144    
800    16     
80     208    
-448   16     
-16    144    
80     -192   
48     -400   
-144   -368   
16     304    
-128   -1824  
256    144    
32     -80    
-272   1408   
496    1024   
112    384    
-160   432    
112    688    
-192   -528   
-336   -640   
560    48     
-656   -992   
-336   -304   
576    -288   
-304   128    
240    -1104  
352    192    
320    -144   
-592   -2096  
400    448    
-992   -256   
-80    912    
576    -1024  
-736   -992   
32     -64    
-96    16     
224    -256   
-96    -592   
-416   -272   
96     272    
240    16     
416    -656   
-432   560    
-64    -608   
368    96     
-768   -1264  
-1120  -256   
976    -160   
-288   400    
160    496    
160    -624   
-352   416    
-368   -384   
208    -480   
272    -192   
-288   96     
-480   -608   
448    496    
288    -80    
-32    80     
0      -240   
32     -304   
208    -64    
288    528    
-192   112    
-16    -240   
192    -80    
256    -672   
-928   -80    
832    -400   
-48    192    
112    864    
112    1616   
80     272    
0      -1200  
-32    -352   
-80    64     
32     128    
0      -16    
-80    96     
144    -320   
-368   144    
-32    624    
208    544    
-16    784    
464    624    
-160   240    
-32    -64    
64     -80    
16     80     
176    -384   
-560   352    
-160   -80    
0      -320   
208    -128   
304    1168   
-592   384    
-48    272    
880    912    
1632   -304   
-1728  1232   
752    912    
432    960    
-192   496    
176    400    
160    96     
16     112    
-320   0      
304    -384   
-272   -256   
-208   -112   
64     48     
112    0      
192    512    
-80    256    
32     528    
256    -128   
-144   144    
-160   144    
160    -160   
144    -320   
-448   256    
48     368    
256    224    
-144   336    
-512   752    
1392   -608   
-656   96     
272    224    
80     0      
-112   -464   
-272   -416   
-80    -864   
-80    -288   
208    -176   
-384   -320   
208    96     
-32    160    
-320   208    
-96    -304   
-192   256    
32     160    
48     -560   
32     48     
-256   -304   
656    976    
-432   160    
-448   -192   
752    -80    
-288   -192   
-224   -112   
112    256    
352    320    
-432   128    
-176   -32    
256    -240   
160    -16    
-160   -16    
96     64     
32     -112   
0      160    
48     48     
-64    96     
-208   16     
128    16     
240    128    
-160   16     
112    32     
-112   -80    
-176   0      
64     80     
144    160    
-208   -144   
304    -32    
-1632  -1664  
-1616  -544   
2784   -400   
-896   -240   
-480   320    
-336   -256   
64     -176   
-48    -224   
-368   16     
208    -208   
-32    192    
-576   -32    
-224   64     
-112   112    
496    192    
-368   -128   
-160   0      
144    288    
-80    -48    
-128   192    
-192   64     
-576   -96    
1360   -128   
-192   528    
-1216  -192   
96     688    
320    192    
-64    96     
32     -368   
-96    240    
64     160    
-96    16     
160    80     
-96    -16    
-288   96     
256    48     
192    256    
-688   0      
-640   32     
496    288    
656    -96    
-496   112    
-1136  320    
576    -64    
176    -176   
144    -32    
640    464    
32     -256   
192    400    
-240   0      
-688   192    
128    -144   
-272   80     
48     256    
-960   -384   
-512   -288   
-384   -528   
576    576    
144    -352   
-32    -160   
-32    144    
176    -48    
-80    64     
-208   176    
112    64     
64     80     
208    64     
160    0      
-496   -48    
-1440  -2768  
2288   -1744  
560    352    
-1776  224    
192    512    
496    -240   
-592   0      
624    752    
-576   48     
-80    176    
208    -32    
-272   16     
96     0      
-224   -16    
240    -16    
-176   -16    
96     96     
-784   0      
-240   16     
-144   -272   
240    16     
-336   224    
-96    16     
560    80     
-16    0      
-384   48     
-48    80     
-48    32     
-32    -64    
64     16     
-48    144    
-16    80     
-352   -96    
-320   -96    
432    -96    
-128   144    
-64    -64    
0      -48    
-96    -112   
32     48     
-16    64     
0      -32    
32     -48    
-192   16     
64     144    
-432   64     
320    304    
-288   64     
128    208    
384    224    
-544   -144   
-96    -576   
464    -464   
-272   784    
-80    640    
240    880    
416    96     
-352   -208   
-48    -16    
240    64     
-304   -256   
-208   -432   
416    -832   
-416   -400   
16     -272   
48     -272   
-256   -128   
176    -272   
64     -640   
-256   -192   
-32    160    
64     272    
224    96     
-288   -112   
-176   144    
-16    128    
448    592    
-64    1104   
-144   -208   
128    -400   
80     0      
-896   -1536  
640    -800   
-320   144    
-320   448    
368    272    
-432   -528   
-64    80     
176    -32    
-16    256    
48     256    
64     -176   
-160   256    
-112   240    
208    224    
0      16     
-96    160    
-32    528    
144    64     
-160   96     
-80    -144   
-64    -400   
32     -336   
192    -128   
-272   -464   
304    176    
64     384    
-208   992    
176    528    
-272   -240   
0      -80    
144    128    
272    -112   
-48    288    
-128   80     
112    144    
176    176    
0      288    
-208   -112   
-16    176    
272    -64    
112    48     
-32    64     
-112   32     
96     400    
256    352    
-80    224    
-240   48     
160    -80    
336    32     
-336   -48    
1760   -592   
-1920  832    
896    432    
496    224    
-848   496    
384    272    
464    -256   
-336   896    
-256   32     
240    -576   
272    144    
80     208    
0      0      
-256   64     
16     -16    
224    240    
-32    -32    
-336   160    
240    -32    
192    160    
-112   -1648  
2336   -48    
-1376  464    
144    -976   
-128   -1328  
176    -912   
-864   -1680  
336    -1728  
-80    -1136  
-112   -144   
176    272    
-144   752    
192    656    
272    0      
-864   320    
560    -720   
320    1600   
-160   976    
96     656    
192    -32    
16     96     
96     544    
-240   -384   
624    -1552  
-32    -288   
-272   992    
512    1376   
48     416    
-464   448    
688    512    
208    -448   
-384   256    
-128   144    
304    736    
320    -416   
-208   -192   
0      -48    
272    800    
720    240    
-144   112    
0      128    
16     -96    
592    32     
112    -208   
-432   -224   
16     -560   
32     80     
240    -2112  
32     -240   
976    2016   
-416   896    
64     -240   
800    32     
32     1040   
-576   1520   
272    656    
384    528    
-368   656    
-192   -480   
-96    -832   
320    -288   
160    336    
-256   -304   
-176   -32    
224    -352   
208    256    
272    128    
-64    336    
-304   528    
448    144    
-16    -96    
-384   80     
688    640    
352    -64    
-560   816    
864    -112   
-352   416    
32     144    
-64    480    
576    128    
-224   64     
-128   -16    
368    64     
320    128    
-176   -64    
-448   16     
224    48     
208    96     
96     256    
-576   80     
144    -288   
544    240    
96     352    
112    480    
-240   -112   
336    16     
-560   -272   
192    -112   
144    -96    
-64    144    
-256   -448   
576    -960   
48     -192   
-208   -112   
176    976    
-176   720    
208    -112   
-352   -624   
32     -112   
-96    -816   
-176   -224   
448    -64    
96     16     
-224   192    
96     16     
-144   -2800  
80     -32    
-48    496    
272    112    
-240   -176   
-80    128    
224    400    
-112   -64    
384    0      
-336   -176   
-336   -944   
592    160    
96     -512   
-368   -64    
-592   -48    
528    -2288  
-1392  560    
1136   -736   
-800   -256   
224    -1648  
416    -48    
64     32     
448    96     
-320   192    
-48    -288   
160    32     
224    32     
-240   -80    
-64    -304   
112    336    
-144   -240   
-80    224    
304    -256   
-208   -208   
-368   -496   
1056   -688   
-528   16     
-16    0      
592    -176   
-608   -64    
336    -848   
176    672    
400    -48    
-832   192    
-32    -32    
416    -144   
-288   16     
240    -336   
-288   -192   
-16    -576   
112    160    
80     -448   
-464   64     
576    -160   
-176   112    
-224   0      
-80    96     
208    -96    
416    -288   
-208   -192   
144    0      
-880   -80    
-128   -112   
-16    -832   
384    -1408  
48     -160   
320    -368   
-352   0      
-976   -576   
1136   144    
480    -256   
-256   128    
112    -272   
-112   32     
-272   -96    
128    80     
-128   -112   
144    96     
-128   -144   
-160   32     
96     -160   
64     -176   
-208   -16    
368    -720   
-64    -352   
960    80     
-656   272    
976    -64    
64     -160   
-1264  352    
1344   16     
144    400    
-560   -240   
-640   96     
352    -240   
-48    -64    
-112   -64    
-16    -80    
176    -496   
192    0      
-176   -80    
176    32     
-112   112    
16     -224   
32     32     
256    176    
-1600  112    
448    48     
-512   64     
-224   -288   
320    -192   
960    -176   
672    160    
-848   -112   
64     192    
192    -288   
-80    192    
-128   48     
0      -112   
-304   272    
-16    64     
-240   -576   
-560   352    
352    80     
-144   16     
96     64     
64     -208   
-128   80     
48     -80    
64     -96    
16     112    
352    208    
-464   16     
608    2400   
1392   -208   
-224   608    
240    -416   
-208   -160   
16     352    
656    -16    
-464   -144   
32     -144   
-368   -32    
192    64     
368    -16    
-48    240    
-1040  -96    
-320   32     
0      -48    
368    32     
-176   -64    
-432   80     
32     816    
736    1568   
-400   512    
-48    -96    
16     -288   
-288   80     
160    400    
176    -160   
-656   -128   
-48    16     
400    32     
-304   -48    
-704   -352   
0      -96    
944    -48    
-864   -160   
-208   -144   
272    176    
256    -288   
-96    -96    
-64    64     
-208   -288   
48     -144   
256    -176   
-528   -240   
256    -208   
-16    -240   
-96    -32    
-704   -272   
-448   -256   
272    -688   
432    -464   
-288   -16    
-96    -128   
-768   0      
448    -160   
224    -544   
-896   -192   
48     -656   
-96    -784   
64     -608   
-144   864    
-112   0      
-288   -608   
-48    -80    
-208   -432   
-16    64     
-16    -240   
-304   -512   
96     144    
-80    -80    
-64    208    
80     64     
-96    96     
-128   96     
128    320    
176    32     
-208   -176   
160    -576   
416    -416   
-272   -368   
-496   416    
560    -672   
-688   240    
304    48     
-96    80     
16     112    
-16    176    
0      176    
-112   240    
80     80     
32     32     
176    0      
-288   48     
-176   176    
-208   -144   
48     32     
48     -112   
-160   352    
-32    -176   
80     -112   
-48    -32    
-224   768    
816    -144   
-800   240    
-176   96     
448    -16    
48     144    
-432   -512   
0      -272   
-112   -368   
16     288    
-48    16     
96     32     
-288   176    
128    128    
144    80     
-96    -48    
-32    -208   
144    144    
16     0      
-272   256    
112    112    
96     -32    
-112   208    
64     -256   
-240   -80    
-208   -224   
32     480    
448    560    
-416   592    
1280   336    
-2640  -16    
-464   -160   
1472   -592   
-576   -656   
-656   -640   
96     -192   
16     -688   
544    -560   
-176   784    
-208   -208   
-320   160    
176    -64    
128    416    
-288   -272   
-224   272    
128    -208   
416    384    
-112   192    
16     112    
-16    528    
816    -144   
-2080  -48    
688    320    
496    1328   
-1424  1056   
-496   192    
1296   1056   
-544   1072   
-432   800    
480    352    
-128   208    
-16    -80    
432    -160   
-224   16     
208    144    
16     48     
112    192    
320    432    
-272   -48    
16     80     
16     96     
-144   -64    
-224   0      
816    1056   
752    576    
-304   144    
96     -64    
-256   -240   
-112   208    
208    -80    
-192   112    
80     -272   
-16    -96    
432    -32    
96     1120   
-1216  1264   
272    288    
-16    80     
-80    16     
-320   144    
-240   -16    
352    448    
320    -144   
-240   64     
-544   -112   
144    224    
304    32     
-288   704    
-448   -752   
864    960    
480    -480   
-1600  -96    
112    512    
672    -848   
-352   128    
48     32     
-352   240    
-48    -240   
448    -176   
-176   0      
-80    272    
-224   80     
-96    80     
720    48     
-560   96     
-96    64     
-112   -624   
656    -1376  
-96    -96    
-96    480    
-96    160    
-128   -80    
304    0      
320    112    
-256   320    
528    -128   
-464   80     
432    560    
-224   384    
304    144    
-48    304    
48     352    
-128   128    
0      -112   
224    80     
416    128    
-208   192    
0      192    
336    112    
-272   -128   
112    144    
208    -208   
-512   -96    
0      48     
624    -736   
-32    112    
-480   48     
192    -32    
272    64     
64     80     
-304   368    
704    64     
224    16     
-176   304    
416    -48    
-64    256    
16     832    
-288   352    
240    80     
128    0      
-144   272    
-32    288    
192    224    
128    48     
-160   224    
208    -96    
0      0      
-352   240    
480    -64    
-32    16     
-128   80     
-176   96     
144    -48    
128    -96    
32     -192   
128    112    
-128   -656   
64     160    
-512   -1280  
2240   160    
-1040  864    
-992   -64    
848    -1120  
-752   608    
128    -320   
272    624    
272    -256   
-304   -400   
192    256    
432    -432   
-160   160    
-96    -272   
112    -592   
-48    -432   
288    336    
-192   176    
64     144    
80     -16    
-176   80     
880    1120   
560    -16    
-1456  -272   
912    -128   
256    32     
-624   -48    
592    -48    
192    240    
-272   112    
16     16     
400    32     
-128   -64    
-144   224    
112    -208   
-144   112    
480    -336   
-352   -80    
480    112    
-240   272    
224    0      
-272   -816   
272    80     
-16    -400   
320    128    
-32    -272   
-336   288    
512    -32    
-224   96     
-368   -592   
912    -336   
400    -80    
48     32     
-528   -256   
240    -80    
528    112    
-288   96     
288    -272   
-384   -160   
-176   -64    
160    16     
320    80     
-272   -64    
80     128    
400    16     
-80    336    
48     -48    
32     32     
48     -64    
256    -32    
-256   -128   
576    384    
928    112    
-720   240    
480    -240   
-464   -144   
-96    224    
656    -208   
-1024  160    
480    -16    
-272   -192   
32     -1584  
80     -320   
-16    -2192  
-256   -16    
512    224    
-16    288    
-32    80     
-80    -432   
-112   320    
176    112    
-208   -384   
-96    144    
320    -176   
-640   112    
80     -176   
496    240    
160    -176   
-384   48     
256    112    
96     -768   
-208   -304   
96     240    
80     -32    
-464   -192   
80     -32    
480    -256   
-80    -256   
-560   48     
720    -240   
-96    48     
-448   80     
144    0      
192    64     
192    -160   
-64    -704   
128    48     
240    -1184  
-80    -304   
-832   16     
1792   848    
592    -576   
-2192  160    
144    96     
1136   80     
-384   240    
-176   -32    
-1472  -256   
-16    64     
288    -192   
32     0      
-176   -48    
-176   -128   
432    -112   
480    -1248  
-288   -64    
-48    96     
64     -32    
368    656    
0      -64    
-400   -336   
240    -240   
-288   144    
-384   384    
240    80     
112    32     
-224   96     
352    64     
336    112    
-416   -800   
-80    608    
368    -128   
208    -128   
-32    64     
-288   96     
256    -128   
-400   32     
432    -688   
-192   -560   
-400   -320   
192    -368   
224    -160   
-96    -272   
-240   800    
720    112    
-544   -656   
80     -1232  
320    352    
-208   768    
-80    -448   
256    1056   
-496   -480   
-192   128    
512    736    
-1296  400    
80     -192   
-144   -464   
-128   128    
112    -128   
-80    -416   
160    -16    
32     -1536  
-224   80     
128    112    
80     272    
0      352    
-48    64     
-336   -224   
48     160    
16     -64    
-96    32     
112    64     
-176   -96    
96     -64    
160    -160   
80     16     
-288   32     
-160   -208   
-144   144    
416    -32    
384    256    
-1344  144    
464    -176   
112    128    
112    -240   
-304   32     
112    784    
48     -32    
128    -192   
-128   -320   
48     128    
-176   128    
128    -32    
-288   -80    
96     -128   
-432   368    
112    320    
80     16     
96     -112   
-32    80     
-160   720    
832    -144   
-1312  -336   
192    -112   
-384   -224   
-64    128    
-192   -320   
-96    16     
16     16     
-800   128    
384    96     
48     -48    
-272   -64    
256    -32    
32     288    
-560   -256   
-240   848    
-560   96     
-16    -144   
-64    -192   
-288   -320   
112    -336   
-352   -32    
112    -32    
-400   144    
368    -32    
-448   -176   
256    -240   
-288   176    
496    -512   
-2352  -304   
672    -160   
-272   752    
480    -384   
-176   -496   
-400   -176   
64     -1520  
672    -672   
-192   640    
-240   1152   
-96    480    
-704   -288   
464    -208   
-592   -144   
-400   192    
32     -160   
368    448    
-80    208    
-48    656    
-272   -640   
1440   320    
-1328  -240   
112    -544   
656    -464   
-160   1168   
-336   1568   
-208   1408   
608    112    
-704   -144   
96     112    
176    -64    
96     192    
-592   -96    
176    160    
192    -48    
-272   -32    
-48    -352   
-176   -240   
16     112    
-128   144    
208    384    
176    384    
-576   -32    
-816   -880   
112    32     
192    16     
-224   -160   
16     32     
-176   -768   
-64    -64    
16     80     
-160   -112   
192    80     
32     -144   
128    -80    
-640   -672   
-144   64     
496    208    
-496   -160   
-64    32     
400    32     
240    -176   
224    96     
-272   32     
352    80     
512    32     
-96    80     
-352   -48    
416    -960   
-544   2768   
1008   528    
-1392  -304   
-384   -240   
1264   32     
224    240    
-1344  176    
0      80     
432    208    
176    -48    
-272   32     
-160   160    
160    48     
-240   160    
192    -32    
-48    208    
-64    -144   
-32    112    
-16    -496   
-576   16     
448    -144   
-704   96     
176    16     
-624   -32    
-80    144    
-144   160    
352    -128   
-160   96     
-128   336    
208    32     
-352   288    
176    -16    
-16    240    
80     272    
-320   16     
96     304    
-144   -176   
208    128    
-128   176    
160    64     
-384   48     
256    224    
272    -32    
32     128    
208    48     
-320   336    
80     416    
96     528    
128    400    
-128   96     
-352   160    
16     -144   
464    -16    
160    96     
-1440  48     
1120   -48    
-96    -592   
-704   -208   
240    -112   
-48    -64    
240    96     
-144   112    
-128   16     
0      240    
80     -64    
-128   -160   
48     -80    
64     224    
160    160    
80     80     
-304   144    
128    80     
208    160    
-176   48     
128    -32    
224    32     
-160   64     
80     32     
-128   64     
96     224    
-848   -2272  
-192   -64    
1312   -32    
-912   112    
384    160    
-272   160    
240    -32    
-112   704    
352    176    
-128   -288   
16     112    
-96    48     
-160   208    
272    -256   
-224   224    
256    -16    
-160   256    
112    96     
192    -80    
-96    32     
464    -240   
-1344  768    
832    -16    
32     -16    
-336   0      
16     48     
-192   80     
176    304    
304    112    
-96    80     
48     -64    
-224   64     
-16    160    
368    16     
32     -128   
-528   112    
544    208    
-192   -96    
-16    160    
96     -96    
-304   128    
336    112    
-80    -208   
-240   16     
256    160    
-96    -1856  
176    112    
64     80     
-208   0      
-256   -176   
1472   -656   
-2272  64     
448    96     
944    144    
-1152  -224   
320    16     
560    128    
-560   -16    
112    -48    
208    144    
-112   -80    
-32    112    
192    80     
80     80     
-464   160    
336    80     
-64    96     
-64    400    
-112   16     
32     160    
480    1152   
-864   -704   
-944   144    
1136   128    
160    -208   
-128   -592   
-256   384    
128    -1376  
224    -80    
-192   64     
64     0      
-192   272    
96     80     
128    -304   
208    80     
-320   80     
-128   -240   
192    160    
144    -48    
-256   -208   
-16    -272   
1040   576    
-368   96     
-176   -400   
448    544    
-144   256    
-320   -224   
320    96     
320    -48    
-144   128    
-144   144    
128    -256   
64     80     
-112   0      
64     160    
1152   224    
-736   272    
-112   288    
80     -320   
-368   -1392  
240    144    
-128   16     
272    224    
32     0      
176    480    
-656   320    
-208   -64    
720    464    
-224   -48    
176    1392   
-368   80     
48     -336   
1792   -1104  
-656   -64    
-1152  -592   
1088   -384   
-560   -592   
-448   -608   
-16    16     
560    160    
-288   -384   
-160   -800   
352    176    
80     -64    
-192   240    
128    528    
-288   48     
-16    320    
640    1120   
-192   576    
-144   16     
-96    -432   
-64    -208   
-304   -768   
-128   -224   
192    16     
320    16     
32     576    
80     640    
-224   -320   
112    -112   
432    512    
-144   400    
96     80     
-176   -512   
224    592    
240    1120   
240    288    
-144   -32    
64     -768   
176    -528   
80     64     
368    256    
-768   -896   
-160   -1264  
192    -384   
176    -576   
144    -480   
128    -112   
208    -480   
-432   -1376  
480    -464   
0      -880   
-112   -1104  
-272   -432   
-32    -608   
-64    208    
224    912    
144    -160   
-336   -432   
256    256    
-32    80     
32     -288   
336    -272   
-32    -256   
-16    -144   
272    -336   
480    -336   
-176   -16    
48     -192   
-272   80     
512    -80    
-64    -160   
-64    -48    
112    -208   
-208   -144   
384    -2224  
496    32     
-224   -80    
-80    96     
-224   1088   
896    -208   
-640   32     
-32    -32    
176    -208   
-16    384    
-144   112    
-112   -64    
-16    -160   
144    -816   
368    -128   
-240   -560   
80     -48    
48     -32    
288    160    
-128   288    
128    512    
-160   336    
-80    -112   
608    -160   
-912   672    
48     -192   
256    96     
-16    -480   
-48    -128   
16     96     
0      256    
-16    96     
240    -544   
-128   -96    
-384   -128   
336    128    
-32    -160   
0      -64    
128    -272   
48     208    
-432   -304   
112    -336   
160    336    
-48    352    
16     -528   
-416   -480   
256    208    
496    -464   
-240   288    
-384   -112   
144    -48    
32     16     
-336   -640   
656    -96    
1296   288    
-1120  16     
-816   96     
1792   -16    
-1408  -176   
-624   -48    
1408   -560   
-592   -32    
-272   -496   
432    144    
160    -128   
32     128    
-512   -64    
272    0      
16     0      
80     -224   
-352   -160   
48     32     
-48    32     
-16    -1008  
-848   448    
1920   -400   
-1712  320    
512    144    
656    16     
-1248  240    
128    -352   
16     48     
272    -16    
-16    64     
-64    0      
-16    208    
-416   -144   
-128   -32    
432    -48    
-112   -16    
-576   80     
384    64     
64     -288   
96     -96    
416    -208   
-352   320    
-16    -96    
208    -528   
-320   -96    
-240   64     
368    288    
528    64     
-640   -16    
-32    -144   
272    -352   
544    -336   
32     -16    
-1328  -336   
144    80     
-272   -272   
240    448    
-608   240    
-560   -112   
384    -64    
-144   64     
16     64     
80     80     
-464   -560   
-48    -32    
288    80     
-1104  -80    
128    -1872  
-896   -3840  
-2000  -1184  
432    -608   
240    144    
-256   -176   
-1248  128    
-416   -16    
400    192    
224    16     
-112   -32    
-368   -128   
128    -128   
-256   160    
-160   32     
-144   64     
-64    48     
-112   -64    
32     64     
336    336    
-560   -192   
-336   608    
736    -256   
-1088  -16    
240    -48    
448    80     
160    -112   
-784   -144   
896    0      
-256   -240   
-16    80     
160    80     
32     16     
-80    112    
480    256    
-784   48     
112    256    
416    16     
-416   -32    
-224   64     
-320   96     
16     -16    
144    176    
-224   -32    
16     -256   
272    16     
-80    -64    
-288   80     
144    0      
-32    64     
400    160    
-272   64     
-512   -576   
48     -80    
480    -96    
-896   160    
416    240    
-96    -448   
48     -304   
-32    -208   
96     -160   
-224   112    
160    272    
16     -16    
-224   -224   
128    -160   
-240   912    
-448   512    
160    -272   
640    192    
-144   240    
-368   -80    
-960   -240   
160    176    
288    64     
-80    160    
-464   -96    
-112   16     
416    560    
240    208    
-368   -256   
-848   -2576  
-144   592    
1648   112    
-1024  224    
560    160    
-112   -48    
-288   656    
-848   208    
432    32     
208    96     
-208   128    
-240   -112   
-48    256    
256    -672   
-80    416    
16     208    
-224   64     
288    -368   
-80    80     
-288   96     
256    -576   
-1376  672    
1136   -112   
-112   80     
-416   -64    
96     -48    
-32    -48    
-192   -32    
320    16     
272    464    
-128   16     
-496   304    
112    -80    
112    16     
-288   112    
48     64     
-160   -272   
-192   144    
288    -64    
-96    96     
64     96     
-48    112    
96     112    
224    128    
-192   112    
-208   112    
352    128    
16     48     
-160   144    
1504   736    
-1952  416    
-16    96     
1104   -160   
-976   -112   
32     288    
672    368    
-240   448    
-96    336    
-208   -64    
208    128    
272    112    
16     240    
-224   208    
-256   -32    
352    -80    
-224   80     
-96    208    
336    192    
160    144    
-112   80     
192    -704   
-1296  1120   
2080   800    
-1424  688    
-768   -128   
864    -288   
-1088  528    
96     -208   
-208   -272   
208    -160   
336    144    
-464   112    
80     224    
432    128    
-48    16     
-384   96     
32     -288   
-288   -48    
224    96     
288    48     
112    96     
144    928    
-128   -256   
160    384    
32     64     
-1056  -1376  
560    -240   
512    416    
-736   80     
336    16     
256    96     
-48    352    
96     112    
416    -176   
0      -96    
-480   416    
240    -240   
-80    -176   
608    224    
320    176    
-112   -16    
-176   160    
128    224    
320    -256   
192    -256   
-80    -368   
-320   -160   
736    -144   
-240   -48    
-784   -1104  
1600   -1680  
864    528    
-960   896    
-512   672    
752    1152   
608    -800   
-256   -256   
-400   -560   
-16    160    
496    -496   
160    64     
-48    48     
-112   64     
-48    112    
592    320    
-160   448    
-304   112    
272    160    
160    80     
-128   32     
-176   -176   
304    96     
336    144    
-448   -16    
192    -576   
128    -560   
64     544    
128    528    
80     -672   
272    560    
-160   464    
-240   -176   
192    -64    
-32    560    
-112   768    
208    -320   
128    144    
240    1312   
48     288    
176    -592   
-512   112    
192    240    
288    -80    
160    0      
-128   496    
-400   -128   
288    -416   
224    304    
-208   32     
-128   336    
-336   -464   
1248   -240   
-224   -832   
-128   1152   
144    656    
224    320    
-96    1024   
-272   -192   
368    -224   
272    -128   
-224   32     
16     64     
80     352    
-80    -64    
272    336    
16     -432   
0      -768   
624    -48    
272    752    
-160   -688   
0      -16    
192    -16    
0      368    
-48    304    
32     -16    
-112   -144   
752    -752   
416    16     
-48    -400   
-768   -48    
640    -528   
688    608    
-352   144    
-704   928    
352    -1184  
16     -720   
48     -624   
208    208    
-192   432    
32     432    
16     16     
-32    -32    
224    272    
80     128    
-48    240    
-384   -80    
112    304    
208    -224   
-16    -32    
112    496    
-352   -352   
-192   -368   
688    -416   
-240   272    
0      288    
400    -48    
-128   -784   
-16    336    
112    -80    
-64    224    
-176   -64    
336    80     
-144   -304   
80     528    
96     32     
-32    336    
144    96     
-16    -32    
-272   256    
224    576    
400    272    
-272   -48    
128    112    
-192   -432   
288    160    
-80    -448   
-48    144    
176    -32    
-432   -480   
-1152  -368   
928    -2560  
1888   -176   
-1312  -912   
-432   16     
1136   -176   
-384   -160   
-160   144    
112    -512   
416    48     
-544   -656   
-96    32     
272    96     
352    48     
-304   -2320  
208    16     
-32    -1088  
-160   -16    
144    32     
144    0      
-160   240    
784    -704   
-1392  112    
1392   -720   
-576   0      
-352   -64    
320    0      
144    208    
480    -16    
-288   32     
-144   64     
96     -32    
16     48     
208    32     
-320   -448   
-192   -112   
432    96     
-272   176    
592    48     
48     -272   
-144   -128   
-112   -528   
-368   -560   
416    -304   
-240   -224   
-48    96     
224    -128   
464    -16    
112    -368   
-160   -48    
-160   112    
16     0      
-160   0      
256    32     
-320   -160   
-192   128    
576    -256   
-80    -336   
352    48     
0      -272   
-304   48     
208    -192   
400    144    
-80    -16    
272    368    
-672   128    
-160   112    
736    48     
-416   -864   
1280   1984   
-48    832    
128    800    
800    208    
-1072  -272   
528    -1600  
432    288    
-384   -144   
80     16     
-32    -256   
80     112    
-112   384    
-240   -32    
-240   32     
48     -224   
-512   96     
-80    -16    
-160   80     
-96    -480   
208    704    
656    -800   
-992   304    
576    -32    
96     0      
-304   -48    
288    -96    
272    -32    
-416   208    
160    -32    
-80    304    
192    -224   
-576   192    
400    -304   
-368   -160   
64     -16    
112    -112   
32     112    
224    -928   
-192   -160   
-80    160    
128    -64    
-48    144    
-16    -48    
-128   -96    
-48    -256   
-80    32     
-144   -256   
-64    -32    
368    -384   
16     0      
-144   -80    
-64    -304   
560    128    
512    -64    
-384   224    
-688   496    
192    48     
16     -272   
-208   -224   
0      -176   
-448   -80    
448    -176   
-32    32     
-80    128    
-240   176    
112    -432   
32     -208   
-592   160    
32     -656   
-192   -224   
272    400    
-128   128    
208    -176   
-16    -240   
-80    128    
-160   224    
208    -256   
128    -32    
-480   112    
16     128    
-656   -1520  
1456   -512   
-688   720    
-496   160    
-432   736    
-624   -448   
240    -144   
512    368    
-160   768    
-400   224    
128    -96    
400    -256   
-144   320    
-224   -176   
96     960    
144    0      
-400   -32    
208    -64    
-96    -288   
-64    368    
-96    96     
-368   -272   
320    -416   
-864   -240   
352    448    
-16    1328   
-352   -64    
368    560    
-304   96     
-192   32     
208    192    
784    576    
-784   480    
-64    -32    
-16    -160   
288    -192   
16     128    
-608   272    
128    256    
400    -352   
16     -192   
-48    64     
80     96     
-80    16     
208    -16    
-48    -112   
-288   64     
96     48     
-64    16     
-16    -96    
1248   -336   
-1920  -112   
384    -640   
-208   -128   
-1232  0      
1728   0      
-224   192    
-560   -256   
-64    -384   
528    16     
-48    224    
-384   96     
272    -128   
-96    -448   
-320   -48    
240    -48    
-256   96     
-96    256    
320    240    
-304   160    
-128   192    
-912   32     
2848   -80    
-1568  288    
-688   -368   
1440   -48    
240    864    
-992   1776   
0      1472   
448    736    
-288   448    
144    16     
32     -64    
16     192    
-48    240    
112    272    
0      -160   
-64    1104   
880    768    
-224   704    
16     480    
176    -80    
304    288    
-144   1088   
496    912    
96     -496   
-880   -320   
112    -352   
208    224    
-288   336    
352    416    
-496   -32    
-16    -224   
-368   -720   
-576   352    
112    304    
80     -448   
272    -64    
416    240    
-560   256    
-16    368    
128    208    
-208   -176   
48     -48    
32     32     
-256   592    
-560   416    
-64    -32    
48     64     
112    -64    
1200   2016   
-2064  848    
576    208    
1744   -48    
-1072  -208   
-816   -624   
240    -960   
496    752    
208    16     
-656   -208   
128    -336   
320    560    
32     -160   
-288   192    
-96    -160   
-160   336    
400    480    
-240   416    
-112   -48    
160    -336   
-304   -304   
96     192    
432    48     
32     -160   
-544   -208   
48     112    
192    -256   
0      -432   
224    -272   
-384   432    
16     -112   
144    128    
-16    -240   
-96    160    
-64    400    
-272   -528   
80     -848   
-96    -352   
-880   -1232  
176    -1696  
272    -528   
-80    752    
-272   64     
320    -592   
96     -448   
-288   -16    
0      -400   
336    -160   
-16    1200   
-240   320    
-128   -624   
592    -224   
-352   912    
-592   304    
832    416    
224    112    
-240   16     
-304   -800   
224    -288   
128    1088   
16     80     
-64    -656   
96     176    
256    576    
0      304    
-96    -208   
-16    176    
288    864    
16     1184   
-112   -48    
64     -528   
-16    384    
352    400    
-208   272    
-48    -16    
288    96     
-432   -80    
640    -416   
512    368    
-144   32     
-928   -1984  
368    -176   
416    176    
-400   -560   
48     -160   
32     -736   
-240   -240   
-112   320    
304    -16    
-16    80     
-176   256    
64     160    
64     -192   
224    192    
16     240    
32     -16    
-128   128    
128    -176   
-96    -160   
-48    -64    
848    272    
-1296  672    
528    -528   
496    288    
-688   192    
64     -848   
336    288    
-128   352    
-480   -368   
240    16     
80     -288   
-32    144    
128    -128   
-96    -240   
48     0      
64     -560   
64     80     
-272   144    
320    160    
-112   48     
-176   96     
320    112    
-112   64     
384    -32    
-368   16     
-224   -48    
224    176    
96     32     
64     -384   
560    256    
-1936  -32    
576    384    
1456   -1712  
-640   -16    
-1072  560    
704    304    
176    656    
-656   0      
384    224    
0      -112   
-304   112    
176    -64    
128    208    
288    -64    
-304   208    
208    32     
0      0      
-320   -704   
448    32     
-96    -496   
-720   -496   
240    272    
928    -464   
-1056  -16    
640    48     
496    32     
-528   -80    
-128   128    
352    -128   
0      176    
16     -144   
48     80     
-160   -16    
80     48     
64     -720   
80     -16    
80     -336   
-128   160    
-704   320    
144    224    
272    240    
-512   -272   
512    256    
816    -96    
-416   320    
-16    608    
-112   512    
-112   -448   
288    -112   
-384   -864   
-32    128    
528    80     
224    480    
-80    0      
112    208    
16     112    
-128   448    
256    304    
352    -304   
-176   -96    
64     80     
336    80     
-144   -80    
-160   0      
336    -128   
336    -128   
192    16     
304    192    
-1216  -3008  
1552   -704   
1184   -16    
-1456  704    
1152   368    
-208   -336   
-528   448    
496    -416   
32     128    
160    -352   
-32    176    
-32    -368   
144    160    
416    112    
-400   -1456  
96     -16    
-704   16     
128    -832   
48     -48    
-320   -1456  
-352   -464   
304    32     
-96    -128   
608    224    
256    -224   
-352   192    
336    64     
240    -1504  
-736   -224   
464    -1056  
112    64     
16     -48    
-48    16     
-368   -96    
496    -368   
-160   -128   
128    -800   
-432   -208   
192    96     
288    400    
-336   0      
-64    -64    
496    -16    
-496   64     
96     -16    
112    -16    
-272   -64    
-48    -432   
288    -368   
-96    -624   
16     16     
-16    -416   
160    -288   
-352   0      
944    -160   
-352   -208   
-512   160    
704    976    
464    752    
-128   0      
80     -80    
-256   32     
64     -48    
-768   112    
-80    176    
-96    96     
256    -192   
-176   -432   
0      -1024  
64     -864   
-48    -832   
16     -256   
96     -144   
-176   -192   
-144   -192   
48     -144   
64     -32    
-240   -64    
-96    -256   
48     -224   
16     0      
16     2224   
1504   -320   
-1616  -144   
464    -16    
400    -1984  
112    464    
-512   80     
16     704    
336    304    
-80    208    
-64    -192   
64     80     
-256   128    
64     112    
-1440  0      
-128   -160   
-32    -416   
288    -32    
-80    -32    
-144   -432   
0      1504   
800    112    
-576   736    
96     144    
48     -560   
192    704    
-32    -432   
-224   208    
-96    -320   
-48    -176   
384    592    
-512   384    
-176   -144   
224    -224   
160    -400   
-320   400    
160    -64    
192    -192   
-192   304    
80     0      
272    -208   
32     128    
-112   -48    
32     -64    
-16    352    
240    80     
-288   0      
-256   -592   
544    -224   
1232   -736   
-3088  288    
32     -160   
1216   -544   
-1152  -912   
-192   -304   
-320   -240   
304    448    
-32    -224   
224    272    
-192   -160   
-304   48     
64     64     
176    -96    
48     64     
-176   -16    
-32    -112   
208    -480   
-336   208    
-304   -160   
-16    -416   
976    896    
752    -384   
-1616  -560   
320    16     
352    912    
48     752    
192    864    
496    -1968  
-864   -2272  
-272   -176   
96     752    
-160   176    
-1072  -400   
-112   112    
-656   -144   
112    48     
144    -304   
-400   80     
160    0      
-144   160    
64     16     
208    80     
-336   -288   
96     1168   
1072   -624   
-784   -1472  
-416   320    
-16    -64    
-272   144    
384    224    
-448   32     
304    32     
96     16     
32     160    
208    -80    
-640   -624   
896    -1488  
-144   -480   
304    192    
-240   -48    
-32    -80    
480    896    
-304   816    
0      128    
-432   672    
-64    128    
-128   0      
48     0      
48     -32    
1104   1328   
-2240  224    
32     992    
1136   64     
288    880    
-704   864    
-400   -352   
368    -576   
0      208    
0      240    
-176   32     
-48    -288   
80     -320   
-64    336    
-720   144    
208    -112   
176    -368   
-176   192    
160    -192   
-16    480    
-48    272    
0      80     
368    -176   
-368   -320   
368    -944   
-32    -160   
-192   -288   
-16    -416   
32     -320   
-320   416    
-64    1360   
64     512    
-112   -208   
160    -240   
48     -224   
-144   -80    
-224   96     
368    -16    
-176   80     
0      192    
-80    0      
-80    -16    
416    -272   
-736   -256   
80     -864   
496    -400   
16     112    
-128   -512   
144    -448   
0      -176   
-304   -224   
560    -368   
384    976    
-944   656    
352    1184   
480    224    
-272   336    
-320   144    
400    480    
144    416    
352    400    
-448   -272   
160    48     
-64    -16    
32     112    
-208   0      
96     -176   
128    112    
96     -48    
208    -176   
-480   -160   
112    64     
192    32     
-80    176    
-288   48     
-48    1344   
48     672    
-192   832    
368    32     
-80    -80    
-1008  272    
1216   -1104  
-656   464    
-688   -96    
784    96     
48     224    
-48    -320   
-368   80     
416    -144   
-176   -48    
240    112    
-192   336    
-16    48     
224    288    
176    304    
16     48     
-80    528    
240    -128   
-224   -96    
272    -16    
320    816    
-560   -640   
-960   432    
1488   80     
-704   -272   
-432   -32    
144    336    
384    320    
-384   480    
-160   -256   
208    96     
16     -80    
-224   0      
176    0      
-144   16     
-32    -144   
-48    112    
64     -32    
-192   160    
64     -32    
288    176    
-288   48     
-64    192    
80     160    
192    144    
128    128    
-336   96     
256    48     
0      96     
1280   1520   
-1472  1184   
-688   944    
1728   -304   
-528   -80    
432    288    
-608   48     
240    -48    
-64    336    
304    -32    
32     144    
-256   64     
48     64     
192    32     
544    64     
-816   -16    
368    96     
16     192    
-80    64     
0      128    
-144   -64    
464    880    
96     -448   
-1840  96     
2144   -64    
-992   32     
-544   112    
752    160    
96     304    
-96    272    
16     80     
-208   -48    
80     128    
16     16     
128    160    
-176   112    
0      96     
48     128    
480    -320   
-384   384    
160    112    
-64    -80    
592    -32    
0      -48    
-224   160    
-64    -112   
192    -592   
512    -16    
-368   272    
512    -144   
160    112    
-352   -720   
32     -128   
320    192    
-224   64     
304    272    
-128   16     
48     448    
272    -96    
-400   240    
240    176    
240    -144   
-96    32     
112    48     
80     -176   
160    32     
64     -1072  
-256   64     
0      96     
304    304    
144    -4752  
-2256  -976   
1280   464    
832    48     
-96    -32    
-320   304    
-128   -32    
256    288    
-336   64     
448    -256   
-240   96     
-256   -928   
512    112    
-32    -224   
-336   48     
208    112    
64     80     
240    16     
224    480    
-448   608    
288    720    
400    96     
-320   -192   
16     144    
256    32     
-160   48     
464    160    
-368   240    
-176   -1136  
464    176    
-176   112    
0      144    
128    -64    
288    -64    
-496   176    
448    192    
16     16     
64     288    
96     0      
-352   -64    
352    64     
-160   -528   
144    -336   
-64    -1072  
-272   416    
48     -496   
608    -96    
-288   -432   
-64    112    
112    -240   
-48    80     
-16    -512   
144    -352   
0      144    
-96    336    
192    -32    
208    -912   
96     -528   
-688   -432   
-96    -128   
384    -752   
-48    0      
32     -112   
-48    -320   
-624   -400   
288    -96    
368    -576   
-96    -656   
-240   160    
144    112    
224    -416   
-96    -576   
64     48     
16     144    
112    288    
-32    64     
16     336    
-96    320    
-48    256    
176    -320   
-352   -512   
864    -1840  
-80    -288   
0      864    
256    -432   
-448   0      
128    -912   
16     320    
-96    -736   
-240   64     
192    -1664  
256    48     
0      32     
-192   -16    
32     96     
192    -480   
96     176    
-176   -672   
32     288    
80     64     
64     736    
144    -384   
-320   128    
544    -128   
-384   64     
-240   -128   
384    -624   
288    192    
-32    -112   
-160   32     
-432   -96    
96     -160   
96     -96    
32     -160   
-96    288    
336    -1312  
-416   128    
-160   240    
432    48     
-160   0      
-240   -64    
128    176    
352    -144   
112    -112   
144    32     
-912   128    
304    0      
336    -96    
-352   -528   
-128   -256   
-1328  48     
2368   -608   
-656   -720   
-272   -336   
576    288    
400    304    
-352   -368   
-256   816    
64     -64    
144    -112   
-368   -496   
-64    32     
48     80     
96     0      
-128   -288   
224    80     
272    32     
-224   464    
-48    -592   
192    -768   
576    1152   
-1552  -1408  
-640   656    
1200   -1136  
-736   -1024  
336    -528   
288    1056   
-1136  1120   
-400   -464   
480    -880   
-432   -1072  
-368   -640   
320    -1408  
-336   -272   
-240   -1696  
16     224    
464    480    
-752   608    
-32    96     
224    -80    
-144   32     
-144   -320   
-96    -368   
16     112    
624    1024   
96     1216   
320    400    
-528   -1504  
176    -368   
416    -688   
-368   -208   
64     -432   
544    640    
-672   720    
464    32     
160    -256   
128    1024   
-1712  912    
128    240    
-832   -160   
-96    -176   
16     -112   
-320   320    
576    -112   
-224   -320   
112    -304   
-48    208    
96     -192   
224    -208   
-560   -1360  
1024   -1744  
512    240    
-704   -48    
-976   -512   
560    -256   
256    -512   
-352   768    
0      496    
-320   160    
496    -560   
304    64     
-528   128    
-496   192    
224    -16    
768    112    
-672   64     
-368   -128   
-416   -672   
192    -1024  
160    -224   
-144   80     
128    656    
-512   -576   
224    240    
432    -384   
-256   400    
32     112    
-64    240    
-16    272    
448    448    
-144   480    
128    -16    
-480   -64    
-224   144    
368    272    
-16    -96    
-128   128    
208    -32    
-96    208    
-16    -32    
176    192    
32     96     
-304   -16    
48     176    
224    0      
-112   -272   
336    48     
16     48     
-288   208    
80     176    
-144   -1024  
-1072  -16    
560    48     
128    80     
-144   -16    
-240   -272   
-528   16     
208    -16    
80     96     
-320   0      
-144   -144   
144    -288   
48     -112   
-128   -80    
-96    64     
16     -256   
96     96     
144    560    
-496   256    
160    -112   
80     48     
-80    -112   
-192   176    
-16    16     
96     832    
640    -32    
-496   -240   
-192   240    
240    -192   
1008   3152   
-2032  -1456  
-1184  528    
1856   -288   
-320   -144   
-544   -128   
352    -48    
336    432    
-256   -16    
-128   0      
-192   96     
-256   240    
112    -256   
-80    -224   
-800   -32    
176    272    
-448   48     
288    -80    
-160   -96    
0      80     
-288   -560   
832    -560   
-720   304    
-320   -320   
-80    144    
-240   64     
0      160    
80     320    
-16    -304   
-464   16     
-64    112    
-192   -160   
432    176    
336    -16    
-912   208    
240    -16    
224    -96    
80     0      
-288   176    
160    128    
-64    160    
-48    144    
-176   48     
96     0      
208    0      
-672   112    
560    64     
-96    112    
-80    96     
-192   -336   
336    -640   
-32    992    
448    48     
-272   -224   
800    288    
-528   32     
-416   -32    
496    -96    
-176   -64    
-160   144    
32     128    
-96    16     
64     16     
272    16     
-512   -144   
240    128    
352    144    
-464   0      
240    48     
-64    0      
-160   -544   
1120   448    
-1584  32     
-208   -160   
1312   80     
-912   96     
-368   -272   
816    112    
-80    32     
-272   -80    
-64    224    
240    16     
-272   48     
256    64     
-112   32     
-160   64     
128    16     
96     -96    
112    128    
-560   -80    
64     80     
-512   -608   
-304   0      
624    80     
-336   0      
48     16     
160    144    
-448   944    
544    -384   
-320   48     
-32    208    
-112   -16    
-224   -128   
32     -16    
96     256    
-576   352    
96     48     
64     -208   
128    -32    
-96    -16    
-48    0      
16     16     
-256   144    
160    112    
368    128    
-768   256    
-160   80     
192    32     
496    848    
560    2784   
-2144  2304   
1008   -576   
1632   -368   
-704   304    
-416   48     
0      272    
976    96     
-480   192    
-384   80     
592    64     
-160   0      
-96    160    
96     -112   
-304   208    
-32    160    
592    32     
-272   160    
192    96     
64     144    
-16    -80    
64     -32    
112    208    
480    64     
-624   192    
624    640    
-480   192    
64     80     
240    160    
0      816    
-144   576    
-96    368    
560    16     
96     400    
-448   416    
-192   288    
736    -32    
80     -32    
-304   384    
0      112    
224    144    
-160   48     
144    192    
80     80     
-320   16     
-48    96     
-16    720    
304    -464   
-272   -320   
96     736    
64     640    
48     -1136  
-400   -432   
320    -1072  
-192   -816   
320    -576   
-352   -1600  
-816   -2080  
304    -656   
0      1024   
320    256    
-112   112    
64     -16    
-240   16     
368    -464   
96     304    
-256   592    
-176   432    
-80    208    
-16    448    
-32    32     
-48    -128   
80     80     
-16    80     
96     304    
-32    0      
-48    -1248  
352    80     
-288   352    
-48    224    
336    -16    
-352   -368   
64     -32    
-256   192    
208    -240   
192    240    
-48    -496   
-16    64     
-288   192    
80     -80    
256    16     
-32    -688   
16     80     
-112   48     
208    48     
16     144    
192    -112   
-64    304    
80     144    
-48    -80    
368    640    
-256   384    
32     -80    
832    -64    
-576   -32    
-112   32     
400    16     
-48    288    
-80    -224   
224    -32    
-16    16     
-16    16     
64     -96    
-80    80     
112    32     
96     32     
-48    -32    
160    -208   
-32    -320   
-64    -16    
144    320    
-256   176    
32     128    
416    -704   
0      48     
-368   -32    
128    144    
240    224    
-464   272    
176    -16    
-1360  0      
1216   752    
1008   -592   
-1232  1056   
560    416    
608    496    
-512   -32    
-768   -1312  
512    -688   
-16    -112   
-208   -368   
16     -80    
-128   320    
272    176    
208    80     
-304   -128   
-112   304    
32     -48    
368    -640   
-192   -784   
272    -176   
-2000  144    
1392   960    
0      688    
-656   944    
640    32     
224    1472   
-848   1504   
-128   1344   
656    832    
-80    368    
-32    -48    
48     -240   
-256   288    
-48    -32    
224    -144   
240    672    
-656   848    
-64    -480   
272    592    
384    -336   
-320   224    
-496   64     
960    -192   
-352   240    
-592   -1088  
-304   -160   
352    -528   
-48    80     
224    -16    
-352   96     
192    48     
384    48     
48     -704   
224    -176   
-192   208    
400    -176   
112    -32    
-528   -304   
544    -48    
-512   -128   
-288   -128   
64     -768   
-192   -256   
336    -64    
-704   -704   
144    -64    
16     32     
768    528    
-144   336    
528    -1648  
320    304    
272    96     
-944   -352   
224    432    
-480   -528   
864    0      
-288   -496   
-96    32     
208    -32    
256    -1472  
64     -176   
-352   -64    
192    64     
-32    0      
32     208    
192    -256   
-752   -448   
656    -1520  
112    528    
-224   464    
128    480    
-736   -288   
352    -32    
560    -176   
-272   -112   
-128   -192   
224    -432   
288    -96    
-16    -112   
-272   240    
128    16     
224    336    
-240   32     
192    -128   
96     208    
432    -128   
-528   -80    
-256   -176   
384    48     
48     -208   
112    128    
-32    -368   
-240   304    
272    -416   
-656   -160   
576    -240   
0      368    
-144   288    
144    304    
-80    -144   
208    -672   
-736   -32    
16     -304   
-48    -80    
0      -176   
0      -80    
192    -16    
160    -64    
16     -1104  
-96    64     
-64    192    
176    288    
-160   128    
144    -16    
-16    -32    
-304   -208   
-80    -192   
496    -352   
-848   112    
240    -80    
160    -224   
-240   -160   
112    96     
-16    288    
-96    -240   
176    -192   
-32    352    
-16    -80    
-416   -1312  
2016   -304   
-1408  464    
-352   -224   
512    208    
-688   336    
-96    240    
880    112    
-320   -448   
-512   224    
304    -432   
272    16     
192    -1120  
-368   -48    
224    96     
320    256    
-352   -64    
336    -272   
-480   400    
96     -320   
-144   112    
496    1168   
1024   -272   
-1168  -400   
-16    144    
1248   -400   
-576   272    
-432   -480   
512    32     
-160   -64    
112    -64    
64     -96    
208    -128   
-320   32     
160    -48    
-80    128    
-48    400    
352    96     
-128   176    
368    16     
-160   -272   
-48    16     
64     128    
128    -80    
144    0      
-32    -64    
-288   208    
112    -32    
144    80     
-16    64     
-816   992    
1088   256    
-576   352    
-784   -320   
-112   32     
80     48     
-128   -160   
64     16     
-368   192    
-336   32     
-304   -32    
32     16     
0      64     
256    256    
-656   -256   
192    208    
-368   -320   
-224   -64    
512    -144   
-48    -16    
-176   -32    
-464   -528   
-128   496    
1376   -240   
-1424  -192   
320    96     
704    64     
-848   16     
-688   -288   
352    -112   
352    80     
-224   -32    
192    128    
-208   -80    
-128   -48    
272    80     
-48    16     
-208   -176   
96     112    
48     144    
-48    16     
-144   -240   
416    272    
-480   -432   
-32    32     
816    224    
-864   96     
128    224    
656    -368   
-384   192    
-80    32     
48     -16    
256    64     
-32    0      
-144   -352   
-352   -48    
32     -352   
160    144    
80     128    
-464   128    
-112   80     
288    32     
-544   336    
-96    -352   
-32    -112   
112    -592   
64     176    
-48    16     
-496   -496   
608    -1248  
-1280  -1712  
-64    512    
288    0      
-32    -16    
560    208    
-80    -96    
-912   -640   
-112   -384   
336    -176   
80     -352   
32     208    
-128   -96    
-112   128    
48     -176   
112    288    
-112   112    
-64    0      
-144   -16    
480    752    
-768   688    
128    240    
-880   -384   
160    -48    
64     384    
384    144    
-160   384    
-464   560    
480    640    
80     192    
-48    -368   
-432   -16    
224    -64    
-256   -384   
144    -144   
-80    -64    
-224   304    
288    -16    
224    352    
-240   80     
128    128    
0      384    
-304   128    
-48    -128   
32     848    
448    -336   
-320   -816   
-256   -384   
96     -208   
32     432    
32     -272   
-416   416    
-224   848    
1472   -336   
-768   480    
192    800    
384    -352   
224    -288   
240    368    
-304   -128   
48     336    
128    64     
-96    176    
16     -176   
256    128    
96     -48    
32     -64    
-256   48     
16     240    
-96    208    
-64    64     
-80    112    
144    -16    
-144   48     
128    -64    
96     144    
-240   -16    
-224   112    
48     -128   
16     -16    
-240   -16    
336    784    
-416   320    
240    -176   
272    208    
-128   32     
96     192    
-256   64     
144    -352   
-32    96     
-256   224    
-176   288    
144    -32    
0      -240   
80     -112   
-304   80     
160    144    
-16    160    
64     -208   
208    -192   
-144   32     
272    -160   
-1056  16     
592    240    
128    320    
-64    32     
-192   -64    
64     -48    
48     144    
224    0      
-144   -16    
-16    128    
-224   48     
96     -208   
-16    -32    
-144   -16    
-80    -272   
32     448    
-144   -16    
208    896    
-208   432    
-112   -32    
288    64     
0      96     
-272   432    
-144   -176   
16     48     
272    -96    
-368   -96    
336    -128   
-192   -864   
2160   -848   
-1104  784    
-192   496    
672    528    
-672   560    
304    480    
464    656    
-480   -576   
-320   -736   
288    -896   
288    -400   
32     -160   
-256   160    
272    32     
0      32     
-64    48     
-16    -224   
288    128    
-256   -32    
240    224    
-576   -608   
400    -64    
1104   -624   
-736   1200   
2528   800    
-1136  240    
864    272    
-144   -32    
-368   -96    
400    16     
48     160    
-160   0      
-208   -400   
0      -80    
400    160    
-224   0      
-208   0      
128    112    
80     -432   
176    -224   
0      -240   
-160   32     
944    -64    
-720   320    
176    -272   
528    368    
-816   208    
32     -80    
128    32     
320    448    
-128   16     
-208   -64    
-48    -64    
272    -144   
384    368    
0      -448   
208    1088   
-160   -704   
-704   32     
208    128    
304    32     
144    -128   
80     208    
-144   -336   
224    112    
464    64     
16     192    
-368   48     
-288   -976   
0      -3488  
-1312  -1648  
384    384    
240    0      
640    224    
-288   288    
-384   112    
96     -96    
480    416    
-272   -192   
-128   176    
400    -96    
-304   -80    
240    16     
-48    -160   
144    -64    
224    128    
48     48     
336    -368   
-1072  -144   
944    -752   
-192   272    
-288   -192   
224    368    
400    48     
-672   -80    
784    -128   
-48    -32    
-224   16     
-32    -48    
128    64     
304    -128   
-400   128    
208    80     
288    -112   
-192   -128   
80     144    
-560   304    
944    96     
-128   160    
-208   96     
-16    32     
16     96     
416    128    
-240   48     
336    48     
-208   -304   
288    80     
336    160    
-320   112    
-80    80     
-128   -752   
-144   176    
240    -320   
-928   -368   
864    16     
336    -336   
-304   64     
80     240    
-16    -352   
144    80     
0      -176   
-128   96     
192    -176   
-48    -128   
-48    -16    
-16    192    
-16    -144   
496    -736   
-320   272    
80     32     
128    -800   
-336   -240   
128    -2448  
256    -112   
0      -208   
-400   80     
576    752    
336    416    
-288   -1072  
16     -2592  
-2128  1584   
1920   512    
-368   352    
-48    0      
-656   608    
-752   224    
-176   -704   
720    -1360  
-400   448    
-160   -656   
0      -192   
-48    464    
224    -768   
-80    -416   
-80    80     
-192   208    
176    32     
192    -96    
-80    -160   
304    192    
-1376  352    
688    -160   
432    -176   
-368   96     
208    -256   
-368   -640   
32     -1952  
368    160    
-144   0      
-16    80     
144    -16    
-288   64     
384    -400   
-144   -304   
-272   0      
384    -96    
-384   -320   
256    -288   
-80    -96    
-64    -64    
112    176    
304    -240   
-32    208    
-176   -176   
16     256    
384    -176   
-112   48     
-272   -368   
1488   2240   
1104   -496   
-3184  -544   
-832   -64    
2016   208    
-1664  -64    
-112   -272   
928    16     
-496   -480   
128    96     
112    -1760  
-112   32     
-16    -32    
-16    -112   
496    -48    
-336   -176   
-384   32     
256    -112   
96     -144   
192    -176   
-1392  -208   
496    80     
-1664  288    
752    80     
464    240    
-544   -992   
-16    -160   
-32    208    
-128   32     
-160   -32    
176    -240   
240    -272   
368    32     
-480   112    
304    224    
-752   64     
96     -208   
-192   -64    
-368   128    
384    -16    
-48    -336   
-48    -80    
-112   -480   
352    -368   
-208   288    
224    -336   
-496   1184   
-1024  416    
96     -208   
-224   -224   
-368   -208   
208    0      
80     -80    
208    -160   
-320   -592   
-416   -224   
416    -176   
256    448    
-544   256    
112    -336   
416    -800   
-400   240    
208    -80    
-160   -128   
-160   160    
64     -480   
-416   336    
16     -16    
-80    -112   
480    -32    
304    192    
112    -752   
224    208    
464    -48    
-656   -96    
-256   96     
400    -752   
464    -1824  
-496   352    
320    704    
208    320    
32     -32    
0      160    
-416   -192   
144    -224   
-400   -1008  
-736   96     
192    -96    
-384   96     
64     -16    
-1360  -240   
16     -80    
-320   -416   
736    368    
-336   80     
32     240    
-624   -336   
432    176    
-240   -432   
-64    192    
-112   -448   
256    480    
16     416    
144    752    
-528   144    
-112   -560   
-32    -400   
-288   -128   
240    1072   
-304   32     
-128   -96    
48     -112   
112    384    
-192   -144   
400    -512   
-48    352    
-64    96     
160    832    
-432   -368   
256    -64    
64     64     
176    1392   
1088   -384   
-832   176    
144    176    
-304   1216   
496    272    
-512   -1616  
400    -1408  
224    -208   
-192   560    
-240   -320   
176    368    
160    0      
-272   -144   
-240   -32    
-272   -144   
96     -96    
16     192    
-368   -16    
224    0      
-128   128    
-32    96     
-16    -320   
128    32     
-288   256    
128    528    
-16    656    
-160   208    
144    0      
-144   128    
-240   992    
672    0      
-544   64     
-16    80     
176    64     
-144   192    
192    368    
-48    656    
-144   192    
192    -144   
144    -160   
-80    -32    
-144   160    
160    256    
-64    96     
-80    48     
48     32     
128    -112   
-112   -208   
368    -224   
-1872  416    
928    96     
-192   144    
176    -672   
144    64     
-80    304    
-400   0      
160    -224   
288    416    
-304   128    
-416   -176   
112    -160   
160    240    
-432   0      
16     144    
-480   -272   
336    16     
208    -96    
-64    240    
-144   -256   
16     288    
80     160    
-128   240    
192    -160   
32     160    
-64    96     
-144   64     
224    64     
-928   -416   
1456   -560   
160    368    
-832   -192   
832    304    
-832   240    
816    0      
-112   32     
16     176    
-16    48     
208    0      
-368   -80    
176    48     
64     176    
-160   176    
-144   192    
32     0      
-208   96     
-64    80     
272    80     
-160   -96    
-128   -800   
1520   1024   
-1040  192    
16     -64    
-288   736    
-112   -432   
-240   -128   
752    192    
-304   48     
-336   -16    
384    128    
-272   128    
144    80     
208    16     
-432   144    
320    48     
-16    240    
48     80     
-112   128    
160    -80    
-144   -144   
480    560    
240    -32    
32     304    
-448   96     
-176   -32    
592    432    
944    176    
-16    -336   
-896   288    
800    48     
-16    -80    
-240   304    
144    592    
-608   368    
752    -432   
-208   48     
-784   -416   
0      208    
528    -16    
48     16     
-272   -16    
224    96     
192    64     
-176   -480   
-112   320    
448    80     
-352   16     
512    1248   
1216   3632   
-1584  2352   
816    768    
1072   48     
-560   128    
-272   112    
256    384    
272    -144   
-256   -64    
512    0      
368    240    
-288   80     
-272   320    
208    64     
-112   32     
160    160    
0      32     
-368   80     
96     -48    
976    -480   
-688   144    
368    96     
-128   400    
-336   112    
-128   96     
-384   32     
480    -240   
-416   240    
128    -32    
-208   16     
560    0      
16     -144   
64     160    
-208   176    
-64    -128   
-224   80     
592    208    
-448   -240   
496    32     
352    -16    
-320   208    
256    176    
-160   160    
288    -32    
-80    64     
-96    -192   
-528   -256   
528    32     
80     -64    
80     96     
-64    240    
288    768    
-592   368    
-16    32     
32     -128   
-480   -96    
208    464    
688    128    
-48    272    
-368   208    
176    96     
160    -192   
-288   144    
80     112    
80     -96    
64     144    
-96    112    
224    -160   
-64    -368   
-256   176    
544    368    
256    208    
-416   -160   
96     -112   
-48    -192   
96     -144   
144    96     
-192   32     
-32    -80    
0      -96    
-368   -1152  
1664   -1392  
-1840  672    
48     -784   
704    256    
-592   128    
32     -16    
304    -512   
720    400    
-320   560    
-224   -256   
352    -80    
-16    32     
-112   -16    
240    528    
64     80     
-32    -896   
208    96     
64     -368   
-112   80     
-288   -288   
1088   1072   
208    48     
-1040  -368   
688    -496   
-144   320    
400    640    
-400   816    
64     96     
-144   -80    
16     128    
368    -208   
16     384    
-320   -464   
96     96     
384    -1152  
32     128    
-208   128    
160    288    
-112   272    
48     48     
48     32     
0      -80    
-112   48     
-208   -448   
560    160    
-272   -48    
32     -16    
32     -240   
336    -336   
-1376  -1472  
64     16     
1664   -544   
-1472  -128   
192    368    
1024   480    
-496   400    
-272   -16    
-112   -320   
480    -96    
-192   32     
0      -32    
64     64     
176    48     
-448   -80    
352    -368   
80     128    
-80    16     
-32    -320   
160    -80    
-48    96     
464    -528   
-1280  208    
752    -560   
-160   224    
-512   400    
16     240    
480    208    
432    -192   
-224   256    
-800   32     
432    112    
416    -16    
-272   -1232  
-336   -96    
-48    128    
80     -112   
320    -592   
-160   -208   
-48    -48    
16     320    
128    32     
160    64     
-48    -128   
32     320    
16     -368   
-448   -1760  
-800   320    
432    16     
-480   496    
-832   -176   
-112   -544   
112    -544   
208    640    
624    256    
-512   -752   
16     -720   
-176   -1872  
128    -256   
256    -208   
-48    16     
-80    -400   
-96    -96    
128    -112   
-48    -784   
576    -1120  
192    -320   
-592   -544   
-96    -656   
32     -48    
1008   1184   
-2080  400    
208    288    
1408   -256   
-1136  -880   
-128   -752   
256    -48    
448    -48    
-160   -128   
-240   336    
-64    -320   
256    -144   
-32    112    
-96    160    
-80    -560   
-160   112    
352    -16    
-160   -400   
-288   -96    
224    -2480  
80     -400   
224    496    
-640   -16    
-208   112    
672    -512   
-112   -848   
-208   928    
-240   -80    
-192   -944   
-128   416    
96     -256   
-288   96     
-80    416    
368    800    
144    -624   
-272   -416   
-16    -272   
224    112    
256    288    
16     -288   
-160   224    
-208   224    
240    -528   
96     176    
-784   -96    
-160   -416   
480    912    
-224   -432   
0      -560   
176    -976   
-240   -352   
528    -160   
-656   -128   
256    -704   
-208   -784   
-592   -496   
-224   -256   
224    -832   
-192   -448   
-464   272    
112    128    
-272   -64    
224    -464   
144    272    
-256   -304   
208    -176   
320    -1568  
-368   -464   
352    0      
128    224    
-192   -16    
0      96     
112    96     
-208   464    
-96    720    
-96    160    
-48    896    
128    -32    
-128   -416   
128    -176   
112    -704   
-1888  640    
1120   -672   
-80    -16    
-128   -64    
-16    -176   
32     736    
-112   288    
-144   -144   
336    -624   
48     48     
-320   128    
-80    -432   
224    272    
-336   -368   
-432   -352   
-224   -384   
-208   -240   
144    240    
160    0      
-624   -448   
416    -560   
-560   304    
0      -912   
160    32     
-144   256    
-160   -16    
-672   -224   
304    176    
-320   448    
-224   -64    
96     272    
48     320    
-192   64     
-208   384    
-32    -384   
208    -384   
-240   -64    
64     160    
-32    0      
-272   -32    
160    112    
32     -368   
64     -96    
80     32     
-304   112    
48     240    
96     48     
-528   -128   
1472   -544   
-2272  128    
384    176    
752    -176   
-1376  -320   
-64    272    
1040   -384   
-352   736    
-192   0      
112    240    
-32    -32    
0      -32    
0      -32    
-240   -32    
48     48     
-16    16     
-224   48     
0      240    
80     144    
-1248  -112   
-64    64     
368    656    
224    -560   
-2016  144    
1648   16     
-368   -16    
-544   64     
192    16     
-160   176    
864    -144   
-368   224    
64     32     
-96    96     
224    64     
-960   -144   
-304   80     
256    -112   
368    336    
-176   416    
-256   144    
176    -48    
96     144    
48     -384   
-608   400    
736    -48    
-224   -288   
-496   48     
-240   -368   
-16    160    
-1056  32     
256    144    
496    -208   
-464   80     
128    80     
-32    -576   
32     -144   
-384   -128   
-48    -272   
448    -176   
-128   64     
-656   112    
240    112    
336    -144   
-128   160    
-656   -400   
128    272    
80     -416   
-16    0      
352    160    
-416   -1216  
-2160  -2704  
-368   -576   
704    -176   
-688   240    
304    -192   
-192   208    
96     240    
-320   128    
240    128    
432    -160   
-48    112    
-192   -96    
128    192    
112    80     
-96    112    
-176   -16    
-32    128    
32     -32    
272    608    
80     -64    
-496   688    
736    -320   
-656   128    
752    112    
-496   -64    
-80    416    
560    -128   
-496   224    
352    -96    
144    144    
-144   80     
112    208    
-224   -48    
64     208    
560    112    
-672   96     
448    -16    
-272   -16    
-192   0      
-96    64     
192    -16    
176    -48    
-112   96     
128    96     
96     -416   
-784   0      
592    -32    
-32    128    
-144   48     
32     240    
64     160    
-256   -272   
128    -192   
176    480    
-384   160    
528    128    
0      32     
-128   448    
-336   144    
144    176    
160    144    
-96    48     
-128   48     
112    144    
176    240    
-128   112    
-272   256    
32     -304   
-16    -464   
32     -464   
-112   32     
128    256    
-384   352    
176    -16    
240    208    
64     192    
-128   416    
112    64     
-240   -256   
144    -208   
-64    -2592  
-1872  1728   
1936   32     
-928   688    
640    -784   
-192   224    
-416   576    
48     688    
592    576    
-16    432    
-480   624    
-96    464    
352    304    
128    304    
-336   656    
-112   -128   
176    -544   
48     -288   
176    96     
-112   160    
288    -48    
-272   368    
320    176    
-144   320    
-368   736    
288    320    
176    -128   
-80    32     
64     -64    
-48    224    
-48    -144   
112    -64    
-32    64     
-128   160    
384    -192   
-32    192    
-384   624    
144    192    
176    256    
-336   -304   
48     192    
224    208    
-208   -80    
32     48     
64     -176   
-16    48     
16     304    
-48    -224   
-16    -672   
112    -624   
1536   -2688  
-2048  368    
80     0      
960    -224   
-480   288    
528    560    
-400   -1072  
96     -720   
80     96     
80     400    
48     96     
-176   80     
384    400    
-304   -64    
-176   304    
528    -272   
48     -336   
-288   -864   
240    -576   
-32    64     
-784   -144   
1504   -32    
848    560    
-1888  768    
624    128    
640    -192   
-608   -176   
112    -336   
128    -416   
-80    64     
80     96     
160    160    
80     -48    
-272   384    
400    272    
144    96     
-112   688    
64     864    
16     784    
240    320    
80     32     
-48    256    
-160   -752   
-768   -944   
176    -1424  
16     -976   
-192   -1312  
-928   -1392  
544    272    
-224   672    
416    -448   
176    -304   
-576   -544   
-80    688    
992    96     
-64    -128   
0      -560   
-672   -352   
672    224    
-224   240    
-192   192    
144    0      
400    -400   
-32    464    
208    -288   
-304   -112   
368    176    
16     688    
-272   176    
-96    -1312  
2032   -1008  
16     96     
-624   240    
-64    96     
96     1200   
416    -800   
-320   192    
-144   1168   
-64    192    
-144   -736   
384    224    
-112   240    
-176   832    
16     -320   
32     544    
-80    496    
112    -672   
-32    -32    
160    48     
0      288    
112    -304   
-192   -144   
144    -16    
448    656    
-640   -944   
544    560    
272    368    
-16    -96    
-32    -864   
0      0      
304    656    
32     80     
-384   16     
640    160    
-208   240    
-320   48     
144    -112   
176    -912   
-320   -432   
-16    -64    
240    -208   
-224   32     
112    -96    
224    -400   
-1856  -944   
128    -768   
208    144    
-32    384    
32     -272   
144    -912   
-304   704    
960    -256   
-160   -560   
-368   240    
736    96     
96     208    
-320   1072   
160    32     
96     -432   
-192   -720   
64     -480   
16     -576   
-48    -528   
352    -240   
-384   -128   
96     192    
400    656    
-112   176    
-144   -160   
0      -32    
-16    -480   
144    -80    
96     -288   
0      192    
0      0      
272    112    
-48    -304   
-112   -608   
64     -256   
1200   1040   
-2128  1472   
1296   -720   
-784   64     
-48    -1792  
-64    -192   
48     496    
80     272    
128    -16    
208    -336   
-704   -96    
-32    -160   
96     -144   
48     -160   
-96    0      
0      -592   
-48    -912   
96     -1520  
-64    -144   
128    -112   
64     816    
-704   -208   
320    400    
368    -160   
-752   -32    
368    -304   
-176   176    
-128   464    
128    -48    
32     288    
0      -192   
-144   -240   
64     -240   
288    128    
-400   96     
256    160    
16     -224   
208    64     
-368   96     
352    32     
-176   96     
-96    16     
48     16     
32     -32    
256    208    
-240   32     
-256   176    
608    -144   
-384   -96    
-880   -1568  
2784   192    
-400   128    
-1232  128    
864    -304   
352    144    
-656   -304   
96     192    
400    -192   
-624   0      
-368   -160   
320    -16    
96     80     
0      -112   
-304   48     
112    -160   
256    112    
-144   -80    
-176   -112   
448    128    
160    -32    
-480   -464   
1200   736    
16     -208   
-976   0      
-432   -272   
400    144    
-240   -272   
48     -544   
528    -80    
-288   96     
16     112    
-112   64     
80     16     
-384   -80    
704    -16    
-96    160    
-368   128    
448    -32    
-32    80     
-240   80     
112    -32    
-304   -672   
32     496    
448    32     
-1280  -32    
896    -608   
-512   -288   
32     -192   
128    208    
-48    -336   
-496   -16    
160    -32    
336    -192   
96     192    
-720   -304   
320    -624   
368    304    
-1008  -416   
-80    -224   
-64    -176   
-432   -32    
-176   16     
176    48     
-16    64     
-176   32     
-1088  336    
176    -64    
240    -48    
-320   -608   
1264   4912   
-304   848    
-1040  -384   
1872   -768   
384    224    
-1424  384    
-208   48     
1024   16     
-80    128    
-336   -32    
-432   128    
-80    64     
-768   -16    
-144   -16    
-48    -80    
-96    256    
496    -80    
-192   128    
80     -240   
-544   112    
848    336    
-672   336    
304    0      
16     -32    
-656   96     
320    64     
-144   64     
-240   80     
-240   -384   
-160   -208   
240    -192   
-96    -80    
96     48     
-480   -256   
336    0      
-160   -96    
176    -112   
-544   -320   
-32    -240   
-32    192    
80     112    
240    48     
-224   48     
432    -336   
-752   -272   
-416   32     
480    80     
112    176    
-304   -64    
-48    96     
208    -16    
-192   32     
64     -256   
-432   -640   
576    -1424  
-464   -304   
-16    288    
144    112    
-464   160    
-368   112    
384    256    
-48    128    
64     192    
80     256    
-176   320    
80     32     
-288   64     
128    112    
-112   160    
208    96     
-144   -448   
320    560    
-896   640    
320    -208   
528    -480   
-256   416    
-1136  784    
-96    304    
336    -1072  
0      -304   
-288   400    
-336   2064   
1824   -160   
-1056  576    
-416   656    
896    96     
-336   -784   
-288   352    
-64    128    
176    -288   
-128   192    
-160   -144   
16     96     
16     96     
96     112    
-48    16     
-208   368    
-16    112    
-16    -336   
-16    80     
-240   240    
240    960    
448    -48    
-816   -752   
32     -608   
352    160    
752    928    
-848   528    
-256   -64    
240    -240   
-16    480    
-112   -272   
-48    -48    
64     -32    
256    -32    
144    48     
48     64     
-528   -128   
-48    -592   
320    400    
0      208    
-432   -64    
80     160    
80     -32    
-32    336    
48     240    
-256   400    
144    112    
240    16     
-192   16     
1312   1552   
-1120  480    
-1888  -448   
1968   736    
-384   1120   
-896   544    
416    256    
192    -368   
-144   560    
128    0      
192    352    
-240   -32    
160    128    
80     0      
-336   176    
-176   0      
336    48     
-80    -32    
-16    288    
272    -192   
-352   -576   
1424   640    
-976   16     
-144   -384   
336    0      
-432   544    
832    1344   
-384   1248   
-144   -464   
224    -1328  
-304   -608   
64     656    
80     448    
368    -48    
-64    736    
432    400    
-320   288    
272    176    
-576   192    
128    144    
432    192    
-288   -144   
400    -176   
288    720    
-560   -16    
-80    -432   
336    -80    
688    1712   
1008   1488   
-352   -96    
-96    -240   
336    -496   
-48    368    
-432   -384   
512    640    
688    -144   
-32    -752   
576    -592   
-320   32     
448    288    
96     80     
-144   224    
-128   -400   
-16    48     
224    144    
-160   384    
-256   -48    
128    752    
416    816    
-256   368    
832    1056   
-1920  16     
832    304    
384    -176   
-688   288    
-272   368    
16     64     
896    1872   
16     32     
-704   -624   
16     -1840  
512    480    
112    400    
-208   336    
-368   -48    
-80    384    
608    160    
-240   -160   
-368   -1088  
-432   -608   
416    256    
240    320    
-320   80     
640    112    
-384   16     
16     -176   
368    448    
112    848    
272    240    
-96    800    
16     432    
208    320    
-496   368    
224    464    
-112   288    
208    -352   
-160   -80    
-256   -144   
240    -480   
0      -224   
16     -480   
-32    0      
64     192    
48     128    
224    832    
-400   128    
16     384    
432    624    
-96    608    
208    272    
-432   64     
16     816    
1584   80     
-960   -384   
-336   -80    
160    -544   
64     224    
192    -1632  
-80    64     
96     64     
-48    224    
-48    64     
192    336    
-192   272    
144    272    
176    -208   
-496   32     
384    144    
-608   368    
192    -32    
400    -48    
256    144    
-496   -112   
32     128    
624    -688   
-400   -400   
-240   -208   
576    32     
-80    144    
-16    256    
160    -2080  
-1168  880    
1312   192    
-272   192    
64     16     
-96    -176   
-192   160    
-128   -208   
608    496    
240    32     
-496   16     
-48    64     
224    96     
208    -80    
-384   528    
256    640    
608    -400   
-528   64     
480    -528   
80     256    
480    1216   
-1152  288    
144    32     
784    80     
-768   -432   
288    80     
-48    416    
80     -32    
-16    416    
272    -128   
-144   144    
-64    -80    
224    96     
0      -416   
32     80     
16     -256   
-64    -112   
224    -128   
-208   192    
416    -80    
-144   32     
-128   -32    
96     -176   
240    128    
-576   -384   
336    -2368  
128    -320   
-464   -144   
512    -64    
-160   928    
-48    -128   
-752   1216   
1280   -208   
-880   -496   
912    64     
-80    -1008  
-1104  256    
704    -560   
96     -128   
-384   -112   
368    208    
-224   -80    
64     112    
368    -128   
-448   -688   
96     -240   
336    240    
-336   80     
-64    -176   
160    128    
64     -928   
1120   352    
-1824  -192   
-64    -576   
2112   -144   
-1792  192    
128    368    
208    -496   
-512   -240   
0      -384   
96     32     
-16    -832   
96     128    
208    -32    
96     16     
-416   64     
48     -96    
176    64     
-304   128    
-128   16     
208    -144   
-576   -416   
912    -160   
144    -208   
-864   -96    
1088   240    
16     -512   
-528   -800   
320    -224   
272    160    
-144   48     
-128   -96    
64     0      
336    -192   
496    -128   
-464   -96    
80     480    
16     112    
-128   96     
240    -192   
-208   64     
208    -208   
-32    16     
-176   -160   
32     144    
768    0      
32     80     
-144   -16    
-336   -864   
1776   -1968  
-2720  -1152  
624    -128   
1216   320    
-592   -48    
-512   -272   
48     192    
816    160    
-496   -240   
256    -1264  
416    -80    
-368   32     
400    -48    
-160   112    
96     -224   
-16    288    
256    -128   
-384   32     
-240   -896   
320    -1472  
96     -1136  
-384   -16    
0      32     
-528   0      
464    -576   
96     -160   
-128   -80    
208    144    
-144   48     
112    624    
96     -16    
-32    192    
-112   16     
176    64     
96     32     
-544   -624   
592    -832   
-32    -352   
-48    160    
16     -176   
16     80     
464    400    
-928   -112   
496    176    
480    224    
-736   144    
480    288    
-192   208    
32     -576   
-48    -672   
-192   -368   
208    -800   
-720   -80    
864    208    
-416   160    
256    592    
416    1920   
-592   1968   
16     1296   
256    1072   
-64    608    
48     -32    
112    -336   
0      -48    
-160   112    
192    -384   
-80    -144   
48     -32    
16     -64    
-464   -272   
-208   -208   
64     928    
-640   288    
368    -144   
-144   -80    
160    -128   
-176   -256   
-64    208    
272    -224   
0      48     
-1376  -176   
-304   1200   
-32    304    
-112   -272   
-384   -336   
32     80     
80     -128   
-128   -224   
144    -80    
256    -80    
80     -336   
-992   -48    
-16    16     
80     -16    
-112   64     
-64    -192   
256    48     
-272   -352   
-64    16     
32     32     
-80    480    
384    -96    
-672   160    
800    256    
-608   176    
0      -128   
-800   -16    
144    320    
-64    80     
-32    -128   
-32    -112   
144    160    
-144   -96    
16     -288   
64     160    
-192   176    
-144   128    
320    -32    
112    96     
-416   -32    
-128   128    
128    144    
16     -32    
96     32     
32     -32    
16     -192   
64     16     
-288   48     
288    16     
64     160    
-1536  -352   
1024   512    
704    -464   
-1456  576    
896    592    
1120   -288   
-912   1184   
384    -768   
-1088  -928   
-160   -944   
0      752    
256    32     
-256   -32    
-64    224    
144    208    
128    224    
-176   512    
176    16     
-48    -192   
-112   -64    
800    384    
-2064  -400   
-336   96     
800    -992   
-672   -656   
-64    128    
-208   -64    
-624   -1088  
272    -1184  
-208   -656   
-112   80     
-32    -48    
160    -80    
96     -160   
-144   32     
160    144    
-96    448    
432    1392   
224    576    
-336   384    
-416   -32    
-16    80     
416    224    
-736   352    
256    800    
-48    480    
608    1968   
-1104  1376   
-496   608    
832    -672   
-368   0      
-112   32     
-160   224    
-128   -96    
368    880    
416    -544   
-160   592    
-496   592    
-48    -192   
784    336    
176    96     
-544   -192   
128    192    
432    80     
256    688    
-624   160    
-608   0      
864    224    
-64    -784   
-896   -880   
992    160    
656    80     
-1712  -400   
368    -1168  
-80    -720   
160    -272   
-288   224    
-336   512    
176    128    
192    304    
-96    -16    
-336   96     
-80    528    
352    -32    
64     112    
-272   16     
288    176    
-192   -688   
176    -1552  
-128   -784   
-160   160    
176    544    
272    -64    
-448   -48    
160    320    
208    -176   
-192   -432   
32     -64    
128    -80    
-288   144    
160    -64    
32     176    
16     480    
0      256    
-400   48     
272    80     
416    -48    
-544   -160   
320    272    
160    -128   
48     -48    
-144   -192   
-336   16     
64     128    
176    64     
-112   128    
352    288    
-16    208    
-144   256    
272    144    
-64    -32    
256    -208   
-368   272    
224    320    
480    32     
-688   272    
0      64     
512    128    
-160   320    
352    -48    
-304   128    
160    208    
112    -96    
-80    -32    
400    720    
-816   384    
112    0      
592    720    
-592   528    
32     -272   
-16    208    
256    256    
32     -16    
-160   -96    
112    48     
400    576    
400    224    
-432   -48    
0      96     
64     176    
208    1760   
3056   -336   
-1536  464    
-256   176    
688    0      
160    -64    
-864   48     
432    592    
-176   -64    
16     -928   
336    16     
48     -144   
-224   144    
128    640    
480    -144   
-96    48     
-112   416    
304    -128   
-176   48     
64     -16    
-304   576    
1104   -400   
-304   -208   
-832   112    
832    -1008  
-64    672    
240    -112   
-512   32     
256    -16    
32     304    
448    -64    
16     128    
-304   64     
-224   -16    
464    112    
112    -80    
-240   32     
-64    96     
448    112    
-32    -1120  
-32    0      
-128   160    
160    112    
0      192    
624    144    
-528   64     
-32    16     
128    224    
160    192    
-1440  -2272  
144    -1296  
2032   -112   
-1456  -160   
320    320    
0      -624   
368    112    
-160   -1184  
-720   -112   
688    -96    
208    160    
-224   -160   
-80    160    
-64    -144   
144    144    
352    16     
-448   112    
128    32     
256    -96    
112    64     
16     -48    
-336   -528   
-400   176    
1152   -432   
-80    -16    
-352   176    
576    -32    
-384   224    
-256   -144   
416    240    
192    -48    
-32    -128   
-16    128    
-128   0      
112    240    
624    -208   
-192   128    
-144   -704   
-96    176    
224    -48    
208    48     
-224   -96    
576    0      
-496   144    
480    0      
-192   -80    
-592   80     
320    -112   
144    -608   
-16    192    
-16    -624   
-128   256    
400    -224   
-16    128    
-336   432    
832    -272   
-288   96     
160    192    
176    0      
32     80     
144    80     
48     -80    
-112   160    
128    -160   
0      16     
336    -272   
-400   192    
-16    -112   
320    48     
-592   -1120  
-880   1680   
896    1168   
-944   -80    
112    -368   
1696   480    
-848   -1168  
-352   -16    
608    -64    
64     32     
-64    48     
-336   80     
480    -64    
-608   -48    
448    -176   
-32    -80    
112    32     
-288   288    
416    -640   
-80    1008   
-256   -80    
112    -1280  
-32    -496   
-160   -32    
992    -80    
-608   -752   
-16    -32    
208    -304   
-288   -864   
128    -1984  
-80    912    
224    496    
-160   -208   
-32    -688   
144    16     
-96    128    
80     -272   
-192   -336   
224    -32    
272    -16    
-208   -304   
256    48     
-80    48     
-240   -512   
-240   -624   
336    288    
-96    32     
80     576    
608    1104   
-432   -16    
-64    -352   
-128   144    
-80    976    
1552   -672   
-832   -240   
128    -320   
160    -144   
448    -320   
-544   -32    
-64    -1664  
352    720    
-208   -128   
-80    -176   
96     -384   
-96    16     
160    -256   
48     32     
-1600  -64    
0      272    
-48    112    
-16    96     
0      -64    
-32    -16    
16     -32    
112    -1360  
48     144    
-48    -176   
-528   16     
512    160    
64     128    
-240   -48    
-208   -96    
-256   576    
752    32     
-624   80     
64     96     
0      -48    
-112   -576   
208    288    
32     -1056  
-320   -96    
208    -32    
0      128    
-112   0      
240    -128   
-528   96     
112    -64    
-80    336    
240    96     
-208   -64    
-96    -336   
512    -432   
-1456  -112   
576    96     
112    -656   
160    -384   
96     368    
-176   656    
-64    352    
-240   -320   
192    -64    
48     32     
-208   -176   
-80    32     
-64    176    
-48    -32    
160    16     
128    -128   
-112   416    
112    208    
320    -32    
64     -112   
-336   -160   
-112   240    
256    224    
-240   336    
-64    32     
128    -80    
-80    -208   
176    16     
-288   -416   
1248   128    
912    400    
-1088  -128   
448    -240   
-48    1136   
96     576    
352    -1280  
-256   -16    
96     1184   
128    160    
48     -336   
32     -16    
64     -272   
-448   -384   
176    -112   
0      224    
112    -400   
-32    896    
112    880    
240    432    
-560   -928   
-112   16     
1264   -1184  
-1024  720    
384    832    
-16    352    
-144   -672   
-512   -288   
320    -224   
112    320    
400    320    
-560   -416   
112    0      
-368   -128   
144    224    
640    -144   
-720   240    
160    -160   
-1136  16     
-32    -80    
32     48     
-32    304    
16     -544   
1472   -160   
992    672    
-928   -160   
48     16     
768    -560   
-416   256    
304    48     
80     48     
-480   -16    
-32    -208   
-240   112    
320    752    
480    -256   
-656   -560   
80     96     
480    480    
-160   -480   
-400   256    
336    -176   
80     240    
-224   208    
-256   -640   
64     48     
384    128    
-576   64     
-144   848    
208    -912   
1088   -2464  
-320   480    
256    320    
-976   160    
112    272    
1008   480    
-224   240    
-432   0      
96     16     
112    -64    
208    144    
-256   -96    
-144   320    
272    -64    
16     160    
-544   16     
-48    32     
-608   96     
720    -528   
-368   -48    
176    96     
-288   16     
-512   112    
576    48     
48     48     
-336   64     
-48    -80    
32     16     
-208   -48    
576    176    
-448   -16    
-32    144    
96     -240   
-400   160    
-288   -544   
480    -48    
-80    48     
48     368    
-16    192    
-64    -16    
-400   -160   
224    288    
160    64     
-144   288    
-176   128    
48     -96    
208    304    
-336   -64    
16     64     
320    16     
368    1392   
-624   16     
-496   0      
464    -32    
-96    -96    
-368   -112   
240    -16    
176    -112   
128    -64    
-128   32     
-96    -160   
112    144    
-176   144    
160    48     
-352   -128   
32     -224   
112    208    
0      -192   
-624   32     
272    16     
192    -112   
-112   192    
0      208    
-112   304    
176    -288   
80     -112   
96     496    
-16    -160   
-64    112    
-448   -1024  
1632   -1200  
-1536  368    
112    -768   
384    -16    
-368   288    
80     208    
224    32     
416    -1024  
-576   512    
-48    112    
288    -112   
0      400    
0      144    
-336   32     
240    -16    
-320   272    
-16    -464   
80     -128   
-16    272    
-64    -208   
144    -752   
-128   208    
592    48     
-368   -16    
-64    336    
-96    -320   
-80    176    
496    -16    
-192   272    
-112   144    
-208   192    
432    -160   
0      -96    
-176   96     
320    -48    
64     0      
-256   -288   
192    208    
256    112    
-464   224    
-288   -96    
448    176    
64     -64    
-224   32     
-272   208    
368    -144   
-64    224    
176    -16    
-512   -400   
864    -1616  
480    -128   
-656   -432   
528    96     
480    -16    
-1136  528    
352    112    
1024   352    
-528   -448   
-240   176    
144    160    
144    96     
-128   16     
-192   -272   
240    176    
64     -32    
-64    304    
-128   -144   
352    -112   
-64    -48    
-144   -112   
912    320    
-1408  96     
656    -960   
0      320    
-32    -128   
96     176    
112    112    
192    -80    
-288   112    
-176   80     
112    96     
240    80     
-80    128    
144    -80    
-480   192    
208    0      
128    -256   
16     16     
-160   272    
64     288    
192    64     
-640   -48    
-336   32     
736    624    
480    208    
-96    -80    
-336   224    
-32    48     
-16    -128   
-112   -128   
864    80     
-192   -768   
-336   -160   
832    -400   
-592   448    
-128   -16    
400    -64    
-304   32     
0      240    
-32    32     
224    128    
16     -48    
-128   304    
384    432    
-592   416    
-160   0      
464    -48    
-192   -896   
-960   -1408  
1520   -2496  
128    336    
-992   -368   
-208   416    
384    -272   
-496   -928   
336    240    
304    -16    
-432   208    
-48    -176   
464    32     
-112   224    
-176   320    
-128   112    
256    -720   
80     352    
160    -2512  
-32    144    
112    784    
16     352    
144    -64    
144    -48    
-688   128    
384    0      
-240   416    
416    -64    
-240   1072   
-96    176    
32     -112   
-80    -576   
64     -112   
240    -48    
-240   112    
208    96     
112    640    
160    80     
80     864    
64     992    
48     0      
256    -128   
144    -32    
-160   144    
64     -128   
384    464    
-16    624    
16     336    
384    -768   
-224   -704   
-128   -1920  
240    160    
576    768    
-1232  688    
80     1296   
768    1088   
-208   816    
-192   352    
256    208    
-672   -1488  
576    -80    
336    400    
-128   96     
-112   -32    
-16    304    
384    -176   
112    0      
-560   -352   
384    -928   
592    -16    
-320   240    
64     -16    
0      -48    
144    144    
-32    48     
-16    -16    
144    -96    
576    304    
-512   -32    
80     80     
272    48     
48     48     
80     -608   
-656   208    
-112   160    
240    192    
304    288    
-240   -240   
-336   -208   
64     -464   
96     528    
-128   16     
96     -160   
112    80     
-128   176    
176    -384   
16     48     
176    32     
-48    336    
-48    192    
64     80     
-176   -304   
608    -896   
-80    720    
448    -192   
-432   160    
80     -128   
320    224    
112    -512   
48     -384   
16     16     
-16    -720   
192    64     
64     144    
-96    352    
-432   384    
-16    -368   
-240   224    
64     -432   
496    -464   
-256   -768   
-288   64     
128    464    
160    -16    
48     16     
192    -208   
-304   -48    
-32    144    
528    144    
-96    -464   
-352   -160   
-1664  288    
1728   -240   
384    208    
-928   -160   
-48    112    
976    -656   
-1248  -1568  
0      -320   
400    128    
-144   80     
-112   0      
-48    0      
96     -48    
96     256    
16     176    
144    48     
-1104  -32    
320    -176   
-80    -240   
16     -368   
144    880    
160    -1312  
-1552  256    
1184   96     
496    464    
-240   176    
-32    -32    
256    32     
112    -32    
-448   64     
368    -128   
-128   112    
-304   -352   
112    -144   
336    -32    
96     32     
-288   -240   
0      112    
560    -512   
-272   64     
-96    -16    
-64    -144   
928    -32    
-592   32     
16     -48    
448    592    
336    -128   
192    752    
-16    560    
-256   -64    
80     64     
-304   -896   
-112   0      
240    -1280  
-176   64     
144    368    
-352   80     
144    -480   
-80    64     
-112   -128   
112    144    
-208   -32    
-48    16     
-464   0      
352    -64    
-464   0      
-192   -192   
304    112    
-64    -336   
144    -208   
1616   -96    
544    -400   
-1280  -64    
-176   320    
704    0      
-288   304    
208    -128   
-224   -16    
208    48     
384    32     
-224   -96    
-144   16     
272    64     
272    -240   
192    144    
-304   -32    
-144   -48    
-288   -320   
944    -32    
-336   -208   
-128   176    
96     144    
-336   -128   
-288   -80    
624    -80    
16     304    
-704   96     
336    176    
640    -160   
-896   -144   
32     80     
208    48     
304    176    
48     256    
-592   112    
96     48     
432    112    
-112   -144   
48     208    
-16    -112   
224    48     
-1088  -272   
-320   -176   
-768   -368   
-288   -32    
336    -32    
-832   -128   
-272   16     
-32    -16    
96     64     
16     -176   
416    112    
368    -544   
-176   -688   
-976   -352   
352    -288   
176    -272   
-192   192    
-704   -80    
512    64     
-224   48     
-144   -128   
-80    -160   
-896   -64    
96     112    
-848   -560   
-160   -304   
208    96     
-224   240    
-176   -288   
192    -48    
-80    -320   
-32    -160   
32     -192   
224    176    
96     880    
80     -304   
-224   -80    
-96    672    
64     272    
928    2544   
1536   224    
-1920  176    
224    240    
432    -672   
-288   96     
0      64     
352    496    
-16    96     
-224   80     
544    -336   
-288   272    
-80    48     
256    144    
224    288    
-432   -320   
64     416    
-768   -16    
32     -48    
208    -144   
-448   -784   
560    -336   
208    144    
-448   208    
592    192    
-224   -112   
-128   224    
32     672    
304    144    
-160   -272   
16     -16    
-256   -112   
-384   128    
320    16     
16     -464   
16     128    
-32    32     
96     272    
-144   96     
-16    64     
224    96     
-224   288    
352    64     
-448   -48    
208    224    
160    -64    
-224   176    
128    16     
240    144    
-896   -1872  
-2096  -144   
1520   -160   
-496   -128   
176    480    
688    -256   
-816   -192   
96     160    
272    0      
64     208    
-208   64     
-32    112    
416    48     
-304   -192   
240    16     
-960   0      
0      -192   
432    -48    
-432   -144   
64     96     
32     64     
-640   -672   
816    -272   
400    -96    
-608   -528   
-144   48     
160    0      
-48    -80    
-32    64     
128    176    
240    32     
48     48     
-240   0      
-80    -16    
288    96     
96     32     
-240   80     
16     -48    
112    -80    
32     64     
144    160    
-176   16     
224    160    
384    16     
-80    16     
-96    208    
208    816    
-336   16     
-608   64     
672    432    
-144   48     
-80    272    
128    -160   
16     400    
-928   -96    
512    0      
0      496    
32     -16    
-240   -128   
-208   160    
288    16     
224    0      
-176   64     
-176   192    
176    -80    
-288   -192   
272    -352   
-448   112    
-240   -544   
560    -416   
960    2544   
-1104  1056   
432    16     
432    -464   
-1104  272    
64     48     
256    -128   
112    -960   
-144   -368   
48     432    
208    416    
240    -304   
-160   -80    
-112   688    
-272   -112   
384    256    
192    816    
-256   -272   
-64    -208   
176    176    
176    608    
-80    -160   
-352   -128   
272    -512   
64     256    
-48    352    
-128   240    
0      80     
-240   128    
384    400    
-128   416    
128    -64    
16     -16    
-128   176    
400    304    
0      32     
96     624    
-272   896    
-16    -368   
336    -656   
-96    -240   
-368   432    
-272   -48    
368    0      
128    -320   
-320   -80    
96     96     
144    -112   
96     320    
-96    64     
-80    -32    
-480   -784   
640    -1072  
256    -992   
-192   -352   
48     1392   
128    576    
-80    1792   
-176   624    
-224   -1056  
208    576    
160    304    
224    -112   
-64    112    
-448   -496   
304    208    
208    192    
256    -272   
-112   32     
96     224    
208    32     
0      128    
-64    112    
224    112    
-64    -160   
-304   -272   
-336   -144   
-128   -352   
112    -128   
368    -416   
-224   0      
288    624    
48     144    
192    -928   
224    400    
176    544    
-656   416    
288    272    
560    368    
-432   64     
-240   208    
64     -112   
64     -64    
272    224    
32     -448   
-96    112    
80     240    
272    176    
144    144    
-64    208    
272    -384   
-736   384    
240    -48    
288    48     
-208   -288   
288    432    
-240   80     
48     -336   
288    0      
0      32     
-32    -176   
-208   -400   
80     368    
-128   304    
208    -256   
-16    224    
-208   -16    
256    48     
-16    -192   
-240   96     
-80    128    
256    368    
-48    -400   
-32    -112   
-240   -128   
320    336    
240    -80    
-128   16     
-80    -576   
-720   -704   
1568   -1296  
-288   -48    
-432   128    
1232   624    
-1504  -288   
352    -160   
800    272    
-480   32     
-224   272    
256    0      
176    208    
-192   -576   
-64    -32    
496    -1888  
-320   -96    
128    80     
192    384    
16     352    
48     224    
112    -64    
-64    32     
976    0      
-1632  32     
1264   -192   
64     -288   
-1280  112    
432    -208   
544    240    
144    -272   
-176   128    
-112   160    
-16    96     
176    16     
192    240    
-256   -32    
-144   32     
432    224    
-288   -64    
16     -112   
-192   -672   
144    144    
288    464    
-32    -256   
-672   -368   
832    576    
16     -64    
-464   336    
-96    32     
-480   752    
560    352    
-480   80     
-176   144    
-80    -160   
576    0      
544    48     
-256   -272   
-752   -256   
576    320    
96     -96    
-192   -768   
272    144    
-240   -560   
-48    176    
-64    -32    
400    -112   
-1104  224    
272    -672   
32     -80    
-864   -1920  
3440   2160   
-1568  2128   
-480   528    
1632   144    
-640   -400   
-416   -176   
304    16     
-48    -352   
-192   48     
0      -576   
-352   -464   
-272   0      
192    80     
352    -80    
64     32     
-784   -32    
432    -2656  
-160   -96    
-112   -400   
592    992    
112    -416   
-656   160    
672    -48    
-592   -256   
-560   -16    
1152   -32    
-800   -160   
-80    240    
480    -208   
-112   -176   
-64    -160   
96     -736   
-16    -112   
224    272    
-176   -192   
-208   144    
368    -64    
112    96     
-48    -192   
-320   80     
416    -160   
-512   -128   
144    -96    
432    160    
-576   -368   
160    80     
576    -1072  
-1024  -224   
448    -1360  
-208   112    
464    48     
16     -464   
208    -192   
-544   64     
288    32     
352    128    
-656   48     
-64    -48    
-80    32     
384    -208   
288    80     
64     -96    
-272   16     
48     -992   
144    -48    
112    -208   
64     -128   
-144   -128   
-128   -48    
-304   -112   
352    -256   
-224   112    
-16    144    
128    -16    
64     96     
-224   224    
-176   272    
288    0      
144    -672   
-384   304    
-272   -640   
736    -2336  
-944   608    
912    -480   
-704   208    
-176   128    
800    -64    
16     144    
-368   -768   
-208   96     
112    256    
64     -160   
176    -80    
-224   -48    
144    -80    
208    -288   
-128   -368   
-176   -176   
240    -16    
-304   0      
48     112    
-48    1344   
1232   -480   
-1232  0      
-240   112    
464    -16    
-112   48     
64     -288   
48     -464   
-64    -80    
-336   -96    
384    -48    
16     -64    
-160   144    
288    352    
-144   432    
-144   -80    
16     80     
192    -80    
-160   -128   
48     144    
400    -288   
-288   -64    
-208   -304   
-1264  80     
176    80     
0      80     
-192   -160   
96     16     
432    -48    
-576   -1312  
-1520  -160   
1632   -64    
-496   112    
48     32     
640    -192   
-736   544    
240    512    
0      -48    
240    160    
176    176    
-288   80     
-192   80     
-304   -304   
-368   -112   
160    -160   
-240   -64    
176    -192   
192    -176   
-160   -112   
-304   -576   
1264   800    
-912   -240   
-672   496    
1712   224    
-912   -80    
496    -48    
16     192    
-256   -16    
-32    -32    
-528   176    
416    112    
288    64     
-304   48     
-176   -544   
16     -64    
112    16     
48     -528   
-352   -272   
-256   -176   
128    96     
48     80     
-112   -704   
720    -1472  
-592   -800   
-64    -208   
384    -528   
-896   144    
528    224    
352    512    
-112   176    
-256   240    
-80    -32    
-48    -160   
256    368    
416    640    
208    -544   
256    64     
-112   112    
80     -80    
-112   -64    
-208   -48    
-1232  -96    
224    -16    
176    -256   
112    288    
416    208    
-64    -496   
-208   -160   
400    80     
224    -880   
-1968  528    
64     -288   
736    384    
768    144    
-1008  -272   
-480   -1520  
128    -288   
272    240    
-544   -400   
48     464    
-320   64     
-64    272    
192    -80    
160    96     
-352   -256   
-208   -64    
-32    -192   
112    -720   
16     -368   
-320   720    
64     336    
208    -288   
-96    0      
-464   432    
176    80     
-80    224    
848    1568   
-32    960    
-288   -256   
-112   -144   
96     192    
368    48     
-352   -16    
-336   -256   
-16    320    
48     32     
-224   -400   
320    -224   
-928   -304   
192    144    
208    448    
16     -560   
-16    -336   
-112   960    
128    672    
-352   128    
400    -400   
-528   640    
208    464    
32     -48    
416    -576   
-976   -96    
-80    176    
240    96     
-208   160    
416    976    
-256   2112   
-112   1712   
384    -256   
-16    -512   
-192   32     
288    -112   
0      80     
-112   -592   
-544   -464   
144    -384   
144    432    
176    -96    
0      -464   
-272   304    
144    448    
16     336    
96     96     
32     496    
-80    1360   
-144   1392   
-288   -32    
304    -368   
320    32     
-896   -480   
544    -752   
-464   0      
-208   -720   
-352   -1008  
-16    160    
-256   672    
208    64     
176    432    
-320   -128   
-240   16     
0      80     
368    -16    
-96    256    
-32    64     
-288   -368   
240    -224   
144    144    
-96    -64    
-16    128    
-16    2016   
144    416    
-64    48     
352    480    
-288   160    
176    -224   
-160   -48    
272    -80    
-192   96     
-96    176    
208    48     
96     80     
-448   192    
464    -96    
-272   -160   
448    -496   
128    96     
-112   80     
-224   176    
272    0      
32     -112   
-352   208    
144    80     
336    64     
-48    -96    
-368   112    
112    144    
160    144    
112    112    
576    208    
-2368  -480   
1152   240    
640    112    
-1056  96     
144    400    
464    496    
-336   160    
288    336    
272    -128   
-160   160    
-160   -144   
16     176    
304    -112   
-464   96     
144    -176   
128    384    
400    160    
-208   256    
240    32     
0      128    
-352   -704   
-816   592    
1264   32     
-608   112    
64     128    
-176   0      
0      -176   
-224   144    
48     272    
176    48     
32     112    
64     64     
-32    80     
-288   -48    
128    80     
208    -80    
80     176    
16     -256   
32     -112   
224    48     
-496   -336   
1296   -208   
-128   432    
-1696  -608   
320    -272   
272    176    
-48    480    
144    608    
-48    -32    
-768   96     
224    144    
512    -112   
-208   -128   
-48    -288   
-64    -64    
160    48     
192    192    
-240   144    
-416   96     
48     224    
1120   496    
-576   288    
-640   -16    
96     64     
560    656    
800    176    
-1024  192    
224    160    
1008   208    
-2592  3008   
880    96     
-240   1088   
-416   -336   
-160   -752   
512    464    
96     -240   
-656   -192   
-336   16     
592    -48    
0      32     
32     -16    
-224   32     
-128   96     
224    192    
560    0      
-464   16     
144    -96    
768    464    
-1296  -160   
912    384    
32     -512   
-32    112    
656    -256   
-672   144    
320    192    
80     80     
0      -32    
-336   -16    
224    -208   
-384   -96    
464    -96    
-304   288    
368    256    
288    -64    
-96    -64    
-384   -112   
448    64     
-320   -192   
-112   64     
80     48     
144    224    
-160   -80    
0      64     
496    16     
-32    144    
-208   192    
224    -288   
256    -208   
-304   16     
-16    160    
-240   -560   
288    -64    
-112   -384   
-272   48     
128    288    
96     -16    
48     -176   
96     144    
-576   544    
240    -16    
352    64     
-48    -288   
-32    -80    
32     -592   
-96    224    
288    -128   
-304   208    
256    -48    
256    64     
-128   -32    
144    -1152  
-320   544    
-64    208    
288    -288   
240    -160   
-256   -1216  
160    -336   
304    416    
-64    -80    
1024   1680   
-2704  1312   
992    -720   
896    -560   
-848   -1408  
-576   -848   
48     -784   
32     176    
16     64     
32     80     
-320   128    
-96    512    
352    32     
208    -1040  
-448   32     
-112   432    
416    -176   
-32    -304   
-80    64     
-48    -48    
0      224    
-32    -448   
560    704    
144    1280   
-480   -464   
256    -208   
96     -112   
288    -176   
-256   416    
224    -304   
-16    -176   
32     -144   
32     -240   
160    288    
0      -336   
160    0      
240    -16    
32     -80    
-240   416    
96     -304   
-592   -176   
160    208    
80     144    
-144   -160   
128    -96    
-128   -800   
-80    96     
0      -304   
208    144    
16     0      
-1456  688    
2768   -336   
-224   -560   
-1568  160    
1488   512    
80     384    
-1200  1088   
768    960    
176    -224   
-448   -448   
160    -368   
0      256    
-160   -1264  
144    16     
336    -224   
-160   304    
-80    224    
96     -128   
-128   0      
128    128    
496    208    
-2208  -544   
-1920  336    
1952   656    
-832   80     
-112   352    
800    -192   
-96    -448   
-128   -64    
272    -288   
-176   112    
-176   272    
112    480    
288    -16    
-96    -320   
-288   32     
160    176    
-608   496    
640    -592   
144    -624   
-512   -720   
-192   -544   
144    -1520  
-448   256    
928    1216   
-416   1424   
-688   -128   
928    -144   
-752   -64    
-112   -352   
-96    -192   
752    48     
-560   192    
-128   -240   
368    -96    
-832   -720   
768    -688   
-112   -1216  
-96    64     
-64    208    
-336   48     
240    48     
-64    -80    
-208   -48    
-64    160    
80     64     
448    256    
-368   704    
0      128    
96     0      
-832   128    
112    176    
144    -944   
-864   -480   
528    288    
32     -1040  
-752   -704   
-464   -80    
288    -32    
368    384    
-272   -256   
-448   384    
176    416    
224    -416   
208    -208   
-48    -400   
-96    -80    
16     96     
-32    400    
-304   -496   
-800   -384   
176    144    
-912   -432   
-784   192    
992    -320   
-816   -32    
512    768    
-400   464    
-16    -752   
-160   -1232  
-240   -336   
16     240    
-176   80     
-16    -48    
-240   0      
128    -80    
-304   624    
-16    944    
48     624    
-432   544    
512    416    
-176   32     
-32    -176   
-32    48     
64     128    
160    -480   
-528   544    
128    16     
-112   -160   
224    48     
192    1312   
-816   560    
-304   368    
896    1328   
1696   64     
-1792  928    
592    448    
384    624    
-128   272    
224    400    
112    -32    
-16    96     
0      160    
320    -272   
-96    -352   
-384   -144   
96     16     
16     -16    
-96    -112   
-32    0      
-176   32     
-336   -336   
-240   -80    
-128   0      
240    224    
128    432    
-496   736    
-32    80     
176    -288   
80     128    
-1056  -576   
768    -1168  
112    352    
-192   16     
-112   -400   
96     -1424  
-384   -496   
272    -784   
-176   576    
224    144    
-384   336    
304    160    
32     0      
-144   -352   
160    64     
-208   416    
32     -80    
176    -112   
-96    -80    
-112   144    
96     1696   
416    -240   
-912   -160   
512    -112   
288    -112   
-480   224    
64     0      
256    256    
-224   -192   
-352   48     
592    -96    
-32    320    
-336   -32    
-16    112    
160    48     
96     192    
-16    -48    
-336   272    
-32    -272   
64     192    
320    -32    
-144   80     
192    208    
-176   16     
-16    208    
-64    128    
160    48     
-16    48     
144    48     
320    -752   
-3200  560    
912    -112   
1200   -304   
-1088  -144   
-192   -32    
240    560    
560    -272   
-368   368    
48     -112   
224    192    
-64    -16    
-64    96     
-112   -160   
96     288    
-16    -160   
-96    80     
80     -48    
96     96     
-144   80     
48     112    
-576   -592   
-160   192    
1584   -464   
-640   -400   
-640   320    
496    -128   
192    -160   
-352   -208   
-224   160    
400    16     
448    176    
-304   -32    
-160   80     
-160   -48    
64     144    
448    -128   
32     208    
-128   64     
-208   96     
816    96     
0      944    
-720   -80    
-416   128    
928    -240   
-608   176    
400    16     
1056   -464   
256    240    
128    -192   
-880   160    
656    272    
160    528    
176    -128   
-144   224    
-192   384    
-288   512    
624    -32    
272    -480   
32     -16    
160    64     
128    80     
-48    144    
-256   64     
96     0      
224    -224   
96     160    
176    112    
-368   64     
-304   -1248  
272    1168   
1168   -80    
-1504  -608   
-816   416    
1312   -256   
-576   -48    
-336   416    
160    -336   
-48    416    
208    16     
-448   64     
272    48     
-80    16     
80     96     
160    0      
-240   176    
-48    64     
-96    96     
16     -432   
-368   -128   
128    -144   
-64    64     
512    64     
368    -64    
-400   208    
-176   144    
240    160    
16     -80    
-176   -112   
-208   32     
272    112    
0      304    
-384   32     
240    -80    
192    -192   
-208   -400   
-160   -96    
0      48     
160    336    
-48    80     
-128   176    
128    256    
-128   384    
256    464    
-144   240    
32     240    
-16    48     
64     160    
320    224    
-368   336    
-192   -16    
640    -560   
-80    -144   
-192   -2128  
128    736    
320    896    
128    544    
-64    160    
224    208    
-16    -256   
-448   0      
496    192    
528    272    
-544   256    
48     192    
-128   816    
512    400    
176    416    
-400   -384   
0      0      
240    128    
192    368    
-192   208    
-160   -64    
32     -224   
240    -464   
80     384    
-64    688    
64     48     
144    -16    
-32    -1504  
-960   640    
1200   0      
-352   -1136  
288    352    
-336   0      
-192   144    
352    -64    
-64    112    
-64    224    
80     400    
-144   -240   
64     96     
16     240    
-208   32     
-16    96     
-64    -208   
160    432    
-64    -160   
-80    208    
352    -656   
-816   208    
800    -1120  
-144   64     
208    208    
96     512    
-480   960    
256    688    
-144   96     
-80    -32    
128    16     
192    -80    
-80    176    
-16    -144   
208    80     
160    208    
-128   144    
-96    -688   
80     32     
368    -240   
16     96     
64     0      
-160   -32    
-32    448    
176    0      
0      64     
-176   -480   
128    -112   
320    -352   
-496   -752   
2256   -1072  
-1152  1248   
-176   -128   
864    816    
-560   144    
256    80     
656    -16    
-432   736    
-384   832    
304    -1264  
400    -48    
64     240    
-32    48     
-208   -80    
112    -80    
256    -64    
-48    -48    
-336   -1152  
240    -64    
160    80     
176    -1360  
2192   -96    
-1680  496    
464    -1456  
64     -432   
160    -592   
-592   -576   
464    144    
112    640    
144    1120   
160    608    
-192   -80    
304    -544   
-80    -928   
-464   432    
864    -560   
-480   -352   
-1056  -592   
112    -432   
112    -48    
16     -208   
160    64     
-64    -272   
64     -288   
-624   -80    
560    368    
928    -16    
-496   256    
224    -432   
256    384    
-112   -368   
0      0      
80     -272   
384    64     
-32    1200   
-176   448    
-272   -752   
192    -1056  
304    -448   
64     -384   
80     -128   
-128   64     
128    -160   
-208   -336   
480    384    
400    -16    
128    464    
-272   640    
-128   224    
32     -1232  
-1920  -1072  
880    320    
672    32     
-512   -704   
-688   -1248  
208    -656   
272    -352   
-224   -368   
-80    544    
-64    976    
-144   -48    
224    -528   
-160   192    
-32    112    
-992   80     
512    48     
160    -64    
-368   -400   
-256   -528   
288    -336   
-32    -32    
496    -1120  
496    224    
-1792  80     
1008   16     
16     -144   
128    -288   
-816   -192   
256    -528   
112    -240   
-272   16     
-80    -80    
224    -112   
48     -48    
-80    -176   
-96    224    
48     -544   
64     224    
48     -400   
-416   -48    
176    32     
-160   -528   
-192   -384   
160    -240   
144    16     
-224   128    
-208   160    
272    272    
-128   96     
-16    -64    
544    848    
-976   432    
-112   208    
784    -144   
16     -992   
-736   -256   
16     608    
704    192    
208    -128   
-576   144    
128    144    
-464   48     
-64    -96    
96     0      
-192   -640   
-400   288    
544    -912   
0      -240   
-320   -16    
-112   256    
48     -320   
-240   -320   
144    96     
0      16     
-160   176    
288    176    
-416   0      
192    -112   
192    64     
608    -1184  
-2400  1584   
1440   -192   
320    416    
272    240    
-688   384    
-64    -64    
512    384    
-560   -112   
256    -112   
-288   320    
-48    -96    
128    -96    
176    -272   
-128   304    
144    -576   
-240   432    
-176   -96    
-192   0      
48     80     
528    688    
-1920  448    
480    -80    
752    -192   
-880   -112   
352    48     
-560   304    
-64    -176   
-560   -64    
528    -176   
-288   -112   
-544   96     
416    -192   
-96    96     
-48    208    
-80    192    
96     -144   
-336   96     
464    -128   
-672   80     
144    64     
176    48     
16     48     
96     128    
-496   -64    
32     192    
-32    64     
80     96     
96     -48    
640    16     
-1008  256    
224    -336   
-32    -432   
416    256    
384    144    
-1328  16     
208    240    
0      128    
-16    -208   
32     96     
-48    -176   
80     80     
208    208    
-512   -112   
144    176    
-32    -112   
-176   32     
-320   32     
160    -48    
-464   16     
224    -352   
-2224  672    
656    160    
-976   -848   
272    112    
608    -352   
-1104  256    
192    -112   
544    -32    
-320   16     
-304   32     
96     64     
208    64     
-80    80     
-320   32     
-80    32     
32     96     
-64    112    
48     -64    
32     32     
-112   48     
-128   224    
1072   -336   
-912   -16    
240    16     
224    288    
224    832    
-992   0      
-400   240    
688    -240   
-32    -16    
-320   48     
304    80     
32     -272   
-256   128    
-112   -16    
-48    -160   
464    384    
352    48     
-480   32     
80     128    
128    48     
0      64     
-48    80     
-272   -464   
-32    96     
64     96     
-80    32     
224    752    
-832   -2784  
-1792  -704   
1312   336    
480    176    
-368   80     
-800   128    
32     112    
912    -224   
-400   -96    
64     48     
112    80     
-80    192    
-64    48     
-32    -64    
-96    -32    
80     -96    
80     128    
336    -16    
-112   -96    
272    -1056  
-16    768    
256    656    
-208   176    
-400   64     
224    304    
112    64     
128    288    
-176   -496   
-384   -16    
-352   240    
224    320    
496    416    
-432   80     
-416   288    
832    -48    
0      752    
-528   384    
224    432    
128    128    
64     112    
-176   128    
-48    224    
-48    176    
480    544    
-800   272    
192    64     
448    -48    
96     320    
32     416    
-176   368    
-176   -256   
512    -832   
-976   192    
592    384    
144    576    
64     688    
464    384    
-144   992    
0      816    
96     -560   
256    -720   
-80    528    
-48    352    
96     192    
-32    496    
224    16     
-80    160    
208    544    
0      -208   
-112   288    
16     -96    
224    80     
-32    0      
-96    -48    
96     -304   
176    112    
-192   176    
240    368    
272    208    
160    80     
-224   -176   
-432   -272   
416    -352   
-320   80     
-336   -16    
0      128    
160    -32    
-16    -176   
144    80     
16     112    
-16    128    
160    64     
32     112    
-272   48     
80     208    
224    -16    
96     -112   
-64    64     
-16    352    
-32    112    
-288   -448   
1040   -784   
-128   624    
16     -64    
-400   544    
272    -80    
96     -16    
-16    928    
288    224    
-560   -32    
112    -224   
624    160    
16     240    
-256   -48    
32     96     
48     80     
16     160    
48     224    
48     -1200  
-16    -16    
224    -16    
0      224    
48     112    
-96    -16    
-256   -144   
160    176    
0      -16    
-112   -272   
528    -240   
-544   528    
224    -560   
-2608  -656   
1584   96     
-416   -2672  
160    -256   
160    768    
-512   -80    
416    -1568  
528    1632   
112    0      
-240   160    
-352   -80    
352    64     
176    -96    
-144   352    
-128   176    
192    128    
272    288    
-16    -688   
80     16     
288    1248   
-240   -544   
-1840  224    
1856   -128   
-368   576    
-1648  -400   
160    -960   
1040   -64    
-1024  816    
16     480    
208    96     
-272   -400   
208    176    
256    -416   
-304   208    
432    -1376  
-64    -80    
256    -32    
96     128    
-192   -64    
160    112    
-96    112    
-256   -160   
-208   -256   
1216   272    
336    544    
-160   640    
-80    288    
-208   -352   
32     432    
448    -1040  
-256   80     
96     -1536  
-32    -176   
528    0      
-16    912    
-1248  1152   
400    416    
-176   160    
0      -176   
-288   128    
-208   -32    
336    512    
400    -272   
-192   32     
-448   -128   
80     192    
320    -160   
-176   880    
-288   -672   
832    448    
544    -272   
-1520  16     
-32    480    
640    -928   
-208   144    
48     -224   
-400   208    
-32    -848   
528    -112   
-160   -288   
-160   304    
-112   -288   
-128   48     
688    96     
-400   48     
-208   128    
-48    -752   
384    -1280  
32     -864   
-128   304    
-16    80     
-64    -64    
32     -400   
560    240    
-272   288    
592    160    
-464   -1664  
160    352    
32     192    
32     320    
-32    32     
0      272    
-128   -1520  
176    0      
-32    208    
448    64     
-96    272    
-32    96     
336    128    
32     -144   
-272   224    
224    16     
-496   224    
-96    -80    
432    -32    
-96    144    
-1584  -192   
208    -816   
-336   -416   
400    -736   
-160   -832   
-432   -1584  
784    160    
288    -256   
-256   -608   
144    -176   
-64    32     
320    -544   
-160   80     
-192   -240   
144    -368   
-544   -128   
208    -128   
112    112    
0      -528   
-480   -192   
368    16     
112    -304   
64     -16    
-96    80     
192    -368   
-48    112    
-16    -416   
128    48     
-16    -96    
-48    -128   
-16    112    
160    -16    
-320   48     
576    1552   
2896   -64    
-1824  -352   
640    992    
960    -112   
-608   32     
-96    -384   
192    -112   
-224   208    
208    -208   
240    96     
0      80     
-512   32     
640    480    
-256   16     
-624   -432   
320    -112   
192    -80    
-64    32     
16     -704   
-544   -32    
1088   -672   
112    -48    
-1312  112    
912    144    
96     -32    
-560   192    
-320   -160   
400    -48    
-240   -256   
160    -32    
-64    96     
-128   48     
208    48     
-48    -256   
-512   448    
688    96     
-48    176    
176    -304   
-416   128    
400    48     
-176   128    
288    -16    
-288   -192   
96     160    
208    -96    
-576   160    
304    -256   
-224   192    
-480   48     
-144   176    
-16    0      
-208   48     
-80    80     
48     -16    
160    -304   
-272   160    
128    -16    
208    176    
-96    -32    
-336   -48    
-32    -128   
80     -320   
-176   0      
208    -224   
-192   128    
144    -640   
192    -224   
-160   -96    
80     64     
-368   -688   
-576   512    
1200   -32    
-880   -112   
416    144    
576    0      
-752   -96    
656    -336   
-512   304    
320    -160   
176    112    
-192   -160   
-112   16     
416    64     
-160   -16    
128    32     
-32    192    
272    208    
464    -336   
-288   -32    
80     288    
-48    32     
0      128    
848    48     
-336   -112   
-320   -416   
-128   48     
704    -80    
-288   -64    
96     16     
304    16     
-192   -64    
-208   -128   
624    -80    
32     256    
-448   80     
-208   32     
800    -224   
-464   80     
-400   -240   
448    96     
-80    -176   
64     -112   
-304   144    
-64    352    
-224   16     
-384   32     
-160   -304   
544    -912   
-944   -3632  
-1056  -1136  
1472   0      
-272   96     
160    240    
-352   0      
-400   176    
64     -336   
192    -400   
-128   80     
-336   -80    
-224   64     
448    192    
-96    -176   
-752   32     
-192   -112   
208    -144   
144    32     
-48    -480   
-688   -704   
320    -608   
-16    -320   
-64    560    
800    192    
-480   368    
-144   -64    
176    80     
-80    -160   
-720   -496   
-352   -432   
304    384    
-288   -272   
-256   -208   
-32    96     
336    192    
-256   -160   
512    112    
-768   -672   
-160   -768   
304    -208   
-16    -48    
-272   -112   
-112   160    
512    576    
-608   48     
0      -944   
192    -1312  
-368   672    
208    752    
-144   -384   
272    -48    
-144   928    
832    16     
-592   1600   
608    784    
64     48     
-336   -128   
224    416    
-144   -144   
256    16     
-80    128    
-288   16     
336    352    
0      32     
-32    64     
-176   -544   
-320   -288   
80     272    
272    -16    
-368   112    
-16    -48    
-144   128    
80     32     
80     -80    
-208   48     
-240   0      
-208   -144   
64     -16    
-384   16     
-304   176    
-272   -192   
592    -128   
448    368    
-208   -112   
-304   272    
320    -256   
304    -272   
-208   48     
-352   304    
48     -32    
-80    112    
80     64     
144    48     
-64    192    
-144   -16    
384    -304   
160    48     
-320   416    
-16    192    
-48    32     
496    -320   
-1376  96     
496    32     
160    160    
-160   -192   
96     96     
96     272    
-272   816    
-64    -352   
416    -352   
-256   112    
-384   208    
336    96     
80     -208   
-224   64     
128    352    
64     784    
-160   112    
208    144    
0      128    
-144   96     
-176   -96    
144    336    
-160   240    
208    144    
-432   64     
-80    16     
-48    -64    
736    -720   
-336   -848   
1520   -976   
-992   272    
784    -32    
-400   -128   
-880   496    
-256   352    
576    -400   
-176   1792   
-16    752    
-224   -544   
464    -624   
496    -304   
-544   512    
-112   96     
192    128    
240    -96    
48     272    
-304   -192   
-160   -320   
96     -192   
-400   368    
2256   -224   
-1104  448    
-272   464    
912    -560   
416    -672   
-624   -1152  
96     400    
512    384    
-400   96     
-48    -160   
320    256    
32     -112   
-336   64     
384    48     
96     176    
-144   464    
-336   416    
48     -16    
144    -48    
96     -192   
224    -80    
624    128    
160    976    
-784   464    
-96    -128   
336    304    
-96    32     
336    544    
-1056  400    
272    -144   
288    160    
-160   128    
-288   48     
0      416    
1056   672    
-928   416    
-432   16     
272    48     
-112   80     
32     64     
240    48     
-432   368    
544    -160   
0      48     
384    96     
0      80     
-480   -224   
1104   1040   
-272   -1552  
-1376  -368   
752    160    
0      -80    
592    224    
16     304    
-608   16     
224    224    
336    -80    
112    -64    
-128   0      
-144   -528   
208    320    
224    -400   
-144   192    
-160   -80    
80     176    
0      -48    
736    352    
-1120  128    
912    112    
-48    176    
112    64     
-400   -48    
64     464    
128    416    
176    272    
-128   144    
-192   -480   
320    208    
-416   48     
256    -144   
144    112    
128    48     
-128   256    
-128   176    
192    -944   
352    -432   
-272   -224   
240    176    
-144   176    
-96    -144   
528    48     
-32    -128   
160    144    
-240   -416   
160    16     
160    64     
-272   -16    
224    -96    
-240   96     
-192   -784   
-304   -192   
656    960    
-832   384    
176    432    
592    -528   
-1056  80     
352    -528   
-192   32     
320    -576   
16     128    
-144   96     
48     -176   
-272   -144   
128    -48    
-32    32     
160    -112   
-208   -256   
-16    -128   
192    48     
48     -96    
-64    160    
-64    -160   
32     192    
512    -256   
-384   288    
336    -1248  
-224   240    
64     -64    
960    -1184  
-3424  2192   
1040   384    
720    80     
-432   -64    
-64    -96    
-400   -80    
224    16     
208    -1600  
160    96     
-160   -256   
0      112    
-96    -160   
272    160    
-496   192    
352    112    
96     -64    
-240   32     
352    272    
96     80     
416    1392   
-1040  -560   
-112   192    
1264   -448   
-576   -96    
-448   -192   
288    272    
192    -912   
288    -144   
-320   -256   
-144   208    
224    144    
80     112    
32     -160   
192    -112   
-208   128    
112    -16    
368    -32    
-560   48     
448    16     
-240   176    
192    32     
128    -240   
-320   -96    
160    0      
384    -576   
-144   160    
-144   0      
-32    -432   
-176   -1920  
1808   -2448  
80     272    
-1536  -400   
864    -208   
976    192    
-1072  368    
272    -1200  
352    -144   
-464   -752   
96     -16    
48     -304   
112    -16    
-880   -208   
464    -192   
-336   -208   
112    48     
48     -16    
-96    -64    
32     -304   
-112   48     
112    -304   
688    -736   
-1424  -176   
1008   -544   
400    -96    
-368   96     
-48    -272   
336    -208   
224    16     
-144   32     
-96    -176   
-96    64     
192    -704   
96     -96    
0      -448   
192    -96    
-64    0      
-592   272    
336    -160   
48     176    
-192   80     
-224   80     
1072   -752   
-304   192    
-304   208    
672    -496   
0      64     
-224   -112   
-64    32     
192    -368   
112    16     
96     -48    
-128   144    
-32    -176   
32     -384   
-32    144    
832    -96    
-464   -96    
624    352    
-1232  96     
-176   -96    
96     0      
96     -64    
96     -16    
-64    -48    
320    -240   
-64    -1648  
-16    -192   
480    -368   
-944   -592   
1472   -608   
464    -256   
-1760  272    
528    208    
944    -112   
-368   704    
-304   528    
208    656    
384    -80    
-448   -304   
64     192    
32     -1296  
160    0      
144    144    
128    -128   
-768   -576   
352    -176   
128    -272   
-208   -800   
-304   -928   
-16    -336   
-368   176    
-224   -240   
-672   0      
288    304    
48     336    
128    -128   
48     400    
-224   -656   
336    -144   
-112   160    
-16    64     
-80    -576   
-208   96     
-144   80     
112    176    
-336   -848   
-512   -752   
160    -224   
128    -176   
192    -96    
240    -224   
-416   -800   
352    -1488  
112    -528   
-16    672    
-16    -272   
-208   944    
48     -272   
-160   448    
496    640    
-592   -272   
-80    -480   
304    160    
-272   464    
-320   480    
304    816    
192    640    
-352   -608   
176    -560   
-80    304    
96     -256   
-80    80     
-112   -208   
-368   -160   
384    -192   
-192   -400   
-448   160    
240    112    
-320   -272   
384    0      
-640   -80    
-176   16     
-128   112    
-320   -16    
-80    64     
-576   -256   
-656   -448   
-112   224    
320    112    
576    464    
-1184  576    
224    -336   
80     528    
-64    -160   
128    -96    
-560   160    
-192   96     
144    192    
-400   -64    
-208   -16    
-416   208    
128    320    
-272   176    
-96    64     
32     288    
64     448    
-464   624    
128    400    
-304   -64    
192    96     
336    256    
-688   -176   
-224   -128   
160    -112   
96     -160   
-208   336    
-64    528    
-1200  -384   
-192   -304   
-208   -64    
160    -96    
-320   -128   
384    0      
-368   -496   
176    224    
112    624    
160    -480   
-288   176    
-96    800    
112    -512   
544    80     
-160   0      
-480   -96    
-288   320    
560    176    
288    -144   
-208   -80    
-144   288    
1120   -352   
-2832  16     
80     320    
928    528    
-240   -1104  
-352   736    
688    -48    
-1056  464    
32     496    
656    256    
-224   -48    
-400   -16    
16     48     
-32    96     
384    304    
-80    240    
-128   -48    
0      -192   
80     -48    
-16    -48    
-448   -464   
992    1216   
880    -32    
-1616  400    
1184   -32    
-352   -112   
-480   384    
1024   -128   
-304   48     
-176   80     
96     160    
224    80     
-48    64     
-176   -80    
320    112    
288    128    
-368   48     
96     176    
544    -48    
-336   16     
-112   112    
96     208    
-656   496    
-176   -192   
160    -160   
96     656    
-224   96     
192    528    
-480   -48    
-160   -144   
512    -80    
64     -16    
-256   288    
128    128    
16     64     
48     208    
-416   -96    
208    176    
-512   -464   
-128   -336   
176    144    
-32    16     
112    48     
-176   16     
-272   -96    
528    672    
848    -96    
-848   -16    
96     192    
16     1904   
-80    3152   
352    416    
-1088  768    
16     -864   
544    304    
32     -144   
-528   352    
384    0      
-64    384    
-192   -160   
-32    192    
-288   -288   
-32    144    
64     48     
-160   32     
-64    80     
208    32     
128    32     
272    304    
-1248  -160   
960    272    
-112   -176   
-176   80     
592    64     
208    144    
-368   -32    
112    336    
624    0      
-688   336    
368    -176   
-80    144    
0      -176   
-32    48     
432    -48    
-976   -272   
432    64     
464    208    
-464   64     
-256   32     
176    240    
-16    16     
288    272    
-336   32     
224    80     
144    96     
-32    -16    
-192   16     
80     -80    
-48    80     
464    144    
-160   80     
-400   -528   
48     16     
480    -48    
-176   272    
272    240    
-80    -384   
16     -464   
-32    -128   
112    -144   
-112   160    
-48    256    
112    0      
32     -48    
64     -128   
-240   880    
-176   192    
208    128    
560    640    
144    384    
-560   -192   
112    32     
128    160    
224    32     
-128   128    
-336   -160   
-256   192    
336    496    
304    -80    
-368   -208   
16     -2352  
-2000  1760   
2000   320    
-528   768    
384    0      
-64    -112   
-224   512    
-320   -560   
144    384    
80     -240   
-192   -1056  
-224   80     
96     -1440  
560    -80    
-656   960    
176    -208   
-128   -144   
592    448    
-64    656    
-304   80     
736    1216   
-1296  288    
192    -304   
944    -16    
-400   -240   
-368   -304   
64     192    
320    -96    
-32    512    
192    112    
-240   -16    
-320   -64    
336    -64    
336    272    
-288   -96    
-288   128    
560    416    
-304   96     
128    80     
-128   48     
-16    -64    
16     112    
32     -304   
16     -16    
48     -384   
-32    64     
192    80     
64     96     
-336   -224   
640    160    
592    64     
-1120  288    
800    304    
-240   128    
-1024  240    
1232   -352   
224    -80    
-720   -400   
64     128    
288    -1056  
48     -48    
208    32     
-192   -64    
-64    -32    
224    352    
-16    48     
-368   -48    
-80    128    
432    -64    
-64    80     
288    880    
-1440  -736   
-384   256    
2000   -192   
-976   -112   
-240   912    
-160   64     
-256   192    
272    32     
-512   112    
144    64     
48     112    
-96    -96    
192    -288   
224    112    
-304   -80    
208    288    
-240   128    
-64    -80    
-48    16     
256    32     
-448   -1408  
624    -512   
-816   528    
672    -80    
16     704    
-1360  928    
368    -48    
272    -368   
-288   112    
160    -192   
-192   -192   
128    -416   
432    176    
544    384    
-560   -320   
240    -448   
608    400    
-64    96     
-96    -192   
-80    192    
224    176    
160    -96    
-240   -48    
-224   672    
624    480    
176    128    
-416   96     
16     272    
-176   176    
224    1952   
1616   32     
-1168  -912   
-608   -1152  
736    -1232  
768    -688   
-752   368    
-240   48     
560    -208   
416    560    
-160   -800   
-544   224    
240    -144   
128    -32    
160    -128   
0      -368   
0      -64    
128    -1152  
-128   -48    
144    -560   
-160   160    
16     -48    
16     -224   
192    -96    
-272   432    
208    480    
240    -560   
-16    -496   
-16    544    
144    -432   
352    -1472  
-224   256    
-176   -368   
272    -320   
176    -720   
-416   208    
48     -112   
320    -800   
-48    32     
-128   336    
-32    -240   
224    -208   
240    -320   
-112   -2576  
128    -192   
-96    432    
224    32     
96     -432   
-224   -112   
-112   -32    
32     -928   
-64    -432   
176    -1216  
-256   -1552  
144    -544   
-208   -608   
112    -1632  
160    784    
-208   -960   
192    144    
-96    -16    
0      224    
160    -176   
0      144    
-240   224    
400    320    
96     -48    
128    -1024  
-160   224    
-128   176    
-80    -224   
288    -384   
-160   128    
-64    -304   
-288   -304   
304    -1424  
304    -672   
464    -736   
-656   528    
32     224    
80     1216   
432    272    
-272   -832   
-304   -768   
160    -864   
-528   464    
96     96     
-32    -48    
96     -736   
-80    -80    
112    -1072  
-32    -16    
144    -144   
80     64     
32     -16    
-208   -192   
112    -240   
288    -128   
-288   16     
-368   -432   
512    -368   
-400   640    
-288   -144   
688    -1376  
-16    -208   
-160   -608   
-16    736    
192    -176   
-128   160    
-112   -64    
144    32     
192    -240   
-224   208    
-416   -112   
400    48     
-64    -32    
160    -16    
-128   128    
-224   -784   
0      -208   
224    -192   
48     64     
-32    96     
256    -64    
-400   240    
208    -96    
-224   16     
80     224    
608    -48    
-1264  -960   
-1376  80     
2256   -208   
-944   -224   
-304   96     
928    480    
-368   -336   
64     144    
-304   -176   
400    112    
-544   16     
-320   224    
352    -96    
464    112    
-576   -208   
128    -64    
-32    48     
-96    48     
80     48     
112    -112   
-272   -448   
-16    -96    
-1424  144    
608    64     
-432   32     
-704   128    
432    80     
176    -144   
400    128    
-384   16     
-304   -16    
112    64     
-384   -112   
80     192    
-496   -448   
-112   192    
352    112    
-576   112    
384    64     
-160   -176   
-208   64     
-704   -336   
-640   144    
480    -272   
-272   -16    
16     0      
240    64     
320    -192   
128    -48    
-368   -272   
-96    160    
160    112    
64     80     
48     32     
-368   -48    
-368   64     
384    -288   
-64    64     
-384   160    
-160   0      
-272   -48    
192    -48    
304    -160   
-64    0      
80     320    
-464   64     
-272   192    
736    96     
-480   -704   
752    1296   
512    96     
192    1088   
816    560    
-1248  -336   
368    480    
-112   144    
-256   -48    
128    -144   
-64    -112   
64     64     
-32    352    
-336   32     
-192   112    
80     0      
16     160    
-192   64     
-160   80     
-112   -96    
144    624    
608    0      
-1440  272    
544    96     
144    -96    
-288   -16    
256    16     
400    64     
-432   352    
352    -32    
-80    304    
400    -208   
-656   176    
240    -304   
-416   16     
-16    -64    
128    112    
-48    -16    
192    -48    
-128   -224   
-32    192    
128    48     
80     192    
-48    64     
-160   -64    
-112   -176   
0      96     
-192   32     
-80    0      
320    -96    
-48    -80    
-160   128    
-256   -384   
608    272    
-144   -240   
-240   480    
-656   672    
128    160    
32     -352   
-192   -208   
0      -64    
-416   0      
480    -16    
48     32     
-112   336    
-288   96     
192    32     
64     -224   
-512   272    
48     -832   
-272   -256   
208    416    
-64    96     
96     -224   
16     -240   
-96    256    
-224   128    
128    -176   
112    32     
-272   288    
-112   0      
-544   -912   
1856   240    
-32    640    
-1136  560    
-400   656    
208    -432   
464    -16    
416    1024   
-48    928    
-464   192    
224    -192   
416    -224   
-240   128    
-64    -32    
16     704    
256    -32    
-336   -48    
192    -160   
0      -128   
16     368    
128    160    
-336   -608   
912    -400   
-768   -224   
320    464    
112    1504   
-160   336    
240    416    
-224   272    
-208   -16    
240    272    
720    560    
-752   624    
-16    32     
48     -80    
336    -208   
80     -32    
-448   192    
144    288    
400    -128   
-96    -192   
48     128    
0      0      
-16    128    
128    -96    
16     -64    
-352   16     
160    96     
32     96     
-16    -128   
1440   96     
-1872  240    
336    -672   
-64    -96    
-512   192    
1360   64     
-128   304    
-432   -192   
-192   -128   
448    -128   
128    96     
-416   32     
256    -32    
128    -512   
-512   -224   
272    -80    
-48    192    
0      480    
336    384    
48     352    
-112   224    
-672   -336   
2208   -400   
-640   -464   
-1440  -544   
1488   288    
640    1104   
-768   1136   
-304   1168   
608    496    
-112   352    
80     0      
16     -32    
-32    224    
144    464    
32     176    
208    48     
-368   768    
608    208    
0      0      
-192   368    
352    32     
144    352    
-112   432    
64     1024   
1072   1120   
-944   880    
-272   -528   
160    -112   
-16    352    
64     240    
320    256    
0      672    
384    624    
-1168  688    
-208   -128   
448    -240   
64     112    
752    912    
-272   784    
-128   160    
384    -48    
48     352    
-304   -96    
160    512    
-16    416    
-368   496    
-112   0      
240    -16    
80     -48    
1024   2576   
-1136  1536   
304    96     
1696   -240   
-688   416    
-816   864    
352    -880   
528    -1072  
208    1488   
-512   -208   
-80    -480   
704    160    
16     176    
-304   240    
80     32     
-96    -208   
352    96     
288    32     
-224   672    
256    -1440  
-96    -192   
0      -112   
192    336    
704    208    
-576   432    
-96    -16    
496    -80    
-80    400    
-224   -512   
16     80     
-16    400    
432    240    
-16    -32    
-368   -16    
192    -592   
304    864    
-176   944    
208    608    
384    1248   
192    1568   
-16    -48    
-192   -592   
112    -64    
-80    640    
576    528    
-96    -128   
-432   64     
336    736    
448    -992   
-144   -496   
-640   128    
0      -560   
1472   -864   
-576   -448   
-896   -848   
560    -160   
112    -544   
80     144    
-16    672    
-128   -656   
-512   -1440  
192    -112   
352    128    
-240   160    
64     -496   
256    304    
96     256    
-144   416    
176    -32    
96     -880   
-304   -16    
448    352    
-288   368    
-16    -96    
208    -832   
-176   -640   
208    -272   
-272   -192   
-416   672    
-80    -32    
624    1488   
-688   -848   
-528   528    
688    416    
-16    -1232  
-448   -1168  
384    -208   
384    336    
-240   -176   
-16    688    
224    512    
-80    240    
32     -496   
-32    -416   
-224   -272   
144    -144   
96     -336   
64     -1584  
-112   -32    
224    -864   
-96    48     
-576   1792   
224    -80    
-576   -416   
400    -336   
160    -608   
0      -464   
-176   64     
448    64     
80     -128   
-96    -608   
80     -32    
-160   -1408  
96     112    
64     -16    
-80    -192   
112    -48    
32     112    
128    -192   
-128   -672   
272    -48    
16     -1168  
-272   48     
288    16     
-352   -128   
528    -48    
16     128    
-80    -224   
-192   80     
-48    -256   
256    1248   
1504   448    
-1120  -144   
-832   -416   
800    -288   
864    16     
-720   -48    
224    48     
448    -2032  
-496   -64    
272    -16    
0      80     
0      128    
-80    -32    
-128   96     
304    -32    
-272   -32    
-320   -64    
112    16     
-112   -128   
-80    -352   
1104   608    
320    80     
-400   -336   
432    80     
-160   -144   
-496   208    
368    -240   
640    -32    
-432   64     
-224   -96    
-240   -32    
288    0      
176    -64    
0      -48    
0      -16    
112    -176   
-48    224    
160    -112   
368    -272   
-48    -464   
-304   16     
224    256    
-80    -112   
-1424  240    
208    240    
32     -464   
-720   -256   
-192   0      
512    160    
-800   80     
-288   -16    
-144   64     
176    -640   
-336   176    
432    -240   
-624   -16    
-48    -480   
96     -160   
416    112    
-560   -64    
-112   -144   
240    32     
-112   -80    
16     320    
-480   64     
-32    304    
528    -96    
-176   -176   
32     4768   
1392   -112   
-1136  720    
1760   -624   
-112   -496   
-832   336    
496    -160   
-432   288    
448    -96    
-128   -16    
192    80     
-192   64     
96     -400   
112    48     
304    -448   
-128   160    
-32    -208   
256    128    
-160   64     
-240   768    
368    432    
-560   480    
176    -176   
256    -112   
-192   64     
16     -48    
-48    80     
-112   -480   
-192   176    
208    -272   
32     128    
-80    -176   
112    -128   
-256   -32    
400    -256   
-384   -144   
320    -160   
-176   240    
32     48     
288    192    
-96    -32    
32     -112   
112    -176   
-160   256    
-672   32     
288    112    
-448   -192   
-320   80     
96     128    
-272   416    
304    304    
32     912    
-496   0      
-64    368    
752    0      
-496   -16    
-240   -16    
400    -272   
192    112    
-96    -80    
256    80     
-256   32     
-16    48     
320    192    
-288   288    
-160   64     
-224   -432   
-80    -288   
-896   -432   
16     -432   
-16    -432   
0      -256   
-224   -560   
-64    -192   
-176   -352   
32     384    
16     208    
-208   -144   
32     -336   
-32    -192   
-144   64     
160    2800   
1184   -16    
-1536  304    
464    16     
256    144    
128    528    
-544   -112   
96     832    
336    288    
-192   224    
80     -112   
-96    80     
-96    176    
64     96     
32     144    
-272   0      
64     -336   
240    128    
-144   16     
-848   128    
-112   1392   
832    160    
-656   752    
128    16     
-64    -528   
176    704    
-80    -128   
-96    80     
-112   -64    
192    -256   
272    640    
-304   272    
-224   16     
176    -352   
-272   -288   
-272   320    
64     272    
48     -336   
-208   -128   
32     288    
336    -96    
-144   128    
-128   80     
0      224    
96     176    
160    80     
-256   112    
-208   -240   
352    144    
1536   -32    
-2928  272    
-1312  -352   
1616   -896   
-736   -720   
-512   -128   
-192   -448   
416    624    
32     -160   
96     400    
-112   -80    
-368   176    
256    176    
176    112    
-16    128    
-448   112    
16     -96    
-192   -512   
-368   464    
-96    -80    
-112   -528   
1264   944    
192    -480   
-1776  -256   
640    -96    
416    832    
-272   368    
208    -320   
224    -2528  
-816   -1760  
96     336    
144    784    
-144   -144   
-16    -176   
-176   320    
-288   0      
272    -16    
128    -80    
-240   96     
96     272    
-80    448    
352    304    
80     -64    
-352   -192   
528    1120   
720    -128   
-896   -1728  
-160   80     
-112   -384   
-240   64     
528    288    
-400   32     
496    96     
80     64     
0      368    
192    -48    
-608   -544   
976    -1504  
-256   -16    
368    224    
-240   -144   
-32    32     
432    816    
-304   720    
64     64     
-416   672    
-16    256    
48     -16    
32     -64    
144    -16    
976    816    
-2256  128    
32     736    
1072   64     
400    992    
-816   1328   
-320   16     
400    -688   
96     96     
16     448    
-128   96     
-32    -320   
128    -352   
-32    176    
-144   320    
240    -48    
192    -288   
-160   128    
80     -128   
48     496    
-80    240    
16     208    
432    -128   
-176   -352   
224    -944   
-48    -224   
-16    -256   
160    -272   
96     -80    
16     1072   
-32    1344   
-48    352    
-128   -432   
128    -192   
176    -96    
-96    96     
-192   240    
288    32     
-128   160    
32     256    
-80    0      
0      32     
432    -288   
-768   -352   
304    -1152  
384    -544   
-192   64     
-80    -656   
96     -416   
80     112    
-224   -208   
560    -400   
176    960    
-800   672    
448    1328   
592    416    
-224   464    
-64    464    
368    528    
208    208    
368    288    
-320   -192   
176    -48    
-144   -16    
160    160    
-160   112    
144    -1184  
64     16     
144    -320   
224    -240   
-368   -80    
112    112    
208    48     
-128   160    
-176   240    
64     1296   
368    672    
-176   1232   
432    320    
-96    -640   
-960   1216   
1472   -1536  
-784   480    
-624   0      
832    48     
96     416    
-16    -224   
-304   224    
480    -112   
-112   -144   
304    64     
-144   304    
-16    112    
304    96     
176    -48    
48     -96    
-64    272    
288    64     
-224   -96    
320    -32    
704    1424   
-1184  -256   
-464   528    
1504   -144   
-1008  -240   
16     -256   
0      320    
320    80     
-320   480    
128    -16    
224    112    
-128   -160   
-96    112    
80     -448   
-160   -128   
-32    -320   
320    64     
-80    32     
-144   80     
144    144    
368    64     
-368   160    
128    -96    
64     96     
176    0      
-16    112    
48     -144   
144    96     
-176   -416   
1216   -144   
-2272  -160   
1344   32     
480    -112   
-160   352    
624    -240   
-528   512    
-80    336    
-64    208    
496    16     
112    -208   
-288   64     
48     -352   
464    480    
-368   -256   
-256   400    
480    -128   
-304   208    
144    -176   
32     96     
32     80     
240    400    
-1728  96     
1008   704    
16     -112   
-1504  -944   
1536   160    
-336   -64    
32     -272   
-80    -128   
16     144    
160    -416   
-64    192    
-32    48     
16     64     
80     80     
16     -16    
192    272    
-272   -160   
416    -128   
-64    -240   
-64    432    
96     -80    
-80    240    
368    -320   
-16    624    
-80    704    
16     -256   
752    -48    
192    -240   
-480   0      
224    -112   
272    -816   
-144   -80    
64     112    
96     -160   
-256   304    
16     -304   
-736   400    
416    -240   
-128   -48    
176    80     
272    -704   
-320   -32    
-160   -656   
400    16     
-336   16     
96     -224   
-304   -48    
432    -1248  
-1440  3168   
1344   -1280  
-880   -176   
-512   -304   
1200   176    
112    -144   
-576   80     
128    -320   
672    -272   
16     -160   
-224   -192   
-32    -80    
-144   16     
128    -160   
448    -688   
-448   -112   
-160   -16    
272    0      
16     -2352  
-480   -560   
112    -544   
16     160    
480    -112   
480    96     
-688   16     
176    288    
32     -384   
-240   -32    
-128   -288   
-192   -176   
224    32     
96     32     
-32    256    
0      -144   
336    128    
-256   -16    
-80    32     
80     -48    
128    208    
80     64     
-352   16     
240    400    
240    176    
-128   -192   
64     -944   
288    112    
-48    384    
16     384    
208    -432   
-352   288    
160    48     
416    192    
32     448    
-80    176    
48     -16    
-64    608    
-144   864    
48     432    
480    480    
48     208    
-240   160    
320    0      
16     -16    
0      272    
208    240    
-384   -1104  
240    832    
464    -240   
-160   -896   
-224   -96    
-48    384    
432    144    
-32    -144   
-64    -208   
-64    -448   
-240   -512   
208    -144   
-160   -416   
96     400    
-208   -144   
1136   48     
-1264  1504   
176    -592   
704    -1152  
128    -240   
-192   288    
416    160    
576    -736   
-288   -96    
112    224    
-144   -80    
-48    240    
224    32     
96     -336   
-288   -32    
144    -576   
256    288    
128    -416   
-64    -224   
192    -272   
80     -656   
-1104  -400   
688    288    
48     64     
-16    -32    
-176   0      
-80    -128   
-64    112    
176    -320   
144    0      
-176   -208   
-144   304    
128    112    
-160   -192   
48     -336   
80     -48    
-384   -80    
64     -608   
224    64     
208    208    
-288   96     
-160   16     
-64    112    
288    -16    
-16    -96    
-208   -192   
-1200  64     
-80    96     
-640   -48    
-608   -768   
1696   -1552  
-656   528    
832    -288   
-368   -208   
-512   -256   
-96    -96    
32     -48    
576    -400   
-256   112    
-240   272    
128    208    
336    -112   
-320   -16    
-240   -64    
336    672    
-80    -160   
-560   -288   
-864   -832   
400    1120   
-176   -80    
-384   -480   
-272   848    
1776   -656   
-1184  256    
864    0      
-288   -464   
-704   -1936  
-384   -688   
992    608    
-160   704    
16     1152   
368    560    
-672   528    
-48    -16    
304    272    
272    -112   
-656   -656   
16     -352   
272    -176   
0      -16    
32     -32    
112    384    
-288   192    
288    -336   
256    -1280  
320    -1184  
112    -384   
176    608    
688    560    
-336   80     
144    544    
272    272    
-448   -704   
-48    -320   
160    224    
-704   176    
-560   -1696  
80     -576   
48     144    
-368   -32    
496    32     
-64    -288   
80     208    
-48    64     
-80    336    
-144   368    
-272   -80    
304    560    
176    160    
560    1392   
-432   640    
352    -144   
544    -400   
-496   576    
-112   208    
144    1232   
992    -32    
-512   -208   
-1008  -80    
400    144    
608    16     
-48    -192   
-608   80     
80     304    
160    -160   
0      48     
-240   -144   
-480   -240   
480    608    
224    864    
-32    256    
-272   -480   
-544   112    
704    80     
-560   384    
224    96     
-224   192    
-432   -112   
304    768    
-144   144    
128    224    
128    16     
-304   224    
-176   128    
160    144    
-192   288    
176    304    
-48    48     
-192   160    
32     -16    
256    256    
-288   112    
-256   112    
384    256    
-96    -176   
-96    -768   
288    64     
-112   400    
-224   480    
144    240    
-64    -1088  
-944   -96    
736    48     
-16    80     
0      -16    
32     -16    
-432   80     
320    128    
64     128    
-64    80     
-64    -144   
176    -208   
64     -80    
-224   48     
32     160    
16     -48    
48     48     
112    672    
-432   256    
144    -128   
224    208    
-32    -32    
-208   176    
32     32     
-112   832    
800    -112   
-304   -144   
-240   160    
352    -192   
272    1456   
-448   -2272  
-1712  864    
1424   -384   
-64    -112   
-752   64     
304    368    
736    272    
-176   -160   
-192   64     
16     224    
-64    -112   
256    -80    
64     112    
-416   368    
320    272    
-448   -128   
240    32     
96     48     
-144   240    
-208   -96    
736    1008   
624    -96    
-960   368    
-528   112    
224    64     
464    288    
-368   -64    
0      -48    
-416   80     
240    32     
-16    112    
80     96     
128    144    
-160   -16    
-176   -64    
144    192    
-208   128    
-32    -48    
-32    144    
224    -16    
-48    128    
32     0      
-192   48     
336    96     
32     16     
-336   240    
480    32     
-336   -48    
112    -512   
288    400    
16     -800   
160    -160   
-208   -16    
-224   320    
768    80     
-96    176    
-144   32     
48     16     
-384   80     
416    160    
80     80     
-160   16     
-80    192    
416    112    
-384   160    
192    -80    
128    -16    
-128   48     
384    128    
-192   128    
304    688    
1536   -144   
-1200  192    
464    160    
752    112    
-640   64     
160    304    
768    -96    
-208   32     
-512   64     
192    -544   
224    -16    
-320   128    
240    64     
-288   128    
240    80     
0      224    
32     160    
-112   32     
-144   176    
384    384    
-944   144    
-384   32     
480    -464   
208    192    
-304   -480   
-368   -1152  
-352   320    
720    448    
-320   16     
48     160    
-208   208    
80     160    
-240   32     
144    -160   
-256   160    
544    304    
112    192    
256    -128   
-224   160    
32     64     
304    48     
-112   96     
-96    96     
208    -32    
-96    112    
256    -288   
-160   80     
-48    -576   
1616   -1856  
672    -368   
-1440  -64    
-768   272    
400    -128   
912    -16    
-544   -48    
-160   32     
288    -560   
-240   112    
304    -880   
-16    0      
-16    240    
16     -32    
240    208    
-576   -16    
240    64     
-176   -272   
272    -288   
96     -160   
-176   304    
32     -144   
-240   176    
608    -320   
-432   192    
512    -240   
128    -16    
16     528    
-176   448    
112    448    
512    -32    
-384   -16    
-416   -32    
448    608    
640    -352   
-432   128    
-48    720    
608    672    
-32    352    
-144   592    
224    64     
-64    336    
-160   144    
288    544    
80     768    
80     704    
32     -48    
240    -176   
-16    656    
-32    -720   
-80    224    
32     -336   
-512   -32    
288    -96    
-272   240    
176    -1040  
0      -512   
16     1072   
272    1296   
-336   32     
160    -336   
48     -416   
192    -288   
-208   80     
80     432    
-16    96     
176    -288   
448    -176   
-224   -288   
64     -112   
-32    176    
64     -1104  
128    48     
-96    160    
144    96     
-256   16     
-272   -1392  
208    -304   
224    -304   
-224   32     
464    -1408  
-352   176    
80     32     
368    176    
-144   -288   
-288   448    
144    -480   
224    -176   
160    16     
-80    -480   
-352   -160   
48     -304   
128    32     
48     -336   
-208   -160   
-192   -368   
256    -80    
-16    144    
0      32     
-96    80     
-128   880    
1056   -256   
-880   -64    
96     -112   
96     16     
-240   -48    
272    -432   
80     224    
-320   128    
-128   32     
352    -432   
96     -32    
-48    -288   
16     -80    
112    -368   
-176   160    
-32    -576   
32     -384   
64     -144   
80     -112   
112    -80    
144    -144   
-1104  -144   
-80    -352   
288    -144   
256    0      
-80    64     
400    -224   
-688   464    
1456   768    
-1744  160    
-1392  -624   
1856   -16    
-480   -816   
-736   -320   
192    -384   
960    -1184  
-528   1008   
-176   -512   
64     16     
-80    -176   
176    272    
-64    -368   
-448   0      
256    -1792  
304    224    
32     -608   
-704   -592   
32     48     
144    -528   
1296   640    
-1424  -240   
-592   192    
1328   560    
-2448  800    
256    288    
1040   832    
560    400    
-512   288    
-80    -80    
-48    -128   
160    -256   
432    -480   
-48    208    
-96    128    
-32    -176   
624    432    
400    336    
80     288    
-800   464    
192    144    
544    528    
-624   -496   
160    -576   
224    -16    
240    -496   
-576   144    
176    -400   
-288   16     
272    0      
-352   -128   
-192   -208   
-352   -32    
-192   -96    
336    -32    
16     -128   
-144   -144   
720    -112   
-512   288    
-304   -288   
256    112    
64     128    
128    -480   
-560   256    
512    -32    
-144   0      
160    -16    
-432   -768   
-288   224    
304    3312   
608    80     
-1200  256    
-672   -784   
960    80     
736    -32    
-1408  -160   
-112   192    
-256   48     
352    160    
-288   -16    
-352   48     
384    160    
-336   0      
400    96     
-48    -16    
-592   -224   
256    176    
-560   1040   
512    672    
-352   -240   
-224   -352   
352    -160   
-288   -80    
0      48     
-640   48     
32     48     
144    -112   
-80    96     
32     96     
-16    -128   
-64    -336   
-336   -208   
16     -256   
-272   128    
80     -304   
-32    80     
-128   32     
-528   48     
304    64     
320    16     
-352   -48    
-496   64     
-544   -288   
352    320    
48     320    
-304   400    
48     -64    
112    -512   
-16    -144   
-128   -80    
400    432    
640    352    
-288   288    
-416   240    
48     -48    
-272   32     
-48    -112   
-32    80     
-48    -16    
-64    144    
80     -160   
-16    -48    
-128   -320   
0      32     
224    208    
-144   160    
-96    160    
64     448    
256    -32    
-432   -112   
208    176    
-224   16     
-112   80     
-384   -304   
-208   224    
16     288    
256    -208   
-176   -144   
-80    272    
16     1424   
3232   -352   
-1280  352    
-688   0      
800    -192   
-128   -464   
-464   -96    
336    320    
-320   32     
0      -272   
176    -64    
-64    176    
-96    64     
-32    288    
528    -320   
-272   -128   
-224   496    
128    -352   
-208   -176   
128    96     
-624   128    
1184   -256   
-144   -48    
-912   -32    
768    432    
320    -80    
-1184  -208   
-16    272    
368    -256   
-160   48     
112    64     
-96    -96    
208    192    
208    192    
-208   16     
-640   192    
688    -96    
-448   144    
368    -160   
-336   -16    
48     -32    
-400   64     
304    -32    
-160   64     
240    48     
-240   240    
112    48     
0      112    
32     160    
-576   -176   
384    224    
48     256    
-480   -16    
-240   -64    
80     112    
400    -336   
-272   -416   
-256   32     
-160   112    
144    128    
96     80     
-96    80     
288    368    
-592   -112   
80     368    
192    -112   
-336   -48    
464    -208   
32     16     
-192   16     
-336   -352   
-176   624    
1520   -112   
-1360  -176   
224    176    
720    0      
-448   -16    
-624   -288   
480    80     
272    80     
-288   16     
192    128    
-192   -32    
-96    -16    
272    48     
-16    128    
-128   -192   
144    128    
-16    160    
-16    32     
-48    -192   
736    240    
-832   -176   
416    64     
672    176    
-1024  96     
240    288    
560    -304   
-256   112    
-48    112    
-80    0      
224    80     
112    112    
-32    -144   
-192   176    
-48    112    
656    -32    
32     240    
-160   128    
-400   144    
160    -416   
-272   416    
272    16     
-384   128    
-80    -368   
336    0      
112    112    
-208   464    
-176   -736   
-432   2832   
1296   1088   
-1280  -176   
-192   -352   
944    256    
-176   -288   
-1104  -464   
464    -48    
-128   224    
-48    16     
208    80     
80     128    
-176   -64    
96     112    
128    32     
-32    96     
-128   -224   
160    272    
192    -272   
-720   -720   
432    -576   
16     -96    
64     240    
-128   480    
544    -112   
32     304    
-400   48     
224    -544   
16     -816   
80     160    
-176   192    
-16    -240   
-224   64     
384    352    
96     448    
-240   128    
160    400    
-48    272    
-224   -416   
176    -416   
-32    304    
-96    -416   
-64    448    
160    -640   
320    -1104  
-304   -416   
-48    16     
48     864    
160    80     
96     48     
-320   320    
528    608    
608    720    
-592   976    
336    -368   
208    -224   
400    -1760  
368    64     
-176   240    
0      112    
96     256    
64     96     
-48    -272   
352    -432   
288    -128   
-128   128    
-64    128    
48     240    
-256   352    
-96    128    
-32    64     
176    -112   
-224   112    
256    -496   
160    96     
-272   96     
-80    304    
144    -384   
-48    -96    
-32    -16    
800    960    
-1232  768    
512    -176   
160    224    
16     -256   
32     192    
-176   176    
64     -208   
32     -1024  
-240   128    
-112   112    
80     64     
32     -240   
-16    -112   
-144   -16    
208    80     
-192   96     
64     -160   
256    -192   
-16    -240   
112    -240   
-608   -48    
304    320    
192    -272   
-16    96     
-96    -960   
-144   112    
160    160    
288    -80    
-144   -144   
32     240    
-160   192    
112    -32    
0      -112   
-64    -64    
-96    48     
0      560    
-192   288    
288    752    
-208   352    
-112   -240   
272    192    
80     16     
-288   528    
-208   -144   
32     96     
288    -80    
-304   -592   
448    -160   
-208   -1072  
1888   -960   
-1312  208    
416    512    
704    656    
-832   944    
448    512    
416    624    
-352   -736   
-368   -720   
224    -1104  
336    -112   
96     -112   
-304   -112   
224    16     
80     -160   
-32    80     
-32    -368   
336    208    
-224   -144   
192    240    
-448   -1504  
176    -112   
1104   -304   
-704   288    
2432   832    
-800   416    
656    -1344  
-80    -352   
-320   -608   
432    -96    
16     192    
-192   0      
-112   -448   
0      -352   
400    160    
-176   -32    
-208   -304   
160    224    
80     -304   
192    -464   
-16    -96    
-224   -800   
1056   -192   
-656   -160   
80     -352   
576    -288   
-816   64     
-160   -112   
32     -96    
448    224    
-96    16     
-208   -224   
64     -128   
192    -432   
352    -160   
224    -464   
96     800    
80     0      
-640   -48    
176    -48    
272    -192   
128    -256   
96     -400   
64     -192   
128    48     
400    80     
64     -160   
-336   0      
-192   -1376  
560    -3760  
-2208  -1520  
640    416    
272    160    
272    -352   
-368   80     
-304   -544   
432    480    
96     -480   
32     -32    
-128   -256   
352    128    
-144   -112   
16     320    
112    -224   
16     112    
-96    -48    
144    -192   
464    448    
-896   176    
624    528    
240    -208   
-272   -128   
-672   -272   
656    96     
272    -656   
-416   368    
416    -400   
-160   272    
192    48     
-128   32     
112    -64    
224    -32    
-320   -80    
624    128    
-400   -64    
368    16     
-256   -416   
48     -432   
624    96     
-432   -432   
48     112    
400    16     
16     -32    
32     -256   
-208   -80    
544    32     
-176   80     
16     -96    
176    -96    
-240   16     
432    624    
-1680  0      
528    336    
464    256    
-736   -416   
80     304    
432    0      
176    -240   
-128   0      
256    96     
80     32     
-48    -32    
-144   208    
224    80     
-240   -32    
144    400    
0      432    
-160   416    
752    -208   
-272   -640   
-96    176    
112    160    
64     32     
-160   -80    
32     112    
128    -320   
-48    -656   
-208   -272   
80     400    
-160   -384   
1040   -1776  
-1616  688    
944    -352   
-160   96     
-512   -144   
752    944    
656    304    
-560   -688   
304    -256   
-144   320    
16     -80    
528    -144   
-288   432    
-336   -240   
256    32     
304    -64    
-48    240    
-928   -400   
-32    32     
-368   -304   
576    528    
112    160    
-1280  -320   
352    -160   
-864   80     
-112   -160   
512    -304   
-240   160    
-48    176    
-64    -80    
-464   -272   
112    272    
-352   -160   
-288   32     
448    -128   
-224   0      
-208   -208   
288    -272   
-288   -16    
400    -48    
96     48     
-944   16     
48     64     
-64    -128   
480    96     
-416   -64    
-32    0      
176    64     
240    -96    
-2384  544    
2560   64     
1872   128    
-2336  80     
880    464    
720    96     
-1120  -96    
112    144    
336    -16    
-336   0      
-96    -96    
208    -32    
-32    112    
-48    -416   
-368   32     
704    -64    
-416   176    
-64    -80    
-192   -144   
224    -224   
-272   -64    
416    496    
976    32     
-1360  80     
-720   -16    
688    -336   
-48    32     
-112   192    
336    -304   
-144   112    
-352   80     
-16    -304   
-208   208    
464    0      
-224   288    
448    -16    
-368   -96    
352    352    
-16    128    
-384   -16    
96     -16    
16     -112   
272    -192   
-240   592    
16     -400   
96     48     
256    784    
816    -288   
-624   -80    
736    64     
-144   192    
-16    96     
-288   -208   
-32    -192   
336    -400   
528    -144   
-592   -160   
-304   608    
448    -64    
-336   -752   
-352   0      
304    48     
-128   -48    
176    224    
48     -160   
80     288    
496    224    
-16    48     
-144   288    
-432   -32    
-144   -2288  
-880   -624   
288    272    
-32    -352   
336    48     
-256   -544   
-192   -128   
-272   -1232  
320    -1088  
-256   16     
16     352    
-48    -336   
160    240    
96     144    
-288   368    
160    208    
-48    224    
-272   224    
368    288    
-160   256    
-16    144    
-96    -80    
544    -48    
-352   400    
80     688    
-80    496    
128    416    
-208   320    
0      16     
192    592    
-304   -64    
-432   -320   
96     -208   
16     368    
272    864    
32     672    
-144   128    
128    -384   
-96    -512   
-128   880    
-208   160    
-80    128    
80     -96    
208    896    
-480   96     
128    -208   
-32    -560   
-224   64     
352    544    
-48    192    
-320   -256   
800    -544   
-768   432    
-144   48     
-208   -400   
-48    -736   
-96    1008   
-128   1856   
208    912    
-64    -640   
16     -64    
-48    144    
144    -272   
272    64     
144    80     
-208   240    
0      272    
-192   320    
-48    64     
64     80     
-128   16     
16     -48    
-192   80     
320    160    
-96    -128   
112    -224   
272    -480   
-288   -368   
32     32     
16     192    
-208   -352   
608    -768   
-208   448    
416    -112   
-576   160    
-288   48     
48     -32    
192    -112   
-448   -448   
-32    96     
-64    464    
32     256    
80     96     
64     -128   
0      -64    
320    -64    
112    224    
-304   224    
64     272    
208    320    
-480   -64    
352    48     
-464   -224   
368    192    
304    944    
-64    48     
-64    -288   
-32    512    
-176   256    
256    -336   
272    96     
-64    272    
-272   -128   
32     288    
416    -304   
96     592    
-304   -224   
-432   288    
192    -832   
304    256    
-32    -1312  
-128   224    
-176   -80    
336    -16    
16     64     
-160   176    
-160   -48    
96     192    
-16    112    
1520   1520   
-1776  928    
-640   176    
1248   -432   
-944   -288   
576    -208   
-624   -512   
208    -368   
80     -256   
-64    -240   
-496   -32    
304    0      
160    192    
-96    -176   
-224   16     
144    32     
128    -192   
160    96     
128    48     
-176   192    
96     80     
384    -336   
-2000  400    
656    368    
-176   400    
160    -736   
-304   192    
288    432    
-800   0      
240    -48    
256    -32    
-560   16     
304    144    
32     48     
-80    -48    
400    32     
-384   -576   
96     176    
-112   -976   
112    -80    
-80    0      
272    640    
-480   -96    
-64    112    
-96    128    
272    -224   
144    464    
-96    96     
-368   -800   
80     160    
224    -16    
-416   -48    
528    192    
80     -736   
-384   -496   
480    -944   
-320   112    
432    -144   
528    208    
0      432    
-544   208    
256    48     
512    16     
-592   192    
-144   -144   
848    368    
-208   0      
-336   96     
400    -192   
-688   176    
-1056  1024   
752    752    
-896   896    
-160   -352   
400    224    
256    80     
-672   160    
224    -400   
304    208    
-848   -240   
224    192    
432    -480   
-16    144    
-64    -128   
128    144    
-176   -272   
240    160    
176    16     
-528   -336   
-384   64     
688    -96    
-416   160    
288    -48    
384    -64    
464    -320   
-240   48     
112    -112   
96     128    
176    -48    
-80    32     
-624   -208   
368    -128   
-48    176    
160    -48    
256    64     
-288   -128   
-32    -1040  
208    -208   
-912   -96    
528    -208   
-144   112    
400    112    
-256   32     
-208   160    
336    64     
224    -304   
-352   -672   
-160   128    
192    -128   
-144   144    
-784   -48    
320    -272   
672    -240   
-304   -1584  
160    -160   
176    -496   
-640   192    
224    -144   
48     -416   
64     -256   
-64    16     
176    -208   
-112   192    
-16    -112   
160    -224   
-112   144    
-400   -128   
48     16     
400    -128   
-240   -400   
-448   192    
528    160    
-208   240    
176    -176   
96     -272   
16     48     
-176   448    
128    320    
80     -416   
64     -224   
-1312  352    
2528   -880   
-768   -240   
-816   -32    
1152   320    
-48    64     
-464   -112   
-224   -752   
720    -528   
48     576    
-272   192    
336    -160   
-80    176    
-48    -640   
112    -304   
-256   384    
208    -96    
-352   0      
-16    0      
224    -64    
-480   -1408  
560    -176   
352    -48    
-1088  672    
592    -176   
112    -288   
144    -752   
-304   144    
192    112    
128    -80    
-240   176    
-64    -320   
192    16     
32     48     
-64    -32    
-144   -96    
48     -112   
96     -208   
192    -160   
0      -1456  
96     304    
144    144    
0      -32    
16     -16    
-336   -288   
304    -96    
-16    96     
-96    -144   
160    144    
1408   960    
-2368  112    
-1232  -80    
2176   -432   
-448   -240   
-768   -176   
96     -96    
352    -64    
64     304    
-192   224    
224    -64    
-352   -144   
224    16     
-16    0      
128    64     
-512   -80    
368    -128   
64     0      
-96    -288   
-224   160    
192    -240   
576    1088   
1328   48     
-832   336    
-112   -112   
144    -192   
-96    -240   
-256   -336   
-400   144    
128    -112   
256    -368   
-32    -144   
0      112    
16     144    
-288   208    
-64    -224   
560    16     
-144   496    
128    48     
-208   -80    
64     64     
80     -16    
208    -224   
240    160    
-32    -304   
480    16     
560    1920   
-864   1232   
-640   592    
624    -256   
48     -384   
-960   48     
-176   176    
-960   -400   
192    -560   
64     -224   
-944   864    
-192   416    
-400   -96    
192    208    
-48    64     
-992   -176   
-128   -16    
-336   -336   
96     -16    
304    672    
448    320    
-80    -80    
-192   368    
-192   64     
0      1680   
16     -48    
-992   -800   
1456   -288   
-800   1088   
-656   240    
704    -352   
352    784    
-688   -512   
-272   112    
208    16     
208    256    
80     -48    
-224   -144   
-208   304    
16     -480   
-160   -144   
-144   208    
-432   416    
288    816    
-80    -496   
-48    -224   
80     16     
-112   416    
304    832    
-32    512    
-304   -448   
-96    1600   
272    736    
-256   -640   
160    592    
-352   -176   
-192   -16    
288    -160   
-544   624    
-256   688    
-208   -64    
320    -80    
272    96     
-272   320    
-192   -256   
-320   272    
464    640    
-144   528    
192    928    
-96    864    
272    -272   
112    1136   
-272   128    
-144   320    
-64    -288   
560    112    
496    336    
-752   432    
48     80     
-352   192    
80     224    
208    800    
-128   -112   
-384   -368   
-160   -48    
336    112    
0      -48    
-368   -80    
-48    -16    
208    608    
-496   144    
-208   128    
-576   -16    
128    -240   
-320   32     
16     48     
0      0      
-192   -320   
16     -400   
-320   -144   
32     -576   
-96    -480   
0      528    
-32    -80    
320    1136   
-2064  -352   
-80    -2096  
1136   176    
-192   0      
208    128    
-528   -480   
144    160    
336    160    
-192   656    
-16    -80    
0      64     
96     336    
48     -160   
-16    -64    
-16    288    
-128   176    
16     528    
48     -144   
-128   -80    
448    304    
-1024  496    
736    -1136  
160    688    
-224   736    
-448   -704   
320    368    
64     -128   
-160   384    
-64    -384   
-16    96     
-176   -224   
160    400    
192    -272   
-272   -256   
32     96     
80     592    
288    384    
-128   96     
-96    48     
-16    -112   
-96    144    
-80    128    
-16    272    
64     208    
400    352    
-112   -112   
-48    32     
160    16     
-656   -304   
1664   -784   
-1520  464    
464    288    
912    416    
-1040  -160   
-432   416    
928    192    
-416   -288   
-80    0      
80     -176   
0      224    
-32    16     
256    240    
-496   -16    
144    240    
160    64     
-240   -176   
-48    -112   
256    -64    
-48    64     
-112   -208   
976    1136   
672    -208   
-1312  256    
816    -160   
-416   96     
-176   64     
416    -80    
-640   160    
336    -96    
-288   16     
96     16     
112    32     
352    272    
-288   32     
-448   -16    
288    -48    
32     -416   
112    -80    
352    96     
144    0      
208    752    
592    -112   
-544   144    
304    160    
16     -144   
-560   336    
-384   208    
736    96     
-528   0      
-528   176    
496    48     
-48    128    
0      224    
-16    -160   
-128   -64    
368    112    
-512   -256   
-16    -64    
768    -256   
288    144    
-400   144    
-96    64     
224    0      
352    -400   
-512   128    
240    -208   
-288   -208   
-240   -832   
1088   -736   
912    -976   
-240   1056   
1056   112    
-592   320    
16     320    
80     -32    
432    224    
224    144    
-1024  -64    
192    160    
176    80     
32     128    
-144   32     
48     -288   
112    128    
144    -336   
-16    176    
112    128    
-640   272    
944    272    
-496   368    
208    16     
-384   -128   
-112   160    
512    48     
-480   -128   
144    368    
48     112    
-304   -128   
32     192    
192    -160   
-176   192    
448    96     
-560   48     
288    304    
64     -160   
-288   64     
240    -96    
32     32     
208    48     
-656   -240   
352    0      
-16    176    
-496   -544   
592    -80    
144    -624   
-368   96     
160    -1360  
128    240    
80     176    
-96    96     
368    -752   
-336   480    
240    384    
352    96     
-368   80     
64     160    
272    160    
224    -208   
-80    176    
-160   -576   
304    64     
16     -352   
-64    240    
96     112    
160    192    
272    -144   
-256   -512   
144    -656   
16     -208   
-144   64     
112    368    
352    64     
-80    0      
-224   272    
16     -240   
-32    -880   
160    -448   
-32    -96    
-224   -1104  
1488   2352   
1904   0      
-2400  352    
624    -1168  
112    272    
80     192    
-96    -432   
-32    192    
-288   -720   
272    -96    
304    -1040  
-160   -48    
-224   32     
256    48     
224    -752   
-16    608    
-160   544    
112    224    
-16    -160   
128    16     
-160   1232   
64     -32    
-128   -464   
112    -848   
288    -544   
-96    208    
-208   672    
176    -464   
64     -32    
80     48     
112    336    
16     256    
-32    160    
288    -80    
-80    224    
16     -112   
80     -400   
176    16     
-144   -208   
32     368    
288    -352   
0      176    
-32    192    
-32    -48    
208    128    
128    -400   
-288   -192   
64     -1296  
432    304    
624    144    
-2816  -512   
-912   -64    
2192   -960   
-576   -160   
-304   64     
-176   -432   
256    1584   
-96    736    
0      -384   
448    -112   
-400   -576   
160    128    
160    -704   
-528   -336   
272    -144   
192    -96    
-240   368    
384    912    
128    720    
-320   -1024  
752    784    
2000   80     
-1744  -864   
-336   -1120  
848    688    
-336   400    
160    816    
176    464    
-80    176    
-704   -144   
400    -336   
48     112    
-160   -16    
176    -64    
112    -288   
-112   -32    
112    -2016  
-384   -336   
-128   -656   
176    -336   
160    -368   
96     144    
-688   -1008  
112    -736   
-16    288    
128    48     
-1328  432    
560    1392   
-160   1184   
-304   -560   
800    272    
-160   256    
-768   80     
1088   -416   
432    592    
336    912    
-672   1168   
-336   496    
480    -192   
-272   288    
336    208    
-144   288    
-16    -352   
16     352    
-144   32     
-272   528    
576    -304   
-224   656    
-320   -1248  
416    192    
1088   -1136  
-288   96     
576    -592   
-272   -64    
-288   -752   
512    -176   
432    1840   
-176   -48    
-688   -128   
96     240    
272    304    
128    192    
-80    -752   
-144   -640   
-144   -128   
112    -416   
-80    112    
-192   272    
304    144    
-304   -208   
32     -288   
-416   -304   
944    -16    
-256   128    
-432   272    
176    512    
48     -320   
256    -1120  
80     -192   
-144   512    
112    640    
-272   -208   
32     256    
608    240    
-688   -32    
-64    -128   
32     -656   
192    -432   
-464   208    
48     176    
-96    16     
80     -32    
48     368    
0      -784   
-480   384    
112    272    
-16    880    
-144   416    
112    -416   
16     -80    
0      1280   
1104   16     
-464   -448   
-368   -80    
832    368    
-384   816    
-400   224    
256    -880   
-64    -1040  
-160   -624   
-16    -160   
-64    -128   
-112   -48    
368    16     
-512   -112   
240    416    
32     240    
-336   -112   
-48    -128   
-112   -240   
-16    -32    
-112   -96    
-32    0      
-288   112    
-224   128    
32     -160   
-224   -528   
-48    -176   
-528   -16    
560    -208   
-1600  1216   
1520   -640   
-1088  704    
336    -288   
-288   32     
112    544    
-48    -288   
64     -528   
-48    -272   
-288   -96    
-112   -48    
-96    80     
80     240    
-352   288    
-96    176    
-800   -64    
-176   80     
64     -64    
160    -32    
432    128    
-1264  672    
912    -432   
-304   -128   
-192   -400   
64     -160   
64     -400   
-80    80     
-144   -32    
0      -96    
-112   256    
-352   128    
192    192    
-352   -224   
-304   64     
304    -336   
-96    320    
16     -208   
-160   368    
400    -144   
-384   32     
48     80     
-16    32     
240    144    
0      -32    
-672   -176   
176    256    
96     16     
-816   16     
1296   1216   
-976   448    
-640   1024   
1648   -16    
-448   -80    
-1008  -96    
320    256    
672    112    
-752   208    
80     -112   
144    64     
-64    32     
-64    -32    
-160   -112   
-464   -96    
336    0      
-16    16     
-144   112    
240    0      
208    -112   
-400   0      
592    912    
-96    -304   
-2016  176    
1104   -352   
608    208    
-272   -176   
-400   448    
1024   416    
-752   -16    
-128   -128   
48     -160   
96     160    
-160   -208   
352    352    
32     -32    
-480   -144   
592    -48    
-272   32     
16     0      
272    32     
-192   -64    
192    576    
768    -496   
-1472  112    
768    112    
-752   544    
160    288    
-176   160    
-400   -96    
32     256    
224    -96    
64     64     
-496   32     
-208   -192   
624    336    
-464   320    
-816   -1040  
272    -80    
96     624    
-288   48     
32     -96    
80     160    
-272   144    
32     -16    
64     624    
848    48     
-448   176    
-496   16     
1328   1824   
-2336  704    
-768   240    
1616   208    
-1664  -384   
-112   272    
1152   208    
-544   96     
-736   96     
704    -16    
400    32     
48     96     
-480   -80    
176    272    
176    0      
176    288    
-336   -288   
-320   352    
256    -144   
112    448    
208    -528   
-608   480    
784    -64    
-784   64     
320    96     
352    -32    
-400   256    
288    -32    
-256   -144   
496    -272   
-224   -288   
-192   -96    
144    176    
208    0      
128    48     
-416   0      
176    -112   
160    -48    
272    -320   
96     96     
-32    256    
-64    48     
-16    288    
-176   -288   
-32    -288   
432    -32    
-96    32     
-176   144    
-16    -64    
288    96     
-304   -48    
-64    48     
-16    -464   
192    -240   
-352   -1152  
-544   -1120  
432    -32    
80     336    
288    256    
112    384    
-352   320    
128    432    
80     224    
-96    -32    
32     384    
80     128    
160    224    
-16    320    
64     176    
-128   -16    
-64    -32    
-32    288    
384    1328   
64     448    
-560   48     
144    48     
-32    560    
416    -224   
-240   -704   
-32    288    
48     624    
1040   1008   
-1888  1280   
736    -800   
1168   48     
-944   672    
-128   -32    
544    1856   
128    32     
-384   -48    
224    304    
-64    16     
-16    160    
64     -272   
112    -176   
-128   128    
384    96     
64     -224   
-176   112    
112    352    
128    144    
-80    -656   
-768   -352   
416    256    
-288   192    
128    16     
-16    -560   
48     -1552  
448    -160   
288    -128   
-80    368    
-144   -352   
64     176    
64     416    
-144   96     
-64    80     
-208   -32    
208    -112   
592    32     
-32    928    
-336   320    
-112   0      
240    128    
80     -208   
48     -240   
-224   224    
240    -400   
0      112    
-112   464    
-32    -16    
-528   -320   
912    416    
2400   -448   
-1488  192    
-208   736    
688    176    
112    -336   
304    48     
-64    0      
-352   80     
-32    112    
544    -480   
16     208    
-208   -560   
32     144    
320    -16    
-64    224    
-128   112    
-160   48     
-288   -144   
288    352    
-800   -320   
1392   -656   
-544   224    
-320   112    
512    -496   
-288   -864   
512    -1184  
-240   -1520  
80     688    
464    432    
-144   -128   
-32    -480   
-16    160    
32     -512   
64     -416   
336    -64    
-240   384    
768    160    
-96    -160   
-112   -208   
160    -368   
-336   512    
560    -736   
560    -16    
-416   -288   
32     320    
-640   -1152  
64     -960   
368    80     
-224   128    
544    688    
368    -480   
80     48     
-928   -432   
1024   -304   
320    480    
16     1280   
368    -256   
-256   384    
352    32     
0      32     
192    256    
-144   272    
80     224    
288    -128   
-368   224    
-368   -512   
-48    -512   
0      -288   
400    1360   
368    -96    
-208   32     
688    -1200  
-1056  -224   
-112   288    
672    480    
-144   -592   
-192   -1024  
-48    544    
240    -240   
416    -592   
-192   -80    
-416   -624   
64     128    
-80    48     
192    -144   
-256   208    
16     416    
-416   -64    
336    -640   
160    -1200  
-592   -64    
32     -800   
368    416    
-32    -176   
288    -896   
-48    -864   
-80    -208   
64     -576   
-64    -1536  
320    272    
-128   80     
128    48     
272    -368   
-64    576    
-112   -448   
64     240    
224    80     
32     272    
-64    176    
176    -16    
0      -144   
352    -416   
-32    48     
128    272    
-80    416    
272    -640   
48     384    
-80    560    
128    464    
-400   -336   
544    304    
448    176    
-464   384    
-48    336    
128    -256   
-432   -288   
64     -384   
-336   -160   
368    -208   
0      -112   
-96    -2672  
-48    -608   
128    -112   
32     752    
-240   352    
384    1088   
-480   416    
96     -112   
-288   288    
256    336    
-512   272    
96     -128   
384    -128   
0      -256   
-688   -32    
480    96     
272    320    
-176   -880   
928    1168   
-1968  1120   
1056   -416   
432    144    
-224   -304   
-464   112    
128    -16    
208    -128   
-144   -224   
272    -400   
-256   -176   
-128   32     
416    -224   
32     240    
-432   -656   
-128   -640   
608    16     
-32    0      
-272   368    
448    160    
-512   -672   
560    -1104  
-800   272    
496    -144   
-336   16     
-144   448    
-48    -272   
64     -32    
208    -192   
0      -560   
-208   48     
-64    64     
400    0      
64     240    
-144   -32    
64     224    
-176   240    
-304   128    
80     -192   
-352   112    
368    64     
-208   176    
-96    -240   
64     48     
528    -480   
-784   -16    
480    256    
-112   0      
-448   32     
0      -1184  
896    -672   
-640   -832   
-336   0      
336    112    
-752   352    
1040   -128   
-528   208    
-96    -416   
288    80     
-368   -240   
64     176    
128    32     
-352   -144   
16     -32    
336    -32    
-464   64     
48     112    
272    16     
-80    -192   
-128   -112   
48     -176   
112    576    
1712   -64    
-1600  48     
-432   464    
1552   -80    
-1376  96     
400    -32    
-64    224    
-256   -16    
-176   64     
96     96     
-32    -96    
160    -112   
128    192    
32     -48    
-128   144    
-96    224    
192    192    
-624   -16    
-416   -80    
416    16     
-1696  192    
768    64     
-128   -368   
-480   -192   
1056   48     
464    512    
-592   16     
112    -32    
-208   -32    
-32    240    
-320   -160   
-64    -128   
-48    192    
752    -128   
-368   -192   
80     -128   
-16    192    
-528   288    
432    -80    
-944   32     
-64    32     
112    -80    
-80    -224   
-496   -112   
496    0      
-144   -176   
-144   0      
-512   -800   
1984   -1360  
-400   1088   
-704   -160   
-288   -16    
112    384    
144    -192   
144    112    
-16    48     
-1520  -368   
336    208    
-176   -48    
-240   160    
400    -80    
-432   48     
80     -112   
-208   64     
272    -48    
-64    80     
-336   528    
352    1408   
-112   1072   
0      -96    
304    16     
-752   -512   
256    336    
128    -192   
-352   80     
224    -400   
112    -496   
-256   32     
-80    -224   
-48    80     
-160   144    
48     -176   
288    -64    
-208   240    
144    352    
-256   336    
-240   -48    
224    112    
-320   -480   
432    -608   
-144   -160   
-432   304    
464    224    
-432   528    
240    368    
160    -176   
-144   144    
288    352    
-432   -368   
416    -288   
-544   640    
208    16     
176    352    
-672   800    
800    1104   
464    240    
-240   -80    
144    -128   
-96    -400   
-128   -128   
-32    176    
112    192    
-112   -176   
-32    -416   
96     352    
32     32     
-416   64     
16     -128   
-400   384    
-48    560    
-64    48     
-48    -192   
-80    -112   
-80    -96    
128    16     
16     240    
-96    -112   
-192   112    
464    896    
-464   1088   
192    0      
32     -432   
256    -160   
-176   80     
-272   64     
160    224    
-400   64     
-80    -208   
112    64     
48     -80    
16     176    
-160   16     
144    16     
-48    -192   
-192   -192   
352    -208   
112    -96    
-48    128    
-816   464    
848    -96    
-432   -128   
-112   336    
176    432    
-32    -192   
48     224    
-208   336    
48     64     
-16    -48    
64     16     
0      80     
-48    48     
112    -80    
16     0      
240    272    
-192   -96    
-224   0      
240    -336   
272    112    
-64    224    
-64    160    
-144   32     
-64    16     
80     -112   
48     0      
192    160    
96     80     
-352   -112   
1120   1760   
-480   544    
-1856  -400   
1904   368    
-480   -288   
-1696  -976   
512    -256   
-512   -1568  
-96    -1392  
192    -704   
208    976    
-480   -48    
32     -144   
144    176    
-96    -80    
-160   256    
224    480    
-208   160    
0      -240   
176    192    
-320   -352   
720    896    
1424   -144   
-1536  544    
560    208    
-384   -352   
0      -672   
480    -1648  
-224   -784   
-112   -96    
160    368    
16     16     
64     -240   
-192   -304   
96     -96    
-176   48     
32     64     
-96    864    
-368   880    
368    480    
-32    -16    
64     240    
-256   -464   
464    -864   
112    64     
48     1248   
272    48     
880    432    
736    1008   
-800   368    
352    304    
-48    -256   
96     224    
208    -32    
-96    -496   
-1088  352    
272    -592   
448    -496   
208    208    
-320   -768   
-384   -1680  
224    224    
-224   -256   
224    144    
48     -208   
256    416    
304    64     
-272   -64    
576    768    
-112   624    
-1088  -96    
80     560    
288    320    
-368   880    
816    848    
-336   -464   
-80    -16    
544    -240   
-448   80     
-64    -320   
112    368    
-160   -48    
80     -224   
-208   -240   
144    144    
-32    0      
176    112    
320    80     
-368   1072   
608    1664   
112    416    
-208   -288   
320    -2592  
704    16     
-656   48     
0      80     
192    416    
336    144    
48     272    
-144   48     
32     240    
-32    -96    
32     -128   
304    16     
64     96     
-320   -16    
192    352    
256    -432   
-160   96     
192    -752   
-80    304    
304    512    
-176   304    
-448   -32    
576    64     
-160   -304   
-656   -352   
592    -144   
48     -240   
-48    -32    
-160   -640   
560    -128   
480    -144   
-512   -272   
0      -384   
400    80     
-416   -144   
288    160    
-64    -128   
0      -16    
-144   304    
256    -80    
240    96     
-336   -48    
80     176    
256    -512   
-80    240    
-16    -32    
176    -416   
-176   -112   
-224   272    
352    -352   
0      -288   
-112   -96    
64     128    
192    112    
320    -496   
-272   176    
32     144    
288    144    
-944   496    
2624   -1184  
-720   16     
-672   -192   
912    80     
416    272    
-1120  384    
272    352    
304    -272   
-112   0      
160    -2960  
16     -416   
-160   224    
112    400    
528    -304   
-192   48     
-144   256    
368    -384   
-144   32     
0      -320   
-368   -1136  
1152   -192   
-16    -448   
-1072  -16    
816    -192   
32     -112   
256    -304   
-512   0      
288    -176   
64     -160   
464    -368   
64     112    
-272   -64    
-224   -848   
480    128    
128    -128   
-112   64     
-32    32     
448    -208   
-272   0      
16     -480   
-96    112    
144    -144   
0      32     
640    -1248  
-576   48     
64     48     
160    80     
80     288    
-1504  -2608  
1424   -1024  
976    48     
-1600  -48    
560    272    
-208   -256   
512    -272   
-432   -672   
-368   -416   
624    -176   
128    -304   
-128   -128   
16     -448   
-192   -80    
560    -32    
-80    32     
-416   -96    
224    128    
144    208    
208    48     
-128   -16    
-736   -576   
720    -224   
496    -656   
-288   -608   
-544   128    
848    -288   
-720   -192   
96     80     
352    -320   
-64    80     
272    -128   
-80    144    
-304   -112   
336    16     
256    -48    
-144   -32    
-144   -256   
-176   -128   
176    176    
128    -240   
32     736    
-656   -544   
-464   272    
784    -48    
-336   0      
64     -80    
0      64     
240    64     
752    -288   
-560   64     
0      160    
-576   288    
-64    -544   
496    -96    
-272   -416   
-16    -64    
320    -240   
-176   176    
192    -240   
-16    96     
0      -112   
80     -64    
-32    64     
32     192    
-416   96     
80     -80    
-128   -48    
-240   -160   
16     -752   
1664   -1472  
-64    -176   
-1488  -48    
-48    400    
688    -1056  
-272   272    
-224   128    
-64    -128   
208    128    
-144   -16    
-128   -16    
-416   48     
368    -64    
-304   -48    
256    -256   
-368   -32    
368    -64    
-128   -240   
432    784    
-112   480    
128    496    
192    -208   
0      96     
-656   16     
832    -16    
-448   -48    
-16    0      
-48    -800   
0      -816   
320    400    
48     736    
64     -32    
-112   -656   
272    0      
-128   -144   
240    512    
-32    240    
-672   80     
192    256    
144    -240   
-304   -256   
240    -432   
-32    -784   
32     -560   
-432   0      
-304   -336   
-496   528    
128    848    
304    -80    
-160   -288   
208    912    
-1344  -16    
-112   -320   
432    64     
-560   160    
192    384    
176    720    
64     -1696  
-176   80     
144    704    
-240   -432   
-64    112    
272    -32    
-432   -80    
-32    32     
48     -192   
208    -112   
-96    240    
-16    96     
112    -48    
16     48     
-768   -80    
-240   80     
-32    -16    
-32    -16    
640    -352   
-48    112    
-416   -176   
176    176    
208    -32    
528    -112   
-1216  320    
576    80     
-224   160    
-64    -16    
96     -96    
-144   -112   
-480   336    
-160   384    
208    176    
96     -400   
-160   272    
-128   -64    
144    16     
128    240    
96     96     
-272   80     
-208   240    
160    96     
-480   -640   
960    -784   
32     656    
-352   64     
-320   -96    
-112   144    
96     96     
-160   688    
352    -240   
-64    64     
-144   32     
-128   112    
176    -32    
-16    32     
128    128    
-144   256    
-208   64     
-48    448    
256    64     
-464   -144   
-256   0      
272    -368   
336    144    
-192   464    
176    160    
-160   -112   
-496   112    
192    144    
96     80     
64     32     
-1120  -1216  
-416   256    
1136   -288   
-864   704    
400    0      
-176   -1440  
-1408  -1040  
480    1584   
-176   -160   
-320   -848   
144    -336   
-304   16     
-112   48     
368    416    
48     176    
-256   -16    
-144   112    
224    96     
0      -1152  
-240   -656   
560    288    
-2288  -304   
-288   704    
752    -688   
-416   -1120  
96     0      
240    1120   
-576   800    
-176   224    
64     -656   
-32    -208   
-64    176    
-368   416    
624    0      
-528   -432   
-96    176    
-160   -336   
-48    96     
656    208    
-208   160    
-224   112    
-288   -48    
304    -144   
-656   2256   
1360   -112   
416    -80    
-912   -192   
800    336    
288    240    
-336   -400   
160    96     
-32    16     
160    384    
-224   160    
-608   -800   
448    -288   
112    400    
-816   272    
368    -432   
912    -208   
-320   160    
-160   16     
16     176    
240    -48    
16     80     
-864   352    
304    112    
160    64     
-544   -1184  
-544   -1856  
1632   288    
112    64     
-1328  -16    
64     192    
416    -32    
-208   -144   
-512   -96    
-480   480    
640    128    
-16    192    
-240   -48    
-208   192    
64     -32    
272    144    
304    64     
-496   160    
176    112    
-208   -320   
528    48     
-208   -144   
-272   -48    
304    272    
-496   -144   
64     0      
336    128    
-208   0      
-160   192    
288    16     
0      48     
-224   0      
192    16     
-320   16     
576    416    
-256   128    
-144   368    
192    160    
48     -448   
-16    -208   
160    176    
-32    192    
240    64     
-80    112    
-32    32     
-336   96     
192    16     
240    -112   
-576   -192   
272    -32    
-48    96     
48     112    
-128   -512   
880    -208   
-560   304    
-80    96     
176    224    
-64    48     
-432   16     
448    160    
80     256    
208    16     
-112   128    
112    128    
0      -80    
-144   48     
224    192    
-80    0      
16     32     
48     288    
-64    32     
0      144    
-48    -480   
160    -64    
-176   -32    
192    -336   
-288   256    
-160   240    
240    -400   
-176   176    
96     80     
80     144    
-320   1680   
2784   -336   
-1184  544    
-1040  -224   
976    176    
176    -864   
-336   -176   
-144   992    
640    -400   
-144   112    
-16    176    
352    -272   
-208   96     
176    112    
256    272    
-48    -176   
128    688    
-64    224    
-96    -256   
64     176    
352    1440   
384    -64    
-736   -1248  
320    0      
48     48     
304    976    
304    -48    
-592   -160   
144    -192   
144    144    
256    -16    
-336   400    
-64    192    
-32    -80    
-208   128    
192    48     
512    288    
-320   -240   
-224   112    
400    -768   
224    176    
-208   0      
176    176    
144    192    
16     64     
-240   240    
320    -336   
-208   144    
96     -528   
-1136  -640   
416    704    
352    -96    
-1120  -656   
-112   144    
1568   -208   
-288   48     
-928   -496   
544    -160   
96     -32    
-112   128    
128    32     
160    -80    
96     464    
-192   48     
-112   400    
224    -592   
32     -240   
-240   -768   
32     -176   
272    176    
-752   192    
1648   -400   
-592   -64    
-320   -192   
-128   336    
368    -32    
64     -384   
-160   224    
16     -528   
256    160    
176    -128   
-160   112    
-112   80     
-144   160    
688    -144   
32     176    
-368   96     
80     -256   
208    -160   
192    96     
-96    128    
336    -192   
384    112    
-128   -688   
-656   608    
176    -256   
96     80     
288    -32    
128    96     
-32    -288   
-240   -688   
-720   384    
832    -1136  
-464   -96    
-16    240    
640    -32    
-320   -384   
64     -736   
272    -96    
80     80     
0      -48    
-112   128    
144    96     
-48    -2096  
32     416    
576    16     
-128   96     
-528   -752   
960    -1072  
-880   -3440  
-1776  -1664  
1232   -112   
768    -144   
-368   0      
128    -992   
128    -704   
-144   240    
-192   176    
672    -192   
-320   -320   
-144   -80    
208    336    
208    112    
-112   -528   
-800   -80    
0      -64    
32     -16    
128    -48    
48     544    
-16    -224   
-16    -336   
32     -432   
544    -656   
-144   496    
16     32     
0      240    
560    976    
16     448    
-128   -288   
-32    -288   
48     -128   
32     192    
144    -624   
0      304    
-144   144    
48     224    
160    464    
64     848    
-32    -496   
-352   80     
256    272    
176    336    
-80    208    
-144   160    
480    1360   
-496   272    
-928   -608   
304    -784   
176    16     
-320   64     
-240   816    
1648   -672   
-640   240    
-320   -2336  
464    688    
240    560    
-144   512    
-16    -1616  
-592   -576   
64     64     
144    -192   
-192   -16    
0      -16    
-432   112    
208    0      
400    -416   
-560   -1104  
-336   240    
640    -1104  
-48    192    
128    32     
-160   16     
80     16     
336    304    
-592   512    
-16    208    
608    -112   
-336   -128   
-672   96     
48     -144   
304    256    
384    64     
-96    -96    
-96    192    
176    48     
-96    -224   
400    -288   
-32    464    
-240   192    
272    -80    
-32    0      
-144   192    
336    32     
-272   0      
64     -112   
-32    224    
128    256    
64     -48    
0      -416   
368    -208   
-1344  -32    
496    192    
96     128    
192    -160   
-368   -192   
-64    -288   
64     -80    
-16    -432   
32     80     
32     208    
-192   48     
64     -480   
-64    -240   
208    -816   
192    -432   
160    384    
-192   672    
-32    560    
592    -144   
-304   -208   
-400   -192   
16     224    
288    368    
-112   -112   
80     -112   
-144   32     
-608   -480   
416    144    
-336   -1040  
1472   -1232  
-656   -144   
-656   -32    
160    672    
-752   16     
-480   800    
1104   368    
-64    -80    
-448   -32    
192    48     
48     -96    
-32    -32    
-144   -192   
-96    -32    
176    16     
-336   -112   
208    -176   
-352   -272   
96     32     
-64    16     
-112   -912   
-1040  448    
1504   208    
-528   640    
-416   672    
112    -96    
32     -96    
-416   -16    
-16    -192   
848    -128   
-336   160    
-256   -144   
128    160    
240    368    
-176   -112   
-336   48     
320    96     
-64    -144   
-480   -208   
256    96     
32     32     
208    320    
-1232  -16    
576    -32    
144    352    
-512   -464   
-96    784    
-16    384    
-208   -144   
48     -176   
-240   -32    
368    160    
112    336    
-1024  -224   
576    352    
-32    80     
464    -176   
-304   -192   
32     144    
-80    16     
112    16     
160    -16    
-32    64     
-32    -32    
-176   32     
288    80     
-112   80     
-272   0      
704    1552   
928    4704   
-2208  2208   
752    -32    
1488   -192   
-1216  -224   
-512   352    
656    -32    
32     -80    
240    464    
-896   -208   
256    0      
448    192    
-32    288    
-400   32     
-208   128    
-16    32     
192    80     
32     64     
448    48     
-1200  64     
880    80     
-16    48     
-400   -256   
64     320    
208    0      
-432   80     
240    112    
208    144    
-448   -16    
-160   16     
832    64     
-544   144    
-432   -48    
0      160    
64     16     
256    208    
-96    112    
-256   176    
272    0      
-64    128    
-32    -96    
-528   -64    
48     -48    
400    0      
-400   -48    
-368   48     
-400   -48    
384    -48    
0      0      
-80    80     
-80    128    
128    320    
-944   -80    
32     -896
[truncated: 8,011 more chars]
