# Supplementary material for: A Fault Diagnosis Method for One‐Dimensional Vibration Signal Based on Multiresolution tlsDMD and Approximate Entropy
Source: Hindawi journal article supplement (doi:10.1155/2019/3262818), 2019-01-01
Supplement: f1 [file 3262818.f1.zip › 3262818.f1/gear signals/pitch errors signal/Data8.txt]

304    -528   
-208   -464   
416    -224   
-192   192    
-128   -288   
160    -64    
32     -48    
112    -320   
-64    32     
32     -224   
32     -16    
208    -336   
-112   192    
-336   -1312  
1152   -336   
-672   -16    
-464   144    
1104   80     
-784   192    
-112   -240   
352    -112   
256    -576   
-432   -48    
-96    32     
336    16     
-48    32     
48     112    
16     112    
112    224    
-288   -192   
-368   -32    
-48    -272   
96     -192   
0      -496   
112    -272   
-336   -400   
128    32     
240    16     
160    -16    
-368   -544   
64     112    
336    -400   
-384   368    
448    -1296  
-2080  528    
1312   -208   
512    -240   
-736   -16    
112    -80    
544    -64    
-32    -272   
48     -48    
-96    -1520  
-96    160    
128    -176   
64     -80    
672    -48    
-496   -160   
-64    192    
352    -256   
-304   48     
-48    -160   
16     -32    
384    176    
800    -224   
-2160  -384   
1632   16     
-128   -960   
-1008  112    
752    -32    
-80    640    
144    160    
144    -192   
-336   -64    
80     -80    
-64    0      
144    -176   
-160   16     
-16    -64    
-64    -176   
544    -912   
-624   80     
272    -784   
80     -128   
400    -1808  
128    0      
-176   0      
-144   -352   
96     -976   
400    80     
-496   176    
432    -80    
32     -16    
-448   -80    
-1280  -224   
416    16     
-272   -16    
224    144    
-16    16     
32     -992   
320    -176   
-384   176    
160    64     
272    -64    
-48    -80    
48     112    
112    -144   
-256   -112   
128    -192   
-400   16     
0      -32    
336    304    
400    -4928  
-2272  -688   
1616   16     
512    -32    
-112   64     
-208   64     
-480   48     
288    64     
-560   192    
528    -96    
-528   0      
-208   48     
416    80     
-64    -192   
-304   112    
208    -176   
-80    128    
304    -144   
352    544    
-848   896    
400    512    
336    0      
-256   -256   
112    32     
144    32     
-336   0      
656    240    
-768   16     
-32    -80    
320    176    
-176   -160   
96     -48    
-336   -176   
-176   -352   
-320   -160   
208    -224   
-240   64     
224    -32    
-64    -96    
-160   80     
96     -80    
-80    -320   
208    -224   
-800   96     
-96    688    
-16    -480   
464    -736   
-576   -368   
-368   -448   
-48    -288   
-832   96     
48     528    
16     -416   
-272   -368   
-48    -416   
-176   -512   
144    -832   
48     -400   
-768   -608   
128    -96    
-160   -336   
-32    16     
128    -80    
-176   -528   
-512   -320   
64     208    
352    -592   
-272   -128   
-352   512    
-96    352    
144    -368   
96     -64    
96     112    
-64    112    
64     336    
-112   528    
80     144    
-112   384    
-128   112    
128    -176   
-480   -672   
688    -1776  
-192   48     
16     1040   
-112   64     
-448   -160   
16     -1136  
304    384    
-112   -400   
-256   96     
192    -272   
240    -16    
-48    48     
-320   -48    
0      112    
128    -160   
-16    -112   
-288   -496   
-16    240    
0      -64    
-96    480    
368    -496   
-400   256    
384    -240   
-288   -192   
-176   128    
320    256    
240    384    
-208   192    
-112   -96    
48     -48    
176    32     
0      -16    
-48    144    
-80    96     
256    320    
-480   272    
0      -48    
352    96     
-144   -96    
-288   96     
80     96     
304    -64    
16     64     
80     -16    
-320   224    
272    64     
256    16     
-416   80     
-368   -80    
-1424  -112   
1408   -240   
-432   -208   
-336   -240   
592    640    
448    336    
-416   -384   
-496   16     
80     400    
304    512    
-144   16     
-320   -240   
-16    32     
160    112    
-256   368    
80     -432   
144    112    
16     96     
-544   928    
64     -736   
448    1600   
-112   -1040  
-1744  608    
1728   -1024  
-848   -608   
112    -288   
288    1104   
224    1872   
-640   2208   
432    944    
-112   0      
-736   -496   
496    -304   
-64    -128   
-320   128    
-256   208    
544    528    
-192   512    
-304   48     
128    272    
-64    48     
-48    336    
112    288    
-112   144    
-144   -384   
-176   -784   
-224   -784   
-208   -1808  
-512   -1120  
256    48     
-208   208    
-272   304    
384    400    
-256   -32    
-16    -272   
720    64     
368    2256   
-992   1184   
-224   -48    
448    -752   
-240   160    
-304   32     
-256   -384   
224    -400   
-48    -352   
-176   -176   
272    208    
-16    -736   
64     16     
-368   80     
704    1072   
848    -224   
-896   272    
-608   480    
576    288    
752    -1296  
-1296  -1504  
-256   192    
624    -32    
400    288    
-160   -32    
-416   256    
32     128    
240    -64    
560    176    
-240   64     
-384   160    
272    560    
112    720    
64     -496   
-224   -224   
112    -128   
-16    272    
-368   16     
848    -128   
-208   16     
-288   -144   
272    96     
-64    -336   
192    -592   
-224   -368   
-16    128    
-176   240    
-80    32     
-32    -160   
320    -176   
-352   -224   
144    16     
320    0      
0      144    
-176   -80    
160    144    
208    64     
-416   0      
208    160    
352    -128   
-272   224    
144    400    
528    176    
-96    -176   
-112   -192   
352    -48    
-576   64     
80     -48    
32     -80    
-128   256    
272    288    
-160   272    
48     32     
80     16     
-48    48     
-48    80     
192    80     
96     144    
-176   96     
80     0      
192    48     
-272   -144   
288    576    
240    32     
-304   -176   
144    208    
176    16     
-16    144    
384    96     
-1088  752    
256    128    
176    -256   
-32    240    
80     128    
176    2000   
2704   -144   
-1408  432    
-320   64     
544    96     
-80    -480   
-224   0      
240    400    
-112   -80    
48     128    
304    16     
-160   224    
-80    -144   
160    -224   
48     144    
320    320    
-64    192    
-64    -304   
-16    32     
48     64     
-208   -1200  
-48    288    
816    112    
-384   32     
336    352    
160    -48    
-32    352    
-320   112    
304    -320   
48     224    
368    -176   
-224   64     
-368   -144   
272    384    
544    -976   
-304   64     
-80    -720   
96     48     
144    144    
-176   16     
160    0      
48     128    
96     -32    
-224   -368   
112    304    
480    -176   
-448   224    
272    -336   
-64    32     
-128   -2368  
-768   -592   
16     -128   
-288   288    
288    112    
-32    -48    
-208   160    
160    144    
-48    128    
272    -80    
0      128    
-160   -384   
64     144    
160    -432   
-352   -16    
560    -48    
-224   96     
-304   64     
560    48     
-352   0      
-16    112    
144    -352   
-1616  -320   
1312   144    
-48    -800   
-1136  192    
880    -32    
112    384    
-864   -192   
144    -32    
448    -112   
112    32     
-224   -272   
240    176    
-192   -32    
304    128    
0      80     
-16    208    
-160   128    
192    -64    
384    32     
-192   -384   
576    256    
528    0      
-320   96     
-16    -304   
112    272    
128    48     
160    -720   
-400   336    
400    -656   
64     -32    
304    -80    
112    -1008  
160    16     
64     -1360  
560    -272   
-208   0      
-160   144    
-304   256    
160    -240   
160    48     
-16    64     
128    -128   
-112   0      
-80    -272   
736    -496   
-64    0      
-448   -80    
-272   -1216  
-464   -288   
0      512    
-736   -2000  
48     -144   
1280   128    
-752   -224   
-240   288    
64     -336   
176    -176   
400    -272   
-384   -64    
64     -224   
-192   192    
80     -48    
128    -80    
320    -48    
-320   -96    
304    -128   
-160   -208   
-336   288    
336    304    
192    32     
-144   -80    
-272   -240   
400    -64    
-160   -256   
-432   0      
-16    96     
64     -384   
448    -368   
-656   -928   
64     -272   
448    -224   
128    16     
-624   -528   
240    32     
304    688    
-704   224    
304    -208   
224    -32    
-224   -96    
128    -96    
16     -128   
-48    -240   
-496   64     
176    -16    
80     -272   
-64    400    
-128   192    
144    -1264  
-80    -288   
-80    1072   
1104   304    
-480   1344   
528    928    
-384   560    
112    1280   
560    1968   
-112   272    
-112   -464   
112    -48    
-592   -16    
-32    -48    
192    160    
-176   208    
64     -160   
256    -1152  
-480   -256   
144    -32    
96     -400   
0      16     
80     0      
-192   64     
304    -224   
-176   -368   
48     32     
-256   352    
0      48     
-352   -96    
128    -208   
-288   272    
0      -128   
832    64     
-544   48     
-128   240    
352    16     
-192   288    
144    -208   
-112   -128   
-352   64     
144    -240   
-176   -48    
-80    32     
-112   48     
304    -272   
128    48     
176    -944   
-160   -16    
-32    48     
64     144    
736    -128   
-1392  112    
288    -64    
496    96     
-80    -224   
-112   64     
-704   -224   
80     -272   
16     352    
272    -96    
-192   48     
-96    -400   
224    -16    
-80    128    
256    -16    
-96    288    
112    -368   
-128   -560   
144    -336   
32     96     
144    32     
-384   -64    
240    -192   
384    -64    
-544   -448   
-384   -128   
0      224    
-160   -32    
-352   288    
-688   352    
-1408  1296   
3136   -592   
-496   64     
-1232  -320   
512    -176   
272    -80    
-1088  -1264  
-624   64     
448    480    
-272   -464   
112    288    
0      16     
-448   128    
336    -240   
176    -112   
-368   32     
-160   -64    
272    -576   
384    -352   
-448   224    
-160   -800   
-848   960    
2304   -368   
-1536  880    
96     832    
96     592    
-208   -528   
-1248  -208   
448    -640   
176    -384   
80     -112   
-400   112    
-336   -288   
-224   -336   
32     288    
128    112    
-64    -736   
-640   80     
192    112    
480    -288   
64     0      
-272   64     
80     256    
128    -416   
-160   -208   
-352   528    
672    -352   
-96    272    
128    -112   
-144   -48    
128    -192   
256    -32    
-112   -32    
192    800    
-224   48     
-288   160    
272    176    
-624   16     
144    224    
336    -80    
-128   -48    
-32    64     
-320   320    
560    -288   
-128   96     
-576   -208   
80     192    
-336   -560   
864    -400   
1152   2272   
-2048  1216   
816    -160   
1712   0      
-320   128    
-1072  -160   
256    496    
1024   -128   
-96    608    
-448   -304   
-208   240    
160    -208   
-64    96     
240    160    
-96    -48    
-256   176    
240    -64    
-384   112    
736    704    
-720   672    
-144   -640   
400    -560   
-480   -304   
128    368    
-192   -224   
-272   240    
80     -224   
-240   304    
-320   32     
-16    208    
-208   -304   
32     -224   
176    16     
0      240    
336    224    
-176   192    
-128   176    
-128   112    
480    112    
-32    -32    
-384   96     
48     16     
112    -16    
192    -144   
-112   -256   
-208   256    
464    112    
-112   96     
0      -144   
-32    112    
-112   112    
-192   -848   
-576   -48    
352    -16    
192    -96    
48     -144   
-64    -240   
16     160    
-32    160    
-256   80     
176    112    
80     64     
-96    -48    
80     -32    
0      32     
-224   176    
32     480    
384    400    
16     -192   
-752   176    
528    208    
-416   -160   
-160   128    
256    16     
-224   0      
160    -240   
160    352    
-304   480    
160    -240   
64     32     
960    48     
-3280  1216   
496    112    
1280   272    
-640   -384   
48     0      
48     -496   
-192   224    
224    288    
64     -64    
-224   -224   
-208   192    
272    256    
272    256    
-592   32     
-32    -176   
544    64     
-416   208    
208    -352   
32     80     
336    1120   
-480   -256   
-848   352    
1280   64     
-128   112    
-1088  128    
640    -144   
592    0      
-352   112    
80     -208   
-144   352    
48     -112   
-160   0      
-48    0      
-272   160    
656    528    
-240   80     
-160   272    
64     -48    
-112   208    
192    16     
144    144    
-336   32     
112    16     
-288   -160   
96     -32    
96     64     
-16    64     
-128   64     
112    32     
512    -1024  
-544   816    
848    64     
32     -16    
400    0      
-768   192    
128    -464   
272    48     
48     0      
64     128    
-80    160    
112    96     
-32    48     
-64    272    
704    32     
-544   -192   
320    208    
-176   -96    
-256   64     
112    -48    
-48    -48    
1072   560    
-1616  144    
320    -160   
960    128    
-1024  16     
64     144    
512    -240   
304    -32    
-752   144    
224    -80    
144    64     
-96    -320   
160    112    
96     16     
-304   144    
272    -48    
48     -224   
-144   224    
144    128    
-32    32     
-16    -288   
-784   336    
1184   -144   
-960   224    
288    64     
688    304    
-704   -1472  
-16    176    
368    176    
16     -32    
-176   64     
-160   176    
0      -208   
368    -128   
-144   -96    
64     -112   
-512   400    
320    -32    
128    160    
112    -432   
64     528    
384    -448   
-192   32     
112    -1424  
0      -144   
-96    464    
176    16     
-512   -928   
336    -736   
256    -1088  
-112   576    
1040   -128   
-1056  -272   
-80    -80    
544    -624   
720    -832   
-272   -208   
-112   -240   
64     -1728  
32     192    
32     -656   
64     -112   
-64    -48    
128    144    
-32    0      
224    -128   
-144   368    
288    112    
16     -368   
-320   -448   
32     -256   
272    128    
-432   96     
-240   -96    
736    592    
-256   -592   
-144   -640   
-16    -480   
224    336    
-48    -16    
96     -144   
64     128    
-224   160    
176    272    
64     -896   
-96    320    
160    -256   
-16    -128   
0      352    
256    112    
144    -192   
384    864    
-912   -864   
16     -688   
272    -368   
64     -144   
64     592    
-208   -192   
272    224    
560    48     
-1472  512    
528    192    
432    1120   
-512   -80    
-64    16     
-288   -96    
48     -128   
224    224    
-128   48     
112    80     
-48    0      
160    -2112  
-416   -112   
-208   -224   
400    -240   
96     160    
-112   32     
304    -48    
208    -192   
-80    -992   
-80    80     
96     -352   
-144   112    
64     144    
352    -160   
64     -192   
64     -464   
160    -160   
-32    -944   
-544   480    
992    -720   
-816   -208   
544    16     
-224   112    
128    -224   
32     -96    
336    -592   
208    80     
160    -192   
0      -176   
-400   -256   
-32    -352   
320    -96    
80     96     
-240   0      
80     -368   
-64    -224   
64     0      
-144   -144   
608    -272   
224    400    
-464   -176   
-192   208    
304    0      
-192   -256   
-16    -416   
48     -48    
80     48     
-16    -128   
64     -64    
208    -560   
0      16     
112    -320   
128    -208   
240    -304   
-128   0      
384    -368   
-128   896    
144    240    
-48    -128   
-176   48     
176    -240   
-848   112    
160    -368   
-32    -112   
-128   -432   
592    -240   
-448   -128   
128    -672   
-2528  -496   
1120   96     
48     16     
-592   -608   
96     64     
-592   144    
-112   480    
480    528    
-336   208    
-704   -432   
-112   -400   
352    -80    
464    208    
-432   -128   
-144   224    
368    -656   
288    112    
-512   32     
80     -192   
-240   -608   
1040   1040   
480    -64    
-832   1552   
1184   -2176  
-1408  688    
1280   400    
-640   -592   
-544   -224   
416    -48    
-16    80     
96     -432   
16     -80    
-16    256    
496    224    
-176   -208   
-80    -80    
-80    -96    
144    48     
-48    64     
-560   128    
-416   -432   
1088   -208   
-960   16     
64     -416   
32     368    
-336   -400   
608    -640   
144    224    
-128   80     
-544   -288   
176    -64    
80     48     
224    48     
208    224    
-416   -528   
-864   240    
-64    -848   
-176   -336   
496    144    
-96    -16    
-256   -544   
352    -16    
-144   64     
-80    224    
-16    48     
-96    16     
160    16     
-192   -112   
160    -48    
544    736    
864    240    
-1312  -96    
-592   272    
-112   -368   
480    240    
-880   -384   
-704   288    
-16    -496   
-1104  416    
96     -208   
-272   0      
160    -32    
-32    0      
0      64     
176    224    
-208   -64    
-560   -208   
-416   192    
288    -80    
-448   608    
16     -384   
592    192    
592    -64    
-1056  48     
240    576    
112    192    
-96    144    
-96    48     
-128   32     
48     64     
-80    0      
-688   -176   
464    32     
-560   240    
416    48     
-752   -256   
320    80     
-144   -32    
-384   64     
400    112    
-304   112    
0      336    
-1440  -96    
176    384    
-64    -240   
-336   224    
336    -128   
16     144    
-448   -112   
-16    -32    
-144   512    
864    16     
-816   -48    
-272   -160   
1056   368    
-400   -16    
-400   64     
-256   80     
-272   240    
-32    160    
160    160    
-176   80     
48     -16    
-80    -352   
208    432    
-208   944    
256    448    
160    -480   
-368   256    
224    16     
-48    224    
-400   0      
160    0      
256    80     
-464   -240   
-160   -112   
272    192    
96     544    
-160   -48    
-272   -2576  
-1104  1760   
1840   336    
-656   160    
48     80     
544    608    
-992   544    
-208   -512   
576    -592   
-144   576    
-288   -160   
-128   -16    
-32    256    
240    -448   
-144   -48    
-16    128    
-384   288    
240    -80    
256    32     
-208   -64    
528    1584   
-1504  368    
240    -160   
784    -144   
-304   96     
-160   -176   
-16    -80    
-384   336    
288    -112   
16     0      
-176   64     
-64    144    
16     -192   
-80    -32    
192    -48    
-192   0      
160    128    
208    -240   
-720   112    
160    64     
-32    304    
-48    112    
112    64     
-176   -160   
256    32     
-288   -80    
112    64     
48     176    
-144   160    
-880   -2176  
2912   816    
1296   208    
-2080  -320   
336    -112   
672    0      
-320   288    
240    400    
272    176    
-320   -48    
-16    176    
128    144    
16     112    
96     0      
-336   272    
832    160    
-352   128    
-128   -128   
0      128    
352    192    
192    368    
-272   64     
672    0      
-1664  -352   
1216   -224   
976    336    
-560   688    
-224   -16    
368    64     
96     48     
-128   -96    
-432   128    
-176   240    
880    -16    
-176   0      
272    -32    
-656   96     
384    304    
16     -368   
-176   144    
176    160    
-128   240    
128    336    
-528   544    
-208   -512   
-16    576    
416    -416   
592    -528   
-656   336    
416    192    
-624   272    
-240   -48    
144    64     
176    224    
80     704    
-528   336    
-752   240    
400    -112   
736    -352   
-416   64     
-80    1040   
672    -32    
-368   32     
-128   176    
64     -64    
176    432    
48     -112   
-224   128    
80     -160   
-64    96     
-144   304    
32     2592   
1056   0      
-992   -368   
-80    256    
1072   256    
-336   608    
-672   1472   
688    1760   
-256   448    
-80    -160   
160    -48    
-288   288    
128    -160   
-176   -272   
352    96     
-128   432    
-240   48     
288    -336   
-240   -160   
-80    -16    
192    208    
128    272    
-880   64     
432    -1040  
-32    -1056  
160    -416   
-96    -416   
-32    -16    
112    112    
96     -48    
0      272    
64     144    
-176   -464   
224    -832   
-32    -688   
32     256    
224    160    
-432   416    
272    -800   
368    -272   
144    128    
-80    -1056  
32     -336   
-192   -208   
208    688    
-96    -160   
-160   304    
320    -704   
-160   80     
-32    96     
96     -528   
-1168  624    
1184   128    
208    304    
96     176    
-224   -992   
240    -2928  
-160   112    
-112   880    
-16    304    
144    -64    
48     96     
-400   -624   
-16    -432   
80     -96    
288    192    
0      128    
-48    32     
144    64     
-96    -144   
80     80     
128    -336   
-48    0      
-144   -144   
112    32     
96     352    
-144   656    
192    96     
64     160    
-16    -96    
704    304    
-1072  608    
560    -288   
-16    320    
96     -96    
48     336    
16     -240   
-192   720    
208    -32    
-112   192    
-144   -160   
-16    48     
304    16     
-160   272    
-128   320    
48     208    
-80    128    
-128   -144   
-112   -160   
-112   -224   
368    400    
672    -160   
-896   192    
320    -720   
-256   -512   
176    -400   
272    608    
-64    -384   
-160   -64    
-160   624    
416    144    
192    -272   
-320   64     
16     128    
96     -288   
208    -192   
-16    64     
-272   -208   
0      -256   
144    32     
144    432    
-176   32     
160    272    
-16    192    
-224   0      
240    32     
0      208    
-48    -112   
448    608    
144    -816   
-2272  -64    
1216   -224   
-208   48     
320    224    
-368   0      
-224   -256   
368    192    
-272   48     
64     64     
80     64     
-64    -64    
-16    64     
32     176    
480    208    
-112   80     
-144   288    
160    224    
0      128    
0      -96    
0      176    
-416   -976   
-176   528    
848    -496   
-432   -768   
304    -192   
672    -400   
-576   -512   
-176   16     
720    -1040  
-320   -128   
256    176    
96     -48    
-384   80     
448    -32    
-112   -320   
0      0      
128    -848   
32     32     
192    96     
288    -192   
-1568  -432   
-608   -48    
320    -480   
208    192    
288    208    
-224   432    
-1136  384    
-432   416    
1072   -544   
-272   -16    
-304   176    
48     32     
256    112    
736    1376   
-736   208    
-784   -288   
848    -112   
336    -272   
-352   -192   
-240   16     
-48    -704   
64     -240   
64     -48    
32     336    
-336   -432   
-464   160    
816    48     
-608   -432   
-224   -32    
2720   -16    
-336   -736   
-1040  -816   
192    272    
560    -112   
48     -144   
-288   -320   
464    112    
-352   -1200  
48     192    
224    64     
-240   -80    
240    -64    
-16    -112   
-288   0      
32     160    
208    0      
-208   -144   
-192   688    
624    -48    
-864   320    
496    -112   
336    -64    
512    -384   
-304   144    
-144   160    
16     -112   
-48    -48    
208    -16    
-144   96     
288    64     
-304   96     
448    -240   
240    240    
-528   -96    
64     192    
704    -48    
-544   160    
608    -160   
-304   64     
256    -368   
272    -16    
-272   0      
32     -16    
-128   240    
-64    224    
-112   160    
304    -352   
-176   -64    
96     -256   
-96    -272   
528    -624   
-480   352    
320    -32    
-336   160    
-272   -800   
-128   -208   
224    192    
-32    -240   
-144   32     
224    112    
-320   -48    
-112   -96    
-32    -16    
144    16     
112    -224   
-544   -64    
240    432    
112    -128   
-144   -96    
304    -368   
32     16     
-832   240    
304    48     
96     160    
64     32     
-416   -16    
96     288    
80     64     
-48    96     
-368   2000   
2304   -704   
-1952  384    
192    -32    
752    48     
-224   -144   
-208   -64    
-48    128    
496    -784   
-256   176    
160    160    
64     -192   
-112   -16    
-256   -496   
320    -528   
-192   448    
-64    -16    
-64    -16    
-208   -240   
128    208    
-464   96     
896    -544   
-528   96     
-736   512    
464    176    
-416   -304   
-208   -784   
-192   -240   
192    176    
144    -144   
0      224    
-464   -192   
48     -80    
-176   -112   
336    0      
-272   144    
-64    -208   
80     -16    
48     -288   
-176   -32    
16     32     
64     80     
-320   48     
-208   -192   
112    48     
304    -160   
-112   32     
-64    144    
400    112    
576    -688   
-2928  640    
304    192    
1216   -112   
-880   -304   
-352   -432   
-256   -176   
208    112    
-1040  224    
-16    48     
16     -176   
-320   -32    
160    -112   
144    224    
-192   64     
-416   256    
448    -16    
0      80     
-256   -128   
-192   144    
32     -368   
976    1216   
272    0      
-848   -576   
-352   -736   
-416   -464   
-48    -400   
-240   -544   
-80    32     
0      384    
80     -160   
-96    16     
96     80     
-48    288    
-432   64     
-64    80     
480    -208   
96     256    
-144   112    
-160   -80    
-208   -144   
144    -144   
160    -368   
272    80     
-160   -272   
512    -176   
400    2144   
-1072  2112   
-448   1296   
352    -80    
-160   -16    
-16    -112   
-96    -80    
-304   128    
432    -352   
-240   -832   
-560   704    
-368   176    
-144   -160   
272    480    
-96    96     
-112   -176   
-144   -304   
-32    -128   
-32    -240   
608    32     
336    160    
-32    -368   
-304   -336   
-96    16     
960    2384   
-1312  960    
-608   32     
1648   -144   
-976   672    
-512   -272   
480    -384   
416    288    
-336   -464   
-384   800    
144    -416   
240    112    
224    272    
-224   16     
-112   -128   
-224   16     
192    32     
-80    112    
-464   160    
304    -80    
-16    -928   
192    592    
-320   16     
-272   352    
512    64     
-48    -512   
-336   368    
48     1504   
-96    -80    
-32    -336   
96     480    
-224   -128   
-32    432    
304    48     
400    720    
-304   240    
-112   48     
240    -112   
272    368    
-224   256    
-208   -240   
-352   256    
512    608    
-160   432    
192    1008   
-176   672    
240    -496   
368    1184   
-272   192    
0      464    
-48    -192   
480    400    
560    240    
-688   304    
0      112    
-256   416    
192    288    
160    848    
-80    144    
-336   -192   
-176   -160   
368    64     
48     -32    
-464   0      
-16    -272   
176    400    
-16    336    
-160   64     
-672   144    
48     -208   
-224   16     
96     -16    
48     64     
-224   -464   
112    -528   
-176   -304   
64     -688   
-32    -480   
0      608    
192    368    
240    976    
-336   -368   
-656   656    
1280   256    
80     400    
352    240    
-560   -272   
272    -80    
240    80     
-208   640    
-16    -192   
32     288    
192    256    
32     -32    
48     16     
-48    224    
16     224    
144    576    
48     -80    
-160   -64    
544    352    
-992   320    
752    -1168  
160    576    
-272   496    
-368   -560   
288    224    
240    -32    
-96    528    
-48    -272   
-80    80     
-96    -224   
112    608    
240    -240   
-320   -304   
16     -16    
-48    496    
368    480    
-96    80     
-112   -128   
128    48     
-96    320    
-128   240    
48     160    
16     320    
400    432    
112    -144   
-160   64     
192    16     
-832   -864   
1696   -704   
-592   -80    
-480   -160   
1088   384    
-272   -240   
-768   464    
752    336    
-208   112    
-64    32     
208    -48    
-112   160    
-96    -48    
176    336    
32     -32    
-336   256    
400    64     
-240   64     
-272   -336   
224    112    
128    -208   
-96    240    
-368   -432   
2128   16     
-928   -48    
-416   240    
704    80     
-272   80     
240    352    
-784   160    
80     -208   
32     128    
128    -32    
-192   -160   
112    160    
448    -48    
-384   80     
16     -448   
-256   320    
576    48     
48     16     
-96    -32    
-192   80     
864    -32    
-416   160    
-304   -176   
640    192    
-160   336    
-176   -208   
736    272    
144    -32    
-896   144    
272    -48    
224    144    
-224   -272   
208    -464   
-160   128    
496    -304   
-544   -512   
-176   -336   
656    -96    
272    208    
-496   64     
-112   -160   
288    16     
688    -544   
-768   192    
-80    -880   
-48    208    
-368   -1136  
192    -2032  
2416   -3952  
-832   128    
400    -144   
48     480    
-480   64     
448    64     
400    400    
112    -16    
-704   320    
64     -176   
352    96     
16     -256   
-96    96     
-128   -640   
160    160    
320    112    
-96    64     
32     112    
-560   -528   
80     208    
336    -288   
-288   368    
288    -64    
-384   112    
416    16     
-32    -224   
-752   -224   
592    -80    
32     80     
-224   80     
16     112    
-80    -96    
224    240    
48     -1120  
-640   48     
608    -400   
-720   -704   
64     -192   
64     -96    
112    16     
-272   48     
112    16     
-208   128    
80     176    
160    -736   
448    -96    
-528   -896   
272    -16    
192    -592   
-112   -416   
48     -272   
432    -432   
336    96     
-128   -272   
128    -160   
-96    48     
-16    -64    
336    -176   
-496   -176   
80     -192   
176    -32    
80     -272   
-96    -48    
-128   -160   
80     -464   
-576   -288   
240    -144   
-32    288    
240    496    
336    384    
-400   -160   
48     -320   
160    -912   
-64    0      
96     -304   
-32    160    
304    528    
-80    736    
-288   224    
80     0      
-672   -1120  
1152   -816   
0      -400   
-912   1056   
1552   128    
-336   -736   
-592   352    
112    -2352  
704    368    
96     112    
-288   528    
-144   192    
96     16     
192    -16    
-176   352    
-208   -80    
32     -512   
-928   -224   
192    16     
-80    -48    
288    -368   
-384   96     
384    -304   
16     192    
-480   320    
272    608    
256    -272   
-112   -320   
-32    112    
0      192    
-32    -96    
80     -192   
-304   -144   
-224   -160   
-128   192    
80     -256   
-272   112    
-48    32     
208    272    
-176   -2800  
-160   -144   
80     240    
-48    112    
16     -144   
64     -96    
-400   -48    
192    -208   
-288   272    
-32    -208   
-864   -512   
1152   0      
1024   768    
-1456  -1280  
464    -1072  
320    -1248  
256    64     
336    2160   
0      960    
144    -96    
-320   -384   
224    16     
48     -16    
-320   -80    
496    176    
-416   96     
-80    64     
288    448    
-48    432    
112    -16    
80     -896   
0      -1152  
-1968  944    
1744   -528   
0      -1152  
-656   -128   
384    -304   
64     -480   
-336   -16    
224    208    
144    -320   
-192   -352   
-32    -160   
160    304    
48     -192   
0      -560   
176    -16    
-320   -464   
128    -640   
256    -880   
-96    -400   
-224   48     
-48    -80    
64     736    
64     544    
-400   1312   
-96    480    
384    1328   
-656   752    
-144   448    
688    -688   
-1168  48     
-16    592    
208    832    
-608   -768   
-352   -16    
48     32     
288    1088   
720    704    
-352   160    
320    -32    
-656   64     
-128   80     
-128   -64    
352    -192   
-16    288    
432    432    
-480   32     
48     -112   
560    256    
-464   80     
-1296  816    
608    128    
-752   96     
-448   -192   
672    -80    
-336   -832   
208    1408   
-576   608    
288    -288   
400    96     
-160   496    
-112   144    
-464   -160   
224    304    
-176   -192   
-192   -704   
-176   -272   
240    16     
-144   368    
-80    -32    
-64    -160   
272    320    
-608   -496   
-384   -80    
528    -208   
64     336    
144    32     
-432   -1024  
-320   -32    
320    688    
64     352    
48     -32    
320    64     
-880   176    
336    96     
96     -176   
-64    -496   
-400   -32    
96     512    
112    448    
96     192    
80     32     
-256   304    
-32    -384   
544    496    
0      912    
16     864    
48     192    
-320   -448   
-32    176    
688    608    
-1328  272    
144    160    
880    -432   
-880   -288   
-128   544    
768    224    
-160   -1136  
-368   -720   
16     -432   
-176   16     
-96    160    
224    272    
-960   32     
112    32     
128    -176   
-304   272    
224    192    
192    -48    
-96    -96    
224    -48    
-208   0      
-80    -48    
96     -32    
-96    368    
192    128    
-208   -208   
64     48     
48     -208   
-368   160    
432    1424   
304    464    
-704   1024   
656    384    
-320   -240   
192    384    
-16    608    
0      -80    
-368   32     
272    80     
224    80     
-208   0      
16     272    
-352   160    
80     -80    
-48    -640   
-48    -768   
80     -288   
-112   -128   
96     80     
-144   832    
672    -576   
-880   32     
704    -304   
-80    -240   
80     -336   
-16    240    
-112   304    
-48    32     
-64    288    
192    -16    
112    32     
-176   48     
128    224    
208    -32    
-272   128    
16     -176   
64     448    
32     64     
-256   -32    
416    128    
-272   80     
80     160    
-192   208    
16     240    
704    160    
-480   -64    
-80    -16    
288    48     
-1120  -736   
-208   -80    
544    -128   
-1168  -112   
176    304    
896    64     
-368   112    
-560   192    
896    240    
-256   -80    
-256   48     
32     -16    
-144   64     
304    80     
160    112    
-144   96     
0      80     
240    64     
-304   64     
-336   80     
192    80     
-272   -560   
-944   400    
1744   -368   
-48    96     
-432   0      
176    432    
384    -96    
-960   -64    
208    112    
160    112    
-16    144    
-16    0      
144    496    
-176   -48    
-528   128    
720    416    
-528   336    
64     176    
96     176    
-32    48     
144    0      
304    -336   
-912   304    
1520   -64    
-96    -160   
-448   -480   
384    -176   
-192   32     
224    -16    
384    -272   
0      240    
-448   64     
16     -368   
432    368    
-80    -592   
-128   -176   
560    1280   
-16    -32    
-320   -496   
304    192    
128    32     
-128   48     
-96    64     
-176   -192   
672    -368   
32     64     
-144   -160   
112    -576   
-800   -2048  
-256   976    
1872   128    
-1424  -224   
-1344  -80    
1056   -160   
928    128    
-640   96     
-192   320    
-624   -32    
448    208    
336    -80    
-208   112    
-112   -16    
-336   -384   
544    -64    
-224   352    
128    -112   
-304   96     
928    48     
-1248  96     
928    32     
-400   -48    
304    -32    
672    0      
-544   144    
416    144    
-288   128    
256    432    
-128   64     
48     544    
160    -640   
-176   112    
-64    144    
96     208    
144    16     
-176   256    
96     272    
-112   496    
-96    -96    
64     80     
-272   -80    
224    -272   
-448   336    
368    144    
288    368    
-352   -144   
-128   16     
416    48     
80     48     
-272   -256   
224    240    
144    816    
592    -32    
-576   -352   
528    176    
-48    512    
-224   -64    
240    -336   
32     -160   
-512   208    
32     -16    
0      32     
80     -496   
272    -16    
-32    -80    
-16    80     
-272   160    
96     -144   
-32    -128   
96     480    
-288   672    
544    -256   
-272   496    
0      16     
32     224    
-240   -464   
480    -448   
96     -528   
-64    928    
-224   -992   
640    -368   
-1264  1152   
1120   -704   
128    -816   
-560   368    
336    160    
96     1328   
144    -1104  
-240   -48    
128    96     
-96    80     
80     176    
64     -32    
128    -48    
-176   144    
416    96     
80     -240   
-176   256    
80     336    
112    -80    
-144   -832   
-352   -768   
48     448    
-288   128    
256    -48    
-32    -800   
0      -1424  
352    224    
304    240    
-112   -528   
-64    496    
80     -16    
96     592    
-224   64     
-32    -320   
-224   0      
208    -208   
560    -16    
16     640    
-320   416    
-112   -240   
272    176    
144    -384   
64     128    
-304   288    
320    -1168  
-160   160    
-144   176    
160    -992   
-256   96     
-160   912    
3712   -992   
-1376  64     
-688   528    
1008   192    
48     32     
-128   -496   
208    304    
-256   -368   
-160   32     
320    -400   
16     272    
-224   -80    
176    208    
-192   -144   
-64    -16    
-160   64     
144    16     
-320   -288   
16     -1696  
-176   -672   
-320   224    
768    -784   
-672   -672   
528    -496   
-336   -608   
-64    416    
224    -1024  
-368   -1504  
-144   112    
336    832    
-64    224    
-240   -240   
208    -448   
-496   -496   
272    176    
-32    -2288  
480    64     
304    -32    
-480   80     
128    32     
-112   -816   
-256   -448   
544    -336   
-304   -1296  
-400   -544   
-192   -1152  
-1152  -832   
112    -528   
16     -400   
-144   -208   
384    -784   
32     624    
-48    -944   
-848   128    
240    -384   
-608   -1152  
368    -256   
-48    -816   
-480   -448   
400    0      
-160   288    
112    128    
-96    -208   
320    -384   
-96    0      
80     -496   
-256   240    
-48    128    
-304   -1312  
1328   -1376  
528    64     
-832   1136   
-16    640    
288    -224   
560    -752   
-96    384    
-1104  -416   
-576   -640   
656    -256   
-80    496    
-192   -496   
-352   384    
416    -3008  
528    240    
-560   144    
-256   -272   
-16    -528   
736    -192   
-16    864    
-272   512    
-64    96     
-240   -96    
-48    48     
208    -320   
-96    464    
192    912    
-80    480    
112    -224   
208    240    
-224   -32    
224    16     
320    272    
48     352    
16     -160   
-112   -432   
240    192    
-112   192    
-80    -32    
208    -480   
-192   -128   
80     -304   
112    160    
48     -16    
80     752    
480    368    
0      96     
-144   864    
304    640    
-144   432    
736    1136   
-512   -80    
-880   -144   
-48    -416   
16     -464   
-112   128    
224    -48    
-16    272    
-272   -400   
-1024  -48    
-32    16     
32     -80    
48     -224   
112    16     
-48    176    
-32    448    
256    176    
144    784    
336    448    
-816   64     
-368   480    
176    336    
288    336    
-320   -224   
-832   -208   
512    -144   
-256   128    
-320   240    
64     128    
-32    144    
864    2240   
336    416    
-960   112    
-32    112    
112    -208   
288    64     
-272   -336   
256    240    
-464   -368   
-176   -64    
400    -32    
-288   16     
-192   64     
-240   -128   
96     -640   
240    -368   
-288   288    
288    160    
-256   192    
-256   -336   
320    -1456  
-800   -16    
768    0      
-560   176    
0      80     
112    -320   
112    -224   
-192   160    
-96    -96    
112    192    
-144   -64    
-112   112    
-224   16     
96     96     
128    -144   
-208   -176   
112    -128   
192    -16    
-80    288    
256    -176   
-336   0      
-144   -128   
80     48     
96     112    
-592   -160   
320    240    
-32    -16    
-1600  -96    
384    32     
208    1024   
-272   592    
-704   1232   
1440   -304   
0      -208   
-64    -128   
-688   -16    
256    -16    
-64    16     
-16    -48    
16     32     
176    144    
-288   -16    
-464   -48    
544    64     
-448   -64    
-48    0      
272    240    
-304   32     
-80    0      
144    0      
-112   -560   
1248   800    
-1168  -128   
-832   -448   
2384   160    
-1376  -32    
-400   480    
544    -64    
-528   80     
-128   0      
32     48     
-16    -16    
-48    144    
224    -32    
176    112    
-336   96     
-16    -80    
128    256    
-256   304    
-656   176    
192    0      
-384   -944   
-544   144    
848    64     
-1392  -48    
576    -224   
512    -480   
0      -480   
-464   352    
432    80     
-288   16     
-192   -128   
-320   32     
96     -16    
672    320    
224    -224   
-368   16     
112    -192   
-256   -80    
-64    320    
480    48     
-352   32     
80     80     
-48    -48    
-144   -320   
48     288    
560    144    
-272   112    
96     224    
736    4816   
880    1280   
-656   224    
624    -688   
-192   32     
-352   368    
128    32     
624    32     
-192   32     
-432   -48    
496    160    
-192   144    
-160   128    
480    -112   
-576   32     
16     -64    
-192   64     
336    0      
-144   80     
-288   720    
496    1552   
-208   928    
48     -112   
368    48     
-576   -320   
192    304    
112    -128   
-448   16     
224    208    
144    -400   
-288   64     
-48    -288   
16     176    
-80    144    
0      -240   
352    -80    
-160   -224   
112    560    
-80    464    
0      128    
176    32     
-192   -144   
272    -528   
112    -144   
-432   384    
512    608    
-336   448    
96     576    
240    -224   
-384   -480   
352    -16    
-416   -352   
544    -352   
-288   544    
80     240    
176    128    
-288   464    
560    2240   
752    1600   
-176   560    
144    352    
-48    80     
-160   -896   
-48    -64    
160    144    
96     208    
-48    -96    
80     -96    
-80    240    
-64    -32    
80     -224   
-160   -336   
-64    528    
96     128    
-432   480    
288    80     
-496   -448   
432    -848   
240    224    
-480   128    
-32    192    
32     -448   
512    -1376  
144    -96    
-144   320    
160    192    
32     240    
400    0      
-416   -32    
-32    -256   
96     304    
64     224    
0      -16    
-48    96     
320    112    
-352   112    
-96    128    
240    -16    
16     448    
-112   48     
-272   -80    
928    -32    
-1392  256    
496    -32    
592    -368   
-464   -112   
16     256    
32     -416   
128    64     
0      -2128  
-16    176    
-112   80     
64     -32    
-64    160    
-256   400    
208    -208   
-112   0      
-128   -192   
208    176    
112    -192   
-176   -192   
-80    128    
-176   112    
64     224    
128    -832   
-240   144    
112    48     
112    16     
-320   128    
272    96     
144    32     
-1296  1616   
3056   -880   
-688   96     
-1072  -592   
1296   -1168  
608    -320   
-800   -992   
208    -1952  
-208   -704   
-96    352    
256    784    
304    48     
-208   112    
-64    -144   
224    576    
128    160    
-80    544    
416    -528   
-96    352    
-16    -240   
512    -256   
-2304  208    
928    32     
272    -688   
-400   -176   
704    -352   
-656   -944   
-496   -1440  
400    -640   
-144   208    
64     240    
-160   -144   
192    -240   
64     -144   
-32    -64    
240    160    
-16    480    
480    1424   
288    480    
-336   288    
64     -272   
-80    16     
352    128    
-576   336    
304    720    
-112   384    
608    1952   
-1056  1488   
-496   560    
992    -1248  
-336   80     
-112   -224   
-96    240    
-96    -96    
112    944    
1008   -624   
-48    960    
-560   496    
32     -48    
688    608    
352    192    
-576   -144   
144    64     
592    128    
288    400    
-448   32     
-704   -176   
928    208    
304    -864   
-1008  -768   
896    256    
864    0      
-1792  -640   
480    -512   
-128   -672   
160    -432   
-176   224    
-304   -32    
32     -1280  
240    256    
-80    224    
-256   128    
-160   320    
336    -416   
176    48     
-272   -208   
256    -384   
-32    -128   
176    80     
-64    -1344  
-256   -1040  
96     -192   
288    112    
-144   -208   
-112   224    
256    -480   
-64    -288   
64     -1184  
208    -208   
-256   272    
128    -80    
0      80     
112    352    
224    176    
-384   -48    
-128   208    
480    336    
-336   -64    
176    64     
256    -144   
-96    -320   
288    160    
-400   -832   
-224   16     
480    144    
-208   -240   
-272   -368   
256    -192   
-128   -208   
80     0      
-256   -480   
592    -576   
-560   224    
-384   -256   
256    -208   
-32    48     
-256   -192   
384    112    
-112   -96    
32     -1376  
-160   272    
144    -48    
176    32     
-208   112    
16     -96    
304    -400   
-64    -16    
-256   -176   
352    -768   
-336   272    
-128   -80    
384    -272   
-64    -96    
160    -48    
16     -944   
80     -512   
128    -208   
-64    208    
48     112    
176    -80    
-880   -2320  
0      80     
976    -112   
-816   -128   
448    112    
368    0      
-1168  -224   
-368   -432   
832    16     
-80    -80    
-128   32     
-256   -1168  
144    96     
112    -544   
-96    -16    
-144   176    
208    -272   
-320   160    
160    64     
-96    -16    
432    -736   
-1712  608    
944    0      
176    48     
-560   48     
432    -416   
-128   -32    
-160   144    
-192   208    
544    -352   
32     32     
-512   96     
-16    -16    
416    144    
-224   -112   
-112   -48    
-304   -16    
64     -208   
16     80     
208    -416   
-304   144    
96     -512   
128    -16    
-96    -224   
-512   64     
416    80     
-64    64     
-160   -160   
0      -80    
992    336    
-1792  -416   
-2208  576    
2816   -384   
-32    -352   
-160   -352   
-640   -112   
368    -288   
656    80     
-688   144    
80     -32    
-224   112    
48     -48    
96     272    
-144   48     
-400   256    
448    -32    
-192   64     
-304   192    
-16    128    
-816   -80    
224    256    
544    -464   
-1584  -16    
560    -1168  
-1072  -208   
-96    -288   
-64    64     
576    208    
-32    -208   
-544   80     
-32    -224   
-128   96     
208    -64    
224    240    
-704   -112   
-32    16     
208    -64    
32     -272   
-96    96     
-288   32     
16     48     
-560   -288   
272    192    
-64    -16    
-608   -160   
704    -96    
-32    160    
-208   -192   
-64    -96    
-320   48     
432    -32    
-272   320    
-32    -160   
400    528    
-688   160    
48     -32    
0      176    
-336   64     
-816   -144   
-208   80     
-16    -64    
112    144    
0      -32    
-32    32     
-208   -320   
224    48     
288    176    
-400   64     
224    576    
1056   3792   
-1680  2352   
1024   -112   
1312   -256   
-1648  -16    
-512   784    
1152   -144   
-48    -176   
-496   -112   
-16    -144   
640    240    
-400   -336   
528    176    
-224   -112   
-208   112    
-288   144    
544    16     
-432   32     
240    224    
-32    -448   
-112   -1088  
-544   -592   
256    448    
-656   -304   
112    240    
320    32     
-160   -192   
16     -512   
-128   -192   
176    832    
-144   832    
0      -256   
128    -432   
-32    240    
-128   -16    
-96    240    
48     -352   
-64    -112   
-448   -112   
224    208    
16     96     
-32    176    
192    -64    
-80    -208   
-80    400    
-96    784    
384    336    
-672   560    
208    736    
80     -352   
0      -48    
512    960    
-1184  224    
240    96     
256    432    
-400   192    
208    416    
32     1888   
320    -832   
-336   -736   
176    816    
64     -320   
-240   80     
192    112    
-176   -144   
96     -32    
-80    32     
208    96     
-48    496    
0      64     
160    0      
-32    64     
32     112    
-160   144    
-64    -32    
-16    -128   
272    192    
176    144    
-592   208    
192    144    
368    0      
272    528    
-1040  560    
256    -144   
656    160    
-176   32     
-16    -32    
400    352    
-496   336    
336    80     
352    -320   
-240   176    
-128   144    
144    32     
-112   16     
272    48     
-288   -160   
-176   128    
64     32     
352    -128   
-48    112    
-704   1056   
1136   -336   
-928   -64    
352    96     
-96    448    
-32    -160   
208    -848   
0      432    
-192   -160   
-272   160    
368    32     
176    224    
-96    144    
-224   -176   
-48    -144   
128    144    
288    -16    
-352   -576   
-48    -192   
64     240    
64     80     
-128   -48    
80     -80    
-352   -224   
256    -112   
464    80     
48     192    
-288   64     
-288   112    
192    368    
1264   -688   
-1616  112    
752    176    
-240   -176   
-640   -1024  
896    -320   
496    1088   
-480   -80    
208    -784   
-96    -288   
-32    256    
400    112    
-96    128    
-384   432    
272    352    
288    96     
-96    608    
-512   -832   
128    -752   
0      -144   
-256   928    
2576   -32    
-1264  992    
112    -1072  
-352   -1168  
160    -112   
-192   720    
464    320    
-64    -320   
208    -528   
0      0      
128    480    
-112   80     
-192   48     
816    112    
-240   192    
144    240    
-432   448    
-320   96     
416    -16    
144    -48    
352    -48    
-192   576    
704    -848   
-1088  -320   
16     336    
944    512    
-1104  672    
256    -352   
288    96     
0      -16    
-144   144    
-48    80     
144    -416   
1056   -64    
-176   240    
-48    352    
544    -224   
112    816    
-976   304    
288    32     
368    64     
-144   -128   
-320   112    
-128   -480   
864    -96    
-128   144    
-608   -64    
624    1552   
1312   2592   
-784   384    
208    -2976  
1136   -208   
-1200  -32    
0      96     
1152   448    
144    -192   
-144   48     
-272   -48    
256    96     
192    -32    
-16    176    
-96    -16    
160    240    
-80    -192   
-16    176    
-96    -176   
-240   192    
784    -944   
-336   304    
208    -64    
-192   224    
-688   80     
608    80     
160    48     
-304   80     
-48    48     
176    -160   
-144   32     
400    -64    
-192   96     
-144   -112   
656    224    
-400   -2224  
-176   -16    
320    -192   
32     -528   
-16    160    
64     256    
32     112    
80     -16    
-48    272    
128    -64    
-368   208    
192    -144   
224    -176   
-432   -368   
208    -64    
-48    -160   
96     96     
-80    -416   
768    -352   
-512   384    
32     160    
128    128    
-160   96     
-368   48     
432    64     
96     320    
224    -192   
-96    144    
112    -16    
-48    -64    
-80    -128   
224    144    
-64    16     
16     -80    
48     272    
64     144    
-64    208    
-96    -304   
224    -64    
-160   -624   
192    -144   
-304   160    
-128   -144   
176    -464   
-176   368    
128    -160   
96     64     
-1056  400    
1920   -928   
-208   176    
-992   -688   
480    112    
544    -288   
-384   -656   
-352   -592   
400    -416   
288    304    
-96    -64    
96     -208   
16     208    
-80    -672   
288    -1376  
-64    384    
48     -752   
48     -368   
176    32     
48     -128   
-352   -1264  
96     -416   
128    256    
-240   -1776  
544    112    
-240   -752   
-48    -96    
208    192    
-304   240    
176    -368   
128    112    
-80    -400   
-144   32     
-16    -176   
272    -384   
-384   -160   
-368   -96    
144    272    
240    -96    
-144   -304   
48     -736   
64     -32    
-256   -304   
0      80     
80     -48    
496    80     
-416   -64    
112    -32    
-224   -48    
784    112    
0      864    
-1392  304    
1312   304    
656    128    
-1584  -448   
128    -288   
576    -192   
0      -864   
-320   192    
288    -192   
-240   160    
-144   -288   
128    16     
-240   144    
688    224    
-464   48     
16     -384   
-112   -416   
432    -688   
-224   -48    
80     720    
272    -432   
-1376  -1168  
1056   -864   
0      48     
-240   160    
144    -64    
160    208    
64     -112   
-176   -176   
-336   -16    
32     -128   
-240   -48    
-32    16     
112    -128   
-528   -96    
160    -80    
176    -1216  
32     48     
-48    288    
-32    256    
192    160    
-528   48     
-720   96     
432    576    
592    -384   
-160   -112   
-256   176    
32     16     
208    -320   
-304   -32    
224    1072   
864    -576   
-736   -352   
224    640    
240    48     
-240   -16    
464    -64    
-384   160    
-192   -176   
304    64     
192    0      
-144   64     
-256   -384   
-176   -32    
448    -464   
-336   176    
192    -160   
592    768    
-928   576    
-96    3904   
928    400    
-1248  528    
-416   -320   
1008   608    
192    1312   
-432   288    
-368   -176   
-112   -432   
96     400    
240    48     
16     240    
-400   -832   
192    144    
320    -416   
208    -128   
-176   32     
160    80     
160    -320   
-192   -512   
-32    -80    
-16    80     
256    400    
0      576    
656    48     
-480   288    
224    -16    
-192   -1104  
-32    -640   
288    -112   
-592   192    
-304   224    
-368   -288   
144    736    
400    384    
-144   448    
0      592    
96     416    
112    -656   
-144   -144   
-512   192    
160    16     
-48    -64    
-64    32     
-112   672    
128    288    
-832   -1264  
-144   -752   
208    -304   
208    80     
-352   96     
-64    1056   
1472   400    
-464   512    
-256   1184   
160    528    
160    512    
-144   656    
0      -960   
-448   -224   
112    176    
112    32     
0      -144   
80     -176   
-144   160    
-80    304    
-320   608    
-464   480    
-176   -144   
528    0      
-240   128    
336    0      
-192   -128   
-32    48     
-96    -16    
-16    -400   
208    -288   
128    -304   
-352   32     
-256   48     
256    0      
-960   -288   
192    -336   
-496   48     
304    16     
176    -16    
-32    -16    
-624   -48    
-32    -368   
80     -64    
-192   144    
-32    96     
32     -64    
-80    -160   
80     -240   
-224   0      
80     -48    
128    -16    
-816   96     
0      208    
-320   -432   
896    -768   
-144   432    
256    96     
-448   160    
-48    -272   
256    -176   
112    -288   
-32    -656   
-32    -64    
32     160    
64     96     
160    176    
-448   64     
112    -80    
-64    -208   
-80    192    
-80    624    
384    288    
-480   -480   
-336   -352   
400    96     
224    256    
-272   16     
-32    160    
0      112    
-288   -112   
464    -16    
320    -320   
-1024  304    
512    -1216  
-1632  -752   
624    -576   
-64    144    
-384   208    
368    704    
-80    496    
-896   400    
528    -64    
32     -112   
-336   -16    
-288   -112   
224    16     
-112   -176   
-80    -112   
-112   32     
160    80     
-160   384    
208    240    
-160   160    
-160   48     
672    1408   
1264   96     
-1056  -624   
-144   -1312  
144    -544   
-32    128    
-32    272    
112    16     
192    352    
-816   272    
160    -128   
464    272    
-144   48     
-352   -64    
-224   128    
496    80     
-96    -128   
-448   272    
176    64     
64     144    
-32    -32    
-368   -352   
208    -80    
176    80     
-288   48     
-592   640    
256    -560   
-336   96     
384    160    
-16    48     
0      -48    
192    -240   
-160   -64    
32     448    
304    0      
-416   112    
192    -48    
-176   -320   
288    80     
-128   96     
48     160    
160    64     
256    32     
-272   -128   
208    64     
464    128    
16     176    
-256   16     
176    -592   
-480   -2960  
-2336  -1568  
992    -64    
816    192    
-304   48     
192    672    
-384   -32    
80     448    
400    -304   
-560   528    
128    -96    
-32    240    
128    -96    
-304   208    
-160   -192   
-160   352    
288    -96    
-32    208    
272    -368   
-1136  160    
848    -208   
-288   256    
48     -112   
416    272    
-176   48     
-528   80     
528    256    
288    128    
-528   48     
-16    -16    
688    80     
-272   192    
-304   -272   
-32    96     
64     128    
320    192    
32     176    
-240   112    
272    16     
-48    96     
112    16     
-448   -16    
96     144    
352    192    
-336   128    
-288   144    
80     112    
384    -688   
-176   0      
-32    48     
96     48     
160    752    
-480   -64    
-240   384    
-560   352    
464    112    
-32    320    
-656   112    
224    256    
448    -272   
-336   48     
-96    80     
256    -320   
64     192    
-64    48     
0      -16    
48     752    
-48    272    
-304   -160   
256    -16    
192    64     
-128   192    
144    -32    
256    320    
-240   224    
-352   -736   
480    -688   
96     -48    
-208   0      
80     -448   
-64    -496   
672    -1920  
-1376  688    
1088   -192   
-240   -64    
-576   416    
672    16     
128    -64    
-112   -432   
-256   32     
400    96     
-32    320    
192    -368   
-192   256    
-80    -352   
304    208    
-80    208    
64     -128   
-192   256    
160    176    
48     112    
-16    1552   
1200   -304   
-1152  -16    
304    -128   
256    -112   
-128   192    
48     -416   
240    -64    
-112   -144   
192    256    
272    -368   
-352   224    
32     -512   
128    192    
128    -128   
48     64     
-176   176    
96     192    
-128   160    
96     -192   
96     64     
-48    96     
336    48     
-480   -256   
528    272    
-32    -336   
-192   112    
224    48     
176    -128   
-560   -1216  
-1248  0      
944    -48    
-176   16     
592    384    
128    -16    
-544   32     
112    368    
352    64     
48     -192   
-256   48     
80     -192   
384    96     
-160   -112   
272    16     
-288   0      
48     -192   
448    -160   
-368   -256   
-48    80     
208    0      
-528   -896   
432    -720   
576    -160   
-320   -896   
-208   -64    
208    64     
0      0      
16     240    
272    80     
64     112    
192    96     
-192   64     
-64    -80    
304    128    
128    -80    
-240   80     
48     -112   
192    -16    
48     112    
160    160    
-80    -112   
192    112    
448    16     
-16    -2720  
48     464    
336    256    
-240   -352   
-688   80     
576    -432   
64     -256   
-160   0      
224    -176   
32     480    
-816   -128   
416    80     
176    288    
-112   -800   
-48    -16    
-176   -32    
240    48     
160    -48    
-224   -176   
-224   -176   
256    -736   
-288   -768   
144    -432   
-320   0      
-176   -1536  
624    -48    
448    1424   
-240   -384   
640    560    
656    192    
-1120  96     
192    160    
160    16     
80     -1088  
-1520  -960   
32     352    
256    -192   
320    160    
-176   -224   
-176   -576   
-80    -256   
272    -752   
144    576    
-256   -48    
80     16     
192    -576   
32     48     
-160   240    
-224   -416   
-240   -624   
16     -976   
-80    -416   
-160   -368   
144    -112   
-208   -592   
176    -512   
176    -1152  
-48    96     
112    32     
-48    -240   
-128   -80    
352    -224   
-480   -432   
256    -64    
-48    1168   
128    272    
-224   -208   
-112   -112   
80     256    
96     -80    
192    256    
-64    -288   
-144   176    
304    464    
96     -176   
-48    64     
80     176    
192    -144   
-1104  848    
368    240    
352    144    
-480   -1248  
-96    -336   
32     -1296  
-416   -512   
352    1088   
256    -656   
192    256    
-112   144    
-304   32     
352    -144   
96     64     
-96    -112   
-256   448    
240    80     
-16    -80    
-64    144    
-64    -160   
-144   -144   
-128   -400   
80     224    
336    112    
-464   752    
32     -800   
320    320    
-48    208    
-352   -128   
-400   -1280  
112    -400   
-416   448    
-64    -560   
-288   -288   
128    -400   
112    -528   
-512   -976   
-96    128    
144    -96    
112    112    
176    -1280  
-80    -240   
-448   -80    
144    80     
96     -16    
-80    -224   
-160   -96    
-64    -48    
-272   -288   
304    -448   
320    -16    
-368   128    
-144   -16    
224    -48    
0      496    
0      -528   
-80    -160   
-96    288    
0      48     
176    0      
64     -496   
-16    192    
160    -432   
-224   -112   
192    208    
32     -416   
-400   -32    
352    112    
-32    -368   
-64    64     
-192   256    
-192   -96    
-128   -256   
32     -48    
-320   128    
32     -16    
48     -32    
-64    -288   
1344   448    
-2544  928    
416    -128   
96     -768   
-1024  80     
688    48     
-416   -256   
-256   -32    
96     -144   
112    272    
-288   -64    
-128   16     
208    0      
144    336    
-736   -16    
208    304    
16     -128   
-128   -272   
-256   -384   
48     -16    
32     32     
480    48     
-1920  1104   
736    -16    
-320   64     
-480   -208   
736    192    
-576   272    
-160   48     
-576   0      
256    16     
-176   -192   
-208   128    
16     0      
224    16     
-80    96     
80     -32    
-384   0      
-128   144    
-336   320    
-16    -16    
304    -80    
48     304    
-1392  480    
-272   -352   
496    -32    
-192   240    
368    288    
-976   -608   
-80    -48    
320    -16    
48     32     
-208   288    
-160   112    
288    80     
496    336    
-656   400    
-464   176    
304    368    
-384   176    
192    64     
160    -80    
-416   176    
-96    -64    
128    32     
400    -80    
-1152  208    
400    112    
-496   32     
-848   -560   
3584   1456   
-2144  1504   
-608   752    
1680   144    
-544   -304   
-432   -80    
-256   224    
-80    -112   
-144   16     
656    -192   
-352   240    
-512   80     
128    176    
288    -80    
80     -16    
-768   64     
160    160    
-32    32     
-128   80     
16     960    
464    160    
-848   288    
544    -48    
-32    80     
-560   240    
944    160    
-368   0      
-448   176    
784    -128   
-288   32     
-96    -32    
-32    176    
112    -96    
-320   128    
352    -176   
-816   96     
304    -224   
176    224    
-192   48     
-416   16     
416    272    
-32    -16    
-272   128    
-80    176    
240    96     
-272   96     
576    656    
-720   192    
-16    240    
304    -256   
-240   144    
0      64     
-144   624    
1104   -32    
-624   -48    
160    176    
176    16     
-160   -96    
256    -160   
-192   16     
-272   -208   
-192   64     
144    112    
0      -80    
-208   -224   
256    128    
-384   -112   
-96    -80    
256    -48    
112    336    
-336   176    
16     112    
160    64     
-224   112    
0      -96    
64     -144   
416    256    
-256   240    
32     -144   
64     -192   
256    240    
-832   -1952  
160    -528   
-16    96     
-288   0      
976    400    
-544   -32    
-432   352    
96     -304   
464    192    
112    480    
-416   128    
-80    -96    
32     320    
272    -32    
-432   416    
48     -176   
-16    16     
112    176    
80     192    
-16    160    
-208   -128   
16     -832   
-368   768    
672    608    
0      -528   
-368   32     
48     -176   
352    64     
192    64     
-336   -128   
-176   288    
64     208    
224    64     
112    32     
-208   -384   
16     -112   
-144   320    
208    112    
32     112    
16     48     
0      96     
-592   -16    
400    144    
160    -16    
16     -496   
-160   128    
-48    160    
288    272    
-176   -128   
-304   -288   
-1312  -32    
1456   -176   
1024   -496   
-1248  -96    
400    224    
608    -16    
-528   352    
96     48     
-144   160    
448    -272   
96     128    
-128   144    
-128   160    
48     -160   
48     32     
80     -80    
-208   -144   
224    -288   
208    -304   
-240   -48    
-256   -608   
1456   816    
-784   -656   
-784   672    
1456   -1104  
-736   -32    
480    736    
480    624    
-304   48     
-64    48     
-272   112    
432    0      
160    224    
-240   112    
48     0      
-272   240    
208    144    
336    688    
-176   976    
-144   240    
96     176    
208    32     
48     224    
416    1536   
928    912    
-528   208    
-160   768    
176    80     
-688   176    
208    -704   
208    -128   
64     -160   
-240   -176   
-16    80     
-208   -1056  
-256   -48    
-288   256    
-368   -608   
16     48     
288    -32    
0      96     
48     -80    
48     272    
-80    544    
-144   16     
144    -64    
-592   -32    
128    448    
512    272    
-448   -64    
-544   -1296  
1760   -1888  
928    624    
-320   -848   
-1136  240    
480    -96    
304    -864   
208    304    
0      352    
-448   -512   
128    304    
320    352    
400    -80    
-16    -64    
-224   -32    
-144   0      
528    -784   
96     80     
-176   -592   
-256   -400   
320    656    
304    640    
-128   -272   
-464   -160   
640    336    
-96    -112   
80     112    
-208   -576   
-96    2128   
288    208    
48     -128   
256    -208   
-240   160    
-16    -224   
432    368    
-48    -528   
-80    192    
16     576    
-32    -176   
-32    -64    
272    -320   
-272   -128   
96     512    
16     192    
-32    -512   
16     -1104  
-512   592    
416    -96    
-16    -640   
544    -496   
-432   272    
208    96     
-960   544    
672    -272   
304    -1632  
-416   -96    
-32    -1232  
160    -608   
-912   -1968  
176    -1568  
432    656    
-96    272    
0      32     
-32    16     
-32    -576   
16     -32    
64     80     
0      576    
-192   -208   
128    -688   
128    0      
-128   -464   
144    -368   
-192   -2336  
176    32     
128    672    
-48    1712   
-176   288    
-256   -752   
384    -176   
272    -48    
-544   880    
928    -400   
-496   -368   
-272   -880   
-368   -560   
64     656    
-352   384    
224    -544   
144    304    
-256   -304   
-80    -96    
0      -272   
288    48     
-16    32     
-144   -16    
-80    -384   
112    -96    
48     176    
-80    32     
-272   112    
-288   432    
304    -304   
-112   816    
448    528    
-160   -384   
160    144    
-32    704    
-16    288    
112    -176   
-112   0      
128    -64    
-16    -272   
-288   -624   
240    16     
-224   224    
-432   768    
464    208    
304    -128   
-48    0      
32     -352   
224    224    
32     -864   
-64    64     
16     -240   
288    160    
64     -128   
-160   64     
-160   -32    
176    64     
-304   -704   
848    -1440  
-3104  0      
624    -16    
1056   336    
-944   -496   
-544   560    
928    -512   
-256   -112   
-400   -384   
304    96     
-96    128    
208    16     
-144   -64    
288    -48    
-336   -112   
256    96     
-480   16     
208    112    
-16    96     
-224   -144   
0      -464   
1392   -112   
-736   208    
32     -1600  
144    -192   
-32    128    
176    -144   
-48    144    
528    -112   
-352   -96    
-208   -16    
-16    0      
80     -32    
112    -16    
368    -272   
-480   96     
144    -160   
-304   -64    
416    -1344  
-240   -144   
-224   80     
240    -384   
-1616  112    
768    -64    
1296   -112   
-464   336    
-336   224    
-48    0      
224    -64    
448    -96    
192    112    
-416   -32    
16     240    
752    160    
-368   -192   
-432   432    
128    448    
384    288    
448    -48    
-128   400    
-496   208    
-384   368    
960    -368   
-304   32     
-32    640    
-256   -16    
192    592    
176    128    
-880   16     
-1872  880    
2800   -2000  
-512   1248   
-128   80     
272    -224   
448    448    
-736   -560   
112    352    
480    64     
144    272    
-1120  -208   
176    352    
-96    -608   
-64    192    
-288   -112   
32     224    
-576   -96    
448    288    
144    -192   
-1728  -304   
112    192    
208    48     
-208   320    
544    -128   
-640   32     
368    -144   
-112   144    
-240   -48    
144    -48    
320    240    
-384   160    
192    304    
-224   16     
0      -144   
368    -128   
-256   32     
-176   144    
448    240    
-400   -208   
-240   208    
32     -64    
16     0      
256    128    
-336   -64    
96     -32    
160    16     
-64    48     
-224   96     
272    512    
-336   480    
-48    544    
-768   80     
-336   432    
576    -368   
-512   -80    
176    -64    
-80    256    
-32    112    
240    -112   
-16    -64    
-672   208    
144    80     
288    96     
0      144    
-144   -32    
-16    -144   
-128   80     
224    16     
-400   -192   
320    -272   
32     -176   
-112   -112   
80     544    
-384   480    
48     240    
128    208    
224    -96    
-304   -176   
0      -320   
208    -32    
-48    0      
784    1776   
-2384  1184   
528    -288   
880    -592   
-528   -544   
-704   -144   
-96    -704   
208    -288   
-48    -144   
-112   96     
-192   -32    
-240   -48    
192    368    
48     0      
-416   352    
-240   -768   
432    -864   
0      -560   
16     -288   
-112   96     
-192   -656   
704    -848   
-592   864    
496    -16    
-208   144    
176    80     
32     688    
176    0      
-144   -224   
-112   128    
48     -48    
-32    32     
-96    -64    
-80    -128   
64     64     
-112   224    
208    160    
-176   96     
-128   64     
-32    -96    
176    128    
-16    -112   
160    -32    
144    384    
-96    208    
-96    -80    
64     -16    
-144   192    
-192   192    
-64    -80    
1136   -352   
-3120  224    
416    528    
640    368    
-624   640    
-48    240    
512    480    
-832   -608   
-64    -1184  
336    592    
-240   352    
-208   48     
64     16     
128    128    
-176   160    
0      128    
-48    16     
112    -64    
224    160    
-160   144    
-432   -624   
1408   1248   
560    -288   
-1488  384    
896    -80    
-176   -848   
-768   -1120  
336    -848   
144    -384   
-384   -64    
0      464    
336    128    
128    112    
-368   -176   
-128   -432   
80     -32    
-48    192    
416    -400   
-704   -1808  
-368   -1152  
432    -176   
128    272    
-208   96     
656    576    
-432   1136   
224    240    
880    800    
-736   432    
-288   192    
368    -480   
-192   368    
-192   -160   
32     304    
416    64     
-400   -144   
432    96     
0      -960   
-928   -400   
480    32     
-256   496    
544    256    
16     128    
-320   400    
80     240    
112    96     
288    32     
-416   -16    
272    688    
64     496    
-96    80     
304    1152   
80     -736   
-496   32     
1312   -976   
48     928    
-608   416    
288    -592   
640    -288   
64     -128   
-368   -592   
0      688    
368    -256   
304    416    
-416   384    
48     -80    
-192   32     
160    -2336  
-48    80     
-160   480    
32     432    
64     -224   
32     -192   
-288   -144   
544    544    
64     -384   
-608   208    
528    64     
-144   1424   
368    1408   
-176   384    
-80    -944   
272    -224   
48     -208   
48     288    
0      256    
80     112    
32     -496   
560    -368   
16     512    
-176   416    
288    880    
128    1040   
208    416    
-496   -464   
240    144    
48     784    
96     -288   
544    -224   
-368   -192   
0      -160   
0      -288   
-64    -976   
144    -144   
240    1712   
-704   -1712  
-1296  560    
1136   848    
-368   -1120  
-368   -656   
-16    -880   
368    160    
-48    -368   
-208   -272   
160    -944   
-96    688    
32     144    
-48    128    
-192   -32    
96     224    
576    720    
-672   432    
-96    128    
384    256    
64     384    
-224   -144   
-64    -224   
192    -1088  
-160   -288   
80     320    
48     224    
48     -1824  
512    2256   
1200   224    
-1056  -80    
368    368    
0      -160   
0      -768   
-304   -752   
16     -944   
-80    -128   
256    304    
-160   -224   
112    416    
64     -48    
-128   -128   
304    -112   
-272   576    
0      0      
240    -128   
-112   -96    
-48    128    
48     1584   
640    -336   
-832   -160   
592    -320   
352    -32    
-288   -304   
112    112    
64     -144   
16     -192   
-304   -288   
656    128    
-144   192    
-256   80     
-48    -16    
320    256    
128    0      
-128   -304   
-272   -32    
256    -336   
160    112    
160    -192   
32     176    
-64    -48    
128    -48    
-112   -448   
64     128    
160    -32    
0      208    
-272   0      
2128   736    
-2432  -640   
-2336  336    
2544   32     
304    -192   
-1216  112    
-64    -160   
864    544    
-96    -672   
-144   304    
304    -160   
-112   256    
256    -96    
144    -576   
-560   -256   
208    -368   
192    -464   
-96    32     
160    -336   
0      -48    
32     -1984  
544    656    
-928   -464   
-1312  -128   
1200   272    
848    -80    
-656   576    
336    304    
0      -112   
-160   -208   
0      -64    
-96    -224   
96     80     
-64    -96    
320    0      
208    -288   
-432   -16    
80     -1344  
-48    368    
592    352    
-608   160    
-224   -288   
320    336    
816    -272   
-640   -16    
272    464    
112    176    
-816   -592   
-480   -272   
-256   -448   
432    -624   
384    64     
-560   -128   
-176   96     
64     -160   
192    160    
368    528    
-256   240    
-368   -272   
144    128    
-464   -64    
176    -208   
-912   -112   
-16    -208   
48     -112   
96     -96    
-112   64     
48     -608   
-64    -176   
160    -544   
880    5152   
384    704    
-912   -144   
1760   -544   
416    -160   
-1280  160    
480    144    
816    -400   
-1008  80     
-480   -272   
176    112    
272    -64    
-256   -496   
304    80     
-112   -496   
-64    208    
496    -80    
-112   16     
-304   -48    
384    688    
288    176    
-624   176    
176    64     
48     -16    
-480   16     
240    -144   
-112   -32    
-336   -32    
64     96     
368    -144   
160    176    
-320   -1040  
0      -208   
-64    80     
144    16     
-320   352    
192    96     
-160   -128   
-160   -320   
-112   -16    
96     -144   
0      -96    
-64    -304   
-112   32     
48     -352   
-272   160    
304    -2016  
-160   160    
160    224    
416    496    
-704   192    
-160   -176   
512    -544   
-48    -192   
-304   -336   
96     560    
320    1024   
192    672    
-144   256    
208    -32    
-48    48     
-368   -336   
224    1024   
864    544    
-608   656    
-128   592    
48     112    
336    320    
-16    560    
-144   256    
-32    -192   
160    -96    
48     -272   
-144   96     
224    96     
48     304    
-64    304    
-304   48     
128    -688   
-16    -144   
-48    176    
256    896    
-528   -992   
48     -272   
768    448    
-560   -400   
144    -208   
-592   -32    
112    -144   
-224   -224   
128    176    
-16    80     
-144   224    
160    192    
-144   96     
-112   144    
-16    144    
256    -48    
-96    416    
-112   32     
-224   32     
-320   -368   
656    -544   
-384   512    
-48    -368   
-48    -160   
-208   288    
160    576    
-16    1296   
-352   672    
32     80     
-752   -32    
64     -48    
-144   16     
176    -112   
-176   208    
-144   -16    
-48    -112   
400    64     
-144   -336   
-240   0      
-160   16     
224    80     
-16    224    
-192   -80    
-96    -288   
16     -336   
112    48     
-1680  128    
-128   80     
-240   -208   
1584   944    
-1888  496    
-800   176    
1808   624    
-944   608    
-384   -32    
272    -96    
-336   912    
-64    -224   
272    -720   
96     64     
-48    480    
80     -176   
-32    -32    
-304   -64    
16     320    
160    224    
-16    -128   
-64    464    
64     -240   
-144   176    
448    960    
1536   -96    
-1104  192    
16     -848   
-496   -1184  
480    -1216  
-800   -832   
368    32     
288    896    
48     992    
320    400    
-288   -160   
160    176    
192    -128   
-864   352    
592    320    
160    1472   
-208   944    
16     416    
96     -96    
-80    0      
-112   560    
-208   -432   
96     -1584  
-80    -208   
-416   928    
448    1216   
160    512    
-624   528    
672    560    
352    -96    
-432   48     
-192   -32    
112    608    
368    -688   
-144   -240   
-64    0      
224    912    
416    272    
-112   64     
-80    160    
96     -48    
528    432    
208    192    
-480   -400   
-256   -192   
32     80     
208    -112   
352    -16    
176    224    
496    -640   
-208   -192   
288    48     
-320   -352   
128    -464   
96     112    
336    -400   
-416   -272   
128    816    
-16    352    
32     -496   
112    16     
-384   336    
-112   80     
176    -48    
0      -48    
-368   -160   
176    80     
32     -64    
80     368    
-16    128    
-192   -16    
-640   48     
1120   816    
112    -432   
-416   -176   
-224   -160   
352    64     
416    -336   
-720   -496   
208    -32    
16     -80    
80     144    
-416   16     
-64    96     
448    176    
112    -48    
-192   0      
-96    -160   
192    -368   
224    -416   
-192   16     
-64    544    
-48    272    
192    16     
-256   -160   
192    -464   
96     -112   
-128   -96    
0      208    
144    64     
-224   -752   
-352   -512   
144    224    
64     96     
96     1120   
432    -16    
-176   -672   
-112   -80    
-96    0      
544    -80    
-240   -160   
-496   -144   
240    208    
208    176    
-16    -64    
128    -128   
64     560    
-160   192    
80     -256   
272    -112   
-224   272    
0      96     
128    32     
-240   16     
544    48     
-64    192    
-496   336    
224    64     
288    16     
-160   -2656  
-1168  464    
1264   32     
-256   432    
832    224    
-736   640    
-80    112    
240    512    
-352   336    
304    -208   
-240   320    
-304   -176   
80     -384   
304    0      
-48    336    
96     -272   
-576   416    
240    -64    
64     96     
96     80     
432    1312   
-1248  -192   
-144   32     
1408   80     
-928   -352   
96     576    
-272   144    
80     -752   
256    -160   
-240   64     
-48    192    
-160   32     
64     288    
480    -64    
-608   -128   
176    -176   
48     272    
-64    -176   
-304   240    
544    -32    
-192   48     
-160   80     
-16    -240   
16     -128   
464    -1008  
-64    96     
80     304    
0      96     
-192   80     
-224   -576   
480    -848   
320    -544   
128    -112   
-432   80     
160    64     
96     -384   
-112   144    
624    -320   
-128   -48    
-32    -864   
96     160    
-112   160    
96     0      
-304   48     
656    192    
-288   -80    
80     32     
80     208    
144    -48    
-144   176    
96     -128   
16     592    
1344   -512   
-800   144    
1040   -512   
-368   -336   
-480   64     
688    -112   
128    64     
-256   128    
272    -16    
256    192    
-128   32     
-64    112    
-16    32     
368    64     
32     112    
-224   -160   
112    16     
64     -16    
-16    64     
64     -160   
752    -16    
-704   160    
1136   32     
80     144    
-464   -32    
-768   -224   
-400   208    
864    16     
-256   32     
0      64     
208    -576   
-192   224    
112    -128   
448    48     
224    -64    
-80    96     
352    -368   
-176   224    
384    -96    
96     96     
-272   128    
128    -208   
192    160    
32     64     
32     64     
-432   -112   
144    208    
512    -416   
-1520  2496   
224    496    
-672   -416   
-368   -320   
896    64     
-464   112    
-368   384    
96     80     
176    -432   
496    32     
-496   -368   
96     160    
-160   64     
96     128    
240    48     
-160   112    
-256   -144   
608    64     
256    544    
-240   1200   
-48    1840   
432    -112   
-240   -1216  
48     -80    
368    -1552  
-384   272    
336    112    
176    -432   
-416   -80    
-96    112    
336    192    
560    32     
-544   -784   
-288   288    
880    -416   
-80    848    
-608   272    
240    80     
112    -32    
96     -192   
-16    160    
-80    -32    
96     176    
480    224    
-720   240    
112    240    
544    -16    
160    -48    
-32    560    
-112   -160   
-176   -224   
624    -464   
-1120  208    
576    288    
176    624    
224    288    
144    -208   
-32    224    
-112   672    
320    688    
144    -1440  
-48    -80    
-96    16     
0      -96    
-96    64     
144    128    
-16    -144   
-64    -64    
-400   32     
-64    -192   
32     -128   
160    -144   
-128   96     
-32    -128   
160    144    
272    -2400  
-448   -256   
160    -784   
368    -448   
-112   -240   
-320   256    
704    256    
-880   720    
352    -64    
256    96     
96     -80    
0      -48    
-32    48     
-96    -256   
-16    -160   
192    -1872  
128    96     
-128   80     
-16    192    
224    144    
-80    -144   
-464   208    
144    -176   
-80    -160   
160    48     
-96    96     
-320   -688   
-16    64     
-208   -400   
432    -256   
-160   -304   
176    -160   
224    208    
-688   800    
32     480    
448    -272   
-256   -320   
-416   192    
64     -64    
224    -160   
-912   -16    
0      -112   
-1328  -128   
64     -112   
-32    80     
176    -416   
-208   112    
-32    -1680  
32     112    
-16    -48    
416    -224   
-352   96     
304    80     
-544   -352   
-128   304    
-336   -80    
976    -48    
1344   -144   
-1664  96     
480    -384   
400    -288   
-32    688    
160    -1184  
-912   -1552  
0      960    
144    -176   
224    48     
64     -112   
-448   -112   
16     -480   
400    304    
-64    0      
-224   256    
-32    160    
112    80     
48     -272   
-688   -432   
512    -48    
1328   -528   
-1392  656    
912    1872   
1312   496    
-416   32     
-736   1088   
1152   864    
-144   432    
-96    304    
-16    0      
-208   -688   
-384   -176   
-720   -160   
-272   160    
288    592    
-960   464    
-336   96     
208    -112   
-48    -48    
16     32     
-160   224    
928    1680   
-832   720    
-976   -480   
256    -1520  
-720   -64    
0      -32    
560    -448   
-16    -32    
64     272    
-832   208    
16     480    
-256   -96    
-656   -1040  
-144   -544   
-416   -432   
-128   32     
416    -32    
-192   -112   
-176   -32    
208    -256   
96     208    
64     -112   
-416   128    
-272   0      
-272   -160   
976    720    
-208   112    
160    -1792  
176    336    
512    256    
-976   -320   
-608   432    
928    -528   
16     464    
-912   -512   
80     400    
336    -208   
-112   240    
224    80     
-480   32     
-256   96     
608    -80    
-400   128    
-160   -224   
-336   0      
624    -800   
-32    1136   
-96    624    
-176   -16    
-192   -272   
544    208    
176    -48    
-288   256    
432    -272   
-240   272    
336    704    
-256   464    
256    224    
-80    256    
80     352    
-320   176    
80     -96    
-528   32     
432    128    
-224   208    
-48    112    
320    128    
-32    -64    
-272   160    
176    16     
-528   16     
-112   -128   
368    48     
-112   64     
-176   80     
-80    -320   
-448   -112   
-704   -144   
80     -528   
-832   -320   
592    288    
416    -288   
-576   -80    
224    32     
-32    -256   
320    -432   
-160   96     
-240   -32    
32     -32    
-112   16     
-16    -176   
192    96     
-64    448    
-624   544    
160    -176   
368    -208   
-304   288    
-176   -48    
80     48     
272    -48    
-48    144    
-208   112    
160    -80    
-464   -32    
272    112    
80     0      
-80    144    
-576   -2544  
-912   1024   
1792   -16    
-864   -624   
224    0      
400    -32    
-320   448    
-384   32     
352    -208   
-112   160    
-272   -112   
-240   128    
320    176    
80     -304   
-368   432    
64     -32    
32     144    
0      -80    
-96    64     
48     -32    
336    1344   
-624   -352   
-832   176    
1520   160    
-288   16     
-576   144    
432    192    
288    304    
-224   -160   
-96    160    
64     -48    
-336   128    
224    0      
128    -32    
-416   176    
576    224    
-96    208    
-352   480    
160    -32    
64     272    
128    -32    
-272   112    
112    16     
-336   -48    
656    96     
-400   64     
-48    224    
224    16     
-288   0      
-432   -464   
960    -672   
400    -128   
160    80     
-480   -240   
-176   112    
448    240    
-80    32     
224    -144   
-512   -32    
-80    -96    
96     64     
272    32     
-80    112    
-144   160    
448    160    
-144   208    
144    -48    
-112   320    
208    144    
208    112    
0      272    
-720   224    
1808   -336   
-528   0      
-192   272    
400    336    
-256   16     
304    576    
-320   -80    
-608   48     
464    48     
176    -32    
-176   96     
-144   96     
224    -80    
-80    176    
224    -112   
-96    80     
208    432    
288    -96    
-256   -80    
112    128    
-320   32     
224    336    
736    32     
-480   48     
-256   -560   
-160   208    
496    160    
-192   -80    
192    192    
256    144    
-304   16     
-96    0      
560    -864   
128    352    
-416   128    
-224   80     
784    144    
-416   64     
-176   128    
464    112    
-80    48     
128    -32    
-304   176    
128    416    
-176   -16    
-112   144    
-144   -272   
704    -880   
-160   -2688  
-2288  -1280  
1904   112    
608    336    
-512   224    
-176   624    
-224   96     
288    -16    
288    -32    
-256   64     
-128   -96    
-80    112    
480    -32    
32     208    
-496   -384   
-80    32     
320    -1504  
-112   0      
304    800    
-128   1200   
160    544    
112    -160   
-416   -976   
320    144    
48     -208   
64     400    
320    64     
-144   -384   
128    544    
0      -32    
304    -80    
176    -1232  
-144   528    
-32    496    
-80    48     
288    0      
-464   -112   
480    -512   
320    512    
-176   560    
144    512    
16     32     
224    -16    
-176   320    
272    -432   
112    -1232  
-544   -752   
576    864    
-80    1056   
80     -176   
-176   -384   
384    1008   
-832   592    
544    1552   
64     1472   
-416   432    
240    240    
64     -320   
-96    272    
112    -256   
-112   -32    
32     -1120  
112    192    
-160   -368   
0      272    
-32    304    
240    816    
-256   -32    
-96    -96    
-16    128    
288    -256   
-144   128    
144    -160   
-224   80     
112    -400   
176    192    
16     -176   
64     48     
-272   -192   
32     208    
48     96     
-128   320    
272    -128   
-336   208    
704    16     
-160   96     
-208   432    
-64    -624   
272    -128   
-48    -336   
-16    208    
-368   0      
128    0      
272    -96    
352    -16    
-752   80     
224    -64    
384    -208   
-128   16     
16     432    
-80    -112   
400    -384   
-992   -224   
528    192    
48     112    
-32    144    
48     -144   
112    176    
-272   320    
192    -1552  
400    -304   
-112   80     
-480   336    
-16    -176   
176    -704   
-224   -48    
0      -800   
288    560    
80     -32    
176    80     
128    112    
-224   -144   
336    -144   
-192   -464   
48     -432   
-64    -96    
208    128    
-32    160    
-224   -176   
-576   -112   
48     272    
-720   1456   
2624   96     
-512   256    
-512   96     
672    -3024  
688    144    
-32    816    
-336   1632   
-496   -1376  
288    -1040  
208    -160   
-448   304    
-64    32     
16     -192   
-976   -192   
160    -48    
-208   -128   
-192   -608   
352    -656   
96     -1360  
272    1328   
-1232  -448   
-608   512    
944    448    
-656   288    
-240   -864   
-624   -1264  
480    -448   
-512   128    
-352   240    
384    -144   
-224   -32    
-128   -400   
-96    -80    
352    -240   
-416   128    
192    -1904  
32     224    
288    -272   
-96    112    
-144   160    
96     192    
-128   176    
-832   -192   
-352   -544   
656    -704   
-576   208    
-304   -160   
-32    144    
-96    -128   
528    -208   
-176   -992   
-128   -80    
368    -144   
192    32     
80     -224   
-912   -832   
208    -496   
624    128    
-528   -64    
-128   -48    
80     -96    
176    -256   
304    48     
-224   -464   
128    16     
640    -160   
64     112    
-464   -512   
800    -544   
-960   1904   
368    432    
-656   -64    
-464   -336   
960    80     
304    208    
-1360  112    
-16    -112   
320    16     
448    -336   
-32    304    
-192   -352   
-32    256    
304    -1184  
96     -160   
-400   -112   
-128   0      
16     32     
624    400    
-896   192    
544    112    
192    80     
-208   -224   
128    112    
32     -160   
480    -176   
-224   -304   
-160   16     
-256   -288   
-96    96     
96     -320   
-16    288    
-48    -144   
240    48     
96     -240   
-160   -112   
48     144    
528    640    
144    288    
-368   48     
384    32     
16     -304   
-272   96     
144    80     
-416   16     
288    80     
160    128    
96     384    
-144   192    
-96    288    
544    144    
-64    272    
-176   -272   
-480   160    
368    128    
272    -128   
-1200  -480   
400    -368   
-128   -16    
-48    -256   
-176   16     
-800   -32    
160    160    
48     96     
208    -240   
-224   -64    
48     -208   
-160   -48    
96     -112   
32     -192   
48     -16    
-160   -192   
-96    96     
-80    -16    
48     96     
-336   16     
-80    128    
16     -80    
-448   160    
160    -144   
-208   -48    
-80    2096   
2128   -800   
-1296  432    
-112   0      
64     -192   
368    368    
64     -224   
-144   -112   
64     448    
-288   144    
304    -144   
-176   -16    
-112   32     
80     -272   
96     -128   
0      256    
-128   32     
48     96     
80     -240   
-16    112    
624    0      
-1584  608    
704    -16    
160    -32    
-336   64     
-112   -48    
-192   64     
-96    320    
352    -112   
-336   -224   
-112   80     
48     64     
-48    128    
144    -368   
160    -96    
-304   80     
16     64     
448    -112   
-576   128    
304    48     
-224   176    
-48    -64    
80     112    
-192   -32    
-304   48     
528    96     
-272   -112   
-112   -16    
112    -16    
80     400    
-560   1904   
3472   224    
-1424  496    
-608   -224   
816    -112   
-240   16     
48     112    
256    208    
-240   32     
-176   32     
176    80     
48     80     
-208   64     
-96    288    
656    160    
-384   192    
80     -80    
48     0      
-64    160    
64     80     
-32    288    
144    672    
1296   16     
-768   336    
-304   272    
80     -96    
32     80     
0      160    
240    -256   
-96    -32    
-160   144    
240    -48    
64     112    
-112   -48    
-64    -144   
-272   80     
160    -112   
128    -208   
-224   320    
-48    -240   
128    -48    
32     192    
-1216  672    
480    -384   
208    176    
-528   160    
64     -80    
304    224    
-160   -48    
-64    160    
48     0      
-16    -64    
-96    -80    
80     384    
-96    64     
112    -80    
-1104  -272   
272    0      
16     -80    
-192   368    
656    96     
-96    -16    
-48    208    
-96    -112   
-80    144    
-96    -352   
-48    -144   
144    144    
-512   -384   
32     16     
880    -1456  
-2272  -1056  
1312   928    
688    288    
-1264  288    
176    320    
-432   -48    
160    496    
-224   304    
144    112    
480    0      
-240   368    
-128   448    
0      144    
-192   -304   
368    496    
144    -592   
-528   -64    
160    32     
128    -176   
-112   -592   
-96    -336   
-336   -48    
128    -592   
64     -240   
-208   592    
80     896    
80     288    
192    512    
80     -144   
-448   -208   
160    336    
272    400    
-96    240    
144    96     
-112   320    
176    704    
240    1056   
240    144    
-144   -48    
-16    288    
144    144    
160    512    
352    896    
-576   -336   
-128   -576   
176    -128   
96     176    
112    -1120  
-64    496    
144    -480   
-16    -112   
-352   96     
400    240    
-160   -400   
-160   -256   
-64    304    
-96    -848   
112    -784   
-80    576    
-80    -656   
0      -16    
288    224    
160    -32    
16     32     
-224   -48    
288    256    
48     112    
-240   640    
64     240    
-80    -16    
128    96     
-48    32     
16     64     
-112   208    
-48    -576   
64     128    
192    -256   
-560   -320   
-64    112    
128    144    
688    336    
-1040  720    
256    -48    
144    320    
-80    -352   
144    -48    
-496   96     
-64    -192   
224    304    
0      -432   
-128   48     
-224   288    
112    240    
-48    112    
-32    96     
-160   416    
-112   320    
-176   -768   
176    -240   
-32    -176   
-592   1072   
736    -48    
-560   -272   
-96    -64    
208    -784   
224    496    
-16    -816   
-352   -912   
176    -32    
208    224    
64     -272   
176    32     
-160   48     
16     240    
0      640    
48     -144   
368    -496   
-80    704    
-336   -112   
32     -528   
880    560    
-96    -160   
-240   64     
-160   400    
480    -336   
-208   -576   
-256   272    
-192   64     
496    64     
0      -512   
1824   -560   
-1824  544    
272    -256   
1312   992    
-480   -256   
-272   -80    
464    -416   
96     -144   
-112   -1376  
112    64     
-16    128    
160    160    
208    144    
-464   96     
32     -48    
224    -128   
144    -256   
-304   -144   
0      48     
192    -512   
-16    -1120  
-1072  128    
1632   208    
-1376  208    
336    160    
672    288    
-1104  272    
96     -160   
64     192    
96     -16    
-32    -48    
-48    32     
112    80     
0      32     
-432   -256   
336    96     
240    192    
-544   32     
-32    -352   
336    -48    
-32    -32    
224    560    
352    -80    
32     -112   
80     688    
0      320    
16     32     
112    -272   
736    80     
-432   -288   
-256   48     
256    240    
-128   160    
-96    -176   
112    144    
96     0      
352    144    
-352   0      
512    -336   
-48    144    
-304   128    
32     -288   
128    -128   
112    -48    
560    848    
-976   144    
-272   176    
1120   48     
48     1488   
-336   -16    
608    -1392  
976    432    
400    416    
-880   -16    
128    -608   
656    0      
144    -816   
-256   -144   
-16    -336   
224    32     
320    16     
80     -256   
64     240    
128    -80    
208    176    
32     48     
-208   48     
32     -240   
-336   160    
816    -32    
-800   192    
304    -224   
288    -160   
-128   288    
-832   -352   
400    -480   
352    -432   
-1104  -144   
688    -96    
-448   144    
-16    48     
64     48     
32     -96    
-528   112    
464    224    
-208   80     
-32    -304   
144    16     
-176   -160   
32     -176   
224    -96    
48     -96    
112    224    
-192   304    
-288   -64    
144    160    
320    -224   
-192   -80    
-96    0      
144    16     
-240   -16    
16     224    
1056   -112   
-672   -432   
240    -560   
240    -96    
-192   416    
-16    -1056  
80     288    
96     -192   
-304   208    
128    128    
-144   -64    
-144   -160   
320    -528   
-224   800    
-592   480    
48     -528   
608    -240   
-176   400    
-384   -304   
16     -144   
160    -528   
176    112    
-16    96     
-272   -176   
-192   64     
384    528    
224    -176   
-368   -336   
128    -1936  
-1968  1696   
1664   112    
-240   624    
224    -144   
-64    -464   
-272   48     
128    -976   
0      448    
128    64     
-144   112    
-224   48     
176    -48    
32     400    
-720   512    
256    -464   
64     -80    
128    240    
96     -128   
-208   -48    
96     -320   
176    -736   
-592   336    
880    80     
64     -80    
-304   96     
-656   96     
336    16     
-144   -416   
-144   -288   
-128   80     
240    0      
-144   144    
64     -368   
-32    192    
32     -176   
-80    16     
624    -544   
-256   96     
-96    -16    
16     64     
48     144    
96     80     
-160   96     
-112   -32    
160    112    
-96    -80    
-288   0      
240    64     
-64    -128   
-1440  -1024  
1376   592    
-608   16     
-896   -80    
1296   496    
-320   -96    
-864   96     
-448   -112   
128    -80    
-80    -48    
-144   128    
176    -96    
-336   -32    
-96    -256   
304    288    
-432   -224   
64     -48    
352    -16    
-224   -112   
-304   80     
96     48     
-800   -192   
1664   -544   
-912   -528   
-1552  -128   
864    224    
-176   -576   
-64    -208   
128    -144   
-336   288    
624    -112   
48     32     
-208   64     
128    144    
80     192    
-256   -16    
80     16     
-320   64     
-48    0      
160    -192   
240    -384   
-640   -192   
576    1056   
-672   240    
560    -384   
-480   16     
-608   -384   
1120   -576   
48     176    
-704   192    
384    0      
192    160    
32     240    
80     256    
48     -240   
-144   -272   
-1296  432    
112    64     
-160   -352   
736    256    
336    -16    
-192   -48    
-240   80     
-16    96     
336    -208   
176    16     
128    -48    
-512   -80    
528    240    
-176   16     
-880   -704   
1264   80     
1984   912    
-1648  -32    
-416   -1264  
608    -560   
1008   464    
-608   1168   
-320   368    
176    448    
256    -320   
48     368    
-560   -64    
-32    32     
0      0      
272    112    
-64    -304   
16     -144   
-656   -272   
-176   -160   
176    112    
80     256    
128    0      
-208   -32    
192    -160   
-384   -496   
-112   320    
240    1440   
-64    -560   
-368   -224   
240    848    
-240   224    
240    -64    
-912   -112   
112    592    
384    768    
-240   -336   
-64    32     
288    848    
-32    128    
-240   -432   
128    -192   
320    128    
-432   -32    
-288   -96    
-16    480    
192    -16    
-32    -432   
-384   -224   
32     336    
208    112    
48     288    
176    -800   
-880   -240   
288    -176   
-48    176    
112    384    
-80    -320   
-16    704    
240    208    
-208   208    
16     -144   
112    192    
-256   0      
-32    -16    
32     128    
160    528    
-384   736    
-48    -352   
-80    -800   
240    272    
256    128    
64     16     
-208   -48    
128    -224   
384    160    
0      48     
16     560    
-128   848    
192    112    
304    304    
-432   -96    
112    -848   
288    -224   
32     480    
-304   640    
96     864    
-80    0      
-80    672    
48     368    
-80    -16    
-304   -288   
0      160    
96     320    
272    16     
32     -16    
-16    432    
-320   400    
-32    240    
208    288    
-16    64     
-256   528    
-80    -560   
128    144    
144    -432   
-336   -1248  
192    480    
512    720    
-128   160    
-16    32     
48     192    
-16    -16    
48     208    
336    -192   
-288   256    
-480   -128   
464    96     
224    -80    
-80    16     
-64    304    
144    -16    
-400   -528   
16     -32    
176    -32    
-144   -32    
416    -64    
-448   0      
64     192    
80     0      
-64    112    
656    240    
880    1792   
-1584  -928   
-2352  112    
1744   -16    
800    96     
-1600  -272   
-16    96     
592    672    
32     352    
-128   240    
64     16     
336    48     
-80    80     
-208   -32    
32     48     
16     112    
-64    32     
256    240    
64     32     
-80    112    
32     80     
-448   -1904  
144    176    
464    -144   
-800   96     
1008   176    
-128   64     
-272   48     
-16    144    
-512   224    
496    32     
112    -208   
-96    96     
-96    -64    
-192   -528   
768    240    
-272   -464   
-272   -272   
224    -400   
-48    -176   
288    16     
-96    -80    
48     320    
816    32     
-112   240    
288    416    
64     96     
-176   592    
-512   -80    
384    -144   
624    -32    
-160   -240   
-528   288    
272    64     
80     -64    
48     -176   
592    336    
-496   208    
-96    -48    
672    -304   
304    80     
-224   96     
-304   64     
240    96     
400    96     
288    0      
-1120  208    
144    96     
432    -976   
-80    80     
2336   2160   
-2352  1904   
656    -832   
880    -640   
-880   -64    
-16    -16    
288    400    
-368   48     
-48    64     
176    -272   
32     96     
192    176    
-592   160    
-128   -288   
80     32     
96     -848   
-240   128    
-160   64     
-96    -96    
272    688    
544    32     
-1008  288    
448    -128   
352    112    
-240   -368   
-16    160    
544    -384   
-320   176    
432    -288   
-160   176    
400    -624   
-416   144    
272    80     
-224   192    
32     80     
336    176    
-64    -16    
256    -224   
-176   48     
-384   -32    
352    96     
176    0      
-16    160    
-160   -112   
96     176    
-48    -400   
160    80     
-48    112    
0      288    
368    208    
-240   96     
144    144    
-80    -64    
592    -32    
-384   -176   
608    -448   
64     -272   
32     544    
-544   96     
128    176    
128    -592   
-16    288    
-16    32     
-128   336    
128    -176   
-32    -352   
0      -368   
176    -192   
-128   -608   
64     -496   
64     144    
-112   128    
80     336    
-112   -32    
176    128    
144    128    
32     160    
16     -224   
-16    -1040  
96     256    
-32    192    
384    -1424  
-2080  1760   
1744   -448   
-80    816    
368    -3216  
-592   -176   
240    1120   
-304   976    
272    80     
48     -288   
-192   -160   
-144   16     
288    -272   
-144   -208   
-432   -1008  
160    -432   
160    -48    
80     -432   
128    0      
-96    -544   
-176   96     
816    784    
-320   -176   
-208   48     
432    -368   
-496   -816   
48     -128   
272    -176   
48     -48    
-224   -144   
48     -352   
-880   -944   
208    -128   
32     352    
-368   48     
368    320    
96     304    
-224   16     
96     -720   
-32    -304   
240    16     
128    224    
64     -256   
-160   -336   
112    -176   
64     -80    
-208   128    
112    32     
16     0      
112    -272   
1184   272    
-2144  -400   
304    -656   
64     -704   
-736   48     
1232   -96    
-96    240    
-272   -112   
-272   -288   
288    -288   
160    -464   
-496   -176   
160    -224   
256    -464   
-672   -720   
128    -320   
272    -96    
-224   128    
80     80     
32     352    
-32    144    
-224   -864   
-224   304    
1776   -688   
-1936  -128   
176    240    
704    -464   
224    -1264  
-880   -1440  
112    -128   
560    -208   
-80    -16    
-144   -16    
-48    -592   
32     -448   
16     -320   
-176   -48    
-64    -800   
-656   -624   
336    -448   
-48    -704   
-272   -160   
-48    -304   
80     80     
-160   -448   
-464   -704   
1008   -1360  
-368   48     
-128   -32    
208    384    
-112   112    
-128   160    
0      -736   
-176   -896   
736    -672   
16     288    
-496   80     
48     -592   
-592   -256   
400    -208   
416    0      
-224   32     
112    240    
96     -304   
-144   176    
-32    112    
560    448    
176    64     
32     48     
-192   48     
-128   192    
128    2480   
1088   176    
-1824  -272   
-288   -416   
1584   448    
-256   -672   
-416   -1472  
-1248  1152   
-80    112    
336    -160   
-816   -656   
-496   432    
112    0      
160    -144   
64     -64    
-64    -240   
-400   -48    
192    592    
240    608    
-96    192    
-96    -368   
160    208    
-992   -448   
32     400    
224    128    
0      48     
-512   208    
320    480    
-32    -624   
-560   -64    
-320   288    
-288   -32    
272    352    
16     -128   
-464   -320   
-80    -128   
272    784    
-240   -416   
-256   688    
400    1216   
128    832    
-80    -48    
-448   -144   
368    -16    
-208   320    
-16    288    
64     -464   
224    1072   
-224   640    
80     112    
-144   -864   
416    -224   
-432   752    
-368   160    
720    960    
144    176    
32     1040   
-432   -304   
0      -768   
-96    752    
80     1328   
-864   16     
112    -480   
64     -16    
0      368    
80     -288   
-272   -592   
-80    -464   
304    -528   
-192   672    
-160   240    
80     -160   
-192   -368   
-112   -208   
-96    -304   
-48    -96    
-208   -512   
-288   240    
-208   128    
80     160    
784    1856   
-1600  448    
304    -112   
512    544    
-288   -960   
-352   -752   
432    -256   
224    64     
-208   160    
-80    416    
128    672    
-304   32     
96     -64    
-32    -480   
-224   16     
96     -80    
0      -112   
64     -16    
-128   -144   
304    -32    
-48    96     
-320   1456   
528    -256   
-496   -288   
32     288    
304    -672   
-128   -384   
-288   -592   
-128   -336   
288    -96    
-160   48     
32     112    
16     -48    
-176   48     
128    -80    
32     -160   
-192   128    
-208   16     
240    80     
-96    32     
-64    32     
-80    -112   
-336   96     
-48    32     
0      -832   
-304   128    
240    -48    
-32    176    
-96    -16    
-304   336    
80     -976   
-1456  -688   
1536   16     
-128   128    
-992   -16    
352    128    
192    -208   
-384   0      
-352   112    
464    -32    
-176   64     
-64    32     
-80    -64    
288    80     
112    -16    
-208   160    
144    176    
-32    16     
-320   32     
320    -16    
-96    112    
-768   -768   
64     160    
448    -192   
-560   -112   
304    -16    
496    0      
-256   128    
-608   -160   
176    32     
160    0      
288    160    
-192   -48    
-208   112    
-64    -112   
32     176    
48     -80    
128    240    
-16    944    
-608   240    
-16    -224   
480    112    
-32    -176   
-368   32     
1200   272    
416    224    
-656   32     
544    -288   
448    -32    
-272   128    
0      192    
128    176    
112    -48    
48     -240   
208    -48    
-128   128    
304    -16    
144    -112   
368    -208   
-336   -80    
0      16     
368    160    
-16    160    
-144   224    
-128   0      
32     0      
224    0      
-336   48     
16     16     
576    1216   
-1728  -1056  
-736   1072   
1568   -800   
-1936  -656   
960    352    
848    176    
-704   560    
-48    -176   
64     96     
-304   -128   
176    288    
144    -112   
-480   224    
80     32     
128    160    
208    112    
-336   160    
48     0      
-48    -384   
688    -960   
-304   144    
288    96     
-336   288    
-560   -16    
208    -160   
-16    192    
-64    64     
-16    192    
368    80     
-160   192    
-240   -32    
288    208    
32     112    
144    272    
-272   256    
192    304    
128    80     
208    -224   
-96    -160   
64     -112   
208    -160   
144    160    
-208   -2224  
112    32     
-272   32     
352    -32    
-144   80     
240    336    
-288   224    
224    272    
368    48     
48     992    
-928   304    
416    208    
64     -320   
-384   -400   
16     -160   
240    -1056  
32     -256   
0      96     
288    192    
-176   80     
48     48     
256    176    
-176   304    
-112   -32    
144    -320   
-128   -288   
-96    -384   
128    -496   
-32    -736   
-64    -192   
0      -336   
-96    -32    
-128   -1312  
16     112    
272    336    
-144   320    
-128   -208   
16     -128   
-16    0      
-624   -64    
848    -1328  
-1056  48     
304    -368   
336    176    
80     -224   
-224   288    
-208   -784   
112    -848   
208    0      
-112   -1296  
32     144    
112    -112   
288    -32    
-256   -224   
144    368    
-96    96     
-176   112    
-32    -464   
128    -32    
448    -288   
-592   288    
224    -160   
-176   384    
352    16     
-64    -592   
-128   -32    
192    -80    
192    416    
-112   -128   
-144   416    
-160   416    
272    128    
112    -560   
-192   -320   
16     240    
304    32     
-64    576    
192    -752   
160    256    
-224   -176   
-224   -48    
176    0      
416    240    
-160   448    
-160   144    
16     -32    
368    -912   
384    672    
-432   592    
-1472  224    
2208   -560   
-256   192    
-1232  416    
1280   304    
400    -2192  
-384   -48    
0      192    
-80    224    
224    -272   
-48    128    
-160   160    
-144   -448   
464    -128   
128    96     
-192   16     
-64    64     
336    336    
-288   64     
112    224    
-96    -576   
1280   -48    
-1744  448    
-176   -1200  
1040   -560   
-720   -544   
-384   -1824  
480    -1600  
224    -1328  
-464   1280   
320    -352   
-272   -336   
32     -560   
128    0      
-240   576    
-400   112    
368    -288   
224    128    
-144   -176   
80     384    
-688   224    
336    128    
144    -176   
-240   -464   
160    880    
960    -864   
-544   -1296  
-416   624    
128    48     
-320   144    
528    16     
-144   -224   
-128   464    
608    0      
-16    -816   
256    -288   
-304   -64    
640    -704   
432    -656   
-240   -176   
48     96     
112    -96    
320    48     
208    -192   
-240   480    
-64    -160   
-144   -480   
-16    96     
96     -160   
256    -48    
-368   -288   
1072   -1424  
176    -880   
128    -784   
-624   -864   
-64    -912   
544    -272   
416    -272   
224    192    
-336   144    
-192   -336   
288    128    
448    496    
-208   448    
-192   -528   
-176   -320   
64     -160   
-272   144    
112    288    
-128   576    
208    144    
128    -160   
-272   -1040  
-112   320    
48     -2256  
-432   -224   
160    32     
-96    -336   
-192   -32    
48     16     
400    1344   
80     864    
-64    -128   
-64    -448   
-416   -64    
-288   -528   
272    -208   
80     -400   
-272   -160   
80     -208   
192    128    
-16    -256   
96     -256   
-160   -16    
592    720    
-384   336    
0      160    
528    672    
-320   -64    
-256   -688   
-80    -512   
656    944    
-592   576    
-224   -320   
128    -1232  
128    -1136  
-16    -1120  
32     -768   
96     -512   
-208   -576   
176    -864   
-48    -400   
-464   -64    
16     -304   
-512   48     
432    112    
-176   -48    
192    -832   
-352   -464   
176    -1104  
48     -448   
-160   64     
-32    112    
32     160    
16     32     
-208   208    
256    1280   
160    912    
-224   1104   
384    480    
32     -240   
-928   -176   
784    -1616  
-544   576    
-512   -368   
640    80     
32     -192   
-1008  -288   
-288   -144   
176    -192   
224    48     
-96    160    
-176   -48    
96     -272   
-16    112    
192    -544   
-144   208    
-304   -464   
80     16     
48     32     
-272   0      
-464   -240   
-16    656    
480    -112   
-1616  96     
1008   48     
-352   112    
-336   -64    
272    -224   
320    -80    
-672   304    
-336   256    
160    -32    
320    240    
-176   -208   
48     -64    
32     0      
48     -32    
-288   128    
128    32     
-112   64     
-320   -32    
-160   240    
416    -144   
80     272    
-208   -128   
-256   128    
144    64     
160    0      
-256   80     
96     -96    
-1008  1488   
2256   1200   
-720   -32    
-1200  -304   
1232   400    
-688   -112   
-400   -208   
112    -240   
-272   -64    
-208   -112   
416    176    
96     -176   
-160   64     
48     80     
-768   -128   
624    224    
-80    -128   
-192   64     
-32    -144   
-48    -16    
48     80     
112    160    
-2112  0      
1248   816    
-432   -256   
-1104  192    
1328   -32    
-688   -112   
128    -352   
-16    16     
-144   112    
96     -32    
-16    64     
-96    32     
80     80     
-240   48     
80     48     
-176   176    
272    -16    
-96    208    
64     112    
-176   -432   
592    -80    
-80    -64    
-336   80     
-112   -272   
96     -992   
384    0      
-400   32     
176    -112   
-32    -128   
-320   80     
-288   -96    
320    304    
-1136  -304   
-16    208    
384    -96    
-352   -208   
848    -352   
-304   176    
96     -144   
-32    112    
-112   112    
-32    112    
368    80     
-272   -48    
-288   208    
-96    -16    
-16    144    
-272   -608   
1744   5024   
-784   1728   
-496   -464   
1600   -304   
-656   0      
-752   128    
400    240    
304    80     
-64    -64    
-1072  -112   
592    192    
-32    0      
-80    -16    
192    64     
-320   -64    
-112   208    
272    48     
-80    0      
-272   0      
400    736    
240    160    
-480   -32    
48     144    
-112   48     
-208   -16    
192    128    
-48    16     
-416   208    
720    144    
-384   80     
-32    240    
192    48     
-48    144    
-368   -208   
352    208    
-112   160    
-208   208    
224    272    
-336   96     
384    32     
-144   -128   
-224   224    
-80    -64    
-32    -208   
208    -544   
176    -288   
192    1152   
-272   976    
176    224    
224    448    
-208   96     
80     -16    
352    144    
64     448    
-64    96     
16     112    
-176   288    
112    944    
-32    336    
144    368    
16     224    
-240   256    
160    400    
224    160    
-112   -192   
-176   224    
-176   320    
304    -352   
240    400    
-144   448    
-272   128    
176    -48    
176    -80    
128    16     
-64    160    
-64    256    
0      576    
160    128    
-64    80     
-208   320    
96     -256   
-448   -704   
720    -1760  
256    96     
-400   576    
-144   176    
-112   -176   
64     -752   
-368   -1472  
336    96     
-208   -16    
80     32     
352    304    
-80    -64    
-352   352    
160    -256   
192    192    
16     160    
-192   464    
-64    -112   
-32    -176   
-112   -416   
656    -64    
80     336    
-304   -256   
-192   192    
192    368    
96     128    
-96    -272   
-48    -160   
16     -16    
-16    224    
208    96     
0      48     
-80    0      
240    16     
-304   160    
160    32     
608    -512   
-416   432    
-336   240    
592    -144   
160    128    
-80    -96    
-320   160    
-112   -16    
16     160    
416    32     
-384   -80    
-32    48     
304    48     
448    336    
256    224    
-864   -448   
960    656    
-112   544    
-624   224    
-64    272    
672    -608   
416    176    
-48    304    
-352   224    
192    80     
240    -288   
-176   240    
-16    16     
304    176    
0      -32    
-544   -496   
416    -336   
384    208    
-160   -208   
-528   -416   
176    32     
864    -592   
-704   480    
880    80     
-320   -128   
-528   -1872  
-528   -1472  
928    -208   
-64    224    
-64    1072   
384    240    
-272   480    
-176   -800   
160    -112   
272    -80    
-368   -448   
-432   -448   
368    32     
128    -80    
32     112    
-64    -80    
-176   -352   
272    112    
800    352    
352    1200   
384    704    
-288   1824   
592    -672   
160    48     
-288   -368   
256    -128   
304    336    
-592   672    
560    448    
-80    -144   
-64    -256   
-1264  320    
144    480    
-32    352    
64     -16    
112    -96    
-416   560    
464    -160   
-208   -16    
240    -464   
-80    192    
64     -240   
272    -160   
-624   -1184  
896    -1536  
624    288    
-400   -96    
-1088  96     
720    -112   
544    -1168  
-752   -544   
-160   208    
176    112    
512    16     
96     -352   
-336   128    
-208   192    
192    -160   
656    64     
-32    64     
-432   176    
224    448    
240    1392   
192    -144   
-208   -192   
-96    -576   
352    240    
-432   -192   
656    320    
0      -672   
-384   16     
304    80     
272    -368   
-16    0      
-608   -432   
-128   -1712  
160    80     
240    -144   
-48    -48    
160    416    
-48    160    
-16    112    
208    -80    
32     -16    
-16    112    
-16    192    
80     400    
-32    96     
-48    96     
-928   -720   
-720   -1360  
-16    -496   
512    -48    
96     96     
-432   -592   
560    -144   
768    432    
-544   112    
256    32     
-112   -112   
64     -144   
320    -32    
-240   -384   
-16    -48    
-240   48     
48     80     
-320   48     
16     -176   
416    -192   
16     -16    
-288   48     
256    -256   
128    -656   
-192   -288   
-32    256    
96     -128   
-80    80     
160    -160   
-240   -368   
384    -576   
16     288    
-224   -48    
176    -80    
-288   176    
944    -560   
-2704  1376   
928    -816   
704    160    
-288   -272   
-48    -80    
96     -400   
-64    352    
-96    96     
160    -16    
-128   -80    
-288   176    
-272   -256   
0      -480   
-96    -96    
240    256    
-432   176    
272    -528   
-240   16     
-16    -2448  
-432   -352   
1120   64     
-208   176    
-576   272    
-224   96     
-320   -96    
448    160    
-256   32     
144    -112   
-256   32     
208    -128   
112    64     
112    -192   
64     128    
16     -640   
-192   176    
208    144    
-208   -160   
-64    -64    
-80    -304   
160    96     
128    96     
32     96     
-144   -80    
-736   32     
768    -208   
-448   -16    
240    -112   
112    128    
-80    -528   
-288   1312   
368    576    
-640   192    
-16    -336   
208    -32    
-64    -48    
320    -48    
-464   -144   
-112   -208   
-16    -48    
80     -48    
0      -16    
-64    -48    
16     -128   
-96    -208   
480    48     
-416   48     
-16    0      
384    128    
-304   -16    
-64    64     
96     -464   
-1616  624    
1328   0      
-272   -64    
-880   -32    
752    128    
144    112    
-672   0      
32     -448   
384    128    
240    16     
-288   0      
112    96     
48     -112   
-64    80     
176    16     
-160   256    
64     96     
32     48     
256    -240   
-16    96     
-48    0      
1168   0      
-496   -48    
-1312  112    
16     16     
-160   -544   
560    80     
-352   144    
-192   -240   
112    -48    
-176   224    
256    -96    
-96    -112   
-304   -592   
-384   384    
224    112    
-304   144    
16     -304   
-272   96     
96     -64    
-208   16     
-304   64     
176    144    
224    -48    
-1136  336    
-256   -80    
112    96     
608    928    
608    3840   
-2192  1952   
1328   -128   
1616   -288   
-1040  224    
-336   -48    
-64    160    
688    -80    
-304   176    
-640   -160   
576    96     
-176   0      
-208   64     
160    -64    
-320   128    
-176   -160   
256    256    
80     -288   
-256   -176   
624    96     
-272   160    
-160   112    
-256   -304   
592    80     
-176   -336   
-448   -48    
368    -400   
-192   112    
-432   -64    
-528   -224   
-48    -976   
352    -400   
-400   -432   
-256   256    
240    -128   
256    -208   
-336   96     
256    992    
272    112    
-256   0      
-16    304    
80     144    
-128   176    
-336   16     
272    576    
16     528    
48     832    
-80    -320   
144    496    
64     928    
-112   0      
-256   -304   
176    -640   
-656   -800   
112    -976   
-464   -576   
64     -896   
80     -2352  
-560   -960   
48     1376   
-304   256    
80     64     
-64    -96    
128    368    
-64    -288   
-400   -432   
192    224    
192    208    
16     256    
32     -16    
-176   544    
32     -64    
64     112    
-400   -64    
144    -304   
-480   -128   
256    -64    
48     64     
-64    176    
-112   -16    
32     0      
-336   176    
176    816    
576    144    
-320   -32    
-368   384    
352    -64    
-48    320    
112    32     
-80    48     
-336   0      
160    112    
96     48     
-128   96     
-112   32     
320    16     
-16    96     
224    -176   
-112   64     
32     112    
-32    128    
416    560    
-304   448    
-160   -240   
768    -80    
-784   -48    
-208   192    
208    448    
-80    512    
32     32     
128    -240   
48     -32    
48     288    
-160   128    
0      -16    
96     256    
64     -32    
-336   288    
80     496    
48     800    
-144   320    
-48    0      
144    80     
-48    16     
0      128    
64     -224   
128    144    
80     160    
224    -80    
288    -224   
-512   176    
1168   -112   
-2944  -80    
-96    48     
1152   -144   
-176   -48    
-192   0      
192    16     
672    288    
-160   96     
16     -160   
-96    -16    
-80    -16    
320    416    
-48    0      
-400   -64    
144    -48    
240    288    
96     96     
-608   -784   
-144   -336   
96     -320   
992    1168   
128    16     
-1104  0      
1136   0      
-464   368    
0      256    
64     1536   
1216   864    
-288   1312   
-160   880    
336    208    
-80    -144   
48     208    
16     96     
208    -192   
-160   208    
-192   160    
464    -256   
32     -176   
-80    -304   
-128   -128   
400    -416   
304    -80    
-608   1008   
208    -128   
560    976    
688    336    
-240   576    
256    160    
-160   -16    
432    -16    
112    80     
-176   272    
192    880    
-256   32     
-240   16     
144    208    
-592   -16    
336    352    
368    -80    
-64    48     
-16    64     
-432   -112   
512    -208   
-32    16     
-288   -16    
96     128    
-288   -304   
928    208    
1024   3792   
-1200  1680   
880    -192   
1088   -272   
-672   64     
-384   0      
-112   -96    
1344   -464   
-304   -80    
48     -272   
-96    400    
336    0      
96     208    
-224   -48    
128    368    
-176   144    
96     160    
176    16     
-576   -624   
512    -1264  
128    496    
64     480    
48     368    
-672   -496   
208    112    
528    128    
-176   -64    
-16    112    
144    208    
304    96     
-80    -112   
-144   -32    
64     112    
112    720    
-240   160    
0      224    
96     -224   
336    240    
-112   -688   
-624   -32    
512    -80    
256    48     
-224   32     
64     96     
-544   -960   
512    368    
128    272    
-352   432    
48     0      
0      -448   
160    -112   
-128   -240   
96     800    
864    -288   
-304   320    
16     -160   
112    400    
16     -64    
-208   192    
-16    -16    
-160   80     
224    48     
192    208    
-128   160    
112    64     
112    176    
-48    16     
16     272    
352    80     
-128   -400   
-352   -352   
336    240    
-288   -160   
32     128    
224    16     
-208   32     
96     -352   
176    432    
-224   352    
80     -256   
80     144    
1216   2528   
-2784  -272   
-592   -432   
1968   -96    
-688   -688   
-512   -16    
608    -128   
352    368    
-512   -16    
320    -48    
-176   384    
-16    384    
272    -48    
-112   -144   
48     -176   
64     -128   
-192   272    
192    -592   
-112   384    
144    64     
-240   32     
848    848    
704    16     
-1200  -48    
272    128    
928    128    
-512   272    
-160   -720   
448    -272   
-240   224    
64     -240   
256    96     
176    -224   
-96    256    
128    64     
64     160    
-336   384    
544    -784   
-384   96     
400    0      
-144   48     
-288   -112   
-16    -192   
304    -160   
-240   -1088  
448    32     
-16    -208   
64     -64    
-160   80     
160    -128   
320    -3344  
-1664  -832   
512    -496   
112    -32    
112    -48    
-288   -208   
144    32     
112    576    
240    192    
176    -32    
192    -144   
-208   -288   
32     -64    
-128   -576   
448    112    
80     -144   
-288   320    
320    -112   
-528   192    
-32    -128   
240    -272   
-112   48     
832    -112   
-1600  0      
784    -816   
576    -304   
-736   -96    
-32    -64    
496    -832   
560    -32    
-672   80     
176    96     
96     -80    
-80    80     
128    -160   
304    48     
-432   0      
128    -16    
-752   -48    
-176   32     
64     -160   
32     -32    
272    512    
-976   -560   
240    224    
736    -672   
-704   -144   
368    -256   
80     32     
-400   192    
640    -32    
-160   128    
-448   64     
-384   -48    
464    64     
144    224    
-48    256    
-192   384    
608    -560   
-80    80     
128    -1056  
-496   224    
-16    -640   
32     160    
448    176    
-512   64     
-192   16     
448    -304   
96     144    
240    880    
-1376  1376   
-416   3744   
1200   352    
-1328  -144   
112    -624   
752    -672   
-32    -304   
-1008  -704   
272    -480   
32     96     
-16    -368   
128    -16    
0      48     
-256   -192   
144    -64    
64     160    
-80    -112   
-96    -176   
0      -64    
288    608    
-288   544    
192    448    
-32    -288   
64     -128   
192    -224   
112    400    
-240   320    
-448   96     
176    688    
432    896    
-256   144    
-256   -16    
128    368    
336    -16    
-32    128    
-144   -544   
-112   -208   
-352   -16    
368    -224   
64     -32    
-192   336    
176    -32    
-80    -160   
0      384    
64     -1360  
-656   -624   
192    208    
-32    304    
352    528    
-48    176    
-368   -368   
176    272    
240    -256   
-944   896    
720    720    
-288   -272   
-480   -1088  
-96    -80    
-400   704    
-64    -112   
96     80     
-752   -208   
96     224    
-656   -192   
128    160    
-416   64     
-144   -16    
304    -128   
-112   128    
-368   -16    
-432   -256   
208    112    
-144   0      
-160   80     
64     0      
-208   128    
-368   -224   
160    -144   
176    -592   
-16    -48    
-160   208    
0      48     
112    -1072  
-784   -288   
-160   288    
0      -224   
336    -112   
-400   -64    
288    0      
80     512    
-64    128    
-32    -208   
112    128    
-144   16     
-32    288    
-128   160    
-128   -48    
-16    -16    
-320   96     
144    352    
128    0      
-48    -160   
-384   -624   
-288   64     
-96    176    
320    64     
32     80     
-48    128    
-320   -224   
80     -16    
208    -224   
-112   -64    
-32    144    
-272   112    
32     -192   
-64    -128   
-96    -192   
-208   -192   
-176   128    
0      -208   
32     608    
-112   384    
-48    144    
208    -96    
-192   -160   
-112   48     
128    144    
-112   112    
144    48     
0      48     
-576   96     
192    544    
-80    1424   
2192   144    
-1440  144    
-176   32     
992    -944   
224    -144   
16     -448   
-528   -400   
-16    544    
-32    1120   
480    672    
-64    336    
-224   0      
-336   48     
448    -16    
48     80     
-240   -384   
-368   240    
560    96     
-848   0      
224    1408   
-256   -1088  
-1568  496    
1584   -928   
-2128  1552   
928    -384   
-496   -944   
-176   368    
704    256    
-256   96     
-272   -64    
64     240    
-32    -192   
416    -96    
-528   -144   
-272   224    
384    -64    
-32    128    
-32    80     
-48    -480   
-304   -16    
64     208    
240    -688   
-976   416    
800    -208   
-592   -128   
0      480    
656    -192   
608    48     
-544   256    
-512   48     
512    -80    
64     48     
240    96     
144    400    
-416   -448   
-752   320    
-240   -800   
-384   -320   
592    176    
-208   -64    
-256   144    
80     64     
-32    48     
-272   240    
208    128    
32     64     
176    80     
-176   64     
368    1920   
-400   4000   
544    1040   
-528   -160   
-1024  -288   
784    160    
496    96     
-496   -112   
-384   80     
480    352    
-432   112    
128    208    
288    32     
-480   -64    
256    80     
-32    -112   
224    64     
48     48     
-48    144    
240    -432   
-960   -96    
768    -480   
-144   400    
-368   -432   
-32    400    
560    16     
-656   -64    
624    -192   
32     16     
-240   -32    
0      208    
-96    -192   
240    176    
32     16     
-336   128    
640    -112   
-432   48     
496    208    
-624   -160   
416    144    
480    80     
-512   64     
32     -48    
288    48     
144    32     
16     -144   
-208   0      
496    48     
-128   64     
16     -80    
160    16     
-64    32     
480    1024   
-992   176    
288    384    
624    144    
-832   144    
176    288    
432    128    
-32    -32    
160    176    
192    240    
0      96     
-112   112    
64     240    
176    160    
-160   160    
64     1088   
160    720    
-304   32     
384    -320   
-80    80     
-288   144    
400    256    
96     -16    
-240   -64    
-160   -48    
272    -384   
128    464    
-544   672    
208    80     
-368   -1152  
1840   1104   
512    848    
-1360  -1968  
448    240    
-32    -48    
-384   -352   
560    -416   
128    16     
-864   512    
496    -176   
416    -128   
-448   352    
-80    -240   
256    256    
288    288    
-176   -160   
112    -80    
-320   -208   
96     128    
288    112    
-448   -1200  
48     0      
448    496    
-768   64     
448    160    
128    224    
-432   32     
96     -384   
224    400    
-112   -16    
80     -64    
80     0      
-304   -384   
432    64     
-224   432    
-48    128    
192    -112   
-304   -176   
256    -448   
-48    80     
-96    -64    
0      224    
224    -32    
-64    208    
32     -176   
-192   -128   
352    -80    
-16    -32    
-176   240    
-48    80     
2128   -304   
-2096  96     
528    352    
624    32     
-544   112    
-80    -32    
768    160    
-176   -352   
-368   -176   
288    144    
-16    48     
-64    112    
224    96     
-272   208    
624    64     
-288   80     
96     -736   
-112   96     
320    464    
288    256    
-144   -80    
800    80     
-1664  -208   
1216   -304   
928    896    
-384   736    
-160   -80    
352    144    
208    64     
-112   -800   
-448   160    
-224   -256   
576    32     
112    -48    
176    240    
-208   -16    
-80    -48    
560    0      
-256   48     
32     208    
64     96     
-16    208    
-32    -1264  
-160   192    
-240   -224   
464    -176   
784    1216   
432    -144   
-320   -96    
608    -64    
-352   224    
96     208    
-192   144    
-80    -464   
400    -176   
336    -272   
-288   -112   
-208   336    
384    16     
-336   -752   
-272   160    
400    64     
-48    224    
96     272    
96     -1280  
-32    368    
720    -16    
176    64     
-144   240    
-304   -736   
752    -2000  
-1872  -768   
400    32     
752    80     
-256   -272   
-240   -1728  
416    960    
-224   -544   
192    -800   
96     -32    
-224   -192   
-336   -304   
128    -112   
208    -304   
-160   320    
-144   656    
368    -368   
-128   -128   
96     -224   
-32    -80    
0      48     
-16    16     
144    352    
704    -320   
-736   -656   
320    -688   
-864   -544   
512    -864   
-320   0      
128    -912   
-224   -80    
160    96     
80     320    
192    -400   
-560   -560   
96     -800   
-112   -16    
80     32     
208    992    
-320   -320   
48     -80    
-32    48     
112    96     
-464   16     
240    -336   
96     -192   
-144   -688   
528    576    
-320   160    
-48    -64    
144    -192   
-560   -160   
896    -832   
16     -96    
-176   -48    
-64    -1280  
288    -256   
464    1552   
-1104  1152   
96     -608   
32     16     
128    0      
-48    -144   
-160   -288   
-96    624    
144    -848   
192    80     
64     -48    
144    -96    
0      96     
-64    -64    
48     16     
112    -240   
-416   -32    
-64    -352   
64     -128   
160    304    
-112   768    
336    -176   
-32    240    
0      -832   
608    608    
-720   864    
448    -176   
-112   176    
-32    -448   
-320   240    
48     144    
-176   -224   
-224   160    
-224   0      
-80    -304   
-80    -208   
128    -592   
-96    32     
-16    -720   
400    -16    
64     -144   
-352   -128   
128    144    
240    128    
-304   -352   
176    -112   
-448   16     
-32    -384   
608    -608   
384    -336   
-192   -208   
-272   -640   
80     512    
416    32     
128    -144   
-640   -144   
-128   208    
-64    48     
96     128    
128    -352   
-320   336    
16     -336   
240    80     
64     -288   
-80    16     
0      208    
0      192    
-96    48     
288    -464   
48     -112   
-224   176    
64     16     
208    304    
-624   864    
480    944    
1984   -80    
-1392  -144   
608    -112   
-464   -240   
528    -304   
96     -208   
-592   -560   
64     -304   
-288   -160   
128    -160   
-272   144    
-160   -112   
320    32     
-608   -80    
-272   -32    
32     -80    
-256   -192   
-32    48     
240    192    
-560   32     
-736   16     
1472   -832   
-80    240    
-224   -32    
96     592    
736    176    
-912   -416   
144    48     
-96    112    
-352   48     
496    -16    
-112   144    
-416   -80    
480    96     
-288   -128   
112    16     
16     -192   
-16    96     
288    320    
176    64     
-192   -80    
-848   352    
160    -352   
-80    224    
464    160    
-256   896    
-1136  592    
-1056  -544   
944    -224   
-160   -48    
-432   208    
272    48     
64     -16    
32     16     
192    -752   
-528   -288   
496    -80    
736    128    
-112   416    
-656   192    
224    -48    
448    48     
-1136  0      
-128   -64    
640    480    
48     96     
-624   -144   
384    96     
-640   -864   
-1712  -1616  
160    288    
-384   480    
-480   -176   
224    0      
-64    96     
-432   -256   
-128   112    
368    352    
-528   -48    
16     96     
192    -80    
-192   -80    
-112   16     
112    96     
224    -16    
-208   96     
-112   -48    
432    496    
-928   16     
416    576    
400    -128   
-528   64     
-752   -160   
-304   -176   
64     48     
96     176    
64     96     
-320   80     
-16    144    
544    32     
-144   80     
-48    16     
-256   272    
-128   -336   
-112   144    
448    -64    
-480   -160   
512    -176   
160    0      
-224   80     
288    160    
-144   160    
224    -128   
-80    64     
-128   -144   
-592   -288   
288    -96    
400    112    
-80    320    
64     176    
-96    288    
272    80     
-496   512    
320    496    
-448   128    
-288   -544   
64     -192   
176    304    
-80    -64    
-48    64     
128    128    
-160   144    
-128   -32    
-48    -32    
128    48     
32     -48    
-544   240    
48     400    
288    16     
-224   -512   
-176   -48    
304    496    
-336   128    
224    16     
48     16     
-32    -80    
-240   400    
112    176    
0      -32    
32     -16    
-1168  -1392  
992    -400   
432    -304   
-1136  -144   
848    304    
16     -80    
-320   80     
80     -112   
-368   768    
224    -80    
-128   -192   
-128   32     
48     80     
224    320    
-432   656    
240    -384   
-320   224    
-80    -32    
-80    -208   
128    0      
512    1248   
-1328  96     
80     -176   
1200   112    
-480   192    
-208   80     
-464   -672   
512    -512   
16     96     
0      16     
-128   64     
-80    160    
32     -320   
-32    160    
80     96     
-128   144    
336    64     
-112   240    
48     96     
-192   64     
96     288    
0      160    
-16    128    
-96    80     
-96    192    
400    48     
-304   256    
64     -32    
80     176    
192    -256   
-928   -1056  
-448   48     
1488   -736   
-1632  -144   
560    208    
560    0      
-448   -64    
-32    320    
-320   32     
368    304    
80     64     
-240   32     
64     96     
48     208    
128    288    
-256   272    
256    48     
-64    96     
80     32     
-192   144    
96     240    
336    1280   
1328   112    
-576   288    
0      -432   
-48    -96    
336    -288   
-352   496    
-496   464    
96     -304   
640    -160   
160    0      
-256   112    
-192   128    
256    48     
16     16     
-160   160    
-96    -160   
-176   -272   
240    240    
-32    48     
112    -288   
-128   96     
-160   -640   
128    48     
-256   -240   
160    -528   
1184   384    
416    352    
-272   432    
432    80     
-256   -336   
112    -384   
192    752    
-400   416    
-448   -384   
880    -752   
112    448    
496    -464   
96     352    
-144   528    
-64    -48    
128    48     
304    -128   
-64    -16    
368    800    
-784   752    
-80    160    
192    112    
336    160    
0      80     
-1216  -912   
-432   -320   
688    -1280  
-624   992    
1280   -1104  
-192   48     
-752   -112   
384    176    
368    -112   
272    32     
-448   32     
0      496    
144    0      
160    -240   
112    336    
-144   -112   
336    -96    
-112   -176   
64     -384   
64     192    
64     992    
128    -976   
-736   -16    
128    -272   
416    -1008  
48     -496   
-96    624    
-192   -1024  
-208   -496   
224    672    
32     -1072  
-128   448    
-192   -144   
256    672    
256    -992   
-224   -176   
0      -2544  
208    160    
240    544    
-96    -48    
-96    -16    
-272   592    
320    64     
-16    224    
112    976    
-144   192    
304    -496   
320    1232   
-144   16     
-32    -176   
-48    -128   
384    224    
768    320    
-592   176    
96     256    
-192   560    
368    272    
32     608    
160    400    
-208   48     
-80    -144   
336    144    
144    -64    
-544   160    
0      -400   
208    -176   
-128   -176   
288    560    
-560   96     
-320   176    
208    112    
144    -96    
-80    352    
-80    544    
496    528    
64     288    
256    512    
-80    528    
32     -224   
32     -624   
-32    320    
592    1344   
768    -1712  
-1152  -896   
240    -912   
-160   144    
-768   -640   
384    112    
-208   720    
-192   -208   
80     -592   
304    -656   
16     48     
-96    -16    
-208   240    
208    -272   
48     176    
-48    -48    
-144   288    
96     -320   
288    112    
-368   1120   
240    -576   
-336   -752   
368    -544   
240    592    
-144   -736   
-256   288    
64     48     
240    240    
16     592    
-80    -48    
16     16     
128    304    
-80    -128   
0      256    
-448   -432   
208    -672   
16     -240   
-32    -176   
64     -48    
-112   -624   
16     -352   
240    -1104  
-96    -80    
240    -208   
112    -64    
-192   96     
32     -16    
-368   -208   
848    1072   
-176   64     
-1232  480    
784    16     
-480   -96    
-912   -112   
992    -16    
144    -496   
-464   -432   
128    -32    
144    112    
-32    64     
-32    -64    
320    192    
-624   -32    
224    96     
192    -32    
-208   -64    
-432   -160   
256    -160   
0      -160   
-64    -96    
304    832    
1488   -400   
-1248  -48    
480    -800   
96     16     
-240   0      
528    128    
-912   176    
160    -224   
-80    32     
144    -96    
-240   -160   
64     -48    
-464   -16    
-336   -80    
112    -64    
-320   -48    
384    112    
0      -848   
-176   48     
-368   -464   
608    -32    
-224   80     
-432   -160   
480    192    
272    32     
192    -320   
272    480    
528    240    
-576   -176   
-160   112    
432    -320   
-272   -32    
240    320    
80     0      
48     288    
80     352    
-224   192    
-80    96     
-240   0      
-112   -16    
-96    112    
160    -128   
-192   432    
48     -448   
-304   336    
-416   -80    
224    128    
-432   336    
176    3632   
144    -224   
-1104  -192   
752    -496   
-80    -112   
288    96     
-624   -224   
-256   -64    
592    -384   
-192   32     
-112   -352   
-272   192    
224    -48    
64     144    
48     -224   
-496   48     
32     16     
-352   16     
576    768    
-416   256    
-128   704    
544    -464   
-304   80     
656    -32    
-544   16     
192    160    
592    -16    
-928   64     
368    -80    
-224   -80    
-368   32     
144    240    
-160   16     
-112   144    
-160   48     
-592   -32    
304    -112   
128    -32    
-144   -112   
96     176    
-48    -64    
352    -32    
-48    -224   
160    256    
208    480    
-752   32     
432    16     
-32    -192   
-480   -80    
-208   -256   
-352   -144   
-368   -144   
-992   304    
448    -176   
-112   -176   
-528   -208   
224    64     
-208   -224   
288    -112   
192    80     
-48    -160   
-144   -48    
-32    0      
48     -96    
-128   -96    
-16    -160   
32     32     
-80    240    
-656   224    
-48    288    
-32    112    
128    -64    
96     -48    
0      256    
-80    32     
-288   224    
80     224    
-304   80     
272    -144   
-64    -240   
-448   -496   
1504   1296   
416    640    
-2624  -160   
496    -656   
-144   -16    
288    272    
32     -224   
-160   -240   
-400   -160   
112    -288   
256    -384   
-208   -304   
-240   192    
112    -240   
64     -224   
-160   448    
-240   496    
-144   32     
144    -64    
80     -112   
-320   -1264  
32     -1216  
336    224    
16     736    
-176   592    
160    -720   
-80    -352   
32     448    
64     -80    
-80    -16    
-112   -192   
32     48     
-128   32     
-64    144    
-512   -352   
0      -1280  
-400   464    
-64    96     
224    496    
-224   -48    
-64    -48    
64     224    
-160   160    
48     -48    
32     -112   
-240   128    
192    -64    
-192   272    
48     -16    
-1136  -304   
432    464    
1584   512    
-1568  -400   
176    -896   
432    -48    
-96    -656   
528    720    
176    1664   
16     464    
-240   -208   
176    -80    
48     0      
-464   -240   
400    -224   
-32    -160   
-544   80     
-48    -64    
432    128    
-320   768    
64     672    
560    1168   
-1184  -656   
-912   176    
1472   1024   
-96    352    
-624   64     
400    768    
-80    400    
-160   -144   
176    368    
160    192    
-288   304    
-32    -320   
32     128    
-16    304    
-304   192    
128    -32    
-16    -128   
-128   512    
128    864    
-112   400    
48     32     
176    -336   
32     1632   
768    1168   
16     480    
208    240    
-48    672    
608    -640   
-784   -1472  
192    160    
160    480    
-304   208    
-144   16     
944    -384   
-384   0      
352    688    
-912   400    
-16    656    
96     -304   
-192   96     
624    -112   
0      336    
-288   16     
-96    256    
-176   480    
-176   592    
576    64     
-368   352    
-368   448    
384    432    
896    -640   
-16    560    
672    -496   
-416   672    
0      -64    
560    -128   
128    1792   
-192   768    
-368   -80    
-16    160    
272    368    
96     512    
-224   -240   
-48    384    
-144   416    
16     272    
80     64     
-80    -16    
192    384    
-96    224    
64     -128   
-176   -160   
96     528    
448    512    
-624   256    
512    224    
272    400    
-288   720    
-80    -752   
-32    -544   
176    80     
320    336    
-320   -320   
48     -16    
128    192    
-288   224    
176    608    
144    864    
-272   -48    
-32    -192   
400    160    
96     192    
-128   -16    
128    336    
304    1120   
-192   -48    
336    160    
-16    -1248  
-128   -304   
16     432    
640    544    
-1264  32     
240    224    
896    0      
-864   -64    
0      768    
816    496    
-80    -896   
-384   -992   
128    -464   
-160   -640   
-16    32     
192    -624   
-208   192    
48     176    
256    16     
-176   32     
-112   416    
240    160    
128    160    
-32    112    
-64    48     
0      -256   
-176   176    
336    -176   
-128   -336   
0      528    
176    64     
64     240    
-32    80     
-608   -272   
1456   -976   
-960   -208   
176    -944   
656    288    
-352   48     
112    -128   
-64    -256   
-144   -544   
-144   -288   
304    -208   
-144   -16    
32     -112   
192    496    
176    -240   
-128   352    
-16    -288   
-80    32     
-64    -80    
272    -16    
496    896    
-1216  864    
688    -160   
-48    -240   
-336   -256   
288    -480   
-160   32     
96     240    
80     64     
80     -240   
-48    96     
-176   -576   
64     96     
208    -64    
-256   32     
-48    208    
208    64     
32     256    
128    -432   
-224   176    
192    -32    
-224   32     
192    -160   
-96    -48    
96     -496   
304    48     
-144   -32    
-32    224    
192    208    
-688   464    
-288   1696   
2048   160    
-1040  176    
-160   -192   
880    176    
-96    16     
-336   80     
336    464    
368    -144   
-368   128    
112    32     
48     -160   
-192   -48    
320    208    
288    16     
-208   176    
0      -336   
272    176    
-128   -112   
-336   224    
272    -112   
-32    -400   
-1424  368    
1344   -96    
128    -128   
224    -80    
-272   160    
720    128    
-624   16     
-160   -1216  
256    48     
80     -112   
96     -480   
-176   -112   
768    -352   
-704   32     
144    0      
320    -512   
-448   -96    
400    -176   
192    -512   
-176   -80    
288    336    
592    -464   
-1184  -576   
976    -112   
-560   496    
64     272    
176    64     
-384   -336   
-160   144    
240    -672   
176    144    
-224   272    
-176   -208   
80     416    
0      512    
-160   -224   
-256   112    
240    480    
-128   -176   
-368   32     
-144   -160   
112    -176   
192    -560   
-192   -928   
-576   -240   
384    112    
-256   -848   
-272   -1104  
3184   992    
-2256  976    
-576   -224   
2480   -368   
32     -16    
-1168  272    
-656   -48    
736    -208   
224    80     
16     -144   
-416   112    
-176   16     
496    -128   
64     -624   
-208   -32    
-192   80     
464    64     
-64    64     
240    -32    
-784   -320   
480    112    
-208   80     
32     -224   
560    112    
-336   -160   
-48    96     
240    -416   
-384   -112   
352    -432   
-656   96     
336    -80    
32     224    
16     112    
-304   -32    
32     160    
112    272    
-96    368    
-112   288    
-480   272    
-48    -272   
-256   -144   
-160   -208   
272    -96    
-544   96     
432    416    
272    -1664  
-304   0      
-176   -80    
416    320    
128    80     
-352   32     
80     48     
-48    320    
224    -496   
-640   -2016  
-512   -1264  
304    96     
208    528    
368    160    
144    464    
-224   -96    
96     448    
80     144    
0      -80    
0      224    
48     224    
-288   80     
272    -288   
-64    32     
-32    288    
-144   160    
112    -448   
-224   -848   
368    -800   
-256   0      
-304   -32    
368    -640   
32     -320   
-32    768    
-560   816    
352    -432   
-272   -832   
720    -864   
-800   464    
-352   -832   
352    -416   
16     -304   
288    1424   
-320   192    
208    -272   
-16    288    
48     -64    
80     -96    
-176   32     
-304   -208   
192    96     
-80    272    
-208   480    
-144   -240   
112    0      
-144   176    
-64    80     
288    816    
16     128    
-544   -928   
-224   -288   
-576   304    
512    1072   
-560   1536   
-288   16     
272    -272   
-80    192    
-128   -352   
-16    80     
-400   -208   
96     -112   
-96    80     
-352   -64    
-16    -80    
288    656    
368    -16    
-528   -272   
-592   -112   
80     -64    
352    -16    
-32    -176   
-368   96     
-208   -400   
-128   96     
-128   224    
64     16     
-480   -32    
48     1264   
3216   -912   
-2000  -304   
-368   -912   
848    -112   
-304   192    
-48    -384   
304    928    
-512   -176   
-176   96     
208    48     
16     112    
-336   0      
240    32     
160    -96    
-48    128    
-288   -240   
192    256    
48     128    
-272   -144   
592    -528   
-1824  1520   
736    -656   
112    -992   
-64    -336   
-32    448    
-656   -336   
224    1104   
176    1616   
-528   -144   
112    -880   
96     -128   
0      512    
-464   336    
160    -128   
-464   -16    
288    -32    
-368   -160   
-240   208    
208    48     
-544   -144   
160    288    
-736   -192   
-656   -560   
-192   -80    
496    224    
-336   -1088  
704    -2544  
-240   -1408  
48     384    
64     528    
-400   592    
48     464    
-384   304    
1056   -784   
-624   64     
32     -432   
32     -608   
-336   -368   
544    -592   
-112   -48    
-128   256    
-208   -96    
-32    -48    
64     48     
-144   192    
-144   -32    
96     528    
320    752    
-288   448    
736    336    
-1936  -272   
800    368    
304    -288   
-1872  64     
-256   464    
-112   48     
640    1904   
160    864    
-576   -416   
-128   -752   
496    448    
-16    144    
-416   672    
-224   144    
-304   128    
448    320    
-336   -16    
-160   96     
-1568  -1008  
480    -608   
288    -208   
-528   208    
-224   16     
272    320    
-64    64     
240    -720   
-16    -1024  
-272   -96    
208    -160   
-128   -208   
272    48     
48     -272   
-96    -336   
256    -448   
-96    256    
80     560    
80     -128   
-320   -224   
-80    32     
96     240    
-64    128    
16     -80    
96     32     
112    -16    
-112   -608   
224    -304   
-112   240    
192    16     
-256   -288   
96     -256   
704    896    
-1376  112    
112    -160   
944    -176   
-384   -240   
96     240    
-48    448    
-80    400    
176    0      
-240   64     
112    112    
-192   -64    
144    32     
64     176    
-32    208    
0      384    
352    272    
-32    1088   
480    592    
160    256    
-384   400    
144    400    
176    208    
-160   -96    
-224   0      
576    288    
224    320    
-464   288    
-48    96     
240    0      
-224   2096   
1072   -560   
-1136  496    
-128   -192   
256    160    
448    -112   
-480   48     
32     112    
384    -240   
-192   96     
64     112    
-192   128    
-112   192    
208    -304   
32     -48    
368    688    
64     32     
-416   -96    
288    -400   
0      16     
784    1488   
-1408  448    
128    64     
720    -96    
-864   -96    
512    -480   
-224   576    
32     64     
32     224    
272    -16    
-304   64     
-144   208    
352    32     
64     48     
-96    96     
224    240    
-272   304    
-80    160    
16     -144   
-128   208    
288    0      
-256   176    
-112   64     
0      0      
528    96     
-704   32     
400    272    
16     64     
-272   96     
64     -320   
480    544    
560    -432   
-880   64     
256    64     
448    272    
-272   -352   
-16    272    
352    -624   
-224   64     
-80    112    
-208   -48    
208    240    
176    0      
-464   -64    
304    144    
112    160    
-288   -32    
0      96     
496    64     
-48    32     
-32    -448   
-304   -640   
-720   -112   
2144   -16    
-1312  -800   
-1072  320    
1792   0      
-768   -96    
192    -256   
496    224    
-96    0      
48     160    
160    112    
-208   -192   
-96    48     
-272   -96    
400    96     
16     80     
-176   176    
320    -1072  
528    64     
-480   -304   
960    608    
480    -240   
-864   128    
896    -96    
-240   592    
-416   304    
-96    368    
576    -128   
-256   -384   
368    128    
48     -144   
160    112    
304    -1472  
-176   -160   
-480   -48    
592    -16    
-368   96     
288    400    
80     -112   
-176   144    
352    144    
-80    -64    
-80    64     
208    144    
656    -176   
-256   -256   
208    48     
-480   -1344  
1008   -4704  
-2368  -1696  
1936   1280   
528    -112   
-736   272    
16     48     
-96    192    
448    176    
-224   -176   
384    240    
352    -704   
-464   96     
416    -16    
-48    144    
16     -48    
48     240    
176    16     
-176   128    
-144   -288   
496    80     
16     -864   
-400   -704   
128    272    
-352   -528   
-320   320    
784    -64    
-400   384    
0      -384   
272    64     
-160   -704   
192    0      
-192   -96    
-144   -96    
16     112    
240    -96    
128    384    
32     848    
464    -96    
-416   -272   
144    0      
208    -48    
-64    -352   
384    -576   
-224   0      
-144   -752   
272    64     
-480   336    
448    -400   
48     -112   
64     288    
304    -48    
-432   -416   
480    -720   
-560   0      
288    -528   
-16    -256   
-96    -960   
672    1680   
576    800    
-288   -480   
256    160    
0      208    
-80    -176   
32     -48    
176    -32    
96     176    
-336   -272   
112    -32    
-48    192    
-48    -304   
176    -400   
-144   -1008  
-16    336    
64     0      
-320   400    
288    -128   
-400   -96    
336    -80    
224    -48    
-528   16     
64     0      
-80    -176   
384    -752   
128    -112   
-272   32     
-64    240    
96     -336   
480    464    
-208   576    
48     224    
240    -240   
32     320    
64     32     
-80    240    
128    160    
-144   272    
-48    -112   
304    -576   
-816   -160   
-176   -288   
0      -16    
272    640    
224    128    
-176   -1616  
912    0      
-608   320    
176    112    
112    128    
96     -48    
-192   -128   
-16    -288   
0      -64    
144    80     
-400   80     
192    -304   
-176   -48    
-32    -144   
-240   16     
192    -368   
144    464    
-112   224    
-16    16     
560    -256   
96     -80    
-304   -96    
240    64     
-192   288    
-112   80     
448    -64    
-96    64     
-1408  -128   
1488   -112   
-2608  864    
-176   384    
1008   336    
-480   -624   
-784   128    
304    -528   
-720   -1024  
320    -352   
448    1120   
-112   32     
-448   -480   
208    272    
32     -480   
-256   -192   
16     -64    
64     624    
-48    416    
-176   -176   
256    -752   
-176   96     
-816   608    
2448   0      
-1360  16     
96     -448   
192    -368   
-432   512    
64     -80    
64     -560   
-512   -864   
368    80     
16     48     
-32    -64    
-160   272    
-16    -96    
224    80     
-208   240    
160    -320   
-368   -624   
16     64     
384    112    
48     -96    
0      112    
-368   400    
128    208    
-96    -1408  
-464   -336   
-656   -2064  
-160   -832   
368    -304   
-912   144    
256    224    
208    -384   
-272   96     
-32    -416   
640    -288   
-384   352    
-48    -544   
-128   -400   
-160   224    
-752   -976   
80     304    
288    -32    
-160   80     
-464   128    
160    -528   
-736   192    
224    48     
-80    304    
-960   1040   
96     -448   
864    -1968  
48     144    
-144   336    
-720   -1072  
-272   112    
768    -96    
-192   -48    
-352   752    
336    256    
112    0      
-192   -144   
-128   48     
-32    320    
80     144    
-32    -48    
-576   96     
48     -112   
-528   -624   
368    -1680  
-48    -1296  
-160   -144   
48     432    
128    -144   
-352   16     
144    272    
144    -96    
-128   -336   
16     -288   
160    -128   
-304   192    
-528   -64    
-80    0      
224    160    
224    256    
-208   -128   
-192   288    
320    560    
0      208    
16     176    
144    -80    
-224   208    
320    496    
-288   304    
-432   0      
464    64     
-192   -224   
-736   -224   
-624   -176   
320    -16    
-192   -176   
-192   96     
96     1024   
1008   96     
-528   -96    
-720   224    
848    16     
-112   -16    
-272   48     
192    144    
-672   256    
352    -144   
96     80     
-416   -144   
224    -16    
-224   -64    
224    640    
480    240    
-272   0      
-144   624    
416    -160   
-32    192    
-192   208    
-96    -288   
16     -176   
16     96     
-272   128    
-272   -144   
-32    -32    
224    192    
-544   96     
-192   208    
320    -2160  
-1488  656    
1136   -384   
-352   -112   
-576   272    
96     -48    
816    -96    
-336   -368   
-720   368    
304    -64    
64     256    
192    48     
-256   -96    
-1056  -112   
32     384    
32     -352   
32     240    
240    112    
-272   0      
64     96     
-32    1280   
1184   -320   
-928   -368   
-336   224    
608    -96    
-112   704    
272    -176   
-400   64     
160    -16    
-176   288    
624    -160   
-144   176    
-32    0      
-352   48     
288    128    
128    -16    
-304   160    
-176   -192   
224    160    
128    -16    
-144   48     
-96    -80    
64     48     
-48    -144   
-16    272    
512    64     
-320   192    
-64    0      
112    48     
1520   832    
-2928  2384   
304    1104   
2096   240    
-848   -80    
-512   -48    
240    -384   
-448   -336   
320    -48    
96     192    
48     48     
-320   192    
-80    0      
208    256    
144    48     
-464   208    
304    48     
-16    128    
-128   96     
48     144    
-240   0      
-48    -496   
1104   32     
-1056  144    
416    -480   
-672   624    
432    64     
-336   -48    
528    16     
176    176    
-608   144    
64     0      
112    128    
-64    48     
64     240    
-32    -64    
-368   176    
240    64     
48     304    
-176   96     
-80    48     
-64    80     
448    336    
-1104  112    
144    -144   
176    128    
-256   -16    
384    16     
-272   176    
208    336    
576    -256   
-304   176    
16     368    
-416   416    
-112   -304   
704    288    
96     112    
-208   224    
320    176    
-96    48     
128    16     
112    80     
48     96     
-160   80     
80     160    
-128   16     
208    -464   
-544   224    
240    128    
64     0      
-416   352    
-432   3024   
400    784    
-1664  64     
384    -416   
2000   368    
-928   -672   
-416   528    
528    -208   
112    160    
48     208    
-448   -208   
544    416    
-672   288    
416    -144   
64     -96    
160    16     
-352   144    
416    176    
-368   304    
16     1264   
128    384    
-96    -48    
-352   -656   
528    432    
0      0      
-368   16     
480    464    
-256   400    
112    544    
-144   -1024  
-400   -624   
224    384    
144    528    
144    -32    
-336   144    
-144   112    
240    -80    
-16    -96    
-416   -64    
64     -128   
-48    240    
464    624    
0      368    
240    1456   
-208   1024   
160    784    
400    32     
-384   864    
272    0      
-32    -240   
144    48     
736    880    
-1264  720    
400    784    
224    880    
-96    -144   
112    352    
-96    1952   
528    528    
-352   -2768  
272    592    
128    -512   
-176   48     
160    16     
288    256    
-32    -32    
-64    64     
-16    176    
0      -160   
-128   224    
208    -80    
-16    80     
-224   -400   
32     112    
16     -496   
144    80     
-416   -32    
-32    16     
96     -16    
112    16     
-32    128    
-384   -288   
640    -672   
-128   272    
128    192    
288    -160   
-256   96     
-224   -912   
592    112    
80     560    
-304   368    
-16    -48    
64     128    
128    176    
272    128    
-464   80     
-16    -80    
192    432    
160    -128   
-96    -16    
-176   -608   
928    208    
-1168  320    
464    -128   
464    -112   
-256   -48    
-32    144    
-256   -128   
288    -80    
-48    320    
320    -80    
144    -48    
-80    -32    
-272   -64    
128    -16    
400    -320   
-64    64     
-176   -16    
-48    176    
304    -432   
16     -32    
-352   160    
160    -2144  
368    80     
-16    240    
224    -336   
-176   -16    
-464   -256   
192    96     
256    -1264  
-160   -16    
-128   -704   
-1840  -144   
1264   -208   
-352   -192   
448    -912   
48     816    
-768   -928   
-96    -256   
656    1328   
-448   -848   
-880   -256   
240    -496   
-144   -96    
80     -240   
272    -608   
-144   -944   
-272   -352   
0      -784   
240    304    
0      688    
-400   -432   
1408   720    
-352   -400   
-768   -352   
352    -992   
-624   -416   
256    -96    
208    272    
672    128    
-320   176    
-16    -512   
0      -176   
448    -80    
-288   128    
-32    80     
544    -80    
-400   -32    
512    304    
-688   256    
-272   32     
256    -48    
144    -320   
336    -176   
-272   -448   
1008   -1376  
-960   -896   
-128   400    
1024   304    
-912   384    
80     -448   
480    112    
0      -64    
-208   64     
-64    -256   
80     -160   
544    592    
416    64     
-944   -400   
560    -320   
336    880    
-496   -144   
-208   96     
592    -544   
-96    240    
-256   48     
-192   -528   
208    -112   
432    256    
-720   -64    
-176   496    
96     -1440  
1248   -2720  
-160   224    
208    528    
-1040  128    
144    112    
800    416    
-80    112    
-704   304    
432    -656   
256    -16    
-48    128    
-176   -176   
-160   176    
288    -208   
304    144    
-320   -48    
-48    96     
-336   -352   
416    288    
32     -720   
-432   -64    
352    32     
-400   -128   
-80    -800   
496    96     
-208   48     
-160   -96    
80     80     
320    -112   
-688   -16    
352    -32    
-336   -80    
-224   -208   
0      -208   
-32    -288   
-80    -64    
176    304    
64     400    
80     -560   
16     -336   
-80    16     
240    64     
-320   160    
176    64     
16     32     
176    112    
-128   -80    
-208   224    
160    48     
-64    -176   
-48    96     
-208   -32    
720    -80    
-144   -64    
-80    -96    
288    0      
208    -224   
-336   64     
48     80     
-432   192    
352    -32    
-96    80     
-48    48     
256    -16    
-1008  -112   
48     256    
-208   -256   
128    0      
-144   96     
160    16     
-144   208    
-576   -16    
-48    -160   
-528   -208   
-96    256    
208    112    
128    -480   
-304   80     
64     208    
-832   -368   
80     864    
-64    -1952  
-1344  528    
1136   -656   
-96    -192   
-560   352    
-160   96     
224    -96    
192    -768   
-496   512    
-240   0      
80     -64    
32     144    
-32    48     
-368   -288   
272    224    
-192   -64    
-32    -224   
-32    208    
-176   128    
-320   -192   
912    -112   
-80    448    
-240   -64    
-48    96     
-400   -48    
560    320    
176    288    
-368   -272   
32     -112   
-16    64     
224    -224   
32     432    
-176   208    
-96    0      
-272   192    
32     16     
368    0      
-336   -304   
-464   32     
352    16     
240    144    
-336   -160   
-256   208    
-80    -224   
448    208    
-304   32     
208    64     
-304   80     
32     256    
992    -176   
-2112  -720   
864    304    
-16    -432   
-1104  -368   
832    128    
240    208    
-480   816    
-496   464    
128    0      
320    32     
-288   -32    
-128   64     
48     -48    
224    192    
304    -48    
-448   192    
-48    -64    
112    240    
192    224    
-464   -32    
672    1120   
-1840  -672   
-128   256    
688    128    
208    -64    
-144   544    
-176   16     
0      -32    
16     0      
-64    -32    
-144   48     
-128   96     
192    64     
112    304    
-272   -160   
-464   176    
0      -16    
64     -80    
0      -368   
-352   192    
0      144    
32     176    
-592   -64    
-416   112    
656    816    
528    32     
-160   -160   
-400   80     
-48    96     
-32    -304   
-208   240    
352    848    
576    -208   
-704   -496   
416    688    
-48    176    
-256   0      
544    32     
-352   240    
-240   0      
112    48     
224    48     
-80    32     
-224   0      
-16    48     
400    -192   
-416   96     
176    96     
544    848    
-960   1136   
-320   3872   
1184   448    
-1216  592    
-368   -416   
896    448    
208    640    
-416   656    
-176   128    
-128   -192   
-96    -224   
96     16     
-32    432    
-352   -288   
336    144    
160    304    
64     112    
-160   -32    
128    32     
192    304    
-240   -240   
48     -32    
-112   -16    
240    560    
432    576    
128    528    
-64    304    
-16    640    
304    1040   
128    -320   
-32    -208   
0      -272   
32     272    
-96    400    
128    -688   
-16    416    
-112   336    
-96    -144   
112    272    
0      928    
-48    16     
-192   -96    
0      384    
96     128    
80     240    
-16    -480   
-432   64     
512    1472   
-256   320    
-160   352    
224    -32    
-16    48     
-208   -1008  
-432   -736   
672    -672   
-720   -944   
176    -416   
0      -288   
-112   -640   
-560   768    
448    352    
288    208    
-16    -112   
-96    160    
-48    464    
272    32     
48     -144   
-400   -464   
192    -720   
512    128    
-352   192    
208    -448   
-192   112    
208    96     
-64    128    
32     64     
48     576    
592    416    
-480   448    
-112   192    
544    96     
-64    -16    
560    224    
-1104  592    
304    128    
-96    48     
0      -432   
-208   144    
496    112    
-528   592    
144    352    
208    -80    
-208   -32    
96     128    
48     96     
-240   304    
128    80     
-32    16     
-240   -480   
80     48     
80     -32    
32     -240   
-560   736    
736    -80    
-816   -32    
192    -112   
160    352    
64     752    
-320   336    
-80    272    
96     448    
-16    16     
64     96     
-112   288    
256    416    
-192   256    
-144   320    
208    240    
576    -1600  
-704   -368   
-176   -544   
656    32     
64     352    
-240   208    
-48    32     
-48    240    
16     192    
448    80     
-288   0      
-720   -288   
704    -48    
-240   -1264  
1552   -1728  
-432   -992   
32     384    
160    -1424  
416    144    
-496   592    
880    656    
16     -160   
-528   48     
224    -96    
288    224    
-32    112    
-176   -128   
-192   -176   
288    -160   
80     0      
-16    80     
-48    384    
112    -128   
288    144    
480    672    
-1872  848    
128    -432   
656    -944   
-48    -992   
-352   -96    
80     400    
16     -64    
112    80     
-48    320    
704    96     
-384   -112   
-320   32     
272    -256   
368    304    
-16    64     
-288   -160   
144    176    
464    208    
-240   128    
-32    -400   
-128   -256   
928    -80    
-288   192    
-96    -80    
192    720    
672    -672   
-160   1184   
256    256    
-96    -64    
80     48     
16     80     
-272   304    
64     304    
208    -416   
-512   352    
-224   -176   
-48    -96    
304    128    
80     -352   
48     96     
-256   -240   
80     304    
128    -336   
0      192    
272    64     
-48    144    
224    -208   
-112   -1360  
-576   -3728  
-896   -2256  
48     -704   
128    -240   
-304   -1728  
464    144    
624    -144   
-832   336    
128    32     
160    -384   
-192   -1088  
192    192    
-256   -432   
96     128    
-160   -336   
48     -400   
-192   -128   
176    -416   
48     -224   
304    -1072  
-1152  -144   
944    -944   
-272   160    
48     0      
528    48     
-224   -112   
-544   32     
624    16     
352    160    
-480   -208   
64     -64    
304    0      
-144   32     
-272   -80    
64     -240   
-64    -192   
128    -272   
256    -208   
-160   -688   
256    -32    
96     -64    
32     144    
-208   0      
64     256    
304    416    
-224   272    
-512   176    
208    208    
304    48     
-288   -96    
64     -48    
320    -192   
-32    -32    
464    -416   
-400   1216   
-32    320    
-240   560    
448    96     
-224   -288   
-416   -304   
16     -192   
240    -96    
-304   -160   
192    -128   
48     -480   
-224   -96    
112    -288   
144    -448   
32     -1680  
-80    336    
-160   144    
-96    80     
208    -208   
32     -336   
-240   -368   
80     -352   
-128   80     
144    -368   
-1120  -688   
0      528    
-64    80     
192    16     
-928   1088   
1824   -1584  
-928   80     
-480   -784   
1280   352    
-544   512    
-224   -160   
0      -192   
272    -368   
-32    -64    
-160   144    
-176   -64    
-48    -144   
192    -112   
64     -400   
-96    464    
112    -512   
128    336    
160    -560   
-208   -48    
272    992    
-672   -160   
-240   224    
928    -256   
-752   -128   
16     80     
-32    -64    
512    448    
-528   272    
-32    -336   
-112   48     
-32    -192   
464    -80    
-288   -384   
-112   -416   
-32    -16    
-48    -32    
-240   -80    
-16    -80    
-16    -32    
64     96     
-352   0      
208    -96    
-496   16     
480    -32    
-32    -32    
-304   80     
304    64     
16     -304   
160    176    
-1248  928    
1616   304    
-304   48     
-352   -176   
704    80     
-480   224    
-288   272    
224    -144   
48     -112   
0      -224   
-32    192    
-272   -96    
64     64     
16     48     
-960   48     
-304   272    
-640   -256   
320    -144   
-464   -128   
-16    96     
48     0      
-608   -816   
800    -752   
400    64     
-592   -576   
-160   32     
-272   -400   
-16    96     
-144   160    
384    64     
-16    0      
-80    32     
-208   -16    
-928   0      
48     160    
208    128    
-208   48     
-288   160    
272    432    
-192   16     
-80    48     
-16    -144   
-144   -256   
416    -144   
304    112    
-320   256    
-112   -448   
512    -192   
-592   -64    
-368   80     
272    320    
16     96     
-192   -144   
64     48     
640    -224   
-400   48     
480    -112   
-656   304    
-352   96     
496    16     
32     -32    
-384   0      
-224   -64    
112    96     
-16    112    
-576   848    
-608   576    
-144   -32    
432    -528   
-320   -1056  
-336   224    
-320   2640   
928    32     
-896   -512   
16     432    
1120   304    
-112   544    
-704   -896   
-64    -1168  
368    544    
-224   128    
-256   64     
-656   -48    
352    -272   
128    416    
-112   -704   
-208   -272   
80     816    
272    -240   
-176   -224   
-224   -224   
0      384    
128    32     
160    -336   
0      -624   
-256   -640   
80     -16    
-384   -128   
-96    -128   
192    48     
-336   -288   
-32    208    
-32    -48    
-128   48     
64     0      
-16    -16    
-288   208    
224    -288   
-688   -1104  
128    -368   
128    416    
-48    464    
-736   -400   
-160   96     
256    -64    
-48    -480   
64     -304   
0      -48    
-32    -288   
-224   448    
-64    -128   
0      0      
-448   -688   
592    -480   
240    496    
-112   176    
112    688    
-80    -208   
-112   1184   
-288   560    
64     -608   
-64    128    
48     -80    
48     464    
-224   32     
-144   480    
80     432    
64     576    
-144   -384   
112    -176   
-336   192    
208    128    
16     -144   
48     -240   
-160   -96    
16     144    
272    224    
-624   320    
-80    80     
304    208    
160    144    
-560   96     
-288   -1184  
272    -496   
-352   848    
-144   0      
-256   80     
-32    -64    
416    -352   
-528   -640   
-176   80     
160    208    
144    48     
176    96     
-128   16     
-352   128    
176    128    
192    240    
-208   -16    
-96    112    
-160   48     
80     176    
48     880    
208    480    
-464   -48    
-128   96     
288    80     
-32    640    
-96    752    
-16    -544   
-64    -288   
32     528    
48     -128   
-32    -224   
32     -352   
16     720    
16     176    
-112   -80    
48     208    
-64    48     
128    112    
32     112    
-160   -16    
16     -96    
240    64     
-16    304    
-288   192    
384    160    
-64    -32    
-16    32     
32     192    
-736   -512   
1712   -1664  
-448   400    
208    544    
-416   240    
-624   96     
752    32     
32     192    
32     544    
-288   96     
64     128    
144    144    
-192   16     
0      -96    
272    176    
48     -336   
-32    208    
-96    -128   
304    48     
16     -96    
-32    176    
-320   -416   
1120   960    
-192   128    
-96    -32    
496    144    
-496   96     
-240   256    
576    144    
96     -128   
-320   -624   
-176   112    
336    48     
96     48     
-128   32     
96     144    
-96    80     
64     -48    
336    -80    
160    400    
272    304    
-256   32     
-144   -112   
336    464    
1152   -240   
-288   -640   
-256   720    
-48    400    
112    160    
1104   -416   
-448   256    
96     48     
16     240    
352    224    
-128   16     
-496   -16    
-128   96     
576    -176   
336    -48    
-496   176    
208    -240   
-96    112    
64     -80    
464    160    
-256   256    
-480   0      
160    624    
1296   -176   
-448   -16    
432    224    
448    -208   
-2640  1248   
944    192    
-112   800    
-1120  -352   
1120   144    
416    160    
-528   -944   
-176   -224   
320    784    
-480   -112   
144    -48    
144    -96    
-448   0      
32     112    
-208   0      
368    112    
-224   -64    
-304   -80    
256    -208   
960    -1040  
-544   112    
304    -880   
-320   192    
-672   -944   
864    -16    
96     64     
-528   160    
272    64     
-160   304    
288    144    
-48    160    
192    32     
-224   -48    
480    320    
-624   -224   
288    272    
128    -16    
176    48     
48     -304   
-320   128    
320    -192   
-256   -48    
144    112    
368    336    
-464   0      
16     48     
672    -400   
-1168  -496   
432    144    
-16    -80    
192    144    
64     -432   
224    112    
432    -512   
-336   48     
528    -208   
-112   16     
-128   304    
96     384    
80     112    
48     -240   
-64    96     
32     -208   
-48    128    
208    -16    
240    352    
-128   -96    
-192   288    
544    -16    
-128   320    
-368   224    
160    0      
144    -112   
-128   256    
32     -128   
128    -352   
304    144    
-256   112    
16     -288   
160    -752   
160    80     
-960   -832   
576    -784   
-576   0      
-128   -176   
976    480    
-544   -1024  
-336   240    
160    -1216  
512    -784   
112    416    
-368   -400   
16     -160   
-16    -1744  
400    -320   
-368   400    
48     -288   
-80    64     
176    64     
96     -80    
0      112    
-336   -1536  
496    -928   
-432   512    
320    -448   
144    -656   
-320   160    
160    -240   
368    64     
400    256    
-448   48     
-320   192    
320    -304   
224    80     
80     -400   
176    -32    
-176   160    
-176   -160   
112    160    
240    16     
48     -224   
96     -192   
192    -320   
-176   -208   
256    -144   
-288   -624   
304    16     
80     -576   
-224   -144   
80     160    
336    544    
320    -752   
-2848  80     
272    288    
1088   -352   
-928   0      
384    128    
-416   -656   
-272   -240   
256    -352   
-112   -640   
128    -304   
-144   -736   
192    64     
224    192    
-400   160    
-32    128    
192    112    
-320   128    
-112   288    
64     144    
-16    48     
-832   -432   
1856   -608   
-112   -816   
-1344  64     
1200   432    
-336   -800   
16     -736   
336    0      
-432   144    
176    -64    
-32    64     
112    160    
96     80     
-128   -48    
256    -496   
-320   -48    
-176   -464   
192    -832   
304    -400   
16     -192   
-112   -336   
-80    -64    
-480   -2432  
-480   -992   
640    -480   
-192   -640   
-16    32     
640    -320   
-512   224    
-224   160    
-128   -256   
304    -320   
-80    -16    
272    400    
-384   -464   
-304   -928   
288    384    
32     -160   
-128   320    
-256   160    
64     272    
16     -208   
176    -144   
-112   -112   
-64    144    
256    -176   
144    64     
-560   256    
288    16     
272    192    
-976   -720   
-752   -464   
-464   -112   
448    -288   
48     -320   
-192   -320   
-272   1632   
-400   480    
368    -272   
432    416    
-240   208    
-288   -624   
-352   -176   
224    -80    
576    -144   
-368   -688   
-432   272    
-1008  -608   
432    -384   
64     576    
-288   864    
-240   -496   
416    -368   
-32    128    
-160   528    
-48    -32    
-144   -208   
896    1648   
-688   704    
-240   -48    
-256   -512   
0      336    
304    -16    
-192   544    
-368   -16    
144    -144   
416    560    
-816   -64    
80     -224   
-208   -224   
-80    -224   
80     16     
-32    544    
-64    -320   
-208   -608   
384    -48    
-272   208    
-320   208    
-432   -640   
-96    -32    
144    208    
192    880    
416    320    
-448   -64    
96     -80    
352    64     
-256   112    
176    -256   
-16    -2192  
-176   -416   
-144   528    
48     0      
-16    -16    
-16    112    
-32    -240   
-48    -288   
-96    -160   
-240   272    
-272   48     
-288   -384   
-80    -80    
208    208    
-128   272    
-160   -160   
80     128    
-48    320    
160    1088   
16     1008   
80     -352   
-384   -160   
-256   -816   
688    -1824  
208    64     
-64    192    
464    288    
848    -864   
-400   48     
176    -272   
-208   -176   
128    -96    
304    -112   
32     48     
-208   256    
-176   -112   
352    112    
384    128    
-304   512    
-208   112    
128    -272   
-48    -160   
-288   -288   
96     -880   
64     -128   
48     -1072  
-32    96     
64     272    
-144   -352   
-144   -416   
288    -32    
-256   400    
-112   96     
256    32     
-112   -64    
-336   448    
240    -112   
-256   -16    
-16    -112   
112    -416   
48     -576   
-224   48     
176    144    
176    32     
-304   16     
48     48     
32     192    
432    -32    
-352   112    
-112   -64    
128    144    
208    32     
160    496    
-176   -688   
-1968  352    
1760   208    
160    192    
-1392  -160   
320    -256   
656    -256   
-432   -336   
-192   64     
192    -64    
-176   240    
144    16     
-64    64     
144    -144   
-352   80     
64     -16    
-432   176    
192    192    
48     144    
-272   -80    
-128   -560   
1456   656    
-448   256    
-192   16     
96     -64    
-128   112    
144    -64    
32     192    
288    -112   
-96    128    
-432   32     
160    144    
144    48     
-80    -32    
208    192    
-80    64     
-160   288    
48     -224   
240    320    
256    208    
-768   16     
448    832    
-672   -112   
-864   -464   
816    288    
384    400    
-704   64     
-80    -192   
496    -240   
-32    -16    
-528   16     
-112   112    
336    80     
512    192    
-176   336    
-896   -32    
16     -544   
832    -160   
-48    64     
-672   -80    
-112   48     
800    -320   
-448   32     
-512   48     
-336   -112   
1008   416    
496    -192   
-176   -176   
80     192    
208    -736   
-1600  2336   
1200   -704   
-528   1184   
-112   -272   
-208   -128   
720    496    
-400   64     
-128   16     
-368   -176   
512    112    
-16    96     
32     160    
-80    -80    
-160   128    
128    0      
672    208    
-256   -128   
-272   208    
736    608    
-688   352    
96     592    
656    -240   
-752   80     
768    128    
-288   128    
-64    160    
448    48     
-80    192    
-400   80     
208    448    
48     112    
-16    192    
96     -48    
-544   -176   
112    -912   
320    320    
-144   160    
-176   224    
480    -16    
32     160    
80     96     
-240   48     
112    144    
240    -80    
-464   -16    
-32    80     
144    368    
16     112    
-128   -48    
144    -1008  
16     208    
16     160    
336    -144   
-320   48     
464    16     
-32    304    
-64    48     
112    -80    
-48    48     
96     448    
432    336    
-128   96     
-48    16     
-16    -80    
-80    -352   
192    96     
96     -864   
-208   304    
416    640    
-160   688    
-160   432    
112    112    
-64    -576   
-176   -288   
16     -80    
208    144    
144    336    
-304   -64    
-80    64     
0      -352   
192    32     
240    -2672  
-1184  1488   
1584   544    
-1040  304    
112    -1344  
80     -880   
-512   304    
-80    560    
496    368    
96     176    
-464   272    
-96    176    
272    368    
256    -176   
-336   240    
-96    -672   
208    -64    
160    -2048  
160    -304   
-144   -80    
-224   -560   
544    -944   
240    1024   
464    -96    
-224   64     
160    848    
0      320    
160    144    
0      -528   
-176   160    
160    -704   
-16    192    
224    -592   
-64    160    
32     -336   
-64    336    
64     96     
-16    -16    
-112   512    
48     -400   
112    64     
224    48     
-96    160    
80     -624   
64     80     
224    -48    
64     144    
-128   -640   
-32    192    
-128   -112   
544    1360   
16     112    
-1648  -384   
1968   -368   
-560   80     
-976   608    
464    -496   
1008   480    
-496   1184   
240    -592   
-32    -592   
-176   -16    
384    -272   
112    176    
-512   -160   
-96    208    
368    -144   
-96    128    
-208   192    
128    -160   
32     -64    
-528   -1008  
272    16     
1200   -736   
-1376  -400   
432    -528   
784    -544   
-528   -160   
-288   608    
368    304    
256    0      
-80    -96    
80     -272   
-32    -928   
192    -544   
192    -1296  
128    80     
-368   -688   
-208   -1504  
624    -1248  
-272   -848   
-288   176    
32     432    
-32    -704   
-240   1008   
1008   416    
-800   112    
-496   -720   
1008   -96    
-416   -112   
-128   -464   
80     -240   
704    -16    
-320   16     
-224   -192   
416    176    
-720   -32    
480    0      
288    -2128  
-528   -576   
64     -320   
-336   -112   
208    -128   
80     -736   
-736   -240   
-64    -240   
144    0      
432    -112   
-224   176    
-144   -384   
384    96     
240    -2272  
-2288  -624   
1232   -352   
368    752    
-48    336    
-208   832    
-272   976    
112    -368   
-384   608    
-144   -656   
-160   240    
-224   -528   
16     -256   
336    -304   
-464   -176   
-144   -2048  
64     224    
-64    -48    
-112   -160   
-48    -544   
0      0      
-80    80     
-32    -64    
1152   -480   
-960   32     
240    48     
400    208    
-96    240    
112    -1936  
-240   -1312  
128    -416   
-48    336    
96     64     
176    0      
32     32     
48     -720   
-48    -304   
624    80     
32     896    
48     752    
-240   944    
144    752    
208    48     
-464   -832   
224    448    
64     464    
144    -272   
544    -1696  
-432   480    
-96    -368   
-32    -496   
-160   -1360  
0      -240   
96     1216   
-432   -1072  
-1616  -912   
480    -336   
-160   -912   
-336   64     
144    -320   
416    -192   
-80    -112   
-192   -2000  
176    0      
-32    160    
-16    208    
-160   48     
-96    -176   
64     128    
528    832    
-432   848    
32     512    
208    -80    
-96    16     
-32    96     
80     -192   
208    224    
-368   720    
144    32     
64     -16    
-16    112    
-896   -1008  
912    -1424  
-256   400    
-240   -160   
416    -112   
256    160    
-112   528    
176    512    
112    752    
16     -480   
-144   352    
208    -672   
-48    32     
64     368    
144    320    
-16    -432   
-96    -128   
112    192    
-32    48     
-48    144    
368    -1200  
-688   496    
448    -128   
-560   112    
-448   -112   
224    -48    
-224   -16    
-640   176    
-224   32     
464    -64    
-320   -80    
-96    96     
-96    336    
352    32     
-224   -128   
-1040  -96    
16     80     
-32    144    
240    -64    
-128   0      
-112   -80    
-272   32     
16     -16    
-208   -48    
176    -208   
-80    32     
-816   -256   
-112   208    
112    -160   
96     400    
-1712  352    
3440   800    
-32    -320   
-2032  -48    
848    -240   
736    112    
-496   16     
-352   208    
304    -192   
-240   80     
16     -32    
-160   80     
-288   0      
-864   48     
464    144    
-224   0      
-144   64     
48     -480   
80     176    
-256   -224   
16     128    
-608   -608   
0      288    
1184   -672   
-528   -288   
-528   96     
752    -256   
-544   -288   
-464   32     
80     80     
208    -32    
576    128    
-256   -112   
-240   32     
64     112    
-256   32     
320    0      
-32    192    
320    -16    
-592   -400   
-384   64     
416    -352   
752    128    
-640   -96    
-16    304    
-304   -400   
-912   -80    
400    256    
352    -336   
112    1056   
-112   416    
-272   -32    
640    -560   
-128   160    
-288   -16    
0      -128   
592    -560   
32     16     
-800   -160   
-224   -304   
-112   112    
80     64     
-80    16     
192    80     
-128   32     
-192   -64    
-80    64     
-224   160    
96     112    
-80    -640   
2448   160    
-2768  560    
512    80     
1616   384    
-496   -16    
-672   -160   
544    160    
-96    -272   
-512   112    
-64    -16    
144    64     
160    96     
-272   -16    
352    176    
-384   -144   
112    208    
240    -64    
-32    80     
-304   -160   
512    880    
-80    -96    
-512   208    
192    144    
-112   80     
-336   64     
288    32     
80     0      
-400   0      
-16    32     
256    64     
192    192    
-400   80     
48     -112   
-256   16     
224    144    
-448   256    
112    160    
0      0      
-192   -112   
48     64     
64     32     
48     -16    
-64    16     
-96    144    
96     208    
-160   192    
80     160    
-80    288    
0      96     
400    544    
-336   416    
-144   336    
560    -16    
64     -304   
-176   -464   
-160   -496   
64     624    
416    1264   
-128   560    
80     336    
144    240    
-416   288    
32     1056   
832    432    
-480   800    
-144   672    
16     -208   
304    32     
-160   80     
-64    464    
0      16     
48     -16    
-32    -32    
-96    32     
80     128    
80     336    
-144   288    
-176   1088   
80     -336   
0      -448   
64     -64    
-208   -640   
464    -1952  
-144   336    
624    160    
-416   368    
32     -144   
368    208    
128    -192   
-144   32     
-16    320    
0      320    
32     -128   
80     -160   
-96    288    
-48    320    
32     112    
48     96     
32     -224   
32     16     
128    144    
-208   368    
-144   720    
752    64     
-736   224    
-48    272    
64     176    
-96    -272   
288    -1040  
0      -1840  
-256   560    
48     -80    
272    -96    
128    0      
144    160    
-224   -32    
0      144    
208    32     
256    208    
-192   176    
-224   176    
192    128    
272    48     
48     48     
-192   -224   
16     304    
352    432    
16     256    
-224   48     
48     -64    
304    80     
-416   -624   
2176   -1200  
-1520  560    
576    -480   
576    -480   
-592   224    
400    256    
448    -656   
-688   -800   
-144   976    
160    432    
64     -544   
64     128    
176    208    
-304   16     
48     -48    
96     -320   
0      208    
-560   -528   
144    512    
432    -96    
-832   -544   
608    -464   
240    -496   
-272   416    
480    688    
-224   960    
128    1040   
-256   1232   
464    -48    
-144   -912   
-144   -752   
240    16     
-256   -96    
96     64     
464    -352   
-944   -384   
208    -1152  
224    -1984  
-144   -944   
-32    -352   
-16    80     
16     48     
-32    48     
-240   368    
592    240    
384    432    
-848   80     
-176   576    
784    160    
-608   384    
-208   -128   
320    512    
0      48     
64     112    
-384   16     
32     240    
208    -1056  
416    144    
-624   -32    
-288   176    
208    80     
-144   80     
48     -624   
-528   -112   
320    320    
96     -448   
48     224    
16     -704   
-384   -320   
96     -720   
-848   2304   
16     96     
32     80     
-608   -256   
656    1088   
336    576    
-640   464    
144    -272   
464    448    
144    128    
-160   -1120  
-128   208    
128    208    
288    80     
144    -240   
-320   112    
256    64     
32     48     
-96    48     
-32    224    
-16    352    
112    160    
496    -48    
144    -544   
-1584  -432   
736    -992   
48     0      
224    -368   
-736   -320   
208    -304   
128    -192   
-144   16     
64     -128   
80     -16    
416    96     
-144   112    
-304   64     
128    -304   
32     -240   
16     -224   
-736   -592   
256    -224   
288    240    
-16    192    
208    -80    
-80    112    
16     -928   
-592   -256   
320    -288   
192    -144   
-128   96     
-208   -384   
480    -1152  
16     -416   
-288   -384   
256    816    
-224   832    
96     -272   
-272   -416   
64     -336   
-112   -96    
-288   -272   
432    -528   
192    -144   
-288   -464   
-64    16     
-48    -304   
16     160    
-400   192    
240    -240   
16     -240   
-224   -720   
336    -320   
-64    -2320  
-96    272    
224    96     
-272   176    
240    48     
176    -64    
-224   -32    
-288   32     
1056   2064   
1184   192    
-2208  384    
0      -416   
80     -208   
288    -512   
-176   -176   
-80    -1056  
0      -352   
160    -1488  
400    -80    
-64    32     
-48    240    
-80    144    
256    -176   
-160   432    
432    -480   
-752   64     
96     -32    
400    -96    
-32    -1744  
-640   352    
704    64     
-688   64     
384    -736   
176    -512   
-464   128    
32     320    
80     352    
576    -176   
-176   16     
-480   -128   
288    32     
-48    -32    
64     320    
224    64     
-48    -16    
-432   -176   
496    64     
0      -560   
0      64     
48     64     
-32    192    
112    16     
112    -112   
-512   16     
432    -288   
-368   -16    
192    -48    
-336   -112   
464    -768   
-80    960    
768    -160   
-352   -80    
0      -400   
128    112    
144    -1744  
304    80     
-256   -192   
256    96     
-336   48     
48     112    
-32    -96    
48     128    
320    -112   
-288   -48    
128    -80    
96     48     
0      0      
32     -144   
-16    32     
464    -160   
688    -304   
-368   32     
976    -16    
-1024  -432   
-64    -16    
576    -144   
32     -144   
-272   96     
368    -160   
224    144    
-112   -80    
-64    64     
32     -320   
384    144    
64     -240   
-240   -160   
-32    0      
80     128    
-192   -96    
-48    -304   
752    -112   
-432   128    
704    48     
480    32     
-416   192    
-416   288    
-608   64     
448    -192   
336    144    
-256   -128   
-272   64     
-48    96     
-176   -304   
160    -128   
48     240    
-192   -336   
768    -48    
112    96     
32     -240   
144    128    
-976   -144   
160    80     
144    80     
-160   -176   
-16    32     
-224   80     
-64    32     
208    1024   
-1232  -1504  
-2256  -304   
1392   208    
384    -224   
-144   144    
-1072  -176   
-208   48     
976    -320   
-48    64     
-112   -128   
96     16     
-240   96     
-64    -16    
-80    -32    
-368   -48    
160    48     
-32    0      
96     -64    
-208   -304   
240    -624   
-80    -1760  
-96    -688   
0      416    
-416   64     
-544   -608   
944    16     
0      -96    
-272   336    
-128   464    
304    -160   
-16    -496   
-592   -160   
128    -144   
176    -224   
-624   32     
-80    -128   
144    -224   
48     -704   
-16    -128   
32     128    
-192   -64    
128    16     
256    -176   
-400   -304   
80     -272   
352    -464   
-592   -464   
-64    80     
-192   -80    
160    -432   
96     -672   
-352   -400   
240    -400   
80     768    
96     896    
-32    1008   
-240   624    
-192   304    
336    832    
32     720    
-288   -880   
-224   -112   
224    224    
-224   -240   
112    64     
-336   208    
-208   224    
112    -544   
80     240    
64     -160   
-96    288    
-32    -16    
-48    128    
272    64     
176    352    
-352   256    
16     32     
336    400    
-416   384    
272    -128   
80     -80    
32     224    
-608   992    
464    0      
-320   -176   
-544   32     
48     64     
96     -64    
96     -208   
240    -112   
-48    -16    
-176   144    
208    176    
-144   80     
-256   64     
-80    -48    
224    0      
160    -240   
-240   48     
-80    288    
-16    -16    
48     80     
-32    960    
768    16     
-896   224    
-272   16     
400    -48    
192    288    
-176   -448   
-368   -288   
-16    -528   
240    -112   
32     -16    
64     -208   
-224   352    
16     144    
224    128    
-80    16     
-128   320    
112    48     
-80    48     
-16    -176   
16     112    
-64    -16    
-16    -16    
-64    16     
176    176    
-336   224    
464    48     
-160   -112   
-240   288    
-272   144    
640    272    
1728   -80    
-1440  336    
320    -48    
0      -48    
96     144    
672    288    
-1296  -1056  
-528   -672   
384    272    
288    -16    
-176   256    
-176   -192   
16     304    
304    -32    
80     144    
-208   -304   
-352   48     
224    112    
80     48     
-16    -800   
-1808  928    
1888   -96    
-432   -160   
-464   -624   
528    1440   
576    1312   
-736   -528   
-80    -480   
608    224    
-544   544    
80     416    
320    704    
-336   464    
-96    224    
416    -112   
-224   -288   
352    -512   
-144   -144   
0      48     
192    112    
-208   112    
-336   -208   
-160   -512   
1440   -480   
80     368    
-112   1376   
-208   256    
-208   -224   
-80    48     
496    96     
-320   -96    
80     -160   
16     -48    
464    256    
288    1504   
-1056  1424   
48     240    
432    -304   
-352   144    
-192   112    
-208   64     
0      -288   
272    -80    
-32    272    
-192   176    
64     -16    
560    -2160  
-400   -704   
-608   -176   
-288   1424   
-176   352    
-720   64     
32     -304   
1376   720    
-624   -96    
-448   400    
736    -96    
240    352    
-352   -176   
48     336    
-32    -16    
80     0      
592    32     
-144   -80    
-432   160    
448    -144   
144    240    
-112   -1328  
-816   -720   
432    -48    
80     576    
96     -256   
80     48     
-352   -64    
-320   416    
-192   176    
16     -48    
448    -400   
-352   240    
304    96     
-288   -144   
288    -192   
128    272    
16     208    
-192   224    
208    144    
-48    -64    
-32    80     
-160   64     
48     -80    
-96    -96    
496    -368   
-16    144    
32     -1184  
16     160    
272    64     
96     0      
-400   -32    
80     304    
496    64     
-80    192    
-208   608    
848    160    
0      -112   
-176   176    
592    112    
-16    64     
-80    704    
-96    112    
160    128    
-48    128    
48     144    
-112   176    
80     192    
144    96     
48     -464   
-464   -80    
224    576    
112    -48    
128    -208   
-96    208    
48     176    
16     240    
16     -192   
176    144    
16     -768   
-304   -16    
192    -256   
176    80     
-16    80     
-1088  -1056  
928    -656   
528    -160   
-1264  -240   
1296   -448   
-112   240    
-240   80     
-416   240    
496    -544   
-64    192    
-192   -64    
-96    96     
240    176    
160    -304   
-192   288    
192    256    
-96    128    
144    -304   
-48    128    
48     -608   
208    992    
-416   -1136  
-768   288    
1504   96     
-160   -32    
-608   128    
480    160    
240    128    
0      -96    
-224   48     
304    80     
-256   176    
176    -192   
96     64     
-288   -240   
160    80     
320    -384   
-448   272    
400    -256   
-160   288    
256    -448   
-240   128    
240    -32    
-144   -480   
288    176    
176    -448   
-448   -16    
496    -64    
-80    -272   
-256   -656   
160    1328   
1280   -560   
-288   336    
-416   -432   
-48    144    
384    -16    
32     -992   
96     32     
-112   -288   
-32    160    
48     -144   
48     -720   
0      -144   
-80    -640   
208    144    
16     -160   
-112   96     
16     -336   
224    -272   
-16    -496   
0      112    
-240   -880   
-336   416    
752    -192   
-880   -80    
416    -16    
432    -224   
-896   -288   
784    -144   
-272   96     
16     -656   
144    -80    
-112   -2144  
0      -128   
192    96     
64     -64    
-224   -80    
-192   48     
-64    -656   
128    0      
-80    144    
-144   48     
288    -16    
-144   -352   
-192   -48    
432    -112   
-64    464    
-192   -464   
-144   32     
352    240    
-320   -96    
-48    -176   
288    192    
160    -160   
-208   -32    
32     -96    
176    128    
48     288    
-416   112    
-144   16     
-64    -128   
-160   16     
272    -128   
-208   32     
64     -448   
-16    384    
64     256    
192    80     
96     32     
-640   -400   
-384   -2672  
1664   -3040  
304    -512   
-576   688    
-976   336    
64     144    
624    -160   
208    -176   
-624   -464   
-144   -112   
416    -96    
256    224    
-144   80     
-432   -48    
400    -128   
432    48     
-80    -128   
-256   80     
16     32     
240    640    
32     -160   
-528   -400   
208    -368   
0      144    
-432   -32    
512    192    
-208   -48    
-208   -144   
208    496    
368    656    
-128   48     
-576   -640   
320    384    
368    240    
48     -16    
-192   -272   
96     304    
-48    -656   
-416   480    
336    544    
-160   560    
112    -1200  
-48    -64    
-192   352    
-16    -320   
-848   -816   
416    -992   
-128   -32    
-32    1408   
-160   -64    
-176   -448   
112    64     
-128   864    
976    256    
-656   1280   
656    1056   
352    752    
-320   -48    
272    0      
-16    48     
-128   -48    
64     -176   
-48    32     
0      16     
128    -128   
160    720    
192    752    
-48    528    
304    -80    
-256   -320   
-336   240    
144    32     
-320   0      
96     -80    
-320   240    
-224   208    
0      64     
144    -32    
32     240    
-32    64     
-272   -160   
224    48     
272    -784   
-864   304    
272    -112   
-320   80     
48     144    
-368   -336   
-80    -544   
-112   64     
-192   240    
-256   32     
144    -208   
-144   -112   
-176   80     
-176   -160   
32     0      
-336   144    
-96    512    
304    -288   
128    48     
-128   96     
-800   496    
816    -256   
-784   -32    
64     -192   
208    -48    
48     144    
-672   -224   
-448   -480   
-112   272    
176    384    
16     -400   
96     -192   
-144   336    
-96    448    
-32    -112   
112    -96    
-112   -352   
-256   -160   
336    96     
-160   -160   
-80    144    
-464   -128   
96     544    
-128   144    
224    240    
-368   -224   
-176   32     
32     -128   
400    -432   
-544   -976   
1360   -816   
0      224    
288    256    
-432   432    
-320   144    
-32    352    
464    -784   
-1264  -1936  
-1504  240    
608    1296   
0      80     
48     -160   
0      -208   
-576   0      
368    192    
112    112    
-240   -416   
-336   -320   
288    144    
96     256    
272    -288   
-1968  1184   
1120   -432   
-704   -448   
-480   -240   
-208   -944   
176    -272   
176    -112   
-688   -160   
416    -16    
16     64     
-336   48     
-224   80     
320    -48    
-48    0      
-464   160    
128    32     
208    368    
304    128    
-64    160    
-176   144    
-96    -16    
-320   -96    
-560   128    
144    224    
608    -448   
-32    128    
-320   112    
48     48     
-112   576    
688    -80    
-528   16     
-80    -32    
208    -160   
336    192    
0      -144   
-1104  -272   
736    -400   
544    288    
-352   160    
-32    192    
112    -32    
-16    -144   
704    -128   
-544   48     
240    64     
288    80     
224    112    
-400   -240   
112    -1120  
-512   2832   
1040   608    
-1200  160    
-176   -208   
1008   96     
256    352    
-864   160    
-96    112    
128    64     
384    16     
0      16     
-304   -48    
32     160    
-112   96     
144    -48    
-192   128    
-48    0      
-32    112    
688    224    
-1040  192    
672    0      
112    224    
-192   -112   
64     176    
-48    16     
464    -112   
-384   48     
-128   64     
80     -144   
-144   96     
144    -192   
-48    288    
32     -32    
192    192    
224    0      
-128   0      
0      192    
336    544    
160    448    
-496   144    
384    64     
160    64     
-352   224    
80     272    
-384   80     
176    80     
336    32     
-112   320    
-16    304    
-16    48     
128    16     
16     -368   
192    -560   
-160   192    
176    768    
1072   320    
-928   272    
384    416    
576    112    
16     -64    
-16    48     
-304   48     
240    96     
144    -64    
176    -48    
-128   32     
48     352    
-128   80     
160    -32    
240    176    
-16    224    
-384   32     
64     -2160  
224    -32    
16     272    
48     0      
-16    32     
-16    -80    
-16    64     
192    -16    
-32    176    
-1184  -560   
1280   -1264  
32     0      
-768   -208   
528    128    
32     240    
80     -224   
-192   800    
560    224    
-160   -336   
48     176    
-64    96     
-224   176    
384    -64    
-208   320    
272    80     
-128   144    
32     208    
144    32     
32     144    
608    1728   
-1344  -32    
-48    48     
1200   -80    
-720   -160   
-192   -96    
80     288    
64     64     
336    -304   
-48    80     
-368   240    
64     -144   
288    -16    
-64    -16    
-192   112    
272    160    
-128   -512   
288    304    
-16    -2752  
-320   240    
480    48     
-80    160    
-48    96     
160    96     
-176   80     
128    160    
64     0      
-112   144    
112    96     
16     208    
-896   -1776  
-992   -464   
2192   -496   
-1152  -448   
16     384    
384    -320   
-368   160    
-128   -768   
304    128    
112    -176   
0      192    
-96    16     
144    224    
224    -32    
-496   -160   
576    96     
-336   -64    
80     -80    
224    -608   
-144   -64    
0      -2848  
368    32     
-1536  848    
960    112    
0      96     
-96    176    
272    -80    
-48    480    
-336   160    
80     -448   
144    128    
0      -48    
-144   64     
-32    -144   
128    -112   
240    -400   
-208   144    
-96    -288   
-240   240    
272    160    
-64    -160   
-160   112    
224    640    
640    -320   
-336   -224   
-16    528    
624    -176   
-96    160    
-160   -416   
-96    176    
96     -16    
96     32     
112    160    
-96    128    
-48    -80    
160    -224   
-480   224    
928    -208   
32     -48    
208    128    
240    -96    
-336   -80    
96     160    
128    -96    
-80    160    
-32    -208   
304    368    
672    192    
-144   -208   
-192   336    
240    592    
-576   1680   
-16    544    
-816   -736   
-880   -528   
1584   336    
-320   -608   
-272   1152   
976    -592   
-272   -256   
-80    -32    
96     -528   
144    -208   
-80    -1824  
-192   384    
-80    -272   
336    -640   
224    96     
96     -416   
-48    -672   
-272   -1184  
400    96     
144    560    
-336   192    
496    -16    
160    976    
64     592    
-112   80     
-112   224    
128    -160   
-96    -672   
-320   -192   
96     512    
-112   -624   
48     -336   
304    -448   
0      368    
-96    -384   
272    -80    
176    -1376  
-160   -64    
112    288    
32     128    
112    304    
368    208    
-784   -960   
-32    -320   
-288   -144   
240    -192   
160    -912   
-80    384    
192    -720   
0      -256   
-288   -352   
464    -336   
32     -592   
-80    -352   
-160   480    
-48    -1056  
256    -928   
-112   496    
-112   -32    
-128   -160   
272    144    
224    -80    
160    -288   
-320   -176   
304    -192   
-128   0      
-336   128    
-32    224    
-64    -176   
272    16     
-80    48     
-80    -80    
-32    96     
160    -80    
-544   -32    
512    -400   
-1056  -384   
-96    80     
464    16     
-80    304    
-64    16     
272    -1008  
128    144    
-96    -304   
-112   144    
432    112    
-176   224    
112    -80    
96     -160   
-288   -32    
208    -64    
-48    -112   
96     16     
-784   -32    
288    -400   
-112   176    
176    240    
16     864    
-144   128    
688    -272   
-928   768    
192    -352   
336    -608   
192    -672   
-80    -32    
-272   -224   
352    -960   
288    -272   
-16    -208   
-32    -352   
-64    32     
64     -240   
144    32     
32     -400   
-64    -240   
-400   -608   
176    -400   
80     688    
512    -208   
-688   -432   
-320   288    
320    0      
256    -32    
-128   240    
-352   -64    
448    -240   
240    -224   
208    176    
-368   -48    
576    -640   
-2480  224    
1072   80     
112    544    
-464   768    
192    560    
192    144    
-608   176    
-192   288    
608    208    
-48    -48    
-160   48     
-1152  -176   
-128   -48    
-16    240    
-560   128    
-96    144    
-384   272    
96     208    
32     -48    
-160   112    
-496   384    
2192   -176   
-1040  -496   
-528   208    
464    -144   
-480   -304   
-560   -320   
272    160    
-288   -112   
208    112    
208    32     
-48    -32    
-96    96     
-1168  16     
224    48     
368    80     
-224   32     
-736   -32    
208    128    
-80    -288   
96     -224   
528    -16    
-48    448    
-176   -144   
192    0      
-304   208    
-272   288    
320    464    
592    192    
-688   -80    
-592   -96    
240    -80    
-128   16     
160    80     
144    112    
48     80     
208    352    
-384   -64    
464    -528   
-272   -48    
-240   192    
-16    64     
80     48     
-112   16     
512    912    
-1824  -48    
-304   240    
1008   -112   
-192   1056   
-224   -1248  
880    -2144  
672    1104   
368    352    
-800   -48    
256    256    
432    192    
176    160    
-288   -96    
-128   -80    
-48    16     
144    -64    
96     112    
144    64     
48     -32    
-16    -16    
112    0      
0      128    
-32    16     
-432   -288   
-48    336    
272    -48    
-368   176    
896    -64    
-48    160    
-448   48     
-496   288    
1264   320    
-1168  -144   
-32    496    
240    -80    
-288   192    
160    32     
144    -32    
128    -208   
-944   -304   
544    -160   
272    352    
-352   64     
-272   32     
112    272    
-160   -64    
352    256    
-608   -112   
128    48     
224    -48    
-32    -64    
-176   112    
144    160    
-80    80     
272    160    
-64    128    
-240   -672   
-960   192    
864    80     
-208   448    
-288   -256   
176    160    
64     352    
272    368    
-32    320    
432    240    
-240   48     
-48    16     
592    336    
-176   336    
-256   -32    
480    592    
224    256    
-432   -1280  
-288   96     
176    256    
160    96     
272    -240   
-256   80     
-176   320    
160    192    
400    -48    
112    464    
-528   368    
112    -96    
-80    -592   
1600   1280   
176    672    
-1248  528    
224    384    
-288   -128   
384    48     
-192   -704   
-80    -128   
-80    144    
16     -48    
336    96     
-144   64     
-64    128    
-192   160    
432    -560   
-240   112    
32     288    
-304   -336   
64     -176   
64     48     
-144   -1168  
-160   416    
672    336    
-720   240    
352    192    
-16    80     
-96    -32    
-224   -128   
336    304    
288    256    
-112   144    
-384   240    
80     0      
144    80     
-112   32     
-48    32     
208    288    
-352   64     
304    64     
-16    96     
-80    128    
-80    160    
-32    80     
64     -16    
112    32     
-96    64     
112    80     
-16    32     
-160   224    
-256   0      
1344   -336   
-240   224    
-432   -32    
352    160    
-432   -400   
-192   96     
704    208    
-416   -32    
-32    48     
336    64     
-272   0      
-368   160    
352    176    
304    256    
-320   -240   
64     256    
240    192    
-16    96     
-320   240    
96     80     
-112   -32    
816    1344   
640    144    
-1248  -320   
1120   -224   
96     48     
-400   544    
1056   -64    
-224   32     
208    240    
96     288    
0      80     
80     32     
144    48     
-192   80     
-112   208    
320    16     
-160   448    
192    64     
32     16     
64     -272   
0      -16    
640    192    
-544   656    
560    -448   
-576   -1392  
-272   400    
1216   -480   
-112   32     
-448   336    
416    48     
144    144    
192    160    
64     320    
240    -48    
-208   -192   
-64    688    
32     32     
-160   -464   
672    256    
432    -64    
-80    64     
-176   -1072  
32     192    
304    -192   
320    -32    
208    -192   
-480   304    
816    448    
64     240    
-896   -928   
1392   -272   
1968   688    
-1760  -32    
-464   -784   
864    -272   
1024   720    
-352   1136   
-368   320    
64     464    
368    -544   
160    112    
-400   16     
-32    -32    
32     32     
272    -112   
112    -304   
-32    96     
-32    -48    
-128   -32    
208    -160   
16     256    
112    -528   
-80    16     
288    -736   
-336   192    
80     672    
272    1120   
-144   -1120  
-144   176    
192    928    
48     32     
240    144    
-208   -240   
240    416    
192    -720   
-304   -608   
192    -192   
176    720    
16     -1296  
-160   -192   
240    80     
320    336    
-384   -64    
-16    336    
-160   480    
448    -144   
16     -528   
-224   192    
208    432    
224    -112   
240    592    
-32    -848   
-752   256    
480    208    
96     848    
80     480    
16     -176   
48     624    
288    224    
-288   48     
96     -640   
48     96     
-192   -96    
96     96     
128    -64    
112    720    
-352   208    
-64    -544   
128    -1040  
272    224    
128    96     
128    32     
-144   -176   
144    -176   
352    192    
176    -64    
64     528    
-80    784    
320    144    
336    64     
-384   -16    
64     -1040  
368    -240   
0      336    
-128   768    
256    800    
-112   -928   
-128   1024   
160    -1216  
-32    -784   
-288   -32    
0      -1040  
128    64     
368    -96    
0      -288   
16     464    
-304   432    
48     272    
272    240    
-48    -240   
-336   464    
96     -704   
-16    240    
336    -720   
-480   -1888  
48     -32    
576    -112   
-336   432    
-64    -960   
128    -208   
32     384    
160    -48    
272    368    
-288   96     
-400   -576   
416    -16    
352    -208   
-160   -176   
-256   32     
288    48     
-1536  -128   
-80    -176   
144    0      
16     48     
432    -128   
-368   -672   
16     -80    
208    -240   
-16    320    
48     32     
1632   1408   
-1264  -496   
-1760  -544   
2032   48     
-720   -528   
-864   -272   
384    -288   
0      -64    
160    16     
0      176    
32     -944   
288    -16    
16     -112   
-144   -64    
-144   80     
192    -16    
-48    64     
192    16     
32     80     
64     0      
-144   -32    
-96    -880   
-624   464    
1024   -480   
-848   -336   
864    0      
32     48     
-384   -496   
80     352    
-384   96     
320    64     
48     64     
-48    -16    
-32    112    
-96    -224   
496    256    
160    -112   
-880   -496   
416    -448   
32     -208   
96     16     
48     0      
-128   -144   
864    16     
32     -176   
176    192    
224    192    
-128   496    
-368   -80    
320    32     
624    -128   
-96    -80    
-640   144    
304    128    
-176   -112   
-48    -416   
576    560    
-320   112    
-208   -112   
736    -624   
304    -144   
-240   32     
-224   -304   
80     -16    
368    -48    
144    128    
-1056  224    
-128   64     
736    -48    
-672   -464   
2160   1984   
-1600  1952   
320    -928   
1104   -576   
-832   -96    
-176   -32    
608    352    
-144   -32    
16     -32    
-32    -240   
-16    32     
272    496    
-432   -32    
-272   -112   
-288   16     
160    -96    
-304   192    
-48    0      
32     80     
-256   464    
128    160    
-960   256    
288    -144   
592    16     
-112   -128   
-352   32     
496    -192   
-320   -80    
432    -176   
-128   -48    
-176   -224   
-160   48     
-304   -16    
0      208    
-80    144    
176    112    
-80    -48    
112    112    
-176   64     
-1088  -32    
144    32     
64     -48    
-32    -48    
-352   80     
160    304    
-288   -64    
160    128    
-224   -256   
-144   -128   
112    48     
-48    96     
0      16     
-208   -752   
-544   -80    
-32    -80    
384    -128   
576    160    
-224   160    
-336   128    
0      128    
-32    -320   
-48    112    
-128   -80    
-64    80     
192    304    
144    -32    
-256   -16    
160    96     
16     -80    
80     -464   
80     272    
-608   144    
16     -224   
16     -464   
-16    -16    
-64    -80    
192    -384   
-208   208    
-32    368    
224    128    
-16    -144   
704    2832   
-2032  -32    
432    -176   
1296   -704   
-592   -176   
-416   192    
112    -64    
384    -1120  
-160   -464   
32     96     
-176   352    
208    96     
192    80     
-128   192    
64     608    
80     720    
-64    32     
16     256    
-64    -192   
-160   192    
48     80     
-320   368    
784    -656   
-1024  144    
592    -336   
-64    848    
-48    480    
240    272    
-144   288    
-256   -48    
112    528    
672    816    
-624   736    
-256   -336   
224    96     
-32    -96    
256    -384   
-976   -224   
-48    576    
480    208    
-112   224    
-96    -64    
0      128    
112    160    
-80    96     
32     304    
-112   -32    
-80    176    
16     16     
176    240    
-448   -704   
1248   -944   
-800   608    
640    480    
-336   -192   
-816   192    
544    80     
208    80     
256    208    
-208   128    
-64    528    
112    304    
0      192    
-352   -48    
448    304    
-288   176    
-64    208    
64     320    
-272   208    
64     160    
80     0      
480    1440   
-1072  -1024  
-1296  416    
2048   16     
-512   272    
-880   368    
-112   384    
736    432    
0      768    
-480   320    
208    80     
-176   -64    
64     16     
16     128    
-128   48     
192    96     
-256   -432   
544    -736   
-304   -704   
-96    -384   
96     -272   
-144   144    
-80    -784   
32     -704   
336    -976   
-1040  -1248  
96     -768   
480    752    
-112   96     
-80    96     
320    32     
-432   -400   
256    -784   
-640   -1200  
-240   -224   
400    320    
0      -128   
400    -384   
384    -32    
-624   -32    
64     352    
64     240    
-48    -80    
32     16     
224    192    
-240   656    
-464   560    
-16    128    
64     -144   
80     -160   
1072   2880   
-1072  1888   
416    160    
1584   -208   
-752   544    
-864   864    
400    -688   
368    -1568  
384    1872   
-368   48     
-272   -240   
624    -160   
192    208    
-256   240    
-16    160    
48     -96    
176    -64    
416    -256   
-224   368    
32     640    
48     256    
16     -112   
-64    176    
624    192    
-224   400    
-80    208    
368    640    
224    192    
-512   800    
16     -560   
-96    -256   
256    176    
96     -240   
-160   224    
-32    112    
400    -1216  
-96    -896   
-112   -112   
192    -960   
32     -256   
-224   640    
32     432    
144    16     
240    -64    
-496   96     
144    240    
-32    256    
-128   -1520  
-80    208    
176    720    
-32    -2160  
368    176    
-1152  480    
560    992    
720    1296   
-368   960    
16     304    
128    976    
-64    912    
-16    -384   
240    -1296  
176    608    
-256   512    
-96    0      
112    -384   
-48    -784   
-80    544    
208    48     
160    368    
-384   -224   
224    -320   
-16    64     
-80    352    
304    448    
-96    288    
-96    160    
304    96     
-304   80     
288    -320   
464    -32    
0      -48    
-544   -1808  
-512   144    
848    -368   
64     -400   
96     1136   
96     704    
-304   384    
48     -304   
80     160    
128    0      
-16    -304   
-64    -16    
80     32     
0      -112   
-96    -352   
96     -96    
272    -1024  
128    176    
-64    384    
112    80     
-80    80     
640    1456   
-64    768    
-416   -48    
160    464    
240    -272   
80     -272   
-144   128    
320    -192   
160    -208   
-16    -256   
64     -832   
-48    -96    
0      -496   
144    64     
16     -160   
-32    208    
-128   112    
256    112    
-48    112    
0      -48    
192    144    
-384   32     
256    272    
-144   -192   
-112   112    
240    -48    
0      176    
-48    -224   
-112   400    
-432   -752   
-288   -256   
1040   -320   
-560   0      
-592   160    
560    -176   
176    64     
-256   256    
-160   208    
256    -288   
-192   64     
32     48     
112    48     
48     -32    
352    112    
-240   128    
96     128    
272    80     
-256   64     
272    -160   
64     -400   
-272   -528   
-1040  800    
1072   16     
-528   -320   
128    -144   
384    -128   
352    256    
-656   -336   
-160   80     
384    16     
448    304    
-96    96     
-160   -96    
16     -1952  
-48    -16    
160    -816   
48     448    
-48    -352   
208    -464   
80     96     
48     -208   
320    208    
-96    -16    
-224   -352   
608    -288   
80     -496   
112    -48    
432    112    
-288   -240   
-16    0      
496    -448   
-464   -304   
64     -1264  
-16    304    
-112   -96    
96     80     
608    80     
-144   432    
-400   -784   
-112   112    
304    -464   
-272   -64    
-208   -160   
272    32     
304    -16    
-768   224    
-304   -256   
400    32     
-64    -528   
2160   2624   
-2208  -16    
144    16     
1200   448    
-720   -256   
400    144    
-432   -544   
-208   176    
528    128    
-272   -288   
-240   -64    
240    -240   
-96    -96    
-144   96     
576    -96    
0      -480   
-64    -96    
112    -1072  
96     144    
-224   1184   
688    432    
-528   432    
144    -256   
208    -208   
144    16     
-272   -80    
48     0      
0      -240   
-384   -208   
384    -352   
96     -720   
0      -224   
32     -1120  
-256   -48    
416    32     
-256   -112   
32     -64    
-464   -272   
0      -128   
144    416    
-336   -48    
-128   32     
-592   96     
-224   -48    
0      -128   
-32    -112   
-80    112    
-112   -144   
272    -48    
112    -608   
-592   -256   
-32    -368   
672    192    
368    0      
-352   -112   
512    16     
-464   -176   
-160   -1104  
48     -1232  
-48    -464   
-416   64     
288    160    
288    -464   
-288   64     
0      -1296  
144    -64    
-32    -144   
80     -64    
-144   128    
96     -176   
-576   -32    
160    -144   
-336   -240   
48     -96    
16     16     
112    80     
-80    384    
192    -320   
-32    -224   
96     -976   
80     -80    
608    1728   
-1136  240    
304    -224   
480    -240   
-416   112    
-144   80     
176    160    
224    -320   
-112   -432   
-224   -80    
128    256    
80     -32    
64     80     
-208   -48    
16     -96    
272    176    
80     -80    
0      272    
48     -272   
48     48     
-320   -512   
544    -688   
-112   544    
384    672    
-448   368    
-32    -240   
240    -512   
-80    240    
-160   96     
-192   -224   
32     240    
-32    -96    
-144   160    
-256   -432   
48     -48    
96     64     
-256   160    
336    80     
64     -720   
-448   224    
144    208    
112    -464   
-112   128    
-112   96     
-352   416    
32     -32    
240    -16    
-64    112    
-640   -48    
-176   624    
1360   2000   
-896   224    
-1168  336    
2048   368    
-928   16     
-704   -416   
176    -272   
-80    240    
192    48     
-128   -64    
16     0      
-96    32     
96     16     
-336   64     
-208   352    
80     -176   
176    240    
-256   208    
368    432    
-96    -288   
16     16     
-720   -496   
752    -128   
896    464    
-1200  -400   
-176   -512   
272    -1024  
-448   -1888  
-832   -224   
768    1552   
-96    992    
112    -272   
128    -704   
-160   -96    
-64    576    
528    448    
64     64     
-336   464    
0      384    
-64    224    
240    192    
-128   288    
-288   -32    
96     64     
400    544    
-1344  688    
-96    -864   
640    -1728  
-336   -880   
704    -80    
-416   -80    
-96    528    
64     -512   
-624   320    
304    -16    
-528   208    
304    -112   
-304   -1568  
-640   -192   
288    16     
-480   32     
352    -448   
-272   64     
-80    1040   
192    224    
160    784    
208    320    
-128   -368   
128    -560   
-240   -96    
48     272    
-208   2176   
1040   -80    
-704   80     
-208   448    
208    1920   
320    1504   
-288   384    
-304   -672   
-192   -304   
400    192    
176    304    
-384   272    
-32    -144   
352    -208   
144    112    
-256   464    
-48    -48    
-32    32     
112    -16    
32     -272   
-128   -240   
-32    192    
-160   48     
-208   784    
320    864    
128    576    
256    384    
-176   704    
0      544    
64     -336   
64     -1072  
-416   -656   
-48    464    
448    480    
48     160    
-192   256    
-192   464    
64     368    
80     608    
80     -16    
96     48     
-64    112    
368    -112   
-624   -128   
320    -992   
224    -448   
-176   -48    
-208   -880   
96     -256   
16     144    
-192   48     
368    -384   
400    976    
-640   912    
320    1168   
464    784    
-80    576    
-320   256    
416    432    
160    1136   
384    640    
-192   144    
-112   416    
336    240    
-16    -64    
-112   -208   
-32    704    
336    352    
64     1088   
384    688    
-384   208    
96     -16    
208    32     
-64    32     
64     -80    
-544   -1008  
16     -976   
176    -1136  
-288   -656   
0      64     
672    -720   
-1568  1792   
1216   -80    
-224   112    
48     288    
-16    -176   
-640   576    
576    64     
-528   272    
368    32     
-288   48     
-112   -64    
64     320    
128    -208   
-384   80     
96     -16    
-16    32     
-80    400    
80     48     
16     -32    
-192   128    
-496   640    
1616   -336   
-624   -96    
-576   -64    
1040   -112   
-96    192    
-16    128    
-80    560    
160    -112   
-80    -48    
0      16     
224    -96    
16     -80    
-112   128    
192    112    
112    272    
16     16     
0      144    
80     64     
-80    16     
-112   96     
320    -64    
64     192    
-112   0      
-160   -720   
32     64     
432    96     
-320   16     
-144   96     
-832   -1632  
256    -160   
928    -48    
-1456  -112   
832    416    
688    -96    
-864   224    
-192   -96    
160    0      
-16    64     
336    -656   
-48    96     
-32    128    
224    352    
-528   16     
208    352    
288    -32    
-304   144    
128    -144   
-16    32     
128    32     
272    480    
-1808  16     
880    736    
80     -16    
-1312  -176   
1376   240    
-560   -1424  
160    -224   
32     112    
-48    176    
80     0      
64     144    
-80    48     
48     112    
-112   64     
80     0      
112    448    
96     -80    
-16    192    
176    -128   
-176   -32    
656    -336   
-192   64     
0      128    
-80    48     
128    -448   
464    16     
-272   288    
544    0      
-96    16     
-288   32     
16     -176   
304    -176   
-288   -16    
256    144    
256    352    
-400   -560   
432    -384   
-144   -4144  
176    16     
224    -64    
-48    32     
144    256    
368    96     
-128   96     
-80    176    
-224   48     
16     96     
16     -944   
2368   -1216  
-2816  -224   
1008   432    
1104   272    
-832   -400   
-240   288    
112    -112   
160    240    
-224   -672   
-528   240    
560    -96    
-496   0      
496    112    
144    -48    
-384   -32    
80     -192   
416    64     
-64    -48    
-160   -336   
480    -976   
32     -240   
16     16     
-96    320    
-688   -112   
80     16     
640    -16    
-400   -336   
192    -64    
176    -464   
-32    -64    
208    -160   
-176   48     
-16    -112   
-16    288    
256    -528   
-400   -208   
400    -208   
-208   -256   
80     16     
128    -64    
-64    -1104  
368    -224   
-288   240    
80     384    
176    656    
160    -64    
-672   -1104  
96     -880   
112    -48    
-80    -688   
192    352    
-16    720    
-208   -96    
64     -304   
96     -432   
0      -640   
-112   -768   
-336   -1072  
320    -432   
272    -2080  
-192   -480   
-32    -16    
0      -240   
-160   64     
400    -240   
272    -464   
-320   80     
-288   -816   
64     -352   
-144   -208   
-112   336    
-192   -16    
176    160    
0      -160   
64     -512   
-96    -544   
144    -1072  
16     -160   
144    -528   
144    560    
-256   -416   
896    1088   
-1088  1584   
-64    -880   
784    -1040  
240    -48    
-752   336    
144    1504   
560    -64    
-208   -176   
-48    48     
-16    -240   
-112   32     
160    -64    
16     80     
-304   32     
0      384    
192    -16    
144    256    
-224   128    
64     304    
368    736    
-608   576    
272    -448   
384    672    
-432   192    
-240   -944   
368    -272   
320    -816   
-48    384    
-16    32     
-80    160    
80     -64    
144    -80    
16     -80    
-80    128    
-16    224    
-208   432    
-304   -336   
240    16     
-176   -128   
-320   -160   
400    112    
272    -416   
-16    176    
-208   -128   
272    32     
32     16     
288    64     
-208   -112   
-192   32     
320    -1024  
-1488  -352   
-272   -544   
-352   -352   
384    -656   
288    -720   
288    320    
-320   144    
-288   -64    
224    -2464  
320    -160   
-224   368    
-144   -112   
176    80     
144    -208   
-224   480    
-128   -368   
-48    656    
-48    -656   
-640   -496   
208    240    
0      848    
1776   -576   
-1024  288    
720    -2752  
-528   96     
-16    144    
256    2448   
1056   1344   
-224   128    
-336   -976   
672    -880   
-176   -720   
-288   -208   
368    400    
416    304    
-144   240    
-288   96     
320    256    
144    -304   
-48    176    
192    32     
192    432    
-464   288    
288    -416   
-192   -1392  
400    -1392  
-144   -816   
368    -768   
560    48     
-128   -32    
256    704    
224    272    
-496   -512   
144    -288   
48     112    
-896   144    
-480   -1760  
0      -688   
208    144    
-480   -48    
496    96     
-32    -336   
304    288    
96     192    
-48    592    
16     192    
-176   64     
-112   352    
288    -208   
112    48     
80     -608   
464    32     
384    -256   
-992   -432   
400    64     
128    1008   
464    1088   
-1024  240    
-848   -64    
480    16     
576    0      
-192   128    
-688   48     
32     176    
672    160    
-144   192    
-496   -80    
-368   -32    
-464   -992   
272    -912   
-144   -352   
96     720    
-560   -192   
0      224    
832    -576   
-384   240    
-160   -368   
-32    0      
-80    -416   
336    -544   
-208   -96    
-112   32     
-224   240    
-496   -112   
144    -16    
-1200  -256   
-320   -256   
64     -144   
288    112    
-48    -176   
-112   48     
48     176    
192    192    
-352   48     
96     176    
224    -864   
-592   -192   
48     512    
688    400    
-80    32     
-528   -656   
720    -720   
-320   -64    
-256   64     
112    -144   
-144   112    
288    112    
96     192    
-208   16     
-112   96     
32     48     
-64    -320   
-352   -176   
32     -96    
256    48     
-384   -256   
-112   48     
-1088  96     
-16    64     
304    -288   
-368   352    
0      64     
32     64     
192    32     
-224   64     
112    -768   
-96    240    
144    240    
64     -64    
-480   128    
240    -2560  
-1840  1584   
1472   -96    
-96    272    
0      64     
96     160    
-224   -304   
-288   96     
64     160    
256    144    
-80    48     
-272   352    
176    128    
-128   -336   
64     -176   
32     -16    
-256   416    
176    -64    
0      144    
32     16     
-496   -496   
832    -496   
-800   448    
272    -16    
-192   272    
-224   112    
112    160    
48     288    
96     -336   
-336   224    
0      32     
-96    208    
176    32     
304    48     
-496   -32    
-80    -32    
256    208    
-48    160    
-96    0      
-144   80     
160    -16    
-48    160    
128    80     
-288   16     
48     192    
288    -144   
-480   160    
160    -144   
-64    96     
-96    272    
-48    1888   
512    432    
-688   224    
192    -320   
-80    112    
16     32     
416    208    
-272   80     
-176   48     
80     0      
32     96     
16     16     
-144   96     
-32    -144   
0      80     
416    0      
-480   96     
-48    32     
432    160    
-384   16     
112    176    
32     -432   
-1472  544    
1184   -32    
-160   0      
-976   96     
736    128    
160    528    
-672   -96    
-48    -32    
384    64     
208    32     
-336   -16    
144    192    
96     -80    
-96    144    
128    -16    
-112   240    
-16    16     
80     96     
112    -32    
16     160    
-240   176    
1056   -80    
48     192    
-448   224    
16     16     
304    -224   
752    464    
-176   192    
-176   -32    
-96    48     
-144   224    
272    -32    
0      0      
96     -304   
-416   384    
304    272    
-272   48     
208    -48    
-144   192    
192    -32    
-32    80     
-240   144    
192    160    
320    -32    
-704   272    
-64    80     
16     64     
688    976    
688    3536   
-2176  704    
1376   64     
1728   -336   
-784   304    
-432   48     
-96    128    
912    16     
-336   208    
-528   16     
640    128    
-128   96     
-96    112    
176    -352   
-368   112    
-144   80     
416    96     
16     16     
-128   -16    
576    416    
-176   128    
-64    80     
-192   -208   
752    208    
-336   -256   
-80    176    
512    -480   
-224   208    
368    -176   
-608   -512   
96     -752   
272    -608   
-224   -64    
-208   192    
240    -288   
64     -288   
-128   224    
480    608    
112    -288   
-304   -176   
64     80     
96     -64    
-112   144    
-48    208    
176    336    
32     768    
0      -144   
16     -128   
304    112    
-112   288    
48     -192   
-96    416    
16     -80    
-480   -128   
448    96     
-368   112    
64     -688   
16     -1808  
32     368    
112    1008   
-224   224    
96     -240   
32     64     
224    144    
-160   -384   
-224   32     
208    368    
144    -48    
192    192    
16     368    
-144   400    
32     80     
32     32     
0      64     
16     -32    
-208   384    
240    -272   
112    -96    
-64    288    
80     192    
-32    -432   
-432   -64    
640    48     
144    416    
64     -272   
-416   336    
272    -48    
48     -32    
160    240    
-80    -96    
-160   128    
64     -160   
112    112    
-48    -336   
-32    96     
208    -256   
96     112    
208    32     
-48    16     
64     -64    
-16    240    
816    208    
-1152  -80    
272    -32    
512    -96    
-80    -80    
-80    -400   
160    192    
-176   -128   
16     432    
288    -656   
32     -48    
-80    48     
-16    128    
-112   112    
208    0      
144    144    
-64    0      
160    240    
-96    -656   
-48    -16    
64     224    
-96    432    
-128   128    
288    128    
96     -688   
-144   400    
-96    32     
352    -560   
-112   -224   
-304   -512   
64     -2000  
-2272  -304   
1808   -128   
-128   480    
-208   640    
240    -208   
400    576    
-160   1168   
-208   -768   
176    -32    
-112   -304   
-32    128    
272    -496   
-320   -272   
-176   -64    
192    288    
-48    -304   
64     -592   
-400   576    
208    736    
80     208    
816    -2928  
-1712  80     
1264   656    
80     320    
-288   80     
144    -576   
912    -848   
-368   -992   
-416   -1008  
-16    -688   
-208   16     
256    -144   
432    -192   
80     -800   
-208   160    
-32    -2512  
656    16     
160    288    
-32    288    
-576   176    
144    256    
416    320    
-640   -368   
288    -640   
96     528    
-64    -368   
-480   32     
208    -416   
-384   -176   
272    -80    
-64    -560   
-192   -128   
-144   -2048  
-368   -368   
288    -256   
64     64     
-240   -480   
640    400    
-352   48     
-480   -32    
-128   -48    
-16    -288   
304    -608   
-368   176    
464    192    
336    -80    
64     64     
128    0      
-688   1088   
-640   832    
-272   208    
-464   -32    
-144   -304   
992    16     
-80    -192   
-816   -64    
-560   -96    
592    -176   
-272   80     
96     32     
-480   -320   
272    160    
368    -768   
-336   336    
336    -64    
-352   144    
272    -64    
32     -1184  
-816   -816   
368    336    
-208   352    
272    80     
544    -112   
-944   -272   
304    -144   
64     -304   
240    192    
-528   -432   
176    -64    
96     -528   
128    272    
-144   432    
208    400    
0      96     
32     448    
-400   0      
-48    208    
448    16     
-192   -112   
-272   96     
128    32     
-64    0      
368    -160   
-304   -96    
160    -960   
144    -272   
-288   -96    
176    48     
80     240    
-128   192    
-256   -976   
-432   -192   
224    -64    
352    -96    
-16    -128   
208    -240   
-16    128    
-32    -128   
-144   128    
128    112    
48     -112   
-128   -144   
160    -112   
-112   -80    
-160   -48    
-96    256    
320    224    
160    272    
-608   272    
0      0      
-1248  -272   
-288   176    
-848   -384   
-64    32     
64     32     
-368   448    
-208   -272   
-320   -128   
48     176    
672    2512   
-1200  -1664  
-1360  320    
1824   -288   
-960   -544   
-960   256    
0      304    
864    304    
-768   -208   
-96    -64    
-96    448    
32     64     
176    -128   
-320   -112   
-48    -128   
80     432    
-240   128    
160    -336   
-192   304    
96     -128   
-208   -16    
736    800    
640    32     
-1184  -208   
176    0      
832    0      
-704   208    
-128   -240   
464    -96    
-416   128    
-144   -192   
176    32     
80     -144   
-208   176    
96     -80    
0      208    
-80    432    
272    112    
-272   352    
400    -64    
-80    -48    
-32    32     
64     112    
176    0      
80     0      
-32    -64    
-320   176    
-208   0      
160    128    
-16    48     
-976   304    
528    480    
192    272    
-576   -96    
-128   48     
288    144    
-32    -448   
176    -320   
-208   0      
-288   144    
112    96     
128    48     
-192   32     
240    464    
-1184  -208   
-128   320    
320    -192   
-464   -128   
352    -176   
64     -64    
-128   80     
16     -608   
-1504  784    
1296   240    
-496   96     
-576   32     
672    -32    
-368   48     
-400   -96    
-800   -32    
704    64     
-128   -48    
-144   128    
-32    80     
-128   -80    
-304   64     
288    32     
-96    256    
-96    272    
272    16     
-80    -48    
-16    128    
-240   128    
1360   -128   
-1296  256    
48     80     
368    -16    
-368   -192   
144    272    
-64    -16    
-448   32     
384    112    
320    64     
-144   16     
-368   352    
-112   128    
416    624    
-448   -48    
-144   -112   
-176   -96    
304    -336   
208    -16    
288    -272   
-640   272    
320    160    
304    656    
-128   0      
-400   96     
-96    160    
720    1376   
1792   3872   
-2432  2416   
848    80     
1248   -144   
-944   -112   
-336   224    
544    736    
-32    336    
-176   144    
496    336    
-64    64     
-256   160    
112    96     
112    160    
-80    -80    
128    -16    
-16    0      
-96    0      
-64    -208   
368    -800   
-304   -720   
-176   -112   
-160   32     
528    -128   
-480   -272   
-448   -64    
576    -304   
-416   -992   
16     -1216  
0      320    
16     144    
0      -32    
144    -48    
16     384    
-224   416    
96     208    
144    144    
-80    176    
96     -224   
-96    -128   
-32    528    
256    -16    
208    208    
336    880    
-832   -720   
-160   -432   
304    -240   
-48    -416   
112    512    
-176   160    
208    0      
656    1216   
-1264  -48    
-128   224    
896    1248   
-640   656    
-48    -560   
-208   320    
112    144    
176    -176   
-288   -208   
112    128    
80     224    
16     624    
112    704    
16     -48    
128    -208   
64     80     
-320   -176   
48     -64    
272    -16    
-272   64     
-64    48     
-32    0      
16     176    
-176   0      
48     -48    
384    -128   
-16    48     
-192   272    
64     64     
432    -752   
-992   96     
64     192    
144    -48    
400    -112   
-112   16     
240    160    
32     576    
-48    96     
-32    -128   
96     96     
-144   208    
-32    -336   
-16    256    
48     96     
64     16     
-176   144    
176    368    
208    128    
48     -32    
-304   -464   
64     32     
-272   208    
240    -16    
80     48     
64     -176   
-384   400    
240    144    
160    -112   
-80    -144   
112    160    
-144   336    
80     368    
-64    16     
0      0      
-16    432    
-16    336    
-208   176    
304    848    
-192   256    
-112   -368   
272    256    
32     -320   
-272   304    
-160   -352   
-16    -144   
384    96     
-336   -192   
96     144    
-272   -352   
1392   -592   
320    560    
-720   128    
480    -176   
544    -400   
192    144    
368    -256   
-304   480    
-96    480    
80     544    
544    -144   
-80    96     
-144   -64    
-176   96     
560    176    
-128   240    
-160   304    
32     80     
544    304    
-240   -176   
624    640    
-1824  64     
-48    304    
176    -1296  
-1072  -1392  
608    -496   
-592   -1440  
848    432    
208    544    
-288   320    
32     48     
32     96     
176    464    
32     144    
-480   -80    
192    -32    
304    352    
-240   -112   
-16    128    
-48    -1168  
272    16     
224    -432   
-992   0      
416    96     
576    320    
-608   -496   
608    144    
368    464    
128    -192   
-224   -112   
128    336    
416    80     
208    16     
-256   80     
-320   -544   
-240   224    
496    -384   
-208   816    
704    224    
320    48     
-208   112    
-48    64     
-16    64     
-208   -48    
384    112    
-448   -96    
-208   144    
224    -224   
80     -64    
-720   -2784  
752    -2480  
992    0      
272    336    
-816   80     
-208   400    
464    -96    
320    -16    
64     -1024  
-640   16     
512    -2816  
0      176    
-128   48     
304    144    
-304   -48    
240    16     
0      0      
-240   -240   
96     -2336  
192    912    
400    -816   
-640   320    
-208   -192   
624    -160   
224    -192   
-848   -304   
768    176    
-480   -112   
208    -144   
-64    112    
0      -16    
112    -592   
-80    -32    
-192   -320   
240    48     
-464   176    
464    32     
-880   -368   
560    -272   
-224   -144   
-160   -48    
432    32     
-304   144    
48     256    
-80    -1552  
304    272    
-32    -240   
-336   176    
368    -32    
32     144    
-368   -64    
64     80     
-176   224    
880    224    
-1776  224    
-208   16     
960    320    
-176   -96    
-240   -32    
0      -672   
-176   80     
224    32     
128    192    
-192   16     
32     -112   
32     -448   
48     240    
-176   352    
48     -96    
320    -512   
-336   176    
80     64     
192    112    
-160   -96    
48     96     
112    112    
224    -560   
-288   288    
320    704    
224    256    
-240   -384   
912    304    
-2448  784    
672    -16    
560    -48    
-608   -288   
-384   -256   
144    -816   
0      336    
480    688    
128    -16    
-512   -912   
-16    432    
528    -128   
112    16     
-608   368    
144    -48    
-112   -144   
272    -112   
64     -16    
-240   -112   
-896   -816   
1072   -816   
-496   448    
128    -576   
176    -112   
-288   -736   
112    112    
288    -512   
-48    176    
-80    160    
112    -112   
-224   -128   
208    208    
-208   -32    
-272   48     
336    -144   
-112   -80    
-176   -352   
416    -480   
-240   16     
288    -96    
112    192    
-112   -1424  
0      -64    
-304   -208   
304    -48    
-384   -64    
-96    64     
48     176    
256    -160   
-1680  -2064  
-832   -192   
2080   -832   
-1344  -272   
-224   304    
752    16     
-224   192    
-752   128    
432    -288   
80     -16    
-144   48     
32     80     
-48    -48    
0      288    
-16    -112   
-464   208    
352    -192   
-64    256    
288    256    
-432   464    
-64    -144   
-192   -784   
-160   400    
1008   -192   
-1168  752    
-144   1280   
288    144    
304    -208   
-592   48     
16     -96    
304    80     
240    -16    
160    -224   
-1600  -32    
304    -80    
-480   -16    
176    -48    
-336   -112   
-192   144    
352    240    
-432   16     
0      112    
-240   -432   
464    -624   
128    624    
0      -48    
-560   464    
-960   832    
272    -608   
-432   -80    
144    -400   
16     176    
32     144    
0      -112   
-240   -592   
-496   -192   
304    -160   
352    368    
-544   384    
224    -512   
448    -688   
-448   -96    
128    32     
-80    -48    
-192   384    
224    -80    
-576   544    
-64    -112   
-112   288    
448    -16    
-544   -1472  
1088   -2400  
832    224    
-608   208    
-1088  -512   
192    -192   
160    -704   
528    -576   
-480   -1872  
-192   -272   
368    320    
-96    -112   
-48    0      
-304   336    
144    560    
304    400    
-304   -256   
128    48     
-32    112    
-256   256    
128    304    
128    -96    
-16    -80    
-688   -80    
624    -16    
-464   208    
576    -96    
-144   304    
192    432    
-352   -96    
192    336    
272    -272   
112    -368   
-320   -720   
160    -240   
-32    832    
-160   352    
192    432    
-592   -416   
384    -480   
272    256    
240    16     
-192   48     
-32    -272   
-96    352    
208    240    
-144   -32    
-48    -464   
240    -320   
-288   144    
96     192    
-288   -928   
-608   464    
960    384    
208    384    
64     128    
-240   -1312  
288    -864   
-256   832    
-48    960    
-160   -176   
272    64     
-112   -192   
-384   -464   
-80    -256   
224    256    
256    288    
48     64     
-96    -16    
-16    -48    
-80    32     
0      0      
64     -16    
32     -32    
0      -96    
-48    -64    
176    448    
-208   896    
288    448    
-48    112    
32     16     
368    656    
-832   864    
448    -208   
-48    240    
-160   -160   
-224   336    
32     304    
-96    -80    
-272   400    
-80    16     
-144   -208   
-160   -32    
240    64     
-144   128    
-144   80     
208    -64    
64     -256   
-320   -160   
80     0      
176    0      
-336   256    
496    -64    
-608   -384   
128    -160   
400    672    
112    112    
-240   -64    
-64    816    
-256   -16    
352    -544   
304    -128   
-272   544    
-272   288    
160    224    
288    0      
176    -96    
-448   192    
-176   -96    
192    352    
208    -288   
-64    240    
-16    -64    
-272   -16    
32     -80    
352    336    
-224   128    
-64    176    
-16    64     
-16    -480   
-192   -1280  
1696   -752   
-1376  288    
528    368    
112    -240   
-464   736    
448    224    
-160   464    
352    352    
-128   480    
-16    16     
-160   256    
288    -48    
64     336    
-480   112    
96     208    
224    112    
-16    176    
32     272    
240    -64    
-144   64     
32     -432   
1104   -272   
-1376  256    
480    -528   
-320   768    
-64    224    
-288   -352   
848    176    
-560   96     
0      128    
208    80     
-256   128    
208    16     
112    0      
-496   16     
336    96     
-64    224    
-16    128    
0      336    
-256   -112   
-128   -96    
672    496    
176    16     
48     272    
-320   352    
-48    0      
624    448    
768    32     
0      -512   
-624   -48    
688    208    
32     -16    
-176   224    
-240   576    
-480   -160   
400    -320   
656    80     
-736   -480   
-368   160    
928    160    
192    64     
-432   -80    
96     -128   
336    128    
128    -336   
-400   416    
512    0      
-272   -176   
416    1168   
1264   3040   
-1328  1872   
752    320    
1040   176    
-800   176    
-448   256    
800    400    
80     -160   
-432   -304   
608    -48    
400    240    
-240   48     
-336   288    
208    -176   
-80    144    
240    0      
48     112    
-400   -704   
-32    16     
1152   -560   
-704   32     
320    80     
0      384    
-368   -16    
-192   112    
-416   0      
448    -80    
-208   400    
16     -80    
-80    16     
512    -272   
-32    -112   
48     0      
-16    208    
-64    -224   
-336   0      
656    -144   
-384   -272   
400    -32    
416    16     
-368   144    
368    192    
-96    160    
224    -368   
-64    80     
-96    -416   
-512   -288   
448    -240   
288    128    
-16    -240   
48     304    
224    1088   
-176   320    
-304   256    
160    176    
-576   64     
32     -304   
432    -16    
32     432    
-208   160    
176    -160   
320    64     
-352   -272   
0      64     
128    -992   
112    176    
0      -80    
-304   32     
240    48     
-96    240    
96     352    
448    -96    
-208   -80    
-240   112    
208    288    
320    -16    
80     224    
-368   -560   
80     240    
160    0      
-176   320    
1072   2144   
1536   -48    
-2000  448    
576    0      
480    16     
-224   -240   
-96    192    
80     272    
400    -544   
-160   -160   
240    256    
144    -240   
-80    240    
-48    -624   
272    -352   
-176   448    
416    128    
-64    -48    
-32    0      
208    64     
-464   -624   
752    -608   
-16    192    
-880   -768   
576    -192   
80     -256   
208    -544   
-192   208    
240    128    
96     -176   
-96    192    
-80    -160   
224    160    
0      176    
-128   -128   
-80    -208   
80     -112   
112    -16    
208    -704   
80     64     
-48    -160   
80     112    
80     112    
192    224    
-400   -240   
208    320    
144    64     
-16    -64    
-416   -224   
768    672    
592    -96    
-2416  -496   
1344   144    
928    144    
-1248  448    
64     -192   
608    0      
192    -320   
-176   128    
-112   -160   
128    144    
48     -128   
48     -32    
-176   -48    
320    16     
-848   -16    
192    32     
160    160    
48     -96    
-144   -240   
-160   -1552  
-80    -304   
432    -1168  
-272   208    
544    192    
256    -80    
-96    -448   
-160   -544   
-96    32     
128    640    
304    128    
-208   -16    
-288   -32    
496    -176   
448    16     
-496   -208   
16     -192   
-224   80     
208    112    
144    -160   
-80    -48    
-240   -256   
-208   -128   
-112   0      
-16    -816   
-416   -80    
512    2016   
512    1728   
-352   368    
32     0      
0      -208   
128    -272   
192    -224   
-256   -112   
-432   -512   
992    -144   
208    720    
432    -192   
0      304    
-112   368    
-80    -32    
224    -112   
-48    -224   
-80    64     
-48    96     
-672   352    
-112   -16    
208    -528   
208    -208   
112    -656   
-752   1760   
864    -400   
-416   -720   
-336   272    
1616   32     
-448   -592   
-416   464    
-128   -80    
608    -464   
-128   432    
-160   -224   
-336   -144   
0      0      
320    368    
-128   -1056  
176    -96    
-144   32     
416    144    
240    768    
-432   -128   
128    -576   
96     208    
-48    192    
208    272    
-896   928    
64     -544   
864    512    
-208   1248   
-288   -320   
384    192    
-96    496    
-48    -336   
-80    144    
-272   32     
-160   672    
288    224    
192    176    
-640   -544   
160    16     
368    320    
-576   -304   
144    160    
-656   352    
80     -560   
-96    272    
-80    624    
-576   -1136  
-144   240    
352    320    
272    416    
144    1248   
-704   128    
-176   416    
688    192    
-224   416    
-352   -96    
-64    96     
480    144    
80     432    
32     64     
-304   -64    
-224   48     
224    -96    
288    -144   
-832   -336   
-32    -272   
272    -112   
-240   -80    
352    -48    
-80    304    
-384   -144   
128    160    
336    144    
-448   416    
-160   816    
-176   176    
144    784    
-96    -192   
-304   -368   
304    -112   
144    -592   
-1984  752    
912    -720   
-48    -704   
288    16     
176    -144   
-304   432    
112    192    
-112   160    
336    -592   
-96    240    
-224   -128   
-80    -112   
240    272    
112    -16    
-48    304    
-96    208    
-64    -32    
112    -128   
128    80     
240    -384   
-848   1312   
544    -336   
160    -64    
-64    176    
-416   144    
-16    160    
96     -48    
-80    32     
-80    -624   
-176   80     
-272   -304   
208    368    
48     -224   
-176   -160   
-32    -64    
-16    448    
288    256    
-176   208    
-48    128    
96     112    
-96    192    
-240   256    
-48    0      
-96    208    
400    368    
64     -112   
-96    144    
-544   -160   
-864   -816   
1168   -688   
-16    -256   
-672   -144   
800    384    
-48    0      
-640   80     
560    672    
-256   160    
32     192    
144    -80    
-16    192    
-256   -176   
64     224    
80     -176   
-448   144    
224    80     
-112   240    
-192   160    
80     192    
112    -16    
-144   160    
-832   -656   
960    -32    
512    0      
-1312  48     
960    192    
-96    -48    
-144   448    
-144   -272   
-416   320    
304    128    
48     64     
-128   0      
-432   -32    
608    192    
176    80     
-176   240    
-512   128    
128    -144   
-32    64     
-320   32     
-240   -640   
-32    352    
336    -64    
-576   32     
464    656    
368    96     
400    -112   
160    352    
560    64     
-256   -64    
-384   96     
304    -128   
-240   32     
0      480    
384    176    
528    368    
-64    528    
-176   352    
-192   192    
-208   64     
-176   80     
64     176    
160    -16    
64     592    
-16    -128   
-416   -144   
-624   128    
400    96     
-720   992    
816    3344   
288    -320   
-1296  -320   
688    -256   
80     -64    
352    144    
-640   -80    
-48    112    
432    -144   
448    224    
-160   -160   
-160   160    
128    32     
-64    176    
96     -32    
-48    224    
64     -80    
-240   80     
896    688    
-1072  112    
480    608    
144    -320   
80     32     
512    80     
-656   64     
496    592    
-16    224    
-272   288    
576    32     
-16    80     
-208   144    
176    64     
-400   -96    
368    256    
256    112    
-320   368    
384    64     
-224   192    
-64    -32    
0      48     
112    -48    
96     -96    
16     64     
144    160    
64     -400   
-848   -64    
416    -48    
-48    -304   
-128   112    
32     144    
-32    176    
-256   -848   
-176   96     
368    912    
-240   272    
256    144    
64     96     
-288   192    
80     -112   
64     256    
32     272    
0      144    
-96    -1600  
192    160    
0      128    
80     304    
-288   64     
48     -48    
48     -192   
-320   32     
144    -32    
208    304    
-160   0      
0      -16    
32     16     
112    -144   
16     -304   
-192   -992   
320    384    
48     416    
176    2112   
-1136  -1696  
-736   320    
2000   -448   
-1216  880    
-256   -96    
400    160    
512    -144   
-384   -64    
-240   -64    
96     128    
272    224    
192    -160   
-112   -48    
-80    512    
144    96     
-112   -576   
96     -176   
-64    144    
48     208    
-128   128    
512    -208   
192    208    
-384   384    
224    416    
176    672    
-272   176    
144    -240   
112    256    
-128   -1344  
16     144    
144    -288   
-96    -160   
160    64     
224    560    
-256   -80    
208    -304   
272    192    
-64    0      
-64    576    
288    48     
176    -16    
16     -208   
48     48     
-128   -640   
256    48     
48     -1296  
-208   32     
-64    0      
448    -16    
1088   -208   
-2864  624    
160    416    
1344   -336   
-1072  -96    
-160   -272   
-176   -752   
-192   1232   
16     1216   
48     192    
416    16     
-432   -368   
192    64     
128    -464   
-560   -112   
432    32     
272    304    
-304   352    
320    896    
128    608    
-272   -1344  
352    816    
1952   64     
-1136  -432   
-592   -144   
768    880    
-144   1280   
176    1648   
256    688    
-16    656    
-304   0      
432    -48    
-16    -64    
-48    -704   
48     384    
240    160    
32     64     
128    464    
-144   880    
-176   16     
272    -256   
144    -576   
-48    304    
-432   -1536  
-512   -1040  
256    -1408  
32     -2640  
-272   -2400  
-576   16     
512    304    
-336   480    
608    -416   
144    -368   
-640   -448   
16     368    
944    192    
-48    -256   
64     -512   
-736   -416   
624    -96    
-240   176    
-416   352    
144    -320   
400    -144   
64     80     
240    -256   
-208   -1200  
288    0      
64     576    
-304   64     
-96    -1312  
1872   -1072  
880    -704   
-1264  1424   
144    928    
32     928    
448    -224   
-304   -224   
-368   1104   
-128   -64    
-160   -416   
544    -128   
-128   48     
-272   800    
112    -464   
48     352    
-96    560    
144    -320   
32     -80    
112    -16    
-96    208    
0      -80    
-80    -224   
-448   400    
512    528    
-608   240    
560    32     
304    256    
-96    256    
-64    -1040  
64     -816   
256    240    
240    192    
-368   -96    
448    96     
-80    112    
-304   224    
192    256    
96     -384   
-384   -768   
-16    -240   
352    -256   
-192   -160   
96     -368   
368    592    
-640   -1408  
-96    -400   
288    -768   
-64    272    
-112   272    
128    -400   
-352   -928   
256    -144   
144    -160   
-240   48     
-784   -224   
368    -928   
-16    -144   
48     976    
176    784    
96     112    
-48    112    
176    -240   
-64    16     
-64    -64    
16     144    
-48    -48    
96     -416   
320    -112   
-368   -80    
-912   0      
288    112    
-48    32     
176    272    
160    80     
-144   -224   
256    32     
-32    -240   
-64    32     
32     416    
-384   -816   
832    -1776  
-816   -144   
720    -800   
-720   784    
-32    224    
304    368    
-16    464    
-48    -832   
-160   -416   
176    -864   
48     48     
192    -992   
80     112    
-320   528    
128    256    
-144   -112   
0      -576   
32     -272   
-80    -160   
-144   64     
432    1840   
336    -208   
-720   -400   
688    -304   
-224   -432   
16     -416   
128    208    
-16    192    
-112   48     
-96    128    
208    32     
144    0      
-272   48     
240    112    
48     -80    
-208   32     
-16    -144   
128    304    
-16    112    
-800   -32    
400    96     
-336   80     
-208   -16    
-256   176    
0      192    
624    128    
-368   -32    
-112   -64    
480    -64    
-1552  -1200  
-1664  -128   
2512   -96    
-528   -176   
-544   272    
288    -272   
64     -320   
-688   -16    
464    192    
128    0      
-384   96     
-16    -32    
-1296  -80    
176    112    
304    32     
-208   64     
-80    -96    
336    160    
-160   -160   
-416   160    
16     -224   
96     -400   
-1696  432    
1216   -16    
544    256    
-32    -192   
-432   176    
320    -80    
-640   -80    
-192   208    
208    176    
-16    -64    
0      48     
-96    32     
560    -224   
-896   256    
480    224    
32     -160   
-464   -96    
304    144    
-64    -176   
-176   -192   
688    112    
-480   -176   
-224   80     
608    -608   
-704   -640   
464    32     
-256   -256   
-80    -80    
432    -96    
96     192    
-448   -240   
-320   -16    
144    16     
208    -592   
-352   -368   
128    496    
-128   -288   
-448   -416   
-16    160    
32     -144   
32     96     
-144   160    
-192   -192   
544    528    
736    0      
-512   80     
-240   160    
816    128    
-2336  2832   
1088   -416   
-64    -32    
-2224  -800   
640    32     
1520   416    
-1136  48     
-592   512    
32     64     
448    160    
288    80     
-528   -16    
96     128    
-160   112    
480    112    
-512   32     
-16    96     
-208   -64    
880    576    
-896   48     
208    640    
-80    -288   
-416   -80    
864    112    
-496   -48    
16     416    
32     48     
-128   112    
496    -384   
-416   208    
-32    -112   
-80    96     
176    -32    
0      -16    
-272   -256   
0      -128   
208    -160   
144    96     
96     272    
16     256    
-192   16     
144    272    
-400   -272   
160    -96    
416    128    
-256   64     
-144   128    
144    160    
288    192    
-368   -48    
16     48     
-192   -336   
240    -368   
-480   -1472  
-560   -1184  
448    96     
160    560    
288    576    
64     512    
-240   352    
96     496    
48     208    
-160   -128   
80     432    
-64    192    
176    240    
-16    128    
16     256    
-144   112    
-128   -240   
-16    -384   
32     1152   
304    -208   
-624   -400   
-80    0      
320    608    
432    544    
-400   -720   
-368   -736   
224    144    
752    1216   
-880   -512   
-160   -112   
1152   1232   
-608   304    
-368   -176   
352    -848   
256    1040   
-192   -272   
32     160    
240    -112   
32     16     
96     80     
-48    128    
-160   -80    
240    144    
96     352    
-112   32     
64     -160   
96     160    
672    816    
-992   992    
368    -320   
752    -304   
-80    192    
-496   160    
-80    1632   
688    32     
-192   176    
-304   -272   
112    80     
240    112    
-96    -384   
16     208    
-208   -144   
80     128    
96     64     
128    528    
-432   -464   
-112   -288   
512    16     
128    176    
-480   80     
-32    80     
256    -112   
-80    -80    
208    128    
-32    -96    
64     240    
240    144    
-560   -992   
-1376  768    
1744   -240   
-384   -624   
80     96     
512    -368   
-496   336    
-256   432    
528    -304   
192    304    
-544   -384   
-32    48     
160    -80    
96     224    
64     16     
-16    80     
-80    224    
288    0      
448    -80    
-128   352    
464    1584   
-448   -944   
-736   608    
1152   752    
-720   608    
352    -1120  
-224   -736   
-240   176    
480    1312   
-160   1248   
-112   -256   
64     -576   
128    208    
-368   288    
224    -432   
-384   -176   
320    -16    
-448   -192   
-144   16     
336    80     
-176   -432   
272    576    
-128   -576   
-672   -560   
160    688    
416    624    
-256   -176   
304    -1344  
-480   -624   
320    288    
80     512    
-608   672    
-48    -352   
416    464    
256    -432   
-784   624    
464    1408   
-528   -368   
160    528    
48     96     
-336   256    
224    -496   
112    480    
48     64     
-304   -192   
128    -224   
352    48     
304    -688   
16     -640   
112    96     
-912   48     
-480   352    
64     -528   
208    80     
944    -1280  
-544   -320   
-672   -496   
624    -1248  
336    720    
32     960    
-496   144    
-288   -512   
656    -384   
320    80     
-320   -96    
32     -272   
304    16     
336    -656   
80     1424   
-64    624    
-208   -128   
160    -448   
656    272    
-80    -464   
-272   32     
192    624    
-416   128    
304    -160   
96     -192   
-208   -32    
0      -800   
-160   -192   
-176   -96    
-144   -528   
-240   -576   
400    16     
-176   112    
16     -432   
112    -464   
-48    -160   
112    208    
-48    -496   
48     80     
-256   -704   
176    -304   
-624   -752   
160    -32    
-16    -336   
-32    -496   
128    -1248  
-672   -176   
560    784    
1376   -48    
-1408  -16    
64     -128   
-32    -192   
64     208    
416    528    
-64    272    
304    304    
-160   128    
48     112    
256    336    
-256   480    
80     -256   
192    -480   
-400   -96    
160    -1120  
-544   -64    
192    -592   
368    -688   
192    -80    
-384   -240   
48     64     
480    -1296  
-288   -464   
0      -176   
208    -176   
-96    208    
128    128    
240    -1712  
-848   880    
880    -400   
-240   176    
-368   -160   
-160   -144   
-240   32     
-48    -144   
400    240    
336    -96    
-400   -144   
-96    0      
352    -32    
160    288    
-416   272    
-64    -448   
528    -192   
-192   -32    
48     240    
384    272    
-416   -544   
224    -1120  
-528   304    
720    0      
-160   -256   
-144   416    
0      -448   
32     -16    
272    -336   
48     64     
-192   -16    
-112   32     
384    0      
144    32     
-320   -16    
192    0      
-480   112    
-304   -32    
224    32     
-368   -144   
272    0      
96     -192   
-160   32     
-48    -2208  
400    208    
-128   -96    
-304   368    
496    -80    
-384   -128   
-96    -144   
128    1696   
736    -32    
-736   -96    
64     -288   
384    256    
160    -304   
-304   -224   
336    -64    
-96    -1568  
-80    144    
-80    -48    
-48    208    
288    -128   
-320   -128   
16     16     
272    96     
-304   -48    
64     48     
16     -32    
-64    -144   
-112   80     
-160   -896   
-736   448    
2144   -416   
-1488  -992   
-976   -96    
2000   16     
-864   32     
448    -128   
416    160    
-144   -32    
-16    32     
176    -64    
-320   -16    
-48    -256   
-240   128    
416    -64    
-80    80     
-96    80     
736    208    
192    -288   
-352   -432   
1024   -64    
-752   0      
336    240    
368    -112   
-960   -80    
-304   -624   
272    176    
144    256    
-352   48     
368    -544   
128    0      
144    -464   
112    560    
-1056  176    
192    -144   
-48    -368   
-80    -192   
592    272    
-400   -16    
-48    0      
272    32     
-160   128    
0      -240   
464    288    
-288   -16    
-96    160    
224    -176   
320    1632   
-2048  2176   
-384   1296   
1040   -624   
-832   -464   
576    144    
32     -16    
-480   128    
208    96     
-48    112    
160    -432   
-208   192    
0      -160   
-144   32     
-96    -128   
96     -64    
240    -16    
-480   -16    
-176   0      
32     528    
208    544    
-64    1232   
80     256    
-384   -384   
-192   -128   
192    -240   
-528   144    
208    -288   
144    368    
-464   -368   
176    80     
-64    -128   
0      -224   
0      192    
176    16     
-160   -160   
-352   -192   
384    32     
-48    560    
192    176    
-240   32     
48     96     
64     -480   
-768   -400   
368    128    
32     416    
32     464    
400    944    
-256   384    
32     -224   
-80    192    
-416   384    
-32    -816   
-208   16     
480    80     
-496   -128   
384    480    
240    1760   
-480   1904   
48     1120   
80     -208   
0      80     
-32    -32    
80     -144   
-96    -96    
-256   16     
0      32     
-160   -272   
-160   208    
32     48     
-16    -112   
96     -304   
-64    192    
0      320    
384    176    
-192   352    
128    -112   
192    80     
-560   -48    
272    208    
192    80     
-96    112    
-192   -976   
-496   -816   
176    576    
-448   176    
-64    240    
16     48     
-48    -192   
256    -48    
-240   -48    
-32    384    
-64    160    
32     256    
-96    96     
48     224    
80     80     
-160   -48    
-288   112    
32     336    
-432   -32    
64     -16    
-288   880    
992    -112   
-1136  0      
576    -176   
-192   0      
-64    176    
176    -64    
-144   80     
-160   160    
0      96     
240    -144   
32     -64    
-16    304    
-112   176    
160    -112   
256    96     
-176   16     
-208   -272   
272    -272   
288    0      
16     384    
-48    160    
-160   160    
-48    32     
192    -144   
96     16     
64     160    
96     64     
-272   -32    
544    1568   
384    160    
-1920  -288   
1664   304    
0      -320   
-1616  -672   
512    432    
32     -448   
-544   -1840  
240    -800   
112    1072   
-208   64     
-16    -160   
96     208    
-304   -272   
-64    -48    
128    352    
0      880    
-304   128    
208    144    
-32    128    
-784   336    
2608   16     
-1008  -32    
-272   -848   
512    -352   
-416   752    
-16    544    
224    -48    
-336   -912   
352    32     
-32    -48    
-16    336    
-176   256    
0      352    
160    96     
-176   384    
144    0      
-336   -400   
48     32     
384    48     
0      -64    
64     96     
-224   1040   
496    368    
-336   -1088  
-80    -416   
-624   -224   
608    -848   
432    -224   
-784   -160   
528    400    
144    -144   
-80    64     
240    672    
-160   -96    
-288   480    
0      784    
128    -416   
144    928    
-656   448    
160    144    
784    272    
-624   256    
-416   0      
-288   -272   
672    -96    
224    160    
-1264  -864   
144    -400   
1808   1248   
-2096  352    
-160   -144   
1920   -672   
-432   336    
-480   -64    
-32    -96    
432    416    
320    -64    
-288   416    
112    -48    
208    96     
384    368    
-80    192    
-384   16     
160    64     
224    -48    
-400   176    
448    -656   
-912   -1136  
160    -1248  
192    -416   
-288   16     
-80    224    
544    240    
-480   224    
192    -336   
-224   -256   
-80    -256   
128    288    
64     -32    
0      16     
-16    336    
48     -352   
240    224    
384    496    
-512   320    
112    176    
384    256    
-304   272    
0      112    
-352   -144   
544    0      
416    -144   
-432   208    
64     224    
208    80     
-208   16     
32     -960   
-64    144    
-80    96     
-96    -1008  
-592   -80    
544    496    
-32    -32    
-176   128    
480    112    
-320   160    
64     464    
64     128    
16     208    
112    16     
-192   -48    
144    -256   
32     160    
-96    0      
80     -256   
-48    192    
-192   -304   
192    -272   
96     544    
-128   -80    
-16    -320   
-48    16     
48     224    
-80    112    
-224   -576   
128    96     
192    -160   
-160   64     
-112   -32    
464    -1840  
-1344  784    
1088   -336   
-176   -96    
-608   256    
128    256    
928    -16    
-432   -320   
-304   128    
224    272    
80     -160   
240    320    
-144   -144   
-144   -304   
240    32     
-80    160    
128    -1488  
96     240    
16     0      
-432   -384   
1200   -352   
-352   400    
-656   128    
992    -112   
-560   96     
80     -400   
192    464    
656    -128   
-656   160    
-16    -576   
128    432    
416    -288   
-240   144    
96     160    
16     208    
160    192    
192    -48    
0      -112   
-240   -320   
176    176    
208    160    
-32    128    
-192   -960   
400    192    
-336   -80    
64     240    
112    -48    
-48    48     
-176   -1424  
-192   2272   
5024   1312   
-1040  32     
-1760  -224   
400    -160   
672    112    
240    -32    
-720   64     
736    32     
-128   160    
128    -160   
112    112    
48     -800   
-64    320    
656    128    
-240   -544   
-96    0      
288    -128   
-64    -656   
224    -128   
32     -2672  
-736   -16    
1632   -480   
-336   240    
-224   -832   
-304   160    
512    -288   
-576   224    
128    -272   
192    -32    
-112   192    
400    48     
-992   -128   
-224   -304   
384    0      
160    -176   
-80    -96    
-112   -800   
-224   -384   
128    -1488  
32     -176   
320    240    
-800   -48    
-224   32     
656    96     
-352   -384   
144    -112   
-192   112    
320    80     
752    -160   
-416   112    
-48    -16    
-272   16     
-48    -576   
736    -1952  
-336   160    
192    -48    
176    16     
-160   -80    
160    64     
48     -176   
0      -112   
-16    16     
64     -16    
-560   192    
-416   -80    
192    -96    
224    -240   
-320   -304   
192    -2272  
1424   -2096  
512    -624   
-1088  384    
-640   224    
512    -384   
224    -16    
80     416    
-432   -224   
320    -16    
-352   -32    
272    -272   
-480   80     
464    -80    
-352   -48    
352    -432   
-320   -64    
336    -2384  
-160   48     
416    432    
-128   1200   
144    624    
144    -112   
0      -64    
-592   128    
464    -80    
-128   208    
-1200  544    
384    32     
-384   -864   
384    -736   
16     640    
-16    -32    
-80    -192   
240    -16    
96     32     
-64    384    
176    240    
64     224    
-48    -16    
208    -32    
-496   -320   
144    -272   
464    -224   
-176   -752   
-96    -1216  
-352   -224   
-96    -640   
-448   -400   
400    112    
32     -80    
-496   -464   
432    -640   
-816   -96    
640    -656   
-304   -416   
-544   -576   
-224   -1280  
528    880    
16     592    
-384   -880   
272    592    
-96    -416   
-32    112    
480    -992   
80     176    
-208   -48    
-32    144    
-48    -208   
-96    -64    
-64    32     
64     0      
-272   64     
48     0      
-48    32     
160    -112   
-336   256    
80     -208   
-208   32     
32     -80    
144    80     
-288   -48    
336    -496   
-416   -32    
704    -208   
0      -48    
-320   128    
32     32     
480    -240   
-320   -480   
-320   -96    
-368   272    
-112   -240   
144    48     
-16    64     
-736   -48    
-240   -96    
-416   -320   
336    -16    
80     16     
-272   64     
-368   -352   
176    32     
48     -368   
-336   240    
-256   -336   
128    -272   
368    -272   
-208   -80    
-240   400    
-128   48     
224    224    
-224   336    
-112   -176   
-160   -96    
-288   112    
320    160    
272    176    
-496   192    
-64    144    
112    -64    
112    48     
-224   -224   
-112   96     
-128   400    
-48    272    
160    288    
128    80     
-288   144    
-112   -160   
-240   -1008  
2000   -800   
-416   688    
-592   240    
336    256    
-304   512    
304    -832   
496    -528   
-432   1600   
128    320    
288    -64    
-112   -240   
112    -112   
-16    -336   
-1024  -336   
176    96     
-240   368    
96     528    
-176   1232   
176    848    
144    -112   
-848   -896   
1056   -336   
464    -944   
-832   144    
160    336    
-48    176    
-160   -160   
-272   -288   
272    -160   
240    -112   
288    160    
-160   -96    
48     -208   
-368   0      
448    288    
512    -160   
-496   560    
32     96     
-320   112    
160    -144   
48     -96    
112    224    
-400   -1200  
1968   -1600  
336    -48    
-992   96     
592    464    
-144   -336   
-272   208    
544    304    
64     -32    
-288   160    
-64    -448   
0      112    
672    672    
608    48     
-576   -496   
480    96     
368    928    
-480   -80    
-400   -64    
528    32     
-640   48     
-304   272    
-192   -496   
240    16     
304    176    
-720   16     
0      928    
816    320    
704    -1456  
64     128    
640    96     
-1104  -128   
-160   320    
1056   464    
192    320    
-400   32     
-272   -32    
160    16     
192    32     
-96    32     
-192   240    
256    144    
-32    48     
-176   128    
-96    -144   
-288   176    
720    -960   
-304   272    
80     -112   
-160   256    
-704   -16    
544    32     
80     32     
-320   112    
-16    16     
112    64     
-128   -32    
496    192    
-352   16     
-80    112    
528    0      
-432   208    
-272   -224   
352    -224   
48     -64    
-160   208    
16     224    
112    80     
-224   -48    
144    336    
144    80     
-224   288    
-48    96     
64     -96    
48     144    
-80    16     
-80    0      
208    80     
112    768    
-32    -64    
-544   272    
384    128    
-16    0      
-368   -224   
80     -32    
240    -96    
160    80     
64     0      
16     80     
96     144    
-144   128    
0      -64    
176    304    
-64    384    
112    480    
240    288    
-528   192    
272    -192   
16     48     
32     176    
-128   160    
96     -192   
-64    -256   
-160   704    
176    -256   
-80    16     
-32    128    
-160   16     
928    2128   
1936   16     
-1504  624    
-608   416    
576    -144   
256    48     
-144   -144   
16     1136   
304    -288   
-160   -112   
256    272    
96     -160   
-192   144    
208    224    
272    288    
-64    -128   
32     592    
-48    80     
-80    -48    
160    96     
64     1472   
480    -336   
-624   0      
192    -96    
160    128    
16     784    
448    -224   
-528   -112   
-112   -240   
224    176    
304    160    
-304   -2112  
-32    -16    
48     160    
-16    -48    
-256   32     
288    -128   
128    -128   
-432   112    
272    144    
288    176    
-112   -112   
-384   112    
64     -192   
480    80     
-208   64     
96     -432   
-224   96     
112    272    
1136   0      
-2080  -704   
832    320    
272    -160   
-992   -336   
576    240    
512    288    
-256   816    
-656   304    
400    -64    
240    -32    
-224   0      
-48    -16    
-16    -192   
496    -128   
-224   -96    
-80    192    
0      400    
320    592    
-208   416    
-80    0      
368    -416   
-1568  720    
1360   400    
-176   528    
288    -384   
-32    256    
-544   -192   
-64    -64    
96     -1312  
256    -32    
-32    128    
-144   144    
-48    288    
432    -48    
-624   -48    
128    48     
112    128    
112    544    
-32    160    
-192   -432   
96     0      
-128   -320   
336    64     
608    -480   
-144   -448   
-544   672    
288    160    
32     -176   
-288   96     
-48    256    
704    224    
64     -288   
-896   224    
832    320    
80     -736   
-624   128    
192    304    
0      176    
256    64     
-96    16     
-256   -368   
128    80     
160    32     
144    16     
-64    -304   
-512   160    
272    128    
-16    -224   
-384   624    
1264   448    
80     576    
608    64     
416    -144   
-208   -832   
-864   384    
288    432    
656    528    
192    -240   
-208   -192   
32     0      
112    304    
400    256    
-80    -640   
-96    480    
-160   224    
-32    208    
32     -64    
-32    -48    
-144   -320   
128    0      
80     -160   
16     176    
-176   656    
-384   192    
160    128    
272    16     
-80    -1440  
128    -896   
-64    -1872  
-160   192    
288    272    
240    -432   
48     672    
-384   416    
176    192    
240    176    
16     -1376  
-304   -976   
112    -256   
304    272    
-352   -256   
-32    -208   
16     -464   
368    -1488  
-688   -832   
240    -2480  
160    -208   
-352   144    
32     160    
240    16     
352    -64    
-1200  576    
544    1152   
304    960    
-192   352    
0      144    
-32    -512   
-736   -1808  
704    -80    
352    752    
-96    48     
-192   -160   
-32    448    
352    -256   
160    -272   
-496   -208   
256    -832   
432    -32    
-288   -48    
144    -320   
-304   16     
176    -32    
-528   112    
128    -16    
-32    640    
544    -48    
-464   112    
-80    -1200  
576    -32    
-48    -48    
496    240    
-912   624    
320    32     
160    64     
-48    -112   
-240   -16    
528    16     
-752   576    
96     224    
256    -320   
-96    -272   
80     80     
48     -272   
-272   256    
224    -224   
-16    -16    
-128   -160   
32     64     
112    -96    
64     96     
-464   1104   
880    -160   
-1472  -112   
240    -240   
224    352    
128    400    
-256   144    
-80    672    
-48    128    
0      -592   
32     48     
112    -96    
128    32     
32     16     
-128   -64    
-80    -80    
368    -432   
-416   0      
-96    608    
16     432    
384    -96    
144    -240   
-112   -288   
-208   -80    
304    -944   
224    176    
-160   176    
0      208    
160    -128   
1520   800    
-1248  1408   
-736   288    
752    -480   
160    -352   
-1312  -496   
960    -800   
-208   -304   
-416   -80    
272    -160   
208    -176   
-144   -16    
128    -2320  
128    256    
0      96     
-128   112    
208    160    
80     32     
-48    -48    
112    -48    
-144   -64    
-592   -224   
1840   -480   
-224   64     
-848   96     
32     208    
400    176    
-288   -16    
-64    -128   
64     656    
128    -128   
-400   144    
368    -16    
144    -96    
-192   -80    
-464   80     
416    -176   
256    208    
-512   -16    
-32    80     
-224   -352   
16     48     
-320   -560   
-512   256    
736    32     
-144   832    
-880   576    
336    272    
-256   832    
256    144    
-96    -112   
-112   -352   
544    -144   
-1056  -336   
-192   432    
288    -176   
-256   560    
208    -272   
-208   -144   
208    -48    
-352   32     
48     48     
240    32     
240    0      
-176   -80    
112    -16    
384    -32    
32     240    
-416   -128   
224    -704   
-400   -2848  
-2384  -1136  
992    160    
608    -48    
-384   -128   
-48    496    
-400   32     
48     400    
320    -368   
-512   432    
128    -32    
-128   32     
128    -144   
-256   112    
-80    -112   
-192   352    
240    -128   
-160   112    
-96    -496   
-784   176    
560    -240   
-416   160    
-160   -112   
528    16     
-1072  -80    
-400   128    
672    128    
272    -16    
-624   -160   
240    176    
240    -112   
-48    96     
-368   48     
-32    112    
368    304    
416    224    
-400   176    
-176   320    
-48    48     
-224   128    
160    -16    
-496   -32    
112    -48    
144    -432   
-208   -208   
-432   -176   
80     -96    
272    128    
64     64     
-112   144    
-336   144    
-16    -176   
-1024  64     
464    -976   
-352   -416   
288    -32    
-1904  -528   
64     0      
608    -272   
-160   112    
-176   80     
256    128    
-112   -64    
64     0      
-144   80     
-176   -32    
128    -576   
-256   -64    
32     208    
48     16     
-96    96     
-848   -32    
96     32     
-48    -48    
128    -160   
-96    1136   
-384   704    
336    -320   
256    224    
-288   448    
656    -992   
-2544  1168   
1296   80     
656    288    
-896   -208   
176    -304   
-64    144    
256    0      
-480   352    
384    336    
-480   112    
-16    -64    
192    272    
96     -336   
-544   352    
160    128    
256    16     
-208   400    
48     -48    
-208   -192   
-32    224    
-192   -480   
-528   528    
816    -80    
-592   96     
-80    -16    
160    80     
496    512    
-560   432    
-64    -80    
-192   -64    
-32    -64    
304    -160   
-288   112    
-240   -240   
128    -80    
-160   -64    
48     96     
-128   176    
176    32     
-32    32     
96     224    
-176   -32    
-96    128    
464    0      
-576   32     
272    160    
-80    112    
-16    240    
-960   -784   
1408   -816   
480    32     
-864   160    
432    400    
-752   -352   
272    -176   
144    -64    
-176   256    
-32    32     
64     208    
208    64     
-256   96     
-176   -16    
320    -160   
-384   -176   
64     -48    
-32    -160   
-160   80     
368    32     
-128   48     
-240   -432   
1072   -80    
-1232  336    
-48    -928   
368    -352   
48     80     
-320   352    
272    -96    
-208   160    
-160   48     
-144   128    
96     64     
240    112    
-112   48     
-256   64     
224    64     
144    64     
-128   -128   
48     256    
-176   192    
-144   96     
128    112    
-480   -96    
-48    -64    
304    -416   
-144   256    
80     672    
768    -96    
-192   -32    
-320   768    
592    -80    
-256   288    
208    -112   
512    480    
256    -528   
-240   800    
-176   544    
-272   -32    
608    64     
-64    96     
-320   48     
-80    0      
336    160    
-16    64     
368    1136   
-576   608    
-32    64     
432    -528   
-272   -1152  
-352   160    
-160   2144   
1088   -320   
-432   -928   
128    256    
640    256    
416    -672   
-432   576    
-240   1312   
80     -112   
352    416    
-80    -560   
-192   -176   
112    336    
352    -224   
304    944    
-432   224    
-48    -464   
256    288    
288    368    
-224   272    
-144   -384   
304    208    
-304   576    
96     992    
80     560    
-32    224    
240    192    
64     176    
-48    512    
144    -112   
-64    -160   
0      48     
96     256    
-160   -224   
160    240    
-64    -112   
176    -688   
240    -3392  
-304   224    
-16    576    
336    240    
224    -128   
-112   160    
-48    -304   
80     -320   
-416   -208   
144    -144   
112    352    
48     -320   
80     192    
528    480    
-1264  592    
-32    304    
816    1776   
96     1120   
-272   -288   
112    -784   
-480   -1536  
448    592    
288    288    
80     -80    
-192   144    
48     -80    
480    -256   
-32    112    
-80    -128   
-128   544    
272    -16    
-96    128    
-16    -1968  
-64    -112   
96     -352   
-32    -176   
80     256    
272    272    
-496   448    
64     80     
368    352    
128    0      
-464   144    
-432   -816   
688    -320   
-480   -32    
-80    -448   
-128   -2144  
176    -384   
160    -432   
-128   -416   
-80    -176   
96     64     
144    -16    
160    -672   
-160   96     
-112   -144   
64     48     
192    -480   
48     -160   
-80    -288   
-96    16     
-48    -1872  
448    -1024  
432    32     
-192   192    
-32    -80    
32     176    
224    -720   
224    -224   
-224   768    
-112   192    
48     -320   
304    208    
80     704    
-16    336    
80     -240   
-32    0      
240    256    
-96    144    
-48    -576   
336    0      
-624   -144   
-32    -256   
-32    -16    
48     -384   
192    -96    
64     -208   
-352   -144   
128    80     
160    -48    
48     64     
368    -1216  
-1808  -896   
1088   -320   
-624   -320   
128    400    
896    -64    
-1040  -112   
368    0      
160    112    
192    -96    
-208   -416   
96     -48    
224    -16    
112    -320   
-720   -720   
560    -144   
-32    -480   
-128   16     
80     0      
-32    64     
-32    -80    
-16    -1264  
-656   384    
960    -368   
-1008  -208   
560    -160   
880    -208   
-656   -1088  
-448   -96    
272    -112   
336    64     
176    64     
-32    -16    
-224   -16    
64     -368   
368    -112   
-64    -96    
-368   224    
-32    -288   
16     -176   
304    -112   
32     -80    
-384   -1200  
-416   96     
304    240    
-752   -496   
432    -624   
576    -224   
-240   512    
128    -192   
-256   -48    
608    -112   
32     -144   
-16    0      
-448   -96    
-192   -384   
400    -432   
224    -144   
-672   -224   
64     -320   
320    64     
-48    32     
192    32     
-208   336    
-336   -64    
-64    224    
1104   -112   
-544   384    
160    -128   
896    688    
-2736  144    
352    496    
400    560    
-1232  -272   
1152   -592   
480    176    
-480   240    
16     -368   
416    400    
-736   -176   
224    64     
224    -224   
-608   0      
-96    -224   
-16    160    
592    -160   
-432   0      
160    -384   
592    848    
-576   -128   
272    736    
496    -1712  
-720   -32    
784    480    
-256   -128   
-672   144    
1024   -32    
-704   -160   
-32    -80    
176    96     
176    -176   
-176   48     
272    -336   
-240   -96    
560    -64    
-32    80     
-320   144    
192    112    
112    -80    
0      -48    
-400   80     
480    224    
-48    128    
-32    96     
320    144    
-512   -320   
176    -48    
704    -304   
-320   144    
192    64     
-304   96     
16     -320   
-864   48     
576    0      
-320   -128   
-352   -160   
320    -80    
-32    272    
336    112    
-288   240    
16     144    
32     0      
64     -112   
96     208    
-816   -96    
-224   80     
432    240    
-336   96     
-32    48     
592    176    
-224   32     
-64    48     
-16    -96    
-16    176    
32     -64    
-432   -192   
176    -176   
-64    112    
-160   -256   
48     -432   
672    2160   
-1520  640    
544    -176   
912    -464   
-960   -80    
-224   80     
-704   -16    
256    304    
-496   -112   
112    -320   
0      -32    
0      160    
208    -336   
-128   64     
-128   -160   
64     176    
-64    96     
-80    -112   
48     -112   
-384   -96    
-96    272    
256    1424   
736    -272   
-1184  -304   
-32    464    
208    -160   
-176   336    
128    -304   
16     -240   
-160   32     
-160   -112   
352    0      
16     -80    
-176   176    
336    384    
-176   432    
-80    32     
-128   112    
0      -176   
-80    128    
-32    144    
528    176    
-384   96     
64     48     
-304   144    
272    96     
32     176    
-272   -144   
48     336    
320    576    
432    -496   
-3088  128    
224    256    
1104   -96    
-464   208    
176    128    
-432   -240   
32     64     
48     -176   
-128   -80    
256    -32    
-224   32     
32     48     
192    112    
-672   -112   
64     16     
-32    64     
-240   384    
32     320    
48     144    
-352   0      
160    1008   
2256   -16    
-1664  -288   
320    -32    
528    96     
-544   992    
976    160    
-288   -112   
-352   -48    
-80    80     
272    80     
288    112    
-240   -160   
-112   352    
-400   368    
160    48     
112    608    
16     528    
-64    448    
-16    32     
192    0      
-64    80     
48     1824   
1008   1088   
-256   496    
-480   464    
368    304    
-784   48     
176    -560   
128    -272   
240    -64    
-176   128    
-144   64     
-288   -576   
-320   -640   
-128   336    
-336   -432   
-16    -224   
288    16     
16     192    
-96    -80    
64     208    
-208   336    
16     112    
-80    -288   
-736   -384   
448    528    
416    528    
-384   192    
-64    -208   
1024   -1472  
880    176    
-48    -496   
-688   -176   
288    -160   
192    1376   
304    1984   
-96    -560   
-304   624    
160    64     
16     -224   
384    288    
112    -112   
-448   -176   
-176   0      
544    448    
400    336    
-192   656    
-64    976    
-32    384    
128    -624   
128    -64    
112    448    
-480   -80    
-112   -144   
544    32     
-128   688    
-272   -1952  
32     -384   
112    80     
128    64     
-544   -304   
16     -400   
144    -288   
192    640    
208    -272   
144    -400   
-400   160    
112    416    
208    512    
-64    160    
-176   -416   
-144   272    
320    384    
-96    400    
512    -288   
-240   528    
320    928    
0      336    
64     -96    
-496   32     
896    -304   
-96    80     
-112   272    
320    256    
-112   224    
64     1744   
816    1904   
-208   -128   
-352   -656   
160    224    
64     -224   
-240   144    
0      -320   
208    -480   
-32    -240   
16     0      
-240   560    
144    -288   
-48    -128   
144    448    
-48    368    
-64    160    
176    80     
-64    208    
32     864    
48     1168   
176    96     
-224   -96    
-160   -272   
480    -1520  
144    128    
256    144    
544    -1136  
576    -656   
-256   -16    
48     -128   
-224   -368   
272    416    
320    -224   
32     64     
-112   48     
-96    320    
272    -48    
192    -48    
-32    -208   
-176   64     
160    256    
192    -64    
-80    544    
-272   -448   
544    352    
-144   1056   
-352   -192   
192    16     
48     592    
192    464    
-112   112    
16     -16    
48     144    
-96    64     
64     -448   
160    -48    
-288   192    
624    912    
-224   752    
-240   -224   
16     0      
144    -32    
-96    208    
-32    112    
256    80     
-128   176    
-64    -160   
-208   144    
336    -96    
32     0      
-80    64     
-352   -400   
-416   -160   
1728   -2368  
-432   256    
-1024  -272   
1088   320    
704    -160   
-1104  -432   
288    -128   
336    16     
-448   80     
304    144    
-48    144    
-64    32     
-16    -16    
240    -96    
-16    112    
336    96     
-160   208    
-144   -288   
256    128    
-128   -96    
-784   -48    
1088   -608   
-32    16     
-560   -16    
-160   160    
176    48     
192    -272   
-240   128    
272    -32    
-208   0      
64     -400   
336    160    
-224   -1472  
-256   144    
352    -64    
-32    304    
80     -128   
-16    432    
560    144    
-560   -64    
272    880    
0      -48    
-1152  -368   
240    192    
720    32     
-640   -240   
-160   -320   
576    -816   
16     -16    
-464   80     
-64    192    
304    80     
784    448    
-256   576    
-880   -368   
192    -16    
848    -224   
160    96     
-576   -96    
-224   112    
128    -400   
368    -64    
-336   16     
-464   176    
768    -432   
416    640    
-528   0      
-672   -1088  
-1104  -1328  
2928   -1984  
-272   1760   
-800   -96    
288    256    
832    -144   
-304   -400   
-416   64     
416    416    
416    224    
-576   -720   
64     160    
192    -352   
-256   208    
-528   -64    
272    -112   
-576   -144   
432    -64    
176    -336   
-976   -128   
560    240    
-96    128    
0      208    
336    -336   
-608   32     
720    -464   
-352   128    
-192   0      
352    128    
352    64     
-400   80     
320    -32    
-144   -400   
320    -256   
144    -384   
-336   48     
0      -1040  
592    48     
-496   -176   
112    32     
16     -16    
-64    16     
160    -16    
-112   112    
-48    -16    
64     -32    
-144   -304   
32     -272   
144    112    
-688   -352   
400    -176   
192    -672   
192    -176   
144    -96    
-32    64     
544    -112   
-496   -160   
128    48     
320    176    
-192   -144   
48     -272   
-384   32     
32     32     
-32    0      
-64    16     
208    -32    
256    -1616  
-176   48     
400    -608   
-224   512    
-64    352    
80     176    
-32    -432   
-112   -368   
-64    -160   
112    -112   
192    240    
-48    272    
-256   496    
48     -112   
48     -16    
-480   -1904  
752    -336   
32     -848   
-1216  512    
1312   752    
240    592    
-864   512    
48     -48    
576    16     
16     -496   
-480   -96    
160    -528   
-672   48     
96     -160   
0      352    
160    -144   
-48    320    
144    -672   
0      64     
-32    -144   
512    128    
-1072  960    
1120   -432   
-400   -288   
-80    -896   
-592   64     
96     112    
-48    -144   
320    0      
-32    224    
0      -144   
64     144    
64     -160   
48     -208   
48     80     
128    112    
-80    16     
224    0      
-272   -304   
80     -144   
-240   272    
240    -80    
-256   -112   
-96    48     
112    0      
0      -544   
112    -32    
112    320    
32     64     
-208   -16    
416    736    
1904   -368   
-1472  -544   
-128   -912   
832    -192   
-208   0      
-96    -112   
240    -1200  
-144   480    
0      464    
320    -224   
240    64     
-848   -128   
-64    304    
160    48     
-672   -112   
-96    -224   
-352   96     
128    80     
144    48     
-256   -704   
-1008  736    
2400   -144   
-1152  -48    
-448   -400   
944    -1024  
-368   -192   
-912   -320   
208    128    
336    112    
-240   -80    
-128   -272   
-112   -304   
-48    32     
-416   32     
32     -176   
-464   -400   
368    240    
192    1152   
-320   592    
240    224    
368    672    
-384   240    
544    -496   
-448   -1312  
-464   -912   
1056   112    
-176   -256   
-96    384    
-176   -48    
-128   416    
-592   -224   
0      -48    
384    -224   
-560   -16    
704    672    
-48    880    
-128   592    
928    -192   
-272   -288   
-80    16     
-224   -192   
432    -96    
304    16     
-192   -32    
-352   144    
-96    -224   
496    -432   
-192   -80    
-720   -960   
1488   -736   
1120   256    
-1376  832    
-416   416    
528    128    
368    928    
-160   784    
-224   -256   
0      -80    
192    -464   
288    64     
-48    -720   
-384   208    
224    576    
240    608    
-240   128    
-80    0      
16     -336   
32     448    
176    560    
-80    192    
-256   -256   
-96    768    
736    -304   
-912   -96    
144    32     
-368   272    
288    1968   
-1024  1520   
-192   -400   
192    -736   
16     -304   
0      320    
-32    288    
0      48     
-16    -544   
608    -320   
16     496    
-144   480    
128    816    
192    1040   
160    272    
-496   -288   
-64    400    
-144   624    
272    -336   
448    160    
-416   -64    
-16    -240   
-48    -32    
-96    -32    
720    -32    
192    1584   
-1616  -1216  
-720   624    
1344   976    
-576   208    
-48    768    
80     688    
256    736    
-48    304    
80     560    
-48    544    
-288   64     
96     -432   
0      -208   
-320   -16    
16     -192   
16     -1200  
-560   -688   
80     -32    
-16    -48    
192    96     
-496   -144   
-80    256    
144    480    
240    -272   
-176   -64    
-224   48     
-128   -928   
1280   -1120  
-576   672    
-64    -160   
-16    -144   
176    848    
-288   1232   
448    1168   
-608   752    
-32    -32    
32     -144   
0      160    
32     -128   
192    112    
-304   464    
48     -80    
-16    -160   
128    128    
-176   256    
144    112    
-544   -544   
400    -1120  
-416   464    
576    256    
-64    48     
-400   256    
176    -144   
-48    272    
336    -16    
-480   240    
128    160    
-224   64     
272    -192   
-112   0      
64     0      
-176   48     
96     192    
208    -80    
48     112    
-288   112    
160    224    
112    128    
-48    176    
64     -112   
-48    208    
-32    -80    
0      208    
32     128    
-32    64     
304    -16    
-2096  -704   
1184   336    
2016   -48    
-1376  192    
-336   304    
672    80     
288    -336   
-544   480    
112    -112   
160    160    
-32    80     
-80    208    
-272   0      
208    288    
480    64     
-400   80     
32     80     
80     144    
-80    16     
16     112    
-96    176    
-560   48     
2000   -80    
-208   560    
-1152  -144   
16     752    
384    192    
-368   80     
288    -48    
-128   144    
96     96     
0      80     
80     112    
-16    -192   
-288   112    
368    96     
256    240    
-16    176    
-608   192    
384    336    
672    -16    
-352   512    
-1296  240    
528    80     
368    -272   
-80    48     
816    624    
112    -96    
224    592    
-288   -48    
-416   160    
384    -32    
-288   208    
192    256    
144    -256   
-480   -176   
-560   -256   
464    496    
192    80     
416    -112   
-272   48     
224    -336   
16     208    
-112   -144   
112    96     
96     128    
272    112    
144    0      
-352   64     
-1296  -2832  
2720   -1168  
-64    1120   
-1456  -112   
528    336    
192    32     
-256   0      
832    464    
-592   128    
-128   -112   
96     0      
80     -352   
-16    -16    
0      208    
112    -16    
-192   240    
304    112    
-96    -16    
-272   16     
-96    64     
400    448    
-400   464    
48     -160   
480    128    
-32    -48    
-272   96     
208    -624   
-112   96     
16     -624   
176    64     
128    304    
-144   80     
0      -80    
-224   -64    
320    -80    
-240   176    
16     64     
0      -112   
-80    -128   
32     -112   
0      48     
96     -160   
-48    -16    
-96    -704   
112    192    
-320   -16    
304    336    
-224   160    
96     320    
400    544    
-400   176    
-128   -256   
560    -816   
-112   256    
-16    -320   
208    1568   
480    1104   
16     656    
-48    -240   
272    208    
-48    -320   
-368   -16    
448    -16    
384    96     
-512   0      
112    176    
-80    864    
416    -400   
80     272    
-272   -368   
-16    192    
272    128    
160    352    
-144   -208   
-176   -64    
16     -208   
144    -608   
64     -304   
32     720    
80     480    
16     -64    
544    160    
-1168  1632   
912    -80    
176    -528   
96     -224   
-224   448    
-144   64     
160    240    
-32    0      
-16    -96    
48     -576   
48     -368   
-32    -272   
0      -160   
-96    0      
64     -464   
80     -192   
16     -384   
16     -288   
0      144    
832    96     
-1072  800    
432    -160   
352    304    
-208   96     
-144   -544   
-192   -704   
-368   -576   
144    48     
208    144    
144    -352   
-160   80     
32     -416   
48     -112   
256    224    
32     -144   
-144   -48    
-128   208    
368    -80    
-208   288    
-176   -96    
-112   -224   
0      256    
192    -176   
80     -432   
-176   -528   
32     144    
48     -464   
112    -128   
224    -528   
-1360  1520   
3312   -1216  
-976   -176   
-832   -192   
1296   272    
-16    176    
-224   320    
0      816    
-224   -1360  
-1440  32     
112    192    
-64    -80    
-96    64     
208    64     
208    -432   
-160   336    
-48    -160   
192    464    
-160   -368   
80     80     
128    -832   
-1968  1168   
1328   -512   
-368   -208   
112    -176   
-208   0      
224    512    
-32    1056   
176    1408   
224    144    
-400   272    
192    -2064  
16     -560   
-240   -720   
768    176    
-832   -160   
-16    -800   
256    -1408  
-96    -1040  
-176   -336   
-32    48     
-560   -336   
-16    -48    
-416   736    
672    -80    
224    -96    
-1008  -1424  
-96    160    
464    -640   
-544   -48    
-16    -80    
240    144    
-384   -112   
-128   -416   
160    400    
144    784    
-16    -64    
96     -1264  
-240   -320   
80     -192   
-256   272    
224    -320   
-80    352    
304    -1344  
144    272    
-752   448    
48     32     
-16    -80    
400    -48    
-704   -1376  
976    -1840  
624    512    
-816   80     
-560   -224   
1088   -1568  
-32    -752   
96     -832   
-384   -528   
288    336    
432    720    
144    368    
0      -272   
-512   96     
16     -160   
320    256    
-128   -240   
-512   144    
224    0      
400    -160   
-32    -320   
-48    208    
-128   -400   
-624   256    
1200   848    
192    -464   
-560   -224   
-144   -288   
224    -32    
448    -352   
-704   -400   
224    -96    
144    -64    
144    -144   
-416   32     
-928   0      
448    368    
-336   -112   
-176   0      
-176   -304   
-48    -352   
32     -224   
-880   -80    
48     -64    
-256   -112   
192    -96    
-80    -288   
304    -192   
-544   16     
-128   336    
240    -16    
96     112    
-176   736    
608    528    
64     240    
-992   -64    
592    -816   
96     -48    
-256   48     
-320   208    
64     352    
192    208    
48     224    
32     176    
80     112    
-192   -272   
400    288    
-48    64     
-288   -512   
32     176    
272    320    
-144   32     
80     -112   
16     32     
-304   208    
224    144    
-288   48     
0      -64    
48     -176   
-112   160    
-160   96     
624    2448   
1568   32     
-1536  528    
-144   -32    
208    0      
272    -288   
-496   -80    
-160   -256   
160    -528   
16     416    
16     -208   
-160   160    
16     16     
-112   544    
144    -144   
96     448    
256    -128   
-416   -64    
-16    144    
-16    16     
-448   176    
928    -544   
-432   192    
-768   -16    
912    144    
-608   -144   
144    -352   
-224   -224   
384    0      
0      128    
64     48     
96     96     
-304   32     
-16    16     
368    -144   
-112   48     
-32    112    
464    192    
-368   -96    
-128   80     
256    64     
48     192    
-128   -16    
-128   -256   
-176   32     
240    -160   
-288   240    
288    64     
-128   192    
64     -64    
-752   -592   
-400   64     
240    224    
96     32     
-192   96     
-176   48     
-32    32     
-400   160    
-16    -64    
128    80     
144    16     
-144   80     
208    64     
-592   -32    
304    80     
-80    0      
-96    -48    
-80    96     
-64    -80    
-96    96     
-224   -816   
-592   848    
352    -64    
-1104  -304   
1264   448    
-128   32     
-880   224    
336    96     
624    -32    
-352   80     
-112   32     
192    64     
64     144    
16     -32    
-336   128    
128    -80    
112    272    
-272   64     
176    32     
16     -16    
-144   -144   
480    400    
496    -352   
-320   176    
784    48     
-80    512    
-304   480    
-352   -112   
-16    144    
624    64     
-304   -240   
-48    224    
224    144    
0      -144   
176    -96    
-48    256    
-112   -400   
816    -160   
16     80     
-16    -16    
272    112    
-288   96     
144    48     
32     48     
-128   304    
16     -32    
-304   240    
112    144    
816    432    
-2064  3072   
-192   304    
-768   -208   
-16    -368   
816    80     
-752   96     
-320   400    
96     -32    
160    288    
304    -64    
-448   80     
144    -16    
-224   192    
176    144    
208    208    
-304   144    
-240   80     
544    96     
592    640    
-848   1584   
112    432    
336    -320   
-304   -416   
576    112    
128    208    
-1040  256    
400    -288   
336    352    
-352   -64    
-288   -208   
400    -272   
400    -48    
-1056  -208   
480    -16    
32     -336   
-64    -656   
-160   -224   
-96    -384   
-176   48     
224    32     
-48    -64    
-352   -192   
48     144    
16     -192   
160    192    
-112   336    
-256   240    
400    80     
80     368    
-192   720    
-80    720    
-48    1024   
1376   -496   
-576   -544   
-560   -352   
432    -448   
112    -112   
48     -1376  
-96    -16    
96     976    
-144   -368   
80     -368   
32     -64    
128    -112   
96     96     
-144   160    
192    -320   
96     -16    
64     16     
-16    96     
-16    -48    
64     192    
160    -1456  
112    240    
-320   272    
80     64     
368    -384   
-288   -464   
16     368    
176    288    
176    32     
-112   656    
272    272    
-336   224    
-192   368    
80     -320   
0      80     
128    -768   
16     128    
-16    -208   
48     -80    
16     128    
160    96     
48     128    
-80    48     
272    176    
-16    240    
128    -64    
-32    -64    
-144   144    
496    608    
-208   512    
-144   -272   
464    -192   
64     -896   
-464   384    
-64    -176   
736    -560   
224    176    
-464   368    
-224   208    
224    -48    
128    0      
-48    -64    
-144   64     
16     -320   
208    64     
0      -208   
-32    128    
96     -640   
112    16     
-128   -2224  
128    0      
16     96     
-128   560    
480    176    
0      224    
0      240    
-160   -400   
192    -352   
-1504  -256   
1776   656    
320    -720   
-1088  320    
864    768    
544    64     
-176   544    
-160   896    
-80    -1008  
224    656    
-32    -240   
-176   352    
-80    -240   
128    624    
272    -288   
112    -512   
-144   -272   
-304   -528   
480    448    
96     144    
-48    -688   
-1904  544    
1920   96     
-336   32     
-672   -176   
880    1232   
624    1008   
-944   -160   
400    -1152  
432    -352   
-528   -304   
112    240    
320    -192   
-608   208    
208    -144   
-64    80     
240    112    
-112   256    
-336   -80    
400    176    
192    48     
-176   -1264  
-176   -1056  
832    880    
-112   -704   
-784   -384   
272    -1072  
-416   -16    
-16    48     
560    -720   
176    112    
128    224    
-624   -64    
176    384    
16     -48    
-608   -336   
-176   -560   
-400   -880   
64     -16    
464    -352   
32     -48    
-112   -464   
32     -400   
-32    304    
320    -160   
-144   -192   
-256   16     
-320   -528   
1136   -288   
832    3184   
-1184  1424   
544    -192   
1328   -736   
-944   -160   
-336   800    
816    112    
32     -1088  
-208   96     
192    -960   
-368   480    
336    -144   
224    144    
-32    -256   
-112   320    
-400   -416   
544    208    
-240   -48    
320    48     
-1392  -800   
192    -880   
368    -480   
-128   64     
144    -80    
16     -160   
-112   592    
-48    16     
-176   416    
512    -832   
-304   256    
288    16     
-304   16     
256    -240   
192    272    
-208   32     
96     288    
-224   32     
128    160    
144    128    
-224   -96    
-512   -48    
352    -864   
0      -16    
192    -32    
304    128    
-128   0      
-208   -144   
48     16     
176    -560   
-144   -288   
-160   -32    
-896   -352   
688    -560   
-352   304    
-560   -304   
288    -320   
-256   -608   
-32    32     
16     -240   
48     -256   
-48    112    
16     -32    
48     -224   
-32    -96    
-240   64     
-144   -128   
160    -368   
176    16     
-352   -48    
256    -208   
-80    288    
96     -256   
-32    208    
176    80     
16     -176   
-176   256    
192    -64    
112    160    
-48    -16    
-64    -16    
1312   2608   
-2400  -592   
-816   32     
2208   -32    
-1552  112    
-48    80     
320    -576   
288    -320   
-64    -2192  
80     -288   
-288   128    
-48    144    
48     -64    
352    208    
-944   208    
368    -160   
256    -240   
-224   -48    
48     48     
144    -64    
-288   -272   
656    -1072  
-784   304    
304    352    
896    -96    
-1056  32     
208    32     
512    64     
-32    -336   
-448   144    
352    0      
-192   112    
80     -240   
64     32     
-464   -112   
576    192    
48     16     
-976   160    
80     -64    
-160   80     
48     -32    
-176   208    
32     16     
-112   0      
576    -16    
-544   80     
144    144    
160    -176   
-144   96     
-112   32     
976    -576   
-240   544    
496    48     
-576   -176   
-64    64     
160    64     
-144   64     
-16    80     
-192   -16    
-160   32     
336    80     
32     -80    
-480   -240   
160    128    
-32    -272   
112    192    
-144   -80    
-32    -32    
-80    -96    
112    112    
-304   -288   
944    416    
272    176    
-688   96     
464    -224   
-688   -160   
-48    224    
656    -272   
-1040  320    
384    -128   
48     176    
-16    80     
-16    -16    
-16    144    
-256   112    
480    64     
-208   256    
-112   -208   
0      -304   
-176   240    
-560   96     
-144   32     
-224   0      
464    48     
-560   -64    
256    48     
192    432    
448    -192   
-400   112    
64     160    
112    0      
-304   -128   
-112   144    
112    240    
-528   96     
-144   -304   
384    -112   
96     -384   
-672   0      
480    -48    
272    128    
-496   128    
64     32     
128    240    
256    -176   
-96    -208   
96     16     
176    176    
80     48     
-736   960    
1120   1984   
1200   256    
-2688  -416   
-176   -48    
1616   144    
-368   512    
-432   -48    
-64    112    
0      80     
400    128    
0      48     
-384   48     
-192   0      
368    80     
432    144    
-432   -112   
-96    288    
-288   -96    
384    640    
-144   -96    
-240   -192   
160    -176   
-32    256    
-432   560    
320    64     
-64    160    
-320   32     
272    672    
240    432    
-416   -288   
-352   288    
384    400    
208    -144   
96     -192   
-448   80     
352    208    
-432   688    
416    304    
-32    -288   
-336   -256   
160    -112   
128    -64    
-80    -400   
-496   384    
608    1312   
-112   480    
-208   -576   
512    -1248  
-448   688    
-64    432    
0      192    
448    -688   
-816   -1200  
480    -976   
-480   16     
-144   560    
160    -112   
-144   240    
32     208    
80     32     
-96    -192   
32     240    
-96    -16    
-16    -48    
-16    608    
-32    864    
-256   64     
-16    -288   
-96    80     
256    -112   
-304   128    
288    0      
-272   48     
-32    192    
304    144    
-112   -48    
16     80     
-240   32     
16     192    
176    96     
-80    384    
48     48     
-272   128    
688    16     
-160   48     
-272   464    
-160   112    
272    -32    
-128   -320   
-16    112    
-336   272    
128    -32    
192    80     
352    -160   
-704   192    
112    160    
224    -176   
32     -16    
64     112    
-112   32     
-144   -448   
16     96     
-32    208    
-112   112    
208    368    
16     128    
224    176    
-544   512    
-32    288    
416    -16    
-80    -32    
-128   80     
-32    320    
48     176    
-112   -112   
176    -32    
-192   -384   
-128   -160   
272    -80    
-64    80     
-112   64     
-192   -32    
80     368    
-160   368    
304    160    
-416   0      
-96    64     
48     -48    
656    -496   
-240   -1248  
1744   -1024  
-912   160    
592    384    
-448   144    
-336   256    
-352   608    
592    -1632  
-320   1616   
-64    592    
32     -48    
208    -448   
496    -32    
-400   192    
-272   320    
352    160    
96     -16    
-32    592    
-48    528    
-96    304    
160    -432   
-624   -608   
832    -2288  
208    -176   
-1008  -416   
784    240    
608    352    
80     -64    
-400   528    
608    592    
-64    64     
-272   0      
128    -240   
400    0      
-208   -64    
-48    0      
448    96     
-144   112    
-128   80     
-32    -48    
208    80     
48     32     
-16    128    
704    128    
480    512    
-464   -528   
-368   176    
304    224    
112    64     
224    1120   
-656   128    
-64    32     
480    -48    
-208   -32    
-336   -1056  
-208   112    
992    640    
-352   320    
-544   -832   
160    288    
0      16     
112    160    
352    16     
-656   -128   
256    32     
176    -64    
-112   -64    
112    -48    
-288   32     
-48    624    
1584   -2528  
-2224  -1008  
592    144    
768    32     
160    240    
-384   80     
-160   -384   
496    384    
256    -448   
-192   368    
160    -256   
64     128    
-96    -160   
576    144    
-64    -672   
-320   96     
-48    -896   
192    48     
304    592    
-320   0      
-16    496    
624    -64    
-368   224    
256    -128   
112    16     
480    -464   
-336   160    
-80    -752   
176    32     
-208   -288   
240    0      
-64    240    
112    16     
240    96     
208    48     
-160   -80    
192    224    
576    736    
192    128    
-304   368    
400    -224   
-160   32     
-112   -480   
128    -16    
-400   -304   
336    128    
224    -32    
304    144    
-416   -64    
160    288    
608    64     
32     912    
-864   400    
-48    -272   
912    -224   
-976   -112   
336    256    
48     0      
-224   592    
96     64     
64     176    
128    -240   
-112   -400   
48     272    
-176   -1488  
320    256    
-240   96     
112    -96    
-320   96     
-112   -1568  
448    16     
112    -400   
-144   -96    
-48    160    
80     -32    
-32    16     
32     -336   
-80    -64    
128    -208   
-16    128    
176    1616   
-688   -1632  
-1344  16     
1472   -384   
-112   -224   
-352   336    
-224   64     
736    -208   
-400   752    
-256   -240   
240    -464   
64     160    
192    -96    
-80    32     
48     -384   
-32    32     
16     -144   
80     48     
-304   -64    
128    -112   
-176   0      
688    736    
384    -160   
-992   0      
496    -96    
80     -32    
-80    64     
400    -128   
-480   256    
-32    -176   
48     -192   
176    32     
304    48     
-352   192    
-336   -576   
288    -96    
384    -464   
-544   0      
448    -96    
-320   -48    
320    240    
32     48     
-208   0      
144    128    
208    -208   
-368   16     
0      0      
-32    -48    
-768   -128   
-16    -496   
496    -96    
-2320  -144   
2064   544    
-96    -336   
-1008  144    
864    -1920  
-48    32     
-272   -304   
352    128    
-80    -48    
112    96     
-256   -96    
224    80     
-320   -336   
-192   96     
64     -160   
-224   160    
80     -128   
144    -352   
224    -48    
32     -64    
-624   -592   
592    -128   
416    -320   
-1184  -288   
400    96     
112    64     
-160   -320   
-224   48     
-96    272    
352    -128   
176    -96    
-64    -32    
0      -224   
32     112    
-256   -192   
256    -272   
432    -928   
-16    -208   
-144   -208   
144    -16    
592    704    
-1248  208    
144    -608   
368    368    
-592   -96    
0      -448   
320    240    
-64    -48    
-48    96     
128    -256   
0      -48    
-112   32     
112    240    
16     208    
-160   -336   
-1056  96     
704    -160   
-384   -144   
240    -16    
304    80     
-96    -144   
48     224    
-128   -80    
0      64     
64     16     
560    64     
-64    128    
-608   480    
496    -96    
-544   -1568  
-736   64     
64     16     
-832   -80    
768    160    
64     -368   
-128   864    
784    -176   
-368   -736   
-192   224    
-240   -96    
96     -512   
0      -144   
-464   -352   
-144   432    
-144   -48    
128    448    
384    128    
-400   480    
-16    992    
336    608    
-160   -288   
224    -48    
48     -672   
-128   -736   
-48    -464   
-240   192    
-160   256    
-144   416    
80     32     
-80    -256   
-224   288    
-64    560    
144    224    
144    32     
-80    128    
-112   720    
-48    1264   
-48    192    
224    -32    
-192   48     
-96    208    
-80    240    
-64    -432   
416    -1264  
-336   -208   
16     16     
-1136  -1008  
96     384    
-736   -384   
-32    0      
416    -976   
-608   224    
80     -432   
-192   -544   
-368   -448   
16     -832   
192    464    
-96    816    
32     48     
48     96     
-144   240    
-288   -160   
-128   -112   
-672   -32    
48     368    
-176   144    
-272   -464   
-240   -512   
0      144    
192    -16    
0      208    
-176   -80    
64     48     
240    64     
-176   112    
336    128    
-480   416    
-80    352    
496    -64    
-128   432    
-624   -256   
272    -112   
272    32     
-176   -160   
-80    288    
160    416    
-224   192    
160    -48    
-64    -96    
-272   0      
-48    112    
160    -32    
-96    -80    
-432   -16    
-16    80     
-1456  -288   
-64    -672   
80     -512   
80     -112   
-448   416    
480    -128   
-448   -336   
16     -464   
256    48     
144    112    
-16    -448   
-496   -1120  
240    -112   
48     -64    
-80    -208   
-320   -80    
-64    -32    
48     384    
0      576    
80     -320   
224    -368   
-96    912    
-304   -624   
112    -240   
672    672    
-192   48     
-208   -240   
-80    304    
240    -432   
-32    -64    
-144   192    
-320   176    
496    -64    
864    1520   
128    -32    
-2144  -304   
1264   -592   
1440   -432   
-1296  -48    
304    -288   
-144   -752   
-144   -384   
464    16     
-272   -16    
-80    -48    
48     -112   
-16    -128   
-144   48     
0      -16    
80     96     
32     528    
-64    128    
-32    80     
-112   0      
-576   240    
2496   -256   
-1536  -368   
-656   -192   
800    -32    
-608   -240   
320    -48    
96     256    
-80    48     
272    144    
176    64     
16     32     
-240   -144   
-240   64     
656    96     
-192   16     
-384   16     
320    -96    
112    176    
-256   64     
400    624    
-384   64     
-336   -128   
240    352    
64     480    
-192   0      
-64    16     
-192   -208   
-176   -96    
400    32     
112    224    
-112   480    
352    144    
-128   224    
-208   48     
-160   -96    
208    256    
176    -304   
-336   -256   
208    128    
192    96     
32     48     
-160   80     
-240   -80    
480    816    
976    -96    
-928   80     
48     160    
320    2288   
160    3648   
480    -240   
-1216  48     
224    -560   
1056   96     
-112   -112   
-608   224    
336    112    
-16    208    
-144   -32    
-32    128    
-320   48     
256    16     
96     64     
-112   32     
-32    208    
288    80     
0      48     
-208   -384   
-896   144    
960    -208   
-496   368    
720    -128   
240    176    
-576   0      
-336   400    
1232   272    
-944   -48    
16     240    
144    -832   
-208   224    
112    -896   
-16    128    
-144   -32    
-80    160    
304    32     
-16    16     
-32    64     
-208   16     
80     0      
128    112    
-32    48     
112    336    
-208   288    
-352   -80    
192    224    
336    -384   
-272   208    
-64    16     
80     80     
48     -16    
304    464    
896    32     
-832   0      
480    -288   
112    96     
-272   608    
-192   656    
384    544    
-160   16     
-112   224    
176    -128   
-416   176    
-16    -784   
384    64     
128    -448   
-816   512    
288    -464   
416    -640   
-320   16     
32     160    
-272   0      
144    -64    
256    240    
112    -160   
-288   272    
80     -544   
160    16     
144    -544   
-16    112    
-1184  64     
1792   -1040  
-400   -304   
-656   -448   
816    208    
0      112    
-144   272    
-736   768    
544    -144   
32     -224   
-16    80     
-96    -304   
-80    240    
64     -912   
352    -256   
-112   -1312  
-144   160    
96     -448   
-16    -224   
48     208    
-16    -1040  
-544   672    
976    48     
-544   208    
16     0      
176    64     
-128   -416   
-208   -112   
384    -720   
288    272    
-48    -64    
-352   336    
128    144    
96     0      
-80    192    
48     48     
-144   -144   
-96    -48    
352    16     
-64    -128   
80     144    
-64    -208   
80     128    
256    -96    
-160   224    
-176   16     
352    128    
96     32     
-208   -192   
1376   1408   
-1104  384    
-512   -112   
1184   -80    
-576   192    
-432   32     
1056   240    
-96    0      
-336   448    
-16    -48    
240    112    
176    -304   
272    160    
-336   64     
-208   -1264  
480    208    
-464   128    
-256   -1072  
208    272    
400    -2560  
-160   -192   
416    -64    
-2016  688    
1504   1136   
0      672    
-1088  -336   
704    512    
-832   -64    
-64    16     
80     -464   
-256   -32    
32     0      
-240   -64    
0      -112   
416    -752   
128    -192   
-528   -512   
208    -320   
-256   80     
128    -176   
272    -1072  
208    192    
-176   -176   
272    -608   
-96    480    
176    -80    
-1056  -1584  
64     80     
720    336    
-624   -96    
224    -80    
288    -384   
-64    192    
96     -1552  
544    -256   
96     -288   
-528   384    
256    -592   
16     -96    
576    -64    
304    -96    
-112   -144   
-112   80     
-64    208    
368    -320   
272    -432   
-192   -640   
-272   -80    
992    -944   
-208   16     
-848   -1248  
1808   -1664  
976    752    
-944   1344   
-592   688    
816    1040   
480    592    
-96    -416   
-480   -704   
-80    -256   
400    -608   
256    -464   
16     -16    
-144   -112   
-96    16     
576    -1536  
-48    416    
-192   -128   
256    320    
16     128    
-144   -160   
-160   -16    
288    -112   
16     0      
-384   -64    
-1040  -784   
160    -736   
16     864    
64     704    
96     -720   
224    -80    
-112   288    
-208   -64    
240    0      
-32    672    
-128   336    
32     -224   
112    64     
144    1184   
144    16     
-32    -464   
-512   48     
256    96     
336    -368   
208    416    
-192   -416   
-272   -112   
320    -400   
256    112    
-336   272    
-240   -64    
-304   -112   
1328   -560   
-240   544    
-176   1216   
-48    480    
336    304    
-48    1008   
-336   -624   
336    -208   
176    -352   
-112   48     
48     32     
16     96     
32     32     
144    256    
-48    -304   
160    -752   
0      304    
96     864    
-352   -32    
-80    80     
240    16     
32     112    
144    208    
-48    -496   
-112   -368   
544    -912   
416    128    
-208   -384   
-704   -32    
560    -64    
528    816    
-208   416    
-672   720    
256    -160   
-144   -976   
304    -784   
336    416    
48     608    
-816   -288   
-848   -48    
64     -144   
-304   224    
-48    176    
-992   144    
-336   240    
160    0      
144    64     
-240   -48    
-384   16     
80     -448   
-448   928    
-256   -592   
560    -1136  
-208   -544   
-176   576    
-128   544    
-128   -288   
-128   -112   
-64    128    
-32    0      
-368   96     
-192   208    
-352   -160   
352    0      
128    -240   
32     -32    
-208   48     
48     -240   
-240   -272   
-32    -96    
192    -48    
-336   32     
432    16     
-768   96     
256    128    
-112   48     
-48    -240   
688    320    
288    240    
-2624  -560   
1024   704    
432    -128   
-880   208    
464    -368   
-144   16     
0      -64    
224    0      
80     -144   
32     176    
-512   0      
144    -16    
64     48     
-64    -48    
-384   176    
80     -128   
224    128    
-192   -144   
-176   112    
-48    160    
48     464    
1840   -224   
-1328  320    
608    32     
-192   80     
64     32     
64     -48    
-384   -32    
176    -160   
16     224    
-32    16     
160    144    
-272   -128   
224    336    
-608   -32    
-48    -64    
352    48     
-656   208    
-64    256    
-128   16     
304    416    
-192   -192   
-656   352    
32     32     
-16    -144   
-304   -224   
224    -96    
64     80     
-480   144    
-352   -64    
496    128    
224    -208   
-464   0      
32     -16    
256    144    
-240   688    
288    64     
-208   -224   
-1024  -224   
192    -80    
0      -480   
16     -48    
-288   240    
-448   32     
608    368    
816    -16    
-672   -64    
-192   176    
-688   -656   
160    2880   
1136   -304   
-1504  -1376  
496    -48    
752    -176   
-464   -80    
-416   160    
144    384    
-48    80     
-64    336    
-256   -176   
144    240    
544    -80    
-48    96     
96     16     
-176   144    
224    16     
288    -16    
176    -144   
-1456  -144   
1088   0      
-272   -48    
64     -16    
400    16     
-288   80     
-576   272    
816    176    
-240   208    
432    32     
-528   160    
416    112    
-176   96     
64     -128   
64     0      
0      -112   
160    96     
-96    224    
80     224    
-144   112    
64     224    
80     -80    
-32    -16    
-16    -80    
112    96     
16     32     
48     128    
160    64     
-176   -240   
-64    -16    
0      -16    
64     48     
0      -720   
-464   -32    
112    -64    
544    -336   
368    48     
-128   400    
-352   544    
176    176    
112    -112   
-208   160    
-80    80     
-96    -96    
288    96     
-128   -16    
-48    80     
160    -16    
-128   128    
80     -176   
0      64     
-48    320    
0      304    
-128   112    
144    48     
176    224    
-96    240    
96     -224   
-240   -208   
96     240    
112    96     
-224   -2512  
-1248  1264   
1424   224    
-304   912    
544    48     
-624   -160   
160    512    
-368   1104   
464    528    
-96    -80    
-352   -256   
-96    160    
176    112    
112    240    
-576   384    
304    -320   
0      32     
32     -144   
144    0      
-32    288    
-400   -832   
528    -768   
-608   160    
944    -352   
-464   64     
-192   -176   
32     416    
-32    -16    
272    -272   
16     128    
-288   80     
-384   304    
736    -64    
-240   0      
-144   208    
-64    -48    
208    -80    
272    48     
-336   448    
-192   400    
208    224    
128    208    
-272   -32    
-32    16     
80     176    
96     -1520  
176    144    
-160   160    
-16    0      
320    368    
-1248  -16    
1216   704    
-272   352    
-560   16     
1952   208    
-768   128    
-384   -32    
80     528    
176    -144   
32     272    
-288   -224   
336    112    
64     256    
-160   608    
480    96     
-96    64     
-112   -128   
368    -336   
64     -80    
-16    -48    
-336   -688   
1456   1232   
-736   -160   
-736   368    
1648   736    
-592   -560   
-752   -1040  
16     -1840  
704    -960   
-816   -480   
-96    -128   
320    -320   
64     96     
-48    -480   
-80    -432   
256    -96    
-176   -304   
592    -880   
0      -816   
-352   -608   
272    -672   
-48    144    
16     -576   
32     -608   
368    -1264  
-944   -848   
288    -400   
624    896    
-128   -48    
96     -32    
96     -160   
-336   -112   
80     -384   
-704   -464   
640    -704   
528    160    
-304   128    
400    -512   
-464   -800   
-144   -1776  
128    0      
-464   -48    
160    -208   
352    192    
16     -304   
-448   -544   
96     -320   
-144   272    
-208   -416   
256    128    
-336   -2256  
-1584  -128   
304    -368   
144    288    
464    -64    
-32    304    
-432   704    
192    -1200  
432    704    
-144   560    
-144   528    
-336   -1248  
224    576    
272    -160   
-368   144    
16     -240   
-304   -208   
-192   -736   
384    96     
-16    352    
-80    432    
192    112    
-288   -32    
-112   464    
336    400    
64     400    
-688   128    
688    608    
176    -304   
96     -144   
-160   80     
-208   208    
304    240    
240    64     
-528   -416   
128    112    
448    976    
-128   -928   
96     1424   
-48    1680   
64     304    
128    -368   
-32    -400   
176    416    
-128   192    
288    -256   
304    608    
-272   1488   
-384   -352   
480    -176   
288    -848   
-144   -240   
-1072  -752   
320    -896   
752    -1344  
-608   16     
-208   -1152  
-144   -224   
384    240    
64     -736   
-64    -1280  
-144   -208   
48     272    
192    -336   
-64    -96    
-32    96     
256    752    
256    896    
-224   320    
0      -592   
96     -464   
-144   304    
288    32     
-144   240    
16     64     
272    128    
-288   -912   
368    -544   
320    208    
-112   64     
-768   -1840  
464    -112   
160    -48    
-32    -752   
16     912    
160    256    
-592   96     
-80    -96    
128    -496   
48     -656   
-128   -176   
80     -1904  
-16    224    
112    176    
48     208    
128    16     
16     208    
32     -128   
-48    -32    
-128   80     
384    800    
-656   -400   
64     -368   
656    48     
-608   -432   
144    -528   
240    -96    
160    -896   
-288   -240   
208    112    
-16    -112   
-192   128    
224    -144   
-160   224    
48     -112   
192    0      
-16    256    
-64    -96    
-560   64     
224    -16    
-176   -32    
176    128    
272    48     
-160   -448   
448    0      
-384   144    
192    -16    
64     48     
272    144    
704    672    
-656   16     
-736   448    
1280   -96    
-144   128    
-672   -608   
-256   64     
576    -832   
-160   208    
-208   -608   
464    272    
-320   -48    
128    144    
-16    -272   
-80    96     
112    -112   
-192   -32    
288    96     
352    -64    
-336   112    
32     -192   
624    1120   
-1248  -832   
-352   352    
576    -32    
-480   128    
-224   112    
576    48     
-48    256    
-544   144    
288    -112   
256    16     
0      80     
-48    -64    
-64    80     
48     -208   
-64    64     
48     176    
-144   -320   
160    -400   
48     224    
-176   -160   
416    16     
-144   -48    
-288   -160   
656    -304   
-16    -480   
208    -416   
656    16     
-512   -96    
32     80     
512    112    
-560   -304   
16     -112   
-144   -112   
-448   -144   
352    80     
304    -208   
80     416    
-608   64     
-80    144    
320    48     
-240   272    
-128   48     
0      80     
-288   -224   
64     -144   
-160   -64    
352    32     
352    928    
-1968  -352   
-176   1136   
960    -512   
-1488  -224   
976    144    
80     -176   
-368   256    
112    -48    
-192   48     
-64    128    
-64    -32    
-32    -192   
48     -32    
-128   16     
-240   80     
336    80     
-352   96     
-208   -64    
736    944    
-832   576    
224    656    
272    0      
-480   -272   
-656   48     
-176   0      
-96    -16    
208    -64    
64     -256   
-192   112    
0      -32    
-48    192    
64     -80    
-128   0      
-48    -64    
64     -80    
-144   80     
80     224    
32     368    
-512   -256   
128    240    
0      -64    
-208   32     
112    -160   
80     112    
0      32     
-48    48     
80     96     
-48    240    
304    624    
-304   352    
-64    272    
160    560    
864    -208   
-1152  -48    
416    64     
208    -160   
-96    -384   
-640   -416   
160    48     
-96    160    
352    160    
96     96     
-272   0      
48     192    
144    80     
-32    -96    
-144   -336   
-112   112    
-160   -400   
-112   -32    
-336   -368   
-80    -144   
32     -160   
-16    -176   
112    288    
-144   576    
288    -112   
-208   -304   
48     -208   
48     32     
944    1728   
-1760  1760   
976    -256   
-144   320    
16     160    
-672   496    
352    -272   
400    256    
-304   1184   
-112   112    
-16    -128   
0      -80    
144    96     
-48    224    
-272   352    
160    48     
0      -80    
-176   48     
16     240    
144    176    
240    608    
-1088  384    
480    -304   
96     464    
-224   -560   
16     16     
-128   400    
-48    -224   
144    320    
-48    -160   
-240   -112   
-352   272    
240    320    
-240   -208   
-192   48     
-64    -48    
368    368    
-32    656    
32     -400   
96     -80    
-144   336    
-208   80     
144    16     
320    176    
-224   272    
-224   176    
-64    0      
432    48     
496    368    
-720   944    
-1504  944    
3136   -720   
-304   -160   
-1696  -240   
1424   -496   
160    -240   
-400   256    
-96    512    
48     -16    
64     144    
64     176    
32     48     
-80    288    
128    224    
96     -272   
-48    96     
96     288    
-144   112    
112    -128   
0      48     
496    1472   
-752   -768   
-1360  416    
1744   992    
176    -80    
-560   -608   
64     64     
608    2016   
-320   2848   
528    1008   
-160   -784   
-448   -224   
384    480    
208    -16    
-288   -320   
-80    128    
144    160    
256    16     
320    112    
-272   -368   
48     -224   
0      -128   
-144   256    
144    -96    
384    -720   
-912   320    
704    1824   
688    720    
-560   880    
272    208    
-272   -208   
704    736    
-464   -32    
-672   96     
208    -576   
-400   368    
1008   1392   
-1104  1040   
48     208    
464    -48    
-48    304    
-480   32     
-464   -496   
240    -160   
-176   -128   
16     -624   
320    32     
32     80     
-80    320    
-16    208    
-960   -192   
-864   -448   
288    -112   
-16    96     
96     -2800  
-64    160    
-32    1120   
-416   112    
-128   -64    
400    -240   
112    352    
-432   256    
-144   272    
368    -656   
176    80     
-144   448    
-32    80     
64     112    
176    352    
80     -736   
-224   -112   
208    176    
-32    32     
-16    848    
176    960    
192    288    
288    464    
-304   688    
112    512    
96     -736   
160    -992   
-400   -432   
96     64     
384    192    
80     -160   
-96    176    
256    0      
-128   224    
144    16     
144    -48    
144    -384   
208    272    
48     240    
160    496    
224    960    
-16    640    
272    -64    
-80    784    
16     832    
-48    -240   
448    624    
64     -2272  
-784   -896   
-256   -848   
544    -1072  
240    -336   
32     -48    
208    64     
-80    -336   
256    -496   
-96    -192   
-64    224    
0      16     
-224   160    
368    -96    
-64    96     
48     -400   
-208   -208   
176    -368   
48     80     
192    112    
-64    192    
-16    224    
96     96     
-176   0      
528    -816   
-160   144    
-48    448    
320    768    
-240   -144   
640    2576   
752    80     
-992   0      
16     -224   
272    0      
272    608    
-16    96     
-16    288    
240    48     
-176   80     
368    -720   
0      304    
-144   -512   
192    -32    
176    208    
0      -128   
16     112    
192    208    
-288   -384   
336    32     
704    1440   
-1072  -288   
-624   448    
1616   -48    
-880   -192   
-192   -400   
80     416    
384    352    
-336   480    
-32    -240   
176    16     
-80    -160   
-144   48     
240    112    
-144   32     
16     -32    
-48    -1408  
96     -48    
-400   -256   
192    -512   
256    0      
-128   -608   
-160   -48    
64     208    
256    -144   
128    128    
-384   -144   
192    80     
128    0      
896    800    
-688   640    
-1200  464    
1904   -128   
-1344  -384   
-640   32     
976    -128   
-160   -288   
-144   -128   
352    -256   
-80    -48    
-128   192    
16     16     
112    -976   
640    80     
-400   -576   
-16    240    
336    -384   
-192   -32    
32     -32    
-80    -96    
80     -368   
1296   -208   
-1904  -816   
752    128    
1024   -240   
-1472  -32    
672    -192   
64     384    
192    64     
112    -64    
-224   80     
128    80     
112    16     
-288   0      
-16    -160   
-976   0      
48     -448   
304    -208   
-208   128    
-32    -112   
352    -1392  
16     64     
352    -80    
-352   96     
32     -288   
272    -240   
0      0      
-256   -368   
-512   -176   
448    0      
-384   80     
-176   208    
192    128    
-64    -240   
-192   -32    
560    -512   
-224   -288   
912    -960   
-240   96     
80     -160   
96     128    
-144   32     
16     -32    
400    80     
-128   32     
-240   160    
-48    -144   
0      48     
-48    -1216  
2784   1232   
-2720  224    
272    -128   
1696   0      
-928   -32    
-496   128    
400    -256   
96     96     
-304   -656   
-608   144    
672    -144   
-768   -16    
464    -80    
-832   -80    
-512   -208   
256    64     
384    -176   
-80    128    
-32    -320   
272    -416   
112    304    
288    128    
-400   -96    
-592   16     
240    80     
352    48     
-256   192    
192    -112   
-272   224    
400    48     
-64    80     
-96    -240   
80     224    
368    -272   
-384   416    
64     560    
288    80     
-512   208    
288    160    
-432   48     
400    144    
-112   48     
32     -16    
32     -352   
-416   -352   
0      624    
448    656    
160    272    
-192   176    
288    224    
-208   -192   
-48    -928   
-256   -64    
176    560    
-192   608    
288    528    
64     576    
416    192    
-544   240    
-192   -112   
464    48     
-208   -224   
-64    -32    
-480   352    
-832   416    
256    -352   
432    240    
-288   -96    
-208   -272   
208    -208   
288    304    
-224   -112   
-176   -32    
-32    -128   
-496   -224   
32     -640   
-176   -256   
80     -288   
-208   -384   
-96    144    
80     48     
-112   1936   
608    416    
-448   -944   
-480   128    
-960   208    
640    992    
-720   704    
32     128    
176    -64    
64     480    
48     -432   
-96    400    
-208   -64    
224    64     
224    208    
-288   224    
-240   368    
-112   176    
48     256    
-320   16     
96     528    
688    -96    
-752   352    
-96    272    
288    208    
0      -416   
-112   -112   
32     -112   
16     176    
-64    240    
160    -32    
-32    16     
-112   -48    
336    208    
-448   -16    
208    -80    
480    320    
-464   416    
-416   128    
496    -48    
128    -16    
-112   -64    
-176   160    
-304   -16    
352    304    
160    80     
-256   -80    
64     0      
112    0      
1904   1056   
-1664  1584   
-1120  32     
560    240    
16     64     
-384   272    
80     -368   
528    608    
-144   224    
64     -288   
64     -304   
64     -48    
-32    272    
-64    -128   
64     272    
-96    -416   
-144   192    
-208   480    
384    1056   
-528   -1248  
208    336    
-416   256    
2448   -16    
-1600  96     
336    -896   
-160   -480   
0      160    
176    2160   
960    656    
-352   -576   
-368   -896   
704    -880   
-240   -784   
-160   -544   
-96    96     
464    192    
-288   240    
-16    752    
544    336    
32     288    
-112   256    
32     160    
192    -48    
0      528    
0      784    
-432   1264   
112    416    
-368   -928   
512    -1360  
-464   -720   
-16    160    
400    96     
-224   32     
-16    960    
208    160    
-624   -272   
208    96     
592    1840   
704    496    
-480   -272   
112    160    
176    0      
80     512    
-96    -192   
-480   32     
304    -608   
-144   160    
-64    -240   
-128   -448   
-64    192    
192    -2800  
-1408  -912   
48     -32    
528    16     
816    -592   
-1296  -80    
48     -320   
272    656    
400    544    
0      -32    
-480   208    
-112   0      
592    368    
208    -64    
-592   -32    
-160   240    
416    144    
320    -160   
96     -1152  
-752   -928   
112    160    
208    352    
64     288    
448    -16    
-768   48     
496    288    
-112   112    
0      208    
256    144    
-288   656    
288    640    
-176   400    
64     -304   
320    144    
32     96     
-272   128    
288    -32    
-112   192    
-176   112    
192    192    
0      48     
-128   64     
32     208    
48     160    
-80    32     
16     -80    
-544   -544   
-16    -272   
320    64     
64     224    
-432   -32    
608    48     
640    192    
-592   208    
192    320    
-144   -64    
208    -16    
320    -16    
-320   144    
-64    64     
112    112    
16     -224   
-304   -64    
0      -32    
240    80     
16     -80    
-64    48     
48     224    
-32    336    
464    -128   
-368   304    
80     64     
-64    48     
160    96     
160    736    
-400   -96    
-112   -80    
384    272    
-16    -352   
-272   -16    
-656   -1328  
928    -192   
640    0      
-1120  -64    
592    304    
512    288    
-720   480    
-176   -208   
112    208    
336    0      
-80    80     
-48    -320   
0      288    
224    256    
-16    224    
-112   -16    
288    -272   
-256   208    
112    -656   
112    80     
672    848    
-1616  288    
80     -96    
1104   160    
32     -288   
-400   64     
-208   80     
496    -32    
112    224    
192    -96    
-336   96     
48     -256   
192    64     
-256   -992   
192    80     
16     32     
176    160    
48     96     
80     48     
112    48     
-192   80     
-64    48     
16     128    
400    176    
-448   -80    
-64    304    
368    -304   
-336   176    
320    -240   
544    640    
-432   -832   
224    320    
448    -48    
-352   -128   
272    144    
-448   -192   
-32    320    
448    -64    
-192   48     
96     -144   
-80    176    
160    -112   
144    224    
32     -80    
-448   128    
656    -480   
-64    80     
-416   -624   
352    64     
-128   -32    
352    560    
736    -208   
-2112  336    
1136   48     
496    -208   
-1200  272    
448    -240   
640    48     
-560   -240   
-16    16     
336    -304   
-96    128    
-256   -224   
512    80     
-256   32     
64     128    
-128   -144   
192    32     
-32    -128   
-80    -16    
128    176    
-448   -288   
832    -80    
384    32     
-560   96     
0      -112   
352    -176   
704    608    
0      48     
-288   -80    
64     144    
-128   288    
304    32     
0      32     
96     -704   
-192   304    
352    64     
-400   464    
0      -128   
-176   160    
352    -48    
-112   48     
-192   -208   
208    112    
-80    -240   
-144   0      
64     128    
-256   -784   
384    -2880  
-768   -2720  
-1552  -464   
720    -16    
816    368    
704    -128   
-960   112    
-336   -80    
1040   176    
-512   -256   
336    -1344  
-16    16     
-48    -192   
64     32     
-320   -144   
-32    -528   
400    208    
48     -384   
-16    32     
80     -80    
-352   -144   
400    368    
96     48     
160    -592   
-176   -160   
48     0      
272    -144   
-608   16     
256    -224   
16     432    
480    -368   
-576   -320   
32     -784   
560    -304   
208    -800   
-720   -240   
192    480    
608    928    
-480   736    
112    288    
320    304    
-224   224    
128    288    
256    80     
-208   -32    
-16    384    
256    560    
48     -208   
160    240    
-16    480    
144    -400   
-16    -1632  
-192   16     
816    -416   
-368   224    
368    320    
-208   192    
-272   -1040  
208    656    
176    1488   
-112   224    
-128   -208   
-80    -128   
48     128    
-32    -208   
208    352    
80     272    
240    -192   
-400   -160   
144    208    
272    -208   
48     96     
16     -16    
-32    -176   
144    288    
-16    240    
-400   80     
96     -112   
384    -240   
-336   -160   
-96    128    
272    -112   
-528   80     
544    -512   
-528   160    
304    -192   
320    64     
-128   -224   
-16    -320   
-400   64     
32     48     
304    -64    
64     -64    
-480   64     
-80    -352   
16     -112   
160    -208   
-16    -48    
-64    -272   
16     240    
96     -176   
-64    64     
352    -192   
-144   48     
624    -32    
-432   144    
-352   48     
272    176    
-64    400    
112    -272   
80     -192   
80     -32    
240    368    
-80    -512   
-32    -48    
144    -640   
176    -160   
-480   272    
272    464    
-144   912    
-144   96     
-112   -48    
160    -144   
-160   80     
112    16     
112    0      
80     -32    
-16    128    
320    -256   
256    -272   
-528   -112   
704    -496   
-3072  -576   
864    144    
672    -560   
-288   -368   
-96    -368   
480    -272   
48     1872   
-432   -576   
192    -96    
-80    -208   
-112   64     
320    -432   
-224   -224   
-224   -16    
-208   272    
-48    -224   
-16    -416   
-512   496    
304    992    
112    880    
784    -720   
-2528  -400   
592    -1024  
96     -640   
-1120  -288   
96     -672   
704    -1296  
-784   -1328  
-304   -800   
-368   -480   
-240   256    
-48    256    
208    64     
64     -272   
-256   320    
16     -640   
528    -656   
-432   -16    
-176   -352   
-304   -144   
144    208    
-128   -224   
-480   320    
320    -240   
-48    1008   
-672   528    
-160   352    
-112   176    
-800   -144   
-32    -32    
-336   -240   
32     48     
128    208    
-208   528    
416    -416   
0      -48    
160    64     
448    -64    
-640   304    
-64    96     
-32    48     
192    528    
-176   -128   
-560   176    
304    32     
-656   96     
240    48     
-256   -800   
-560   352    
560    2192   
784    64     
-1520  -288   
-1072  -272   
1120   -16    
640    48     
-1296  -96    
-80    176    
-128   96     
560    240    
-192   -32    
-576   64     
336    256    
-400   -176   
464    160    
-32    0      
-128   -16    
272    112    
-224   1328   
560    1376   
-320   192    
-192   -400   
496    -112   
-144   -16    
-144   128    
208    0      
-144   16     
160    -112   
-160   64     
64     192    
256    80     
-32    -80    
-496   -416   
144    -160   
-368   -32    
176    -224   
-192   48     
-80    -32    
-208   128    
160    112    
160    -16    
-272   -128   
96     304    
-752   32     
208    512    
384    144    
-528   320    
48     80     
208    -176   
64     -160   
-176   0      
112    912    
832    192    
-304   304    
-272   208    
160    432    
-176   112    
-112   128    
-432   -96    
-48    0      
80     48     
80     32     
-64    144    
64     128    
48     128    
0      -272   
-80    -368   
48     -224   
-256   160    
208    -192   
-176   112    
-272   -48    
240    80     
-496   -112   
48     208    
-80    240    
224    -400   
-16    32     
0      432    
-64    -80    
-640   -2032  
-160   528    
1248   -32    
-864   96     
368    592    
784    288    
-1152  320    
-272   -32    
800    32     
32     176    
-176   128    
-256   -128   
176    160    
352    -192   
-528   352    
144    208    
144    -176   
-32    256    
176    96     
-160   -256   
672    1040   
-1728  0      
96     48     
1344   192    
-864   -240   
-464   432    
624    -144   
-64    -192   
-144   128    
240    -48    
-288   128    
-96    -48    
-48    -96    
128    160    
-320   -96    
480    512    
-448   80     
240    272    
-224   32     
-48    80     
64     80     
112    48     
-288   80     
128    -48    
-288   32     
288    -16    
48     96     
-32    -32    
-144   128    
368    720    
304    64     
-560   800    
816    -16    
-240   -160   
416    96     
-480   128    
-64    -560   
32     -208   
272    -16    
48     128    
-176   144    
112    64     
96     128    
-288   160    
784    240    
-400   80     
80     208    
160    -80    
-368   -32    
96     -16    
-192   -464   
1152   800    
-32    192    
-768   48     
1040   96     
-448   -16    
-176   96     
384    0      
688    160    
-560   -32    
-176   112    
304    112    
48     112    
64     16     
304    176    
-192   96     
96     144    
192    240    
-144   176    
-48    -16    
32     160    
336    672    
-1104  -368   
304    336    
704    -48    
-704   -208   
416    32     
64     -768   
-352   320    
656    0      
-64    160    
-416   192    
-80    80     
416    32     
288    288    
-144   -112   
-32    400    
176    -384   
32     0      
64     -144   
-320   -64    
-272   48     
640    -1552  
112    144    
-256   256    
-208   688    
448    -16    
272    128    
-16    -176   
-1456  -128   
1424   -752   
1056   -112   
-1184  -160   
-640   352    
624    160    
128    48     
320    912    
128    -272   
-416   128    
-256   -1616  
368    64     
0      16     
176    304    
-240   64     
48     240    
-32    112    
320    464    
-96    -32    
-208   96     
144    592    
240    480    
208    416    
-624   -192   
112    64     
144    -48    
176    0      
224    32     
-144   1072   
16     208    
192    -48    
240    64     
-192   432    
-64    0      
16     -496   
48     -112   
176    0      
-432   -320   
-128   176    
304    448    
-272   -1024  
288    32     
112    -768   
-128   -368   
240    1120   
0      752    
288    80     
48     128    
-336   -672   
208    0      
64     16     
192    -80    
288    -416   
-1040  -1040  
848    -496   
-432   -528   
-16    32     
80     -1008  
288    704    
128    64     
-288   0      
-32    -48    
192    96     
-64    336    
336    320    
384    -16    
-128   -368   
112    -48    
-224   -336   
-112   112    
112    -224   
-144   128    
-16    16     
-16    128    
32     80     
-80    64     
16     -32    
480    32     
-48    176    
-176   -32    
144    16     
448    -896   
-1152  320    
272    -80    
96     176    
384    -288   
-64    -16    
112    -192   
128    672    
-112   48     
-48    -736   
96     32     
-480   144    
-64    -144   
-16    48     
64     -800   
48     -192   
-32    160    
192    288    
144    160    
48     -208   
-384   -2512  
224    48     
-288   -144   
176    0      
208    -384   
32     128    
-864   384    
304    -32    
112    -144   
-96    -320   
112    64     
-16    -192   
16     240    
-64    112    
96     -128   
-48    736    
-48    304    
-256   704    
480    304    
-192   -320   
-160   -464   
-16    176    
320    -64    
-320   144    
-240   -288   
80     -32    
240    -624   
-336   -288   
512    -1872  
-128   -688   
1600   -832   
-1552  544    
512    368    
704    768    
-848   400    
432    400    
256    592    
-448   -512   
-464   -832   
288    -992   
112    -416   
128    -272   
-192   128    
240    -32    
96     96     
-80    -96    
-16    0      
416    32     
-176   -80    
96     128    
-240   -864   
-432   288    
1568   -288   
-1824  1136   
2688   544    
-864   784    
592    256    
192    -480   
-416   -672   
336    0      
128    -2160  
-192   -32    
-32    -432   
-288   -16    
288    64     
32     -160   
-480   -272   
64     -64    
-48    -368   
272    -400   
-784   80     
-384   -544   
864    -240   
-448   -384   
-112   -240   
640    -48    
-720   368    
-912   64     
224    -16    
560    352    
-576   176    
-240   -112   
-96    -144   
224    -144   
480    256    
-736   -432   
272    816    
-304   480    
-512   -304   
176    96     
80     -256   
144    32     
272    16     
-112   -304   
112    -32    
480    16     
-112   176    
-272   -16    
-432   -624   
-400   -2800  
-688   -272   
-64    -96    
-384   96     
880    256    
0      80     
-448   -112   
-160   -144   
384    512    
-448   -240   
-128   288    
416    -208   
-496   160    
320    -352   
-288   -16    
160    -256   
128    224    
-32    -144   
192    -304   
-1024  -480   
912    -336   
-240   -272   
-224   -96    
432    256    
144    32     
-800   -96    
1024   -176   
-288   128    
-208   -144   
-160   -32    
144    48     
320    176    
-496   -32    
368    320    
32     -368   
-160   320    
-336   16     
-608   272    
912    64     
-784   48     
-192   16     
-1392  -64    
-160   64     
480    64     
-240   192    
320    16     
-240   0      
112    -96    
336    416    
-352   -64    
0      192    
-176   -832   
-288   208    
208    -256   
-864   -240   
640    -48    
80     -256   
-352   96     
32     272    
-80    0      
128    -48    
-80    64     
-352   -64    
176    -48    
-144   -336   
-64    256    
-48    -32    
-64    -304   
352    -608   
-416   288    
160    -32    
16     176    
-288   80     
48     -32    
112    48     
-576   -384   
-288   112    
320    640    
256    480    
-288   -448   
208    -2144  
-2192  1648   
1440   288    
80     224    
-256   48     
464    384    
-704   48     
-160   -416   
352    -416   
-224   512    
-528   -176   
-64    160    
176    208    
160    -528   
-272   -112   
0      64     
-320   240    
320    -144   
224    96     
-224   -48    
384    1632   
-1168  32     
16     -48    
912    0      
-336   96     
-304   -192   
176    272    
-400   128    
176    -144   
-16    -224   
-112   96     
-128   144    
160    -112   
-160   48     
160    0      
-128   144    
112    192    
320    160    
-704   208    
192    128    
-208   176    
32     16     
-48    16     
-96    -64    
272    176    
-112   16     
-48    160    
0      96     
-48    64     
-1008  -1728  
2064   368    
2912   256    
-2192  -160   
-32    -240   
1088   -176   
-544   320    
-16    432    
224    192    
-112   112    
-144   80     
96     96     
0      64     
16     64     
-288   112    
624    208    
-96    48     
-304   -32    
0      96     
80     80     
368    384    
-384   -624   
1104   736    
-1392  -224   
448    -128   
1216   576    
-304   960    
-224   -176   
368    208    
288    -32    
-192   64     
-592   80     
-192   -64    
784    -80    
-80    -32    
288    32     
-496   144    
320    240    
128    -336   
-272   224    
176    176    
-48    256    
96     352    
-528   256    
-160   -352   
-208   544    
480    -576   
800    -144   
-624   256    
416    288    
-464   240    
-320   -96    
64     128    
144    272    
128    656    
-352   496    
-832   192    
240    -144   
784    -416   
-384   96     
-288   848    
768    0      
-304   128    
-128   176    
32     -208   
144    384    
-48    -192   
-112   -96    
16     -96    
80     128    
-80    272    
-560   1856   
1168   -64    
-384   -400   
-592   528    
1040   96     
32     112    
-624   1968   
368    896    
-528   -560   
240    144    
128    -112   
-336   288    
48     -16    
-96    -112   
400    256    
-224   208    
-176   112    
272    -208   
-128   32     
-32    288    
80     192    
48     -16    
-976   32     
800    -656   
-208   -208   
336    -448   
-240   -160   
240    208    
-160   -96    
208    208    
160    0      
192    -128   
-288   -880   
224    -656   
-80    144    
112    560    
192    496    
-464   -32    
352    -736   
336    288    
208    32     
-112   112    
32     -400   
-48    512    
240    144    
-208   -32    
32     -528   
256    -336   
-192   336    
64     112    
-160   -960   
-416   272    
896    464    
32     -16    
-32    -784   
16     -1024  
336    544    
-160   1632   
128    656    
-96    -400   
192    336    
-128   -336   
-128   -208   
64     272    
160    176    
144    352    
16     128    
144    144    
-16    64     
-48    -128   
16     16     
192    -608   
64     80     
-208   0      
176    -48    
-144   -128   
-112   -224   
304    -128   
80     272    
-128   -80    
304    -160   
-672   288    
320    208    
32     240    
176    272    
80     224    
0      -336   
-96    848    
192    96     
-32    176    
-128   336    
80     208    
240    224    
-144   256    
-128   224    
96     256    
-96    240    
-144   176    
-48    0      
-80    0      
128    640    
992    -192   
-1136  640    
512    -1200  
-176   -528   
192    176    
192    496    
32     -528   
-304   -160   
-80    624    
352    272    
240    -608   
-352   -256   
-80    -16    
400    -320   
16     560    
-80    -320   
-352   352    
160    -736   
208    384    
192    -496   
-240   16     
-80    64     
208    176    
-64    -64    
0      160    
-112   -96    
48     0      
64     416    
1408   1008   
-2048  592    
-272   192    
1072   -208   
-832   -304   
688    -224   
-704   -240   
224    -320   
-32    -288   
16     -160   
-432   0      
304    32     
144    176    
-48    -208   
-304   64     
224    -112   
240    -80    
80     -192   
96     0      
-128   -80    
144    80     
496    752    
-1648  -64    
112    96     
-32    384    
112    -800   
-320   208    
272    624    
-640   -224   
208    32     
288    -320   
-496   96     
224    -288   
112    128    
-176   16     
496    48     
-336   -112   
16     32     
-160   -16    
16     -624   
0      -16    
208    288    
-80    -912   
-208   160    
-208   -1088  
208    -592   
448    80     
400    -480   
160    -176   
-400   544    
32     16     
-192   96     
512    -1344  
112    -48    
-496   -1408  
368    -560   
672    -96    
288    -512   
320    272    
368    -352   
-448   16     
400    -1040  
688    304    
-592   288    
-144   -224   
688    256    
528    -240   
-688   32     
240    192    
-160   -1392  
-1824  -2720  
-272   144    
80     816    
-320   -240   
160    48     
32     -96    
-448   -464   
80     -96    
512    -864   
-816   -368   
48     -80    
496    64     
-144   -64    
-112   -48    
224    -16    
32     -176   
-224   -32    
224    -32    
240    -144   
-1104  -144   
1072   -368   
-272   112    
-96    -160   
48     -384   
384    176    
112    -144   
-80    -48    
208    -144   
-48    64     
0      112    
-560   -144   
496    32     
-464   -144   
-448   -112   
352    48     
208    -256   
-752   -288   
592    208    
-672   96     
160    208    
128    -1712  
-400   96     
96     -224   
-48    32     
208    -48    
48     32     
176    -16    
-112   -352   
-464   32     
176    16     
-1088  64     
-192   176    
464    -96    
-128   -288   
256    192    
528    -1776  
-112   -288   
-288   304    
160    368    
272    32     
-144   0      
-144   96     
336    -64    
-128   -16    
-32    64     
-272   -48    
336    -80    
304    0      
-336   0      
336    288    
-176   -432   
-64    80     
352    32     
80     304    
-112   272    
-336   32     
448    -272   
80     -176   
-64    208    
-64    64     
960    2272   
-2432  -512   
128    112    
1504   -528   
-912   288    
32     -240   
256    112    
224    112    
-560   -720   
-240   16     
224    416    
-336   16     
208    -16    
-320   -16    
48     -880   
128    480    
-64    -112   
-192   112    
352    -32    
-112   272    
-304   -768   
256    -704   
-496   464    
752    320    
-64    192    
-400   -112   
48     -304   
304    240    
-32    160    
-256   -48    
-32    208    
144    -240   
112    -64    
-176   16     
96     240    
-1392  -272   
-448   -32    
-240   224    
-256   192    
-144   96     
144    176    
-112   112    
-16    32     
-16    64     
112    240    
240    112    
-544   128    
16     -48    
-16    -192   
-16    -176   
-1696  -464   
1744   112    
752    -576   
-1936  -112   
864    320    
-272   384    
-544   112    
-96    -16    
-128   -48    
432    64     
-256   -64    
-304   -208   
16     80     
-64    -80    
-368   -80    
368    32     
-16    128    
-80    64     
-96    64     
96     -64    
-224   160    
400    -864   
-1184  432    
672    -144   
-656   512    
-288   432    
-128   96     
352    -128   
336    -304   
-80    624    
-720   448    
112    -144   
400    48     
-320   -208   
-464   -96    
176    208    
224    -336   
240    -384   
-176   176    
-416   32     
-16    48     
96     -48    
288    32     
64     -112   
-192   -176   
144    -496   
-192   -16    
-1040  1328   
96     848    
-272   528    
-272   -112   
-176   -512   
-16    -608   
32     752    
144    208    
-464   -704   
-32    -576   
-128   -256   
-32    -336   
176    240    
0      16     
-48    -208   
-144   -144   
80     0      
-64    -432   
704    -960   
192    0      
-144   -368   
-80    -336   
-128   32     
1152   816    
-2384  80     
-528   1200   
1600   -816   
-720   -608   
-416   -16    
-64    -96    
608    -448   
0      480    
-240   -16    
-112   144    
176    -192   
320    80     
-96    176    
-272   -368   
-240   592    
160    16     
-160   -48    
-192   -256   
48     -560   
144    400    
160    416    
-864   -112   
-144   -304   
816    -928   
-80    -400   
-224   784    
-272   -1360  
-224   -736   
32     608    
16     -496   
-208   256    
-64    0      
160    352    
-64    -592   
-176   -256   
64     128    
128    432    
144    -32    
64     -128   
-64    384    
-384   80     
80     -784   
208    240    
-480   -304   
-96    -208   
288    1088   
-352   -784   
176    -272   
80     -624   
-288   -256   
368    -400   
-512   -176   
352    -528   
-240   -208   
-640   -192   
-240   -48    
416    -912   
-128   -80    
-352   176    
0      224    
112    16     
240    64     
80     176    
-336   384    
256    -128   
240    -16    
-512   -32    
-80    64     
-32    272    
-64    16     
112    16     
240    64     
-560   576    
48     1056   
-96    656    
48     944    
208    320    
-224   -464   
336    -192   
80     -112   
-1488  1056   
848    -80    
320    192    
400    -608   
64     -560   
-192   176    
96     832    
0      -160   
304    -464   
-112   320    
-176   -304   
-16    208    
288    32     
144    160    
0      160    
48     16     
-96    -272   
192    48     
192    80     
-64    -496   
-368   832    
208    -48    
272    -256   
-16    -96    
-352   688    
-64    -32    
176    32     
16     -496   
64     -624   
-224   80     
-16    48     
384    -464   
-64    144    
-192   -208   
16     -32    
240    288    
0      80     
-128   144    
64     64     
48     80     
-80    -16    
96     208    
-112   304    
240    240    
320    176    
-272   -16    
32     48     
80     160    
-64    1120   
1056   -384   
-1424  672    
992    0      
112    192    
-1088  -96    
416    160    
416    -400   
-368   -32    
112    -48    
112    80     
-16    64     
-112   128    
336    144    
-560   80     
224    176    
64     96     
-160   -160   
0      -48    
240    -544   
-80    128    
-80    -2544  
1120   1232   
752    -160   
-1360  240    
1040   -144   
-432   96     
-112   -16    
320    -240   
-592   224    
384    -96    
-304   -112   
464    80     
-144   16     
384    80     
-304   48     
-272   -304   
256    -64    
368    -320   
272    -144   
208    96     
128    -128   
496    640    
32     -16    
-192   -16    
496    512    
-464   80     
-592   192    
-336   464    
32     -320   
-608   -352   
480    -400   
112    32     
16     -400   
416    480    
-144   752    
-416   384    
-144   480    
256    480    
176    192    
144    48     
272    -112   
224    144    
-160   304    
16     64     
-368   288    
576    -288   
592    -64    
-368   -656   
816    1424   
592    1264   
-2832  336    
1600   -352   
816    272    
-576   -176   
-736   176    
432    176    
576    -16    
-176   16     
-416   -384   
208    144    
48     -160   
32     16     
192    -64    
-32    112    
-96    -2688  
-96    176    
192    -32    
-384   -352   
1104   -672   
-496   -80    
336    208    
-272   -64    
-288   224    
608    0      
-656   -208   
736    -672   
-32    -160   
-288   -144   
64     144    
288    -208   
-32    208    
112    112    
-240   112    
464    48     
-176   -192   
48     80     
528    -272   
-144   64     
144    48     
-32    160    
352    -208   
-32    32     
176    -32    
240    592    
-640   -1552  
432    32     
0      -160   
-320   48     
240    -224   
-272   -160   
80     -800   
-592   160    
480    672    
-128   -160   
-128   160    
192    -112   
-256   0      
144    -352   
32     96     
0      16     
80     -1888  
-144   16     
160    -592   
-32    48     
-176   176    
-288   -656   
96     -16    
64     -496   
-288   16     
176    16     
144    144    
-96    -128   
0      -96    
80     32     
48     -272   
16     -1136  
-144   -288   
224    272    
96     208    
336    2576   
-1904  -1568  
-368   48     
1920   -912   
-1024  720    
-112   -1136  
176    -224   
512    -304   
-320   -432   
-64    -336   
0      160    
208    -208   
320    48     
-112   0      
-128   -448   
-688   64     
48     -80    
64     -240   
-96    -112   
16     32     
-160   -704   
304    -1680  
336    -2560  
-112   496    
336    688    
-224   -160   
-176   -720   
256    -32    
-32    64     
48     96     
-224   -16    
16     -224   
-96    96     
288    -64    
-240   -208   
-160   -288   
432    368    
112    -432   
-112   192    
112    -304   
208    -96    
-80    112    
32     64     
32     -144   
-32    -32    
-64    -48    
16     -16    
-96    160    
-16    -112   
-128   -48    
-624   -1024  
-368   384    
1376   -640   
-1328  160    
-16    400    
416    16     
-688   720    
240    -1520  
-48    -800   
-16    48     
-144   176    
176    32     
-336   0      
-112   288    
-80    160    
-160   96     
-304   -144   
208    -832   
-208   -800   
-160   -528   
416    864    
848    -432   
-2096  144    
528    752    
1072   64     
-1024  -976   
48     -592   
160    -736   
-208   -448   
-352   -128   
288    352    
-528   368    
-64    -576   
16     112    
128    -160   
-304   96     
64     48     
96     144    
-144   208    
80     464    
-336   368    
48     224    
112    -32    
512    1312   
432    688    
-16    -160   
-96    -256   
448    -544   
336    -1472  
-592   -1456  
320    352    
-544   -432   
-112   -624   
496    368    
96     16     
-688   -352   
-16    -1056  
-384   -816   
480    -432   
-560   -208   
416    -704   
272    -112   
0      -80    
-592   384    
80     -240   
-528   -320   
288    -160   
-256   -240   
-176   -592   
48     -16    
736    608    
-2224  -528   
736    160    
1120   144    
-368   -80    
-384   672    
-208   -624   
736    -1568  
176    464    
-288   64     
-832   -576   
-128   -240   
352    -208   
-16    608    
-64    -224   
-32    416    
160    288    
-336   -32    
176    -320   
-80    32     
-384   240    
-16    -64    
272    48     
-384   240    
32     368    
320    320    
-384   496    
96     928    
-192   -192   
-80    -704   
-16    32     
-208   176    
272    288    
208    -256   
-592   128    
432    -64    
336    528    
-640   -416   
160    -496   
288    -480   
-368   -192   
-96    64     
192    64     
-176   192    
-160   -672   
336    -816   
-576   -672   
64     496    
176    576    
-144   -336   
-352   -64    
416    32     
-592   -448   
0      480    
-16    432    
-448   -112   
208    336    
384    1168   
-208   784    
-16    192    
-16    -256   
-160   -384   
-112   -272   
-1296  -432   
112    64     
64     16     
-16    -176   
-384   -176   
0      80     
352    192    
-176   160    
-16    128    
128    128    
-336   208    
352    -240   
-240   -48    
-64    112    
128    144    
-32    288    
-32    64     
-576   -1200  
960    -880   
-576   -432   
48     -16    
736    560    
-544   128    
144    48     
-144   -64    
-96    -240   
-160   -368   
304    -32    
-288   -80    
16     144    
192    320    
256    432    
-480   384    
32     464    
-176   384    
-48    48     
288    -80    
400    48     
-1232  800    
832    -304   
-480   -128   
-32    -272   
0      -224   
-32    -368   
112    272    
-224   -48    
240    -16    
-256   112    
-224   32     
224    192    
112    -16    
-320   80     
320    -32    
-192   160    
240    -32    
-304   432    
448    -64    
-336   144    
-96    -32    
64     64     
112    160    
128    240    
-640   16     
128    304    
400    16     
-480   32     
-80    352    
2672   80     
-1712  384    
-1264  -448   
1200   -224   
-464   64     
-224   128    
400    16     
-96    400    
-560   -176   
336    192    
96     0      
96     208    
-96    -32    
-336   64     
160    64     
80     240    
-240   -160   
-112   80     
560    0      
-80    112    
-240   -288   
1232   688    
-800   -128   
-752   -544   
-32    -128   
512    240    
-640   -128   
384    -48    
656    -64    
-448   224    
32     80     
80     64     
16     80     
-400   48     
848    32     
-208   224    
-288   288    
512    0      
-176   128    
-176   112    
160    192    
-432   -672   
192    688    
352    -96    
-1472  304    
752    -640   
-112   -272   
32     -128   
0      352    
-224   -272   
-320   16     
288    160    
288    64     
-272   208    
-560   -176   
464    -608   
0      736    
-288   800    
432    -384   
96     -240   
-240   448    
-112   80     
240    48     
176    96     
-32    -592   
-944   288    
352    128    
-32    80     
-512   -848   
3136   2064   
-1872  1008   
-576   176    
2464   -304   
-64    -160   
-1088  320    
-336   128    
800    0      
368    304    
16     -32    
-496   80     
-48    128    
272    48     
320    96     
-128   -80    
64     320    
48     32     
96     144    
-160   -160   
112    1088   
560    128    
-656   384    
544    -16    
-672   -48    
-16    224    
176    48     
-80    272    
240    0      
-496   -480   
432    336    
-112   -1056  
32     -48    
48     48     
0      144    
96     -64    
-160   -48    
-16    -240   
-96    144    
96     48     
-48    224    
160    176    
128    -48    
-48    0      
352    -896   
-480   128    
-80    -992   
368    240    
128    336    
-320   224    
144    176    
224    32     
-32    496    
-176   64     
-320   -1072  
528    -1696  
-528   -416   
-16    544    
240    352    
-304   -80    
272    320    
320    0      
32     336    
112    112    
64     384    
-112   416    
160    96     
-176   -16    
240    208    
-144   128    
224    -80    
-64    -448   
336    544    
-560   672    
272    -448   
496    -400   
-96    -336   
-352   896    
-128   -2864  
384    -1024  
32     48     
-272   304    
-352   1648   
1168   -240   
-720   368    
-32    784    
560    80     
-352   -896   
-80    320    
-48    336    
160    -400   
-112   -96    
64     -16    
48     -272   
48     176    
208    112    
-112   0      
-144   240    
48     256    
-32    -320   
32     -16    
-96    336    
-96    1264   
608    80     
-624   -368   
-80    -224   
336    -288   
768    1488   
-656   1040   
-208   288    
448    -992   
-80    672    
-208   -480   
128    80     
160    -128   
224    -144   
128    128    
-112   -368   
-80    384    
16     -304   
544    -240   
-128   -528   
-432   352    
176    -176   
224    384    
-288   -224   
192    -144   
-224   304    
256    -112   
208    -96    
-384   336    
-304   -800   
2464   -944   
-1504  1248   
-784   -720   
816    -704   
-176   -400   
-48    64     
560    -128   
-384   -112   
-272   -320   
400    64     
304    272    
-48    -448   
16     112    
-192   -320   
48     -784   
80     0      
-80    224    
-320   -272   
0      352    
208    16     
-720   624    
2208   -352   
-928   960    
240    832    
80     304    
-96    -192   
560    -432   
-256   1072   
-688   1392   
352    -272   
-240   -880   
16     -864   
192    288    
0      -432   
224    -64    
304    -112   
-208   208    
560    -288   
-272   32     
144    -528   
128    48     
-224   640    
688    -32    
288    512    
-448   1056   
160    240    
-496   -16    
496    -464   
336    80     
-192   -32    
656    240    
256    -336   
0      -560   
-896   656    
1328   -480   
336    640    
320    1152   
272    352    
-304   528    
544    80     
-16    -192   
144    -48    
-176   144    
144    208    
208    -160   
-416   -1120  
-304   -256   
48     -32    
-128   112    
1008   2752   
-736   1296   
304    -144   
720    -1696  
-1360  -272   
-192   352    
288    608    
64     -32    
-48    928    
-96    192    
144    -256   
448    -528   
-384   -144   
-400   -16    
32     224    
-112   96     
240    0      
-432   160    
-32    240    
-688   -832   
432    -1008  
32     -368   
-640   -128   
288    256    
176    608    
-128   -528   
384    -1040  
0      -496   
-64    -560   
16     -480   
-64    48     
336    192    
-272   64     
224    32     
256    688    
-64    352    
-272   -96    
-16    272    
-128   560    
112    400    
-128   176    
192    -144   
-16    -64    
352    -384   
0      288    
64     656    
-64    256    
208    -288   
0      208    
-208   592    
112    352    
-512   -656   
400    80     
208    160    
-432   448    
208    496    
112    -464   
-208   -64    
-16    -992   
-288   -128   
240    16     
-32    64     
-112   -224   
-48    -368   
-16    -80    
128    480    
-368   240    
464    960    
-448   720    
208    0      
-16    384    
256    240    
-224   304    
128    -160   
416    -48    
-176   -432   
-400   -176   
448    224    
112    288    
-224   80     
720    32     
-1472  1456   
1152   -16    
48     272    
32     -160   
-336   144    
-48    -96    
80     0      
96     16     
-640   -320   
-400   80     
-1072  0      
352    32     
160    192    
-544   96     
-16    -512   
288    -240   
-32    -144   
-240   384    
-688   80     
-432   -736   
528    -880   
-560   448    
-112   -240   
48     -16    
-384   352    
96     -368   
-16    224    
128    -176   
-176   112    
-768   32     
-128   32     
208    -64    
80     208    
-272   -48    
208    240    
-192   -16    
-288   176    
224    32     
-480   -48    
288    48     
-64    80     
-160   96     
-80    -160   
384    128    
-1136  -176   
-112   384    
432    -160   
-448   80     
48     -400   
320    1408   
768    -352   
-768   144    
0      -112   
400    288    
-176   -176   
-272   144    
160    -64    
-224   16     
-96    32     
-400   -48    
176    192    
-80    -176   
-288   160    
512    -16    
-112   160    
-400   -176   
448    144    
288    144    
-112   112    
-48    128    
-848   -416   
1504   192    
704    -176   
-2272  -208   
1696   48     
528    -64    
-960   144    
832    144    
-16    -160   
-352   160    
96     128    
80     -32    
-80    80     
0      48     
368    80     
-48    144    
-128   -112   
176    80     
-32    16     
-400   32     
640    1104   
-1312  -160   
-304   288    
832    -224   
-864   224    
-32    64     
432    512    
-112   -272   
-256   0      
96     96     
-64    352    
-128   160    
-192   -208   
-544   -368   
256    -80    
176    272    
-416   144    
464    384    
-1680  -80    
352    -2240  
-128   32     
-112   128    
208    80     
32     192    
-736   -144   
32     -144   
96     -16    
-240   -48    
-896   -3104  
2416   -2224  
-336   1040   
-1344  256    
416    368    
-144   48     
128    -144   
16     336    
-16    -48    
-304   -208   
-112   128    
240    112    
-400   -32    
304    240    
-352   -48    
144    80     
-320   64     
336    32     
-144   -32    
-480   16     
-144   752    
128    1120   
48     144    
368    80     
-368   -384   
-192   320    
272    -272   
-384   144    
272    128    
224    -240   
-336   112    
-64    -304   
128    176    
-320   -64    
80     -160   
352    48     
-144   480    
432    624    
-240   320    
0      32     
176    80     
-96    -368   
384    -544   
-240   -112   
-256   160    
400    64     
-576   384    
464    192    
48     224    
144    992    
176    688    
-96    432    
176    -16    
-688   -160   
288    -320   
-112   96     
96     336    
736    -1024  
-80    -1312  
-288   -1136  
16     -272   
-32    32     
48     144    
-80    240    
-80    32     
16     -144   
112    192    
128    240    
-32    -16    
-192   224    
128    288    
32     352    
16     -208   
-96    -32    
-80    -464   
0      160    
0      -96    
-160   208    
128    -16    
128    48     
-160   112    
304    704    
-208   976    
400    -256   
-16    -160   
208    16     
-160   96     
-160   496    
64     432    
-432   0      
-64    -336   
112    -128   
80     -80    
0      112    
-80    48     
112    144    
-96    -96    
-80    -112   
352    -160   
128    -48    
-144   128    
-624   128    
512    80     
-96    -64    
-416   464    
496    304    
-80    -208   
16     80     
-240   320    
208    16     
160    -112   
-80    144    
-176   160    
16     -112   
368    -432   
-32    304    
128    288    
-64    -80    
-208   272    
64     128    
256    288    
-384   80     
-16    -272   
80     -64    
-16    -288   
192    -128   
64     144    
-80    112    
240    0      
-176   160    
-304   -624   
2176   -640   
-1552  848    
80     656    
1120   976    
-960   1104   
-64    736    
832    1456   
-368   672    
64     0      
-16    -992   
224    560    
112    128    
64     320    
-112   80     
144    112    
48     -144   
96     432    
-256   304    
32     -16    
96     -96    
-1136  80     
2032   -208   
80     -400   
-800   -864   
976    256    
-304   -288   
-112   2032   
416    800    
-192   208    
208    -432   
64     64     
-16    368    
-64    592    
-16    304    
208    -208   
-160   176    
128    -832   
-144   -784   
-96    -768   
448    96     
16     -736   
96     320    
-336   1072   
512    464    
-256   -1344  
-176   -176   
-608   -864   
480    -832   
608    -288   
-864   -16    
512    368    
240    -192   
-80    144    
160    224    
144    -144   
-416   336    
112    608    
112    -944   
192    1040   
-624   304    
192    192    
704    176    
-608   304    
-336   0      
-192   -368   
640    -112   
288    144    
-1136  -704   
80     -464   
1792   1104   
-2192  -80    
192    -80    
1776   -784   
-448   608    
-352   32     
-16    -48    
416    432    
304    -32    
-256   448    
112    -352   
224    64     
416    208    
-112   272    
-368   -80    
272    160    
192    -256   
-384   144    
416    -1056  
-896   -1376  
192    -1184  
128    -320   
-240   -48    
32     48     
480    -1136  
-608   96     
192    -400   
-64    -320   
-48    -32    
64     64     
64     64     
16     -192   
0      384    
112    -80    
384    -480   
272    240    
-784   -800   
304    -336   
192    -64    
-240   -960   
48     -160   
-464   -560   
592    -272   
352    -224   
-384   32     
288    464    
-240   48     
-16    400    
368    128    
-192   -16    
-192   48     
-112   -640   
448    -400   
-288   336    
-512   -32    
496    128    
416    -288   
-496   -128   
192    -1040  
-432   96     
416    48     
0      -16    
-176   -192   
240    -48    
-160   -320   
176    640    
544    16     
-256   -48    
-320   784    
576    -320   
0      0      
-224   0      
-32    -304   
160    -1088  
64     128    
-64    -496   
-464   176    
320    -192   
32     16     
-208   16     
1008   2976   
-1968  -912   
-624   48     
1328   -304   
-576   -288   
-1456  32     
304    336    
672    16     
-480   -208   
208    -272   
-80    -496   
-464   -160   
352    -32    
160    288    
-528   -144   
272    48     
-16    192    
0      -192   
-160   -96    
160    -32    
-528   -464   
624    -544   
-608   336    
272    64     
592    -432   
-720   64     
112    -288   
128    -208   
720    -144   
-576   112    
-48    -160   
-32    272    
352    -320   
-48    -16    
80     16     
-128   176    
288    192    
-464   -32    
0      -352   
-320   16     
240    -16    
208    112    
16     -800   
-192   -16    
400    96     
-432   -160   
96     80     
96     48     
-96    16     
-192   -1648  
-352   1360   
5312   1840   
-672   -240   
-1680  -96    
800    96     
112    -368   
256    128    
-592   -1008  
656    240    
-224   -48    
64     -96    
128    32     
80     112    
-288   144    
672    112    
-368   32     
-128   -32    
544    320    
-32    128    
192    96     
32     -80    
-768   -176   
1056   -592   
64     -512   
-320   -832   
-336   192    
608    -384   
-688   160    
-144   -96    
400    -80    
-112   48     
272    -16    
-304   64     
-144   -240   
176    304    
544    -192   
-224   80     
-80    -336   
-192   -160   
176    192    
176    -16    
-144   272    
176    -192   
-704   384    
816    -112   
-544   -144   
-288   -16    
80     -80    
80     -720   
448    96     
-800   -48    
-64    544    
-240   128    
-224   -304   
112    448    
192    -176   
-288   176    
48     224    
-64    80     
144    16     
96     32     
48     -48    
-208   112    
-272   0      
0      304    
-16    -208   
-496   208    
368    64     
-80    -80    
-144   1424   
592    1824   
848    496    
-2128  -336   
-208   -96    
1360   224    
-1104  736    
-352   -320   
208    496    
240    -64    
-240   128    
32     -352   
-224   -128   
-112   96     
0      304    
256    160    
-672   272    
160    -128   
-160   -240   
-16    -1472  
-736   -704   
144    112    
-176   272    
208    0      
-64    -576   
-48    208    
0      -96    
-352   176    
496    1056   
48     768    
128    -432   
80     -656   
-368   48     
48     592    
0      -16    
272    -32    
-176   -336   
-368   -240   
320    48     
-176   -240   
16     384    
-80    512    
-80    672    
400    720    
192    1392   
368    880    
-608   112    
448    816    
-80    -32    
-160   -240   
112    160    
-560   112    
368    736    
576    800    
-336   464    
336    192    
-432   288    
256    -432   
-640   -1664  
256    -240   
-288   320    
-64    -256   
112    304    
-96    -48    
96     -176   
128    0      
-224   -48    
-208   -144   
160    144    
-912   -16    
-96    176    
0      32     
-160   112    
96     64     
80     64     
64     272    
-208   -80    
-448   -112   
416    -32    
16     192    
-320   0      
-288   -32    
272    176    
432    464    
-704   -32    
16     160    
-64    -16    
-240   0      
368    192    
64     720    
-416   144    
48     -128   
80     64     
-16    192    
176    64     
-496   80     
80     128    
0      272    
208    208    
-976   -160   
-144   -64    
784    -192   
-1360  400    
464    0      
384    -64    
-336   240    
48     288    
-336   256    
208    368    
-384   -256   
224    -112   
96     32     
-192   -208   
-208   224    
-16    336    
176    16     
128    32     
-176   -208   
-48    -608   
256    144    
208    160    
48     48     
-224   288    
-96    -16    
416    -272   
-48    -48    
-144   32     
-240   32     
192    16     
304    176    
144    96     
-1488  528    
2288   -256   
-208   -336   
-800   80     
592    224    
-32    -240   
-560   1152   
32     -240   
-448   -1456  
-48    -336   
400    304    
-256   16     
-160   208    
320    496    
48     288    
-80    -16    
-48    192    
240    -144   
-32    -960   
-80    -672   
576    352    
-2208  112    
48     544    
416    112    
-192   -624   
192    -160   
16     640    
-400   528    
-160   320    
144    -672   
48     -96    
-96    192    
-304   496    
624    -48    
-336   -304   
-336   160    
304    -32    
-80    272    
800    288    
-192   80     
-272   112    
-224   -128   
176    -48    
-832   1200   
1072   -624   
848    112    
-880   -176   
640    672    
464    -80    
-336   -224   
80     144    
48     80     
128    304    
-160   112    
-624   -1024  
176    48     
384    560    
-864   288    
336    -368   
752    80     
-32    80     
-288   -16    
96     128    
288    -144   
288    672    
-960   224    
-16    128    
432    -48    
16     -208   
-1088  -32    
672    1456   
1728   480    
-1952  -192   
-432   -160   
1136   -128   
-336   -240   
-736   -208   
-400   208    
528    48     
272    320    
-384   -80    
-208   320    
32     -176   
192    160    
416    0      
-432   128    
96     96     
0      -1280  
304    800    
144    -96    
-480   0      
288    240    
-256   -112   
-160   80     
368    128    
-128   112    
-144   192    
208    96     
144    96     
-464   -32    
320    -416   
-208   -16    
256    -368   
48     80     
-48    608    
112    336    
96     -144   
32     -288   
112    -272   
-16    176    
304    64     
-144   0      
-80    16     
-272   48     
224    64     
288    -128   
-480   -32    
320    -208   
-16    144    
0      -672   
-48    -544   
880    -336   
-240   384    
-224   -48    
208    304    
0      160    
-464   112    
304    144    
96     144    
288    48     
-80    96     
32     80     
0      -160   
-48    96     
176    -128   
-32    -80    
-64    -784   
80     336    
80     16     
-112   256    
-16    64     
192    -48    
-224   -144   
176    -208   
-176   512    
-160   -416   
224    -272   
-208   208    
112    -16    
96     -288   
-720   672    
1872   -1040  
-400   272    
-1008  -608   
704    432    
496    -112   
-432   144    
-400   -240   
576    -784   
224    480    
-80    -288   
64     -16    
-32    -32    
96     416    
192    -336   
-16    352    
80     -240   
0      -208   
80     -48    
160    144    
-384   -480   
320    -464   
-96    336    
-160   -240   
528    144    
-320   -560   
352    -192   
-112   176    
-144   256    
224    -48    
192    240    
-288   -272   
0      -64    
96     96     
192    -480   
-320   -32    
48     -384   
336    -720   
-304   -208   
80     -1392  
288    -16    
96     64     
-544   -224   
112    -96    
512    -192   
-48    -288   
-192   224    
-48    -384   
48     176    
1360   288    
-2256  -368   
-256   224    
832    -192   
-880   -416   
-96    -128   
896    0      
-144   -240   
-736   240    
496    80     
272    -112   
-288   -224   
-64    160    
64     -320   
544    32     
-272   -384   
-16    -112   
-176   368    
288    352    
-144   336    
16     -304   
176    -688   
-1456  224    
1488   144    
-144   192    
144    -176   
48     16     
-688   352    
80     -208   
48     64     
112    -176   
16     -48    
-224   32     
-16    -48    
352    -448   
-416   -272   
272    -128   
-128   -272   
208    176    
-32    -128   
-80    0      
-32    -336   
-16    64     
688    32     
704    624    
-880   -224   
-400   -48    
80     32     
160    -128   
-416   -272   
160    0      
944    1248   
-912   32     
-352   -304   
928    -80    
-496   160    
0      -944   
16     256    
64     64     
384    -16    
-80    -80    
-256   -48    
-32    16     
160    -64    
96     -112   
-432   -416   
112    -128   
288    32     
-640   -48    
592    704    
2112   3392   
-2080  1520   
864    -80    
1312   208    
-272   176    
-752   1312   
288    560    
240    -656   
-160   -144   
464    576    
-272   688    
-896   -368   
432    -752   
48     192    
-96    -416   
-304   16     
32     -544   
-32    192    
-80    -432   
48     48     
-16    160    
16     -48    
-400   -400   
384    -656   
-32    80     
-64    64     
32     -368   
576    720    
304    912    
-80    80     
-64    -32    
176    -272   
-32    352    
-384   -496   
-144   64     
-144   272    
0      -16    
96     352    
32     1056   
-48    -352   
-224   -96    
0      256    
176    256    
48     272    
-80    -16    
352    1440   
-224   896    
-176   112    
112    -352   
224    -96    
-304   64     
-400   64     
1072   -896   
-224   -1136  
-736   -304   
448    -64    
224    64     
0      1312   
-304   -288   
-336   -1216  
288    -16    
-592   -128   
-48    16     
-96    -128   
-880   48     
-16    256    
464    384    
-464   256    
-160   32     
448    -32    
-112   240    
256    -16    
-736   0      
64     176    
-32    160    
-112   224    
112    -176   
320    -272   
-496   -32    
-400   16     
416    64     
-1040  592    
336    -272   
-1120  -16    
288    48     
112    -112   
-16    0      
-592   464    
144    320    
-80    -560   
96     -64    
-112   240    
-160   -16    
144    0      
-144   64     
-144   -64    
-128   -16    
-32    -160   
-368   -160   
-64    -16    
96     512    
-32    48     
-112   -144   
768    -64    
-576   -48    
-32    352    
144    512    
192    176    
-112   528    
-16    64     
-64    64     
112    176    
-128   144    
-496   32     
176    384    
-336   -48    
-352   -192   
-144   -448   
560    -208   
-224   112    
-224   352    
-48    32     
96     16     
144    128    
160    -48    
-464   16     
-112   112    
384    160    
-352   -112   
0      64     
-2128  1184   
2096   80     
-32    176    
-768   128    
80     80     
784    -688   
-1312  -480   
0      -224   
240    176    
-384   -128   
-96    64     
-32    0      
32     272    
80     256    
48     176    
-352   -112   
-368   -80    
240    -240   
-96    -112   
-64    32     
-48    336    
656    -720   
-1680  304    
832    336    
736    704    
-336   512    
-48    -64    
256    0      
-32    -48    
-400   -80    
32     -48    
256    272    
-480   -192   
-80    16     
64     48     
288    -64    
-224   16     
-208   80     
576    -64    
-128   16     
-144   112    
-224   -240   
912    368    
-176   -80    
-400   176    
176    624    
784    -176   
-528   1088   
320    320    
-160   -112   
112    48     
-176   -80    
-256   176    
144    336    
96     -112   
-336   640    
-368   0      
128    -128   
0      128    
64     -64    
-48    0      
-224   0      
-16    128    
-176   112    
368    288    
-224   16     
-320   48     
400    128    
432    224    
96     2032   
976    3472   
1184   80     
-1696  272    
-304   -288   
1248   192    
-352   256    
-208   -160   
112    240    
96     208    
560    80     
-608   -96    
-32    240    
256    0      
224    96     
16     16     
-48    160    
-272   32     
-96    -224   
464    384    
272    -32    
-784   96     
352    304    
80     16     
-288   -32    
256    48     
272    240    
-528   176    
64     240    
528    16     
-656   -32    
-48    256    
240    -64    
208    128    
0      80     
-192   96     
-160   16     
32     48     
80     -272   
-256   144    
112    -112   
32     80     
400    32     
-240   192    
48     160    
448    176    
288    304    
-400   112    
32     96     
80     32     
-112   -64    
128    -48    
16     336    
752    -48    
352    528    
336    -48    
-384   32     
496    288    
480    416    
-544   208    
0      176    
336    80     
-224   128    
-32    128    
16     176    
224    32     
0      240    
-176   416    
544    96     
0      -64    
-208   160    
32     144    
176    -48    
-368   112    
160    128    
16     160    
80     -1088  
-304   -320   
176    704    
-64    -464   
80     -496   
-960   368    
1344   -1184  
-336   -32    
-576   -336   
960    368    
-320   192    
-176   32     
-80    96     
368    -160   
0      -176   
-16    336    
-144   -112   
48     -32    
80     304    
144    -576   
-144   240    
16     -624   
224    -256   
128    240    
-48    224    
560    192    
-1344  560    
864    -256   
208    -64    
-240   -144   
176    272    
-336   32     
-48    -496   
288    -96    
96     112    
-320   160    
192    -624   
48     32     
64     80     
-176   288    
-96    64     
304    48     
96     32     
64     144    
-96    -256   
-80    128    
160    -128   
-304   96     
448    128    
-320   -80    
-32    304    
384    -880   
-272   128    
-16    -1744  
-144   -448   
1648   -16    
-1200  416    
368    304    
-224   -80    
-640   144    
896    -208   
16     400    
-352   -128   
16     176    
160    -32    
96     160    
-336   -144   
96     160    
-48    -656   
112    176    
16     -912   
-256   -336   
128    48     
224    64     
-128   80     
96     256    
544    -672   
-1424  64     
400    -192   
496    -656   
-80    32     
-400   224    
464    64     
-288   -912   
-16    192    
-240   -64    
160    96     
256    48     
-112   32     
-288   0      
224    128    
128    0      
-32    -400   
32     128    
-224   176    
-32    192    
128    -208   
-384   -48    
-112   -528   
368    -304   
-112   256    
80     704    
768    -64    
-192   -32    
-384   720    
624    -32    
-240   288    
176    -528   
576    512    
288    -528   
-208   832    
-192   400    
-176   16     
576    -32    
-80    128    
-320   -128   
-48    32     
352    112    
-16    112    
368    1120   
-640   448    
16     352    
336    -848   
-176   -1248  
-320   -96    
0      2480   
1120   -480   
-656   -368   
304    -128   
656    304    
336    -224   
-336   -2496  
-240   1200   
16     -400   
240    192    
-320   -688   
-144   -704   
176    208    
368    -560   
304    736    
-352   544    
-128   -688   
320    352    
304    -224   
-208   -1904  
-208   -208   
320    -80    
-160   592    
64     896    
64     96     
176    160    
176    -208   
80     128    
-16    368    
160    -16    
64     -672   
16     64     
96     -400   
-144   -144   
80     64     
64     384    
144    -544   
160    -1264  
-336   -224   
-32    64     
-48    112    
240    -352   
-32    32     
-208   -128   
304    -384   
-272   -304   
-112   -560   
272    -80    
112    -288   
16     -64    
368    1040   
-768   -80    
-480   448    
592    1088   
192    1472   
-224   208    
464    320    
-1040  -1440  
400    -480   
208    176    
48     -192   
-160   -208   
32     -176   
576    -208   
-96    -416   
-80    -320   
-160   80     
224    448    
-80    -32    
-112   112    
-176   -64    
160    -272   
-240   -160   
32     128    
128    368    
-96    624    
176    400    
240    -80    
-128   288    
-320   -576   
0      -960   
-112   32     
-64    -48    
-112   -880   
-144   -160   
256    704    
288    -464   
-672   -640   
-64    304    
-48    304    
160    -112   
-144   80     
-80    -448   
-208   32     
272    -416   
208    112    
-144   -272   
-112   -48    
-96    16     
80     -128   
48     320    
32     272    
-560   160    
128    224    
-48    128    
16     560    
-80    -384   
-64    -96    
48     48     
64     112    
112    -112   
32     -672   
160    -80    
160    16     
-112   -400   
0      256    
16     -464   
-208   -16    
320    -224   
-80    32     
64     -336   
0      208    
336    -240   
-208   -128   
240    -512   
-160   144    
-368   32     
192    48     
-176   -304   
1264   656    
-1712  1264   
176    -16    
592    -480   
-1488  -480   
960    112    
-64    -336   
-560   -80    
224    -480   
112    272    
-96    -464   
-352   -32    
208    -16    
112    368    
-656   -64    
272    336    
144    -80    
-144   -272   
-336   -320   
176    48     
112    80     
144    80     
-1936  848    
464    -80    
-192   304    
-896   -320   
528    160    
-336   352    
-400   -96    
64     64     
-64    -80    
-48    -96    
-192   64     
-32    128    
256    -80    
-96    96     
-48    -128   
-336   128    
-176   -96    
-288   304    
208    192    
112    -128   
-32    -320   
-1392  624    
64     -64    
-336   -688   
32     -272   
-112   -64    
-960   80     
288    -752   
-64    -160   
288    -352   
-80    160    
64     -64    
-128   192    
-64    -144   
-144   -16    
48     144    
-416   -128   
-320   96     
480    48     
-32    -80    
-272   -16    
-128   128    
-96    -112   
-192   -272   
416    32     
-160   480    
-176   -224   
864    1424   
-1344  -1744  
-1440  592    
1376   -192   
-1008  -64    
912    608    
368    320    
-720   -112   
-560   16     
448    368    
-1072  -352   
-240   80     
240    -112   
-272   144    
-16    -96    
-288   16     
384    64     
-256   16     
-256   32     
400    224    
48     0      
-336   512    
576    -80    
-704   16     
304    528    
112    128    
-720   240    
560    -64    
-304   -144   
-192   192    
240    -16    
160    64     
-64    16     
128    32     
-144   -256   
160    224    
320    -16    
-320   256    
128    64     
272    0      
-64    -96    
-288   192    
48     96     
144    192    
-144   208    
272    176    
-368   32     
48     96     
800    -128   
-448   0      
96     256    
-240   64     
224    -128   
-1040  96     
640    64     
-496   -160   
-336   -80    
256    -48    
16     416    
320    272    
-320   272    
-112   192    
112    -64    
48     96     
16     224    
-128   288    
-320   -16    
512    192    
-480   -32    
144    16     
352    64     
-144   160    
-16    96     
-16    -48    
-48    160    
48     -16    
-144   -96    
176    -256   
-48    320    
-128   144    
176    -144   
720    1088   
-1904  1248   
1072   -240   
512    -64    
-480   -80    
-96    80     
160    160    
272    160    
-432   368    
192    -384   
-112   64     
32     192    
176    -48    
-48    32     
-320   0      
176    48     
-80    384    
-16    16     
128    -96    
-272   -144   
-256   -144   
912    560    
-80    -48    
-816   -608   
416    160    
-16    208    
-64    160    
272    432    
160    48     
-416   304    
-256   0      
416    16     
32     -64    
16     -16    
160    -64    
-96    304    
-144   16     
80     224    
112    192    
-96    -160   
112    32     
-112   -352   
96     -48    
192    -48    
-144   448    
80     -64    
-64    96     
-64    -64    
-32    -288   
320    -176   
-1248  -1312  
256    416    
1040   -496   
-1248  128    
608    272    
352    -80    
-416   736    
272    160    
-224   208    
448    224    
48     96     
-144   128    
-96    176    
0      -80    
16     96     
128    -48    
-256   -192   
304    -144   
160    -304   
-112   96     
-208   -512   
1456   496    
-1664  -208   
0      16     
1248   -224   
-1024  -512   
752    -240   
-176   80     
-48    256    
16     0      
-352   176    
384    176    
96     224    
-192   48     
80     -256   
-16    -208   
128    48     
-16    -720   
-400   -384   
-144   -256   
128    80     
112    160    
-96    -720   
640    -1536  
-624   -464   
-16    -864   
336    -480   
-576   304    
592    128    
320    608    
-160   128    
-288   464    
128    112    
-96    -176   
480    448    
560    496    
368    -240   
288    -224   
-16    -80    
64     -176   
32     -608   
-48    -80    
-192   336    
192    64     
176    -144   
192    240    
608    528    
-288   16     
-240   -64    
576    128    
-160   -1984  
-1920  352    
-176   -304   
1040   64     
656    -384   
-976   -1840  
-432   -304   
192    960    
352    -128   
320    448    
-96    336    
-352   -352   
-112   224    
112    -176   
560    -384   
-384   -176   
-368   160    
-64    496    
544    -80    
128    720    
-384   592    
-80    -304   
304    -1024  
-16    256    
208    -272   
-304   -112   
336    928    
0      912    
-32    -1344  
-80    -512   
-208   -48    
384    80     
208    -272   
-256   -1008  
48     32     
-128   544    
-400   -192   
112    -272   
400    80     
-320   32     
176    592    
-64    -368   
256    -96    
0      400    
48     1392   
-352   -512   
-16    16     
496    160    
-320   752    
144    144    
144    576    
192    -336   
-736   -608   
16     -80    
-64    -32    
-96    16     
576    1104   
-288   2288   
-208   784    
464    -816   
-16    -288   
-160   -576   
208    32     
128    0      
-48    -480   
-400   -560   
144    -336   
160    256    
128    224    
0      -496   
-48    192    
160    528    
0      304    
-16    -96    
-48    128    
96     736    
288    1088   
-176   384    
192    -624   
144    80     
-512   -1136  
176    -816   
-416   256    
-16    -352   
-816   -928   
160    -688   
32     16     
80     -640   
144    128    
-336   96     
64     -176   
96     -48    
224    -1200  
-176   48     
-160   -64    
128    -448   
192    0      
96     176    
-160   -2288  
64     176    
-272   -464   
384    -384   
-208   304    
464    192    
-528   -592   
320    288    
-112   720    
-32    48     
112    32
[truncated: 488,011 more chars]
