# Supplementary material for: A Fault Diagnosis Method for One‐Dimensional Vibration Signal Based on Multiresolution tlsDMD and Approximate Entropy
Source: Hindawi journal article supplement (doi:10.1155/2019/3262818), 2019-01-01
Supplement: f1 [file 3262818.f1.zip › 3262818.f1/gear signals/pitch errors signal/Data9.txt]

-240   -96    
-48    -384   
144    -1392  
32     -224   
-368   -224   
160    192    
-80    416    
96     528    
208    288    
-112   -176   
-192   -16    
240    368    
-32    288    
96     -384   
-64    160    
-48    -16    
208    80     
-112   -736   
160    -224   
80     -304   
-16    112    
0      272    
576    352    
-656   144    
240    48     
304    80     
-224   -192   
304    48     
-496   -64    
400    224    
96     144    
0      112    
-160   -688   
-192   976    
160    448    
-448   192    
-80    48     
80     32     
-48    -16    
32     -160   
-112   272    
128    -144   
-160   -176   
-144   -496   
320    -96    
160    -544   
16     48     
-736   320    
880    -64    
-832   16     
480    32     
-16    224    
-192   448    
144    320    
-176   -272   
160    -64    
128    -144   
-16    144    
-128   144    
-16    -48    
336    -640   
96     176    
48     240    
80     96     
-304   192    
48     208    
288    160    
-320   -576   
-48    -2160  
128    -208   
32     -368   
48     -224   
80     -1248  
-112   -352   
272    -80    
-128   -32    
-400   -976   
2128   -896   
-80    352    
-832   96     
1008   96     
-144   1200   
-416   16     
1056   1056   
-224   528    
-400   -880   
-80    128    
416    -320   
144    128    
64     -224   
-304   16     
64     224    
128    -240   
224    -944   
96     -80    
-160   -176   
112    144    
-352   -816   
-672   672    
1744   -432   
-848   704    
640    480    
272    -848   
-768   -624   
32     -192   
336    400    
-96    -624   
192    144    
-144   -352   
144    -112   
32     -336   
128    160    
112    -320   
0      464    
176    704    
144    576    
-208   -128   
64     -32    
-128   -240   
288    -1168  
-512   -304   
368    -928   
-352   592    
640    1712   
-1120  1408   
-304   400    
784    -624   
-432   -112   
112    272    
-288   16     
-192   16     
288    608    
944    -416   
-112   480    
-480   352    
-208   -208   
688    544    
384    176    
-544   -192   
32     256    
576    32     
224    288    
-224   -176   
-704   -96    
624    -144   
720    -896   
-1424  -416   
736    592    
992    112    
-1696  -896   
368    560    
64     -576   
32     64     
-208   -2144  
-288   -256   
-240   -256   
256    256    
-96    32     
-320   176    
-336   -64    
304    -208   
-112   -80    
-208   -192   
-512   192    
384    -64    
-48    2016   
720    704    
-368   160    
-144   -672   
560    96     
160    -160   
-416   160    
96     -208   
-48    64     
-64    -448   
192    16     
-128   176    
48     128    
-288   -16    
80     -384   
272    16     
-80    -400   
-176   64     
256    128    
208    416    
-224   208    
80     -192   
-336   160    
432    464    
-272   272    
-368   64     
528    -16    
-208   -496   
-816   -240   
496    -496   
128    -96    
-16    -224   
-240   48     
400    176    
848    32     
-864   -512   
-224   -80    
560    -160   
-352   -112   
64     80     
48     -528   
-576   -16    
240    -80    
-144   -96    
128    -48    
-32    176    
-1280  -480   
704    -256   
64     160    
-480   -288   
320    112    
-128   320    
-112   -304   
0      320    
-224   320    
176    160    
32     -16    
-176   -32    
-416   400    
-48    -32    
224    16     
-272   -240   
992    -304   
-3184  1920   
784    -176   
784    144    
-656   -96    
-96    -160   
-112   -256   
-48    128    
16     368    
352    -192   
-368   64     
-240   112    
224    -160   
416    288    
-784   48     
32     -336   
176    336    
-96    16     
-96    -16    
48     -16    
16     848    
-816   -464   
-624   96     
784    48     
-368   -288   
-368   256    
-48    176    
32     -144   
288    -96    
-176   48     
-272   96     
-48    -16    
-112   80     
320    -176   
-32    -32    
-208   96     
64     272    
112    192    
-208   -96    
-256   192    
112    -64    
32     112    
16     16     
-96    64     
208    128    
-576   32     
352    -16    
-96    96     
-80    16     
-560   -992   
2352   4144   
2560   -352   
-2368  192    
-720   -272   
976    32     
-96    -48    
-384   -112   
224    320    
512    32     
-592   288    
128    -128   
272    176    
48     -128   
-192   272    
368    -16    
-352   160    
-128   -176   
80     144    
-304   -128   
208    208    
-480   112    
-592   -176   
1088   -640   
-208   -336   
-128   -704   
-464   272    
656    -304   
-640   272    
-16    -16    
256    -48    
-160   16     
208    -48    
-64    176    
-240   -32    
96     304    
288    -112   
-96    128    
-176   -256   
-208   80     
112    128    
224    80     
-160   -128   
512    -16    
-512   48     
352    -16    
-48    -32    
-656   256    
304    -144   
-128   -256   
-288   256    
-96    -160   
-144   -96    
480    -320   
0      368    
-528   -80    
432    -176   
-96    -48    
-336   -128   
384    64     
-160   96     
48     32     
0      32     
-80    48     
-96    0      
112    64     
176    320    
80     -16    
-384   64     
320    128    
-176   -336   
-784   -3728  
-1296  -784   
1168   80     
304    224    
-240   -240   
80     320    
-384   304    
560    320    
-320   16     
144    208    
-144   -176   
-32    400    
272    -336   
-112   304    
96     -240   
112    304    
128    64     
-208   112    
-80    -672   
-96    -368   
320    992    
-224   304    
-48    -16    
-320   0      
320    -256   
-336   32     
240    96     
-80    288    
-48    848    
112    352    
-512   -496   
208    -432   
128    144    
48     480    
-240   112    
-112   160    
192    -528   
-80    -96    
-416   -64    
160    80     
0      416    
208    448    
96     128    
80     288    
-48    656    
-48    912    
384    512    
-496   1088   
320    688    
48     -320   
96     -32    
592    896    
-1248  608    
384    544    
16     720    
-224   -80    
208    80     
-128   1312   
240    -1392  
-176   -368   
176    832    
208    -304   
-144   240    
208    80     
-64    0      
-16    0      
-48    80     
240    256    
-144   368    
0      448    
144    32     
-32    0      
48     96     
-160   112    
-32    0      
32     -96    
160    384    
320    144    
-640   208    
144    64     
304    32     
304    688    
-720   384    
112    -272   
832    -1456  
-128   144    
-32    -32    
224    352    
-288   48     
384    -176   
480    -256   
-336   384    
-96    32     
96     -16    
-32    0      
288    0      
-304   -160   
-16    -48    
192    -16    
320    -240   
-80    144    
-800   592    
1088   -128   
-832   -96    
512    160    
-64    432    
-144   -368   
480    -1056  
-144   336    
-16    -80    
-288   96     
240    32     
96     224    
-32    80     
-192   -464   
-16    -80    
128    -240   
368    16     
-352   -624   
-208   -240   
144    192    
16     32     
-96    160    
144    48     
-368   -48    
112    -48    
304    48     
112    -256   
-304   144    
-32    -128   
-32    -976   
1824   -1952  
-1312  304    
96     -160   
464    -192   
-496   800    
416    -880   
672    -464   
-272   1792   
240    304    
208    -240   
-256   -240   
272    -96    
272    16     
-528   -512   
144    32     
320    -48    
96     -112   
-96    112    
48     1280   
272    576    
-304   -736   
-160   16     
1216   -880   
-784   448    
304    768    
16     288    
32     -720   
-624   -160   
272    -176   
112    928    
528    -432   
-80    -256   
-192   -224   
96     128    
-144   32     
768    -16    
-544   -80    
144    -288   
352    64     
-96    112    
-64    208    
-256   0      
304    16     
272    2192   
1616   784    
-160   -576   
-624   -16    
1072   -432   
-64    336    
-96    -320   
208    208    
-144   -80    
160    496    
-128   -16    
-544   -944   
432    -208   
272    464    
-736   304    
368    -416   
752    0      
0      144    
-240   -16    
-16    -160   
320    -32    
240    688    
-736   272    
-176   80     
544    288    
352    912    
-880   1104   
544    3376   
1360   112    
-1824  -208   
48     -352   
1024   -128   
-512   -576   
-880   -448   
-64    -464   
144    48     
448    256    
-496   -784   
-128   160    
208    -800   
0      -1008  
208    -32    
-32    -208   
-80    -96    
416    -240   
-672   -208   
368    304    
-64    240    
-128   224    
640    -80    
-48    -144   
-464   80     
400    -880   
-32    80     
-192   -48    
368    -208   
-432   16     
64     -48    
352    -16    
-528   -208   
336    0      
96     -2224  
96     -400   
-320   -320   
176    96     
-16    160    
64     -16    
-128   -64    
400    176    
-368   128    
272    16     
-1184  -96    
-32    -336   
48     -256   
-192   160    
320    -112   
-80    -320   
-112   -16    
-272   -1104  
800    -32    
-192   -32    
-192   -32    
368    -48    
176    -256   
-400   -16    
32     -96    
-640   96     
480    0      
-256   64     
16     80     
272    -32    
-160   -528   
32     256    
96     -352   
-64    112    
192    336    
288    -112   
-240   -144   
-16    64     
96     48     
32     -32    
-48    -496   
208    336    
-688   320    
80     -352   
64     128    
16     -368   
1200   480    
-3120  240    
336    32     
1456   464    
-288   -192   
-576   -80    
-16    -320   
608    624    
-768   608    
176    -240   
128    -32    
-720   -16    
176    -368   
-64    -96    
-416   208    
112    -112   
128    -144   
-16    512    
16     -2800  
-16    -64    
320    1264   
-992   304    
352    -48    
416    -144   
-416   -288   
416    448    
-976   208    
192    -192   
560    -80    
-176   -32    
-48    160    
-128   -96    
240    96     
96     -672   
-144   80     
320    16     
-80    -128   
-304   -320   
304    -48    
80     80     
-400   64     
-64    144    
384    80     
128    -32    
-128   -272   
-400   144    
368    -464   
-32    208    
288    -320   
-560   -144   
656    448    
1216   -96    
-704   128    
-112   -288   
912    256    
-800   -240   
-192   96     
848    672    
-864   64     
-384   16     
144    -32    
368    -144   
32     32     
-96    0      
-800   -160   
528    16     
-112   16     
112    208    
-144   320    
224    144    
16     208    
-240   176    
1936   -560   
-1040  960    
-528   -64    
128    304    
160    32     
304    -128   
-160   224    
-544   -48    
64     16     
0      -32    
-144   80     
-336   16     
-288   128    
816    -144   
-96    144    
-704   80     
48     -208   
64     -208   
176    32     
-144   -32    
144    -96    
272    160    
-16    80     
-960   464    
176    -304   
32     48     
96     -32    
-96    -144   
128    -112   
160    320    
-1280  112    
560    -288   
32     -304   
-416   624    
384    -448   
-304   -208   
64     48     
240    64     
16     80     
-240   -16    
-112   64     
0      64     
112    64     
-192   -224   
272    -48    
32     64     
-400   128    
448    1040   
2032   3440   
-2256  2032   
1120   -368   
1248   240    
-720   -16    
-864   752    
224    688    
544    48     
-80    -352   
64     64     
-112   -16    
-96    336    
352    -256   
48     -128   
-208   64     
-336   400    
112    -48    
-96    80     
-112   -176   
-112   -496   
-48    -272   
-48    -80    
112    320    
-368   816    
-400   240    
-192   32     
432    -32    
-480   -640   
32     -512   
-64    -848   
-304   192    
160    64     
256    -64    
-48    512    
-48    848    
80     752    
208    560    
96     576    
-64    -256   
-80    -624   
224    192    
0      256    
-144   -16    
80     -16    
240    176    
-272   512    
32     -720   
192    -880   
-304   -384   
-160   112    
272    96     
528    704    
-1264  864    
64     1328   
640    1136   
-336   624    
64     208    
-240   -32    
-672   -1408  
544    -640   
368    560    
-192   208    
-160   96     
-96    144    
192    -64    
192    96     
-608   -96    
240    -288   
368    0      
-112   -32    
-336   -32    
-80    160    
-384   -96    
96     32     
-32    128    
-128   448    
480    176    
-432   -48    
-48    0      
416    80     
-144   -16    
464    592    
-880   608    
384    -80    
112    272    
-208   -80    
-176   64     
512    240    
-512   768    
128    80     
384    -384   
-224   224    
0      64     
64     64     
-272   240    
160    96     
-96    -64    
-64    -240   
-48    -80    
128    0      
-32    -48    
-608   656    
720    16     
-800   -80    
192    32     
112    368    
-16    608    
-240   224    
-144   496    
96     352    
16     -32    
16     32     
-80    272    
176    416    
-64    176    
-304   112    
176    176    
624    -256   
-688   -592   
-256   -208   
512    352    
112    304    
-80    64     
-64    -48    
-272   -80    
192    384    
496    -112   
-368   80     
-720   -208   
1008   -128   
-192   128    
1152   -1360  
-1152  384    
592    544    
400    576    
0      144    
-480   816    
1136   464    
-208   -144   
-368   128    
272    -32    
64     144    
48     96     
-176   -96    
-208   -112   
96     -128   
16     -80    
128    176    
-176   256    
176    304    
160    160    
304    48     
-1712  688    
544    -336   
528    -528   
-400   -752   
-224   -32    
144    336    
-176   16     
64     -16    
80     288    
704    -2176  
-528   96     
-240   64     
336    -192   
352    288    
-96    80     
-256   -192   
240    224    
320    240    
-144   128    
-80    64     
-80    -208   
768    -96    
-464   192    
208    96     
336    624    
560    640    
560    1248   
368    944    
-496   -32    
144    112    
0      -224   
-208   112    
64     352    
96     16     
-336   560    
-288   160    
64     -112   
32     112    
32     -32    
144    -192   
-288   0      
0      512    
-80    128    
208    288    
-32    32     
-208   32     
288    0      
-16    32     
-544   864    
-224   3200   
1104   1072   
-1072  240    
-576   -736   
1088   224    
352    -672   
-640   160    
208    -704   
-288   224    
672    -352   
-384   96     
-352   -32    
-32    32     
304    144    
-32    0      
-32    288    
-272   16     
80     192    
-208   -272   
448    272    
-384   0      
-288   -160   
880    -128   
512    -48    
-896   240    
176    144    
416    -224   
80     48     
-192   80     
144    208    
-144   -80    
336    112    
-256   32     
-80    0      
352    256    
368    96     
-368   192    
-64    -144   
-64    80     
-48    -800   
192    -80    
-432   -656   
64     -32    
112    -384   
-48    -112   
-496   -240   
176    -48    
288    32     
80     -96    
-128   160    
-96    0      
176    496    
-864   -384   
144    -704   
-512   -432   
528    -144   
-416   16     
-272   64     
384    224    
288    144    
-304   160    
48     128    
80     128    
80     -16    
-16    80     
-16    -640   
48     704    
-80    224    
-176   -128   
224    -48    
160    96     
-160   128    
192    192    
224    240    
-176   352    
-272   -464   
512    -592   
64     384    
-304   -400   
80     -432   
-224   -1584  
1232   -1728  
-1408  352    
560    -80    
-64    -416   
-608   416    
592    -128   
112    96     
32     -448   
-304   -320   
384    -32    
0      80     
192    -832   
-208   80     
112    -336   
160    160    
-64    176    
176    -80    
-224   480    
48     -80    
272    -1648  
-432   544    
1104   -528   
-912   -48    
64     -224   
512    80     
-256   -80    
48     -352   
240    576    
176    -512   
-32    -128   
208    -1120  
-256   -144   
80     160    
176    0      
128    -544   
80     96     
0      -32    
-48    80     
-160   -32    
64     -112   
-320   -32    
-192   -16    
432    -144   
-352   -688   
32     -224   
368    -816   
-256   160    
208    80     
-16    112    
1424   -224   
-2032  16     
256    -64    
512    -144   
-592   -64    
720    0      
-640   176    
0      -288   
96     80     
-32    -96    
32     -80    
-80    -224   
144    0      
32     -432   
-208   192    
480    -144   
-48    192    
-80    432    
336    -48    
-176   48     
16     -256   
544    1120   
-1616  -528   
-896   80     
720    832    
288    288    
-352   -624   
-240   128    
224    -928   
-112   -16    
128    16     
-208   112    
192    48     
96     -144   
-272   -256   
-208   -128   
-32    16     
96     -224   
-368   -240   
-16    -128   
-352   16     
-64    -80    
96     160    
-368   -720   
-128   -32    
320    -256   
-160   384    
-48    384    
768    -96    
-144   -112   
-496   112    
368    -192   
-240   144    
-320   -208   
112    160    
624    -384   
-784   416    
112    96     
128    -160   
320    -32    
-112   -384   
-224   0      
-16    80     
384    32     
-16    -96    
-400   -496   
144    -1072  
48     -48    
704    304    
-288   944    
-400   384    
-480   -544   
-128   160    
-304   96     
-208   -144   
960    -400   
-688   176    
-240   448    
480    -64    
-400   -128   
-64    -176   
-336   48     
-80    80     
-16    -224   
128    -176   
-80    96     
-368   -832   
336    -224   
224    -240   
-272   416    
-192   -256   
112    -192   
112    208    
160    256    
128    592    
-80    -256   
-80    -112   
272    0      
-160   48     
96     384    
-32    192    
-240   -160   
272    64     
-32    96     
-112   112    
256    128    
-560   0      
336    416    
-1472  -912   
-80    -1104  
288    -80    
16     448    
-288   -96    
-272   0      
-320   -192   
-64    -496   
32     -464   
-80    -160   
-80    -448   
-128   432    
-80    -272   
-64    0      
-544   -96    
816    -560   
80     336    
-464   976    
80     864    
64     -432   
-112   1424   
-464   -880   
-48    -32    
-96    128    
48     192    
224    -352   
-144   16     
-608   144    
128    -96    
208    -80    
240    -480   
-144   80     
-112   16     
192    32     
-80    112    
-208   240    
96     32     
-32    -16    
-240   -656   
-448   -192   
-112   -48    
64     -32    
192    32     
-176   112    
-48    1312   
528    -304   
-288   -672   
208    160    
-64    256    
-848   512    
-32    1008   
464    480    
-288   192    
-416   96     
112    48     
96     192    
96     48     
32     240    
-256   80     
16     320    
192    176    
0      64     
-224   0      
48     448    
-480   400    
208    -80    
256    -624   
-96    144    
-240   -160   
272    400    
96     112    
-128   16     
-48    -256   
-32    240    
208    112    
32     -288   
-96    -448   
-64    464    
80     176    
-32    -144   
-32    176    
-16    48     
32     80     
192    144    
-192   96     
-48    96     
-240   208    
368    320    
-304   48     
-208   0      
128    80     
80     112    
80     272    
-752   -1216  
-352   0      
512    96     
-1168  -128   
1616   592    
-320   -176   
-784   432    
688    64     
64     352    
-16    -256   
-208   192    
176    -16    
-16    112    
16     -320   
-576   0      
416    -144   
-240   96     
32     288    
-192   16     
-16    160    
-96    0      
48     -768   
-832   720    
1088   -80    
-960   -80    
288    176    
848    -224   
-576   448    
-400   -16    
128    160    
304    16     
-16    48     
0      -16    
-368   64     
16     -112   
160    176    
80     0      
-368   128    
-96    -96    
-304   256    
304    64     
256    112    
16     48     
-1232  752    
-16    -160   
192    -368   
-64    -496   
192    112    
-960   -256   
80     -368   
80     -96    
192    -112   
-144   224    
-208   -96    
288    80     
352    272    
-448   528    
-256   240    
240    496    
-448   128    
208    32     
288    -64    
-400   192    
-80    160    
272    128    
480    208    
-1088  336    
112    368    
32     64     
-896   -832   
3328   2512   
-1328  1792   
-992   304    
2256   -176   
-96    -288   
-1200  -128   
-32    320    
384    -400   
-176   -144   
512    80     
-144   224    
-512   96     
320    240    
288    -160   
144    208    
-624   80     
144    208    
128    -80    
-208   112    
-240   672    
640    416    
-816   480    
480    -112   
192    96     
-656   272    
896    192    
-192   16     
-512   160    
816    -112   
-384   16     
-32    -80    
-48    160    
128    -64    
-464   96     
608    -48    
-848   80     
320    -256   
112    -864   
-272   32     
-304   80     
432    256    
-16    80     
-272   160    
-144   144    
240    80     
-288   144    
592    624    
-768   240    
96     288    
288    -128   
-224   144    
64     112    
64     368    
832    96     
-480   80     
384    96     
0      16     
-160   112    
240    112    
-48    192    
-80    -64    
-128   128    
144    64     
-96    16     
32     -80    
304    304    
-192   144    
-160   -224   
560    272    
-144   336    
-368   272    
128    -32    
160    0      
-144   80     
64     32     
32     -224   
368    0      
-320   -240   
64     -224   
16     -720   
128    -32    
-960   -32    
752    -2064  
-800   -16    
64     -48    
944    480    
-640   -176   
-304   288    
176    -48    
464    -368   
-16    128    
-272   240    
-144   -64    
64     240    
256    -112   
-256   160    
16     16     
-16    -384   
48     64     
112    -112   
80     128    
160    672    
-688   -432   
-80    864    
1056   576    
-416   -304   
-96    112    
-64    -144   
208    0      
192    64     
-176   -224   
-112   176    
-32    -48    
240    144    
64     -416   
-320   -160   
144    -2816  
-112   240    
32     -160   
80     144    
208    176    
-160   128    
-576   272    
544    80     
-112   48     
176    -384   
-272   64     
144    -48    
192    256    
-256   -592   
-112   -576   
-560   1712   
2320   288    
-896   -112   
304    -352   
224    -96    
-160   256    
320    -240   
176    -256   
-224   -208   
192    160    
144    80     
-64    -128   
-80    112    
-48    -224   
368    256    
-96    -16    
-48    -144   
400    -240   
0      -80    
-128   -48    
32     -80    
880    -128   
-1824  -256   
1184   -144   
592    -512   
-1024  -528   
880    -592   
-384   112    
80     96     
16     -32    
-272   48     
304    80     
16     0      
-128   48     
16     -384   
-160   -32    
224    96     
224    -240   
-368   -592   
-144   -352   
32     96     
224    -96    
32     -160   
880    -48    
320    304    
-528   -144   
288    976    
-384   -16    
-256   -560   
544    80     
128    -400   
-80    -896   
-176   -368   
48     -400   
-448   -176   
288    -2432  
-32    176    
-256   416    
48     -144   
256    320    
144    96     
-64    16     
0      -48    
-64    176    
-32    48     
-416   -448   
-368   -608   
480    272    
256    -144   
-336   -32    
128    -592   
880    -1616  
768    -320   
96     -848   
-880   -416   
240    -320   
304    864    
224    1552   
-80    -752   
-384   144    
-48    416    
16     -176   
336    256    
176    -368   
-480   -320   
-368   -832   
672    80     
384    -64    
-112   -80    
-320   48     
224    1056   
336    -368   
-16    -480   
-176   -192   
320    208    
-464   -128   
496    -16    
-400   1104   
-224   416    
16     -496   
128    -400   
400    224    
-400   -112   
-16    96     
320    -1024  
64     -192   
144    416    
192    -176   
-224   -352   
-80    -256   
320    -352   
-272   96     
-544   112    
-240   -672   
128    -368   
144    336    
-64    448    
208    -192   
-288   -688   
720    -576   
-496   64     
-176   -848   
-480   32     
608    224    
112    -128   
-176   64     
-80    -304   
-256   -1584  
176    -176   
160    1632   
-48    688    
80     -368   
208    -32    
-320   144    
32     -96    
384    624    
336    304    
-96    208    
-400   -240   
128    192    
112    352    
160    -272   
-96    -320   
-320   -128   
0      240    
48     -96    
-320   -400   
-112   -1520  
-336   80     
224    240    
176    240    
464    1440   
1024   480    
-656   -576   
-240   -752   
128    928    
-192   288    
-512   48     
624    224    
-480   224    
-48    -16    
-48    160    
16     -320   
192    32     
144    -304   
64     224    
-368   -1088  
224    -240   
160    176    
16     -80    
-128   -64    
48     1872   
80     784    
0      480    
336    112    
-176   -16    
288    176    
-128   320    
128    272    
-224   -448   
-80    192    
160    48     
64     -48    
-272   -144   
336    -16    
-176   256    
-192   832    
352    -112   
256    -400   
-336   96     
304    -96    
96     224    
-864   -272   
-16    64     
-224   -160   
368    80     
-384   0      
-32    -48    
-48    48     
-592   128    
1248   1200   
-1088  832    
-816   496    
1456   -32    
-224   160    
-1328  -544   
256    352    
240    -560   
-464   80     
-64    -304   
256    112    
-304   32     
160    16     
-160   -176   
128    128    
-304   -48    
208    224    
-528   0      
-96    128    
48     16     
-448   -80    
32     -512   
1344   768    
-160   64     
-432   -48    
240    -176   
-160   144    
224    16     
96     304    
272    96     
-208   0      
-352   -32    
96     48     
-1264  -128   
16     16     
208    96     
-128   96     
-80    208    
-272   -96    
320    144    
64     0      
-544   32     
480    784    
-1152  -48    
-576   -416   
1184   144    
144    464    
-640   32     
-592   -480   
560    -256   
0      -112   
-336   112    
-320   -176   
208    16     
608    272    
-16    464    
-1008  32     
-80    -384   
896    -304   
128    16     
-720   -176   
-304   -16    
640    -368   
-192   16     
-352   64     
-1072  -288   
1136   0      
144    -320   
-224   144    
528    192    
-736   -1680  
-928   1904   
2144   192    
-1472  576    
-656   -144   
320    -96    
896    224    
-576   32     
-512   -368   
-256   96     
-400   -32    
-112   96     
320    -48    
-336   -64    
-272   112    
224    16     
592    112    
-560   -64    
80     80     
624    528    
-1120  32     
448    400    
320    -368   
-624   -128   
768    144    
-720   32     
256    144    
288    80     
-64    32     
-544   0      
384    224    
-304   -80    
304    80     
-144   -96    
-176   -64    
64     48     
208    96     
-352   48     
128    208    
192    16     
-176   -96    
128    -32    
-352   -32    
144    80     
32     112    
64     176    
-144   32     
48     64     
-160   16     
192    560    
400    480    
-224   96     
240    624    
-624   256    
432    176    
-448   -176   
64     -96    
128    224    
-176   160    
-80    -96    
336    -288   
0      -144   
-240   -64    
-32    96     
208    368    
64     336    
-112   0      
-96    32     
-96    -544   
-160   -464   
-48    -336   
48     -192   
0      32     
144    80     
288    0      
-48    336    
-496   176    
96     112    
192    -496   
-208   -320   
0      -48    
-272   112    
1328   2160   
1104   336    
-2064  -48    
624    -288   
544    -672   
128    -720   
32     -288   
-224   64     
-144   128    
192    240    
336    16     
-176   400    
-336   96     
192    384    
256    -400   
-352   -496   
-384   -592   
0      -368   
176    -192   
16     -32    
-240   -816   
480    -48    
-416   240    
-192   352    
160    160    
-176   208    
-80    672    
-176   -784   
384    16     
-288   -32    
96     208    
-64    208    
-32    272    
0      -80    
64     208    
16     0      
-64    144    
304    160    
-128   -352   
0      144    
-208   224    
256    -144   
-272   16     
-96    48     
64     144    
-48    -128   
176    16     
-208   -608   
128    64     
48     336    
-576   1648   
3008   -688   
-1568  224    
-64    -48    
1296   464    
-240   -16    
-608   1184   
640    368    
-272   -880   
-192   -48    
336    576    
48     144    
-192   -768   
144    -32    
352    144    
-144   320    
96     224    
80     80     
-32    -224   
48     0      
704    1776   
-976   -816   
-1824  256    
2448   -720   
-512   -368   
-704   656    
928    512    
176    -384   
-224   -48    
80     304    
-112   16     
-304   48     
144    -112   
208    304    
-48    384    
-336   -16    
336    96     
-32    -64    
-240   1120   
480    896    
0      400    
-96    608    
16     528    
288    -48    
-752   -2256  
528    -1536  
64     -32    
-848   528    
448    -272   
0      448    
240    576    
-176   288    
640    -144   
-144   160    
-176   64     
432    -16    
-720   -736   
224    336    
-32    1248   
-448   176    
736    224    
-64    160    
-144   624    
-176   224    
64     0      
288    -16    
-256   80     
80     368    
144    512    
-48    112    
288    752    
64     -304   
-496   -464   
1088   -256   
128    944    
-640   240    
368    -3648  
704    -176   
-32    -224   
-320   -896   
0      656    
432    -240   
320    304    
-448   304    
64     256    
-48    384    
48     -16    
32     -240   
-144   -80    
16     464    
192    416    
64     -672   
-240   -256   
-240   752    
976    -96    
-928   176    
304    112    
-128   -80    
-64    944    
320    1776   
-272   -336   
320    -208   
128    -656   
-48    320    
64     48     
32     496    
16     -304   
352    -816   
80     -784   
-448   -720   
304    -352   
128    -176   
112    384    
-144   272    
-32    -272   
352    -448   
-112   352    
400    -624   
-320   352    
64     272    
240    208    
144    -1008  
-912   -32    
288    -816   
432    -816   
-1808  736    
912    -1552  
336    304    
-592   -96    
80     -896   
464    -640   
-32    -272   
-208   -192   
96     -448   
272    112    
48     816    
-144   32     
-48    -1440  
32     288    
560    864    
-320   1056   
-464   432    
304    -480   
-64    144    
-128   16     
16     -256   
240    -864   
-416   544    
128    320    
160    -176   
-32    208    
-720   -96    
1552   -1216  
-560   400    
-96    -80    
288    -240   
48     -1424  
-144   -768   
-112   -736   
0      384    
208    128    
-272   480    
272    -80    
-64    -1120  
224    -336   
64     112    
-64    -16    
-48    -304   
304    48     
-80    -320   
48     -48    
-304   -784   
736    -512   
-528   64     
-208   48     
752    64     
-304   -64    
128    -192   
-80    -544   
288    -16    
-64    96     
256    192    
32     -128   
-96    -32    
-16    16     
160    -64    
80     -48    
-288   48     
-320   -304   
32     112    
272    -400   
-240   -144   
80     0      
-96    -384   
224    80     
-80    -1520  
192    64     
-112   64     
-16    0      
-16    176    
-512   -208   
1824   -784   
-2112  -16    
-576   16     
1216   -96    
-704   -64    
-160   96     
-128   -240   
352    144    
-192   -272   
-64    -496   
96     16     
48     48     
64     -64    
48     160    
-240   -160   
240    80     
-16    -64    
-208   -32    
176    0      
0      -48    
-96    -560   
784    544    
-560   -240   
-624   -448   
16     -352   
352    -512   
-432   -720   
752    32     
64     16     
-80    -320   
-544   128    
-176   0      
128    32     
32     -64    
-192   16     
176    -368   
-128   336    
-112   -384   
-384   16     
928    -112   
80     32     
-432   -1248  
-816   336    
624    -16    
-240   -240   
480    -64    
736    432    
-592   -160   
368    336    
-400   -64    
-656   128    
176    64     
-48    48     
128    112    
96     -336   
-384   -32    
-512   -128   
496    272    
256    -272   
96     -240   
-128   112    
208    -16    
-96    64     
-192   -32    
64     -64    
144    -256   
128    144    
256    -48    
-416   64     
-368   -1808  
416    992    
1088   16     
-1712  528    
-208   -16    
400    -176   
-368   -240   
-32    208    
144    -160   
-48    192    
16     -32    
-384   -112   
176    32     
-368   -256   
16     160    
-96    -256   
-368   208    
-64    96     
-48    48     
272    -192   
-704   -336   
480    -176   
-544   -112   
64     48     
752    -64    
-384   32     
-512   -48    
368    224    
48     -96    
-256   192    
-512   -96    
320    64     
144    192    
-256   96     
-80    384    
224    128    
-48    336    
-384   192    
80     272    
-336   112    
-176   112    
-272   -96    
96     64     
-96    -304   
144    -176   
336    -144   
-384   -112   
-16    -192   
128    32     
-176   80     
64     -272   
16     -288   
-432   -688   
240    -64    
-1264  592    
496    1232   
-640   240    
192    -112   
176    -544   
-336   -128   
-32    -160   
240    -144   
-96    -752   
-736   -96    
544    -128   
-256   -336   
256    -16    
-224   -32    
-224   48     
-208   -416   
464    -32    
-272   16     
-64    368    
-16    -64    
160    -272   
32     -288   
-80    -224   
-192   -432   
80     576    
64     288    
-192   48     
-192   -144   
1008   864    
176    896    
-880   -496   
112    -208   
-992   464    
272    -48    
32     464    
-32    80     
-192   -192   
32     -48    
0      80     
-16    -16    
-96    -240   
-32    -16    
-32    64     
-144   112    
0      -576   
-96    -16    
32     -160   
-816   0      
-416   848    
960    -80    
-608   336    
-64    496    
64     48     
-176   48     
288    -928   
192    -576   
-288   128    
-112   240    
64     -448   
336    -112   
112    -112   
-224   -48    
-192   48     
224    160    
208    288    
-192   -16    
-240   224    
256    16     
240    64     
-64    32     
-208   144    
16     192    
384    400    
-48    240    
-256   176    
-96    -80    
384    32     
-400   -464   
1920   -752   
-1776  816    
496    -112   
784    -96    
-768   352    
224    368    
368    -480   
-512   -32    
-256   464    
128    -432   
-48    -240   
160    128    
64     96     
-288   -64    
16     0      
48     -288   
-64    176    
-384   -256   
112    288    
304    -112   
-720   -368   
512    -496   
288    0      
-192   448    
256    912    
-352   480    
128    704    
-272   1216   
512    352    
-112   -240   
-96    -544   
208    -336   
-256   -304   
64     0      
416    -320   
-784   -48    
224    -880   
176    -1168  
-112   -832   
-16    -160   
-176   -32    
80     -112   
-96    -64    
-288   848    
704    -16    
304    320    
-864   -192   
-176   320    
576    -48    
-560   192    
-80    16     
304    336    
-112   112    
-64    -128   
-176   592    
-16    336    
208    -320   
240    -400   
-544   0      
-224   64     
80     144    
-48    0      
0      -704   
-448   -272   
352    384    
-64    -256   
-64    208    
208    32     
-464   112    
-96    176    
-432   2608   
496    160    
-736   224    
-224   -384   
384    1344   
400    784    
-528   592    
128    80     
352    400    
224    -16    
-224   -848   
-192   176    
0      432    
304    0      
176    -96    
-416   -192   
144    64     
48     128    
-48    -176   
-32    176    
-112   128    
160    176    
336    -16    
-272   -816   
-1232  -608   
624    -912   
-240   96     
272    -336   
-624   -496   
256    -192   
-128   -272   
-80    -112   
48     -144   
96     -464   
304    48     
-96    144    
-320   64     
64     176    
80     160    
-32    -432   
-528   -144   
192    -32    
128    144    
-80    0      
272    -144   
-112   -16    
-112   -688   
-448   -128   
384    -464   
128    272    
-96    336    
-16    288    
224    -112   
-224   48     
0      288    
528    736    
-848   240    
144    -672   
0      -592   
128    80     
-240   208    
-16    -256   
352    64     
32     -192   
-112   304    
16     -2608  
-224   -208   
240    32     
-48    448    
176    0      
-192   -128   
-80    128    
176    304    
-128   48     
384    112    
-304   0      
-304   -96    
512    224    
96     -112   
-256   48     
-496   -1408  
1328   -1664  
-1152  320    
496    -208   
-608   0      
128    480    
560    368    
32     48     
208    832    
-176   -160   
-128   144    
464    32     
32     -48    
-112   -320   
-112   48     
48     80     
448    -48    
-128   -304   
-48    -80    
-96    64     
48     288    
256    1456   
960    -272   
-1184  -192   
384    -128   
544    80     
-288   528    
368    -208   
-128   -240   
48     -240   
-256   -352   
400    112    
256    -560   
-384   112    
48     112    
208    -48    
32     128    
0      160    
560    176    
-496   -304   
16     80     
304    -32    
64     128    
16     -160   
-128   -144   
-208   -464   
208    -96    
-224   -144   
384    160    
-144   128    
-96    -640   
-1024  -896   
-112   -256   
48     192    
352    80     
-64    -96    
-80    96     
80     32     
-368   48     
80     -112   
48     32     
144    128    
-48    32     
96     -1008  
-32    64     
-160   -224   
240    16     
-384   48     
-176   -208   
256    -64    
48     -1008  
320    1008   
-752   -1504  
-224   -48    
736    192    
-1248  -160   
880    -320   
64     16     
-144   -928   
-416   160    
208    -368   
-160   96     
-160   32     
176    -160   
-64    -112   
208    -352   
-160   16     
32     -32    
224    16     
-112   240    
96     -80    
0      -288   
80     96     
-1024  32     
672    96     
-704   112    
-160   -208   
128    -96    
96     -528   
512    -96    
-608   144    
-240   48     
464    -32    
-144   32     
-128   -480   
48     -384   
48     176    
160    48     
48     288    
-832   352    
256    -128   
144    -48    
-128   -96    
-80    -80    
-192   16     
-16    -192   
384    -400   
-176   -400   
16     -96    
-32    -480   
-944   -1648  
1840   -1664  
560    -240   
-1904  240    
32     160    
880    -128   
144    -48    
-544   400    
-672   -16    
320    128    
-96    -224   
-400   -16    
16     -336   
-176   96     
240    -48    
400    256    
-448   -400   
-112   96     
240    -160   
704    528    
-912   480    
64     -464   
176    -624   
-208   -256   
400    64     
208    224    
-1168  144    
640    -208   
400    160    
-496   -272   
-208   -16    
432    -912   
592    48     
-976   -112   
96     -32    
544    -416   
144    544    
-736   80     
224    -144   
-480   -176   
80     -48    
-256   64     
-208   112    
48     96     
544    0      
-816   80     
272    -512   
304    -16    
160    -1328  
48     256    
-144   448    
-128   -32    
512    -400   
-1024  208    
496    320    
112    592    
176    400    
224    112    
-64    592    
-48    528    
272    432    
272    -944   
-48    64     
-192   176    
64     -96    
-176   384    
192    160    
-144   -288   
0      192    
112    128    
-96    288    
-112   0      
224    -48    
-240   128    
-16    -80    
112    64     
320    -320   
-112   -256   
-16    -720   
176    -512   
-256   -224   
-192   208    
816    448    
-1072  672    
400    -16    
208    -48    
16     -80    
-48    -112   
-112   112    
-240   -224   
48     -48    
144    -544   
-304   48     
-208   96     
0      128    
208    96     
-544   16     
-320   64     
-224   -16    
-192   -96    
240    144    
-64    48     
-320   -512   
-272   144    
-160   -48    
480    -160   
-240   64     
-128   -96    
96     240    
-352   576    
80     256    
224    -144   
-192   -128   
-1456  272    
352    48     
240    -240   
-112   240    
-64    -336   
144    48     
-160   -208   
0      64     
272    208    
-256   240    
-192   64     
0      112    
-128   0      
64     -80    
352    96     
-320   0      
-64    336    
-768   48     
400    -160   
-1856  160    
2384   160    
-112   -608   
-1104  -112   
784    304    
416    -752   
-416   -16    
-96    1888   
-288   -96    
112    -96    
0      -368   
-464   48     
-48    -192   
-384   -224   
96     128    
32     -16    
64     384    
-192   -368   
160    -128   
128    64     
256    896    
-1472  -416   
-464   192    
1456   -208   
-1120  -1152  
-848   -1808  
352    -1248  
384    -368   
-1344  64     
400    224    
-512   -256   
-304   0      
320    -176   
64     -144   
-416   32     
240    128    
-64    0      
144    320    
272    320    
-240   -16    
-80    48     
-176   -32    
48     32     
-384   16     
160    1952   
608    48     
-448   -1040  
400    -688   
-32    -16    
-192   -640   
-320   -192   
48     208    
80     368    
496    256    
-256   192    
16     -320   
80     -976   
-128   -16    
768    -112   
-480   304    
-336   -16    
144    112    
240    -256   
-336   192    
-32    112    
-48    192    
448    16     
208    48     
80     912    
-848   1088   
-288   -2048  
-352   -656   
112    112    
-368   0      
784    -64    
-112   -1008  
-704   80     
608    16     
208    -16    
-224   -528   
-128   -16    
32     -48    
112    256    
400    -80    
-176   0      
-544   -80    
496    -80    
0      96     
-16    -1088  
-1024  -1552  
288    -640   
160    96     
80     240    
48     -48    
-272   -128   
16     640    
-240   240    
-32    256    
400    -384   
-288   240    
304    96     
-384   -208   
288    -304   
144    208    
32     224    
-64    384    
-32    32     
-16    0      
64     16     
-192   80     
-64    -64    
0      -32    
368    -16    
32     192    
144    80     
64     192    
-128   80     
224    -16    
-272   -80    
112    288    
496    144    
-272   160    
192    800    
688    80     
-320   -176   
-224   288    
528    128    
-224   -64    
0      224    
-528   304    
352    128    
160    -112   
-128   96     
-272   0      
-48    128    
144    64     
32     -48    
32     -192   
0      240    
-272   256    
464    -192   
-64    32     
-48    80     
-192   128    
64     16     
256    0      
-96    208    
-32    192    
-64    64     
96     80     
-32    176    
496    2320   
2672   176    
-1936  240    
576    928    
1056   -16    
-768   64     
-80    -192   
240    320    
-224   256    
96     -112   
96     96     
64     128    
-288   96     
176    400    
464    -288   
-624   0      
336    128    
0      48     
-32    64     
32     16     
-176   -1056  
-496   352    
1152   672    
-1072  0      
-144   112    
864    -112   
-608   -80    
-192   -192   
208    -368   
320    -128   
-480   192    
176    -64    
144    144    
-64    32     
288    64     
-256   -224   
-48    -96    
112    -144   
-64    176    
128    32     
-128   192    
224    -256   
-256   112    
304    -224   
-496   -64    
384    240    
48     32     
-288   80     
288    64     
1152   -1216  
-1664  272    
-32    -432   
448    176    
-16    -144   
-64    48     
-320   -128   
256    -128   
-192   -16    
224    -208   
32     176    
0      -1344  
-64    96     
48     -16    
64     160    
-272   96     
368    144    
-240   0      
32     -96    
-48    -112   
-16    96     
-208   -544   
1120   240    
-880   128    
400    -288   
208    128    
-688   -1168  
224    80     
224    -880   
-608   176    
448    112    
-176   96     
64     112    
176    64     
-80    80     
-240   144    
400    32     
0      224    
48     -144   
96     -208   
-112   304    
96     -128   
-64    -64    
-320   -96    
544    176    
-368   -32    
16     80     
-32    112    
480    -96    
-240   224    
0      -48    
352    128    
-48    -192   
-416   160    
272    -48    
32     0      
48     -288   
-144   160    
368    304    
48     80     
-368   16     
432    64     
-80    -16    
-144   128    
160    -64    
48     -224   
144    160    
-128   -544   
-16    48     
96     80     
144    -704   
-1360  -3024  
-336   192    
400    -784   
-128   272    
960    272    
-304   -96    
-752   288    
368    -128   
464    -224   
-96    -256   
-176   96     
-176   -80    
512    256    
0      -336   
-336   208    
-256   -208   
256    48     
240    -128   
48     16     
-624   -448   
400    -816   
-32    -352   
-960   128    
880    -1968  
-384   544    
112    -1408  
256    144    
128    304    
-384   544    
32     -32    
544    -496   
160    912    
-352   288    
-176   -416   
160    16     
128    -960   
16     480    
-64    624    
-176   592    
240    -16    
128    -384   
32     -192   
32     -1408  
128    -448   
480    -64    
-224   480    
128    1184   
-16    640    
-368   -1120  
576    -256   
-144   272    
-112   -848   
-560   240    
752    -464   
-800   -544   
336    -640   
160    -688   
-80    -560   
144    -192   
32     -912   
-96    -16    
176    96     
64     0      
-48    64     
48     -448   
16     -736   
496    -912   
304    -48    
-512   128    
-960   -128   
-32    -112   
288    -144   
-144   -224   
16     -176   
112    -816   
208    -288   
32     -128   
-112   176    
-64    64     
-48    0      
224    -16    
528    -128   
-1568  272    
768    -128   
-704   256    
240    -272   
-224   -96    
16     400    
48     288    
16     -352   
-32    -64    
96     -768   
-160   240    
48     16     
112    -16    
-160   48     
-304   416    
-64    352    
320    -64    
144    64     
-112   -16    
-1248  560    
992    -448   
-896   -112   
240    -336   
256    -32    
48     -848   
16     -416   
-384   -832   
16     176    
-32    336    
144    -528   
160    -240   
-208   96     
-16    400    
96     -304   
-144   -224   
-272   -608   
-368   -144   
384    48     
-32    -96    
0      -848   
-336   240    
192    368    
0      320    
240    -192   
-496   224    
-32    128    
32     96     
656    -544   
-160   -1088  
1184   -1168  
-1136  0      
864    -48    
-48    -624   
-768   304    
-208   -208   
576    -1248  
-272   800    
32     1200   
64     320    
112    -352   
304    -208   
-192   -176   
-448   240    
384    64     
-16    -32    
-16    -64    
-80    352    
128    368    
112    208    
-32    -1024  
-800   512    
1264   -640   
-992   -1024  
-80    0      
256    816    
496    1392   
-416   -144   
-96    -224   
512    -336   
-416   192    
-96    -224   
80     336    
464    16     
-320   80     
-320   -128   
-128   -240   
224    48     
-464   -32    
0      96     
-288   32     
-176   -32    
-448   -272   
128    16     
560    592    
176    272    
-1040  -272   
0      304    
-64    -320   
496    576    
192    -128   
-336   -64    
-112   112    
64     80     
480    432    
-704   144    
-256   1184   
416    176    
0      -224   
64     16     
192    192    
-624   144    
16     240    
512    -496   
-320   464    
80     -48    
-384   64     
336    48     
96     416    
-688   -1440  
432    352    
1392   -208   
-1952  -32    
-560   288    
464    -144   
560    80     
-768   -240   
-192   160    
-144   -224   
336    192    
-160   -96    
-144   80     
-80    80     
-400   112    
256    -96    
-128   160    
-96    -96    
-240   64     
656    -144   
-1776  32     
944    48     
-208   32     
240    144    
-448   48     
-144   496    
368    368    
80     352    
-256   96     
-304   -192   
224    80     
-336   -160   
208    -64    
-48    -32    
144    -336   
-304   -112   
-208   -96    
160    0      
592    288    
128    -128   
-208   288    
160    96     
-304   -128   
80     -16    
-32    -96    
-464   128    
240    32     
160    80     
192    -96    
-448   -32    
-64    128    
656    240    
-624   848    
-496   464    
-416   -192   
1104   -432   
-528   -224   
-288   -272   
336    -208   
-352   272    
368    -80    
-112   32     
-96    16     
-80    96     
112    336    
64     -80    
-192   16     
-48    -384   
-128   176    
0      144    
-64    -64    
16     -48    
16     -128   
-32    144    
-208   64     
288    48     
-384   32     
128    224    
-128   80     
64     400    
-64    112    
-528   -400   
1520   1632   
1568   544    
-1632  496    
288    112    
-192   -80    
608    -80    
-16    48     
-176   -496   
-208   -48    
16     304    
256    -16    
-272   -48    
64     16     
-176   -160   
384    -80    
-592   224    
80     16     
0      -16    
-96    48     
48     -16    
-128   -1216  
-208   464    
672    256    
-768   192    
352    224    
64     16     
-416   -48    
192    48     
48     256    
80     64     
96     80     
-288   -48    
-64    192    
288    -64    
80     -112   
-368   48     
336    192    
-208   -128   
0      176    
160    -208   
-336   192    
112    16     
16     96     
-208   -48    
208    64     
96     48     
-112   112    
-64    80     
48     80     
-208   -912   
1328   384    
1280   368    
-1552  -160   
416    -224   
432    -96    
-496   -96    
256    208    
464    432    
-560   32     
-48    48     
160    96     
192    144    
-208   96     
16     208    
384    112    
-288   240    
208    -32    
-16    48     
-16    80     
112    112    
16     336    
0      528    
1632   0      
-960   368    
-320   336    
160    -32    
176    160    
16     96     
128    -256   
-192   176    
-32    80     
336    64     
32     112    
-80    0      
-112   -48    
-176   240    
192    -336   
352    176    
-48    144    
-48    32     
48     160    
560    800    
-896   -368   
-112   -240   
448    640    
-304   -128   
-512   144    
272    0      
288    48     
0      48     
-64    128    
-144   32     
48     -336   
112    -112   
0      -144   
368    512    
384    272    
-944   176    
320    192    
-432   -240   
0      -64    
256    256    
-240   -80    
240    208    
-48    -144   
272    496    
-720   272    
-240   -32    
624    320    
-80    -288   
-448   -400   
528    -1728  
592    48     
960    320    
-336   -16    
-592   192    
1088   1584   
-416   1840   
-416   -112   
160    -400   
-16    96     
-80    160    
-16    0      
336    -128   
128    -432   
-16    -160   
-560   -640   
176    272    
-32    -48    
176    -864   
-208   -496   
-272   64     
336    464    
-32    -272   
-112   -480   
144    496    
0      400    
128    0      
144    512    
-192   -192   
176    -288   
96     -416   
-64    672    
160    0      
-160   96     
96     112    
96     608    
256    320    
-480   -112   
16     -240   
304    16     
-16    64     
96     144    
-80    256    
-32    32     
528    -1328  
-192   -720   
48     96     
-480   -2000  
288    672    
-320   -608   
-112   -272   
544    -608   
-448   -176   
-160   -656   
-160   -592   
144    496    
128    -672   
-384   -880   
208    352    
32     608    
240    -880   
-128   448    
-304   -480   
-32    128    
192    48     
-256   416    
-192   128    
240    640    
-192   416    
384    -272   
-160   224    
176    -336   
-144   112    
208    -160   
48     144    
160    -256   
-368   -128   
432    -528   
464    16     
-144   112    
-16    80     
-144   864    
544    176    
96     -32    
-256   -336   
48     -32    
64     48     
592    -32    
-192   144    
-16    192    
112    0      
256    112    
-48    288    
16     96     
112    144    
64     144    
64     32     
-96    -560   
208    -992   
-32    -496   
64     608    
224    -544   
-160   -128   
544    64     
-64    288    
-160   -32    
-96    288    
240    -144   
320    -2112  
-304   -208   
-128   -1008  
336    0      
-768   80     
0      -368   
304    -224   
-240   752    
-240   -320   
128    -1808  
464    704    
160    176    
-384   544    
-224   -1008  
640    96     
96     -592   
-272   32     
-336   -192   
480    304    
304    -368   
-32    -256   
-80    208    
1024   -528   
-2560  272    
320    -96    
816    208    
-208   144    
64     688    
320    144    
-400   192    
-160   192    
512    224    
-128   -64    
-96    -176   
48     -80    
16     -336   
-16    -64    
96     -192   
-48    -112   
48     -224   
0      112    
16     -800   
-96    -80    
-544   -784   
1056   -448   
-256   -528   
-1328  512    
1008   480    
-32    -416   
-944   -64    
368    -80    
-1296  -240   
208    -64    
192    -48    
-16    64     
48     208    
-352   -64    
-240   64     
416    -272   
16     192    
-576   64     
96     16     
160    -80    
32     -496   
224    272    
240    -96    
16     -96    
-48    320    
0      448    
48     -256   
96     80     
848    -544   
-528   16     
-272   -1728  
96     352    
-32    32     
-64    -112   
-48    0      
80     -96    
112    288    
-112   -176   
512    48     
-48    144    
-1552  0      
96     -384   
128    -64    
16     -336   
160    576    
-64    -912   
-784   224    
1152   -16    
-544   -944   
-176   -3184  
2256   -2368  
288    544    
-512   -384   
-208   32     
624    -96    
16     32     
352    -160   
-320   0      
-16    -80    
-80    192    
400    -560   
-192   128    
288    -128   
16     -48    
-16    96     
80     112    
80     80     
-64    -80    
-32    -256   
-1104  -176   
1008   -144   
-368   32     
624    32     
320    -208   
-192   160    
-480   -96    
1024   400    
-464   -32    
-400   416    
256    -208   
-208   64     
-48    -192   
0      -96    
288    -256   
-944   -336   
448    -80    
384    32     
-400   64     
-144   -336   
32     208    
96     -272   
160    240    
-272   -144   
-224   -160   
304    -80    
112    -80    
-352   -16    
208    144    
-32    0      
224    160    
-400   0      
-160   -880   
-848   144    
448    -48    
-224   528    
-336   -32    
0      -112   
176    96     
-272   -32    
-32    240    
-624   96     
-320   -64    
160    -32    
608    416    
-208   176    
-560   -432   
528    -560   
64     176    
-464   -576   
144    -320   
-224   192    
-16    32     
288    -80    
-384   -112   
-240   192    
288    384    
16     -144   
-704   -160   
-512   320    
-48    96     
-160   -928   
1296   -1872  
-1680  608    
480    -512   
-384   -80    
-448   -16    
320    208    
320    432    
352    -304   
-544   80     
160    48     
160    -64    
160    48     
-128   64     
144    432    
0      640    
-80    -416   
-32    0      
-352   432    
192    288    
16     80     
-128   1248   
928    -432   
-1136  -224   
32     -64    
480    -48    
80     176    
-96    128    
-144   368    
-560   -256   
64     48     
80     -400   
208    16     
-304   16     
-144   112    
224    96     
160    -64    
-592   -32    
128    -48    
-64    208    
144    -64    
0      -32    
-112   -48    
48     64     
-240   -176   
-208   0      
-48    -80    
240    176    
-16    48     
-48    192    
1296   384    
-1824  432    
192    240    
928    -64    
-880   0      
-240   256    
864    240    
-272   288    
-224   288    
-176   -32    
144    128    
160    -192   
304    128    
-288   -80    
-384   -96    
448    352    
-160   96     
-256   112    
0      0      
272    80     
-240   -80    
432    1264   
-1424  -800   
-560   64     
1808   -256   
-736   48     
-896   352    
192    -192   
-464   160    
432    336    
-448   128    
-80    16     
64     64     
-96    -80    
-32    -16    
80     128    
0      64     
-112   288    
208    336    
-304   -80    
-32    -464   
-560   -208   
48     304    
-176   1168   
288    -496   
-384   192    
912    192    
-448   -752   
-752   48     
704    304    
-64    64     
-304   192    
32     224    
-96    128    
-352   -288   
-304   -336   
592    256    
-336   -80    
240    -96    
-80    320    
-736   480    
96     16     
96     0      
80     256    
-224   32     
64     64     
-208   64     
-96    176    
176    448    
-176   352    
400    192    
352    -1184  
-2432  -592   
560    -16    
800    -1232  
48     -208   
-880   -224   
-480   192    
944    752    
-144   320    
-240   464    
-208   -496   
272    80     
208    -32    
-112   -16    
0      192    
-32    144    
-208   -224   
-64    -144   
224    -240   
-32    -208   
-144   -160   
-16    240    
48     128    
160    48     
-448   -400   
496    -432   
-48    432    
-32    1216   
96     -368   
64     -336   
176    768    
-240   -16    
-128   32     
256    96     
-64    928    
-192   592    
208    -160   
-112   64     
224    1200   
80     -112   
224    -160   
-672   -224   
160    272    
400    -224   
64     16     
32     544    
-432   96     
112    -624   
272    112    
-160   64     
-256   128    
-400   -928   
592    -1056  
48     -720   
-320   -48    
256    480    
48     176    
32     448    
-128   320    
32     368    
160    -64    
-176   32     
64     112    
128    -16    
16     176    
-208   96     
336    432    
336    240    
-48    -848   
-64    -32    
-96    416    
-208   -80    
256    -256   
-160   -16    
-48    -1200  
-352   -64    
352    -112   
144    544    
256    -400   
-592   416    
128    128    
-304   -80    
656    -656   
-512   -16    
512    -240   
-512   400    
-32    192    
0      352    
80     592    
16     -1920  
-64    -256   
224    160    
96     192    
-208   224    
-64    112    
96     48     
352    464    
112    320    
-112   192    
-144   192    
160    192    
-208   480    
640    -464   
-720   64     
368    -1408  
320    -544   
-288   -624   
160    304    
192    80     
0      -208   
80     -64    
96     -80    
-144   336    
-32    112    
368    -32    
64     -16    
-480   80     
64     -384   
112    96     
16     -96    
128    -128   
160    -944   
192    -96    
-192   16     
-128   -368   
-48    144    
416    0      
-240   192    
208    112    
144    272    
-1360  -272   
608    608    
1664   -608   
-1072  112    
208    -224   
144    -144   
224    -736   
64     480    
-240   -704   
0      416    
48     -32    
-128   48     
144    16     
-16    304    
64     -16    
-160   32     
272    48     
-112   48     
-128   32     
96     96     
144    0      
-80    -368   
816    -128   
-1344  224    
1184   -112   
-512   112    
-336   192    
272    0      
128    -16    
560    224    
-144   -80    
-352   32     
240    -288   
160    16     
-128   -112   
96     -224   
-576   -96    
672    -160   
-416   -640   
64     -304   
-32    16     
-240   144    
432    592    
-736   320    
96     -48    
-96    16     
-48    240    
112    -64    
272    128    
304    128    
-608   320    
-352   -160   
608    112    
256    -624   
-368   -80    
-16    112    
272    528    
-240   976    
512    240    
-240   -1392  
-576   -400   
352    -944   
240    -384   
-128   80     
-304   112    
-80    80     
256    -416   
816    -816   
-464   144    
-544   -432   
736    -528   
-2272  -1104  
128    144    
-432   656    
-624   -272   
896    -96    
-320   -464   
-96    128    
240    -1968  
-96    48     
16     -192   
144    144    
240    -560   
-544   160    
80     -144   
-64    0      
304    -128   
256    -160   
-544   -144   
-272   -224   
1152   -480   
-464   -368   
288    -64    
-256   -32    
-736   -416   
320    -1840  
800    80     
-592   -208   
64     208    
-544   -432   
544    288    
-144   -224   
-48    224    
0      -112   
-144   144    
-32    -48    
-144   -80    
192    144    
48     -64    
-80    48     
176    -80    
-32    96     
176    -160   
-144   80     
16     -304   
-64    -80    
64     96     
-224   16     
-96    -32    
288    -400   
-288   -192   
-64    -112   
-192   -144   
608    160    
672    -48    
-224   288    
-288   640    
-96    -480   
208    -544   
-368   -160   
192    80     
-400   112    
448    -96    
-80    -64    
-192   -16    
-160   -112   
-64    -16    
-352   128    
-384   -80    
-48    368    
-448   -16    
128    -192   
288    -1168  
-16    112    
-320   128    
192    -16    
80     -128   
-160   -32    
224    48     
-240   -176   
-64    -48    
176    -224   
-1392  -1904  
384    -1024  
-208   -208   
-224   -224   
1184   640    
-464   -288   
-384   -464   
-304   208    
624    192    
16     304    
-288   -224   
-368   0      
128    64     
208    336    
-512   480    
256    -160   
-240   -304   
144    -112   
192    -144   
-96    272    
-336   -1120  
384    -912   
-848   16     
1088   -384   
-816   -192   
-80    -448   
-80    80     
32     -224   
32     -384   
-32    -144   
-256   96     
-336   -464   
544    -16    
-112   -112   
-208   160    
224    -16    
0      304    
-48    -112   
-16    16     
-304   112    
272    128    
-32    48     
-112   0      
-128   -16    
112    -48    
-304   192    
80     -64    
16     16     
-384   -192   
112    240    
-784   -912   
-1760  -1024  
432    64     
-960   16     
384    160    
-400   0      
-272   320    
-272   -16    
-112   224    
368    -128   
0      160    
-672   -160   
176    64     
0      -624   
-512   -160   
256    -128   
-64    96     
-176   368    
-256   80     
-96    176    
-288   64     
-256   -720   
-464   624    
1664   -432   
-1776  -256   
192    144    
656    -928   
368    -672   
-704   -1072  
128    -256   
400    -416   
-192   192    
-96    128    
-32    48     
-32    -160   
-16    144    
-240   48     
208    560    
-752   512    
-80    384    
464    528    
-384   208    
96     224    
-336   592    
496    1120   
-800   528    
240    1136   
736    224    
-96    -400   
-48    16     
16     48     
-416   -176   
-336   352    
-32    400    
-608   576    
992    -240   
96     -192   
-256   432    
224    -320   
-576   -208   
128    16     
-48    0      
-464   -16    
160    -48    
304    0      
-128   -336   
-432   -400   
-48    -144   
-80    32     
-480   32     
256    256    
112    -2144  
-2000  -752   
656    -208   
752    208    
-144   -560   
-624   -592   
-256   -112   
416    1728   
528    -1200  
-384   -576   
-176   112    
32     400    
160    176    
-288   -320   
-16    176    
-448   0      
336    336    
64     592    
-80    288    
112    -112   
-336   -256   
64     48     
224    112    
592    352    
-672   368    
-96    80     
224    -608   
-48    240    
-144   -560   
-96    256    
-448   432    
368    32     
128    368    
-368   -16    
-16    -160   
272    288    
-176   880    
176    480    
480    1168   
-80    1664   
64     848    
-288   -224   
128    304    
-112   -16    
144    528    
-720   192    
-576   -48    
80     736    
592    1264   
192    80     
-576   0      
0      -1120  
176    -32    
256    -16    
-16    320    
-976   480    
576    320    
16     -224   
-96    -1104  
16     480    
96     1584   
48     560    
80     -384   
-48    -192   
-64    528    
16     320    
-112   -208   
192    -336   
-304   -704   
-112   624    
432    640    
-208   0      
144    -304   
-144   -448   
-32    -64    
80     304    
-48    112    
240    224    
128    384    
-48    -176   
80     208    
368    2576   
1488   320    
-1184  528    
-256   160    
528    -624   
-320   480    
-352   144    
48     16     
304    336    
-80    912    
80     -16    
0      112    
-32    -272   
192    64     
192    224    
-32    -64    
-160   160    
112    -32    
-96    -144   
-112   0      
640    1264   
-1008  176    
352    -480   
368    -48    
-592   -160   
160    -704   
240    64     
16     -800   
-336   0      
288    208    
-80    80     
-208   272    
224    -32    
-80    112    
-64    -48    
80     256    
128    176    
144    16     
-272   112    
160    0      
-16    -16    
-64    128    
352    16     
-384   -16    
160    128    
176    16     
-48    48     
16     64     
-208   -272   
-320   -432   
1248   -16    
-304   144    
-656   -112   
416    -144   
544    352    
-192   64     
-16    416    
352    32     
0      160    
-240   0      
320    192    
-16    -64    
0      368    
-96    -96    
-160   288    
224    -16    
-112   -96    
-416   96     
272    96     
-16    16     
-32    192    
288    576    
1200   0      
-640   448    
320    32     
176    464    
-304   48     
-160   80     
480    -32    
48     208    
-272   128    
-128   -240   
192    16     
-16    -2048  
0      96     
112    48     
-32    80     
160    -64    
-16    -400   
-480   368    
80     352    
192    384    
-528   -80    
352    128    
640    -112   
-288   32     
32     544    
-80    592    
-128   -1184  
144    0      
-192   -64    
-64    160    
416    48     
160    176    
256    -96    
-256   208    
240    -48    
-112   112    
208    -432   
128    32     
80     -64    
112    32     
208    -32    
-240   -176   
-80    16     
288    -96    
640    144    
-304   192    
64     32     
720    1408   
-2176  4064   
1936   -736   
-400   -880   
-2224  -512   
1472   48     
624    -160   
-208   -320   
-336   160    
128    -16    
48     160    
80     -160   
-112   -256   
32     -672   
-176   48     
-32    80     
288    160    
-384   96     
0      32     
352    384    
-112   -80    
-96    784    
400    -336   
-400   -16    
-272   32     
128    -16    
-128   -1072  
176    -96    
112    -64    
-32    -64    
-16    -48    
-240   96     
432    -64    
-64    96     
128    48     
-240   16     
304    48     
96     160    
240    -208   
-48    -448   
80     336    
192    -368   
-48    160    
-32    176    
224    -16    
-224   16     
160    112    
80     48     
224    144    
-624   -176   
448    -752   
208    -320   
0      -320   
-1024  432    
720    -304   
-544   -48    
256    -192   
80     -336   
-240   -2176  
-256   -720   
176    -64    
176    112    
-240   -32    
80     -80    
352    96     
-256   -240   
-80    288    
32     -336   
96     -32    
-16    -48    
176    160    
-16    128    
48     -128   
-96    16     
16     -2624  
-96    224    
16     -192   
80     224    
-272   -176   
32     -1088  
-96    -176   
0      -512   
16     2352   
1088   -848   
-1376  -272   
672    -336   
96     32     
176    -1104  
-448   272    
-96    -112   
400    352    
128    240    
-48    -608   
-400   -16    
-48    -272   
112    -416   
-80    -496   
64     0      
0      48     
96     -272   
-128   -176   
32     -80    
-144   -1152  
352    -848   
-64    592    
-128   48     
384    -144   
-96    -416   
-224   48     
160    48     
48     -208   
64     208    
-112   -464   
32     0      
160    -576   
256    528    
-64    368    
368    -144   
-208   -192   
-192   -304   
240    400    
-16    -160   
-128   -208   
-64    192    
-144   96     
-192   -128   
192    -416   
-352   0      
96     -192   
160    -96    
368    -608   
-992   48     
-112   640    
2208   160    
-1248  -288   
336    -640   
320    -464   
-48    32     
208    64     
-240   240    
-528   -320   
48     208    
160    -240   
80     -144   
-144   320    
64     -96    
32     -128   
48     -496   
160    208    
-288   -192   
192    32     
32     -112   
480    1440   
-848   -880   
-1104  176    
1472   736    
192    192    
-960   -240   
96     224    
560    1168   
-192   1152   
208    288    
0      -1216  
-528   -384   
320    176    
400    400    
-496   160    
-208   256    
384    -48    
160    96     
80     128    
-64    -32    
-352   272    
336    -96    
-48    -80    
-112   -384   
1056   384    
160    -128   
-784   -1392  
336    -1264  
-400   -640   
-304   -192   
496    288    
-304   -272   
624    176    
-352   -96    
80     288    
-288   -224   
-448   -672   
864    -1072  
-208   -368   
304    304    
-64    -1024  
-16    48     
144    704    
-48    880    
-32    464    
-288   688    
-288   -352   
-144   -688   
80     -496   
224    -80    
576    2304   
-544   736    
80     -80    
784    32     
-432   544    
-656   256    
304    832    
320    -64    
496    -224   
-208   -464   
-176   16     
16     384    
592    528    
-288   208    
-336   -528   
-48    -16    
-352   0      
16     160    
-64    544    
-304   432    
16     96     
0      -240   
-336   -160   
128    96     
-336   -192   
-640   784    
-208   464    
-112   64     
256    720    
-240   1312   
-96    624    
-48    -480   
288    -896   
-288   -16    
-144   240    
-256   288    
352    160    
-48    336    
-112   288    
-80    512    
192    16     
-64    256    
-544   -336   
-32    -208   
320    -368   
-944   -608   
-144   -544   
528    464    
-336   -576   
-192   -560   
112    -112   
144    -304   
-1184  112    
528    1104   
720    832    
-368   1088   
-128   224    
-176   -512   
-80    -320   
-384   784    
-352   752    
192    256    
448    48     
-480   192    
-144   -32    
-48    -320   
368    416    
-384   448    
128    1040   
-160   816    
96     336    
288    -48    
-384   -208   
-288   -48    
-736   -240   
-32    -576   
384    -1152  
-384   -832   
-80    -1536  
160    -336   
-576   -624   
1296   528    
224    832    
-752   -608   
144    288    
-144   -144   
432    192    
48     160    
-32    304    
-128   64     
-112   144    
384    -288   
64     80     
-128   160    
64     -160   
128    272    
80     -304   
48     208    
-16    176    
-208   32     
256    -32    
752    1520   
-1520  -336   
-192   560    
960    -416   
-1040  -192   
400    -288   
-16    208    
272    208    
-480   416    
128    -80    
96     48     
-128   16     
-256   16     
160    112    
-160   -80    
-16    -48    
-240   -64    
128    16     
-304   0      
256    48     
-224   16     
-240   -32    
-304   208    
64     112    
208    16     
64     160    
-368   -96    
80     112    
176    16     
208    928    
-16    496    
-1456  1040   
1760   48     
-640   -336   
-960   0      
1056   48     
16     0      
-176   -160   
240    -64    
-128   112    
-224   208    
64     80     
0      -48    
192    192    
240    -48    
-464   176    
288    -48    
-272   96     
176    -96    
-112   48     
-144   64     
752    800    
944    -96    
-1472  528    
1728   64     
-560   160    
-592   112    
784    -352   
-368   -176   
0      96     
32     112    
-48    64     
80     80     
-208   -176   
112    -128   
16     48     
64     304    
-352   208    
160    64     
-80    144    
-160   0      
48     -64    
-672   128    
544    16     
-80    -16    
-16    -496   
-496   -688   
0      464    
256    -240   
-448   -128   
288    80     
224    192    
16     304    
-160   160    
272    -80    
-368   -16    
-128   64     
-80    -448   
-480   320    
160    -80    
-176   -64    
240    32     
112    240    
-224   16     
-208   112    
464    -80    
192    96     
16     160    
-304   -64    
912    1520   
-2416  2416   
496    464    
400    -400   
-976   -352   
976    64     
320    -80    
-720   336    
32     80     
288    560    
688    -64    
-624   128    
48     -32    
80     192    
-48    -48    
0      240    
160    0      
-288   96     
416    48     
352    528    
-496   1008   
224    640    
304    128    
-304   -528   
-160   208    
256    64     
-80    128    
256    224    
0      48     
-272   416    
384    128    
-160   192    
96     272    
-80    176    
304    384    
-368   272    
320    576    
304    48     
-176   -192   
272    352    
-352   224    
304    240    
240    272    
-128   608    
128    480    
-272   -64    
-96    -1072  
-304   -64    
384    400    
-176   144    
-16    96     
240    224    
48     720    
-528   144    
240    -160   
0      -1568  
32     -160   
-176   -672   
-208   16     
240    -112   
272    -16    
-144   -160   
-64    -80    
-32    -80    
-128   -176   
336    -448   
208    32     
-288   -48    
-400   -624   
256    64     
288    96     
-96    416    
-64    64     
32     0      
-64    80     
144    -16    
-128   -336   
128    -16    
-112   -320   
208    -288   
64     384    
-288   -272   
848    32     
-1216  480    
64     -336   
656    -1936  
-80    -304   
32     -880   
144    1120   
576    -1168  
-128   304    
64     304    
-112   -16    
-144   352    
176    -128   
112    112    
-320   -176   
176    368    
80     48     
320    256    
-112   -160   
32     16     
576    192    
-912   1088   
720    -800   
288    496    
-192   512    
-352   304    
80     304    
208    32     
112    0      
-32    -112   
-64    208    
-48    -128   
112    64     
64     -64    
-112   416    
432    256    
-496   176    
-208   -144   
432    208    
-224   32     
-304   -32    
160    144    
304    96     
128    96     
48     -256   
-176   32     
80     -128   
384    160    
-176   -176   
-272   160    
-400   -1808  
-720   -224   
112    -1360  
-512   -144   
528    -352   
448    -592   
304    272    
-544   96     
-352   16     
240    -400   
336    -320   
-128   384    
-176   -96    
240    -240   
112    -288   
-32    480    
-176   -192   
240    880    
-48    -1152  
-80    80     
128    -208   
-16    720    
1872   -336   
-1008  16     
752    -192   
-496   -1776  
64     32     
128    2160   
1088   1728   
-80    1104   
-176   -416   
672    -1872  
-32    -560   
-384   -464   
288    80     
336    32     
16     128    
-592   -96    
336    -192   
192    -112   
-16    48     
176    -128   
176    160    
-256   160    
320    -112   
160    -1488  
416    -1360  
112    -448   
128    400    
528    544    
-64    -32    
80     304    
-144   48     
-272   -640   
-240   -224   
448    256    
-544   0      
-432   -2576  
-512   -560   
288    -1216  
-288   368    
304    -288   
224    0      
-112   752    
432    240    
-272   256    
304    -368   
-368   96     
48     -400   
240    -288   
-384   -1472  
672    -2544  
432    -128   
176    -112   
-1248  -1424  
448    384    
560    -880   
-416   608    
-96    128    
-256   416    
432    -160   
304    -48    
-400   160    
-368   0      
-80    -208   
768    -96    
32     -64    
-432   -336   
32     672    
320    1056   
272    528    
-176   -416   
-160   -384   
368    -128   
-496   -192   
624    320    
96     -64    
-608   -32    
272    -96    
-336   -112   
-16    0      
-272   -352   
-176   -32    
128    224    
416    0      
16     112    
-32    -656   
48     272    
-32    64     
176    16     
32     80     
32     -32    
-224   48     
-48    16     
-16    144    
-160   -112   
-48    128    
-544   -560   
32     -512   
304    -496   
16     176    
-288   -1072  
352    720    
1024   240    
-528   0      
32     224    
-80    -256   
-752   -208   
576    -176   
-368   32     
-80    0      
-224   48     
144    -112   
-272   272    
-112   -192   
384    48     
48     -144   
-320   144    
80     144    
192    -784   
-736   32     
144    80     
0      96     
-32    48     
-16    -16    
-224   -464   
592    -240   
288    192    
-160   16     
160    96     
-288   288    
1472   1632   
-2928  656    
-352   -144   
1584   -32    
-640   -128   
-208   -144   
288    -464   
96     272    
-208   -16    
96     -48    
-64    144    
-256   256    
320    -96    
-208   -448   
-112   160    
-384   128    
-1488  96     
304    -80    
-560   48     
-80    192    
-64    -96    
800    608    
176    -224   
-960   224    
-64    64     
0      80     
144    48     
-192   -32    
-256   -352   
-432   64     
160    -32    
-32    176    
0      -16    
-304   80     
224    -192   
-496   224    
32     96     
-176   -32    
32     96     
-176   -144   
80     192    
80     -64    
112    208    
-96    -64    
-352   48     
592    224    
-224   -128   
-144   160    
176    -16    
-336   -64    
-256   -272   
144    688    
-768   192    
0      80     
672    -128   
-336   112    
-272   -256   
544    192    
-208   -240   
16     32     
32     48     
-160   0      
-64    -16    
96     48     
-416   -80    
336    208    
-32    64     
-464   -112   
224    32     
-288   -96    
-16    128    
544    944    
-1200  -400   
-672   -176   
1136   464    
-896   -208   
-208   272    
416    160    
-32    -48    
-528   112    
176    0      
304    -16    
-736   -80    
-208   96     
160    -16    
-336   96     
32     -32    
-32    -48    
64     -32    
32     -64    
-192   128    
0      112    
-368   -448   
-48    0      
432    112    
-400   -96    
-16    -32    
16     48     
-176   432    
448    -368   
-320   272    
64     -48    
-208   -208   
-128   16     
-48    64     
-96    480    
-352   -16    
-144   -16    
416    -160   
16     304    
256    -128   
-320   144    
80     128    
0      80     
-272   -144   
240    288    
-944   -288   
-352   128    
416    16     
-96    -128   
-224   -1872  
1168   -2624  
128    864    
-480   32     
-1104  144    
16     144    
1152   -48    
-656   320    
-144   -112   
160    32     
-320   64     
96     112    
112    -32    
-16    256    
-48    -192   
224    432    
-576   -144   
160    224    
-48    -16    
0      496    
64     -32    
-192   192    
144    -128   
-576   256    
112    0      
32     160    
-112   416    
384    80     
-416   -32    
48     -208   
256    576    
160    848    
-80    624    
-384   48     
112    -256   
320    144    
32     208    
-1088  -992   
144    -288   
352    -112   
-240   -336   
-48    -160   
-96    -144   
112    64     
-64    -176   
288    -400   
-16    -656   
64     176    
-320   176    
144    -784   
16     -400   
16     352    
144    1136   
800    480    
-416   1488   
720    976    
-480   768    
208    1904   
816    2000   
-224   -112   
32     -512   
-64    32     
0      128    
-16    16     
240    224    
-112   480    
0      128    
144    -368   
-496   -240   
128    272    
256    -464   
192    64     
-16    96     
-48    48     
192    400    
-144   128    
-64    144    
16     240    
144    80     
-176   80     
-64    48     
192    96     
-688   -384   
640    -192   
-752   192    
320    -160   
240    96     
64     -144   
-112   48     
-192   208    
16     112    
240    16     
-16    32     
16     -32    
-48    80     
-32    176    
224    32     
-176   160    
64     -224   
-80    112    
112    32     
-304   -480   
976    -544   
-144   704    
16     32     
-224   192    
-96    64     
16     -368   
272    -464   
176    -16    
-192   128    
-128   320    
240    32     
112    -624   
-64    112    
-32    64     
128    160    
-416   -64    
64     -304   
224    -96    
-80    96     
96     -96    
224    -224   
128    -48    
-272   -144   
-96    64     
320    -128   
144    -48    
-128   -192   
432    288    
-128   -928   
784    1872   
48     480    
-2336  -720   
1776   -432   
64     -480   
-752   -128   
0      288    
704    -848   
240    752    
-160   64     
96     224    
-96    112    
112    -176   
288    480    
-336   -352   
32     0      
336    48     
16     688    
144    592    
-320   -416   
256    -448   
-240   720    
2048   -48    
-1328  240    
256    16     
272    -512   
-288   -160   
-352   -1072  
704    -912   
80     -1568  
-400   -304   
432    16     
32     256    
-320   352    
192    -96    
128    32     
-32    192    
-240   -912   
-192   -208   
48     -16    
368    -464   
208    144    
16     -208   
80     320    
-64    -624   
32     -96    
-32    224    
640    -32    
-144   320    
304    -144   
-64    -64    
96     0      
160    -128   
96     112    
32     192    
64     -128   
-224   288    
272    -240   
-208   -80    
-288   112    
720    -64    
48     -48    
-224   192    
-144   -784   
-48    192    
336    16     
-736   272    
80     48     
48     128    
160    720    
304    -1008  
672    -2144  
480    -48    
560    -16    
-1232  64     
0      544    
320    -944   
928    432    
-176   -512   
-384   352    
416    -96    
128    272    
256    -32    
-352   -240   
-176   32     
432    -288   
-64    128    
304    -112   
-400   64     
256    -192   
304    -1344  
-256   -896   
96     400    
-144   -80    
-208   144    
688    -16    
-192   -176   
64     -304   
96     0      
304    -16    
-112   224    
112    -144   
-48    -336   
-160   112    
48     -48    
-320   96     
192    -368   
32     128    
-32    96     
-480   -112   
352    16     
224    -448   
-240   -1520  
-96    160    
-208   16     
256    416    
336    -656   
-480   160    
48     -32    
224    -272   
208    -80    
-192   -128   
-32    112    
768    -112   
-352   32     
96     176    
128    224    
96     80     
-672   96     
-16    -144   
-128   -176   
224    -160   
176    0      
-64    -560   
80     144    
160    112    
-96    -16    
-32    -16    
432    128    
-192   -624   
-240   128    
224    176    
-320   -96    
-400   -32    
240    -352   
-224   -32    
96     -544   
240    80     
-176   32     
112    -32    
32     -1216  
1120   128    
-3520  1200   
192    224    
1504   176    
-784   -336   
-320   -352   
320    -496   
-464   16     
32     208    
400    -176   
-240   96     
-80    176    
128    -64    
192    -192   
-272   -1056  
-224   48     
256    272    
-48    -160   
112    -96    
128    240    
-464   -800   
1232   -144   
-592   160    
-512   -16    
304    144    
48     -240   
-400   160    
432    -80    
240    -224   
-432   112    
288    -64    
128    -528   
160    96     
-288   -64    
160    -192   
-80    48     
256    336    
-16    32     
-112   192    
352    -112   
-80    -208   
-848   -16    
160    48     
112    -16    
176    -80    
48     16     
-224   -608   
64     96     
80     32     
-32    0      
-816   -48    
528    192    
-432   288    
-352   -128   
-16    0      
128    -80    
-288   -368   
160    -464   
-240   -272   
-176   -512   
112    144    
80     -192   
-80    64     
-32    144    
320    80     
-624   48     
400    -80    
-432   -32    
-160   -112   
160    96     
-32    0      
496    736    
-1408  -544   
-48    272    
720    240    
-560   208    
80     -144   
-80    128    
112    304    
-400   -160   
-416   -32    
304    -64    
-304   112    
64     80     
128    208    
-256   -272   
48     80     
160    -368   
-64    -112   
96     -144   
64     160    
-64    -208   
-704   -496   
-624   304    
928    -192   
-1024  112    
416    64     
544    160    
-640   -96    
-144   112    
496    -144   
-112   -16    
-832   -32    
-176   96     
-112   -352   
304    -32    
-176   -304   
-80    128    
-320   128    
-48    -16    
80     -80    
-656   64     
-464   32     
672    -224   
-48    16     
-1040  96     
-128   512    
224    -96    
192    112    
-16    32     
-1264  672    
1792   416    
352    16     
-1808  -208   
-432   224    
1024   96     
-624   -160   
-560   896    
592    288    
-384   384    
-288   224    
432    -80    
32     -192   
-80    224    
-144   -208   
32     0      
-96    0      
-64    -32    
112    -48    
-64    -672   
-752   -832   
240    -400   
-48    -80    
-192   96     
-80    368    
320    -384   
176    336    
-576   352    
368    80     
-160   -928   
160    -240   
-320   80     
112    32     
-208   -240   
240    -144   
-16    -80    
-320   224    
128    160    
336    416    
-96    256    
-208   -624   
208    144    
-432   400    
-16    -304   
-64    336    
272    1264   
-64    560    
-464   144    
384    16     
-32    -304   
16     416    
-272   -272   
-336   -1008  
160    -864   
64     -1168  
-896   -368   
528    1072   
-176   1120   
-288   -64    
-240   0      
32     64     
288    112    
-240   -48    
-144   176    
16     -384   
-656   -608   
-96    320    
208    160    
-208   -128   
320    128    
48     48     
48     64     
32     -96    
-64    80     
0      64     
-80    48     
64     112    
336    208    
-192   208    
48     0      
192    -96    
-128   0      
-672   528    
912    -320   
-768   176    
224    -64    
-128   288    
-848   -192   
192    -128   
320    -256   
64     224    
0      112    
64     -144   
32     -16    
-112   -160   
32     160    
176    96     
-208   0      
-80    -128   
32     32     
0      16     
144    224    
-304   1056   
624    -160   
-864   0      
240    80     
144    80     
-16    -144   
-320   144    
368    192    
-32    240    
-224   224    
48     0      
96     -80    
112    224    
-272   80     
160    320    
-64    272    
80     48     
-304   624    
464    -592   
-208   -416   
-128   128    
176    144    
320    240    
-352   128    
-368   -96    
192    256    
112    -48    
-384   -64    
544    -176   
-208   -1088  
1600   -1328  
-1136  64     
528    112    
208    -32    
-496   400    
160    384    
592    368    
-432   784    
-240   128    
48     -432   
352    -336   
-128   -256   
-160   160    
-208   160    
368    304    
-160   112    
-128   336    
32     48     
336    384    
-192   -112   
560    352    
-1744  704    
416    32     
-464   -1568  
-288   -1680  
336    48     
-496   -96    
832    288    
48     528    
-144   224    
0      112    
-48    48     
160    400    
144    0      
-464   -32    
64     160    
272    272    
-80    -16    
48     160    
-128   -80    
48     64     
96     416    
-416   -1152  
-384   400    
880    0      
-672   -304   
368    256    
1120   0      
16     80     
-208   224    
-112   320    
368    -16    
32     96     
352    64     
-176   176    
-560   -576   
-640   -368   
-112   -960   
-96    -304   
448    208    
-160   0      
-176   144    
208    128    
-112   0      
-208   224    
208    160    
112    32     
80     16     
-256   64     
64     1472   
-176   3648   
704    1264   
-752   -800   
-752   -224   
704    192    
352    80     
-320   -128   
-192   48     
352    400    
-464   80     
112    176    
464    64     
-544   -144   
144    192    
112    -112   
112    64     
192    32     
-96    -208   
464    288    
-1024  96     
848    224    
80     208    
-384   -352   
-544   272    
752    32     
-224   -48    
-32    0      
256    -96    
-160   80     
160    208    
-48    -16    
80     96     
240    -400   
-320   96     
480    -176   
-16    64     
80     48     
256    -144   
-304   64     
464    128    
-256   -288   
80     144    
304    144    
-144   224    
240    304    
-288   -144   
240    144    
32     -240   
-272   96     
240    -448   
304    80     
32     -1728  
144    96     
-624   -80    
1216   288    
-608   80     
-448   112    
368    -80    
32     160    
160    80     
128    -128   
-80    0      
-144   112    
256    -16    
-64    -288   
16     80     
-32    -336   
224    -160   
-64    -640   
-592   304    
480    160    
-176   0      
160    -112   
96     48     
0      272    
-144   -160   
64     560    
208    176    
-400   48     
176    -1072  
272    48     
-928   768    
2640   -1312  
-1216  -1408  
-320   -96    
928    96     
-160   -736   
-800   48     
544    816    
-544   -32    
336    -608   
368    224    
-576   -544   
-16    160    
336    80     
240    -240   
-160   -224   
-64    176    
0      224    
176    96     
32     0      
320    -16    
-1392  528    
960    -400   
64     64     
-176   -144   
128    208    
-192   -464   
-128   368    
352    -16    
-16    128    
-176   -32    
64     144    
-16    -112   
-32    -272   
224    -80    
-160   -320   
96     176    
192    -512   
-496   -320   
128    -192   
32     -352   
0      -144   
96     176    
-80    -352   
272    160    
-224   -224   
32     0      
96     128    
-16    -496   
-896   -1104  
1392   -752   
1632   -96    
-2688  -144   
768    -96    
480    -208   
-304   160    
80     112    
512    -976   
-192   176    
-112   112    
256    16     
48     -272   
-48    48     
32     -416   
-208   32     
480    0      
-288   -16    
-160   -64    
-256   -464   
128    -208   
-16    -448   
80     496    
1776   -240   
-1280  192    
0      -688   
288    -848   
224    -32    
-80    128    
272    -16    
-112   112    
-64    16     
272    256    
-768   64     
112    -464   
-176   -144   
496    -208   
64     144    
-240   -144   
400    -224   
-176   -1024  
144    144    
256    -64    
96     368    
368    -400   
384    80     
-416   176    
-592   -896   
-848   320    
544    -224   
-1584  0      
624    -240   
-32    32     
160    -16    
-80    48     
-32    -656   
-80    256    
480    -240   
128    96     
-464   400    
256    -432   
272    -672   
-304   16     
176    32     
-32    -48    
-304   304    
176    -368   
-544   400    
16     -368   
-160   96     
464    -448   
-416   -1392  
800    -3600  
352    240    
-384   96     
-464   -112   
128    -208   
272    -720   
320    1184   
-144   -960   
-704   -848   
416    -480   
-432   48     
-64    -96    
-192   32     
32     208    
464    544    
-256   -336   
160    272    
-32    -400   
-208   -288   
112    176    
144    160    
-16    272    
-960   -144   
496    -768   
-160   -400   
176    -528   
-64    -416   
64     -144   
0      -176   
176    16     
192    -240   
160    272    
-160   -304   
144    -656   
-112   -928   
-16    -96    
192    80     
-400   464    
32     48     
448    -592   
-16    -16    
-128   -160   
0      160    
48     -832   
-128   176    
208    128    
-176   624    
240    -96    
176    -288   
-224   -144   
576    1456   
-1456  176    
80     -304   
144    -224   
128    -240   
-128   960    
-112   688    
-64    -912   
-1472  -1264  
144    400    
160    224    
-528   -80    
-128   496    
352    432    
128    -192   
96     -304   
80     -64    
-480   96     
-176   288    
-736   -16    
-112   96     
-240   -208   
-32    144    
176    16     
-64    -48    
128    -256   
208    -736   
-272   -464   
-224   -32    
-48    240    
-400   -528   
512    -864   
-336   208    
304    -144   
-544   128    
-80    368    
-160   -224   
512    448    
-416   208    
-272   64     
0      208    
64     208    
-32    16     
-96    176    
32     192    
-80    16     
-32    352    
64     80     
48     32     
144    16     
352    -80    
-1424  688    
1008   -224   
-176   512    
-160   640    
112    208    
-16    416    
-448   144    
256    -592   
304    384    
-512   704    
-416   -160   
-192   -272   
432    608    
-304   -656   
-256   608    
-304   -848   
640    784    
176    -64    
-272   176    
-272   80     
-192   -80    
432    -80    
-144   64     
-160   192    
32     224    
0      -48    
128    -64    
-224   -96    
-48    -672   
-1104  848    
2064   96     
-560   48     
-544   112    
896    -320   
-592   224    
464    224    
-288   128    
-32    96     
-48    224    
528    160    
-320   128    
-368   -128   
144    320    
352    80     
-96    192    
-256   224    
192    304    
-160   80     
96     -48    
-48    128    
-336   -928   
-624   -96    
752    -192   
128    -144   
-288   -96    
224    -208   
-32    -256   
-960   304    
640    -32    
-64    0      
-480   112    
80     -16    
-160   -16    
16     176    
368    32     
-288   64     
48     240    
-288   -160   
432    160    
384    -48    
-128   560    
-240   -176   
-128   336    
-128   -256   
144    -416   
176    -144   
336    -624   
192    -64    
-432   720    
-64    96     
-224   48     
448    -64    
256    -32    
-336   -192   
-144   432    
608    656    
144    -112   
-240   288    
128    -80    
-48    -96    
304    80     
288    352    
-208   -144   
-208   128    
192    -240   
576    48     
0      64     
-400   32     
1008   1168   
416    2432   
-2608  1120   
1328   -512   
656    144    
-784   112    
-368   144    
496    208    
-208   96     
-160   -128   
576    -48    
80     112    
-48    -48    
-320   208    
80     112    
-80    16     
208    128    
64     80     
-528   -16    
16     -112   
960    -464   
-640   16     
256    144    
-48    304    
-288   128    
-96    128    
-336   -16    
368    -144   
-336   192    
0      -112   
16     0      
112    -80    
144    -96    
-224   144    
208    0      
240    384    
-528   0      
224    96     
400    -48    
-416   240    
640    176    
-368   96     
336    -16    
208    16     
-208   -16    
16     80     
-32    480    
96     576    
-208   416    
336    -112   
-144   -96    
-96    -240   
0      -480   
672    -544   
64     176    
-48    224    
-128   80     
-176   48     
-432   32     
304    -320   
-16    -176   
-80    16     
80     128    
80     0      
-176   -2592  
-80    144    
224    32     
176    288    
-384   80     
-32    80     
384    -80    
-80    -192   
-704   240    
464    272    
0      -192   
64     -144   
-112   -256   
-144   16     
-64    112    
160    -416   
128    64     
-64    -96    
-432   -2704  
-768   1248   
2208   -208   
-1136  144    
96     160    
320    -224   
-192   224    
208    592    
-736   1248   
400    -368   
-16    -224   
-240   112    
160    -192   
160    352    
-528   272    
352    -304   
-352   256    
64     -16    
-16    -224   
112    -16    
352    912    
-1040  -16    
144    192    
1120   192    
-528   272    
-16    32     
-400   -608   
464    -800   
-16    128    
-32    -400   
64     208    
-64    32     
112    -128   
-80    96     
144    80     
-160   -48    
304    112    
-128   272    
96     208    
-240   64     
80     -128   
0      144    
-16    -208   
48     160    
-32    -176   
320    128    
-304   272    
160    -64    
96     160    
176    -160   
-1488  -1472  
576    -16    
928    -928   
-1824  16     
864    352    
320    -16    
-304   160    
48     192    
-352   64     
384    16     
80     80     
-160   128    
32     80     
48     240    
-32    272    
-96    336    
368    64     
-160   64     
-32    64     
-48    176    
144    -112   
624    1232   
864    48     
-336   208    
-128   -832   
-80    -288   
288    -1200  
-304   256    
-464   480    
112    -224   
592    -320   
64     80     
-176   112    
-144   160    
160    144    
0      -96    
0      208    
-144   -112   
-80    -112   
176    -224   
0      112    
176    32     
-160   144    
-80    -16    
96     64     
-320   -272   
192    -496   
1216   432    
336    368    
-96    496    
384    -320   
-240   80     
112    -544   
208    656    
-304   32     
-448   -320   
944    -416   
64     496    
528    -208   
48     256    
-144   432    
0      -32    
128    176    
240    -512   
-16    -864   
400    544    
-752   1136   
-16    -128   
112    624    
512    512    
-144   208    
-1424  -768   
-96    -32    
512    -368   
-656   -992   
1024   1008   
-112   480    
-816   -512   
592    -624   
384    -480   
176    -272   
-432   -112   
96     208    
352    32     
48     -528   
96     240    
-320   160    
400    -160   
-144   -96    
-64    -720   
-144   -368   
128    848    
144    -592   
-944   -160   
192    -16    
448    -16    
-16    -1712  
-64    816    
-80    -1344  
-208   -688   
192    400    
144    80     
-240   -400   
-128   224    
320    176    
464    688    
-400   176    
-176   -32    
-288   -112   
368    -80    
-80    352    
-144   -192   
-432   -320   
304    -192   
0      -64    
192    -400   
-48    592    
32     -80    
320    -1072  
64     800    
-320   160    
-96    704    
-64    816    
1200   224    
-560   64     
-96    96     
208    112    
592    -304   
-192   -448   
-128   240    
144    16     
-64    0      
224    -128   
160    160    
-352   80     
-32    80     
224    -272   
-416   -416   
192    512    
-224   -160   
-608   256    
320    96     
16     -16    
32     -560   
-272   80     
416    192    
-80    976    
224    560    
0      816    
48     304    
80     -400   
-240   128    
464    2016   
1520   -192   
-1632  -512   
-96    -368   
16     -352   
16     -416   
288    -464   
-352   528    
-32    384    
80     -384   
272    -1584  
-32    96     
-192   -144   
-224   320    
112    -192   
32     96     
-208   0      
-16    240    
-128   -192   
240    176    
-176   1168   
224    -208   
-432   -704   
592    80     
96     512    
-208   -656   
-224   352    
-16    0      
288    208    
-16    784    
-144   -16    
-96    64     
320    -144   
-160   -144   
-64    160    
96     -208   
320    -528   
-144   -48    
-32    -496   
16     48     
-64    -208   
32     -320   
176    -80    
-128   0      
0      -144   
192    -80    
-288   16     
16     -64    
0      112    
240    1632   
624    224    
-1088  352    
912    -80    
-512   -480   
-512   192    
640    336    
-288   -112   
-160   192    
-416   -112   
-16    48     
80     -32    
-176   128    
400    224    
-368   80     
-112   48     
384    48     
-1408  -128   
-80    64     
-288   -128   
48     64     
-64    192    
-896   -48    
1680   -80    
-864   -128   
-304   256    
-144   64     
-272   96     
336    432    
-624   32     
-368   -192   
208    128    
-192   -80    
-80    16     
-240   -128   
336    32     
32     32     
-224   160    
-448   160    
-16    -192   
-256   192    
-384   -64    
-80    -352   
-496   160    
336    -160   
-592   -96    
176    288    
624    -352   
624    160    
-304   -416   
176    -112   
592    176    
-496   128    
80     160    
16     176    
-256   64     
480    192    
-368   256    
-336   -144   
496    320    
-304   -80    
-672   96     
192    -32    
400    32     
-80    -192   
-768   -352   
96     128    
288    -192   
96     0      
336    16     
-144   -832   
-2400  -3552  
-672   -752   
1280   208    
-960   16     
384    -16    
432    96     
-416   16     
-288   176    
352    112    
208    -208   
-272   176    
-224   -96    
-112   0      
144    -64    
160    48     
-144   -32    
-368   240    
224    -144   
-304   -240   
-112   160    
-112   -96    
-448   144    
240    16     
-640   64     
640    48     
-368   0      
-16    384    
544    -224   
-528   112    
-224   -64    
176    48     
112    -48    
-112   -128   
272    48     
-672   32     
624    256    
-336   0      
208    0      
48     -16    
-144   32     
208    -80    
-496   -128   
256    -48    
-48    256    
-528   -352   
576    -256   
64     16     
-416   -64    
128    144    
-32    64     
144    128    
-160   -224   
448    -592   
-320   672    
288    512    
240    96     
-272   256    
-32    176    
144    -320   
-192   -240   
-208   80     
96     96     
96     32     
-48    0      
-160   -240   
-16    -128   
-208   -336   
304    16     
-48    368    
192    960    
352    656    
-368   192    
80     -256   
-48    -64    
-16    32     
160    -48    
-32    304    
112    1104   
96     800    
-288   128    
32     16     
-160   -2624  
-832   784    
1360   -272   
-1472  0      
1184   -448   
-80    192    
-512   256    
-144   384    
592    640    
32     128    
-432   336    
-240   16     
320    320    
-48    64     
-240   128    
48     -144   
80     240    
144    144    
0      64     
-128   96     
16     320    
-288   112    
96     -160   
192    -32    
16     -416   
-160   -320   
-48    -336   
240    224    
-176   -48    
64     16     
-16    160    
0      192    
16     272    
16     112    
-320   -320   
0      144    
432    608    
-64    -192   
-128   224    
80     -176   
80     -48    
-192   128    
80     112    
192    176    
-48    -32    
0      176    
32     0      
256    208    
-128   192    
-112   -48    
-288   -1120  
-800   64     
976    -560   
-624   -336   
48     -80    
160    -112   
-944   1104   
416    368    
16     -528   
-208   -384   
80     80     
0      112    
160    16     
-208   -224   
-96    0      
400    0      
-160   160    
-176   384    
464    912    
0      736    
-160   112    
64     448    
2144   -2880  
-1120  -16    
-816   528    
816    688    
0      1328   
48     880    
224    -128   
-64    192    
-224   144    
272    384    
208    176    
32     96     
-240   272    
480    288    
48     48     
-192   -112   
192    304    
16     416    
176    96     
96     416    
-128   96     
368    1408   
-608   1712   
32     816    
-48    288    
336    960    
-752   416    
160    -1200  
528    -912   
-368   416    
256    160    
336    320    
-688   -768   
-176   -144   
208    144    
96     976    
816    816    
-272   176    
304    160    
-304   272    
-208   0      
16     80     
336    -160   
-32    336    
448    560    
-336   -192   
-16    304    
608    -272   
48     96     
-1264  -1168  
-256   464    
416    -160   
-368   0      
912    1072   
-560   -400   
-176   688    
448    1376   
160    400    
416    -352   
-160   304    
-256   -256   
240    672    
144    -656   
192    224    
112    560    
-32    304    
-128   48     
144    -160   
-32    320    
80     272    
0      -112   
400    384    
-304   96     
-16    112    
416    -208   
-560   -192   
-80    400    
480    944    
96     288    
-80    -3472  
-240   -288   
-336   -992   
544    -256   
-320   -224   
32     -96    
80     -16    
64     560    
336    960    
192    96     
-64    272    
-336   320    
336    304    
-16    -176   
-16    224    
-80    976    
288    752    
-256   544    
176    96     
112    -160   
-16    352    
0      848    
992    272    
-464   -176   
-144   -48    
848    672    
-496   624    
-336   368    
336    -1104  
-16    -960   
-272   -720   
144    -256   
16     -304   
-112   -16    
416    160    
-416   32     
0      160    
368    272    
32     336    
-192   -320   
-16    144    
0      -368   
160    -96    
176    -336   
-160   80     
-32    -304   
224    528    
-96    352    
0      32     
-16    -144   
832    1744   
-1744  -128   
336    1216   
496    -544   
-736   -544   
320    -752   
-80    -1008  
16     -384   
208    432    
416    368    
-464   -16    
-48    -832   
352    112    
-96    -464   
-240   -288   
352    160    
-144   448    
240    1024   
304    -144   
-176   176    
-352   -592   
864    -240   
-480   -1536  
80     -48    
32     320    
-16    368    
-144   96     
16     -368   
208    16     
-48    -256   
-592   -144   
400    -288   
-320   80     
-208   -240   
256    -64    
-208   -192   
192    -144   
-160   -864   
400    0      
-416   -128   
128    0      
240    32     
-96    112    
176    -80    
-304   176    
-32    112    
592    144    
-592   -16    
64     -16    
400    -112   
-1472  -1648  
-560   -464   
1424   -768   
-1472  -240   
288    464    
848    96     
-416   -176   
-560   -48    
672    32     
0      -144   
-288   112    
160    -32    
-416   0      
64     -192   
-176   128    
-80    -128   
-208   -16    
288    -80    
176    144    
-256   -672   
-96    144    
576    592    
-1488  -288   
-432   224    
1168   384    
336    -208   
-560   -32    
352    48     
368    144    
-1248  -16    
256    -96    
-32    -16    
-16    -96    
-128   -224   
544    -448   
64     0      
-416   -192   
608    176    
-272   80     
96     -32    
160    0      
-112   -192   
-384   64     
1136   80     
-1376  -64    
-128   544    
-512   288    
-432   -320   
384    176    
-208   64     
-240   -64    
-240   -656   
448    464    
80     32     
-112   160    
-432   -128   
544    -384   
-96    848    
-544   720    
48     -592   
112    -352   
-368   112    
160    -176   
288    80     
0      -176   
224    -96    
-1008  -272   
336    -320   
-144   0      
-96    -272   
944    4000   
496    496    
-1248  -176   
1616   0      
608    64     
-928   -32    
-1280  -16    
1488   -160   
-16    -96    
-944   -416   
-128   224    
112    48     
592    0      
-496   -48    
-176   96     
-240   64     
624    32     
-128   -32    
-32    16     
-384   -592   
-384   -64    
656    -176   
-400   -32    
576    0      
-112   -384   
-272   128    
304    64     
-672   0      
416    336    
-1248  352    
144    224    
224    32     
-96    96     
-176   80     
144    288    
64     96     
-128   336    
0      32     
-192   448    
64     -224   
80     160    
-304   -16    
64     16     
-640   64     
416    240    
192    352    
-480   -16    
-224   48     
352    288    
48     0      
-784   -256   
176    96     
-176   112    
448    -352   
-752   -1904  
-192   -1040  
176    96     
-16    304    
368    32     
-64    272    
-368   352    
112    464    
16     160    
-848   -64    
-16    352    
-48    96     
192    224    
64     112    
96     384    
-144   144    
-256   -240   
16     -592   
-96    1008   
384    -80    
-768   -304   
-176   -112   
368    112    
368    576    
-912   -144   
-544   -816   
320    -288   
560    800    
-448   -1296  
-640   32     
1056   1056   
-368   256    
-624   480    
400    -1744  
-64    -96    
-64    -240   
-192   -176   
192    -96    
-80    128    
-240   96     
-128   224    
-688   -160   
64     -80    
-48    -688   
48     336    
-16    -64    
16     -160   
-112   -512   
640    -592   
0      416    
176    1392   
0      144    
-560   -256   
32     -544   
256    816    
-144   288    
-624   -576   
304    336    
112    -64    
-160   512    
48     144    
32     -16    
32     96     
272    -64    
-528   -288   
-272   -64    
272    672    
144    272    
-64    -192   
-144   -80    
-32    0      
-448   240    
240    448    
-208   368    
48     96     
176    -112   
-304   16     
352    1216   
544    -160   
-2160  -64    
1536   1120   
192    576    
-1408  -80    
592    -16    
368    -592   
-432   -176   
-336   192    
320    -32    
-48    128    
16     32     
112    208    
-304   -176   
-48    192    
224    128    
-48    96     
-416   -16    
-288   16     
112    0      
-752   -208   
1008   -768   
16     800    
-400   1168   
416    400    
-320   -272   
80     96     
192    -1296  
-480   -1168  
160    480    
288    976    
-112   384    
-224   -464   
288    224    
-544   208    
112    400    
80     -80    
96     256    
288    64     
-352   0      
-112   224    
368    144    
-544   320    
160    688    
544    832    
-176   416    
544    2080   
-528   2224   
-544   1568   
368    -192   
-32    80     
-592   -224   
0      -432   
528    752    
-208   240    
-656   576    
384    1360   
-592   784    
64     400    
80     288    
-304   208    
112    -16    
-96    560    
128    224    
-304   -288   
32     -192   
208    -224   
176    -464   
192    -240   
-112   -16    
-544   -2352  
-1152  -320   
768    -160   
-48    1136   
336    48     
-544   -240   
-400   -176   
880    -128   
320    -864   
-784   -352   
-352   688    
320    -208   
304    544    
16     -400   
-576   352    
-320   160    
608    304    
48     0      
-272   -880   
-864   -1008  
496    -16    
384    320    
-544   -64    
208    160    
48     400    
-80    -96    
416    -912   
80     -1216  
-144   -48    
64     128    
-80    16     
304    384    
0      -160   
-32    -64    
272    32     
-128   496    
32     336    
-16    -32    
-16    160    
-160   320    
16     400    
144    176    
16     -752   
128    80     
64     -224   
-16    -880   
48     -352   
16     176    
96     -528   
-352   -496   
208    -528   
608    320    
-1472  128    
592    240    
736    128    
-448   -256   
272    496    
-272   256    
112    528    
96     112    
0      272    
128    96     
-208   48     
96     368    
288    352    
-208   48     
96     -96    
240    -480   
96     800    
224    368    
176    -224   
-512   432    
224    -144   
368    336    
-192   240    
-304   -144   
576    -64    
112    176    
-304   352    
64     256    
48     0      
528    3024   
928    432    
-1152  448    
16     -144   
288    -64    
368    0      
-368   -432   
224    96     
-160   -2144  
-96    32     
336    112    
-160   176    
-144   112    
96     -288   
176    -432   
512    480    
-336   160    
-64    192    
176    -32    
-192   -304   
896    576    
-1536  256    
784    64     
48     -464   
-624   -48    
576    -3184  
-128   272    
16     -96    
32     208    
192    48     
-192   64     
-64    208    
176    -80    
32     64     
48     -128   
144    80     
-320   -112   
80     64     
-112   -240   
192    304    
112    -656   
-320   96     
-16    80     
48     80     
480    64     
-688   32     
544    128    
-208   -48    
-128   96     
-144   -912   
1120   -1440  
-208   -592   
-160   96     
432    -448   
80     96     
-240   128    
80     416    
-16    272    
-32    64     
32     -16    
-272   -32    
384    128    
-64    -304   
-224   112    
480    -176   
-32    176    
-272   -576   
192    96     
400    -592   
-48    64     
-48    80     
-320   -480   
-592   304    
2112   80     
-1536  -816   
-896   128    
1920   0      
-784   -128   
288    192    
448    0      
-80    48     
16     -112   
192    208    
-144   -256   
-48    80     
-288   -144   
384    -656   
-16    80     
-144   -2048  
432    -272   
336    -448   
-208   -336   
736    512    
752    -528   
-976   -144   
800    -2608  
0      560    
-176   672    
-288   416    
832    -1408  
-192   -112   
192    -32    
-80    96     
160    -112   
352    -16    
240    -304   
-608   -64    
448    224    
-176   -720   
-208   -400   
352    -304   
144    32     
-160   -288   
80     -240   
16     -128   
-96    -16    
592    208    
160    128    
-96    16     
48     336    
1776   5344   
-400   1840   
-608   -176   
1536   -432   
-544   32     
-336   96     
304    -224   
560    -528   
-80    -176   
-320   -192   
496    176    
-336   80     
-64    144    
496    -368   
-448   16     
-96    -112   
-144   48     
256    -16    
0      -48    
-384   -48    
64     544    
48     848    
64     -832   
672    0      
48     -400   
-624   272    
448    -432   
-288   288    
96     -64    
480    368    
-432   448    
160    80     
0      304    
-48    -208   
-688   -160   
64     -480   
64     -576   
-720   -736   
272    -144   
128    -464   
0      112    
-176   -80    
-80    704    
448    272    
-96    -128   
-464   -464   
512    -544   
-800   -624   
80     -48    
-144   624    
-128   512    
80     128    
-304   80     
736    -208   
-432   -1248  
80     -144   
128    144    
-416   -544   
-640   -1072  
192    -1248  
-256   -496   
48     -720   
-48    -272   
96     96     
-96    256    
-80    16     
112    -464   
0      -160   
-32    240    
64     -480   
-16    -80    
128    -608   
192    912    
-224   80     
464    144    
-704   96     
416    -128   
-112   -272   
-512   -96    
176    32     
240    16     
-32    -96    
-496   -960   
-32    -368   
112    -128   
-112   -192   
80     -1200  
16     32     
48     -480   
304    -208   
-48    -64    
16     272    
-48    208    
64     112    
-112   64     
144    -48    
16     192    
-160   32     
-16    384    
-240   208    
96     80     
0      -112   
64     688    
560    -80    
-1088  -48    
688    -160   
32     -192   
-64    160    
96     0      
-176   336    
-48    160    
160    144    
-272   -304   
112    -112   
-208   112    
96     320    
48     -144   
64     -64    
-96    -128   
-432   -224   
80     -112   
624    -64    
-208   256    
-48    16     
-80    160    
-384   -208   
240    -192   
-192   -416   
-16    112    
64     -352   
-176   112    
-352   -896   
2048   -1072  
-1488  288    
240    320    
688    496    
-1216  688    
-240   96     
1136   720    
-400   736    
-432   -736   
0      176    
272    -16    
160    112    
96     96     
-464   16     
-80    240    
64     -336   
176    -480   
-160   -192   
-272   80     
16     48     
-208   -672   
-1056  768    
1712   -224   
-784   128    
480    112    
320    -848   
-752   -784   
-176   -272   
320    352    
-144   288    
80     144    
-144   -224   
48     -160   
0      -336   
-16    0      
160    -80    
-688   352    
464    1344   
208    704    
-272   320    
-80    16     
-128   -32    
384    560    
-480   560    
16     288    
112    -48    
256    1456   
-448   592    
-848   64     
880    -736   
-208   64     
-416   160    
128    240    
-736   -64    
-224   576    
800    -592   
-208   944    
-272   64     
64     112    
176    592    
352    112    
-528   64     
-272   272    
704    16     
-80    -320   
304    -544   
-608   112    
176    112    
736    528    
-288   640    
-704   2608   
640    512    
-960   -272   
-128   1600   
976    800    
-448   32     
-208   -96    
400    -96    
-400   80     
-192   -96    
128    16     
-336   -32    
160    -288   
-640   -16    
80     112    
-64    304    
-32    -176   
224    160    
-288   -1424  
-576   -528   
448    400    
-224   512    
-16    -176   
672    384    
-160   -80    
-624   224    
112    -352   
192    192    
-128   240    
48     80     
16     112    
-32    -144   
16     320    
48     -16    
272    272    
240    608    
-480   256    
160    -80    
320    96     
-384   112    
0      176    
-464   -240   
560    -128   
432    -64    
-464   128    
96     288    
48     112    
-32    32     
0      -48    
-176   128    
-80    32     
-32    -1008  
-704   -112   
432    384    
-64    -144   
-176   256    
384    -32    
-272   144    
-32    384    
144    0      
32     224    
128    96     
-240   -48    
80     240    
192    96     
-240   -448   
-256   -320   
80     192    
-80    -640   
-160   -208   
256    368    
16     -176   
-32    112    
-32    304    
-16    176    
32     -112   
128    -416   
16     112    
-64    112    
-16    80     
-704   -1264  
2208   480    
-688   416    
-720   -96    
176    160    
-368   80     
-16    -448   
592    -48    
128    -80    
-944   464    
528    -48    
256    272    
112    80     
-384   -48    
256    480    
112    160    
0      -240   
-32    336    
176    80     
-320   16     
256    144    
-160   992    
1088   -272   
-880   -432   
-336   128    
672    -64    
-96    768    
240    -112   
-384   112    
272    -48    
-160   320    
544    -128   
-176   96     
-16    0      
-320   64     
288    96     
112    -32    
-256   -560   
-128   16     
320    128    
96     64     
-96    -16    
16     128    
48     96     
-32    16     
192    176    
112    32     
-288   176    
96     80     
48     -64    
1584   736    
-4304  1280   
160    -800   
2560   64     
-704   80     
-800   -64    
288    -16    
400    320    
-400   496    
64     224    
336    -16    
-224   64     
-336   -272   
368    352    
-384   -128   
-16    -32    
288    16     
-224   -48    
64     208    
-16    144    
-64    96     
256    400    
288    -656   
-1152  224    
672    -1008  
-176   -160   
64     -176   
-112   64     
528    176    
-48    -192   
-400   32     
160    80     
-144   -32    
192    144    
240    -1168  
-464   -16    
-224   48     
304    112    
176    240    
0      304    
-160   -112   
-32    128    
-16    -464   
-608   320    
496    -96    
-448   -176   
528    160    
240    -288   
-256   32     
320    -512   
272    64     
-208   -1584  
-32    -192   
-336   -32    
0      112    
560    -352   
-432   288    
256    -176   
32     16     
-112   240    
192    -96    
16     160    
16     -336   
-16    80     
64     -112   
32     400    
-288   -352   
-96    80     
304    48     
-160   96     
288    1136   
1424   1568   
-128   -144   
-1904  -288   
688    208    
1568   192    
-1200  464    
-272   -560   
288    448    
176    -96    
-176   160    
-64    -432   
48     -160   
-480   112    
352    176    
192    320    
-304   80     
-80    176    
208    -176   
-80    192    
-352   -1264  
176    -256   
0      -384   
-144   336    
816    -464   
-560   288    
-48    -320   
144    -272   
-384   -832   
144    -656   
-80    608    
176    912    
-96    112    
-64    -656   
272    112    
-208   -16    
192    224    
-224   -144   
112    208    
288    -144   
-240   80     
192    -400   
112    -304   
-400   -288   
-288   -3536  
-320   -768   
416    -3344  
-80    -1216  
384    -1456  
-32    -656   
-192   560    
240    -944   
-48    -1104  
528    -240   
-400   -640   
-464   -224   
784    80     
32     -1120  
272    560    
-240   1568   
112    -1040  
-48    -256   
-256   256    
256    144    
0      -944   
-496   -48    
192    -1424  
48     -432   
48     -144   
144    -352   
176    80     
-48    -128   
240    -288   
80     16     
-32    -208   
0      96     
-256   -80    
704    -288   
-48    -240   
-128   0      
80     32     
112    -272   
512    -480   
-864   -352   
288    16     
-256   -208   
240    -80    
208    -16    
192    128    
-672   416    
256    224    
144    -64    
144    -352   
-1088  160    
-48    -48    
144    176    
304    -144   
-48    32     
-224   -32    
-112   -32    
368    -432   
-96    144    
-208   960    
912    -128   
-1040  -80    
640    -368   
-352   -208   
-80    16     
400    -448   
-80    800    
-32    -320   
-288   -416   
240    -288   
304    -176   
-64    224    
-208   -208   
-48    0      
112    -112   
368    -144   
-368   -816   
-144   -208   
96     176    
112    -16    
-256   -96    
96     -80    
-448   -112   
96     -272   
272    128    
208    -32    
-400   208    
-64    -160   
-64    -1072  
1984   -1248  
-1072  336    
-160   -208   
352    -480   
-512   1008   
464    -656   
640    -688   
-448   1328   
-16    560    
400    -208   
-352   -208   
192    -160   
288    208    
-480   -784   
16     -80    
352    -1312  
176    -560   
-240   -384   
0      496    
192    704    
80     -720   
-1856  912    
1648   -816   
-1040  16     
464    -160   
-80    -112   
208    -144   
-720   368    
0      -48    
224    176    
208    -496   
-48    -144   
-736   208    
576    -16    
-272   -400   
-208   160    
192    96     
-208   560    
800    240    
-64    -176   
-384   16     
-16    -432   
-176   288    
-832   -2672  
-352   -1216  
1056   416    
-448   240    
-688   400    
1072   -560   
-480   288    
-304   256    
176    160    
208    -432   
-64    -16    
176    816    
-1120  560    
-16    -448   
544    -144   
-800   -192   
-384   -208   
128    -208   
-192   160    
-272   -32    
-272   336    
80     -416   
416    208    
-64    -160   
-96    -176   
-80    -480   
-496   -1040  
-112   -2112  
-2272  -832   
1408   -176   
-288   -112   
-16    32     
-288   144    
-320   -464   
848    480    
128    -336   
-624   272    
128    -48    
16     176    
352    48     
-144   96     
-176   -80    
-192   128    
176    -16    
-128   32     
320    512    
-320   592    
96     688    
464    176    
-576   -176   
-192   80     
368    64     
-512   96     
16     80     
-592   48     
-192   32     
16     -112   
528    160    
-352   -80    
32     160    
432    16     
-368   208    
-272   -256   
368    -304   
-16    -240   
-96    240    
-48    208    
16     64     
-32    16     
-1088  -32    
160    16     
-480   -160   
128    16     
224    -304   
-400   -32    
176    -96    
-64    96     
-16    16     
-112   -544   
752    -208   
-96    304    
-352   64     
160    208    
-32    304    
-448   32     
304    208    
-48    -16    
32     16     
-64    32     
-48    -48    
96     80     
-240   48     
160    -16    
-80    -224   
-144   -80    
-224   -176   
448    -32    
-192   64     
-256   -80    
16     128    
80     128    
-736   352    
48     128    
128    -96    
-304   368    
48     -144   
0      48     
0      96     
736    -1520  
-3184  1840   
1056   48     
800    784    
-64    -144   
-432   80     
-240   -80    
544    704    
-1072  720    
240    -160   
144    128    
-432   96     
80     -32    
256    16     
-384   336    
64     -144   
-32    320    
16     240    
0      -128   
-16    -32    
144    784    
-816   -144   
288    128    
448    -272   
-448   -128   
144    384    
-352   -96    
48     16     
592    256    
-224   32     
-160   128    
-224   80     
416    -256   
-80    64     
-128   -160   
0      0      
256    -32    
160    96     
-400   176    
256    -48    
-112   176    
-48    32     
32     128    
256    -48    
-64    112    
-352   -112   
64     368    
208    -64    
0      80     
-256   -512   
-1296  -912   
592    192    
704    -192   
-1488  -208   
512    592    
1104   -32    
-736   0      
-144   -832   
-432   -512   
112    -192   
160    96     
144    48     
32     48     
-320   -16    
448    48     
-400   -16    
144    16     
-80    368    
288    528    
-432   304    
128    144    
320    -240   
-1376  736    
1104   224    
-128   464    
288    -160   
96     144    
-528   176    
-48    0      
144    32     
160    48     
-208   -32    
-144   -16    
64     64     
368    240    
-480   80     
-176   32     
288    288    
-80    128    
160    -176   
-352   -240   
64     112    
-176   -32    
-352   -80    
-144   -128   
752    560    
-16    64     
-48    -16    
-176   176    
-80    112    
-48    -192   
-64    176    
672    560    
160    -112   
-544   -368   
592    688    
-256   352    
-144   -16    
496    -16    
-416   96     
-48    128    
48     32     
224    -208   
-16    32     
-240   48     
32     112    
336    -208   
-272   144    
224    80     
544    928    
-880   1072   
-176   3712   
960    624    
-1408  320    
-240   -544   
1040   128    
320    144    
-496   208    
-240   528    
-112   -192   
112    -368   
-48    -384   
128    624    
-320   64     
368    160    
144    80     
32     288    
-304   -48    
224    128    
176    512    
-144   256    
32     176    
-96    -1360  
-48    48     
432    -720   
-176   304    
112    -112   
-160   288    
576    720    
288    784    
-176   64     
48     -48    
128    -80    
0      304    
176    -560   
-544   -736   
-16    -416   
-16    -960   
144    -560   
-240   -832   
112    640    
64     -80    
-112   -176   
0      -144   
-48    48     
304    192    
-896   -976   
400    -656   
128    480    
-400   576    
64     16     
240    64     
176    -832   
-928   240    
624    -2432  
-336   -320   
-80    -800   
-32    -592   
-32    -1312  
-736   -256   
496    240    
480    512    
-192   -176   
-128   16     
-16    464    
272    -64    
224    80     
-496   -576   
208    -944   
608    -608   
-448   192    
208    -192   
-304   192    
96     64     
64     48     
16     64     
-32    640    
464    224    
-464   16     
64     80     
464    32     
-192   16     
544    336    
-832   688    
384    -448   
96     240    
-64    -96    
-208   128    
560    384    
-368   736    
80     0      
400    -304   
-272   256    
80     0      
112    80     
-240   -240   
160    112    
-64    -272   
-144   -240   
112    -320   
144    80     
-48    -576   
-496   -272   
512    -128   
-528   48     
16     -48    
288    240    
-112   480    
-304   320    
-32    -96    
96     48     
48     112    
96     -144   
-144   416    
224    -80    
-192   400    
-112   -304   
352    64     
432    480    
-400   592    
-208   -432   
688    -1952  
-48    -1808  
-432   -112   
0      -64    
144    336    
0      -64    
96     -144   
-48    64     
-512   -224   
192    272    
32     -560   
560    -544   
240    -432   
-224   -976   
-48    -96    
256    -32    
-752   -640   
272    336    
720    176    
-560   -128   
0      -144   
272    -256   
-64    128    
-80    176    
-96    -400   
304    176    
96     -144   
-256   160    
224    -128   
-64    112    
64     -80    
368    1280   
-512   -736   
-1040  16     
1040   16     
272    -288   
-272   96     
48     -96    
208    -96    
64     -64    
-288   80     
432    -464   
-128   208    
-176   -176   
32     -144   
112    48     
288    -208   
-128   -16    
-144   -208   
464    -176   
-32    -272   
-112   32     
-32    -288   
496    464    
496    -272   
-848   144    
80     -112   
368    -608   
-224   -272   
416    -928   
256    -144   
-32    -160   
-384   288    
-176   176    
-128   -64    
304    -128   
-400   -160   
-96    -1216  
-368   320    
336    128    
144    112    
48     -16    
-144   48     
-32    144    
224    0      
-240   -208   
304    -176   
16     -64    
144    80     
-144   -48    
-144   -1808  
-944   -4608  
-1024  -1808  
576    -96    
256    -912   
432    80     
368    304    
-640   208    
-80    320    
400    -448   
-368   400    
96     64     
-240   80     
144    -80    
-800   0      
128    -144   
-240   32     
224    -240   
128    80     
656    -688   
-1424  0      
912    64     
-48    0      
-352   -176   
320    288    
-32    16     
-560   -96    
256    80     
352    32     
-1088  -96    
16     -192   
672    112    
-128   -80    
-224   160    
48     -304   
-144   -144   
48     -1696  
272    -80    
-112   -96    
288    -32    
80     -96    
32     96     
-304   0      
64     208    
352    416    
-208   336    
-240   272    
256    80     
272    128    
-304   -144   
176    48     
224    80     
-16    112    
384    48     
-272   1200   
-192   480    
0      480    
464    272    
-352   80     
-336   -176   
256    -320   
-80    -32    
-320   -320   
336    48     
32     -176   
-128   64     
-32    96     
-1392  -240   
64     -224   
-112   48     
-304   -16    
128    -48    
48     -80    
-64    16     
0      -64    
-16    -208   
368    0      
-368   976    
224    -16    
-528   -496   
-480   512    
80     352    
864    2512   
1856   160    
-2256  416    
224    240    
176    -448   
-592   -80    
160    128    
96     528    
-16    16     
-256   -64    
416    -368   
-208   368    
-192   -144   
80     368    
320    48     
-544   -240   
-144   112    
64     -416   
-32    -96    
-672   -48    
-16    -944   
-640   432    
1024   -128   
-464   240    
352    64     
-96    -160   
-288   160    
-224   -352   
480    -256   
-64    16     
-224   -48    
80     32     
-240   80     
192    -16    
-208   272    
-144   128    
32     -144   
80     48     
0      -192   
-64    112    
-128   -144   
96     -48    
-176   128    
464    -16    
-576   -48    
208    272    
144    -16    
-320   32     
-96    -288   
400    640    
656    400    
-1104  368    
720    208    
-624   -384   
-384   368    
608    -112   
240    432    
-304   80     
-224   -32    
176    80     
-64    48     
-240   48     
-16    80     
-208   -96    
176    80     
48     80     
-576   -528   
144    96     
-96    -96    
-80    192    
-32    -256   
672    -160   
-1520  304    
224    -832   
240    -432   
-48    208    
-304   208    
352    64     
-304   16     
-464   -112   
-80    0      
-160   -32    
288    80     
-464   48     
-80    112    
0      64     
224    80     
-64    256    
-80    320    
192    80     
16     96     
32     -48    
-128   16     
-464   32     
-144   416    
32     16     
-336   -688   
-96    32     
128    48     
-144   -96    
-752   336    
384    -96    
-208   176    
-192   -368   
-432   400    
288    -384   
-16    128    
624    144    
-320   32     
-336   80     
288    128    
192    -128   
-48    64     
-352   96     
-288   80     
-64    1184   
720    16     
-592   -80    
-256   -1104  
224    -448   
1632   2288   
-1792  1408   
448    -256   
1072   80     
-1328  672    
-192   -336   
176    -336   
464    -1328  
-272   -544   
64     496    
256    48     
176    112    
-256   -96    
-64    576    
-288   -144   
256    -416   
272    864    
-240   -272   
-80    -32    
80     -240   
176    272    
-96    64     
-272   -96    
-160   -288   
16     -704   
-48    -160   
-240   -64    
96     -48    
-240   64     
144    -336   
208    -240   
-144   112    
128    144    
16     -272   
-368   -176   
480    80     
-416   -80    
176    -832   
128    400    
48     944    
-32    656    
-16    -80    
192    48     
64     112    
-16    -144   
-112   -240   
-320   -112   
112    -256   
224    608    
96     -352   
-32    160    
416    976    
-720   912    
-336   1056   
576    960    
-96    224    
-240   -576   
560    896    
-400   -992   
144    -304   
336    48     
-64    288    
-192   32     
-272   -80    
560    128    
224    -288   
-160   -96    
-496   -416   
32     304    
336    96     
-288   -32    
-192   80     
-80    240    
32     208    
32     32     
-128   -384   
464    -800   
352    -288   
-64    -208   
-512   -256   
240    32     
864    1296   
-1168  752    
544    -512   
-176   224    
-48    80     
272    144    
416    464    
-320   992    
-80    256    
464    -272   
48     -16    
-208   -16    
0      336    
32     -80    
48     160    
96     -16    
-256   -848   
-96    336    
224    128    
48     -16    
-160   -656   
0      -512   
-16    432    
96     -32    
-32    -208   
112    -480   
-288   -448   
128    528    
272    352    
0      -320   
-48    96     
-224   16     
-32    608    
-48    -384   
192    160    
-128   464    
-128   -48    
96     208    
-48    96     
-240   -592   
-80    64     
192    112    
-128   0      
16     -176   
-224   -144   
176    208    
272    -160   
-144   80     
-320   -560   
144    -480   
256    1056   
1072   -336   
-1056  -800   
1024   64     
-528   -272   
-288   160    
752    -240   
-368   -80    
144    0      
-96    -192   
304    96     
-176   -224   
0      128    
-80    -704   
608    256    
-256   224    
-32    0      
128    -64    
160    192    
-80    0      
32     288    
-688   -112   
1552   -416   
-496   80     
-336   64     
896    272    
-96    -144   
-32    -144   
-352   -400   
48     96     
48     -208   
288    160    
96     32     
-272   112    
-192   32     
576    80     
-16    64     
-224   208    
-128   -272   
-112   -320   
400    128    
16     -64    
-144   -544   
-848   160    
112    352    
-208   -576   
240    -512   
336    -368   
-704   336    
208    -464   
-112   -16    
496    -96    
-80    32     
-32    160    
64     32     
272    240    
-352   336    
-32    432    
48     288    
-320   400    
336    -160   
400    48     
-464   80     
-32    208    
224    64     
480    192    
-1072  368    
256    -224   
-384   96     
-720   -1296  
3072   2512   
-1104  1440   
-960   272    
2224   -320   
96     -128   
-1344  -640   
144    384    
528    -288   
-256   -784   
320    272    
-752   -128   
-464   -544   
256    -64    
256    -976   
208    288    
-288   -112   
-112   80     
496    -32    
-240   -208   
-560   -784   
-304   256    
224    -720   
-64    16     
736    -816   
0      -384   
-1584  304    
752    -64    
-272   0      
288    176    
0      96     
-48    -704   
-80    -96    
80     176    
32     -96    
-32    -192   
576    80     
-400   112    
-128   -64    
64     0      
320    -352   
-352   -48    
32     -96    
304    176    
-272   -112   
208    96     
464    -672   
-768   -208   
336    -1424  
496    -304   
-224   64     
192    192    
-320   64     
304    48     
-832   208    
624    -32    
-480   -112   
-464   -192   
-592   -272   
-16    -176   
224    -32    
-176   80     
144    48     
128    -688   
-144   -144   
224    -800   
-304   320    
-48    0      
464    320    
-160   -192   
-320   112    
272    144    
208    48     
-384   -48    
80     48     
112    0      
64     16     
-240   64     
-64    -400   
64     64     
64     -1392  
-288   208    
-288   -1168  
912    -2320  
-544   416    
752    -304   
-848   224    
48     96     
592    128    
64     48     
-464   -320   
-384   496    
384    64     
160    -336   
160    272    
-224   -800   
96     368    
336    80     
32     -288   
-80    144    
-64    -368   
-48    80     
80     -32    
-208   -1136  
-112   400    
400    -448   
-464   -816   
64     224    
304    -272   
-208   416    
-272   -288   
32     304    
480    -432   
-64    -240   
-416   -48    
112    32     
0      176    
192    352    
-160   64     
48     -176   
-528   64     
144    -32    
272    0      
-240   0      
272    304    
96     -192   
-48    176    
128    192    
-192   224    
0      -48    
208    -80    
0      240    
-848   1040   
928    832    
1584   176    
-1360  -272   
624    -336   
-32    80     
-224   -512   
656    -512   
-16    -432   
-224   -144   
-32    -128   
224    32     
-176   -128   
32     32     
-272   -16    
400    256    
-176   48     
0      -112   
352    -160   
-32    -240   
-80    0      
-304   -368   
784    -496   
-1888  -160   
1104   336    
544    240    
-1136  -304   
768    -368   
-576   -112   
-112   160    
32     -48    
-240   176    
288    0      
-48    128    
-272   -208   
48     -176   
-416   -16    
288    160    
272    400    
-640   224    
-160   32     
-208   -96    
224    32     
80     112    
464    1424   
512    960    
-496   368    
-176   576    
272    112    
-880   -48    
224    -288   
288    -176   
256    320    
-208   400    
-272   96     
-80    -640   
-400   672    
-368   560    
-592   -736   
-32    -336   
176    -384   
-240   -192   
144    -384   
64     400    
64     32     
-224   80     
144    -96    
-576   480    
-464   -48    
384    -464   
-64    -48    
-432   -256   
1152   624    
784    736    
-656   112    
-720   352    
-144   -192   
416    -48    
64     -928   
-272   -288   
32     704    
-320   -368   
336    -112   
0      176    
-288   272    
-160   -160   
368    128    
144    720    
-320   -160   
-256   608    
272    784    
144    -48    
-112   -656   
-176   96     
-192   -112   
0      96     
688    -560   
-464   32     
224    1120   
-352   -1008  
144    -704   
-128   -160   
-256   192    
64     -160   
208    -96    
-208   -784   
-64    352    
-288   576    
-480   -464   
-272   -320   
480    160    
-304   16     
144    352    
16     144    
208    -528   
112    -128   
-208   1040   
112    208    
-368   -64    
432    -304   
-608   544    
48     160    
-80    -672   
544    -688   
-976   64     
-128   128    
112    112    
-48    16     
80     -160   
0      768    
-192   1856   
112    944    
0      -352   
-64    -96    
64     144    
256    128    
-144   608    
-736   352    
240    144    
96     -528   
224    528    
-128   416    
-368   -112   
176    -368   
208    -176   
176    240    
-96    -160   
-112   -768   
-512   -1504  
416    -352   
16     368    
-96    64     
688    1280   
-1536  2080   
0      -432   
416    -480   
-64    320    
-416   736    
816    80     
16     112    
-368   704    
208    -48    
64     240    
16     -160   
80     48     
-176   320    
-176   176    
-16    -160   
288    -272   
-288   64     
-16    224    
80     -32    
496    800    
-544   1360   
304    384    
-320   992    
-192   -112   
64     -16    
32     656    
208    304    
-336   -16    
112    -128   
-112   64     
0      128    
32     -112   
128    -80    
-320   288    
576    944    
-256   784    
-256   -272   
-80    64     
160    -96    
-144   208    
-112   64     
288    96     
-192   -32    
80     0      
-336   64     
272    -96    
0      176    
-32    48     
-128   192    
-768   448    
1216   416    
-80    224    
-768   -176   
480    336    
832    144    
-864   144    
32     -400   
400    112    
-304   -96    
64     144    
-16    0      
-96    144    
240    -112   
-288   112    
208    -128   
64     240    
432    176    
-256   112    
240    96     
112    80     
-128   -272   
-1392  992    
880    176    
-160   112    
96     80     
-96    0      
-112   320    
-160   0      
-144   128    
304    0      
48     112    
-176   -32    
-16    160    
48     48     
-192   160    
240    0      
-64    -48    
-64    -192   
-400   320    
368    112    
384    -2352  
-416   224    
1104   32     
368    240    
-1088  528    
400    -144   
496    -192   
-176   -112   
-496   32     
464    -112   
480    144    
-160   112    
-464   0      
-208   -128   
464    144    
720    -688   
-512   -224   
-464   0      
432    -96    
656    -144   
-544   -256   
-256   48     
560    192    
400    48     
192    112    
-1360  288    
656    208    
-336   128    
-608   -944   
3008   3200   
-1200  720    
-752   672    
2048   -288   
-64    -48    
-496   -96    
-608   416    
960    -256   
256    -144   
-224   -352   
-256   240    
176    16     
-144   224    
432    -112   
-160   -208   
-224   32     
-416   -672   
720    64     
-512   -1152  
-144   464    
864    144    
-944   384    
448    -256   
-320   -16    
-48    128    
608    96     
-560   144    
32     64     
256    112    
304    -96    
-336   240    
272    -96    
-160   144    
336    -272   
0      208    
-272   64     
0      144    
496    16     
-448   64     
112    32     
32     64     
-48    -16    
176    -176   
-160   176    
176    32     
48     304    
16     -64    
-16    16     
368    -112   
-496   576    
272    -272   
160    144    
-128   464    
576    96     
-528   -176   
512    -32    
-432   96     
80     48     
432    144    
-48    -336   
-560   16     
64     -688   
288    144    
48     -256   
-48    176    
80     48     
96     160    
96     -112   
-272   -256   
240    -688   
-48    -336   
32     -176   
128    96     
-272   480    
0      -384   
240    256    
272    -400   
-272   -96    
112    -208   
384    192    
-96    -192   
992    2560   
-2384  272    
256    -80    
1632   -848   
-560   544    
-992   -16    
208    -752   
416    -1216  
-240   -608   
0      -48    
-96    -384   
-144   -320   
224    -160   
224    368    
-432   144    
-176   -1936  
512    -800   
336    -336   
32     -112   
-864   16     
-96    192    
688    -256   
-448   96     
-64    -256   
48     -368   
128    48     
16     -128   
0      240    
80     -2576  
-192   192    
240    -144   
-48    112    
192    -176   
-144   128    
-256   -400   
-64    32     
-48    96     
-32    -368   
-32    416    
144    -960   
96     64     
112    -240   
-112   -32    
192    64     
32     -80    
192    336    
64     -144   
-112   -224   
128    -144   
-368   -64    
1200   1376   
-1056  336    
-1392  -928   
2256   -896   
-720   -1200  
-1072  240    
720    -240   
576    1120   
-480   176    
448    -864   
-80    -448   
-112   304    
224    -160   
240    0      
-560   -320   
-112   32     
-880   32     
-80    192    
16     -48    
32     -160   
-32    -48    
-800   -720   
1728   -256   
48     -1280  
-1472  -448   
1040   352    
288    768    
-752   752    
32     320    
192    16     
16     -128   
128    -208   
32     -384   
16     -304   
-32    0      
272    48     
192    -480   
-656   -240   
208    -1808  
336    272    
-352   112    
96     288    
96     640    
-224   -128   
64     784    
304    -1168  
-976   -1232  
400    816    
464    0      
-496   -352   
272    304    
-128   672    
336    -112   
-480   -736   
304    0      
-112   -336   
-544   -352   
944    -1008  
-368   -336   
192    464    
-96    192    
-432   128    
480    144    
-1072  -96    
-32    -320   
-144   80     
64     -128   
512    416    
-192   608    
-32    240    
208    -80    
-768   -720   
-320   -208   
480    -272   
-416   624    
480    992    
32     368    
-368   736    
-400   -96    
192    -416   
240    -672   
-208   208    
-608   -496   
256    -208   
480    432    
-736   192    
96     96     
32     96     
-80    -176   
0      -384   
0      352    
-240   272    
32     -80    
368    304    
288    -176   
-720   288    
880    -320   
-448   -608   
144    -2080  
128    -464   
96     1008   
-384   624    
-240   32     
16     -128   
128    -112   
96     -80    
-144   240    
320    912    
-240   672    
-480   -272   
432    80     
-1680  -544   
-64    -592   
32     -704   
-48    304    
128    448    
-800   -480   
544    192    
-880   352    
-80    -432   
-96    -32    
-224   336    
64     1088   
880    96     
32     592    
-2000  896    
368    -432   
64     -704   
-400   -1312  
32     -336   
-128   480    
-128   224    
-16    176    
64     320    
-128   464    
-592   224    
-48    -672   
16     -208   
-368   -160   
-64    -224   
192    -960   
-816   -816   
128    -320   
192    -96    
48     -176   
-352   0      
-64    160    
64     -464   
-16    -672   
16     32     
-288   -64    
-144   -288   
1280   1968   
816    736    
-1184  -400   
576    336    
-48    640    
-288   1344   
48     736    
-400   -48    
-80    -432   
16     -144   
16     -336   
0      0      
96     336    
-304   -160   
224    16     
-672   272    
112    384    
64     -96    
-32    64     
-128   -96    
128    1648   
384    -64    
-656   -80    
720    -16    
-96    -160   
-256   208    
64     -16    
0      0      
-144   -336   
-336   80     
256    -48    
-128   208    
-192   -384   
-176   48     
272    112    
240    48     
-208   48     
-304   -192   
48     -16    
176    16     
16     32     
80     144    
-272   -32    
304    -48    
-112   128    
80     -32    
32     144    
64     48     
-128   64     
1008   1552   
464    -816   
-2784  928    
1248   -320   
1008   112    
-1392  -144   
32     -32    
352    48     
0      -48    
-336   -240   
128    80     
-176   0      
48     112    
-560   -80    
32     -240   
-352   112    
288    -16    
-48    64     
-224   -240   
32     112    
48     -144   
-112   -400   
1216   592    
-752   80     
-544   -432   
-96    160    
192    -576   
-480   -32    
640    -32    
96     144    
-160   128    
-240   240    
-208   96     
320    64     
16     48     
-128   96     
272    80     
-112   320    
-16    208    
-624   0      
736    448    
384    -96    
-288   720    
-1040  192    
336    64     
208    -256   
-208   96     
864    -80    
576    -448   
160    416    
224    288    
-944   224    
592    352    
176    400    
288    -64    
-432   384    
-176   496    
-112   656    
608    -208   
256    -208   
-64    400    
304    -16    
-176   112    
144    48     
-80    0      
-80    32     
176    224    
-208   64     
-16    80     
-112   -96    
480    992    
-1616  -2016  
-800   576    
1264   32     
-800   -416   
496    352    
-48    96     
-416   272    
80     224    
480    -64    
-288   112    
336    80     
-112   -32    
-48    224    
-208   -96    
128    176    
256    -128   
-208   144    
352    32     
-160   -112   
352    -736   
-144   32     
144    16     
-144   288    
-576   -64    
0      -96    
576    208    
-144   48     
-208   112    
64     -16    
384    96     
16     -96    
-176   192    
0      128    
304    464    
-336   288    
-224   240    
416    240    
144    80     
-192   144    
-80    192    
208    64     
176    -80    
-160   -16    
-80    -320   
-304   -112   
-144   64     
320    128    
-320   80     
176    208    
304    384    
-400   -80    
-144   -640   
400    -592   
-144   512    
64     592    
272    1680   
416    912    
-176   112    
-32    -16    
256    -80    
-144   -192   
-416   -720   
496    432    
608    320    
-640   448    
96     224    
32     640    
368    384    
96     848    
-144   464    
-48    192    
-16    -448   
32     96     
-32    80     
32     -128   
48     176    
48     -320   
-96    -240   
144    -448   
-112   96     
112    208    
560    1600   
-944   -320   
0      -224   
912    144    
-624   -64    
256    -48    
112    64     
64     -160   
-32    -288   
144    224    
16     -624   
64     304    
208    -1456  
16     192    
0      240    
224    160    
176    -64    
-48    688    
-32    80     
224    192    
-224   48     
544    96     
-240   288    
-480   -592   
112    -32    
-176   128    
-112   -304   
400    -496   
48     896    
-112   576    
-224   -32    
144    -144   
-80    48     
320    -64    
-256   -32    
-96    160    
112    -320   
448    48     
-144   64     
-256   80     
96     64     
352    128    
-80    -752   
-176   160    
0      -2608  
416    272    
16     224    
-288   304    
-80    64     
208    -48    
-176   0      
1296   -928   
-1728  176    
1088   336    
176    448    
-480   144    
240    528    
272    -1328  
-448   672    
-48    208    
192    -720   
112    112    
160    80     
48     16     
-304   -48    
80     -80    
144    -688   
-64    224    
-384   -592   
176    320    
368    -784   
-784   -288   
768    -832   
0      192    
64     480    
128    864    
-192   704    
80     496    
-176   1088   
512    32     
-144   -400   
-16    -816   
176    -272   
-256   -608   
96     112    
480    -560   
-816   -32    
304    -992   
192    -1280  
-128   -1504  
-16    -288   
-128   -64    
32     -2208  
-80    128    
-304   144    
528    -240   
464    560    
-752   96     
-224   496    
800    352    
-416   288    
-320   48     
272    320    
80     -1264  
80     192    
-416   -1424  
-16    -144   
304    -720   
368    592    
-624   368    
-336   -32    
304    -160   
-144   -208   
176    -176   
-640   -320   
224    48     
496    -256   
-32    -48    
240    -160   
-464   464    
-176   224    
-752   352    
112    224    
-352   112    
-16    -352   
32     -1120  
-304   -736   
-64    -128   
32     -704   
320    176    
0      640    
-224   -208   
-192   -256   
128    -480   
336    256    
64     160    
-320   176    
384    -112   
384    48     
-336   -96    
-400   -160   
-288   64     
0      -96    
352    144    
1008   1312   
-1184  1344   
464    512    
384    -16    
272    144    
-576   448    
-32    -16    
608    192    
-352   96     
48     -48    
160    128    
480    80     
-464   -112   
-480   -224   
80     0      
288    0      
144    336    
-544   -192   
80     16     
400    -256   
176    336    
80     336    
-320   144    
400    528    
-304   48     
-32    -16    
96     -560   
-560   -192   
-208   -544   
-160   -192   
800    96     
-144   -256   
-752   -704   
512    -160   
272    -464   
-304   768    
-208   160    
208    -112   
-352   16     
320    112    
272    16     
-176   -112   
-288   -192   
496    320    
-208   192    
-256   -480   
48     -144   
304    -32    
-32    80     
208    -464   
112    16     
-400   80     
352    -96    
16     16     
-144   -320   
128    -128   
-48    112    
-192   128    
-512   1136   
2320   -416   
-1296  -128   
-256   -224   
496    -384   
-48    -416   
-192   -208   
-208   -544   
-288   -16    
432    -160   
-176   -80    
-48    128    
-128   224    
128    -48    
112    -288   
-176   32     
160    -416   
-256   128    
32     48     
272    -144   
-128   -1232  
-528   176    
672    272    
-672   144    
224    16     
208    -512   
-288   160    
-80    256    
160    400    
368    -64    
-208   -80    
-448   32     
352    -48    
-208   128    
-992   32     
96     192    
-416   -304   
-416   16     
512    -48    
-848   48     
208    80     
-352   -32    
-96    112    
272    160    
-304   112    
-80    352    
208    -32    
-464   -16    
192    16     
384    496    
-352   1264   
560    464    
528    32     
-672   -192   
-272   -64    
208    -112   
-464   400    
-208   48     
48     160    
112    -32    
-320   0      
192    -16    
-272   -320   
320    64     
-160   -288   
48     192    
0      80     
-16    80     
-208   -32    
256    -16    
-208   -496   
816    192    
-768   176    
800    -64    
-16    -128   
-1424  64     
1136   16     
176    240    
-304   -128   
-320   96     
432    96     
16     96     
-288   16     
48     0      
-112   32     
384    48     
-256   96     
-144   32     
-48    -160   
-16    128    
-992   -16    
176    224    
304    -288   
-592   368    
1136   -288   
-256   128    
-368   -80    
-432   144    
-496   240    
448    -160   
-96    128    
-48    -64    
48     -160   
-496   96     
160    368    
-144   -64    
160    192    
-128   -160   
352    -256   
-224   -672   
416    -32    
-32    80     
-208   128    
144    80     
144    96     
-16    336    
-32    0      
-384   192    
64     128    
832    640    
-2288  2176   
-320   1296   
-176   -368   
-48    -368   
512    176    
-864   64     
-240   80     
656    -96    
-144   144    
288    -112   
-208   96     
-32    128    
-128   240    
-32    -48    
80     64     
-64    -208   
-128   96     
96     -16    
-144   -176   
240    -992   
64     640    
224    896    
-176   112    
-512   16     
16     -128   
512    -224   
-32    272    
-16    48     
-560   -128   
128    240    
48     48     
144    400    
256    48     
-464   16     
368    304    
-208   16     
-96    -128   
48     288    
256    128    
-16    256    
-144   32     
176    -16    
64     48     
-80    224    
-32    224    
-160   288    
464    272    
-192   64     
-400   -64    
176    240    
416    464    
240    1136   
-528   112    
-640   -320   
240    -704   
176    -656   
-816   -416   
0      -496   
-176   -672   
240    -400   
-144   752    
-48    384    
0      -240   
-32    272    
-48    -176   
-144   -256   
128    240    
-320   96     
-224   -192   
112    -208   
48     -16    
-192   144    
-32    64     
-192   112    
128    288    
-16    160    
-144   256    
-112   1024   
144    672    
-368   80     
-32    80     
320    368    
-240   -224   
32     -240   
720    -192   
224    128    
-192   96     
-16    48     
-16    -112   
-80    64     
0      112    
-144   240    
32     32     
160    80     
192    16     
-240   16     
-144   32     
272    -64    
64     336    
32     48     
-32    -32    
496    -208   
-1440  352    
768    16     
176    848    
-16    160    
-368   -128   
-112   80     
352    -400   
160    -304   
80     -48    
-336   64     
-176   128    
384    192    
64     16     
-176   -48    
-80    -16    
288    192    
-288   -64    
48     144    
128    112    
160    0      
-192   -16    
48     16     
64     96     
-288   560    
480    288    
-144   256    
112    -32    
368    -544   
-272   -160   
-256   -1088  
-1504  608    
2240   112    
-1168  880    
384    496    
592    768    
-592   -400   
80     -2160  
544    272    
64     512    
-208   320    
-144   160    
48     144    
160    208    
-32    16     
-128   16     
48     -192   
240    240    
-16    -448   
16     112    
-192   -1200  
1120   80     
-1648  -16    
400    128    
544    1072   
-624   2064   
-480   1248   
640    736    
272    192    
-704   448    
512    592    
32     368    
-112   192    
256    -80    
240    16     
-256   -288   
192    0      
-384   -160   
192    -240   
272    80     
-336   272    
80     128    
384    224    
128    80     
-1040  -1920  
-112   -752   
656    592    
-192   1168   
608    336    
320    736    
-752   496    
0      -80    
240    -1536  
208    -160   
-160   -192   
-304   -16    
1200   752    
480    256    
-224   272    
288    -16    
-144   16     
544    64     
176    496    
-528   -64    
-176   -48    
416    -160   
288    -48    
-192   -128   
-384   -352   
688    -1120  
1264   1872   
-1792  1552   
1216   -240   
1136   -112   
-1072  288    
16     1104   
432    272    
-112   -144   
-96    -144   
368    352    
-368   272    
112    80     
384    -848   
-272   160    
-256   96     
144    144    
16     112    
64     96     
-32    848    
448    1648   
-224   1088   
352    272    
-192   -384   
-128   0      
752    368    
-144   -352   
0      -48    
176    -240   
112    752    
240    240    
-320   304    
464    144    
-64    560    
96     192    
-144   192    
-16    -144   
272    -144   
496    176    
-240   288    
-16    176    
288    -160   
80     64     
-192   0      
128    96     
-528   -576   
48     32     
432    16     
-128   224    
-160   128    
144    -368   
-400   -192   
304    -64    
64     -576   
-784   -336   
560    240    
416    -368   
-560   48     
240    -64    
64     -304   
368    -320   
-96    -2384  
-224   -48    
144    -608   
16     144    
-336   -80    
208    -240   
96     448    
-384   -496   
80     -336   
400    -1152  
-144   128    
-160   -96    
0      -112   
288    -96    
16     32     
-160   -96    
128    16     
-176   0      
256    -176   
-128   0      
-176   -416   
1056   -752   
-3168  944    
880    32     
1136   -976   
-1568  240    
704    96     
-16    -112   
112    -704   
-48    496    
288    -208   
-336   96     
-64    80     
128    -192   
240    160    
-832   64     
384    -240   
384    -80    
-288   112    
208    -192   
-48    96     
-320   -1136  
1328   368    
-288   -16    
-896   112    
1104   -224   
-304   -32    
-448   -96    
560    -208   
208    64     
-272   -48    
0      144    
528    -96    
-176   96     
-176   -288   
336    -112   
-480   -224   
272    288    
272    -416   
0      80     
-64    -304   
-112   144    
128    16     
-80    144    
272    16     
-400   -32    
-368   48     
-112   -352   
-32    -80    
304    -32    
-400   320    
-896   -80    
336    448    
-384   -1552  
-32    -128   
560    144    
16     64     
-368   -240   
-112   272    
256    16     
-32    160    
48     -48    
-208   64     
-160   -96    
144    48     
-352   -80    
272    -176   
-208   80     
272    -432   
-96    96     
-64    -16    
64     80     
400    320    
-1424  144    
320    96     
48     -128   
-288   -176   
560    192    
-400   48     
112    496    
928    -96    
-320   -320   
-112   96     
64     -32    
128    160    
0      48     
160    -80    
-496   16     
192    -368   
-208   272    
-368   208    
80     -128   
80     -128   
-80    16     
352    64     
-736   16     
0      -224   
304    -256   
512    -384   
-256   208    
-112   -96    
144    80     
-336   32     
-144   -96    
352    64     
-32    112    
-624   96     
128    -128   
400    -288   
32     -480   
-560   48     
592    32     
48     160    
-1152  -160   
-1088  -64    
0      176    
-16    -256   
80     -208   
192    32     
0      80     
416    656    
-672   1008   
16     3296   
1104   464    
-2320  -176   
432    -384   
1328   -304   
-640   -80    
-672   -160   
224    128    
64     -224   
256    224    
-160   -128   
-1104  112    
16     -112   
144    -48    
-96    -192   
-608   176    
48     -112   
368    48     
-80    -768   
-800   -1248  
384    -464   
-96    -176   
-32    368    
832    336    
-560   528    
48     -80    
64     192    
64     352    
-896   224    
0      -400   
400    -208   
80     960    
-432   -80    
-144   -432   
96     0      
32     80     
128    656    
432    576    
-320   432    
176    48     
96     0      
-224   32     
0      -16    
-96    -336   
432    -144   
-672   176    
112    1376   
16     688    
-448   -832   
640    -496   
-240   336    
-160   -544   
-688   448    
1008   544    
-960   304    
256    224    
208    -304   
-128   96     
-144   -384   
64     80     
-1296  -128   
128    384    
176    -144   
-96    96     
0      -432   
-112   -208   
368    -784   
240    -224   
-624   160    
176    208    
128    32     
-16    64     
-112   80     
-352   -144   
144    -80    
96     16     
-16    80     
-64    -160   
-192   48     
-32    16     
96     48     
208    608    
-624   48     
128    64     
256    112    
80     -112   
-496   192    
-176   208    
96     -32    
32     -64    
-160   16     
-416   208    
-1216  -208   
192    48     
384    -16    
-816   112    
192    -144   
240    -304   
-176   48     
16     16     
-128   -112   
144    -528   
-928   112    
496    176    
80     384    
-288   80     
-48    176    
-704   64     
-80    544    
160    -112   
480    -288   
-128   128    
-576   576    
352    -48    
192    -336   
-208   112    
-112   96     
336    496    
80     144    
208    336    
48     48     
-256   160    
96     16     
-144   -320   
32     -176   
-192   -368   
144    464    
0      64     
272    -16    
-624   288    
-64    112    
-1232  1552   
2688   48     
-656   -304   
-480   -512   
256    240    
880    -304   
-384   112    
-112   1792   
-448   -544   
160    -864   
272    -432   
-432   64     
-112   448    
320    192    
16     160    
-96    -112   
-208   272    
-128   464    
400    624    
32     112    
-256   128    
512    -1024  
-1376  544    
1136   96     
32     336    
-144   864    
-448   1056   
128    368    
256    160    
-384   -16    
240    160    
96     96     
32     64     
-432   272    
64     176    
208    -16    
-288   -80    
48     -160   
-336   -32    
64     224    
32     32     
128    96     
432    80     
-48    -16    
-336   240    
-560   816    
224    -64    
-128   48     
-16    16     
128    -320   
-880   288    
304    -112   
48     112    
48     176    
-144   64     
-144   352    
912    800    
-640   896    
-96    -80    
128    32     
-240   48     
176    96     
464    -32    
-576   -112   
224    80     
32     208    
48     -32    
96     80     
-208   80     
-192   160    
1808   -816   
-2496  -448   
960    352    
976    192    
-240   96     
-480   -144   
112    16     
672    128    
-16    -80    
-272   224    
128    -64    
128    304    
-112   -64    
464    304    
-16    -48    
-48    320    
-64    48     
272    144    
-304   -448   
592    320    
-176   -128   
-128   320    
-128   -16    
96     -592   
624    48     
-240   624    
48     304    
64     336    
128    64     
128    -160   
-112   272    
208    -96    
-144   192    
-208   -240   
-32    -96    
0      32     
288    80     
-384   432    
-384   -224   
576    304    
-176   -704   
-96    48     
336    80     
-304   -32    
496    96     
16     96     
-144   128    
-384   128    
208    32     
512    400    
-528   112    
-80    320    
192    448    
656    96     
-256   -608   
-1136  -192   
1232   -192   
-320   -576   
-176   -176   
16     16     
-176   -96    
304    -80    
-16    224    
-48    64     
-80    0      
0      -208   
-48    -336   
-64    -32    
128    -32    
16     -192   
-32    -912   
48     -16    
64     -848   
32     176    
0      -80    
-112   160    
416    -144   
-160   272    
304    80     
-208   176    
32     -80    
1472   1600   
-3200  1216   
144    -272   
1360   -32    
-464   -432   
48     0      
-672   240    
432    -512   
96     -1104  
256    400    
-288   128    
16     128    
144    -48    
0      128    
-208   -336   
-16    224    
352    64     
-144   -192   
16     -64    
192    -80    
-384   -544   
1040   -336   
-480   400    
-128   -528   
432    144    
-320   352    
176    64     
384    -32    
-224   208    
-32    256    
-176   -64    
192    80     
448    -144   
-288   224    
-368   -544   
368    112    
240    -224   
-448   32     
464    -1312  
-320   0      
336    -48    
16     112    
-128   -96    
64     176    
288    -48    
-368   -256   
160    112    
96     32     
48     96     
-80    -624   
992    32     
-3040  -144   
1200   704    
576    16     
-656   224    
192    0      
0      -304   
-192   48     
176    96     
288    -1552  
96     32     
-224   -1248  
112    -32    
352    -96    
-576   -48    
464    208    
-176   16     
16     -640   
192    -32    
-96    -112   
48     128    
384    224    
-1504  480    
-48    144    
336    16     
-240   -176   
368    -416   
-304   192    
-160   -704   
160    -400   
32     192    
128    -112   
-208   -48    
-16    80     
208    -464   
192    16     
-256   64     
-96    -336   
-224   128    
224    16     
-160   -352   
-96    -208   
656    720    
272    -208   
-384   -176   
240    -400   
448    -112   
-240   -176   
32     80     
64     -80    
0      128    
-80    0      
192    -112   
-176   48     
-112   -352   
-240   -480   
144    -112   
784    -96    
-368   -112   
688    368    
-368   -480   
-160   -16    
112    48     
96     32     
48     32     
-96    32     
352    -208   
64     -80    
-192   -304   
432    208    
-608   368    
1024   1808   
512    -112   
-2064  -1072  
-64    -96    
1712   -592   
-896   -720   
224    -2352  
656    -96    
-48    48     
-544   432    
48     -64    
240    -368   
-240   16     
-64    -112   
16     352    
-16    560    
-96    80     
704    -96    
-384   496    
-112   832    
368    592    
144    -1456  
144    -80    
336    384    
16     -464   
80     -528   
-176   -256   
-256   -336   
-16    -80    
-16    368    
32     160    
-192   -496   
-384   -224   
240    256    
160    -208   
96     -464   
-496   -1152  
304    -160   
-64    256    
0      352    
0      -112   
-384   48     
-224   -480   
32     -704   
-160   432    
144    1056   
-528   176    
576    672    
-96    144    
288    144    
-176   480    
-336   256    
864    64     
-208   352    
464    1152   
448    48     
96     -16    
-160   1152   
96     -16    
96     -464   
-192   384    
0      -80    
0      -176   
16     64     
368    -176   
-192   -208   
-64    -176   
272    -384   
528    -400   
-128   112    
16     -16    
-192   48     
288    0      
-16    80     
-32    -16    
-96    0      
48     16     
32     96     
336    240    
-576   -128   
-176   64     
-800   -208   
-176   -384   
-976   128    
-912   -224   
256    112    
-160   80     
-80    128    
48     -128   
-144   -112   
224    -128   
-48    0      
-32    -288   
-112   16     
160    -288   
-32    -32    
64     -448   
96     -240   
80     144    
176    144    
-288   -768   
480    -512   
-320   448    
-400   192    
-160   432    
-272   160    
48     48     
-48    848    
304    800    
-416   176    
-192   64     
448    176    
176    256    
-240   112    
304    -160   
-320   -304   
32     592    
96     640    
80     -800   
-304   352    
32     144    
16     -80    
368    -112   
96     -16    
-320   -288   
-208   400    
336    240    
240    240    
-272   -96    
144    -144   
1408   1168   
-1648  528    
-1232  -112   
1024   -384   
192    -1168  
-704   400    
192    -32    
-416   -288   
-80    96     
608    128    
-80    -112   
-288   -48    
128    -80    
0      -192   
-304   -144   
128    -16    
16     16     
64     304    
-272   48     
-16    160    
-464   -128   
-608   -464   
1328   -560   
-256   -368   
-1248  464    
944    448    
-112   -432   
-672   32     
336    64     
-224   -64    
192    96     
128    16     
-48    128    
-32    208    
-496   192    
-16    -16    
448    144    
-176   -16    
-576   272    
160    -48    
16     -96    
64     -336   
384    224    
32     256    
-32    -144   
32     192    
-32    288    
-160   240    
272    320    
800    160    
-768   -96    
-192   0      
-160   -128   
-32    144    
48     0      
80     192    
32     48     
128    368    
-208   -16    
624    -336   
-288   80     
-352   224    
128    96     
48     -16    
80     80     
288    880    
-640   -32    
-752   176    
1216   80     
-592   -272   
-176   -3520  
1584   -3056  
480    992    
-96    96     
-576   -16    
352    144    
368    192    
320    208    
-464   -144   
0      96     
-224   -16    
416    112    
-64    112    
224    96     
0      -32    
32     224    
96     32     
80     112    
-64    -16    
-288   -288   
-576   128    
672    -192   
-416   208    
704    -96    
96     224    
-560   -48    
-256   384    
1136   336    
-896   -16    
112    368    
144    0      
-144   272    
80     64     
112    32     
112    -272   
-784   -240   
480    -208   
368    368    
-352   96     
-224   64     
32     224    
-80    32     
384    224    
-336   128    
192    112    
112    160    
16     16     
-16    -32    
16     -32    
-48    -48    
304    192    
-144   80     
-368   -624   
-160   32     
544    48     
-352   480    
240    208    
-64    -208   
144    -384   
-32    -112   
144    32     
160    80     
-288   -80    
240    80     
320    288    
-96    208    
-576   -464   
560    -784   
-160   160    
-128   256    
304    -336   
-352   208    
96     304    
400    128    
-176   -48    
-224   96     
272    352    
-48    32     
192    -272   
-336   192    
80     368    
32     -64    
560    -2112  
-1696  320    
1120   -512   
-672   -112   
-48    112    
272    304    
320    560    
336    -288   
-592   128    
256    176    
160    32     
240    144    
-160   96     
208    544    
-96    608    
16     -208   
-96    -192   
-224   352    
304    336    
64     48     
-128   1280   
880    -448   
-1008  -96    
96     -144   
368    80     
176    144    
-48    224    
-208   288    
-80    -112   
32     -272   
176    -176   
176    -48    
-288   -32    
-96    176    
192    -1840  
256    48     
-480   -64    
192    112    
16     256    
176    0      
64     -32    
-32    0      
16     0      
272    80     
-240   -64    
32     112    
208    176    
16     -176   
48     208    
1296   192    
-1776  96     
304    128    
912    -16    
-736   32     
-144   272    
784    384    
-112   544    
-192   240    
-80    80     
48     48     
240    -64    
288    112    
-288   -224   
-368   -16    
560    144    
-176   128    
-256   -368   
16     0      
288    64     
-112   32     
464    1104   
-1344  -720   
-480   64     
1856   -112   
-848   -80    
-224   176    
272    -208   
-448   -16    
496    416    
-384   -688   
-112   32     
96     -1568  
0      0      
-64    96     
96     208    
176    48     
-64    304    
288    192    
-128   64     
-32    -352   
-320   64     
192    496    
-432   864    
608    -400   
-448   -64    
624    -336   
368    -1264  
-704   320    
384    -32    
160    -32    
-352   192    
128    352    
-80    192    
-96    -160   
-576   80     
352    288    
128    -720   
-96    -176   
32     880    
-592   -112   
240    0      
176    -224   
-160   32     
48     -96    
304    704    
-64    512    
-496   496    
288    80     
240    128    
48     160    
1184   1840   
-1472  1264   
352    240    
1664   384    
-816   1312   
-144   -48    
-240   -1120  
768    -864   
-448   -480   
-128   -80    
128    320    
400    32     
256    -80    
-112   -128   
-192   -1424  
432    320    
-32    352    
-208   -96    
256    288    
128    112    
-112   144    
-144   -544   
224    64     
336    176    
-160   80     
32     160    
144    -1168  
-208   -912   
-560   864    
-48    -192   
64     -800   
256    -48    
-192   -192   
-96    -2016  
208    -784   
112    -240   
-400   496    
368    -368   
96     -944   
128    112    
-224   416    
80     -480   
128    -96    
-576   -16    
-48    112    
-144   -528   
144    -176   
304    384    
64     -1392  
32     32     
-192   0      
576    176    
-784   592    
528    400    
64     64     
112    -352   
96     -496   
48     224    
208    -464   
-112   -400   
-304   -16    
112    -48    
192    -208   
-32    -352   
144    64     
32     -688   
-400   -256   
224    -480   
-128   768    
-480   752    
-208   -176   
128    48     
-96    -64    
224    32     
-288   240    
-1152  -192   
16     16     
176    -480   
-752   -304   
32     -208   
384    -1296  
864    416    
-1472  848    
-16    -16    
480    -144   
240    -640   
-32    -336   
128    -176   
-272   -832   
0      -272   
-64    192    
32     336    
-32    -96    
-192   -432   
-16    96     
0      -80    
16     -352   
112    -656   
-224   16     
64     -160   
368    -208   
-48    -768   
-448   160    
336    -112   
-32    -192   
-464   -208   
-160   -560   
-816   304    
112    -16    
32     304    
48     -288   
-160   304    
16     -992   
-16    272    
256    112    
240    -64    
-368   0      
128    16     
0      -176   
0      -240   
-112   336    
368    -96    
-80    240    
-304   -256   
96     144    
-336   -272   
480    96     
-48    -944   
-176   80     
-112   176    
288    -1072  
-1616  -240   
1744   640    
-176   -608   
-1136  80     
1408   128    
-64    272    
-128   -400   
400    -368   
-96    0      
208    -16    
-272   128    
-160   -64    
96     -256   
240    160    
0      -128   
-304   64     
16     -32    
-16    64     
-112   80     
-48    128    
-96    -224   
448    704    
656    -208   
-640   304    
496    -64    
-528   144    
400    -48    
-160   32     
-336   32     
-96    -96    
-96    112    
-64    64     
144    32     
-112   32     
128    352    
-528   -144   
32     48     
-528   64     
-432   352    
-288   96     
-80    144    
-48    -48    
288    -208   
-672   304    
-48    -128   
80     -192   
-352   -160   
-64    -400   
-400   144    
64     -112   
-544   -192   
304    64     
-32    -336   
-336   64     
-128   32     
640    528    
-384   -32    
-304   272    
224    352    
-608   16     
560    64     
-128   -16    
-512   80     
-512   16     
128    -16    
0      -272   
320    112    
-208   48     
-592   48     
1136   400    
-2064  -2368  
-1136  208    
544    416    
-576   608    
608    32     
-400   32     
-384   -48    
16     -16    
-304   192    
0      -112   
160    16     
272    -176   
-688   16     
96     48     
-240   -160   
288    -32    
176    176    
-432   -64    
-320   -208   
1184   -352   
-592   -48    
96     128    
-112   224    
-816   -112   
304    48     
-176   80     
-640   16     
208    112    
-528   -144   
512    336    
-240   0      
-80    320    
64     -112   
-144   176    
-96    96     
-256   48     
112    272    
32     80     
-272   -96    
240    208    
-480   -64    
128    80     
-80    -80    
64     -128   
-128   -32    
96     112    
-384   32     
-16    -64    
304    -272   
-240   -16    
16     64     
-416   -368   
640    -16    
176    32     
-32    400    
-816   512    
64     224    
112    -576   
-272   -160   
16     16     
-352   -32    
400    -64    
64     32     
-112   336    
-64    144    
0      96     
320    48     
-496   256    
128    -400   
-432   240    
128    128    
224    -112   
-160   -384   
-160   -176   
-16    64     
-64    -368   
48     -16    
352    464    
-320   384    
-144   -32    
112    -64    
-112   2448   
1968   -768   
-2304  160    
304    -976   
320    80     
208    336    
-1072  -720   
80     -848   
64     -256   
272    128    
16     336    
-192   -16    
-48    224    
240    -304   
0      400    
64     336    
-224   400    
-304   -64    
160    48     
-208   -128   
496    1152   
-1072  192    
608    448    
224    -128   
-320   592    
528    512    
-336   -32    
64     448    
272    208    
128    160    
-336   288    
144    992    
160    -32    
-160   64     
16     -112   
-416   -256   
256    -128   
416    336    
-384   80     
-96    96     
32     96     
-16    48     
48     176    
-16    -16    
-16    48     
16     -144   
240    0      
-240   80     
-144   -80    
208    -128   
-832   1808   
1392   608    
-528   -400   
192    0      
416    -128   
-464   224    
-176   -64    
144    -16    
48     -416   
-144   -48    
-176   -272   
208    -32    
-128   112    
80     384    
464    48     
-240   48     
-96    0      
352    -240   
48     0      
48     -128   
-336   -464   
1328   1152   
-320   -128   
-816   -64    
1456   -96    
-480   -224   
-544   -512   
-208   -80    
592    -16    
-416   112    
-224   96     
256    112    
128    96     
96     -64    
-32    -176   
80     192    
80     48     
304    448    
592    592    
-384   528    
128    400    
160    -16    
256    176    
-96    96     
544    944    
288    32     
-944   256    
160    -224   
96     112    
-64    416    
224    336    
176    128    
64     544    
304    464    
-1088  784    
-256   96     
528    -224   
32     656    
672    784    
-272   800    
-160   48     
544    -128   
16     304    
-272   80     
32     480    
128    352    
-336   176    
-176   64     
304    0      
112    112    
16     480    
256    -464   
448    256    
1088   64     
-848   80     
-688   448    
944    704    
160    -800   
-256   -240   
-144   800    
112    656    
336    -592   
320    224    
-256   -208   
0      352    
352    32     
64     32     
512    -400   
-176   -1008  
-128   160    
176    -176   
32     144    
-160   16     
304    160    
208    32     
-192   80     
176    576    
320    -272   
-592   768    
176    368    
-48    -400   
240    -128   
112    -416   
-176   80     
32     432    
480    -544   
-144   -1104  
-176   -992   
176    -1280  
-112   -1120  
-336   -304   
112    608    
48     480    
192    -528   
-592   -368   
176    -160   
-64    -80    
-80    -1424  
-48    560    
224    720    
0      192    
240    -400   
-912   -304   
736    1040   
848    896    
-960   1312   
224    224    
224    1120   
-96    48     
-48    -544   
352    1184   
208    1264   
-48    256    
-32    -736   
-48    -64    
-16    -240   
-144   192    
352    -560   
-240   -1152  
-336   -656   
512    544    
-160   368    
192    -160   
64     -288   
-160   -544   
80     -336   
16     -528   
160    80     
352    -128   
16     32     
144    -112   
-16    1984   
1664   -48    
-1056  1488   
-144   112    
528    -816   
-160   -208   
-400   -96    
128    224    
336    464    
-48    928    
16     64     
64     96     
64     -384   
208    192    
192    80     
32     -16    
-224   -64    
112    -32    
-32    -336   
-112   64     
736    1376   
-1072  128    
384    -480   
480    -272   
-608   -1824  
144    -1200  
272    -144   
96     -768   
-352   -128   
224    -144   
48     -80    
-176   -96    
288    -1536  
-32    192    
-48    -464   
192    144    
160    176    
16     -112   
-976   -16    
240    -336   
-64    -112   
96     224    
352    -16    
-352   -128   
512    -64    
-176   128    
128    -48    
48     96     
48     336    
256    -448   
512    -832   
-1200  96     
464    -352   
608    128    
-448   -320   
-544   -144   
608    -512   
160    -80    
-288   -1456  
224    48     
176    -64    
-96    128    
208    -112   
-672   32     
384    -112   
-32    128    
-144   -192   
368    80     
-448   -32    
-176   -160   
272    -320   
1088   -496   
-1360  64     
752    -688   
0      160    
-384   -1024  
-464   -16    
624    -144   
96     -112   
-224   -176   
-112   80     
-96    -48    
160    160    
48     -96    
144    32     
-1312  -64    
112    -16    
0      240    
144    384    
416    -320   
-176   -384   
-368   -160   
304    272    
144    384    
-1232  368    
96     256    
0      -464   
-704   -320   
-16    96     
480    224    
-624   144    
-96    64     
80     32     
144    -288   
-544   96     
496    -336   
-416   -96    
-32    -1104  
128    240    
496    208    
-400   -48    
-32    48     
224    -112   
80     -32    
-96    112    
-80    -176   
-64    -256   
-336   -256   
32     -160   
-1792  -3264  
2784   -2240  
0      416    
-848   944    
784    320    
-768   -144   
176    432    
352    32     
-96    -144   
16     -32    
112    64     
-160   0      
128    96     
192    32     
-432   -32    
64     32     
144    48     
112    32     
-208   -272   
304    -592   
-1104  -544   
576    -400   
-352   0      
352    80     
432    -112   
-288   16     
112    80     
128    336    
-272   144    
304    368    
-48    -32    
272    -64    
-144   256    
-80    -176   
224    192    
224    112    
-224   240    
-336   16     
160    0      
-288   -368   
32     -160   
-176   -32    
-80    -16    
96     -160   
224    -160   
-48    16     
-960   -272   
176    80     
-528   -32    
192    544    
-144   496    
-544   416    
64     96     
560    -176   
-720   -80    
-64    48     
592    32     
112    656    
-528   1328   
-608   592    
160    80     
16     0      
-32    80     
-144   64     
-16    80     
176    96     
-128   64     
-96    128    
-48    0      
112    96     
-128   -224   
144    -80    
-16    112    
32     -96    
192    -32    
-16    0      
-80    -464   
-400   48     
288    256    
192    384    
-128   96     
-528   -1120  
992    -1856  
-240   512    
496    160    
-784   208    
128    -64    
-128   -352   
-48    352    
144    -48    
0      -368   
-176   -288   
208    -48    
-144   16     
-144   96     
128    352    
224    32     
-304   -16    
48     160    
80     -288   
-192   -384   
-176   240    
416    816    
-192   736    
-384   -304   
-48    240    
-160   -304   
272    96     
64     -128   
-224   128    
-144   -64    
224    -176   
304    384    
-224   480    
-144   -144   
144    -16    
320    112    
-1056  0      
16     592    
0      -896   
-96    304    
128    208    
224    -128   
-80    320    
-144   0      
-64    400    
-96    -272   
160    32     
-112   96     
-48    80     
-336   816    
880    1904   
-448   -608   
-1568  0      
2128   304    
-576   624    
-896   -192   
272    32     
96     0      
80     80     
-208   -176   
32     -96    
96     112    
64     144    
-96    0      
-352   272    
144    -32    
0      64     
-208   224    
48     448    
16     16     
-64    0      
-496   -608   
160    160    
1248   0      
-992   -544   
-112   -224   
112    -688   
-320   -1376  
-864   -1056  
512    64     
272    1008   
-208   608    
240    -208   
-672   -640   
-96    144    
416    176    
128    -32    
-480   128    
144    48     
192    144    
16     224    
-48    208    
-240   176    
96     144    
544    1216   
-896   560    
-592   -432   
1296   -448   
-128   800    
272    0      
-160   272    
-288   384    
656    560    
-784   416    
-288   -592   
-176   -544   
-96    48     
608    528    
-1280  -272   
208    -160   
160    256    
-80    112    
-272   176    
-464   -240   
272    384    
-112   -48    
96     -544   
256    -128   
128    -16    
-272   112    
48     256    
-848   -1056  
-480   0      
80     592    
-80    -32    
208    -1440  
-272   -1120  
-32    288    
-256   656    
-96    464    
512    -176   
16     -112   
-384   -112   
-192   496    
304    368    
128    -32    
-32    -304   
-48    -112   
-160   112    
128    272    
208    576    
-288   352    
-96    0      
560    80     
-304   -208   
416    -976   
80     -112   
-192   -160   
128    -272   
208    -416   
-112   -480   
-336   1040   
224    768    
64     160    
-16    -416   
-64    -112   
240    -256   
-544   -448   
352    -160   
-96    -464   
-96    16     
-192   96     
240    80     
-272   352    
-16    208    
-80    784    
352    608    
-192   288    
-176   736    
448    704    
96     -1024  
-96    128    
-480   192    
640    -352   
144    -912   
-272   -592   
-704   -784   
192    -160   
96     272    
-128   192    
-16    -960   
-528   -416   
144    -128   
32     -224   
224    -224   
96     -432   
-240   496    
144    -432   
-112   -240   
128    -848   
-512   -432   
144    -112   
160    144    
32     48     
-112   48     
256    400    
464    1008   
-480   1376   
416    1424   
-256   1184   
-176   0      
464    1280   
-208   -1760  
-336   352    
1376   160    
-288   -176   
-336   560    
-160   -192   
432    256    
-32    -288   
-304   64     
240    80     
-160   160    
224    0      
96     272    
-400   0      
208    160    
-64    -992   
32     -128   
-80    -64    
112    64     
-16    224    
-112   -1200  
-736   384    
1312   80     
-1264  80     
416    320    
480    208    
-224   0      
-384   -320   
208    -496   
416    192    
64     -240   
-176   128    
80     -976   
-32    -16    
-96    144    
80     48     
400    16     
-208   112    
-32    0      
144    144    
320    48     
-336   16     
208    -32    
16     -64    
64     160    
80     16     
-16    256    
192    -752   
-160   224    
1344   112    
-2576  -144   
944    -80    
480    64     
-1024  -80    
1136   320    
-32    16     
-752   80     
384    432    
256    -192   
0      -32    
-176   -64    
-64    144    
192    -496   
496    64     
-672   -96    
368    256    
-96    -16    
96     160    
-16    64     
-112   80     
288    -32    
912    -208   
-1936  -352   
1296   80     
224    -32    
-1056  -320   
768    96     
-240   208    
208    96     
160    -16    
-208   128    
-32    48     
128    192    
128    112    
-48    -256   
-144   176    
128    -432   
96     192    
-32    -288   
-96    -64    
464    48     
-272   160    
272    112    
-192   176    
-48    -768   
400    912    
-368   304    
32     -64    
-720   384    
368    128    
288    -1424  
-352   -224   
-80    -240   
352    16     
-224   -32    
64     48     
352    -48    
-240   416    
576    -352   
-160   480    
-160   -2128  
-80    80     
144    -304   
-240   128    
368    -160   
-400   -544   
240    -144   
288    -432   
-208   64     
-1408  -2432  
2272   -1712  
592    336    
-1136  352    
64     -480   
352    128    
-192   -208   
368    0      
80     -64    
128    -736   
-288   48     
688    -80    
-240   16     
-144   80     
112    16     
512    -1328  
-384   80     
-16    -48    
-48    32     
-176   -592   
-96    -208   
64     192    
-192   80     
464    -48    
592    -48    
-976   80     
96     80     
192    -304   
-288   -352   
240    -384   
-304   -368   
208    -16    
96     -752   
80     240    
32     160    
208    16     
-224   -176   
-160   16     
96     -80    
48     96     
48     112    
-288   16     
128    240    
304    224    
-64    416    
32     -320   
80     -944   
336    -608   
-320   320    
96     -192   
-64    192    
48     128    
224    736    
240    -256   
-272   -528   
-144   -608   
-96    -800   
0      -608   
128    -240   
-528   -288   
64     -128   
16     -80    
-80    -704   
128    -80    
-192   -2272  
-368   -128   
64     384    
432    -640   
-64    -160   
-96    352    
-224   656    
128    -464   
80     -208   
144    -96    
-496   176    
-16    -272   
-128   96     
96     -608   
-96    -160   
-112   -608   
272    -192   
-576   -784   
928    -1888  
224    -32    
-576   352    
0      48     
-48    -144   
-64    -608   
-384   -1392  
176    96     
-208   -48    
96     16     
352    208    
-80    -16    
-256   64     
192    -272   
96     64     
144    -176   
-256   128    
32     -288   
-128   -128   
-176   -464   
816    -432   
-368   144    
-336   -672   
-48    -624   
192    384    
192    144    
-16    144    
-32    -576   
64     64     
-128   -16    
320    96     
-16    320    
-32    192    
112    -224   
-400   -528   
176    -608   
688    128    
-416   -144   
-208   -48    
160    240    
288    -240   
0      144    
-336   -352   
-448   224    
480    160    
272    240    
-176   -112   
128    16     
0      32     
1856   816    
-2064  1264   
-240   80     
128    80     
-1088  -192   
-256   272    
-960   -240   
304    736    
-96    -160   
288    32     
32     -240   
-208   -144   
-128   304    
80     -128   
64     224    
32     -240   
-160   176    
48     608    
240    704    
-400   -1200  
160    448    
-544   16     
2320   -128   
-1584  -16    
384    -1024  
-240   -400   
-416   0      
0      2112   
848    1696   
-112   880    
-944   -240   
560    -464   
-112   -768   
-336   -512   
144    -320   
400    224    
-112   16     
-400   448    
432    -32    
32     64     
-80    112    
144    80     
160    448    
-176   480    
112    -240   
-672   -1088  
96     -1312  
-272   -1024  
512    -1136  
256    -256   
-112   288    
320    400    
32     368    
-544   -384   
160    -144   
-96    -64    
-608   256    
-416   -352   
368    -528   
16     32     
-352   -320   
512    256    
-1120  -432   
384    0      
-144   -240   
464    576    
-176   208    
-272   112    
-80    608    
400    16     
1072   2816   
-1200  1856   
496    -608   
1024   -688   
-480   544    
-304   -32    
-144   1536   
992    -176   
-288   -16    
-1168  -400   
336    176    
672    32     
176    -96    
-608   160    
-16    224    
176    112    
64     -48    
-96    -64    
-608   -976   
48     -560   
368    336    
64     432    
-208   48     
-512   64     
672    176    
-304   384    
112    176    
176    272    
-432   0      
128    720    
240    592    
112    512    
48     -64    
-400   192    
-336   112    
224    96     
128    32     
-160   64     
144    256    
-80    112    
64     -112   
-16    32     
80     -112   
-96    -80    
-96    80     
288    80     
16     880    
336    0      
16     -336   
-320   32     
-32    -96    
624    1296   
-960   640    
32     192    
240    64     
-176   16     
144    -16    
-96    -48    
-224   32     
224    112    
64     16     
-16    48     
-16    384    
352    368    
-80    240    
-176   32     
208    256    
80     144    
-384   -192   
496    -176   
-32    128    
-96    -96    
48     176    
112    80     
-64    80     
256    -432   
-928   464    
352    272    
48     -128   
32     432    
64     208    
448    2336   
2416   -48    
-1744  336    
-80    80     
480    80     
-192   -464   
-64    -240   
176    320    
-96    -80    
64     80     
288    224    
-208   208    
-160   -224   
336    -240   
-112   128    
320    576    
-224   -80    
-112   -48    
160    64     
0      112    
16     -1248  
-704   384    
1104   176    
-160   624    
256    128    
-48    64     
32     416    
-320   -48    
336    16     
48     96     
288    64     
-160   176    
-208   48     
-64    304    
640    -160   
-224   192    
0      -16    
16     128    
272    128    
-160   -32    
0      16     
0      -16    
16     32     
144    0      
-544   16     
672    208    
-320   96     
-64    -16    
224    112    
416    -192   
-976   -304   
240    -208   
-80    -128   
16     32     
192    96     
-608   -64    
304    192    
288    192    
-112   -16    
80     128    
-272   -992   
112    112    
192    192    
-96    80     
-272   240    
576    144    
-208   16     
-208   112    
240    -48    
-144   80     
384    464    
560    -240   
-1872  336    
1200   -96    
240    -16    
-1008  -96    
352    -112   
576    80     
-368   128    
-96    -16    
144    192    
16     64     
-288   48     
352    144    
-80    32     
-256   80     
176    128    
64     -64    
128    176    
-272   128    
-80    -272   
-16    -368   
-672   -1504  
416    80     
-32    -96    
-32    160    
-48    96     
-384   -192   
608    -224   
-48    352    
-144   48     
176    64     
-336   32     
16     256    
-144   400    
-208   -176   
-176   32     
560    -1248  
64     272    
352    160    
-272   192    
160    208    
0      80     
-80    -64    
288    320    
-304   -80    
-288   192    
416    32     
-112   -288   
-64    -1648  
752    -2592  
320    1136   
-96    -224   
-1120  32     
176    -576   
1008   -160   
-560   -128   
128    -224   
-48    -128   
-64    64     
224    176    
16     0      
64     288    
-16    -384   
96     224    
-480   -224   
320    64     
-224   -176   
288    -208   
48     -288   
-208   256    
144    -880   
-416   224    
464    16     
-320   208    
288    384    
288    32     
-240   384    
64     64     
240    1120   
448    448    
-256   400    
-416   -448   
304    480    
656    -304   
-320   48     
-752   -496   
560    432    
272    608    
-224   144    
128    304    
-96    256    
16     96     
32     -288   
352    -160   
80     -720   
32     288    
-448   -896   
272    -752   
96     352    
-32    512    
448    448    
448    544    
-224   720    
352    448    
-496   112    
560    1472   
672    320    
-480   -1648  
240    -112   
-96    16     
64     144    
-32    -368   
288    416    
-352   -128   
144    -64    
224    -656   
-528   -1984  
208    -80    
64     -1088  
64     80     
112    192    
-112   -16    
256    -352   
-192   -2112  
224    -144   
-48    480    
96     -96    
-112   0      
128    -32    
-128   -688   
-208   1056   
864    -784   
-464   240    
-240   304    
640    -80    
-112   48     
160    -656   
-176   -16    
-176   -464   
240    16     
112    -272   
-64    16     
-96    16     
304    -176   
64     -192   
256    -112   
-96    -32    
80     160    
48     48     
528    512    
-1184  320    
112    -768   
784    -240   
-400   -144   
-128   128    
304    -160   
-128   208    
32     -544   
208    -304   
80     -320   
48     272    
-112   0      
-48    -112   
-32    -16    
208    -192   
-592   112    
224    576    
-16    48     
-80    48     
-16    80     
16     288    
-112   -112   
208    -32    
48     384    
-80    320    
-32    192    
384    -32    
16     -240   
-544   -384   
528    -784   
-2656  -272   
1328   528    
432    240    
-224   -96    
304    -240   
240    -32    
-16    1344   
-272   -1216  
192    176    
-128   256    
-80    64     
336    0      
-128   -544   
-224   -96    
208    288    
-112   -160   
128    -608   
-832   -320   
112    576    
-448   -704   
1168   -48    
-1632  -272   
384    -224   
752    208    
-576   64     
368    400    
784    1296   
656    976    
-560   928    
48     288    
-224   -112   
192    -368   
208    -288   
-48    208    
-368   0      
32     -16    
176    864    
656    64     
80     464    
-448   112    
-32    32     
608    224    
-96    -304   
-432   176    
256    -400   
448    -528   
-144   -192   
96     -48    
-192   176    
-96    64     
480    176    
-192   256    
-384   -112   
176    -16    
-320   -288   
144    -80    
-384   192    
-128   -16    
304    -96    
-320   0      
112    -32    
176    -112   
-368   576    
512    -448   
-432   -272   
496    -304   
-96    80     
-256   -512   
656    -688   
1040   -624   
-2288  80     
1184   -32    
1200   144    
-32    96     
-816   112    
-208   384    
704    0      
16     368    
144    -192   
-512   128    
416    -48    
-32    64     
96     80     
112    64     
-896   48     
-96    32     
-96    112    
0      320    
192    1056   
-1440  1184   
288    448    
-96    -336   
-640   192    
560    -16    
0      240    
-32    64     
-448   -64    
288    -208   
0      80     
-16    64     
-96    272    
64     160    
160    -336   
-400   -32    
-672   -208   
16     112    
288    -112   
-128   0      
-352   96     
192    128    
0      -112   
208    144    
-112   -128   
-240   208    
240    -320   
-576   -320   
384    -224   
-32    320    
-160   336    
-128   416    
-16    -368   
272    -576   
-256   48     
-160   -464   
-352   32     
-96    -272   
-80    16     
240    0      
16     48     
32     48     
-224   48     
0      80     
32     32     
-32    -16    
0      32     
192    368    
-288   240    
-240   144    
384    144    
112    96     
-288   -80    
384    224    
-48    -144   
-192   -16    
128    -240   
-240   128    
16     464    
208    -272   
-160   16     
-112   64     
-1008  368    
2656   -1200  
-656   -160   
-1648  -384   
1168   112    
336    -64    
-1040  320    
128    320    
320    -176   
-64    256    
80     256    
-320   48     
32     -80    
80     -256   
-96    160    
272    496    
-384   -224   
192    352    
-112   320    
-160   32     
512    272    
-1696  144    
528    -64    
816    160    
-928   -160   
-160   416    
416    -96    
-240   -240   
-48    160    
192    -80    
-352   112    
-112   -224   
64     80     
-176   -16    
-176   128    
320    384    
-416   176    
208    336    
-160   -16    
-128   96     
64     96     
16     -16    
-304   64     
144    48     
-288   -96    
96     0      
-80    -80    
80     64     
-224   -16    
-32    -352   
784    -896   
-448   560    
752    144    
-144   -80    
208    80     
-624   128    
256    -512   
-176   -368   
144    -304   
-96    96     
32     160    
32     16     
96     160    
-384   -16    
608    288    
-128   32     
-128   144    
448    32     
-320   -144   
16     80     
-144   -112   
656    400    
960    -64    
-992   384    
432    320    
176    112    
-256   0      
192    128    
496    208    
-32    -16    
-368   96     
272    48     
80     64     
-64    0      
240    224    
48     16     
-128   144    
80     208    
-64    -32    
-144   0      
64     208    
48     288    
112    -96    
-1184  240    
1408   -144   
-256   96     
-496   96     
496    208    
112    -224   
-32    16     
96     208    
-272   -32    
96     32     
224    192    
32     0      
-112   128    
-176   -64    
608    0      
-32    224    
-80    192    
-336   128    
304    48     
-512   448    
224    -48    
-304   -64    
0      -592   
304    112    
32     80     
-336   -304   
304    -1328  
-1296  -1504  
240    48     
-192   -144   
96     48     
864    272    
-176   160    
-768   -256   
-288   -272   
416    -80    
256    -224   
0      112    
-192   16     
-160   96     
208    32     
48     192    
16     256    
-128   128    
-48    160    
384    560    
-96    1024   
64     880    
32     -48    
0      -16    
448    -240   
0      368    
-192   240    
-352   -160   
160    592    
448    992    
-96    416    
-256   64     
160    224    
224    -752   
-16    -80    
-80    0      
0      -64    
160    208    
400    16     
32     464    
-96    176    
272    -368   
-368   32     
64     352    
-32    -880   
-192   304    
288    1104   
-352   480    
400    -240   
-16    -352   
-32    -16    
-16    -32    
-176   -704   
144    368    
416    -272   
-752   -1392  
368    -48    
-160   992    
-480   -176   
-16    112    
160    -80    
224    256    
-96    80     
-112   64     
96     -400   
-480   -1152  
0      416    
160    240    
16     -64    
448    96     
192    272    
0      64     
160    112    
64     128    
-16    112    
-64    0      
160    48     
272    384    
-352   416    
144    160    
192    -496   
-112   128    
-96    352    
1024   144    
-528   32     
32     352    
-256   96     
352    272    
-288   96     
144    -48    
288    -208   
256    128    
-64    224    
96     -208   
-96    -144   
240    -800   
160    96     
-160   -432   
48     -48    
-80    -16    
48     -48    
-304   -512   
896    -576   
-176   496    
32     16     
-208   192    
112    0      
-48    48     
240    -288   
-144   -64    
144    -400   
64     -32    
32     80     
272    0      
-80    -416   
112    -32    
-32    -272   
224    224    
-48    16     
384    352    
-160   896    
240    336    
-80    -176   
-48    80     
160    112    
192    0      
208    -32    
-80    -368   
-192   64     
624    -720   
-464   464    
320    -624   
-2304  -96    
1120   16     
224    -624   
-592   -784   
208    -224   
-528   -208   
-192   272    
800    944    
368    528    
-704   320    
-144   -224   
416    64     
432    -144   
-288   64     
-352   96     
256    192    
432    272    
-368   -144   
-112   176    
144    0      
-128   864    
2256   -224   
-1328  -608   
1232   -1552  
-1104  -224   
736    -800   
208    32     
-1056  736    
352    -1152  
320    80     
96     -368   
-112   -672   
-368   96     
512    -768   
432    -16    
-384   -304   
-16    -64    
272    64     
96     288    
-64    48     
-80    16     
208    352    
944    -112   
-976   432    
336    -128   
272    -288   
-832   -336   
-1472  -64    
320    -160   
80     80     
-368   16     
16     -80    
-288   -768   
384    -240   
496    384    
-176   -16    
256    784    
-384   416    
-560   -48    
272    80     
-16    16     
160    -96    
-304   16     
32     -288   
48     -80    
352    -80    
192    96     
-288   -208   
-336   -1360  
80     -6048  
-1600  -1760  
736    304    
-336   464    
592    -208   
16     272    
-528   -112   
48     192    
128    80     
208    -160   
-144   -144   
384    -144   
-256   -32    
32     -288   
224    -112   
0      -736   
48     144    
112    -48    
544    848    
-784   160    
448    464    
208    -256   
-416   16     
-624   -32    
624    0      
-416   -256   
-336   96     
416    -512   
-144   0      
208    32     
-32    -288   
64     48     
304    -576   
-368   -32    
544    -16    
-48    -80    
96     32     
96     -112   
-224   -48    
560    -32    
-576   -80    
160    96     
-272   112    
-96    112    
192    -16    
-304   -288   
544    128    
-112   -992   
-128   -48    
192    -16    
112    0      
384    1088   
-656   -64    
-144   432    
944    0      
-848   176    
16     192    
416    128    
32     -128   
112    112    
144    -336   
96     112    
-16    -240   
0      240    
112    16     
-80    -16    
32     960    
144    592    
-432   128    
496    -304   
-240   32     
-224   32     
240    128    
208    -352   
-224   -16    
-144   -288   
352    -336   
-16    -608   
-368   368    
16     208    
-448   -1744  
2432   576    
-672   816    
-928   208    
512    224    
-608   64     
96     848    
944    -80    
-544   -1104  
-160   288    
416    160    
160    -96    
-1216  -80    
-400   -128   
-176   -352   
288    176    
176    192    
32     -96    
-368   -48    
80     16     
240    112    
-48    1424   
832    -400   
-1328  -144   
64     64     
112    -192   
-64    208    
192    400    
-304   192    
-288   -368   
-48    144    
256    32     
-1392  -96    
224    -32    
48     -176   
-208   -16    
256    0      
-320   240    
16     176    
320    320    
-400   -304   
-144   144    
160    16     
-176   192    
336    -16    
-432   256    
240    32     
-208   240    
-64    -48    
-352   160    
1488   -496   
-3584  720    
496    944    
1440   48     
-816   -48    
-848   -32    
576    400    
-176   336    
-256   656    
272    0      
-128   -32    
-176   -48    
-128   128    
-64    -64    
416    80     
-704   16     
112    -112   
-48    176    
240    -48    
0      -32    
-240   -32    
240    -416   
-1424  880    
1200   256    
-368   768    
-480   352    
192    16     
-96    128    
-384   128    
-240   -128   
160    64     
32     -288   
320    160    
-496   112    
288    128    
-432   144    
176    -16    
-16    32     
-432   288    
528    160    
-96    -192   
-112   -32    
-192   -480   
192    224    
-352   160    
288    -112   
-144   1168   
-784   64     
-48    -32    
-32    -176   
-544   80     
192    144    
16     32     
288    -128   
-208   -256   
-864   -432   
0      0      
592    576    
-128   -16    
-288   -224   
672    64     
16     32     
-96    176    
-32    320    
-240   -80    
288    384    
-464   144    
-224   32     
-16    32     
128    320    
-560   -528   
784    -160   
768    112    
-1184  32     
-144   272    
832    240    
-464   96     
-432   1680   
-208   1008   
-304   640    
-16    -448   
288    32     
-240   112    
-32    -128   
-224   -384   
416    -16    
-208   336    
-192   224    
256    -224   
-320   -400   
112    -192   
48     -32    
80     336    
-432   -208   
-112   -80    
112    -784   
128    32     
224    -320   
-544   -16    
384    -112   
0      -176   
16     224    
-192   176    
176    672    
32     576    
416    -32    
-208   -320   
160    -176   
-112   -64    
240    1088   
176    -48    
-96    -32    
-224   -128   
96     656    
192    -160   
-592   -400   
288    320    
-320   -160   
224    752    
272    -32    
-176   96     
368    1584   
-752   -304   
-544   -176   
144    -144   
-64    -560   
96     848    
-128   2128   
80     64     
-400   -832   
96     -464   
112    496    
64     -144   
48     640    
144    592    
192    64     
0      -272   
96     -160   
-432   64     
-32    384    
96     128    
-112   112    
-48    -16    
-48    80     
288    256    
-128   192    
272    -256   
80     -656   
-80    -288   
96     -192   
0      128    
-176   -352   
560    -800   
-176   400    
448    -96    
-448   160    
-224   0      
-80    -208   
352    16     
-448   -336   
-96    32     
16     384    
-112   160    
32     112    
-48    -128   
64     192    
208    16     
32     528    
-48    384    
96     224    
224    208    
112    -512   
-1264  272    
912    176    
-224   0      
352    -368   
288    128    
-208   192    
-496   -576   
272    -96    
336    448    
-128   368    
-528   -384   
112    32     
336    112    
32     288    
-80    336    
-256   -464   
416    464    
272    -368   
-144   416    
-256   -16    
-96    224    
336    160    
-144   208    
96     -528   
112    240    
-128   -48    
192    -16    
64     272    
-432   928    
32     2112   
2624   -48    
-1360  32     
224    -32    
-96    -464   
272    -80    
256    -272   
-368   -160   
128    -336   
176    -80    
160    -96    
-64    -528   
-16    -80    
304    96     
0      0      
-144   48     
32     16     
-192   -48    
0      176    
144    80     
-32    176    
-624   -112   
1120   -800   
-224   672    
-48    -272   
112    416    
640    32     
-512   16     
656    -16    
-64    224    
-96    144    
464    48     
-192   96     
-176   128    
336    0      
-224   144    
240    -128   
32     -192   
192    448    
-176   48     
-368   16     
208    -1216  
-448   288    
96     -688   
208    352    
176    144    
-112   544    
-1360  560    
-592   416    
1072   -528   
32     96     
-352   112    
-112   96     
208    192    
544    800    
-192   32     
-576   -416   
528    -96    
768    -512   
-192   208    
-560   112    
32     208    
352    -48    
-176   112    
-96    -64    
448    384    
-288   208    
-96    -32    
368    128    
-752   -256   
-1136  1072   
976    384    
-1008  800    
-320   -400   
512    208    
64     -48    
-560   64     
256    64     
304    368    
-848   0      
160    112    
400    144    
-96    -1136  
-80    96     
256    0      
-16    0      
-16    -64    
224    128    
320    -432   
-1232  -48    
1072   -80    
-32    160    
-336   -160   
-48    256    
176    288    
288    -144   
-48    -96    
176    -144   
-160   64     
160    192    
-224   64     
400    -32    
-384   -192   
-32    -336   
64     240    
576    144    
-688   -224   
416    576    
48     -928   
-208   -1168  
368    -160   
-672   -416   
288    48     
256    -1008  
-48    -32    
96     304    
336    432    
96     320    
-384   -96    
336    -208   
-272   -80    
-192   -1840  
-624   -64    
528    -96    
-16    -288   
192    -160   
176    -320   
-96    -208   
192    -432   
-64    -160   
-48    -2032  
-80    -112   
256    160    
208    -32    
-128   -176   
-128   -48    
80     -224   
448    240    
-496   -80    
-48    -112   
16     -224   
-112   192    
-208   -48    
224    -416   
-16    -176   
-128   -128   
400    96     
-160   -656   
-48    80     
0      -48    
-336   -912   
1392   -1712  
-1952  672    
528    -416   
400    0      
-864   32     
96     -304   
320    0      
688    320    
-368   528    
-176   -512   
336    -208   
96     -784   
-128   16     
208    736    
64     32     
16     -208   
224    96     
-128   -160   
-16    -208   
-288   64     
592    1712   
80     -160   
-1168  -496   
608    -352   
0      112    
208    176    
-400   -880   
80     -48    
16     0      
-32    -48    
304    -112   
-64    240    
-224   -192   
-64    -48    
432    -64    
-176   160    
-160   -224   
32     -128   
112    -224   
16     -80    
240    64     
48     -112   
-96    128    
-32    -1600  
0      176    
304    -320   
-112   192    
-32    32     
272    128    
1136   320    
-2944  400    
112    496    
1632   -112   
-1360  -208   
224    -352   
-208   -160   
-144   -432   
288    160    
176    -432   
80     128    
-416   -48    
144    160    
80     -96    
240    -144   
-560   -256   
96     -112   
-144   96     
160    -112   
-224   64     
96     0      
-416   80     
1808   -944   
-464   672    
368    -128   
272    976    
304    560    
-224   688    
-592   160    
112    -272   
368    64     
384    128    
-368   64     
-176   0      
464    -80    
160    -192   
-352   144    
-48    -496   
-208   -80    
304    32     
0      -80    
-240   0      
-176   -208   
-224   -96    
64     0      
-256   -512   
96     -240   
1072   1088   
592    1104   
-304   528    
336    -208   
-192   48     
-48    -576   
224    736    
-496   208    
-1072  -448   
832    -496   
-896   416    
448    -224   
32     208    
-240   368    
80     -224   
32     -32    
224    -288   
-80    112    
-144   -528   
-752   368    
-176   -176   
144    176    
448    -32    
16     0      
-688   2384   
1328   432    
-1104  -208   
-240   544    
1648   752    
-528   -288   
-448   160    
128    352    
560    -592   
32     544    
-192   -96    
-416   -304   
-16    272    
320    416    
-208   -208   
80     -224   
-144   96     
320    336    
224    816    
-560   -16    
-272   -496   
64     192    
112    272    
64     16     
-320   336    
48     -320   
608    -288   
-32    1456   
-288   304    
96     -288   
112    560    
-240   -656   
-208   -96    
-512   -560   
-192   544    
256    448    
208    256    
-1104  -608   
-48    96     
320    80     
96     -224   
176    -80    
-208   512    
144    -528   
-128   144    
80     592    
-544   -1088  
-160   480    
400    208    
224    624    
320    1248   
-736   400    
-1040  176    
640    400    
-160   400    
-272   192    
-176   -32    
320    352    
32     528    
64     80     
-128   -112   
-224   128    
240    48     
336    -96    
-304   -416   
-96    -320   
224    -192   
-144   -224   
768    256    
48     160    
-64    -16    
-48    336    
80     288    
-208   256    
-16    32     
-48    -160   
-32    256    
-80    -768   
-224   -192   
48     32     
-352   -1776  
-1008  160    
1008   -560   
-192   112    
-480   80     
-64    400    
-128   1088   
-80    -272   
-192   -480   
560    -400   
-64    336    
-336   128    
-112   -304   
240    256    
160    208    
0      -224   
0      -224   
-288   -496   
272    400    
192    32     
-464   -928   
224    -448   
-288   528    
0      -832   
192    -144   
-128   736    
-240   16     
80     32     
192    -64    
0      272    
-400   -32    
48     224    
240    -464   
-128   128    
-128   256    
160    -240   
320    -160   
-160   -176   
-80    0      
0      -96    
-80    144    
0      -176   
240    32     
-272   -16    
256    0      
32     -64    
-224   128    
-16    -32    
64     208    
720    2240   
0      -16    
-1520  544    
1568   160    
-400   48     
-1088  -112   
976    -128   
0      -384   
-256   336    
32     -48    
48     96     
16     -48    
0      240    
272    16     
-656   48     
368    80     
-48    32     
-80    -16    
64     32     
208    64     
-176   48     
-48    -384   
1152   1040   
80     -128   
-1104  48     
1152   -16    
-704   96     
48     128    
272    -448   
-480   256    
304    96     
-272   96     
128    64     
160    128    
368    176    
-400   64     
-256   48     
208    -128   
320    -384   
192    -160   
288    160    
48     -64    
352    720    
272    -64    
-320   112    
400    416    
-48    240    
-480   464    
-496   272    
592    -16    
-736   -112   
-64    304    
416    64     
-64    192    
64     256    
-112   16     
-16    -96    
208    160    
-320   240    
0      224    
656    -208   
352    16     
-176   144    
-256   80     
304    208    
128    -320   
-64    144    
144    -80    
-272   96     
-48    160    
1872   1952   
-864   1312   
16     512    
1840   -400   
-800   160    
-368   240    
464    64     
224    -80    
32     16     
-544   128    
-96    272    
80     112    
192    -16    
32     0      
-128   -352   
80     176    
192    32     
64     -112   
64     48     
-656   592    
1008   144    
-608   384    
256    -80    
-400   -32    
32     144    
480    32     
-560   256    
400    272    
-96    224    
-240   -48    
32     176    
176    16     
-144   -16    
416    160    
-528   -336   
144    320    
208    -192   
-448   64     
160    -192   
-32    80     
208    160    
-528   -128   
336    -64    
-160   320    
-336   -176   
512    -336   
192    -160   
-400   -320   
240    112    
112    -608   
96     80     
-224   -368   
480    -576   
-240   480    
320    624    
272    176    
-288   304    
-16    112    
256    -96    
-48    -256   
-16    96     
-48    224    
304    0      
-32    128    
-48    -512   
128    208    
80     -1616  
384    112    
-272   -320   
304    -64    
80     -304   
-272   0      
0      192    
448    -16    
-112   160    
-144   -16    
0      -64    
240    -848   
-80    -64    
-32    128    
48     144    
16     1104   
2576   -864   
-2016  176    
384    -144   
752    528    
-96    -144   
-448   -320   
176    -336   
16     -528   
112    -416   
128    -512   
-208   -544   
-176   0      
256    -576   
144    -224   
-16    0      
-256   144    
48     -512   
240    80     
-48    -80    
-192   -1152  
-16    -848   
448    192    
-80    720    
-272   560    
272    -288   
-16    -656   
32     352    
160    -80    
32     256    
-32    -464   
32     -32    
-64    0      
-80    272    
448    -96    
-96    0      
-416   624    
112    0      
304    -2032  
-288   -176   
32     112    
256    192    
-144   -16    
144    16     
-32    -256   
-32    -64    
176    208    
-80    16     
-112   -288   
-160   -1568  
2112   -176   
-1008  -560   
-608   -672   
848    -1040  
-352   16     
768    -224   
224    1216   
-272   -2080  
160    -944   
-80    -16    
288    64     
-240   -288   
96     192    
304    -368   
-640   304    
304    -16    
256    160    
-832   336    
224    -224   
176    -608   
-128   -1312  
-1488  640    
1856   -1488  
-208   -1216  
-448   32     
480    -224   
-48    -736   
-272   -96    
256    80     
320    -48    
-224   -48    
-80    -224   
64     256    
64     -400   
-32    -192   
208    -64    
-160   -432   
64     -704   
384    -400   
96     112    
-352   -160   
-80    -208   
-80    240    
304    -352   
-352   480    
-112   384    
176    576    
-288   448    
-128   1376   
720    240    
-496   -384   
-112   624    
592    528    
192    -320   
-896   -64    
-160   192    
-208   640    
752    496    
-16    272    
80     416    
48     432    
-224   224    
-560   -464   
256    -160   
-384   32     
224    224    
-16    -208   
-160   288    
464    464    
-32    -352   
-912   -2016  
-1072  -880   
1232   144    
-304   32     
704    464    
-432   368    
-304   -368   
496    304    
256    544    
240    -144   
-192   -352   
-944   0      
400    48     
160    -272   
128    -80    
64     720    
16     -336   
-160   112    
160    -352   
0      272    
-112   240    
0      -144   
320    304    
-176   -112   
-192   352    
416    -272   
-576   -16    
48     576    
352    928    
32     -496   
-32    -288   
-240   -1328  
-112   240    
480    -240   
-496   32     
160    48     
272    448    
-304   608    
240    288    
192    -352   
-208   -176   
-368   144    
368    -144   
-64    -16    
-144   768    
304    80     
-32    -304   
-320   -800   
192    -288   
208    416    
-720   -368   
688    -1040  
-32    512    
-592   304    
368    192    
96     -144   
-832   -640   
64     -1024  
240    368    
32     480    
48     848    
224    608    
64     560    
80     384    
464    0      
-320   96     
224    64     
-304   -336   
-304   -192   
352    -272   
-256   -384   
-128   16     
-896   -64    
-192   96     
32     80     
-272   256    
-128   -480   
-96    -320   
0      -96    
-256   208    
208    -1312  
-1600  704    
1344   -1008  
-1008  800    
624    400    
-272   480    
48     1136   
-16    160    
224    -304   
-128   -544   
-288   -208   
-80    -240   
-176   -176   
80     128    
-16    272    
-96    -368   
-320   -864   
64     -928   
-1472  -208   
96     -32    
96     704    
-736   -64    
352    192    
432    -32    
-624   -304   
256    -304   
-208   64     
128    528    
80     -16    
-96    368    
-80    -112   
-240   -160   
-32    -32    
-320   16     
-384   0      
112    128    
80     0      
96     -32    
-240   96     
192    32     
-96    160    
-256   -32    
192    112    
-176   -48    
304    96     
-80    64     
-448   16     
480    112    
-336   0      
-1200  -1440  
1584   1072   
3168   -496   
-2224  16     
-352   -304   
816    16     
144    -256   
-416   0      
480    -240   
-368   80     
-96    0      
256    176    
-64    128    
16     192    
176    112    
-80    144    
-448   -64    
-16    96     
-272   -112   
128    -16    
336    48     
-416   80     
0      16     
1968   -64    
-848   848    
-960   -32    
-64    160    
656    -176   
-1008  48     
112    -80    
352    -16    
-464   -32    
128    128    
48     -48    
48     -208   
-768   144    
704    -16    
-160   -272   
-272   96     
384    128    
-336   80     
0      -16    
288    592    
-896   -320   
256    320    
864    -96    
-656   896    
480    416    
-288   -192   
-80    -144   
368    480    
256    224    
-112   0      
-288   336    
272    -64    
256    240    
-240   320    
112    -48    
864    832    
-352   128    
-160   -48    
384    32     
-16    64     
-80    0      
-48    64     
-208   -128   
704    -464   
-208   64     
192    -96    
-32    192    
-912   -2208  
-80    784    
1824   -128   
-1168  32     
-1648  -224   
784    -160   
1136   64     
-560   80     
-400   496    
-624   -16    
496    224    
480    -48    
-304   64     
-144   48     
-368   192    
688    0      
-400   256    
48     -32    
-368   48     
816    448    
-864   160    
352    624    
80     -96    
-384   -32    
848    160    
-272   96     
-32    320    
0      128    
-80    64     
528    -224   
-336   192    
32     -32    
-144   -16    
192    48     
-16    -96    
-80    -112   
-144   -256   
256    -128   
16     -112   
192    192    
32     256    
-176   0      
48     384    
-224   -208   
64     -176   
384    -80    
-224   48     
-128   -32    
48     -16    
160    48     
-80    176    
-96    48     
-32    -944   
-128   0      
288    480    
-784   624    
720    -16    
80     -304   
128    464    
64     336    
-112   -160   
240    64     
-16    16     
-112   16     
-192   -224   
-32    -1152  
160    192    
272    -80    
32     128    
-64    352    
16     416    
96     128    
-176   -1008  
256    -544   
-64    32     
-368   192    
464    -480   
-128   -384   
-16    720    
-256   832    
336    -1152  
-288   -1072  
800    -1504  
-912   736    
128    -320   
288    -624   
-336   352    
368    400    
-192   -640   
464    688    
-336   -208   
224    352    
64     64     
-32    224    
-352   -128   
96     112    
80     48     
-112   -272   
192    128    
64     352    
-48    -64    
-160   -640   
1040   -560   
-176   656    
48     624    
32     240    
-544   -48    
112    -1024  
240    832    
-192   288    
-224   80     
352    -128   
208    -992   
-112   688    
80     144    
48     96     
112    96     
320    48     
-576   -256   
-96    720    
48     576    
352    64     
32     -128   
-176   -128   
-64    144    
432    -192   
-80    144    
96     -816   
-16    272    
-128   96     
48     32     
1328   160    
-2896  32     
-864   -368   
2080   144    
-848   -448   
-656   192    
208    -656   
-32    112    
-48    528    
336    -352   
-16    224    
-224   -208   
208    128    
112    -1776  
-272   160    
-48    16     
272    0      
-48    176    
48     -128   
288    144    
-368   -480   
1296   256    
-656   64     
0      -752   
-16    -720   
-304   128    
656    208    
16     1152   
-144   -192   
352    -656   
-224   -784   
-80    288    
192    496    
352    112    
-112   1040   
624    624    
-240   128    
176    -64    
-288   304    
-16    -16    
480    288    
-112   -208   
240    640    
560    656    
-160   832    
-256   704    
304    160    
176    2560   
1136   1808   
-192   416    
-128   -32    
528    -320   
32     -144   
-128   -544   
-304   928    
1232   -144   
192    -160   
624    224    
-16    208    
144    688    
432    304    
-176   0      
80     -240   
-112   -64    
160    224    
48     224    
-368   160    
-240   -16    
160    304    
-64    112    
992    2784   
-848   1392   
160    -304   
816    -1296  
-1120  16     
-160   544    
432    720    
96     608    
-48    1040   
-208   -160   
112    -720   
496    -624   
-160   -496   
-448   640    
16     -32    
-96    144    
240    -176   
-272   272    
96     624    
-304   -1280  
304    -416   
224    -528   
-496   -112   
-208   -224   
432    -208   
-144   -48    
192    -608   
48     -992   
-192   -400   
192    -576   
-80    96     
208    -336   
224    -1344  
-32    -288   
224    -640   
-64    240    
80     272    
0      -48    
-144   -48    
-112   -96    
32     320    
128    48     
48     -160   
176    -384   
32     -384   
0      -1424  
16     -320   
48     -304   
32     -752   
-384   -736   
160    -416   
224    -560   
-1296  0      
960    208    
352    224    
-496   32     
288    64     
-576   -64    
240    64     
-192   224    
288    -32    
96     -32    
-144   -64    
-112   80     
304    -112   
-176   -48    
80     -80    
32     -240   
32     -928   
-128   -80    
-272   -176   
-304   -496   
-336   -240   
160    -176   
-208   256    
352    416    
-544   224    
-144   -320   
464    -112   
-48    -208   
0      1024   
-304   -1584  
-224   80     
1136   -176   
-448   -160   
-368   64     
160    -240   
496    144    
-480   -480   
-176   -144   
272    -80    
-96    64     
368    -640   
-192   0      
-32    -736   
-64    -96    
-272   464    
400    -80    
-464   224    
304    -256   
-288   -48    
848    1056   
-96    -32    
-688   -208   
416    -32    
-224   -560   
-48    -192   
80     -112   
208    144    
-192   -1168  
-80    160    
-32    -192   
96     -160   
96     -128   
-128   32     
-256   0      
192    -192   
-448   -96    
224    144    
-368   -80    
80     -112   
352    112    
-48    -128   
0      112    
32     -64    
368    -176   
-736   176    
656    16     
-208   16     
-208   224    
-96    2288   
1376   464    
-1328  80     
-192   -256   
1072   304    
-112   -144   
-416   32     
432    -304   
-144   112    
-80    -224   
-96    -32    
-32    176    
336    0      
-448   -112   
160    -16    
96     0      
-256   -48    
112    112    
480    64     
-304   -16    
-208   -112   
-352   -576   
-544   16     
2032   32     
-1792  -832   
-528   352    
1824   -48    
-1040  144    
528    -80    
384    96     
-288   16     
128    80     
96     64     
-208   16     
-32    -32    
-128   -32    
320    80     
-224   -48    
-16    320    
688    176    
-528   -32    
-32    96     
-64    -336   
-1088  240    
512    144    
-224   160    
-720   -208   
-352   -384   
112    -288   
-48    368    
-64    -96    
256    -112   
144    -384   
-176   176    
-160   64     
-1040  224    
496    -144   
-416   -32    
144    -64    
272    80     
-416   48     
-96    -128   
96     -32    
-192   -48    
32     96     
288    0      
-512   288    
-32    -272   
32     16     
592    1664   
-2352  3600   
576    768    
448    -656   
-1168  -384   
976    80     
0      112    
-848   -96    
64     224    
80     240    
-16    16     
-288   -48    
512    48     
-384   -32    
0      0      
208    80     
320    0      
-400   80     
-64    -48    
288    592    
-208   1120   
112    1296   
144    240    
-352   -288   
-336   0      
528    -176   
-640   64     
576    -144   
-16    272    
-400   -128   
240    -192   
-192   -240   
80     -368   
-32    0      
32     0      
-304   -64    
-96    352    
192    464    
-64    672    
-16    16     
-208   96     
-32    0      
0      -576   
-736   -384   
576    112    
-16    352    
-16    448    
400    688    
-272   320    
208    -272   
-224   96     
-48    304    
-256   -1104  
-48    176    
128    16     
-336   224    
480    624    
144    1456   
-688   704    
240    368    
48     400    
-32    -144   
112    -336   
96     -176   
128    400    
-208   64     
80     -288   
-160   -112   
48     288    
-80    -112   
48     -112   
96     -48    
48     864    
-144   320    
368    192    
-240   192    
304    -48    
-240   -288   
-240   16     
272    32     
16     96     
32     64     
-560   368    
48     112    
-320   -432   
-112   -352   
144    128    
-112   -480   
160    -1152  
320    -304   
224    32     
-48    -256   
64     64     
32     -112   
-80    96     
176    -320   
192    176    
0      432    
-48    240    
-176   128    
144    304    
-224   -336   
928    -512   
-384   544    
-160   16     
64     112    
-16    -32    
160    -240   
32     -16    
96     16     
-208   64     
144    112    
160    48     
32     80     
112    16     
-320   0      
32     192    
96     96     
32     240    
160    320    
-144   224    
16     32     
592    -96    
32     112    
-112   -16    
224    80     
-48    272    
-240   128    
368    -112   
-112   192    
-128   96     
784    -624   
-2976  -32    
464    192    
752    -320   
-560   -64    
-208   544    
192    -448   
-320   1088   
528    1808   
208    -224   
48     -160   
-480   -64    
112    96     
176    80     
176    304    
-192   208    
16     16     
-320   -672   
192    48     
32     -48    
-336   -736   
1472   656    
-880   -32    
-544   416    
384    688    
-752   -112   
368    -1168  
496    -2272  
-304   -224   
0      864    
-16    192    
96     160    
80     -320   
-208   -192   
-16    -176   
-240   48     
144    160    
-80    1072   
-432   1040   
240    352    
144    64     
-32    -128   
-96    -1856  
272    -80    
320    112    
-288   1168   
528    256    
224    1824   
1168   1184   
-800   -128   
32     128    
320    -64    
-80    384    
368    -96    
336    1120   
-1232  208    
208    -80    
384    384    
304    416    
48     32     
-816   736    
304    -160   
400    48     
-432   96     
-128   48     
-384   464    
1056   -32    
-160   240    
-992   -688   
320    -720   
800    -1024  
-2128  -432   
944    -144   
880    -672   
-208   -2752  
-160   224    
-144   -384   
512    848    
208    -80    
-288   592    
80     -432   
144    144    
336    240    
-144   368    
-400   -48    
208    16     
240    16     
-416   -192   
592    -48    
-928   -960   
160    -976   
240    -416   
-288   -32    
0      176    
464    336    
-528   0      
240    -320   
-192   -352   
-32    -80    
-32    192    
176    -80    
-16    -16    
-16    160    
48     64     
144    80     
400    608    
-432   -864   
128    240    
368    176    
-256   272    
-16    112    
-352   -96    
528    -96    
480    64     
-480   160    
192    144    
112    192    
-112   0      
112    64     
-128   48     
-64    80     
-112   -2816  
-432   -128   
432    16     
-96    64     
-160   288    
592    64     
-384   48     
-48    272    
16     112    
112    192    
96     144    
-208   -432   
176    160    
112    -160   
-256   16     
224    -480   
32     208    
-272   -272   
352    -192   
80     432    
-32    -16    
-48    -576   
-16    -336   
64     144    
-16    -128   
-96    -384   
64     -144   
144    192    
-96    80     
-448   -384   
1184   -1904  
-1504  784    
544    -576   
0      96     
-720   112    
208    320    
1008   64     
-384   -576   
-496   -1152  
352    -432   
208    64     
192    0      
-272   -112   
112    -416   
64     560    
-64    -496   
224    -1536  
0      176    
-80    -528   
-176   -16    
1088   304    
112    64     
-1136  -64    
912    -112   
-224   -256   
16     -1376  
96     144    
560    48     
-544   -96    
16     -48    
144    -96    
592    -704   
-544   96     
32     -336   
176    96     
128    -624   
224    -112   
-128   -16    
-48    -80    
48     80     
304    -48    
-64    48     
-96    -1408  
256    64     
208    -32    
-352   240    
208    -112   
-192   96     
-80    400    
-1536  -864   
3264   640    
-656   -400   
-2640  -512   
752    176    
912    80     
-272   -208   
-560   -432   
272    -304   
80     -96    
-16    -32    
224    -16    
96     -64    
-256   32     
384    32     
112    48     
-464   -32    
288    32     
-112   64     
176    -48    
32     -64    
-480   -976   
128    -32    
560    -928   
48     -80    
-304   -112   
576    -16    
-464   128    
-272   -32    
416    64     
192    -80    
80     32     
-32    0      
-272   64     
64     16     
416    -64    
-64    -32    
-112   128    
-48    96     
240    64     
272    -1120  
-240   -144   
576    -176   
-288   80     
288    -48    
16     -48    
-816   128    
336    -384   
-112   -384   
-272   144    
160    -64    
-144   -160   
592    -272   
32     144    
-560   64     
672    -624   
-112   32     
-112   -48    
368    112    
-112   32     
160    -192   
-16    0      
-144   -64    
-64    32     
128    -32    
336    192    
-256   -96    
-1008  -80    
432    -304   
-544   -992   
-1184  -3056  
-224   512    
448    -704   
0      -48    
784    -112   
-112   -832   
-736   688    
784    -112   
-144   48     
48     -64    
-432   224    
416    128    
-528   160    
160    -400   
80     -32    
320    -288   
-272   272    
224    -256   
-192   224    
-160   1152   
240    880    
-240   16     
-256   -496   
400    160    
-112   -160   
-400   208    
496    192    
-432   576    
208    208    
-256   -864   
-80    -912   
224    384    
48     -256   
-240   -256   
-448   -128   
-96    128    
0      336    
-64    -64    
-80    32     
-32    -112   
-64    96     
592    272    
-320   576    
48     1072   
-400   592    
-384   -112   
144    112    
0      -192   
224    -1008  
-288   48     
-304   160    
112    -768   
-1696  320    
608    528    
-752   192    
608    720    
32     -240   
64     -1408  
-176   912    
80     1168   
208    -864   
-336   208    
48     32     
112    176    
-432   128    
-96    64     
-80    -336   
-144   -128   
32     -368   
112    144    
-128   -64    
64     -144   
112    64     
-112   -96    
32     160    
-96    -112   
576    -304   
-144   -144   
-48    -64    
-32    128    
96     64     
224    -704   
-464   16     
80     336    
-656   192    
336    -16    
160    0      
-80    -144   
-336   144    
-16    368    
-16    112    
288    -272   
-192   64     
-208   112    
256    80     
128    192    
128    128    
-368   -64    
-176   224    
-224   224    
-304   -576   
992    -864   
-208   784    
-16    -32    
-48    80     
-208   144    
240    128    
-352   752    
416    -256   
32     160    
-288   -112   
-192   80     
192    -176   
144    48     
-80    224    
-32    256    
-928   -96    
0      352    
208    416    
-192   208    
-272   -80    
240    0      
352    240    
-288   288    
144    320    
-80    416    
-272   176    
128    16     
144    224    
-432   -96    
432    -336   
-2544  96     
1200   336    
256    304    
-128   1088   
272    1840   
-448   80     
-288   -1472  
464    800    
-272   1072   
-80    592    
-48    -48    
-208   -48    
144    -208   
160    -304   
-208   -16    
-496   -64    
96     -400   
336    832    
-192   944    
-320   -128   
1296   80     
-1760  -480   
448    -416   
160    1008   
-112   512    
-16    -224   
464    -352   
112    -272   
-192   832    
-560   560    
-32    32     
416    -368   
-304   224    
336    336    
-608   0      
-48    32     
320    -256   
-352   -272   
224    128    
-160   96     
304    432    
-240   0      
384    448    
-2336  1408   
-272   272    
864    -192   
-896   -656   
-32    96     
32     416    
-336   0      
80     32     
224    -16    
0      64     
304    1184   
-944   -32    
-320   0      
672    -192   
-496   320    
-512   -608   
288    80     
128    96     
-224   32     
-48    304    
112    -320   
384    160    
-80    -64    
-48    -32    
-48    -432   
448    -912   
-560   -2912  
-1760  -832   
1392   -80    
48     192    
96     96     
32     672    
-544   256    
912    912    
-80    -16    
-208   240    
192    -80    
-112   176    
416    48     
-128   160    
-368   16     
64     192    
320    0      
-272   48     
656    -48    
-1168  -16    
704    -112   
32     -80    
-64    -48    
592    224    
-400   -16    
-48    160    
384    144    
-80    -16    
-160   256    
336    32     
-240   -32    
272    80     
0      48     
-304   272    
240    64     
80     544    
-304   16     
128    -208   
-128   -64    
32     128    
-80    128    
-48    48     
176    -208   
48     -48    
160    48     
-304   -160   
-32    64     
304    -208   
-144   112    
32     -64    
-48    -352   
-160   -992   
-896   240    
944    160    
-112   128    
-112   80     
304    176    
128    112    
-32    464    
-128   272    
48     224    
0      96     
-144   32     
288    16     
-208   128    
0      -128   
144    -144   
32     48     
-240   112    
352    0      
-80    224    
-48    48     
96     -16    
80     -176   
80     16     
160    304    
0      -176   
16     -48    
128    288    
-96    -48    
1104   3072   
-1872  -992   
-1264  -800   
1904   -112   
0      -336   
-848   208    
48     -160   
736    640    
-432   -240   
-192   16     
96     112    
-128   -176   
32     -32    
288    144    
-544   272    
288    -368   
-64    304    
-16    -768   
0      -224   
48     208    
160    720    
-544   64     
192    192    
592    -96    
-512   -96    
208    544    
-496   176    
128    -48    
688    -48    
-240   160    
-112   -64    
-144   272    
320    -272   
64     32     
-160   -240   
368    16     
-64    -496   
-256   -272   
272    96     
288    192    
-496   160    
-80    160    
464    144    
128    -176   
-224   32     
-304   -64    
368    -96    
-32    -144   
240    32     
-528   -480   
944    -144   
880    -224   
-784   -192   
400    -304   
656    112    
-1088  512    
480    384    
976    496    
-304   -496   
-304   224    
144    -32    
272    112    
-48    -192   
-144   -272   
-48    -192   
320    -16    
-96    352    
96     272    
192    240    
192    192    
-352   -624   
1168   144    
-864   304    
0      -544   
16     256    
-32    -240   
192    272    
352    -160   
96     -16    
-320   16     
-16    160    
208    16     
192    192    
-176   -160   
272    64     
-224   80     
96     -192   
192    -128   
-96    336    
144    304    
-16    -304   
336    272    
-432   224    
-624   80     
-144   0      
1120   -304   
-160   160    
-256   -2752  
144    32     
416    -1632  
-528   -272   
-368   560    
1152   -864   
-336   -64    
-560   -816   
656    -528   
-48    112    
224    48     
-240   176    
-32    -80    
272    -2224  
64     48     
0      -288   
-144   -64    
-16    16     
608    -544   
-176   -144   
48     -864   
544    832    
-752   -512   
-864   2688   
1136   -352   
-864   176    
-400   -560   
1088   160    
224    -288   
-464   768    
-224   112    
0      32     
-16    -336   
-16    -208   
-144   112    
-336   -512   
432    -96    
272    -48    
176    -64    
-176   -368   
272    -80    
256    -80    
-272   -640   
0      -480   
-64    80     
336    336    
144    688    
384    32     
-480   416    
32     -128   
-352   -912   
-32    -720   
400    -16    
0      224    
-208   0      
0      -224   
176    -160   
400    416    
-80    640    
0      432    
16     -368   
208    -784   
-208   -176   
-48    -32    
0      -320   
64     -304   
-384   -304   
48     208    
224    -1408  
-496   -928   
320    -16    
320    128    
-192   288    
-336   -256   
768    384    
400    960    
-512   992    
736    688    
-80    272    
-304   -368   
320    -1680  
-768   -192   
-448   1248   
-128   224    
272    -176   
176    208    
-208   -464   
-192   16     
224    -96    
48     -640   
-368   -384   
0      352    
-32    32     
80     -112   
-144   32     
-112   16     
-288   -96    
320    224    
-1120  288    
-32    256    
384    256    
-240   -304   
-128   144    
-224   -592   
704    -160   
144    448    
240    -384   
-448   112    
96     80     
-48    -224   
688    -416   
-128   352    
-304   240    
16     -160   
16     -320   
-80    208    
224    -16    
-208   96     
128    -384   
0      -48    
32     224    
48     -96    
-144   -112   
384    -432   
-1136  208    
784    176    
-416   0      
128    -272   
-976   -320   
-80    -528   
224    -144   
-64    -784   
64     160    
128    -960   
-48    -160   
16     -48    
-128   -224   
32     -368   
448    -32    
-64    608    
-224   688    
16     208    
720    -416   
-384   -144   
-432   -128   
144    304    
-832   0      
-64    -48    
-64    64     
-256   16     
-416   -128   
-240   384    
48     -928   
800    -800   
-176   -352   
-176   -416   
112    96     
496    96     
-928   1040   
688    576    
480    112    
-768   -224   
80     144    
320    112    
-16    32     
-240   -16    
-512   -288   
272    -32    
-1072  -128   
32     224    
-16    176    
112    384    
0      -176   
384    256    
-1952  336    
464    -224   
576    -704   
-448   -688   
-192   -160   
144    240    
-224   112    
-32    -144   
256    320    
448    48     
-576   0      
-112   96     
384    -80    
368    48     
-272   160    
-256   -240   
432    240    
96     176    
-208   112    
-32    64     
-48    16     
272    -416   
-640   336    
480    -256   
176    256    
80     112    
832    -112   
-256   496    
-432   272    
112    112    
-128   -256   
-64    -304   
144    96     
-352   80     
384    -320   
-144   272    
48     64     
-352   128    
96     48     
-16    -32    
-240   112    
-480   -160   
-96    176    
80     -80    
-480   192    
-160   -112   
192    176    
-64    -272   
96     -880   
1744   -1232  
160    -304   
-640   -176   
-416   544    
-48    80     
-144   144    
640    -16    
-432   -192   
112    128    
80     352    
160    0      
-112   -160   
64     128    
96     -128   
288    224    
-48    -48    
-256   160    
-352   -432   
848    288    
16     -224   
-368   304    
320    240    
-464   96     
-144   48     
192    16     
32     352    
-672   144    
128    48     
464    16     
-768   -80    
-16    96     
80     -48    
208    96     
80     192    
-368   208    
-176   16     
208    96     
-240   -304   
-32    192    
-144   -208   
80     64     
368    64     
-256   96     
0      112    
368    160    
320    176    
-416   112    
32     128    
144    64     
-112   -80    
16     -112   
64     400    
640    -304   
176    320    
0      -272   
-144   -32    
432    240    
240    400    
-496   304    
160    256    
256    64     
-176   160    
0      160    
-16    112    
240    32     
-80    240    
-160   496    
448    64     
96     -80    
-416   16     
16     112    
224    -16    
-432   96     
176    96     
16     192    
192    -992   
-448   -272   
160    560    
-48    -336   
0      -224   
-1136  -1040  
1360   -864   
96     -208   
-880   -176   
1120   352    
-448   272    
-272   80     
16     -64    
304    -176   
64     -224   
-224   432    
32     -32    
-80    -32    
160    64     
128    -192   
-144   384    
-48    16     
176    -208   
208    208    
-160   192    
672    896    
-1472  640    
864    -208   
288    -128   
-304   -176   
160    256    
-320   16     
-32    -544   
224    -96    
80     176    
-480   96     
224    416    
32     -48    
0      112    
-192   256    
-128   64     
272    32     
112    32     
96     160    
-64    144    
-80    96     
208    -80    
-336   80     
400    0      
-336   96     
-48    256    
400    -64    
-336   -80    
-80    -1648  
64     0      
1232   -48    
-1184  512    
736    448    
-576   -224   
-576   400    
976    -48    
64     560    
-304   80     
-112   112    
224    128    
64     192    
-272   64     
112    176    
-224   -1040  
352    208    
-16    80     
-304   -240   
224    48     
128    64     
-128   64     
256    640    
96     -752   
-1424  288    
656    112    
432    -288   
-224   -112   
-368   320    
416    32     
-256   -576   
-16    176    
-208   16     
208    80     
192    48     
-144   16     
-240   32     
128    112    
80     -80    
-48    -192   
-64    64     
-144   272    
-160   48     
80     -272   
-416   -208   
-80    -416   
288    -96    
-128   -512   
16     544    
800    -64    
-144   -64    
-448   608    
576    -96    
-288   352    
192    -48    
304    496    
592    -416   
-512   896    
-32    416    
-96    48     
496    -96    
-96    176    
-320   -848   
32     96     
384    160    
-80    64     
112    480    
-288   32     
-32    0      
576    -320   
-144   -464   
-320   432    
-64    2848   
736    -176   
-800   -144   
208    -224   
928    16     
-272   -880   
-544   -384   
32     -1168  
240    -80    
-192   16     
-176   0      
48     0      
336    -16    
96     368    
-144   64     
-112   624    
48     176    
288    -80    
-80    -656   
-160   448    
0      80     
256    -64    
144    -1072  
-144   -576   
-128   -64    
208    160    
80     0      
128    96     
32     -384   
-256   80     
160    320    
-128   -48    
32     -208   
336    -80    
-416   48     
96     -112   
96     32     
224    944    
-48    1040   
-176   48     
272    -384   
128    272    
48     96     
-288   0      
16     176    
688    16     
-176   192    
-208   -240   
-64    160    
160    144    
-192   -912   
752    -80    
-512   -864   
-432   -1104  
-32    -1040  
400    656    
-224   -224   
448    -896   
272    784    
-112   -608   
-176   112    
-80    160    
144    64     
192    80     
160    400    
-80    416    
224    496    
-176   -288   
144    496    
-48    272    
-144   -1520  
64     -160   
208    -1744  
-128   -240   
-64    -96    
528    -944   
544    -672   
-144   -1184  
-432   -480   
192    256    
816    1200   
-928   496    
384    -240   
-64    784    
-96    288    
352    -464   
352    480    
-512   720    
-32    -288   
624    -656   
64     -784   
-208   -288   
64     16     
64     64     
96     -640   
80     -128   
-288   304    
-112   32     
224    -176   
208    80     
-176   464    
112    576    
-576   -448   
192    -64    
-1136  -176   
-112   -288   
-112   704    
240    -288   
0      -272   
64     0      
-32    -208   
48     -1504  
112    -320   
144    512    
-32    288    
-16    -416   
64     -320   
-192   -192   
240    224    
-160   -32    
32     -96    
80     -80    
384    -48    
-288   -32    
48     -528   
208    -48    
-64    -1200  
96     96     
160    64     
416    1808   
-368   1072   
-400   432    
1200   -384   
-1600  -624   
-368   80     
1056   64     
-704   -224   
160    -160   
-16    -240   
128    0      
-144   -16    
256    -656   
192    336    
-288   112    
-176   320    
240    -80    
32     -112   
-400   -144   
224    128    
32     48     
576    1008   
-1680  -480   
-48    224    
-384   256    
-592   -352   
304    304    
64     -192   
-144   16     
80     -1872  
304    -48    
32     -48    
-320   112    
48     112    
320    -112   
-240   48     
160    -128   
-240   -64    
-48    208    
-624   448    
144    -48    
352    -112   
208    320    
-1232  480    
-192   -960   
464    -80    
0      80     
336    208    
-1264  -464   
-64    -304   
80     -112   
48     -48    
-272   176    
-128   0      
256    -48    
496    -16    
-496   544    
-272   48     
336    496    
-320   160    
224    64     
144    -48    
-400   16     
-112   16     
224    112    
336    -80    
-1040  256    
240    -80    
-448   -96    
-1136  -784   
3760   1296   
-2368  1312   
-480   672    
1792   112    
-624   -176   
-1856  -448   
96     176    
-48    -80    
-288   96     
848    0      
-400   176    
-368   -48    
96     192    
352    -160   
32     -16    
-752   -16    
336    160    
-320   -256   
-112   -96    
560    992    
32     -208   
-816   272    
640    32     
-688   -192   
-256   96     
1008   -80    
-752   -96    
-32    144    
208    -160   
-128   80     
-256   -160   
160    112    
-192   -400   
16     288    
-144   -208   
-352   240    
448    -80    
96     96     
-192   -16    
-384   32     
336    -48    
-304   -144   
176    112    
240    192    
-528   32     
64     -16    
496    -592   
-992   -384   
320    48     
-272   128    
496    48     
-96    -480   
208    -256   
-480   112    
208    -16    
352    96     
-608   256    
-96    112    
-336   0      
384    -16    
240    0      
80     112    
-176   16     
-160   128    
128    -48    
32     -240   
16     -112   
-192   -128   
-96    0      
-288   -272   
192    -160   
-352   64     
-128   64     
336    -176   
64     240    
-128   288    
-176   384    
224    -192   
272    560    
-384   736    
-608   -880   
1472   -880   
-624   640    
-192   144    
-464   416    
144    -208   
288    192    
32     128    
-192   -96    
-384   752    
240    -64    
112    -48    
64     272    
-256   160    
128    368    
368    176    
-128   -112   
-32    176    
32     112    
-160   96     
48     160    
-560   -1136  
880    0      
-208   512    
-848   16     
464    -80    
0      -256   
-32    -144   
-288   192    
144    96     
336    112    
-16    64     
-144   -32    
-336   -16    
32     -96    
144    -336   
48     96     
-32    64     
-80    -128   
-16    96     
-128   128    
576    400    
-352   320    
-80    320    
32     -128   
208    128    
112    48     
-160   128    
-16    240    
-144   0      
1872   832    
-2512  688    
224    -32    
336    -320   
-240   -64    
144    192    
-416   -464   
-160   -16    
176    -256   
-144   32     
192    -112   
-112   48     
16     80     
208    304    
-560   -48    
176    256    
-32    48     
-368   272    
64     304    
32     80     
-48    144    
-496   96     
2544   -144   
-1568  -304   
-448   160    
912    176    
-640   576    
896    -448   
-144   16     
-576   -80    
208    64     
0      16     
272    240    
-208   -128   
-160   368    
32     176    
96     16     
0      288    
176    128    
16     160    
112    16     
144    16     
-112   32     
-480   432    
768    32     
288    160    
-816   -368   
752    144    
-496   208    
-256   0      
176    -16    
352    496    
-16    400    
-128   176    
208    -352   
-688   992    
-448   416    
-368   -592   
64     -272   
128    -208   
-160   -96    
80     -256   
160    432    
-48    192    
-224   80     
192    48     
-624   432    
-208   128    
512    -352   
-192   -64    
-464   -1184  
1568   -1328  
480    912    
-32    -128   
-1392  -160   
384    -240   
368    -1216  
64     -2528  
-32    368    
-336   -320   
112    32     
240    464    
320    -144   
16     112    
-192   160    
-80    144    
448    -528   
80     -48    
-96    -496   
-480   -544   
336    656    
368    560    
-80    -880   
-512   16     
720    400    
-176   336    
208    48     
-160   528    
-112   1984   
112    -48    
160    -160   
304    240    
-432   -128   
48     176    
320    -400   
32     -368   
112    720    
160    -480   
-256   -288   
-80    -336   
352    -560   
-336   288    
80     368    
-224   -368   
112    -400   
48     432    
112    480    
96     -208   
-32    -432   
608    80     
-496   144    
-176   -848   
-304   -1248  
688    336    
0      176    
-16    432    
16     144    
-32    -880   
320    752    
448    1936   
-112   528    
0      -96    
160    128    
-368   176    
64     240    
528    448    
288    208    
-272   -272   
-272   320    
160    416    
80     64     
192    -320   
-192   16     
-400   320    
16     -144   
-176   -1120  
368    -1696  
-32    -432   
-288   640    
-224   96     
-224   -480   
1072   -704   
288    144    
-240   16     
112    864    
1008   1264   
-192   -2432  
-272   -272   
48     -32    
32     -640   
192    240    
96     32     
-176   96     
-32    64     
416    160    
320    -128   
-304   688    
48     -64    
208    -48    
208    -480   
-464   -272   
272    -2176  
96     16     
112    -1088  
-208   96     
240    96     
-48    32     
48     80     
176    224    
-112   176    
16     0      
192    48     
96     48     
48     80     
-80    -176   
32     -256   
480    -736   
0      688    
-304   336    
112    144    
0      144    
32     32     
-32    224    
0      -336   
368    64     
-304   -192   
64     112    
16     -16    
64     144    
48     -32    
-640   -928   
-368   -1200  
880    -400   
-688   32     
-400   240    
1088   448    
-256   288    
-464   -432   
624    -48    
-16    -64    
-80    -16    
32     80     
-48    -48    
352    -16    
-432   -160   
208    -64    
32     -384   
528    112    
-224   176    
208    -752   
144    144    
-112   -2608  
-1280  368    
912    80     
-96    -1712  
64     0      
-128   -1072  
-16    96     
-160   96     
-144   -128   
320    112    
32     48     
0      -304   
0      96     
-80    -336   
-224   112    
336    -368   
144    -32    
112    -528   
-352   112    
576    -192   
-112   -720   
576    0      
928    544    
-1232  -288   
-576   784    
848    176    
208    -448   
-208   -208   
-144   160    
-288   272    
224    -112   
368    128    
-944   64     
-96    352    
560    -48    
384    656    
-336   272    
-528   -64    
16     160    
368    -112   
560    464    
-240   -352   
-432   80     
560    -80    
-240   0      
432    96     
-640   -208   
-528   -128   
1424   1600   
-1824  -1856  
-1456  688    
1696   -768   
-1152  -672   
448    0      
336    -400   
64     -160   
-496   576    
-224   -48    
560    288    
480    -224   
-672   -112   
64     -208   
-112   -48    
368    -256   
-304   96     
176    -16    
-688   -176   
720    -272   
608    -480   
-800   -48    
704    32     
-592   160    
480    144    
96     -192   
-448   32     
512    0      
-64    144    
-432   -32    
240    448    
-368   48     
-96    240    
48     -384   
-512   -480   
80     -224   
320    -48    
-112   176    
-16    -896   
400    48     
-48    32     
144    -32    
-272   -16    
160    64     
176    -80    
-256   -128   
-32    -16    
224    -32    
-464   -16    
192    640    
560    640    
-128   96     
224    672    
-352   -720   
224    208    
-208   -160   
48     -240   
176    208    
-128   16     
-624   -176   
464    -352   
-144   -144   
-176   -80    
32     48     
240    144    
80     256    
-64    -288   
-112   48     
112    -1392  
-176   -512   
-32    -304   
80     -192   
-320   -112   
176    -224   
144    -208   
-16    240    
-528   272    
208    160    
-16    -608   
-32    -720   
-32    -128   
-416   -480   
1696   1120   
32     592    
-1392  480    
768    -496   
-352   -1376  
208    -32    
656    880    
-496   496    
-256   288    
368    240    
544    96     
-528   608    
-224   -416   
176    -112   
400    208    
-400   976    
-208   176    
-656   16     
0      0      
-432   -112   
-464   224    
560    -496   
-800   1168   
384    0      
-176   -512   
-528   -80    
-240   -96    
0      656    
-80    96     
-176   -224   
128    -96    
-128   16     
-32    -160   
32     224    
32     -64    
-256   144    
-560   -144   
-160   -336   
144    624    
-96    -48    
32     16     
-208   112    
-64    -352   
224    64     
-32    -176   
48     400    
-208   -16    
48     -80    
16     128    
144    640    
832    -224   
-2448  -64    
1728   288    
-480   64     
-1280  256    
448    448    
992    656    
-688   1040   
224    64     
-32    -640   
48     176    
128    224    
144    -96    
-528   -352   
-128   -48    
256    128    
-144   336    
-48    112    
-224   -224   
-64    0      
-848   16     
2576   48     
-800   -880   
-1504  -944   
1424   592    
-240   992    
-784   192    
144    64     
176    -16    
-80    96     
416    -80    
-48    128    
-112   368    
-160   400    
384    272    
64     -240   
-80    528    
656    1248   
-512   1120   
-16    240    
256    -64    
240    -96    
-368   32     
592    -496   
-608   864    
368    272    
416    -880   
-704   144    
176    16     
-240   -512   
-656   -576   
-720   352    
544    -128   
64     16     
-176   144    
1168   1008   
-944   736    
208    -672   
640    -560   
-240   -208   
0      -176   
-560   -416   
528    -496   
144    -32    
-64    80     
-672   -96    
-112   80     
496    -256   
-224   64     
-720   -1040  
1488   -768   
1152   400    
-1360  800    
-320   -16    
560    64     
304    848    
-112   800    
-48    -80    
-96    256    
208    -560   
64     144    
272    -432   
-400   0      
96     464    
464    352    
-272   448    
-80    208    
128    -496   
-96    -416   
96     384    
64     448    
48     144    
-752   80     
704    192    
-288   16     
-416   32     
352    -1648  
-832   -848   
272    -96    
16     1440   
192    256    
32     16     
-144   -80    
80     160    
-48    240    
160    400    
-80    -176   
224    -576   
-464   -704   
304    -560   
160    -656   
-144   -96    
0      496    
-48    80     
320    -320   
-80    416    
240    -192   
-240   128    
64     496    
240    240    
96     -752   
-1040  -80    
336    -1024  
528    -624   
-2032  128    
848    -1040  
208    416    
-752   -320   
208    -608   
480    -480   
-112   -208   
-288   -112   
128    -336   
288    240    
-144   688    
-128   400    
-128   64     
160    464    
704    1344   
-624   768    
-112   352    
400    160    
48     464    
-304   80     
-96    -256   
224    -960   
-176   -368   
48     496    
0      352    
-16    112    
656    2400   
1200   464    
-1280  48     
544    208    
-80    320    
-144   400    
-176   -80    
-240   -448   
0      -240   
96     16     
-64    -464   
96     208    
240    224    
-336   176    
240    -144   
-224   464    
128    288    
16     32     
-32    -64    
-240   -304   
464    1648   
224    128    
-576   -48    
720    -32    
-192   -128   
-96    32     
112    352    
320    400    
-432   160    
-128   -16    
384    -48    
32     160    
-224   224    
-16    80     
224    -864   
48     192    
240    112    
-288   320    
16     16     
80     128    
368    128    
-96    48     
160    272    
-256   32     
0      256    
64     224    
176    96     
-48    64     
48     144    
256    -1776  
-2704  -288   
1696   -176   
608    0      
-560   16     
-288   -160   
432    128    
112    -560   
-272   352    
256    -112   
48     112    
16     48     
-112   160    
-256   -368   
32     256    
64     -208   
-48    128    
240    -1104  
0      48     
0      80     
0      112    
-416   -560   
-272   256    
1104   -608   
-192   -304   
-560   0      
608    -288   
-384   -176   
-336   -96    
80     128    
224    -112   
512    224    
-240   -224   
-144   96     
-16    -32    
-176   144    
432    208    
64     256    
192    -192   
-544   -288   
112    48     
400    256    
192    -128   
-720   -80    
816    48     
-608   -192   
-224   -464   
1088   -432   
192    96     
416    -4080  
-368   16     
336    160    
352    -16    
224    -128   
-336   448    
0      448    
-48    592    
480    -192   
208    -64    
64     320    
464    -176   
-64    144    
128    0      
-48    48     
-16    -256   
240    0      
-64    64     
112    144    
-224   -32    
720    1008   
-1936  4256   
1232   -176   
-224   -48    
-1136  -752   
1216   336    
-96    -448   
-752   -176   
832    -368   
96     192    
112    -96    
-288   176    
224    -64    
-32    32     
-160   160    
464    16     
-384   160    
-112   -144   
96     160    
384    -400   
-800   -128   
560    -320   
-48    32     
48     -144   
768    64     
-384   -272   
-368   320    
432    192    
208    160    
-288   64     
-368   224    
416    -1120  
160    -48    
-176   -848   
80     176    
480    -32    
-96    16     
-144   160    
64     96     
336    304    
-128   0      
-176   176    
224    208    
-80    128    
256    304    
256    -176   
-144   -176   
48     -416   
0      -448   
80     -320   
0      -880   
0      80     
256    864    
432    -96    
-224   -320   
-128   -1312  
-544   -1072  
416    -496   
128    -208   
-384   -144   
-16    272    
-144   160    
-560   176    
624    0      
-416   -16    
-224   -96    
128    -672   
256    -1568  
-240   -464   
16     112    
208    384    
-32    -160   
-256   -112   
-16    -304   
272    320    
-16    384    
-16    384    
-240   240    
224    -544   
-144   -304   
64     -624   
464    1200   
-592   -1280  
-176   -160   
1104   224    
-656   -80    
272    -384   
32     336    
80     -176   
-64    16     
32     -192   
-32    -480   
-672   320    
176    96     
32     -368   
-48    -480   
192    -48    
304    208    
-224   -288   
80     -1568  
96     -336   
96     160    
288    -192   
-688   240    
704    -384   
-160   -448   
-144   -368   
160    -240   
-448   -848   
-336   -592   
352    -208   
32     160    
-176   -608   
-16    32     
48     128    
192    64     
-48    96     
-224   48     
-176   176    
416    -112   
-160   160    
-240   -128   
-192   176    
240    64     
144    48     
-80    -464   
-432   240    
224    176    
160    80     
-80    -288   
112    64     
-1616  -192   
2112   112    
-272   -560   
-1264  32     
1216   608    
256    16     
-688   80     
464    848    
-352   -640   
-128   -464   
-240   112    
-64    -32    
-112   80     
288    -272   
176    112    
-48    -272   
-192   -112   
288    272    
96     -64    
-240   -32    
304    -336   
-2128  240    
736    32     
-256   -160   
0      -240   
0      288    
96     -400   
-32    -192   
-48    288    
256    912    
-192   720    
192    432    
128    -96    
-400   -704   
448    384    
-80    144    
-224   560    
448    464    
112    448    
-64    192    
-96    304    
176    112    
-112   768    
-320   -1344  
240    -608   
800    1168   
-704   1488   
-576   736    
624    464    
-496   448    
-432   48     
304    192    
64     -48    
-48    80     
-384   240    
16     368    
-16    -784   
320    -80    
-960   -336   
-176   176    
64     32     
-80    -48    
-96    -864   
-576   -224   
336    416    
-688   -144   
-160   192    
0      -416   
-240   -304   
-624   -80    
-112   2416   
624    -176   
-1072  112    
-128   -224   
400    1680   
496    992    
-528   464    
-32    784    
-144   -432   
320    -720   
-192   -112   
-208   96     
-432   -64    
176    112    
192    -208   
-208   480    
-336   -160   
-80    -48    
400    -224   
-144   -176   
-352   -160   
288    320    
-416   -64    
-704   -400   
736    496    
-784   688    
-64    -128   
-784   368    
384    288    
-224   352    
-128   432    
224    -272   
-128   320    
-240   16     
-240   128    
368    -176   
272    -64    
-400   -80    
-16    160    
48     160    
512    144    
-272   128    
-336   480    
64     368    
-512   224    
-48    0      
-32    32     
368    32     
-64    -112   
-176   80     
112    16     
-144   -1184  
-1040  -656   
96     -80    
496    160    
0      1088   
272    208    
-368   -176   
128    0      
-1232  -368   
304    -176   
-176   -128   
-544   -224   
192    48     
224    -16    
-160   -128   
80     -96    
16     528    
-208   192    
16     -320   
208    -144   
-240   304    
-144   16     
32     -64    
-576   -16    
640    16     
-144   32     
-432   224    
224    112    
208    -16    
-736   -2144  
48     -192   
928    -64    
-720   272    
816    -240   
-752   192    
-80    336    
208    224    
-464   848    
512    -240   
-336   224    
-32    16     
-80    0      
224    -416   
16     80     
-192   -352   
112    96     
-32    240    
-128   -64    
288    80     
352    -704   
-1392  784    
704    32     
-80    64     
-400   -144   
384    -352   
-464   272    
-16    240    
80     416    
608    0      
-256   -96    
-544   48     
336    16     
-224   112    
272    240    
48     176    
64     -128   
-560   -48    
608    -64    
-560   -48    
272    112    
80     64     
32     176    
272    224    
-432   16     
16     368    
0      32     
0      112    
208    32     
928    240    
-912   544    
432    176    
224    -96    
-400   -64    
16     32     
32     -112   
176    480    
-336   -32    
112    80     
0      -64    
-112   208    
80     0      
128    224    
64     80     
-304   224    
256    -16    
-96    192    
-256   -16    
240    112    
16     48     
336    1056   
-1088  -176   
48     -16    
304    -32    
-992   -208   
1024   80     
-528   32     
-48    -128   
-192   -16    
144    0      
-368   16     
-16    224    
320    -48    
-96    256    
80     -48    
-368   176    
288    -80    
144    32     
-96    64     
128    208    
-80    96     
-464   -512   
256    320    
-176   -48    
-880   64     
544    -32    
528    -16    
256    448    
192    -336   
-352   32     
128    240    
-112   0      
208    96     
192    416    
-656   272    
-48    -64    
64     80     
-208   112    
320    -144   
-272   160    
-272   16     
400    112    
-16    -96    
-192   -848   
128    320    
-240   320    
464    48     
32     48     
-576   -304   
2384   3136   
-1904  1536   
416    -416   
1648   0      
-1104  176    
-304   32     
560    48     
560    352    
-64    -32    
-608   -160   
688    48     
-16    80     
96     96     
224    256    
-416   16     
128    288    
512    16     
-208   80     
-288   128    
608    1408   
496    496    
-496   -528   
-16    -320   
-80    96     
-544   -384   
912    528    
144    48     
-592   80     
144    272    
480    -64    
-64    -304   
-704   -208   
336    -48    
720    -48    
-864   -32    
-80    -288   
272    -400   
48     -640   
48     -128   
-64    -240   
-144   -64    
272    -864   
240    -288   
-384   -272   
208    -256   
64     -208   
0      -144   
-240   -256   
-304   -272   
208    -496   
480    -208   
-224   176    
-192   -416   
-624   272    
416    -576   
256    -112   
-752   -272   
144    -112   
0      -720   
80     -720   
-112   576    
-16    464    
144    -176   
16     144    
-160   -176   
-64    -80    
176    160    
-352   -416   
-32    48     
112    -224   
32     128    
-48    -240   
-32    80     
-176   -624   
112    480    
176    144    
-32    80     
16     960    
400    -128   
-416   80     
-224   64     
928    1040   
-928   880    
368    -160   
496    -432   
160    16     
-144   -1072  
-32    -48    
-96    -304   
80     -48    
192    -48    
32     192    
-160   48     
192    64     
240    160    
-256   -384   
-256   272    
240    -432   
-32    128    
208    -256   
-16    160    
-208   -752   
-112   240    
-16    -64    
368    -192   
-128   144    
96     0      
256    256    
-592   880    
112    688    
448    -240   
-96    -64    
-496   48     
208    64     
256    -240   
32     304    
0      -80    
-16    64     
80     -128   
-48    96     
128    -48    
-192   224    
-16    96     
64     -176   
-16    -928   
384    -512   
-112   288    
304    -64    
-160   -224   
-272   336    
-176   128    
944    -320   
1328   0      
-1680  -496   
592    -784   
256    -96    
128    624    
272    -576   
-576   -800   
-192   896    
96     -480   
416    -144   
64     -400   
-320   96     
32     -544   
400    -224   
-16    -128   
-256   304    
48     656    
16     -608   
96     48     
-560   -848   
1312   -144   
272    -608   
-1056  368    
944    976    
1024   -384   
-752   -512   
-96    464    
912    944    
-176   -864   
160    240    
160    -32    
-304   -160   
128    -112   
192    128    
-336   16     
320    -80    
-432   320    
80     176    
-80    -112   
-48    -400   
240    -288   
96     -592   
528    944    
-1344  480    
176    -128   
-224   -2256  
112    -496   
192    -80    
-48    -320   
-80    80     
304    -272   
-464   176    
176    48     
-320   192    
400    1360   
928    272    
-656   -64    
368    -160   
144    112    
352    -48    
16     -288   
-320   -16    
-144   -32    
480    -32    
96     -96    
-272   -112   
-432   -432   
848    -1456  
1056   2560   
-1664  1600   
720    -624   
1520   -256   
-1008  176    
-112   768    
448    432    
-16    -1072  
-32    416    
224    48     
-400   416    
128    -208   
288    -128   
-224   -16    
-112   160    
-432   -32    
448    96     
-416   -32    
384    512    
-704   544    
48     -800   
384    -464   
-128   -272   
96     224    
272    192    
-336   352    
192    96     
-256   160    
432    -640   
-336   -272   
160    -208   
32     -256   
-192   -240   
192    -256   
-480   32     
-48    112    
288    32     
-80    -272   
-128   -144   
-16    -320   
48     -112   
-240   -32    
432    -48    
-16    192    
208    16     
112    128    
-48    32     
64     -48    
-96    -64    
64     144    
400    -16    
-272   96     
416    48     
592    240    
-464   -416   
64     160    
288    160    
-160   -128   
-224   -624   
-464   -80    
128    0      
416    -160   
-160   96     
-80    64     
-704   64     
32     -320   
192    544    
-848   -64    
-336   -336   
-160   288    
224    160    
-80    -144   
-800   -80    
-144   -64    
176    240    
-128   -128   
160    -144   
96     -32    
-512   -128   
-32    176    
-336   -656   
1280   -1328  
-1712  464    
160    304    
32     -624   
-1120  304    
640    -128   
192    384    
16     -176   
-560   -176   
128    304    
448    -288   
-272   16     
-320   -208   
0      -576   
-80    48     
400    304    
-256   48     
-48    48     
64     0      
-336   -96    
896    944    
336    -32    
-1408  -240   
736    -144   
48     -80    
-1056  -80    
592    -128   
208    64     
-320   80     
0      128    
448    96     
-192   0      
-208   144    
64     -176   
-256   64     
560    -352   
-384   112    
352    16     
-304   224    
240    -32    
-560   32     
272    112    
-96    -32    
288    208    
-16    -192   
-336   288    
512    -16    
-288   80     
-320   -560   
544    -112   
640    -496   
-160   48     
-368   -272   
48     128    
192    112    
-48    352    
80     -48    
-576   -48    
0      -64    
144    -48    
160    -32    
-272   160    
48     160    
432    64     
-192   144    
-64    -128   
-16    256    
128    112    
192    192    
-192   304    
-272   80     
1648   -112   
-944   0      
272    -48    
-256   -32    
-240   112    
816    496    
-1184  320    
96     -160   
224    112    
64     0      
0      64     
-96    240    
-144   -64    
320    144    
-64    -96    
16     -192   
96     64     
-32    400    
0      64     
-96    -224   
-432   32     
544    176    
-192   -16    
-128   48     
-32    32     
448    -80    
-160   256    
-176   -64    
400    160    
-112   16     
-336   192    
208    160    
-96    32     
16     -96    
-96    0      
384    144    
-320   -48    
-64    112    
432    48     
-432   16     
-96    64     
128    64     
32     -256   
64     -192   
-32    -32    
160    112    
192    608    
-672   608    
-352   2880   
1568   848    
-2080  -160   
-80    -288   
1824   16     
-640   -240   
-688   256    
416    368    
32     112    
480    192    
-224   32     
-416   -16    
192    0      
112    160    
32     -96    
-288   256    
0      96     
416    160    
-352   464    
-64    848    
112    784    
-32    160    
496    -400   
-256   -448   
-128   64     
-272   368    
-16    -192   
96     80     
48     464    
32     320    
-432   -288   
96     -112   
176    256    
48     0      
-208   -48    
80     256    
0      -176   
-432   608    
288    704    
-288   304    
176    336    
-144   208    
16     320    
-304   -592   
-336   -592   
448    -16    
-192   1088   
512    864    
-400   -896   
-16    192    
80     -48    
608    32     
-416   896    
176    352    
352    64     
-288   -224   
0      192    
-80    -288   
-64    0      
288    48     
-80    416    
-176   -112   
160    -64    
-192   80     
0      -32    
-304   -320   
-336   144    
256    32     
-48    208    
128    -48    
-176   128    
144    16     
-176   16     
16     192    
32     80     
-48    96     
160    208    
-240   480    
192    80     
-112   144    
-400   -304   
992    -448   
-416   416    
560    -208   
-496   192    
96     256    
224    -608   
176    -1888  
-272   352    
80     288    
-272   64     
192    64     
208    0      
240    208    
-576   144    
400    -224   
272    -288   
-176   -16    
48     208    
-144   -16    
256    -448   
-720   112    
496    80     
-112   304    
64     208    
96     96     
352    512    
-448   1248   
16     144    
624    -208   
-128   80     
-288   240    
96     128    
160    -80    
-96    16     
96     80     
-48    160    
-80    -624   
336    48     
-48    -1088  
-176   160    
-128   160    
192    304    
-208   320    
224    160    
-464   368    
-144   80     
-64    -80    
800    -624   
-224   -1152  
1440   -1136  
-1344  400    
1136   -32    
-336   464    
-784   -976   
-240   656    
688    -272   
-176   1888   
-80    208    
-192   -368   
384    -512   
592    -96    
-528   368    
-160   256    
272    160    
192    -176   
96     608    
-144   160    
-80    176    
240    -304   
-624   -416   
1632   -720   
-448   -32    
-912   -256   
1088   -80    
496    -176   
-304   -656   
-96    752    
672    528    
-208   176    
-176   -304   
304    112    
240    -224   
-288   -16    
208    -784   
336    160    
-144   368    
-240   352    
32     -80    
192    80     
96     -160   
64     64     
768    32     
400    672    
-624   80     
-208   -144   
320    336    
48     -192   
352    1072   
-896   -256   
16     -176   
544    -96    
-144   0      
-368   112    
-160   288    
1120   752    
-480   704    
-464   -48    
192    192    
-32    112    
96     176    
384    80     
-656   -224   
352    16     
176    64     
64     -48    
0      48     
-256   64     
112    720    
1136   -3056  
-2544  -1760  
864    624    
928    240    
208    -112   
-400   -224   
-144   -480   
416    544    
272    -368   
-16    400    
128    -400   
-96    176    
80     -304   
624    -2288  
-192   0      
-256   -416   
-32    176    
320    -240   
112    336    
-16    -576   
-352   64     
656    -352   
-272   -624   
336    -160   
112    -80    
432    -576   
-192   -208   
-144   -192   
192    -448   
-224   -16    
368    -416   
-80    320    
32     -144   
208    -16    
176    16     
32     -496   
16     160    
416    496    
176    416    
-448   -976   
384    -128   
128    -256   
-400   48     
160    -16    
-384   64     
352    80     
272    176    
0      288    
-208   -16    
-816   288    
672    80     
-32    656    
-272   16     
-480   -400   
1120   -1040  
-400   -384   
-384   -464   
480    -208   
-272   288    
304    -48    
-96    0      
16     -96    
-16    128    
48     368    
-176   80     
-32    -64    
160    -240   
-48    96     
-112   240    
-32    -176   
224    64     
112    -832   
-160   96     
-112   -64    
224    -112   
-272   -176   
128    -112   
-128   64     
208    -224   
-48    192    
-528   -1408  
1152   -1280  
-1264  384    
128    -48    
128    112    
-64    400    
128    -736   
224    640    
-160   336    
-288   -96    
176    -208   
32     128    
240    -48    
-144   -160   
32     -48    
-32    -144   
-368   -64    
288    64     
-304   -16    
64     -480   
-16    320    
352    656    
944    -160   
-1152  -496   
304    -80    
352    -128   
-16    -96    
208    128    
-480   256    
-144   -256   
224    16     
96     -48    
144    96     
-160   -32    
-224   -608   
192    -16    
384    -240   
-528   -16    
448    -384   
-112   -304   
80     -32    
96     -128   
-336   0      
128    48     
224    -176   
-496   -48    
144    0      
112    -32    
32     32     
-32    -448   
672    128    
-3056  16     
1216   592    
1088   -928   
-1696  -480   
368    320    
848    192    
-672   -192   
208    64     
0      -112   
224    48     
-320   -160   
144    80     
-144   -272   
-336   -80    
464    -96    
-720   -192   
64     -16    
80     -144   
288    -144   
-16    144    
-496   -912   
-256   528    
928    -272   
-1120  -368   
192    176    
272    0      
-256   -224   
-384   400    
-784   -32    
352    16     
-400   -112   
-80    -32    
-48    208    
-128   256    
-160   0      
-224   -112   
208    336    
464    -336   
-192   160    
-16    160    
464    384    
-176   -896   
-704   400    
176    -16    
128    -208   
-784   32     
32     -16    
352    -80    
-32    80     
-224   0      
-368   16     
80     160    
-96    -176   
-96    -32    
176    352    
288    160    
-1248  -80    
416    128    
-672   -304   
160    -64    
144    192    
-208   -80    
240    96     
-96    -32    
80     48     
-848   384    
-48    144    
480    208    
-384   240    
384    2816   
-1248  1744   
768    -720   
2032   -288   
-1072  -208   
-992   192    
1168   -768   
-784   -1168  
-368   -432   
64     48     
560    192    
-464   -272   
-160   -432   
224    -32    
-80    208    
-304   80     
112    864    
-416   -48    
-128   480    
656    640    
-128   688    
-192   176    
-96    -256   
16     400    
-192   -112   
-176   -368   
-16    -448   
224    -192   
-176   -368   
80     928    
-272   80     
-80    -240   
0      -256   
16     512    
-144   -144   
-304   -80    
320    128    
64     592    
64     560    
-80    352    
-96    144    
288    208    
224    112    
112    960    
160    1616   
-80    1584   
272    -112   
-256   288    
80     -736   
64     304    
112    -400   
256    -224   
-704   640    
688    608    
-288   48     
-144   -496   
-176   16     
16     -688   
208    -688   
-128   672    
-272   -112   
32     80     
32     144    
192    -48    
-224   128    
-112   160    
256    288    
16     208    
-48    432    
-80    48     
-48    32     
-16    64     
-32    176    
-176   -160   
-192   128    
-368   -160   
256    144    
-400   48     
-304   112    
64     -48    
-176   80     
560    -528   
-784   224    
-224   160    
224    64     
144    256    
16     -288   
-656   -176   
16     48     
80     208    
16     48     
-80    64     
-208   -16    
-48    192    
160    176    
-16    32     
64     208    
112    448    
-160   928    
128    592    
-336   128    
208    -80    
432    192    
-560   -16    
-96    128    
16     -64    
176    -128   
-144   416    
32     800    
-240   144    
-144   -16    
464    304    
144    -64    
-304   128    
432    -48    
-336   -512   
48     432    
96     688    
336    -640   
-240   464    
-96    496    
16     -352   
528    64     
32     128    
-288   -192   
-272   544    
496    336    
272    -48    
-208   -64    
-48    160    
1232   -128   
-2704  272    
48     272    
976    608    
-112   -1008  
-288   816    
656    -320   
-1120  464    
288    688    
768    288    
-336   0      
-256   -32    
16     0      
64     304    
432    304    
-192   288    
-160   16     
64     -160   
144    48     
-32    -32    
-384   -176   
832    1392   
1392   128    
-1712  352    
1056   -16    
-208   -176   
-352   512    
1024   -144   
-144   256    
-96    32     
64     144    
112    -32    
80     96     
-240   -176   
144    96     
352    -192   
-272   -1072  
-160   176    
528    -64    
-96    160    
-96    160    
416    608    
-448   128    
-224   -176   
32     144    
336    528    
-144   128    
96     400    
-560   -208   
-192   -32    
608    -48    
192    -560   
-208   400    
320    144    
192    224    
48     112    
-272   64     
-32    288    
160    -240   
-432   176    
480    240    
0      80     
48     80     
-80    -48    
-144   -352   
-96    640    
1200   -448   
-544   96     
-432   304    
-368   16     
-848   -1472  
-144   608    
-592   656    
128    -16    
448    416    
-64    -48    
-720   176    
416    64     
16     176    
-64    -352   
-224   208    
-48    -400   
-96    320    
16     -288   
-176   112    
-64    -48    
160    128    
160    48     
320    624    
-816   -80    
224    624    
528    -288   
-640   128    
608    48     
480    0      
-176   -112   
-224   96     
832    -32    
-624   112    
496    -16    
-112   80     
176    32     
-112   -64    
464    208    
-816   -80    
304    240    
272    48     
-288   96     
-128   144    
80     16     
96     -16    
128    -48    
-224   -96    
112    -336   
496    16     
32     -1232  
-272   192    
224    144    
16     128    
272    128    
-64    208    
-256   -784   
-720   -256   
960    64     
-224   352    
0      144    
112    -176   
192    -224   
32     -336   
80     0      
176    -96    
-160   32     
224    112    
352    304    
-144   160    
-480   -112   
400    -816   
-48    16     
48     928    
528    -496   
-576   32     
176    128    
256    224    
-16    -240   
-160   -16    
192    96     
-448   304    
224    -304   
128    -384   
-240   208    
1280   3008   
-2576  -256   
-352   -144   
1312   -592   
-464   -80    
176    192    
-240   -384   
752    96     
-240   -128   
-112   -48    
0      -64    
-48    304    
304    -128   
112    160    
-672   -176   
272    -832   
224    16     
0      176    
96     -784   
-144   -160   
48     -992   
320    -1088  
-688   560    
784    112    
192    240    
-464   -32    
64     -240   
400    208    
-80    -640   
-128   -336   
-256   64     
192    -160   
64     240    
224    -336   
-64    0      
-128   -624   
160    112    
368    -592   
-272   48     
48     80     
-64    16     
160    -256   
80     16     
-96    32     
80     32     
0      -160   
-112   -208   
-64    -112   
32     -160   
-720   -320   
1344   -1040  
320    -64    
-912   -2112  
448    -80    
64     -672   
-480   384    
560    224    
-240   224    
192    -176   
224    48     
-544   -48    
-272   176    
-16    112    
240    80     
-400   -208   
240    -112   
80     16     
-240   -112   
-16    0      
128    -816   
-256   -304   
1072   256    
-1792  -96    
1120   -400   
1328   -48    
-1024  -192   
720    -16    
-32    80     
176    -208   
0      -192   
-512   -160   
288    64     
256    -160   
-288   -16    
-16    -320   
400    48     
-64    112    
304    -80    
-208   32     
-48    -352   
-336   80     
176    400    
-640   816    
528    -704   
-992   160    
976    -64    
-464   -704   
-768   112    
736    320    
-32    -528   
-352   128    
96     32     
-128   96     
-288   -128   
-64    -512   
448    16     
-480   528    
352    -448   
-160   -464   
-768   352    
80     32     
-32    -16    
304    -112   
-560   176    
-304   -1360  
128    -256   
496    -1200  
-464   -384   
-192   -192   
544    16     
-1008  -784   
-768   -80    
336    112    
-128   1072   
864    432    
-720   656    
-256   -192   
224    -864   
384    -176   
-160   -928   
-272   960    
-80    -848   
128    96     
112    0      
-176   -112   
-304   480    
352    176    
80     -16    
-192   208    
-16    224    
128    -192   
-48    -304   
-304   -288   
192    448    
192    -272   
-544   -560   
-96    -640   
240    1088   
-208   128    
-176   -1056  
-192   256    
288    464    
-96    -112   
-224   -320   
80     320    
288    896    
-192   272    
48     48     
144    1344   
-896   -416   
-16    -416   
400    -96    
-1136  -224   
-192   -144   
-1056  352    
432    320    
128    -544   
-416   -224   
64     48     
336    144    
-48    592    
-80    -592   
-976   -448   
512    304    
32     -48    
-208   -64    
-80    848    
336    816    
192    -368   
-768   -144   
0      -128   
112    -240   
-160   -32    
32     192    
64     144    
-496   16     
-64    -416   
-192   -288   
-336   1264   
-96    48     
256    96     
-192   -80    
160    96     
-240   256    
-48    -64    
-128   144    
-224   -144   
-736   -32    
-480   -224   
64     64     
544    -848   
-928   -96    
-272   672    
848    1056   
-352   1008   
16     -304   
-48    -576   
-32    -64    
48     528    
-96    896    
80     0      
-48    224    
-176   176    
-208   208    
16     -96    
384    96     
144    512    
-240   272    
-32    160    
224    128    
-512   448    
784    -48    
-224   -768   
-640   -160   
336    720    
-112   272    
-128   -256   
160    0      
-240   -208   
-48    144    
336    -112   
16     -96    
-192   -48    
352    144    
-208   272    
-128   192    
-48    256    
-16    320    
64     -208   
192    -128   
-288   320    
-224   112    
336    80     
-304   352    
368    64     
-800   64     
272    0      
-48    -48    
-176   -480   
-32    -640   
1520   -464   
-1808  192    
640    0      
352    64     
-1088  544    
256    688    
336    -272   
-272   64     
-144   -144   
-80    224    
416    -48    
-64    64     
-160   -112   
-400   128    
352    -32    
-112   32     
80     160    
32     96     
16     144    
16     -16    
-192   -720   
-832   752    
1216   0      
-1104  -192   
752    112    
-208   -96    
-336   192    
0      32     
-448   288    
304    16     
208    96     
-160   -16    
48     160    
-144   -112   
672    192    
-400   80     
-96    -128   
176    -128   
-352   -48    
240    -16    
-32    -144   
368    288    
352    48     
-80    16     
400    640    
224    384    
-336   528    
-752   80     
432    160    
496    32     
-128   -112   
-288   384    
80     336    
-112   0      
448    -16    
-144   -880   
-576   -288   
352    432    
64     224    
544    208    
32     192    
-576   256    
-32    16     
272    -48    
-176   -432   
-80    0      
16     80     
-432   32     
928    1120   
-1488  -2608  
-1872  -96    
1344   -160   
-544   320    
496    48     
-192   272    
0      -128   
160    112    
-80    128    
64     -64    
160    -32    
224    -192   
-576   128    
208    112    
-320   -112   
368    96     
192    208    
-512   16     
-16    48     
880    -256   
-576   208    
496    16     
-448   176    
-608   -80    
576    208    
192    -16    
-704   32     
336    -400   
-592   16     
496    -176   
-608   64     
480    64     
-128   240    
112    208    
-80    272    
-336   32     
112    176    
-32    48     
272    -64    
176    48     
-304   -32    
-64    16     
144    128    
144    224    
-96    144    
128    128    
-304   32     
352    432    
-80    192    
64     320    
64     80     
-32    768    
-112   -80    
-256   400    
0      -448   
-512   -384   
240    128    
272    224    
416    160    
-160   96     
144    -1424  
-112   256    
80     80     
208    -176   
-176   32     
0      176    
-176   128    
400    -96    
-64    784    
320    288    
-96    -368   
-160   176    
288    128    
128    288    
-144   -80    
192    -352   
-288   352    
32     -96    
320    -192   
-128   64     
-32    192    
496    -2288  
-880   352    
1456   -1184  
-912   640    
32     288    
144    -176   
752    -1136  
-288   -368   
-160   288    
-32    -32    
432    128    
64     -288   
-112   208    
224    880    
64     752    
-64    112    
128    384    
16     -160   
32     416    
96     80     
-320   592    
816    -528   
-1248  -144   
944    -48    
-112   1168   
-48    336    
272    -640   
-224   304    
-192   16     
240    272    
736    464    
-624   592    
0      -80    
-16    16     
272    -256   
128    -48    
-368   128    
176    96     
368    64     
32     -368   
80     96     
96     -288   
-80    96     
208    -2192  
0      -16    
-272   64     
208    160    
96     48     
-128   -272   
1408   272    
-1632  448    
80     -672   
240    -368   
-608   192    
944    -128   
80     160    
-160   -368   
-384   -224   
352    -976   
224    -208   
-272   -160   
144    48     
160    -512   
-512   -224   
304    -176   
32     176    
-80    432    
224    368    
16     288    
16     256    
-656   -496   
1488   -464   
32     -976   
-1712  -752   
1296   432    
688    592    
-496   -144   
-656   -32    
560    -80    
112    48     
16     -752   
-80    80     
-48    128    
192    368    
112    -144   
112    32     
-496   -416   
208    -416   
352    -656   
-336   -272   
304    48     
16     192    
-16    -832   
-400   -1472  
1024   208    
-400   448    
-464   176    
-16    -256   
112    -416   
-160   -496   
512    -96    
-192   112    
624    944    
-688   96     
-464   -1904  
256    288    
-208   -1264  
96     -256   
192    16     
-288   -256   
592    -16    
128    -592   
-352   16     
-208   -1744  
384    -176   
-80    -160   
-96    -48    
320    -304   
-16    16     
-528   -1344  
1056   -1568  
416    368    
272    176    
-704   -400   
-576   -704   
992    400    
144    -192   
-528   -1456  
-112   160    
288    576    
352    -848   
208    -64    
-272   -576   
64     464    
384    -464   
-112   -144   
528    -464   
-176   -320   
-304   176    
192    240    
-304   -32    
-160   -96    
496    192    
64     288    
-176   112    
272    288    
352    -176   
-384   640    
64     -496   
-32    -288   
384    96     
112    -176   
-176   96     
0      -128   
384    -880   
-592   -336   
128    64     
256    -368   
-32    240    
64     1152   
0      544    
-80    -32    
64     -800   
48     288    
144    112    
-496   -16    
144    592    
640    1088   
176    128    
-624   48     
-48    -1024  
480    144    
320    -112   
-480   -880   
-832   -480   
688    -176   
96     -880   
-80    -688   
160    1120   
-160   464    
16     -608   
32     -528   
32     384    
-32    672    
64     144    
-144   -368   
48     192    
-448   896    
368    896    
-240   -224   
96     -208   
-80    112    
-16    -432   
432    1040   
-160   -288   
16     592    
368    224    
-704   -272   
-96    208    
0      -1168  
1168   -960   
-896   -48    
-352   -1296  
240    1392   
-112   1568   
-32    -32    
176    -80    
-32    -368   
-384   -608   
224    -1680  
336    144    
-112   160    
-48    416    
-560   400    
288    -32    
-432   160    
-64    16     
-48    -192   
240    16     
-16    -32    
-560   -1488  
688    -656   
-112   208    
-272   -288   
576    96     
-448   176    
-416   -384   
80     -448   
144    176    
-80    176    
-16    336    
336    64     
-336   -48    
192    48     
-112   48     
-256   80     
-144   -80    
-160   32     
80     48     
-272   16     
-112   48     
-432   64     
160    176    
112    0      
-336   96     
224    -96    
-48    48     
-32    -16    
-16    160    
-624   -272   
400    -160   
448    -160   
-1120  -304   
-432   -112   
736    -496   
-400   -192   
-368   -208   
-128   160    
-48    -144   
-1616  -32    
192    96     
-160   -128   
368    64     
-224   -160   
-16    128    
-16    -96    
-272   48     
-320   -272   
320    96     
-192   48     
-784   -368   
928    -544   
-432   -192   
-304   -176   
-80    288    
336    -208   
-608   112    
0      256    
176    0      
-32    192    
-96    -48    
96     96     
-64    0      
-64    -16    
64     96     
-64    -96    
176    -144   
-128   16     
-672   416    
-64    160    
256    368    
-1232  -272   
240    176    
832    -256   
-464   288    
64     624    
-96    560    
-224   -112   
64     -112   
-288   -160   
-192   128    
352    -16    
208    288    
112    -112   
-240   176    
144    0      
-256   192    
272    208    
320    -64    
-144   -144   
48     0      
256    -16    
-160   16     
-240   -64    
352    80     
256    -128   
304    80     
64     96     
-1104  -2768  
1088   -560   
1440   272    
-1936  1376   
224    384    
-352   -208   
144    336    
192    -80    
-368   -96    
352    16     
0      16     
-48    80     
64     192    
368    96     
-576   0      
192    64     
0      80     
16     80     
-112   -32    
-80    -896   
-544   -448   
416    -144   
-288   -32    
528    128    
240    -112   
-304   80     
256    144    
48     208    
-512   -112   
400    32     
-16    48     
32     48     
-96    256    
-368   -80    
432    352    
-560   -16    
32     320    
-432   -240   
112    0      
160    272    
-336   -16    
-128   32     
432    240    
-256   48     
176    48     
-48    240    
-144   32     
-160   112    
160    -240   
64     -448   
-624   -320   
-144   -496   
672    -224   
-128   32     
48     0      
192    176    
-528   192    
128    -256   
432    -240   
-240   -224   
-448   32     
144    -48    
128    0      
-304   48     
80     -176   
-208   -32    
288    384    
-144   432    
-64    384    
160    800    
96     592    
-160   528    
384    368    
-192   224    
-64    112    
48     -176   
64     -400   
304    -256   
-528   176    
112    336    
144    128    
-112   -2288  
-544   240    
400    160    
-432   304    
480    -144   
-240   -176   
192    -112   
80     16     
-208   -528   
240    -176   
-192   128    
0      96     
160    16     
192    -48    
-320   -16    
176    224    
-16    288    
-256   -32    
-32    -496   
64     96     
224    -576   
-320   96     
32     -96    
-192   144    
480    544    
-240   -560   
-32    -80    
128    192    
128    -144   
-16    368    
-160   -288   
112    -32    
224    -224   
64     480    
-160   176    
352    96     
-400   -384   
-112   352    
144    288    
16     -336   
-160   64     
80     64     
-336   -112   
-16    -80    
304    272    
-192   144    
176    -32    
-48    208    
-208   -400   
-208   -1504  
2032   48     
-1376  1008   
48     752    
768    992    
-864   544    
272    -384   
512    -96    
0      -64    
-336   -432   
16     -192   
480    288    
32     192    
-192   -112   
-256   240    
256    112    
224    112    
-272   144    
272    544    
-16    -32    
0      112    
-560   -544   
688    272    
1568   0      
-1648  -1040  
64     -480   
384    -816   
-448   -1152  
-592   -16    
832    1568   
-144   1120   
336    -80    
64     -304   
-320   192    
160    304    
560    416    
-208   -80    
-192   -400   
-176   80     
112    -80    
304    208    
-240   48     
48     176    
160    0      
-560   -1392  
-480   224    
1136   1312   
-1152  224    
112    -48    
496    -144   
-208   -80    
32     -448   
-592   -208   
928    -128   
272    128    
-16    96     
192    -912   
-144   1872   
928    432    
-576   176    
-160   160    
400    496    
384    -368   
192    -752   
-352   32     
352    -576   
-144   -32    
-48    352    
64     368    
144    176    
-400   -896   
1216   -1968  
-32    -96    
208    -1136  
-496   -784   
64     -1312  
64     -528   
400    1040   
512    288    
-336   96     
-256   -240   
176    288    
592    560    
-144   640    
-304   -1024  
48     -112   
96     -256   
128    256    
160    480    
-368   480    
128    176    
256    -128   
-304   -96    
400    336    
-464   320    
96     976    
-16    560    
-144   176    
384    896    
160    1136   
-272   0      
-32    -704   
416    -384   
-112   528    
-240   224    
-32    624    
304    384    
-80    384    
224    656    
-128   416    
96     -160   
64     224    
-448   -656   
320    112    
-64    -1152  
-560   -192   
48     -336   
-112   -1120  
112    -544   
32     496    
96     480    
-288   -880   
-112   -352   
656    80     
320    1200   
-592   640    
304    944    
128    864    
-80    1104   
64     -736   
-608   -144   
240    -400   
144    -192   
160    -496   
112    112    
-224   464    
176    -2048  
-96    -336   
-48    -2096  
-256   -672   
64     -160   
112    -528   
96     112    
-80    -704   
320    320    
224    128    
-608   160    
784    912    
-416   880    
-80    416    
1328   2304   
-1936  912    
224    128    
544    112    
-400   -256   
-64    128    
-480   496    
800    -16    
-512   -240   
160    -176   
-32    128    
-80    -48    
112    384    
176    -320   
-400   -336   
144    -32    
0      -352   
-208   320    
96     96     
-16    0      
-208   -80    
-224   464    
1664   -272   
-960   -656   
-16    0      
688    -496   
-128   16     
80     -224   
176    480    
144    112    
-240   80     
0      -32    
304    -16    
-80    -96    
64     -208   
160    -192   
160    -336   
-304   48     
368    -64    
16     176    
-128   -384   
-128   176    
464    -2160  
16     192    
-64    -80    
-256   128    
208    256    
144    -144   
-256   -32    
-48    16     
-224   2208   
2288   576    
-1536  -32    
288    -224   
784    -16    
-1344  -240   
432    -224   
688    -1824  
-576   96     
-144   -32    
224    96     
256    48     
-176   -16    
-496   -256   
288    48     
144    -48    
-320   128    
64     -48    
-48    16     
112    -16    
-64    -176   
-672   -128   
1664   0      
-384   -448   
-736   -208   
1312   32     
-864   48     
496    192    
-64    272    
-128   32     
-32    0      
32     -16    
-112   -32    
-128   -96    
-432   176    
128    -144   
112    400    
-400   -560   
112    112    
80     -1568  
-208   -64    
48     -240   
-512   128    
304    -48    
-80    -176   
-640   -704   
-224   -800   
-80    624    
-16    208    
-672   -16    
432    -384   
224    -32    
-176   -496   
-64    336    
224    -1328  
-336   80     
256    -128   
-592   -192   
160    -256   
96     352    
-256   -96    
48     112    
176    -32    
-304   96     
176    208    
-128   -112   
272    112    
336    -80    
-288   128    
-1280  -2480  
1536   -768   
1008   48     
-1616  400    
-80    320    
928    -16    
-352   32     
144    -224   
80     272    
80     -496   
-256   272    
592    -224   
-352   144    
-208   -32    
176    96     
272    -128   
-1392  16     
-144   -16    
-448   -16    
-224   -48    
368    496    
-304   624    
-80    -80    
416    -96    
192    -160   
-512   256    
192    -64    
-352   80     
352    -160   
-96    112    
-272   16     
256    240    
-16    336    
-272   80     
320    512    
-32    384    
-368   336    
304    0      
-336   256    
368    96     
80     128    
-320   -16    
144    80     
-272   -592   
160    -576   
304    240    
-32    992    
-272   752    
208    -176   
80     176    
-528   -128   
32     -304   
304    -640   
-112   336    
96     240    
128    480    
-128   336    
-208   288    
48     144    
560    336    
-64    176    
-448   176    
256    160    
-32    0      
144    544    
32     -64    
-400   32     
-512   288    
384    -544   
-240   -1280  
-176   160    
-192   176    
448    192    
-80    -160   
32     -144   
-208   -400   
176    -384   
96     80     
-96    -304   
64     480    
-256   -144   
1088   976    
-1472  1584   
0      -512   
672    -1200  
160    -304   
-320   352    
272    1744   
720    -256   
-368   512    
0      128    
-112   192    
-160   240    
128    -48    
128    96     
-464   -176   
96     368    
-32    160    
304    320    
-608   -240   
64     16     
528    -224   
-1248  448    
640    128    
368    128    
-160   80     
-288   368    
-96    160    
32     -112   
112    -160   
0      112    
-96    48     
-288   112    
112    144    
-464   -16    
96     16     
208    -192   
-368   -176   
-144   320    
496    224    
-208   144    
-240   192    
-224   -32    
144    144    
400    32     
48     48     
-592   176    
-32    80     
96     80     
80     -80    
-544   -432   
192    896    
1488   464    
-64    -112   
-208   64     
-176   -320   
-80    -224   
-192   528    
240    -320   
-144   -48    
-352   -320   
128    336    
256    288    
-144   -16    
-304   -288   
96     -144   
160    624    
48     192    
-400   -256   
320    -960   
-48    544    
32     -976   
-2000  480    
1472   480    
-608   288    
-208   -912   
528    -272   
-640   -1088  
-1248  -1328  
528    -1408  
288    -944   
-496   -560   
32     16     
0      64     
-336   96     
-48    0      
224    -48    
-48    -48    
-640   -144   
224    96     
48     -288   
32     176    
-128   -304   
-80    -272   
112    16     
752    736    
336    1376   
400    928    
-384   1472   
496    608    
304    -112   
-368   -320   
208    -224   
208    176    
-576   608    
464    400    
-80    -112   
-192   -416   
-1168  464    
112    384    
-64    288    
64     -144   
112    96     
-336   624    
560    64     
-320   96     
160    -208   
-224   128    
32     -336   
192    -144   
-480   -1248  
672    -2320  
400    752    
-144   864    
-896   -112   
304    368    
464    -592   
-80    848    
-80    592    
-544   368    
448    0      
496    0      
-208   416    
-576   256    
128    96     
800    80     
-176   240    
-384   -48    
-112   400    
80     -512   
272    -864   
-176   -352   
176    464    
-528   32     
32     256    
736    -240   
-368   400    
16     16     
-48    288    
64     -128   
496    256    
-112   528    
48     64     
-352   -272   
-320   96     
288    80     
144    -192   
-272   -208   
176    48     
112    96     
32     -32    
-192   -192   
192    -96    
-16    -192   
-240   64     
272    16     
176    752    
272    272    
160    -1088  
-192   -128   
32     -48    
704    1392   
-784   688    
-160   144    
272    -32    
-96    -16    
96     -64    
-128   -32    
-192   48     
288    128    
64     16     
-16    -112   
16     352    
496    32     
-128   160    
-160   -960   
176    176    
160    256    
-352   -128   
400    -464   
-176   240    
96     -176   
160    208    
0      32     
-48    144    
-192   -912   
-208   -704   
192    448    
-208   -432   
288    16     
-336   -1744  
1968   1584   
32     320    
-1216  112    
544    80     
-192   32     
-224   336    
704    -48    
80     -32    
-224   80     
-48    -16    
464    -288   
-112   416    
96     272    
-272   48     
272    -1520  
176    -208   
-208   -320   
272    64     
-208   16     
192    64     
-336   496    
1344   -128   
-400   -48    
-704   -320   
416    288    
512    -32    
-288   -208   
-240   320    
0      64     
176    -144   
352    80     
-160   -528   
-384   96     
624    -80    
-64    368    
-48    -112   
-304   112    
160    96     
-64    -112   
64     208    
192    -240   
64     272    
-16    -1024  
-304   128    
704    32     
-304   -32    
-32    112    
288    176    
-256   -176   
-128   944    
352    960    
-896   304    
288    -96    
640    -144   
-480   16     
224    -416   
128    80     
-288   -160   
96     80     
112    16     
128    80     
-144   -2320  
-64    -80    
112    48     
304    96     
-480   64     
288    208    
256    -1664  
-192   -240   
96     -80    
-480   -720   
-160   464    
1648   -128   
-1216  -352   
-16    -128   
880    144    
-464   -192   
-464   -208   
480    48     
144    -112   
-144   32     
-912   -96    
16     -368   
-288   80     
480    -464   
-32    -80    
0      -576   
-256   -224   
336    144    
240    -208   
-160   -480   
624    48     
-368   80     
-48    -96    
288    -368   
-192   112    
-112   800    
-528   -144   
-16    -16    
352    32     
-48    -208   
272    -144   
-16    16     
240    -432   
288    320    
336    -176   
-304   -144   
192    -576   
-192   288    
192    -272   
-128   -288   
240    48     
144    32     
-544   -96    
304    -48    
736    -64    
-80    -496   
-368   -80    
-304   192    
992    2608   
672    0      
-2064  -192   
16     -432   
864    128    
-80    208    
-272   -176   
-304   176    
768    16     
-640   0      
-112   -272   
320    48     
-96    -208   
176    128    
288    -336   
-256   -112   
-256   -2624  
400    32     
-384   288    
80     496    
112    160    
208    -64    
-704   -288   
64     -32    
208    -240   
-352   256    
320    -32    
-400   -144   
224    -336   
176    -208   
32     464    
0      -192   
-160   304    
112    -464   
288    112    
-64    -80    
-976   -1120  
32     -480   
400    -336   
-352   -464   
48     -272   
-800   -224   
128    -272   
-160   -240   
272    -672   
16     -576   
112    -272   
-480   -400   
272    -1328  
112    128    
-224   352    
560    -32    
160    448    
-112   304    
32     32     
-368   48     
240    992    
432    -896   
-368   -1152  
288    -32    
-176   416    
64     -144   
32     192    
128    -336   
-416   -768   
240    -128   
192    144    
-224   304    
160    48     
-208   224    
64     32     
112    48     
-144   48     
64     -144   
-160   -48    
256    -192   
0      -496   
-96    336    
0      64     
-16    16     
-688   -320   
944    -752   
-320   368    
352    -480   
-512   48     
176    48     
112    -80    
224    320    
-416   -32    
-96    -256   
0      160    
128    -96    
16     80     
128    128    
-1008  32     
400    -80    
-288   -32    
0      -16    
-32    -48    
32     0      
80     -368   
-528   320    
96     -32    
-160   224    
-160   -64    
-16    16     
-304   -80    
-96    80     
-16    -128   
-48    -80    
-176   144    
-304   208    
64     -16    
320    -48    
-480   160    
288    -240   
48     160    
-304   656    
80     576    
-64    -16    
-160   112    
128    -32    
-160   112    
-304   48     
0      208    
32     320    
-256   -144   
-336   -160   
528    -448   
-416   -1216  
1760   -560   
256    736    
-1520  -448   
528    -432   
32     -256   
-304   -384   
192    1248   
432    240    
-176   -512   
-16    400    
288    -16    
-192   -112   
-80    -128   
48     128    
-64    144    
-688   -48    
-160   -32    
464    672    
32     944    
-112   -64    
-816   -432   
2112   -240   
-272   -1168  
-1440  -880   
944    -624   
-320   -272   
-560   -960   
256    -912   
256    -272   
-304   -224   
288    80     
80     48     
-432   368    
160    -80    
176    -144   
-128   64     
-384   -528   
160    -544   
112    48     
-16    -576   
-144   -64    
304    -272   
224    160    
-592   752    
368    -224   
208    624    
560    352    
-240   320    
144    176    
-32    -32    
512    144    
0      256    
-416   160    
160    480    
-368   160    
-16    -96    
-144   400    
-368   112    
416    -48    
-240   32     
-64    -128   
160    48     
-544   640    
576    -176   
-160   16     
464    16     
-128   80     
-256   0      
272    -976   
256    -2000  
-2048  -816   
1040   208    
1136   208    
32     16     
-848   368    
48     272    
48     576    
352    192    
-320   224    
-192   -80    
48     32     
64     -144   
448    224    
-320   -240   
-128   192    
144    -80    
-352   48     
880    544    
-1040  -80    
32     -784   
208    -560   
-288   -128   
384    176    
-480   -80    
-336   96     
272    -32    
-32    352    
-304   144    
112    64     
-224   -176   
96     -240   
112    192    
-16    368    
368    224    
-208   256    
-176   48     
-112   160    
336    48     
0      16     
-368   96     
80     96     
80     -32    
160    -112   
-16    -320   
-240   240    
448    64     
-32    80     
-16    -160   
-112   48     
0      208    
-64    -560   
-688   224    
304    16     
320    48     
80     -144   
96     -176   
16     80     
0      144    
-192   160    
128    128    
32     32     
-48    -160   
32     32     
-80    -32    
-128   208    
-64    304    
368    432    
112    -48    
-672   384    
560    144    
-144   128    
-192   176    
240    -16    
-192   -16    
112    -208   
96     480    
-336   272    
192    -192   
-48    48     
1280   2000   
-3152  -160   
-752   80     
2064   -160   
-720   -544   
-480   -112   
448    -304   
16     272    
0      288    
176    -80    
-224   32     
-112   256    
144    176    
240    176    
-464   -208   
-96    -16    
400    192    
-272   32     
160    -288   
80     272    
-96    -240   
464    -480   
-848   448    
608    0      
288    240    
-880   16     
288    48     
736    464    
-128   0      
-272   -16    
32     288    
272    176    
-80    -32    
-176   -16    
-128   176    
416    16     
144    -112   
-512   16     
416    -112   
-160   256    
208    32     
16     224    
-192   16     
192    240    
-32    -288   
-256   128    
32     0      
96     -880   
96     64     
-320   -768   
672    -1632  
-208   -480   
288    144    
-304   32     
480    400    
-272   -112   
-288   -256   
208    -432   
-16    -320   
-240   144    
160    96     
128    144    
80     -144   
-384   16     
544    240    
-32    112    
-112   128    
496    128    
-336   -176   
0      128    
-144   -176   
832    416    
560    -16    
-832   400    
720    272    
-112   -96    
-176   32     
256    -896   
608    192    
-192   -224   
-288   96     
336    112    
0      80     
-32    -32    
304    208    
-160   -48    
48     160    
80     272    
-80    144    
16     0      
16     -32    
272    704    
-752   -576   
-80    432    
1056   -160   
-640   -160   
208    16     
176    0      
-368   128    
672    16     
-32    224    
-432   176    
-112   32     
480    80     
320    384    
-96    48     
-128   432    
320    -144   
32     48     
128    -256   
-416   160    
-256   -1232  
416    16     
256    176    
-352   352    
-160   576    
480    -80    
160    80     
144    384    
-1344  1168   
1888   1104   
864    -368   
-2128  -400   
-176   272    
1168   -304   
-448   0      
-272   528    
560    320    
-384   208    
-272   544    
400    -176   
64     48     
-32    192    
-224   96     
144    80     
0      -368   
96     320    
96     -800   
-320   -640   
-128   -384   
448    464    
112    496    
-384   -160   
64     -512   
320    32     
48     -624   
-80    -576   
-64    -480   
160    176    
-16    512    
256    80     
-208   288    
0      336    
288    224    
32     -96    
32     -16    
-160   -80    
-256   -16    
304    624    
-224   -832   
80     -256   
240    -368   
-320   -1136  
352    -864   
128    -2592  
80     480    
176    688    
-272   -48    
352    -144   
16     48     
-176   -624   
592    -448   
-832   -240   
224    -800   
112    -1024  
176    624    
224    480    
432    -352   
-16    -16    
-176   -336   
-64    48     
304    -320   
-160   -352   
384    -960   
624    -384   
-256   160    
128    -80    
-192   -96    
-336   192    
192    -192   
-128   80     
-48    -32    
-128   -160   
240    16     
48     -128   
-176   32     
336    -112   
0      96     
-144   -1440  
176    -80    
800    592    
-1616  912    
560    -320   
-80    224    
432    -176   
-112   -144   
-240   240    
64     144    
-688   -368   
-128   -208   
-64    176    
-48    144    
32     -48    
-48    -416   
-32    -96    
80     -176   
-208   192    
208    128    
192    -32    
16     -160   
-144   -528   
-176   32     
32     160    
-720   -80    
224    16     
-64    80     
-400   368    
192    192    
240    -352   
-96    -368   
64     -240   
-80    416    
96     336    
-64    -80    
-16    16     
0      400    
-96    352    
-288   496    
448    704    
-144   0      
-544   -224   
240    160    
-96    -32    
-304   144    
-304   -128   
112    -496   
208    32     
-400   -192   
576    -304   
-272   -944   
1776   -1216  
-1600  400    
416    448    
752    880    
-880   400    
48     400    
736    352    
-1232  -528   
-240   -1040  
224    -992   
288    -1040  
48     -80    
-224   -2064  
240    -64    
32     -16    
-128   80     
-64    -16    
416    336    
-272   -176   
96     144    
-304   -960   
-640   240    
1680   -176   
-1264  784    
2512   976    
-800   656    
496    496    
256    -2096  
-464   -400   
240    -64    
144    144    
-304   -16    
48     -432   
-496   96     
304    0      
80     -48    
-288   -336   
-64    272    
144    -432   
288    -176   
144    -176   
-336   -496   
128    192    
352    -160   
-336   -96    
672    624    
-576   224    
-1072  -80    
-144   -48    
672    352    
-336   64     
-256   -112   
-96    -176   
-944   -160   
352    -176   
144    -784   
96     112    
480    -256   
-688   -48    
-48    128    
-192   -32    
64     0      
48     176    
176    16     
0      128    
16     -48    
0      -144   
-112   96     
-656   -384   
1072   48     
-2336  160    
640    160    
928    -16    
-160   -272   
-384   -16    
-912   -208   
544    592    
-256   -128   
272    -16    
-160   -240   
176    128    
-144   -288   
-112   352    
128    -224   
0      416    
-176   -112   
32     64     
176    464    
-192   -16    
-240   464    
384    -80    
-416   224    
-960   -208   
256    64     
800    -32    
-784   464    
352    -144   
-32    304    
160    -192   
-48    192    
-128   -32    
240    -48    
-176   -192   
160    288    
160    0      
-80    128    
416    -224   
-544   16     
304    -16    
-288   32     
80     160    
320    144    
-160   224    
224    176    
-400   -16    
288    80     
-16    16     
-304   32     
224    16     
192    -16    
96     640    
-208   176    
-592   624    
1200   272    
-896   96     
-256   224    
544    -144   
64     64     
96     -16    
48     80     
96     80     
-144   176    
-16    80     
-32    -128   
-112   64     
48     928    
192    608    
-432   -208   
240    -208   
-144   -16    
-320   80     
-720   64     
192    32     
-224   -128   
-224   -64    
352    -288   
96     -48    
-432   544    
96     128    
-416   -1472  
2144   1008   
-592   832    
-960   144    
384    288    
-688   -96    
272    928    
704    -112   
-528   -848   
32     256    
80     176    
240    -160   
80     320    
-272   48     
-96    -368   
304    240    
160    192    
-80    -64    
-400   -176   
0      96     
208    176    
224    1648   
736    -320   
-1216  -208   
64     0      
208    -48    
-80    112    
384    160    
-96    336    
-304   -336   
96     128    
240    -16    
-352   64     
208    -144   
-80    -16    
-64    -80    
160    -80    
-864   -96    
464    96     
96     224    
0      112    
-64    240    
128    16     
-160   144    
256    -128   
-176   144    
96     -64    
-112   256    
48     112    
352    208    
16     -1440  
-3216  816    
1776   624    
496    16     
-1088  256    
64     -32    
208    368    
-448   48     
48     160    
160    -80    
-32    192    
-16    96     
-112   64     
144    256    
-224   96     
-400   224    
416    0      
-64    272    
80     192    
-336   464    
112    160    
-512   -608   
608    -64    
432    -160   
-1344  -32    
0      832    
304    64     
128    -112   
-496   -32    
80     0      
272    16     
400    480    
-272   -192   
-480   176    
144    -256   
192    128    
224    128    
-544   -48    
432    -32    
96     144    
-64    208    
48     64     
144    336    
464    -416   
480    304    
-432   160    
-752   -1088  
-160   352    
448    -96    
-384   208    
752    -16    
-64    -48    
128    272    
-48    192    
80     448    
736    352    
256    288    
-624   -544   
-144   272    
784    784    
-576   288    
-272   16     
352    16     
-128   -64    
0      144    
-288   -48    
128    -176   
16     112    
-192   0      
304    -192   
1376   2768   
-1456  1536   
544    -336   
976    -336   
-848   368    
-320   288    
560    -2496  
416    -896   
-368   1056   
416    976    
112    192    
48     112    
16     32     
80     144    
-80    -448   
-256   -720   
320    -48    
160    32     
-160   96     
16     -96    
-96    -144   
80     -320   
-272   -192   
768    336    
-288   176    
80     400    
-320   144    
496    304    
-64    -160   
-224   16     
-64    -112   
224    176    
192    416    
144    928    
-288   512    
-16    48     
80     -896   
-32    -192   
112    672    
-32    864    
-64    80     
176    0      
192    144    
-96    368    
192    -448   
128    -96    
-128   128    
464    912    
-432   96     
224    -288   
112    32     
-400   736    
1728   -496   
-544   -1488  
144    0      
64     704    
768    1456   
-192   -256   
-16    -816   
64     -880   
-32    512    
-160   -80    
96     704    
112    592    
-208   -80    
-112   -32    
-160   -528   
320    -32    
256    -192   
0      192    
128    -528   
-16    144    
160    -96    
-144   112    
0      432    
-96    112    
-208   -176   
160    -176   
-80    48     
128    -240   
-128   128    
-464   -176   
832    -288   
-832   -384   
464    -256   
240    -720   
224    -144   
-208   -368   
400    -816   
272    -336   
272    -16    
80     16     
-48    96     
-160   0      
224    -320   
-48    -80    
-112   -544   
208    -48    
320    -656   
-128   160    
-176   176    
416    -192   
-496   592    
1040   112    
-736   352    
-96    672    
-16    272    
128    448    
160    560    
208    -880   
-416   -432   
160    112    
224    496    
240    -624   
-64    -32    
-496   -496   
272    848    
544    -400   
144    672    
-448   -416   
-48    304    
144    -432   
304    -96    
32     -1184  
-272   -256   
144    96     
176    -160   
272    0      
-240   -160   
80     -496   
-1200  384    
2256   -1952  
-592   -48    
-608   16     
912    -480   
-592   144    
560    256    
-576   -336   
80     -544   
352    0      
336    -624   
-256   96     
-32    -32    
304    -32    
176    80     
-128   64     
-80    -336   
-144   48     
32     -160   
112    208    
-320   0      
-528   -256   
1808   -560   
-448   736    
176    -496   
160    272    
272    144    
-192   -1616  
784    -288   
-352   192    
112    128    
336    16     
-128   48     
-64    48     
128    -208   
-240   -16    
368    -304   
-704   32     
224    320    
-448   64     
-208   -384   
-32    -560   
144    -1280  
-48    32     
304    -304   
-160   64     
-320   -832   
-960   0      
160    592    
560    192    
-32    -96    
-128   16     
-1232  -32    
160    -96    
1008   384    
-832   496    
-48    -32    
512    160    
-160   -64    
-96    -880   
-96    80     
-240   -112   
-32    112    
256    -80    
0      288    
-448   -432   
-448   -112   
528    16     
-464   -576   
-736   240    
2736   256    
-304   -672   
-992   -1088  
192    192    
544    -832   
-48    -64    
-128   0      
336    176    
-464   -208   
112    96     
96     -16    
-64    -352   
-32    128    
16     -144   
-352   0      
-96    48     
416    32     
16     -576   
-448   176    
688    -912   
-592   272    
48     -224   
704    -80    
384    0      
-64    96     
-320   496    
96     -32    
128    48     
256    -16    
-656   -32    
0      112    
-48    16     
368    -144   
144    144    
0      -192   
-400   336    
736    -1072  
-496   -240   
-16    80     
208    -64    
-224   -16    
640    48     
-320   96     
-96    112    
112    256    
224    144    
-416   256    
64     -128   
16     -192   
-48    -448   
80     -352   
240    -448   
144    -208   
-144   32     
0      32     
-64    176    
-496   64     
176    -464   
-16    -576   
-80    16     
64     16     
-320   0      
-48    -32    
-48    144    
-208   -416   
128    272    
-544   80     
96     112    
368    -144   
-160   -352   
-624   128    
544    288    
-208   -160   
112    -176   
-16    -144   
-80    -48    
-32    400    
-880   -96    
128    80     
-304   -256   
-1280  -1680  
624    80     
1152   -480   
-1456  48     
-32    208    
128    -160   
-320   0      
-32    -304   
-208   736    
304    128    
-352   -336   
64     48     
0      -112   
320    256    
-560   736    
144    -128   
-336   -48    
48     -96    
-208   -96    
-16    -80    
576    432    
-1856  880    
656    -400   
160    -592   
-112   -16    
64     96     
-224   688    
128    -96    
32     32     
160    176    
-80    -160   
-160   208    
16     112    
320    -64    
-432   0      
-16    208    
-112   -64    
0      -80    
-768   -80    
64     80     
-160   -160   
-16    -16    
96     -32    
48     0      
128    16     
-480   -64    
256    -64    
32     224    
-192   64     
-496   -912   
2032   112    
-192   480    
-1424  -256   
976    -32    
-224   -272   
-224   -96    
528    208    
96     16     
-288   -288   
-304   176    
288    48     
144    80     
-160   -32    
-208   288    
528    288    
-336   128    
-208   -32    
64     64     
208    16     
-176   -16    
16     -368   
-1504  1264   
880    -416   
-240   -608   
304    -592   
16     -400   
32     -320   
352    -160   
-96    240    
-256   -368   
16     -16    
-144   64     
48     192    
112    64     
352    224    
-480   -96    
32     592    
-176   288    
128    -64    
112    32     
-176   80     
0      128    
-192   240    
-208   192    
256    400    
-592   400    
-720   -592   
640    -1072  
-112   -560   
-336   16     
240    112    
112    656    
-64    0      
416    -416   
16     -32    
160    816    
304    -208   
208    256    
432    176    
-208   -240   
-48    176    
-32    64     
224    272    
-32    16     
368    1168   
-752   720    
-64    96     
192    304    
240    464    
-192   336    
-1232  -1504  
-608   -240   
1200   -480   
-848   -16    
496    288    
-128   800    
-672   288    
656    -256   
304    336    
176    -400   
-512   320    
-48    240    
192    -112   
112    -128   
-32    352    
16     16     
240    -240   
-96    0      
192    -80    
0      944    
0      288    
80     -448   
-608   0      
176    -352   
208    -240   
64     736    
96     -1184  
-112   -432   
-176   1056   
160    -304   
32     -80    
-32    96     
-352   -112   
-16    -64    
-368   -640   
224    0      
112    -208   
-112   208    
-160   -272   
288    -368   
-32    256    
-80    -240   
-112   -624   
160    -240   
-576   -752   
-112   -416   
304    832    
-480   -1152  
160    -112   
128    -576   
-144   192    
176    -416   
-720   0      
560    -688   
-320   -288   
-400   -128   
-336   48     
480    -688   
-272   -432   
-256   368    
80     336    
96     64     
160    -80    
176    256    
-256   320    
144    0      
272    -48    
-480   16     
64     -288   
176    80     
-288   144    
-16    -64    
208    -144   
-176   176    
-16    800    
-224   752    
-16    640    
32     960    
-64    128    
320    -128   
560    1488   
-1888  736    
240    304    
1408   -32    
-160   -512   
112    -896   
-448   -896   
272    1120   
-16    1120   
64     432    
16     -384   
-112   -128   
48     432    
160    -160   
160    -48    
-48    528    
144    384    
-32    400    
112    -288   
48     -944   
368    -64    
-944   1280   
768    -560   
176    656    
-96    272    
-320   -368   
144    288    
208    128    
-48    -64    
-48    -848   
-112   256    
-80    -80    
192    80     
240    -48    
-240   -912   
112    208    
48     496    
272    400    
-96    96     
0      176    
48     64     
-96    192    
-96    336    
80     208    
-32    288    
368    352    
-16    -64    
-32    -144   
240    0      
-880   -1792  
1648   -832   
-960   -480   
96     224    
816    320    
-800   -32    
-64    128    
720    240    
-576   -544   
176    64     
64     -128   
64     272    
-96    0      
288    288    
-80    16     
-272   224    
336    16     
-160   -368   
-128   0      
256    16     
64     48     
-80    112    
-144   208    
1888   -112   
-1056  64     
-32    160    
448    -16    
-320   0      
368    96     
-816   224    
224    -416   
-64    96     
112    -272   
-96    -64    
128    -2192  
320    112    
-384   0      
96     -112   
-272   272    
544    144    
128    32     
16     -96    
-144   112    
832    -304   
-480   208    
-96    -208   
528    80     
-144   -576   
-192   -144   
688    -1152  
96     144    
-784   224    
400    160    
112    128    
-224   -96    
288    -496   
-160   -752   
400    -240   
-480   -368   
-144   -288   
720    -176   
272    208    
-480   -112   
-128   96     
304    -128   
832    -240   
-736   176    
-112   -320   
-160   128    
-304   -624   
512    -1728  
2320   -3040  
-1072  -128   
512    32     
112    240    
-688   -112   
480    112    
304    208    
64     384    
-688   112    
16     32     
240    0      
192    -1632  
-96    -64    
-736   32     
80     48     
368    16     
0      240    
-48    -176   
-592   -752   
176    -80    
320    0      
-304   288    
272    -464   
-368   -80    
576    -1216  
-160   -272   
-544   -16    
480    -32    
-304   192    
-64    -496   
0      -32    
-80    -208   
256    176    
16     -2000  
-480   32     
656    -144   
-752   -240   
112    -112   
80     128    
160    32     
-256   48     
160    176    
-240   -48    
-96    48     
160    176    
400    -256   
-464   -64    
320    -144   
160    -224   
-80    -368   
-48    -144   
480    -288   
192    64     
16     -192   
160    -144   
-224   144    
64     -320   
336    -368   
-848   -176   
48     16     
176    -80    
96     64     
-80    -160   
16     -176   
32     -432   
-112   -544   
192    -96    
16     384    
208    928    
368    464    
-368   144    
-32    -336   
112    -224   
-80    96     
128    -192   
-80    224    
368    896    
0      896    
-192   16     
80     288    
-576   -2208  
960    -608   
32     -736   
-1008  1232   
1632   240    
-320   -48    
-576   512    
80     384    
656    448    
80     64     
-464   320    
-128   -16    
112    -96    
304    -48    
-48    480    
-32    -176   
-48    -368   
176    -592   
144    128    
-112   -32    
608    432    
-496   1392   
320    400    
-208   -368   
-432   -256   
112    592    
304    208    
-304   -416   
32     304    
48     160    
0      -352   
80     -112   
224    -480   
-288   160    
144    400    
64     -304   
-368   -192   
0      0      
48     16     
-144   -16    
-256   -80    
80     208    
-64    160    
96     -336   
-16    -64    
-112   -176   
208    -80    
-64    16     
-160   -64    
-512   -560   
1072   -80    
784    768    
-1424  -704   
160    -848   
432    192    
80     -32    
320    1232   
-208   -240   
64     -864   
-304   -64    
384    0      
-48    96     
-128   -160   
352    320    
-432   160    
96     160    
208    320    
-176   368    
176    -160   
112    -592   
-256   -1040  
-1456  912    
1744   -496   
-240   -1200  
-464   -80    
672    -480   
-16    -528   
-416   -560   
-112   64     
160    -208   
-608   -80    
-16    -240   
-384   208    
-224   -256   
144    -192   
208    96     
-320   -416   
80     -512   
320    -464   
48     -128   
-336   -112   
-160   -80    
240    928    
-320   960    
-272   832    
-272   384    
336    1056   
-816   656    
16     -32    
768    -720   
-464   288    
288    544    
368    640    
-608   -944   
-384   96     
-64    -128   
176    1072   
736    784    
-336   64     
320    0      
-432   208    
-160   192    
-112   224    
288    -176   
-208   448    
544    480    
-560   -128   
64     -48    
448    208    
80     176    
-1344  688    
784    384    
-272   -480   
-624   48     
864    624    
-464   -640   
224    1568   
-208   1632   
48     -160   
480    -192   
-96    704    
-1344  320    
-192   240    
272    -240   
368    112    
-64    -384   
-160   -304   
144    128    
16     512    
-128   144    
48     -112   
160    304    
-64    -176   
-784   416    
416    -64    
144    480    
-240   272    
-160   -160   
-576   -1200  
224    -224   
112    16     
-192   336    
432    256    
-304   384    
64     304    
416    128    
32     -240   
-704   -688   
144    -464   
256    -16    
-176   -80    
48     -80    
-128   176    
-736   -48    
240    -1072  
192    -368   
-352   -80    
144    720    
112    528    
-128   -352   
336    1040   
-496   688    
-448   -560   
656    -160   
-656   -80    
-336   432    
816    656    
240    384    
-1568  -816   
128    -688   
-112   -672   
-32    -496   
112    0      
-352   -128   
64     80     
208    -48    
-256   320    
-112   432    
368    240    
-64    32     
16     80     
-256   -192   
-16    -48    
-240   -80    
32     176    
112    80     
-48    224    
32     32     
32     -240   
-240   128    
688    2848   
1280   432    
-1440  1536   
1056   -224   
-464   -464   
176    0      
-96    256    
256    528    
-496   416    
224    416    
336    144    
-192   160    
-64    16     
-96    -80    
96     -208   
16     -608   
-64    -784   
-128   -656   
16     -112   
32     80     
-192   -272   
640    -512   
-688   128    
432    -208   
128    -48    
64     -208   
80     496    
-176   304    
80     240    
-80    272    
80     -192   
144    -96    
-144   -48    
64     336    
288    -64    
-304   192    
0      -304   
-96    544    
192    0      
-224   96     
384    128    
-112   80     
48     144    
-160   0      
-112   256    
608    240    
-304   -48    
-192   16     
560    80     
-1136  -1680  
-1248  -528   
1360   -368   
-1136  -160   
-96    368    
1056   144    
-368   -48    
-672   96     
896    288    
-16    -32    
-272   112    
32     -16    
-80    128    
240    128    
288    192    
-224   32     
0      144    
208    48     
-160   112    
-352   128    
272    96     
-176   -480   
-1136  464    
1616   -176   
224    128    
-496   -32    
64     304    
576    -128   
-1040  -224   
128    288    
224    32     
-80    112    
32     80     
112    464    
96     -64    
-640   208    
672    304    
-256   112    
-208   16     
304    208    
-48    -16    
-48    -160   
720    16     
-848   48     
928    48     
128    -560   
-624   -560   
672    224    
-304   -864   
-64    -192   
512    -176   
160    272    
-480   -112   
-64    144    
256    128    
192    -672   
-528   -416   
240    560    
272    -464   
-256   -176   
32     -32    
208    -192   
-176   128    
-48    -816   
-112   -144   
544    528    
624    0      
-464   96     
-144   128    
704    304    
-2304  3504   
1392   -528   
-160   640    
-2096  -608   
640    128    
1520   288    
-800   -256   
-784   560    
304    -256   
640    208    
224    16     
-560   0      
176    176    
-80    160    
528    128    
-480   48     
-112   144    
16     16     
640    544    
-512   32     
-80    720    
496    -208   
-576   -16    
848    48     
-160   80     
-112   -1264  
80     64     
-128   96     
592    -352   
-352   64     
64     -48    
-96    48     
336    0      
16     -96    
-176   -112   
-32    -160   
336    -192   
80     -64    
144    -176   
0      256    
-176   -480   
112    368    
-240   -1360  
96     -208   
400    -272   
-176   80     
-96    0      
80     80     
256    128    
-160   32     
-80    80     
-64    -976   
48     -80    
-64    -400   
-704   -192   
608    -448   
144    -64    
208    -1040  
96     496    
-176   16     
176    272    
16     128    
-64    48     
-48    96     
-16    80     
176    336    
288    -48    
48     352    
-48    256    
-112   176    
144    -992   
-144   -80    
400    -864   
-560   -336   
-224   16     
512    -112   
224    384    
-112   496    
-480   -368   
448    -816   
320    176    
-160   -1760  
-784   464    
896    304    
-160   -432   
-672   0      
368    -1760  
144    -416   
32     96     
-112   -224   
336    176    
32     -32    
160    352    
-112   64     
0      -160   
176    -208   
64     -32    
80     208    
80     -400   
48     -64    
320    608    
-448   -32    
176    -448   
896    -864   
-144   416    
-576   -720   
-272   1280   
496    544    
-208   -352   
-160   -608   
272    -464   
208    -208   
-128   -1392  
0      -64    
-208   0      
176    112    
192    144    
16     432    
-400   -800   
-80    -224   
656    -112   
96     272    
-544   160    
-16    -288   
320    -160   
-48    -768   
144    64     
16     -704   
32     224    
304    -288   
-656   -1088  
-1200  384    
1712   -304   
-480   -944   
240    32     
576    -240   
-560   848    
-592   -176   
608    -464   
-80    -80    
-400   128    
0      -64    
160    -96    
48     128    
176    -1008  
32     -128   
-96    96     
208    -192   
544    64     
-144   16     
496    1152   
-544   -880   
-528   368    
720    464    
-848   512    
368    -48    
-64    -528   
-624   -1104  
416    32     
0      176    
-80    800    
128    -256   
64     -192   
-224   -368   
272    -848   
-400   -432   
48     144    
-224   208    
-528   256    
80     0      
48     -320   
-16    -96    
176    -672   
-928   -800   
-288   -880   
448    -320   
-288   -1664  
672    -2304  
-80    -1456  
80     96     
0      528    
-464   704    
-16    208    
-144   96     
864    -928   
-688   352    
-704   160    
-192   -64    
-224   -176   
416    -784   
-256   96     
128    -208   
-80    672    
64     -32    
-48    -256   
-96    -176   
288    -96    
144    -480   
288    -336   
-480   -96    
-544   -2528  
-960   -384   
704    -16    
-32    912    
528    -288   
-576   -480   
-528   -672   
976    -1136  
272    -928   
-480   144    
-464   672    
176    -400   
240    112    
160    -688   
-688   -80    
-80    144    
432    -112   
128    -368   
-272   -688   
-352   112    
336    800    
224    80     
112    0      
512    224    
-384   -64    
-112   512    
288    720    
32     608    
288    272    
-304   576    
96     144    
-96    80     
-384   96     
160    528    
-112   96     
208    -304   
-96    -224   
-80    -208   
112    -96    
80     -368   
-96    -160   
80     -144   
32     192    
96     112    
144    1056   
-288   160    
-96    320    
416    624    
0      912    
-144   576    
-400   384    
-288   176    
1088   32     
-784   -272   
-800   -144   
192    -336   
-480   0      
64     112    
-128   -96    
-192   -96    
96     64     
-192   48     
192    0      
-208   256    
-144   16     
224    32     
-736   -128   
416    400    
-592   640    
112    -48    
128    192    
480    384    
-512   192    
-624   64     
576    -96    
-256   -448   
-384   -112   
224    -128   
48     288    
-128   -48    
528    -800   
-1424  1440   
1248   64     
-80    384    
-64    -128   
-192   208    
-192   112    
-48    0      
32     416    
304    0      
-1440  -80    
-16    96     
272    -144   
144    304    
-464   176    
-112   -144   
720    -240   
-416   16     
64     16     
176    288    
-448   -368   
208    -976   
-576   384    
640    64     
-240   48     
-1040  432    
-48    -16    
0      -32    
192    -64    
32     -112   
-272   32     
-144   64     
336    144    
80     128    
-176   32     
240    288    
-176   416    
-336   112    
-48    -224   
-272   80     
112    48     
-80    176    
-64    80     
-16    -32    
480    176    
-464   -160   
-64    368    
240    -64    
-416   64     
0      -160   
608    1152   
608    -480   
-1376  -16    
688    -192   
720    208    
-944   32     
160    400    
-912   144    
-112   160    
-112   0      
-288   -160   
432    208    
-128   16     
-272   96     
576    112    
-208   160    
-416   -64    
400    48     
224    -16    
-96    144    
-96    48     
-736   -416   
656    -32    
944    -208   
-2000  -320   
1648   144    
464    80     
-640   240    
864    80     
-32    -64    
-320   112    
96     128    
144    32     
-224   32     
48     48     
240    -16    
128    144    
-368   -192   
48     144    
496    16     
-304   80     
416    832    
-448   -240   
-896   416    
1360   -80    
-688   256    
-304   -272   
-128   176    
80     -304   
-240   368    
-32    48     
16     112    
192    -48    
-208   144    
-448   -480   
-336   256    
528    192    
-528   416    
496    96     
96     -112   
-544   144    
96     -112   
64     112    
-48    32     
96     400    
-144   -48    
-560   336    
256    -32    
-96    48     
464    736    
-1184  3328   
1600   528    
-1040  -384   
-800   -336   
1168   -96    
-64    112    
-656   0      
112    288    
272    384    
-464   160    
-48    -16    
448    64     
-432   64     
64     48     
224    240    
176    0      
-304   128    
176    -32    
496    688    
-752   976    
352    96     
112    -320   
-320   -272   
704    240    
-288   -32    
-368   512    
448    -48    
-96    0      
-288   -160   
96     -608   
16     112    
208    -96    
-16    -80    
64     144    
-336   192    
352    1152   
-400   416    
144    -96    
192    -160   
-224   0      
-64    176    
-128   -512   
-64    144    
320    -48    
-384   -96    
512    368    
-144   64     
-80    240    
336    496    
-160   976    
240    528    
-304   0      
688    -48    
-320   -448   
80     -128   
160    416    
-480   -576   
-592   -1152  
144    -1264  
-192   -768   
-16    -704   
48     -192   
112    352    
112    240    
-160   -64    
64     -176   
-48    352    
-48    16     
80     48     
80     -80    
48     496    
144    -1568  
-176   16     
176    -192   
-96    0      
224    80     
-240   16     
32     176    
16     -176   
16     96     
160    128    
-208   1584   
144    720    
-336   -336   
-208   -400   
208    48     
48     -1216  
80     -160   
176    48     
384    16     
0      -240   
64     -80    
16     0      
96     96     
0      16     
160    -80    
256    0      
-144   -160   
-96    16     
128    48     
-80    64     
864    -544   
-512   480    
672    -224   
-448   432    
128    -32    
64     -48    
80     -48    
48     32     
-80    -96    
160    96     
208    192    
-48    160    
144    -176   
-80    -224   
-16    272    
-128   0      
304    112    
304    -816   
-336   368    
-96    192    
400    48     
80     -144   
-16    64     
192    -80    
-32    -80    
-96    -96    
48     -32    
160    96     
-48    112    
-496   -1056  
-1056  384    
1296   -112   
-992   32     
208    1600   
944    656    
-768   1136   
304    1680   
272    928    
96     -368   
-112   -640   
-64    128    
-224   48     
288    240    
160    -416   
-112   64     
-256   -592   
336    784    
256    -128   
-160   256    
608    960    
-144   -768   
-1888  320    
1552   -592   
-688   -720   
-112   576    
592    1488   
-224   896    
272    752    
-64    -1552  
-304   96     
192    -48    
80     560    
192    256    
-176   176    
144    -368   
32     -272   
-160   -720   
336    -592   
-208   -160   
-256   144    
176    144    
144    496    
-16    800    
-496   -800   
640    -832   
-160   -576   
384    -784   
-976   -1248  
656    208    
144    -96    
-528   480    
192    -64    
-16    0      
-464   -208   
672    -272   
0      -1808  
-224   -112   
208    -560   
96     400    
416    112    
-448   -16    
-128   448    
784    -112   
32     -320   
192    -656   
-656   -224   
368    -128   
1008   -736   
-624   256    
-288   2672   
1264   0      
-1472  -688   
352    1040   
272    688    
0      -736   
-224   -208   
-112   -368   
-160   -288   
256    48     
-96    32     
-240   192    
-192   -160   
320    -160   
176    -160   
-208   0      
192    48     
320    32     
32     1376   
560    464    
-272   -176   
-80    -528   
480    -432   
-80    -80    
-272   16     
352    -192   
-32    -288   
-32    -304   
304    128    
-176   16     
80     48     
0      -192   
-288   224    
192    128    
-336   0      
48     480    
640    656    
-304   -160   
192    160    
208    -144   
-48    112    
240    64     
-496   -48    
-160   96     
368    -192   
-208   -80    
176    -208   
-464   0      
-128   -16    
240    32     
-160   -928   
464    -752   
-208   176    
-80    272    
512    -576   
-608   256    
-32    -80    
512    112    
-272   208    
336    -112   
-496   128    
224    0      
256    -176   
-272   0      
464    544    
-224   -16    
32     80     
256    288    
-144   32     
-64    -576   
-128   288    
368    -256   
-48    -416   
-144   -160   
64     -272   
176    256    
416    -144   
-400   -16    
48     -64    
208    48     
-944   -112   
2080   -1072  
-832   -160   
-656   -112   
1024   -784   
304    256    
-928   384    
176    224    
288    -400   
-96    16     
128    -256   
-64    -160   
-416   96     
-32    -96    
400    -384   
-64    416    
-144   -160   
160    -528   
-64    -16    
80     -480   
-272   -1040  
432    -16    
512    320    
-1056  -48    
544    -48    
0      240    
160    -160   
-688   -16    
384    -48    
48     224    
432    -272   
-336   128    
144    -240   
-240   192    
336    -48    
96     32     
-256   192    
-32    -128   
352    48     
112    -128   
-240   -16    
32     64     
48     112    
0      -48    
384    176    
-144   -160   
-240   160    
80     -16    
128    96     
144    -752   
-3392  -400   
2208   -128   
-576   256    
-432   208    
-336   -240   
48     128    
496    96     
-1120  -128   
496    -352   
48     -64    
-800   -208   
-128   80     
160    -352   
-448   16     
192    -368   
-160   48     
-128   -80    
144    -272   
-96    -16    
-128   16     
64     -32    
-1456  592    
864    272    
-192   880    
720    128    
-208   560    
192    -32    
-528   -144   
176    192    
432    -80    
-288   80     
-80    96     
0      128    
-32    -128   
96     -80    
-32    112    
-736   224    
128    352    
208    0      
112    64     
-224   -352   
528    272    
400    -384   
-240   96     
256    176    
-752   112    
304    -32    
64     80     
-704   144    
128    -176   
-64    -176   
336    -400   
-80    336    
-848   -304   
480    32     
48     -144   
-320   0      
384    -32    
-96    80     
80     0      
32     80     
-144   16     
32     112    
80     -32    
368    144    
-256   64     
-304   32     
320    32     
-688   -1248  
-1184  -2112  
-96    496    
400    -160   
-48    -160   
832    32     
-224   -912   
-528   528    
800    -64    
-288   48     
-16    -16    
-384   288    
480    208    
-656   320    
288    -320   
-368   64     
288    -208   
-448   240    
352    16     
-192   1008   
-176   880    
112    272    
-32    -256   
-304   -96    
816    192    
-544   144    
-240   -32    
448    112    
-768   -528   
128    -528   
-288   -352   
80     752    
-560   336    
-160   -2624  
192    -256   
-288   0      
192    256    
-144   416    
32     224    
224    160    
-272   32     
112    -304   
112    -416   
-544   -288   
-240   -848   
-304   -864   
336    -608   
-336   -800   
368    -1168  
0      368    
-208   544    
176    0      
-256   -816   
752    -240   
-496   -736   
-384   -320   
752    -192   
-64    -176   
208    1216   
-336   784    
208    -1392  
96     480    
-384   32     
240    288    
-160   48     
-272   -16    
176    -48    
-16    224    
-128   224    
224    368    
128    112    
-48    16     
96     -48    
32     -16    
128    96     
-96    -48    
112    80     
-80    416    
160    192    
288    -16    
-224   -32    
-128   128    
-352   448    
896    -352   
-656   32     
-464   80     
352    144    
64     16     
-512   176    
208    -304   
-352   -144   
176    96     
80     208    
96     -112   
-16    32     
-144   64     
80     16     
224    -192   
-80    32     
-208   -128   
-48    112    
496    928    
-144   304    
-432   -208   
1040   16     
-720   304    
-128   -48    
-144   -624   
144    -672   
112    560    
288    176    
80     176    
-160   176    
-256   176    
128    -160   
400    -176   
-80    -32    
-224   112    
-80    112    
336    -256   
-192   -160   
-336   208    
32     0      
304    -16    
144    240    
144    -80    
-320   -224   
-464   0      
240    240    
208    32     
80     96     
-1424  -1360  
480    256    
992    -304   
-1152  176    
624    -352   
-80    -1632  
-912   -288   
464    1936   
-80    16     
-416   -688   
272    -480   
-192   80     
-224   -16    
336    256    
192    256    
-224   240    
-224   288    
368    1328   
224    -416   
-224   -400   
448    1072   
-848   -864   
-1248  864    
1584   -720   
-528   -1008  
144    -192   
96     816    
0      512    
-288   0      
96     -1152  
-320   -416   
-64    208    
-192   176    
544    -112   
-80    -80    
-864   -272   
608    48     
-112   336    
704    384    
-16    16     
-368   96     
-32    -208   
-112   304    
-960   -2160  
-80    -1024  
1168   400    
-528   112    
-272   720    
896    -544   
-464   16     
-96    -192   
176    272    
64     272    
-80    80     
-288   -576   
-800   656    
432    256    
-592   96     
-32    -64    
512    800    
480    -128   
-448   48     
-16    -64    
272    -176   
384    624    
-464   -656   
-512   192    
688    -656   
512    992    
-800   976    
-1248  1840   
1488   160    
-816   -272   
-480   -240   
1504   304    
-496   -320   
-1104  224    
336    -512   
32     -16    
464    -80    
-480   -176   
-48    -176   
368    -272   
-80    -64    
-16    -1344  
176    16     
-96    64     
416    144    
-608   -528   
-128   -16    
208    144    
-144   0      
608    112    
112    -112   
-560   80     
448    0      
144    80     
-176   -192   
352    176    
-352   -176   
-16    272    
432    144    
-496   -16    
208    128    
192    96     
144    -208   
-368   -272   
144    160    
0      -224   
80     80     
-176   -240   
432    208    
-208   -176   
208    192    
128    80     
0      -48    
96     -96    
-208   160    
208    16     
0      80     
-96    144    
-208   -640   
272    32     
176    80     
-128   16     
224    -80    
256    -112   
-224   -176   
16     96     
-384   -288   
416    128    
-208   96     
0      128    
304    -80    
-272   32     
80     -976   
112    224    
16     112    
32     304    
384    -48    
-208   16     
0      192    
128    -64    
32     16     
112    -448   
224    -416   
-160   208    
144    -368   
96     144    
-688   -208   
1312   720    
-2896  160    
-464   -640   
1888   96     
-176   -1696  
-704   32     
32     -160   
704    672    
-624   -368   
16     -144   
224    208    
-320   -112   
144    -320   
272    176    
-816   160    
256    -368   
16     176    
-16    -80    
16     -480   
64     -1056  
224    688    
-672   144    
224    -32    
528    -336   
-400   -160   
224    400    
-608   256    
144    -240   
640    -160   
-288   48     
-80    -32    
-128   128    
320    -288   
96     -112   
-144   -656   
336    -112   
-16    -416   
-208   -320   
320    -32    
48     128    
-448   48     
-112   128    
384    64     
144    -48    
-320   -144   
-384   64     
-1040  -256   
0      96     
240    -144   
-432   48     
240    1136   
1728   -352   
-1264  144    
0      -256   
1008   288    
-864   192    
-64    560    
976    976    
16     -128   
-640   96     
160    -80    
-80    32     
-16    -16    
-32    -352   
-368   -144   
416    -160   
-32    -272   
128    432    
80     -432   
320    336    
-288   -480   
992    384    
-192   128    
-464   16     
-128   240    
160    -208   
144    208    
496    -16    
-336   -16    
-304   -208   
48     -80    
208    -112   
96     176    
-112   -1104  
224    192    
144    16     
-64    -112   
64     16     
-96    336    
192    0      
32     -16    
64     144    
-176   112    
-704   -144   
-352   -640   
880    -384   
48     144    
-272   -48    
224    -640   
432    224    
-688   -64    
-624   -224   
1088   -144   
-32    368    
-1072  -208   
832    -448   
-96    -48    
176    336    
-304   48     
16     48     
208    64     
80     -160   
-32    64     
-112   -320   
-144   -32    
688    0      
48     16     
-240   -48    
352    480    
-496   -592   
-1344  832    
672    592    
-96    -208   
-304   -432   
656    -160   
416    -1152  
-320   512    
-368   288    
32     32     
160    -688   
-144   -224   
192    240    
-368   0      
400    -128   
32     160    
208    80     
-320   -96    
272    64     
144    240    
-512   -608   
-64    -288   
-560   -400   
272    512    
-208   96     
288    320    
-528   224    
160    608    
-16    -240   
-448   -880   
208    -496   
32     208    
-176   128    
-64    128    
96     448    
16     384    
-160   544    
96     704    
128    832    
64     -16    
-96    -272   
-240   176    
-80    -48    
32     144    
-192   -48    
-112   448    
-96    240    
-848   -1056  
32     -880   
400    -48    
-32    224    
-288   208    
224    720    
1408   624    
-816   928    
192    816    
192    880    
64     416    
128    -160   
-160   -1904  
-592   144    
-208   512    
96     176    
288    0      
-80    32     
-320   64     
176    96     
144    -736   
-608   -912   
-256   272    
528    96     
-96    176    
48     96     
-224   48     
112    32     
224    448    
-592   672    
-176   400    
400    48     
-352   -16    
-272   -32    
64     96     
160    480    
368    224    
-64    -144   
-176   224    
64     112    
-64    -16    
224    240    
-112   416    
-256   64     
304    -80    
-112   96     
-544   144    
272    160    
-144   64     
96     64     
-32    176    
0      288    
-16    -112   
-144   -144   
672    -96    
-1424  384    
480    0      
224    48     
32     -96    
-208   -32    
-128   -176   
144    224    
-64    64     
128    48     
-48    208    
-128   -16    
-32    -16    
0      -272   
112    -416   
208    -144   
-96    48     
-96    464    
96     848    
512    224    
-224   -288   
-416   -256   
-16    128    
304    240    
-432   -96    
-128   0      
-16    64     
-336   -144   
16     464    
-32    -896   
960    -592   
-192   -224   
-288   -400   
112    160    
432    128    
-1024  1008   
1104   784    
368    -48    
-688   16     
-224   32     
352    80     
16     16     
-208   -96    
-208   -192   
240    -16    
-16    -48    
144    160    
-144   192    
128    400    
144    112    
160    -432   
-1712  784    
960    -32    
256    368    
-688   -112   
160    -64    
176    80     
-320   208    
-48    -320   
592    112    
176    32     
-464   -16    
-80    208    
448    176    
368    80     
-544   96     
48     112    
304    0      
-128   144    
48     128    
48     144    
240    672    
-496   -288   
-320   320    
480    -448   
32     -640   
-288   -208   
944    -432   
-832   -256   
-192   288    
32     -64    
-80    304    
80     -64    
-16    -192   
-48    -32    
448    -704   
128    144    
-192   320    
-64    192    
48     144    
80     0      
64     32     
-144   112    
16     16     
-16    48     
-352   32     
80     128    
-160   -16    
-48    -224   
624    -768   
-416   -816   
80     752    
1168   -96    
-880   -112   
-864   224    
576    0      
512    160    
-32    208    
-608   -288   
128    -64    
624    80     
96     176    
-192   96     
-96    224    
352    -64    
-32    224    
224    -96    
144    672    
-480   -128   
96     528    
800    -176   
-672   128    
-528   48     
544    112    
0      48     
-272   -112   
64     48     
-48    112    
-32    -16    
576    288    
-144   32     
-240   144    
192    -16    
-208   -192   
-160   -128   
304    80     
16     -112   
208    80     
128    -64    
-96    240    
-176   -240   
48     -512   
288    336    
-176   -976   
-224   256    
176    272    
256    64     
-240   0      
80     64     
304    80     
-64    304    
304    48     
-288   1264   
-432   544    
224    464    
336    288    
-416   64     
-160   0      
320    -1248  
-48    -32    
-256   0      
336    80     
-32    80     
-16    80     
64     80     
32     528    
80     112    
-240   -16    
-16    -128   
224    32     
-96    144    
112    160    
368    352    
-208   -320   
-128   -400   
528    -176   
208    384    
-336   -368   
64     -480   
-320   -1840  
1504   -1680  
-1472  304    
144    16     
192    -48    
-560   416    
496    -112   
144    0      
-16    -480   
-224   -160   
432    240    
-48    -1056  
144    -208   
-176   80     
16     -176   
224    96     
-48    272    
32     -256   
-160   272    
128    112    
0      224    
384    1840   
688    -208   
-1200  32     
528    -272   
80     144    
96     32     
16     -336   
48     -1184  
-192   128    
448    304    
144    128    
-224   304    
80     80     
80     256    
224    256    
-112   48     
-256   -112   
128    -96    
48     16     
64     144    
-272   -544   
336    96     
-208   -464   
160    224    
256    -32    
-448   144    
272    -96    
32     144    
160    176    
-1184  1632   
2224   608    
-432   32     
-432   -144   
1456   -48    
-1056  528    
-32    112    
368    80     
-64    -160   
80     -96    
-48    16     
192    96     
-144   176    
400    304    
-288   224    
0      -48    
240    512    
-192   -80    
192    112    
80     -112   
-320   224    
704    576    
1488   -32    
-752   -48    
-416   464    
384    384    
448    -512   
-96    240    
-48    -112   
-192   -848   
160    -240   
-48    -1424  
64     -144   
80     240    
144    -80    
32     128    
128    -272   
-48    -832   
-80    144    
336    -400   
32     16     
64     32     
-224   96     
-688   0      
48     224    
-112   144    
-352   -1040  
192    96     
656    -208   
-576   -1136  
-304   80     
208    -400   
-160   -128   
-208   -272   
688    288    
-592   48     
192    -704   
416    -320   
-224   32     
-96    -160   
-128   128    
112    48     
288    -16    
-64    -384   
-496   -576   
640    -2320  
96     16     
672    304    
-304   1216   
-192   368    
-592   -32    
96     464    
-480   -16    
-304   -432   
992    160    
-672   320    
-368   -592   
352    -720   
176    -224   
-160   -80    
-160   -528   
48     -80    
272    -688   
0      480    
-256   -560   
-80    -640   
144    656    
160    -304   
-320   -176   
-144   -256   
-16    0      
192    -256   
240    -176   
16     -496   
-160   -528   
240    -192   
48     16     
48     -368   
160    -96    
-368   -448   
128    240    
-64    48     
0      -160   
208    -256   
-288   -208   
0      80     
48     -880   
-448   512    
96     1136   
-320   672    
160    -704   
64     32     
32     -688   
-96    208    
-32    720    
496    240    
-176   464    
-48    -144   
-288   0      
112    304    
-256   -512   
880    400    
-752   128    
-400   -736   
-208   -1600  
368    -512   
-208   -448   
416    -1360  
176    1472   
-160   0      
-128   -160   
-112   208    
224    0      
128    112    
32     304    
-304   400    
304    480    
-144   -144   
160    160    
-32    272    
-144   -160   
112    -80    
240    -672   
-128   176    
-576   -32    
432    -224   
464    -368   
-64    -336   
-432   -256   
256    32     
608    880    
-736   16     
112    -48    
96     1248   
-96    192    
336    -416   
208    288    
-192   112    
48     -192   
512    -592   
112    -128   
-288   -48    
48     272    
-48    16     
80     48     
-32    -144   
-256   16     
-144   240    
224    -64    
-16    32     
-864   -208   
-16    464    
-1216  -448   
48     160    
80     256    
-704   -576   
-240   432    
-224   320    
-32    -112   
48     -352   
-16    304    
64     304    
-96    -176   
64     -96    
0      448    
-352   -224   
112    80     
-64    -96    
112    272    
-144   -16    
-384   32     
48     -208   
-432   128    
-176   192    
96     80     
304    32     
-160   -64    
-32    64     
-16    16     
-288   1024   
624    -304   
-928   816    
1296   336    
-1120  -352   
-736   240    
1296   304    
-720   144    
-80    80     
-192   -272   
-256   -96    
-336   -112   
96     -32    
128    224    
-64    128    
-400   240    
240    -192   
64     96     
-336   160    
128    144    
176    48     
464    1328   
-800   -1024  
-800   496    
1072   96     
-992   -368   
-336   304    
-16    -160   
0      80     
-16    128    
192    -96    
-160   -160   
-368   128    
128    112    
336    96     
-288   80     
0      -32    
-80    -64    
-192   496    
-320   352    
-176   -112   
368    -96    
-240   944    
-800   96     
-528   -384   
736    400    
64     272    
48     368    
-688   -496   
-400   192    
416    160    
-336   32     
-176   48     
-304   16     
480    -16    
416    304    
-432   208    
-1040  -112   
528    432    
-352   -32    
-32    -16    
384    176    
-336   160    
-48    160    
272    48     
400    368    
-1056  384    
48     416    
176    112    
-944   -816   
2768   2624   
-848   1552   
-1104  368    
2192   -160   
-368   -288   
-1184  -80    
32     320    
224    -208   
-288   -176   
432    160    
32     96     
-432   80     
288    224    
160    -224   
160    160    
-768   -32    
176    288    
64     -128   
-208   144    
-304   608    
544    352    
-816   432    
480    -16    
0      64     
-624   304    
1024   160    
-320   0      
-464   112    
704    -128   
-320   -16    
-96    -64    
-16    176    
64     -144   
-320   96     
512    0      
-848   48     
464    -96    
128    240    
-256   16     
-336   32     
480    208    
-96    0      
-208   160    
16     208    
64     112    
-224   144    
688    368    
-1056  -16    
272    208    
192    64     
-48    192    
128    80     
32     368    
768    64     
-512   48     
448    16     
-32    -48    
-128   288    
80     272    
16     240    
-64    -64    
0      160    
-64    -64    
-240   64     
224    112    
240    240    
-128   224    
-272   368    
656    352    
-304   176    
-368   240    
208    -64    
128    -64    
-144   -48    
32     112    
-16    -208   
304    -176   
-256   96     
16     -64    
16     -592   
16     -96    
-384   2096   
1008   -496   
-1376  240    
288    -400   
784    256    
-544   -160   
-176   -16    
32     304    
304    -496   
0      -128   
-16    144    
-240   -112   
96     -48    
160    -176   
128    -48    
-112   272    
96     -128   
-144   80     
144    -48    
80     16     
640    688    
-1648  688    
752    -512   
736    208    
-480   384    
208    192    
-304   272    
-128   0      
48     -64    
320    128    
-48    0      
-384   80     
272    144    
-32    176    
32     496    
16     112    
192    -48    
-272   128    
96     176    
112    -96    
-256   -288   
416    -32    
-96    80     
208    208    
-176   128    
-64    256    
112    64     
32     -16    
128    144    
-624   -544   
2144   -992   
-1056  368    
-112   -80    
688    480    
-832   64     
464    -144   
304    832    
16     32     
128    384    
-400   192    
144    208    
112    192    
80     -96    
304    -64    
-224   -160   
16     112    
272    -48    
-288   -96    
0      -96    
112    96     
208    -720   
-1840  1008   
1968   -128   
-800   512    
-544   -16    
928    352    
-1152  768    
336    128    
224    -192   
96     144    
160    -160   
-480   -64    
64     96     
224    0      
208    256    
-96    -64    
-32    48     
0      -512   
368    240    
80     -1904  
-112   112    
-64    32     
160    464    
-1152  416    
320    352    
544    112    
-352   624    
720    -240   
-128   -16    
-288   16     
-80    -176   
320    -112   
192    -112   
192    688    
-80    -688   
-32    -64    
400    -176   
-96    512    
-80    160    
-144   288    
-16    144    
272    64     
144    32     
-48    -64    
0      240    
272    -336   
-128   -176   
-400   352    
368    272    
-32    -832   
-656   2032   
544    -2032  
-864   704    
400    64     
-80    624    
320    592    
160    1264   
-288   -480   
192    544    
-112   368    
224    -576   
-64    368    
-256   -672   
32     256    
464    -464   
128    672    
-400   16     
-144   608    
464    736    
160    176    
16     -528   
-208   96     
-304   16     
304    -224   
656    -416   
-592   112    
192    80     
-720   -2304  
400    -208   
-16    80     
-96    128    
224    -96    
16     32     
-16    96     
176    720    
-416   -464   
-416   -288   
416    144    
208    240    
-64    576    
80     -176   
0      -304   
288    368    
-64    688    
96     112    
-800   -800   
320    -320   
384    -2416  
16     96     
-80    -624   
192    1232   
-320   240    
-144   -1056  
272    -144   
-368   -704   
32     -80    
576    800    
-656   16     
-32    -624   
496    -1744  
64     -2528  
-192   192    
96     16     
48     -16    
-48    -704   
-64    -608   
112    272    
-112   96     
176    -496   
16     -336   
-144   528    
208    -592   
-112   32     
192    -448   
96     592    
-16    1744   
-16    912    
-256   -336   
336    -272   
240    -208   
-480   1312   
976    -224   
-640   -656   
-224   -1568  
288    -1152  
-48    -208   
-288   208    
352    48     
32     576    
-160   -240   
-48    112    
16     -16    
288    -368   
48     -16    
16     208    
-368   -272   
224    -208   
288    16     
-480   -160   
-144   -192   
336    1504   
96     512    
-16    -384   
304    -224   
32     384    
80     -720   
-176   -480   
336    -304   
-208   432    
-128   96     
304    32     
80     144    
-208   208    
32     -176   
-176   -640   
352    -640   
96     208    
-304   224    
-48    -320   
48     -64    
64     -704   
-320   192    
192    -16    
384    48     
-144   -48    
-256   -144   
0      32     
144    -176   
-128   -160   
-144   -1296  
-1712  -736   
1104   -320   
64     -80    
-736   -752   
-352   496    
1216   -224   
-448   576    
80     304    
544    16     
-416   -112   
64     -224   
-192   -48    
400    64     
-752   -32    
176    -32    
-96    32     
480    -288   
-160   112    
160    -320   
240    160    
-32    -560   
-1392  1072   
816    160    
0      48     
-128   -80    
-144   -48    
-160   192    
-112   32     
-320   -16    
432    -160   
32     -16    
-48    -32    
-48    128    
-144   -208   
-32    144    
352    -768   
176    192    
-112   -464   
-176   -16    
544    -16    
-336   -336   
944    240    
432    384    
-1840  -320   
96     160    
480    352    
-16    256    
16     400    
0      -16    
-736   128    
0      -480   
448    -96    
-400   -128   
-16    -96    
32     -80    
256    -64    
128    304    
-352   48     
-480   192    
32     128    
1184   384    
-336   80     
-560   48     
-336   -192   
752    768    
32     -352   
-880   288    
624    144    
16     -576   
-2080  2736   
1424   -400   
-960   864    
-560   -384   
240    -64    
928    240    
-672   96     
-656   -560   
112    320    
208    -240   
-256   272    
448    -48    
-400   128    
-320   16     
144    176    
320    -16    
-656   16     
480    32     
-432   -64    
-1392  -96    
1296   -16    
-336   -80    
176    -368   
160    -32    
-592   16     
496    176    
-240   48     
-32    -192   
-96    32     
-112   -288   
-224   192    
336    -112   
-240   224    
272    80     
-64    16     
-208   -176   
64     176    
32     -80    
-304   256    
-64    16     
-112   -80    
224    144    
-336   -160   
16     -64    
368    -64    
-48    144    
-176   128    
224    336    
-144   160    
-128   544    
-656   128    
-256   288    
560    -208   
-368   -16    
128    -192   
-144   176    
-16    48     
272    -48    
-64    -128   
-640   96     
64     -80    
272    48     
-64    208    
-48    80     
48     -48    
-224   64     
0      -160   
-304   -576   
208    -384   
-160   -112   
80     -96    
16     -128   
-368   -144   
-32    32     
208    416    
320    192    
-448   -160   
-32    -576   
16     -240   
128    -16    
64     -1776  
-1584  1552   
1648   336    
-1072  640    
32     -1216  
304    -448   
-624   832    
64     704    
640    432    
-96    -64    
-352   224    
144    368    
208    -64    
-80    -448   
-208   208    
208    864    
128    1088   
-272   496    
-16    368    
-96    96     
432    624    
-1168  144    
1152   -336   
-464   -688   
-352   -1088  
240    336    
64     -224   
64     640    
0      -240   
80     352    
-144   -176   
112    176    
-144   -64    
-96    64     
-16    -368   
48     480    
112    -112   
128    48     
-112   320    
64     -256   
-256   192    
224    32     
-144   -144   
-272   224    
176    176    
-128   -32    
176    16     
-80    256    
80     64     
-32    304    
-368   1440   
3088   -720   
-1696  -336   
-160   -864   
1344   224    
-160   -96    
-560   400    
560    -720   
-208   -560   
0      656    
-32    176    
272    32     
-192   160    
16     288    
240    208    
-80    144    
48     -80    
-208   -288   
112    208    
32     208    
272    -976   
-2368  464    
1696   592    
256    1392   
-992   -224   
752    -960   
-192   -1152  
-528   -608   
112    -352   
288    -144   
-112   224    
-112   192    
160    80     
160    -224   
0      -128   
128    192    
-448   -224   
-112   -672   
608    -992   
-320   -272   
-272   -16    
80     352    
-128   -208   
80     864    
384    -640   
-784   -816   
560    1008   
640    144    
-384   64     
256    576    
-160   1184   
-64    -272   
-464   176    
496    0      
-432   -208   
16     -32    
720    -448   
-576   1376   
896    464    
-288   -80    
-160   368    
304    224    
144    816    
304    96     
-176   -160   
-144   240    
-64    -176   
224    -400   
-96    32     
-288   144    
560    1520   
1408   352    
-1168  -800   
-704   -432   
576    -224   
192    -432   
-432   -544   
-256   480    
176    528    
208    320    
112    64     
-80    432    
-16    -48    
16     -464   
496    -400   
-208   192    
-80    -896   
496    80     
-80    -560   
-96    -480   
48     80     
256    432    
-784   -464   
112    400    
512    -16    
-736   128    
480    -992   
-976   -1712  
0      -1776  
32     240    
240    528    
128    -80    
-208   -16    
144    -96    
-208   16     
176    352    
-112   848    
240    176    
-224   -64    
144    -656   
432    -544   
-272   -480   
64     288    
16     368    
272    -704   
48     416    
48     -224   
-160   -256   
0      400    
352    416    
336    544    
-1072  464    
368    -1360  
992    1280   
-1520  -336   
-416   -1152  
736    -128   
-640   -896   
144    -144   
448    -688   
32     -176   
-304   -448   
64     -544   
400    -1152  
-112   448    
-160   96     
32     64     
64     192    
448    1120   
-256   1104   
-112   736    
352    64     
-64    304    
-160   112    
-32    -384   
320    -304   
-416   176    
96     352    
176    -336   
80     288    
-752   -384   
1552   -752   
-720   304    
48     112    
144    -304   
80     -1440  
-368   -816   
128    -1376  
-64    416    
304    112    
-272   368    
272    -192   
64     -96    
32     -656   
128    160    
-192   288    
48     -192   
288    -96    
-64    32     
-32    160    
-160   880    
768    -224   
-720   -256   
384    48     
544    -464   
-320   368    
112    -336   
112    80     
80     -464   
-320   48     
608    32     
-96    272    
-128   -48    
-112   32     
288    176    
240    80     
-96    96     
-240   -48    
256    -32    
96     -288   
208    -32    
-16    -192   
-80    160    
112    -240   
-112   0      
16     -176   
208    80     
-16    112    
-288   -864   
2112   720    
-2720  304    
-2064  -288   
2304   -48    
48     -800   
-784   -144   
-64    352    
832    496    
-176   -80    
-96    208    
272    -576   
-112   208    
288    -1808  
16     160    
-480   -368   
272    -64    
-128   64     
-16    -144   
160    -16    
-64    -416   
48     0      
240    -368   
-1520  368    
464    208    
960    896    
96     -544   
-192   240    
112    -368   
-640   288    
224    -80    
112    -256   
-480   -224   
-64    -272   
-304   -80    
304    -384   
-176   -96    
-16    -160   
96     -224   
512    -3504  
-96    -64    
-800   -112   
336    -352   
1024   32     
-80    -16    
-480   80     
112    -288   
-896   -112   
160    512    
32     -368   
192    192    
352    -384   
-64    -144   
608    -864   
-224   -816   
-96    32     
0      -288   
560    -752   
80     -80    
-192   352    
-192   112    
560    -16    
-160   -32    
0      80     
