# Supplementary material for: A Fault Diagnosis Method for One‐Dimensional Vibration Signal Based on Multiresolution tlsDMD and Approximate Entropy
Source: Hindawi journal article supplement (doi:10.1155/2019/3262818), 2019-01-01
Supplement: f1 [file 3262818.f1.zip › 3262818.f1/gear signals/pitch errors signal/Data10.txt]

128    80     
304    -304   
-32    304    
-128   -64    
128    -224   
-112   -448   
256    -336   
176    224    
-320   160    
-128   384    
368    -272   
-96    1216   
352    -48    
-336   -320   
64     512    
240    -320   
288    160    
-144   80     
-32    736    
112    0      
112    112    
-128   -176   
48     192    
224    624    
-160   144    
-80    -448   
128    -384   
192    -400   
-144   -1088  
160    -64    
112    -608   
-256   -192   
128    -1248  
-64    -400   
-240   -240   
368    -32    
0      144    
48     160    
224    -64    
-912   1824   
2112   80     
-832   -16    
-288   -320   
1216   -192   
-720   -256   
-48    -80    
400    272    
-128   -480   
160    48     
-112   -1008  
64     -144   
-144   -480   
464    192    
-16    -256   
-176   240    
192    -80    
-32    -304   
-112   16     
128    -48    
-320   128    
-336   -848   
-832   496    
1888   -144   
-1184  -48    
208    -432   
576    80     
-432   -96    
304    -112   
-432   112    
416    -48    
-176   96     
96     -80    
-528   -96    
240    96     
-576   -64    
-160   176    
-352   -480   
-288   -224   
-48    96     
-240   48     
112    -176   
-560   -1488  
544    -96    
-336   -144   
96     480    
480    96     
720    144    
-224   16     
480    -64    
-16    -80    
-640   -16    
-800   -16    
0      48     
112    592    
304    -336   
-384   496    
128    -352   
272    448    
-224   16     
-432   48     
-112   80     
208    -16    
112    -160   
16     336    
-32    -112   
-384   496    
-288   128    
112    -112   
-416   1088   
1568   2096   
624    320    
-1792  -352   
736    32     
160    16     
-144   -16    
-192   -144   
32     64     
32     -160   
160    144    
48     -112   
32     -112   
-144   -32    
-320   -128   
-416   -112   
160    -64    
112    -16    
-256   -192   
624    96     
-1216  -3200  
976    64     
-448   -48    
432    -96    
-64    -96    
-448   96     
768    144    
-928   -112   
96     -160   
400    128    
-80    -32    
-160   48     
64     -80    
-256   -272   
576    176    
-704   -32    
384    304    
-432   144    
-224   320    
-64    64     
-16    -128   
176    64     
-80    192    
-192   -144   
256    -128   
-80    32     
0      -32    
-48    192    
320    -112   
128    176    
-256   144    
272    176    
-160   752    
656    -304   
-560   -688   
-192   16     
352    -48    
32     -112   
64     288    
-496   208    
112    48     
-96    -368   
-64    -32    
-208   -144   
-96    128    
64     144    
-176   -48    
-208   144    
-96    -16    
-80    -144   
208    -64    
-240   112    
144    160    
-400   224    
64     -96    
176    272    
-16    80     
-48    240    
16     -128   
-304   -304   
48     -240   
64     -1904  
-1824  1936   
1744   -80    
-1104  16     
96     -864   
-64    256    
-464   96     
-144   432    
432    384    
112    256    
-496   144    
-96    304    
336    272    
-64    96     
-336   416    
-16    -224   
176    -80    
-32    -64    
16     48     
-592   -64    
272    704    
-1120  864    
48     -176   
80     -544   
-160   -736   
-16    -80    
288    720    
-192   -16    
-96    -240   
0      -176   
64     320    
80     288    
208    32     
-320   -128   
-112   256    
80     128    
-160   -288   
-96    80     
-48    -336   
224    448    
-256   112    
-224   -48    
160    80     
64     80     
32     144    
-320   96     
64     160    
-16    -16    
64     -16    
-272   416    
-864   1552   
3296   -432   
-976   400    
-1280  464    
992    -128   
-208   -416   
48     -992   
336    1472   
80     720    
-336   48     
80     0      
240    0      
-464   -96    
384    -352   
0      -272   
-608   -48    
-160   0      
432    640    
-608   816    
176    608    
528    400    
-2144  -144   
-144   -112   
1872   -160   
-720   160    
-144   1280   
352    1104   
-64    1088   
160    384    
224    672    
80     48     
-480   -32    
144    288    
384    -96    
-256   144    
64     144    
80     -96    
48     -112   
320    48     
-32    -16    
-320   -160   
-48    -48    
-272   -384   
560    -1200  
-512   -208   
-144   160    
-128   192    
416    240    
-528   1440   
592    528    
-496   -304   
-192   496    
592    640    
192    -144   
-992   672    
-144   176    
-128   960    
752    528    
-176   256    
80     304    
80     608    
-400   192    
-64    -64    
112    -368   
-208   416    
528    512    
-272   0      
-128   224    
544    688    
0      -64    
-1520  -704   
-16    432    
592    -224   
-688   208    
912    1040   
-320   -384   
-48    1280   
64     2032   
32     -16    
576    -304   
-80    704    
-208   512    
-64    416    
192    -480   
384    224    
-64    -112   
-112   -96    
112    192    
160    576    
-160   160    
96     -80    
80     224    
48     32     
-624   592    
560    208    
240    608    
48     416    
-256   -272   
-528   -1072  
224    -208   
144    224    
-160   352    
416    160    
-368   400    
32     208    
416    144    
-48    -320   
-592   -640   
128    -416   
272    32     
-128   -48    
192    -48    
-176   128    
-64    80     
240    -1184  
240    -512   
-352   -224   
128    752    
160    704    
-160   -336   
384    1088   
-544   688    
-432   -560   
656    -144   
-560   -80    
-320   352    
848    848    
240    544    
-480   -496   
160    -576   
-128   -688   
-48    -672   
16     -192   
-224   -160   
80     96     
288    64     
-224   320    
-112   144    
368    240    
48     160    
96     96     
-112   0      
-48    -48    
-32    48     
48     192    
48     -16    
-96    256    
96     16     
80     -160   
-304   128    
512    2736   
1376   368    
-1440  -752   
1024   -464   
-240   -128   
112    112    
0      256    
192    528    
-400   528    
240    480    
336    144    
-160   240    
-96    -96    
0      -80    
48     -288   
0      -672   
64     -656   
-128   -976   
-16    -32    
160    192    
-240   -608   
656    -464   
-592   192    
352    -112   
144    48     
128    -400   
160    528    
-224   224    
64     272    
-64    208    
112    -368   
144    -96    
-48    -576   
-32    256    
416    -2256  
-320   176    
160    -48    
-256   368    
320    64     
-224   112    
240    -48    
-16    48     
-48    112    
-80    -96    
-240   80     
528    32     
-48    -32    
-288   -16    
576    0      
-304   -1888  
-2048  -768   
1088   64     
-384   160    
-320   -32    
656    64     
-80    -288   
-640   48     
624    144    
224    96     
-288   48     
48     -80    
-96    64     
144    48     
288    208    
-144   -112   
-96    64     
288    -1568  
80     256    
-448   80     
224    176    
128    -288   
-1616  240    
912    16     
752    176    
-112   -112   
-368   16     
848    -80    
-624   -64    
-208   192    
480    -576   
-16    32     
-80    -752   
32     208    
448    -176   
-768   256    
480    96     
64     -208   
-448   -112   
352    -304   
64     0      
-48    -496   
784    256    
-608   -448   
352    128    
624    -720   
-1104  0      
976    -800   
-224   0      
-256   -128   
544    -48    
176    208    
-416   -224   
-240   160    
272    -64    
384    -496   
-496   -416   
-96    80     
528    -688   
-112   32     
-192   64     
272    48     
-176   -16    
-16    224    
-80    -160   
464    368    
704    0      
-464   -352   
-96    -176   
912    464    
-2560  3152   
1184   -304   
144    576    
-2064  -640   
608    96     
1488   224    
-832   32     
-752   0      
384    -464   
608    160    
256    -624   
-608   -32    
-112   80     
-64    64     
544    -32    
-464   -240   
-48    16     
-48    -656   
704    464    
-560   128    
-80    416    
464    -160   
-544   -64    
912    -48    
-240   0      
-16    256    
16     48     
-208   0      
480    -432   
-448   160    
96     -208   
-80    32     
256    -272   
32     -160   
-80    -1360  
-64    -304   
352    144    
16     96     
192    160    
-32    304    
-192   -176   
176    32     
-528   -384   
288    -240   
144    96     
-272   -32    
-64    0      
240    -432   
304    32     
-272   -80    
0      32     
-32    -288   
176    -208   
-480   -1264  
-496   -864   
352    -48    
112    176    
240    272    
64     464    
-1040  96     
160    416    
80     -64    
-48    0      
48     320    
48     32     
144    272    
192    -880   
64     320    
-80    32     
-160   -160   
96     -592   
-16    528    
240    -272   
-608   -624   
-160   -128   
352    -160   
272    464    
-128   96     
-656   -576   
400    -944   
288    416    
-352   -1984  
-560   272    
960    720    
-384   -336   
-560   288    
336    -1808  
-32    -272   
32     16     
-272   -464   
320    80     
-544   0      
144    32     
-16    -16    
-32    -496   
96     -112   
32     -464   
128    224    
64     -16    
0      -176   
16     304    
64     -720   
-32    32     
624    1088   
-368   256    
-608   -256   
-128   -112   
432    720    
-336   208    
-176   -544   
320    528    
256    -432   
-192   496    
96     -480   
-112   -128   
112    128    
256    -48    
-288   192    
-208   544    
-208   128    
512    -288   
-80    96     
-304   -304   
-112   256    
544    -336   
-272   -224   
208    -368   
-48    240    
-272   144    
304    -144   
576    -848   
-3392  -416   
896    272    
1104   -288   
-912   -976   
-208   -224   
-240   -576   
-240   432    
192    -208   
240    -496   
-352   -128   
-1648  -240   
64     16     
-32    80     
-304   -192   
-96    256    
-32    -32    
-64    48     
320    -320   
96     80     
-288   -112   
896    -880   
-1296  272    
352    384    
-704   -208   
48     48     
384    528    
-736   -144   
48     -1520  
-160   -832   
-384   912    
-576   672    
96     272    
-144   -224   
224    32     
272    0      
-416   384    
80     112    
-656   272    
224    128    
288    16     
-336   -368   
448    -816   
-400   112    
-720   -1024  
208    -976   
-64    -624   
896    -1184  
288    -848   
-208   -432   
-16    -16    
-336   32     
-96    368    
-384   32     
1088   -592   
-224   256    
48     -560   
96     -608   
-432   -432   
560    -448   
-176   -96    
-80    352    
-128   288    
16     112    
32     -160   
-736   -112   
128    -48    
176    112    
400    256    
-336   -80    
-192   -2560  
-1504  -816   
672    224    
0      1024   
240    16     
-480   -240   
-560   -304   
1072   -416   
80     -1040  
-704   -400   
-368   608    
288    -96    
432    384    
80     -288   
-640   -144   
-144   48     
592    32     
0      -208   
-288   -1088  
-592   -80    
368    752    
64     384    
-128   80     
512    80     
-256   32     
-208   448    
368    672    
-1504  592    
288    256    
-192   480    
64     256    
144    336    
-464   272    
176    592    
-64    544    
128    -64    
-192   -256   
-48    256    
256    256    
0      64     
-240   -240   
192    0      
-832   80     
208    224    
96     848    
-80    912    
-80    544    
256    592    
48     896    
48     896    
-160   560    
-400   -368   
784    288    
0      -176   
-528   352    
80     112    
-16    -176   
-256   -288   
-80    -272   
-416   -224   
304    -32    
-48    -32    
16     -208   
-240   -288   
144    64     
208    656    
-320   272    
272    1072   
-512   688    
64     240    
-176   272    
256    288    
-288   32     
16     64     
272    64     
80     -64    
-704   144    
432    352    
304    304    
-176   32     
704    2048   
-1456  768    
672    -96    
496    112    
-224   -208   
-448   128    
160    32     
288    -80    
-352   -208   
288    -352   
-144   272    
-80    96     
368    160    
-96    32     
-272   -448   
-48    -544   
64     336    
176    112    
-288   416    
352    80     
-560   -576   
848    144    
-288   304    
-256   -32    
560    144    
-384   16     
-16    -336   
64     224    
240    -48    
-240   176    
-80    80     
32     0      
192    -32    
-16    32     
-192   0      
-80    32     
208    -192   
-240   144    
192    224    
-384   16     
128    -16    
176    80     
-128   112    
0      80     
144    288    
240    -48    
-640   192    
672    48     
-304   0      
-48    368    
-128   2256   
1520   784    
-1360  112    
-240   -208   
1184   384    
-240   -32    
-400   64     
432    -16    
-112   160    
-160   96     
-112   16     
-64    144    
384    64     
-352   -112   
64     48     
288    96     
-272   32     
64     128    
544    80     
-80    64     
-144   192    
-320   -592   
-320   304    
1936   -32    
-1824  -1056  
-144   272    
1616   -32    
-848   240    
656    -96    
256    144    
-240   80     
96     -1536  
96     80     
-208   64     
0      -48    
112    144    
272    80     
-112   0      
-32    208    
768    208    
0      128    
-128   192    
576    -224   
-1136  304    
1184   48     
-400   208    
-464   -272   
-288   -96    
80     -128   
-128   112    
192    -16    
128    -32    
192    -32    
-32    192    
-368   -368   
-576   368    
560    -192   
-448   368    
400    -16    
272    -208   
-560   160    
208    -336   
128    96     
48     80     
64     352    
-64    48     
-608   320    
304    0      
-112   96     
432    -16    
-1200  3760   
1424   352    
-928   -240   
-640   -416   
992    -160   
192    176    
-704   -496   
48     240    
432    -1744  
-496   160    
-16    16     
432    128    
-384   32     
144    96     
176    144    
112    32     
-288   80     
304    48     
464    624    
-800   656    
320    -32    
128    -448   
-288   -224   
800    80     
-400   -16    
-160   224    
464    -16    
-96    -240   
-240   -80    
32     -576   
48     192    
176    -96    
0      -208   
32     160    
-288   0      
352    1136   
-448   112    
224    -128   
272    -736   
-224   16     
-112   -960   
-176   -352   
128    240    
208    -32    
-496   -208   
608    288    
-304   -160   
0      48     
256    544    
-144   800    
288    480    
-224   0      
816    -64    
-384   -768   
160    -128   
96     -352   
-624   -992   
-560   -1344  
144    -1328  
-224   -800   
48     -496   
-80    -96    
128    96     
96     128    
-112   -96    
64     0      
16     128    
-32    -112   
128    -336   
80     256    
16     432    
160    -96    
-96    -16    
80     -176   
-48    -80    
128    144    
-80    256    
144    128    
-160   -144   
144    -240   
224    176    
-80    1104   
-48    640    
-192   -368   
-208   32     
208    -128   
112    -1920  
-80    384    
128    -1936  
272    -192   
-192   -304   
96     -496   
16     -80    
112    -944   
-128   64     
128    -16    
336    -352   
-208   -192   
-128   -128   
96     -304   
80     544    
592    -1632  
-512   240    
896    112    
-608   496    
96     -128   
48     -464   
128    64     
-32    32     
-16    -160   
80     -464   
224    176    
-80    16     
128    -336   
0      -16    
-96    208    
-144   80     
336    80     
320    352    
-368   -96    
-480   -64    
336    -288   
80     -240   
-32    -96    
192    -160   
0      -368   
-64    -304   
-80    -2096  
224    -144   
-16    64     
-688   -1136  
-1008  624    
1392   -160   
-1088  -688   
48     1008   
896    560    
-864   832    
-112   1632   
304    656    
208    -544   
-160   -592   
-48    -32    
-224   -128   
224    304    
160    -352   
-96    112    
-224   -624   
272    784    
240    -256   
-96    256    
592    1392   
-304   -1008  
-1632  48     
1392   -448   
-848   -464   
-64    688    
592    1696   
-256   1040   
208    192    
-160   -2992  
-320   -240   
192    -64    
96     448    
128    224    
-144   16     
96     80     
-80    -400   
-176   -240   
384    -832   
-576   -112   
-192   -32    
64     64     
320    624    
-272   1104   
-368   -1248  
432    -576   
112    704    
-208   272    
-1152  -480   
992    -608   
-160   -192   
-384   240    
-240   -64    
-64    96     
-96    752    
1088   -432   
-48    1072   
-496   288    
112    16     
608    464    
528    208    
-624   -928   
80     304    
640    -64    
208    512    
-464   -224   
-784   0      
752    -128   
640    -1024  
-1040  -960   
928    -304   
1168   -240   
-1744  -832   
-128   -928   
32     -912   
496    -160   
-528   144    
-480   304    
160    48     
208    176    
-144   -96    
-224   96     
-288   464    
464    -160   
-32    48     
-240   -224   
16     176    
-176   -848   
288    -1136  
-160   -1648  
-64    -464   
112    208    
80     144    
-640   48     
656    208    
80     -96    
-96    -192   
-176   320    
224    -144   
-192   0      
144    -176   
80     304    
-896   176    
-176   208    
-704   -160   
-64    -336   
112    -688   
-816   -192   
368    32     
-352   -192   
240    -208   
-352   -320   
-208   0      
384    128    
-288   80     
128    32     
576    384    
-544   -16    
112    240    
240    -128   
208    976    
-496   256    
-400   -128   
624    176    
-304   -192   
-592   0      
-848   80     
64     -144   
272    -32    
-48    -80    
-208   -432   
-32    128    
-160   -192   
224    16     
192    32     
-992   384    
272    -16    
448    160    
-688   384    
208    -208   
-48    -80    
-16    432    
-48    144    
-496   -64    
80     64     
240    208    
208    288    
-384   -192   
48     112    
-256   -144   
1280   2240   
1536   176    
-1712  352    
304    256    
112    -32    
-16    -368   
-368   -160   
336    400    
-1056  112    
288    -64    
352    96     
32     -64    
-336   -32    
80     560    
304    -64    
-144   -224   
-48    464    
272    -80    
-288   112    
96     -48    
-208   976    
1056   -336   
-832   -416   
-688   176    
640    32     
48     480    
192    0      
-352   -48    
80     -16    
-96    224    
400    -64    
256    64     
-368   64     
-320   -64    
432    80     
96     -96    
-160   -80    
-80    368    
192    16     
32     80     
-544   -144   
-96    160    
-16    128    
32     176    
624    32     
-592   112    
32     0      
-16    128    
80     368    
-1456  -2304  
864    -688   
1376   -96    
-1264  352    
-112   -80    
304    160    
-304   -336   
-608   -288   
-192   -32    
464    -112   
-160   64     
-32    -80    
-32    64     
-192   -112   
176    96     
224    16     
-352   96     
32     -128   
128    32     
16     -128   
0      128    
-688   -656   
-16    384    
624    -768   
-80    192    
-448   96     
704    -48    
-544   240    
-208   -64    
400    192    
80     0      
80     -16    
-192   0      
-192   112    
144    272    
592    112    
-240   -64    
-240   -80    
-192   32     
112    128    
272    48     
-192   96     
368    -48    
-704   272    
800    32     
-432   -208   
-464   208    
160    -128   
80     -368   
272    64     
-112   128    
-112   464    
128    240    
-112   -48    
16     544    
576    -288   
-304   160    
288    208    
-16    64     
112    16     
64     0      
16     48     
-176   112    
176    208    
-160   64     
96     -112   
-528   224    
336    112    
48     32     
-240   864    
336    3920   
688    320    
-2048  -176   
368    -464   
2272   576    
-1344  128    
-400   -16    
656    224    
192    32     
-464   16     
-176   -32    
160    -144   
-352   320    
240    192    
96     272    
-320   160    
-16    48     
208    64     
-96    -544   
-304   -912   
96     -384   
16     224    
-16    48     
544    -160   
-560   64     
208    176    
-224   -256   
80     16     
80     -64    
-16    544    
240    -128   
-288   -320   
80     112    
32     192    
208    176    
-144   -192   
-96    -320   
224    -128   
80     32     
-96    208    
192    432    
-144   272    
-80    -256   
-160   0      
400    608    
-240   416    
432    1024   
464    1504   
-480   0      
64     -192   
-320   224    
336    1248   
1024   -384   
-640   224    
464    208    
-304   32     
496    1008   
-624   -656   
32     -1088  
160    1104   
-240   64     
16     -192   
96     -160   
-176   64     
48     32     
64     -112   
-80    208    
-112   192    
0      -192   
-64    144    
-16    -272   
-80    128    
112    96     
64     128    
144    176    
-112   224    
-624   -48    
592    256    
112    -112   
-208   112    
-288   48     
240    816    
528    96     
-576   -288   
80     112    
-48    -416   
-160   128    
224    544    
64     432    
-448   -64    
224    -16    
16     80     
80     288    
176    -96    
-384   256    
32     0      
192    400    
192    224    
-176   -160   
-128   -32    
992    -416   
-1472  528    
496    -336   
416    -64    
-144   32     
32     368    
-400   224    
304    320    
-352   -304   
368    0      
80     -16    
-32    -32    
-240   240    
32     48     
192    0      
128    -128   
-144   -176   
-32    -800   
224    0      
336    -832   
32     160    
-400   304    
-64    48     
496    -416   
64     64     
-224   -48    
-208   -112   
16     48     
352    -128   
320    160    
-1648  608    
2624   -432   
-384   -752   
-784   -544   
624    -944   
144    -16    
-432   1648   
144    -192   
-480   -1696  
240    64     
384    272    
-256   -272   
-128   256    
256    272    
112    144    
-16    -272   
-32    144    
112    -1088  
48     -736   
0      -464   
512    336    
-2224  320    
704    592    
48     16     
-128   -368   
208    -272   
128    128    
-528   416    
-80    208    
176    -112   
208    -480   
-112   128    
-352   176    
624    48     
-368   -544   
-112   192    
192    -144   
16     -1008  
704    112    
-304   80     
-208   -384   
-304   -128   
208    -688   
-560   1984   
1568   -176   
512    -176   
-880   -208   
880    528    
336    96     
-272   -464   
192    -848   
-80    -32    
128    -96    
-336   160    
-784   -896   
384    -336   
272    480    
-832   -224   
384    -560   
896    -624   
-192   64     
-144   32     
96     176    
272    -96    
176    432    
-896   32     
128    48     
368    -96    
-240   -832   
-784   -816   
1328   1152   
944    -368   
-1920  -656   
288    -112   
544    -208   
-336   -48    
-384   -2000  
-528   240    
544    -240   
80     304    
-240   -208   
-208   304    
-16    -304   
224    0      
320    -80    
-336   16     
-1296  -16    
144    -64    
112    1056   
416    288    
-496   -112   
240    -880   
-192   -336   
-128   0      
400    144    
-32    64     
-144   144    
224    -80    
128    -96    
-560   -80    
304    -112   
-400   -96    
16     -48    
256    -96    
-32    -240   
32     224    
304    -464   
-16    -48    
144    0      
-32    16     
336    32     
-96    -64    
-304   -96    
-96    -144   
96     -32    
320    384    
-592   -16    
96     16     
272    -48    
-32    -80    
-48    -176   
656    -32    
576    -32    
-656   -1696  
112    208    
320    128    
-224   208    
32     176    
32     64     
-16    -80    
32     -16    
-96    -112   
112    -16    
-384   128    
208    -96    
0      -272   
-144   -416   
-96    -48    
480    -736   
-160   336    
-48    -96    
224    96     
-144   -48    
144    160    
-176   480    
-16    -544   
-176   32     
-80    128    
128    -80    
160    64     
-944   -2096  
208    -608   
928    -80    
-832   -528   
384    416    
240    -176   
-368   352    
-400   -896   
128    -160   
352    192    
-192   -160   
-208   160    
128    -16    
-96    -272   
80     -208   
-112   176    
176    -592   
96     -96    
176    -208   
-16    80     
-288   -1376  
-320   96     
224    160    
-192   224    
352    96     
-176   -608   
-400   0      
304    352    
-336   64     
240    -32    
48     48     
-32    -304   
-128   176    
-16    -176   
-800   32     
0      112    
-592   176    
80     336    
320    32     
-224   -128   
16     -96    
-16    128    
-128   -96    
-16    112    
-448   -48    
496    112    
-656   32     
176    -16    
-192   -192   
112    -464   
592    -240   
-1856  416    
1312   368    
80     208    
-1472  -128   
-272   -256   
400    80     
80     -432   
-320   192    
320    -112   
-256   160    
-320   -240   
192    208    
-128   272    
656    256    
-464   160    
-16    -336   
-128   -272   
368    -464   
-304   32     
16     944    
-272   -432   
-1168  -176   
1184   -544   
0      -112   
-320   368    
32     -192   
32     304    
144    -48    
-176   48     
-192   32     
-96    0      
272    -16    
64     352    
-272   -80    
-432   128    
384    192    
-992   -144   
80     -224   
-368   -160   
128    144    
-112   -96    
-448   -272   
-176   -144   
752    336    
-48    304    
-16    -144   
-288   176    
-128   64     
-144   -160   
-272   -448   
944    -224   
-1616  -128   
-192   -48    
800    96     
-736   480    
-64    -288   
288    -48    
-240   -48    
-144   160    
-64    16     
224    192    
32     -64    
-160   208    
384    384    
-736   336    
-160   32     
352    32     
-400   -1072  
-1296  -1712  
1744   -1952  
-80    320    
-1248  -528   
-384   560    
672    0      
-496   -672   
96     -32    
112    -128   
-416   288    
96     0      
368    96     
-272   -128   
-288   512    
-96    96     
-176   -176   
32     400    
176    -32    
-256   32     
128    640    
80     752    
96     272    
-48    -160   
-544   -480   
256    -304   
-256   192    
240    -112   
-240   1232   
-336   736    
272    336    
-480   -640   
-128   -32    
128    112    
-240   -112   
272    -272   
-144   64     
48     -320   
0      144    
224    816    
64     640    
96     64     
128    32     
-32    304    
-96    192    
128    112    
320    288    
32     1728   
512    272    
-144   -336   
-128   -256   
144    208    
464    1152   
-656   0      
-560   160    
928    32     
-160   704    
-272   768    
352    1312   
-224   736    
80     -1184  
256    -1008  
-304   208    
-16    160    
-112   -144   
128    96     
192    224    
-336   240    
96     336    
352    -128   
-288   -64    
-96    176    
-160   112    
16     176    
-32    16     
0      144    
-160   304    
240    128    
-320   -224   
-32    -32    
416    64     
-112   32     
256    560    
-560   592    
352    -176   
-16    192    
-176   80     
-128   16     
576    400    
-368   816    
32     48     
384    -432   
-224   256    
64     160    
112    64     
-304   160    
144    96     
-16    0      
-192   -288   
112    48     
96     0      
0      96     
-848   592    
944    -64    
-960   -224   
64     16     
256    448    
64     672    
-320   176    
-160   464    
80     480    
-80    96     
112    -112   
32     16     
144    240    
-16    176    
-80    544    
0      240    
272    -672   
-384   -576   
-80    96     
160    560    
256    400    
160    -112   
-80    -144   
-320   -176   
240    80     
400    176    
-304   96     
-128   272    
192    -128   
1488   1360   
-1104  1792   
-880   464    
944    -208   
432    -624   
-992   -288   
1056   -528   
-208   -192   
-368   208    
464    -128   
96     128    
-208   32     
112    144    
160    288    
-32    240    
-160   176    
256    208    
-32    48     
64     144    
-32    -384   
-32    144    
-400   352    
2336   -64    
-1024  -192   
-720   -720   
480    -272   
160    112    
-224   192    
144    80     
176    480    
-720   320    
-16    -240   
544    -80    
-128   0      
-352   -336   
-192   240    
576    -16    
-64    -160   
-496   288    
304    224    
16     128    
80     48     
-368   -368   
512    80     
16     0      
-208   -704   
-256   336    
32     -1040  
-416   -160   
800    48     
-96    272    
32     112    
112    0      
-80    -160   
208    368    
-352   -576   
-144   -272   
-96    592    
240    96     
144    48     
-16    112    
-64    160    
96     32     
144    128    
-176   -304   
368    176    
112    -416   
144    112    
-144   -1056  
-608   -1424  
-1072  -912   
672    592    
-560   80     
-240   -304   
1232   -32    
272    -384   
-832   432    
208    -96    
-32    144    
592    -688   
-432   32     
-432   -688   
96     256    
400    -832   
-240   112    
-48    96     
-208   144    
128    112    
-112   224    
656    176    
-800   192    
16     -128   
912    -112   
48     0      
-544   -208   
352    144    
192    -272   
0      112    
144    96     
-144   112    
-320   160    
496    48     
-144   16     
48     -32    
288    0      
0      -336   
-400   -112   
224    -32    
-432   80     
224    0      
16     128    
144    -320   
-144   48     
-80    -464   
448    64     
-32    224    
-80    240    
32     48     
144    352    
-160   32     
-48    -80    
-64    -240   
-112   32     
624    848    
528    80     
-480   336    
64     -96    
512    64     
0      -144   
-256   0      
240    -16    
16     -2016  
-128   -112   
-240   -32    
96     -400   
-160   160    
160    -384   
208    -96    
96     -1856  
-128   -272   
-48    112    
336    320    
-272   -736   
112    320    
32     -352   
224    -272   
-656   688    
208    -144   
80     -752   
-160   -416   
-592   -2992  
-672   208    
1728   -128   
-784   -2256  
320    176    
16     -224   
-240   80     
-48    -592   
80     -128   
320    -176   
-464   496    
128    -304   
80     96     
-112   -240   
-64    -160   
48     304    
96     -144   
160    -32    
176    -160   
-192   32     
720    880    
-1440  272    
576    -432   
624    -208   
-336   -352   
176    224    
-272   -32    
16     -608   
176    -160   
64     -48    
-944   112    
240    256    
112    -48    
64     -80    
-224   256    
-80    -352   
288    -144   
128    -128   
16     -16    
-48    144    
0      144    
0      -288   
-80    -160   
304    -192   
-560   -160   
304    208    
144    -48    
-208   0      
-64    -496   
1168   1200   
-560   192    
-992   608    
1392   -1456  
-1200  -416   
-96    176    
944    352    
-224   32     
-32    240    
-208   -48    
144    96     
-272   -80    
-48    16     
-1120  -160   
-272   224    
512    16     
96     128    
-272   320    
384    -80    
-112   0      
64     -112   
608    656    
-1984  -48    
-96    -80    
896    704    
32     176    
-496   -48    
0      -176   
-96    -16    
160    -224   
112    32     
-112   -80    
160    176    
16     -544   
-160   48     
-96    16     
16     192    
-16    128    
96     176    
-560   -192   
-256   -96    
32     32     
32     -80    
256    128    
368    -80    
-112   -80    
144    -848   
640    256    
-384   -192   
-464   -16    
832    -64    
-64    112    
48     -48    
32     64     
464    -224   
-576   336    
544    -672   
-688   -32    
-32    288    
288    -176   
160    0      
-48    -112   
-224   160    
-16    -112   
432    112    
48     -864   
-768   96     
-128   16     
112    864    
368    1072   
-848   -1712  
992    -2032  
800    1264   
-512   320    
-272   -576   
656    528    
256    -176   
0      768    
-400   -144   
-560   -16    
80     -384   
-112   704    
-224   112    
-496   -304   
128    0      
416    -640   
-304   -448   
-32    16     
16     0      
-320   -208   
-112   -144   
-16    0      
-32    48     
-608   -240   
-112   -336   
-112   -208   
-368   -48    
256    -64    
-384   -112   
64     -224   
-624   -400   
-128   128    
-80    112    
-16    -96    
-416   -304   
432    32     
-512   -368   
240    -720   
192    736    
112    1008   
-64    528    
-224   -144   
144    224    
-64    -48    
224    384    
-800   160    
-352   -112   
576    272    
192    -288   
-144   16     
-16    192    
208    -384   
-1104  864    
560    528    
144    80     
-368   -1488  
-112   -576   
-32    -1472  
-544   -640   
272    1104   
-16    -336   
128    96     
-1296  64     
-112   112    
208    -128   
80     480    
-80    128    
-96    432    
176    -128   
-144   192    
16     144    
-144   -144   
80     -272   
-112   -144   
48     224    
160    176    
-688   192    
-208   -176   
384    96     
224    -128   
-512   208    
-640   -160   
1136   -416   
-816   832    
-96    16     
-16    -400   
-64    -592   
-304   -112   
-32    -304   
-192   -432   
-240   -304   
176    0      
80     -80    
-112   96     
-352   -64    
-16    64     
96     -288   
112    -128   
-80    -64    
-256   -16    
-96    -368   
336    -1008  
304    -64    
-240   -240   
-144   -400   
-208   -48    
208    -880   
112    352    
-240   608    
-816   32     
48     -1024  
208    272    
160    992    
-32    512    
-64    -608   
-64    432    
288    16     
-80    304    
-240   128    
240    64     
128    -48    
-16    320    
-192   -160   
-80    80     
-144   192    
128    240    
-432   80     
48     32     
144    16     
96     144    
384    -928   
-1904  -992   
1152   -320   
-752   -240   
464    496    
656    -64    
-1232  128    
320    -16    
224    512    
144    -144   
-288   160    
80     -16    
128    96     
64     -272   
-656   0      
464    -208   
-128   240    
-144   128    
48     96     
-16    32     
-176   0      
-32    -944   
-560   416    
976    -128   
-1104  -272   
560    320    
848    -256   
-640   208    
-480   80     
208    0      
192    80     
176    128    
-80    -96    
-288   80     
-16    0      
400    32     
-32    96     
-240   224    
-80    -224   
160    -240   
192    112    
-64    192    
-464   -624   
-160   -176   
288    544    
-768   -48    
416    -416   
528    -272   
-16    624    
-16    48     
-160   128    
512    -32    
16     -176   
-16    160    
-528   128    
-432   -448   
320    -496   
368    -64    
-672   -128   
32     64     
192    -32    
-96    32     
176    32     
-384   80     
-224   64     
-16    80     
928    160    
-528   288    
-128   -48    
1280   1280   
-2656  -160   
-96    512    
1104   -336   
-1872  -528   
960    0      
1248   176    
-720   256    
-432   -256   
544    496    
-336   -64    
-64    32     
96     -32    
-224   208    
64     -16    
-112   224    
464    -96    
-352   112    
-192   0      
368    96     
592    -416   
-464   480    
512    48     
-640   144    
-80    192    
768    208    
-736   -176   
320    -400   
-96    -64    
-208   464    
272    -48    
16     64     
80     0      
80     32     
160    -128   
-480   192    
704    16     
-288   16     
96     -96    
160    -48    
160    192    
-304   64     
112    -160   
448    -32    
-80    -2096  
-432   96     
368    128    
-96    560    
640    336    
-320   64     
-272   -32    
400    64     
240    848    
-208   16     
-560   400    
512    256    
-288   192    
64     -112   
-48    -304   
-112   -400   
176    -64    
192    -32    
96     64     
-272   32     
256    32     
-128   48     
-16    80     
304    64     
-64    -160   
-352   80     
304    304    
256    48     
-160   -128   
32     208    
128    -48    
64     48     
-272   -128   
-48    448    
160    -192   
-48    -688   
-208   -192   
-160   -352   
368    -2304  
-256   368    
880    -496   
-880   48     
112    224    
560    -176   
64     208    
-240   -800   
-336   272    
352    16     
64     176    
240    -1120  
-256   272    
128    64     
176    368    
-64    -320   
-32    -32    
160    112    
-160   64     
128    192    
-384   32     
1296   -368   
-640   464    
-576   432    
496    16     
-80    32     
96     -832   
-144   -32    
32     -352   
208    128    
224    48     
-16    32     
-288   144    
208    80     
16     128    
160    -576   
-48    112    
112    -400   
-48    112    
-96    32     
672    416    
-320   416    
-64    320    
-80    -64    
272    368    
224    160    
-208   32     
0      336    
320    352    
1392   1296   
-2944  -32    
-736   144    
1824   -480   
-560   48     
-48    0      
-272   -336   
-192   -976   
272    -256   
-224   -224   
256    112    
-144   -32    
16     -320   
272    -176   
-496   -224   
144    288    
112    128    
-272   368    
160    272    
32     192    
-48    -64    
0      640    
2416   -16    
-1584  -128   
224    96     
592    -48    
-624   864    
832    -336   
-288   -288   
-304   -80    
64     -144   
144    -64    
304    -2544  
-176   -176   
-128   352    
-64    288    
192    -288   
144    672    
80     208    
-112   208    
64     -592   
304    -80    
-128   48     
-64    1648   
1104   864    
-128   336    
-432   176    
496    -416   
-800   -224   
176    -992   
304    -272   
208    160    
-128   336    
-176   -64    
-224   -528   
-144   -256   
-288   256    
-560   -688   
208    -432   
304    -96    
0      -224   
-16    -256   
80     -64    
-112   384    
-16    -128   
-32    -320   
-656   -384   
560    464    
352    128    
-432   64     
272    144    
752    -704   
288    -48    
352    -800   
-1120  -240   
576    -112   
192    1056   
224    1408   
-32    -784   
-160   112    
48     0      
-192   -512   
416    336    
208    -272   
-416   -224   
-384   -496   
480    352    
480    432    
-96    288    
-352   816    
-32    128    
112    -464   
112    -496   
128    288    
-368   -752   
-240   -176   
672    -352   
-144   576    
-176   -2160  
-16    -320   
64     80     
144    -112   
-448   -224   
48     -416   
128    -48    
192    496    
256    -496   
144    -432   
-256   336    
160    224    
112    704    
32     -1072  
-224   -384   
-112   208    
352    400    
-48    32     
624    -240   
-544   128    
416    832    
-400   256    
160    -128   
-560   -96    
1072   -464   
-144   -592   
-160   -288   
416    -160   
-176   -432   
-64    2032   
640    1792   
-112   864    
-560   -384   
128    -240   
-48    -640   
-304   96     
-32    -512   
336    -432   
-32    -400   
-96    -16    
-240   608    
96     -448   
-80    -272   
304    208    
-176   384    
-192   208    
96     -80    
-48    240    
144    960    
0      1136   
128    144    
-320   -80    
-96    -336   
352    -1440  
-112   -224   
608    304    
416    128    
448    -336   
-544   -544   
-144   16     
-384   -352   
-112   224    
160    -384   
80     -16    
-96    160    
-144   176    
128    -48    
160    -208   
-208   -384   
-1072  -176   
128    336    
0      -16    
-16    592    
-448   -352   
208    320    
-160   1136   
-336   -48    
32     112    
-144   512    
208    352    
-816   -272   
16     -208   
-16    -160   
-48    144    
96     -224   
96     -48    
-368   160    
784    1008   
-448   720    
-304   -672   
64     -112   
16     -112   
-144   128    
-176   64     
288    -64    
-768   112    
-320   -64    
-96    112    
384    -32    
16     -48    
-176   112    
-528   -176   
-336   960    
2496   816    
-816   176    
-1184  -400   
1152   144    
320    -288   
-928   -368   
336    240    
-96    -208   
-400   192    
-320   -112   
-32    160    
-224   -320   
-176   48     
384    -192   
32     160    
176    64     
-416   0      
-64    -16    
112    0      
-208   112    
-640   -48    
1584   -400   
-416   64     
-432   32     
-528   -128   
368    208    
16     -320   
-192   160    
240    48     
-336   80     
48     128    
272    32     
-304   -96    
-240   160    
288    -16    
-96    224    
192    -80    
-192   304    
432    224    
-544   -208   
400    1008   
-448   -304   
-1072  -272   
816    208    
480    192    
-864   -208   
-272   -528   
592    -400   
80     -16    
-432   48     
-256   144    
96     0      
592    240    
-176   480    
-1248  224    
-16    128    
576    -224   
416    64     
-576   144    
-368   128    
-32    -208   
448    -32    
-256   96     
-448   224    
496    -400   
-176   320    
752    -176   
-608   32     
-1600  -528   
3296   -2400  
-656   496    
-720   -784   
480    224    
-224   480    
-528   -272   
400    240    
672    272    
-192   0      
-832   48     
416    208    
96     -16    
80     16     
-480   0      
48     16     
-512   64     
720    176    
-368   0      
-704   176    
1120   272    
-736   208    
304    160    
-304   -240   
-416   144    
688    -16    
-496   240    
-80    32     
320    112    
16     -304   
-192   224    
-16    -272   
-128   224    
304    112    
16     432    
-416   -64    
192    16     
288    -96    
-352   16     
272    0      
0      112    
64     128    
-80    16     
112    224    
-224   112    
-64    160    
48     0      
16     -16    
-176   -512   
-560   -560   
336    -272   
48     -288   
368    -224   
-272   64     
400    48     
192    112    
-272   -128   
32     -64    
32     160    
-16    240    
384    160    
-208   112    
-128   96     
-48    -128   
-80    -144   
128    64     
160    0      
-192   464    
480    656    
-352   544    
16     240    
0      176    
0      -144   
16     144    
-96    -64    
-16    -192   
-16    0      
144    368    
-288   624    
16     304    
96     208    
-672   -800   
1504   -848   
-864   -560   
-880   272    
1440   1136   
240    512    
-816   112    
96     -368   
368    -144   
0      -304   
-240   -96    
144    -336   
16     368    
112    144    
32     208    
-16    -464   
-80    -16    
64     144    
16     48     
32     96     
416    -80    
-864   1168   
976    -176   
-448   -320   
128    -1072  
-160   320    
-32    112    
-64    -352   
416    96     
-96    224    
-48    208    
-32    96     
80     416    
64     -192   
-16    -16    
16     192    
-16    112    
240    -32    
-144   -176   
0      -528   
-208   368    
256    -1440  
-208   -144   
-112   240    
144    128    
-96    -256   
160    16     
0      368    
48     48     
-64    192    
0      1168   
2576   -544   
-1600  64     
144    -80    
928    96     
-128   80     
-160   128    
464    -848   
-320   -480   
64     768    
208    112    
208    -32    
-288   16     
16     288    
144    80     
64     128    
0      -176   
-256   -160   
80     240    
96     -336   
320    -976   
-2224  208    
2000   480    
-160   624    
-816   128    
976    -656   
-64    -608   
-560   -272   
160    -16    
352    -144   
-144   208    
-144   32     
176    -240   
144    -256   
32     -384   
112    160    
-432   -560   
-80    -720   
608    -2192  
-384   -192   
-160   -320   
144    656    
-160   -112   
192    944    
224    -912   
-704   -1040  
608    928    
528    48     
-320   96     
256    528    
-160   1136   
-112   -384   
-320   112    
528    -480   
-496   -224   
208    -64    
656    -16    
-448   1696   
992    400    
-320   -240   
-96    368    
192    160    
288    608    
400    80     
-176   -544   
-176   224    
-80    -912   
304    -432   
-64    -160   
-368   208    
560    1264   
1808   864    
-1408  -288   
-832   -416   
704    -240   
256    -224   
-352   -176   
-256   224    
176    624    
224    -32    
160    176    
-80    240    
-64    -64    
64     -416   
544    -176   
-192   128    
-80    192    
416    272    
0      -288   
-112   -480   
32     -112   
240    368    
-624   -752   
-256   352    
864    -176   
-800   96     
640    448    
-816   -1152  
-32    -1936  
16     -528   
176    336    
96     432    
-160   112    
112    -384   
-320   -112   
192    -192   
-288   -368   
128    816    
32     -1488  
-32    336    
592    224    
-240   -448   
16     -176   
128    -160   
96     -272   
256    -368   
-464   368    
176    -64    
-144   -384   
320    -32    
144    1056   
-464   352    
-240   560    
624    1792   
1904   48     
-1216  128    
288    -1200  
112    288    
80     448    
256    432    
112    288    
-80    -288   
16     688    
400    -288   
48     -720   
-304   -384   
128    -128   
192    -160   
-240   -528   
256    -1168  
96     -1184  
-80    -208   
-208   -1600  
48     48     
288    288    
-128   688    
-160   64     
-48    -224   
16     -384   
128    -208   
-160   -1488  
-1584  1312   
1184   -448   
-368   -384   
224    0      
48     1120   
128    640    
-48    976    
384    -224   
-80    -400   
32     -480   
-48    -160   
112    128    
-32    512    
16     -32    
-112   -368   
192    400    
-528   -16    
64     64     
48     -208   
608    -192   
-848   656    
608    -624   
-512   -160   
64     -672   
224    -176   
-112   160    
48     48     
-144   256    
512    -320   
-416   -112   
48     -80    
-80    384    
320    48     
-816   -176   
-80    -128   
-32    -64    
112    -112   
32     80     
112    -1008  
-272   48     
-80    80     
240    -176   
-352   112    
320    -288   
-80    144    
-80    -224   
-176   -16    
112    0      
-1200  -1408  
1888   1296   
1920   -320   
-1936  -480   
-96    -464   
896    -528   
96     80     
-688   144    
288    -160   
32     128    
-352   -112   
240    128    
-80    -64    
-64    -96    
192    -160   
-320   -144   
48     -16    
48     48     
-176   64     
176    -64    
32     -288   
-176   -512   
976    736    
32     -32    
-544   112    
-560   0      
512    -432   
-416   -304   
560    320    
208    -224   
-192   208    
-480   48     
-224   160    
512    -416   
-80    64     
32     -352   
192    48     
-128   304    
-256   0      
-576   -96    
960    0      
-128   -80    
-480   -736   
-704   288    
800    -112   
-496   48     
720    -240   
208    944    
-1920  -48    
320    80     
-496   32     
-32    272    
-368   -368   
-512   -224   
-304   -16    
-384   -224   
-480   -832   
0      -352   
304    560    
-736   16     
80     -160   
-128   -32    
160    32     
-240   -16    
-112   160    
208    208    
-176   80     
256    32     
-144   -112   
-352   16     
-1184  -2688  
2592   -2624  
-1088  416    
-1072  288    
16     96     
32     48     
-192   -128   
800    704    
-784   -48    
80     144    
-16    -48    
-80    32     
0      -48    
-80    144    
128    -112   
-448   32     
80     -16    
-640   -48    
-336   -64    
-144   -416   
240    64     
-240   128    
-64    48     
464    -256   
112    -32    
-496   80     
16     128    
-16    96     
-32    -112   
-48    -208   
-256   64     
-16    0      
64     304    
-336   -112   
-208   -256   
96     -288   
-224   -400   
-160   48     
-64    -112   
96     0      
-48    96     
-128   192    
80     208    
-144   320    
256    464    
-64    256    
-16    192    
0      32     
-64    -64    
96     -112   
-96    432    
-80    432    
448    848    
288    -144   
-336   -608   
-192   -1440  
-464   -864   
368    -160   
-144   160    
-32    48     
112    288    
-224   368    
-272   192    
656    176    
-1008  16     
-144   400    
128    -496   
224    -224   
-272   -384   
80     224    
96     224    
-96    128    
-80    0      
-16    -48    
176    256    
-16    288    
-48    352    
-240   752    
144    -144   
-192   -432   
64     -48    
64     -48    
112    -1728  
-240   96     
752    240    
-512   224    
64     -192   
256    208    
64     -304   
-16    -64    
16     160    
-80    448    
-80    0      
224    96     
-112   160    
16     320    
80     272    
192    -64    
-64    496    
-80    0      
160    336    
-368   -272   
640    -224   
-256   240    
-208   -128   
16     -16    
-64    400    
64     368    
32     944    
-96    592    
80     288    
-304   -48    
128    96     
-128   64     
272    -96    
-160   176    
-192   16     
-48    0      
368    -64    
-32    -16    
-112   0      
-128   80     
192    48     
48     272    
-160   -160   
-112   -224   
272    -208   
176    0      
16     144    
-128   128    
-288   144    
1520   224    
-2576  592    
112    176    
688    96     
-992   -368   
-256   -48    
-80    -192   
-224   1008   
240    -1424  
256    144    
-80    720    
-32    -64    
80     128    
-128   32     
-16    -32    
-16    496    
16     -176   
160    240    
128    -80    
-80    64     
-384   -736   
1456   576    
-672   -224   
-464   -128   
48     48     
-208   864    
416    336    
32     1392   
448    1824   
-304   736    
320    0      
0      -432   
-320   -416   
336    -688   
-368   -560   
0      160    
544    16     
-528   -1008  
-224   -816   
80     -720   
64     32     
-32    -192   
208    96     
0      672    
-64    576    
-704   -48    
592    32     
880    -240   
-512   0      
240    16     
336    256    
-304   144    
-32    -1376  
224    -96    
304    -48    
-80    1376   
-176   304    
-256   -272   
160    -752   
272    -240   
96     16     
112    96     
-320   -112   
352    -512   
-288   -32    
192    416    
416    -80    
-96    -48    
-16    -240   
-80    64     
1504   768    
-1952  -96    
672    -64    
560    -64    
256    832    
-720   960    
16     96     
288    640    
0      -16    
-304   -928   
-224   -64    
128    192    
208    -128   
128    -16    
-224   -1136  
-80    224    
384    144    
400    112    
-144   -320   
-528   32     
432    -144   
80     -16    
-64    -336   
864    1008   
-416   400    
-256   1136   
864    32     
-176   304    
-288   336    
-80    -432   
640    416    
-352   80     
-112   32     
384    128    
304    160    
-144   -224   
-448   -48    
80     -48    
288    112    
32     416    
-656   -64    
112    128    
384    -368   
176    336    
80     -208   
-320   128    
496    -1456  
-400   32     
96     64     
80     -80    
-16    48     
-240   -432   
560    -880   
448    -128   
-256   -144   
-304   512    
288    880    
144    336    
-400   176    
-80    -240   
192    -288   
-368   -272   
304    -144   
272    -512   
-272   112    
-80    -48    
192    -64    
-80    464    
-160   320    
240    -272   
16     -448   
-320   144    
352    -240   
-80    64     
48     -288   
32     32     
-384   -720   
448    352    
224    64     
-304   32     
-672   -960   
1824   512    
-288   176    
-512   160    
-240   176    
144    576    
480    272    
-32    -256   
32     688    
32     -592   
-128   240    
496    -128   
-112   16     
-32    -192   
-80    160    
32     112    
400    -32    
32     160    
-64    -304   
-96    144    
-16    256    
448    1680   
944    -432   
-1152  -208   
464    -192   
256    0      
48     592    
272    224    
16     -880   
-320   -64    
-176   -16    
544    256    
256    32     
-464   80     
432    -1136  
-320   96     
160    -480   
16     32     
320    -160   
-464   64     
368    32     
-128   -32    
80     64     
-96    16     
-208   -400   
512    80     
-160   -224   
208    -128   
0      -144   
-64    -368   
16     768    
192    -224   
-944   96     
320    -864   
400    -160   
-272   192    
-48    -304   
176    -480   
224    96     
-208   -272   
304    112    
48     -80    
-80    -208   
96     -304   
-16    -512   
144    -32    
-96    32     
112    -32    
320    -768   
-304   -96    
16     0      
-384   384    
1424   -576   
-1120  -64    
400    448    
560    -176   
-1056  96     
448    -464   
96     176    
-16    -208   
160    -160   
176    -64    
-16    -112   
-128   -336   
32     -128   
240    -560   
160    80     
-272   -208   
48     112    
80     16     
16     64     
-16    -160   
656    -32    
-768   192    
1232   -80    
96     48     
-464   -208   
-304   320    
-448   -16    
368    -208   
-32    -96    
80     -32    
0      -560   
-208   208    
480    128    
384    -64    
48     -32    
128    688    
-400   -160   
16     -16    
208    -64    
-208   -32    
-96    -48    
112    80     
112    -16    
304    -192   
-224   -16    
-240   -1360  
176    80     
-576   -1504  
352    400    
1008   -240   
-1840  -288   
-496   -16    
1488   -304   
-256   -32    
-672   272    
-608   272    
816    -192   
-144   -80    
-272   -528   
64     -64    
-144   -880   
224    176    
336    96     
-496   160    
-272   0      
304    -48    
608    256    
-1024  192    
-48    -432   
112    -496   
-288   -352   
784    -304   
-176   48     
-1024  -80    
656    -16    
320    208    
-240   80     
-448   -432   
400    -304   
256    -48    
-976   -144   
544    -16    
32     -304   
-32    -592   
-256   -384   
16     -368   
-192   -224   
272    96     
32     -224   
-416   -208   
112    -1136  
48     -672   
-288   -256   
96     -160   
-288   -80    
368    -272   
-192   -512   
-560   -496   
-240   16     
-16    -448   
896    -48    
-192   -272   
-288   -320   
48     -208   
432    -48    
-1056  -800   
-272   -688   
16     -224   
-160   960    
-32    320    
-16    -240   
16     80     
0      -384   
0      -48    
144    288    
144    -352   
-96    -160   
-176   -160   
-304   -80    
80     64     
160    -16    
0      240    
-176   384    
-112   144    
208    704    
-256   1168   
288    0      
224    160    
-48    128    
-704   784    
624    -192   
-544   -272   
-480   208    
64     -144   
96     -32    
48     -304   
192    -96    
-16    -144   
-144   128    
32     32     
-80    112    
-272   -32    
-944   96     
240    -128   
-32    -256   
-128   96     
-160   64     
-48    48     
-336   -512   
896    -560   
-32    496    
-160   48     
-656   672    
464    -272   
48     -32    
-64    352    
-128   -96    
-560   -320   
112    -272   
384    144    
64     256    
-304   0      
-16    -48    
80     128    
-144   -112   
48     -176   
16     176    
-16    96     
-256   272    
224    64     
-16    -80    
-256   112    
80     -272   
-432   -352   
-912   -288   
-80    448    
192    224    
48     432    
1296   1600   
-1024  608    
-1984  -480   
2368   -320   
-688   352    
-1040  544    
160    -192   
-64    1200   
256    -1728  
64     128    
-240   176    
-528   16     
208    224    
160    -352   
-336   32     
-192   64     
160    -160   
208    -416   
-96    144    
-208   192    
-224   -528   
1248   1072   
400    -112   
-1456  240    
800    -592   
64     464    
-768   1056   
176    688    
640    -944   
-784   -448   
272    224    
240    288    
-256   192    
96     432    
352    16     
-272   16     
128    -64    
-384   -208   
240    -368   
192    -48    
-432   192    
48     48     
480    256    
-208   112    
-1152  -1616  
192    -720   
480    416    
-96    704    
528    496    
240    368    
-944   592    
-80    -160   
64     -80    
400    -320   
-464   -288   
-320   -544   
1136   -784   
80     -304   
368    416    
-96    16     
-208   -32    
528    112    
224    304    
-656   320    
-112   -96    
272    -16    
480    -64    
-32    128    
0      848    
-448   416    
512    -2448  
-1600  -1312  
1088   560    
320    288    
-416   -528   
448    -528   
-496   -288   
448    368    
176    -368   
-208   -224   
-352   -512   
256    240    
128    32     
304    192    
-144   -48    
-576   96     
528    16     
-112   32     
368    -256   
-1008  -1280  
160    -992   
336    -384   
-80    256    
128    32     
-96    -32    
-224   576    
16     384    
-208   192    
560    -480   
-496   -96    
336    16     
-240   -272   
208    -272   
144    64     
-32    144    
-64    288    
176    48     
-48    -48    
-64    -48    
-112   96     
16     -64    
-16    -32    
304    -80    
-16    208    
144    32     
128    208    
0      80     
96     -48    
-160   32     
96     240    
464    208    
-224   240    
208    832    
752    96     
-320   -192   
-160   288    
544    224    
-224   -32    
32     48     
-576   208    
368    96     
272    -16    
-176   64     
-144   176    
-96    80     
144    32     
0      224    
160    -96    
-144   -16    
-304   320    
400    -208   
-64    0      
-128   -32    
-176   112    
64     32     
192    -560   
-32    192    
-16    128    
-64    144    
64     128    
-240   -128   
1440   2208   
1392   352    
-1920  64     
1040   336    
144    144    
-336   -96    
-16    -224   
208    48     
-448   272    
144    -192   
288    96     
-16    240    
-288   192    
240    816    
368    -48    
-544   -112   
240    48     
0      64     
0      80     
32     -64    
-224   -1152  
-240   -160   
928    464    
-1184  256    
256    -224   
624    -32    
-624   -2112  
-240   -256   
256    144    
224    -128   
-320   144    
160    -48    
80     16     
16     112    
304    -80    
-448   -128   
128    0      
48     -32    
16     176    
-16    -144   
48     112    
160    -400   
-128   32     
256    112    
-576   -64    
528    240    
-16    64     
-272   -96    
240    48     
992    -464   
-1712  240    
-112   -384   
592    0      
32     -48    
-176   -128   
-80    112    
64     -352   
0      32     
192    -288   
32     160    
-160   -448   
80     192    
128    64     
-112   176    
-192   272    
256    32     
-32    160    
-112   0      
-64    96     
-64    -176   
416    960    
-32    -512   
-1248  80     
1344   -1120  
-464   128    
-304   -272   
320    32     
-384   -256   
704    -224   
16     256    
-352   48     
80     144    
160    -176   
48     -32    
-96    0      
0      48     
128    112    
32     608    
-448   -368   
48     -144   
224    80     
-144   256    
352    256    
-400   -48    
-496   144    
544    -224   
464    384    
-32    -320   
-240   -32    
176    16     
-144   96     
-224   -288   
352    160    
-48    80     
-576   192    
160    0      
576    -32    
-112   -368   
-608   160    
688    64     
-16    -224   
-384   144    
80     -224   
176    256    
192    -320   
0      -32    
240    -208   
80     192    
-160   -640   
-464   336    
1600   1984   
976    -672   
-2688  96     
288    -528   
1440   -224   
-512   224    
-320   -80    
160    192    
-80    -1424  
544    64     
-48    32     
-368   -64    
-16    64     
288    48     
368    -640   
-288   32     
0      112    
256    -32    
-160   720    
144    544    
-192   736    
-48    -1024  
496    -368   
-368   -576   
192    192    
-368   -368   
16     -128   
96     144    
112    576    
48     368    
-592   -384   
176    -368   
208    304    
96     48     
-112   -432   
-240   -16    
80     -528   
-544   192    
336    352    
-112   400    
144    -112   
-96    -64    
-16    208    
16     -176   
-640   -768   
448    -1056  
64     -336   
-64    1440   
-208   -96    
-160   -480   
336    80     
-16    960    
880    160    
-688   1664   
896    736    
224    640    
-288   48     
352    -240   
-144   -144   
80     -64    
0      -48    
0      -16    
96     64     
112    80     
192    48     
160    432    
-272   -176   
-192   -32    
336    -192   
-256   96     
64     -176   
-160   64     
208    -240   
160    144    
-224   112    
-144   112    
144    -144   
192    -272   
64     -32    
48     -64    
-112   -48    
-496   -48    
464    -528   
-752   0      
128    -304   
0      432    
-32    -32    
128    -896   
256    -96    
-16    -560   
64     256    
176    32     
-96    -64    
-144   -48    
-240   304    
384    -240   
-256   -464   
80     -320   
112    256    
-288   -16    
-96    -448   
656    -336   
-32    64     
-272   -48    
16     -144   
96     112    
-64    -160   
-112   240    
80     320    
-176   -352   
-256   -96    
464    416    
-16    144    
-160   -416   
144    -224   
144    160    
-192   384    
-224   384    
-64    400    
-128   -432   
128    -144   
48     -304   
0      -352   
-112   -320   
208    -400   
-80    192    
16     -144   
-176   -224   
448    32     
-16    624    
1408   1120   
-1840  1280   
-864   -256   
992    -544   
128    -560   
-944   -448   
-128   -64    
176    1792   
784    -1776  
16     -704   
-816   128    
256    336    
352    -80    
-176   -272   
128    48     
-448   -128   
192    96     
-512   -320   
-224   -288   
-368   -592   
-32    48     
-208   752    
2032   256    
-1200  416    
-736   832    
464    -368   
416    -1120  
-416   -1328  
16     -48    
304    288    
-432   -128   
160    16     
256    -288   
256    -32    
-480   -256   
224    176    
240    32     
-160   512    
-352   208    
-336   48     
80     -64    
144    -144   
-48    -128   
528    80     
384    704    
-816   -368   
-240   16     
256    64     
32     48     
240    1056   
-848   320    
-128   -160   
432    16     
-272   -160   
-304   64     
-336   48     
864    608    
-352   32     
-816   -224   
208    256    
-16    -16    
-32    -32    
144    -16    
-688   -272   
208    80     
128    0      
-176   -112   
-112   80     
-208   80     
-32    608    
1712   -2256  
-2816  -1184  
704    272    
928    144    
-32    96     
-608   -48    
-64    -384   
576    416    
272    -240   
-336   240    
-48    -128   
96     240    
-32    -32    
528    80     
-272   -48    
-320   128    
-256   48     
240    48     
-752   144    
208    -464   
-576   80     
608    -112   
-400   64     
352    32     
144    -160   
272    -352   
-240   -128   
-128   -192   
192    240    
-368   -48    
416    96     
-240   192    
32     80     
-64    288    
176    272    
48     -64    
-112   160    
128    48     
-48    384    
-352   -16    
256    0      
336    96     
-640   48     
80     256    
-288   -16    
176    96     
256    -32    
-96    464    
-144   96     
0      304    
464    0      
-48    -224   
192    -464   
-320   208    
608    656    
560    48     
-992   -112   
512    -144   
32     -112   
192    -224   
-176   -80    
-432   -80    
256    160    
-96    -112   
320    -272   
-288   -64    
64     -16    
-192   96     
80     -224   
192    64     
-48    64     
-240   -64    
16     128    
80     -16    
192    192    
-208   48     
-112   128    
80     32     
0      288    
176    -16    
-272   80     
448    2320   
2112   -48    
-1632  448    
96     -16    
80     -160   
688    288    
-224   -176   
-144   -400   
-48    96     
-48    336    
176    -144   
-128   128    
-96    -128   
16     -64    
256    -80    
-224   240    
-16    -64    
112    32     
-96    32     
-64    -32    
128    -1232  
-832   480    
896    96     
-736   80     
304    304    
-16    16     
-384   0      
0      -112   
176    304    
80     64     
96     16     
-304   -64    
-32    240    
400    16     
32     -80    
-416   80     
336    272    
-224   -80    
112    112    
112    -112   
-384   64     
176    112    
64     0      
-208   16     
288    48     
-96    64     
80     112    
16     80     
-144   16     
-400   -2032  
2464   -80    
-848   64     
-1472  -544   
1584   224    
-176   -192   
-864   80     
640    -144   
-160   -48    
-272   0      
144    0      
0      80     
48     32     
-240   -64    
496    16     
-480   -144   
208    224    
-144   16     
-32    144    
-80    -160   
-64    128    
-128   -368   
944    -304   
-1472  -112   
864    -432   
512    -112   
-528   432    
16     -160   
576    128    
144    256    
-48    64     
-160   160    
-208   64     
208    48     
80     128    
-64    256    
224    -128   
-48    192    
-624   96     
176    -64    
240    320    
-224   208    
-656   -208   
1168   -480   
-112   432    
-448   -96    
592    -48    
400    224    
-384   -80    
-304   240    
192    64     
112    160    
48     -736   
-160   48     
-64    -320   
176    80     
-672   368    
848    112    
272    -48    
32     160    
352    -112   
-352   192    
32     -48    
80     32     
-176   96     
-80    -160   
576    256    
512    -128   
-320   -144   
224    -304   
-16    352    
128    3632   
704    176    
-1856  -864   
-352   -176   
1968   176    
-784   -672   
-80    -1296  
912    -432   
-96    32     
-592   320    
160    80     
256    -528   
-192   -48    
-80    -400   
112    512    
-48    -576   
208    144    
704    160    
-464   656    
-176   752    
400    544    
96     -208   
128    -192   
208    -192   
-80    -720   
128    -176   
-144   -368   
-208   -208   
-16    0      
160    384    
32     -848   
-112   -288   
-240   384    
208    352    
112    48     
96     -112   
-192   320    
160    848    
48     720    
208    -48    
-32    256    
-272   -272   
0      240    
32     288    
464    1552   
32     480    
-304   128    
352    720    
-144   -96    
112    576    
-272   -368   
560    1040   
80     800    
-96    1280   
288    240    
384    -528   
256    672    
-528   -96    
176    -896   
160    336    
32     -336   
-16    272    
-336   64     
48     160    
400    -160   
0      96     
0      80     
256    -640   
144    400    
176    -160   
-144   144    
112    -144   
0      112    
80     -208   
80     128    
96     -256   
-288   -80    
416    -672   
512    16     
-336   32     
64     -1696  
-464   1104   
768    -320   
-400   -608   
-32    128    
176    16     
-112   96     
528    176    
-176   -32    
-80    176    
192    -80    
192    -368   
64     80     
-16    -1504  
128    112    
-16    -1056  
128    -64    
64     -384   
176    -928   
-16    -624   
-64    -752   
368    -608   
-256   0      
576    176    
-64    432    
-288   176    
-48    176    
320    240    
432    -512   
-304   80     
-192   128    
352    -272   
16     128    
64     -80    
64     -304   
-160   64     
-176   -448   
96     -1568  
400    816    
320    -432   
-528   -80    
-320   -288   
544    32     
144    144    
-256   128    
-480   96     
576    -272   
-304   -368   
144    -48    
-448   256    
400    -944   
-1920  272    
1456   -272   
400    736    
-1200  592    
992    64     
208    192    
-816   496    
112    400    
400    -240   
-16    240    
-96    -144   
-176   64     
0      96     
512    288    
-48    48     
-144   -48    
-48    -304   
384    -144   
-16    -304   
-416   -496   
1344   912    
-112   16     
-928   272    
1216   -336   
-736   -96    
-64    384    
896    -48    
-240   -128   
-432   16     
32     -288   
160    -176   
64     -272   
-256   -112   
240    -576   
368    192    
-272   -336   
-80    128    
400    -224   
-144   64     
-160   96     
368    480    
-528   -32    
-240   -288   
-288   160    
144    528    
-864   80     
48     -160   
-256   -288   
-240   -624   
448    32     
192    -1088  
-224   384    
416    -64    
192    160    
176    0      
-336   -192   
-368   224    
368    -128   
-720   464    
608    48     
-32    -96    
-160   -224   
112    96     
64     -400   
-560   -192   
784    -176   
64     160    
-1040  64     
240    -2208  
-1200  -4176  
-2032  -1312  
-112   -560   
592    144    
-208   -224   
-384   208    
-480   -176   
272    -32    
224    -80    
0      80     
-144   -112   
144    128    
-224   0      
-192   112    
48     48     
-32    96     
-240   32     
-16    32     
-16    -272   
832    -208   
-544   -176   
-416   80     
-48    -192   
-736   16     
480    -208   
512    336    
-368   -176   
-560   112    
944    -128   
-592   144    
240    32     
-48    144    
48     -112   
-384   -288   
560    -160   
-176   -288   
-176   256    
208    160    
160    -16    
-160   -224   
-80    208    
-256   -96    
144    272    
0      -48    
-144   80     
-240   -80    
-400   -192   
-256   -48    
256    -112   
-288   32     
-96    32     
112    -208   
288    -448   
-560   224    
144    80     
-224   448    
16     48     
-144   -496   
-352   -192   
64     -272   
-496   -176   
-32    -16    
0      -112   
-656   144    
-112   -16    
144    -16    
160    -720   
-240   -432   
48     1104   
-240   16     
256    -32    
320    48     
-592   208    
0      -48    
160    -32    
80     -16    
-208   192    
80     -112   
-176   -400   
96     272    
112    0      
-1168  -80    
1936   -1088  
-736   -112   
-416   -496   
672    192    
-192   16     
0      256    
-816   704    
448    -128   
-16    112    
-80    -32    
-224   -112   
-320   128    
208    -528   
160    -96    
-16    416    
-240   -80    
400    -144   
-112   64     
-112   112    
608    832    
-1456  752    
768    -272   
256    -16    
-288   -144   
-208   -192   
-144   -48    
80     176    
80     432    
-48    128    
-224   -32    
-368   -112   
160    -80    
352    208    
-128   -160   
-304   144    
336    400    
-80    192    
16     160    
-64    -16    
-288   -16    
-16    -16    
-112   32     
16     32     
-368   -48    
112    -48    
-64    -16    
-32    -48    
-80    224    
-432   400    
1328   1392   
272    256    
-896   -240   
448    -144   
32     -304   
-720   208    
576    432    
-208   160    
16     64     
-208   -112   
-288   96     
-384   -64    
304    144    
352    160    
-304   -48    
16     224    
272    128    
-16    80     
-272   192    
16     48     
-112   0      
816    1264   
736    -80    
-1456  -256   
864    -336   
272    112    
-432   560    
1072   -80    
-304   0      
176    112    
112    272    
-96    16     
144    96     
64     32     
-272   -64    
-112   96     
368    48     
-256   224    
336    128    
-48    144    
-16    -64    
-48    32     
400    -416   
-384   592    
528    -240   
-656   -16    
288    1024   
1136   -96    
-544   -288   
-112   272    
112    -96    
128    96     
160    -64    
64     432    
-288   -64    
-464   -192   
736    784    
-624   512    
-224   -544   
720    -320   
240    112    
-48    0      
-368   80     
272    176    
368    16     
160    -464   
-608   -160   
-16    -96    
864    -256   
-320   16     
-384   -688   
1488   -1152  
-192   16     
240    592    
-656   640    
80     1264   
656    1152   
96     -576   
-320   -608   
-256   -112   
416    400    
224    -208   
-48    112    
-96    144    
-176   -80    
432    176    
32     432    
-96    368    
96     272    
64     224    
0      352    
-272   48     
256    -64    
208    48     
-16    272    
-240   624    
192    -64    
-48    -1264  
32     528    
-96    336    
128    -432   
256    -160   
-160   240    
-160   224    
256    -496   
64     -752   
-512   160    
352    192    
128    -992   
-32    -336   
-240   464    
272    352    
48     48     
128    -80    
-32    400    
-96    -320   
144    48     
208    624    
32     -64    
32     288    
-176   0      
512    224    
-960   960    
448    624    
176    848    
112    112    
96     -128   
-96    80     
368    -1104  
-112   -240   
-272   96     
96     320    
128    -112   
80     48     
64     192    
-48    -16    
-416   -192   
80     -432   
0      288    
-336   1072   
-144   -64    
288    128    
-160   48     
240    -400   
-368   304    
128    -2240  
0      32     
96     -512   
-832   -496   
128    48     
336    -16    
832    512    
-1360  1088   
112    -32    
208    -416   
368    -1072  
128    -528   
96     -144   
-224   -816   
32     80     
48     -64    
96     160    
-80    -80    
-176   -160   
-16    176    
-16    176    
-16    -384   
96     -160   
-304   -176   
16     -64    
352    -64    
416    -608   
-1216  720    
896    672    
336    928    
-752   1008   
192    96     
0      -800   
-80    112    
16     224    
32     48     
-224   240    
0      -112   
64     256    
32     32     
208    304    
-48    -64    
0      304    
160    -336   
-96    64     
-192   -224   
352    544    
192    16     
-208   80     
112    416    
-176   -48    
176    160    
16     -64    
-208   144    
288    240    
-384   -240   
-736   -96    
-928   -656   
2240   -672   
64     160    
-976   -160   
752    -256   
224    -768   
-256   -944   
-96    -48    
368    128    
-144   224    
-496   160    
192    -80    
560    -208   
-208   -64    
-16    -144   
0      112    
48     0      
-32    48     
80     -96    
-256   -496   
1024   240    
-352   48     
-64    0      
208    32     
-576   192    
400    64     
192    -64    
80     -272   
352    256    
-192   -16    
16     176    
208    -96    
-128   112    
272    -176   
-816   224    
528    -640   
-80    -336   
-272   -64    
0      -1424  
-208   96     
448    -224   
-400   -544   
-400   160    
64     -32    
-144   -352   
-384   -864   
400    -336   
320    256    
-656   0      
-304   48     
672    32     
160    16     
-368   64     
112    -160   
0      -80    
-224   352    
576    -320   
-496   -208   
-672   -352   
48     -192   
304    -272   
192    -240   
-320   464    
-432   -112   
608    496    
800    -64    
-512   -672   
-320   64     
-368   -1184  
-448   2912   
1264   176    
-1584  -16    
480    -512   
448    -256   
-368   -208   
0      96     
528    64     
-176   -272   
-112   256    
96     -272   
144    176    
464    -352   
-80    144    
48     -80    
112    112    
240    -32    
0      -208   
-288   400    
-912   -160   
496    464    
608    -320   
-688   -144   
128    -592   
432    112    
-656   -3264  
176    320    
80     -240   
-112   400    
-32    -224   
-272   -64    
368    -288   
-192   -64    
112    -208   
-80    -144   
16     48     
-160   -304   
112    -272   
368    -672   
-224   -256   
-80    -656   
-160   144    
304    128    
48     160    
80     -48    
64     -32    
-144   -16    
288    400    
-496   128    
304    144    
-704   -96    
160    800    
-448   -112   
-96    0      
-48    -192   
-80    -336   
96     192    
160    -576   
384    112    
-80    64     
160    112    
-208   224    
80     32     
208    -192   
-192   -144   
-416   48     
-112   0      
32     -128   
-32    656    
272    208    
0      -528   
-160   192    
240    -1152  
96     256    
-128   -32    
144    496    
-416   144    
128    -528   
-336   -320   
-64    -48    
-576   -1344  
1392   -1968  
-1056  656    
816    -384   
-880   672    
80     -640   
304    -16    
736    256    
-80    544    
-608   256    
112    -80    
288    -240   
48     48     
-240   -80    
-96    368    
112    -208   
-144   -128   
-64    -320   
-112   -288   
80     240    
160    -48    
-240   -1232  
336    -32    
32     -240   
-672   144    
560    -192   
-80    0      
48     256    
-208   -304   
48     -64    
16     16     
224    -192   
-272   32     
-64    -64    
496    144    
-112   96     
176    240    
-272   -80    
-1088  -400   
192    112    
80     272    
-272   64     
64     160    
112    -208   
-48    32     
-112   64     
-64    -16    
0      160    
-208   -128   
32     208    
-800   -848   
1392   -1648  
-240   32     
304    480    
208    -144   
-1440  384    
400    0      
144    16     
224    80     
-224   112    
-80    528    
160    256    
-96    272    
-480   -144   
464    400    
-320   48     
-96    160    
192    128    
-400   -48    
32     -176   
-16    -160   
544    1120   
-1840  -960   
-816   528    
1072   144    
-832   80     
-592   80     
96     1168   
704    1104   
-96    928    
-96    320    
80     176    
-112   32     
96     192    
-64    608    
-160   560    
-96    160    
16     512    
80     464    
-608   160    
336    384    
-224   96     
64     384    
-448   -80    
560    224    
-448   112    
-416   1360   
944    192    
64     -192   
-160   -288   
48     48     
-320   -256   
16     320    
-176   240    
-576   608    
1088   -112   
-528   -208   
-272   624    
176    112    
-640   240    
272    176    
-144   -208   
-560   -80    
288    288    
416    -32    
-272   48     
-192   -416   
96     -256   
-160   -112   
-336   0      
160    192    
-928   -1472  
-832   640    
208    -224   
-432   -16    
800    -144   
-32    -32    
-368   1648   
-32    -1024  
432    304    
0      352    
-144   672    
-560   -736   
32     320    
208    80     
-304   128    
-112   16     
-336   -272   
-400   -576   
384    -240   
-16    272    
-128   368    
48     160    
112    -32    
-400   32     
112    0      
80     592    
-432   -16    
432    32     
384    576    
-256   -368   
-256   -208   
-128   32     
96     0      
160    496    
-256   48     
-352   -992   
176    -1056  
-176   -672   
-784   -1664  
224    -1248  
272    480    
-48    624    
-272   -160   
128    -752   
80     -400   
-352   -160   
64     -256   
96     -1168  
96     1072   
-224   368    
-176   224    
320    848    
688    560    
-624   400    
-256   976    
832    208    
-384   368    
256    1408   
32     704    
-192   -1360  
-272   -64    
208    800    
240    480    
-224   -496   
32     -576   
176    304    
-16    544    
-128   96     
256    -128   
32     -752   
-288   -48    
336    352    
-320   592    
0      304    
320    -480   
-256   -288   
48     352    
112    -192   
-704   32     
-96    432    
208    -928   
560    -1616  
-816   576    
400    -416   
32     176    
-160   736    
160    -16    
224    224    
-224   -176   
-304   -400   
160    -352   
128    208    
32     112    
-48    448    
-80    288    
192    128    
-320   208    
-192   96     
128    64     
112    176    
-16    208    
-272   -1200  
-16    176    
272    448    
-272   -160   
320    448    
-464   896    
224    656    
-192   544    
-32    416    
-32    -32    
0      176    
160    80     
96     288    
-80    112    
144    256    
-224   -32    
64     -32    
-240   112    
208    -624   
-48    64     
-128   176    
288    192    
-80    0      
272    192    
-32    0      
-416   208    
160    96     
160    144    
176    -256   
-80    544    
-272   -144   
-1664  304    
1632   240    
32     -352   
-928   -336   
96     -240   
432    128    
-256   -368   
-144   160    
416    16     
-208   176    
-16    32     
-16    -32    
-192   -80    
224    80     
-208   -144   
176    208    
448    16     
-272   -384   
-64    16     
560    1248   
-320   -768   
-832   208    
720    48     
-208   128    
-496   0      
336    0      
512    464    
-496   64     
144    -64    
48     48     
64     -48    
-80    176    
112    -272   
96     16     
-160   48     
32     -240   
-160   -48    
400    256    
464    64     
-272   96     
-128   32     
608    -48    
-544   -128   
-800   256    
864    320    
-144   -224   
-336   48     
160    -272   
32     32     
272    -160   
-192   80     
-320   352    
-80    -192   
-80    32     
336    64     
-432   48     
32     -208   
-160   -288   
288    64     
-304   96     
-32    -208   
80     176    
256    0      
176    320    
-416   -480   
-208   320    
464    -720   
-64    176    
112    3952   
1360   16     
-1760  -464   
2112   -1056  
592    -16    
-1776  480    
416    192    
368    176    
160    64     
-368   -192   
320    208    
80     -64    
80     0      
80     -224   
96     80     
-80    160    
144    112    
128    -64    
-32    128    
-512   -432   
320    256    
-144   336    
-16    -448   
608    32     
176    -1008  
-240   160    
224    -80    
80     144    
-496   -320   
400    -16    
-16    128    
128    16     
-160   240    
-144   16     
272    256    
48     96     
64     400    
-448   -352   
96     -112   
0      -160   
-144   16     
-144   -32    
272    256    
-80    -1216  
224    112    
-96    32     
64     192    
-112   160    
144    320    
352    -240   
-560   -192   
80     -352   
480    624    
768    -32    
-752   -112   
496    -32    
-48    -400   
16     -384   
-416   -704   
128    -352   
-192   208    
384    96     
160    96     
-240   64     
-16    -176   
240    32     
48     -496   
-16    -384   
-48    -480   
48     -928   
-304   -528   
208    -784   
-176   -32    
64     -256   
192    -112   
48     176    
-128   -752   
-128   608    
192    144    
80     64     
48     -96    
-240   -736   
304    -2416  
16     192    
944    -224   
-752   -1248  
256    -272   
-32    -432   
160    480    
176    -800   
-48    -208   
32     -192   
192    112    
-64    -48    
-144   -64    
-384   256    
256    -432   
-144   -160   
224    192    
160    -288   
-32    -768   
-224   176    
656    -800   
-368   384    
-224   -864   
-80    576    
0      -160   
320    -96    
-16    96     
-96    -224   
-608   80     
240    -528   
272    384    
-128   144    
0      336    
80     -624   
304    -544   
-112   -1152  
-320   496    
-80    -96    
-176   -464   
192    224    
320    208    
-144   -240   
-256   -128   
-352   176    
192    -304   
-960   -112   
80     -64    
-128   64     
-384   192    
256    528    
656    -1152  
-1200  368    
1312   1056   
-144   1424   
-832   432    
352    -512   
112    -320   
64     -208   
-128   192    
32     -368   
-192   256    
144    -16    
-160   -224   
-368   -128   
128    64     
256    -176   
-224   -96    
240    -1744  
80     -128   
-224   0      
-48    -896   
-912   848    
1776   -480   
-544   -736   
-240   -16    
-208   -160   
16     -912   
-928   -1600  
480    -688   
496    704    
-224   480    
96     48     
0      -1808  
32     -192   
224    16     
160    -64    
-432   80     
256    0      
128    -48    
0      80     
-80    16     
-160   208    
-16    112    
576    848    
-656   560    
-544   -560   
1328   0      
-80    864    
144    -48    
-112   288    
-320   208    
528    592    
-704   288    
-480   -432   
-64    -560   
-208   48     
608    192    
-1536  -752   
352    -464   
96     208    
64     48     
-256   160    
-544   -320   
-352   368    
-224   -224   
352    -720   
112    -144   
144    32     
-336   32     
96     176    
-768   -2032  
-976   -368   
352    576    
-1040  -192   
192    -1744  
-96    -1632  
-112   -32    
-352   608    
-240   512    
480    -160   
-272   -192   
-480   -240   
-464   432    
192    432    
240    -96    
-64    -480   
-144   -144   
-160   96     
112    16     
176    496    
-272   256    
-352   -16    
480    0      
-320   -368   
192    -736   
-128   -688   
-176   -304   
-16    -416   
144    -544   
-96    -1008  
-416   672    
208    480    
64     208    
-80    -448   
-80    48     
160    -528   
-624   -464   
256    -208   
-128   -496   
-160   -112   
-352   -16    
112    80     
-512   368    
32     304    
64     784    
240    512    
-176   176    
-224   688    
464    384    
80     592    
-96    176    
-496   -512   
352    -304   
384    -768   
-48    96     
-720   -400   
112    304    
144    416    
-112   496    
112    -576   
-688   -384   
96     -448   
256    -128   
-64    -240   
128    144    
-224   448    
240    -256   
-320   -32    
208    -240   
-528   -144   
64     -368   
208    64     
-48    -144   
-192   80     
80     -80    
352    832    
-272   720    
0      272    
-80    -304   
-176   -304   
-224   -1216  
992    -1904  
-752   656    
624    -272   
-32    32     
-384   64     
240    -576   
-16    96     
112    -160   
-512   64     
80     48     
208    -128   
112    -160   
-160   192    
-96    -352   
0      80     
0      -352   
96     -48    
32     320    
-144   176    
192    48     
880    1136   
-1872  272    
256    336    
592    -288   
-800   -112   
192    -160   
-112   96     
160    176    
-352   224    
256    144    
144    -64    
-160   160    
-192   112    
144    160    
-208   -144   
-64    -128   
-160   -16    
160    32     
-288   80     
192    64     
-160   32     
-96    -304   
-256   176    
0      144    
224    16     
112    160    
-320   -96    
16     32     
144    -16    
-272   544    
544    -1072  
-2032  864    
1712   144    
16     -368   
-1472  -64    
816    -16    
384    64     
-272   -192   
224    -48    
-96    112    
-192   208    
80     80     
0      16     
96     304    
512    64     
-528   176    
352    0      
-288   128    
208    -128   
-96    64     
-240   48     
768    816    
1184   48     
-1440  512    
1792   112    
-768   112    
-368   160    
720    -384   
-288   -288   
32     160    
-64    64     
-128   48     
144    96     
-48    -48    
64     176    
0      96     
96     208    
-416   272    
224    -16    
-192   64     
-112   0      
-32    -208   
-576   48     
480    80     
-288   -48    
-80    -880   
-208   -1040  
336    832    
-256   -80    
-176   -160   
448    176    
192    96     
-176   128    
-240   208    
400    -112   
-400   32     
336    176    
-448   -512   
-128   16     
192    0      
-48    -64    
128    192    
128    176    
-400   96     
32     208    
144    192    
144    112    
272    144    
-368   0      
144    -880   
-1248  2720   
1632   112    
-1136  -288   
-768   -224   
1264   176    
16     -96    
-528   0      
160    -96    
560    -48    
-32    -2192  
-112   16     
160    -16    
-192   192    
-80    32     
448    160    
-256   208    
-288   80     
256    64     
144    -288   
-736   -784   
256    -448   
-16    -48    
240    96     
608    64     
-512   -432   
-144   336    
704    16     
-784   -80    
224    -96    
-32    48     
-112   -80    
192    -160   
112    -16    
-32    -240   
-160   -256   
80     -240   
-192   16     
272    -256   
-48    -32    
-160   -144   
0      -64    
-80    -128   
288    -176   
-208   320    
-48    688    
32     16     
496    -608   
-384   -288   
-16    0      
0      -240   
-48    192    
-16    -272   
240    -336   
-128   96     
-80    48     
224    96     
112    -1392  
240    -432   
-752   -176   
-48    -32    
384    -144   
-64    16     
-64    -144   
80     160    
-592   -160   
352    -544   
320    160    
-304   -576   
-304   -400   
272    -256   
208    384    
-48    -48    
-160   -16    
16     -240   
-32    -160   
80     -576   
-80    16     
80     0      
-160   -208   
208    320    
224    96     
-272   2256   
784    320    
-208   -640   
-432   384    
496    432    
464    560    
-752   1344   
-384   -832   
288    96     
-48    -32    
192    -48    
-80    128    
16     -48    
80     272    
192    -112   
-288   288    
-32    -192   
80     320    
64     -64    
0      304    
-592   480    
496    80     
-464   -64    
-128   240    
352    -128   
176    -240   
-240   160    
-32    416    
-48    224    
144    -64    
-48    96     
32     -432   
48     256    
-96    -256   
144    0      
-64    208    
-80    -48    
16     -432   
112    -112   
432    144    
-80    48     
-176   176    
-208   80     
320    176    
-16    -304   
48     -16    
-256   0      
-144   160    
432    -96    
-640   -512   
1424   -1504  
-112   480    
480    -848   
-160   -352   
-272   -272   
-144   -1040  
-32    688    
448    -976   
-128   -784   
-176   -192   
64     -2640  
320    272    
-128   -208   
-96    -128   
-16    -240   
128    384    
224    240    
-384   176    
304    -2096  
0      560    
432    -336   
-2016  528    
-256   -528   
-64    -1056  
-112   -528   
480    -400   
208    1312   
-832   896    
-368   -656   
416    -2768  
-416   -1120  
-336   -928   
384    -208   
-336   -48    
-192   224    
-16    -112   
512    704    
-592   560    
-112   0      
-288   112    
-64    -112   
-48    224    
160    -32    
-144   32     
0      -1392  
-160   -960   
-48    -640   
-192   -1792  
-496   -1088  
96     -48    
-112   128    
-240   176    
144    16     
64     -496   
-1168  -384   
832    -32    
96     640    
-240   176    
-384   -416   
640    -400   
-96    -128   
-288   -400   
-192   -656   
-256   -240   
320    0      
-544   400    
496    48     
128    128    
-240   448    
-496   16     
-448   2704   
656    480    
-912   -336   
-512   -432   
544    288    
1104   880    
-912   656    
-928   -560   
1072   -400   
720    160    
-752   -80    
-528   -16    
368    -176   
480    -48    
-432   -96    
-80    64     
-352   -64    
384    -320   
336    -1392  
-528   -752   
-96    352    
32     368    
432    192    
432    16     
-864   -32    
496    304    
-208   -32    
-64    -16    
352    -48    
-304   256    
48     688    
-928   176    
32     -624   
400    -128   
240    -256   
-480   -176   
64     -544   
144    112    
-240   -2976  
128    -176   
-176   -80    
16     -208   
-160   -176   
112    -32    
64     16     
-480   320    
64     816    
288    432    
-704   -128   
160    -160   
160    -64    
-560   -640   
384    -240   
160    -1072  
-192   -384   
240    192    
-192   -64    
-16    320    
176    -80    
-208   32     
64     -48    
-112   -48    
160    -208   
-128   -16    
-80    -80    
48     192    
16     -288   
64     -32    
144    656    
-416   96     
208    -16    
288    0      
-192   -80    
-80    0      
-80    -16    
-160   64     
464    -400   
-144   -48    
-320   64     
-560   -368   
-480   -1152  
1280   -768   
-1200  560    
64     -352   
-16    176    
-448   48     
-752   304    
672    -96    
80     -160   
-304   112    
16     -96    
288    0      
-336   160    
-80    224    
-784   -544   
80     -32    
320    -96    
-224   288    
-16    -48    
-240   -128   
96     32     
-864   -1152  
192    144    
512    96     
-576   224    
464    176    
64     0      
-80    192    
-304   160    
336    -176   
16     240    
288    -256   
-304   0      
-272   -16    
-336   176    
640    -176   
-176   64     
-16    -16    
-192   -16    
64     48     
-224   -368   
-48    48     
-48    -128   
-16    128    
304    -80    
-480   -96    
176    160    
32     -80    
-336   32     
240    96     
816    1488   
-640   1392   
112    224    
384    -240   
-608   -176   
144    224    
-224   -112   
-176   448    
640    160    
-256   -32    
80     80     
-128   144    
16     0      
48     48     
176    0      
-464   -160   
160    80     
240    112    
-464   0      
288    64     
-192   16     
-240   -432   
1120   496    
-512   -16    
-496   -224   
1024   160    
-432   128    
-368   64     
416    336    
400    -112   
-352   -32    
-448   80     
288    64     
-16    -32    
-208   112    
176    -144   
-368   144    
-32    -80    
64     192    
32     64     
-128   112    
-224   96     
496    496    
-864   128    
-416   -112   
464    240    
192    176    
-272   16     
-416   -912   
-464   416    
416    -48    
-336   96     
176    160    
-240   256    
-80    112    
-192   -80    
192    -16    
-272   192    
320    288    
64     -112   
224    80     
-176   80     
-144   96     
288    -48    
-32    96     
-368   -96    
384    240    
80     32     
176    48     
-256   80     
-96    1232   
1488   1920   
528    -608   
-2080  32     
0      -144   
544    0      
16     272    
-144   -288   
-448   288    
544    80     
-448   176    
-16    -80    
80     -32    
-112   -208   
0      288    
240    -48    
176    176    
-384   48     
352    48     
-352   80     
-240   272    
320    32     
128    144    
-176   -288   
-240   80     
352    16     
-288   -64    
-496   -96    
208    48     
128    320    
320    -192   
-640   -480   
0      -432   
448    -144   
256    400    
-656   240    
-96    192    
704    624    
-368   704    
112    544    
0      368    
48     576    
128    528    
160    224    
96     48     
-368   208    
-80    112    
-96    496    
288    -592   
-304   -400   
80     816    
-96    320    
48     -816   
-512   -400   
432    -144   
-480   -176   
672    -96    
224    896    
-848   288    
16     -1552  
96     -288   
160    208    
-64    256    
32     16     
-32    208    
144    160    
112    -208   
-368   -144   
272    128    
144    192    
-240   -512   
96     128    
-64    64     
-128   384    
48     -48    
64     -672   
224    -32    
-80    368    
-144   96     
144    -208   
192    0      
-208   96     
608    656    
-784   560    
432    -144   
48     416    
-128   128    
-224   160    
96     -64    
160    -48    
128    224    
-80    48     
-144   32     
-32    -16    
64     -16    
256    48     
-464   80     
400    160    
-368   -112   
160    208    
-16    192    
32     -2384  
64     -272   
-448   448    
112    240    
-16    288    
272    80     
16     -192   
-112   -400   
-48    -80    
128    96     
176    336    
-144   272    
-192   -272   
224    96     
-112   128    
16     80     
64     176    
176    -176   
-32    -640   
16     -112   
160    112    
144    144    
-224   -128   
16     80     
544    80     
16     -304   
-304   -32    
-128   0      
208    32     
-320   144    
16     -912   
-1040  -1072  
16     1312   
1472   -416   
-1248  -48    
528    144    
464    -96    
16     208    
-672   -208   
64     208    
48     176    
-160   192    
96     192    
64     -624   
-192   224    
224    48     
80     208    
-208   -1504  
160    -64    
-208   992    
160    464    
16     512    
336    -1088  
-1520  288    
1456   704    
-256   336    
-144   80     
208    -592   
800    -1184  
-496   -1072  
-240   -1152  
32     -592   
-432   -96    
256    80     
432    -416   
0      272    
-240   96     
-16    -224   
544    400    
352    416    
-16    288    
-688   208    
144    224    
448    432    
-512   -320   
128    -560   
112    -48    
400    -528   
-496   -48    
320    -672   
-432   128    
256    144    
224    288    
-352   -16    
-352   -128   
64     -464   
-112   80     
176    80     
-304   -640   
240    320    
320    -480   
-640   112    
320    -352   
144    -128   
256    416    
144    80     
-48    16     
704    48     
-112   144    
48     672    
-384   -96    
96     -3264  
-1328  -944   
736    -160   
608    352    
560    -144   
-768   400    
32     112    
-144   656    
416    160    
-144   240    
-288   -192   
192    144    
-128   -160   
464    128    
16     0      
-368   64     
192    -400   
-176   -336   
528    1008   
-240   1504   
-176   560    
448    -160   
-224   -96    
-368   -208   
448    -2064  
-288   208    
224    -80    
-400   -144   
32     0      
-48    64     
80     -16    
-64    -352   
128    -80    
144    -1072  
-208   32     
224    -96    
64     16     
320    -880   
-160   32     
16     -48    
128    128    
96     -192   
160    112    
-96    -128   
-240   -96    
288    -448   
-528   -288   
416    -208   
96     48     
-64    272    
48     64     
0      -544   
448    -496   
-96    160    
16     -96    
-400   32     
0      -288   
-192   -240   
80     -80    
32     -160   
-160   0      
-80    0      
128    -128   
-32    -464   
-16    -144   
48     -928   
144    -160   
0      -128   
48     176    
16     368    
384    -128   
-368   -336   
16     -32    
64     0      
16     112    
-224   96     
-64    160    
144    -560   
48     -432   
16     288    
-16    -192   
-720   -2240  
-320   -192   
1248   -48    
-832   -96    
416    640    
640    208    
-880   128    
-368   -176   
832    -96    
-432   -64    
-160   -336   
-496   -112   
32     80     
336    176    
-336   -144   
-64    -256   
224    -384   
-256   192    
336    -480   
-32    96     
0      384    
-48    -656   
-800   304    
1120   -192   
-336   0      
-784   -80    
448    -32    
624    288    
-32    -112   
-128   -464   
0      272    
240    -176   
-32    176    
-144   -144   
-96    -32    
16     -224   
512    -368   
-592   -112   
416    0      
-64    128    
80     80     
-272   112    
64     16     
16     -48    
384    -112   
-368   160    
-176   -48    
80     144    
288    -928   
-192   -208   
-416   2064   
1136   640    
-416   160    
-368   -496   
96     112    
256    64     
-272   400    
304    304    
-240   400    
-176   0      
80     32     
192    -160   
-16    80     
-80    240    
-608   -208   
144    256    
144    -96    
-288   -128   
528    -96    
-112   -224   
-32    -176   
-224   -800   
-768   688    
1216   32     
-688   -320   
-176   128    
-160   -496   
-144   160    
-608   -112   
-304   96     
672    0      
-160   16     
-160   16     
-48    64     
-112   -96    
-224   112    
288    16     
-16    256    
-112   272    
-784   -272   
32     0      
-224   -32    
-544   -112   
1264   256    
-1024  96     
-496   -16    
240    0      
-288   -128   
-208   64     
128    -96    
-336   80     
336    64     
80     -288   
-64    240    
-352   32     
160    208    
112    240    
-320   -224   
-448   112    
128    -32    
80     128    
-48    -336   
320    224    
-464   80     
-48    64     
80     -288   
-144   -208   
-272   80     
208    48     
-416   -80    
752    144    
-48    -864   
160    -64    
672    -240   
-1008  -64    
-16    128    
16     -128   
1152   -848   
-464   -224   
-448   -400   
-896   -144   
128    128    
-48    64     
224    -32    
-192   -112   
-48    272    
32     48     
224    16     
-112   176    
-80    848    
288    816    
-208   272    
256    -80    
-640   -64    
64     -16    
-224   224    
224    -192   
112    -192   
-112   704    
32     352    
-16    256    
208    0      
-288   320    
16     368    
112    192    
-64    -208   
48     -80    
-240   48     
-432   -192   
224    512    
-176   128    
-32    -256   
208    -64    
-176   320    
176    -1376  
96     -704   
-176   96     
-48    80     
-128   688    
192    96     
32     160    
-240   320    
608    608    
288    1040   
-512   560    
224    -1264  
48     -1184  
-608   -592   
320    544    
-208   -32    
128    224    
112    288    
-144   64     
208    -160   
-128   704    
-16    272    
-96    -96    
-272   192    
48     208    
224    384    
-528   -304   
144    96     
-160   -48    
192    0      
0      112    
64     176    
-48    64     
-336   -320   
-112   -256   
144    144    
-144   224    
-352   -496   
944    -1088  
-288   400    
320    -320   
-672   112    
-16    256    
-16    -80    
-272   336    
-160   320    
32     48     
160    -192   
16     96     
144    176    
-80    272    
0      112    
0      -48    
144    112    
-128   208    
-240   128    
-48    -80    
-224   -400   
880    -880   
-192   448    
288    -112   
-288   -16    
0      240    
16     320    
192    192    
-304   -128   
144    -224   
64     16     
32     256    
64     -16    
-32    112    
16     -160   
32     -224   
208    128    
-144   -144   
224    -32    
-112   864    
192    432    
-160   -128   
-96    80     
192    -80    
128    32     
16     112    
80     -80    
-400   64     
608    192    
-384   256    
1280   832    
-2560  912    
-16    208    
944    304    
-512   -512   
-928   -656   
-112   208    
96     -816   
544    208    
32     368    
-256   1280   
-176   496    
416    144    
144    -16    
-80    -32    
-464   -112   
176    -144   
336    240    
-16    -128   
-416   208    
256    16     
-864   -544   
1632   -512   
-512   -640   
624    1744   
544    -224   
-96    -608   
608    368    
-832   528    
-48    32     
448    32     
32     48     
-208   144    
-96    -320   
-128   -272   
432    208    
-112   16     
-208   16     
-48    -80    
32     -48    
192    -496   
0      160    
-272   -640   
432    416    
-48    -48    
-224   32     
752    720    
-656   304    
-464   -256   
-112   208    
528    288    
48     -64    
-288   80     
-112   -112   
-288   64     
256    -176   
848    -128   
-224   -352   
752    -448   
-416   -80    
-192   -208   
320    16     
160    160    
-112   96     
224    128    
80     128    
-128   16     
16     80     
-80    128    
592    880    
1024   4672   
-1216  2496   
-336   -464   
1808   -1008  
-112   320    
-720   -176   
-128   208    
784    0      
-80    32     
-48    96     
416    176    
-448   48     
336    160    
80     16     
-176   208    
80     32     
-448   112    
-80    16     
80     -656   
704    48     
-400   -384   
-112   -16    
208    -1952  
160    64     
-544   -112   
384    320    
128    -496   
-736   384    
384    -320   
112    176    
16     -112   
-64    80     
-144   64     
448    400    
-432   -176   
-208   -80    
256    -80    
-320   -464   
512    80     
-848   80     
304    176    
304    -128   
-352   112    
80     160    
-384   -16    
512    208    
-208   -32    
-176   224    
112    -272   
-80    -80    
-160   -288   
64     144    
-32    736    
1008   96     
-672   -2320  
16     208    
624    336    
-224   192    
-96    128    
-16    224    
-272   192    
208    0      
176    192    
-144   -32    
48     -80    
-32    -304   
128    320    
-32    -560   
-80    -48    
528    -1600  
-288   256    
-16    144    
192    112    
-176   -112   
32     208    
112    48     
240    -832   
-288   368    
288    736    
304    112    
-288   -336   
1072   2688   
-2160  -304   
-144   176    
1392   -352   
-800   -128   
-208   -112   
592    -528   
16     464    
16     784    
416    -400   
-528   32     
16     240    
640    -320   
-48    416    
-480   -192   
64     48     
288    -176   
112    384    
-96    -784   
-160   96     
-96    160    
864    -1008  
496    80     
-1008  -1968  
160    -128   
16     16     
64     48     
512    -256   
-176   192    
-304   -384   
128    80     
368    48     
-256   -608   
272    32     
-80    -624   
-48    80     
240    -176   
-304   272    
-16    416    
304    -272   
-112   -96    
-80    -272   
192    -32    
-96    -1744  
304    64     
-400   352    
272    -96    
80     48     
-32    -64    
-48    -336   
1856   944    
-2752  128    
-80    64     
896    -368   
-592   96     
-368   -272   
176    -128   
336    -432   
-448   96     
224    -80    
48     -720   
-224   -224   
208    16     
0      -128   
224    112    
112    -64    
-240   -112   
176    -288   
-272   -176   
480    -240   
-704   -144   
592    1216   
-960   -1008  
-784   144    
1360   -784   
128    -1040  
-128   -48    
-480   304    
416    -112   
112    -80    
-128   -48    
-336   0      
-176   112    
672    -32    
-32    0      
80     -112   
-576   -80    
352    32     
160    -656   
-272   80     
288    -272   
-192   240    
112    144    
-448   -320   
-16    -256   
-304   416    
480    -320   
1056   640    
-32    16     
-48    -64    
0      -176   
-352   -96    
128    96     
-176   64     
-16    -240   
384    -272   
48     -96    
-272   -944   
48     480    
240    48     
-480   -768   
-192   96     
432    160    
-352   -160   
176    96     
-160   -288   
192    256    
336    160    
208    304    
-208   368    
-272   -176   
720    -1776  
-1936  -1712  
1264   416    
672    480    
-544   -112   
-128   256    
624    752    
-208   1936   
160    272    
32     -448   
-160   -256   
-48    16     
96     -160   
208    -320   
-208   -368   
-240   80     
448    -304   
-16    80     
-32    -336   
-48    -240   
-272   -192   
64     -192   
-336   -112   
864    208    
-448   -80    
96     256    
-608   96     
544    48     
0      -336   
-144   -64    
-112   -160   
240    -32    
320    128    
-112   880    
64     928    
-240   464    
240    -224   
16     -112   
-288   -384   
160    576    
64     384    
336    -192   
0      -208   
64     304    
112    480    
256    -304   
-336   -144   
-48    -784   
-80    288    
-656   176    
160    112    
-752   -1456  
-368   -208   
576    128    
176    320    
288    144    
-224   -1392  
16     -1024  
-176   1088   
-128   752    
-160   -416   
112    -48    
-80    -160   
-320   -256   
-112   -368   
96     96     
112    128    
-112   -208   
-176   -160   
-32    32     
-48    16     
-64    96     
-144   -192   
0      48     
64     -80    
-176   288    
256    64     
-64    336    
-32    496    
-16    -96    
0      -176   
-304   160    
192    -400   
-256   -16    
96     80     
-304   -432   
-192   -448   
-208   -544   
368    -272   
-464   -752   
-48    -64    
96     208    
-128   -160   
48     -96    
-16    -224   
64     64     
144    -128   
-80    304    
-176   208    
128    96     
-928   -16    
464    -208   
-1520  432    
848    32     
144    272    
16     416    
80     368    
-176   368    
-544   480    
320    -528   
384    64     
-448   528    
-416   48     
-80    -384   
352    448    
-272   -448   
-336   208    
-176   32     
576    384    
176    -176   
-208   96     
-320   192    
-144   -160   
448    -128   
160    -128   
-320   -32    
-80    16     
64     -16    
304    -32    
-144   -96    
32     -608   
-1200  -1104  
-224   208    
336    -256   
-960   240    
992    0      
-368   448    
304    384    
-256   384    
-16    208    
-48    96     
384    224    
-208   144    
-208   32     
176    240    
384    16     
-48    224    
-1344  16     
352    288    
-32    64     
-112   -64    
32     128    
-48    -480   
-1168  1088   
944    -64    
144    160    
-160   -496   
-160   -176   
304    160    
-1136  352    
368    -320   
272    48     
-736   48     
240    0      
80     64     
-176   64     
416    -16    
-288   64     
-48    96     
-144   48     
-96    -256   
80     -32    
64     0      
176    -448   
-224   592    
-48    -304   
-544   80     
384    -400   
752    -288   
896    832    
-752   288    
-272   -80    
288    -64    
224    64     
192    208    
-112   816    
-640   992    
816    -208   
-224   -128   
-640   -144   
-32    -128   
544    16     
144    32     
-128   -16    
128    -112   
-48    112    
48     -432   
-144   352    
544    96     
-368   16     
176    912    
1232   2560   
-912   1504   
400    912    
1216   528    
-752   64     
-208   192    
480    336    
192    -144   
-320   0      
384    112    
480    16     
-128   224    
-272   288    
208    -48    
-80    144    
-32    0      
160    144    
-192   16     
-176   -128   
576    656    
240    -176   
-864   272    
480    96     
384    160    
224    176    
-416   144    
160    128    
-240   -80    
64     32     
192    176    
-128   32     
112    240    
-288   128    
384    -16    
144    160    
-16    16     
-384   304    
608    176    
-576   -128   
-224   144    
352    0      
-256   64     
576    80     
-352   128    
-160   208    
96     -96    
192    -192   
-336   -320   
-96    144    
80     160    
-48    304    
320    288    
80     912    
752    64     
-496   -96    
336    48     
496    384    
-256   112    
-192   400    
-16    384    
272    144    
0      96     
-64    0      
208    80     
-32    32     
48     -848   
-144   -16    
240    16     
352    208    
-352   192    
256    144    
-176   -224   
-80    160    
224    176    
96     288    
-80    208    
-272   224    
480    -48    
16     96     
64     304    
-160   -608   
752    2128   
-912   -1504  
-976   752    
1920   -448   
-800   144    
-384   160    
288    -16    
192    -224   
224    -496   
-192   560    
32     112    
-64    -176   
144    -64    
-96    32     
144    320    
0      96     
32     -336   
256    144    
0      -32    
-32    64     
-64    160    
336    1536   
784    -224   
-992   -176   
224    160    
128    368    
32     -96    
-112   -608   
0      -176   
48     48     
0      -112   
160    -1552  
-96    128    
64     -112   
-32    176    
176    -64    
-128   16     
-16    -112   
0      32     
176    -128   
144    144    
-16    304    
96     64     
16     80     
192    -288   
-384   -64    
256    -256   
80     112    
32     -1280  
-112   16     
144    -112   
912    -288   
-2192  -320   
1456   336    
352    80     
-912   384    
224    160    
176    96     
352    176    
-16    80     
-176   96     
96     -192   
112    112    
80     -1472  
-128   384    
480    288    
-288   272    
64     16     
96     144    
192    -48    
-160   -48    
320    -224   
-1504  976    
960    -368   
-400   -592   
432    -720   
-192   -704   
144    -176   
560    -112   
0      352    
-304   -656   
-144   -16    
48     -16    
80     96     
128    144    
208    -128   
0      112    
-96    464    
128    64     
-32    -288   
64     48     
-128   -144   
112    384    
32     96     
-112   160    
288    672    
-304   240    
-800   -2144  
-464   -1328  
592    -608   
-688   192    
128    272    
-96    -144   
160    -96    
240    336    
480    336    
-528   -560   
288    -496   
-352   -128   
64     -1712  
320    224    
-64    -1024  
-144   -80    
-272   -112   
96     -416   
-112   -496   
752    -1744  
224    -160   
16     -624   
-208   -576   
-80    -160   
1232   2704   
-1872  736    
544    336    
1904   0      
-1632  416    
-112   -720   
640    -400   
48     992    
-464   -1344  
-128   496    
80     -608   
80     -64    
288    -592   
112    -128   
-192   64     
-80    -672   
-80    -416   
128    304    
-288   176    
320    992    
-16    -400   
0      -288   
-240   -240   
-80    64     
32     -560   
16     992    
-144   -656   
-368   96     
640    656    
-64    -2304  
-128   144    
-48    384    
208    -640   
160    -368   
16     -272   
176    -208   
-192   -32    
-16    -16    
96     -384   
-368   -112   
-48    384    
320    16     
-192   -1168  
112    -336   
32     -992   
144    -624   
80     48     
176    128    
-64    -864   
-176   -192   
-384   -384   
144    -800   
-96    -704   
112    -224   
-640   -176   
656    -656   
400    -144   
-160   -544   
-400   -352   
304    -480   
224    192    
-48    -960   
-128   112    
48     -144   
32     272    
208    320    
-256   304    
-96    -208   
688    32     
80     -304   
288    -208   
-784   -32    
-80    64     
32     -160   
80     -800   
-32    -752   
0      -704   
-96    -736   
192    336    
0      480    
-352   240    
-416   -800   
496    -384   
-320   896    
-784   816    
80     160    
0      608    
32     240    
-832   -864   
-96    -848   
320    736    
144    -528   
-144   240    
-144   0      
176    -208   
48     352    
96     -384   
-256   -400   
-208   -464   
96     160    
288    -112   
-224   -800   
-336   -32    
128    -48    
128    -1536  
160    -304   
-112   640    
-240   -192   
16     224    
160    -400   
-32    -416   
-224   368    
-208   96     
208    144    
192    -96    
-128   -464   
-144   -16    
-32    304    
336    416    
16     64     
-16    96     
80     48     
-64    0      
-336   192    
80     -176   
-128   80     
224    192    
240    48     
-80    48     
112    64     
-432   -592   
128    560    
1104   -496   
-816   -80    
144    80     
208    -32    
-480   -496   
-96    96     
-48    144    
-352   96     
128    80     
-480   16     
-144   -96    
-144   -224   
336    -112   
-112   -160   
-160   160    
144    -96    
-32    16     
-288   -208   
80     64     
-208   -48    
-208   -576   
-1200  736    
1520   176    
-896   -288   
-112   144    
672    48     
-1040  -272   
448    128    
-176   160    
256    -32    
-272   -112   
-32    160    
-304   -272   
-192   80     
560    128    
-16    128    
-16    -112   
-464   256    
-192   96     
-384   144    
256    608    
-992   -64    
112    64     
-1120  16     
-352   -384   
-16    -640   
368    112    
0      -608   
-528   160    
816    400    
-96    0      
-464   80     
144    -16    
-208   -560   
0      112    
-32    -32    
-224   -512   
448    -272   
-736   -176   
-640   176    
208    16     
528    -32    
-64    96     
-448   -80    
-384   448    
800    -224   
48     144    
272    16     
464    992    
-864   -736   
-2320  -912   
1760   -288   
-512   -224   
-416   16     
432    176    
-208   16     
0      272    
240    -144   
-224   -128   
-160   160    
-224   16     
-32    32     
176    0      
96     -16    
-64    48     
-240   128    
96     -16    
-16    -32    
0      1040   
560    64     
-2080  176    
496    -96    
-768   -16    
464    96     
-32    0      
-288   560    
672    112    
-544   256    
-240   -240   
16     176    
208    -32    
-176   80     
368    80     
-752   -128   
352    352    
-528   -288   
-224   16     
144    -176   
-80    64     
256    80     
-496   -176   
272    -80    
-272   304    
-256   -96    
496    0      
256    -160   
-528   -112   
272    64     
-64    -192   
96     -80    
-368   -368   
464    -384   
-48    464    
144    176    
176    -16    
-320   144    
16     112    
272    -272   
-352   -144   
-96    64     
160    0      
0      -32    
-32    -64    
-112   -192   
-32    -176   
-224   -416   
96     32     
64     368    
48     656    
336    512    
-304   224    
176    -32    
-272   96     
96     144    
96     144    
64     224    
-144   192    
96     64     
-288   -208   
112    -208   
544    -672   
-2176  2000   
1680   -160   
-576   -416   
256    -544   
0      400    
-352   -144   
-80    -416   
112    -416   
160    -304   
-320   -160   
-48    -224   
352    32     
-112   -32    
-128   -304   
64     112    
32     624    
288    192    
-64    64     
-80    -32    
-288   -352   
448    -1152  
80     -208   
-176   352    
256    672    
0      688    
-368   -496   
208    -448   
-16    448    
-96    128    
32     -16    
80     -208   
-112   -80    
160    128    
208    448    
-192   32     
176    -320   
224    32     
-32    -224   
-112   272    
144    336    
144    -240   
16     144    
32     272    
-128   -64    
176    224    
176    288    
-224   -272   
16     96     
336    224    
992    1632   
-736   672    
-784   768    
1392   0      
-896   352    
-128   368    
416    -240   
-864   -1936  
-64    0      
256    672    
192    336    
-192   0      
48     208    
320    416    
-496   -160   
-80    96     
624    -32    
-112   -320   
-464   -704   
400    -352   
-32    480    
-768   -544   
432    -448   
976    528    
-1024  -2400  
96     0      
400    -1024  
-416   -1168  
32     16     
128    -32    
48     -272   
-224   -64    
32     -96    
192    320    
-160   -224   
80     -224   
176    96     
-256   -608   
80     -528   
320    -1616  
-64    -144   
-224   -112   
-16    464    
-224   -240   
592    -960   
-288   160    
-48    432    
-384   -304   
768    -112   
-192   1360   
464    1248   
-336   -384   
-608   -320   
448    144    
896    624    
-768   576    
-512   -256   
-320   -816   
176    -448   
464    -224   
-512   336    
576    16     
-80    96     
-48    -256   
-304   -48    
32     -416   
-544   -352   
528    -336   
-448   -96    
112    -768   
-16    48     
672    48     
-2304  -128   
1024   -208   
896    336    
-288   -656   
-224   -160   
-144   96     
752    -1248  
96     -880   
-144   240    
-304   144    
0      -80    
528    -272   
160    -160   
-352   16     
-96    -624   
160    -256   
-208   -112   
64     512    
224    112    
-176   -320   
-16    64     
-176   -64    
976    80     
-208   -80    
-512   320    
240    272    
80     112    
240    -1440  
-32    -224   
-208   144    
240    720    
-16    -448   
-288   208    
640    336    
-288   240    
-224   176    
128    112    
224    -640   
-320   -784   
-96    32     
304    -1312  
-96    0      
96     -160   
368    1088   
-368   -464   
-224   -528   
384    -1072  
64     -288   
-112   160    
16     688    
400    -992   
-944   -352   
416    560    
640    -368   
-656   -128   
336    240    
560    -448   
-288   -1632  
-352   -336   
240    -336   
-96    336    
112    512    
112    320    
-288   192    
64     -320   
288    0      
-272   96     
32     -1808  
240    -32    
64     128    
96     16     
-48    0      
-96    -240   
-96    112    
224    -192   
-48    -352   
0      560    
176    112    
-16    -208   
-48    -864   
-768   -304   
1152   -688   
-960   -304   
304    -864   
480    -288   
-256   -464   
160    -752   
32     -496   
-256   -416   
-112   -240   
288    -256   
-112   -128   
0      -96    
192    432    
176    -16    
-160   128    
-176   -144   
-128   -144   
-48    -112   
224    -480   
496    976    
-1168  608    
672    -240   
16     -208   
-176   -432   
32     -608   
-80    -176   
144    304    
96     128    
64     240    
0      16     
-272   -272   
64     -256   
-80    -112   
-192   -64    
-16    208    
176    -32    
16     160    
128    -768   
-144   48     
176    32     
-272   -64    
176    128    
-64    -96    
-16    -208   
416    -224   
-272   -144   
-48    -48    
-144   80     
-528   336    
-544   2128   
2352   -64    
-1152  80     
-240   -688   
736    128    
-176   528    
-256   112    
256    512    
336    -144   
-480   48     
112    -112   
-80    -16    
-192   -144   
160    176    
368    -32    
-160   32     
16     -128   
272    128    
-32    32     
-368   160    
224    -512   
224    -96    
-1616  400    
928    16     
288    400    
320    -400   
-400   64     
720    -48    
-496   -32    
-288   -80    
64     0      
64     -112   
16     112    
-176   -368   
688    208    
-336   -992   
-160   -112   
544    -288   
-384   -160   
160    -160   
240    16     
-112   -128   
-96    176    
928    -336   
-1328  0      
320    480    
-16    320    
-576   96     
624    -240   
-288   144    
-304   -432   
-224   -48    
464    448    
80     64     
-64    160    
-448   -80    
336    -352   
-64    912    
-736   736    
400    -480   
80     -176   
-256   48     
32     16     
240    -160   
32     112    
208    -400   
-1072  368    
400    -32    
96     -48    
-144   -448   
1632   4192   
256    1536   
-1264  -384   
2016   64     
1008   -128   
-1520  128    
-592   -144   
1600   80     
112    -144   
-720   64     
-288   80     
-704   48     
528    0      
-1440  -128   
-224   48     
-368   64     
624    48     
0      -16    
-176   -96    
-384   -848   
-432   -144   
-272   -496   
-304   176    
624    -160   
-48    -96    
-480   -224   
208    -48    
-384   16     
336    288    
-480   464    
64     224    
64     112    
-528   32     
-256   144    
-64    112    
160    176    
-80    224    
112    336    
-384   240    
0      80     
64     128    
-304   -48    
160    192    
-704   -112   
432    176    
208    192    
-304   48     
-368   -16    
224    336    
272    96     
-336   64     
32     -144   
-144   -416   
192    -480   
-464   -1104  
-624   -960   
432    -16    
160    304    
240    640    
32     592    
-304   96     
144    288    
-80    96     
-112   -80    
-480   -128   
16     256    
112    176    
272    -64    
-48    16     
-64    416    
-48    352    
96     112    
-112   -1056  
128    -288   
-32    352    
-240   208    
400    -288   
-304   -592   
-128   144    
-384   928    
304    416    
-304   -544   
912    384    
-512   544    
-656   -880   
432    -80    
32     -384   
96     1040   
-368   1248   
128    -752   
-112   560    
-32    -192   
128    -176   
-128   96     
-384   -16    
224    80     
-48    208    
-176   304    
-192   48     
-96    -320   
-48    64     
48     144    
-192   1424   
368    32     
-352   -80    
-480   512    
240    96     
144    256    
-352   1120   
-352   192    
512    224    
-1440  -288   
-112   -2688  
48     640    
96     0      
-32    320    
112    48     
-432   48     
64     -240   
480    16     
208    848    
-368   336    
-304   -96    
192    128    
160    -288   
144    128    
-656   304    
288    -144   
-160   224    
-176   96     
288    -48    
-32    192    
-1456  1536   
3264   -1056  
-736   192    
-1248  480    
1184   32     
-32    96     
-752   -512   
320    -592   
112    864    
-336   -192   
80     272    
48     16     
-224   128    
160    -128   
320    176    
-64    16     
-240   64     
384    96     
304    128    
-224   0      
624    1200   
-1104  32     
-432   -48    
800    432    
-400   592    
288    -320   
-192   -896   
-736   -1104  
432    96     
96     1264   
-224   784    
80     -432   
64     -80    
-224   48     
320    -720   
-160   -448   
-48    176    
-96    -176   
-592   32     
320    208    
96     112    
-256   -304   
512    -688   
-336   48     
-688   -784   
208    -976   
64     -384   
864    -320   
560    -272   
-304   -848   
32     -96    
48     -416   
-288   416    
-272   -416   
496    480    
544    -96    
16     -720   
688    -480   
-304   -48    
368    528    
288    128    
-304   96     
16     -432   
-192   -128   
224    224    
-160   240    
-320   96     
-272   240    
112    -32    
-96    48     
704    2384   
-128   1312   
-272   -192   
1072   -928   
-1152  -208   
-384   400    
640    640    
-80    -896   
-288   480    
48     688    
144    64     
400    -192   
-16    -224   
-656   -384   
96     240    
240    96     
-128   -144   
-288   -80    
-208   144    
384    1360   
256    1008   
48     128    
-192   -320   
-608   160    
192    -208   
336    -112   
-112   624    
224    816    
-320   -32    
128    288    
208    128    
-80    -64    
192    48     
240    288    
16     592    
128    -96    
-160   -320   
320    368    
-192   160    
-96    112    
256    -144   
-160   -432   
16     112    
32     -272   
-96    176    
160    960    
336    592    
16     -16    
-304   496    
416    608    
-32    496    
64     -160   
400    -320   
-848   224    
256    208    
336    320    
-224   -96    
336    -352   
-48    -704   
224    -80    
48     -160   
-208   16     
208    80     
112    -128   
-272   -224   
64     32     
16     96     
32     -48    
-224   -688   
80     -496   
128    112    
224    -528   
0      -64    
-208   -496   
32     288    
160    -496   
-128   256    
320    -112   
-96    -144   
-192   -528   
208    128    
-144   -2128  
-208   32     
304    64     
-400   -304   
320    224    
0      -96    
-272   160    
-144   -192   
496    528    
320    -464   
-464   0      
-64    -1200  
208    48     
160    256    
-288   320    
-208   -384   
528    -48    
-208   176    
32     240    
384    384    
-544   -688   
704    -624   
-528   224    
400    128    
112    -272   
-352   320    
144    -320   
16     192    
240    -144   
-80    144    
-128   48     
-16    16     
224    0      
144    -16    
-192   32     
-32    -400   
256    -128   
-240   -256   
224    352    
-224   -192   
16     0      
288    0      
-48    192    
0      48     
-144   176    
560    -96    
-640   64     
416    208    
144    -288   
-272   16     
-544   -1120  
464    496    
-112   -32    
-768   -16    
528    -48    
432    96     
-368   -544   
384    96     
128    -144   
-192   80     
304    80     
-336   -320   
192    -1344  
288    64     
-576   -48    
192    80     
384    224    
-176   -144   
-256   80     
0      -144   
16     112    
528    1056   
-368   -1520  
-1712  144    
2096   608    
-1040  -272   
-1312  176    
1264   -1344  
-944   -80    
16     -544   
176    -128   
160    464    
-80    -96    
32     128    
80     48     
16     -1024  
-336   176    
224    -160   
16     192    
-416   -160   
-112   -160   
0      -64    
-688   -704   
544    16     
368    -160   
-944   48     
832    -1008  
224    -464   
176    -528   
-192   224    
304    -32    
-432   128    
128    -272   
-272   80     
112    -144   
608    368    
304    -176   
-400   -480   
320    -256   
-96    -32    
-384   80     
176    -912   
-48    64     
16     -1872  
48     -16    
-48    -480   
-720   16     
560    -144   
-160   32     
-32    -64    
-768   -1472  
1696   -2688  
-80    816    
-2064  272    
224    -32    
-144   192    
336    -160   
224    208    
-144   -880   
-544   -288   
16     -16    
208    112    
-192   -112   
192    320    
-336   -128   
80     128    
-304   -48    
208    -80    
-128   16     
16     -656   
-736   -1328  
288    -896   
-16    -208   
96     -128   
800    176    
-912   -560   
480    400    
-16    0      
16     -400   
-64    32     
-48    -320   
112    304    
192    -16    
112    -96    
0      160    
-928   208    
416    800    
-480   176    
208    -464   
304    -48    
-208   -832   
-112   128    
-112   -720   
-144   -80    
240    -16    
-272   32     
400    496    
112    304    
-256   64     
384    -256   
-448   560    
96     192    
-80    -880   
-160   -352   
304    16     
-512   -960   
416    -48    
256    1152   
-256   1728   
80     1440   
144    -112   
0      336    
160    256    
-96    -144   
-16    -176   
-320   0      
384    352    
-80    16     
64     -464   
0      240    
-80    -144   
112    192    
-176   -496   
176    -192   
-160   -176   
160    -640   
-192   96     
272    -48    
-416   160    
224    -32    
208    -48    
-256   -288   
528    896    
-448   1104   
272    -32    
192    -448   
128    -160   
-192   -240   
-96    -432   
-16    -48    
-208   -48    
-272   -256   
128    -112   
-96    -208   
96     0      
-224   -224   
-112   -352   
-32    208    
-576   192    
288    320    
-352   96     
-464   64     
416    -336   
-1536  64     
752    112    
-208   192    
-128   -288   
0      16     
-80    -80    
176    368    
16     272    
-288   0      
-64    80     
48     -128   
-80    176    
-224   96     
96     -112   
-80    -80    
-528   -96    
320    16     
304    32     
-480   -48    
-752   96     
32     224    
160    16     
-32    16     
160    -192   
-64    -32    
-96    -160   
-16    48     
96     48     
-208   160    
16     -1008  
-2160  160    
1328   144    
-928   288    
-336   576    
-368   784    
-192   -496   
-768   720    
720    1200   
192    -160   
32     -160   
-416   -288   
-112   -16    
48     320    
320    48     
-112   400    
-160   176    
-336   -32    
16     -320   
96     32     
-144   -32    
416    1280   
1104   -112   
-1216  -528   
304    -1168  
-16    -112   
-320   928    
416    -352   
-112   -1472  
-432   -1232  
320    256    
-16    208    
-48    304    
-144   256    
-16    128    
-16    32     
-240   304    
32     -544   
-208   -480   
-80    80     
512    272    
32     0      
0      192    
-544   -96    
272    0      
-16    -1120  
-656   -352   
-416   -2288  
-464   -752   
864    -192   
-736   256    
96     144    
64     -352   
-320   240    
-512   -624   
832    -224   
-352   176    
-16    -720   
-288   -128   
-192   -64    
400    -912   
128    208    
48     0      
-48    -48    
-336   48     
464    432    
-784   464    
-176   48     
496    448    
-624   640    
-544   -1168  
1248   -2080  
96     288    
-704   -16    
-144   -2096  
-256   -336   
560    -544   
-256   560    
-608   416    
336    400    
144    112    
-144   176    
-240   -96    
-208   512    
-432   -256   
160    -112   
-96    -16    
112    176    
80     208    
160    864    
288    -576   
-464   -832   
0      -272   
288    176    
192    -16    
-528   32     
288    128    
-224   48     
224    -112   
128    -112   
48     256    
-96    176    
16     96     
0      -208   
304    48     
160    16     
-368   -384   
-288   -464   
352    16     
0      48     
-96    -144   
-96    -64    
-192   0      
272    80     
-16    48     
80     128    
64     256    
-592   144    
208    400    
480    208    
-192   240    
-256   128    
-224   -480   
272    -240   
16     416    
-512   128    
480    240    
96     96     
-352   144    
144    544    
-336   192    
272    144    
80     128    
-224   -48    
144    80     
16     96     
-192   -128   
80     -224   
-128   96     
-112   -576   
0      -240   
144    416    
-16    -176   
-96    128    
-16    320    
32     192    
32     -64    
160    -192   
0      160    
-80    64     
32     48     
-560   -800   
1856   1552   
272    368    
-960   16     
176    256    
-176   -48    
112    -288   
160    64     
368    384    
-736   288    
272    -128   
336    112    
64     -64    
-272   112    
32     528    
304    -240   
16     192    
0      256    
48     -112   
-224   -16    
160    0      
-240   -960   
320    -144   
384    400    
-1056  -64    
624    16     
32     32     
48     -64    
-464   64     
144    112    
192    -128   
240    128    
-464   -48    
-48    112    
192    144    
-32    -288   
-32    96     
-192   -192   
-32    96     
-96    160    
272    -64    
-128   96     
-80    160    
64     16     
320    192    
-464   -208   
128    192    
224    -80    
-64    128    
-48    96     
-256   -176   
1440   -3248  
-2032  -1184  
1344   64     
800    144    
-1392  0      
352    448    
352    432    
-128   256    
368    -192   
-208   208    
-32    192    
112    96     
128    32     
144    112    
16     -336   
-192   192    
256    -736   
-32    112    
80     48     
112    96     
0      256    
-368   272    
1536   -544   
-544   672    
80     -928   
-416   288    
400    -64    
-512   -64    
128    144    
240    -224   
-192   128    
368    -112   
-16    128    
-192   -240   
96     304    
528    -80    
-128   80     
-96    -176   
-208   64     
112    160    
304    80     
-176   -96    
544    -144   
-592   272    
608    -128   
-80    -32    
-672   176    
288    -96    
80     -640   
-112   256    
48     -704   
-192   -48    
480    -304   
80     384    
-544   -80    
560    -96    
-128   -64    
-240   -224   
480    128    
-112   -48    
32     32     
80     -352   
-80    48     
16     -144   
160    96     
224    176    
240    -16    
-432   -16    
352    192    
-128   -272   
96     -1920  
-2096  -1360  
2064   -480   
672    192    
-1072  -288   
256    928    
-16    -224   
672    288    
-352   -144   
-80    224    
208    -400   
-224   144    
720    -528   
-240   464    
0      -48    
-80    544    
592    -16    
-320   -192   
368    -80    
-48    -752   
64     -640   
-96    -144   
320    656    
-464   -160   
-112   432    
512    -224   
-160   48     
64     -176   
-112   -416   
0      -624   
304    320    
144    384    
-16    -112   
-176   -176   
256    -96    
-48    128    
176    320    
128    272    
-80    -64    
48     -320   
272    64     
-496   -416   
80     0      
400    -32    
368    80     
-864   -224   
-560   -272   
272    176    
-464   -992   
224    -352   
128    -576   
-608   -240   
656    192    
-32    528    
400    144    
224    320    
-432   432    
432    144    
-752   -1776  
448    -400   
-144   1072   
-176   -448   
176    208    
-16    -608   
-32    16     
64     -656   
32     176    
-32    320    
-32    192    
80     192    
-160   96     
-48    -176   
-32    64     
80     -16    
48     -80    
-96    -32    
128    32     
-224   144    
224    -256   
240    -224   
-176   -432   
-32    16     
-272   -400   
560    -448   
-368   64     
-656   144    
336    0      
128    -48    
-160   -224   
-112   -144   
-608   64     
32     80     
-608   -192   
-160   -192   
-192   -16    
208    80     
176    128    
224    -160   
-96    80     
-224   -832   
160    192    
-64    -144   
432    -64    
336    304    
-688   -176   
48     -80    
-112   -80    
64     80     
160    256    
0      752    
0      -448   
-512   -320   
176    -832   
288    -80    
32     -1488  
-192   -16    
16     -80    
96     -112   
208    -304   
-192   -800   
-208   -240   
144    208    
16     -128   
-16    -176   
-144   -80    
-336   -176   
48     -144   
400    -80    
208    176    
-320   -96    
-112   16     
-256   -1184  
2224   -1184  
-1040  448    
-176   240    
352    -208   
-528   592    
336    -592   
736    -560   
-448   992    
-48    288    
496    80     
-112   -144   
96     96     
224    -48    
-512   -448   
-320   -48    
336    128    
96     -464   
-192   352    
48     736    
272    96     
-128   -1232  
-1088  800    
1984   -832   
-1168  224    
624    464    
48     32     
128    -32    
-768   -16    
64     80     
112    720    
400    48     
-176   -112   
-320   176    
256    48     
-320   -400   
128    48     
48     -48    
-192   272    
832    16     
-224   48     
-256   -384   
-240   -240   
-1056  -112   
-912   -256   
688    -768   
752    144    
-976   224    
32     1056   
800    -336   
-496   -304   
-80    160    
208    288    
48     224    
-160   -288   
-64    -144   
-1120  512    
400    176    
-272   -224   
-448   -96    
-16    528    
336    -272   
-400   48     
-144   -64    
96     288    
304    -48    
96     -528   
-608   -64    
320    48     
448    704    
-512   704    
-1232  -2240  
-176   -432   
80     -256   
-32    208    
1024   368    
-480   544    
-848   864    
704    384    
-144   112    
-1472  -288   
-112   -16    
-176   -320   
448    352    
-128   -128   
-352   208    
-48    -192   
160    16     
-64    -32    
592    32     
-1104  -96    
656    -96    
-16    -208   
-128   -96    
576    176    
-624   -80    
-80    224    
240    -64    
16     112    
-368   -160   
368    144    
-176   -304   
16     32     
144    -32    
-272   -48    
64     -48    
-224   96     
112    240    
-128   672    
-16    32     
-128   112    
128    -32    
-592   -112   
432    112    
80     -32    
0      176    
-224   208    
-32    224    
384    272    
-352   16     
-48    -32    
48     -16    
128    976    
-224   -96    
-496   224    
368    16     
-128   0      
-496   -352   
0      -32    
272    -112   
128    224    
128    0      
-208   80     
192    128    
-160   -64    
-144   -16    
192    96     
-48    0      
32     -32    
-16    256    
-240   -48    
16     208    
-128   32     
144    64     
-256   -16    
192    -32    
-192   416    
-128   -416   
64     -96    
-144   272    
80     -32    
96     80     
-768   -2064  
-48    -416   
704    -112   
-880   -256   
464    416    
192    -160   
-384   416    
-448   -576   
-288   400    
416    0      
-176   -208   
-176   224    
32     48     
112    -256   
-128   144    
-48    -32    
32     0      
32     592    
32     32     
-16    -128   
336    1040   
-1024  976    
432    -48    
224    -128   
-112   -144   
320    544    
-848   544    
256    -80    
464    -176   
-96    256    
-112   80     
-320   240    
208    -64    
112    -96    
-96    96     
128    -176   
64     32     
-64    -96    
128    208    
208    48     
-304   176    
-112   176    
160    208    
288    -80    
-32    0      
-592   16     
288    176    
64     192    
144    -64    
-320   48     
-1040  1056   
2176   752    
-464   640    
-1056  -240   
1376   240    
-416   -48    
-272   208    
0      -480   
160    112    
-112   80     
0      112    
352    -48    
96     128    
-240   144    
80     112    
-368   256    
304    -112   
64     288    
-80    -576   
-448   -176   
352    0      
-464   -832   
208    304    
448    -448   
-400   -240   
208    208    
112    -192   
-544   256    
-208   128    
256    80     
208    32     
0      112    
-112   80     
-160   80     
432    -64    
-496   160    
192    48     
0      96     
112    480    
-176   128    
-176   -64    
64     16     
-176   -144   
-32    -176   
416    -288   
320    -448   
-432   528    
272    144    
-176   -48    
-240   128    
-128   96     
224    -560   
880    -336   
-800   208    
80     208    
768    48     
-864   544    
112    -16    
176    -320   
-208   -1520  
-96    304    
-80    32     
192    160    
128    16     
-176   192    
304    448    
-336   112    
-304   48     
480    160    
208    -192   
-1008  960    
1008   2080   
672    160    
-1792  -32    
-384   -32    
1552   512    
-80    304    
-512   -192   
-208   32     
16     -112   
-176   320    
224    224    
32     272    
-400   -336   
368    -112   
368    480    
16     -128   
-192   96     
304    -48    
192    112    
-192   -112   
-16    -1552  
-80    -224   
144    512    
432    304    
240    592    
-160   304    
0      400    
512    1008   
16     -544   
0      -272   
-32    -208   
112    160    
-112   384    
208    -1136  
-256   -224   
-96    -192   
-96    -304   
224    -976   
-176   480    
112    560    
-16    -256   
-96    -80    
0      16     
48     80     
288    176    
-896   -1088  
544    -400   
16     672    
-384   208    
128    160    
224    -80    
112    -432   
-928   -944   
624    -96    
-240   -864   
-64    -432   
-128   -400   
0      -544   
-672   -432   
608    304    
288    160    
-128   -256   
-80    96     
0      176    
240    -112   
208    -64    
-384   -160   
112    -1808  
448    -384   
-432   208    
192    128    
-256   96     
48     224    
-64    32     
80     128    
-64    304    
144    0      
-272   -192   
64     -112   
432    32     
-192   -576   
16     336    
96     -160   
256    -64    
192    240    
-352   96     
-16    -32    
112    32     
464    -256   
224    -96    
192    -80    
-144   112    
80     96     
176    16     
-112   64     
-96    -96    
192    96     
-112   208    
80     176    
128    48     
-32    80     
288    -336   
-848   -48    
352    160    
-16    64     
368    -208   
-208   -912   
-96    -320   
336    -224   
-16    -272   
32     -96    
112    160    
-112   -144   
-64    -64    
64     -608   
128    -944   
208    96     
-416   -1056  
32     -608   
432    400    
224    16     
-208   80     
-304   -848   
176    -208   
336    224    
320    -176   
-432   -32    
-272   -64    
608    -1888  
112    -64    
-224   -176   
-1520  -800   
688    -352   
368    144    
-800   112    
-320   -608   
1056   528    
-688   896    
-400   192    
768    -1104  
-112   -176   
-320   112    
80     16     
128    -208   
256    -112   
64     -208   
-272   64     
-208   -192   
-32    64     
-352   48     
-144   192    
-112   64     
384    1328   
1680   -64    
-832   -1008  
-224   -1696  
0      -2112  
192    208    
0      352    
0      0      
240    416    
-608   176    
-160   -128   
560    16     
-128   -48    
-96    112    
-544   -80    
304    -112   
384    -64    
-416   -208   
-112   -16    
256    -496   
48     48     
256    16     
-1056  272    
656    -208   
64     592    
-432   -208   
-208   384    
96     -112   
-368   -400   
144    -224   
-144   -112   
240    272    
160    304    
-416   -352   
32     -528   
320    -608   
352    -1504  
-192   192    
-144   160    
48     32     
16     16     
160    -112   
-384   -48    
-16    -160   
-112   -80    
-384   32     
-432   48     
-32    -96    
-160   -688   
80     -2672  
1360   -1856  
304    -2336  
-624   -32    
-448   304    
48     160    
-128   -208   
640    -80    
-448   -336   
16     336    
64     -176   
-288   80     
-528   -96    
160    64     
160    -128   
0      80     
240    -64    
-416   -80    
-16    -224   
0      576    
928    -128   
-1152  384    
368    -272   
528    0      
-64    -160   
-368   112    
400    -208   
-384   -160   
96     -208   
176    240    
-144   -32    
-304   176    
416    -512   
-112   -320   
-160   -96    
336    64     
240    48     
-480   0      
32     384    
-256   32     
-144   144    
96     -208   
-448   16     
16     -240   
64     -176   
48     -640   
-464   -208   
-16    -640   
144    0      
128    80     
-64    128    
-208   192    
176    368    
-1008  -80    
144    -976   
-544   -432   
480    -176   
-528   32     
32     -96    
384    320    
-736   -96    
-176   176    
-48    96     
16     48     
48     176    
-848   -64    
-48    -64    
-512   624    
-16    224    
-160   -240   
80     -80    
144    -32    
-176   176    
-144   176    
192    352    
-240   160    
0      -224   
384    560    
0      320    
-400   -544   
48     -112   
-352   -672   
1504   976    
80     624    
-1632  64     
336    256    
-160   -672   
-48    -16    
96     80     
192    384    
-96    -48    
-144   -160   
416    -208   
-192   320    
-176   0      
144    448    
240    -48    
-320   -32    
-128   -96    
-176   -448   
48     -16    
32     32     
704    368    
-1472  816    
912    -336   
-128   -192   
32     -368   
-32    176    
-448   0      
-32    -480   
160    80     
176    224    
-672   112    
0      368    
240    -64    
-96    144    
-224   -192   
-16    -112   
96     64     
144    80     
16     -32    
0      32     
-160   32     
96     208    
-192   -48    
-208   64     
496    -16    
-640   -64    
160    208    
-80    16     
-32    112    
-768   -240   
368    576    
1328   352    
-1056  -64    
400    16     
-48    -320   
-400   432    
32     -240   
-32    -208   
16     -272   
32     80     
64     48     
0      176    
-128   -48    
384    384    
-544   -16    
-64    384    
112    80     
-16    80     
0      160    
48     16     
-96    48     
-640   80     
1984   -544   
-128   848    
-624   656    
-112   -64    
528    -160   
-384   -208   
272    352    
-80    -48    
48     144    
80     -48    
-192   80     
-64    -96    
112    32     
64     0      
-240   64     
16     32     
112    -16    
0      160    
0      -32    
-128   -64    
-192   -352   
496    -256   
256    176    
-64    944    
192    176    
224    -96    
-784   208    
0      -224   
864    -544   
-288   192    
240    0      
-112   96     
352    -208   
-640   320    
736    -544   
-800   -64    
32     320    
224    64     
128    48     
-176   64     
-192   -16    
16     32     
272    208    
608    576    
-1056  944    
-16    48     
-64    -16    
208    -32    
-624   -288   
528    1008   
928    208    
-1376  -176   
336    320    
1024   208    
-32    -736   
-464   -752   
-240   928    
-16    352    
-32    -160   
16     -256   
-16    -224   
80     608    
240    -368   
112    416    
-208   1136   
-208   -512   
240    288    
-16    -384   
-128   432    
-64    240    
144    -16    
144    -528   
0      -304   
-80    224    
48     112    
64     -16    
224    48     
16     -224   
-352   -96    
112    320    
-192   80     
16     -32    
352    32     
-368   0      
0      320    
48     -1168  
-32    64     
144    1152   
96     1120   
80     0      
16     -160   
-80    64     
-16    192    
-208   96     
752    144    
-272   -208   
-96    640    
-240   -128   
96     112    
-64    112    
96     1264   
1120   1056   
-224   944    
-48    448    
128    -368   
16     -160   
-144   864    
16     -912   
-160   432    
-176   96     
-64    256    
320    -1968  
-64    -48    
-496   240    
96     -224   
48     48     
288    -448   
-16    256    
-80    80     
240    -16    
160    176    
-64    80     
80     192    
-16    -96    
160    -320   
-704   -592   
-64    -464   
320    0      
240    -144   
-416   176    
-688   528    
1216   -400   
-624   688    
224    352    
-272   80     
-96    80     
-48    -272   
-160   -176   
-192   -640   
-16    -112   
96     0      
256    -352   
-144   48     
-224   -2336  
96     80     
160    -64    
32     -368   
-16    -32    
-192   48     
-64    112    
336    304    
320    -32    
-304   208    
-208   -80    
208    128    
32     1008   
112    -240   
-64    -288   
-144   -1024  
80     528    
144    -208   
128    -624   
32     -336   
80     912    
-48    -80    
80     160    
48     -48    
-128   -112   
208    320    
272    80     
-160   -64    
-96    -96    
416    192    
-144   -576   
-32    0      
288    -768   
-48    128    
-64    16     
192    64     
-480   -272   
896    -416   
-816   736    
1024   496    
-1056  -64    
-288   -32    
800    352    
-352   16     
176    288    
-464   -464   
304    144    
-48    -640   
-48    128    
-32    -320   
368    112    
-352   -224   
224    144    
-80    192    
240    272    
64     208    
0      -208   
-272   -608   
1232   16     
-1040  128    
656    -528   
496    480    
-1008  -832   
160    208    
400    112    
336    -48    
-288   64     
-128   256    
96     64     
208    144    
-48    16     
64     288    
-256   128    
208    -480   
352    -224   
304    0      
144    400    
-432   -192   
0      -96    
464    480    
960    -48    
-240   -336   
-48    496    
-176   320    
64     -144   
1056   -528   
-528   -96    
144    48     
-32    -336   
416    96     
-192   -496   
-464   80     
0      176    
608    32     
128    16     
-320   128    
240    160    
-208   -800   
128    128    
480    80     
-272   -496   
-384   -176   
128    400    
1216   -272   
-416   432    
352    -112   
816    624    
-2736  1024   
784    304    
208    -32    
-1744  -1920  
1120   80     
976    -208   
-416   -128   
-176   -288   
400    400    
-464   -416   
96     -1360  
240    -160   
-336   192    
64     -96    
-112   176    
400    -96    
-224   -272   
-208   32     
224    -544   
912    -832   
-464   80     
400    -336   
-624   -208   
-528   -896   
912    -128   
-128   -96    
-320   96     
304    -272   
-208   112    
272    -128   
-32    16     
192    -208   
-272   48     
448    160    
-624   -80    
224    112    
128    -32    
-32    -144   
48     -128   
-240   0      
304    -160   
-288   -320   
240    -608   
256    -80    
-432   112    
208    160    
480    -576   
-976   -288   
448    -32    
-288   160    
288    48     
64     -304   
176    0      
224    -80    
-848   -64    
576    -288   
-208   -32    
-80    48     
-64    336    
160    -96    
0      128    
-16    48     
-48    48     
-48    -64    
224    -32    
128    224    
-80    128    
-432   192    
528    144    
-896   128    
-336   80     
112    -112   
144    -112   
-128   0      
64     -352   
80     -112   
304    -1616  
-240   272    
-32    -416   
160    -704   
48     -144   
-832   -1056  
448    -928   
-672   -16    
-400   -336   
944    416    
-784   0      
-352   160    
128    -224   
544    -176   
80     480    
-352   -416   
0      64     
-32    288    
384    -16    
-384   368    
80     -224   
-464   0      
128    64     
-16    128    
64     112    
-400   -720   
464    -1360  
-480   656    
416    -560   
144    -544   
-160   -80    
160    -48    
192    480    
400    256    
-960   128    
-224   160    
160    48     
224    48     
32     -64    
176    -256   
-256   128    
-128   -512   
144    208    
256    48     
-128   -48    
144    -944   
224    -208   
-416   -256   
224    -112   
-256   272    
320    16     
-48    0      
-128   -208   
-96    96     
400    224    
464    -48    
-3104  320    
288    384    
1104   -368   
-848   208    
-400   0      
-864   -512   
-464   -480   
480    -368   
-256   -176   
144    -288   
-224   -96    
176    -128   
144    288    
-240   32     
-96    400    
-176   -144   
-208   -16    
-240   -272   
160    112    
-48    -32    
-800   -1040  
592    -496   
752    272    
-1920  768    
992    384    
48     -512   
-640   -208   
400    -32    
-416   48     
240    0      
-288   -272   
-96    32     
-48    80     
48     -64    
272    -176   
-64    160    
-192   32     
80     240    
304    -48    
96     0      
-176   -32    
-464   96     
256    784    
-1120  368    
192    -208   
448    -224   
-416   432    
704    -224   
-48    32     
-304   -208   
-320   16     
176    -32    
192    80     
-96    32     
496    -304   
96     176    
-192   -288   
256    -720   
-320   -32    
-32    240    
-208   -256   
176    96     
-80    256    
32     160    
-112   -352   
416    160    
592    496    
-608   -128   
-224   -32    
336    -128   
-112   -1840  
-1936  -96    
-64    144    
-464   -48    
1184   -96    
-832   176    
-608   -1264  
144    -832   
288    928    
80     -448   
64     -64    
-400   560    
-48    208    
272    -96    
-80    -32    
-336   1024   
-160   -64    
448    64     
-16    288    
-48    -112   
-400   -800   
48     208    
144    368    
448    336    
-640   -368   
-272   -144   
480    -48    
-208   304    
-48    -1472  
-48    80     
112    160    
16     -96    
-336   144    
-144   -320   
128    -400   
96     208    
160    -48    
256    -480   
-416   272    
-80    -16    
240    -272   
-288   368    
0      -32    
-400   -496   
160    64     
128    816    
-64    -112   
64     -192   
-288   -416   
704    96     
-880   -272   
16     -736   
-624   -48    
768    96     
80     -80    
-224   240    
-48    32     
-96    -1488  
-384   -1536  
240    512    
160    768    
-224   -112   
176    304    
-160   192    
-48    -16    
48     32     
96     112    
80     576    
-224   48     
192    -176   
64     -64    
-128   512    
48     -48    
-192   80     
144    80     
96     656    
-192   1568   
-32    1264   
-368   -416   
400    -240   
240    -80    
-736   -1216  
112    -1104  
-304   592    
0      528    
-912   -192   
0      240    
-96    -224   
-16    -192   
128    -448   
-160   352    
-288   0      
48     400    
64     -400   
-160   -208   
-368   288    
96     384    
112    320    
-64    -80    
-144   -64    
-160   64     
576    -352   
-336   384    
144    -416   
-112   -736   
96     224    
-336   80     
208    -96    
16     -176   
-64    224    
256    464    
-144   80     
-144   -48    
80     128    
48     80     
-176   176    
736    640    
-528   416    
-96    -720   
-112   -352   
112    0      
-176   112    
32     112    
368    16     
-176   160    
-16    -32    
-352   112    
288    -112   
80     160    
-128   0      
-368   -208   
-352   -1984  
-608   -176   
1680   -448   
-1216  32     
128    240    
512    368    
-400   -256   
-176   -112   
400    48     
112    -16    
-80    160    
64     48     
-112   112    
384    192    
-528   0      
240    80     
-224   -48    
512    32     
-32    -80    
48     96     
176    144    
336    368    
-1568  400    
224    80     
208    208    
304    -48    
16     208    
-320   128    
288    128    
-368   -48    
224    48     
288    80     
-320   176    
-96    -64    
352    224    
-112   -96    
-208   -400   
80     -128   
-192   608    
16     32     
-192   0      
624    48     
-688   -656   
-624   -48    
1536   400    
288    -384   
-544   -384   
336    368    
-336   336    
-128   176    
640    208    
416    -560   
-480   80     
-208   -1040  
704    208    
-224   -96    
-224   448    
-48    464    
352    192    
544    128    
-64    288    
-464   144    
-480   32     
720    -48    
16     0      
-416   144    
480    -576   
-400   112    
928    -736   
-16    192    
-1920  -2080  
1984   -640   
672    -416   
-880   416    
464    288    
-288   16     
128    -272   
-160   192    
192    -112   
-160   176    
-112   32     
-96    -160   
640    -16    
-336   -144   
-272   32     
96     -512   
432    96     
-304   -96    
448    64     
192    240    
-1280  48     
1120   368    
48     -144   
32     112    
400    -96    
-592   160    
512    -48    
-16    208    
64     -352   
-416   48     
352    -448   
-384   -48    
400    -48    
-208   48     
64     144    
144    240    
304    128    
-464   0      
368    256    
48     -96    
-96    48     
192    -576   
-224   16     
176    -48    
-32    160    
192    -272   
-208   64     
64     -32    
-80    48     
288    416    
448    384    
-160   32     
160    640    
-512   384    
400    -48    
-256   112    
80     -160   
176    208    
-128   -224   
-64    16     
288    -512   
96     -48    
-144   -672   
16     192    
112    208    
80     0      
16     0      
-80    -64    
16     112    
80     -304   
-304   -304   
144    -608   
-32    64     
160    256    
144    400    
-48    112    
-176   -192   
80     -192   
336    -736   
-336   480    
0      -912   
128    -368   
-640   -1056  
1440   -1216  
-736   -448   
-912   -1936  
1232   592    
400    544    
-800   560    
32     -144   
544    -128   
16     -288   
-240   112    
80     368    
-64    -128   
144    -288   
48     -128   
128    880    
-192   -224   
-16    -288   
160    -768   
-48    -96    
-80    -272   
-448   -720   
592    -1184  
368    -624   
-336   464    
176    -112   
-144   192    
400    -592   
-320   176    
128    -144   
48     224    
16     -16    
160    64     
-16    -416   
16     192    
-144   -176   
240    160    
-96    -720   
-48    96     
0      -80    
112    -144   
96     -96    
144    -48    
48     320    
-80    48     
-32    32     
80     -208   
96     16     
-80    272    
-96    -192   
1456   752    
-1712  800    
-512   -48    
1408   176    
-928   1056   
-384   672    
480    128    
448    928    
-592   -64    
416    -1312  
-208   256    
-80    -160   
-592   -64    
224    -304   
-512   -160   
-32    -96    
144    -128   
-80    -224   
48     128    
32     176    
-112   -16    
-800   -752   
1232   -272   
160    -400   
-1264  16     
592    496    
608    64     
-1360  704    
-128   592    
416    -48    
112    -336   
144    -112   
96     -576   
-64    -192   
0      -1552  
304    48     
192    64     
-592   -272   
-80    -864   
592    -496   
-416   -32    
-32    32     
0      656    
-112   -272   
-128   1184   
704    64     
-912   -704   
-32    96     
896    80     
-464   -1200  
96     224    
-64    496    
592    -64    
-608   80     
160    -128   
-400   -240   
-704   -304   
912    -800   
-288   -1056  
-288   128    
32     48     
-464   64     
384    -176   
-48    -32    
-80    -496   
-64    128    
-208   -16    
560    240    
-432   720    
-48    176    
176    -48    
-624   -1920  
-1296  -464   
1328   -352   
-496   560    
192    1040   
304    528    
-464   496    
-400   -32    
16     -624   
0      -768   
-208   416    
-608   -768   
208    160    
480    240    
-400   304    
176    240    
80     80     
-128   -416   
0      -512   
-16    192    
-112   384    
-240   48     
336    240    
400    -224   
-1360  240    
816    -80    
-768   -448   
240    -1680  
-688   -1104  
0      672    
-96    640    
-176   64     
96     -32    
160    -64    
32     -128   
-80    16     
-112   240    
64     1024   
160    416    
384    752    
-720   0      
48     -144   
128    -480   
-352   -48    
192    480    
-688   -192   
480    64     
320    288    
-112   -384   
-224   -128   
-144   352    
-48    416    
736    64     
144    1184   
-1760  1264   
48     160    
144    -272   
-144   416    
-368   400    
96     848    
-128   336    
-48    240    
80     224    
0      384    
-288   32     
32     -304   
144    -16    
-352   -80    
48     16     
400    96     
-672   -96    
32     -64    
176    96     
-96    144    
-272   16     
-160   -272   
80     -1040  
-288   -720   
144    480    
-64    112    
144    112    
288    2096   
1184   16     
-1136  -64    
464    320    
-48    -448   
16     -1008  
-288   -944   
16     -1056  
-160   240    
64     400    
-160   304    
-160   336    
16     -336   
-48    -464   
256    256    
-224   256    
-96    -240   
256    -64    
-128   16     
0      64     
-352   -80    
688    -480   
-656   64     
64     128    
512    48     
-288   304    
16     -32    
-128   -160   
288    -80    
-208   64     
304    208    
-32    -128   
-96    -64    
-96    96     
80     80     
128    -64    
-336   48     
-96    -208   
-48    208    
224    -208   
-208   144    
-96    -64    
-32    32     
272    144    
80     304    
160    144    
-112   96     
-48    -48    
32     192    
-880   -1280  
2400   32     
-1360  -704   
-1504  160    
1296   208    
16     -96    
-480   400    
-256   -384   
320    464    
-176   -144   
-176   176    
128    0      
-144   112    
48     -144   
96     144    
-112   -160   
16     240    
64     80     
-272   240    
96     16     
-96    -32    
-128   -64    
608    624    
1200   144    
-992   816    
-608   336    
624    -288   
-416   -64    
416    176    
272    96     
-128   160    
-240   192    
-288   48     
288    0      
80     80     
-304   64     
336    112    
-80    304    
-64    -96    
-512   64     
720    480    
416    -32    
-288   576    
-1104  192    
384    64     
240    -240   
-80    16     
848    272    
288    -432   
208    560    
-48    32     
-832   240    
432    208    
-112   336    
224    -112   
-208   64     
-208   384    
-512   640    
736    64     
240    -496   
96     -96    
96     144    
48     176    
48     128    
-256   112    
-48    -80    
272    -176   
0      112    
256    128    
-416   48     
368    96     
-1040  3424   
1392   -112   
-976   0      
-992   -336   
1232   96     
-272   -32    
-624   -128   
720    -112   
-16    160    
80     -16    
-272   -160   
272    64     
-32    64     
-192   240    
496    64     
-400   304    
-192   48     
224    64     
432    288    
-800   608    
560    304    
176    160    
-320   -208   
464    240    
-32    -96    
-352   -64    
304    64     
192    128    
-176   256    
-208   176    
80     176    
256    -160   
64     -64    
-128   -192   
80     144    
-16    144    
48     176    
32     -96    
96     -64    
-144   32     
16     -480   
-80    0      
96     64     
112    96     
128    96     
32     112    
0      384    
336    288    
-368   80     
192    528    
272    368    
96     208    
-816   144    
464    -544   
-256   -704   
176    -352   
-48    608    
-16    704    
144    400    
-16    416    
112    272    
544    784    
-544   480    
176    544    
560    544    
-128   112    
-96    16     
-64    64     
320    224    
-96    192    
112    0      
16     -80    
128    -128   
-48    176    
-64    384    
48     368    
352    576    
-32    432    
-64    -416   
64     64     
-96    48     
-672   -1456  
480    -1184  
-368   128    
-192   368    
368    -32    
-176   -192   
-144   -448   
96     304    
-32    -2064  
32     192    
64     -224   
-48    96     
-144   -48    
64     320    
-128   112    
96     224    
-80    -176   
16     96     
16     -16    
-32    144    
816    496    
-1152  320    
560    -448   
480    -192   
-112   16     
-144   128    
80     -368   
-400   -992   
224    -176   
240    144    
112    16     
-192   -256   
96     64     
-32    368    
192    -256   
-16    272    
-192   -448   
-48    48     
336    112    
-64    -48    
-256   16     
-64    -16    
208    -128   
464    272    
-240   368    
-464   304    
240    -64    
320    -192   
-16    112    
-416   -112   
544    -976   
-2208  -240   
960    -464   
-512   -1184  
-160   -704   
-192   240    
-320   112    
-160   -352   
608    -544   
96     464    
-208   -144   
192    -288   
-64    -80    
16     256    
112    -96    
-32    368    
-80    -480   
256    528    
272    -560   
-32    368    
-496   -912   
1664   224    
-912   0      
112    -2896  
-496   -480   
208    688    
400    304    
-32    1776   
544    2032   
-336   368    
352    -208   
-16    -560   
-192   -112   
336    -704   
-320   -1424  
-144   144    
752    -464   
-528   -752   
-208   -1392  
112    -864   
96     -48    
32     -144   
160    384    
-240   -1968  
320    -1296  
-464   -528   
64     1024   
800    1008   
-160   656    
-224   96     
640    624    
144    -688   
-400   112    
-112   -32    
176    592    
560    -384   
-176   -336   
-48    -64    
96     688    
784    432    
0      -544   
-96    240    
112    -288   
368    656    
496    -48    
-416   -336   
-464   -160   
-128   -64    
320    -160   
544    -208   
-1248  -1392  
992    -2368  
624    288    
-256   64     
-496   -608   
448    -1456  
0      -480   
416    -2624  
-560   -784   
48     480    
480    1088   
208    112    
32     -528   
-416   -240   
32     -96    
-128   176    
-80    0      
-592   -48    
-80    -48    
672    -80    
-64    -560   
-64    -208   
192    -368   
-624   256    
-320   752    
1248   1072   
-640   752    
-128   -352   
32     528    
592    256    
-352   384    
-128   272    
-48    32     
-208   176    
-96    -80    
-192   -224   
288    -48    
320    -464   
-272   16     
80     -1008  
64     544    
400    336    
-176   160    
-416   -32    
48     32     
80     208    
144    -144   
-336   576    
432    128    
-176   240    
-208   -224   
64     0      
544    736    
-960   944    
-192   -1632  
720    -48    
-32    -1024  
-784   -464   
48     544    
656    208    
144    96     
-336   112    
16     320    
48     240    
-352   176    
288    -272   
-144   208    
-432   -320   
352    -256   
112    -576   
96     368    
-288   80     
192    240    
-272   128    
48     -32    
160    -128   
-304   -48    
-192   -112   
400    160    
64     128    
-160   -192   
-464   -960   
912    -2176  
-1008  528    
832    -512   
-720   96     
-16    480    
336    192    
0      -48    
32     448    
32     -256   
-160   96     
368    64     
64     -224   
-304   -48    
-192   0      
-32    128    
128    32     
208    128    
-320   -224   
-576   112    
-16    48     
-240   -16    
1056   -560   
-688   96     
-480   -64    
960    80     
-400   48     
192    -560   
-224   -80    
-160   -112   
144    224    
-368   -272   
-32    16     
-144   -112   
-272   -32    
608    -112   
-144   160    
-32    -128   
-208   208    
96     -96    
-224   -48    
304    96     
-64    -16    
80     128    
96     80     
-544   48     
80     80     
-160   -32    
80     96     
144    0      
832    208    
-832   640    
112    0      
-112   -224   
-272   -96    
-464   80     
32     -64    
240    560    
-320   96     
-48    48     
80     -16    
-224   48     
80     -64    
-144   -16    
384    48     
-352   -96    
144    48     
-192   48     
64     -32    
-80    32     
-48    16     
-192   -192   
688    -448   
-928   304    
1216   -80    
-528   -16    
-880   640    
1296   -16    
-48    416    
-432   -112   
-272   144    
336    96     
-16    32     
-176   96     
0      -32    
-288   32     
432    80     
-928   -64    
-64    112    
-16    -32    
0      112    
112    128    
160    432    
-112   -320   
-608   240    
1088   48     
-496   64     
-176   -144   
-352   -80    
-368   352    
-48    -272   
-80    176    
32     -32    
112    -48    
-304   80     
192    432    
368    16     
176    0      
-32    272    
-64    -176   
-192   192    
544    -48    
-160   -16    
-384   0      
64     128    
-16    -32    
128    544    
-224   -96    
-432   192    
128    32     
592    112    
-1824  2176   
192    1264   
-400   -208   
-208   -528   
768    128    
-688   128    
-384   160    
416    -16    
0      144    
400    -48    
-288   80     
-224   32     
-144   160    
32     16     
64     -16    
112    -16    
-176   32     
496    80     
-160   -384   
288    -1376  
-80    256    
224    896    
-64    224    
-560   64     
-96    -240   
608    -288   
-176   128    
48     208    
-304   112    
96     112    
128    0      
-112   240    
256    48     
-336   -192   
80     176    
-160   -192   
80     -352   
-144   -208   
192    16     
-208   32     
-144   -48    
64     -176   
192    -272   
-288   -240   
224    -288   
-48    -272   
0      -208   
-240   -224   
-272   -208   
160    -416   
384    -800   
-528   -976   
80     -912   
-416   592    
192    160    
128    560    
-432   416    
-16    496    
304    464    
-16    -192   
-288   -912   
-176   464    
320    768    
-64    272    
176    496    
-128   112    
-160   -80    
144    112    
-144   544    
112    240    
160    192    
-176   -16    
32     160    
80     48     
192    -144   
-336   -224   
-48    -32    
96     -576   
-624   -992   
128    176    
320    -16    
-208   48     
352    432    
128    608    
-480   -160   
16     0      
96     64     
-96    32     
96     192    
160    64     
-64    -80    
-64    -112   
64     112    
160    16     
-80    160    
-112   224    
336    176    
-80    128    
112    112    
-128   -16    
-128   160    
-320   -480   
1216   -752   
-288   656    
304    -128   
-624   656    
240    -160   
96     -144   
80     496    
128    128    
-528   176    
144    -272   
464    144    
96     272    
-368   -176   
64     -816   
48     128    
-32    32     
112    -208   
16     240    
-64    64     
-240   176    
320    -16    
96     0      
-144   208    
336    96     
-400   16     
-240   -16    
-16    176    
-192   -48    
416    -1040  
-224   -384   
2000   -304   
-2432  928    
1232   -112   
-144   336    
-944   320    
96     -96    
336    -1168  
0      640    
-192   960    
-64    -128   
288    384    
336    -224   
-272   544    
-160   -576   
208    384    
80     -368   
-112   560    
-144   192    
0      160    
96     -64    
-672   -384   
1168   -432   
256    -64    
-1056  320    
1040   1888   
976    -128   
-416   -720   
-640   864    
1040   592    
-128   128    
-80    -64    
224    -224   
-112   -544   
-480   -256   
384    16     
-160   272    
224    592    
-96    464    
-352   16     
432    160    
48     -32    
-80    32     
-272   400    
384    0      
416    -736   
-736   -720   
512    -208   
-704   -896   
-128   352    
624    352    
544    112    
-144   208    
-464   48     
-192   0      
528    -224   
-544   -1296  
-592   -560   
160    64     
-608   272    
496    -112   
-208   -400   
-304   48     
160    336    
544    160    
-48    0      
-448   144    
-224   48     
128    224    
192    1088   
-128   -608   
672    -720   
320    -208   
-896   160    
-80    -352   
16     -720   
128    -432   
176    208    
-528   -352   
-128   -80    
528    -592   
-48    112    
-240   32     
-144   432    
-192   -144   
608    -80    
-32    -176   
-352   -208   
48     -128   
320    208    
304    -1072  
-400   -848   
-32    -32    
176    -32    
-384   16     
384    16     
-32    192    
224    400    
-128   -160   
-544   -624   
592    -784   
-560   -144   
304    -176   
-368   -240   
0      -272   
256    224    
-48    -224   
-400   -64    
80     -544   
160    48     
112    144    
-64    -672   
32     0      
-304   -80    
368    -1296  
112    -64    
-288   -224   
-96    -160   
240    -816   
224    80     
-96    224    
-224   -48    
176    192    
96     -160   
-448   -176   
-144   416    
208    -64    
-384   160    
176    -144   
80     64     
96     -160   
-112   -64    
-64    16     
208    -176   
96     -176   
-64    -432   
-192   -192   
384    -96    
240    304    
-304   -272   
48     48     
-64    -288   
128    112    
-128   112    
112    0      
-320   96     
-112   -192   
208    -112   
192    -416   
-176   -64    
-16    -336   
-112   0      
576    -1856  
-1408  432    
1008   160    
-384   -560   
-640   368    
560    -224   
96     384    
192    -688   
-1280  -288   
192    -128   
224    -144   
96     -144   
-256   -48    
256    -336   
-32    304    
0      -1280  
-208   -192   
16     -16    
64     16     
96     -32    
-416   64     
1024   -464   
-256   -288   
-992   208    
976    32     
-864   48     
-272   48     
-48    -96    
272    -304   
-64    -176   
80     -448   
96     80     
-48    -96    
16     160    
400    -144   
-544   -240   
320    -16    
-16    -16    
-32    96     
-64    16     
-80    16     
112    -240   
-96    -32    
272    -208   
-544   -80    
528    64     
-48    64     
-208   -1776  
192    16     
1168   -704   
-1424  272    
-416   -448   
720    16     
-80    -160   
-224   -144   
-448   16     
384    112    
-288   -160   
144    -288   
-16    208    
96     -208   
-48    112    
80     -1520  
80     64     
-320   48     
320    80     
-272   96     
128    -176   
-320   -176   
-32    -48    
-368   -496   
1104   -64    
-1120  128    
912    -320   
-112   64     
-624   -128   
272    32     
160    -800   
-432   -16    
240    208    
-144   16     
64     80     
112    -112   
-64    64     
-288   96     
384    32     
32     304    
-32    -16    
-32    -576   
-144   112    
192    -64    
-160   64     
-128   64     
512    -32    
-784   96     
288    -112   
32     224    
560    -304   
-384   208    
64     80     
256    64     
-96    -112   
-368   144    
176    -80    
-176   16     
-224   -304   
16     112    
320    272    
-352   -48    
-288   0      
544    16     
-288   0      
-112   96     
80     -80    
144    -96    
16     -48    
-480   -80    
-16    16     
-64    528    
-160   224    
-1392  -2592  
-544   32     
480    -208   
-384   112    
976    384    
-384   -288   
-880   400    
-480   -384   
496    -224   
-80    -224   
-224   80     
-160   -128   
464    320    
16     -352   
-400   240    
-288   -352   
176    -32    
192    32     
112    112    
-688   -304   
288    -448   
-32    -416   
-464   80     
672    112    
-1120  432    
176    64     
240    160    
64     528    
-352   656    
16     224    
416    -720   
96     608    
-320   496    
-176   -48    
96     -80    
64     -48    
-240   192    
640    160    
-80    912    
16     528    
112    400    
64     32     
112    176    
-144   -352   
512    -432   
-272   -368   
-208   736    
368    1312   
-480   -160   
464    -720   
-320   176    
96     -80    
-896   688    
1152   768    
-992   384    
112    128    
-288   -768   
-80    -144   
96     -176   
48     -48    
-128   -64    
96     368    
32     -112   
-112   208    
48     -112   
-160   -224   
304    -128   
0      -192   
-512   256    
-160   -16    
128    32     
-288   0      
0      96     
-224   -80    
80     -80    
304    112    
-80    64     
0      -48    
-272   -32    
208    112    
-128   160    
-112   48     
352    -256   
-448   192    
592    -144   
-160   64     
-144   384    
176    -256   
64     -208   
-80    48     
-16    224    
-384   112    
112    -64    
288    -128   
-96    16     
-48    -64    
144    -288   
240    -48    
-96    -96    
-256   -32    
-32    192    
560    544    
-1024  672    
400    -352   
368    32     
-256   -288   
-112   -96    
-80    -304   
352    -960   
336    144    
-224   400    
-272   128    
-96    -320   
240    128    
-112   400    
-176   96     
-112   -160   
80     -496   
288    -128   
-48    -96    
-160   80     
64     160    
128    208    
48     608    
32     320    
-112   448    
-112   -112   
512    96     
-96    320    
-160   -336   
-368   -192   
-192   -1584  
-832   -272   
656    -320   
-816   -464   
560    -368   
576    -528   
-720   -432   
160    -1216  
768    1648   
-128   928    
-144   144    
-208   -384   
-320   0      
592    144    
128    224    
-400   80     
-80    0      
320    192    
-16    368    
-80    496    
-384   -544   
1328   944    
-416   -352   
-384   -304   
784    -528   
-304   368    
16     480    
-256   1104   
672    -128   
-368   -176   
-240   -48    
304    96     
224    448    
-112   64     
-272   80     
624    64     
-176   192    
-16    192    
-448   512    
-48    0      
192    96     
192    -272   
160    -96    
560    128    
48     960    
-752   192    
-128   -144   
272    176    
32     96     
352    1136   
-816   336    
-64    -96    
448    16     
-176   -32    
-288   32     
-320   -96    
624    112    
256    -288   
-928   -80    
64     -1552  
208    48     
-64    -80    
0      48     
-320   -432   
-432   288    
608    -160   
-672   112    
-96    112    
-96    128    
-272   -960   
1168   2368   
-720   1024   
-400   -224   
1808   -144   
-864   -144   
-656   176    
416    544    
752    -192   
-160   208    
-448   -304   
-32    240    
112    0      
160    -16    
80     48     
-208   0      
16     80     
368    16     
-64    112    
64     64     
-256   592    
704    272    
-752   400    
192    -64    
-32    -112   
-64    336    
-224   -208   
-16    80     
160    16     
-16    -256   
112    -112   
-192   -112   
192    144    
0      192    
16     336    
-176   -112   
-192   -16    
256    -160   
-16    400    
32     464    
80     352    
112    -96    
-368   16     
208    -224   
256    16     
64     128    
288    96     
-432   160    
112    -144   
144    416    
0      -560   
64     144    
-368   -112   
80     -784   
-528   -192   
592    976    
-720   336    
64     464    
608    448    
-832   400    
240    80     
-240   160    
320    112    
144    -64    
-240   16     
80     0      
-368   368    
432    -128   
48     272    
112    -432   
-272   352    
-144   48     
336    160    
176    144    
-48    48     
-192   128    
160    64     
-176   48     
192    -160   
-48    128    
48     -288   
-112   304    
-480   -1840  
1696   -784   
-768   -192   
48     -96    
32     144    
-320   320    
432    -288   
272    608    
-208   -80    
-432   -384   
272    160    
192    -48    
48     128    
32     -240   
-80    224    
224    -224   
-176   384    
160    32     
-16    112    
-128   208    
96     32     
-208   -1216  
64     112    
416    192    
-832   -48    
832    352    
-128   32     
-368   0      
160    -240   
160    368    
64     -80    
96     80     
-256   -256   
-80    224    
336    -96    
208    -96    
-384   64     
256    -368   
-48    -1456  
-80    -224   
352    80     
-384   -160   
160    80     
112    -32    
-176   64     
48     -128   
352    96     
-208   -240   
-48    -848   
112    112    
48     352    
-240   1856   
3680   -32    
-1568  144    
-384   -288   
592    -400   
32     -288   
48     -96    
176    48     
-16    144    
-144   -96    
224    -1392  
112    160    
-32    48     
-272   96     
736    0      
-400   32     
-48    -96    
176    96     
-416   352    
272    32     
32     96     
-736   -944   
1552   -752   
-416   -944   
-800   80     
400    0      
160    176    
-176   -384   
32     48     
-176   256    
144    -64    
224    -48    
48     -32    
-672   32     
32     144    
-128   -272   
144    -336   
208    16     
368    -688   
-224   -32    
-32    -592   
288    160    
240    -736   
-800   416    
336    64     
304    -96    
-704   160    
0      -160   
-16    -32    
192    -80    
-192   -96    
0      32     
144    -48    
80     -240   
-48    16     
160    -912   
960    320    
-736   32     
48     432    
128    -352   
-544   144    
192    16     
-144   -80    
112    48     
112    -80    
0      528    
-448   16     
-336   -32    
704    32     
32     -224   
-1200  -2128  
1504   -2640  
576    192    
-272   880    
0      256    
144    80     
256    880    
176    1632   
-320   128    
288    -96    
-400   -144   
128    -128   
-64    384    
224    -224   
96     -32    
192    -256   
-672   -80    
224    -1648  
384    0      
-192   -80    
-224   -656   
-208   -416   
304    -128   
32     -96    
-48    -1056  
-288   -432   
48     160    
-16    224    
32     272    
-160   352    
128    80     
80     -384   
-80    -672   
-80    208    
80     176    
128    128    
-16    64     
-176   336    
32     688    
64     480    
32     16     
16     96     
-336   80     
16     -112   
-32    224    
304    1072   
48     784    
-352   -192   
576    960    
-256   -160   
368    736    
-528   -96    
-80    992    
624    128    
-336   720    
448    1184   
496    -80    
-80    112    
-48    944    
16     -256   
96     -528   
-112   272    
16     64     
-368   112    
-48    32     
-352   -64    
80     -336   
192    -64    
0      -368   
464    -304   
-96    144    
-32    -224   
-144   48     
48     -224   
-16    128    
-32    -32    
-112   208    
160    48     
-352   496    
224    256    
-656   -64    
-272   16     
0      -576   
-32    -256   
-544   288    
160    -112   
-256   -64    
32     -96    
-528   -176   
176    128    
-112   -144   
0      -48    
-48    16     
-368   32     
-144   160    
-96    144    
80     48     
-176   304    
-16    448    
-416   464    
80     336    
-112   240    
-368   992    
752    -96    
-560   -352   
-208   -768   
144    -32    
128    480    
96     -432   
-384   -944   
0      -112   
80     32     
32     -256   
80     0      
-96    -128   
-176   16     
160    576    
128    -96    
272    -880   
-208   336    
-224   272    
-176   208    
720    -256   
-128   -160   
-528   528    
-208   -272   
416    544    
-192   224    
-416   -528   
-64    -128   
0      304    
-320   -352   
672    784    
1392   256    
-1248  -176   
-128   496    
672    928    
-496   352    
-64    192    
688    496    
-208   224    
-432   32     
192    128    
0      0      
-96    -96    
176    176    
-752   48     
96     32     
64     288    
112    176    
32     224    
48     -16    
496    1680   
-1264  -320   
-960   -112   
1696   -256   
-752   -16    
-176   -64    
736    -288   
-656   160    
368    32     
112    16     
-224   144    
-192   112    
48     -112   
368    256    
192    80     
-368   48     
-112   -160   
608    240    
48     80     
-160   128    
-160   -16    
-224   -208   
-496   320    
272    256    
-128   -368   
112    -256   
320    128    
48     416    
-864   288    
192    128    
432    32     
-32    -192   
-112   112    
-272   112    
-64    80     
-224   96     
32     32     
64     64     
-256   -416   
-336   -368   
304    -336   
-144   144    
112    64     
-48    96     
-208   64     
112    768    
1200   0      
-816   0      
-96    336    
-608   352    
-976   -1376  
-112   560    
-608   672    
112    -16    
272    256    
48     -112   
-800   352    
416    32     
96     208    
-32    -192   
-224   176    
-32    -160   
-320   400    
32     16     
-16    272    
-128   -160   
-160   144    
80     -96    
0      256    
464    -448   
-656   352    
672    0      
-672   80     
-368   -64    
432    128    
608    176    
-688   -144   
32     144    
672    -192   
-384   176    
224    16     
-48    240    
0      -160   
-272   32     
688    -80    
-384   -16    
-128   192    
160    224    
144    -48    
240    96     
-16    224    
-160   -32    
128    304    
0      -32    
80     160    
-224   -32    
144    -96    
-224   -80    
224    -32    
-224   96     
32     112    
128    -64    
400    -144   
-592   272    
400    352    
-320   368    
48     80     
-64    -608   
-320   -288   
144    -224   
-352   -128   
384    48     
-80    -160   
-272   0      
-96    -96    
144    64     
144    -624   
-96    -320   
16     1136   
-320   160    
368    -32    
240    -48    
-480   304    
16     0      
240    32     
64     -80    
-48    288    
96     -64    
-80    -2704  
128    288    
176    240    
-1072  -240   
1760   -976   
-784   -112   
-240   -528   
688    288    
-80    80     
-16    448    
-752   672    
528    -64    
-32    48     
16     48     
-144   0      
-64    -96    
320    -368   
-64    416    
32     256    
-288   -80    
544    176    
-64    384    
-112   160    
608    1216   
-1296  320    
320    -272   
752    -32    
-320   -160   
-496   -272   
-128   208    
320    112    
-80    176    
176    -96    
-240   16     
-96    0      
96     192    
368    176    
-48    -16    
-288   208    
176    112    
208    16     
-80    160    
48     16     
-128   -64    
64     32     
48     -320   
-32    96     
16     -1008  
240    64     
-112   96     
-176   64     
176    112    
-528   -176   
-144   544    
1888   800    
-1072  480    
-32    0      
1264   240    
-1056  112    
-96    240    
592    224    
-48    48     
144    192    
-160   128    
-16    -272   
-160   -80    
224    64     
176    112    
-192   320    
256    64     
352    192    
-112   48     
-176   80     
240    -48    
-448   416    
2112   -416   
-1360  -352   
-688   -592   
896    176    
-512   -1760  
176    -192   
160    0      
-336   256    
576    128    
64     0      
-192   0      
160    -112   
112    304    
-192   -112   
112    96     
-144   -256   
-80    0      
144    -1104  
320    -272   
96     -240   
320    944    
-304   -16    
256    -48    
-128   176    
-736   -1104  
480    -240   
384    144    
-592   112    
448    -480   
128    144    
0      -368   
64     64     
656    -64    
304    240    
-784   -32    
560    -672   
-16    352    
416    592    
208    -96    
-128   224    
32     64     
128    -112   
96     -112   
16     496    
576    400    
-288   -160   
176    400    
144    0      
-608   144    
384    -80    
1696   432    
-1808  -672   
-320   -1696  
624    -1104  
736    -1968  
-560   -464   
-272   784    
208    -112   
240    496    
176    -48    
-448   -256   
0      64     
32     -16    
176    160    
48     -256   
128    -1088  
16     -128   
-256   -144   
176    -112   
-208   -304   
128    -608   
-256   -160   
288    -400   
-176   -720   
-352   -592   
304    400    
96     272    
-304   -496   
64     -128   
-96    672    
288    -496   
32     16     
-144   144    
416    1024   
-208   544    
-112   -112   
-528   224    
-48    816    
-32    -192   
-16    -752   
432    -256   
-352   -1984  
-192   -288   
-48    -1040  
272    320    
176    32     
-528   -544   
-48    -288   
240    -112   
-208   -544   
512    -176   
-1120  -816   
-64    -1280  
-112   -976   
-64    -496   
112    336    
-320   -608   
80     128    
320    -368   
0      320    
-48    -224   
32     80     
-96    0      
80     -144   
224    -336   
-64    -464   
-176   160    
384    416    
48     -416   
-176   -128   
112    192    
128    -112   
-32    288    
208    -384   
-80    -48    
-224   -384   
672    -800   
432    112    
-128   -288   
-656   48     
352    1280   
320    208    
-208   -640   
-480   -688   
80     -848   
192    -16    
64     -528   
96     -640   
176    -784   
-336   48     
208    -112   
208    80     
-48    -304   
-48    -352   
-80    128    
128    -256   
208    -224   
176    16     
-432   -80    
-176   -16    
-192   848    
496    -192   
-672   192    
208    912    
464    176    
-320   -1248  
192    -480   
-32    32     
80     -144   
16     160    
304    -144   
-112   -80    
-160   240    
304    176    
32     80     
-256   48     
-48    -80    
-16    192    
176    -480   
192    -384   
-192   -112   
16     -288   
-48    -48    
-144   -240   
-48    176    
112    96     
-208   -64    
224    -96    
-80    0      
-768   1184   
160    128    
3632   32     
-1344  -368   
-1680  -432   
1808   -96    
96     -144   
-512   624    
144    368    
-96    336    
16     -64    
-272   -48    
96     -112   
-16    192    
128    -16    
-160   144    
288    -32    
-208   48     
-96    -32    
-400   -96    
112    -16    
-192   -352   
640    -352   
-1248  208    
-80    -224   
-288   -16    
-448   160    
336    -16    
112    -64    
400    304    
-80    -64    
-352   80     
16     -144   
240    0      
-176   -96    
64     -128   
-928   144    
464    -272   
-272   -528   
-464   -320   
-32    80     
-352   112    
368    464    
-352   -304   
-448   240    
-272   80     
-96    80     
48     48     
160    0      
96     160    
-416   224    
-384   -112   
480    16     
160    -272   
-416   -64    
80     80     
224    432    
-416   880    
-880   144    
-208   0      
-704   -112   
288    -112   
160    -368   
-96    80     
-224   304    
-304   -16    
112    288    
896    96     
-400   160    
-656   0      
560    -896   
-2336  544    
432    80     
-1152  992    
-256   16     
576    0      
-304   -48    
-64    192    
352    -192   
-352   224    
64     -240   
192    176    
-80    -240   
-240   -32    
112    32     
-304   -64    
176    -64    
256    112    
-752   -96    
-240   -128   
1184   -688   
-448   64     
176    -224   
-304   160    
-768   -112   
272    96     
800    192    
-640   -112   
160    256    
-544   -144   
416    336    
-112   0      
-96    368    
80     -208   
-320   144    
-528   -112   
-16    144    
96     -16    
0      -80    
-112   48     
-64    80     
64     16     
144    80     
-160   144    
-80    -48    
-16    -32    
-128   16     
16     80     
-304   16     
176    128    
64     0      
-272   128    
64     240    
128    560    
848    -112   
-496   192    
272    192    
-128   208    
-16    48     
-592   192    
160    176    
-176   64     
224    288    
-160   -16    
-192   0      
64     -176   
-80    160    
208    192    
-80    -96    
-32    448    
-96    208    
80     64     
16     112    
16     416    
-240   208    
224    192    
144    224    
-48    352    
80     -192   
-128   -144   
-16    16     
128    208    
96     -1936  
-1616  1520   
1568   48     
-208   1120   
480    -272   
-624   -96    
160    928    
-448   1104   
432    368    
16     -224   
-256   80     
-160   -96    
240    80     
-192   -224   
-112   -928   
80     -112   
176    128    
128    96     
64     208    
-224   -256   
-96    256    
464    1744   
80     96     
-688   496    
688    32     
-432   176    
-32    -96    
384    80     
-192   336    
-208   128    
160    96     
624    416    
-528   272    
112    -144   
-176   -112   
128    -304   
192    -224   
-272   192    
48     768    
304    48     
-64    -192   
64     -48    
32     128    
0      352    
64     128    
96     240    
-176   32     
16     144    
-32    144    
208    96     
-320   -496   
976    -704   
-544   928    
672    432    
-448   -256   
-672   208    
384    64     
144    112    
256    192    
-192   128    
-16    368    
32     272    
0      192    
-352   -80    
464    160    
-240   112    
-48    144    
160    368    
-208   288    
96     160    
144    128    
160    912    
-48    -832   
-1760  448    
2160   144    
-80    592    
-992   672    
-272   -432   
368    -912   
272    224    
-624   304    
208    208    
-112   -80    
112    -64    
16     -432   
-112   -352   
256    -128   
-288   -2144  
672    -688   
-32    -544   
-240   -208   
240    -272   
-112   -80    
272    -464   
-208   192    
752    -144   
-528   -1040  
-688   -656   
416    -64    
-16    128    
0      640    
256    464    
0      -32    
192    304    
32     32     
-1104  576    
32     384    
432    -352   
48     592    
880    960    
-400   560    
-192   48     
496    -560   
48     208    
-352   -128   
32     272    
80     480    
-400   128    
0      320    
256    -48    
16     -48    
-112   0      
656    -624   
576    448    
784    272    
-736   320    
-720   1056   
1056   960    
128    -16    
-416   -1216  
-32    688    
176    528    
288    -464   
304    96     
-160   -944   
-96    336    
512    32     
32     160    
480    -752   
-48    -800   
-304   -400   
240    208    
64     320    
16     0      
-240   144    
432    -688   
-176   -160   
112    -496   
176    -144   
-576   -272   
112    816    
416    -944   
-96    -96    
-16    -176   
-32    -112   
48     32     
80     480    
352    592    
-160   -368   
48     1024   
320    -32    
-272   -784   
16     -672   
160    48     
144    176    
-192   256    
-112   -480   
480    -32    
320    1248   
-464   -96    
-400   -480   
720    -16    
304    656    
-416   -336   
-704   -912   
208    -1520  
608    -1200  
-384   -336   
-80    -1392  
-480   -976   
336    400    
240    816    
144    -368   
-224   -624   
64     464    
240    688    
-48    384    
48     -432   
-48    -240   
16     224    
272    448    
-176   464    
64     -304   
-64    -16    
128    -624   
-32    -80    
-48    336    
32     288    
-32    -320   
-224   144    
96     -160   
64     -48    
704    1920   
-1648  656    
480    -928   
576    240    
-240   -640   
-288   -736   
432    96     
208    96     
-96    112    
-16    272    
112    -368   
-32    128    
64     -976   
160    0      
-208   288    
192    64     
-64    -192   
16     -976   
-64    -416   
256    -1984  
80     48     
-656   -864   
624    -976   
-64    -240   
-240   -288   
624    -192   
-304   240    
-144   -240   
-32    -144   
32     -16    
-64    272    
-16    0      
288    -48    
0      -112   
32     -32    
224    144    
-336   -144   
-48    -576   
-32    -832   
304    48     
-208   -48    
32     144    
208    -48    
-144   -176   
368    -32    
-240   -96    
-752   96     
160    32     
208    80     
128    -528   
288    736    
-832   112    
-1360  0      
1888   -80    
48     80     
-1168  -160   
288    -16    
576    80     
-368   -528   
-144   192    
432    -112   
-528   96     
80     -112   
-96    -128   
64     -48    
128    80     
-128   -176   
16     144    
400    -656   
-256   80     
16     -96    
464    1136   
-384   -976   
-864   32     
704    16     
-272   -112   
-1040  -112   
352    -368   
-368   320    
-464   -144   
112    -144   
160    -176   
-32    96     
-96    -304   
80     144    
192    -176   
-192   128    
-48    -272   
-176   32     
336    144    
480    -112   
-432   -16    
-96    -16    
48     -128   
-320   -32    
-880   192    
416    -16    
-176   -80    
-368   -544   
256    -48    
64     -96    
160    176    
-320   128    
-272   96     
80     -336   
-128   32     
448    0      
-608   -16    
96     -96    
-96    -336   
368    16     
-400   -256   
16     112    
96     16     
208    128    
32     -576   
-128   -384   
-48    288    
288    -240   
-608   80     
-1088  -1056  
2448   -2528  
-1248  -48    
608    -432   
752    -16    
-1376  352    
272    320    
128    224    
208    -176   
-64    -112   
-16    112    
-128   -80    
160    160    
368    0      
-304   64     
-64    32     
-32    32     
224    -224   
-192   64     
-144   -960   
-640   -368   
368    -448   
-96    32     
-640   -64    
288    -32    
-384   96     
208    96     
160    384    
-384   32     
208    288    
-16    -48    
240    144    
-160   208    
-112   64     
176    224    
208    256    
-592   160    
-208   112    
-240   -224   
-720   -352   
-80    -32    
-336   -16    
-32    32     
-336   -208   
48     96     
96     -96    
-16    80     
48     64     
-32    272    
80     400    
-336   544    
-208   96     
256    704    
752    -288   
-848   -80    
176    -176   
224    -224   
32     384    
-704   704    
112    624    
-192   160    
224    144    
48     0      
-224   48     
-48    112    
224    240    
-16    48     
-32    48     
80     -160   
-16    -352   
-336   -416   
80     -320   
-96    128    
-112   -128   
192    128    
-64    -112   
-96    -336   
-992   -192   
336    384    
160    368    
-96    112    
-480   -1008  
880    -1312  
-272   848    
512    -96    
-592   208    
272    -64    
-160   64     
-80    0      
32     784    
-208   -224   
-80    -240   
-176   -160   
-80    160    
-160   144    
112    256    
16     -160   
-224   96     
112    -320   
240    400    
-176   256    
64     -16    
32     1360   
128    -80    
-496   -448   
160    -624   
112    640    
32     368    
160    144    
-576   -144   
64     80     
144    192    
0      -400   
-96    -224   
208    32     
144    544    
256    64     
144    -208   
-624   -448   
-64    752    
32     176    
112    -256   
-112   64     
0      128    
-704   -128   
48     -128   
320    288    
-320   240    
80     16     
-128   16     
96     -560   
-752   -864   
864    128    
192    480    
-544   -1008  
736    -1376  
-32    -368   
-352   16     
448    528    
-672   -48    
-16    -224   
-32    336    
0      -160   
64     -208   
64     416    
-48    304    
80     16     
32     192    
208    96     
-400   -144   
144    48     
0      -16    
400    1520   
-848   -640   
-832   112    
1136   1040   
160    240    
-320   -208   
16     240    
544    896    
-96    896    
144    384    
32     -624   
-720   -496   
304    208    
320    560    
-480   352    
-336   352    
480    128    
16     144    
224    -16    
-144   -32    
-160   384    
304    128    
96     -32    
-96    -176   
752    496    
160    240    
-832   -1776  
272    -1008  
-448   -176   
-128   96     
352    304    
-240   -272   
688    144    
-288   -64    
48     736    
128    -48    
-432   -576   
736    -752   
-480   160    
368    272    
-128   -272   
-48    -32    
400    864    
-256   800    
240    288    
-560   592    
16     80     
-80    -144   
80     32     
240    128    
1168   3024   
-1248  1184   
-240   -288   
992    -128   
160    1680   
-160   2080   
-32    896    
176    -624   
320    -448   
32     -384   
-192   400    
-80    400    
432    240    
-192   -368   
-336   -16    
64     272    
32     192    
64     32     
224    544    
-400   -48    
80     -32    
32     -384   
-192   128    
416    16     
-544   608    
112    912    
-112   512    
-144   272    
336    768    
96     1328   
-96    304    
0      -352   
320    -848   
-80    192    
-176   176    
-288   224    
480    0      
32     384    
-48    336    
16     416    
144    80     
-96    144    
96     -128   
-64    -112   
560    672    
-592   -16    
32     144    
464    960    
-128   224    
-176   -480   
-192   -368   
640    944    
-560   736    
-240   -304   
160    -592   
-16    -976   
-48    -3104  
64     -384   
224    -528   
-288   -512   
128    -560   
-80    -160   
-16    16     
-48    -336   
-432   48     
384    240    
-112   -16    
160    -304   
-368   -576   
176    -1120  
0      -416   
-48    -160   
-32    160    
64     128    
-16    208    
-80    272    
176    1344   
256    992    
-304   1120   
400    544    
32     128    
-976   -1248  
448    -1040  
-320   448    
-624   -368   
688    128    
-16    -368   
-128   -144   
-160   -608   
144    48     
288    96     
-240   160    
-48    -480   
80     16     
-80    -224   
192    -208   
-112   -48    
-80    -288   
16     192    
240    112    
-144   224    
-144   -16    
96     1248   
1328   -368   
-1184  -128   
528    -320   
256    16     
-256   16     
288    80     
96     448    
80     176    
-256   48     
0      -224   
224    -32    
48     -384   
-112   112    
176    -256   
192    240    
64     -336   
16     144    
16     -1776  
48     96     
-96    32     
240    176    
64     48     
-32    -32    
-80    32     
-64    -128   
416    240    
-112   -48    
-128   16     
16     -1888  
-1664  -1184  
1728   -128   
-864   96     
16     -752   
1312   48     
-704   304    
-352   512    
240    176    
160    48     
64     -128   
-80    -336   
-128   112    
208    48     
496    96     
-672   -128   
480    192    
-224   -256   
160    208    
-96    -1184  
-64    112    
368    96     
800    -272   
-1920  -384   
1696   80     
-240   -48    
-720   96     
672    -16    
-480   352    
304    192    
176    -144   
-240   96     
0      0      
96     144    
112    -80    
96     48     
-144   144    
224    -2352  
-176   416    
112    -1616  
-96    -464   
448    96     
-336   -672   
96     0      
16     144    
-144   32     
368    1024   
-512   464    
208    192    
-640   304    
128    -432   
384    16     
-224   -448   
-96    -176   
16     64     
32     -288   
-336   -96    
448    -768   
-528   -144   
400    -1376  
-48    304    
-128   96     
32     0      
192    128    
-352   48     
128    -528   
-64    240    
224    -96    
320    48     
-512   -112   
-352   -1728  
-560   976    
1776   -352   
-1616  -16    
-384   0      
1152   -32    
-144   -960   
-176   -208   
0      -288   
512    16     
64     -32    
-96    0      
80     -144   
-176   -128   
-224   -160   
400    48     
-16    176    
-272   0      
352    -16    
400    144    
-752   80     
256    -496   
160    -208   
-64    -144   
352    144    
-16    -96    
-320   144    
592    160    
-496   96     
-224   256    
368    208    
-464   32     
208    48     
-16    -160   
288    -192   
-400   272    
464    0      
208    128    
-32    -176   
224    224    
-416   -48    
416    288    
-64    224    
16     304    
0      -16    
-336   -464   
-192   -816   
32     752    
400    720    
-256   64     
256    352    
160    -48    
112    448    
-544   -32    
352    176    
-48    -496   
64     96     
-128   -512   
-192   112    
256    -160   
128    -208   
-176   -208   
-48    -208   
-144   0      
-112   -288   
144    -336   
176    -256   
-336   -128   
-352   -1136  
256    48     
288    512    
-16    224    
-128   112    
16     -224   
-224   -96    
160    -352   
-272   -352   
96     -352   
-176   112    
144    -512   
96     432    
-240   -464   
992    1184   
-1168  1232   
0      -400   
592    -896   
288    -336   
-736   512    
48     1168   
352    560    
-144   144    
-128   -48    
-16    256    
-368   -256   
224    -160   
48     16     
-208   16     
-16    192    
240    -224   
-64    -112   
-208   -192   
-48    64     
-336   -16    
640    -656   
128    64     
-80    -432   
-336   -736   
96     16     
256    16     
192    96     
-96    48     
-176   -176   
-80    0      
160    -256   
-784   224    
-256   64     
-112   -96    
-480   -496   
144    -544   
592    240    
-512   64     
-320   48     
336    48     
160    112    
-304   -64    
-352   -48    
-544   -128   
208    320    
176    -208   
-416   -160   
0      32     
128    96     
496    656    
400    128    
-800   352    
48     704    
-160   656    
-272   -32    
-112   240    
400    -464   
496    112    
-48    160    
-176   48     
32     544    
192    -320   
-128   176    
-208   -272   
192    752    
-272   -224   
-304   -80    
-288   -880   
432    784    
-672   32     
0      -752   
-1168  1040   
1200   -192   
-672   -656   
704    -48    
-80    -32    
-208   -32    
-1216  -1808  
176    -1792  
272    -688   
-448   160    
-48    208    
-96    -96    
-480   304    
-768   -496   
128    176    
240    464    
-560   576    
-48    -384   
192    -224   
-208   -176   
-112   160    
96     -112   
-224   -64    
96     -320   
-144   -512   
-128   -192   
-208   -1600  
-528   -784   
-32    -256   
-80    240    
-336   144    
272    64     
128    -896   
-416   -208   
672    208    
-192   -384   
288    -816   
-304   -320   
480    256    
-224   -208   
-320   304    
80     -320   
-464   528    
320    272    
-560   736    
-704   -224   
208    496    
-304   576    
-224   16     
-768   -688   
-480   160    
-352   -288   
-96    -544   
672    -336   
-384   480    
-96    1808   
-480   112    
784    480    
112    -496   
-576   288    
-752   -144   
432    352    
368    -32    
-480   0      
-528   320    
384    0      
400    144    
352    208    
-736   -800   
32     -304   
272    -256   
-304   272    
848    128    
-672   -176   
-560   16     
416    -208   
48     0      
-272   -32    
16     -544   
-576   -752   
272    -400   
128    16     
48     -16    
0      160    
-160   208    
-96    224    
272    64     
-240   0      
-272   96     
16     112    
112    240    
80     224    
-224   144    
384    208    
-144   -80    
-32    -688   
336    -80    
-16    176    
-288   416    
0      160    
432    416    
-1328  272    
464    320    
80     256    
-48    128    
144    80     
-272   -176   
-128   48     
192    80     
80     96     
32     32     
-48    336    
384    464    
-144   192    
-208   64     
256    176    
80     176    
-336   -160   
416    112    
144    96     
-192   -144   
64     80     
0      80     
64     112    
448    528    
-880   816    
208    -112   
112    -96    
64     16     
-128   -112   
-928   -576   
1952   -976   
-336   160    
-944   -224   
736    320    
320    224    
-672   528    
-32    -112   
48     80     
176    16     
-48    -48    
48     -176   
-80    288    
96     432    
176    -160   
-144   -304   
32     16     
-48    352    
-80    -32    
192    16     
-48    480    
-160   -576   
-720   448    
1008   -432   
-176   96     
-224   208    
-96    96     
320    288    
48     -128   
-32    32     
-208   144    
-176   -16    
320    144    
480    160    
-656   112    
0      32     
160    64     
16     224    
0      32     
-16    192    
144    -16    
-96    112    
96     0      
-144   32     
160    176    
176    -32    
-496   96     
576    48     
-128   96     
-64    -1040  
-48    1792   
464    -128   
-592   352    
464    -176   
-304   224    
-64    32     
608    352    
-512   32     
-48    288    
-32    -176   
144    128    
80     -48    
-144   -160   
-64    -112   
16     -1072  
368    48     
-416   112    
32     96     
352    80     
-288   32     
80     144    
-16    -368   
-1168  576    
1440   96     
-608   -112   
-592   224    
736    48     
0      224    
-688   -48    
80     -400   
384    128    
176    192    
-224   -16    
96     160    
16     -64    
-32    160    
272    112    
-176   48     
64     64     
-32    16     
208    -32    
16     192    
-336   -16    
1008   -144   
112    -96    
-464   160    
64     -2816  
256    -96    
640    672    
112    96     
-240   0      
160    80     
-336   -32    
304    0      
-80    -112   
144    48     
-432   416    
176    32     
-144   -192   
304    -416   
0      112    
64     -784   
32     160    
-256   -272   
176    176    
416    128    
-688   224    
-272   32     
240    144    
416    288    
208    1472   
-912   1040   
1184   240    
1216   -368   
-1504  16     
96     240    
592    -352   
0      0      
112    -432   
-640   -256   
480    240    
-32    32     
16     112    
208    64     
-288   144    
-64    -304   
-112   320    
224    -736   
-240   208    
528    -144   
-112   544    
-144   -80    
32     96     
-112   -272   
400    32     
-512   0      
576    368    
160    -64    
-176   416    
64     608    
112    368    
480    240    
-272   -96    
-352   32     
112    -112   
688    336    
-224   -336   
-832   -464   
448    64     
272    368    
-144   48     
160    352    
-176   256    
16     -1520  
96     -656   
336    -384   
32     -528   
64     160    
-464   -224   
256    -1024  
80     240    
-32    128    
416    528    
496    432    
-128   848    
544    640    
-496   416    
448    1984   
336    1504   
-256   -1296  
144    -432   
-80    112    
144    -160   
-80    -1424  
272    -64    
-144   400    
96     -48    
192    -848   
-448   -208   
192    80     
96     -352   
272    -496   
144    144    
-272   112    
256    96     
-176   -224   
96     32     
16     224    
160    16     
-240   0      
32     272    
320    -48    
-544   -240   
544    -304   
-608   -32    
272    -96    
240    -112   
112    -320   
-48    -32    
-176   32     
-80    48     
256    -272   
16     -96    
32     -48    
-96    32     
80     -32    
224    -128   
-128   -96    
-16    128    
-32    48     
64     32     
-336   -368   
912    -560   
-16    576    
-192   -256   
-384   80     
32     -144   
0      -368   
416    -752   
224    0      
-304   -1136  
-224   96     
320    -192   
240    -224   
-80    160    
64     -112   
-128   -96    
-160   -32    
-112   -256   
128    -848   
-160   -336   
128    0      
-32    288    
256    -80    
-528   -160   
-224   96     
96     352    
304    -752   
-160   160    
-224   -128   
592    -304   
-400   -1456  
2400   -768   
-848   1312   
-528   720    
608    528    
-512   384    
-992   -160   
-64    112    
240    -304   
-32    -288   
160    240    
176    -576   
0      208    
-96    -208   
272    -112   
-48    16     
-80    160    
-160   -416   
96     -560   
144    272    
-192   512    
-64    -1104  
-624   144    
1296   224    
-1008  224    
384    832    
240    192    
192    1936   
-992   2192   
240    1616   
352    960    
-144   288    
48     -80    
0      64     
-432   144    
64     0      
144    -144   
240    848    
-480   304    
-240   -528   
272    368    
368    32     
-224   64     
-560   -416   
784    656    
-176   512    
-288   -160   
-880   272    
432    0      
-288   368    
368    256    
-384   -80    
-320   -192   
352    144    
400    0      
-128   528    
416    -288   
224    -128   
144    336    
-800   -368   
-480   128    
272    80     
-224   64     
304    672    
-256   48     
-224   -16    
192    -96    
-192   -112   
352    -64    
-544   -1168  
-304   -48    
176    2608   
176    208    
-1168  384    
-672   -384   
432    -16    
736    160    
-1024  -432   
-800   64     
-272   -464   
-96    272    
144    -16    
-736   64     
384    192    
-304   -64    
-96    192    
368    -96    
-480   -112   
256    112    
-176   -1072  
-496   -256   
224    384    
-224   304    
-912   -48    
704    -32    
-864   0      
160    -32    
-16    -64    
288    192    
-608   -208   
288    -64    
-240   -64    
112    -144   
112    368    
-16    448    
336    144    
-256   272    
-96    144    
-496   96     
544    96     
-416   -96    
-256   80     
-128   -160   
160    32     
32     -96    
288    -48    
-496   480    
640    352    
0      256    
-80    -288   
-432   -128   
288    -128   
304    1120   
-688   416    
-48    80     
-304   -32    
240    64     
-256   64     
368    112    
32     32     
128    64     
16     64     
-176   -16    
-176   272    
256    224    
-112   160    
0      96     
208    336    
-480   0      
-144   -208   
80     -368   
-160   192    
224    64     
208    128    
-208   64     
-32    32     
128    -208   
-80    -96    
0      736    
32     0      
-64    -80    
-48    208    
-48    1504   
2384   -592   
-1360  304    
-576   -320   
896    -64    
-688   0      
-688   160    
144    336    
128    -176   
-64    224    
240    96     
-208   48     
-96    -48    
240    -80    
-96    240    
32     288    
-48    -272   
0      400    
96     144    
-48    -112   
400    1360   
-1504  -96    
0      48     
1248   -48    
-720   -64    
-592   176    
432    -128   
288    -48    
-224   80     
128    -128   
-160   288    
48     80     
-16    144    
-160   32     
-256   32     
-304   -176   
352    -272   
-560   32     
480    -80    
-224   192    
64     80     
-48    176    
-16    64     
0      80     
288    128    
-416   160    
-272   -48    
48     144    
176    -64    
-240   48     
-576   1984   
960    400    
-272   176    
-336   -448   
16     48     
192    240    
-48    176    
272    304    
-256   400    
-272   128    
144    64     
48     -32    
0      128    
192    320    
-400   48     
0      320    
160    -48    
-336   -96    
384    -64    
0      -128   
-48    144    
64     -464   
-1184  832    
1008   112    
-480   112    
-288   144    
400    -64    
-80    208    
-384   112    
-544   96     
640    0      
-80    48     
-160   128    
0      144    
64     96     
-352   32     
192    32     
-80    112    
-144   0      
224    -32    
32     16     
-112   80     
-336   -544   
400    576    
-16    -48    
-1008  144    
912    272    
256    336    
-672   -48    
208    -16    
16     128    
96     -16    
-32    16     
-128   176    
-112   -128   
336    -160   
-112   -288   
112    -32    
-528   368    
240    48     
64     64     
80     0      
-240   496    
608    -160   
-192   0      
96     -144   
-144   336    
96     128    
336    112    
-432   -960   
-1136  -1952  
1680   -1088  
272    144    
-1392  64     
-560   304    
1008   224    
-320   0      
64     1360   
336    304    
-496   240    
-240   352    
528    96     
-64    -208   
0      384    
-240   -32    
80     96     
-32    16     
-48    80     
144    -32    
-144   -2448  
-480   -656   
448    -48    
64     320    
0      112    
64     16     
336    -160   
160    160    
-448   320    
272    -400   
-80    -976   
80     -160   
-192   144    
160    -224   
-288   -144   
336    -592   
32     288    
-224   288    
224    176    
208    336    
-144   -64    
160    -256   
64     416    
-400   160    
-112   -384   
112    864    
464    1024   
-128   80     
-208   -64    
240    -304   
-112   -560   
112    256    
-288   -672   
-416   -864   
512    -752   
-32    -1136  
-448   -224   
512    1184   
-256   1120   
-320   -48    
-80    -16    
64     176    
272    112    
-80    -256   
-48    208    
16     -512   
-592   -544   
64     -2256  
304    256    
-32    224    
128    208    
288    -224   
64     256    
96     64     
-144   208    
64     64     
-112   64     
-48    192    
336    -160   
160    -208   
0      -304   
112    144    
-80    -192   
-144   -944   
-16    -800   
-384   432    
336    -272   
304    -176   
-160   -32    
416    80     
0      512    
0      64     
64     -96    
64     -176   
-96    144    
-80    -224   
-16    224    
80     -80    
144    48     
-368   64     
208    352    
208    -48    
0      -16    
16     -432   
-464   80     
176    400    
240    -208   
48     96     
-160   -416   
-16    -160   
32     -240   
272    -48    
-32    -144   
16     208    
-176   -144   
16     -80    
160    0      
-64    32     
48     -336   
-144   -48    
304    -304   
-368   -1136  
144    -16    
96     320    
80     32     
-128   -16    
-80    160    
336    -240   
-32    416    
-128   -80    
432    208    
-576   272    
240    -224   
-1600  96     
1664   -208   
-192   -2592  
-928   -480   
896    992    
864    -32    
-480   448    
-208   624    
272    -528   
224    -1104  
-384   -944   
48     -336   
-144   -288   
368    64     
-80    -736   
-48    -64    
-160   384    
272    -352   
-288   480    
208    -224   
-208   -448   
768    48     
672    -304   
-672   384    
752    -1120  
-832   592    
-144   1440   
288    -48    
-592   224    
64     -272   
256    -80    
64     -64    
-96    -48    
-416   -80    
480    -448   
448    -96    
-464   -416   
0      192    
128    -672   
160    320    
-96    -224   
-144   48     
64     -320   
720    160    
-688   240    
192    -192   
400    64     
-720   528    
-480   -192   
0      -224   
576    304    
-272   48     
-224   -64    
-176   -576   
0      -176   
368    -400   
416    -464   
-16    -16    
656    -272   
-640   -96    
-48    16     
-16    -96    
128    32     
-96    16     
256    0      
-32    128    
-64    -144   
64     -96    
-16    -96    
384    464    
1008   3664   
-1200  1888   
320    96     
1536   -432   
-368   -32    
-464   -144   
-224   16     
624    128    
-112   -64    
144    224    
288    -80    
-416   -144   
96     -64    
112    -192   
-96    96     
160    -816   
-512   32     
48     16     
96     -640   
672    64     
-336   -544   
-176   -32    
224    112    
80     16     
-528   -400   
-1152  48     
192    -656   
-848   256    
480    -512   
32     160    
96     -1152  
-96    64     
-112   -192   
336    320    
-336   -240   
-240   96     
240    -144   
-448   -64    
400    -32    
-720   -32    
64     64     
336    -48    
-384   128    
192    0      
-336   48     
432    -96    
-112   80     
-208   192    
224    64     
96     -16    
-240   -64    
0      32     
-144   336    
832    160    
-528   272    
-224   128    
816    192    
-192   0      
-112   -128   
-80    240    
-208   0      
224    144    
176    160    
-160   32     
-80    -208   
-16    -224   
-160   48     
-16    -224   
-272   -320   
608    -224   
-256   192    
-64    -64    
176    32     
-224   -224   
-16    208    
-240   0      
144    160    
-192   368    
0      272    
128    -224   
-320   -80    
768    2832   
-1232  -1088  
-720   -16    
1504   -400   
-720   -272   
-1152  -32    
656    64     
256    400    
-208   240    
64     -672   
-512   272    
-64    80     
432    -144   
-160   384    
-528   -144   
80     64     
16     -16    
48     192    
-144   -288   
-128   112    
32     160    
560    1600   
640    -256   
-1008  -192   
0      -48    
-80    -32    
96     144    
352    304    
-192   288    
-416   -512   
32     176    
-544   -64    
-320   64     
112    16     
144    176    
-240   0      
192    256    
-208   0      
-80    576    
480    224    
-192   -16    
-128   -64    
128    96     
-96    64     
128    128    
-400   80     
160    144    
192    144    
-176   -96    
-128   -176   
1792   1728   
-1296  1024   
-1184  336    
1184   -208   
-592   -32    
-192   16     
16     -80    
464    -320   
-464   -528   
-176   -144   
224    112    
-272   144    
112    160    
-496   -112   
-224   288    
624    48     
-336   208    
160    -160   
-160   160    
432    304    
128    320    
-208   -128   
736    -160   
-1712  -96    
1376   -208   
384    752    
-288   992    
-176   -176   
80     -64    
304    96     
-304   16     
-448   128    
-240   -272   
336    -64    
176    32     
144    208    
-112   64     
-96    -96    
544    32     
-288   352    
-96    128    
-32    16     
0      144    
80     -384   
-160   464    
-368   -80    
256    -2800  
400    992    
704    -368   
-432   48     
784    -32    
-176   352    
-16    112    
-304   32     
-112   -304   
432    -208   
656    -176   
-320   288    
-624   432    
384    -144   
-272   -48    
-768   192    
384    32     
-80    176    
16     288    
96     -224   
-160   240    
480    -64    
-32    192    
-32    128    
-160   160    
1520   1984   
-1664  176    
224    624    
1504   32     
-1088  192    
-256   544    
672    928    
624    1616   
-272   1232   
288    -32    
-96    -496   
80     448    
80     -16    
96     -96    
-160   -256   
-352   -464   
512    176    
32     32     
-112   32     
80     96     
-96    -160   
96     16     
-352   -208   
656    368    
-304   288    
-16    800    
-112   656    
432    608    
-32    -176   
-224   224    
-176   -320   
256    224    
256    -80    
16     944    
64     1120   
-208   496    
224    -336   
0      -160   
-256   -432   
272    624    
16     416    
368    -112   
-48    -64    
32     160    
-144   768    
176    -256   
-176   144    
208    -688   
48     416    
-208   208    
144    32     
-208   -1552  
-272   -16    
544    288    
208    288    
272    -176   
-256   -1552  
320    -352   
-208   1600   
-64    736    
-144   -480   
224    272    
-64    -240   
-352   -368   
64     112    
256    400    
304    304    
32     -48    
-96    -64    
32     48     
-64    80     
0      64     
96     112    
48     16     
192    192    
-208   192    
256    368    
-64    816    
112    496    
64     0      
64     -48    
144    704    
-256   160    
240    -128   
-16    96     
-144   -384   
-240   -400   
64     -48    
48     -480   
-320   -592   
-80    -16    
32     -112   
-48    -80    
128    -48    
64     -208   
16     -96    
320    -80    
48     272    
-128   432    
112    224    
224    240    
240    -512   
-1168  144    
672    64     
-96    -112   
448    -112   
208    432    
-112   496    
-576   240    
352    -304   
320    464    
-224   576    
-400   -144   
32     -224   
448    560    
-16    -128   
-304   512    
-208   -432   
544    496    
256    -176   
-96    272    
-320   -288   
-144   48     
400    -1744  
80     144    
-176   224    
80     208    
64     -64    
320    0      
-112   -96    
-16    -256   
-1440  -240   
1632   208    
-144   -208   
-704   192    
960    -80    
-352   192    
432    464    
-272   -112   
96     256    
-96    -240   
544    256    
-160   160    
-224   80     
128    288    
544    240    
-48    176    
-256   384    
224    288    
-96    32     
96     -16    
0      48     
-240   -1008  
-560   -128   
832    0      
160    -64    
-224   -80    
320    -1008  
80     -208   
-1008  320    
880    96     
-16    -128   
-224   272    
192    48     
-96    -176   
32     272    
432    -48    
-320   112    
64     128    
-144   48     
160    -112   
544    16     
16     32     
-304   -128   
-32    304    
-256   -144   
176    -384   
432    -32    
320    -416   
288    -256   
-432   640    
-32    -272   
-128   112    
400    -464   
352    -32    
-160   -384   
-176   720    
464    592    
96     80     
-240   256    
336    64     
-80    -224   
304    128    
288    256    
-48    -416   
-144   160    
144    -448   
576    176    
160    -32    
-384   32     
1024   1216   
640    2800   
-2576  864    
1456   -720   
720    -208   
-800   96     
-416   176    
672    64     
-256   -704   
-128   -400   
592    0      
96     16     
-64    -16    
-208   -48    
128    112    
-176   -256   
352    288    
32     0      
-400   -576   
-32    -160   
1088   -848   
-656   -160   
272    -48    
48     -352   
-352   16     
-176   -112   
-176   -64    
288    -992   
-320   80     
48     32     
0      -112   
272    -1120  
160    -48    
16     -32    
0      64     
256    -112   
-544   -416   
192    -96    
176    -576   
-224   128    
736    -176   
-352   -48    
416    -224   
64     -192   
-32    -16    
96     -16    
-64    384    
-112   544    
0      144    
208    -144   
-128   -112   
0      -240   
-352   -544   
704    -704   
-144   144    
224    96     
-240   32     
-160   -496   
-368   -32    
352    -1536  
-96    -304   
-48    -272   
80     128    
96     -272   
-112   128    
-48    96     
192    48     
-192   176    
-272   -64    
-640   -128   
272    -288   
-16    -16    
-560   320    
400    16     
160    -384   
-48    -64    
-112   -208   
-224   128    
128    -224   
112    -208   
96     16     
-16    -160   
176    -1232  
-2144  976    
1920   -64    
-352   176    
-272   -192   
112    -48    
-112   160    
256    -192   
-736   0      
448    -1664  
64     432    
-192   64     
160    -32    
-256   -112   
192    -880   
80     384    
-32    48     
-112   80     
352    176    
-1440  80     
-384   -416   
784    -576   
-352   96     
-160   -432   
336    -1312  
-224   208    
448    592    
-160   864    
16     112    
-240   -16    
-128   48     
416    -80    
-144   272    
-240   -32    
-304   -160   
464    -32    
-144   224    
64     -272   
-48    -32    
176    -496   
-32    0      
208    0      
32     -160   
-96    64     
16     -96    
-336   176    
400    -176   
-288   256    
16     -208   
224    160    
1200   1296   
-1568  -288   
-1168  -160   
2240   320    
-992   -192   
-64    464    
-64    384    
-144   -64    
416    176    
16     -464   
-272   -16    
-176   -224   
-16    208    
112    -176   
48     208    
304    -192   
-400   144    
208    -336   
64     128    
304    -368   
-368   -96    
96     -928   
-1120  320    
560    -672   
-416   -576   
528    -496   
-160   -592   
-48    -560   
336    -320   
-272   304    
-848   -288   
48     112    
-480   -288   
-64    64     
32     80     
240    240    
-256   -32    
-256   496    
-48    192    
-848   -144   
176    32     
-96    80     
0      320    
-272   176    
-112   272    
208    656    
-528   480    
-800   -2288  
-64    -1616  
416    -816   
-864   128    
112    176    
-288   144    
64     -96    
288    496    
384    304    
-1376  -112   
272    -880   
-512   -160   
208    -48    
224    -16    
-64    -128   
-160   -256   
-96    64     
48     32     
-176   -448   
688    -896   
64     80     
48     -448   
-320   -592   
-96    -224   
1200   2528   
-1824  784    
448    848    
1856   -80    
-1632  -432   
-176   -528   
480    -288   
176    1024   
-416   -1008  
-144   992    
64     -80    
-16    272    
272    64     
16     -144   
-208   352    
-128   -448   
-160   -96    
144    256    
-336   416    
272    816    
16     -64    
-48    -400   
240    -48    
32     384    
-64    -144   
-160   976    
-64    -160   
-608   -848   
544    400    
-32    -112   
-400   -384   
48     720    
-224   -624   
160    -16    
-128   -448   
128    -448   
-96    128    
32     -32    
-64    528    
-80    -240   
-160   -144   
528    544    
-208   -128   
16     -304   
16     944    
288    16     
0      -432   
-32    1344   
48     160    
-224   144    
-160   -336   
416    -592   
-896   160    
544    80     
-128   -112   
400    304    
96     64     
-96    432    
-176   304    
0      16     
176    -176   
-64    256    
-400   -144   
176    112    
-160   -144   
-80    -48    
32     192    
-32    64     
416    -288   
784    352    
-128   176    
-96    64     
-128   128    
208    464    
-224   464    
-176   384    
32     -32    
-32    592    
-64    -208   
-608   -496   
112    -16    
304    -432   
-1280  960    
704    -224   
0      -544   
112    -96    
288    -560   
-432   -416   
160    832    
-16    656    
176    -752   
16     528    
-272   -256   
16     224    
224    224    
112    -288   
-48    464    
-48    368    
64     464    
96     -128   
-64    96     
448    640    
-880   768    
496    -896   
384    -656   
-272   288    
-240   304    
64     272    
208    128    
32     144    
-48    368    
-80    -192   
64     -16    
-112   -16    
80     272    
112    496    
-176   192    
-64    -352   
-112   -576   
160    -16    
-256   32     
128    208    
16     -64    
-32    -96    
64     128    
32     32     
-288   -112   
64     32     
144    16     
-16    -64    
624    80     
-1520  -976   
304    656    
560    16     
-672   -64    
752    272    
64     256    
-608   352    
320    112    
80     -16    
-112   -48    
16     144    
80     176    
16     80     
-224   48     
464    208    
-240   -16    
-96    144    
272    288    
192    240    
-256   64     
32     144    
288    624    
336    -800   
-1568  352    
1440   384    
-256   32     
-528   192    
320    80     
-400   -208   
672    -160   
-160   112    
-112   144    
80     80     
256    256    
224    48     
-576   64     
-16    96     
336    240    
128    -240   
16     -176   
528    -64    
-16    -96    
512    832    
48     -48    
-112   96     
304    416    
-256   -48    
-624   96     
-432   224    
368    -320   
-592   -320   
-96    240    
400    208    
-128   272    
48     80     
64     -336   
-176   32     
384    0      
-464   -240   
-128   -64    
672    -48    
416    224    
-464   -144   
-176   112    
240    -32    
832    -336   
-624   272    
-160   -1904  
-176   192    
-304   -592   
-32    -1584  
2784   -3104  
-992   -144   
176    -64    
208    576    
-512   208    
352    0      
224    384    
-64    192    
-352   304    
176    -304   
192    96     
144    -448   
-32    112    
-240   256    
80     96     
288    256    
64     -96    
-272   32     
560    -160   
-1168  0      
1008   -32    
-352   256    
496    -64    
16     80     
-240   -80    
688    528    
-896   -32    
416    32     
400    -272   
32     48     
-288   -112   
160    64     
-384   -288   
560    288    
-16    96     
-112   480    
160    32     
-256   32     
16     0      
-80    -176   
192    -16    
-16    -224   
128    192    
160    -448   
-16    -448   
-656   -3008  
448    0      
-16    0      
0      160    
-48    128    
80     272    
-272   -832   
-64    -112   
288    960    
-224   256    
272    240    
16     -224   
-272   176    
80     -1232  
96     160    
32     -112   
32     176    
-96    32     
144    48     
-48    -48    
128    96     
-144   -64    
0      -144   
192    656    
-336   720    
256    272    
176    -160   
96     -288   
-80    0      
64     -112   
32     -48    
320    640    
-272   1136   
352    656    
-16    272    
-528   -928   
1040   -1072  
-1136  336    
896    80     
-544   -192   
-336   -80    
336    48     
624    544    
-112   448    
-608   544    
272    -64    
288    112    
80     48     
-192   448    
0      32     
128    -64    
208    -400   
-192   112    
-48    -592   
48     -272   
144    112    
-256   -864   
32     -784   
192    -352   
176    -848   
32     368    
48     -1136  
-80    16     
160    208    
80     -192   
-720   -240   
16     -624   
80     16     
-64    -336   
-64    64     
336    -1216  
-64    -80    
-304   416    
-16    -208   
208    464    
-144   32     
32     -144   
160    256    
-128   48     
160    -352   
-336   -192   
-96    80     
192    -192   
-128   0      
-48    -288   
-176   -240   
512    464    
1056   -1056  
-1024  -496   
880    272    
144    64     
-128   -976   
752    -1024  
96     1360   
48     992    
-192   128    
240    0      
176    -48    
-288   -160   
464    -432   
144    -96    
-512   48     
0      -272   
480    160    
-320   528    
80     592    
656    880    
-1056  -784   
-816   192    
1424   1248   
-192   176    
-448   -688   
-416   128    
-48    336    
-112   -32    
144    448    
272    384    
-272   160    
-160   -336   
240    -176   
-112   336    
-336   112    
224    -16    
-144   176    
80     304    
-16    384    
-64    416    
-128   208    
256    -320   
-96    1584   
848    1072   
-448   352    
240    -336   
160    848    
576    -1792  
-784   -1296  
320    288    
128    432    
-320   -112   
-48    -384   
768    -448   
-272   0      
304    640    
-592   416    
-528   448    
80     -528   
-48    48     
560    -320   
48     496    
-368   16     
160    480    
-400   416    
-16    368    
448    -192   
-368   176    
-416   416    
448    1056   
384    -192   
-288   304    
848    -960   
-272   -16    
-384   -528   
608    -160   
384    2016   
-64    -352   
-512   -96    
-160   176    
208    160    
32     480    
48     -576   
-224   416    
-160   -48    
-224   -432   
-16    48     
-256   48     
336    352    
-144   64     
-48    -368   
-256   -80    
432    144    
304    640    
-848   560    
432    688    
240    304    
144    -160   
-144   -928   
-160   -240   
208    416    
176    192    
-416   32     
608    176    
-320   288    
-1328  -48    
192    512    
-624   -352   
-976   -640   
-112   -160   
32     -128   
-192   -96    
-768   -224   
256    1008   
-320   -272   
-176   -336   
368    -896   
-64    -304   
-544   176    
64     448    
48     -1504  
-496   -208   
432    528    
160    0      
-320   64     
-16    -560   
-16    -976   
-336   -592   
-32    704    
336    736    
-64    608    
240    640    
-16    160    
-656   -144   
112    -160   
128    -128   
-128   80     
368    -48    
-96    -160   
-144   -112   
320    -80    
-192   -16    
-80    48     
16     48     
-256   368    
80     128    
-208   -192   
64     -32    
-64    -208   
-112   416    
608    2432   
768    208    
-912   1408   
608    96     
-384   -528   
32     -464   
0      -560   
96     352    
-416   624    
-256   320    
320    112    
-272   48     
-48    -96    
144    -512   
144    -80    
112    96     
256    528    
-400   448    
0      288    
192    128    
112    -928   
-384   112    
144    112    
-400   384    
160    352    
-208   592    
-16    48     
-144   -256   
-112   -160   
336    -128   
-96    32     
-208   384    
208    192    
32     48     
-64    80     
128    -64    
-256   224    
160    -16    
-112   320    
336    -64    
-256   96     
-272   80     
32     32     
128    240    
224    384    
-624   176    
32     320    
272    -16    
-416   16     
0      672    
1312   -864   
-1936  848    
1376   176    
624    192    
-1392  -192   
64     -80    
688    176    
-336   32     
-560   0      
400    48     
-16    96     
-32    48     
48     192    
-144   64     
-112   224    
256    64     
-144   16     
-384   -96    
336    64     
144    -64    
-368   48     
352    400    
1648   -32    
-1376  736    
-720   -112   
224    160    
176    -256   
-688   48     
752    96     
-160   112    
-192   80     
96     64     
-128   48     
176    -256   
-688   128    
704    96     
-352   -400   
-48    -32    
288    32     
-464   80     
144    96     
304    672    
-848   -272   
320    496    
704    -128   
-336   816    
304    544    
-368   384    
304    80     
384    336    
256    144    
-304   -112   
-176   336    
288    16     
336    352    
-208   128    
112    -16    
864    960    
-240   224    
-208   -256   
352    192    
64     96     
-144   -64    
-16    144    
-336   -256   
800    -240   
-272   -96    
112    -48    
-16    160    
-448   -1632  
-832   1472   
2016   -96    
-1056  -224   
-1536  -192   
800    -96    
992    304    
-400   48     
-352   496    
-560   128    
336    224    
576    -32    
-336   -32    
-48    128    
-368   208    
608    32     
-368   176    
48     64     
-336   16     
704    544    
-464   160    
96     752    
336    -112   
-640   -80    
688    224    
-96    80     
-96    272    
160    0      
-272   -48    
624    -320   
-288   -176   
-32    -48    
32     144    
224    48     
160    32     
-208   192    
80     -16    
128    80     
304    -320   
256    -32    
-64    0      
16     144    
-256   176    
480    144    
-128   240    
256    -32    
32     16     
64     0      
-192   -208   
-16    32     
272    48     
-144   176    
240    400    
-720   544    
656    1136   
-240   864    
0      -208   
-96    -144   
-96    -704   
-48    -592   
288    -32    
176    -48    
-64    -32    
16     144    
0      240    
-208   -48    
80     -256   
64     48     
96     -224   
-112   -32    
128    -144   
16     -256   
512    752    
-592   -688   
448    272    
208    16     
128    368    
-336   720    
-224   -96    
272    -912   
112    144    
-208   368    
-192   2096   
1168   -464   
-880   448    
80     832    
640    320    
-496   -928   
96     -2000  
-96    1040   
192    -848   
-160   384    
128    144    
-16    80     
32     304    
256    160    
-112   -240   
-80    112    
0      64     
-80    128    
128    -96    
-32    -80    
-336   208    
432    -384   
-48    880    
-560   -832   
352    -32    
192    -752   
-80    -224   
-80    432    
448    480    
-128   -432   
-64    272    
-64    256    
80     144    
-80    448    
48     -512   
-272   256    
64     -480   
688    -368   
16     672    
-352   544    
-16    -592   
224    48     
64     -80    
192    192    
-432   224    
288    320    
-224   96     
-144   -352   
368    -16    
48     -32    
-1680  368    
2016   -256   
80     -128   
-1520  -560   
1152   256    
192    -256   
-896   -32    
240    -688   
432    768    
-224   48     
-48    416    
144    48     
-128   32     
128    192    
352    -96    
0      0      
-224   -576   
320    -64    
528    -32    
-144   64     
416    1184   
-208   -800   
-544   400    
752    944    
-352   864    
224    -112   
224    -128   
-912   -1392  
336    -928   
192    272    
-208   1328   
64     -672   
80     -112   
0      -192   
272    -368   
16     -1072  
-176   176    
112    16     
-656   -80    
320    144    
192    -112   
-224   -416   
544    -848   
-240   112    
-640   -960   
112    -864   
224    -432   
816    464    
752    304    
-320   -560   
64     -288   
96     -3568  
-176   352    
-224   -1024  
592    640    
432    -128   
48     -1584  
688    -672   
-320   -128   
368    128    
352    208    
-176   96     
0      -400   
-96    -400   
272    160    
-80    432    
-272   -352   
-320   608    
352    320    
-48    -112   
848    2848   
-800   1248   
160    -160   
1024   -1648  
-1152  -416   
-384   -112   
368    640    
272    32     
80     1376   
-272   -272   
-160   -272   
608    64     
-32    -160   
-544   -16    
-16    -32    
-480   -288   
112    -240   
-176   176    
-64    768    
-32    1008   
320    80     
256    -544   
-336   -336   
-576   192    
352    -352   
288    -32    
112    304    
176    -288   
-464   -80    
304    -80    
-32    48     
48     -288   
-112   16     
176    -192   
176    16     
32     -864   
-96    -208   
352    -336   
-240   -80    
-144   -640   
256    -320   
-176   -208   
64     -96    
-80    96     
128    80     
-16    768    
480    240    
-464   -16    
16     800    
240    496    
-32    512    
416    768    
-128   -640   
-896   32     
896    -752   
-16    80     
-96    -128   
304    -128   
-160   -80    
320    -352   
-320   -192   
-16    -240   
32     0      
64     -416   
-176   -224   
32     -16    
-32    464    
224    -128   
-144   448    
368    32     
112    256    
48     -16    
16     -112   
32     -208   
-48    -112   
-80    112    
240    448    
288    272    
-400   -16    
-272   -80    
320    -208   
-560   -608   
576    -1104  
-576   400    
-96    -736   
336    336    
256    -32    
-496   64     
-304   48     
672    224    
-16    160    
-320   -32    
-192   16     
80     -192   
-112   -96    
-192   368    
0      352    
560    -496   
-432   16     
368    -960   
224    224    
-272   64     
-16    -848   
-496   400    
960    208    
-512   0      
32     544    
-160   0      
16     -176   
-96    -48    
160    -176   
-256   160    
-128   -112   
304    192    
16     -288   
-352   -144   
64     224    
-144   128    
-304   176    
256    48     
-448   -32    
208    -160   
96     32     
-32    96     
-32    64     
128    96     
320    -64    
-720   -32    
640    96     
-432   -272   
-112   160    
-432   1584   
912    1104   
-1056  48     
-560   -384   
512    96     
48     64     
-368   -48    
496    -144   
-112   -32    
-336   -16    
112    192    
-432   -64    
464    112    
48     32     
-672   -128   
352    128    
112    128    
-288   -32    
-48    -16    
-48    -64    
-496   64     
512    704    
-1680  -512   
-32    176    
1216   352    
-2240  48     
272    32     
592    -240   
-880   0      
288    80     
128    16     
-32    96     
0      160    
-96    64     
-96    192    
-608   -128   
16     80     
96     -48    
-80    -368   
-96    -160   
480    32     
-160   -48    
-160   464    
1488   -80    
-1136  -160   
176    192    
464    416    
-272   496    
-464   -288   
560    -96    
-176   -288   
-160   144    
-1056  -224   
48     16     
256    -256   
800    0      
-512   -192   
112    416    
-80    80     
-320   -208   
256    176    
160    144    
-288   -32    
48     -16    
-128   -32    
-160   -176   
448    384    
224    128    
-208   208    
96     240    
1968   4960   
-608   2176   
-368   -864   
1744   -416   
-912   48     
-432   128    
336    -32    
480    -32    
-240   96     
-320   80     
560    0      
-400   128    
-128   16     
480    -80    
-336   -64    
-48    -64    
16     192    
320    16     
-64    80     
-208   752    
416    1536   
-208   1056   
16     -128   
400    16     
-560   -304   
48     192    
32     -48    
-352   -16    
240    256    
160    -304   
-304   -16    
-32    -224   
64     176    
-144   112    
-48    -272   
400    -144   
-176   -160   
32     512    
-160   432    
96     128    
32     -96    
-128   32     
160    -288   
240    -64    
-416   224    
352    512    
-96    96     
-256   384    
272    -16    
-496   -704   
368    -480   
-464   -208   
432    -80    
128    240    
-48    672    
224    272    
-320   -80    
192    1056   
624    1360   
80     1008   
32     560    
112    576    
-112   256    
32     -144   
80     -32    
-16    144    
-48    528    
-16    -208   
-48    -208   
96     288    
80     336    
-80    80     
-160   -576   
0      -464   
-272   -272   
128    -64    
-64    96     
160    400    
128    128    
-304   -48    
144    -16    
208    208    
144    1152   
80     592    
-272   -16    
-336   144    
176    48     
-144   -80    
16     192    
80     48     
336    -112   
16     -128   
16     -128   
32     48     
-80    16     
96     -64    
64     -80    
240    224    
-112   -48    
-144   176    
16     256    
-240   -224   
1040   -704   
-400   704    
48     48     
-160   208    
128    -96    
208    -352   
64     16     
-32    -16    
-112   288    
160    128    
208    48     
64     -112   
256    304    
-416   144    
96     112    
272    -64    
-48    112    
-48    -48    
128    -240   
176    -16    
416    16     
16     256    
-96    80     
32     288    
112    192    
-32    144    
320    160    
-64    176    
-128   -96    
1424   1872   
-912   848    
-1264  -160   
1712   -352   
-352   -496   
-1136  -704   
560    144    
-336   -1040  
-240   -928   
480    256    
112    544    
-448   144    
176    -112   
112    -16    
-272   -144   
-16    -448   
112    528    
80     896    
-224   208    
192    224    
16     64     
-912   416    
2384   -256   
-752   400    
-144   272    
624    544    
-320   1248   
0      736    
256    336    
-320   -1008  
352    -512   
112    160    
-80    -208   
16     560    
16     480    
240    32     
-224   144    
112    -832   
-144   -1088  
-128   -368   
448    -160   
48     32     
0      176    
-416   -384   
256    -80    
224    -640   
-736   64     
-288   -2400  
-704   -368   
912    0      
-496   560    
-16    32     
448    -128   
-352   176    
-80    -416   
928    -384   
-368   256    
-32    -896   
-304   -176   
-176   -16    
400    -1136  
80     176    
176    -896   
-48    0      
-336   -1536  
592    -16    
-832   176    
224    176    
224    208    
-480   1040   
-64    -928   
1104   -2064  
432    288    
112    704    
-880   -720   
0      416    
736    32     
-304   -128   
-112   400    
464    -224   
48     0      
-16    -144   
-64    -96    
64     48     
208    272    
112    128    
-112   320    
-16    -176   
-336   -320   
720    -416   
-160   1120   
144    768    
160    -176   
-320   -64    
-544   -128   
960    128    
-128   -224   
-64    160    
-32    480    
160    128    
-96    -32    
112    16     
48     192    
-32    176    
-192   96     
-208   -576   
432    -144   
176    -896   
-544   -160   
336    -336   
128    -64    
240    -304   
-256   -240   
-272   -112   
224    224    
-96    96     
160    112    
464    416    
-272   160    
16     272    
256    -160   
-16    -240   
256    -864   
-368   224    
240    416    
480    160    
-608   80     
176    176    
320    128    
16     144    
368    -48    
-416   192    
176    -928   
208    -144   
-192   -1136  
224    432    
-112   64     
80     48     
96     96     
64     -320   
-144   368    
-112   176    
384    -1056  
-96    -80    
16     144    
64     -512   
-224   -336   
256    -336   
-160   32     
32     -528   
160    -96    
-608   -2736  
160    -80    
736    32     
-752   -368   
720    -144   
208    48     
-624   -592   
-304   -96    
800    80     
48     112    
-512   -192   
-192   64     
96     -80    
304    -432   
-160   320    
-16    -352   
128    -224   
-192   -1728  
160    -96    
48     -128   
672    992    
-1488  560    
320    -128   
912    -176   
-704   64     
224    -256   
-336   192    
240    -80    
-144   144    
576    -96    
-464   -192   
-144   -160   
-160   -1776  
752    0      
-208   -112   
-208   64     
176    -96    
64     416    
-144   -32    
-96    32     
0      -64    
0      48     
-112   -32    
80     -96    
-96    -192   
-368   -64    
544    -160   
0      -256   
-64    64     
-448   -192   
2432   1520   
-608   -1296  
-1936  400    
256    -432   
368    224    
176    32     
-368   -144   
-224   464    
272    -208   
-656   32     
256    -16    
208    96     
80     -256   
0      192    
256    -1056  
-288   224    
224    -96    
0      -16    
80     16     
96     -64    
-96    160    
-128   304    
1392   -144   
-496   976    
-464   -496   
-272   256    
256    -32    
-320   -576   
240    240    
16     -384   
-160   192    
352    16     
-16    32     
-272   -176   
288    48     
32     -16    
16     -32    
-240   -272   
-272   -128   
-128   128    
112    -432   
272    576    
-432   -304   
-448   480    
832    -176   
-416   -32    
-112   -64    
-64    32     
160    -224   
752    -32    
-352   160    
32     512    
-320   272    
-32    -400   
320    352    
352    -288   
-192   208    
288    80     
-48    96     
192    -144   
128    -96    
-64    -48    
-64    48     
144    112    
-32    112    
96     -176   
-544   128    
320    48     
32     -112   
-48    1232   
128    4304   
480    624    
-2016  -224   
192    -400   
2544   192    
-2224  -80    
-704   -128   
432    176    
144    32     
-208   32     
-480   -128   
400    -176   
-784   240    
544    16     
-176   208    
-368   -192   
-240   112    
144    -288   
-48    208    
-448   -848   
96     -544   
-16    -176   
-384   192    
880    64     
-1024  128    
-80    -32    
320    -80    
-528   -592   
-64    -880   
-128   224    
-48    592    
80     448    
-304   -544   
224    -32    
-208   80     
80     240    
-208   208    
-32    64     
192    112    
-400   32     
176    -288   
96     -336   
-480   -144   
-224   -624   
-320   -592   
320    -928   
-176   -608   
288    -1408  
16     -176   
-272   560    
96     -48    
-192   -1152  
208    -240   
-272   -576   
-544   -432   
672    128    
-496   -864   
80     -912   
-320   1776   
208    -48    
160    -432   
-192   544    
176    0      
0      96     
-368   192    
192    48     
0      -256   
0      -16    
112    -224   
80     96     
32     0      
176    16     
-32    48     
-208   16     
32     144    
-80    0      
688    -240   
80     16     
-352   32     
-16    160    
192    64     
560    -112   
-976   320    
432    224    
-192   112    
48     -64    
176    96     
288    128    
-992   352    
384    352    
176    -112   
32     -80    
-272   256    
-64    80     
32     208    
272    48     
-176   -96    
-272   80     
-32    -16    
240    -176   
64     64     
-960   752    
944    -368   
-1088  -240   
448    128    
-288   128    
-80    -288   
496    -880   
-192   -224   
-112   288    
-256   224    
192    256    
-80    496    
-80    -192   
-32    -144   
-192   112    
112    128    
368    336    
-320   368    
-128   288    
-320   -96    
256    144    
-288   0      
-288   176    
64     432    
-144   320    
64     128    
16     -64    
-272   -112   
208    96     
160    384    
-176   1376   
2176   -80    
-1440  96     
240    400    
112    272    
-160   1152   
0      -384   
0      -1200  
-320   736    
384    112    
176    160    
-256   128    
-16    128    
-32    384    
16     -192   
-48    -336   
112    -256   
-144   -1264  
0      112    
64     432    
544    160    
-2288  624    
1120   256    
-384   96     
144    -464   
256    -336   
32     400    
-432   448    
-224   336    
208    -336   
0      -128   
-32    96     
-480   224    
560    48     
-208   -288   
-464   208    
400    112    
-144   608    
880    304    
-144   32     
-368   32     
-160   -224   
-64    272    
-976   -1248  
224    -1120  
1168   368    
-688   272    
-240   912    
928    -432   
-528   -80    
-112   224    
192    304    
64     64     
-64    -64    
-80    80     
-1104  704    
336    32     
-192   -176   
-304   -48    
64     656    
480    -304   
-304   128    
-96    0      
128    336    
320    128    
112    -432   
-576   160    
368    32     
560    960    
-528   800    
-1392  -1360  
-192   -304   
-128   16     
64     96     
1088   480    
-400   496    
-848   944    
816    304    
-144   240    
48     -192   
-112   80     
-96    -176   
416    384    
-32    0      
-352   192    
80     48     
80     32     
48     32     
368    -448   
-1008  -576   
560    -464   
-80    -544   
208    128    
608    128    
-688   16     
160    176    
288    128    
-144   -16    
-48    256    
256    -48    
-240   64     
304    48     
-16    128    
-368   32     
352    128    
-32    400    
-336   -256   
128    -64    
-32    -1552  
32     208    
-80    112    
-224   80     
288    -128   
64     32     
192    32     
-272   80     
-160   144    
624    80     
-368   64     
128    144    
32     144    
128    96     
-1296  320    
720    -288   
112    48     
-240   0      
48     176    
272    80     
-32    112    
144    -80    
-160   144    
112    -144   
16     144    
-16    224    
96     80     
16     64     
96     64     
224    288    
16     -816   
-528   160    
384    -96    
64     -16    
-16    128    
-80    192    
16     -160   
64     -192   
-176   528    
272    16     
-128   -144   
80     176    
-160   32     
928    2000   
1600   224    
-1360  160    
-384   336    
496    -832   
176    64     
-32    -128   
-64    784    
256    -464   
-80    144    
256    128    
144    -80    
-128   192    
64     432    
224    -16    
32     80     
32     96     
-48    -592   
112    176    
160    -160   
-272   -752   
208    -1168  
-96    416    
-48    16     
480    272    
-320   -560   
224    -96    
-16    384    
-288   80     
256    -16    
112    -128   
-48    -208   
-112   -304   
160    112    
256    -560   
-48    160    
-400   128    
144    416    
224    32     
-96    -64    
32     0      
32     176    
-160   64     
112    -192   
-64    48     
448    48     
-352   160    
160    -80    
-80    96     
720    -1408  
592    -432   
-1552  304    
1376   608    
288    224    
-1184  128    
528    -272   
96     -176   
320    -528   
-256   -192   
208    80     
-208   80     
-112   112    
176    32     
-176   -64    
400    96     
-160   48     
16     32     
-112   -480   
400    -400   
-48    -1584  
-384   -256   
928    16     
-1376  0      
832    -928   
-112   -496   
-128   -352   
224    -16    
288    96     
176    -48    
-256   16     
-96    -624   
128    80     
256    -496   
-144   -112   
288    -560   
-160   80     
-976   -64    
176    -192   
-16    224    
192    -128   
-64    -32    
272    160    
-160   80     
-752   208    
-240   -256   
1008   -784   
-32    240    
-208   -80    
224    96     
400    144    
-528   -64    
-1040  -112   
1120   -336   
-160   352    
-944   -432   
928    -448   
0      -64    
128    288    
-160   -2128  
16     80     
224    -64    
64     96     
-32    0      
-64    16     
-352   -192   
736    96     
-160   -80    
-160   -176   
-192   480    
-176   -656   
-1232  -1872  
-576   -288   
272    -48    
384    -2256  
96     -224   
512    -1600  
-288   656    
-240   160    
-16    400    
208    -832   
-256   -368   
16     96     
-48    656    
-48    -48    
16     -144   
0      144    
-112   -352   
176    128    
192    272    
-16    480    
-32    -432   
-64    -160   
-32    -176   
496    -656   
0      400    
-80    -16    
-32    400    
592    704    
128    544    
-64    -480   
-400   -272   
176    -128   
-64    432    
160    -800   
-224   -112   
-80    -864   
-112   -288   
208    -32    
-112   640    
112    368    
-224   -368   
-16    224    
48     -48    
160    112    
48     -496   
-560   -192   
496    1024   
-208   800    
-80    -256   
160    -64    
-16    -528   
-208   -1152  
-32    -896   
304    -1088  
-1104  -960   
416    -416   
-64    -16    
16     176    
-544   1072   
320    96     
240    -224   
128    -336   
-128   208    
64     -112   
192    32     
80     -80    
-48    -16    
-80    272    
64     128    
32     -176   
96     -176   
-112   -32    
144    -96    
-176   48     
144    -192   
144    -304   
608    -48    
-464   304    
-32    224    
400    192    
-16    -160   
64     -384   
-800   80     
64     192    
32     0      
224    80     
-176   112    
192    -320   
-672   -416   
208    368    
-288   224    
-96    -336   
112    96     
-192   -96    
-16    208    
-64    -272   
-256   -16    
-128   352    
-144   48     
0      -48    
-560   80     
0      784    
656    0      
-832   -16    
160    -80    
80     240    
304    -128   
-48    192    
-432   432    
0      -64    
-16    48     
-48    64     
160    -48    
-64    -80    
32     -144   
-464   -224   
-64    -80    
352    -272   
-320   -32    
-256   576    
-16    464    
352    -64    
240    -224   
-208   -320   
-368   -48    
224    -32    
368    192    
-320   48     
-384   96     
304    -144   
880    1536   
-160   1152   
-1504  896    
1008   -96    
272    -464   
-976   -224   
608    -640   
448    -368   
-640   -96    
240    0      
320    208    
-192   -64    
32     80     
-80    -48    
-112   224    
-32    96     
48     64     
32     -320   
-368   -224   
48     -304   
0      80     
-416   -1248  
0      -176   
944    592    
-784   1200   
-192   1024   
144    -48    
16     -256   
-272   64     
-112   -160   
704    -240   
-320   192    
-272   -160   
176    176    
-272   288    
80     -64    
-320   0      
288    368    
16     -128   
-384   -128   
192    -48    
64     112    
240    768    
-992   -16    
112    -32    
240    -80    
-272   -704   
-576   -80    
496    -624   
-768   -448   
144    16     
-192   -48    
176    352    
160    272    
-384   -336   
128    16     
256    -400   
416    80     
-256   160    
-80    144    
-80    32     
128    32     
192    -64    
-96    224    
-144   -32    
-112   144    
-928   -96    
-16    112    
-128   32     
144    656    
720    2192   
-912   880    
-128   560    
1488   -112   
-480   -80    
-1232  32     
608    224    
496    -128   
48     480    
-736   -528   
48     -112   
336    16     
96     240    
-160   -64    
-256   352    
320    -144   
0      192    
256    -176   
-16    736    
-304   -272   
-96    528    
912    -208   
-752   32     
-864   -128   
560    32     
240    64     
-336   -176   
-192   -32    
48     0      
0      80     
320    144    
-64    32     
-208   128    
336    144    
-192   -80    
-464   -112   
336    96     
240    -96    
64     80     
304    64     
-112   224    
240    160    
-64    112    
48     32     
-64    16     
-112   32     
128    0      
48     48     
-352   -80    
160    112    
272    160    
-128   -160   
512    16     
-64    672    
-288   -128   
-320   416    
592    112    
-144   0      
-352   -128   
-64    -64    
288    0      
-272   -32    
256    48     
-48    -80    
-144   64     
96     112    
64     -288   
-64    -336   
-32    256    
-192   192    
96     0      
96     -16    
-32    128    
64     16     
-64    -48    
240    32     
160    1264   
208    -48    
-208   -192   
48     640    
-32    272    
1280   2384   
976    560    
-1680  320    
480    320    
384    -272   
-208   240    
48     160    
224    416    
64     112    
-176   32     
512    -304   
-160   416    
-176   80     
320    400    
272    128    
-320   -192   
-48    208    
32     -608   
48     -80    
256    32     
-192   -1056  
-288   320    
688    16     
-480   368    
528    96     
-112   -16    
-224   272    
-320   -48    
560    -176   
-112   -80    
-48    0      
32     -16    
-80    96     
336    0      
-48    320    
-64    224    
160    16     
96     0      
96     0      
-64    112    
32     144    
16     -80    
16     112    
400    64     
-608   -64    
400    304    
80     -16    
-192   -384   
-80    -304   
880    1136   
-64    304    
-880   288    
928    80     
-736   -224   
0      336    
496    144    
160    256    
-224   144    
-176   0      
192    48     
-32    128    
-80    80     
48     -304   
-288   176    
448    -416   
96     240    
-400   -160   
336    112    
0      -16    
-96    112    
512    912    
-704   -944   
-1200  304    
944    864    
240    -144   
-96    -240   
-336   176    
320    -96    
-272   32     
160    32     
-224   80     
160    -2096  
160    48     
-112   -80    
-208   48     
112    80     
112    -16    
-80    -288   
16     16     
-288   144    
-48    112    
128    160    
-352   -224   
-64    0      
336    -352   
-144   288    
64     -16    
832    0      
-160   -112   
-448   448    
544    -224   
-320   288    
176    -176   
416    576    
640    -352   
-560   864    
32     336    
-80    -224   
512    -48    
-144   -528   
-288   96     
-32    -336   
400    144    
-80    -560   
-80    304    
-48    -560   
-32    64     
704    -352   
-320   -832   
-288   80     
-896   2112   
0      192    
240    -880   
-448   288    
1072   192    
208    864    
-592   -288   
48     -1520  
320    224    
-96    -16    
-176   32     
-48    288    
304    -432   
208    -384   
-240   -144   
-16    -432   
32     832    
240    -256   
-80    -336   
-112   32     
0      352    
208    -208   
240    -272   
-64    -784   
-144   -336   
176    32     
64     -1136  
64     -160   
112    -560   
-304   -1408  
80     176    
-64    -64    
32     -144   
272    -128   
-304   -480   
32     256    
128    -864   
80     784    
80     1264   
0      -128   
128    -304   
128    -576   
16     48     
-960   16     
80     432    
656    368    
-112   -448   
-32    320    
-176   -1520  
144    256    
-160   -64    
704    672    
256    704    
-400   -128   
-144   -1440  
320    -608   
-176   -384   
208    -1568  
-160   768    
-192   160    
-208   -112   
-32    -640   
288    -112   
-32    -800   
-144   -96    
-64    96     
432    64     
0      560    
-144   -48    
224    -208   
-32    112    
160    -160   
64     0      
-256   -112   
-48    -96    
32     656    
240    432    
-128   240    
-128   112    
192    176    
48     -1216  
400    -528   
-368   256    
384    -1088  
320    -208   
48     288    
-592   -144   
272    144    
304    -32    
-64    528    
-1008  384    
96     16     
80     -48    
192    -192   
144    -32    
-128   -352   
112    496    
304    256    
160    176    
-16    48     
224    560    
-384   1200   
224    -224   
416    -96    
-80    176    
-352   -128   
272    32     
160    432    
-16    -272   
-32    -400   
16     208    
288    48     
224    -1216  
-160   -528   
-80    544    
112    -80    
112    -128   
64     160    
-240   -64    
16     80     
0      160    
-16    -192   
-480   -128   
-224   48     
416    480    
-80    -80    
-240   -32    
96     -672   
48     48     
304    560    
-528   -1584  
-816   -368   
704    144    
-864   -128   
1280   160    
-512   -192   
-464   160    
480    176    
32     352    
272    -208   
-240   -64    
144    32     
96     -48    
96     -192   
-544   80     
448    -240   
-496   160    
-48    144    
48     32     
32     48     
-128   -32    
-64    -1152  
-448   112    
784    -96    
-976   -160   
544    96     
832    -144   
-512   112    
-400   -64    
112    16     
256    -96    
-32    -16    
-32    -144   
-272   160    
112    -176   
144    144    
128    -272   
-592   32     
-80    -752   
-160   96     
368    -80    
48     144    
-832   -304   
-1856  608    
-112   32     
-320   -752   
64     -304   
544    -16    
-928   320    
192    -384   
-96    -16    
432    -208   
-176   240    
-912   -80    
112    208    
0      -16    
-256   464    
-64    352    
-416   208    
-448   304    
240    0      
352    -48    
-848   0      
-96    -16    
400    -64    
240    -336   
-1280  64     
176    -400   
-560   -16    
-240   -448   
2912   -160   
-2912  288    
336    16     
592    -224   
-496   32     
-32    -48    
-448   -400   
-448   48     
-288   48     
0      -48    
-464   144    
-400   -64    
16     128    
32     -64    
144    -128   
-656   -64    
112    128    
-320   96     
0      16     
416    1152   
448    0      
-960   336    
464    64     
-400   -64    
-416   288    
1136   48     
-864   -208   
-96    160    
400    -288   
-160   -16    
-80    -16    
0      96     
32     -16    
-256   112    
288    -64    
-864   80     
464    -144   
80     240    
-224   80     
-576   0      
448    224    
-304   -144   
-176   208    
16     112    
80     112    
-112   176    
496    320    
-880   128    
64     96     
160    -80    
-192   96     
128    112    
-128   496    
880    32     
-704   -144   
320    160    
-512   -128   
-176   16     
224    -176   
-80    112    
-144   -144   
-240   48     
192    192    
-16    -16    
48     0      
208    144    
-272   -16    
-112   -128   
192    -80    
-16    176    
-320   192    
-16    80     
240    96     
-880   48     
16     -80    
64     -64    
336    272    
-224   288    
16     -192   
80     -112   
144    128    
-640   -2080  
-64    -464   
-32    96     
-256   16     
768    352    
-672   -16    
-288   352    
-48    -400   
352    256    
80     432    
-432   80     
16     16     
-16    288    
304    64     
-464   416    
128    -144   
-176   96     
112    144    
48     32     
16     208    
-448   -736   
464    -800   
-496   592    
352    -400   
160    -400   
-256   160    
112    -48    
352    464    
320    400    
-464   144    
-176   336    
176    96     
208    144    
16     -128   
-48    -256   
-128   -64    
-176   32     
240    208    
96     224    
-96    -128   
48     -64    
-336   -320   
112    -80    
272    -16    
-80    288    
96     -32    
-208   -96    
112    144    
-160   -352   
320    -128   
-1088  -1456  
-416   512    
1520   -176   
-1168  -80    
352    128    
464    -192   
-752   576    
288    800    
-112   240    
256    320    
272    224    
-240   64     
-48    224    
128    -112   
-368   -32    
80     -240   
-176   128    
-16    192    
288    128    
-112   80     
-112   80     
864    1248   
1440   0      
-1600  -384   
976    -368   
96     -16    
-352   960    
1040   576    
-368   -64    
-144   16     
-144   128    
352    96     
176    80     
-128   48     
-32    368    
-160   448    
112    -16    
96     400    
176    464    
-64    320    
96     80     
112    0      
48     160    
-432   1008   
928    -2048  
16     720    
-624   240    
736    240    
-640   240    
-64    -288   
192    -144   
304    528    
-96    432    
-96    272    
112    -560   
-544   624    
-512   448    
-208   -512   
-96    -320   
192    -496   
-144   -96    
240    -176   
96     432    
-128   304    
-128   144    
368    16     
-752   368    
-368   352    
736    -192   
-256   -32    
-576   -1232  
1664   -1344  
656    1200   
0      368    
-1280  336    
368    0      
336    -1408  
160    -624   
-16    704    
-384   -416   
96     192    
256    480    
400    -224   
48     32     
-256   112    
0      320    
384    -672   
96     80     
-80    -528   
-352   -800   
256    336    
400    16     
-64    -32    
-672   -48    
864    240    
-128   416    
32     160    
-256   -320   
-112   2016   
240    784    
64     80     
288    80     
-112   224    
-64    464    
352    -112   
-32    -608   
16     160    
112    624    
-96    -160   
-112   -160   
352    -368   
-272   -80    
112    688    
-96    0      
-32    -368   
144    -512   
-256   768    
272    -320   
-80    -560   
704    -304   
-496   240    
-32    -688   
-736   256    
832    544    
112    192    
-272   96     
0      112    
-48    -1648  
-160   -1328  
240    -48    
96     1088   
0      400    
176    64     
-304   0      
32     48     
320    672    
288    16     
-80    320    
-320   -752   
256    352    
128    -1136  
-80    -160   
80     -272   
-128   64     
128    112    
0      -192   
128    -976   
-64    -1216  
-176   48     
112    64     
-16    208    
624    1136   
800    656    
-608   -528   
-320   32     
736    176    
-304   288    
-208   96     
416    320    
-48    -112   
160    -160   
0      144    
-144   -928   
144    -64    
368    -272   
224    256    
-464   224    
192    128    
304    -416   
80     -48    
-320   -320   
368    496    
-48    400    
96     -928   
176    -96    
32     -352   
-16    -656   
-112   -976   
288    -16    
-208   160    
16     112    
256    -64    
96     48     
-272   16     
400    -32    
-208   -160   
352    -32    
48     -208   
80     -1104  
-272   64     
208    -112   
80     16     
-272   -48    
160    32     
96     144    
336    -16    
-432   -96    
64     48     
96     -208   
320    -288   
960    1008   
-1680  912    
-176   496    
1456   -176   
-960   -1104  
-1024  48     
1120   -704   
-128   128    
-288   -480   
592    64     
-48    -2256  
-176   64     
160    -80    
112    112    
128    -96    
-368   224    
-80    -272   
-208   176    
544    -112   
-112   -48    
-320   0      
288    640    
400    -912   
-1280  96     
976    -400   
240    48     
160    160    
-272   -48    
224    -128   
32     -304   
-16    -32    
176    -16    
-160   112    
-80    96     
384    128    
-288   -176   
-272   0      
-16    -336   
144    272    
-208   -64    
-64    -128   
736    0      
-800   -880   
464    -208   
1328   208    
-720   256    
-240   -64    
432    -272   
64     208    
-544   -288   
272    -224   
560    -160   
-288   0      
-384   -128   
-288   -32    
576    -336   
448    -304   
-432   -560   
-544   32     
272    -240   
720    -304   
-256   -256   
-176   -624   
64     128    
640    -192   
-176   -768   
-1040  288    
-144   -240   
320    -16    
-80    -640   
1760   -1632  
-3232  -1056  
1200   -1136  
400    -352   
-416   -528   
-528   16     
368    -16    
368    192    
-400   -96    
-288   16     
768    -48    
-368   32     
-336   -48    
288    112    
-592   -176   
-208   16     
448    176    
-576   -176   
-64    -192   
1440   -640   
-640   -48    
-64    208    
-144   -192   
-160   208    
720    -96    
-816   -32    
432    -128   
-64    64     
-128   -80    
-80    272    
384    -96    
-304   352    
320    -352   
-480   -48    
-16    -1120  
304    224    
-80    176    
-224   96     
400    -48    
160    32     
-128   -48    
-144   -32    
-16    80     
288    -144   
-512   -80    
-80    -272   
240    240    
-64    -320   
80     688    
544    448    
-192   272    
160    704    
-352   112    
-16    208    
32     -160   
-112   48     
192    256    
-96    96     
-112   -64    
224    -192   
-16    -208   
-80    16     
-560   16     
160    416    
64     160    
-16    0      
-224   96     
-688   -336   
-144   -528   
-240   -448   
64     -336   
32     0      
112    416    
208    0      
-80    368    
-528   -32    
176    -32    
128    -656   
-176   -240   
-144   -16    
-112   144    
800    2448   
736    -192   
-1920  -16    
192    -448   
160    256    
448    -656   
-240   -704   
-224   -304   
112    48     
64     64     
160    -128   
-272   -416   
-192   144    
112    400    
192    -368   
-288   -784   
-192   -336   
-80    -16    
128    -192   
80     -16    
80     -624   
-64    384    
-64    -48    
-160   448    
112    64     
-112   -16    
-272   160    
-176   -864   
496    336    
-144   -96    
32     400    
-176   -16    
0      432    
-64    -272   
64     256    
-32    -112   
-16    288    
368    -160   
-80    -320   
80     -176   
-224   368    
176    16     
-272   -112   
-64    176    
-32    64     
-80    -304   
48     -96    
-144   400    
0      32     
64     224    
-208   1200   
2592   -528   
-2208  -256   
208    -416   
1008   208    
-320   -112   
-272   1136   
576    -624   
-272   -576   
-16    592    
208    208    
128    -192   
-272   32     
112    176    
160    80     
-208   -32    
64     48     
-272   -240   
96     144    
96     -64    
464    -576   
-2720  208    
1024   304    
384    1072   
-928   112    
880    112    
256    -608   
-512   -592   
-96    -432   
336    -160   
-400   304    
-96    336    
-80    480    
320    -112   
-848   -368   
-208   160    
-160   -48    
-528   -192   
816    -1248  
-32    -608   
-512   -112   
-272   -384   
16     -560   
-528   272    
976    1296   
-736   928    
-496   -16    
864    -80    
-256   112    
-176   -240   
-64    -96    
704    80     
-448   288    
-64    0      
64     -16    
-832   -256   
928    -608   
-208   -1280  
-192   48     
64     400    
-528   16     
416    48     
-256   -144   
-64    -16    
0      272    
32     192    
512    384    
-240   832    
-112   320    
128    -80    
-864   -1232  
-656   -432   
912    -512   
-896   32     
352    656    
240    -576   
-592   -128   
-592   -64    
80     -640   
400    144    
-256   -176   
-576   112    
352    480    
256    -32    
-16    176    
112    -144   
-16    -192   
96     192    
192    688    
-112   752    
-80    -64    
144    -144   
320    16     
-976   240    
720    16     
80     128    
-240   720    
464    1936   
-16    1536   
272    -384   
-64    -528   
-192   48     
-48    16     
-32    208    
64     256    
-64    112    
-304   -752   
-400   192    
304    256    
-112   368    
160    592    
0      720    
-128   208    
368    -304   
-256   336    
448    352    
-816   -416   
144    528    
272    -64    
-80    -288   
-224   -752   
352    -624   
-592   320    
-64    -1088  
1840   -640   
-448   432    
-512   848    
592    240    
176    -304   
-384   -256   
-192   128    
64     0      
112    -112   
-64    400    
320    704    
-272   -80    
192    -624   
192    64     
-144   224    
0      768    
496    544    
-112   320    
-112   432    
144    160    
240    -128   
-320   -528   
176    -544   
112    288    
-48    432    
-32    144    
656    2432   
-1632  384    
384    -80    
560    -32    
-448   16     
-256   -960   
80     -720   
144    -1088  
128    -160   
48     352    
64     608    
-48    176    
0      208    
-128   -464   
64     -304   
0      592    
240    -336   
-336   -64    
80     -560   
112    128    
208    752    
-688   -64    
144    96     
800    160    
-880   -64    
272    208    
-32    -96    
0      -32    
-96    -224   
208    112    
16     224    
-416   128    
288    -32    
176    -1392  
64     224    
-320   32     
80     176    
224    -128   
288    -80    
-400   32     
96     208    
16     112    
96     240    
16     -192   
-32    48     
-16    -112   
0      112    
96     176    
48     -176   
272    -32    
-1824  -1168  
1552   576    
1504   48     
-1488  272    
-80    112    
624    160    
112    -384   
-368   592    
96     -224   
96     80     
48     16     
48     16     
-256   -32    
144    -48    
368    112    
-144   -1152  
-96    16     
208    -784   
0      16     
16     -16    
-32    144    
-624   -640   
128    176    
1072   -640   
-576   -656   
-624   304    
880    -144   
-96    -176   
-208   -464   
-192   16     
352    -448   
592    128    
-176   64     
-208   -16    
-16    128    
-128   96     
400    64     
32     288    
240    192    
-512   -560   
112    144    
272    112    
464    48     
-512   -32    
544    192    
-592   -240   
-400   -176   
1040   416    
176    -96    
336    368    
-176   224    
16     -80    
608    -688   
80     208    
-384   -336   
-112   96     
464    -832   
464    -128   
16     240    
-352   544    
560    -144   
-48    96     
64     -80    
128    96     
-96    16     
192    432    
-128   0      
-96    -112   
128    -1280  
528    960    
-1568  -1312  
-672   784    
1776   656    
-1328  -528   
288    592    
720    -208   
-880   -64    
272    272    
464    -768   
0      32     
48     32     
64     -480   
48     -16    
-304   -416   
480    128    
-144   -208   
-256   64     
352    -1648  
400    144    
-656   576    
448    448    
368    -272   
-368   -80    
304    192    
128    96     
-304   -240   
208    -560   
-224   -16    
-160   0      
-176   160    
112    -64    
240    -304   
80     -1152  
-208   -368   
224    224    
160    272    
-32    64     
0      -128   
208    -304   
-112   32     
-160   -144   
-32    -96    
-224   -304   
64     -272   
336    -320   
-48    -96    
0      112    
384    224    
-240   240    
192    304    
288    -32    
-208   -1120  
-176   -48    
272    208    
224    800    
-96    1664   
128    1088   
112    112    
-64    -80    
-816   -160   
272    -336   
384    208    
-864   480    
656    208    
256    -432   
-48    208    
-16    720    
-48    528    
160    448    
304    0      
-112   -128   
64     16     
-288   -16    
112    -272   
-336   -64    
64     16     
0      -448   
-160   -880   
64     128    
32     -752   
64     208    
240    1984   
768    64     
-672   160    
64     64     
0      -416   
112    400    
-224   -272   
144    -128   
-384   -96    
224    48     
-576   288    
-160   -16    
-144   -48    
240    -352   
48     144    
-32    -16    
-80    608    
80     -112   
32     -112   
-112   -208   
-80    -416   
272    -400   
96     -80    
-544   -560   
496    -224   
32     -128   
-160   976    
288    176    
-128   -576   
0      144    
192    -48    
112    192    
-288   96     
-16    64     
80     -96    
224    48     
-304   -128   
-112   -224   
-64    -112   
384    -304   
-16    112    
96     -240   
-192   48     
-112   -384   
112    32     
160    -864   
-32    -144   
-112   0      
224    256    
-256   -160   
496    640    
1312   112    
-880   -272   
640    -272   
192    -112   
-80    96     
592    480    
-496   -400   
-192   -480   
144    912    
-400   16     
-480   -192   
48     160    
-1264  64     
112    144    
-80    -48    
48     144    
-144   352    
-112   -144   
32     112    
-224   -976   
-1216  592    
1344   -592   
-800   0      
768    736    
-560   720    
352    1040   
-256   1472   
-80    560    
-96    -864   
-1056  -304   
224    -336   
-224   -352   
-96    -304   
464    -592   
-896   -80    
224    -1488  
128    -1296  
-192   -1136  
0      -32    
-96    -16    
-128   -112   
-32    -320   
-144   1808   
816    592    
-240   -528   
-992   -1536  
-784   -176   
96     -896   
-512   -464   
352    64     
0      48     
-352   80     
-288   -736   
416    192    
80     224    
-128   304    
128    -736   
-16    -48    
-32    -160   
-352   160    
160    -48    
-672   464    
336    -80    
32     176    
-720   496    
-32    -176   
48     368    
480    32     
-688   -1168  
1008   -1552  
528    176    
-432   -160   
-880   -128   
816    -848   
-64    -768   
64     -288   
-400   -448   
0      176    
-688   688    
48     368    
-16    -576   
-208   -16    
0      64     
288    352    
-176   0      
-480   80     
-32    -32    
512    -176   
-96    -352   
-128   48     
64     80     
-816   176    
416    2032   
1072   576    
-848   528    
-144   -368   
288    432    
656    48     
-688   -80    
48     80     
240    0      
-128   304    
-416   48     
-176   32     
464    64     
208    -16    
-352   -144   
-48    -64    
160    -400   
336    -352   
-160   -48    
-80    624    
-112   272    
224    48     
-336   -288   
192    -480   
64     -80    
-80    64     
48     336    
16     80     
-272   -752   
-368   -544   
224    384    
-112   160    
224    1024   
528    -256   
-160   -704   
-272   -144   
-48    176    
528    32     
-144   -48    
-384   -64    
224    176    
48     80     
-96    -112   
208    -128   
-144   192    
-144   336    
128    -80    
288    -112   
-176   448    
128    304    
-112   -48    
-32    112    
416    0      
-224   -96    
-176   160    
80     112    
192    64     
-832   -1248  
976    -640   
-240   0      
-464   48     
672    -128   
-416   48     
-128   256    
-16    48     
-224   672    
400    -288   
-176   128    
-176   -16    
-80    48     
224    -304   
80     144    
-224   -304   
16     128    
-192   128    
-16    0      
240    16     
432    -496   
-1376  864    
736    -64    
16     -48    
-368   -16    
448    -224   
-512   368    
-16    224    
64     304    
672    -32    
-320   -80    
-432   144    
240    64     
32     208    
80     256    
80     176    
48     -64    
-432   -16    
592    -32    
-320   96     
176    80     
64     80     
0      208    
208    288    
-256   176    
-256   208    
240    16     
-176   64     
224    48     
656    864    
-528   1024   
560    352    
384    -64    
-432   -144   
192    160    
48     -16    
176    624    
-304   64     
32     128    
112    -48    
-192   128    
160    32     
-144   64     
368    128    
-352   64     
368    96     
-176   224    
-128   16     
160    192    
112    0      
368    1056   
-496   -352   
-496   176    
960    208    
-1232  -16    
768    272    
-16    48     
-144   -64    
-320   -368   
208    0      
-240   112    
-48    128    
320    48     
-128   160    
128    -16    
-320   192    
192    -128   
240    80     
-160   32     
144    208    
-144   -160   
-304   -528   
-160   528    
144    -624   
-1104  128    
544    -16    
496    -224   
688    288    
-112   -256   
-352   80     
112    256    
-176   -80    
192    160    
112    336    
-496   128    
-160   -48    
16     224    
-288   -224   
208    -288   
-160   272    
-400   384    
352    128    
96     48     
-176   80     
144    432    
-240   416    
432    32     
240    144    
-688   -368   
2144   2576   
-1600  1024   
928    -96    
1296   -32    
-1200  -16    
-96    80     
480    -352   
576    416    
0      0      
-704   96     
624    16     
32     144    
80     -496   
224    240    
-432   -48    
224    320    
432    -32    
-176   -96    
-320   112    
768    704    
176    -112   
-336   -816   
80     -144   
-416   -2320  
-464   -112   
1200   -80    
-112   16     
-288   288    
-48    400    
304    -144   
16     -352   
-432   -48    
512    -32    
-32    -16    
-64    32     
-80    -160   
48     -544   
0      -48    
240    -720   
-16    240    
-192   -16    
240    64     
176    -64    
0      240    
-80    80     
-80    352    
464    192    
-96    160    
-160   192    
320    688    
400    1024   
560    1120   
-1072  384    
-192   -736   
368    -240   
32     -640   
-464   -320   
16     -704   
-64    -240   
320    624    
48     400    
-32    -624   
-128   -1328  
-64    -80    
-160   -992   
240    288    
-64    -304   
-128   -272   
-16    224    
32     80     
16     208    
64     0      
-112   112    
0      80     
176    272    
224    -32    
-208   -80    
96     -16    
384    -240   
-240   -160   
-304   448    
896    160    
-864   928    
496    -144   
352    304    
-80    -80    
32     -1376  
-48    16     
-144   -80    
16     -800   
192    -176   
112    -800   
-160   48     
80     -112   
352    224    
-160   80     
-224   208    
96     128    
-16    -224   
272    -576   
16     144    
-304   -432   
-96    208    
-64    -16    
480    -1040  
-288   -16    
128    -688   
272    128    
-592   720    
112    448    
368    -528   
-16    -432   
-464   400    
144    -80    
256    -256   
32     224    
48     -80    
-64    -16    
0      32     
-16    32     
-272   -32    
-240   96     
-16    64     
112    32     
-32    -256   
496    -544   
-112   48     
304    -112   
-144   -96    
-352   704    
16     480    
32     656    
3024   -1216  
-2064  -96    
400    -896   
336    -560   
-144   -688   
288    -784   
-896   -1552  
-32    752    
64     -272   
320    176    
80     -320   
-288   -128   
96     -144   
352    224    
-48    -160   
-192   -160   
-160   320    
128    16     
-32    -112   
-400   -992   
-512   368    
2000   -608   
-1392  448    
464    1568   
1520   1488   
0      272    
-992   1008   
1024   624    
128    624    
-208   400    
288    32     
-80    -384   
-528   -448   
160    -160   
-176   48     
-128   448    
-192   448    
-224   160    
448    -96    
16     -16    
-32    -240   
-144   400    
832    752    
-464   592    
-688   -304   
352    -1488  
-528   96     
16     -224   
512    -400   
112    0      
96     432    
-688   224    
-608   352    
48     -288   
-576   -624   
560    -752   
-416   -224   
-48    -112   
496    176    
-80    -112   
-128   -208   
128    -240   
-16    160    
224    128    
-240   128    
-368   -64    
-320   -496   
912    -144   
176    1056   
-160   -256   
464    0      
1184   -48    
-1008  -736   
-576   1152   
1056   32     
-192   -48    
-448   96     
256    304    
-176   672    
112    -96    
304    0      
-432   -208   
-224   320    
256    -304   
-64    352    
32     -368   
32     1280   
256    1456   
-144   896    
448    64     
-192   -288   
-80    208    
784    320    
-448   -224   
256    -400   
-160   -128   
528    176    
-16    -336   
-496   -176   
528    64     
-944   160    
208    -144   
-96    0      
-272   -160   
400    -16    
-240   48     
-384   16     
96     32     
144    96     
-80    -160   
144    32     
96     -144   
-608   -96    
-160   -336   
512    80     
-208   -176   
-368   64     
208    80     
144    48     
-112   -144   
-400   -432   
256    -96    
48     176    
-64    64     
336    -48    
-16    112    
-224   480    
48     288    
0      -128   
-48    160    
32     96     
-224   -16    
112    64     
48     0      
-64    -480   
-560   -80    
256    512    
48     -112   
32     -16    
-912   32     
48     208    
-64    32     
32     -32    
160    32     
48     304    
-240   -144   
16     16     
96     32     
16     64     
-624   912    
2240   -608   
-1136  48     
-320   672    
1216   -240   
-832   256    
-144   -208   
-160   464    
128    112    
16     -256   
-16    176    
-32    -64    
-144   -16    
80     320    
448    -400   
-512   128    
176    240    
80     48     
-80    0      
-32    80     
160    -1088  
-832   512    
720    416    
-640   -64    
-496   -112   
944    0      
-560   0      
-288   -64    
160    128    
320    -48    
-480   144    
48     -96    
160    112    
-80    32     
272    64     
-320   -224   
16     -48    
-272   -304   
-48    320    
16     -144   
-48    160    
240    -80    
-256   32     
256    32     
-608   -144   
352    192    
-16    -48    
-304   32     
224    64     
1040   -528   
-1536  48     
-48    -208   
-48    -128   
96     0      
-224   -208   
-176   96     
288    224    
-128   -16    
144    -128   
0      112    
-48    48     
64     160    
64     80     
-128   32     
-208   208    
224    -32    
-128   176    
-64    -48    
0      80     
-112   32     
80     32     
672    -64    
-1440  16     
1152   -160   
-224   240    
-448   192    
272    -64    
-288   -448   
240    -272   
128    320    
-416   -16    
112    160    
80     -16    
16     -16    
-240   192    
160    0      
32     400    
32     528    
-432   -160   
-32    -176   
256    128    
-240   208    
256    208    
-352   -112   
-496   240    
464    -160   
512    480    
-160   -112   
-288   -64    
160    288    
-112   96     
-176   -64    
320    112    
-80    160    
-576   176    
96     -16    
608    -48    
-160   -272   
-592   144    
768    96     
-144   48     
-272   160    
-64    -48    
144    256    
208    96     
32     32     
256    48     
112    176    
-432   -816   
-384   -624   
1632   480    
864    352    
-2240  -80    
-304   -80    
1440   272    
-384   288    
-208   144    
-16    64     
-128   160    
400    48     
112    128    
-400   -64    
-160   144    
400    0      
416    240    
-208   -80    
-144   272    
80     -48    
240    592    
-128   128    
-208   32     
128    -208   
176    144    
-384   176    
400    256    
-320   240    
-80    128    
336    800    
384    1040   
-304   -176   
-496   -352   
368    560    
384    544    
16     48     
-336   0      
384    224    
-400   -400   
96     1104   
176    464    
-272   272    
160    32     
64     160    
-16    -64    
-528   -480   
-16    -64    
496    752    
-240   1248   
672    -416   
-560   -512   
16     496    
-240   -576   
704    -1136  
-672   -32    
512    -752   
-176   -160   
-304   -432   
160    -64    
-128   -256   
-64    352    
256    192    
0      192    
-128   16     
-16    -192   
-128   -224   
96     288    
-288   320    
-352   -80    
224    -272   
-16    0      
-16    64     
-64    64     
224    80     
-208   0      
112    512    
128    112    
64     64     
0      176    
-96    352    
208    144    
-592   -48    
-336   -192   
960    -704   
-464   496    
656    -2128  
-416   368    
32     208    
256    -480   
192    -304   
-144   368    
0      80     
-256   64     
144    -224   
352    -48    
48     176    
-256   96     
352    -336   
416    -400   
-208   112    
-80    -544   
0      96     
640    -1376  
-1344  208    
784    -128   
64     112    
-224   -400   
144    16     
-160   -144   
176    -256   
240    32     
336    -272   
-224   176    
-384   -16    
480    -80    
144    -352   
-256   128    
-112   -1296  
368    160    
240    208    
32     352    
96     -80    
-80    240    
448    0      
-144   16     
48     -144   
-192   -496   
240    416    
112    96     
176    32     
-640   144    
144    192    
-1200  896    
2736   -368   
-544   -528   
-592   -944   
544    512    
944    -192   
-240   400    
-224   928    
-528   -1312  
432    -928   
272    272    
-464   0      
48     352    
48     -624   
160    112    
176    -272   
-208   128    
-176   -352   
416    -240   
96     -320   
272    1536   
-1408  -688   
-480   752    
1248   976    
-912   144    
-240   -976   
-352   -1840  
624    -480   
-640   -352   
224    416    
320    -160   
-272   176    
-240   -256   
176    128    
176    -176   
-560   288    
352    0      
240    384    
288    -320   
-96    -272   
-144   144    
0      -48    
-368   -32    
-448   64     
368    768    
608    -192   
-32    128    
-176   192    
64     -976   
464    688    
592    -16    
-384   -112   
16     -160   
128    -464   
544    272    
-400   -576   
-304   1024   
592    416    
48     -336   
64     208    
304    80     
-464   96     
112    480    
384    -240   
-272   576    
-32    -96    
-368   64     
368    -128   
528    464    
-1888  -752   
1264   -1792  
688    -32    
-544   -272   
-432   -64    
-304   -128   
512    -336   
80     -48    
-416   64     
-160   80     
32     176    
-16    0      
112    -272   
-144   0      
-272   -240   
272    208    
384    -256   
-112   48     
32     -736   
-320   336    
800    288    
-704   464    
96     -240   
-16    48     
-16    -16    
-240   -288   
-208   -64    
176    -32    
-112   -304   
160    -320   
-192   -256   
384    -144   
-80    256    
-176   -224   
-64    -48    
-128   -1840  
288    192    
-336   640    
-336   448    
416    144    
-80    -160   
-288   0      
480    64     
-560   -112   
464    -32    
-368   -80    
-96    -96    
-368   -48    
144    -80    
416    -16    
-624   -768   
176    192    
336    224    
784    176    
-544   -800   
48     -160   
368    80     
-272   80     
768    112    
-192   272    
176    160    
-48    32     
-48    64     
96     -208   
32     336    
192    -368   
-64    384    
16     -464   
128    304    
272    176    
0      -128   
-464   64     
176    -32    
-16    -96    
-16    128    
-16    -128   
48     -48    
-368   -208   
32     -240   
48     -208   
32     -208   
-800   -592   
1456   -1696  
-320   -240   
-736   -240   
496    -112   
112    144    
-16    -80    
-240   448    
512    320    
-336   -352   
128    -32    
-96    -144   
-80    0      
272    -128   
-16    64     
112    -64    
-96    -256   
144    48     
-32    -256   
-16    -16    
656    368    
-1424  672    
656    -128   
416    -304   
-592   -208   
64     -32    
-448   128    
272    304    
224    16     
-96    -384   
-48    -64    
-128   144    
-256   64     
160    -144   
272    -336   
-464   64     
240    0      
-32    -192   
-160   64     
240    -144   
-336   96     
208    -16    
-288   -112   
-240   -32    
-304   -304   
128    48     
-96    176    
-16    32     
-48    96     
-400   -1456  
1616   272    
-304   -112   
-1808  -432   
1168   -32    
208    -48    
-928   64     
512    80     
48     -208   
-240   160    
0      -160   
32     160    
128    32     
-352   -32    
480    -16    
-528   -224   
64     224    
-160   0      
-48    32     
-64    -96    
-240   16     
-128   -528   
1040   288    
-1504  -272   
896    -464   
512    -272   
-656   352    
48     -224   
512    32     
112    144    
-160   0      
-256   176    
-160   112    
192    0      
-848   32     
-128   144    
192    -272   
-48    512    
-688   -32    
224    -80    
224    304    
-320   96     
-672   -192   
1184   -640   
-144   384    
-368   80     
608    -16    
272    176    
-416   -160   
-416   64     
176    112    
-272   64     
96     256    
-208   -48    
-80    -272   
16     -208   
-416   224    
1040   48     
-176   -64    
352    320    
-112   -32    
-224   112    
-80    -16    
-32    0      
-144   16     
-80    32     
112    -224   
128    64     
-208   -464   
480    -160   
-688   112    
1152   656    
704    -160   
-2000  -368   
112    128    
1456   -80    
-832   -32    
-16    -848   
480    880    
64     304    
-608   128    
-48    -16    
64     416    
80     -80    
176    240    
80     -144   
-688   -176   
256    -16    
192    -112   
-48    -624   
-288   -832   
-64    -176   
304    384    
-144   192    
-192   368    
192    720    
-48    304    
176    208    
0      -128   
-208   -560   
240    -64    
-96    352    
96     -16    
96     -464   
-224   144    
-96    96     
208    144    
80     -800   
-624   -960   
0      -576   
0      -80    
208    -64    
256    -48    
-480   -1072  
64     -1488  
-64    -784   
80     592    
-96    -144   
-96    864    
16     288    
-48    400    
400    784    
-624   -800   
-352   -304   
160    -96    
-240   864    
-320   368    
320    752    
112    800    
-192   -464   
240    64     
-32    80     
-48    -176   
112    144    
-80    -32    
-288   16     
-80    -112   
-112   0      
-384   64     
48     -128   
-96    160    
208    -144   
-48    96     
-96    48     
32     16     
224    144    
-112   112    
432    16     
-624   -32    
-80    384    
576    32     
-64    560    
-224   -16    
288    -64    
96     112    
-64    -176   
-16    224    
208    384    
-288   272    
320    0      
-16    -96    
-272   32     
-96    48     
192    -32    
-32    -16    
-192   144    
16     -96    
-112   -416   
80     -320   
-48    -288   
48     -64    
-112   -496   
128    -208   
32     112    
-128   -16    
176    384    
192    -80    
272    272    
-432   560    
128    208    
368    32     
-80    240    
-336   160    
160    240    
-272   -80    
128    -224   
304    688    
208    -272   
-464   -720   
16     832    
-16    288    
400    -416   
-48    64     
-448   192    
48     128    
448    464    
-112   320    
-448   -256   
96     -192   
-32    128    
-224   -1184  
736    560    
1616   192    
-1184  16     
-1120  -224   
2064   240    
-1344  -112   
-672   -48    
1568   -32    
-528   48     
-496   16     
432    144    
16     80     
-32    320    
0      272    
-32    -896   
64     16     
112    272    
-48    32     
48     144    
128    0      
720    784    
-2064  800    
464    432    
784    -80    
-864   0      
576    496    
-80    -176   
-480   368    
304    144    
-16    -192   
-80    128    
-160   80     
80     16     
480    48     
-320   48     
-256   64     
320    192    
144    16     
-256   144    
224    -144   
-32    192    
-576   -128   
480    -544   
272    256    
-112   112    
-112   128    
240    -1616  
16     -480   
304    16     
-64    96     
-224   160    
64     496    
-144   -224   
-400   64     
32     -64    
176    16     
272    416    
-112   -192   
432    384    
112    208    
-576   128    
0      -480   
240    96     
0      -384   
192    768    
-96    -544   
-832   336    
1280   64     
-448   -528   
-224   -3520  
1568   -2720  
880    1216   
-464   256    
-704   448    
48     32     
848    192    
288    144    
-528   -48    
-192   -272   
400    64     
384    -240   
80     0      
-16    208    
128    -48    
304    224    
224    64     
-288   144    
0      -80    
-240   -16    
656    48     
-432   288    
16     -336   
496    48     
-288   -48    
-720   -192   
496    160    
48     -272   
-800   64     
704    -160   
-496   80     
240    -224   
-112   272    
64     -176   
-192   368    
688    128    
-192   176    
-16    -480   
176    144    
-64    -192   
-32    16     
160    80     
-144   -96    
272    112    
-304   224    
-432   -32    
336    -96    
208    224    
-144   304    
-32    128    
0      -16    
80     -16    
400    192    
656    144    
-736   0      
528    0      
80     48     
-144   -720   
-288   512    
384    -944   
-112   -608   
48     64     
144    -576   
-448   -96    
48     -160   
400    -336   
96     -368   
-800   256    
288    -384   
352    -928   
-224   -1408  
32     64     
-176   -496   
16     -48    
240    -80    
128    144    
-288   64     
112    -224   
176    176    
176    -48    
-80    -80    
-832   -1984  
640    -80    
576    -48    
-720   -64    
800    -656   
-144   16     
0      256    
-816   224    
464    0      
160    48     
-880   0      
-160   -208   
-32    160    
416    -704   
-144   448    
64     -368   
-224   -176   
592    -112   
-80    352    
-144   48     
688    1152   
-1248  448    
448    -192   
528    -272   
-288   -432   
-192   -272   
-96    -16    
288    192    
0      176    
240    -128   
-224   -512   
-208   -208   
192    -1744  
400    224    
-96    -144   
-288   224    
368    112    
32     128    
-80    64     
0      16     
-128   -32    
64     -48    
176    -128   
-48    -240   
96     -272   
176    -128   
-208   96     
-64    -432   
-16    256    
-304   304    
1200   1600   
288    192    
-800   -336   
656    -112   
-112   -400   
-624   272    
672    272    
-608   128    
64     -160   
368    64     
-272   -32    
-272   128    
496    -320   
224    160    
-352   128    
160    224    
144    112    
-112   -64    
-256   160    
112    -96    
-480   -528   
1312   704    
-848   0      
-368   96     
1264   192    
-448   -160   
304    688    
800    -320   
-272   -176   
368    -32    
-352   128    
64     192    
352    240    
-320   -32    
-272   -240   
240    96     
96     -160   
176    -128   
176    16     
-208   368    
-448   112    
192    336    
-384   -864   
560    48     
-288   208    
32     -656   
864    48     
-288   352    
-176   80     
416    -112   
-352   160    
192    128    
-128   288    
-96    -368   
-720   112    
304    48     
192    -816   
-208   -32    
80     1120   
-656   -432   
144    -144   
48     -32    
-160   80     
-16    -16    
240    272    
-352   208    
-176   224    
192    160    
-320   256    
272    176    
1376   560    
-2528  -208   
-512   608    
1600   -1088  
-800   -1232  
-1552  -848   
-128   224    
880    1392   
-112   432    
-736   720    
-368   -800   
304    96     
128    -144   
64     160    
-80    -32    
-576   -608   
64     -96    
-224   64     
144    16     
80     64     
-112   160    
-48    32     
-288   160    
-144   -208   
-304   144    
384    832    
0      912    
-480   -720   
336    -224   
112    832    
-320   -320   
-64    160    
240    48     
-64    -64    
-320   -736   
64     -768   
-16    32     
-336   -224   
-560   -1200  
80     64     
32     512    
-432   192    
-96    160    
-96    192    
256    144    
-288   -480   
-16    192    
32     640    
-160   -32    
368    -64    
-128   -16    
192    912    
368    848    
-224   688    
-144   320    
-208   288    
128    416    
-624   -768   
-144   -96    
384    -96    
32     320    
-48    64     
32     80     
-224   80     
64     -64    
208    -544   
-144   -192   
-48    720    
336    528    
240    -592   
-192   48     
-32    48     
-64    192    
192    -48    
192    544    
80     304    
-352   400    
416    400    
176    320    
240    -304   
-848   -240   
560    -576   
320    592    
-96    576    
-880   912    
160    160    
-448   -992   
176    -720   
-176   304    
96     656    
-416   -160   
32     16     
96     -80    
288    384    
16     304    
-16    -64    
-368   208    
64     176    
288    -16    
-240   80     
-528   -304   
608    -528   
-272   544    
272    -944   
-112   1040   
-144   176    
96     -176   
-128   400    
-48    -16    
-64    -304   
48     480    
144    -304   
112    656    
-224   -32    
-336   -112   
272    48     
240    -144   
-208   16     
-208   80     
384    384    
-336   96     
-48    -80    
144    16     
-32    16     
416    -80    
-496   48     
16     48     
224    112    
-144   160    
352    496    
1232   1840   
-1728  -912   
-2384  0      
1632   224    
752    96     
-1600  -144   
336    192    
528    1072   
64     144    
-96    192    
192    16     
64     32     
-112   32     
-128   64     
240    48     
-288   176    
32     -16    
288    64     
-64    -16    
-160   16     
64     160    
-624   -144   
1520   -240   
-784   32     
16     240    
416    112    
-64    32     
-48    -64    
-384   -192   
16     -176   
432    128    
-96    -16    
-16    240    
-128   -112   
-48    512    
160    -224   
-576   448    
512    480    
-352   576    
-96    112    
-32    0      
16     -16    
512    -32    
-464   240    
16     -176   
96     -80    
-160   -224   
-16    -368   
-448   336    
224    0      
-144   64     
288    80     
160    -240   
-256   -128   
-96    80     
688    720    
-320   656    
-48    512    
144    288    
-688   0      
400    -160   
144    -256   
-304   32     
-144   416    
-160   16     
112    304    
912    112    
-416   176    
-672   -16    
496    -1088  
-1808  2048   
624    -144   
-816   112    
144    -288   
640    -208   
-480   16     
-208   336    
240    -1616  
-112   240    
-16    -16    
-96    0      
32     160    
480    32     
32     160    
-48    160    
48     96     
208    -32    
16     80     
544    496    
-1152  112    
656    448    
224    -160   
-560   -2208  
368    224    
144    224    
-784   96     
528    304    
-128   208    
240    336    
-336   64     
144    112    
128    16     
-16    -144   
176    -32    
-32    -224   
144    160    
-240   -48    
160    -80    
192    144    
-64    -48    
64     64     
-32    192    
96     -16    
80     -48    
128    -32    
-16    64     
224    144    
-80    -224   
-432   -64    
352    -64    
16     144    
160    -96    
-1072  0      
496    -288   
128    32     
608    336    
-176   -32    
-32    -240   
48     80     
144    48     
-32    -112   
-144   0      
-32    -32    
288    368    
48     -112   
-272   -208   
176    176    
96     -208   
224    -352   
64     -816   
-160   144    
48     -304   
16     -256   
16     -48    
32     48     
144    -592   
-176   192    
32     432    
240    272    
32     0      
752    2064   
-2144  1008   
1136   -336   
736    -256   
-208   -848   
-384   336    
272    192    
-32    128    
80     -336   
128    -64    
-176   192    
80     224    
240    -80    
-192   0      
-48    -864   
128    -64    
176    96     
48     -208   
176    288    
-176   -1088  
-112   352    
736    912    
-192   224    
-464   544    
432    -560   
-432   -688   
192    0      
176    -176   
48     80     
-176   -32    
0      -288   
-64    -768   
368    -464   
-48    304    
-304   -16    
464    448    
64     16     
-160   -64    
-32    -416   
-80    -16    
320    240    
48     96     
-128   -32    
-64    -224   
160    32     
16     64     
32     208    
-32    -80    
128    160    
240    -80    
-80    -656   
-1152  -1120  
672    64     
-816   -304   
640    288    
752    -48    
-464   -944   
-320   -448   
48     176    
336    384    
-112   448    
-80    288    
384    -352   
-304   -240   
-64    128    
320    240    
-224   -64    
272    576    
224    -64    
-48    -544   
-64    -48    
-560   -400   
2704   -688   
-1296  144    
-848   -560   
1392   80     
416    -160   
-464   880    
-240   1408   
544    560    
-80    384    
224    -32    
0      -1360  
0      512    
144    -272   
32     480    
208    32     
-480   448    
528    96     
160    -256   
-192   288    
336    0      
144    416    
-64    -2256  
-272   544    
1200   992    
-720   1024   
-288   -288   
16     -256   
48     -160   
-16    -48    
288    -176   
-80    368    
-512   832    
-1088  240    
-432   -320   
608    -336   
-144   592    
544    400    
-32    560    
-256   -1008  
736    -224   
96     -48    
-368   160    
80     448    
144    496    
-464   112    
-80    -144   
0      -256   
96     -64    
528    1824   
-16    1040   
272    224    
1440   -608   
-496   336    
-1088  608    
528    -688   
256    -1920  
304    1600   
-320   -400   
-128   64     
576    -272   
176    368    
-320   192    
112    16     
-736   -176   
320    -32    
352    176    
-176   336    
272    624    
-144   -496   
16     -192   
224    144    
640    240    
-736   224    
-32    -144   
432    -416   
-96    320    
-128   -432   
-80    0      
-288   336    
416    32     
-528   208    
-272   -144   
192    -208   
192    512    
-144   1296   
272    -832   
176    1504   
64     1616   
240    336    
-240   -784   
80     -448   
-320   528    
640    512    
-352   16     
-448   16     
-80    1056   
416    -1040  
-48    -224   
-624   -176   
-80    192    
1392   -1184  
-432   -704   
-800   -1344  
208    -624   
96     -560   
96     -480   
-112   400    
-16    -288   
-576   -1120  
176    -720   
80     256    
-128   32     
0      -80    
160    -48    
160    544    
-112   -80    
176    704    
-64    -480   
-240   -432   
176    144    
-256   352    
-32    384    
416    16     
-336   -208   
144    48     
-816   -224   
-576   -192   
-96    416    
272    -1136  
688    -1248  
-720   672    
-656   -720   
128    224    
80     672    
112    -48    
176    32     
-272   -192   
-272   -336   
144    -128   
160    208    
-16    208    
-800   400    
-112   608    
48     -16    
-272   240    
-144   112    
-176   -208   
208    144    
-224   176    
-528   -1136  
528    -688   
48     512    
-336   -416   
624    112    
-288   320    
-112   -48    
-64    -336   
160    352    
-96    16     
-240   176    
288    192    
-176   32     
112    176    
176    176    
-432   144    
-352   -272   
-32    96     
320    -80    
-272   80     
-32    -32    
48     96     
-272   -400   
528    32     
-656   -272   
-48    128    
48     96     
160    128    
16     -256   
416    416    
-1840  64     
752    464    
1104   -48    
-1360  -208   
-352   432    
608    48     
-96    336    
-448   0      
368    256    
80     48     
-400   32     
192    32     
-224   32     
432    128    
-304   96     
-64    32     
368    112    
-144   96     
-192   -144   
64     160    
-192   -352   
-1440  1136   
1088   -32    
-512   160    
-16    -224   
320    288    
256    32     
-592   -64    
0      -112   
144    48     
368    0      
-144   64     
-224   -16    
-176   -144   
-48    112    
32     -64    
32     496    
16     448    
-112   -64    
-112   -208   
256    -32    
320    48     
-368   -32    
496    160    
992    368    
-288   -304   
464    -416   
576    -16    
-544   144    
-16    256    
400    192    
208    0      
-160   -368   
16     -16    
-160   48     
240    160    
320    -80    
112    -176   
-320   -48    
64     80     
352    112    
16     208    
-240   224    
-112   0      
80     0      
-80    -160   
-224   288    
320    32     
496    1344   
-2096  1136   
624    1024   
208    -528   
-1680  -272   
1152   80     
160    -144   
176    48     
-208   48     
-160   16     
-160   -64    
64     176    
-336   -352   
32     240    
-112   -32    
-80    128    
288    96     
-368   80     
-48    32     
512    608    
-352   496    
96     784    
400    -16    
-608   -304   
64     240    
-112   -144   
0      240    
32     -176   
128    -240   
-112   64     
48     -144   
-192   176    
192    -176   
-32    0      
112    -144   
-160   -128   
-64    -176   
208    48     
112    320    
-128   368    
96     304    
96     48     
-352   -96    
160    -64    
112    112    
0      80     
-48    64     
240    48     
-16    -64    
-64    208    
48     416    
-96    400    
48     -336   
288    -64    
-384   256    
-192   96     
624    240    
192    816    
-528   1440   
208    848    
176    64     
80     128    
-96    64     
-128   80     
128    192    
208    256    
-64    160    
-16    80     
80     -144   
80     -224   
-288   -496   
192    -336   
-176   128    
80     -128   
192    144    
32     -48    
-160   -528   
-208   416    
384    528    
96     416    
-16    16     
-336   -848   
336    -2128  
-112   592    
976    -48    
-864   48     
224    -432   
-80    -336   
176    496    
48     -512   
-112   -144   
32     80     
160    112    
0      -48    
-160   48     
144    336    
176    -128   
-96    0      
64     240    
112    -224   
0      -400   
-240   -976   
640    240    
-416   208    
-192   -960   
-16    288    
0      320    
272    -176   
32     96     
-128   16     
-48    80     
176    -192   
320    384    
-176   240    
-112   176    
160    -96    
256    -688   
-208   256    
-16    656    
-96    -624   
-128   -80    
224    400    
256    32     
-32    112    
-176   80     
-48    576    
48     -368   
192    16     
-96    96     
-64    112    
-112   880    
1056   1808   
-544   -464   
-1120  -816   
2064   464    
-928   752    
-544   -336   
352    -192   
-80    176    
144    320    
-96    -208   
64     64     
16     0      
32     -128   
32     -32    
-128   352    
112    -448   
96     160    
-128   64     
384    112    
-96    176    
96     -48    
-976   -64    
1520   -288   
224    1072   
-1200  96     
176    -624   
192    -1008  
-416   -1312  
-224   1088   
752    2320   
-336   272    
448    -800   
80     -672   
-352   352    
144    -176   
592    240    
-192   176    
-16    208    
-256   160    
96     336    
320    48     
-208   32     
16     32     
64     -80    
-320   -864   
-768   160    
832    624    
-704   -880   
16     -496   
624    -624   
-304   -128   
112    -240   
-528   -416   
304    -208   
528    784    
-368   288    
320    -96    
-464   464    
736    848    
-272   656    
-400   -352   
368    192    
240    -496   
304    -208   
-112   -864   
544    -336   
-96    464    
-96    416    
192    400    
64     160    
-624   -896   
1184   -416   
1568   720    
-720   16     
-576   384    
512    -1152  
128    -1040  
160    -640   
112    672    
-208   80     
-176   256    
240    -496   
128    -160   
64     400    
0      288    
-96    -112   
-64    -400   
0      208    
32     -576   
32     304    
96     240    
224    384    
-224   -560   
-224   464    
288    -1712  
-800   -352   
304    -48    
16     -1200  
-272   -192   
48     -1872  
432    1056   
96     864    
176    -432   
-64    -368   
48     160    
-304   -592   
512    80     
16     -192   
-144   -128   
96     80     
176    -928   
32     176    
-32    -976   
-48    -176   
560    -928   
-768   -432   
80     -176   
544    560    
-320   -544   
-192   -848   
48     -304   
464    -592   
-1088  128    
448    1008   
656    320    
-256   224    
-96    -144   
240    -512   
-80    -496   
-208   720    
-320   544    
-240   336    
416    -560   
-400   16     
16     -448   
16     -288   
464    80     
-384   288    
304    416    
-208   656    
96     208    
272    -96    
-32    -128   
-176   -96    
-32    -256   
48     -480   
-224   -496   
-272   -912   
-48    -1424  
64     -416   
-336   -1120  
1072   -960   
-480   368    
32     -1072  
64     224    
-240   -208   
464    -128   
32     208    
192    -128   
-320   64     
16     -96    
80     -160   
80     -272   
-288   208    
-16    -448   
144    64     
0      -528   
288    -160   
80     -384   
-128   240    
256    64     
800    288    
-1824  256    
672    32     
64     -416   
-736   96     
320    -144   
-192   -144   
-736   -320   
-112   -96    
272    224    
160    -128   
-256   208    
-16    -336   
112    144    
-128   -1952  
-64    -128   
240    16     
-112   64     
-144   16     
160    48     
288    32     
-304   0      
-432   -96    
-32    -80    
-48    208    
112    -96    
-192   160    
224    -192   
-80    224    
1488   -592   
-2256  496    
496    -160   
928    -176   
-1216  -256   
1040   192    
-272   -96    
-672   48     
176    400    
240    -80    
32     16     
-160   -112   
-64    96     
320    -432   
352    80     
-736   -512   
592    64     
-272   48     
80     32     
-480   -16    
-64    -112   
192    352    
496    -416   
-2128  -160   
2128   80     
-912   -192   
-832   -144   
976    32     
-176   240    
112    272    
32     -368   
-176   32     
-112   -16    
112    16     
-64    32     
-96    32     
-80    80     
-16    -256   
304    -432   
-320   144    
64     0      
160    -272   
352    288    
112    -64    
-400   224    
-80    -368   
-32    -768   
400    -112   
-256   -256   
16     -112   
448    112    
-368   48     
-112   112    
96     128    
-800   -352   
-48    224    
368    -160   
-208   -224   
704    -656   
-464   48     
160    -192   
-80    64     
-96    128    
-320   192    
336    48     
-320   64     
-256   96     
-144   -32    
-112   80     
-288   -1072  
2336   -288   
-3120  -656   
800    -32    
1536   -208   
-912   -16    
-544   304    
256    -160   
160    160    
-416   -480   
-256   160    
368    -96    
-512   208    
224    96     
0      128    
-528   -144   
256    128    
208    -112   
48     128    
-16    0      
32     -192   
32     624    
304    256    
-352   -160   
-624   0      
448    96     
0      32     
176    368    
16     112    
-352   400    
432    -64    
-128   240    
-48    96     
80     192    
256    192    
-432   384    
400    544    
112    80     
-192   112    
128    192    
-384   144    
304    128    
-176   64     
-48    -208   
0      -400   
-1888  -544   
80     656    
384    832    
128    288    
-240   192    
176    32     
-80    -304   
-304   -784   
-48    -48    
128    480    
-96    432    
272    272    
32     512    
240    208    
-288   416    
-400   240    
528    256    
-32    144    
-80    128    
96     704    
-432   400    
416    -320   
160    208    
-336   160    
-400   -576   
336    -512   
160    384    
-208   224    
-288   0      
48     -64    
-144   -272   
16     -608   
-192   -112   
176    -224   
-112   -304   
192    400    
64     -16    
0      1872   
480    336    
-400   -800   
-432   496    
240    320    
656    960    
-864   944    
96     144    
-112   112    
64     512    
224    -176   
-160   432    
-128   -80    
256    128    
240    224    
-224   320    
-192   336    
64     336    
160    288    
-48    224    
-16    752    
336    -112   
-480   432    
-240   592    
128    80     
80     -176   
-112   -16    
-32    -32    
16     112    
16     208    
16     0      
48     -112   
-16    32     
304    272    
-368   144    
160    448    
352    80     
-352   464    
-256   0      
592    -176   
32     304    
-112   -128   
-256   144    
-128   -64    
16     288    
416    -64    
-336   32     
-16    16     
288    96     
288    432    
448    -96    
-992   144    
944    656    
-224   400    
-368   112    
-80    48     
608    -608   
416    656    
32     112    
-240   288    
176    -64    
192    -288   
-192   112    
96     192    
128    256    
-32    -288   
-624   -240   
736    176    
112    944    
-144   -448   
-736   -256   
944    -448   
-16    -368   
-464   -80    
752    -192   
-400   -320   
-560   -1456  
128    -208   
800    896    
-352   1072   
400    1040   
240    160    
-512   144    
128    96     
336    320    
160    80     
-576   -176   
272    0      
368    368    
-96    288    
64     16     
176    608    
-272   352    
368    -208   
-64    -1520  
336    -1328  
-160   -896   
480    -2480  
496    64     
-128   192    
336    672    
160    384    
-528   -400   
112    -256   
80     -16    
-608   320    
-432   320    
560    -496   
0      32     
-368   -256   
528    304    
0      -352   
464    -544   
-224   -96    
624    32     
-256   336    
-240   -64    
144    -240   
64     272    
1456   3040   
-1584  1216   
368    48     
1008   160    
400    1184   
-1360  -288   
0      -640   
1536   -864   
-256   -976   
-896   208    
64     192    
448    0      
272    -112   
-272   80     
-240   112    
-368   112    
448    -64    
144    48     
-256   784    
96     1232   
64     144    
304    -288   
-544   -640   
464    -720   
160    64     
-880   -2448  
672    -64    
0      -128   
-368   64     
176    -384   
-576   -528   
240    -432   
192    224    
16     -144   
80     208    
-176   0      
-112   128    
352    80     
-336   -128   
-48    96     
0      -320   
240    272    
16     224    
-128   128    
496    240    
-416   -416   
80     -400   
272    464    
-496   336    
32     384    
208    160    
-480   -1344  
-176   -336   
528    -208   
-144   -32    
320    -560   
-176   96     
-32    -2128  
272    128    
-80    16     
0      144    
-32    32     
176    -32    
-112   0      
0      112    
64     256    
-16    -112   
80     0      
240    480    
-544   384    
352    -368   
96     112    
0      -224   
-48    176    
48     32     
160    944    
560    32     
-304   -112   
-96    256    
96     -272   
320    1696   
-656   -1712  
-1296  816    
1552   -544   
-256   -32    
-496   -192   
288    416    
560    96     
-48    -80    
-144   -352   
-48    240    
-48    -96    
272    -16    
80     112    
-368   224    
288    272    
-160   -832   
128    160    
192    -144   
-176   176    
64     48     
144    1344   
1232   -480   
-704   32     
-496   -128   
256    96     
400    64     
-112   -176   
-64    -576   
-224   -240   
128    -448   
400    -112   
-16    0      
-352   -16    
400    48     
32     -48    
-32    -32    
-224   -80    
112    128    
-48    -16    
16     -368   
256    64     
32     -480   
96     -352   
-304   -256   
384    -704   
176    -64    
-288   -816   
368    16     
-208   128    
-64    -448   
-336   -896   
-416   -64    
112    -192   
512    48     
-368   -256   
-128   80     
352    -48    
-144   -32    
144    -176   
32     -16    
-32    -80    
0      -1056  
240    -224   
-432   -752   
448    112    
0      -320   
-288   48     
416    -208   
-256   80     
0      -128   
480    512    
-1744  -80    
368    112    
-176   192    
-1200  -208   
544    16     
368    176    
-496   -128   
-160   -96    
384    16     
352    -288   
-352   96     
96     -224   
112    -48    
16     -80    
192    16     
-176   144    
32     16     
-160   0      
304    -144   
-48    16     
-48    256    
1136   -144   
-128   32     
-400   96     
144    -1456  
96     -384   
848    -224   
-544   416    
128    -80    
-96    -96    
-80    64     
304    -144   
-272   -112   
64     -496   
-544   -16    
192    240    
-352   528    
-96    -352   
-256   16     
336    -464   
-208   48     
0      32     
96     144    
-144   -304   
-32    -48    
-96    -16    
-272   -48    
208    -160   
-320   -2544  
-2720  -1248  
1008   -208   
944    192    
560    -128   
-784   128    
-448   -176   
1040   352    
-480   -384   
320    224    
0      -96    
-160   -144   
-16    64     
48     32     
-96    -176   
384    240    
-16    -144   
-144   -80    
-64    -512   
32     -224   
224    624    
48     0      
128    112    
64     -1152  
-128   160    
368    208    
-640   128    
192    -32    
240    480    
144    544    
-432   160    
-192   -224   
688    -272   
176    368    
-688   160    
-16    224    
832    32     
-192   736    
16     -304   
208    464    
32     496    
128    512    
16     240    
96     48     
-336   304    
160    400    
-144   592    
368    -528   
-672   160    
208    544    
-80    304    
-48    -1376  
-16    -304   
48     -1024  
-560   -768   
176    -432   
-336   -1216  
-784   -1888  
416    -416   
-128   1040   
304    80     
-96    0      
96     -240   
-336   48     
560    -640   
112    336    
-160   336    
-80    384    
-96    -16    
80     128    
-96    -32    
-704   -96    
-16    -64    
-160   112    
240    208    
-80    -96    
-16    -352   
-288   -208   
32     304    
-256   -176   
320    48     
192    -448   
-1008  96     
240    64     
208    96     
-112   192    
-80    32     
-208   256    
-272   160    
112    -192   
48     -80    
-80    48     
-48    96     
16     208    
-48    -16    
96     16     
-416   -32    
32     -128   
-16    -48    
64     -64    
-96    224    
-272   864    
784    -464   
-976   -96    
272    -48    
-704   -64    
32     336    
144    240    
32     304    
-352   -128   
-64    0      
272    -32    
32     -64    
-112   208    
176    0      
-256   -80    
48     176    
-16    144    
-144   -128   
80     -304   
-224   -16    
-128   592    
32     -16    
-144   224    
-368   -16    
80     352    
208    80     
-240   112    
-256   16     
464    -336   
-368   -1312  
2464   -656   
-1184  1552   
-768   752    
656    1040   
-608   -96    
-80    -304   
-496   1872   
416    -384   
-160   -368   
128    384    
144    64     
-160   -160   
80     -80    
-16    272    
-48    144    
32     -32    
-96    112    
416    704    
-80    640    
-192   -192   
-736   -144   
1712   -432   
-672   -160   
-736   -304   
816    -624   
-400   -560   
-448   -1856  
48     -1488  
320    -1296  
-352   -976   
320    -112   
-64    144    
-608   240    
112    -128   
-16    0      
0      128    
-496   -960   
-160   -336   
128    80     
208    -592   
-32    0      
176    -144   
208    368    
-416   256    
80     -304   
240    1040   
752    304    
-320   512    
336    16     
-160   -96    
384    -48    
48     -16    
-128   240    
80     832    
-240   16     
-192   64     
160    320    
-608   80     
368    176    
336    32     
-112   -16    
48     64     
-464   384    
608    -256   
-304   -96    
80     16     
-176   32     
-192   -352   
736    -704   
1216   2336   
-1680  1120   
800    -144   
1344   -144   
-112   192    
-992   -64    
160    624    
640    -64    
-64    608    
-112   -112   
-416   128    
512    32     
-224   -32    
272    256    
112    32     
-416   224    
288    64     
-288   96     
512    1024   
-240   1888   
-208   528    
528    -16    
-320   -432   
-304   352    
448    -16    
-448   256    
272    32     
-320   208    
112    32     
32     416    
-160   -32    
32     16     
160    -320   
16     -448   
208    16     
-80    -80    
176    -96    
0      -64    
80     64     
352    144    
-368   64     
-64    16     
320    96     
-96    144    
352    304    
-528   240    
496    448    
128    256    
-64    -96    
-464   -192   
304    -16    
272    1024   
-576   352    
-112   -32    
128    144    
208    -64    
-208   208    
304    64     
96     112    
128    128    
-48    80     
-16    64     
-128   176    
192    240    
-112   112    
80     80     
96     -176   
-304   -208   
16     -32    
224    -160   
-192   -64    
240    -272   
64     48     
-144   192    
112    96     
32     288    
-128   -240   
-16    -32    
16     480    
32     -64    
-576   -1184  
1728   400    
-528   528    
-656   16     
528    512    
-592   144    
-16    -416   
912    64     
-128   -160   
-608   224    
240    -176   
336    48     
64     160    
-256   224    
0      400    
384    -64    
-272   -256   
192    400    
-240   -176   
-48    -320   
256    112    
-304   -96    
1136   -320   
-448   16     
-592   32     
960    384    
80     -48    
-512   32     
-48    320    
208    -272   
-64    208    
192    16     
-112   256    
128    160    
176    16     
16     16     
-384   -224   
512    -32    
-208   -640   
192    -64    
-32    192    
32     0      
16     128    
224    32     
-256   64     
368    176    
64     144    
96     128    
-240   16     
160    -64    
144    -1168  
-1056  -1024  
240    -192   
-16    -80    
160    144    
-112   -80    
528    128    
-112   -208   
96     -128   
160    -128   
144    112    
-112   64     
-80    144    
-48    -64    
560    -160   
-512   -96    
208    32     
-32    64     
-400   -512   
304    112    
-16    -496   
576    960    
-1264  -544   
-528   272    
1040   480    
-416   144    
-96    160    
32     256    
192    368    
-528   -16    
160    32     
176    16     
-224   128    
48     -544   
176    224    
-384   -32    
80     128    
144    96     
-96    -16    
160    -16    
64     112    
-32    80     
-336   -1040  
832    672    
-272   -816   
-912   192    
944    -96    
-16    16     
-464   -128   
208    -128   
-256   -80    
304    64     
128    -144   
-64    256    
-368   288    
176    224    
224    480    
-192   -192   
-288   160    
176    -208   
256    192    
176    -400   
512    144    
-384   80     
224    128    
288    128    
-112   -96    
-336   208    
80     -240   
720    1376   
1744   2864   
-2112  1648   
832    -640   
944    -1008  
-560   -208   
-464   64     
576    560    
416    160    
-176   144    
256    80     
32     256    
-128   160    
32     288    
224    48     
0      64     
-336   -224   
-48    -368   
-96    -48    
48     -192   
448    -352   
-256   -848   
-80    -496   
-240   128    
608    -224   
-560   -160   
-352   -160   
656    -592   
-448   -704   
0      -1440  
-160   112    
-256   144    
-64    -32    
16     -64    
-48    464    
-96    192    
112    -272   
32     -128   
192    -1024  
128    -544   
-48    224    
224    304    
-80    -192   
96     320    
224    -624   
-928   -1360  
208    -416   
-16    48     
176    672    
-48    -16    
-176   -48    
176    64     
144    -544   
-592   864    
880    720    
-528   -1184  
-96    -976   
-112   256    
-432   176    
96     64     
80     -32    
48     96     
32     -64    
-704   32     
-16    -368   
-384   -576   
-16    224    
192    240    
80     -112   
80     -208   
192    -240   
48     48     
64     0      
16     112    
48     96     
-48    -48    
32     0      
240    272    
-528   384    
192    48     
-112   -128   
-112   48     
80     1088   
656    -320   
-592   -144   
208    -96    
-240   -16    
352    336    
-208   560    
-128   64     
368    -624   
208    48     
-80    128    
-64    128    
-64    -80    
112    -112   
112    -192   
-352   192    
0      -304   
-160   32     
160    -192   
-224   -304   
800    -960   
-112   352    
-224   -128   
-112   128    
128    80     
-144   -144   
112    -288   
0      -224   
-144   32     
0      -256   
-272   16     
336    -384   
-32    64     
64     -400   
-64    -144   
256    -1120  
-32    -448   
64     -512   
-48    528    
64     448    
-32    -128   
-176   80     
304    -192   
-112   64     
160    32     
128    -48    
-288   -16    
608    160    
-272   192    
1168   544    
-2944  432    
160    -80    
1216   -272   
-832   -1088  
-848   -304   
-32    -208   
-128   -224   
512    592    
192    768    
-304   672    
-352   336    
528    -272   
336    128    
-736   -128   
-352   96     
224    -176   
64     352    
-576   -64    
-224   144    
112    16     
-192   736    
2304   64     
-1552  -496   
1440   -688   
-1632  -880   
848    -656   
-208   -240   
-1248  736    
160    272    
176    32     
0      -80    
-160   64     
-432   272    
640    -48    
272    32     
-672   128    
32     288    
352    -128   
144    544    
-544   112    
-144   48     
544    624    
304    -160   
-1008  400    
288    16     
-272   -592   
-288   -496   
240    256    
64     64     
-160   -176   
-768   64     
-16    -48    
-816   224    
432    160    
-32    528    
-832   832    
-80    -432   
-528   -16    
112    -48    
-32    -16    
-240   0      
160    112    
96     0      
-368   -16    
256    -96    
-16    -48    
96     48     
-512   0      
0      1184   
-592   2320   
416    848    
-928   -608   
-576   -176   
880    304    
208    32     
-464   112    
-288   -80    
496    304    
-656   32     
128    128    
-32    32     
-96    16     
96     -64    
-128   32     
-352   -64    
336    64     
-176   0      
-160   -880   
-768   -96    
704    -464   
-336   192    
-16    -256   
608    304    
-400   -80    
-496   224    
1072   -32    
-288   400    
-496   -224   
-112   144    
-96    -144   
304    256    
-544   -80    
368    272    
32     -80    
-128   320    
-80    32     
-448   256    
896    144    
-400   80     
80     96     
-272   -64    
-96    64     
320    -80    
-288   256    
32     -80    
-192   80     
352    32     
224    352    
-432   96     
-16    160    
-192   -864   
-128   208    
256    0      
-736   -176   
720    -32    
144    -320   
-288   160    
-112   192    
-16    32     
160    -16    
-32    112    
-192   48     
96     -64    
-16    -80    
-128   64     
-48    -432   
-224   -368   
496    -400   
-240   240    
0      16     
16     32     
-160   64     
-48    48     
144    208    
96     -144   
-304   272    
256    688    
240    80     
-256   -176   
944    1408   
-2624  -336   
224    160    
1088   -288   
-816   -224   
-32    -96    
128    -864   
16     512    
240    768    
224    -144   
-656   -176   
-64    400    
512    -160   
96     256    
-576   352    
64     80     
64     -128   
208    288    
96     80     
-240   48     
-352   -528   
800    -768   
-192   432    
-144   -160   
96     -32    
-192   240    
192    48     
240    -192   
-96    96     
-16    368    
48     -64    
-32    48     
112    176    
16     64     
-320   16     
384    -32    
-192   32     
-80    -240   
176    -304   
-144   -16    
272    64     
64     128    
-176   48     
16     32     
-112   -80    
400    32     
-224   32     
-80    64     
176    144    
144    -208   
-2208  -1184  
240    -128   
2096   -784   
-1504  -208   
-160   288    
864    256    
-624   -368   
-512   -64    
576    -528   
-32    160    
-80    80     
96     128    
-176   -32    
384    400    
-576   -64    
208    304    
96     16     
0      176    
-48    112    
-400   208    
208    96     
-624   -64    
1680   -416   
-704   -128   
-928   -672   
128    -48    
288    240    
64     -224   
-208   160    
-96    -32    
368    96     
320    496    
-512   112    
-256   0      
16     -640   
336    0      
176    176    
-512   -96    
480    -96    
-80    16     
-48    256    
112    80     
144    448    
304    -384   
432    144    
-400   320    
-688   -1072  
-160   400    
384    -16    
-272   -432   
768    -48    
-96    0      
96     192    
-48    224    
64     304    
624    432    
320    256    
-528   -480   
-144   304    
720    720    
-480   128    
-240   -16    
304    -112   
-144   -112   
0      -96    
-320   -64    
48     -320   
-80    112    
112    -272   
48     144    
1344   2864   
-624   1472   
-592   208    
1648   -384   
-688   432    
-688   576    
720    688    
784    736    
-240   1776   
160    -432   
32     -224   
192    -496   
80     144    
80     -32    
-144   -144   
-208   -48    
416    64     
-48    -240   
-16    -176   
-32    -80    
-32    -48    
48     -32    
-112   0      
864    -144   
-592   -560   
272    -16    
-672   -384   
528    -304   
-240   -352   
32     -32    
-192   0      
192    368    
0      544    
224    32     
-560   -448   
128    -576   
-144   32     
192    256    
352    896    
-432   -448   
-16    -432   
-96    -608   
224    336    
-256   -1840  
416    -416   
-192   -192   
240    240    
-144   336    
-240   -480   
304    176    
-48    112    
576    928    
1248   -624   
-864   0      
240    32     
-144   1024   
432    -400   
-400   -1824  
320    -1344  
-32    352    
0      256    
-96    -208   
96     464    
-16    -128   
-112   -272   
-144   -224   
-224   64     
368    -192   
128    96     
176    -320   
80     160    
-48    -32    
96     64     
-80    -1264  
128    336    
-176   208    
-128   304    
80     656    
-80    208    
192    -112   
-80    -32    
-336   96     
528    -512   
-640   240    
480    -400   
64     -368   
208    -304   
-160   -288   
304    -1248  
352    -1376  
16     -32    
128    -1408  
-16    80     
-288   -368   
160    -608   
-16    -432   
-64    -1168  
112    160    
160    -128   
-144   96     
-368   -368   
992    -864   
-336   512    
336    -464   
-128   -256   
-352   16     
96     -608   
400    -480   
32     -32    
32     400    
-320   16     
320    -160   
400    -80    
-160   576    
16     -160   
-80    -1616  
272    -672   
96     48     
-224   -528   
-96    112    
48     -256   
224    224    
-112   0      
48     288    
-64    32     
-448   32     
304    -80    
-16    160    
-32    -368   
368    736    
688    -496   
-2560  112    
1072   304    
0      -384   
-512   304    
304    -288   
-416   -256   
288    -400   
-432   -288   
256    -256   
-688   -144   
192    -240   
48     -176   
0      -416   
-16    -176   
96     -864   
64     -192   
160    -1504  
64     -112   
-176   -80    
64     48     
480    624    
-1632  992    
400    -32    
144    368    
-48    -624   
-576   -272   
208    528    
-752   96     
112    -288   
336    -32    
-416   80     
224    -880   
176    128    
-192   -32    
464    16     
-272   64     
0      -112   
-192   32     
0      -144   
304    -80    
32     144    
-176   -352   
-128   384    
-208   -400   
32     -720   
432    -112   
560    -1264  
384    48     
-496   224    
-144   64     
-128   16     
400    -368   
192    -208   
-272   -800   
-96    -208   
768    160    
368    -16    
144    160    
-1136  112    
-432   -336   
480    96     
640    96     
-480   176    
-112   -816   
448    368    
768    -304   
-480   144    
-80    64     
416    -928   
-2064  -3744  
-1120  -768   
688    416    
-96    -368   
-16    48     
-32    -160   
-336   48     
128    96     
480    448    
-912   -208   
48     -80    
448    160    
-320   16     
-128   32     
208    16     
80     -64    
-64    16     
-16    -16    
576    368    
-1296  48     
928    48     
208    16     
-576   -528   
-160   240    
0      288    
352    -80    
-160   -112   
336    -224   
-288   64     
160    96     
-352   64     
368    256    
-416   -128   
0      0      
-96    208    
0      -48    
-656   64     
-32    208    
112    64     
-304   336    
224    -48    
-784   -112   
-128   16     
80     16     
-160   32     
80     224    
368    560    
0      224    
-448   -272   
288    -160   
-240   -304   
-192   -1056  
-736   -224   
400    80     
-64    80     
80     -128   
128    -304   
-464   -96    
176    -256   
-80    16     
-128   128    
16     32     
224    80     
-80    -128   
-112   160    
-144   -224   
208    192    
480    224    
-592   144    
112    -144   
176    -320   
-224   224    
80     336    
112    16     
-16    80     
-352   -32    
160    32     
-80    352    
-16    96     
-96    80     
688    1616   
-720   -1280  
-1104  688    
1744   -416   
-784   256    
-240   32     
224    48     
112    -352   
-48    -976   
-272   432    
80     400    
-464   -240   
160    288    
-176   -80    
288    320    
16     400    
-160   -240   
-16    160    
192    80     
-144   352    
-368   -160   
848    176    
-384   96     
-560   -256   
416    -592   
-272   192    
288    512    
-208   1008   
-672   -96    
-208   96     
-48    -160   
272    -80    
-16    288    
-352   112    
16     48     
304    -48    
-32    112    
-224   -16    
48     128    
-112   128    
-16    -64    
0      -208   
16     48     
-1232  -192   
-208   -16    
432    112    
-48    96     
-64    96     
0      224    
352    -144   
-16    -832   
-2352  896    
1712   928    
80     32     
-1168  80     
784    -320   
-432   80     
-96    352    
-144   0      
384    192    
112    112    
-464   -16    
128    -32    
160    224    
-160   176    
-176   416    
336    0      
-112   192    
-80    -128   
-176   64     
-32    -240   
928    1120   
336    80     
-448   96     
64     -464   
-240   -128   
16     -336   
-256   -320   
-192   112    
32     80     
352    -272   
-112   64     
-32    32     
-96    256    
-384   96     
-64    80     
432    -32    
64     384    
0      96     
-160   -112   
0      48     
112    -48    
176    -32    
272    192    
-32    48     
416    224    
528    1600   
-576   496    
-688   608    
576    -304   
-32    64     
128    16     
-80    416    
-272   -384   
160    -528   
256    -48    
-880   896    
32     544    
-512   -32    
96     256    
112    192    
-48    160    
-208   -64    
-32    -16    
16     -176   
528    736    
320    448    
48     -48    
-224   224    
-112   128    
880    2736   
-144   672    
-816   -704   
1568   -272   
-704   832    
-976   144    
736    -80    
432    672    
-544   -528   
-432   144    
192    32     
48     224    
160    128    
128    0      
-112   256    
-96    -400   
-112   -16    
80     368    
-320   448    
416    736    
-112   -848   
64     208    
-96    -32    
-176   480    
384    576    
0      592    
-384   -160   
80     1488   
224    304    
-144   -176   
96     320    
-320   -448   
112    784    
208    560    
512    736    
-224   384    
-240   -16    
192    -352   
480    592    
-224   160    
-144   -304   
-384   224    
496    768    
0      320    
80     688    
-80    544    
256    -416   
272    1280   
-96    0      
32     496    
-176   -304   
416    368    
480    144    
-384   352    
64     0      
-336   400    
224    224    
240    336    
32     128    
-400   -176   
16     48     
352    96     
96     -80    
-416   32     
-48    -16    
288    528    
144    288    
-208   64     
-688   256    
48     -192   
-256   -320   
256    32     
64     32     
-288   -272   
160    -512   
-16    -144   
80     -640   
112    -208   
-80    704    
224    336    
192    784    
-464   -272   
-384   64     
848    32     
-112   384    
448    240    
-448   560    
288    -992   
320    -528   
-128   -1152  
-176   496    
32     48     
256    176    
64     256    
-32    112    
-80    -448   
-80    -176   
128    48     
112    400    
-208   80     
160    576    
-160   -512   
304    -448   
208    192    
-320   -720   
-112   496    
352    -224   
208    176    
-128   288    
64     656    
16     -32    
144    224    
-176   -112   
32     368    
288    432    
-192   32     
-128   -192   
96     -480   
224    80     
-64    0      
96     224    
0      -1232  
-160   -64    
144    -256   
-80    -272   
-272   -208   
368    192    
16     48     
-64    -32    
512    160    
-1136  1344   
1840   192    
-576   -256   
0      -48    
784    -672   
-640   16     
-176   -848   
416    320    
-80    -128   
80     320    
-112   32     
160    144    
-192   -240   
448    -144   
0      -80    
-176   -32    
240    32     
-48    -80    
-80    32     
112    -320   
32     176    
-256   -736   
-1024  640    
1840   208    
-1120  -32    
144    112    
560    128    
-400   -16    
432    -288   
-528   304    
432    -32    
208    112    
-208   -96    
-416   -32    
320    16     
528    112    
-144   320    
-448   -144   
-32    -192   
-32    -304   
-256   48     
0      -944   
-384   -1152  
608    -160   
-560   -1808  
304    288    
416    -192   
448    -272   
240    352    
432    -144   
-96    -48    
-384   -240   
352    -1120  
-208   144    
16     576    
272    288    
432    496    
-16    432    
-48    224    
-64    -272   
-256   -208   
-160   -400   
80     80     
208    -80    
96     384    
16     -960   
-384   -48    
-480   -16    
432    80     
-704   1248   
1584   2528   
16     -544   
-1408  -1200  
416    64     
576    -752   
160    208    
-496   -32    
-80    208    
352    -1120  
352    48     
-16    -400   
-128   64     
160    -48    
-240   160    
160    -80    
80     80     
-144   -208   
-160   -160   
-592   -288   
-1296  -240   
960    -128   
-320   -304   
576    -496   
-64    -1456  
-224   0      
720    -240   
-992   -144   
528    -208   
192    240    
-80    -240   
-128   96     
-48    -144   
-128   128    
304    32     
-576   -224   
544    144    
-448   48     
-96    144    
48     64     
-64    96     
128    -160   
-64    368    
-224   -416   
304    176    
-128   432    
368    240    
-304   144    
320    16     
-16    -112   
-176   -272   
-624   -64    
240    400    
384    -160   
-320   -896   
0      -240   
128    -384   
32     16     
272    -144   
-576   176    
64     -32    
240    -112   
-128   -144   
-32    -224   
-112   -112   
48     -224   
-128   -208   
48     -64    
16     304    
96     64     
224    400    
-208   -896   
128    0      
-176   240    
160    208    
80     16     
64     144    
-16    656    
32     432    
-288   -64    
160    -176   
-240   -2448  
-1104  1392   
1568   -176   
-960   -176   
896    -768   
-224   256    
-288   272    
-64    0      
496    240    
-96    96     
-400   32     
-256   48     
384    176    
0      112    
-224   256    
48     -144   
208    -176   
128    48     
64     -144   
-32    112    
224    448    
-496   800    
-352   -192   
192    -272   
-256   -752   
64     -192   
128    528    
0      192    
-256   -400   
64     -288   
-160   176    
96     192    
176    144    
-144   -160   
-224   32     
48     32     
128    112    
-80    -96    
-464   -32    
240    160    
-560   352    
-320   -144   
192    32     
32     208    
32     -176   
-272   240    
-656   256    
192    -256   
80     -224   
-416   432    
-1616  336    
2144   -752   
-256   -80    
-1552  480    
1200   -48    
-640   240    
-448   -656   
112    -1552  
-160   -272   
-112   304    
-176   192    
352    -192   
-256   160    
32     -80    
576    32     
-576   -96    
-240   -144   
384    -560   
-448   -384   
-144   368    
336    1392   
144    -560   
-2224  448    
1408   1056   
320    -32    
-928   -1008  
0      -1040  
144    -288   
-224   -336   
-80    -80    
160    384    
-240   336    
-192   -176   
128    64     
-80    112    
-448   112    
144    16     
-48    288    
-64    352    
-816   592    
-16    448    
-48    192    
240    -208   
320    1408   
768    800    
-32    208    
48     64     
272    464    
304    -1248  
-672   -1248  
304    352    
-336   0      
-432   -528   
352    112    
288    -304   
-496   -272   
96     -432   
-480   -256   
256    -96    
-336   -240   
224    -352   
368    -224   
-48    0      
-656   544    
144    -240   
-688   48     
352    -160   
-368   -304   
-176   -624   
-448   128    
992    2640   
-2272  352    
288    400    
1632   -800   
-400   -336   
-448   384    
48     0      
736    -1600  
112    -416   
-128   256    
-256   208    
-112   -256   
400    -432   
160    544    
-272   -336   
64     80     
-16    96     
-352   -96    
0      16     
256    -80    
-48    256    
-144   -32    
64     400    
480    -480   
-528   -288   
48     -448   
-464   -544   
-80    224    
528    1296   
-160   352    
-64    -192   
-384   -304   
-192   320    
512    176    
-288   -176   
-80    112    
192    0      
80     736    
192    976    
112    128    
-112   16     
-352   64     
128    -48    
-32    32     
-384   288    
160    1136   
80     528    
-336   192    
144    -160   
80     160    
-192   304    
272    448    
720    368    
-592   -224   
80     -96    
544    560    
-688   448    
-320   -448   
320    -1216  
-80    -784   
-64    -240   
-96    -64    
-16    224    
64     240    
288    224    
-384   -80    
144    480    
192    416    
-272   144    
32     96     
-256   -128   
0      32     
128    0      
128    -32    
-16    288    
-160   128    
208    352    
-32    -224   
-48    -320   
-32    -112   
1072   1920   
-1872  1232   
1104   624    
-592   192    
-160   -672   
-144   -432   
48     -64    
32     16     
240    768    
256    464    
-400   352    
16     224    
176    64     
-80    -208   
-144   -208   
208    -288   
-144   0      
240    192    
272    80     
-48    176    
-400   -336   
320    -1104  
-464   512    
592    -112   
-560   480    
400    208    
-336   576    
0      -112   
272    -48    
-128   0      
-16    -16    
176    192    
-32    32     
16     96     
-32    -16    
-192   144    
368    48     
-256   192    
336    -320   
-432   176    
288    32     
-128   112    
64     96     
-48    0      
-48    -64    
448    96     
-96    64     
-112   240    
176    80     
-352   576    
-1760  -320   
2464   1024   
1472   -416   
-1536  304    
544    368    
544    352    
-496   -96    
16     768    
576    -400   
-176   368    
-16    -64    
-64    128    
-16    -192   
368    192    
144    -128   
-128   224    
160    128    
80     160    
-208   112    
-176   64     
176    -1344  
-544   -400   
0      352    
1568   -448   
-608   0      
-720   208    
928    496    
-368   32     
-576   224    
608    -16    
-224   128    
32     160    
16     -16    
192    64     
-480   64     
-208   -416   
656    352    
-608   432    
208    352    
-48    48     
32     176    
240    80     
112    -272   
-768   192    
1728   -96    
-576   144    
-16    -144   
224    -272   
-160   -32    
352    -64    
544    -192   
-32    208    
-496   -48    
288    0      
400    416    
-112   -480   
-96    -80    
720    1264   
-320   128    
-288   -352   
496    48     
128    256    
-16    -16    
-144   48     
-144   -208   
768    -240   
112    48     
-80    -304   
64     224    
-400   -2144  
-992   1424   
2176   -624   
-1456  16     
-1104  -64    
864    -160   
608    240    
-96    -48    
-192   464    
-816   -128   
320    192    
640    -352   
-144   128    
-144   -112   
-416   208    
576    -1008  
-176   336    
144    -176   
-400   128    
960    320    
-1024  320    
672    336    
-176   -288   
-32    -32    
768    -64    
-384   96     
272    16     
-224   176    
208    80     
144    240    
-80    112    
96     80     
-112   80     
48     160    
48     48     
96     -112   
-192   32     
208    -272   
-128   448    
128    32     
48     272    
-176   -112   
208    160    
-544   -176   
464    224    
288    16     
-352   96     
-32    208    
432    560    
208    128    
-368   112    
176    176    
64     464    
464    -272   
-688   -1888  
-16    -896   
160    192    
96     624    
384    -64    
16     336    
-448   112    
176    432    
32     32     
80     -2144  
176    304    
0      -1056  
144    128    
-80    128    
128    -176   
-128   -256   
-64    -1648  
-32    -160   
352    1360   
128    304    
-416   64     
-32    -176   
208    64     
480    -80    
-384   -1536  
-208   -304   
96     496    
1104   1072   
-1504  400    
688    -1344  
704    768    
-688   0      
-16    -160   
272    -384   
144    1056   
-96    -320   
128    384    
144    144    
-64    -144   
176    0      
-48    -176   
-368   -176   
320    0      
32     96     
-80    -240   
112    -192   
48     0      
656    432    
-1056  -1328  
480    -720   
688    -432   
-240   192    
-272   160    
-80    1520   
512    -320   
-64    -80    
-368   -368   
48     0      
-240   112    
-48    -448   
80     96     
-208   -240   
48     16     
96     -48    
144    384    
-256   -576   
-64    -304   
544    -64    
80     224    
-352   32     
16     -144   
240    -96    
-160   -240   
160    128    
16     -176   
0      144    
176    -288   
-368   -976   
-1856  368    
1952   48     
-144   -928   
-272   -160   
368    -176   
-336   752    
-272   352    
400    -896   
0      336    
-288   -320   
-240   -144   
112    -304   
-720   160    
96     -208   
96     80     
-32    -48    
192    -160   
528    -288   
-112   112    
448    1088   
-400   -784   
-512   464    
624    496    
-656   336    
432    80     
-112   -432   
-672   -736   
288    -48    
32     976    
-320   624    
112    -832   
112    -176   
-304   -704   
304    -896   
-288   -1328  
160    -48    
-448   -288   
-368   -272   
240    -16    
-96    -96    
16     336    
112    -144   
-800   -768   
-128   -96    
352    192    
-240   -1024  
592    -2128  
-320   -1344  
240    448    
0      736    
-640   608    
-432   -192   
48     352    
448    -672   
-720   576    
320    976    
-464   352    
-176   112    
288    -320   
-1120  32     
192    -240   
0      720    
144    48     
-272   -224   
-48    -400   
304    -240   
224    -848   
144    -544   
-48    32     
-832   -1616  
-928   -96    
544    -272   
-128   704    
848    -16    
-576   -384   
-768   -656   
592    -1200  
160    512    
-464   560    
-544   192    
-416   -560   
608    -224   
-240   16     
-448   -160   
-48    -304   
288    -112   
288    96     
16     1280   
-80    880    
-128   240    
48     -528   
720    192    
-256   -704   
-272   224    
144    304    
-704   -464   
288    -448   
-16    -128   
-208   -448   
0      -192   
-352   -320   
96     -144   
-368   -880   
-224   -272   
368    400    
-224   -304   
96     -176   
0      -32    
112    256    
112    240    
-160   208    
-16    -112   
-528   -32    
144    -896   
-544   -304   
96     -144   
-864   -736   
176    -544   
-112   -672   
-464   -544   
768    -272   
-32    160    
-768   224    
432    288    
-288   144    
192    -192   
64     -336   
64     16     
144    -16    
-352   0      
160    32     
-32    -304   
-304   -240   
64     -96    
112    464    
96     16     
-288   -48    
224    -224   
-16    208    
128    -96    
-112   0      
-80    -96    
-112   160    
-80    64     
32     400    
368    224    
-640   -32    
-32    16     
352    -160   
-560   608    
944    -1040  
-992   288    
-80    -288   
320    288    
320    -80    
-448   96     
-16    -64    
320    -224   
-64    144    
-80    96     
-128   48     
-144   176    
192    -320   
-496   -240   
352    496    
-96    96     
-224   -80    
224    -64    
-64    -96    
832    672    
-1488  560    
528    -48    
128    -208   
-576   -80    
384    -336   
-176   336    
-96    112    
0      160    
80     -64    
-192   -32    
-80    208    
32     -64    
64     64     
48     -32    
-80    -112   
-96    -304   
176    48     
-144   192    
336    128    
-240   -32    
-64    48     
-272   -80    
176    240    
-464   -272   
16     320    
400    -80    
-544   176    
400    48     
32     544    
48     240    
-592   1008   
1472   96     
-224   -32    
-688   -48    
288    -32    
64     96     
-368   -192   
208    48     
-80    -64    
368    320    
-192   -80    
-304   64     
512    0      
-192   -32    
-176   80     
192    224    
-112   192    
-160   -16    
160    -16    
-192   -416   
976    1056   
-32    -320   
-1392  -176   
2416   384    
-784   -64    
-832   352    
832    16     
-560   192    
-128   128    
48     64     
-112   0      
16     48     
144    -48    
288    208    
-288   -16    
-16    112    
32     288    
-112   80     
-448   192    
128    16     
-192   -656   
-864   352    
1056   32     
-896   32     
288    -240   
560    -144   
320    -96    
-400   256    
320    224    
-448   96     
32     160    
-336   48     
32     -48    
320    480    
608    -64    
-464   -272   
352    -112   
-112   80     
-368   352    
448    -16    
-288   112    
128    96     
-32    16     
-96    -352   
-400   96     
560    48     
-320   48     
96     112    
608    3232   
1408   32     
-816   -32    
976    -400   
-464   -16    
-432   368    
496    -16    
400    0      
-112   144    
-528   -80    
736    192    
-400   80     
-80    288    
432    -128   
-368   256    
-16    -96    
16     208    
176    0      
-80    208    
208    1376   
416    1184   
-400   288    
96     -272   
32     -32    
-656   112    
928    288    
-400   368    
-160   -208   
272    128    
-96    -1312  
112    -64    
-192   160    
-112   -112   
32     96     
320    192    
-16    368    
192    832    
400    -192   
-416   -16    
112    -96    
144    176    
64     -48    
272    -160   
-400   0      
80     -720   
-32    -288   
-320   -160   
432    -304   
-192   272    
512    928    
16     448    
160    816    
-208   160    
-272   -128   
96     -464   
-96    0      
32     -240   
432    -1888  
-240   -1168  
-80    -1152  
-32    -784   
-80    -496   
-32    32     
64     512    
-16    -16    
32     -176   
16     32     
112    448    
64     48     
-128   80     
128    208    
-64    480    
96     -80    
-48    224    
64     -304   
-48    176    
-64    -896   
16     -16    
144    272    
-16    -80    
-128   128    
352    496    
-240   480    
416    -176   
-48    -336   
304    -144   
-160   304    
64     -480   
-16    -192   
-144   -352   
-64    -80    
128    -1024  
48     -48    
0      -1200  
128    0      
-16    -48    
0      160    
-32    288    
352    112    
64     320    
-256   96     
144    -352   
-768   -112   
816    352    
-384   -240   
208    -272   
-32    -96    
-16    -112   
32     -336   
192    208    
-16    96     
-112   128    
-160   32     
128    96     
-32    464    
96     80     
-16    -16    
0      -560   
-144   160    
64     -64    
112    48     
-144   -160   
-128   64     
32     -96    
240    96     
-336   320    
112    240    
-64    -80    
-112   80     
240    96     
16     -704   
-560   1632   
3168   -992   
-1232  64     
-528   -832   
1216   -960   
144    -432   
-352   -1248  
432    -1120  
-96    576    
-208   1392   
240    -448   
256    -528   
-160   -2400  
-64    -528   
128    112    
128    -112   
16     432    
416    -176   
-96    -32    
-112   -32    
720    16     
-2112  288    
496    -288   
560    -1216  
-512   -560   
656    -288   
-448   -320   
-816   -1504  
304    -1920  
-80    272    
-48    112    
16     -16    
128    -704   
176    -272   
-64    -80    
240    176    
-64    256    
304    1440   
480    736    
-320   560    
-80    -96    
-64    64     
256    544    
-480   640    
48     0      
192    -192   
320    1376   
-592   112    
-768   -16    
1040   -768   
-240   -176   
-192   -80    
-16    160    
-32    -336   
0      944    
1040   -576   
-64    1024   
-544   448    
-16    -160   
128    528    
480    128    
-544   -304   
160    384    
576    -48    
272    224    
-368   -160   
-640   -192   
736    208    
368    -848   
-960   -960   
1024   -96    
1056   -160   
-1664  -784   
0      -1488  
-624   -1056  
576    -208   
-192   112    
-496   608    
256    144    
224    -176   
-128   -112   
-256   -1264  
-80    640    
480    -32    
96     144    
-352   -128   
224    -16    
-272   -800   
368    -1808  
-64    -672   
-32    192    
-416   304    
160    -560   
-416   -144   
528    32     
176    -176   
-80    -576   
-48    144    
352    -80    
-304   0      
-16    -96    
112    96     
-16    480    
-48    160    
-576   -96    
368    48     
-64    -336   
-544   -128   
336    176    
192    -128   
144    -48    
-64    -864   
-368   -48    
176    -32    
128    -64    
-16    176    
432    272    
-176   192    
-48    48     
320    -32    
-64    -560   
272    -608   
-304   256    
48     368    
528    -160   
-720   192    
128    -464   
336    112    
16     -928   
384    -128   
-352   160    
144    32     
-48    -272   
-144   -160   
240    688    
-336   128    
48     96     
192    240    
-112   -128   
-96    -192   
-112   272    
416    -496   
-80    -272   
-96    -64    
64     16     
0      112    
352    -176   
-320   128    
32     144    
176    64     
-784   -512   
1552   -1008  
-512   -288   
-816   -144   
864    96     
384    320    
-1568  240    
-96    160    
416    -320   
-320   128    
64     -112   
-160   48     
-160   208    
144    -304   
256    -160   
-144   432    
-96    -272   
-96    -128   
128    48     
16     -80    
-48    -1136  
-800   80     
432    400    
-640   -144   
-144   208    
320    -368   
-288   32     
-384   144    
-1328  48     
368    -160   
80     -80    
-480   112    
48     -80    
240    272    
-208   -240   
-32    112    
-336   -64    
0      -112   
16     80     
256    -32    
-304   64     
-176   32     
-32    -48    
-336   -112   
-480   -16    
352    80     
-48    224    
-32    -112   
-16    144    
928    880    
-1216  -1040  
-2832  1136   
2560   112    
128    -32    
-480   112    
-448   -112   
224    192    
384    -240   
-960   128    
336    0      
-848   176    
16     16     
16     96     
0      48     
-400   64     
416    112    
-192   32     
-96    368    
16     48     
-160   112    
48     -128   
576    -272   
-1568  -16    
704    -1104  
-192   32     
-448   -400   
-128   0      
544    0      
-96    -192   
-368   112    
80     16     
-208   96     
240    32     
128    192    
-544   48     
-64    16     
160    32     
272    -80    
-48    96     
-272   0      
-192   -48    
-192   -368   
336    272    
-48    160    
-480   -96    
784    16     
-80    144    
-128   -112   
-64    -96    
-320   224    
464    32     
-336   304    
112    -144   
320    432    
-736   192    
64     -32    
128    272    
-736   80     
192    16     
-288   64     
-112   -32    
112    128    
32     96     
-32    -16    
-256   -352   
320    112    
208    80     
-352   48     
288    528    
944    3936   
-1248  1952   
800    224    
752    -736   
-1344  -80    
-896   560    
1296   -336   
-96    -224   
-384   16     
-160   -208   
656    304    
-288   -368   
688    336    
-224   0      
-176   144    
-32    288    
416    -16    
-272   96     
-16    -304   
160    -576   
-64    -752   
-160   -384   
336    688    
-704   -240   
224    -32    
112    0      
-16    -48    
64     -448   
-208   -112   
256    800    
-368   416    
16     -400   
144    -240   
-16    560    
32     160    
-144   256    
208    -512   
-128   -144   
-384   0      
256    272    
0      208    
32     464    
112    32     
16     128    
-112   480    
48     1024   
320    528    
-400   1136   
304    544    
16     -384   
192    48     
608    496    
-1504  448    
736    208    
0      576    
-144   176    
288    272    
-112   448    
128    -1472  
-48    528    
224    272    
-32    -288   
-48    -80    
128    128    
-176   32     
144    288    
0      96     
208    -16    
-32    96     
224    0      
32     96     
128    96     
0      80     
-80    176    
64     0      
-80    128    
432    -272   
112    80     
-480   80     
96     320    
336    -32    
432    192    
-1104  464    
480    -32    
224    192    
-16    16     
160    -32    
304    160    
-672   464    
304    192    
336    -96    
-64    0      
-224   304    
48     80     
144    192    
272    64     
-176   -16    
-160   272    
-32    48     
320    -144   
48     128    
-448   1216   
864    -480   
-992   32     
576    -128   
-192   192    
-80    32     
368    -736   
-144   448    
144    -48    
-320   112    
240    96     
176    288    
-32    160    
-96    -176   
-48    -80    
96     160    
240    -112   
-240   -736   
-80    -288   
48     240    
-64    128    
-64    -2896  
176    -96    
-288   -192   
144    -208   
400    160    
48     224    
-208   144    
-112   80     
16     -368   
1504   -784   
-1984  144    
848    576    
400    288    
-592   -1008  
544    -1552  
528    -768   
-304   2128   
528    -464   
-48    -416   
-112   16     
384    0      
-16    -80    
-352   336    
208    -96    
336    416    
64     1040   
-176   448    
32     -624   
-16    -512   
-640   64     
2448   -352   
-1136  416    
-64    -1648  
-128   -464   
32     -48    
-96    880    
256    32     
-16    -352   
256    -768   
128    96     
0      272    
64     64     
-384   -112   
896    192    
32     48     
-32    224    
-304   448    
-400   -1488  
432    -32    
64     -528   
352    144    
-320   -960   
1280   -1696  
-800   -432   
-288   480    
912    544    
-960   320    
128    -288   
464    192    
-16    -16    
-112   -80    
-112   -48    
272    -1168  
1104   160    
-112   -576   
-96    288    
624    -112   
144    800    
-976   368    
320    -16    
288    112    
-128   -192   
-320   192    
0      176    
864    -48    
-112   -336   
-640   -32    
768    1184   
1744   4288   
-1344  1344   
240    256    
1616   -480   
-992   48     
-496   -208   
1104   -400   
528    -304   
128    -1056  
-768   16     
512    -144   
304    32     
128    48     
-128   -64    
-96    -112   
-176   -32    
416    -272   
-336   -16    
640    768    
-672   832    
464    400    
368    112    
-448   -192   
384    -144   
-16    -32    
-160   128    
240    16     
0      32     
-240   16     
432    80     
32     -64    
0      -144   
176    64     
-288   96     
240    -816   
-16    432    
-656   64     
112    -1120  
-96    -256   
80     -288   
-32    32     
-224   -448   
288    -448   
64     0      
176    -64    
-224   32     
-80    32     
512    -240   
-336   80     
176    -144   
-80    96     
-512   -1008  
-1120  -192   
1040   -64    
-144   -400   
-128   -144   
208    -48    
240    -32    
0      528    
-176   144    
80     256    
32     -80    
-32    -432   
160    32     
-64    -320   
16     -256   
-16    -400   
128    -144   
-256   -272   
192    -272   
32     128    
16     -240   
64     -96    
128    -432   
-64    192    
144    16     
144    -560   
64     208    
96     176    
-144   -144   
368    1232   
-448   -1504  
-1136  128    
1328   -480   
-80    -672   
-640   288    
128    -112   
448    160    
80     -1552  
-352   288    
128    80     
-80    -176   
160    208    
112    192    
-448   16     
384    -128   
-336   160    
32     -480   
-384   -160   
16     128    
-48    -432   
256    -1040  
-16    128    
512    -352   
-352   0      
-96    -272   
96     -416   
0      208    
480    176    
-320   96     
0      -16    
-304   48     
464    -416   
-112   48     
-64    -80    
-176   -80    
320    16     
32     -80    
-144   16     
224    -32    
-176   192    
0      96     
240    0      
288    -240   
-128   32     
-464   0      
384    192    
32     96     
64     -16    
-320   0      
-432   2096   
2128   112    
-1200  448    
-416   -528   
1072   240    
-768   -464   
32     336    
432    880    
448    320    
-384   320    
160    -144   
336    0      
16     -224   
-32    48     
-608   -256   
416    208    
-64    -112   
176    0      
-224   -272   
304    192    
96     -512   
-160   384    
1760   -400   
-960   944    
-320   48     
80     224    
16     80     
320    -224   
-160   176    
-128   48     
96     16     
336    -112   
-144   96     
-48    -208   
-160   336    
752    -144   
-32    144    
-256   320    
32     -224   
224    -320   
160    -272   
-32    144    
368    144    
-16    -16    
-320   -768   
-464   256    
272    144    
-80    -80    
-32    -80    
320    256    
-288   -144   
-1040  -1344  
-128   368    
-80    384    
-1104  -304   
16     -48    
304    144    
-256   -32    
-176   -96    
144    -16    
-96    -64    
-592   -32    
-128   64     
-176   16     
-176   16     
288    160    
336    0      
-240   -64    
-336   48     
272    -912   
-1088  -3152  
-1008  -496   
48     -32    
608    -528   
-256   -528   
416    -1440  
-160   -144   
-272   560    
-240   32     
240    -704   
-208   -384   
0      208    
-112   656    
336    -80    
16     240    
-64    32     
-176   128    
-192   -192   
192    448    
-144   112    
-80    112    
-96    -320   
224    496    
544    528    
192    544    
-288   272    
272    624    
0      256    
-144   -800   
144    -512   
-176   64     
-144   160    
-256   96     
208    160    
-80    608    
-96    432    
-32    304    
160    992    
-240   -192   
144    -432   
-288   288    
128    160    
-64    96     
-16    176    
-112   128    
560    1104   
-688   -96    
-96    -672   
144    -416   
-160   16     
-272   128    
-192   1200   
1456   256    
-544   464    
-80    1040   
352    1168   
80     672    
208    1296   
-128   -928   
-608   -1328  
352    192    
32     496    
16     -192   
-32    -32    
-544   48     
224    336    
-688   -48    
-528   -512   
-48    96     
352    176    
-144   288    
272    96     
-176   144    
32     144    
144    416    
-320   432    
64     48     
464    -208   
-448   -16    
-256   32     
320    144    
-800   752    
496    -144   
-576   -64    
224    80     
128    32     
96     80     
-368   704    
16     352    
-16    -432   
144    -80    
-96    320    
-192   48     
272    32     
32     96     
-32    16     
16     -160   
-48    -176   
0      0      
16     128    
240    832    
-256   176    
-48    -96    
752    -240   
-560   176    
64     400    
112    512    
64     80     
-16    368    
-176   48     
-64    112    
-32    -80    
-32    144    
-64    416    
80     480    
-16    304    
-240   224    
-16    112    
432    -816   
-192   -368   
-144   224    
16     368    
-128   -16    
80     96     
144    -320   
-240   0      
-240   240    
640    48     
272    -288   
-704   160    
-752   -1152  
-128   -672   
464    -64    
-496   656    
-512   656    
1136   352    
-752   672    
-624   32     
768    -32    
-192   -80    
-272   112    
64     32     
96     -64    
208    -224   
-112   -112   
-48    64     
-16    -16    
0      272    
112    112    
-192   160    
-272   -480   
1232   976    
-80    -64    
-656   -304   
384    -224   
128    -240   
-80    48     
48     192    
208    144    
64     -288   
-992   224    
576    80     
240    128    
-336   112    
-320   -80    
32     64     
384    256    
-288   -160   
-32    96     
208    64     
-160   160    
48     112    
-208   0      
912    -64    
-464   64     
-208   -1008  
112    -48    
-208   -880   
-368   -272   
1024   96     
-240   240    
128    496    
-64    160    
-64    -96    
272    48     
-416   -176   
-240   -448   
64     448    
320    48     
48     80     
48     112    
-160   112    
112    272    
256    144    
-160   48     
272    16     
80     32     
32     -128   
192    96     
-736   -1248  
-1104  -2160  
640    992    
32     96     
-1072  -192   
880    192    
976    -416   
-1088  464    
-16    -32    
-208   32     
592    -384   
-480   128    
-400   0      
-128   128    
192    -192   
16     64     
-144   -1792  
-192   144    
64     80     
-160   -32    
240    160    
-336   176    
-320   -192   
1008   144    
416    -80    
-832   160    
160    112    
464    -64    
-16    -96    
-64    48     
32     208    
-208   -288   
416    96     
-240   -608   
0      64     
432    160    
224    160    
-528   -16    
176    432    
-400   32     
112    272    
16     -64    
-48    160    
-16    -48    
0      -304   
240    -256   
-208   -352   
32     80     
96     -2192  
208    144    
-208   64     
-160   256    
0      -432   
-496   176    
560    112    
368    176    
-416   96     
-160   -112   
448    0      
192    -400   
-288   96     
128    -96    
80     112    
-144   -368   
144    64     
64     -272   
-192   80     
144    -448   
-64    0      
112    144    
112    96     
-144   64     
144    144    
-32    160    
80     0      
64     -192   
128    816    
-448   944    
336    -768   
240    32     
-256   240    
592    -336   
-2256  1184   
1472   96     
336    48     
-512   -16    
128    -144   
-96    192    
320    80     
-464   80     
384    272    
-336   -608   
64     176    
160    160    
224    -48    
-608   224    
272    -144   
160    32     
-16    32     
-16    -160   
16     144    
-432   -320   
864    -832   
-576   176    
16     -528   
-144   144    
-144   -80    
320    240    
368    208    
-336   -160   
-272   -896   
368    96     
64     -48    
144    160    
-176   176    
32     16     
208    -1904  
-112   -32    
-144   -288   
16     -192   
96     48     
96     32     
-176   80     
272    -160   
-256   32     
144    144    
272    -1184  
-464   128    
288    -128   
-16    96     
-1104  -16    
-1088  1568   
1424   336    
-224   112    
-112   -432   
896    -208   
-928   128    
32     448    
256    -48    
160    -880   
-16    -128   
-32    -192   
208    16     
48     -320   
128    16     
-240   96     
-144   160    
128    176    
96     96     
-96    16     
96     -176   
-96    48     
-352   128    
2256   -512   
-400   640    
-720   688    
256    -160   
496    -160   
-240   -96    
208    -48    
-16    32     
224    48     
-80    -48    
-112   -256   
64     -112   
304    -832   
32     48     
-16    80     
-48    -96    
-16    -288   
352    48     
192    -64    
16     272    
112    320    
-32    320    
-608   -272   
224    -688   
0      -16    
-672   -64    
272    -240   
608    592    
-944   480    
384    -464   
-112   160    
-64    -1648  
-752   320    
592    -496   
16     384    
592    176    
-256   -112   
-352   48     
272    -16    
32     -144   
-32    -64    
112    112    
-224   64     
96     944    
688    -112   
-352   16     
-144   -576   
16     16     
1680   320    
-2080  -480   
-144   624    
1216   -688   
-832   272    
-688   -112   
-48    -512   
944    1360   
-752   496    
-48    -336   
-16    -624   
0      0      
16     368    
-48    -1120  
-240   16     
-112   320    
240    -1008  
-64    352    
-144   208    
-64    176    
0      -448   
-304   48     
144    32     
64     608    
-32    -224   
16     0      
208    -272   
-144   64     
288    -144   
-272   -64    
-128   -192   
112    80     
-64    144    
160    32     
-128   144    
-32    432    
80     -528   
-416   -736   
192    592    
208    640    
-32    192    
-48    -640   
-96    304    
128    -384   
-16    160    
656    224    
-256   0      
-48    464    
-176   -240   
96     128    
-80    -16    
480    928    
704    1264   
-304   1056   
-256   176    
16     -1280  
-224   -1152  
48     -1696  
48     -720   
0      768    
-240   -352   
-880   -160   
160    160    
-80    -240   
-160   -272   
-80    -48    
352    240    
-80    304    
-144   -32    
208    -304   
-176   80     
-432   -400   
144    -128   
0      -96    
-112   144    
80     624    
336    384    
-160   96     
-528   352    
128    128    
256    -224   
352    -1072  
-336   640    
160    -64    
-144   -624   
208    -192   
-528   -752   
624    -928   
448    -352   
64     128    
-160   208    
-192   128    
-64    -48    
256    -32    
48     -112   
-176   -160   
-48    -224   
144    -176   
240    16     
-64    -112   
112    -656   
-512   -800   
176    512    
304    -160   
-240   -208   
144    160    
-320   -624   
96     304    
80     176    
-144   112    
-272   -128   
-256   48     
-608   352    
-48    496    
96     -640   
-80    496    
-240   -400   
240    96     
-32    16     
-208   144    
-144   96     
160    368    
-80    -224   
0      -144   
-352   128    
144    224    
304    64     
-240   -32    
-160   48     
-608   -592   
1184   -704   
144    -544   
-640   -144   
1008   352    
-1328  -96    
496    -224   
432    -32    
-384   176    
-128   240    
16     144    
256    128    
-272   0      
-160   -224   
448    80     
-112   -192   
-80    144    
-32    32     
208    -48    
-80    -32    
-48    -16    
-208   -656   
1104   752    
-752   -256   
96     -80    
576    384    
-1040  -112   
0      144    
368    80     
240    -176   
-1248  64     
-240   176    
48     0      
176    0      
-48    80     
32     -32    
-416   144    
464    352    
-16    -64    
272    -208   
-224   -32    
-304   160    
-64    -272   
944    48     
80     304    
-224   -128   
144    -608   
-416   -112   
336    432    
-192   560    
464    192    
-416   144    
-256   16     
16     -16    
48     -64    
320    32     
32     -240   
-368   -96    
288    -208   
576    -320   
-400   -144   
-304   160    
144    48     
16     64     
272    176    
464    432    
-432   -192   
-208   336    
0      240    
-128   -48    
-640   1200   
2592   -2496  
-960   1808   
288    208    
64     80     
-544   480    
48     64     
-16    320    
-112   -336   
112    560    
336    -48    
-480   288    
224    -32    
160    112    
288    96     
-384   160    
-144   112    
352    48     
-336   -48    
-160   560    
704    512    
-720   560    
448    32     
-16    32     
-560   304    
1120   128    
-384   32     
-416   128    
720    -112   
-320   -80    
0      32     
-32    48     
32     32     
-208   112    
288    -112   
-768   112    
528    -80    
192    288    
-288   16     
-352   -64    
512    192    
-272   -32    
-128   160    
224    304    
-320   -64    
-48    192    
560    -288   
-1072  -192   
304    32     
-96    192    
240    144    
32     -176   
160    64     
256    112    
-240   16     
528    0      
-160   0      
-96    352    
-80    384    
160    192    
144    192    
32     128    
-16    16     
-160   96     
208    80     
224    112    
-48    208    
-208   480    
432    320    
-304   0      
-128   64     
112    -32    
32     -32    
32     32     
-48    160    
112    96     
0      -160   
-32    32     
112    368    
-96    -416   
32     272    
752    2896   
656    16     
-1376  352    
192    -128   
448    -32    
-112   48     
-192   -96    
96     576    
-80    -320   
208    -224   
96     48     
-224   -208   
32     -48    
80     -800   
288    -144   
-176   384    
176    0      
-208   128    
144    -32    
240    96     
560    272    
-1472  784    
880    -640   
288    -224   
-208   368    
240    160    
-304   320    
-176   80     
96     -112   
384    112    
-112   -80    
-336   48     
272    144    
16     208    
64     512    
64     208    
64     -176   
-256   192    
112    80     
208    32     
-208   64     
256    -272   
-80    112    
128    -992   
-144   384    
-112   -80    
128    -32    
80     0      
240    368    
-944   112    
1840   -512   
32     672    
-800   -272   
896    64     
-528   -16    
128    -96    
576    -48    
-160   288    
80     -96    
-288   128    
288    -80    
-32    32     
-16    -16    
208    32     
160    -96    
-32    176    
256    384    
112    400    
-64    288    
144    -32    
560    848    
-2192  48     
112    -32    
992    -656   
-1136  -48    
864    688    
-768   592    
-208   -880   
560    -272   
-96    96     
240    64     
-512   -16    
48     -32    
320    -32    
-48    320    
80     288    
48     32     
-112   736    
192    -528   
64     240    
-64    -1040  
-16    240    
512    1680   
-688   1488   
-336   816    
800    336    
-336   112    
448    96     
304    160    
-208   -496   
-192   224    
208    -544   
288    368    
-64    -400   
480    -352   
240    -208   
16     32     
192    -624   
-208   192    
-64    288    
-160   0      
224    0      
208    272    
32     320    
-32    -32    
496    32     
176    -448   
-752   496    
320    128    
128    144    
-1216  816    
-192   -208   
-672   -16    
224    -832   
272    -608   
96     512    
-64    2224   
-448   48     
480    -576   
48     -128   
112    -2928  
-224   -128   
-272   -128   
96     -64    
496    -144   
-32    304    
-352   336    
-176   320    
512    544    
80     800    
-64    -720   
-224   -48    
-752   -224   
240    -208   
608    -624   
-496   -192   
304    496    
-592   -2016  
272    -1504  
-128   128    
-144   -144   
288    -448   
64     -304   
-16    -400   
80     752    
-240   16     
-464   -544   
160    48     
304    96     
-96    592    
112    32     
-32    -576   
336    -192   
-48    304    
96     -1376  
-688   -880   
256    160    
352    480    
-64    304    
-64    -160   
288    1168   
-400   176    
-288   -384   
224    -80    
-160   -320   
-32    -208   
640    704    
-656   368    
-48    -832   
464    -1792  
48     -128   
-160   -80    
64     304    
80     -240   
-48    -480   
-240   -240   
144    128    
-32    384    
176    -416   
-784   -320   
-176   432    
176    128    
-32    -32    
128    32     
32     368    
96     1856   
112    -288   
-208   -384   
240    -464   
224    -96    
-672   480    
544    -656   
-400   -320   
-336   -880   
-432   -848   
32     -48    
-592   256    
224    -112   
-64    240    
-224   -240   
-112   48     
64     -128   
352    16     
-48    384    
-128   -160   
-192   -384   
208    -192   
128    192    
-128   -16    
-112   112    
-368   384    
-224   -496   
-160   288    
320    336    
-208   -704   
240    512    
0      288    
-16    416    
80     -112   
-16    -128   
16     -48    
0      112    
-272   -304   
144    192    
-96    32     
-512   480    
368    320    
256    96     
32     96     
48     -192   
96     304    
48     -400   
-128   160    
48     -240   
176    16     
64     64     
-48    144    
-80    80     
48     -96    
304    -944   
560    -1088  
-2096  432    
1056   -16    
624    368    
-1104  -352   
80     352    
672    -288   
-400   -64    
-160   -80    
384    16     
-224   48     
176    -64    
-240   -240   
288    0      
-320   -64    
128    192    
-688   -96    
256    144    
64     0      
-640   -224   
64     -528   
928    336    
-960   -112   
-144   -112   
352    -48    
32     160    
-400   -96    
128    32     
256    96     
-256   192    
-48    32     
64     -80    
-1008  -240   
144    80     
-112   -208   
-368   128    
208    -112   
-320   240    
240    -128   
-544   -176   
368    96     
-864   -800   
-1088  96     
1008   288    
640    -256   
-464   -608   
-224   192    
-112   304    
-128   144    
512    -176   
512    96     
-464   -48    
-304   -32    
16     -400   
-160   -576   
272    -160   
-368   -32    
-80    32     
288    -176   
448    192    
-1376  -112   
-560   496    
1008   -64    
272    0      
80     576    
-1216  368    
176    -560   
0      144    
-368   -352   
1168   4624   
448    1328   
-336   80     
400    64     
-656   -32    
-256   64     
-192   272    
784    -240   
-48    -112   
-256   -336   
-80    208    
176    -80    
-352   256    
224    -160   
16     192    
-224   -112   
-368   272    
480    -64    
-656   32     
240    528    
816    96     
-1232  304    
624    -96    
-720   -416   
272    128    
304    0      
-480   192    
112    -32    
272    64     
-48    -272   
96     -80    
-176   -128   
16     256    
48     400    
-80    432    
-288   -48    
-48    -176   
-16    -160   
-1344  -336   
320    80     
32     144    
80     144    
-96    64     
240    64     
-384   128    
-96    112    
224    176    
-64    32     
-208   -528   
-240   -528   
176    16     
-80    -160   
432    -192   
-560   96     
464    -560   
80     320    
-80    128    
48     -128   
-176   -16    
240    400    
304    416    
-112   96     
-144   -32    
-32    -48    
-80    -352   
128    32     
-112   176    
16     480    
0      144    
-352   -16    
96     -208   
-64    32     
176    480    
80     368    
-64    160    
-272   -320   
80     -224   
208    -112   
-336   256    
-96    224    
64     128    
-192   1392   
1648   -656   
-2208  -608   
352    112    
800    1200   
112    128    
-384   -656   
-128   -352   
240    -176   
0      -16    
-80    -208   
-32    -320   
-64    416    
112    288    
176    -192   
-304   -912   
-176   -288   
64     144    
80     -96    
112    64     
144    -288   
-224   720    
16     -336   
-128   -512   
288    896    
-160   96     
-160   144    
-112   -688   
416    80     
-112   208    
-192   32     
-64    144    
128    432    
16     -192   
0      272    
0      -176   
48     336    
176    32     
-112   -416   
128    32     
-224   304    
32     -160   
-272   32     
-144   64     
144    128    
-64    -384   
208    64     
-64    416    
48     48     
-16    112    
272    864    
2128   -512   
-1664  -176   
336    -528   
976    192    
-464   -368   
-192   640    
576    -1136  
-256   64     
-80    752    
272    192    
240    -208   
-224   112    
0      256    
144    96     
64     80     
64     -32    
-240   -128   
80     112    
112    16     
336    -880   
-2544  528    
1648   480    
160    1296   
-912   16     
960    -336   
80     -544   
-528   -80    
64     -80    
352    -160   
-192   304    
-112   208    
96     240    
256    -304   
-160   -304   
128    208    
-288   -128   
-288   -448   
656    -1520  
-192   -1344  
-368   -128   
-128   320    
0      -560   
-176   944    
848    720    
-768   112    
-176   592    
896    128    
-400   -224   
96     176    
-80    736    
432    -144   
-496   288    
192    -128   
-160   -480   
-608   -352   
1056   -1360  
-480   112    
336    768    
-96    272    
-400   288    
416    256    
-96    704    
176    256    
-112   32     
-16    176    
272    16     
-32    -48    
-64    208    
-96    -112   
-688   1872   
1120   -1472  
-464   -672   
-1440  -1088  
1152   -272   
368    -656   
-656   -128   
-448   224    
256    704    
256    256    
-16    192    
-208   304    
48     -160   
112    -112   
528    -480   
-128   208    
-144   -256   
512    208    
-16    -960   
-144   -544   
96     368    
272    464    
-976   -576   
496    480    
288    80     
-736   48     
416    -1360  
-832   -1440  
288    -464   
-144   1120   
256    304    
208    -128   
-176   -80    
32     -112   
-16    128    
112    432    
144    -208   
112    -816   
-336   -592   
320    -544   
224    -512   
-112   -144   
-176   128    
0      -64    
336    -512   
-96    368    
352    -400   
-304   384    
144    -432   
144    64     
16     -2048  
-720   0      
304    -432   
336    -368   
-2128  224    
880    -768   
144    -48    
-640   -576   
192    -608   
416    -832   
-16    -208   
-272   -528   
96     -96    
224    -144   
-16    656    
-128   384    
-64    160    
112    352    
560    1024   
-464   608    
-32    448    
320    224    
32     352    
-160   32     
-32    -336   
208    -896   
-192   -400   
96     544    
48     288    
208    256    
192    1904   
1168   -112   
-1088  48     
560    448    
-80    -288   
64     -832   
-240   -1200  
-144   -752   
0      -448   
336    32     
-96    -96    
48     208    
112    -64    
-240   -208   
432    -32    
-256   240    
-16    -80    
128    -144   
64     -544   
-112   144    
-624   1504   
592    -144   
-704   -576   
640    -784   
160    -224   
-272   -288   
256    0      
112    224    
-112   -288   
-304   -672   
672    48     
-64    64     
-192   48     
-144   -144   
304    -64    
32     -48    
0      -176   
-288   32     
224    0      
112    64     
304    -288   
-96    -96    
32     -1392  
48     -256   
0      32     
32     32     
144    64     
64     96     
-288   -288   
1632   128    
-3312  688    
-688   -144   
1776   -48    
-352   -336   
-336   -48    
-144   -304   
624    208    
-112   -1776  
-16    176    
320    -144   
-96    176    
160    -320   
16     64     
-528   -320   
336    80     
-304   -16    
0      80     
-1040  80     
0      -80    
64     -80    
256    -80    
-1552  400    
640    192    
832    960    
-32    -1440  
-336   -224   
160    -432   
-288   272    
-224   16     
304    112    
512    16     
-144   -304   
-576   0      
240    -128   
-176   -48    
96     16     
0      208    
432    -688   
-352   -112   
-544   -896   
336    -288   
896    -16    
-368   -96    
-48    112    
-192   -272   
-752   -240   
944    464    
96     -528   
336    544    
-816   176    
-16    -16    
768    -832   
128    -480   
-448   192    
-80    -208   
288    -16    
352    -192   
192    192    
-480   608    
480    -176   
-272   64     
224    48     
-64    -48    
-96    -48    
-16    112    
-48    -48    
112    144    
-192   -208   
640    1392   
-2080  3536   
880    368    
96     -432   
-1920  -848   
1104   288    
368    -80    
-1280  -288   
784    -208   
80     176    
112    -96    
-320   160    
304    -224   
-64    0      
-112   112    
416    0      
-304   -304   
-128   112    
-288   48     
384    -352   
-816   -336   
432    -192   
-144   -16    
256    -224   
592    -48    
-512   -288   
-432   192    
400    0      
128    96     
-144   -320   
-368   -16    
-976   -480   
-448   304    
-384   64     
16     144    
304    -304   
-192   -272   
-256   -32    
80     144    
112    48     
-32    80     
-224   160    
-768   176    
-48    464    
176    256    
-32    368    
-80    64     
0      96     
16     96     
128    176    
-256   544    
-528   416    
448    192    
-16    -304   
-80    -528   
-64    -784   
-64    240    
224    448    
-80    384    
240    144    
96     112    
-416   208    
272    816    
688    480    
-704   128    
-80    320    
-528   192    
480    544    
-432   656    
-272   560    
-16    48     
0      -160   
-128   -48    
-48    176    
-16    -64    
16     0      
0      -304   
-80    -832   
80     384    
-80    160    
48     112    
768    992    
-1632  1248   
784    -528   
240    208    
-80    -800   
0      496    
-176   48     
112    416    
-192   -304   
16     -80    
0      -144   
16     -96    
112    -48    
-80    -32    
-80    -32    
-48    -208   
160    64     
-272   -496   
32     48     
-64    -160   
400    416    
-224   -288   
-304   32     
544    -528   
-288   -624   
-80    -64    
400    -112   
-448   16     
112    -336   
192    0      
-128   48     
-176   0      
-64    160    
0      384    
-64    -96    
-16    128    
-512   -48    
-64    32     
336    288    
-112   32     
-224   64     
-64    64     
176    -128   
352    112    
-256   -96    
-576   368    
176    96     
224    -144   
16     16     
-432   96     
-896   -928   
-16    560    
800    -640   
-1328  -320   
608    528    
0      96     
-640   -112   
672    -704   
240    1584   
-256   16     
0      -432   
0      272    
-368   -240   
224    48     
-64    -48    
16     -96    
-464   48     
352    -224   
208    544    
-224   -96    
528    1504   
-960   -816   
-464   608    
624    -80    
-512   -144   
192    -672   
-160   -752   
64     -1760  
-432   -1072  
16     320    
-32    608    
-224   720    
352    416    
-464   240    
336    544    
416    272    
-432   800    
336    1488   
160    944    
-48    416    
-80    112    
160    464    
-144   624    
-240   -1744  
-256   -816   
752    944    
-96    1968   
-592   864    
816    944    
-320   416    
-496   320    
384    208    
176    368    
32     112    
-608   416    
112    304    
272    -320   
224    208    
-640   -80    
-304   144    
176    -32    
-160   176    
48     -848   
-368   -48    
352    336    
-208   -80    
0      64     
-128   -240   
-224   -288   
80     144    
-736   2640   
656    -48    
-624   -96    
-464   -80    
656    1424   
592    656    
-416   848    
0      800    
32     -224   
496    -528   
-144   448    
-112   160    
-144   -208   
208    112    
288    -80    
-272   464    
-272   -32    
-240   112    
672    448    
-160   96     
-304   -80    
368    256    
-336   -64    
-800   -448   
736    464    
-480   576    
-64    16     
96     432    
368    320    
-160   464    
-272   384    
432    112    
-224   208    
-208   128    
-160   32     
352    -176   
224    16     
-272   80     
64     160    
64     368    
608    288    
-240   192    
-304   448    
16     288    
224    464    
-144   -96    
64     176    
368    -32    
-32    -32    
-176   96     
144    128    
32     -976   
-992   -640   
144    0      
576    160    
-128   992    
320    240    
-16    112    
208    -32    
32     -208   
240    -192   
-112   -32    
-528   -320   
192    -128   
304    64     
-112   -928   
64     16     
176    624    
-112   96     
80     -256   
128    48     
-96    240    
-16    144    
80     -64    
-80    96     
368    -16    
-48    304    
-432   128    
240    -208   
256    32     
-272   -2784  
-704   384    
1024   64     
-464   384    
800    160    
-624   384    
112    96     
32     688    
-384   320    
448    -128   
-288   224    
-112   -80    
64     32     
320    -224   
-48    368    
80     -624   
-448   400    
256    -368   
48     96     
144    112    
624    1392   
-1408  112    
160    48     
1056   -64    
-784   -48    
208    480    
-400   288    
160    -160   
96     -288   
192    -112   
-128   0      
-352   96     
112    -224   
528    80     
-560   128    
256    -112   
-32    128    
-208   0      
16     224    
464    96     
-336   64     
16     -112   
-80    96     
112    -320   
336    -64    
-432   -192   
432    144    
-256   -1136  
64     112    
192    48     
176    -352   
352    1056   
1168   544    
-704   -112   
-272   80     
304    128    
288    80     
-224   288    
-80    -272   
256    144    
-288   0      
80     96     
-80    -272   
368    128    
-32    -1424  
-80    208    
64     48     
0      64     
-32    -80    
240    16     
-128   -176   
848    -448   
-880   384    
1296   144    
-544   128    
-704   496    
1232   144    
-96    -64    
-560   176    
32     112    
144    176    
-32    -112   
16     224    
-48    -32    
144    256    
96     64     
-112   64     
240    128    
-64    48     
32     48     
0      -48    
208    256    
-1024  224    
640    112    
-800   160    
-64    -160   
416    160    
320    -2336  
640    0      
-784   288    
16     -144   
352    -112   
-128   432    
-112   -336   
-80    -288   
64     144    
64     160    
-176   -720   
-592   176    
288    96     
-224   -400   
176    32     
48     -272   
-160   96     
-176   64     
144    -464   
96     -48    
352    -432   
-448   0      
512    -96    
1856   -672   
-400   560    
336    -384   
-736   -656   
480    192    
800    -16    
-448   0      
96     32     
-272   -208   
-528   32     
304    -320   
-32    96     
224    -48    
-208   -64    
-80    -160   
432    16     
-256   -480   
-320   -32    
-64    624    
832    1504   
-256   976    
-224   176    
192    -160   
-336   -176   
288    400    
368    -64    
-704   -160   
240    -64    
544    -64    
-48    -272   
-800   -592   
416    -1104  
528    -240   
-608   48     
-80    -160   
160    -592   
64     -432   
96     -256   
-32    -48    
-304   -64    
208    -112   
-32    -352   
-336   -496   
256    -480   
0      -784   
-48    -224   
-160   -240   
-240   -352   
192    -1248  
432    -448   
-192   112    
-144   -400   
-752   432    
448    -176   
128    -112   
-704   -48    
-160   -48    
48     -608   
-1056  -976   
-64    -16    
32     832    
96     -144   
-80    -80    
-48    -1392  
-64    -256   
112    48     
-304   48     
-96    -240   
96     -352   
-16    -240   
-80    112    
-16    -80    
-144   96     
128    256    
80     112    
-96    96     
16     672    
64     640    
-320   -48    
64     16     
384    656    
-240   128    
48     -480   
448    -288   
16     -16    
-80    -240   
-32    -96    
-16    -128   
-96    32     
176    -208   
-80    256    
-48    -336   
176    16     
336    -464   
-304   32     
-320   0      
320    -256   
-48    176    
128    -48    
-144   -80    
208    -368   
-976   176    
672    16     
48     336    
-96    96     
-144   -224   
176    112    
-224   816    
96     -528   
464    -160   
-304   -192   
-400   368    
256    48     
224    -144   
-112   144    
0      48     
48     48     
-16    -160   
-48    112    
240    -48    
-336   304    
-704   -112   
208    192    
-784   -480   
-464   -672   
144    16     
-144   128    
16     176    
-768   816    
368    256    
-976   1776   
3664   -1088  
-1264  -160   
-656   -448   
432    -80    
144    -128   
224    208    
-592   -160   
-320   -1904  
32     560    
128    -64    
-288   288    
-272   -144   
-784   384    
256    -240   
112    96     
-224   -384   
-160   16     
208    144    
-192   -160   
-144   -864   
-1632  496    
2192   112    
-784   64     
-464   -464   
864    1024   
336    1136   
-944   -32    
448    -352   
368    144    
-544   544    
144    416    
128    192    
-576   272    
144    -96    
32     48     
48     64     
0      -96    
-416   -96    
288    -32    
144    112    
-304   48     
-288   352    
288    64     
544    -944   
-960   -368   
384    -224   
-1920  400    
-64    240    
672    -144   
320    160    
0      272    
-720   224    
-64    176    
208    -288   
-752   -1328  
160    -672   
-224   -224   
-400   192    
416    -16    
-192   -112   
-256   -96    
-160   -240   
128    272    
128    64     
-368   320    
-288   0      
-240   -288   
1152   128    
-144   496    
256    -1072  
640    432    
864    80     
-1056  -128   
-608   1280   
960    -160   
-160   176    
-560   -112   
192    496    
-256   384    
208    64     
352    -16    
-480   32     
-96    368    
48     -208   
32     304    
-64    -160   
368    1264   
-304   1472   
-16    448    
400    -288   
-208   32     
-64    -32    
496    304    
-928   64     
336    144    
-384   112    
688    -496   
-416   -480   
112    -80    
96     -288   
16     -160   
192    -208   
-16    32     
-192   256    
160    -64    
-48    -144   
-272   -320   
-16    112    
-176   -96    
-160   -48    
400    -48    
-32    176    
128    16     
128    208    
-128   80     
160    32     
-96    0      
48     128    
304    128    
-320   64     
416    496    
464    208    
-432   -64    
128    288    
288    192    
-224   16     
-64    -496   
-464   48     
384    128    
288    -48    
-176   112    
-96    128    
-192   48     
80     0      
144    512    
320    208    
-352   -352   
-128   272    
272    128    
48     -64    
-144   64     
-32    112    
96     288    
16     -80    
64     -96    
96     -16    
-160   32     
-112   48     
-320   -624   
960    -1360  
-1232  576    
352    112    
-128   -576   
-656   336    
464    -128   
240    480    
208    -256   
-336   -128   
176    192    
256    -64    
-80    128    
-128   16     
-80    -608   
96     304    
192    240    
-144   112    
-32    64     
64     48     
-128   192    
672    1248   
752    80     
-1312  -464   
656    32     
352    48     
-720   160    
496    -64    
176    432    
-208   -64    
-96    256    
480    -80    
-128   224    
-144   160    
288    64     
-320   96     
304    -48    
-16    64     
208    96     
-256   16     
128    16     
80     96     
48     112    
144    160    
-304   16     
416    112    
-496   -64    
400    160    
0      112    
-272   -160   
80     1728   
640    -320   
-656   -48    
240    -240   
128    176    
-16    32     
-48    -128   
240    240    
-96    -96    
-96    128    
48     32     
112    48     
-112   -176   
-16    -64    
352    208    
-144   80     
-48    160    
32     80     
256    0      
176    48     
-96    96     
-768   -192   
912    -272   
256    -304   
-784   352    
608    448    
16     -96    
-64    96     
-32    -128   
-656   -2208  
544    80     
208    0      
-160   144    
-192   80     
304    -64    
-144   112    
272    -80    
-112   128    
400    560    
224    -16    
-160   -32    
160    128    
-400   -208   
368    304    
608    -400   
-512   112    
-192   -576   
144    160    
352    224    
-208   -48    
320    208    
192    176    
-448   80     
208    96     
224    -64    
64     128    
-272   224    
304    384    
160    32     
-320   96     
352    112    
-192   -656   
-80    112    
176    -16    
128    -16    
128    48     
-128   144    
32     -80    
368    672    
-464   448    
-1312  672    
0      -16    
-48    -144   
-160   -144   
800    -176   
64     -528   
-688   -240   
224    128    
128    -96    
400    48     
-208   112    
-320   16     
192    80     
144    80     
-144   -80    
-160   144    
64     -16    
384    -64    
-272   32     
-208   144    
208    448    
-16    144    
400    -144   
-48    -464   
-64    208    
-272   448    
48     -240   
-16    -576   
-224   -224   
256    640    
-416   -80    
32     -528   
112    224    
48     464    
48     -144   
-96    224    
288    -560   
-736   80     
240    448    
-32    448    
112    320    
-96    256    
-32    432    
-80    -336   
-528   -720   
416    -1408  
-144   672    
432    1296   
-304   -480   
-48    -656   
192    80     
496    -144   
-128   960    
112    -48    
560    480    
-240   -96    
-16    112    
0      -176   
-160   -336   
336    -128   
-80    352    
-96    -64    
128    -288   
-144   144    
112    -656   
-320   -544   
-272   -160   
320    288    
-80    224    
160    -752   
-160   192    
240    -608   
-128   80     
-16    240    
48     -192   
-32    -64    
64     -1280  
-32    224    
320    -576   
-176   0      
-304   -192   
816    -640   
-160   672    
240    -320   
-384   16     
208    -96    
256    -592   
32     -800   
-576   432    
96     -368   
-32    -208   
144    -768   
224    -32    
-96    -288   
80     -240   
304    -304   
288    288    
-160   -48    
-144   112    
16     -48    
784    336    
-1072  448    
464    -368   
-288   -256   
-144   -448   
96     -208   
-160   -272   
352    -992   
336    160    
48     224    
-240   -1536  
-224   -176   
416    -176   
112    224    
-320   -16    
-64    -32    
256    -688   
272    -96    
-128   64     
80     -320   
-144   144    
416    -80    
-112   320    
112    -736   
-208   -512   
192    -992   
208    240    
112    240    
-656   384    
64     -96    
-1376  944    
2176   -304   
-352   -576   
-768   -1040  
656    496    
800    -352   
-384   48     
-128   1136   
-400   -1744  
240    -448   
208    -304   
-480   320    
80     -112   
80     -16    
160    -96    
128    -144   
-288   112    
-112   -368   
288    -256   
96     -400   
0      1408   
-1376  -640   
-704   832    
1408   880    
-1056  448    
-272   -1408  
-256   -1472  
624    -1056  
-688   48     
240    304    
368    -64    
-352   48     
-176   -224   
144    -16    
144    -272   
-608   112    
352    16     
96     480    
304    112    
-64    -32    
-160   -320   
-16    48     
-432   -672   
-352   176    
432    736    
544    -208   
-96    -16    
-128   128    
-320   -160   
464    672    
544    -48    
-352   -16    
-80    -32    
112    -432   
528    496    
-400   -480   
-336   1008   
928    -384   
112    -112   
16     160    
352    64     
-576   112    
160    432    
240    -208   
-224   528    
16     -32    
-368   48     
-592   -96    
528    608    
-1840  -672   
1440   -1264  
576    128    
-432   -144   
-1424  64     
-368   32     
368    -496   
-112   96     
-240   48     
-160   224    
32     112    
-48    32     
128    -240   
-224   32     
-112   -208   
320    240    
112    -144   
-112   128    
-64    -32    
-608   400    
688    208    
-1168  352    
112    -224   
-368   -32    
-224   32     
-192   -400   
-240   -48    
192    32     
-48    -272   
32     -384   
-256   -32    
224    -96    
-16    400    
-288   -64    
-48    16     
-128   -112   
288    176    
-416   816    
-432   448    
432    336    
-816   -176   
-272   16     
464    16     
-320   16     
256    -160   
-64    96     
-176   -288   
-368   -96    
144    -176   
288    -112   
-704   -128   
176    32     
352    608    
624    64     
-640   -512   
32     -48    
192    192    
-160   272    
784    224    
-240   160    
64     240    
-80    0      
64     16     
32     -96    
32     224    
0      144    
-80    256    
-48    80     
64     176    
224    208    
-128   -64    
-352   112    
-352   -16    
176    -16    
-32    96     
80     -48    
0      -64    
0      -112   
-32    -16    
48     -192   
-64    80     
-768   -128   
1600   -1232  
-752   -64    
-592   -256   
400    -112   
288    352    
-320   -160   
-144   480    
464    320    
-176   -160   
112    48     
-208   -48    
-112   144    
272    -192   
0      208    
0      -80    
-160   64     
48     80     
16     -224   
-144   -16    
608    208    
-1440  640    
688    -32    
-480   -320   
-416   -64    
64     0      
-304   96     
208    416    
176    16     
-112   -16    
-48    -112   
-160   176    
-80    80     
224    -96    
48     -336   
-320   128    
144    -48    
-32    -32    
-848   16     
224    -96    
-352   224    
208    -16    
16     128    
-192   -80    
144    64     
144    16     
-96    192    
-32    64     
32     112    
-112   -1264  
1248   208    
96     -160   
-1216  -64    
1072   144    
-224   -48    
-272   -32    
400    128    
-80    80     
-208   144    
80     -32    
-16    128    
144    48     
-288   16     
448    80     
-352   -224   
32     272    
-48    -48    
-48    -48    
32     -112   
-112   32     
-192   -432   
1072   592    
-896   64     
160    -448   
560    -48    
-528   368    
112    -176   
432    192    
176    144    
-64    -48    
-304   320    
-16    96     
208    -176   
32     272    
-192   -32    
288    16     
48     672    
-448   -64    
-32    -32    
336    400    
-208   32     
-656   -608   
576    16     
272    448    
-384   -528   
224    272    
560    0      
-288   16     
-416   160    
128    64     
208    160    
-48    176    
-64    0      
-16    -176   
128    416    
-864   0      
384    368    
672    16     
-320   96     
576    -384   
-192   304    
-80    32     
32     0      
-112   240    
-80    -192   
496    432    
672    144    
-336   -176   
96     256    
128    336    
-464   3168   
416    416    
-1280  -816   
-784   -144   
1808   208    
-752   -736   
0      -1504  
736    -416   
48     432    
-576   384    
96     176    
304    -240   
-176   384    
160    368    
96     384    
-240   928    
288    -304   
448    -80    
-272   672    
-144   160    
128    -208   
208    -288   
16     -352   
-16    -688   
0      112    
160    480    
64     608    
0      816    
-144   352    
240    -224   
32     -160   
-80    560    
80     352    
-16    112    
80     256    
32     272    
352    752    
-384   208    
80     -144   
240    -208   
16     -16    
128    176    
-144   208    
128    -128   
320    -1168  
-352   -1200  
64     -160   
-448   -560   
112    160    
-272   -304   
112    176    
352    -1088  
-736   -1760  
192    -1072  
-64    -32    
-176   560    
160    -80    
224    880    
-80    416    
128    -128   
16     368    
-96    -160   
-80    112    
32     48     
-32    272    
-48    -32    
-128   128    
-256   -656   
16     -208   
-48    240    
304    -32
[truncated: 206,011 more chars]
